# Supplementary material for: Evaluation of Five Mammalian Models for Human Disease Research Using Genomic and Bioinformatic Approaches
Source: Preprints.org preprint supplement (doi:10.20944/preprints202305.1816.v1), 2023-05-26

## Variant–Disease Network (carcinoid–endocrine tumour)

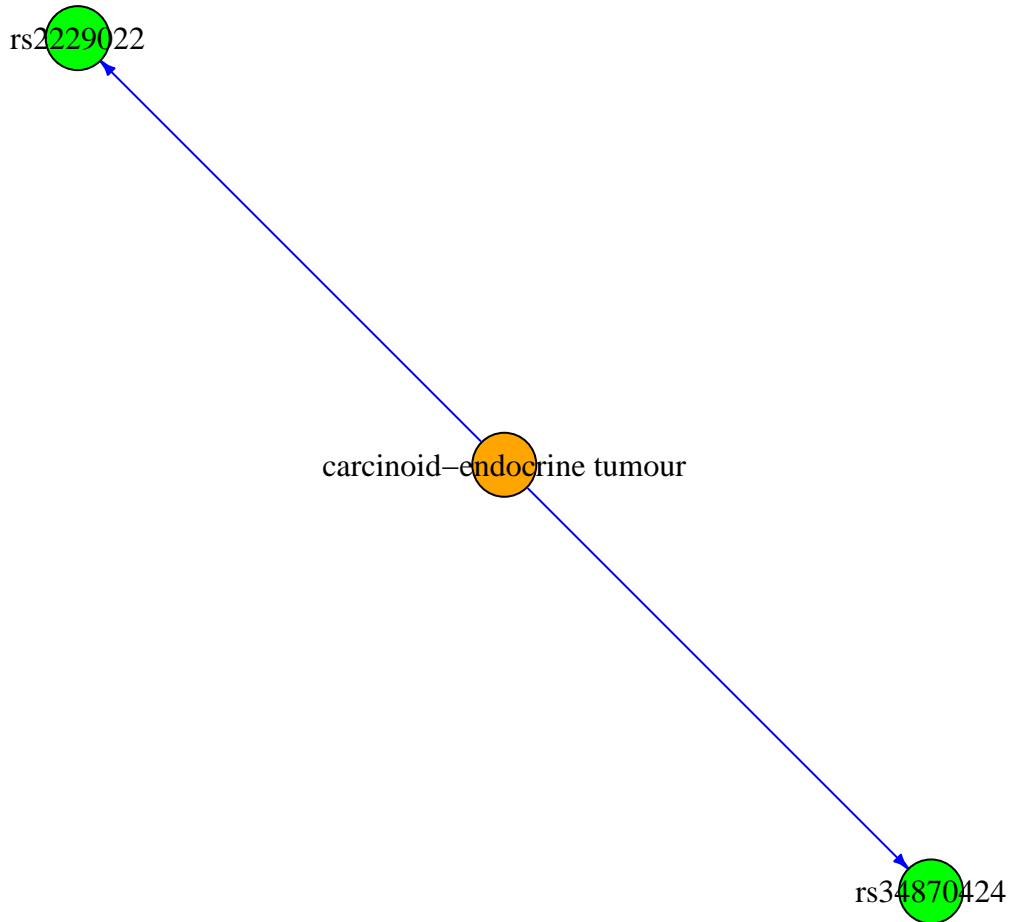

## Variant–Disease Network (breast carcinoma)

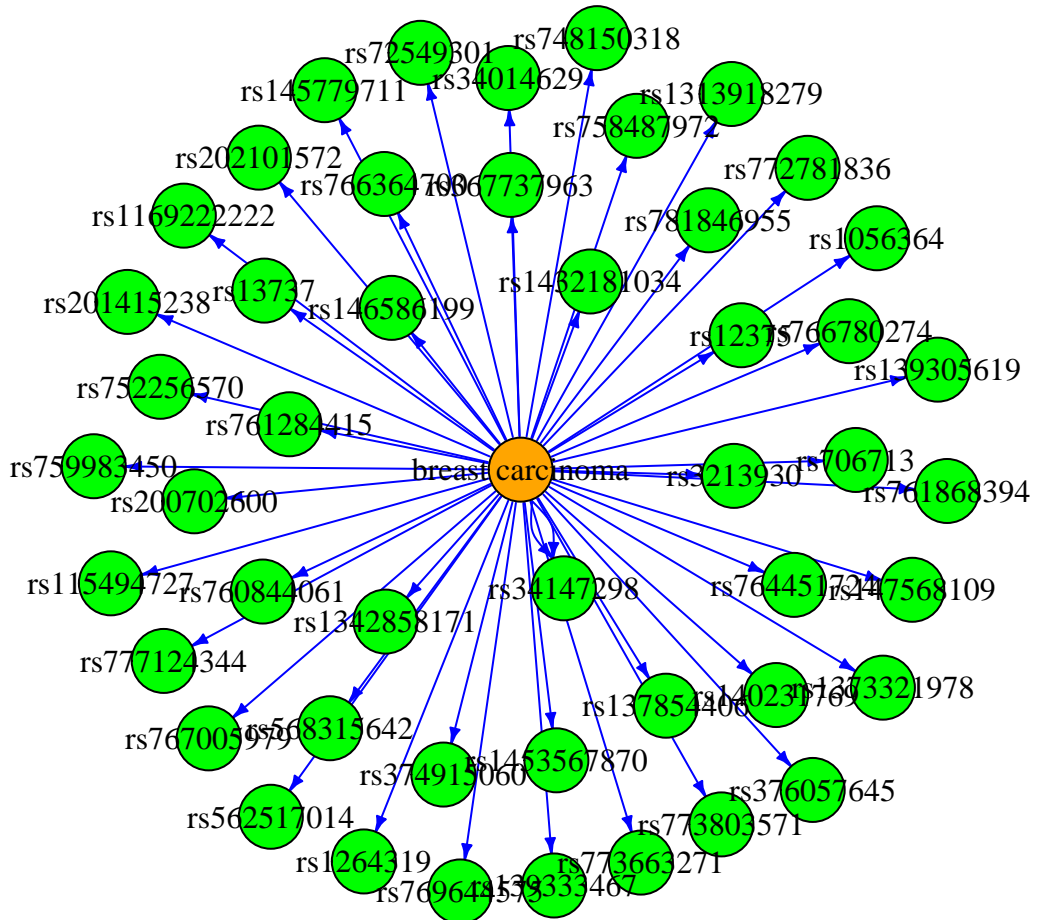

## Variant-Disease Network (skin carcinoma)

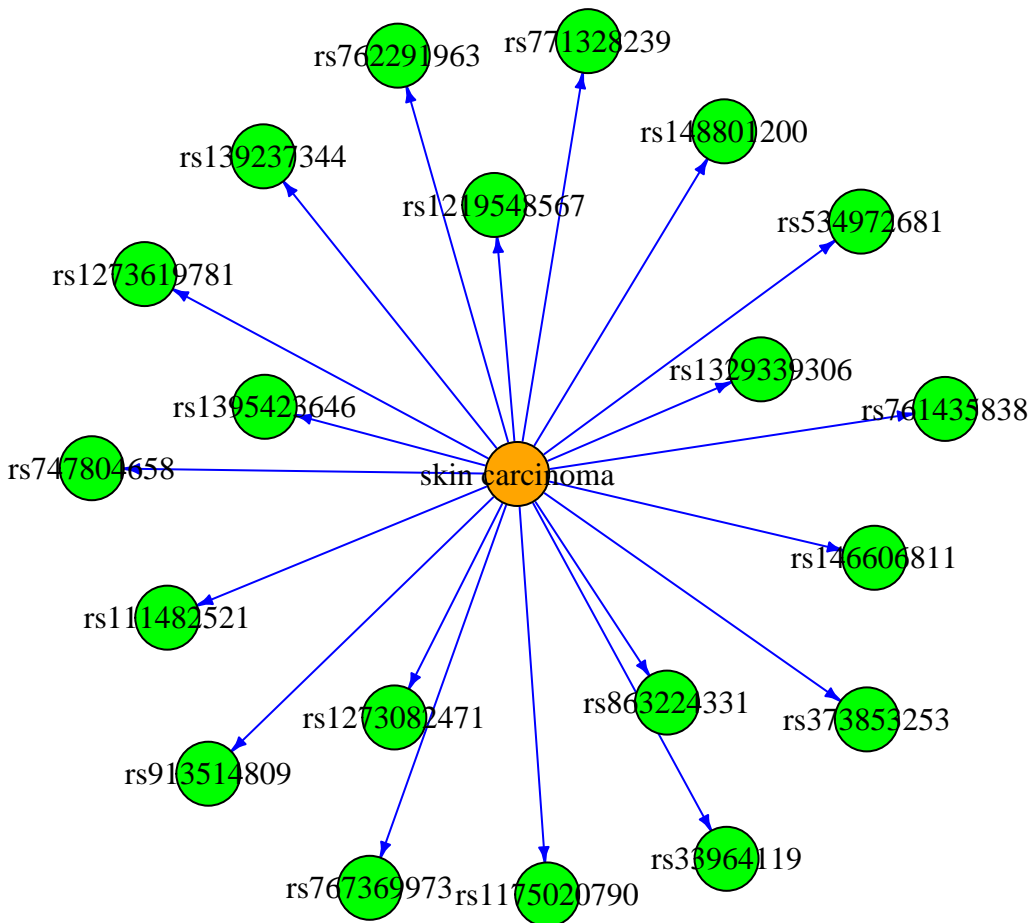

**Variant–Disease Network (large intestine carcinoma)**

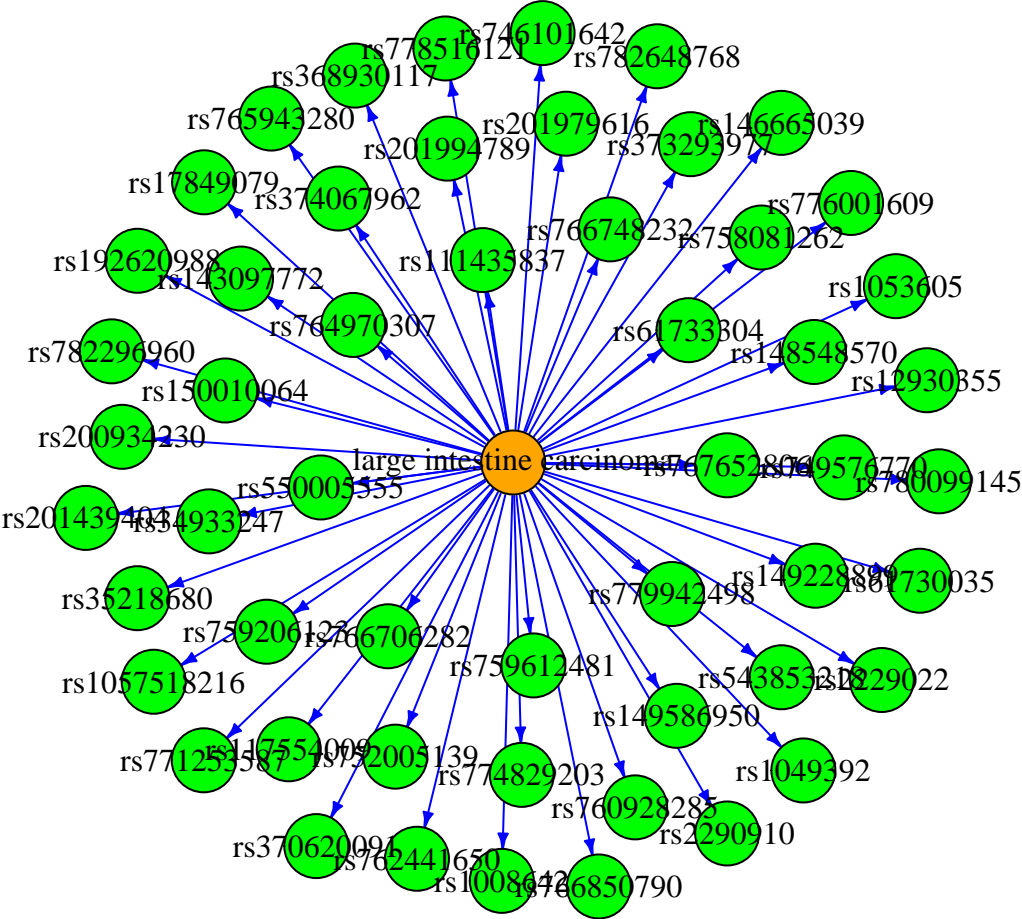

## Variant-Disease Network (liver carcinoma)

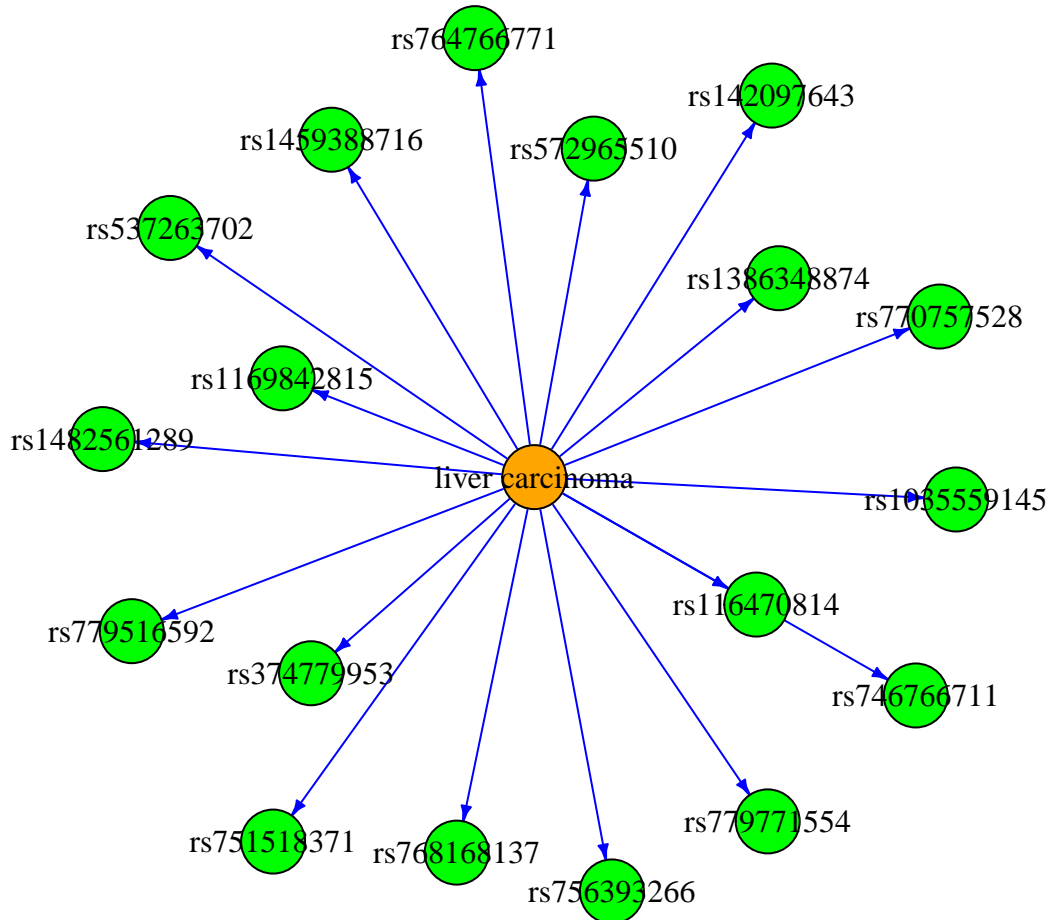

## Variant–Disease Network (lung carcinoma)

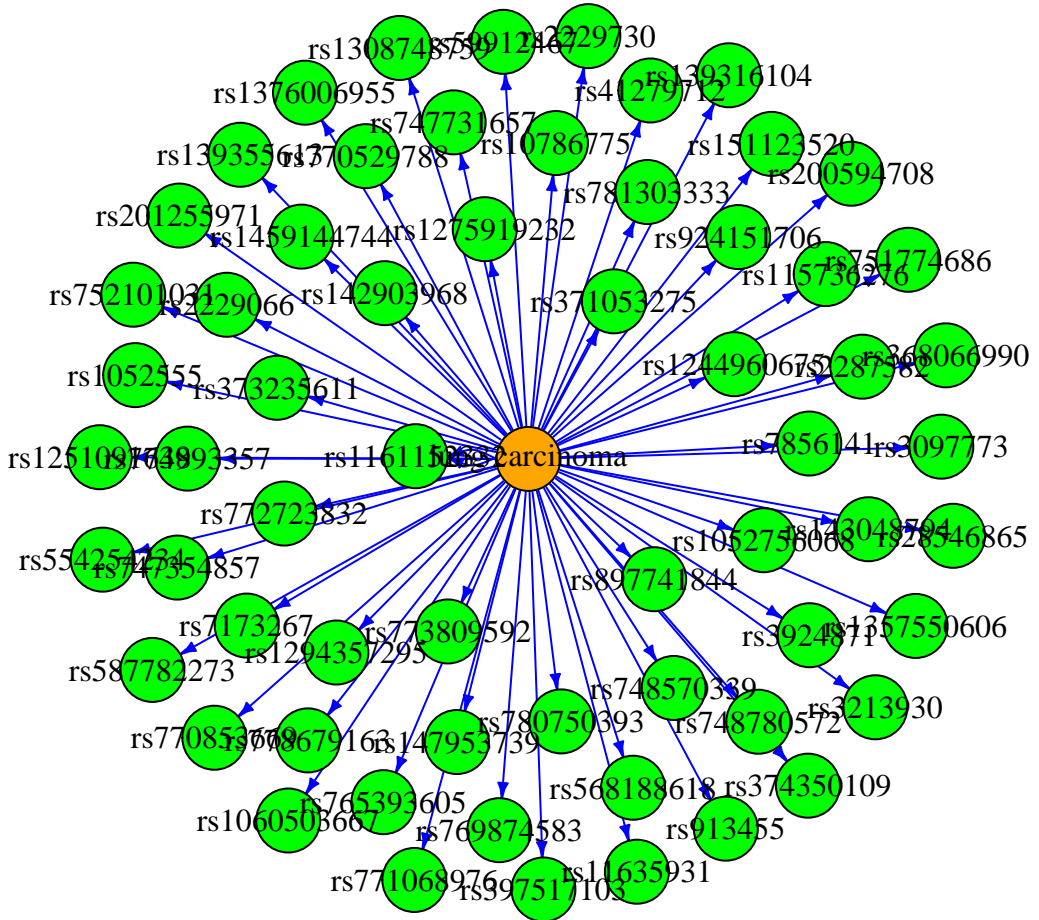

## Variant–Disease Network (urinary tract carcinoma)

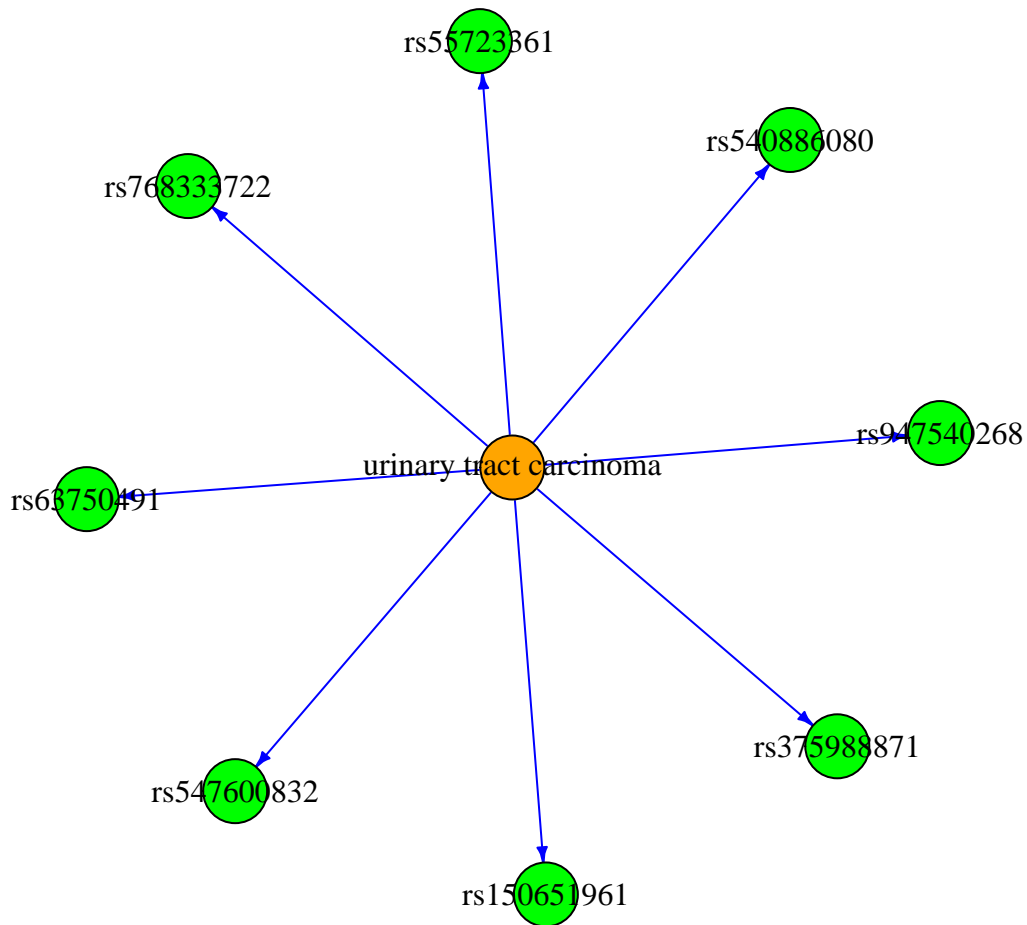

## Variant-Disease Network (prostate carcinoma)

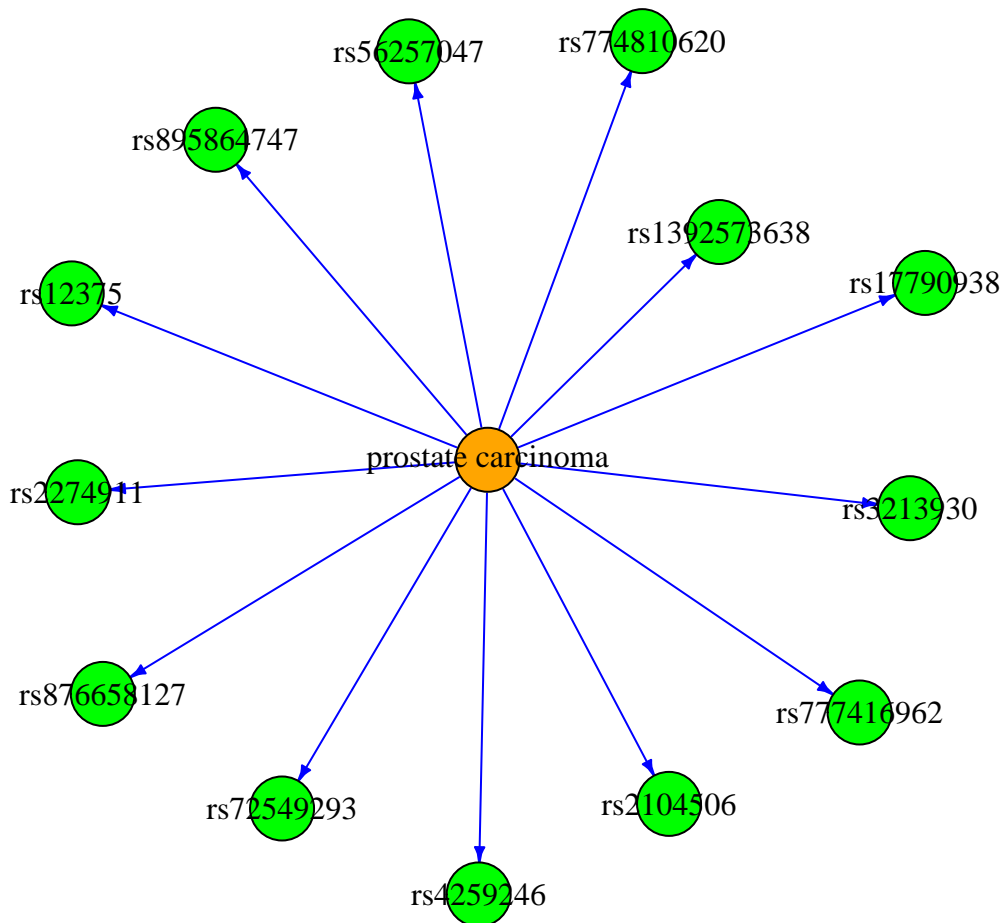



## Variant-Disease Network (endometrium carcinoma)

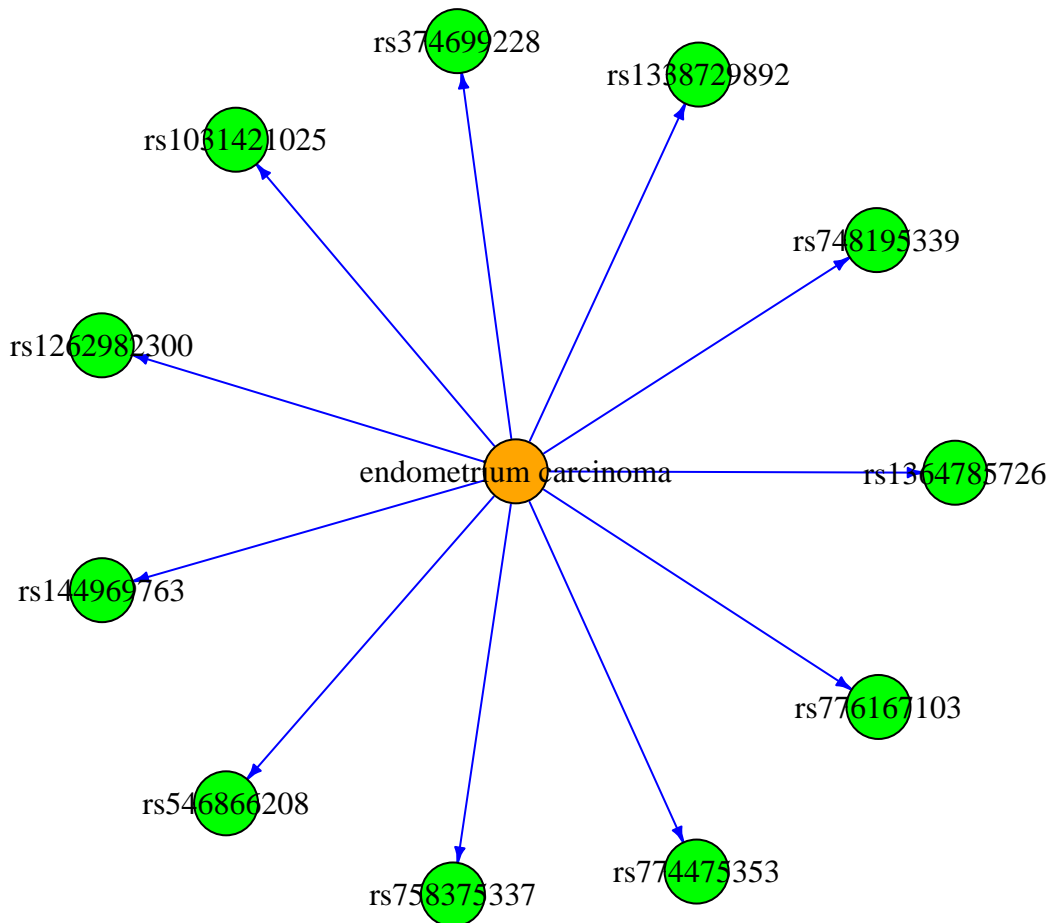

## Variant-Disease Network (cervix carcinoma)

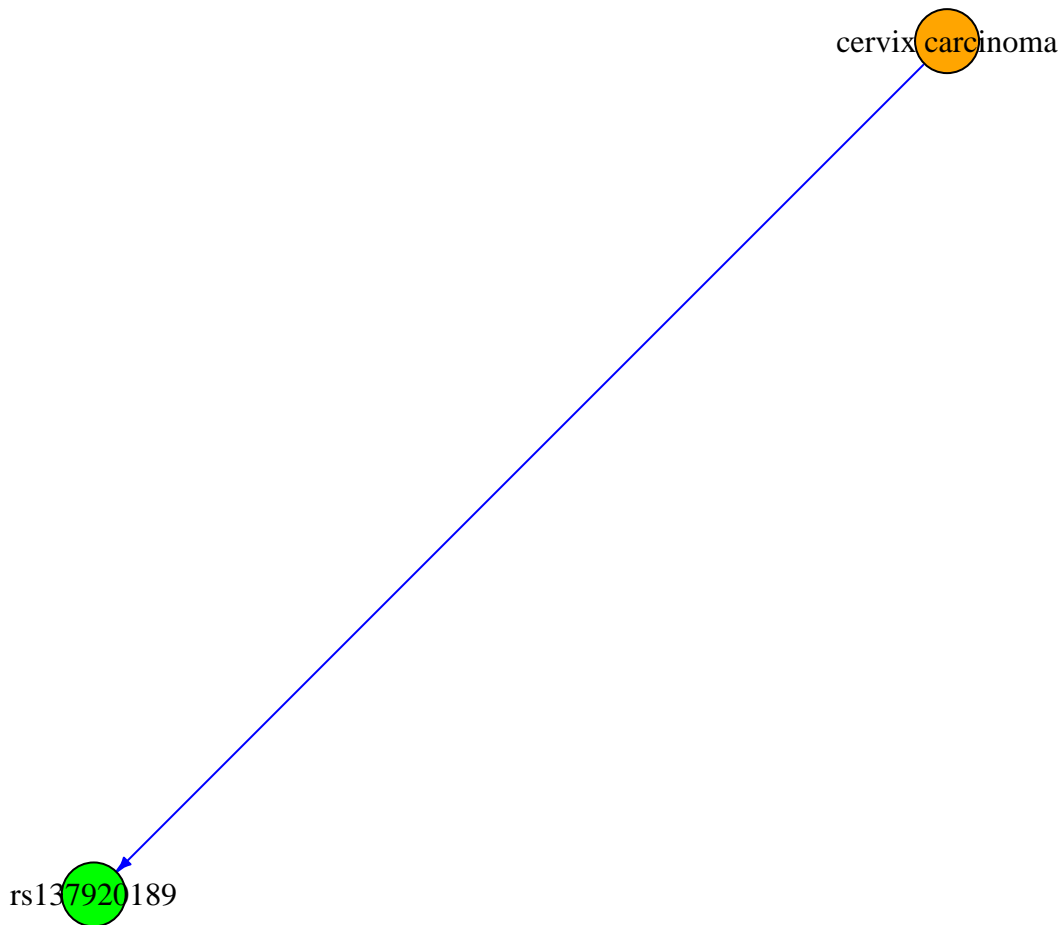

**Variant–Disease Network (upper aerodigestive tract carcinoma)**

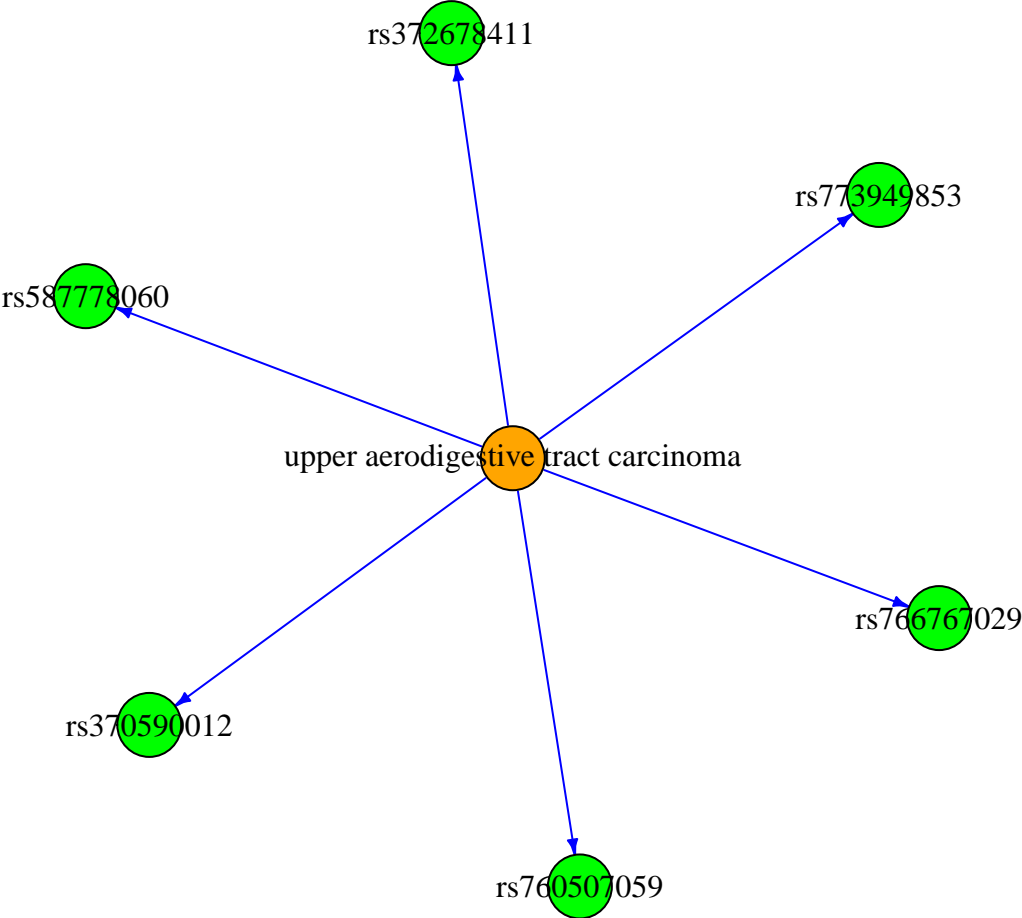

## Variant–Disease Network (stomach carcinoma)

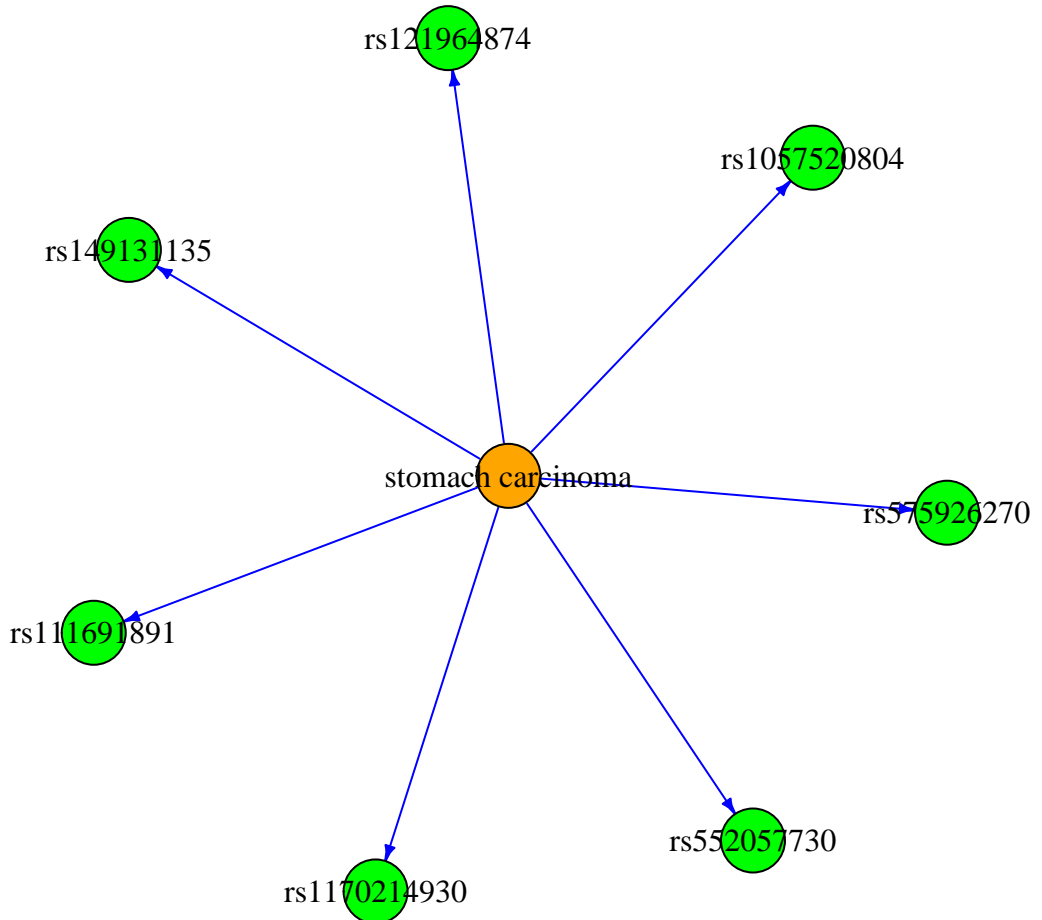

## Variant–Disease Network (biliary tract carcinoma)

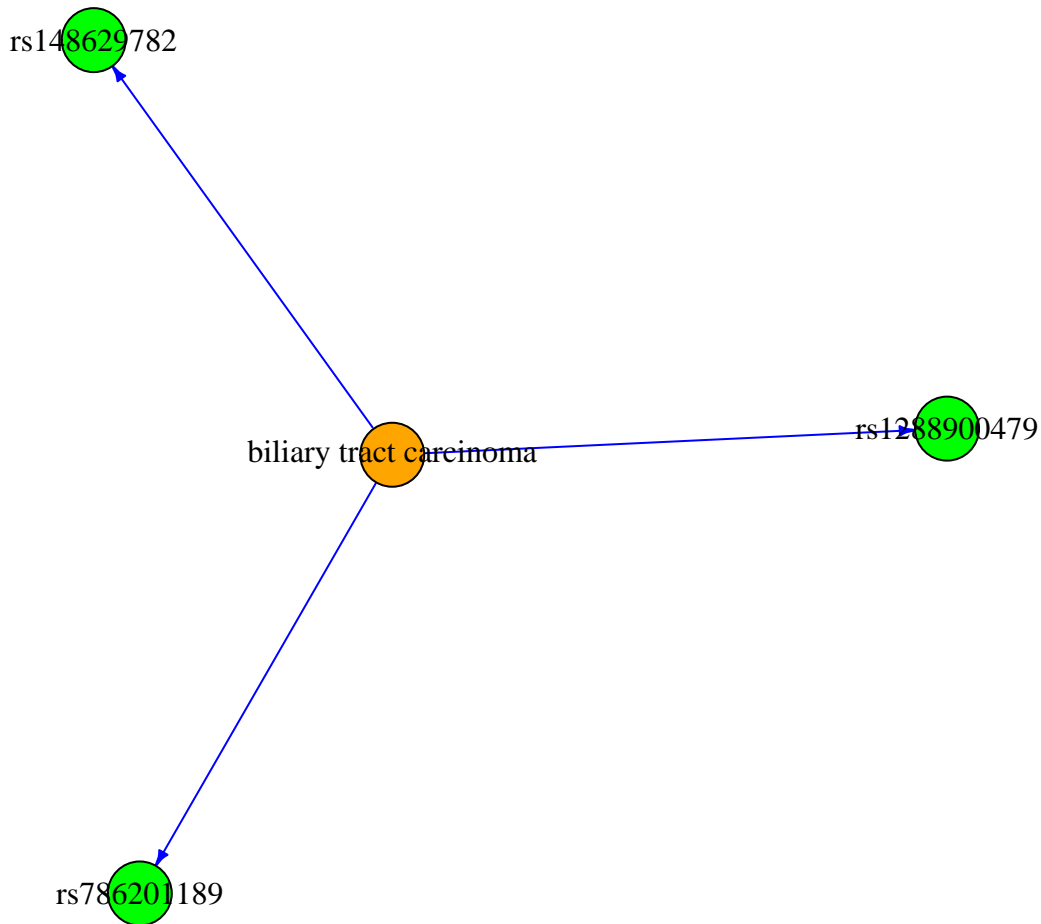

## Variant–Disease Network (kidney carcinoma)

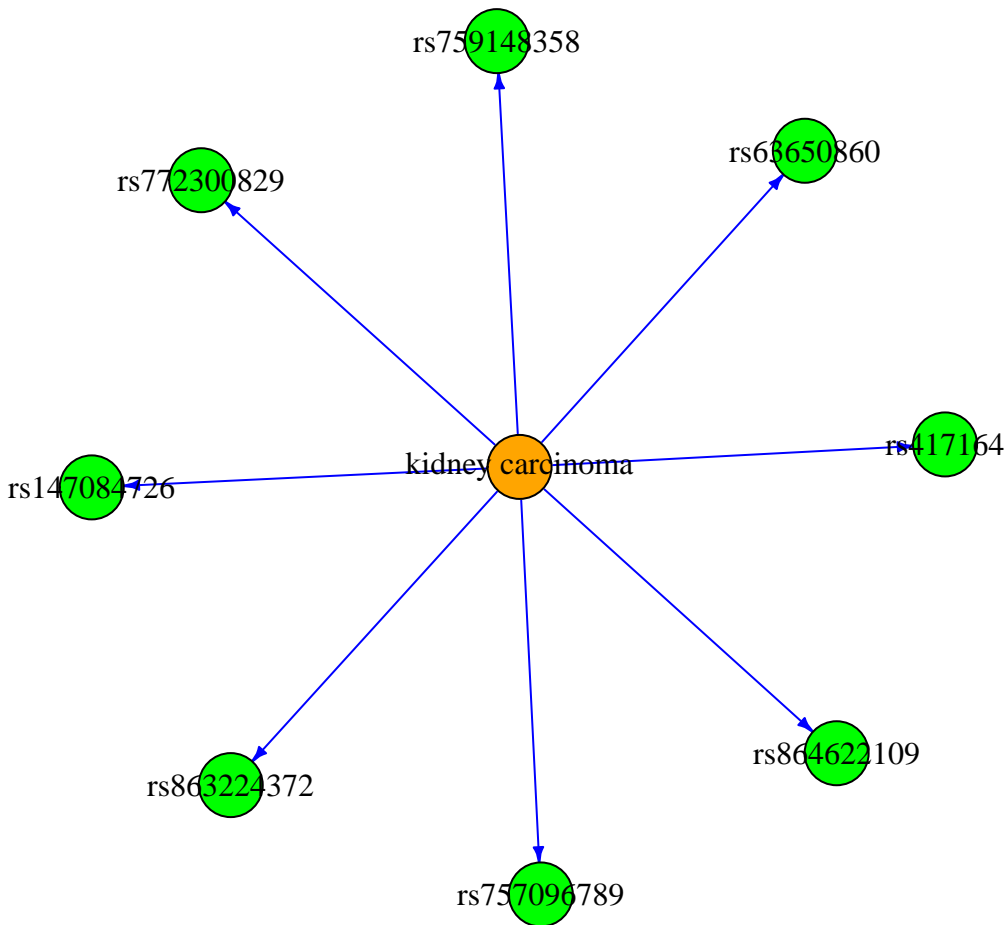

**Variant–Disease Network (oesophagus carcinoma)**

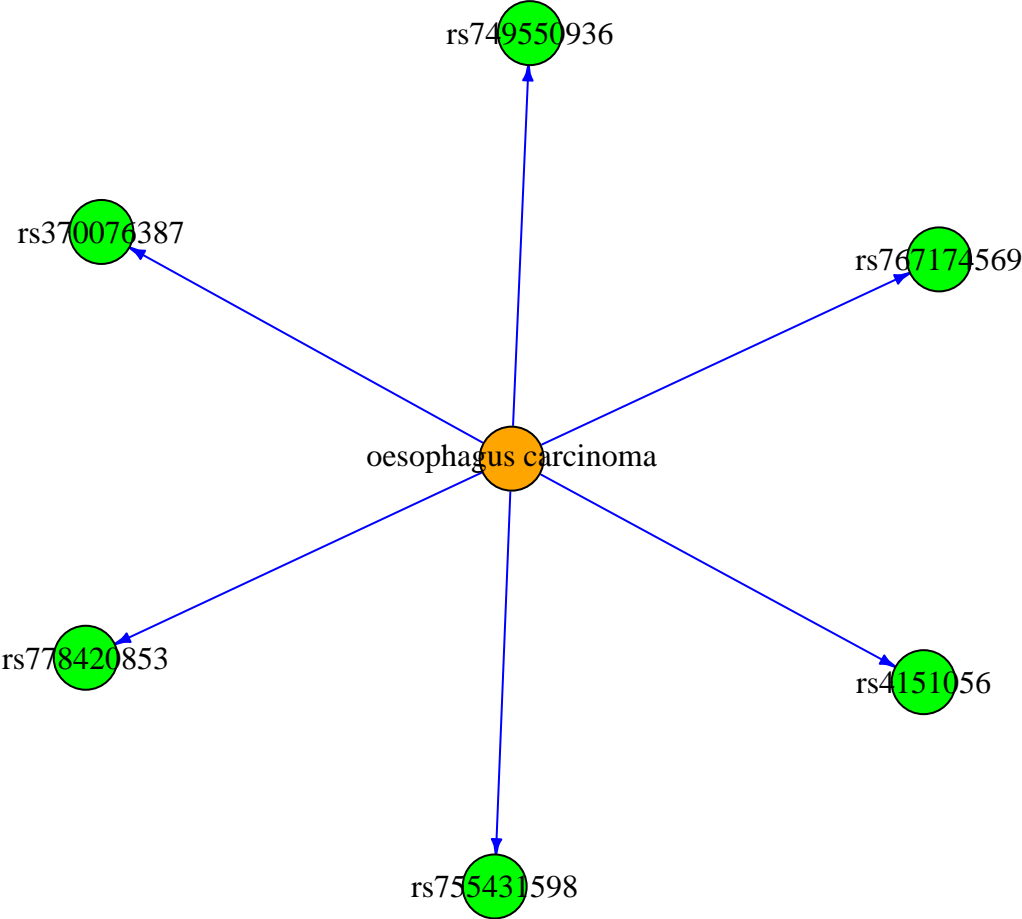

## Variant–Disease Network (ovary carcinoma)

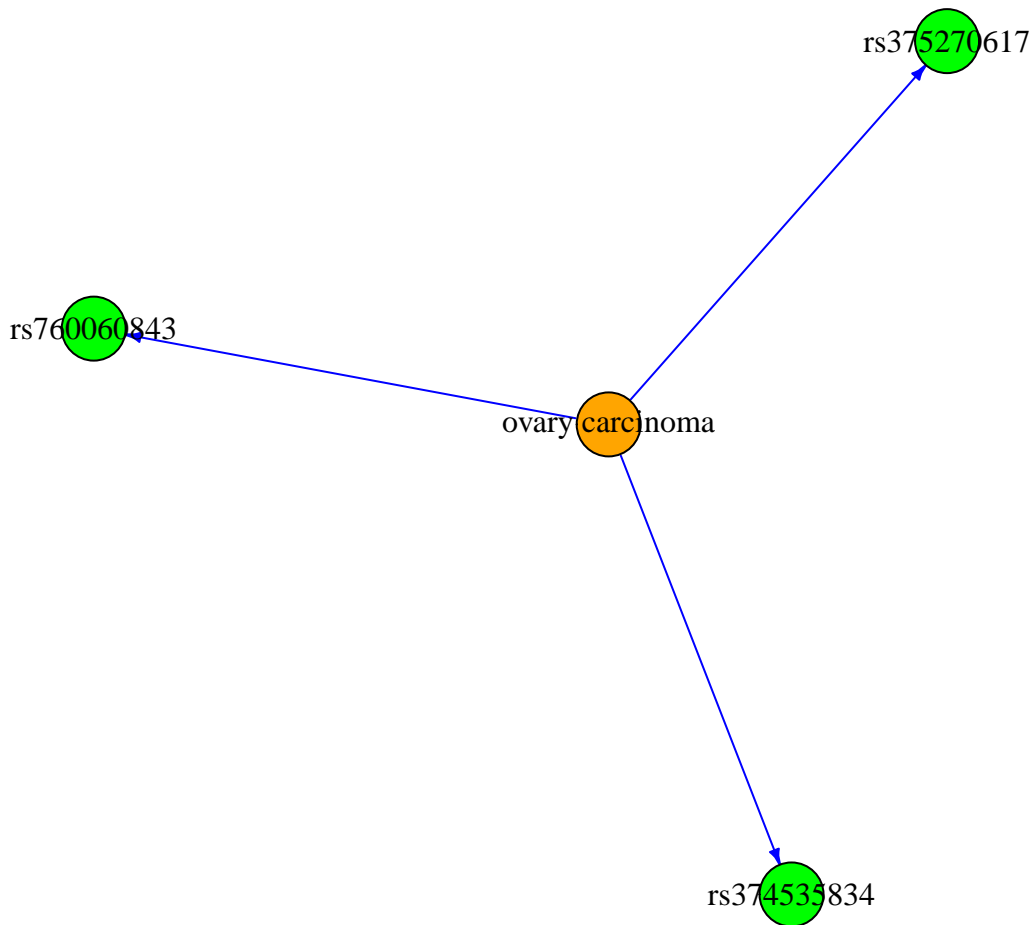



## Variant–Disease Network (pancreas carcinoma)

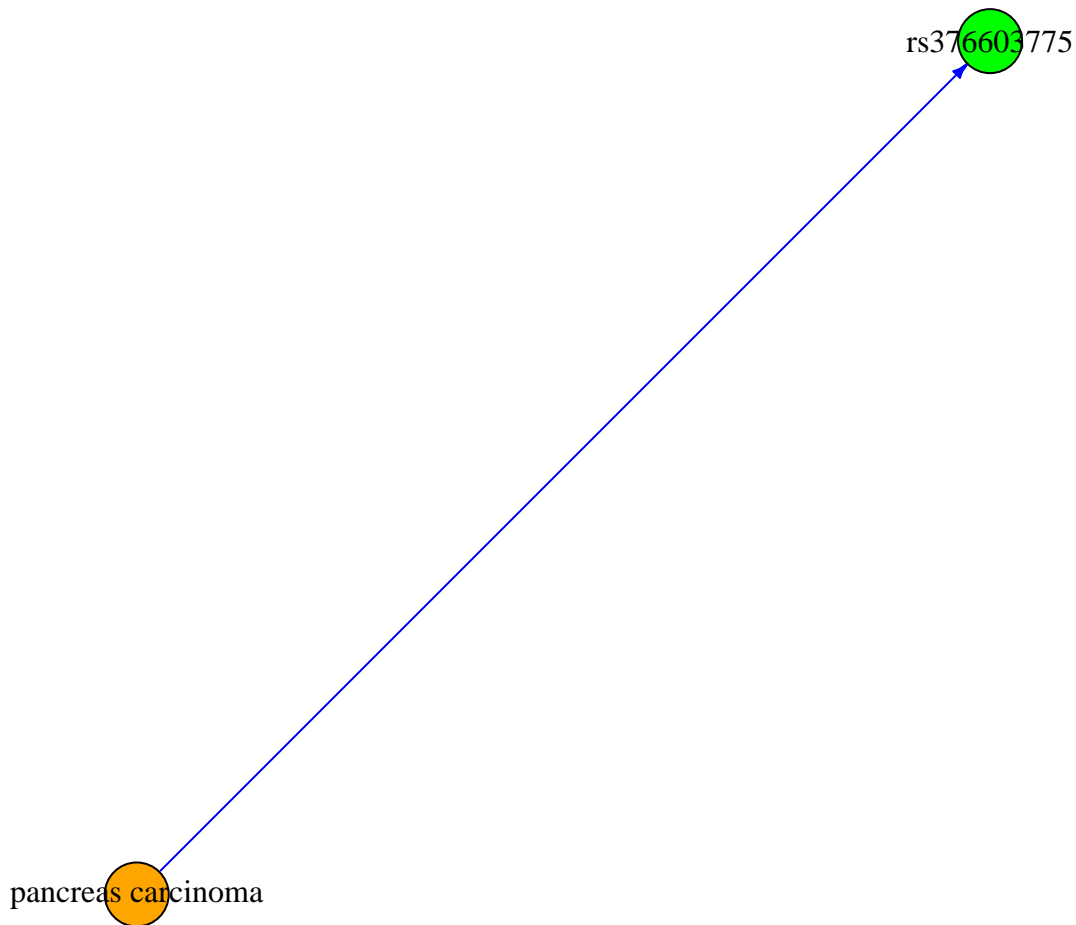

## Variant–Disease Network (thyroid carcinoma)

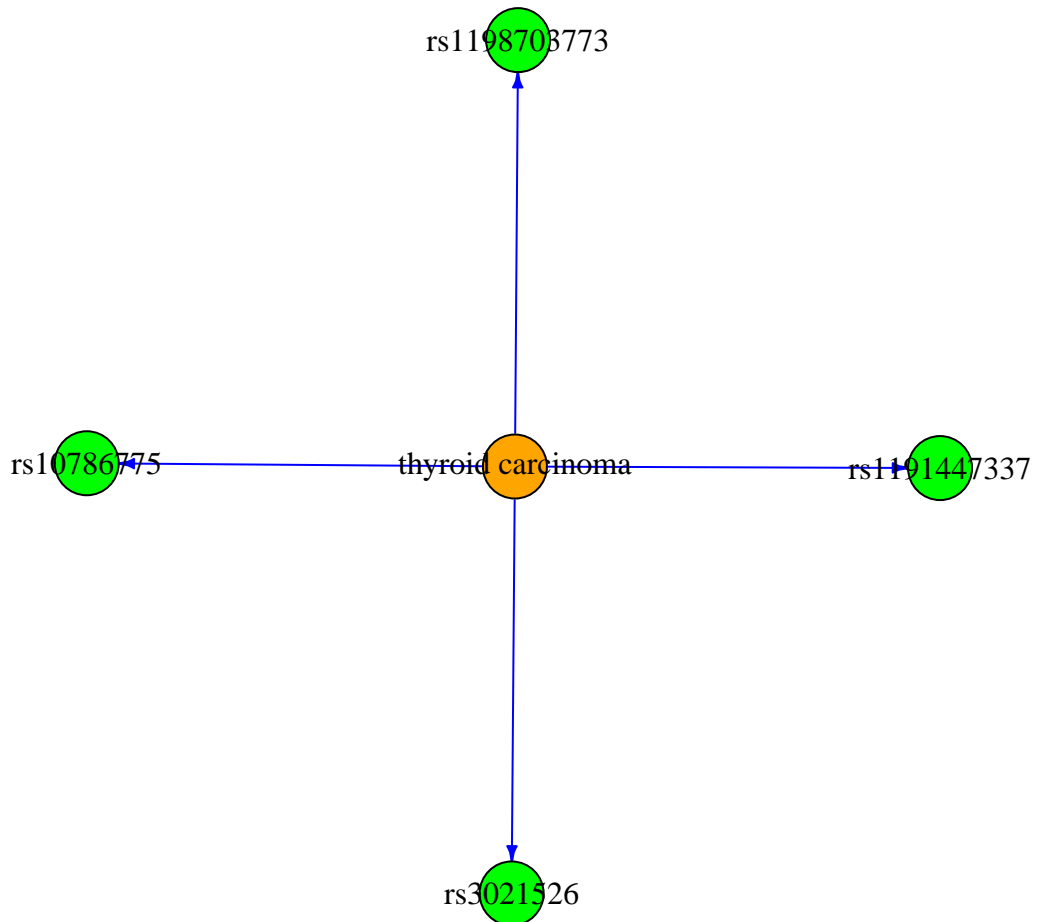

## Variant–Disease Network (small intestine carcinoma)

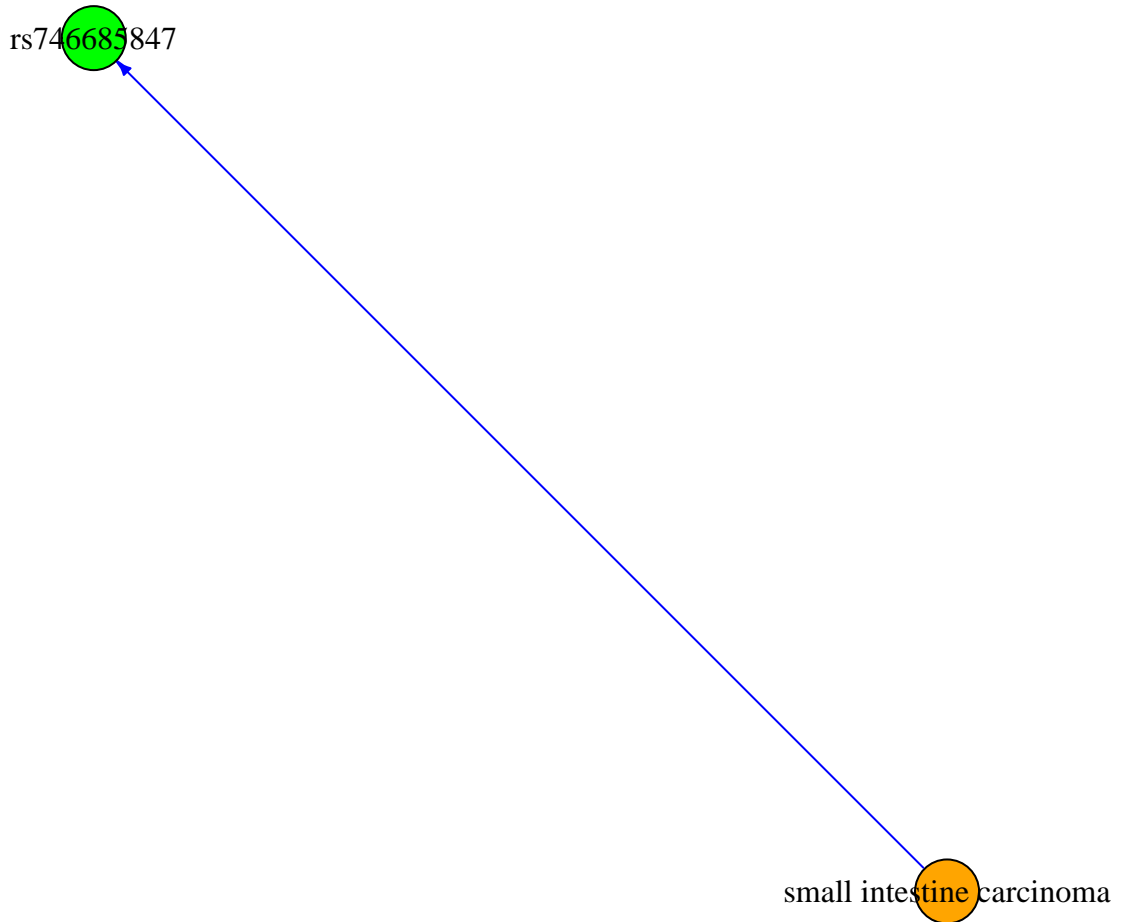

## Variant-Disease Network (penis carcinoma)

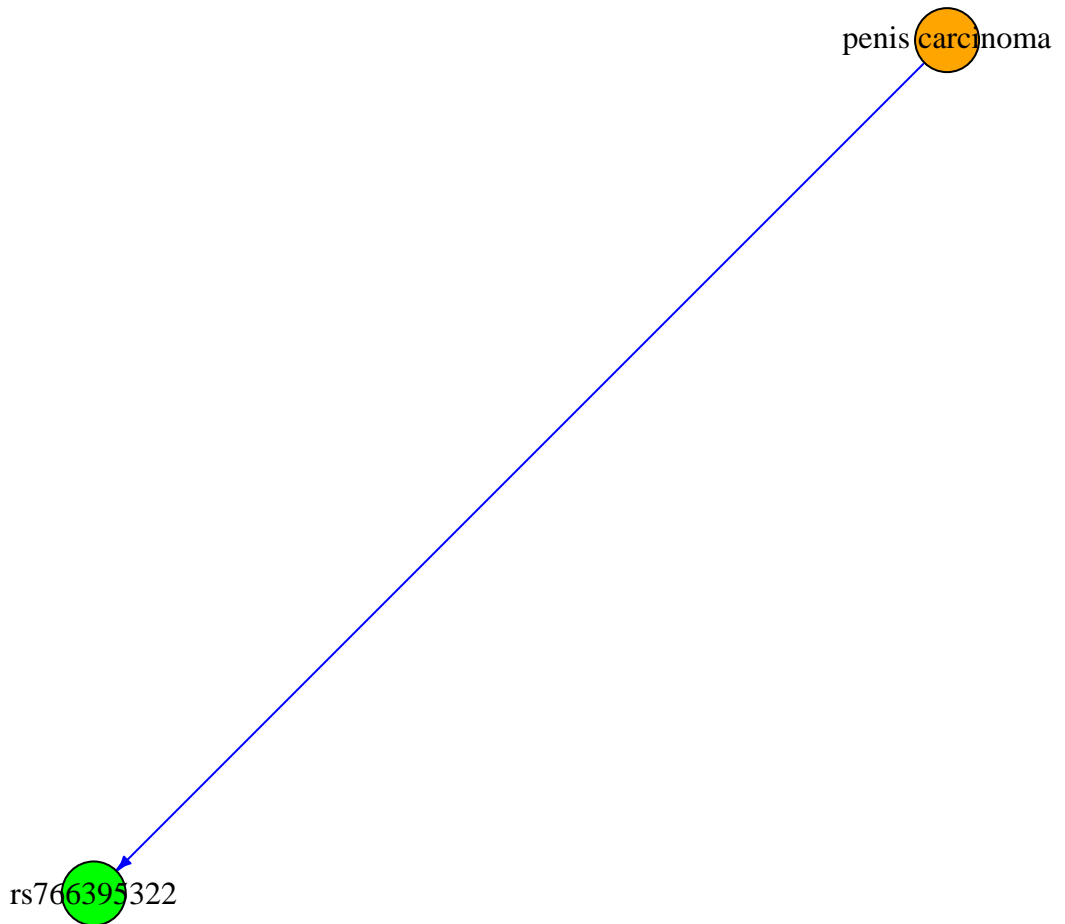

**Variant–Disease Network (salivary gland carcinoma)**

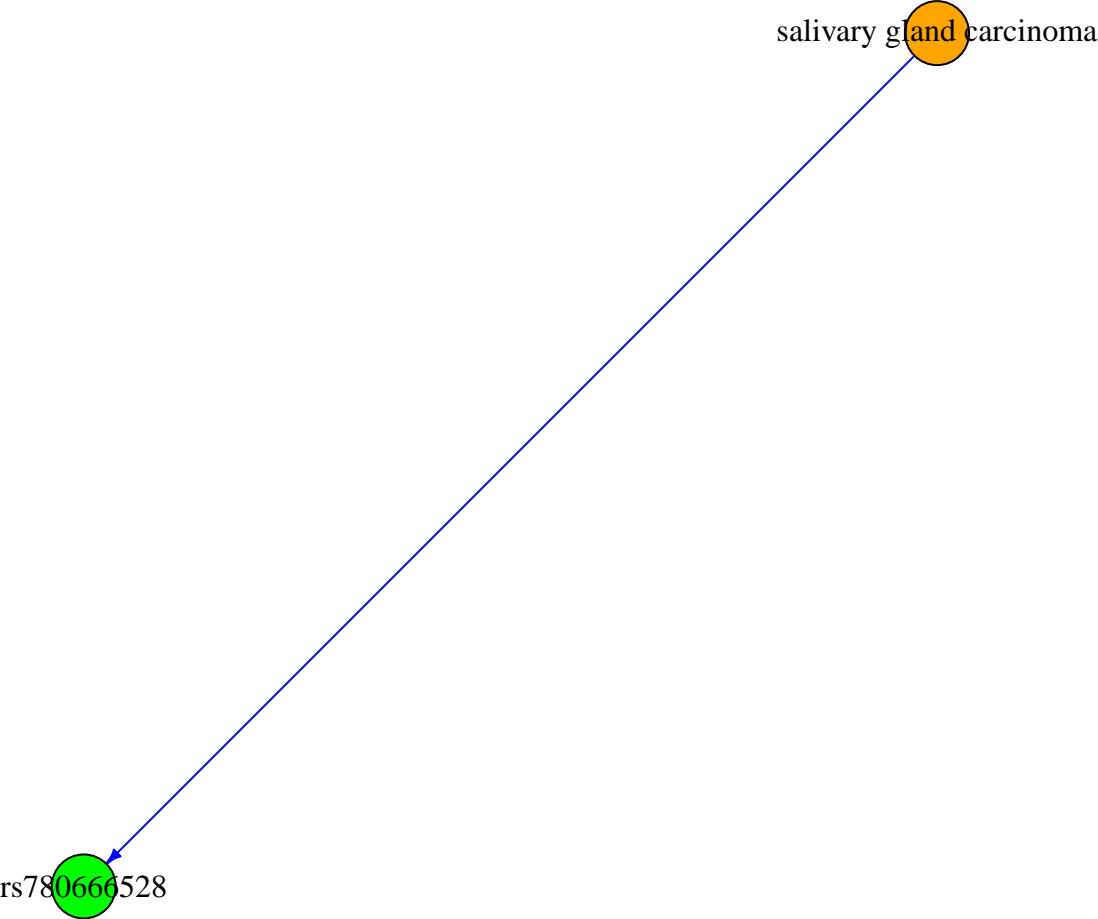

## Variant-Disease Network (fibroepithelial neoplasm)

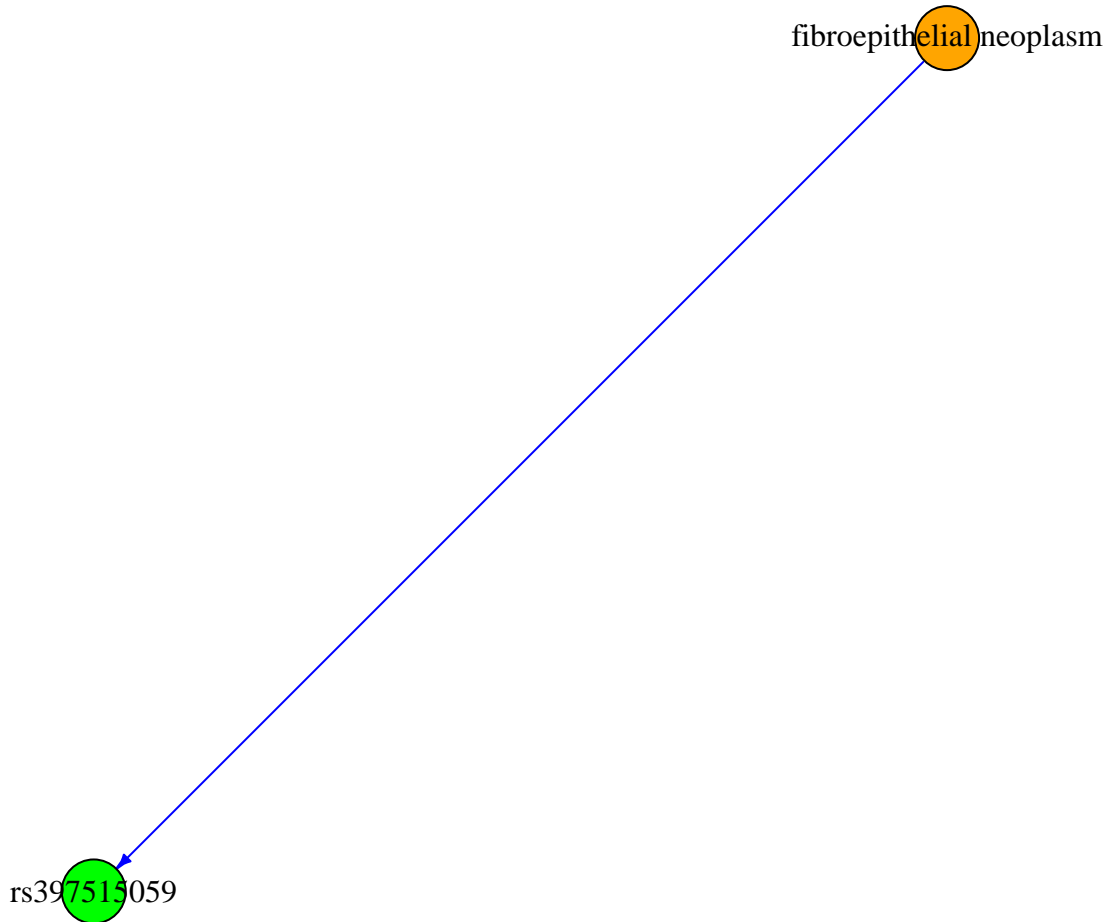

## Variant-Disease Network (fibrosarcoma)

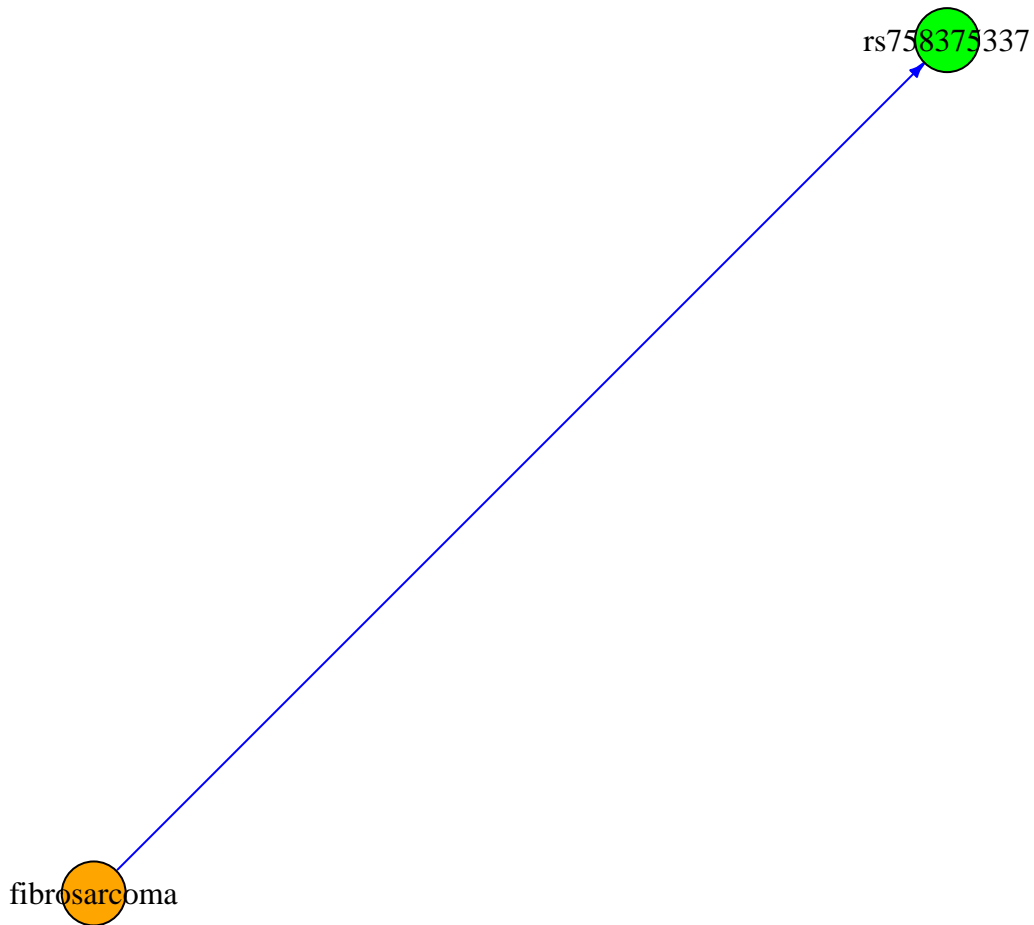

## Variant-Disease Network (glioma)

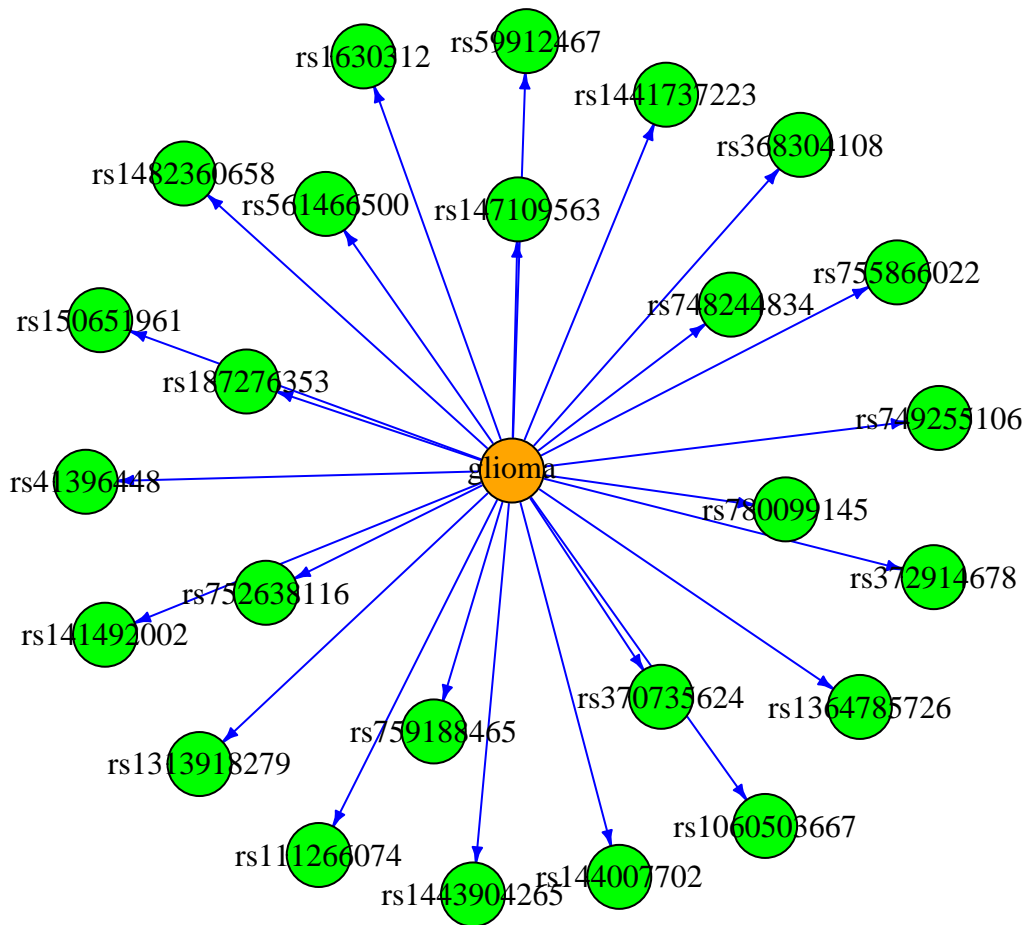



# Variant–Disease Network (haemangioblastoma)

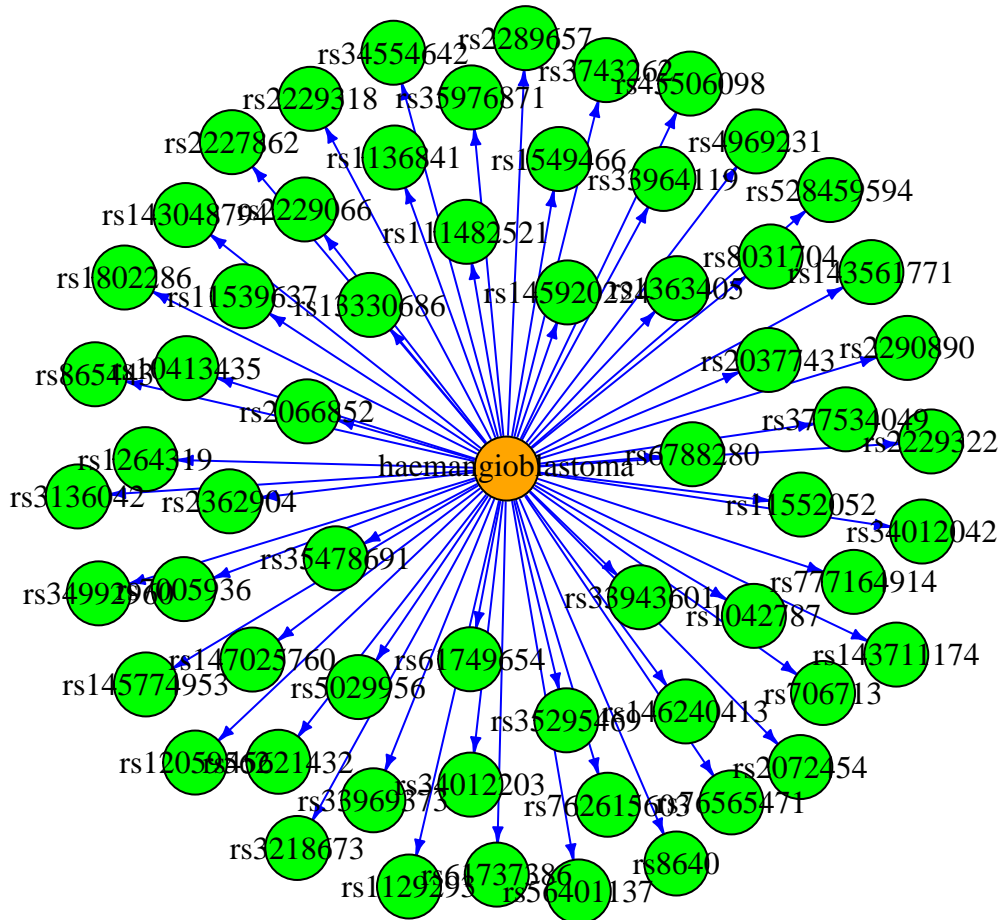

## Variant–Disease Network (haematopoietic neoplasm)

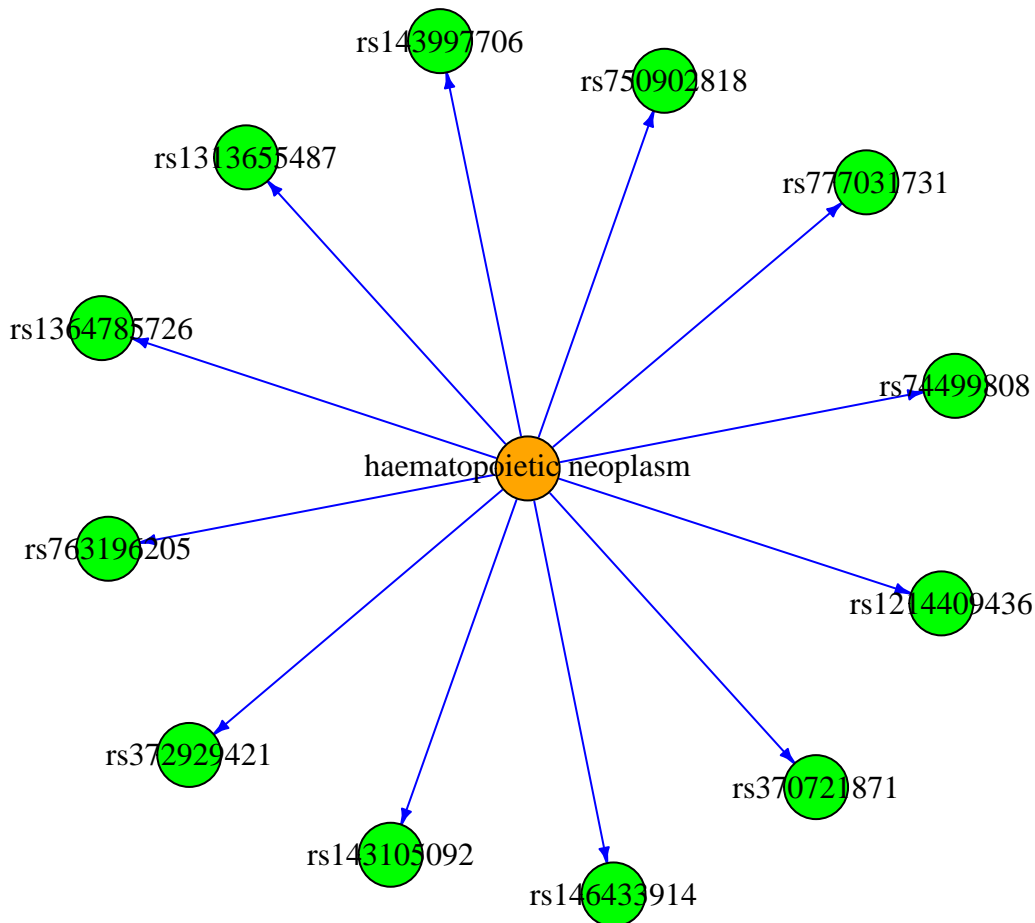

## Variant–Disease Network (liposarcoma)

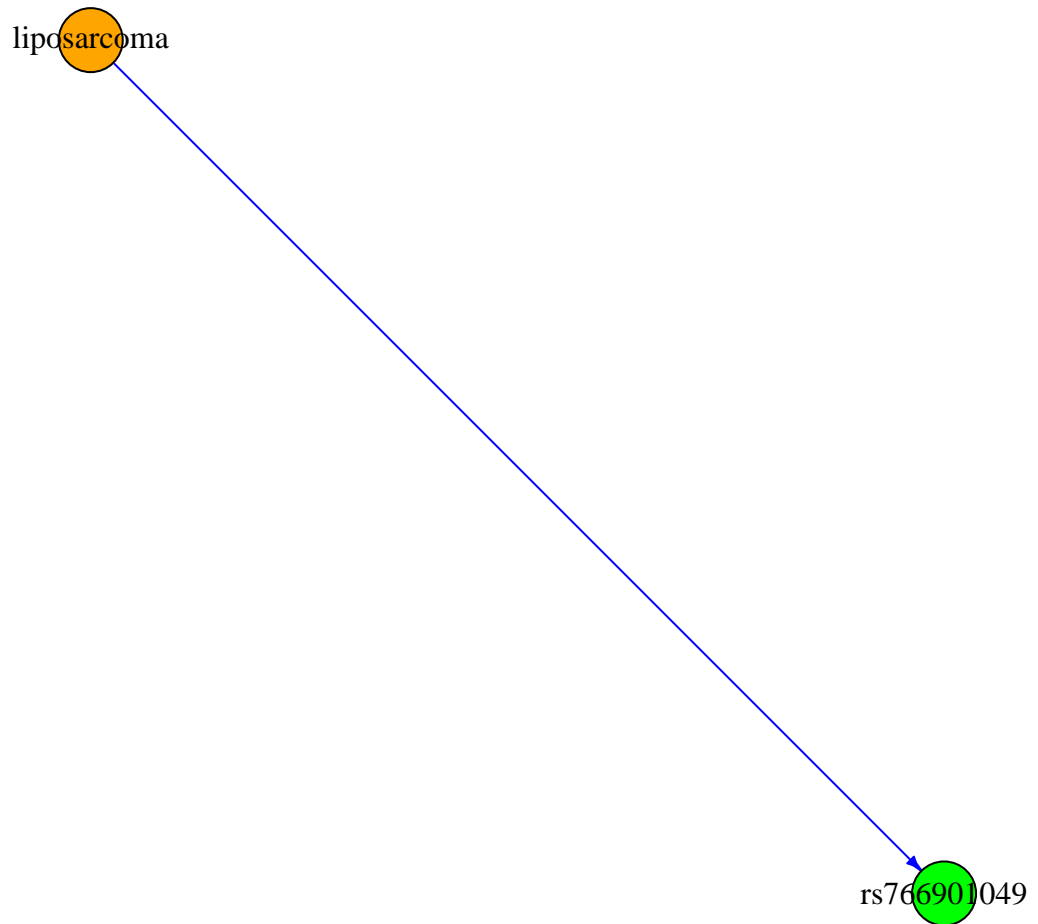

## Variant–Disease Network (lymphoid neoplasm)

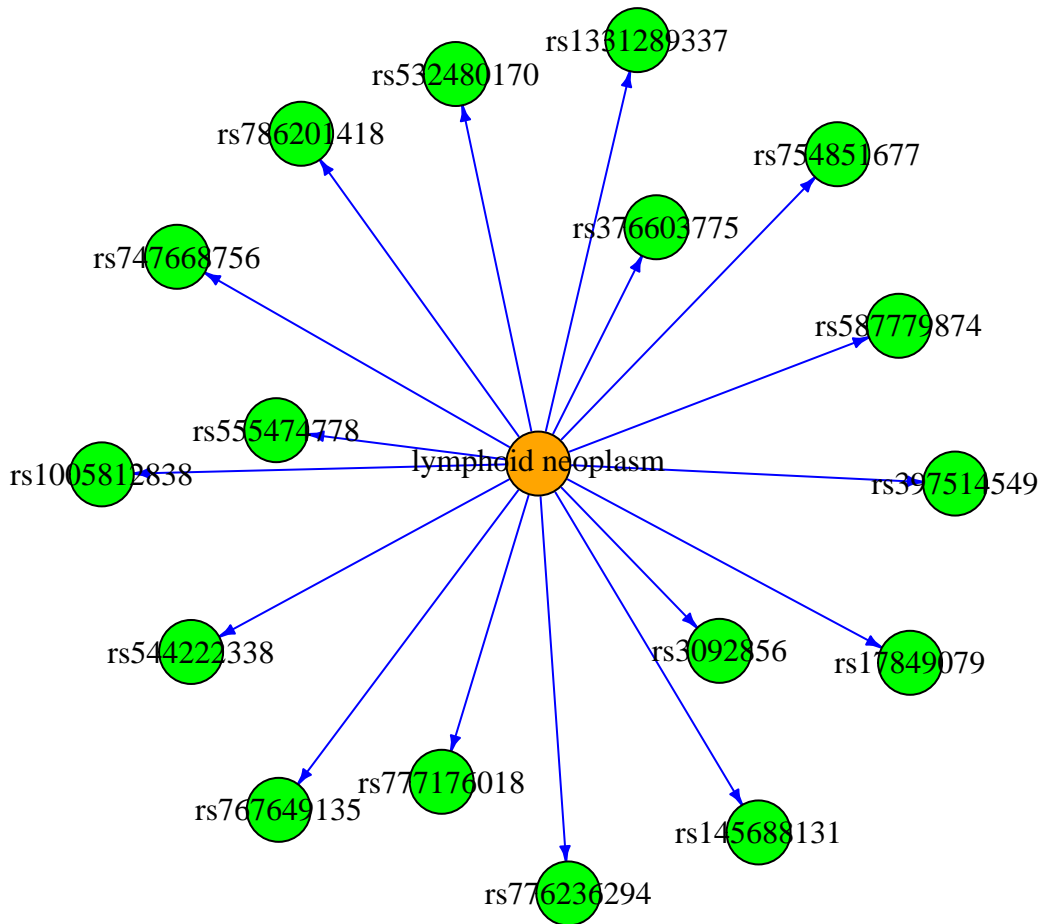

## Variant-Disease Network (malignant melanoma)

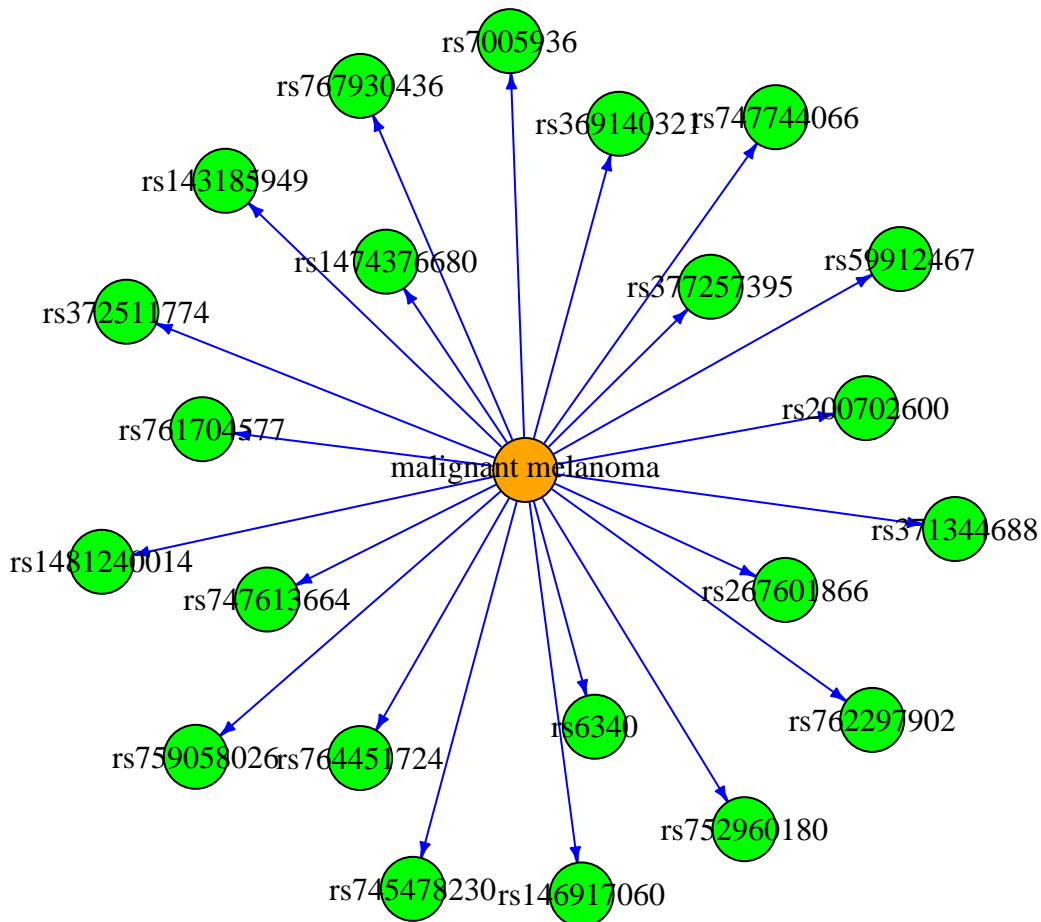

## Variant-Disease Network (meningioma)

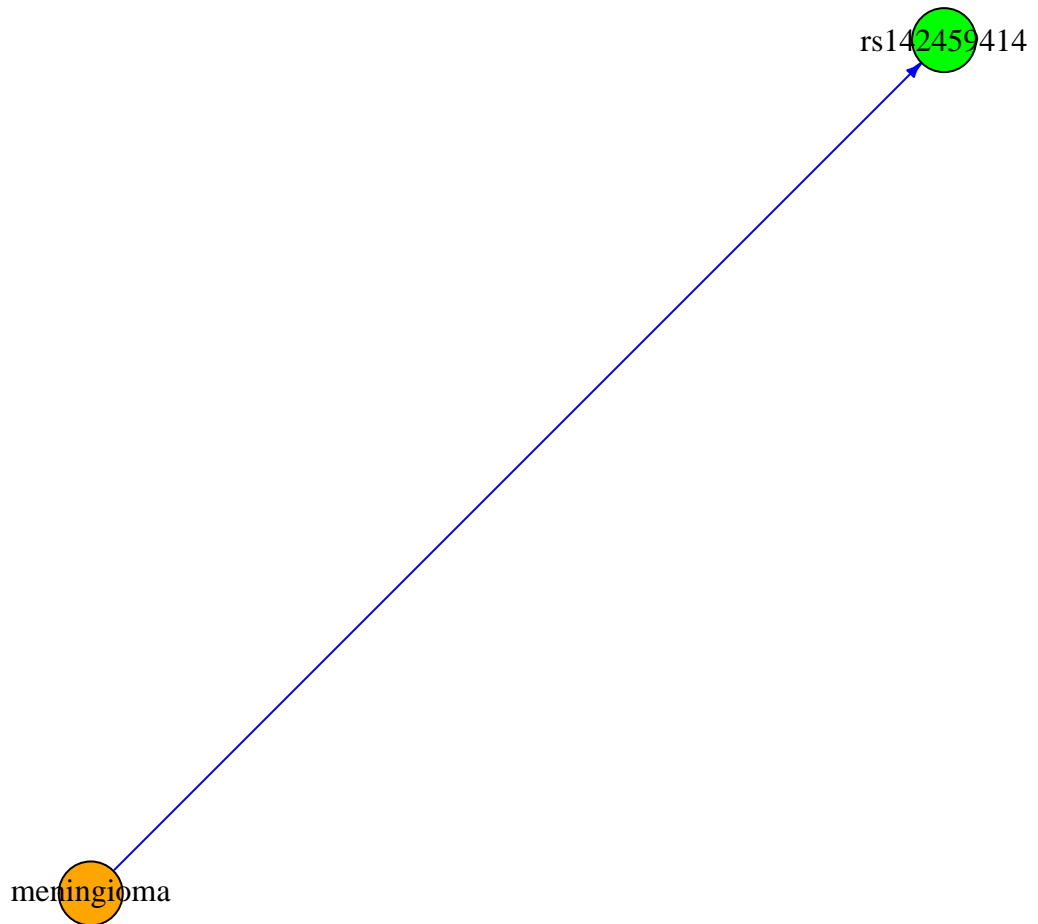

## Variant–Disease Network (mesothelioma)

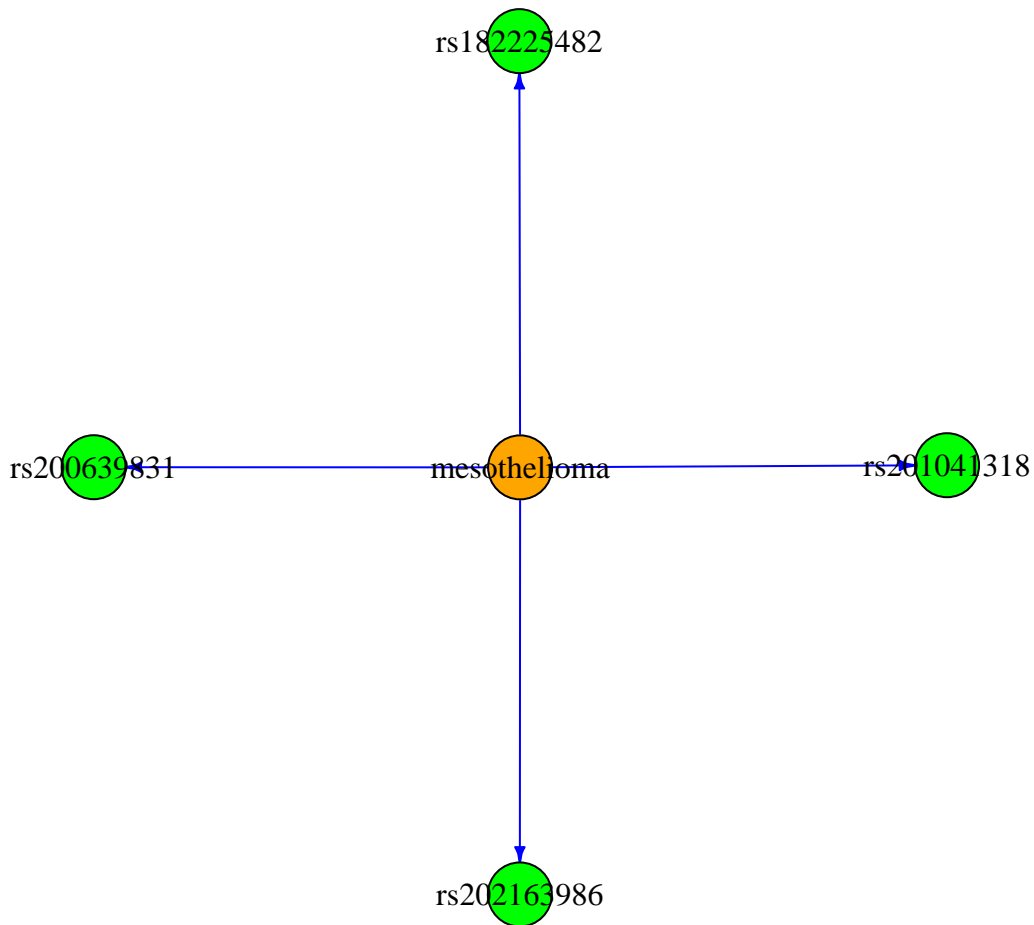

# Variant–Disease Network (primitive neuroectodermal tumour–medulloblastoma)

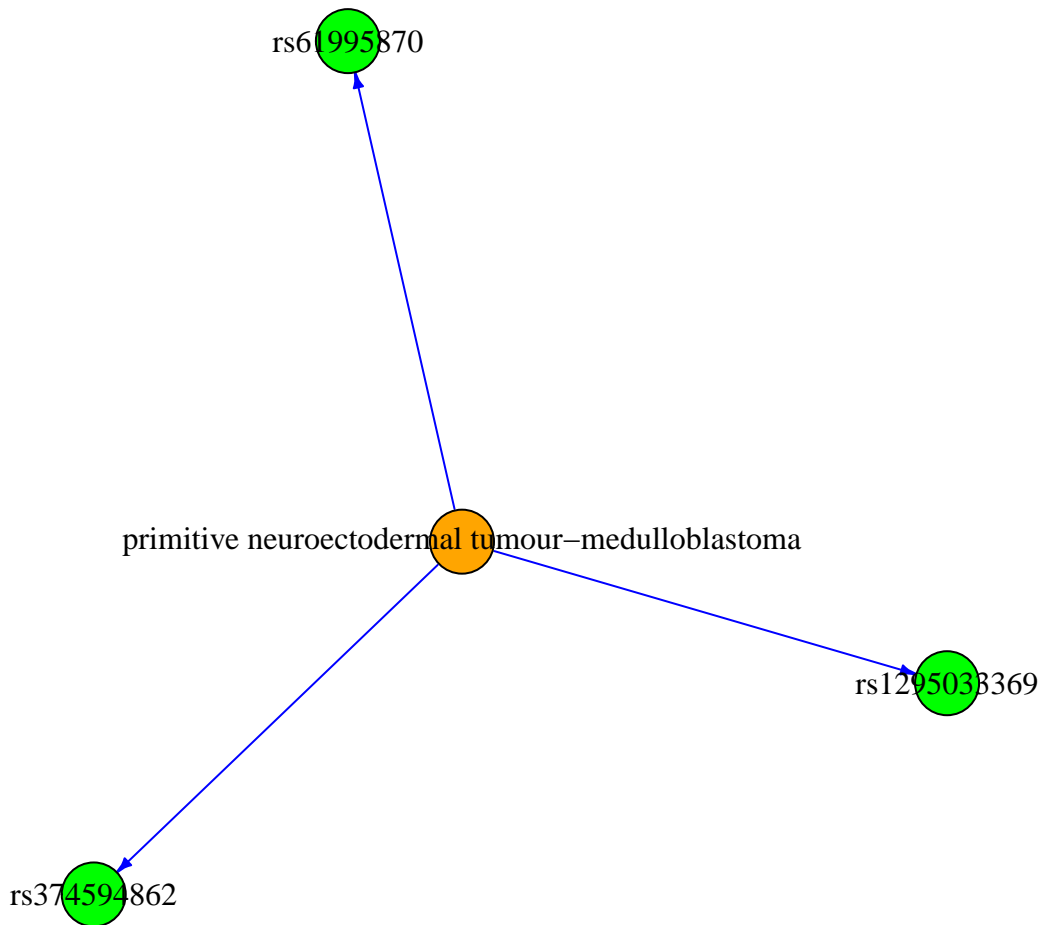



## Variant-Disease Network (thymoma)

thymoma

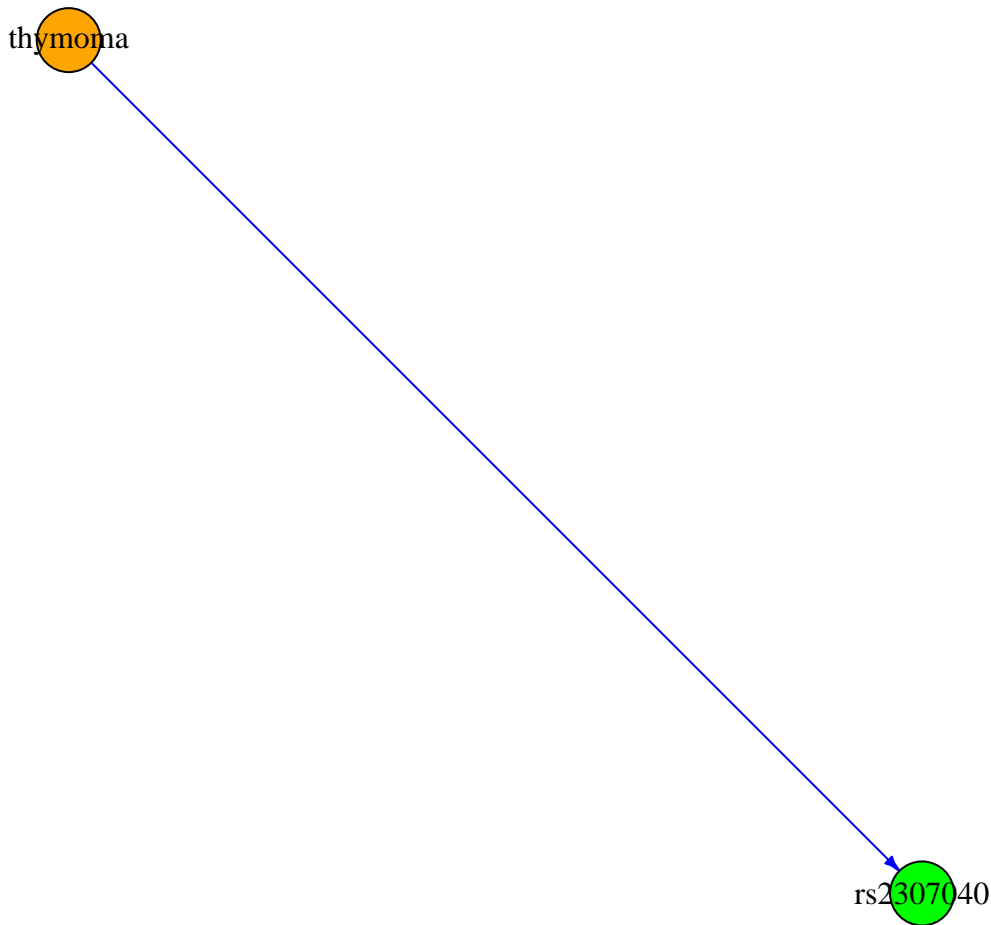

```
graph TD; thymoma((thymoma)) --> rs2307040((rs2307040));
```

The diagram illustrates a directed edge in a Variant-Disease Network. The source node, labeled 'thymoma', is represented by an orange circle. The target node, labeled 'rs2307040', is represented by a green circle. A blue arrow points from the 'thymoma' node to the 'rs2307040' node, indicating a causal or associative link between the disease and the specific genetic variant.

rs2307040

## Variant-Disease Network ( Autosomal Dominant)

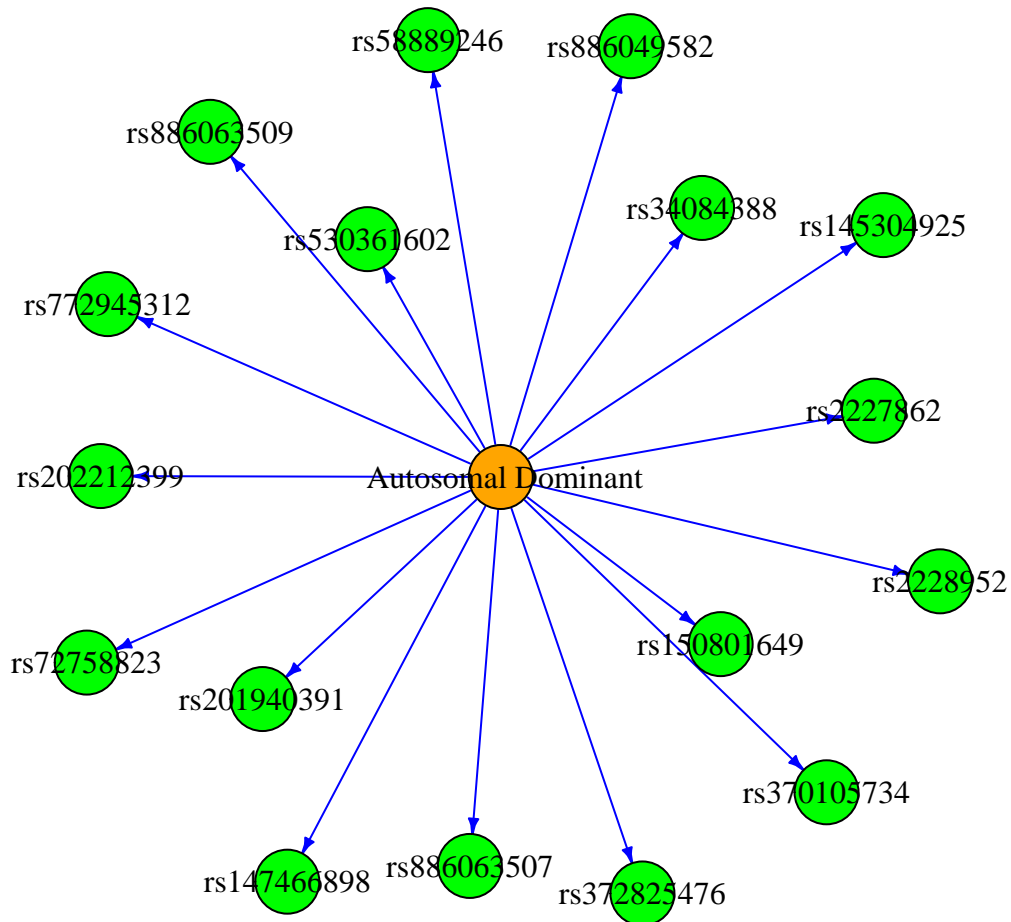

## Variant–Disease Network ( Autosomal Recessive)

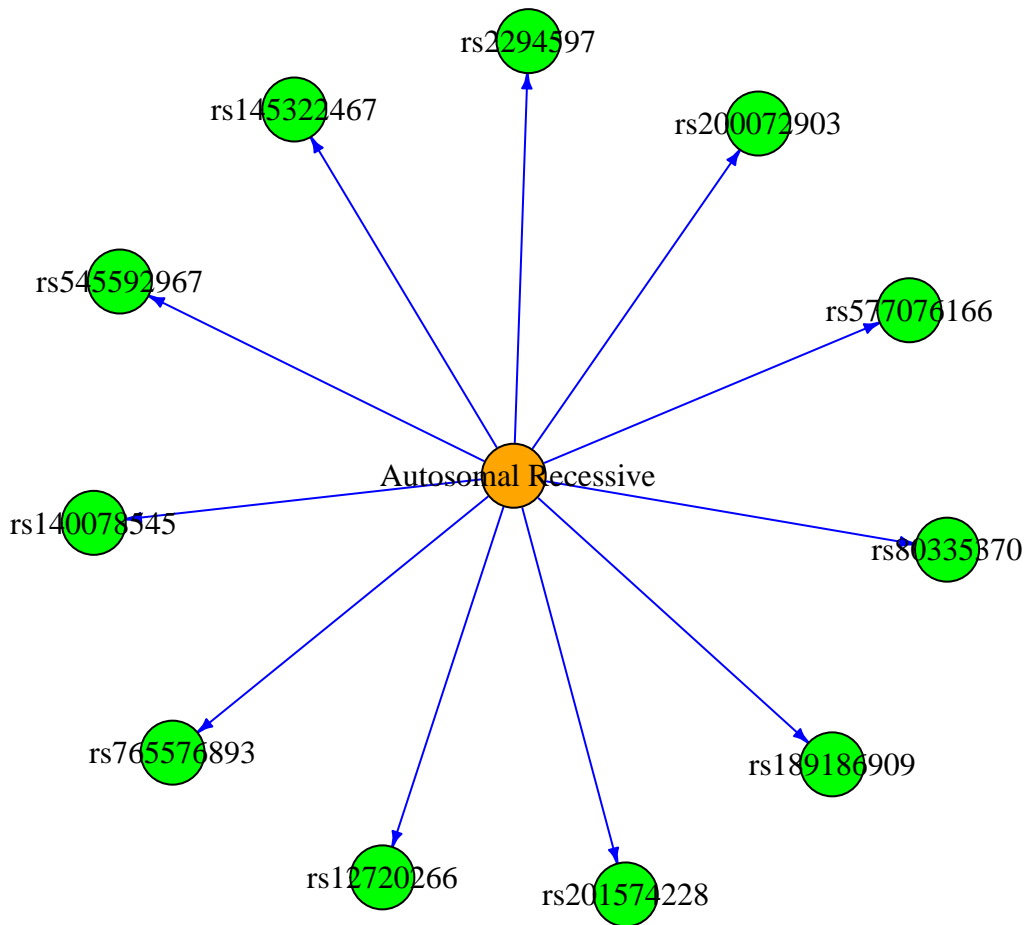

## Variant-Disease Network ( Deafness)

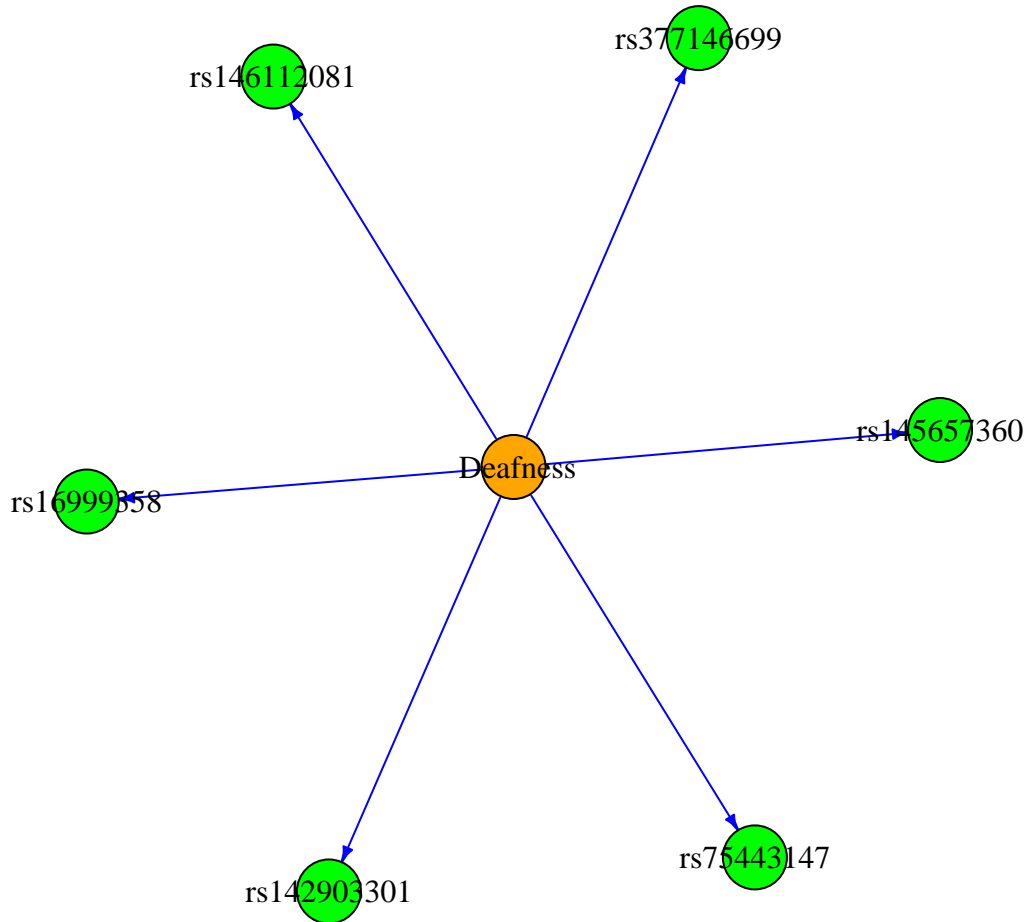

## Variant–Disease Network ( Dopa-responsive type)

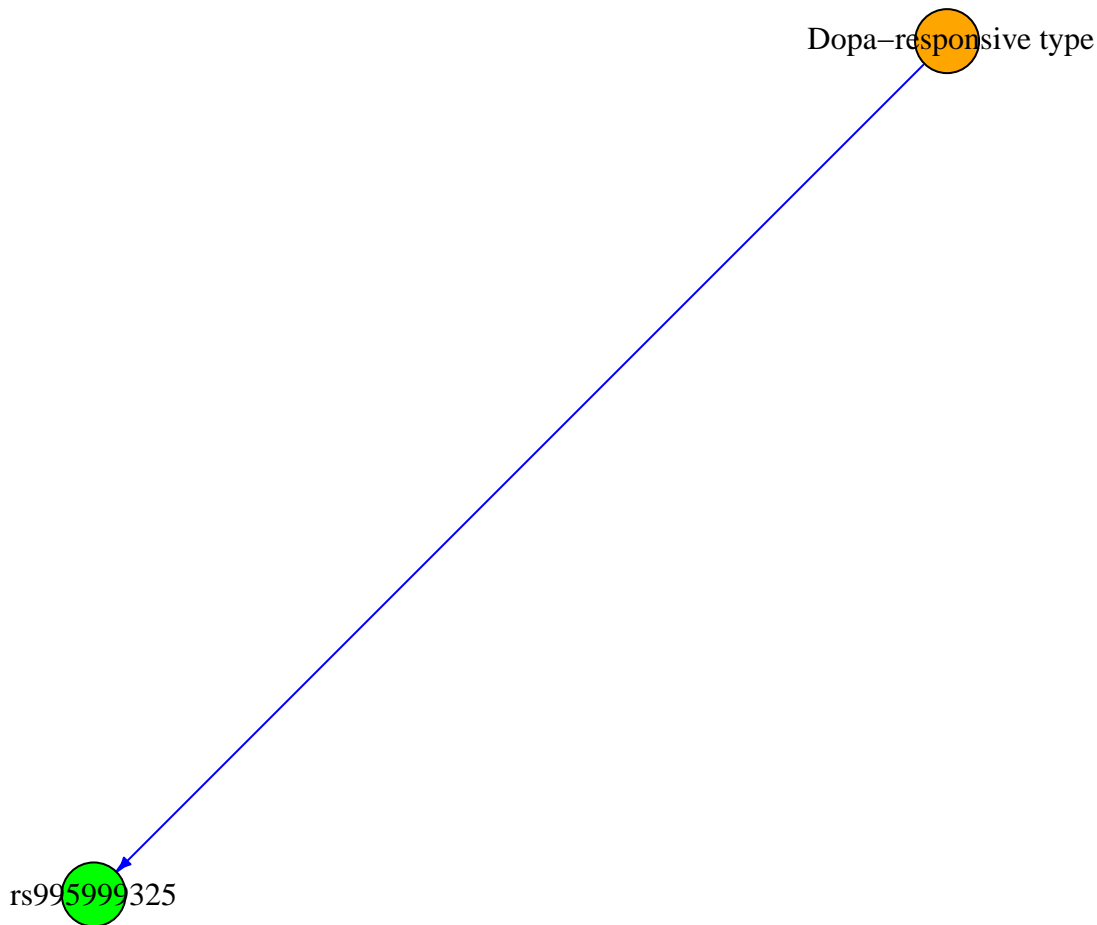

## Variant-Disease Network (Epilepsy)

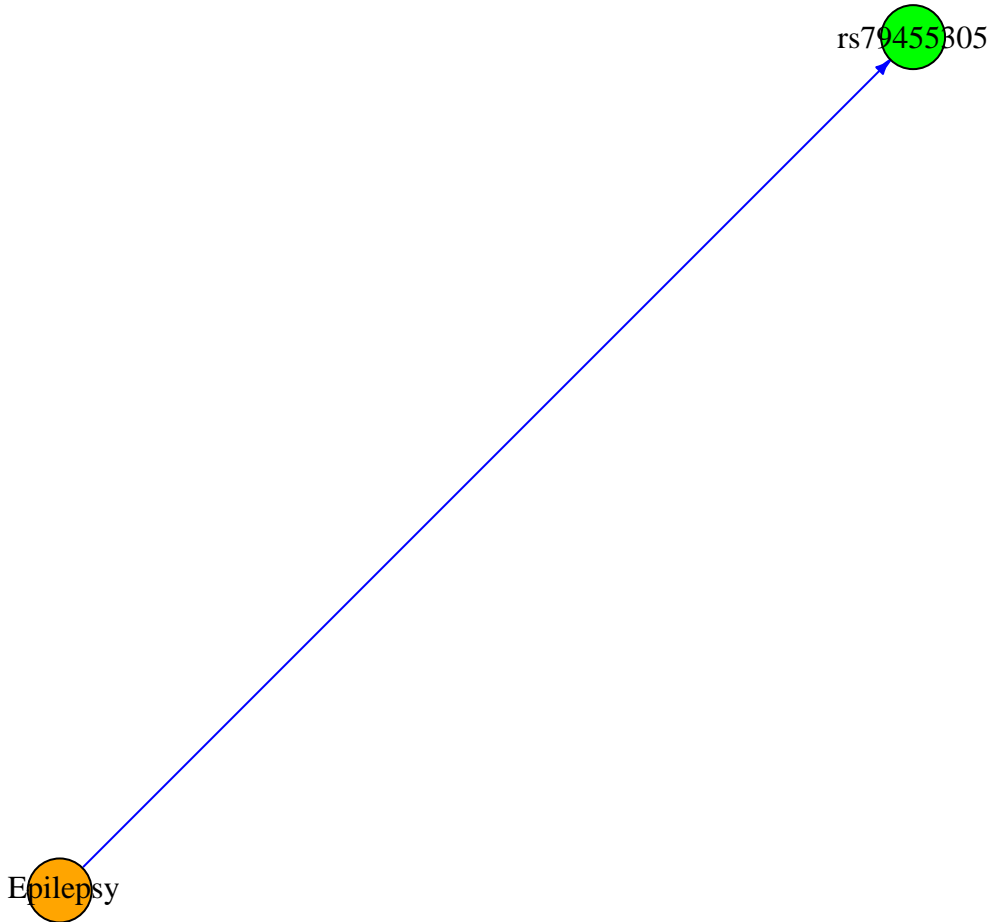

## Variant–Disease Network ( Hepatic Steatosis)

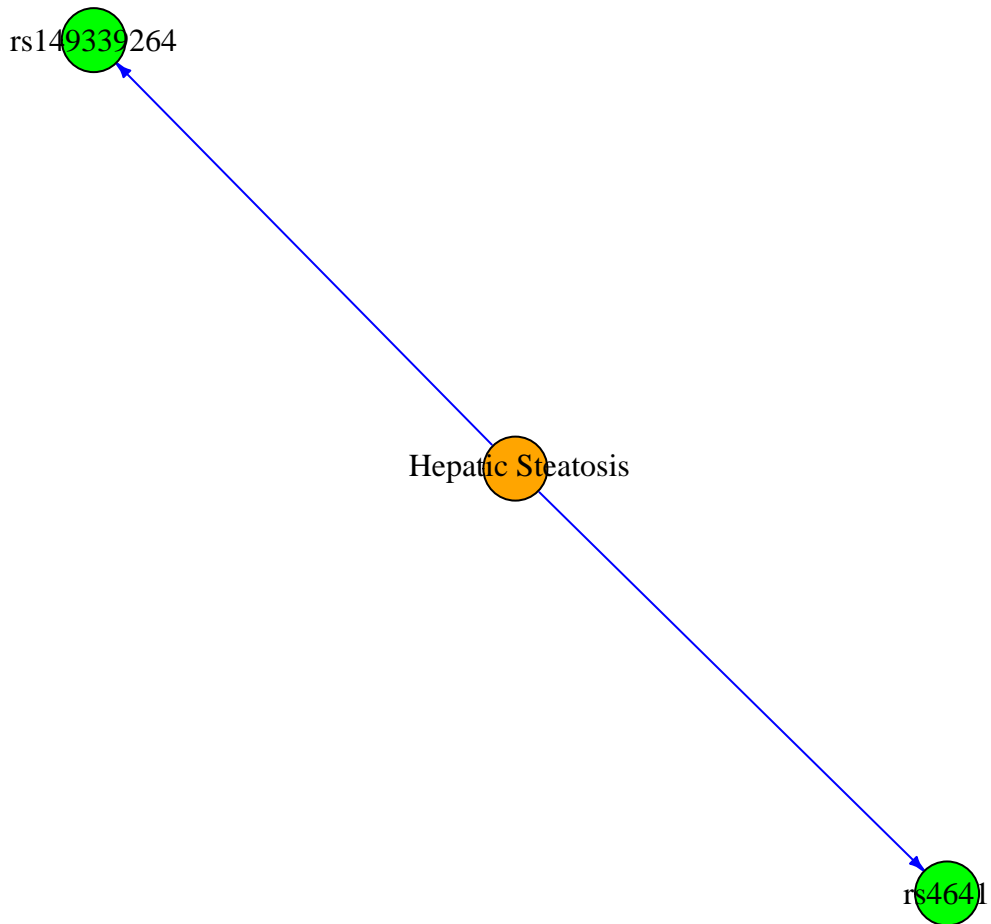

Variant–Disease Network ( Hypertrophic Cardiomyopathy)

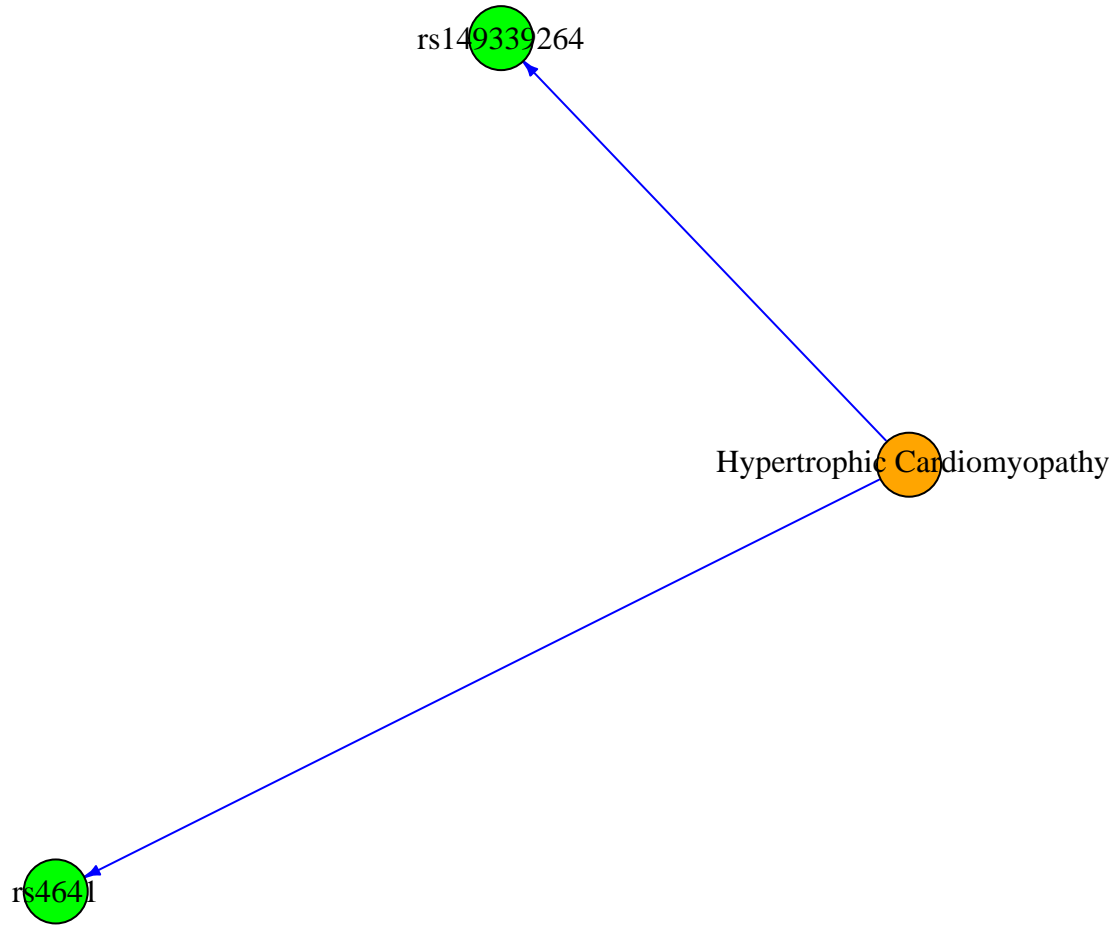



## Variant-Disease Network (Abetalipoproteinaemia)

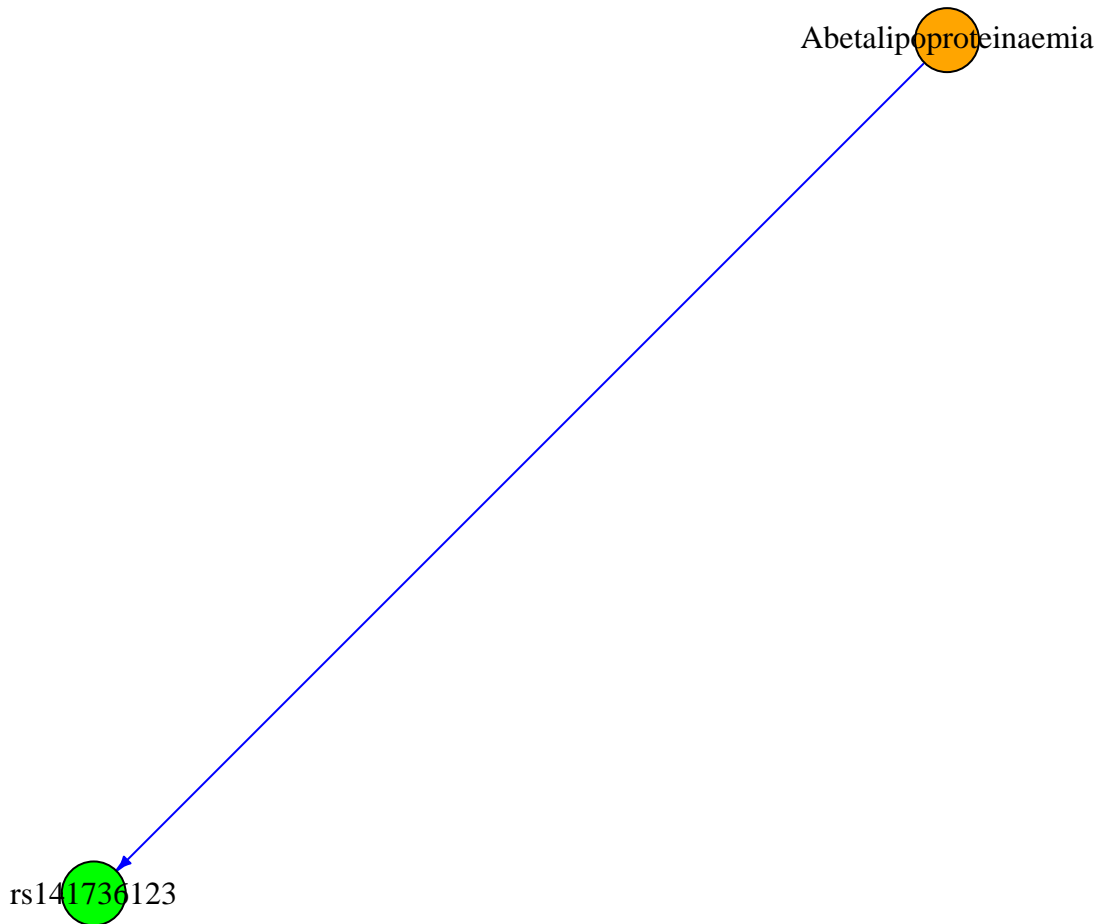

## Variant-Disease Network (Abnormal bleeding)

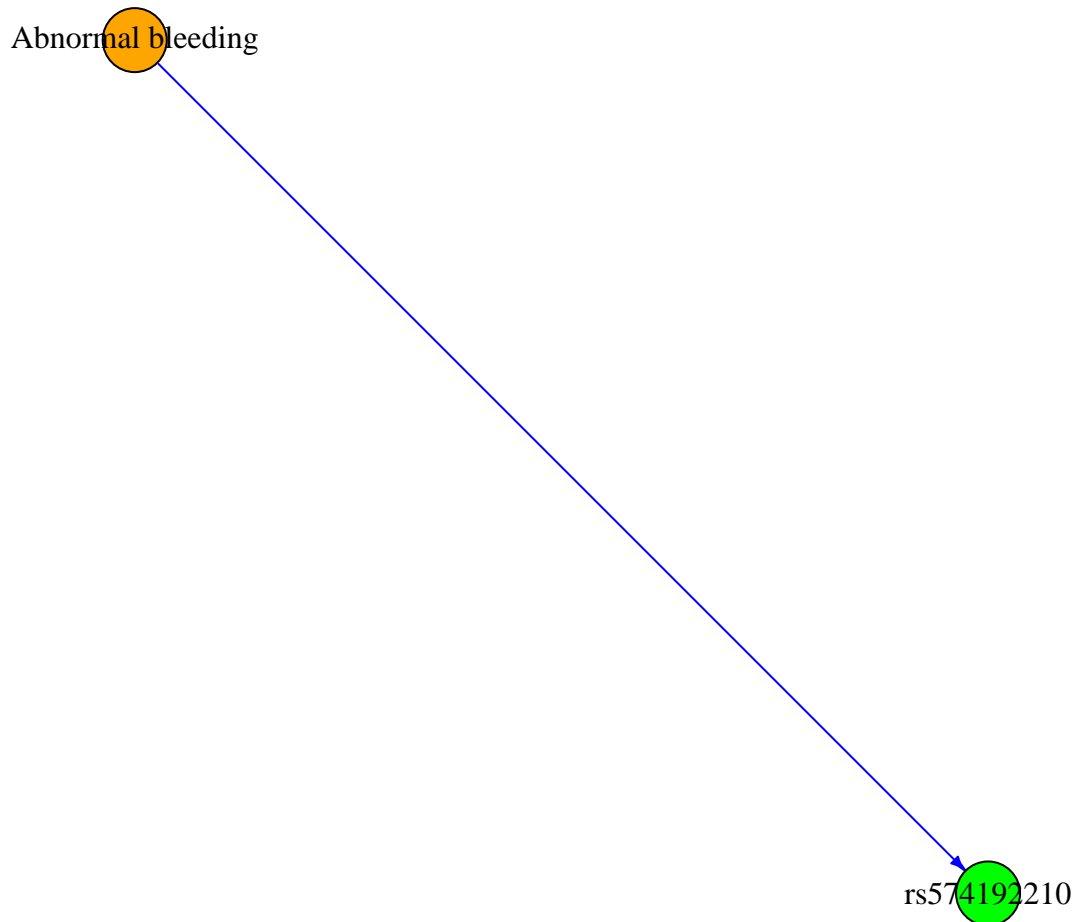

**Variant–Disease Network (Abnormality of neuronal migration)**

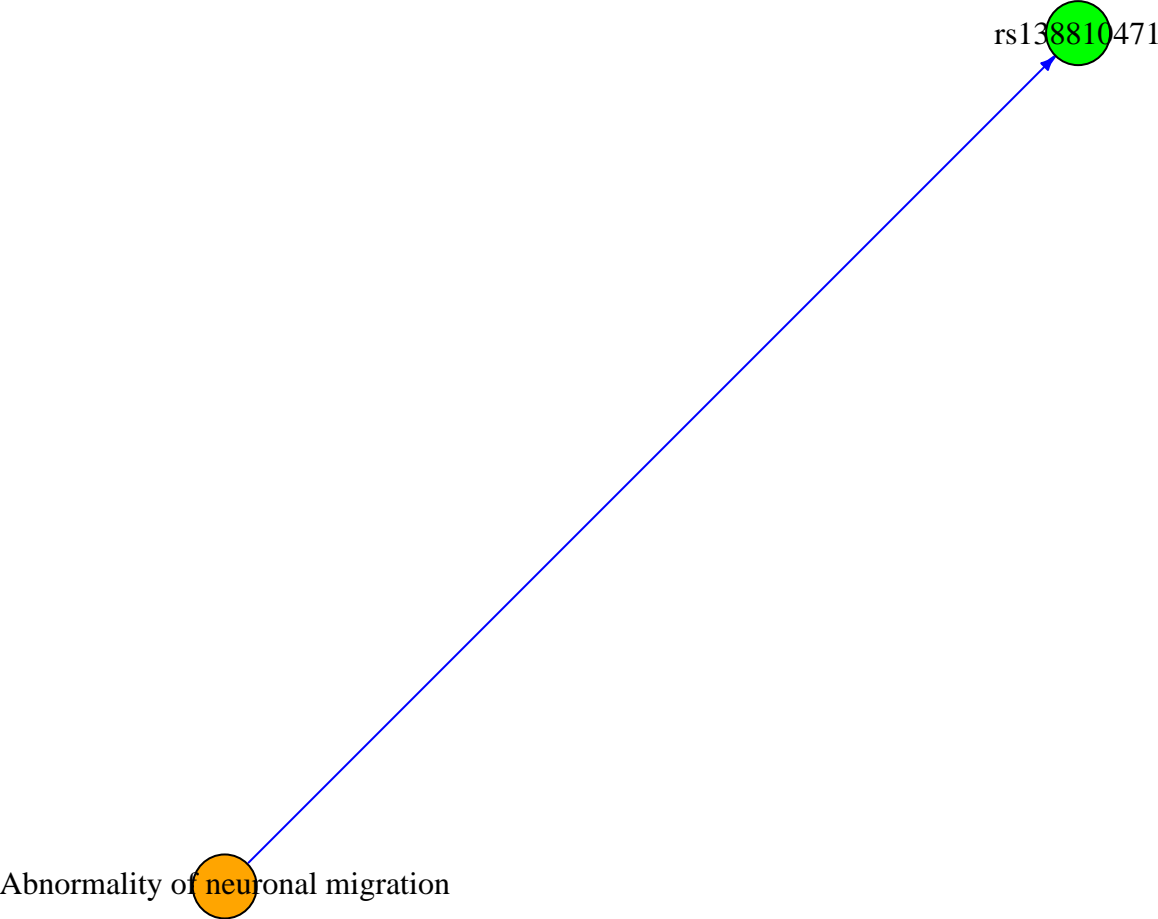

**Variant–Disease Network (Abnormality of the dentition)**

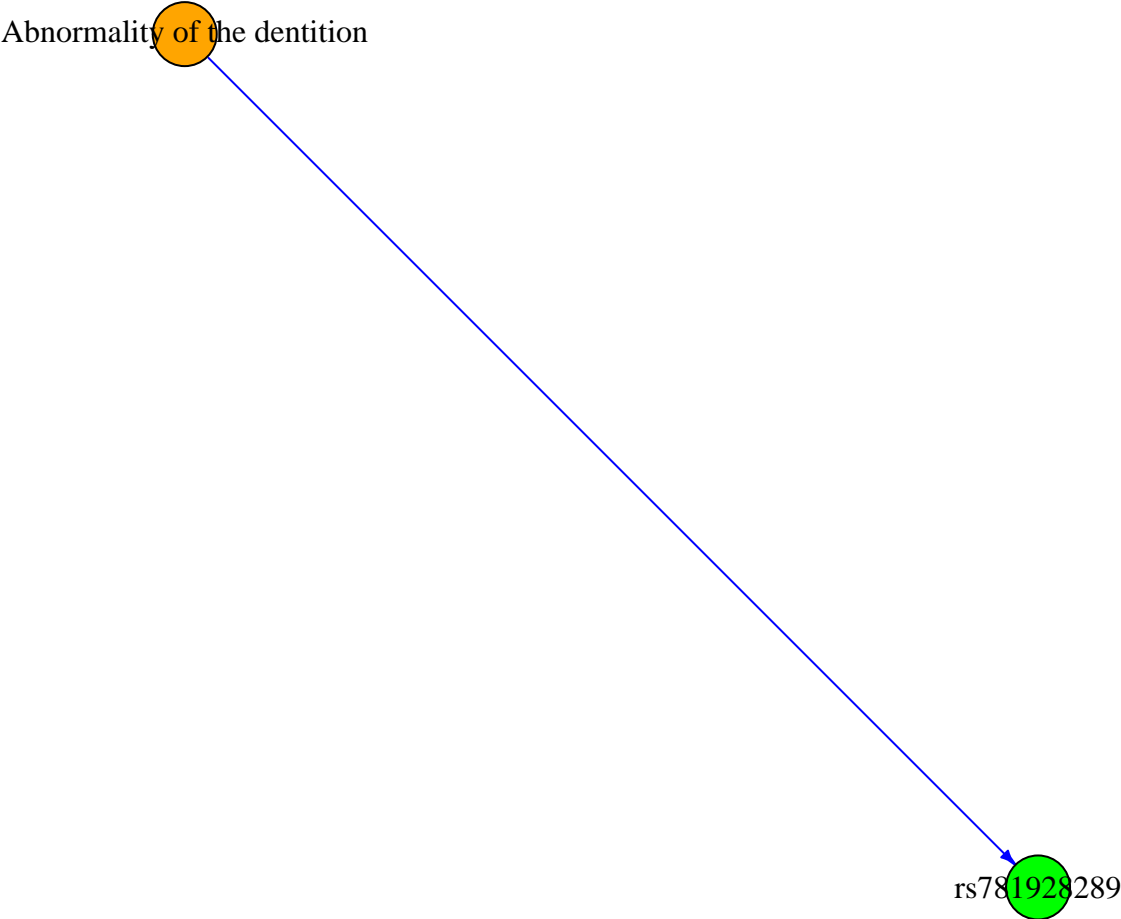

## Variant–Disease Network (Absent speech)

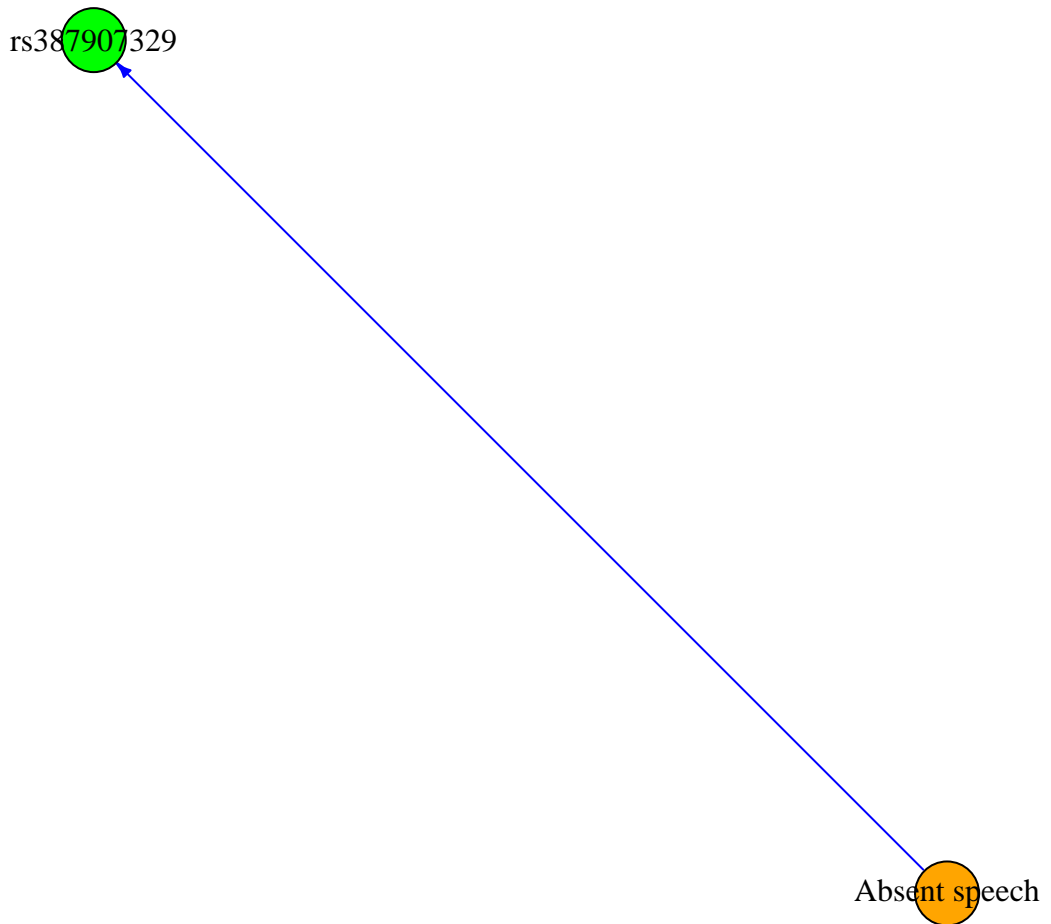

Variant–Disease Network (Achondrogenesis)

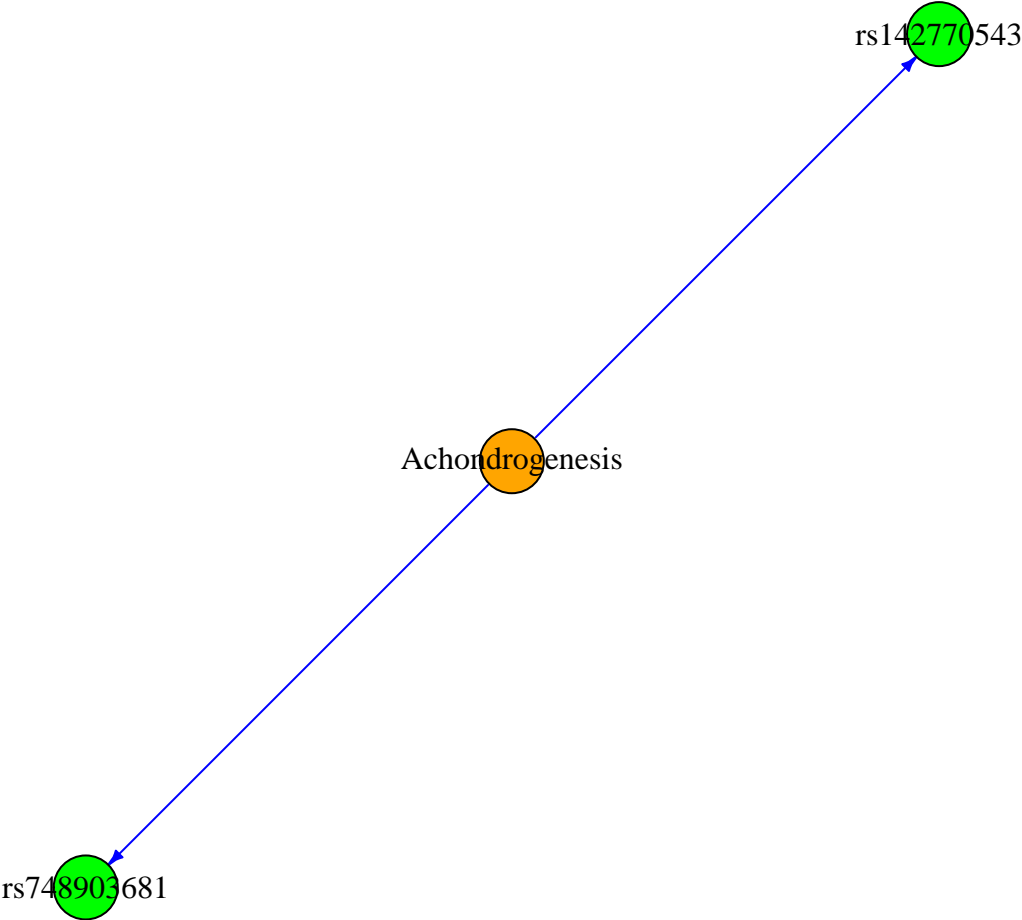

## Variant–Disease Network (Achromatopsia)

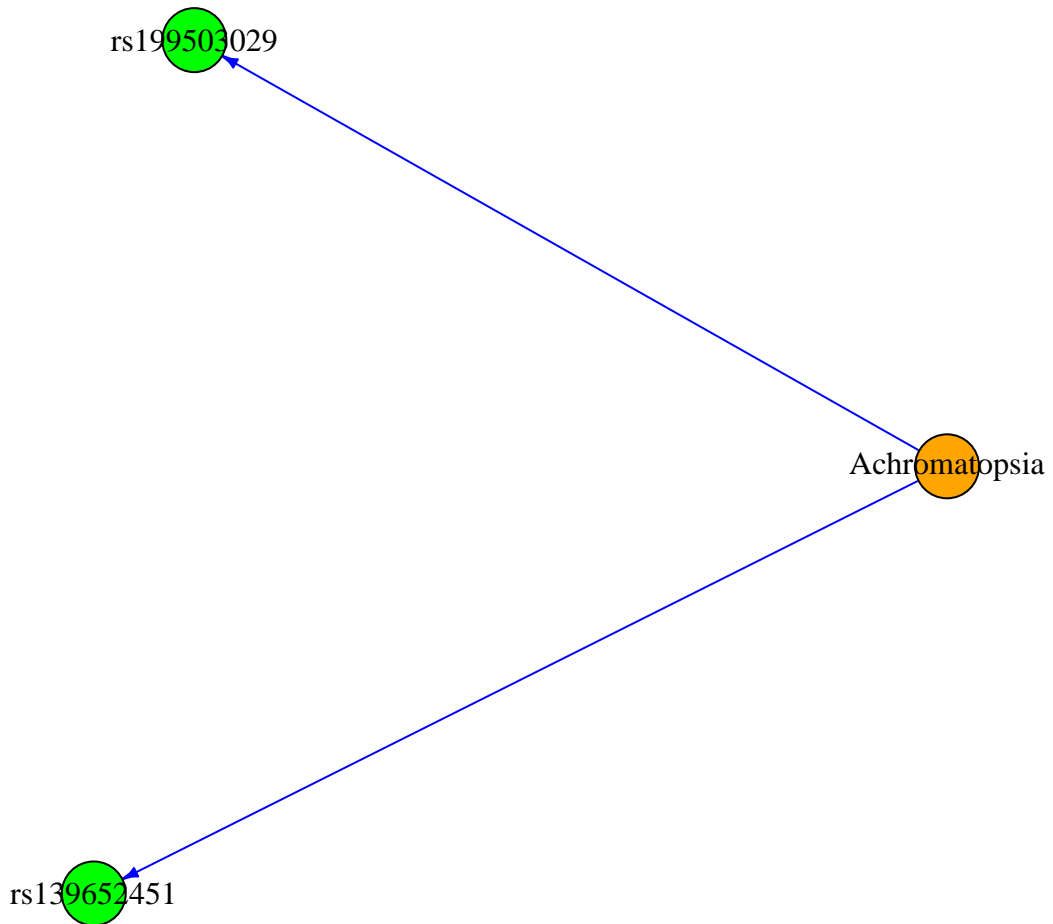

## Variant-Disease Network (Achromatopsia 3)

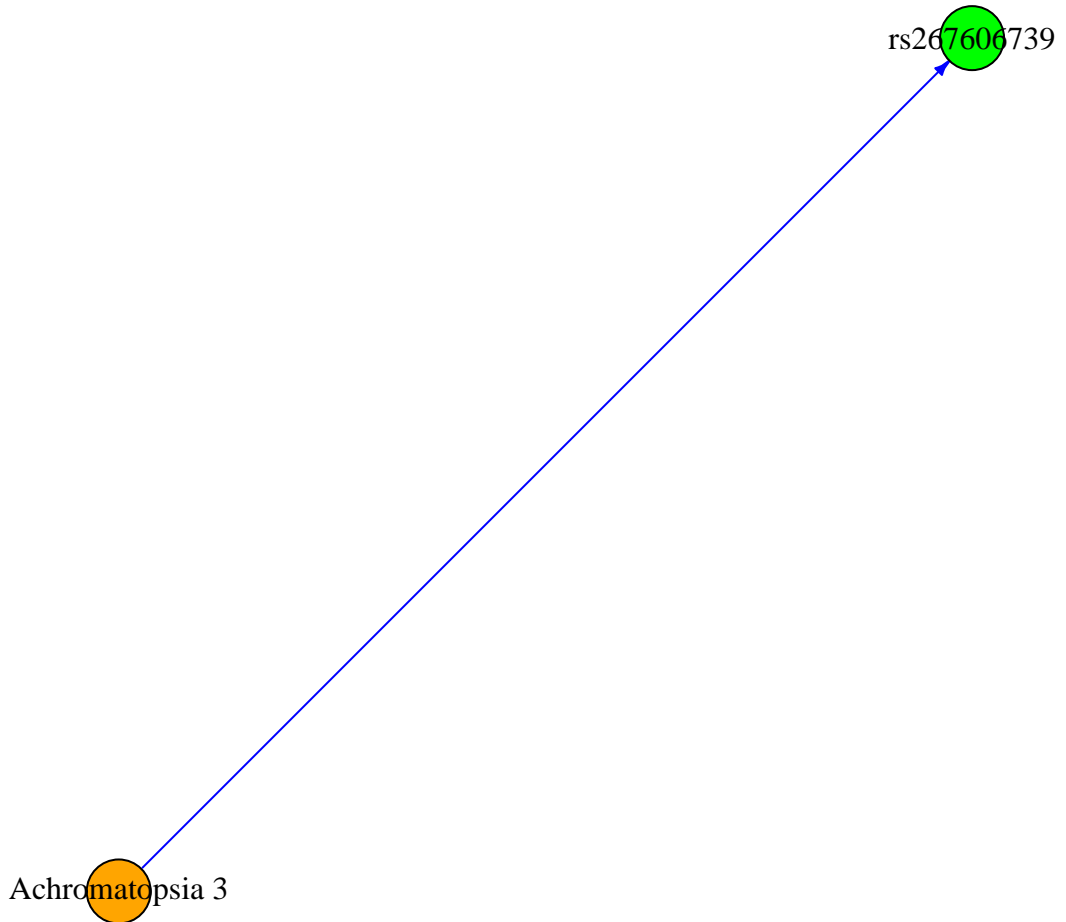



**Variant–Disease Network (Acrocephalosyndactyly type I)**

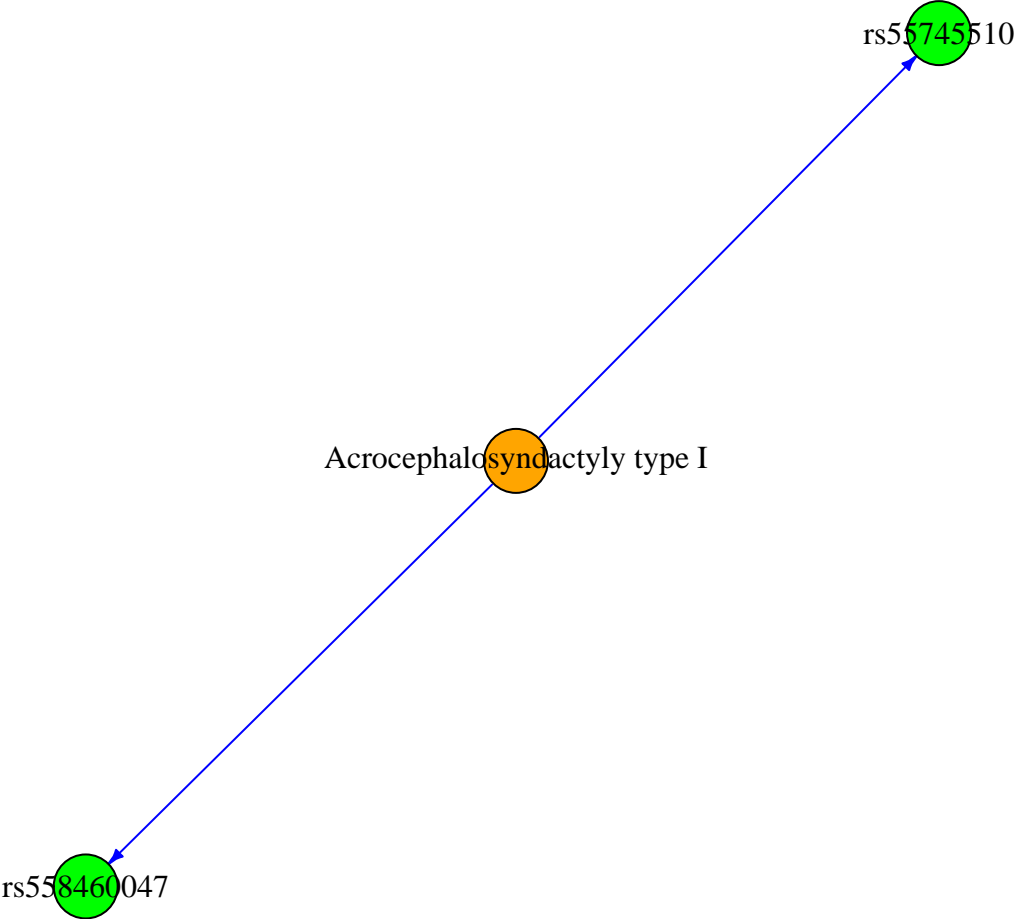

Variant–Disease Network (Acrodysostosis)

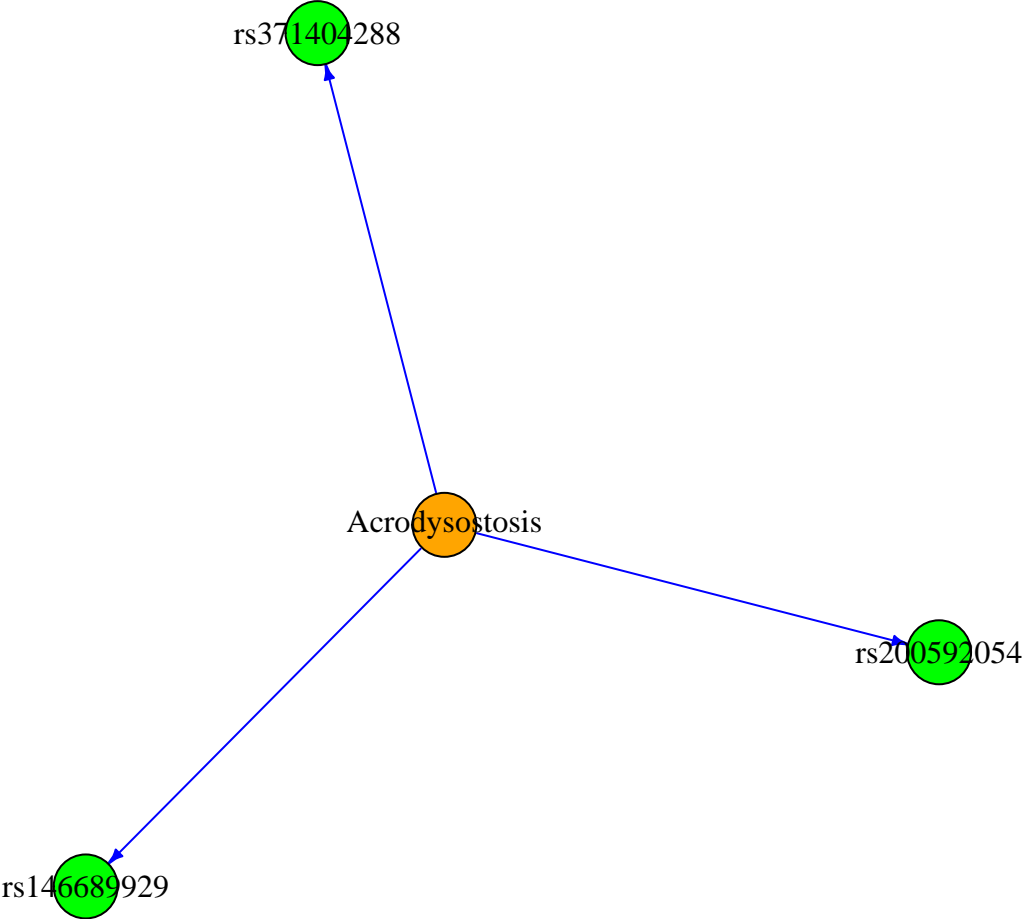

## Variant–Disease Network (Acromesomelic Dysplasia)

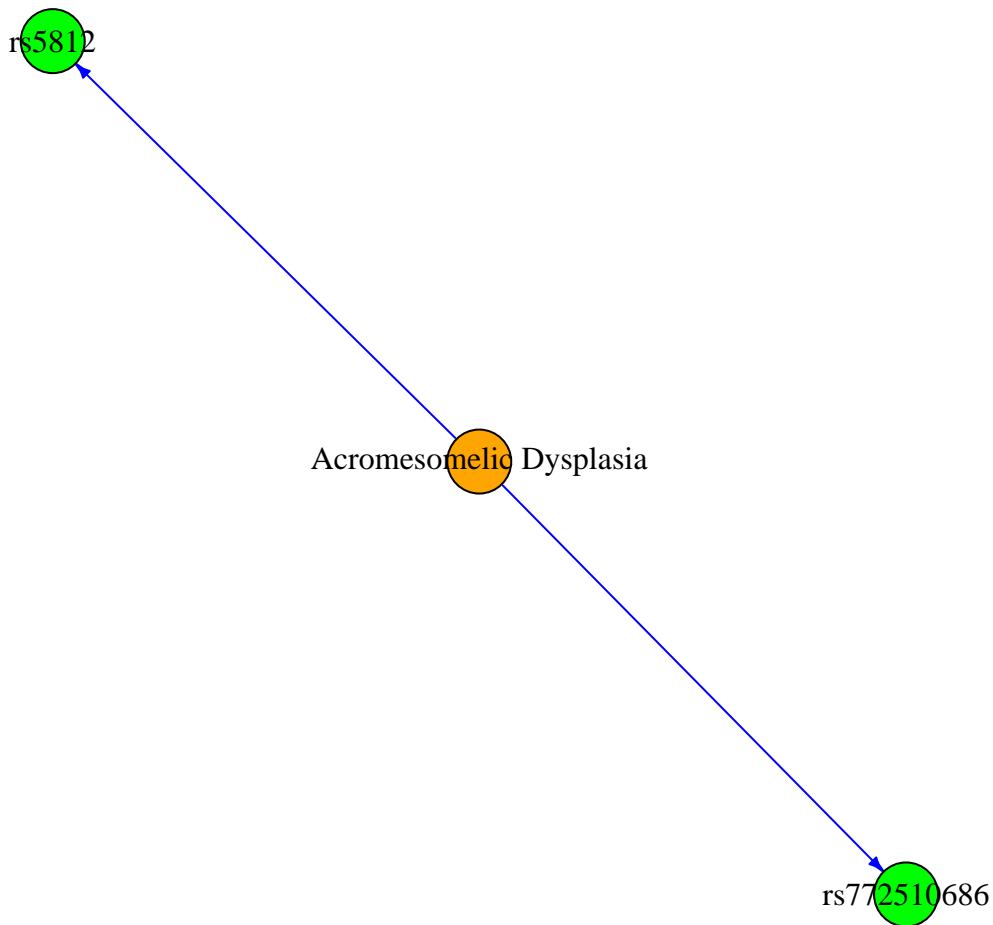

**Variant–Disease Network (Acromesomelic dysplasia Maroteaux type)**

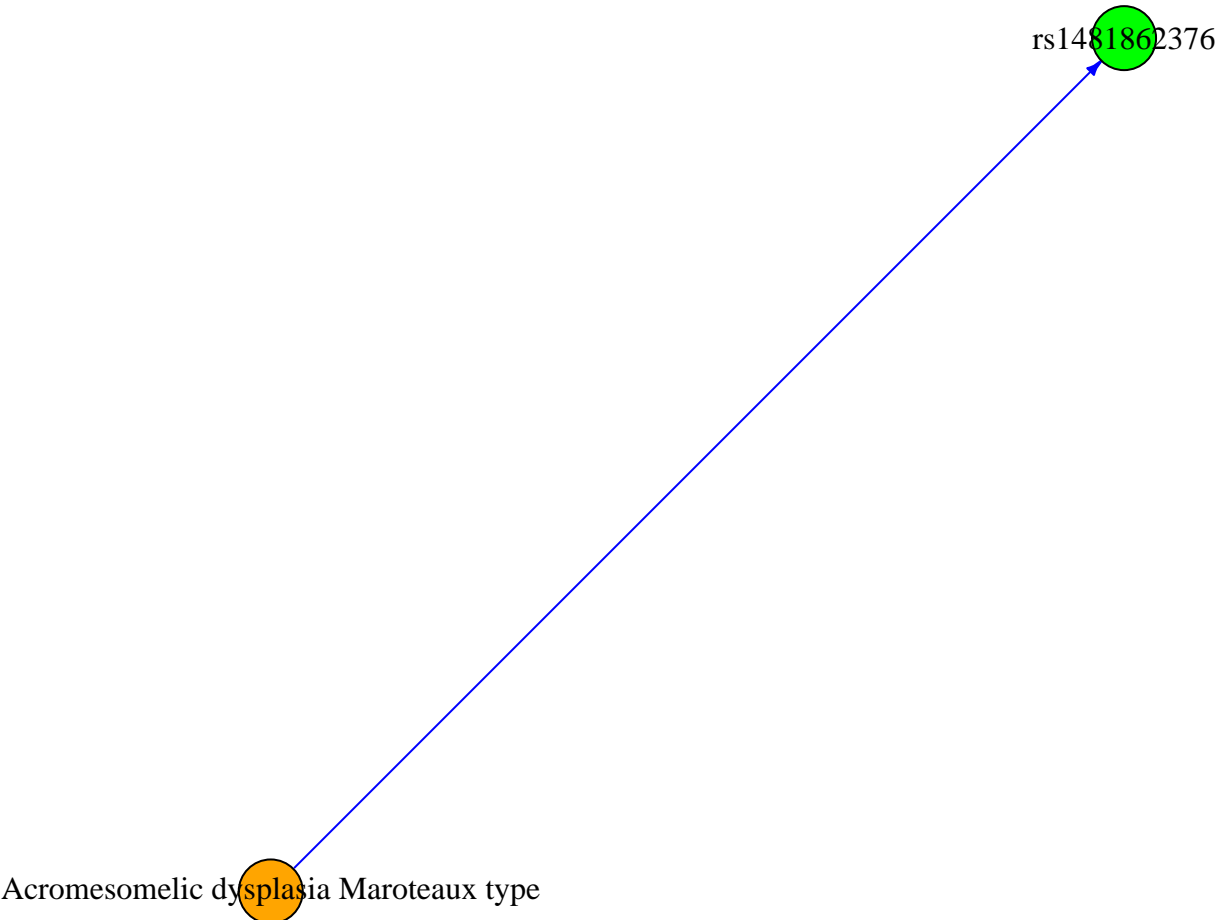

## Variant-Disease Network (Acromicric dysplasia)

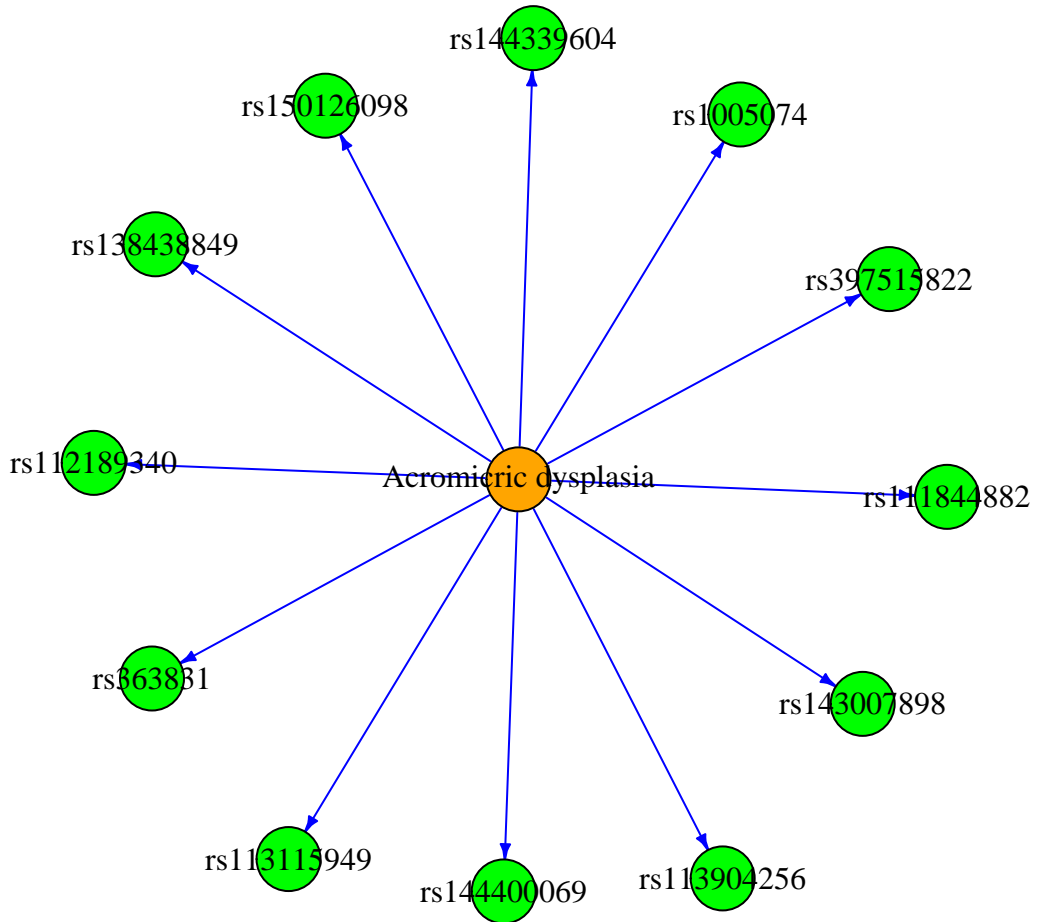

Variant–Disease Network (Acute intermittent porphyria)

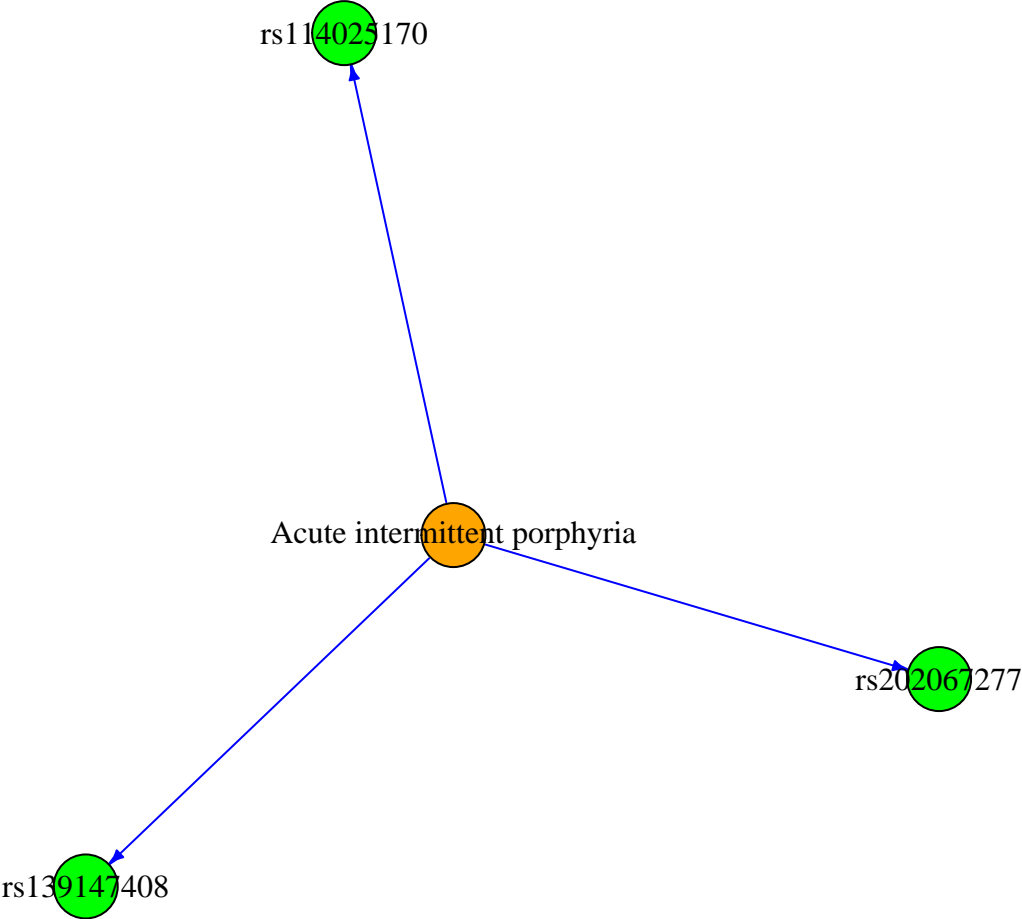

Variant–Disease Network (Acute Recurrent Myoglobinuria)

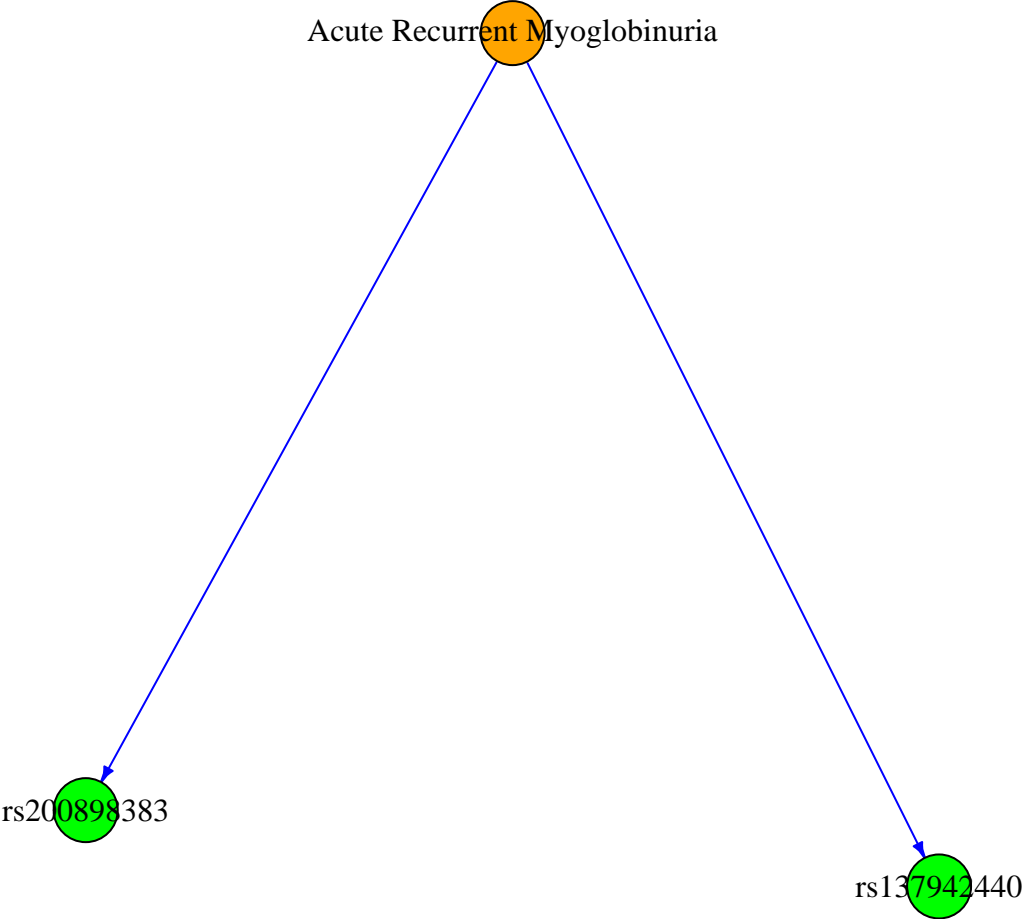

## Variant-Disease Network (Adams-Oliver syndrome 5)

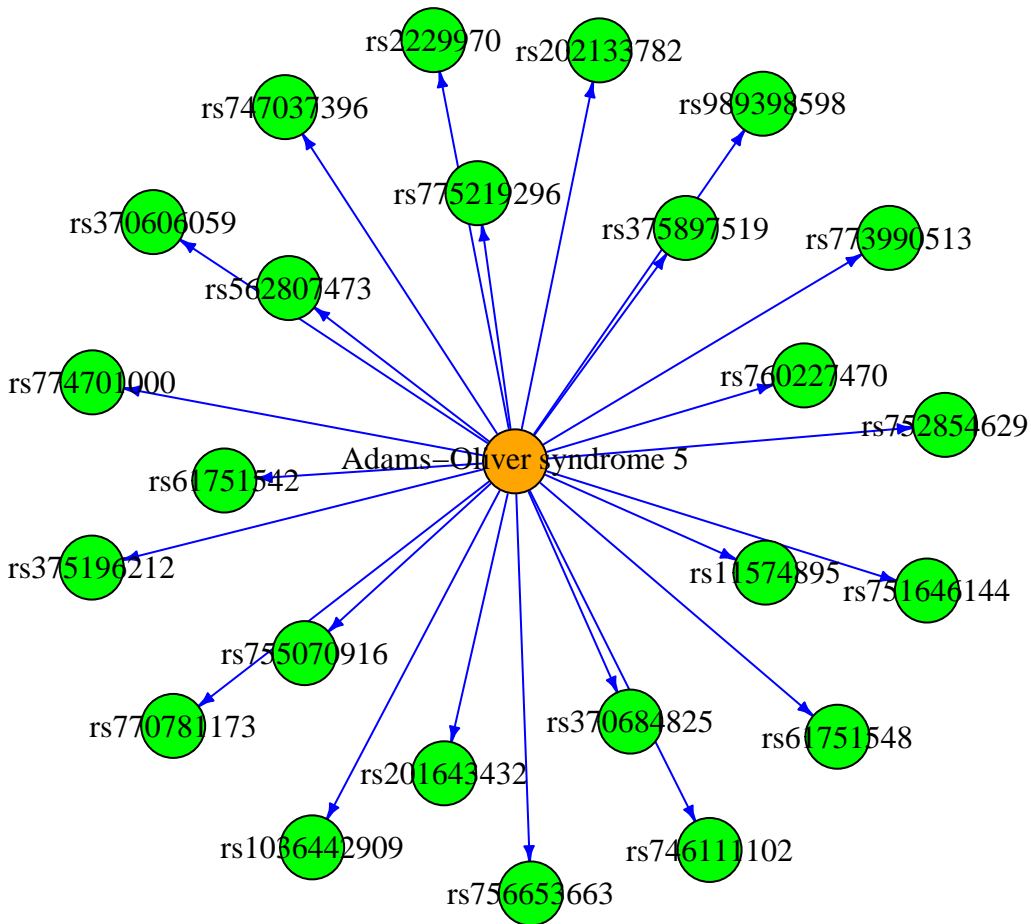



## Variant–Disease Network (Adenocarcinoma of stomach)

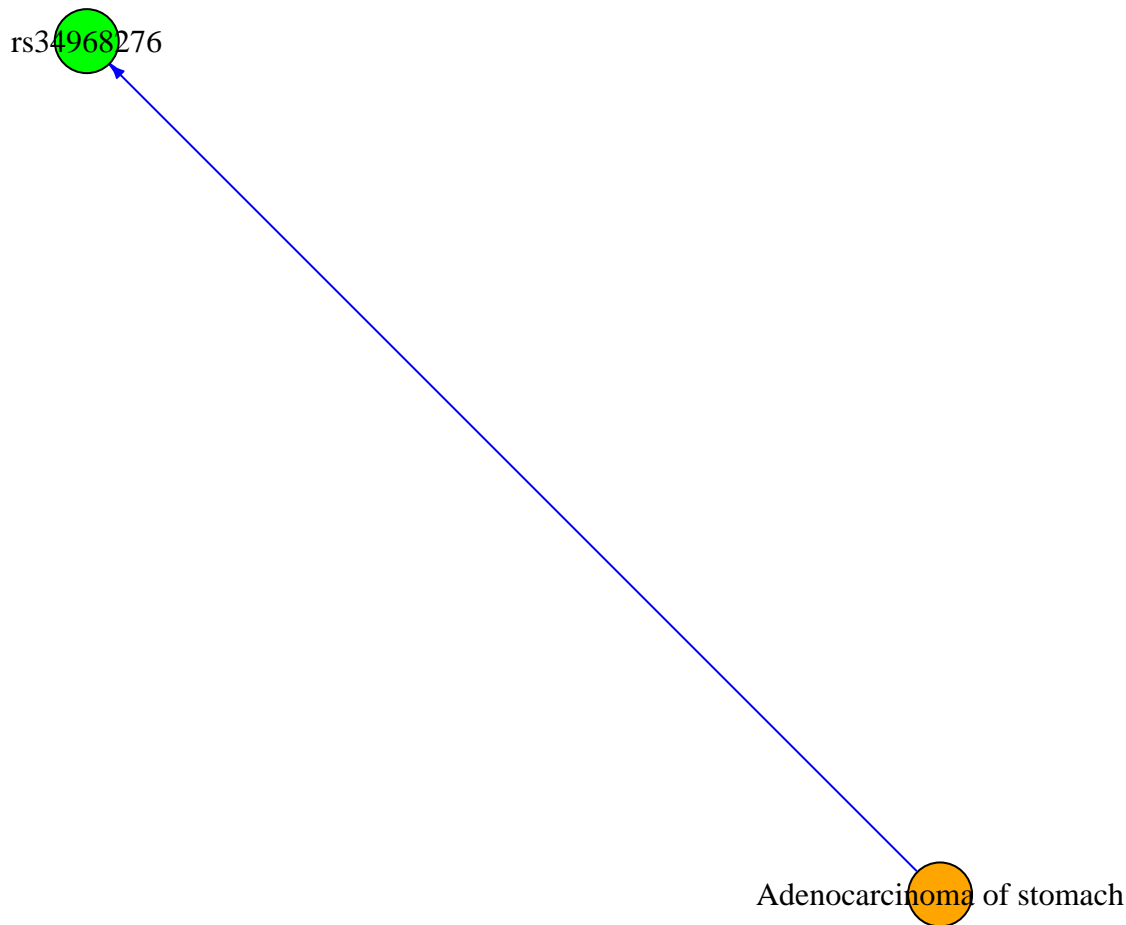

Variant–Disease Network (Adenylosuccinate lyase deficiency)

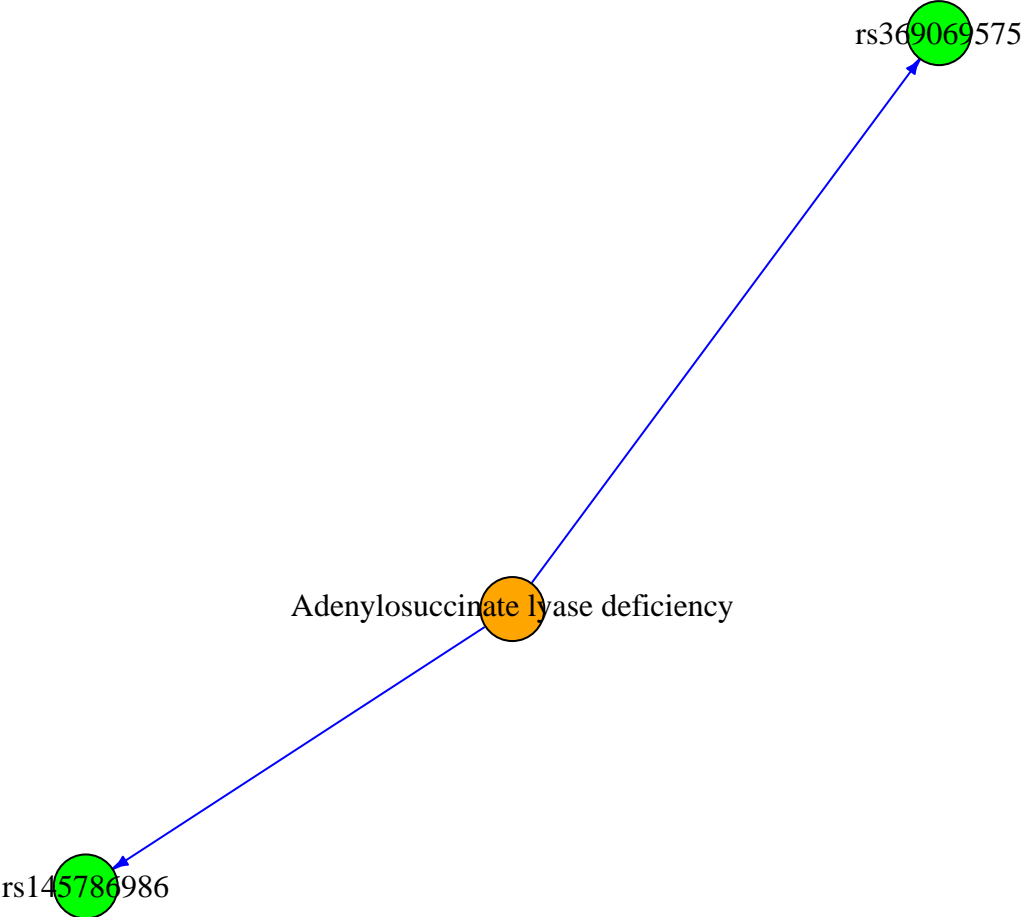

## Variant–Disease Network (Adrenoleukodystrophy)

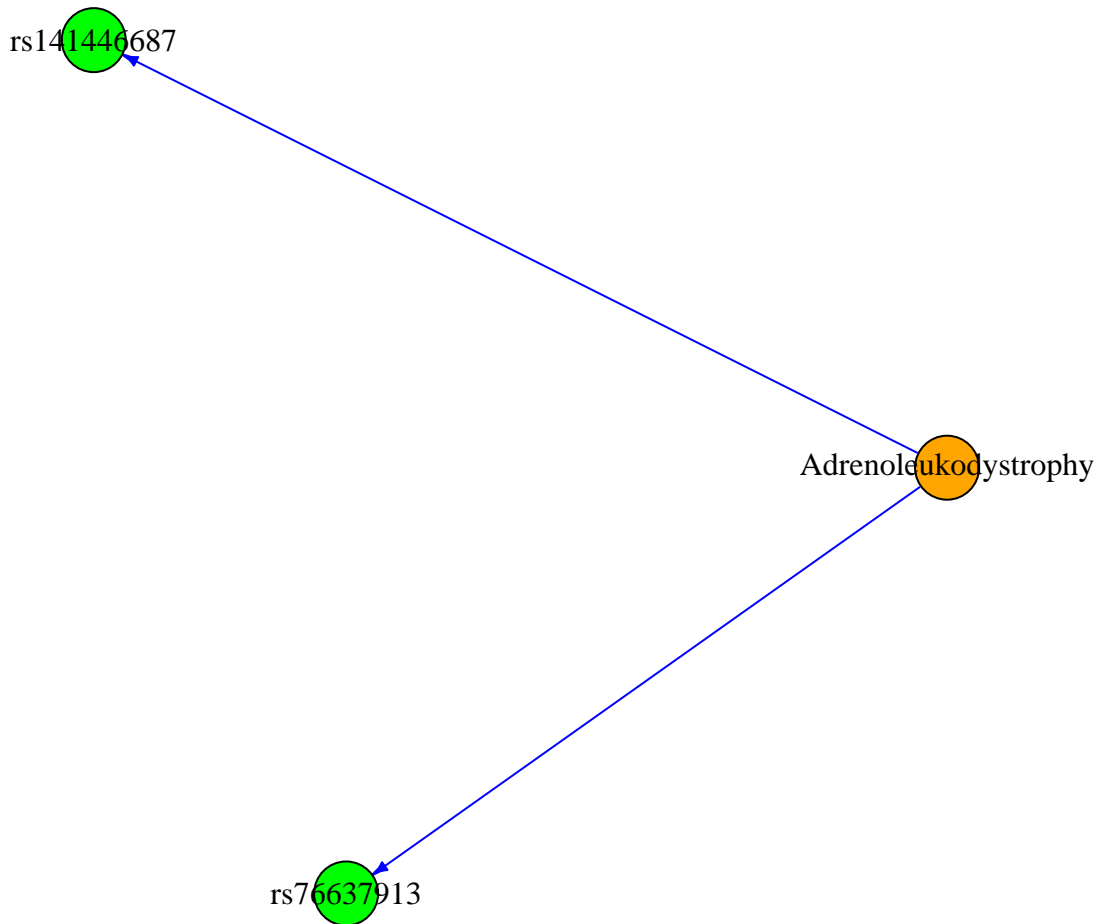

Variant–Disease Network (Agammaglobulinemia 5)

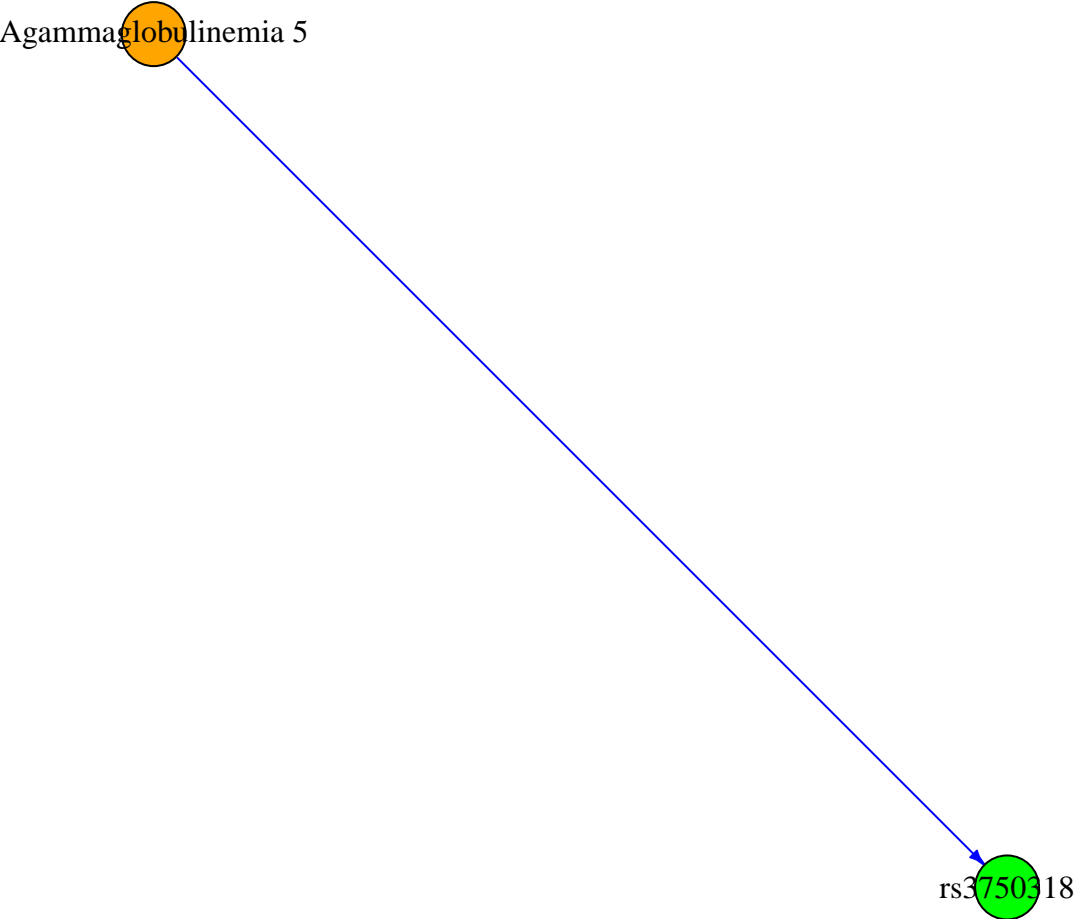

## Variant–Disease Network (Age-related cortical cataract)

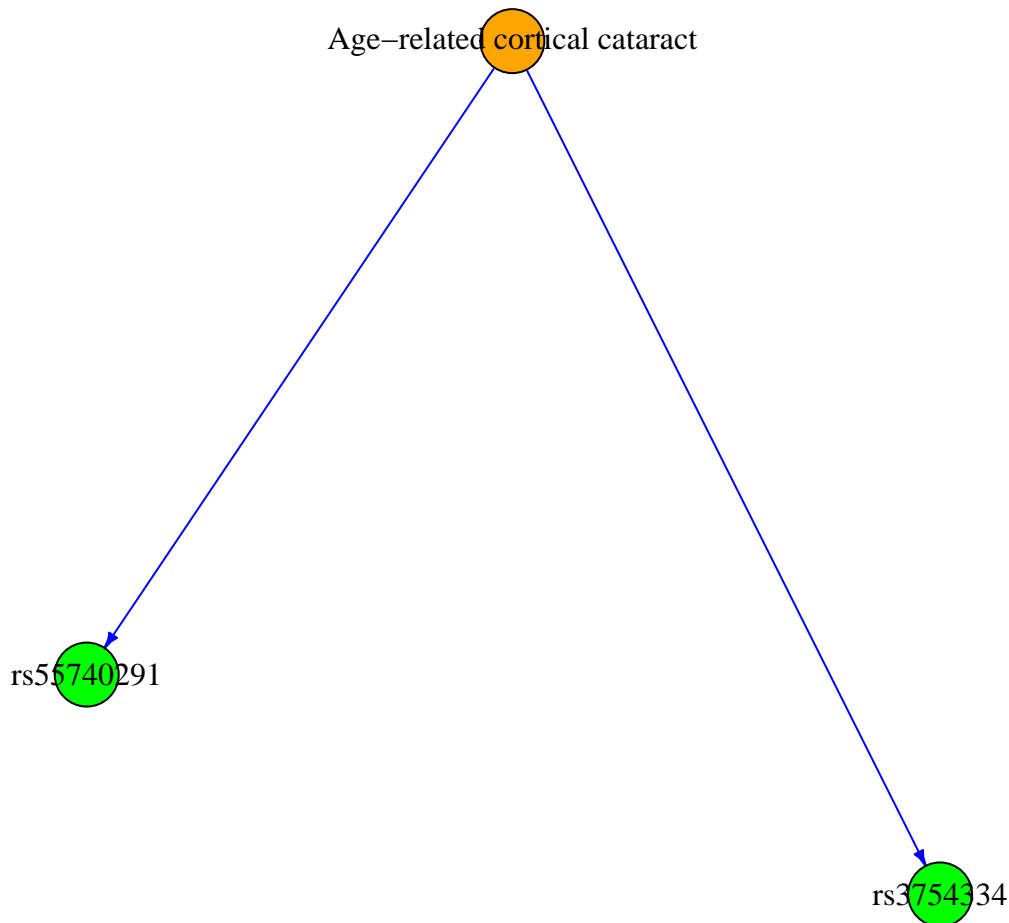

## Variant–Disease Network (Age-related macular degeneration 3)

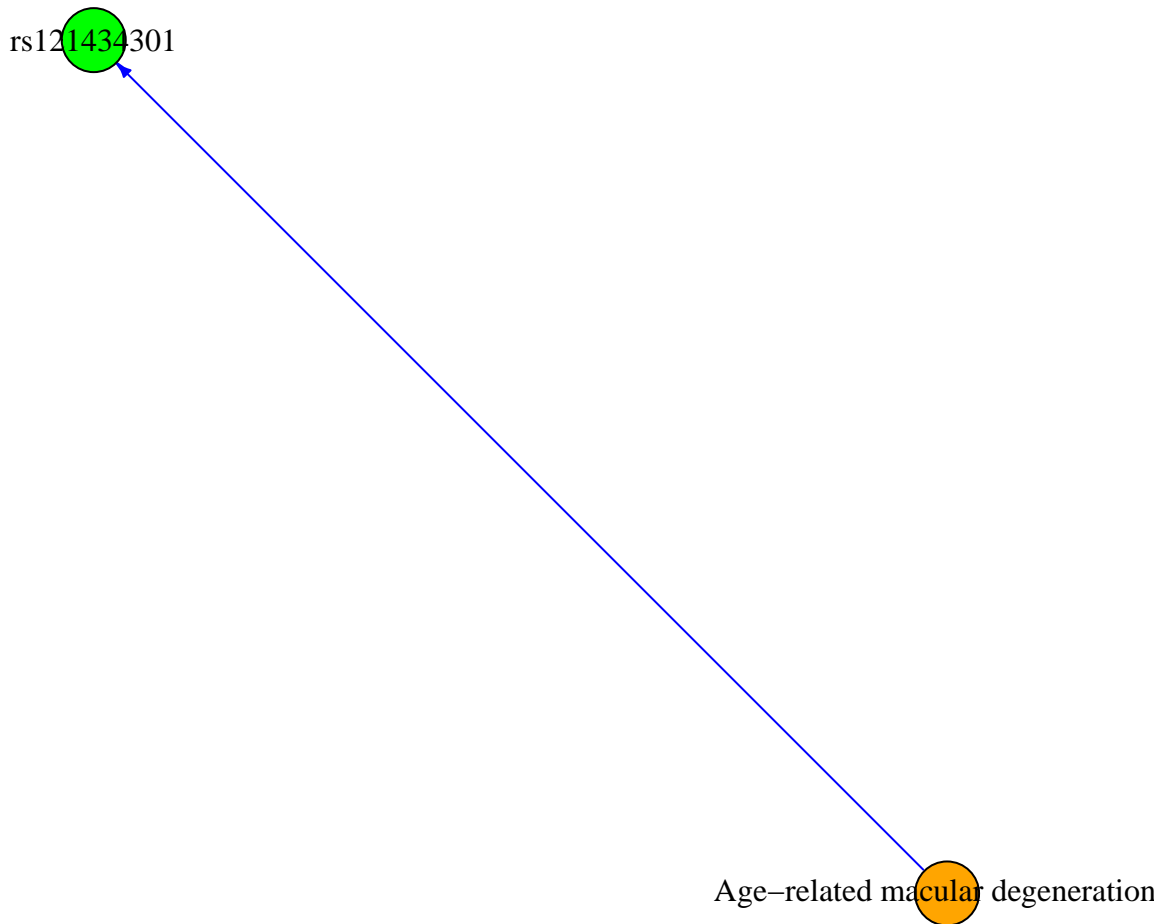

**Variant–Disease Network (Aicardi–Goutieres syndrome 6)**

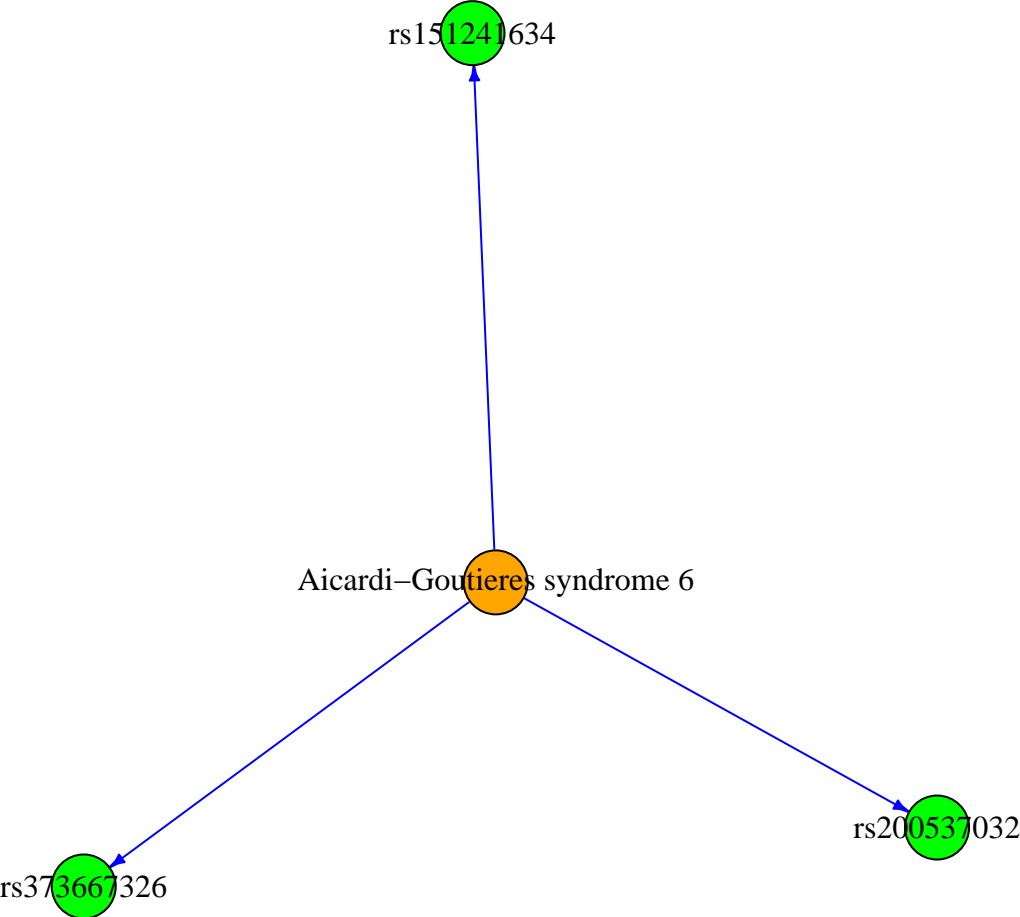

## Variant–Disease Network (Aicardi–Goutieres syndrome 7)

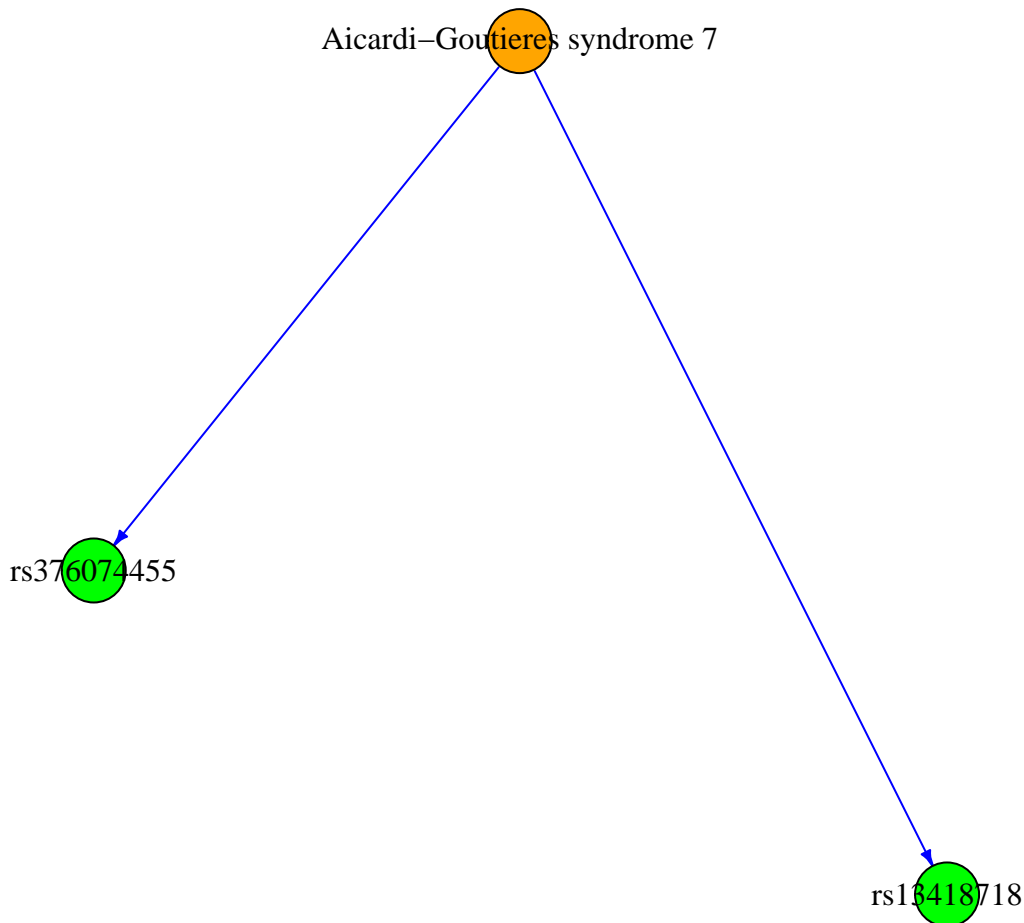



Variant–Disease Network (AIPL1–Related Disorders)

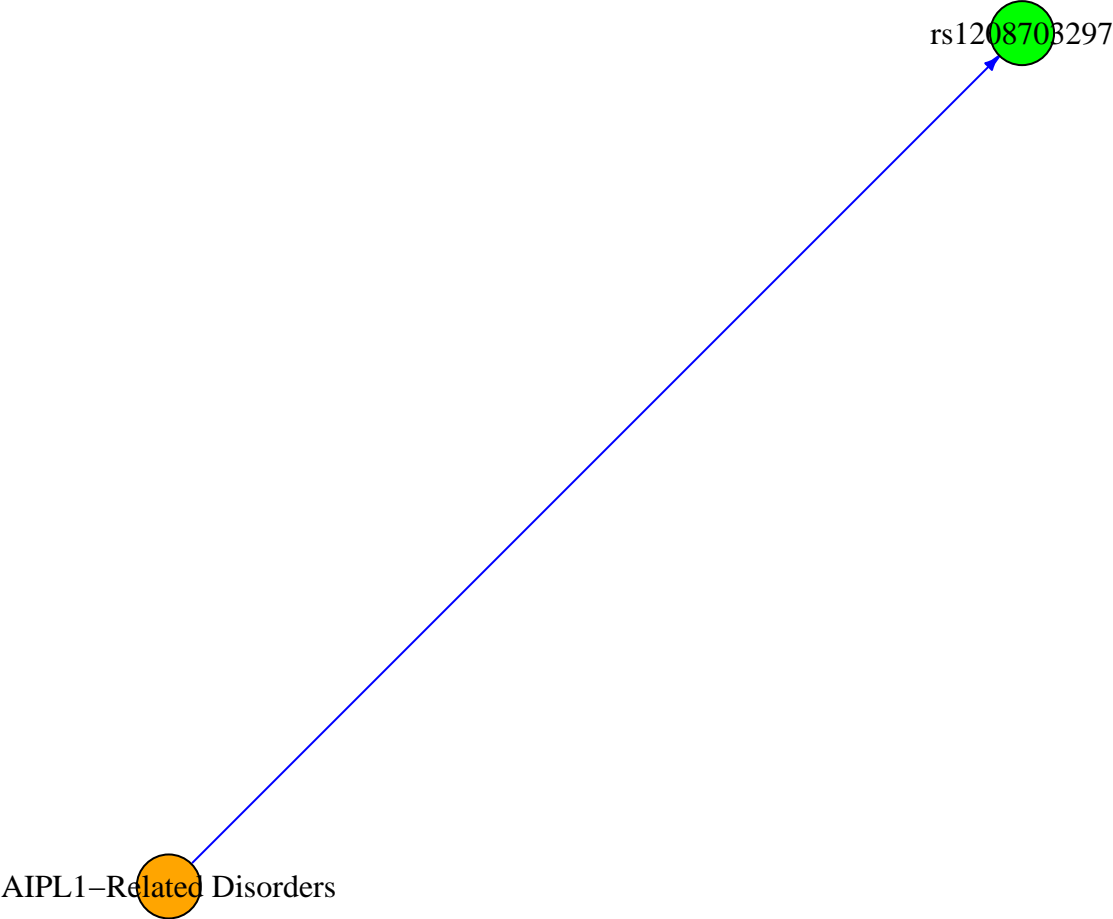

## Variant–Disease Network (Alagille syndrome 1)

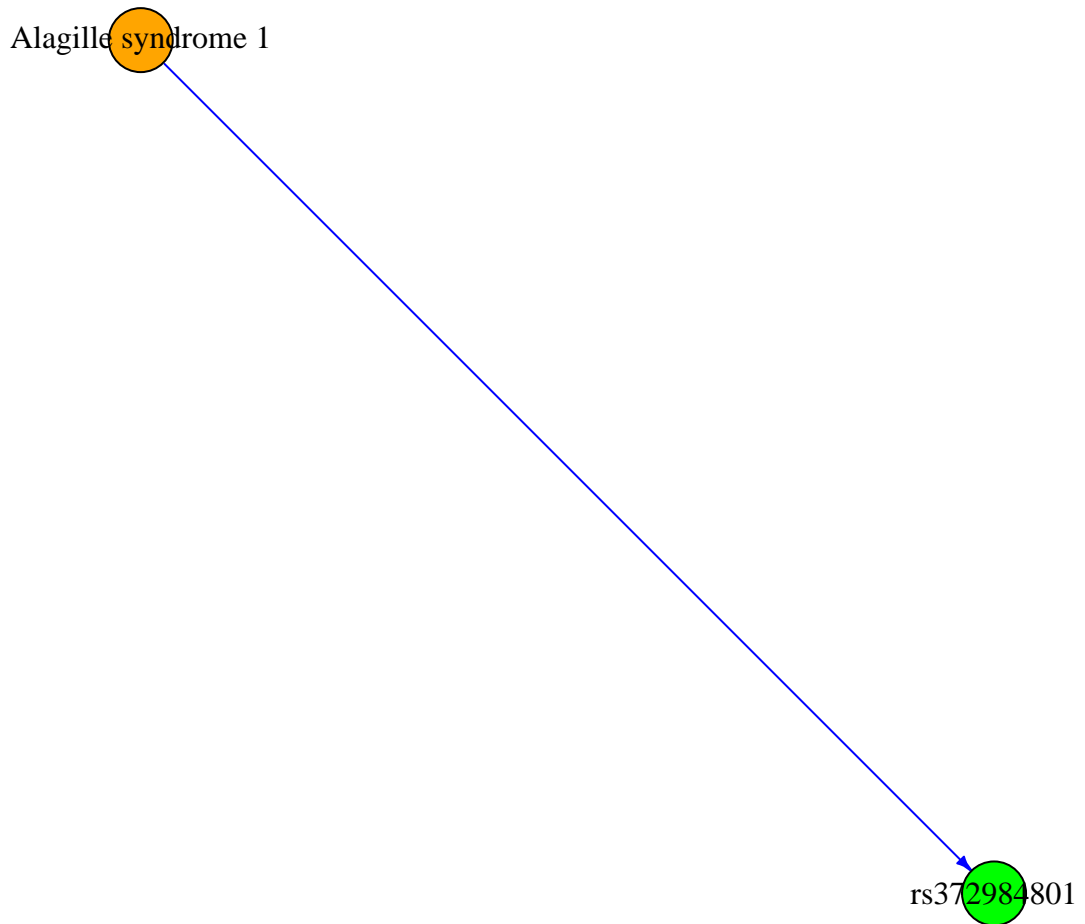

## Variant–Disease Network (Albinism)

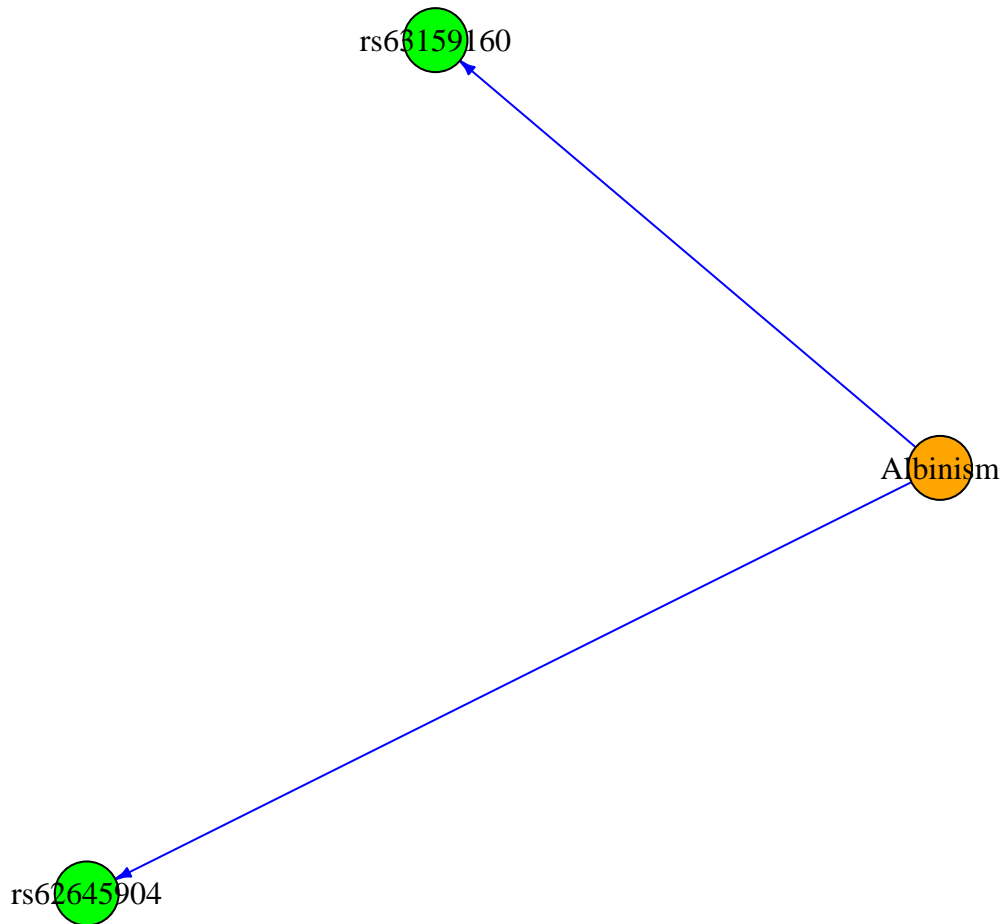

# Variant–Disease Network (ALG12–congenital disorder of glycosylation)

ALG12–congenital disorder of glycosylation

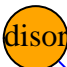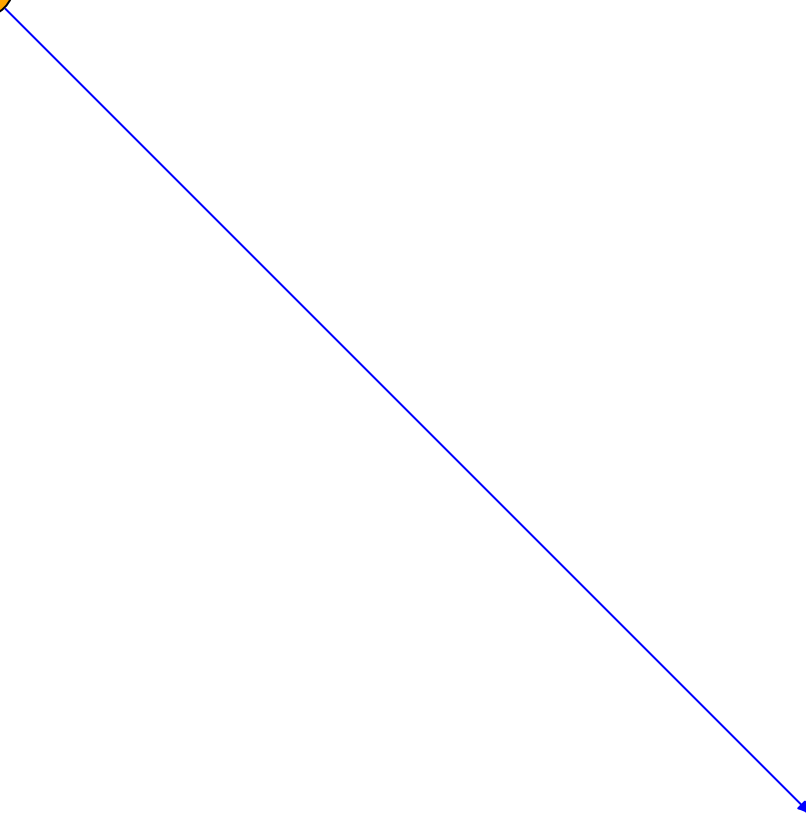

rs121907935

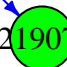

## Variant–Disease Network (Alopecia universalis)

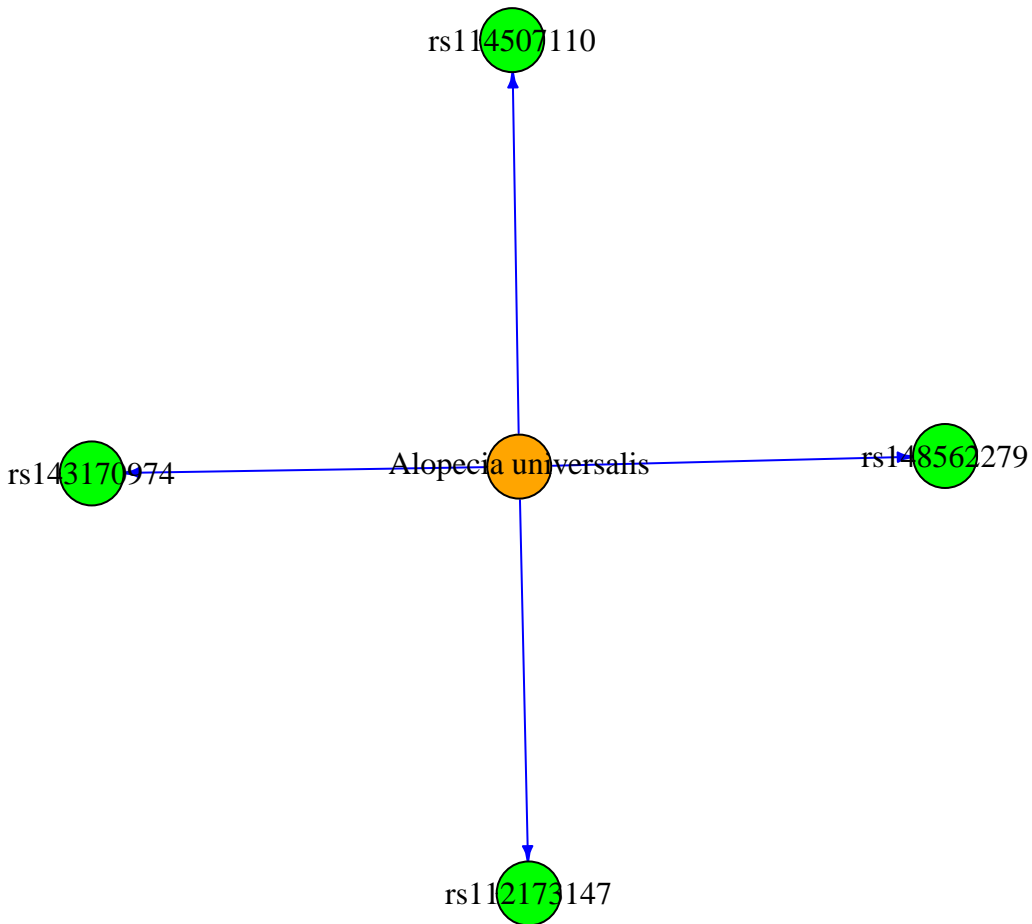

Variant–Disease Network (Alpha–B crystallinopathy)

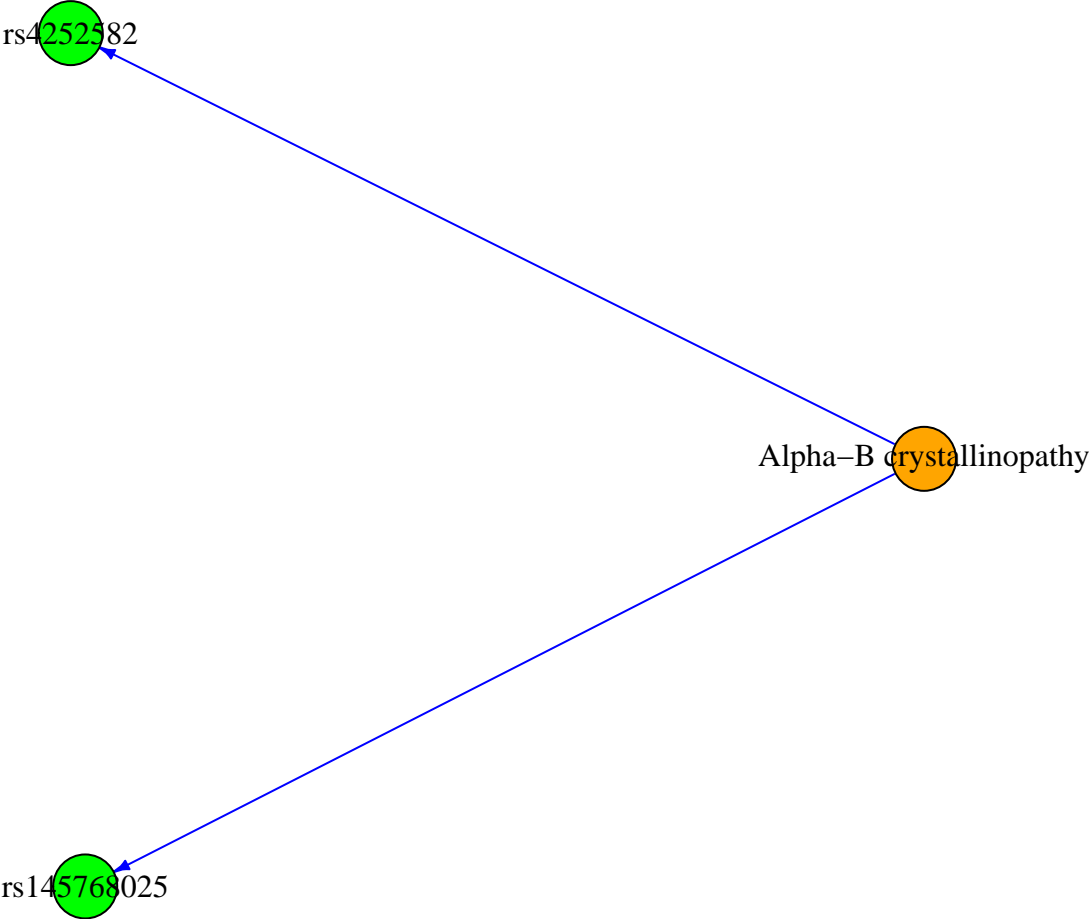

## Variant–Disease Network (Alport syndrome 1)

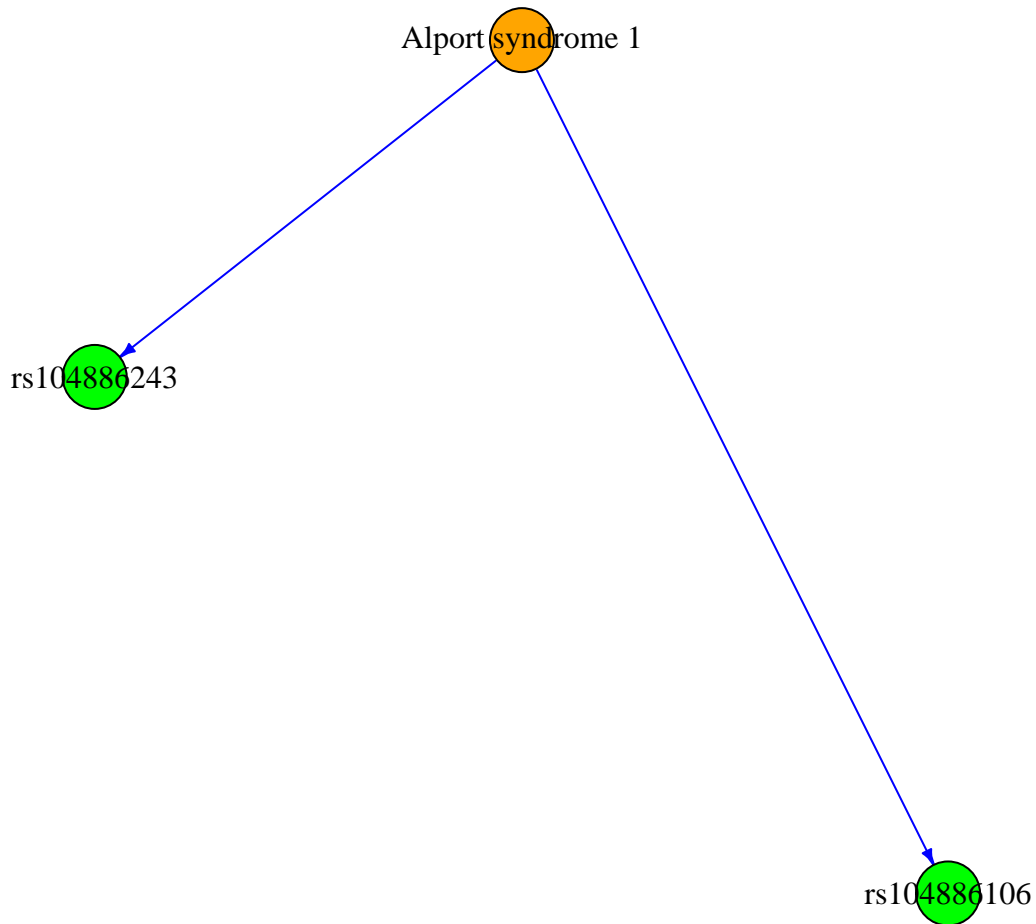

# Variant-Disease Network (ALS2-Related Disorders)

ALS2-Related Disorders

rs3219161

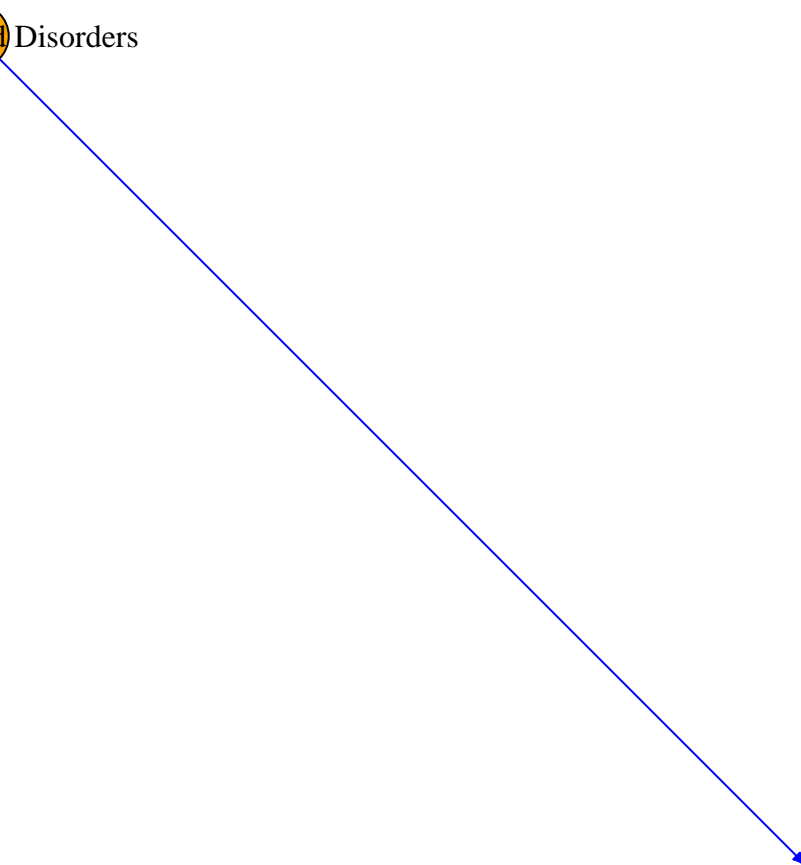



## Variant–Disease Network (Amelogenesis Imperfecta)

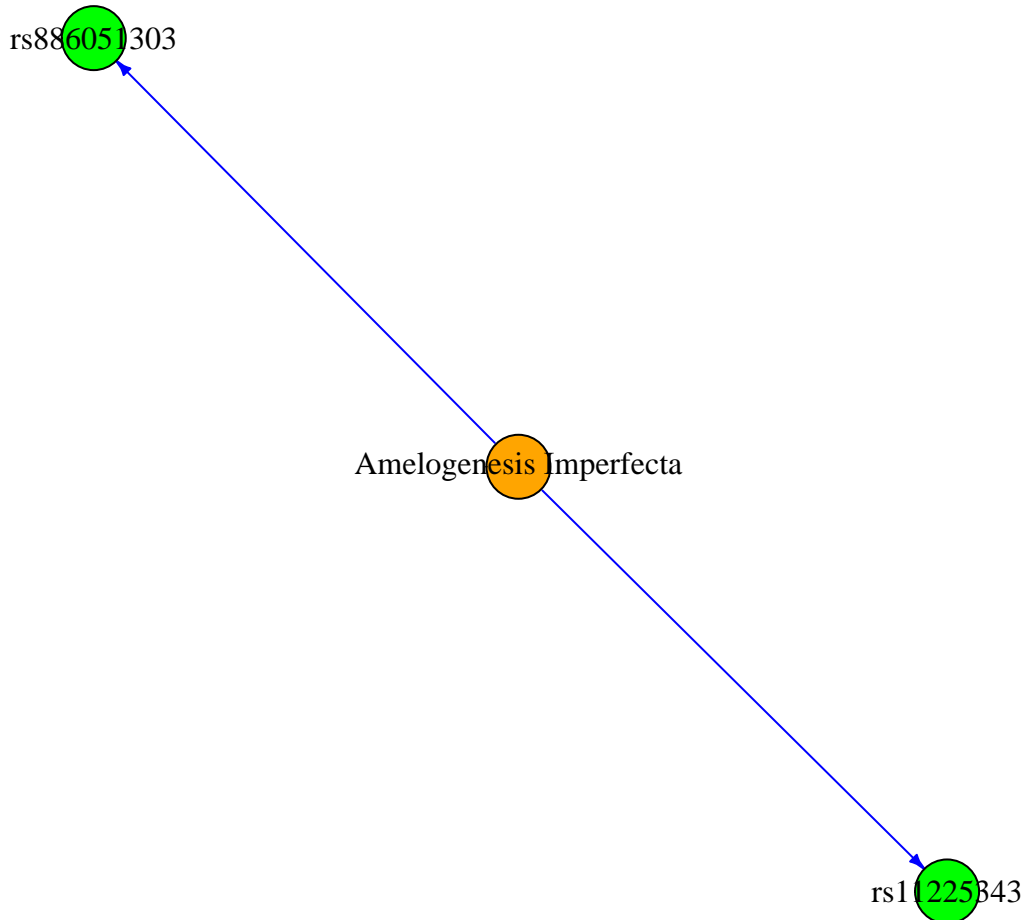

## Variant–Disease Network (Amyloidosis)

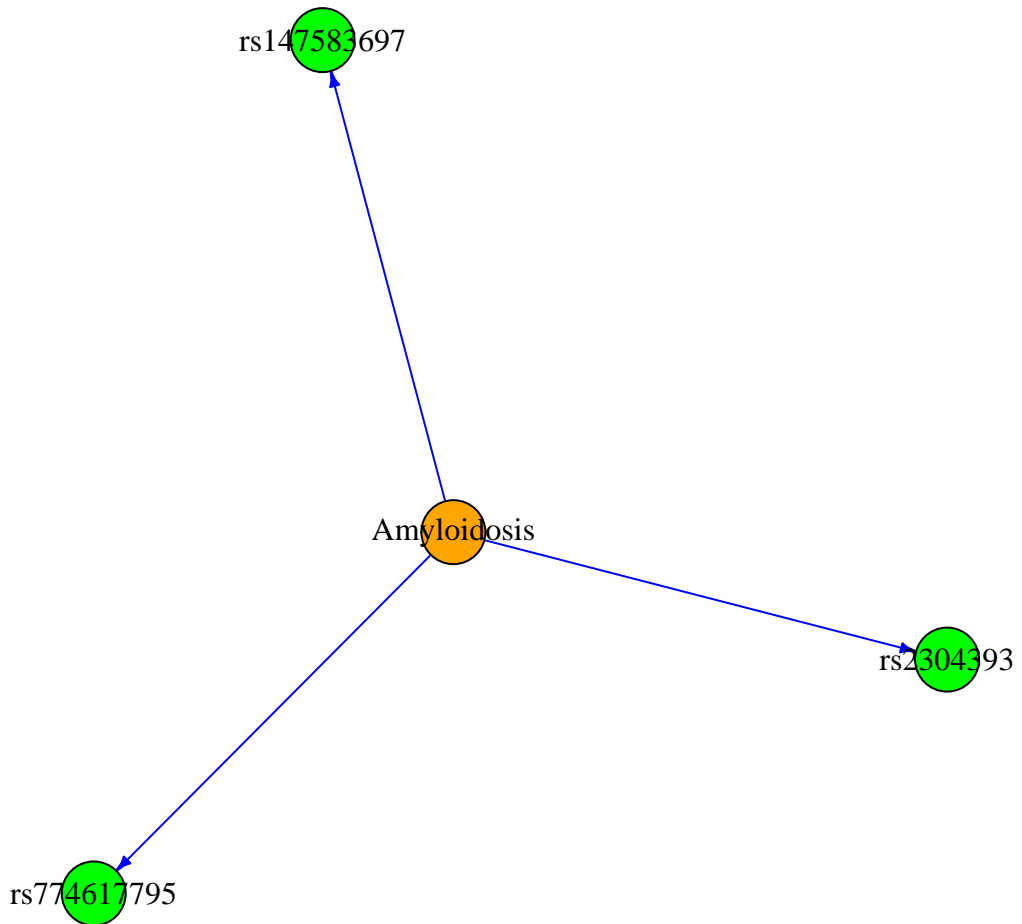

Variant–Disease Network (Amyotrophic Lateral Sclerosis)

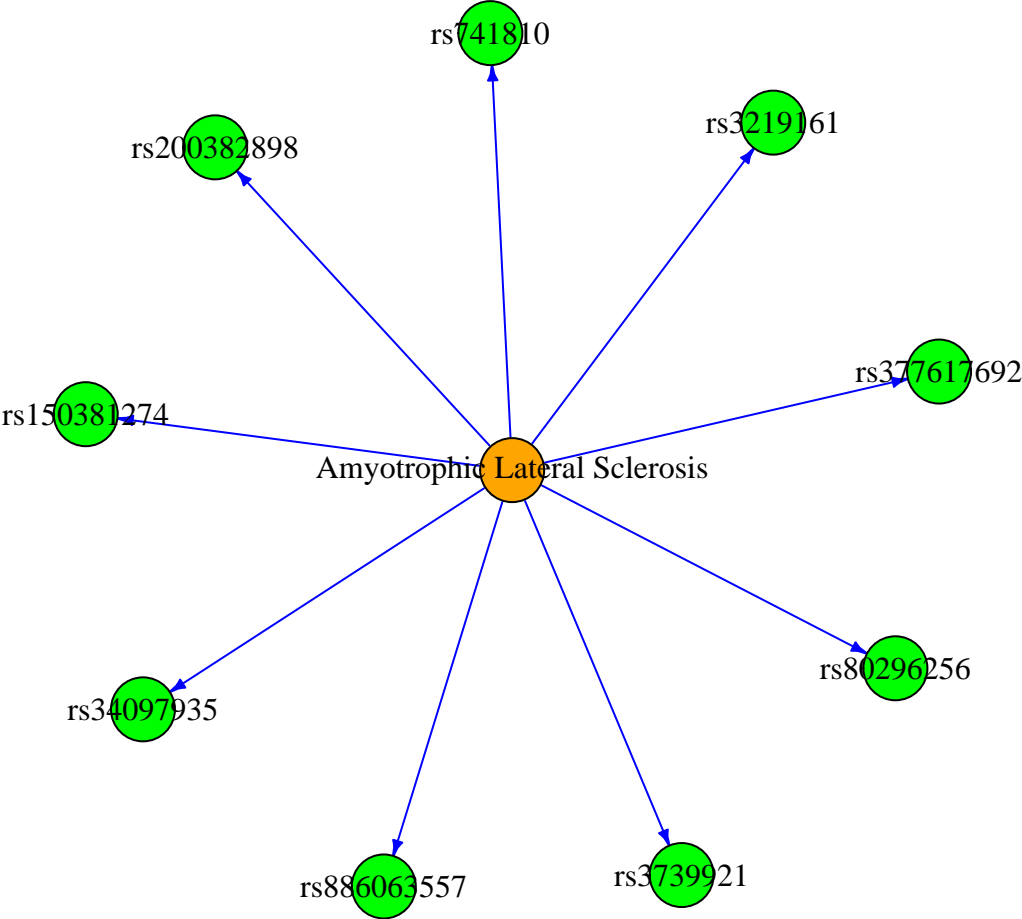

## Variant–Disease Network (Amyotrophic lateral sclerosis 14)

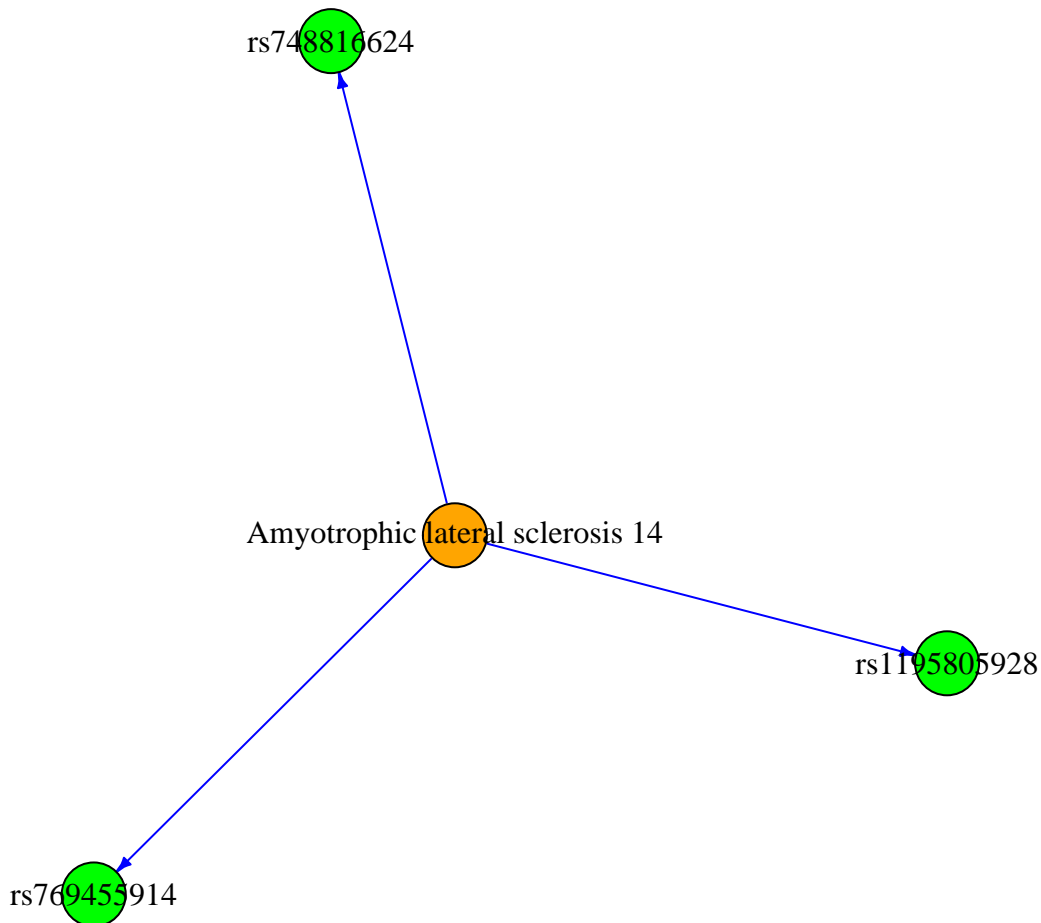

# nt-Disease Network (Amyotrophic lateral sclerosis and/or frontotemporal de

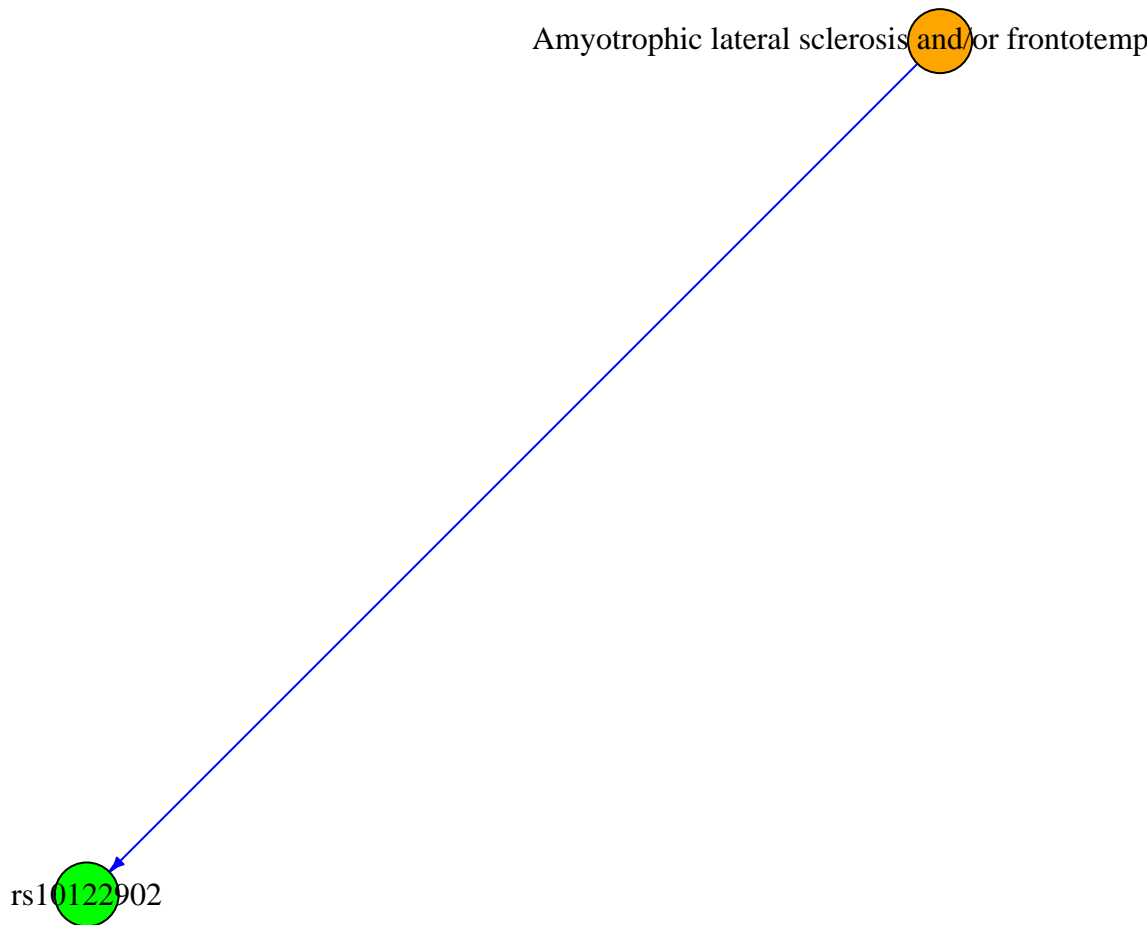

Variant–Disease Network (Amyotrophic lateral sclerosis type 1)

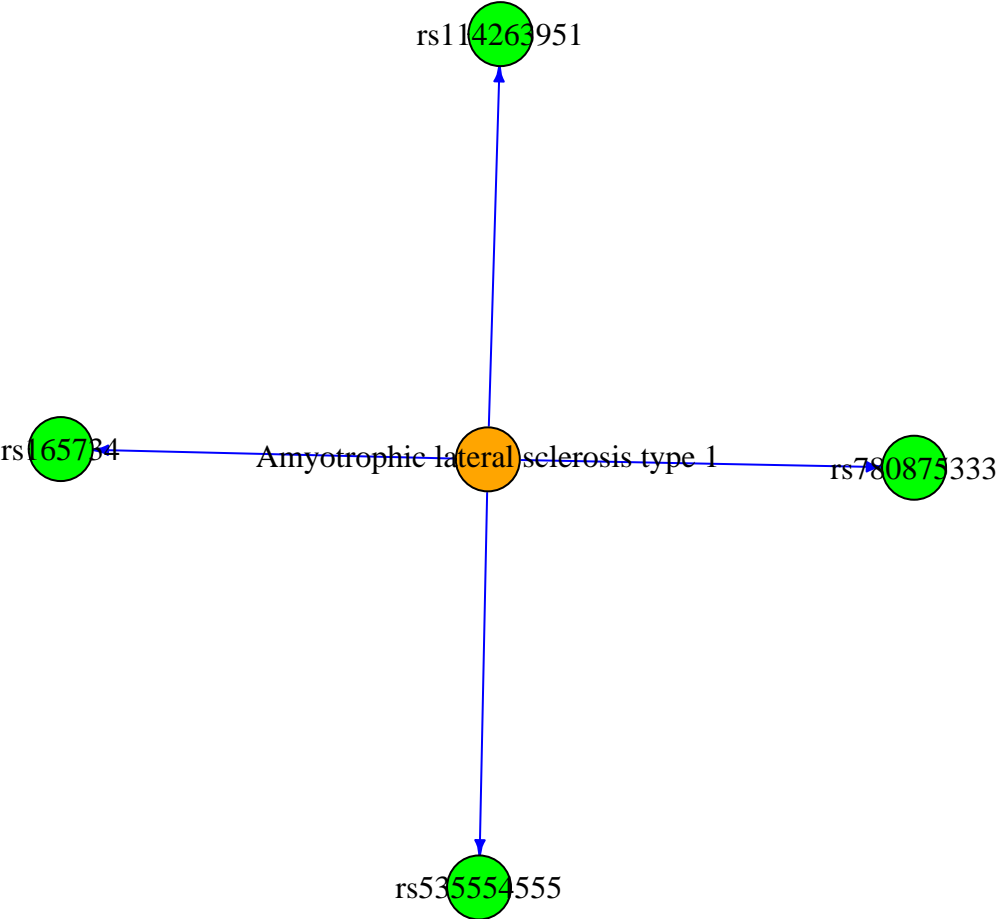

# Variant–Disease Network (Amyotrophic lateral sclerosis type 12)

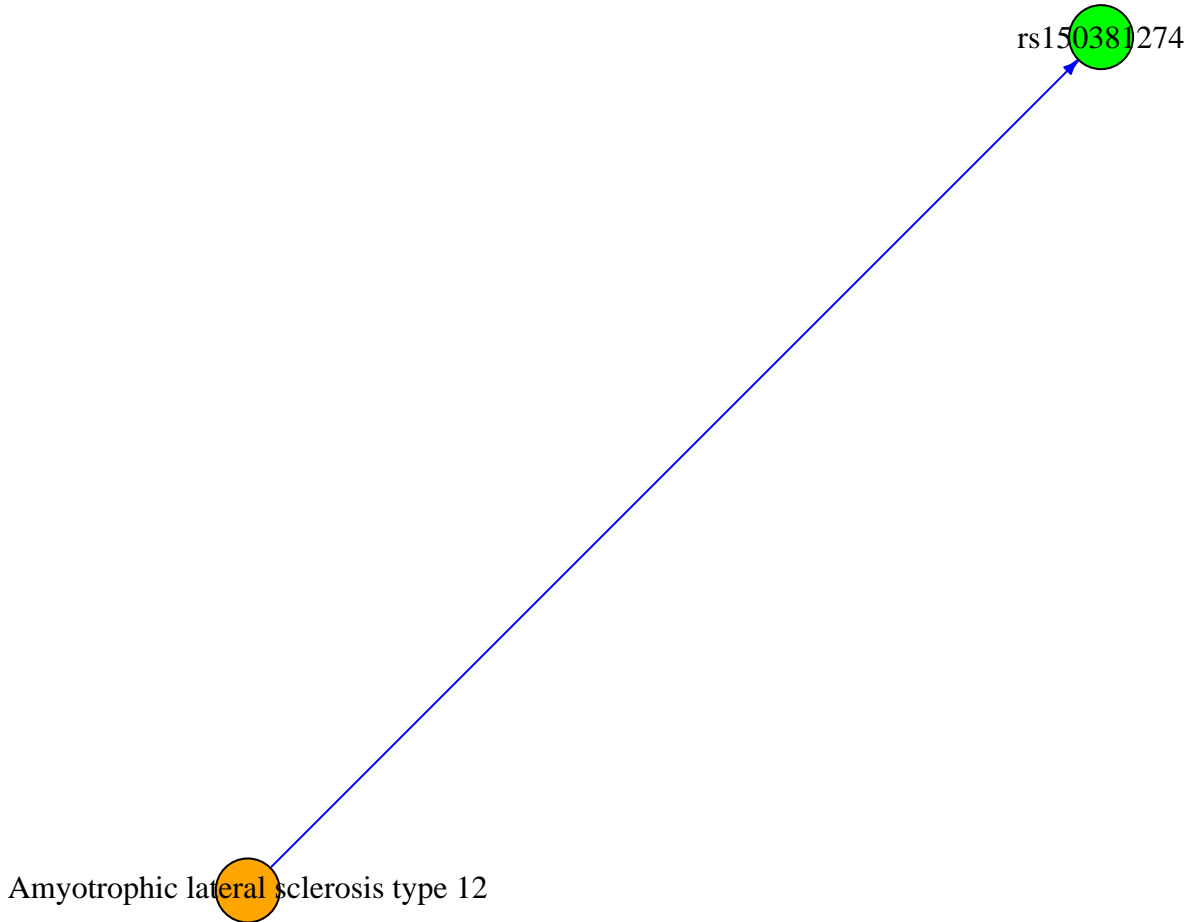

Variant–Disease Network (Amyotrophic lateral sclerosis type 4)

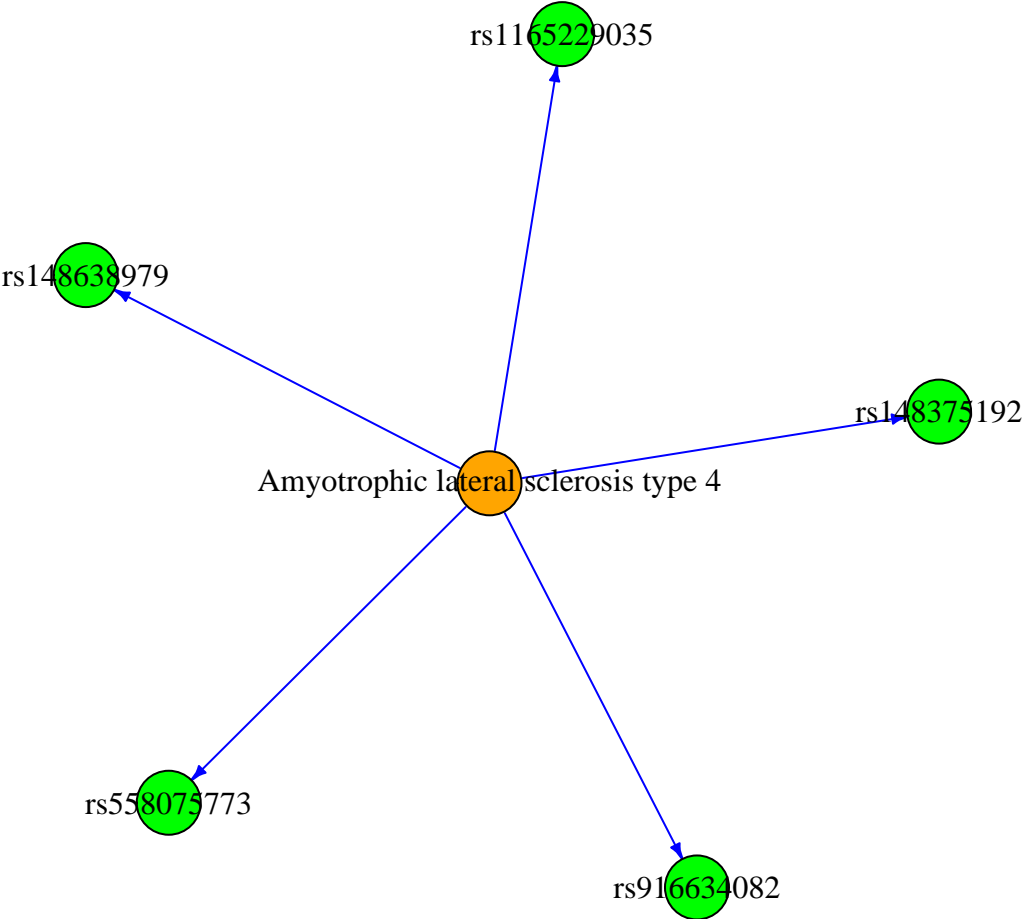



Variant–Disease Network (Amyotrophic lateral sclerosis type 6)

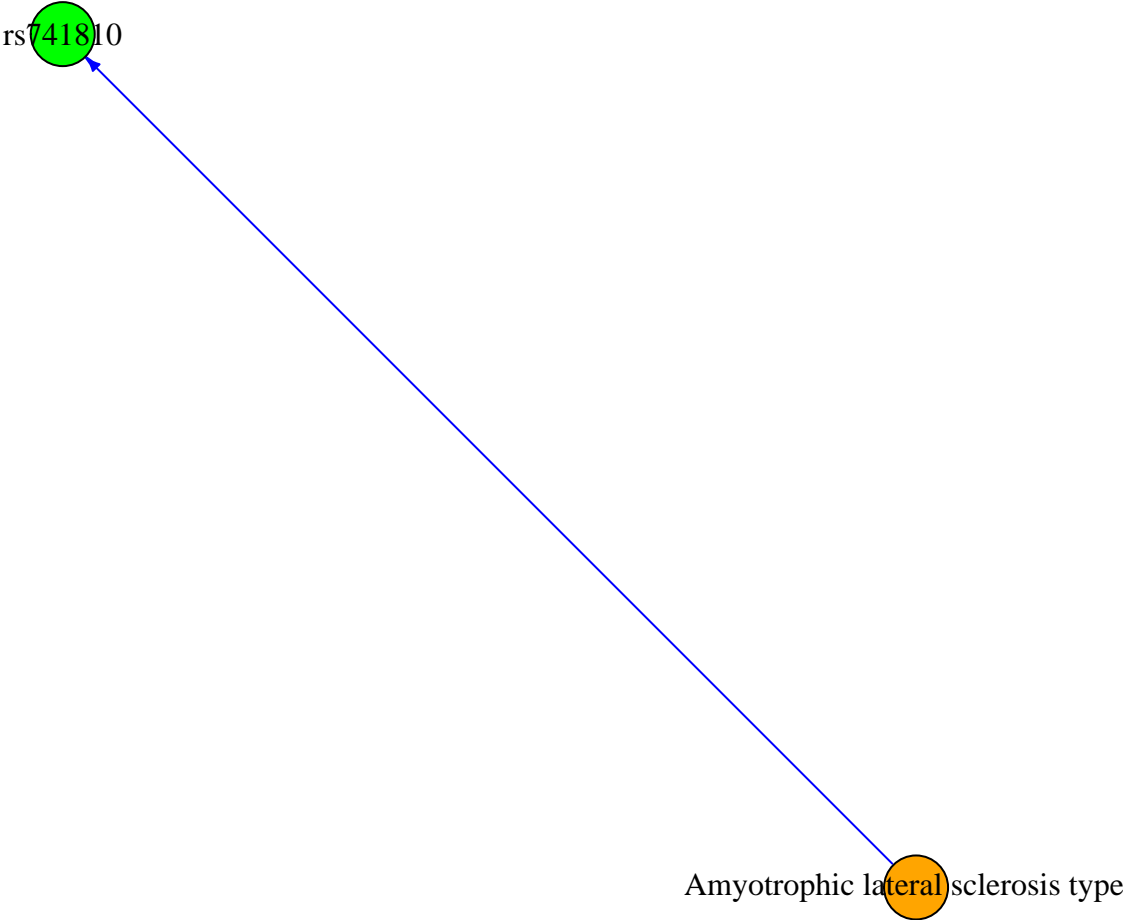

# Variant–Disease Network (Amyotrophic Lateral Sclerosis/Frontotemporal Dem

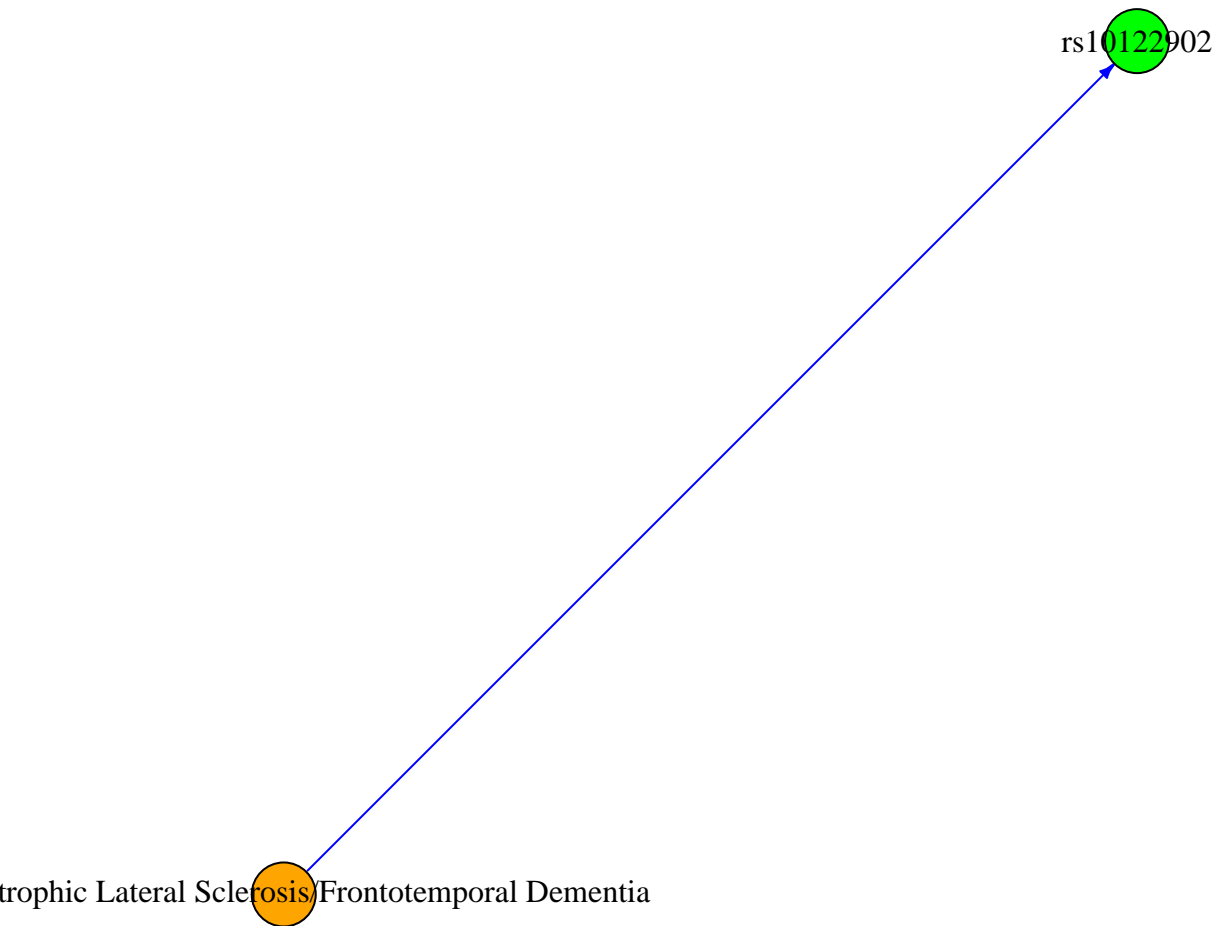

# Genetic-Disease Network (Amyotrophic lateral sclerosis–parkinsonism/dementia complex)

rs8042919

Amyotrophic lateral sclerosis–parkinsonism/dementia complex

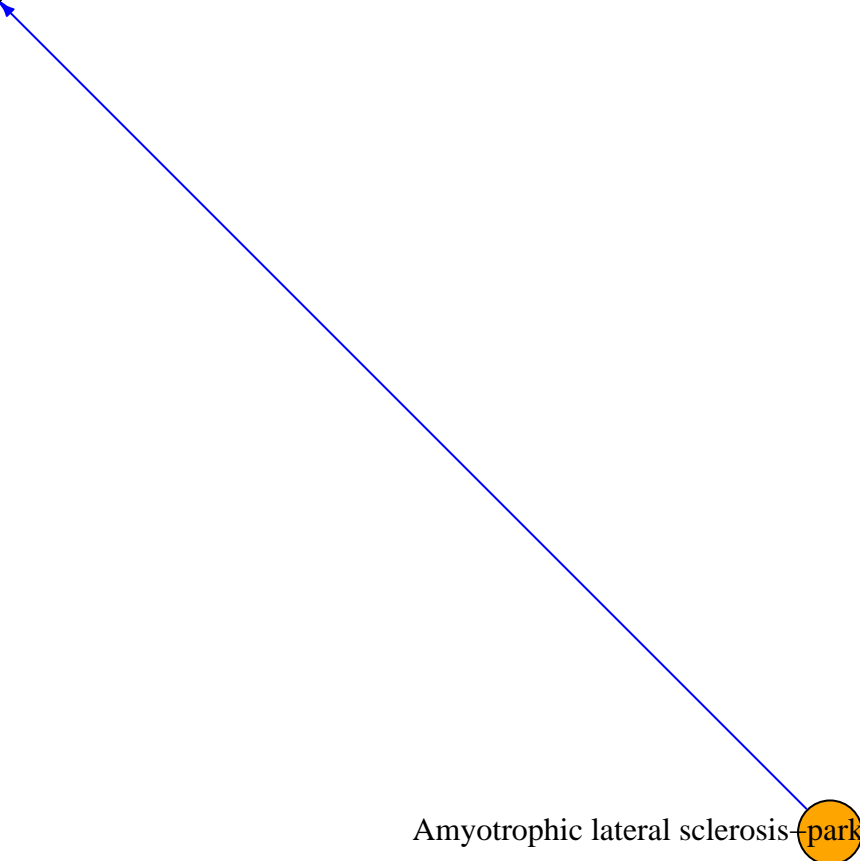

## Variant–Disease Network (Andermann syndrome)

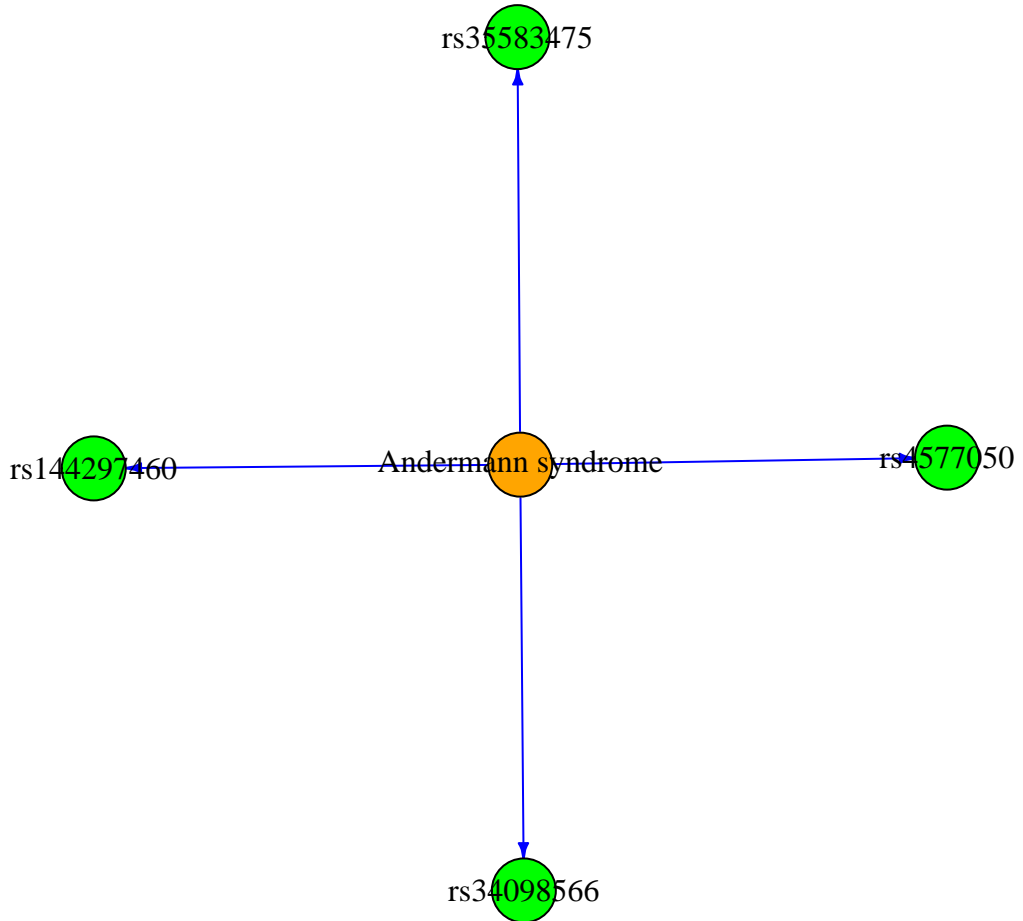

## Variant–Disease Network (Andersen Tawil syndrome)

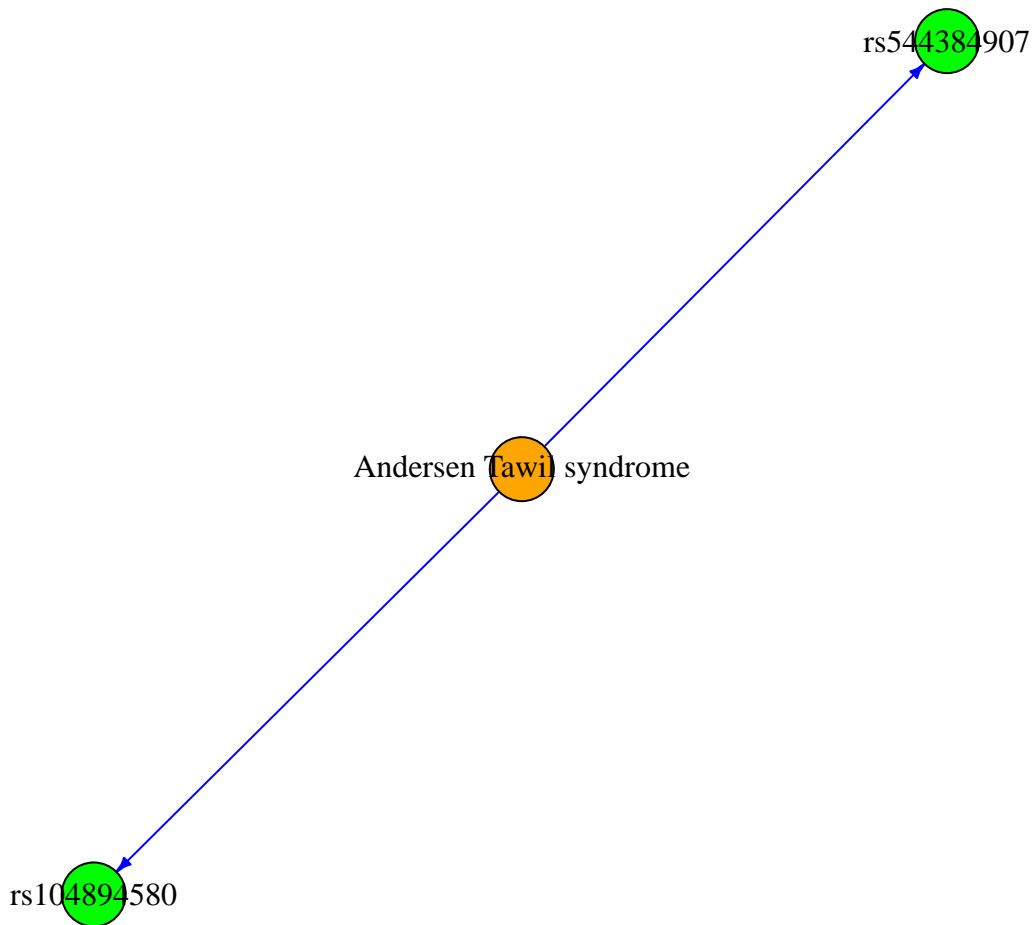

## Variant-Disease Network (Angelman syndrome)

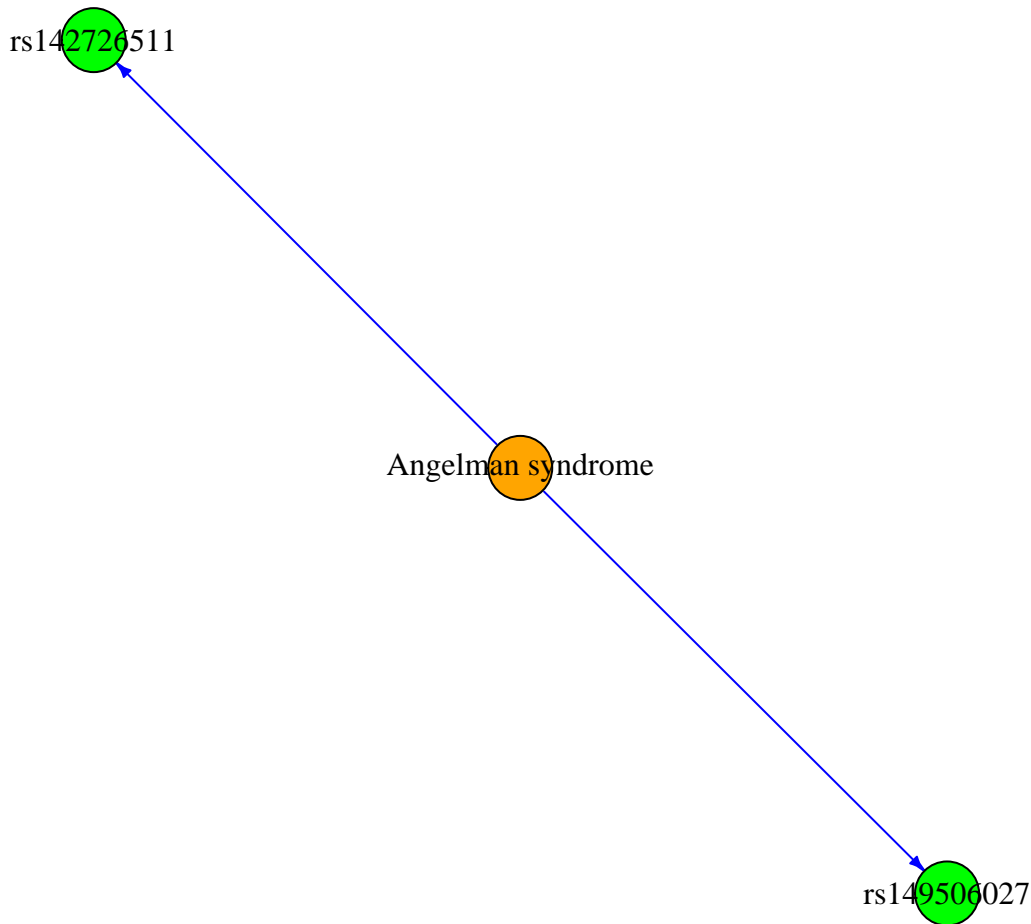

## Variant–Disease Network (Angelman syndrome–like)

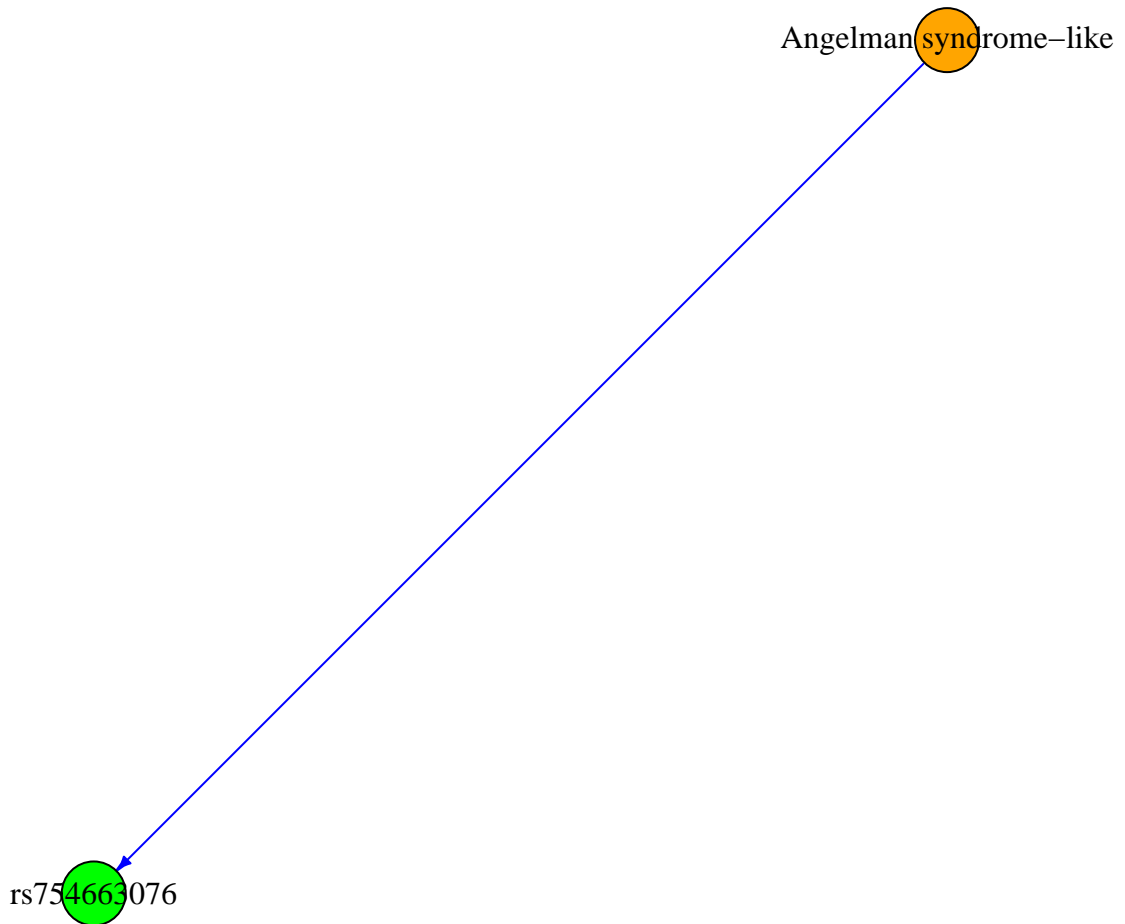

# ant-Disease Network (Angiokeratoma corporis diffusum with arteriovenous

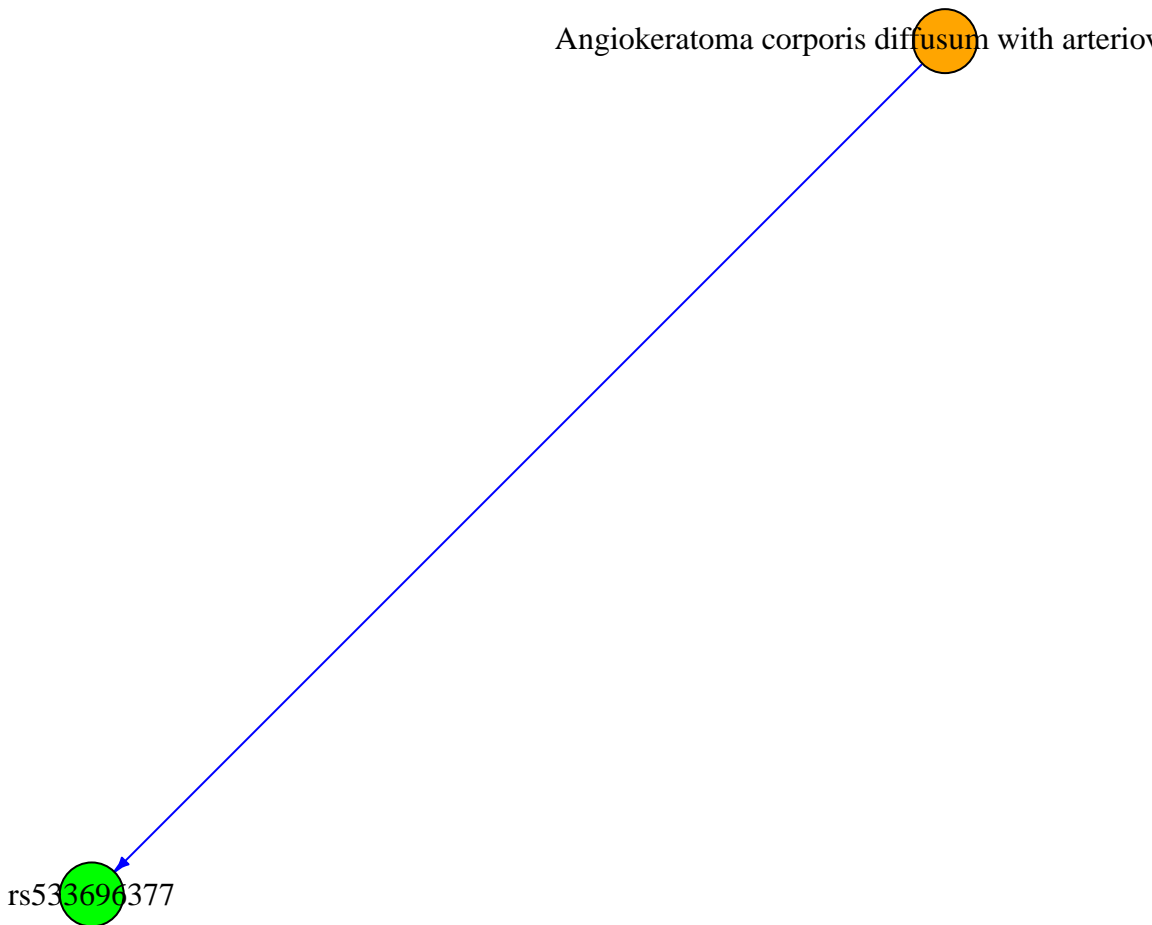



## Variant–Disease Network (Aniridia 1)

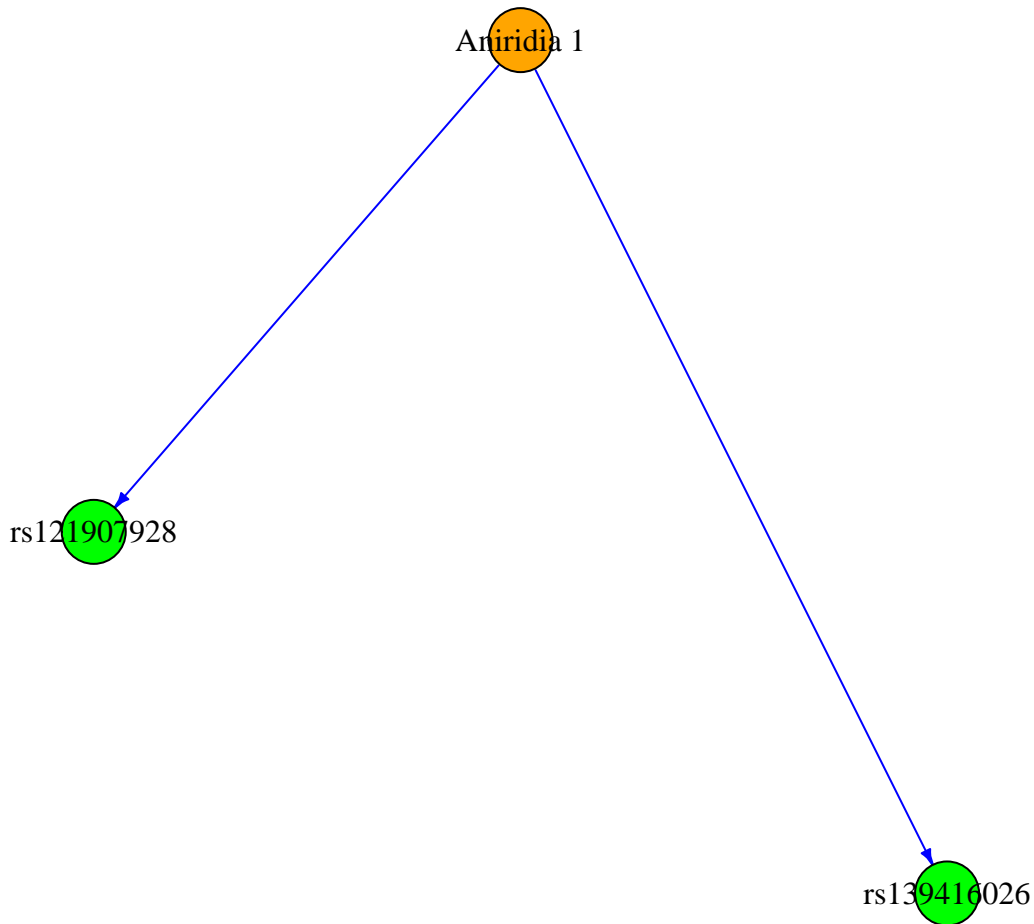

Variant–Disease Network (Antenatal Bartter Syndrome)

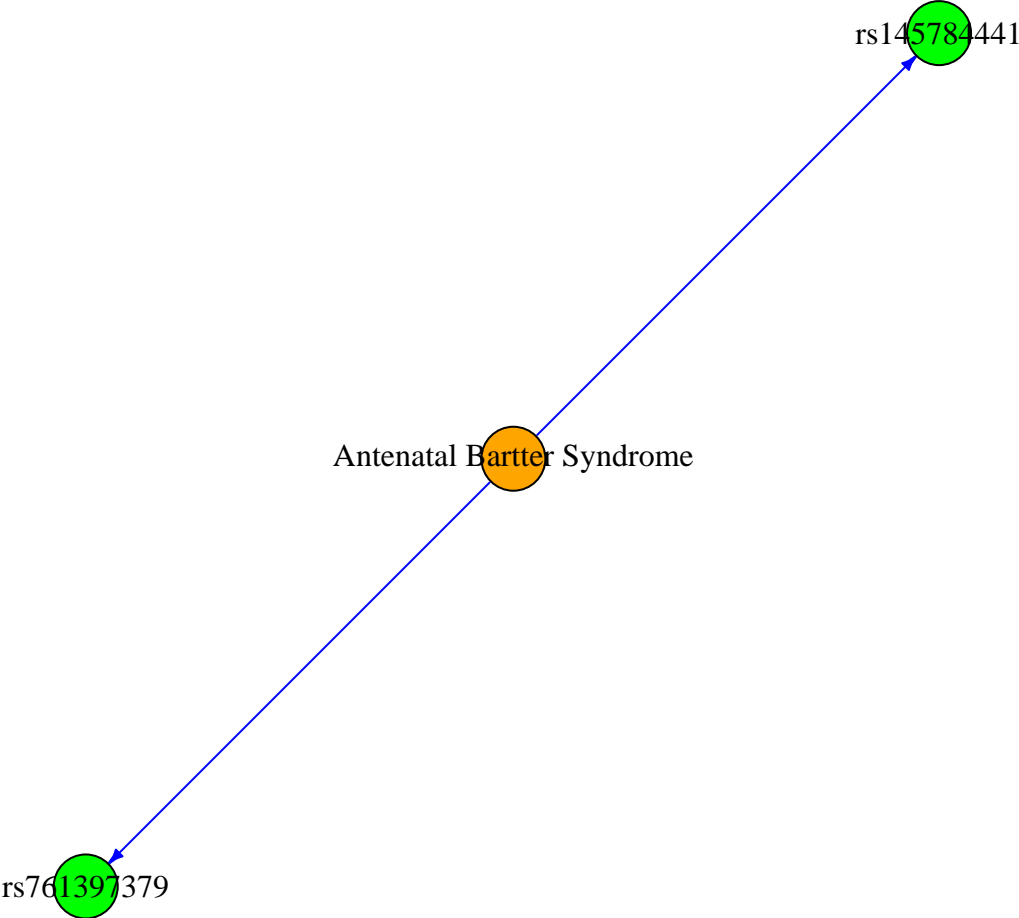

**Variant–Disease Network (Anterior segment dysgenesis 3)**

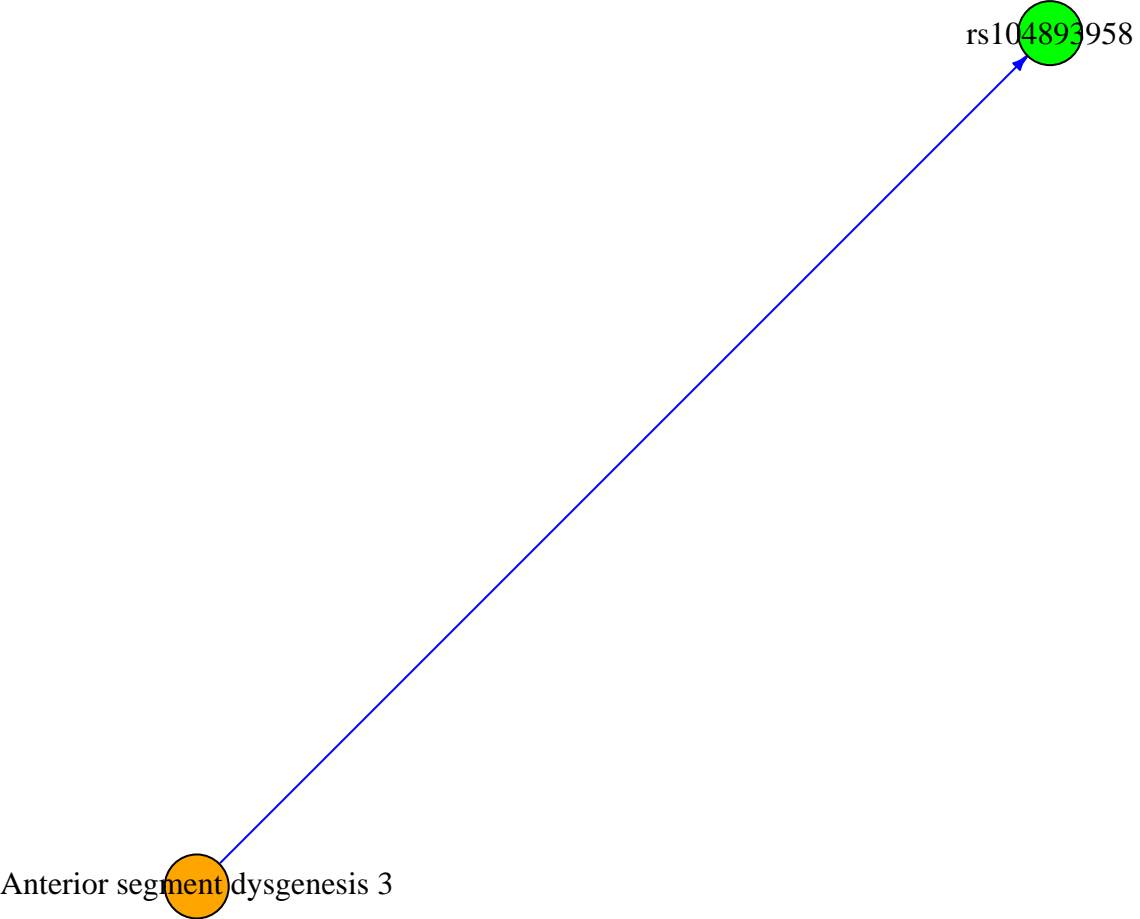

**Variant–Disease Network (Anterior segment dysgenesis 7)**

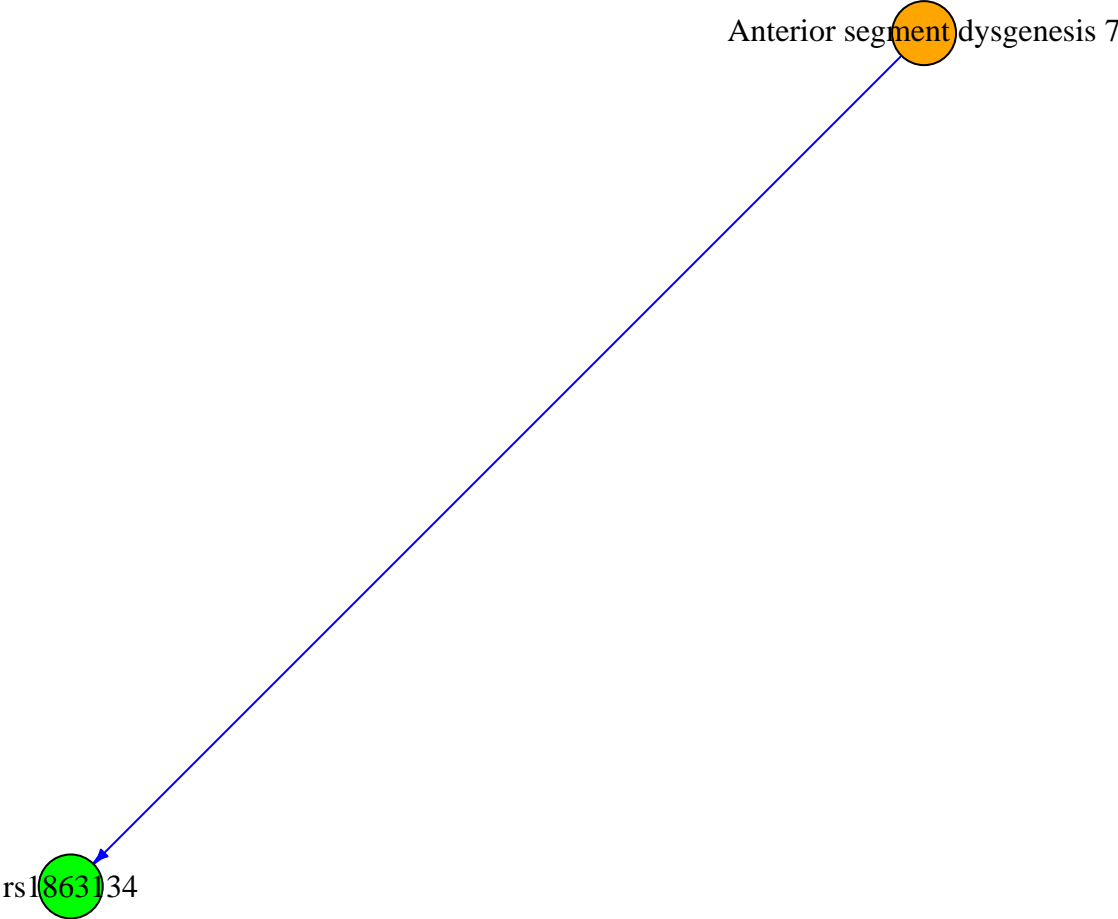

## Variant-Disease Network (Aortic aneurysm)

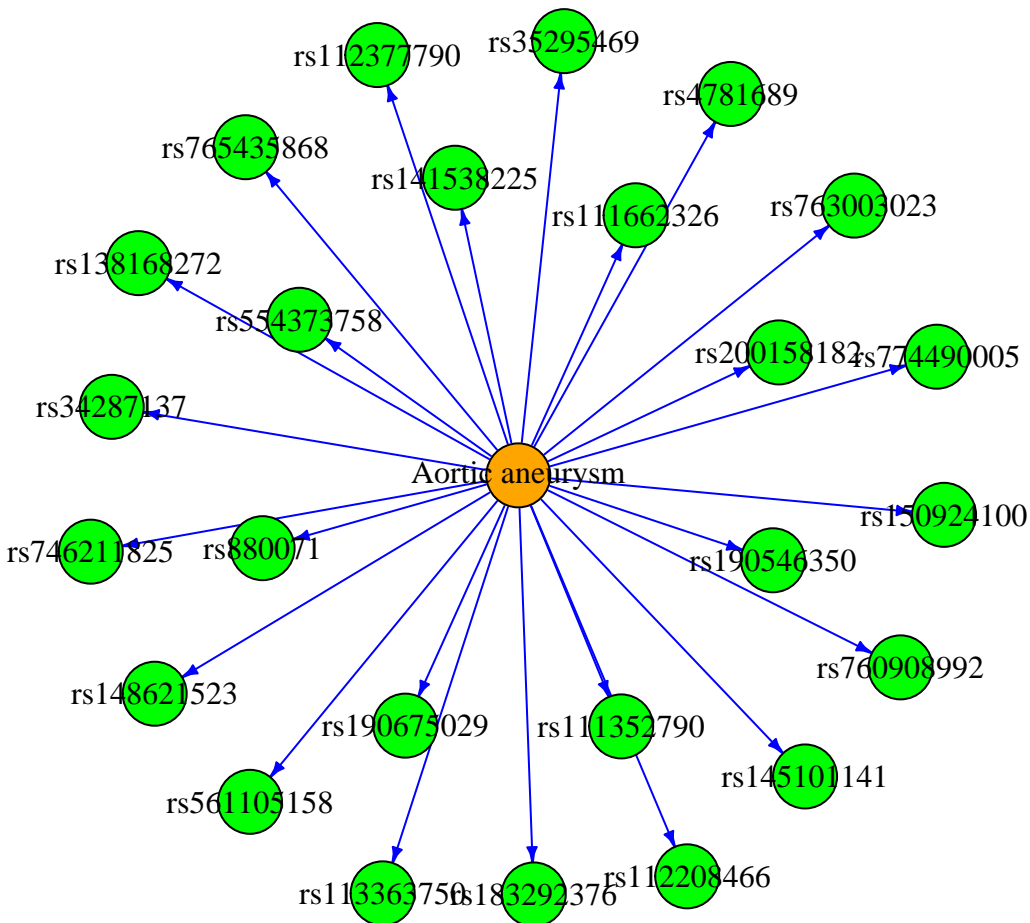

Variant–Disease Network (Aortic valve disorder)

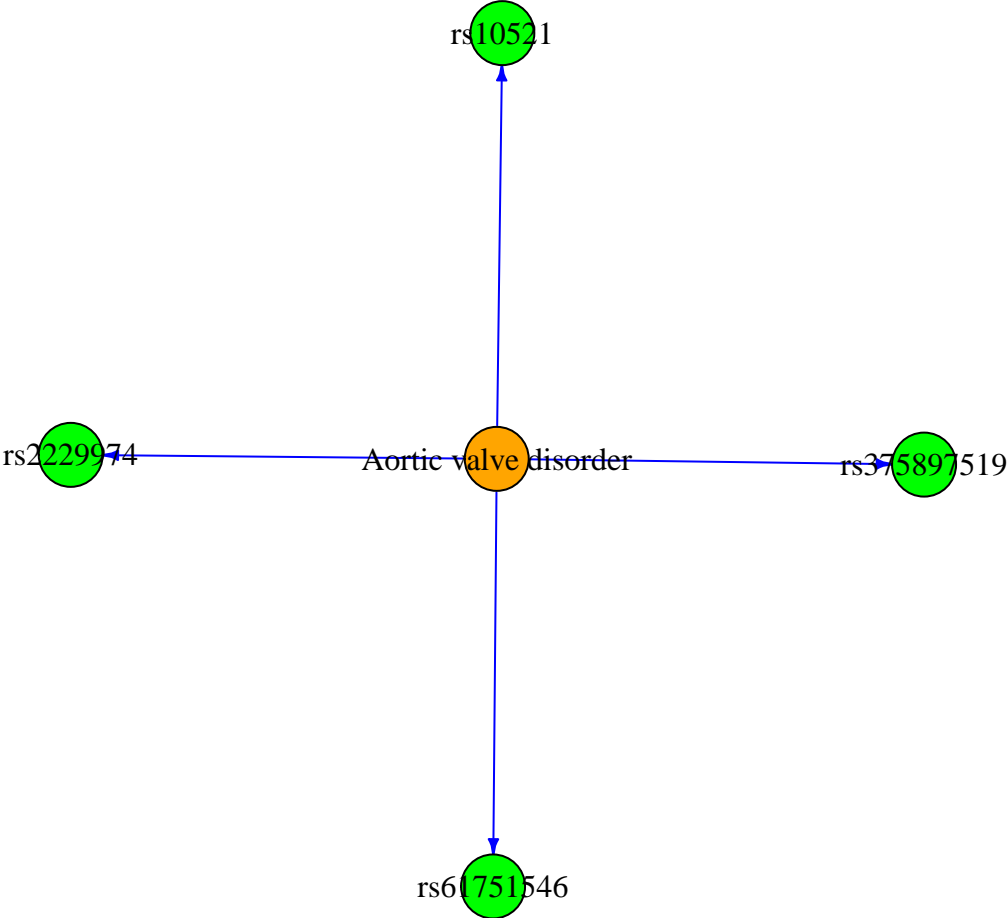

Variant–Disease Network (APC–Associated Polyposis Disorders)

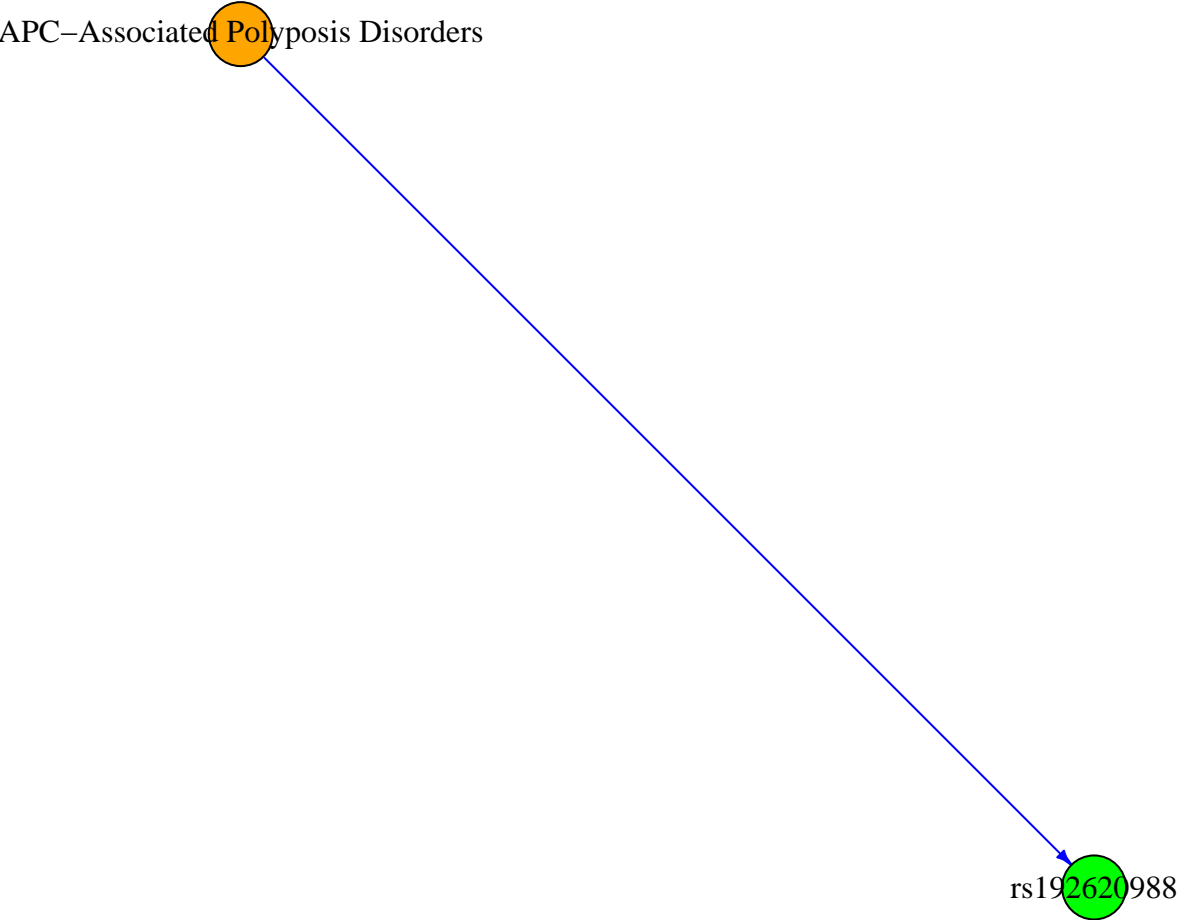

Variant–Disease Network (APOLIPOPROTEIN A-I (MILANO))

APOLIPOPROTEIN A-I (MILANO)

rs28931573

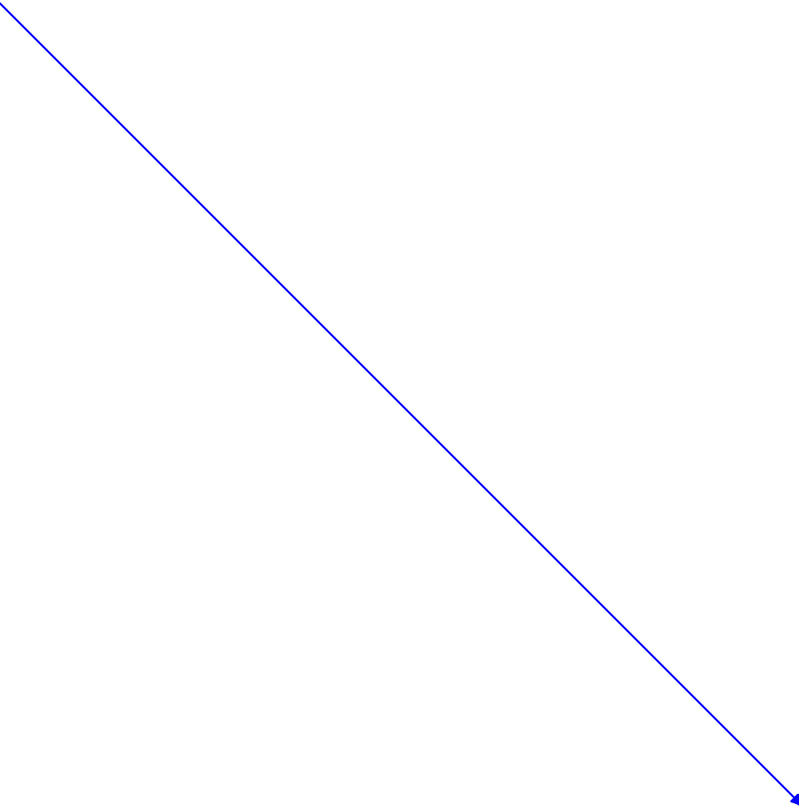



# Variant–Disease Network (APP POLYMORPHISM)

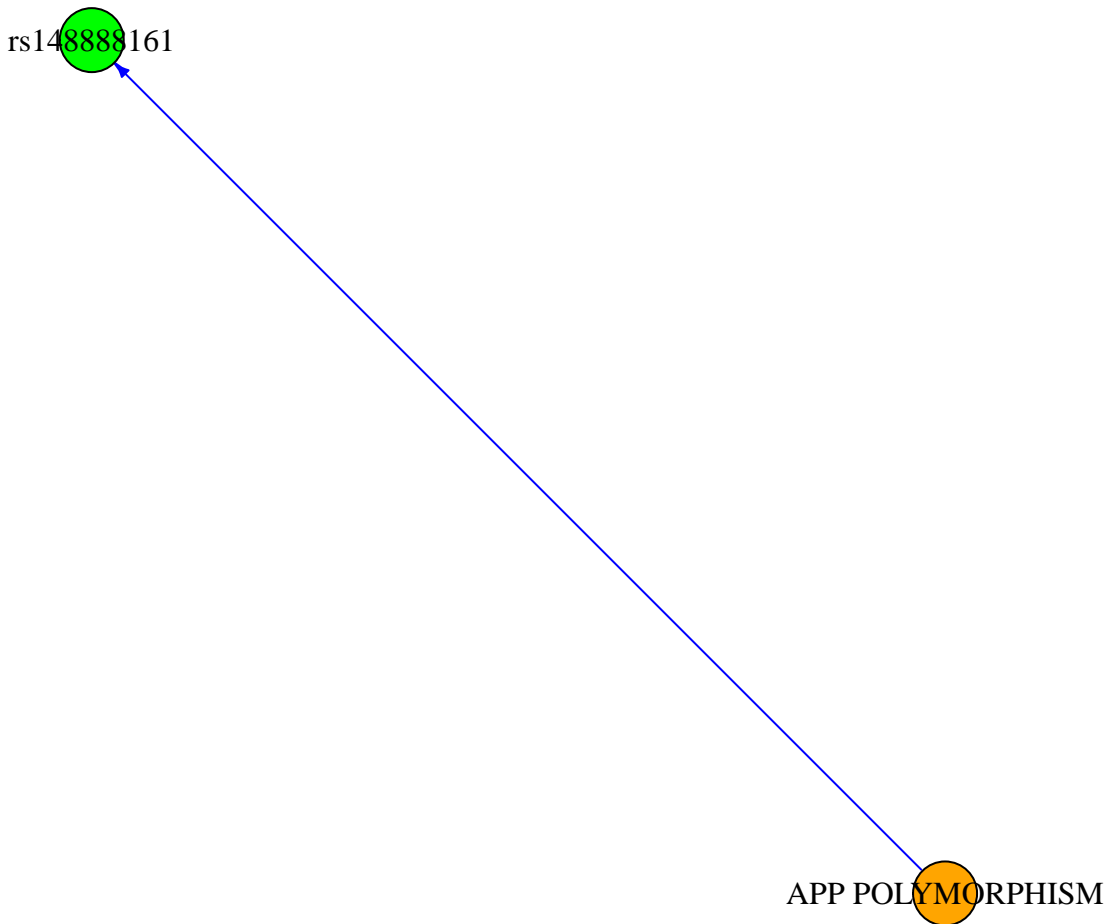

## Variant–Disease Network (Arginase deficiency)

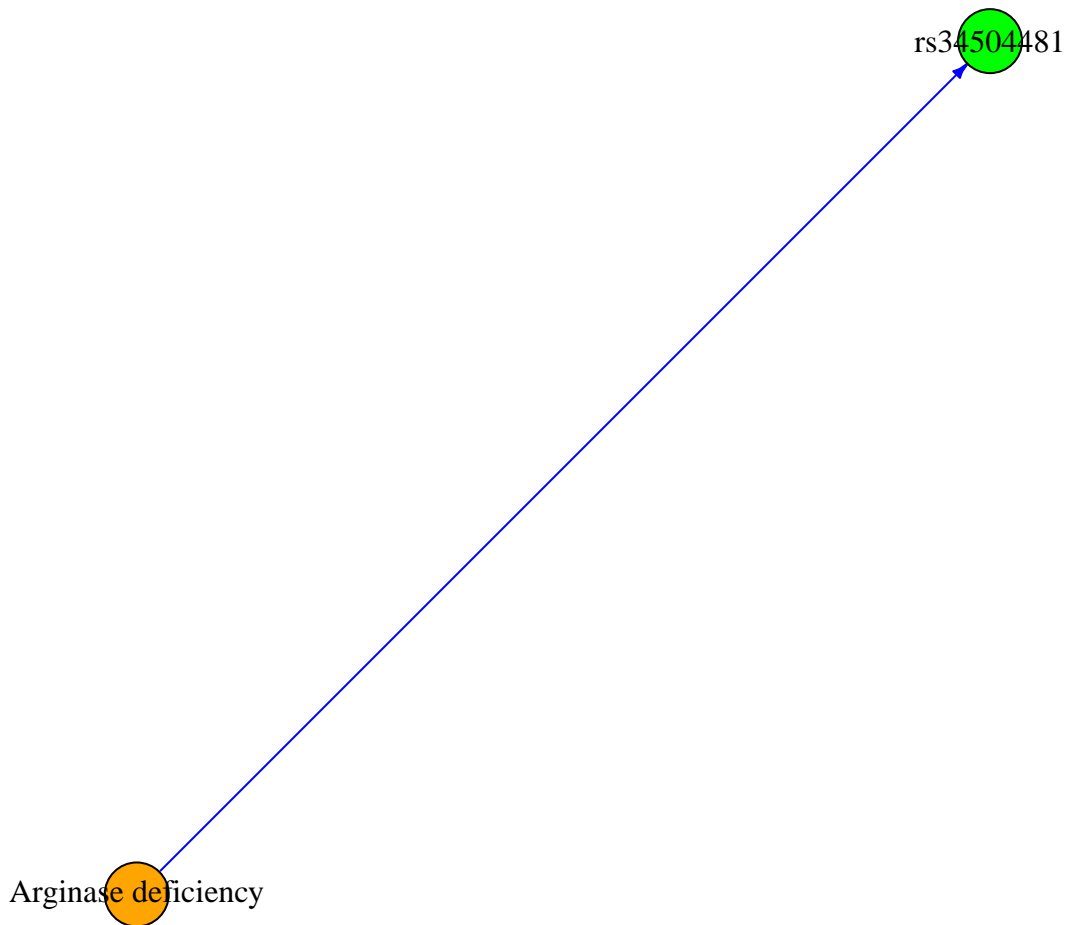

Variant–Disease Network (Arginine:glycine amidinotransferase deficiency)

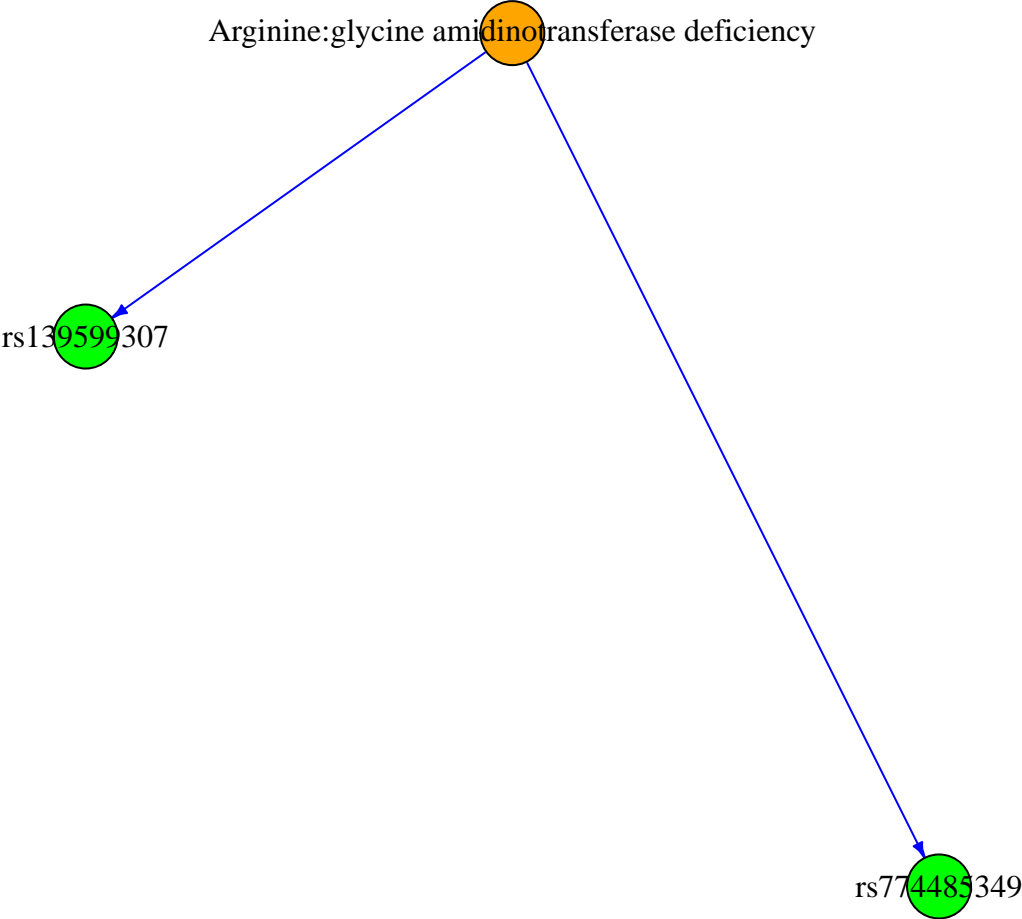

## Variant–Disease Network (Argininosuccinate lyase deficiency)

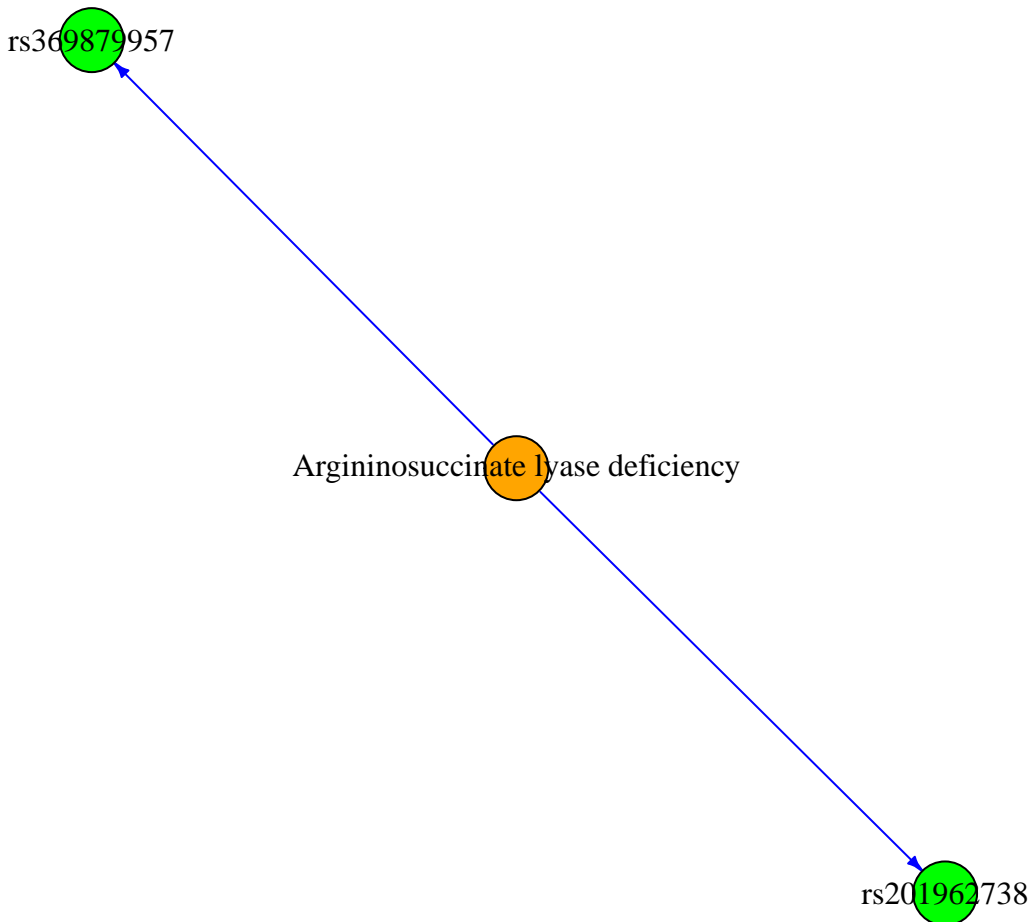

Variant–Disease Network (ARMC9–related Joubert syndrome)

ARMC9–related Joubert syndrome

rs372770167

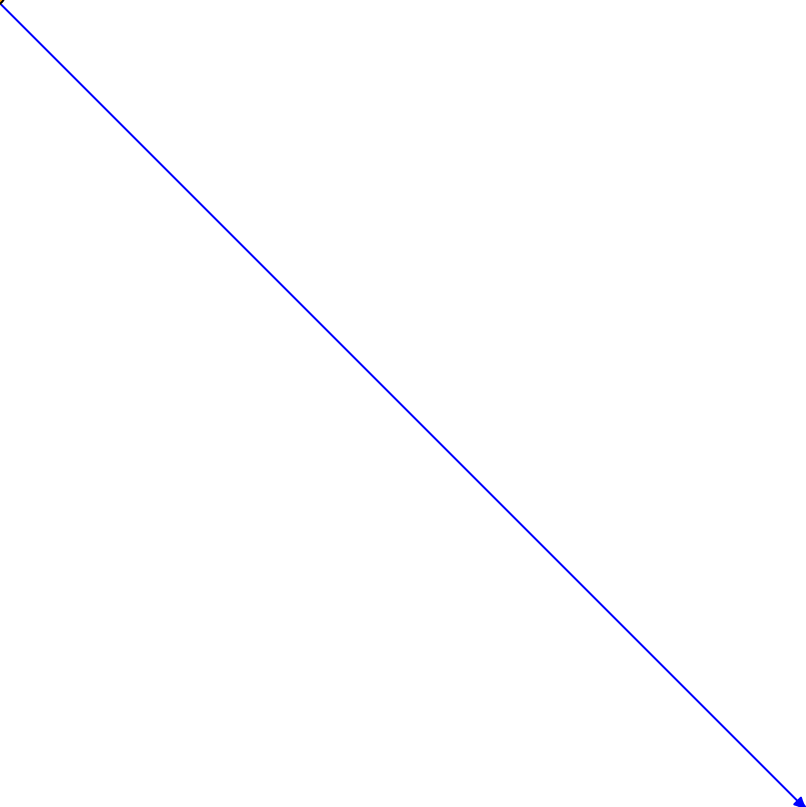

## Variant–Disease Network (Aromatase deficiency)

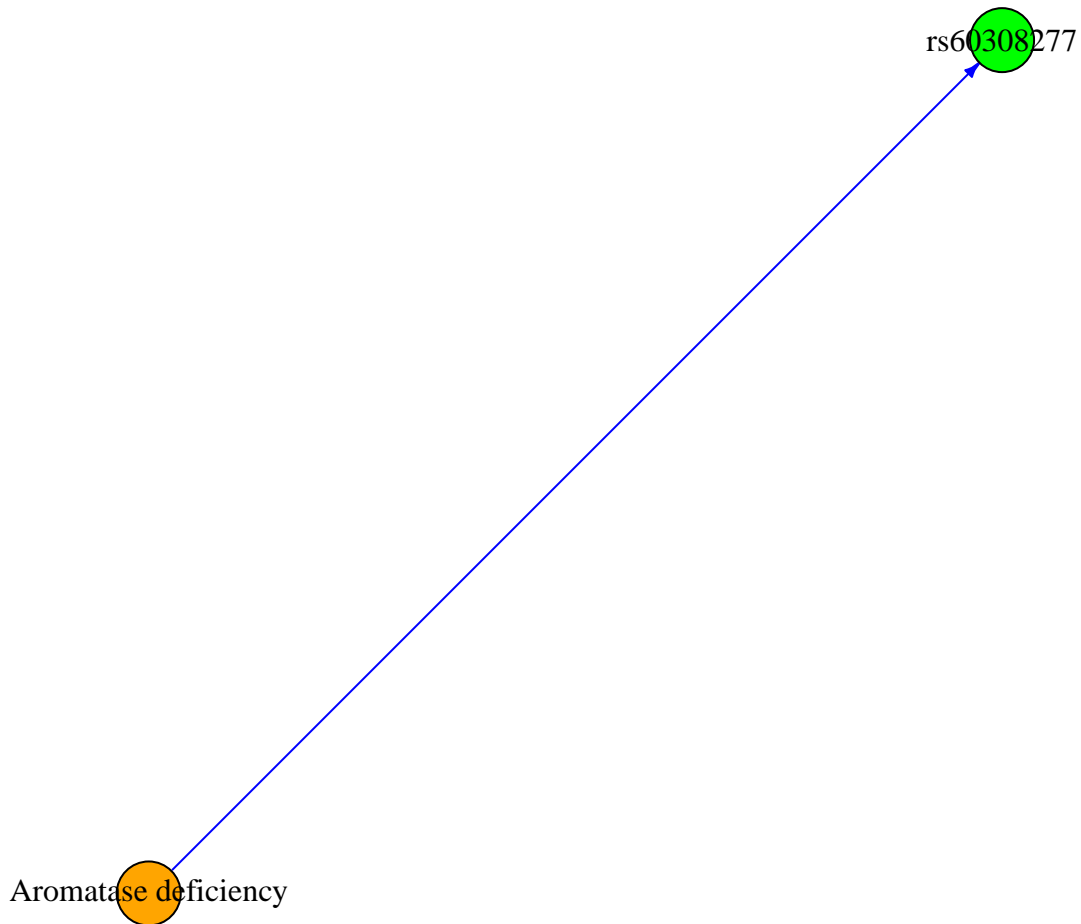

## Variant–Disease Network (Arrhythmia)

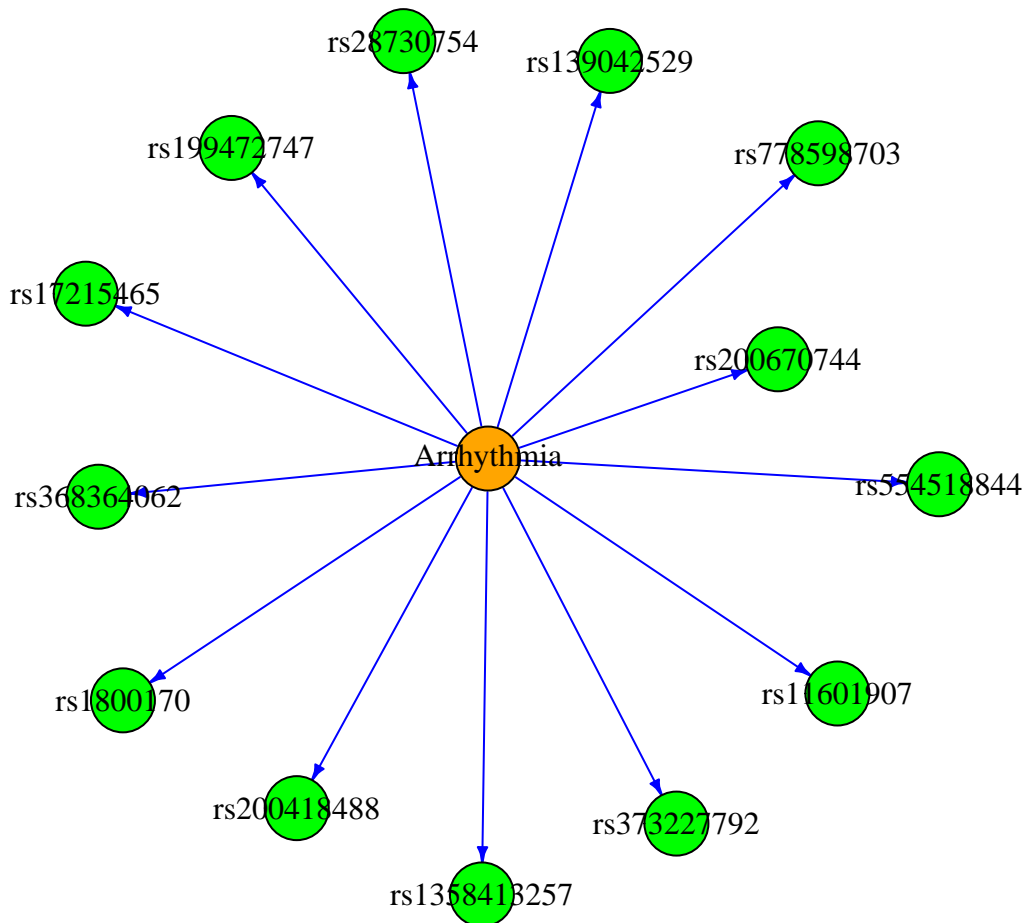

Variant–Disease Network (Arrhythmogenic right ventricular cardiomyopathy)

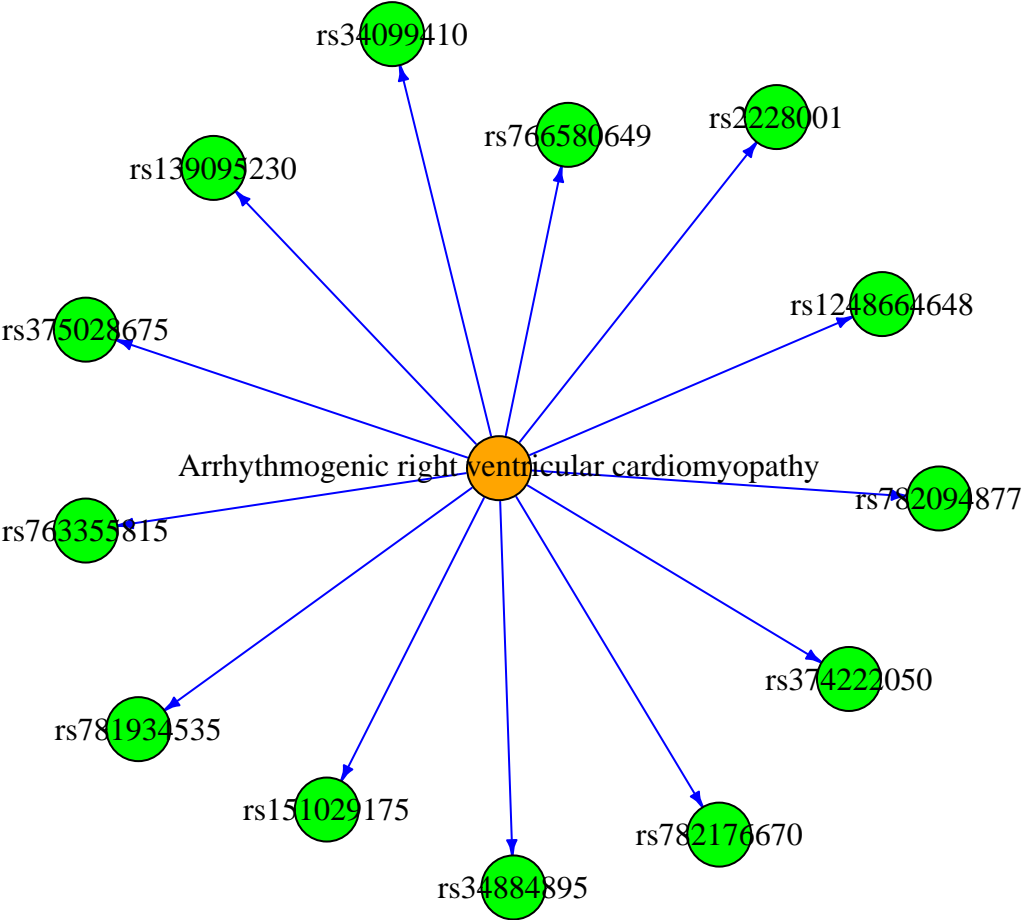



## Variant–Disease Network (Arterial calcification)

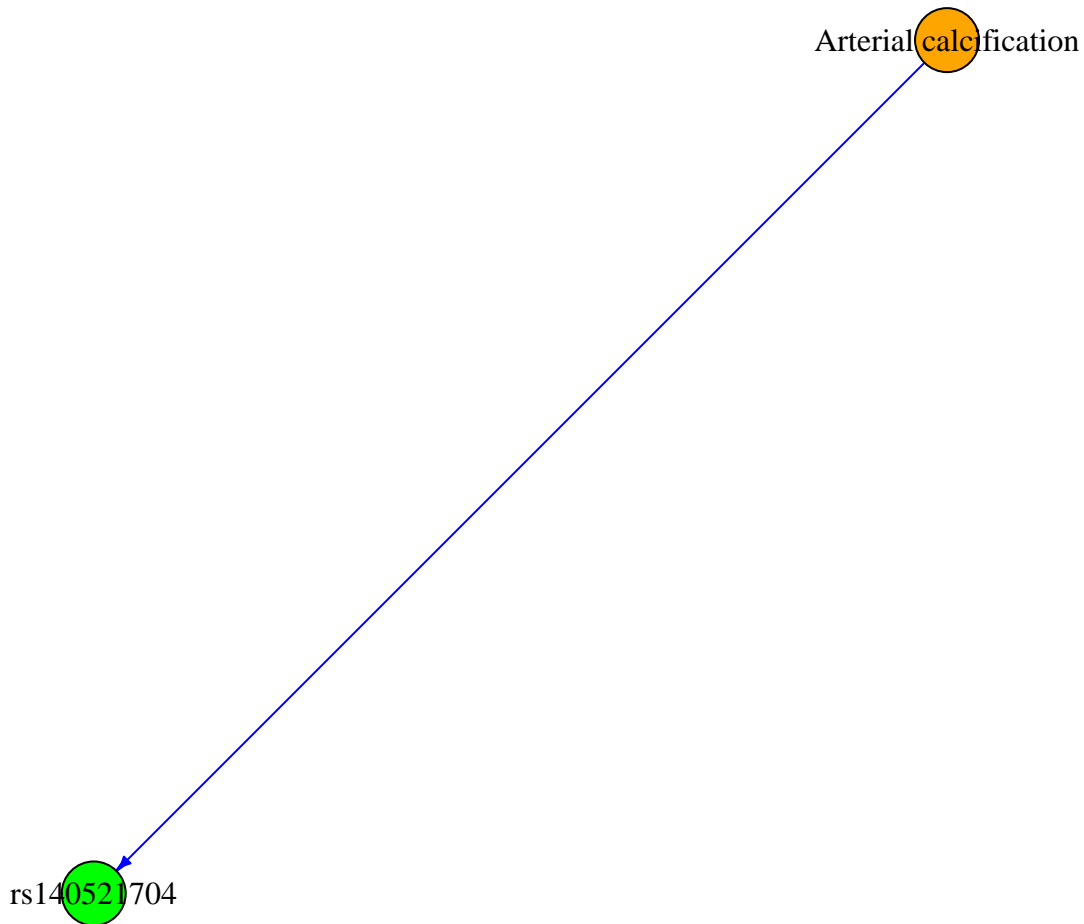

## Variant–Disease Network (Arterial dissection)

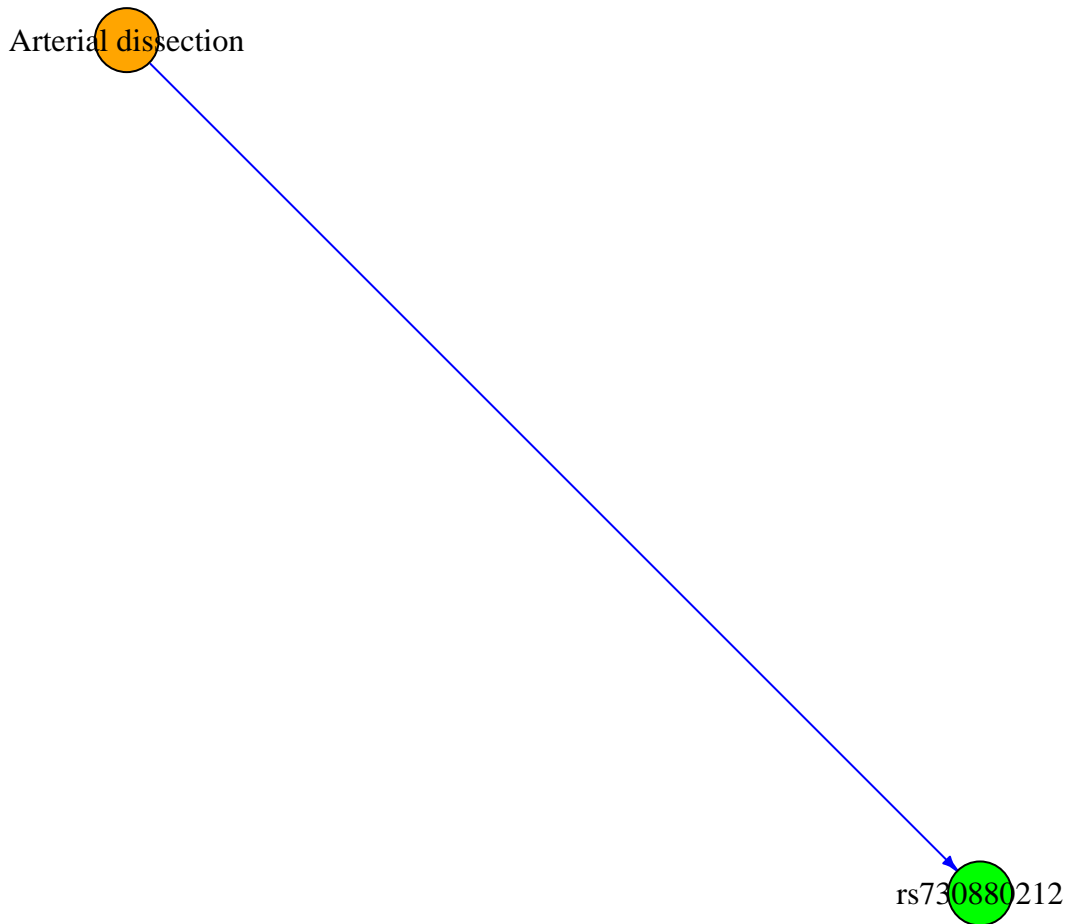

**Variant–Disease Network (Arterial tortuosity syndrome)**

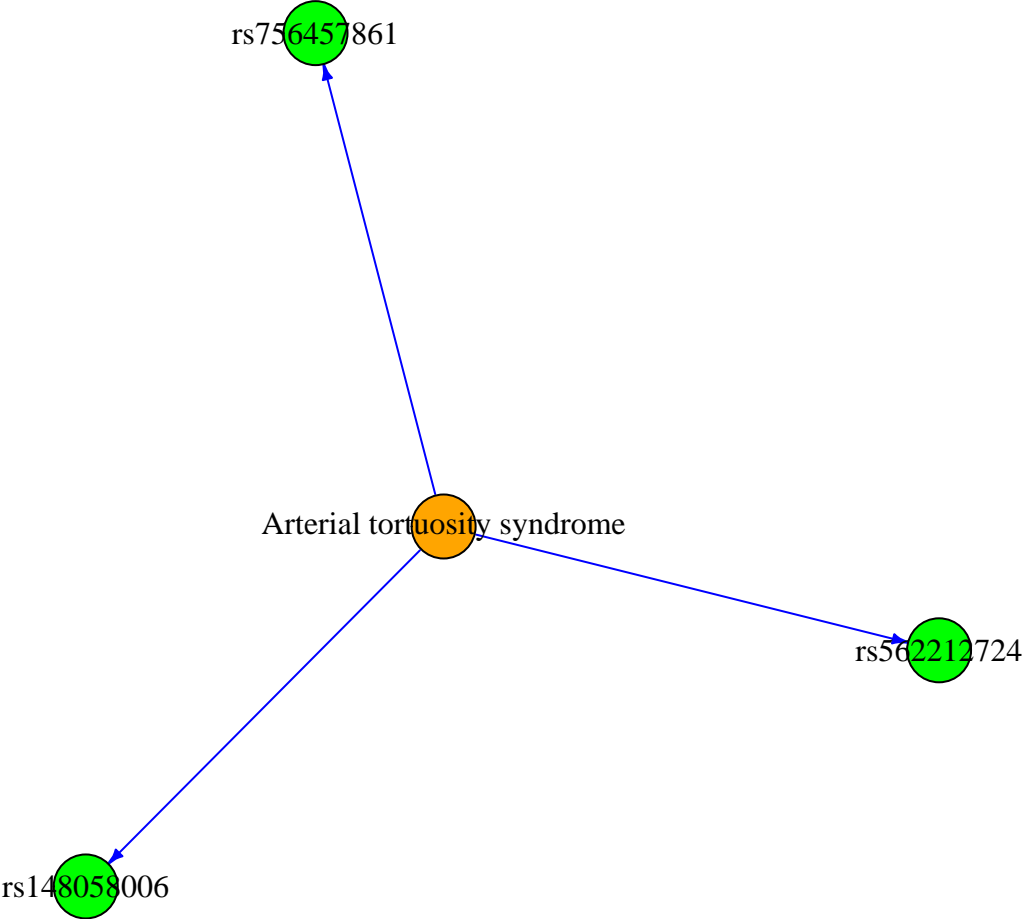

Variant–Disease Network (Arteriohepatic dysplasia)

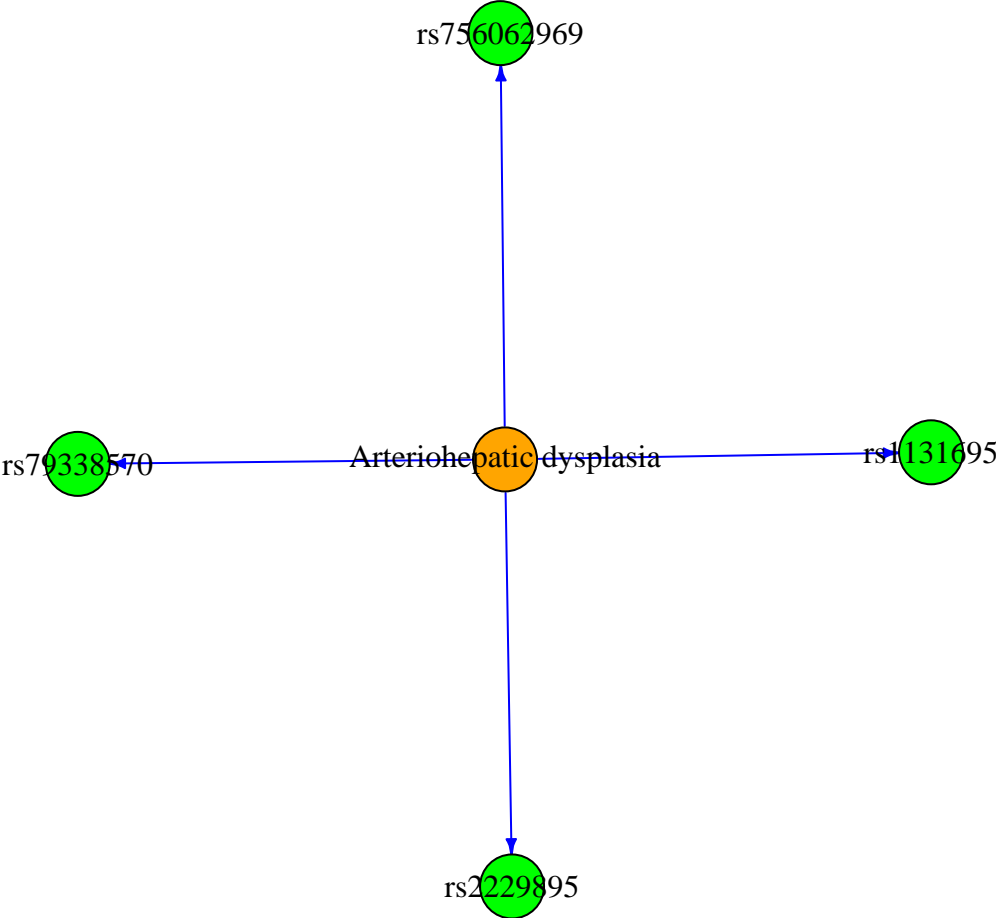

Variant–Disease Network (Arthrogryposis multiplex congenita)

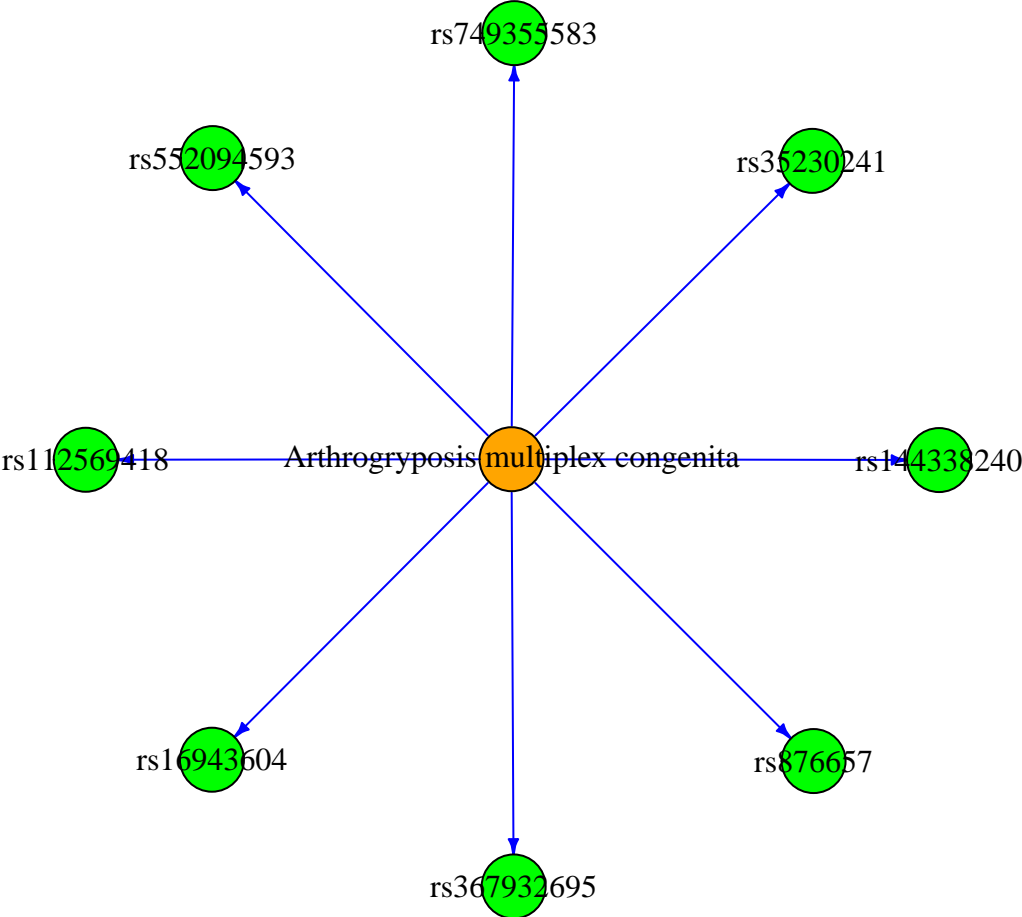

# Variant–Disease Network (Arthrogryposis multiplex congenita distal)

rs367932695

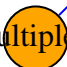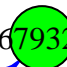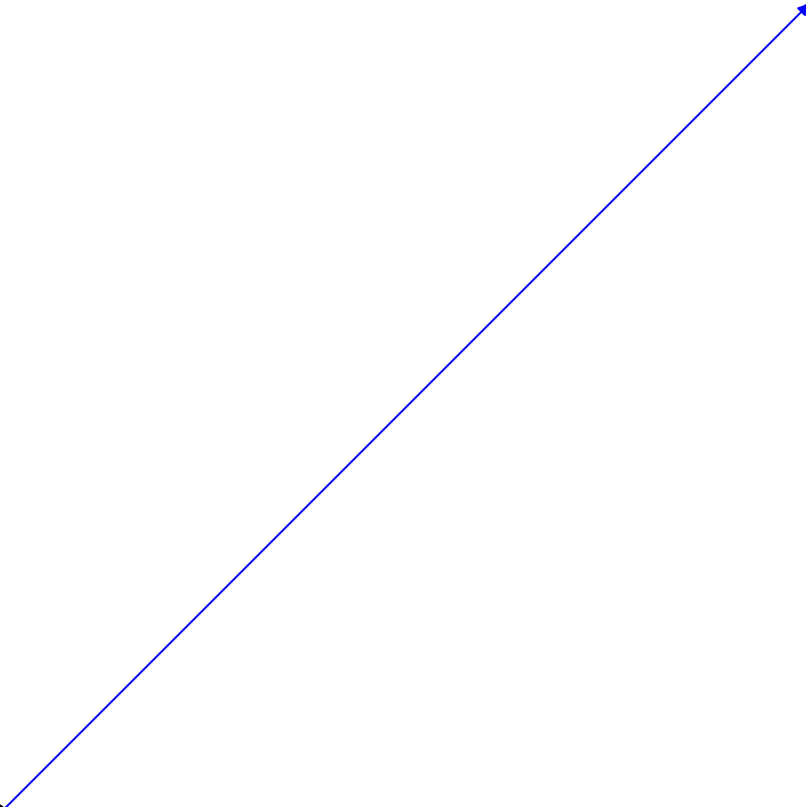

Arthrogryposis multiplex congenita distal

Variant–Disease Network (Aspartylglucosaminuria)

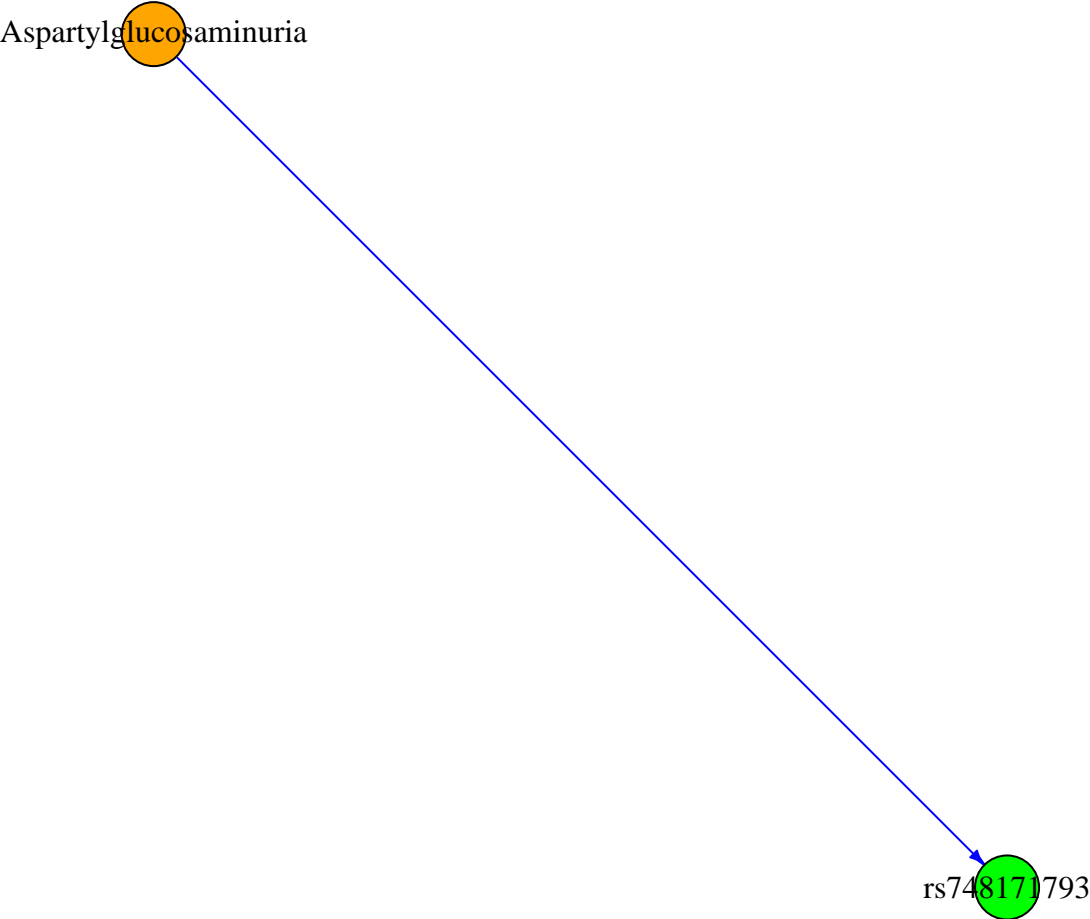

## Variant-Disease Network (Ataxia)

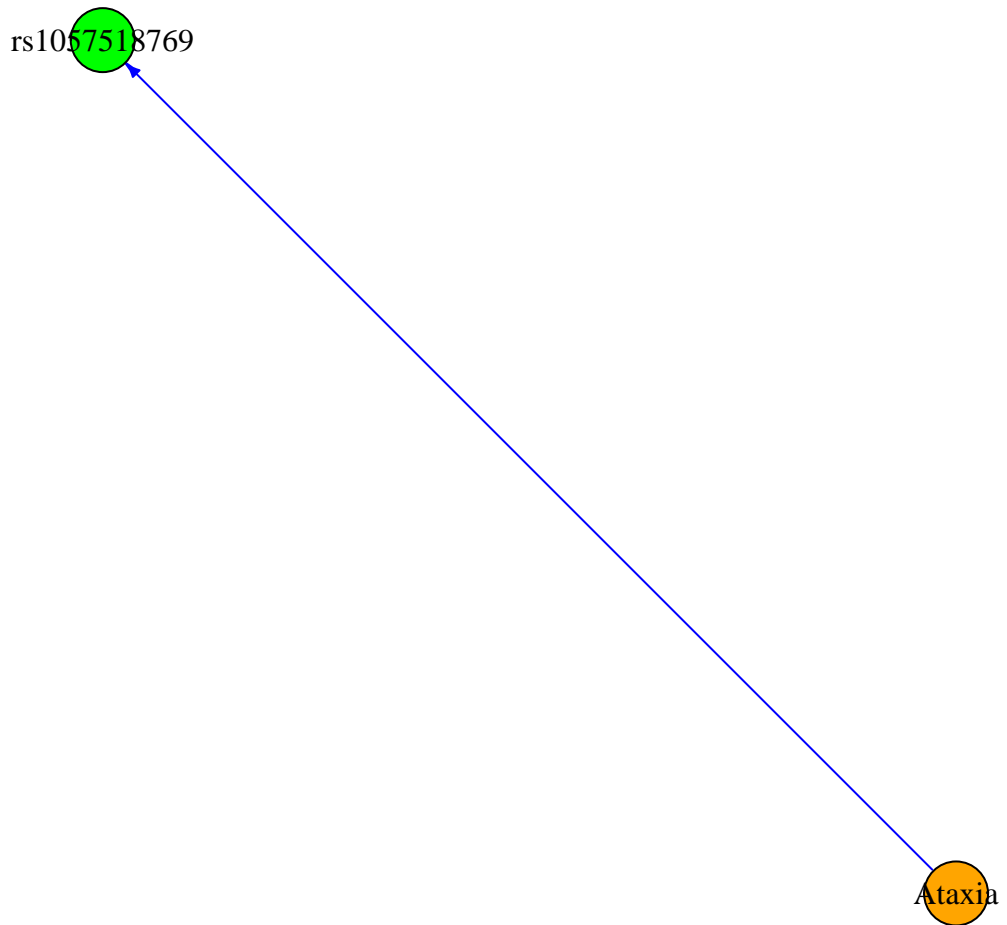



Variant–Disease Network (Ataxia Neuropathy Spectrum Disorders)

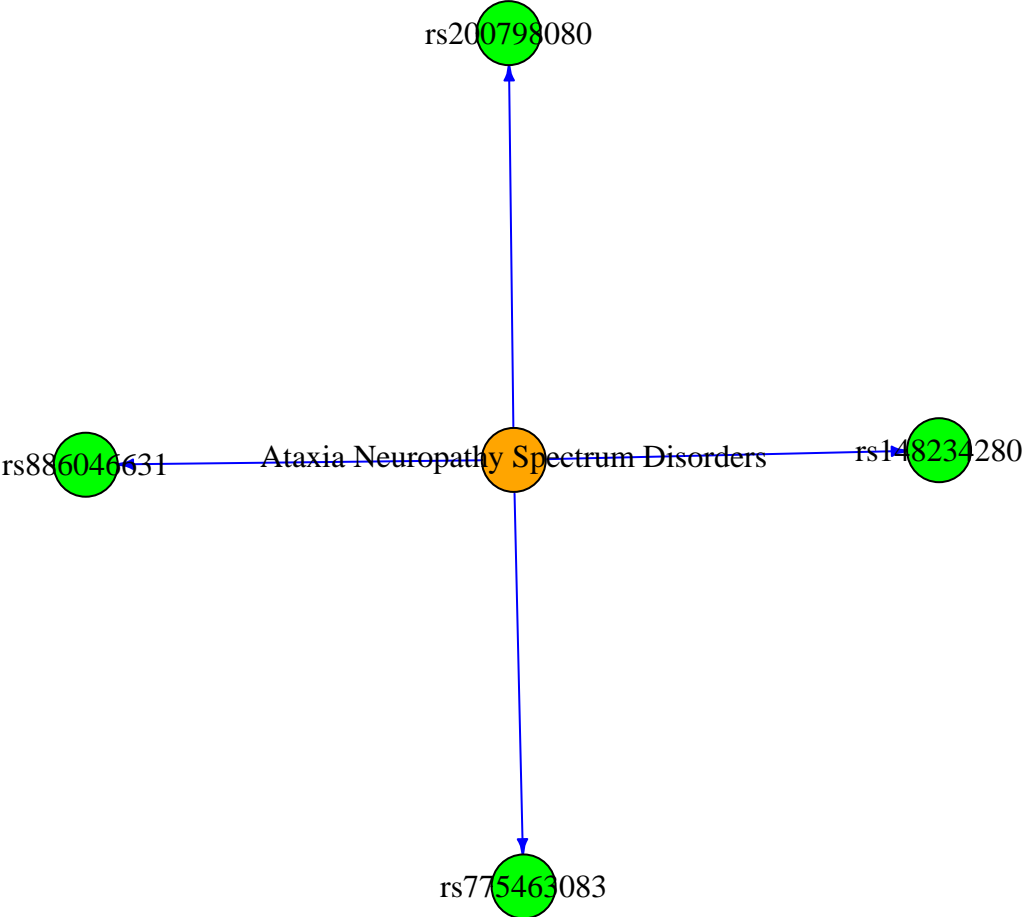

# Variant–Disease Network (Ataxia with Oculomotor Apraxia)

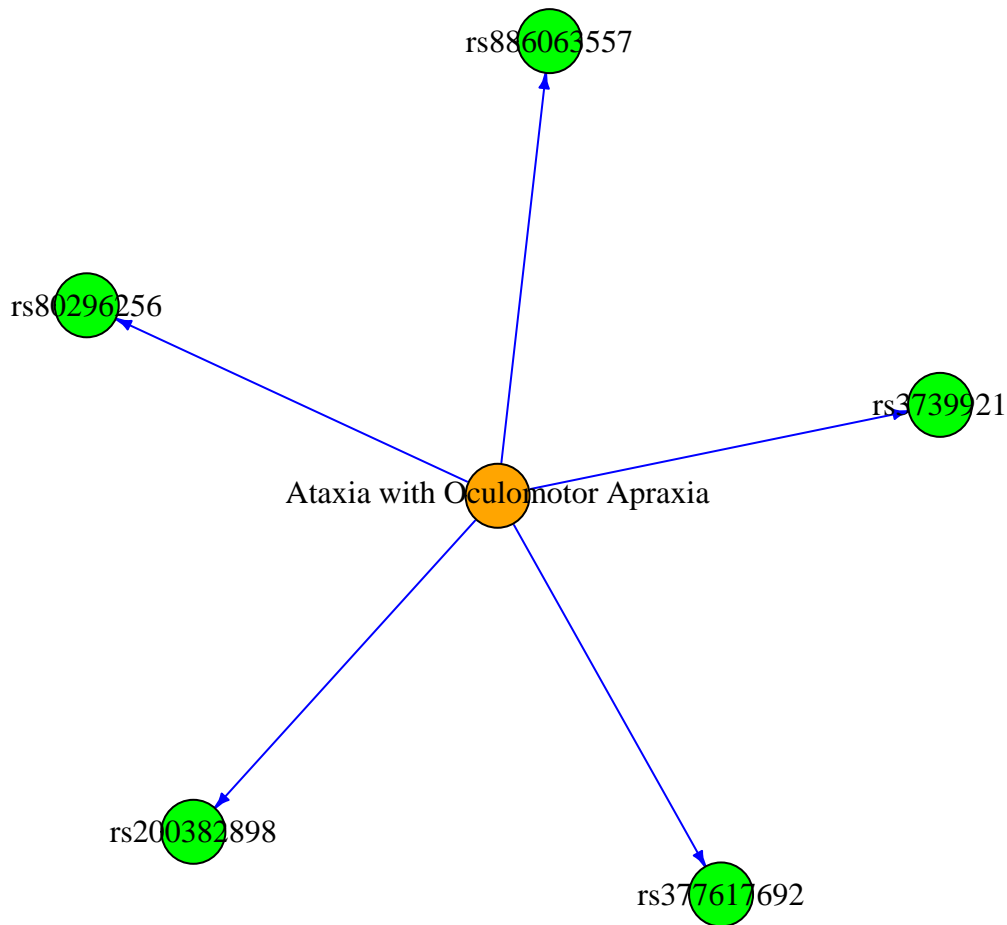

# Variant-Disease Network (Ataxia-telangiectasia syndrome)

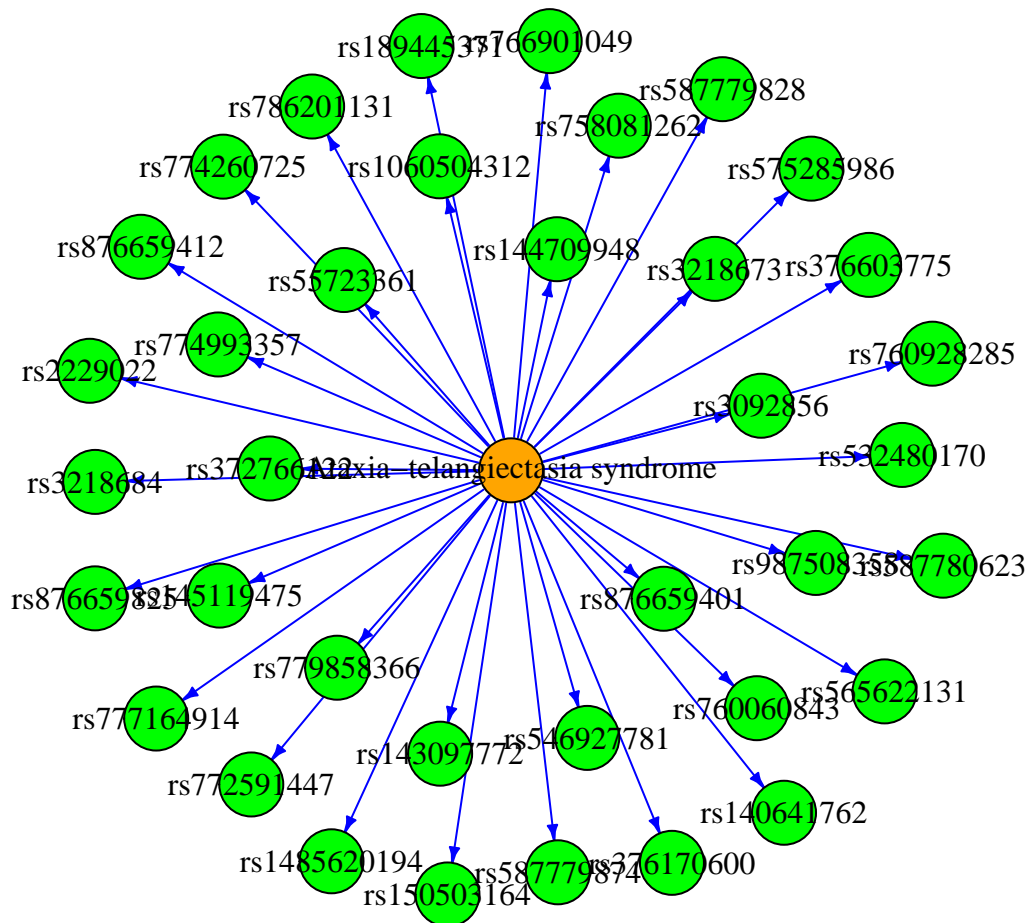

Variant–Disease Network (Ataxia–telangiectasia–like disorder 1)

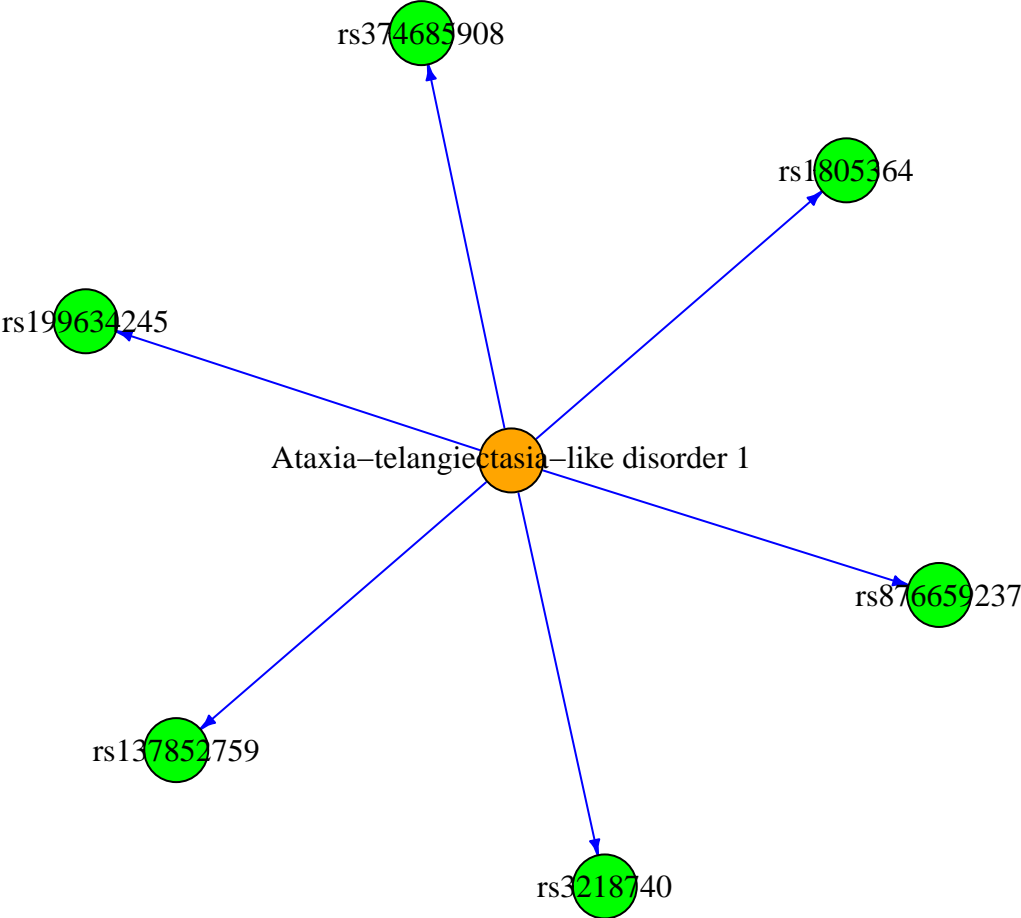

Variant–Disease Network (Atrial fibrillation)

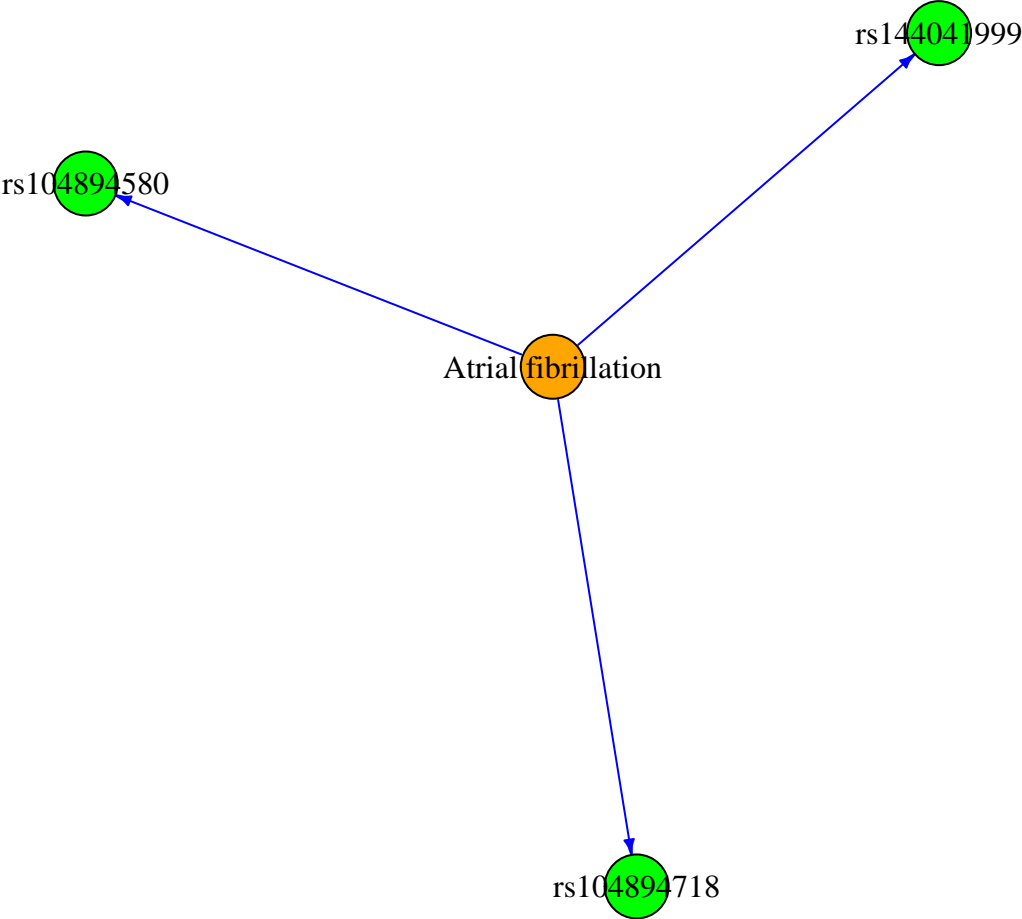

## Variant–Disease Network (Atrial septal defect)

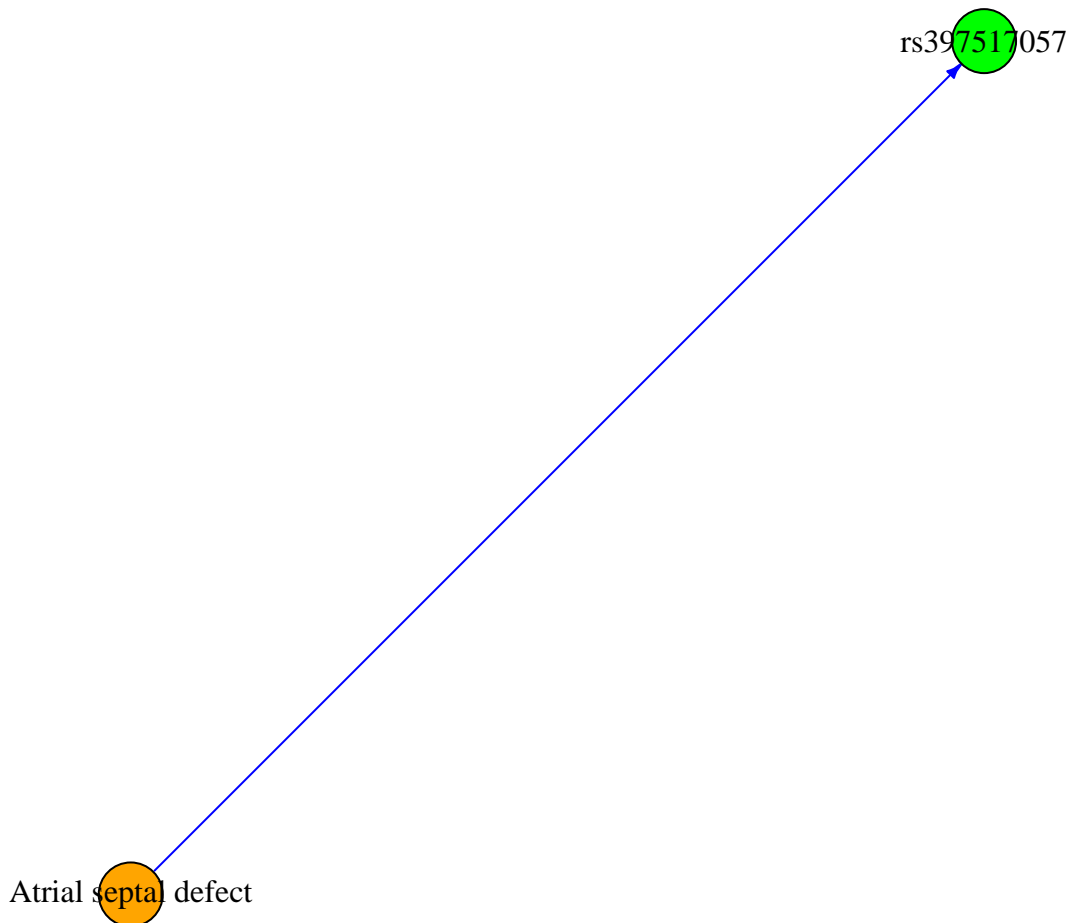

**Variant–Disease Network (Atrial septal defect 5)**

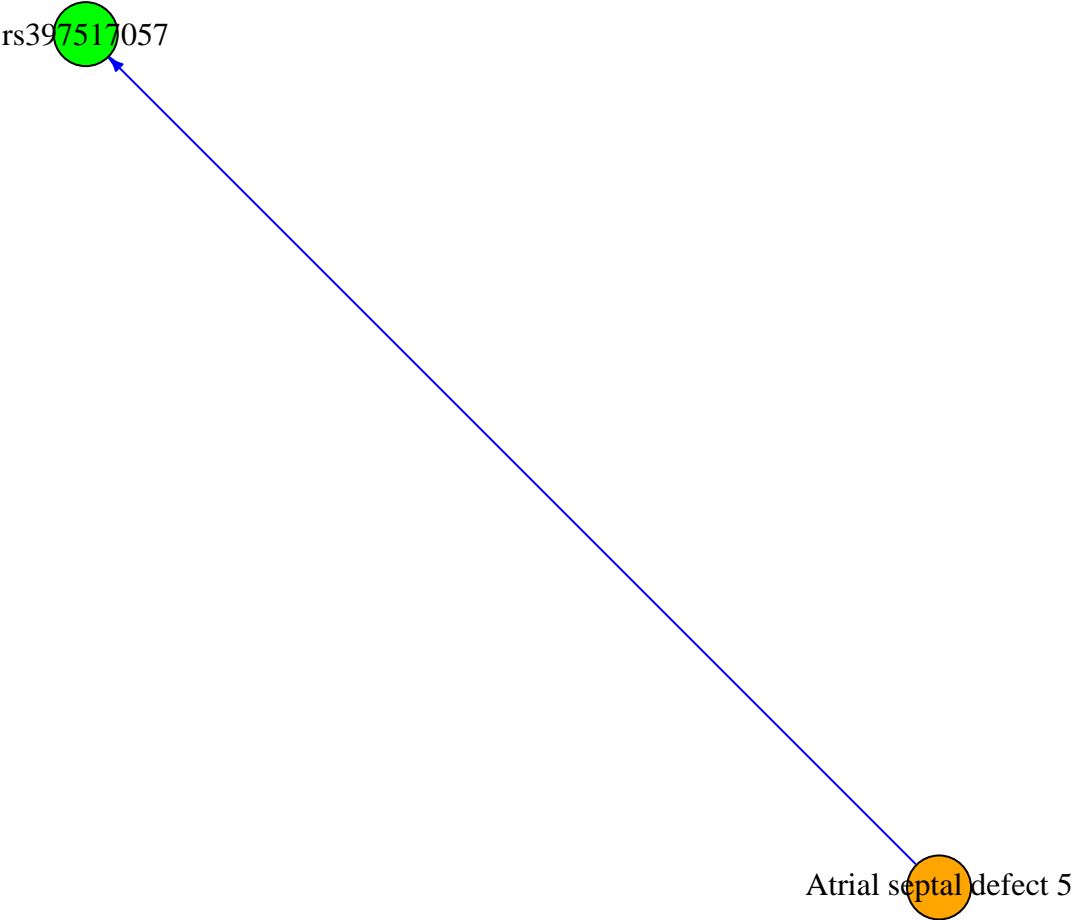

## Variant–Disease Network (Atrichia with papular lesions)

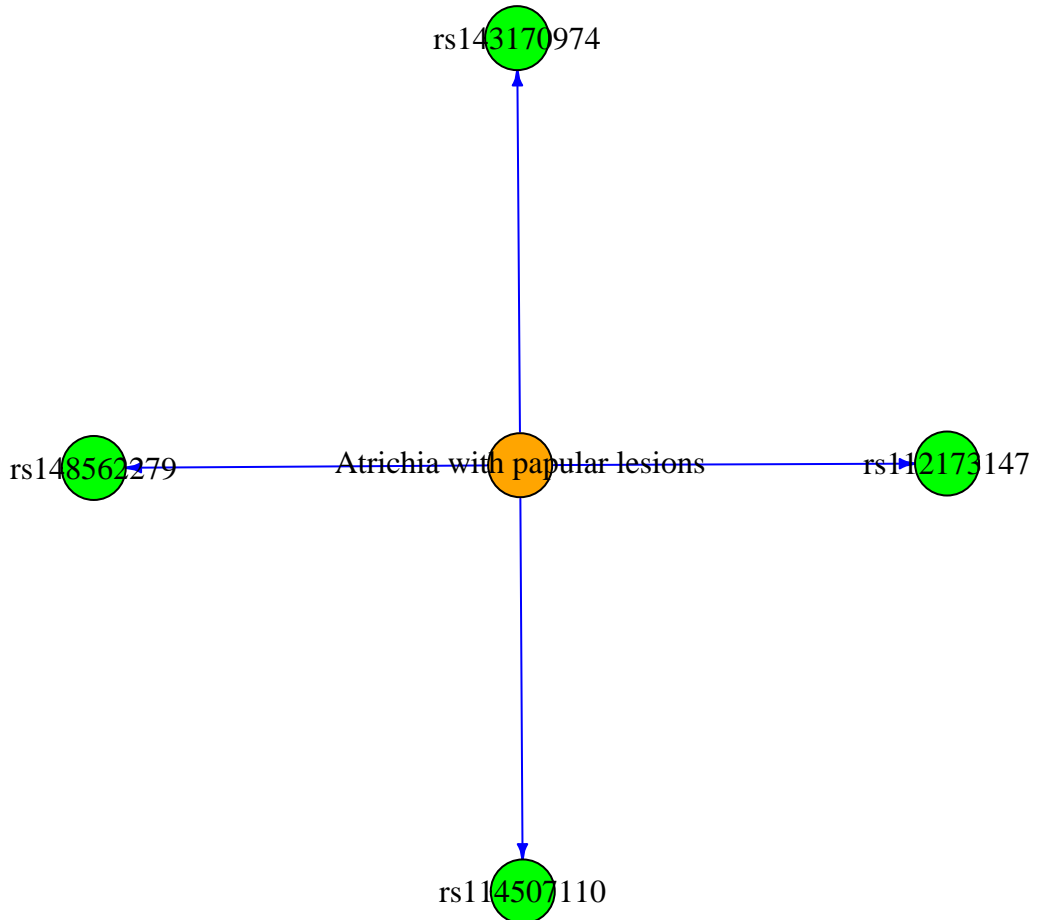



## Variant–Disease Network (Atrioventricular septal defect 4)

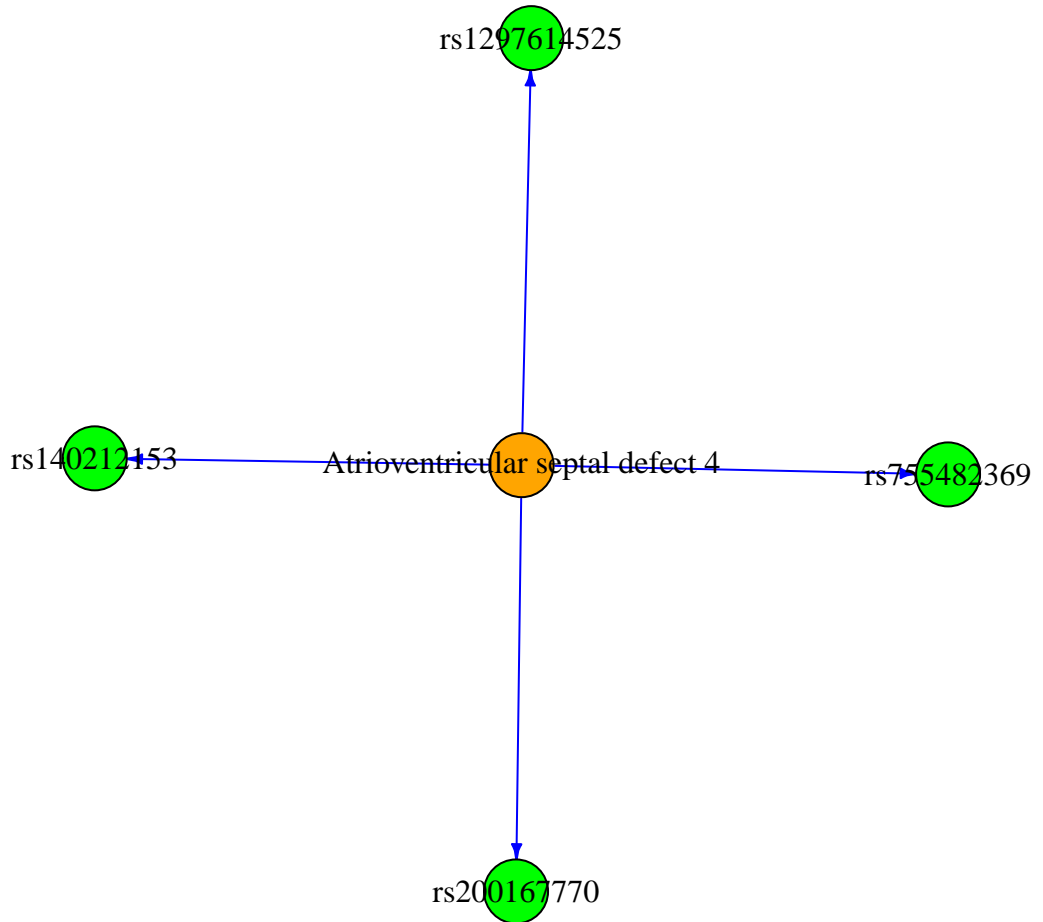

Variant–Disease Network (Atrophia bulborum hereditaria)

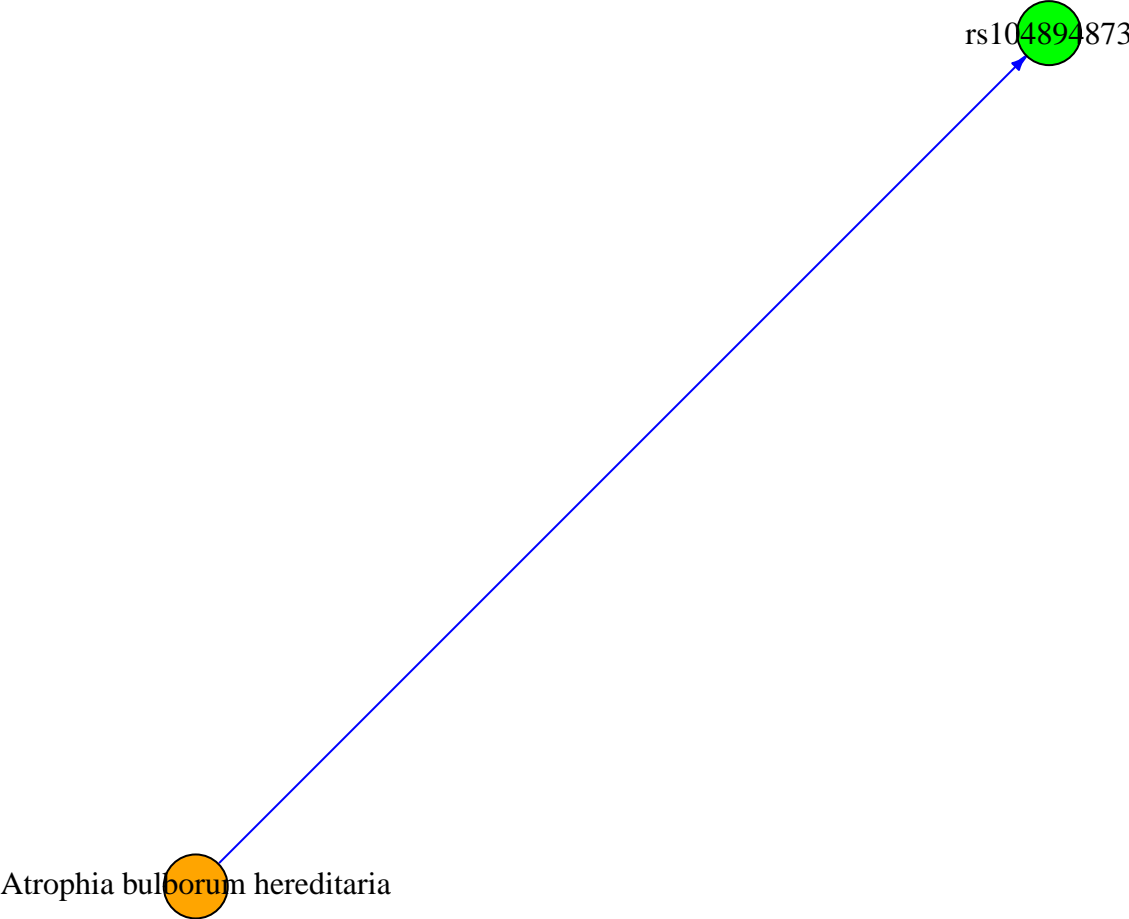

Variant–Disease Network (Atypical hemolytic uremic syndrome)

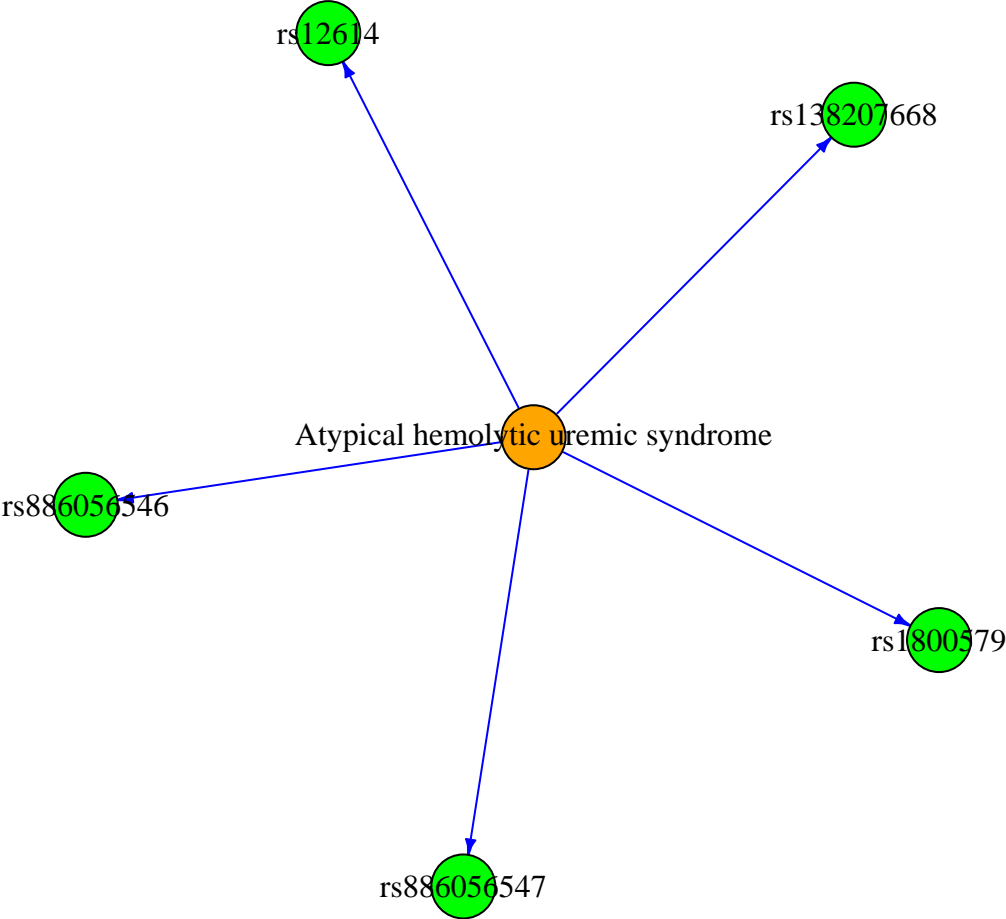

## Variant-Disease Network (Aural atresia)

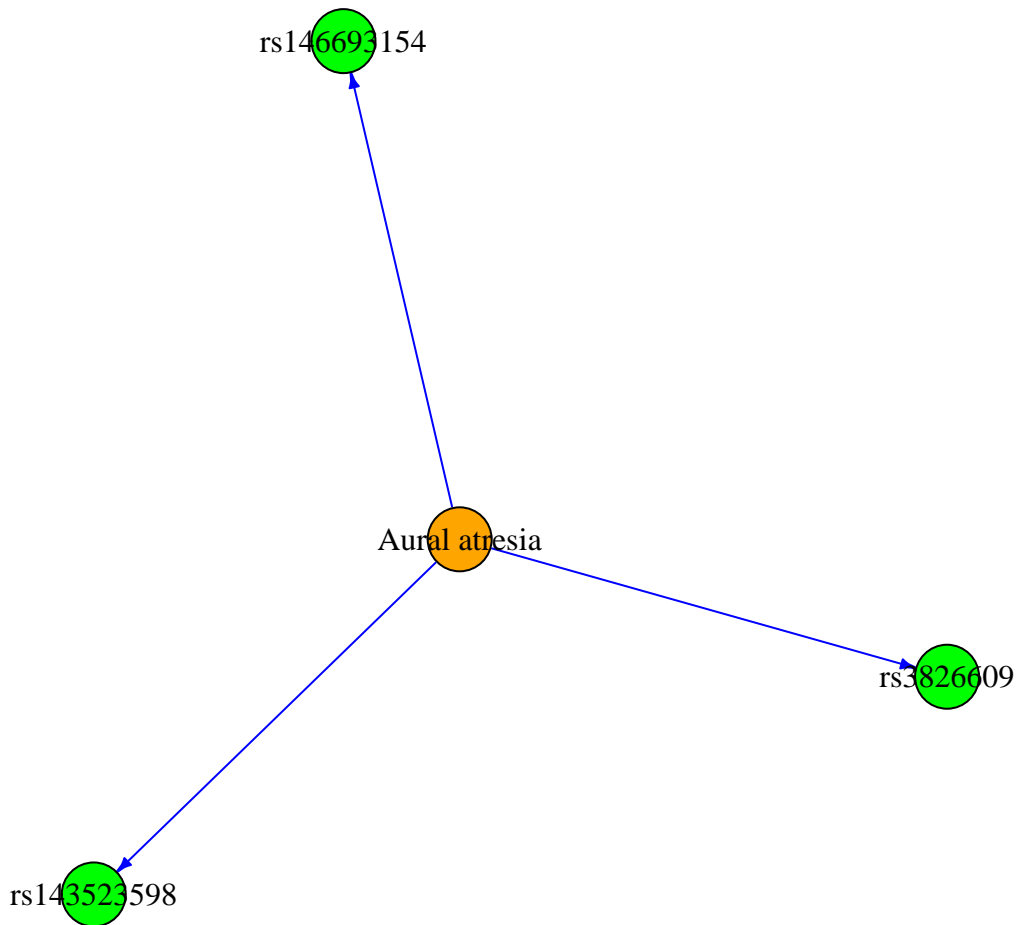

Variant–Disease Network (Auriculocondylar syndrome)

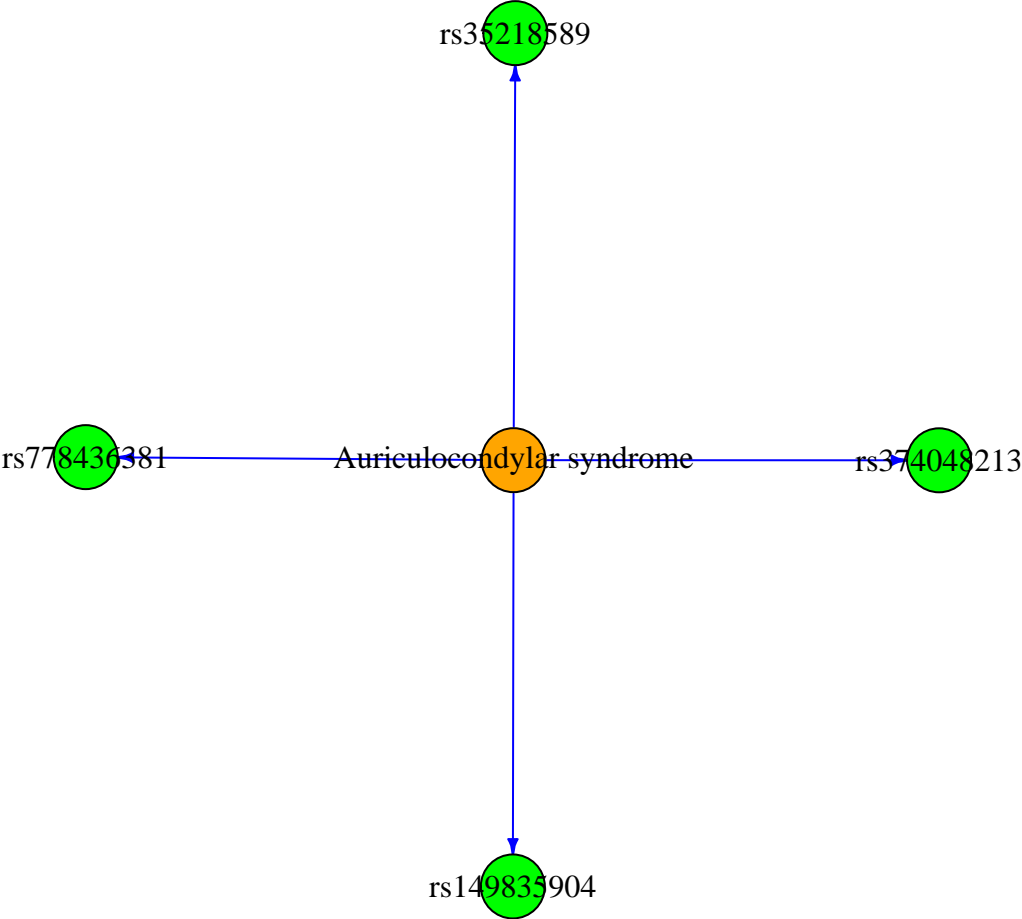

## Variant–Disease Network (Autism spectrum disorder)

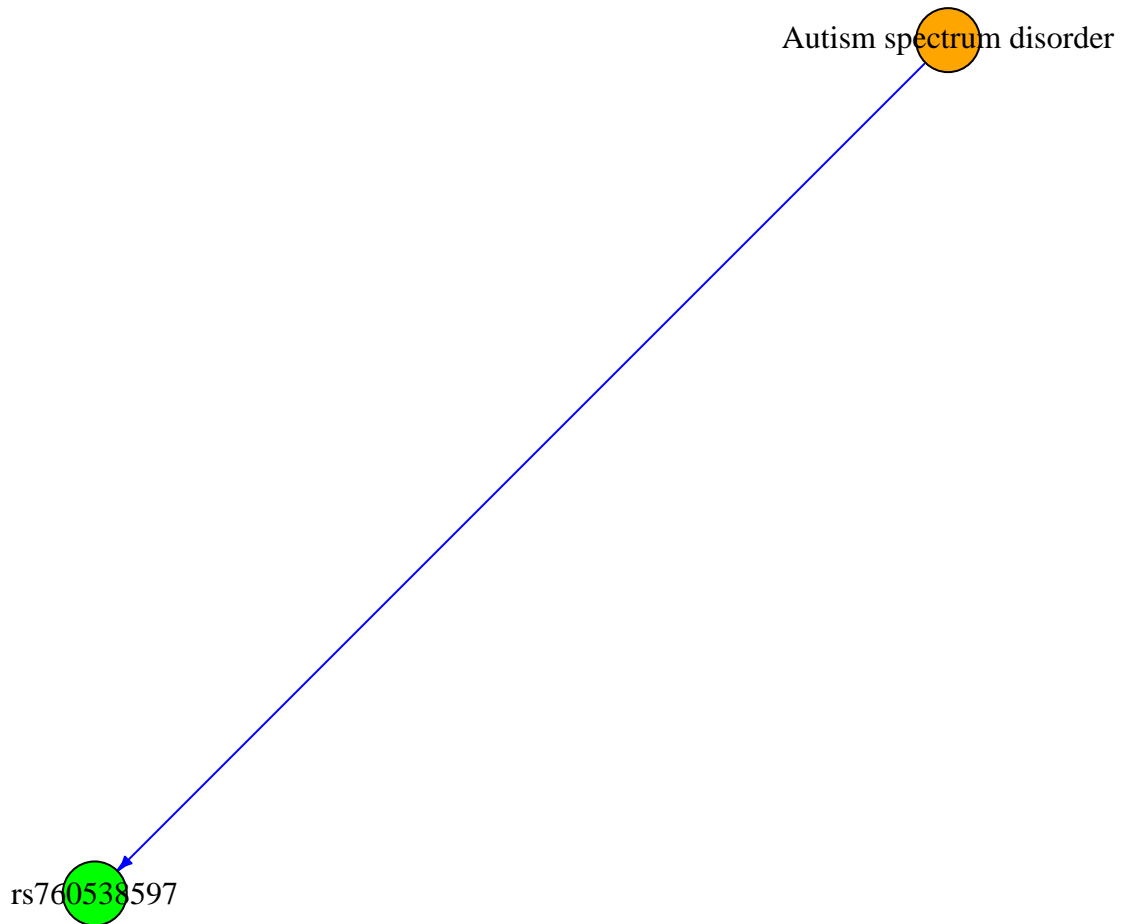

## Variant-Disease Network (Autoimmune interstitial lung)

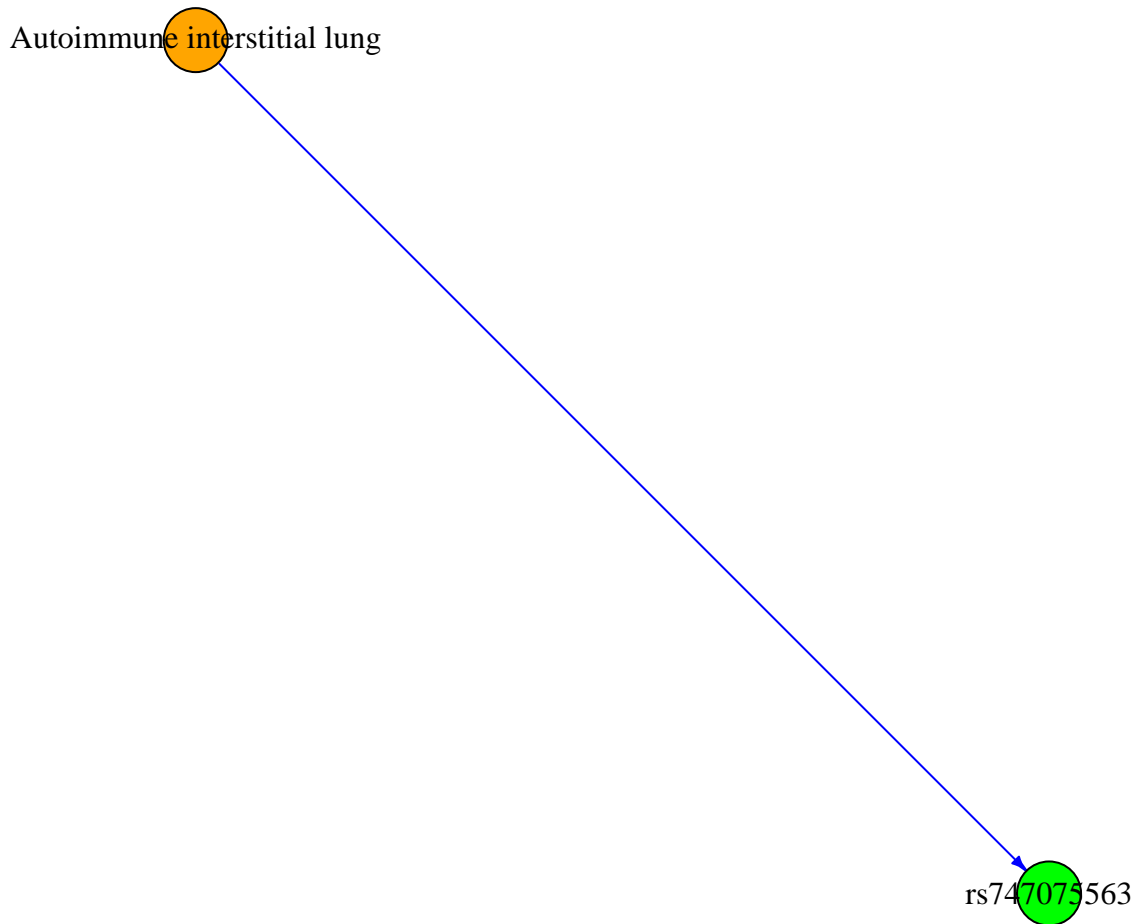

## Variant–Disease Network (Autoinflammatory syndrome)

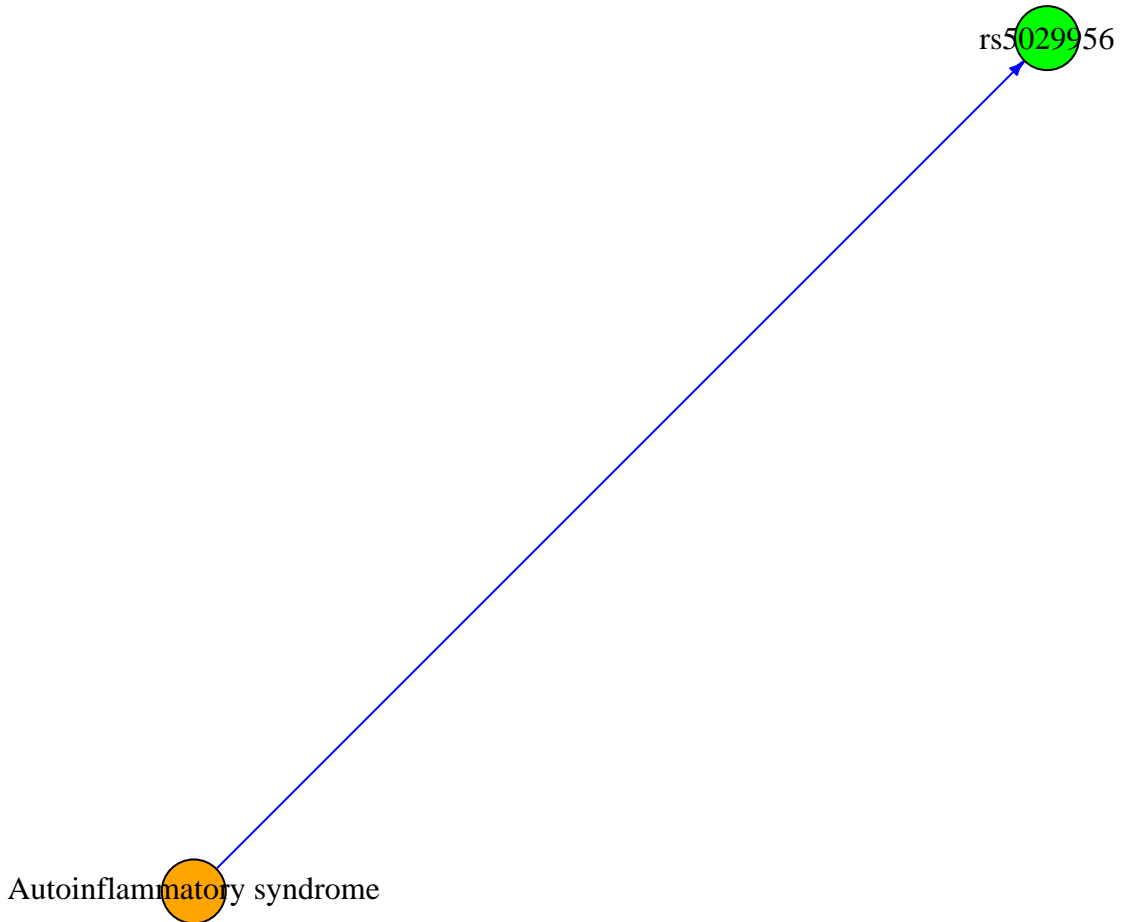



# Variant–Disease Network (Autosomal dominant nocturnal frontal lobe epilepsy)

Autosomal dominant nocturnal frontal lobe epilepsy

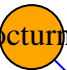

rs751699392

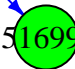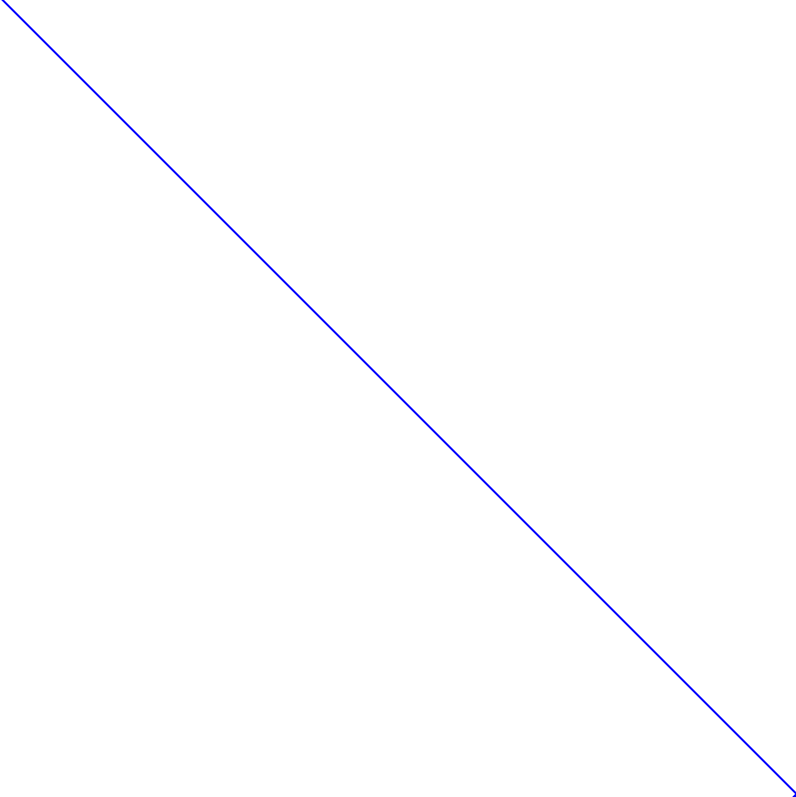

Variant–Disease Network (Autosomal recessive centronuclear myopathy)

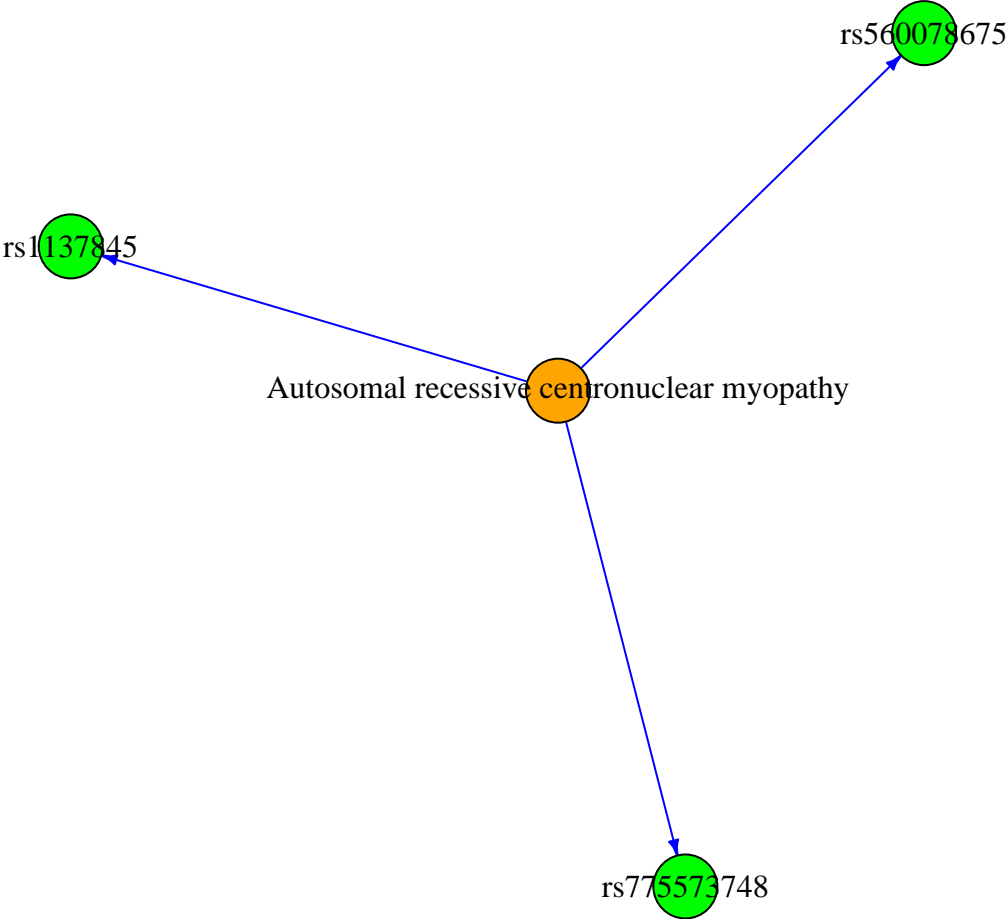

# Variant–Disease Network (Autosomal recessive cerebellar ataxia)

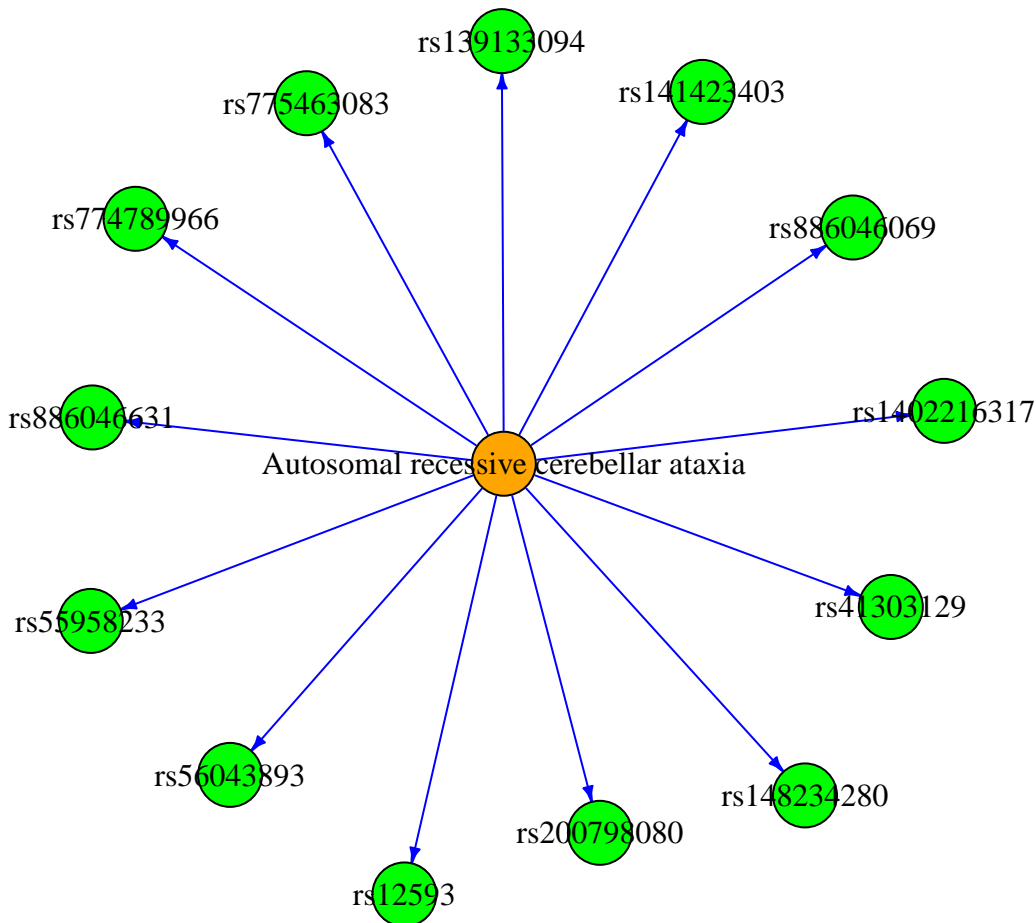

**Variant–Disease Network (Autosomal recessive congenital ichthyosis 1)**

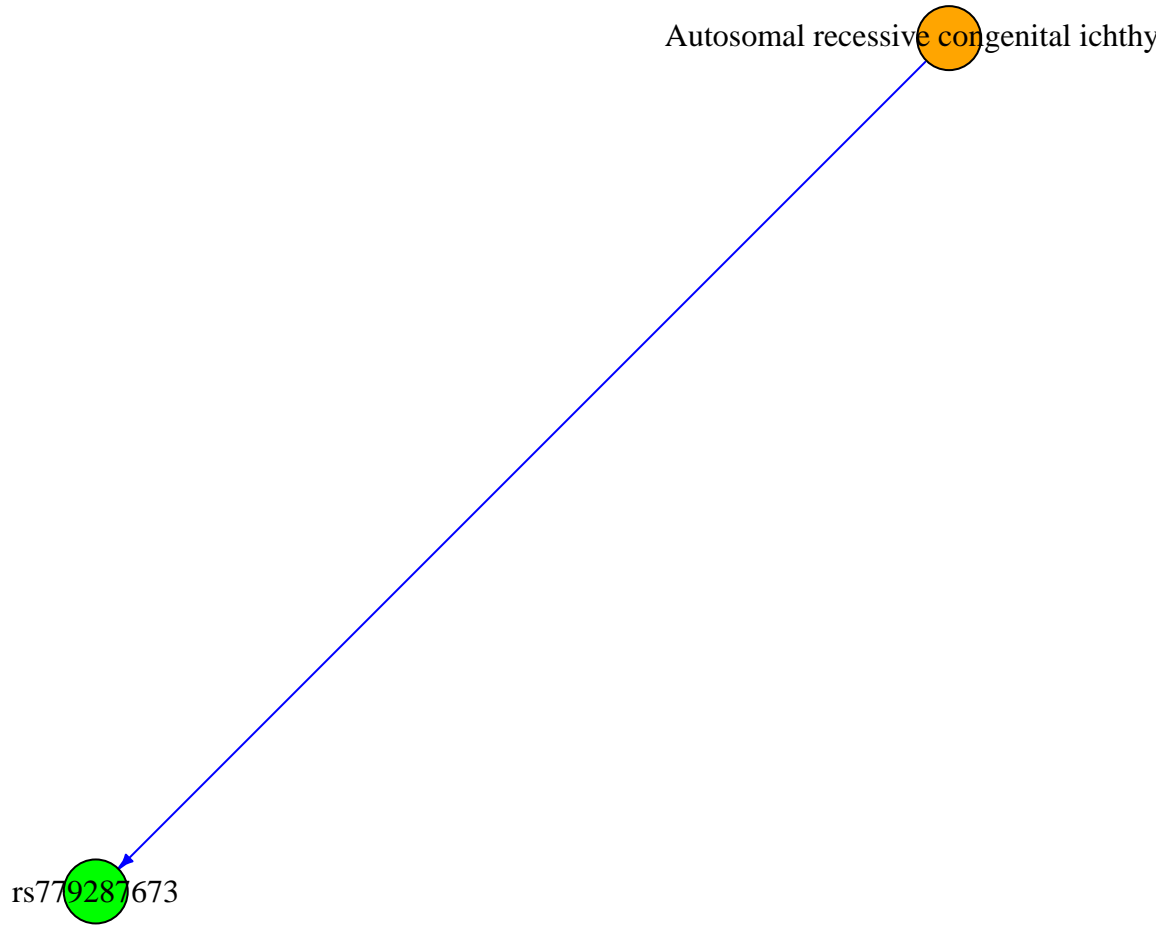

**Variant–Disease Network (Autosomal recessive congenital ichthyosis 6)**

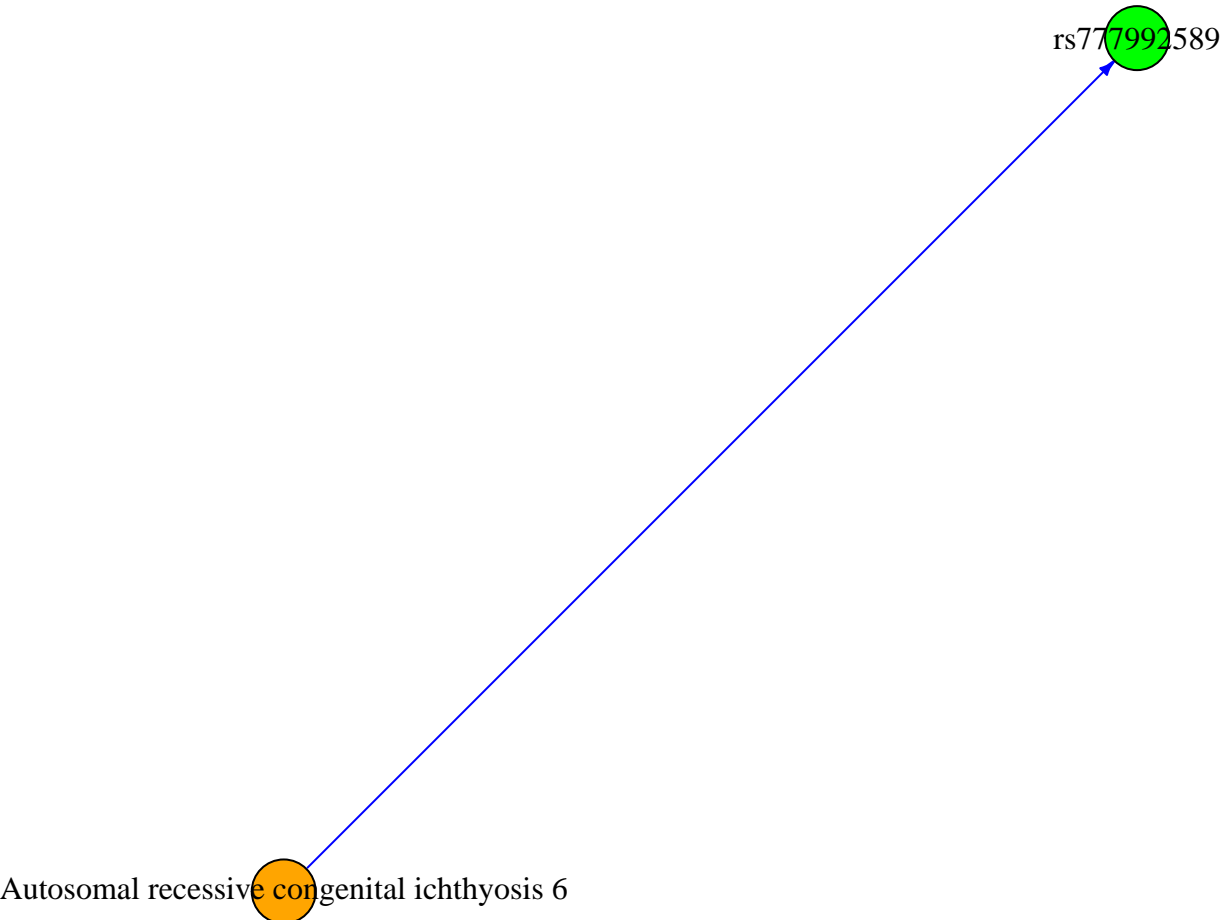

# Variant–Disease Network (Autosomal recessive cutis laxa type 1B)

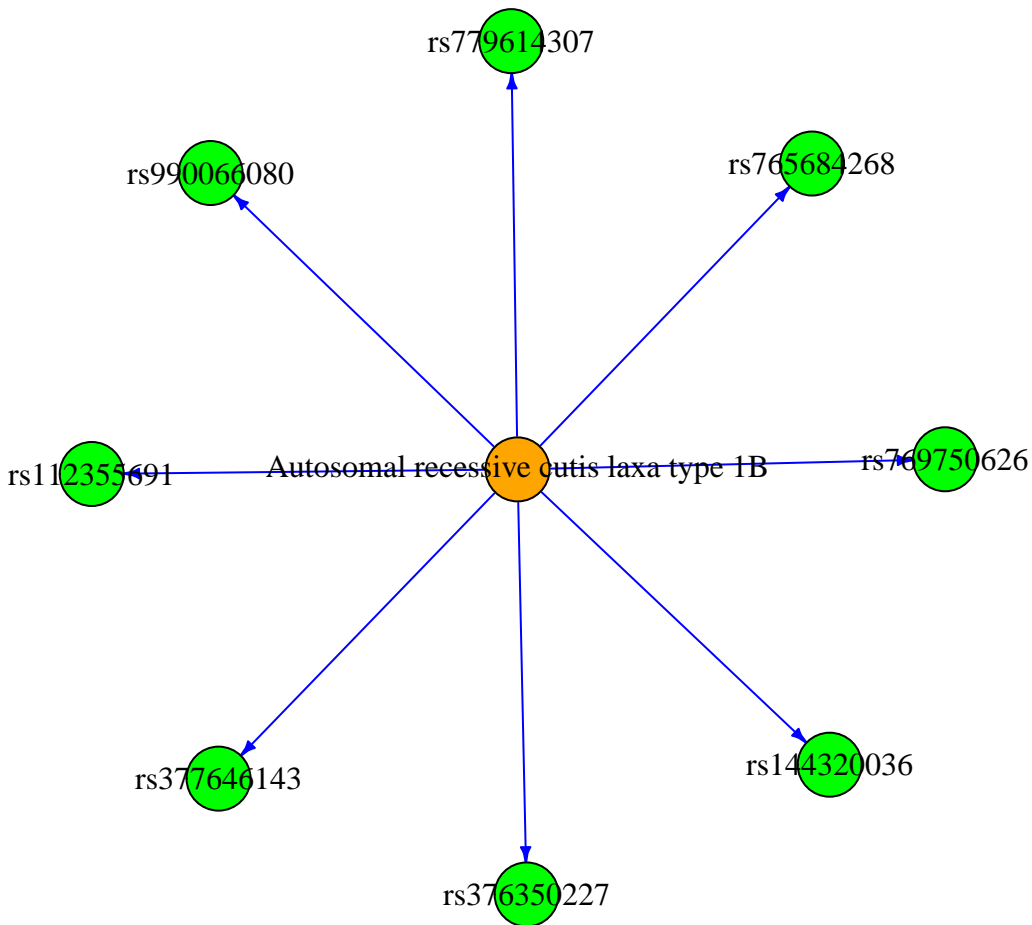

# Variant-Disease Network (Autosomal recessive hypophosphatemic bone dis

Autosomal recessive hypophosphatemic bone disease

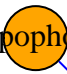

rs121918238

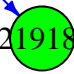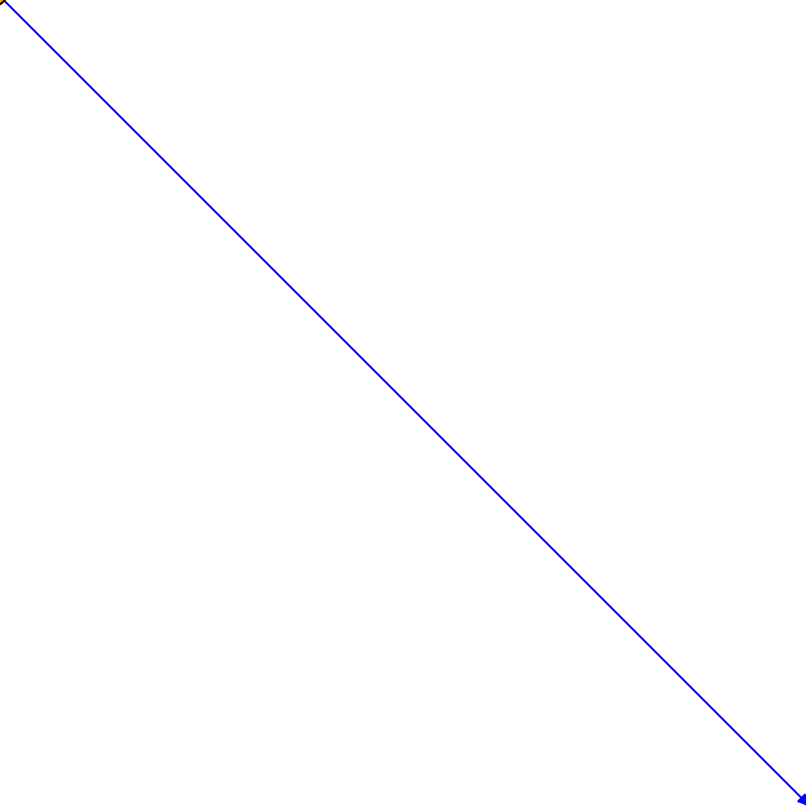

## Variant–Disease Network (Avascular necrosis of the head of femur)

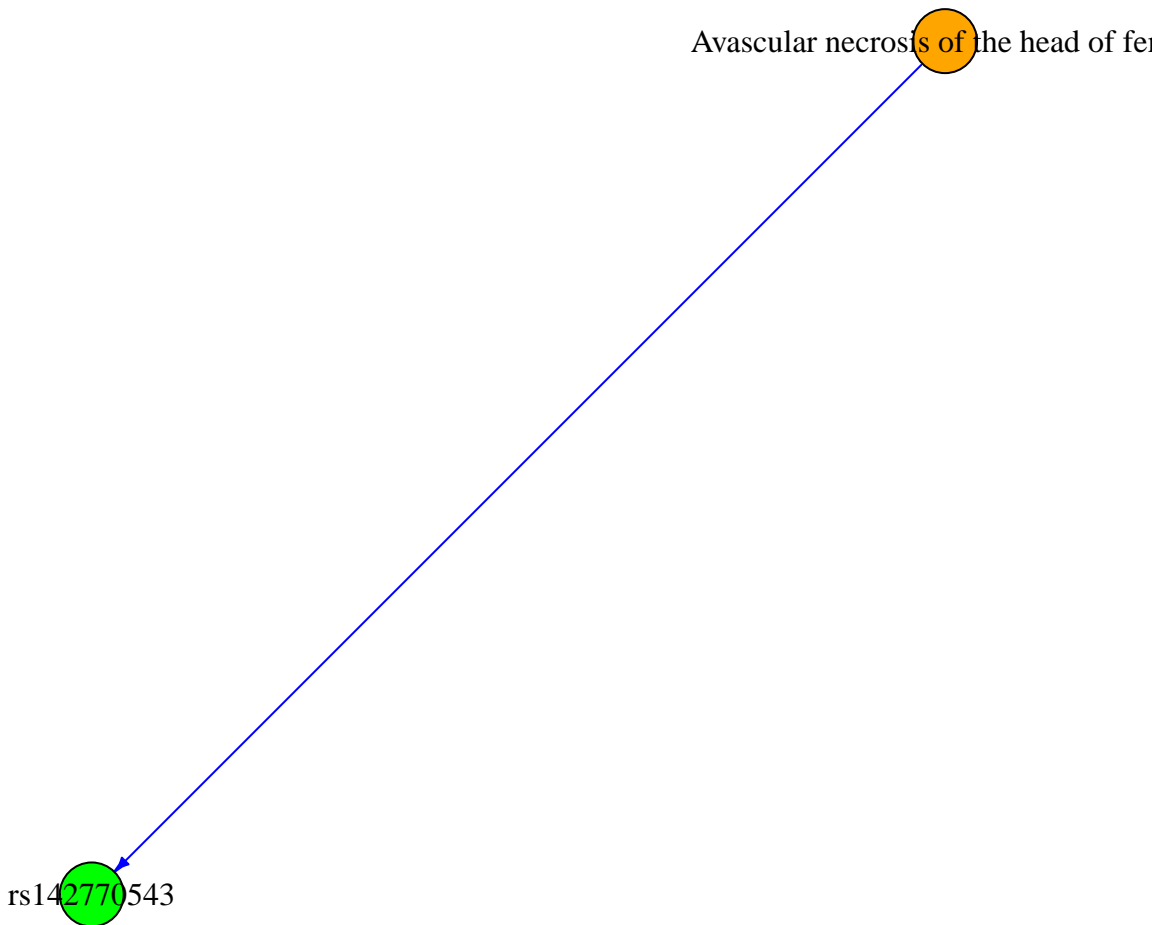



# Variant–Disease Network (Axenfeld–Rieger syndrome type 3)

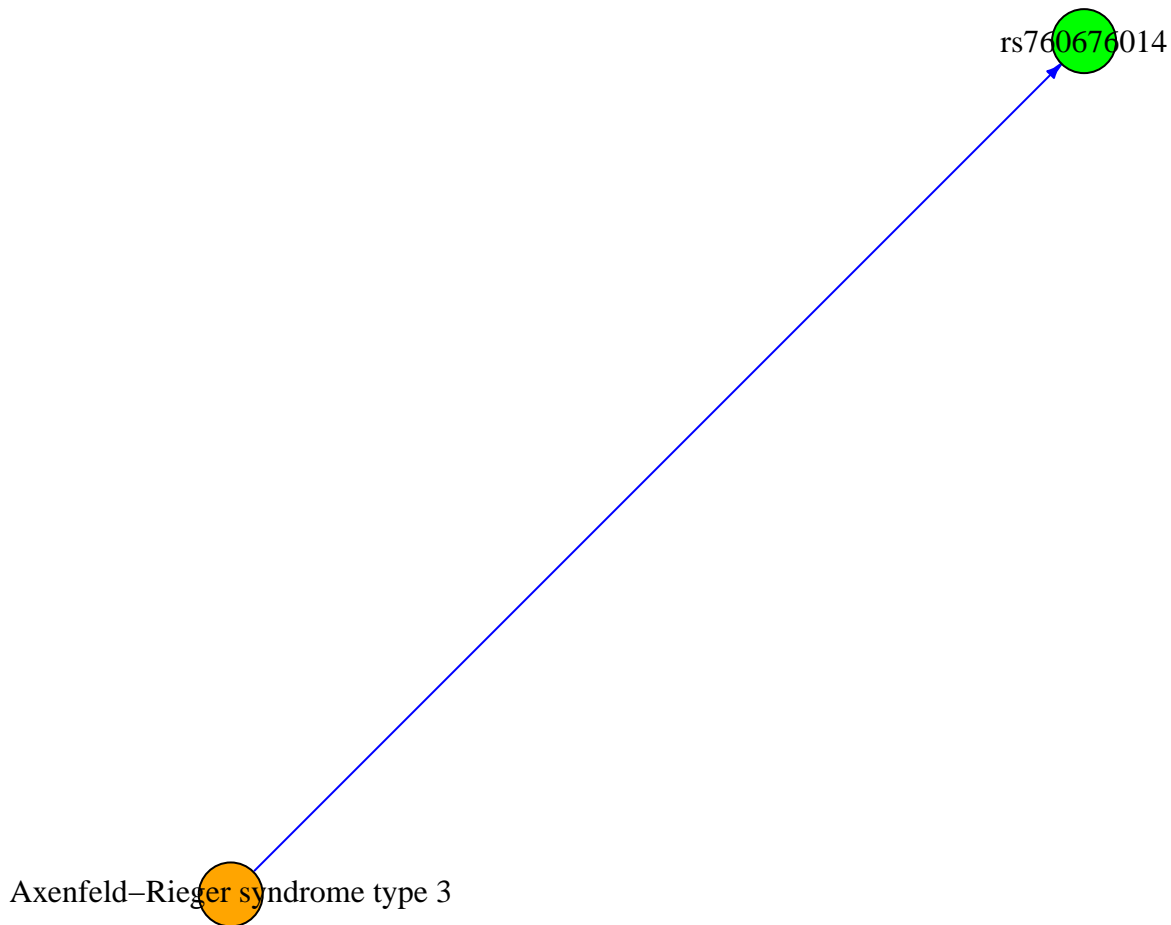

Variant–Disease Network (Bainbridge–Ropers syndrome)

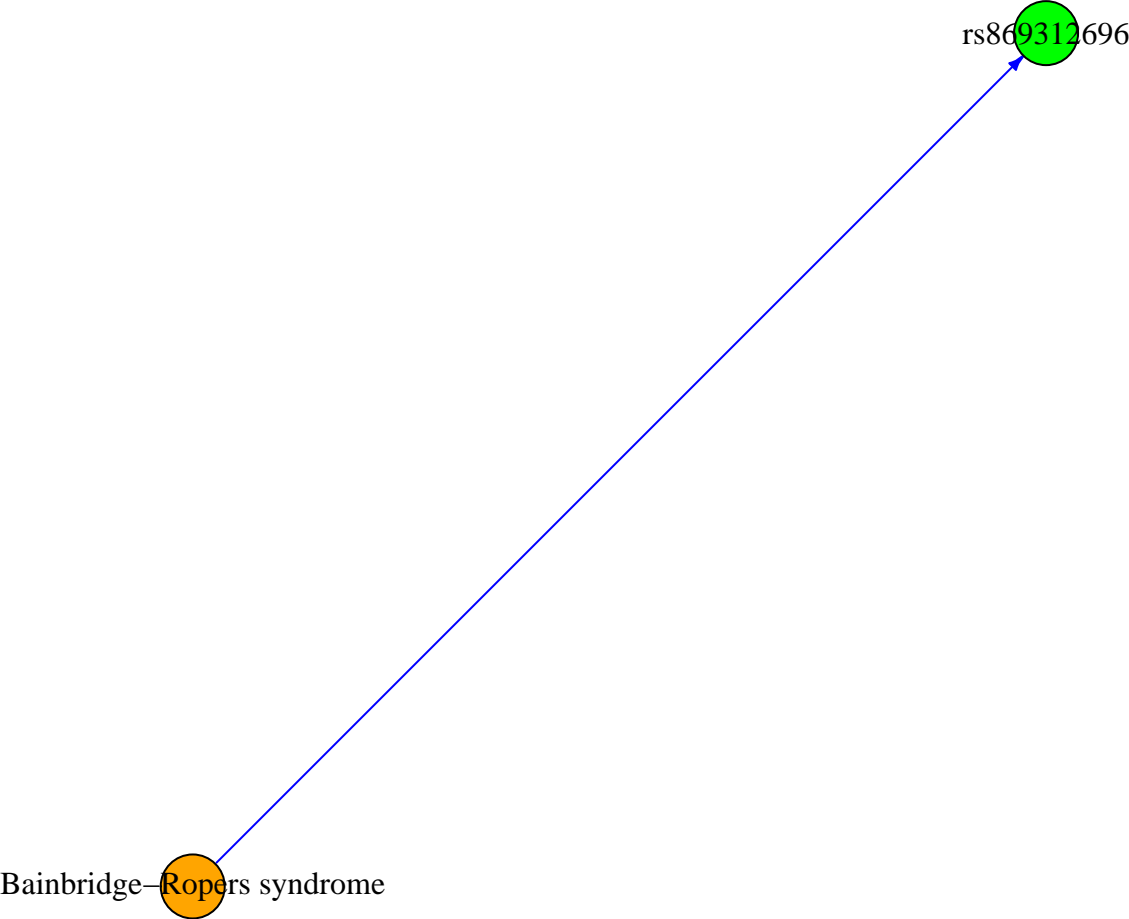

## Variant–Disease Network (Bamforth syndrome)

Bamforth syndrome

rs3021526

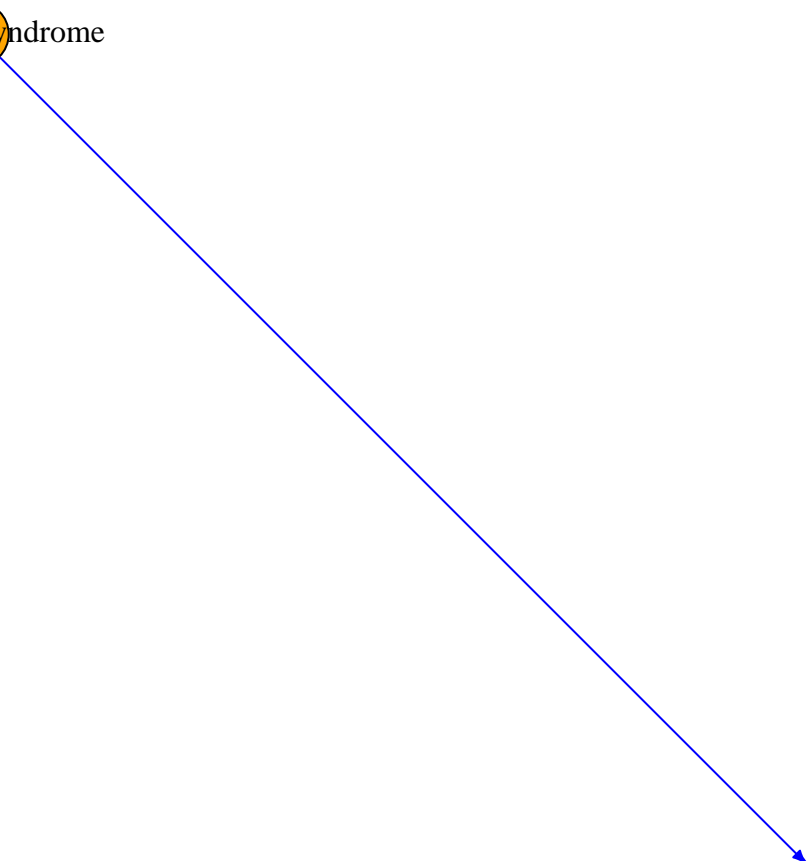

Variant–Disease Network (Baraitser–Winter Syndrome 2)

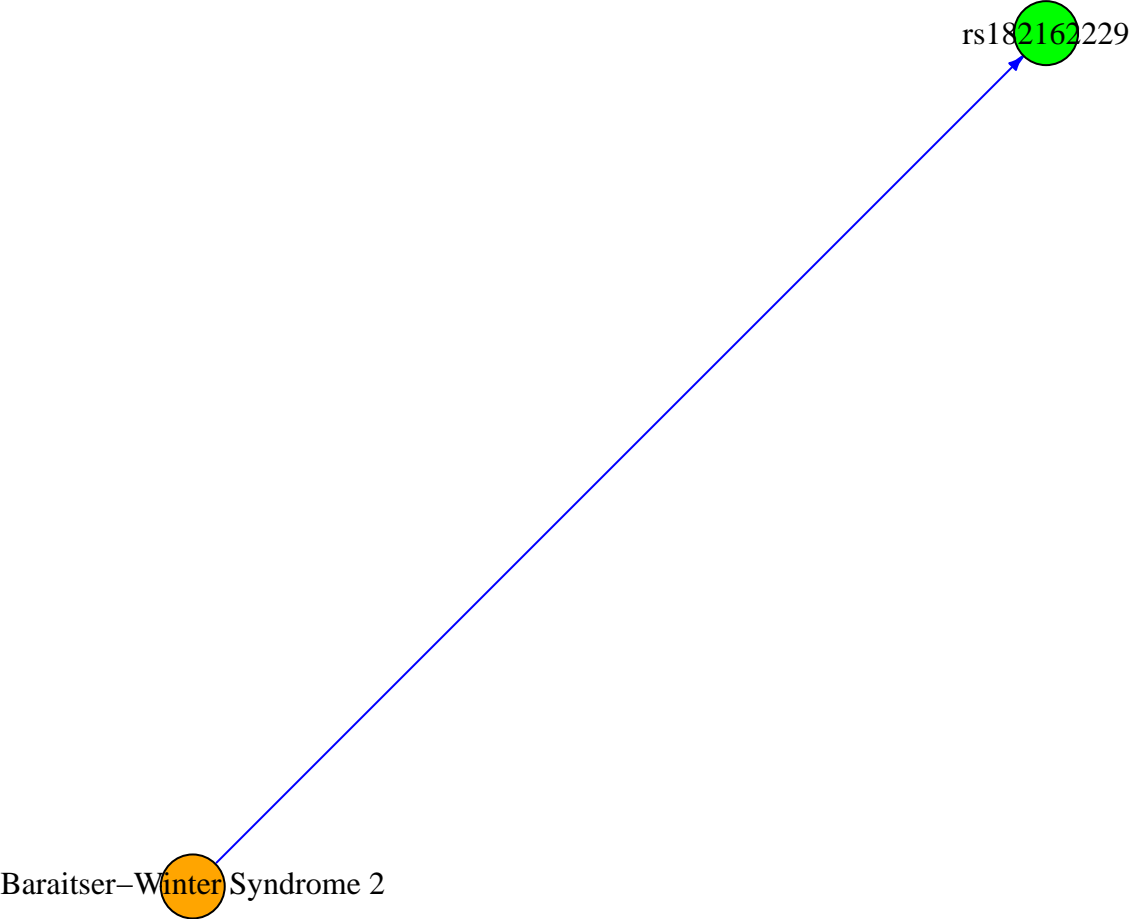

**Variant–Disease Network (Bardet–Biedl syndrome)**

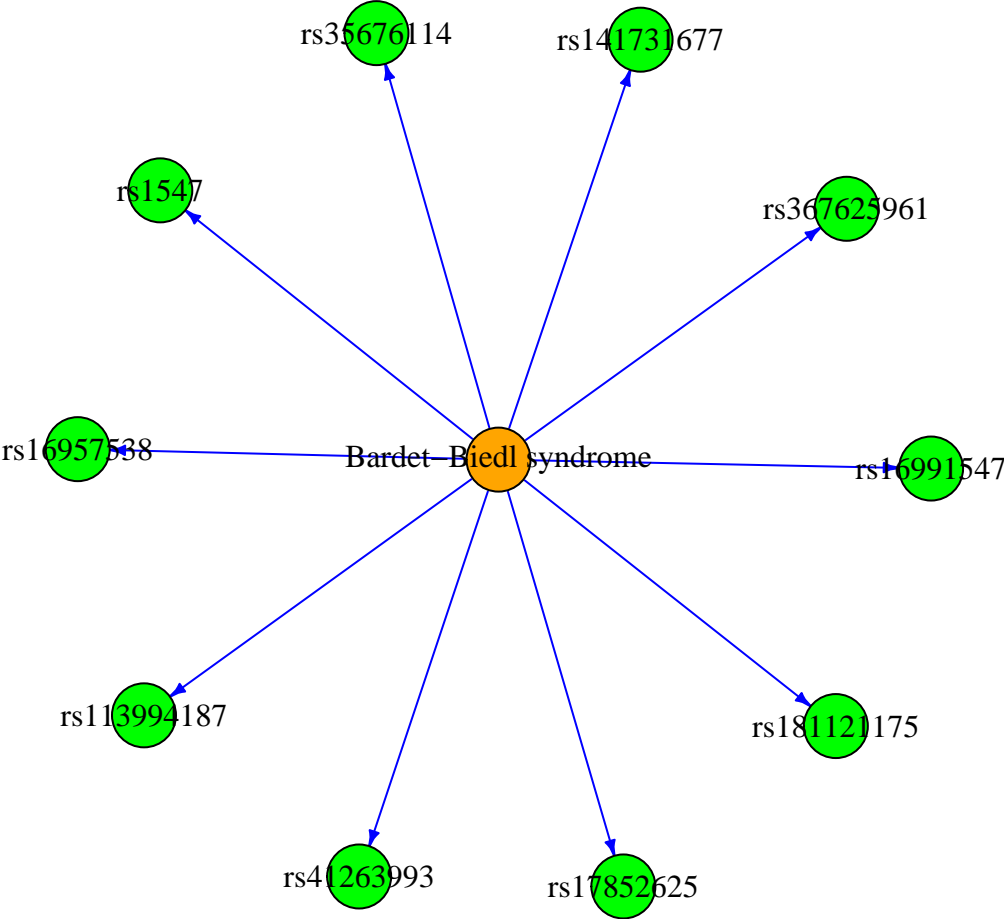

Variant–Disease Network (Bardet–Biedl syndrome 1)

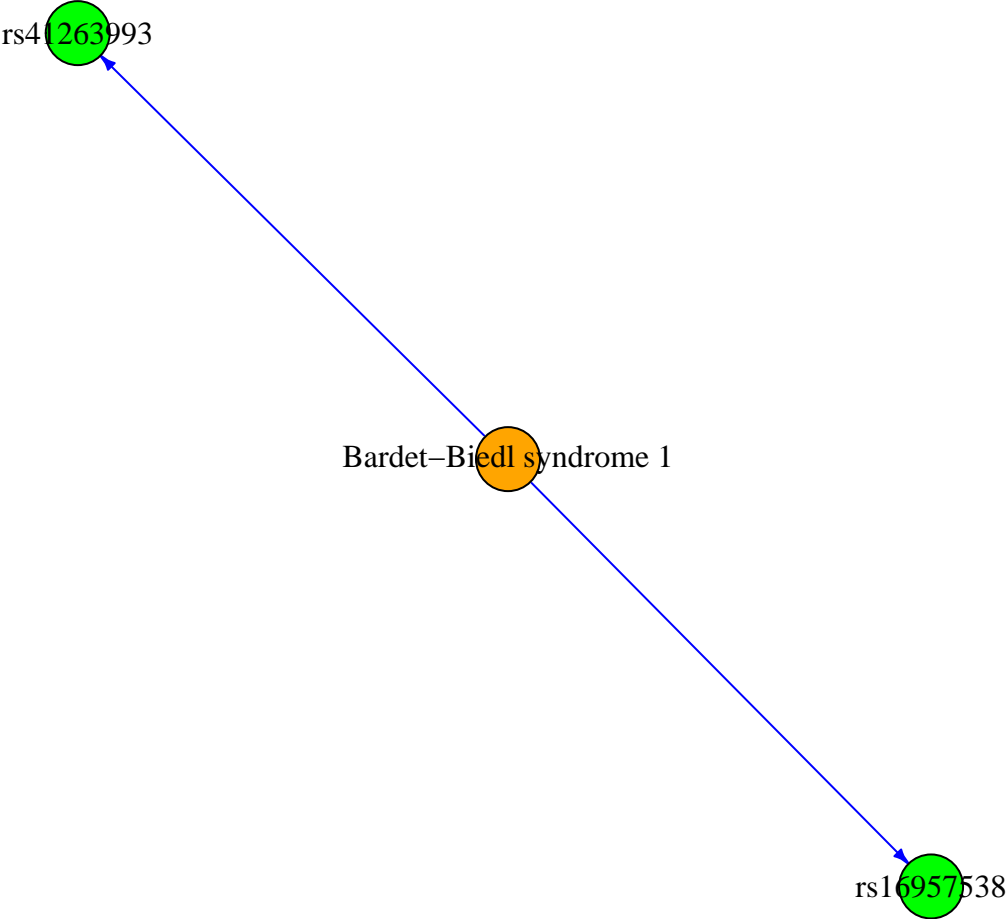

Variant–Disease Network (Bardet–Biedl syndrome 10)

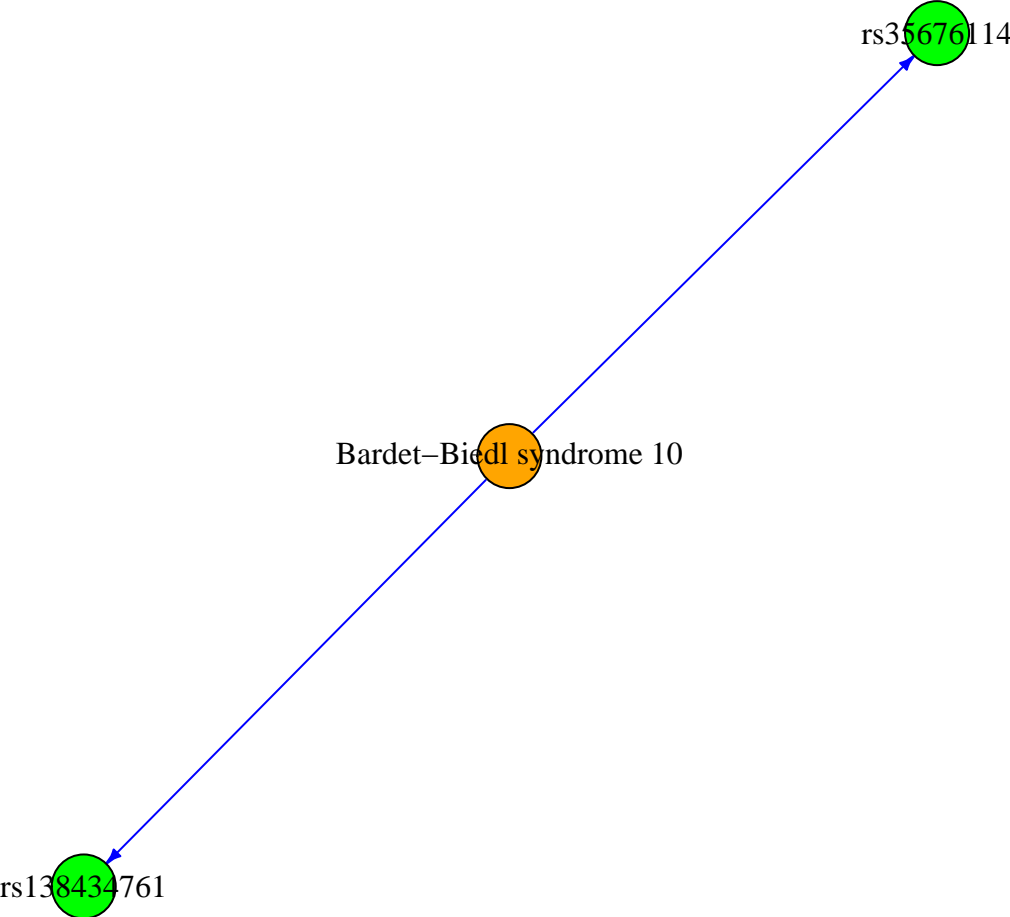

## Variant–Disease Network (Bare lymphocyte syndrome 2)

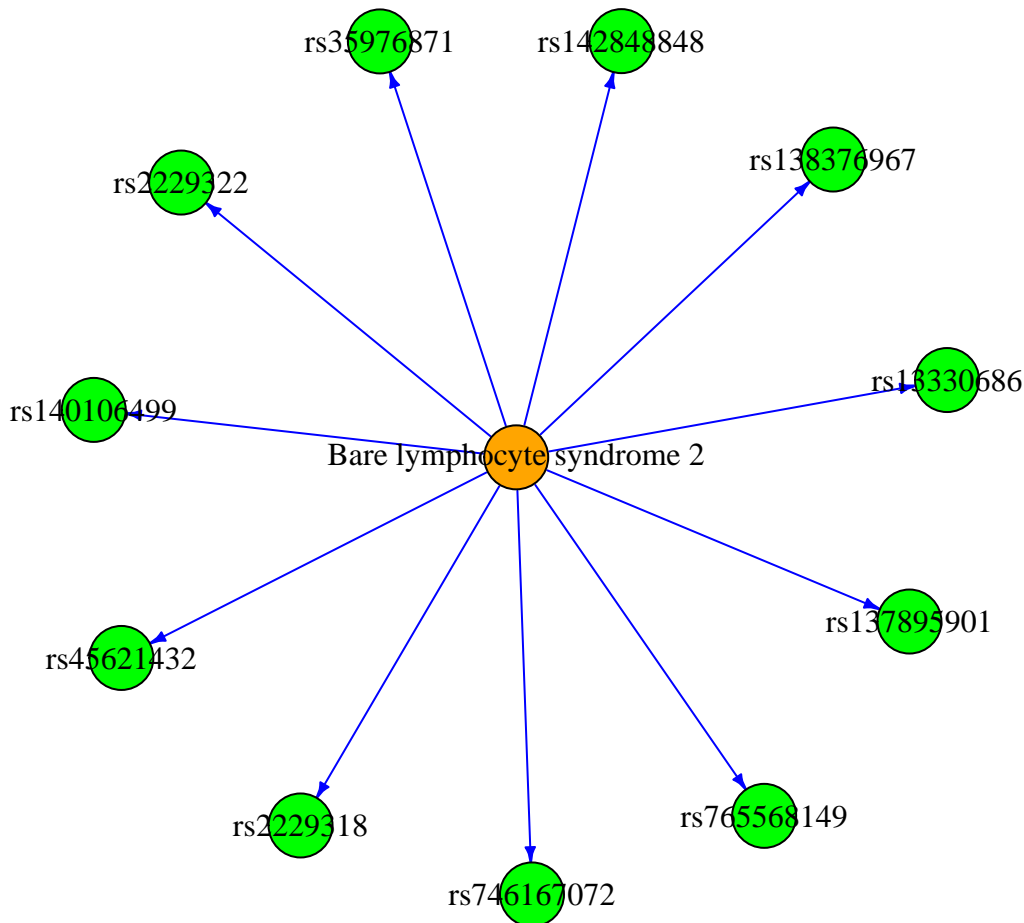



# Variant–Disease Network (Beaulieu–Boycott–Innes syndrome)

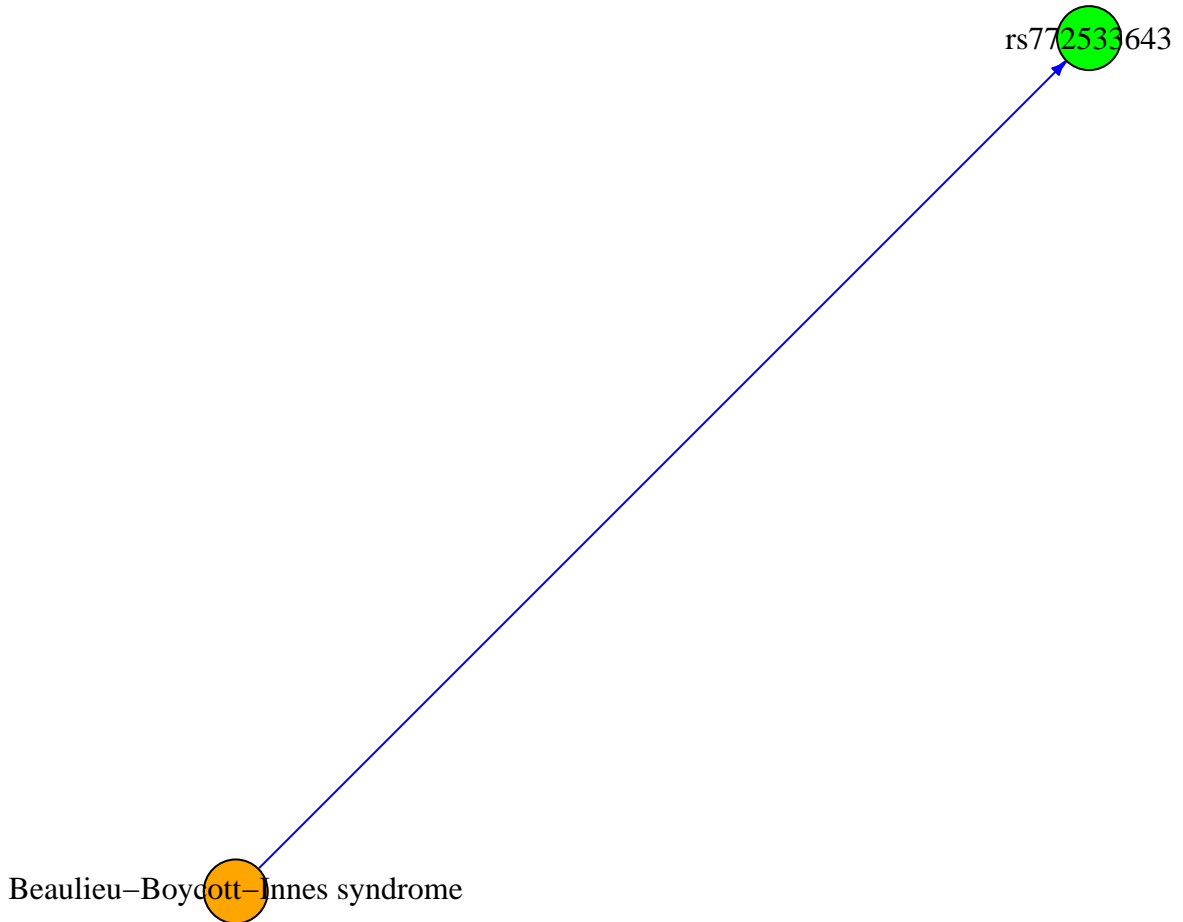

## Variant–Disease Network (Behavior disorder)

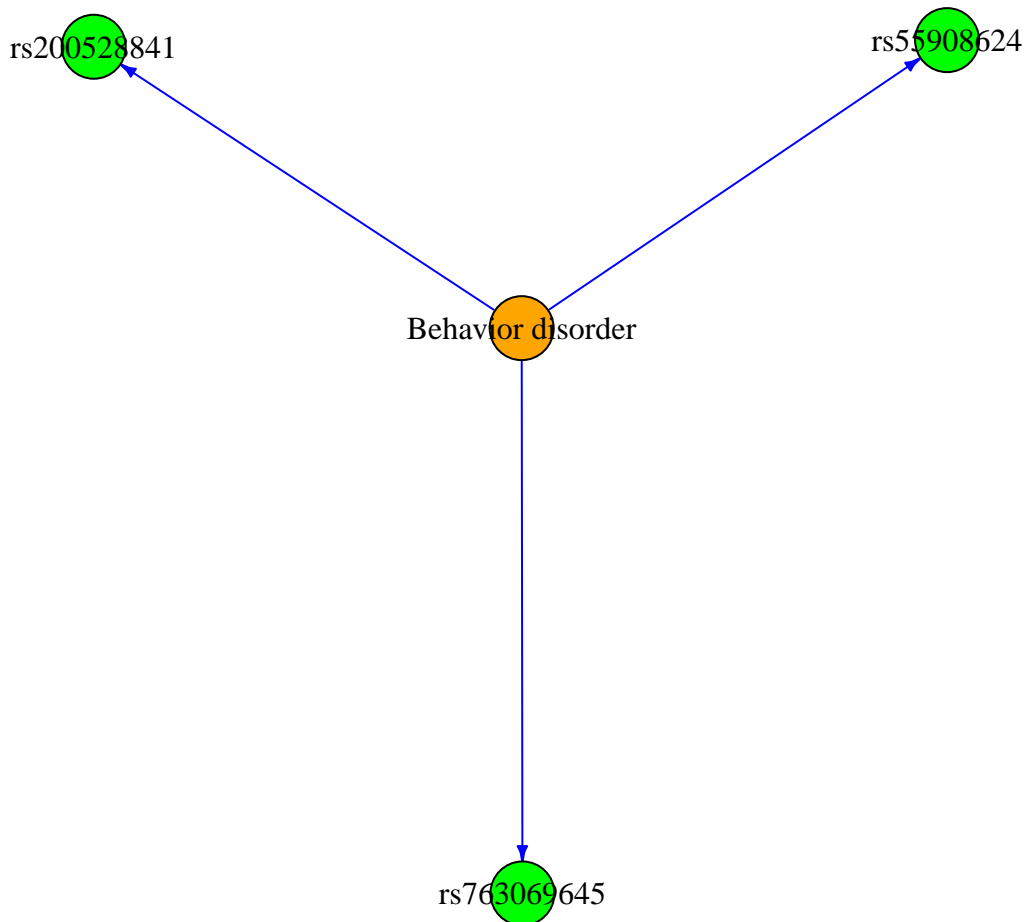

# Variant–Disease Network (Benign familial neonatal seizures)

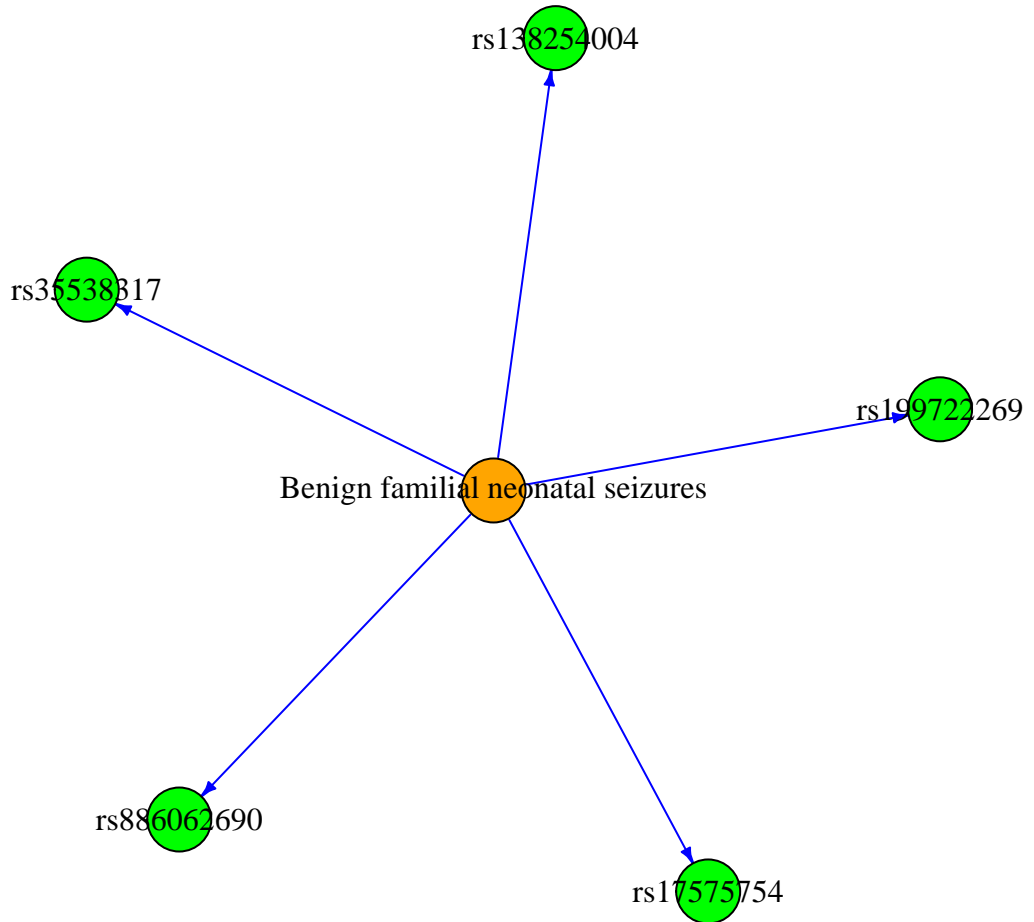

## Variant–Disease Network (Benign familial neonatal seizures 2)

rs375379466

Benign familial neonatal seizures

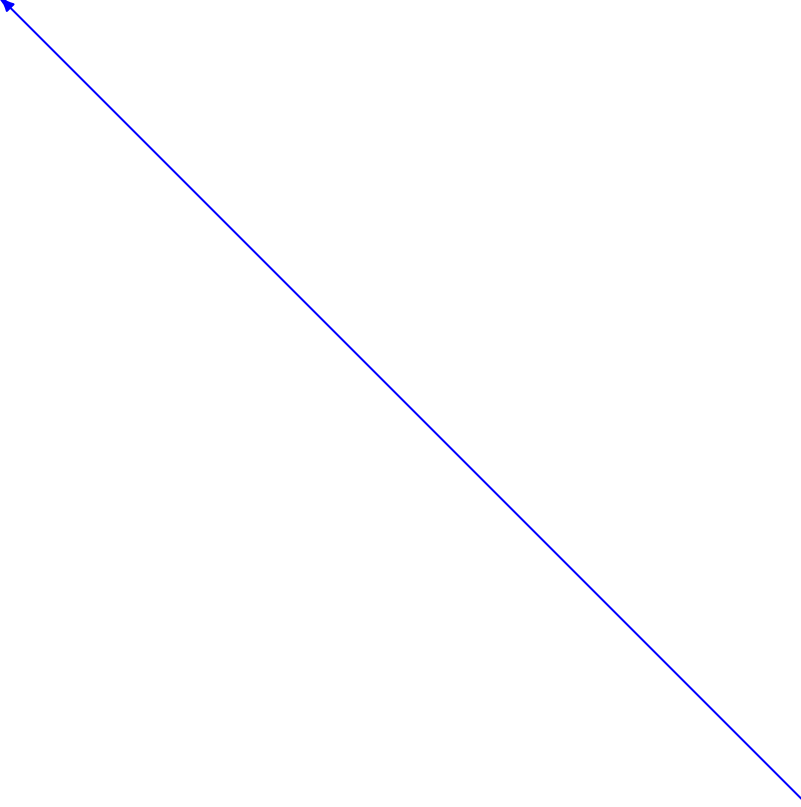

## Variant–Disease Network (Benign Neonatal Epilepsy)

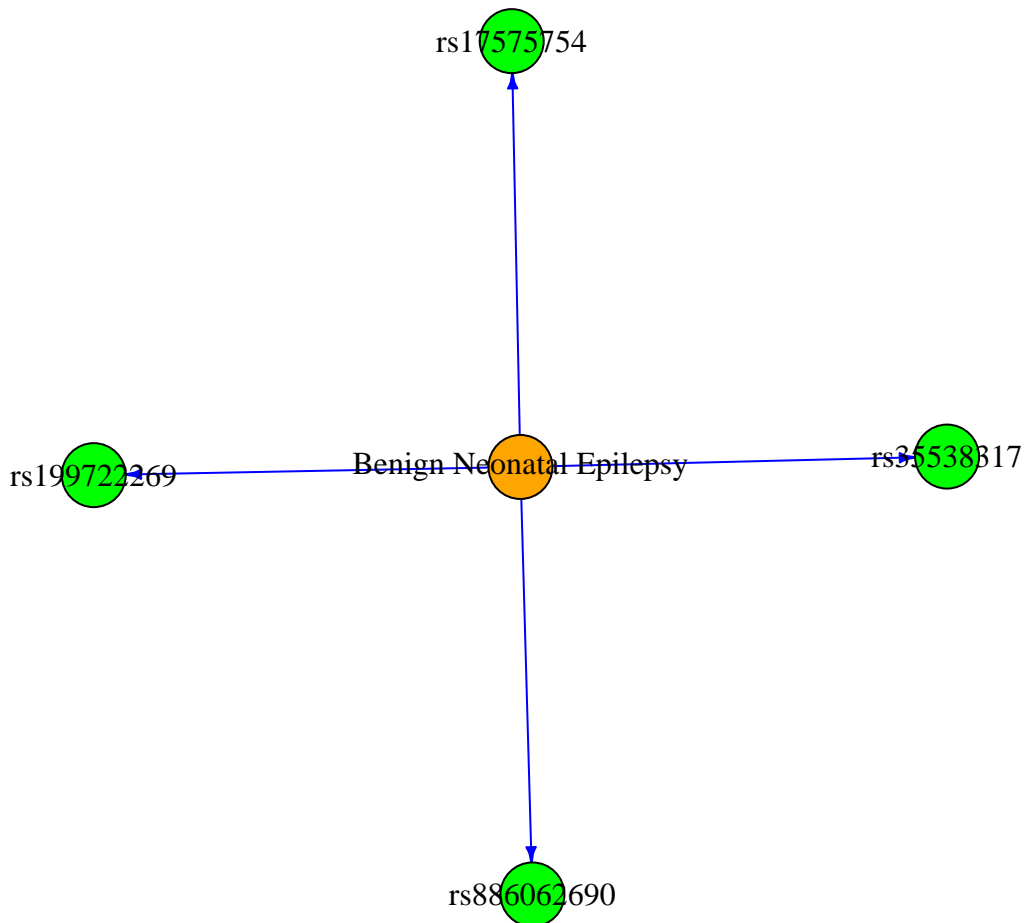

## Variant-Disease Network (beta Thalassemia)

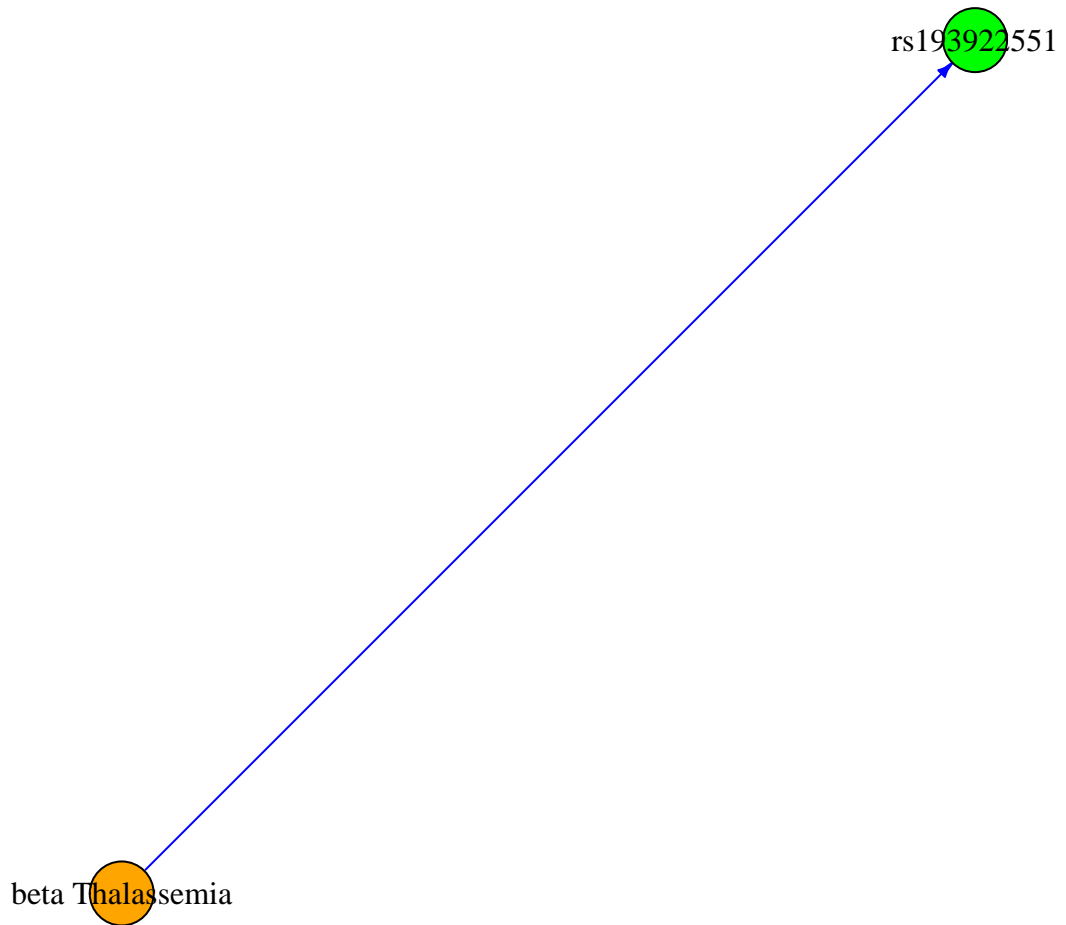

## Variant-Disease Network (Beta-D-mannosidosis)

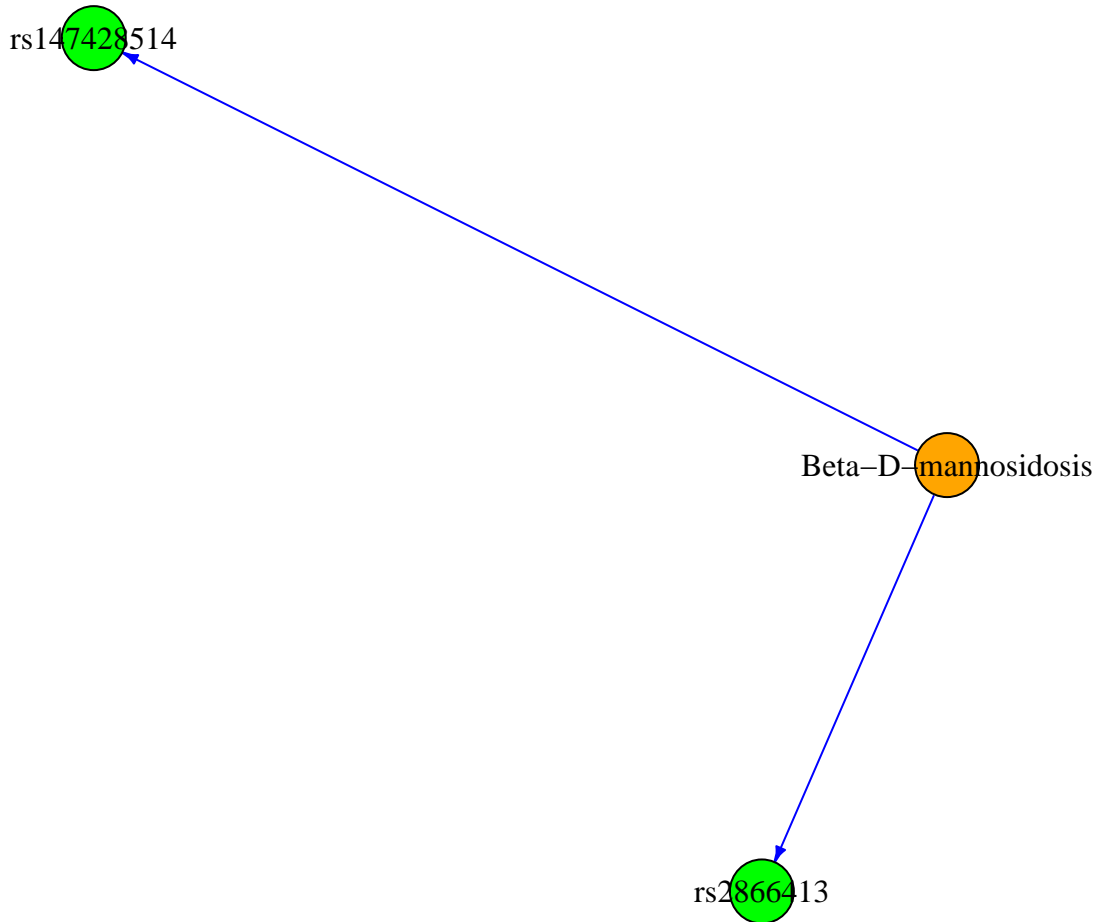

Variant–Disease Network (Beta–hexosaminidase a)

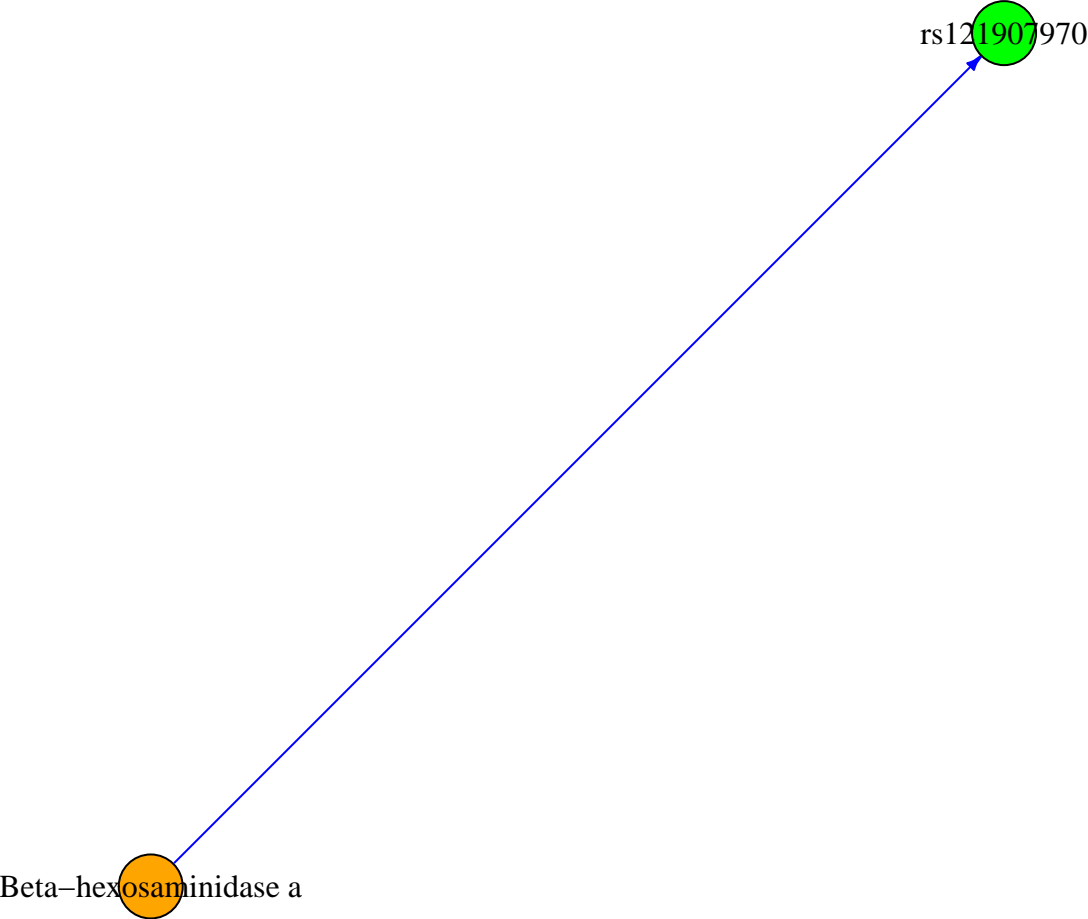



**Variant–Disease Network (Bethlem myopathy 1)**

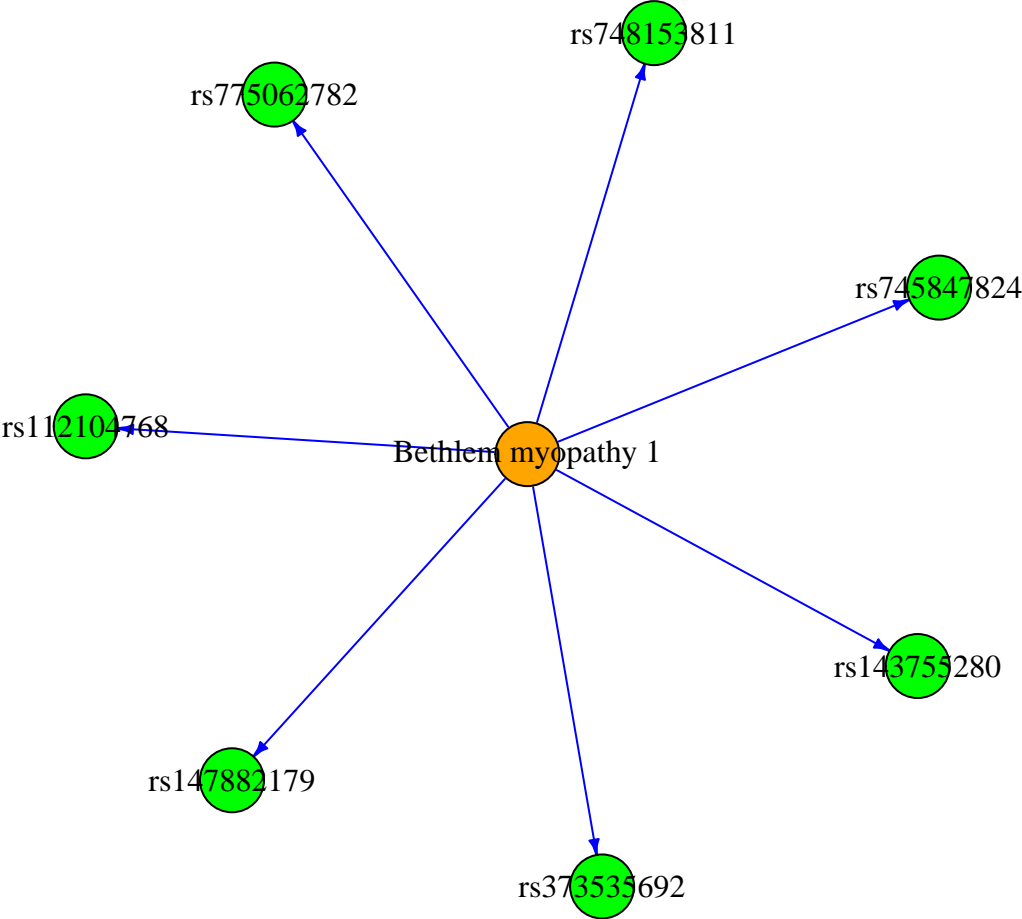

Variant–Disease Network (Bethlem myopathy 2)

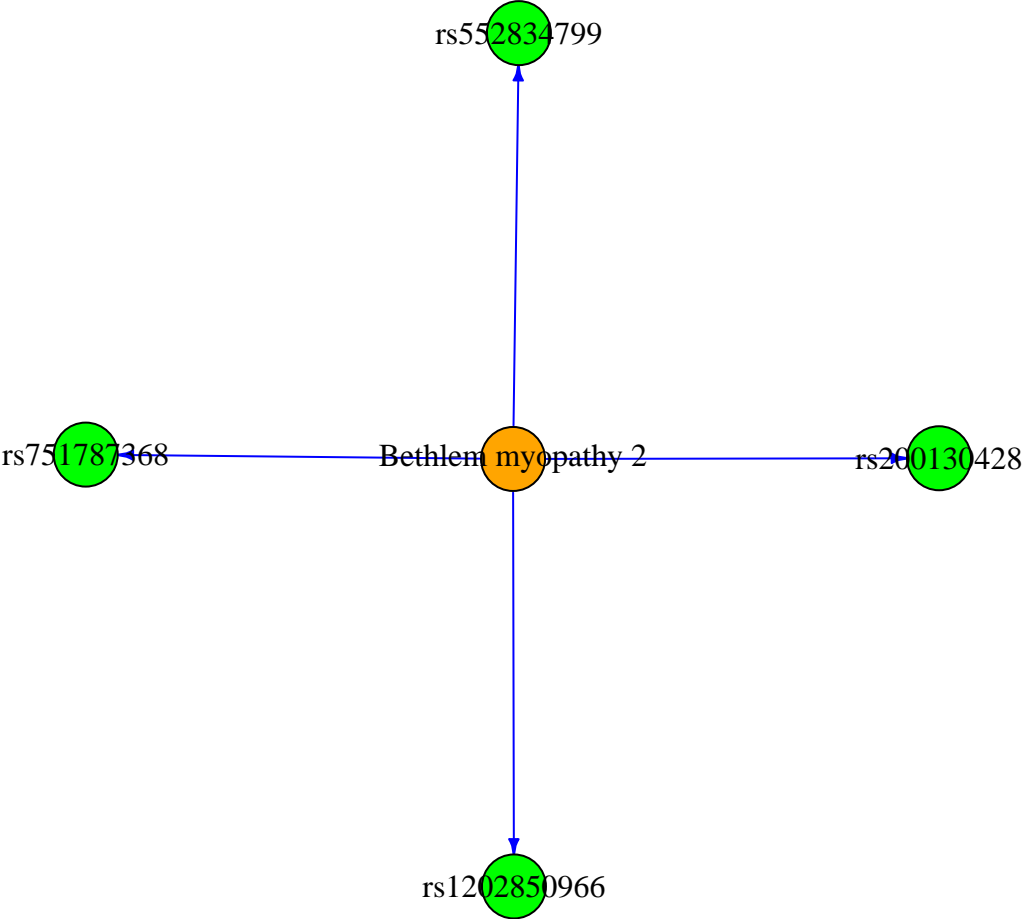

# Variant–Disease Network (BH4–Deficient Hyperphenylalaninemia)

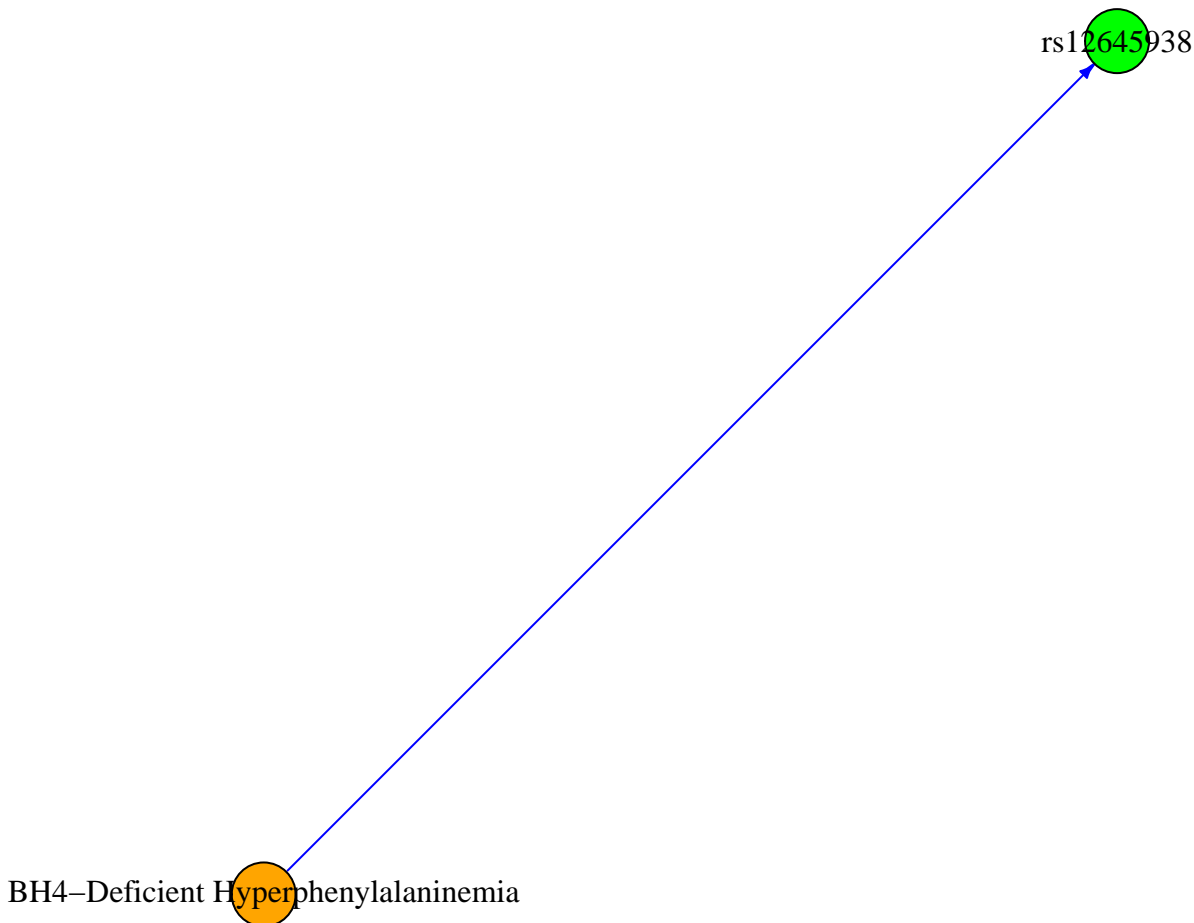

**Variant–Disease Network (Bifunctional peroxisomal enzyme deficiency)**

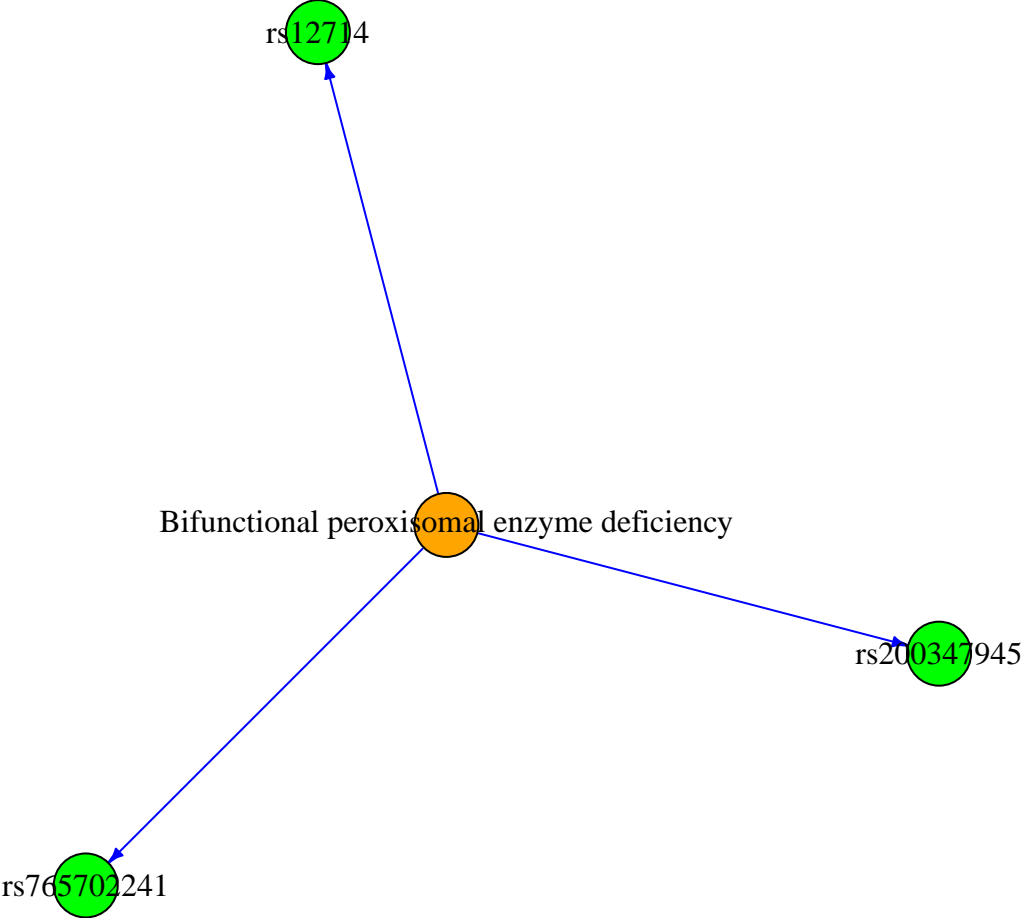

# Variant–Disease Network (Bilateral right–sidedness sequence)

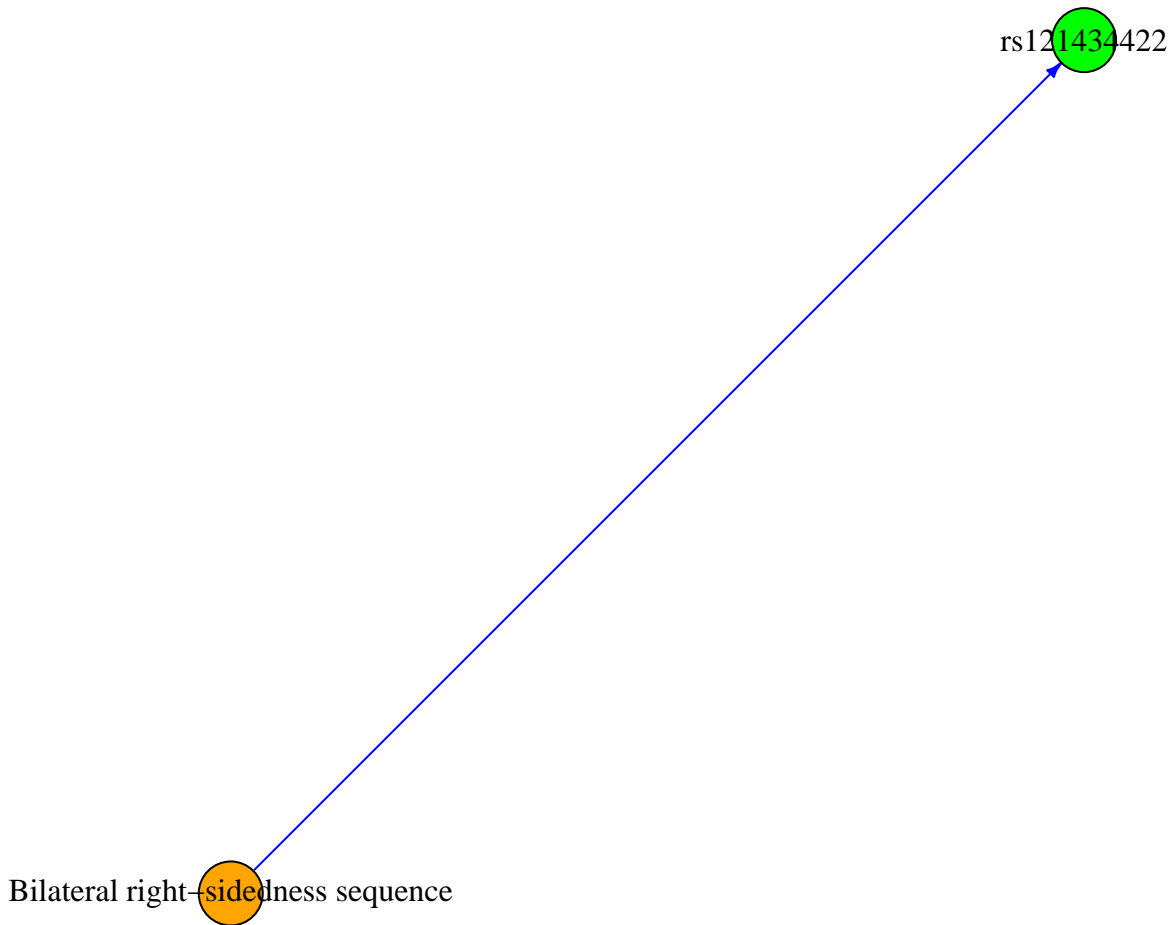

## Variant–Disease Network (Biotinidase deficiency)

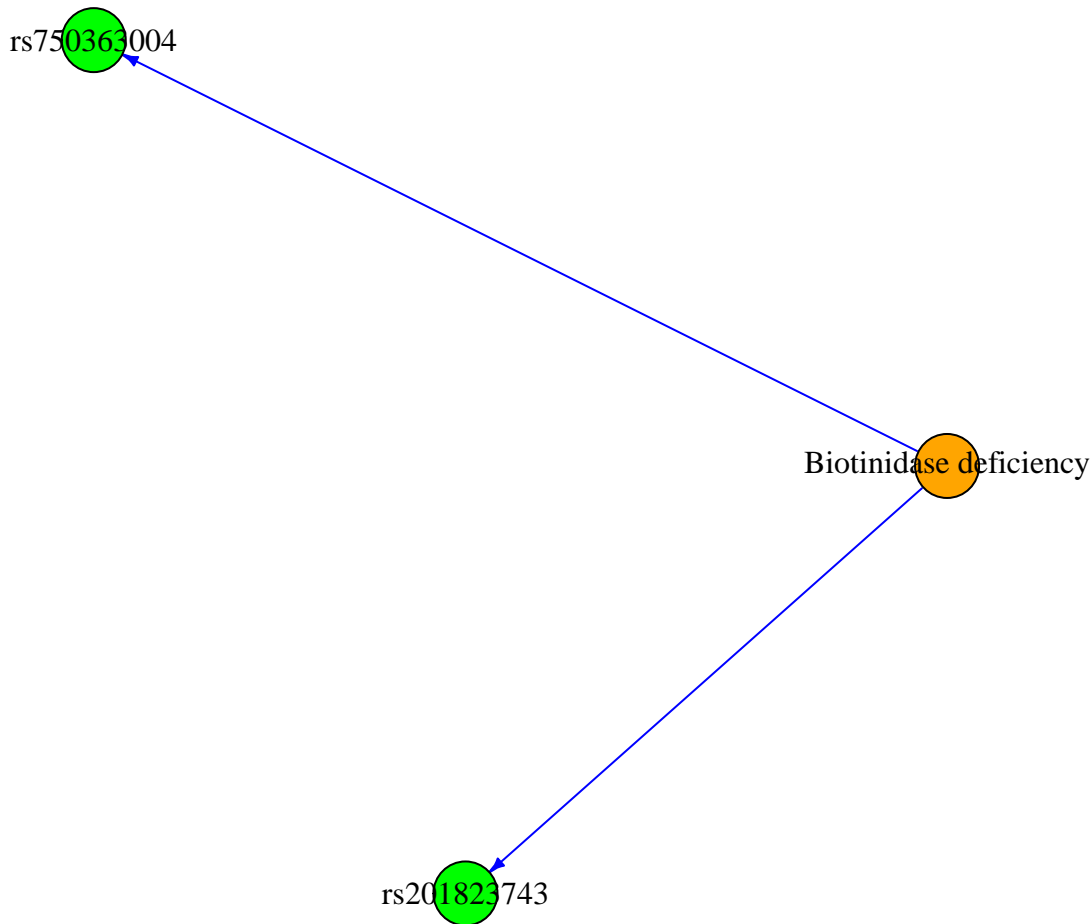

## Variant-Disease Network (Bladder cancer)

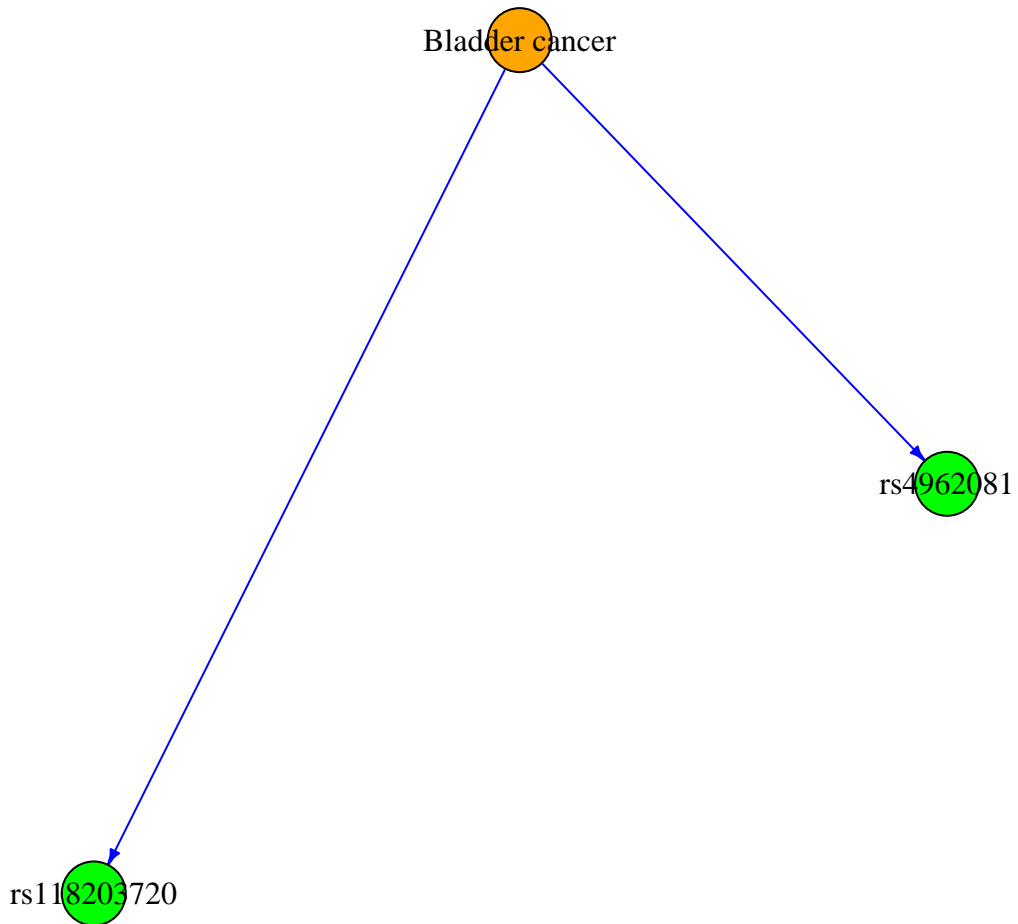

## Variant–Disease Network (Blau syndrome)

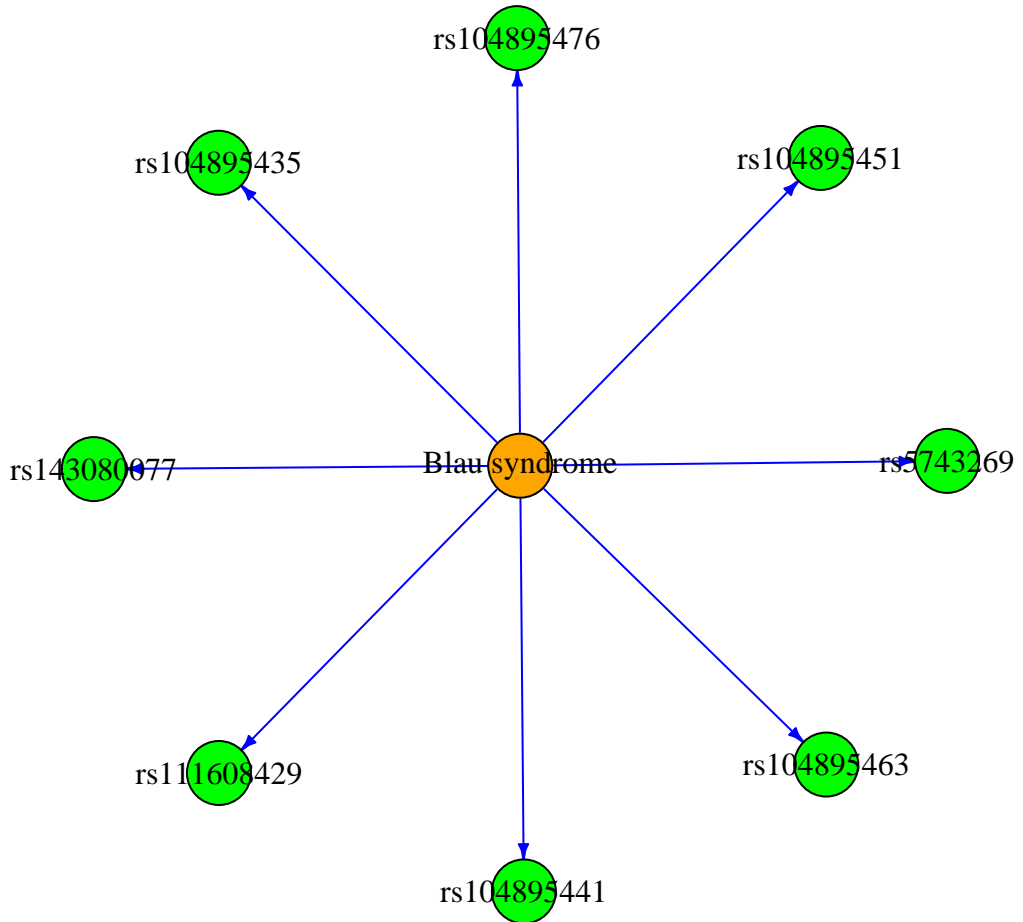



## Variant-Disease Network (Bloom syndrome)

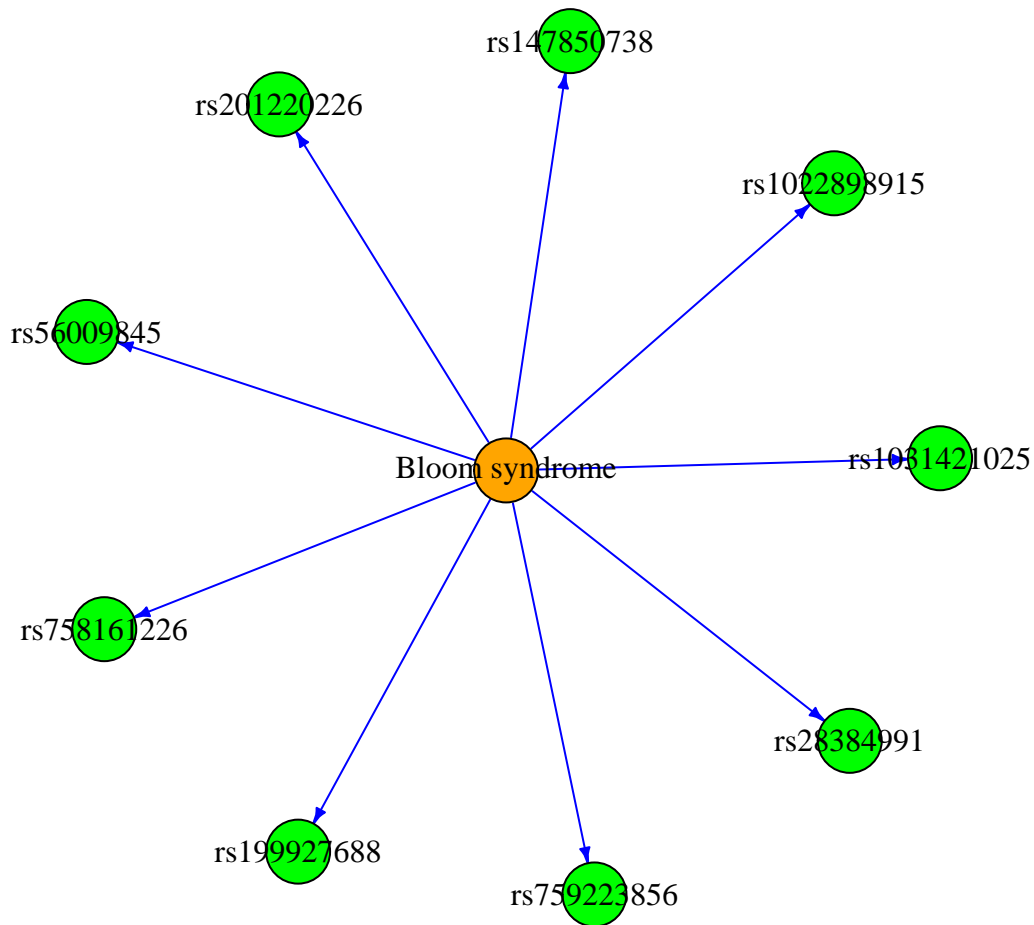

**Variant–Disease Network (Bone fragility with contractures)**

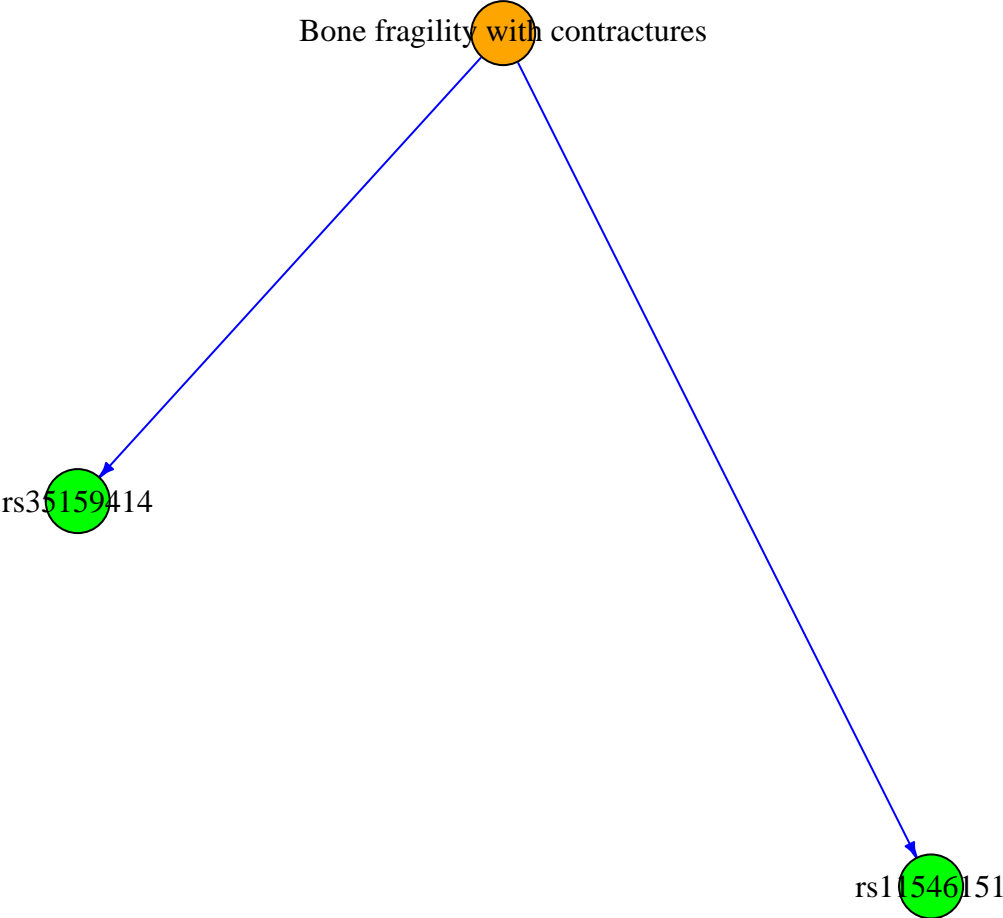

## Variant–Disease Network (Brachydactyly)

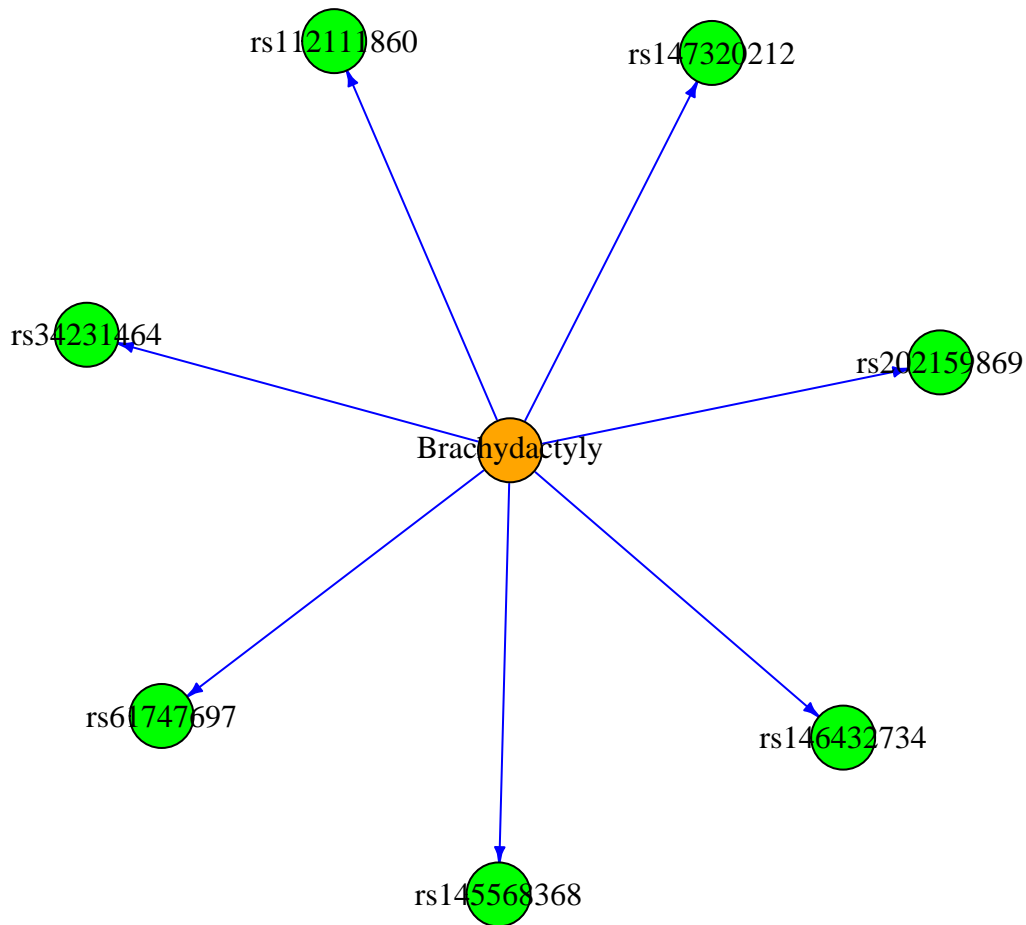

# Variant-Disease Network (BRAIN ABNORMALITIES)

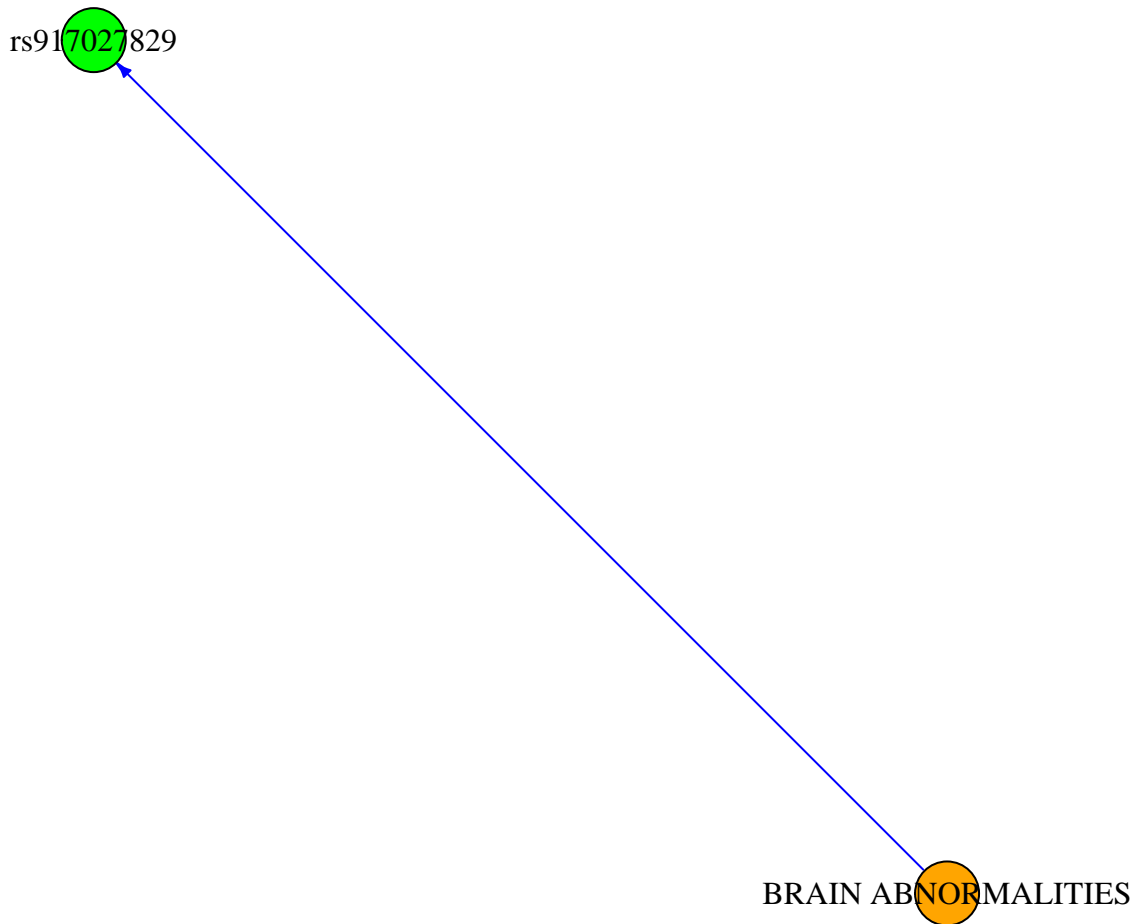

## Variant-Disease Network (breast cancer)

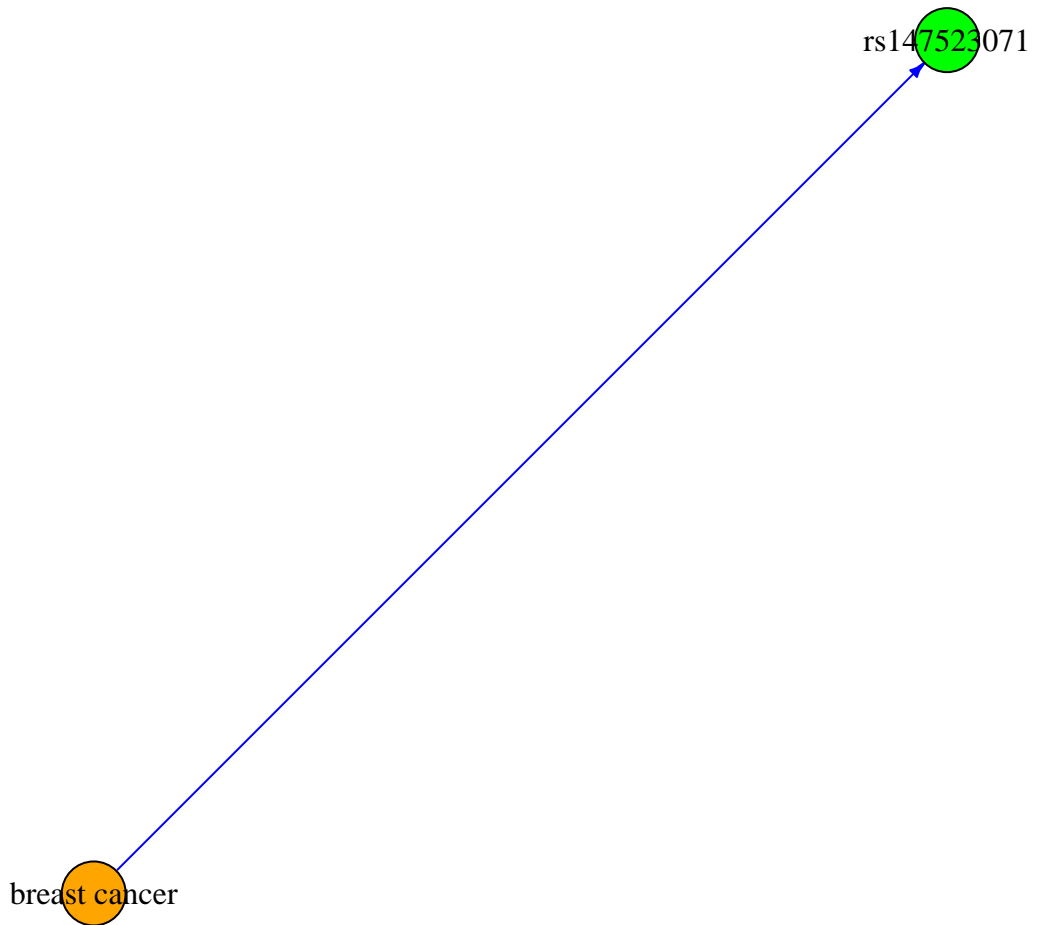

## Variant-Disease Network (Breast-ovarian cancer)

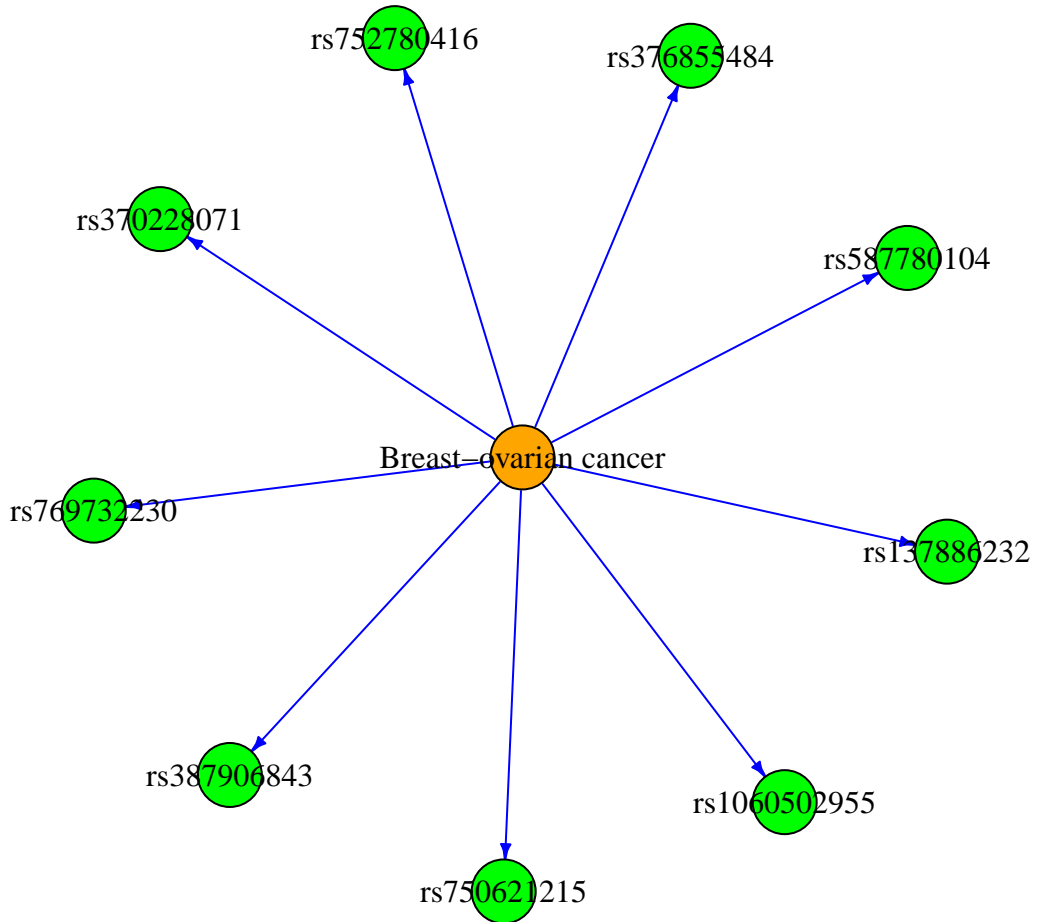

## Variant–Disease Network (Brittle cornea syndrome 2)

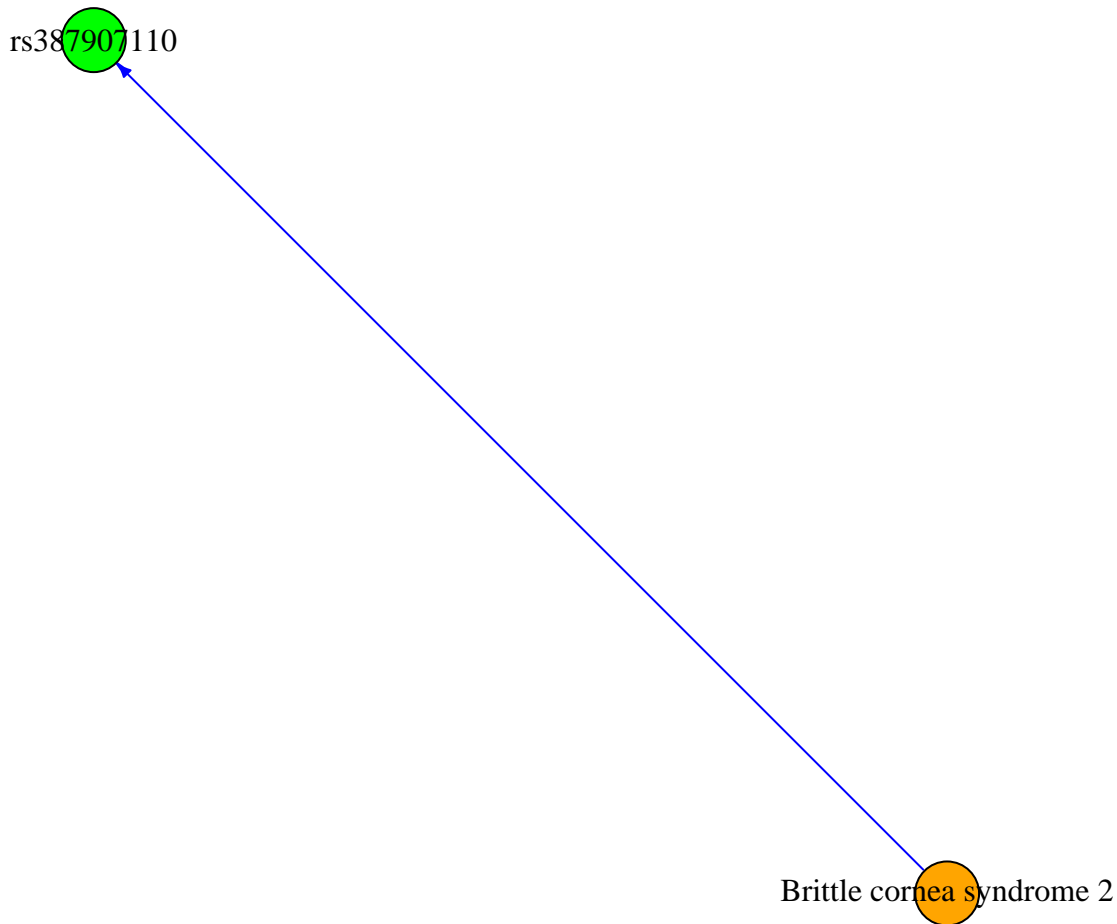

# Variant-Disease Network (Bronchiectasis with or without elevated sweat chloride 1)

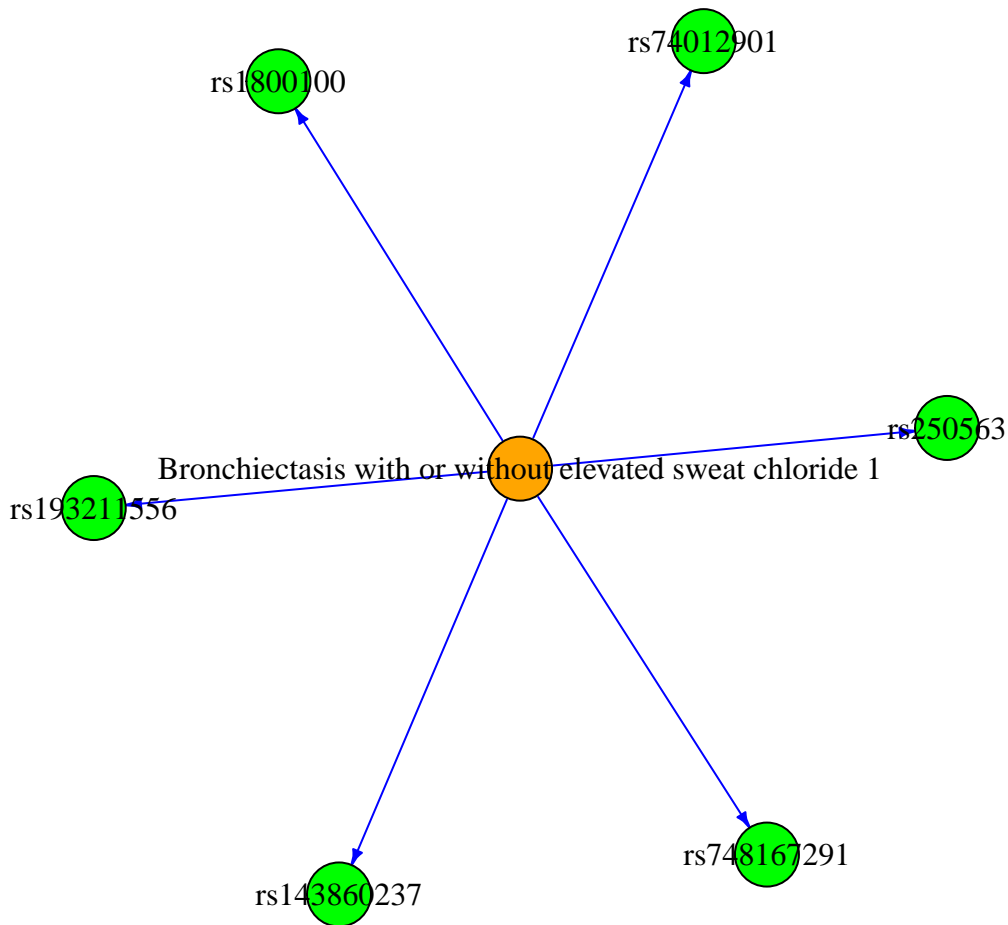



Variant–Disease Network (Brown–Vialletto–Van Laere syndrome 1)

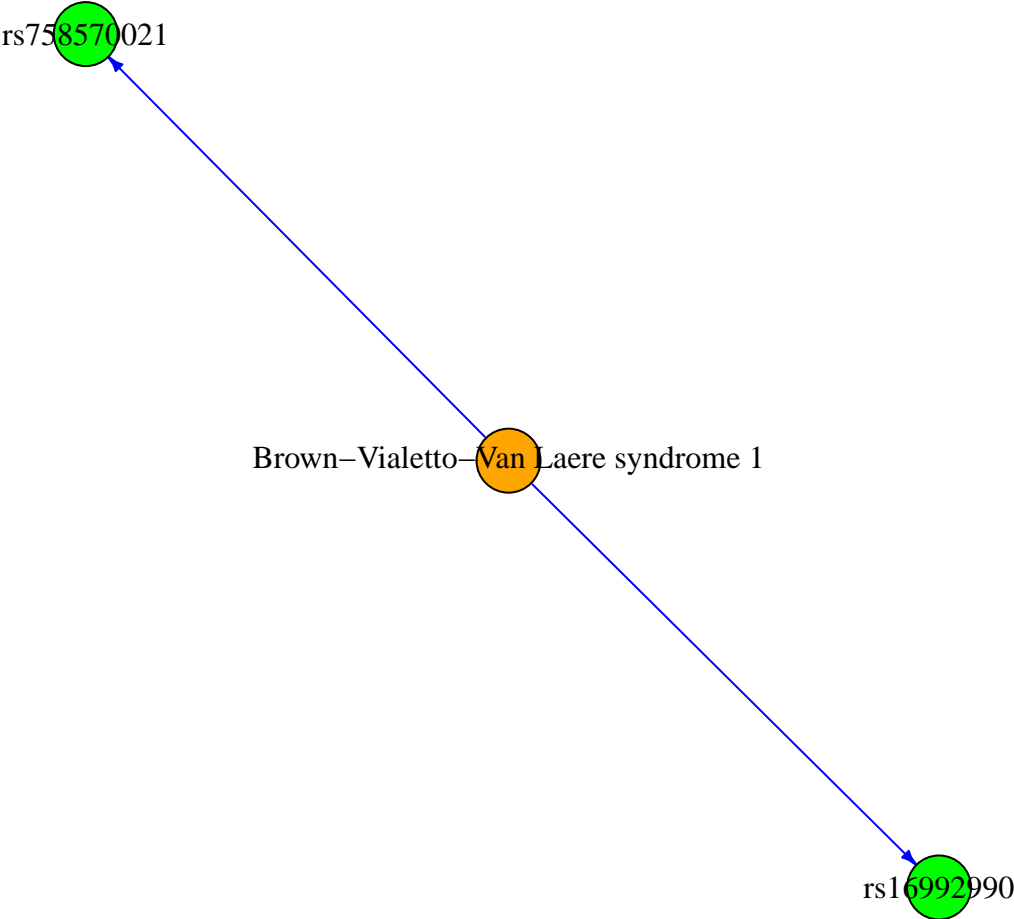

## Variant–Disease Network (Brugada syndrome)

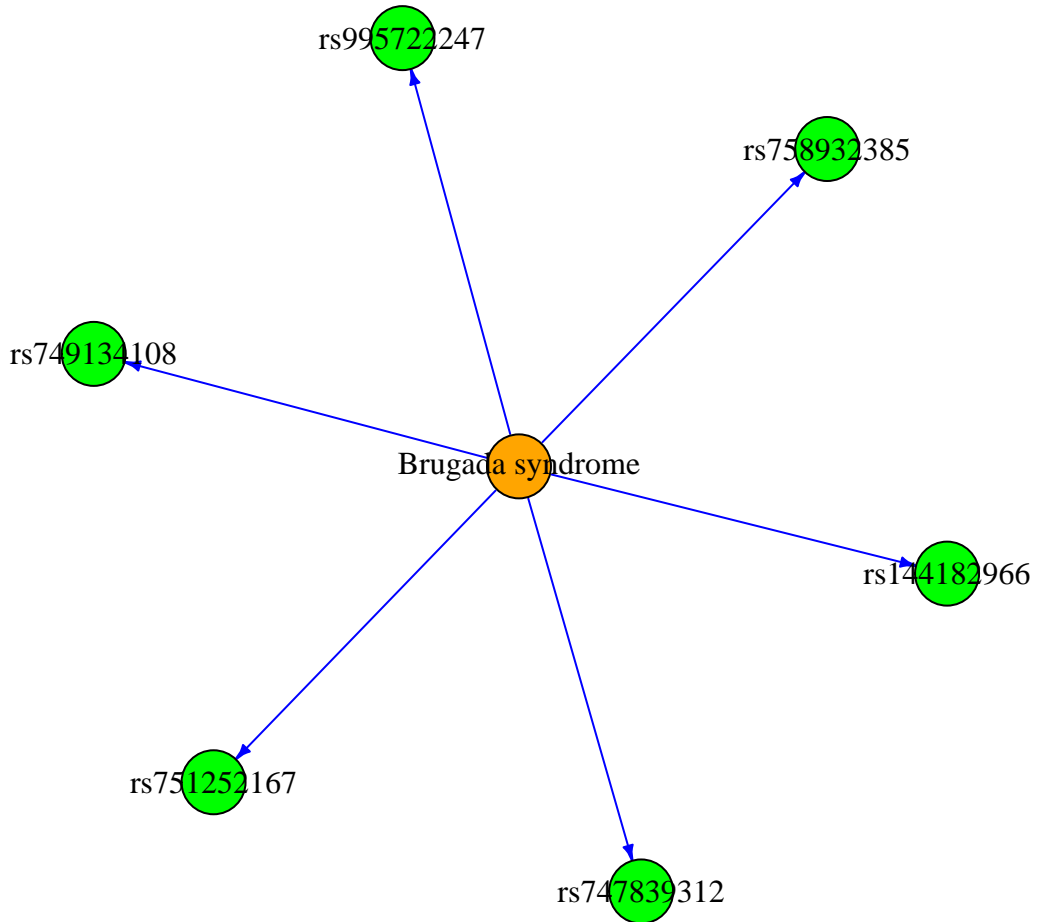

Variant–Disease Network (Brugada syndrome 4)

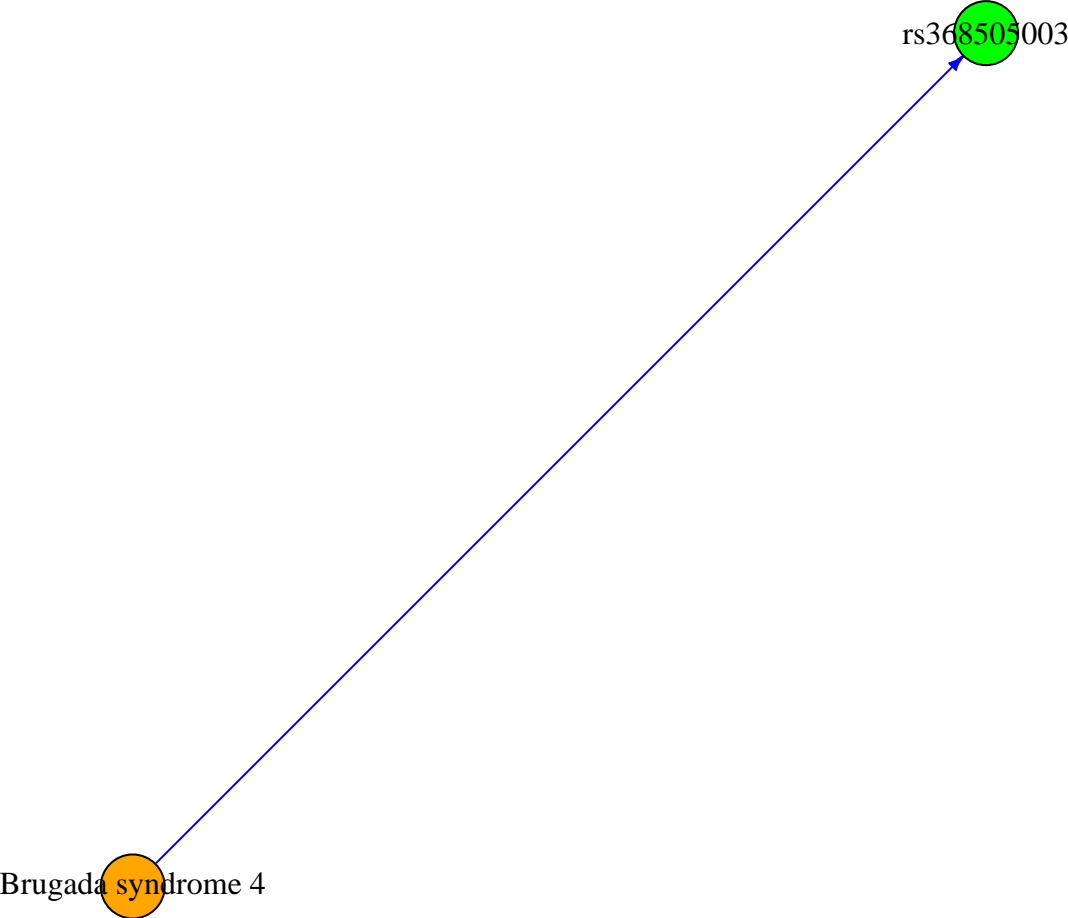

Variant–Disease Network (Brugada syndrome 5)

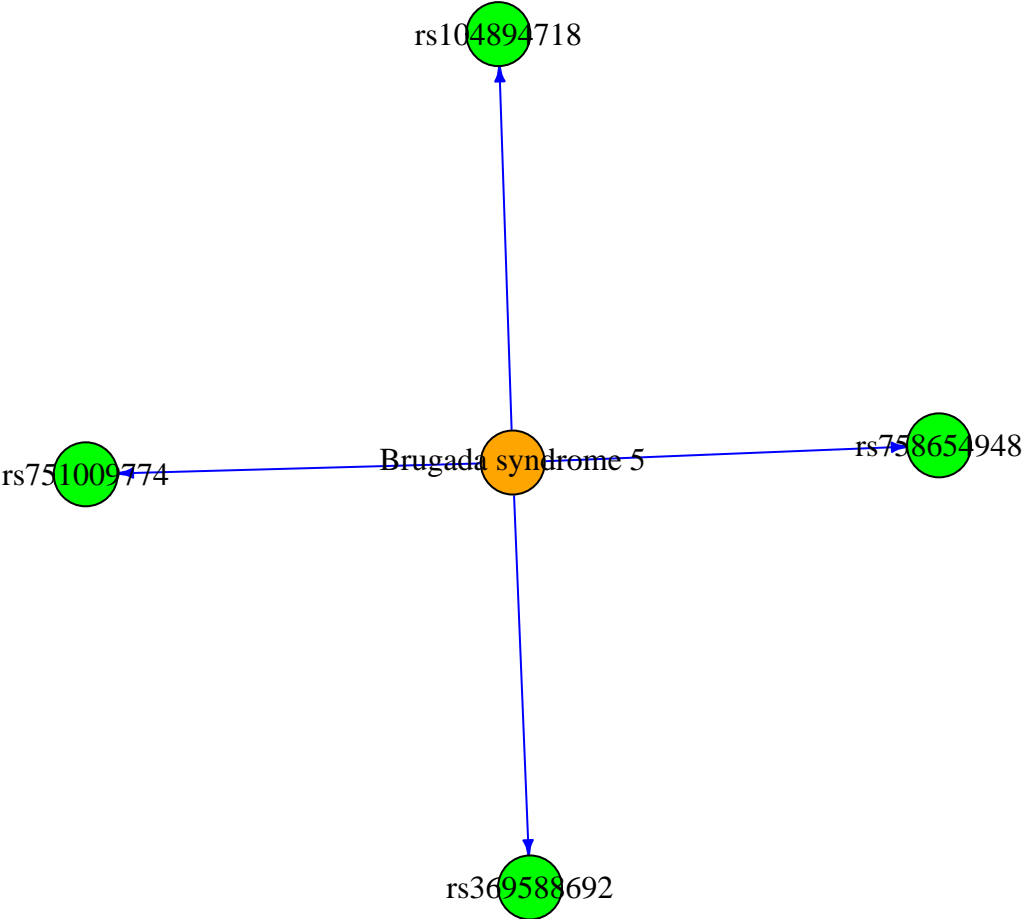

## Variant–Disease Network (Brugada syndrome 8)

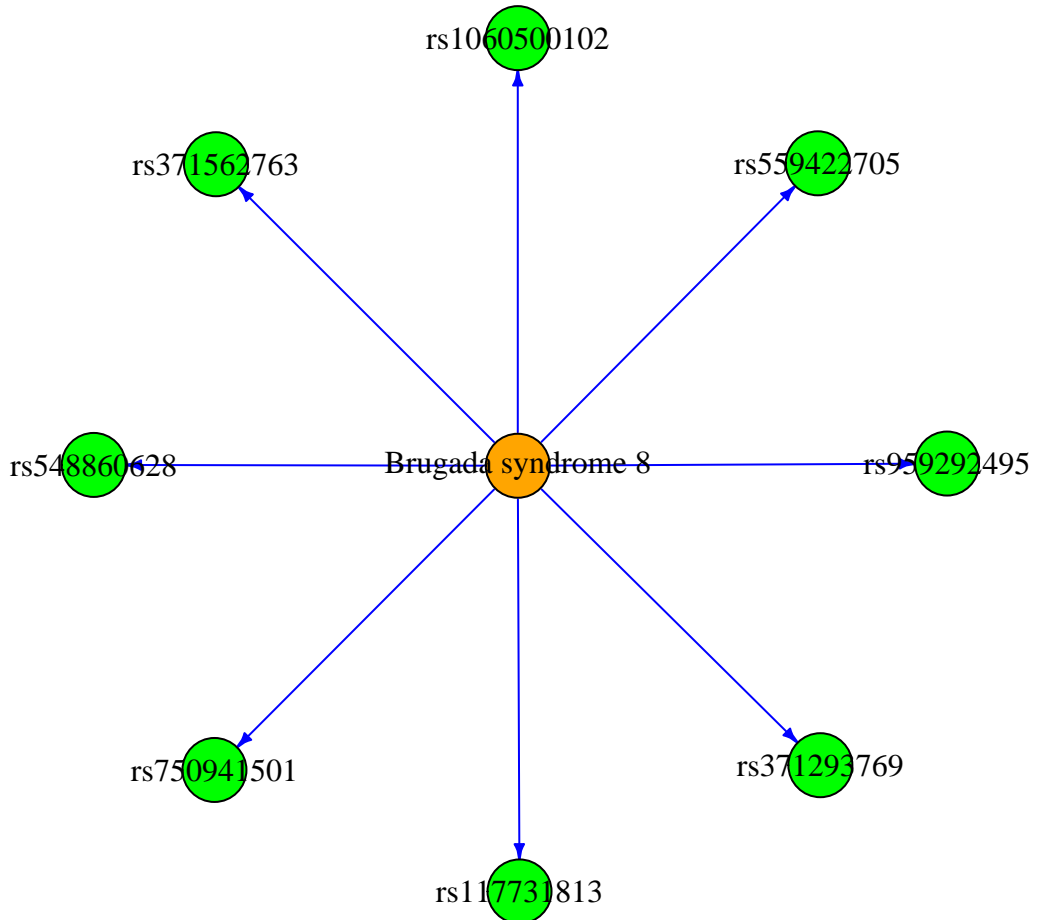

## Variant–Disease Network (Budd–Chiari syndrome)

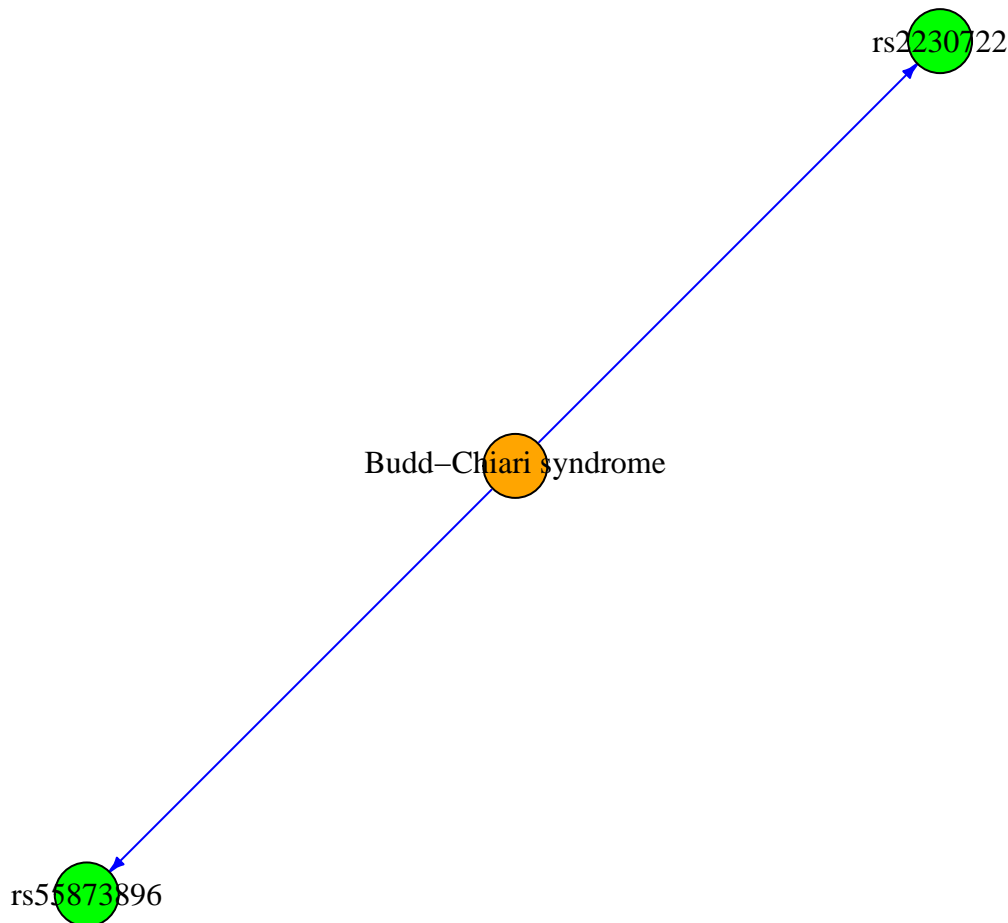

Variant–Disease Network (Bullous ichthyosiform erythroderma)

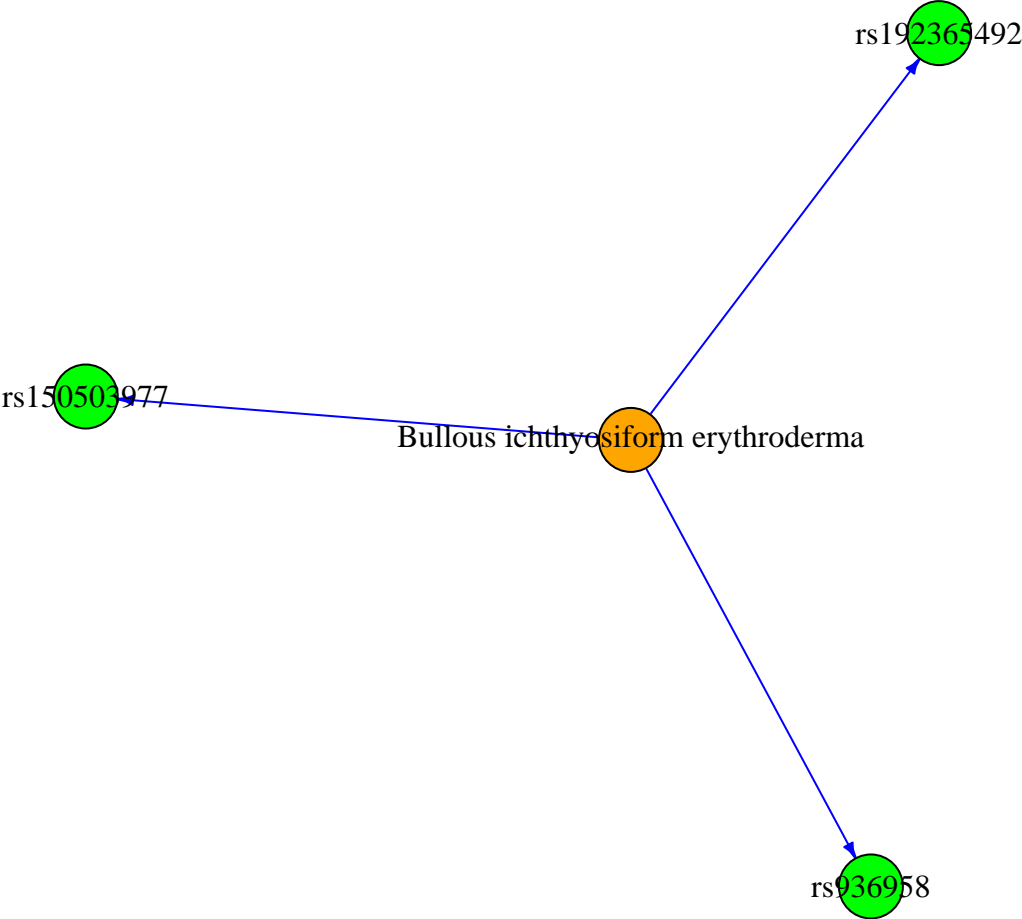

## Variant-Disease Network (Bulls eye maculopathy)

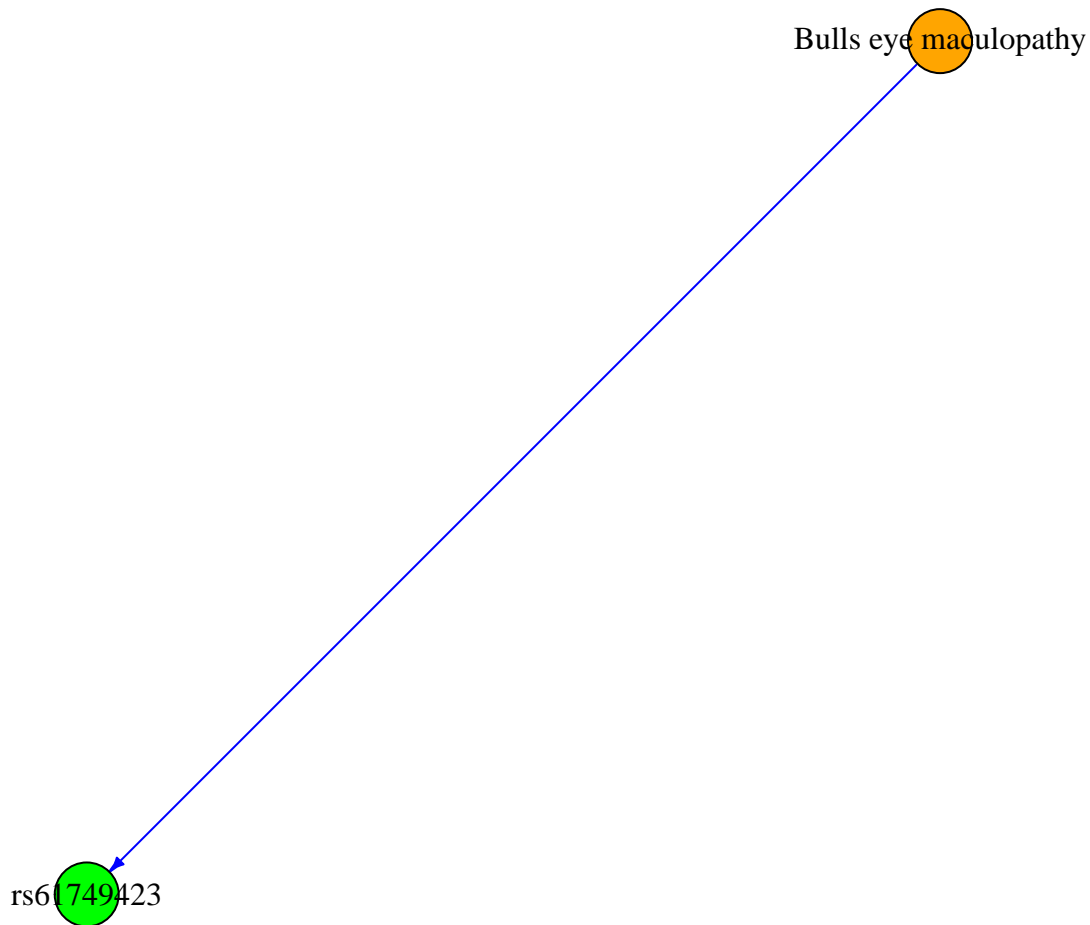



**Variant–Disease Network (Café–au–lait macules with pulmonary stenosis)**

Variant–Disease Network (Campomelic dysplasia with autosomal sex reversal)

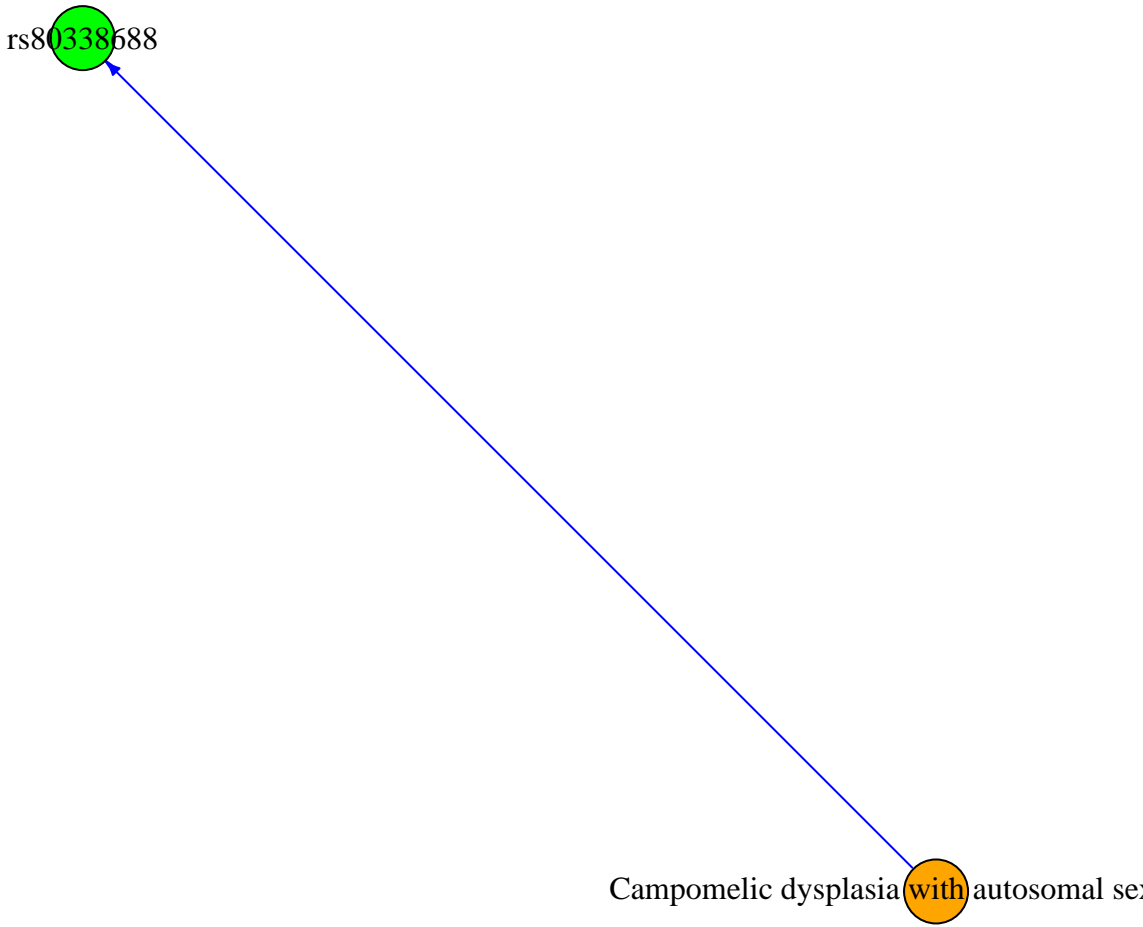

**Variant–Disease Network (Camptomelic dysplasia)**

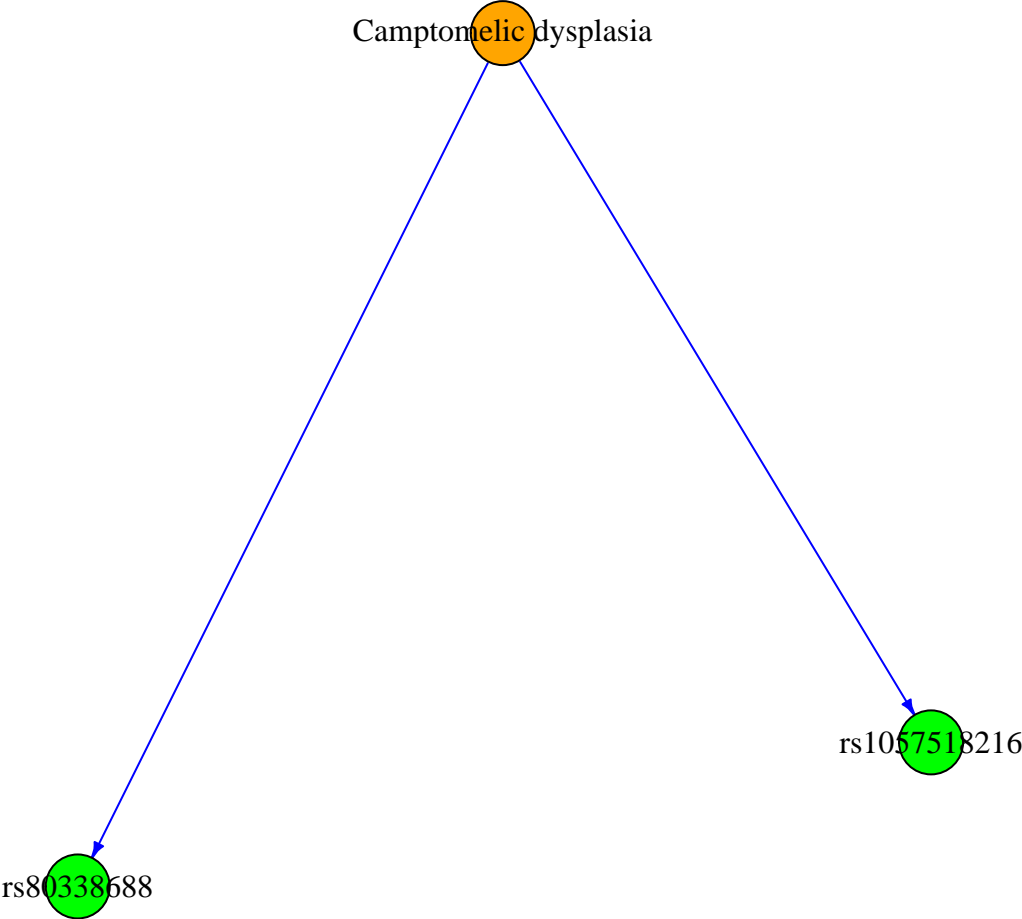

# Variant-Disease Network (Canavan Disease)

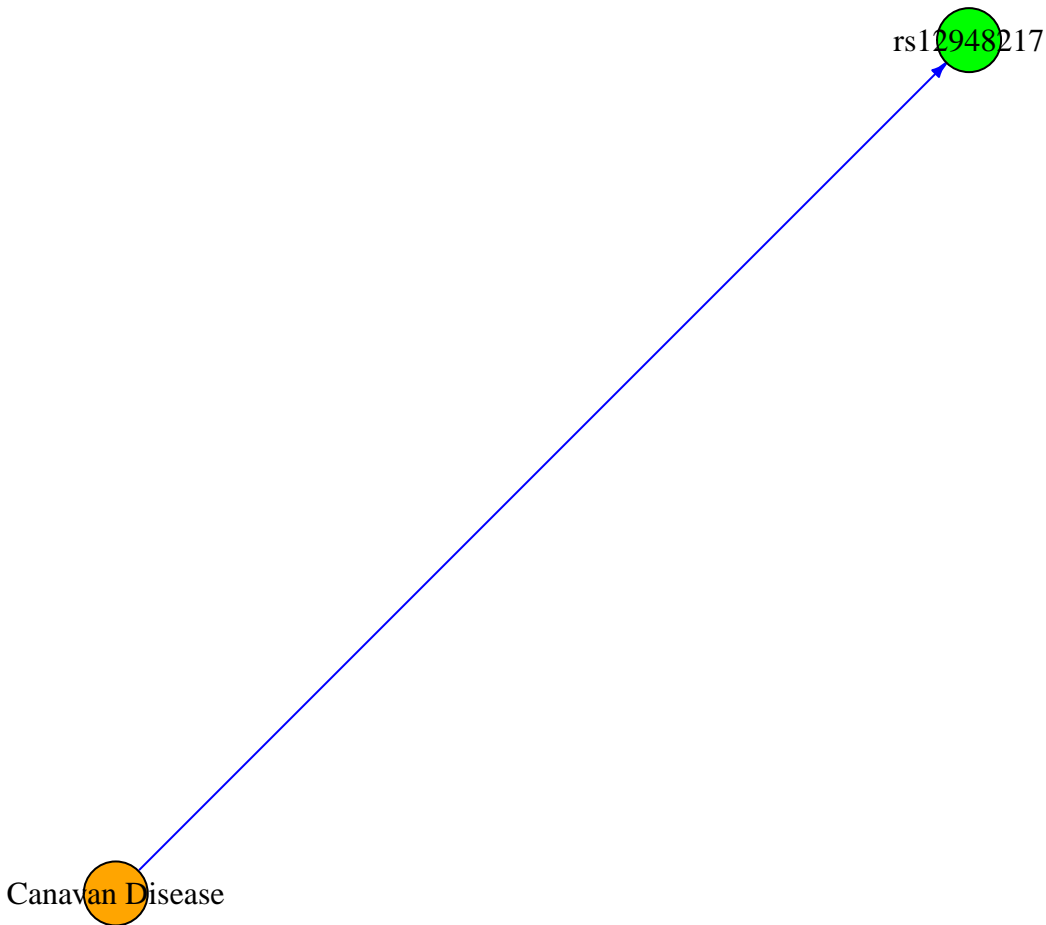

## Variant-Disease Network (Candidiasis)

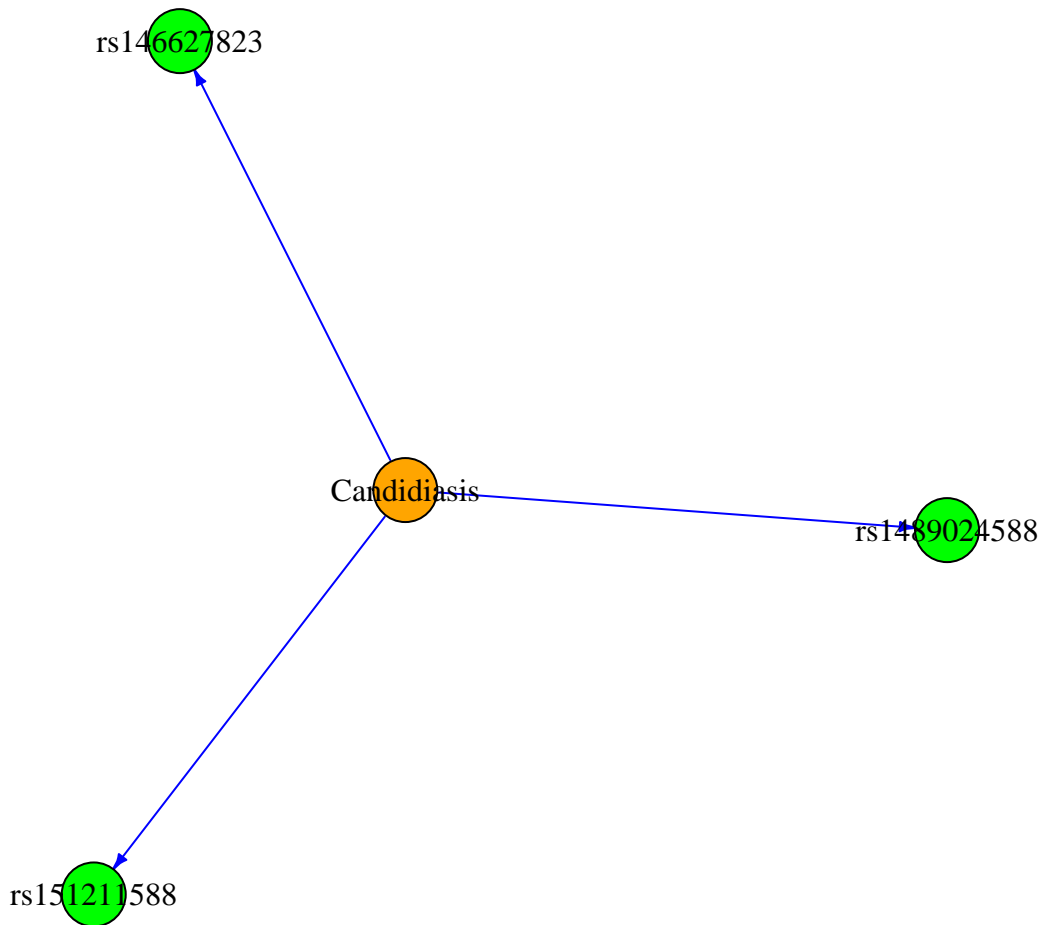

## Variant–Disease Network (Carcinoma of colon)

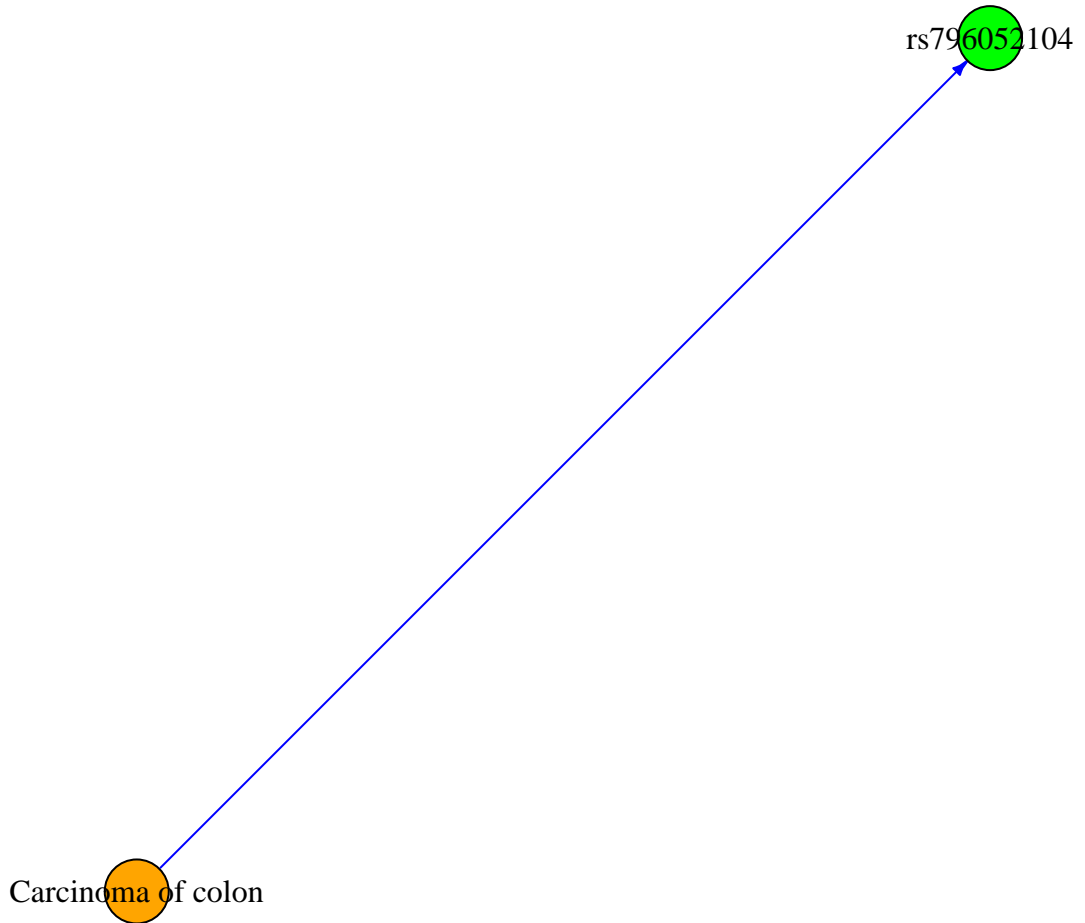

# Variant-Disease Network (Cardio-facio-cutaneous syndrome)

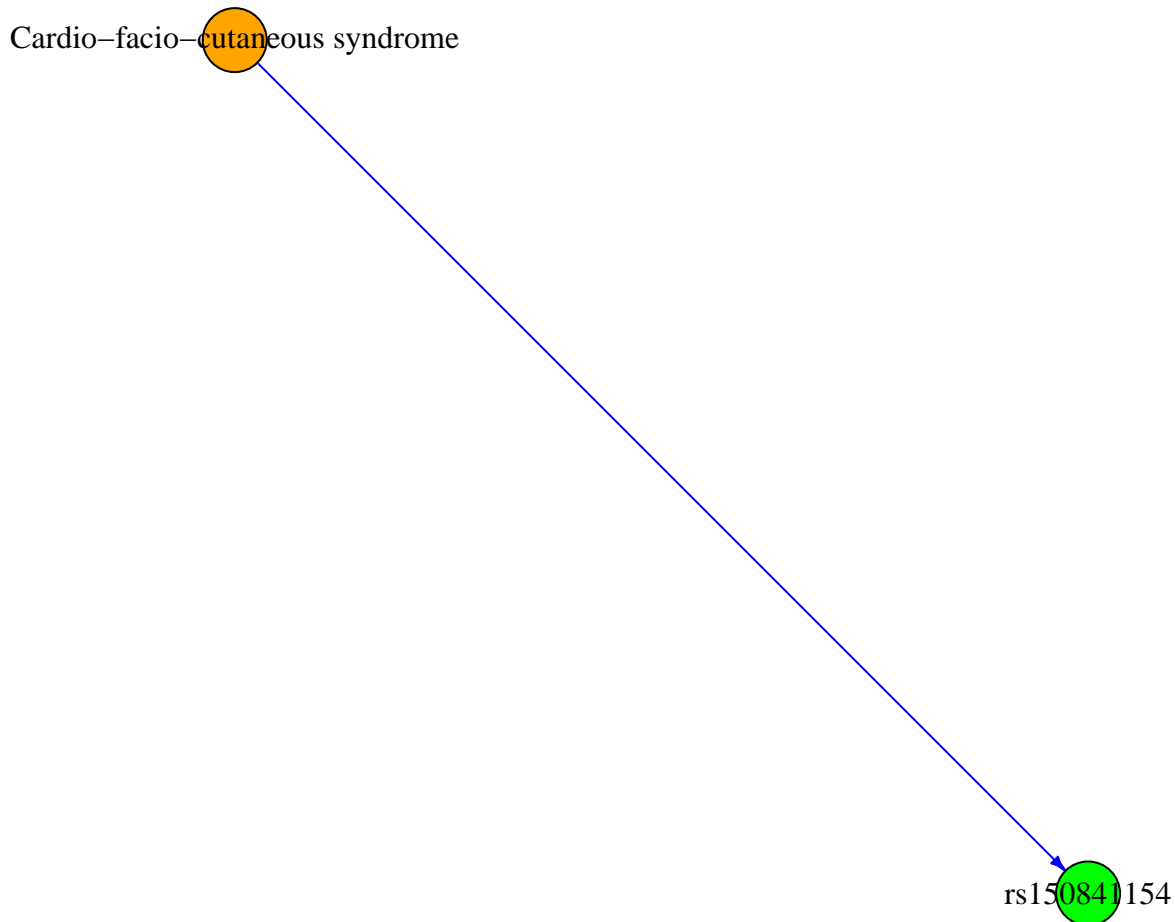

Variant–Disease Network (Cardiofaciocutaneous syndrome 4)

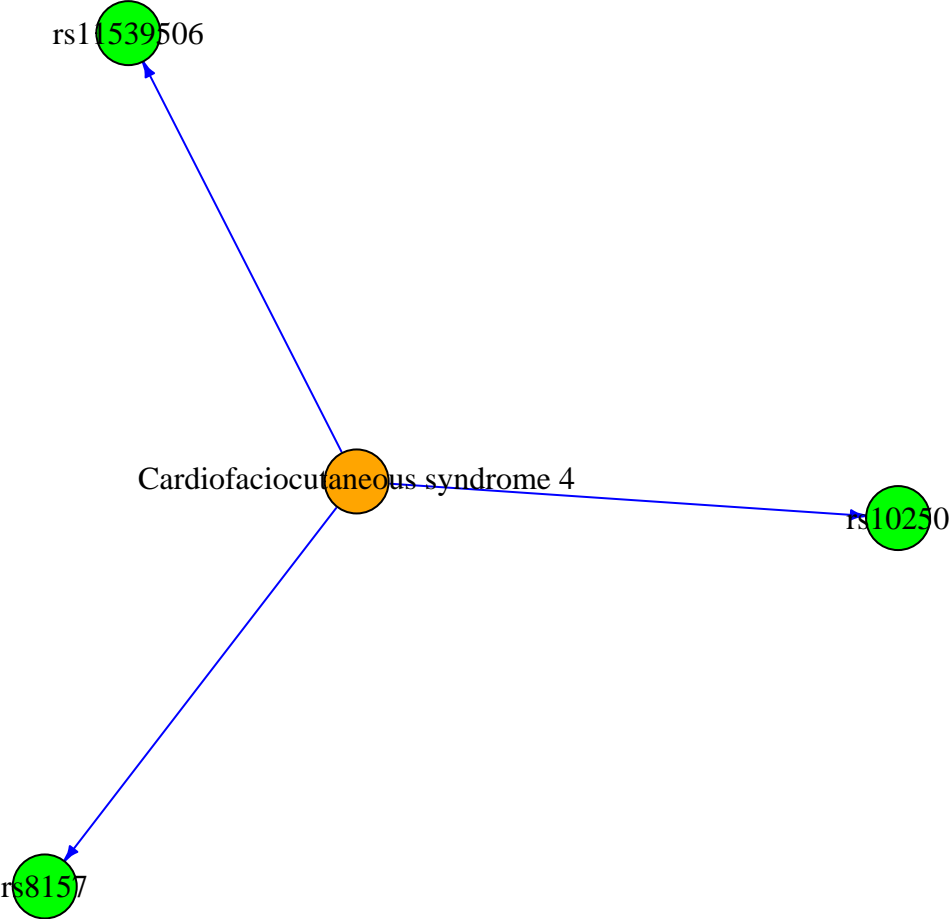



### Variant–Disease Network (Cardiomyopathy)

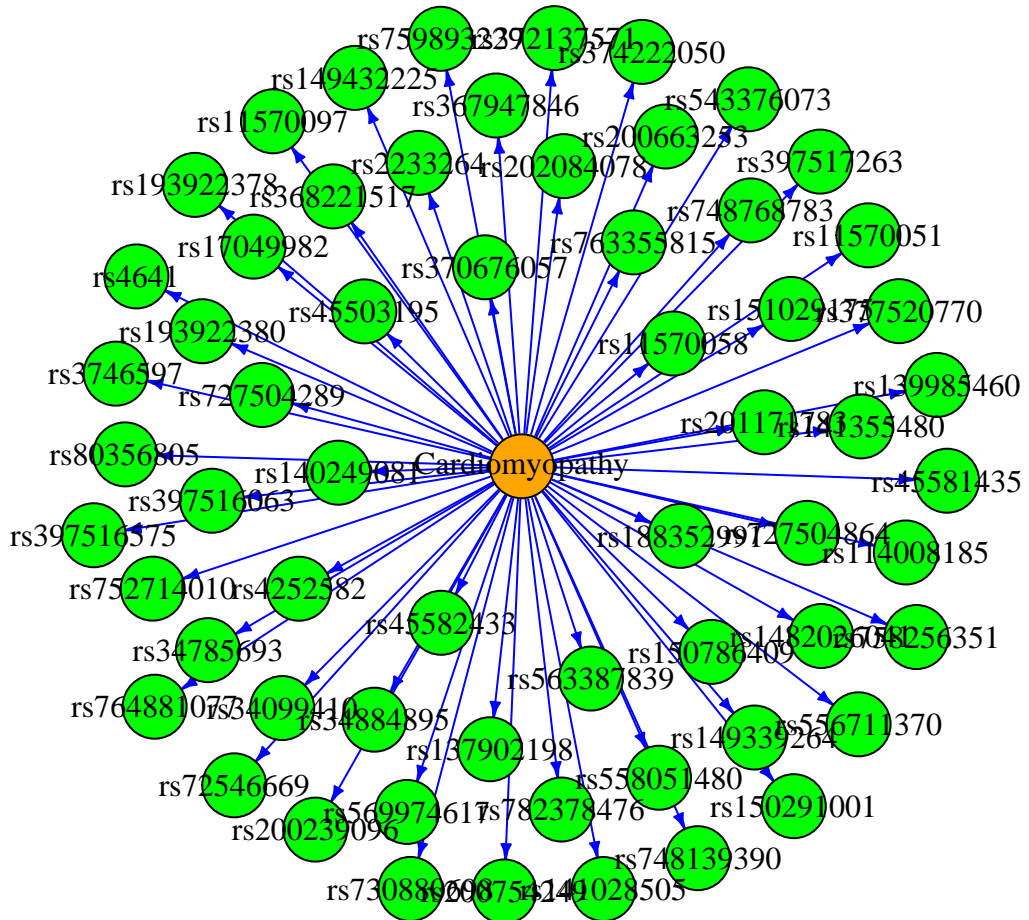

Variant–Disease Network (Cardiovascular phenotype)

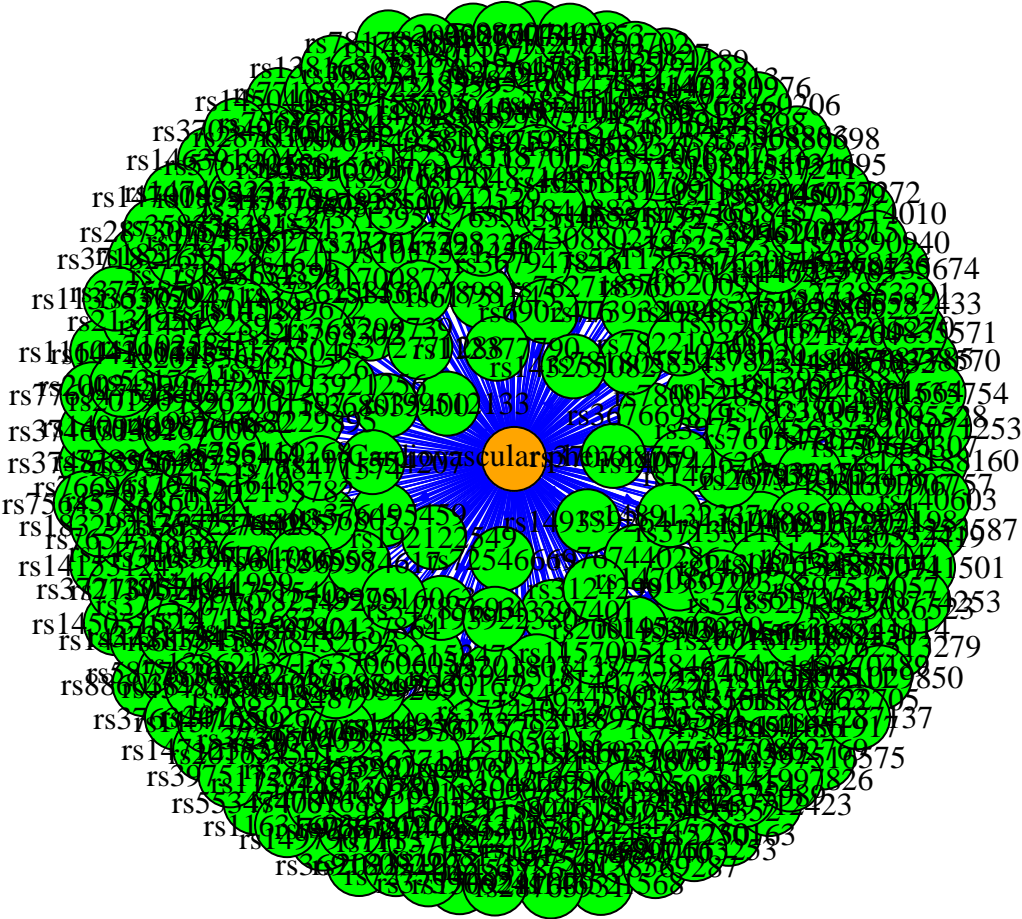

## Variant–Disease Network (Carney complex)

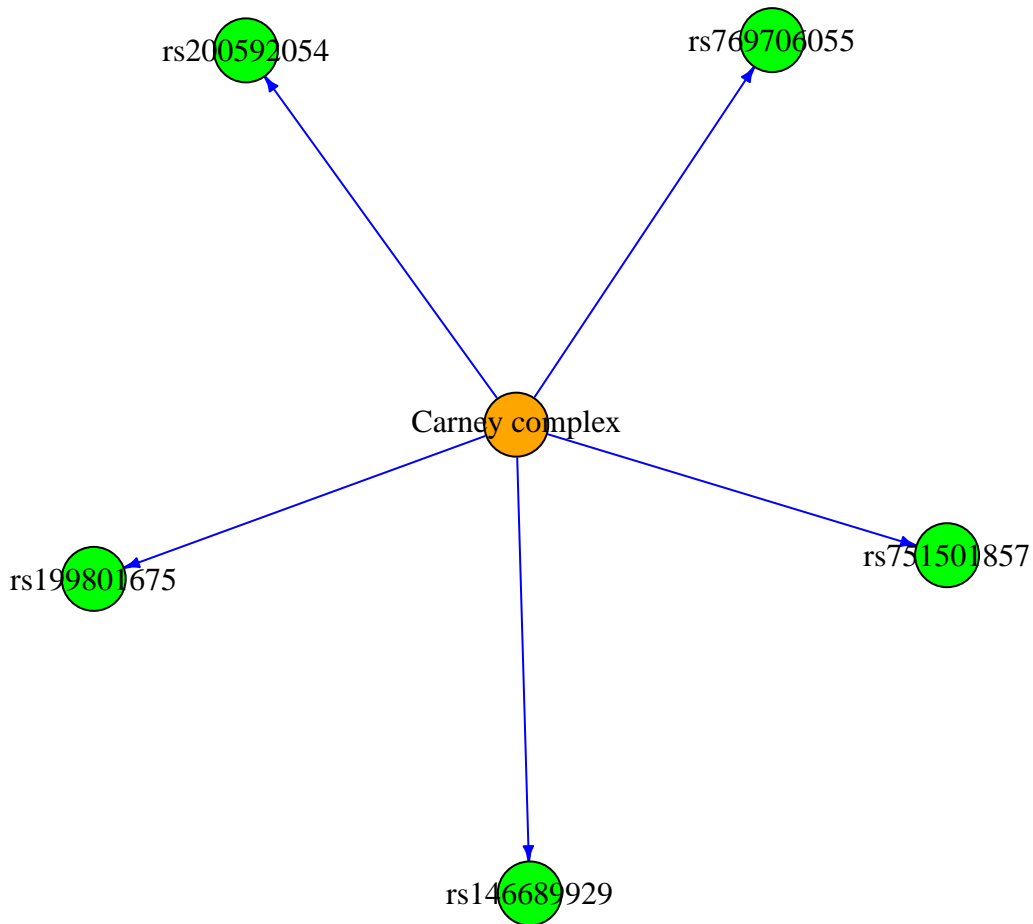

Variant–Disease Network (Carnitine acylcarnitine translocase deficiency)

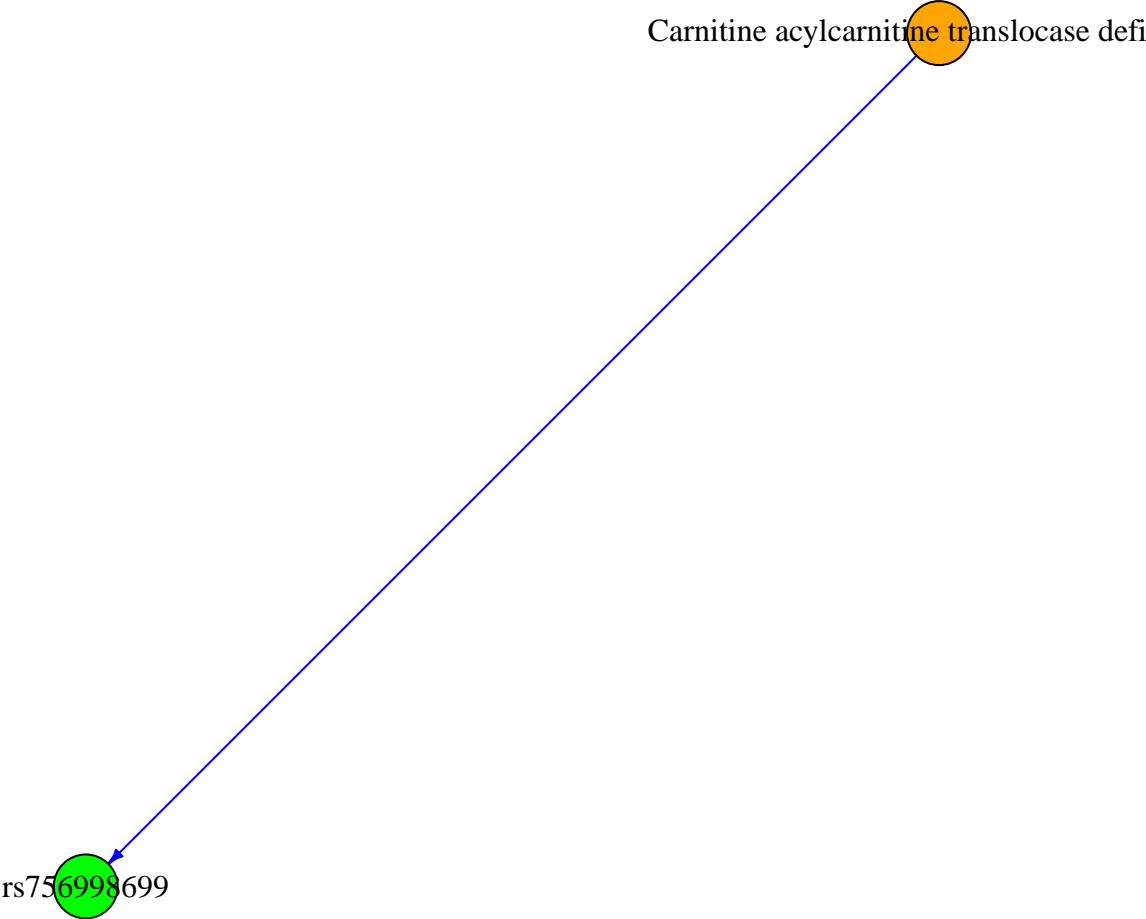

**Variant–Disease Network (Carnitine palmitoyl transferase 1 deficiency)**

rs398123654

Carnitine palmitoyl transferase 1 deficiency

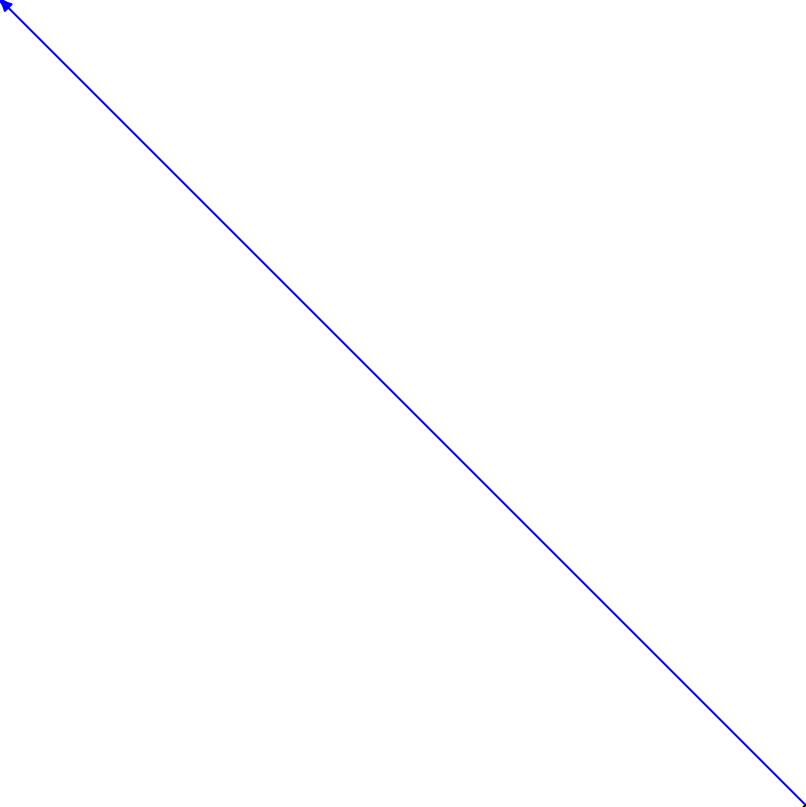

**Variant–Disease Network (Carnitine palmitoyltransferase I deficiency)**

Carnitine palmitoyltransferase I deficiency

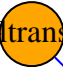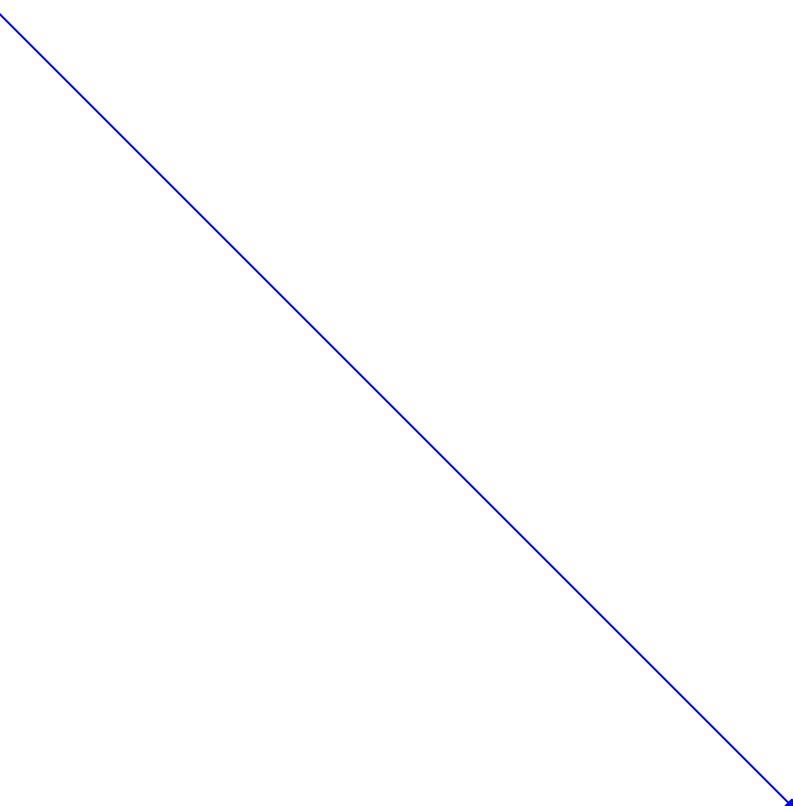

rs398123654

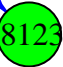

# Variant–Disease Network (Carnitine palmitoyltransferase II deficiency)

Carnitine palmitoyltransferase II deficiency

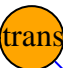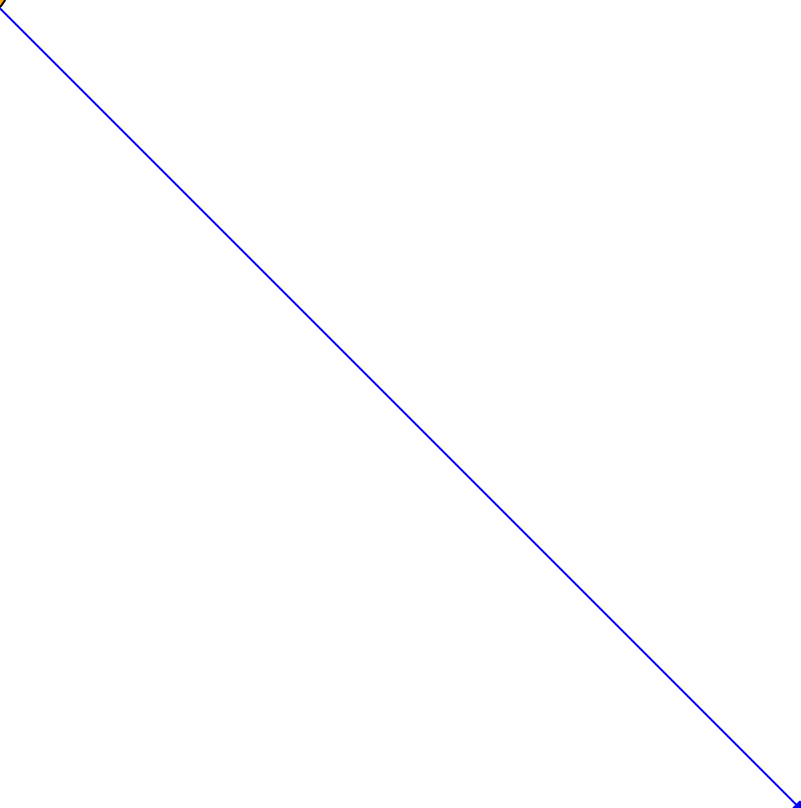

rs2229292

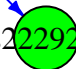

## Variant–Disease Network (Carpenter syndrome 2)

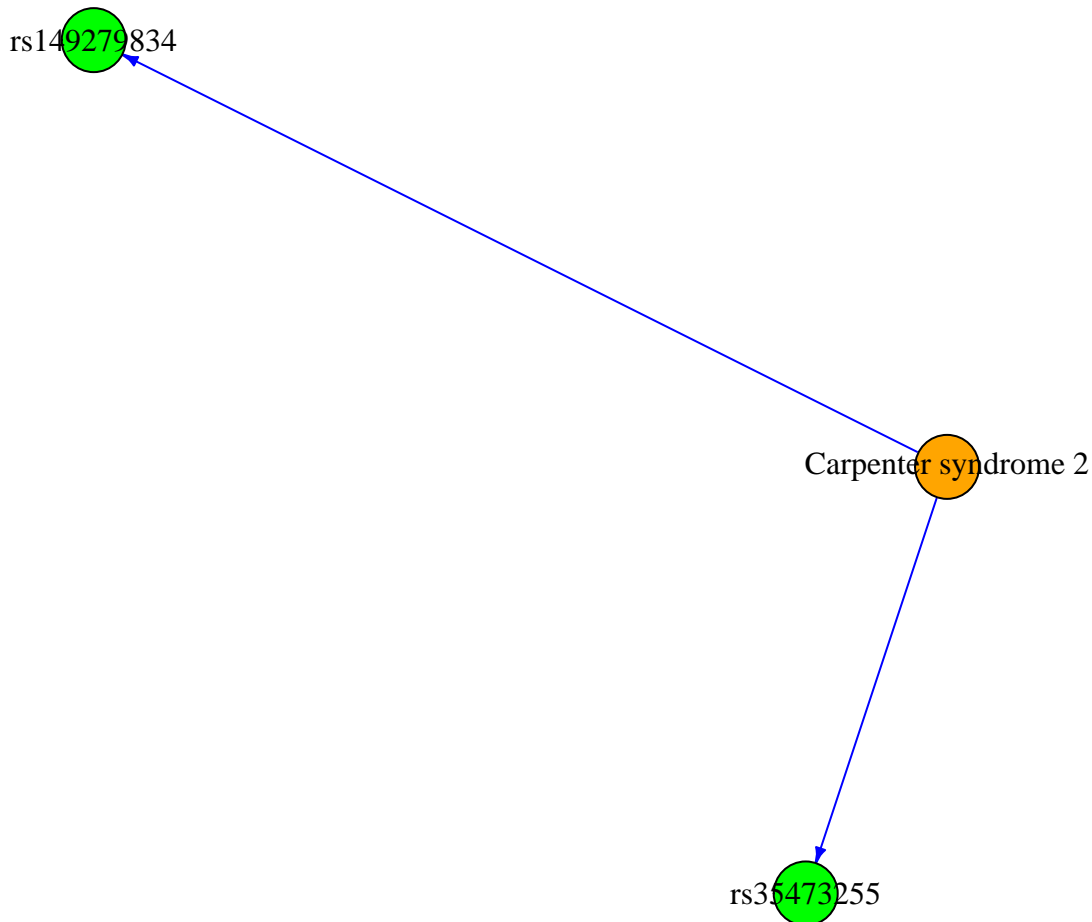



## Variant-Disease Network (Cataract)

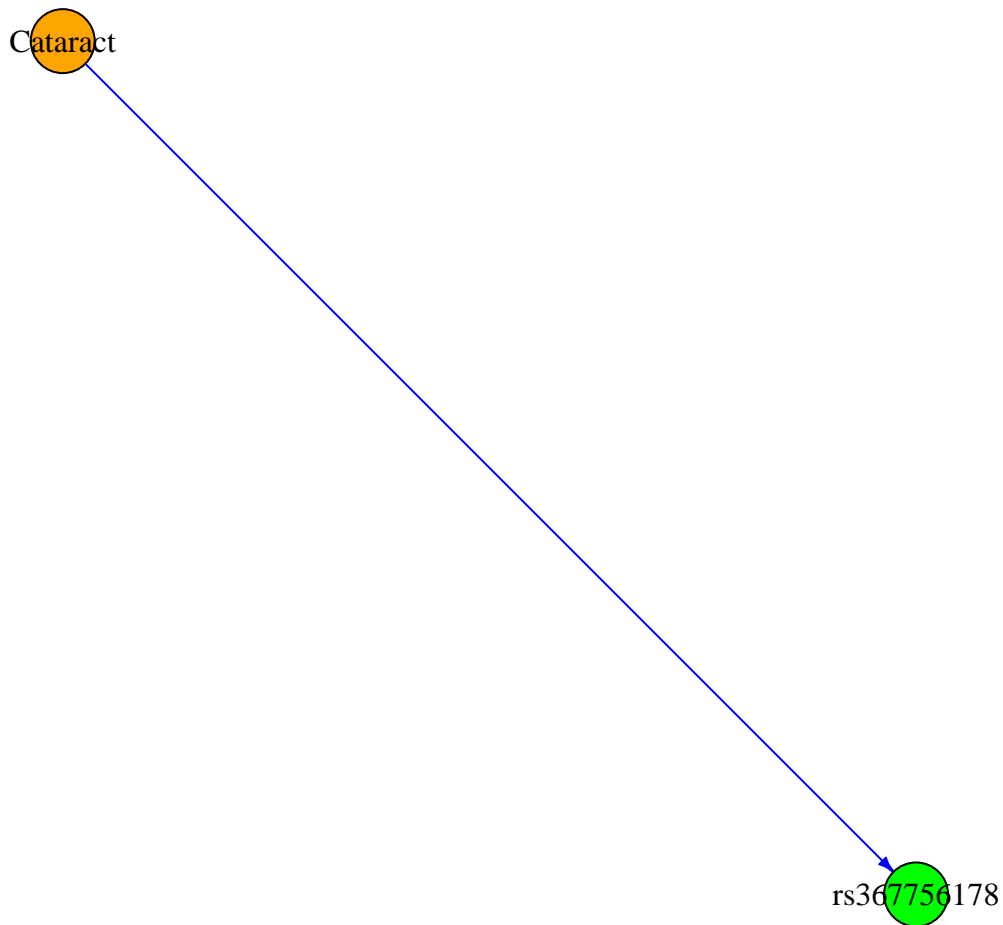

## Variant-Disease Network (Cataract 1)

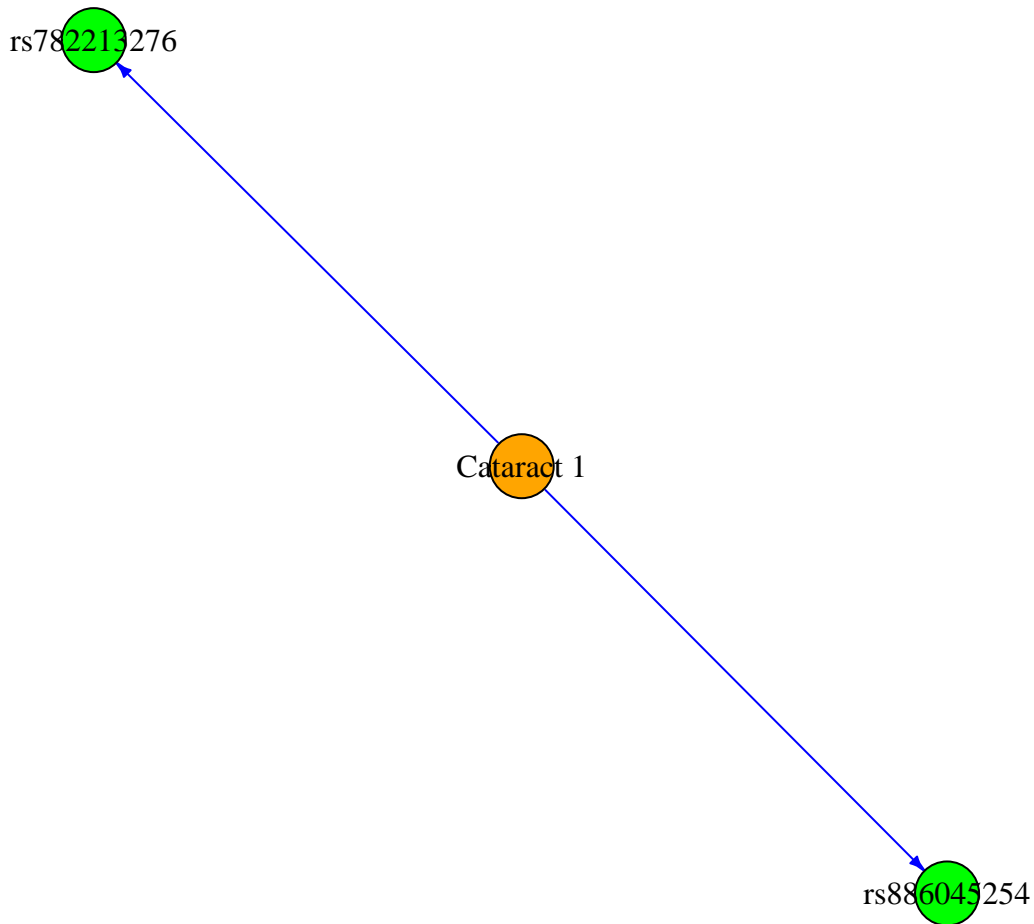

Variant–Disease Network (Cataract 16)

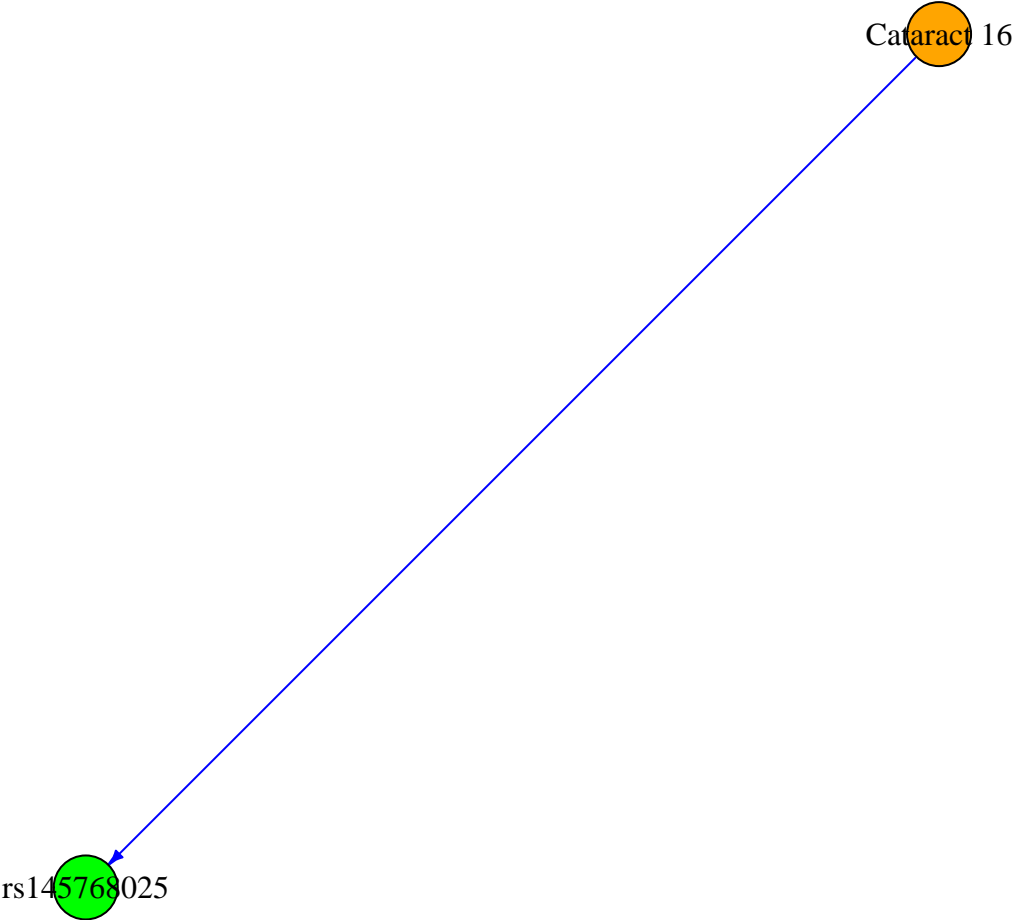

**Variant–Disease Network (Cataract 33)**

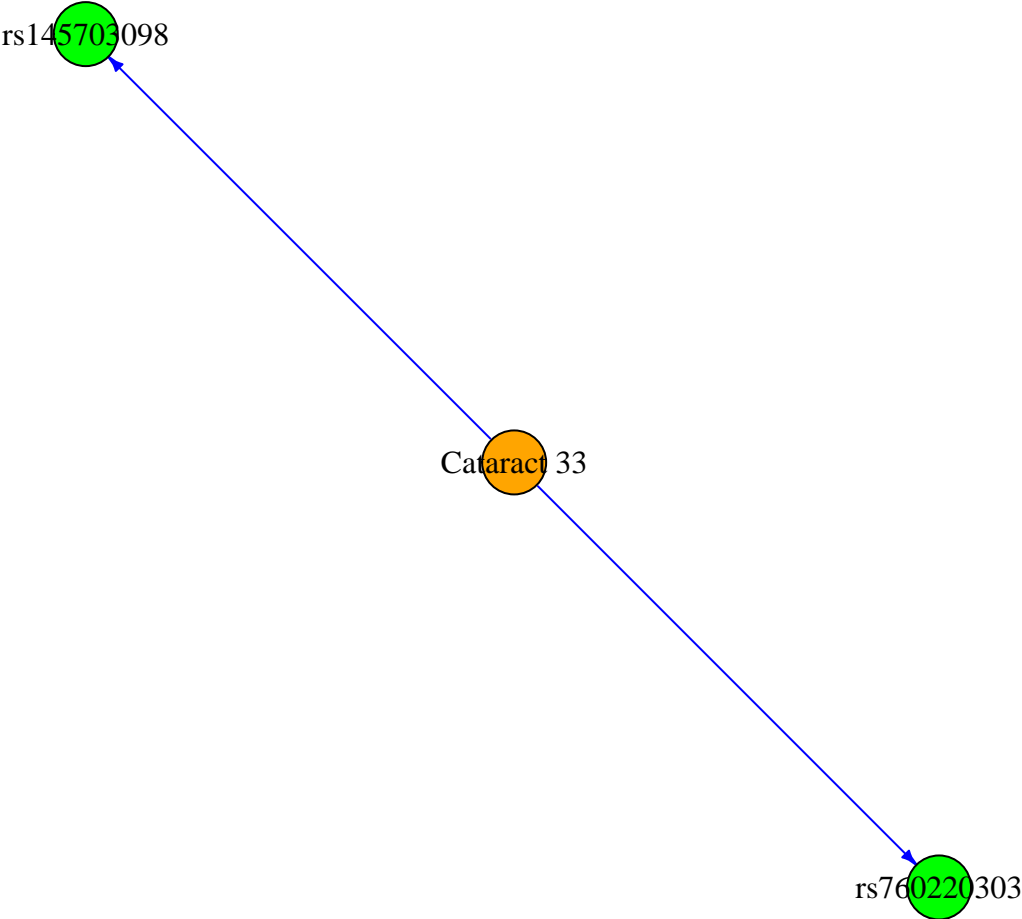

## Variant-Disease Network (Cataract 4)

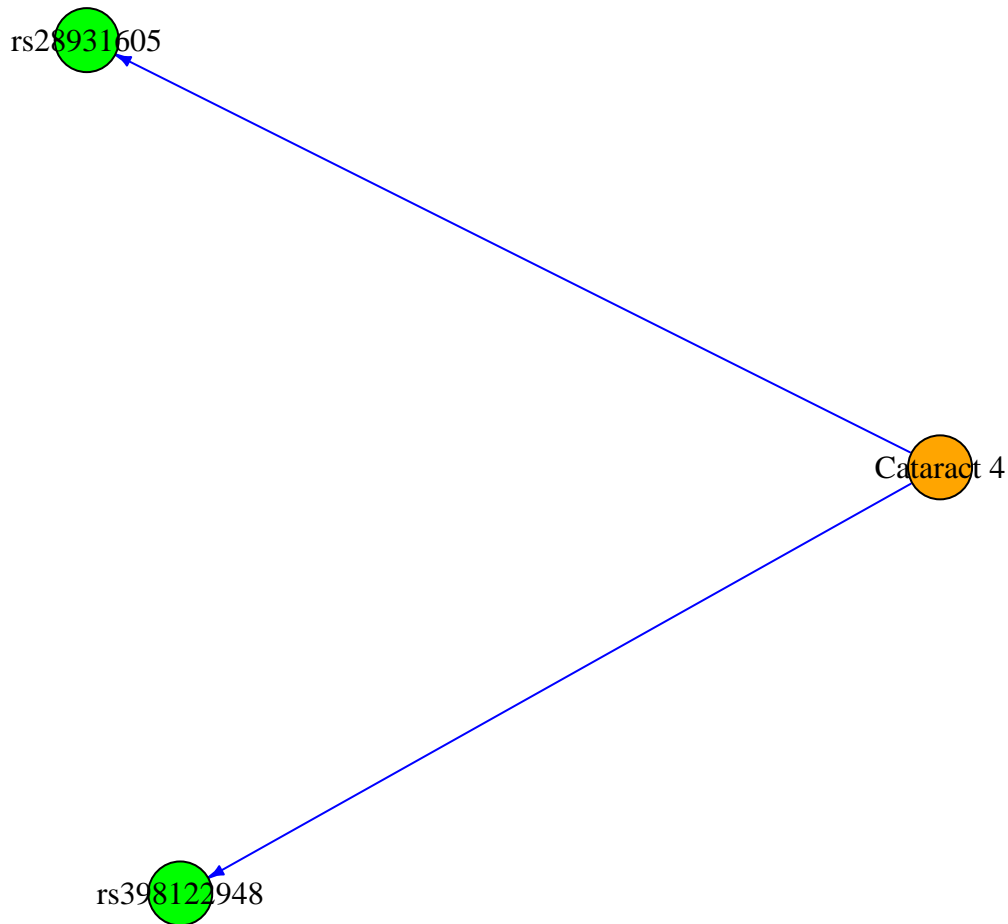

Variant-Disease Network (Cataract 6)

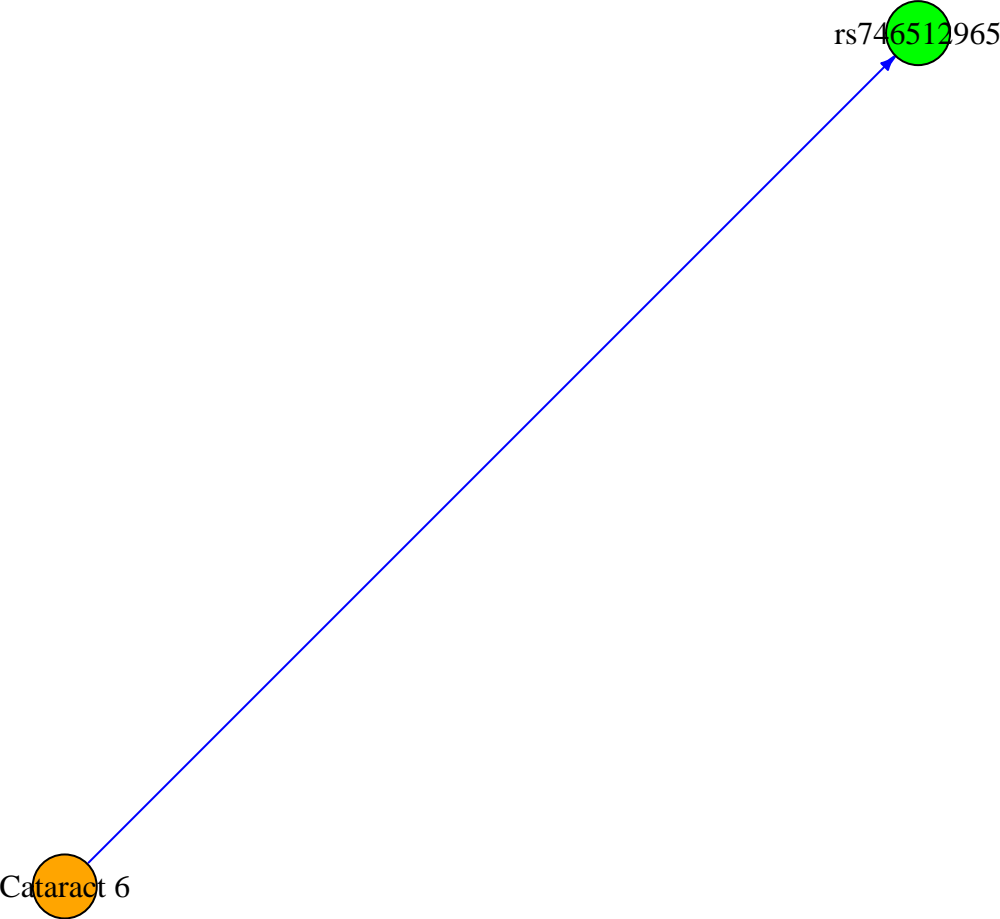

# Variant-Disease Network (Catecholaminergic polymorphic ventricular tachycardia)

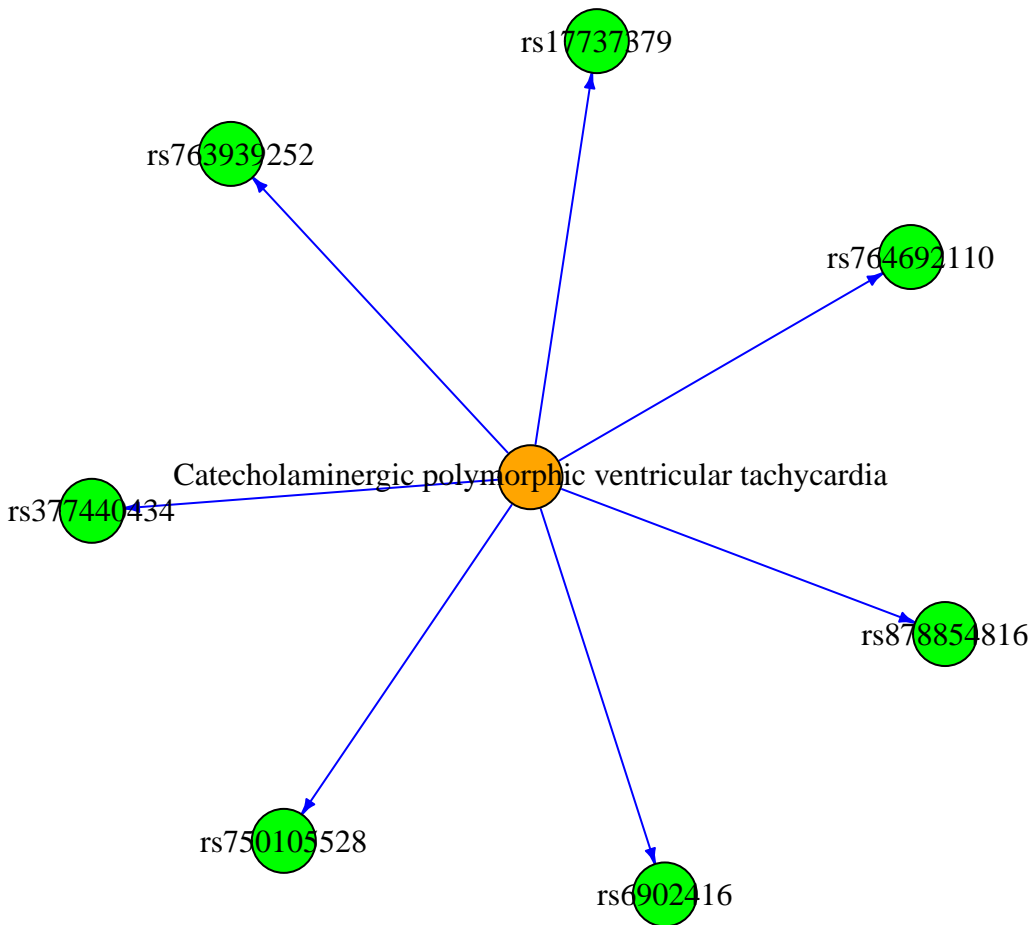

**Variant–Disease Network (Caudal dysgenesis syndrome)**

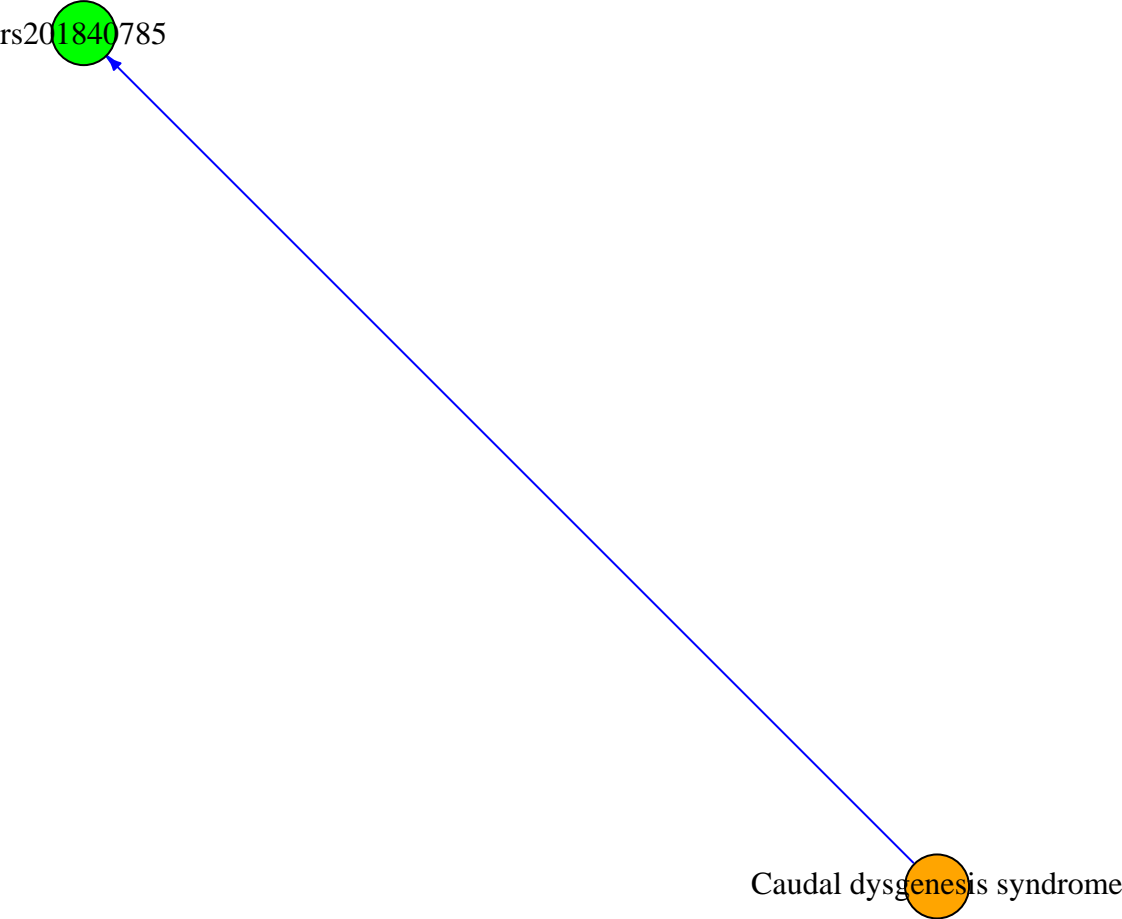



**Variant–Disease Network (Caused by mutation in the TBC1 domain family)**

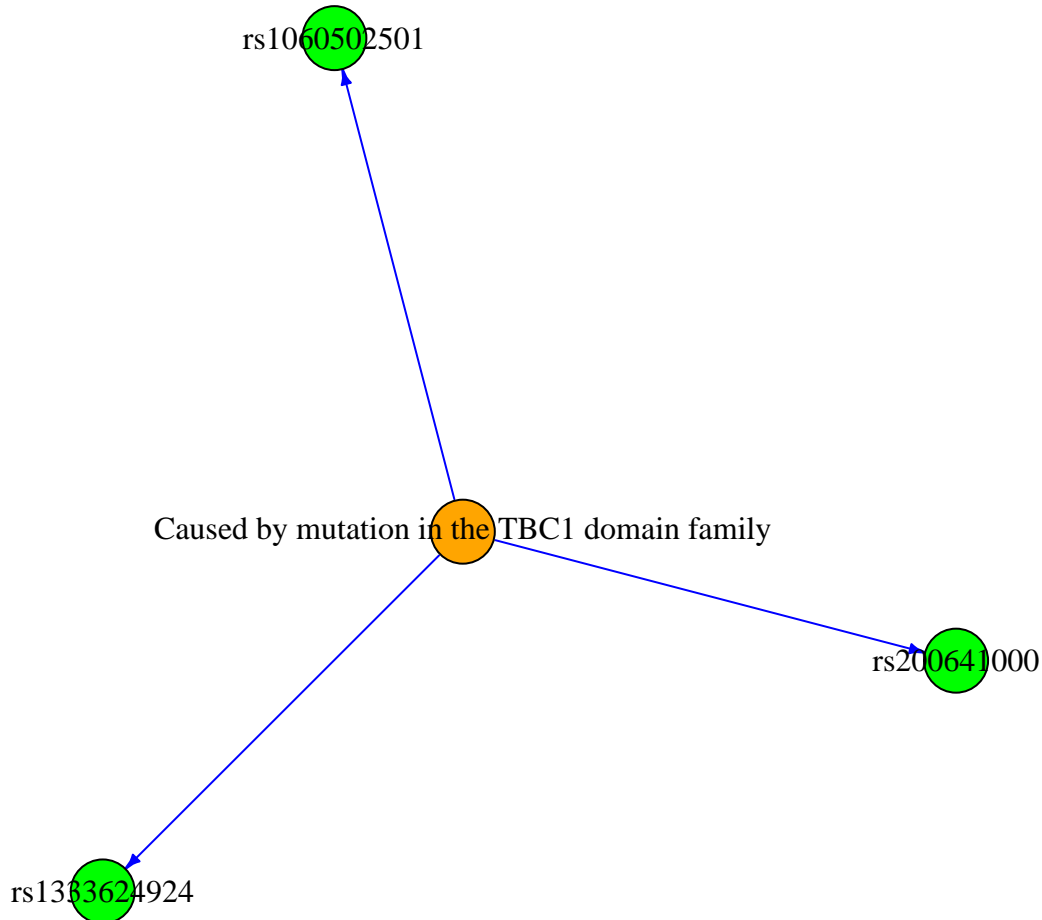

## Variant-Disease Network (Caveolinopathy)

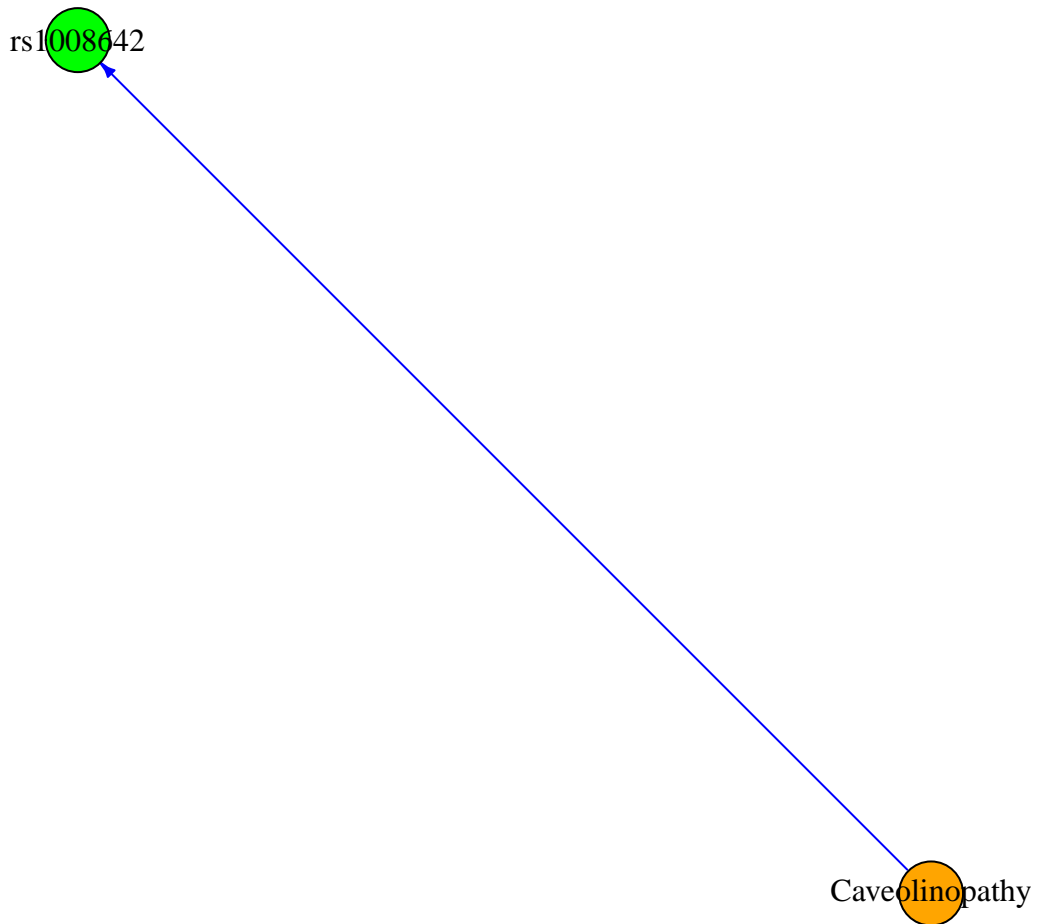

# Variant–Disease Network (CC2D2A–Related Disorders)

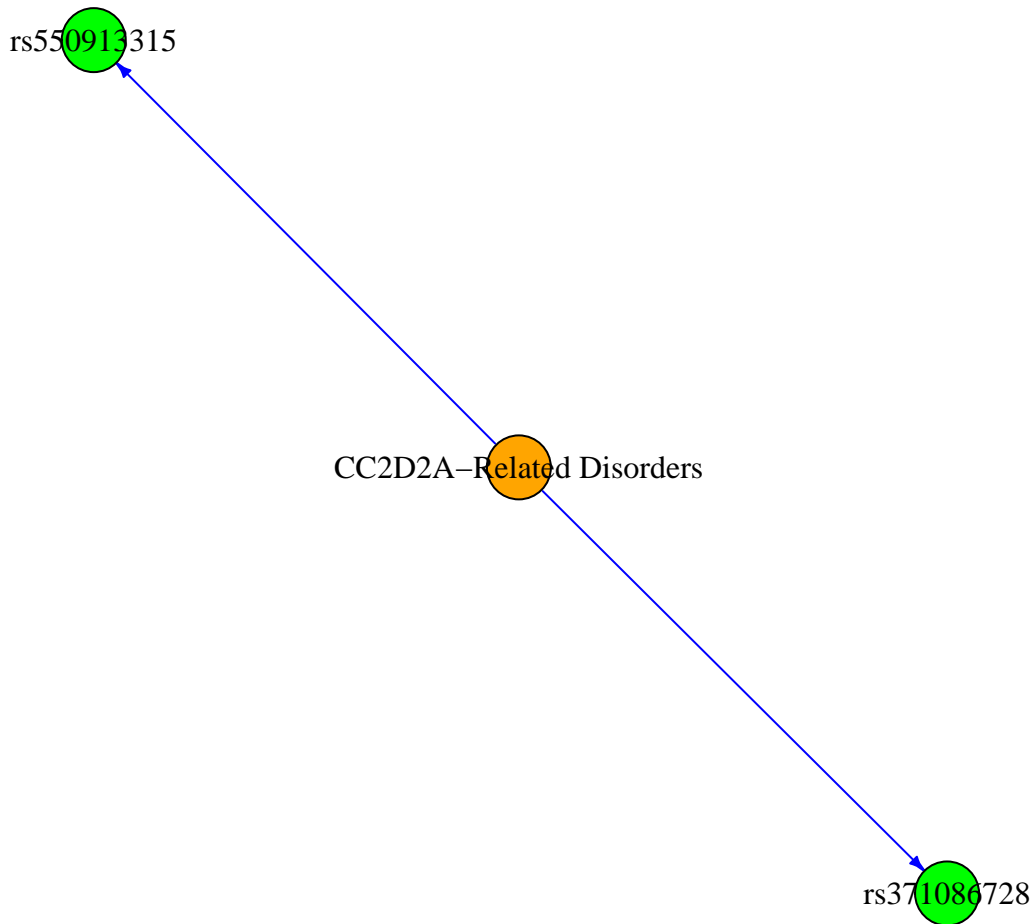

Variant–Disease Network (CCR5 POLYMORPHISM)

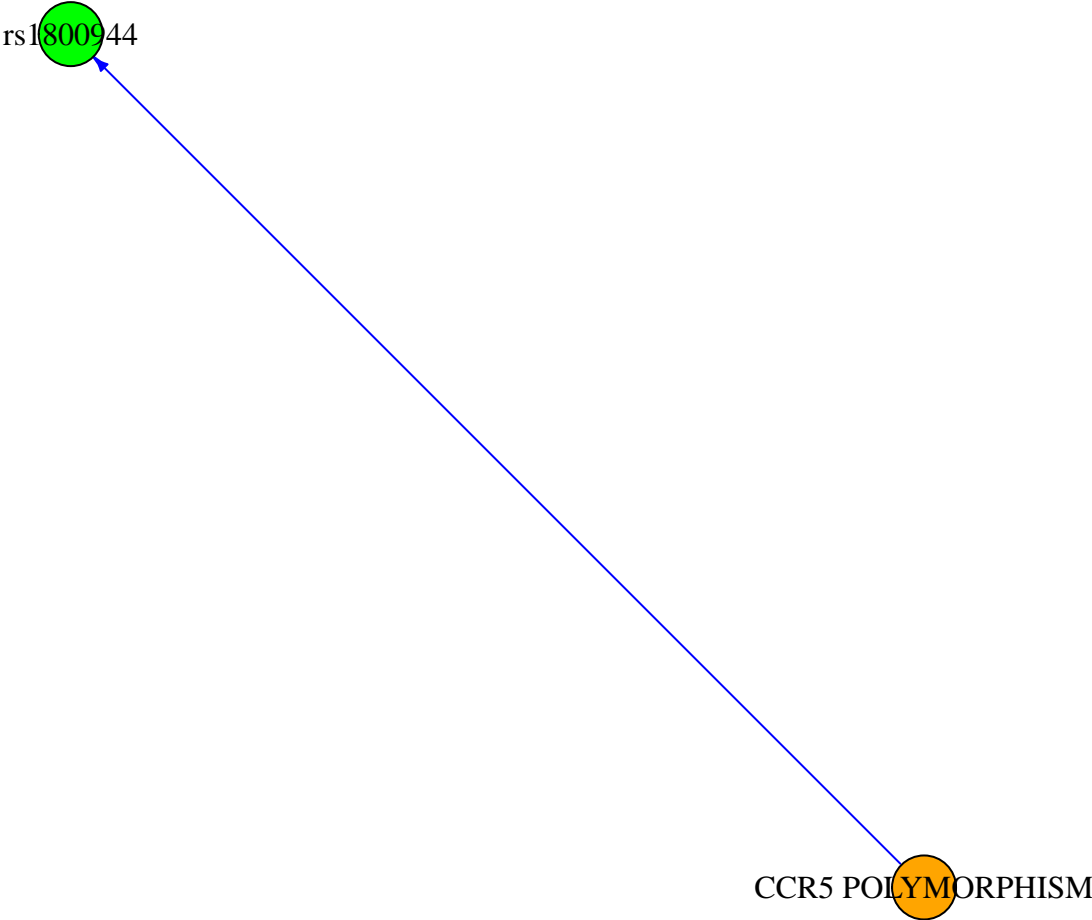

Variant–Disease Network (Centronuclear Myopathy)

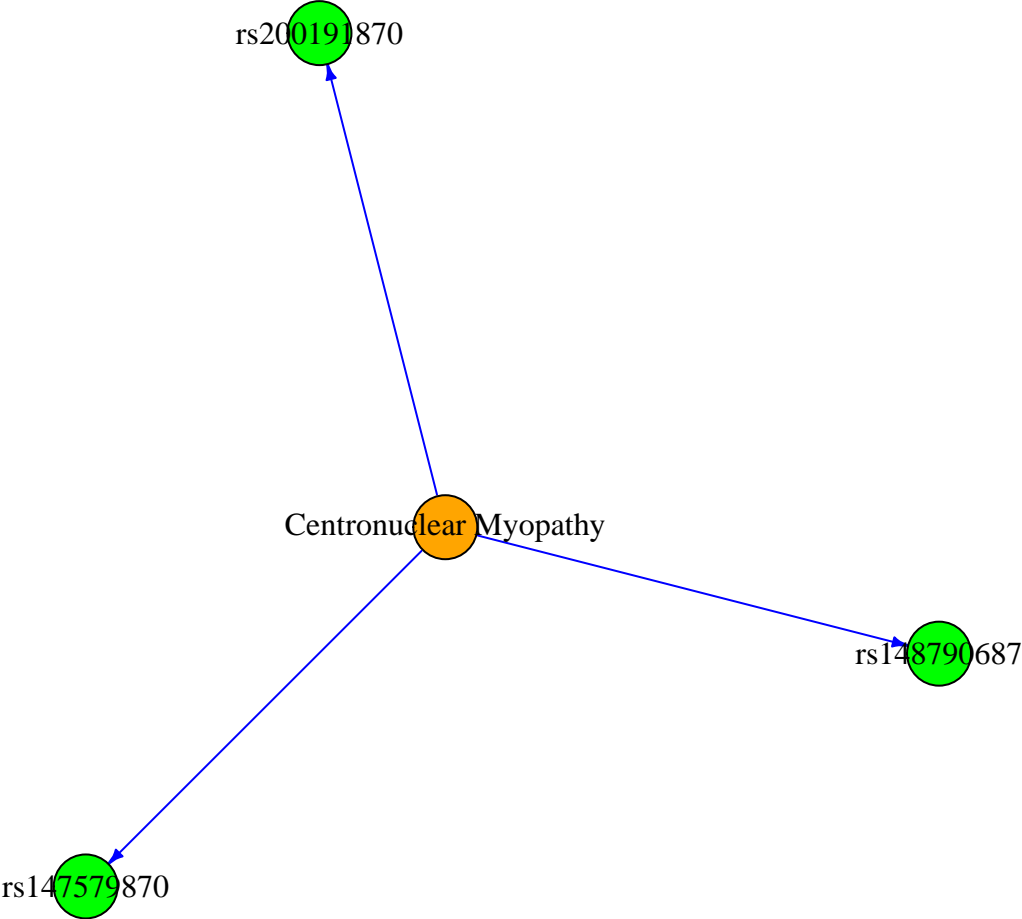

## Variant–Disease Network (Cerebellar ataxia)

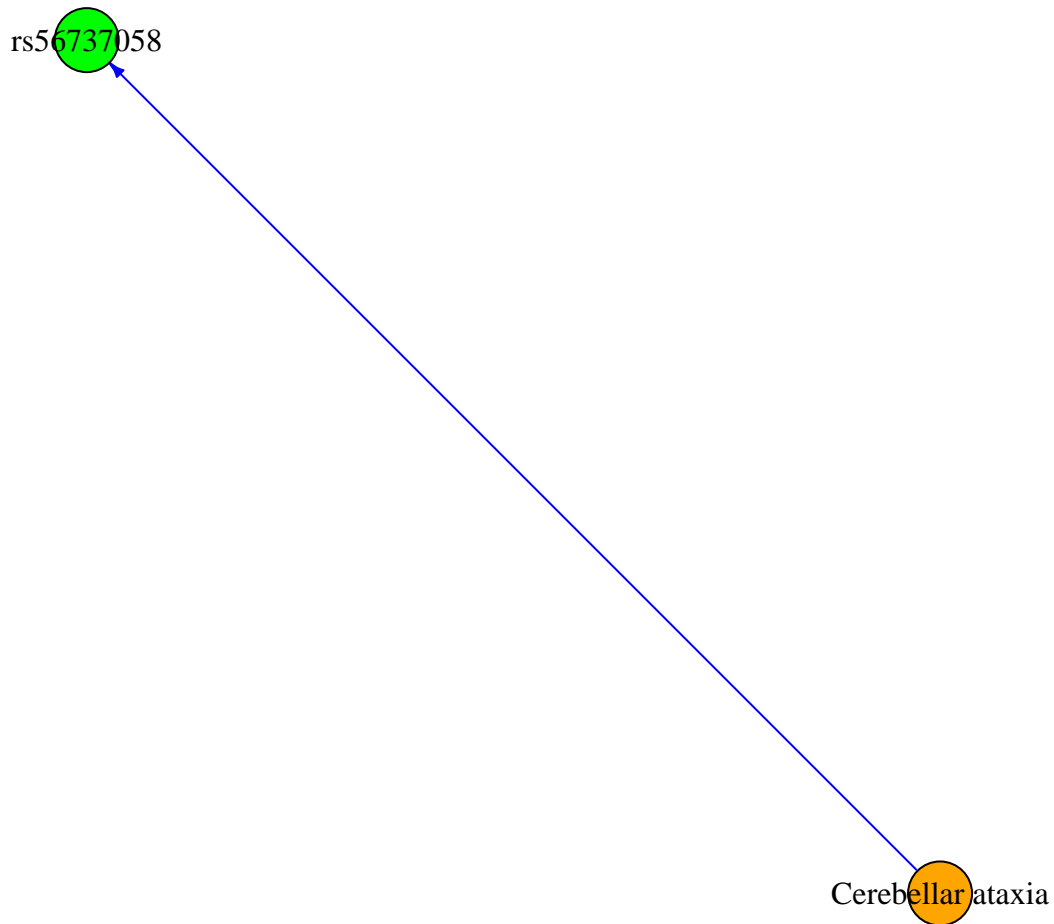

# rs112197217 (Cerebral autosomal dominant arteriopathy with subcortical infarcts and leukoencephalopathy type 1)

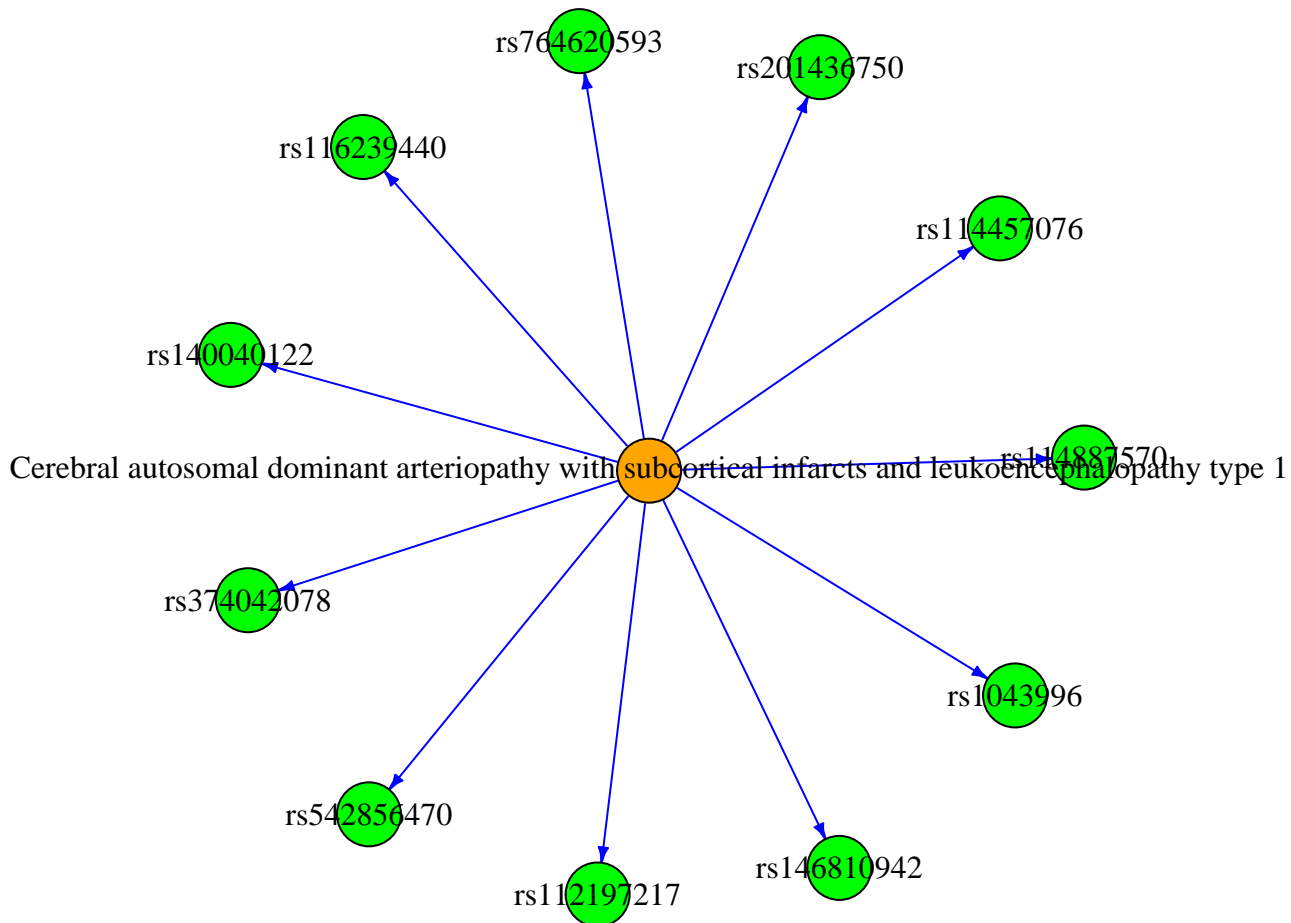

## Variant–Disease Network (Cerebral cavernous malformation)

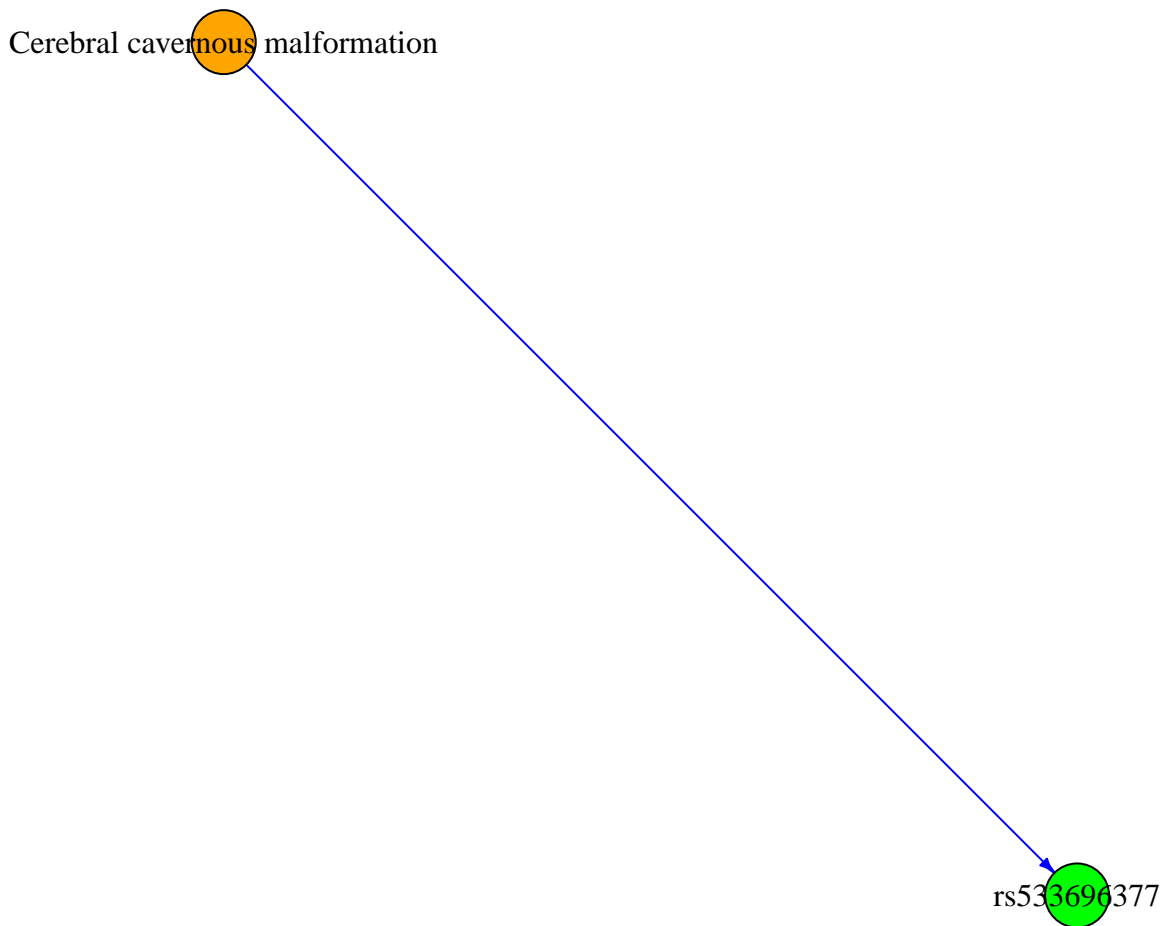



Variant–Disease Network (Ceroid lipofuscinosis neuronal 2)

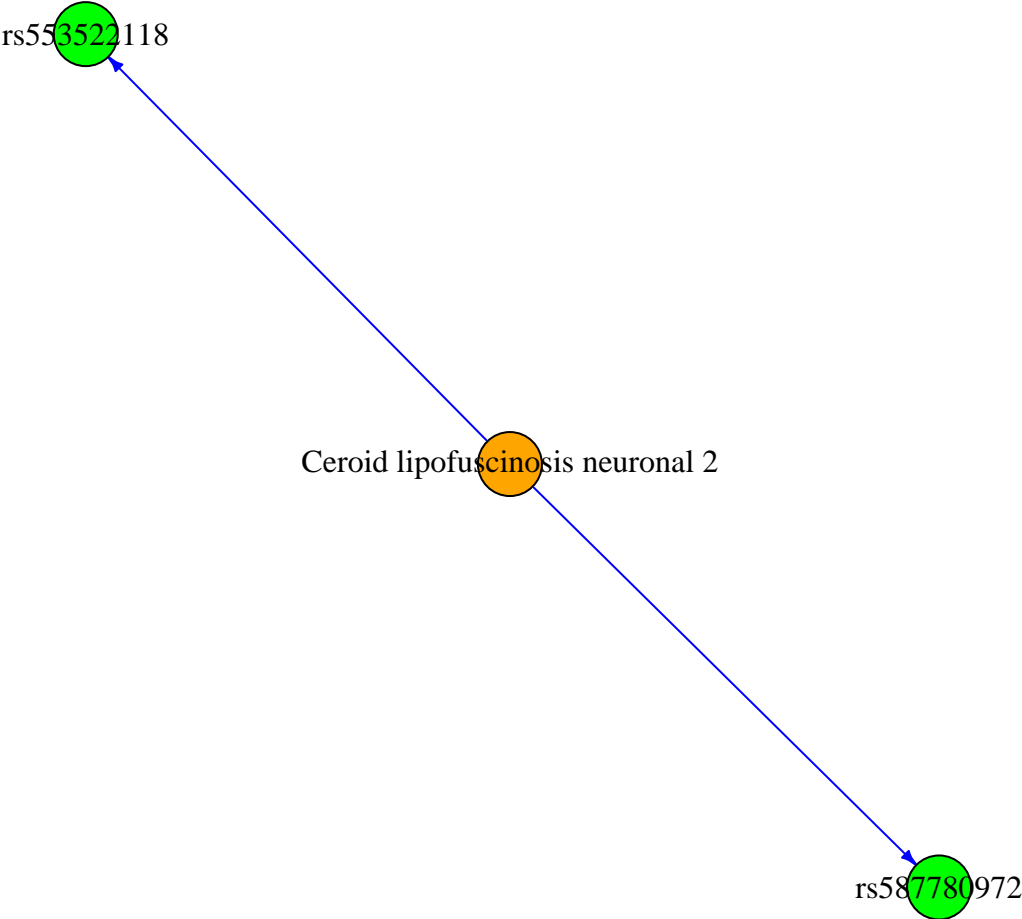

Variant–Disease Network (Ceroid lipofuscinosis neuronal 7)

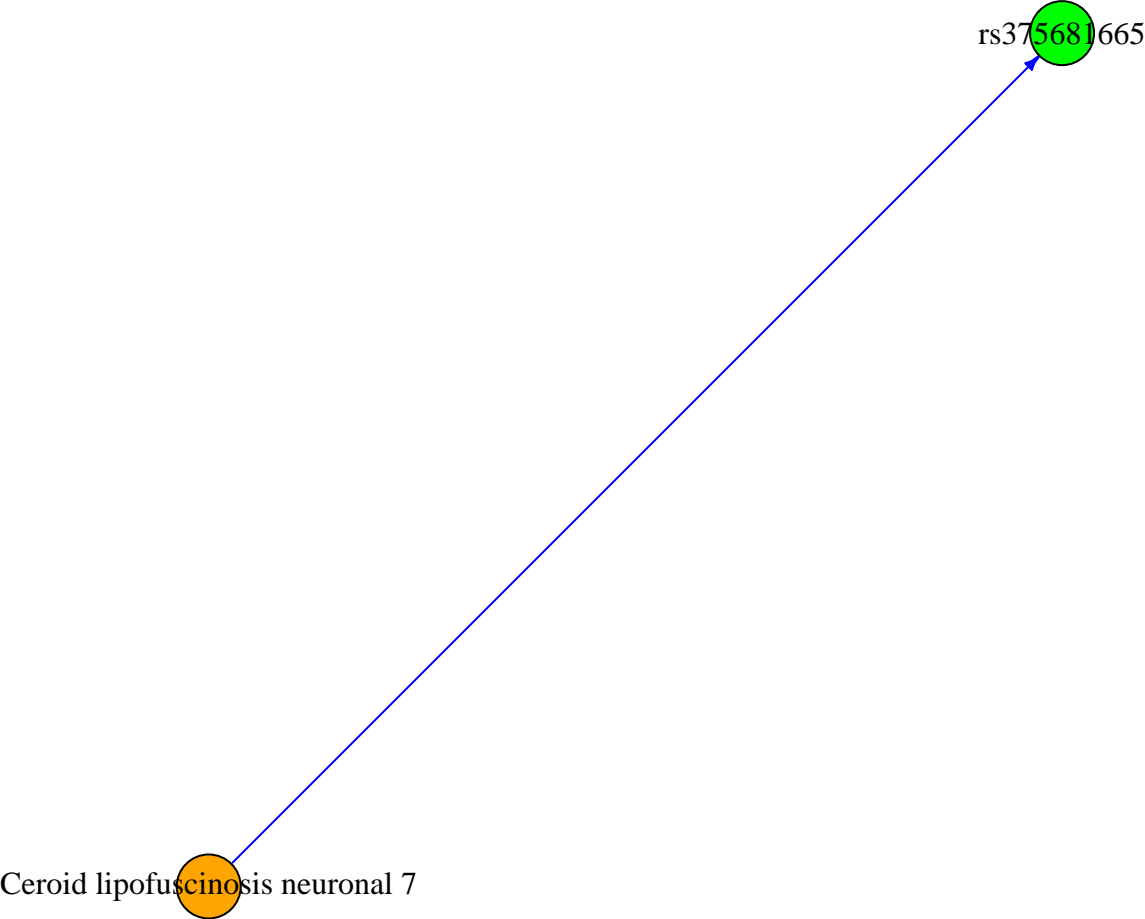

## Variant–Disease Network (CFTR–related disorders)

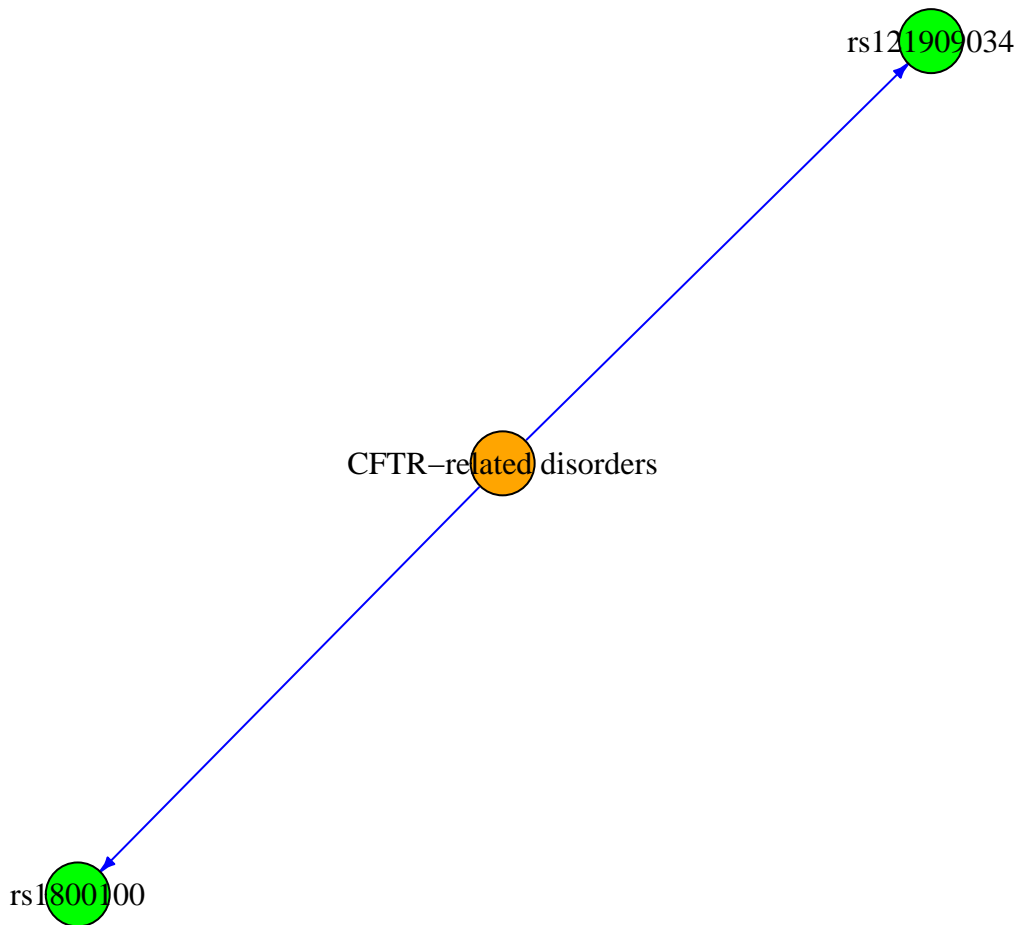

**Variant–Disease Network (Charcot–Marie–Tooth)**

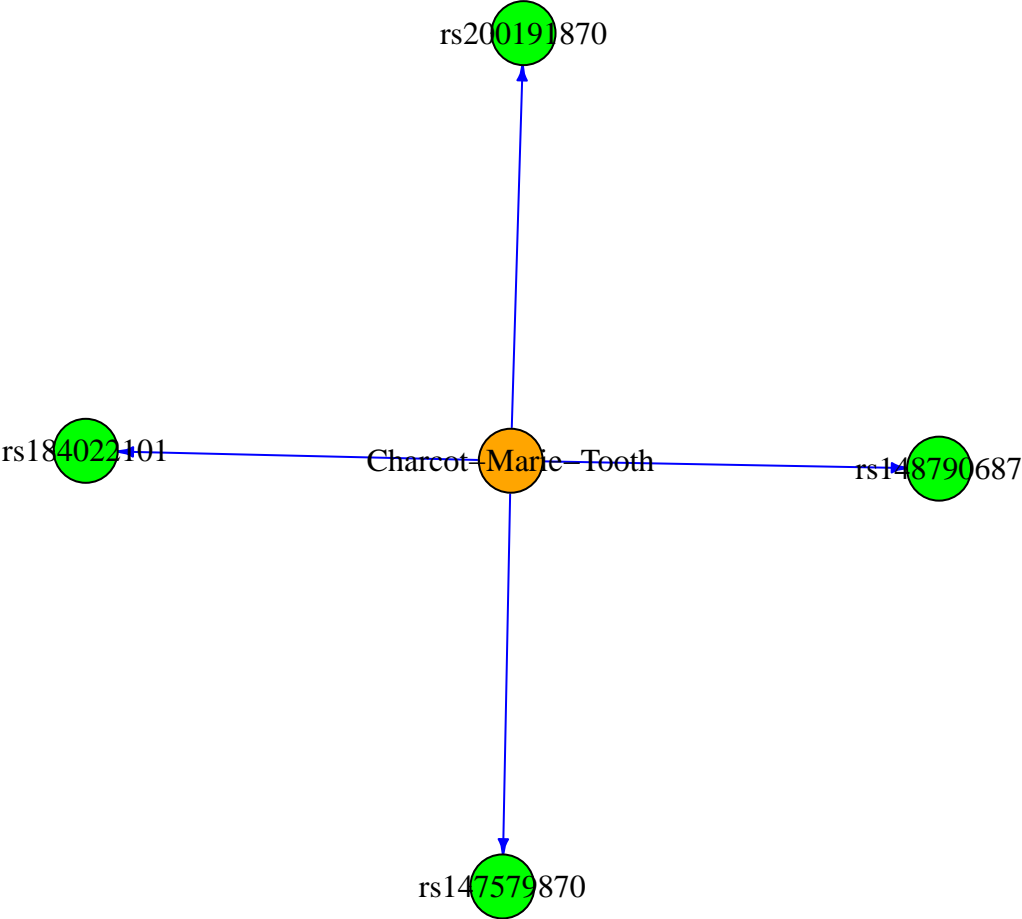

Variant–Disease Network (Charcot–Marie–Tooth disease)

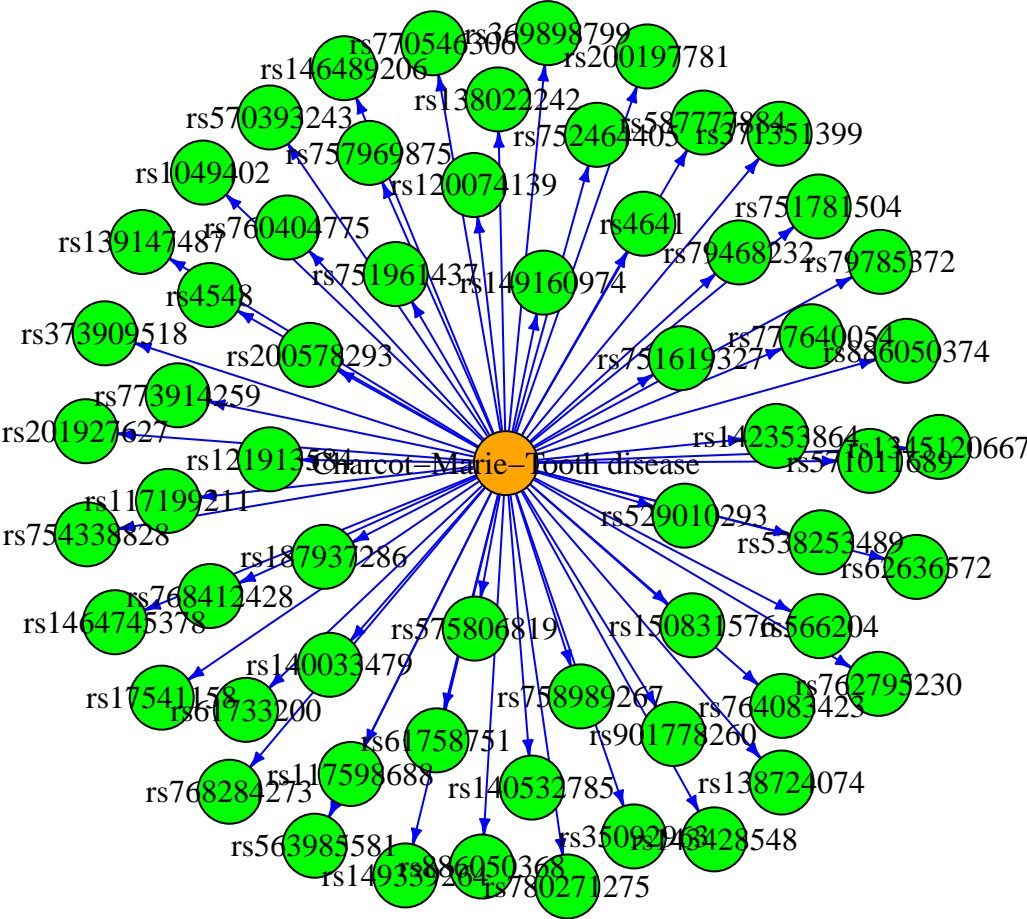

Variant–Disease Network (Charcot–Marie–Tooth disease type 2B1)

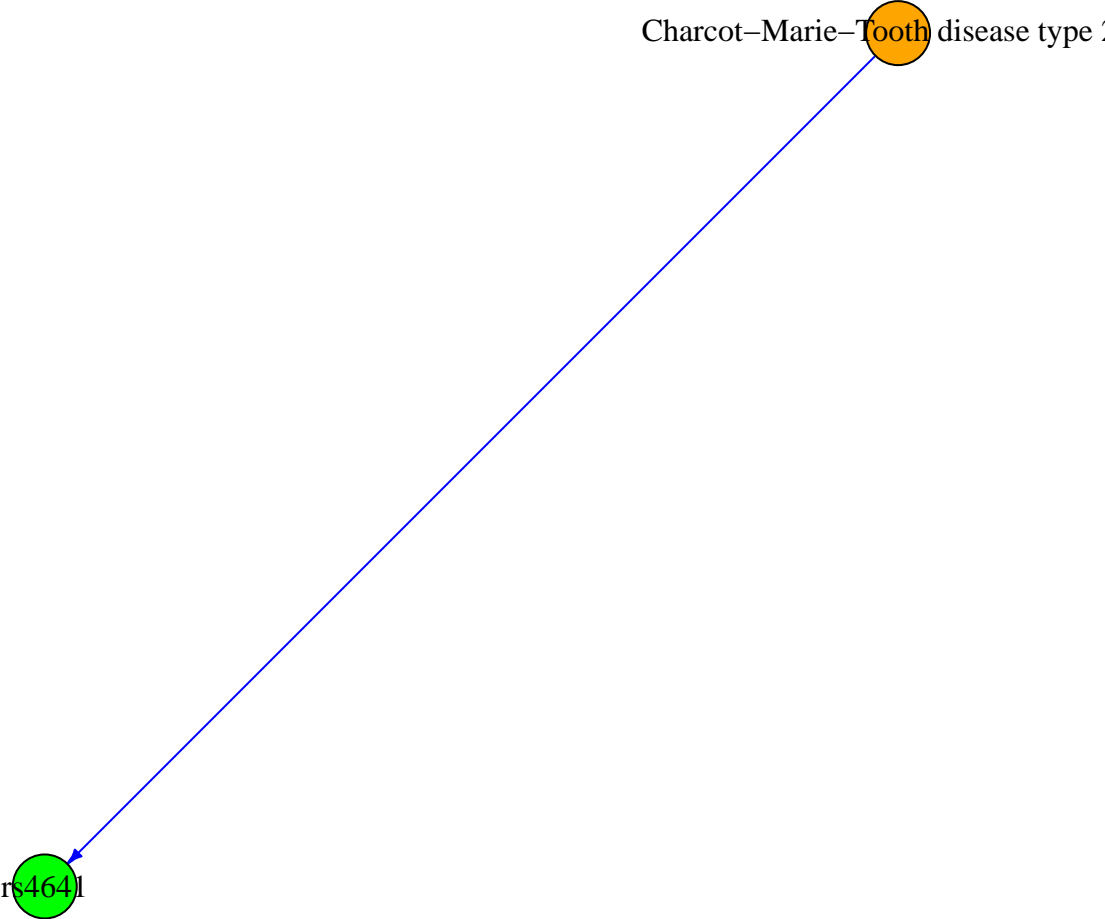

# Variant–Disease Network (Charcot–Marie–Tooth disease type 2D)

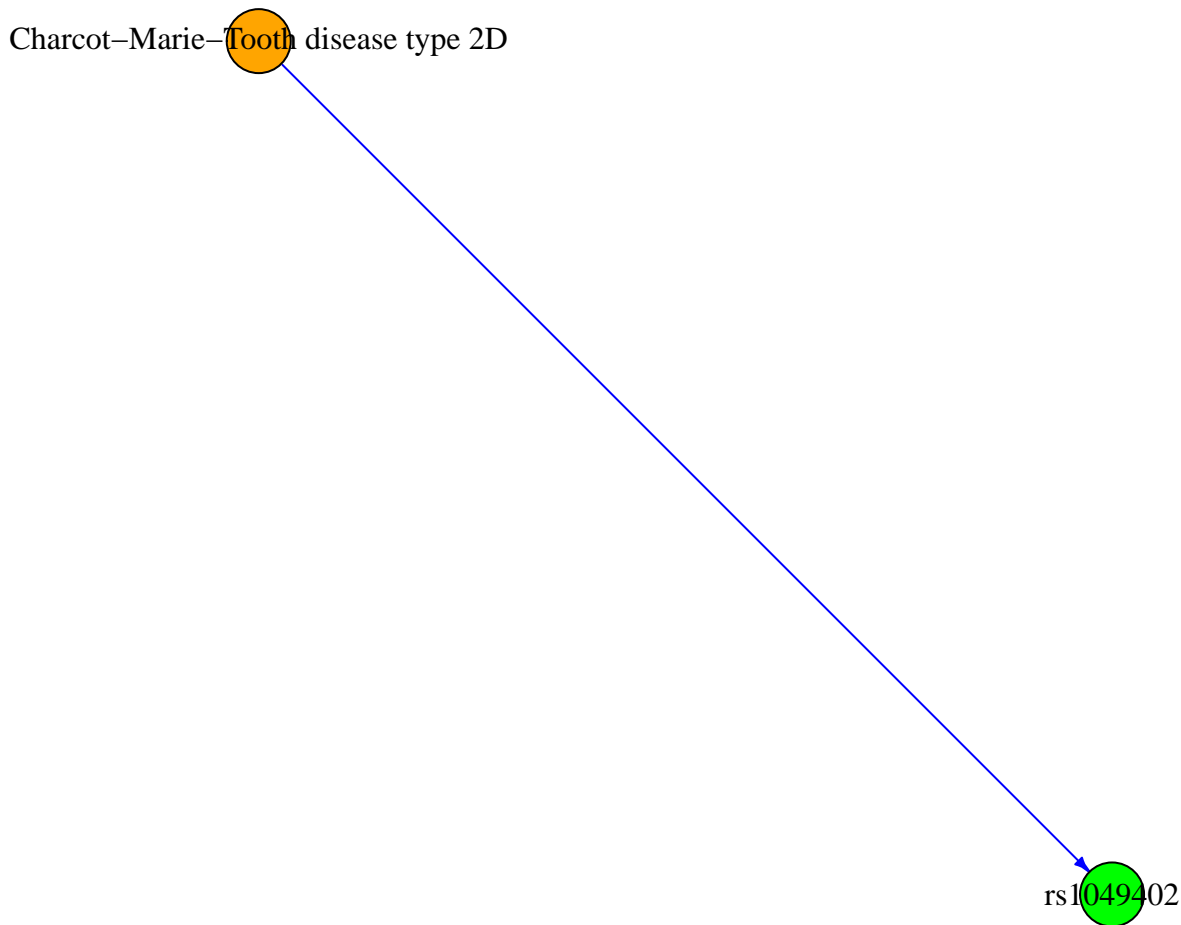

# Variant–Disease Network (Charcot–Marie–Tooth disease type 4)

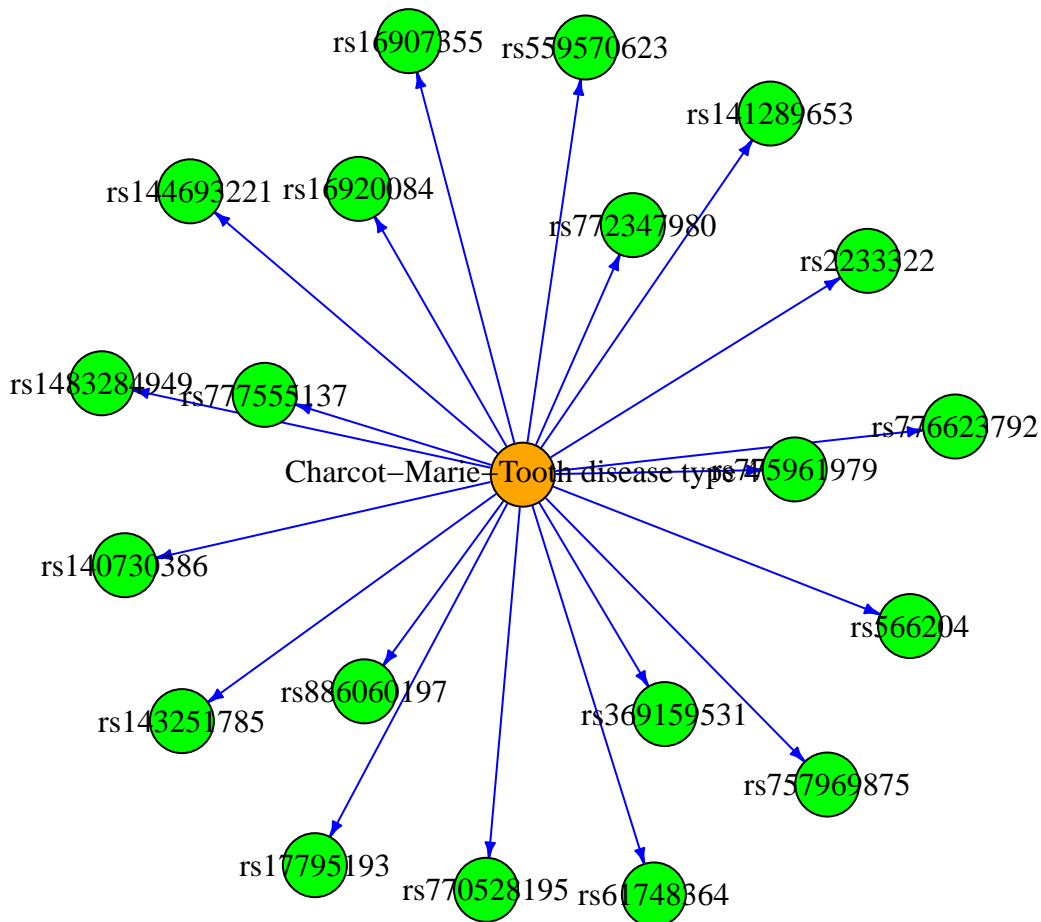



# Disease Network (Charcot–Marie–Tooth disease type 4B2 with early-onset

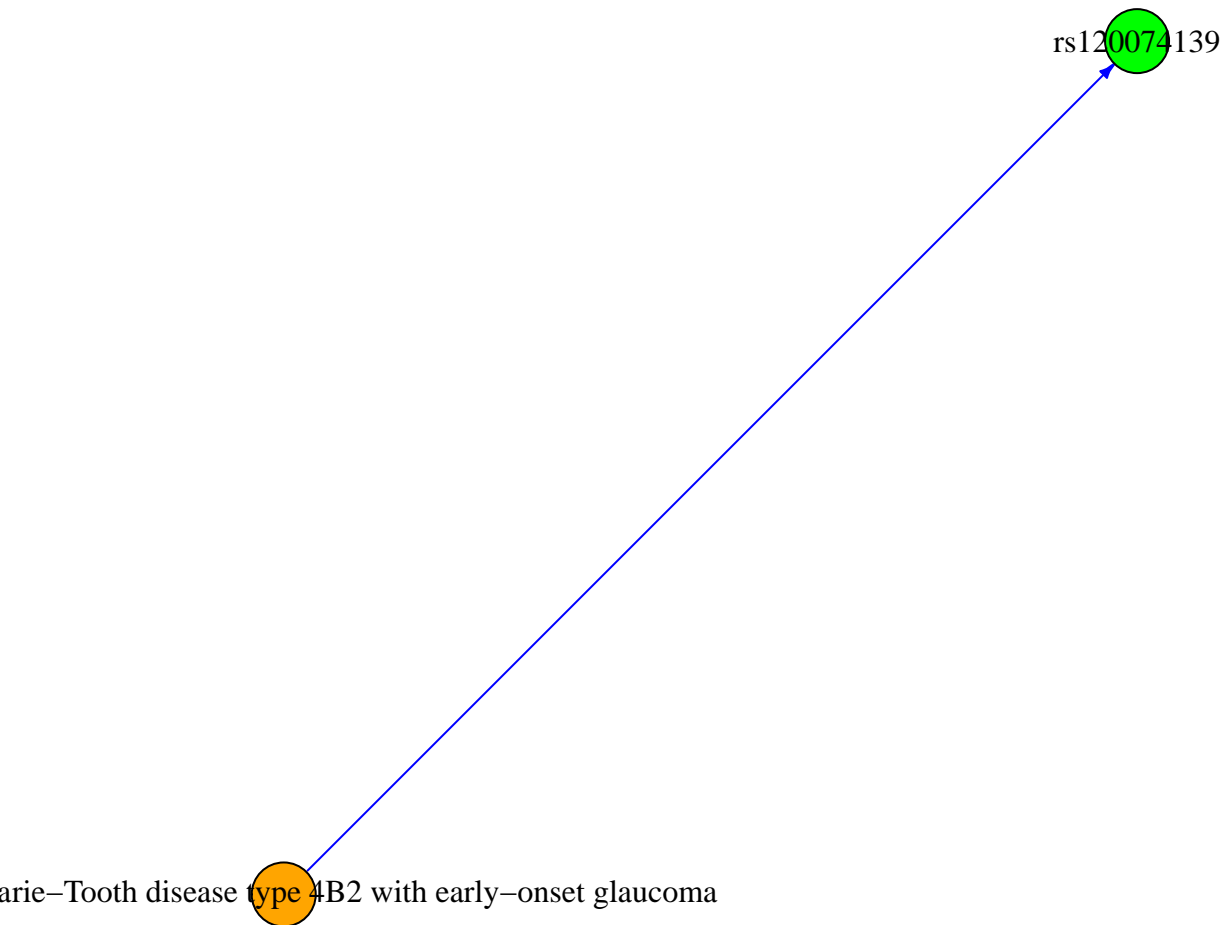

Variant–Disease Network (Charcot–Marie–Tooth Neuropathy X)

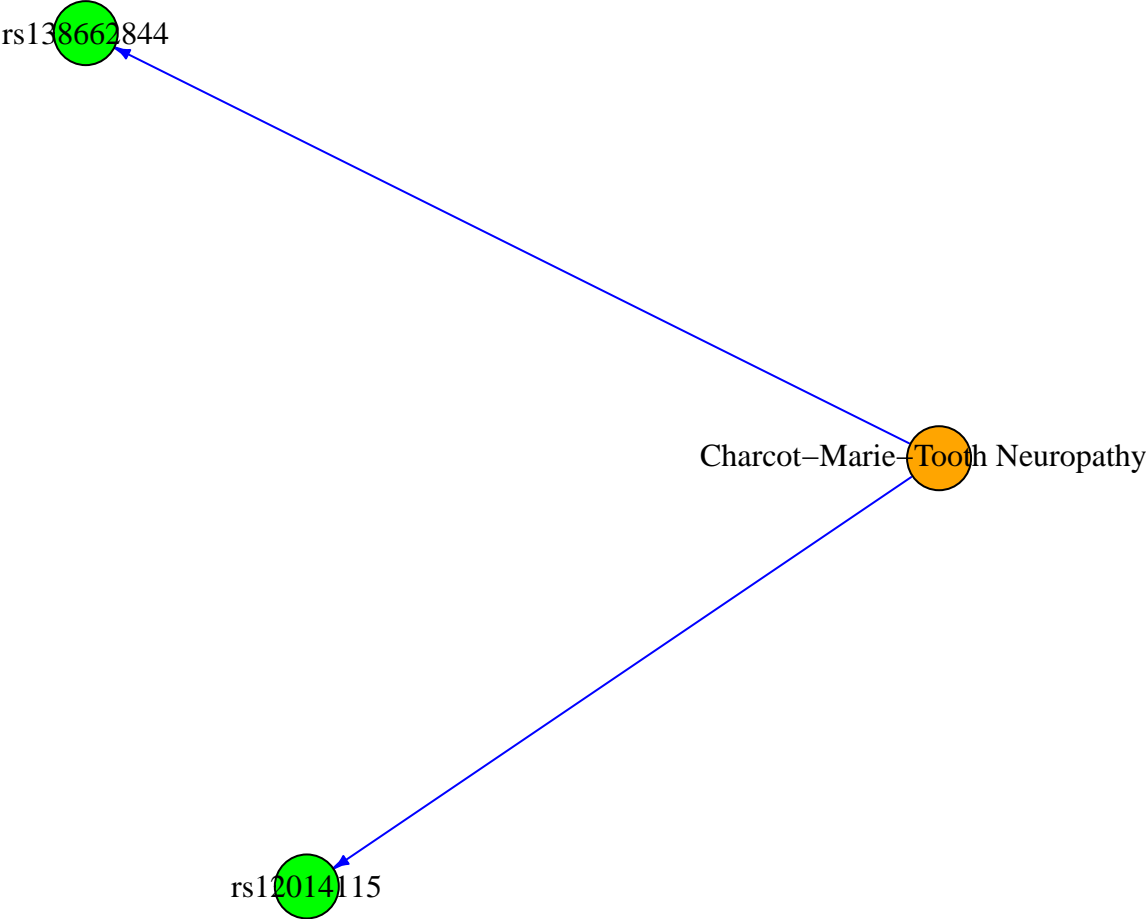

## Variant–Disease Network (CHARGE association)

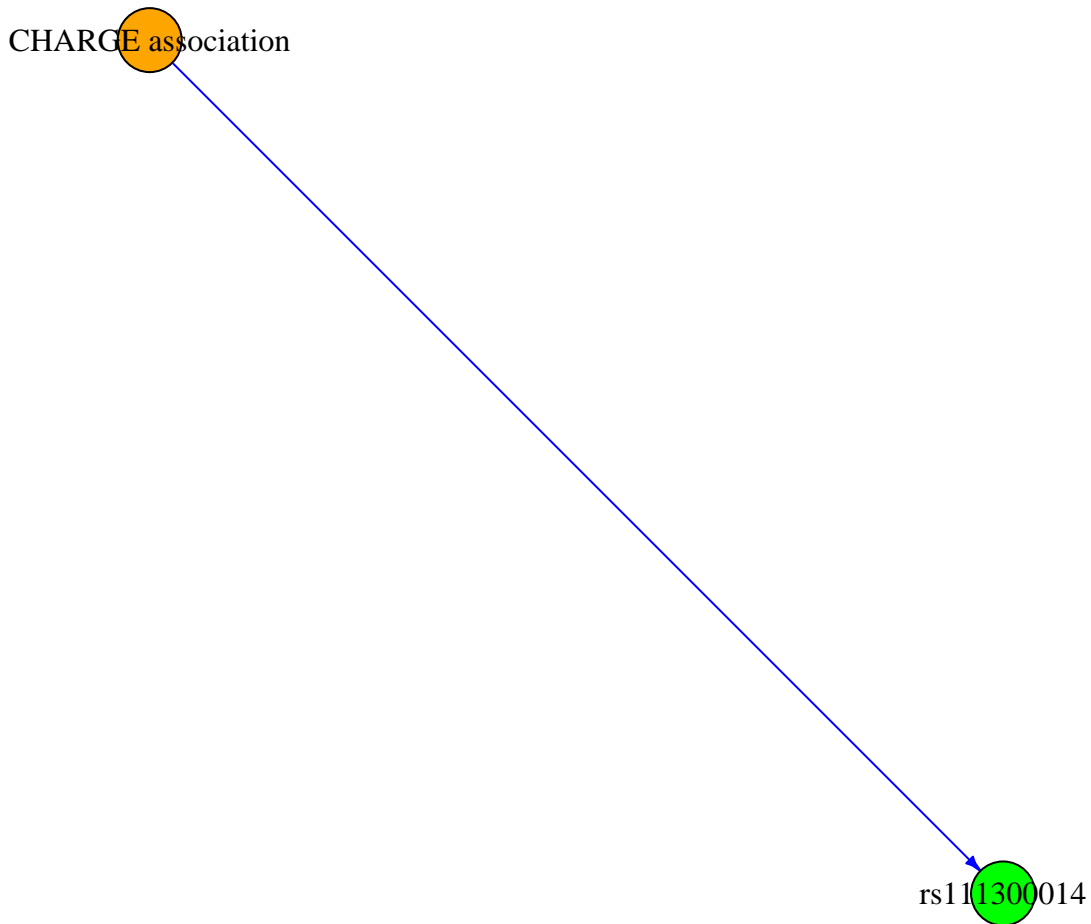

## Variant–Disease Network (Child syndrome)

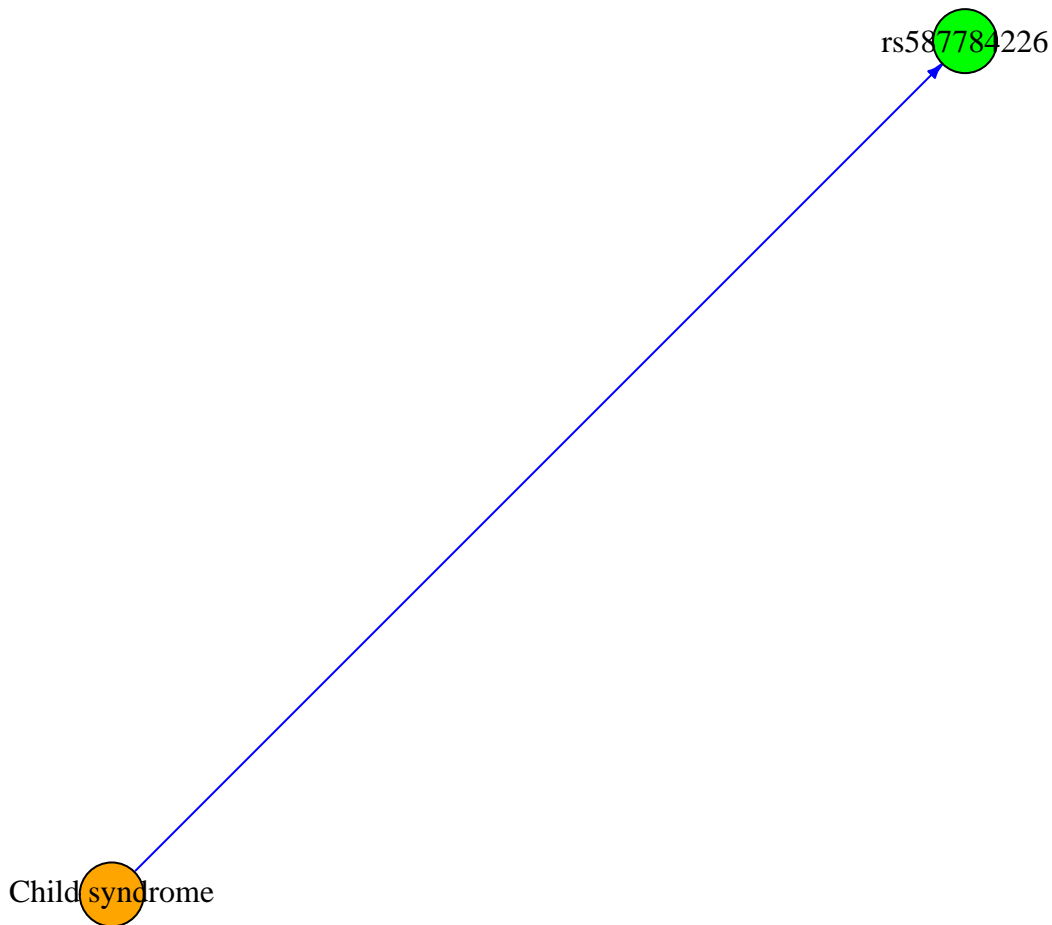

Variant–Disease Network (Childhood–Onset Schizophrenia)

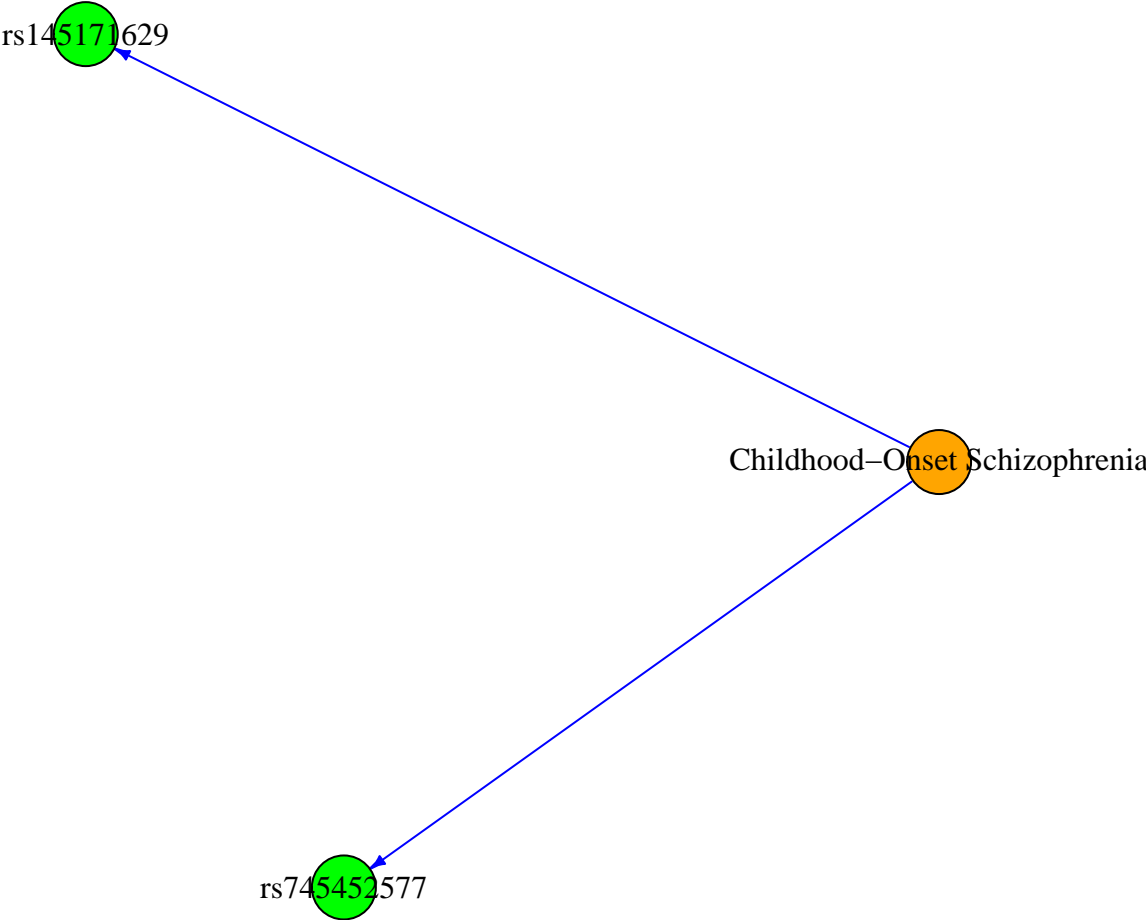

## Variant–Disease Network (Chitotriosidase deficiency)

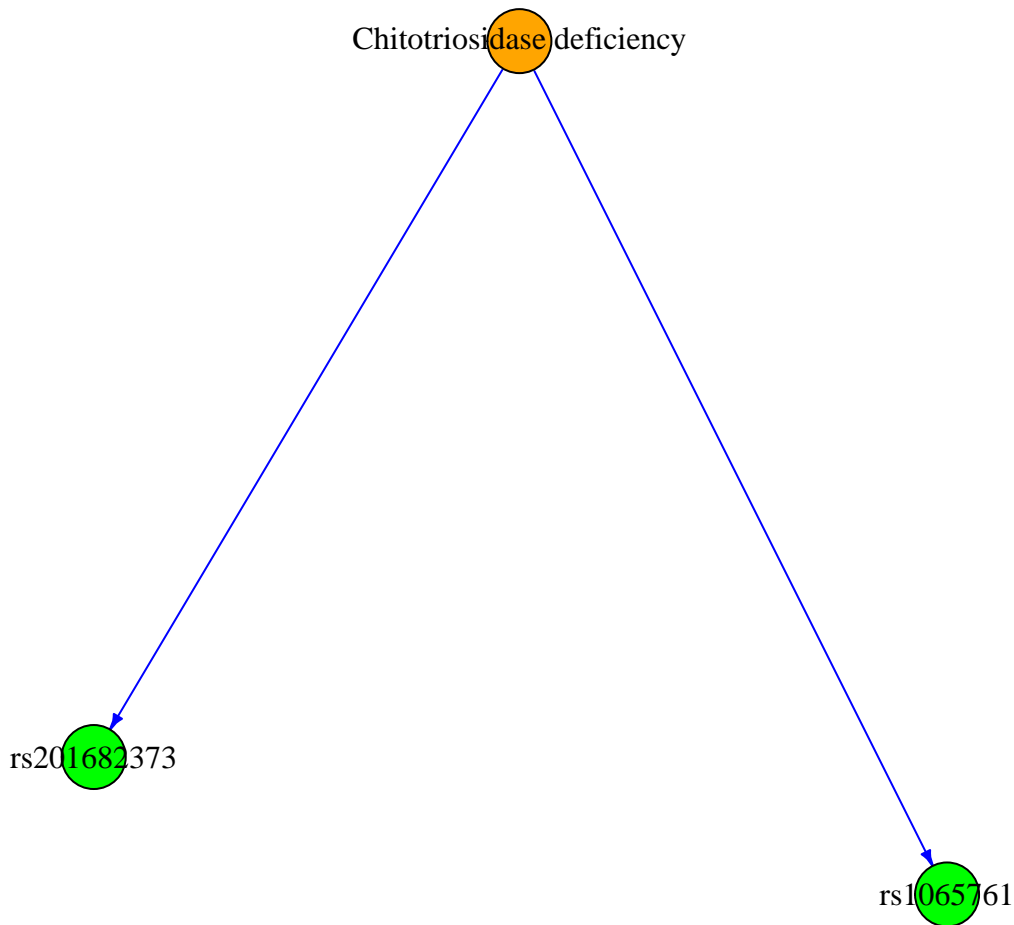

## Variant–Disease Network (Cholestanol storage disease)

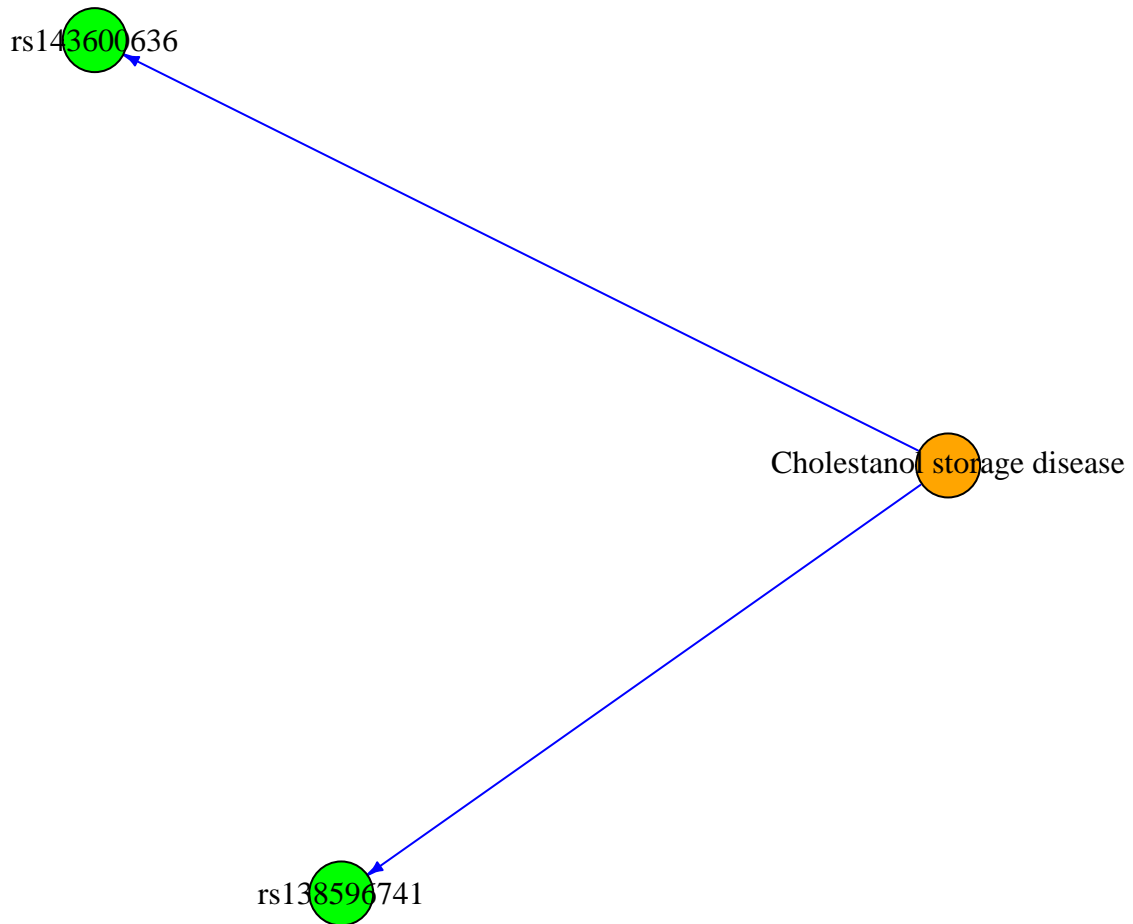

## Variant-Disease Network (Cholestasis)

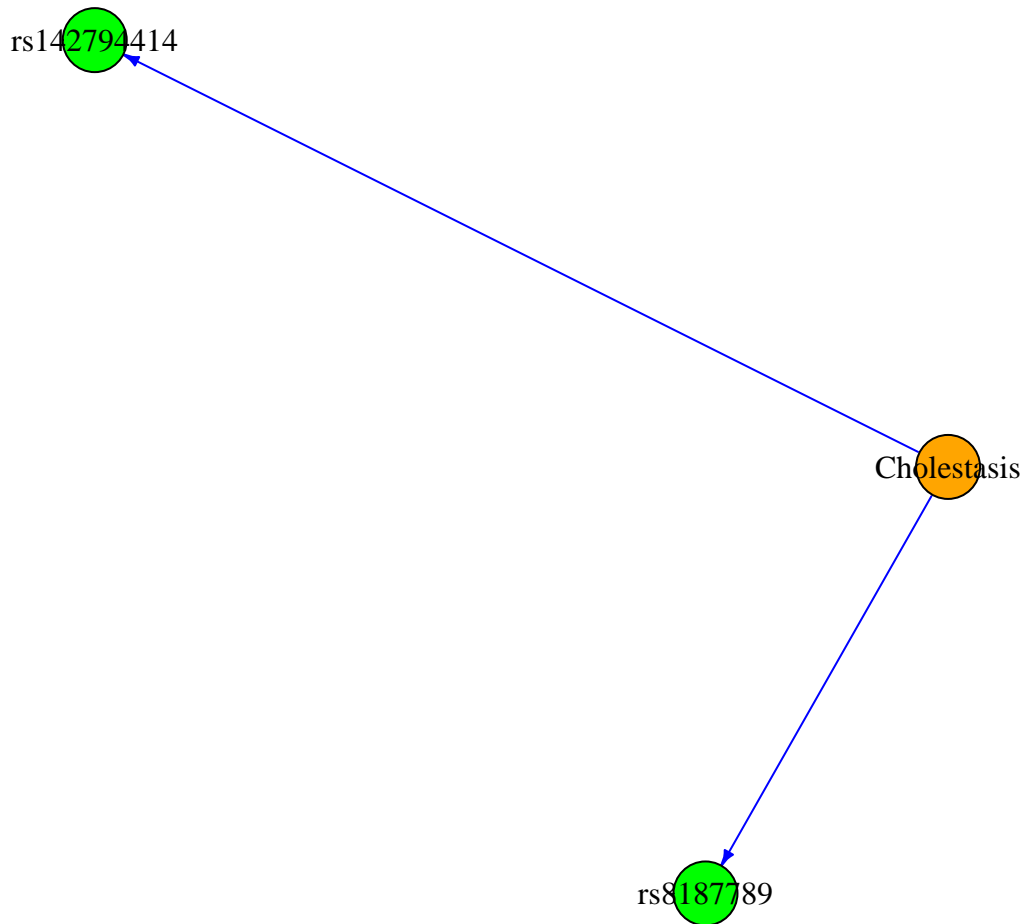



## Variant–Disease Network (Chondrocalcinosis)

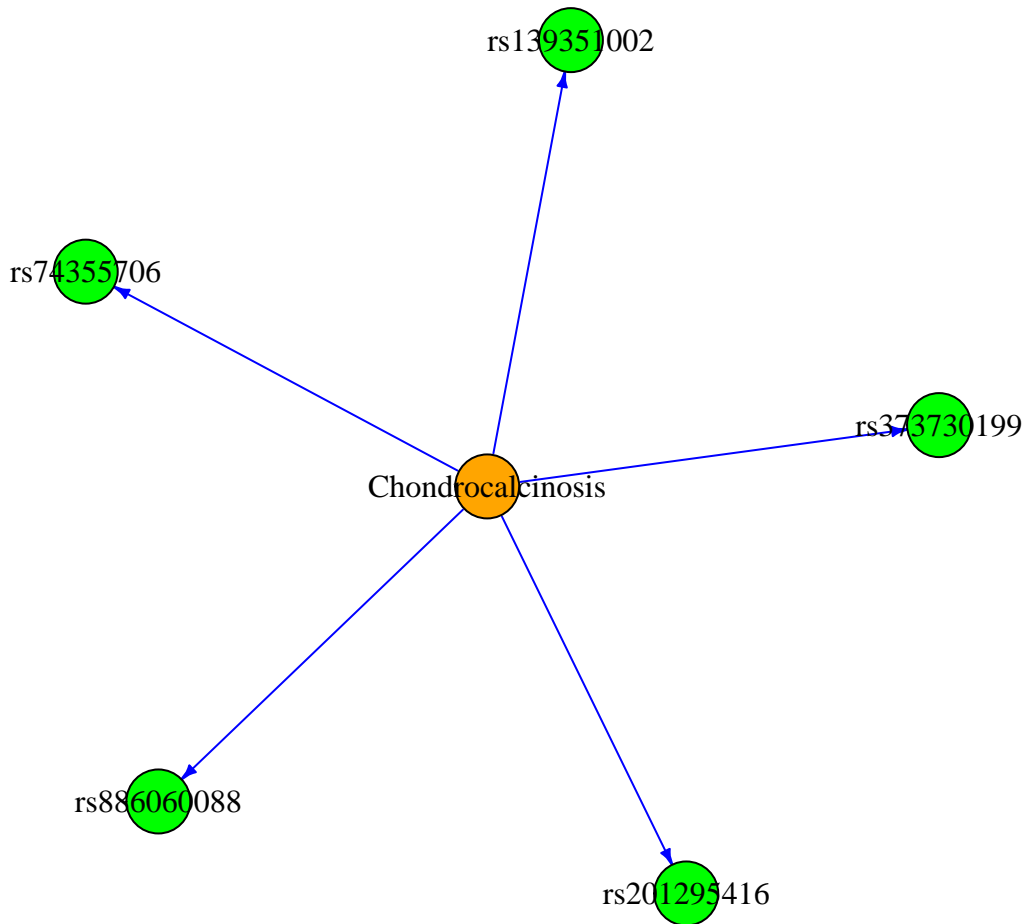

## Variant–Disease Network (Chondrodysplasia)

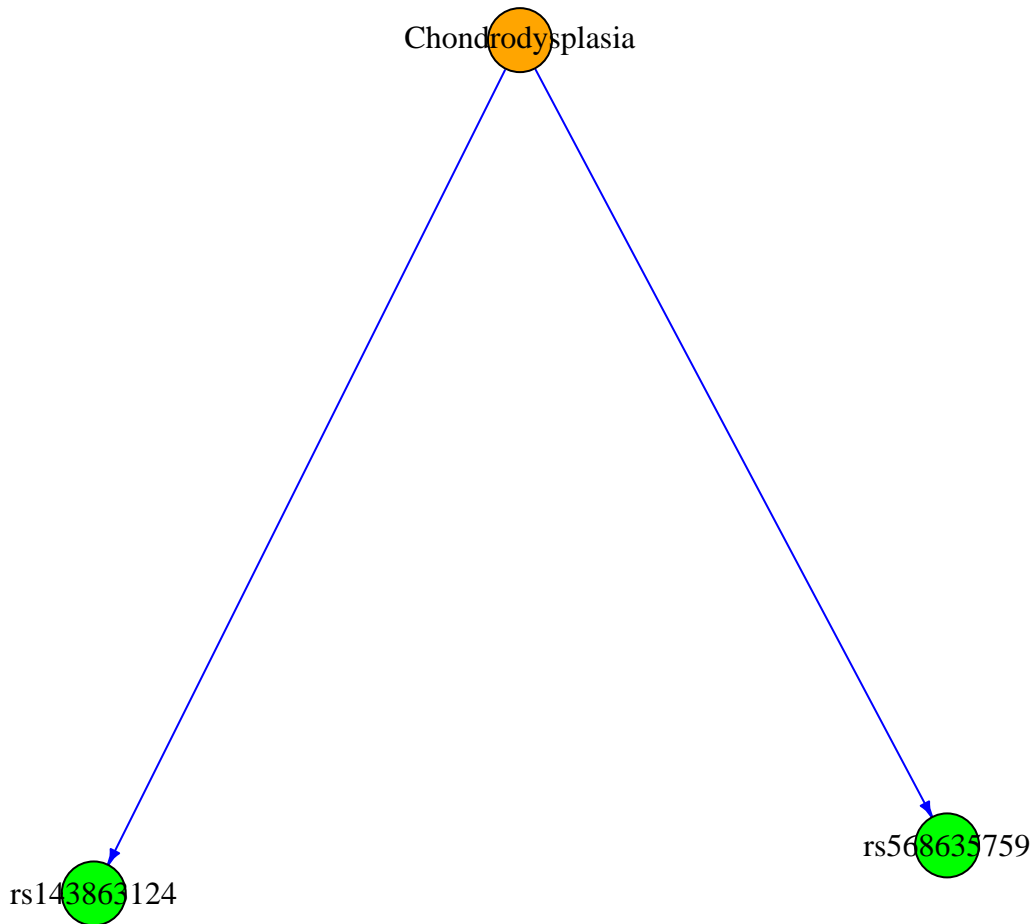

## Variant-Disease Network (Choreoacanthocytosis)

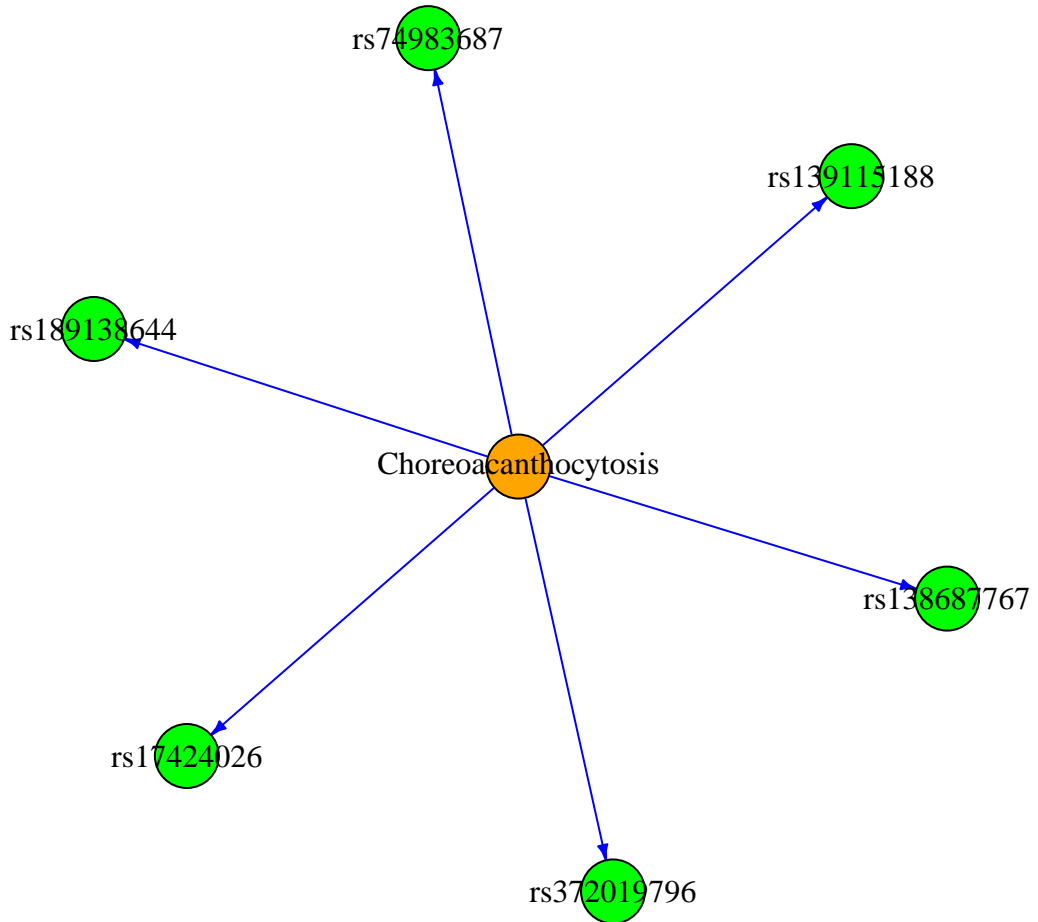

**Variant–Disease Network (Christianson syndrome)**

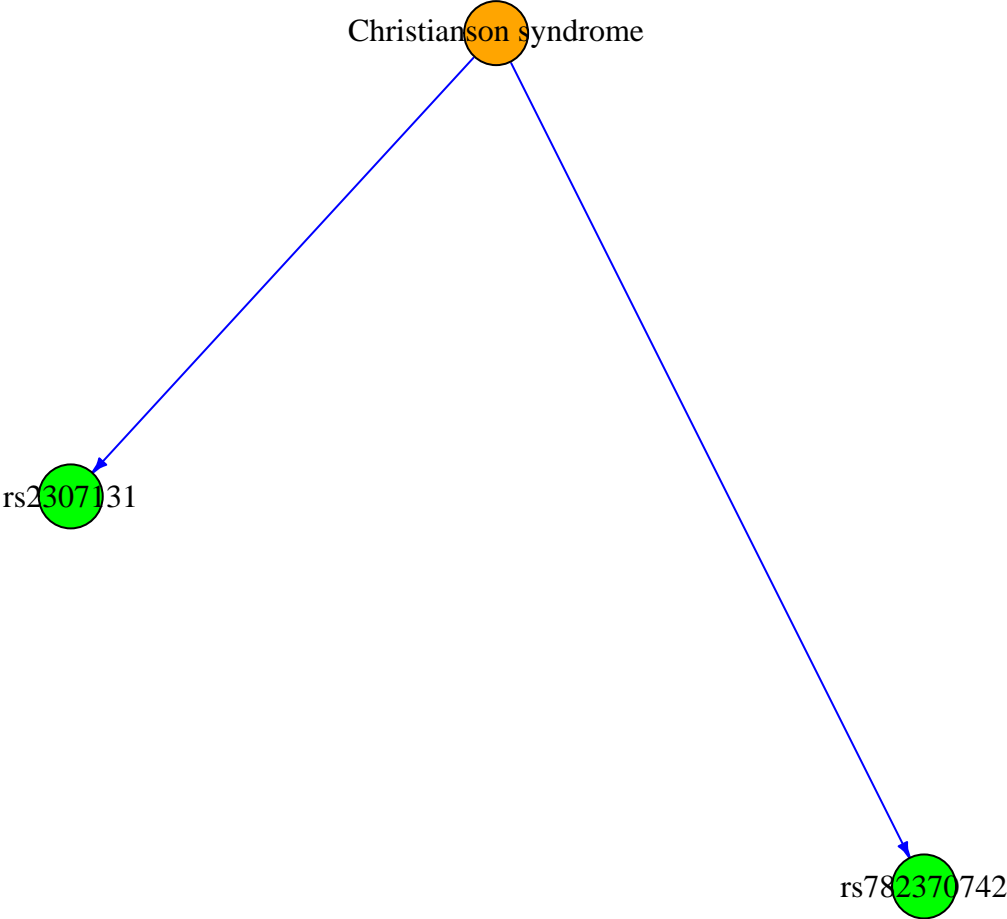

**Variant–Disease Network (Chromosome 2q32–q33 deletion syndrome)**

Chromosome 2q32–q33 deletion syndrome

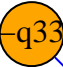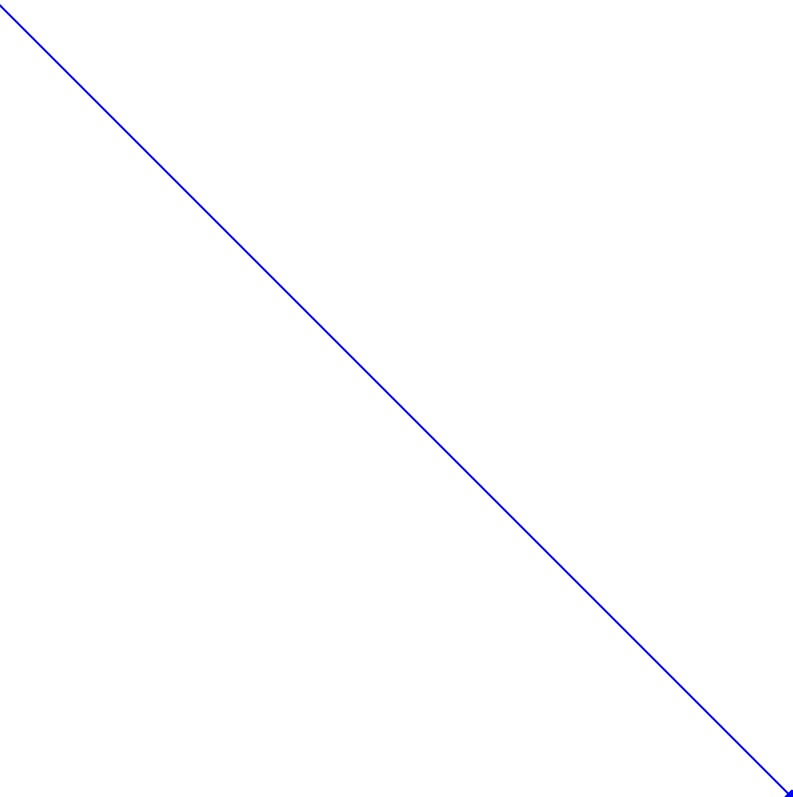

rs746473092

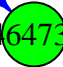

## Variant–Disease Network (Chronic granulomatous disease)

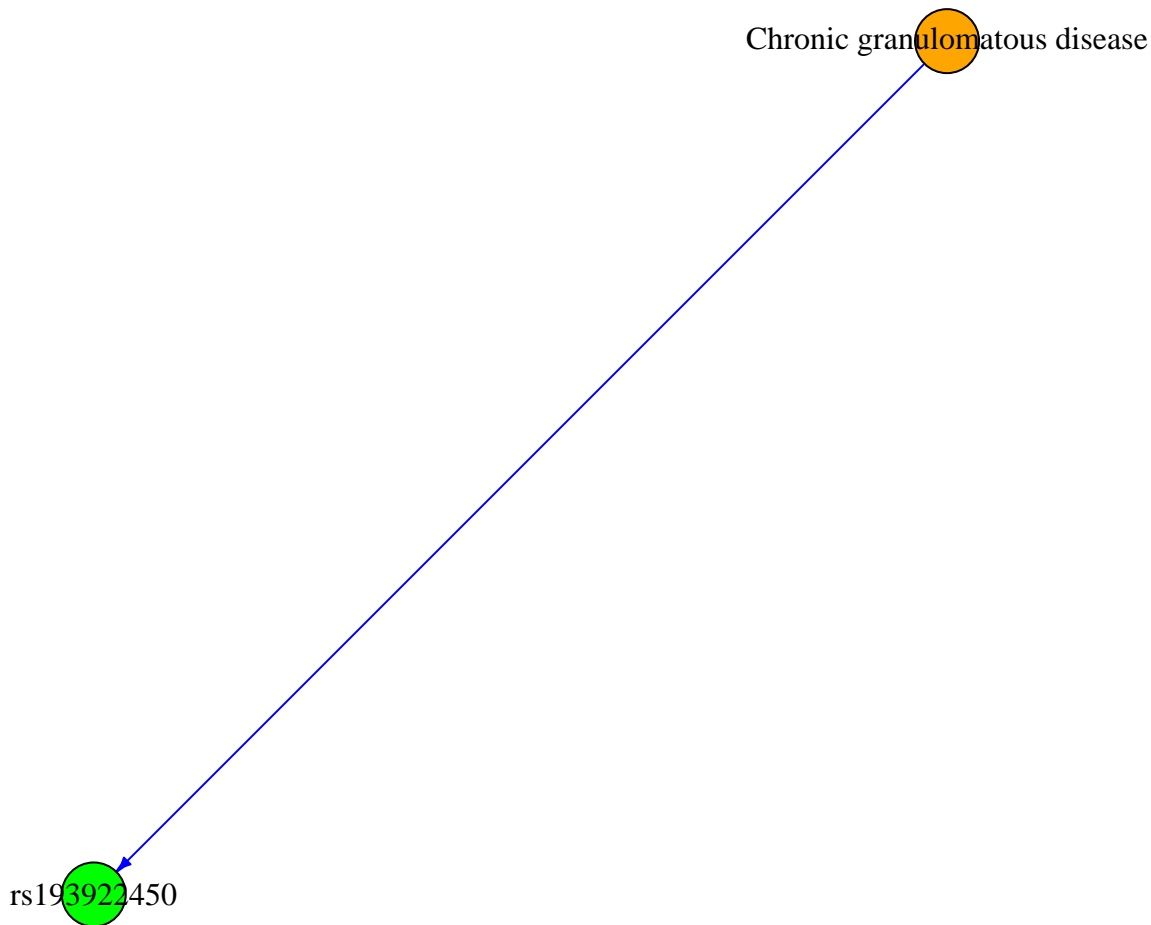

**Variant–Disease Network (Chronic infantile neurological)**

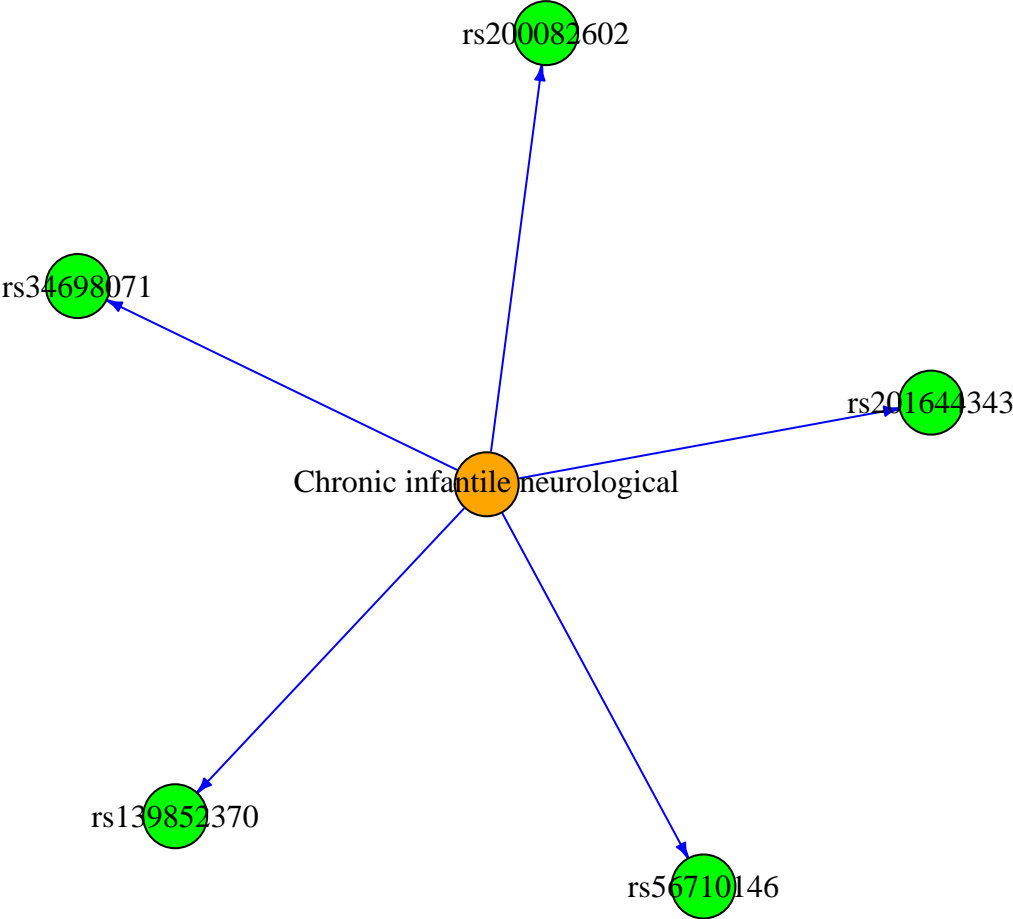

# Variant–Disease Network (Chronic obstructive pulmonary disease)

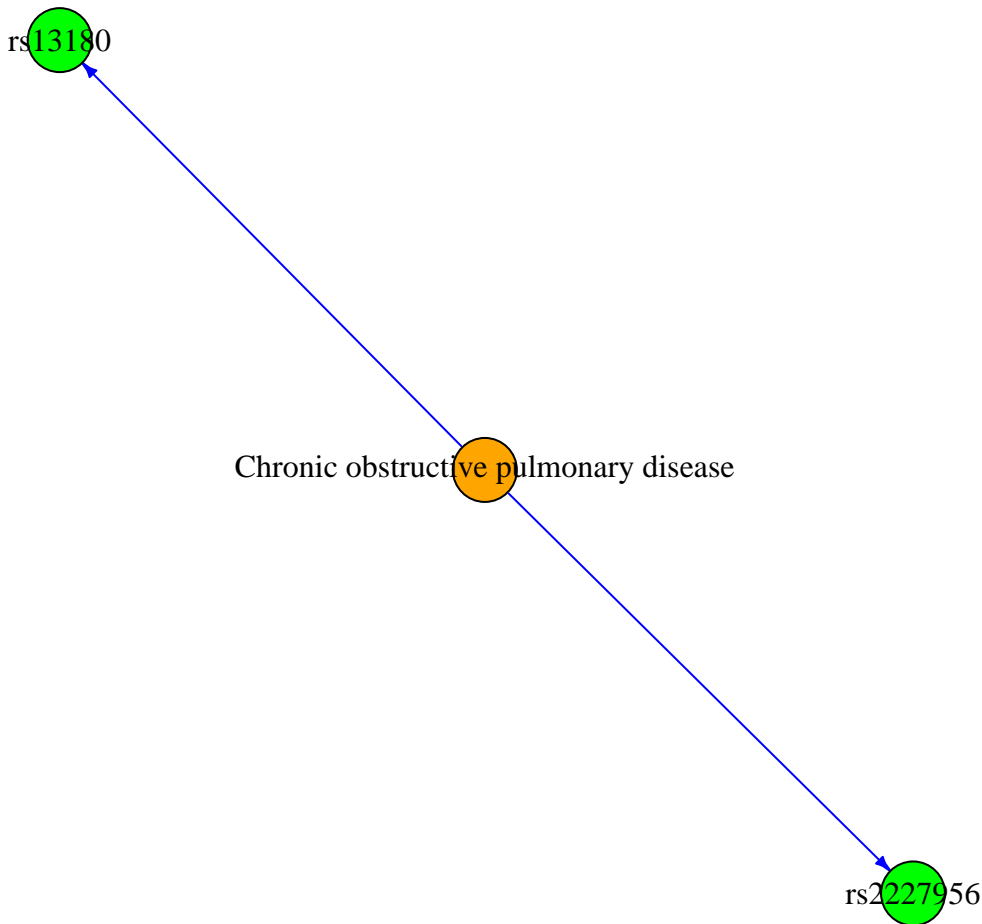



## Variant-Disease Network (Chronic sinusitis)

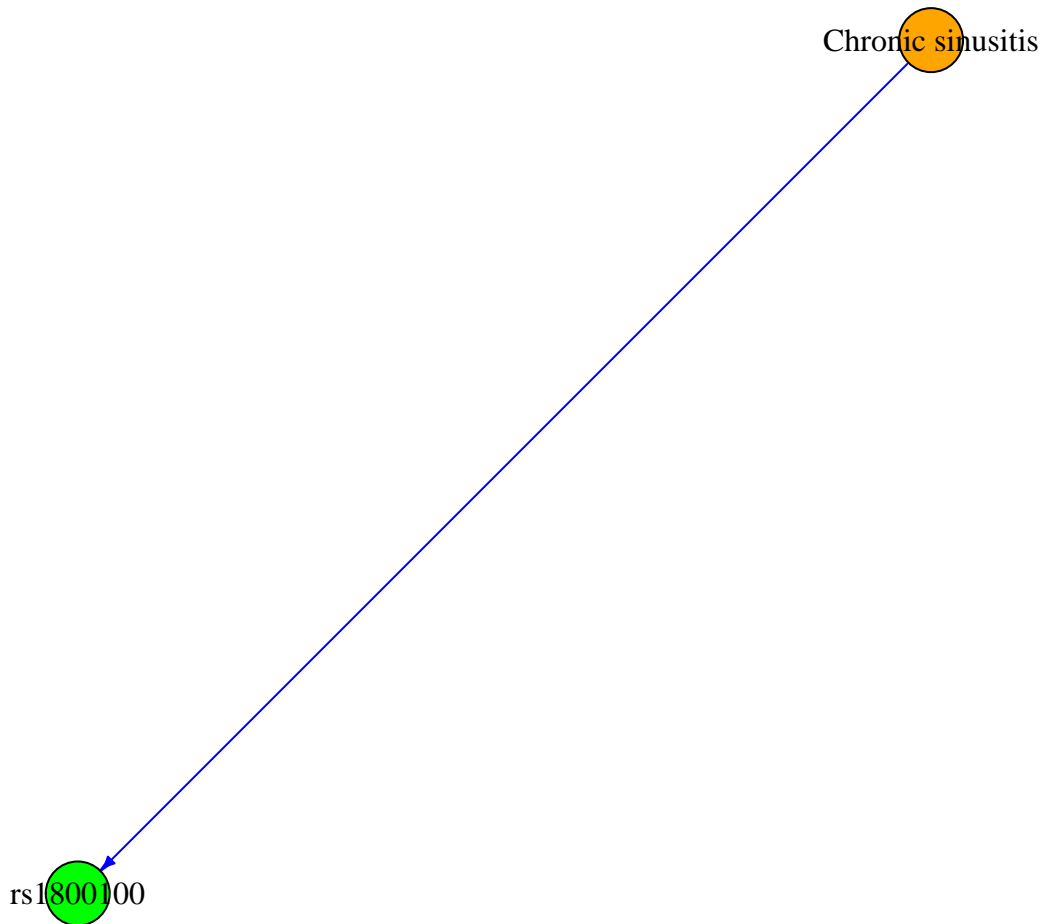

## Variant–Disease Network (Ciliary dyskinesia)

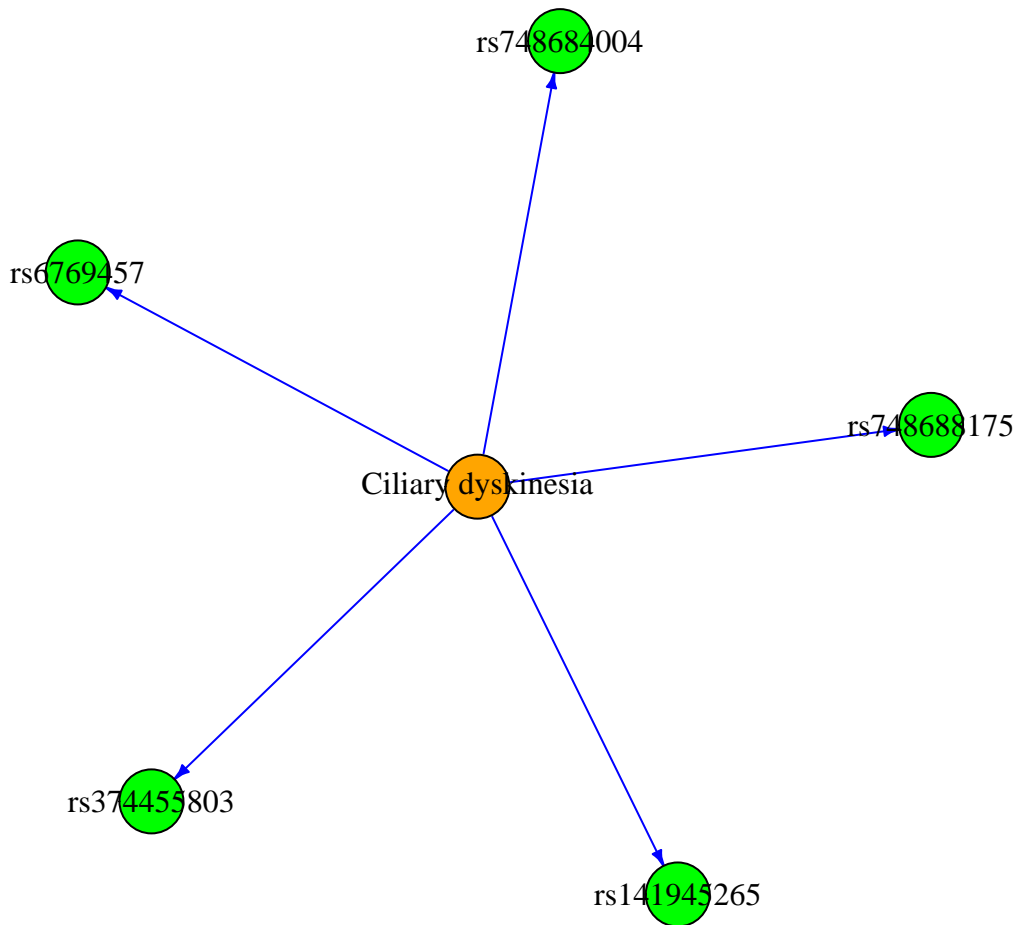

**Variant–Disease Network (cisplatin response – Toxicity/ADR)**

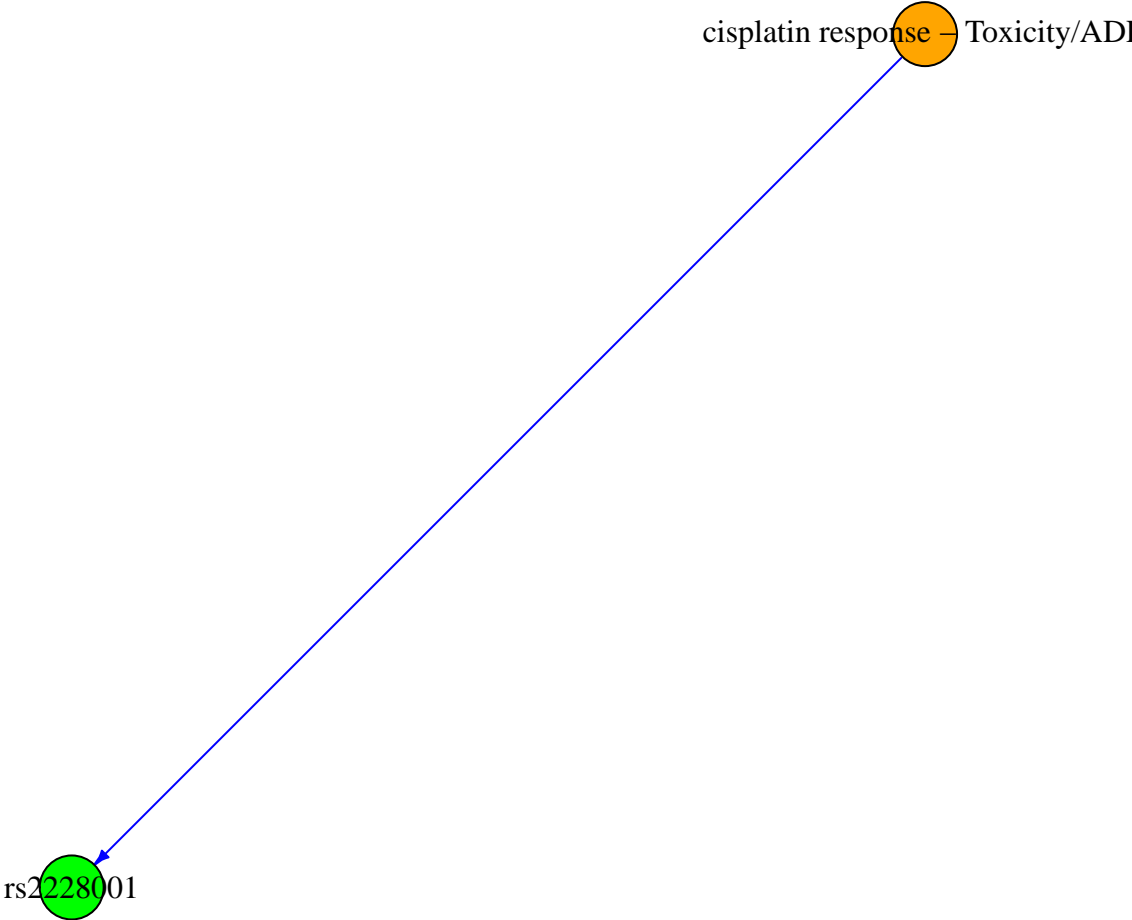

## Variant–Disease Network (Citrullinemia type I)

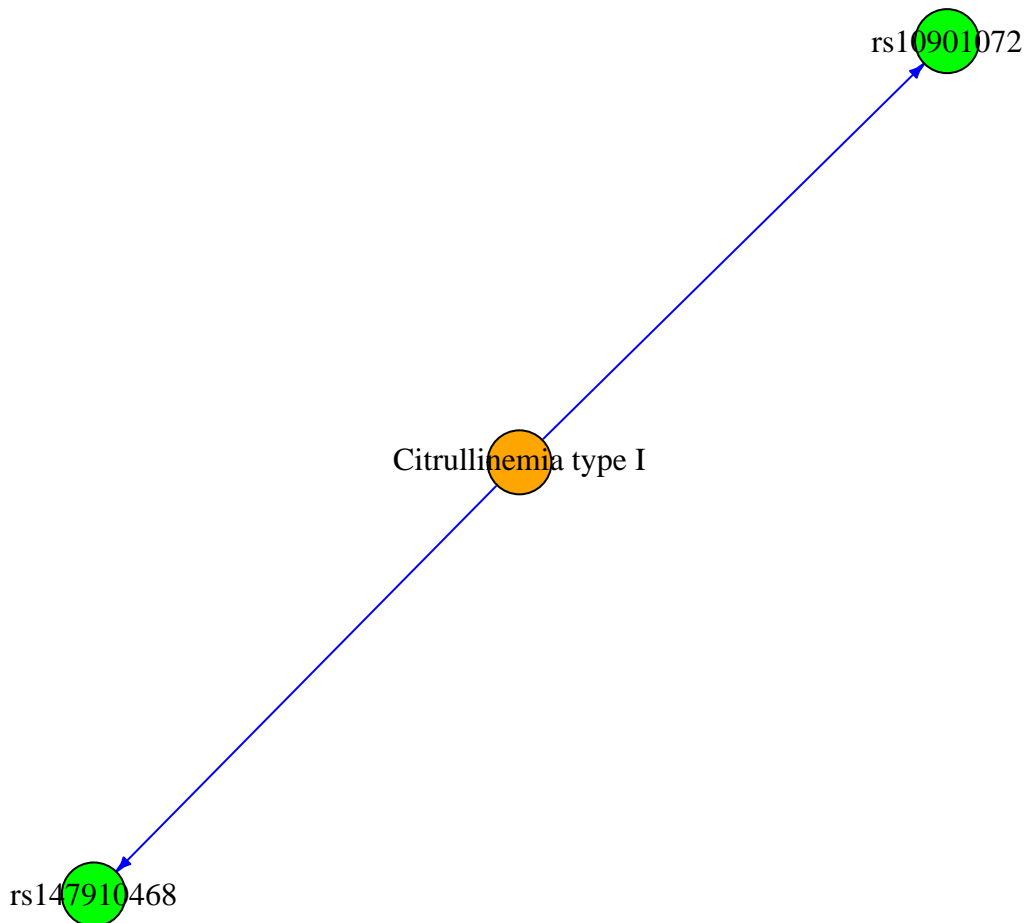

## Variant–Disease Network (Cleft Lip +/- Cleft Palate)

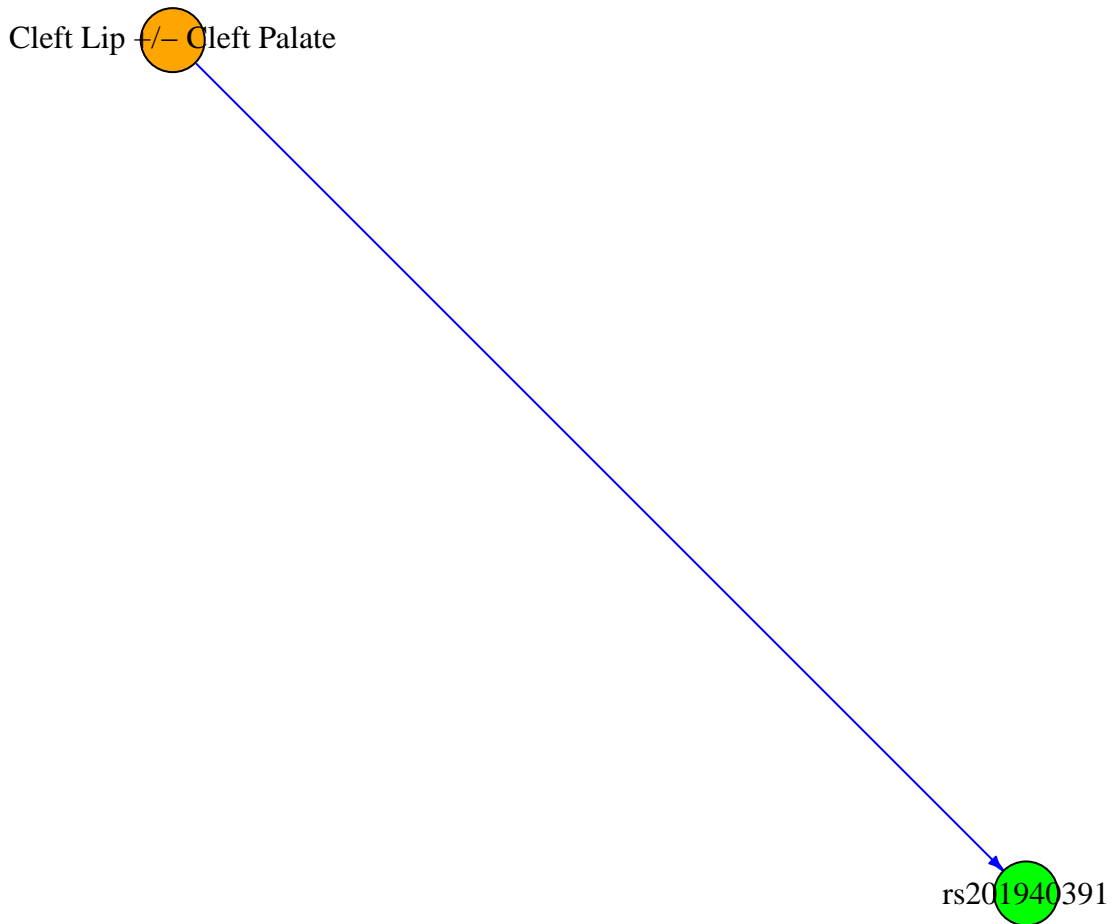

**Variant–Disease Network (Cleft palate)**

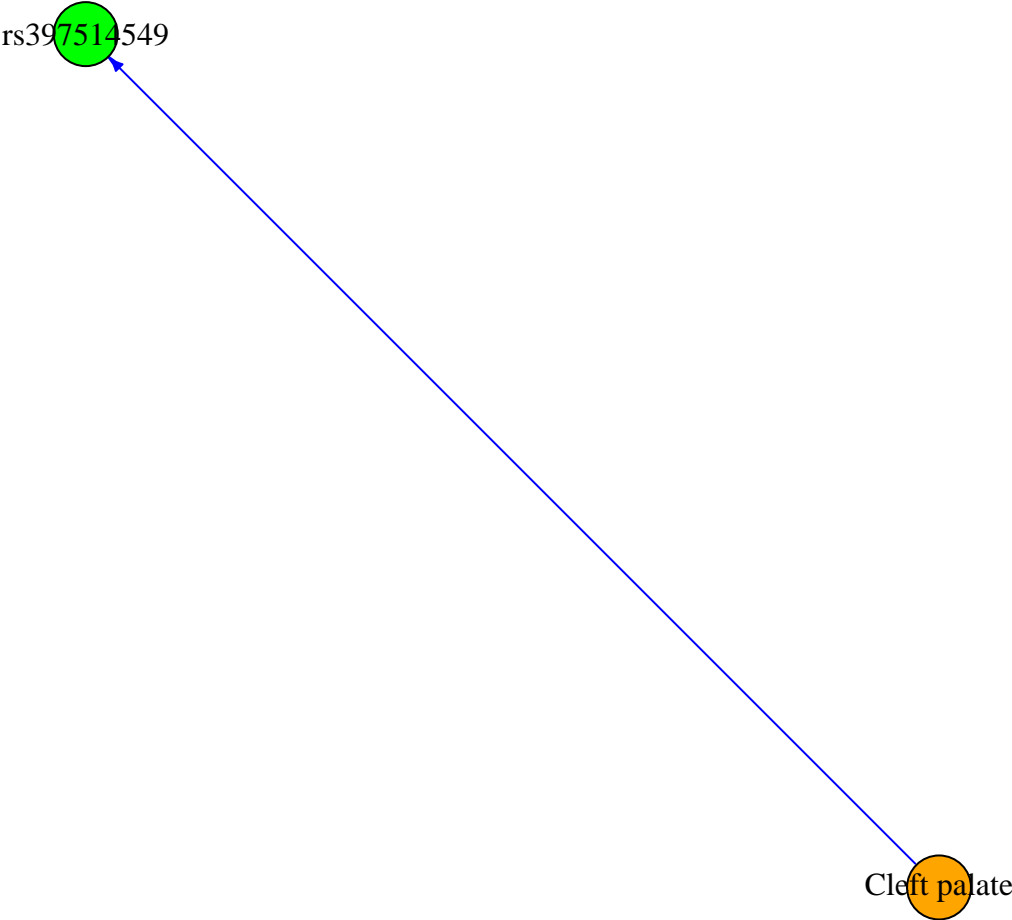

**Variant–Disease Network (Cleft palate X-linked)**

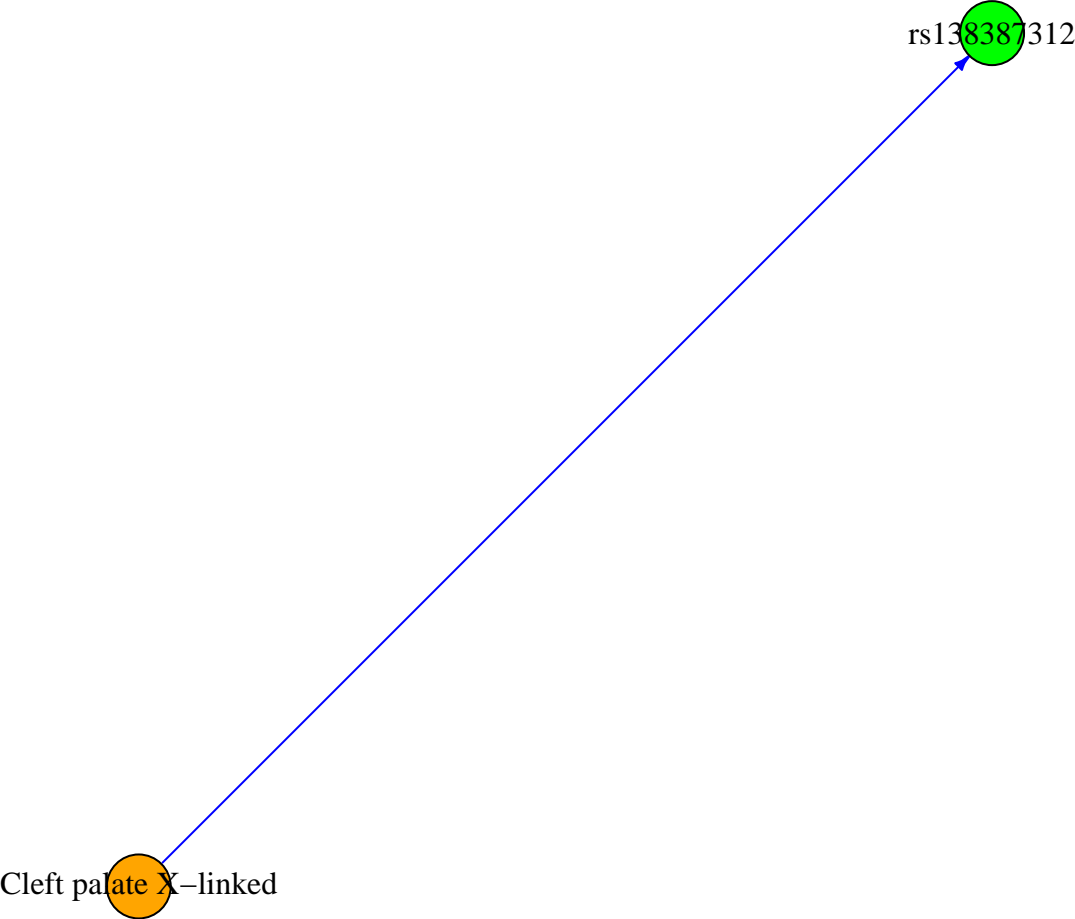

## Variant–Disease Network (C-like syndrome)

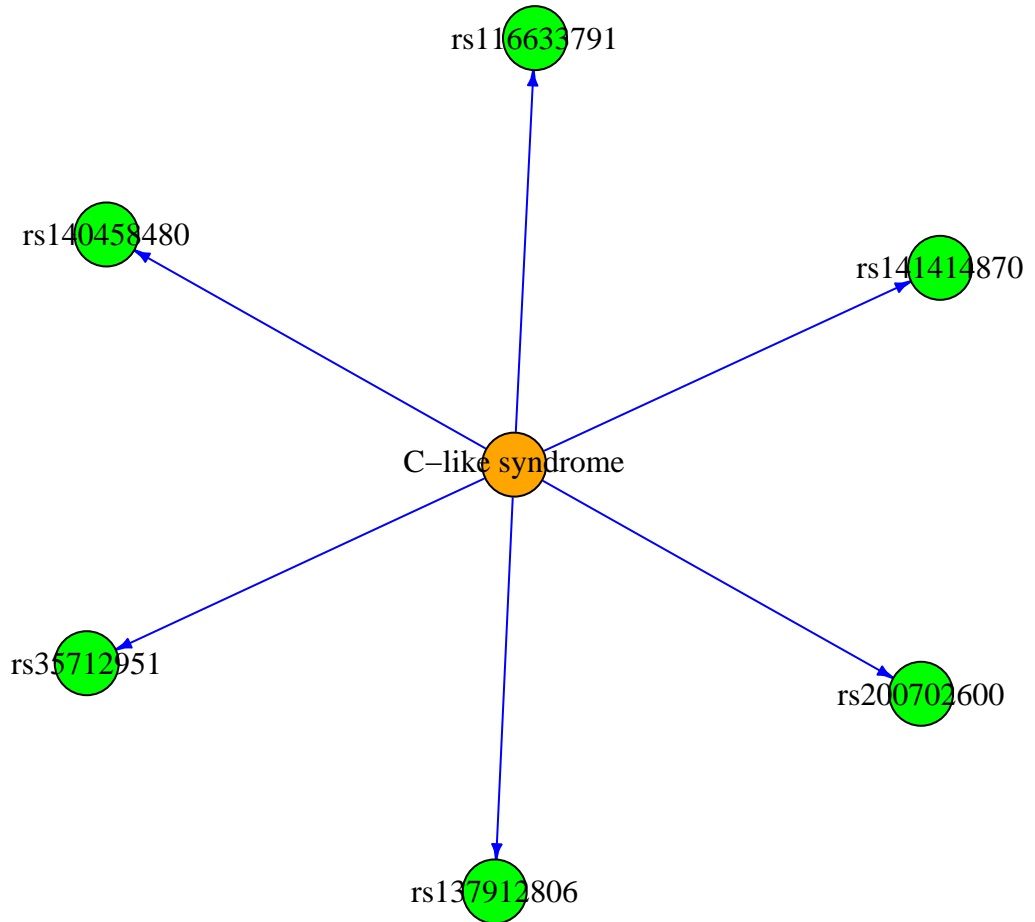



**Variant–Disease Network (Cockayne syndrome)**

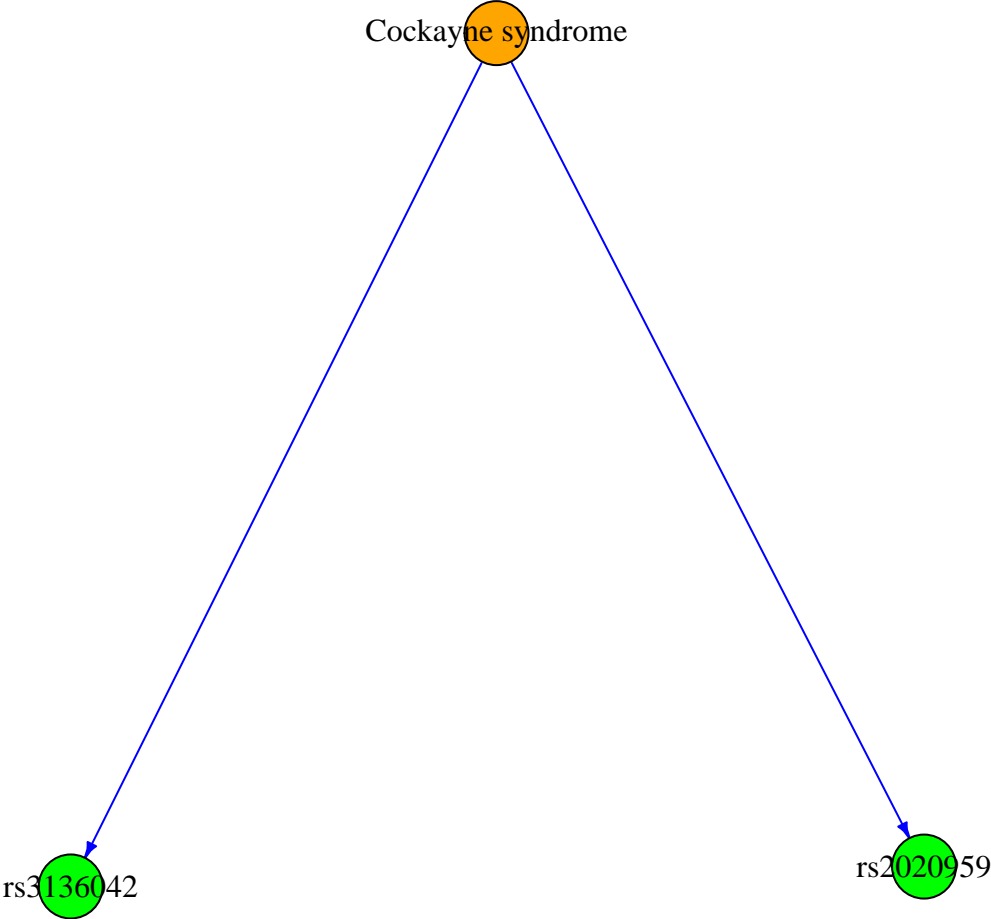

## Variant–Disease Network (Coenzyme Q10 deficiency)

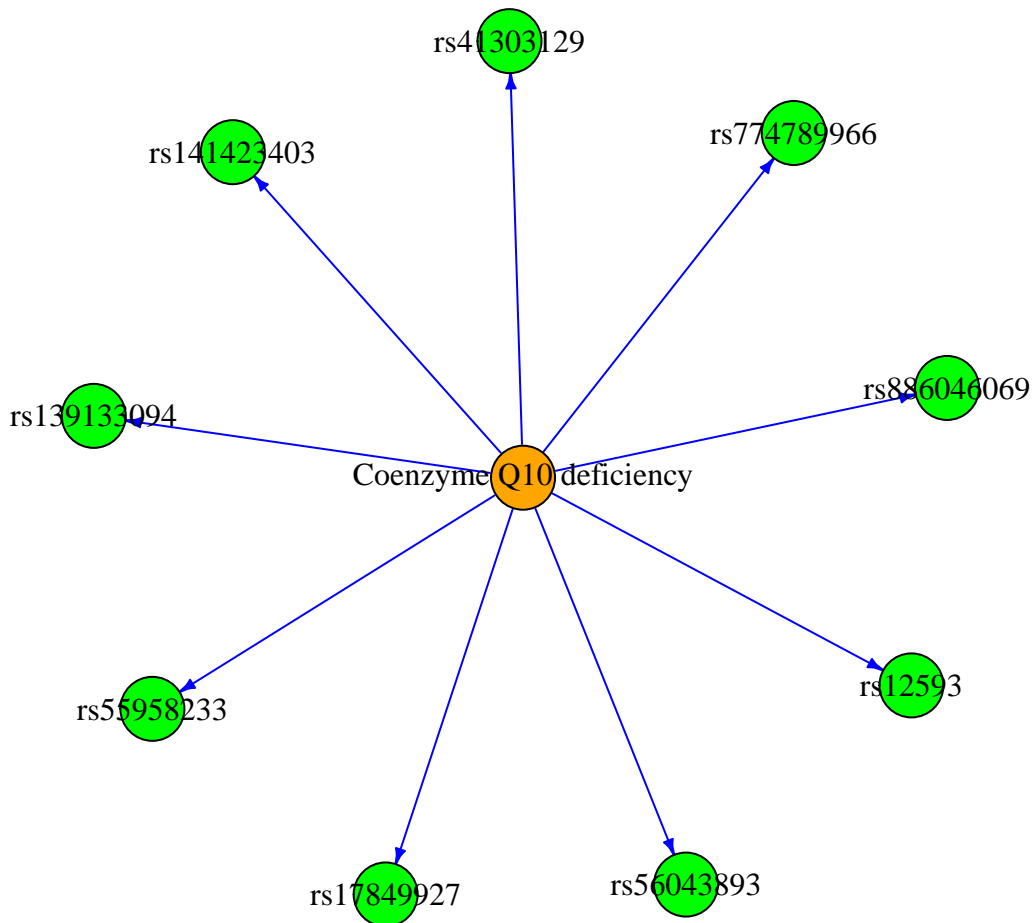

## Variant–Disease Network (Coffin–Siris syndrome)

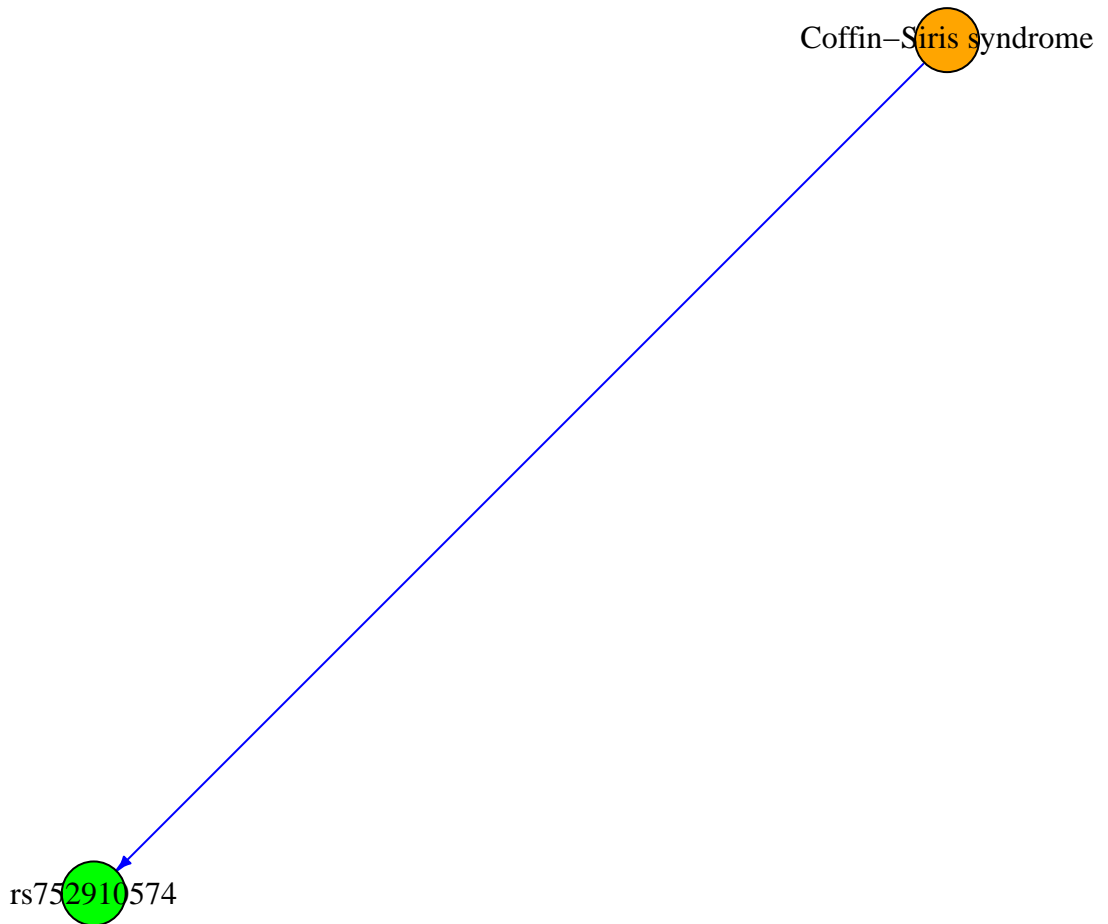

Variant–Disease Network (Collagen VI–related myopathy)

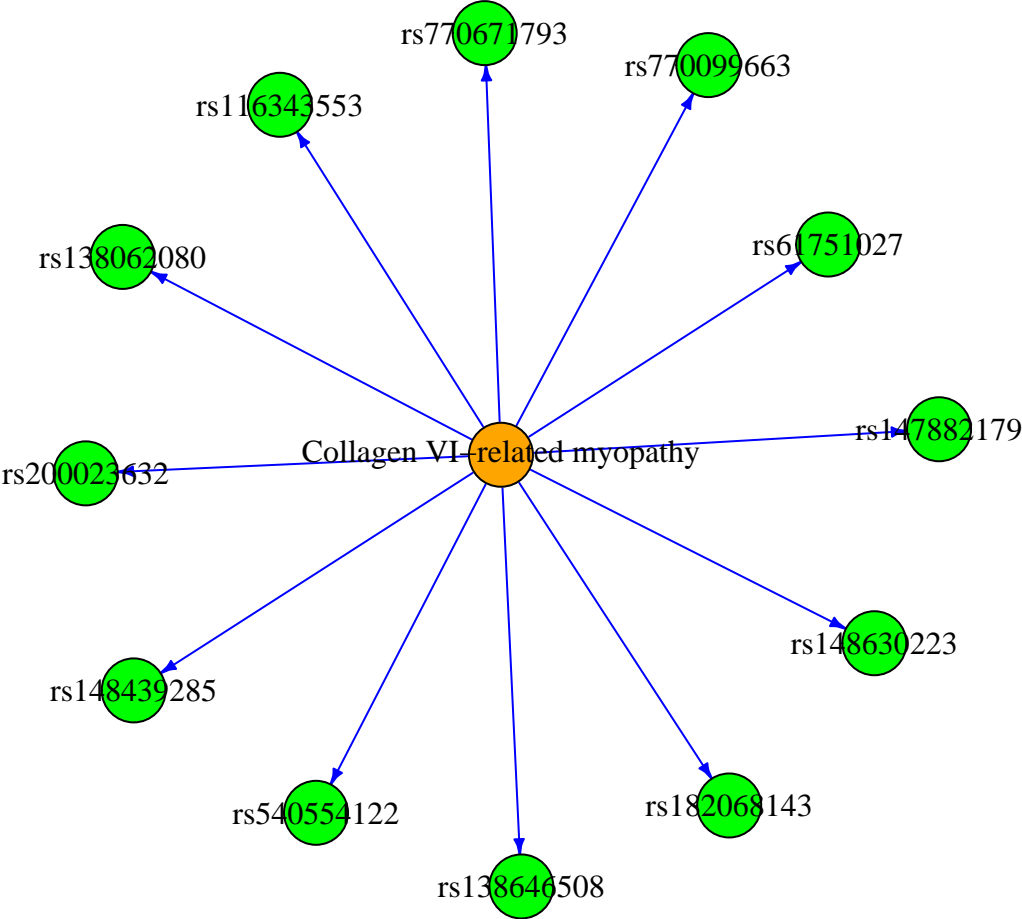

## Variant-Disease Network (Colorectal cancer)

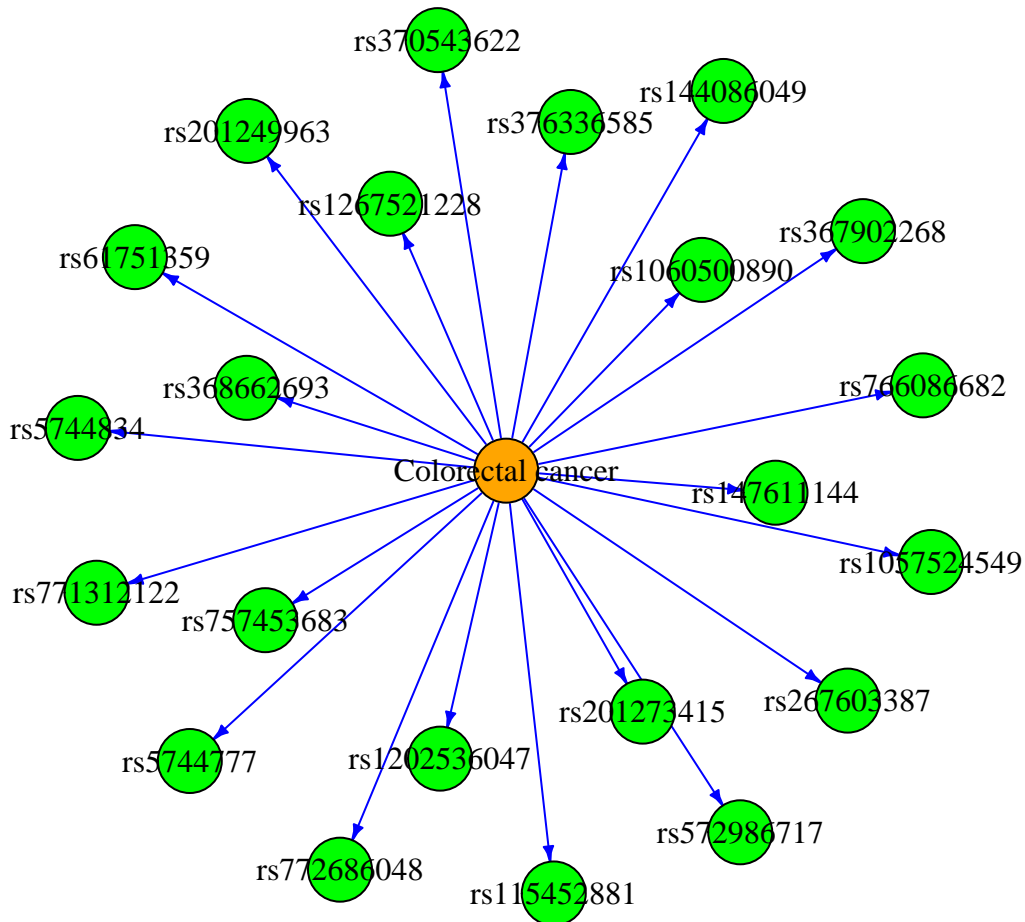

# Variant-Disease Network (Combined deficiency of sialidase AND beta galactosidase)

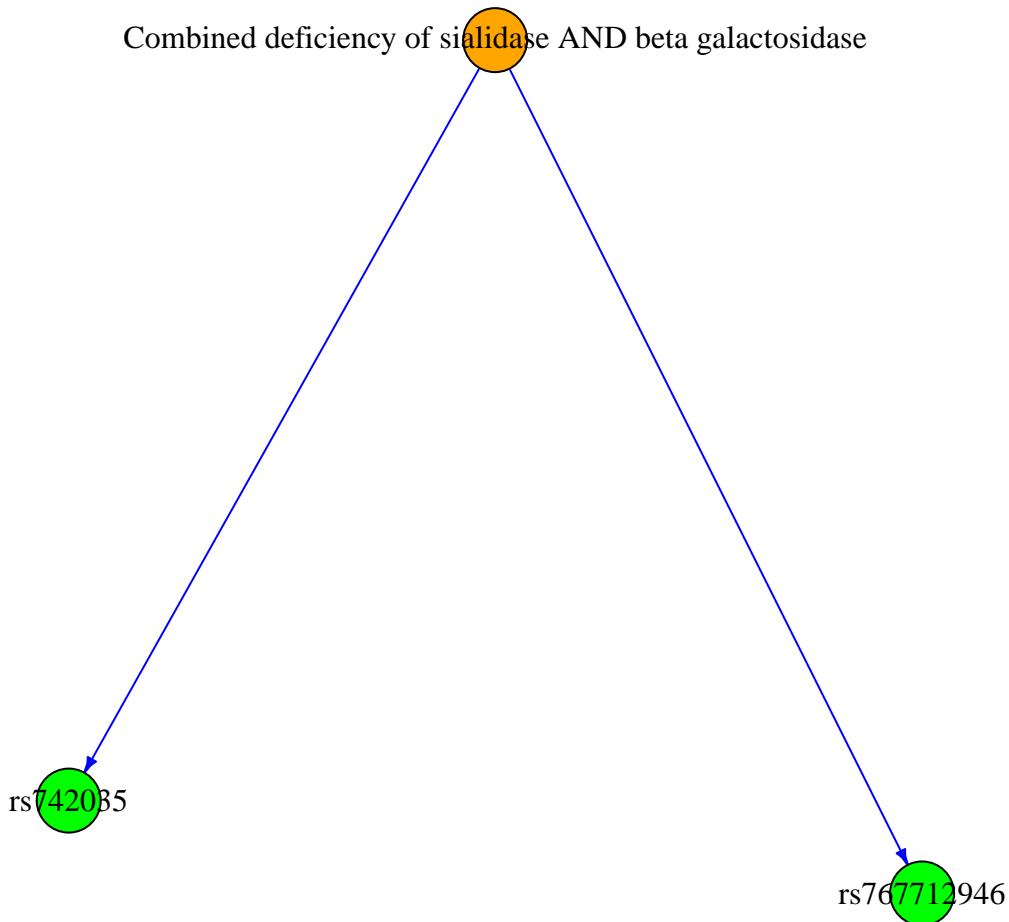

Variant–Disease Network (Combined oxidative phosphorylation deficiency)

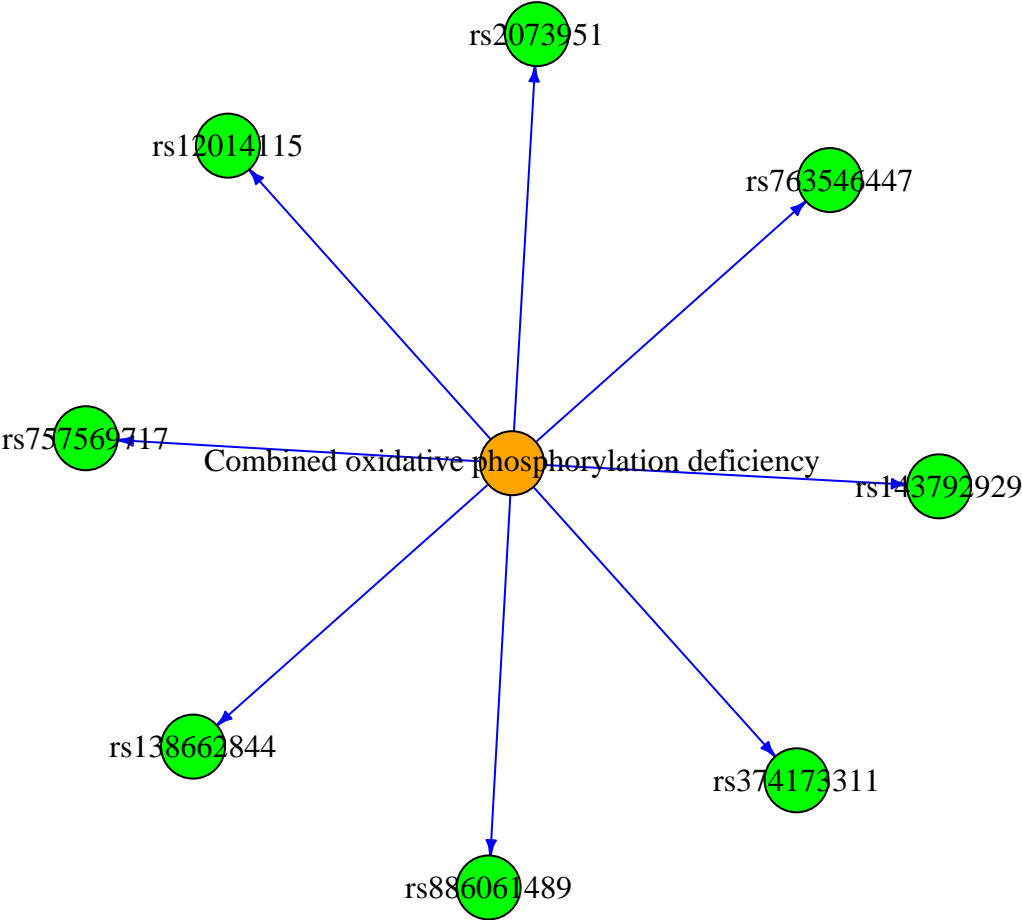

**Variant–Disease Network (Combined oxidative phosphorylation deficiency**

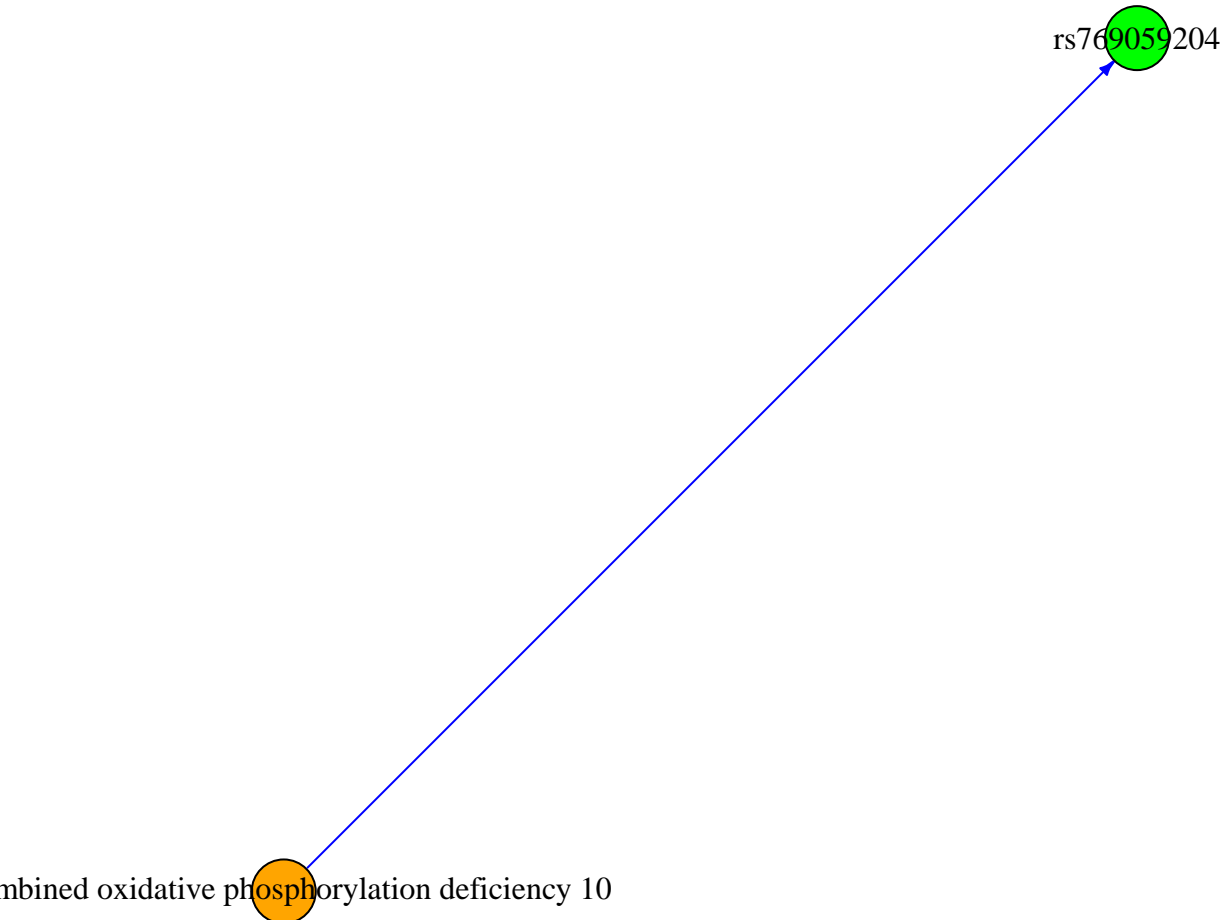



Variant–Disease Network (Combined oxidative phosphorylation deficiency

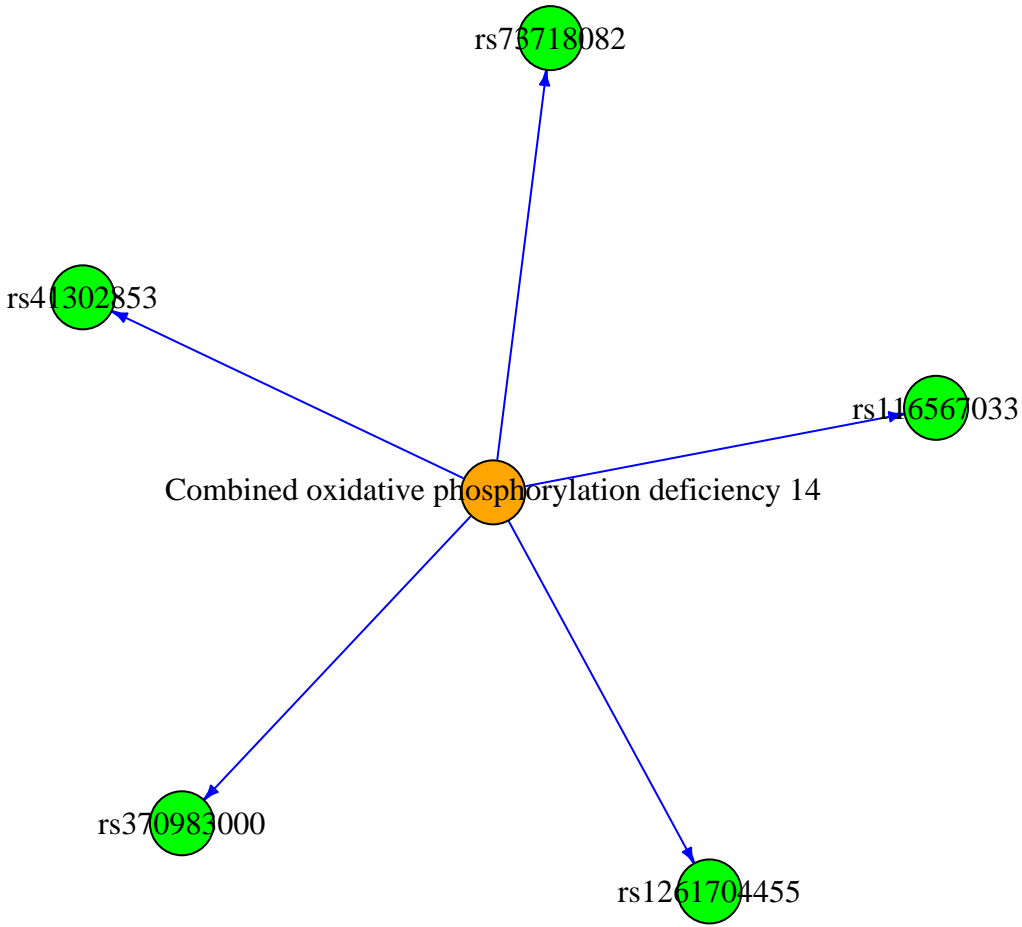

**Variant–Disease Network (Combined oxidative phosphorylation deficiency**

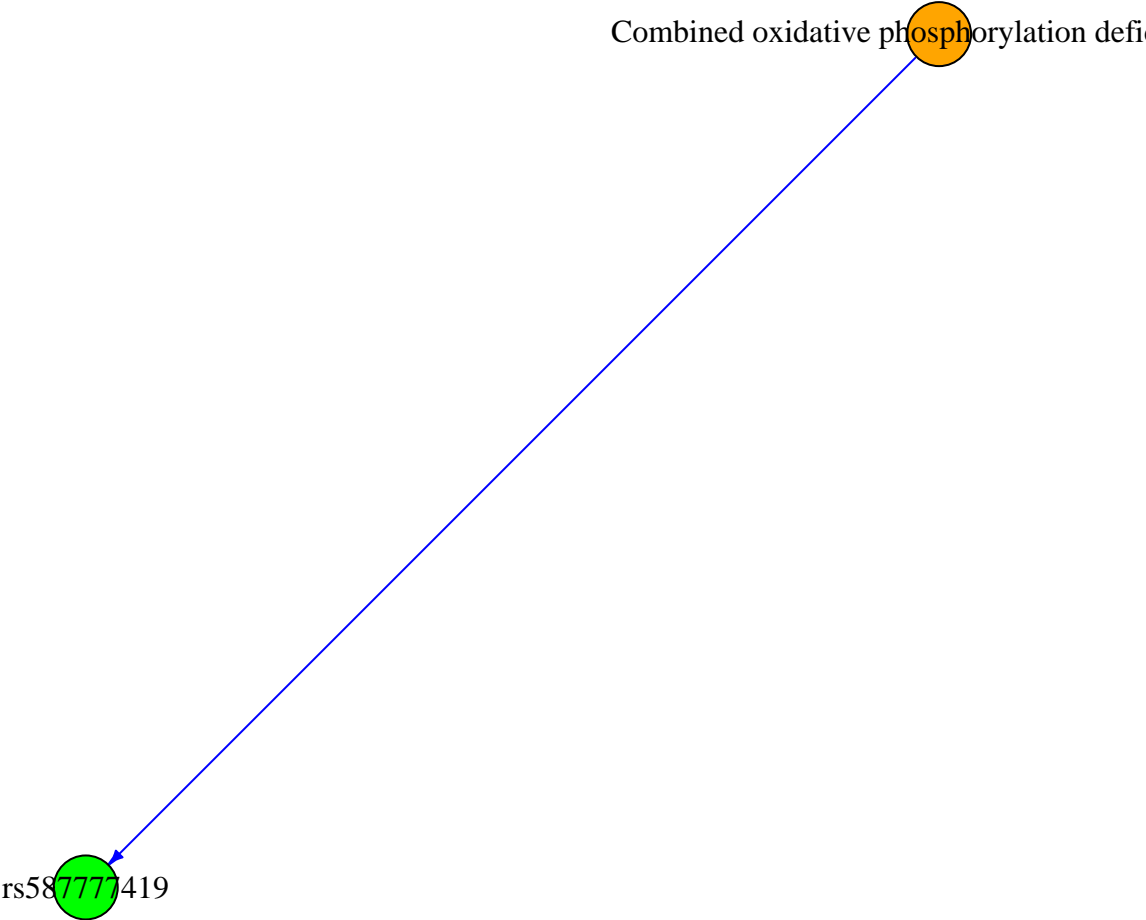

Variant–Disease Network (Combined oxidative phosphorylation deficiency

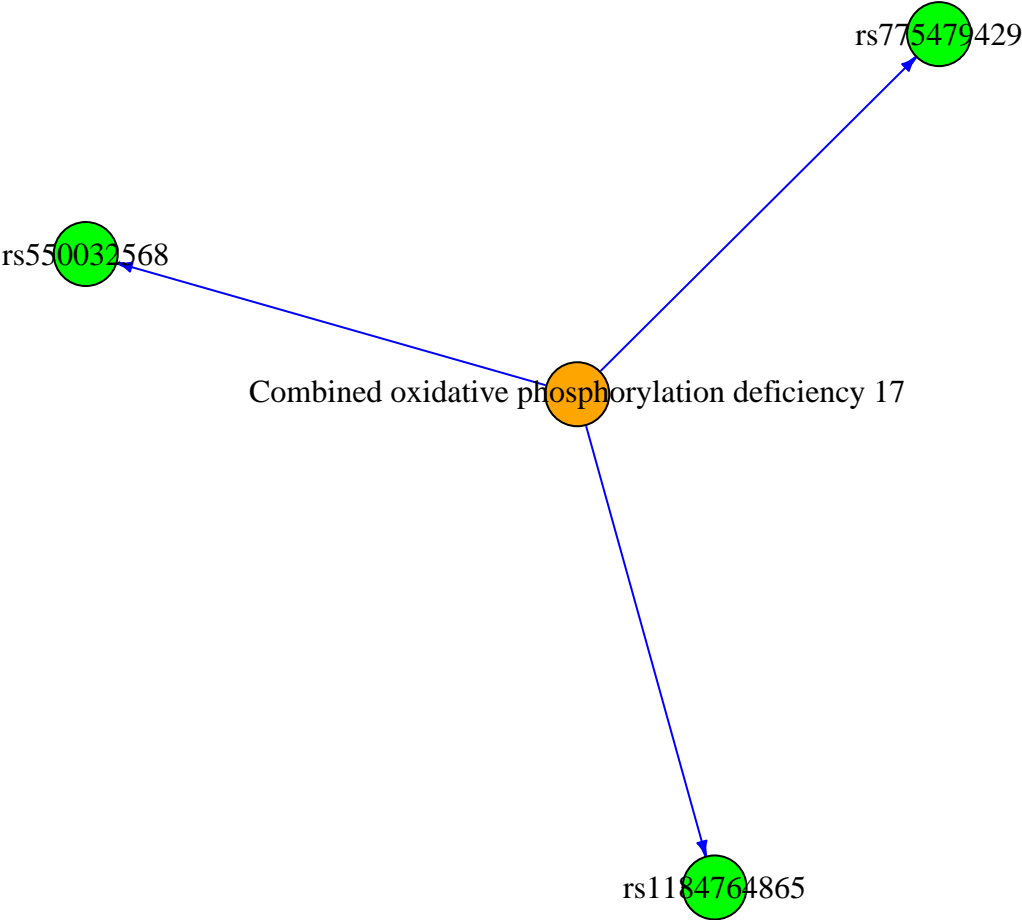

**Variant–Disease Network (Combined Pituitary Hormone Deficiency)**

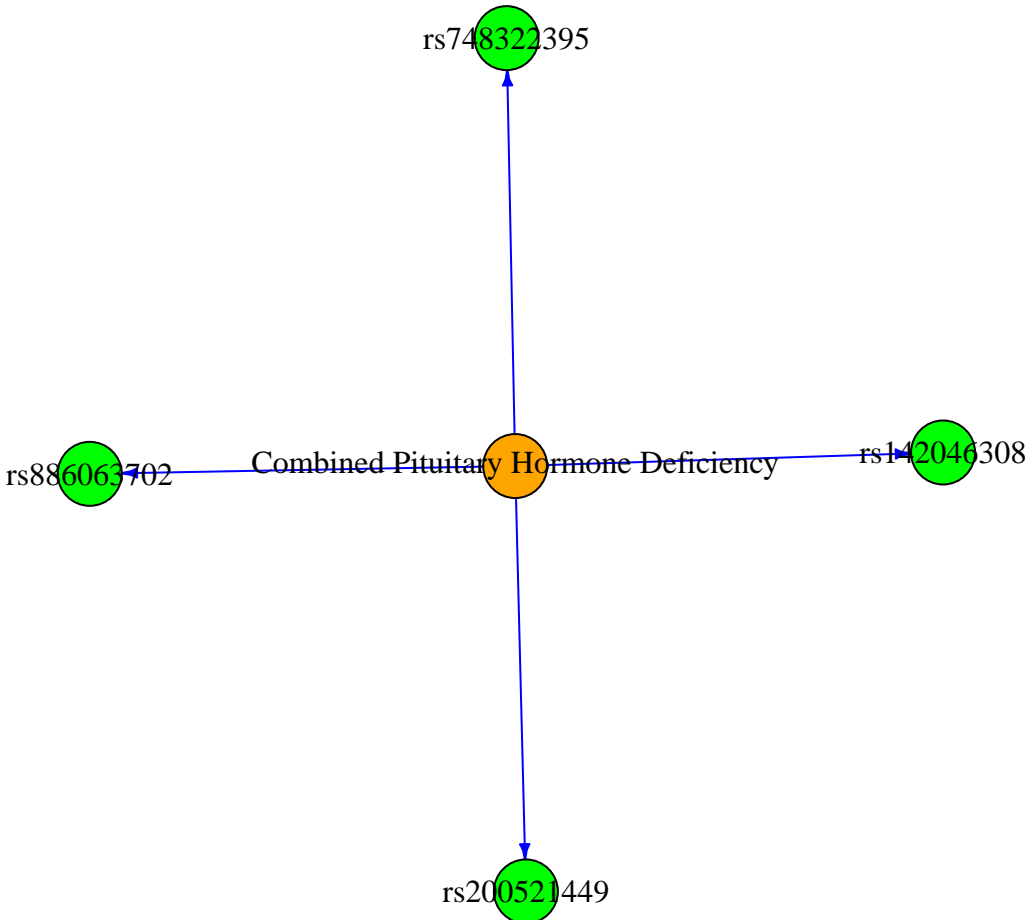

## Variant–Disease Network (Common variable immunodeficiency 10)

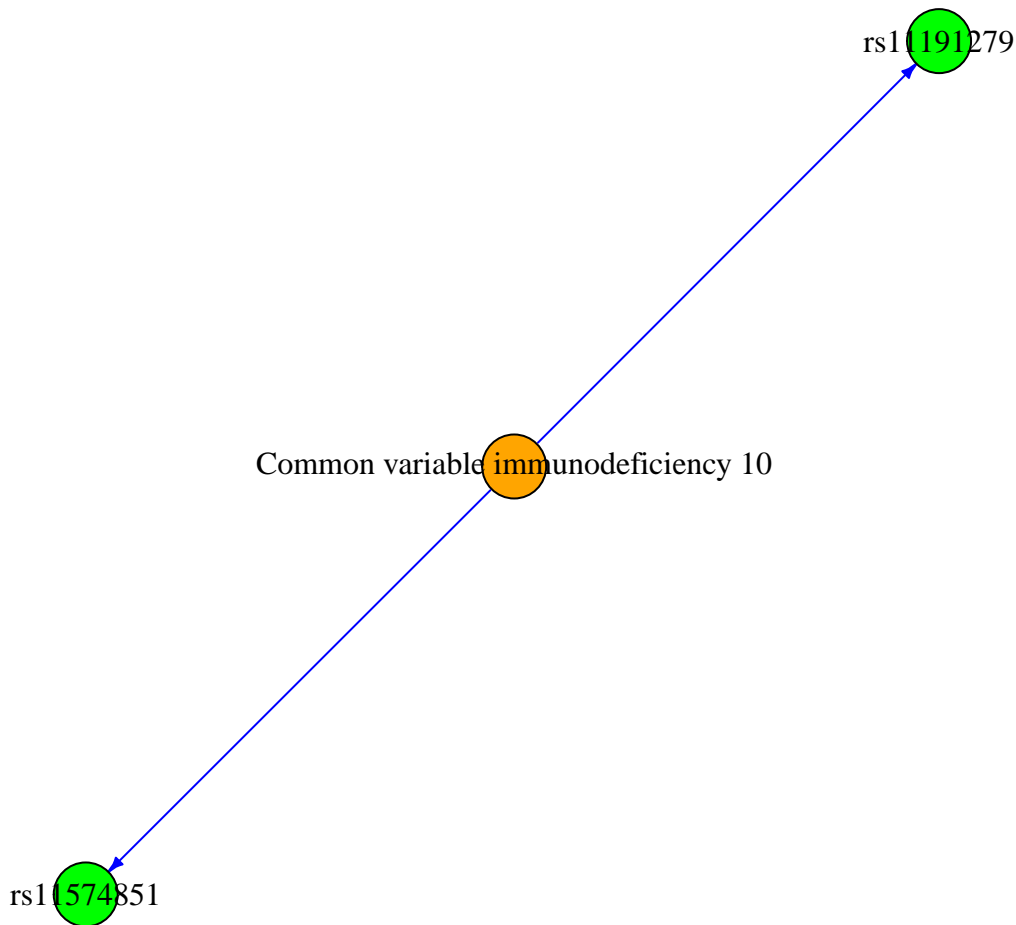

# Variant–Disease Network (Common variable immunodeficiency 6)

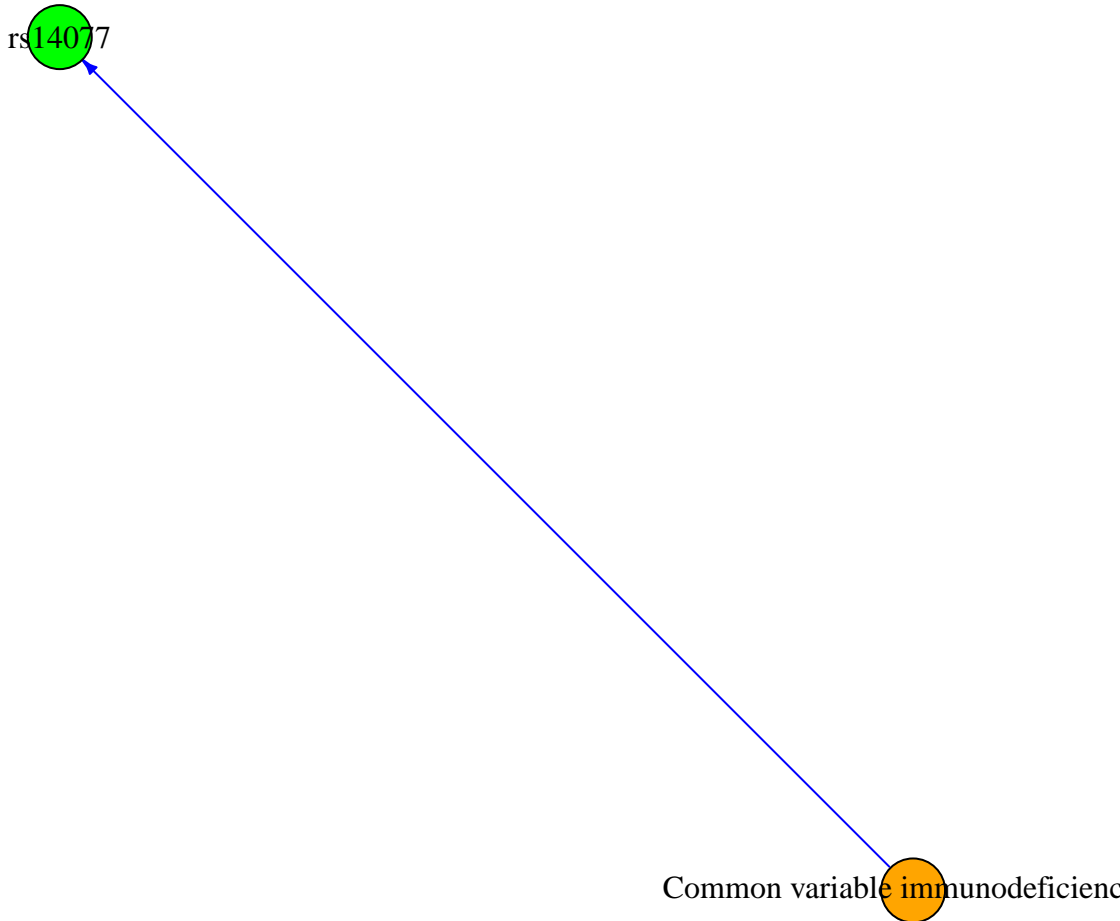

# Variant–Disease Network (Common variable immunodeficiency 7)

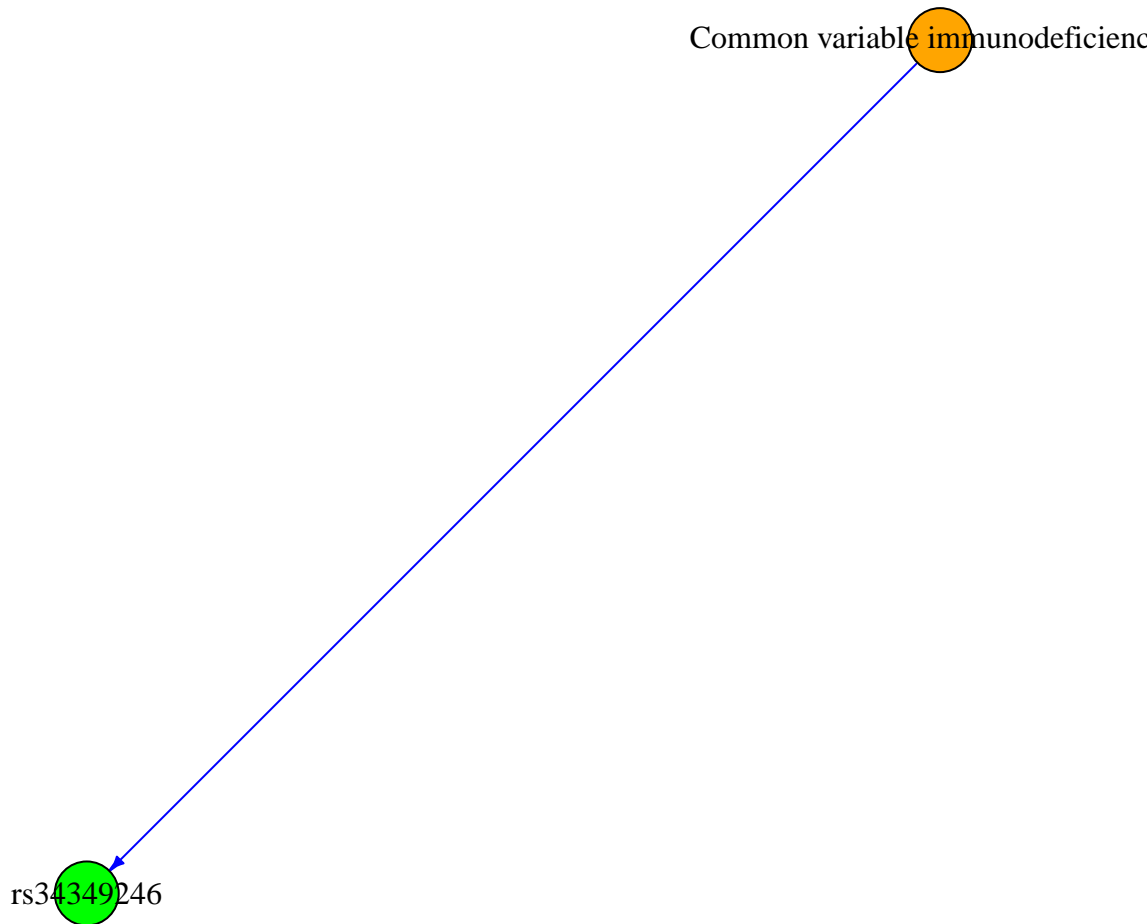

Variant–Disease Network (Complement component 2 deficiency)

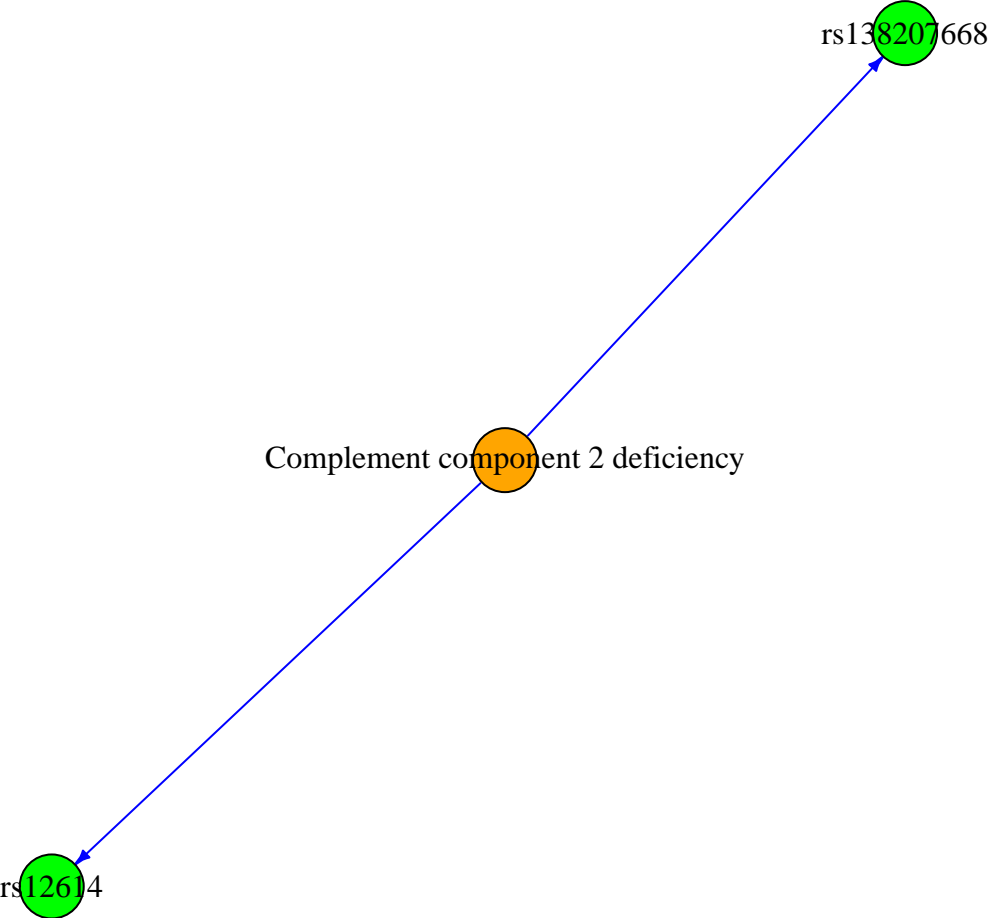



## Variant–Disease Network (Cone dystrophy 3)

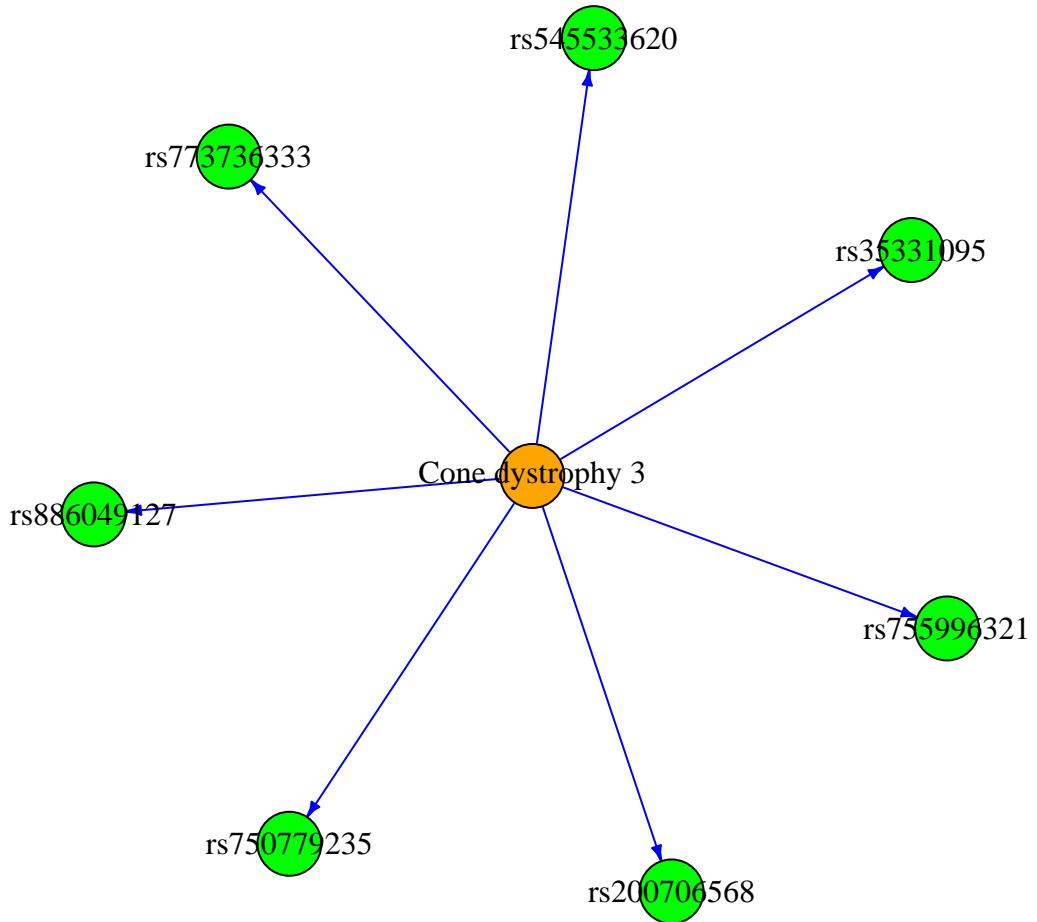

## Variant–Disease Network (Cone–Rod Dystrophy)

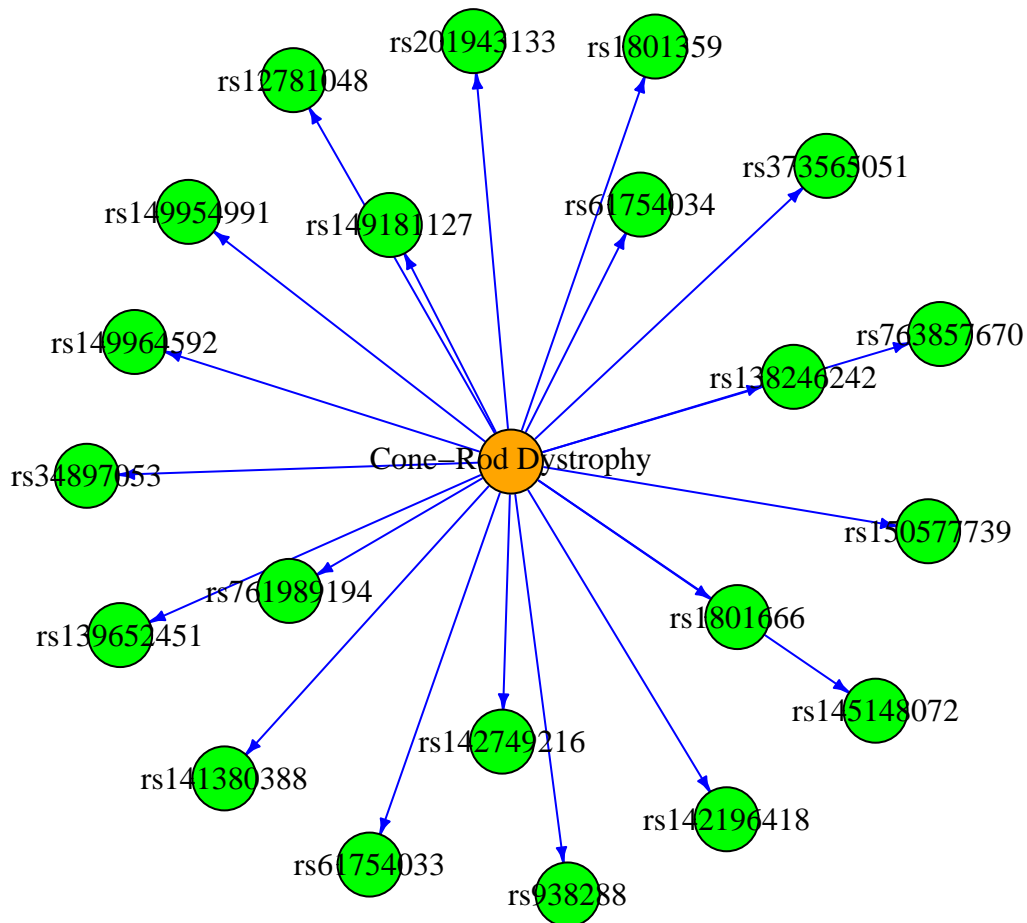

## Variant–Disease Network (Cone-rod dystrophy 3)

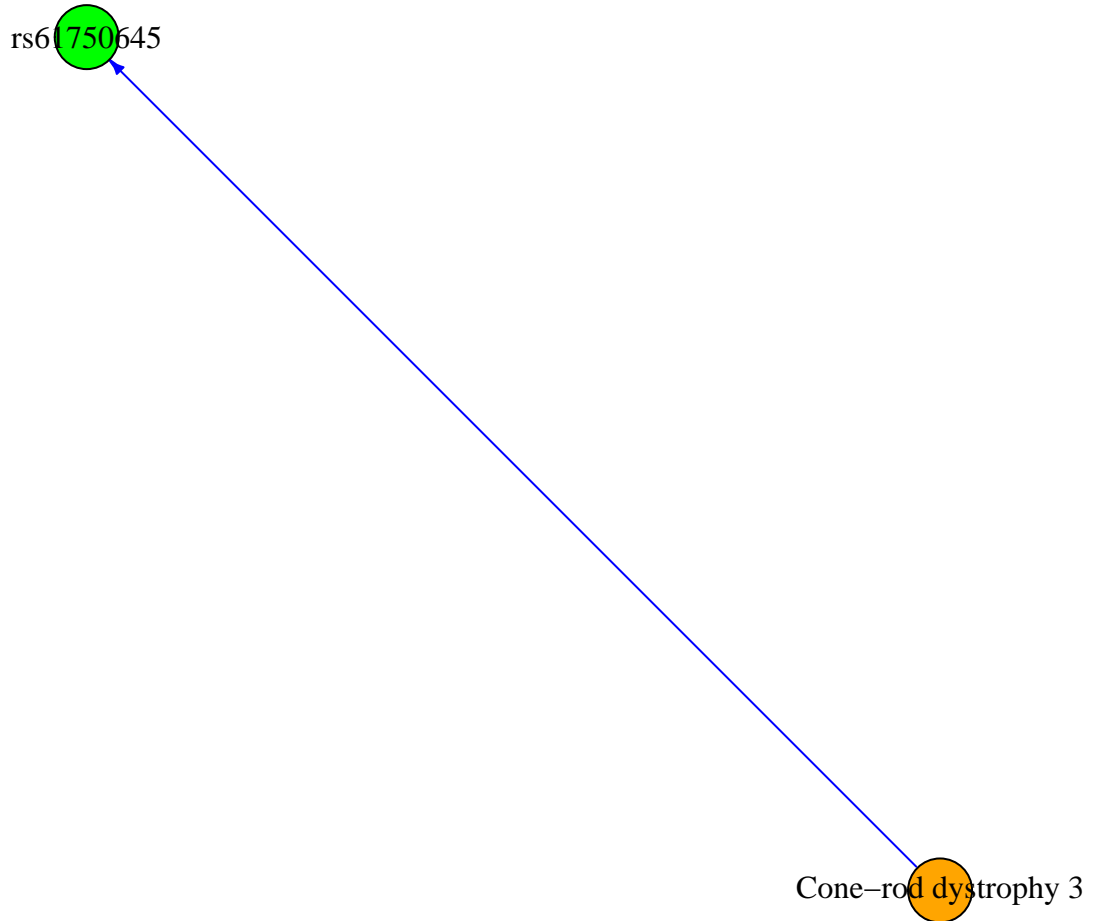

**Variant–Disease Network (Congenital adrenal hyperplasia)**

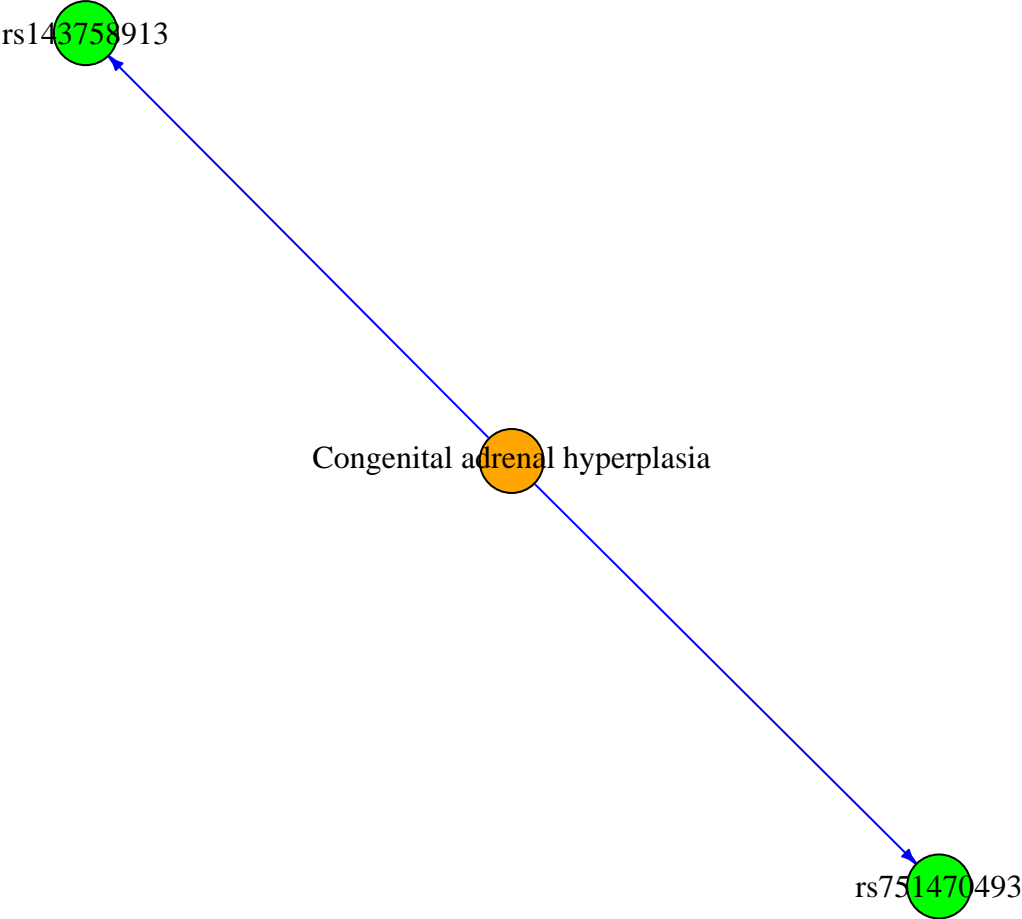

Variant–Disease Network (Congenital Adrenal Insufficiency)

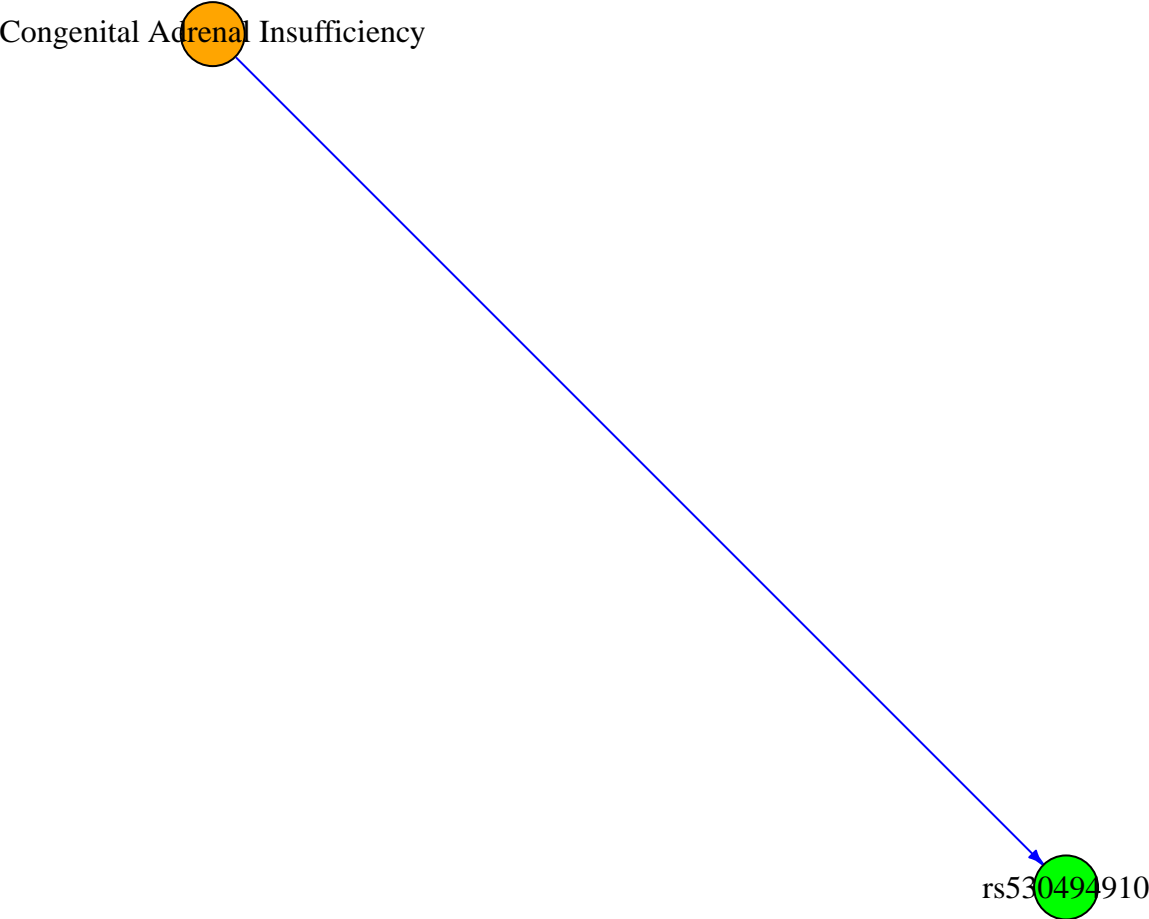

Variant–Disease Network (Congenital amegakaryocytic thrombocytopenia)

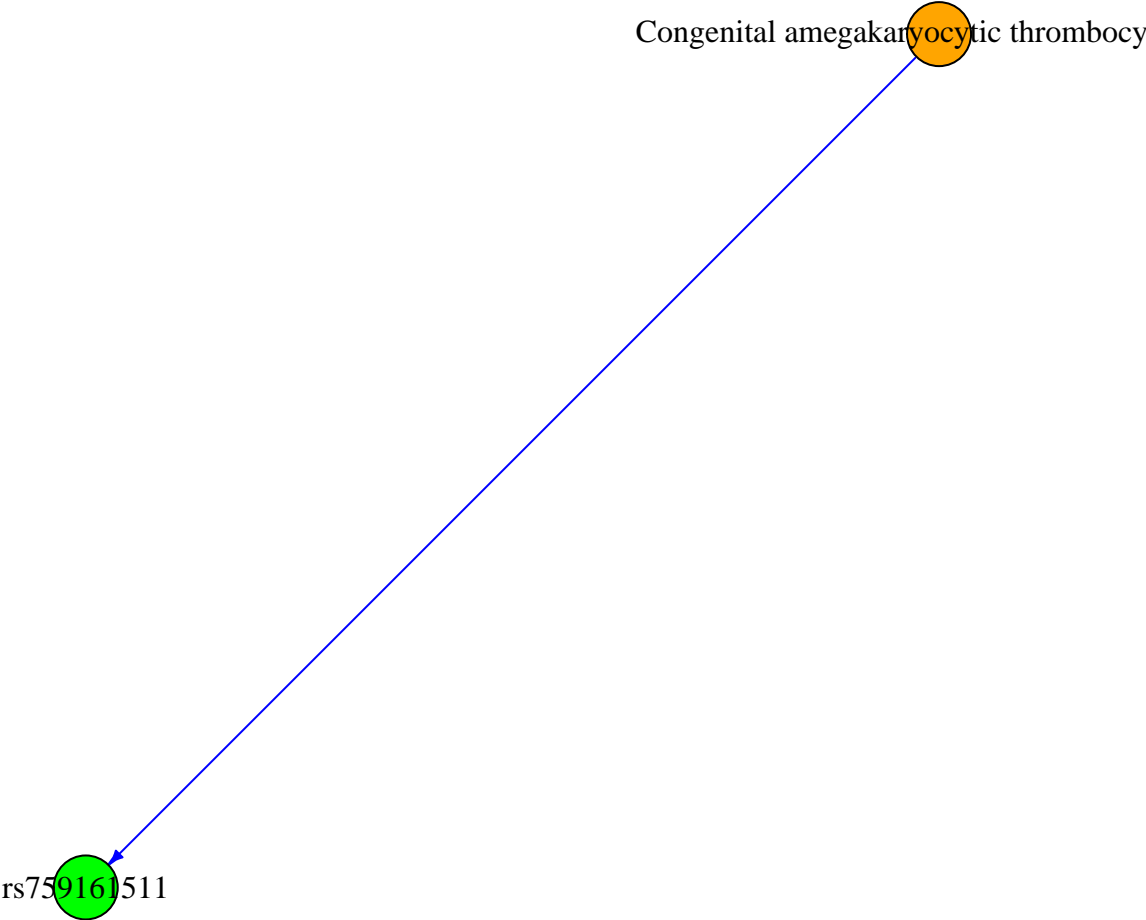

Variant–Disease Network (Congenital anomalies of kidney and urinary tract)

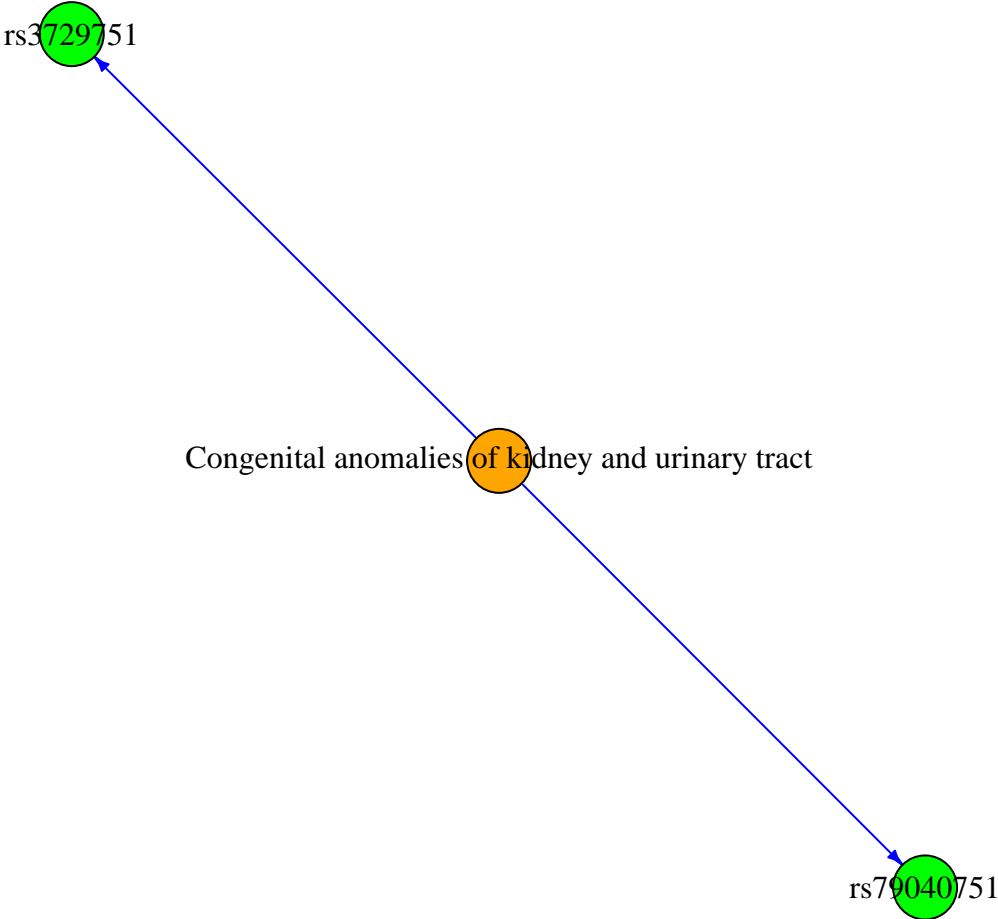

# nt-Disease Network (Congenital bilateral aplasia of vas deferens from CFTR

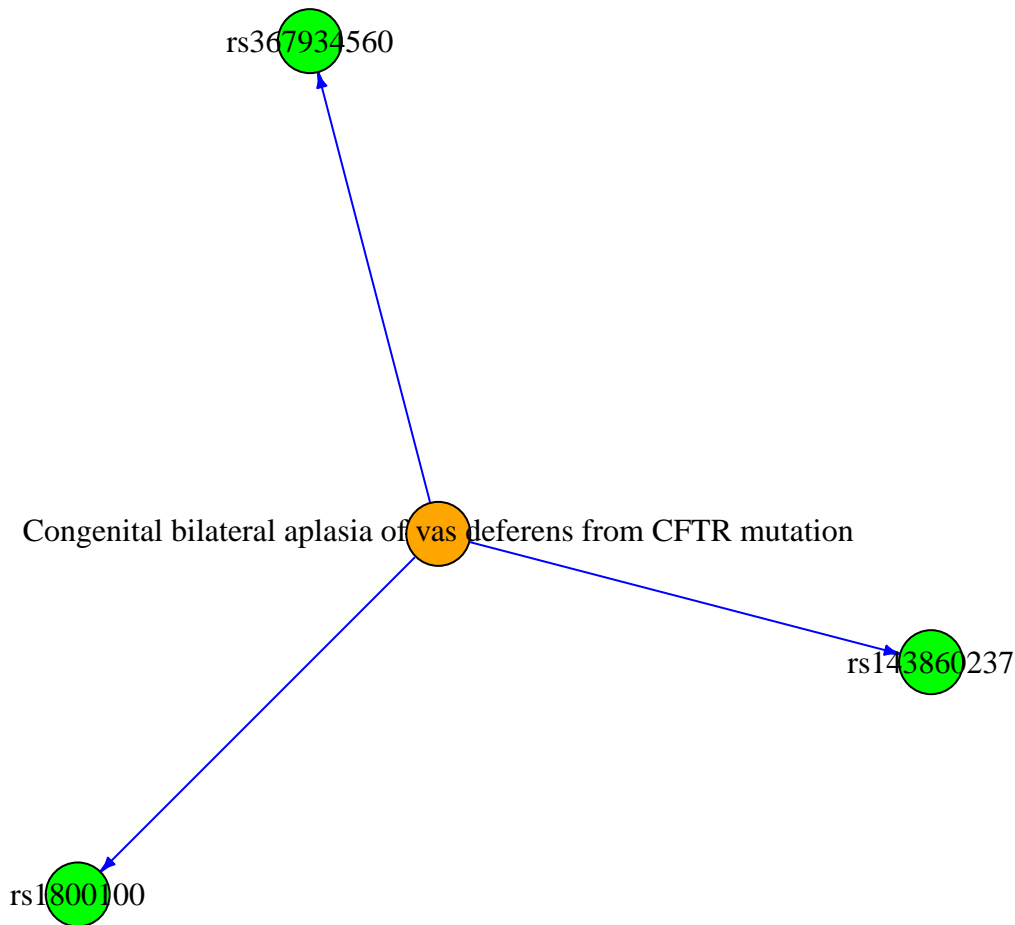



## Variant–Disease Network (Congenital cataract)

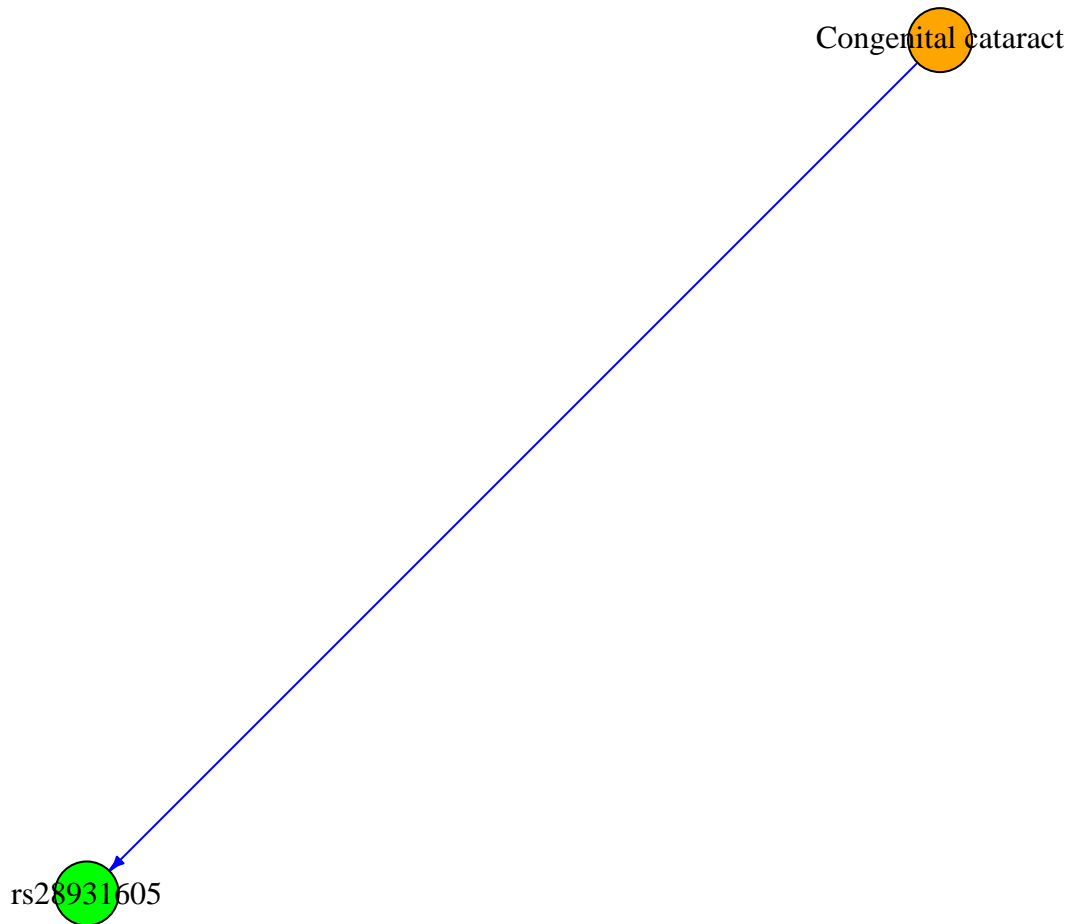

**Variant–Disease Network (Congenital central hypoventilation)**

Congenital central hypoventilation

rs1420638452

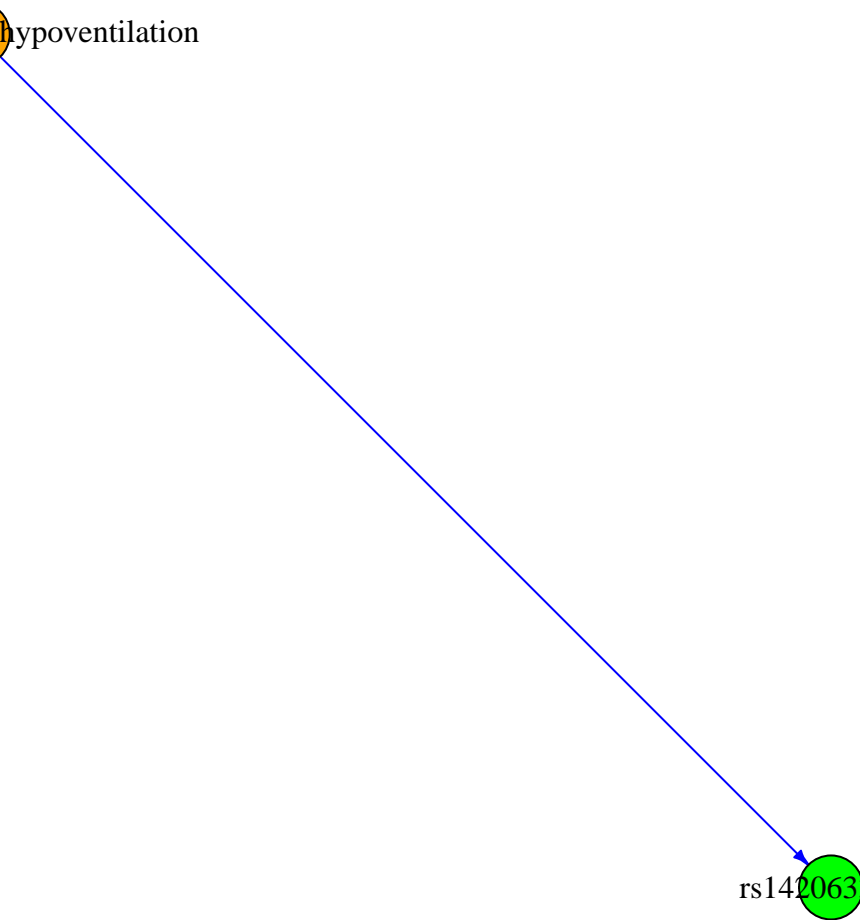

**Variant–Disease Network (Congenital cerebellar hypoplasia)**

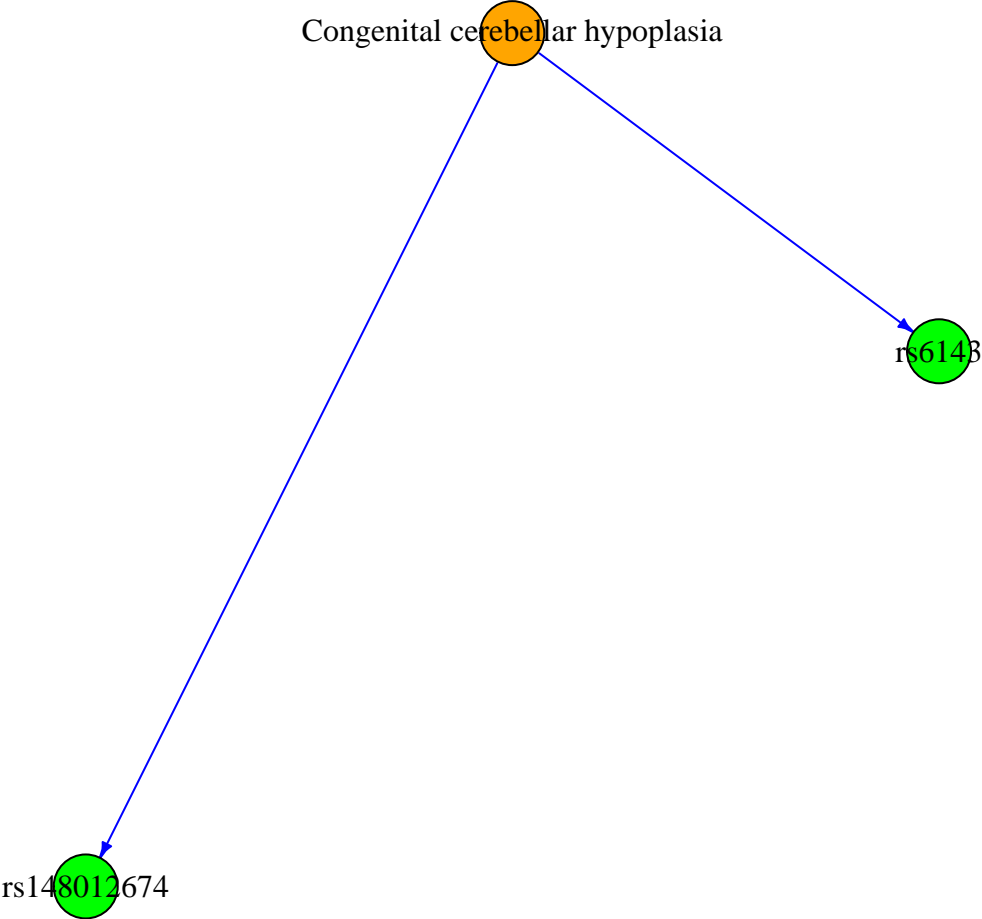

**Variant–Disease Network (Congenital contractural arachnodactyly)**

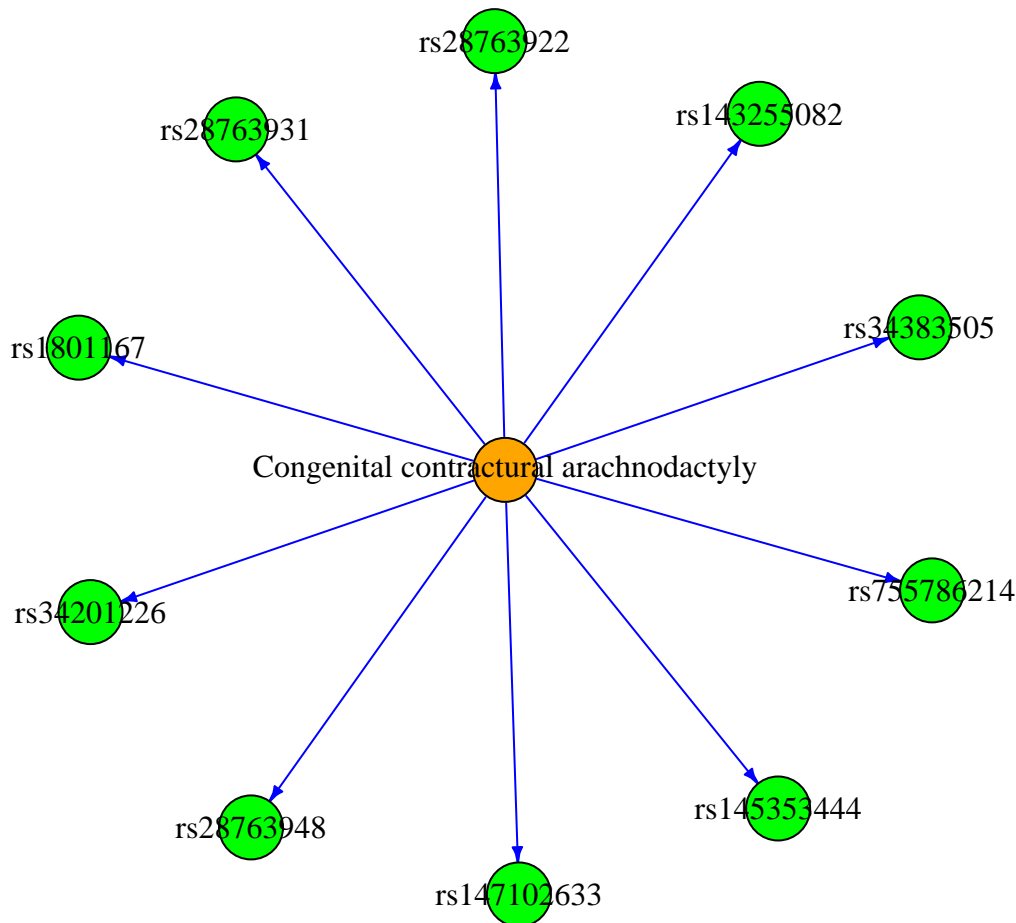

Variant–Disease Network (Congenital defect of folate absorption)

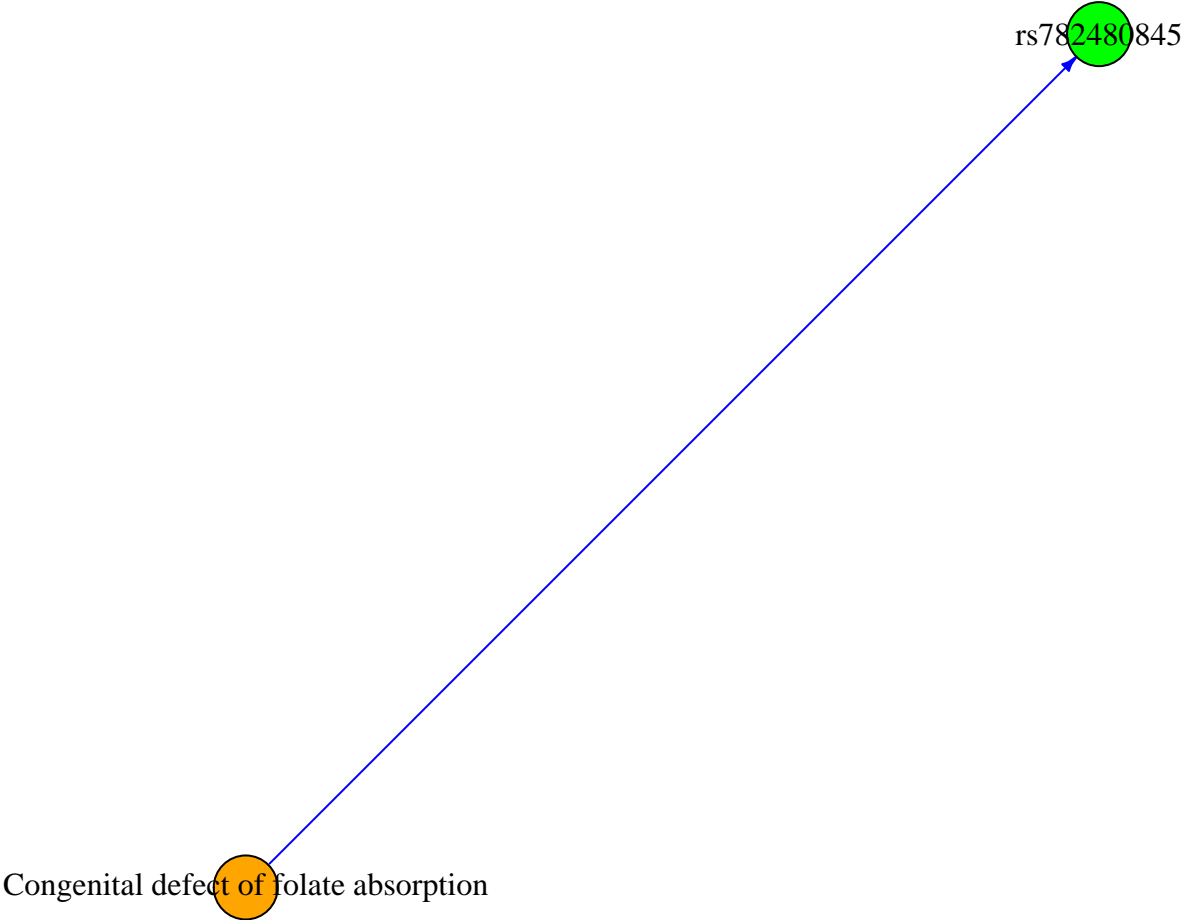

**Variant–Disease Network (Congenital disorder of deglycosylation)**

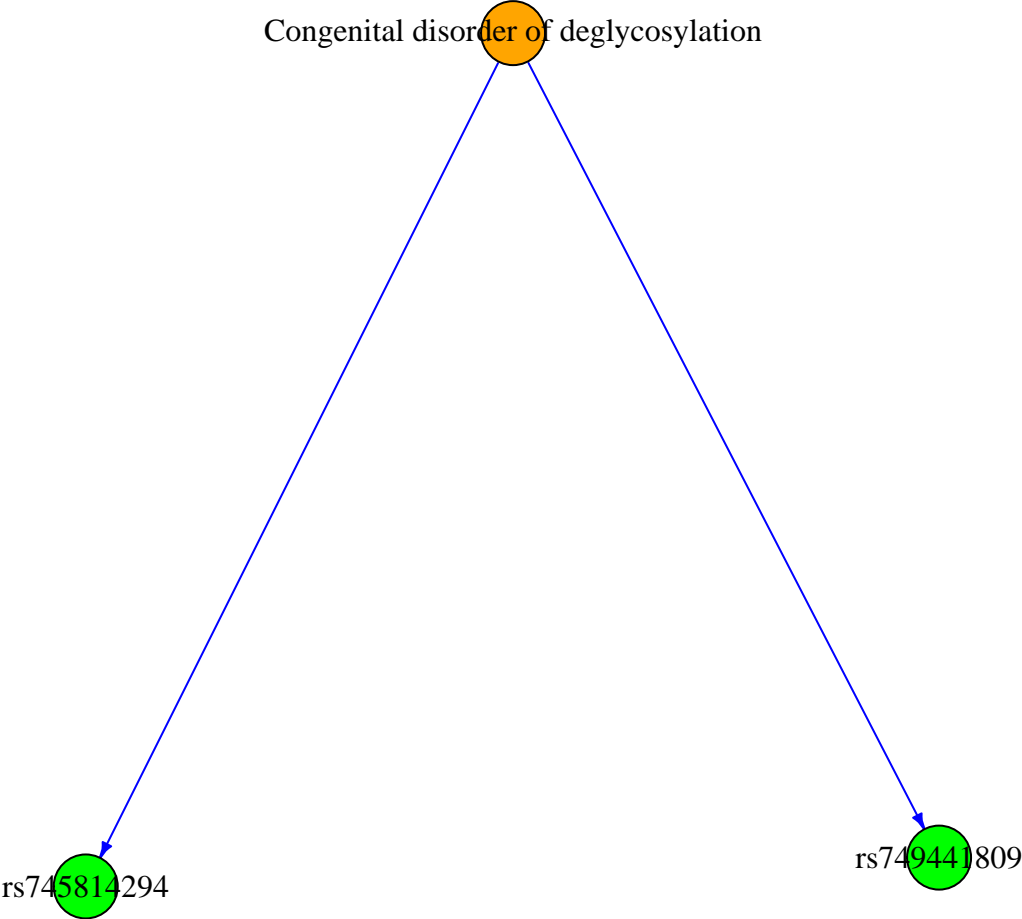

# Variant–Disease Network (Congenital disorder of glycosylation)

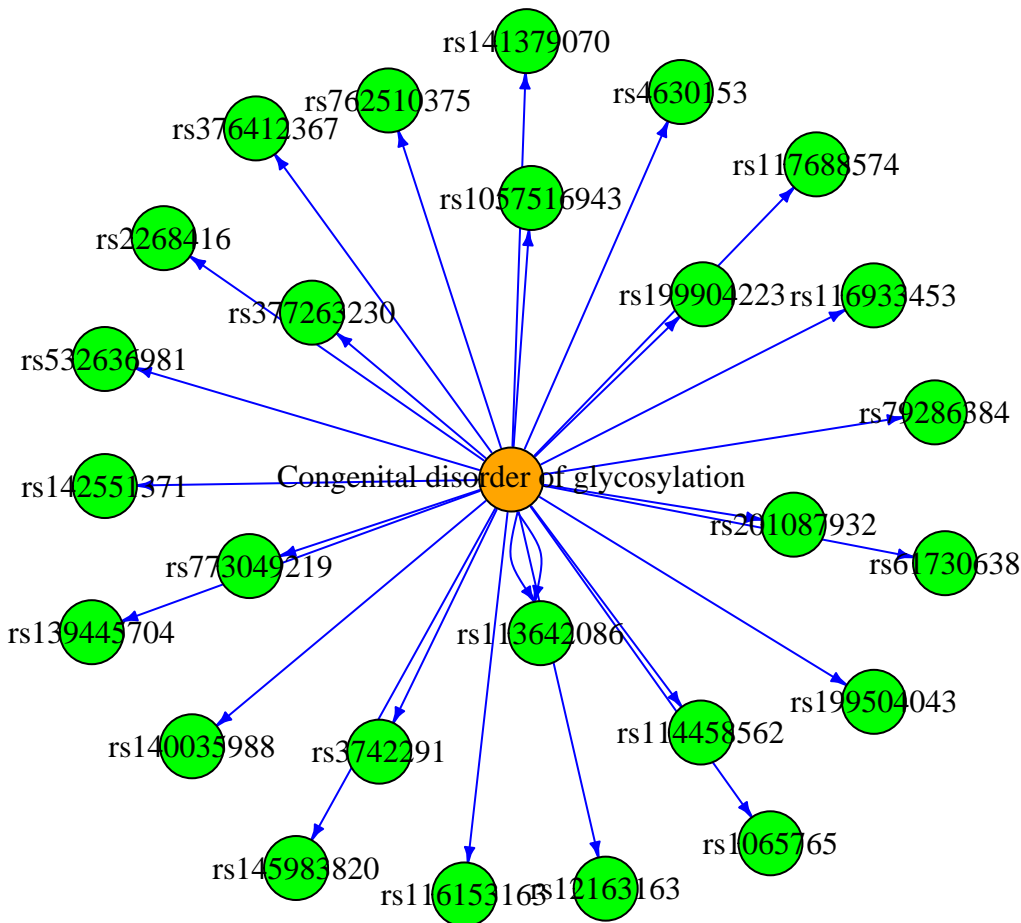

**Variant–Disease Network (Congenital disorder of glycosylation type 1D)**

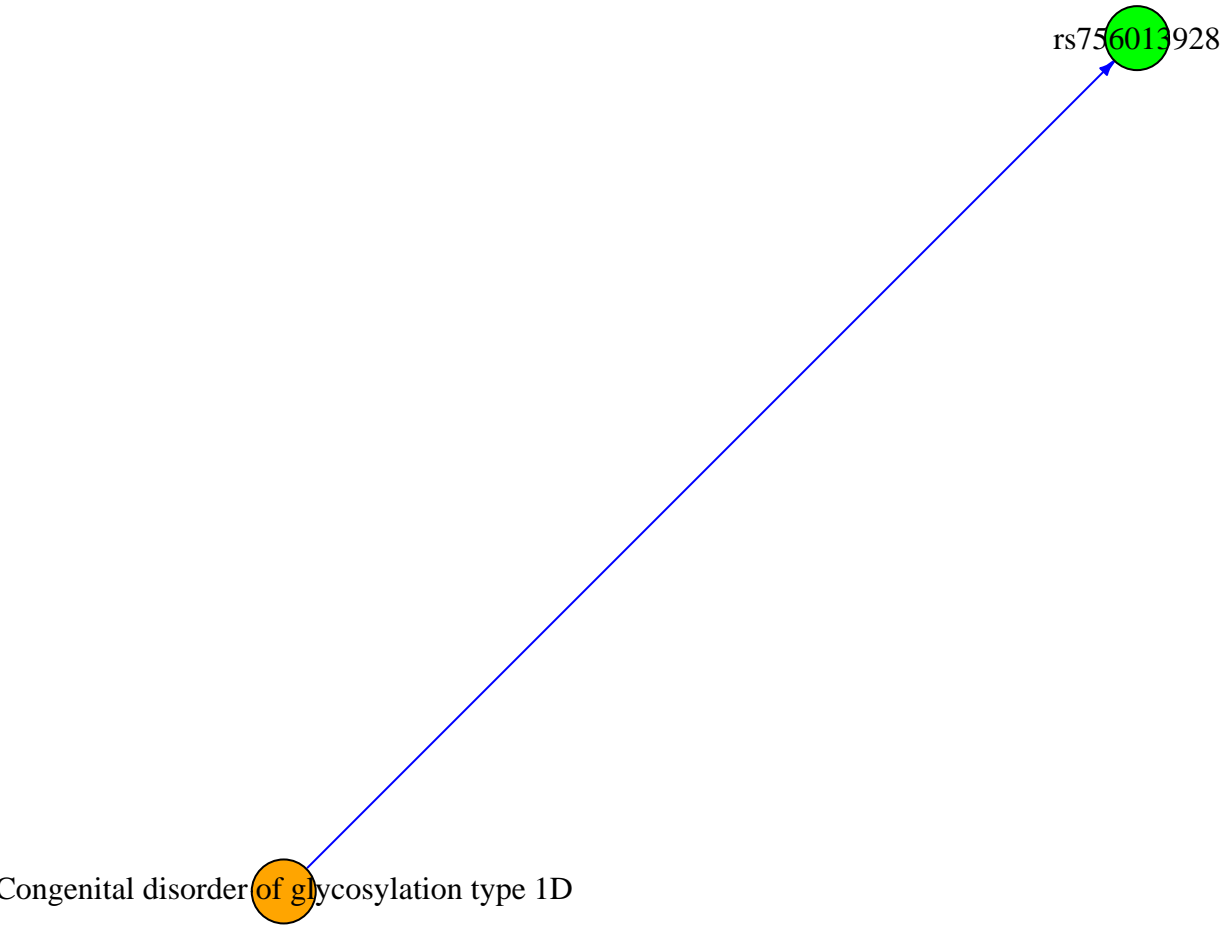



# Variant–Disease Network (Congenital disorder of glycosylation type 1N)

rs138803905

Congenital disorder of glycosylation type 1N

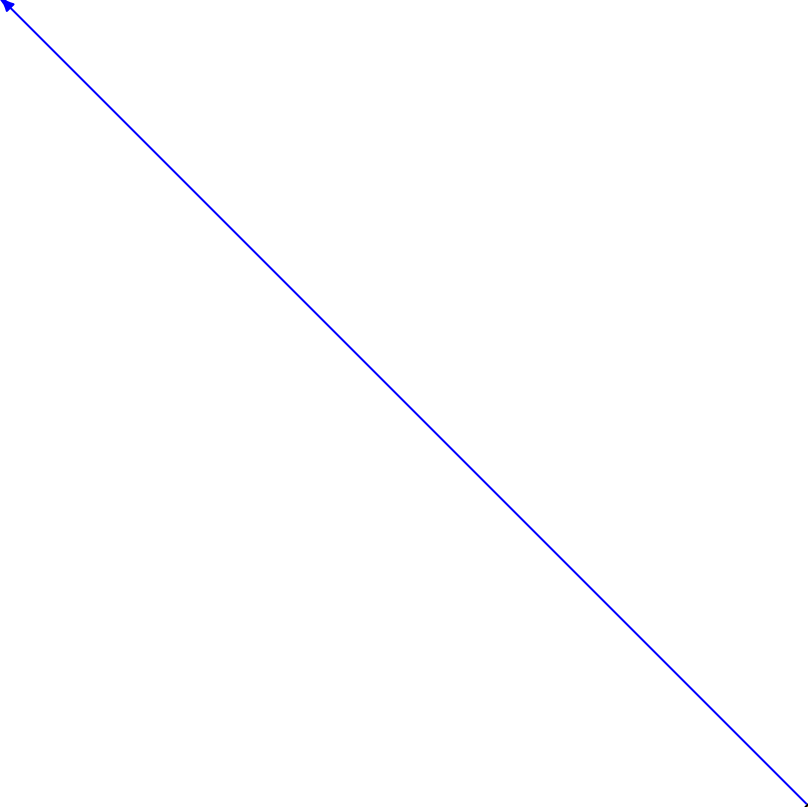

**Variant–Disease Network (Congenital disorder of glycosylation type 1t)**

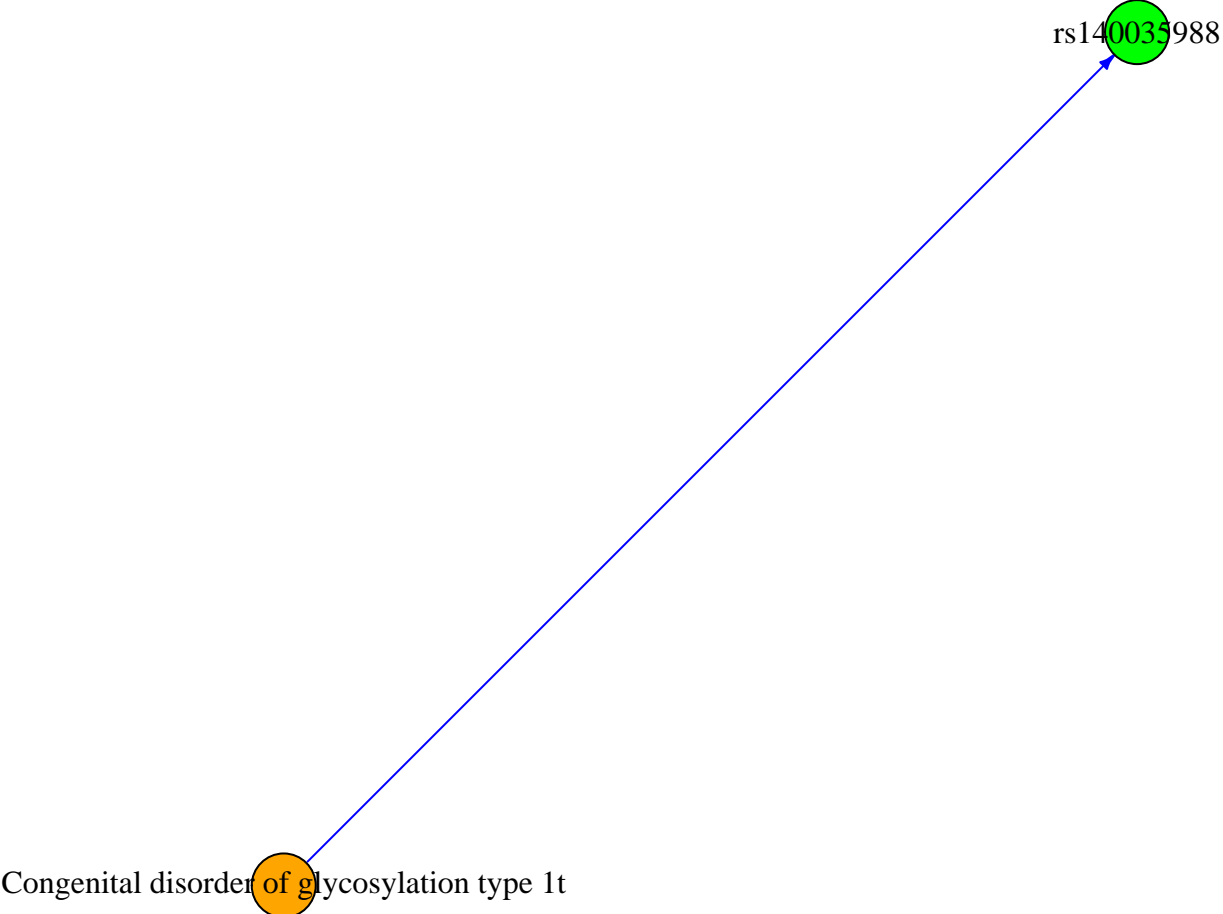

**Variant–Disease Network (Congenital disorder of glycosylation type 2C)**

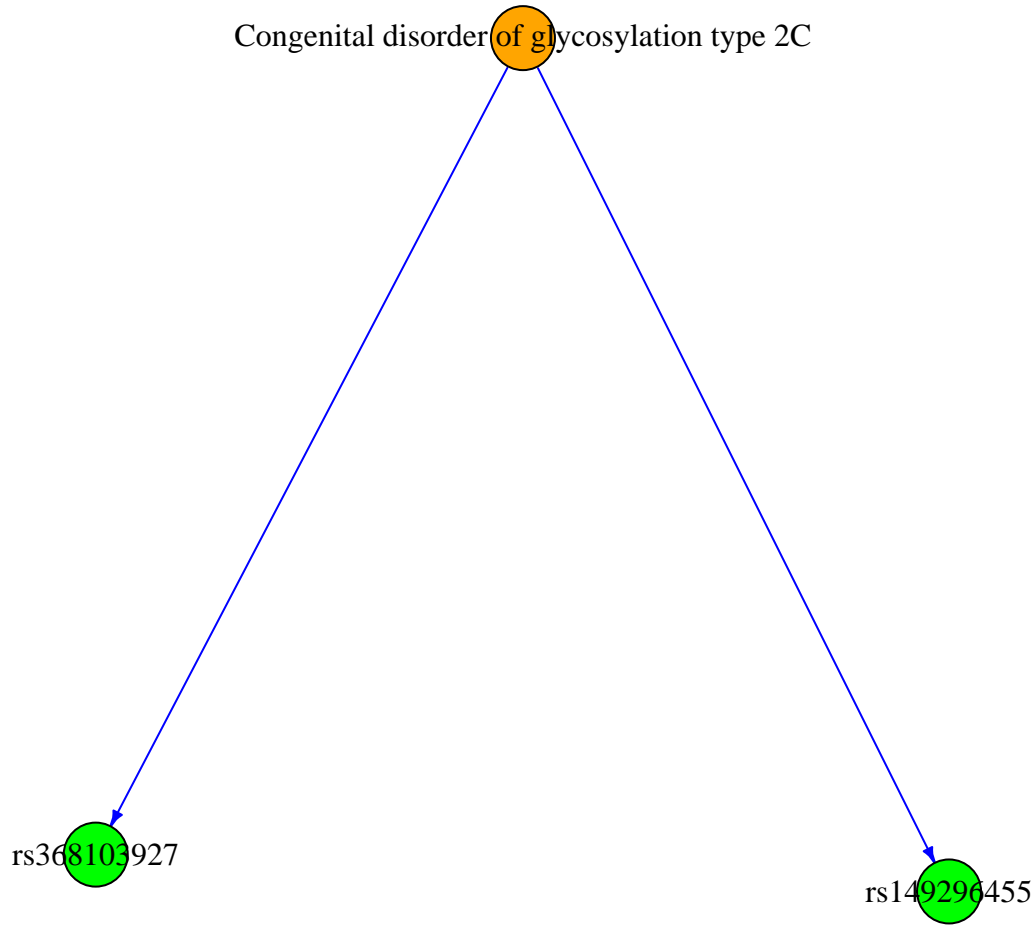

# Variant–Disease Network (Congenital dyserythropoietic anemia)

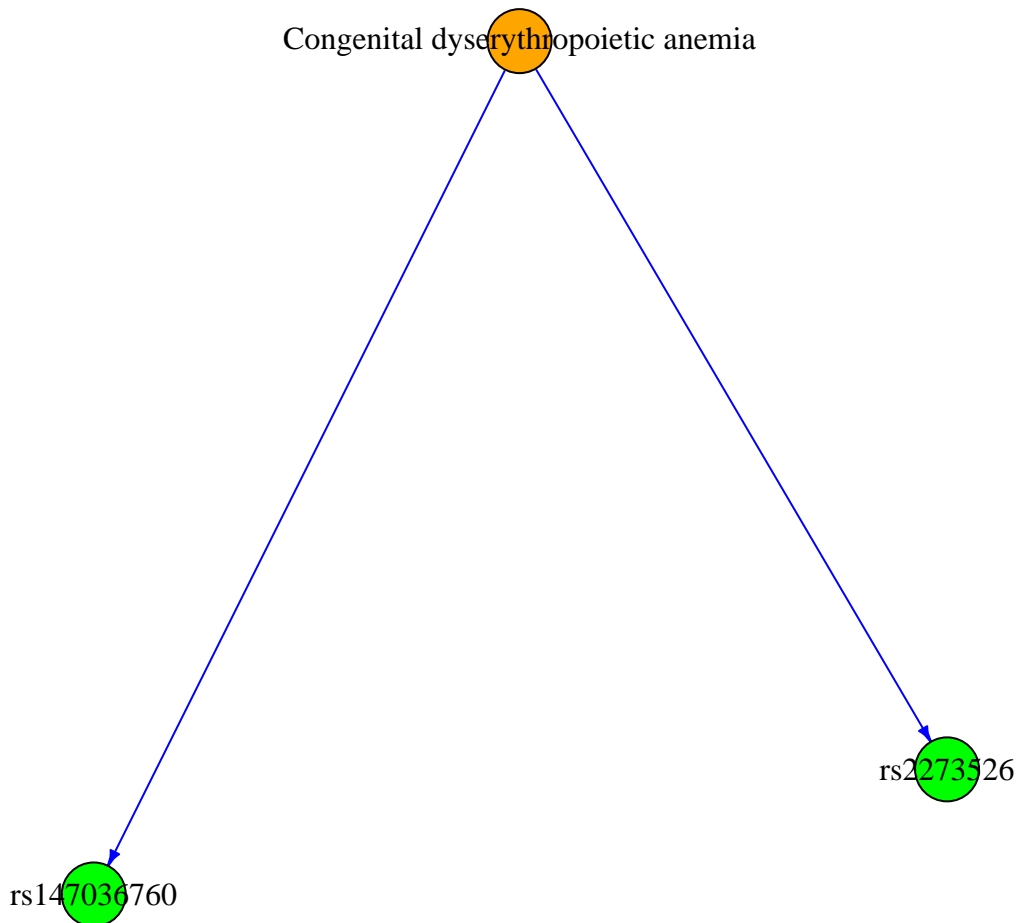

Variant–Disease Network (Congenital fiber–type disproportion)

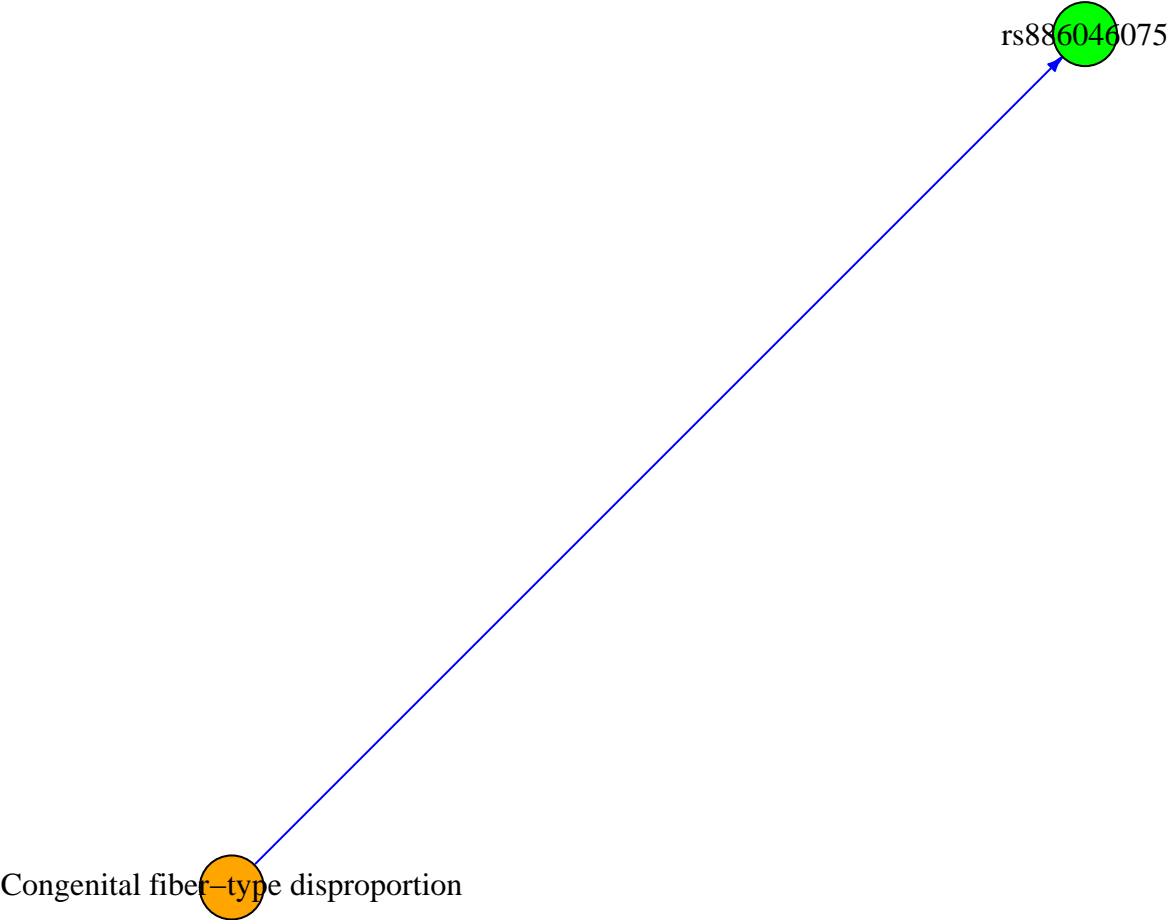

Variant–Disease Network (Congenital fibrosis of the extraocular muscles

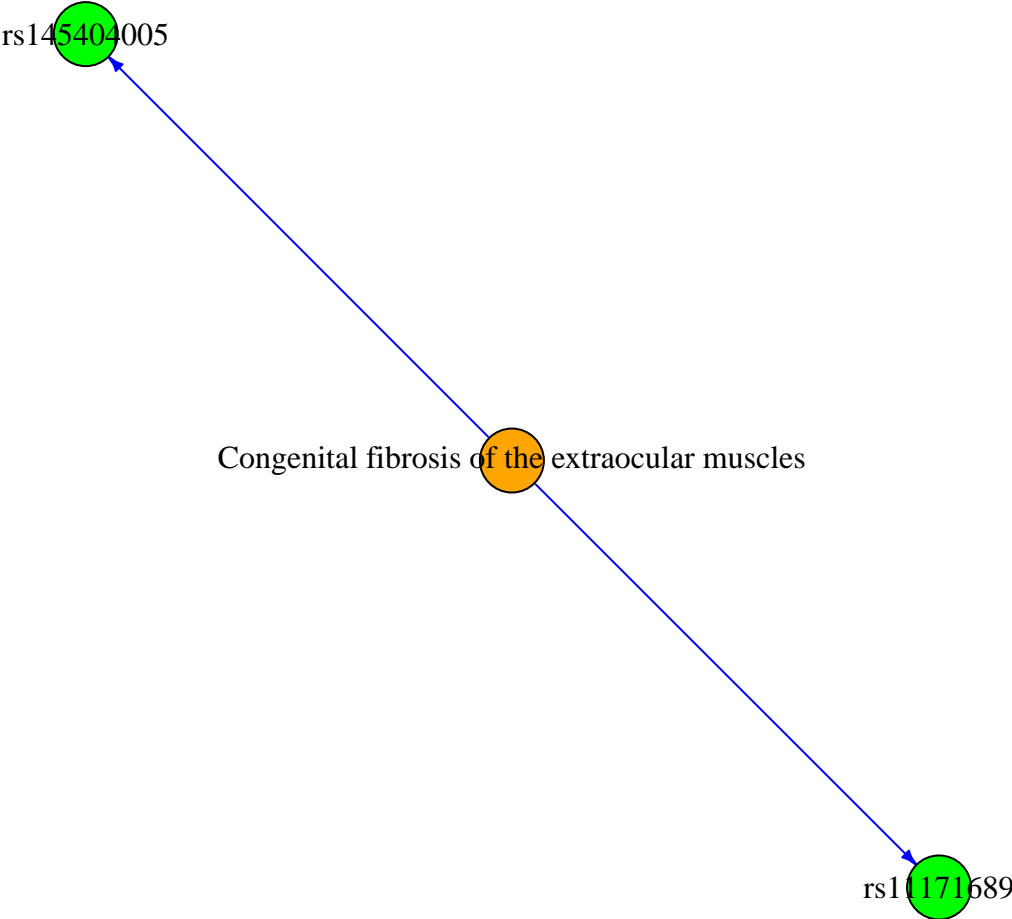

Variant–Disease Network (Congenital generalized lipodystrophy)

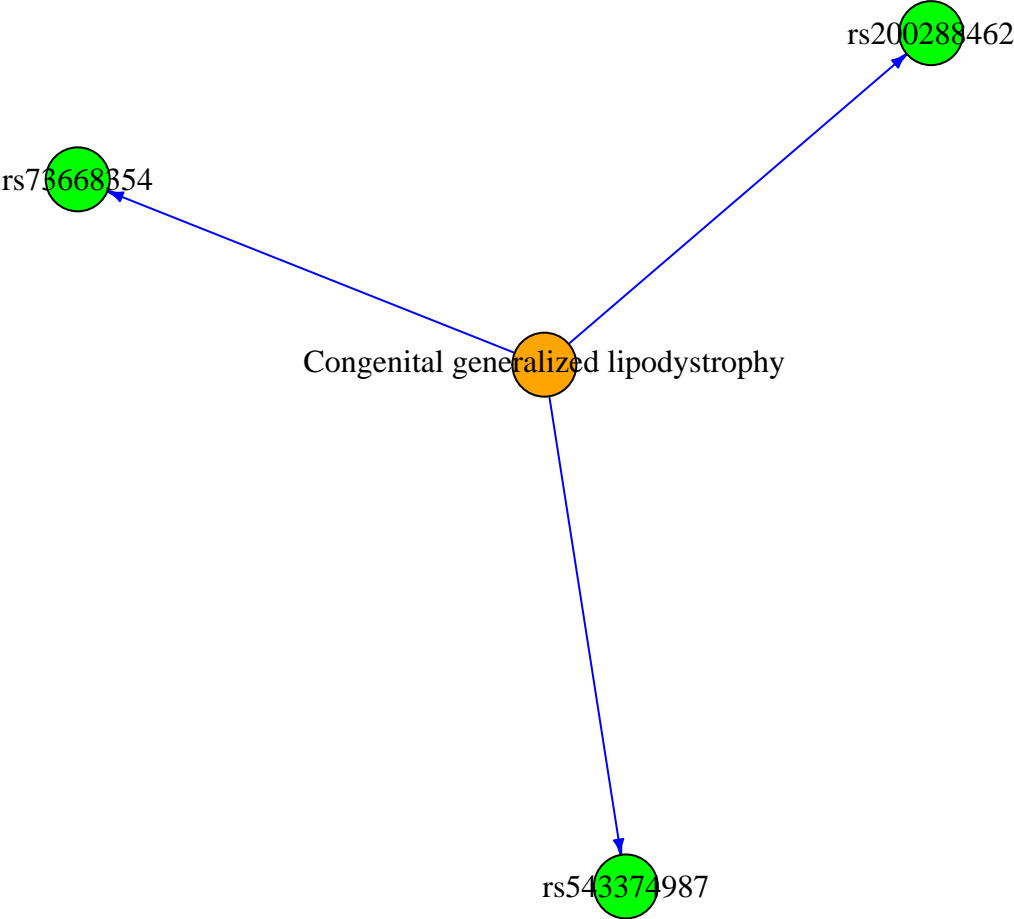

Variant–Disease Network (Congenital glucose–galactose malabsorption)

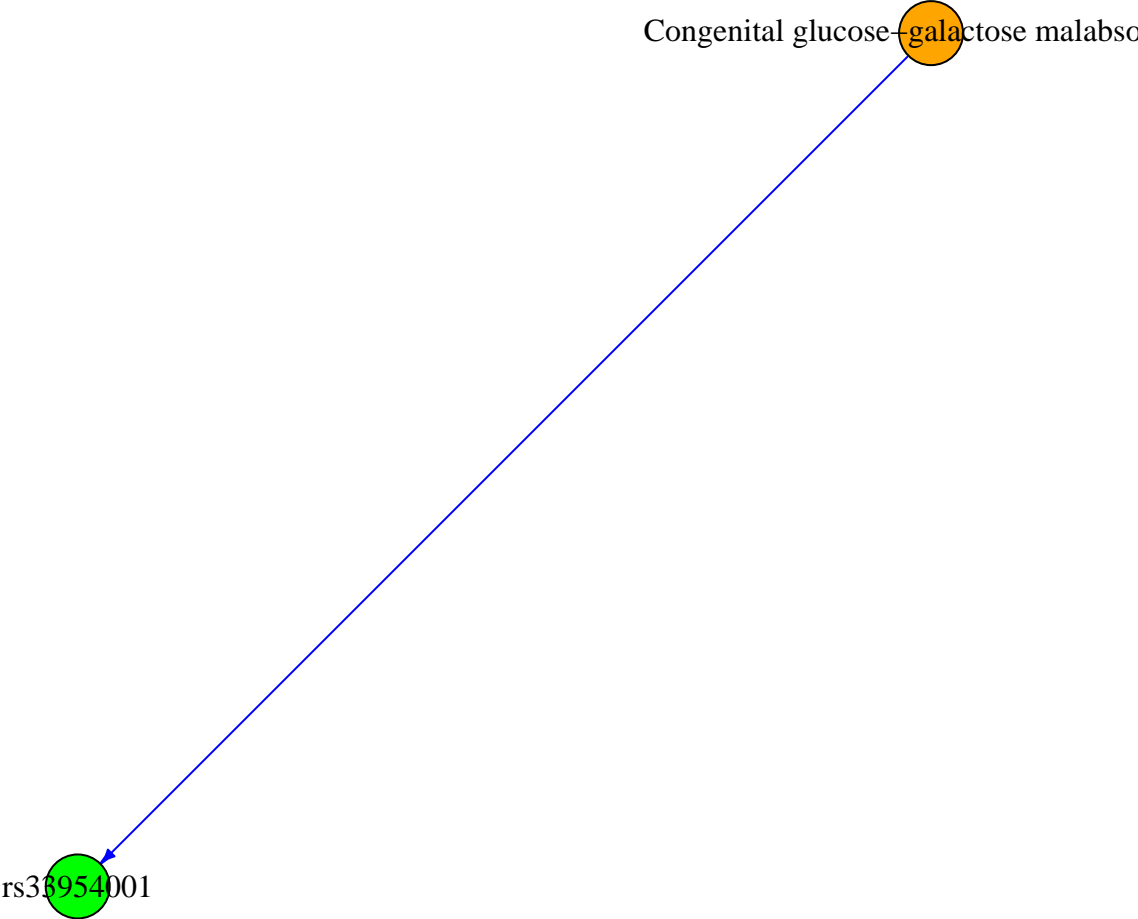



# Variant–Disease Network (Congenital heart defects 1)

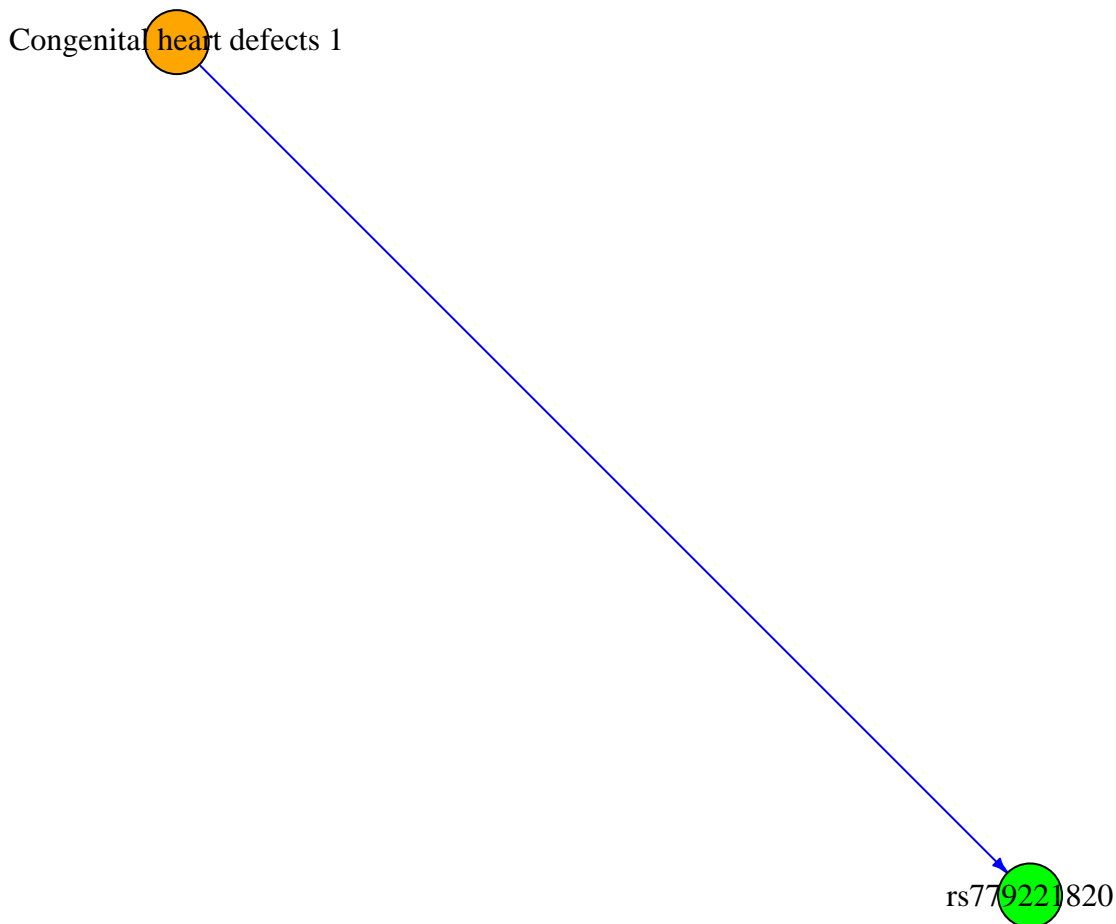

**Variant–Disease Network (Congenital hyperammonemia)**

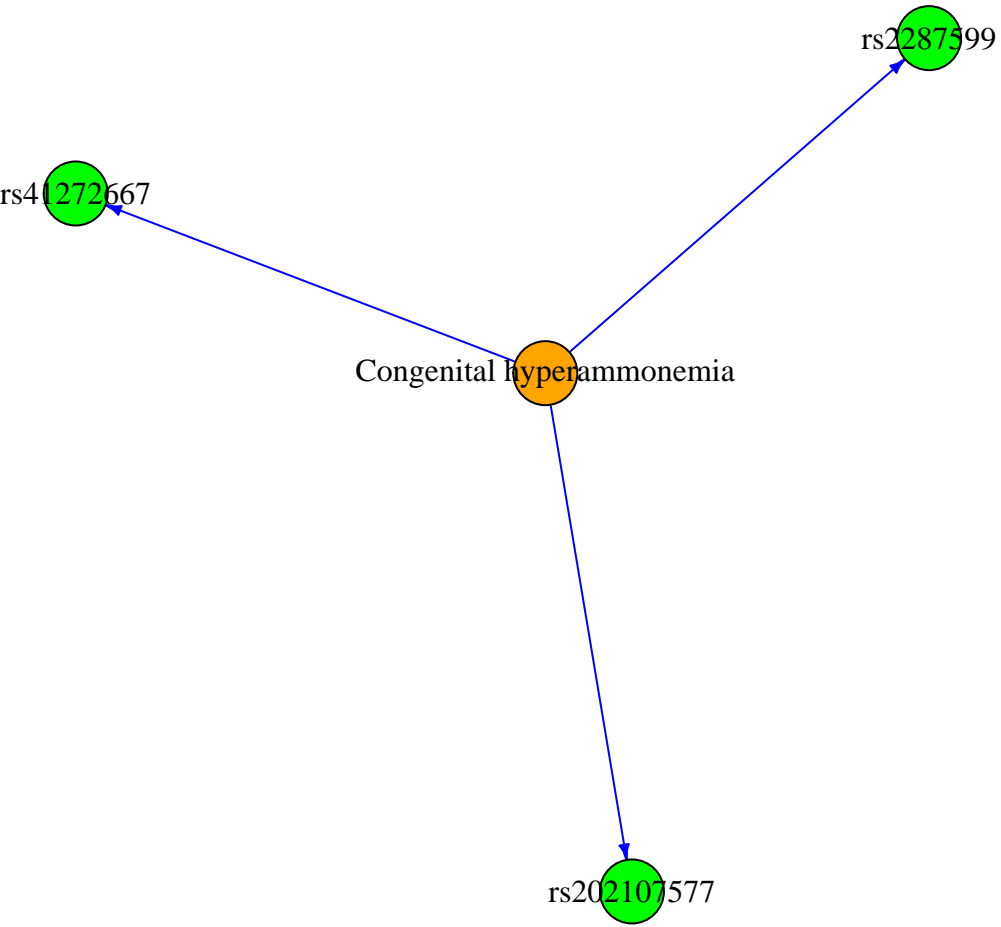

## Variant–Disease Network (Congenital hypothyroidism)

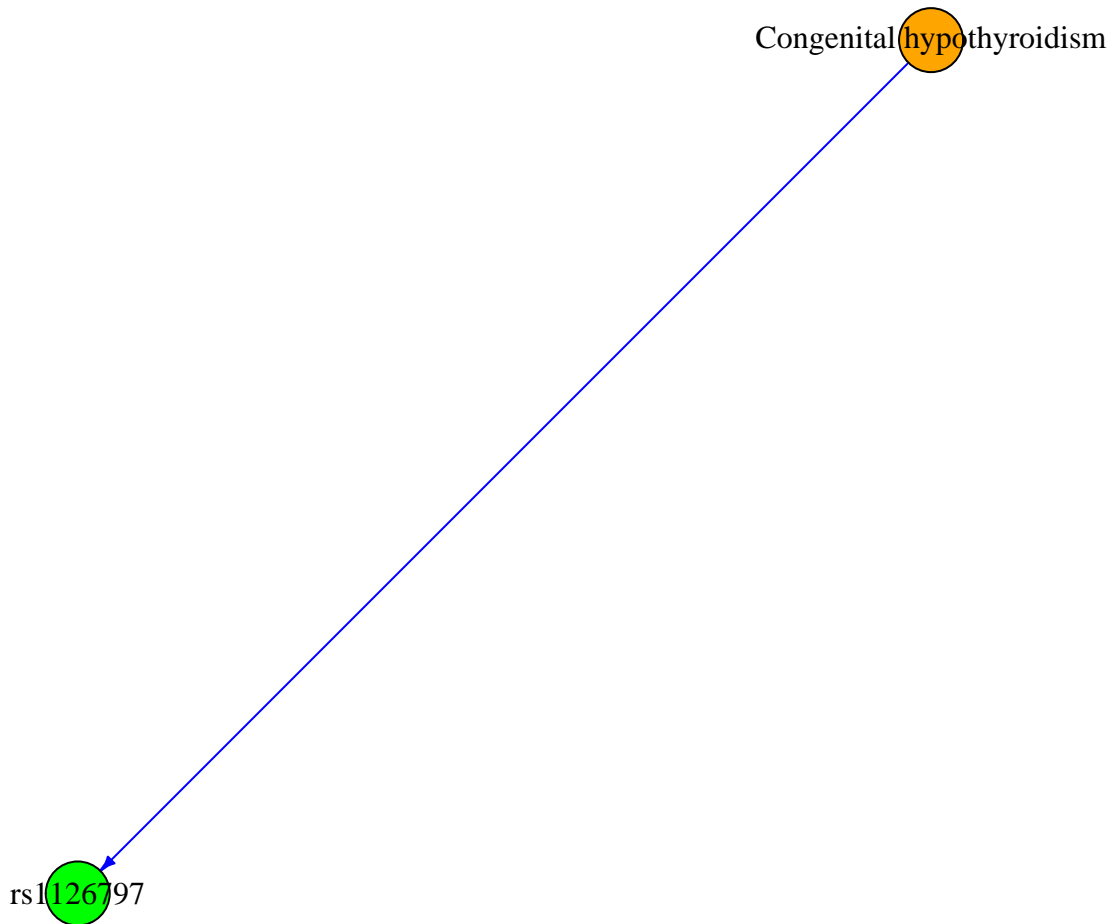

# Variant–Disease Network (Congenital ichthyosiform erythroderma)

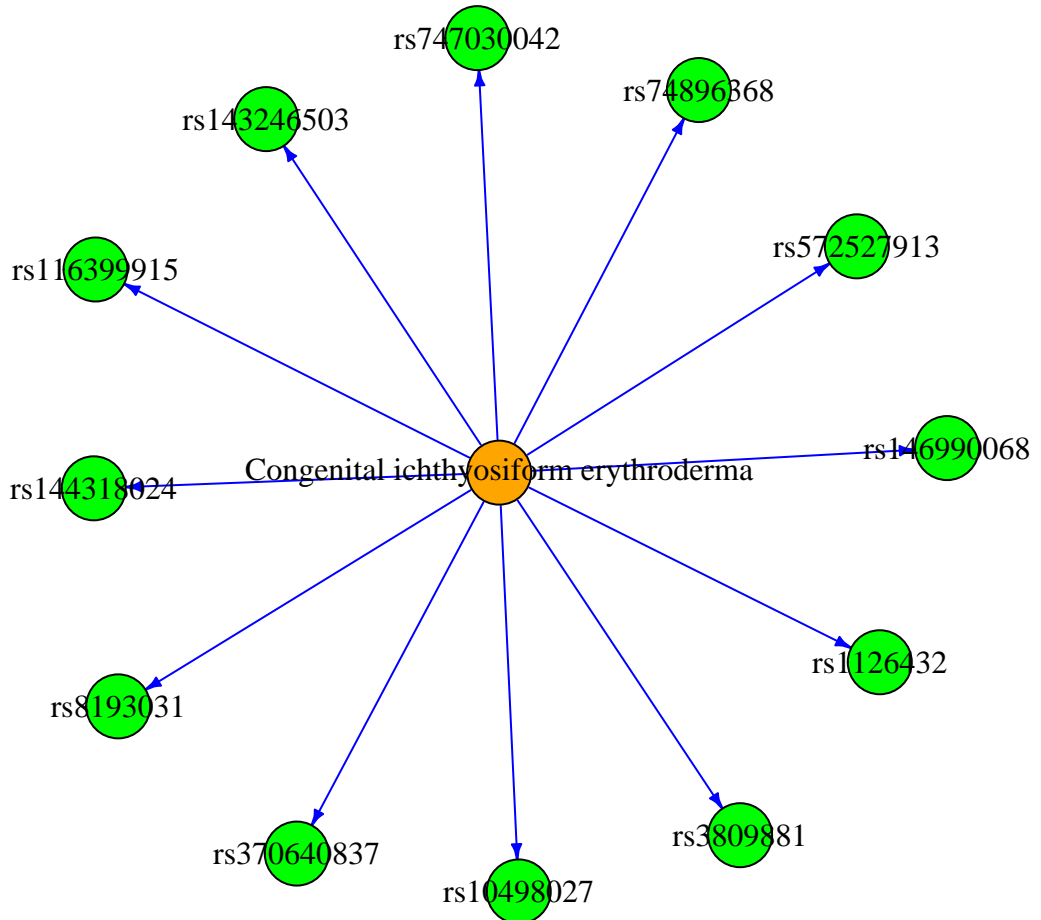

# Variant–Disease Network (Congenital ichthyosis of skin)

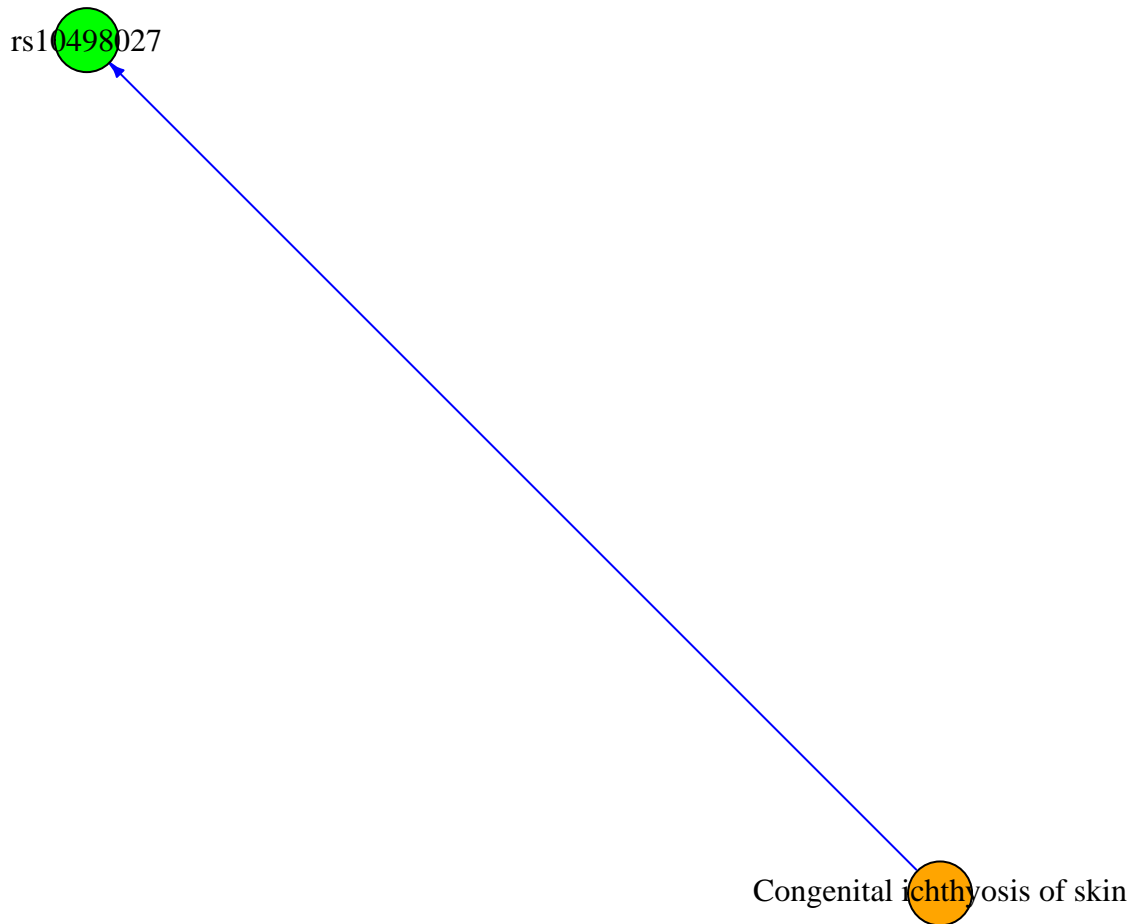

**Variant–Disease Network (Congenital lactase deficiency)**

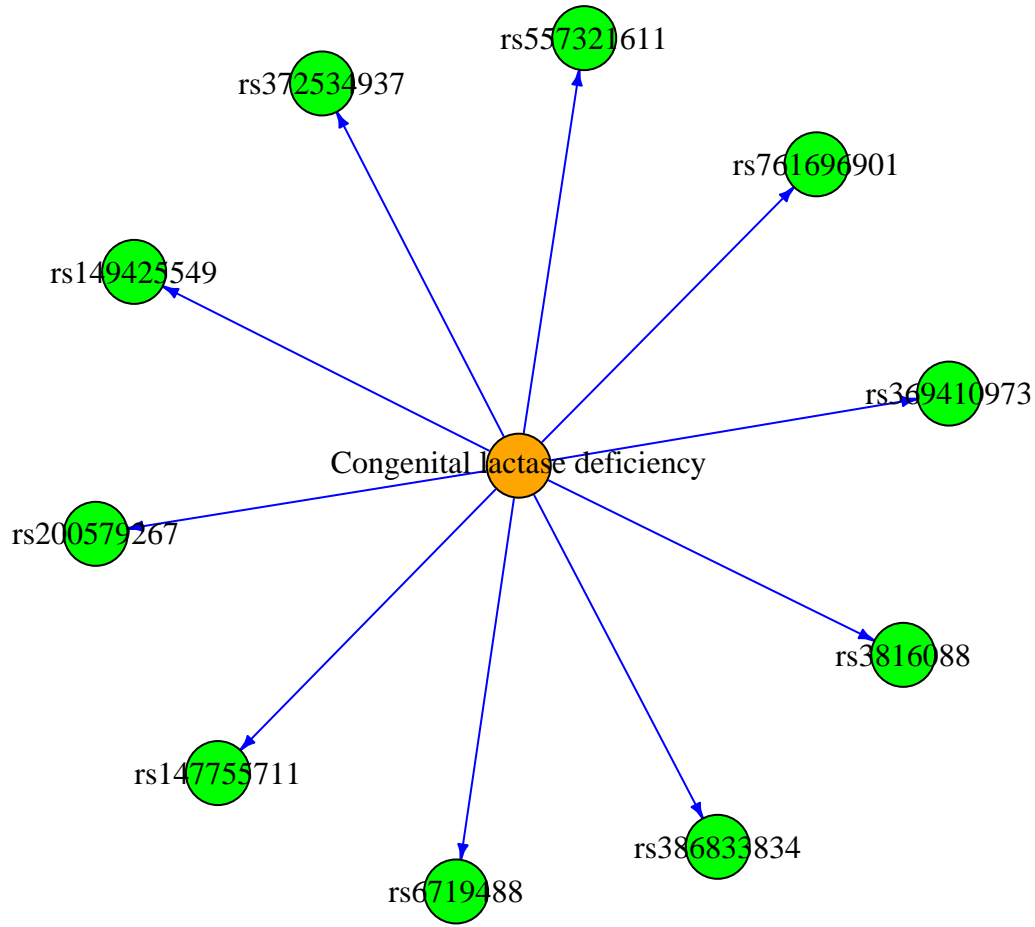

**Variant–Disease Network (Congenital long QT syndrome)**

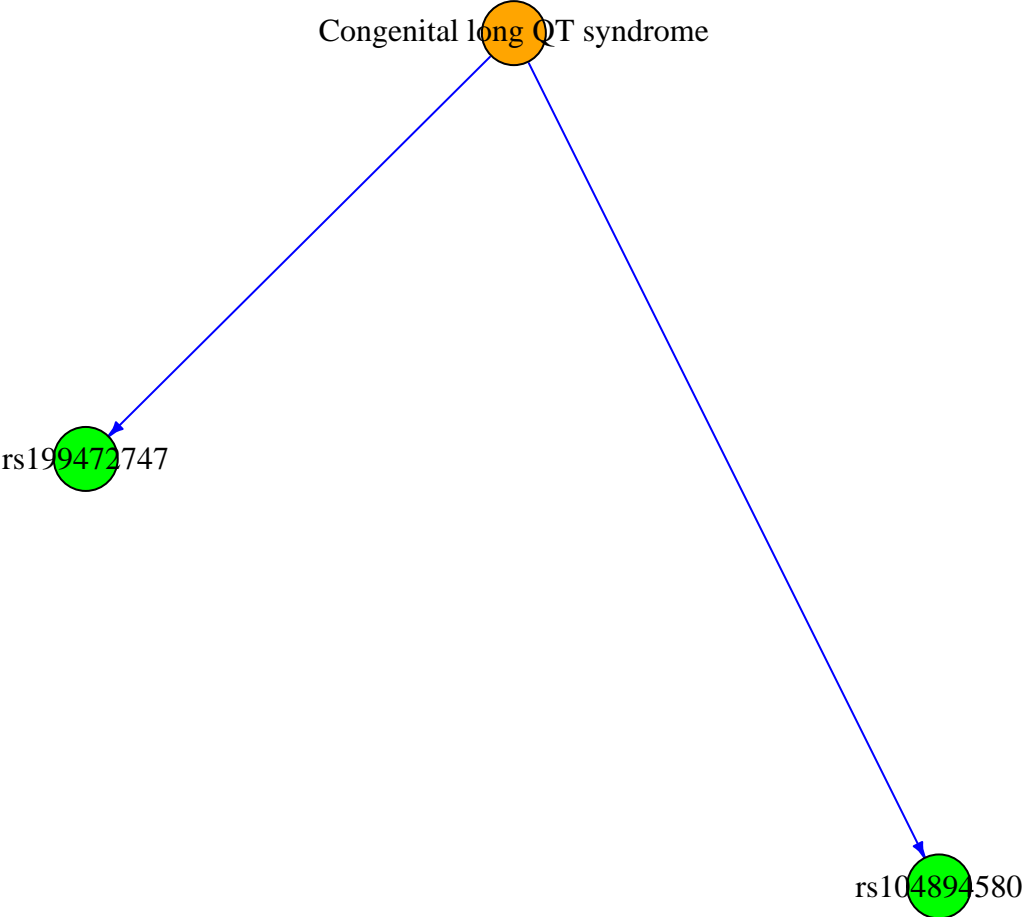

Variant–Disease Network (Congenital Muscular Dystrophy)

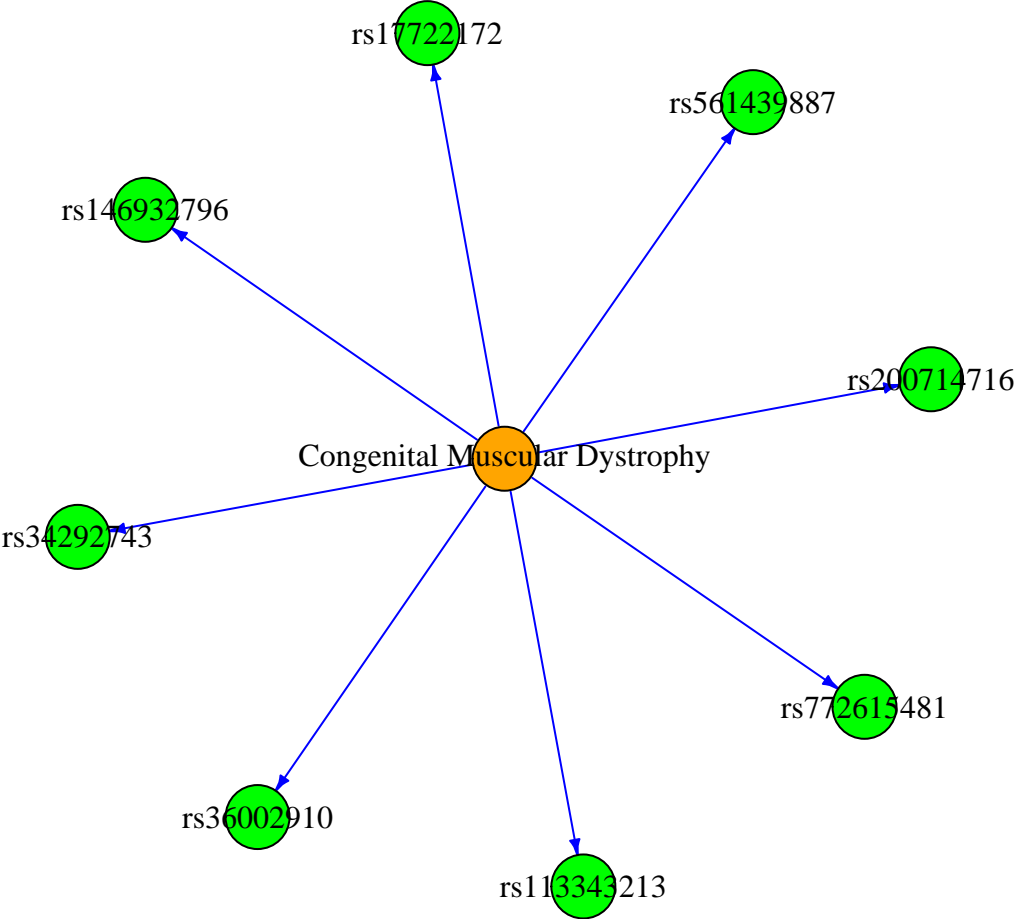



ork (Congenital muscular dystrophy–dystroglycanopathy (with or without m

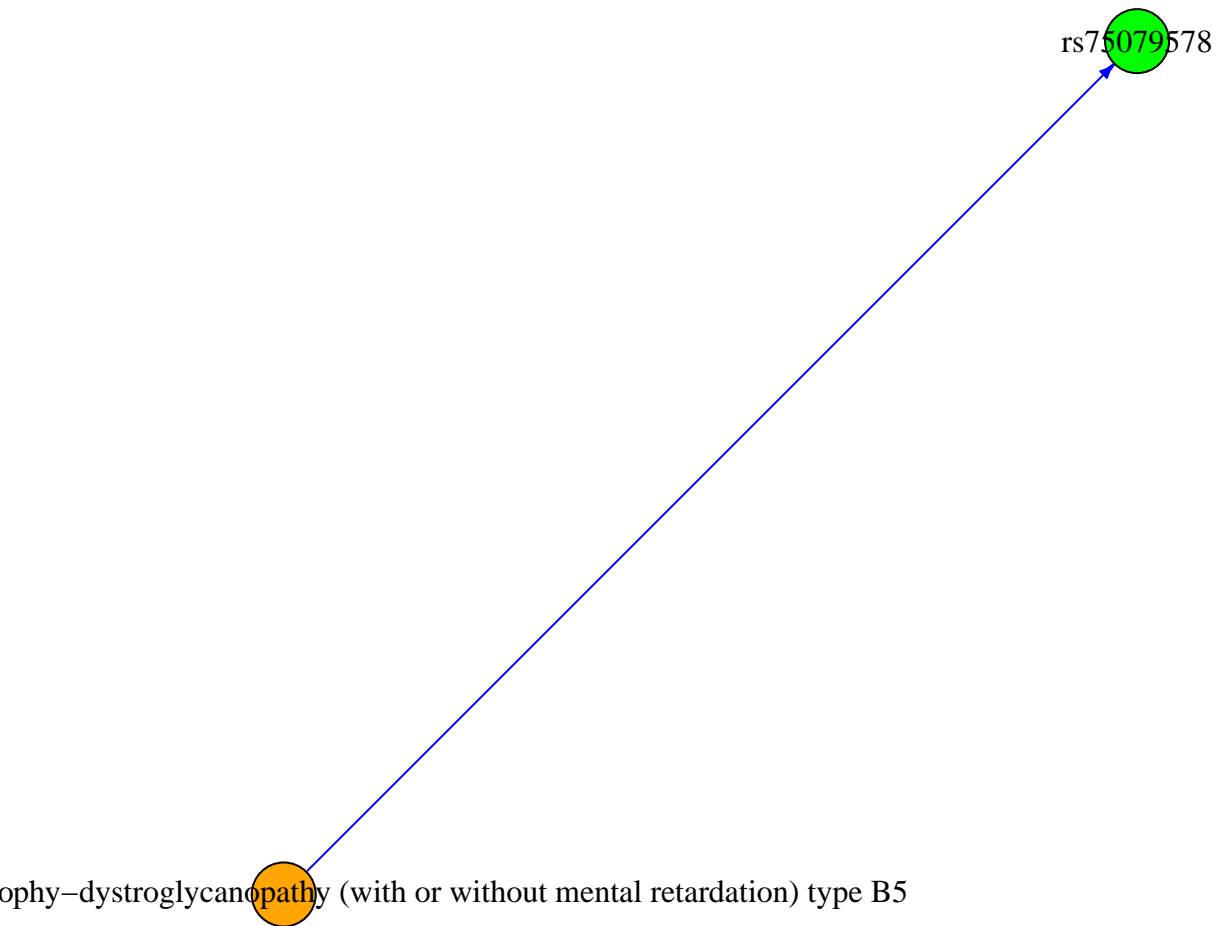

# Case Network (Congenital muscular dystrophy–dystroglycanopathy with brain a

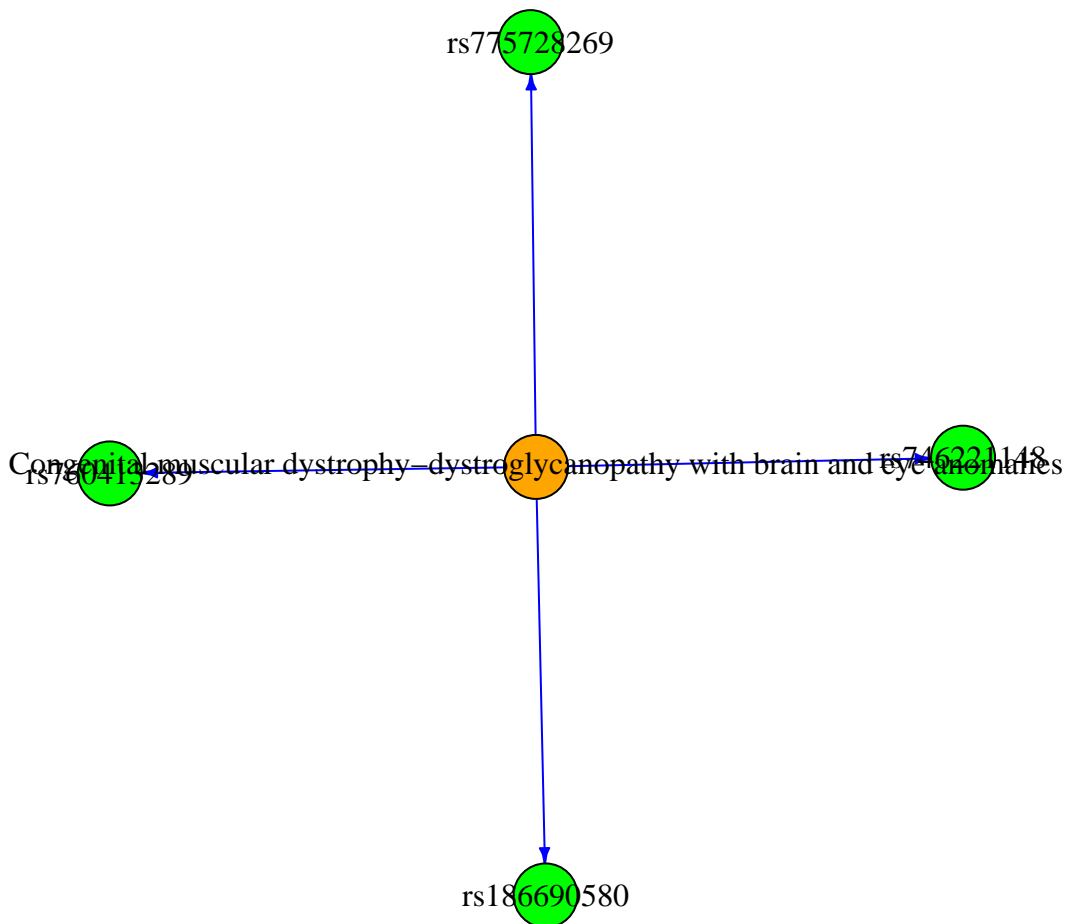

Network (Congenital muscular dystrophy–dystroglycanopathy with brain and c

rs75079578

Congenital muscular dystrophy–dystroglycanopathy with brain

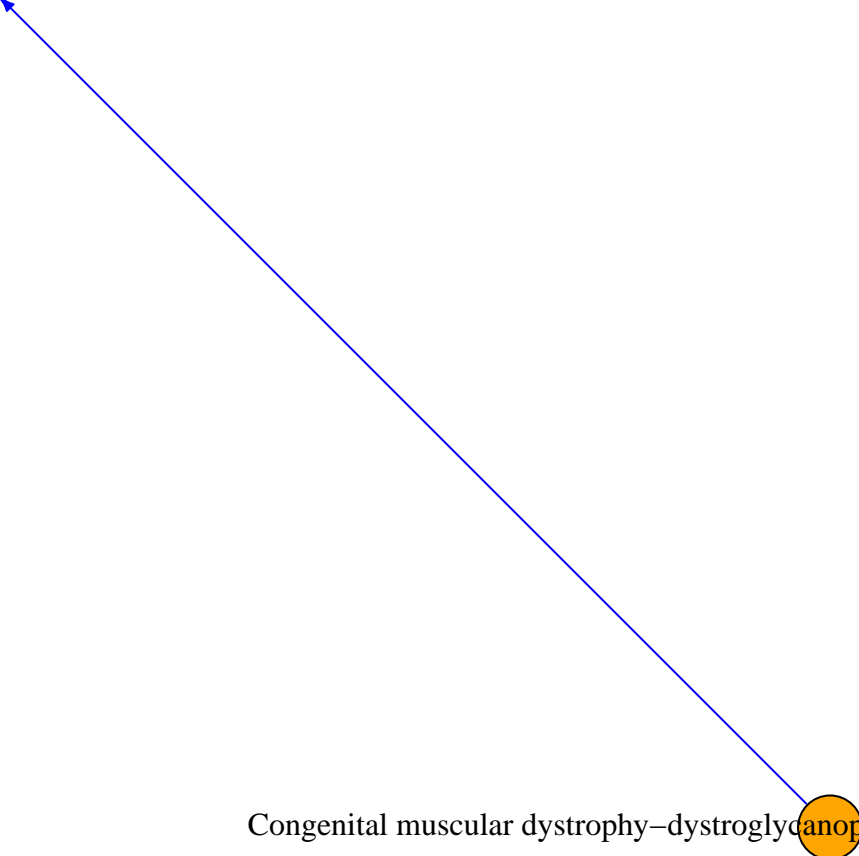

# Disease Network (Congenital muscular dystrophy–dystroglycanopathy with me

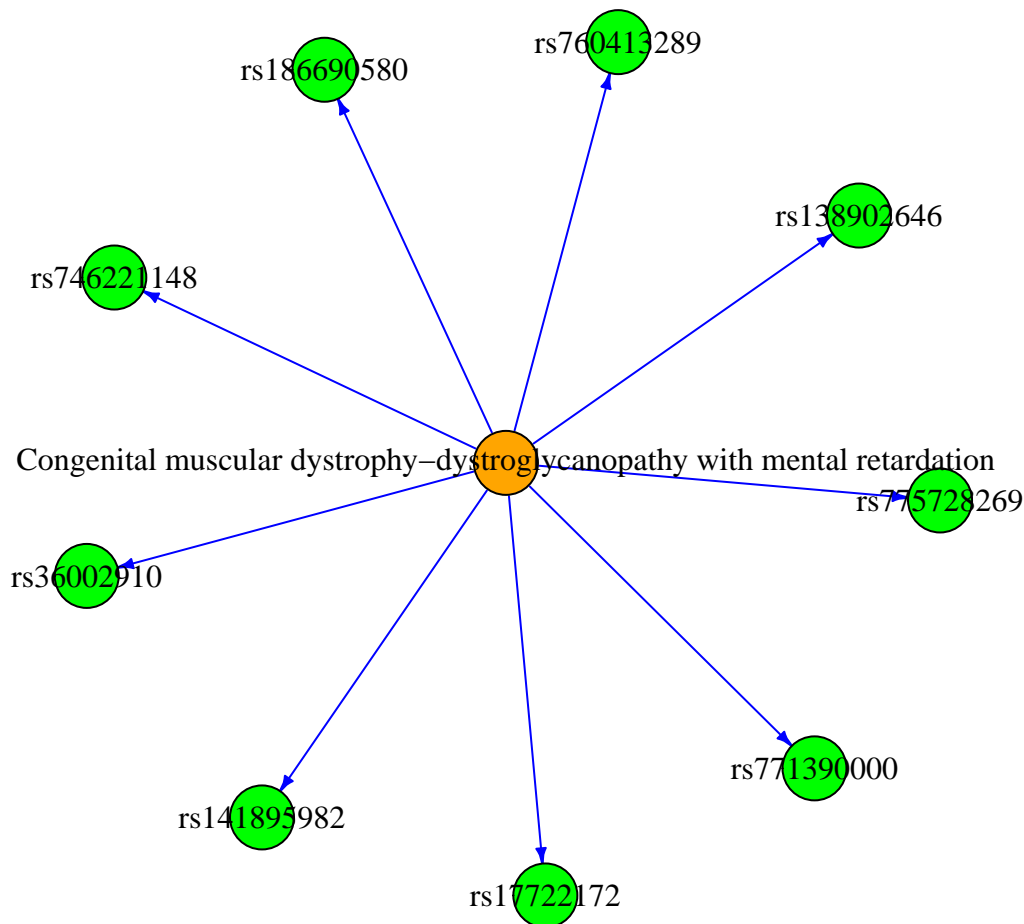

# Variant–Disease Network (Congenital muscular hypertrophy–cerebral syndrome)

congenital muscular hypertrophy–cerebral syndrome

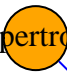

rs372307204

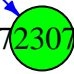

Variant–Disease Network (Congenital Myasthenic Syndrome)

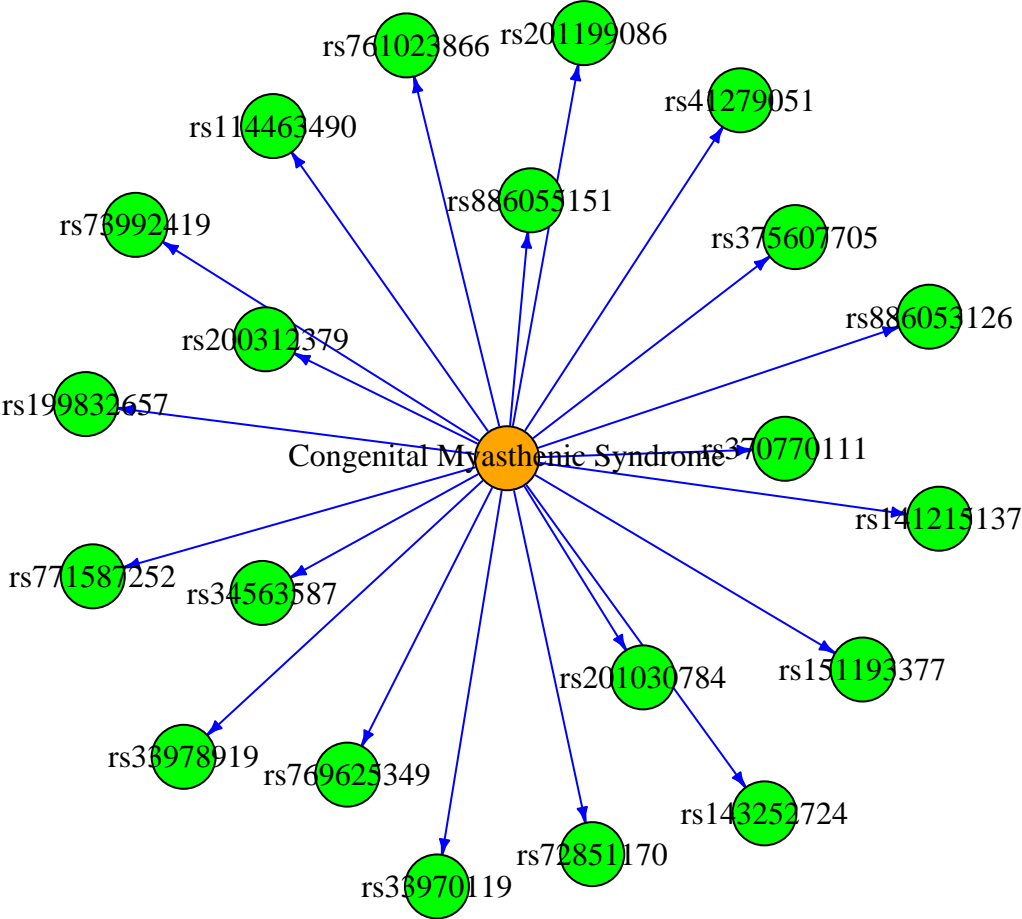

## Variant–Disease Network (Congenital myasthenic syndrome 12)

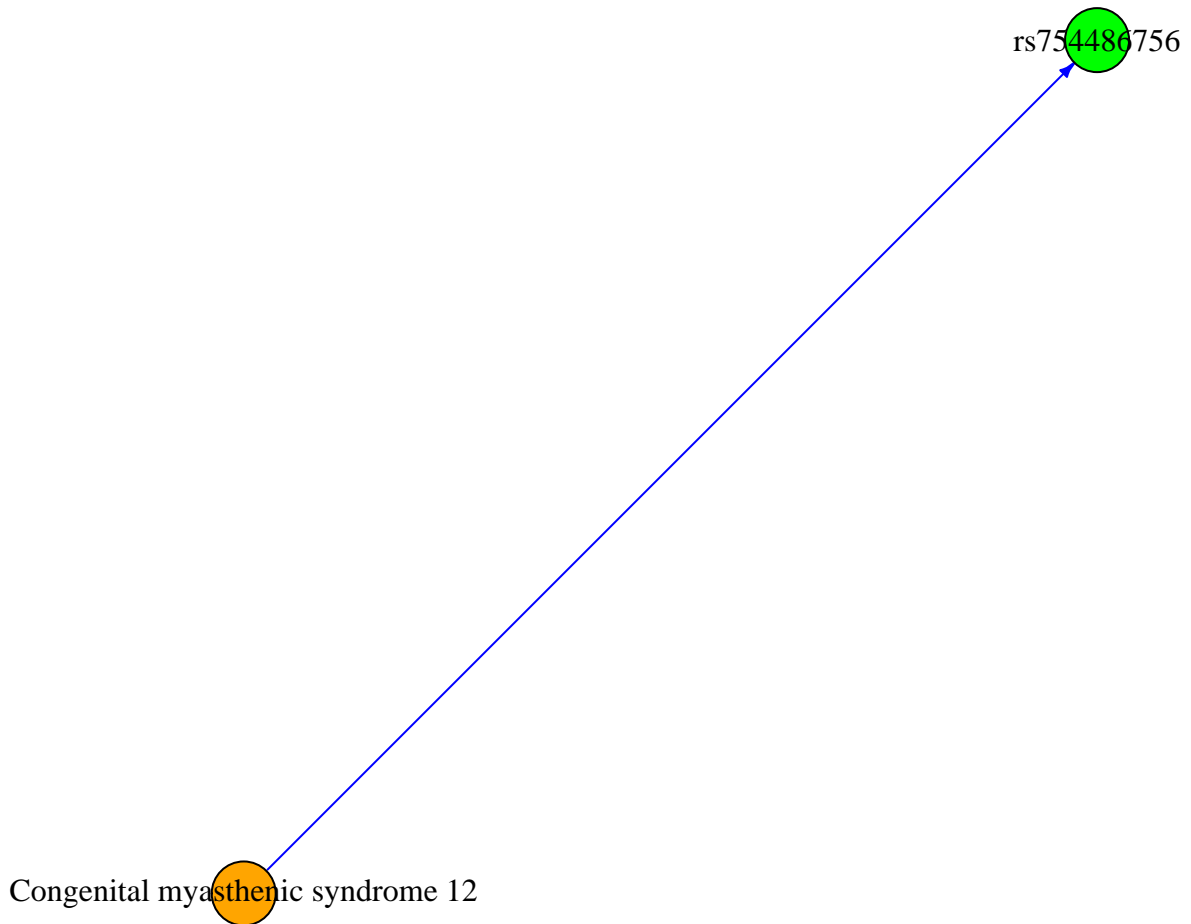

## Variant-Disease Network (Congenital myotonia)

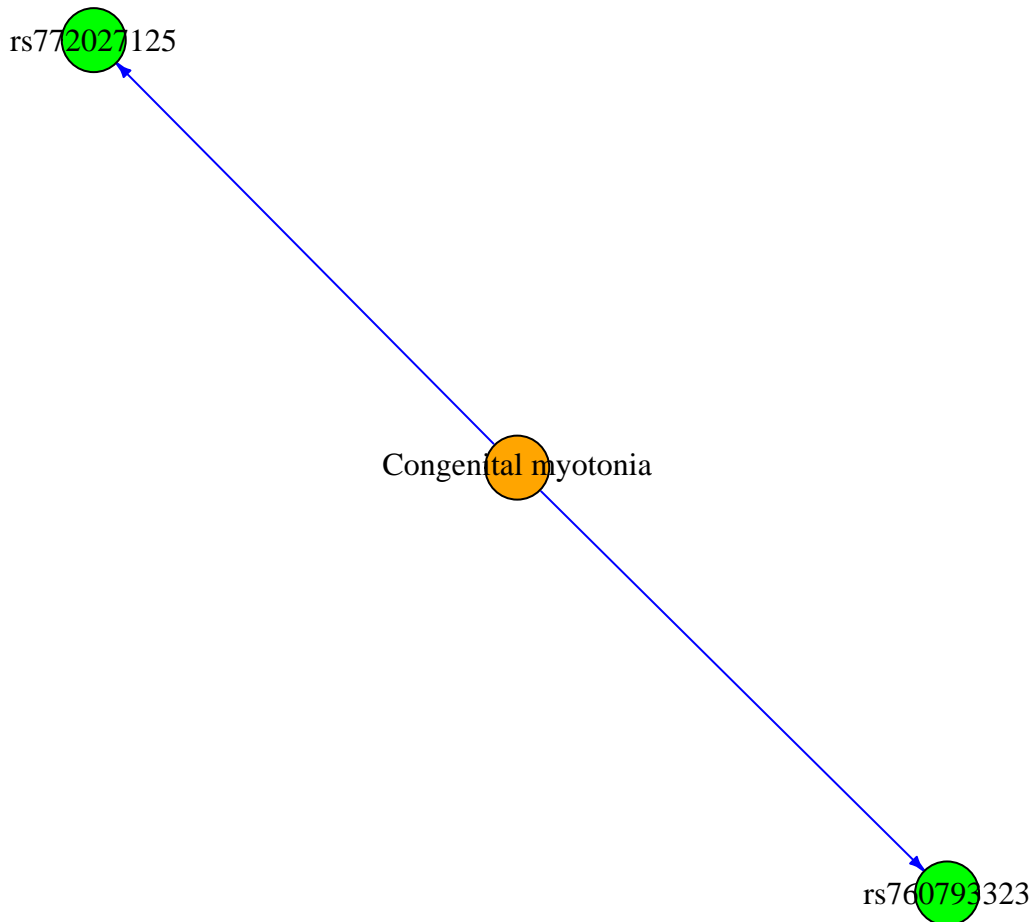



Variant–Disease Network (Congenital secretory diarrhea)

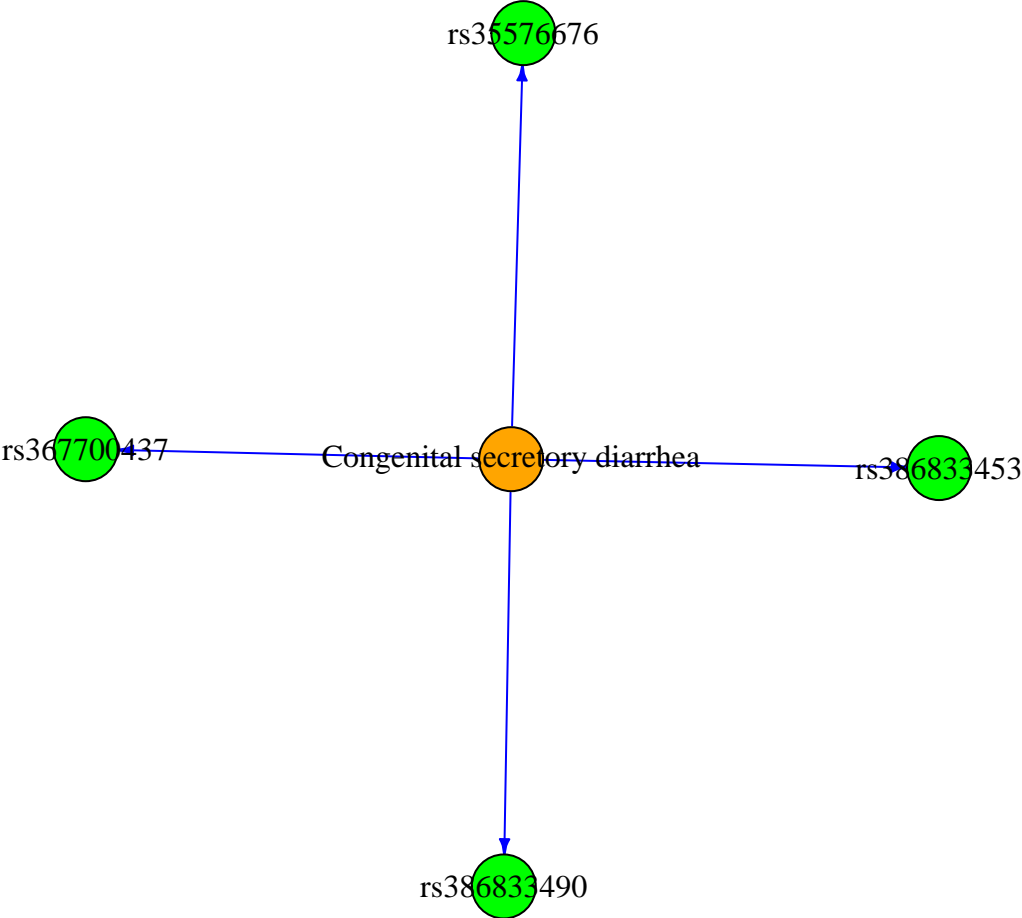

# Disease Network (Congenital sensory neuropathy with selective loss of small m

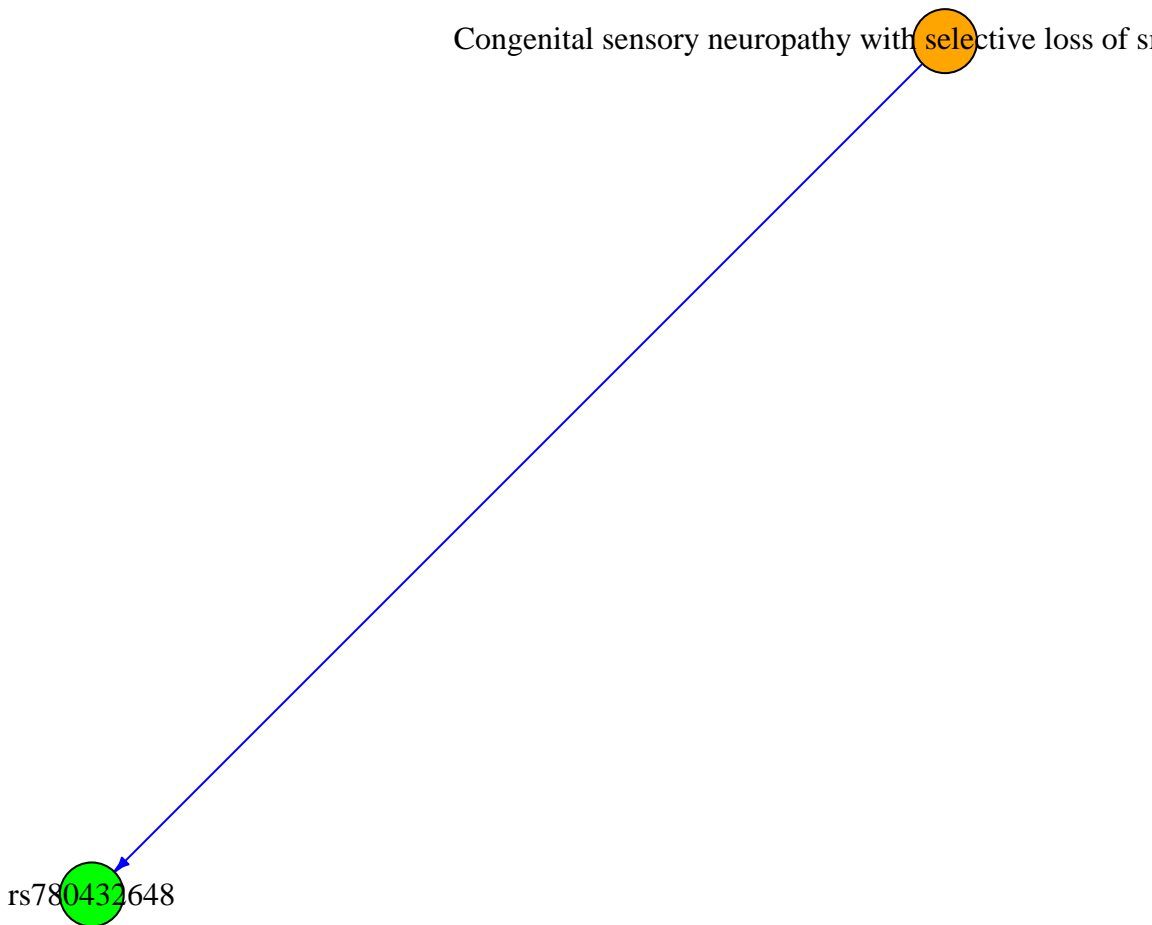

# Variant–Disease Network (Congenital Stationary Night Blindness)

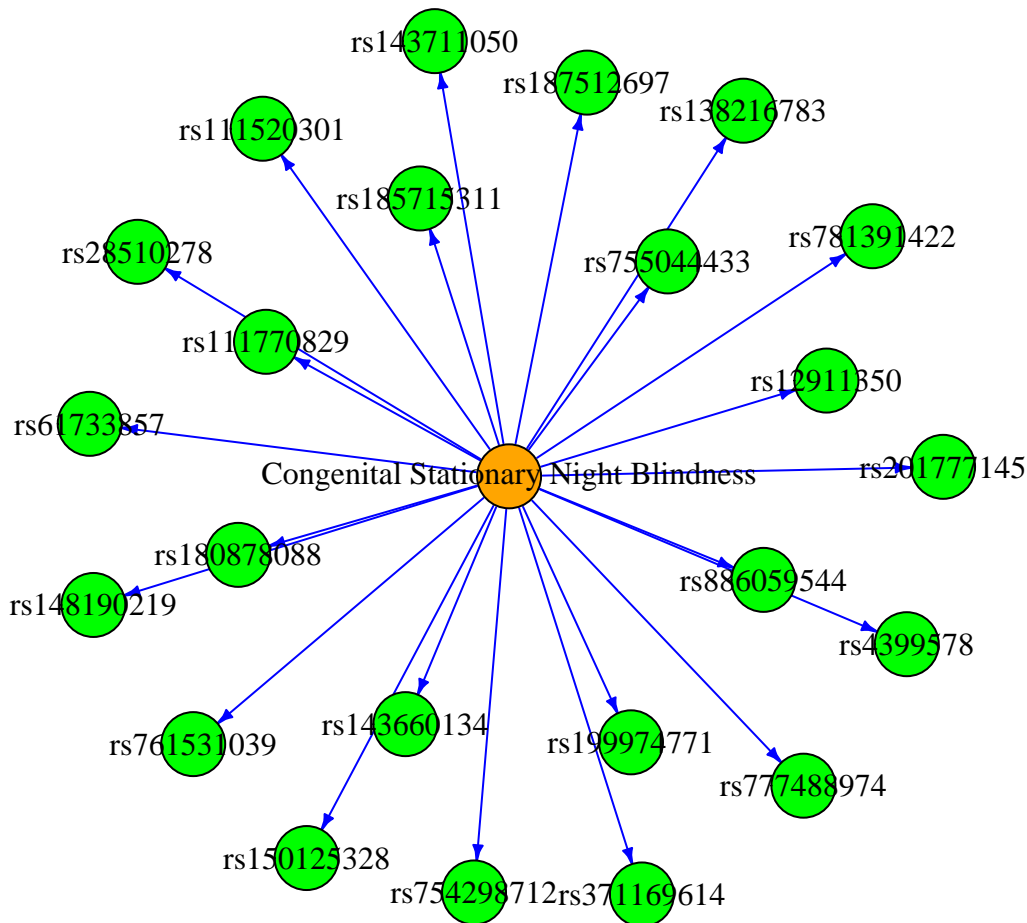

## Variant–Disease Network (Connective tissue disorder)

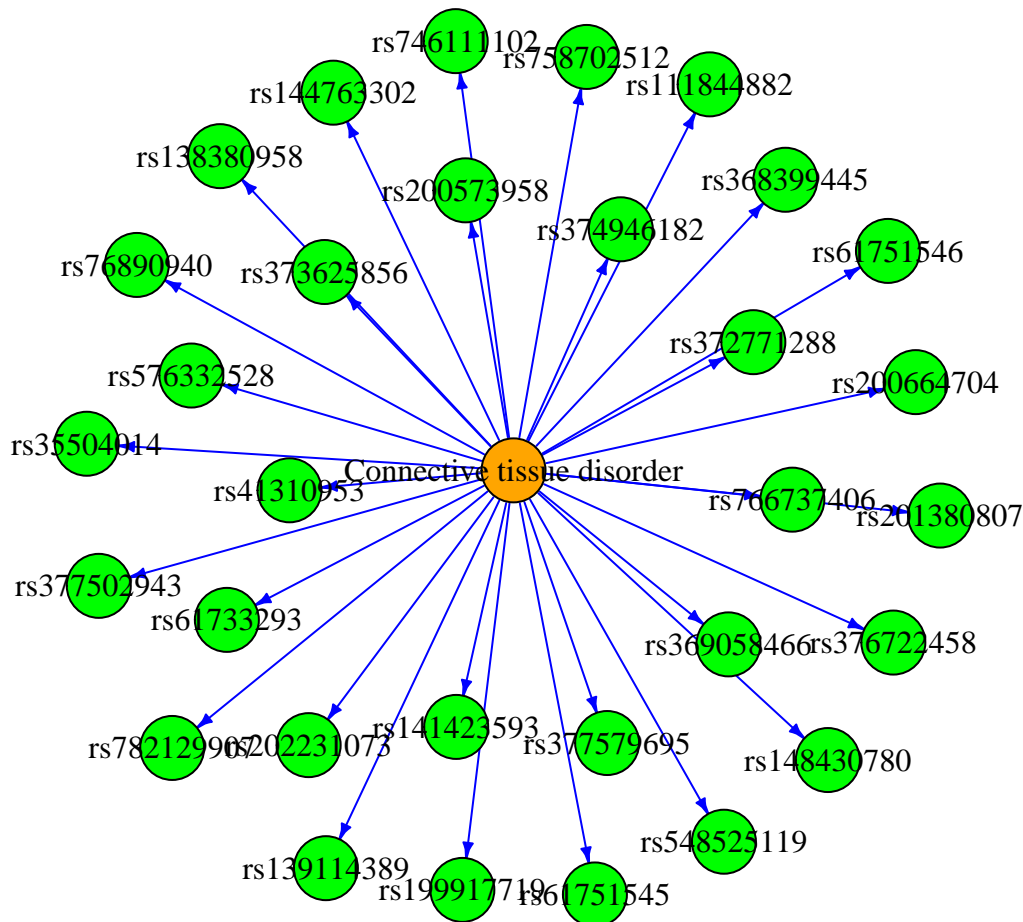

## Variant–Disease Network (Corneal Dystrophy)

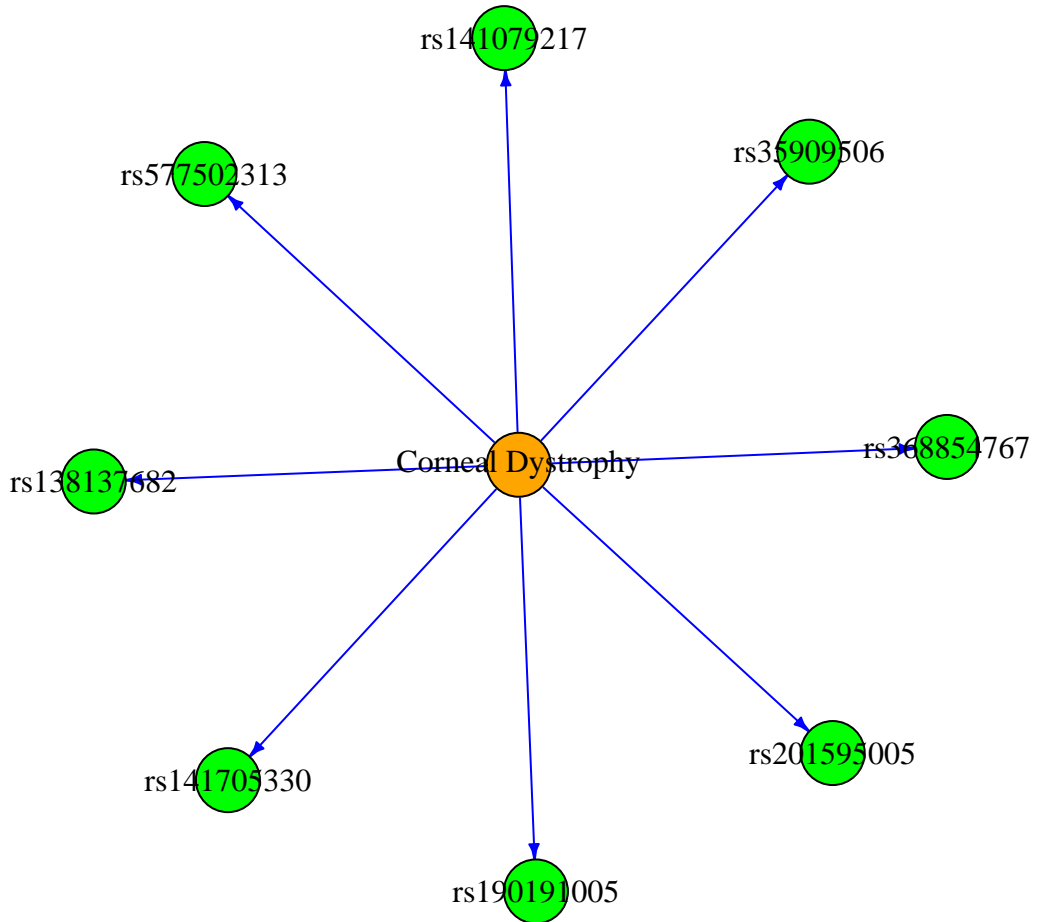

# Variant–Disease Network (Cornelia de Lange Syndrome)

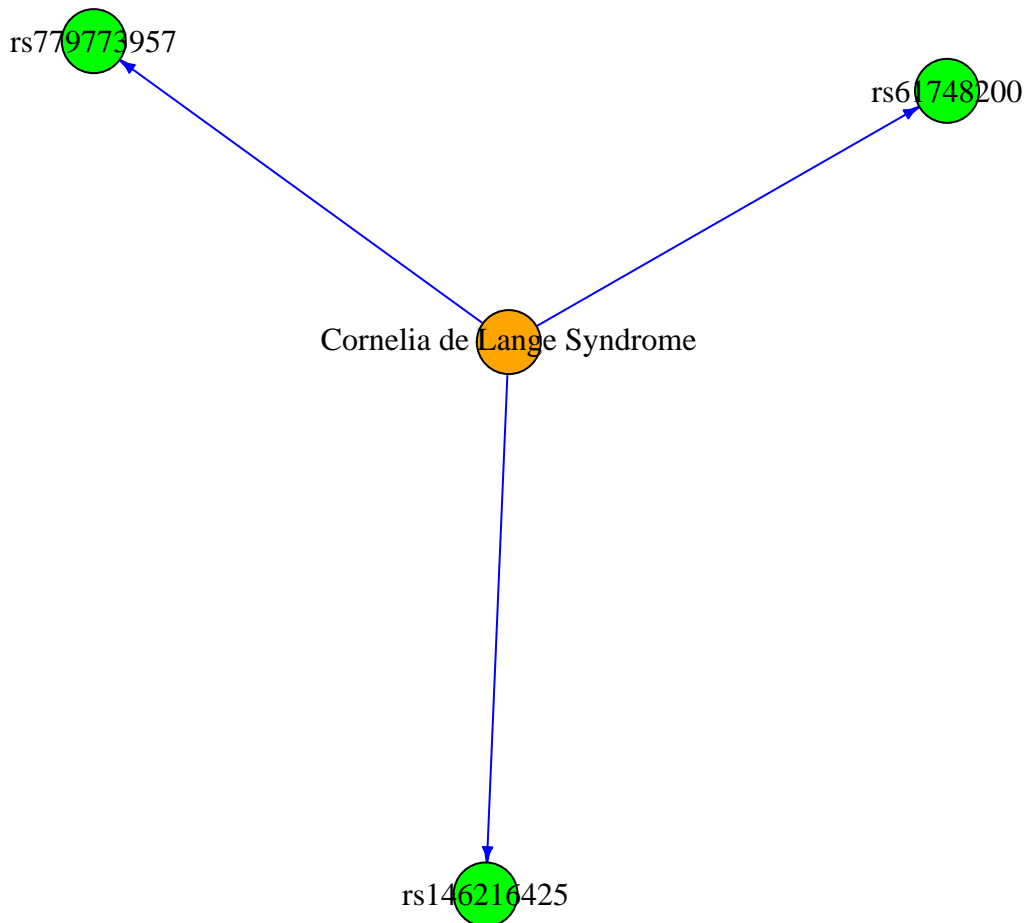

**Variant–Disease Network (Cornelia de Lange syndrome 1)**

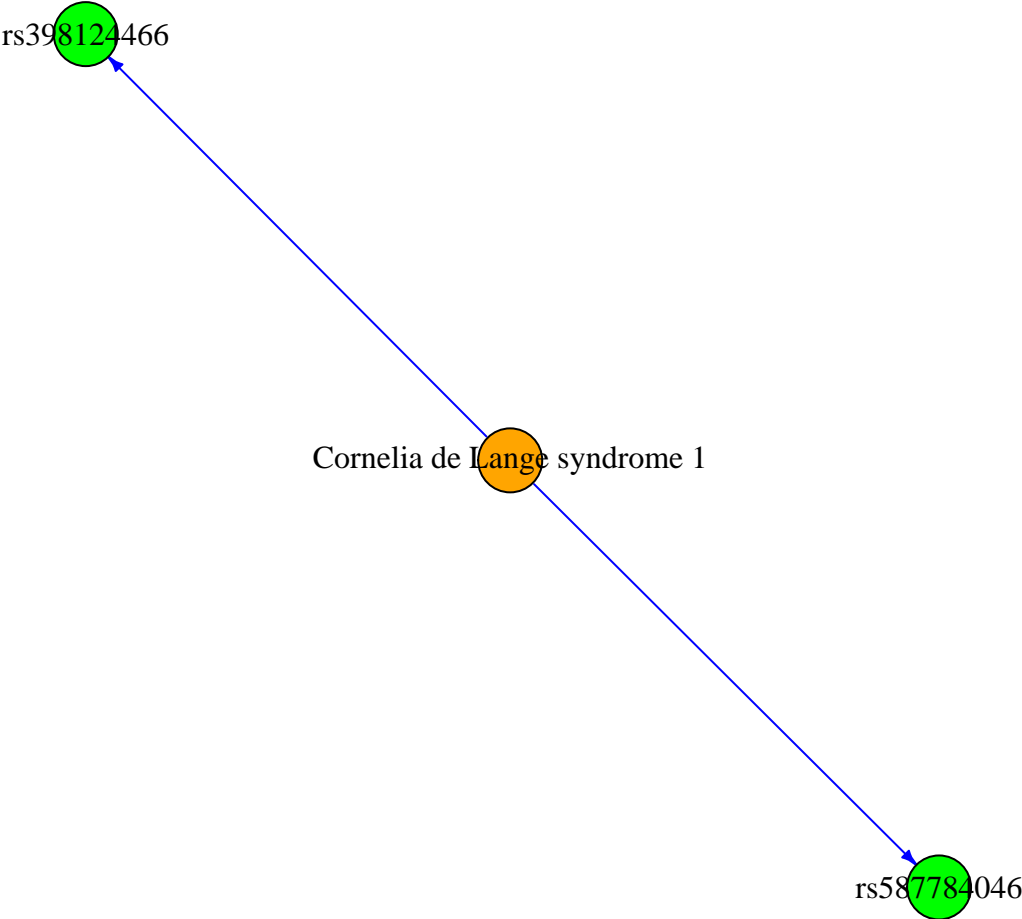

## Variant–Disease Network (Cortical malformations)

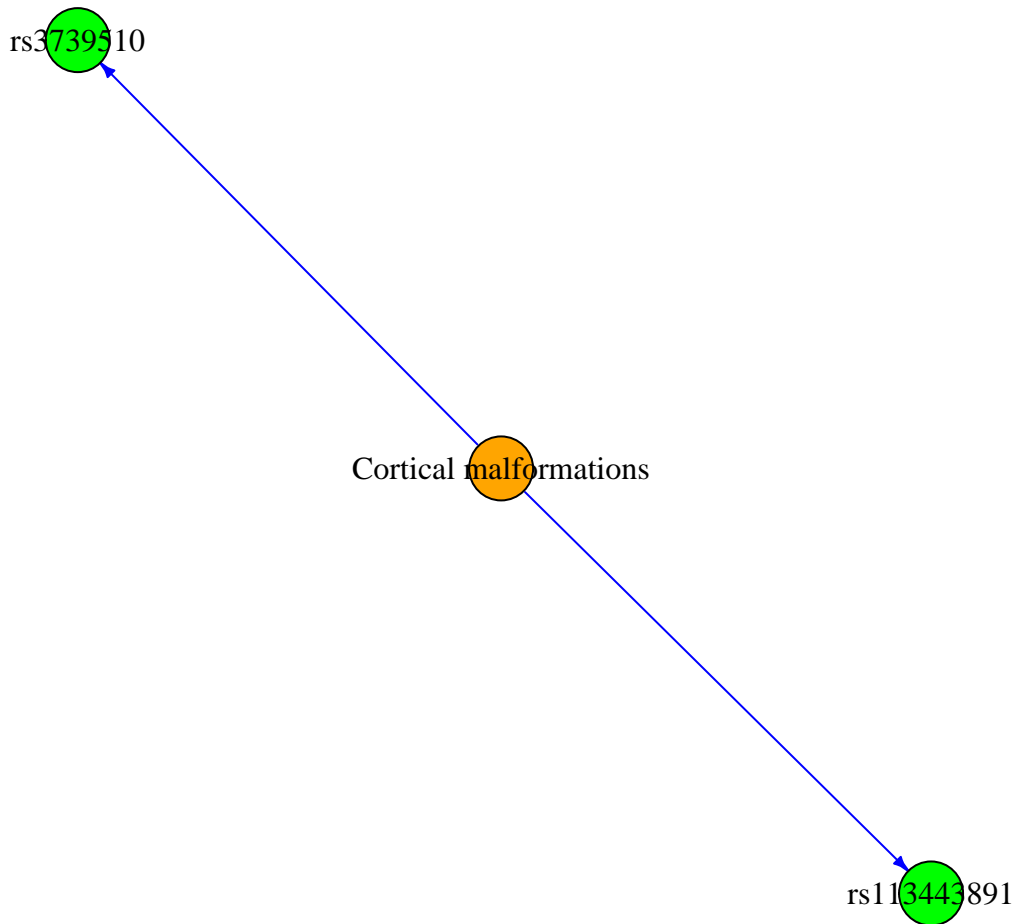



Variant–Disease Network (Corticosterone methyloxidase type 1 deficiency)

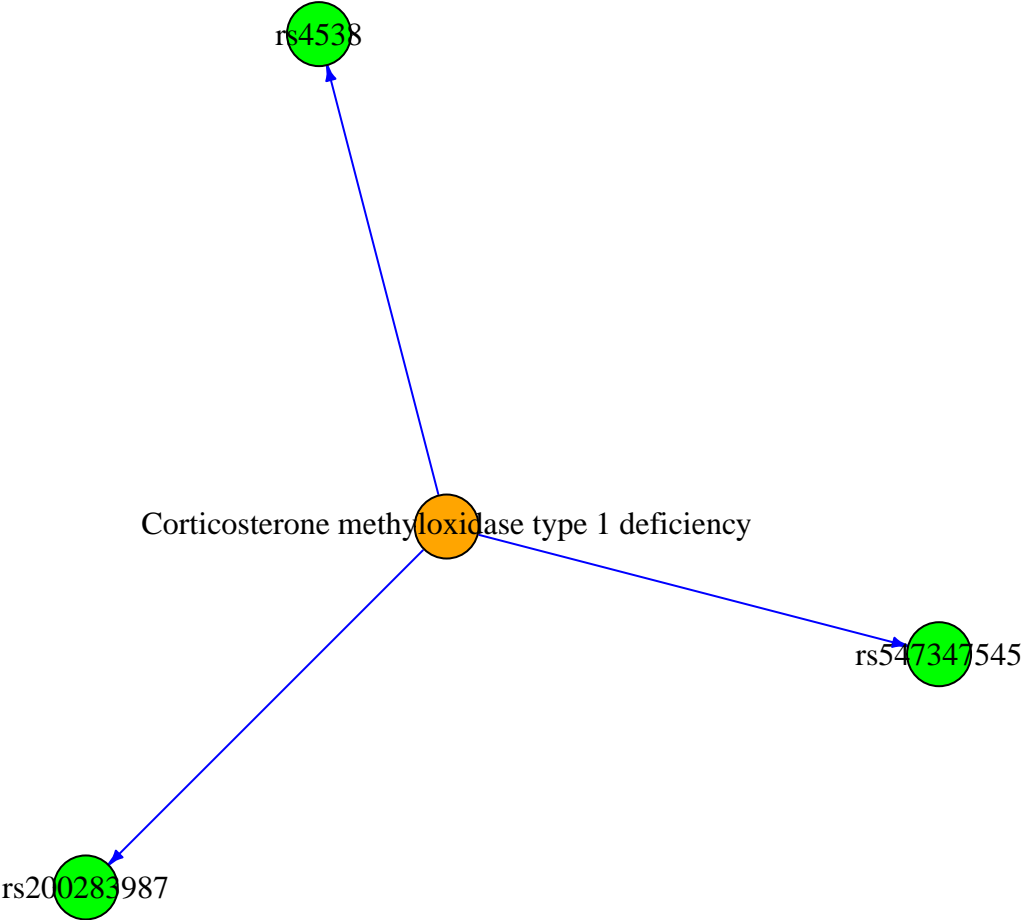

Variant–Disease Network (Corticosterone methyloxidase type 2 deficiency)

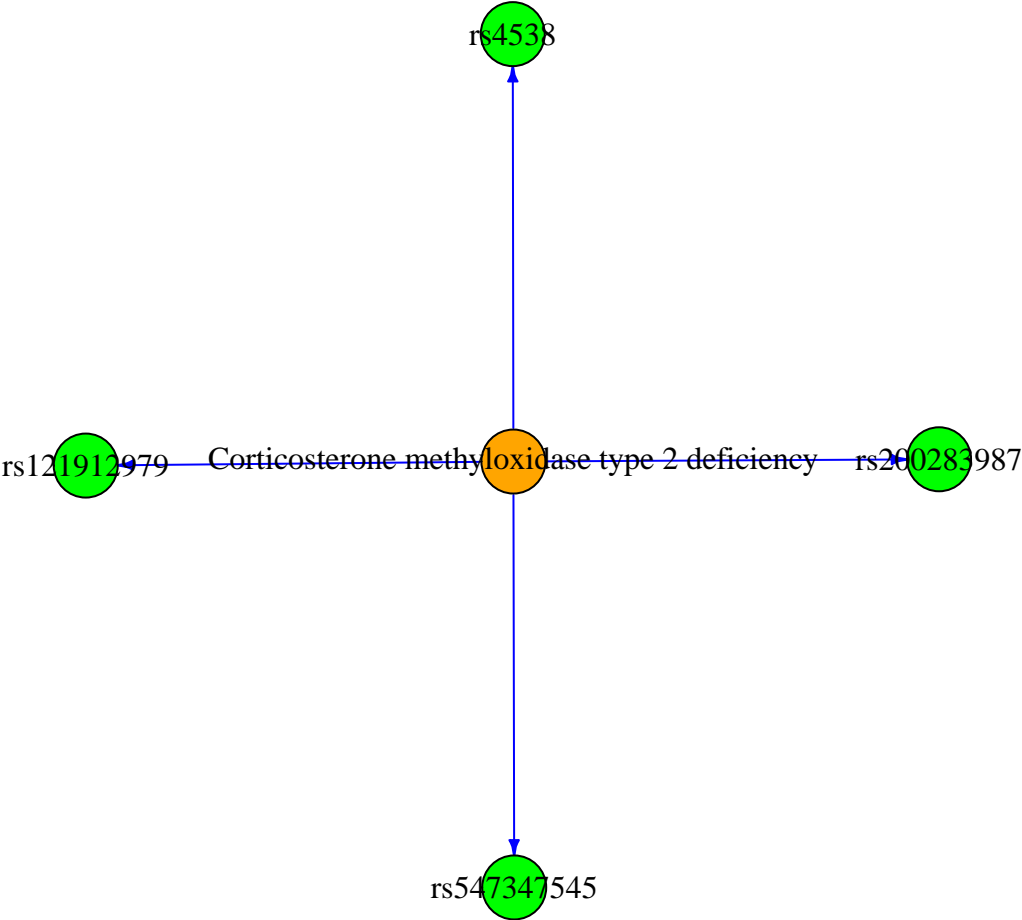

## Variant–Disease Network (Cowden syndrome)

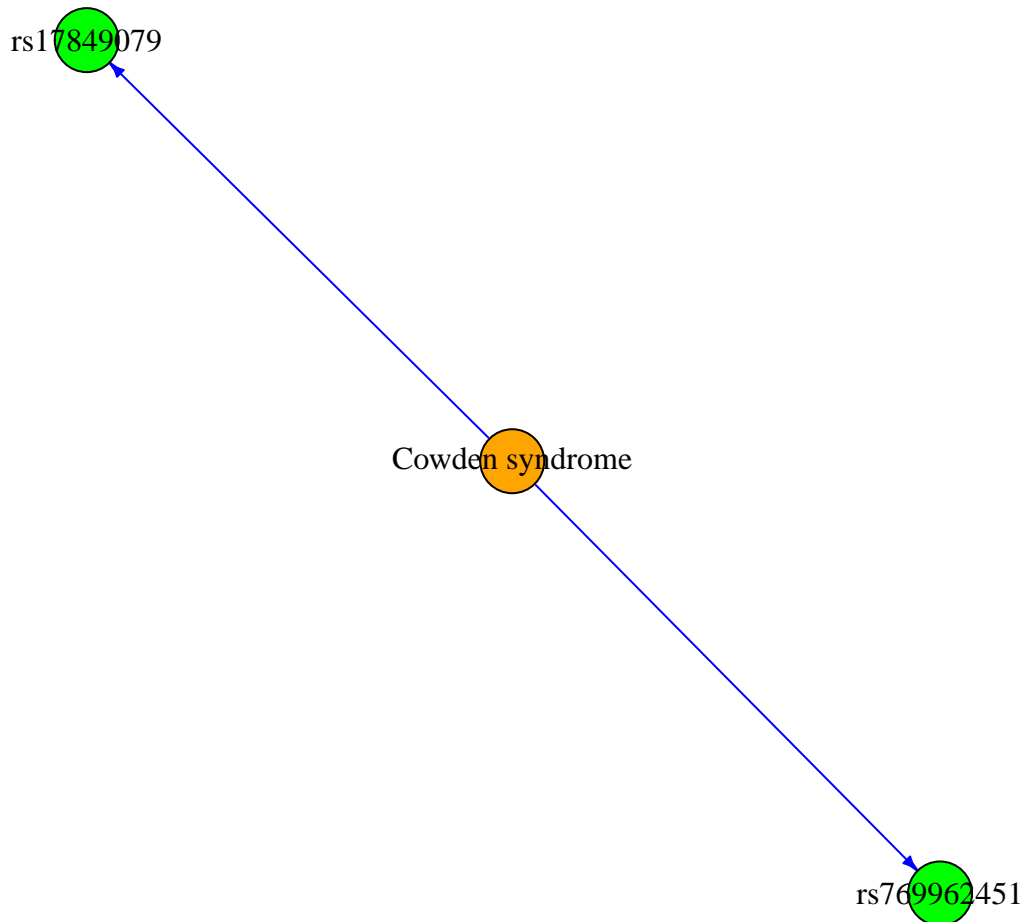

**Variant–Disease Network (Cowden syndrome 6)**

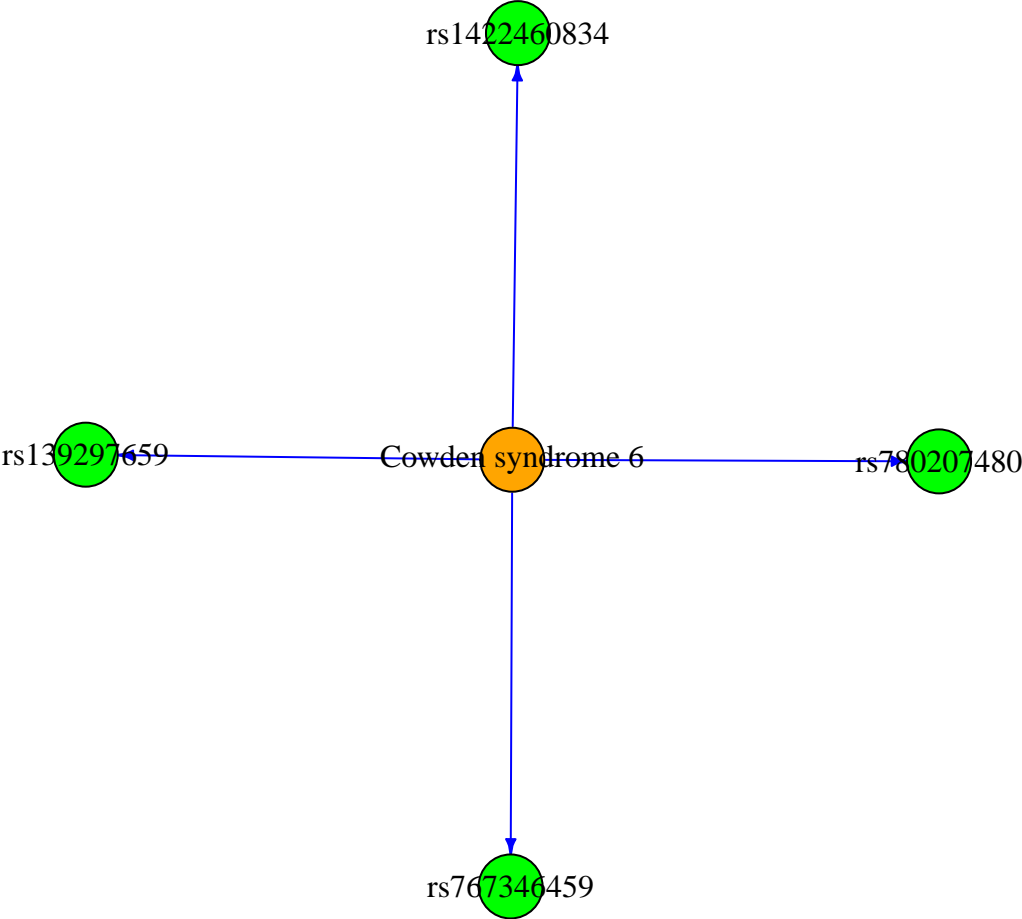

## Variant–Disease Network (Coxa plana)

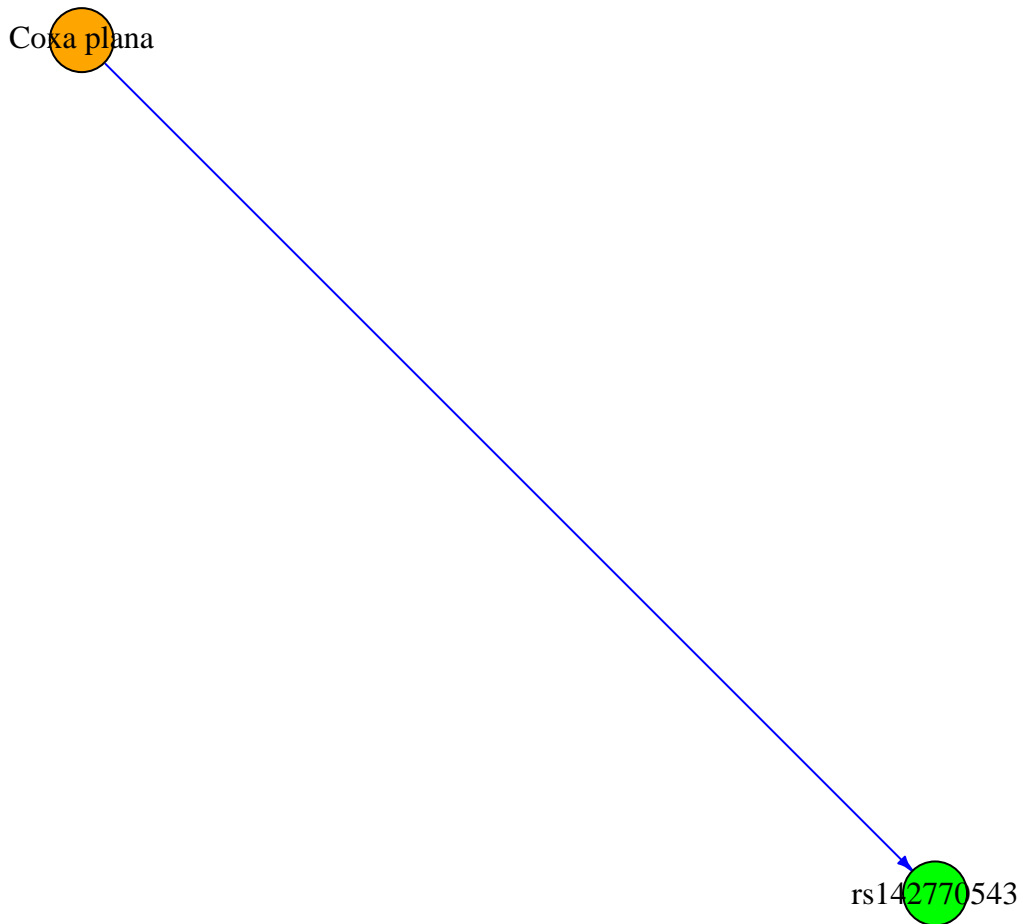

Variant–Disease Network (Cranioectodermal dysplasia)

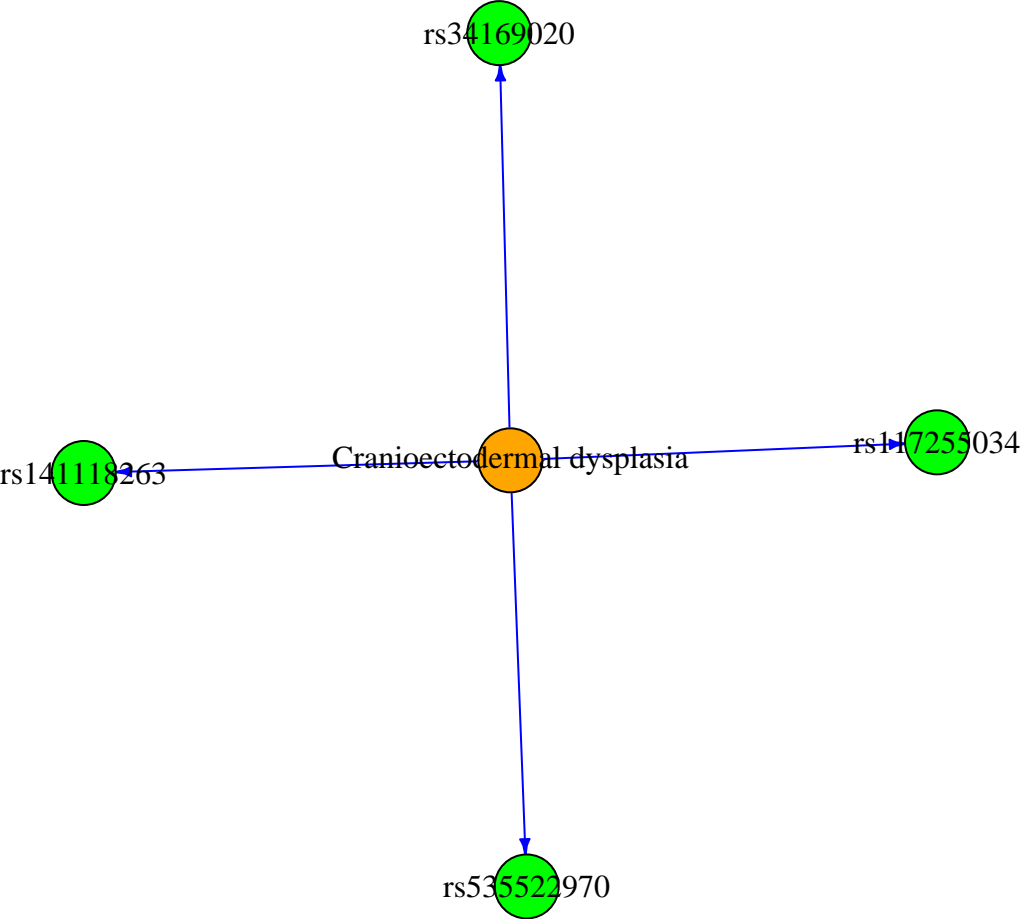

**Variant–Disease Network (Cranioectodermal dysplasia 2)**

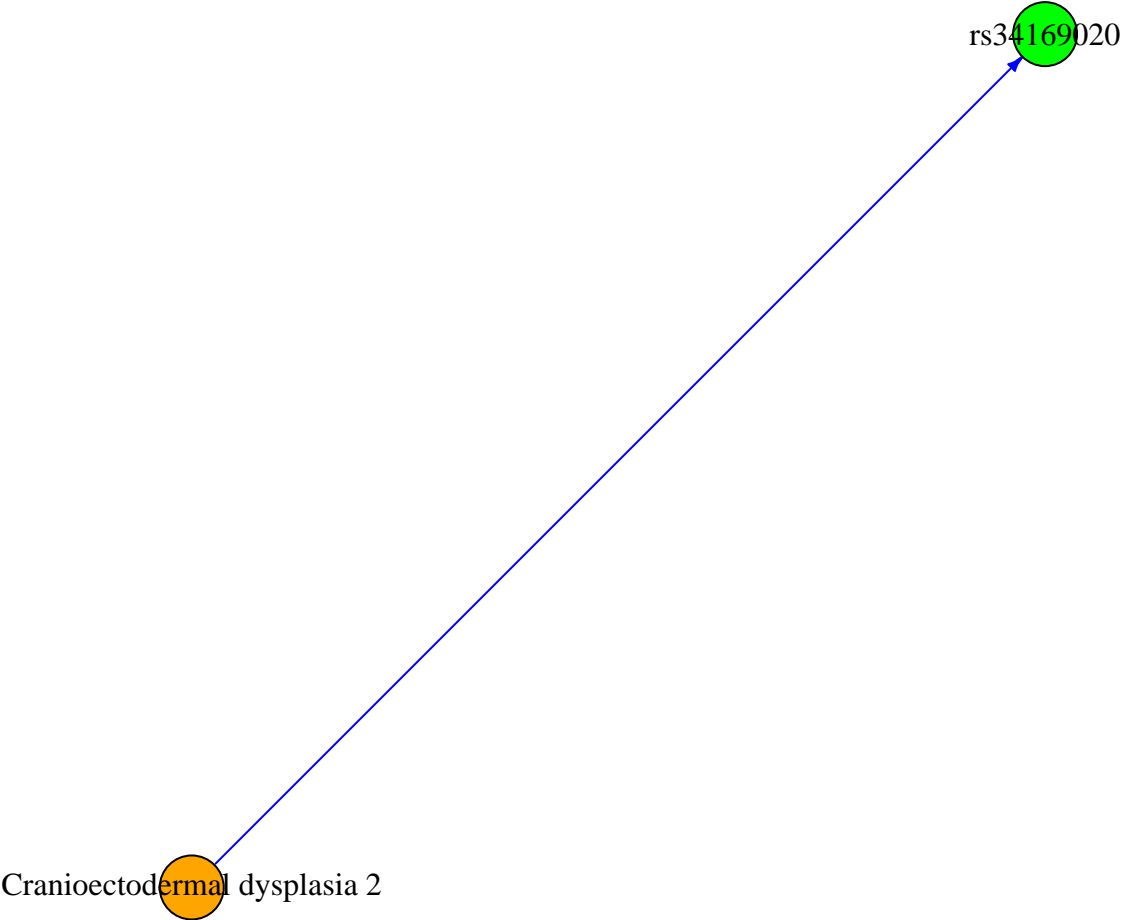

# Variant–Disease Network (Craniofacial deafness hand syndrome)

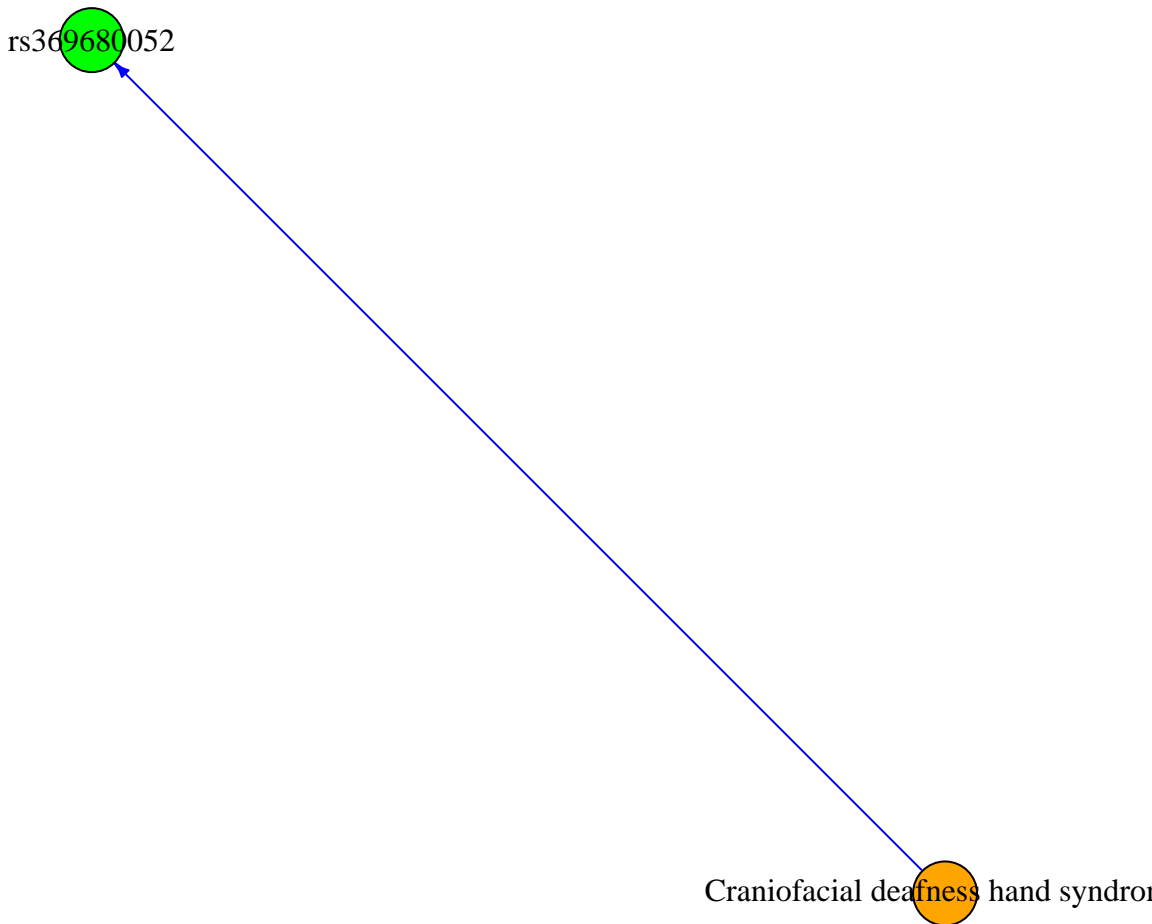



**Variant–Disease Network (Cranio metaphyseal dysplasia)**

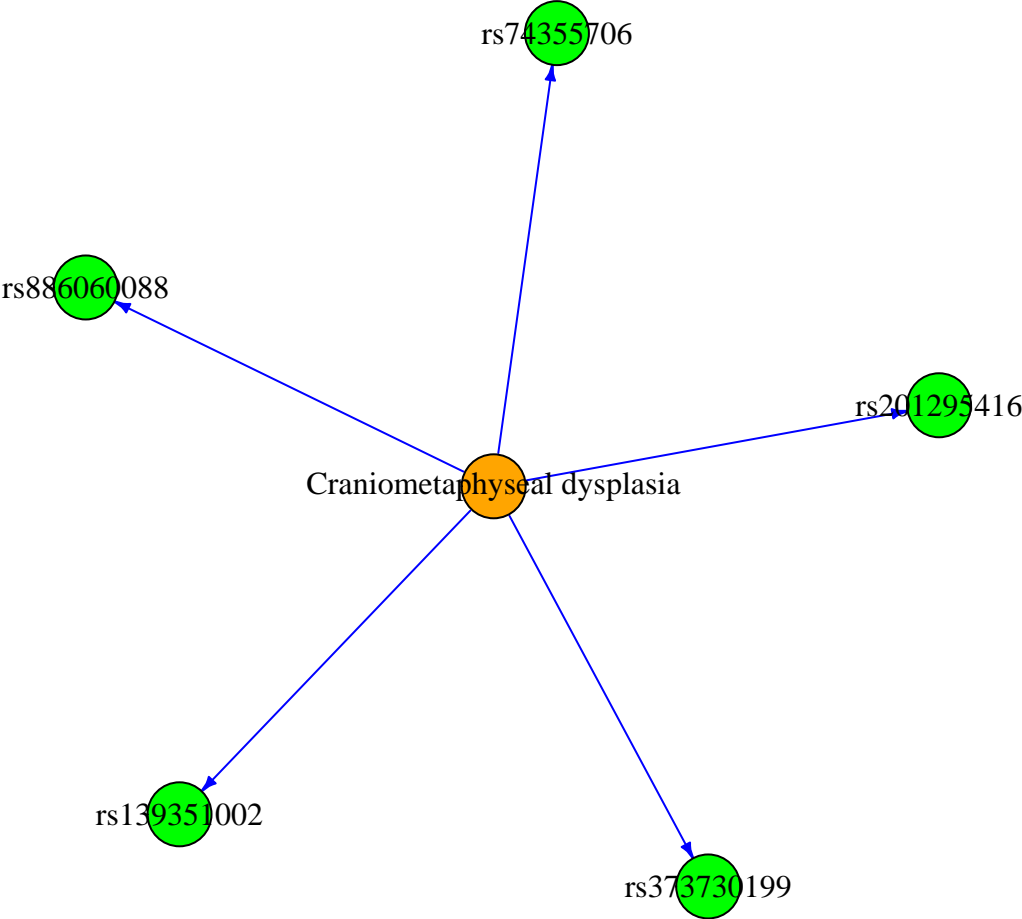

Variant–Disease Network (Craniosynostosis)

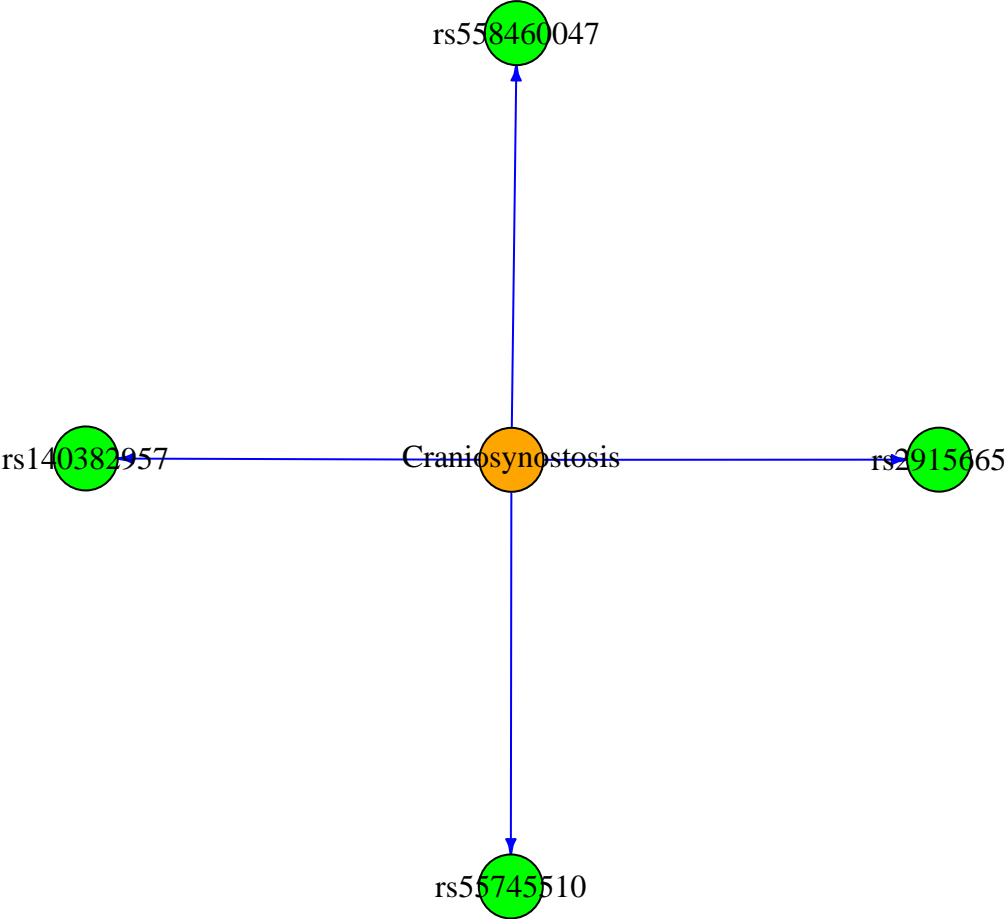

Variant–Disease Network (Crohn disease)

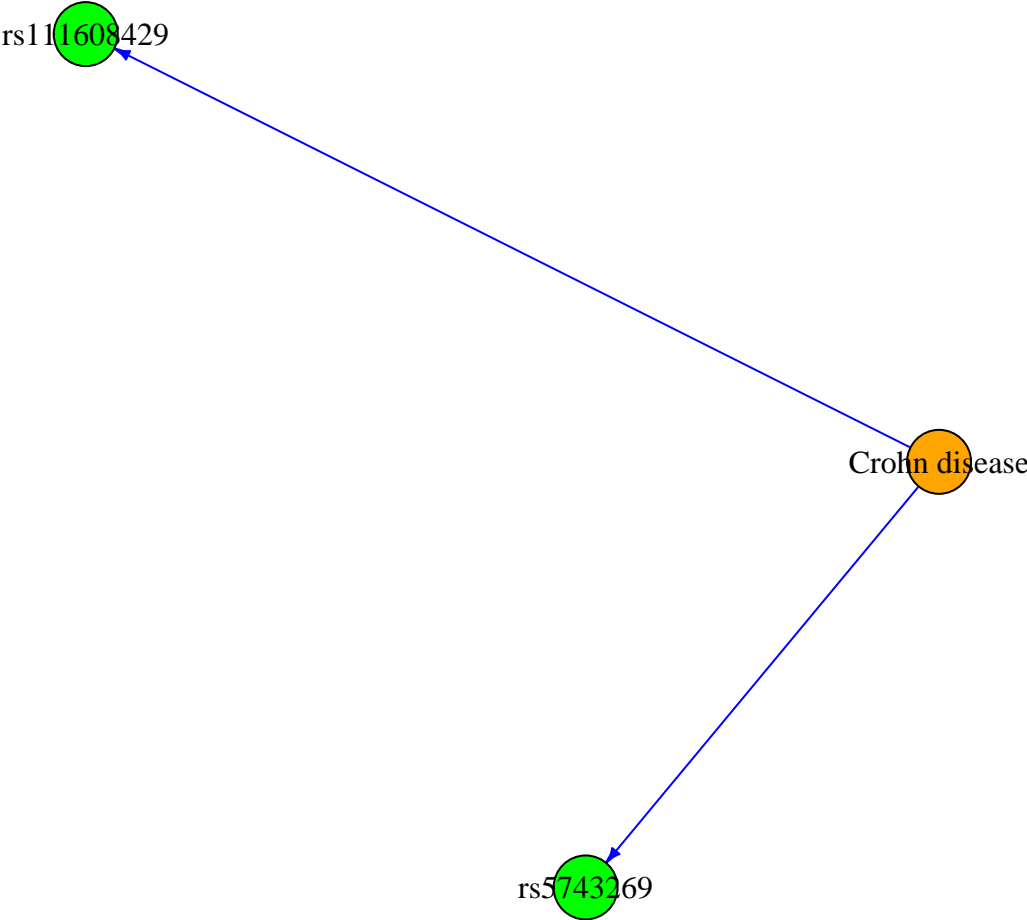

## Variant-Disease Network (Crouzon syndrome)

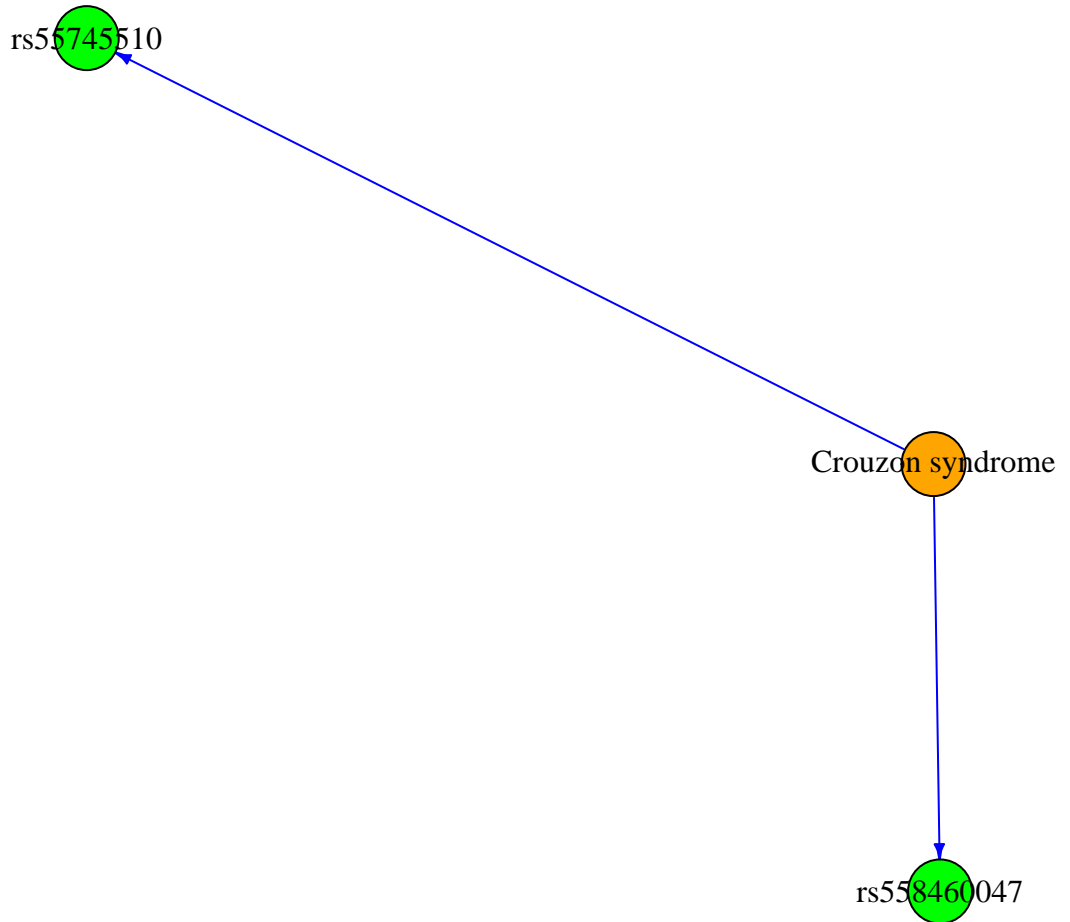

**Variant–Disease Network (Cryopyrin associated periodic syndrome)**

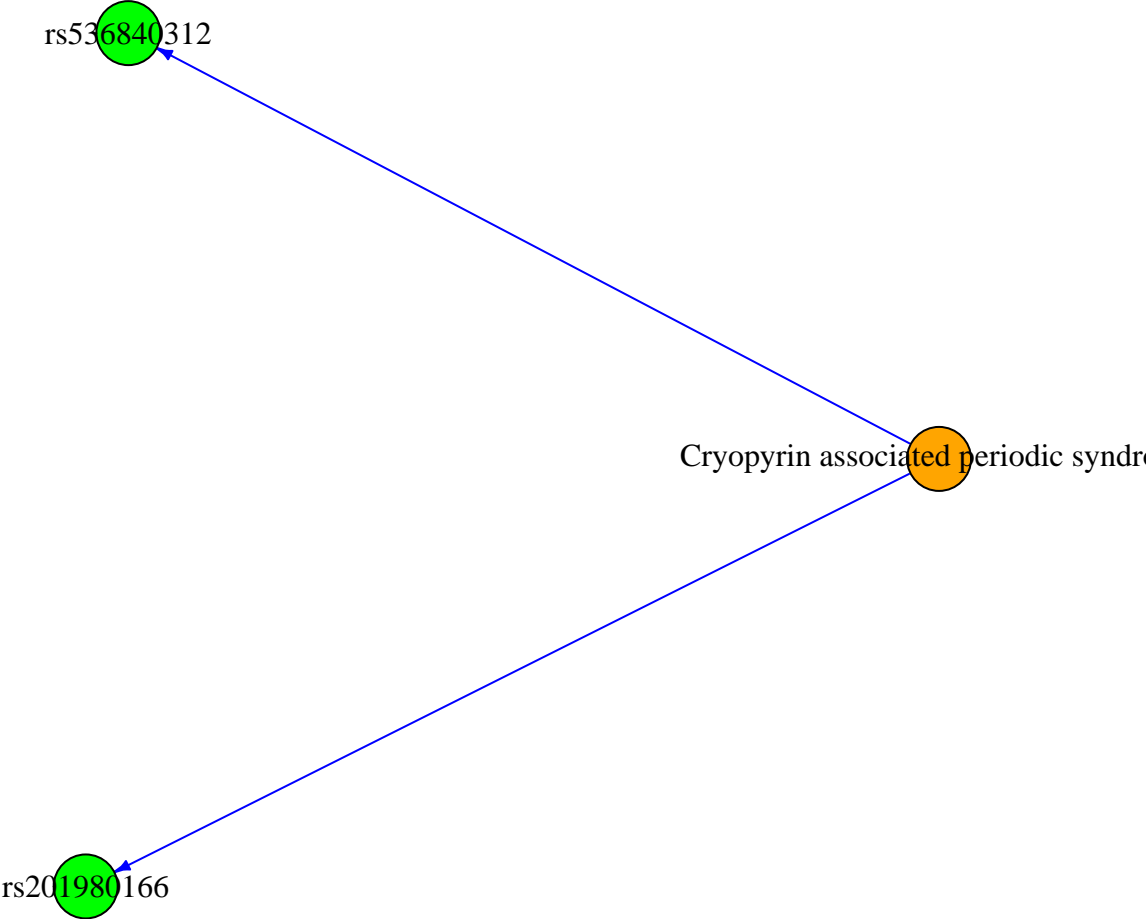

Variant–Disease Network (Cryptophthalmos)

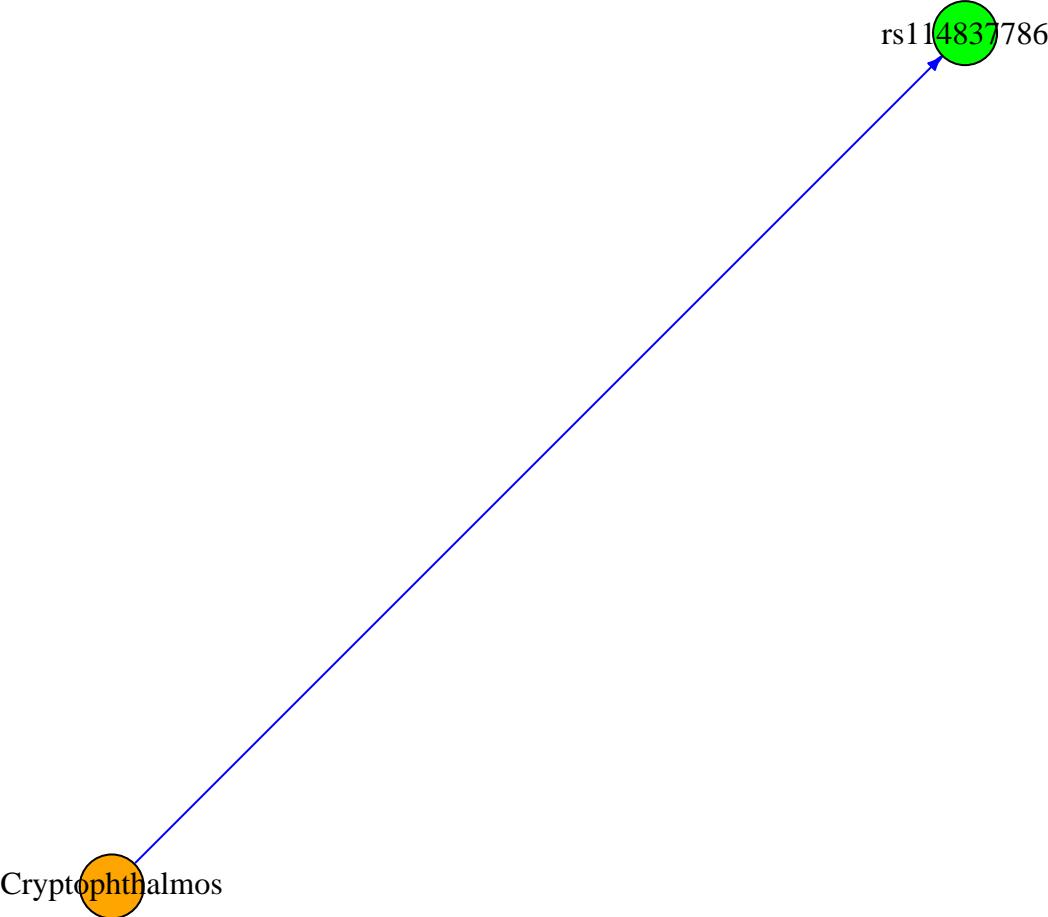

Variant–Disease Network (Culler–Jones syndrome)

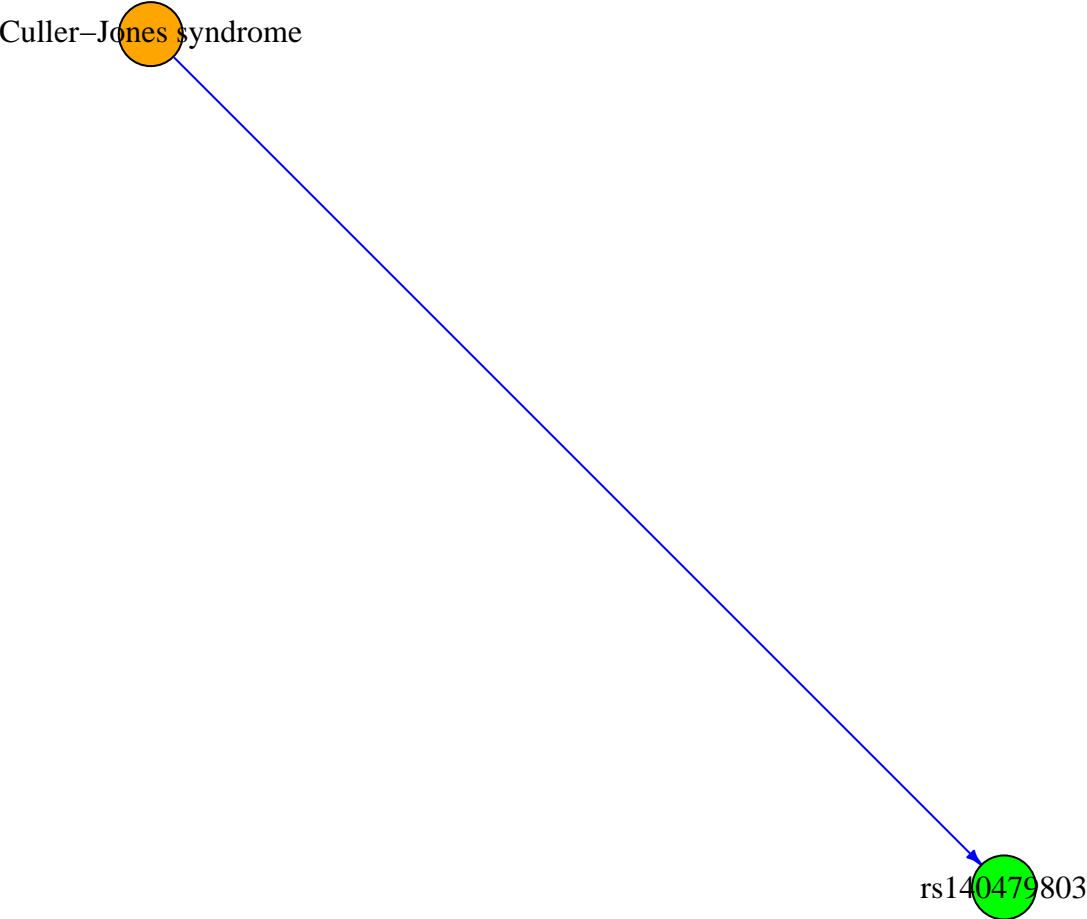

**Variant–Disease Network (Cutaneous malignant melanoma 2)**

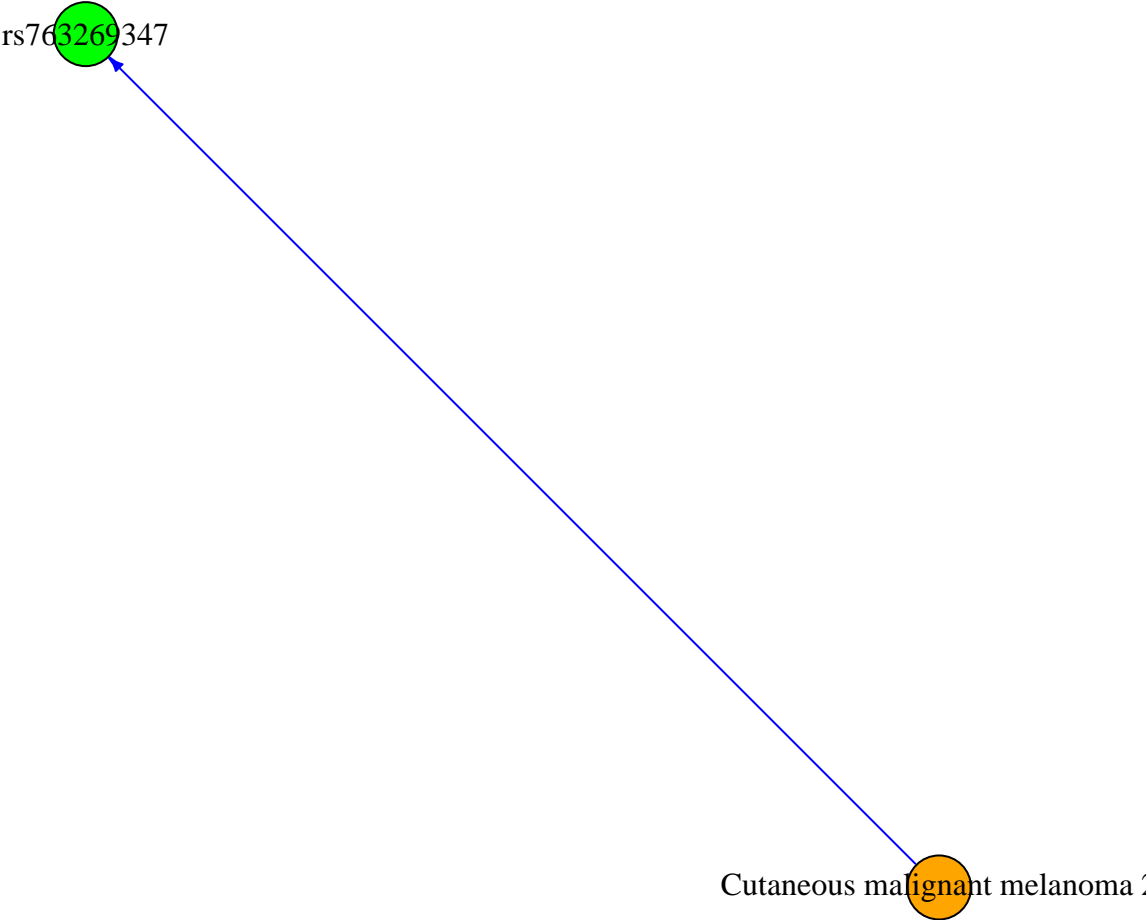



**Variant–Disease Network (Cutaneous malignant melanoma 3)**

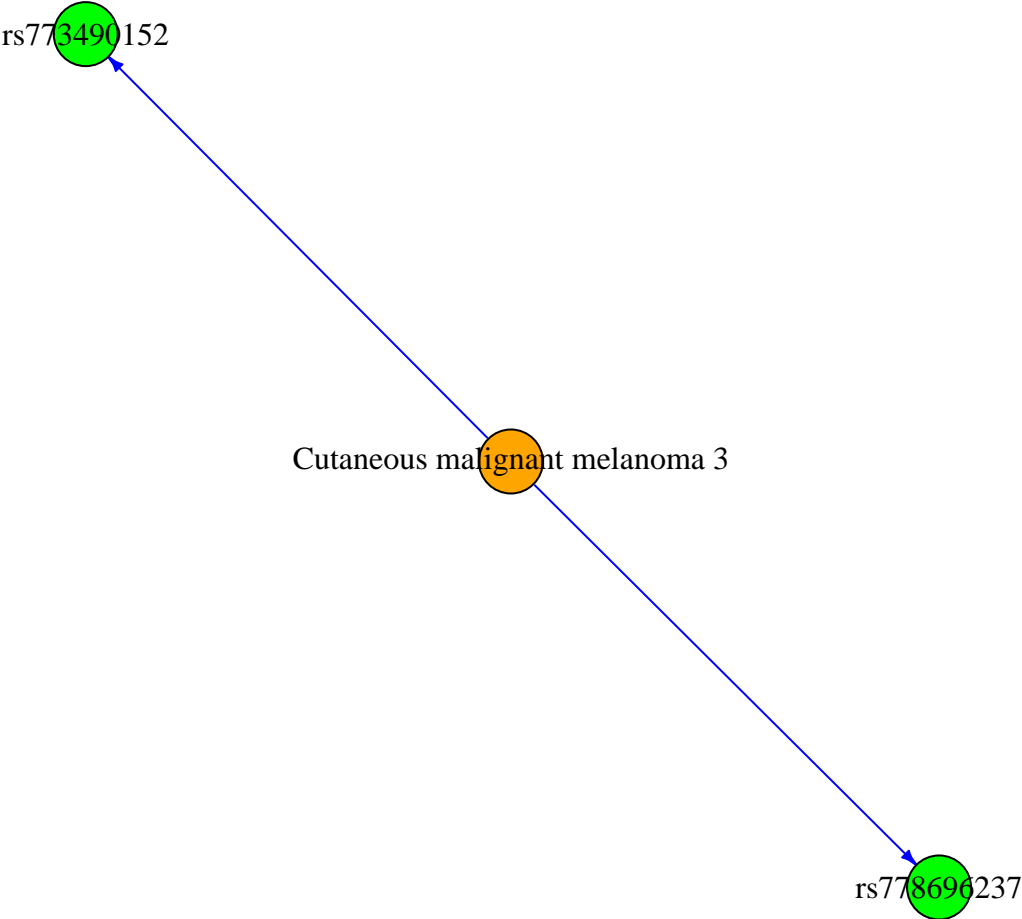

Variant–Disease Network (Cutis Gyrata syndrome of Beare and Stevenson)

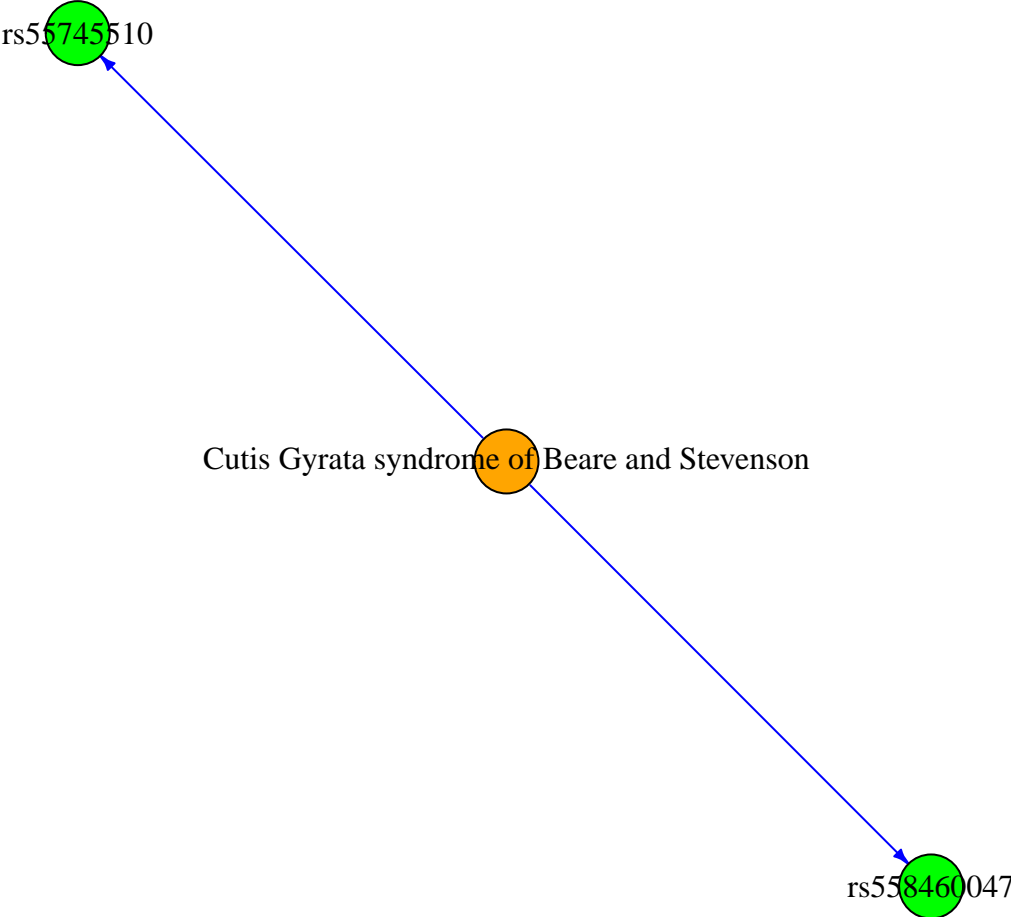

Variant–Disease Network (Cutis laxa)

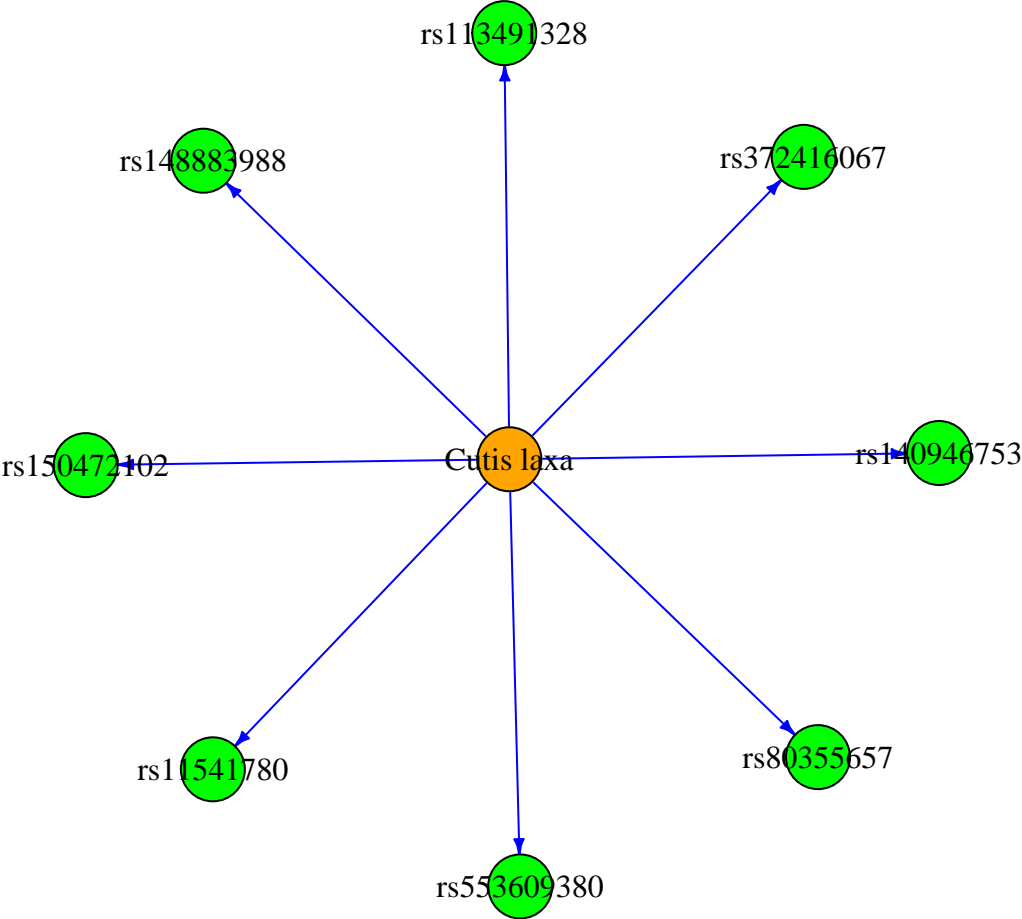

## Variant–Disease Network (Cutis laxa with severe pulmonary)

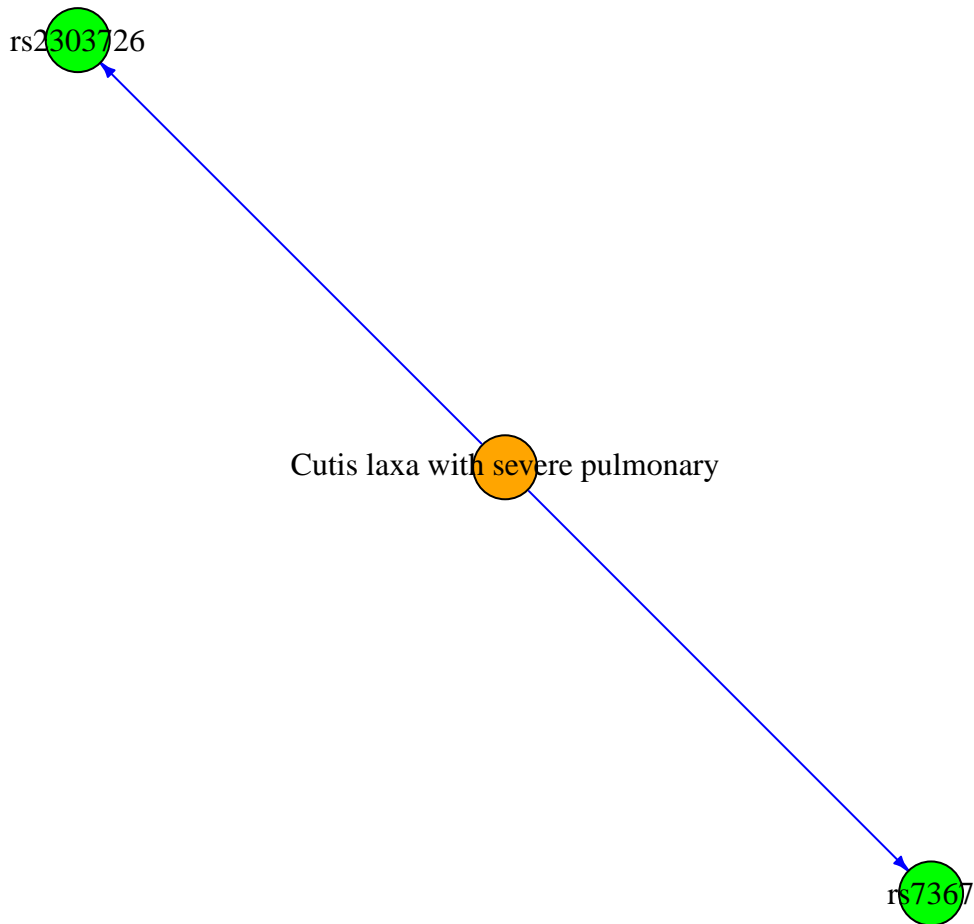

# Variant–Disease Network (Cutis laxa–corneal clouding–oligophrenia syndrome)

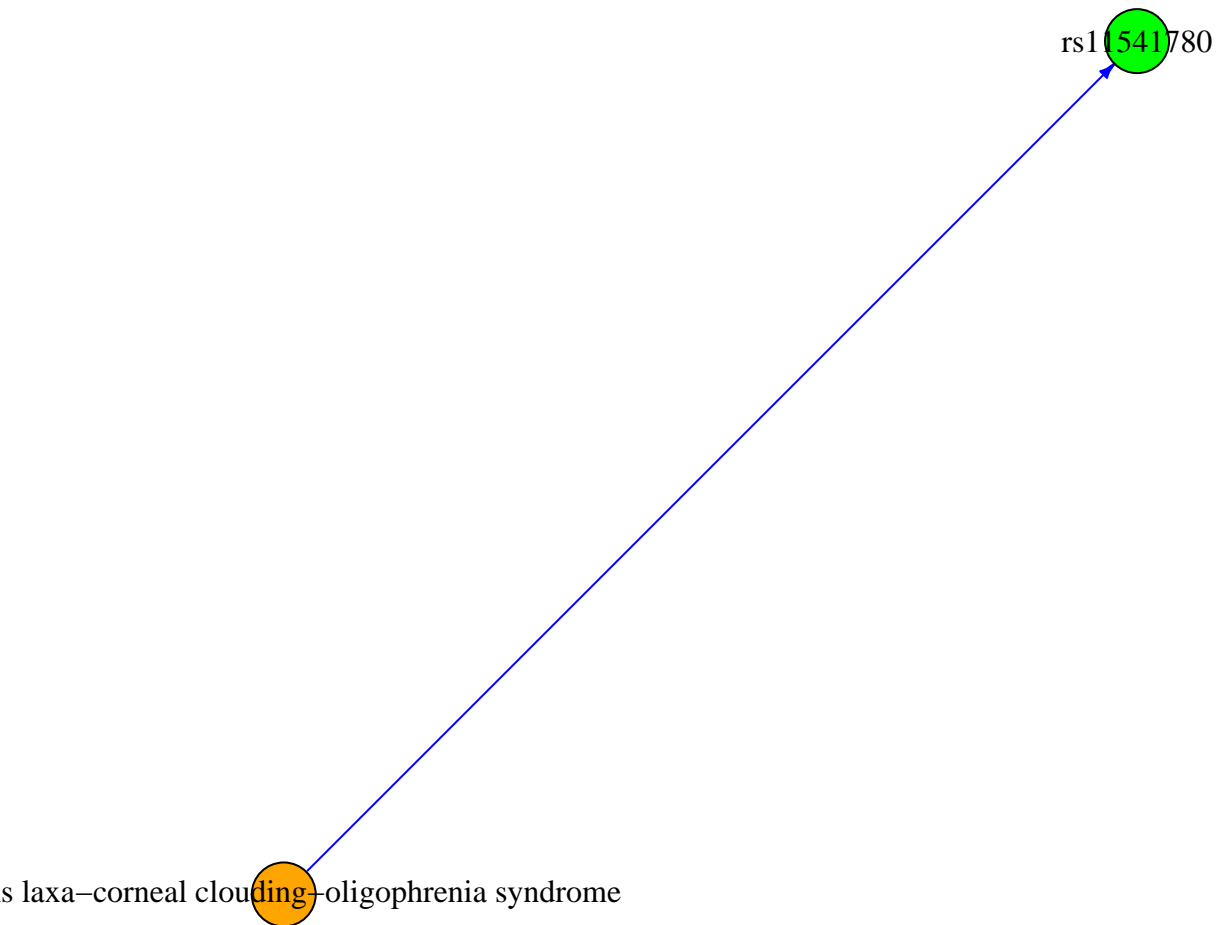

Variant–Disease Network (Cylindromatosis)

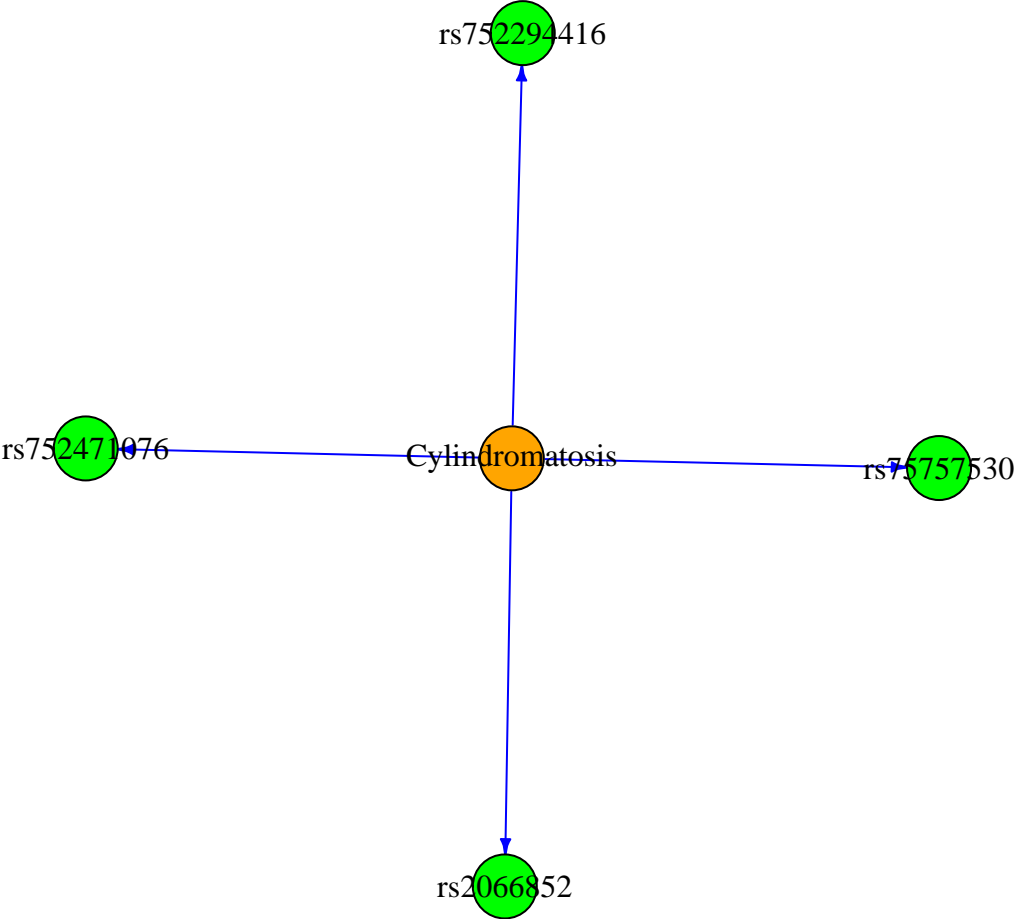

# Variant–Disease Network (CYP2C8 POLYMORPHISM)

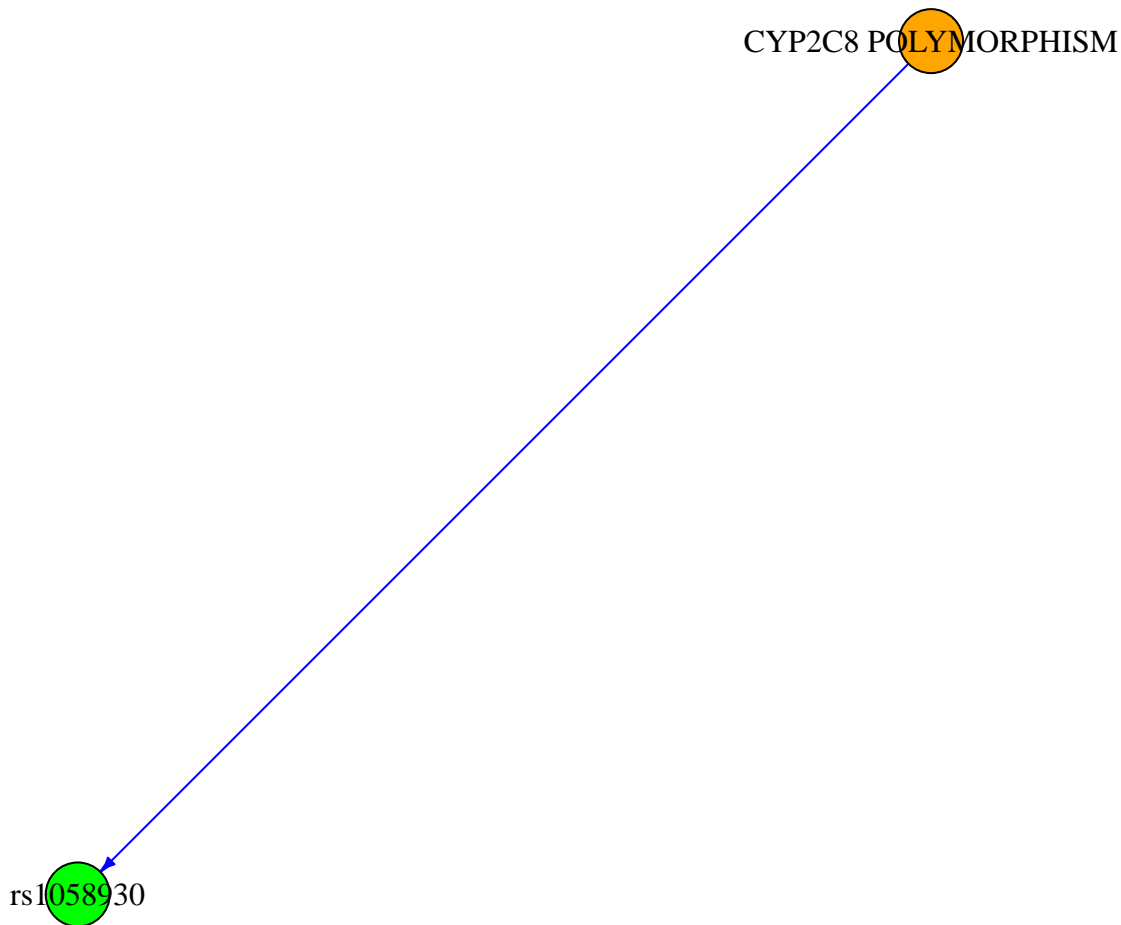

Variant–Disease Network (Cystic fibrosis)

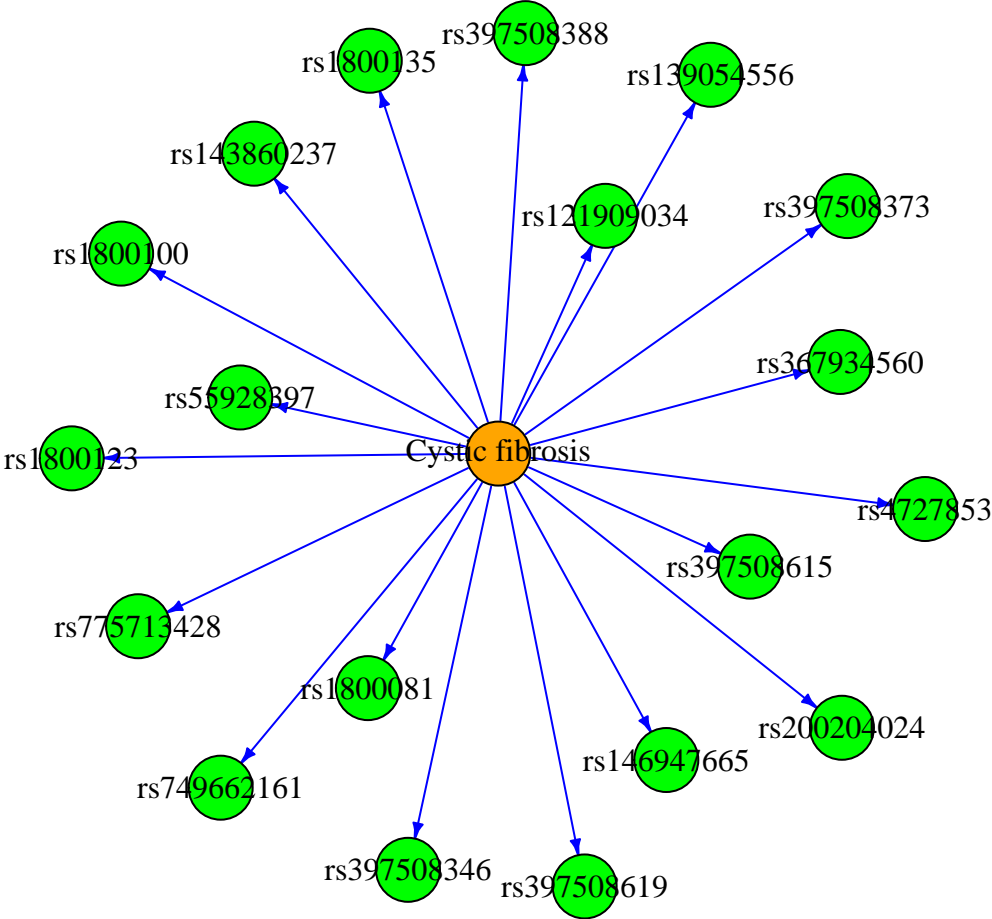



Variant–Disease Network (Cystic Fibrosis–Like Syndrome)

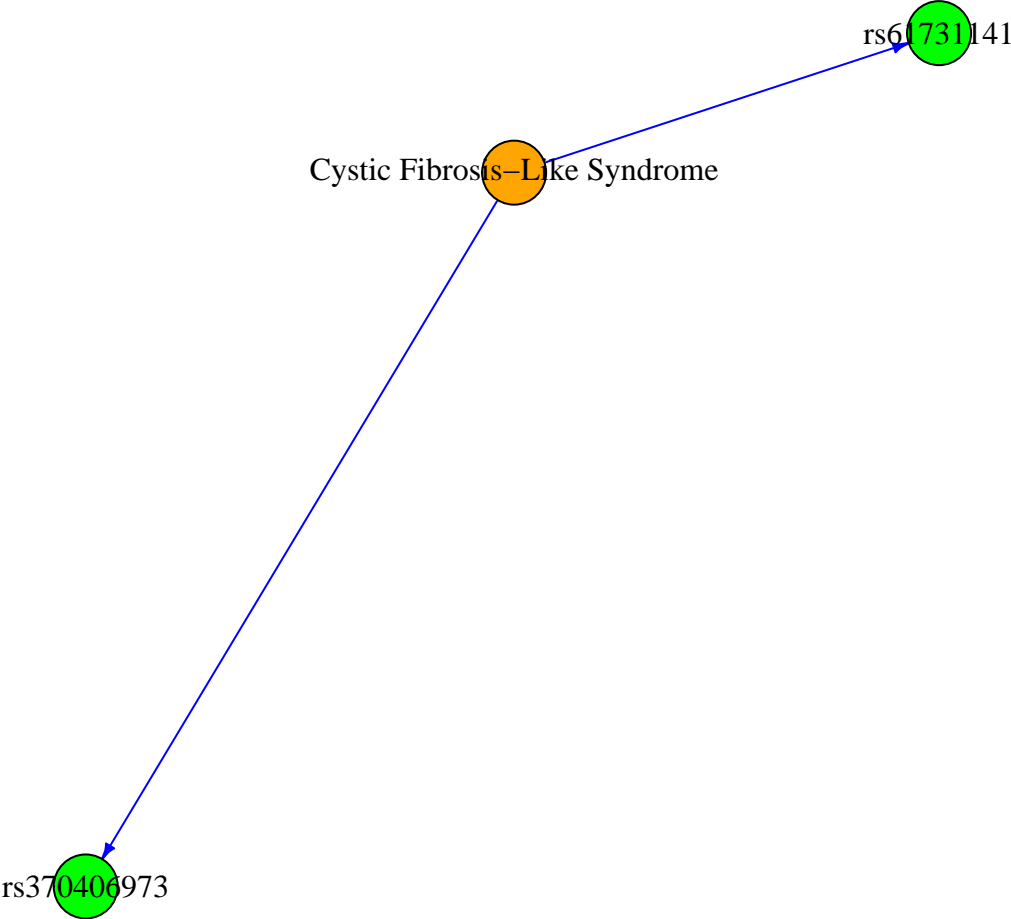

## Variant–Disease Network (Cystinosis)

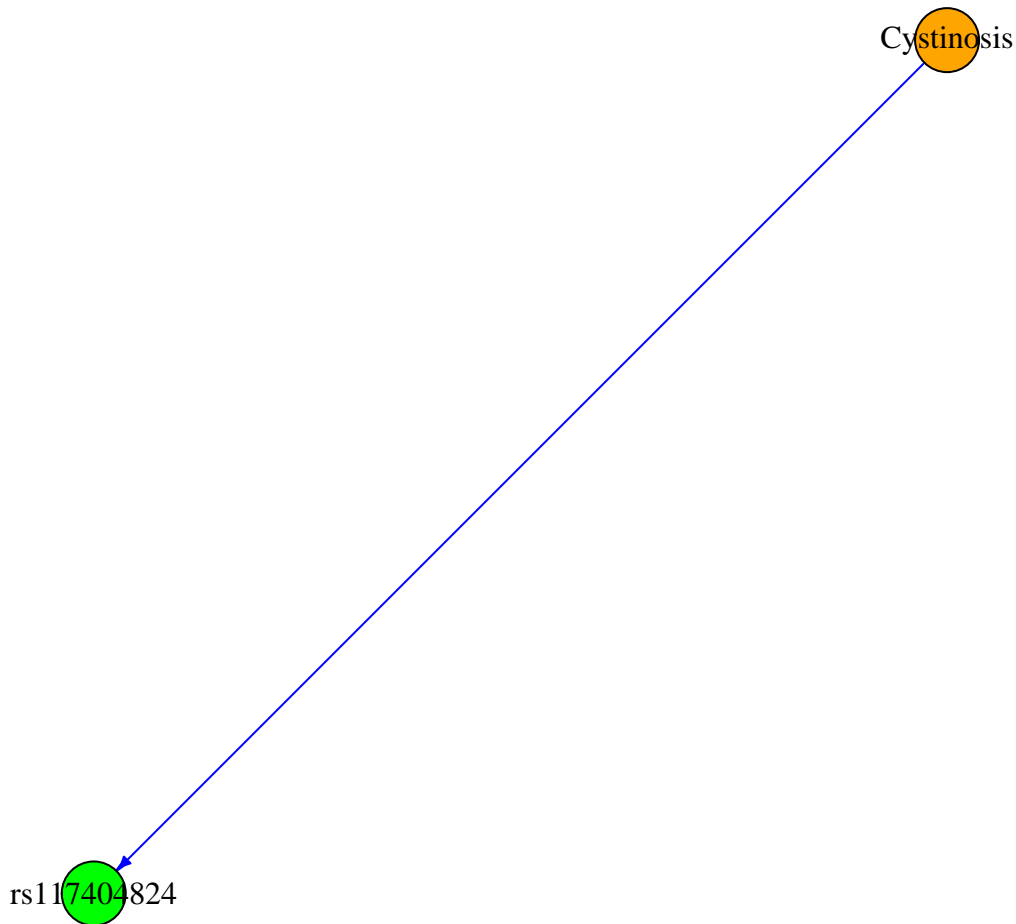

## Variant-Disease Network (Cystinuria)

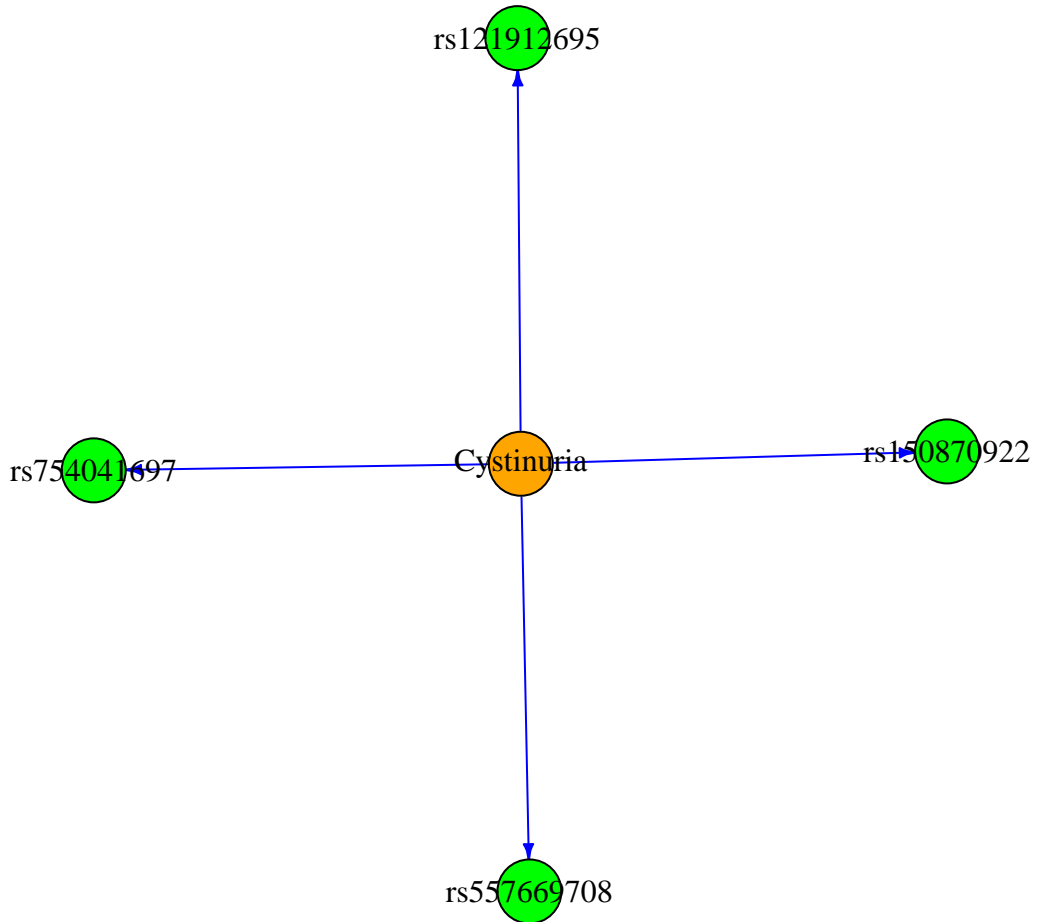

## Variant–Disease Network (Czech dysplasia metatarsal type)

rs142770543

Czech dysplasia metatarsal type



**Variant–Disease Network (D–2–hydroxyglutaric aciduria 2)**

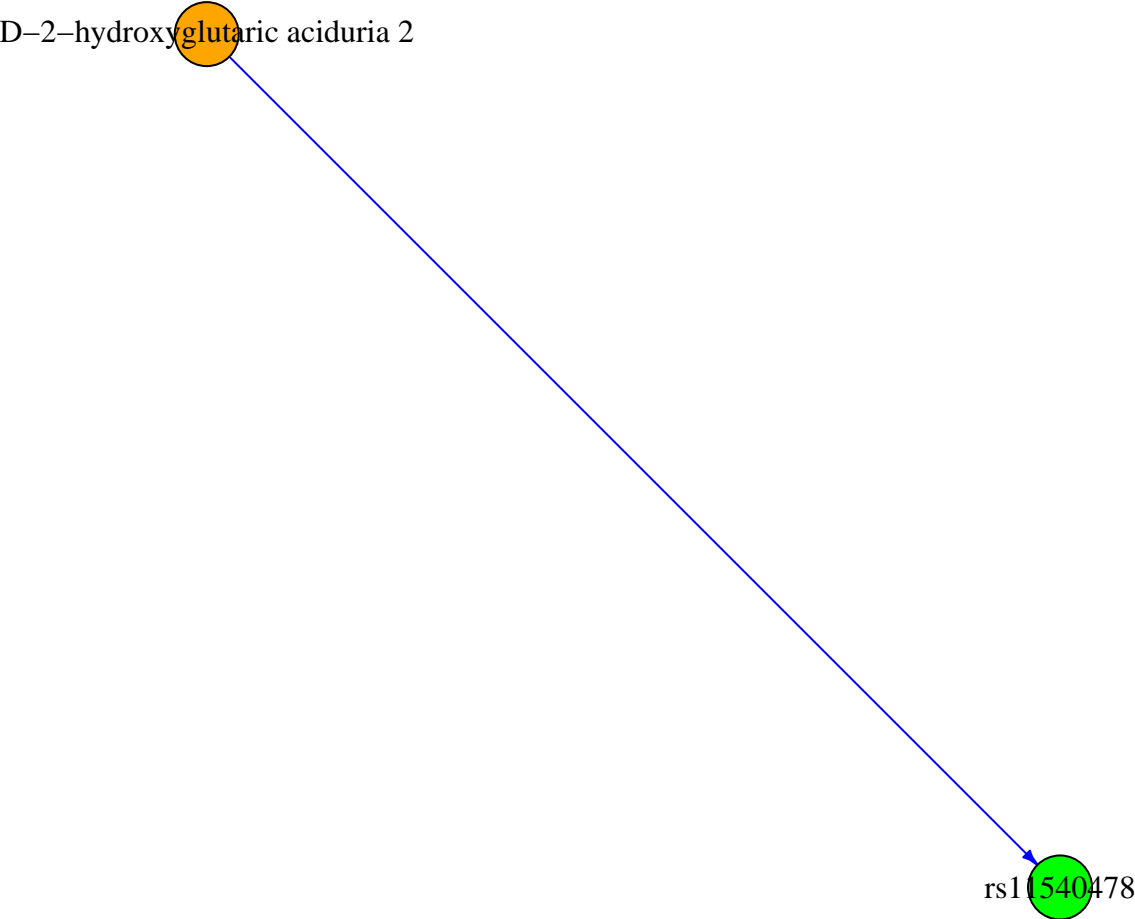

Variant–Disease Network (Danon disease)

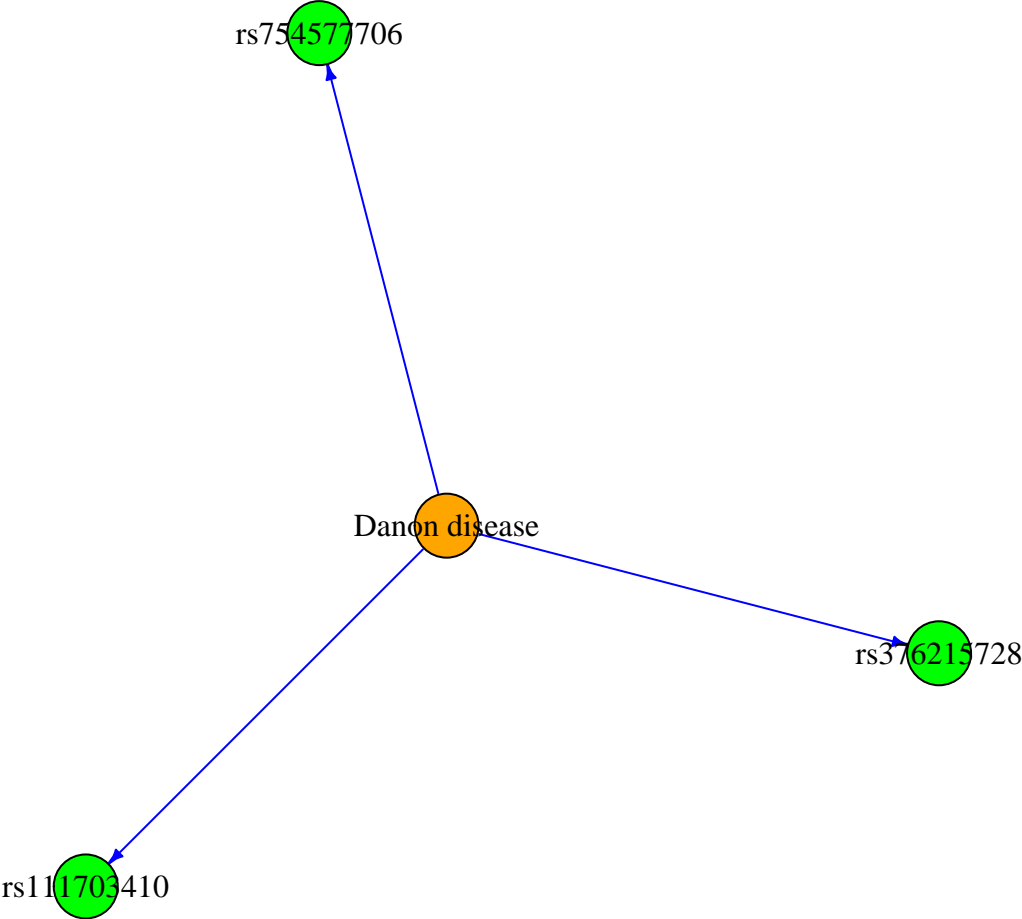

Variant–Disease Network (Darier disease)

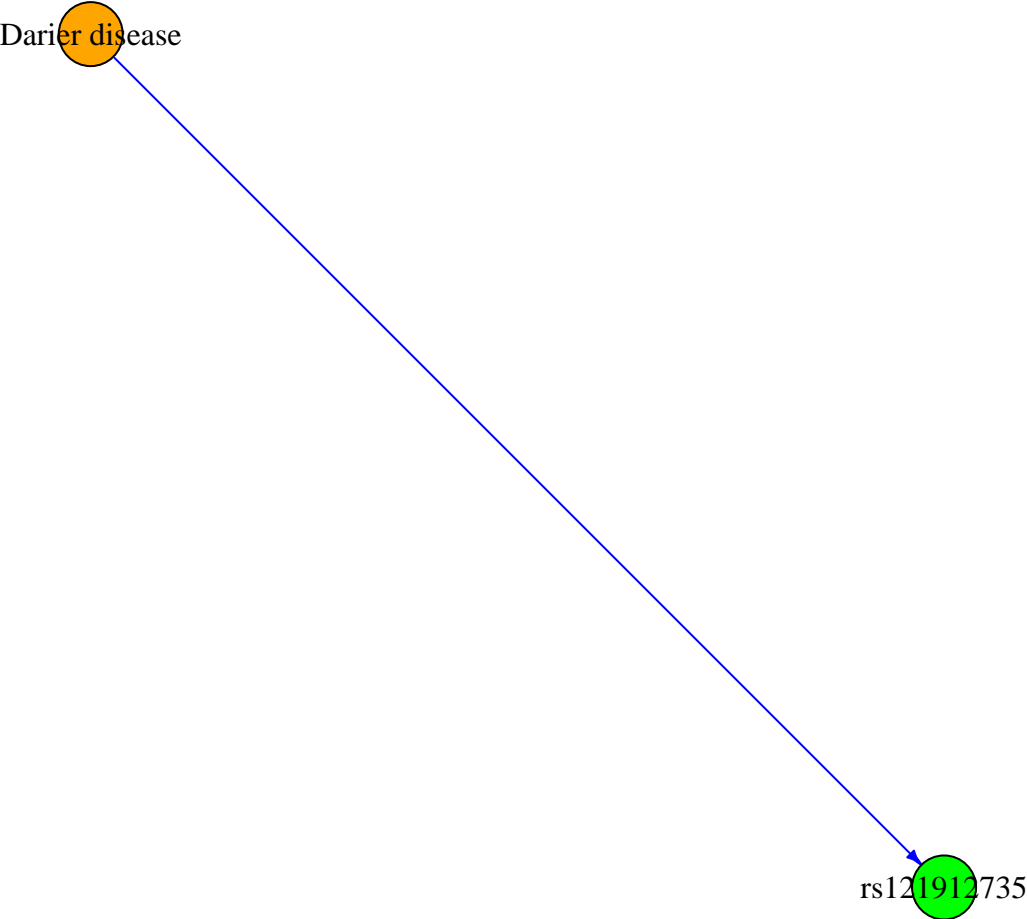

## Variant-Disease Network (Deafness)

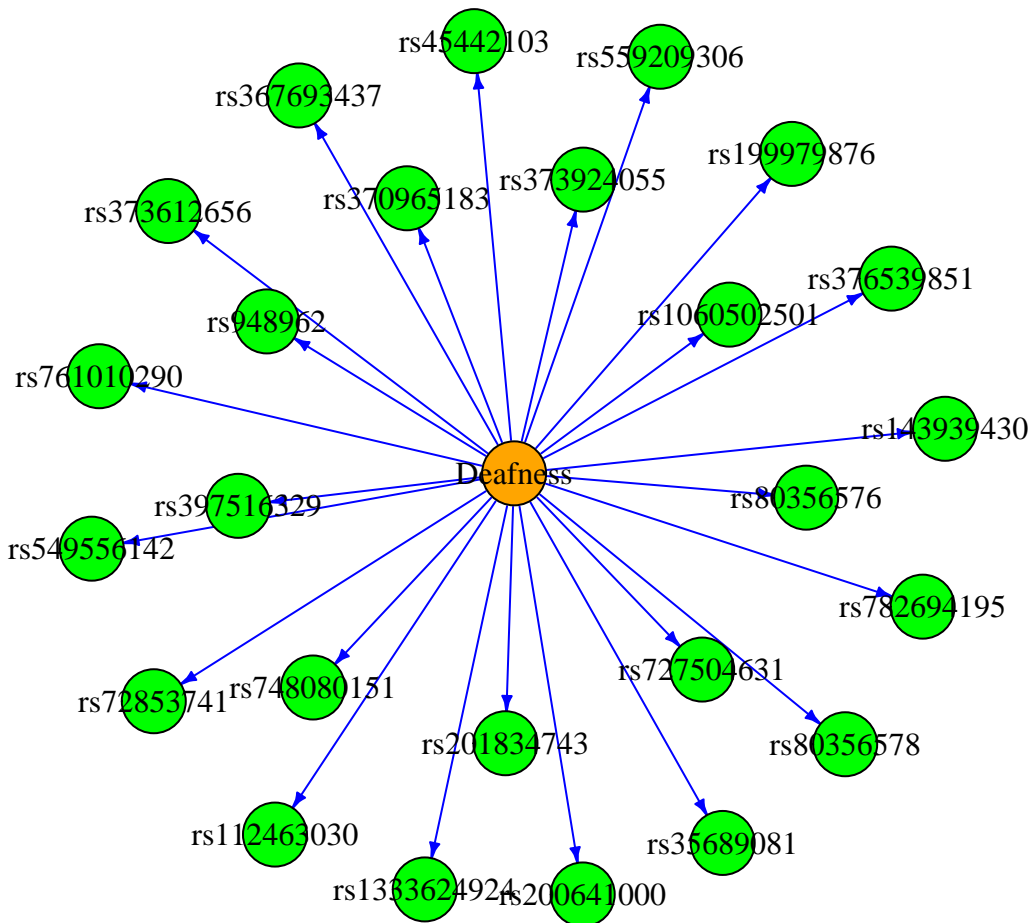



Variant–Disease Network (Deficiency of 2-methylbutyryl-CoA dehydrogenase)

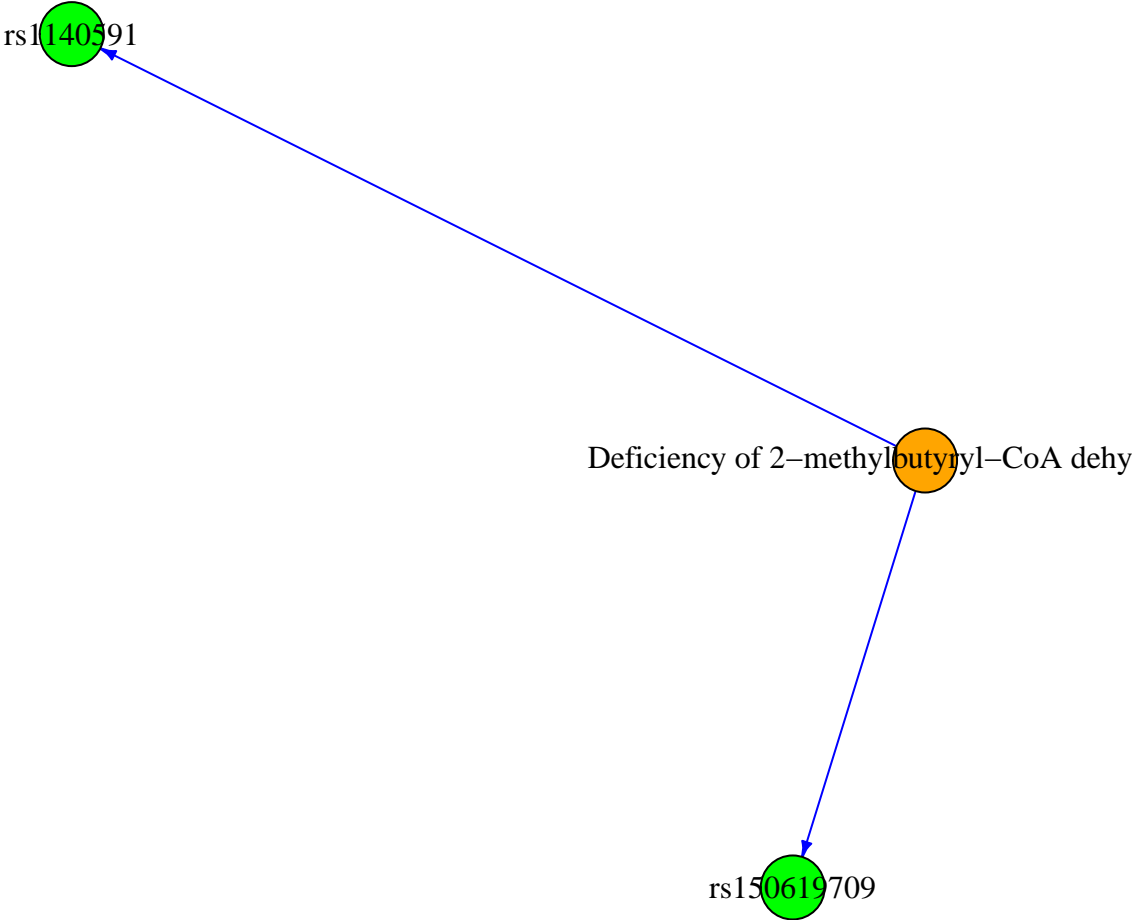

# Variant–Disease Network (Deficiency of acetyl–CoA acetyltransferase)

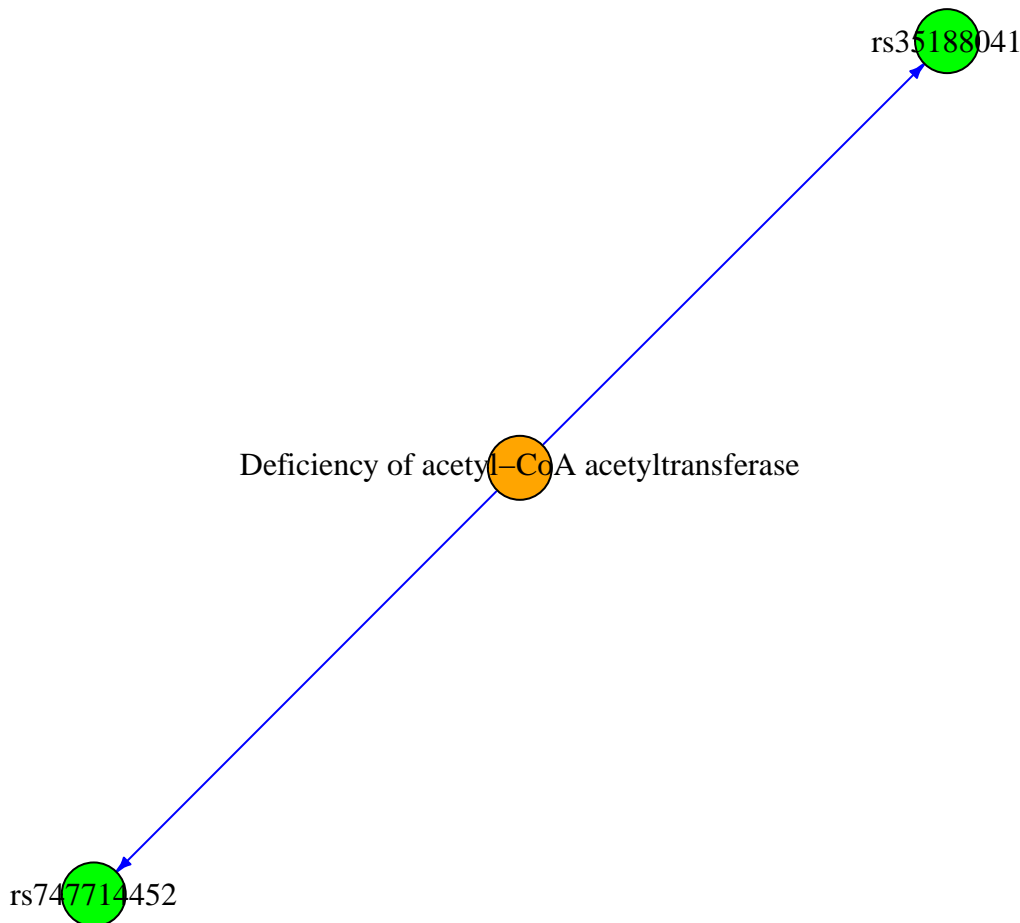

# Variant-Disease Network (Deficiency of alpha-mannosidase)

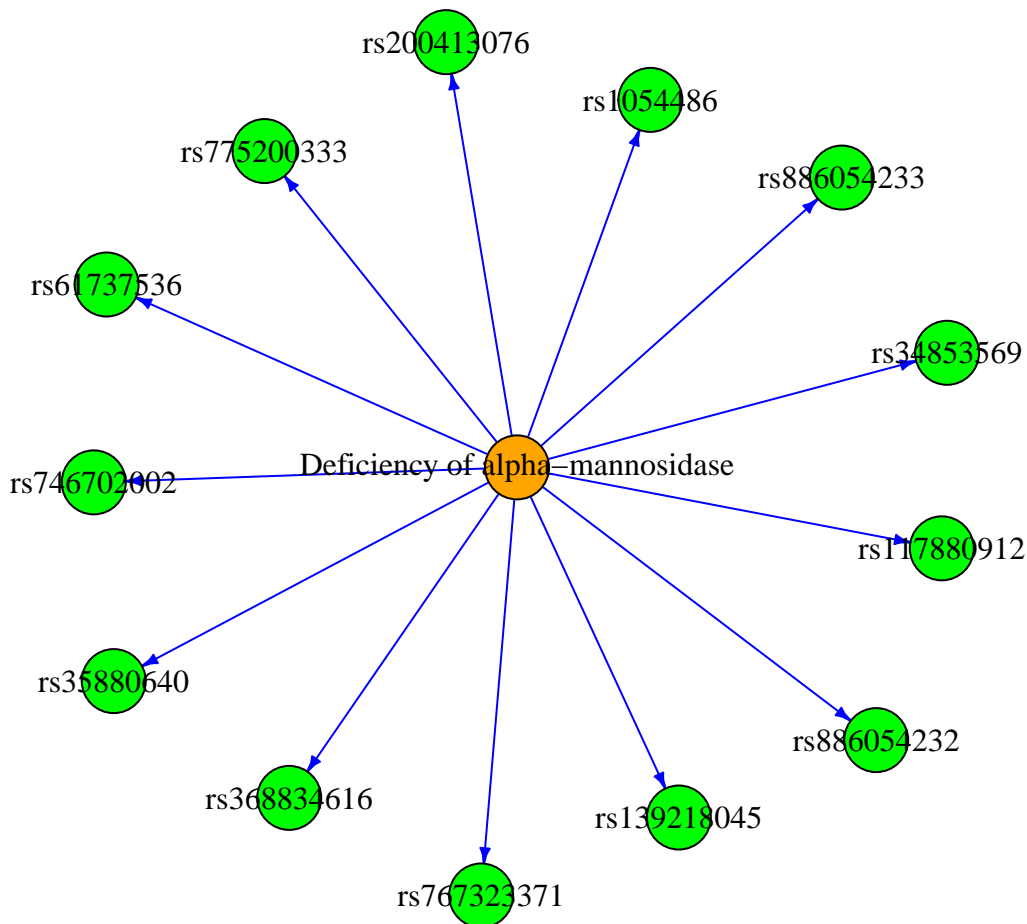

# Variant–Disease Network (Deficiency of aromatic–L–amino–acid decarboxylase)

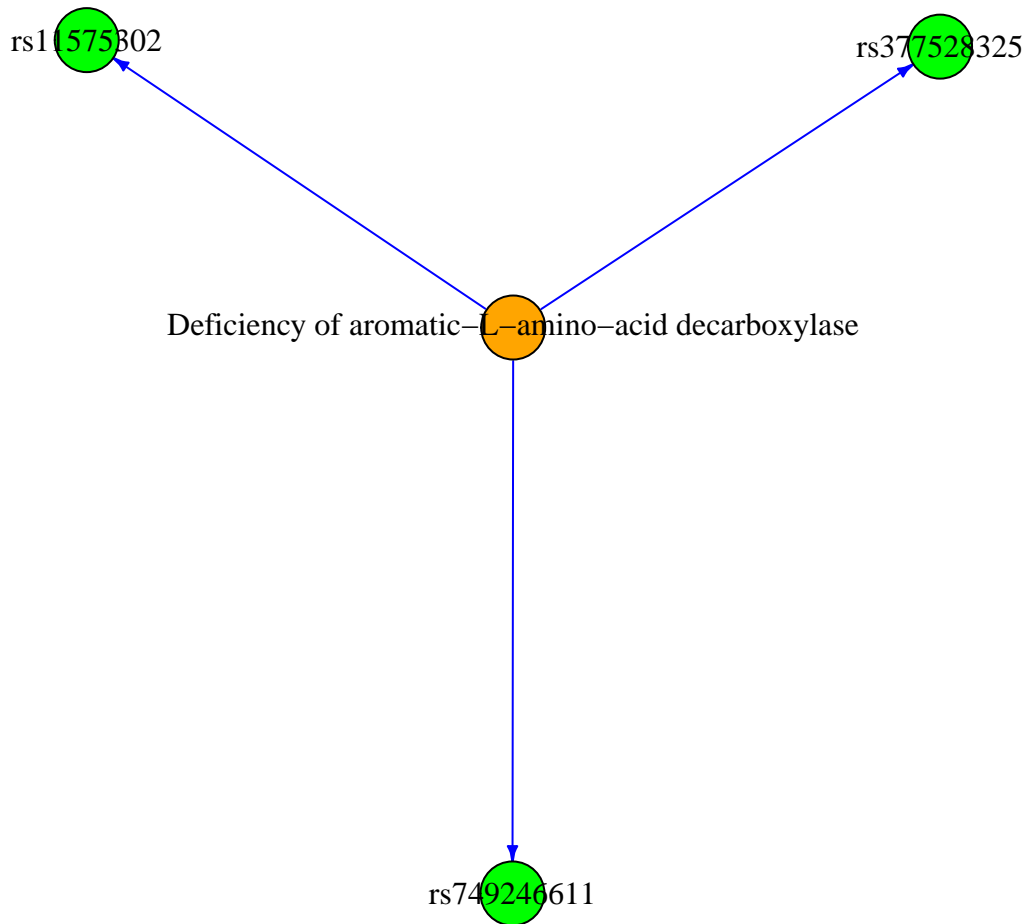

**Variant–Disease Network (Deficiency of butyryl–CoA dehydrogenase)**

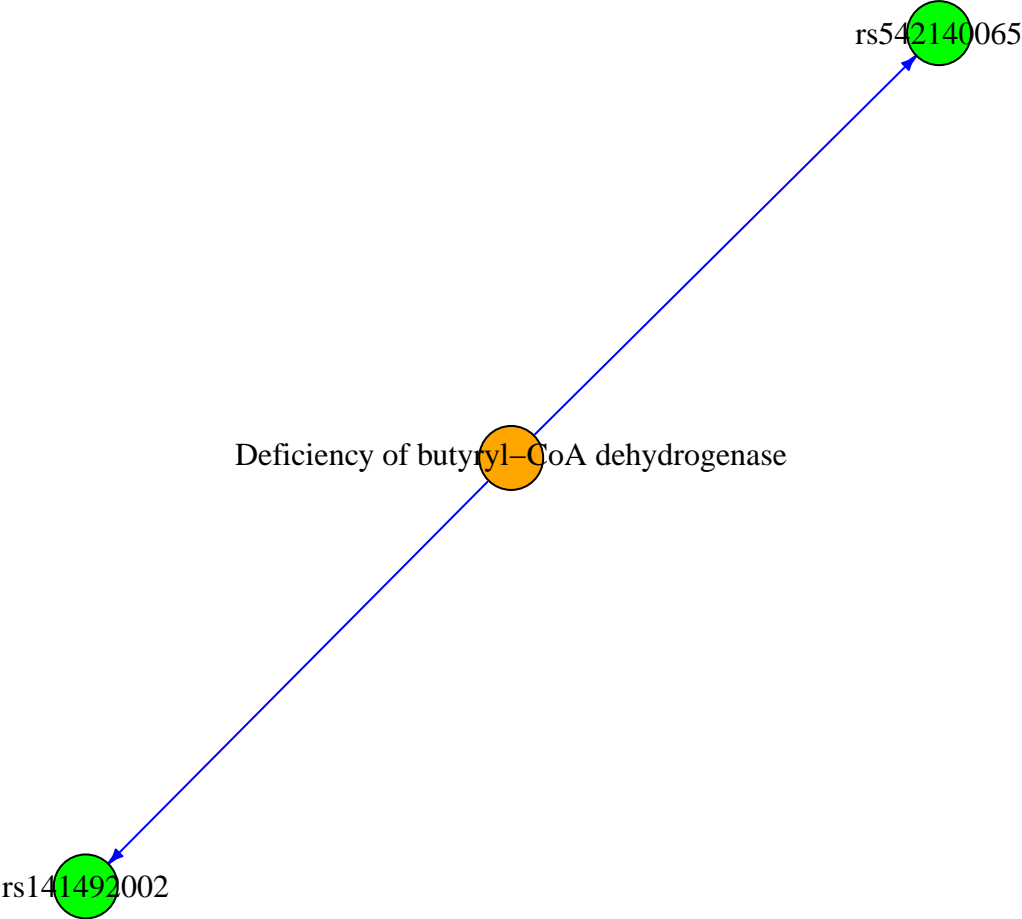

# Variant–Disease Network (Deficiency of ferroxidase)

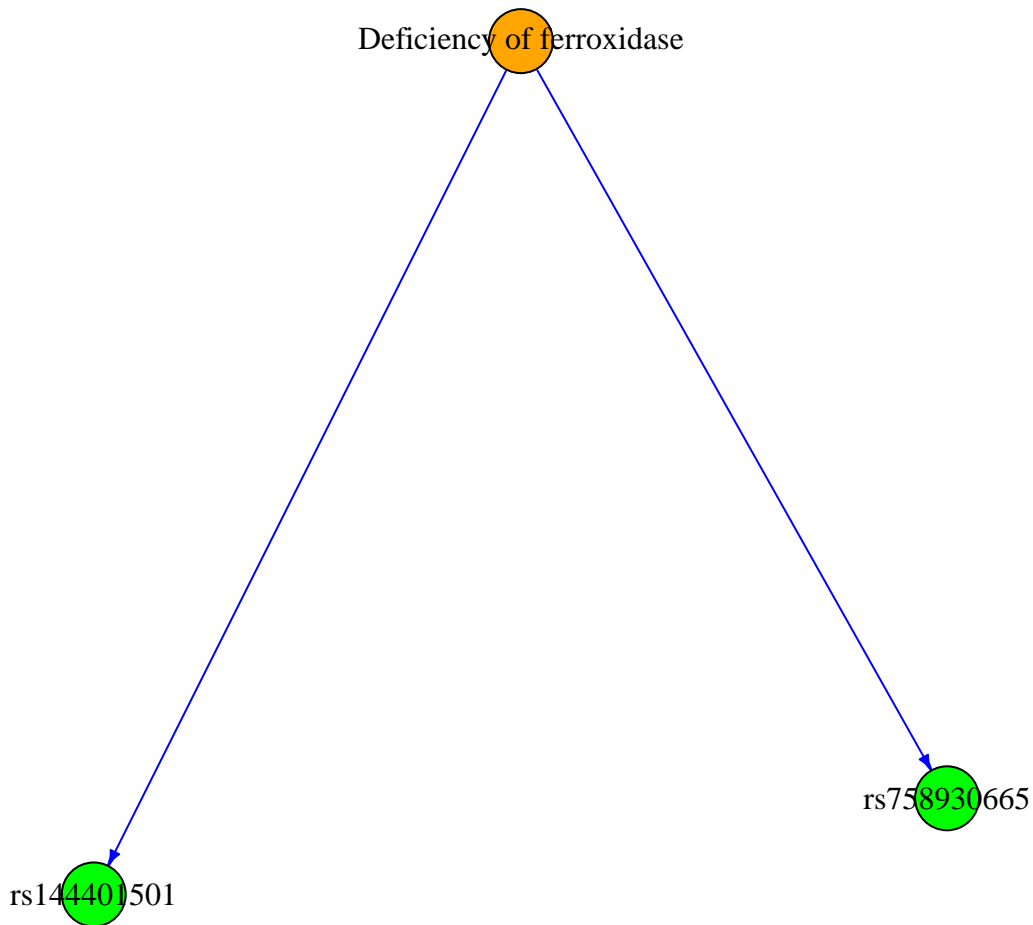

Variant–Disease Network (Deficiency of hyaluronoglucosaminidase)

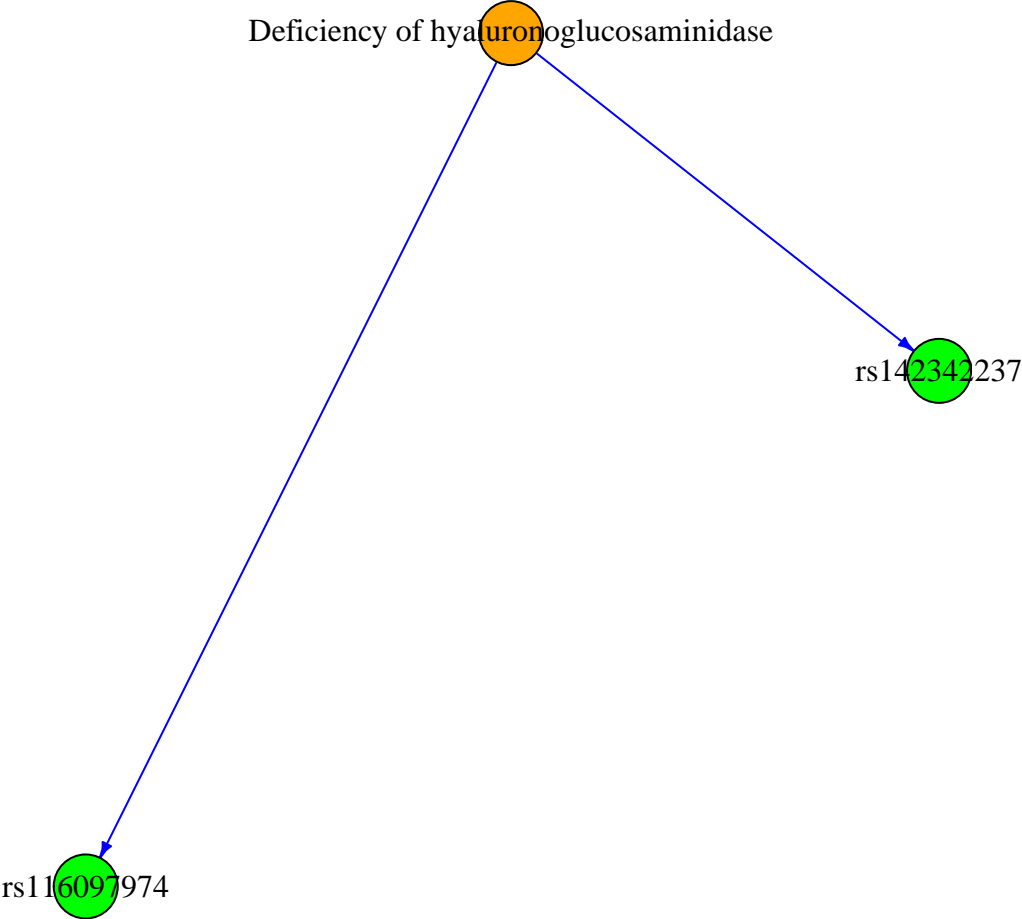

**Variant–Disease Network (Deficiency of hydroxymethylglutaryl–CoA lyase)**

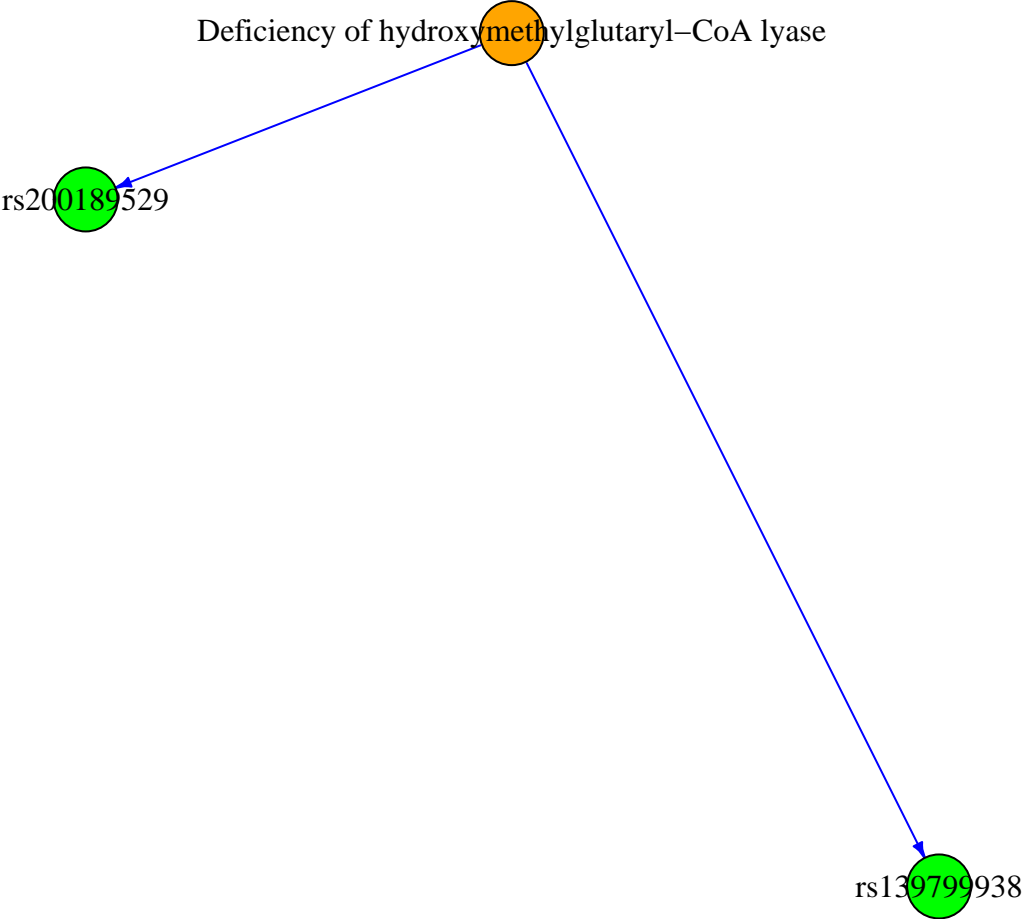



Variant–Disease Network (Deficiency of iodide peroxidase)

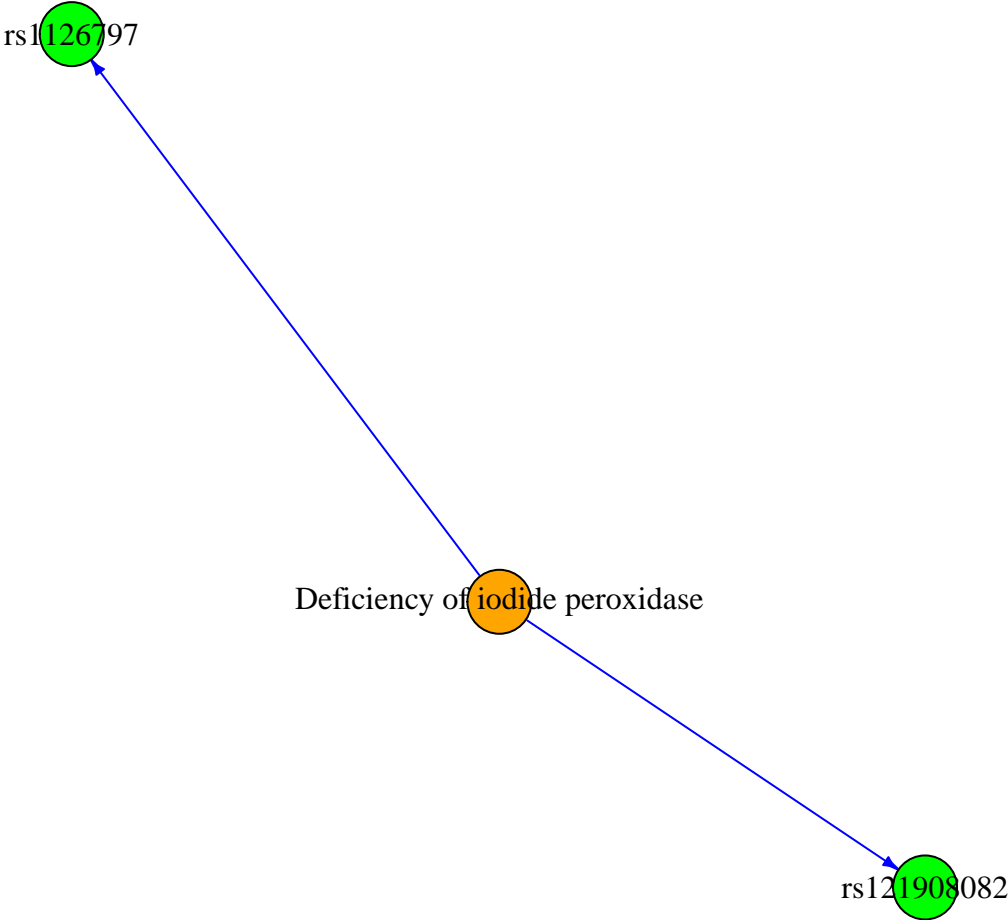

Variant–Disease Network (Deficiency of pyrroline–5–carboxylate reductas

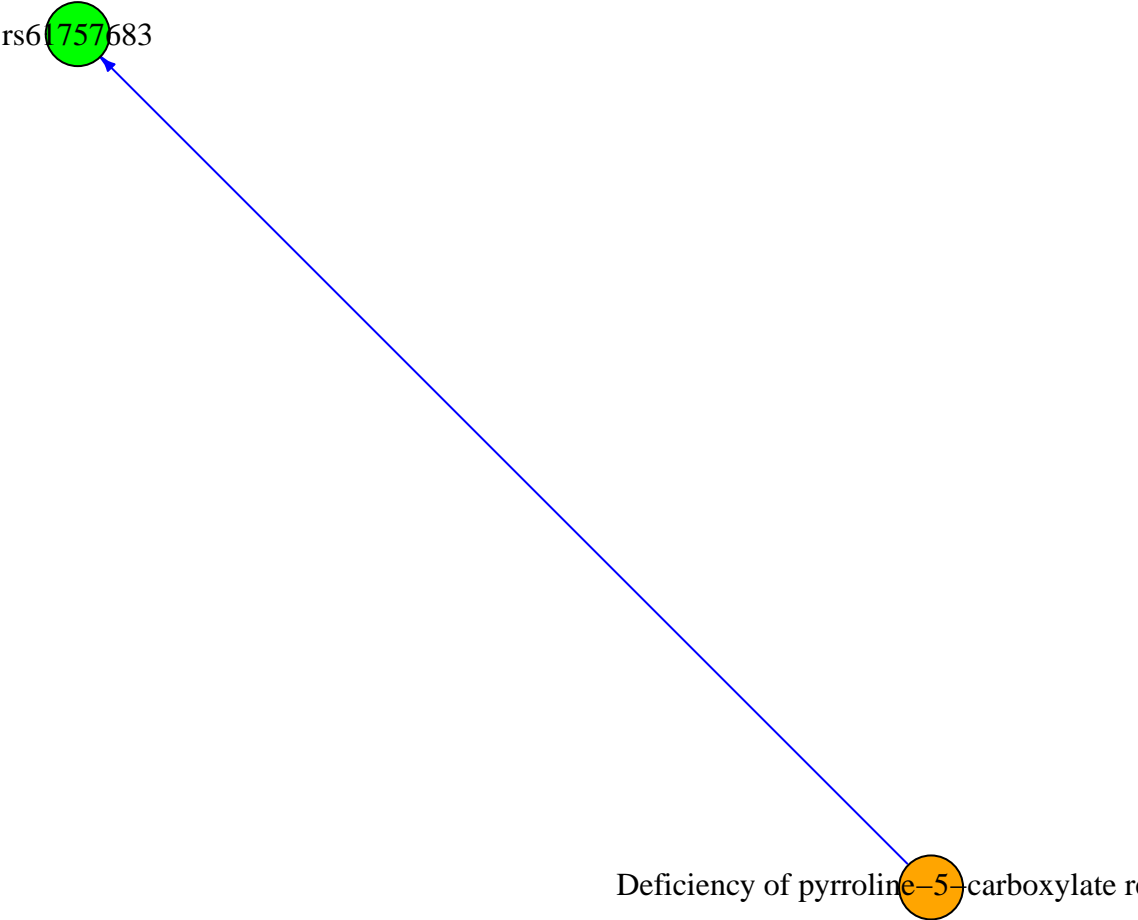

## Variant–Disease Network (Deficiency of transaldolase)

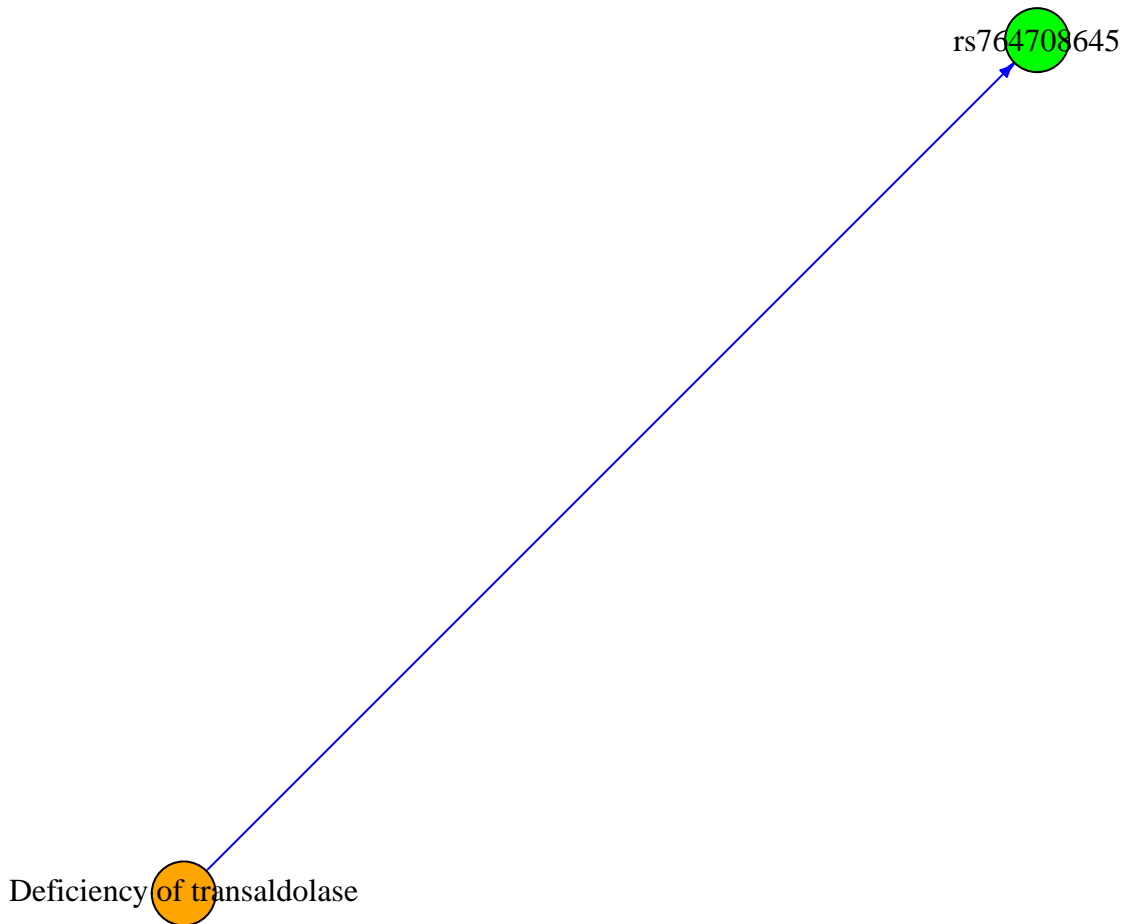

# -Disease Network (Deficiency of UDPglucose–hexose–1–phosphate uridylyl

rs111033792

Deficiency of UDPglucose–hexose–1–phosphate u

rs2070075

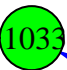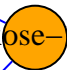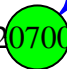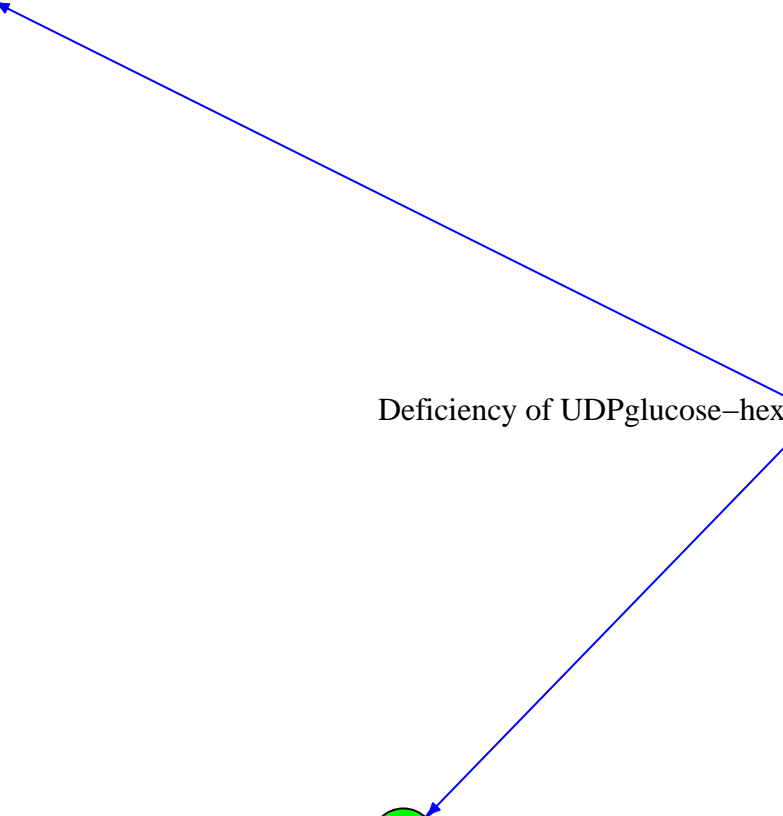

Variant–Disease Network (Delayed gross motor development)

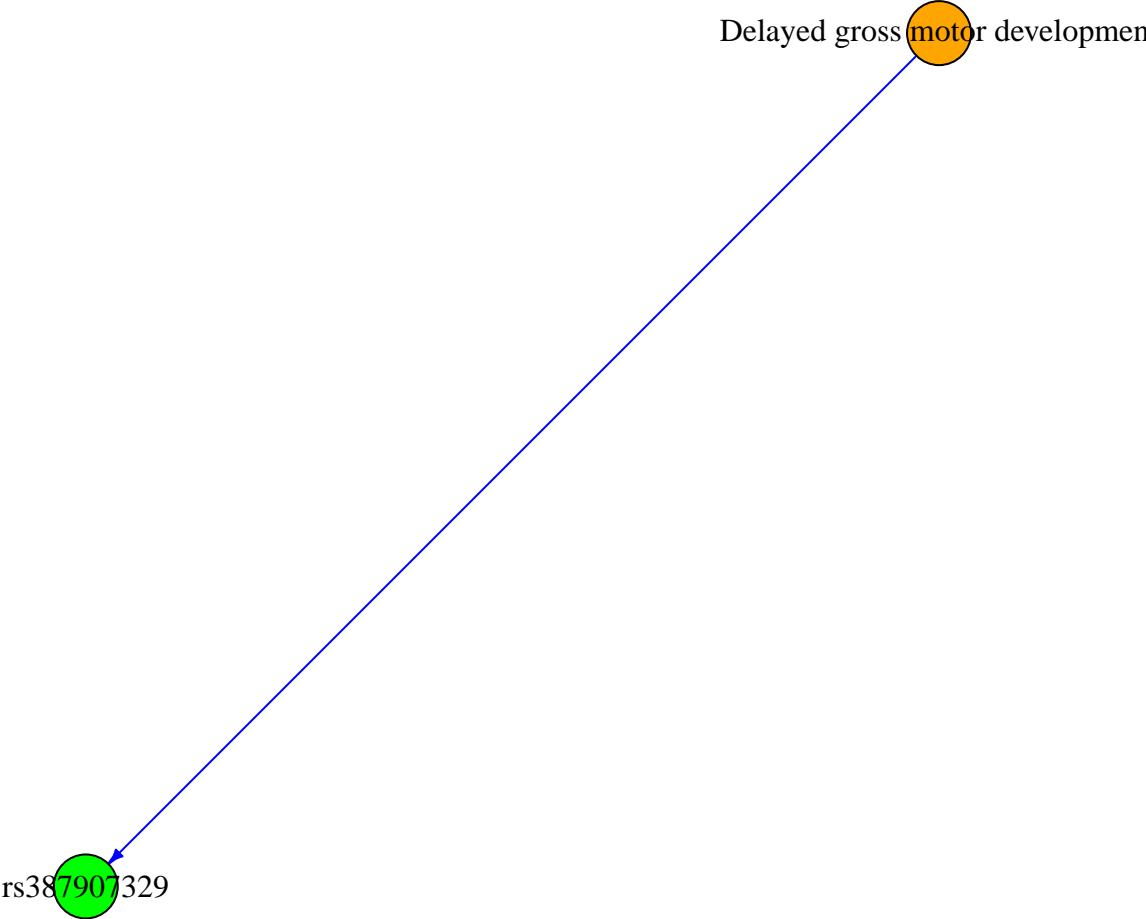

# Variant–Disease Network (Delayed speech and language development)

Delayed speech and language development

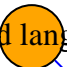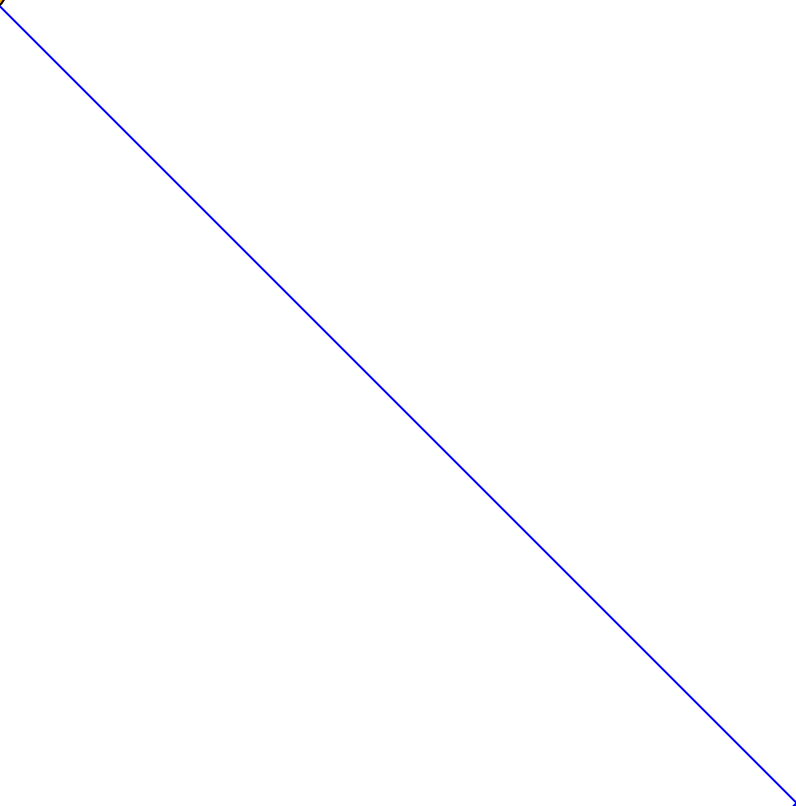

rs387907329

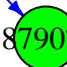

## Variant-Disease Network (Dementia)

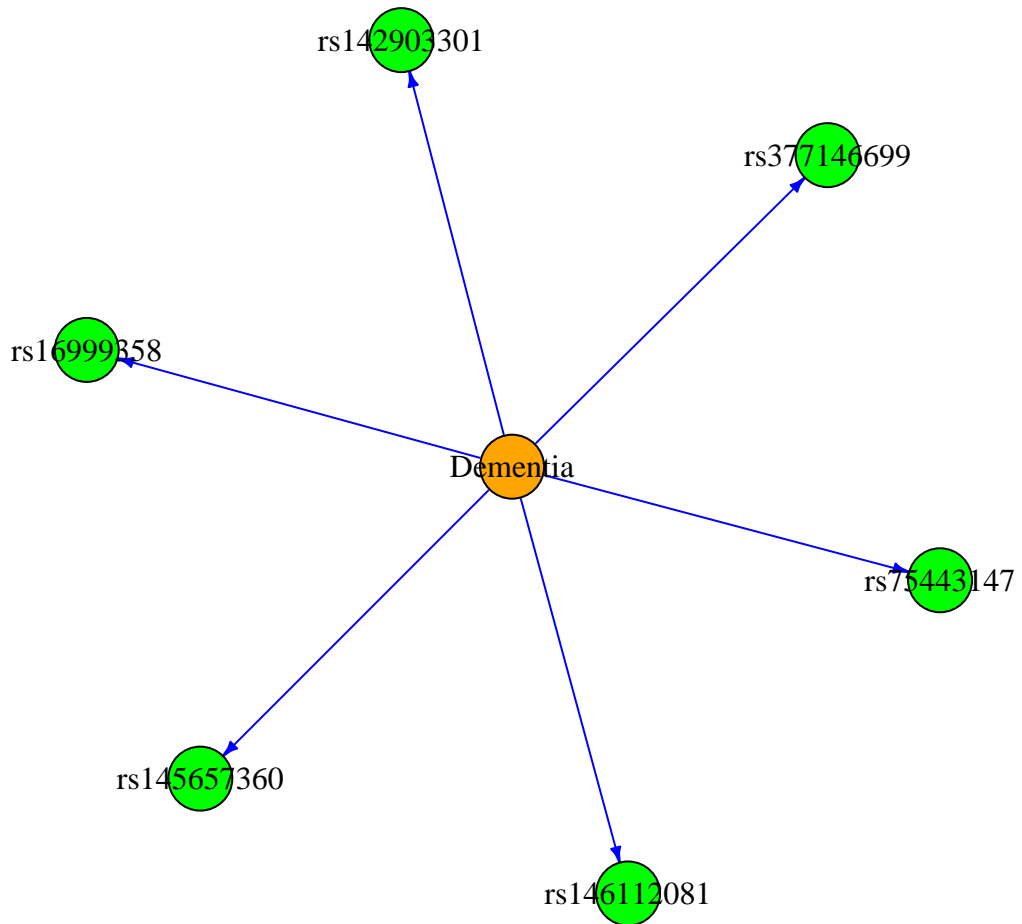

## Variant–Disease Network (Dendritic cell)

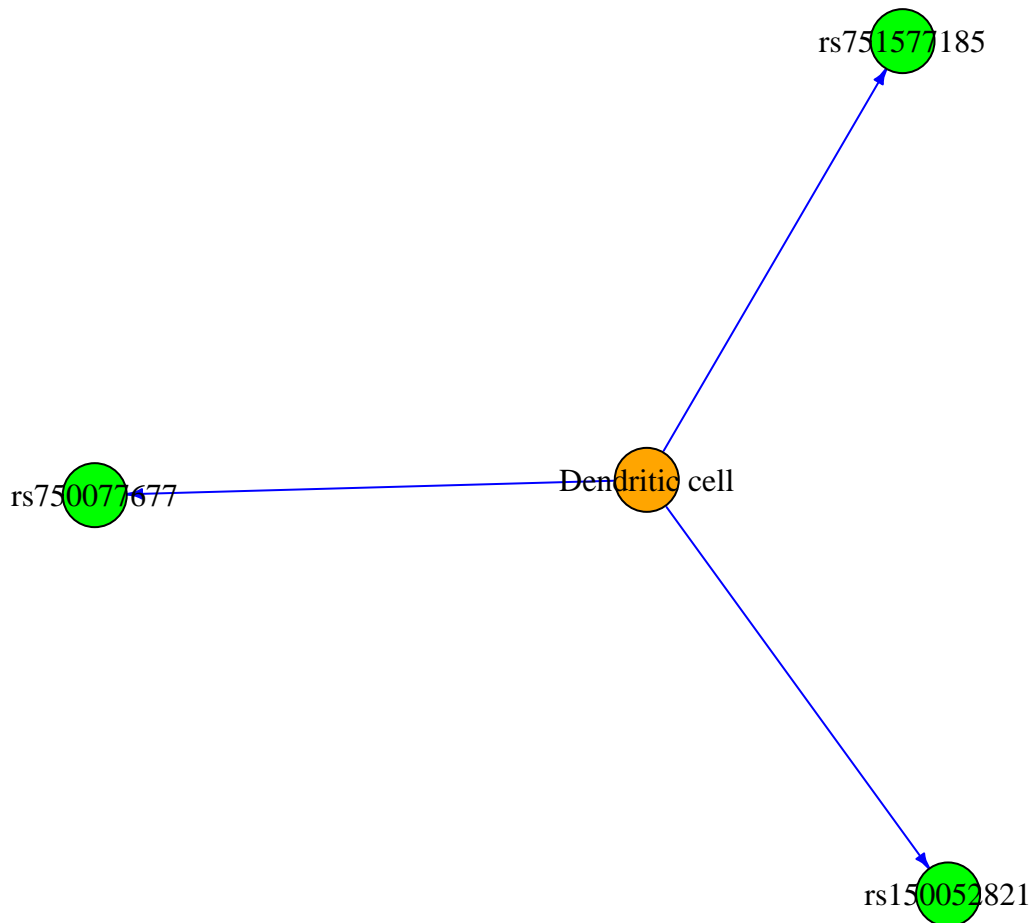



# Variant–Disease Network (Dental anomalies and short stature)

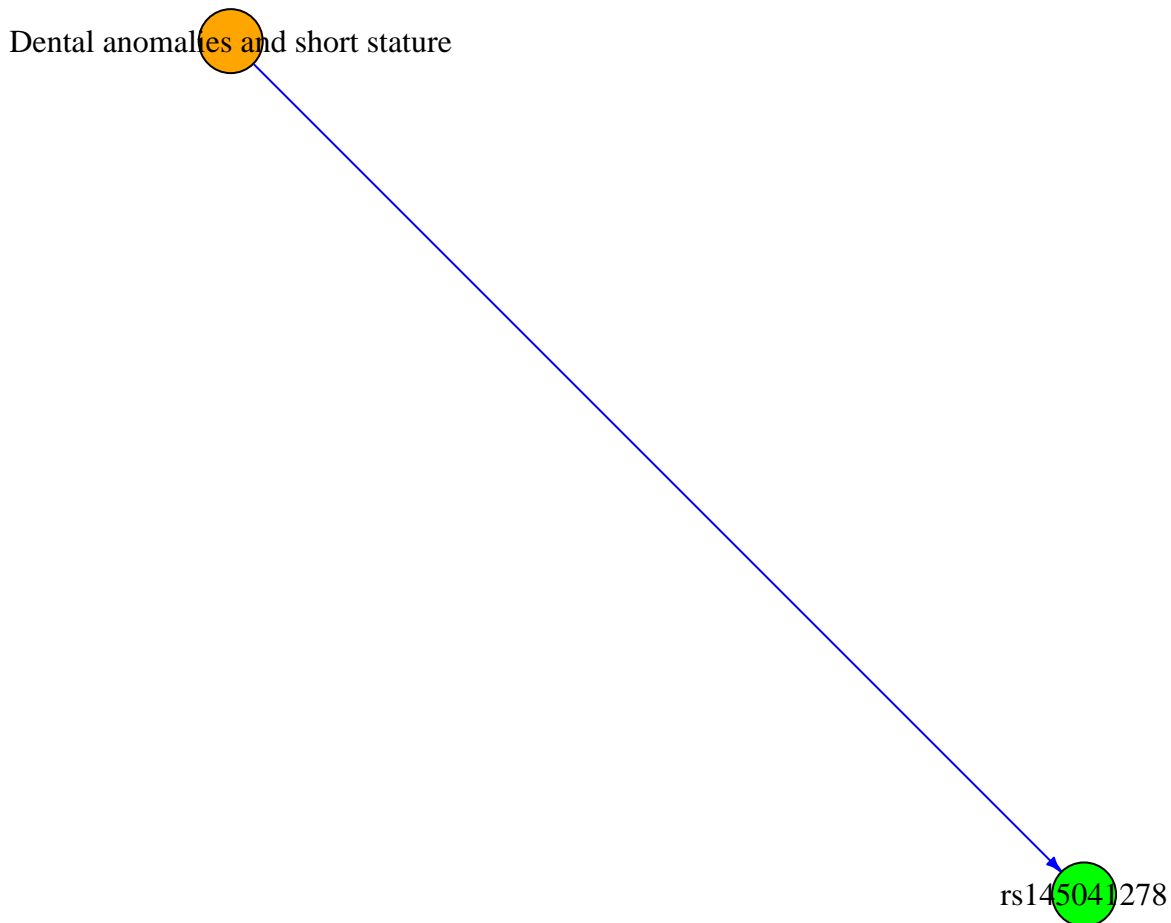

# Variant–Disease Network (Developmental regression)

Developmental regression

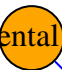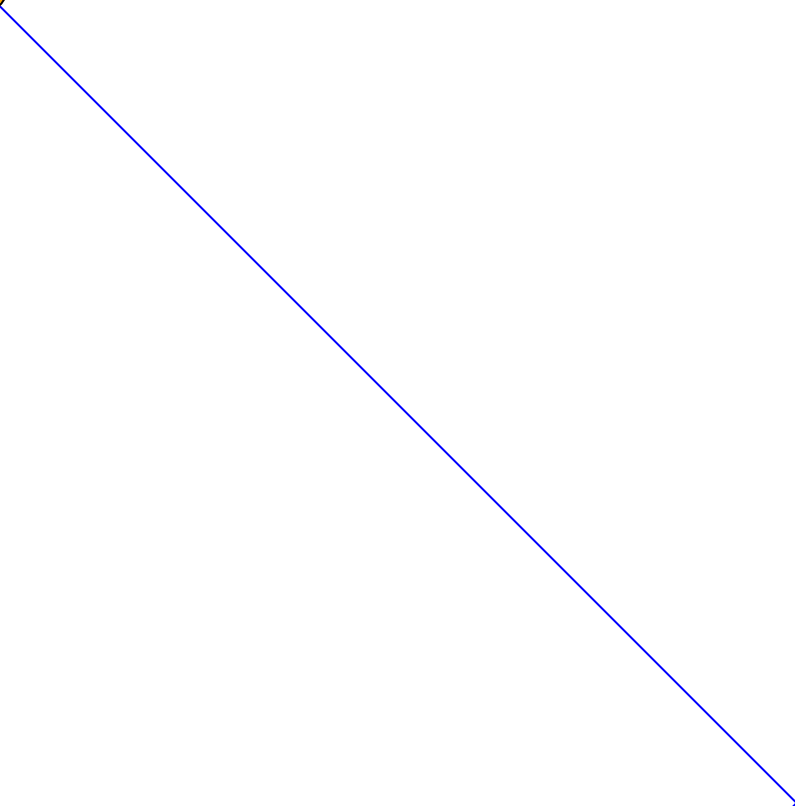

rs61748421

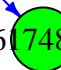

# Variant–Disease Network (DFNA 2 Nonsyndromic Hearing Loss)

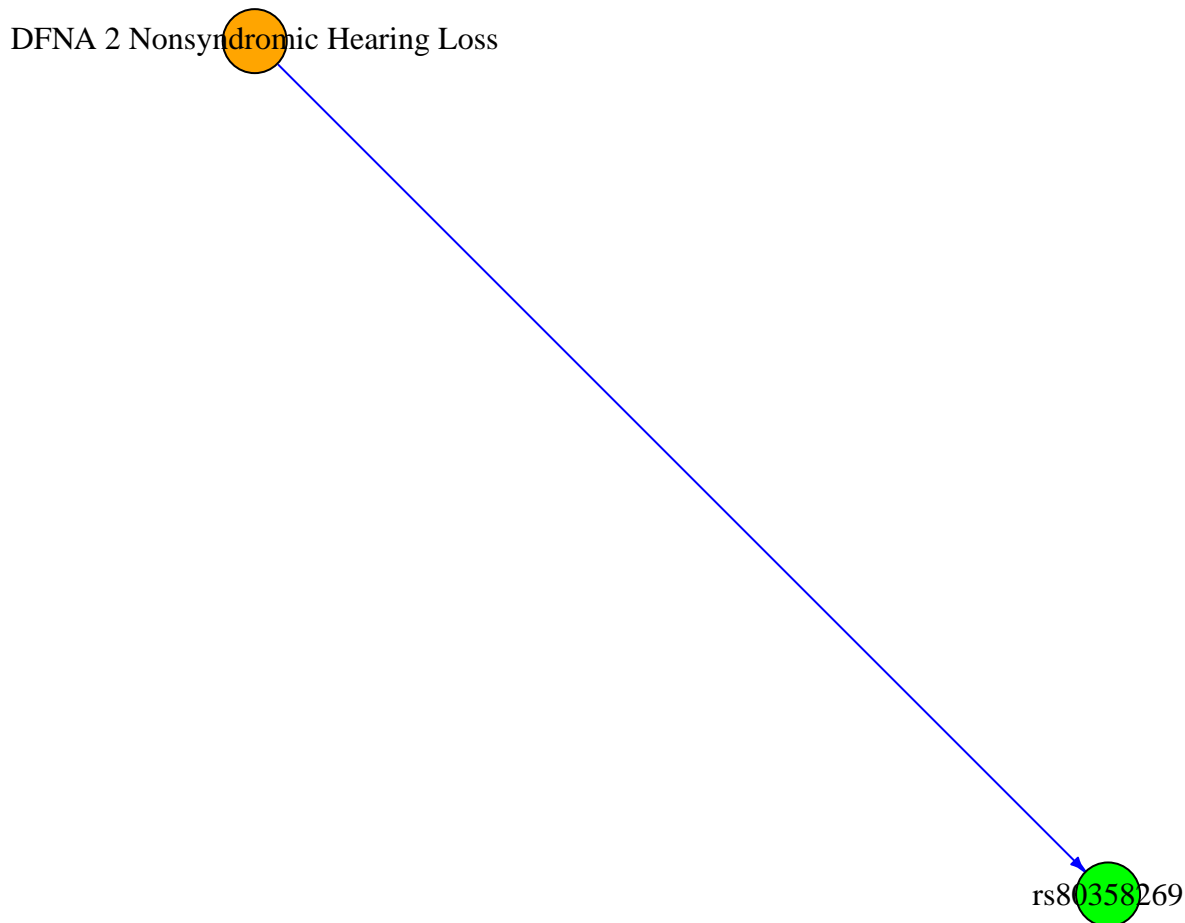

Variant–Disease Network (Diabetes mellitus)

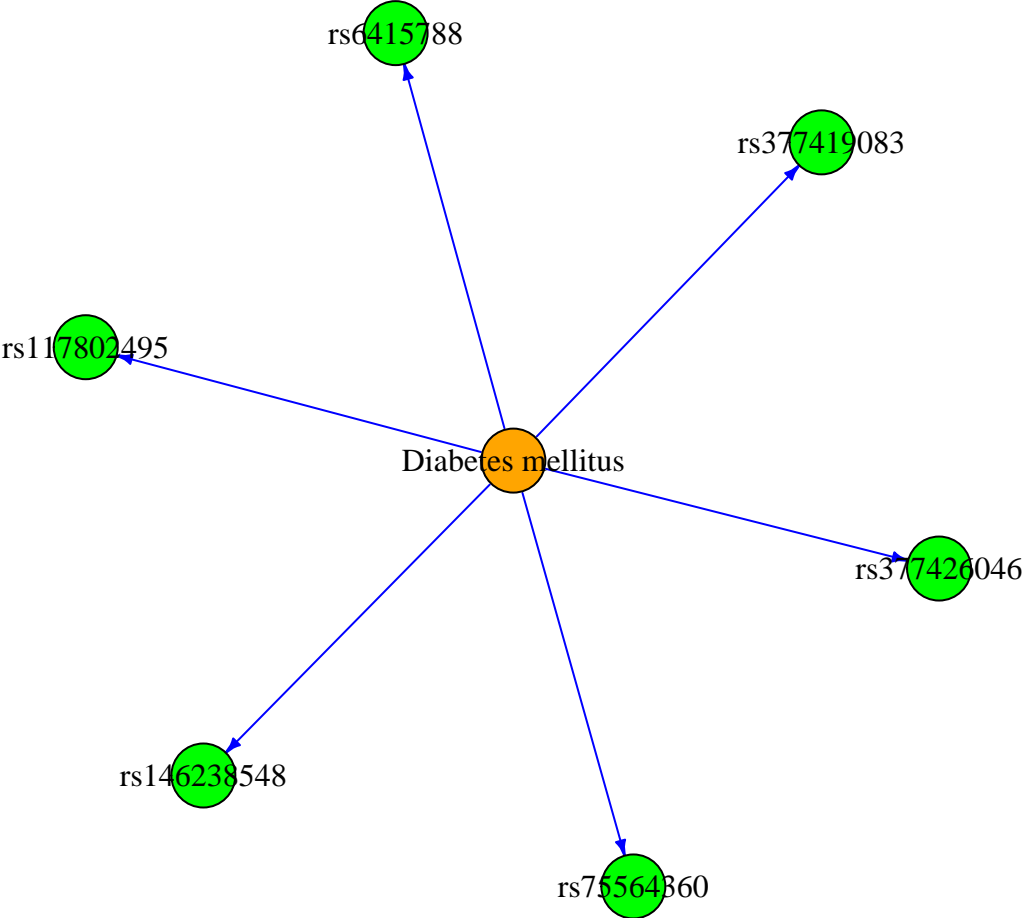

**Variant–Disease Network (Diamond–Blackfan anemia)**

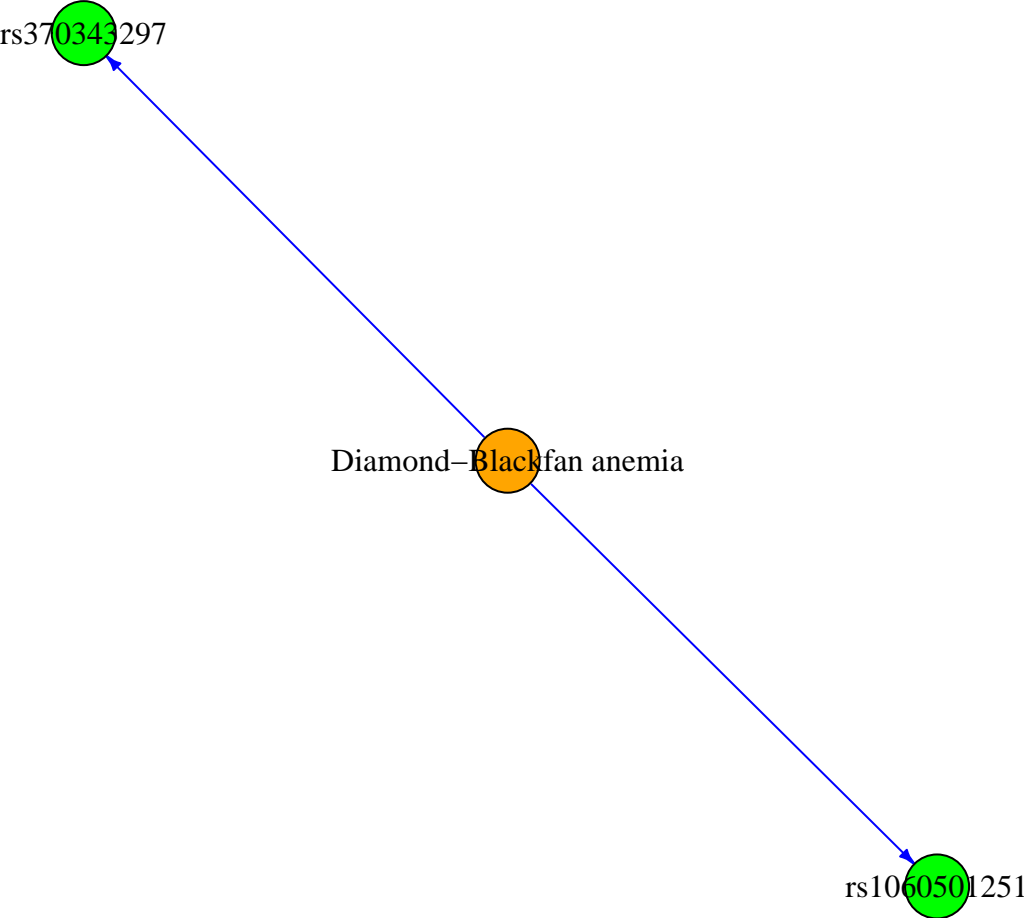

## Variant–Disease Network (Diamond–Blackfan anemia 1)

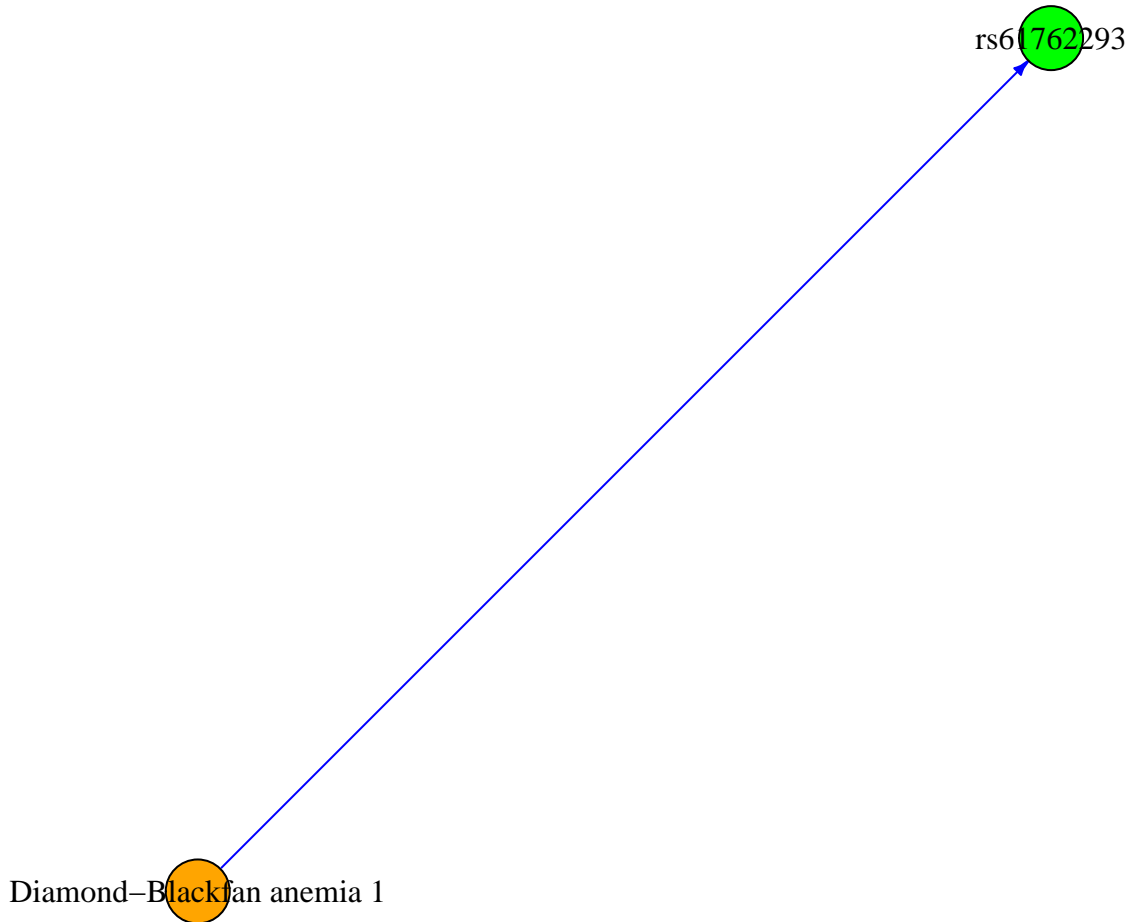

Variant–Disease Network (Diaphanospondylodysostosis)

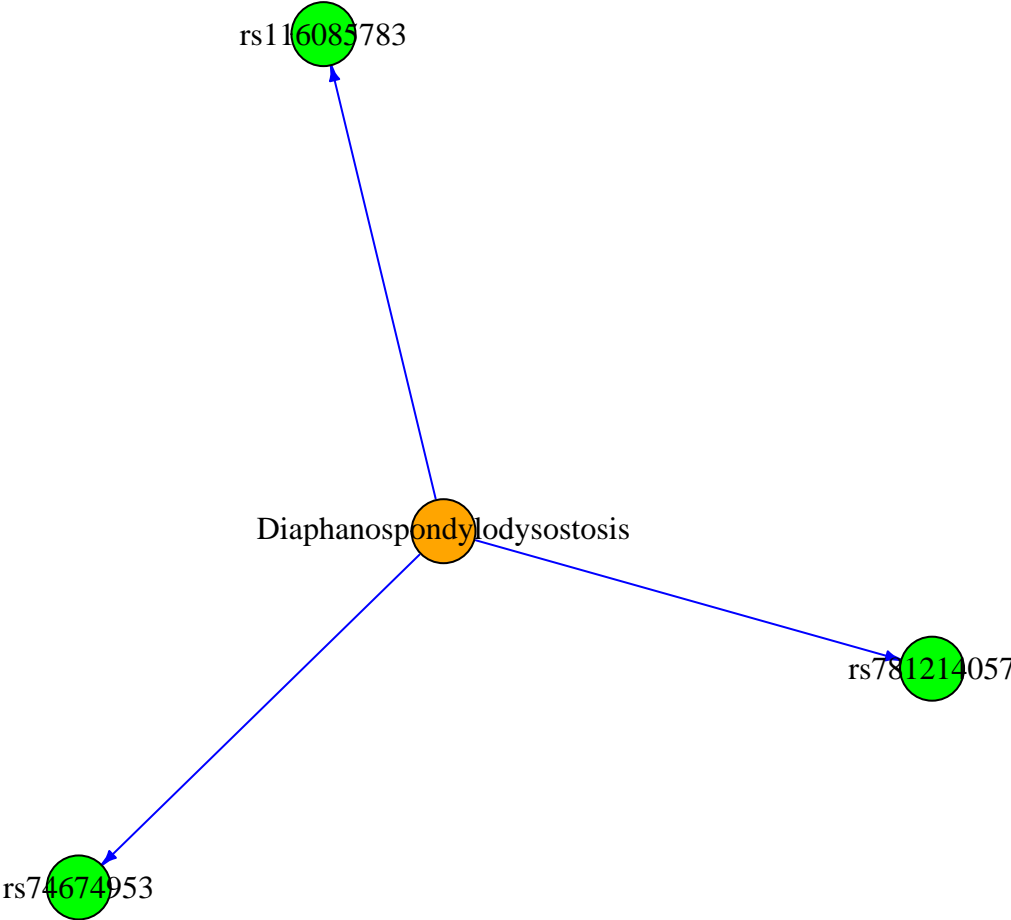

## Variant-Disease Network (Diarrhea 5)

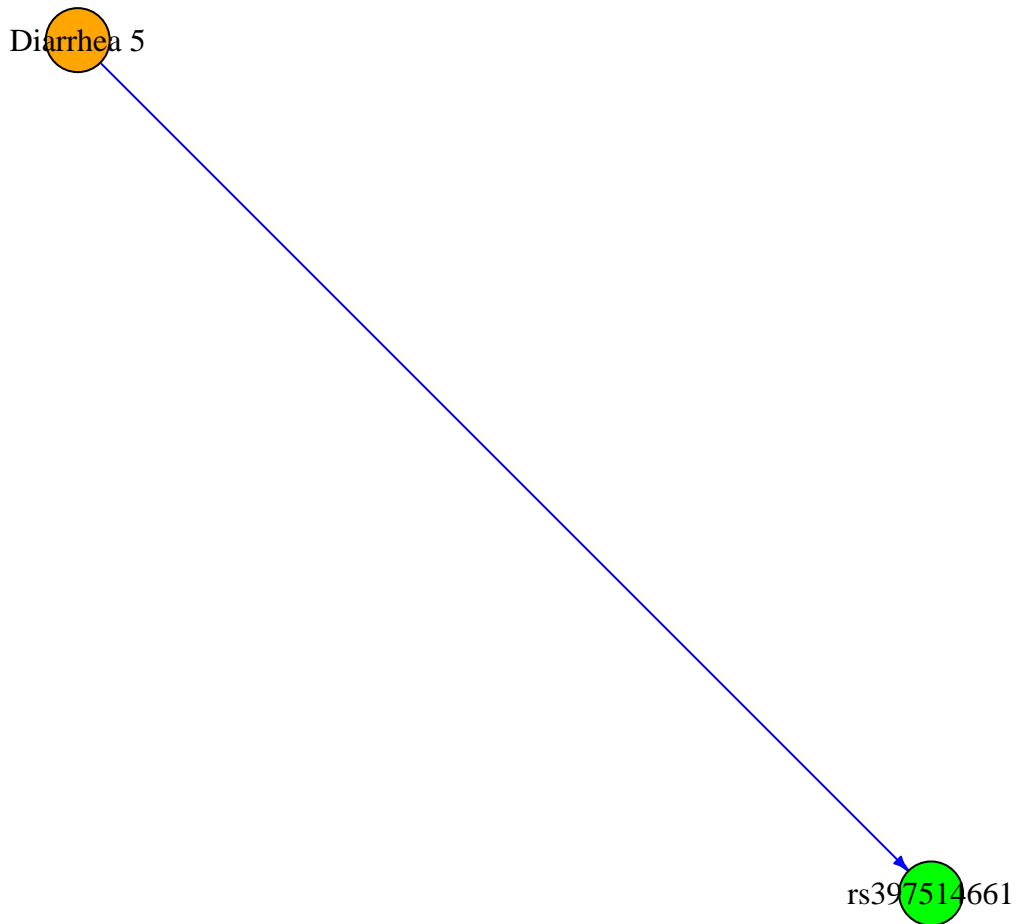



# Variant–Disease Network (Diarrhea with Microvillus Atrophy)

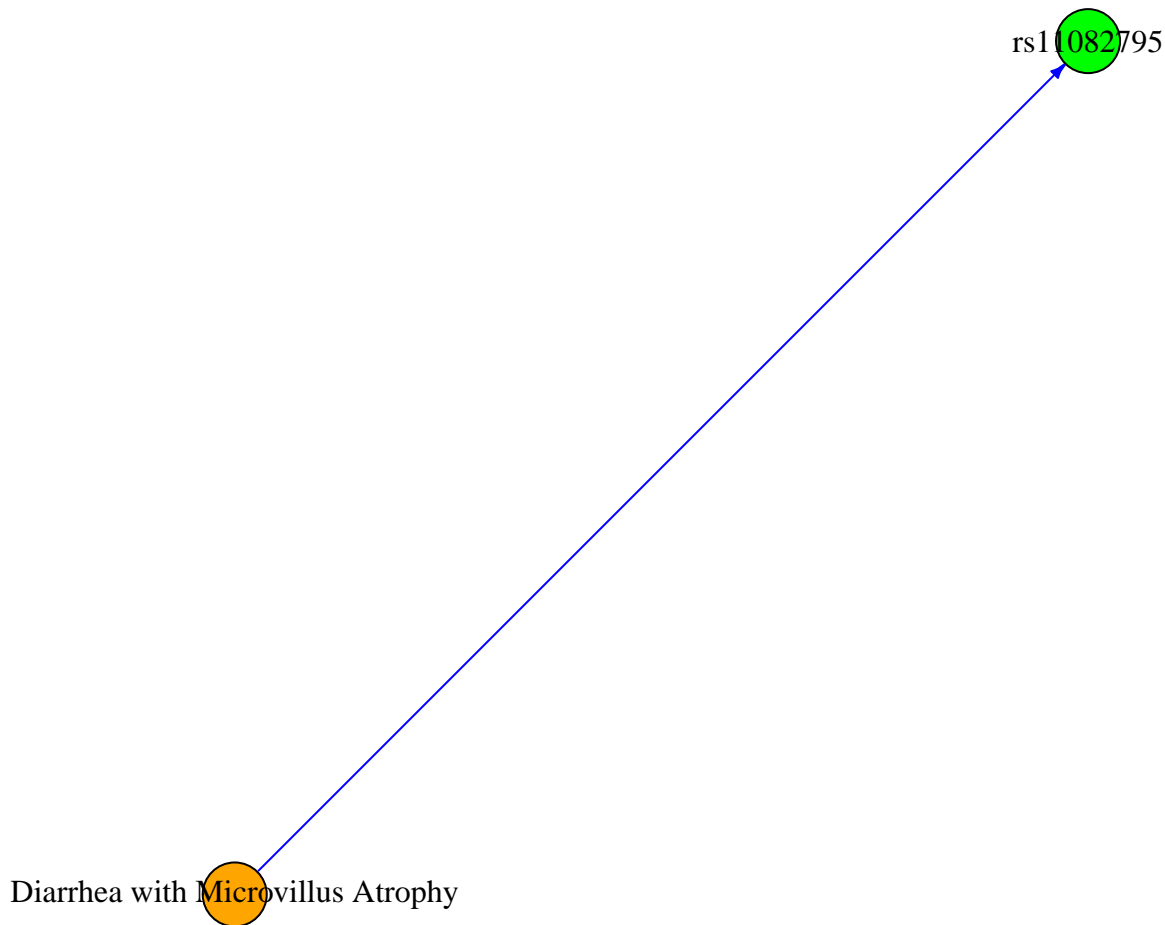

# Disease Network (DICER1-related pleuropulmonary blastoma cancer predispos

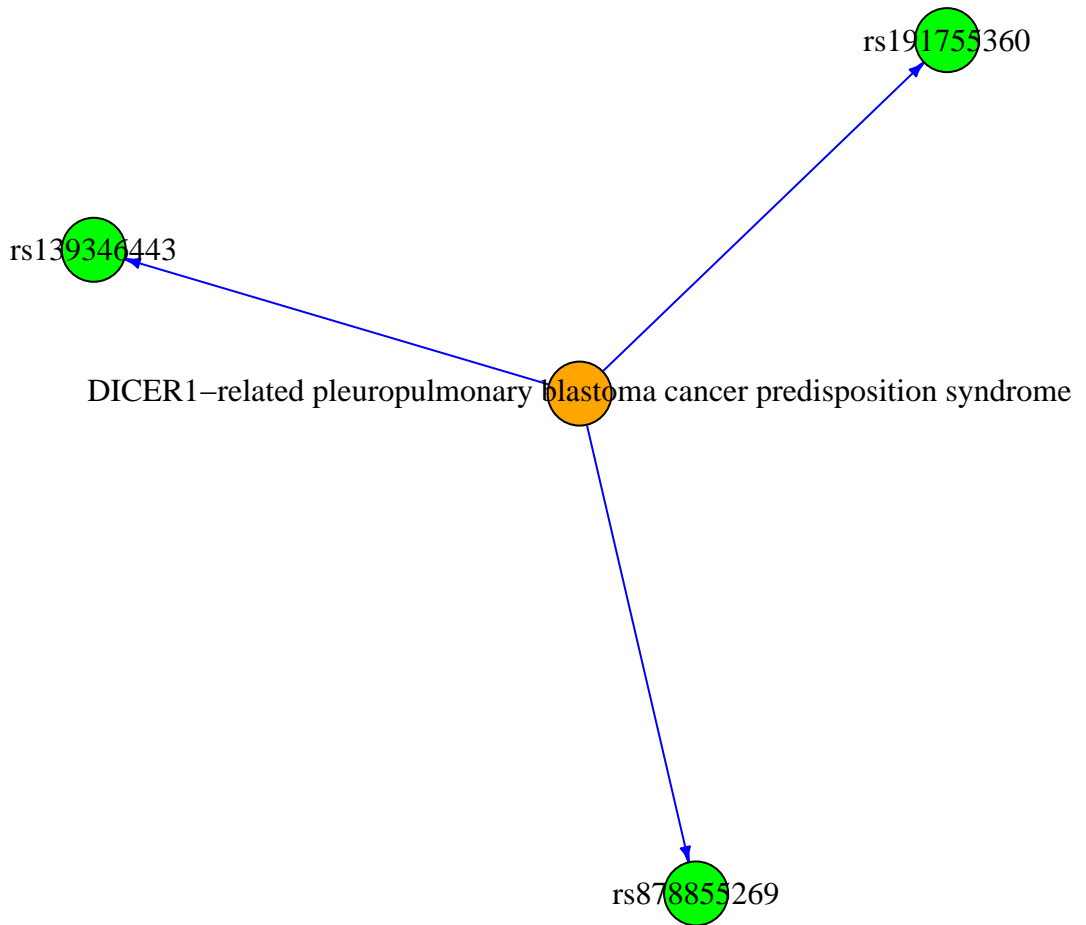

## Variant–Disease Network (Diffuse mesangial sclerosis)

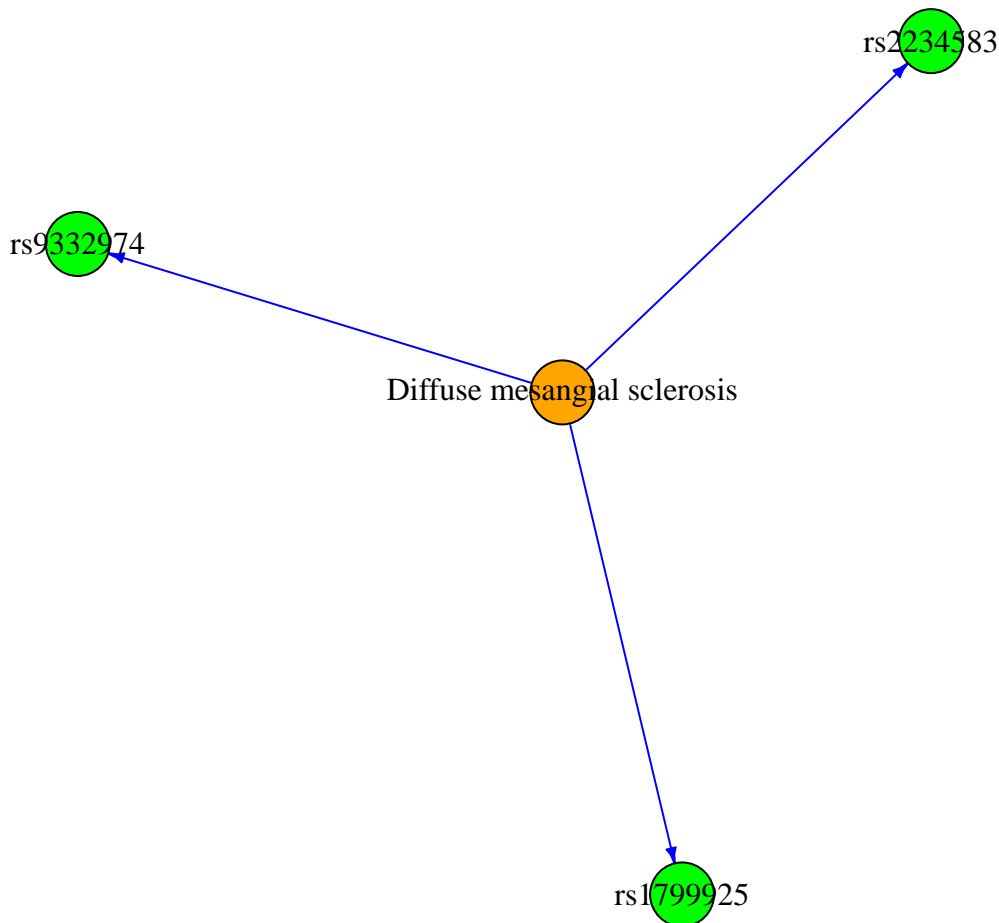

Variant–Disease Network (Digital clubbing)

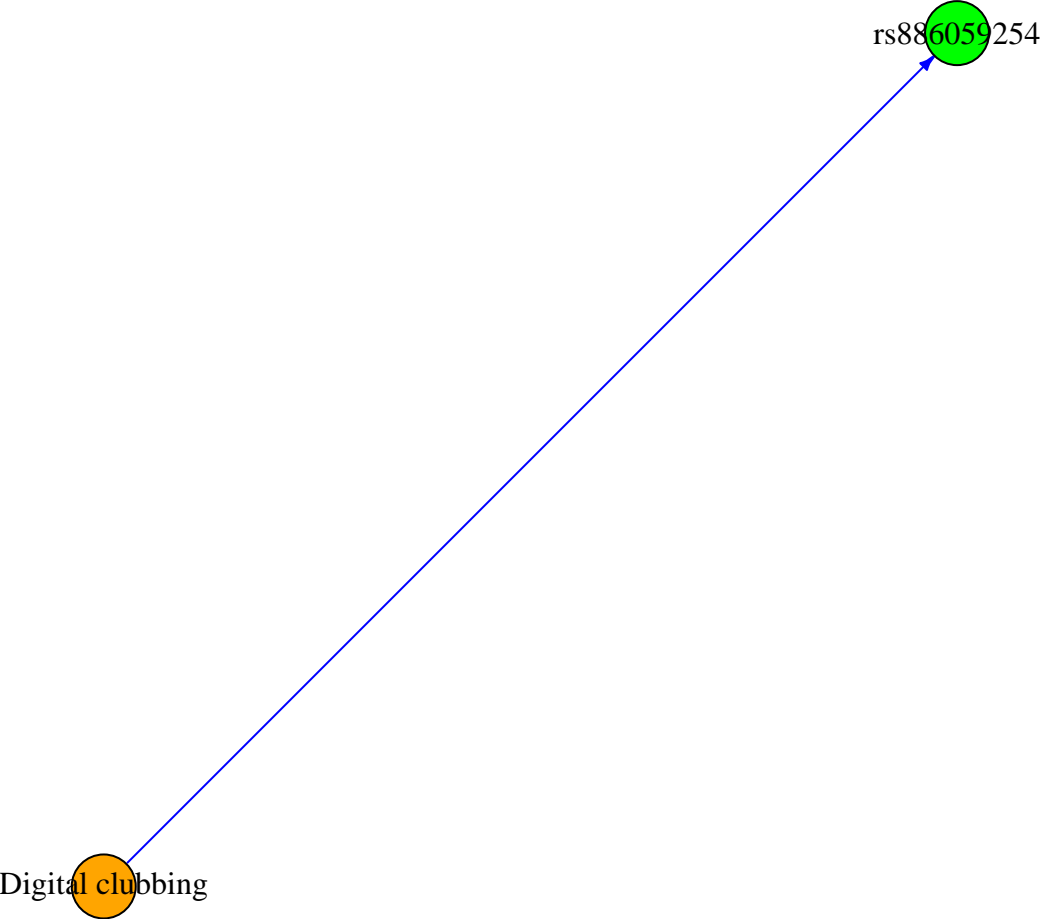

# Variant–Disease Network (Dihydropteridine reductase deficiency)

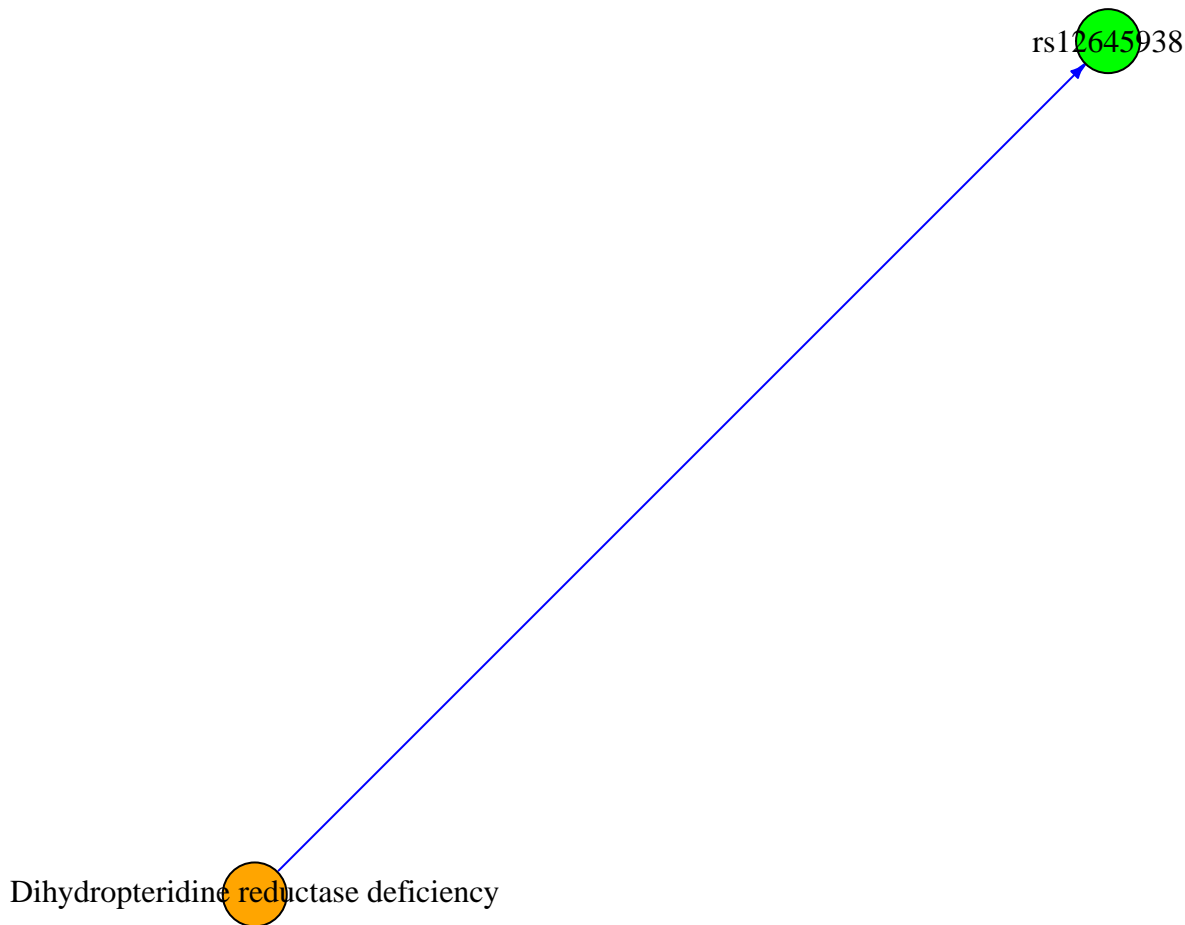

## Variant–Disease Network (Dilated Cardiomyopathy)

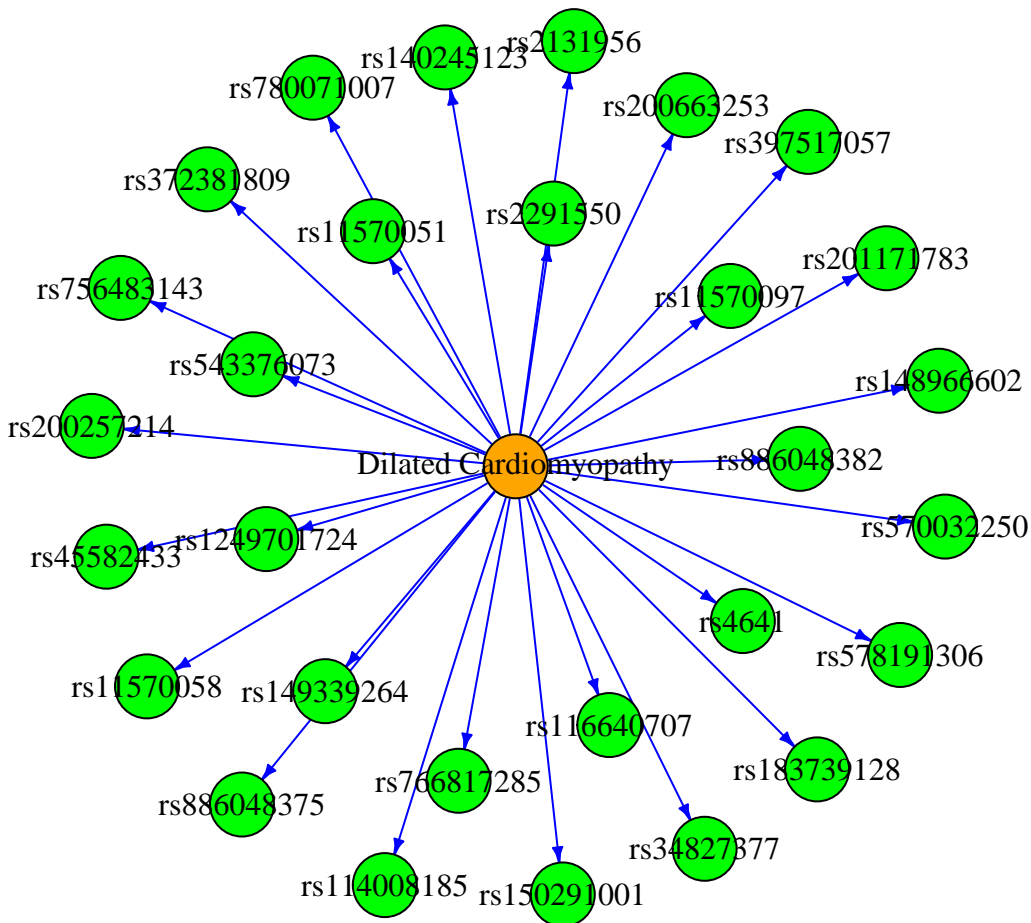

Variant–Disease Network (Dilated cardiomyopathy 1AA)

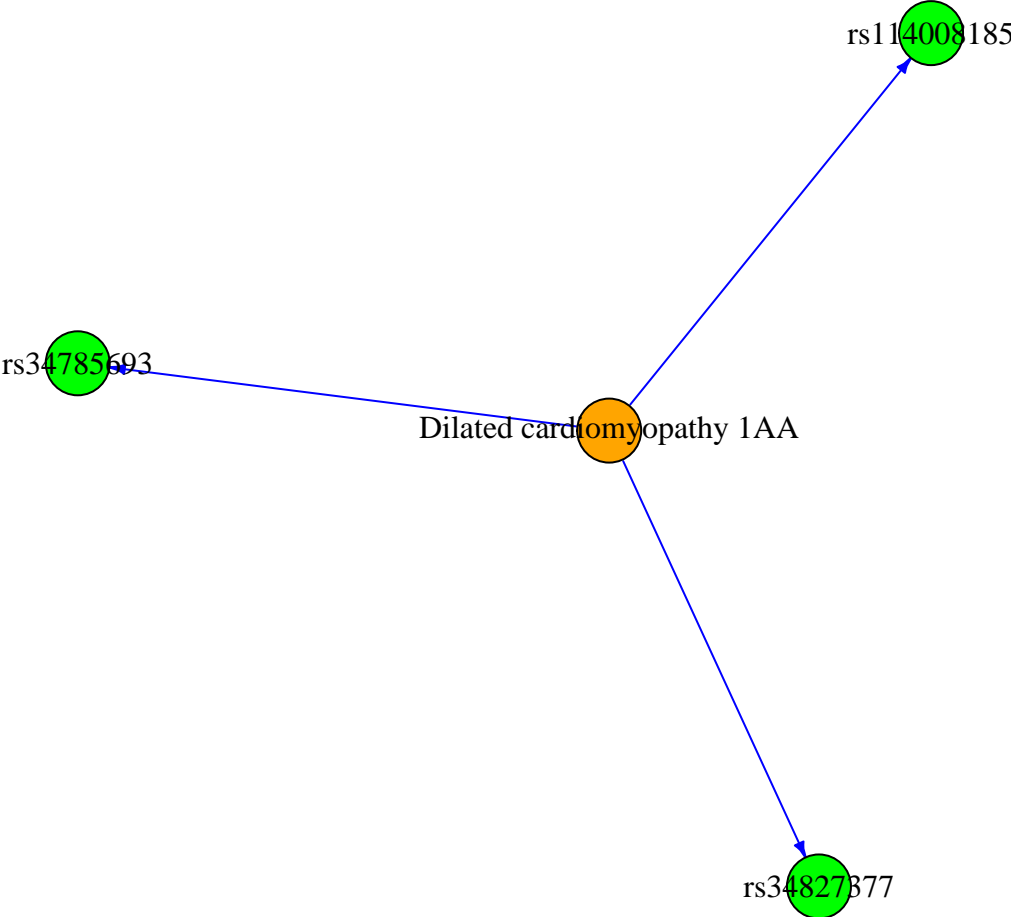

**Variant–Disease Network (Dilated cardiomyopathy 1C)**

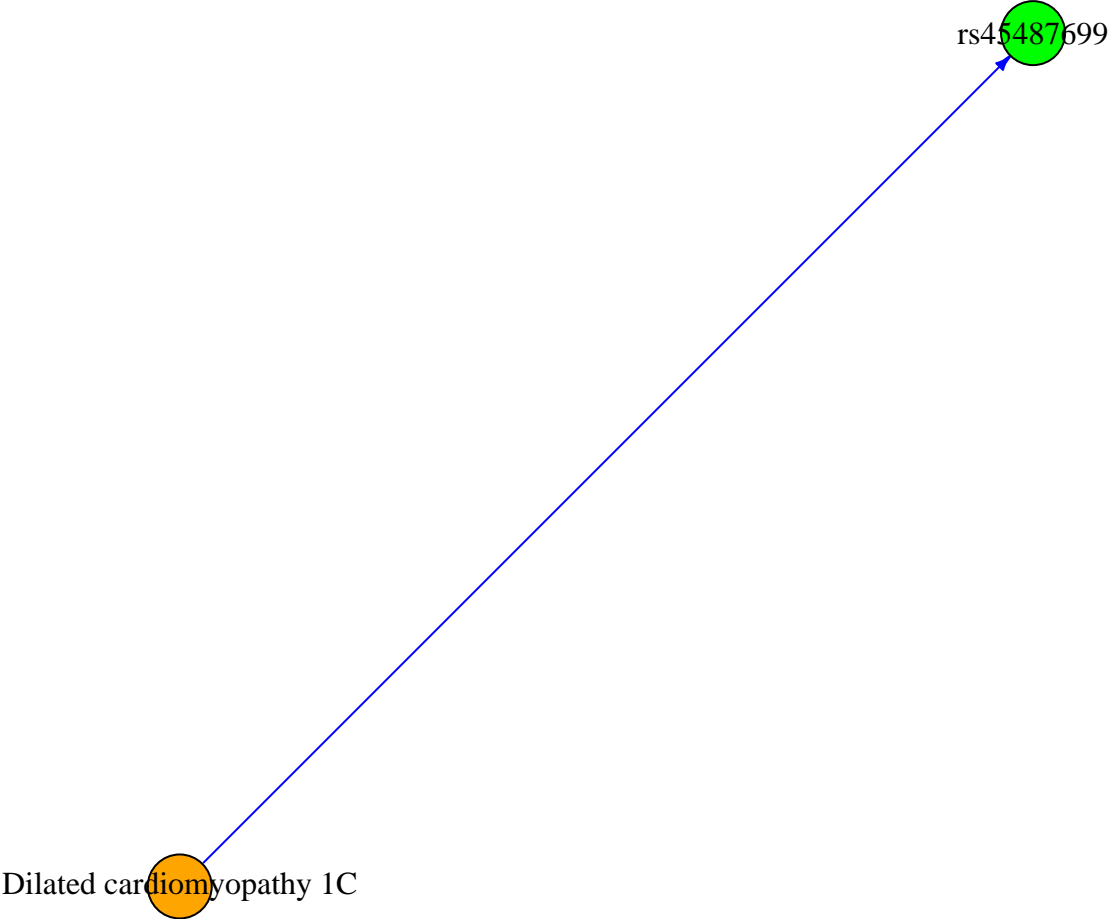



## Variant–Disease Network (Dilated cardiomyopathy 1CC)

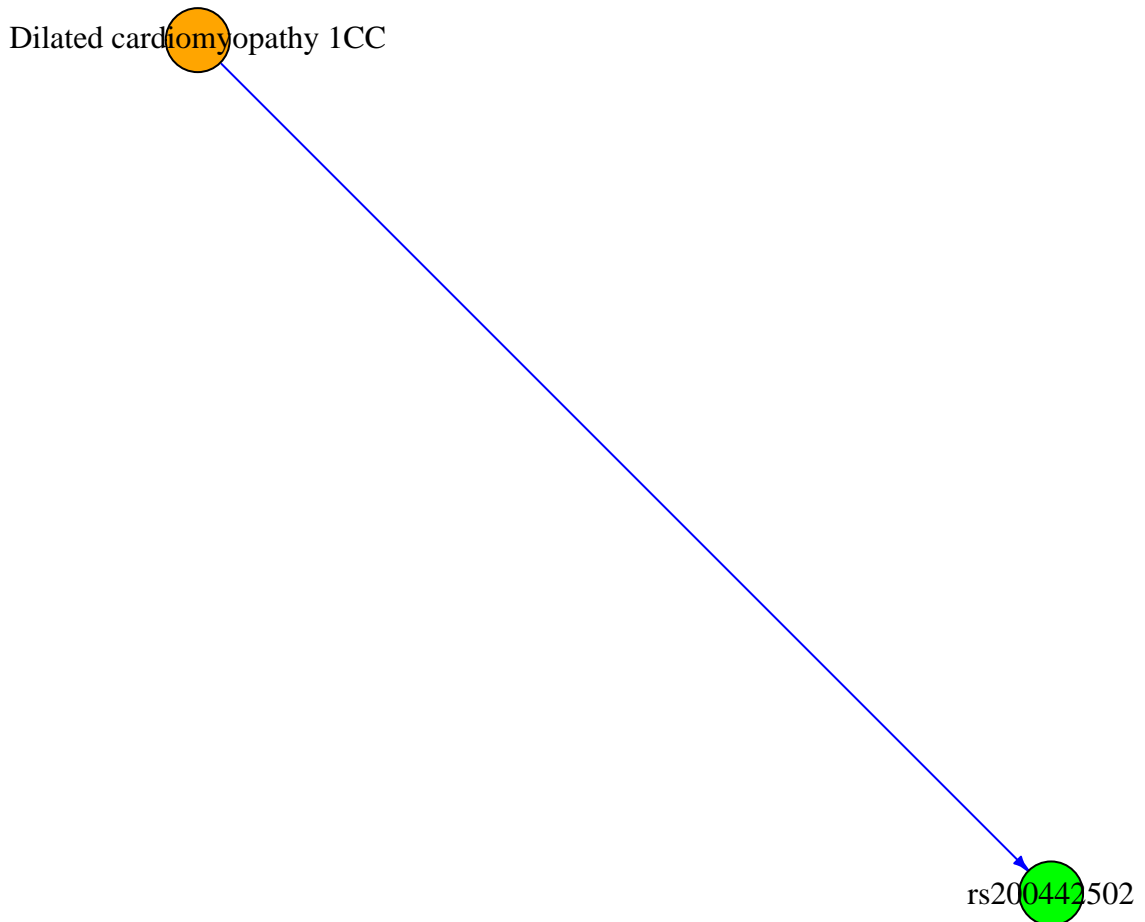

**Variant–Disease Network (Dilated cardiomyopathy 1HH)**

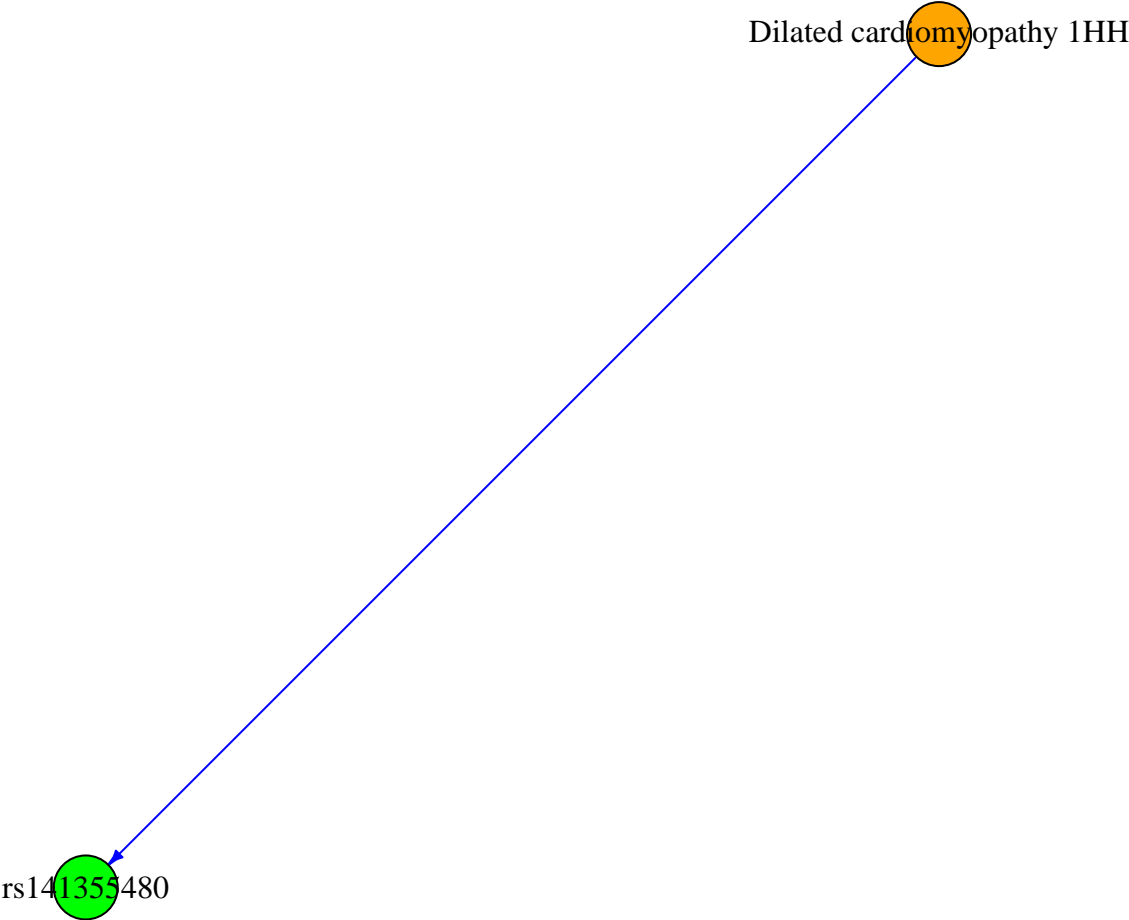

## Variant–Disease Network (Dilated cardiomyopathy 1I)

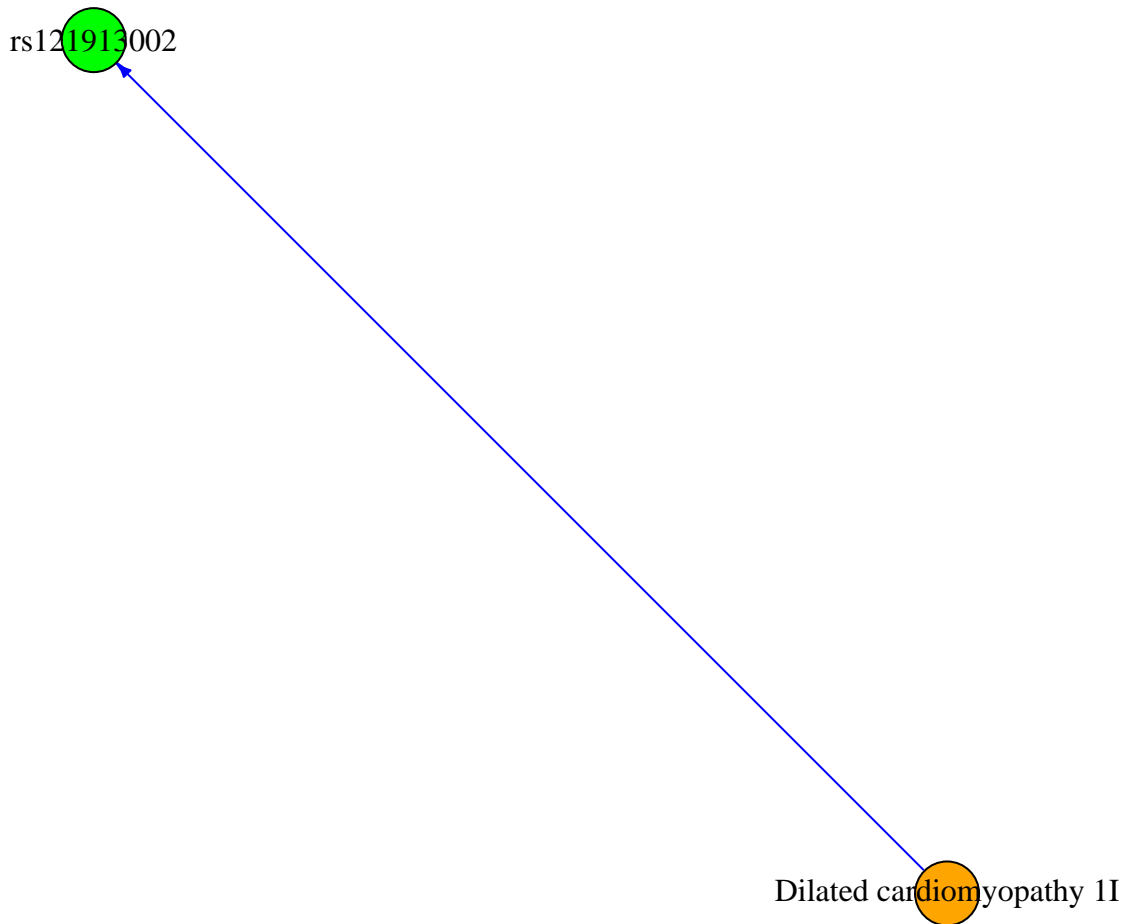

**Variant–Disease Network (Dilated cardiomyopathy 1II)**

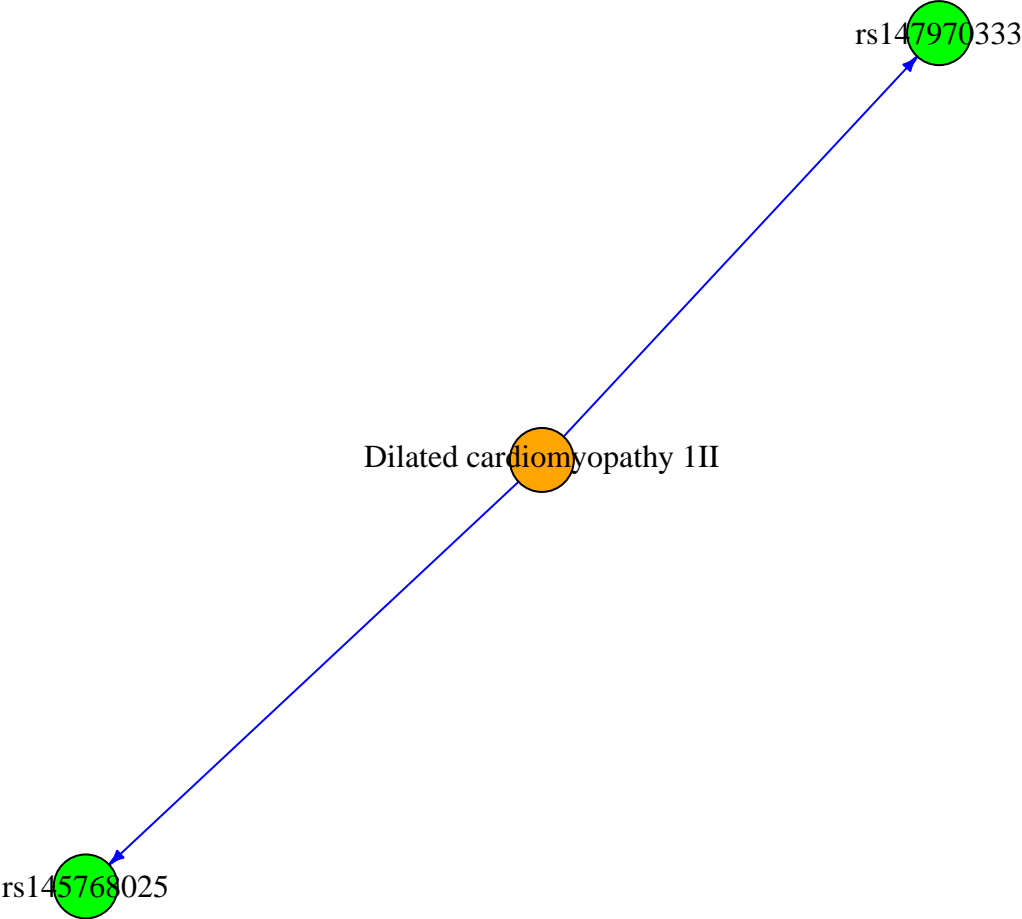

**Variant–Disease Network (Dilated cardiomyopathy 1J)**

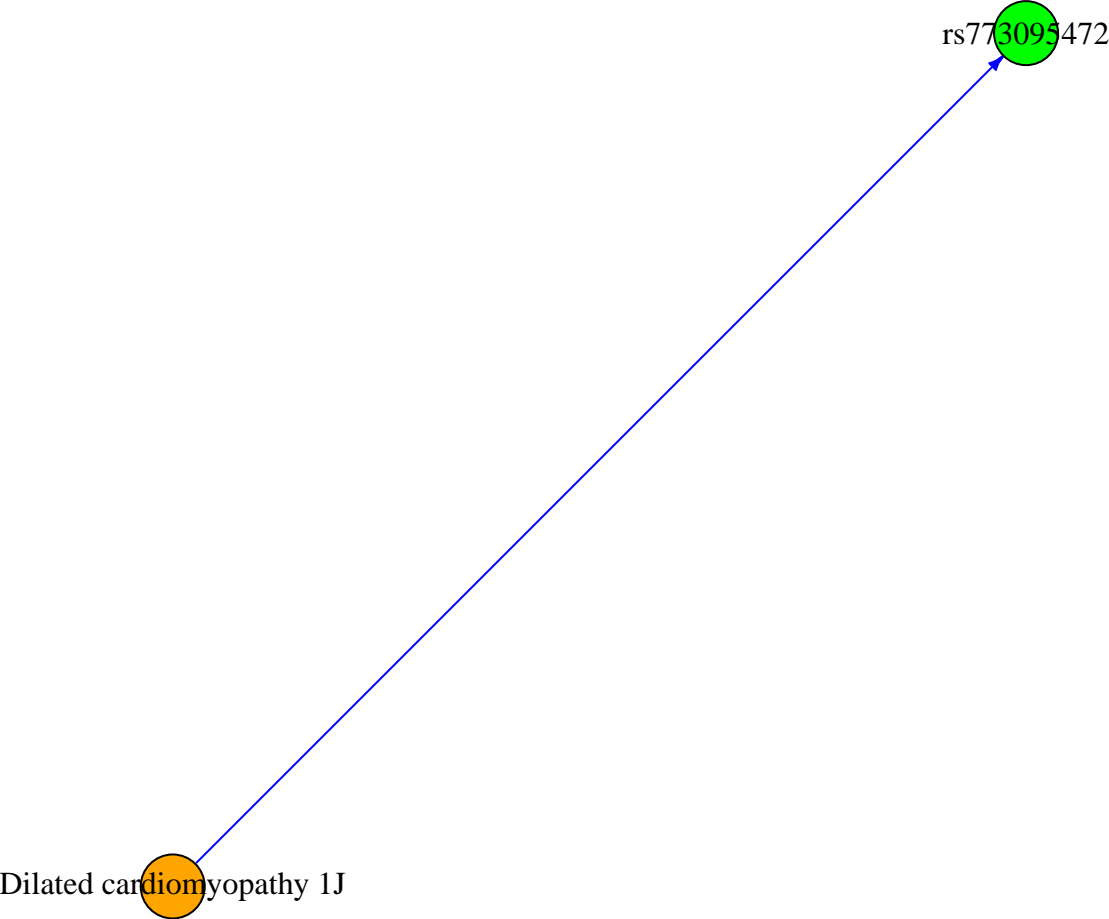

# Variant–Disease Network (Dilated cardiomyopathy 1JJ)

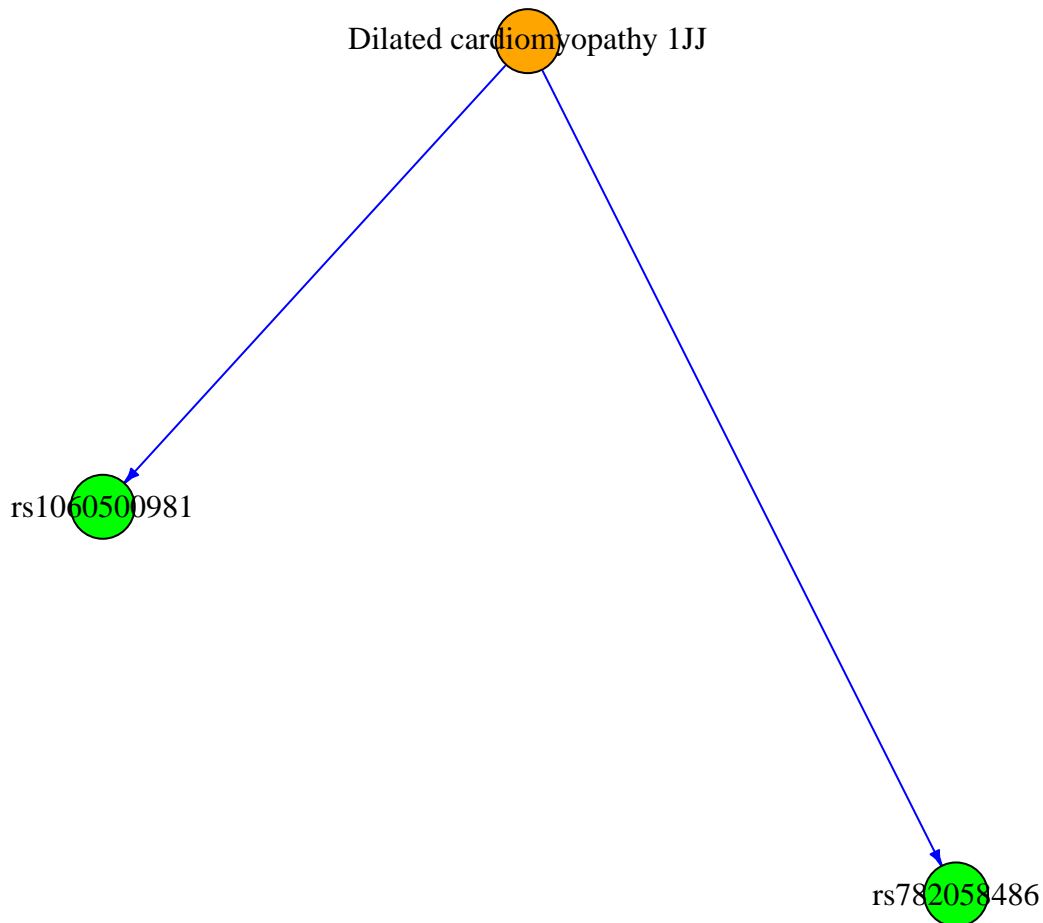

**Variant–Disease Network (Dilated cardiomyopathy 1KK)**

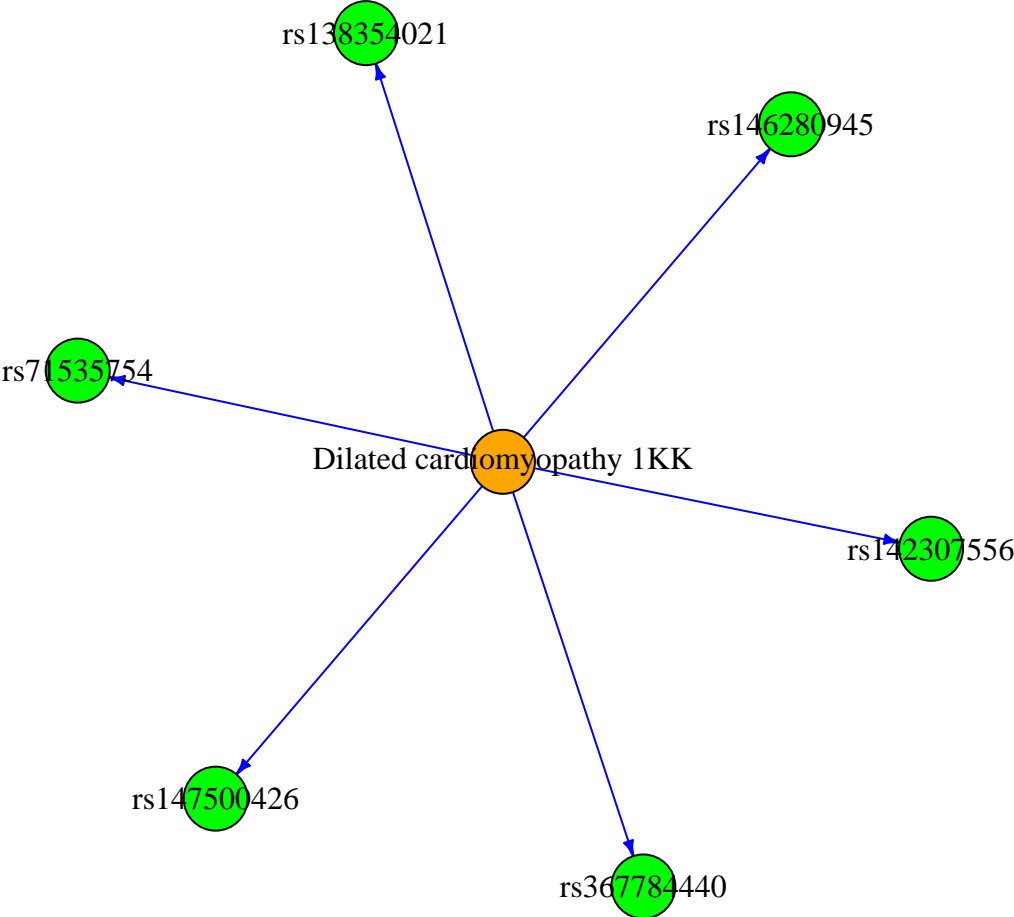

## Variant–Disease Network (Dilated cardiomyopathy 1M)

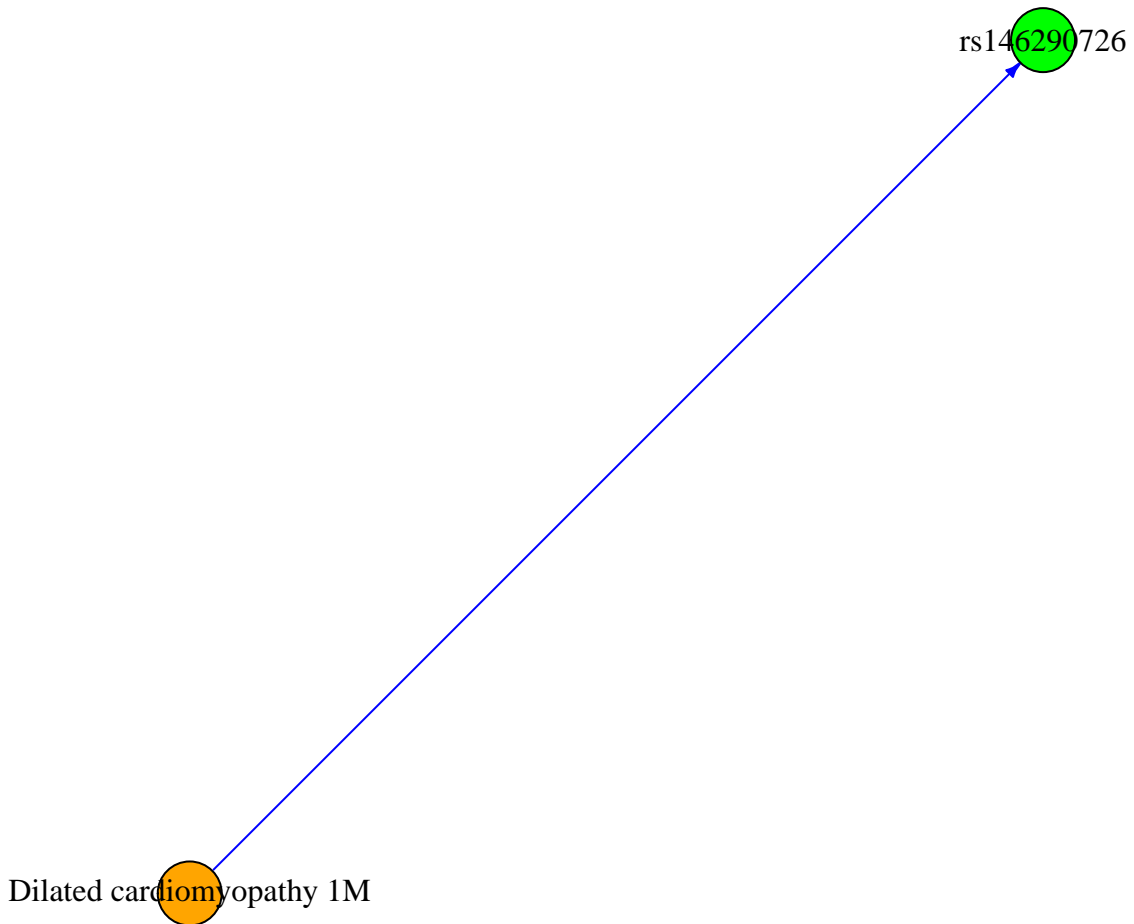



## Variant–Disease Network (Dilated cardiomyopathy 10)

rs1273498300

Dilated cardiomyopathy 10

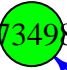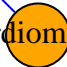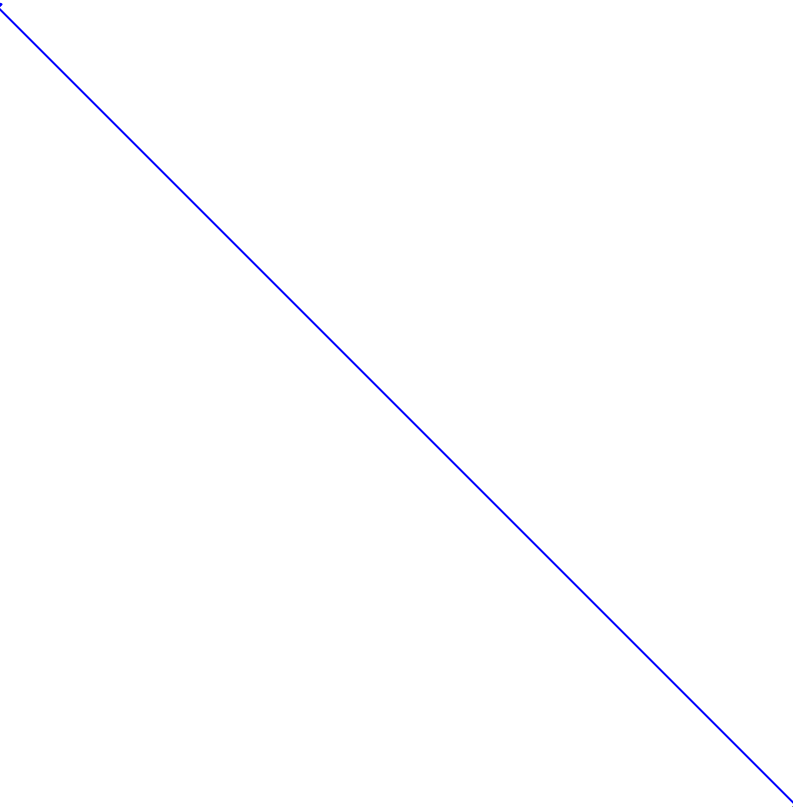

**Variant–Disease Network (Dilated cardiomyopathy 1R)**

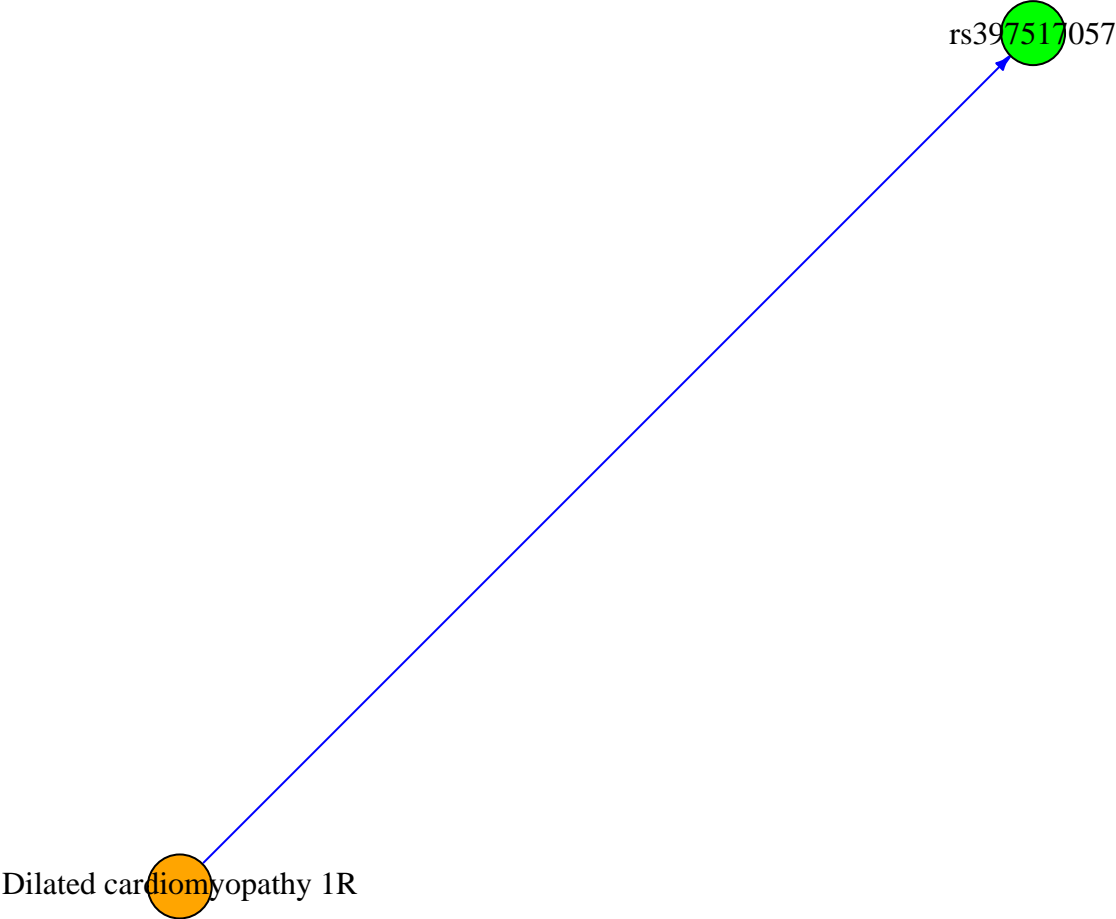

**Variant–Disease Network (Dilated cardiomyopathy 1S)**

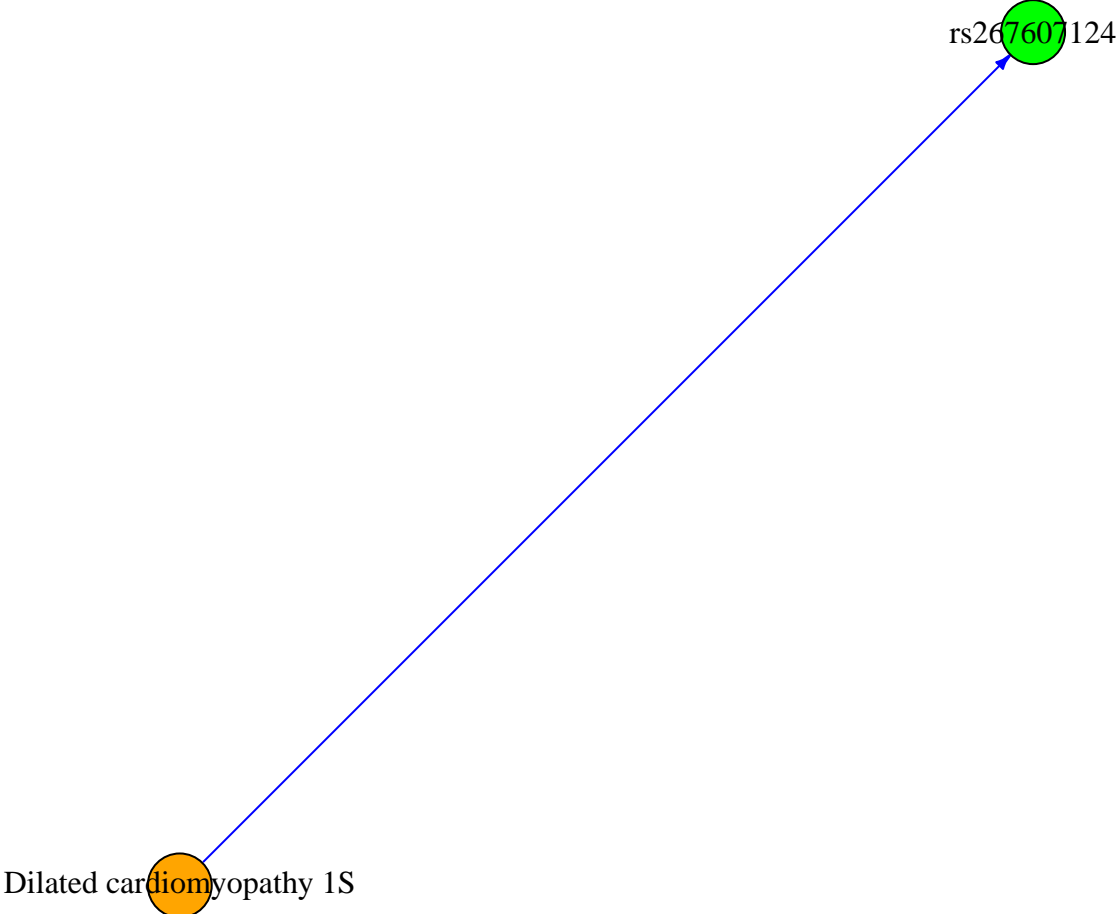

## Variant–Disease Network (Dilated cardiomyopathy 1W)

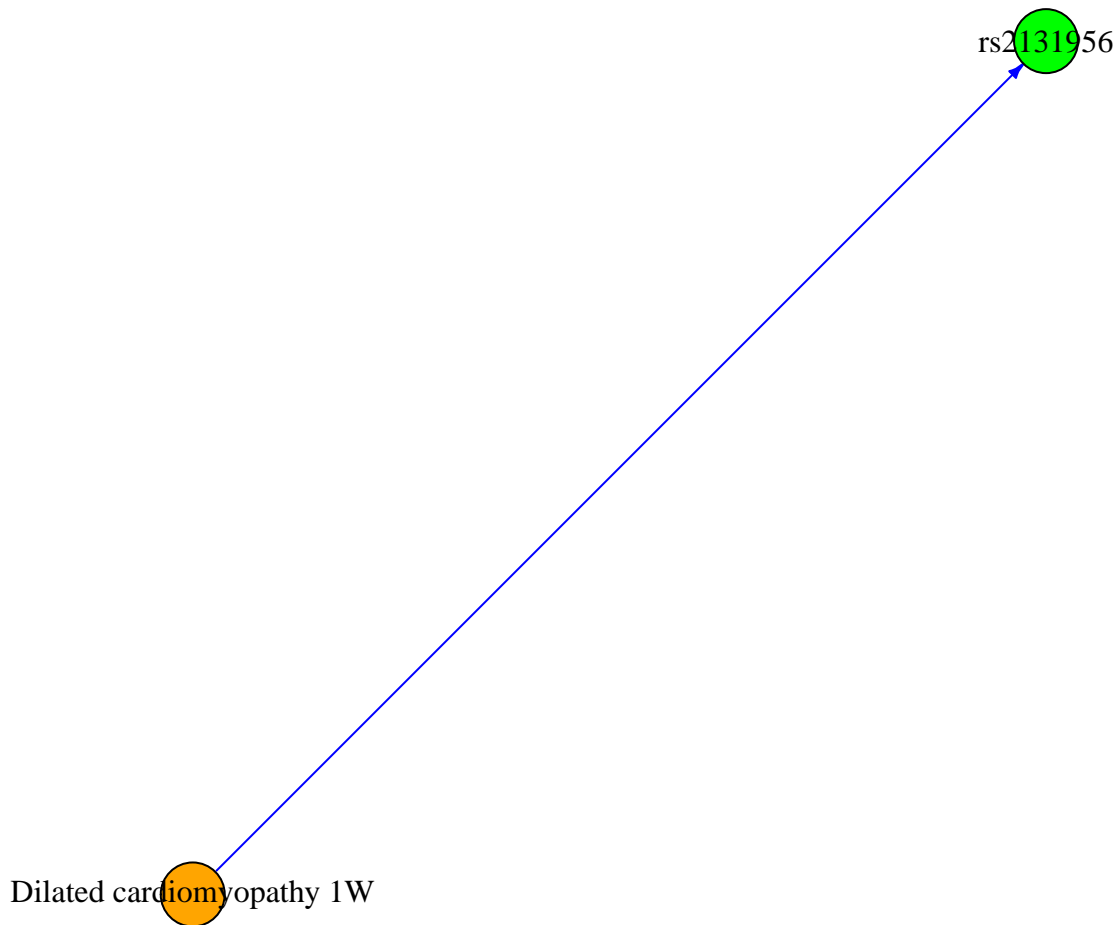

**Variant–Disease Network (Dilated cardiomyopathy 1Z)**

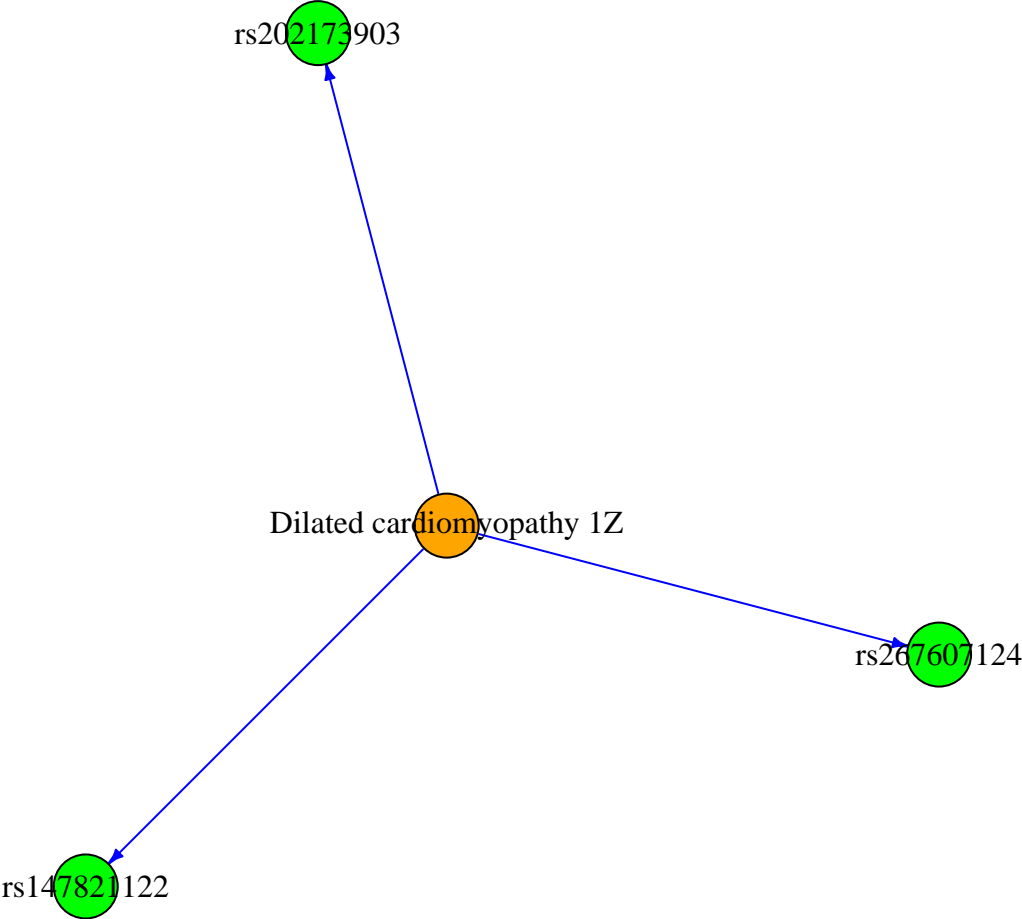

## Variant–Disease Network (Dilated cardiomyopathy 3B)

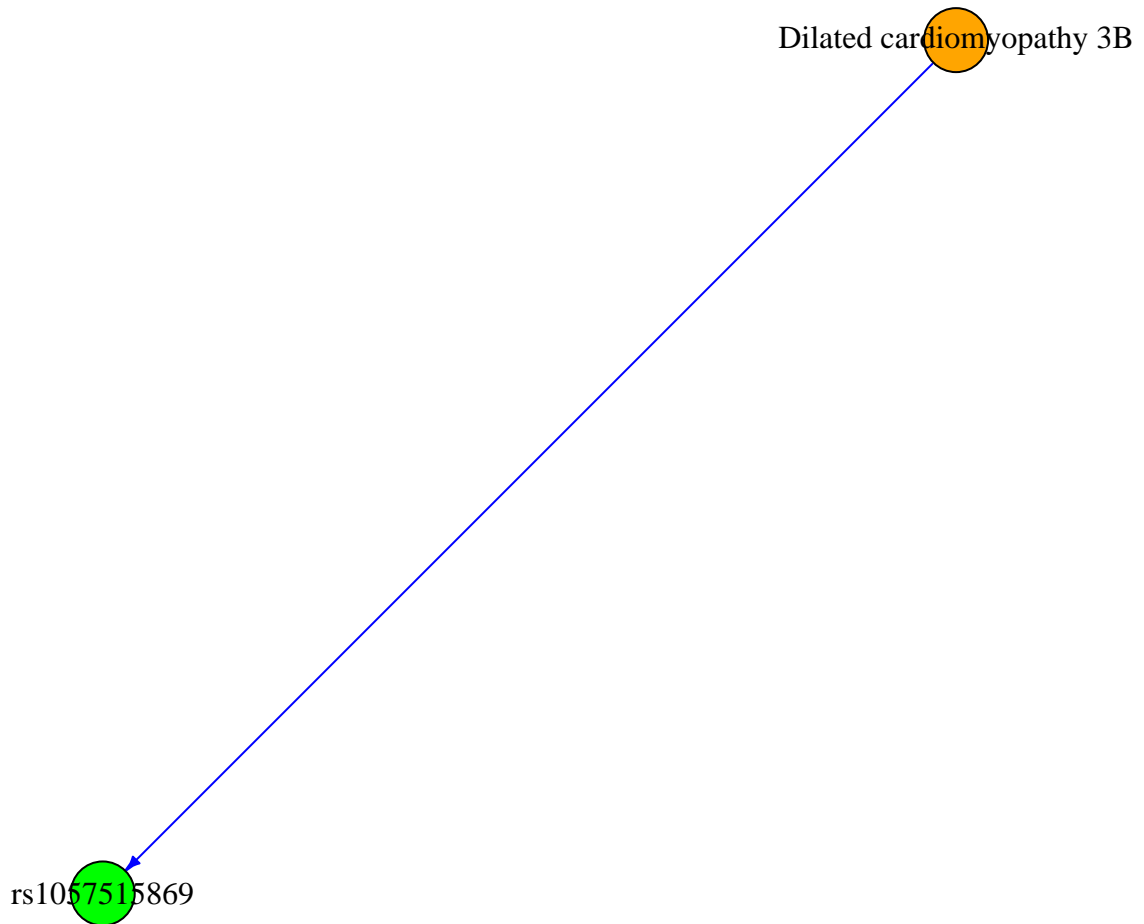

# Variant-Disease Network (Dilated cardiomyopathy with woolly hair and keratoderma)

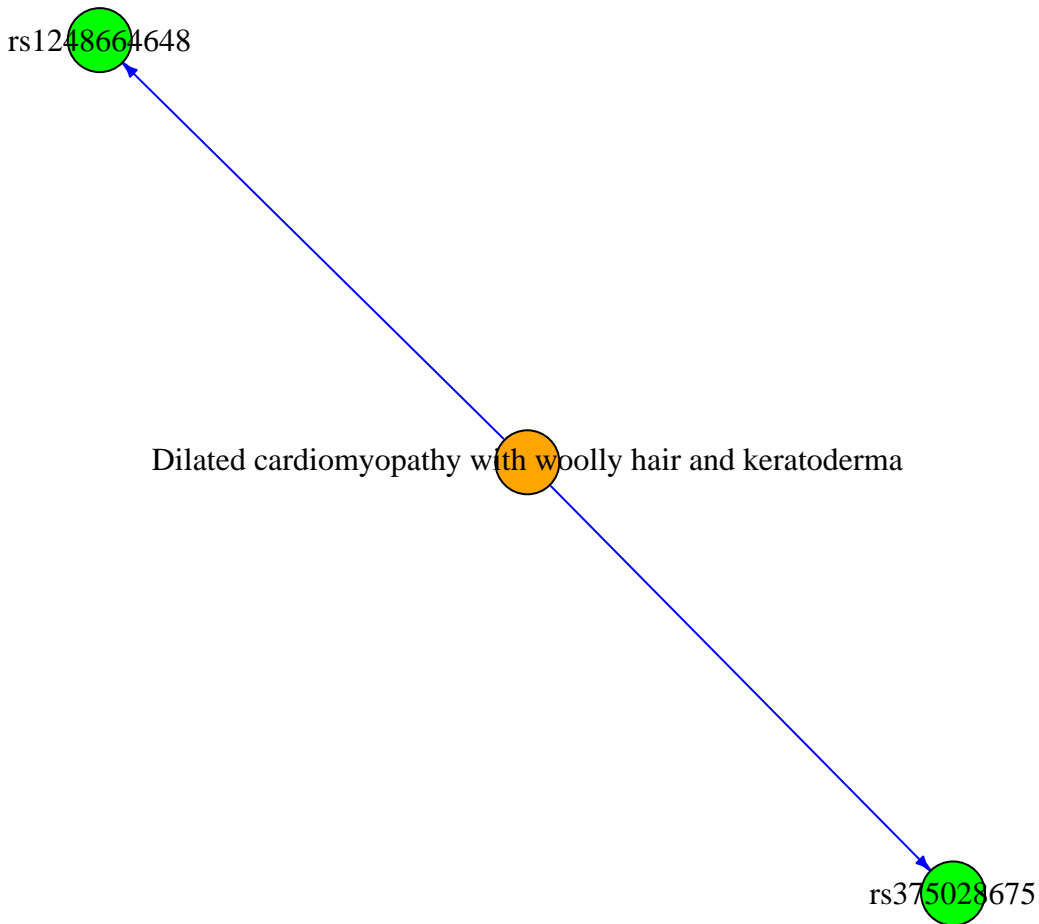

Variant–Disease Network (Disorders of Intracellular Cobalamin Metabolism)

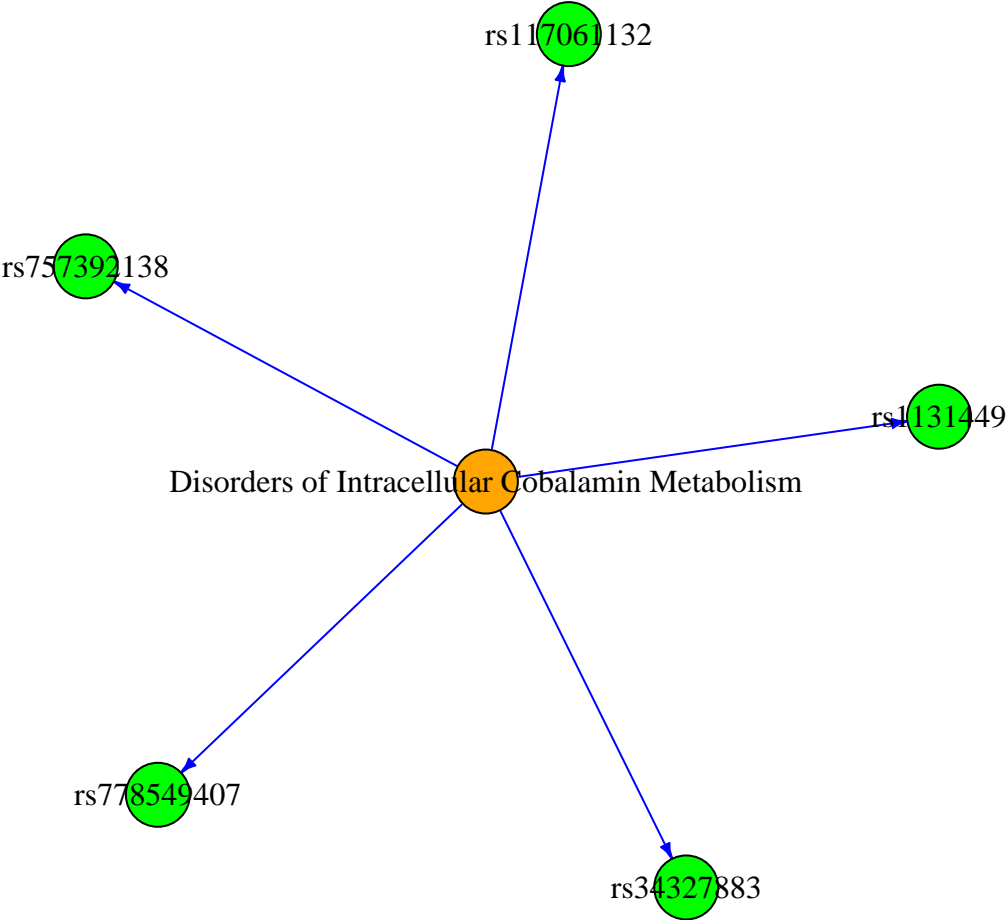



## Variant–Disease Network (Distal arthrogryposis)

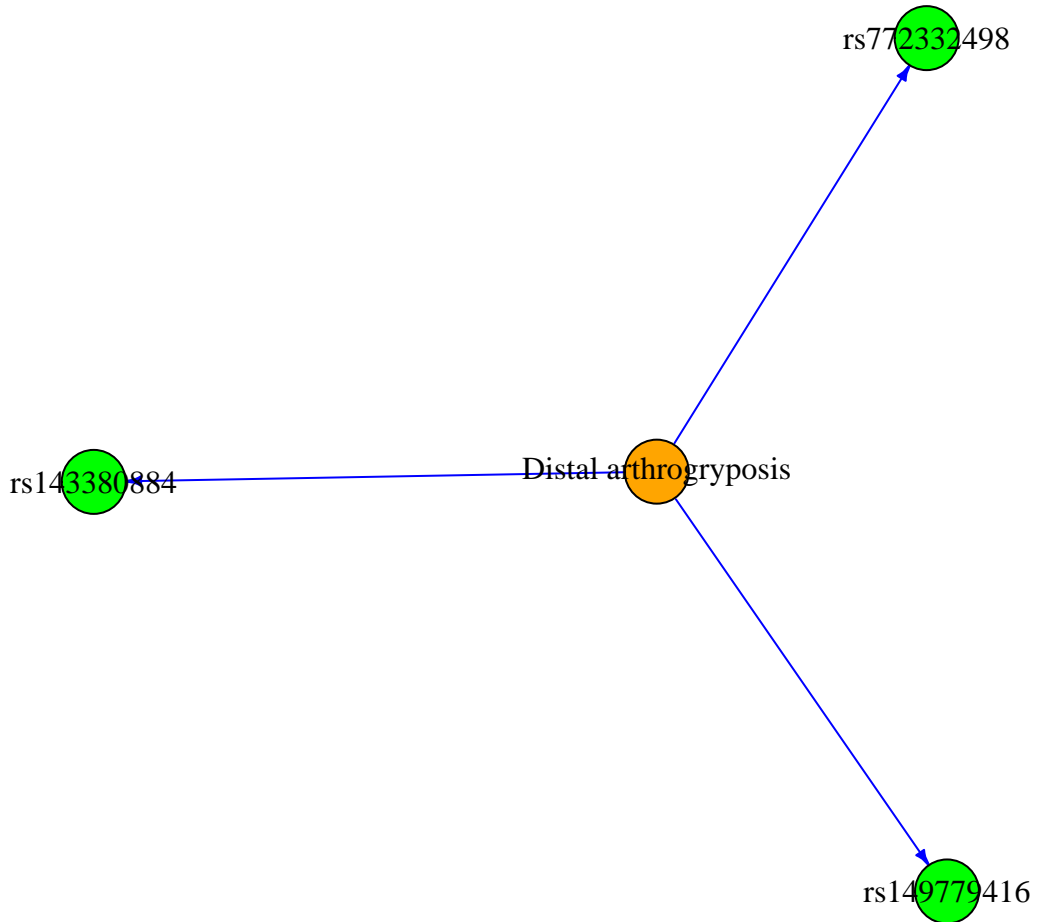

# Variant–Disease Network (Distal arthrogryposis type 1A)

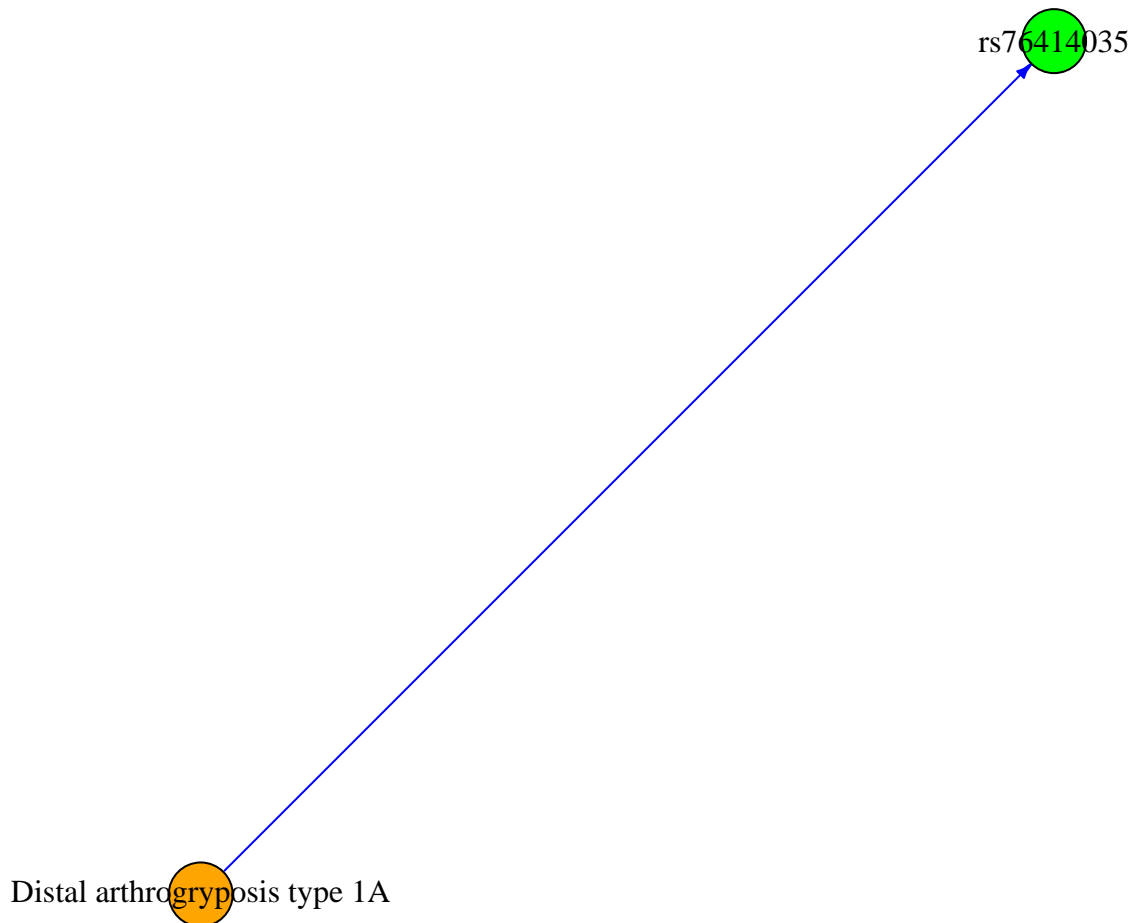

Variant–Disease Network (Distal hereditary motor neuropathy)

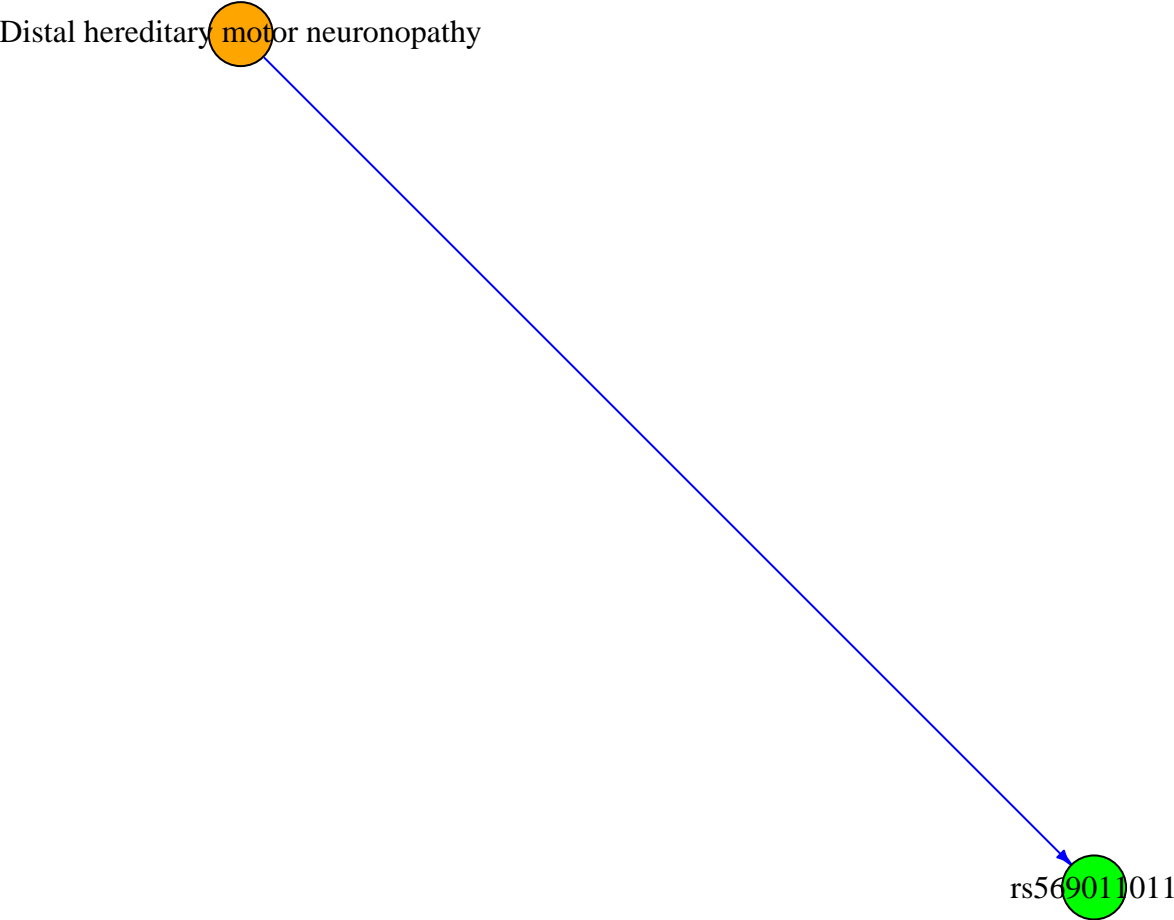

## Variant–Disease Network (Distal hereditary motor neuropathy 2D)

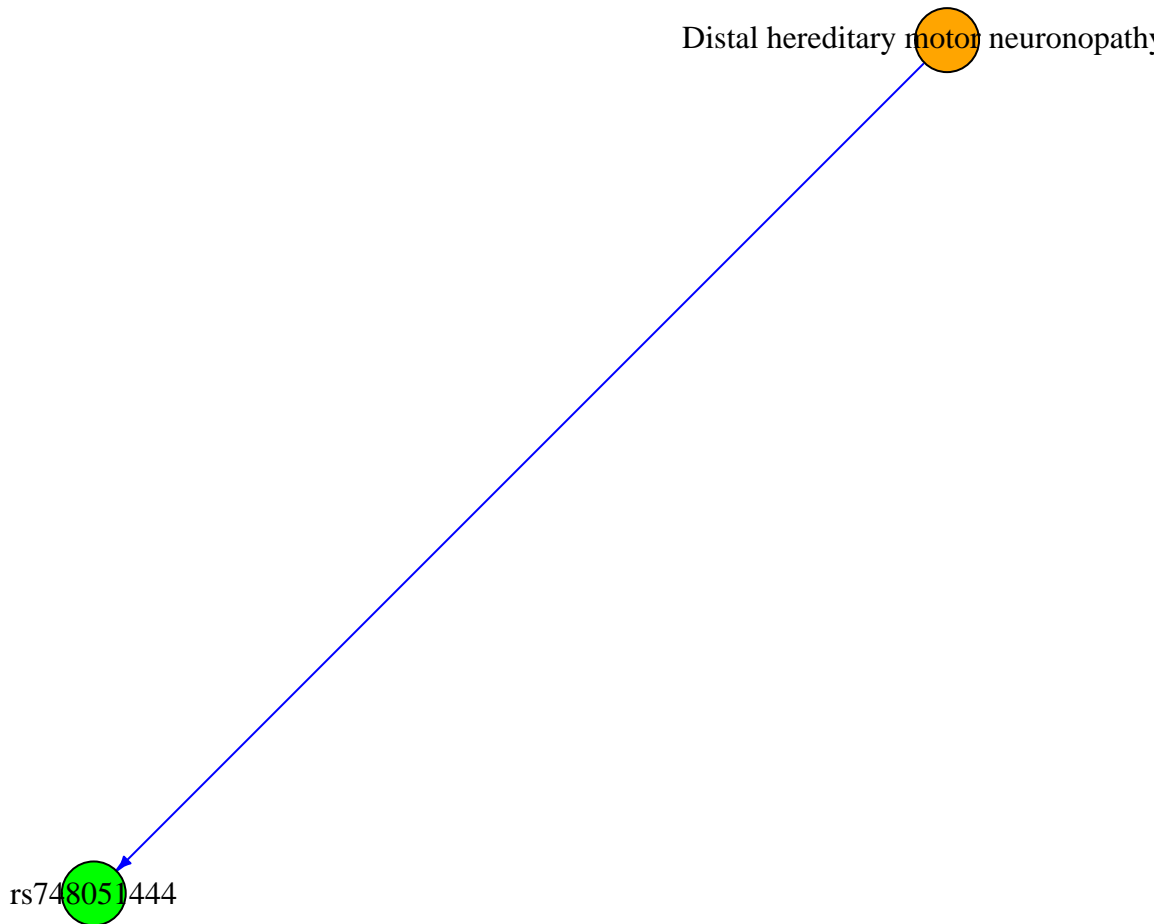

**Variant–Disease Network (Distal hereditary motor neuropathy type 5)**

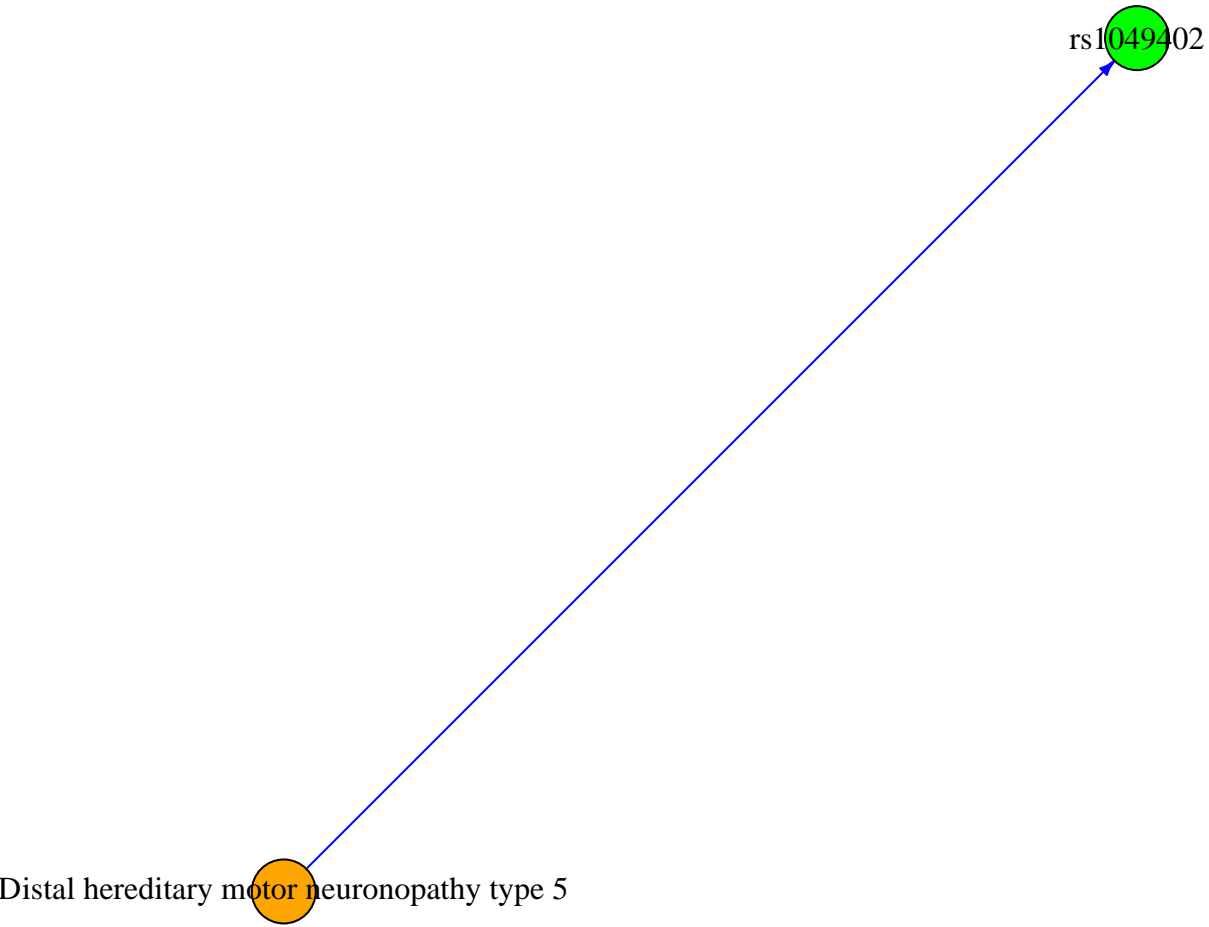

Variant–Disease Network (Distal hereditary motor neuronopathy type 7B

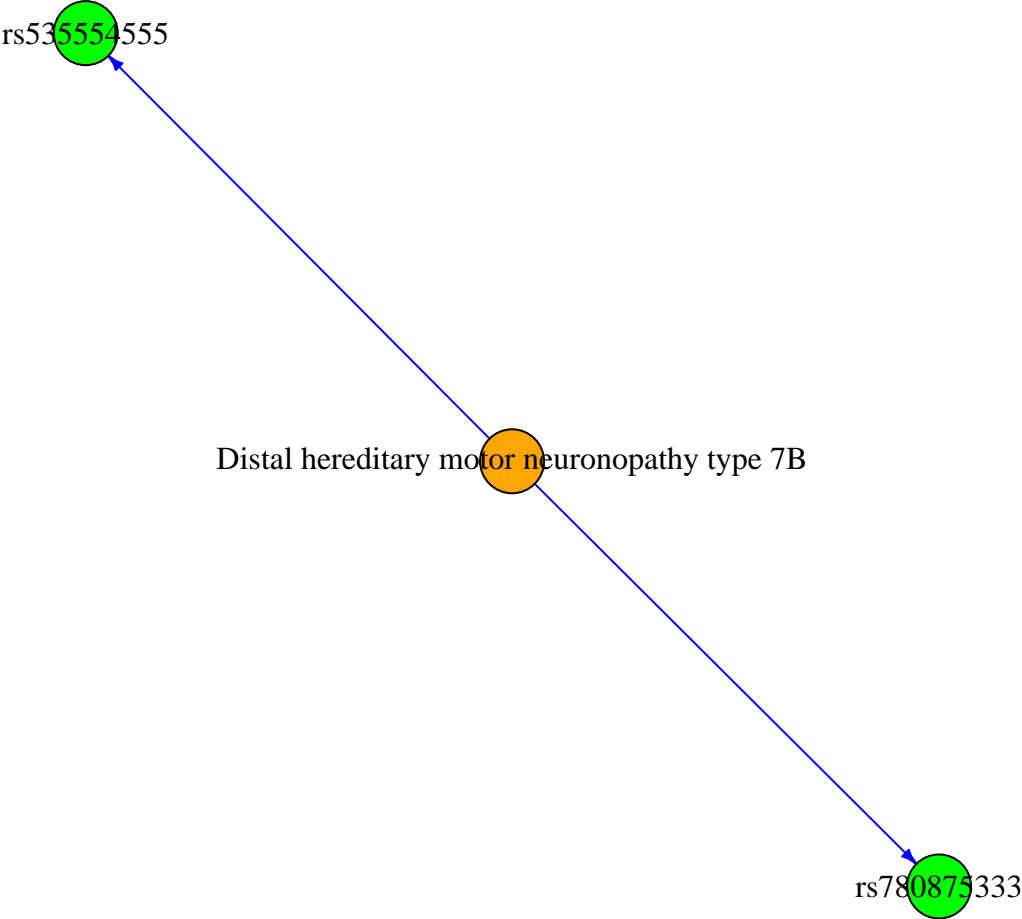

Variant–Disease Network (Distal myopathy)

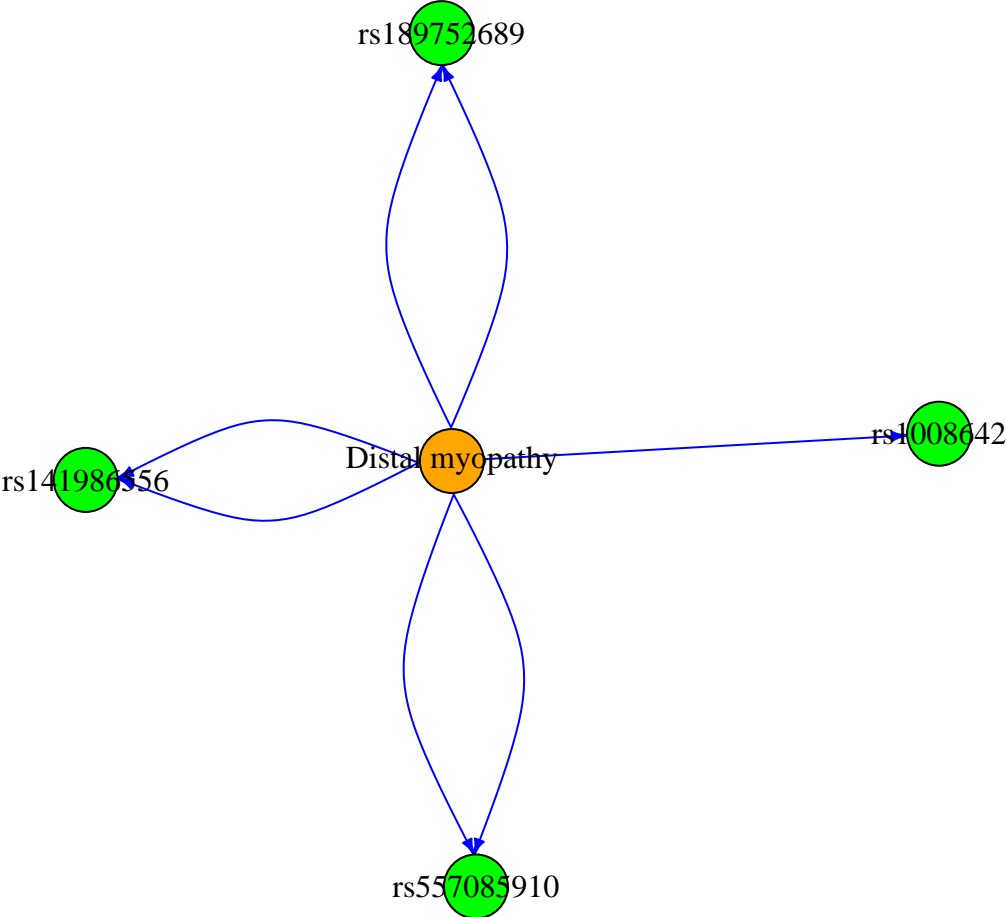

**Variant–Disease Network (Distal Renal Tubular Acidosis)**

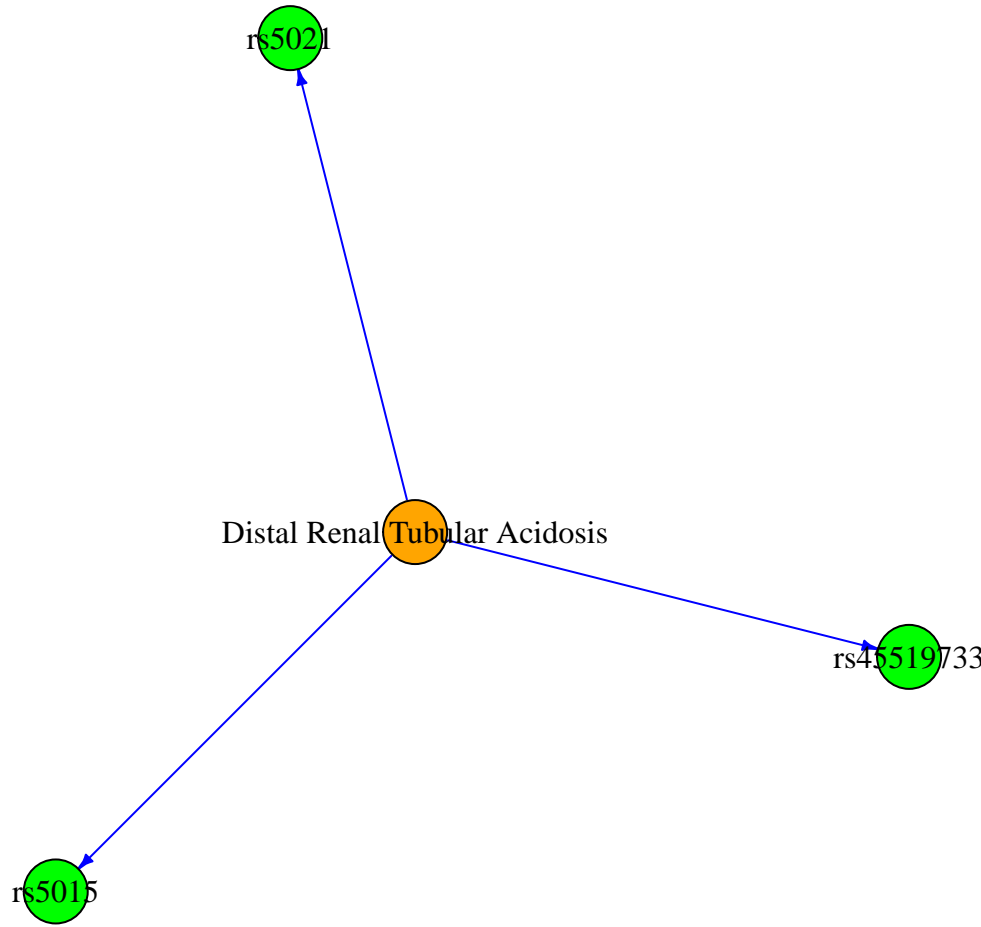



## Variant–Disease Network (Distal spinal muscular atrophy)

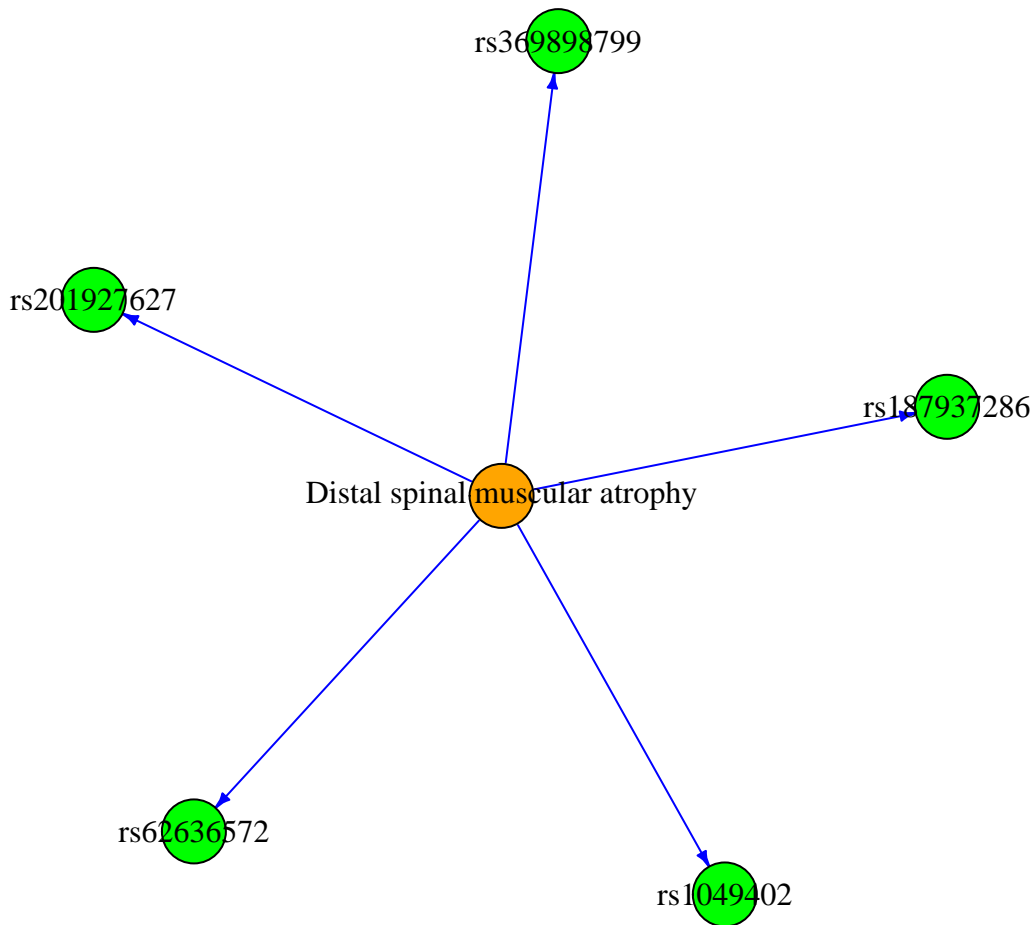

**Variant–Disease Network (Donnai Barrow syndrome)**

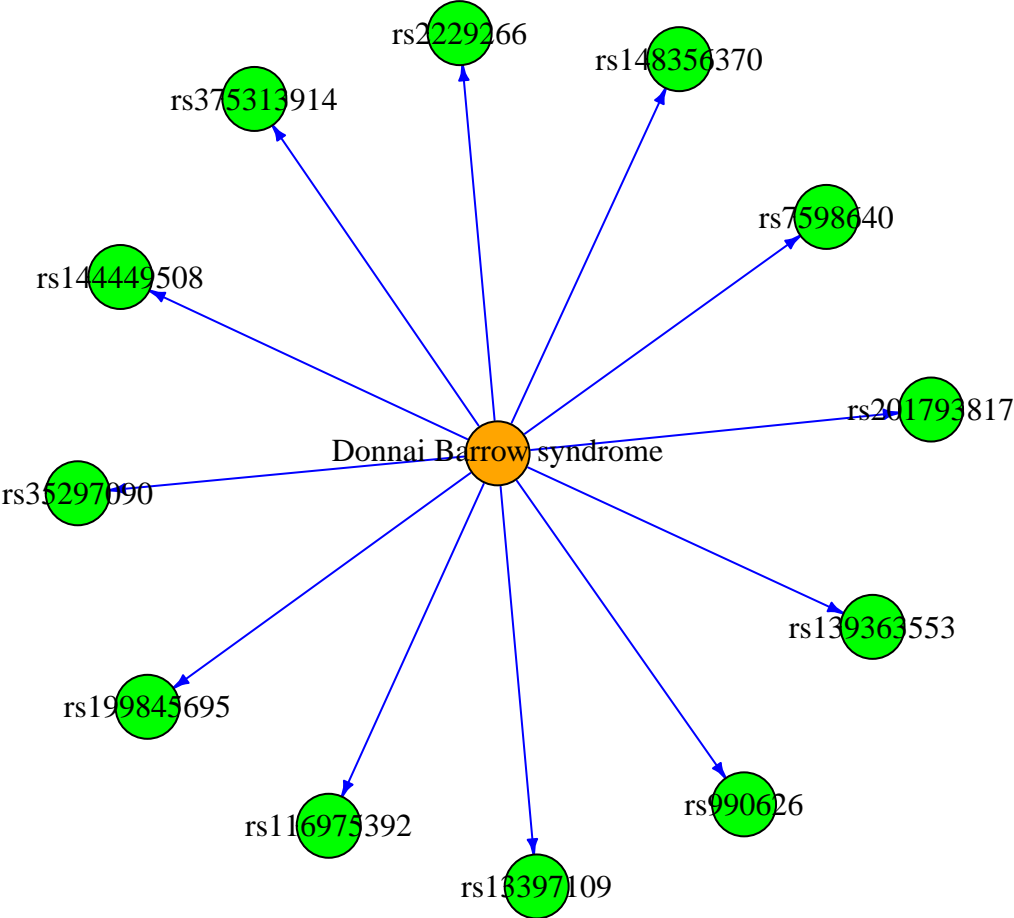

**Variant–Disease Network (Doyme honeycomb retinal dystrophy)**

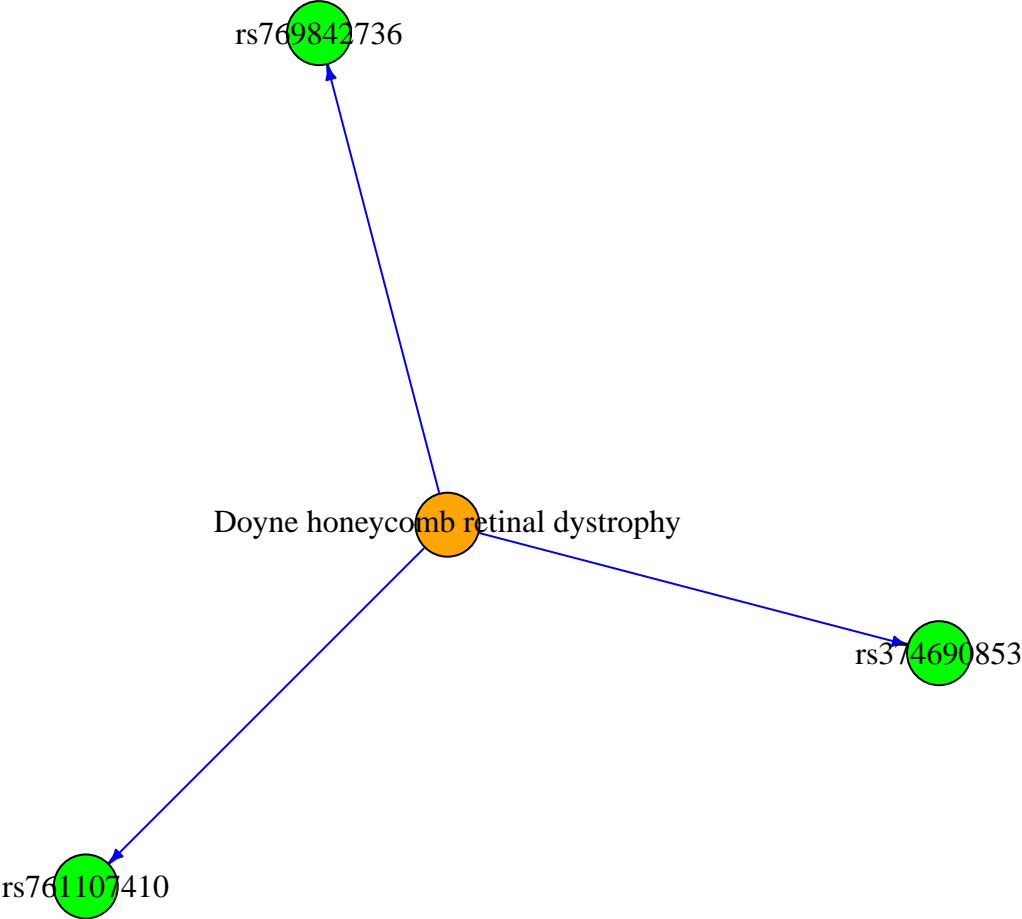

## Variant–Disease Network (Drash syndrome)

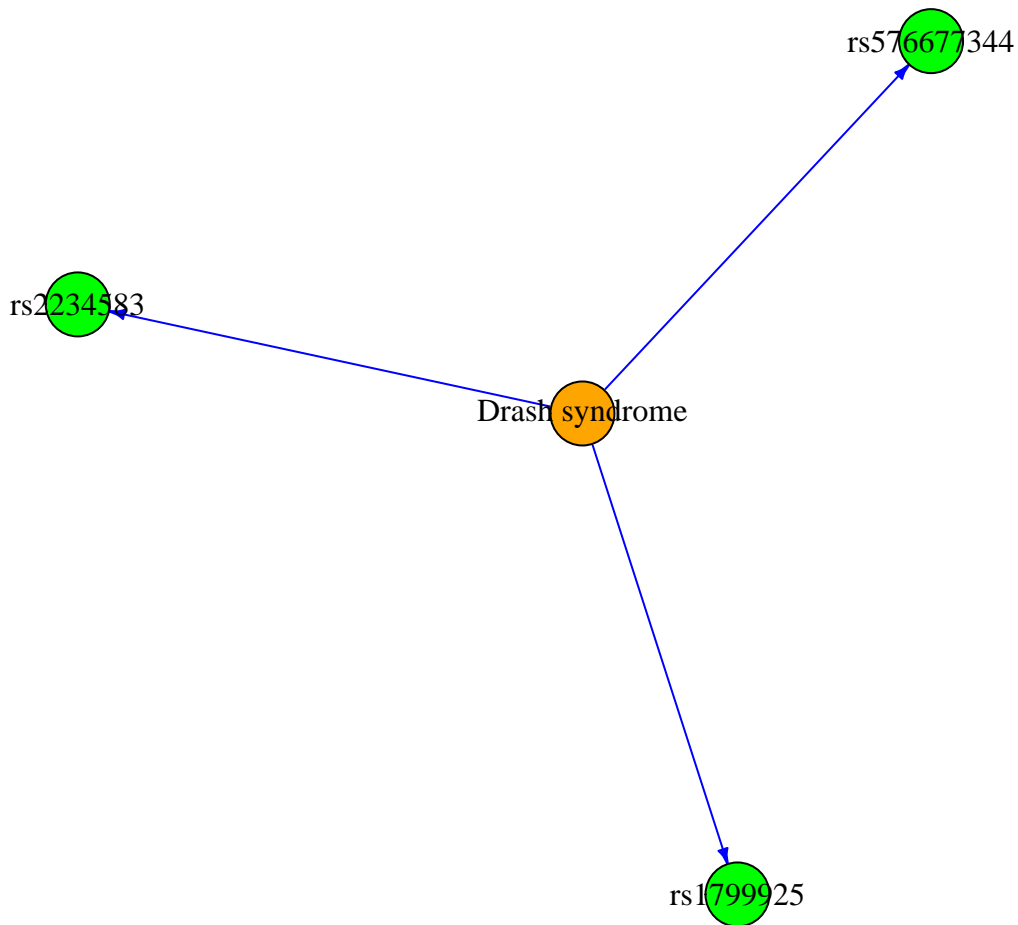

**Variant–Disease Network (Dubin–Johnson syndrome)**

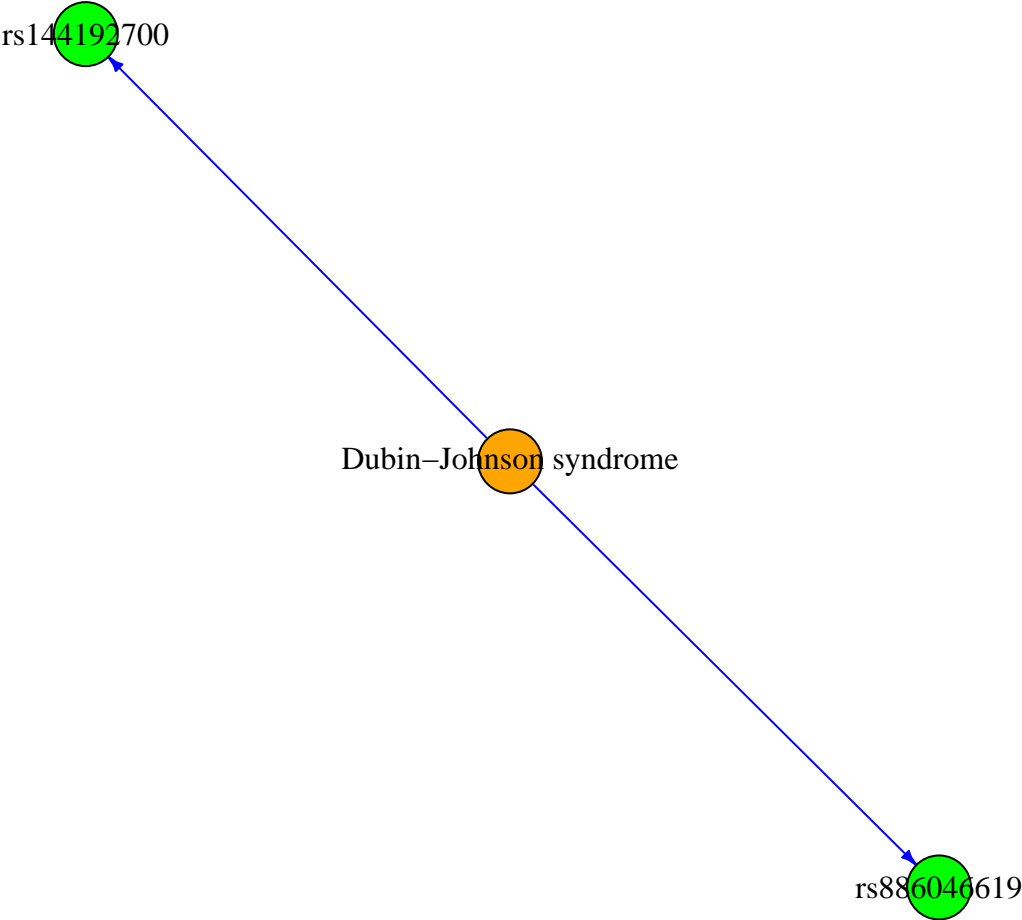

# Variant–Disease Network (Duchenne muscular dystrophy)

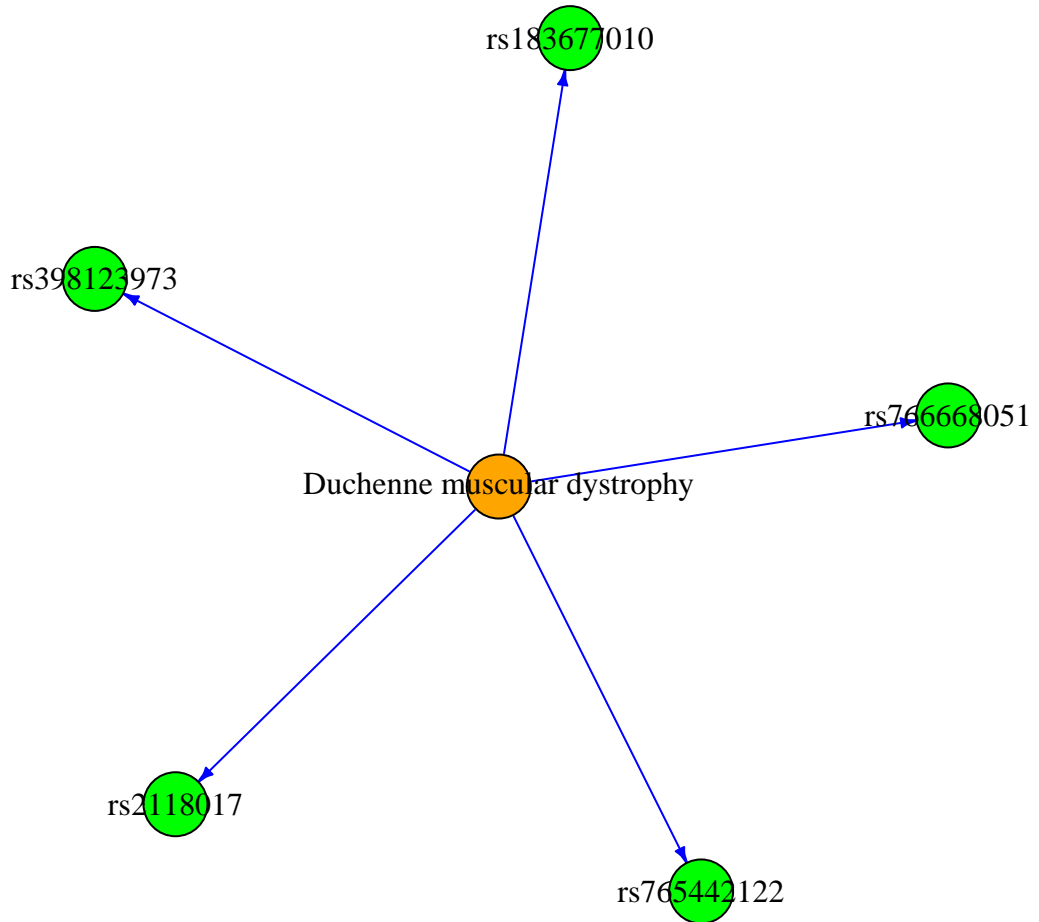

Variant–Disease Network (Dyggve–Melchior–Clausen syndrome)

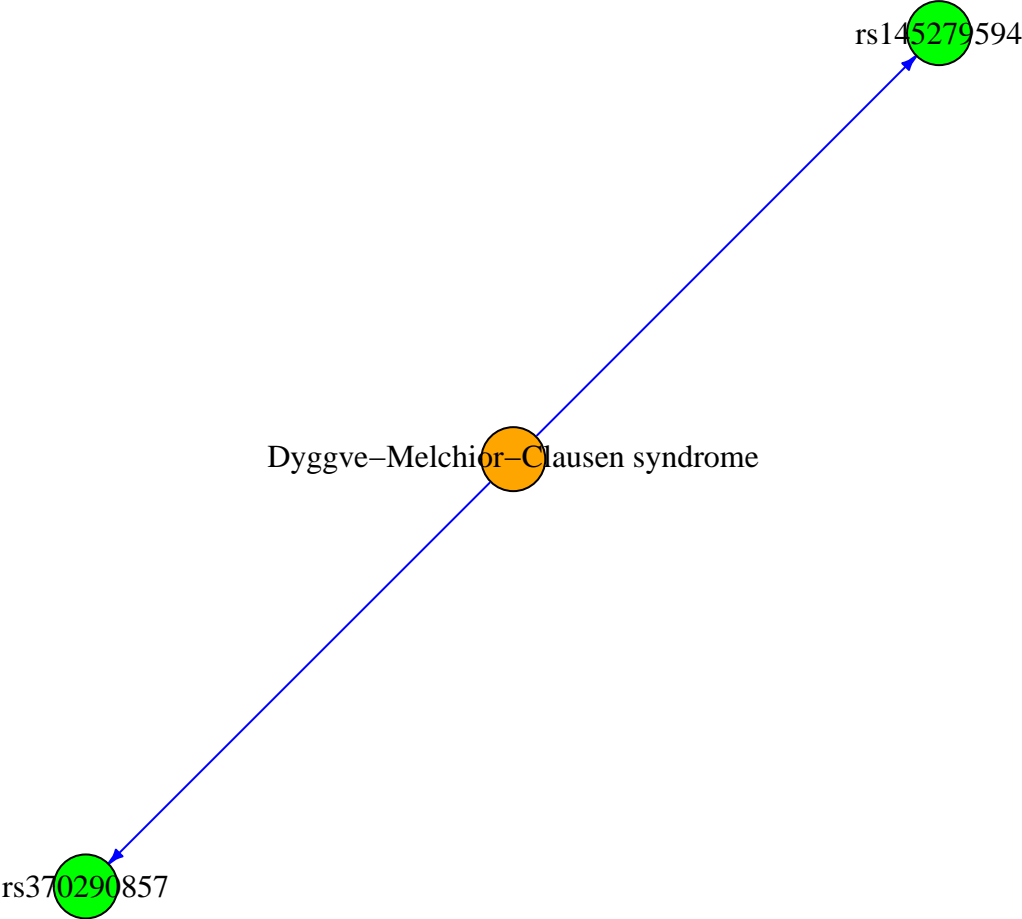

Variant–Disease Network (Dysgnathia complex)

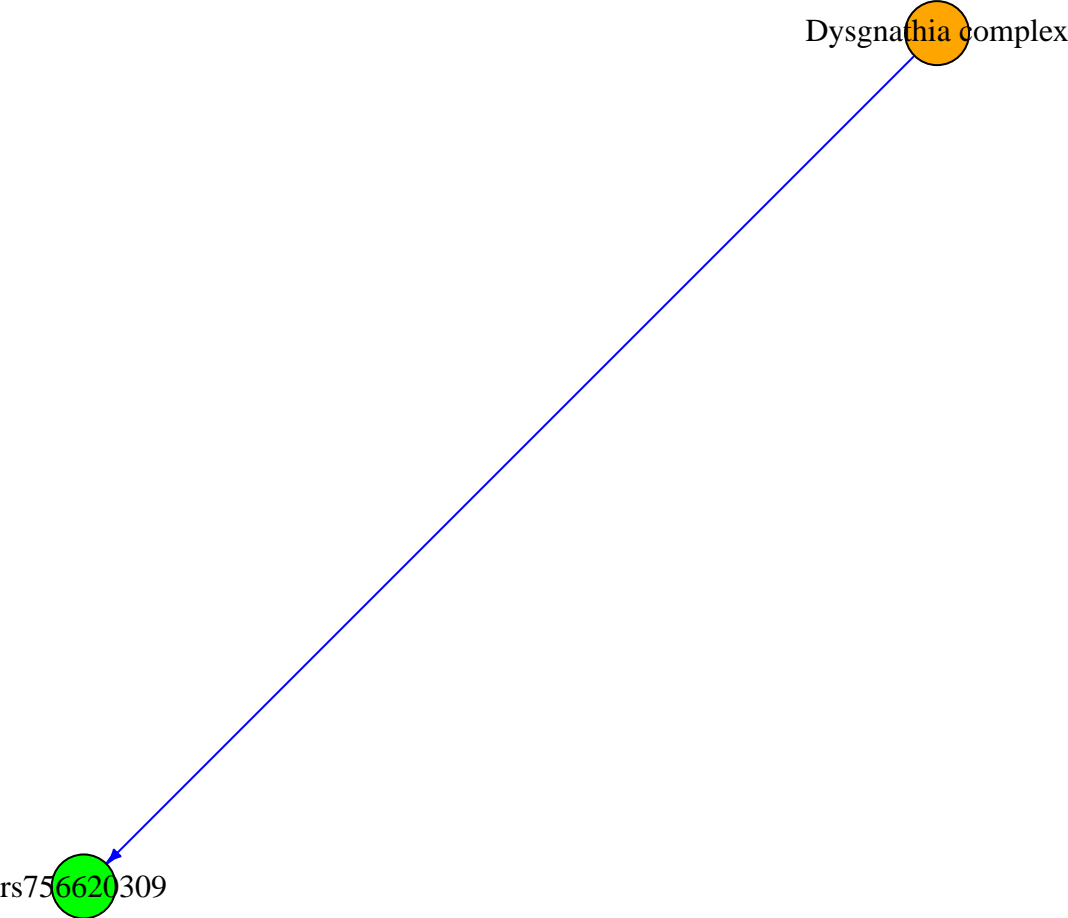



Variant–Disease Network (Dyskeratosis congenita)

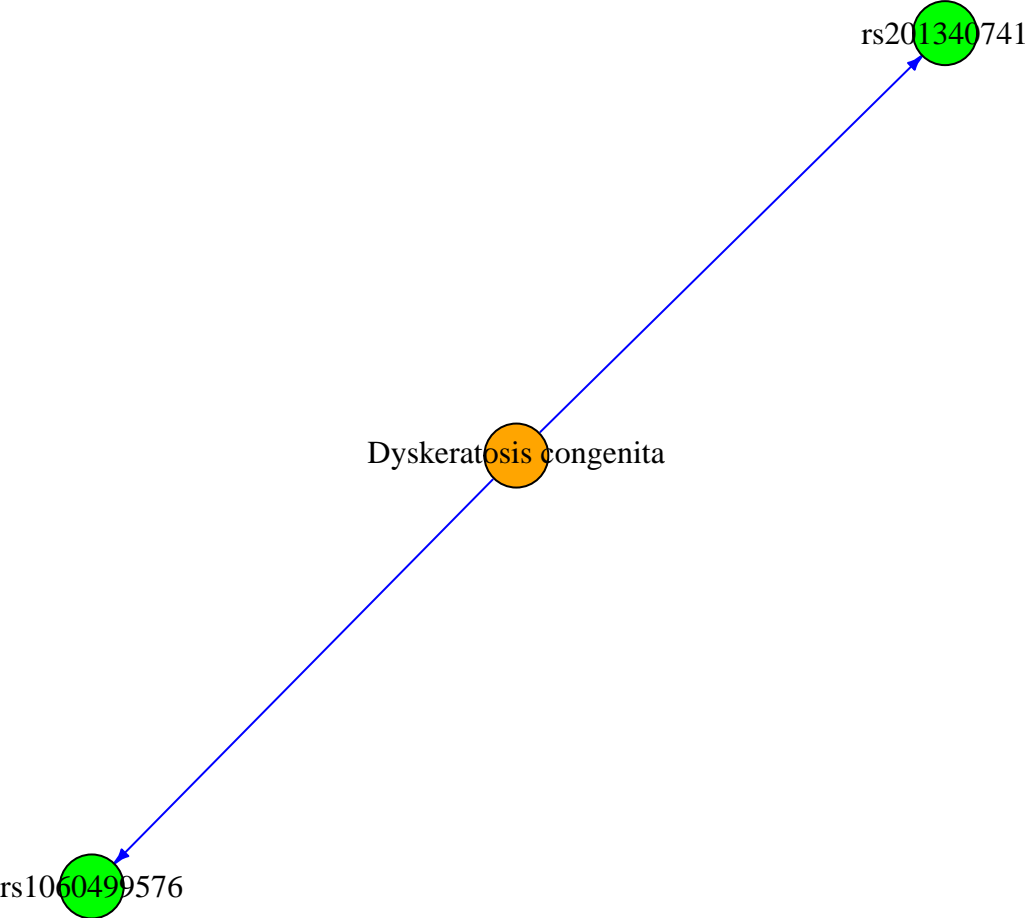

Variant–Disease Network (Dyssegmental Dysplasia)

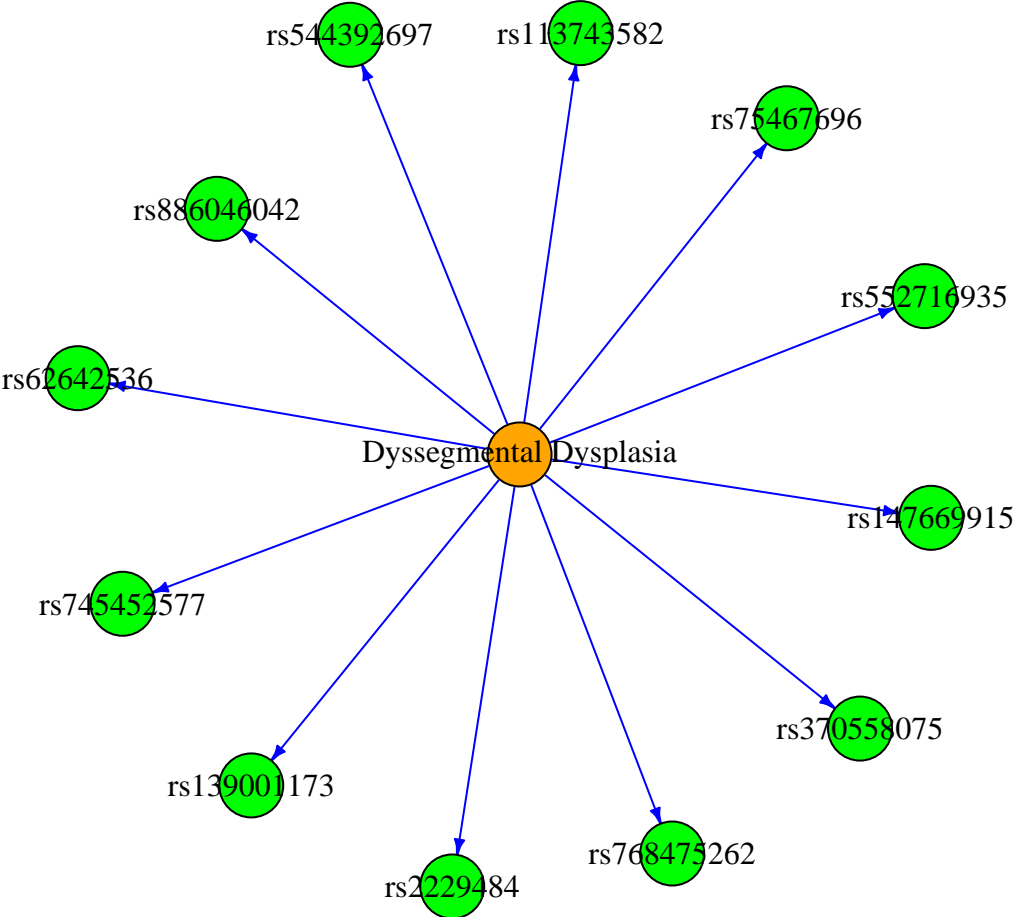

## Variant–Disease Network (Dystonia)

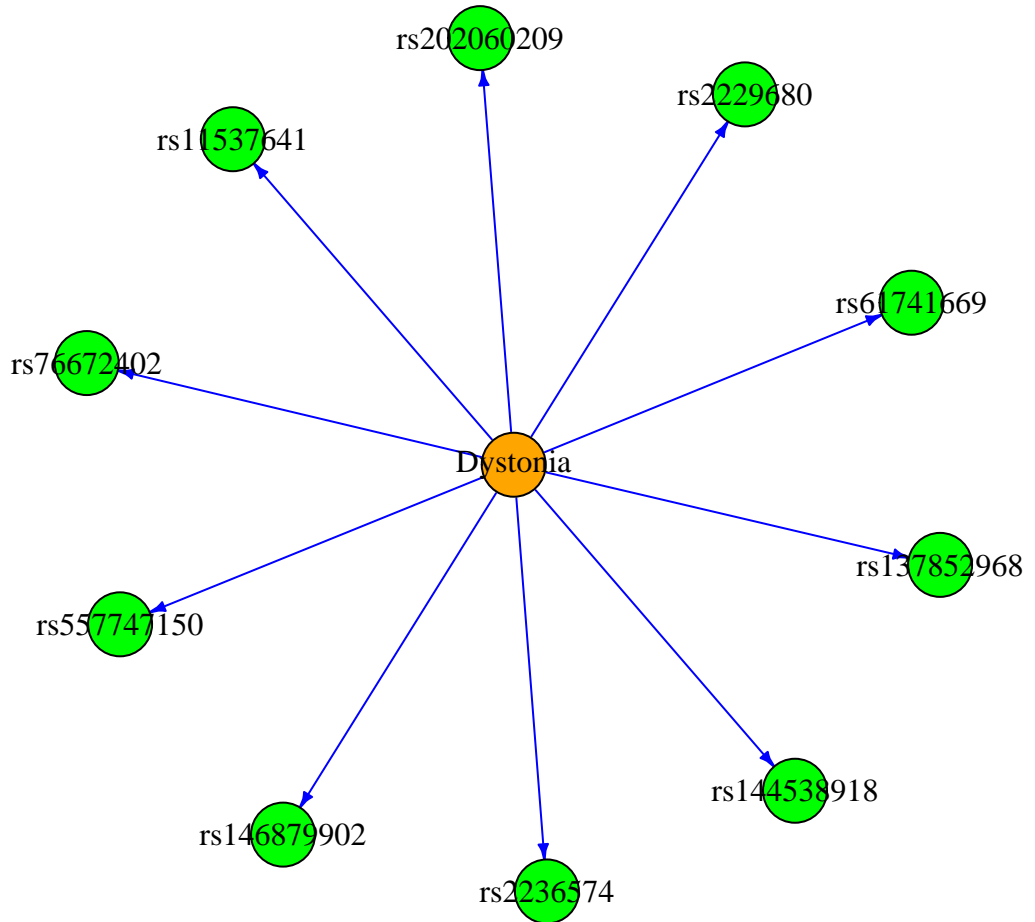

## Variant-Disease Network (Dystonia 24)

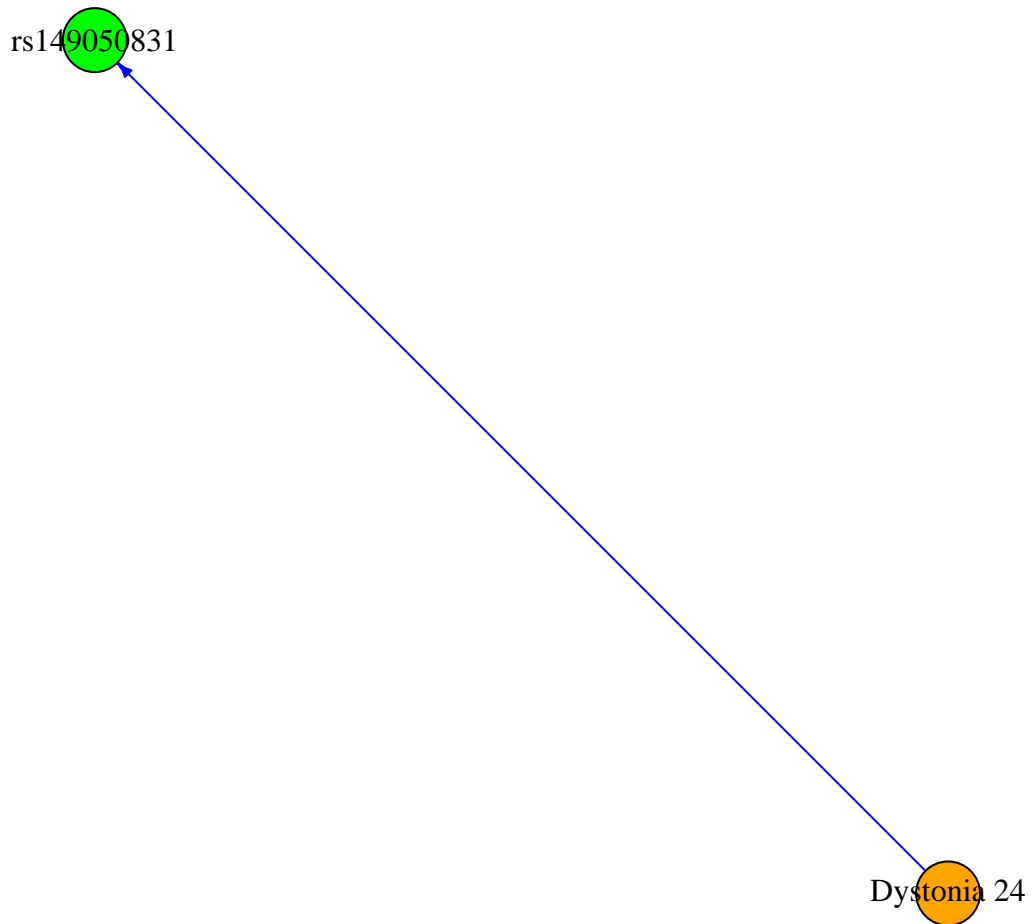

## Variant–Disease Network (Dystonia 5)

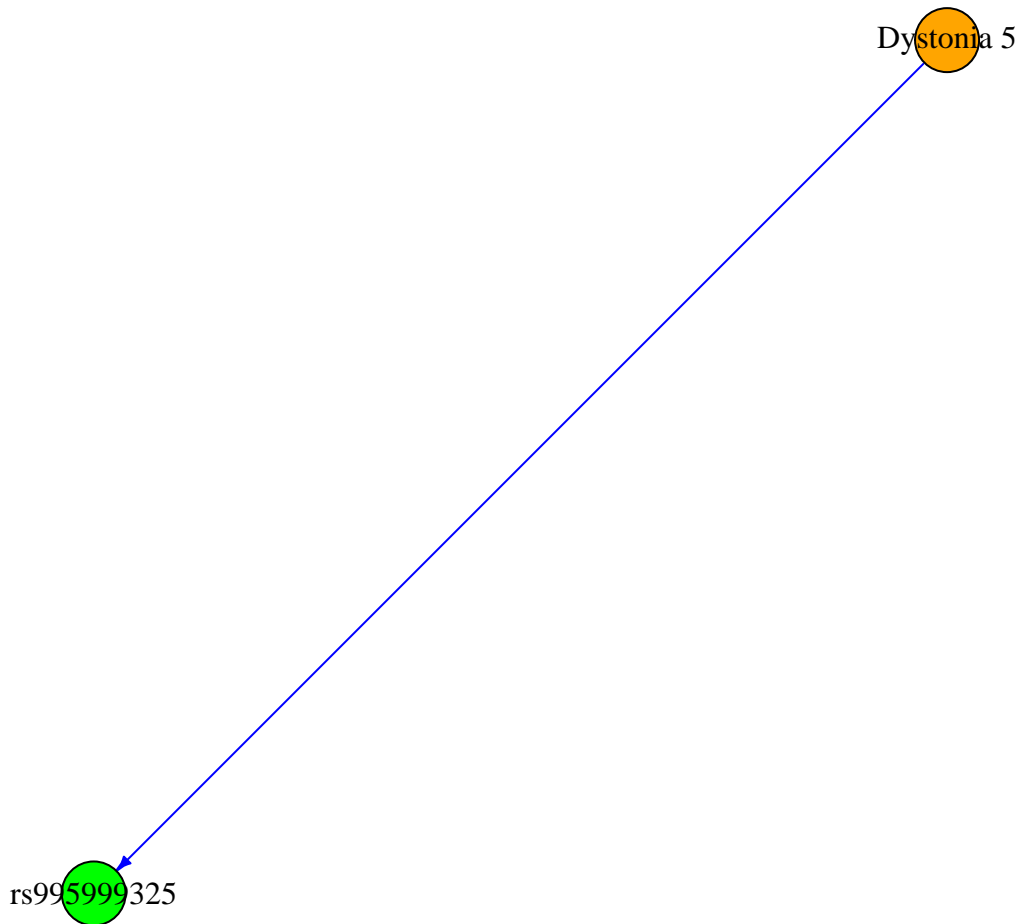

# Variant–Disease Network (Early infantile epileptic encephalopathy)

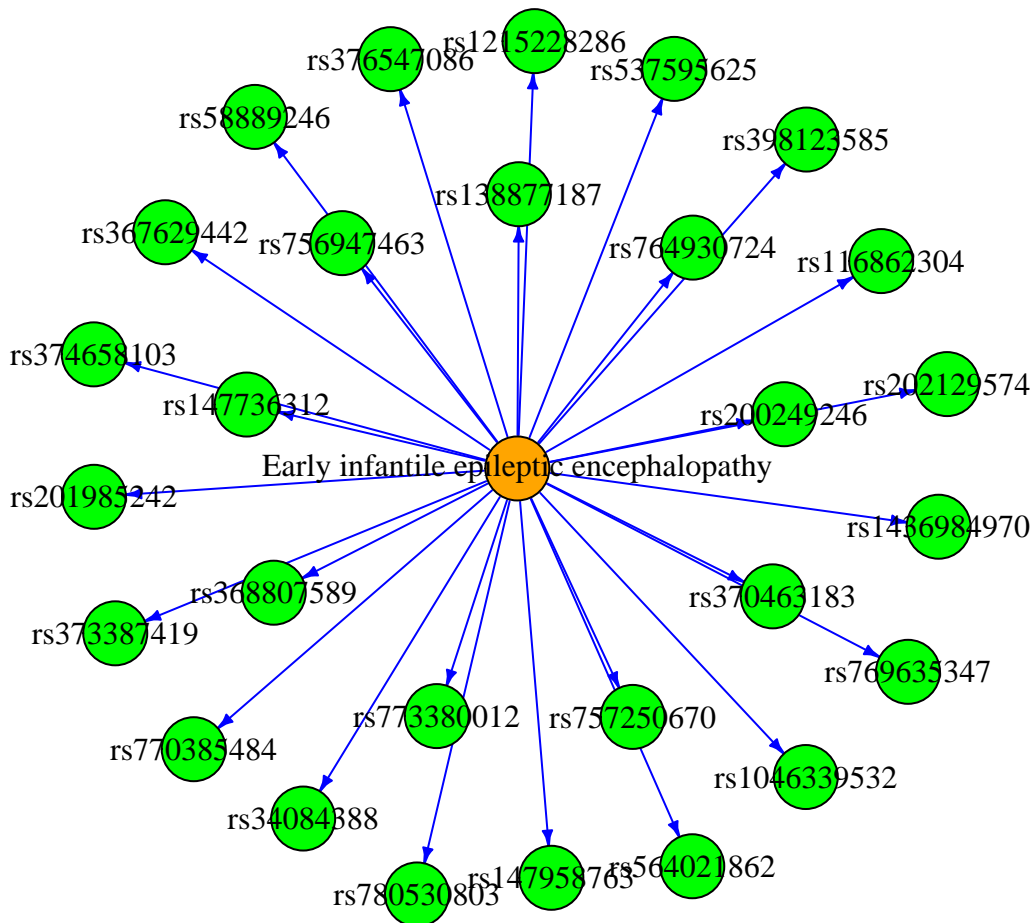

**Variant–Disease Network (Early infantile epileptic encephalopathy 12)**

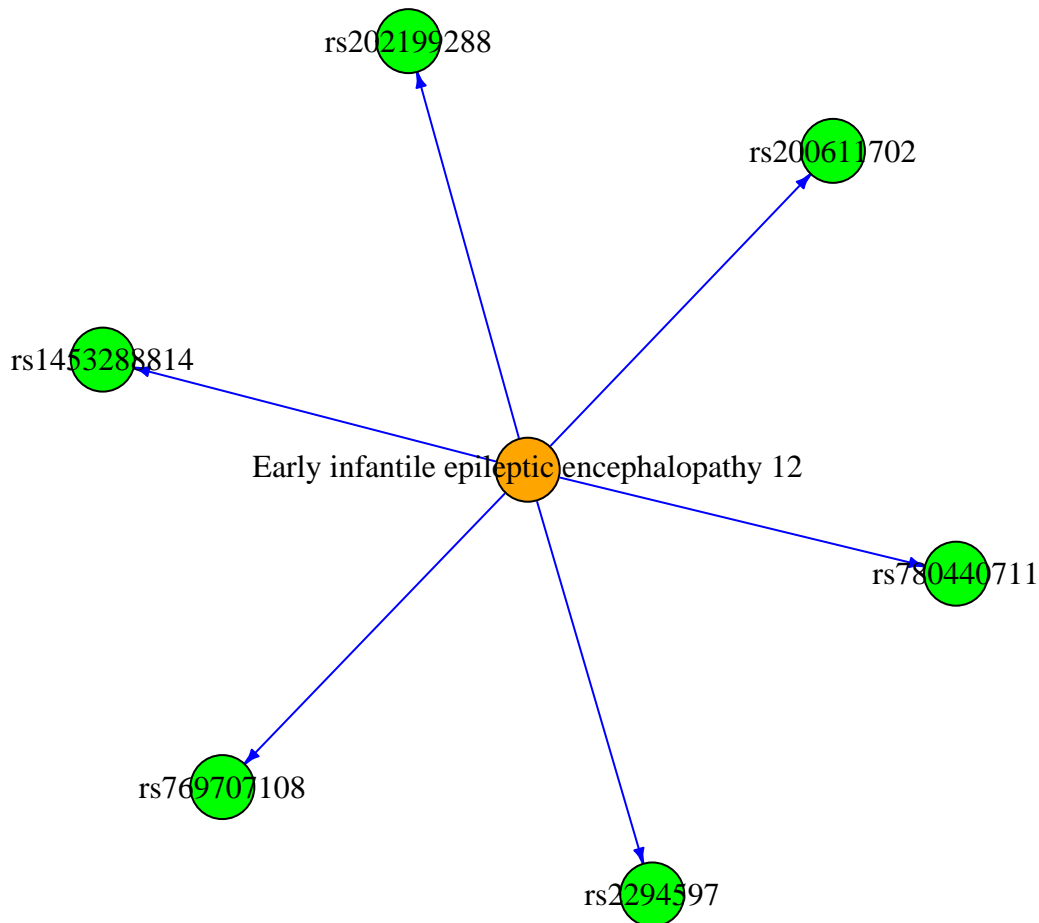

# Variant–Disease Network (Early infantile epileptic encephalopathy 14)

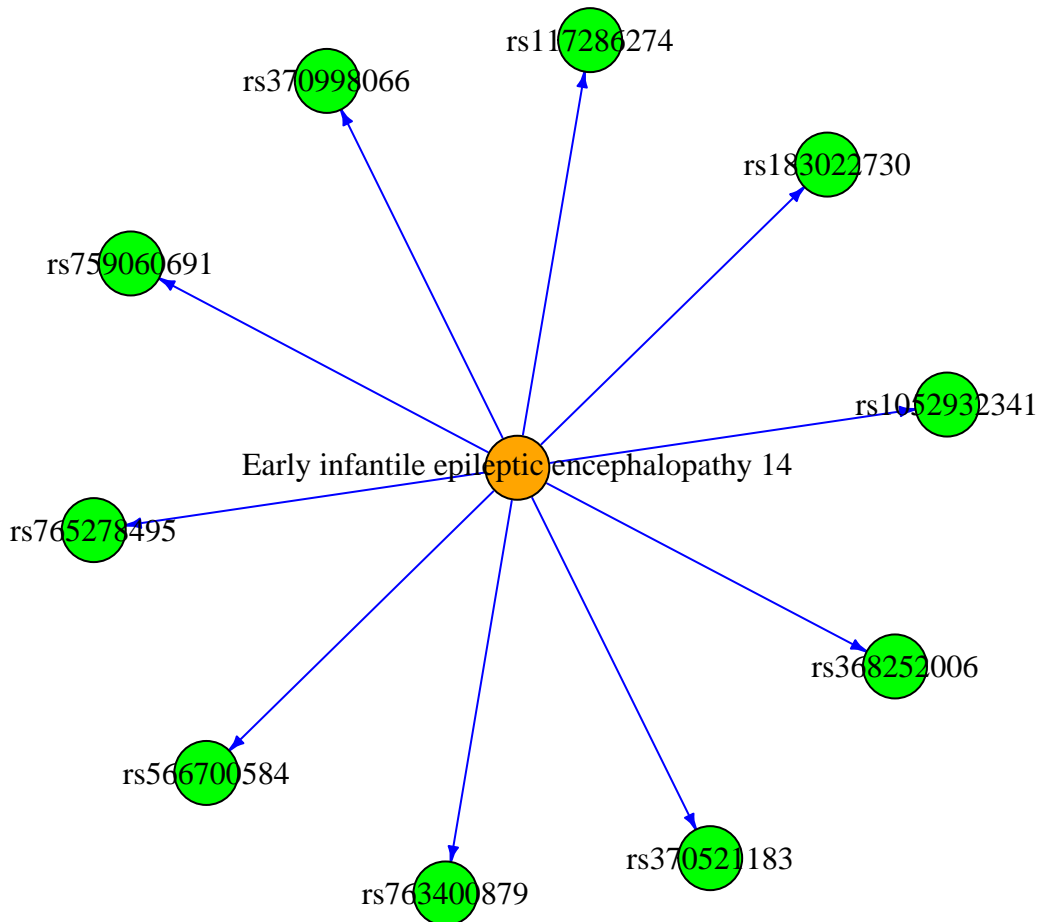



**Variant–Disease Network (Early infantile epileptic encephalopathy 2)**

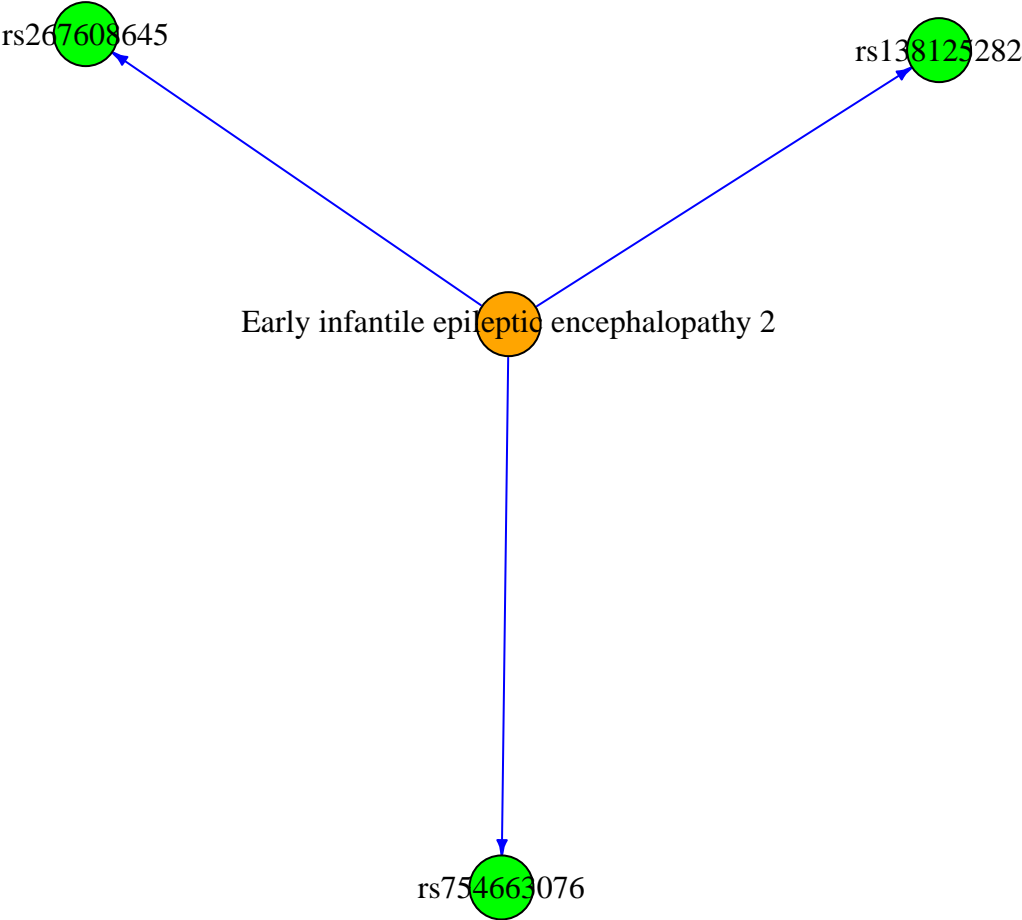

## Variant–Disease Network (Early infantile epileptic encephalopathy 34)

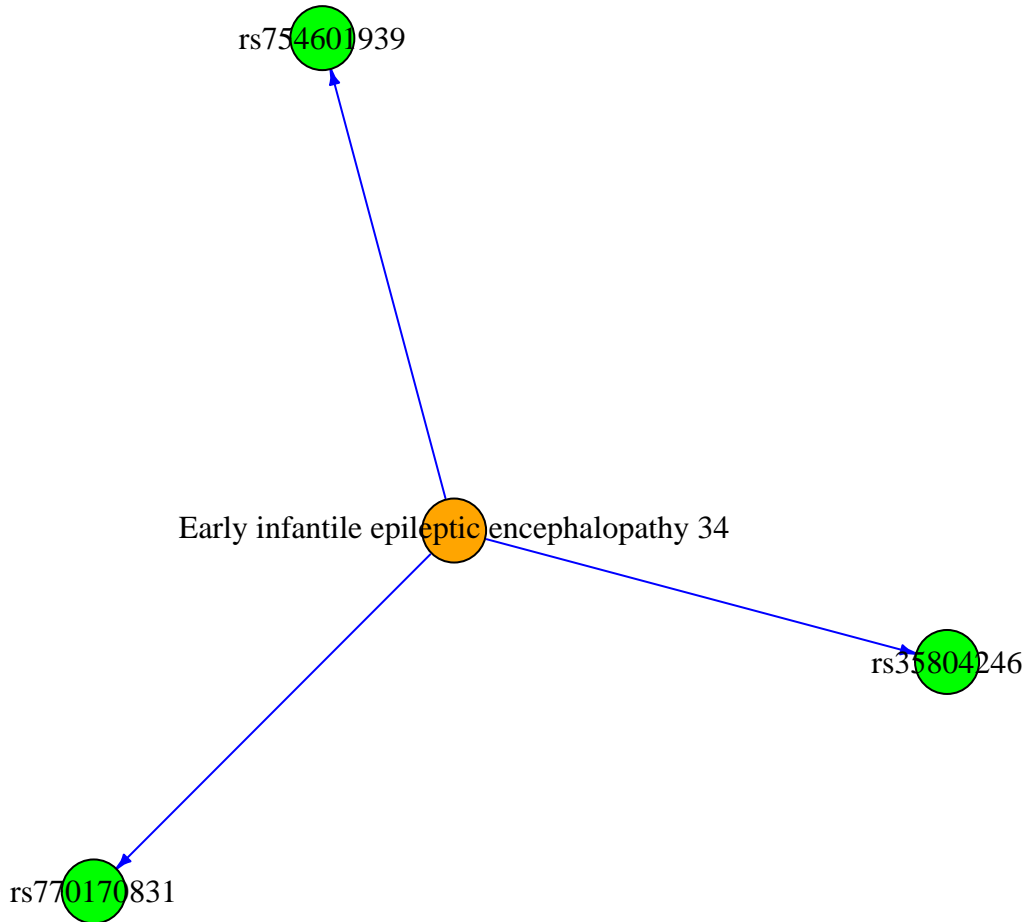

## Variant–Disease Network (Early infantile epileptic encephalopathy 4)

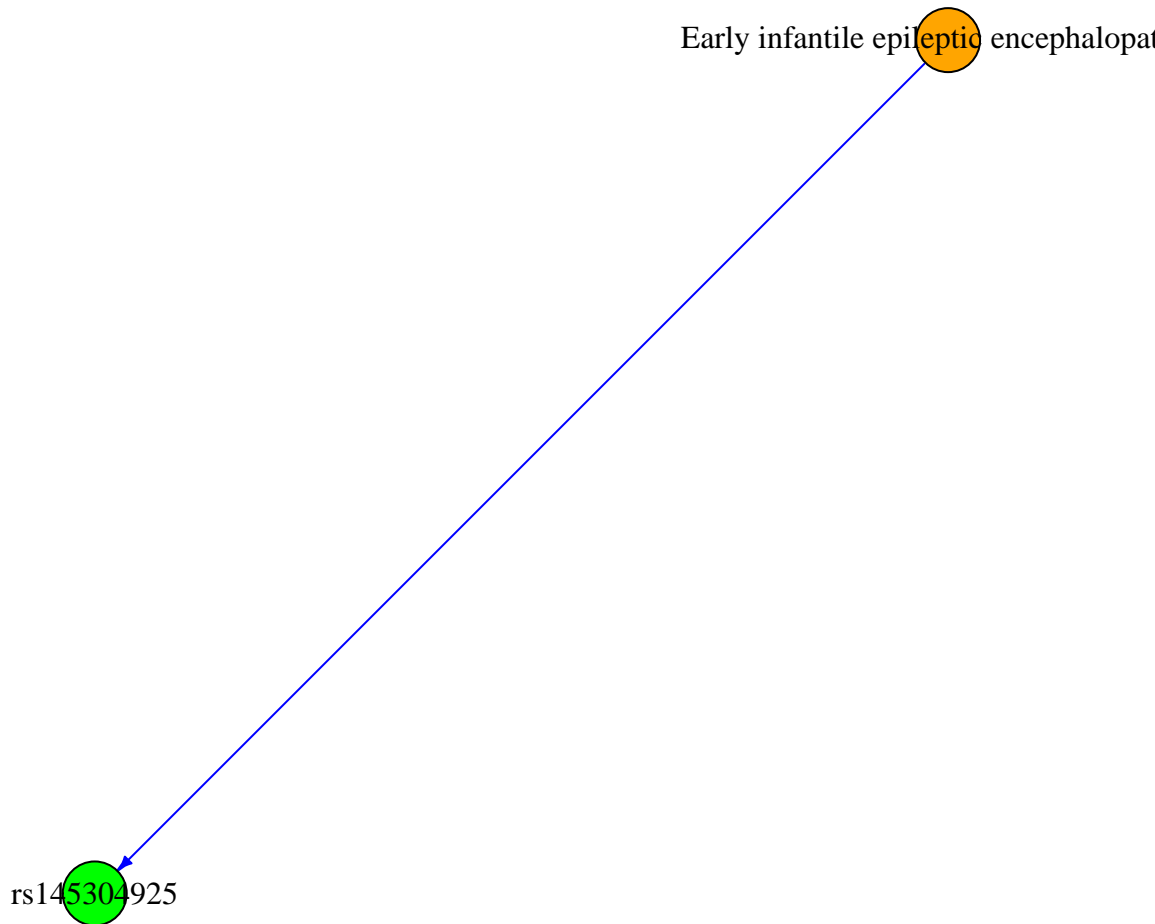

**Variant–Disease Network (Early infantile epileptic encephalopathy 5)**

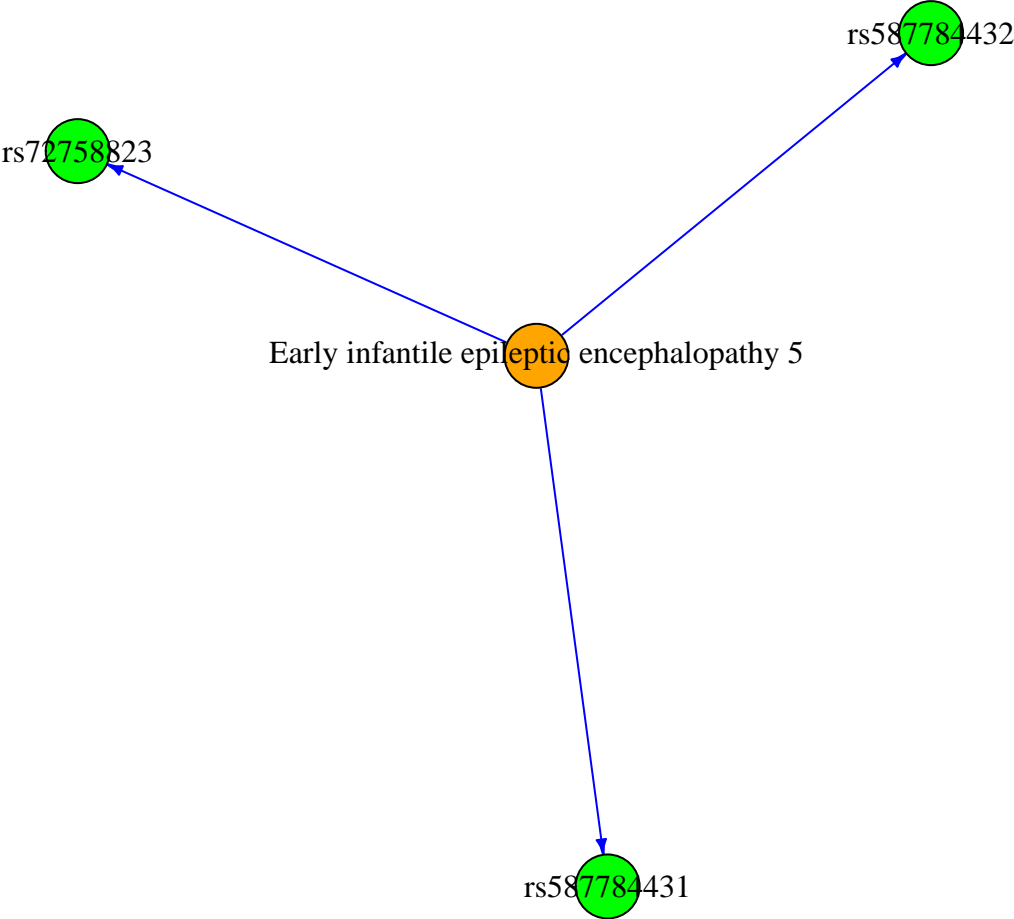

**Variant–Disease Network (Early infantile epileptic encephalopathy 9)**

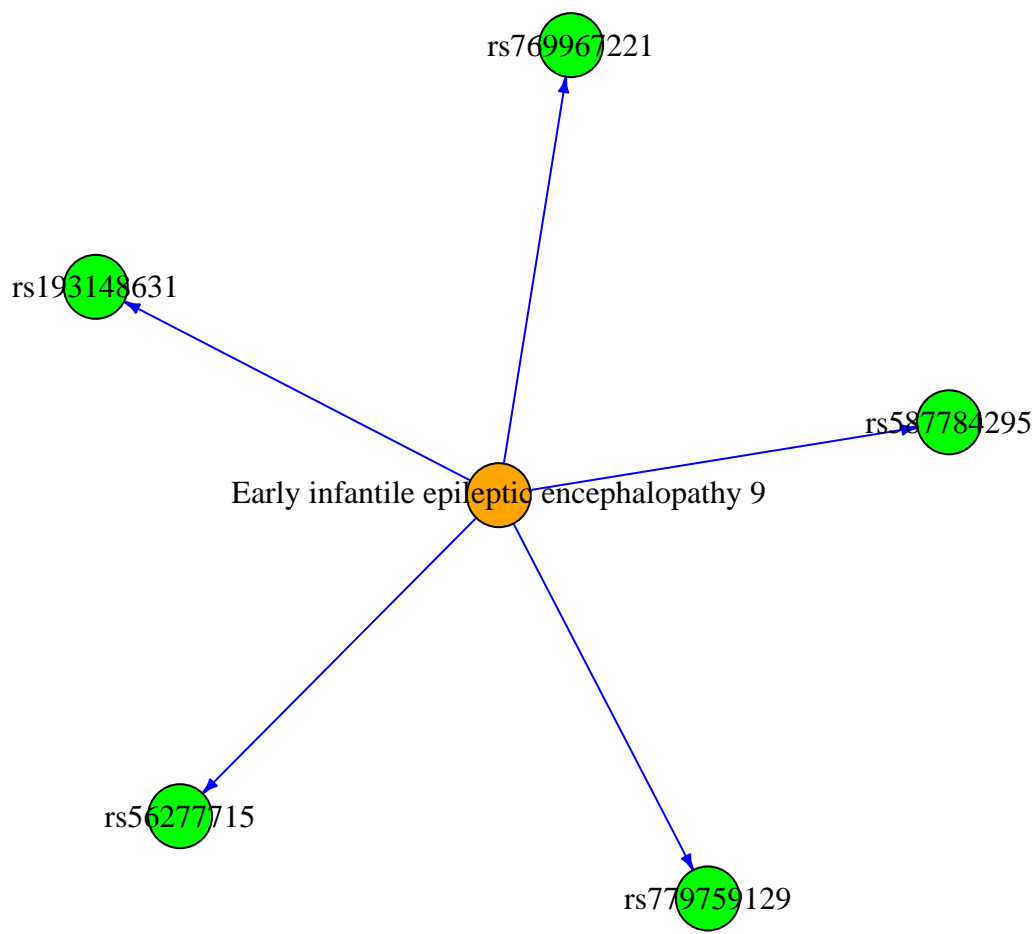

Variant–Disease Network (Early myoclonic encephalopathy)

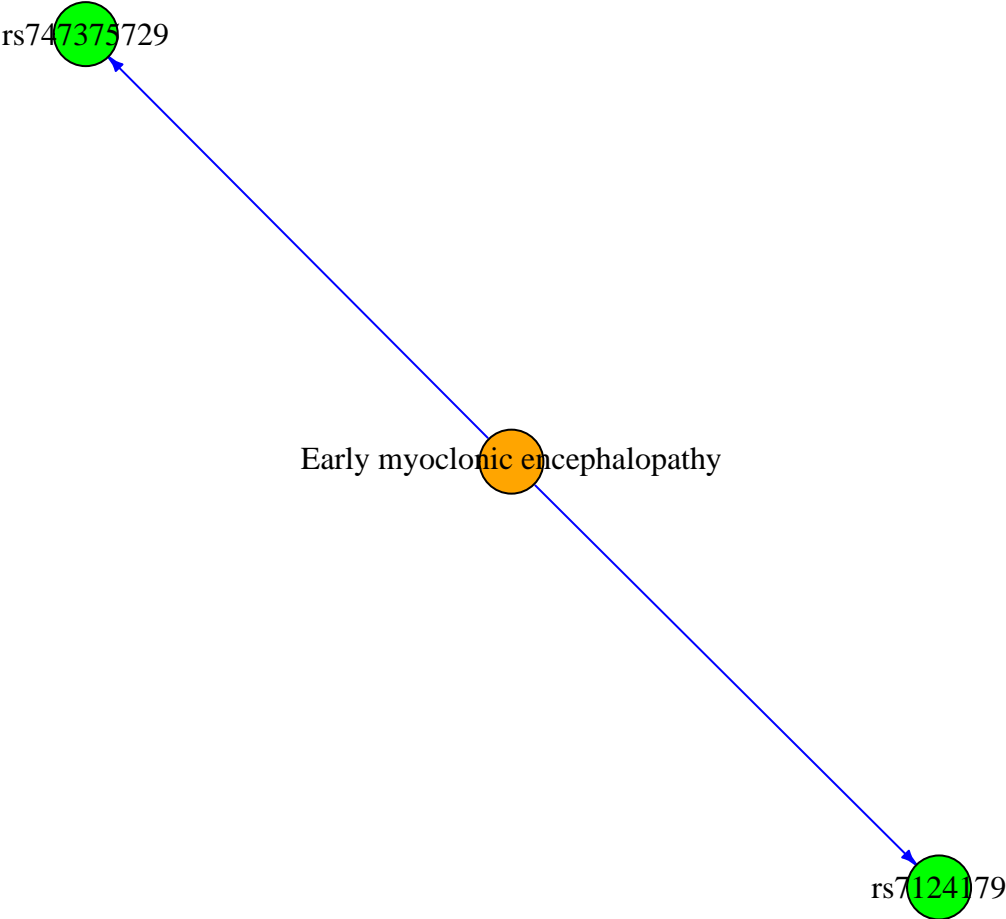

# Variant–Disease Network (Early–Onset Familial Alzheimer Disease)

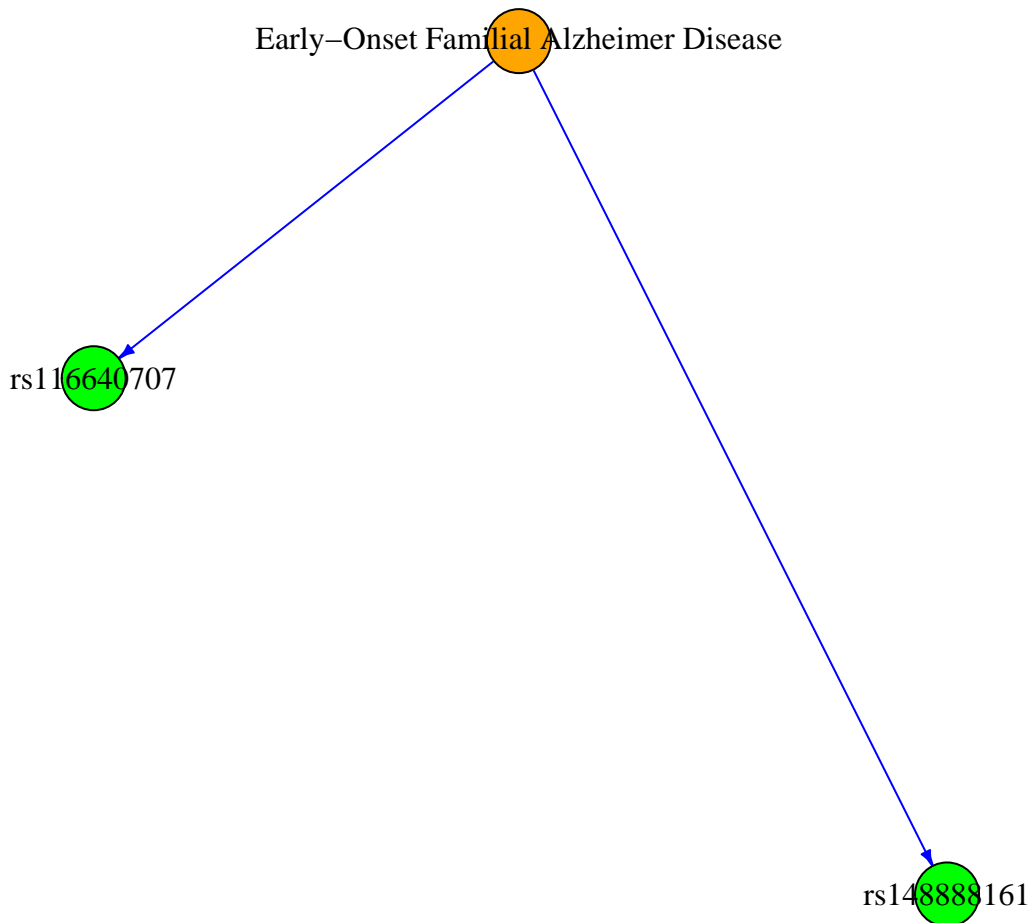

**Variant–Disease Network (Ectodermal dysplasia skin fragility syndrome)**

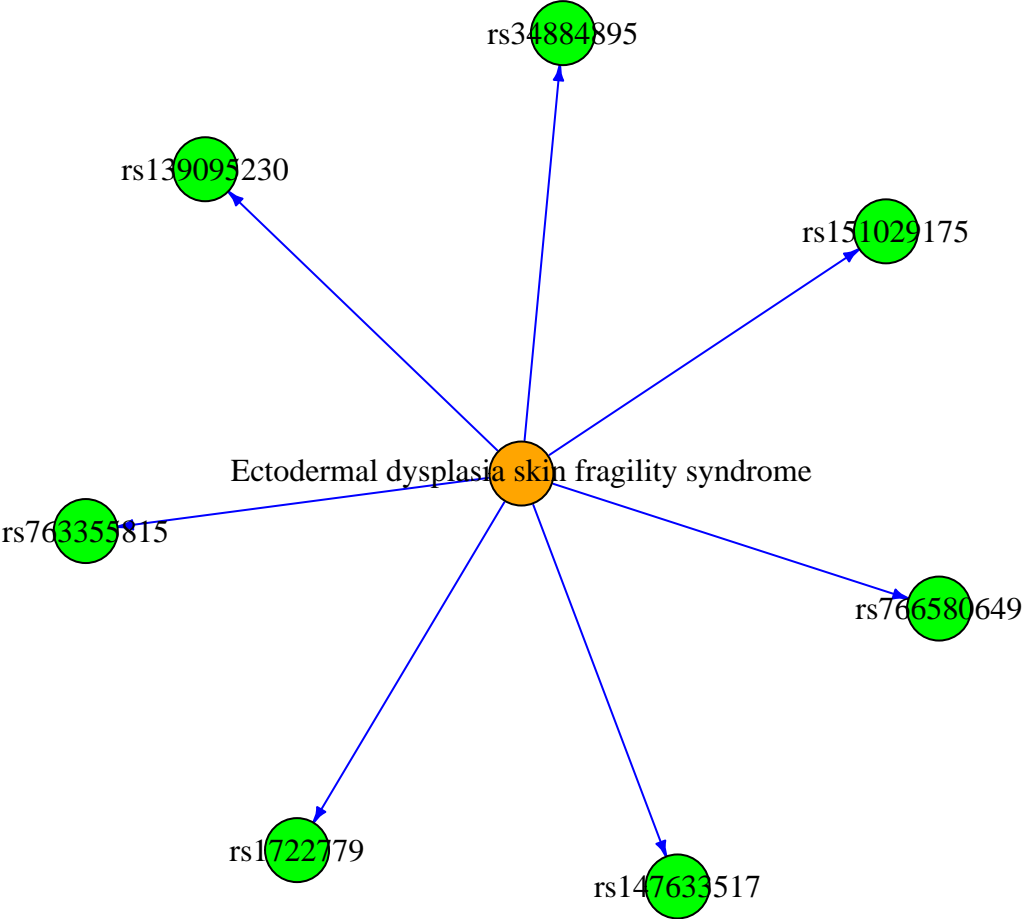



## Variant-Disease Network (Ectopia lentis)

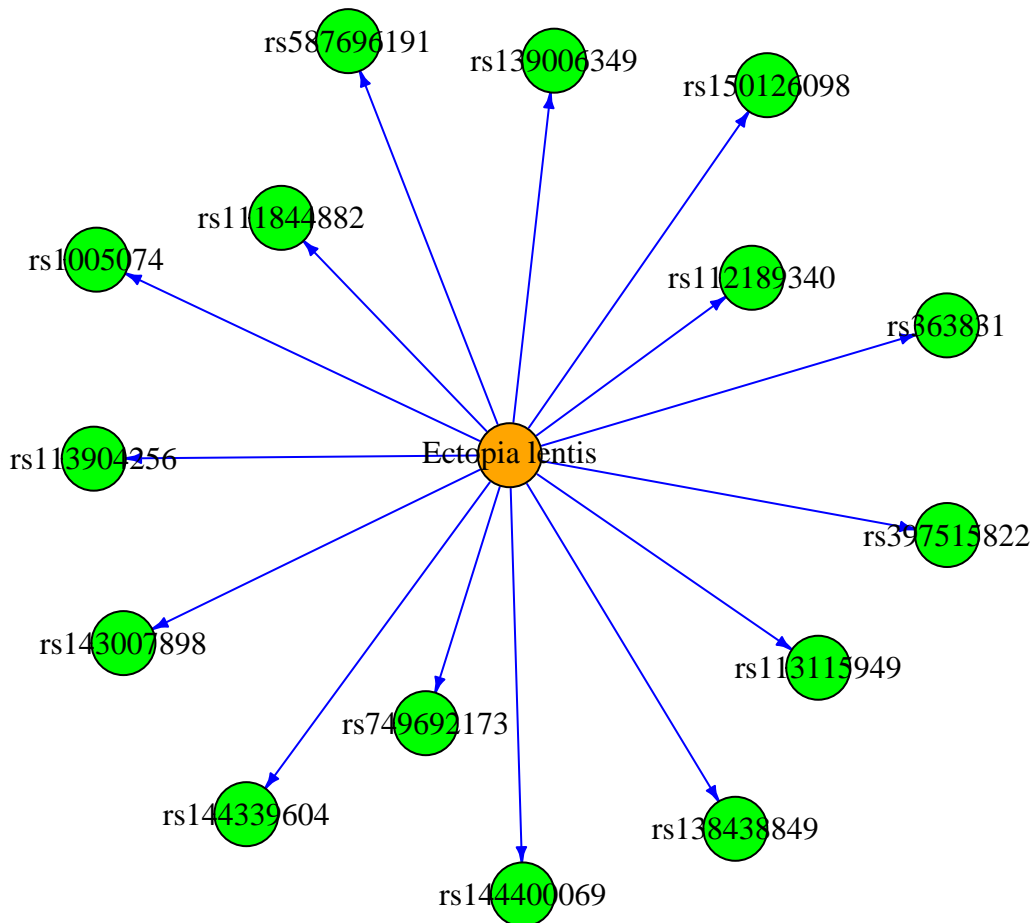

## Variant-Disease Network (EEG abnormality)

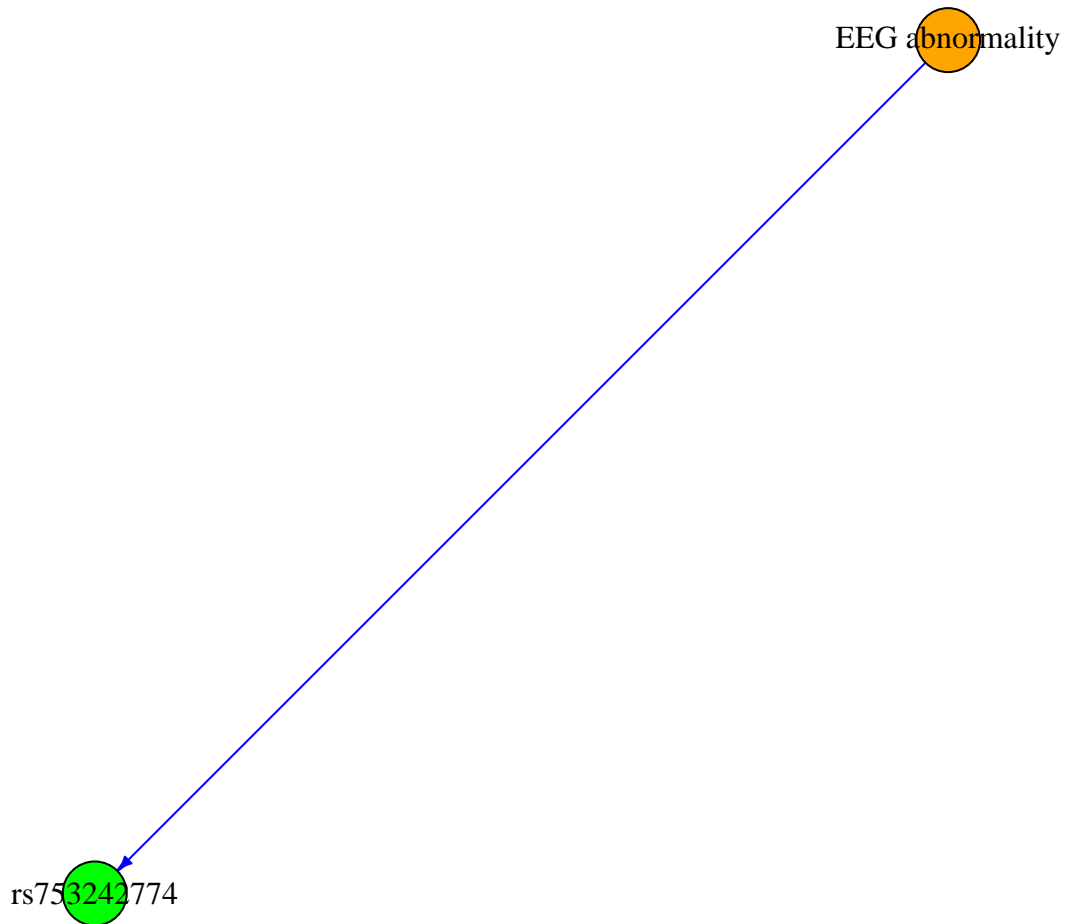

### Variant–Disease Network (Ehlers–Danlos syndrome)

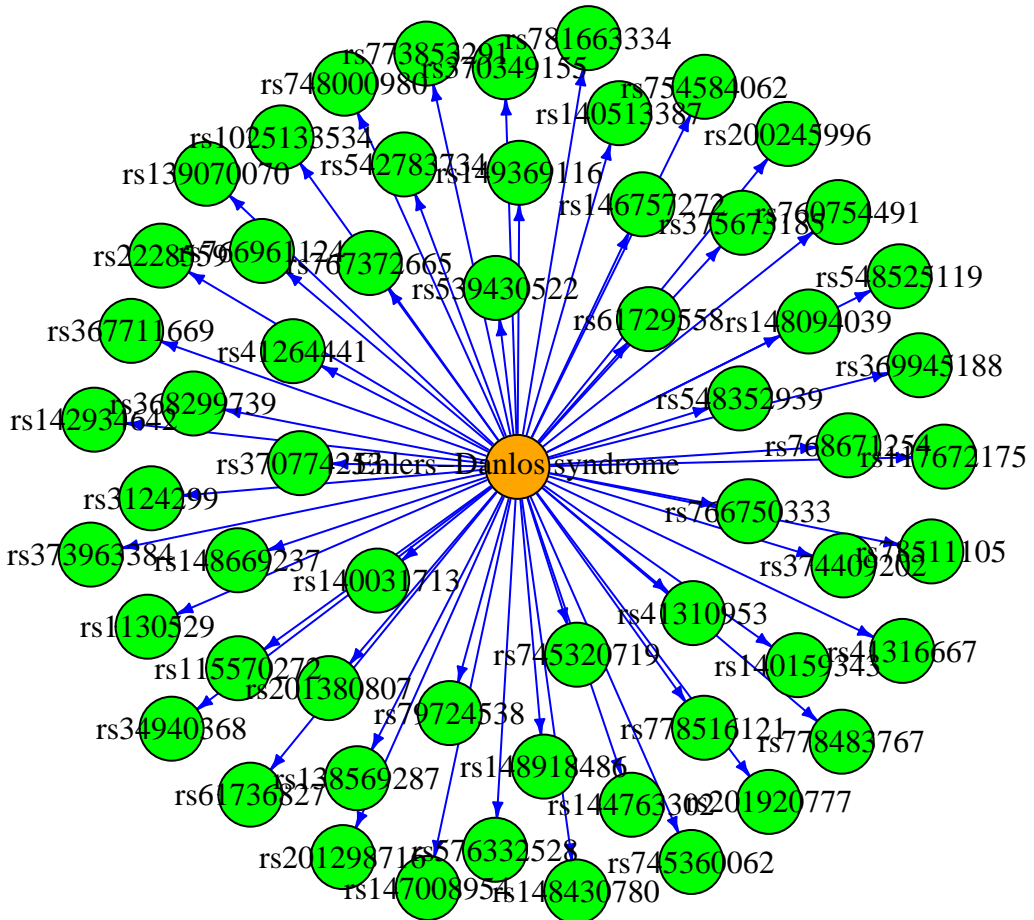

## Variant–Disease Network (Ehlers–Danlos syndrome classic type 2)

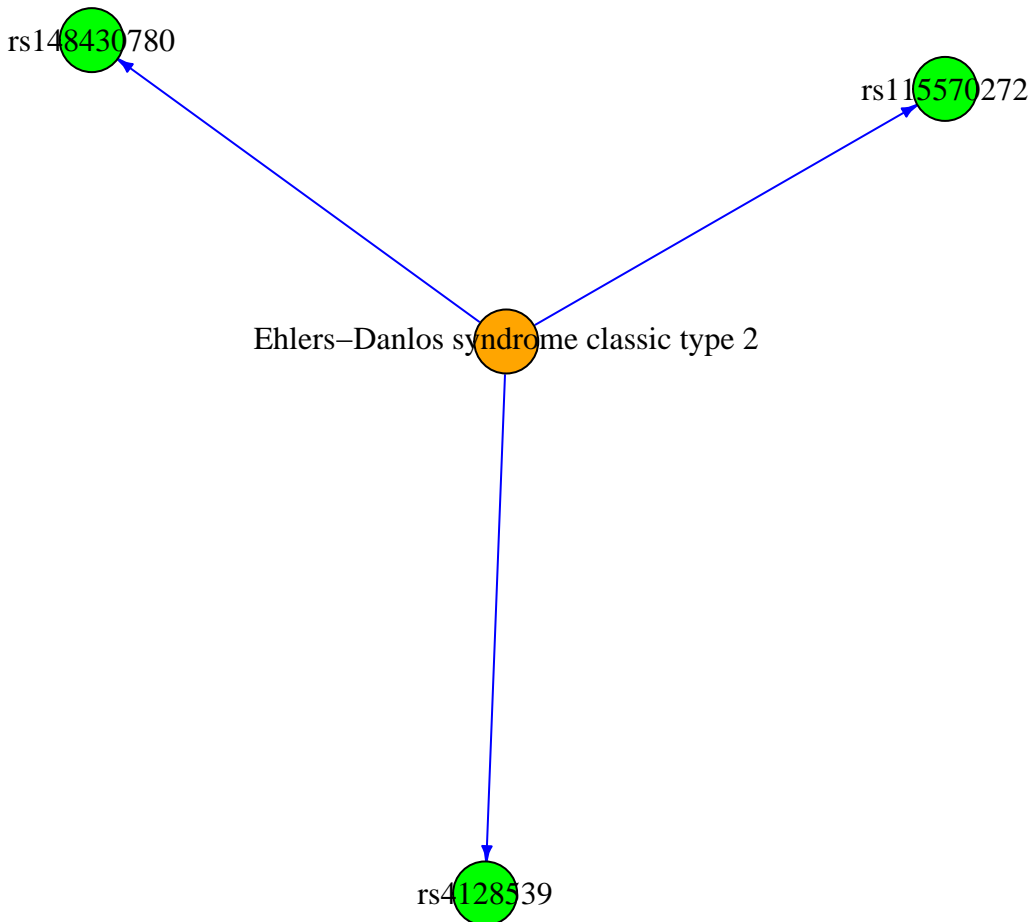

**Variant–Disease Network (Ehlers–Danlos syndrome dermatosparaxis type)**

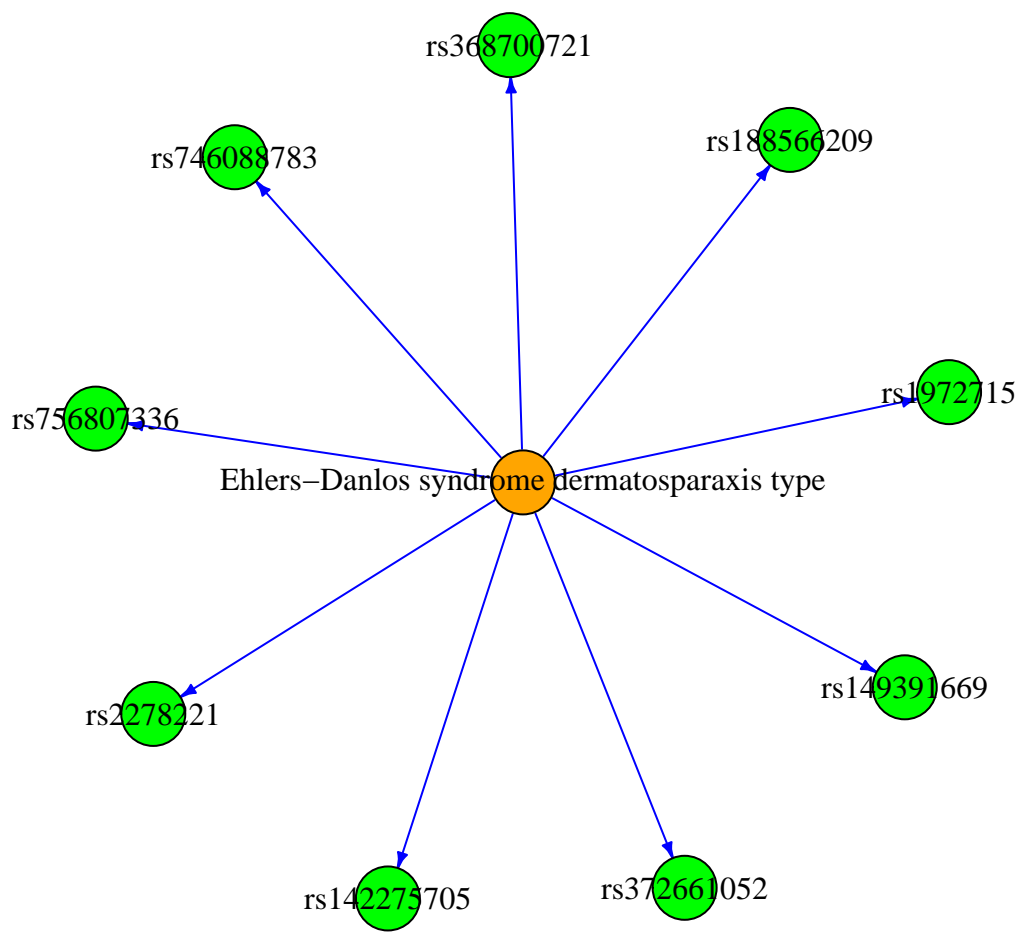

**Variant–Disease Network (Ehlers–Danlos syndrome progeroid type)**

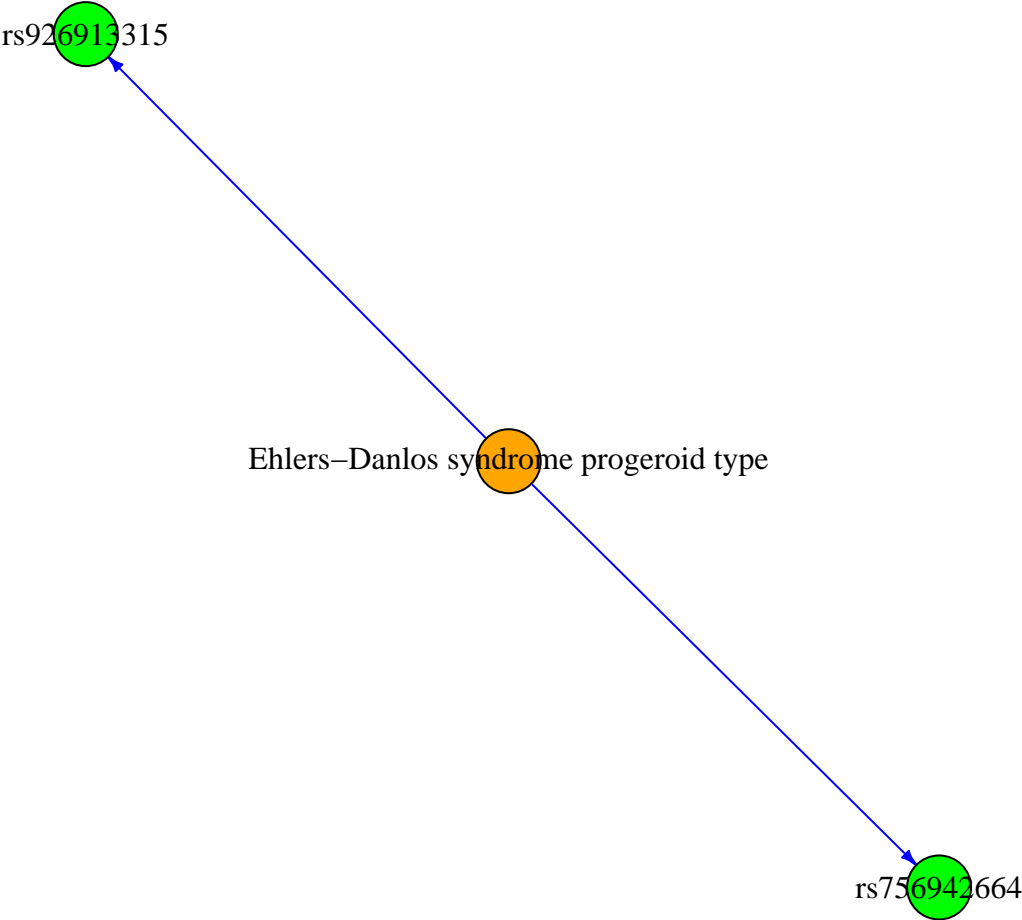

# Variant-Disease Network (Ehlers-Danlos syndrome with progressive kyphoscoliosis)

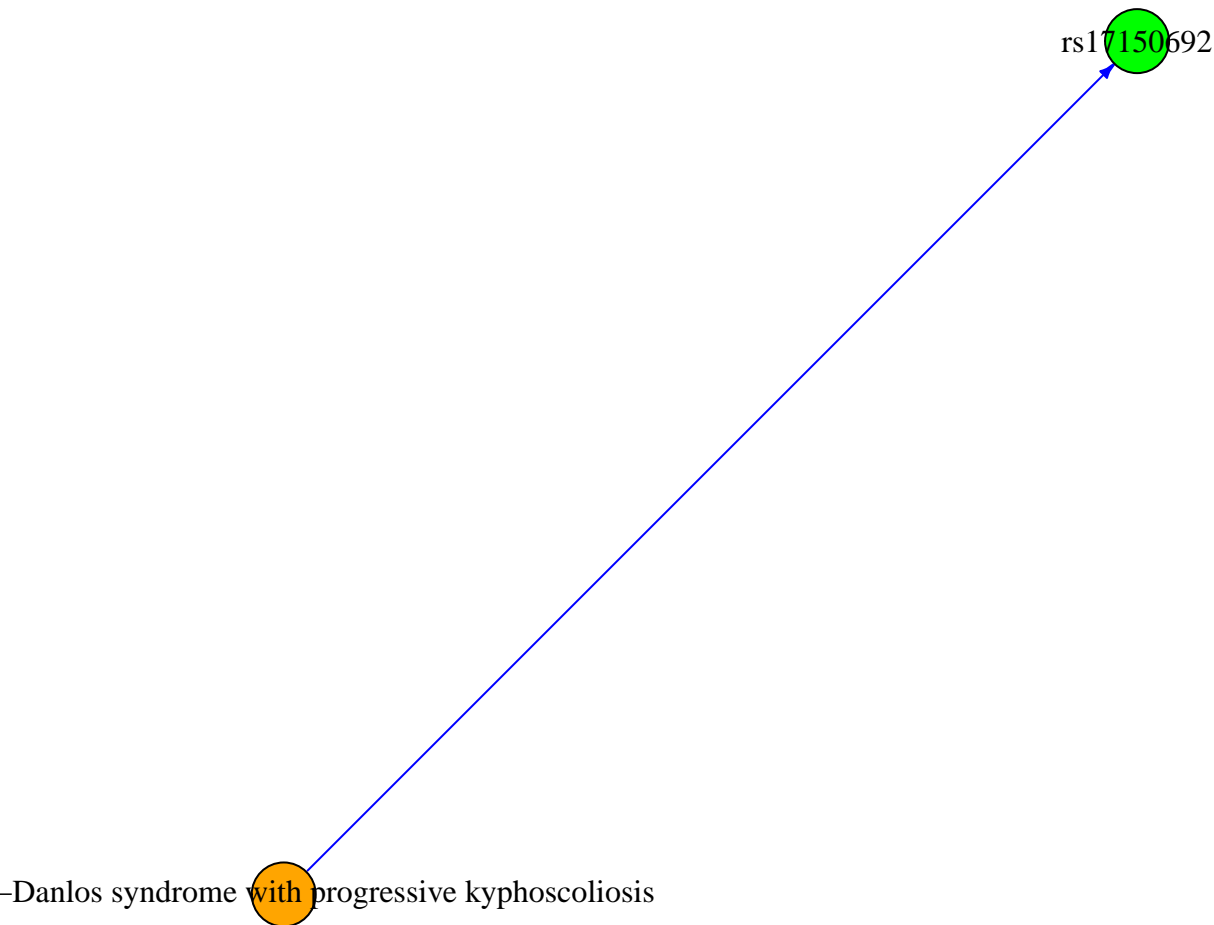

## Variant-Disease Network (Elliptocytosis)

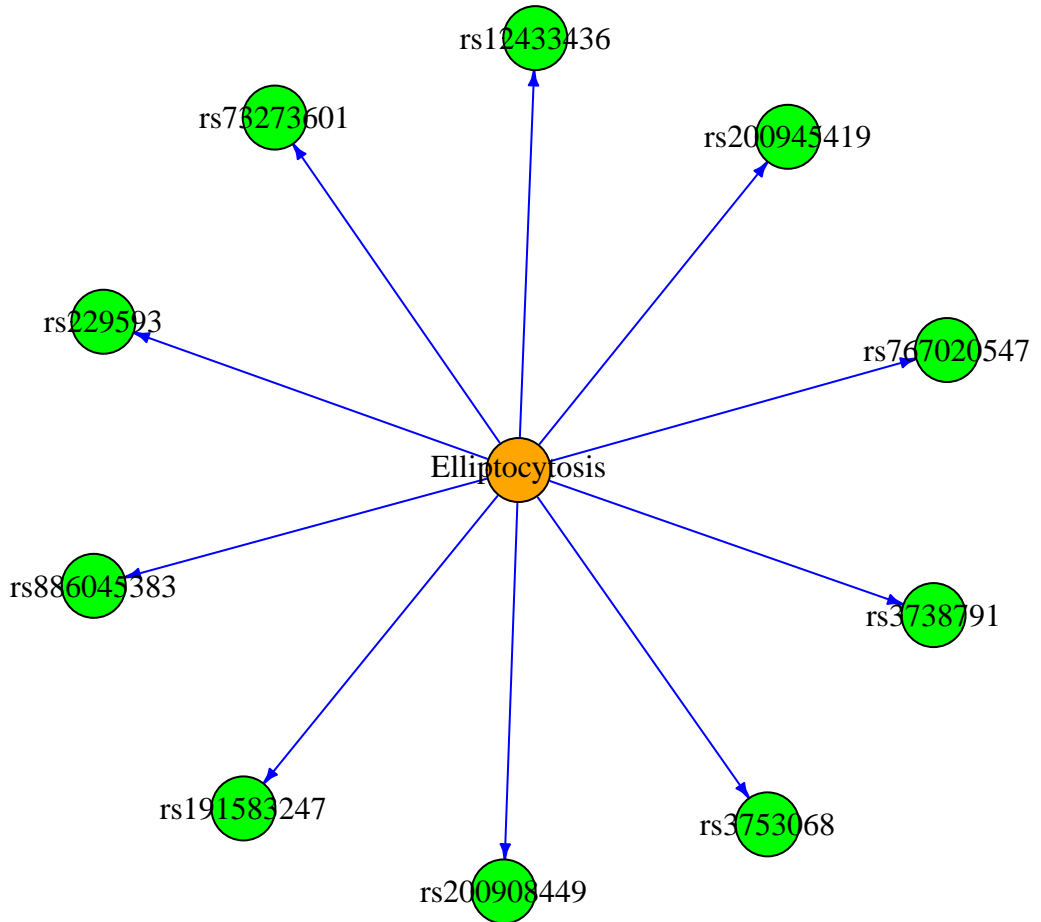



## Variant-Disease Network (Elliptocytosis 2)

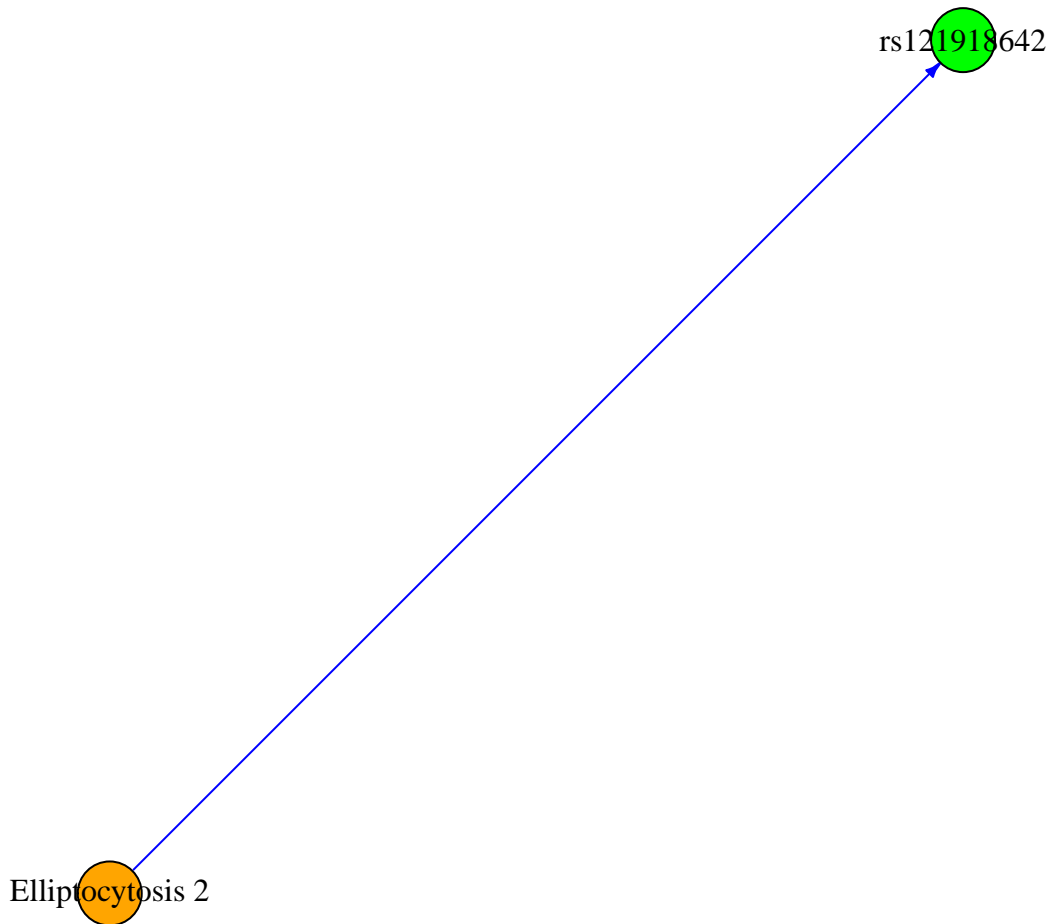

Variant–Disease Network (Ellis–van Creveld syndrome)

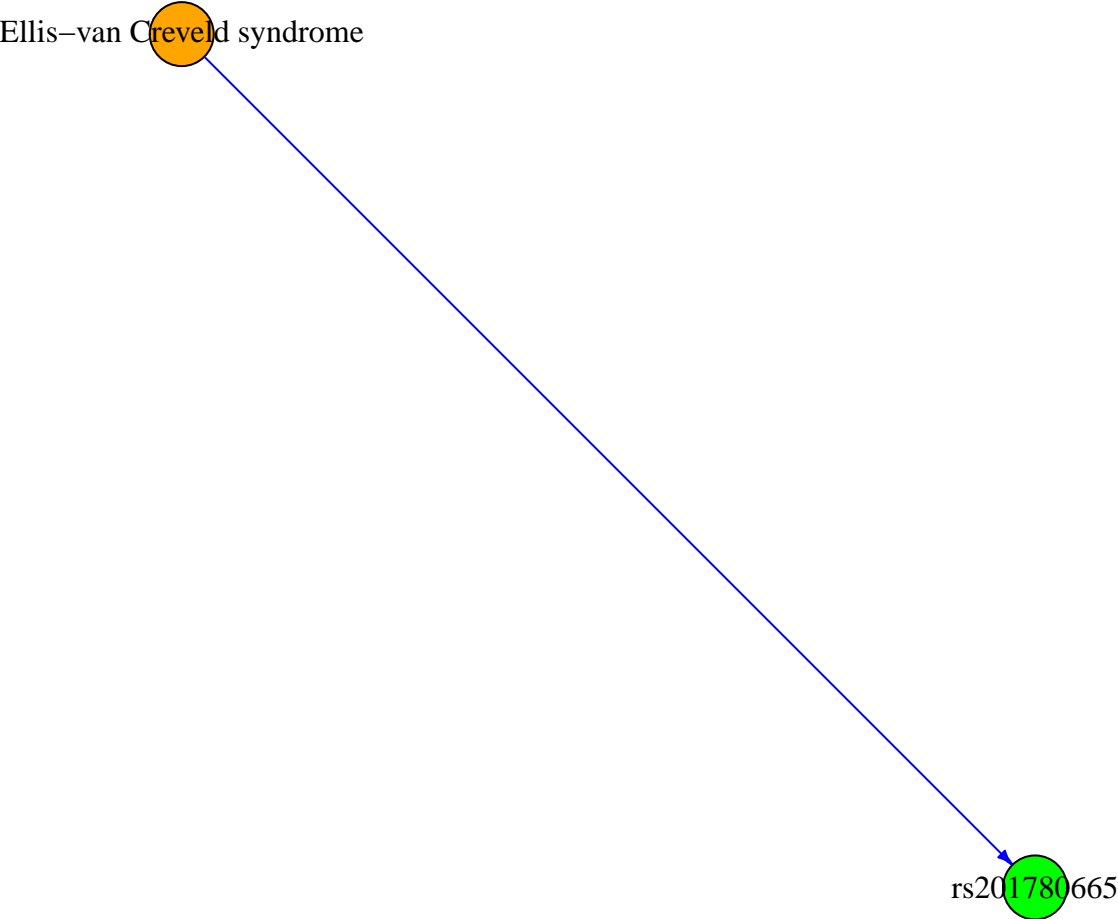

Variant–Disease Network (Emery–Dreifuss muscular dystrophy)

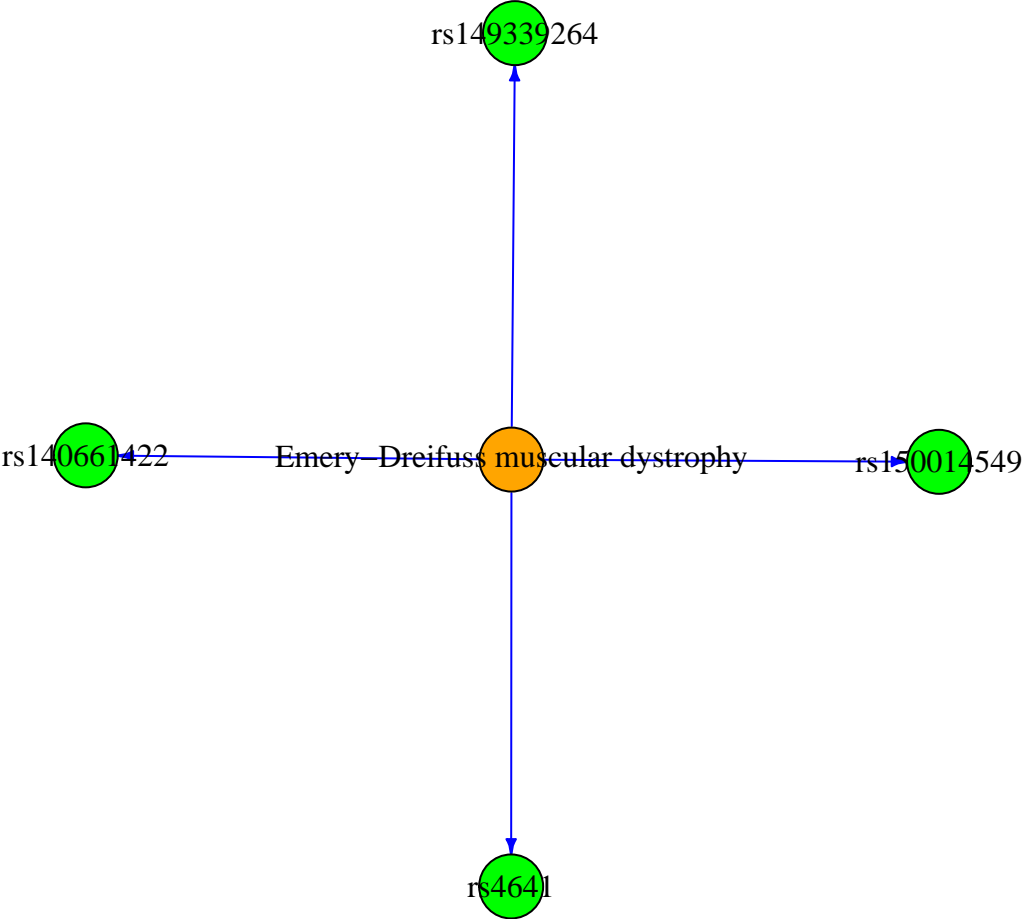

# Variant–Disease Network (Emery–Dreifuss muscular dystrophy 3)

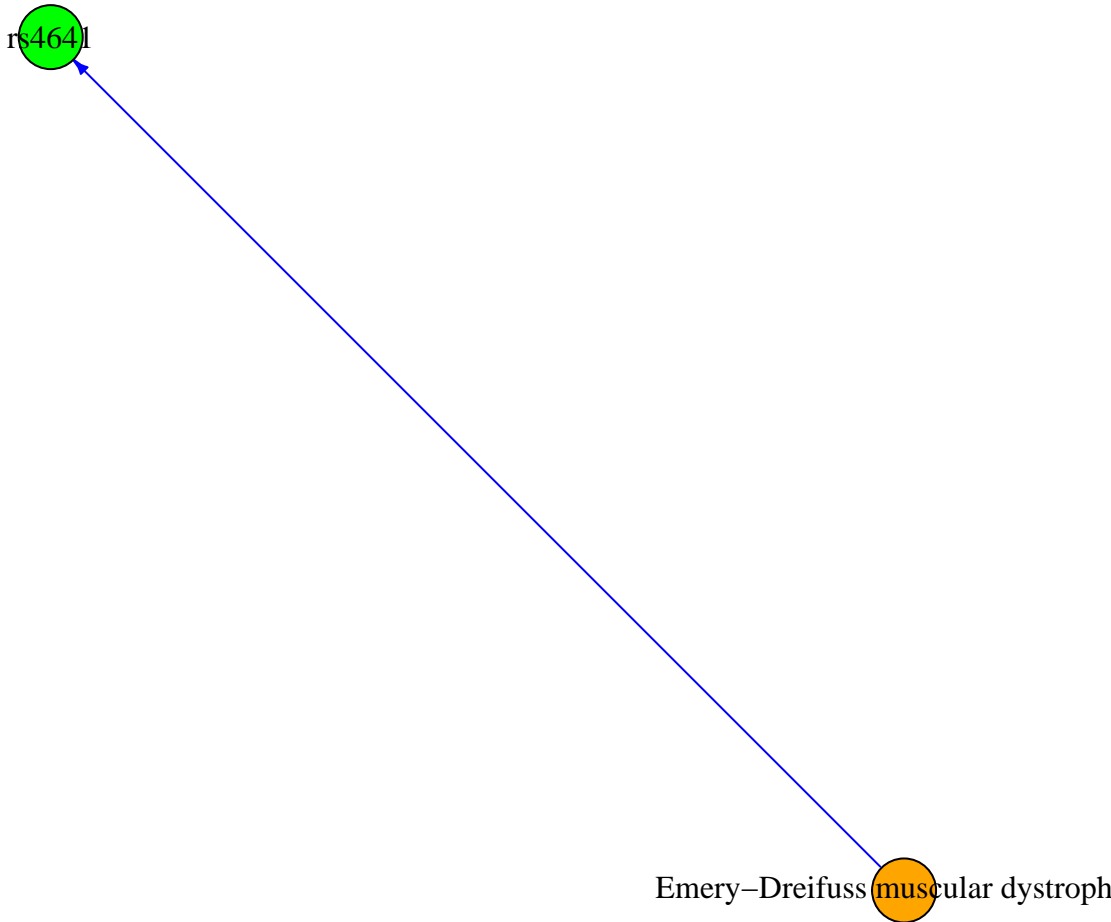

Variant–Disease Network (Encephalopathy)

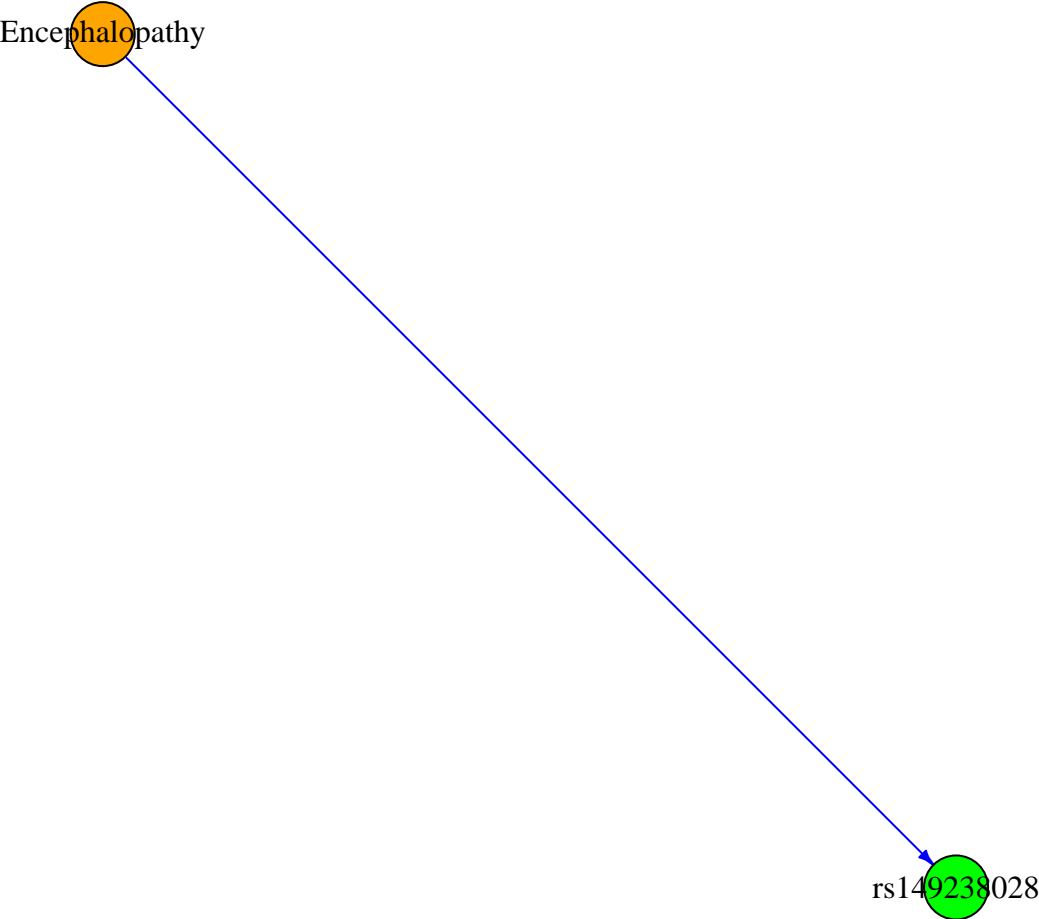

## Variant–Disease Network (Endometrial carcinoma)

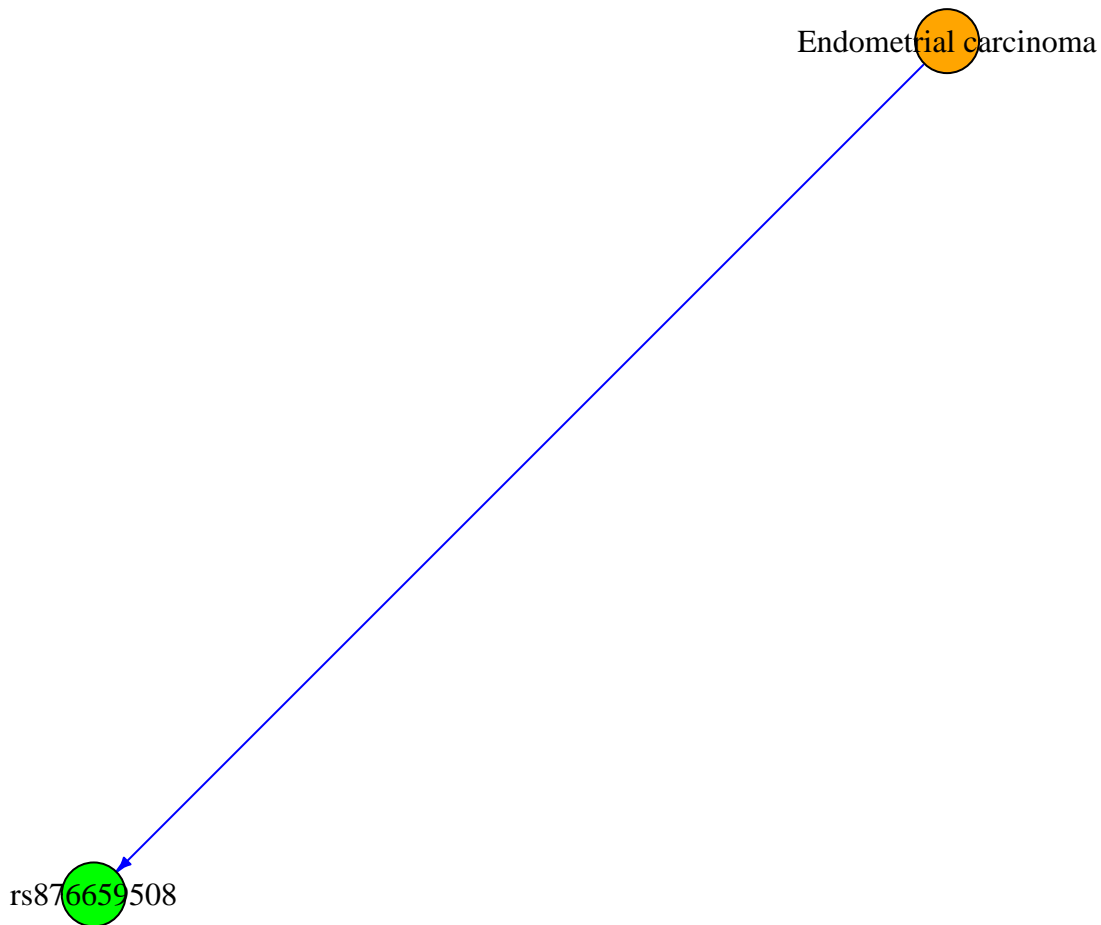

## Variant–Disease Network (Enhanced s–cone syndrome)

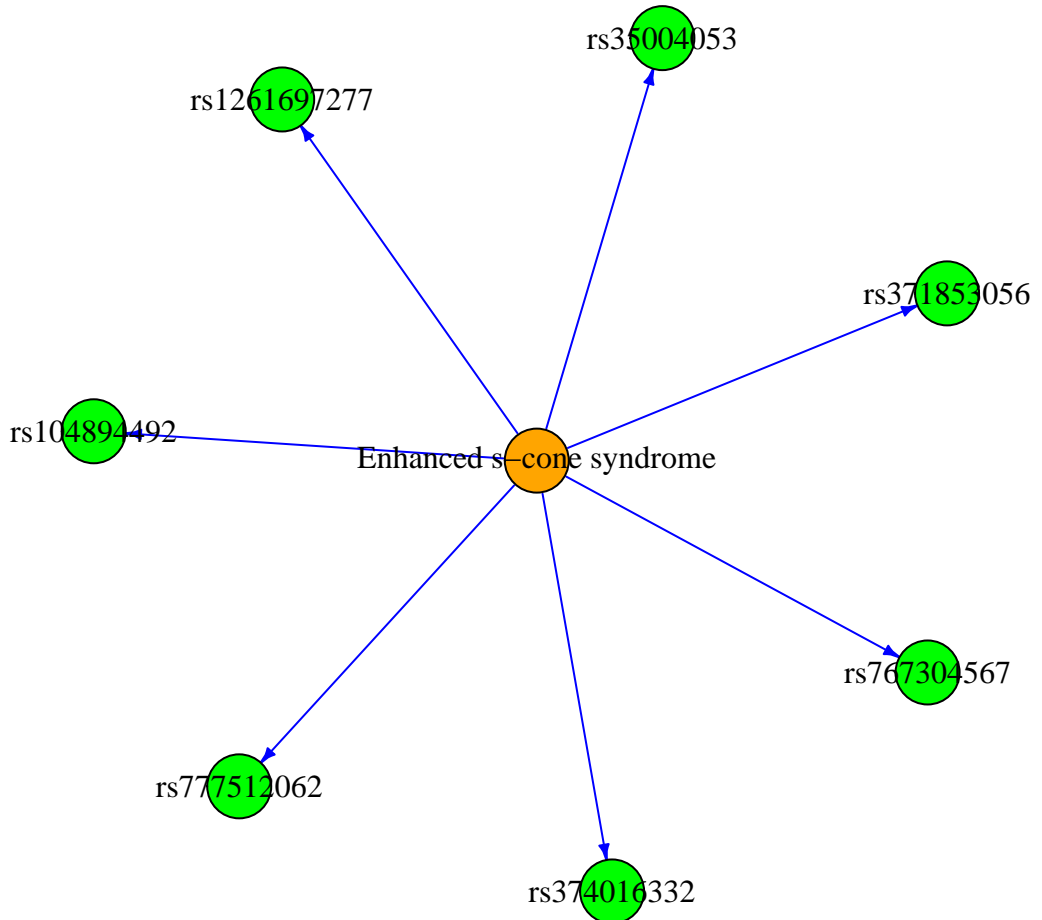

**Variant–Disease Network (EPIDERMODYSPLASIA VERRUCIFORMIS)**

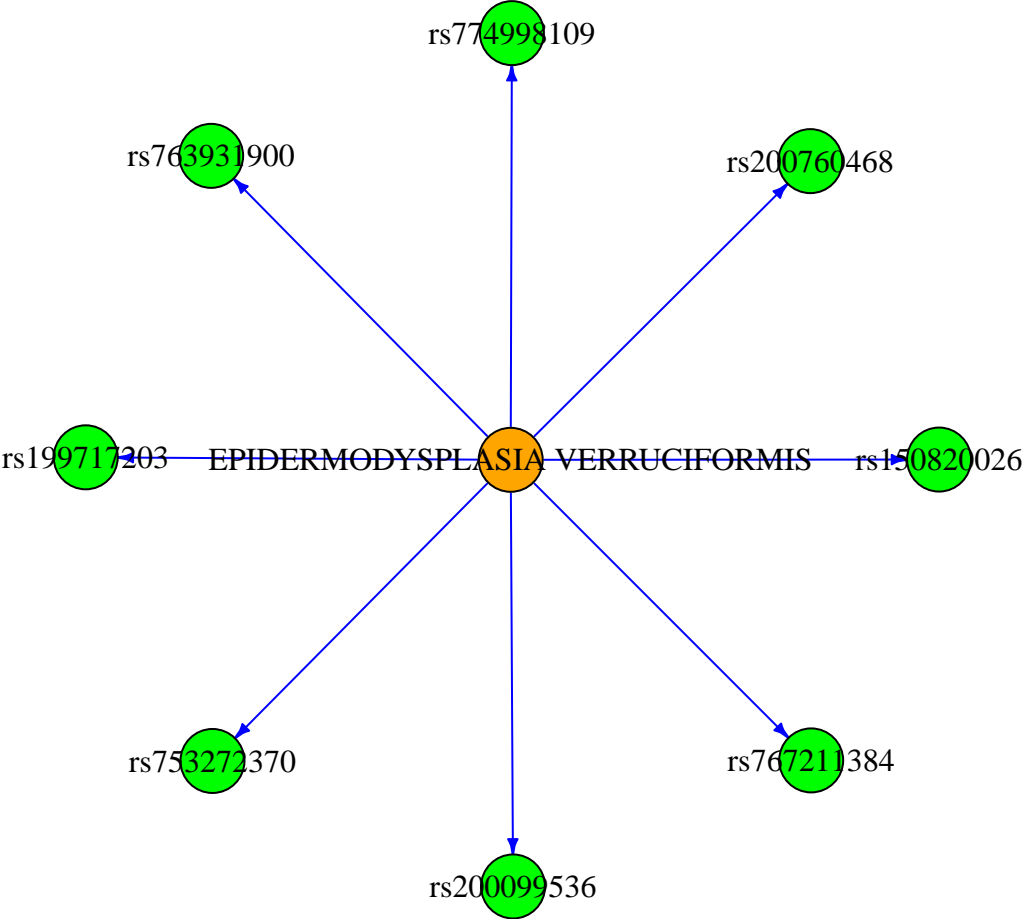



## Variant–Disease Network (Epidermolysis bullosa)

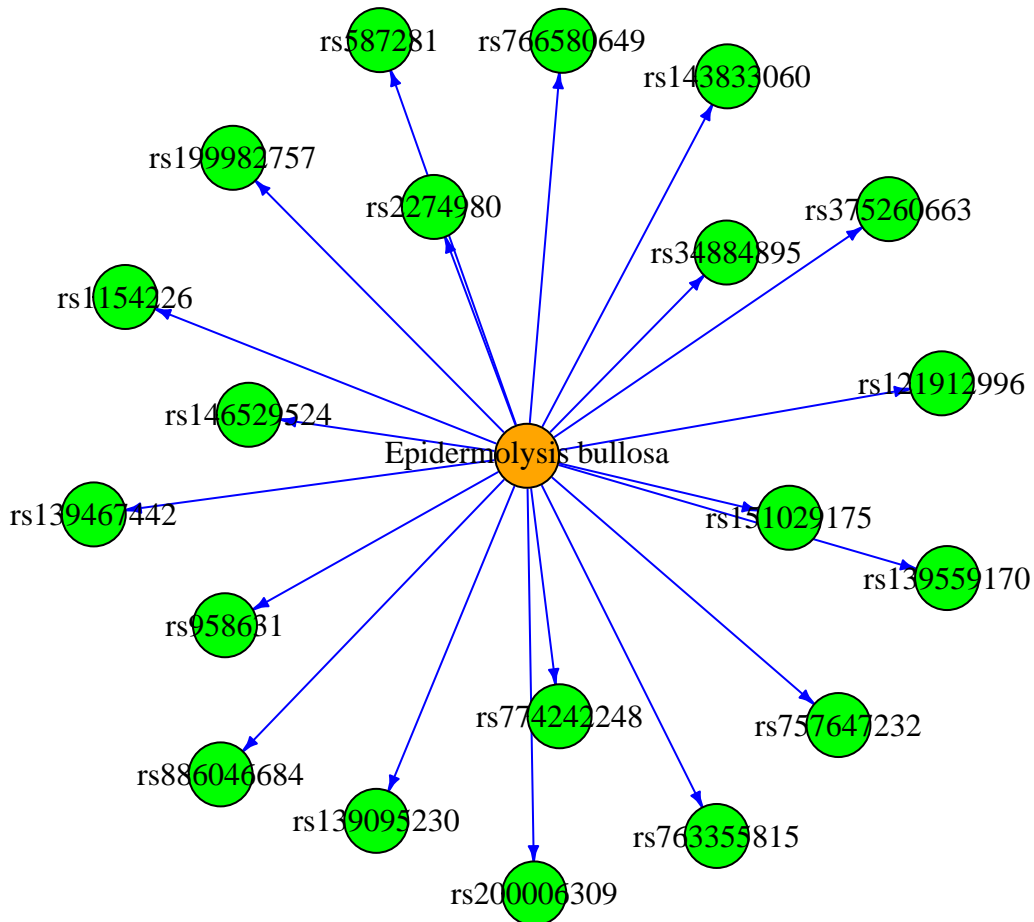

# Variant–Disease Network (Epidermolysis bullosa junctionalis with pyloric atresia)

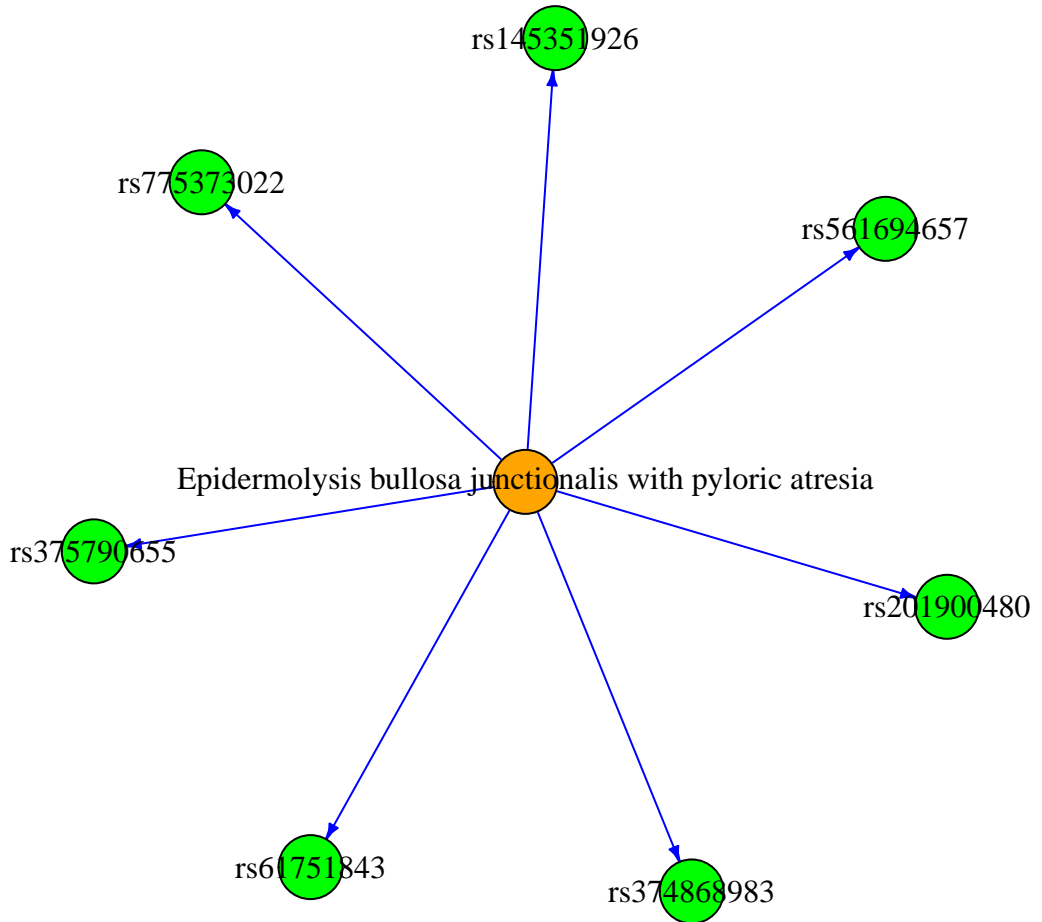

**Variant–Disease Network (Epidermolysis bullosa simplex)**

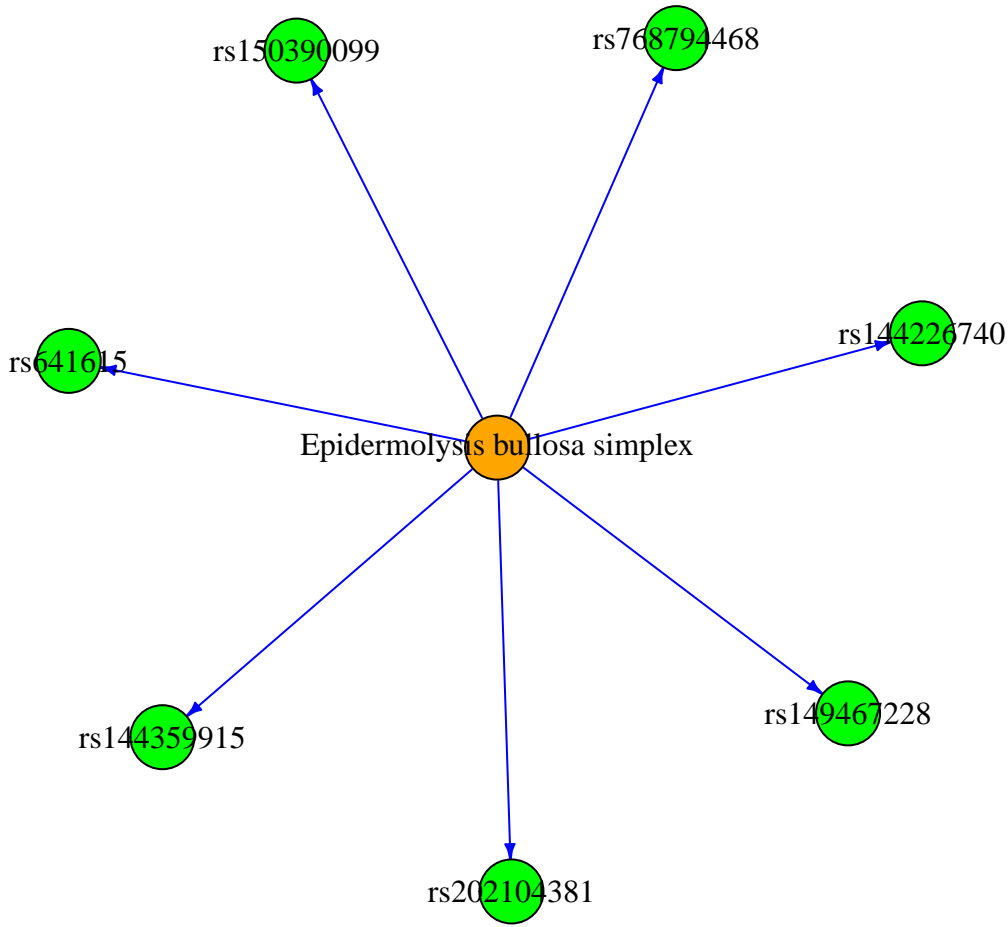

## Variant-Disease Network (Epilepsy)

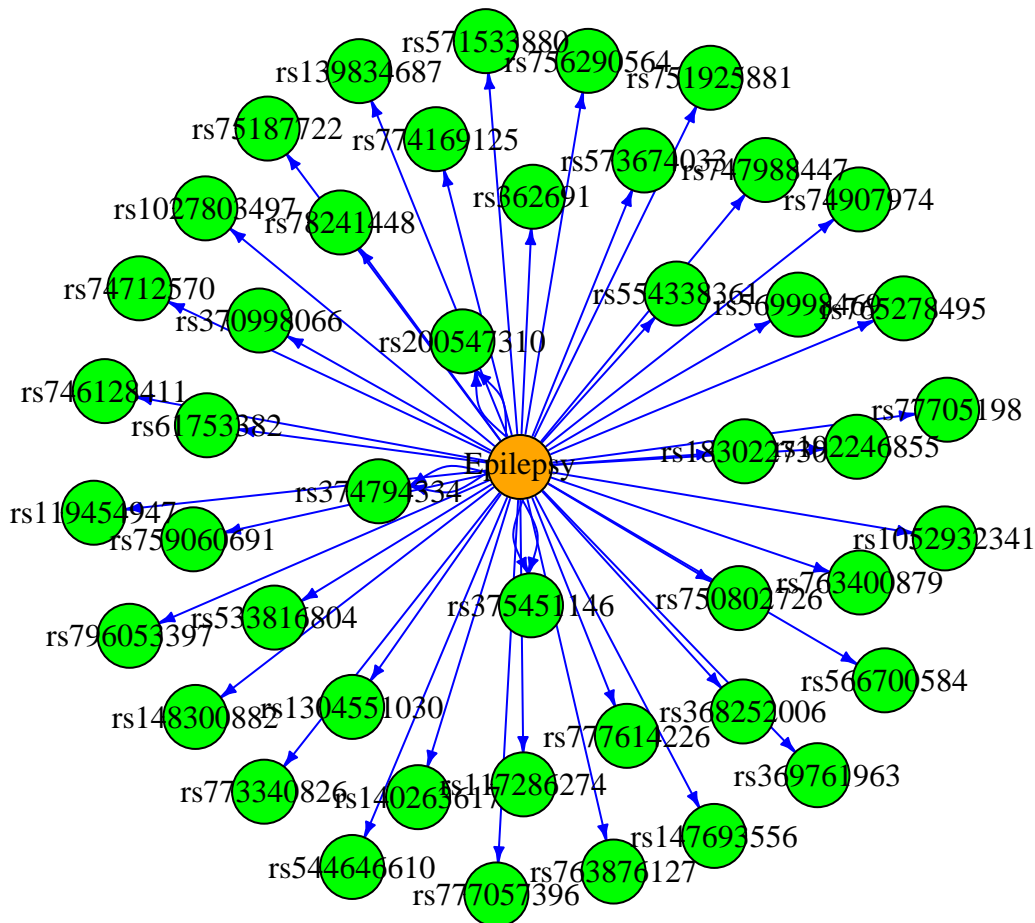

**Variant–Disease Network (Epileptic encephalopathy)**

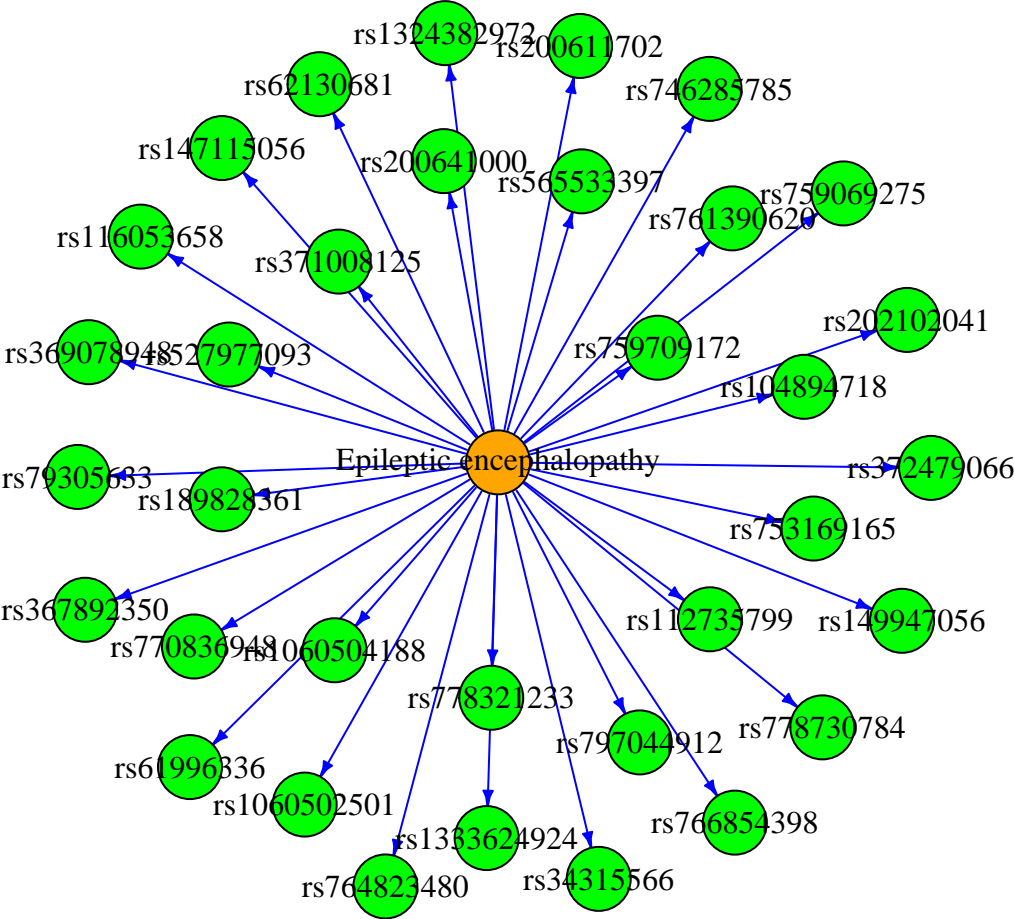

**Variant–Disease Network (Epiphyseal chondrodysplasia)**

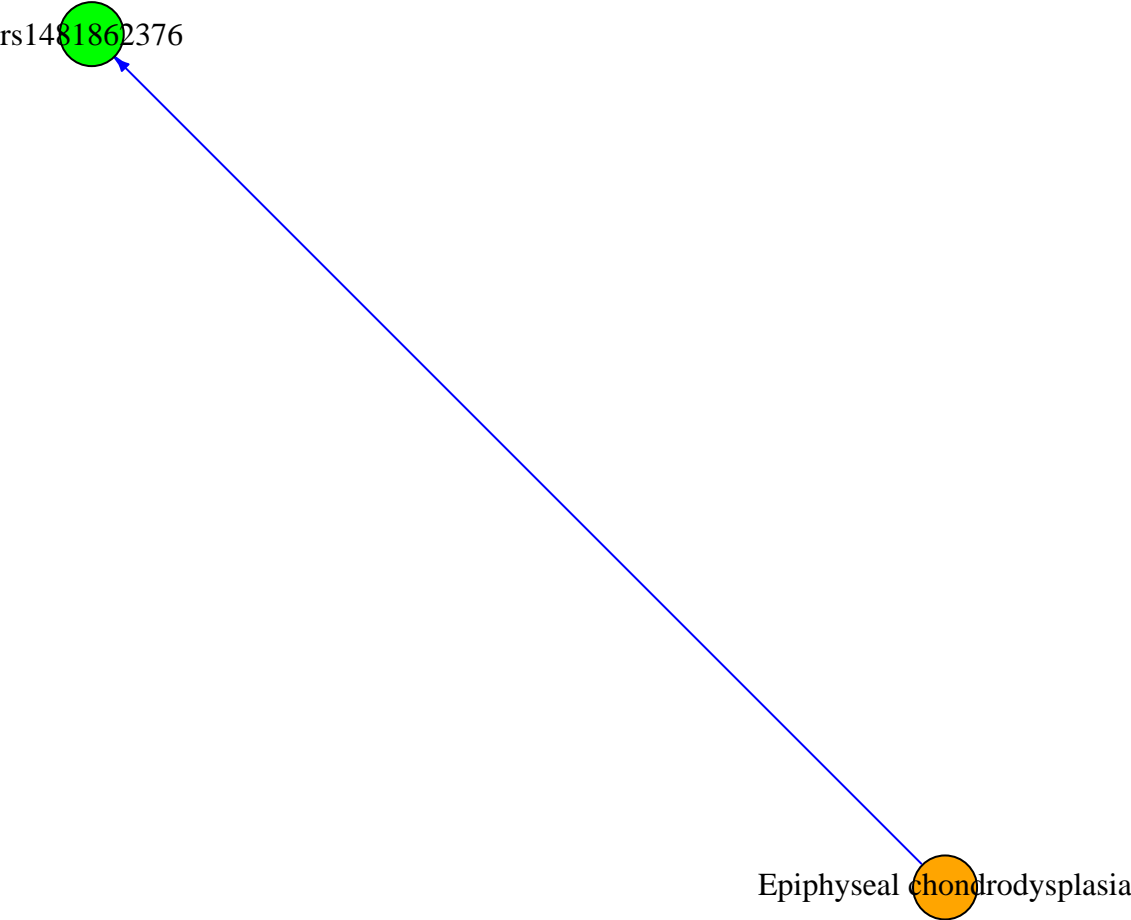

## Variant-Disease Network (Epiphyseal dysplasia)

Epiphyseal dysplasia

rs142770543

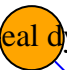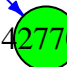

**Variant–Disease Network (Erythrocyte AMP deaminase deficiency)**

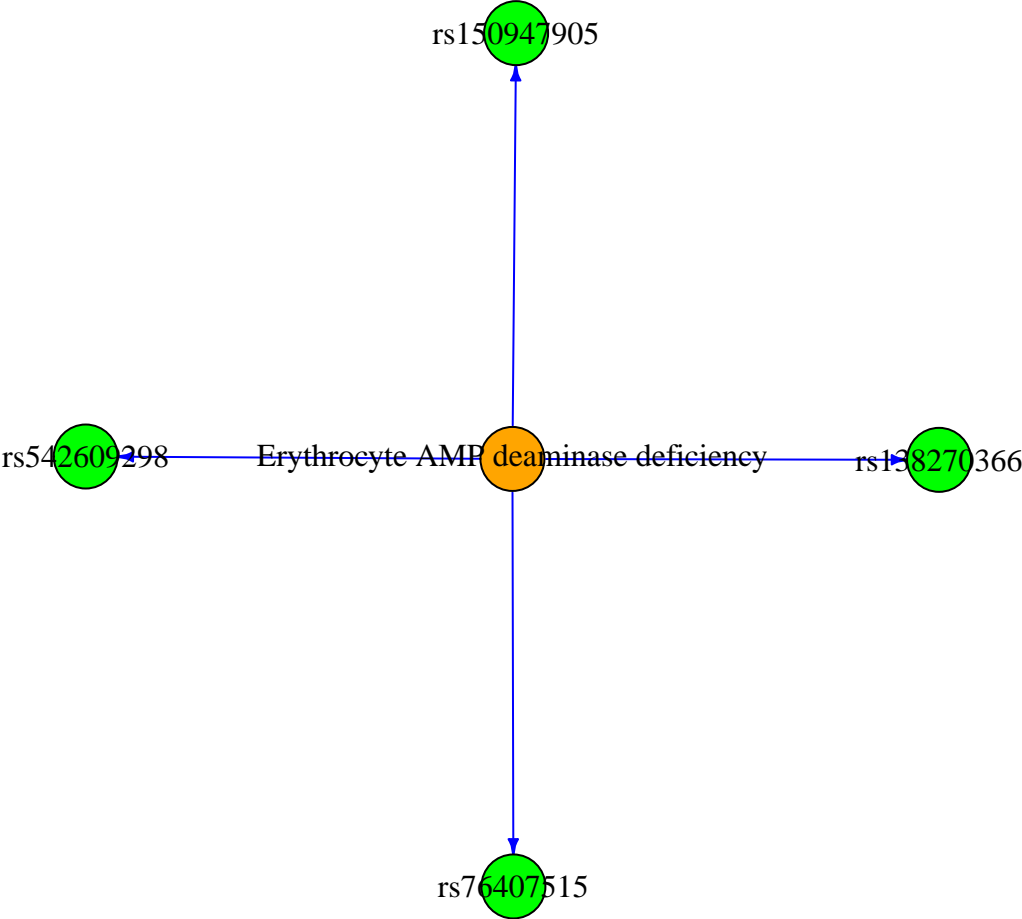



Variant–Disease Network (Erythrocytosis)

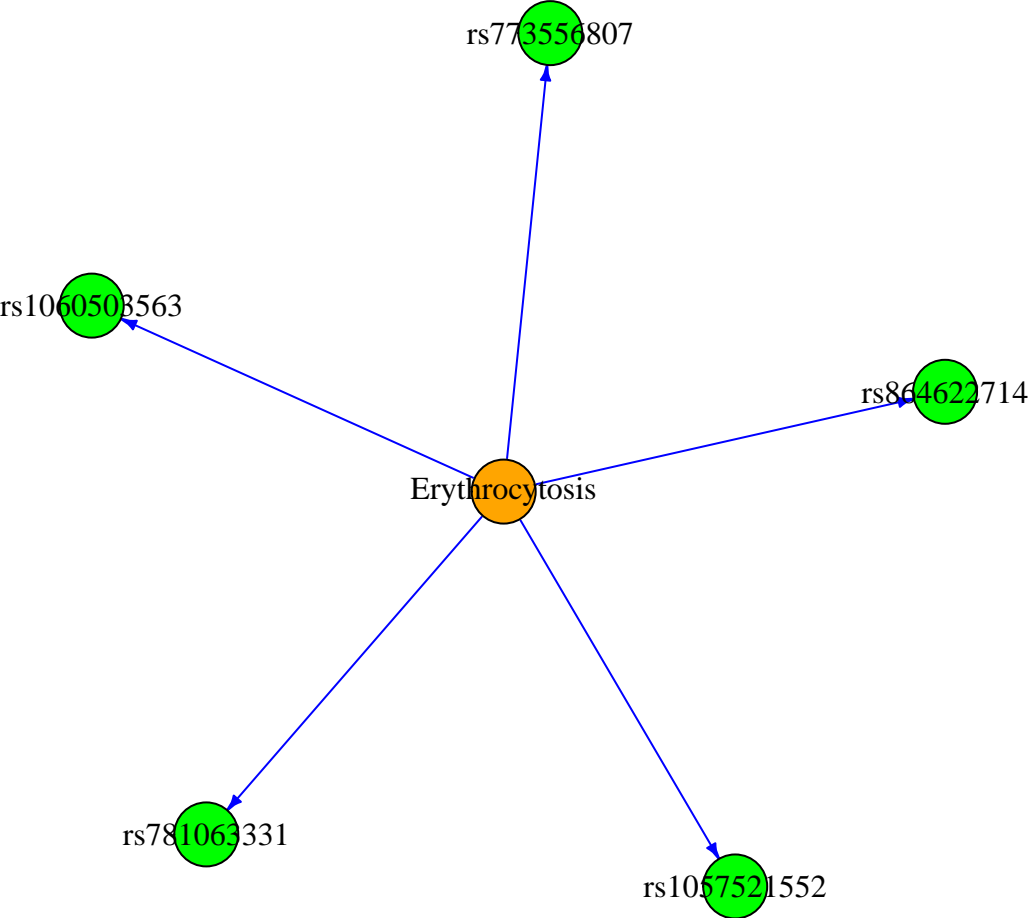

## Variant–Disease Network (Evans syndrome)

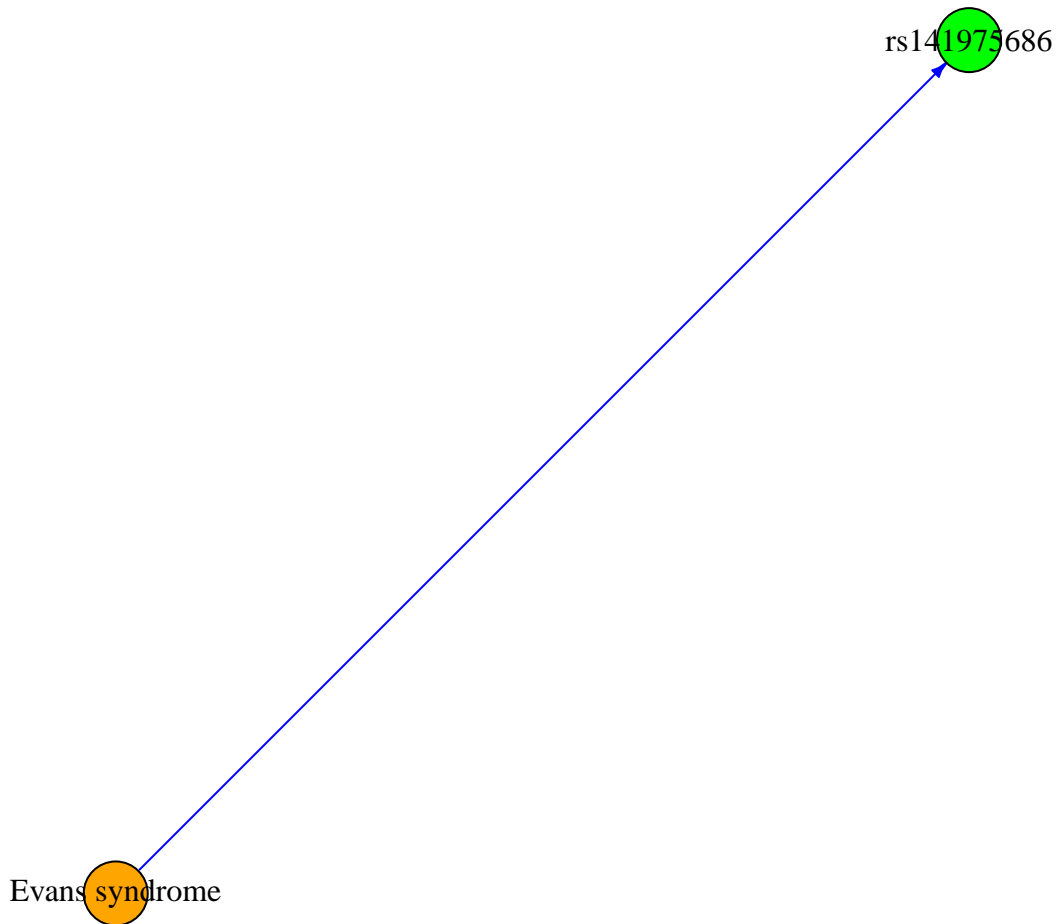

## Variant-Disease Network (Fabry disease)

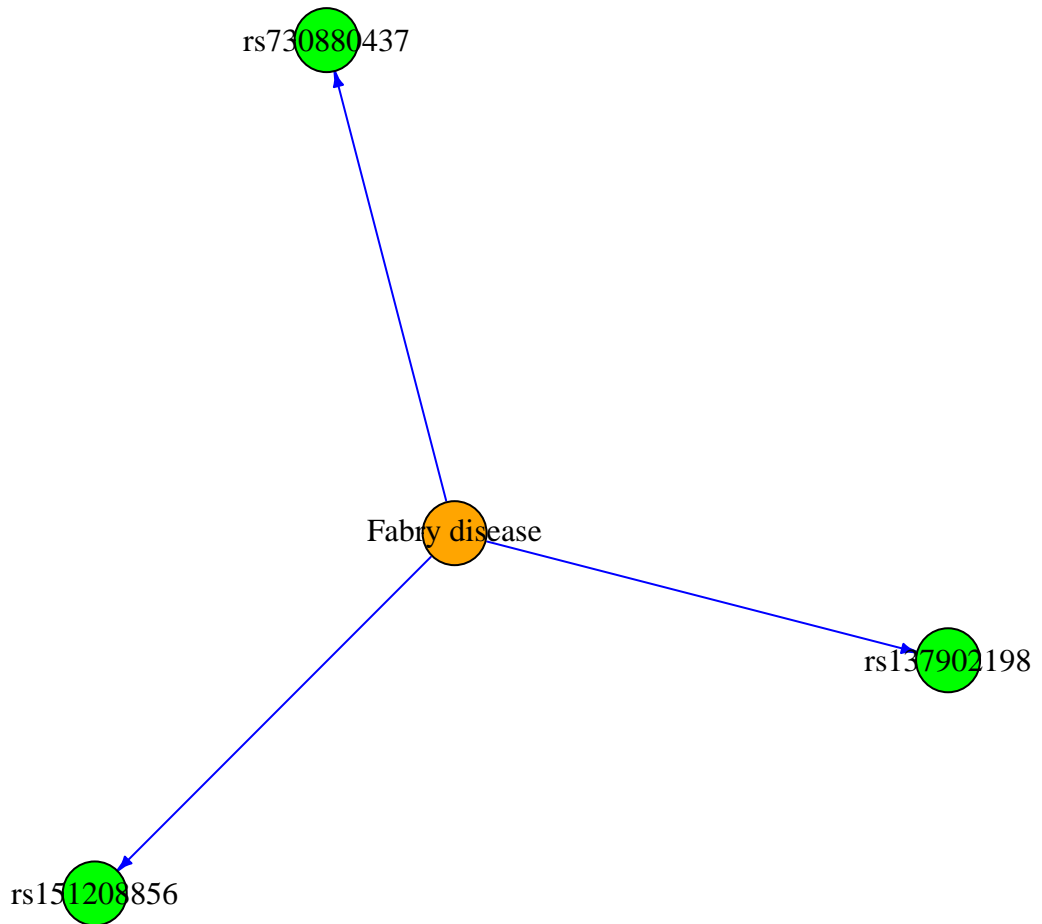

## Variant–Disease Network (Facial dysmorphism)

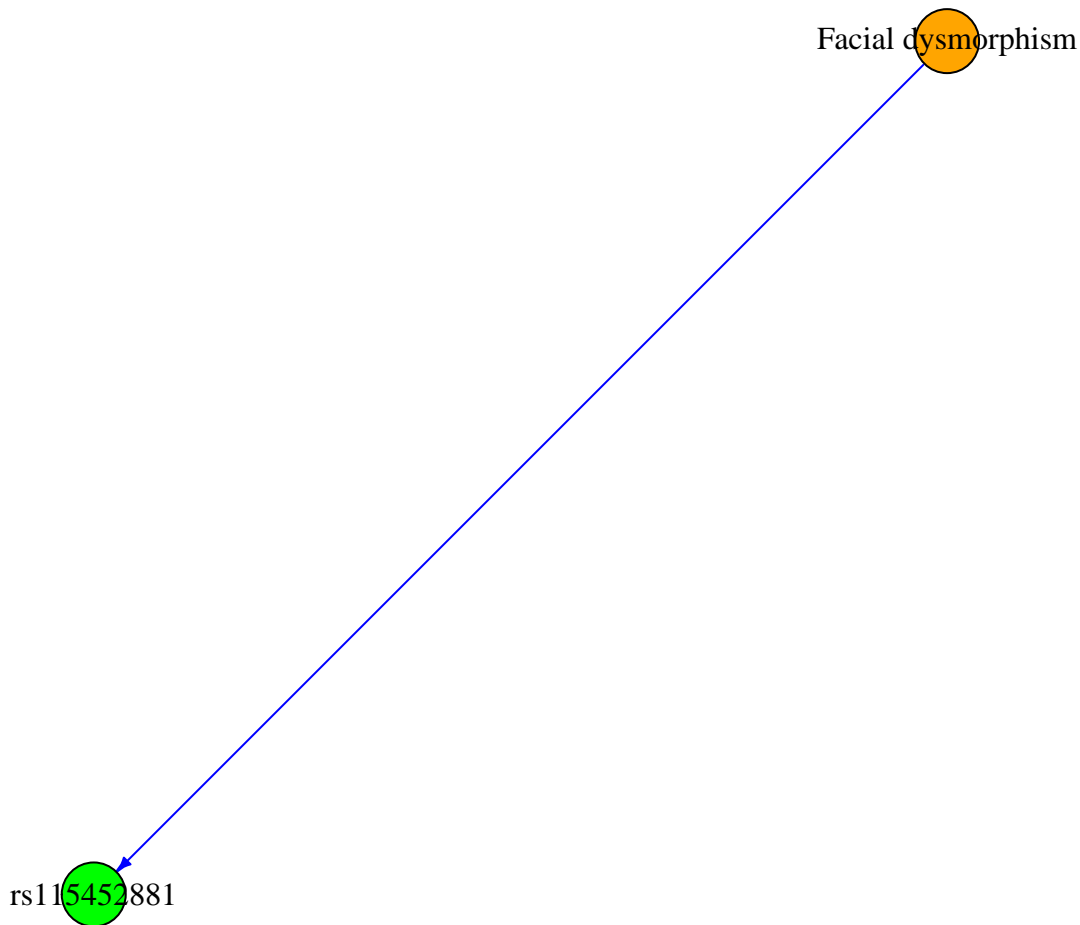

**Variant–Disease Network (Facioscapulohumeral muscular dystrophy 2)**

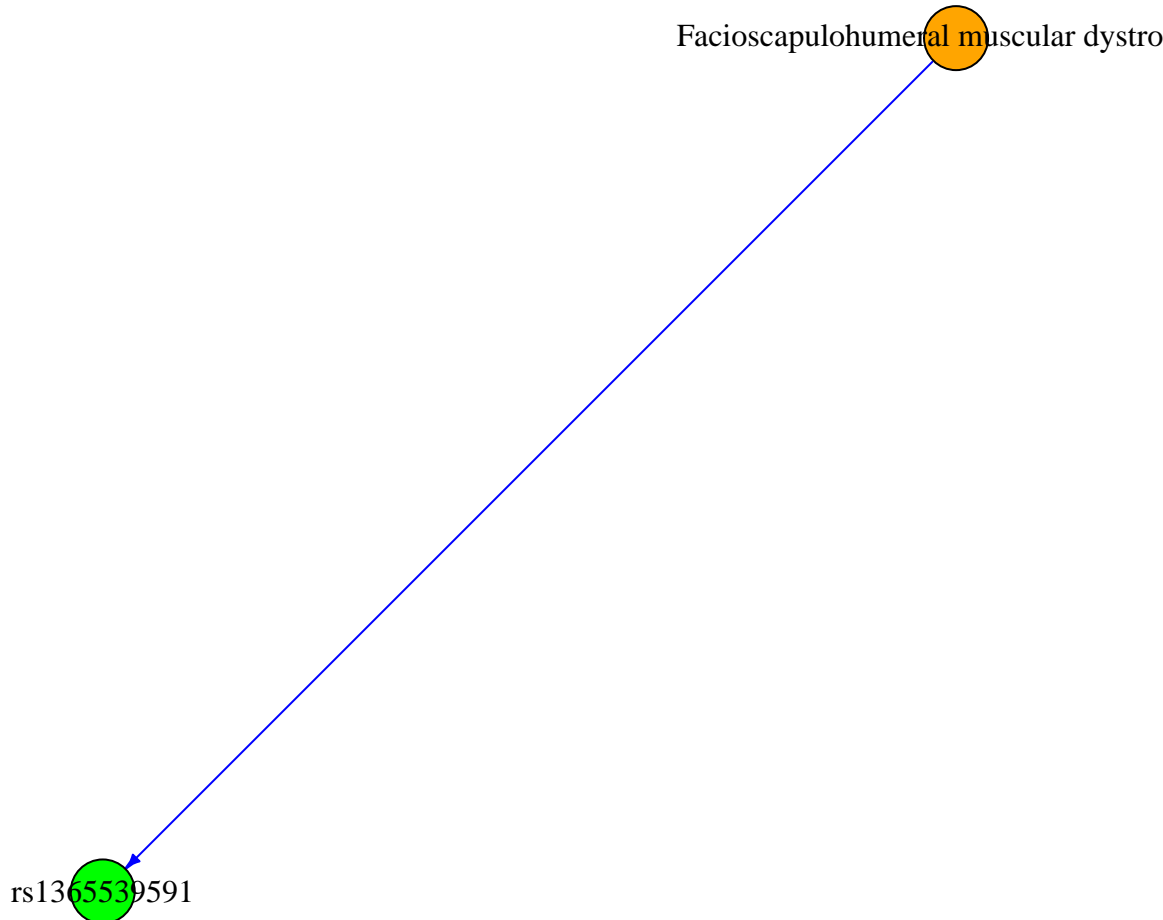

Variant–Disease Network (Factor B fast/slow polymorphism)

Factor B fast/slow polymorphism

rs12614

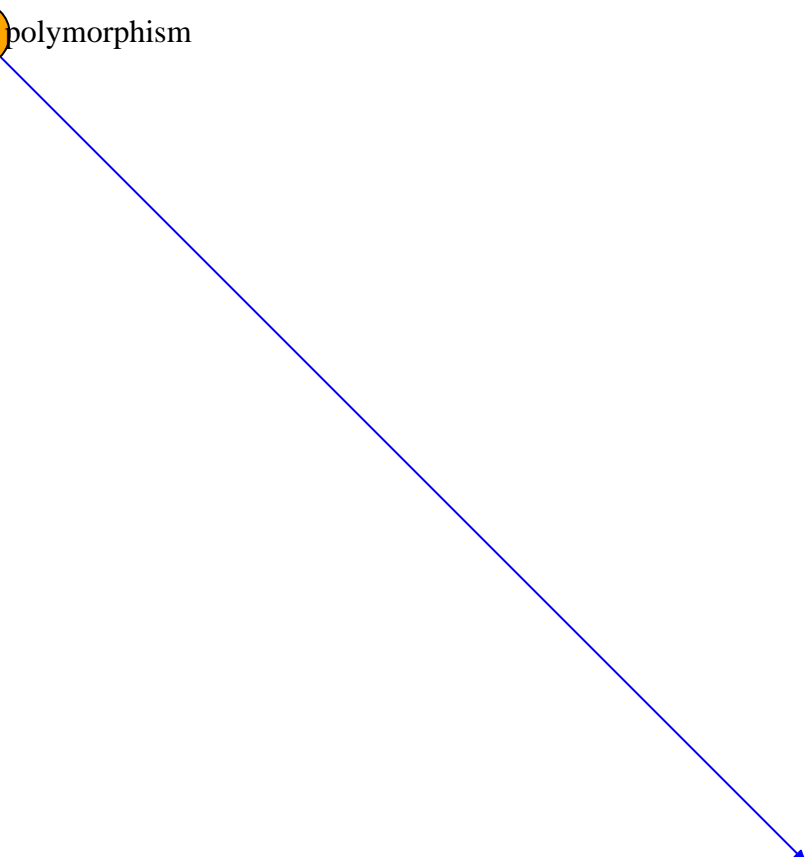

**Variant–Disease Network (Factor XIII subunit A deficiency)**

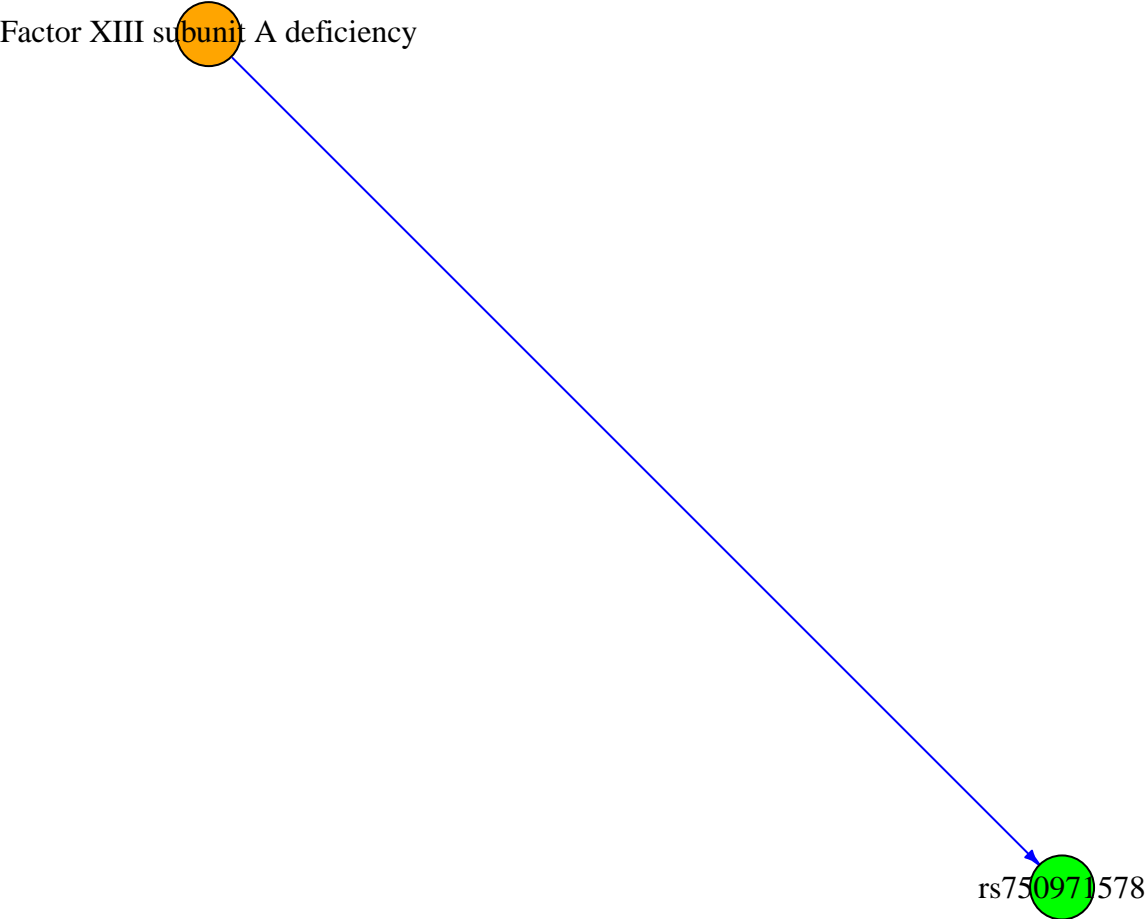

Variant–Disease Network (Failure to thrive)

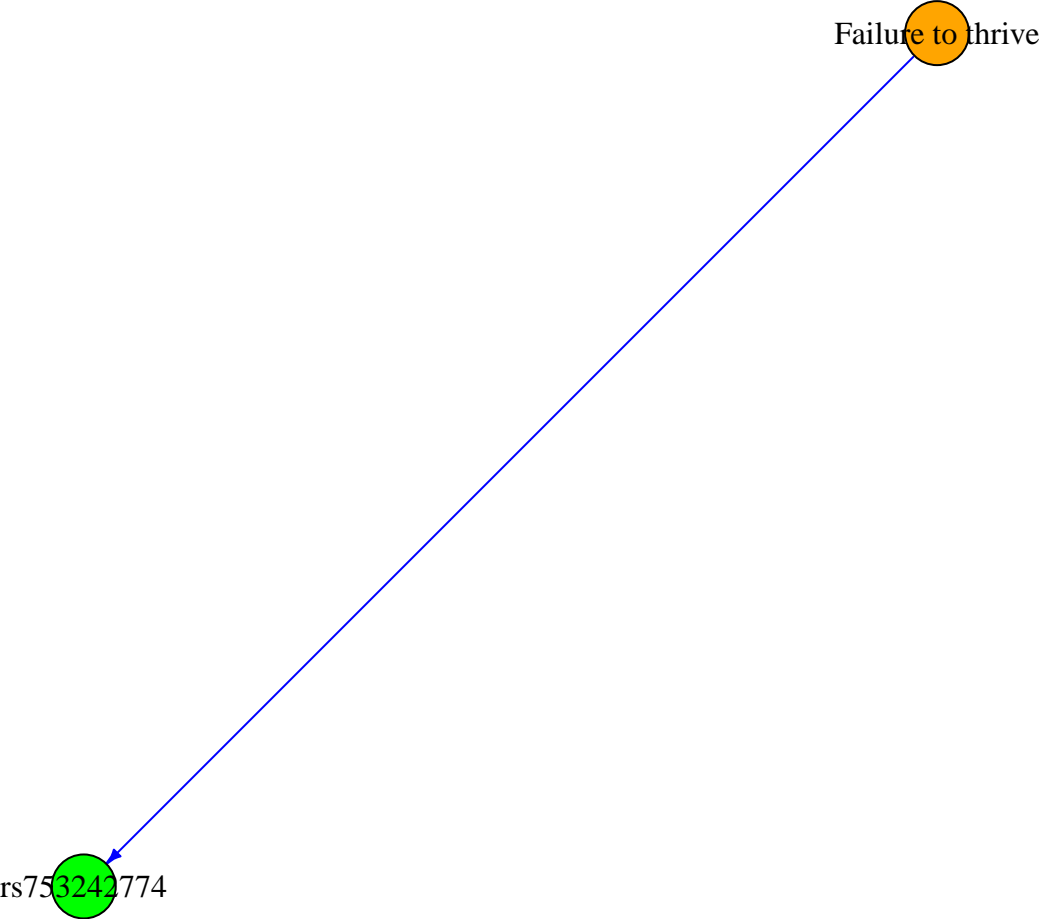



Variant–Disease Network (Familial adenomatous polyposis 1)

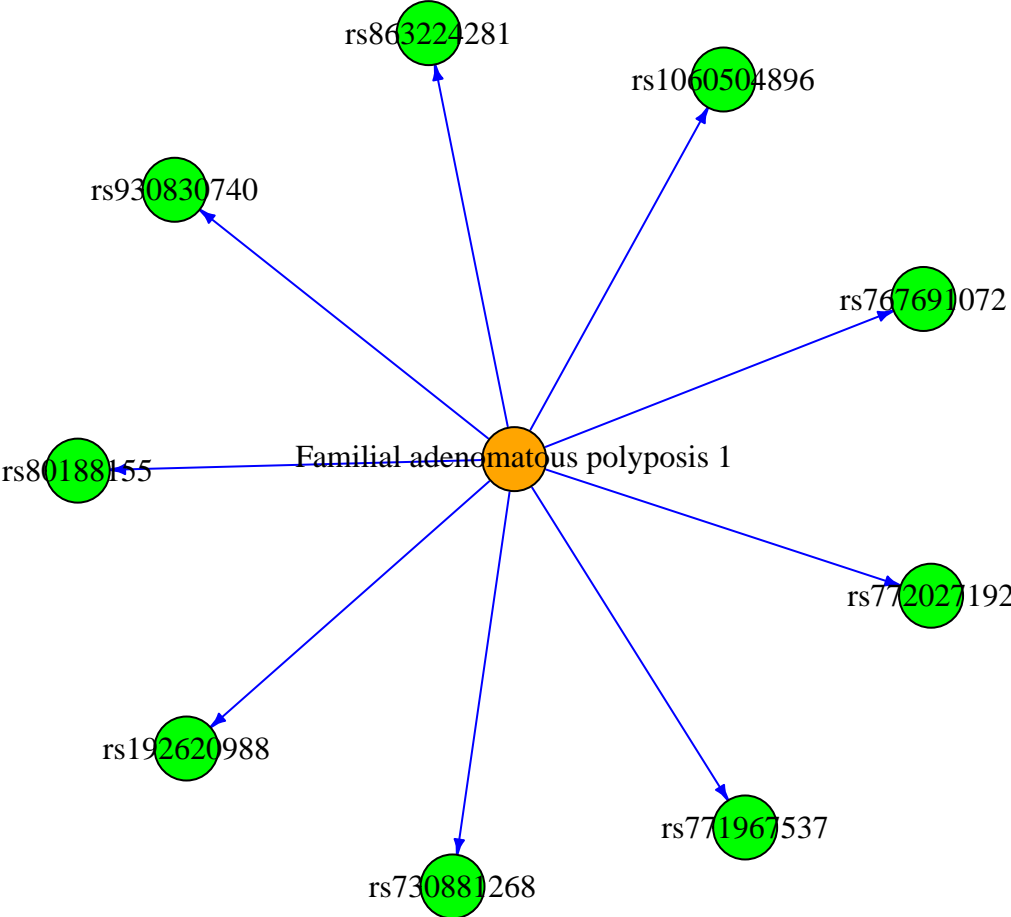

# Variant-Disease Network (Familial amyloid nephropathy with urticaria AND deafness)

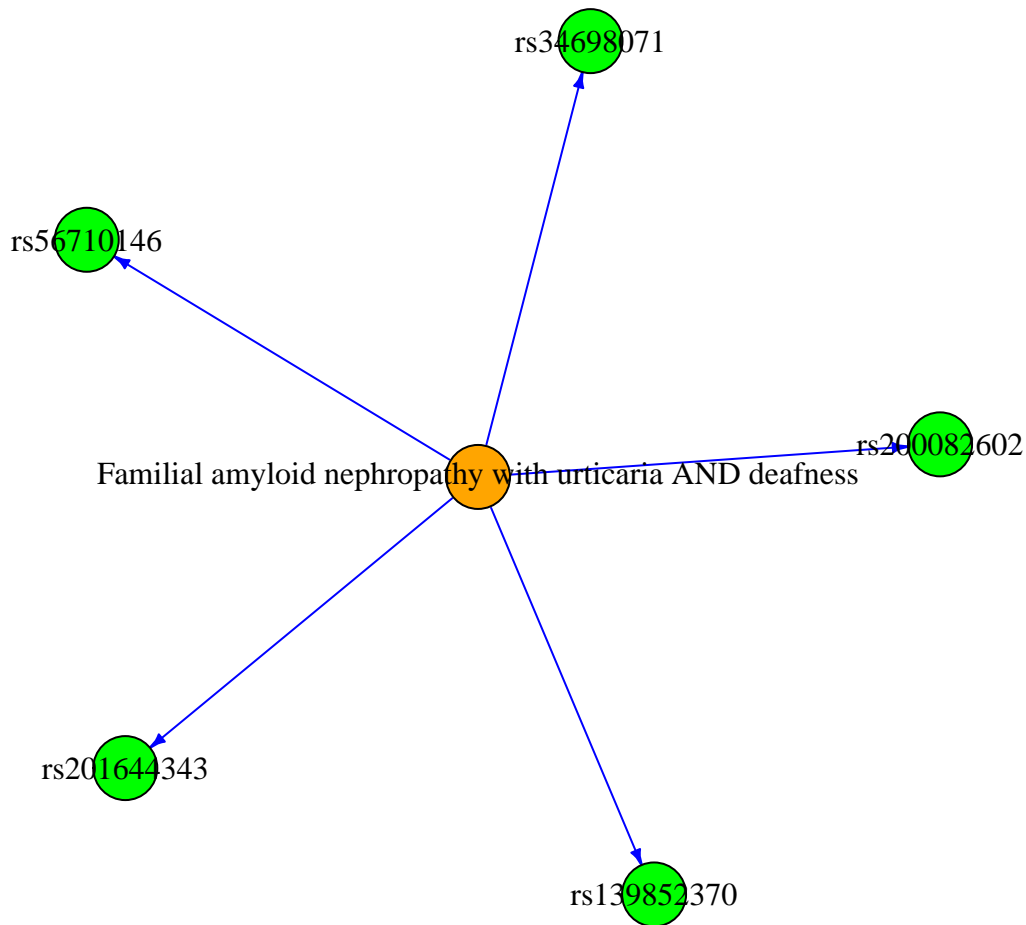

## Variant-Disease Network (Familial atrial fibrillation)

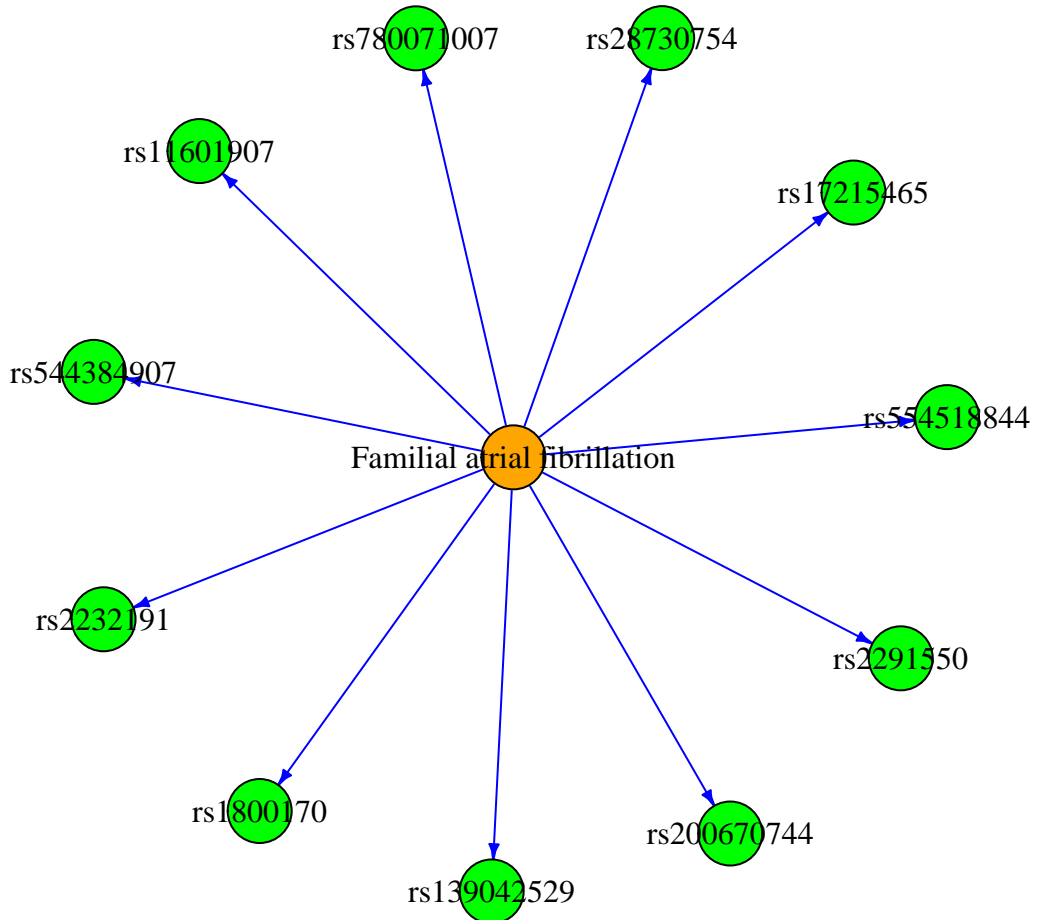

**Variant–Disease Network (Familial Atypical Mycobacteriosis)**

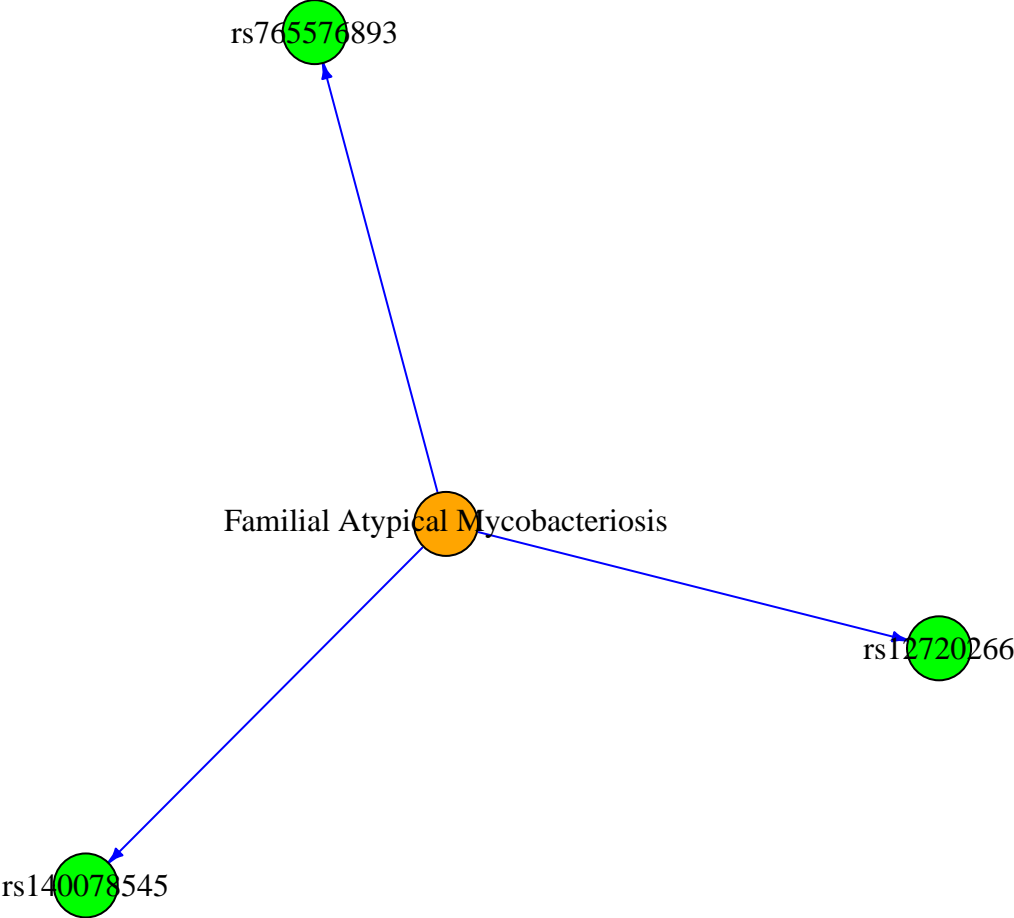

## Variant-Disease Network (Familial cancer of breast)

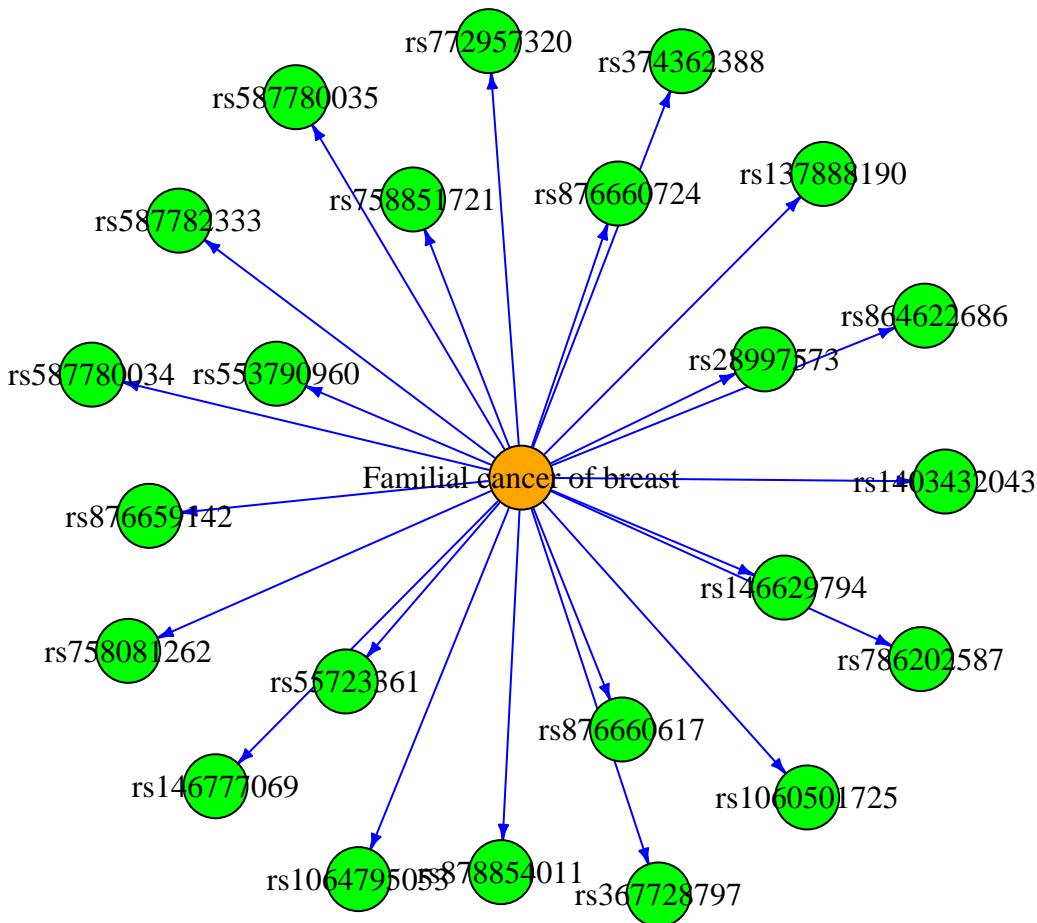

## Variant-Disease Network (Familial Candidiasis)

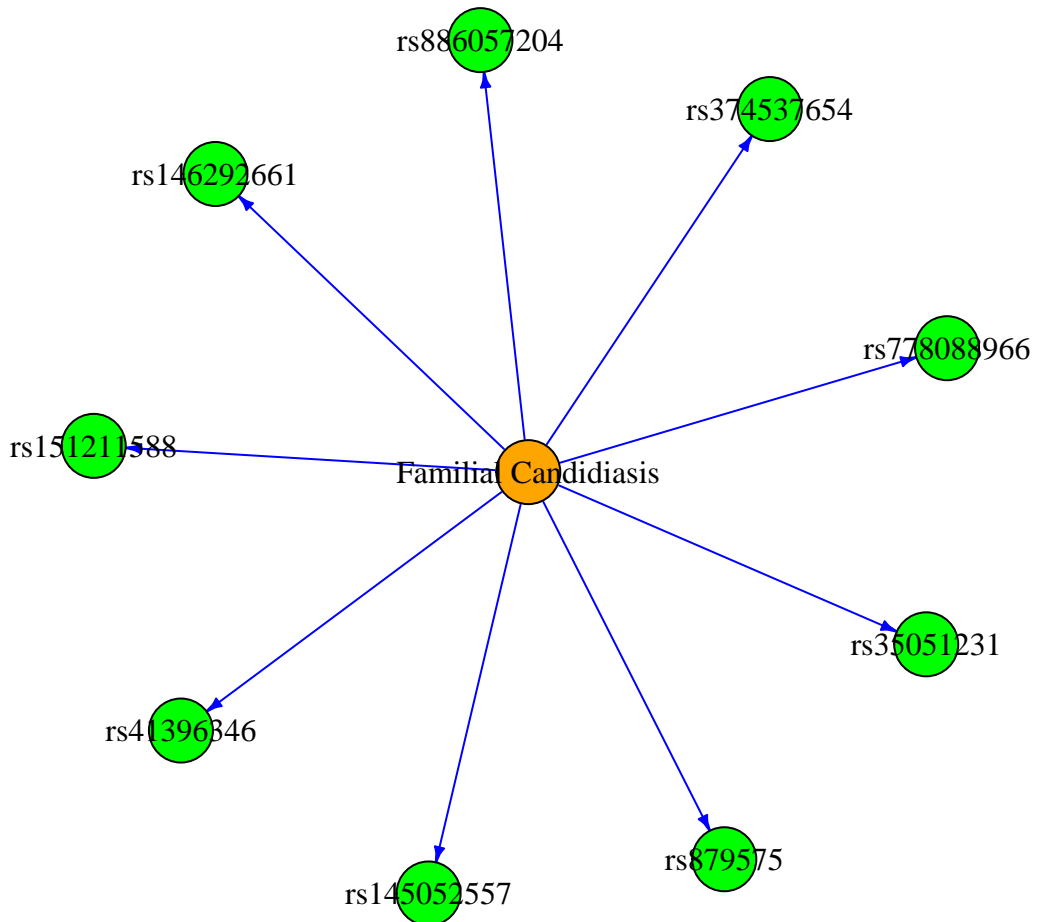

# Variant–Disease Network (Familial cold autoinflammatory syndrome)

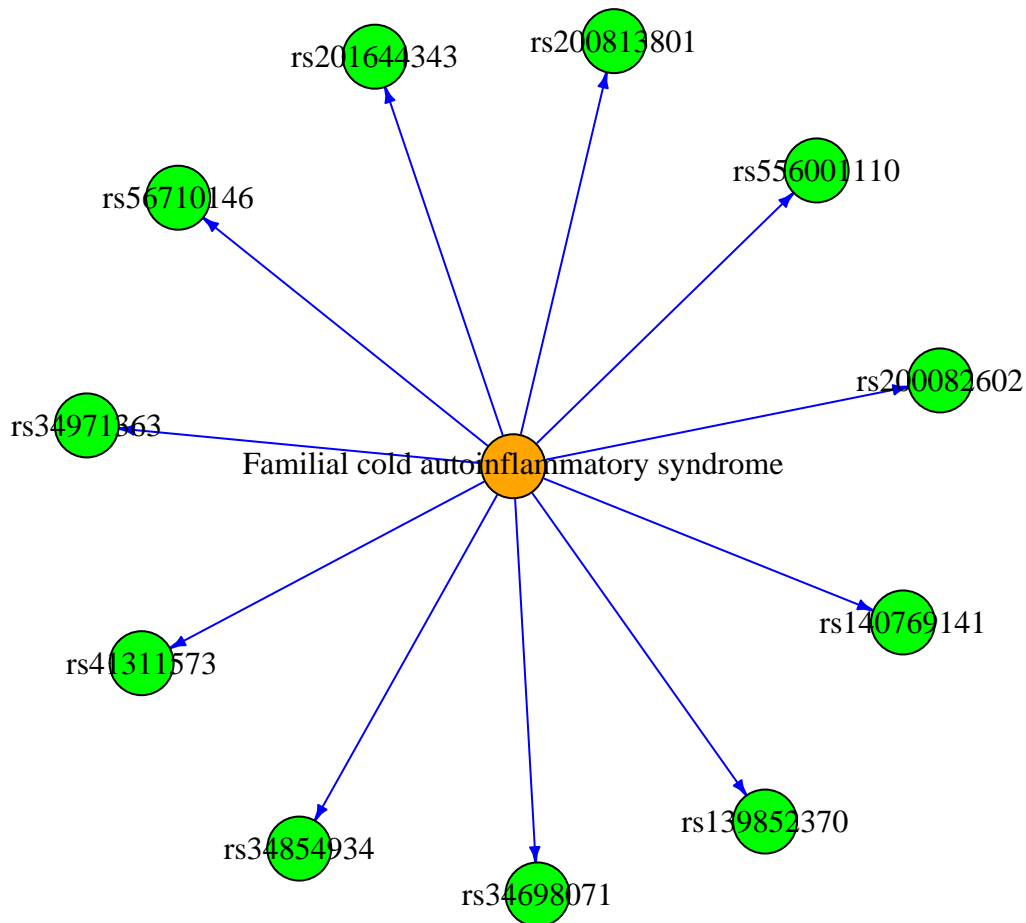

# Variant–Disease Network (Familial cold autoinflammatory syndrome 2)

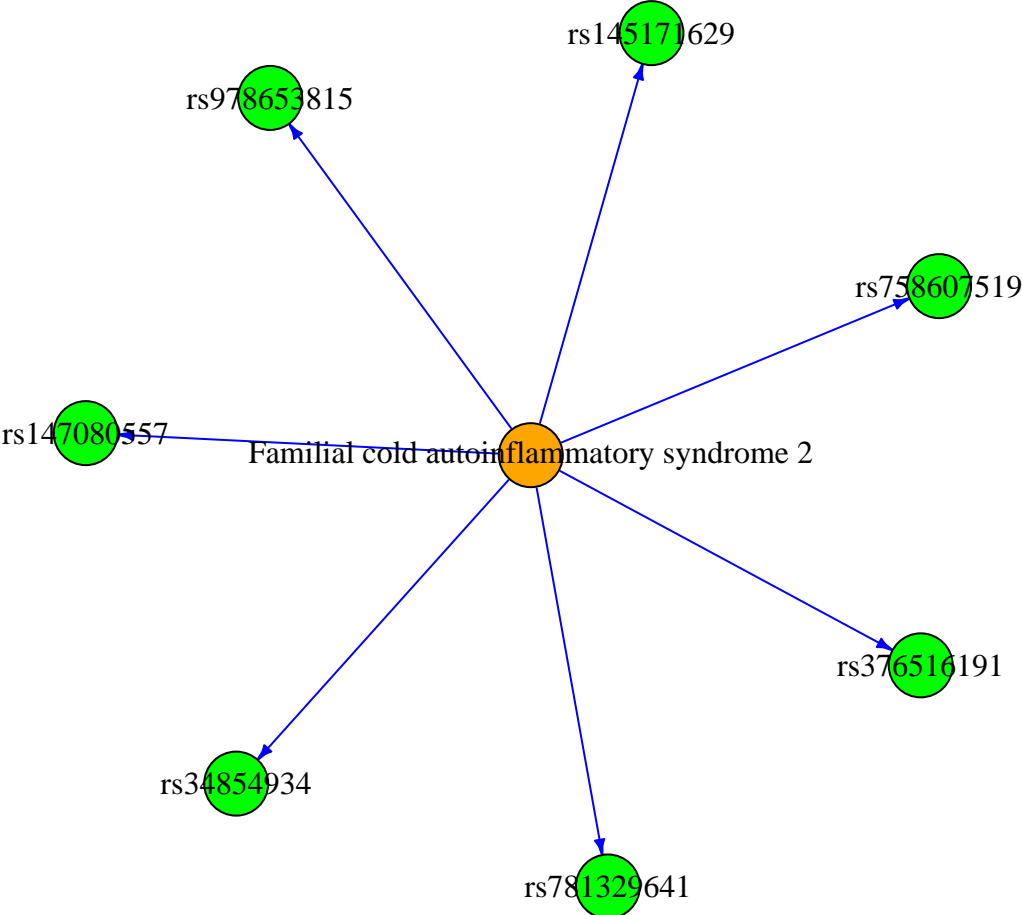



**Variant–Disease Network (Familial cold autoinflammatory syndrome 3)**

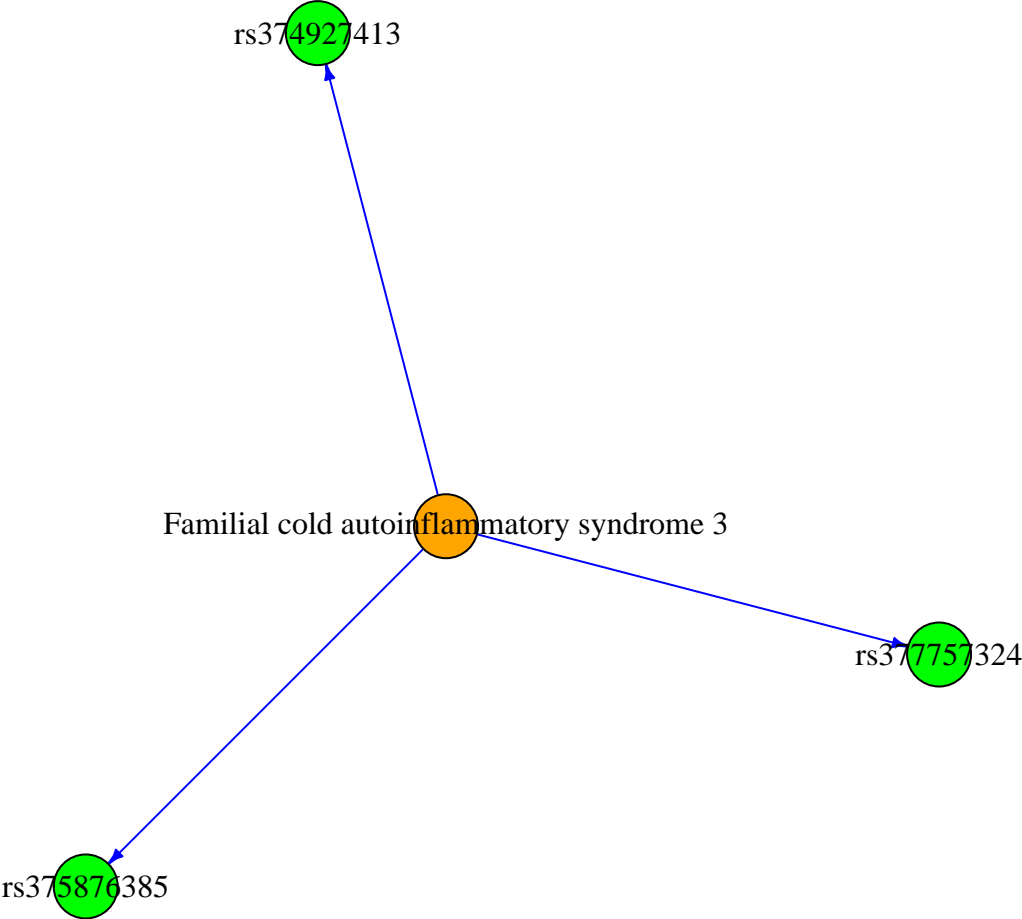

## Variant–Disease Network (Familial cold urticaria)

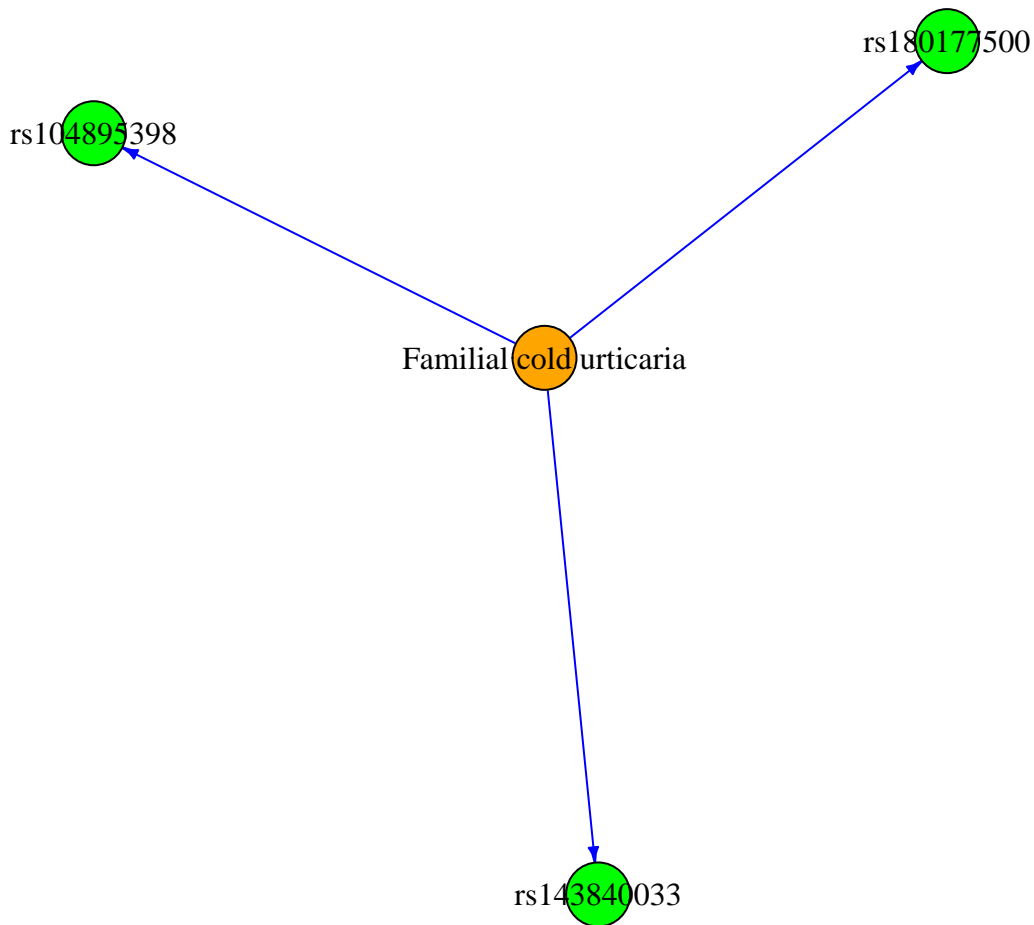

## Variant–Disease Network (Familial colorectal cancer)

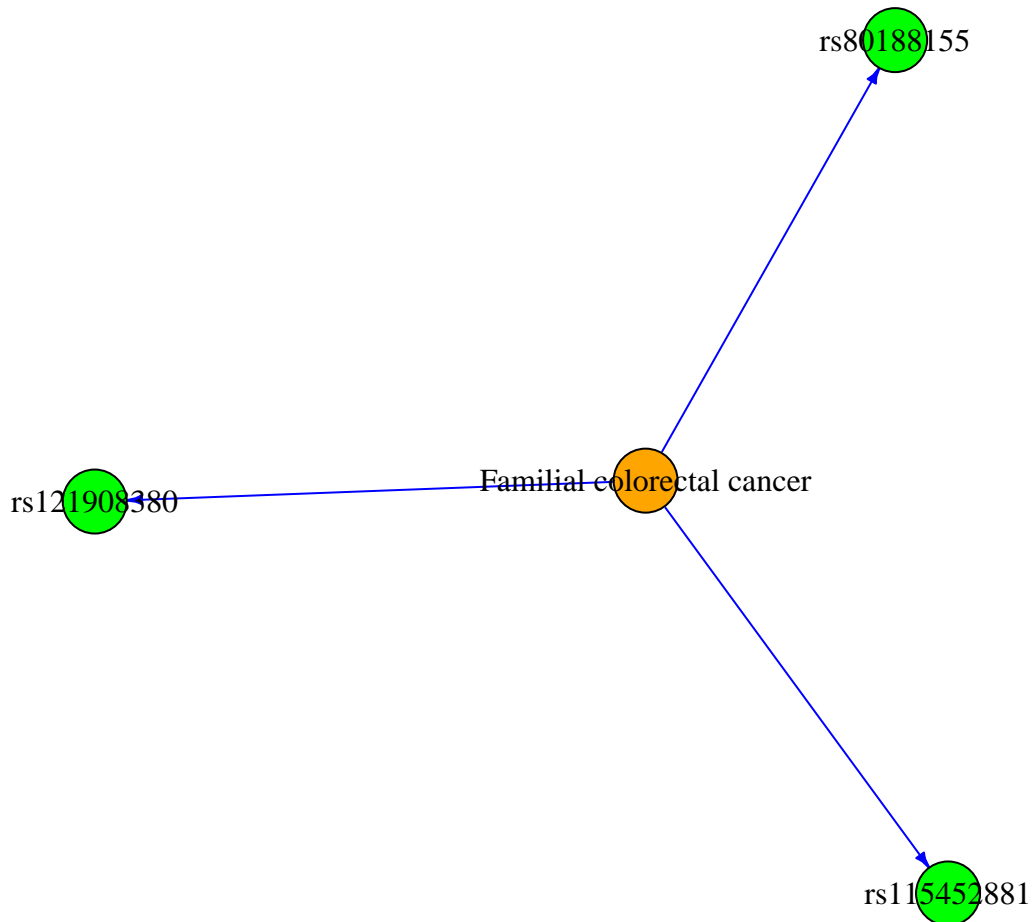

## Variant–Disease Network (Familial dilated cardiomyopathy)

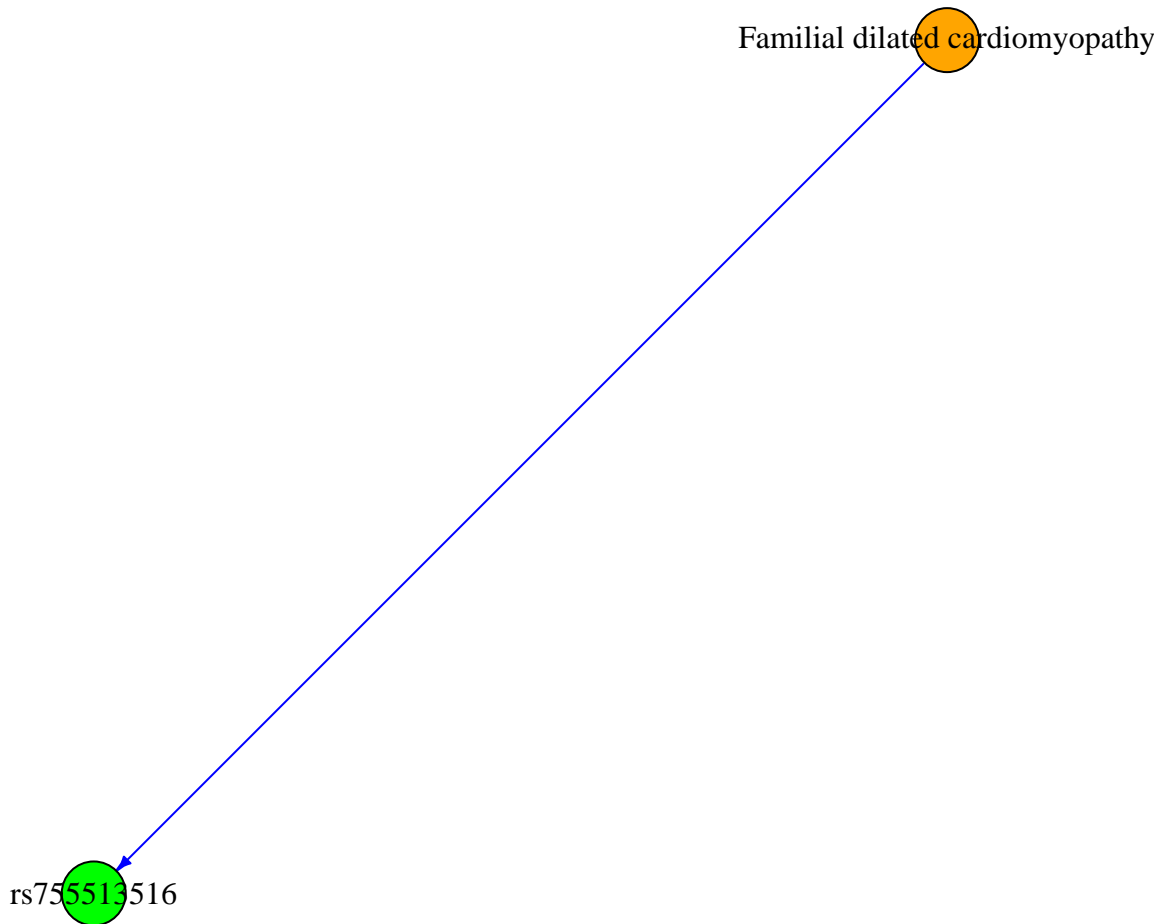

## Variant–Disease Network (Familial erythrocytosis)

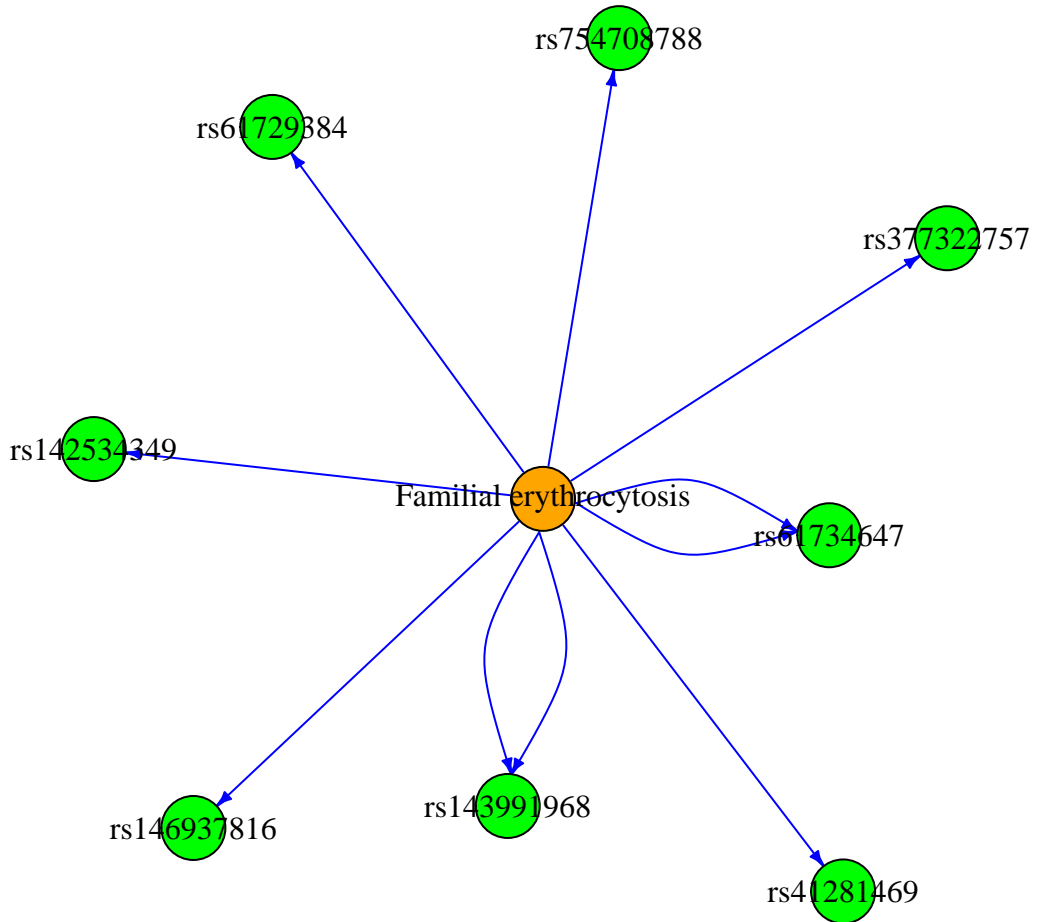

## Variant–Disease Network (Familial febrile seizures 8)

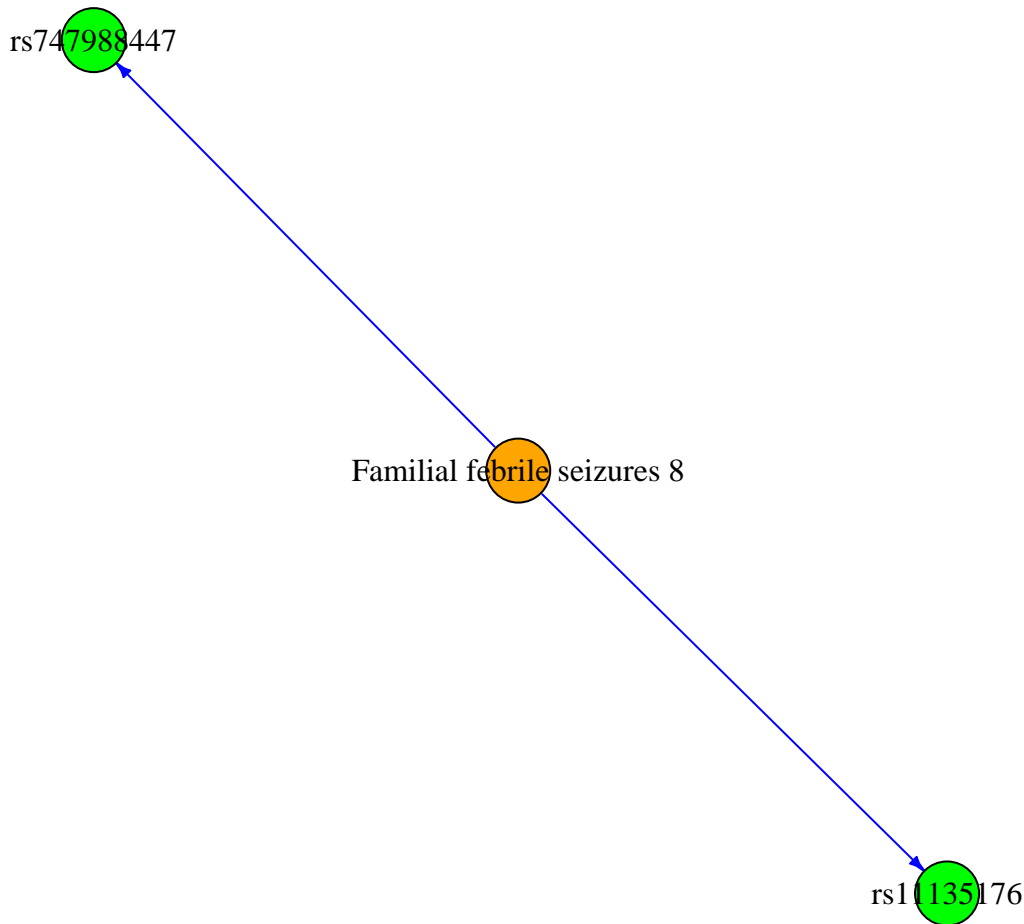

## Variant–Disease Network (Familial hemiplegic migraine type 3)

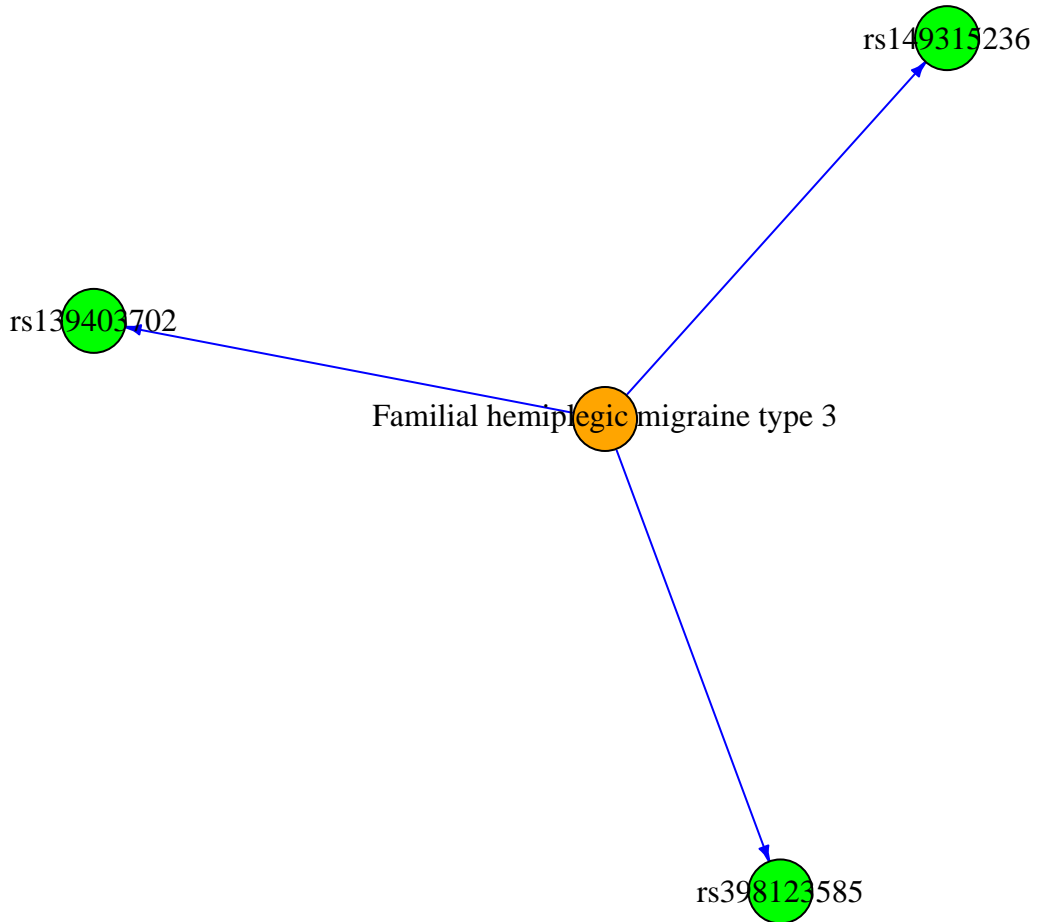

Variant–Disease Network (Familial hemophagocytic lymphohistiocytosis)

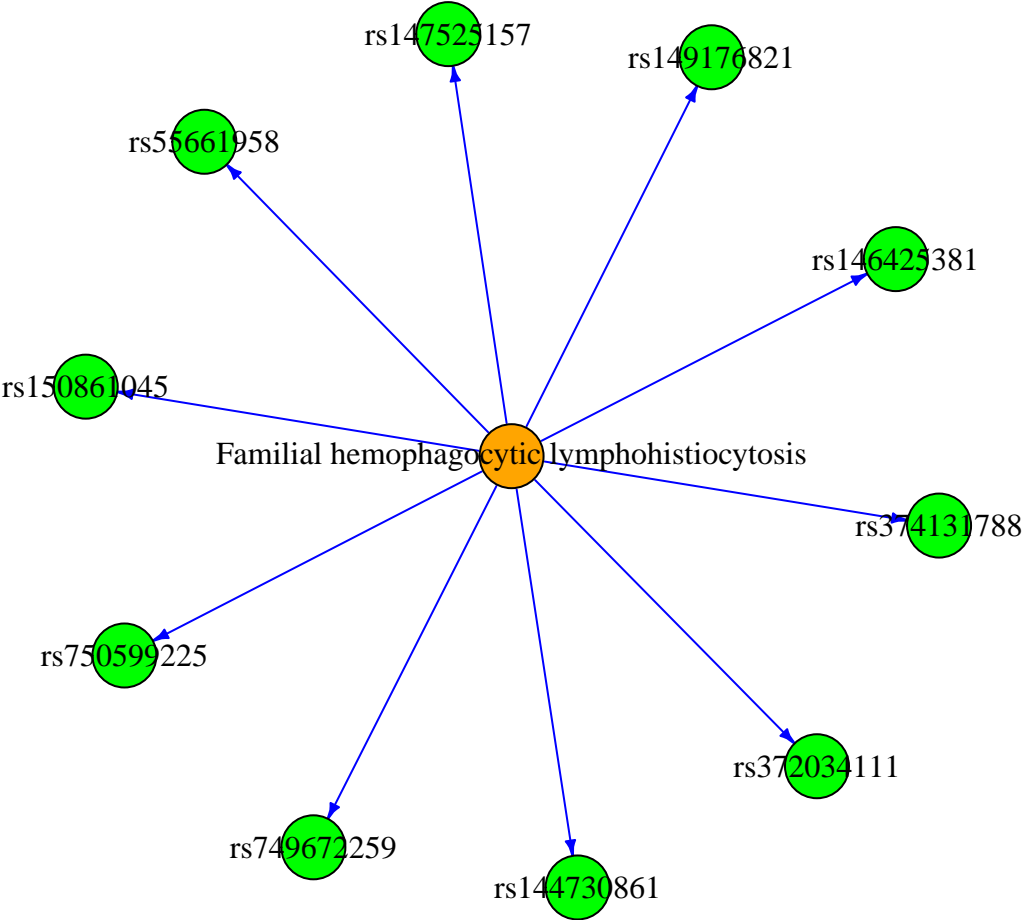



# Variant–Disease Network (Familial High Density Lipoprotein Deficiency)

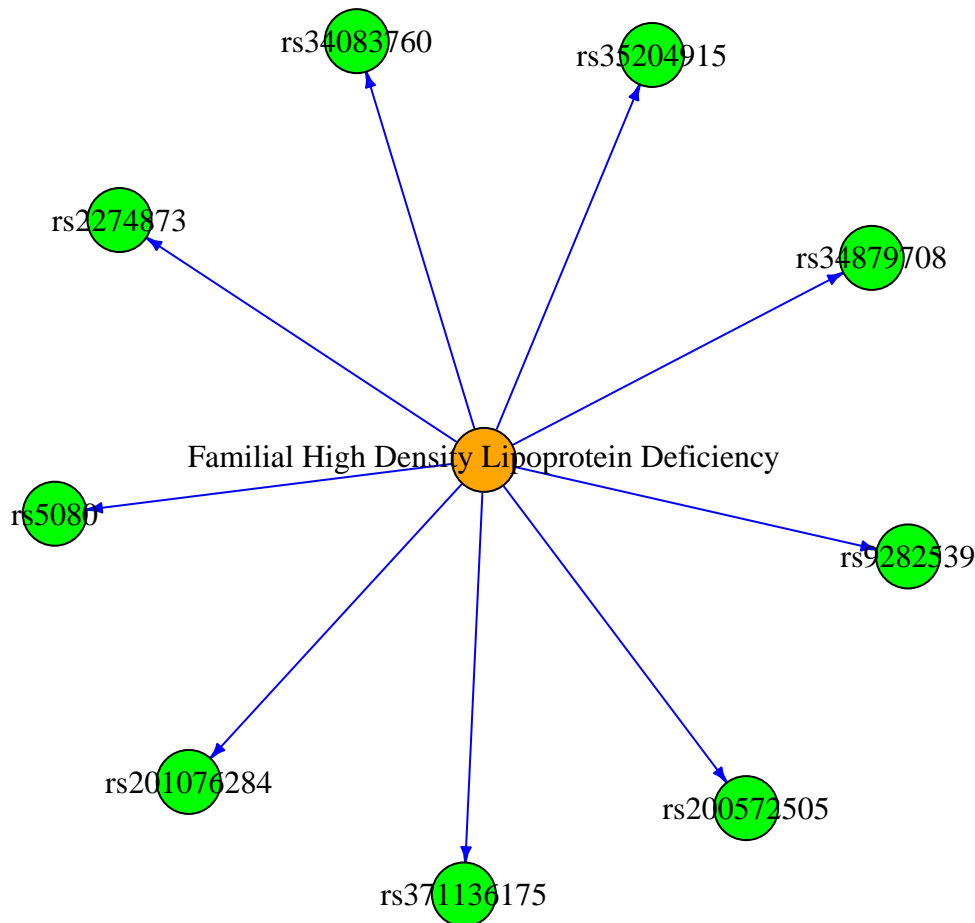

Variant–Disease Network (Familial hyperaldosteronism)

Familial hyperaldosteronism

rs7102584

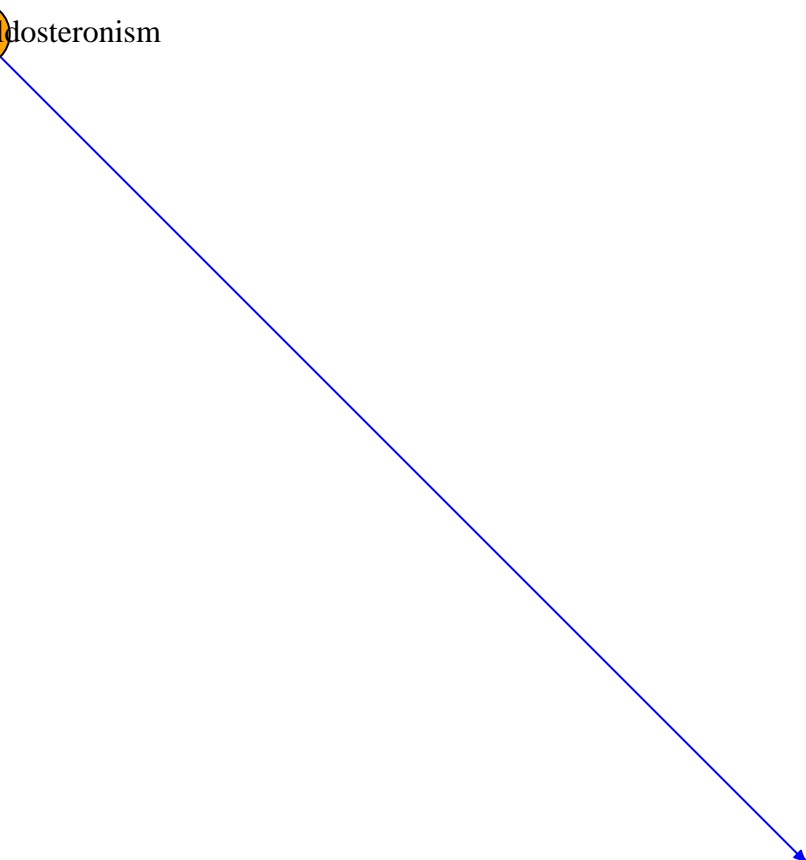

### Variant–Disease Network (Familial hypercholesterolemia)

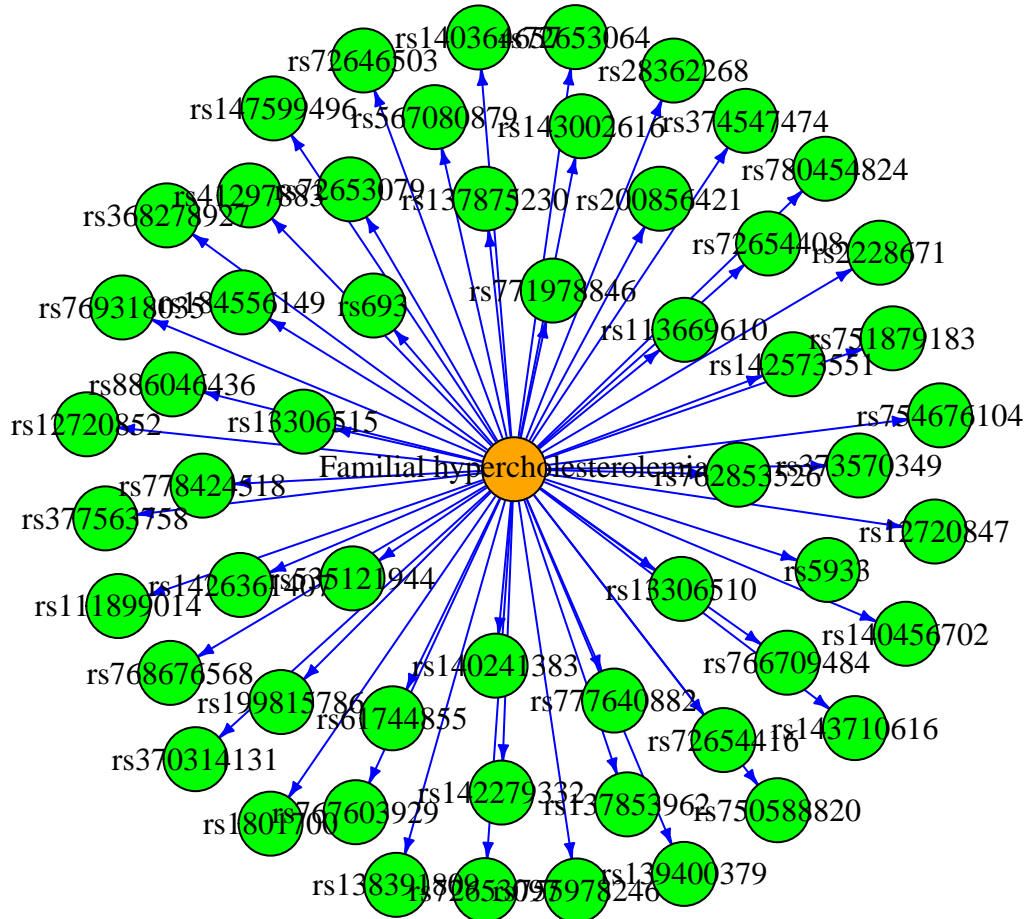

## Variant–Disease Network (Familial hypercholesterolemia 1)

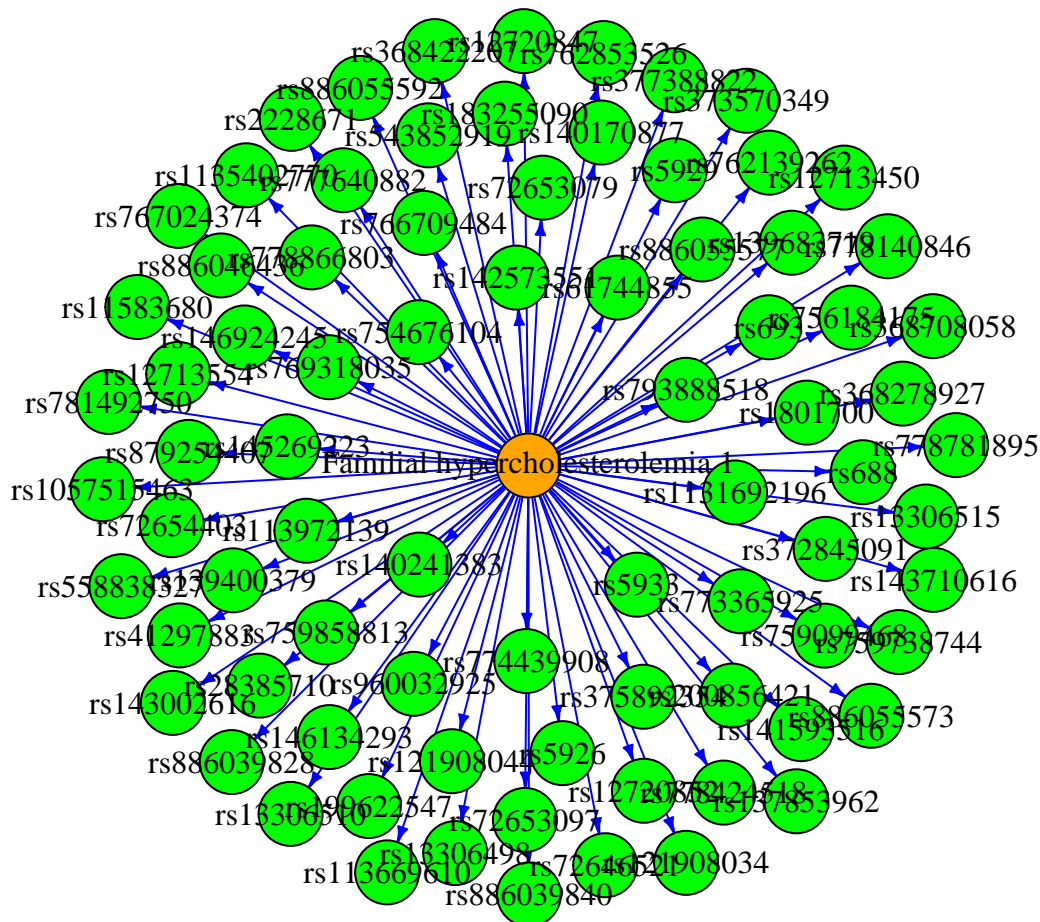

## Variant–Disease Network (Familial hypercholesterolemia 2)

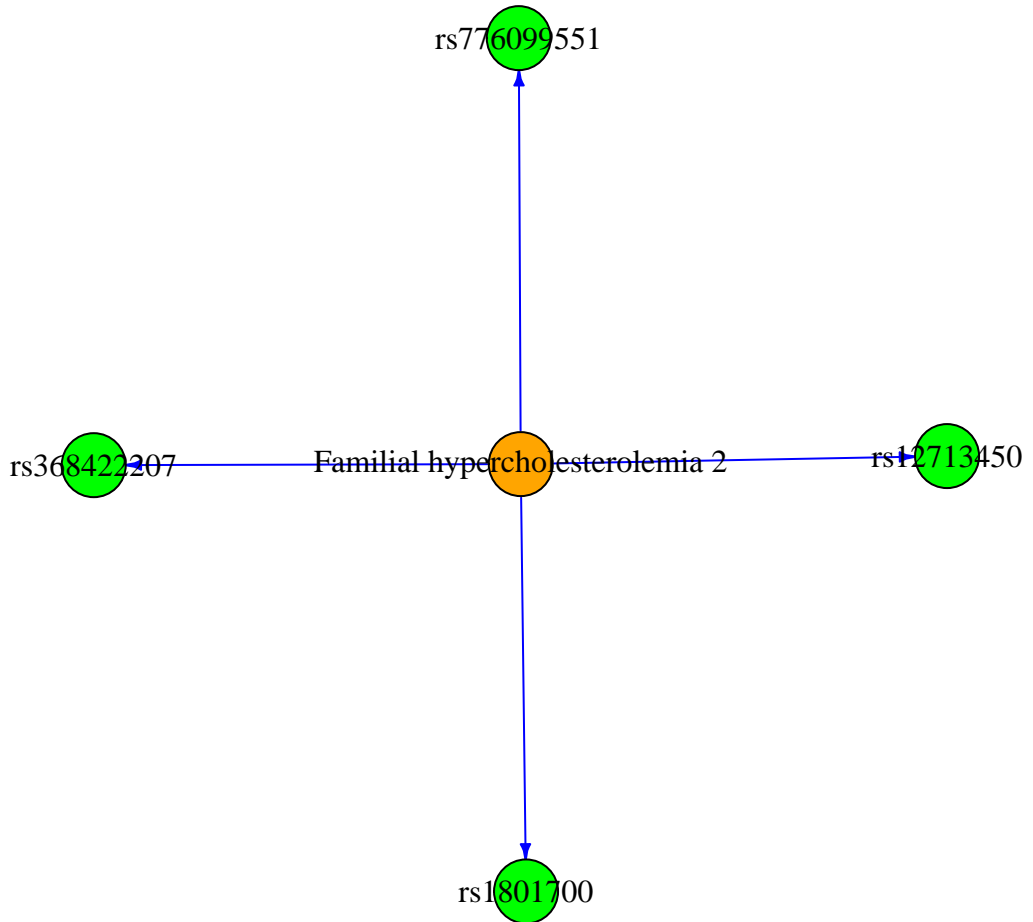

## Variant–Disease Network (Familial hypercholesterolemia 3)

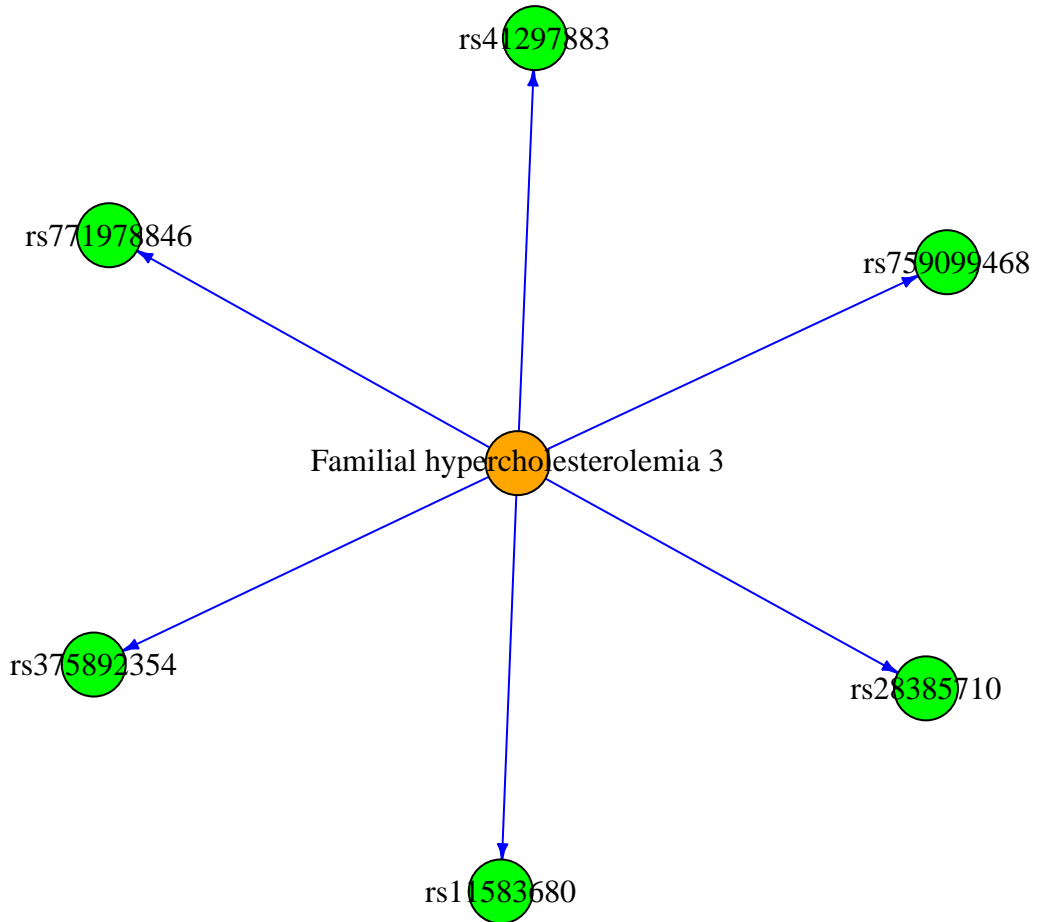

## Variant–Disease Network (Familial hypercholesterolemia 4)

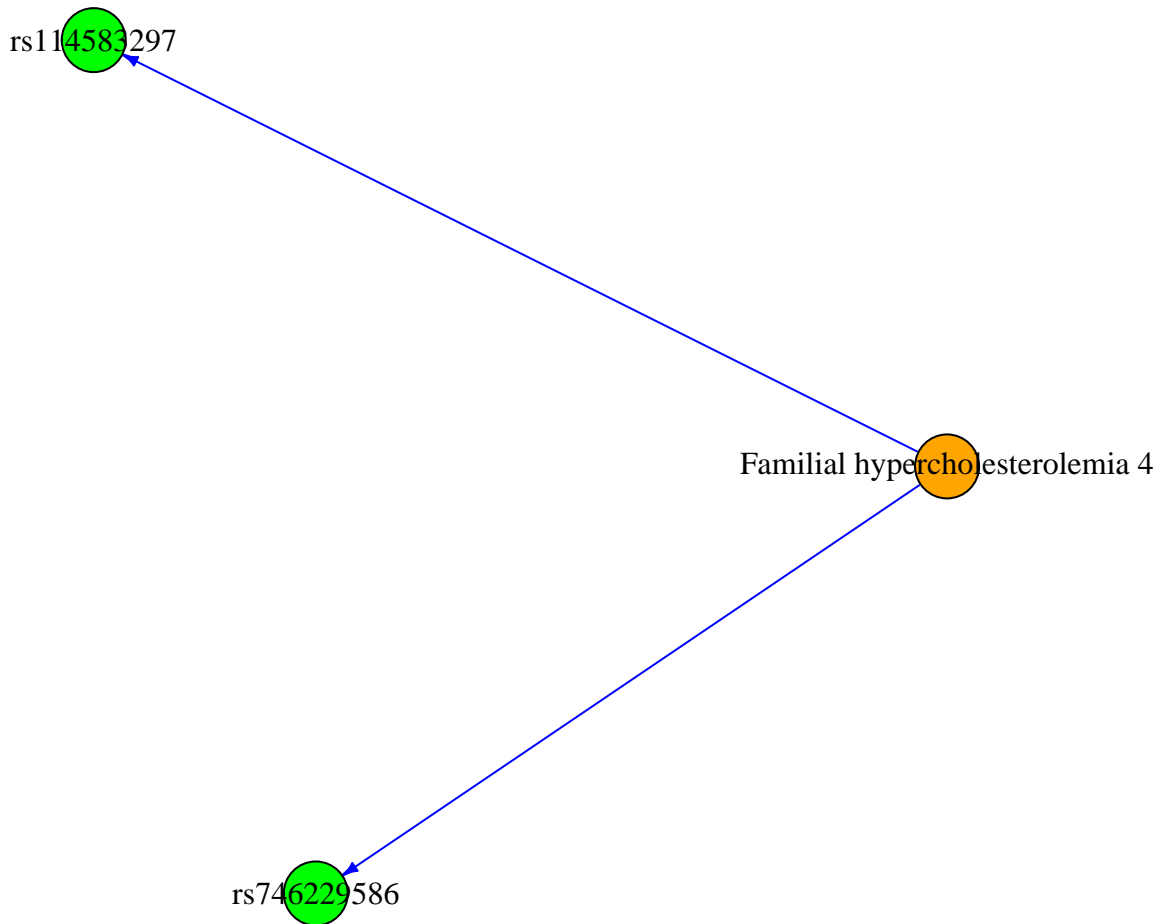

# Variant–Disease Network (Familial hypertrophic cardiomyopathy 1)

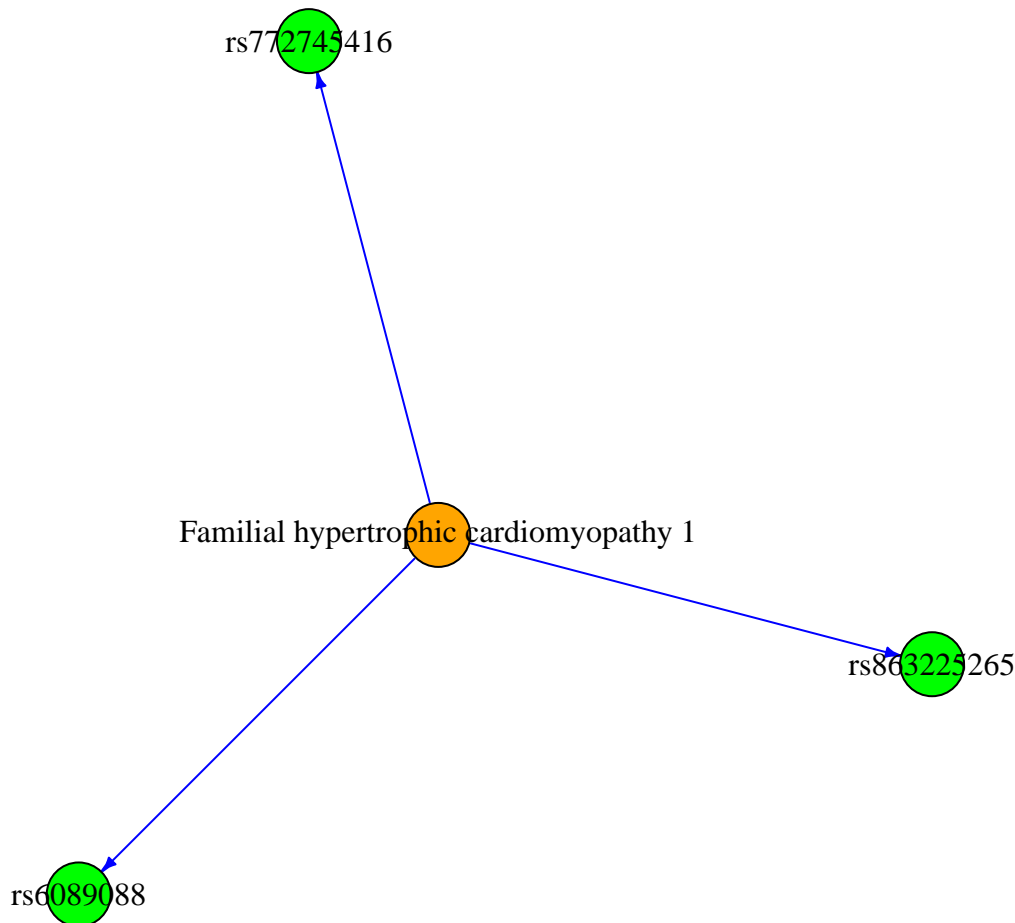



**Variant–Disease Network (Familial hypertrophic cardiomyopathy 11)**

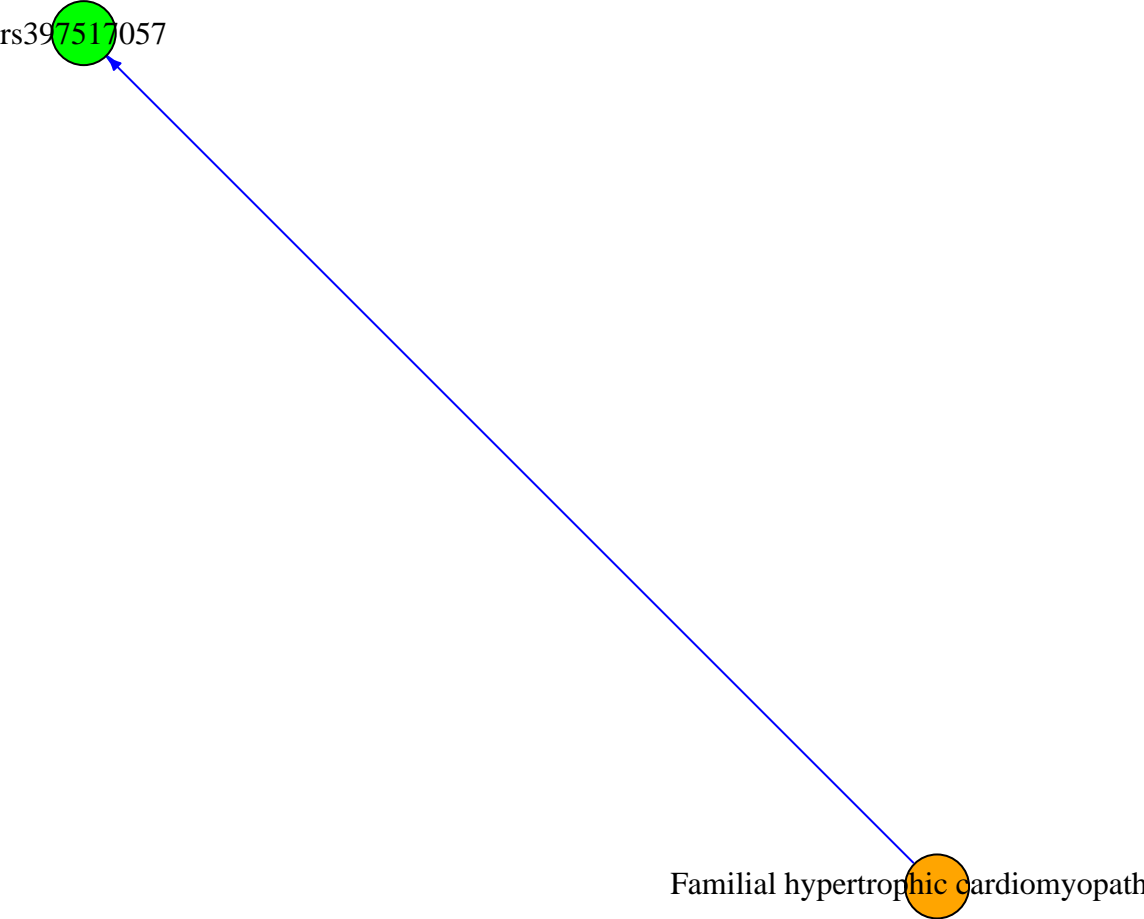

**Variant–Disease Network (Familial hypertrophic cardiomyopathy 12)**

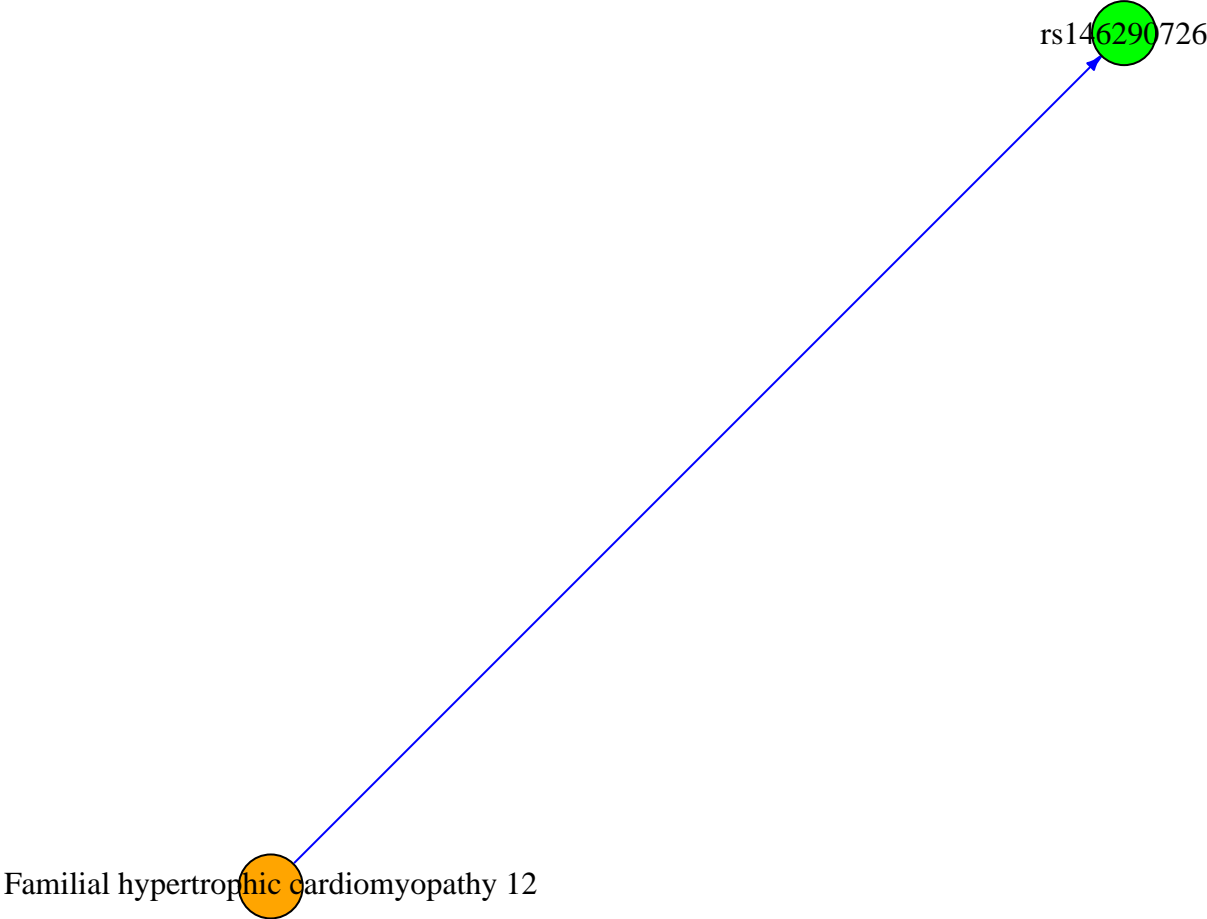

**Variant–Disease Network (Familial hypertrophic cardiomyopathy 13)**

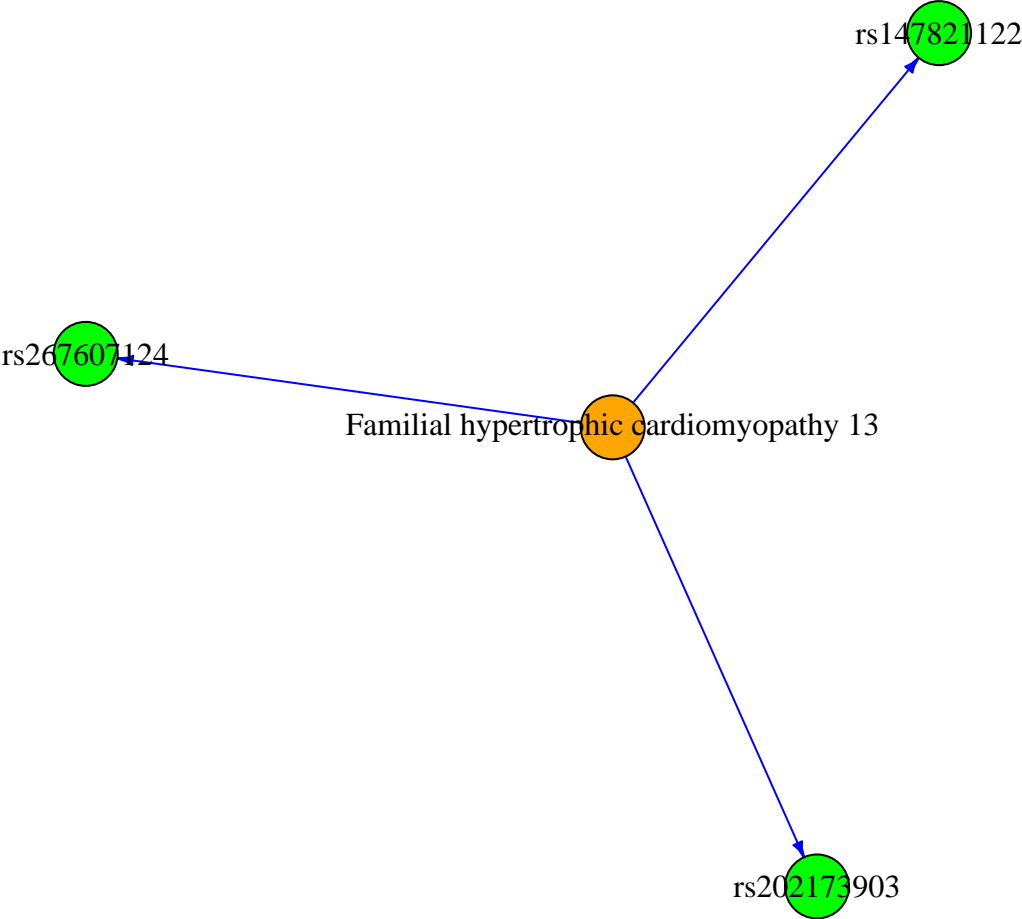

**Variant–Disease Network (Familial hypertrophic cardiomyopathy 16)**

rs17049982

Familial hypertrophic cardiomyopath



**Variant–Disease Network (Familial hypertrophic cardiomyopathy 19)**

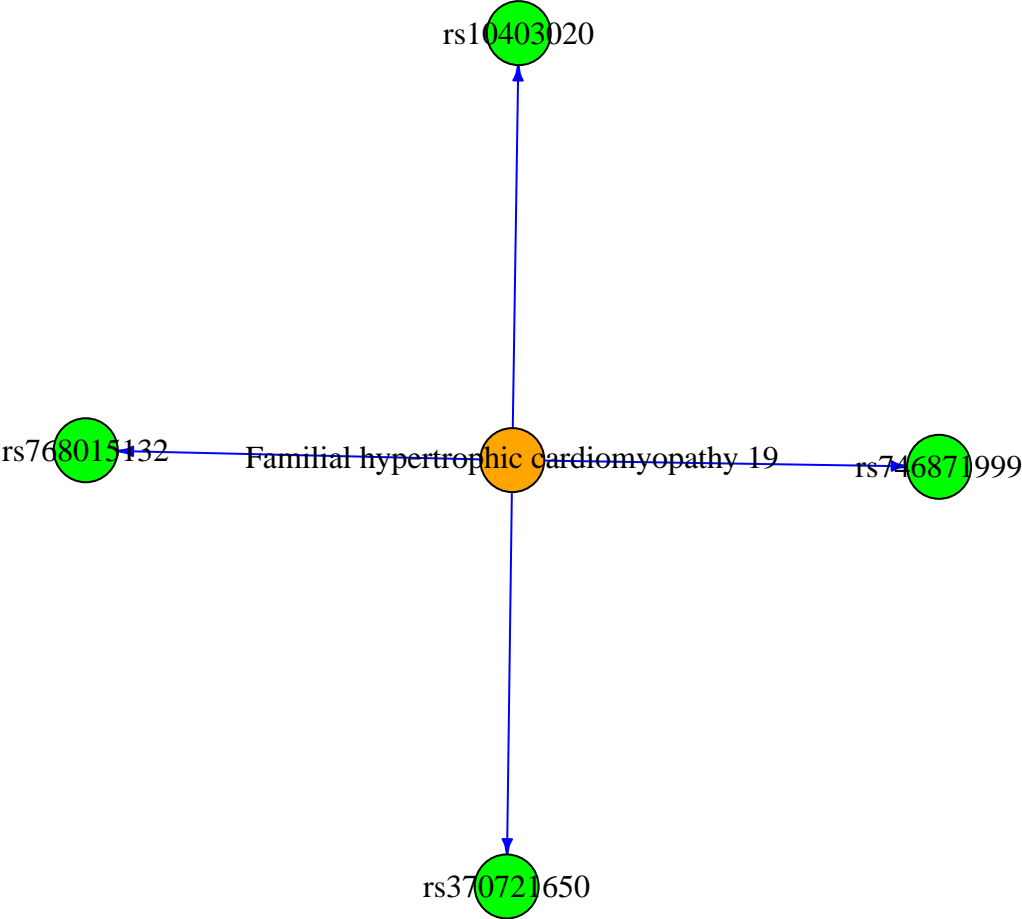

## Variant–Disease Network (Familial hypertrophic cardiomyopathy 2)

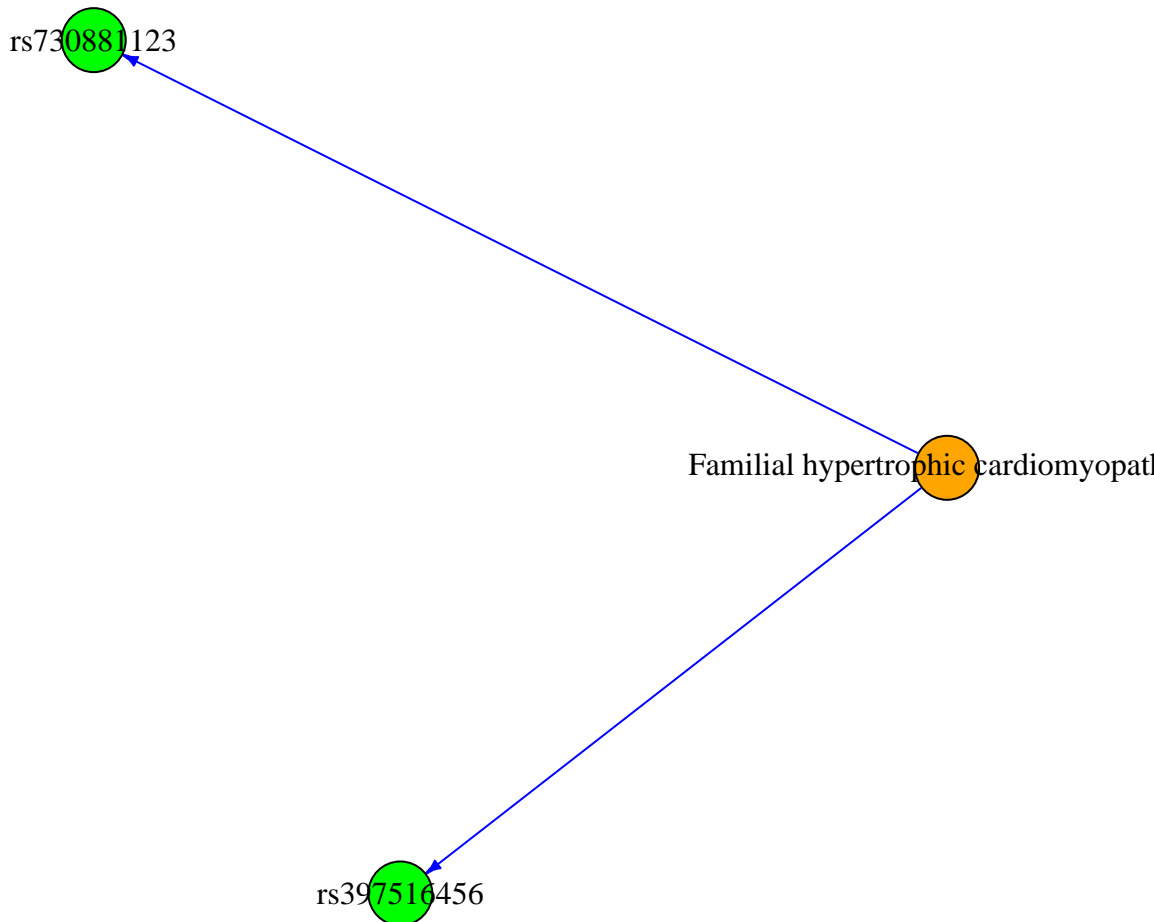

**Variant–Disease Network (Familial hypertrophic cardiomyopathy 20)**

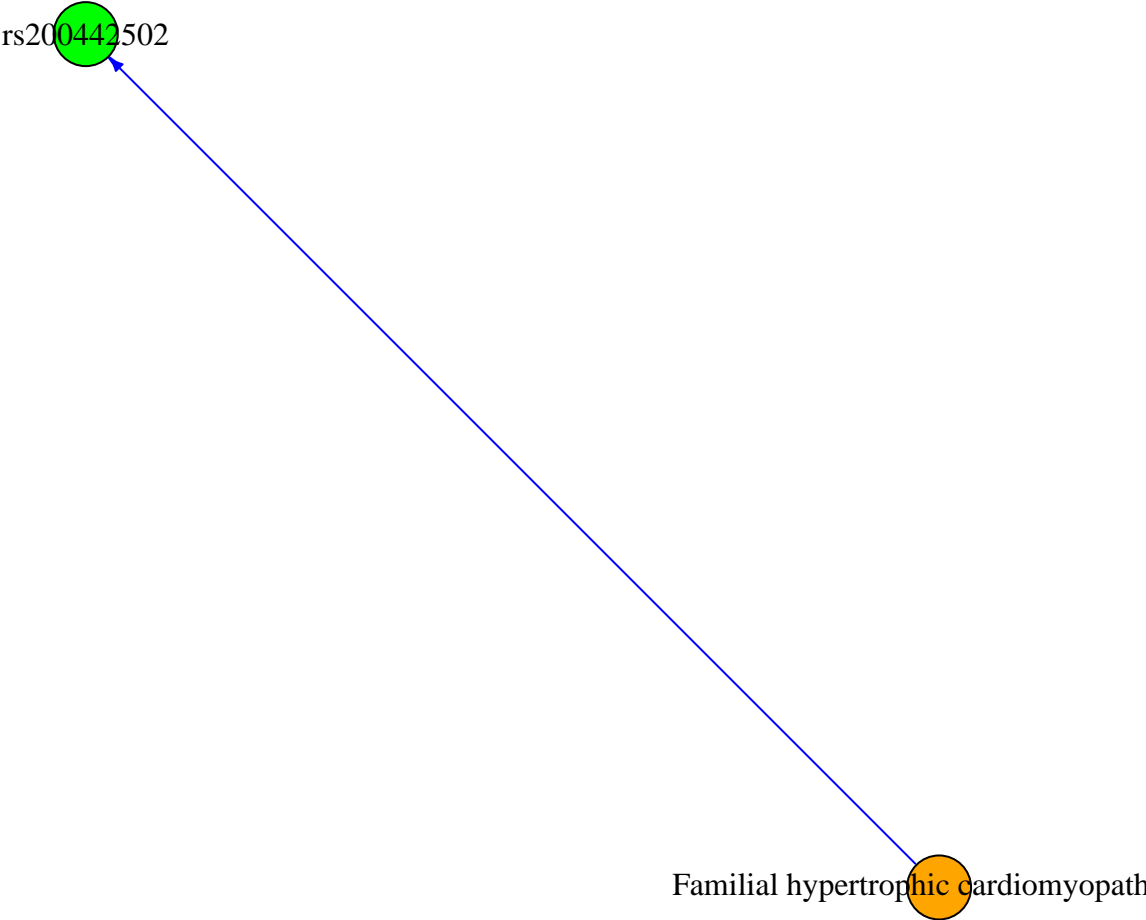

Variant–Disease Network (Familial hypertrophic cardiomyopathy 24)

Familial hypertrophic cardiomyopathy 24

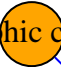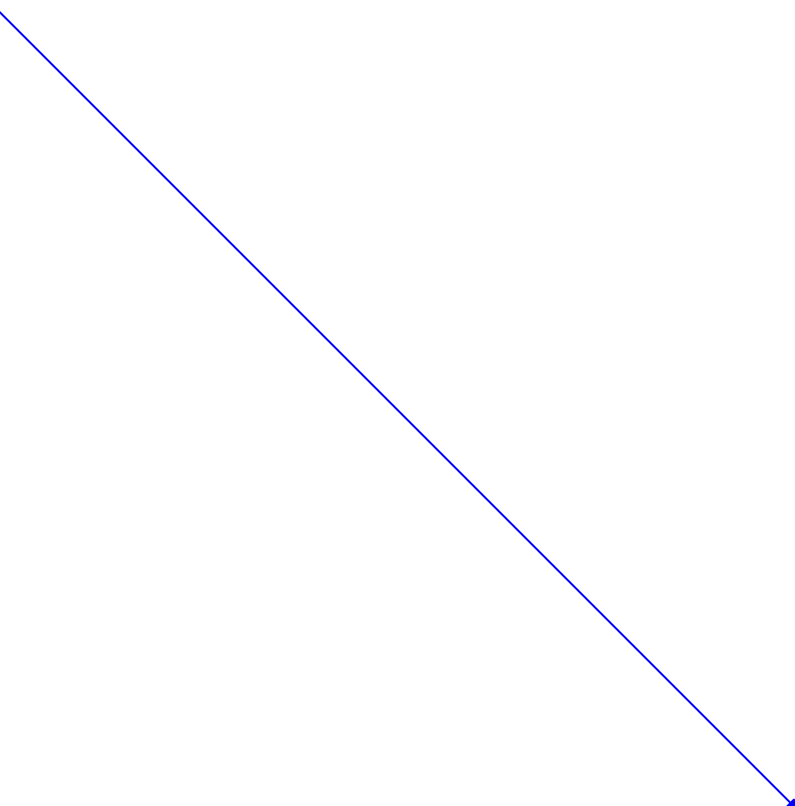

rs45487699

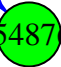



**Variant–Disease Network (Familial hypertrophic cardiomyopathy 4)**

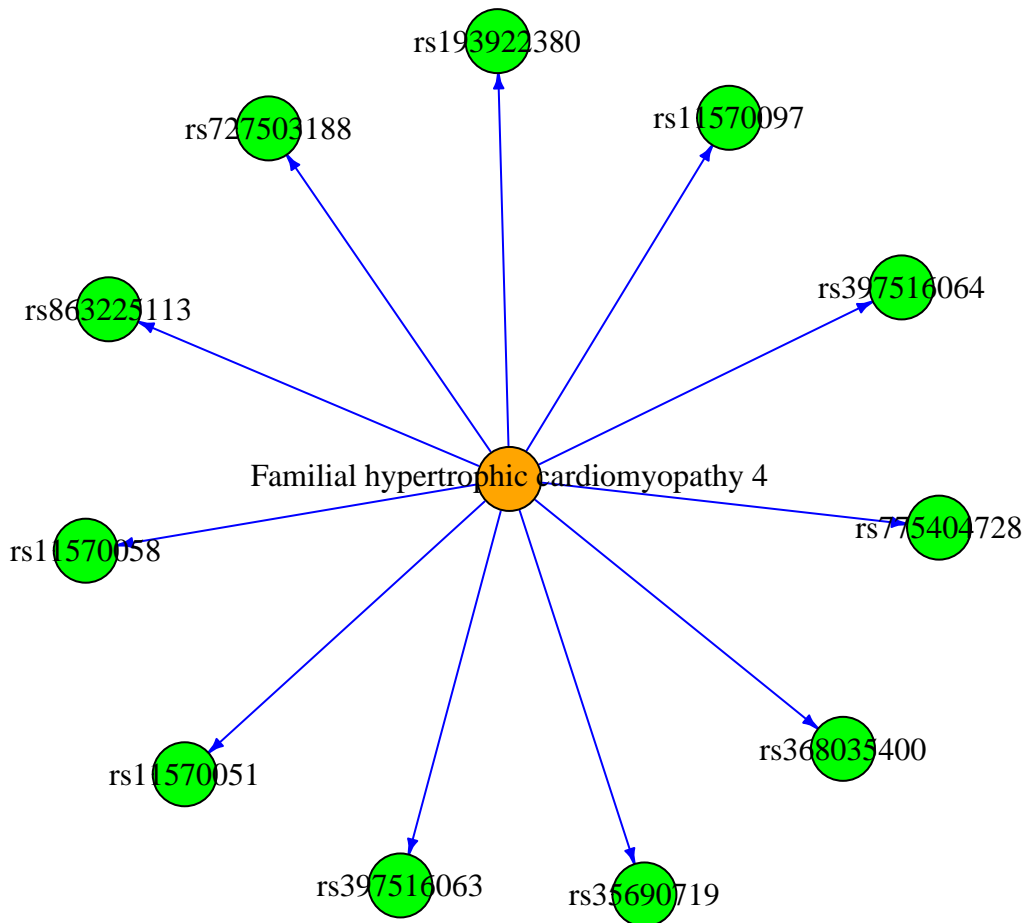

**Variant–Disease Network (Familial hypertrophic cardiomyopathy 8)**

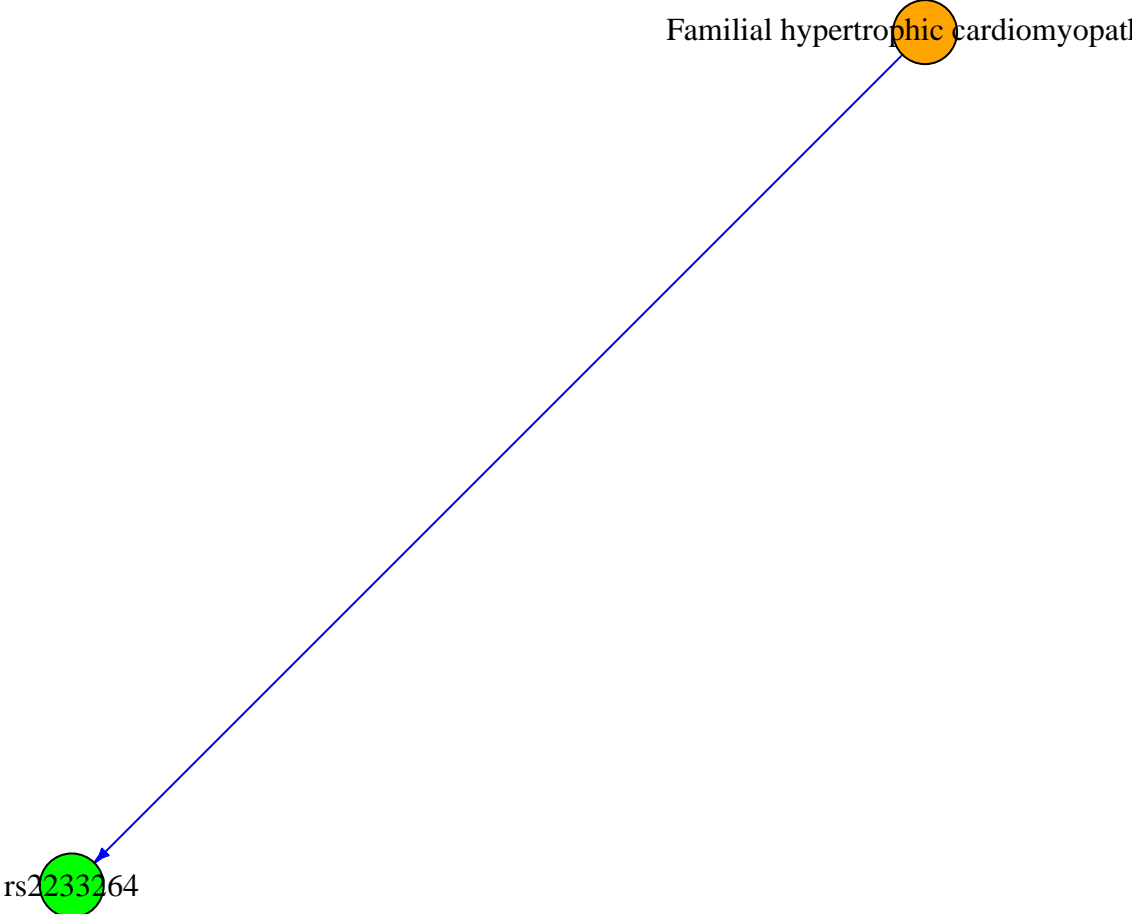

# Case Network (Familial Hypertrophic Cardiomyopathy with Wolff–Parkinson–White Syndrome)

phic Cardiomyopathy with Wolff–Parkinson–White Syndrome

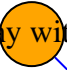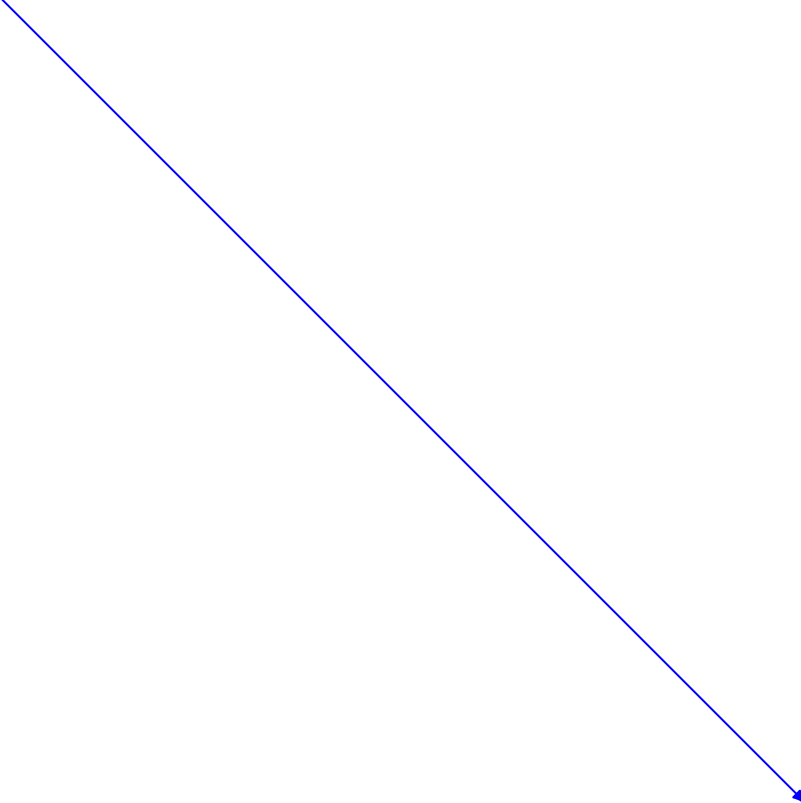

rs397517263

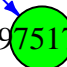

## Variant-Disease Network (Familial hypobetalipoproteinemia)

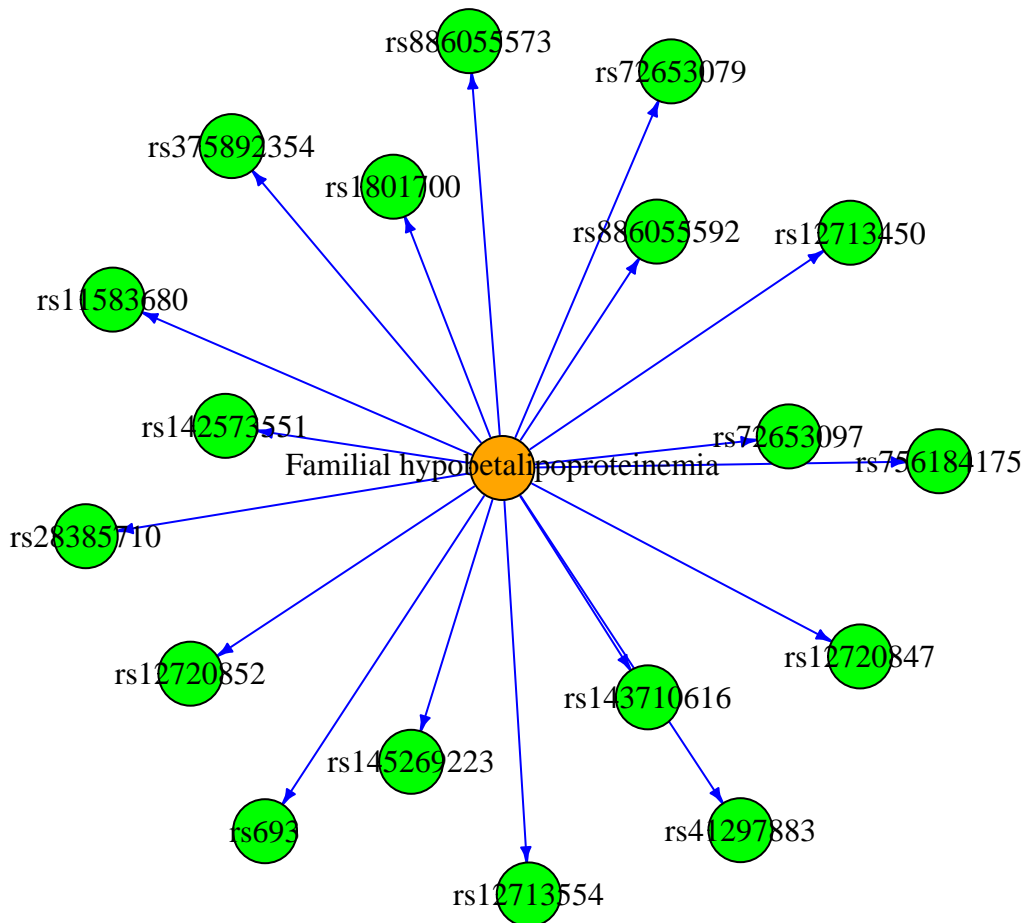

# Variant–Disease Network (Familial hypokalemia–hypomagnesemia)

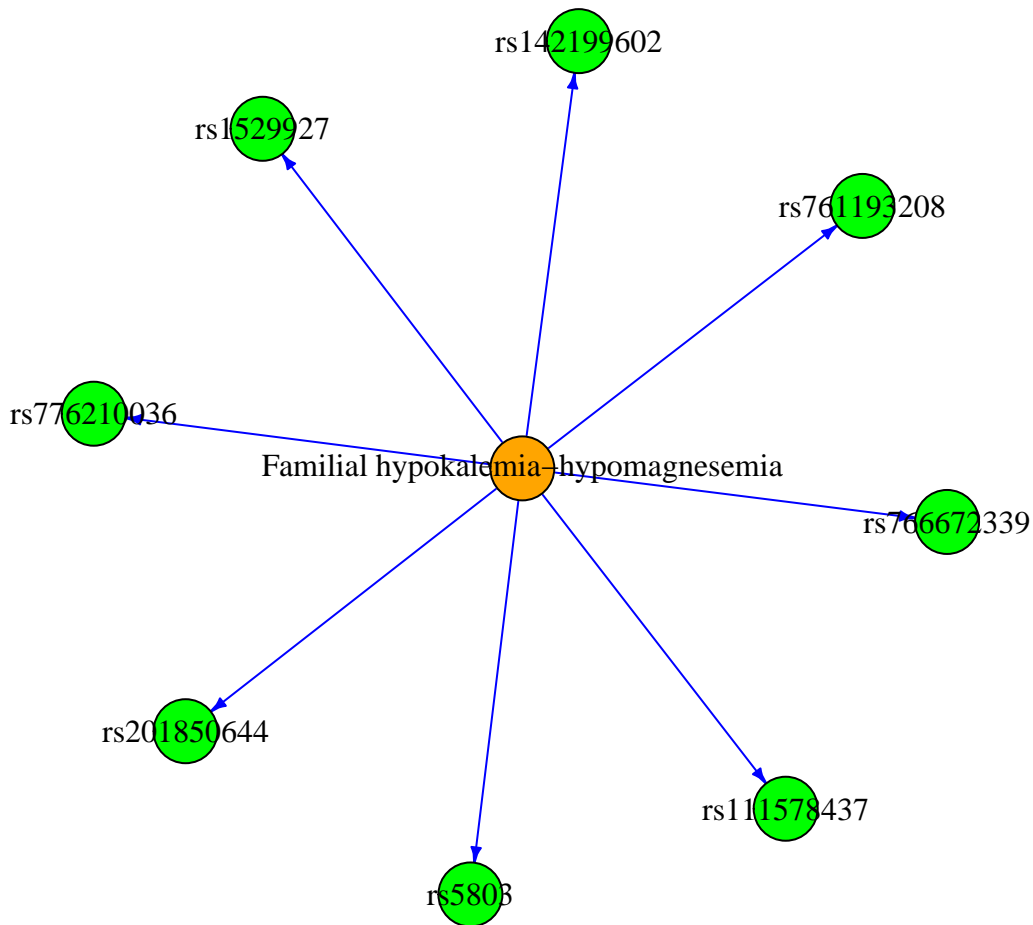

## Variant–Disease Network (Familial infantile myasthenia)

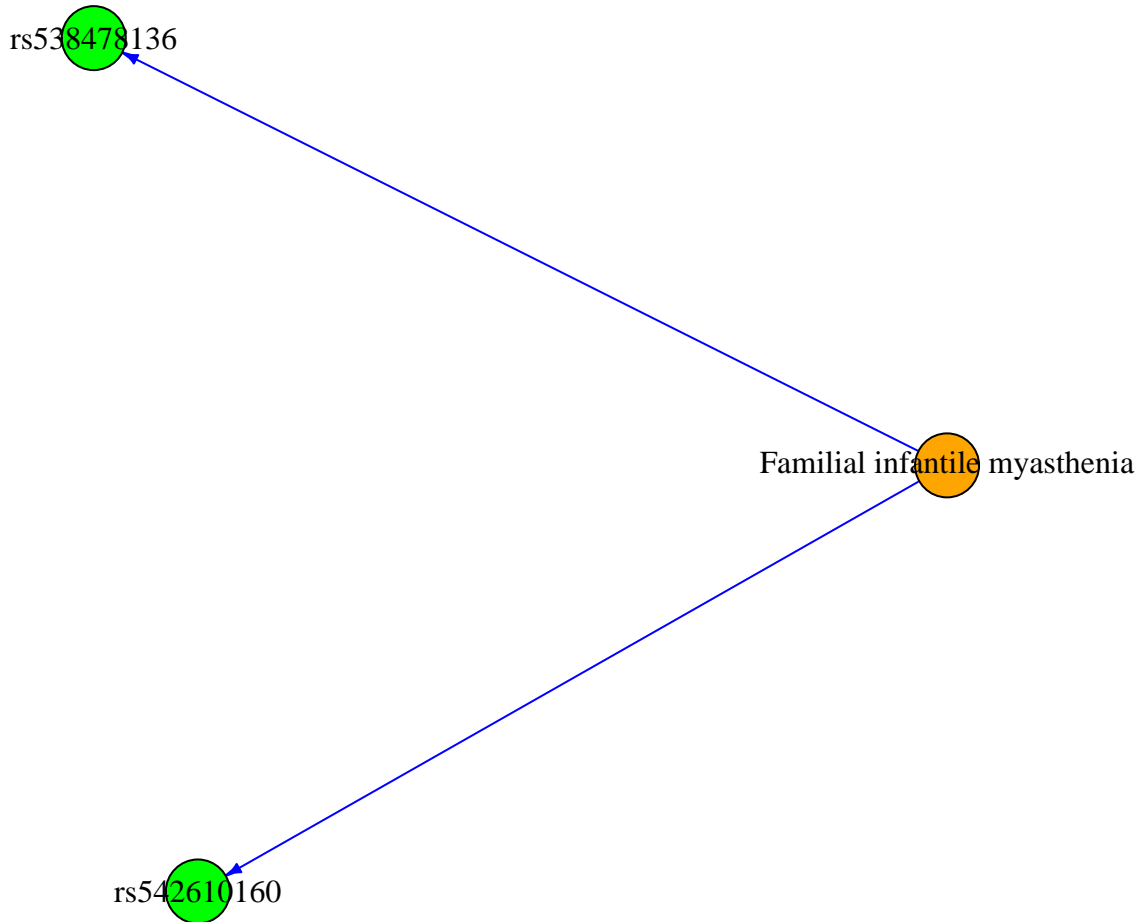

# Variant–Disease Network (Familial isolated hypoparathyroidism)

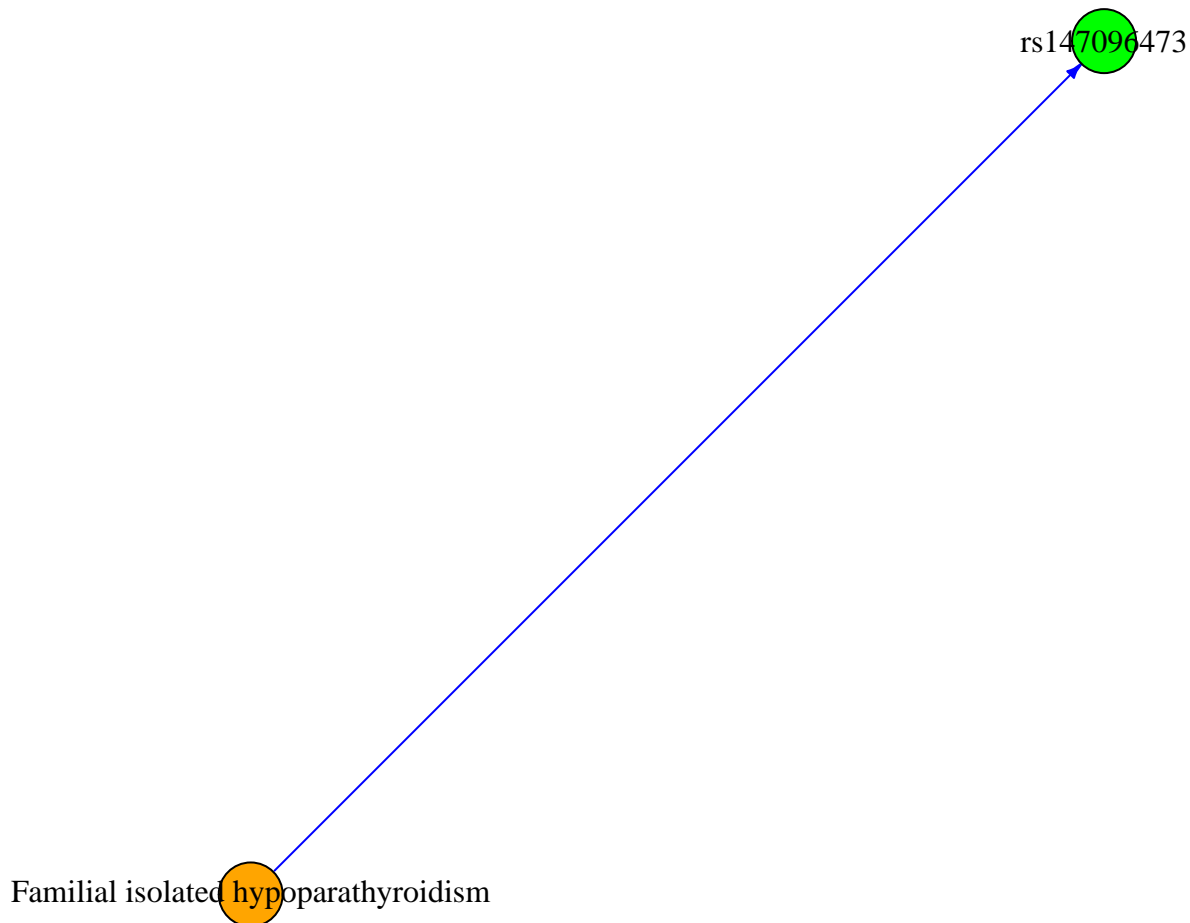

# Variant–Disease Network (Familial Isolated Pituitary Adenomas)

Familial Isolated Pituitary Adenomas

rs2276020

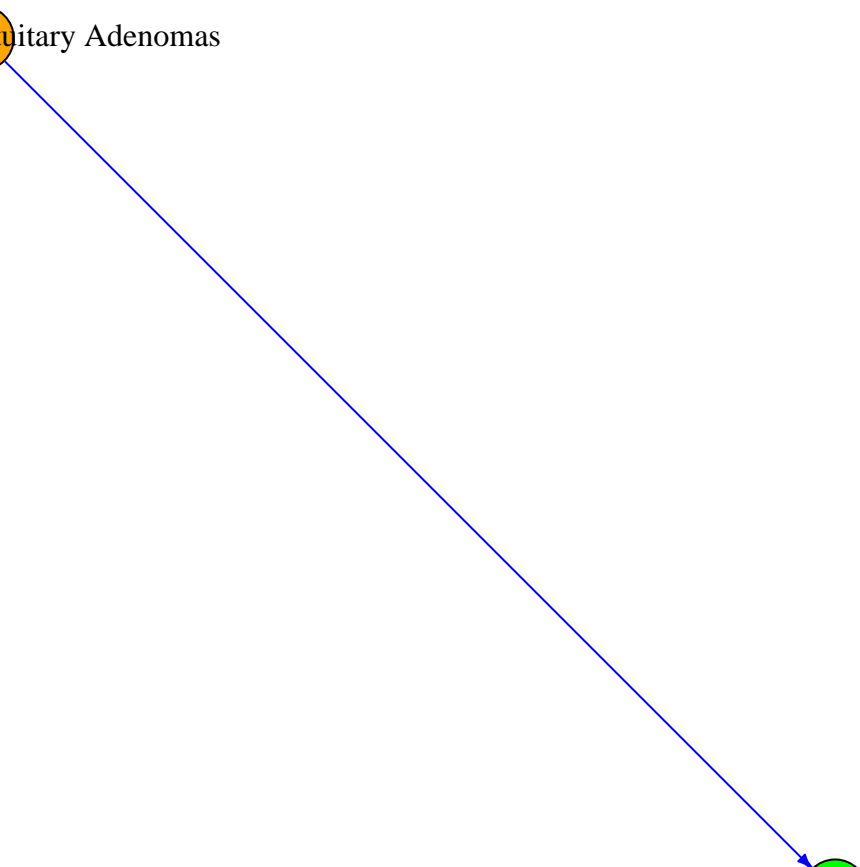



## Variant–Disease Network (Familial juvenile gout)

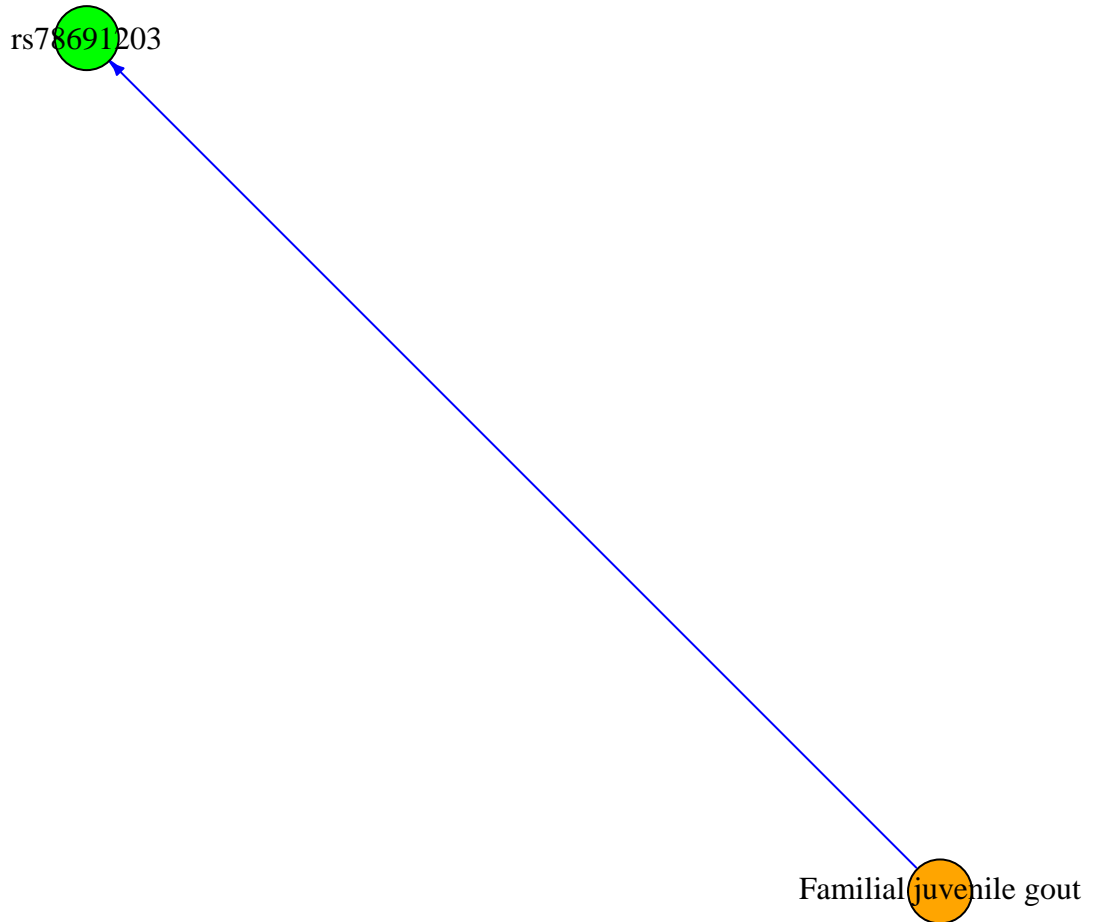

Variant–Disease Network (Familial multiple polyposis syndrome)

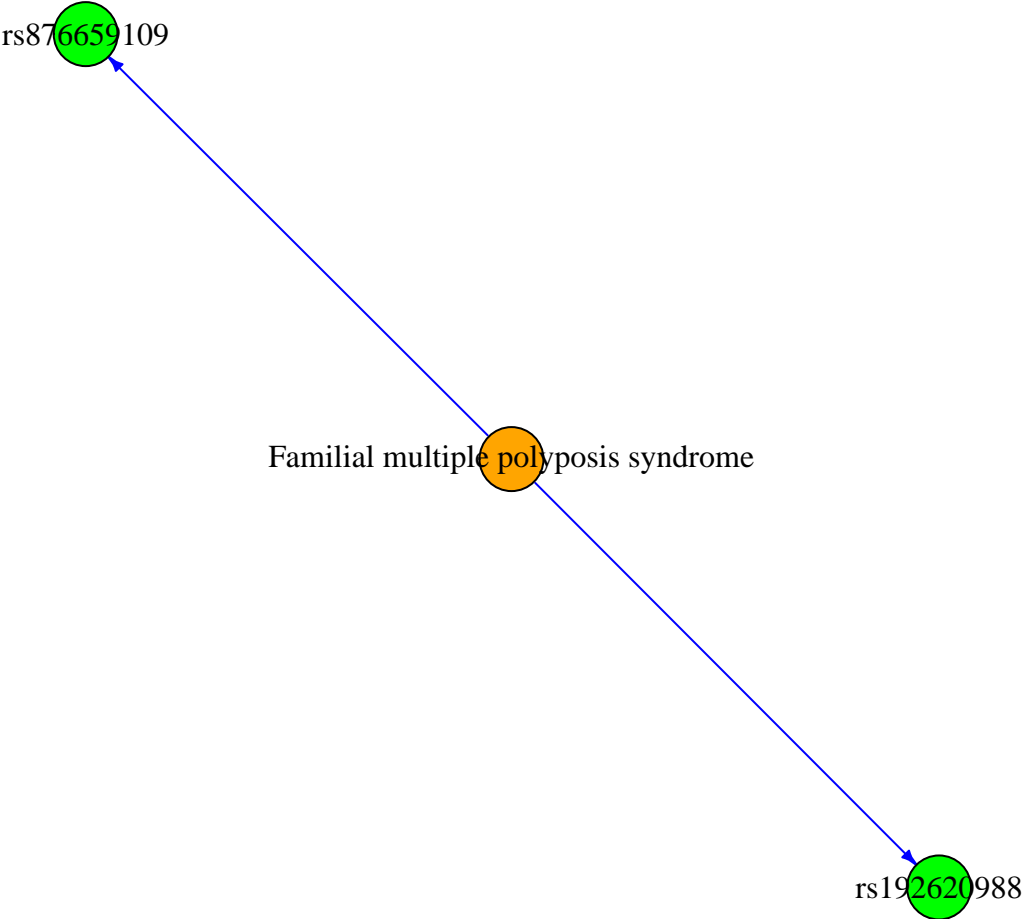

# Variant–Disease Network (Familial partial lipodystrophy)

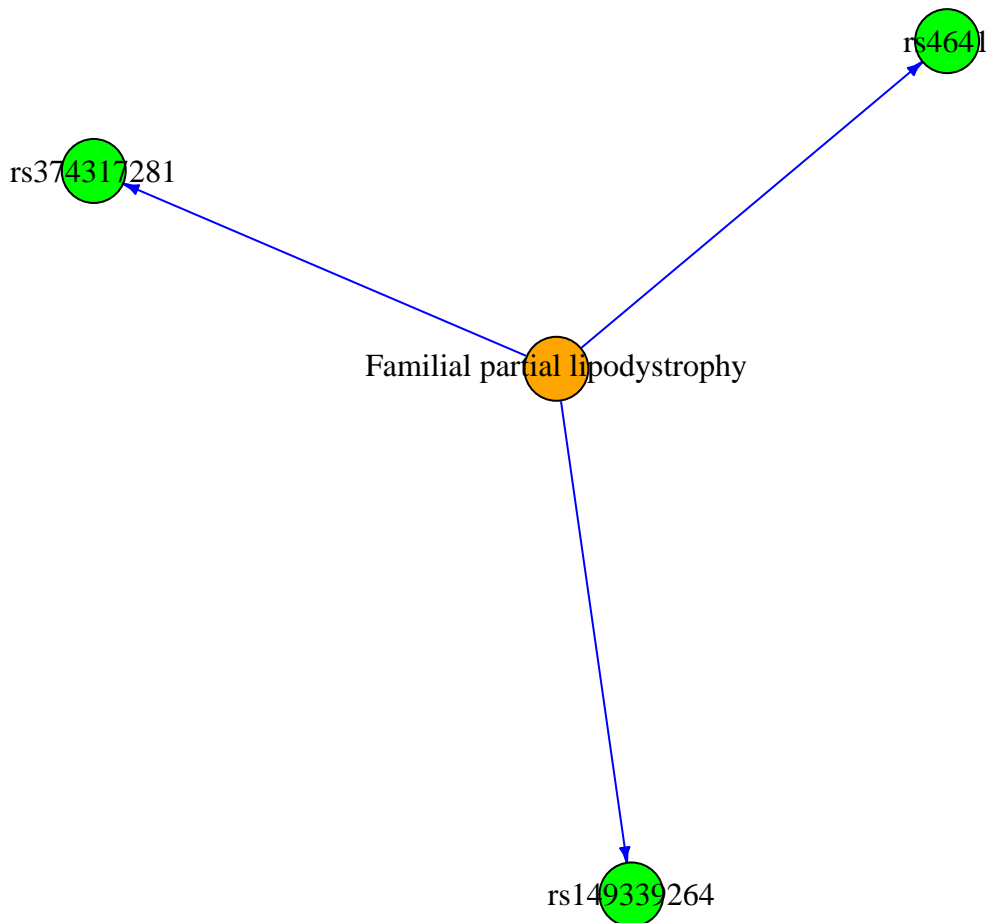

# ant-Disease Network (Familial platelet disorder with associated myeloid mal

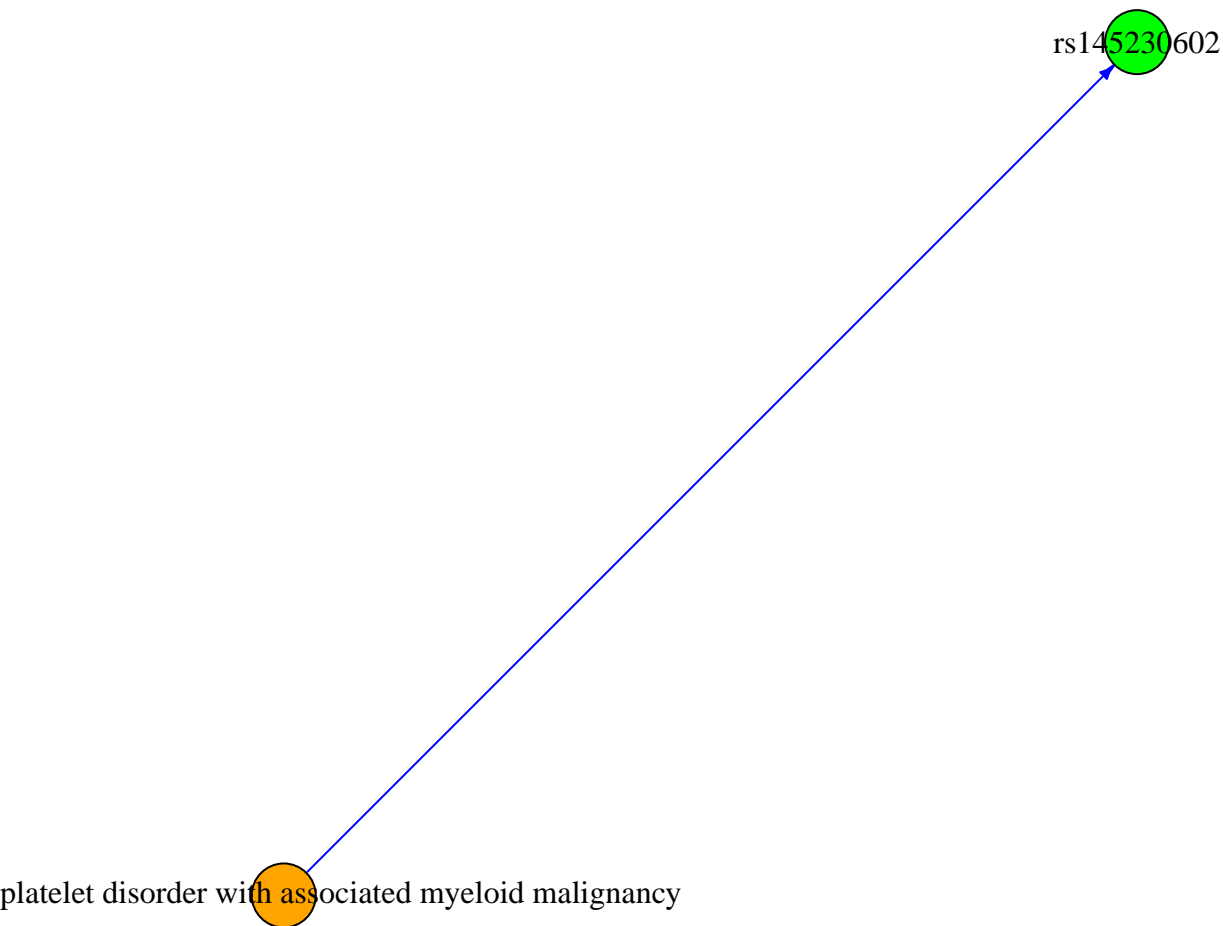

## Variant–Disease Network (Familial renal glucosuria)

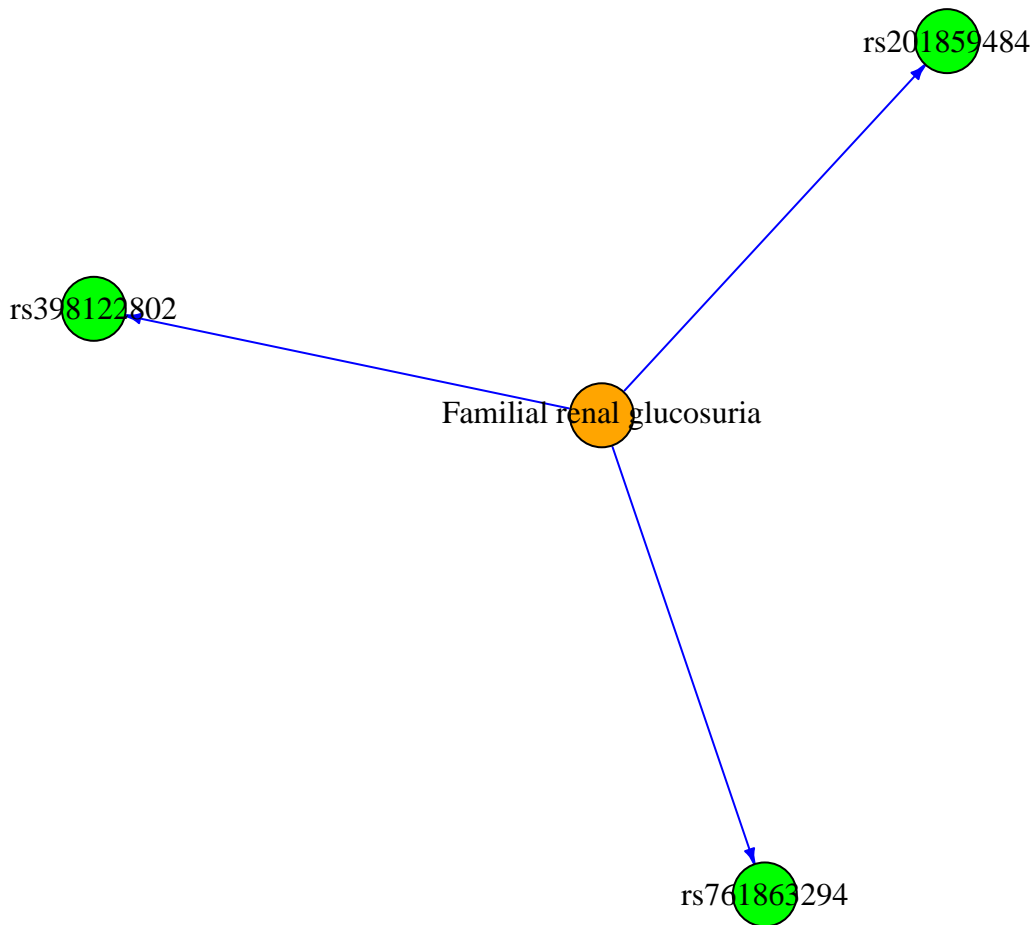

# Variant–Disease Network (Familial restrictive cardiomyopathy)

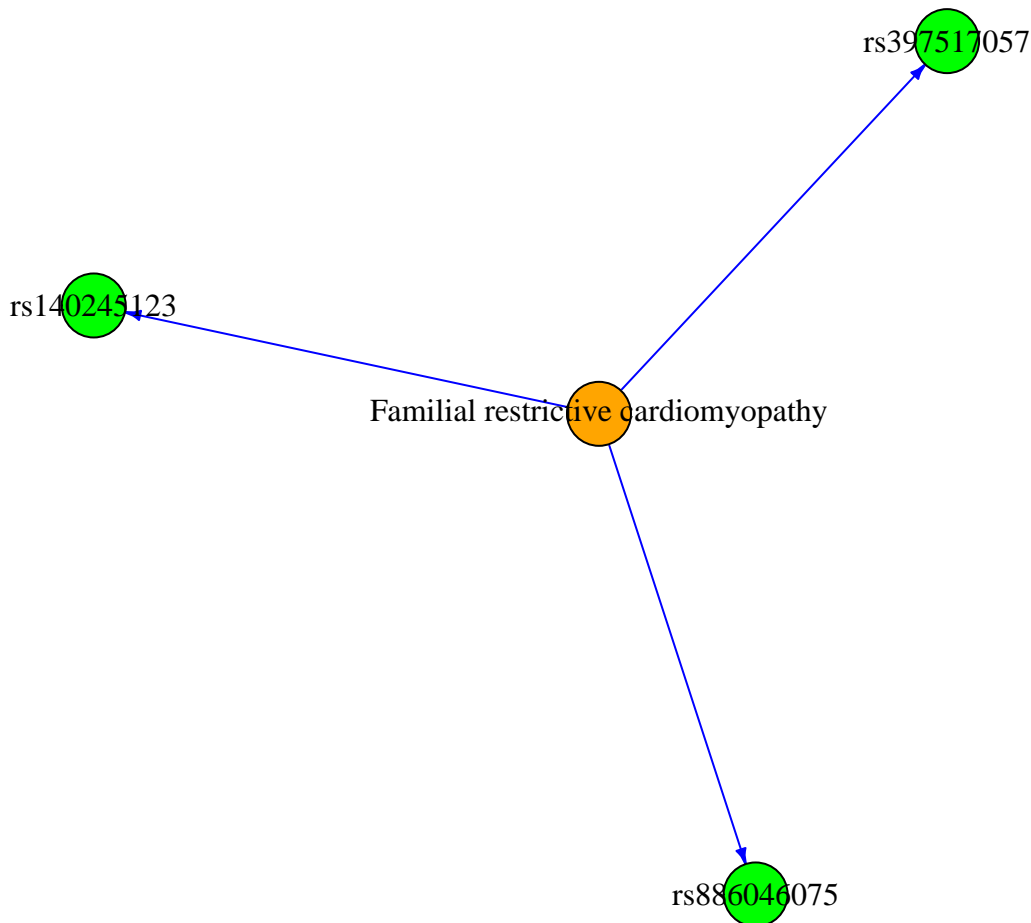

Variant–Disease Network (Familial restrictive cardiomyopathy 3)

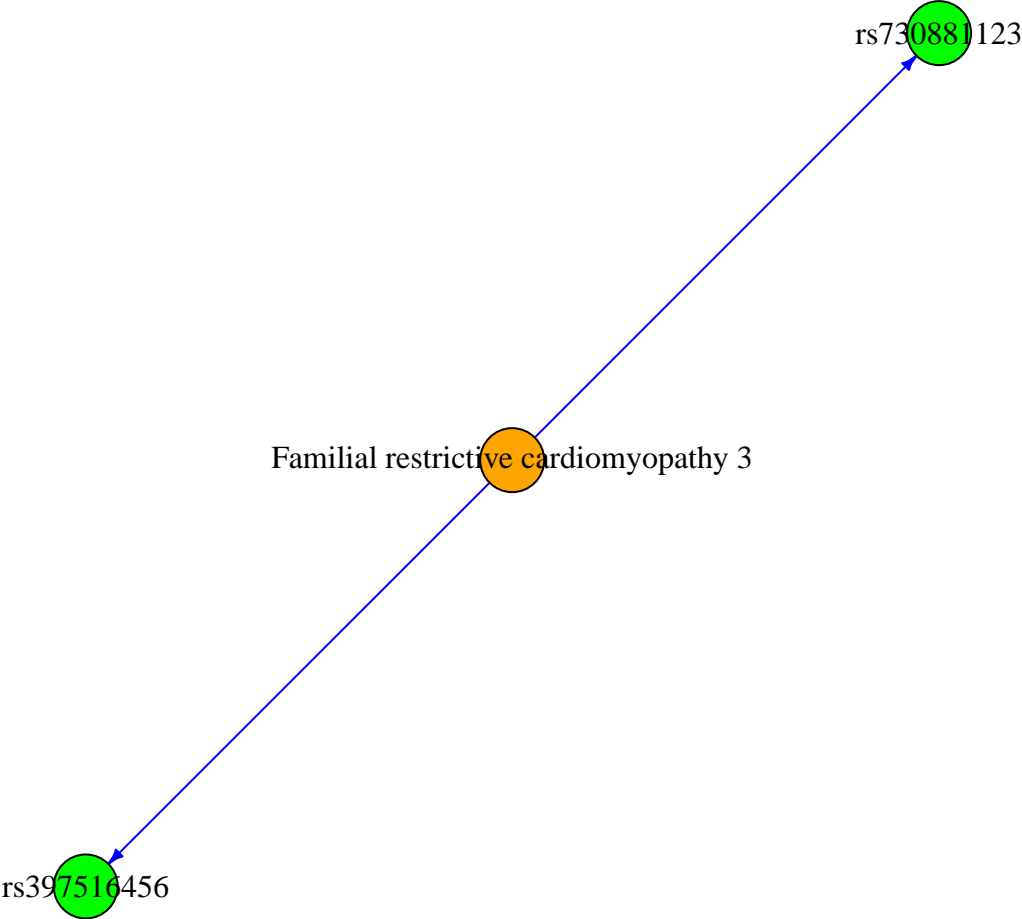

## Variant–Disease Network (Familial visceral amyloidosis)

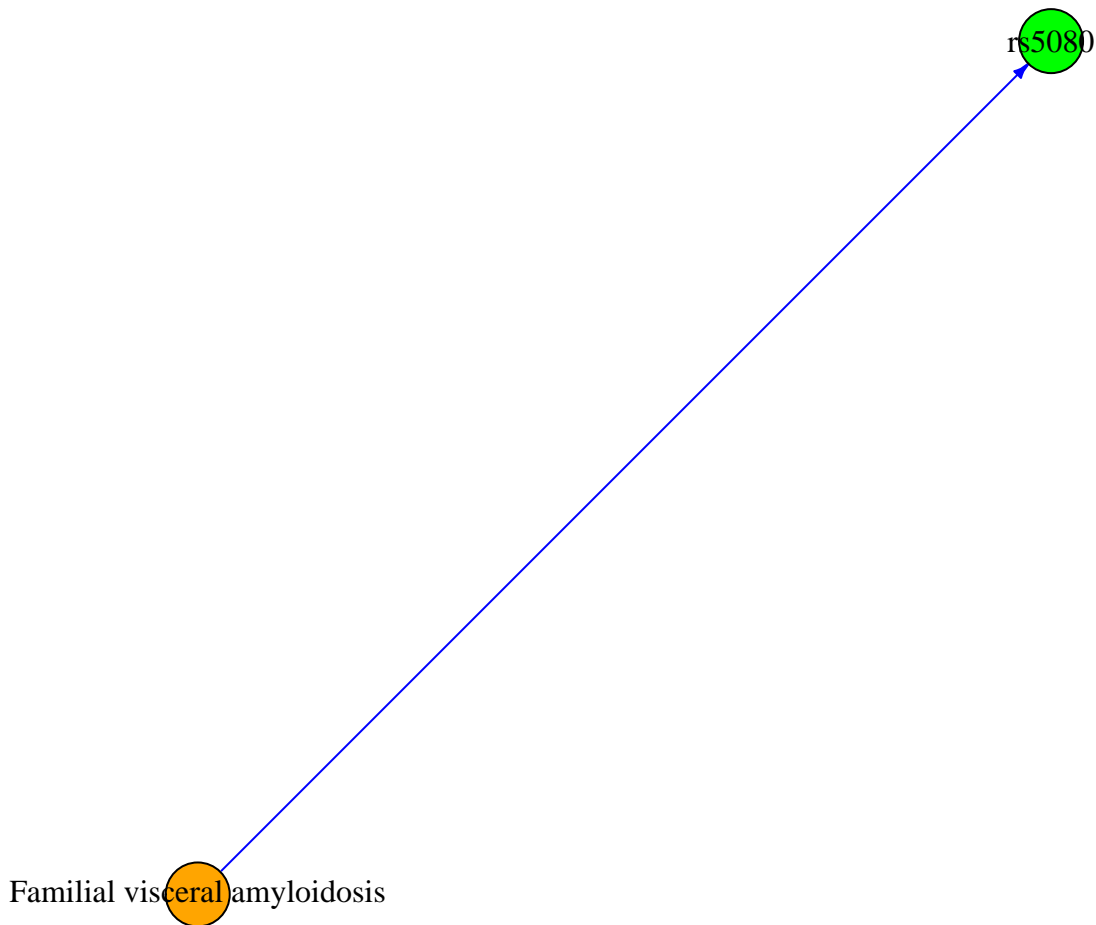



# nt-Disease Network (Familial X-linked hypophosphatemic vitamin D refracto

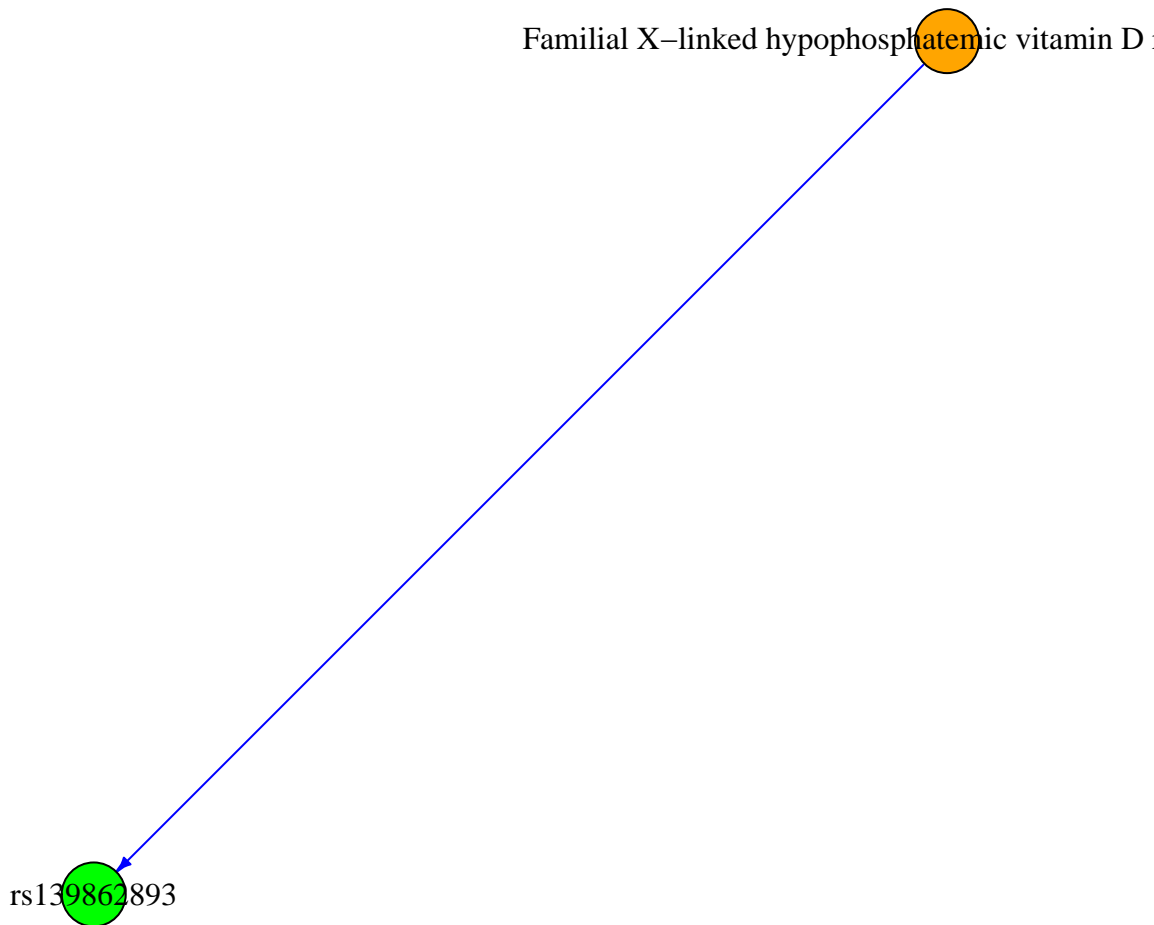

Variant–Disease Network (Fanconi anemia)

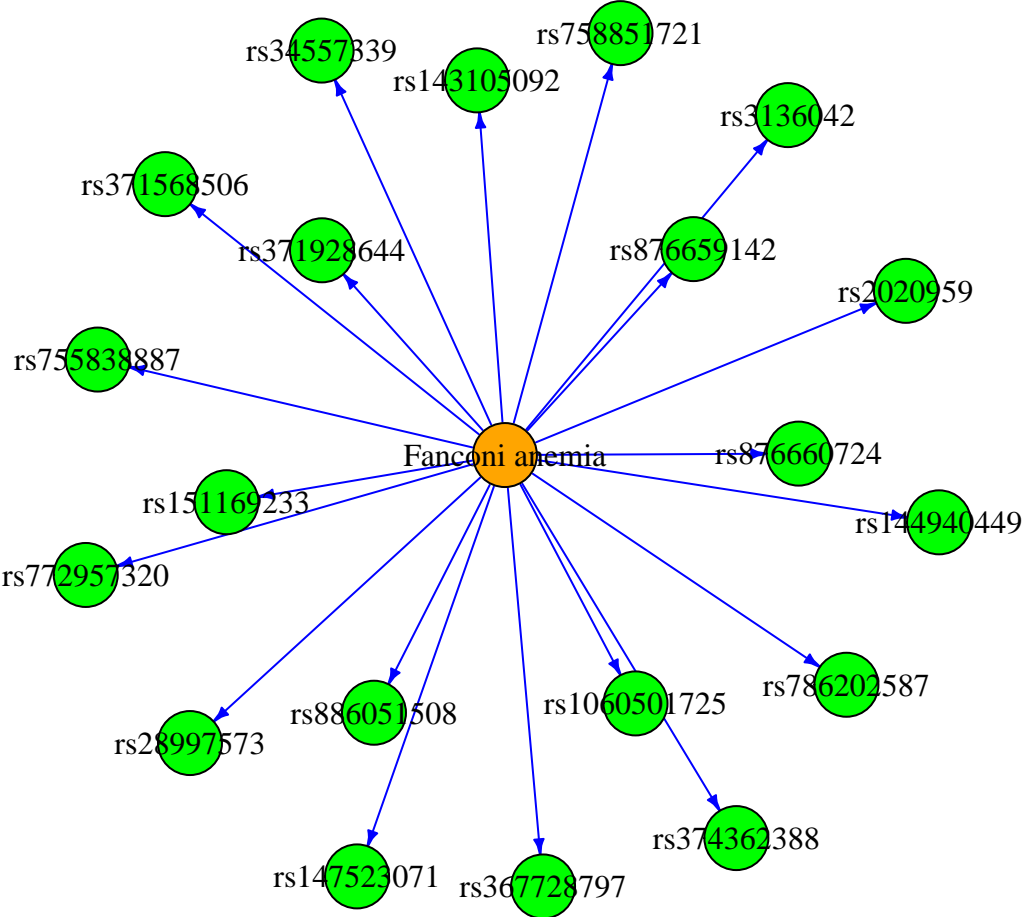

## Variant–Disease Network (Fanconi–Bickel syndrome)

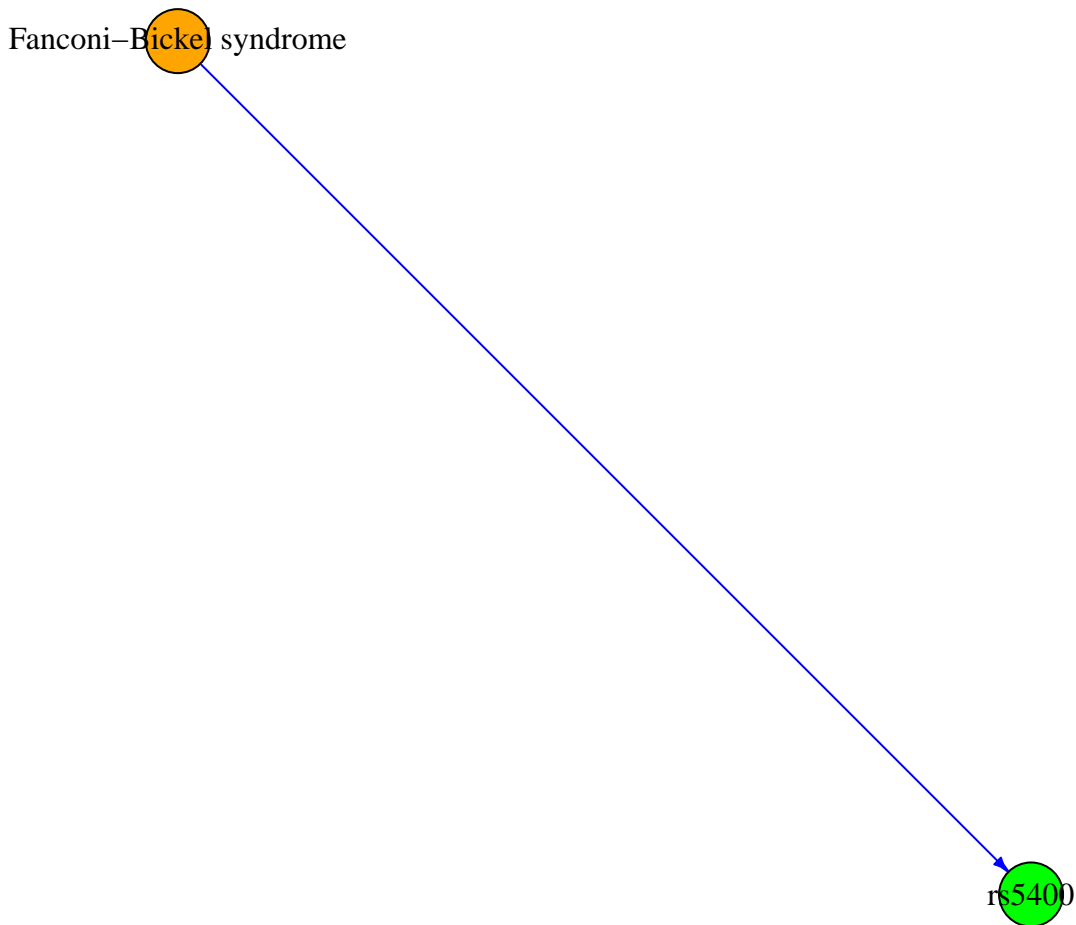

Variant–Disease Network (Farber disease)

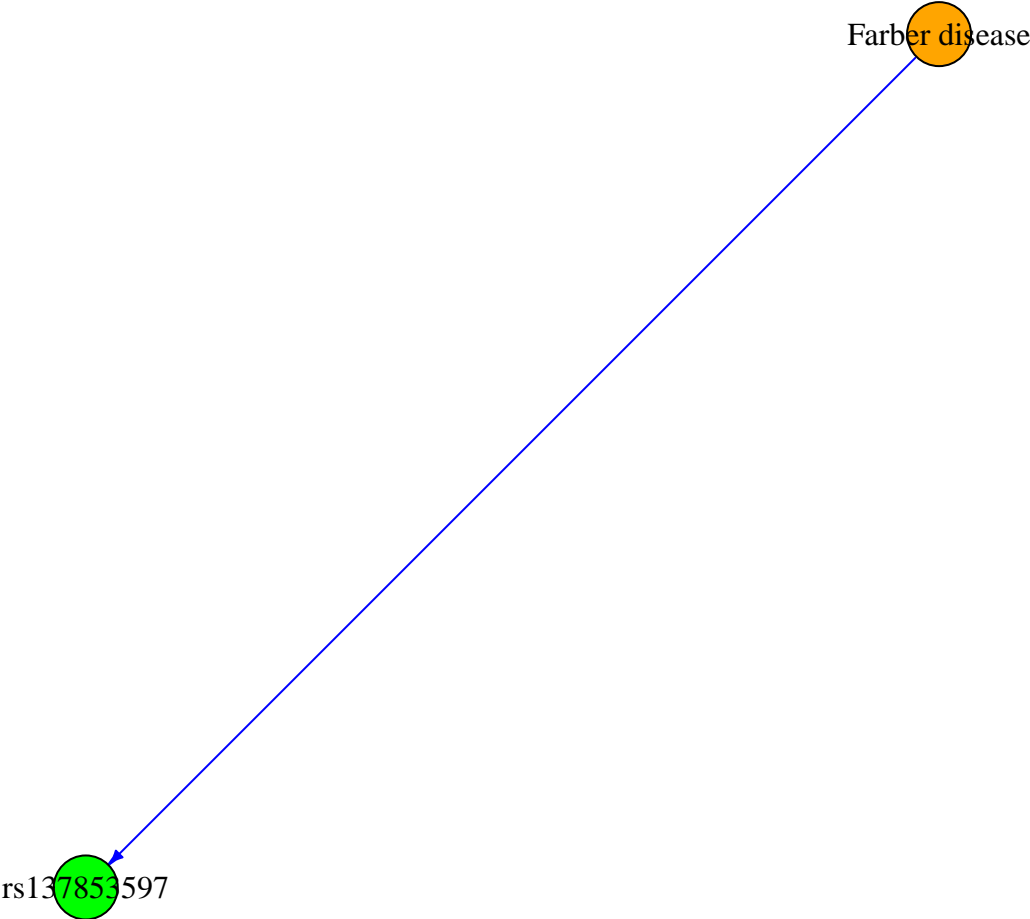

**Variant–Disease Network (Fatal infantile hypertonic myofibrillar myopathy)**

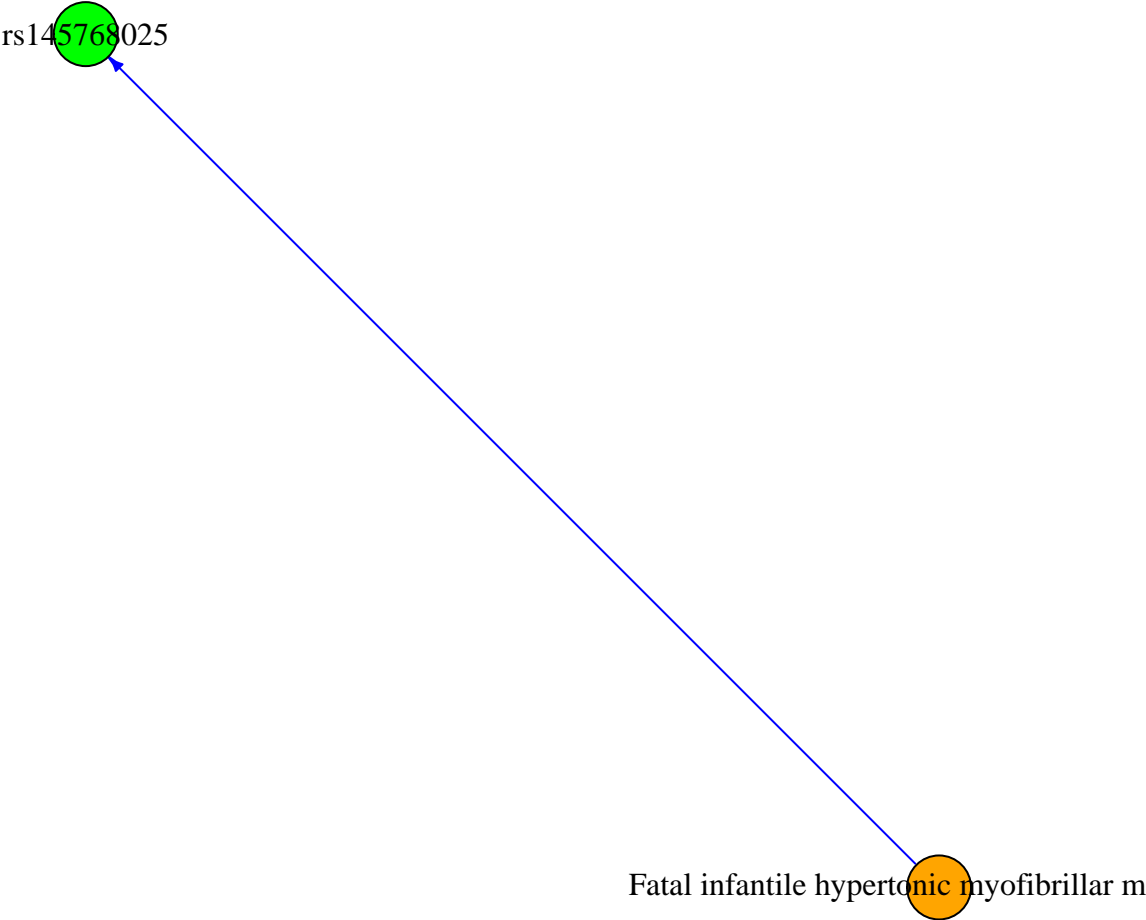

## Variant–Disease Network (Fetal akinesia sequence)

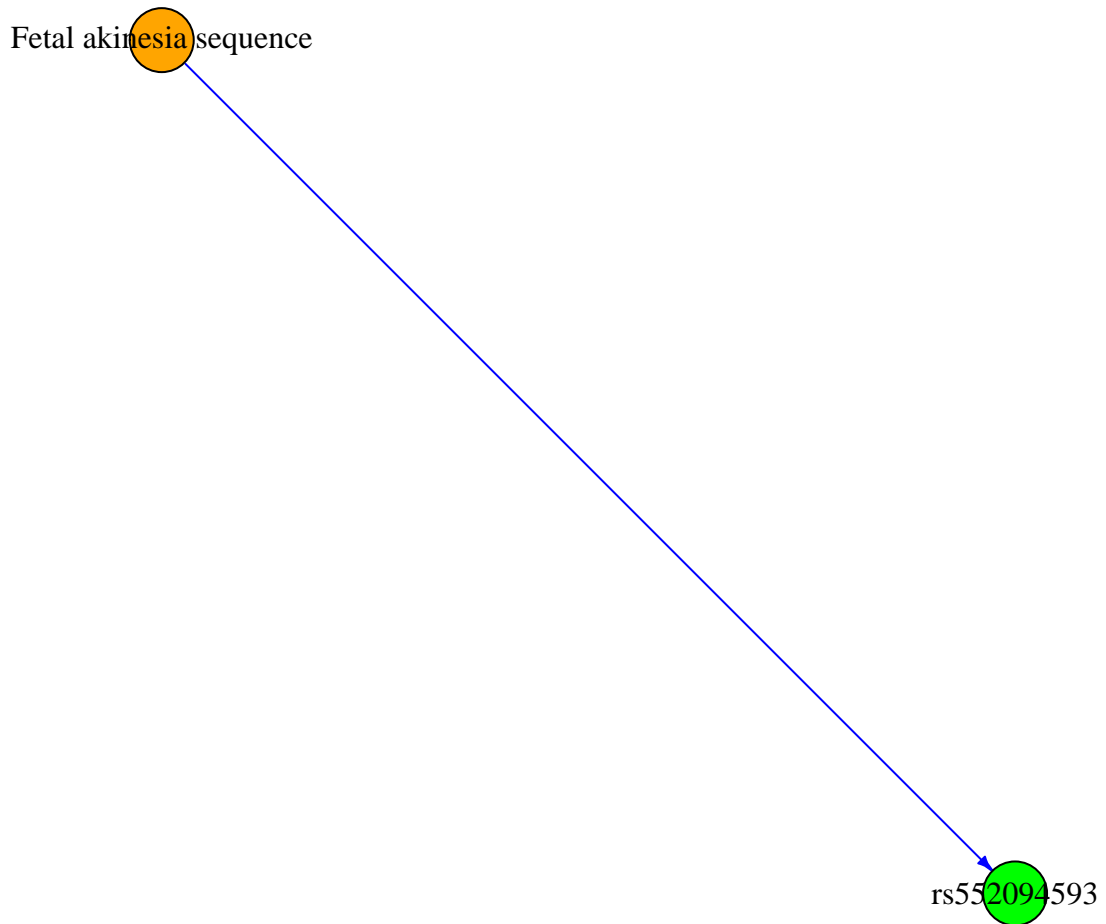

# Variant–Disease Network (Fibrochondrogenesis 1)

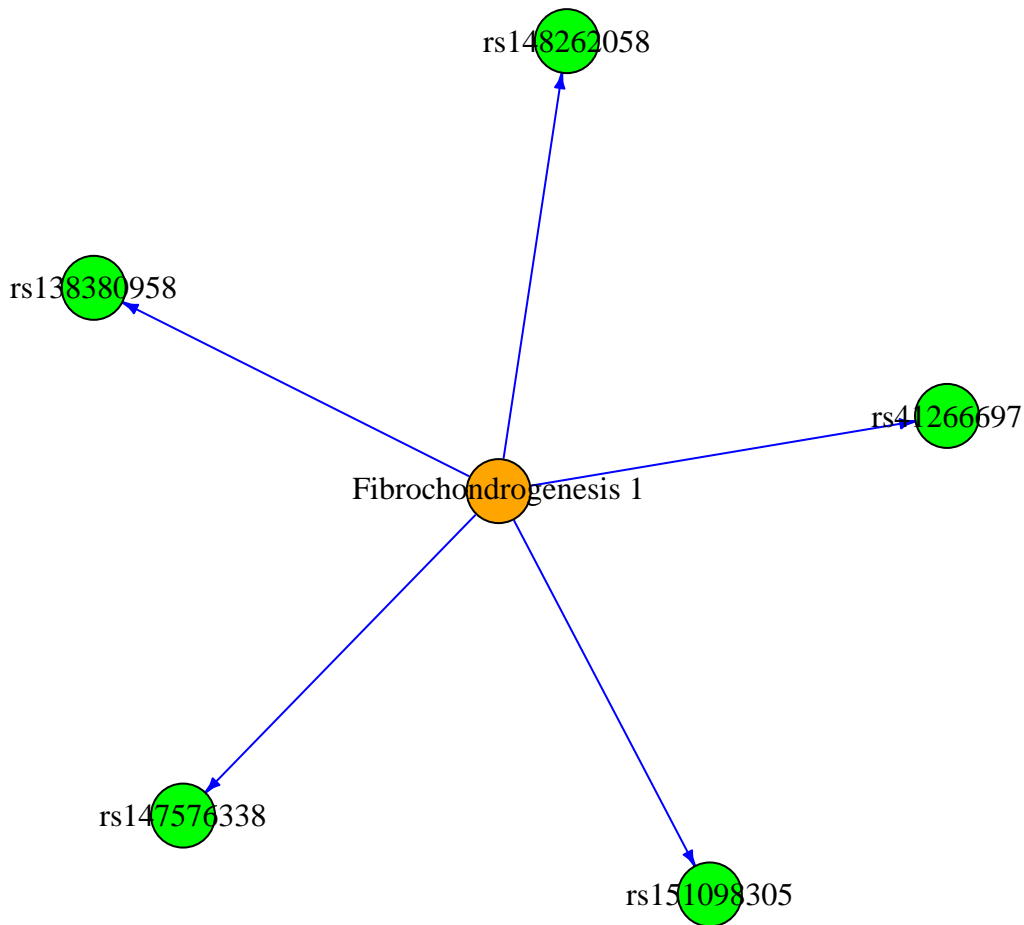

## Variant–Disease Network (Fibrous dysplasia of jaw)

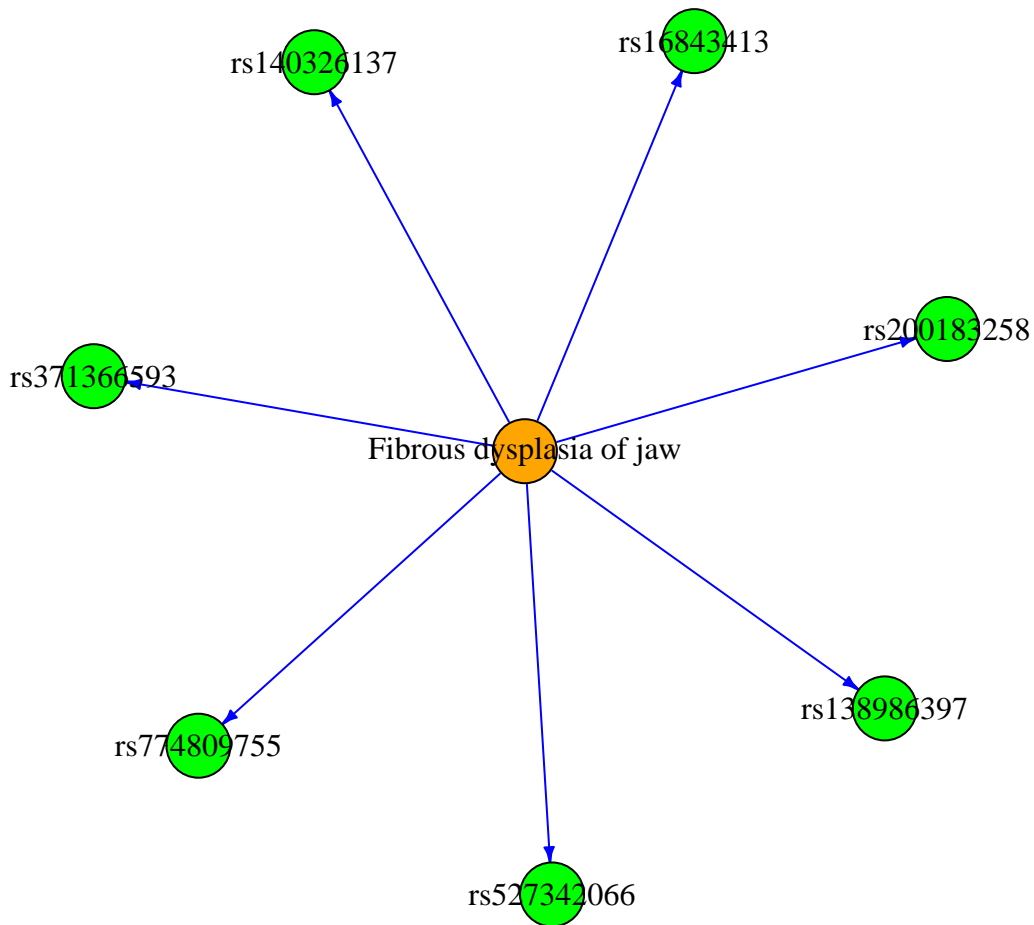



**Variant–Disease Network (Finnish congenital nephrotic syndrome)**

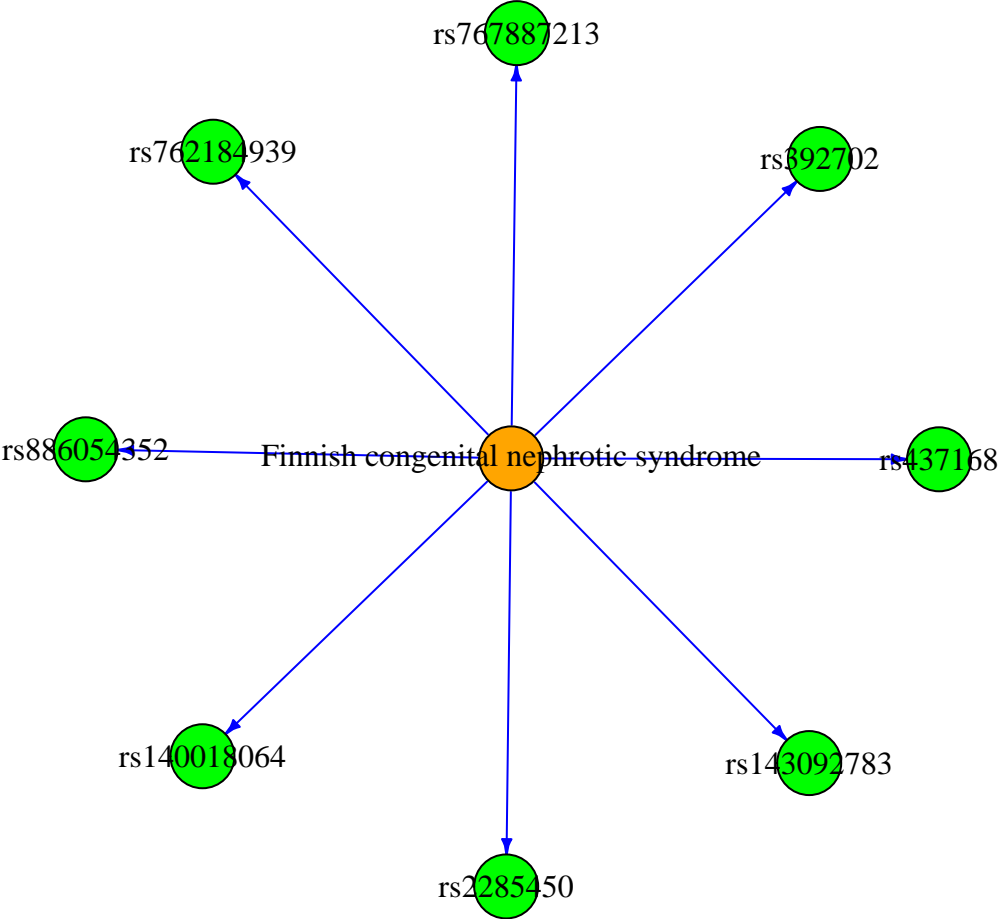

## Variant–Disease Network (Fleck corneal dystrophy)

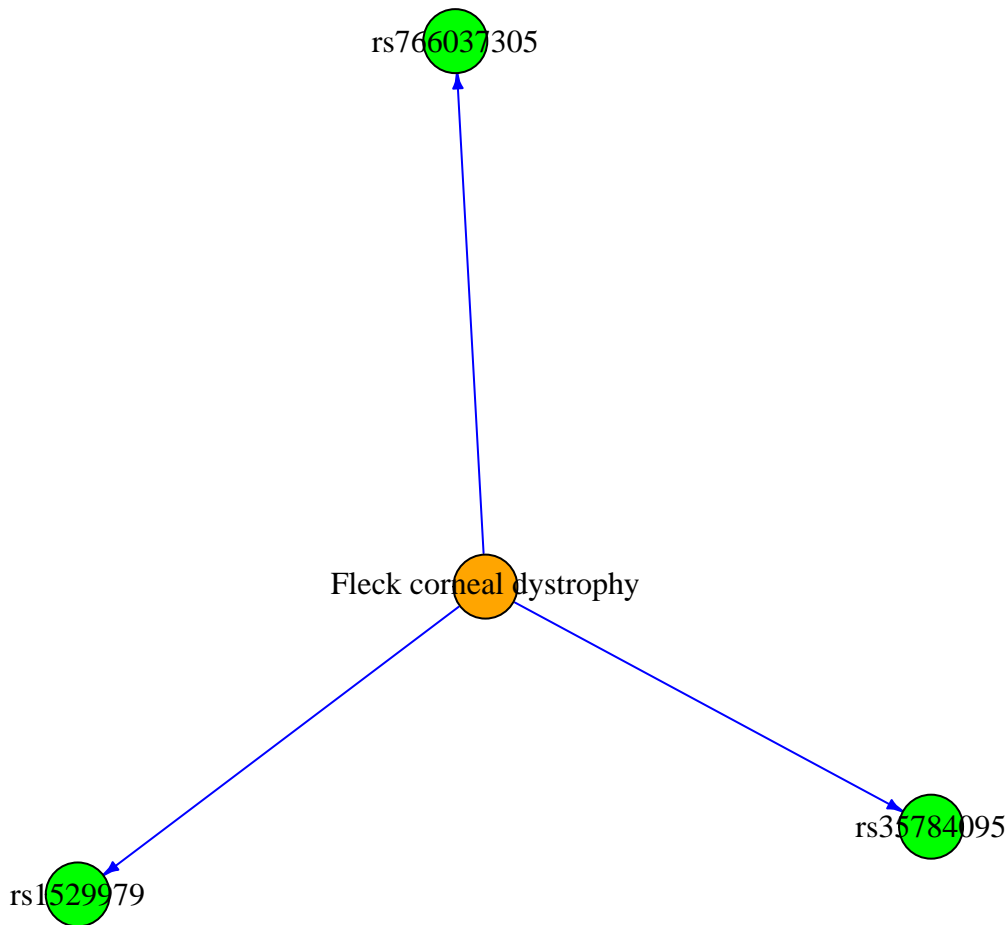

# Variant–Disease Network (FLNB–Related Spectrum Disorders)

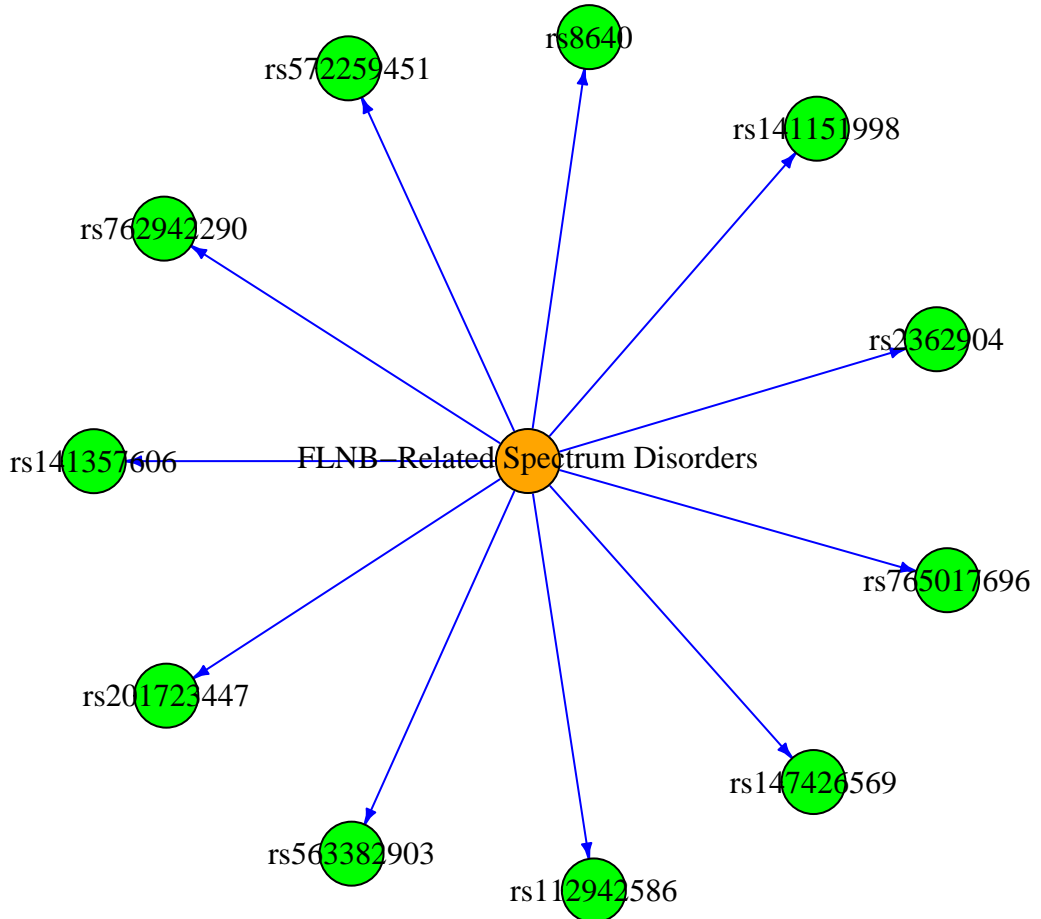

## Variant–Disease Network (Focal cortical dysplasia type II)

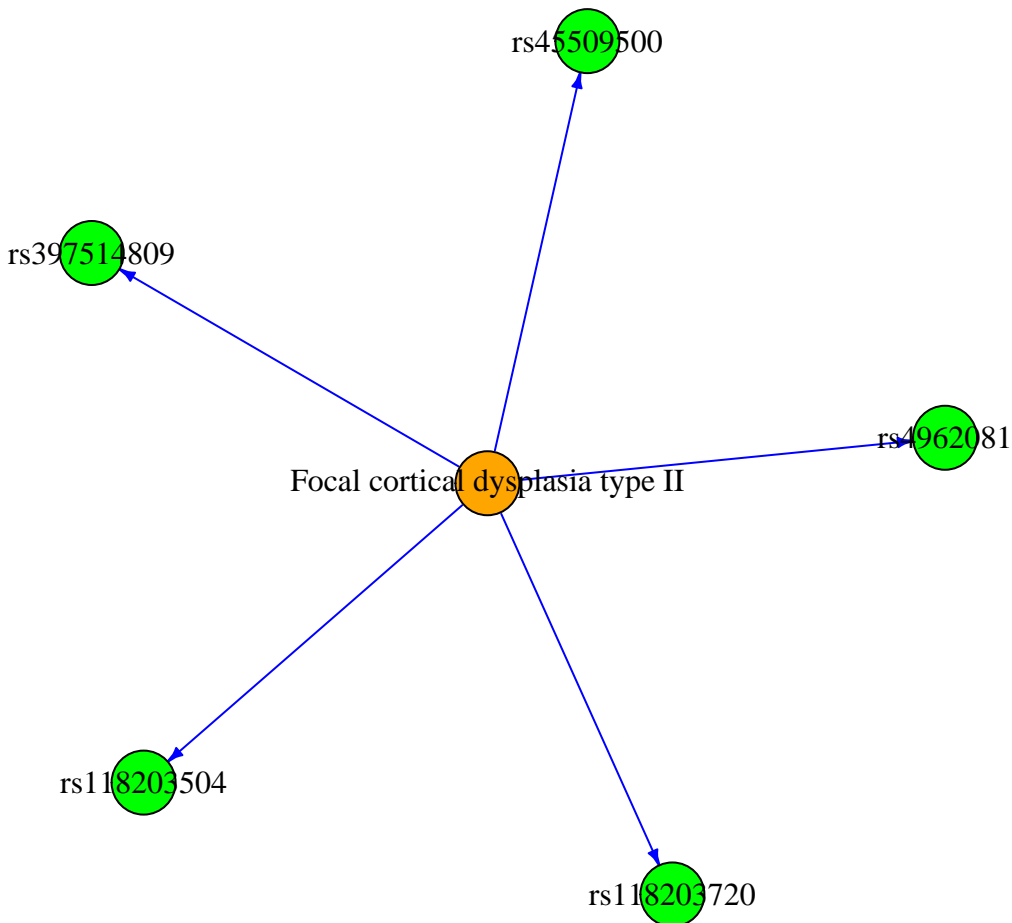

# Variant–Disease Network (Focal segmental glomerulosclerosis)

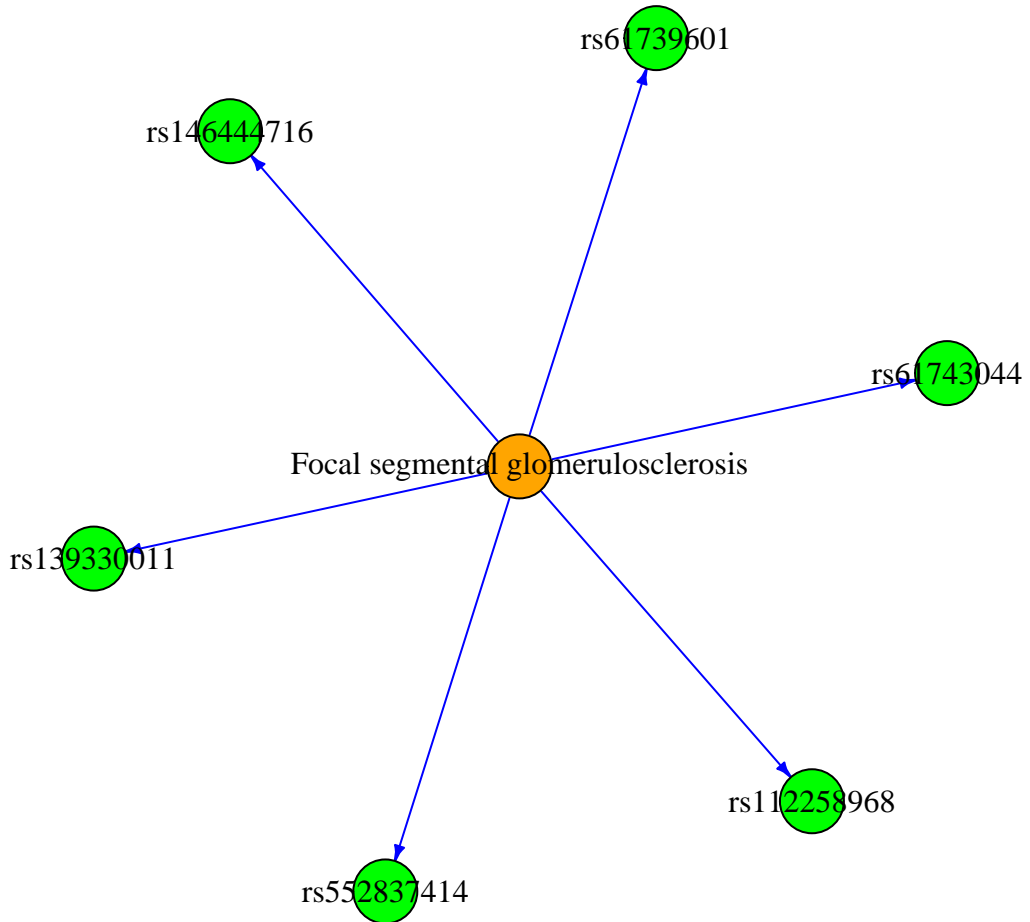

## Variant–Disease Network (Focal segmental glomerulosclerosis 2)

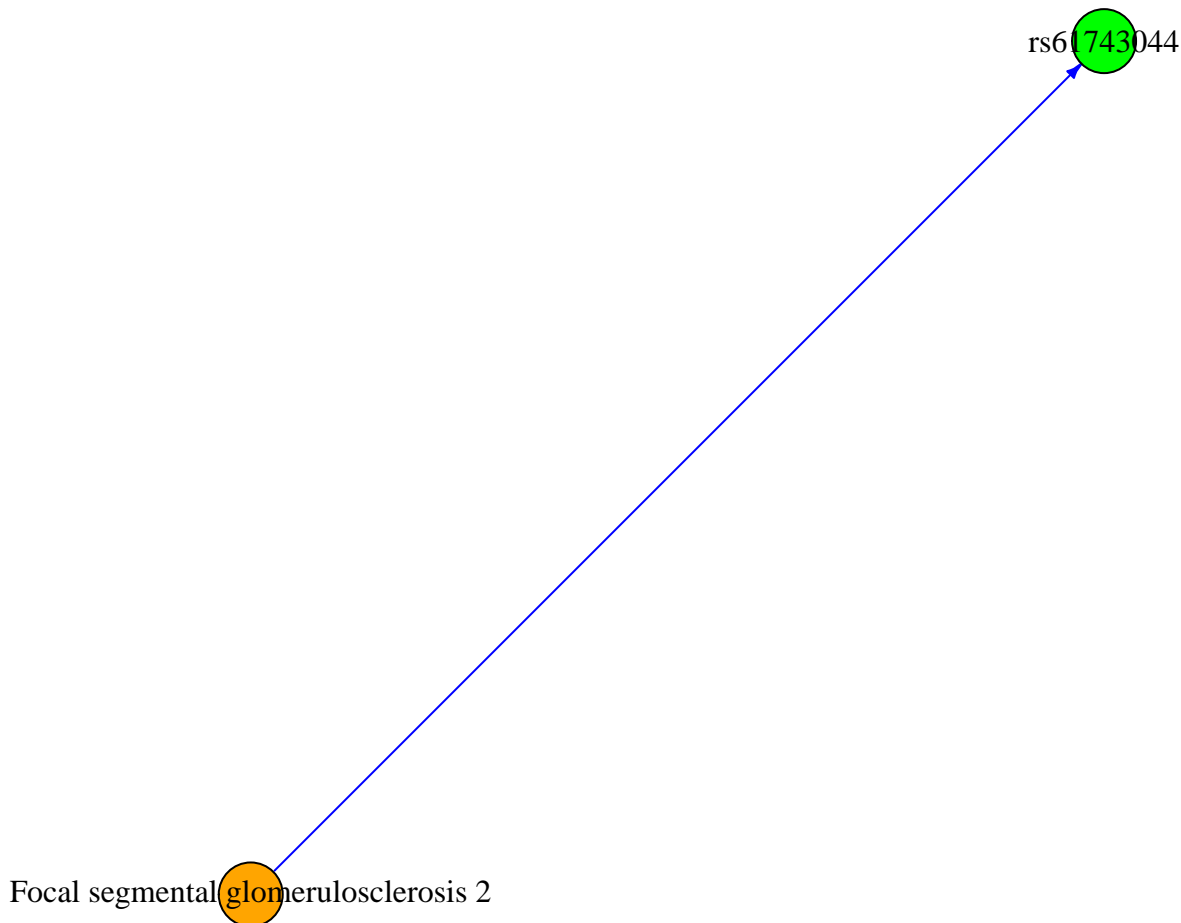

# Variant–Disease Network (Follicle–stimulating hormone deficiency)

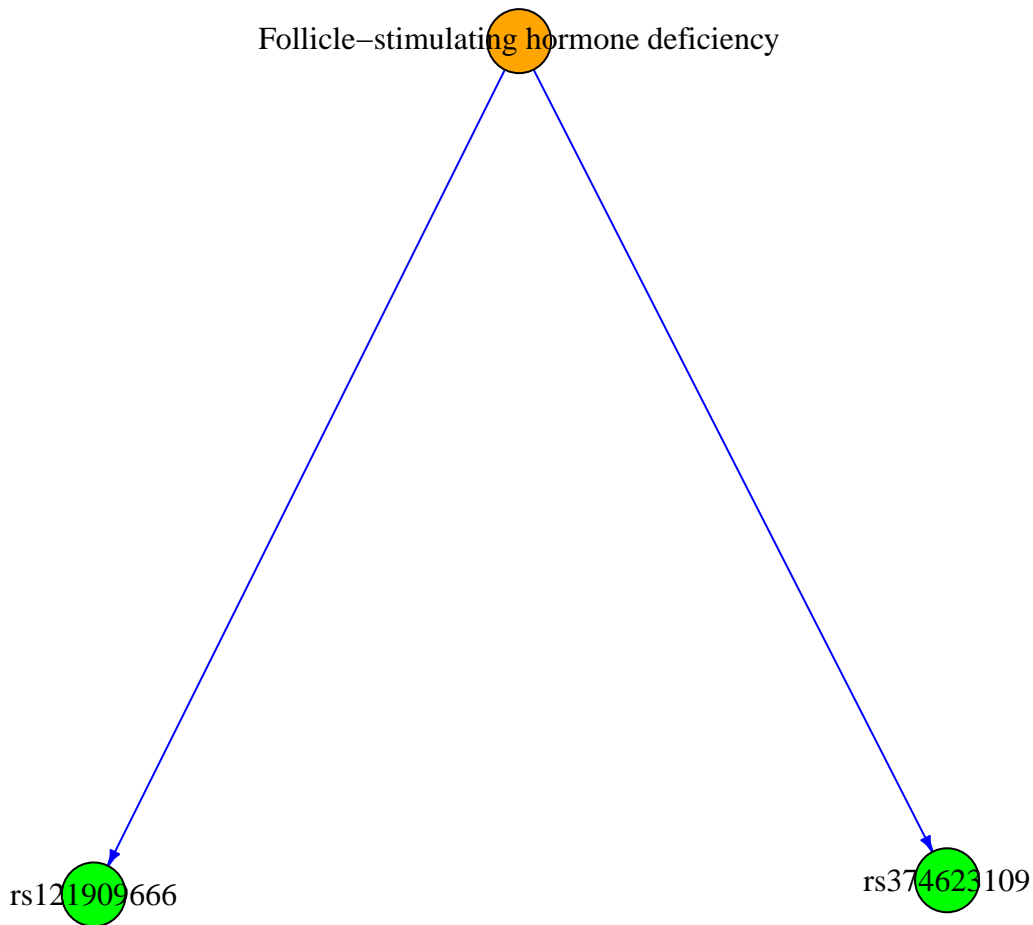

**Variant–Disease Network (Frank Ter Haar syndrome)**

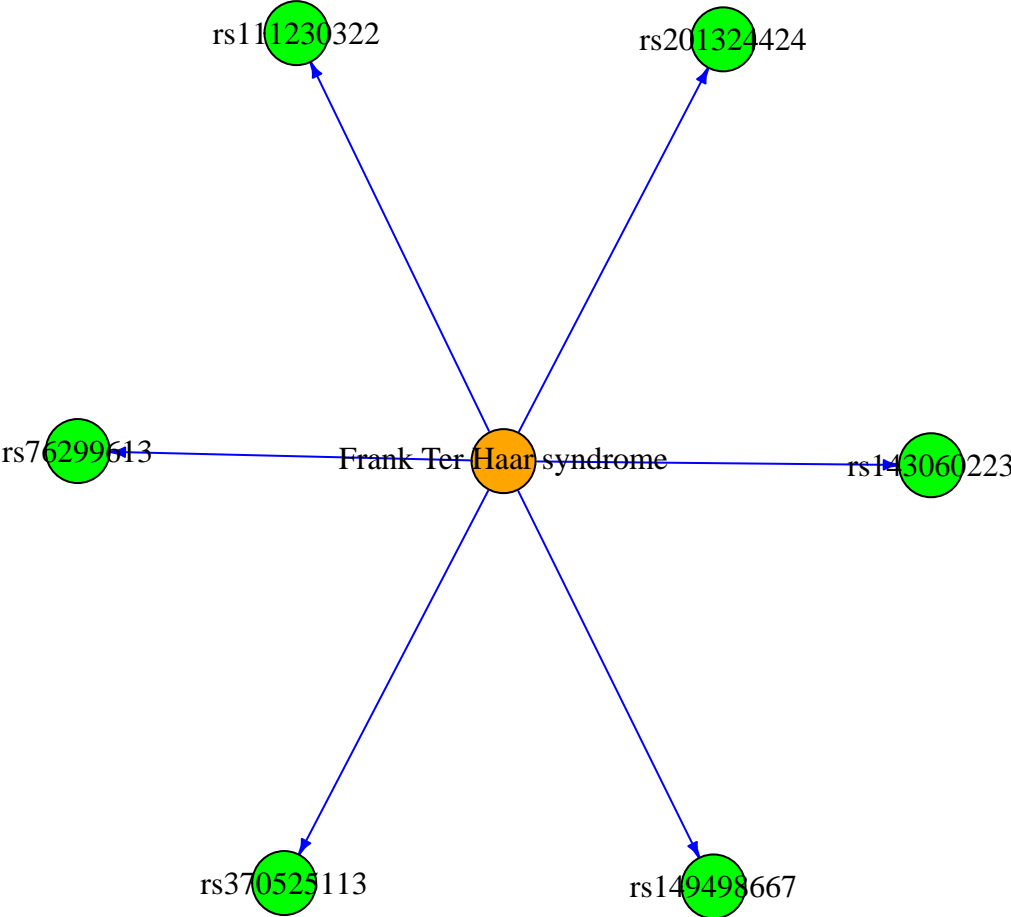



# Variant-Disease Network (Fraser syndrome 1)

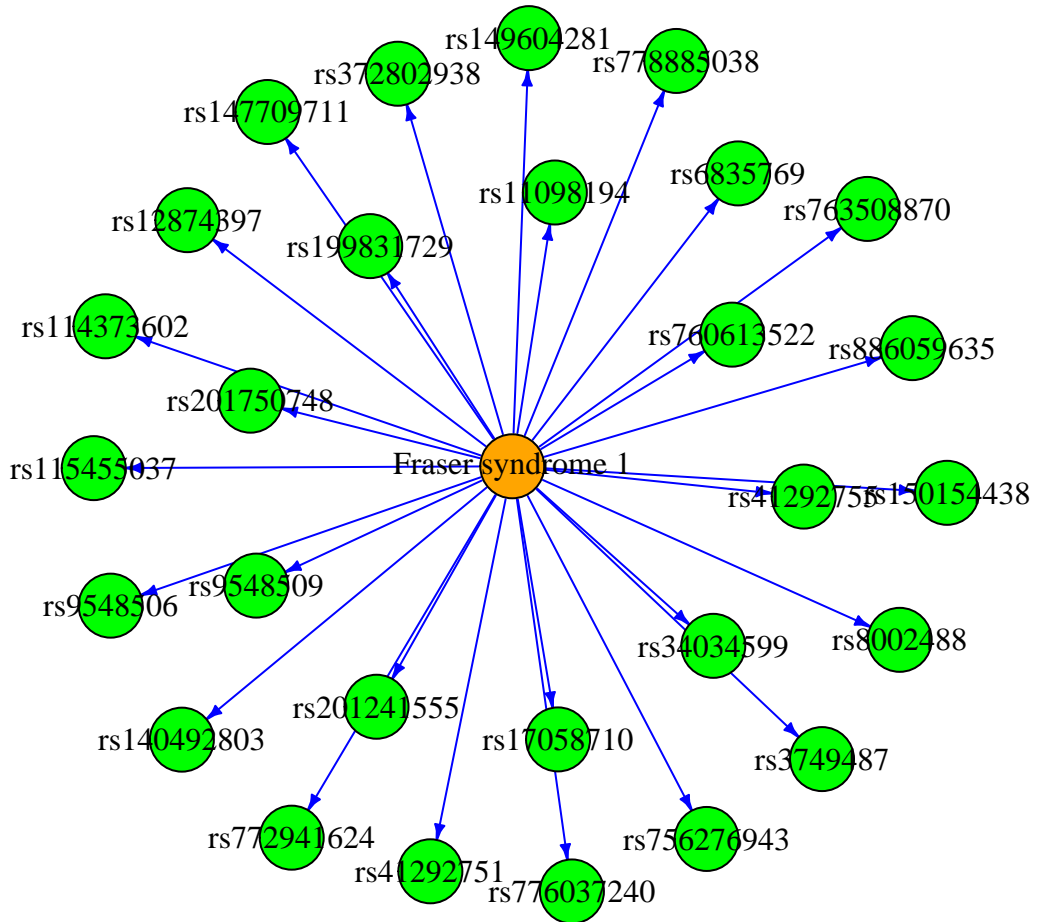

## Variant–Disease Network (FRASER SYNDROME 2)

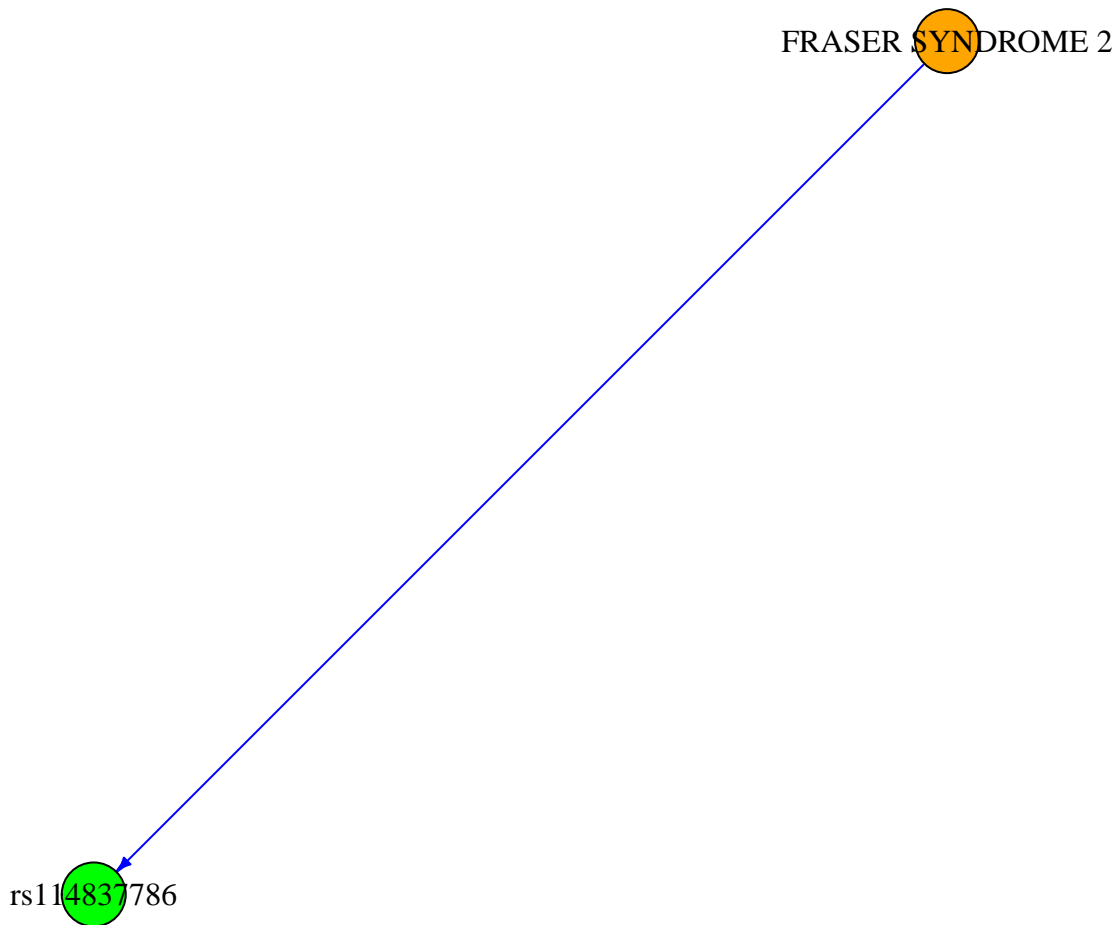

## Variant-Disease Network (Frasier syndrome)

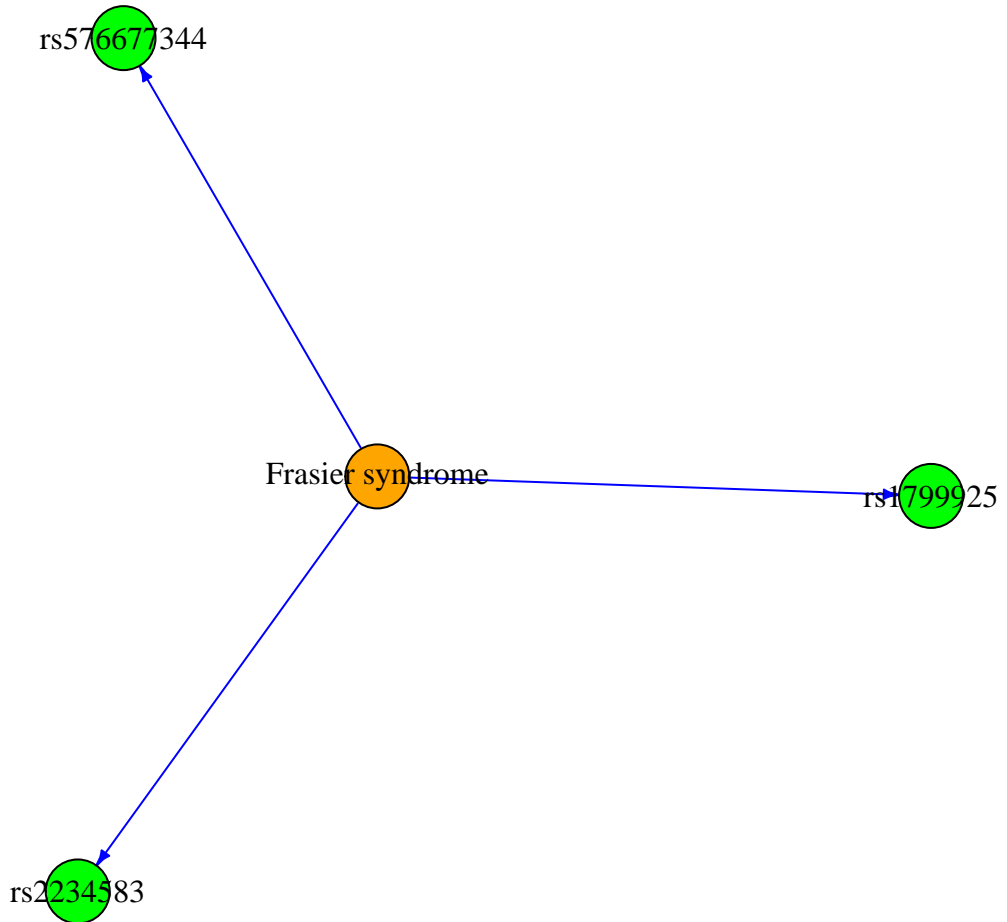

# Variant–Disease Network (Freeman–Sheldon syndrome)

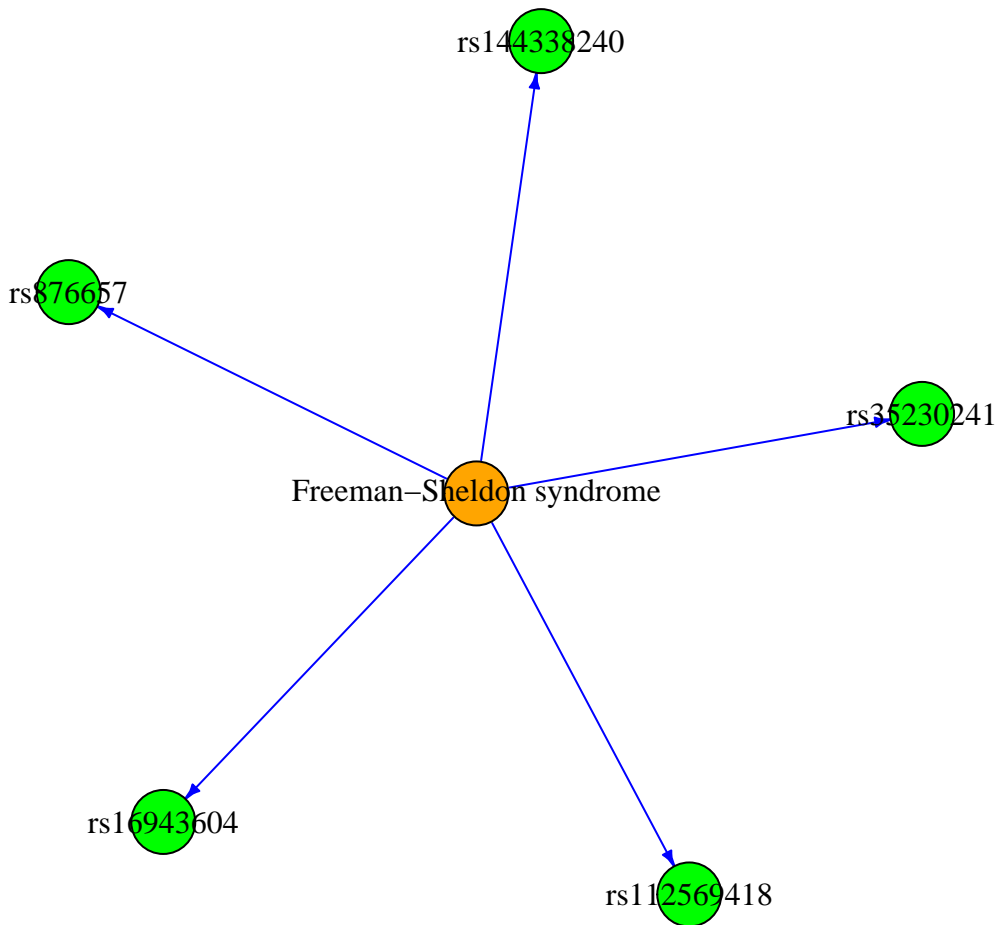

**Variant–Disease Network (Frontometaphyseal dysplasia 1)**

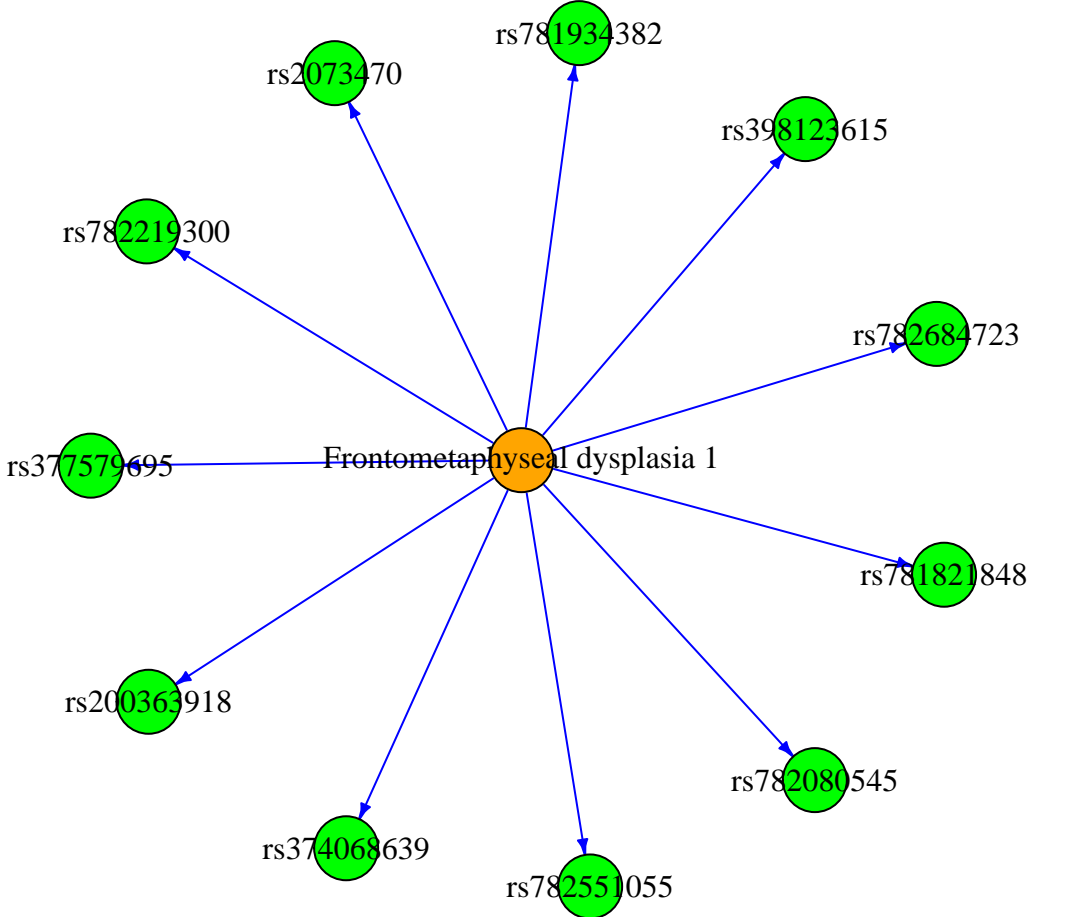

## Variant–Disease Network (Fumarase deficiency)

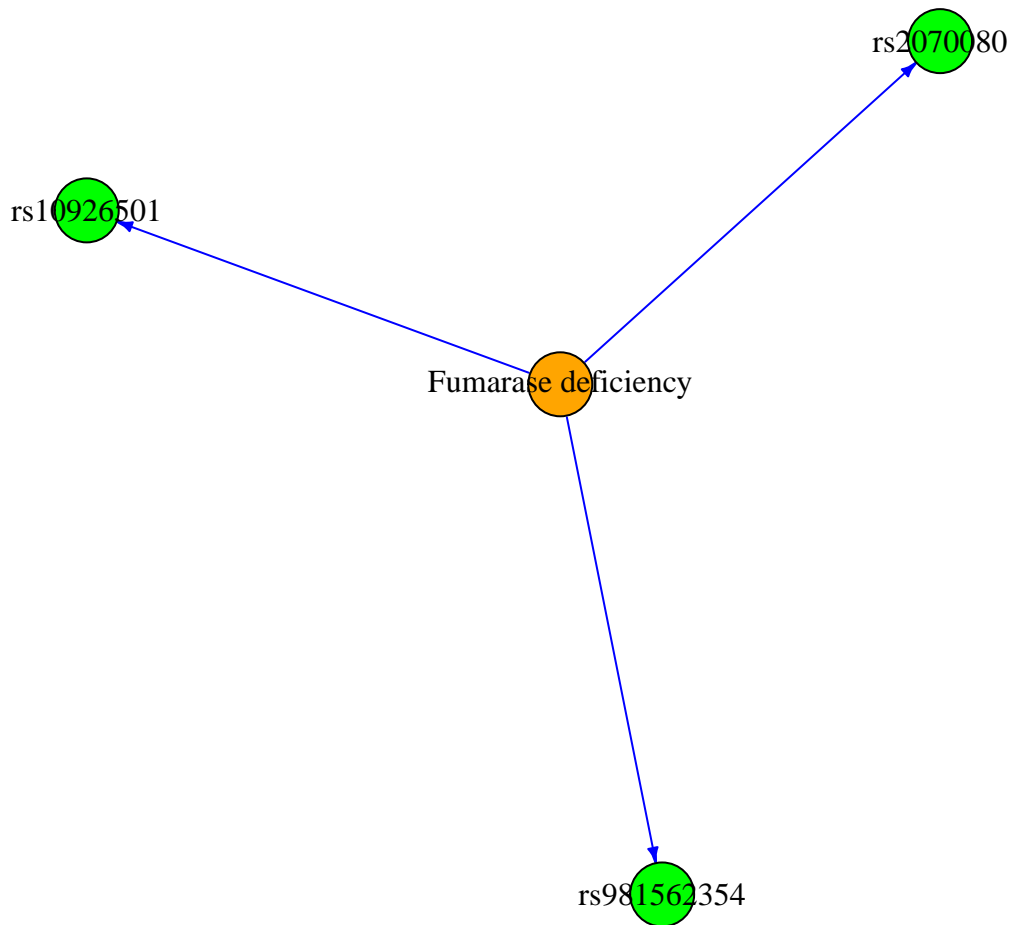

# Variant–Disease Network (Fumarylacetoacetase pseudodeficiency)

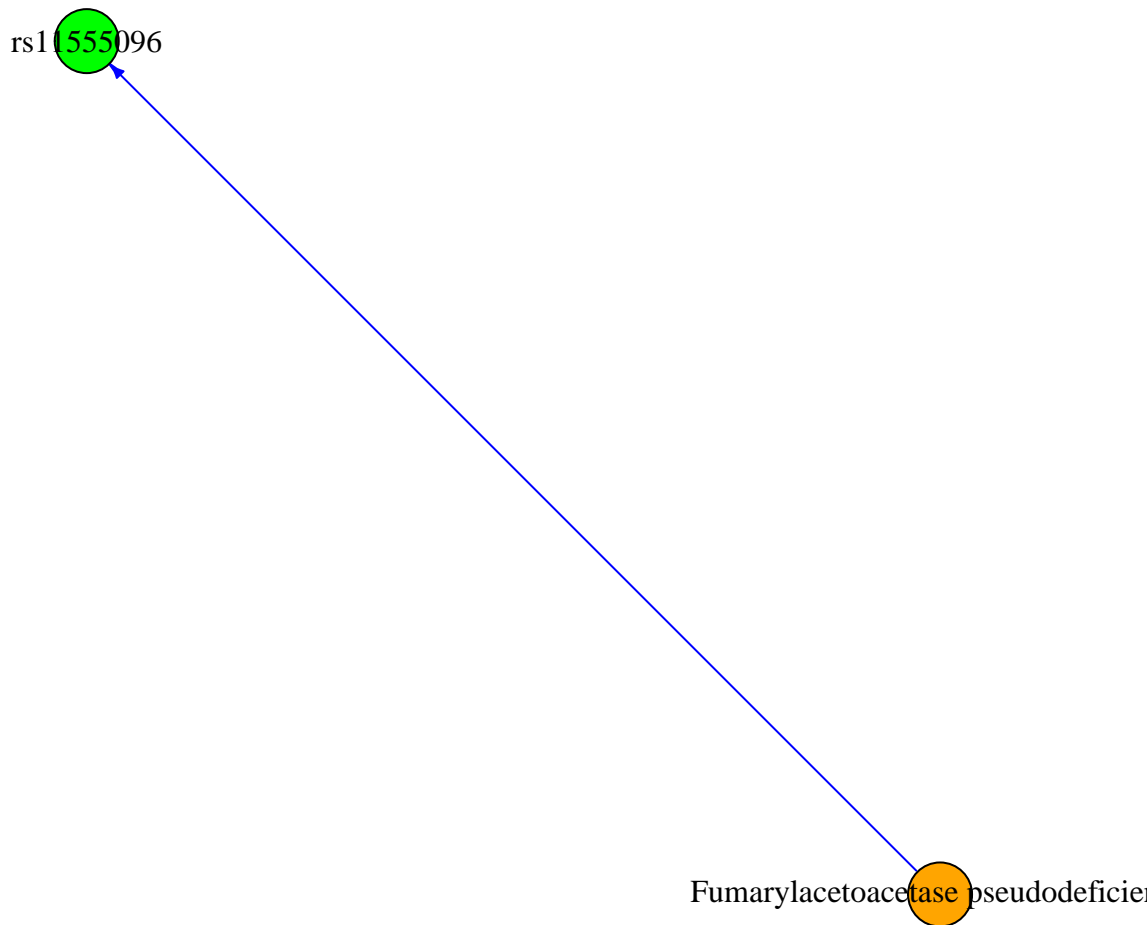

## Variant-Disease Network (Galactosemia)

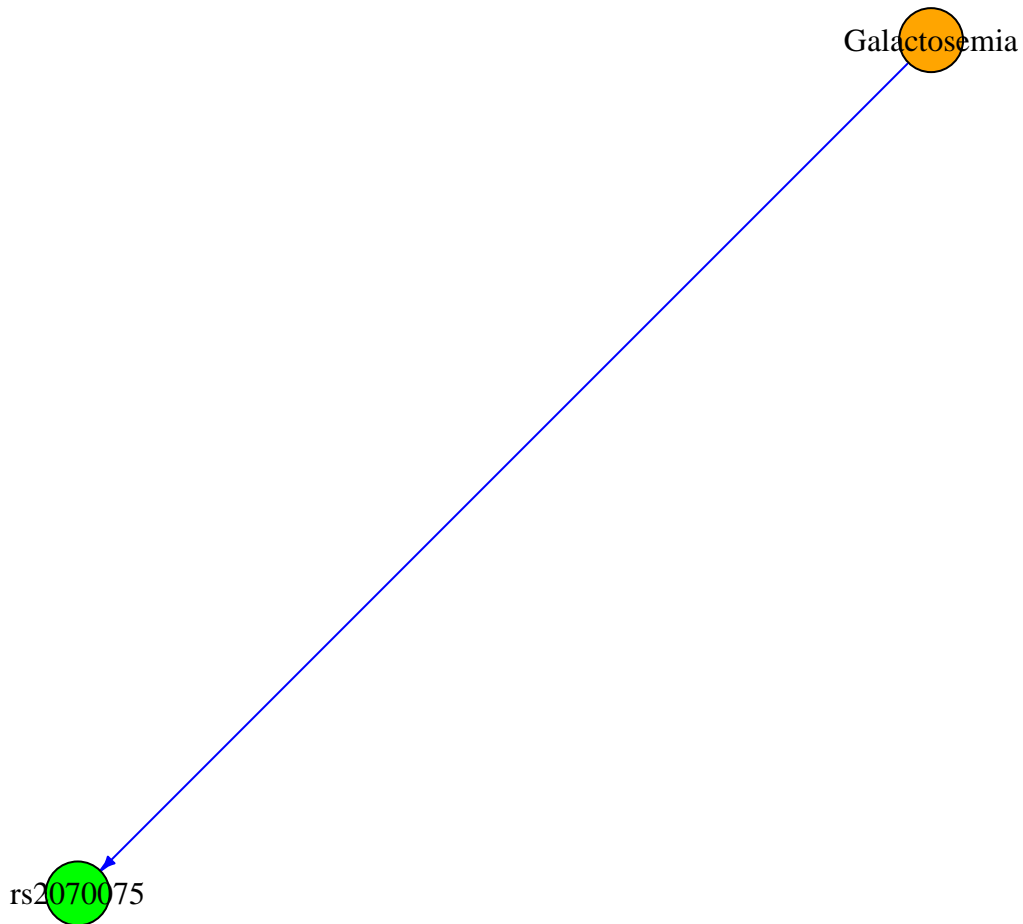



**Variant–Disease Network (Galactosylceramide beta–galactosidase deficiency)**

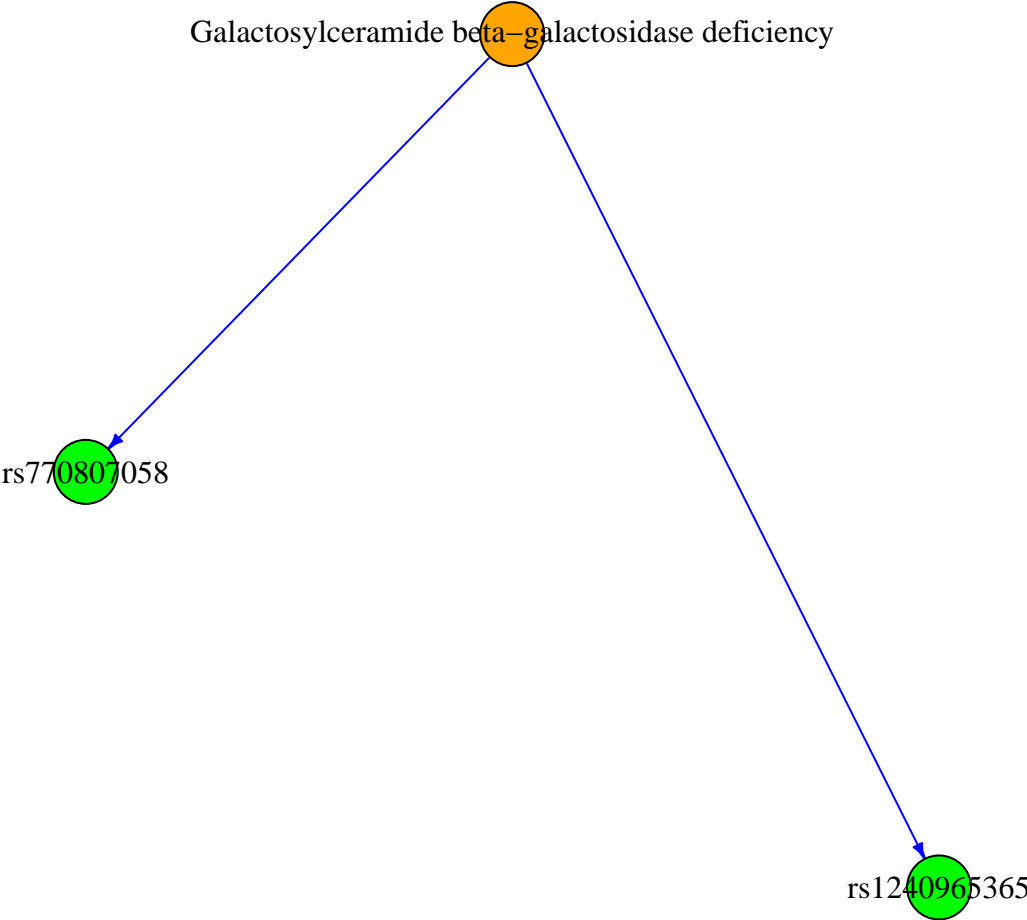

## Variant–Disease Network (Gallbladder disease 1)

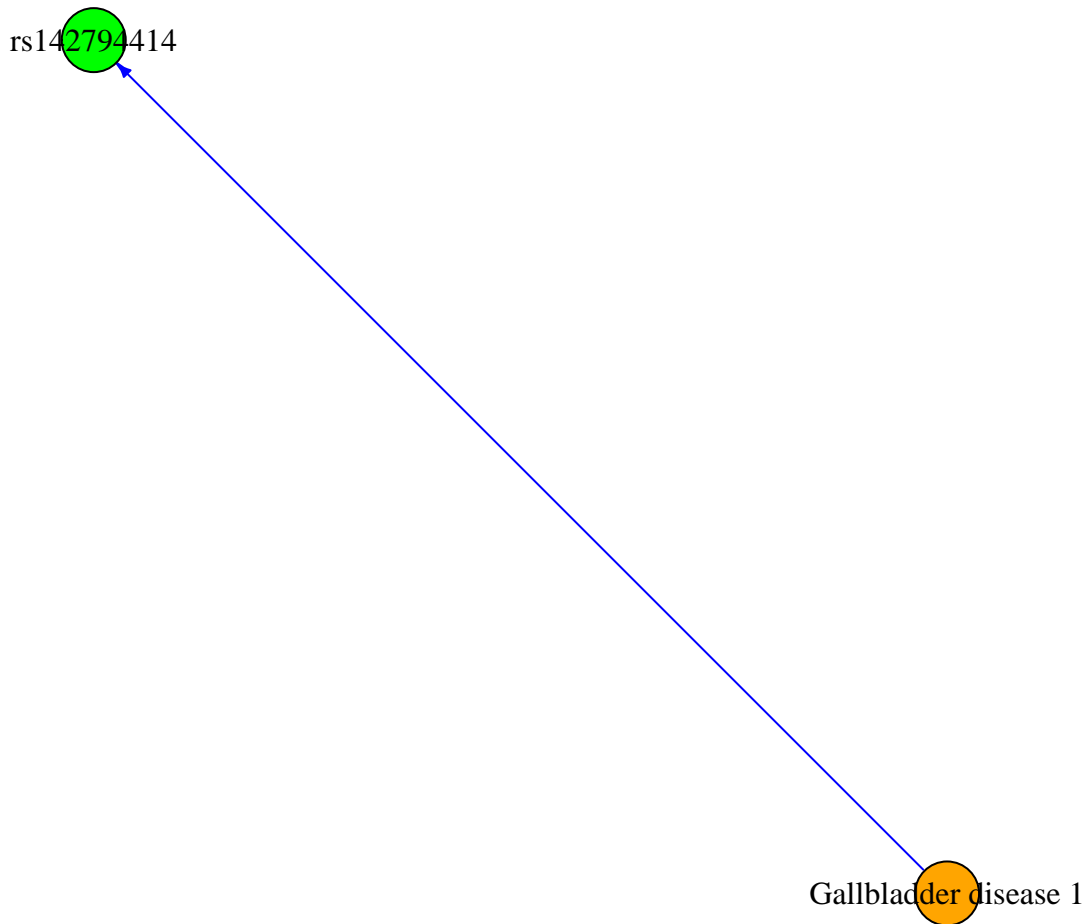

Variant–Disease Network (Gamma–aminobutyric acid transaminase deficiency)

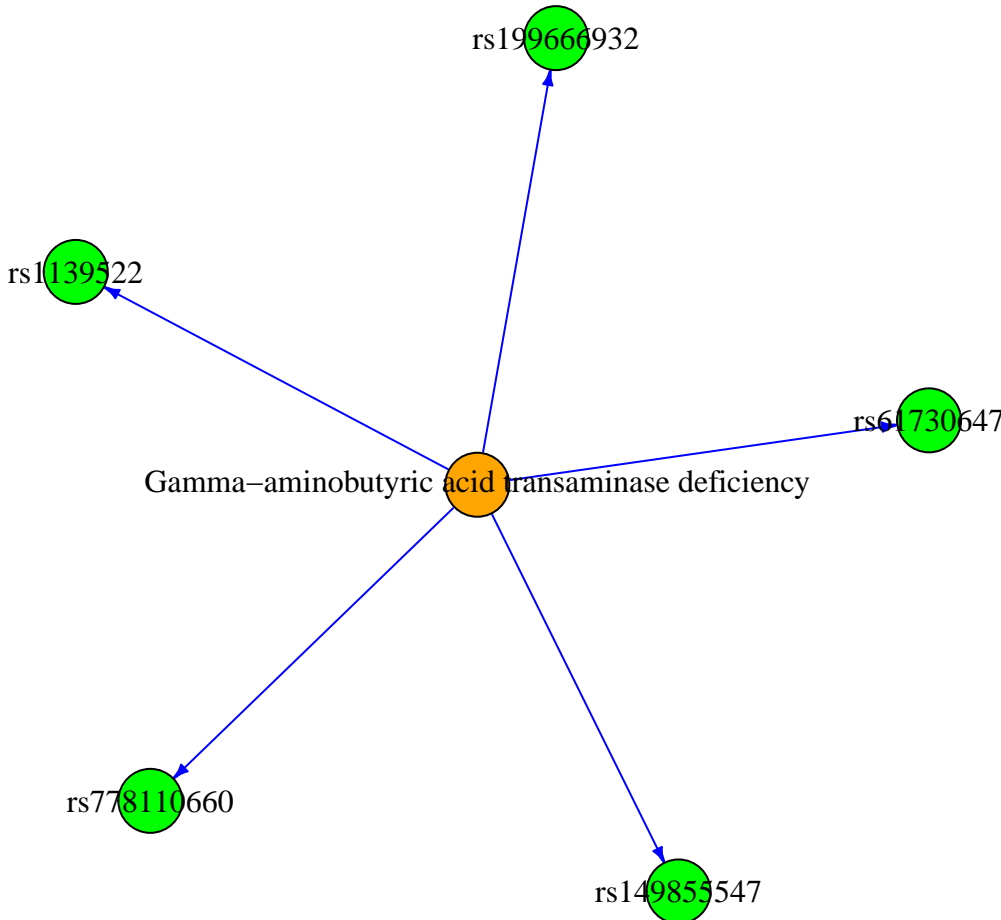

**Variant–Disease Network (Gangliosidosis GM1 type 3)**

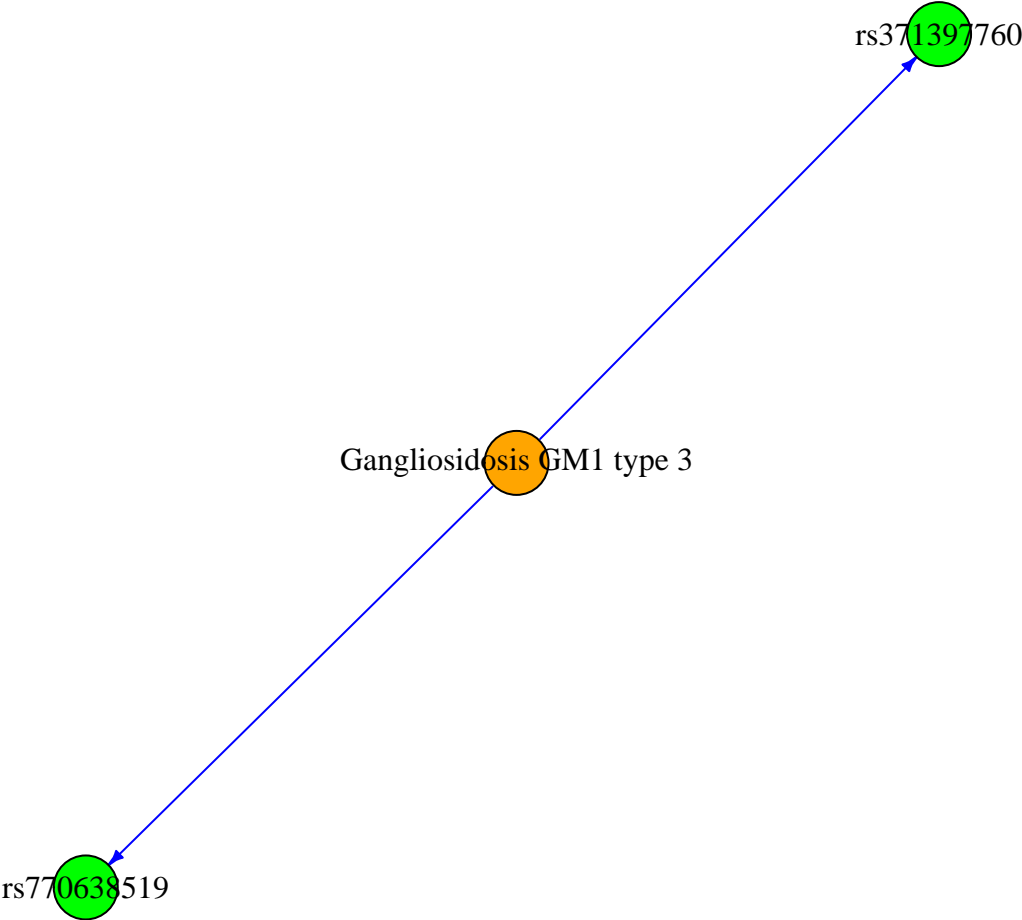

**Variant–Disease Network (Gastrointestinal stroma tumor)**

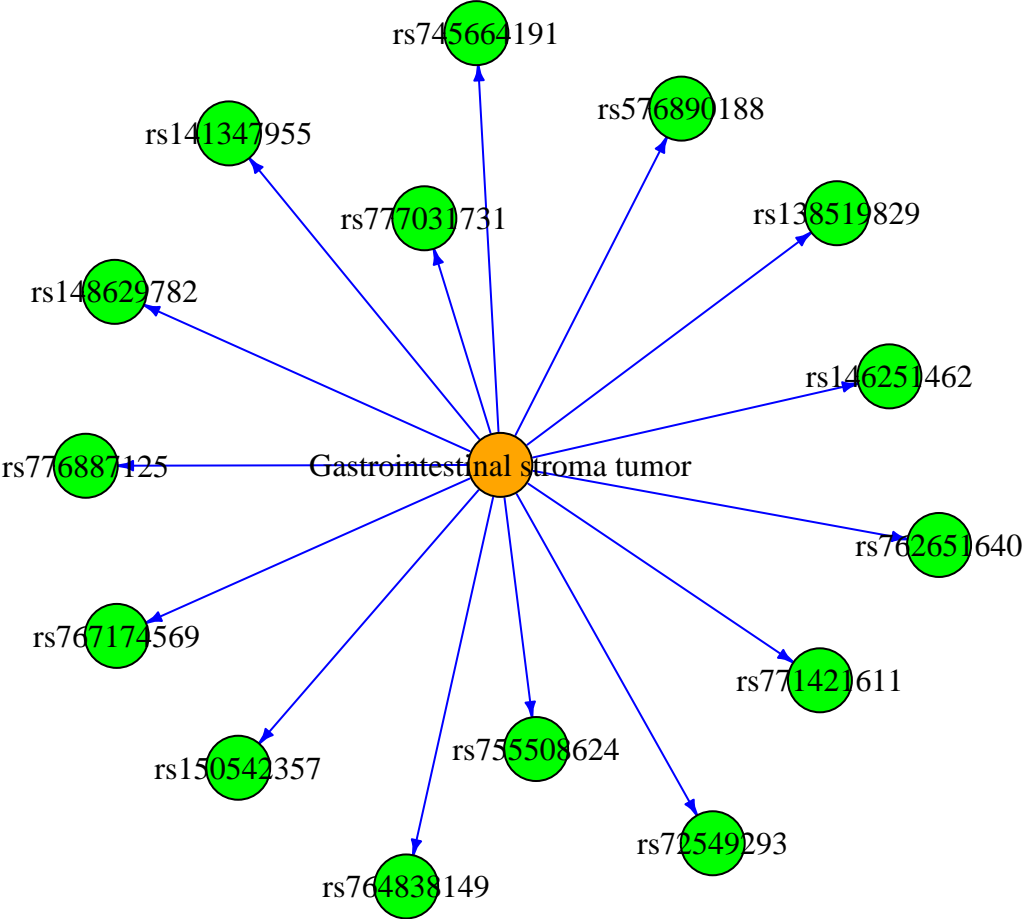

# Variant-Disease Network (GATA-1-related thrombocytopenia with dyserythropoiesis)

GATA-1-related thrombocytopenia with dyserythropoiesis

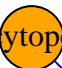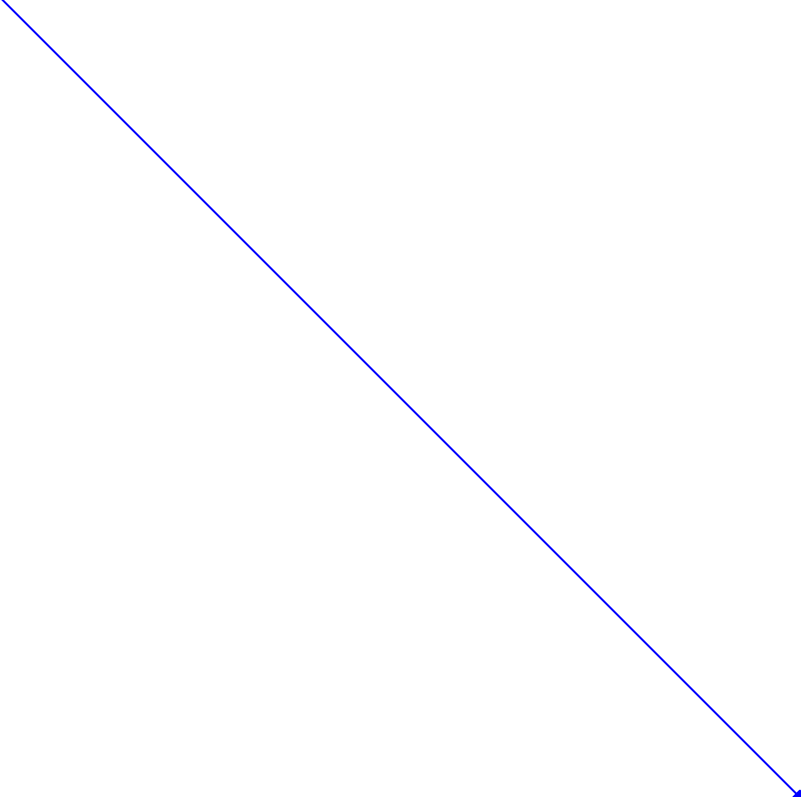

rs1060501251

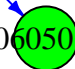

## Variant–Disease Network (Gaze palsy)

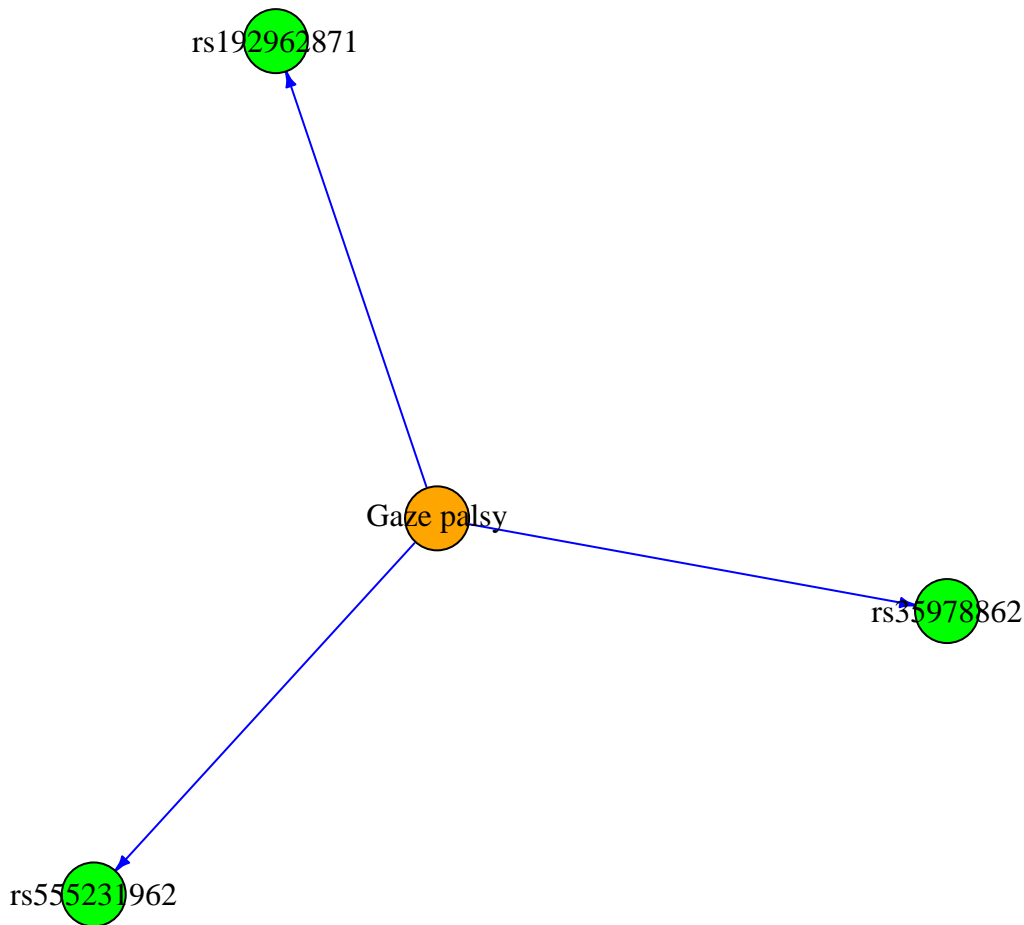

**Variant–Disease Network (GC1/GC2 POLYMORPHISM)**

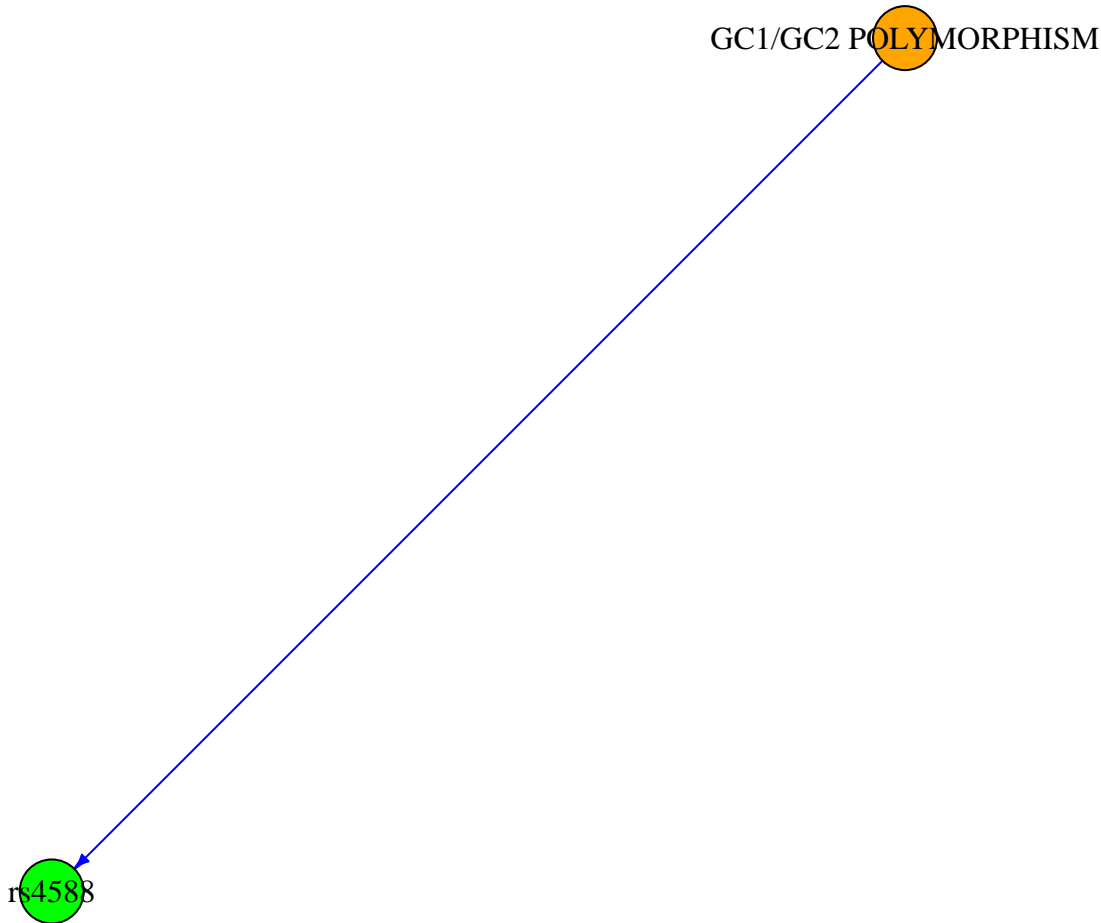



## Variant-Disease Network (Geleophysic dysplasia)

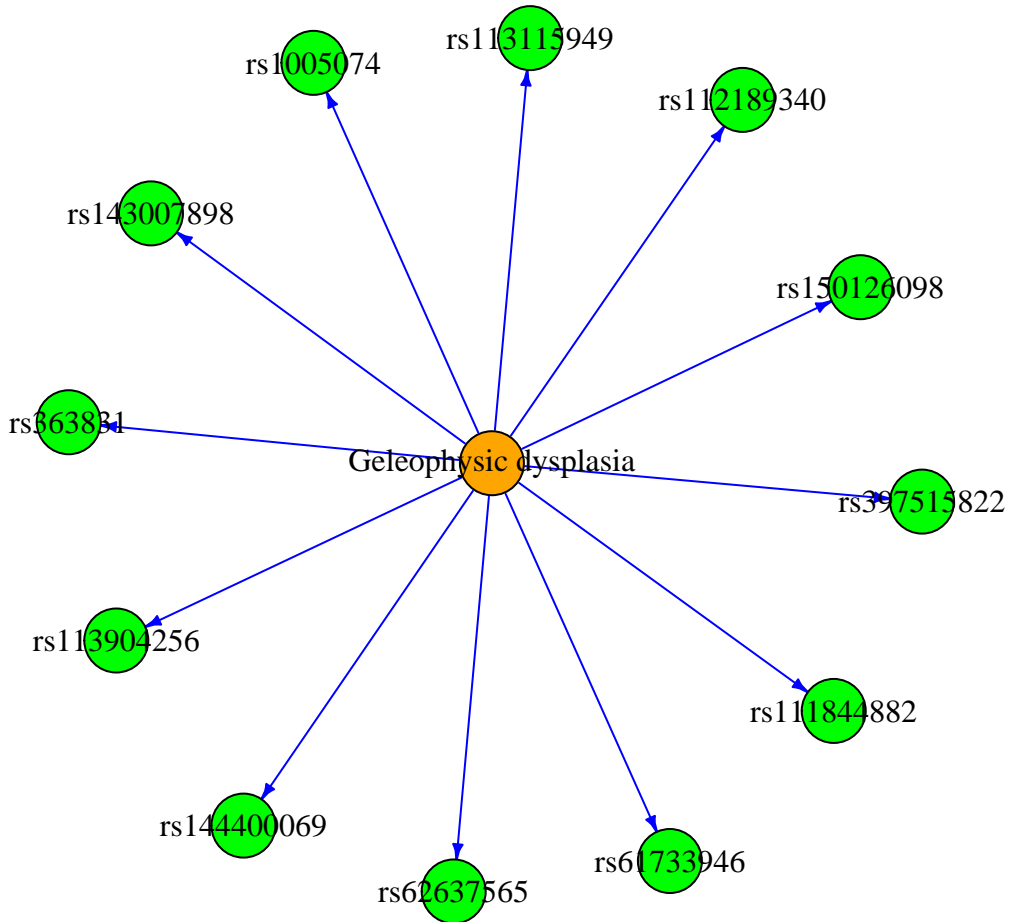

## Variant–Disease Network (Geleophysic dysplasia 2)

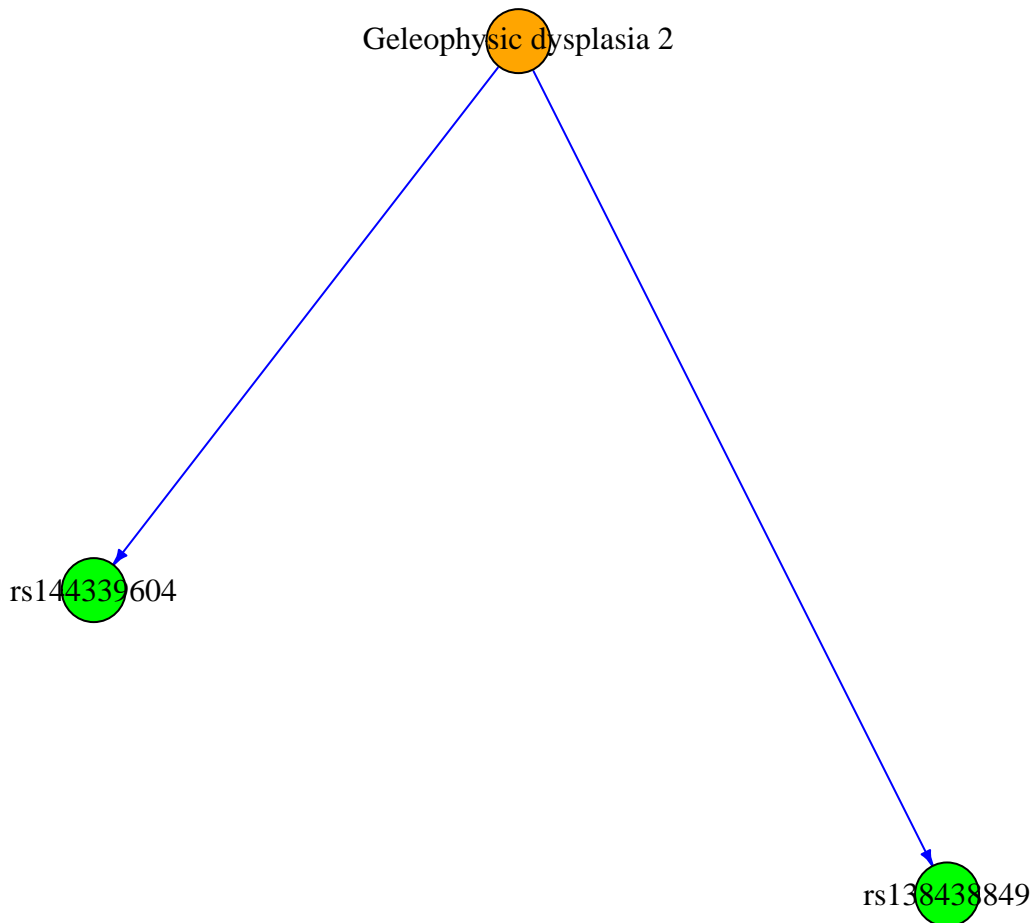

Variant–Disease Network (Generalized epilepsy and paroxysmal dyskinesia)

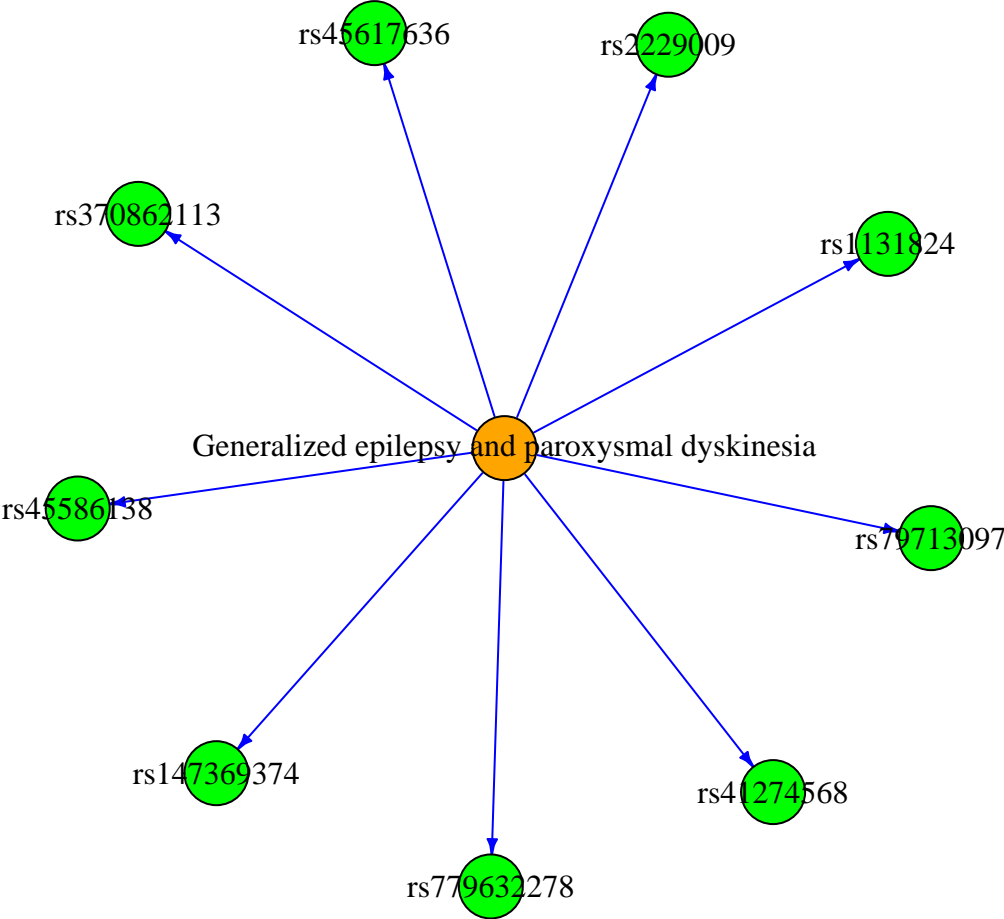

Variant–Disease Network (Generalized epilepsy with febrile seizures plus

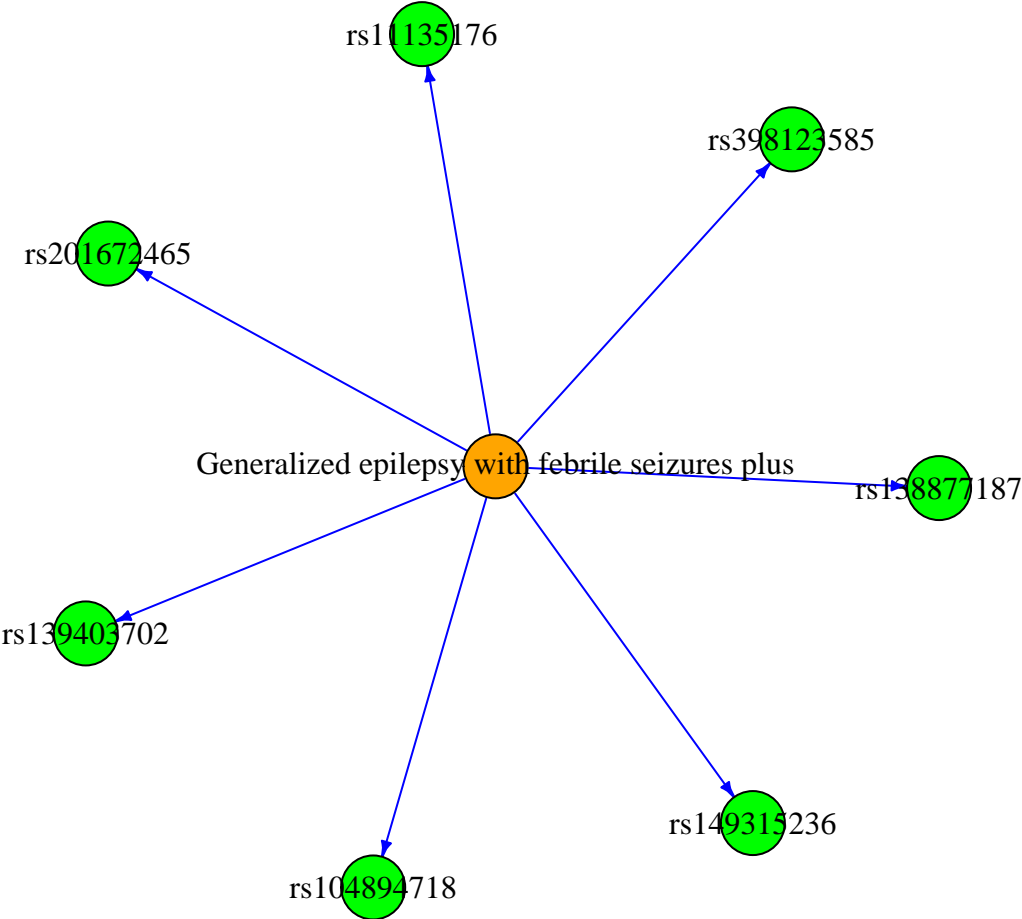

## Variant–Disease Network (Generalized hypotonia)

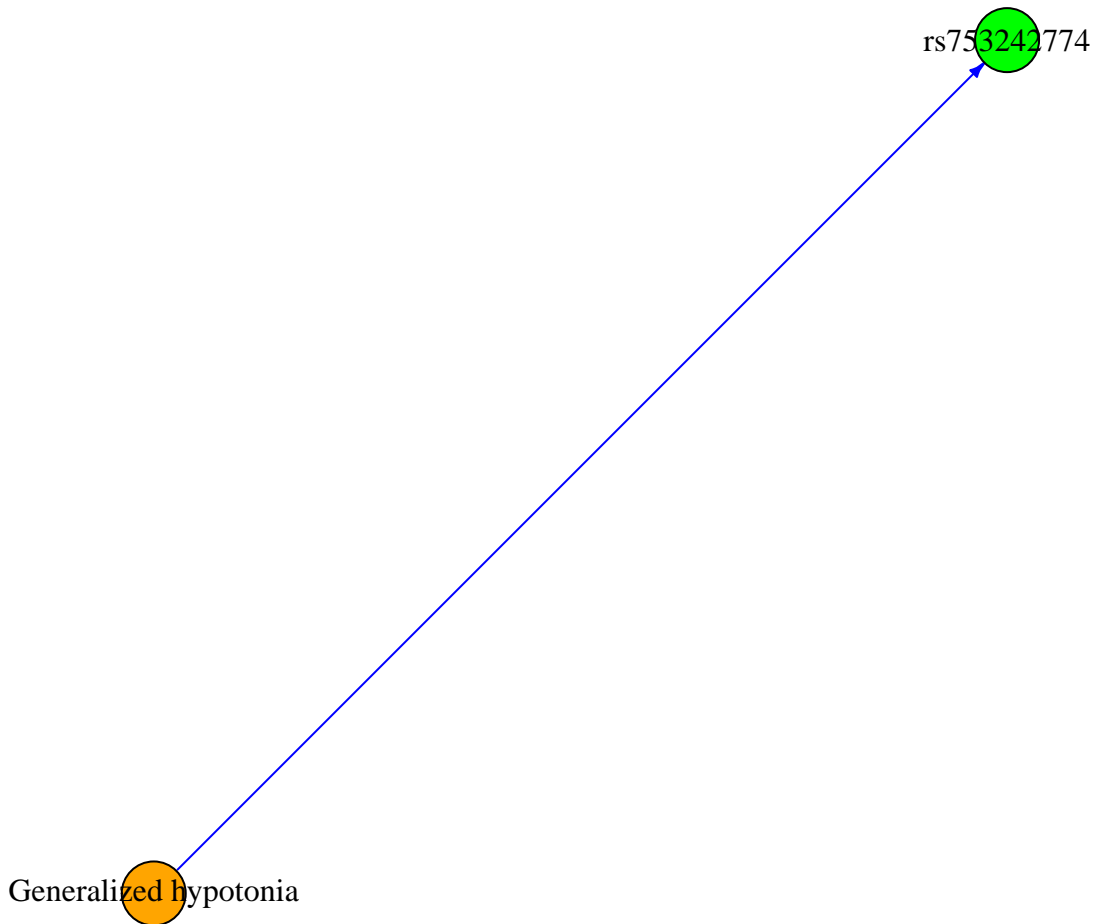

# Variant–Disease Network (Generalized tonic–clonic seizures)

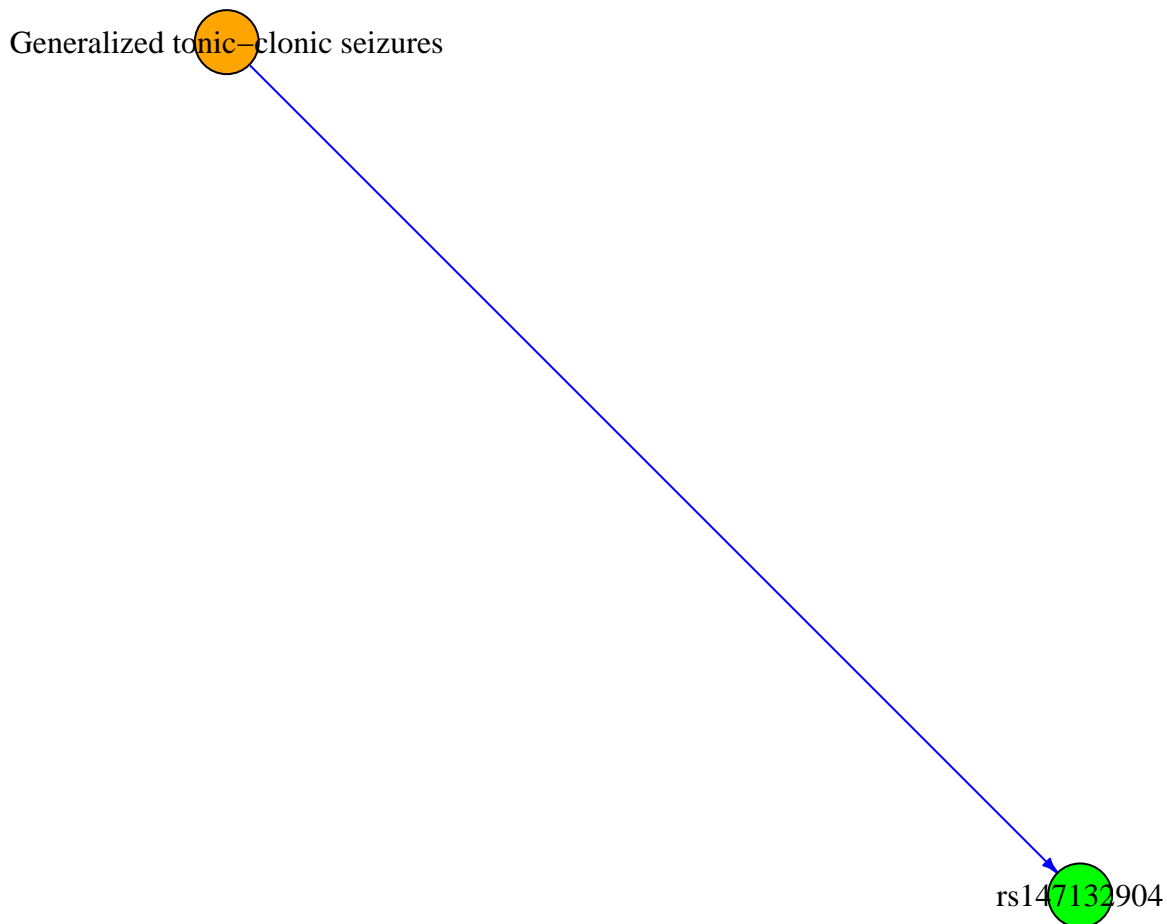

# Variant–Disease Network (Geroderma osteodysplastica)

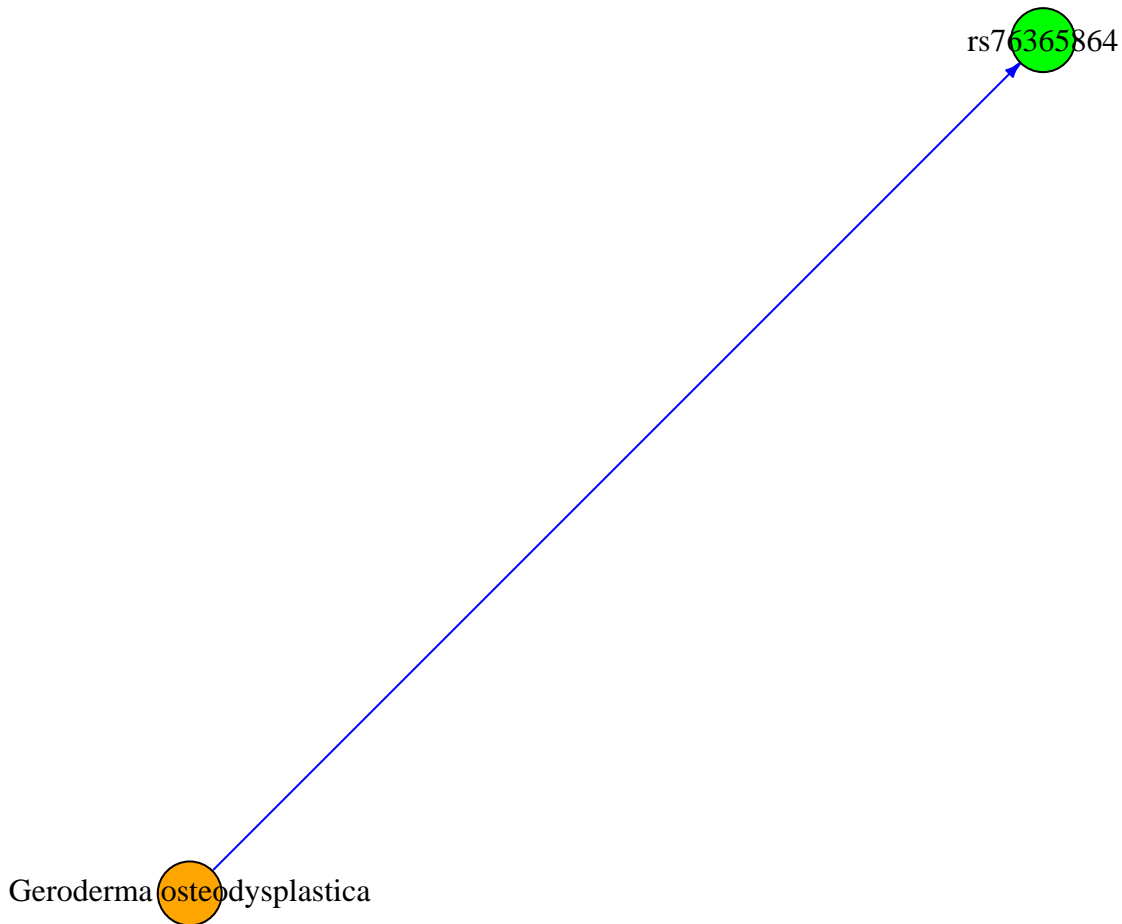

# Variant–Disease Network (Giant axonal neuropathy 1)

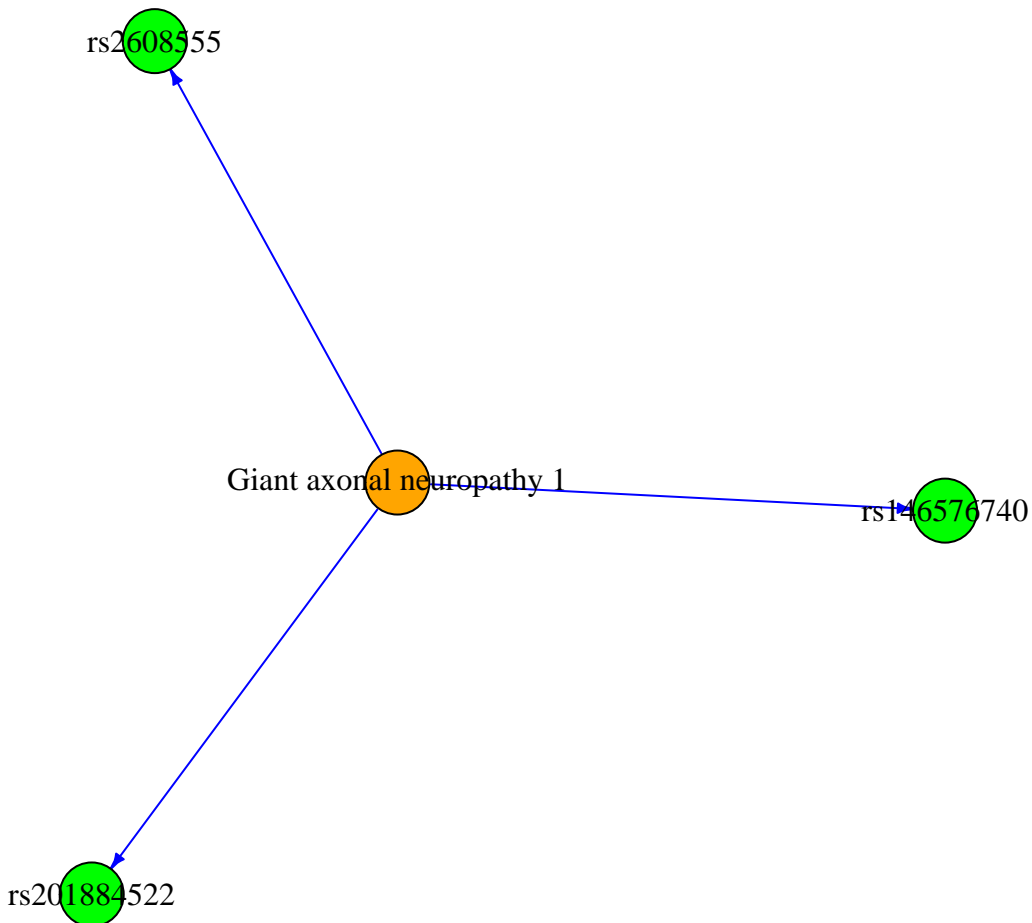



## Variant–Disease Network (Gillespie syndrome)

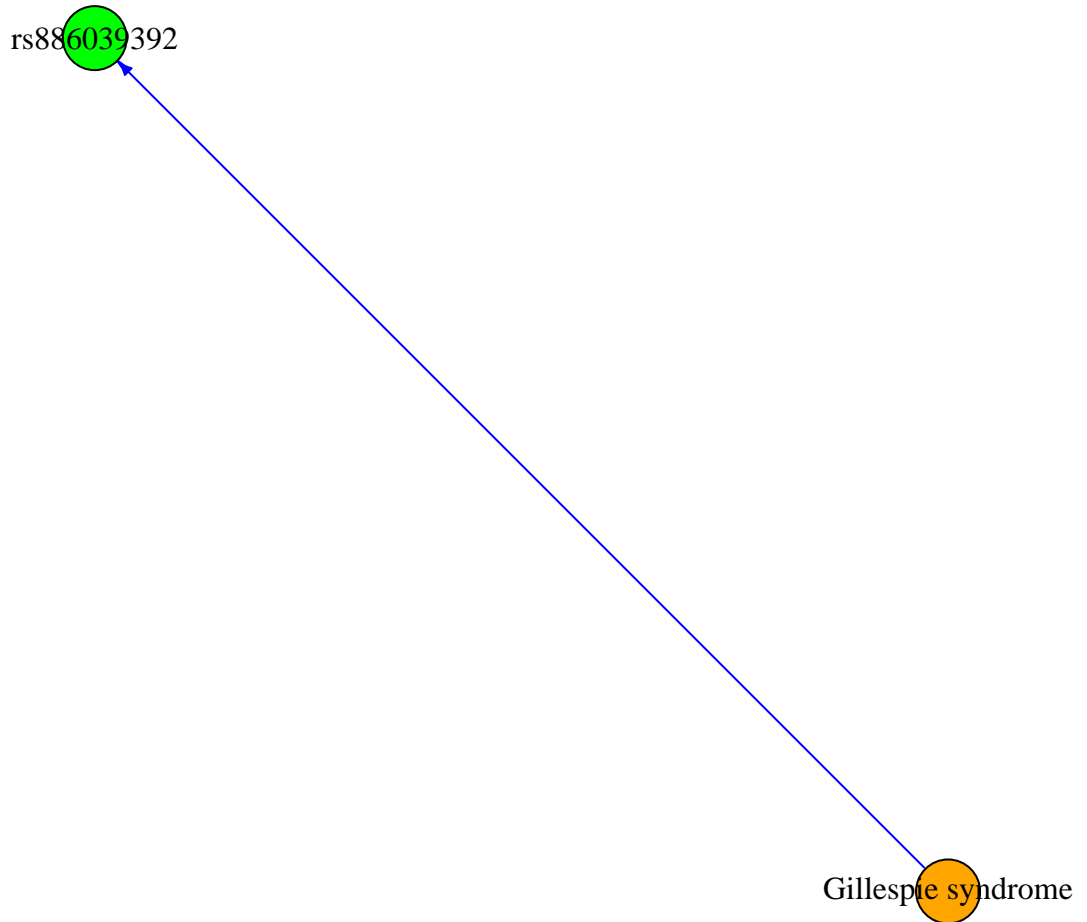

## Variant–Disease Network (Gingival fibromatosis)

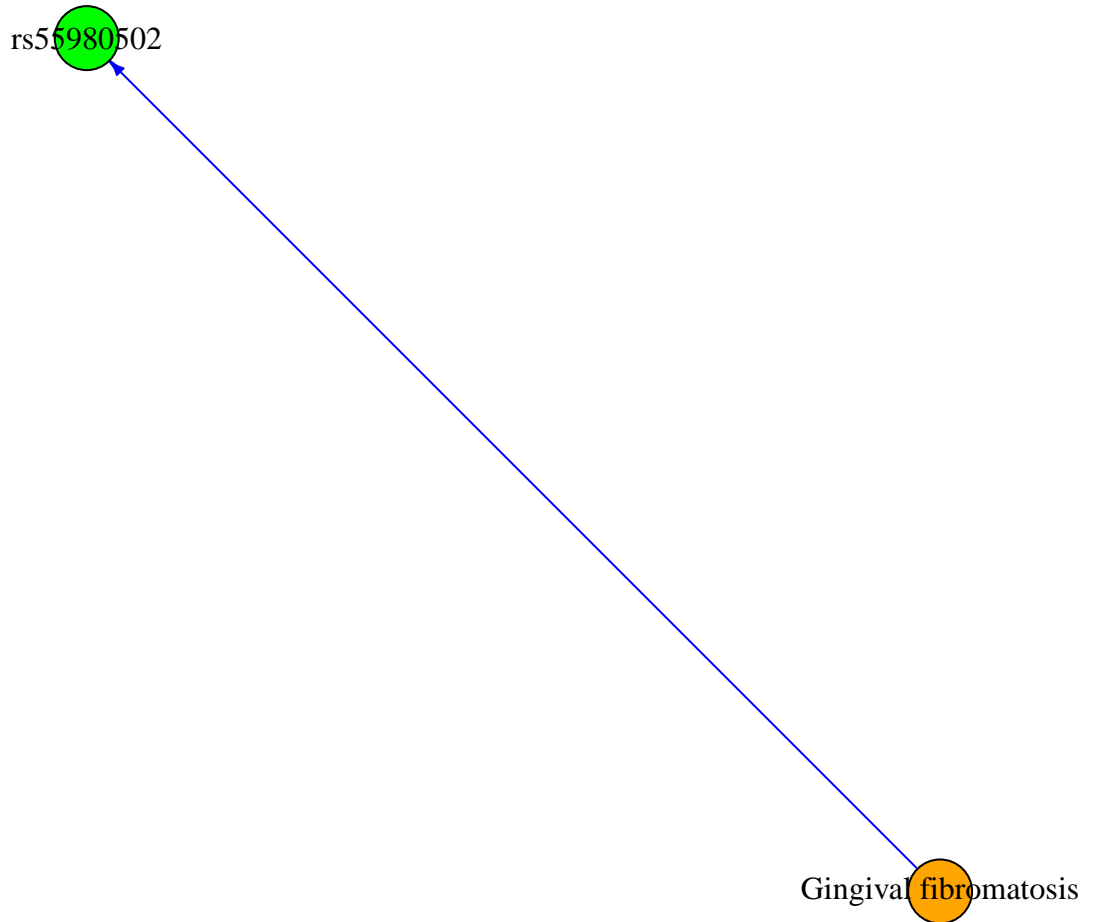

## Variant–Disease Network (Glanzmann thrombasthenia)

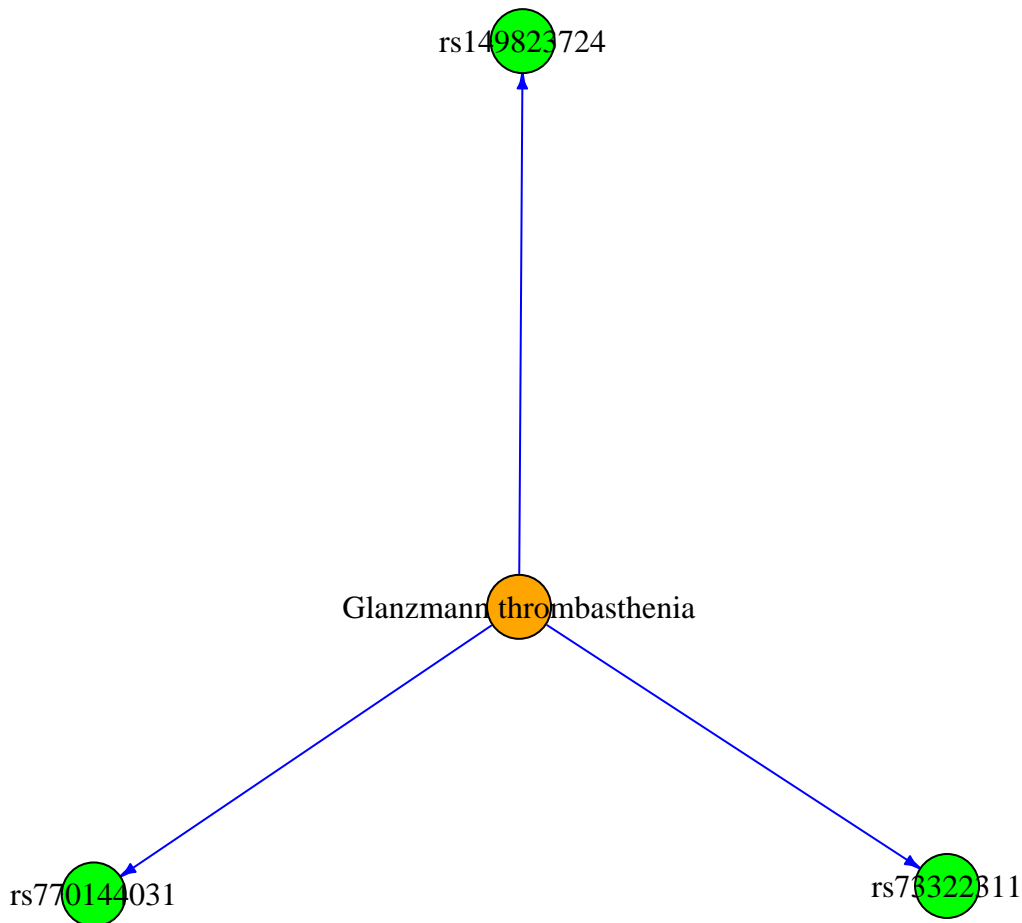

## Variant-Disease Network (Glaucoma 1)

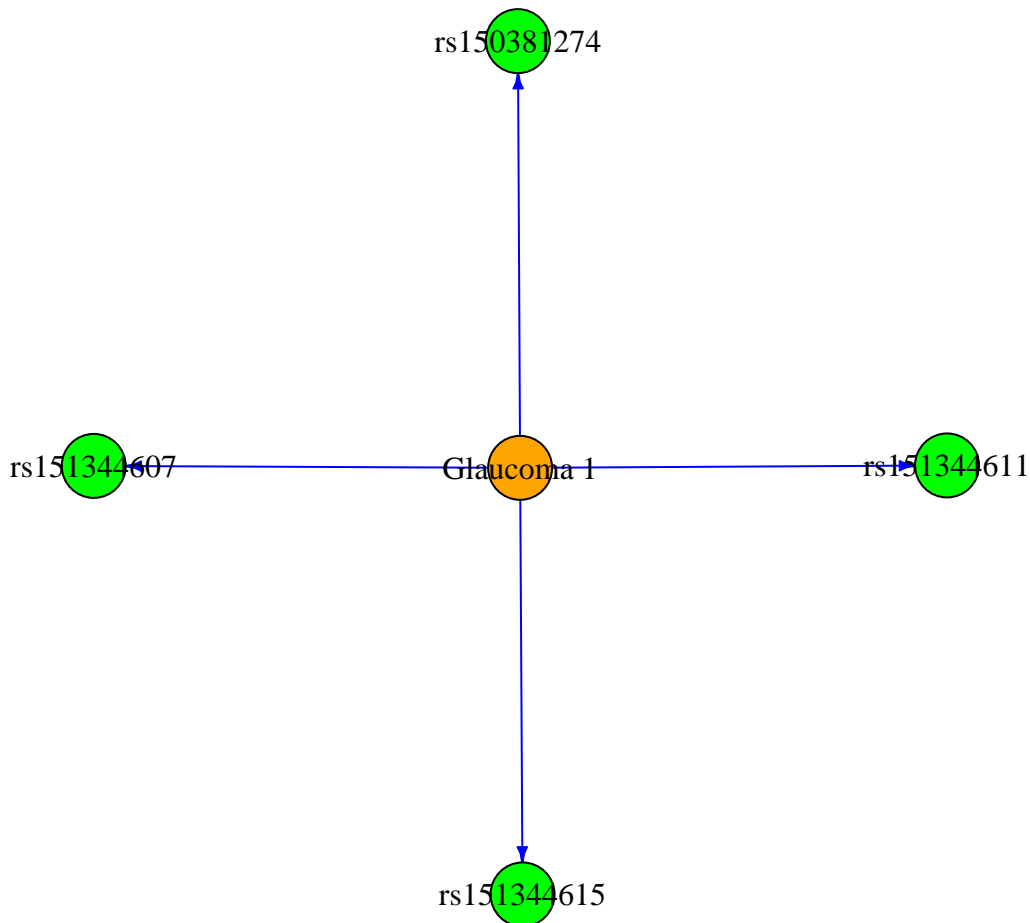

## Variant-Disease Network (Glaucoma 3)

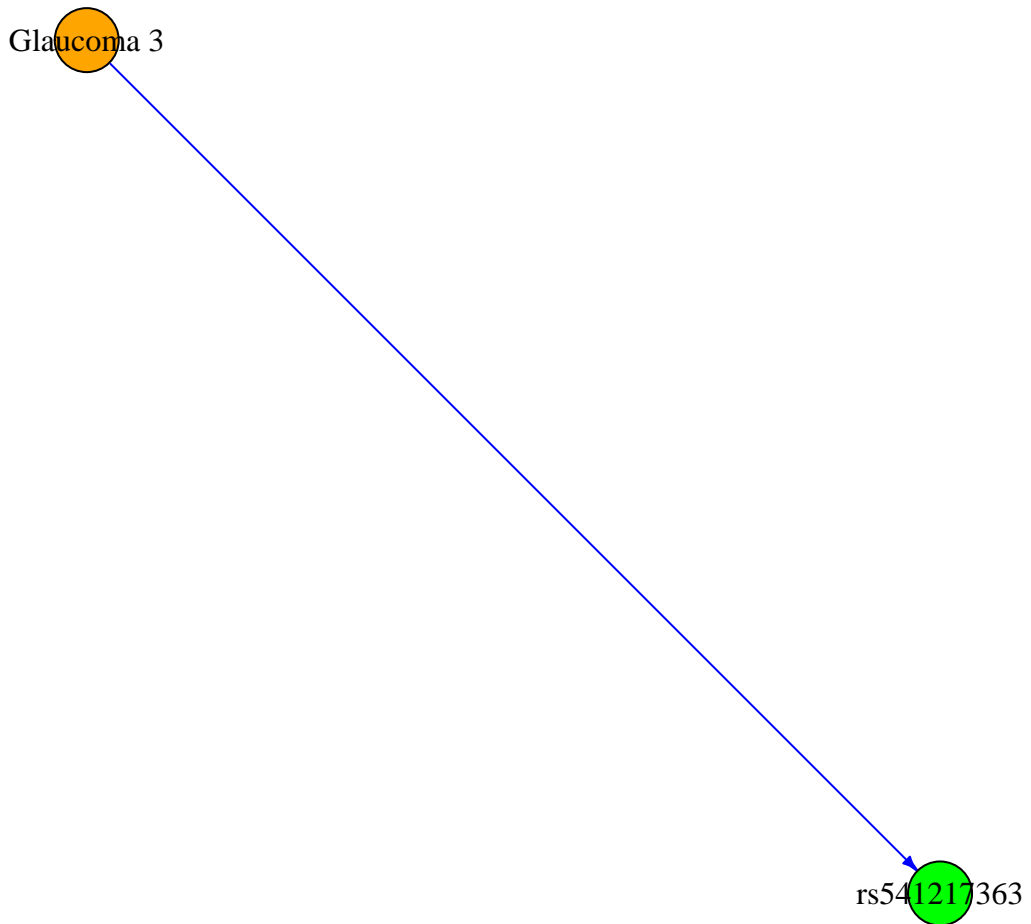

Variant–Disease Network (Global developmental delay)

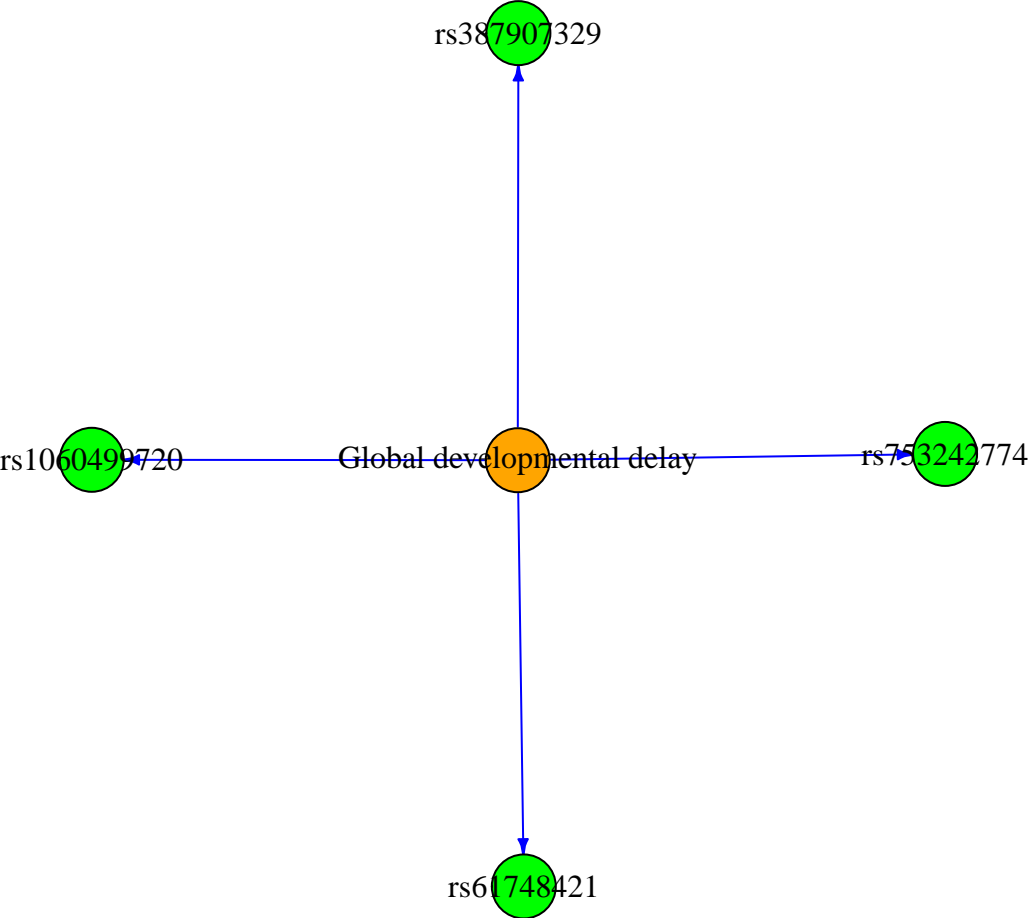

**Variant–Disease Network (Glucocorticoid deficiency with achalasia)**

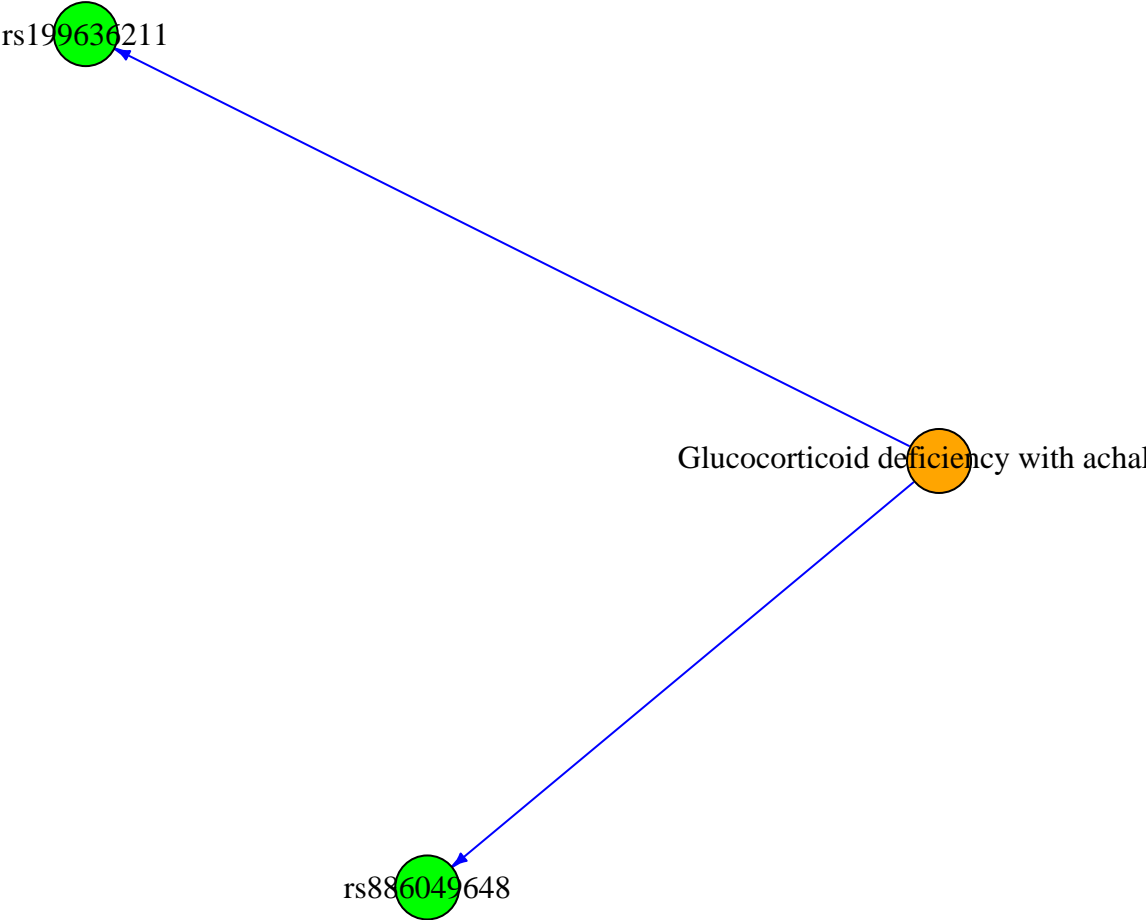

Variant–Disease Network (Glucose transporter type 1 deficiency syndrome)

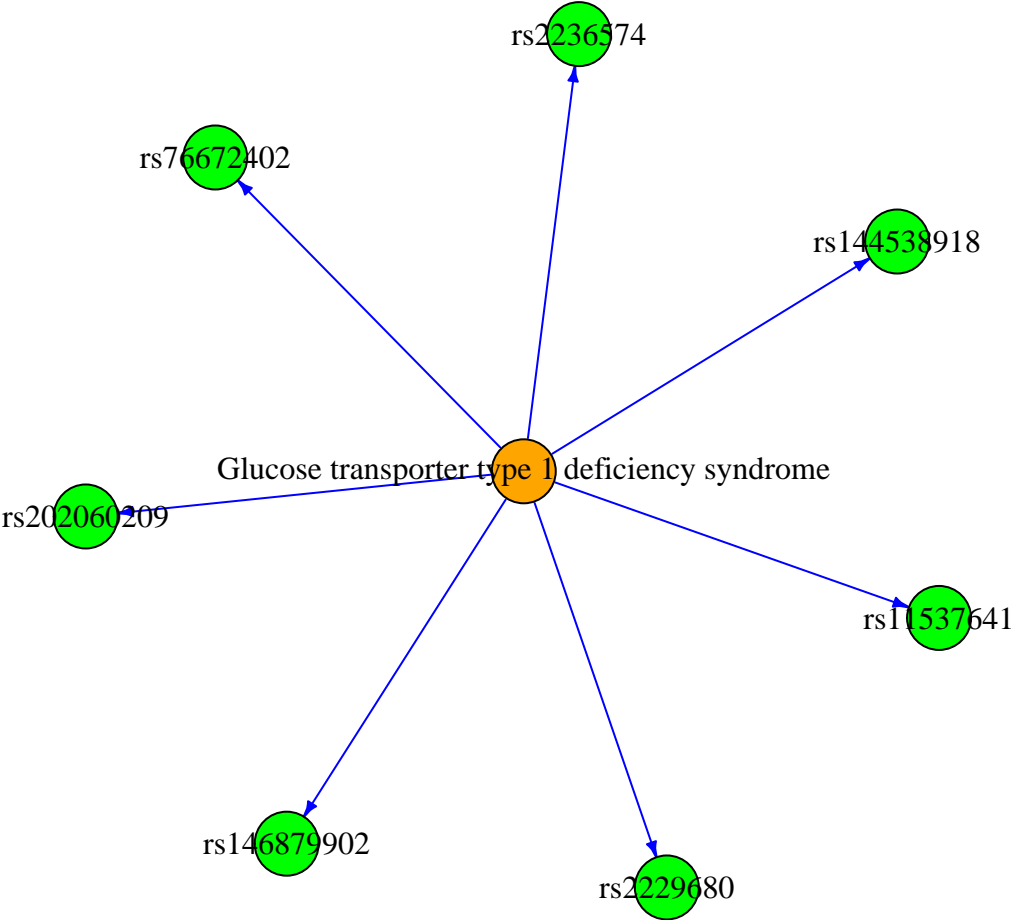



Variant–Disease Network (Glucose–6–phosphate transport defect)

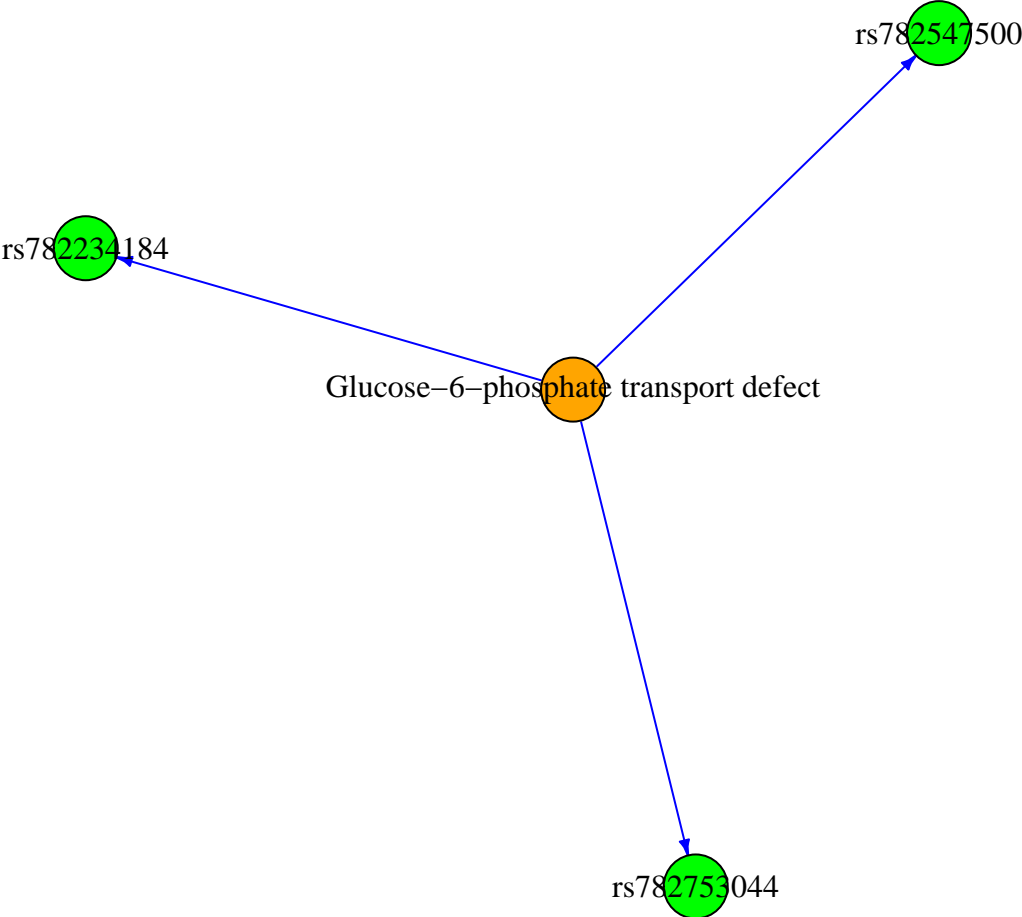

Variant–Disease Network (GLUT1 deficiency syndrome 1)

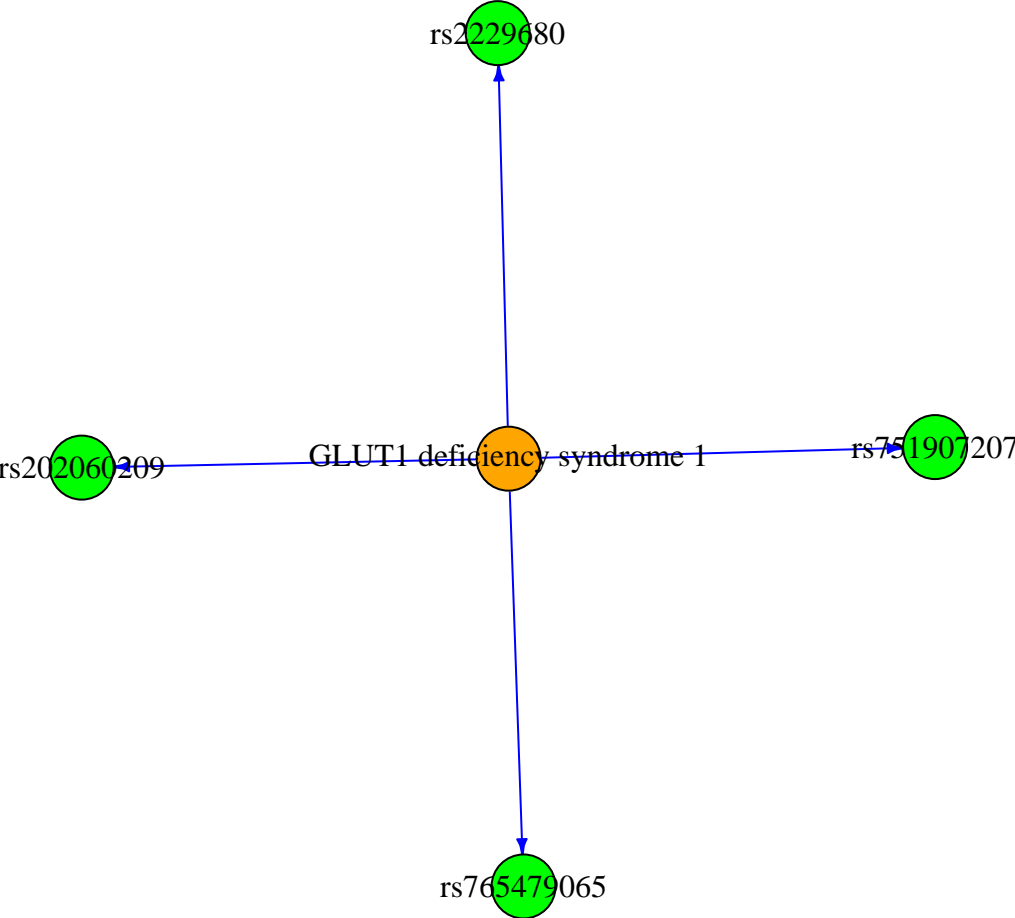

**Variant–Disease Network (GLUT1 deficiency syndrome 2)**

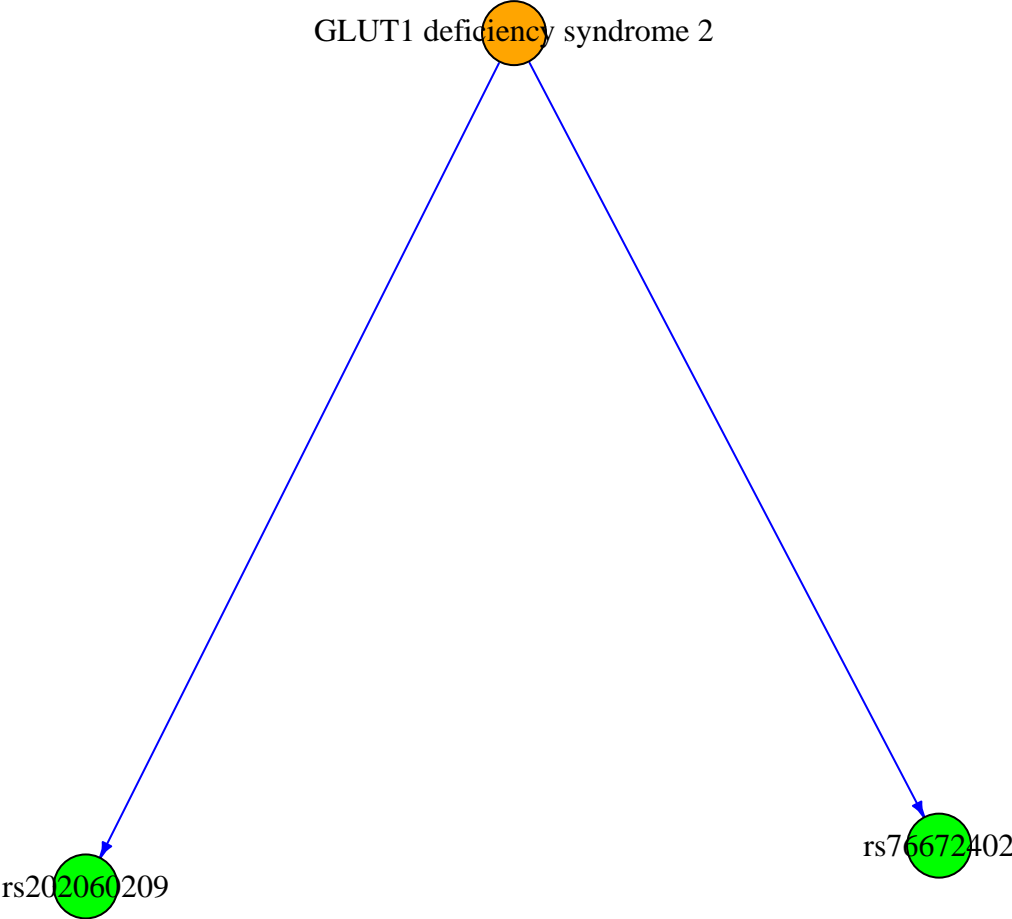

# Variant-Disease Network (GLUTAMIC PYRUVATE TRANSAMINASE POLYMORPHISM)

GLUTAMIC PYRUVATE TRANSAMINASE POLYMORPHISM

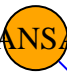

rs1063739

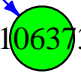

# Variant-Disease Network (Gluthathione synthetase deficiency)

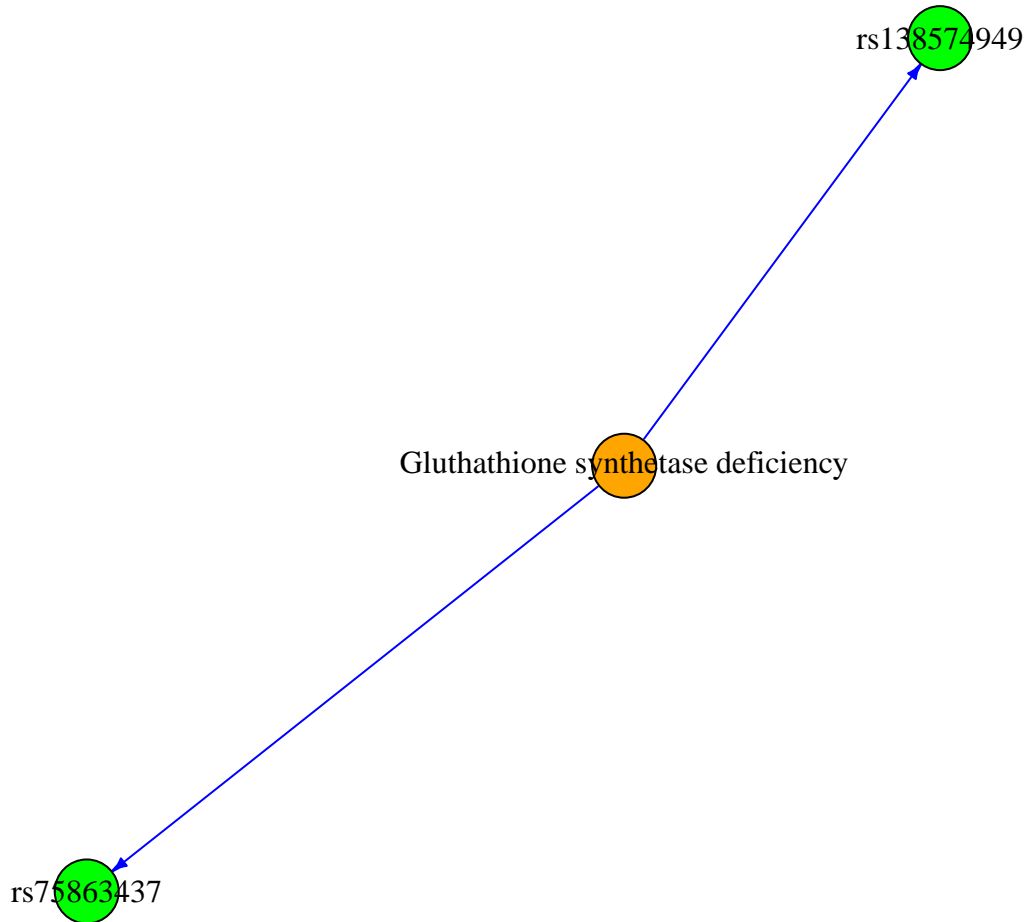

# Variant–Disease Network (Glycogen phosphorylase kinase deficiency)

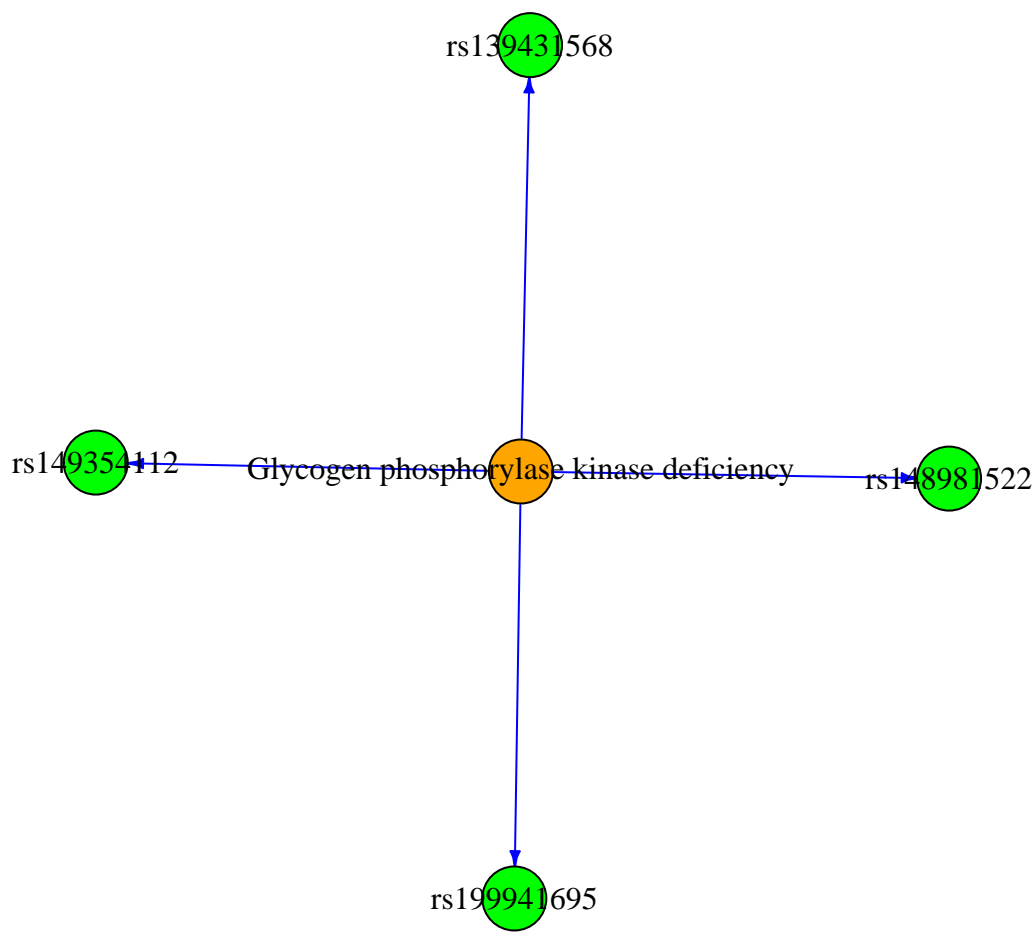

## Variant–Disease Network (Glycogen storage disease)

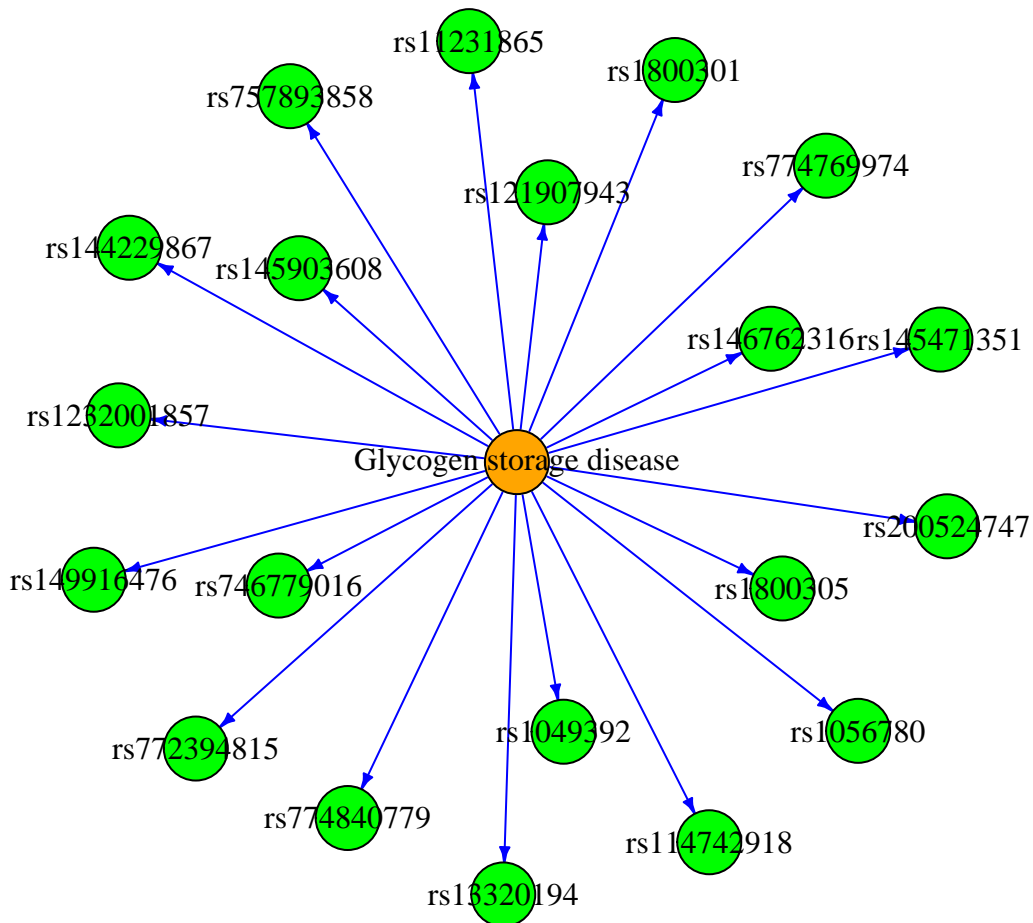

## Variant–Disease Network (Glycogen storage disease 0)

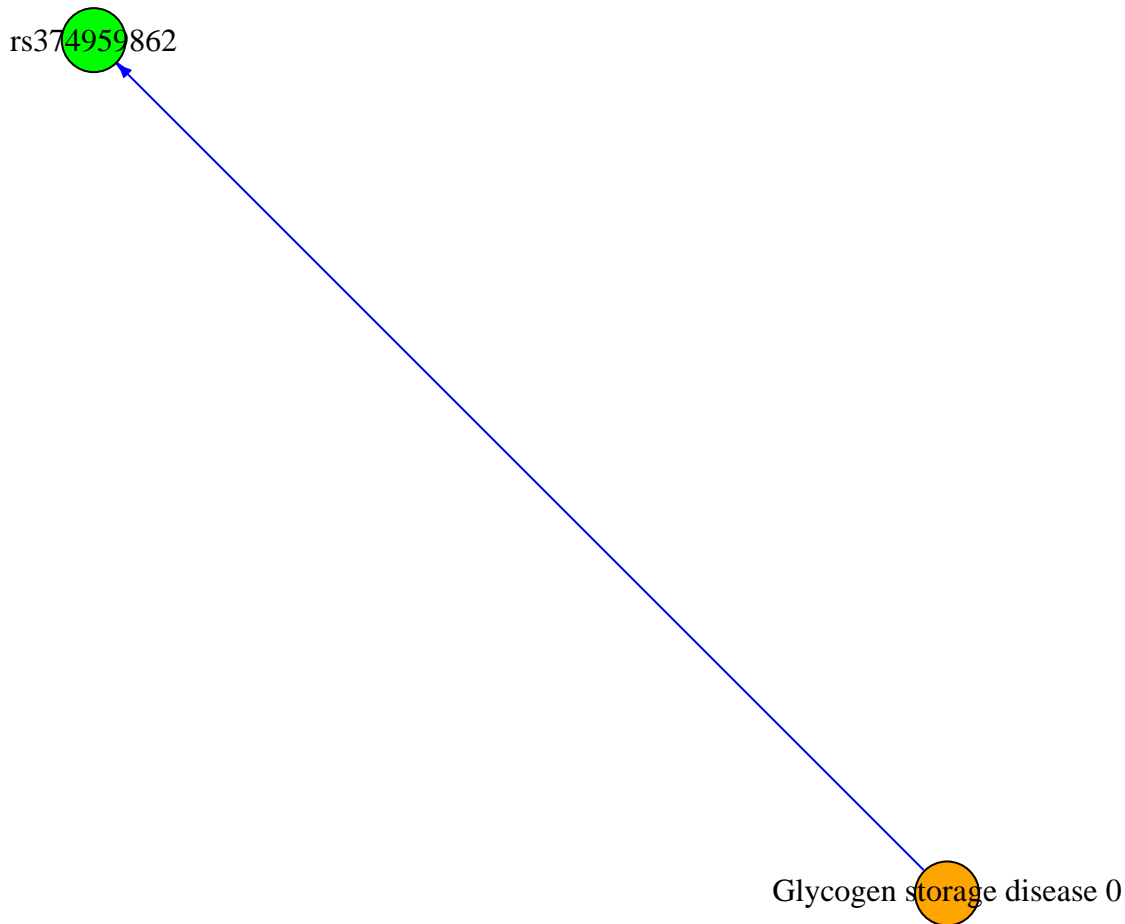



Variant–Disease Network (Glycogen storage disease IXb)

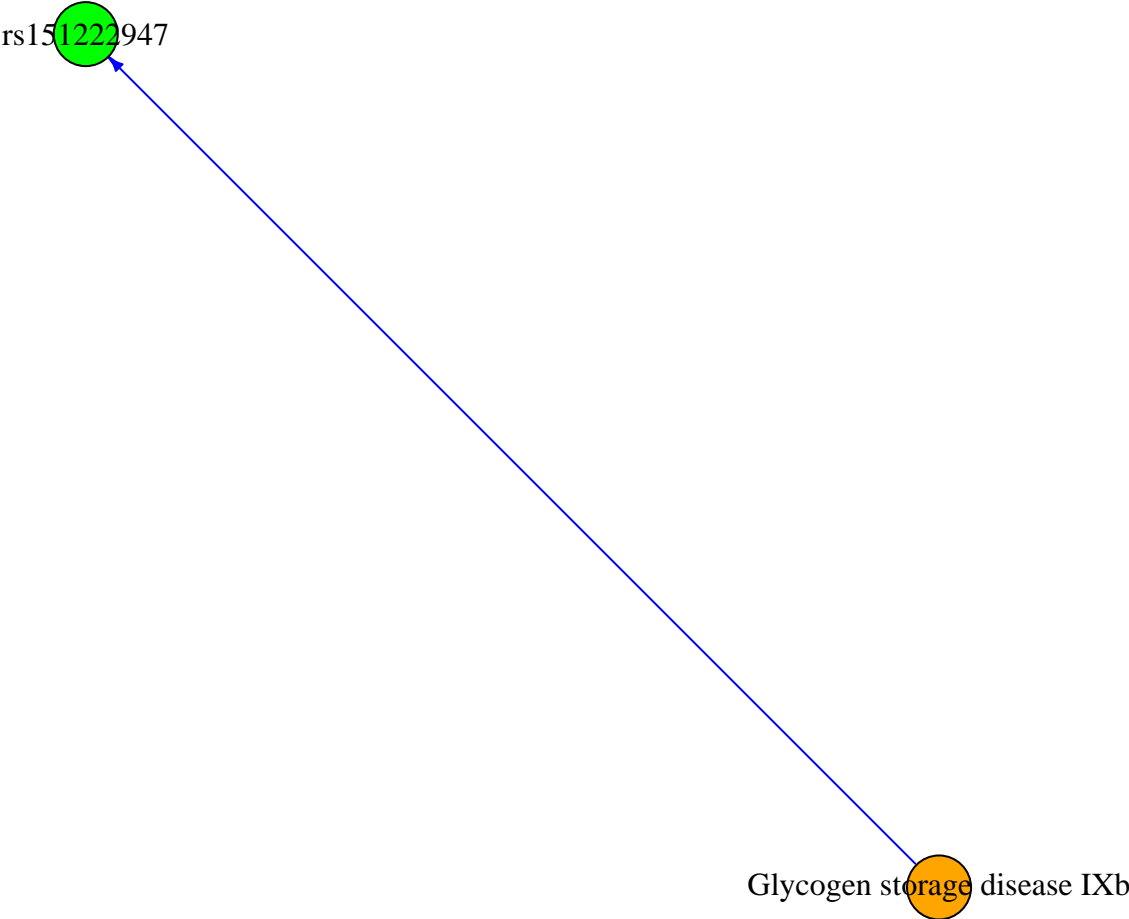

Variant–Disease Network (Glycogen storage disease of heart)

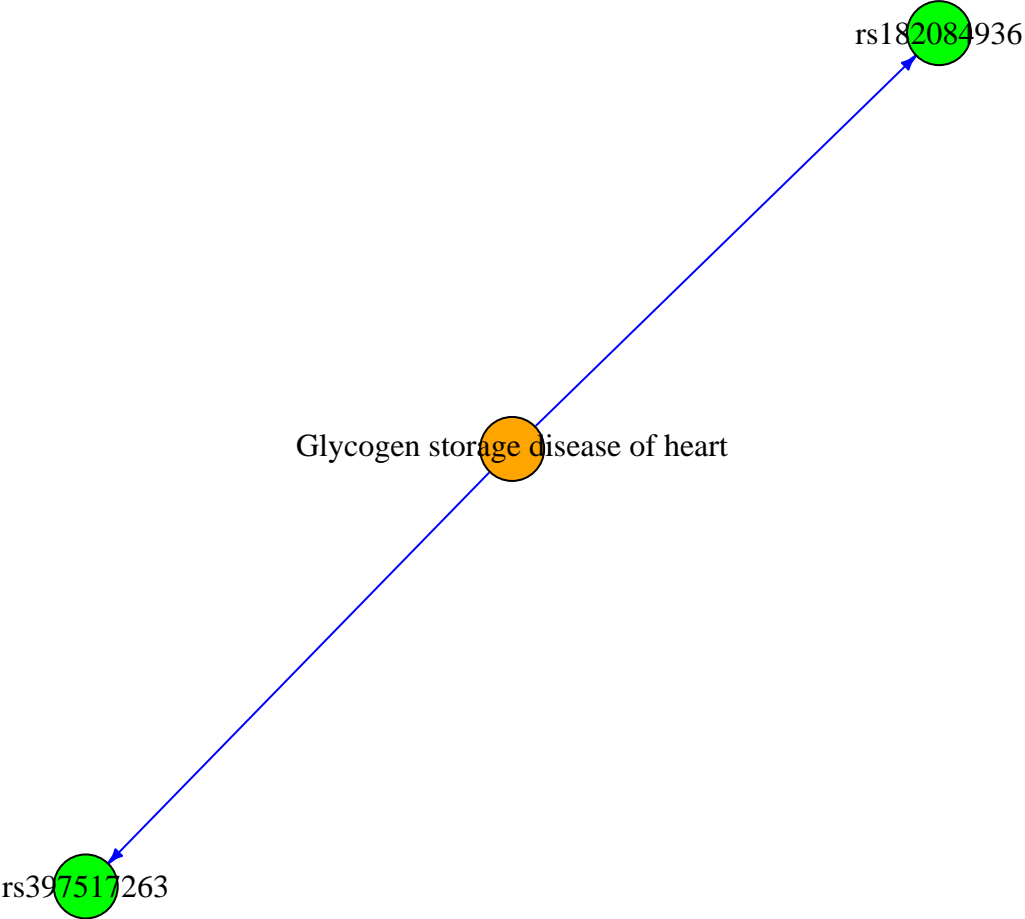

## Variant–Disease Network (Glycogen storage disease type 13)

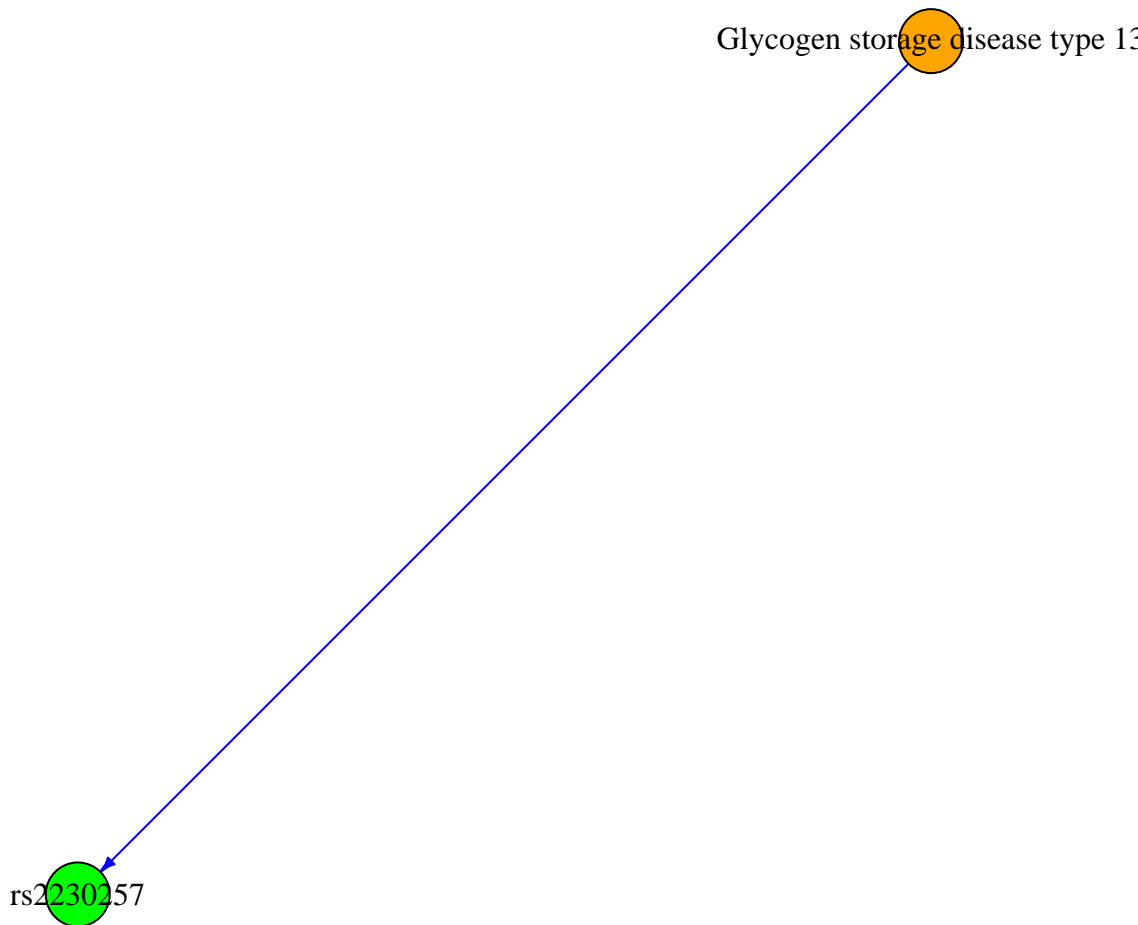

## Variant–Disease Network (Glycogen storage disease type III)

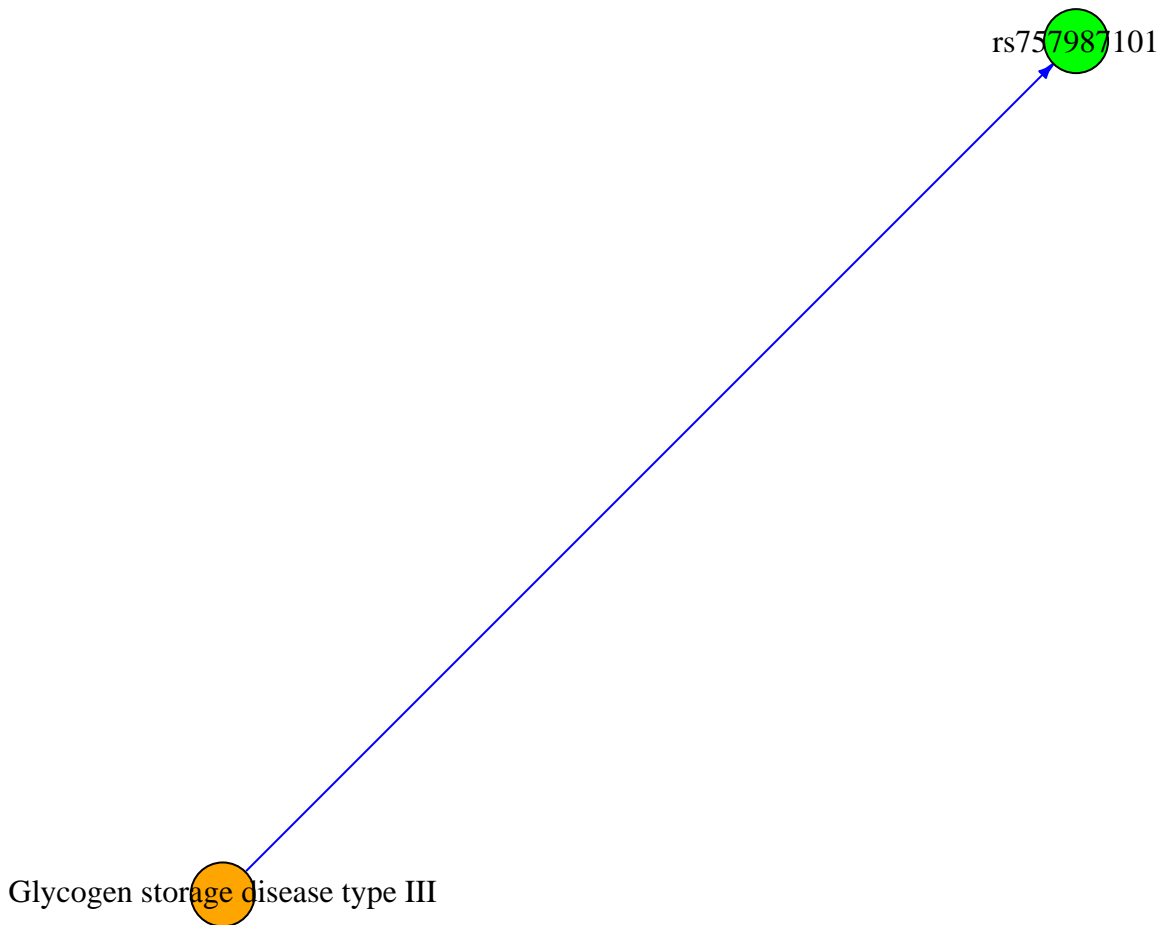

Variant–Disease Network (Glycogen storage disease type X)

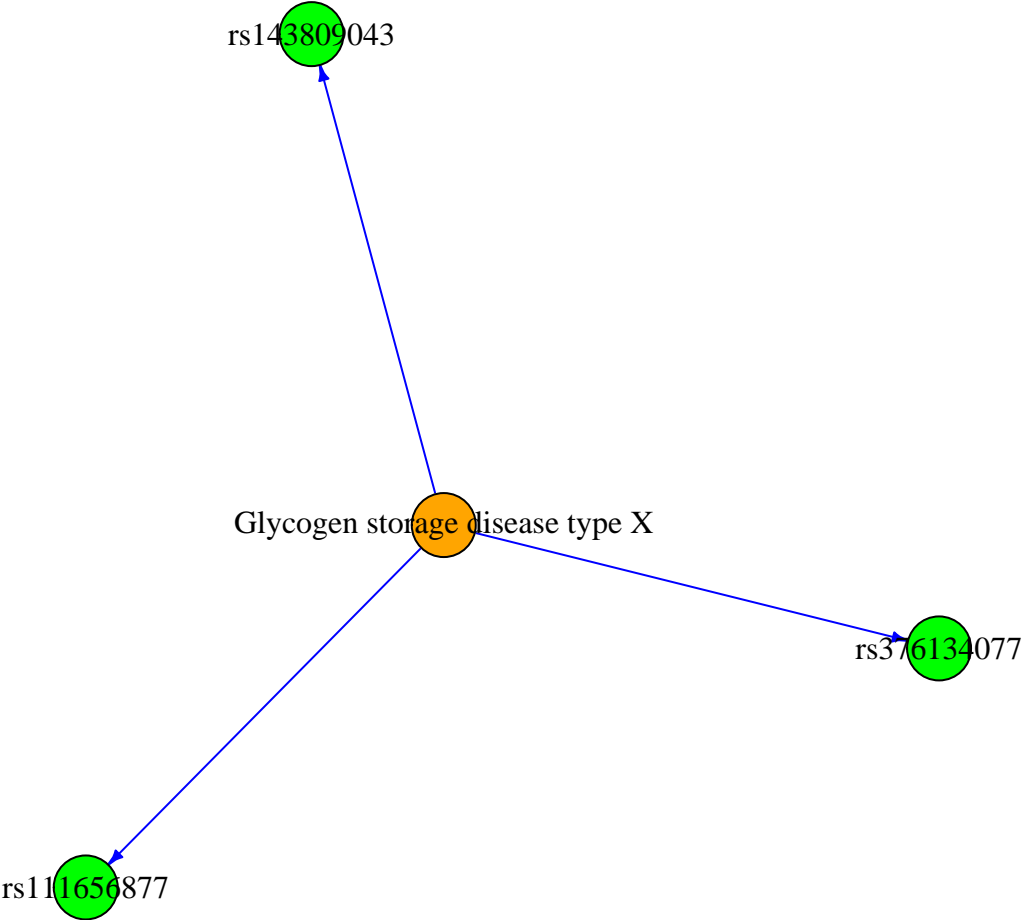

## Variant–Disease Network (Glycogen storage disease XI)

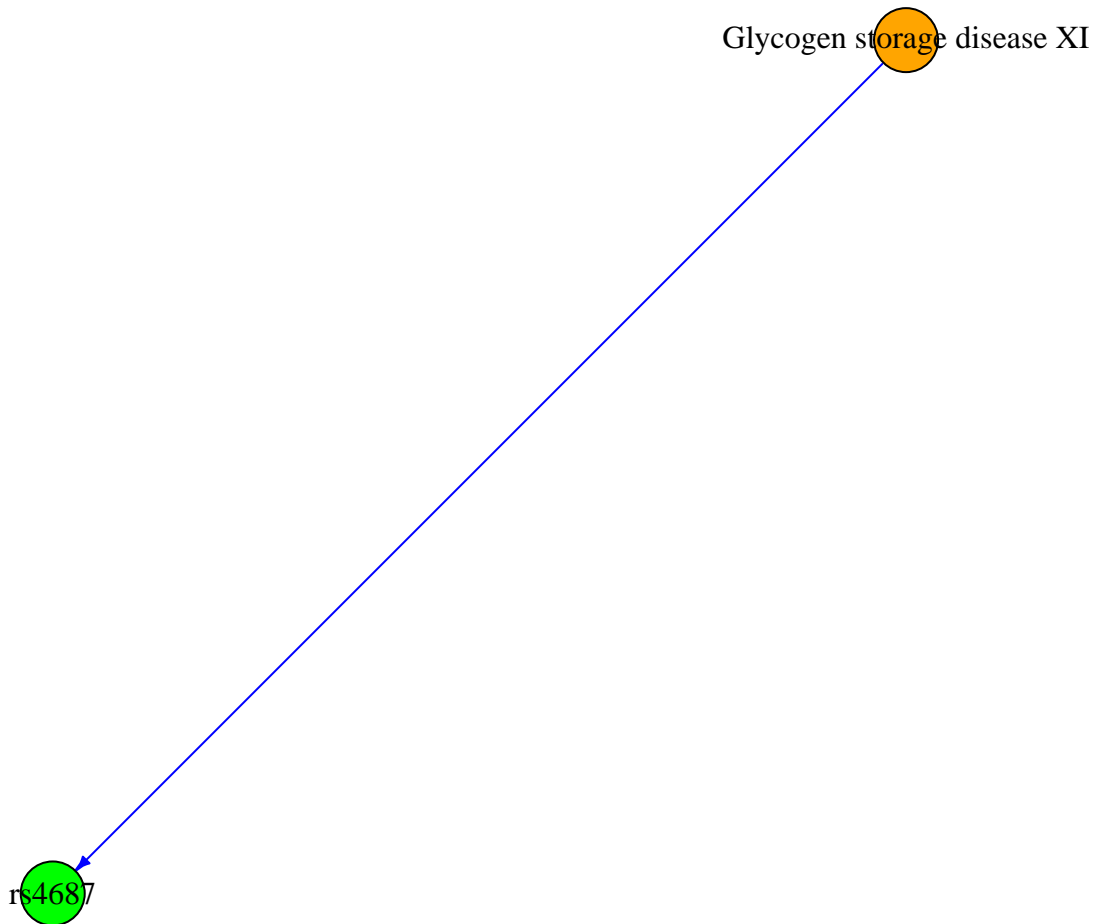

**Variant–Disease Network (GM1 gangliosidosis type 2)**

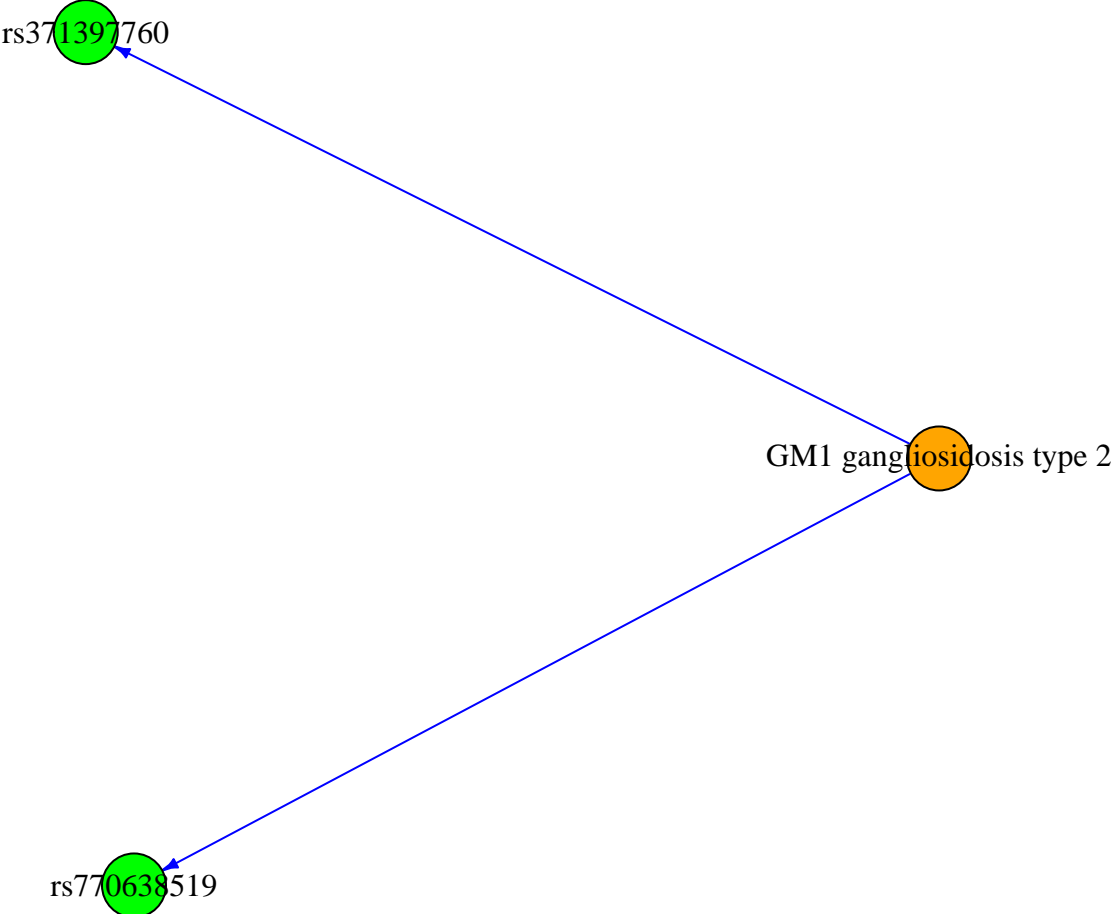

## Variant–Disease Network (GNE myopathy)

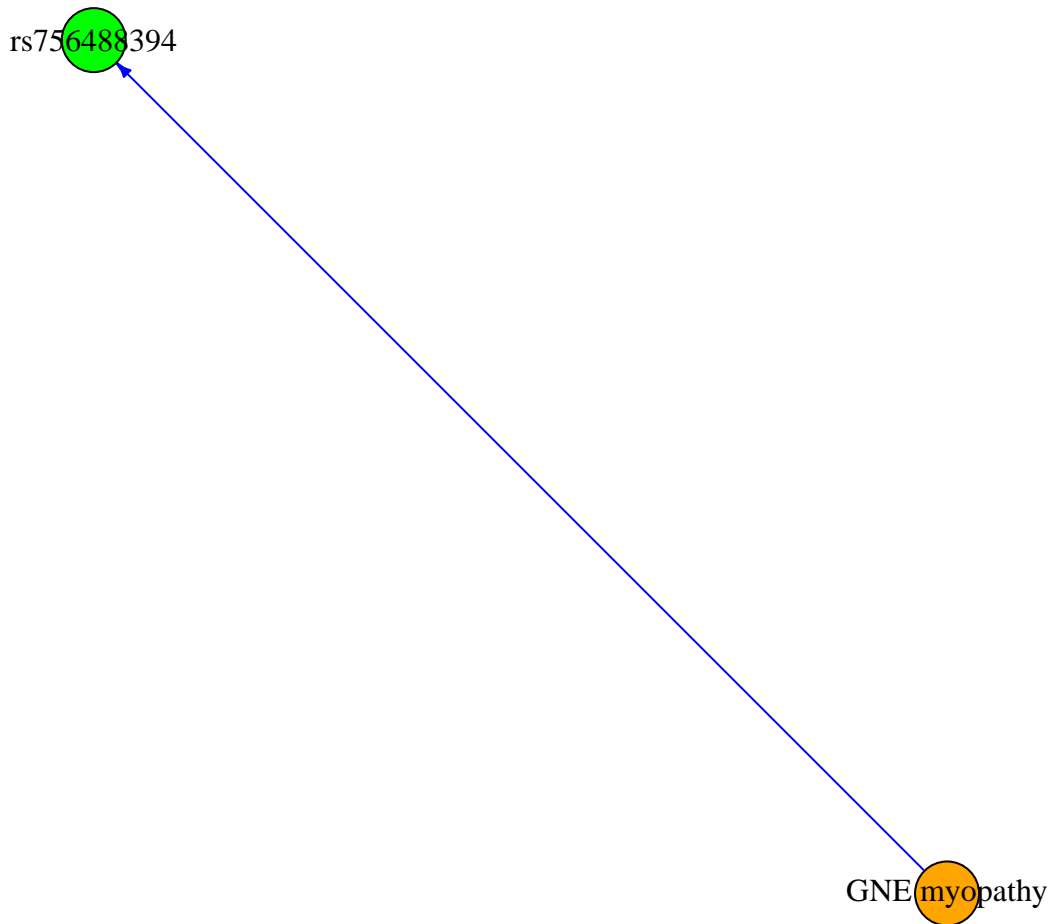



## Variant-Disease Network (Gorlin syndrome)

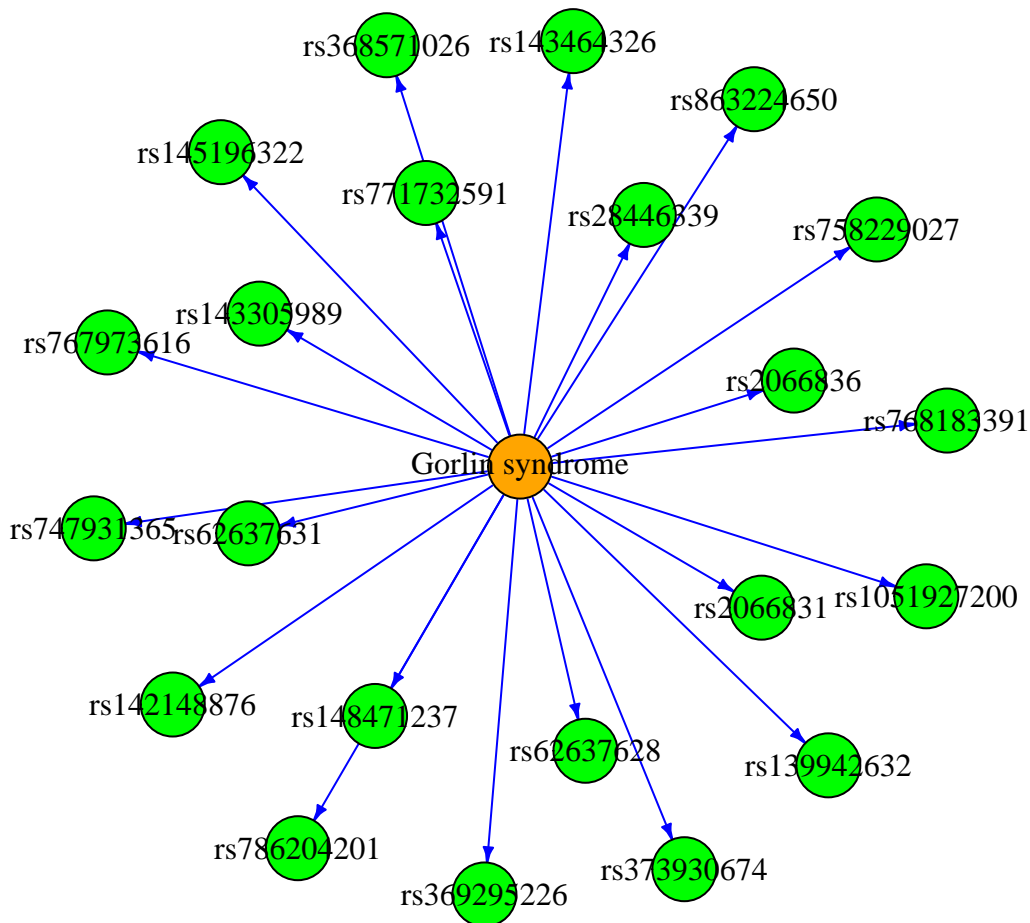

## Variant–Disease Network (GRACILE syndrome)

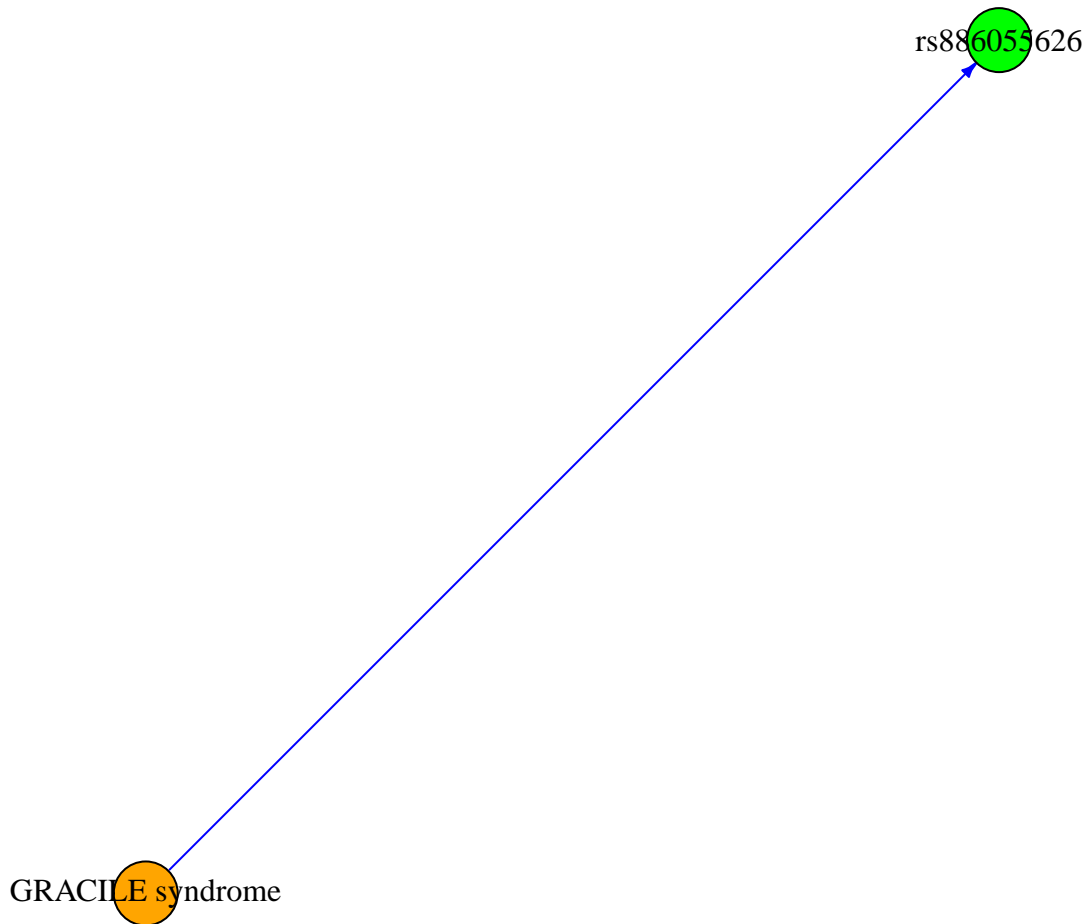

## Variant–Disease Network (Gray platelet syndrome)

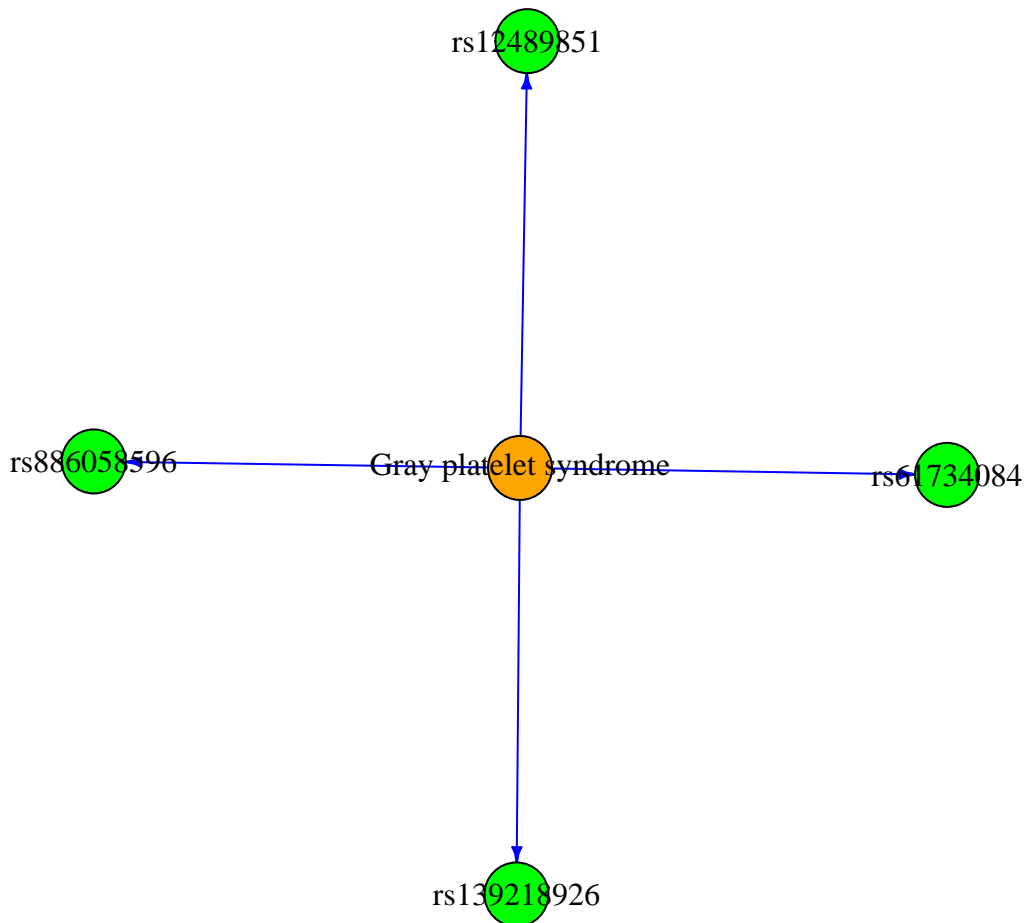

Variant–Disease Network (Greenberg dysplasia)

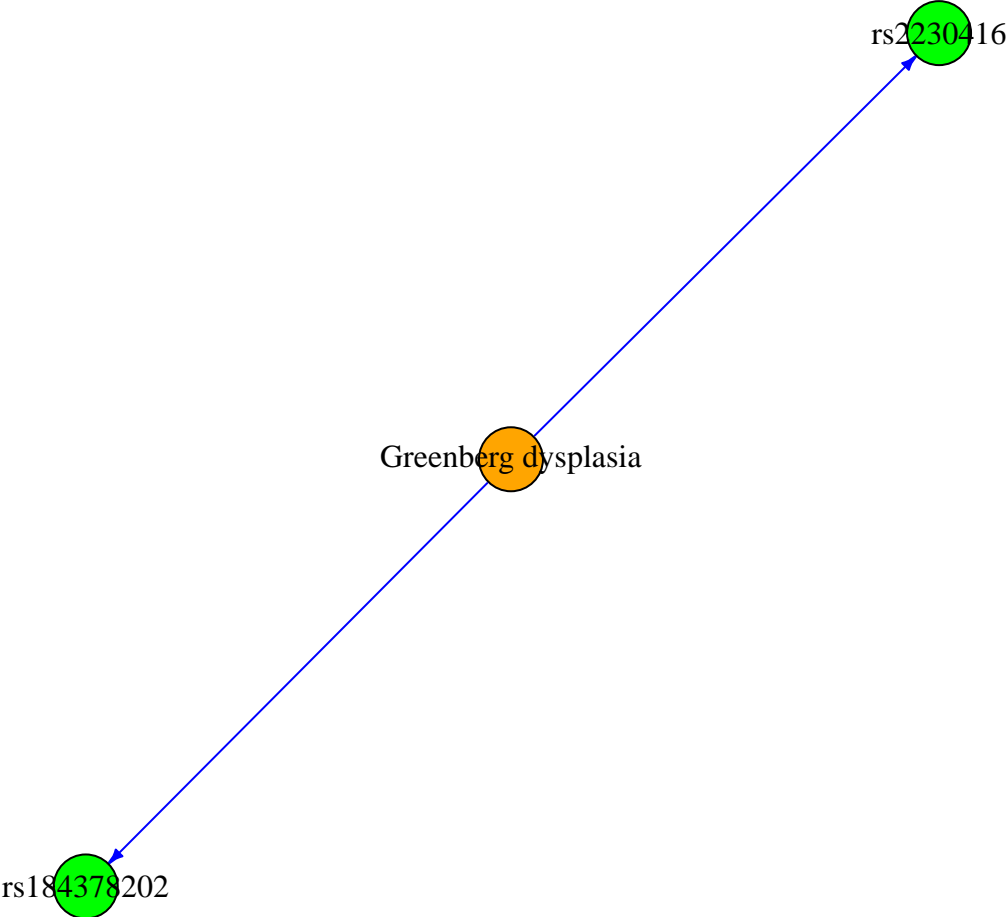

**Variant–Disease Network (Greig cephalopolysyndactyly syndrome)**

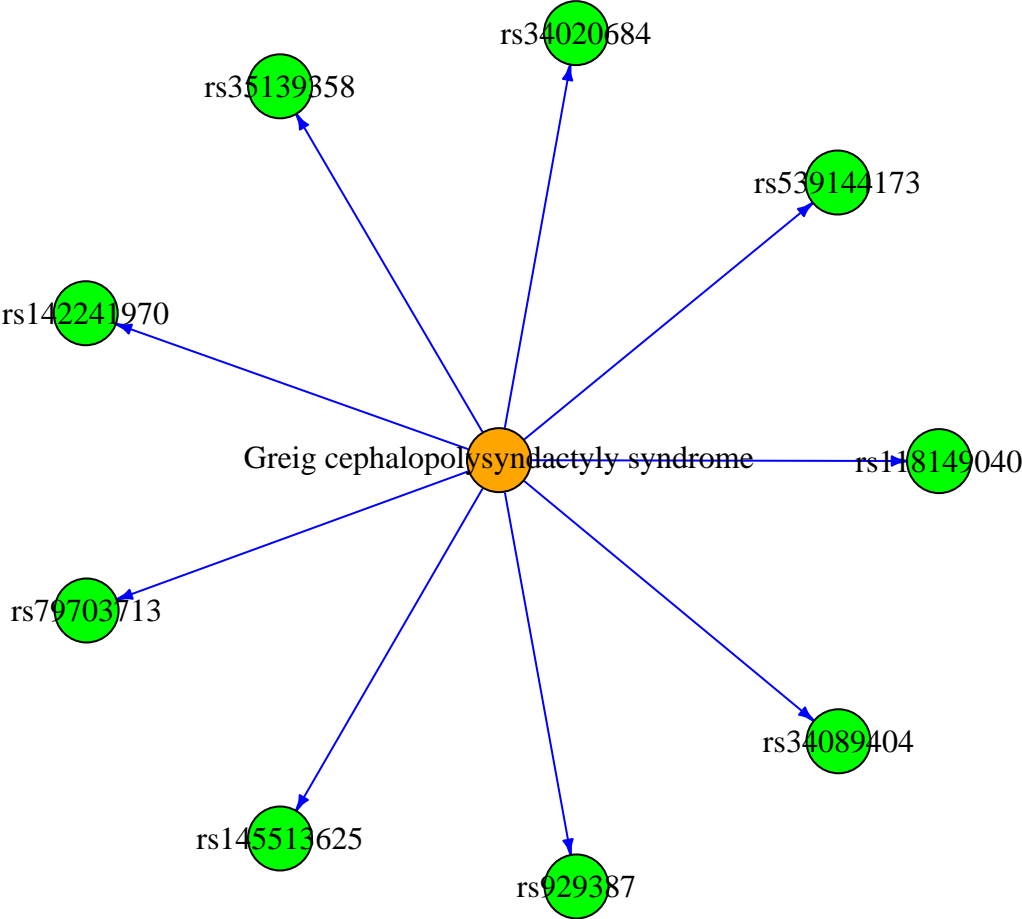

# Variant–Disease Network (Growth hormone insensitivity with immunodeficiency)

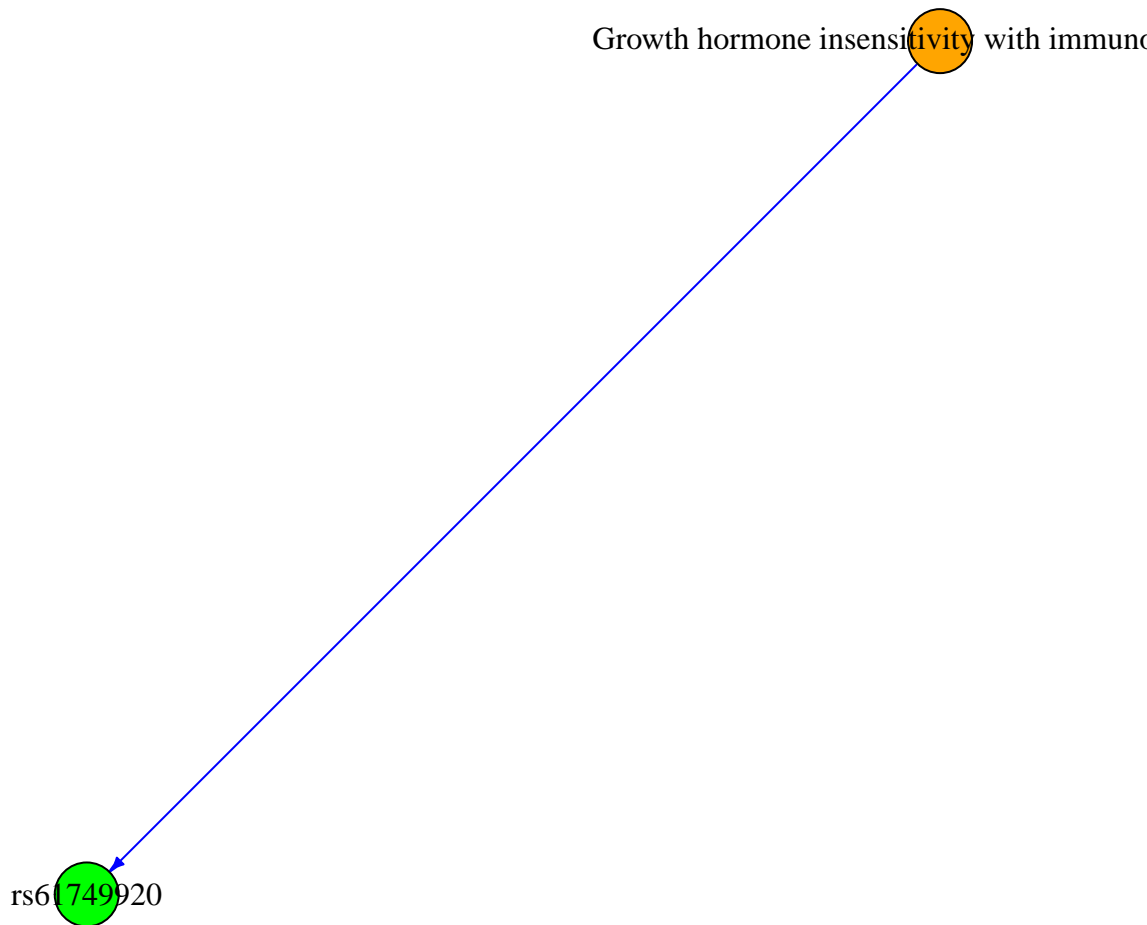

# Variant-Disease Network (GTP cyclohydrolase I deficiency)

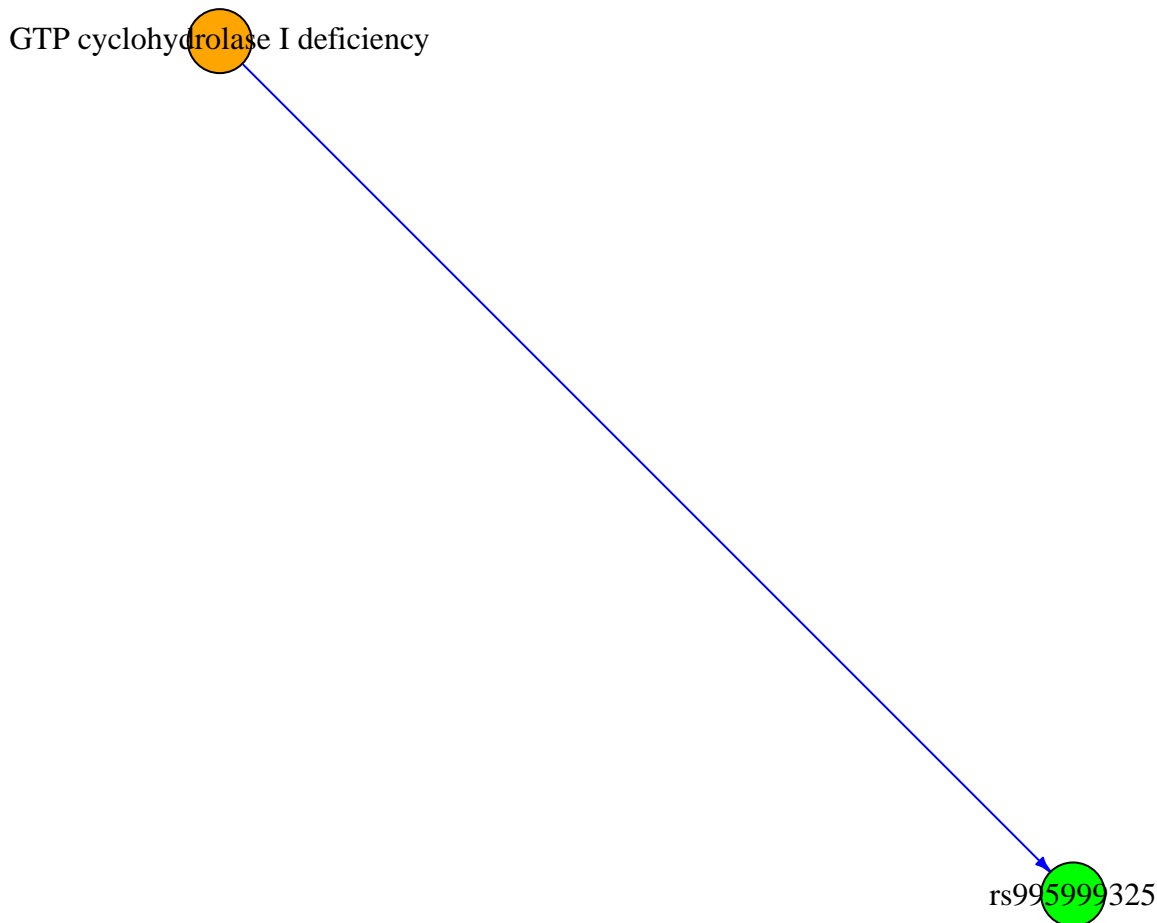

## Variant–Disease Network (Haemorrhagic telangiectasia 1)

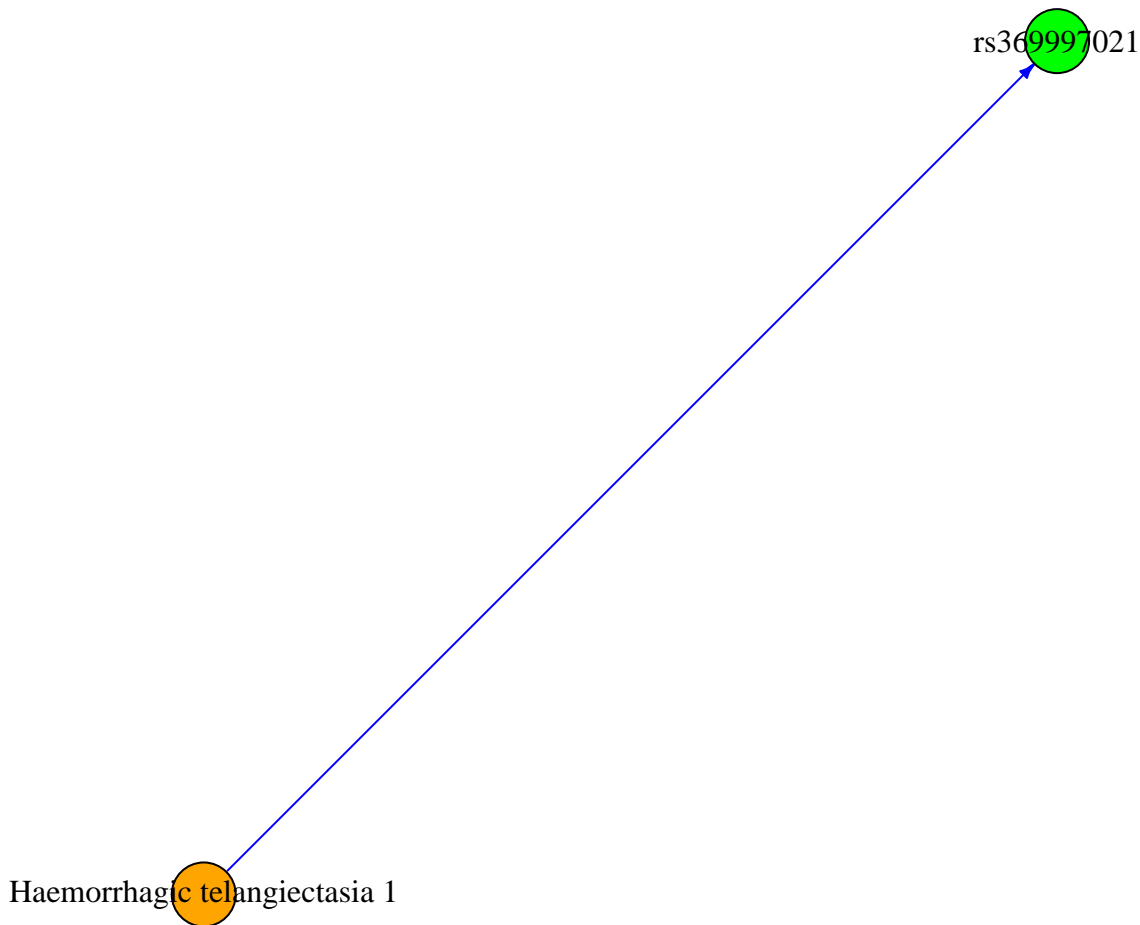



Variant–Disease Network (Hajdu–Cheney syndrome)

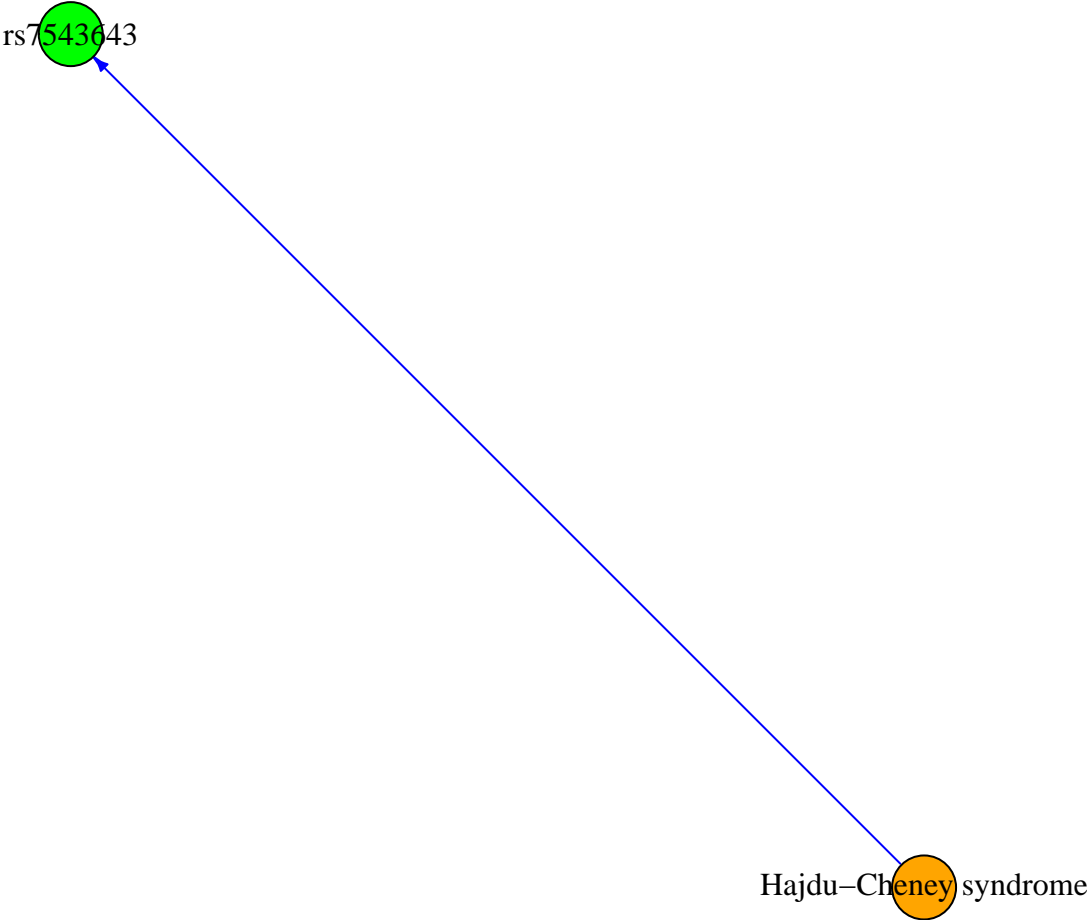

## Variant–Disease Network (Heart failure)

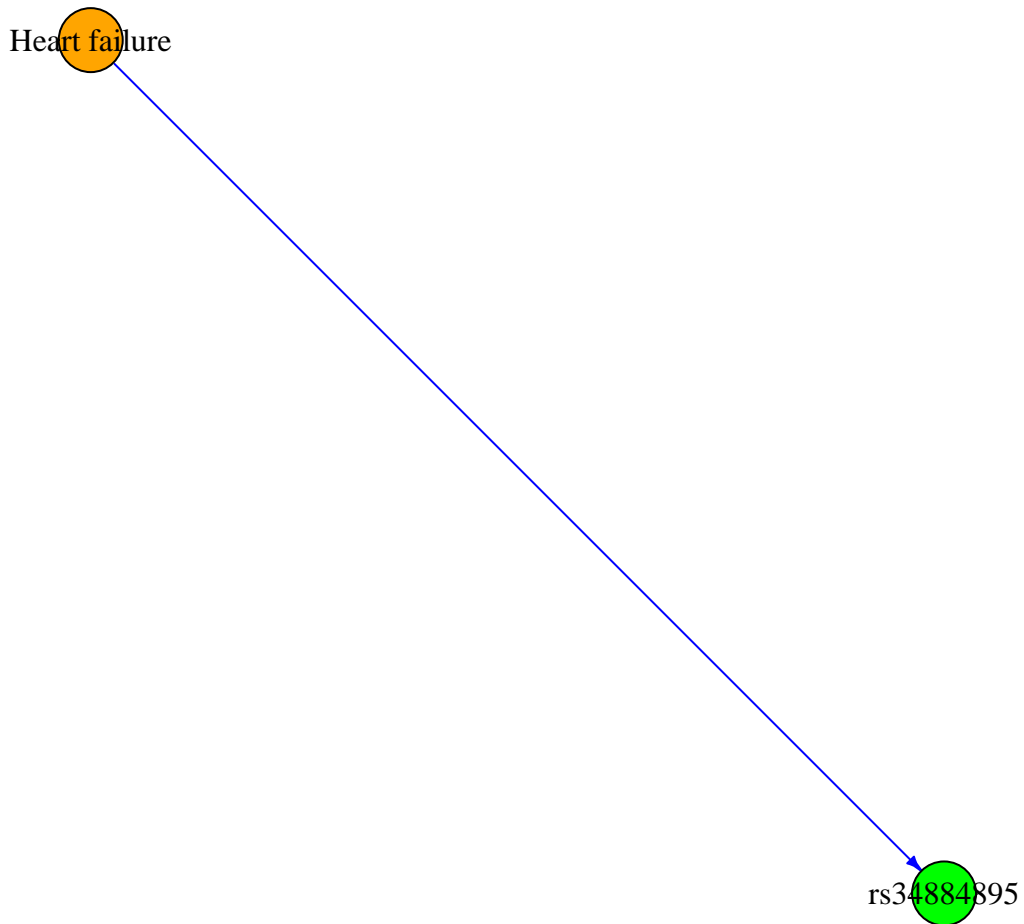

Variant–Disease Network (Hecht syndrome)

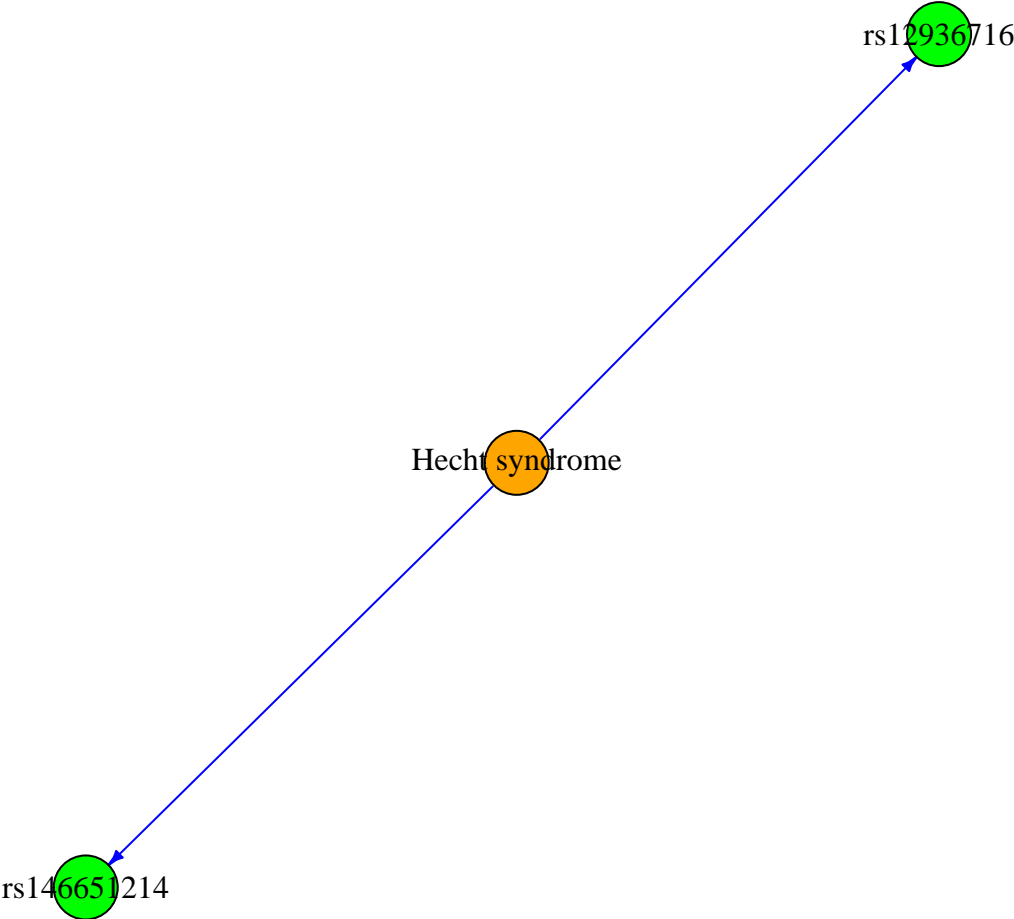

# Variant–Disease Network (Helsmoortel–Van der Aa Syndrome)

Helsmoortel–Van der Aa Syndrome

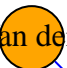

rs587777526

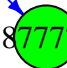

**Variant–Disease Network (Hemochromatosis type 3)**

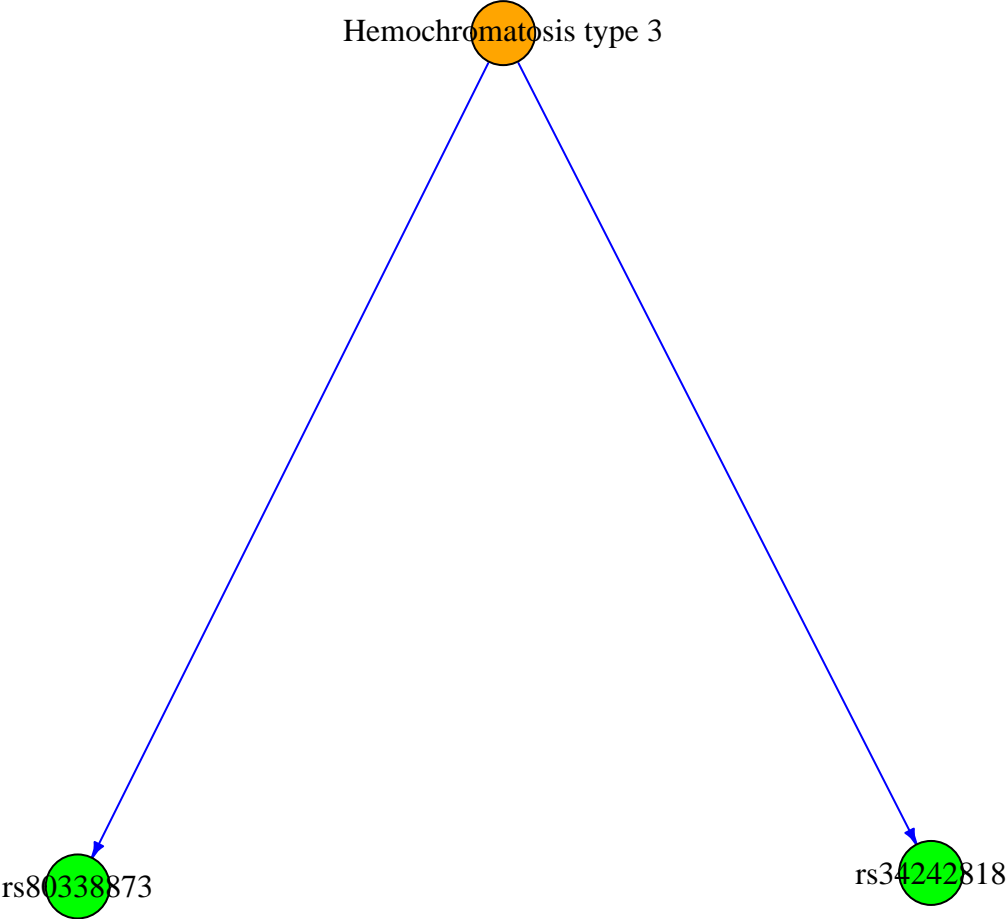

**Variant–Disease Network (Hemochromatosis type 4)**

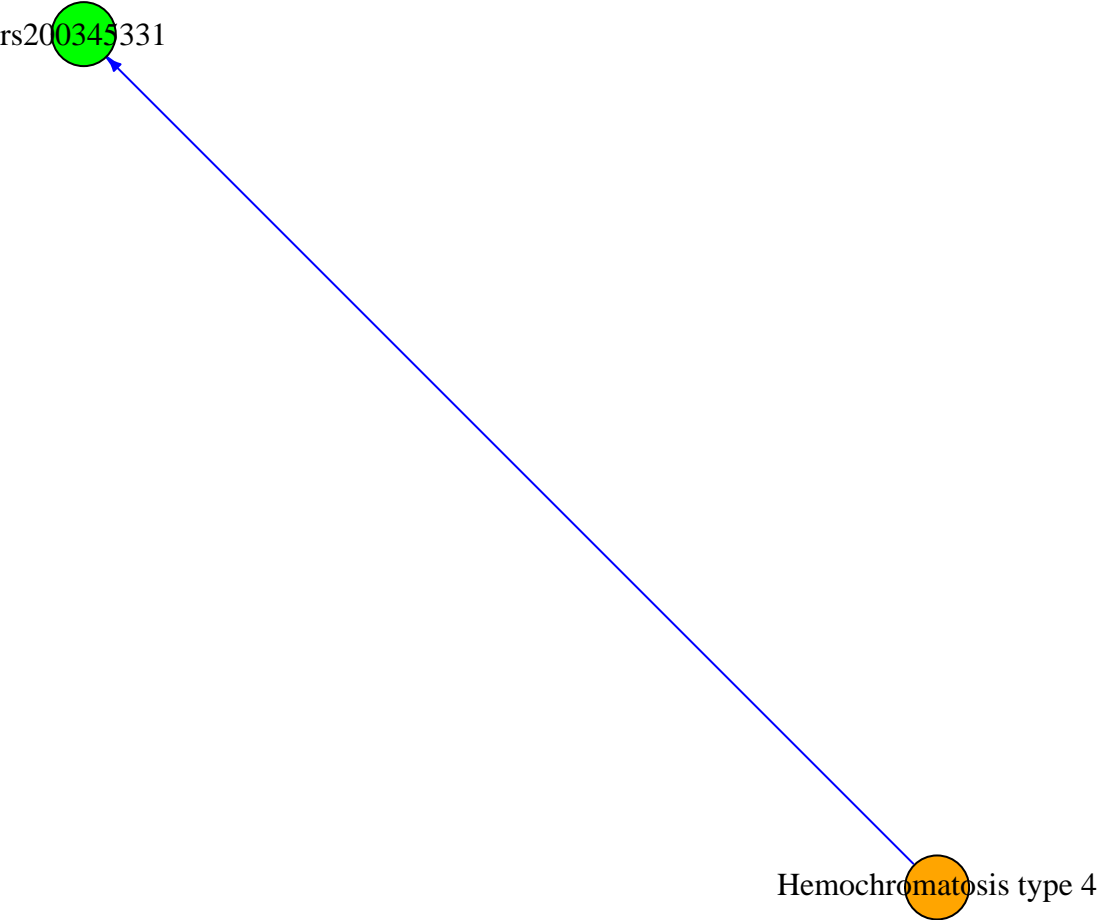

**Variant–Disease Network (HEMOGLOBIN D (IBADAN))**

rs31993568

HEMOGLOBIN D (IBADAN)

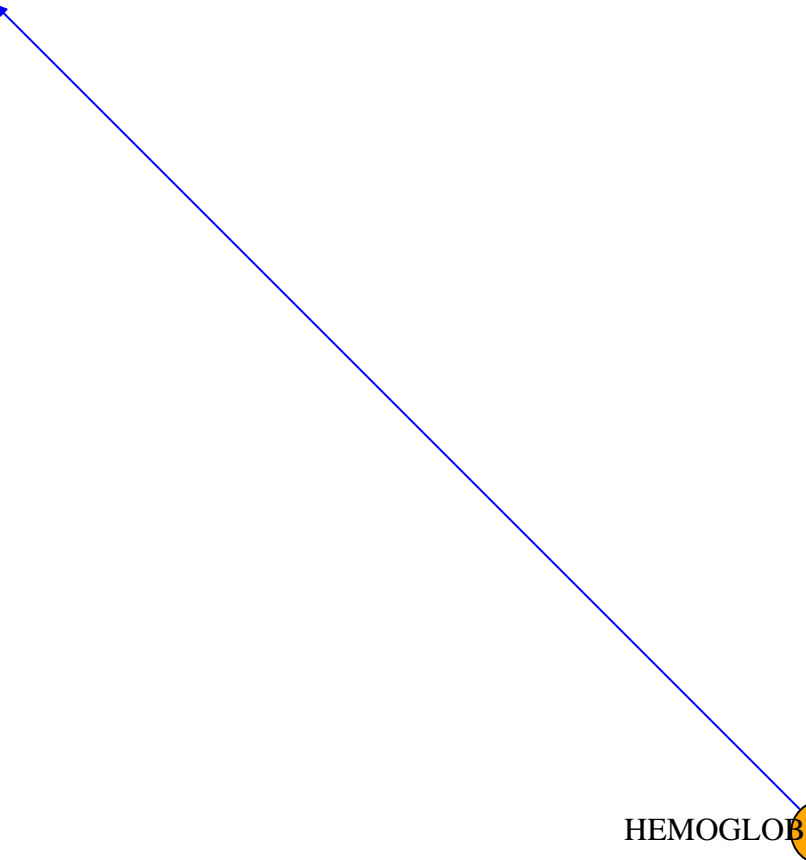

Variant–Disease Network (HEMOGLOBIN J (CHICAGO))

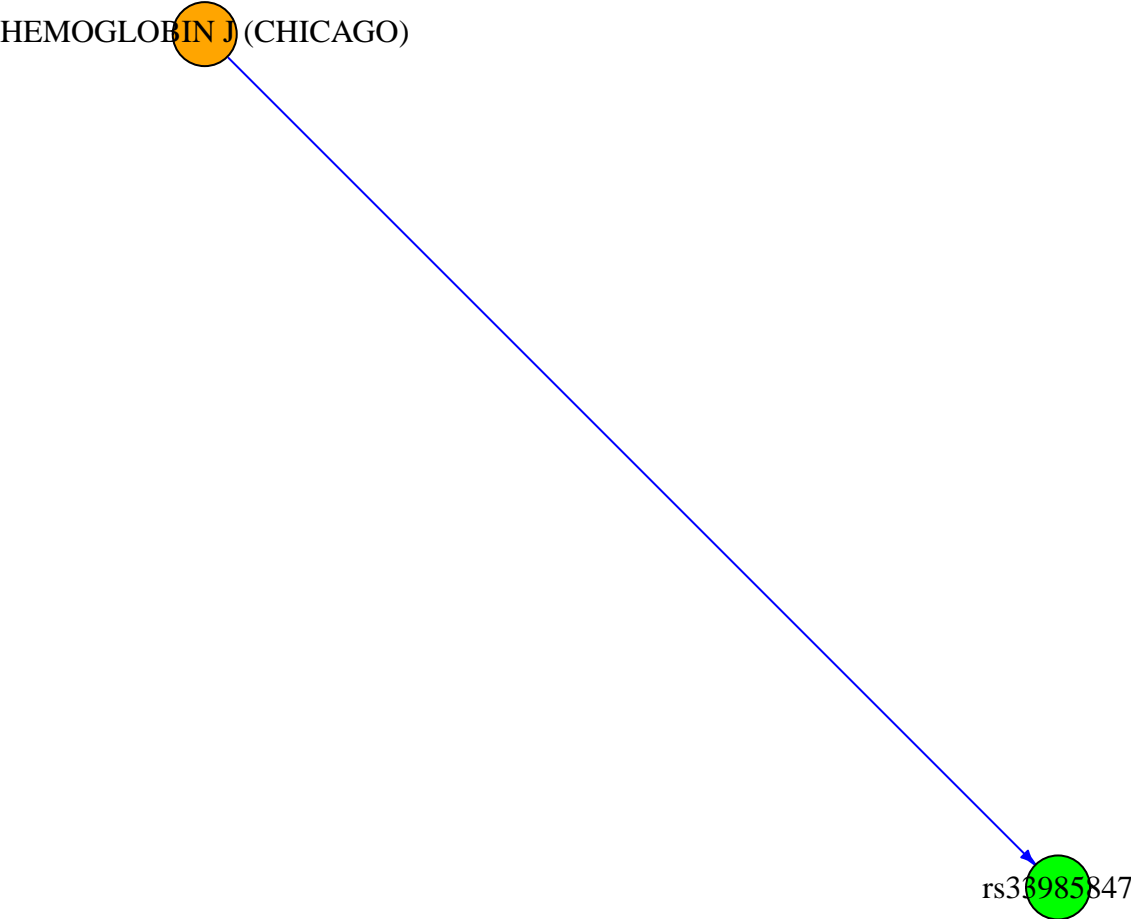



Variant–Disease Network (HEMOGLOBIN J (LENS))

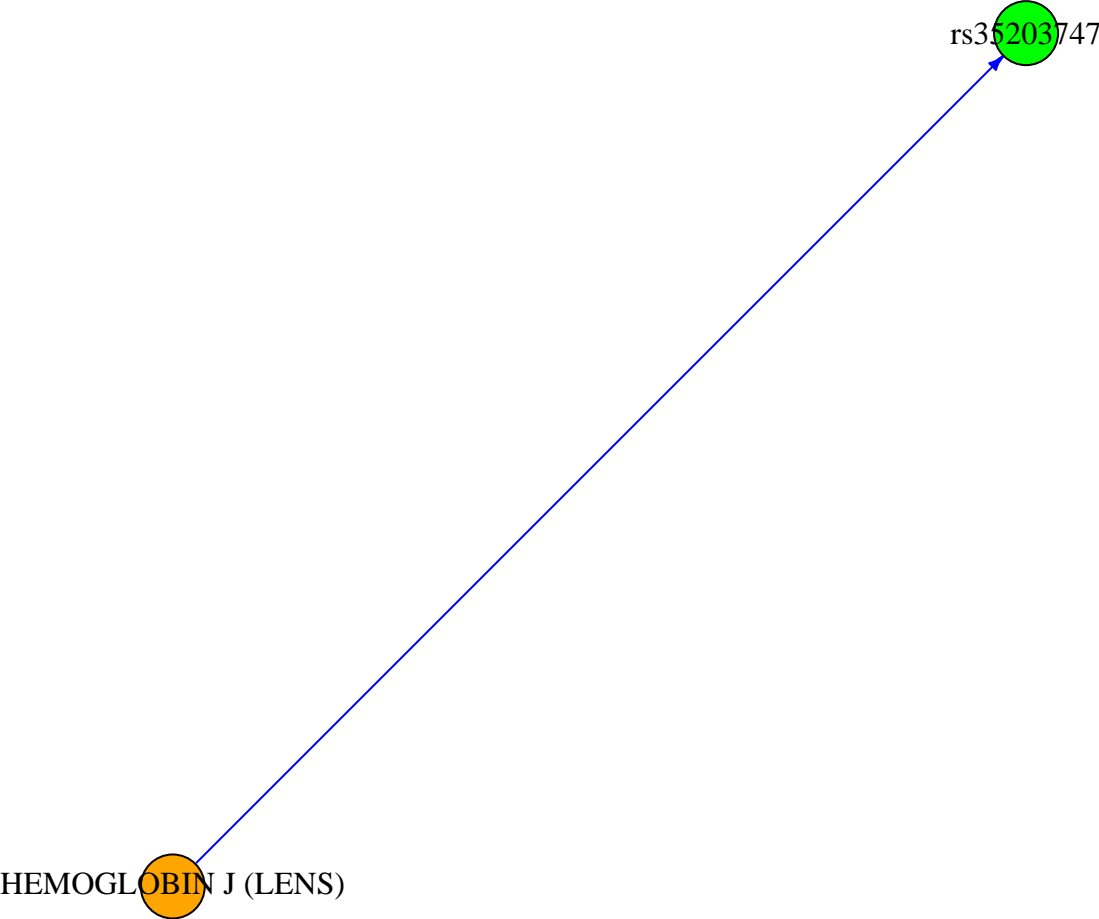

Variant–Disease Network (HEMOGLOBIN TYNE)

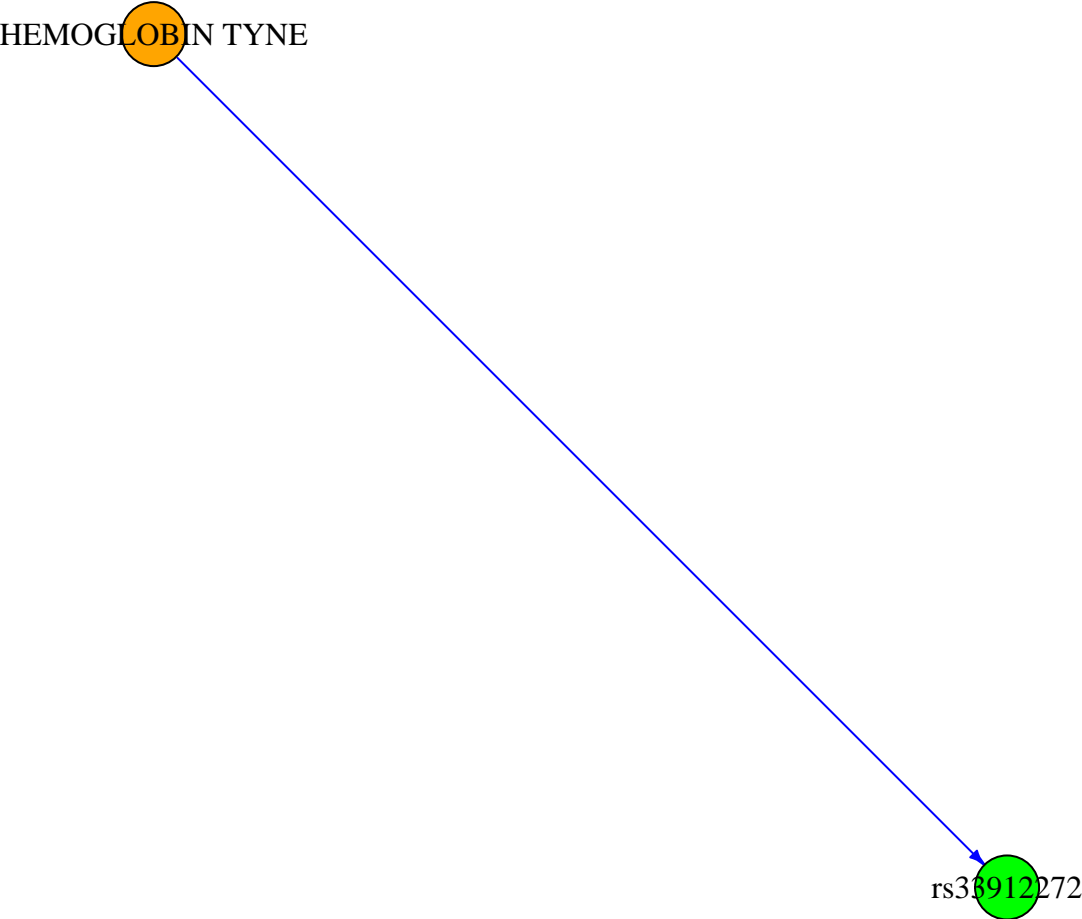

# Variant-Disease Network (HEMOGLOBIN WARWICKSHIRE)

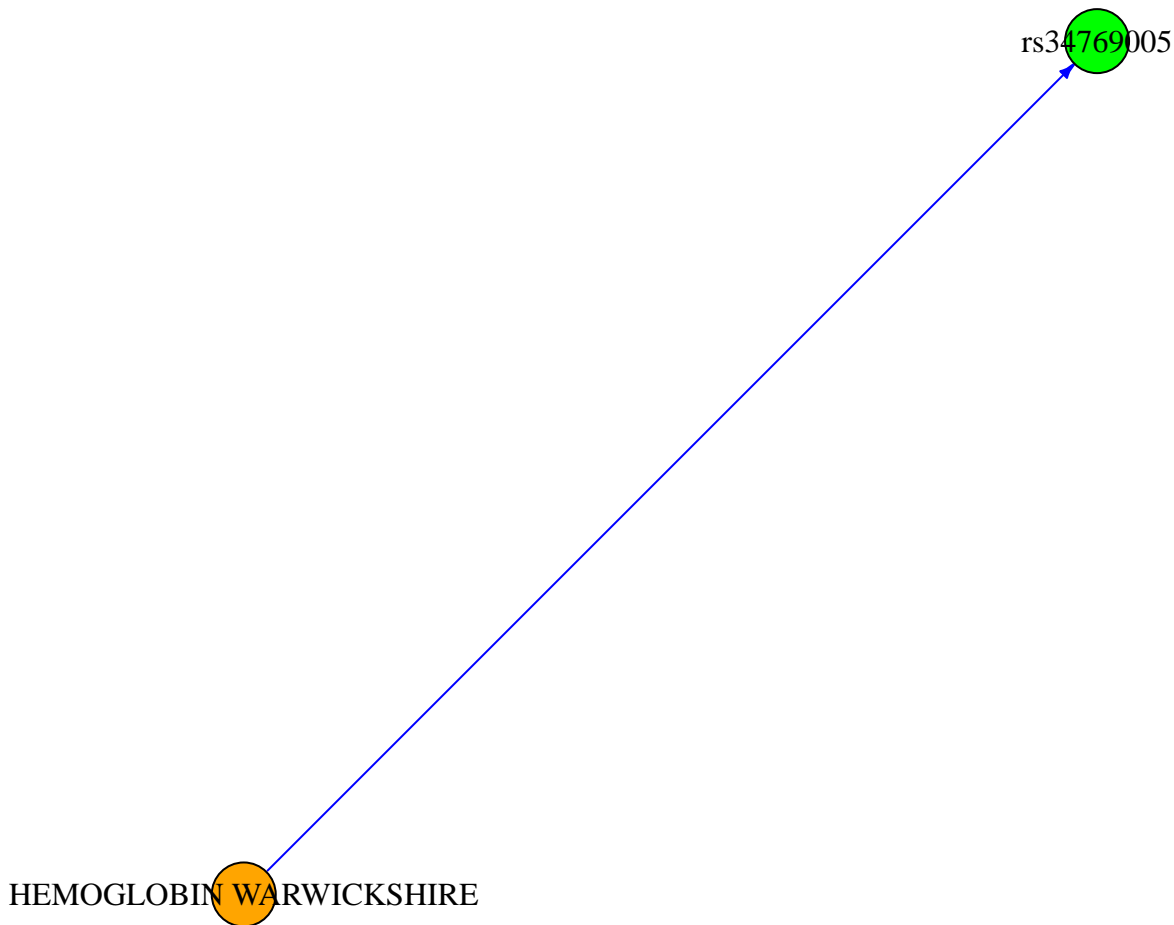

## Variant–Disease Network (Hemolytic anemia)

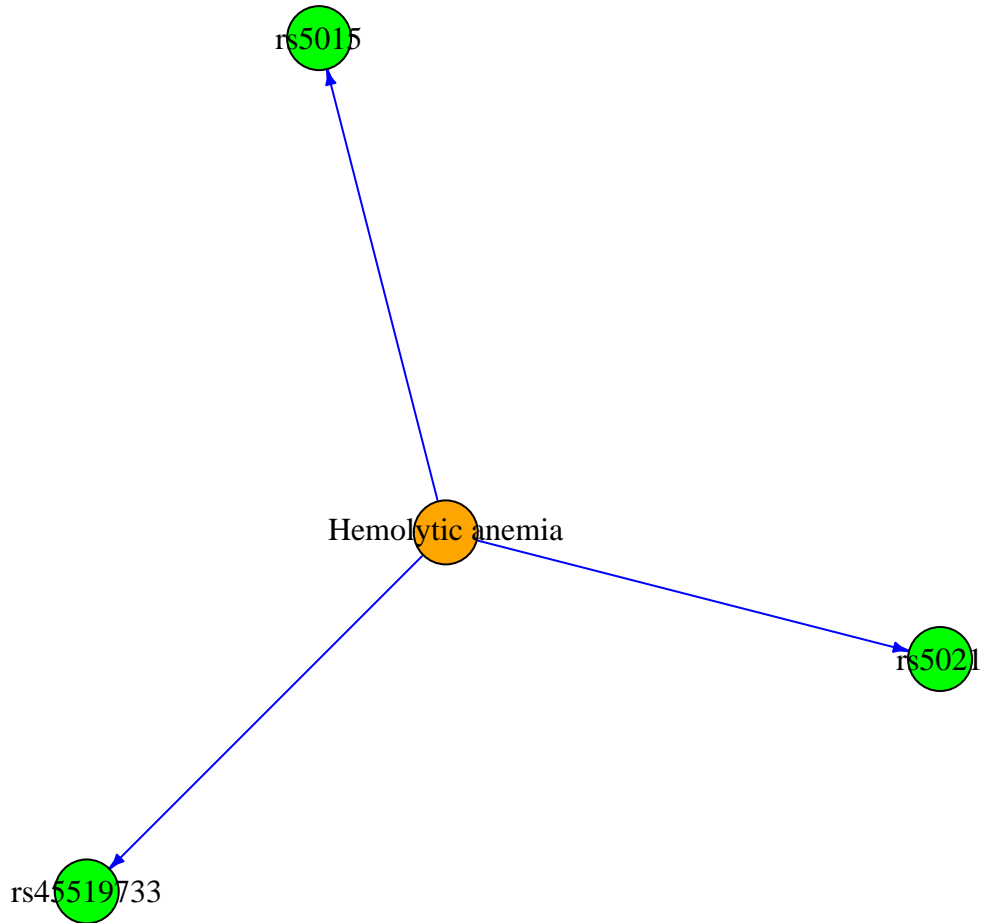

Variant–Disease Network (Hemophagocytic lymphohistiocytosis)

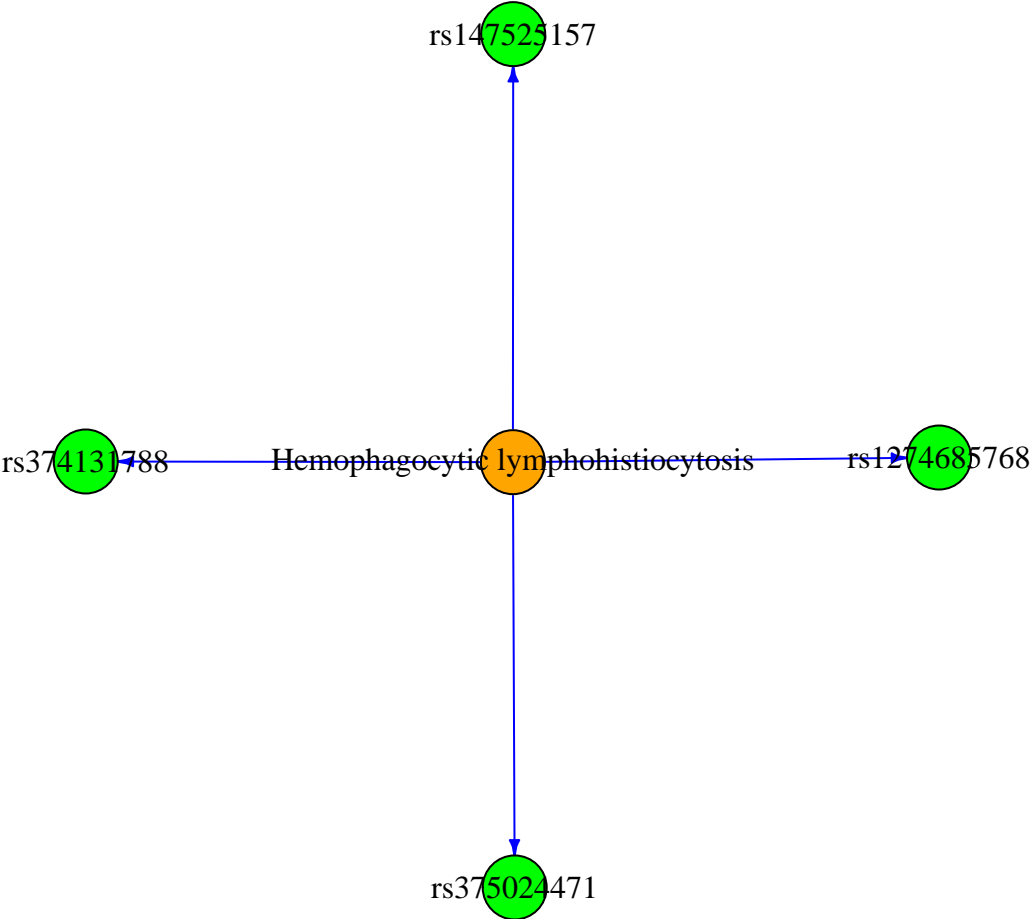

## Variant–Disease Network (Hemophilia B)

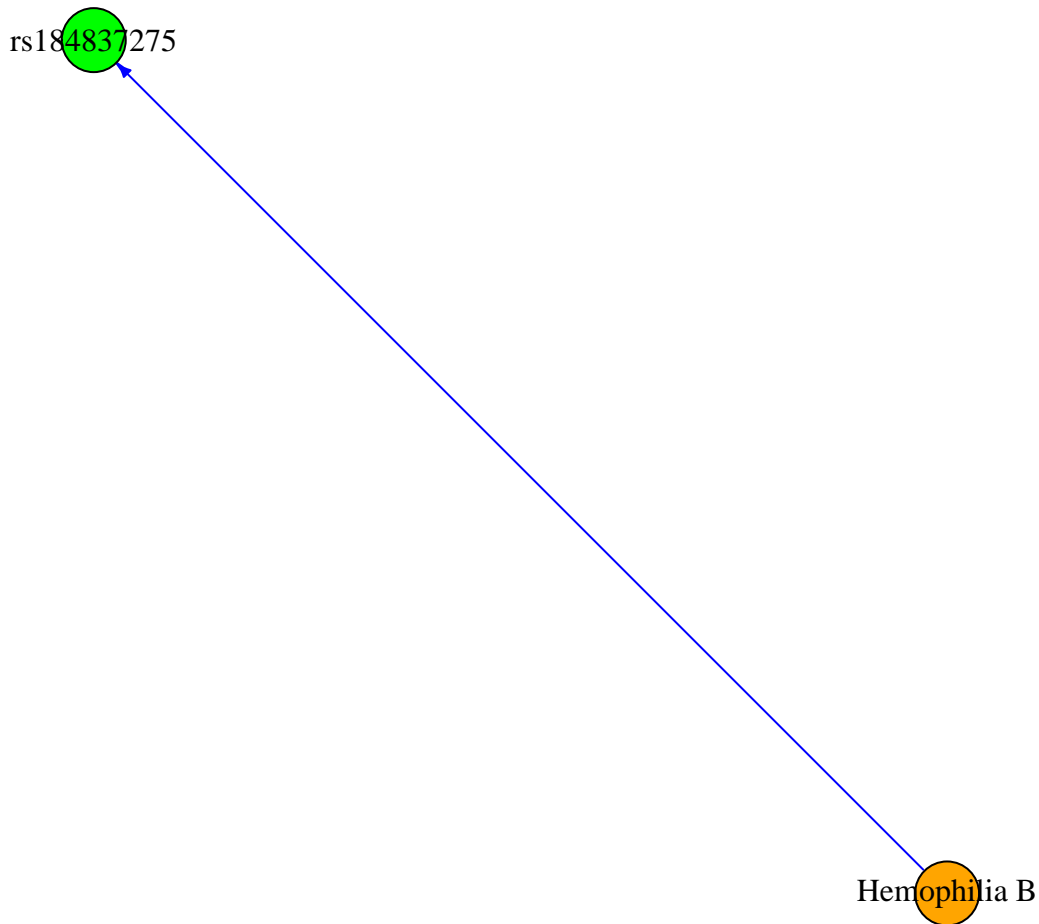

**Variant–Disease Network (Hepatic failure)**

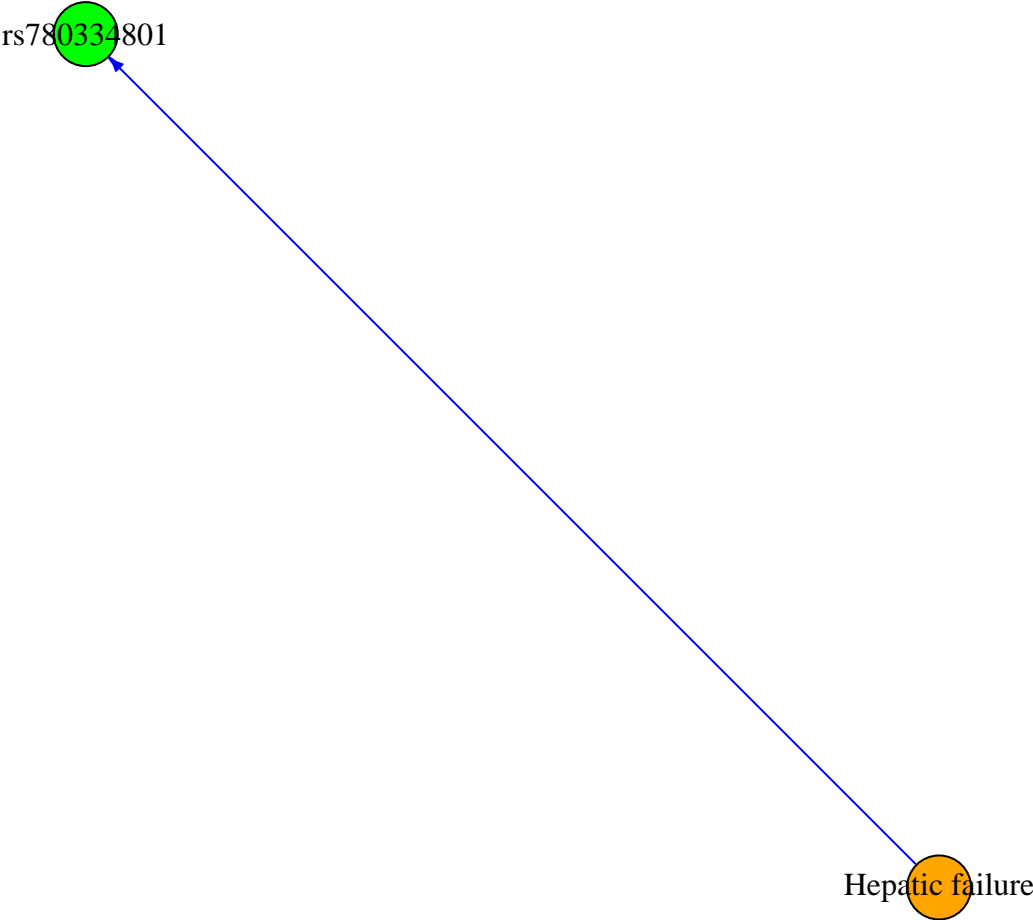

Variant–Disease Network (Hepatic methionine adenosyltransferase deficiency)

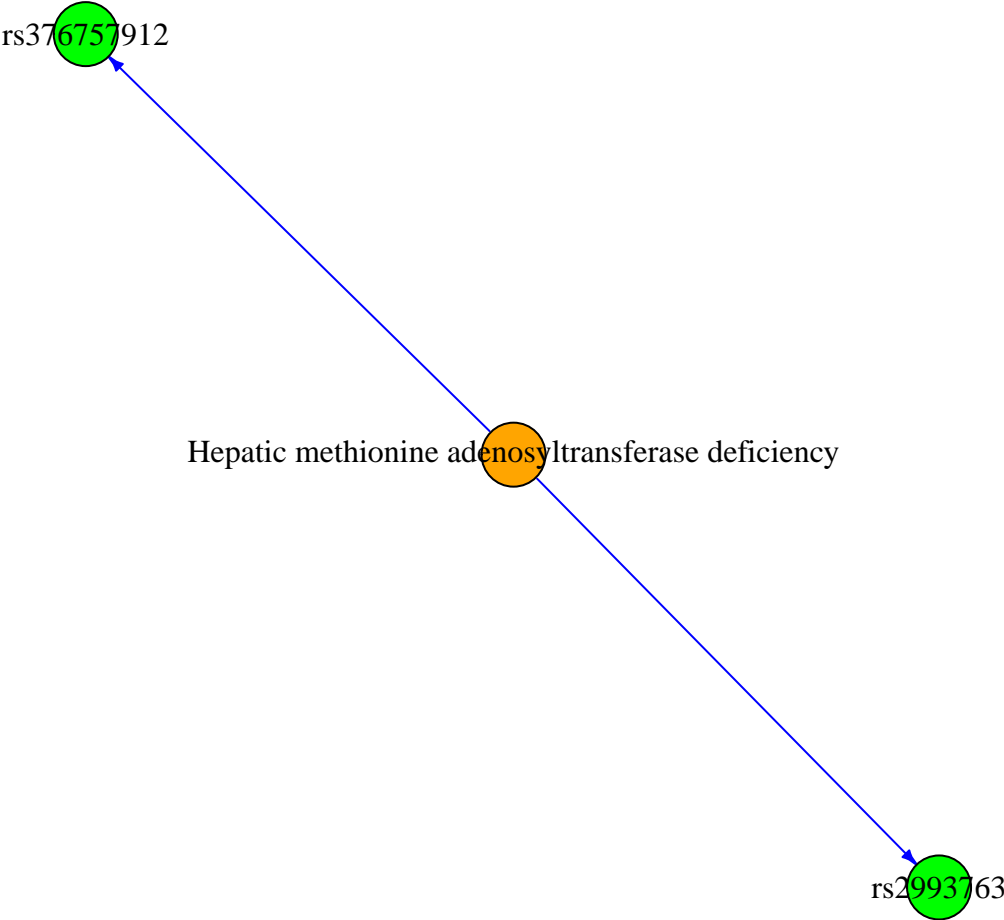



## Variant–Disease Network (Hepatoblastoma)

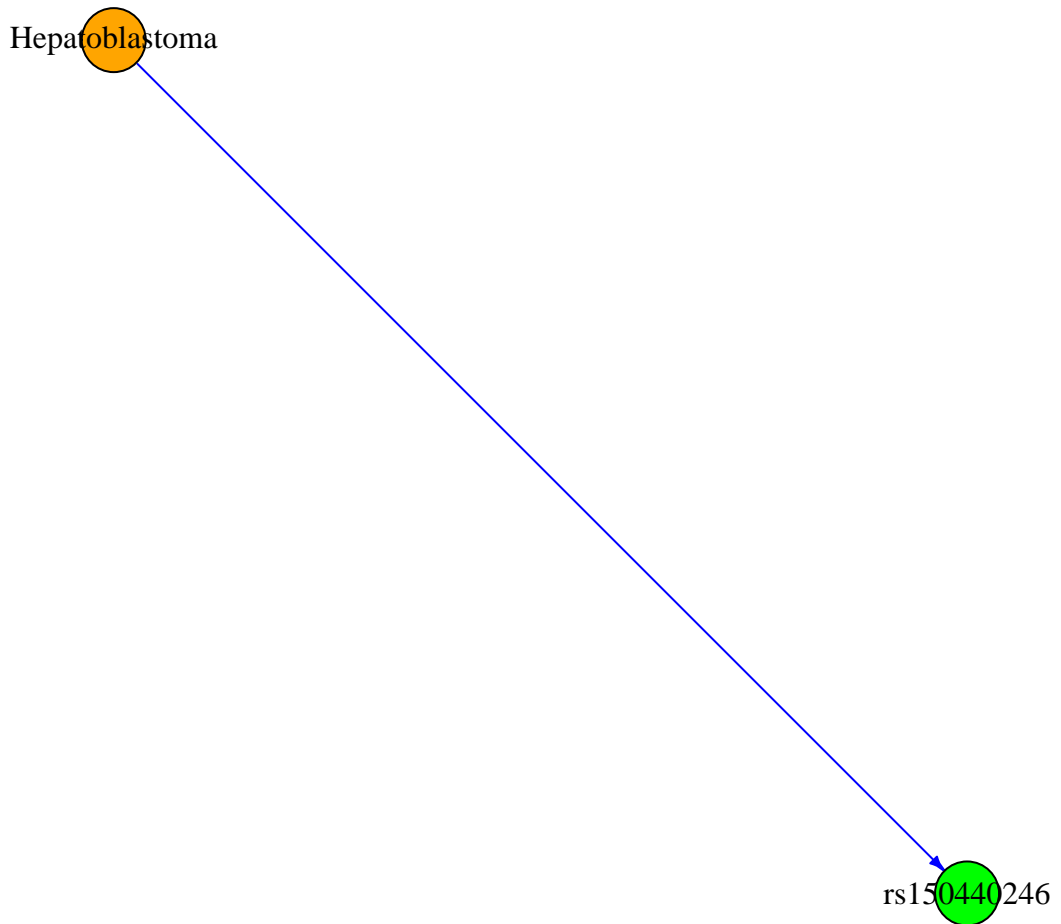

## Variant–Disease Network (Hepatocellular carcinoma)

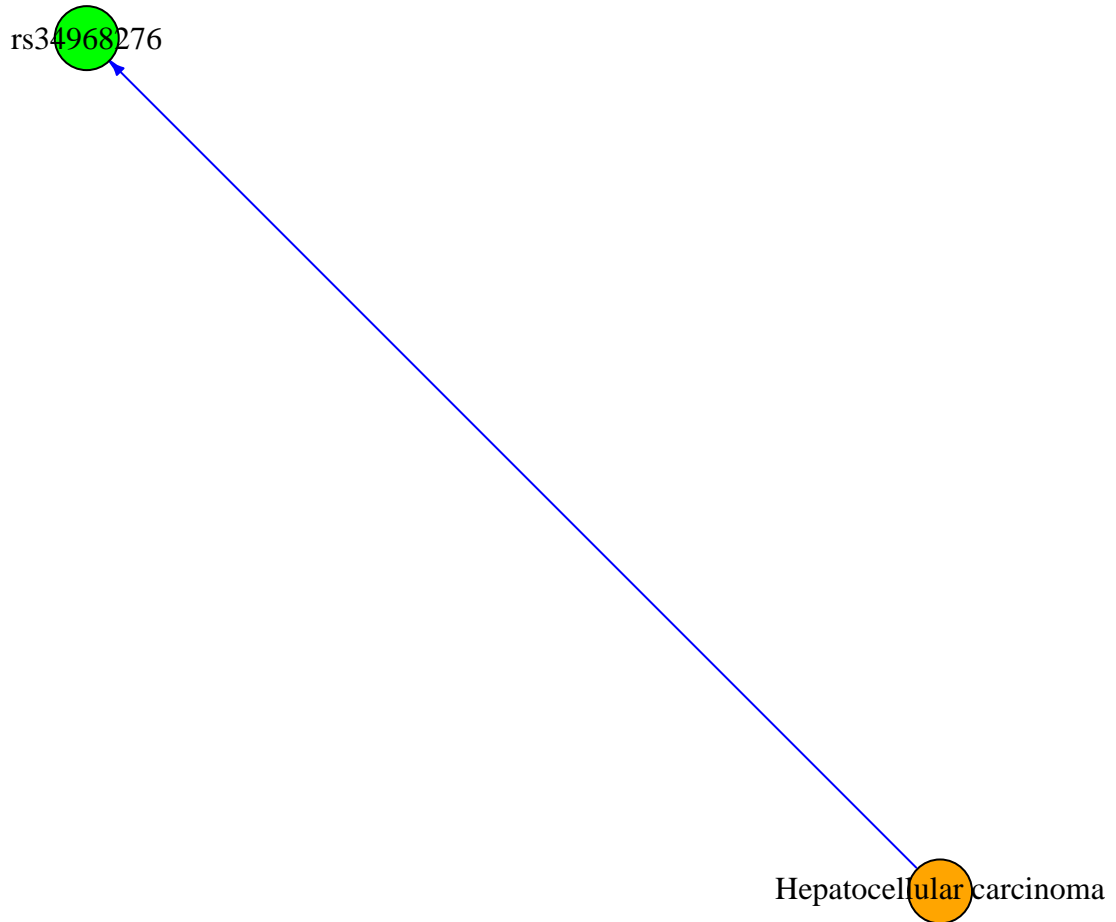

Variant–Disease Network (Hereditary breast and ovarian cancer syndrome)

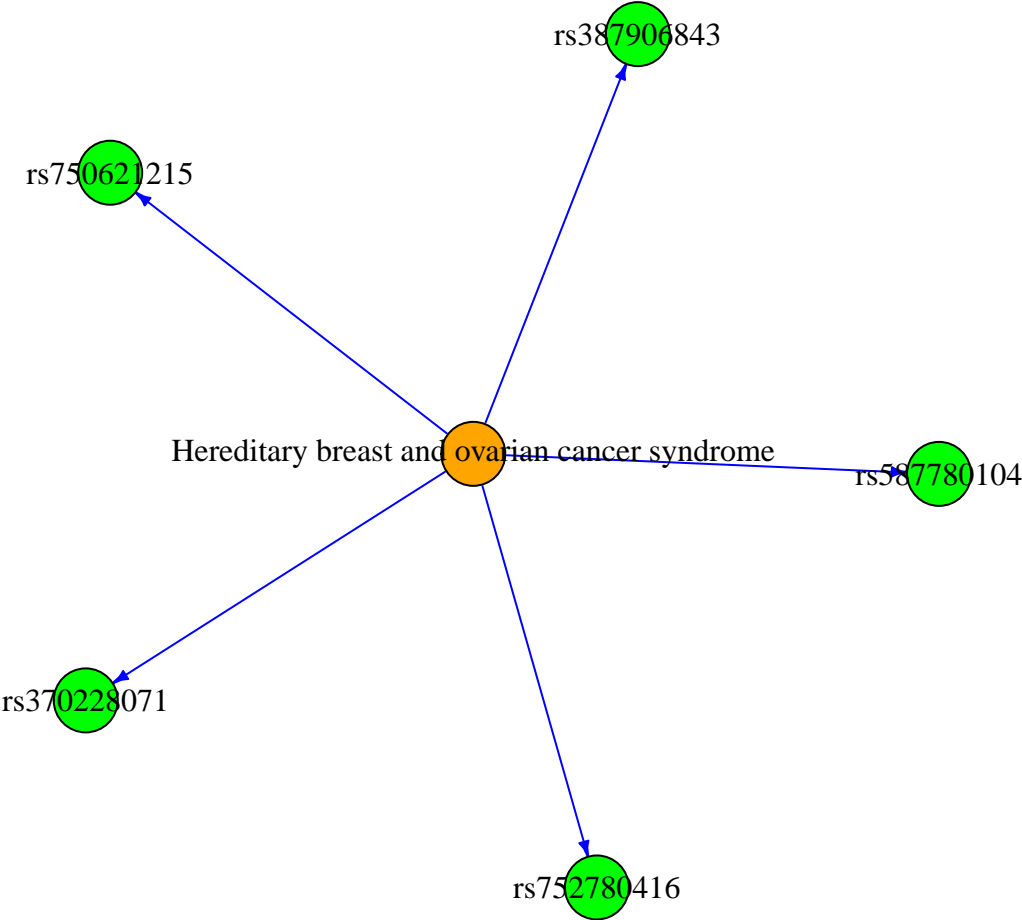

# Variant-Disease Network (Hereditary cancer-predisposing syndrome)

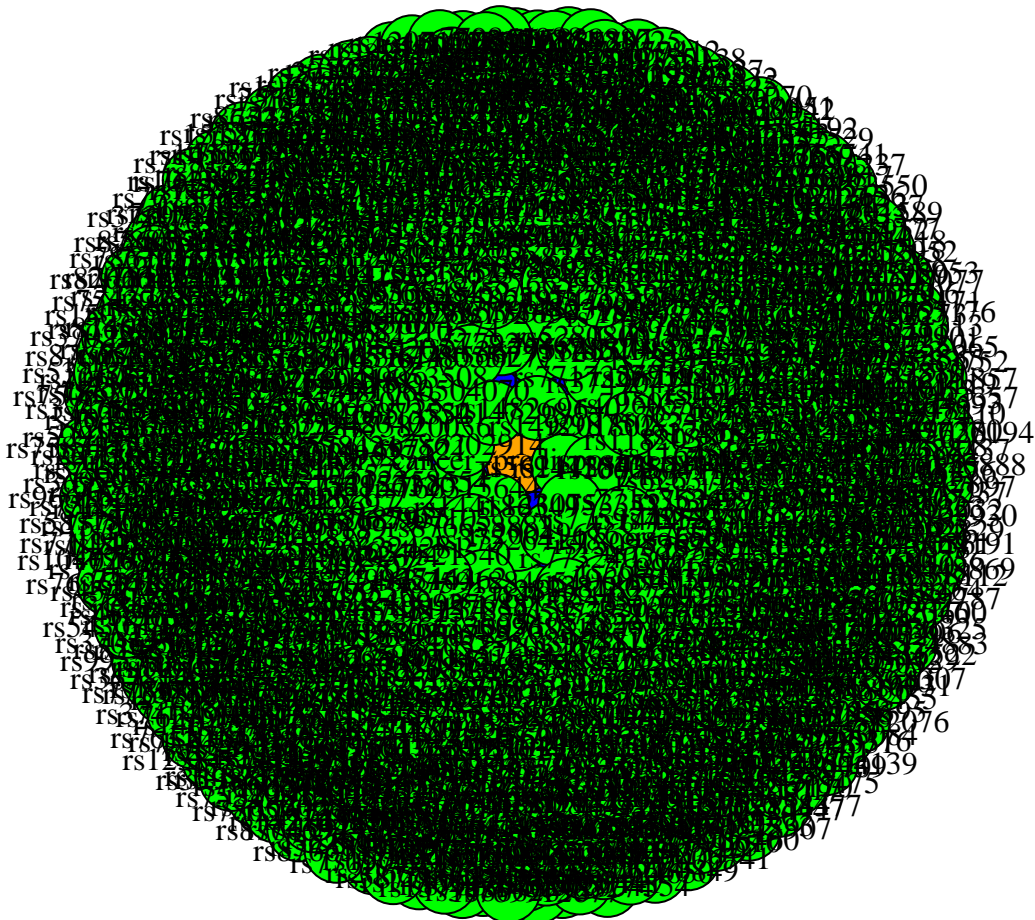

## Variant–Disease Network (Hereditary coproporphryia)

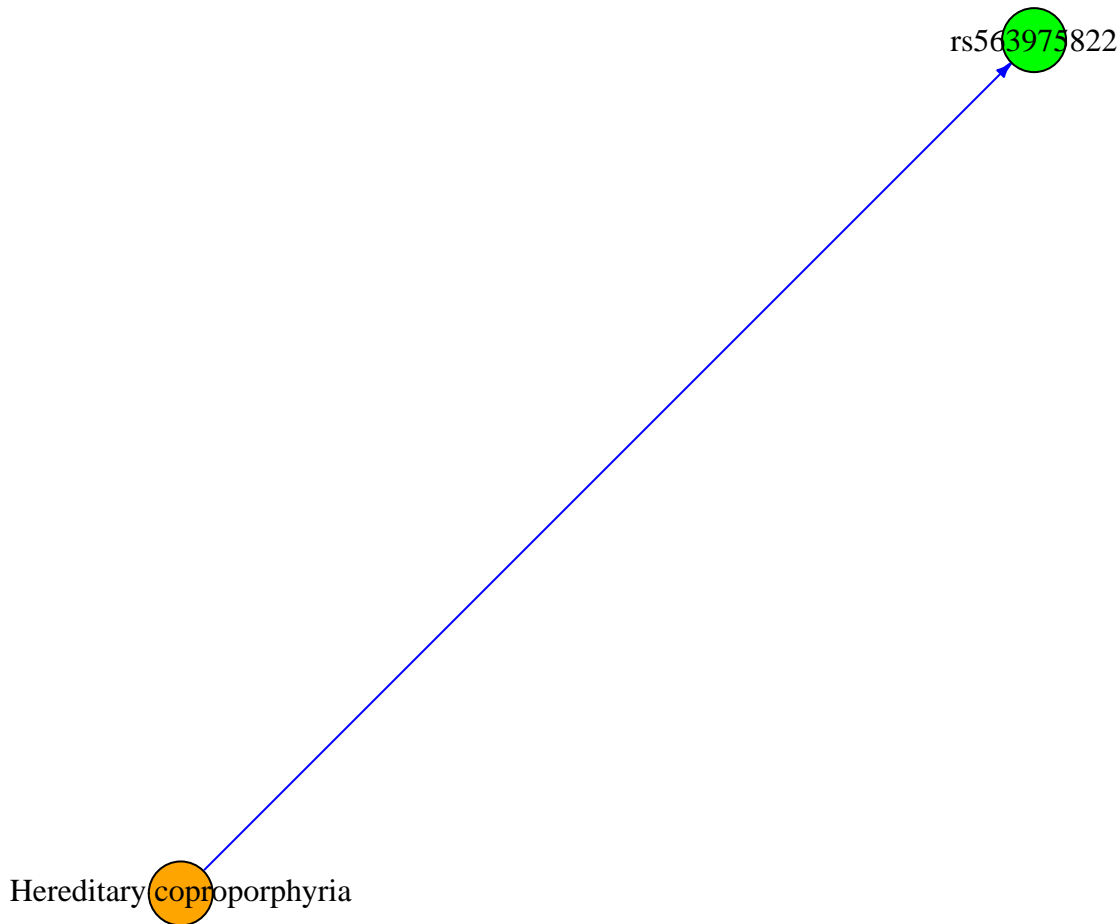

# Variant–Disease Network (Hereditary cutaneous melanoma)

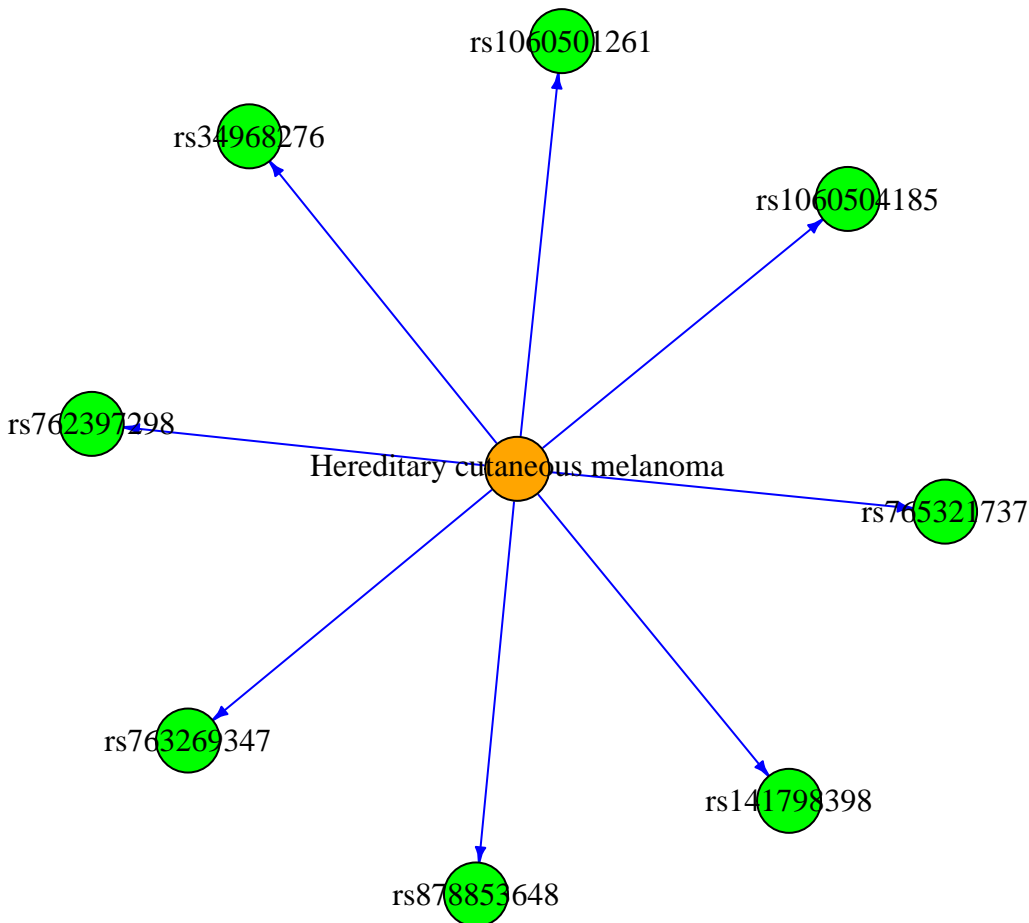

## Variant–Disease Network (Hereditary diffuse gastric cancer)

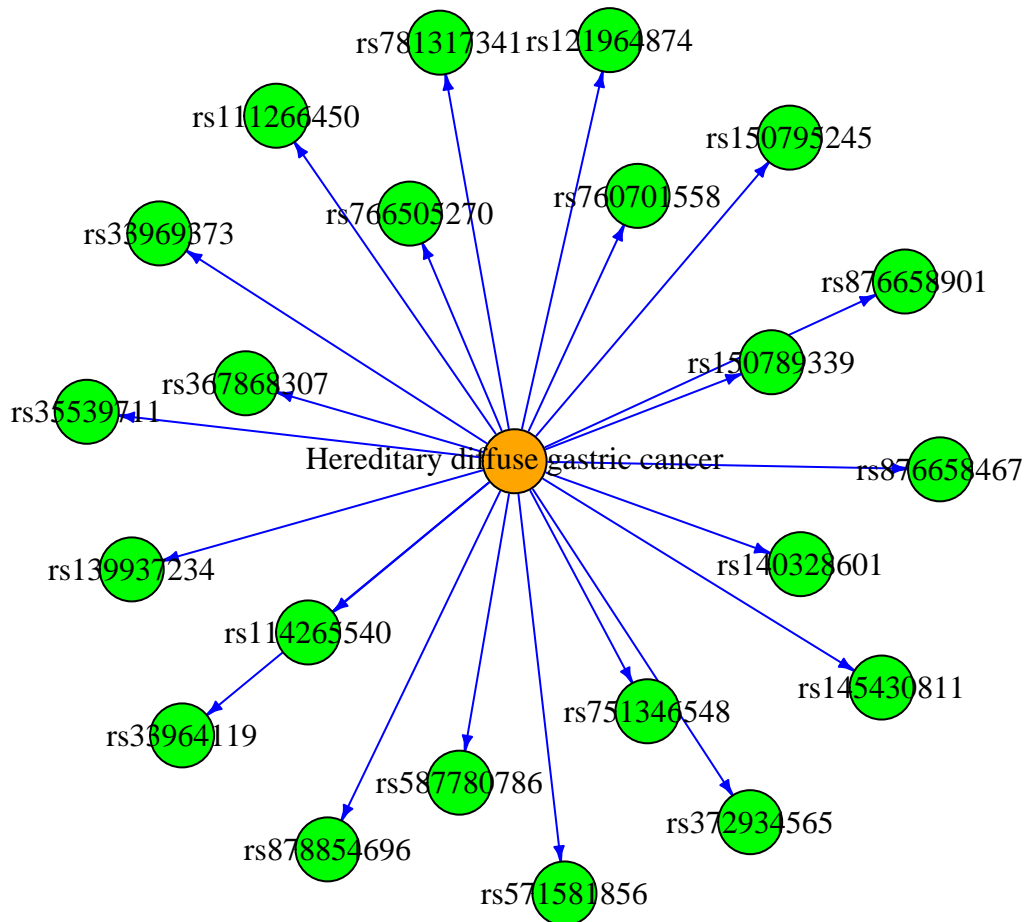

# Variant-Disease Network (Hereditary diffuse leukoencephalopathy with spheroids)

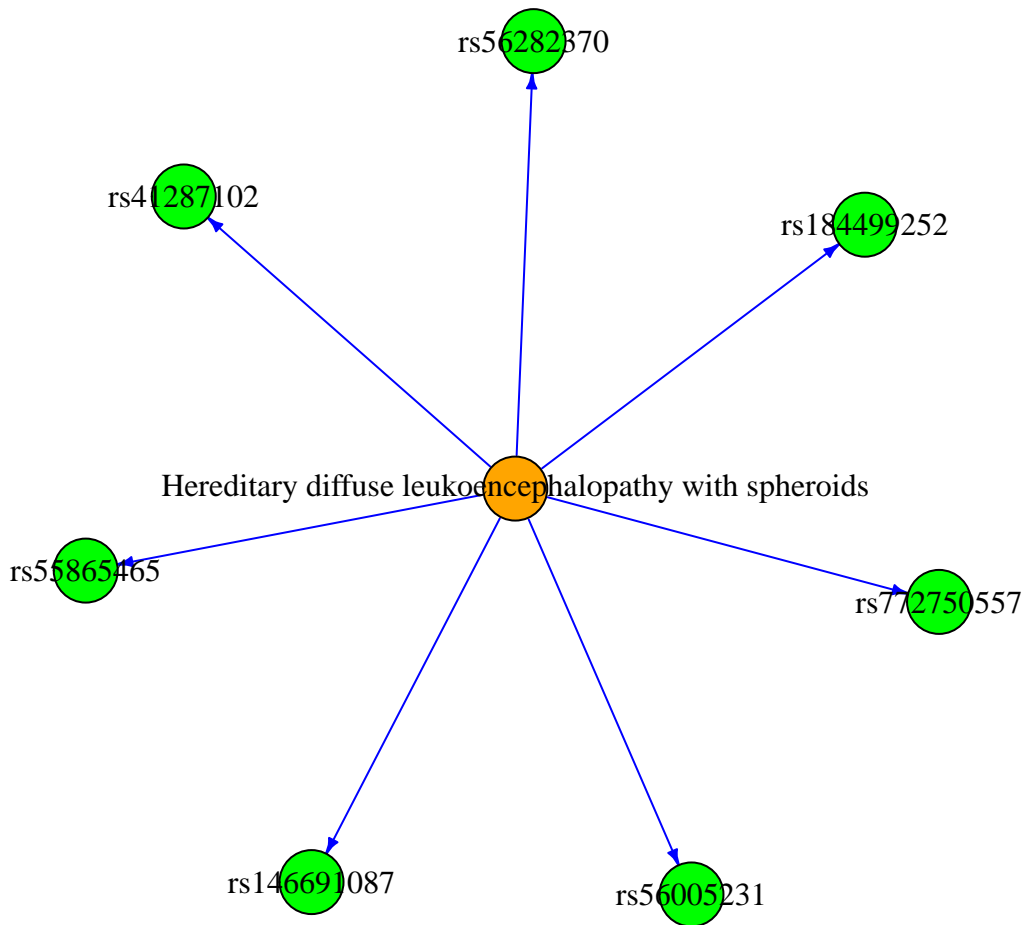



**Variant–Disease Network (Hereditary factor II deficiency disease)**

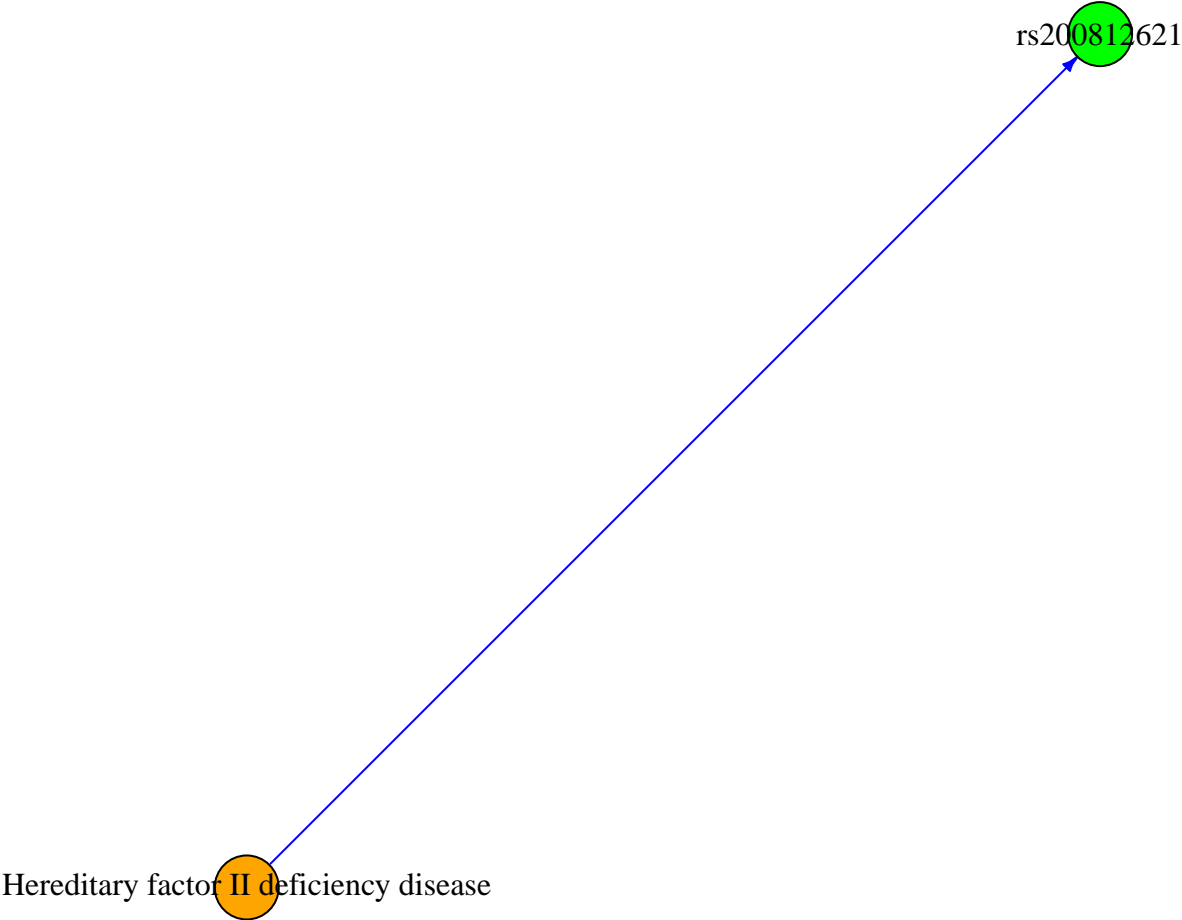

Variant–Disease Network (Hereditary factor IX deficiency disease)

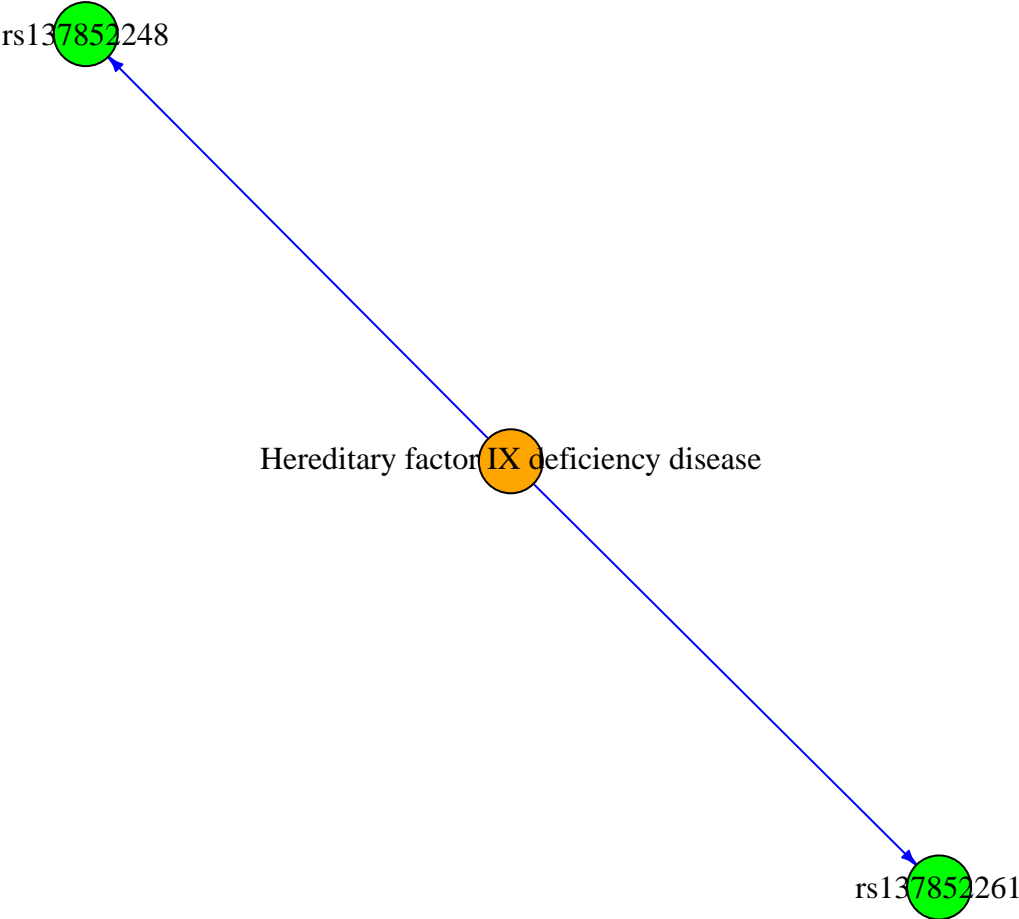

# Variant–Disease Network (Hereditary factor XI deficiency disease)

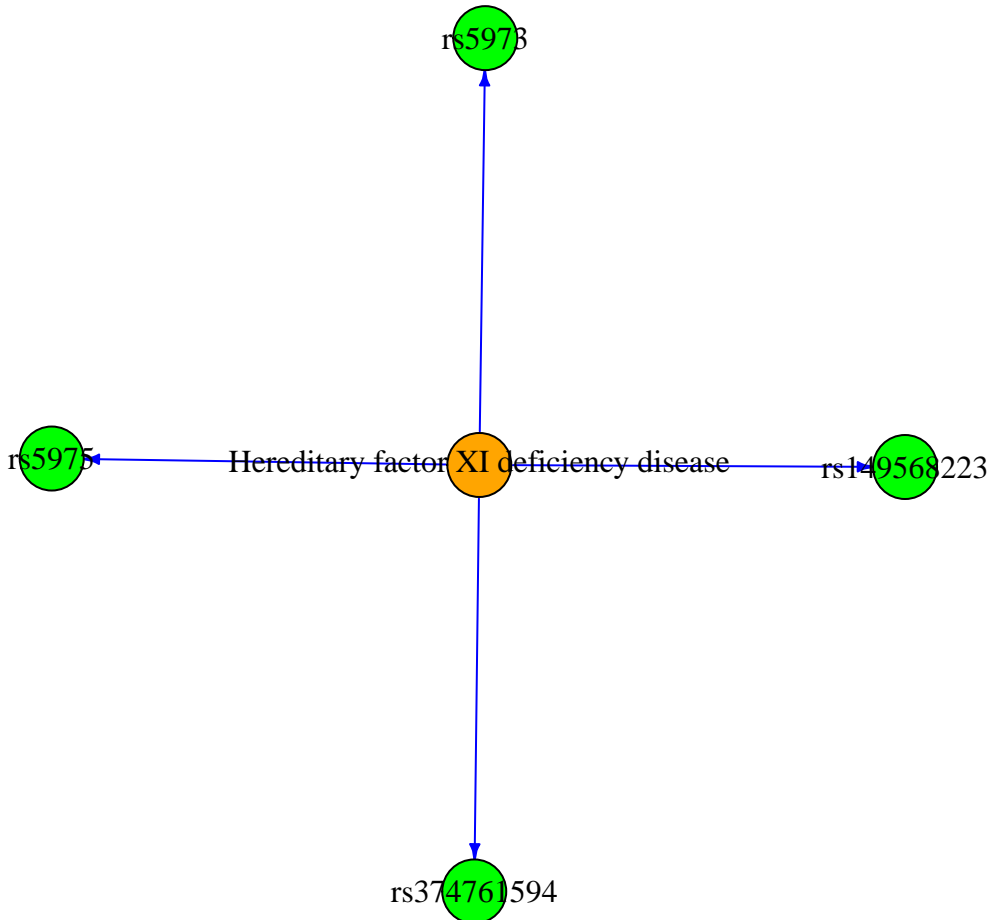

**Variant–Disease Network (Hereditary fructosuria)**

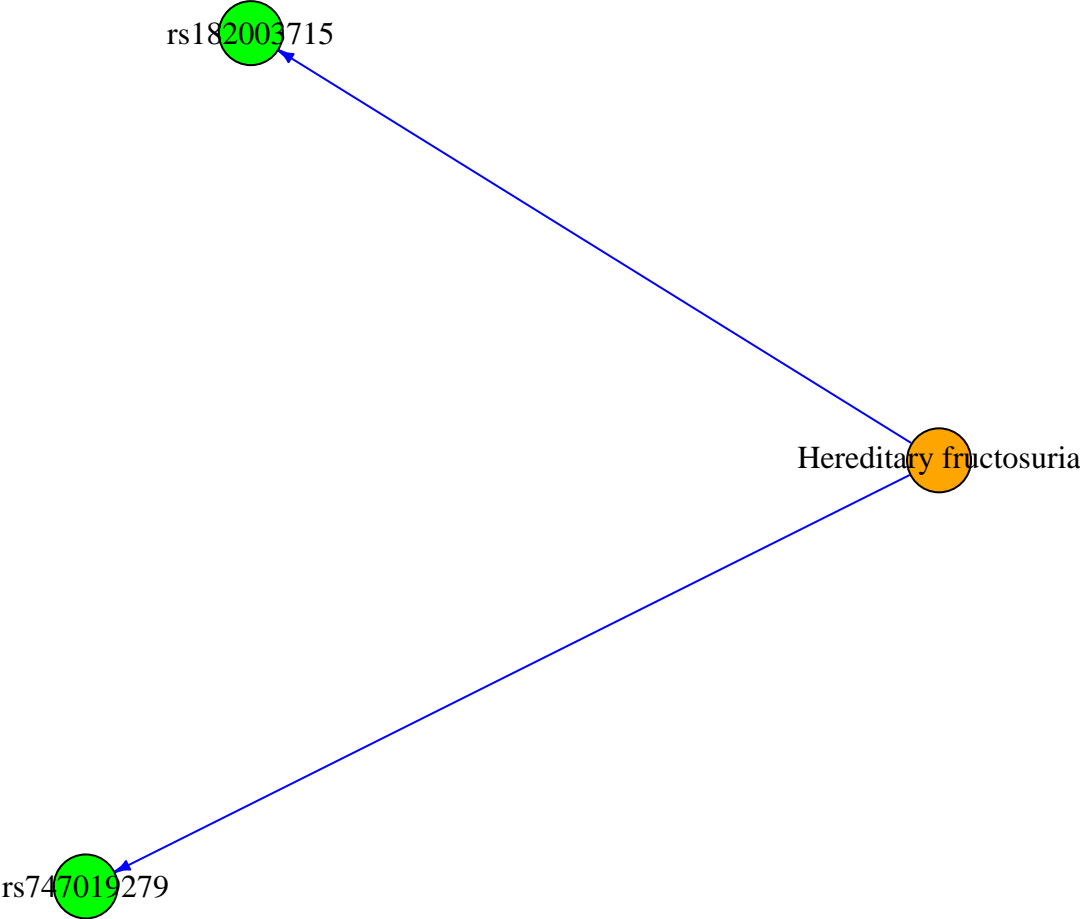

# Variant–Disease Network (Hereditary hemochromatosis)

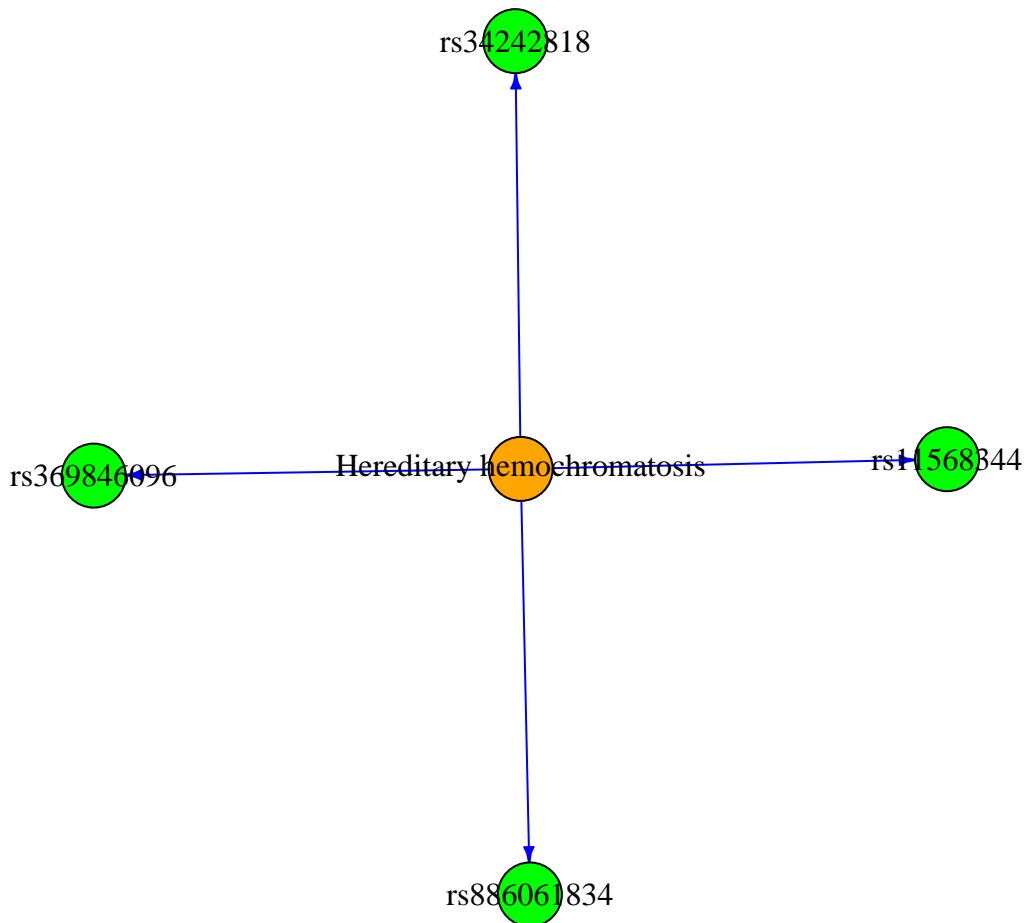

# Variant–Disease Network (Hereditary hemorrhagic telangiectasia)

Hereditary hemorrhagic telangiectasia

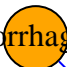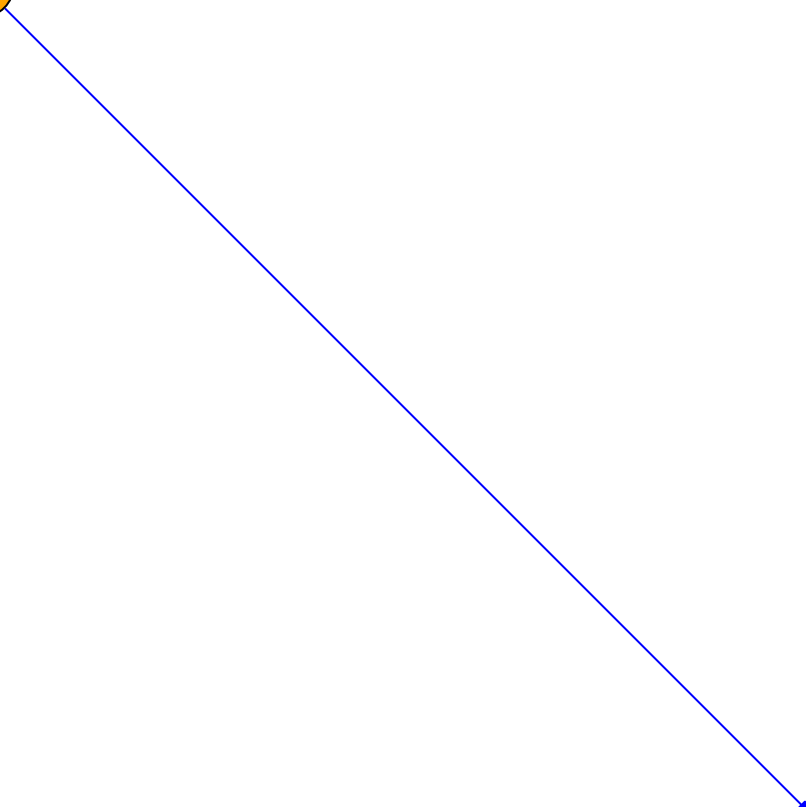

rs928192105

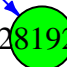

**Variant–Disease Network (Hereditary hemorrhagic telangiectasia type 1)**

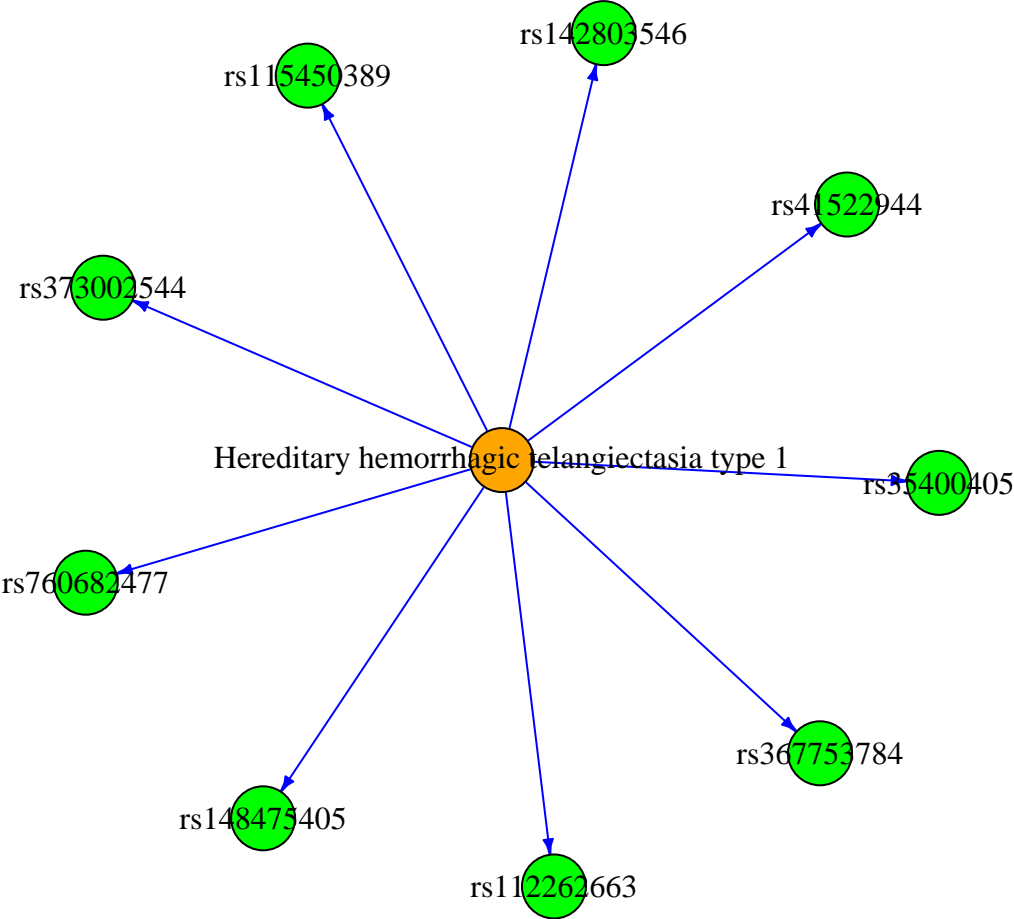

**Variant–Disease Network (Hereditary hemorrhagic telangiectasia type 2)**

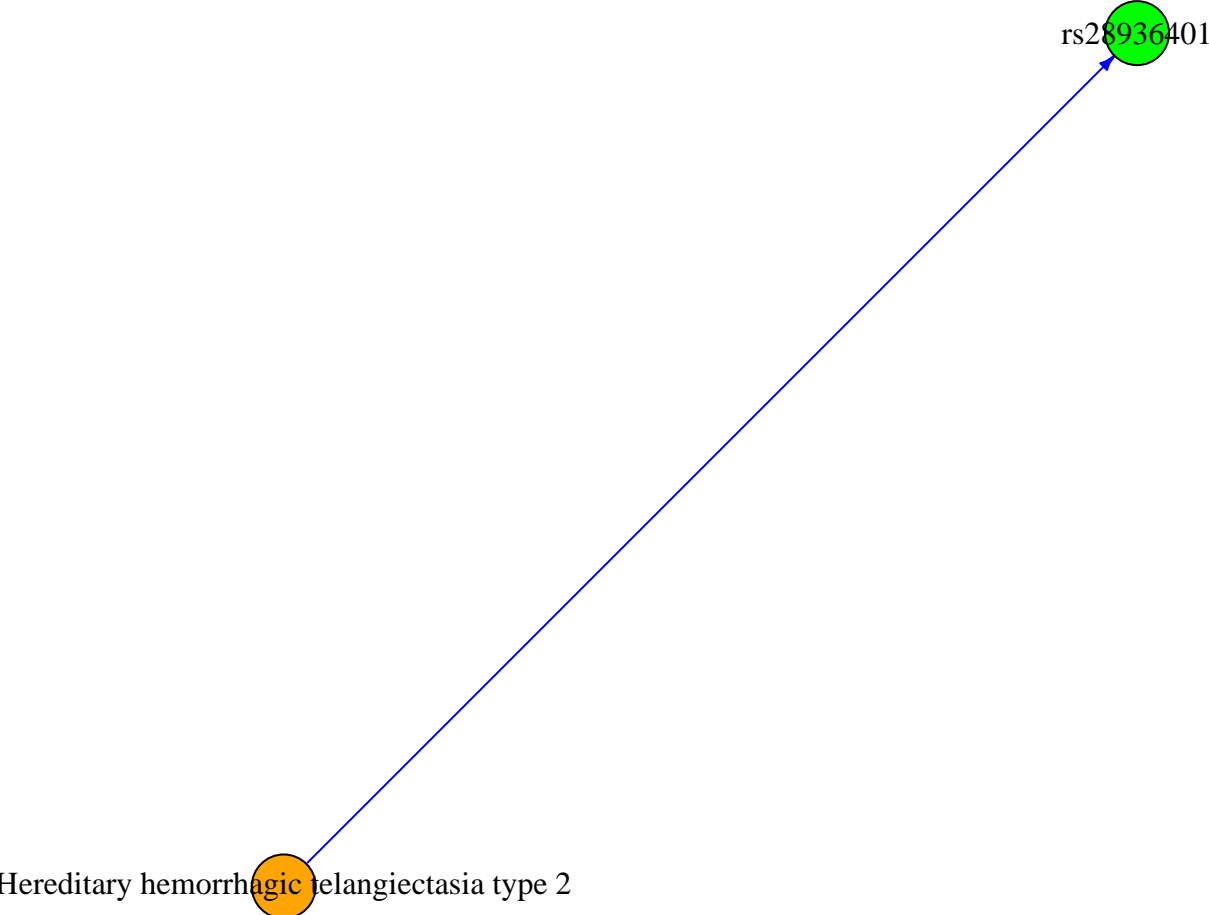



Variant–Disease Network (Hereditary insensitivity to pain with anhidrosis)

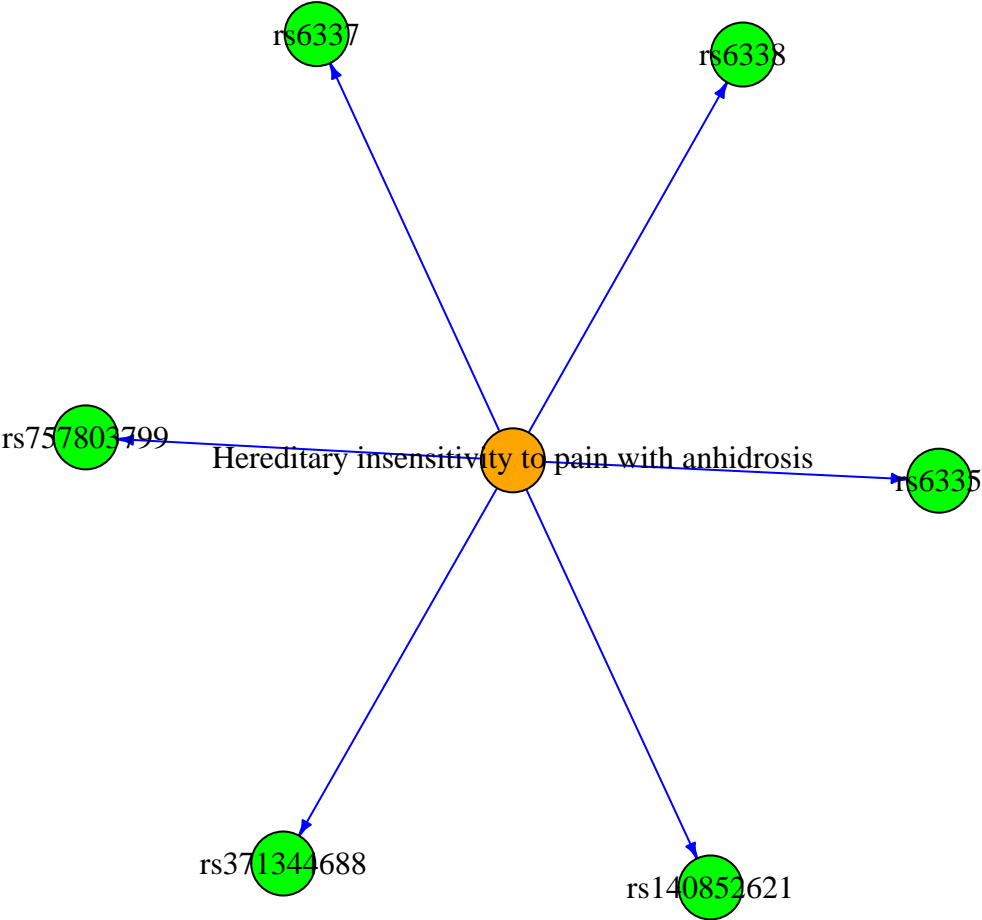

**Variant–Disease Network (Hereditary motor and sensory neuropathy)**

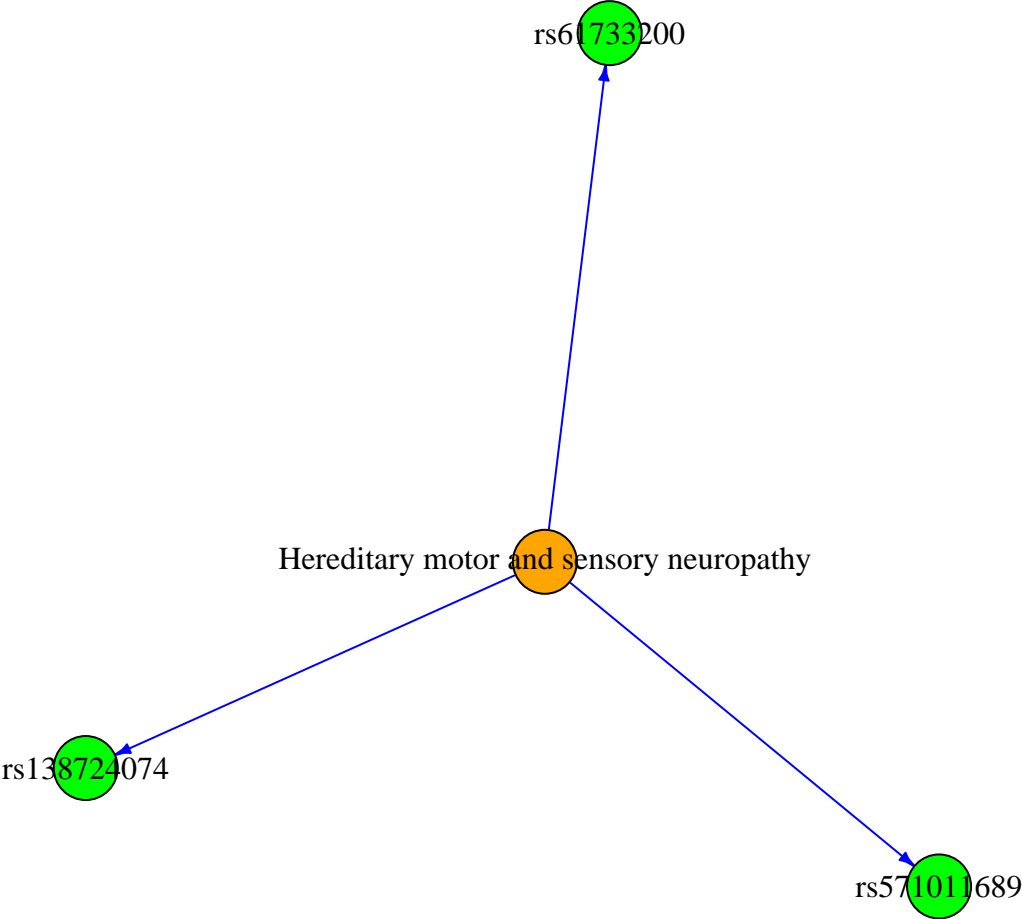

**Variant–Disease Network (Hereditary Multiple Osteochondromatosis)**

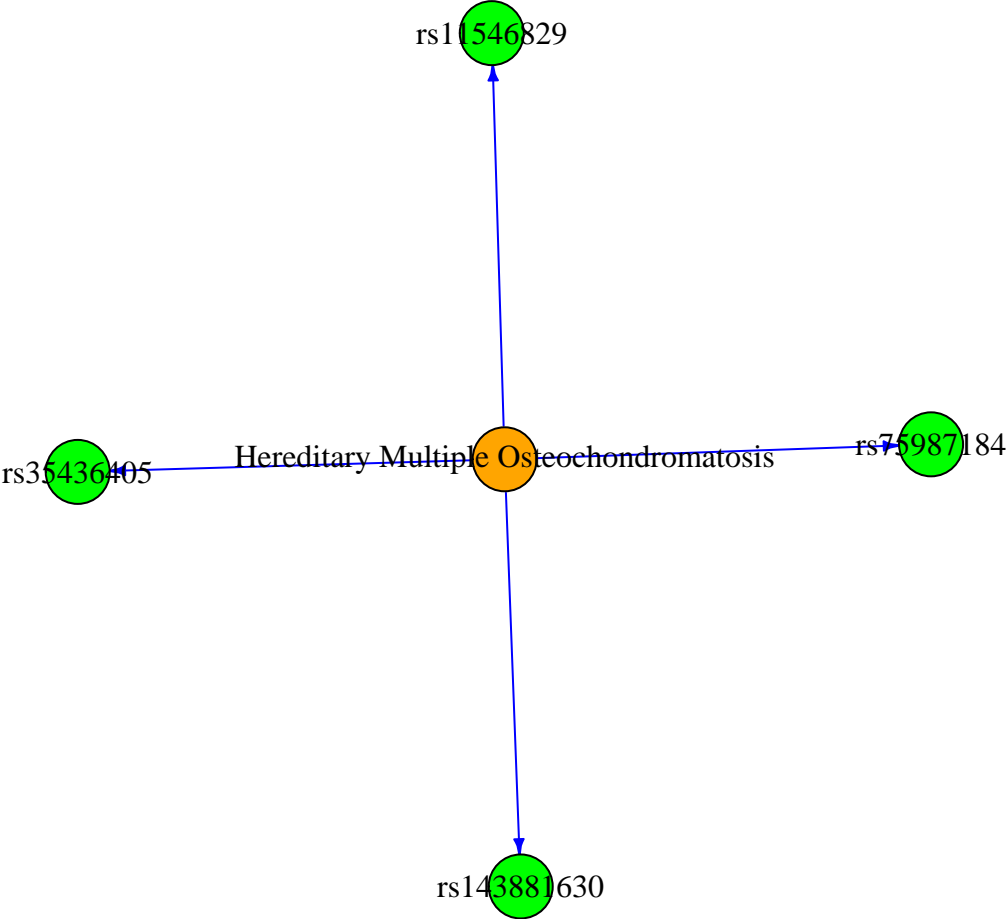

**Variant–Disease Network (Hereditary Neuralgic Amyotrophy (HNA))**

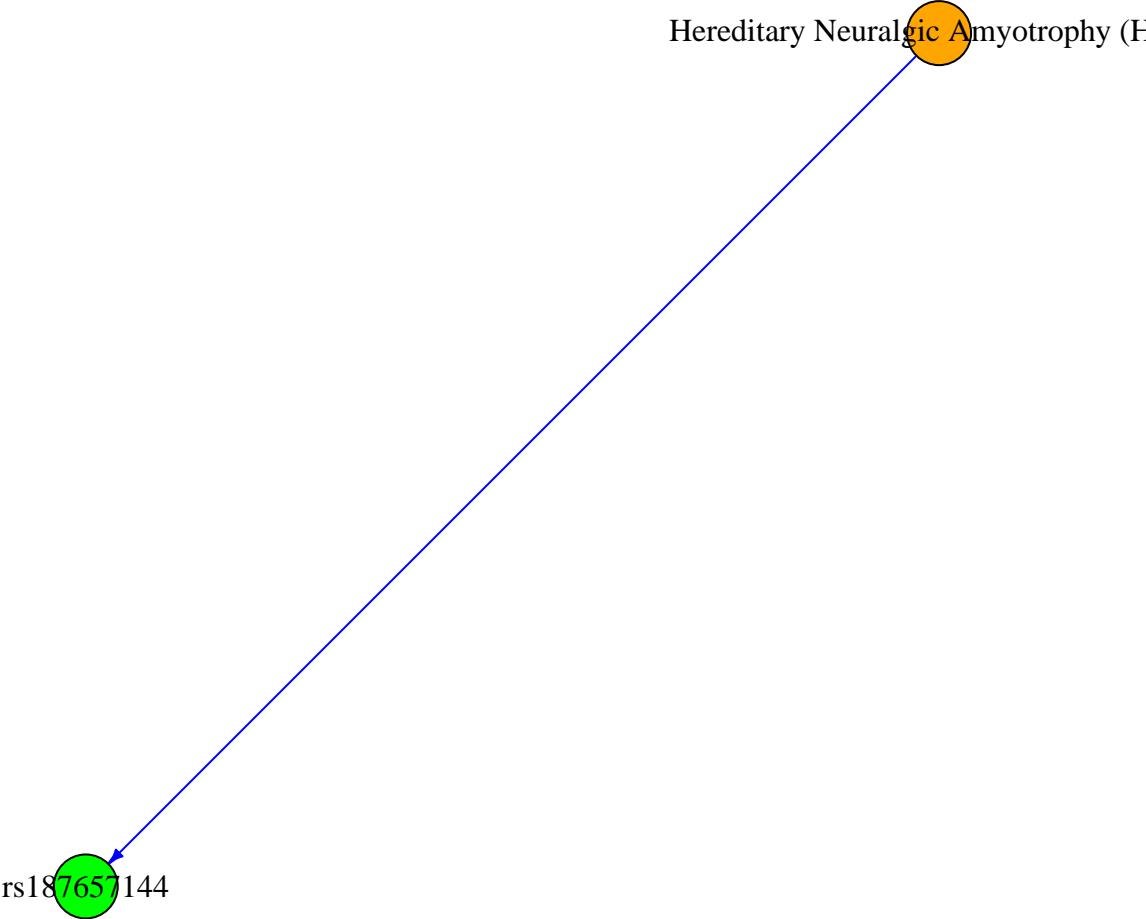

## Variant–Disease Network (Hereditary nonpolyposis colon cancer)

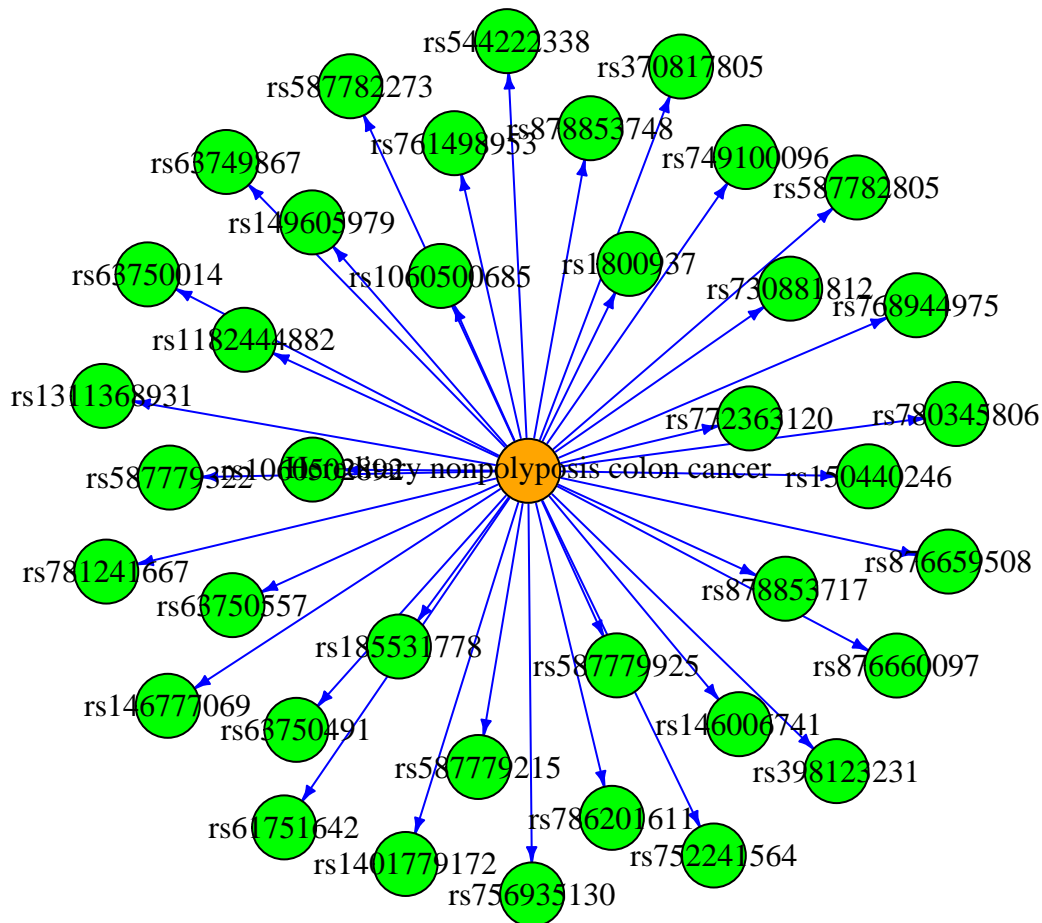

Variant–Disease Network (Hereditary nonpolyposis colorectal cancer type

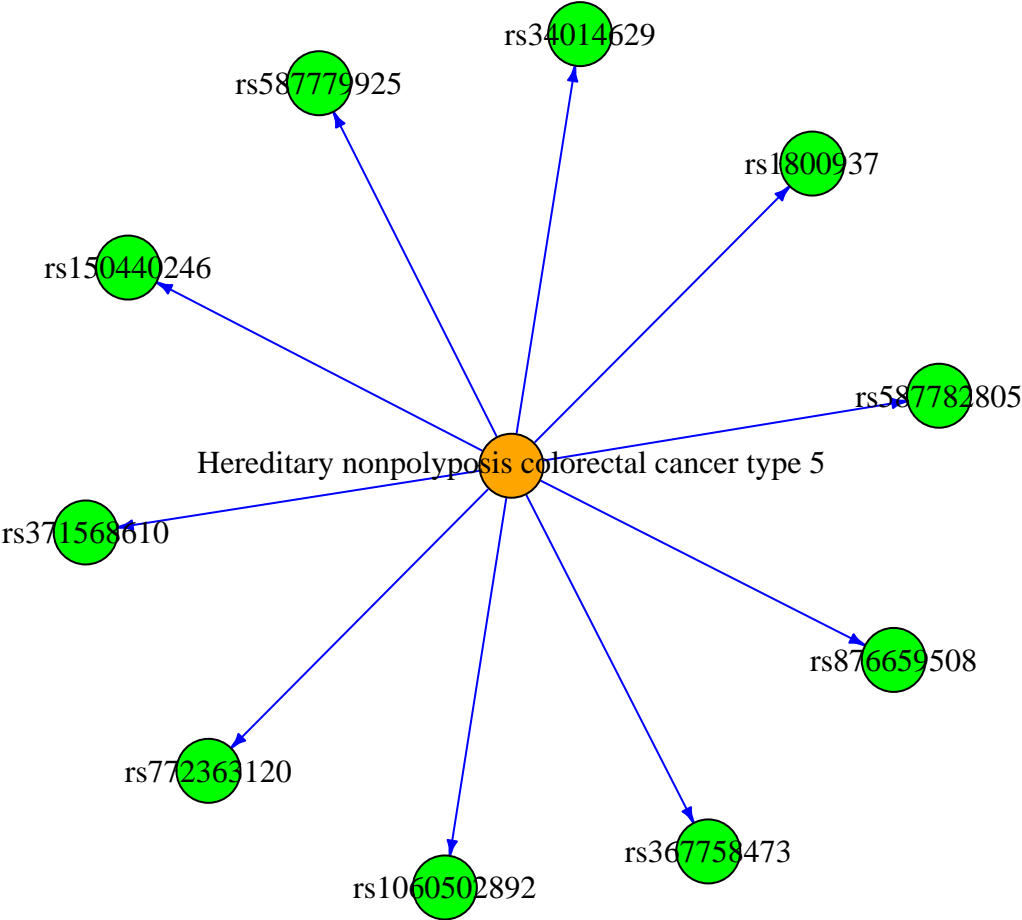

Variant–Disease Network (Hereditary nonpolyposis colorectal cancer type

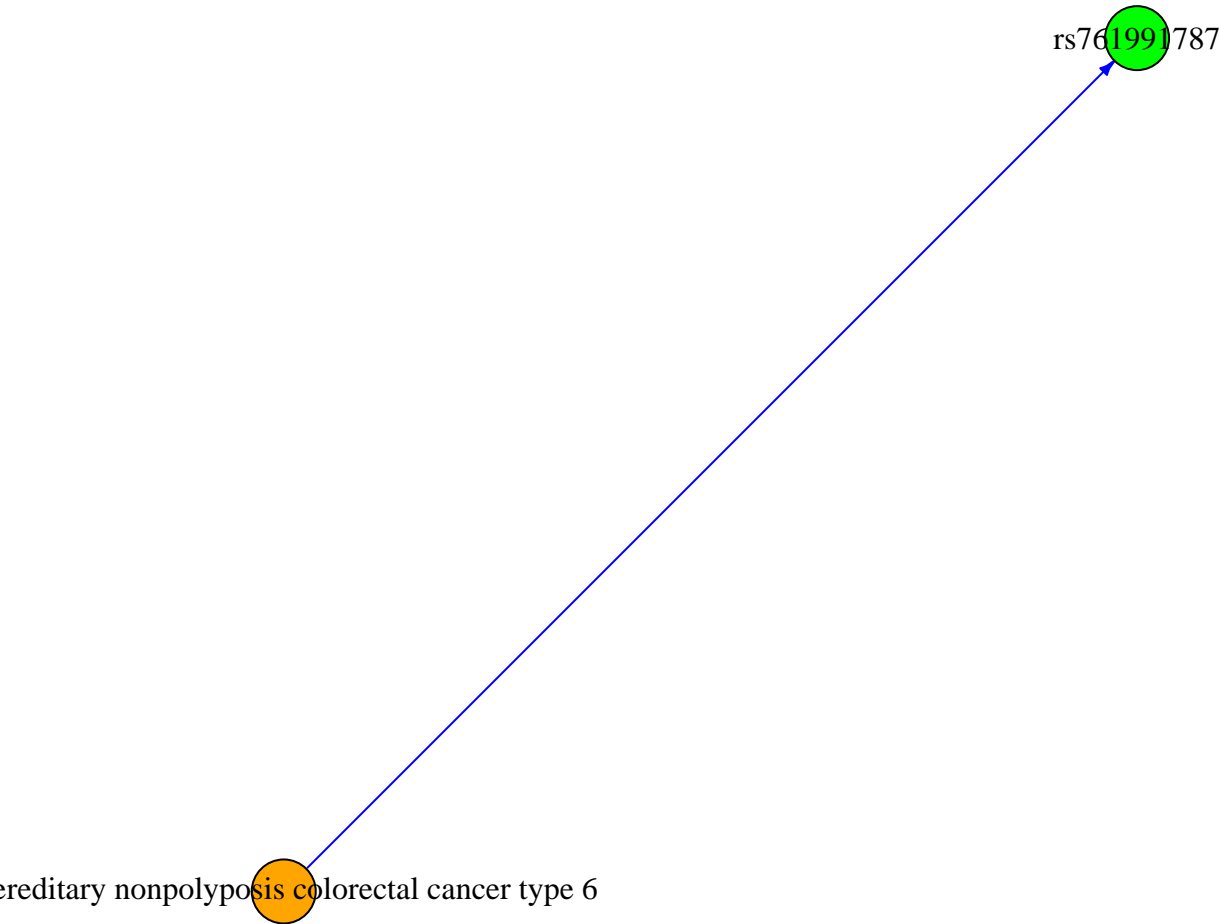

Variant–Disease Network (Hereditary nonpolyposis colorectal cancer type

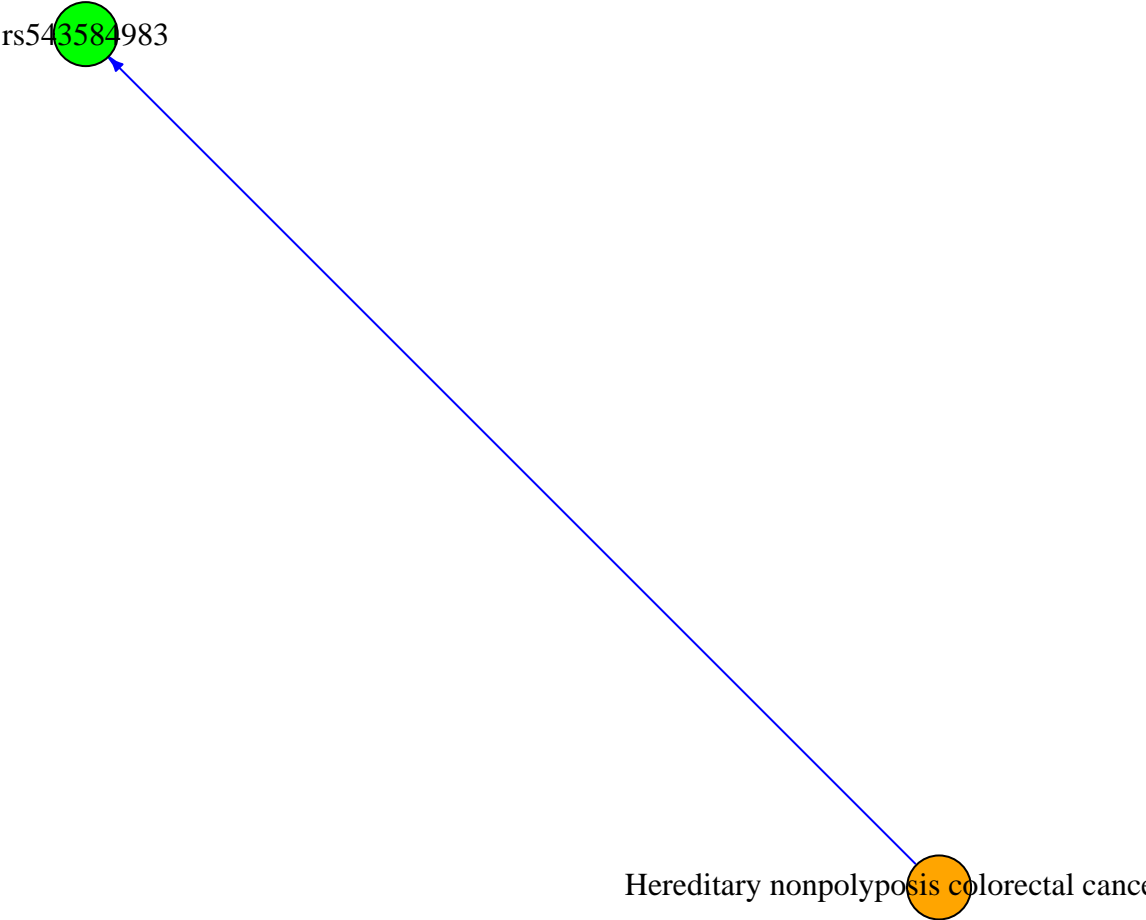



## Variant–Disease Network (Hereditary pancreatitis)

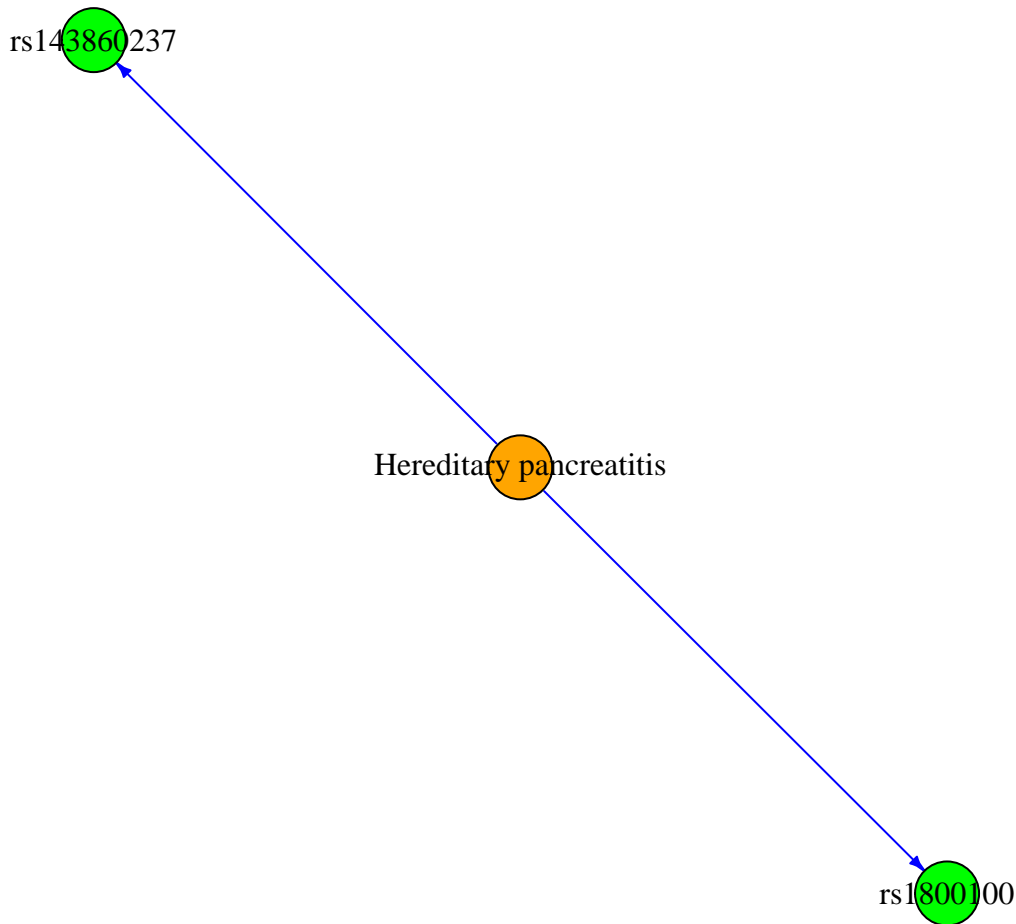

# Variant-Disease Network (Hereditary Paraganglioma-Pheochromocytoma Syndrome)

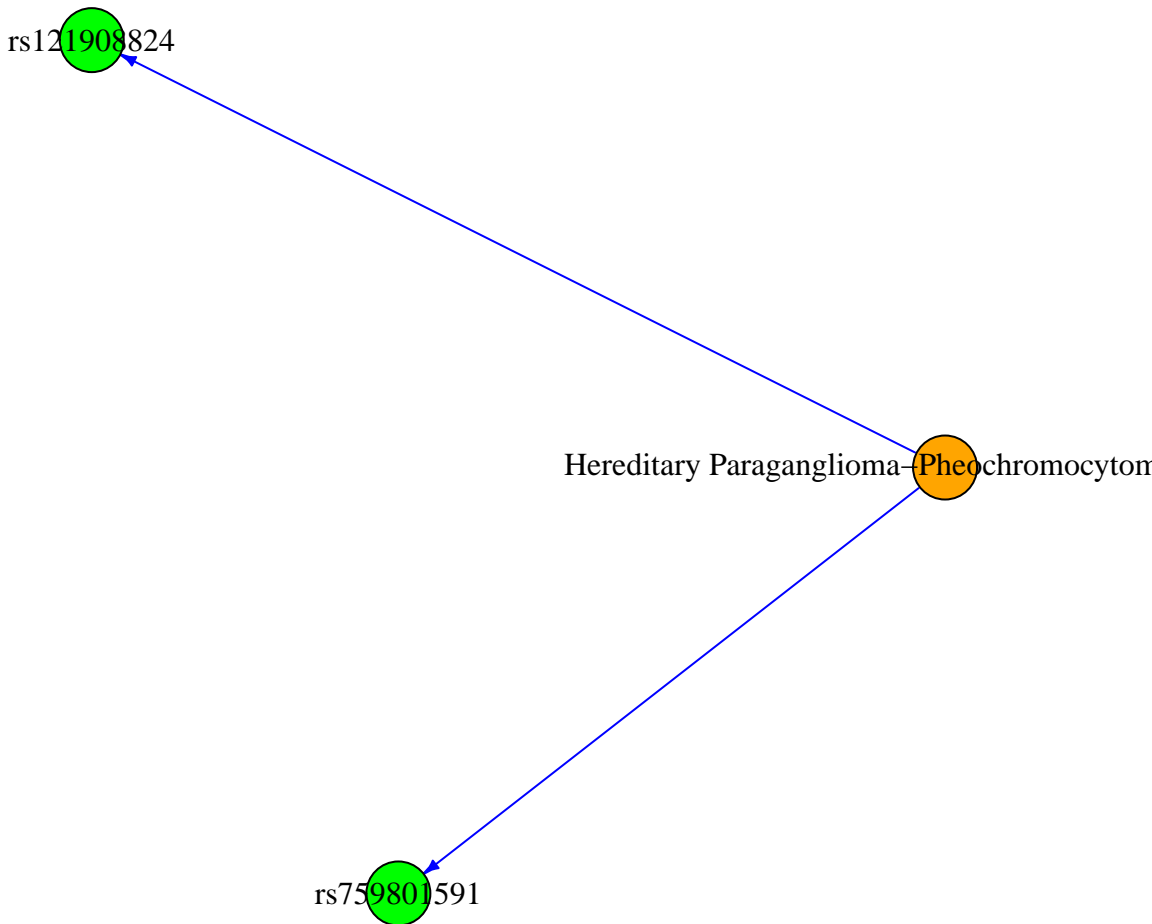

**Variant–Disease Network (Hereditary pyropoikilocytosis)**

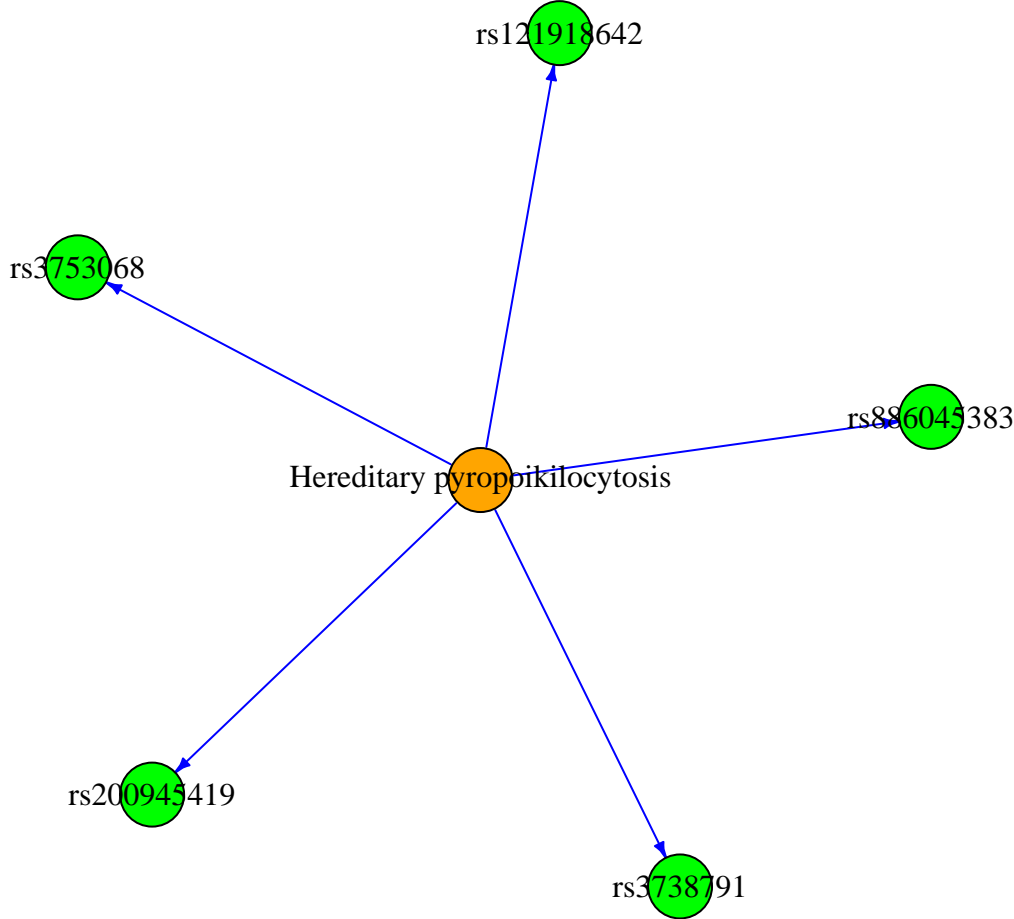

# Variant–Disease Network (Hereditary sensory and autonomic neuropathy type II)

Hereditary sensory and autonomic neuropathy type II

rs162848

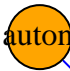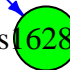

# Variant-Disease Network (Hereditary sensory and autonomic neuropathy type 1)

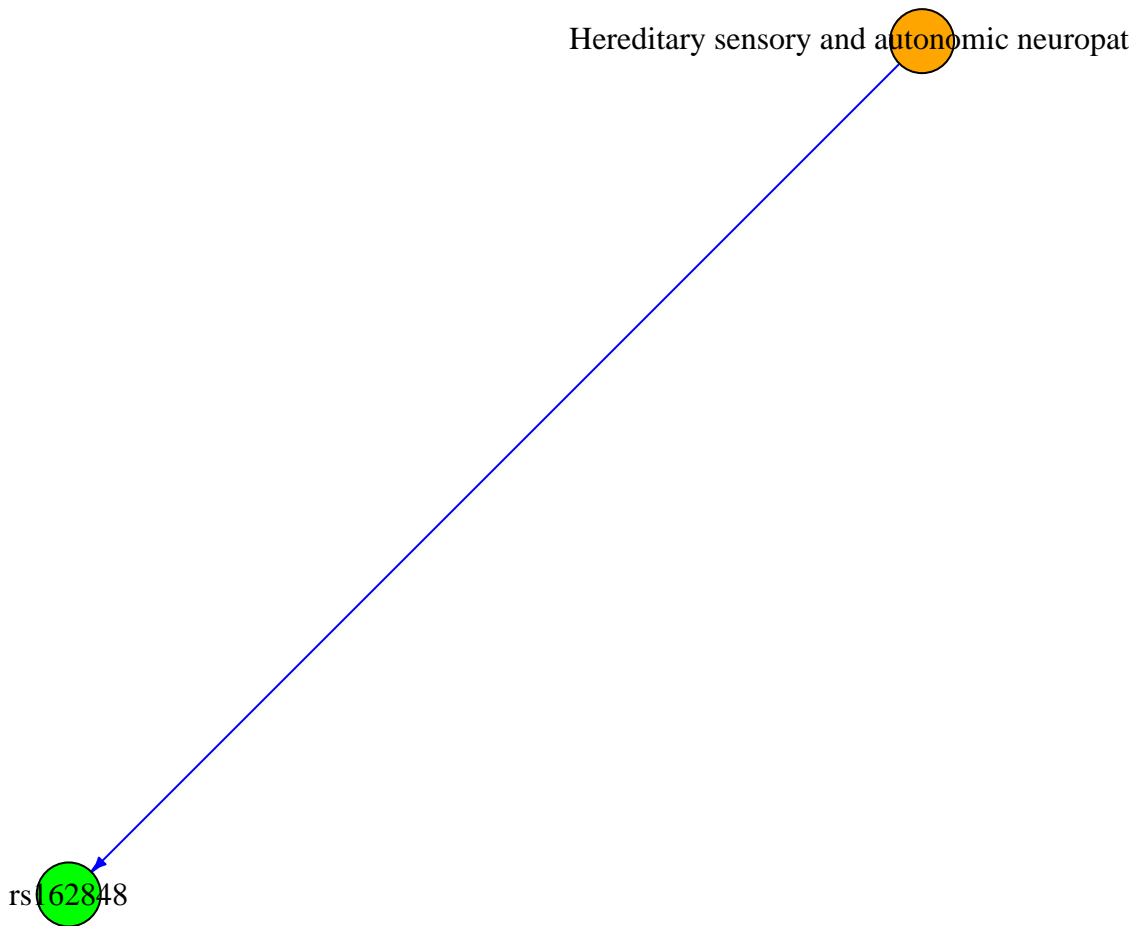

# Variant–Disease Network (Hereditary sensory neuropathy type IE)

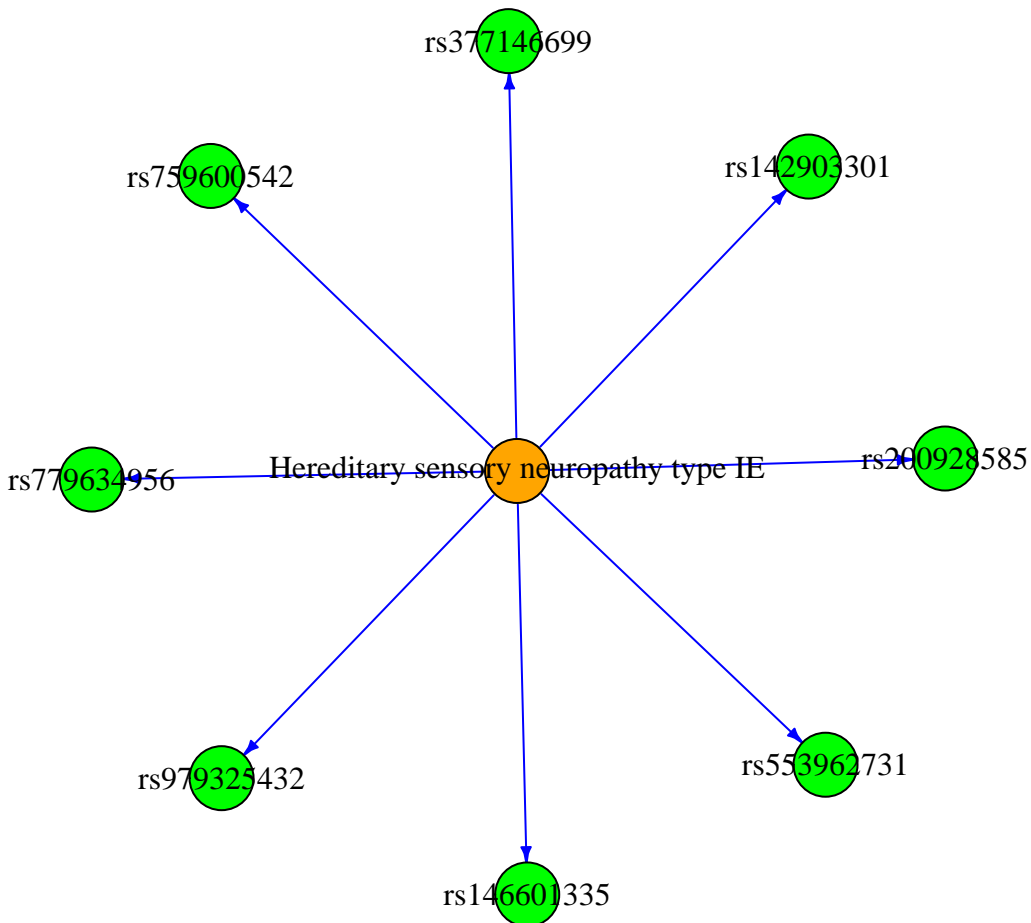

# -Disease Network (Hereditary Sideroblastic Anemia with Myopathy and Lact

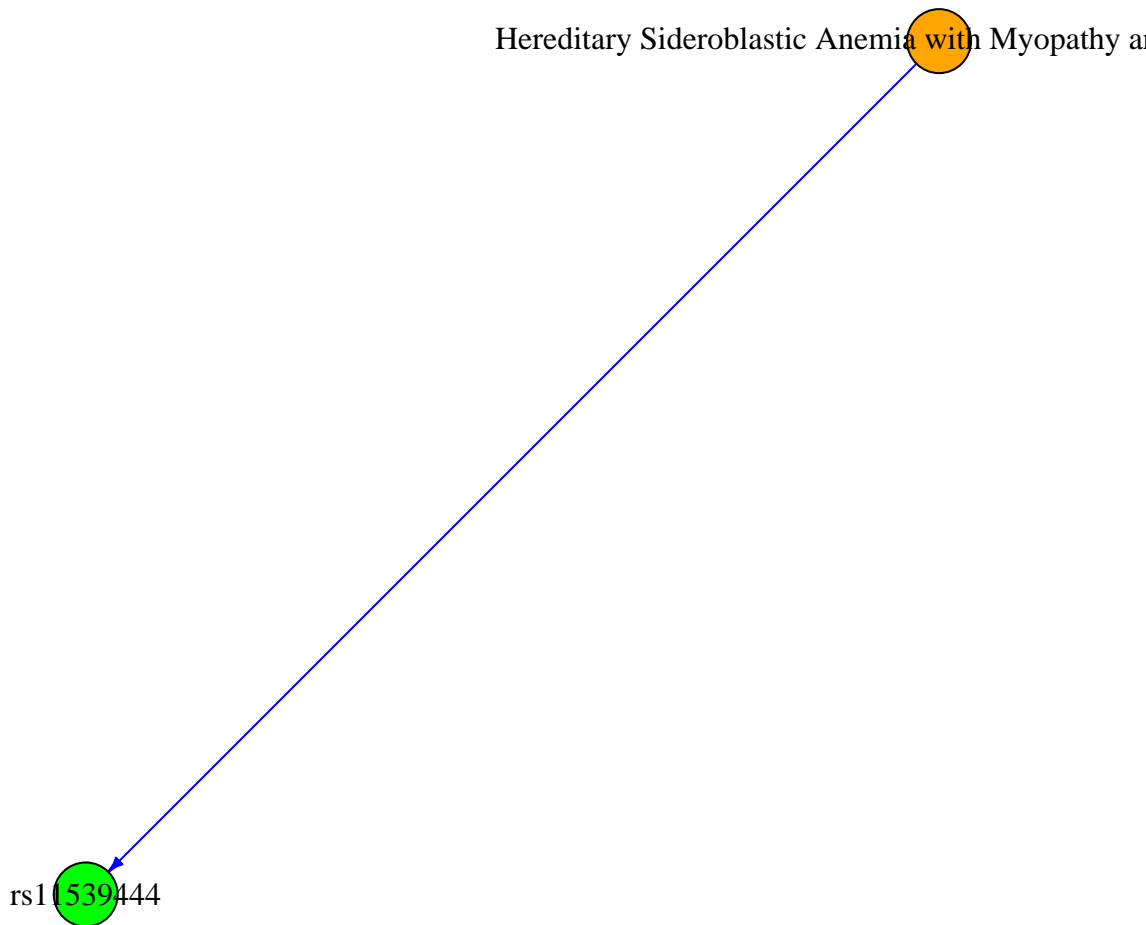

Variant–Disease Network (Hermansky Pudlak syndrome 2)

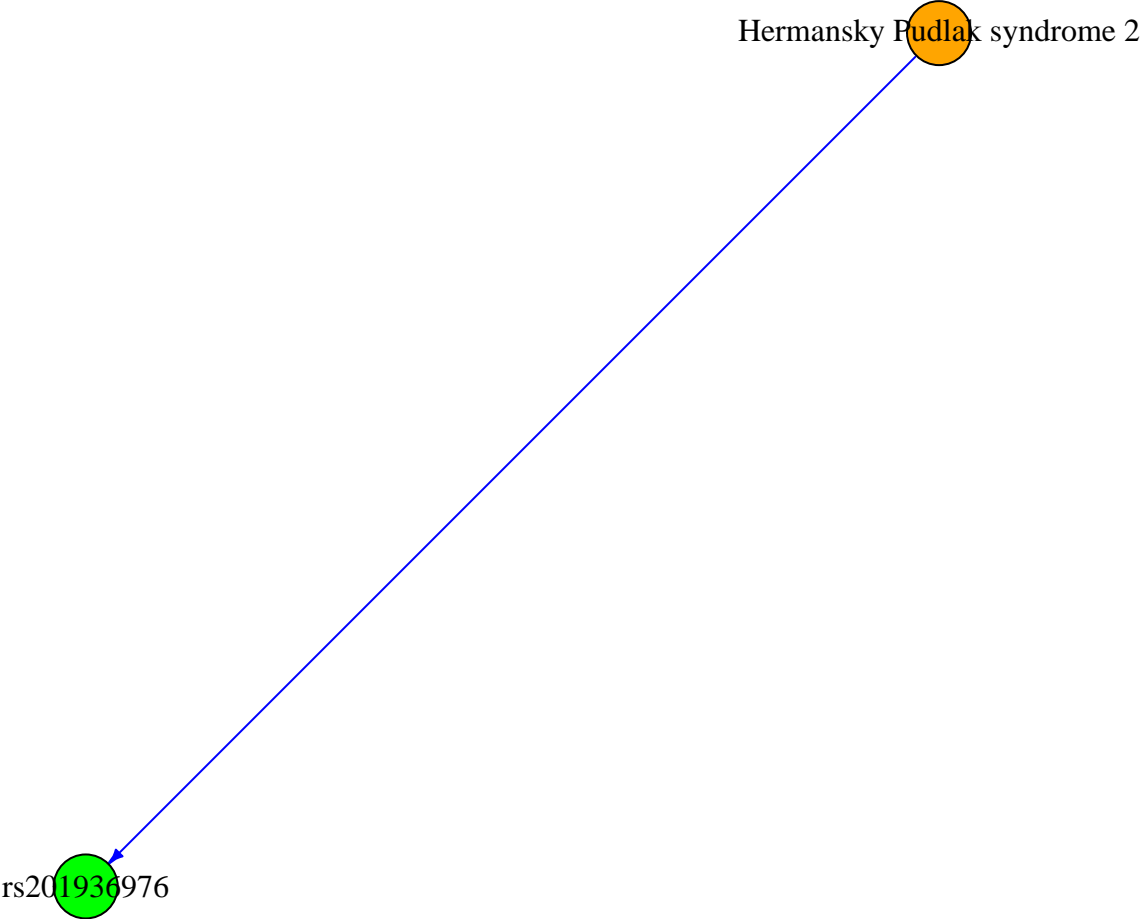



Variant–Disease Network (Hermansky–Pudlak syndrome)

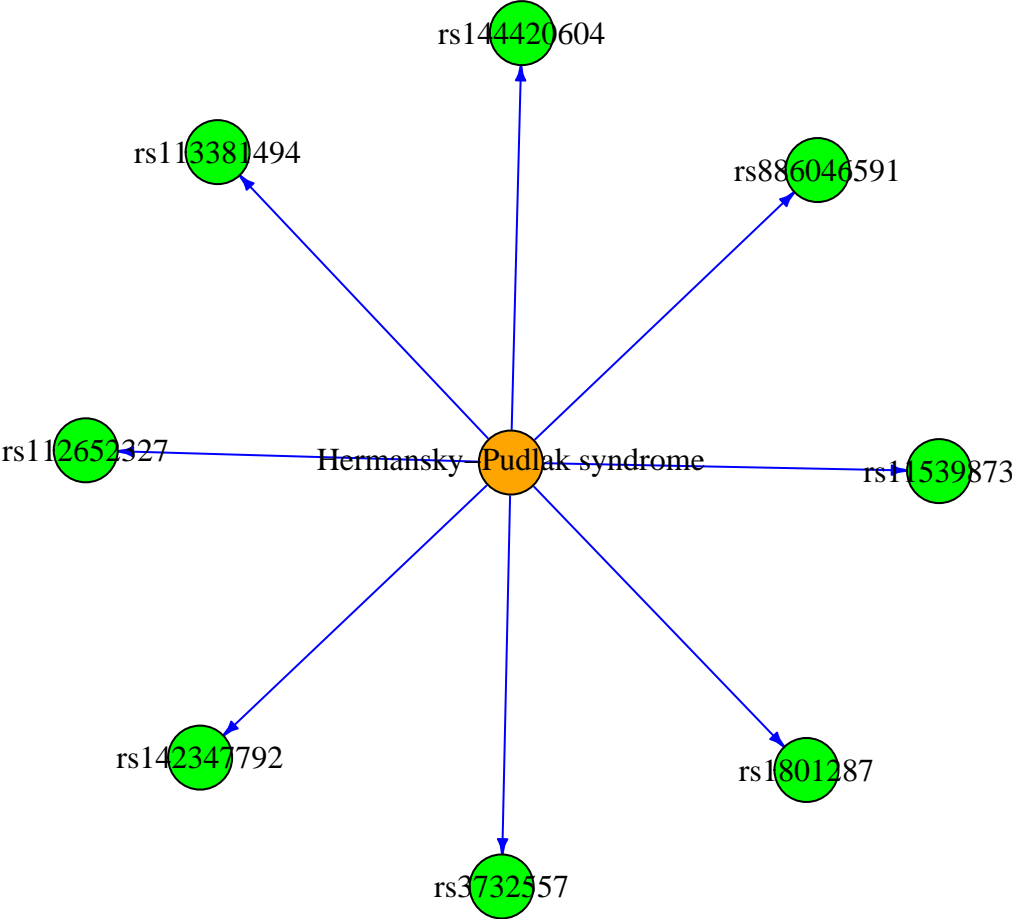

Variant–Disease Network (Herpes simplex encephalitis 1)

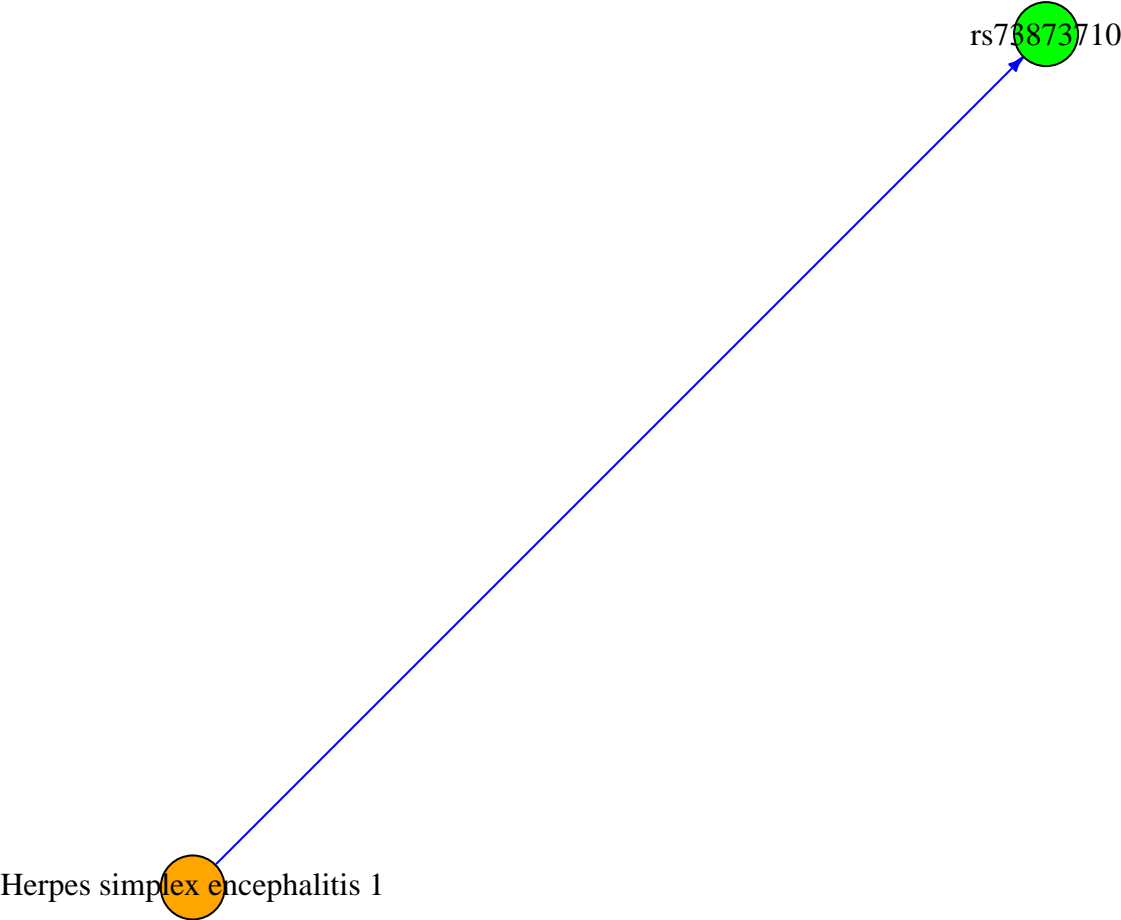

**Variant–Disease Network (heterogeneous nuclear ribonucleoprotein G)**

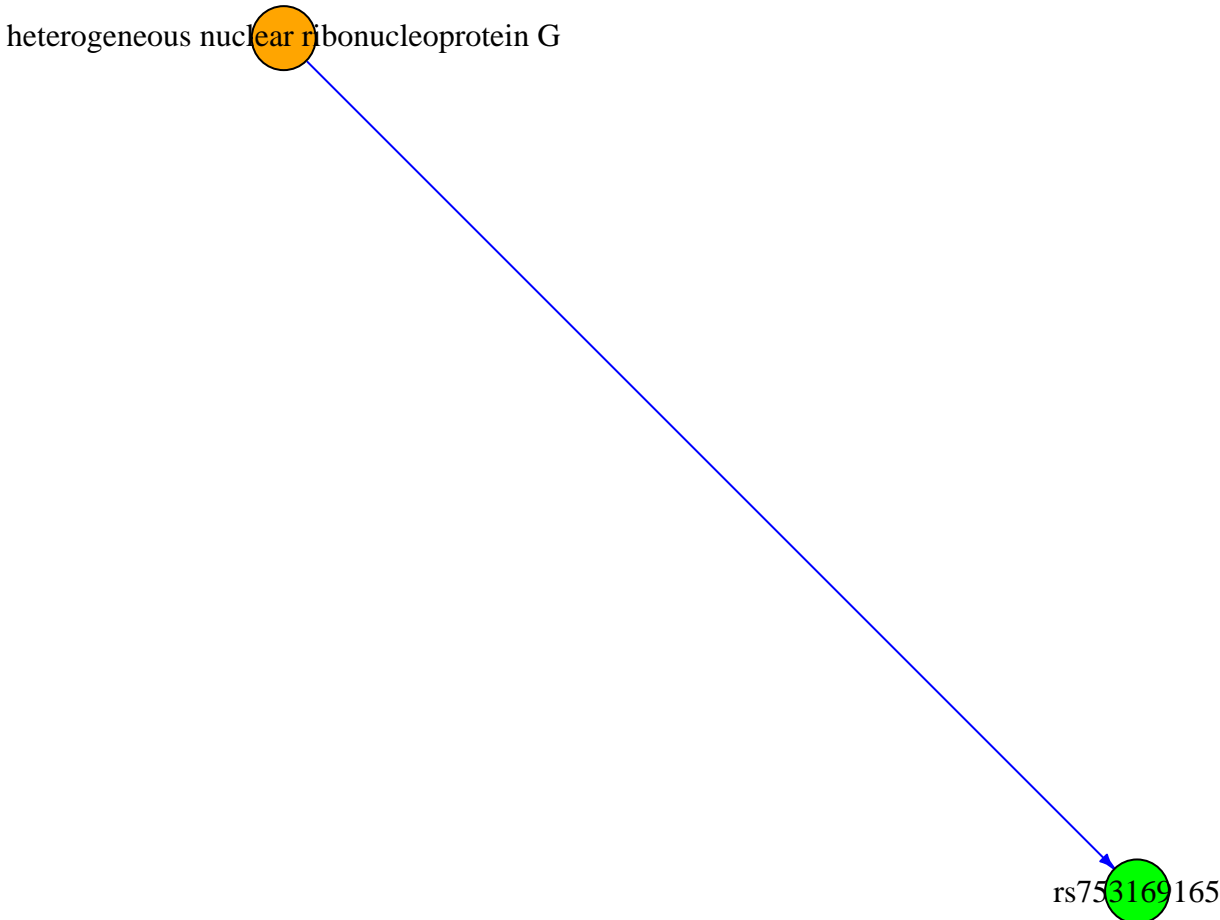

Variant–Disease Network (Heterotaxia)

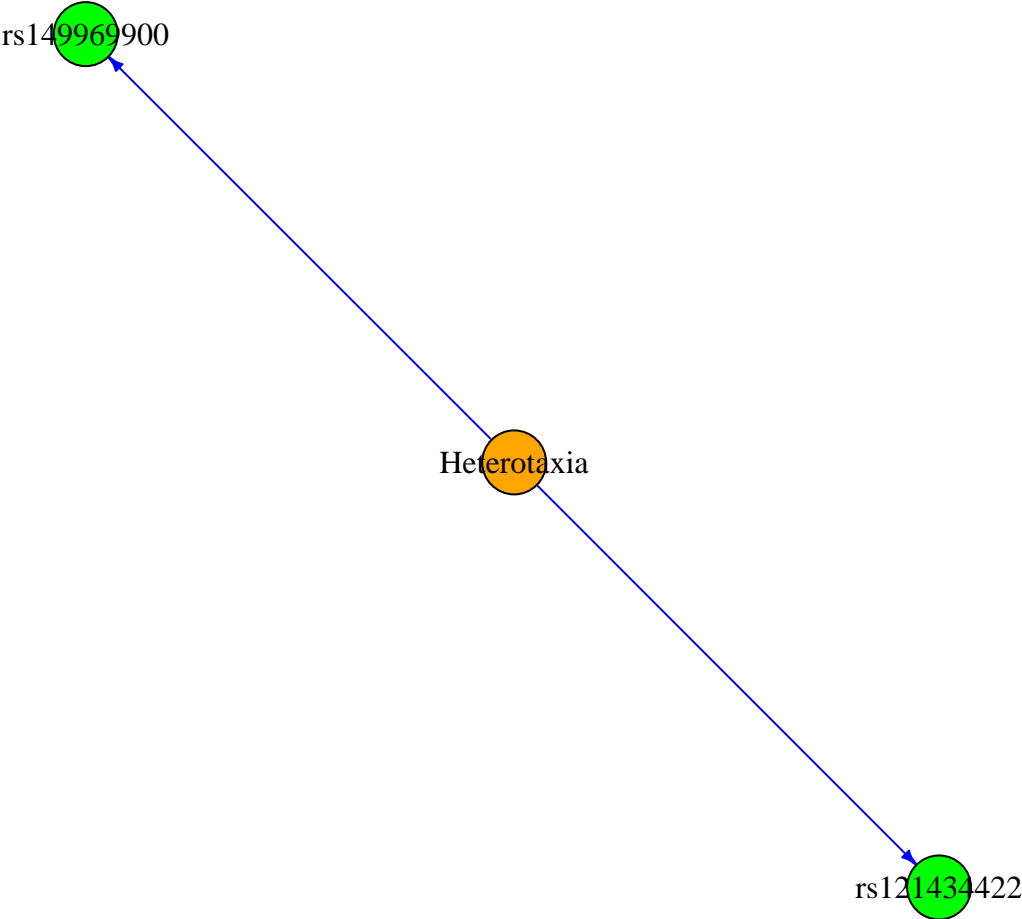

## Variant–Disease Network (Heterotaxy)

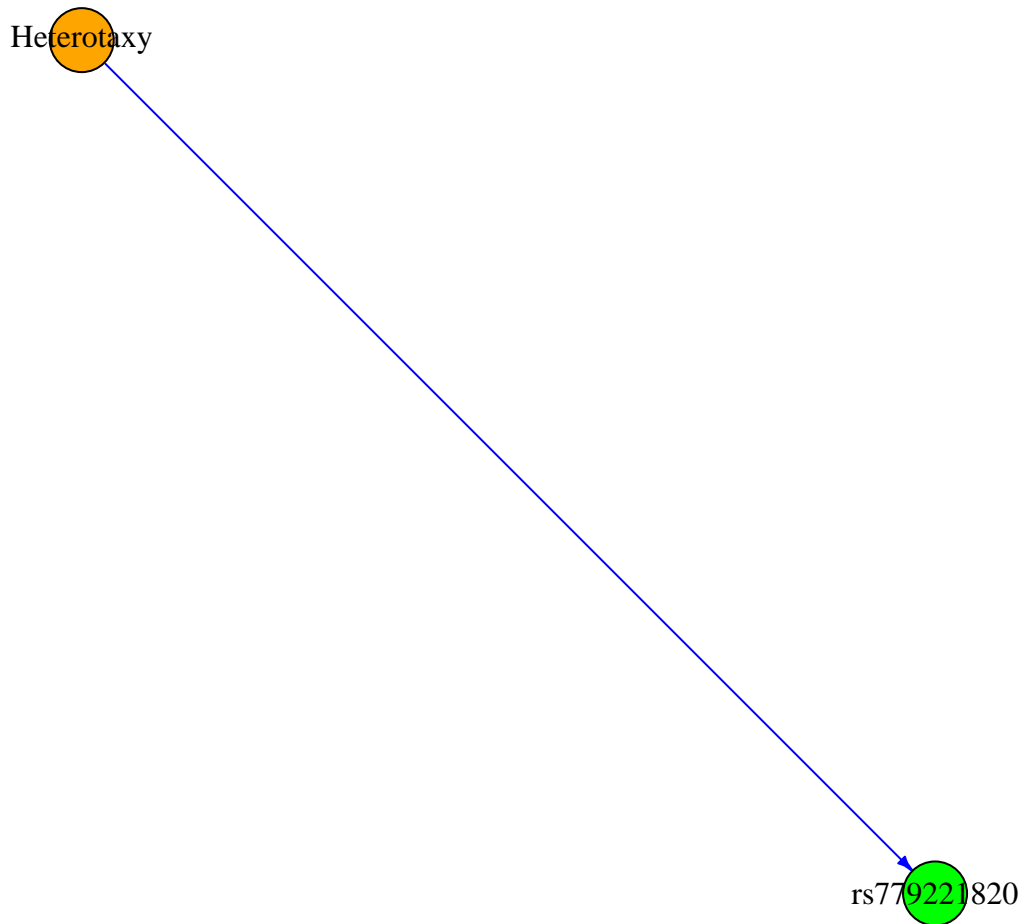

Variant–Disease Network (Heterotopia)

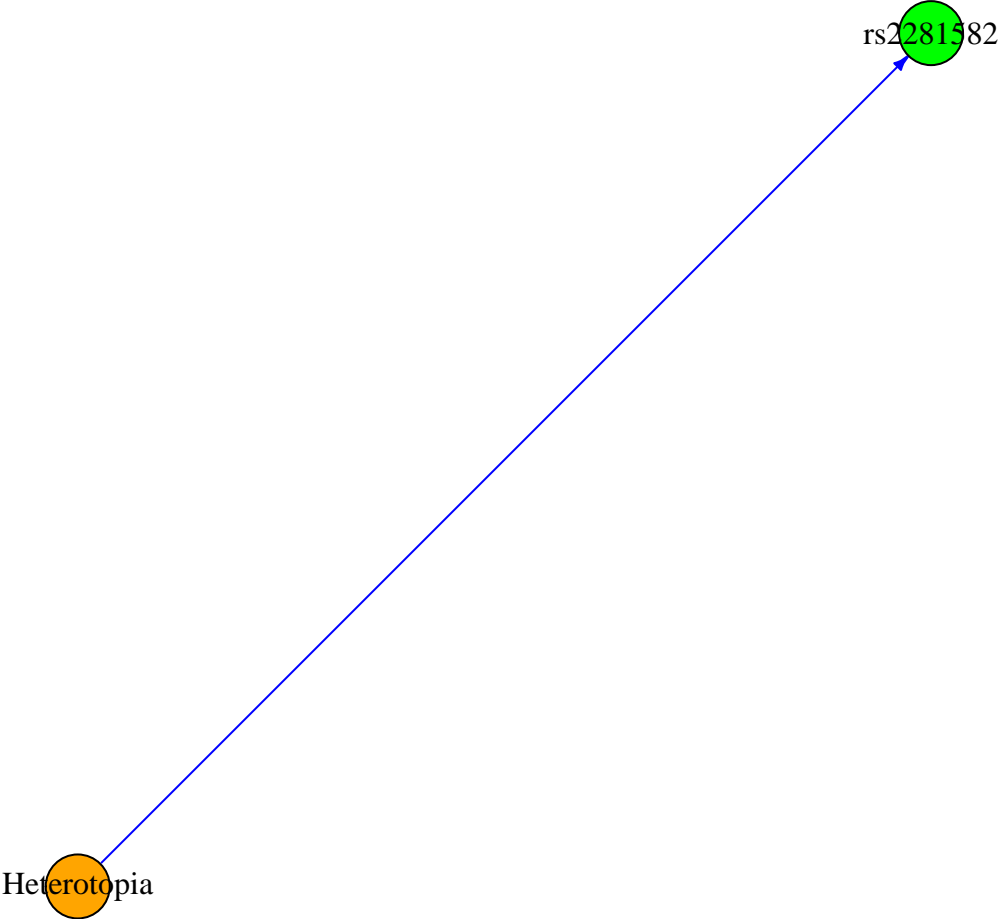

Variant–Disease Network (Hirschsprung Disease)

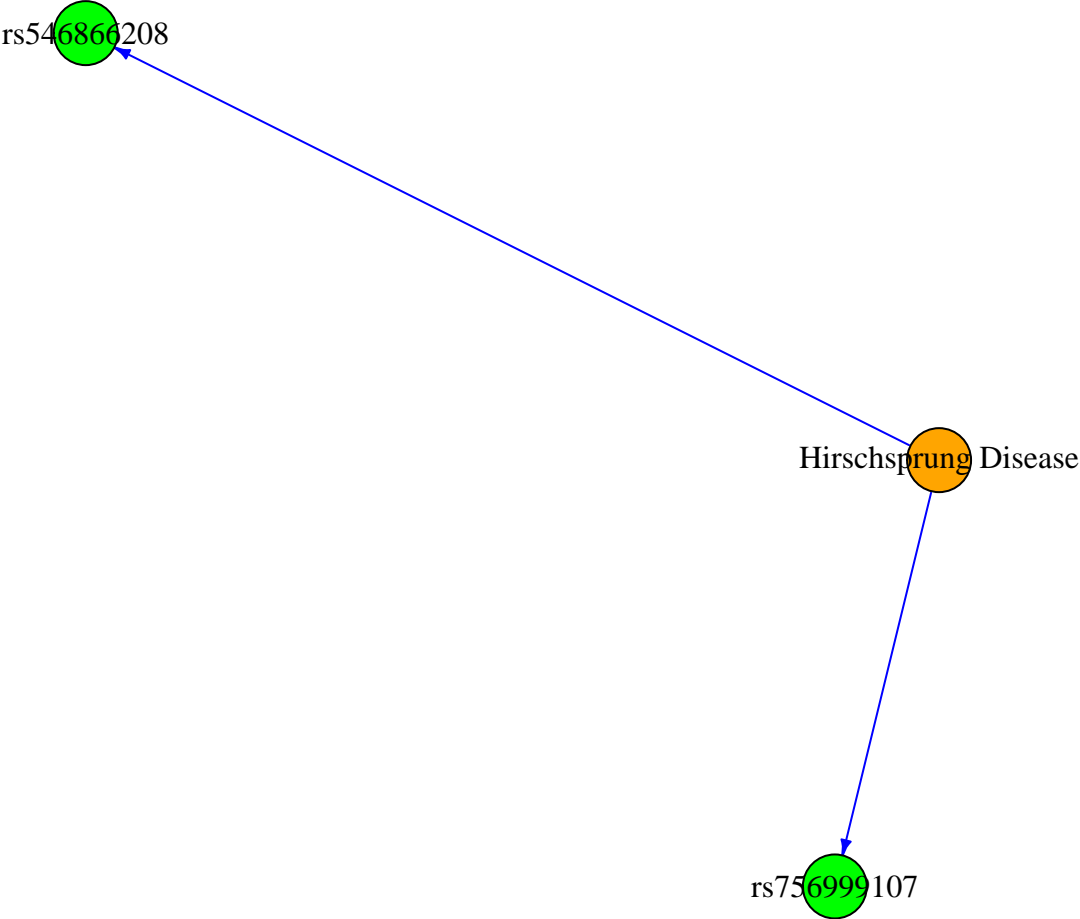

Variant–Disease Network (Hirschsprung disease 1)

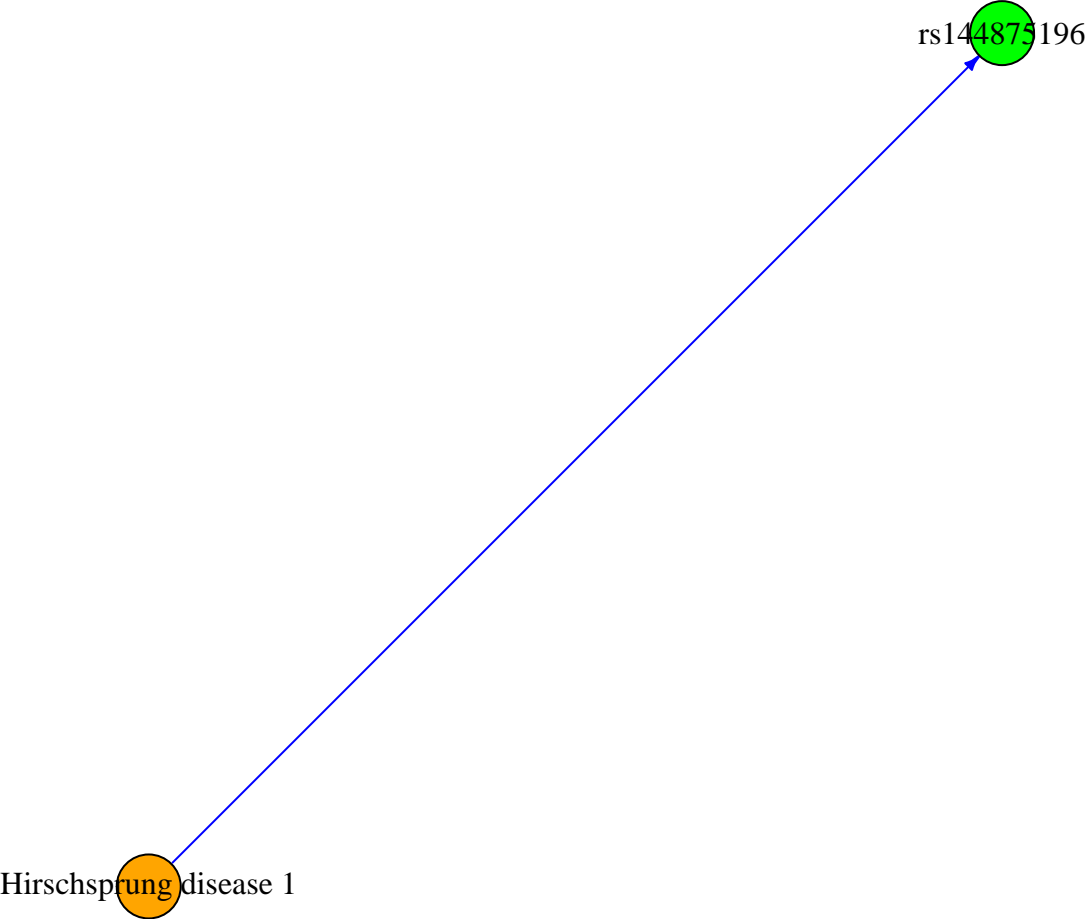



## Variant-Disease Network (Hirsutism)

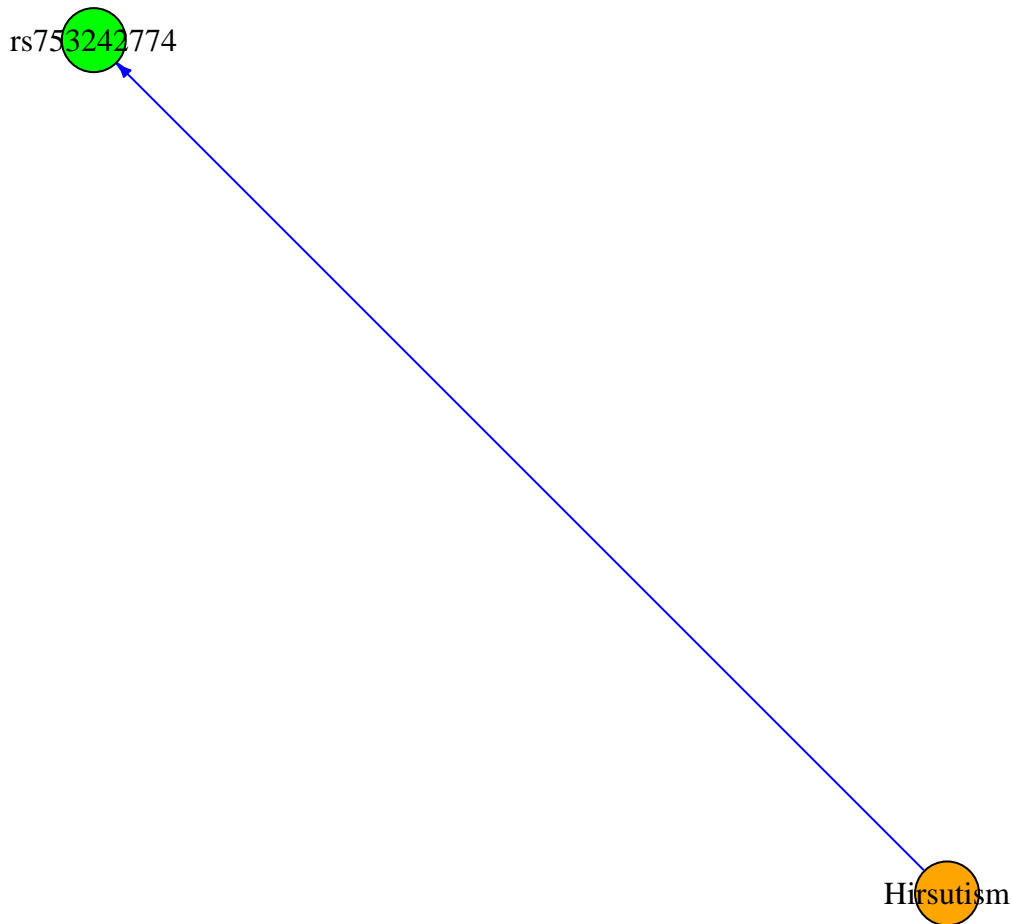

## Variant–Disease Network (Histidinemia)

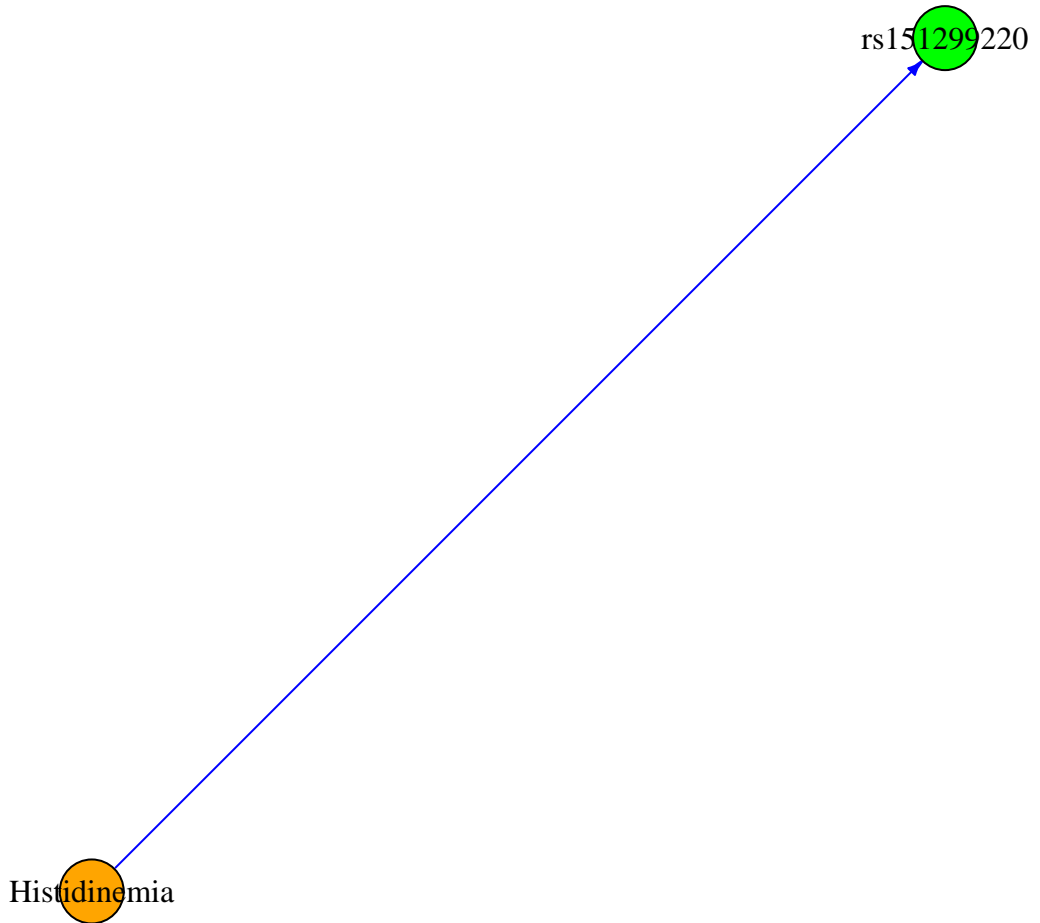

## Variant–Disease Network (Histiocytic medullary reticulosis)

rs7076862

Histiocytic medullary reticulosis



Variant–Disease Network (Histiocytosis–lymphadenopathy plus syndrome)

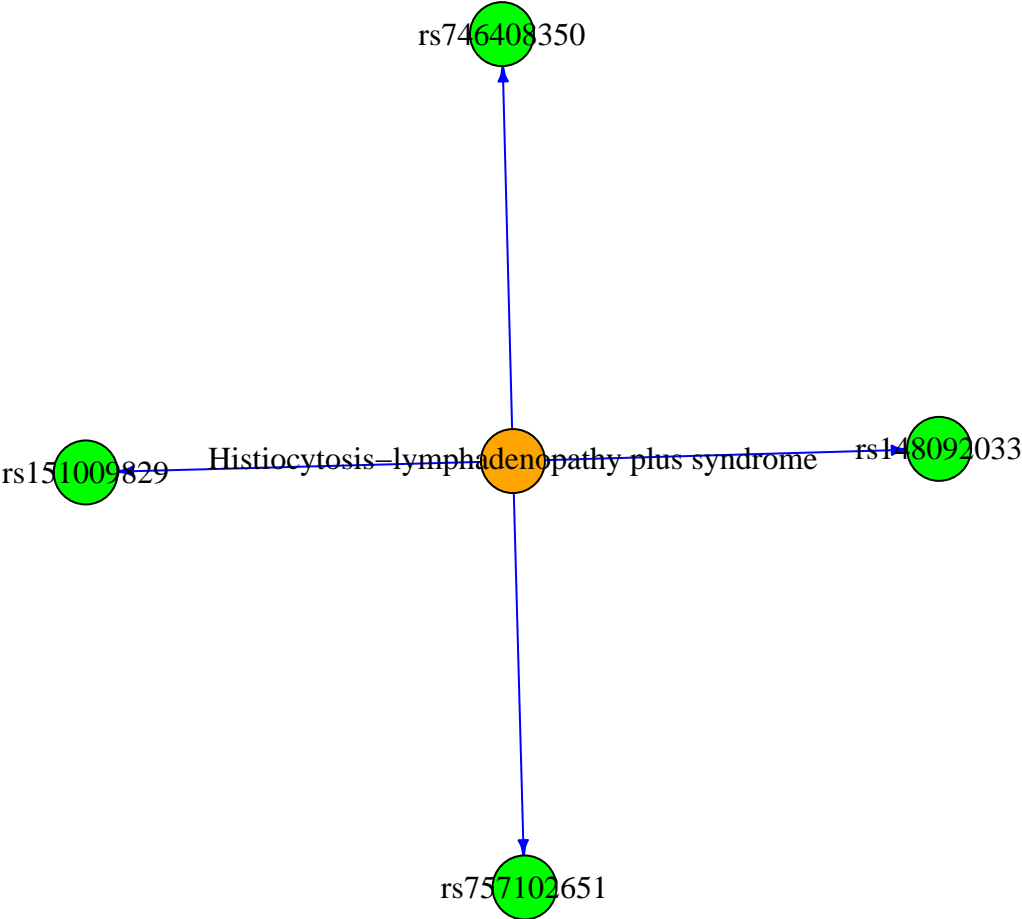

## Variant–Disease Network (History of neurodevelopmental disorder)

## Variant–Disease Network (HNSHA due to aldolase A deficiency)

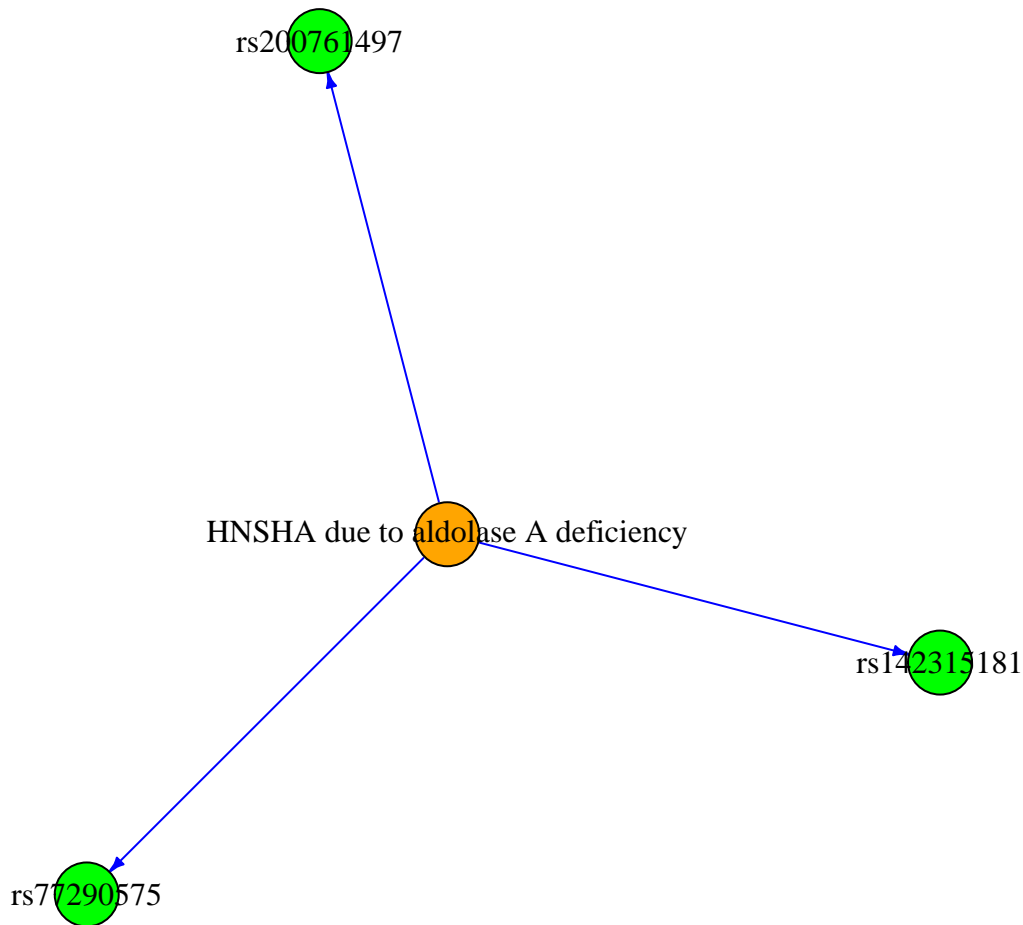

Variant–Disease Network (Holocarboxylase synthetase deficiency)

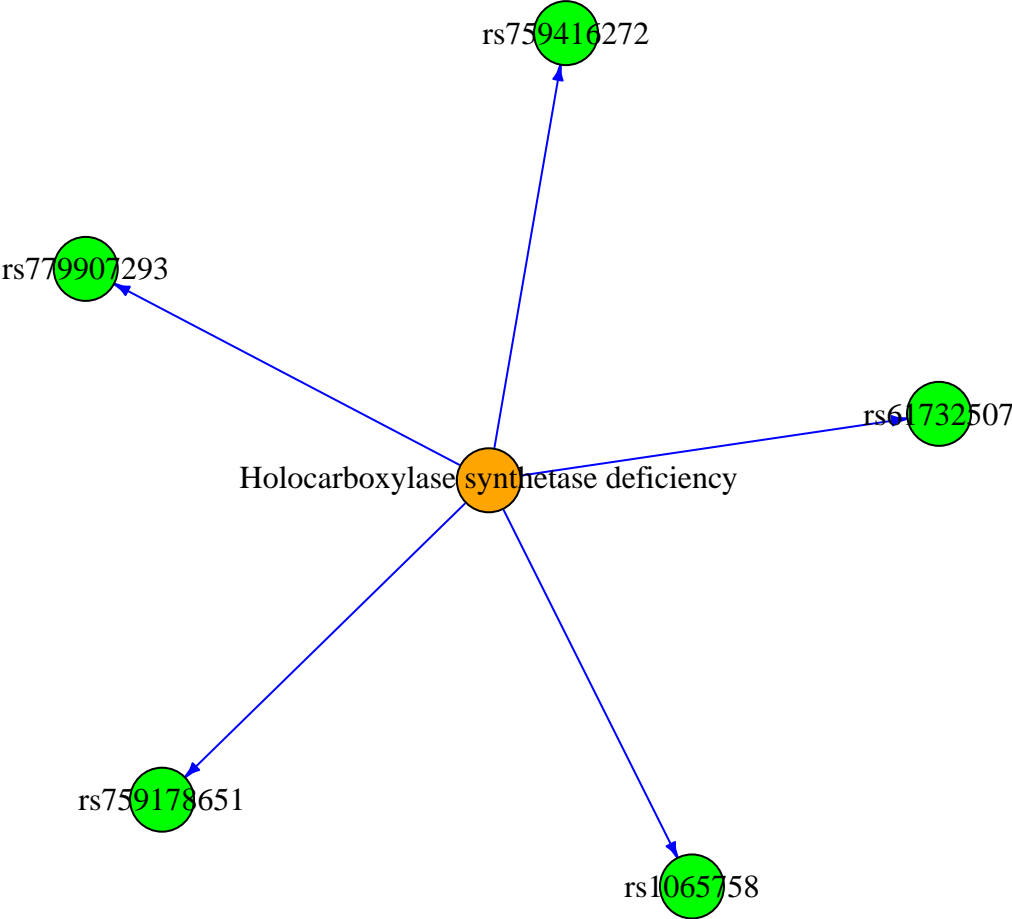

## Variant-Disease Network (Holoprosencephaly 3)

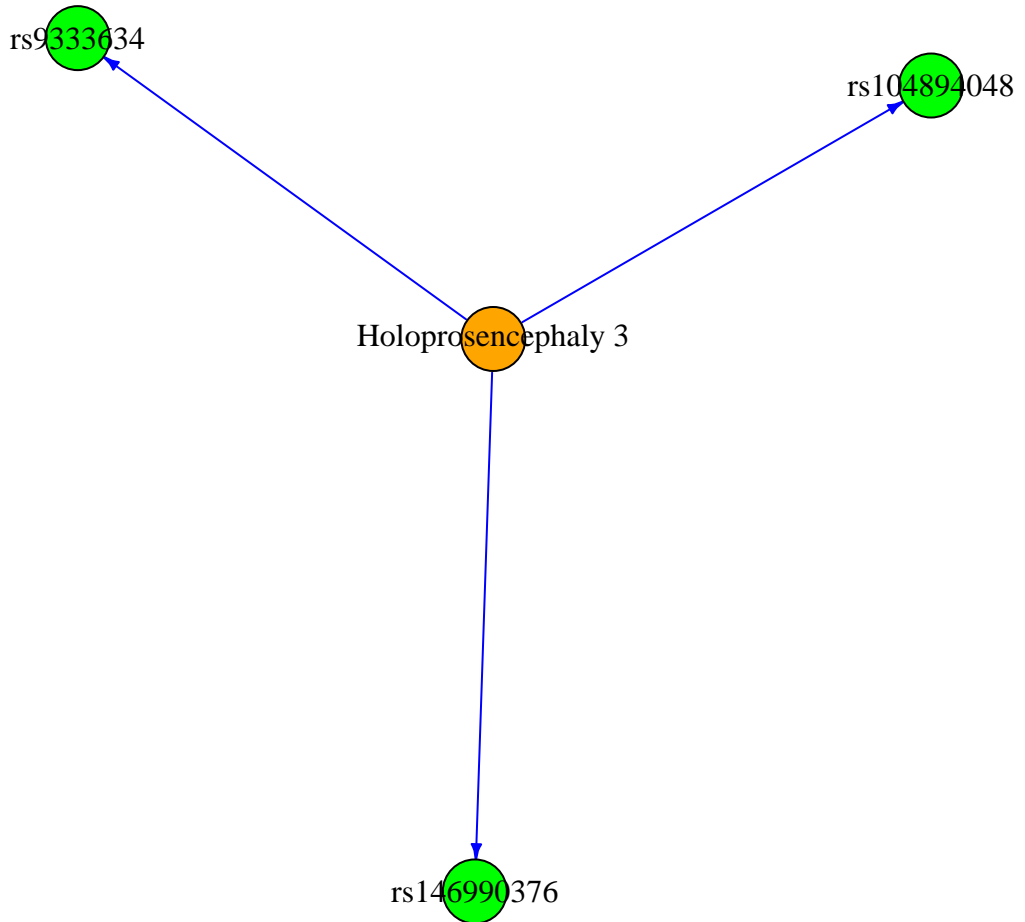



## Variant-Disease Network (Holoprosencephaly 9)

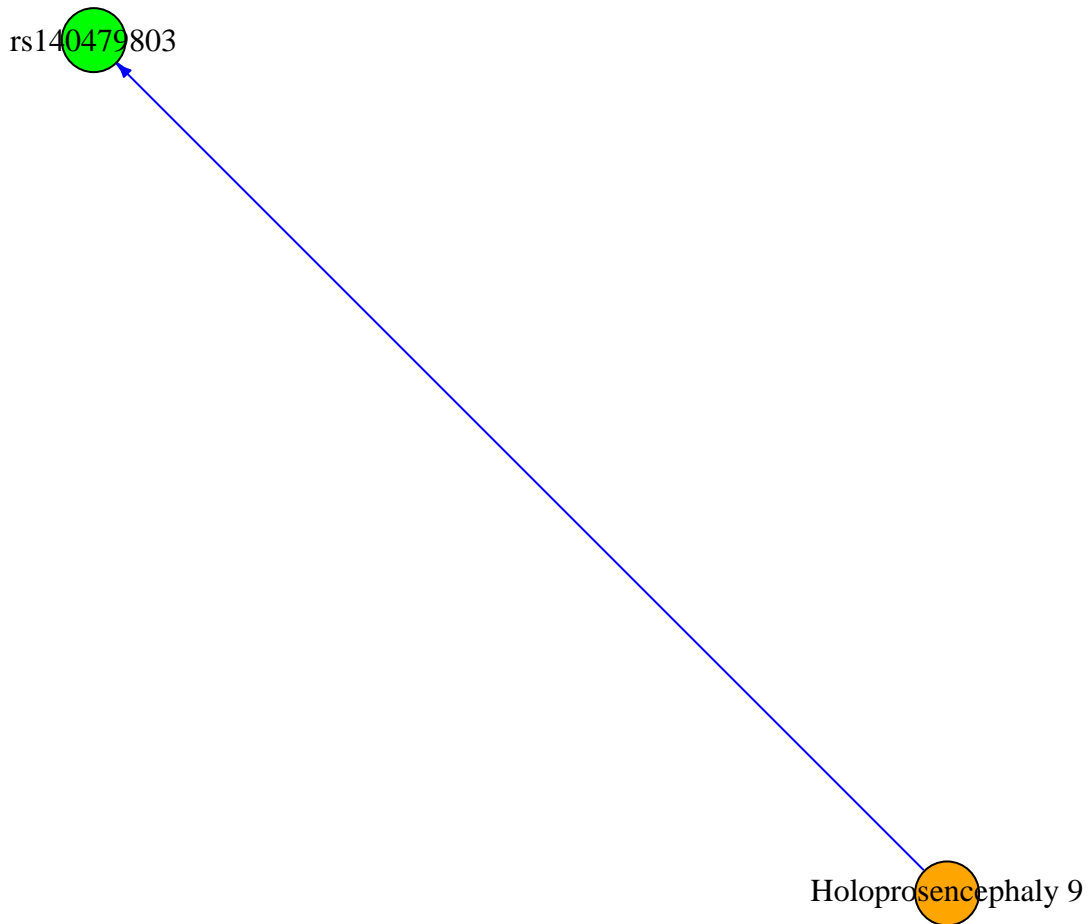

**Variant–Disease Network (Holoprosencephaly sequence)**

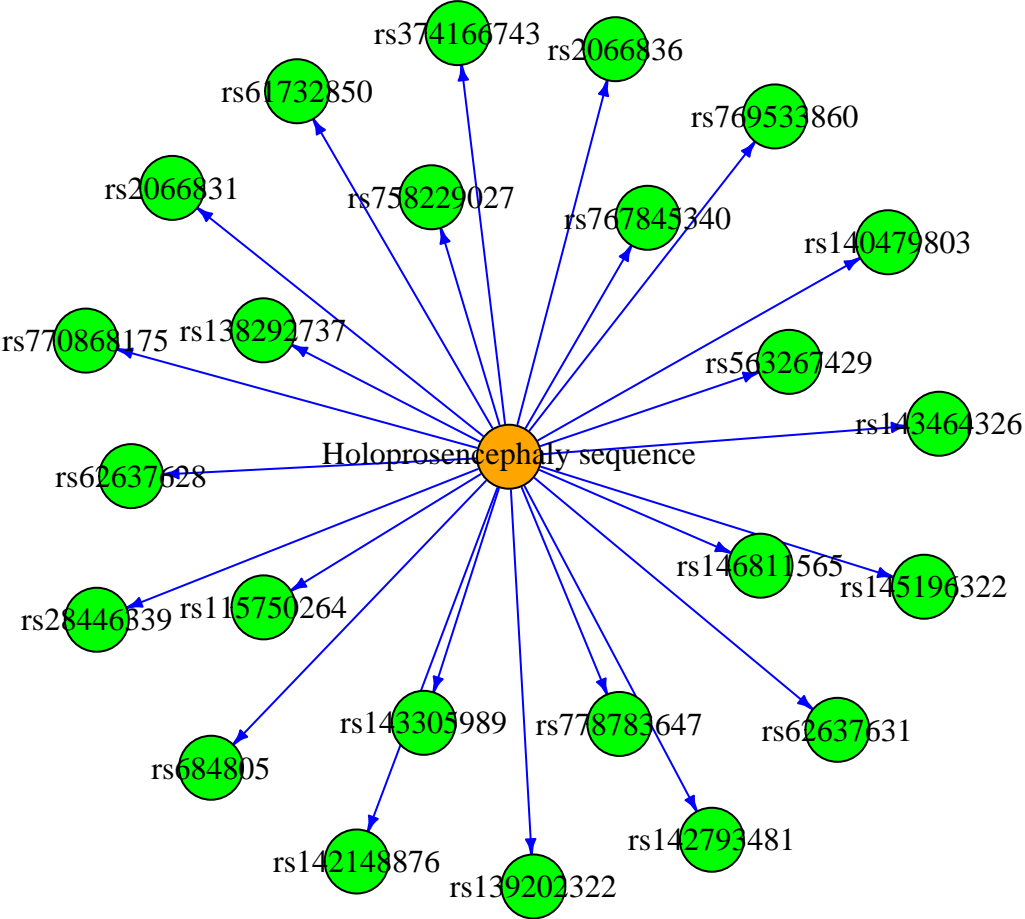

## Variant–Disease Network (Holt–Oram syndrome)

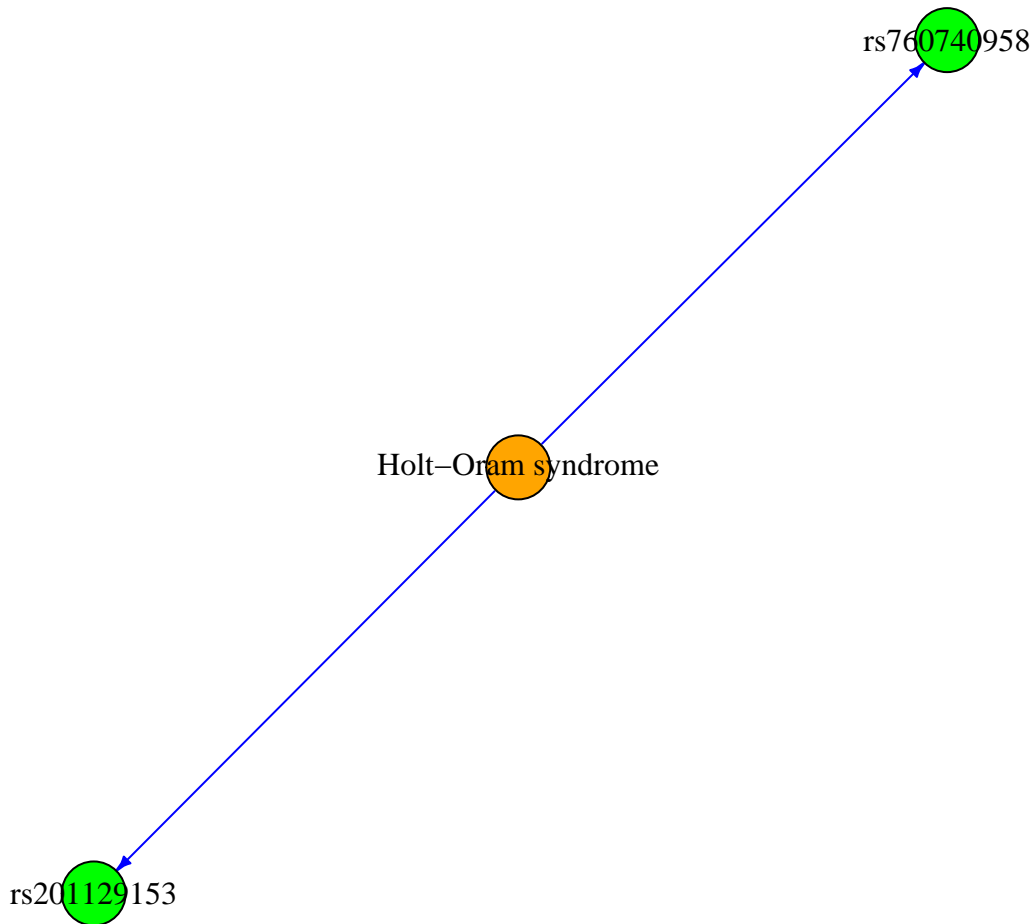

Variant–Disease Network (Homocystinuria)

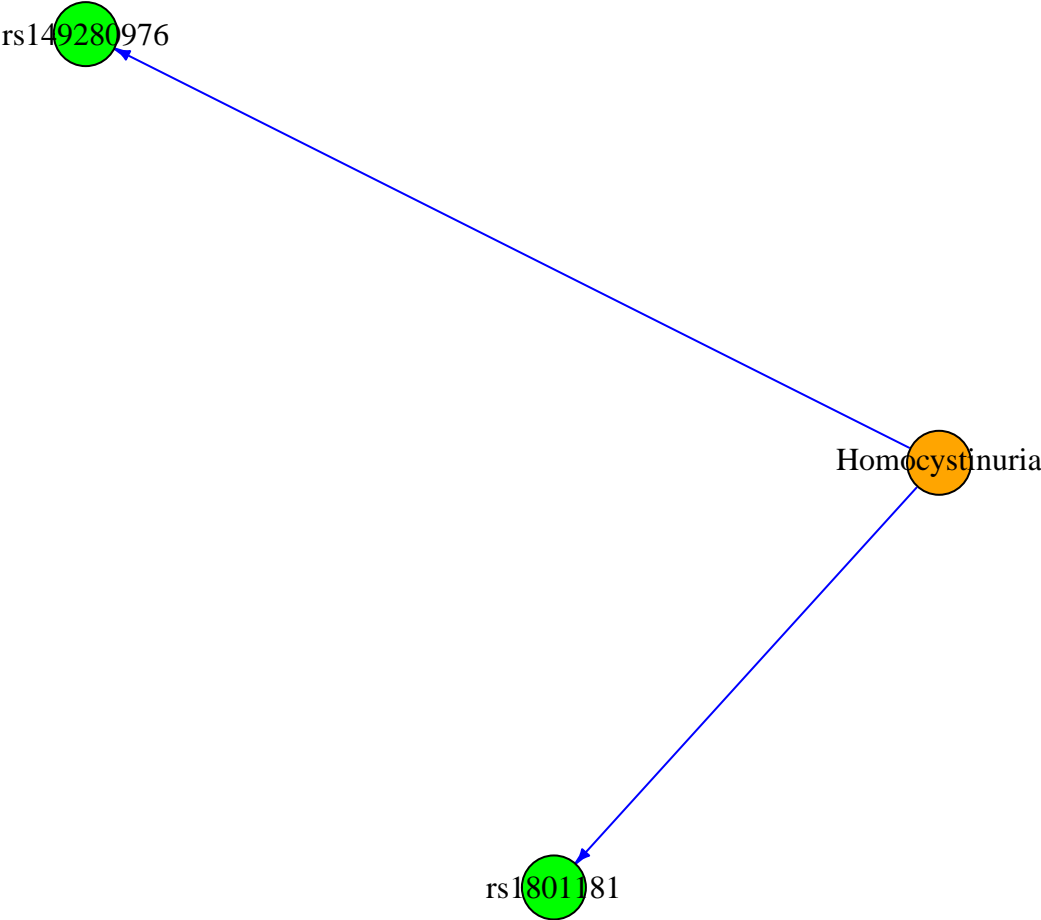

**Variant–Disease Network (Homocystinuria due to CBS deficiency)**

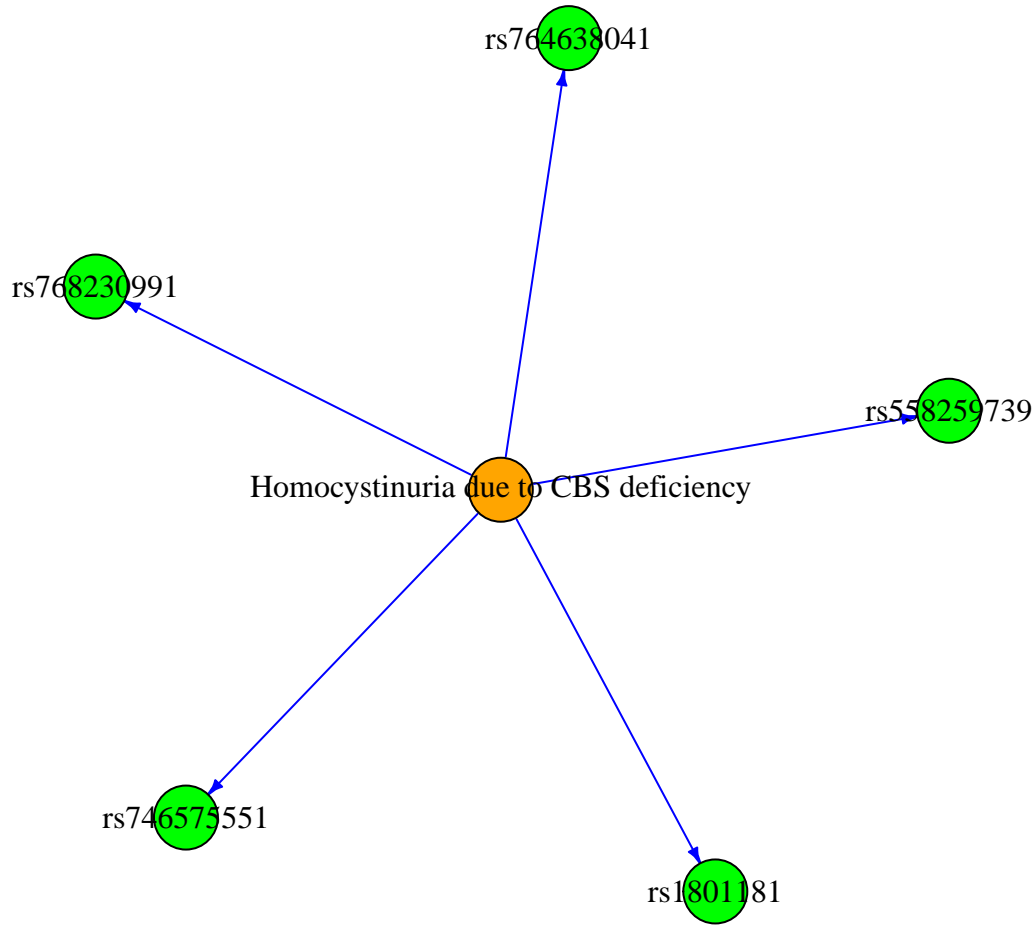

## Variant-Disease Network (Howel-Evans syndrome)

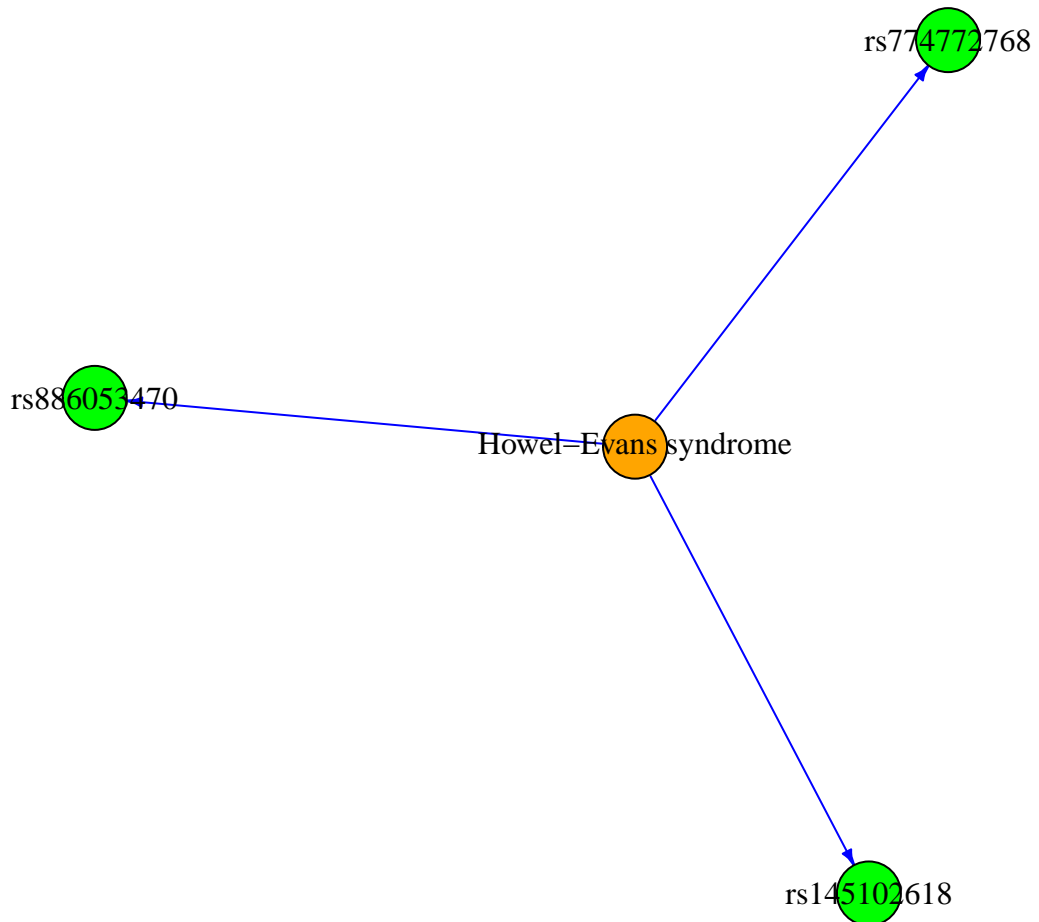

## Variant–Disease Network (Hurler syndrome)

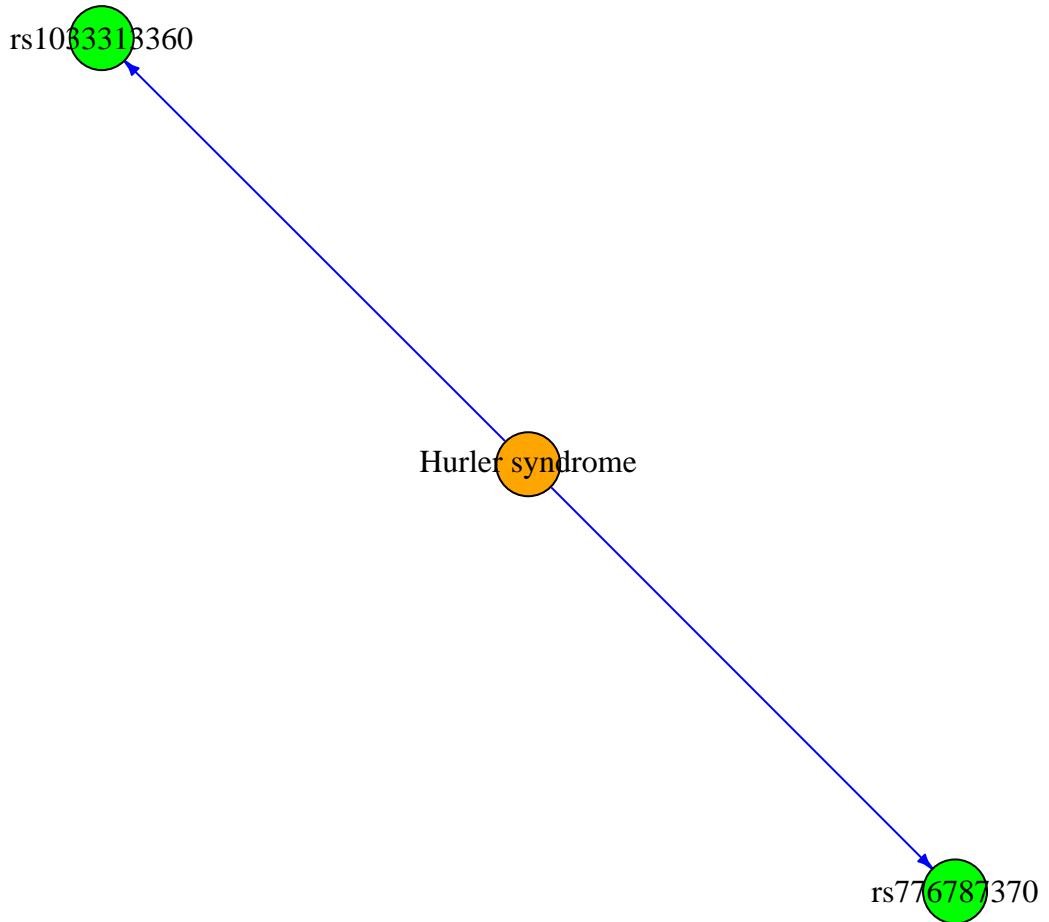

## Variant–Disease Network (Hutchinson–Gilford syndrome)

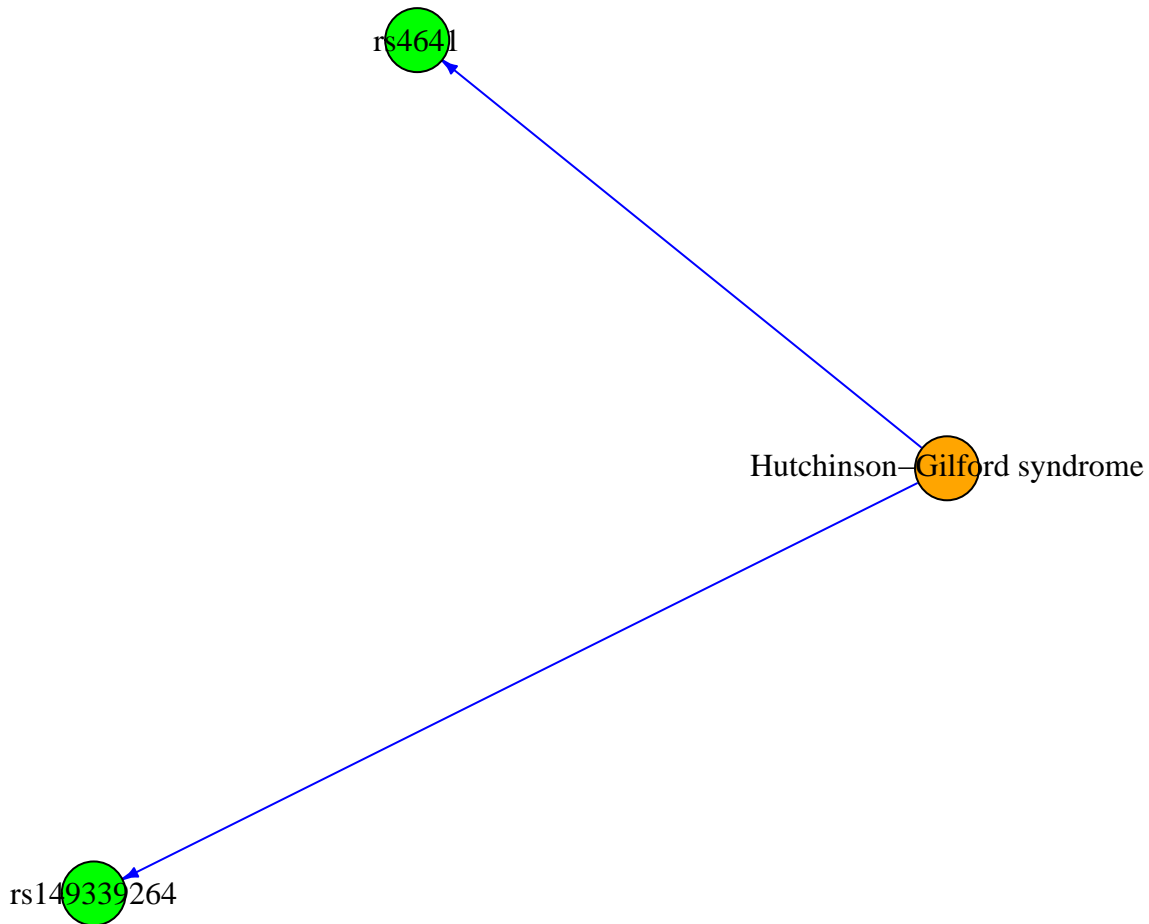



## Variant–Disease Network (Hydronephrosis)

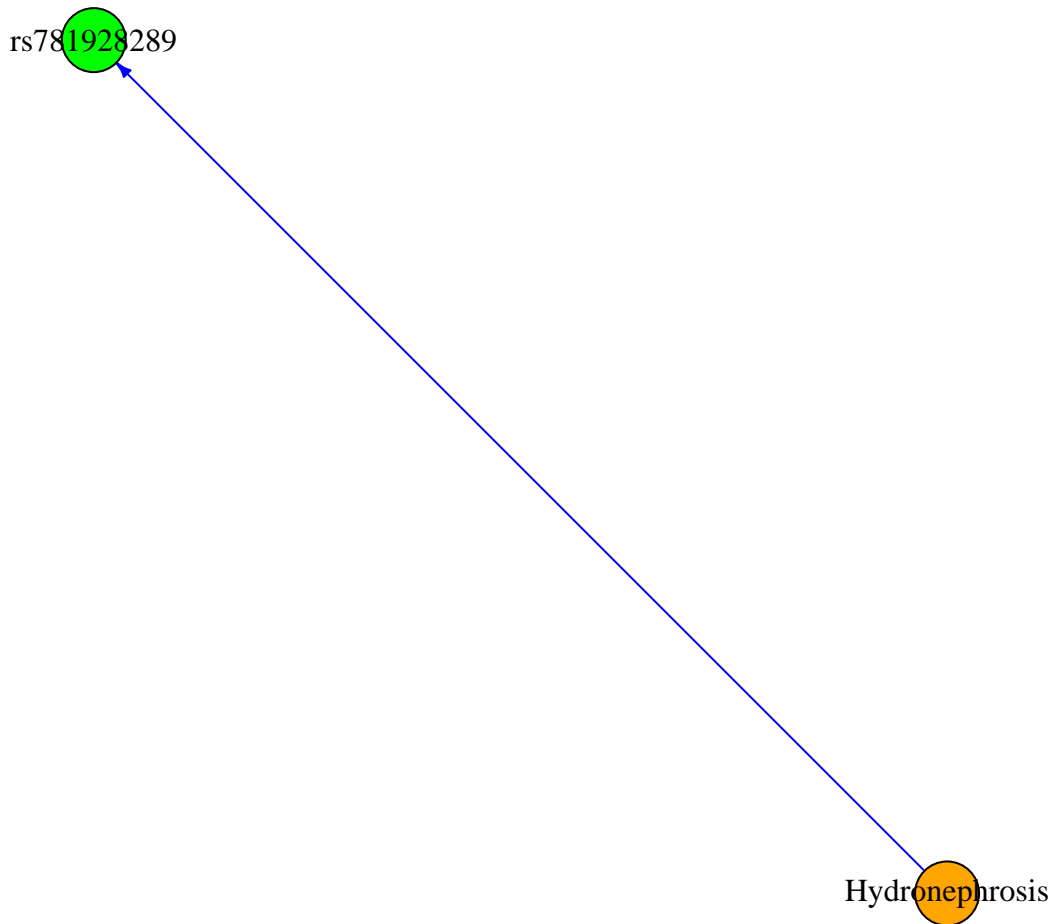

## Variant–Disease Network (Hyperaldosteronism)

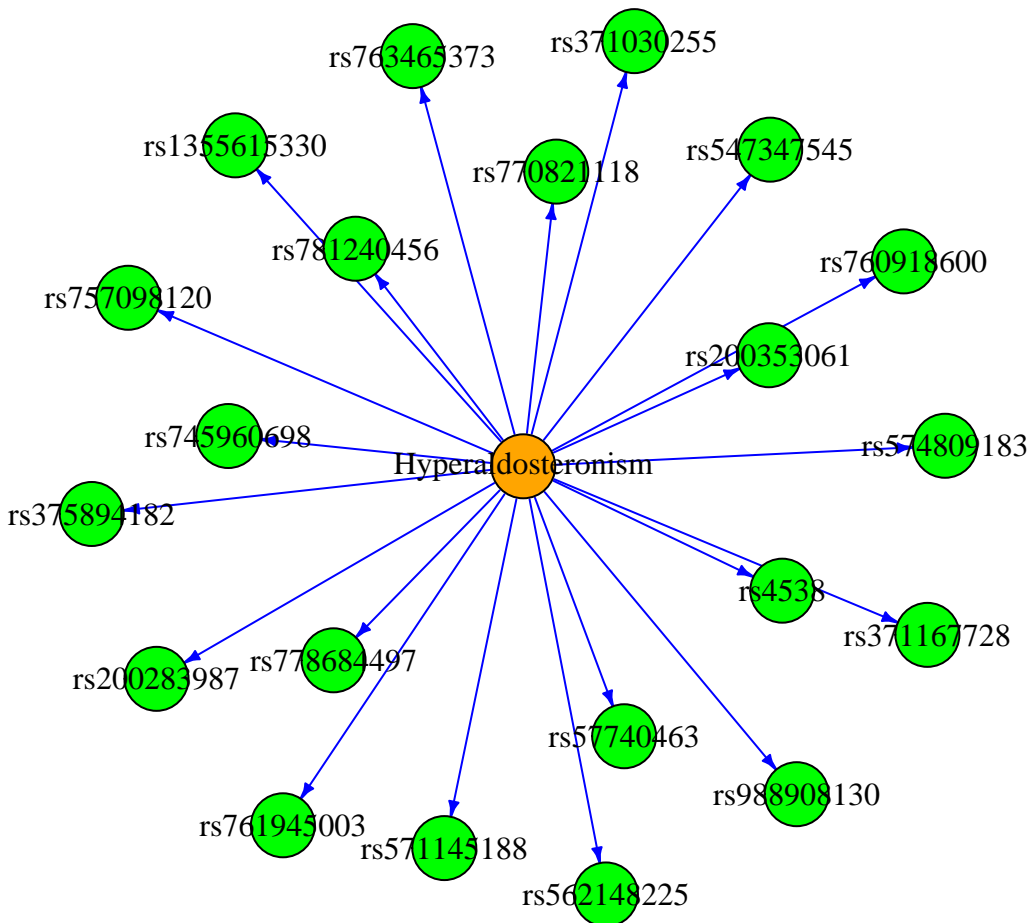

## Variant–Disease Network (Hyperammonemia)

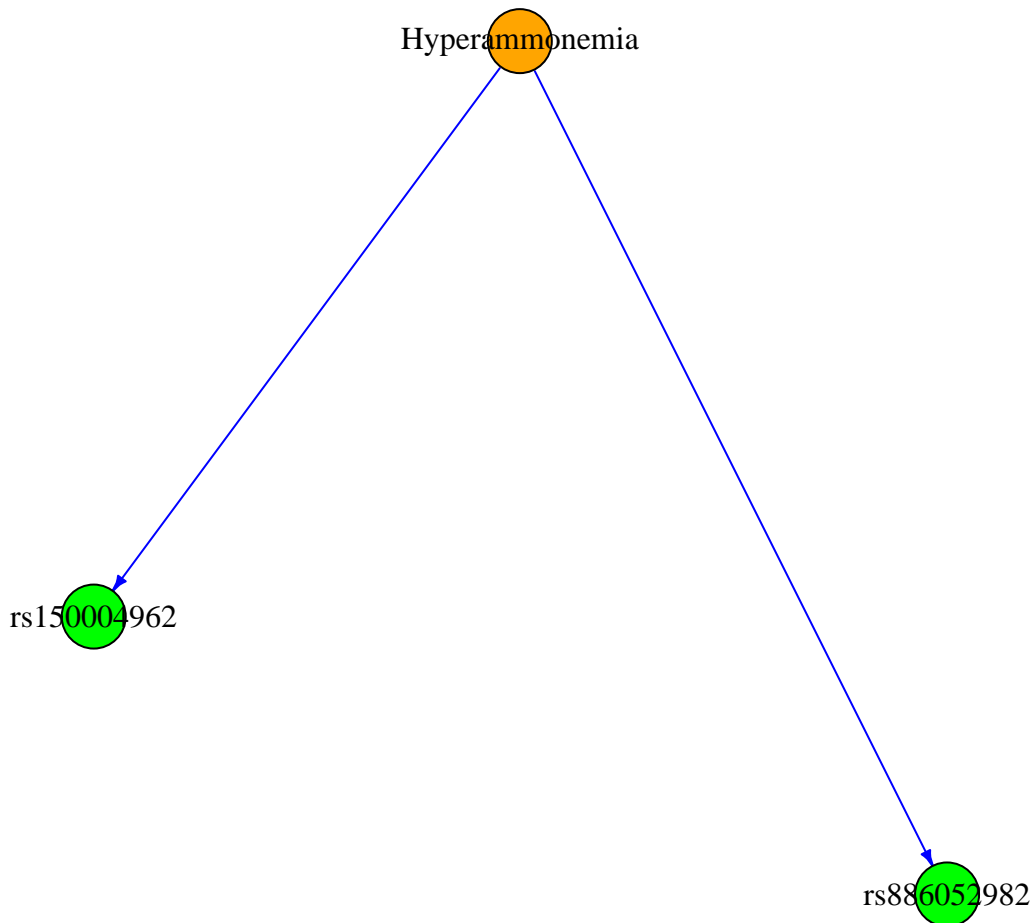

## Variant–Disease Network (Hyperekplexia)

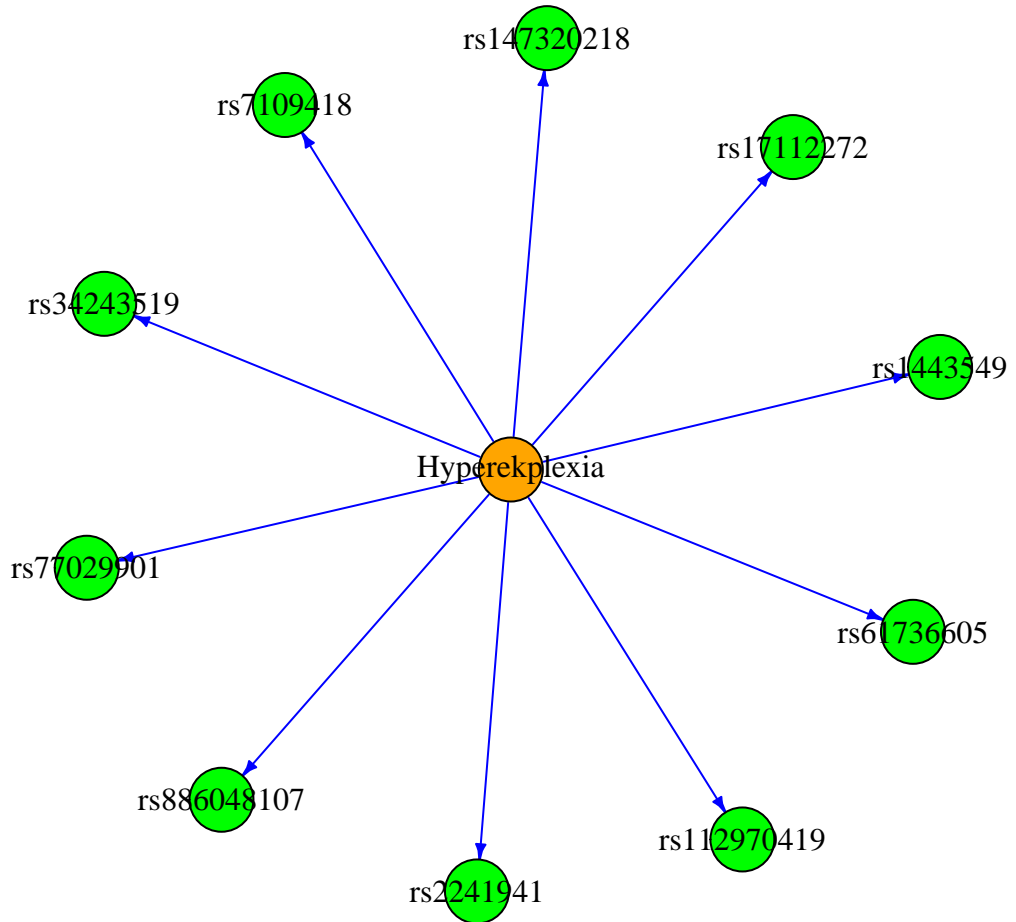

Variant–Disease Network (Hyperekplexia 1)

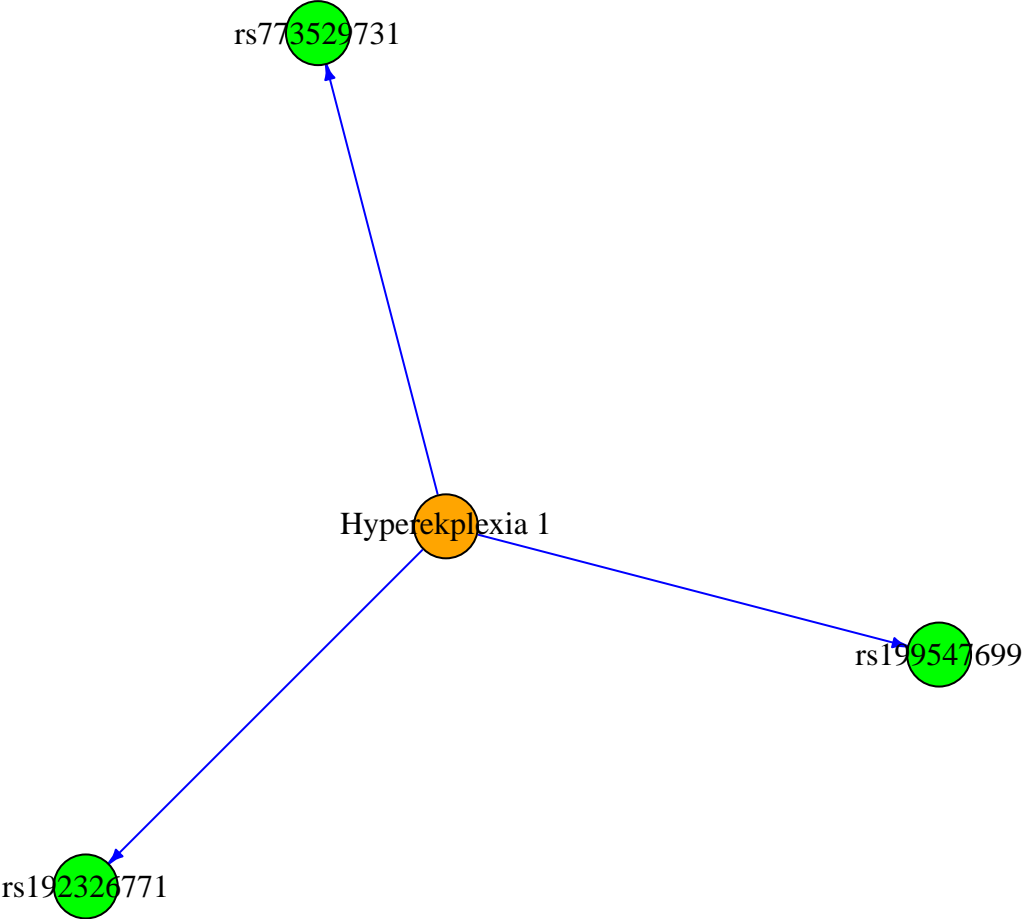

## Variant–Disease Network (Hyperekplexia 2)

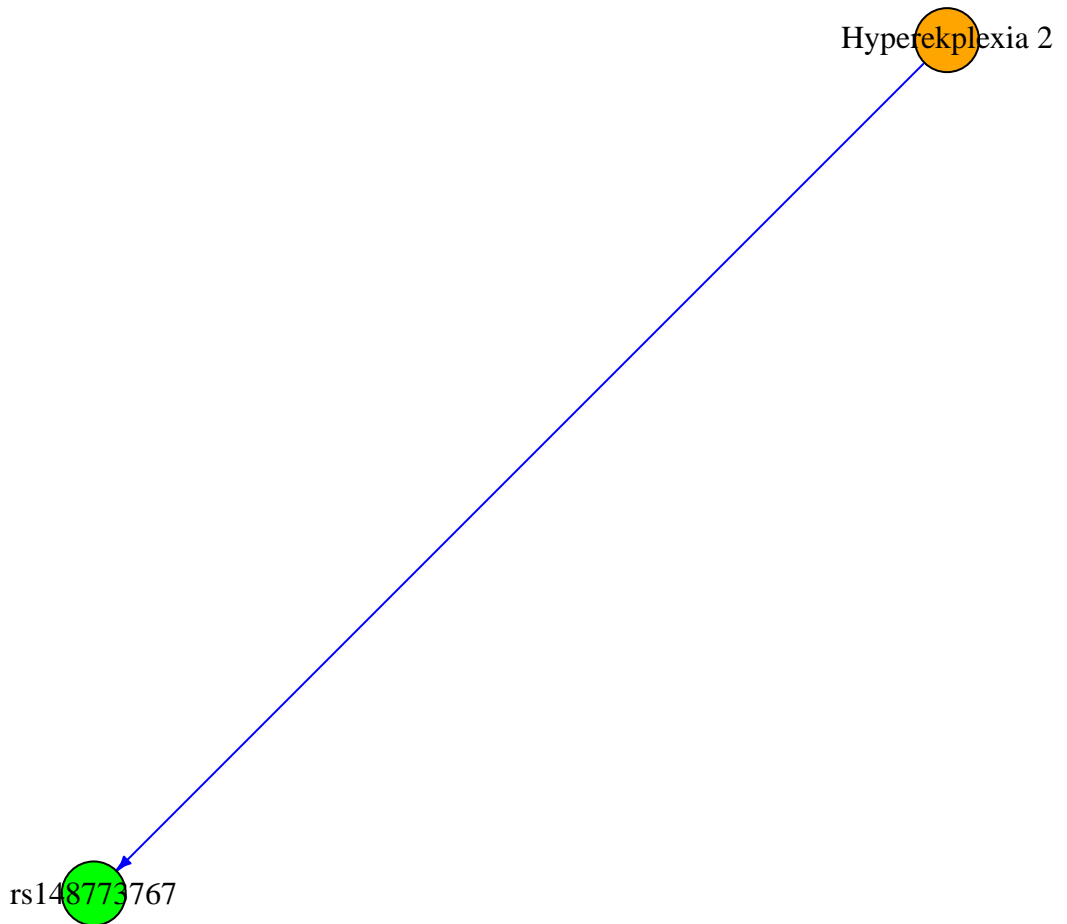

Variant–Disease Network (Hyperekplexia 3)

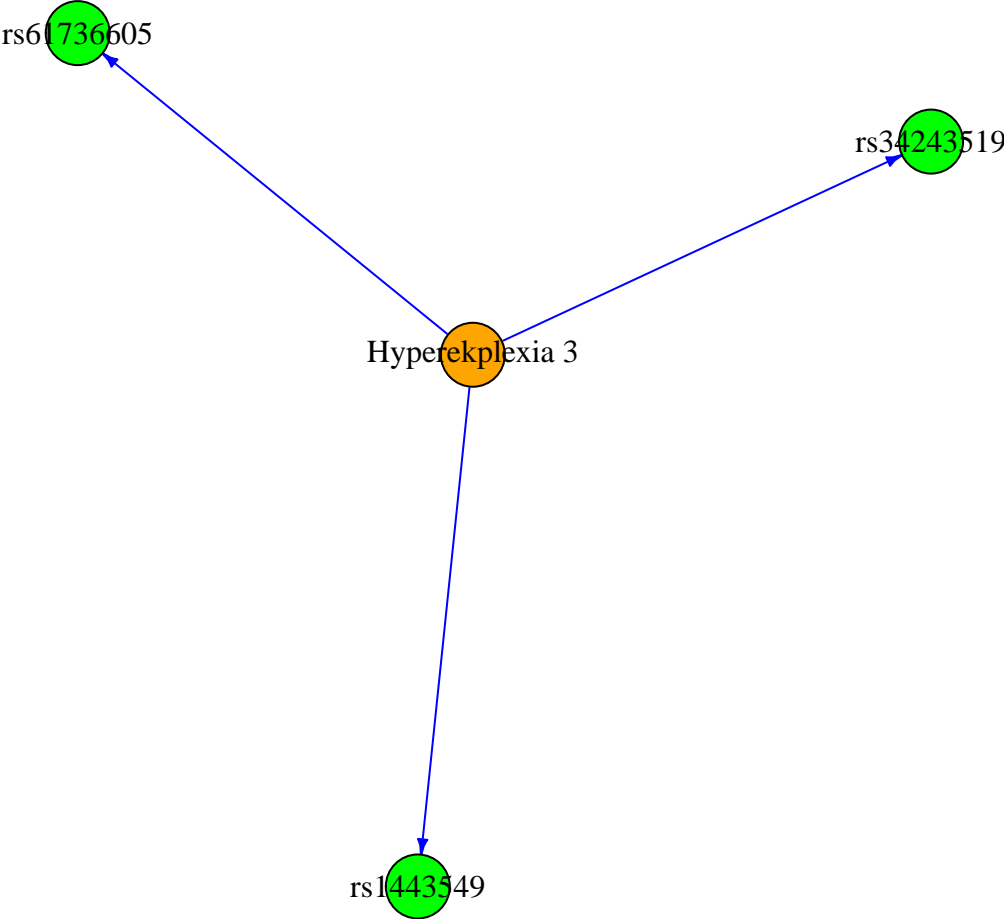

Variant–Disease Network (Hyperferritinemia cataract syndrome)

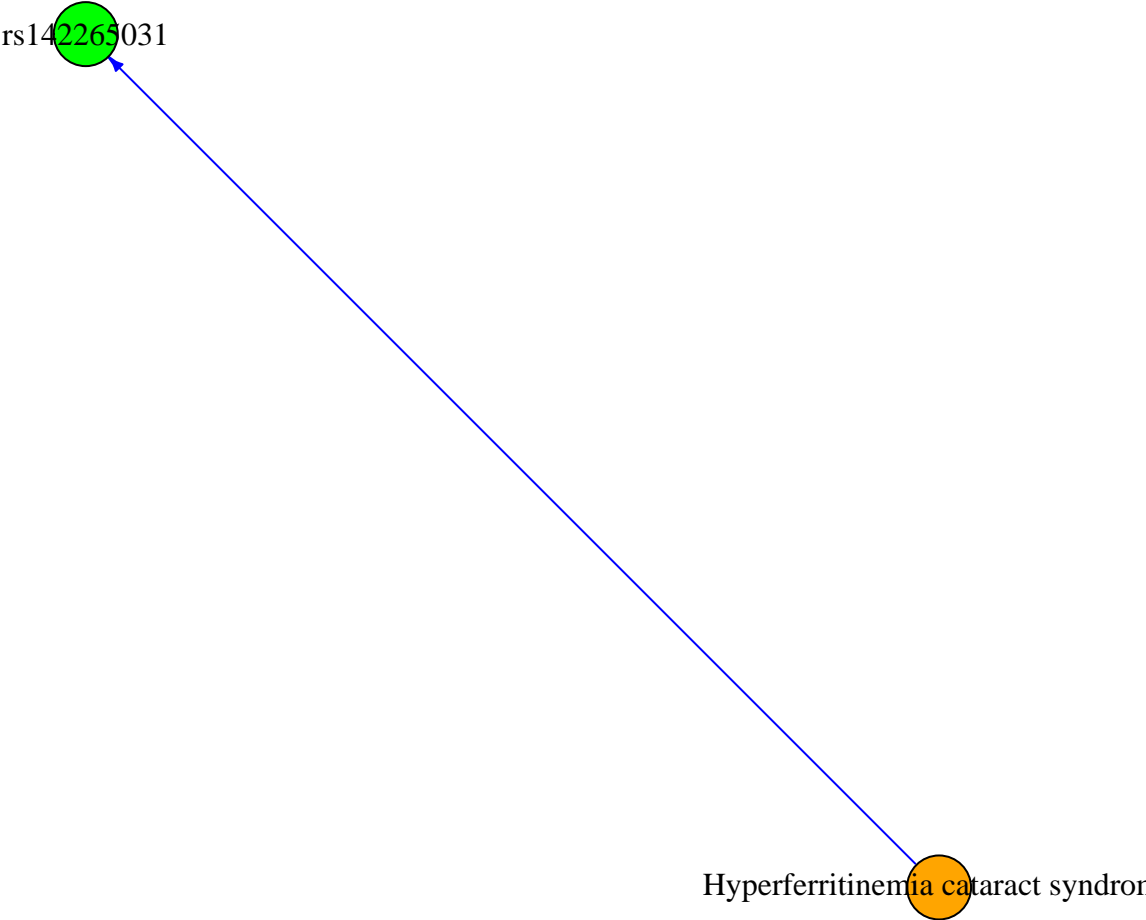



Variant–Disease Network (Hyperglycinuria)

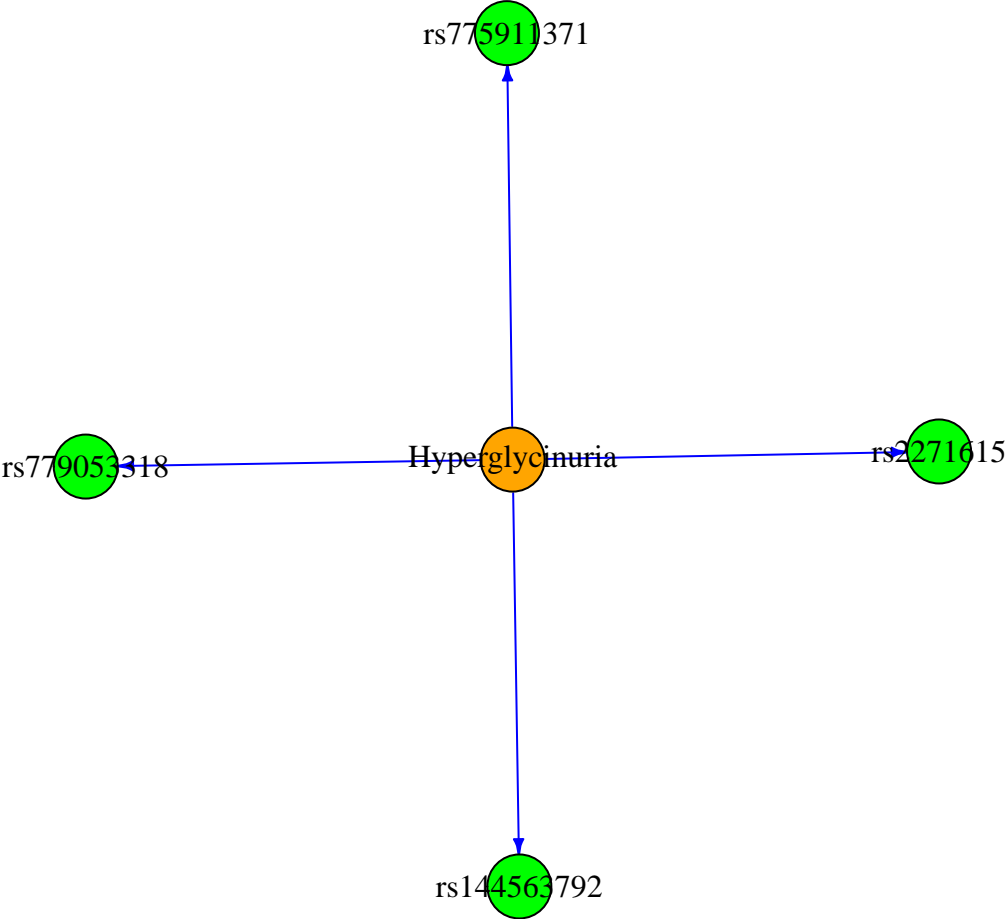

**Variant–Disease Network (Hyper-IgE recurrent infection syndrome 1)**

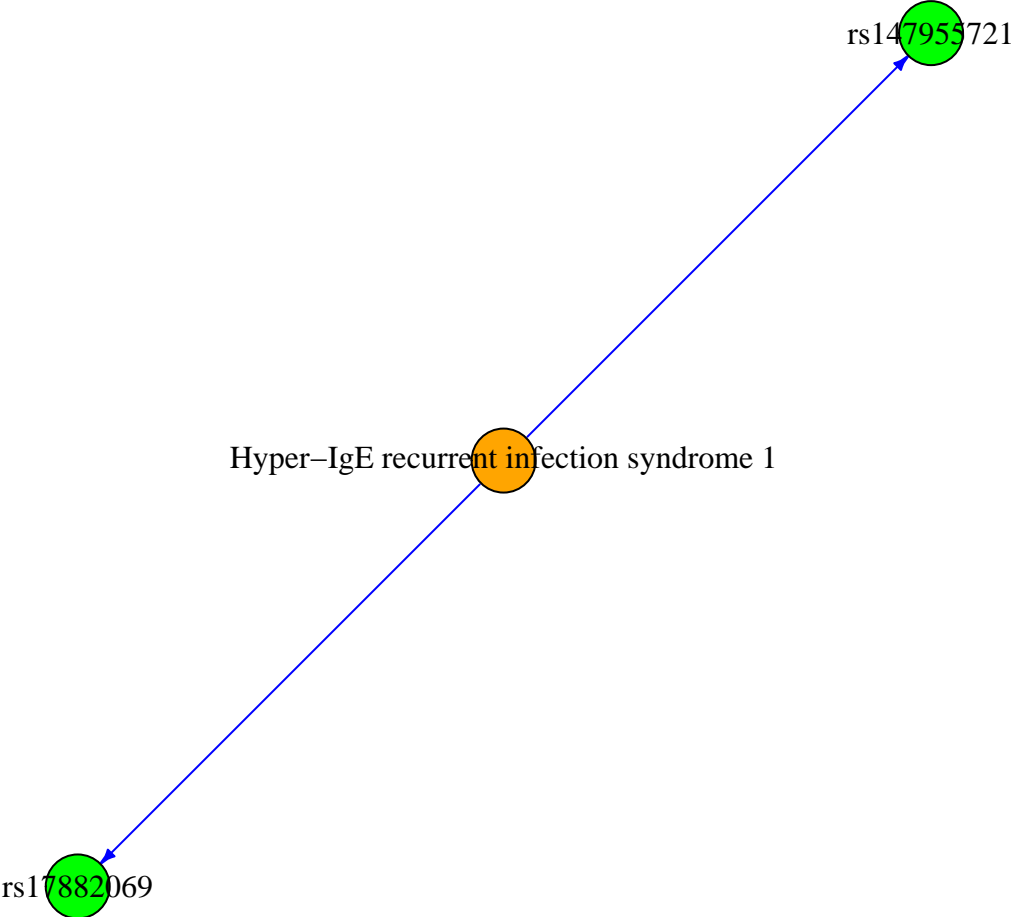

## Variant–Disease Network (Hyperinsulinemic hypoglycemia)

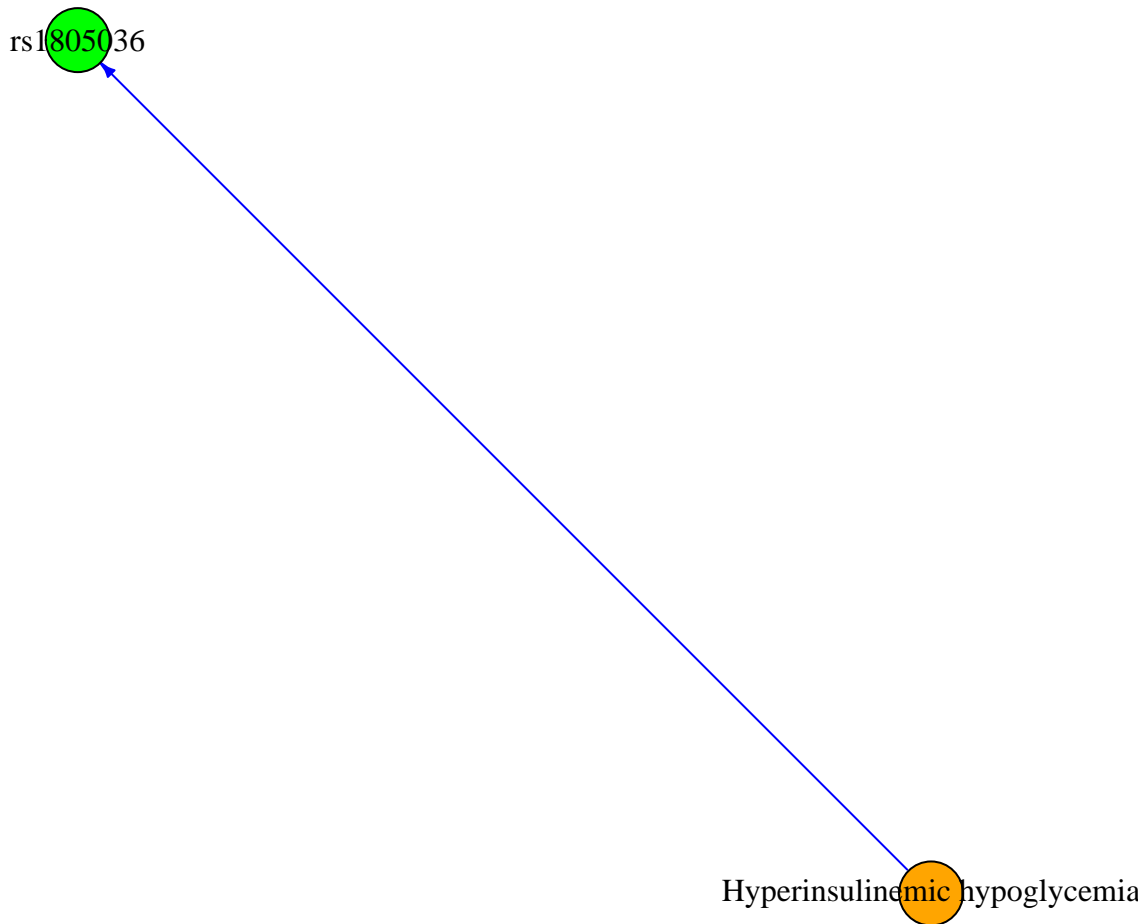

## Variant-Disease Network (Hyperinsulinism)

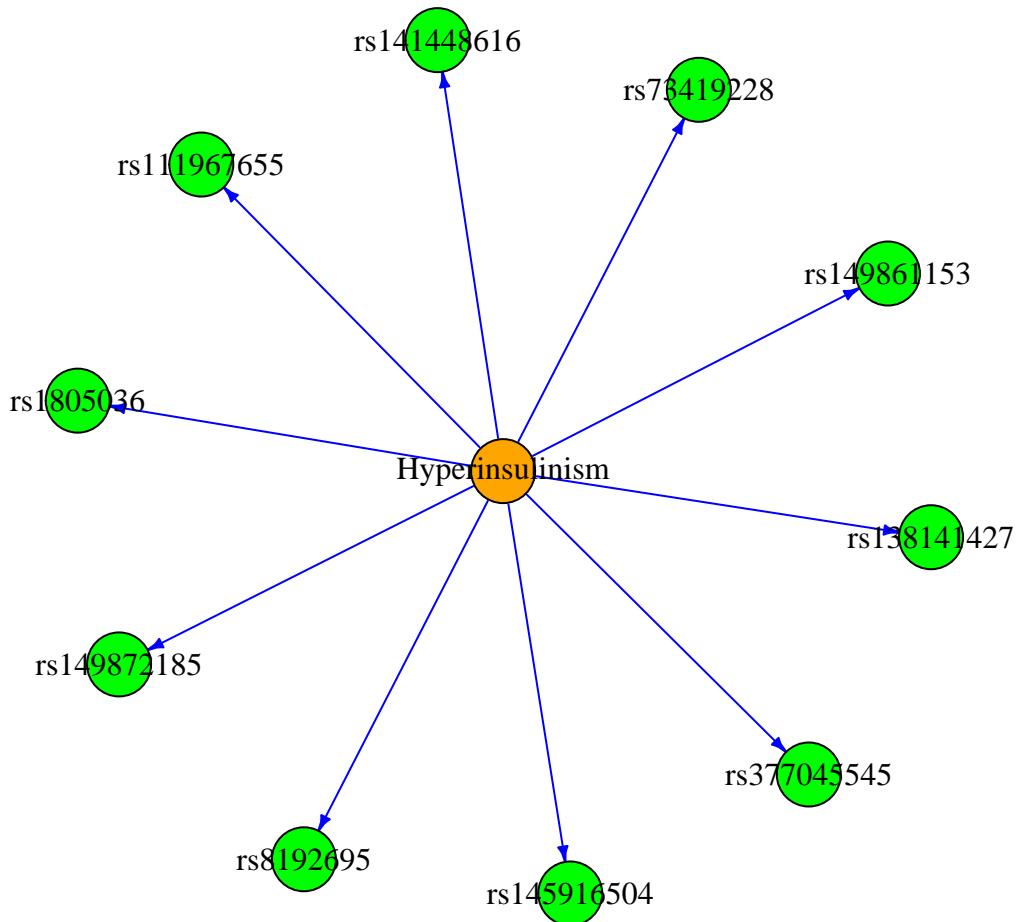

# Variant–Disease Network (Hyperkalemic Periodic Paralysis)

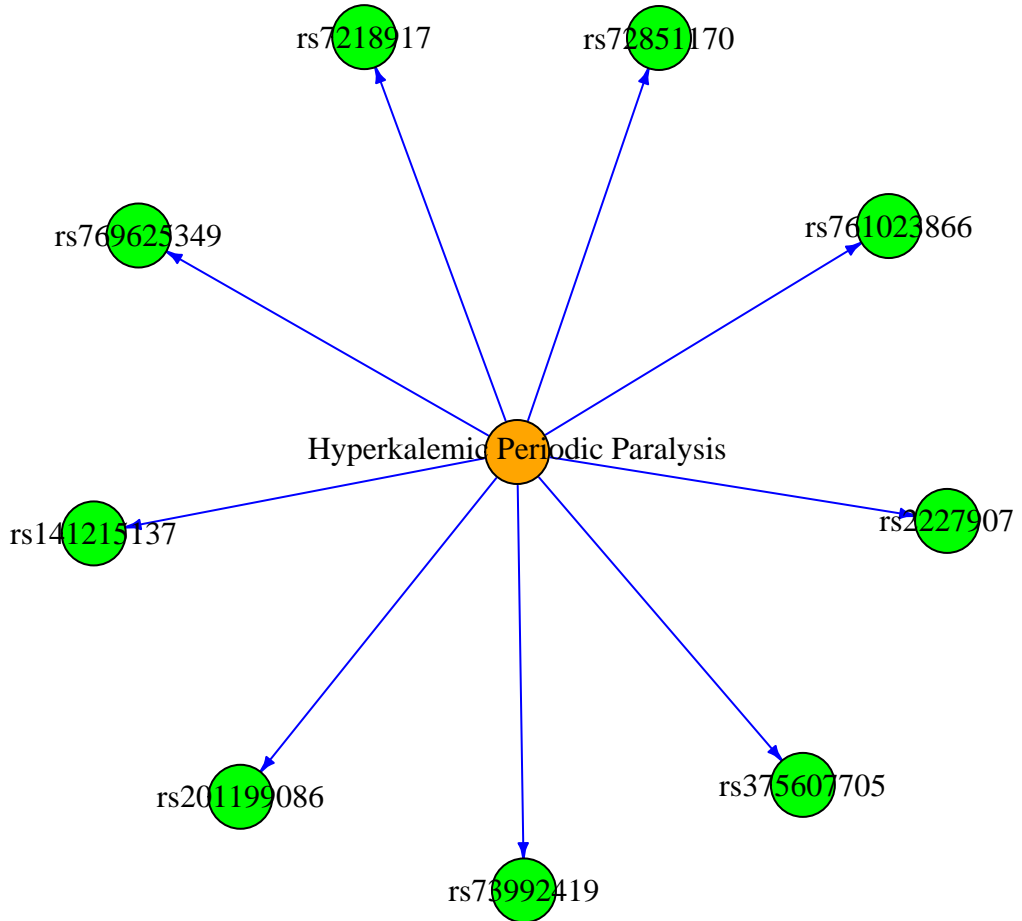

# Variant–Disease Network (Hyperkalemic Periodic Paralysis Type 1)

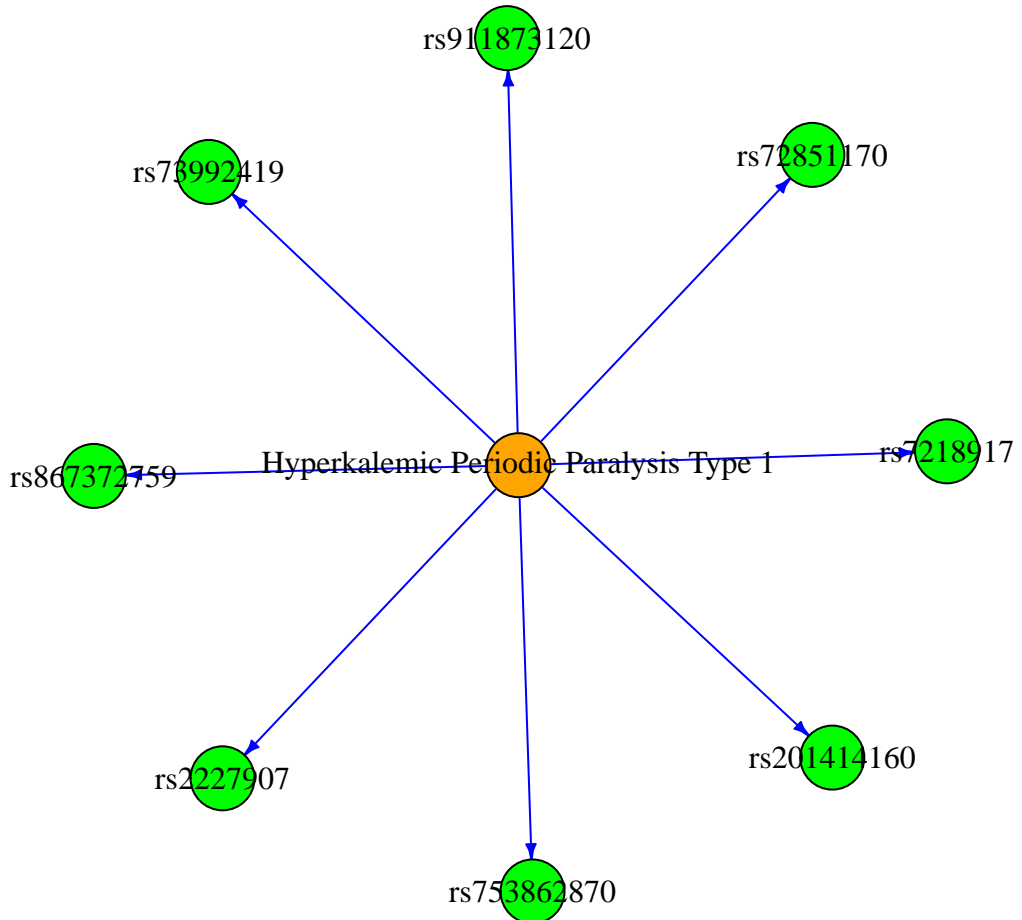

## Variant–Disease Network (Hyperlipoproteinemia)

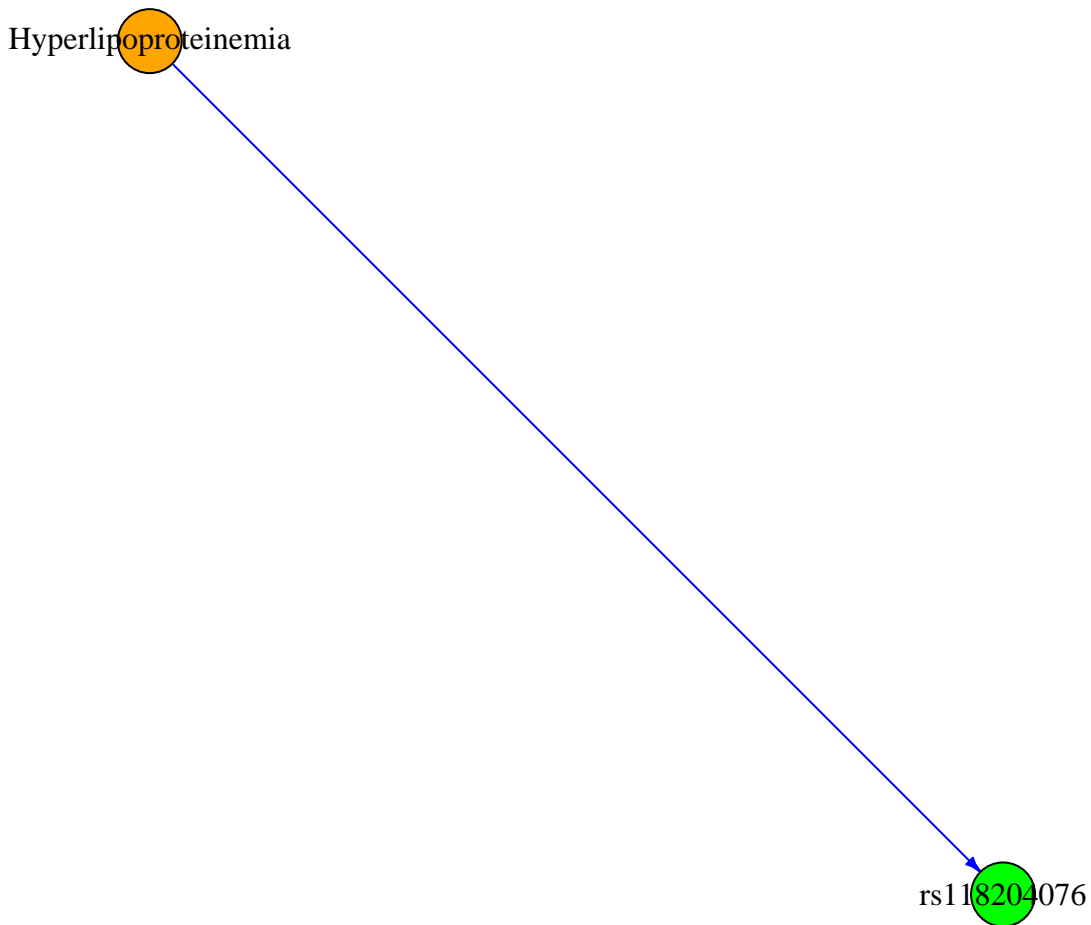

# Variant–Disease Network (Hypermanganesemia with dystonia 2)

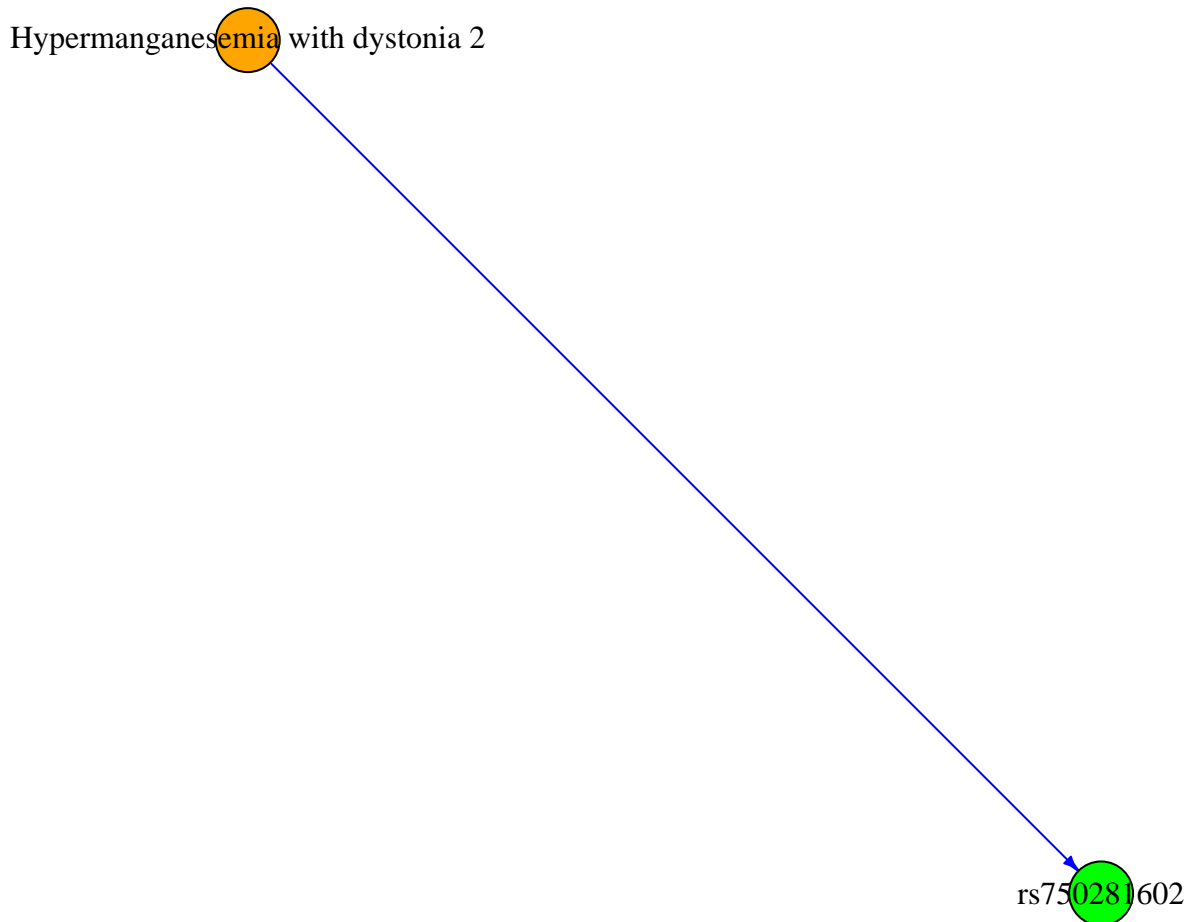



Variant–Disease Network (Hypermethioninemia)

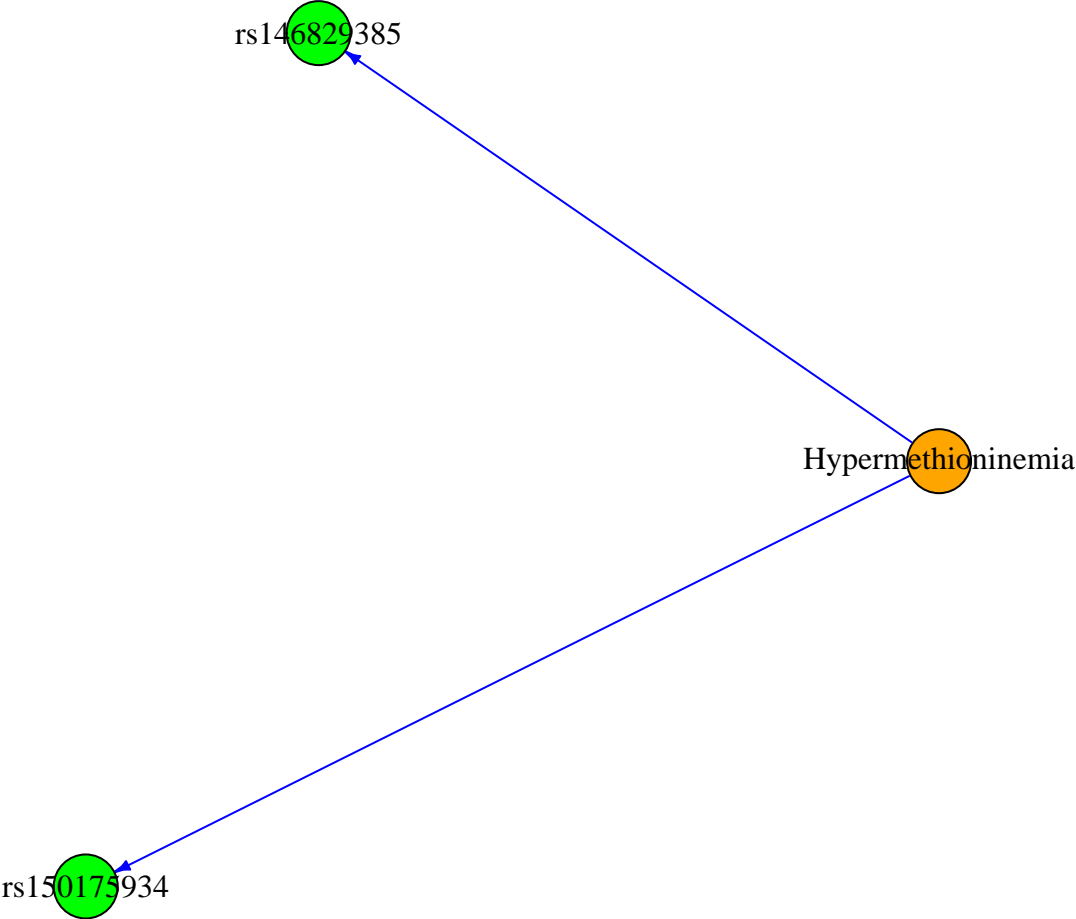

# Disease Network (Hypermethioninemia with s-adenosylhomocysteine hydrolase deficiency)

rs13043752

Hypermethioninemia with s-adenosylhomocysteine hydrolase deficiency

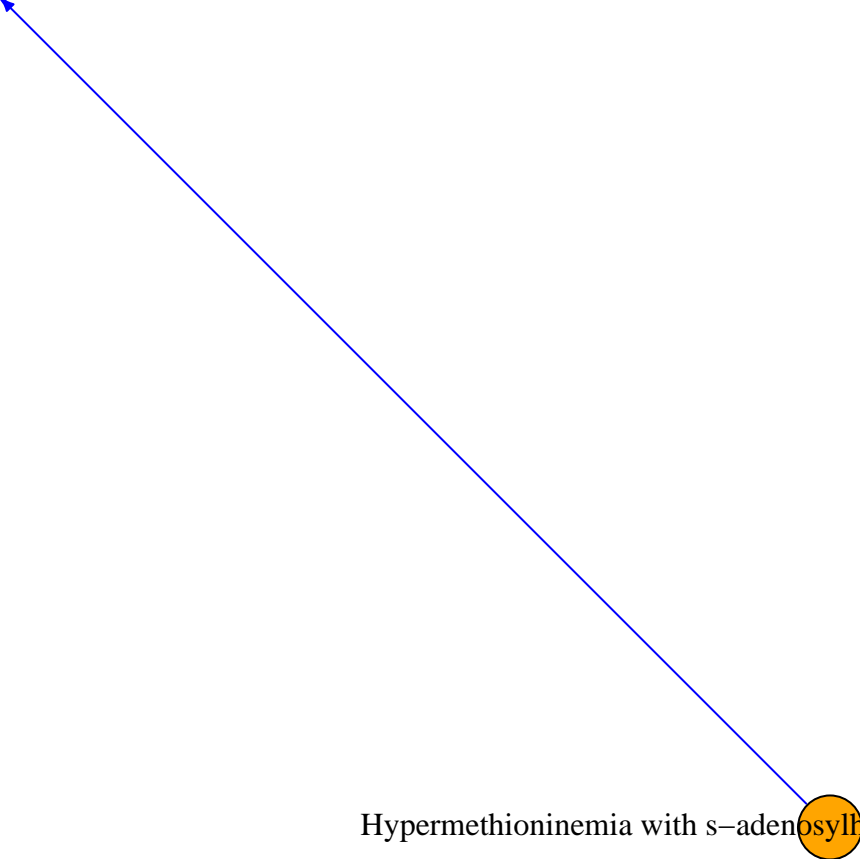

# Disease Network (Hyperornithinemia–hyperammonemia–homocitrullinuria

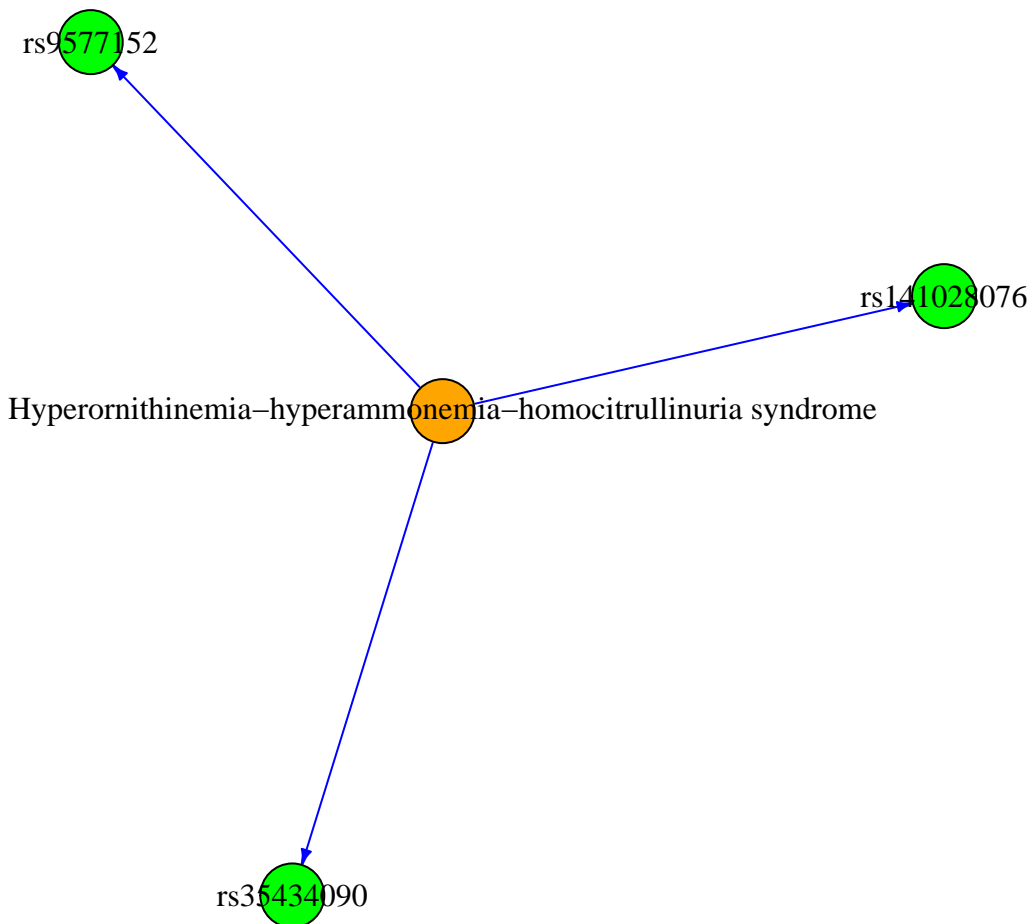

## Variant–Disease Network (Hyperparathyroidism)

Hyperparathyroidism

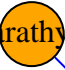

rs2071313

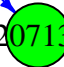

## Variant-Disease Network (Hyperparathyroidism 2)

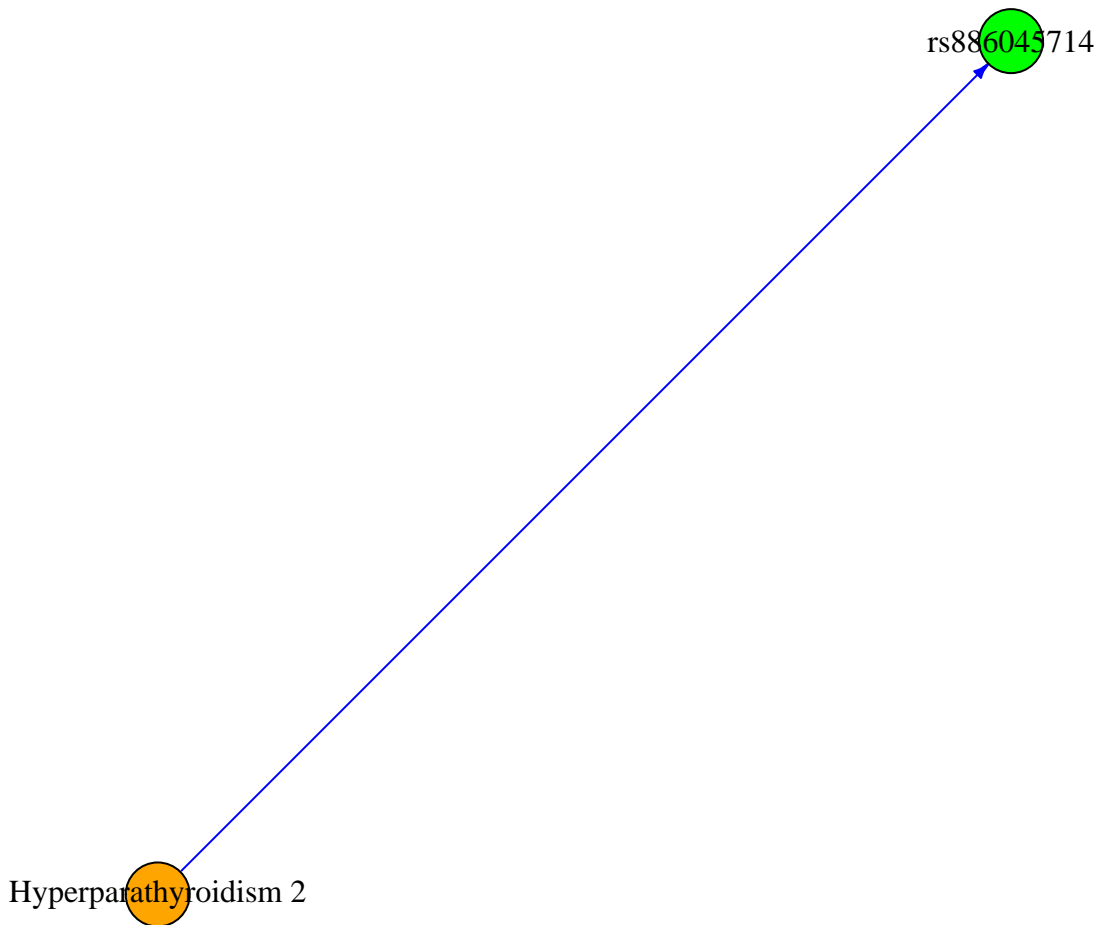

# Variant-Disease Network (Hyperphosphatasia with mental retardation syndrome 2)

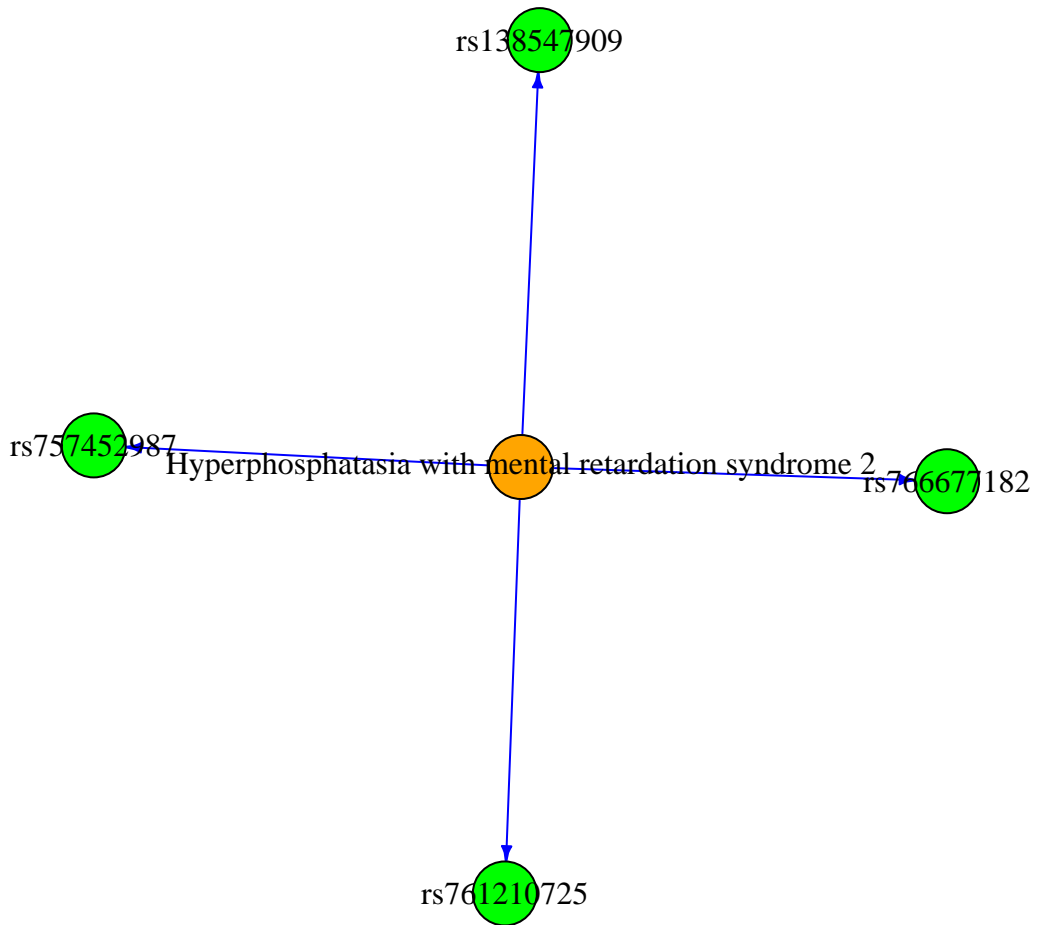

Variant–Disease Network (Hyperphosphatasia–intellectual disability syndrome)

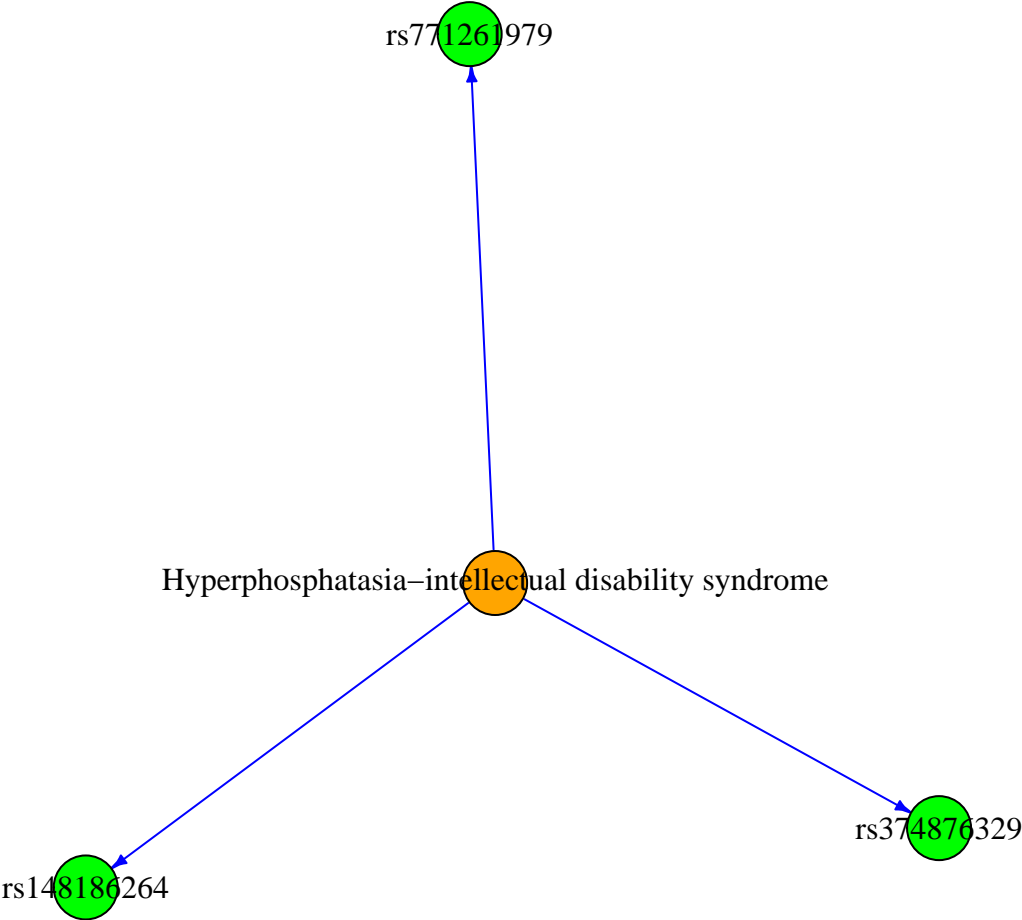

## Variant–Disease Network (Hyperprolinemia)

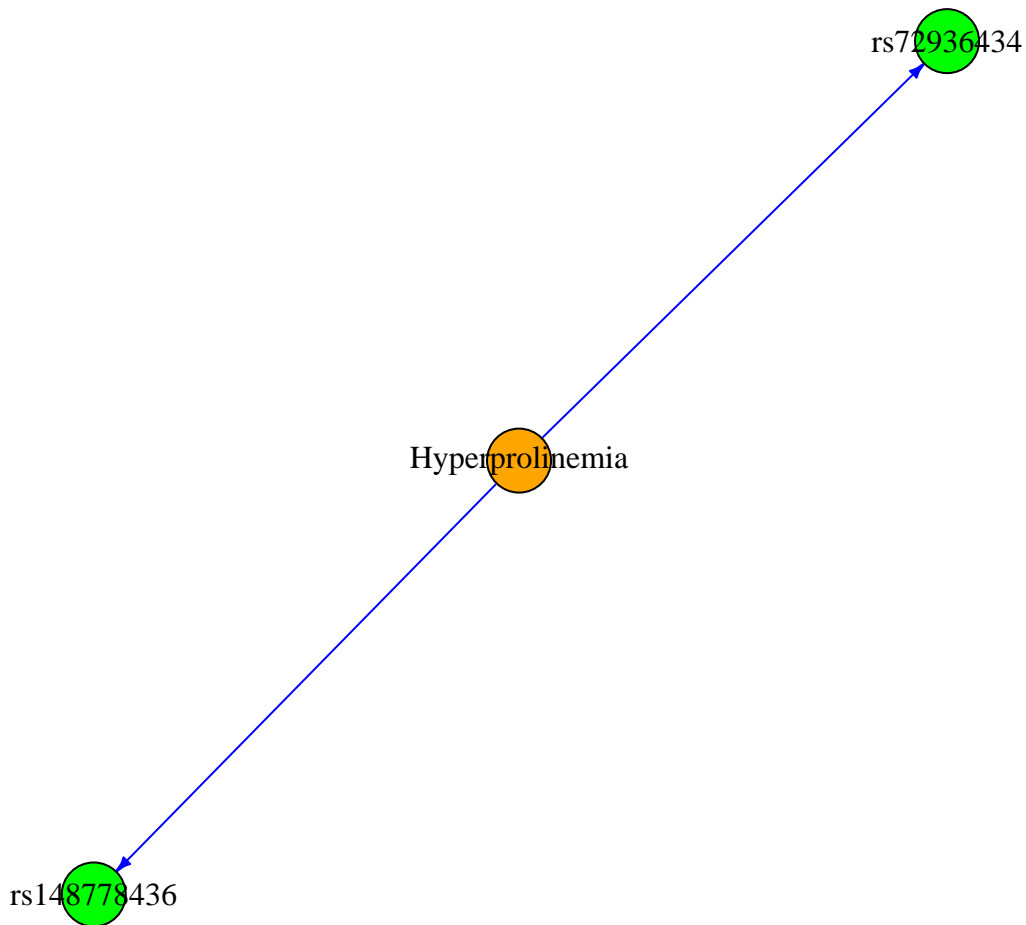



# Variant–Disease Network (Hypertrichotic osteochondrodysplasia)

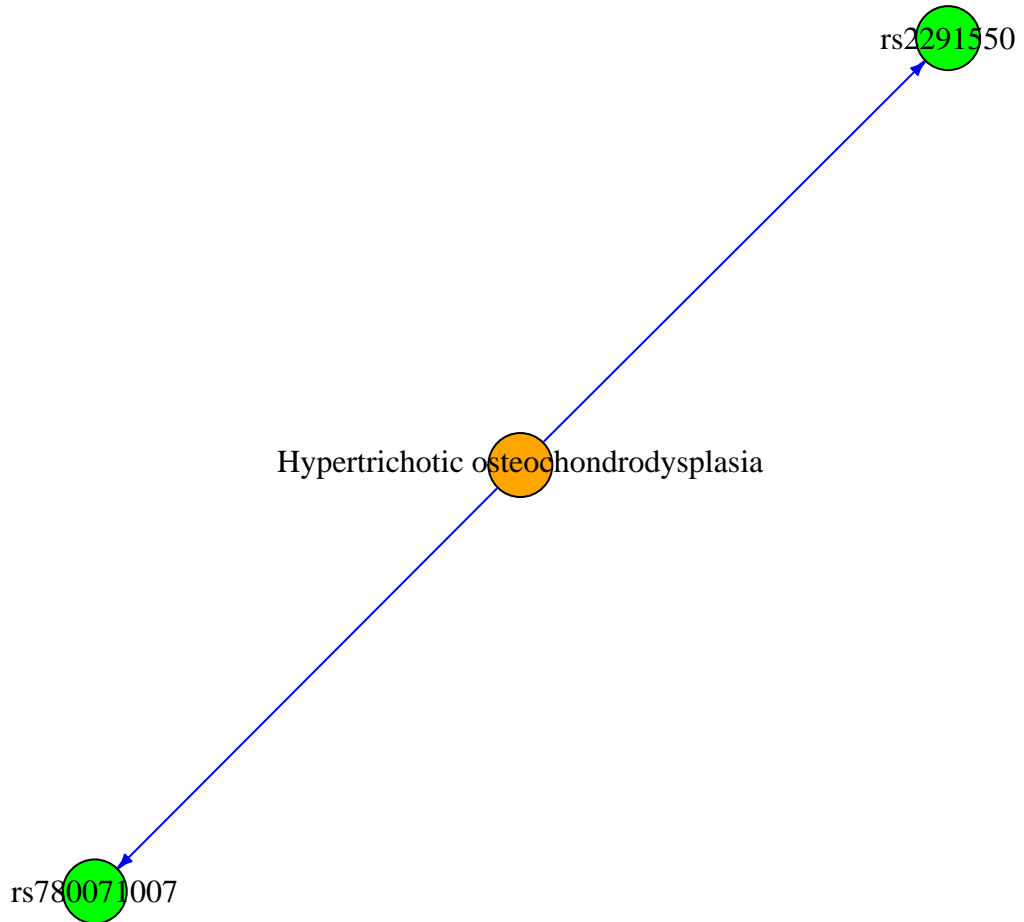

### Variant–Disease Network (Hypertrophic cardiomyopathy)

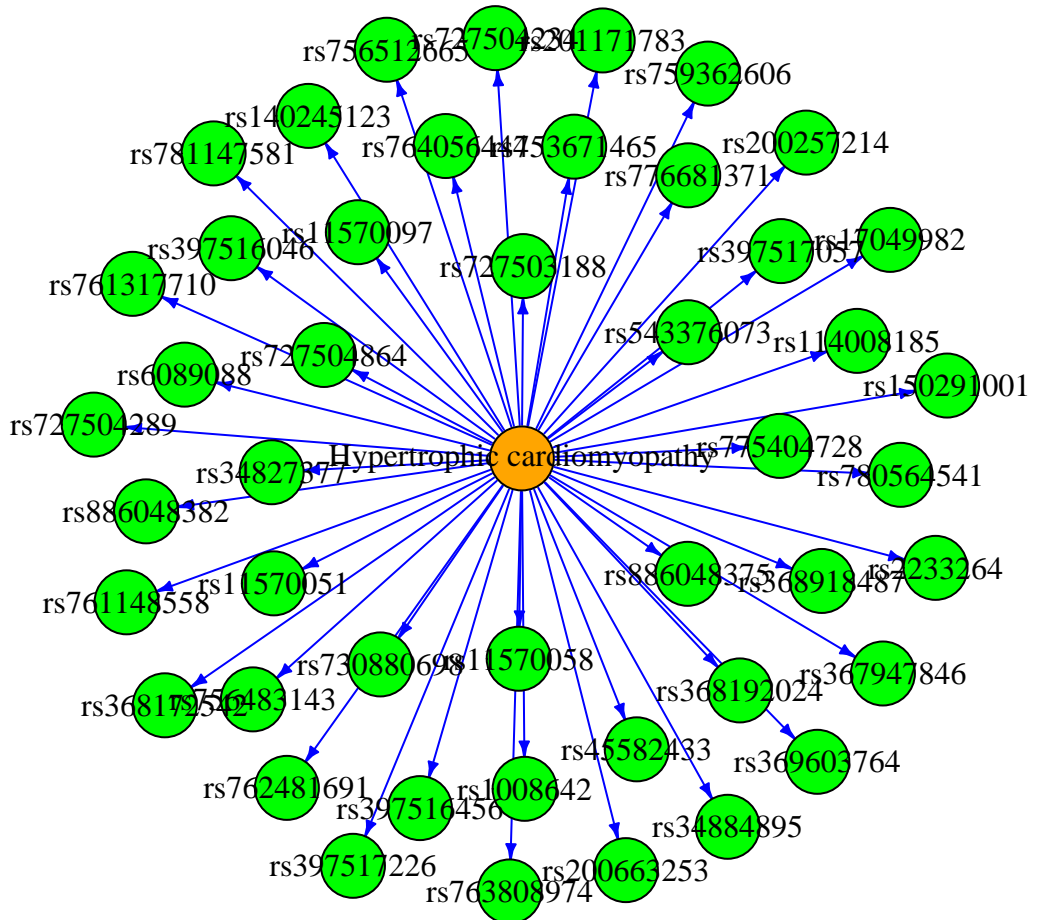

**Variant–Disease Network (Hypertrophic osteoarthropathy)**

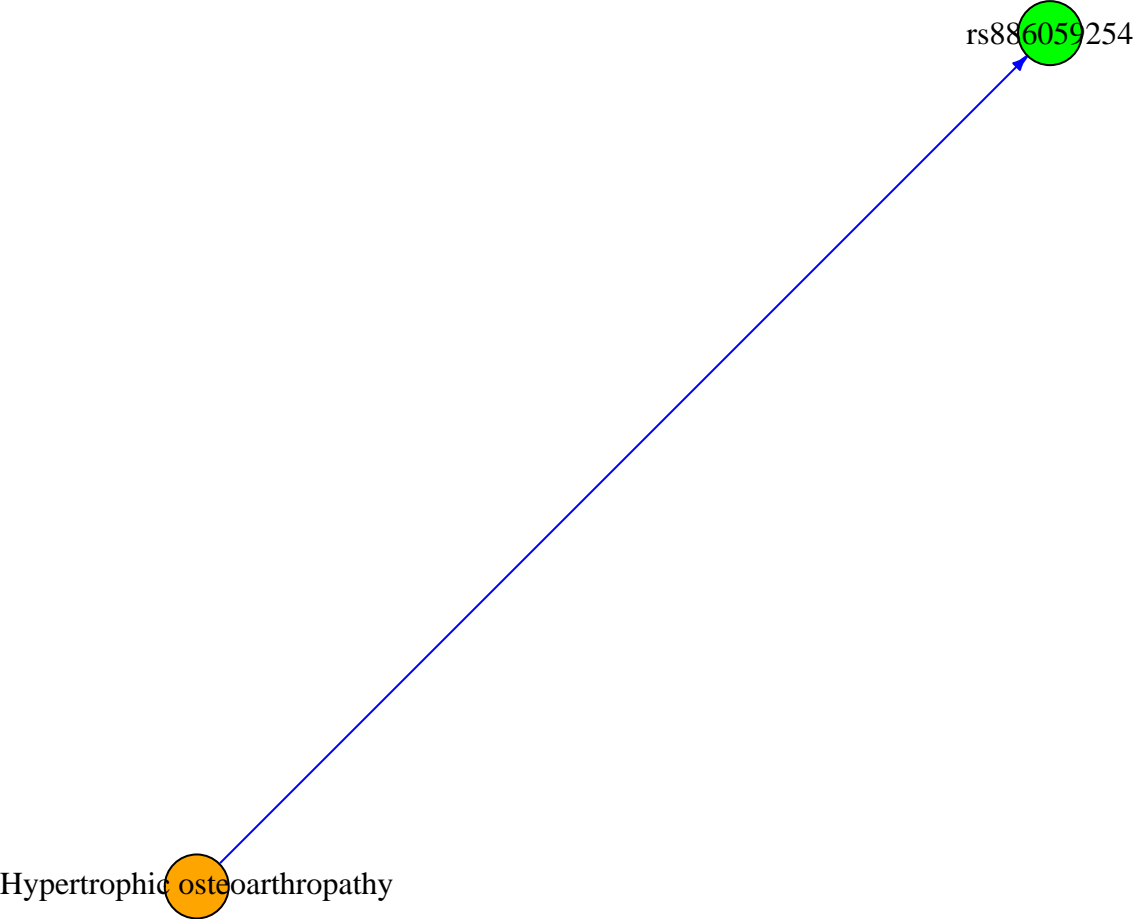

## Variant–Disease Network (Hypertyrosinemia)

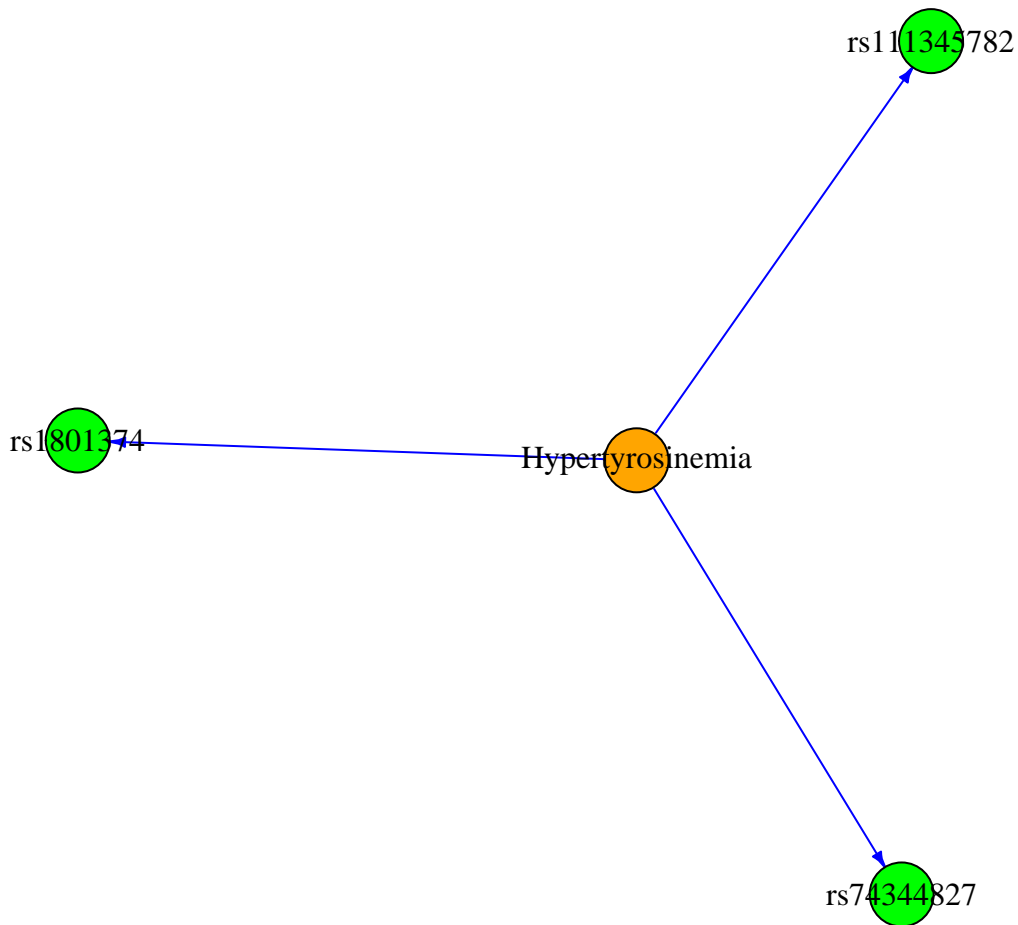

Variant–Disease Network (Hypobetalipoproteinemia)

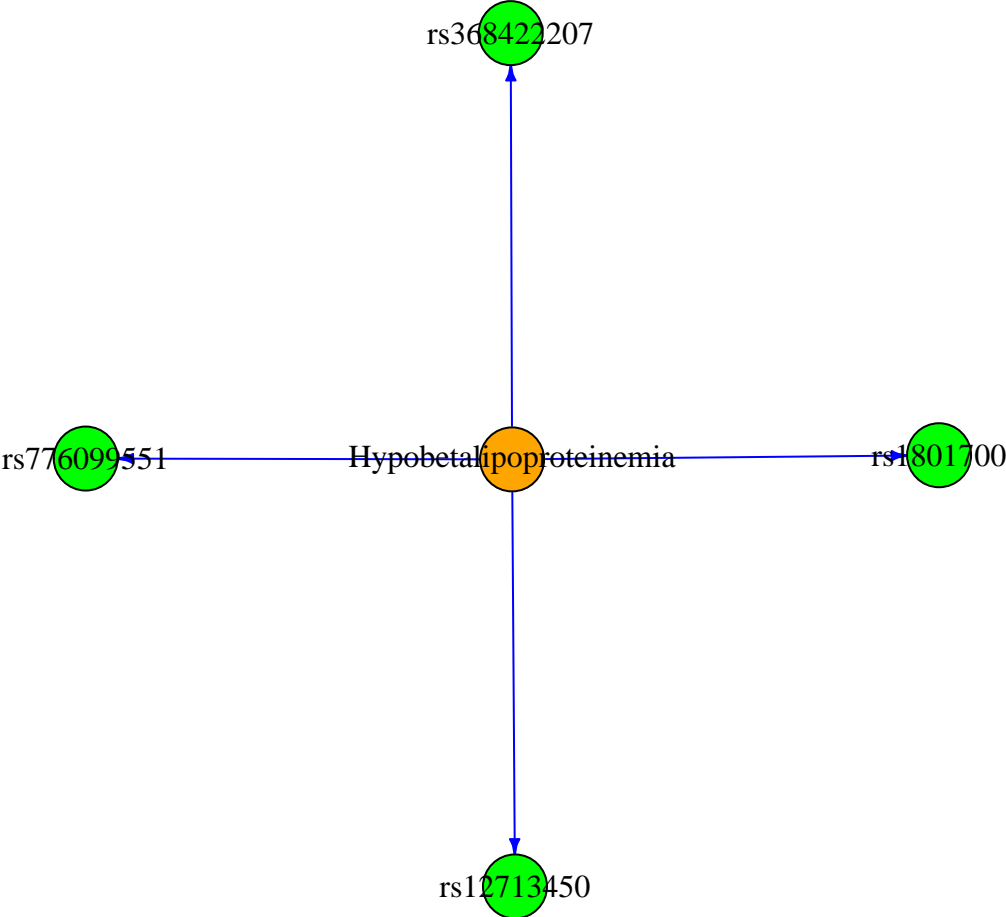

## Variant-Disease Network (Hypocalcemia)

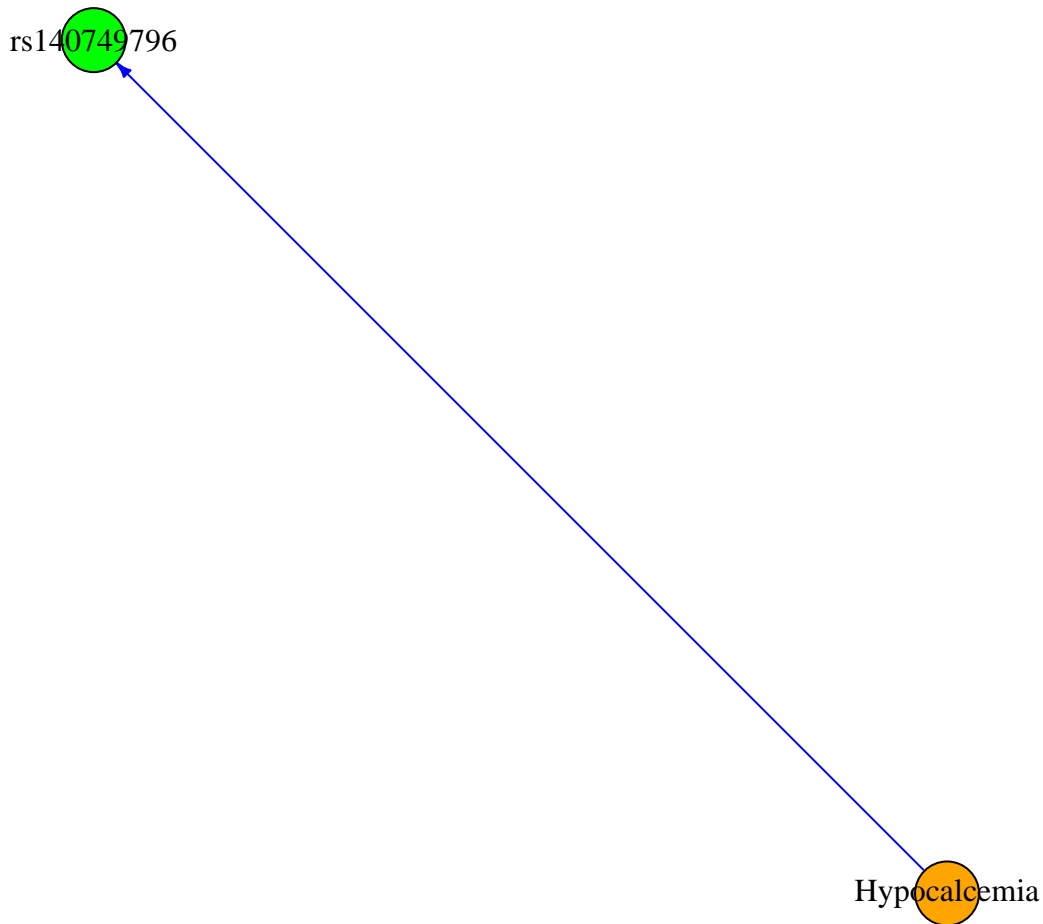

# Genetic-Disease Network (Hypoglycemia with deficiency of glycogen synthetase in the liver)

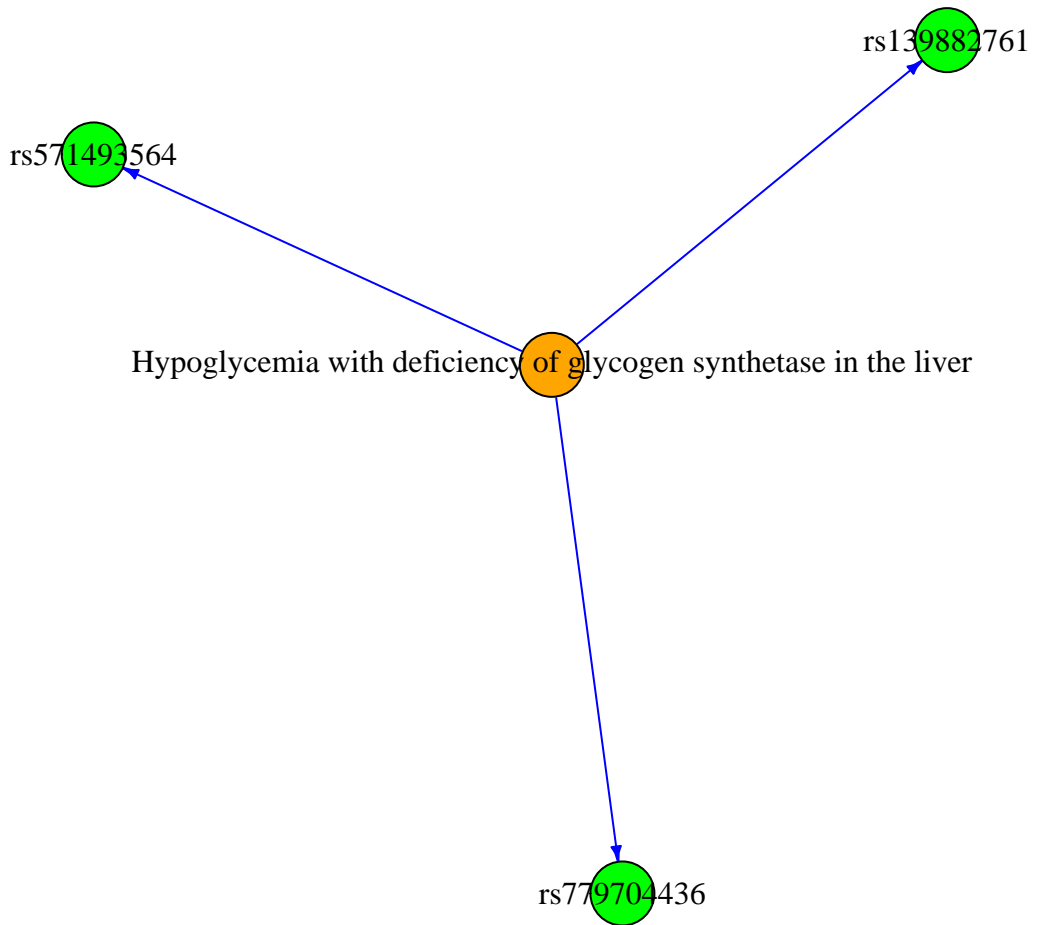

## Variant–Disease Network (Hypogonadism)

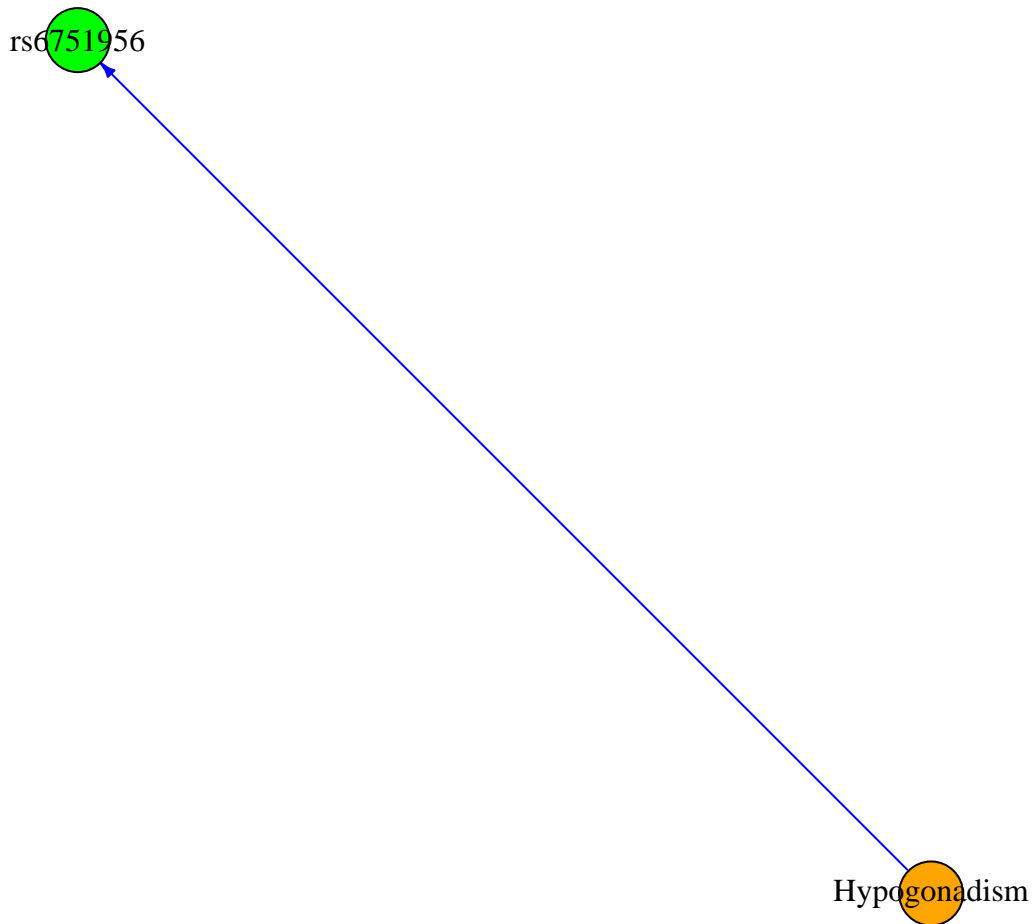



## Variant–Disease Network (Hypogonadism with anosmia)

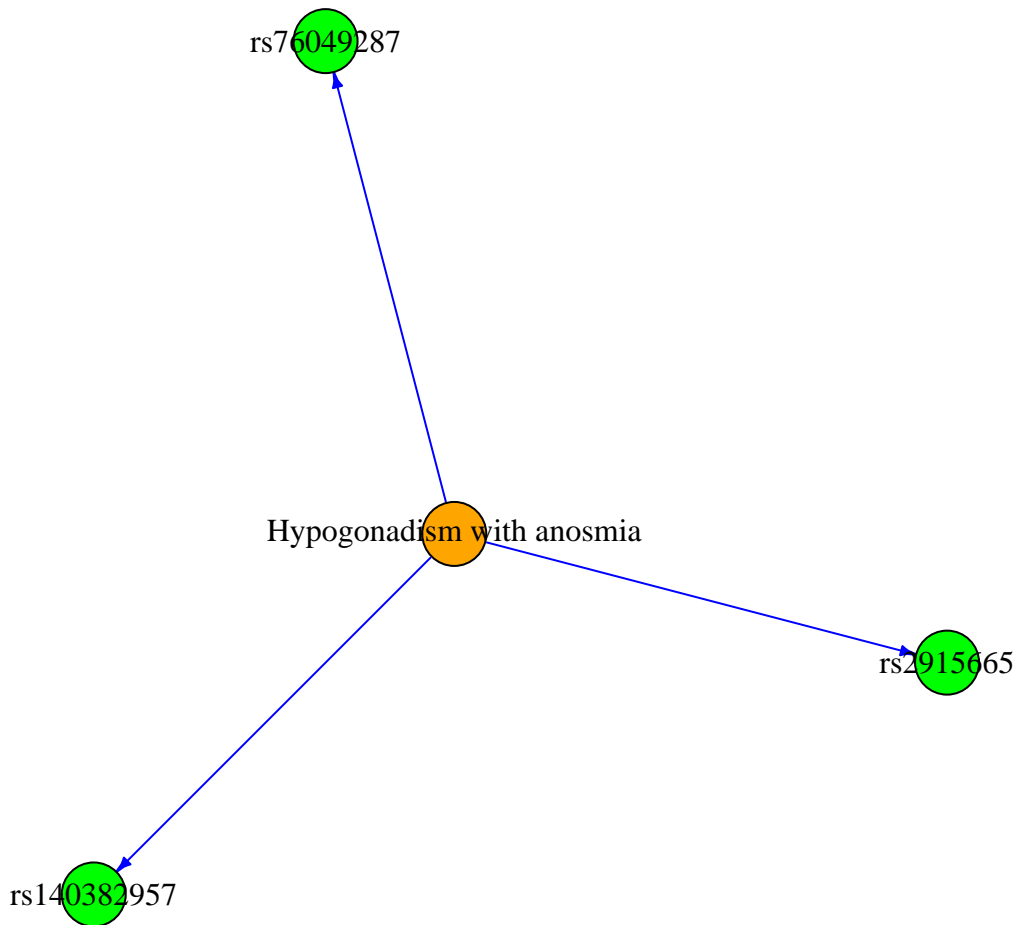

# ant-Disease Network (Hypogonadotropic hypogonadism 11 with or without a

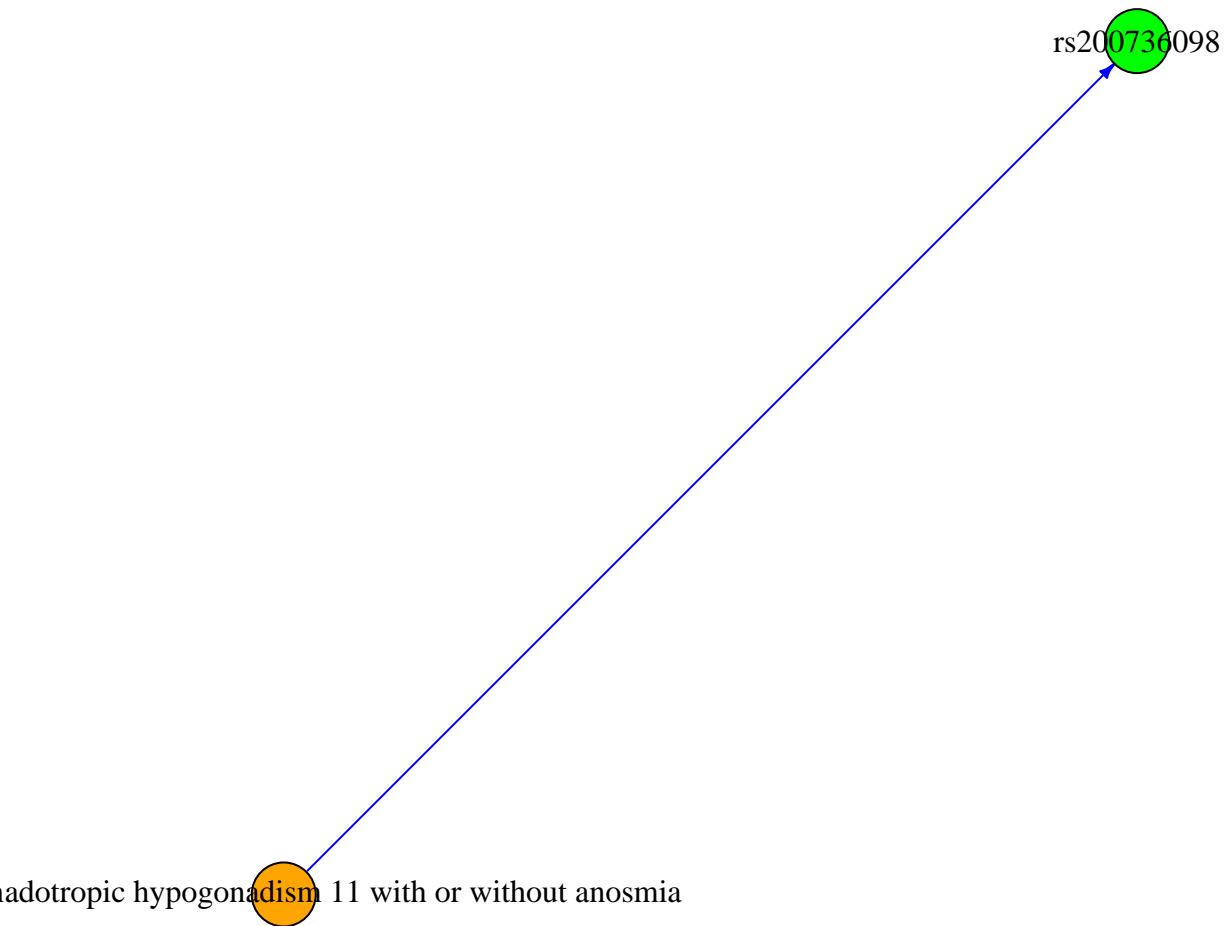

Variant–Disease Network (Hypokalemic periodic paralysis)

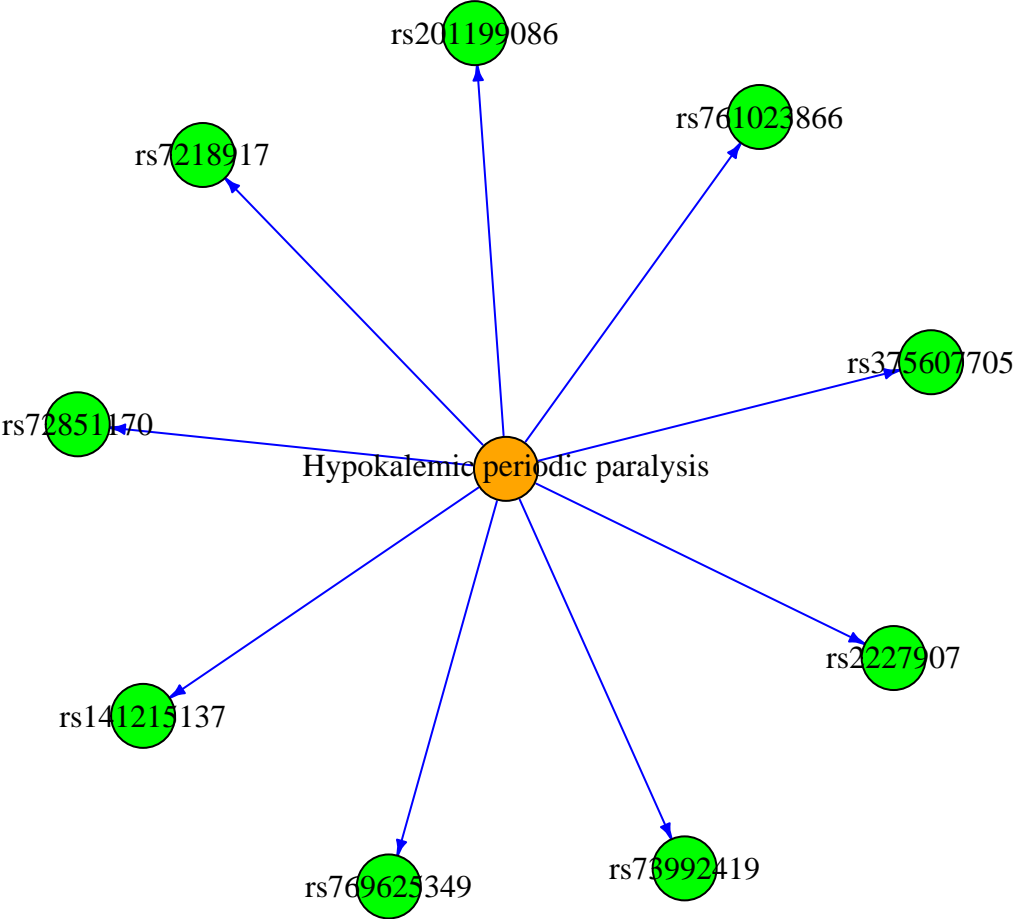

## Variant–Disease Network (Hypophosphatemic Rickets)

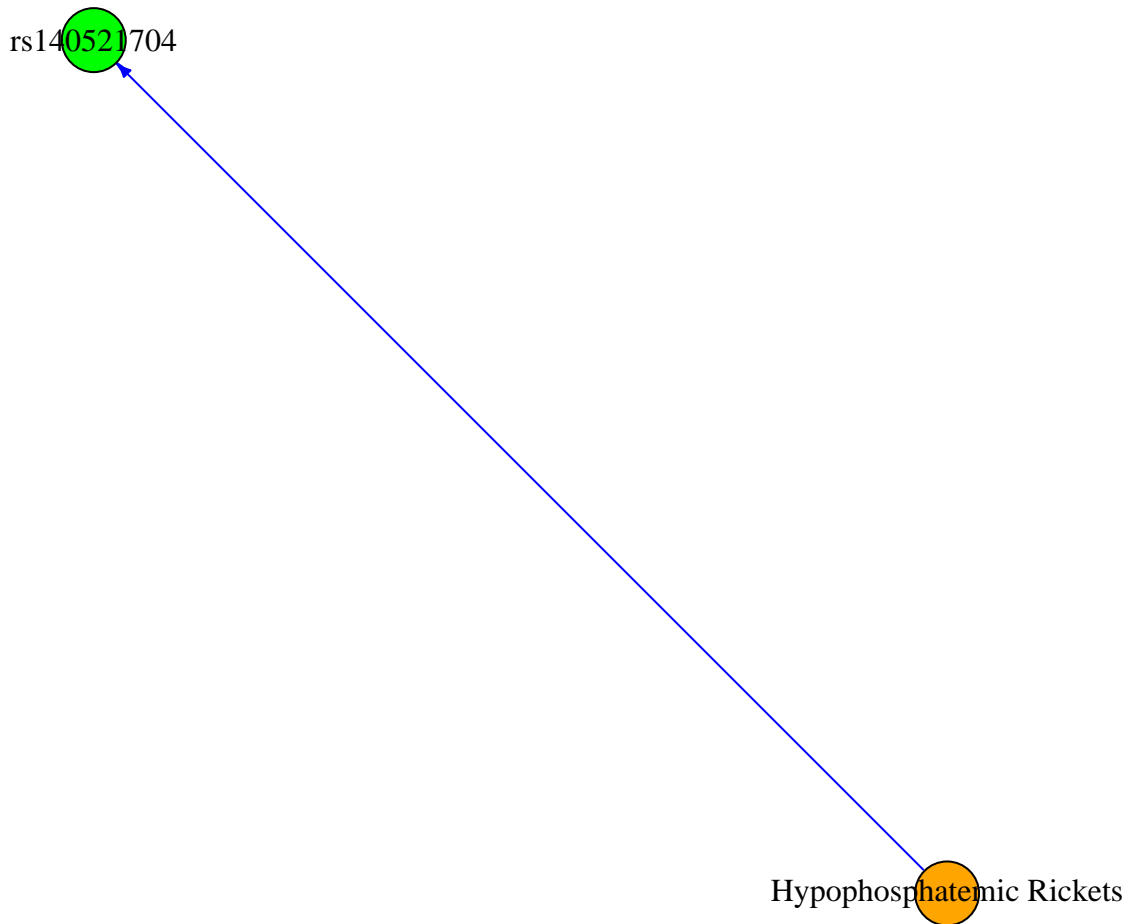

## Variant–Disease Network (Hypoplasia of the corpus callosum)

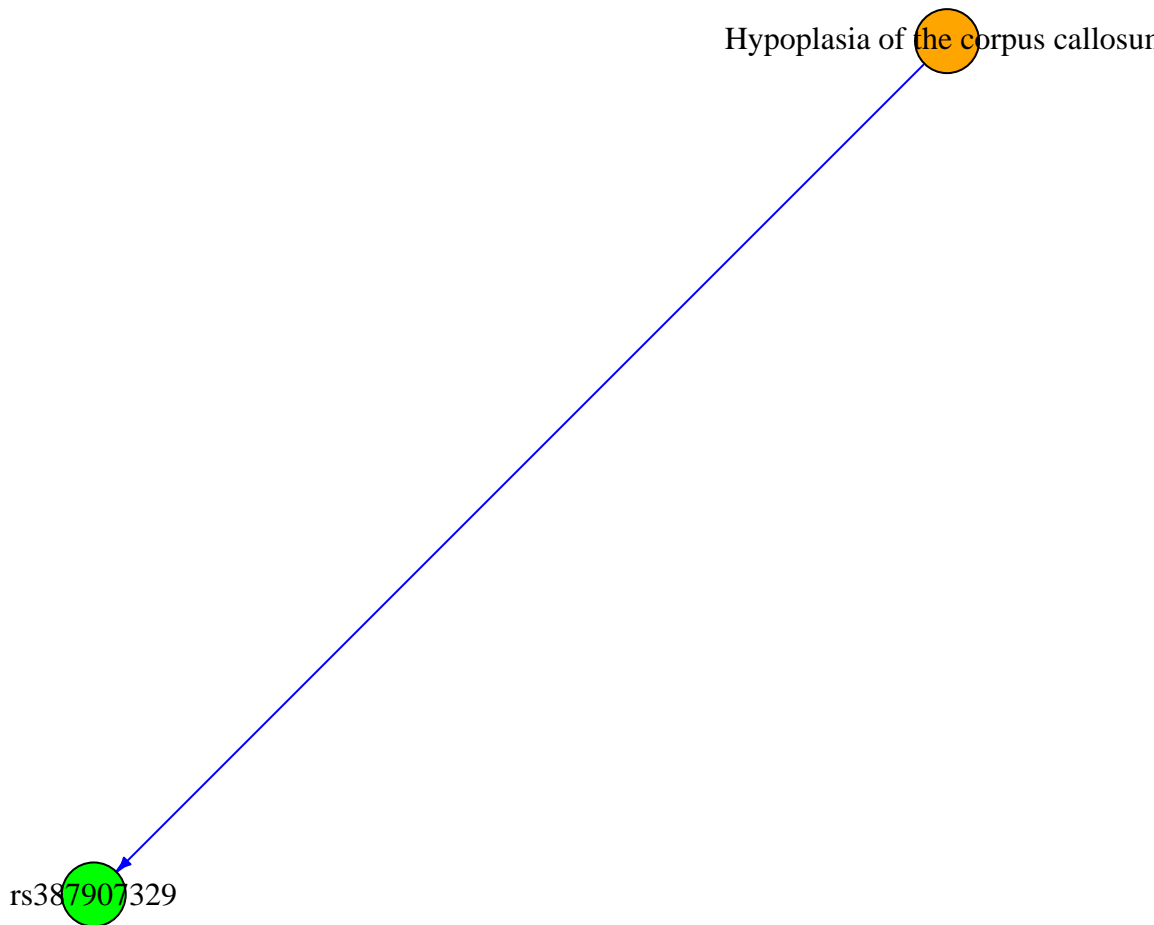

## Variant–Disease Network (Hypoprebetalipoproteinemia)

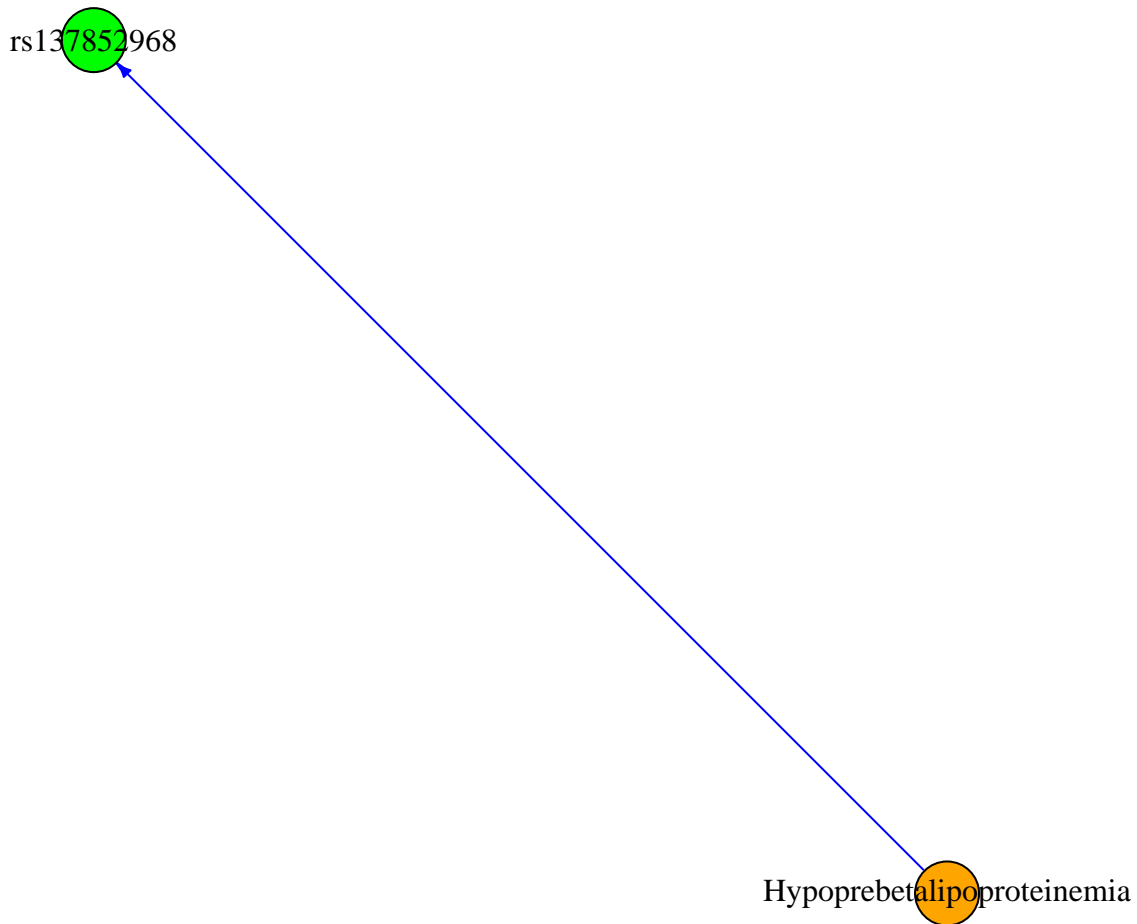

Variant–Disease Network (Hypotension)

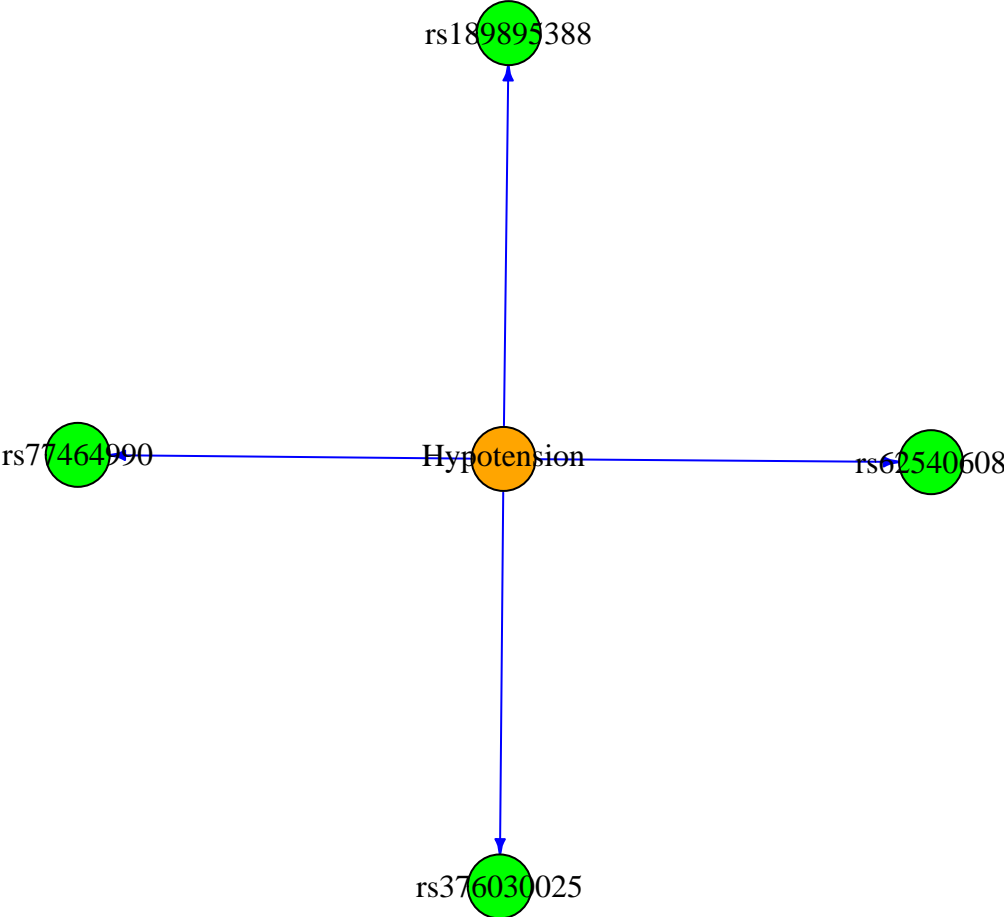

## Variant-Disease Network (Hypotonia)

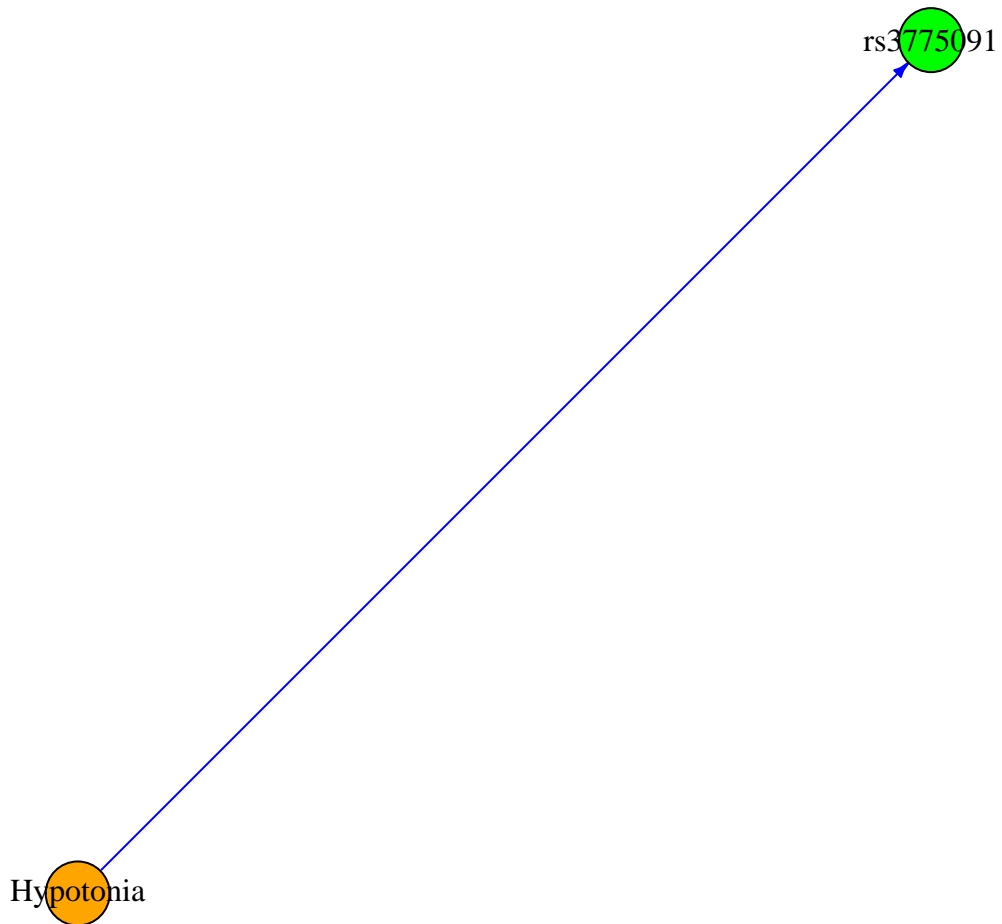



# Variant–Disease Network (Idiopathic basal ganglia calcification 1)

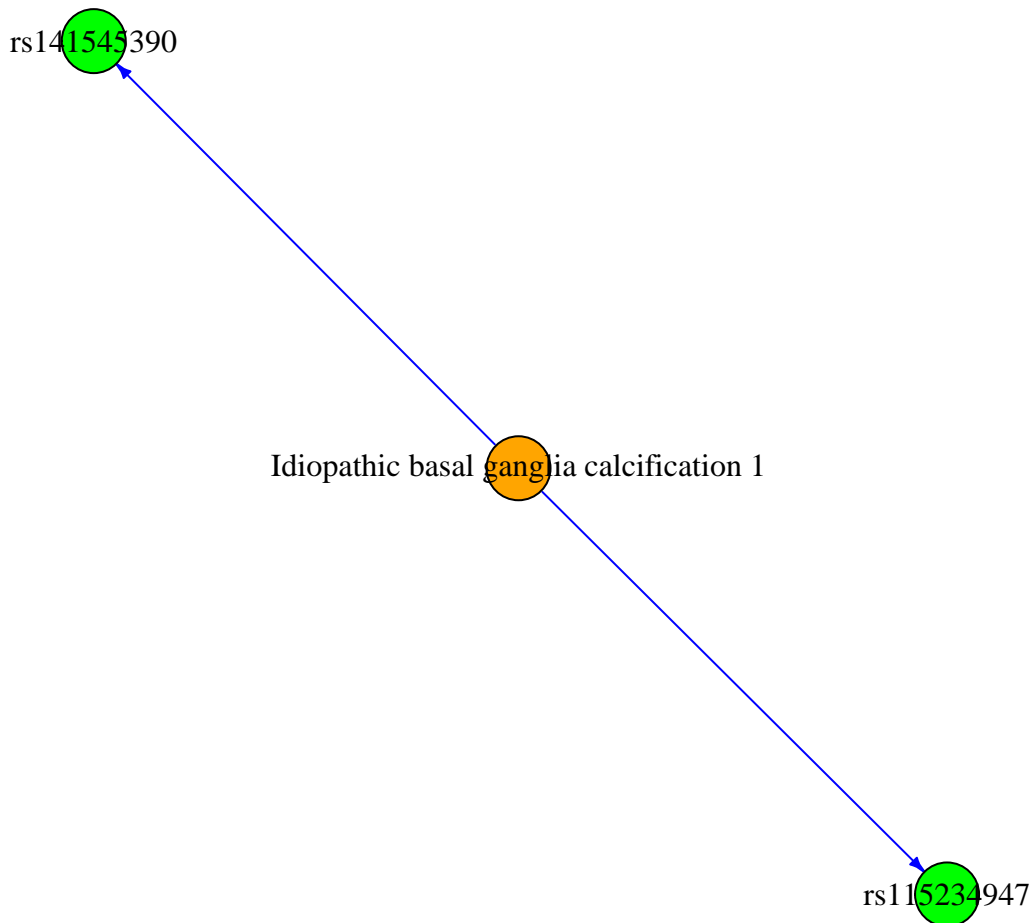

## Variant–Disease Network (Idiopathic fibrosing alveolitis)

rs759225610

Idiopathic fibrosing alveolitis

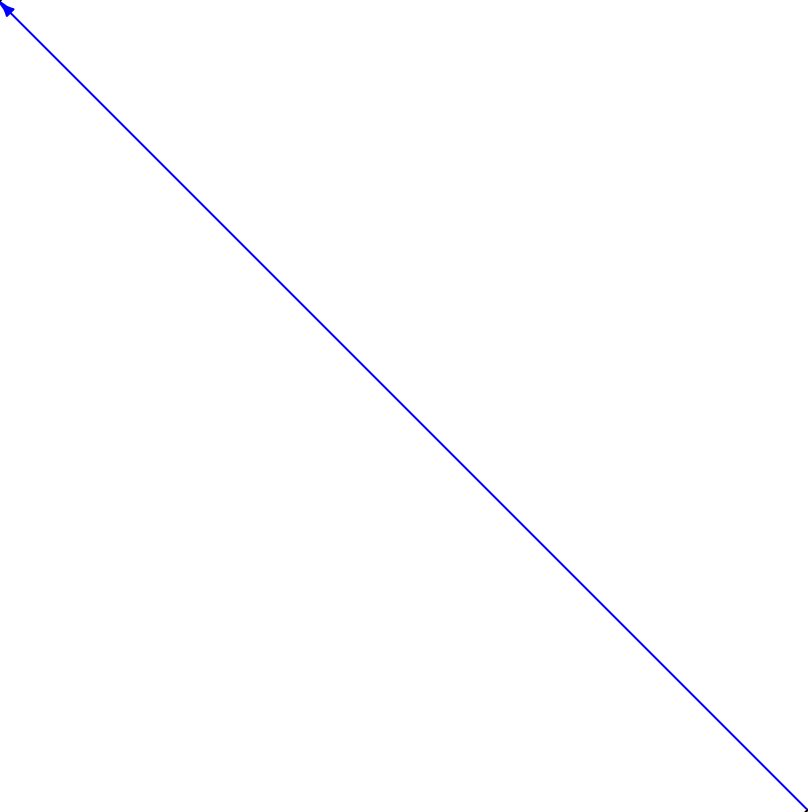

**Variant–Disease Network (Idiopathic generalized epilepsy)**

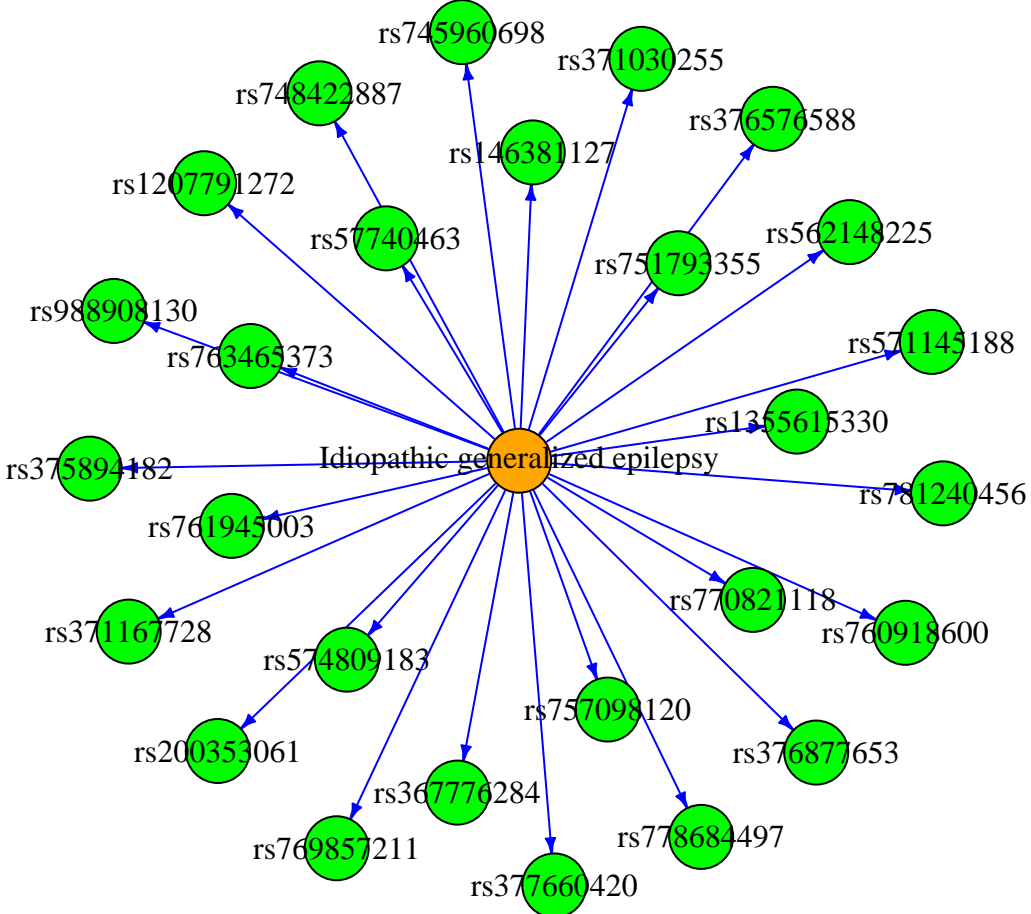

Variant–Disease Network (Idiopathic hypereosinophilic syndrome)

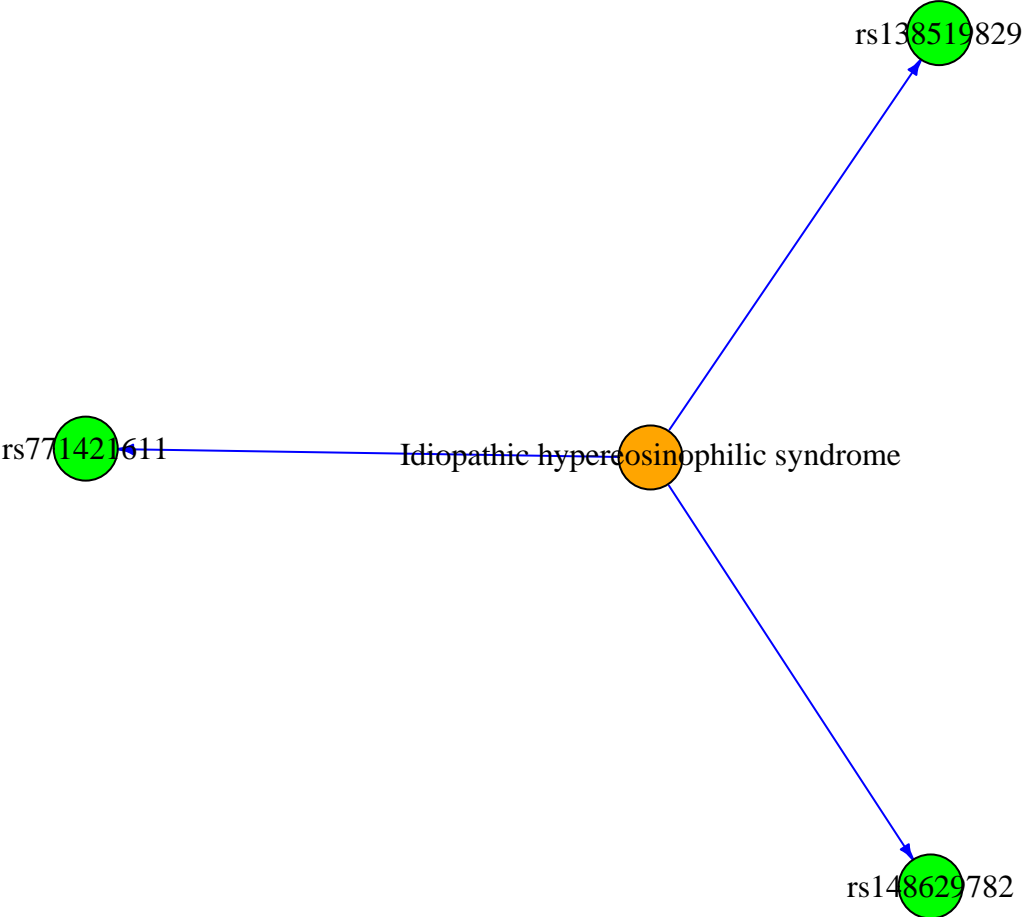

## Variant–Disease Network (Immunodeficiency)

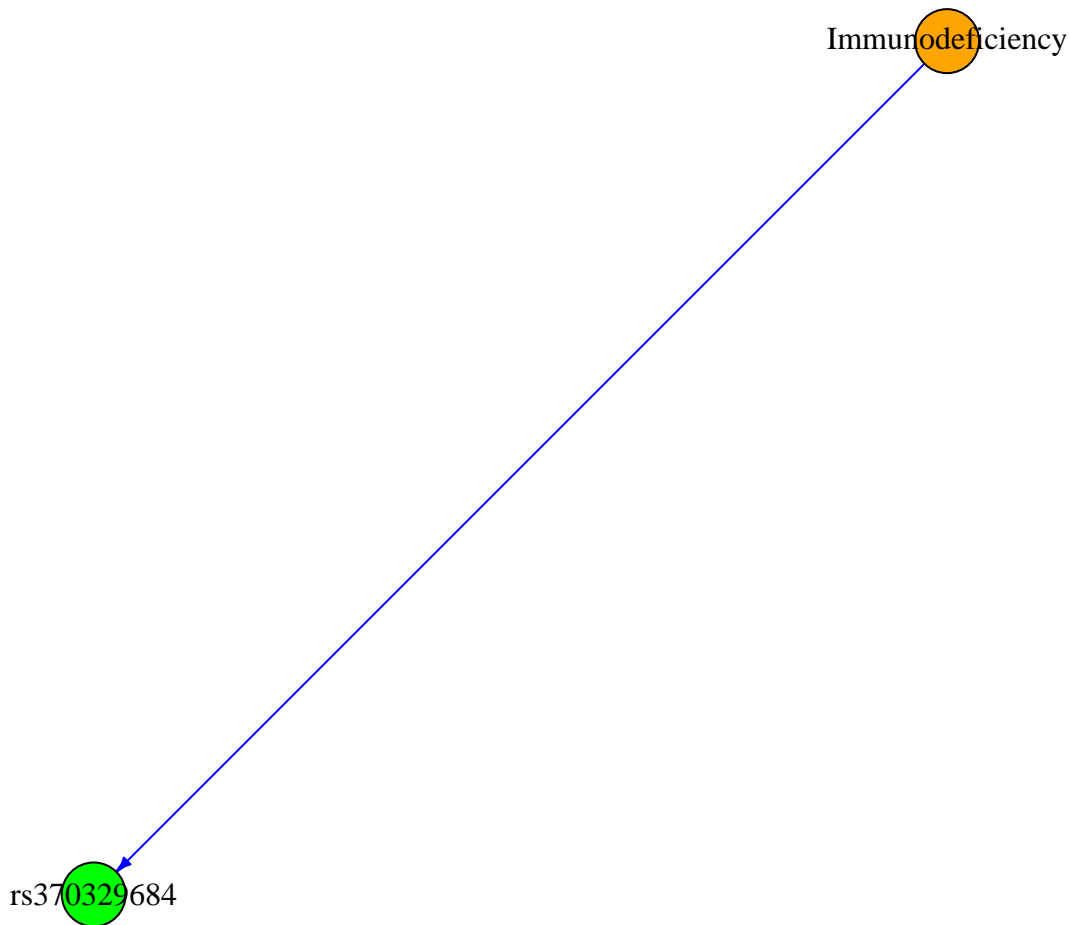

## Variant–Disease Network (Immunodeficiency 24)

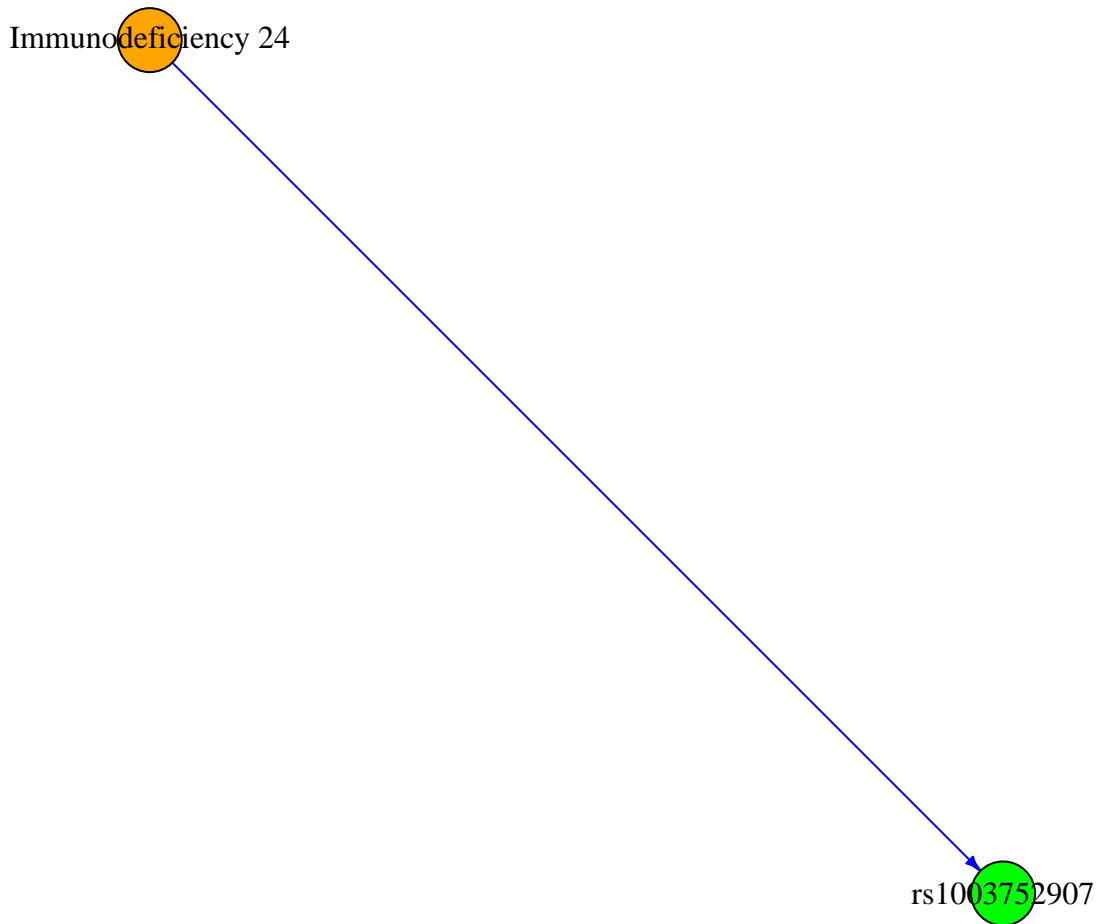

# Ant-Disease Network (Immunodeficiency 26 with or without neurologic abnormalities)

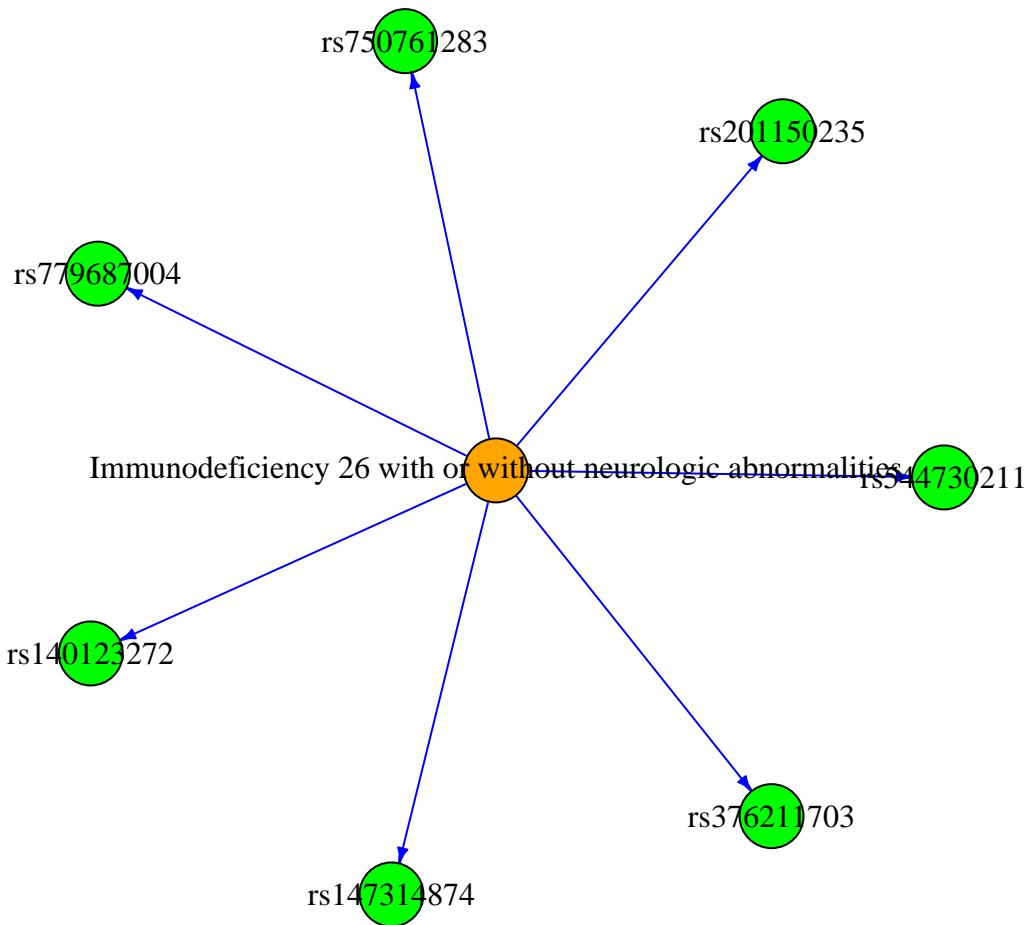

## Variant–Disease Network (Immunodeficiency 32a)

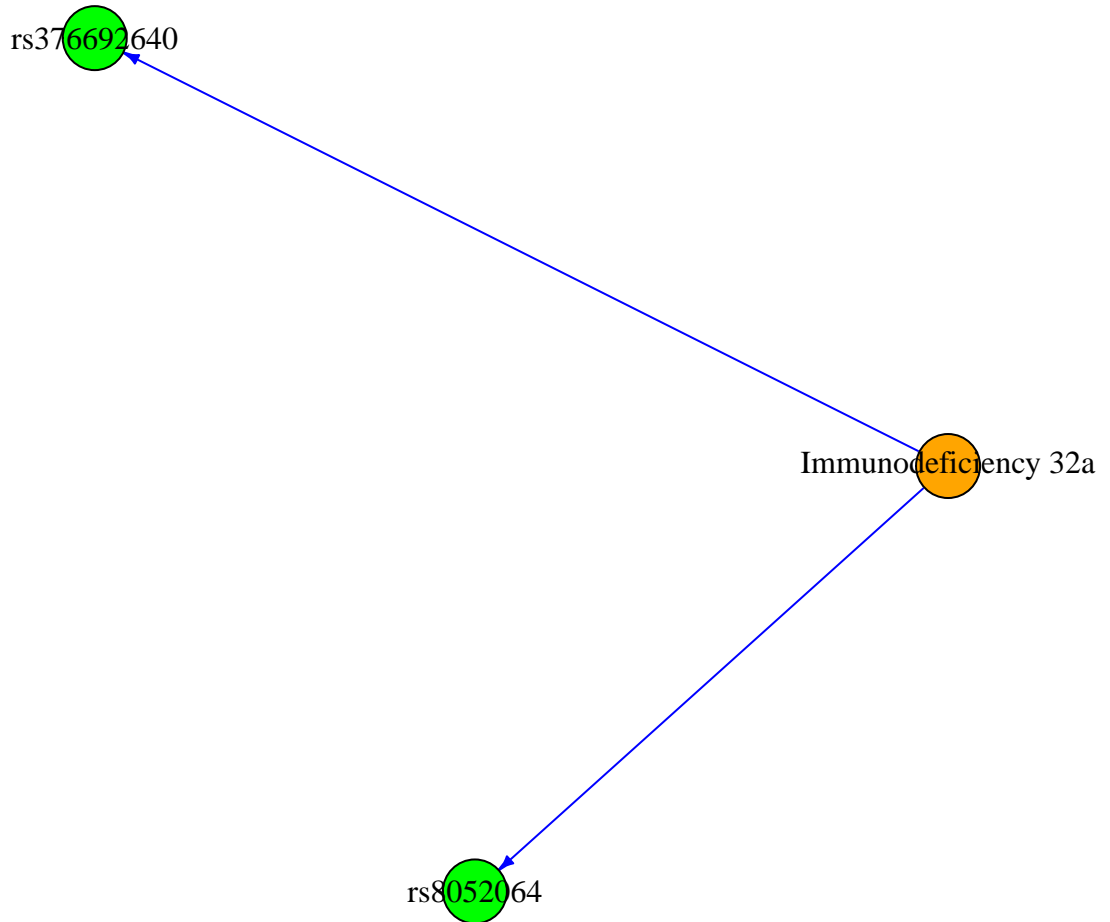



## Variant-Disease Network (Immunodeficiency 32b)

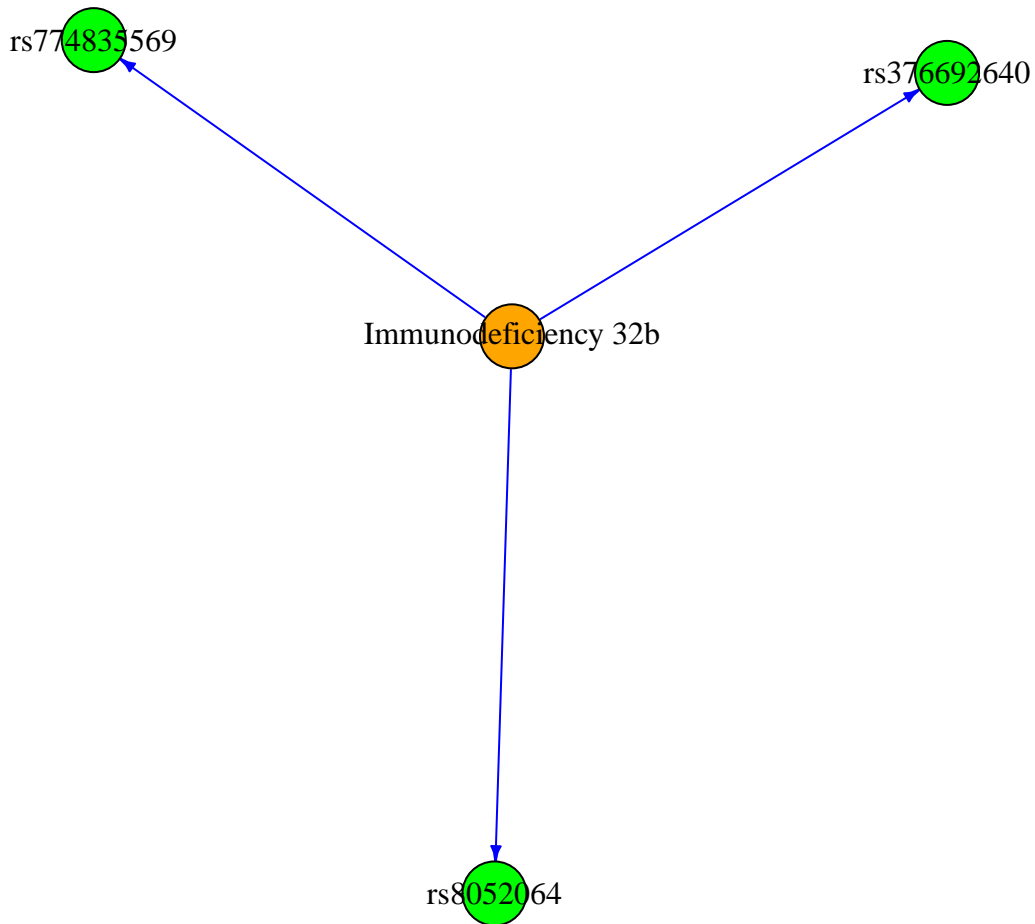

## Variant–Disease Network (Immunodeficiency 44)

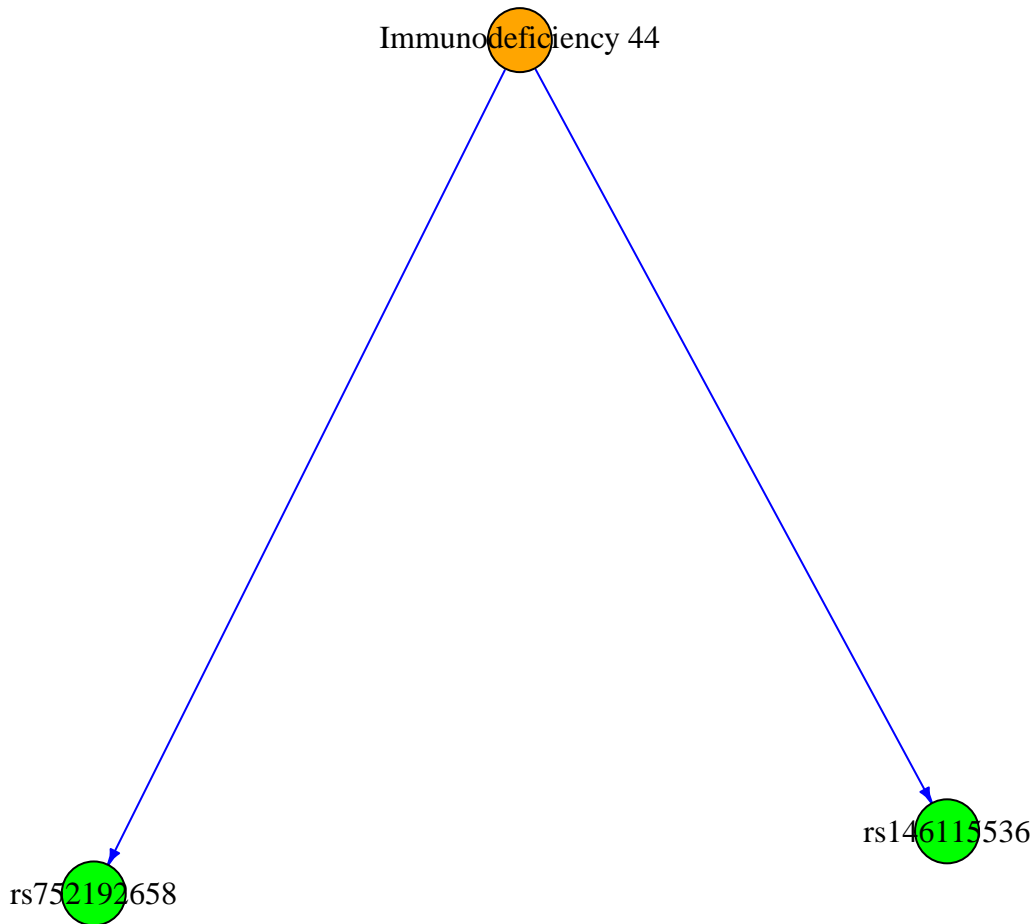

## Variant–Disease Network (Immunodeficiency 51)

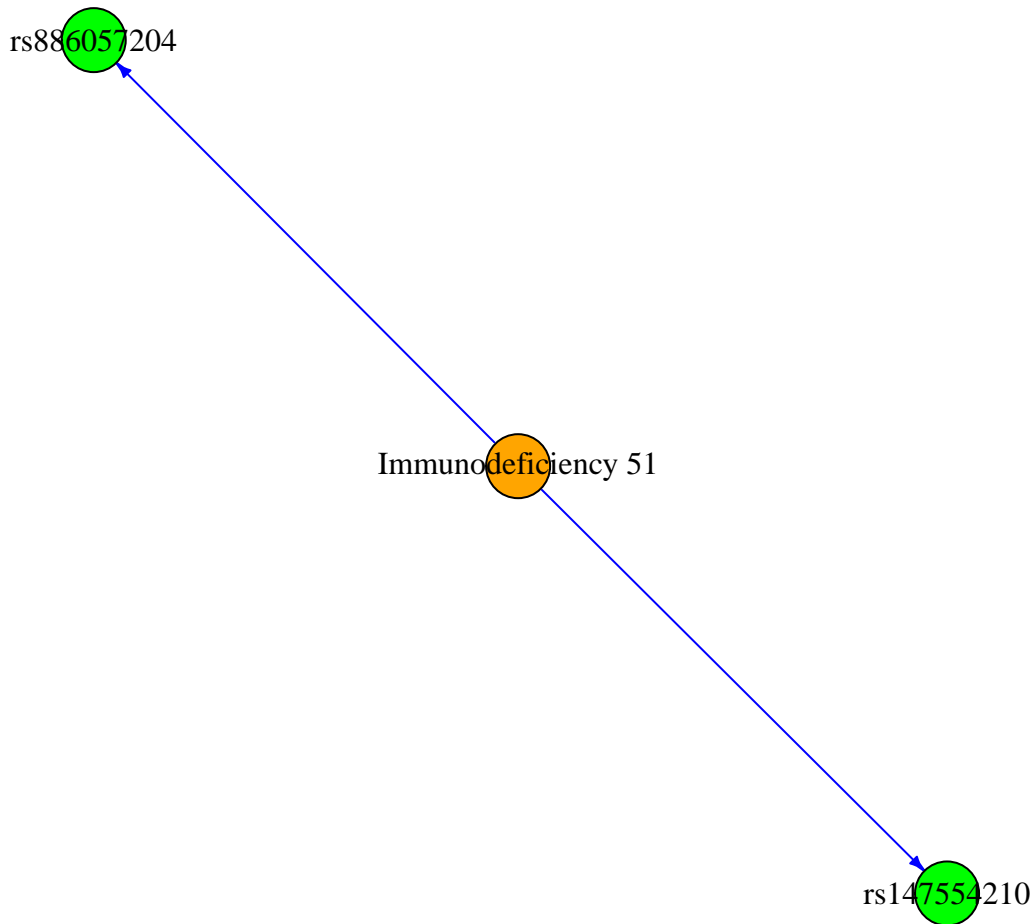

## Variant–Disease Network (Immunodeficiency 8)

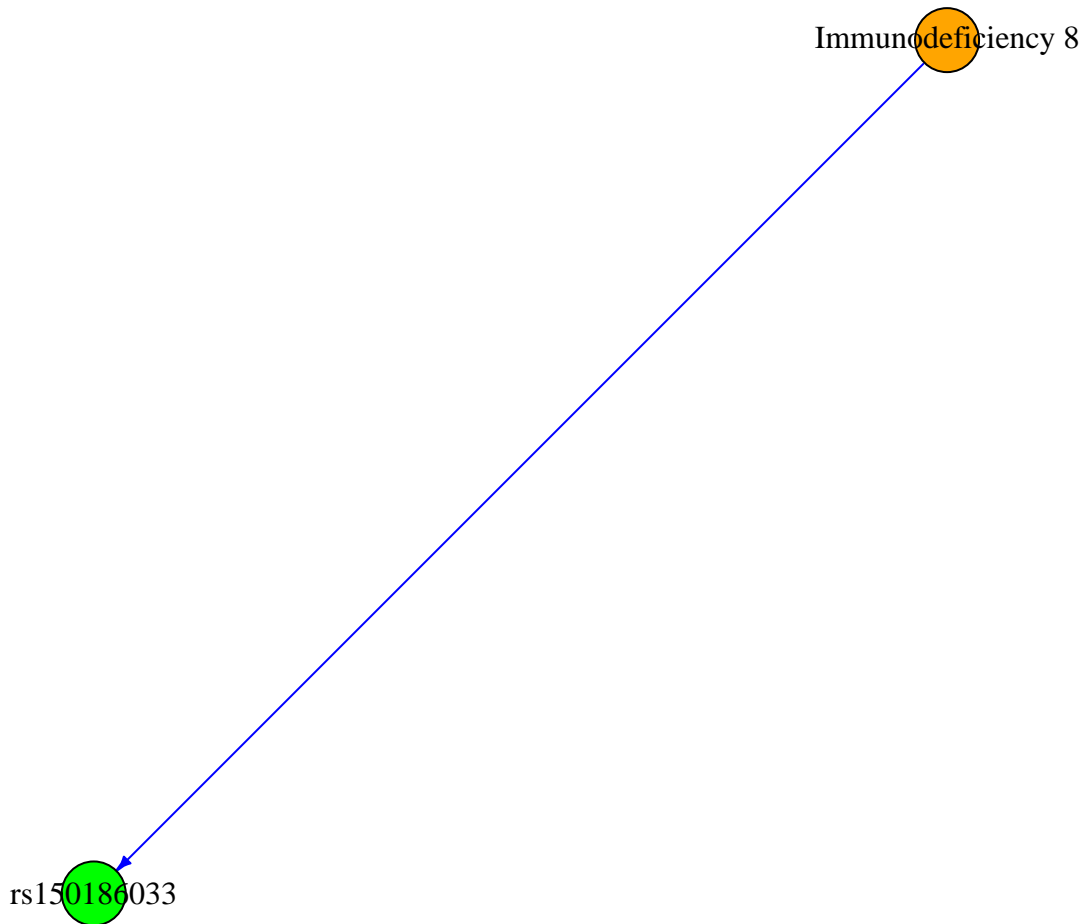

**Variant–Disease Network (Immunodeficiency with hyper IgM type 2)**

Immunodeficiency with hyper IgM type 2

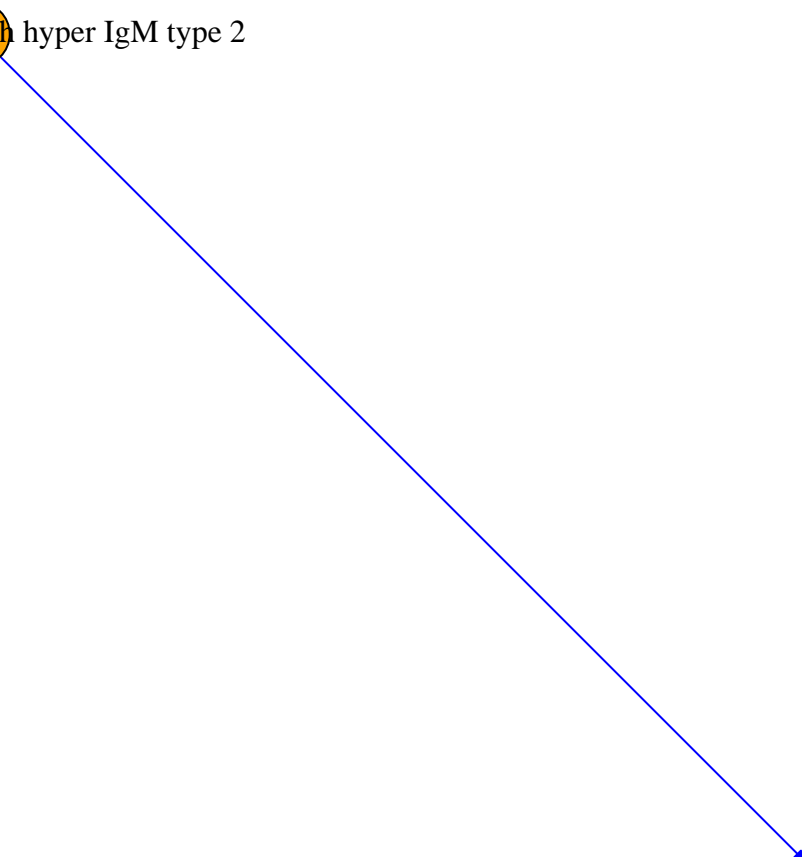

rs2028373

Variant–Disease Network (Immunodeficiency with Hyper-IgM)

Immunodeficiency with Hyper-IgM

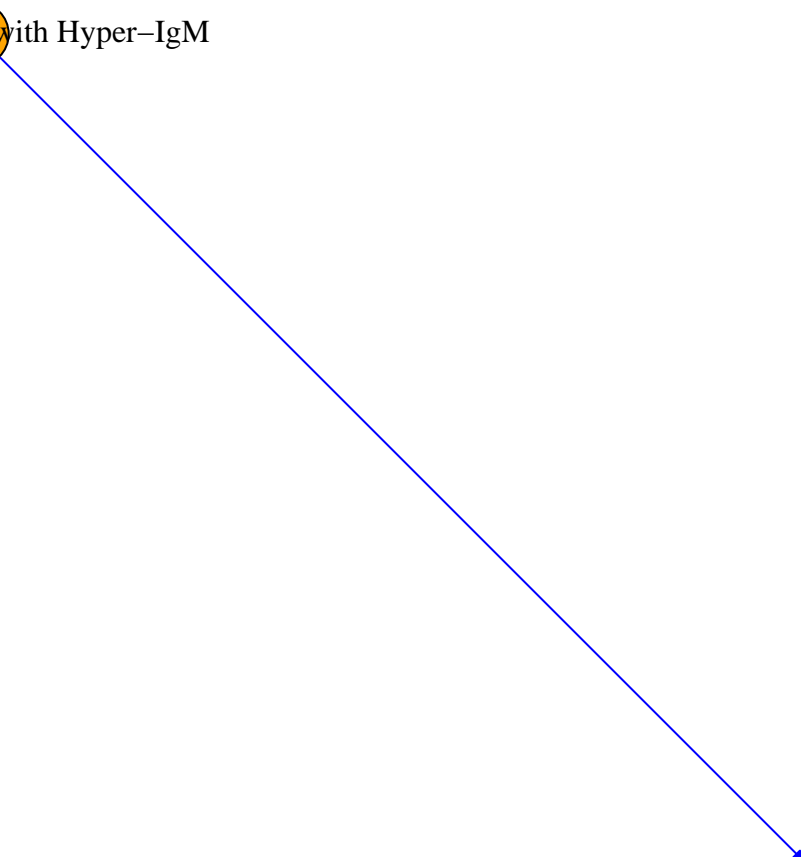

rs2028373

# Disease Network (Immunodeficiency–centromeric instability–facial anomalies

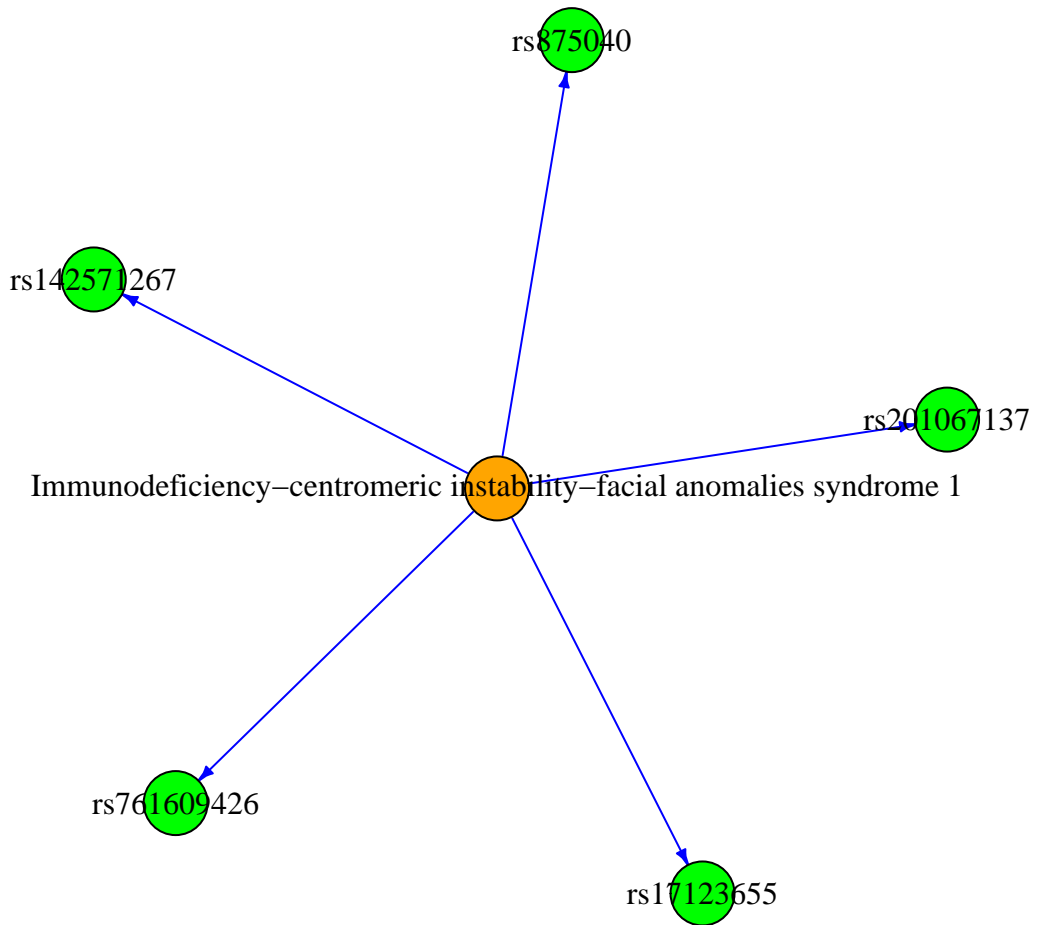

## Variant–Disease Network (Inborn genetic diseases)

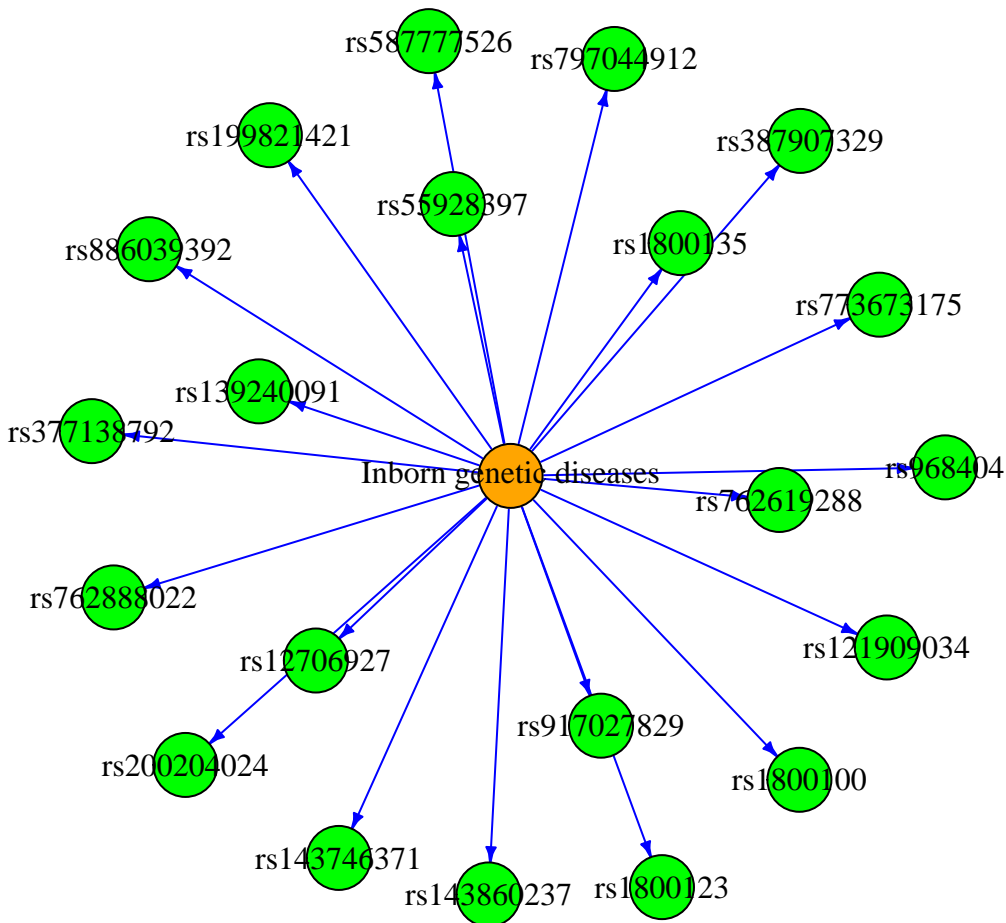



## Variant–Disease Network (Inclusion Body Myopathy)

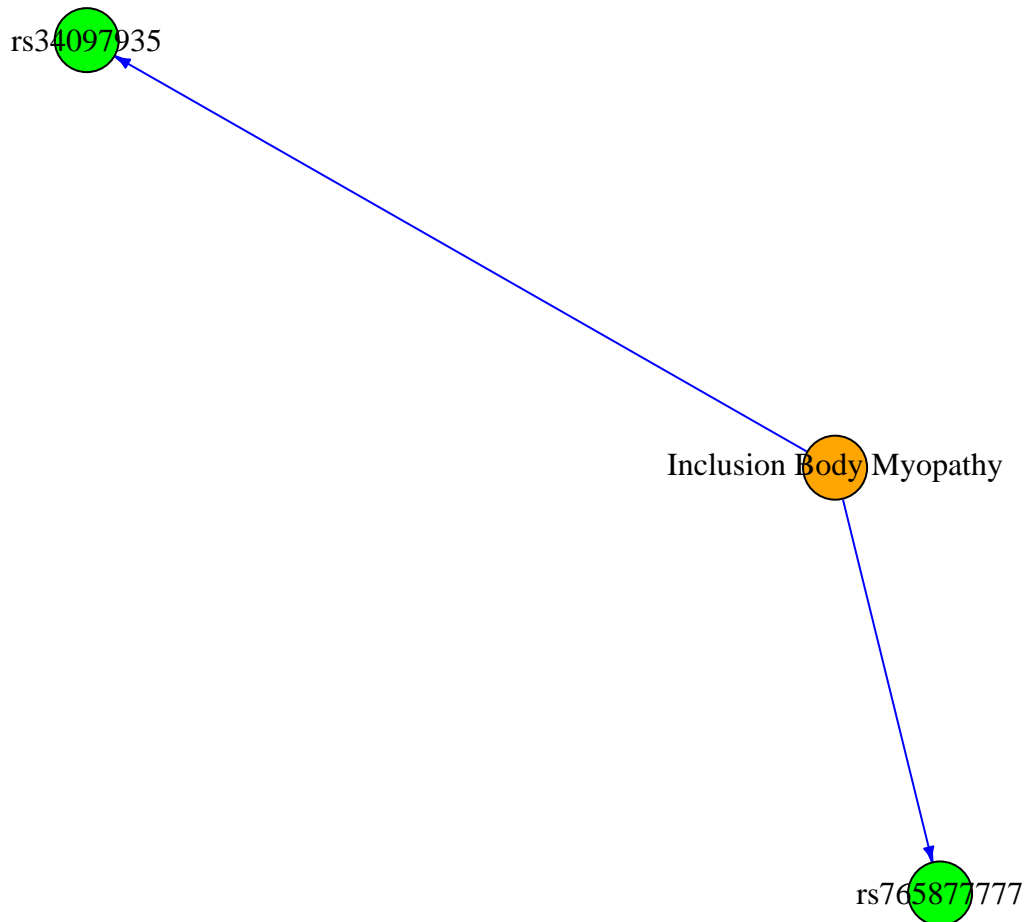

**Variant–Disease Network (Inclusion body myopathy 3)**

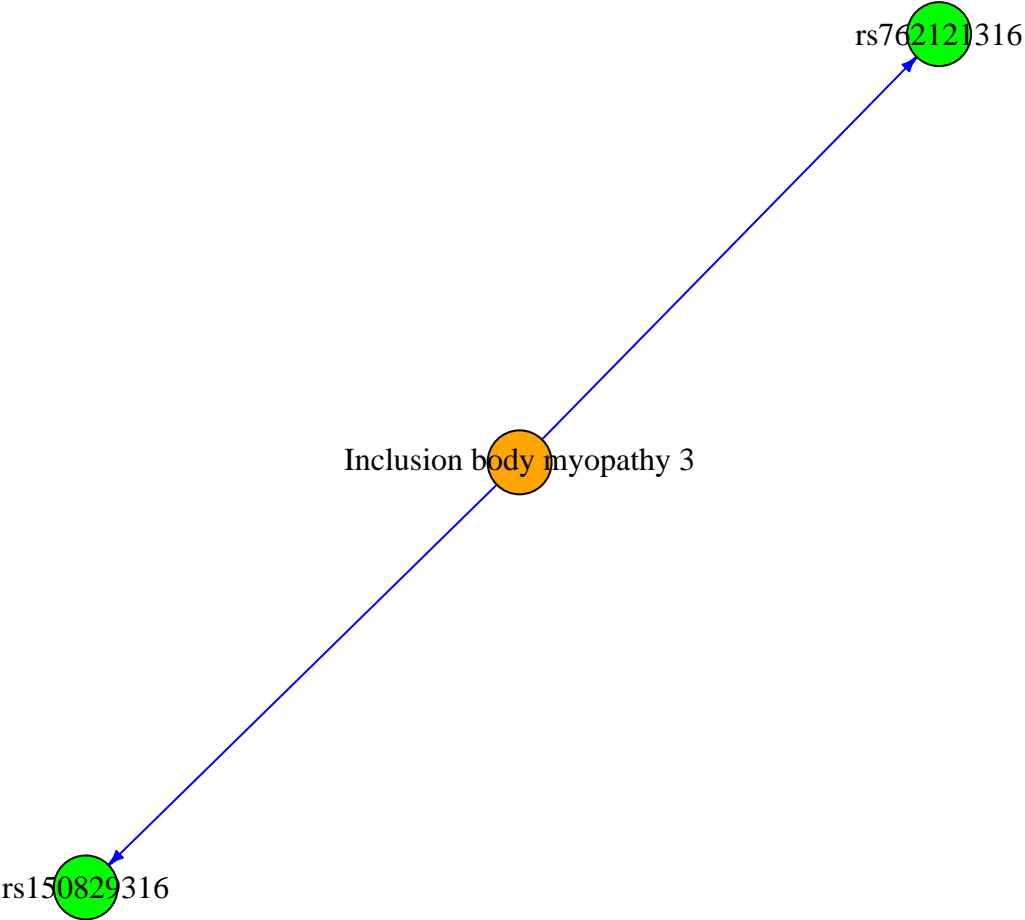

rk (Inclusion body myopathy with early-onset Paget disease with or without

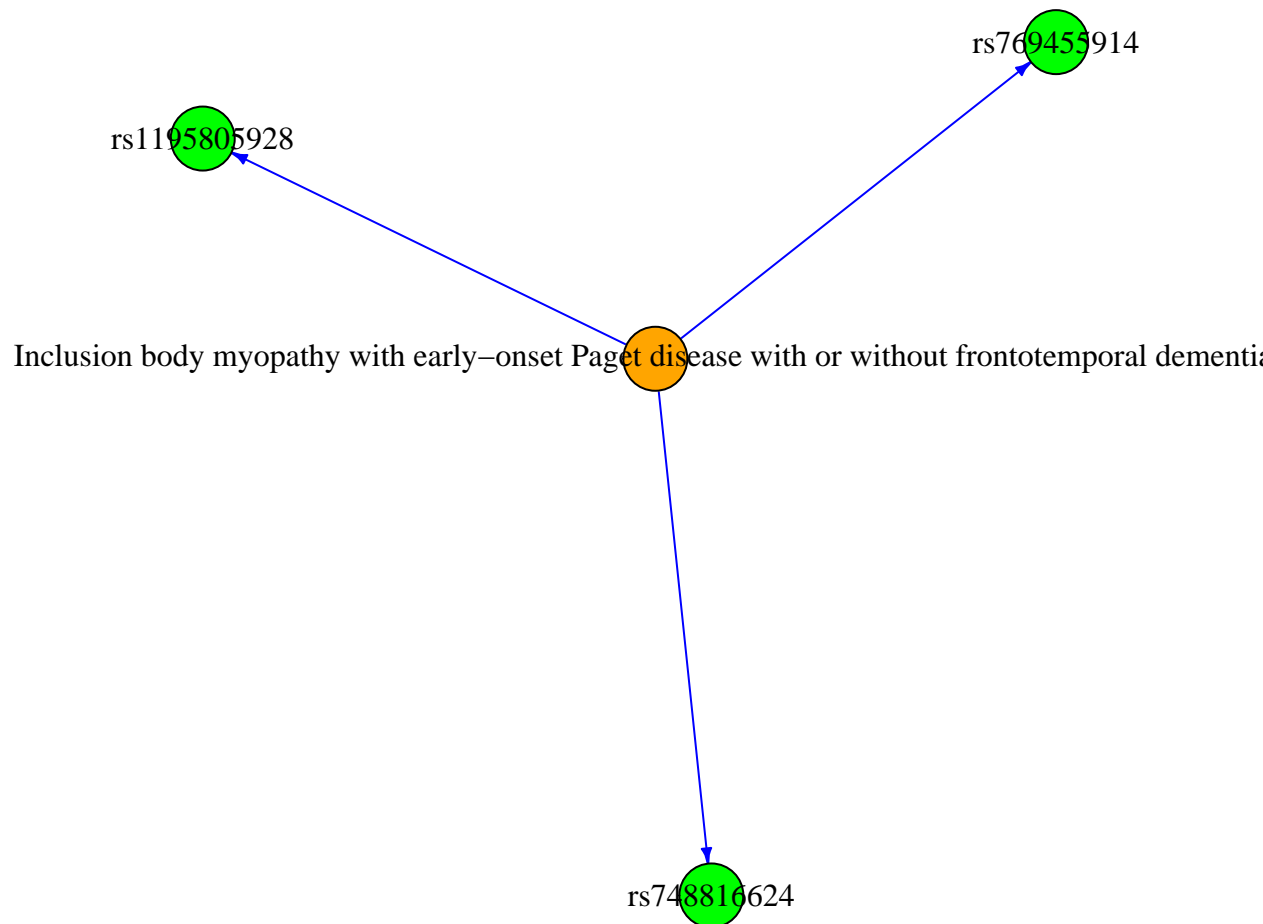

## Variant–Disease Network (Increased left ventricular wall thickness)

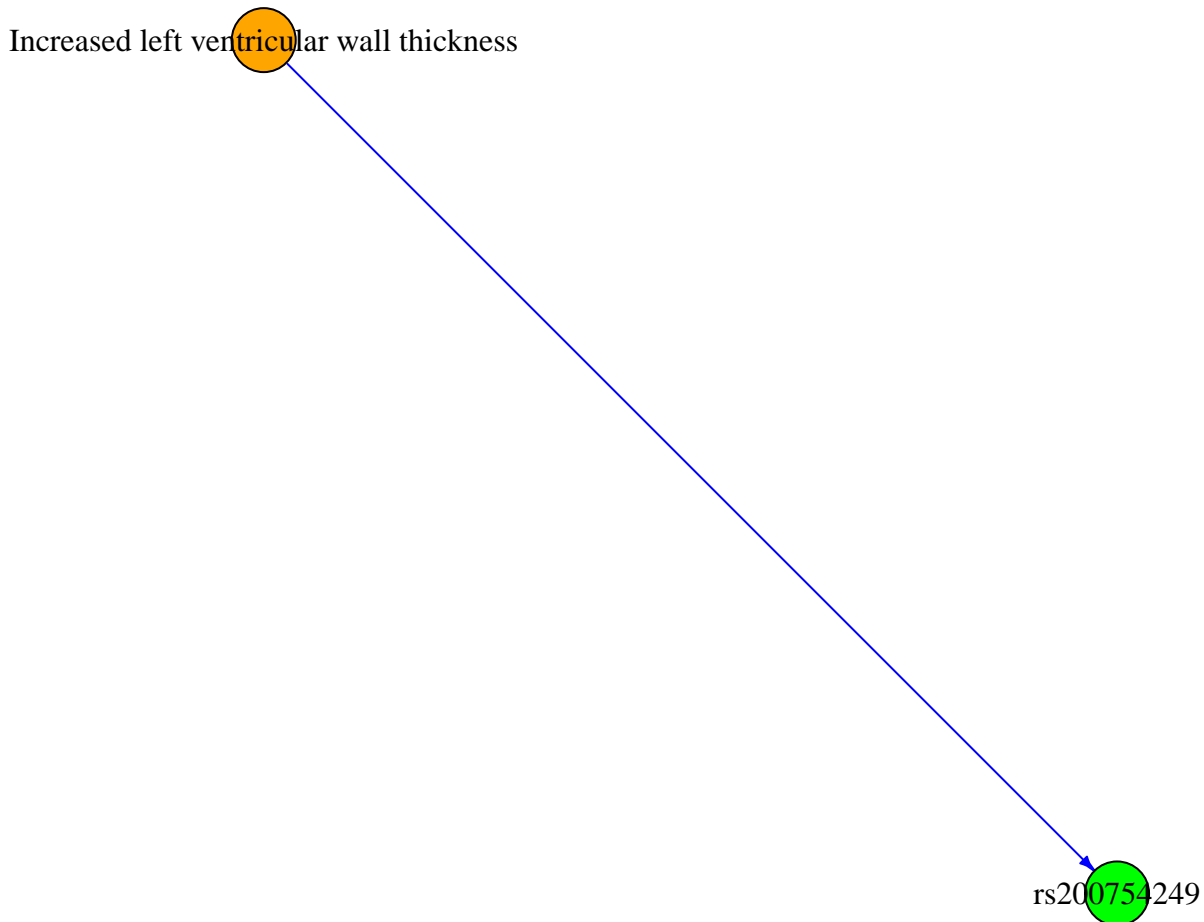

Variant–Disease Network (Infantile cortical hyperostosis)

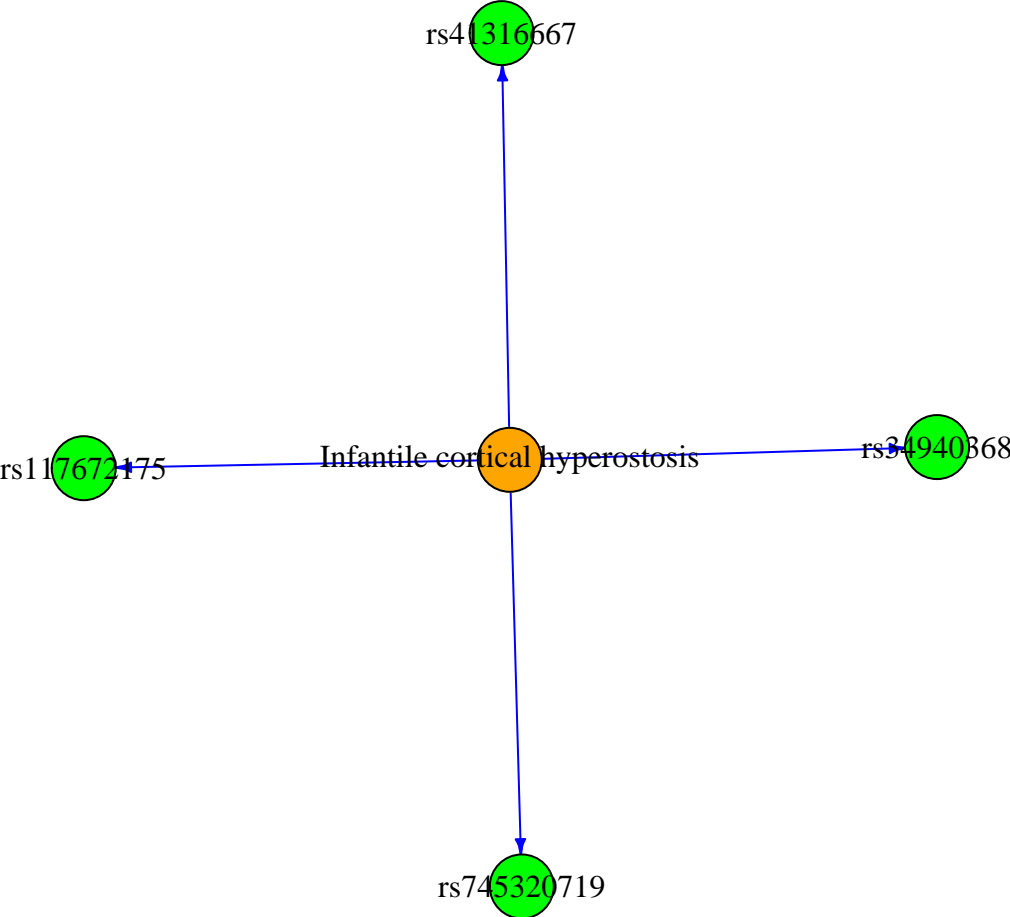

## Variant–Disease Network (Infantile GM1 gangliosidosis)

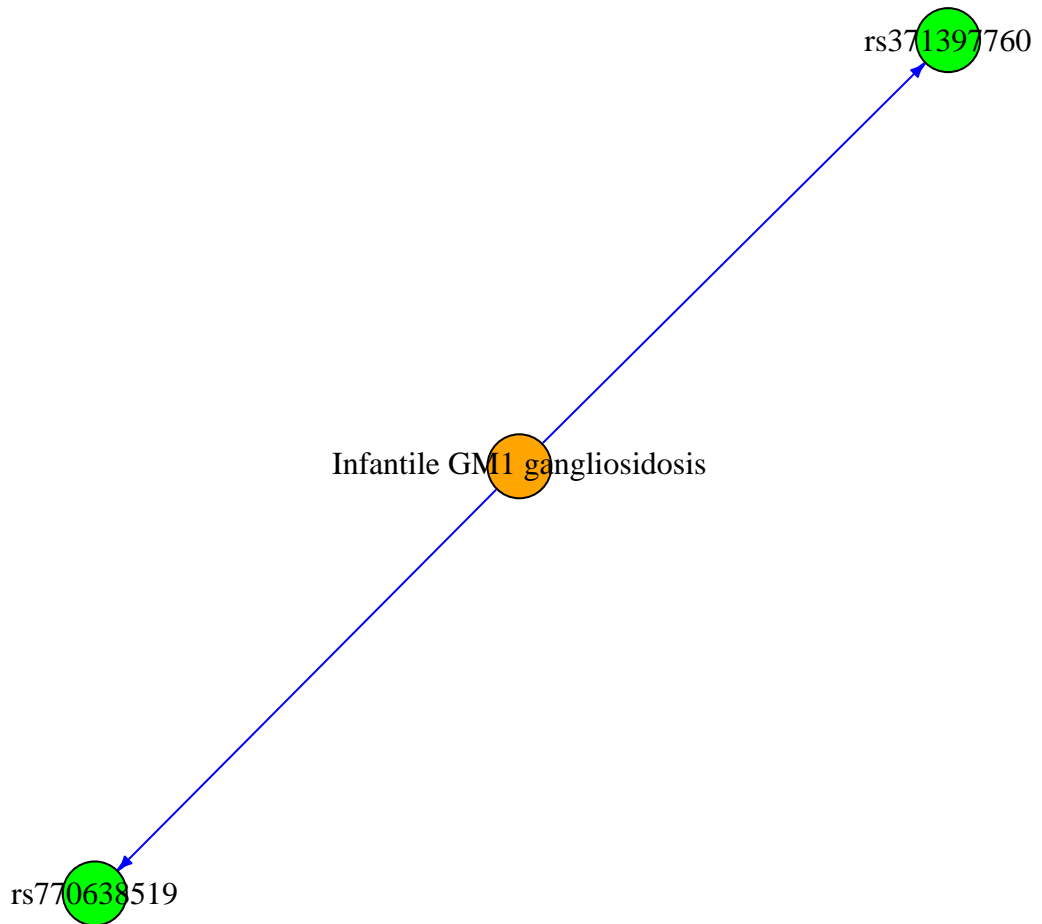

## Variant–Disease Network (Infantile Nystagmus)

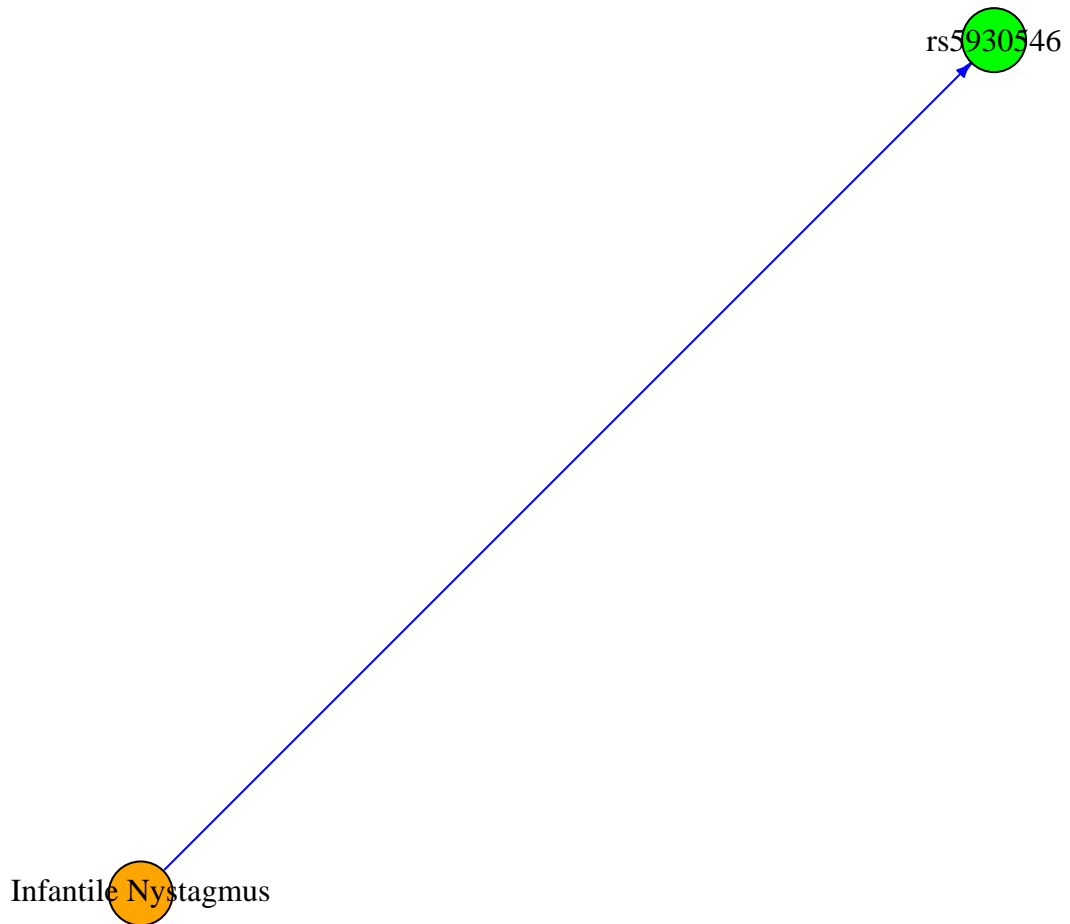

## Variant–Disease Network (Infantile spasms)

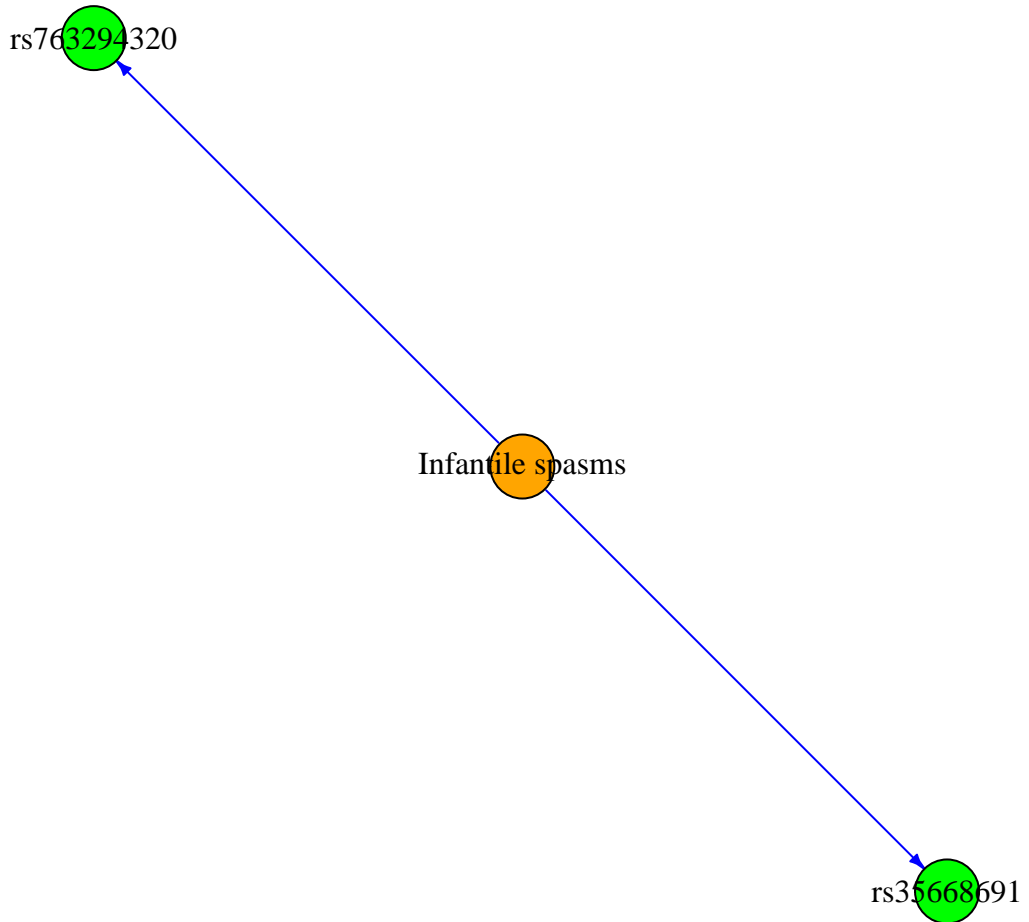



**Variant–Disease Network (Inflammatory bowel disease 1)**

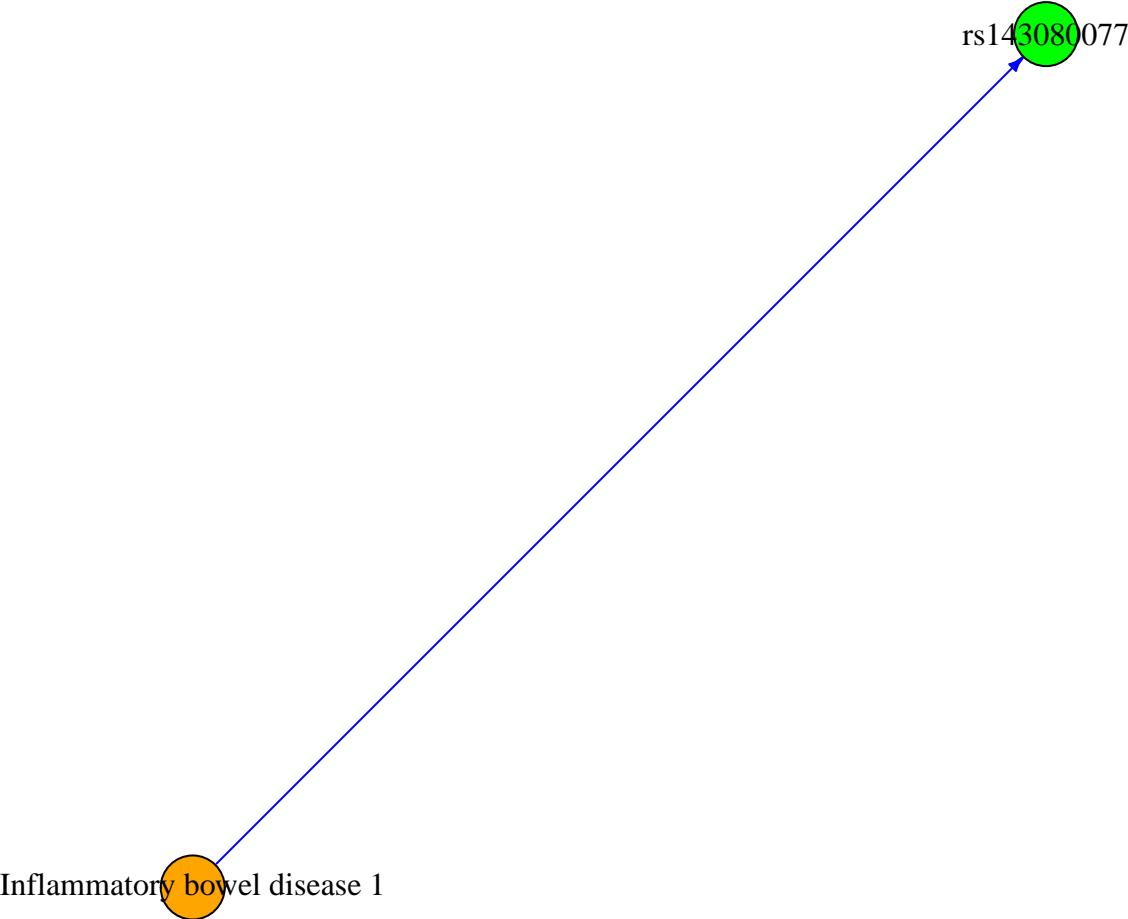

Variant–Disease Network (Inflammatory skin and bowel disease)

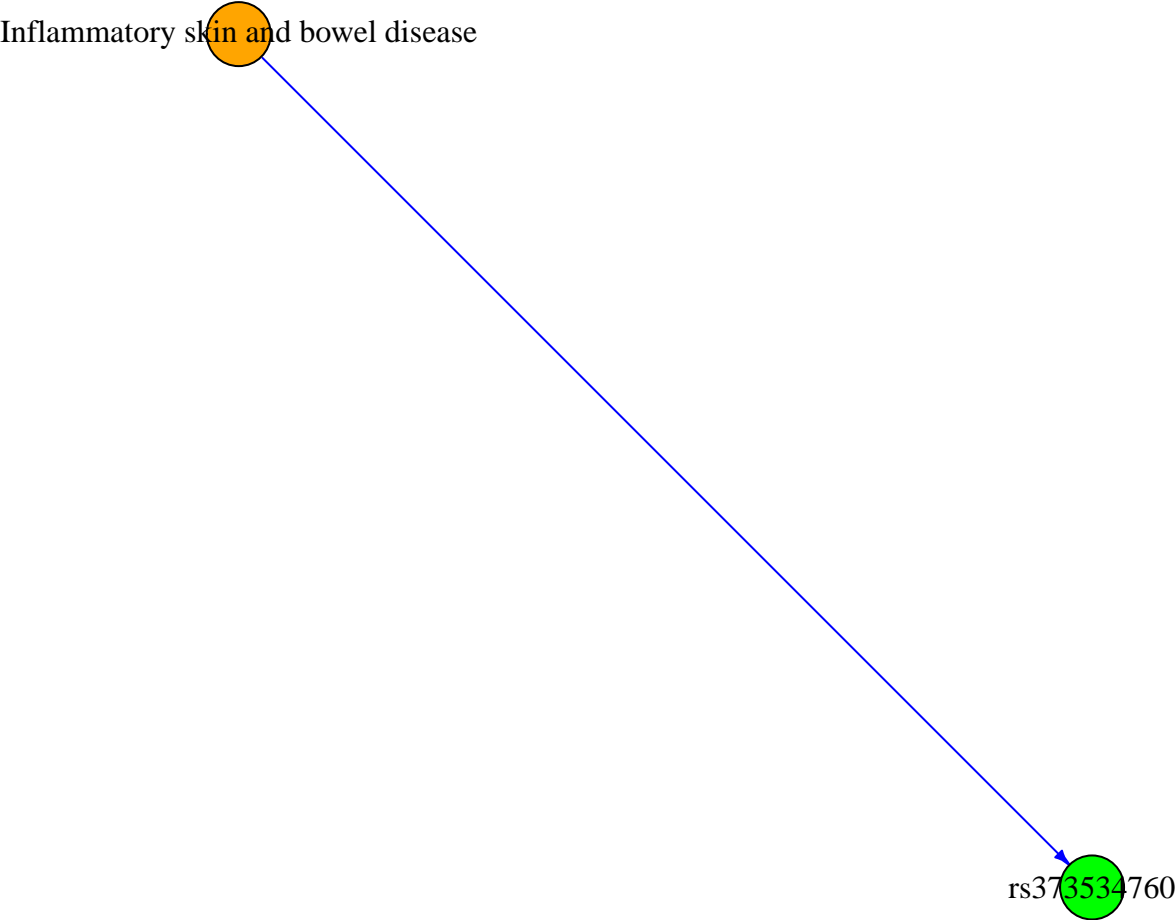

# Variant–Disease Network (Inosine triphosphatase deficiency)

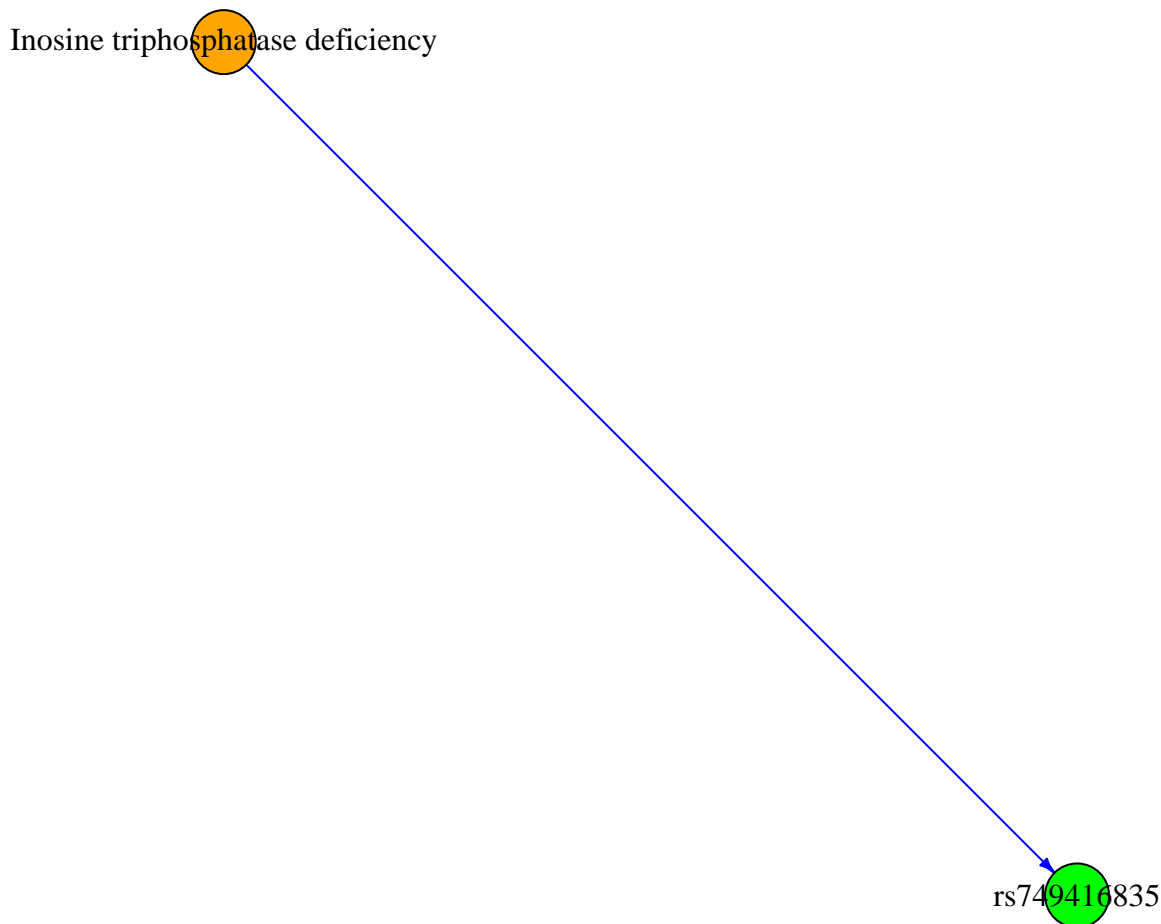

**Variant–Disease Network (Insulin–like growth factor 1 resistance to)**

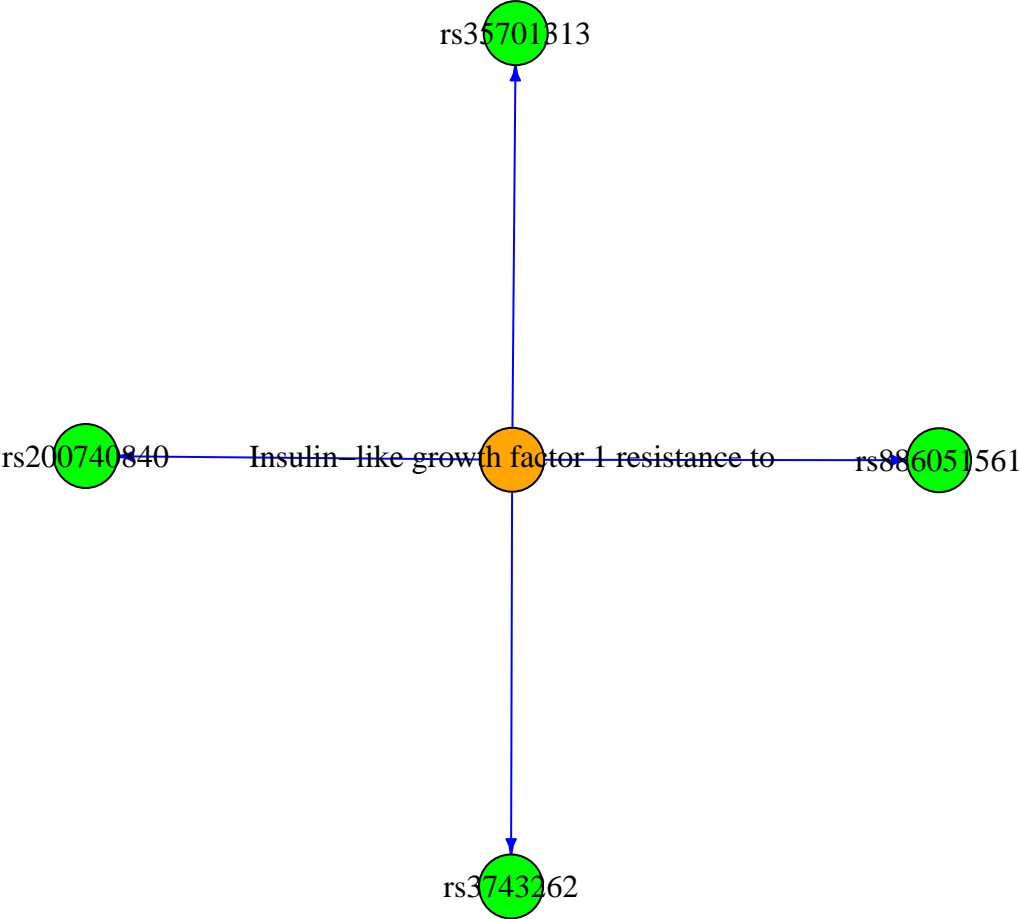

Variant–Disease Network (INTELLECTUAL DEVELOPMENTAL DISORDER)

INTELLECTUAL DEVELOPMENTAL DISORDER

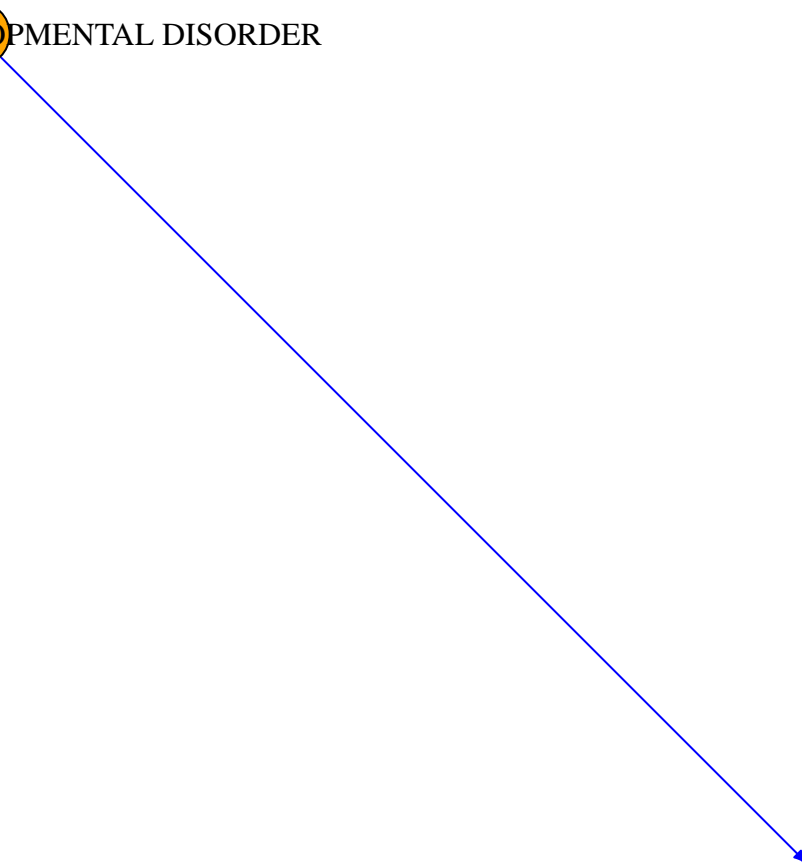

rs375189195

## Variant-Disease Network (Intellectual Disability)

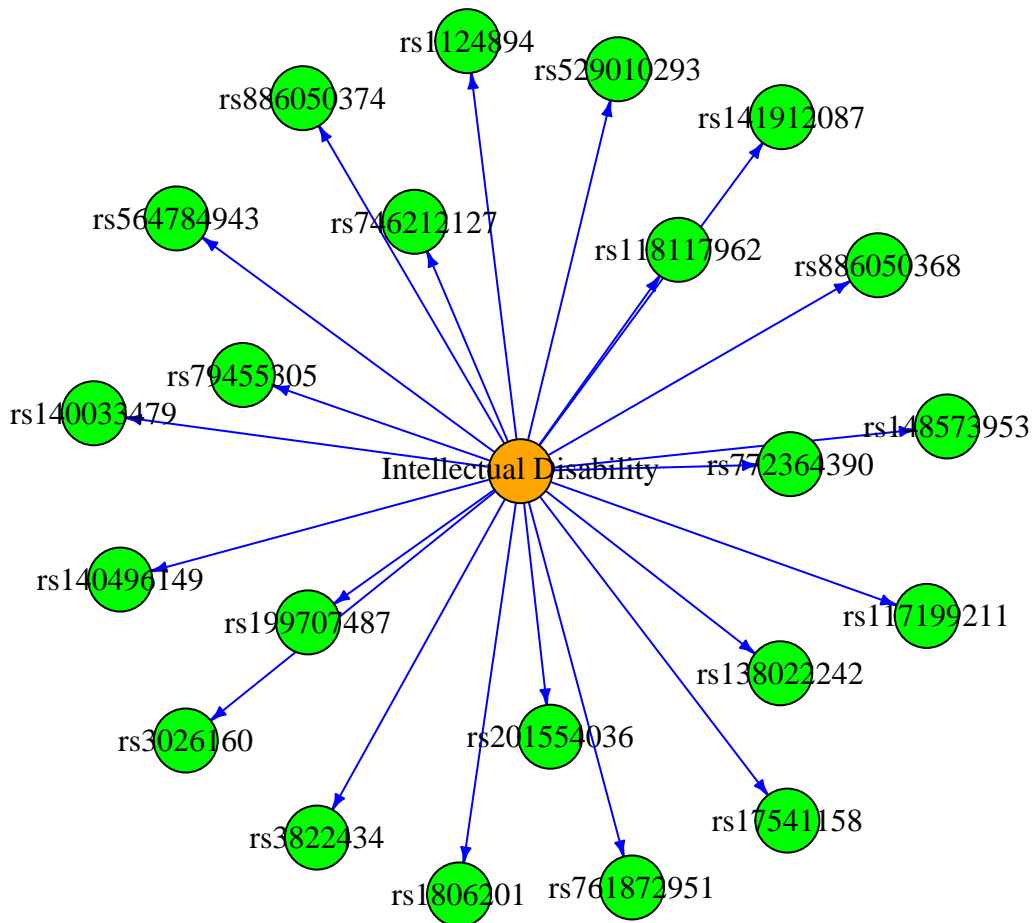

**Variant–Disease Network (Interstitial lung and liver disease)**

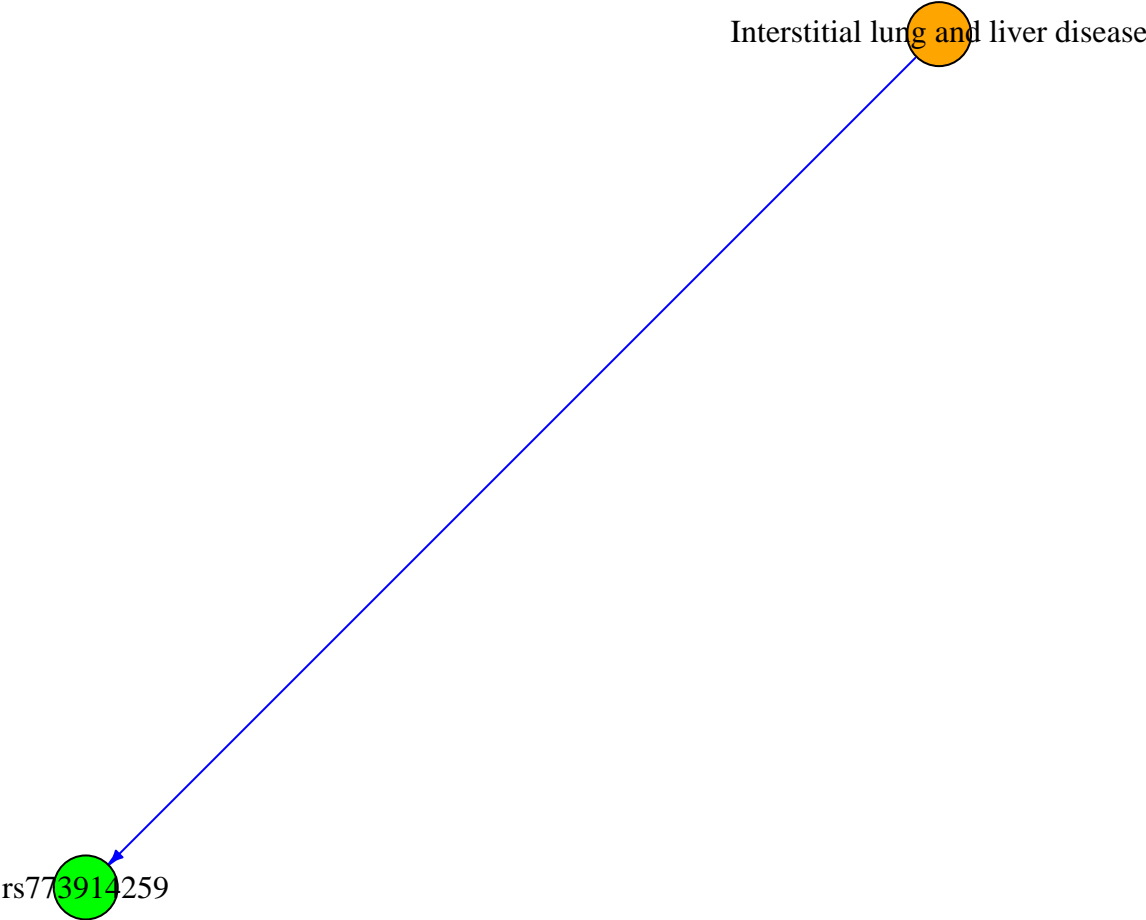

**Variant–Disease Network (Intrinsic factor deficiency)**

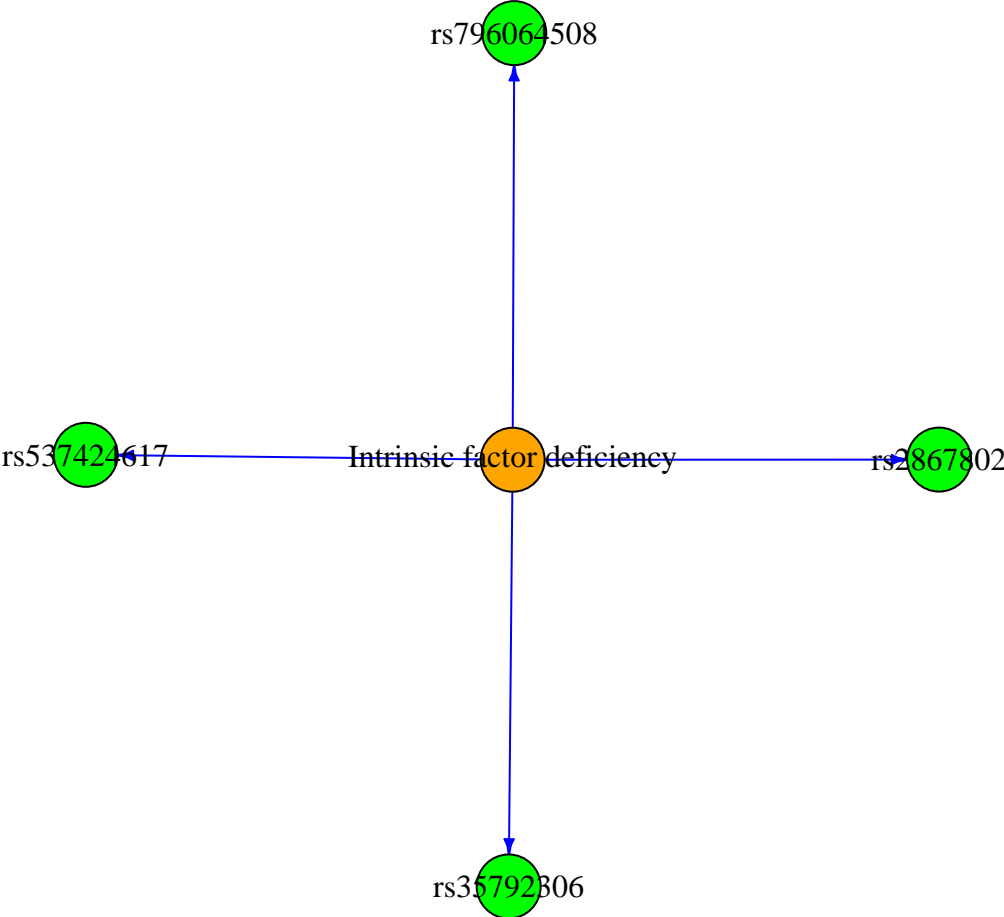



# Variant–Disease Network (Iodotyrosyl coupling defect)

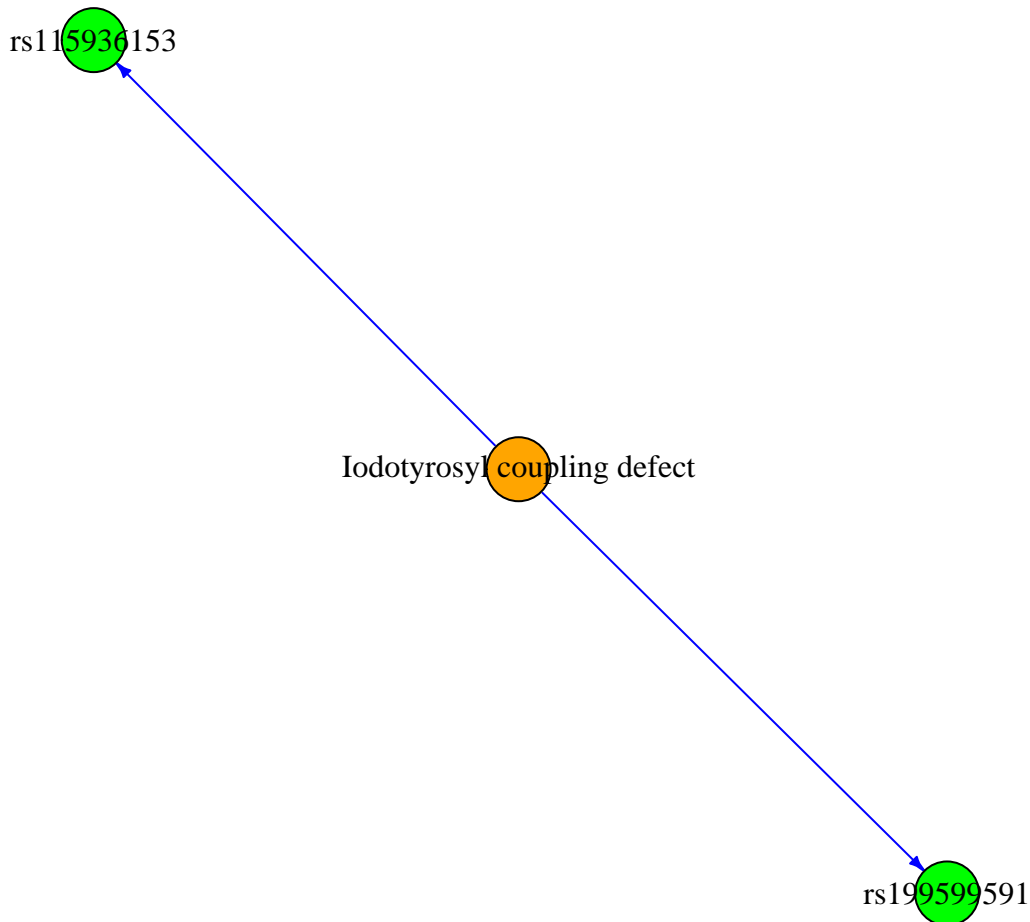

Variant–Disease Network (Irido–corneo–trabecular dysgenesis)

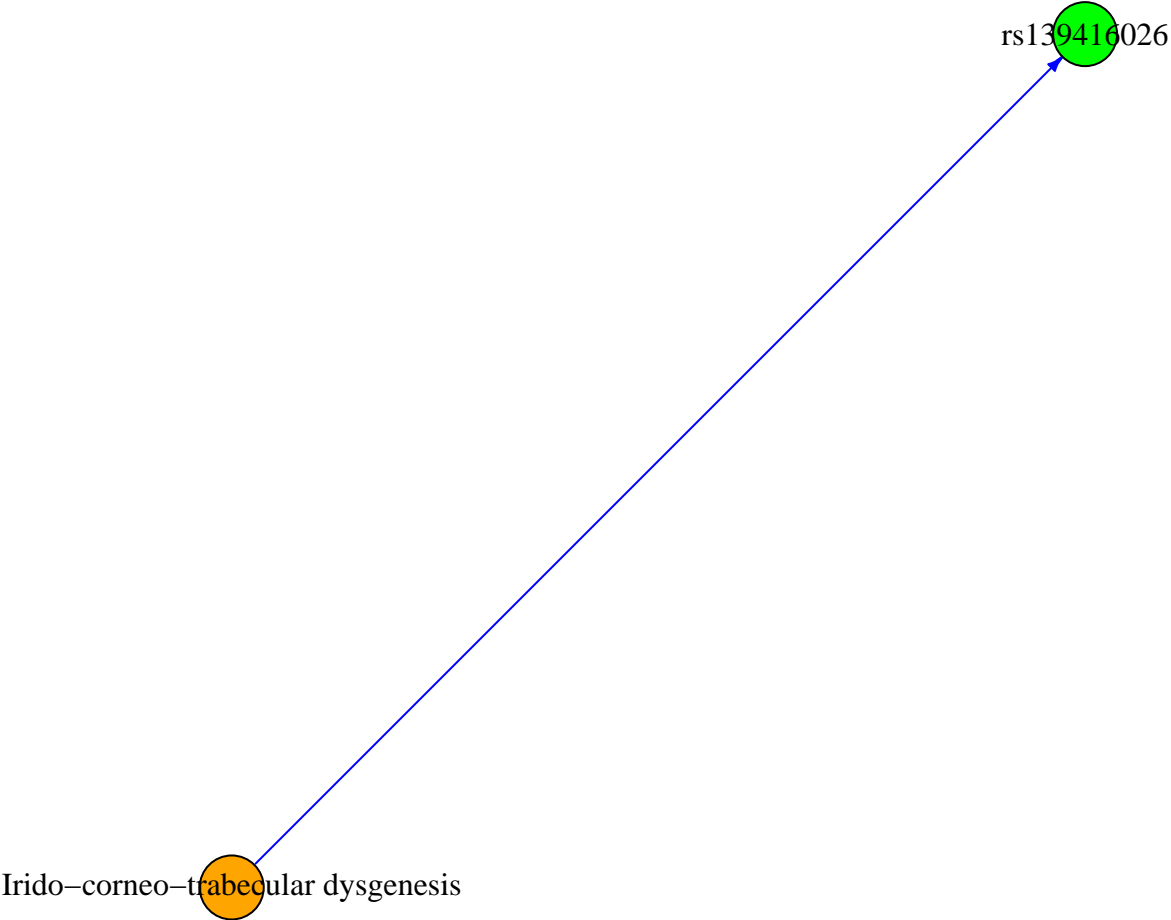

## Variant-Disease Network (Iron Overload)

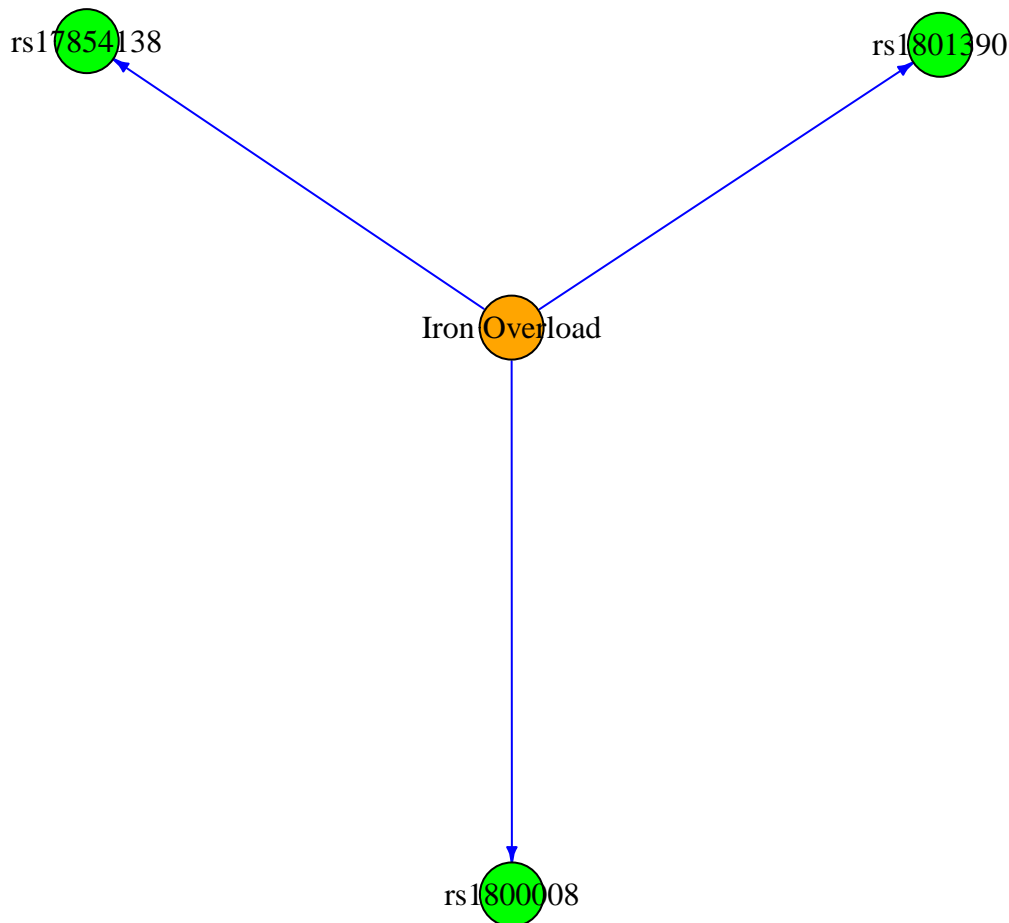

**Variant–Disease Network (Ischiopatellar dysplasia)**

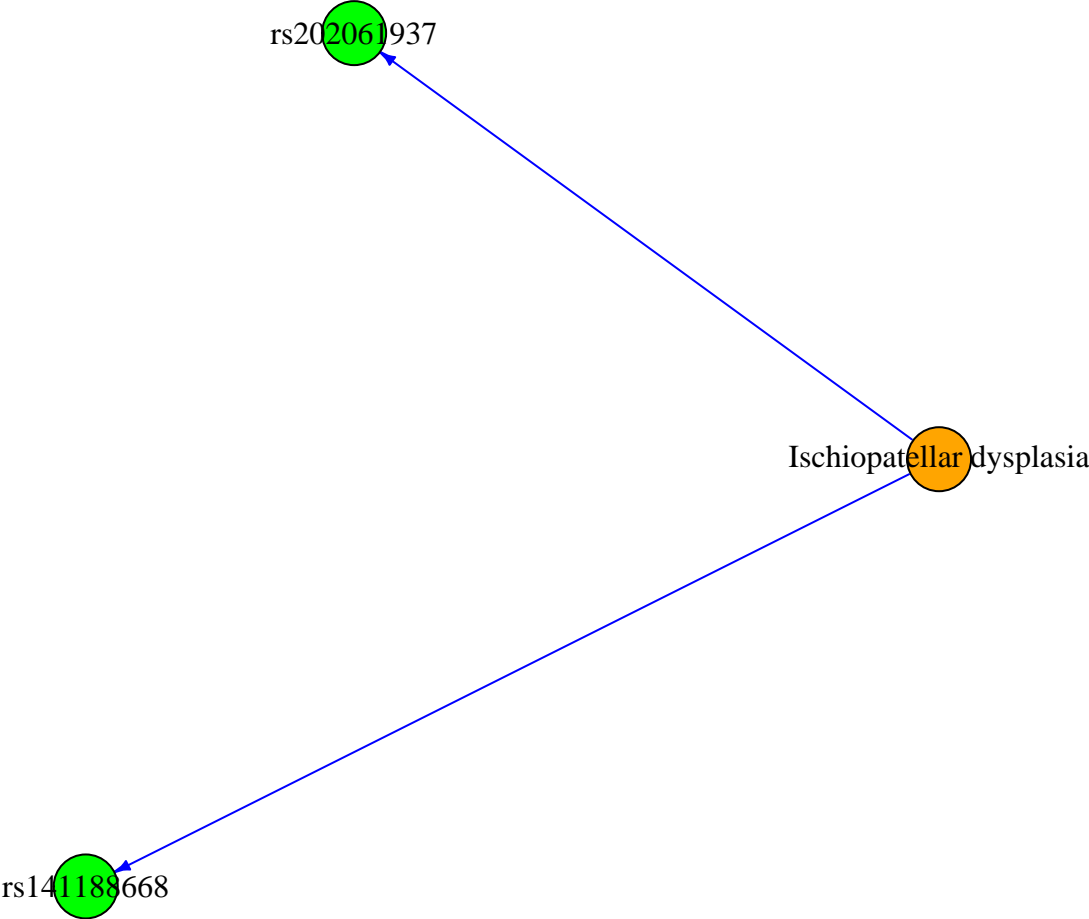

## Variant–Disease Network (Isolated coronal synostosis)

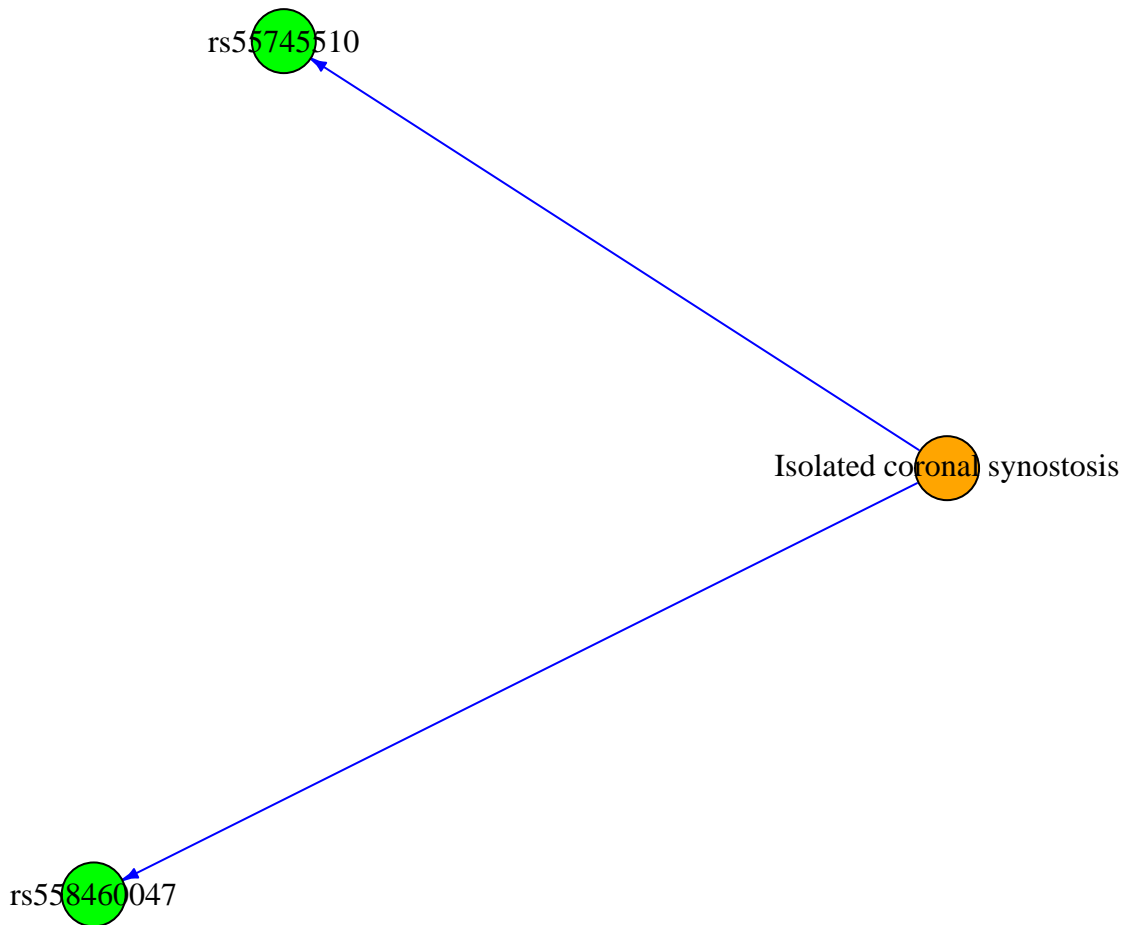

**Variant–Disease Network (Isolated Hyperparathyroidism)**

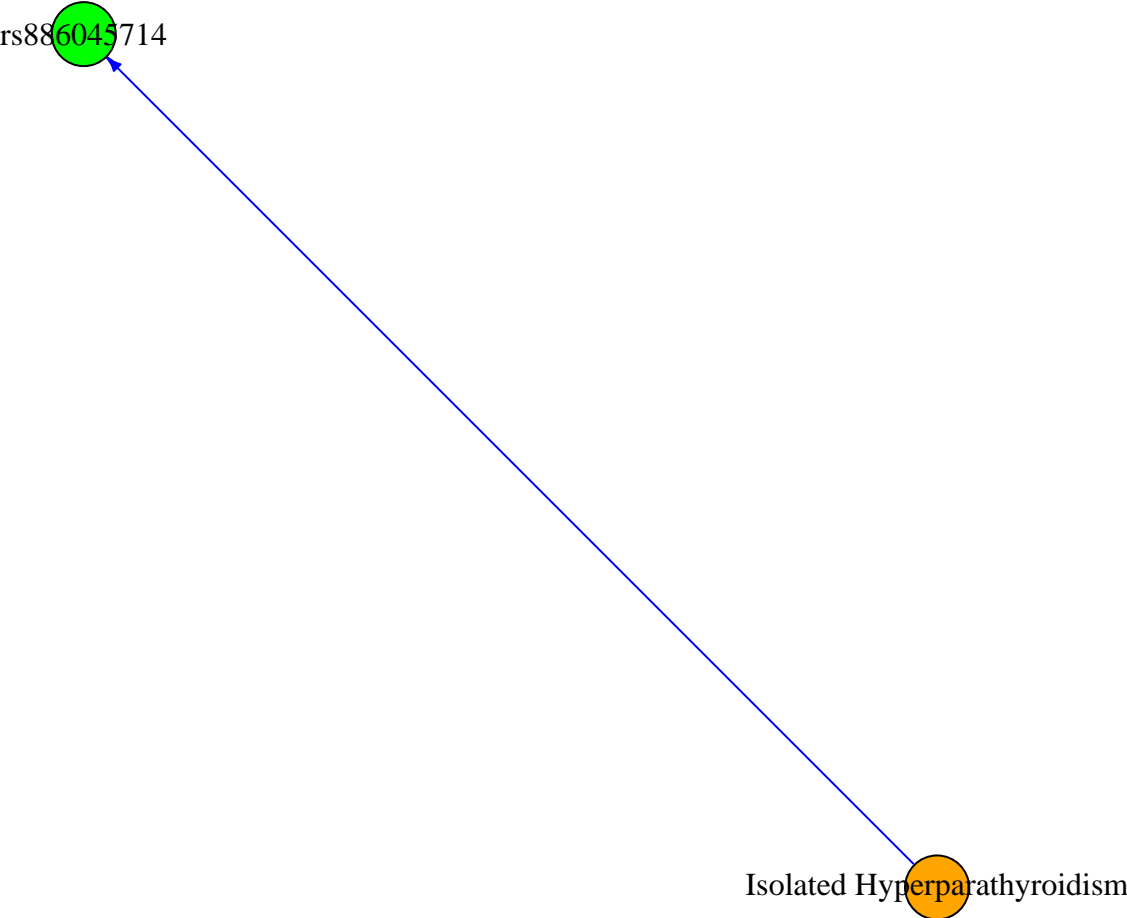

Variant–Disease Network (Isolated Nonsyndromic Congenital Heart Diseases)

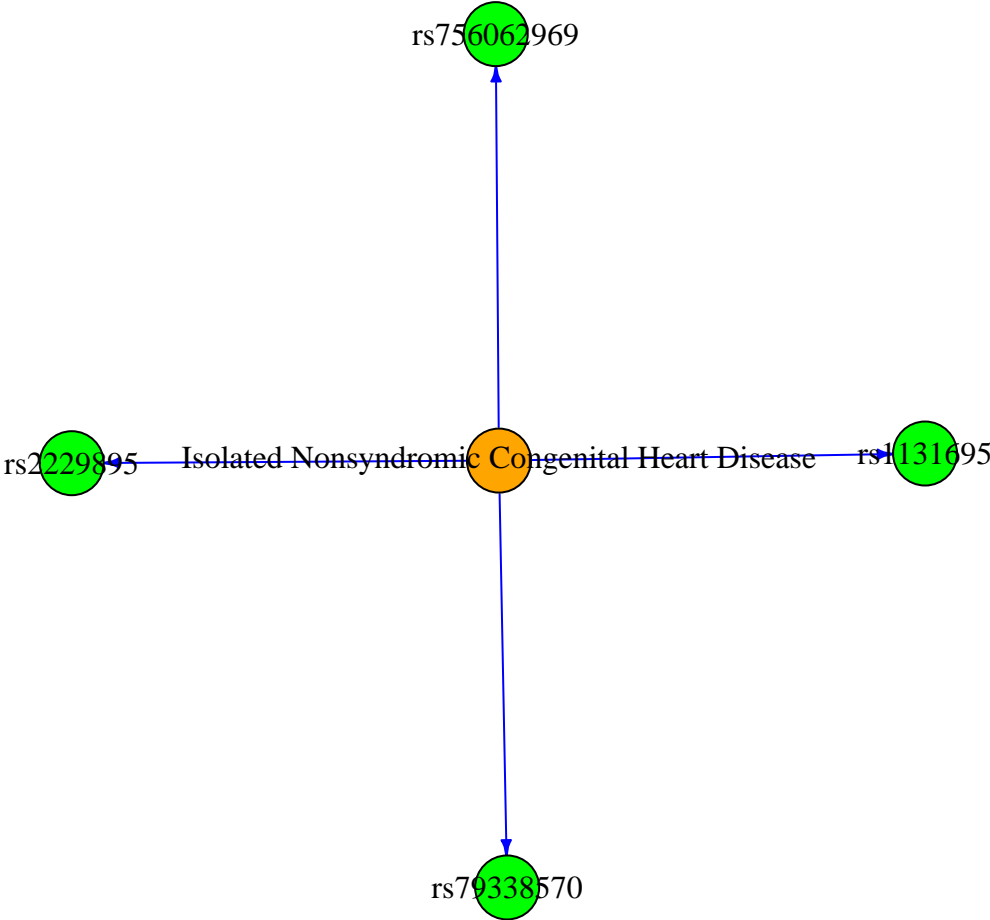

**Variant–Disease Network (Jackson–Weiss syndrome)**

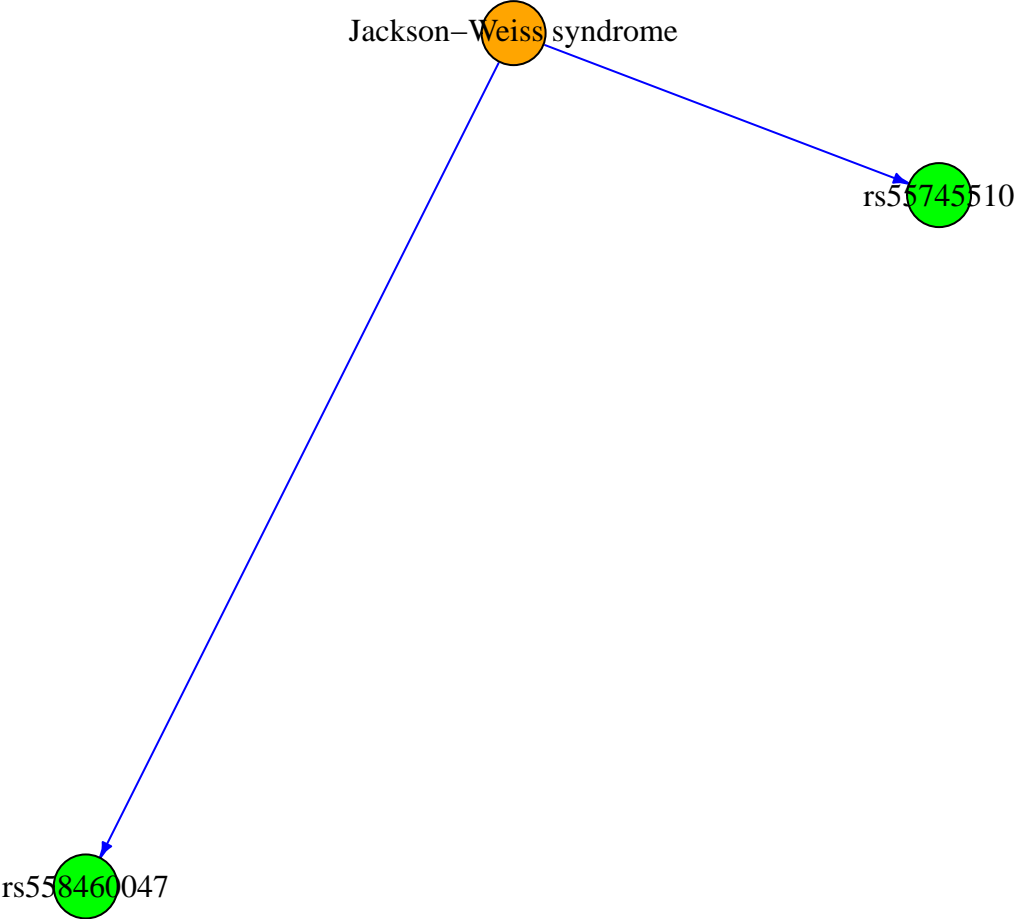



# Variant–Disease Network (Jarcho–Levin syndrome)

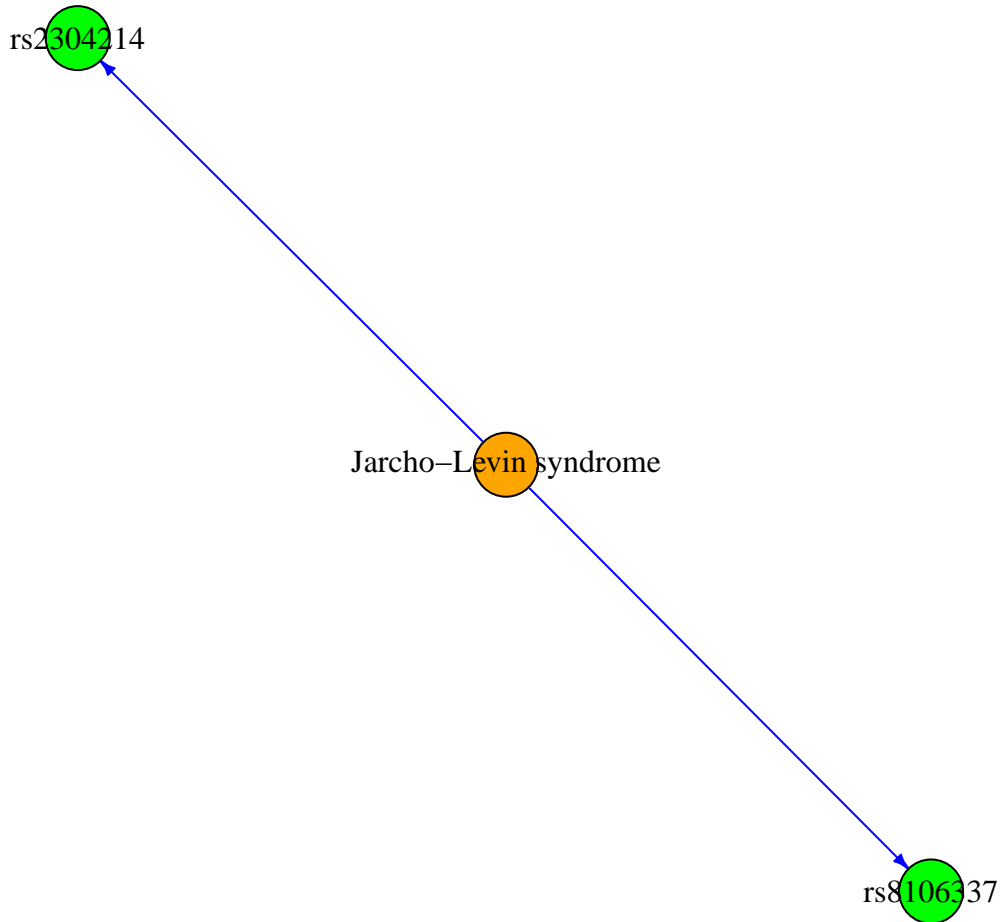

Variant–Disease Network (Jervell and Lange–Nielsen syndrome)

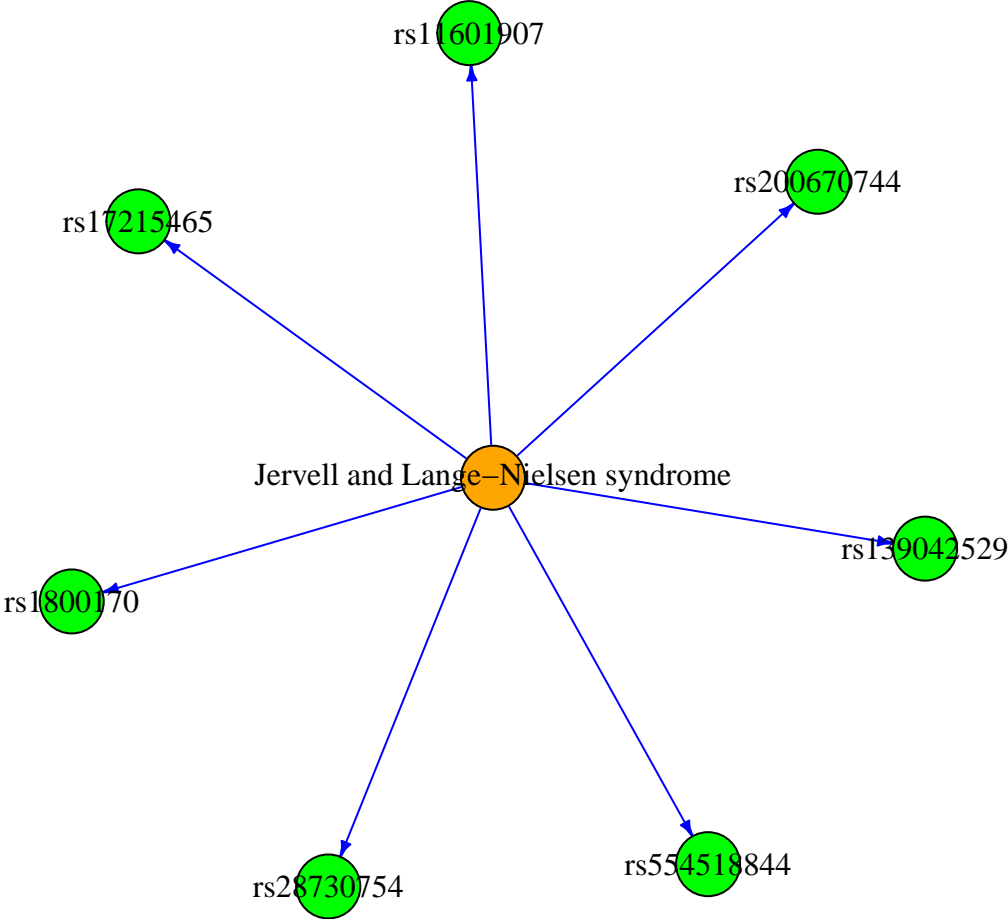

**Variant–Disease Network (Jeune thoracic dystrophy)**

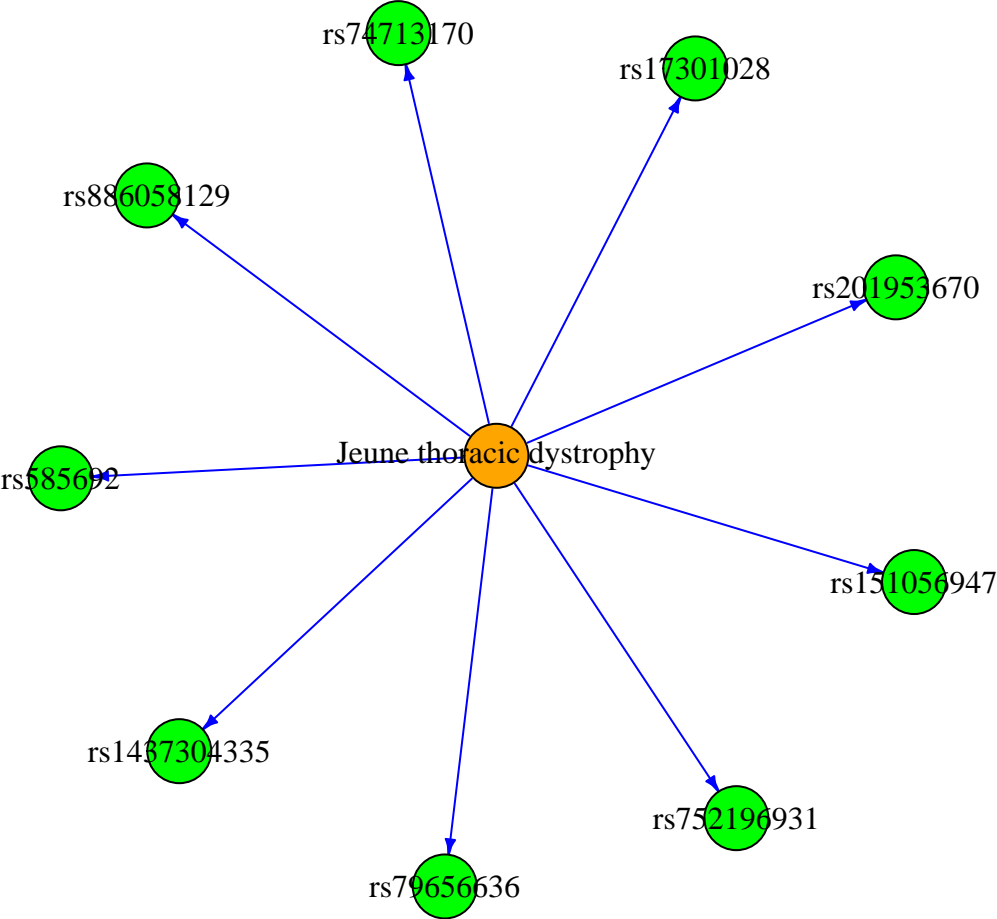

## Variant–Disease Network (Joubert syndrome)

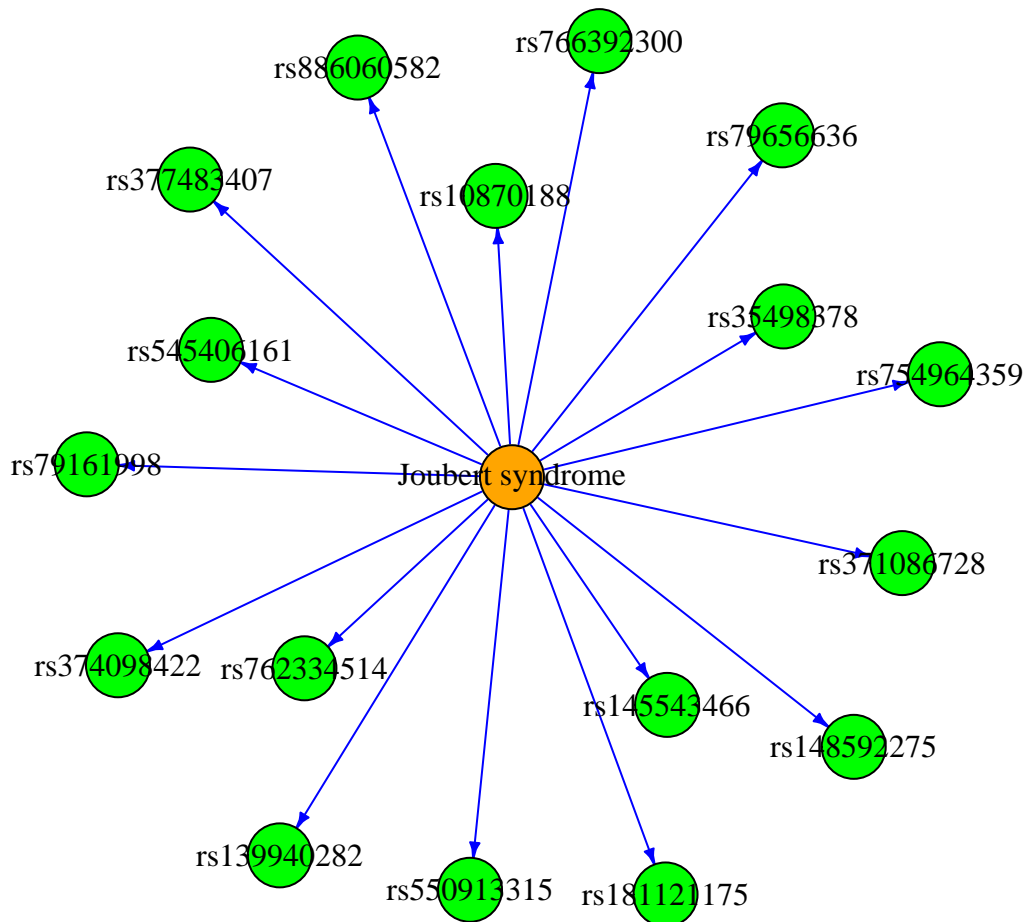

## Variant–Disease Network (Joubert syndrome 1)

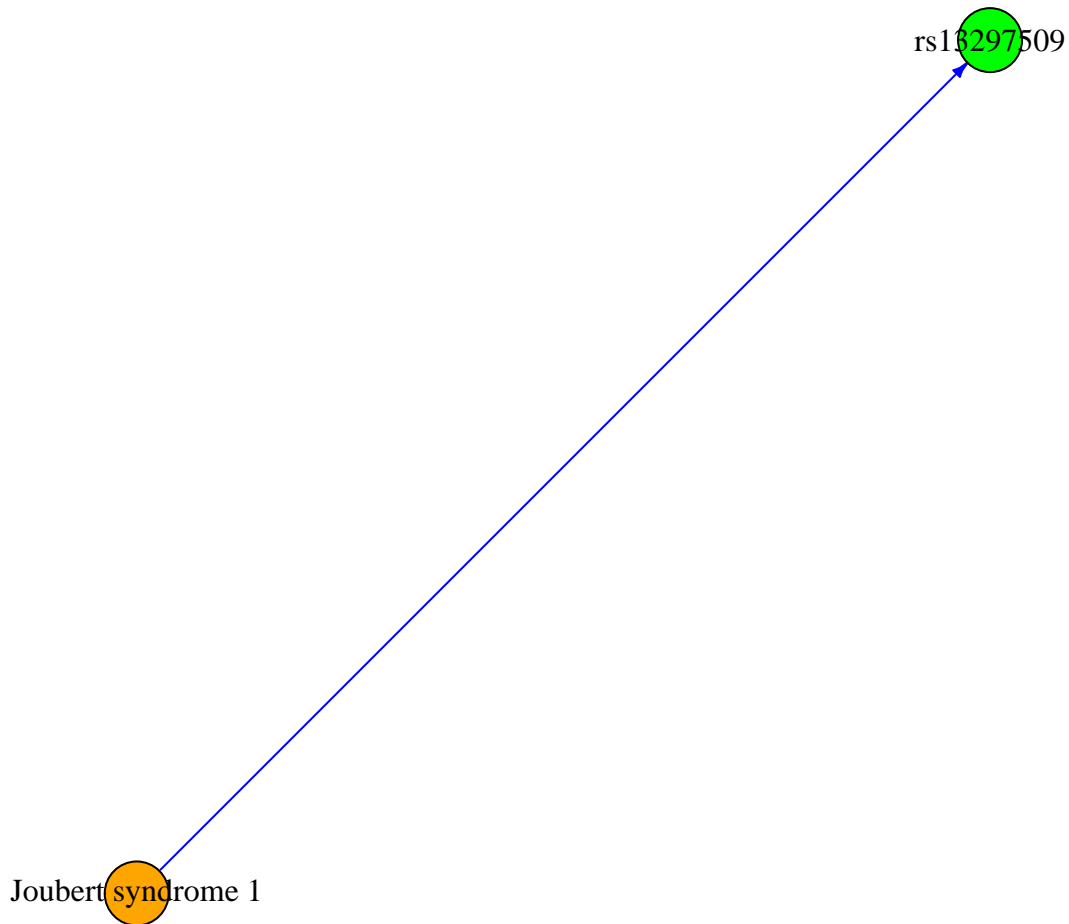

## Variant–Disease Network (Joubert syndrome 17)

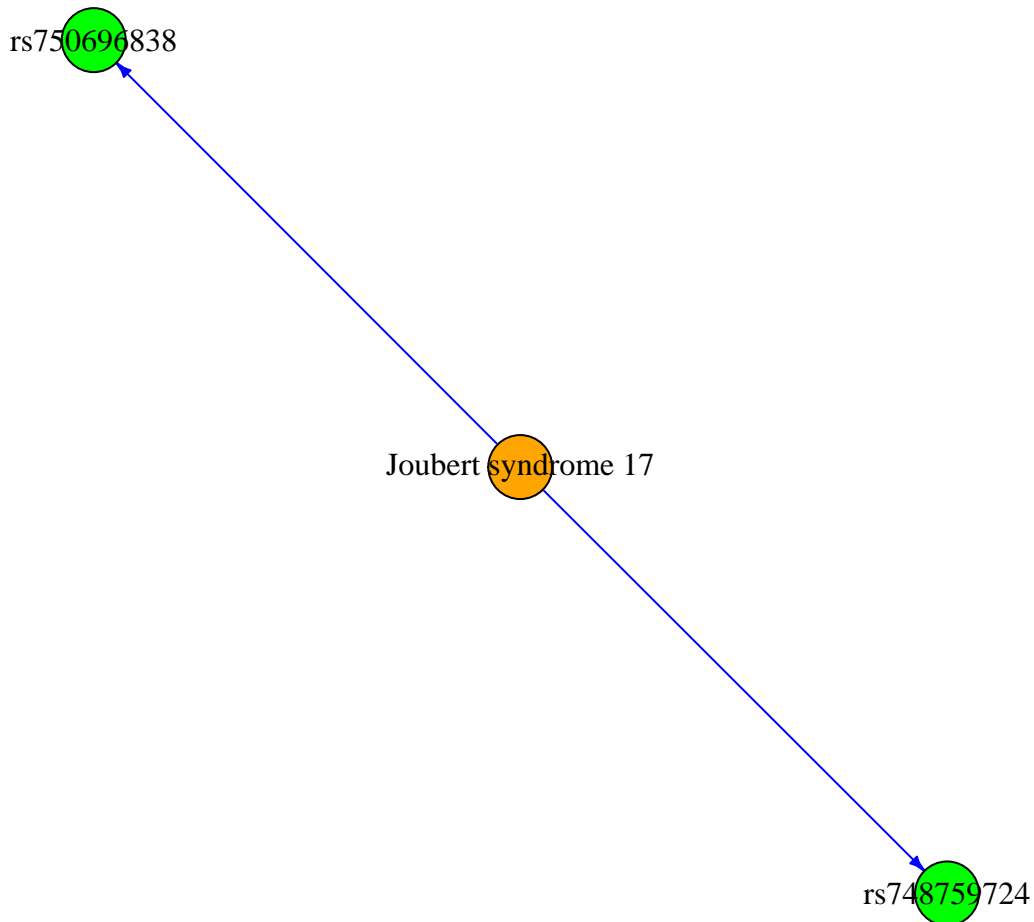

## Variant–Disease Network (JOUBERT SYNDROME 30)

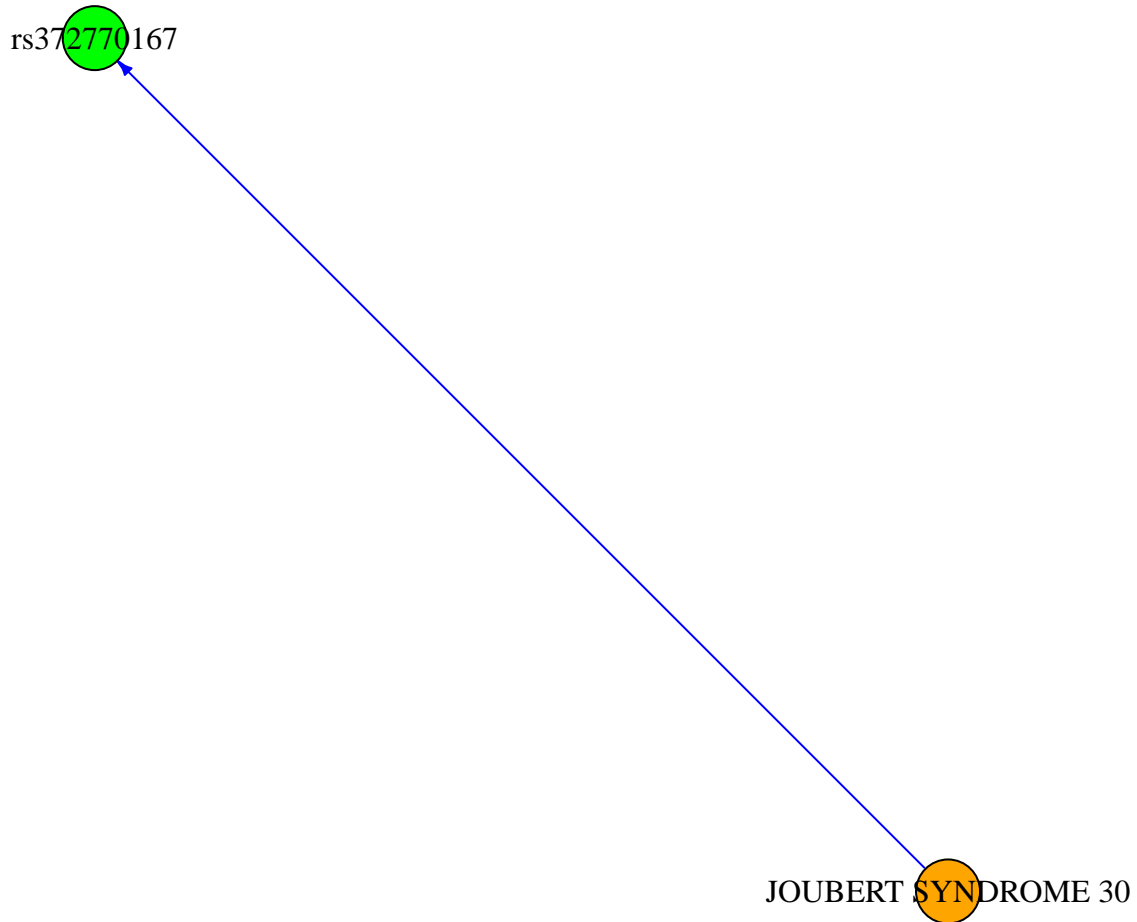

## Variant–Disease Network (Joubert syndrome 6)

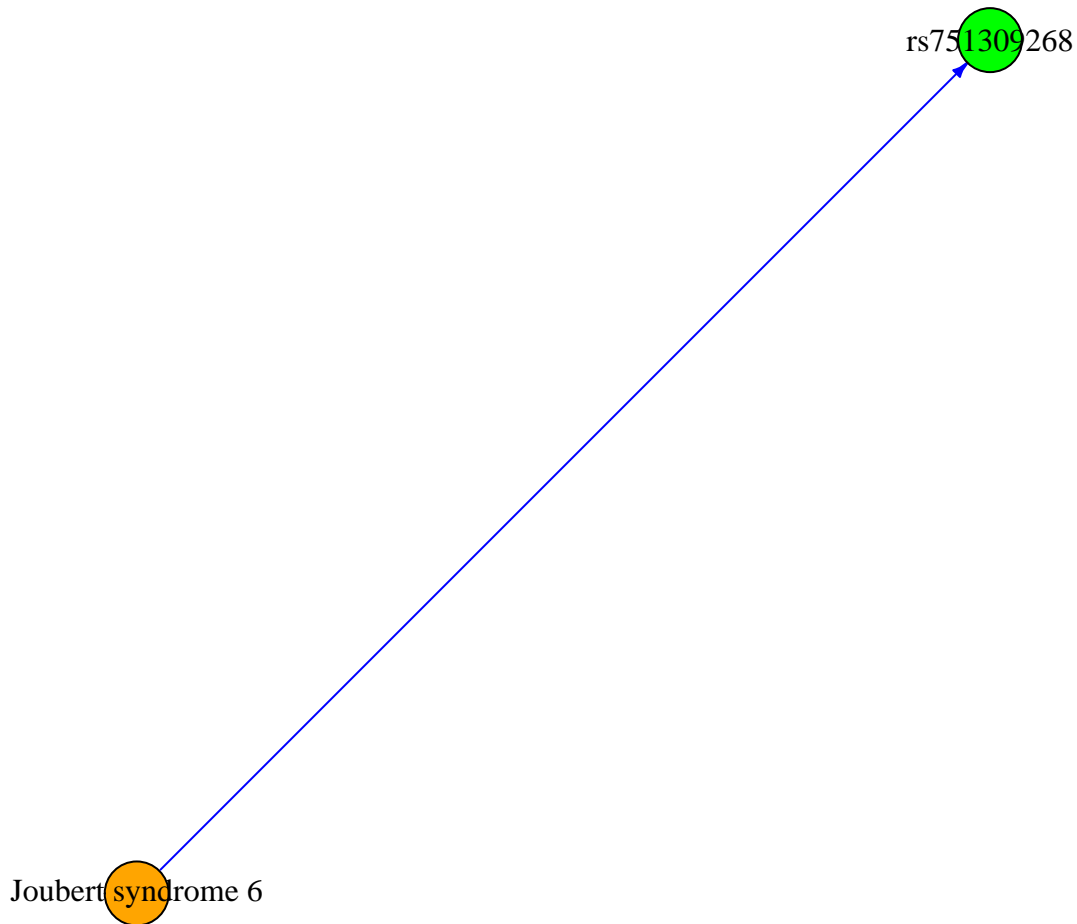



Variant–Disease Network (Junctional epidermolysis bullosa gravis of Herli

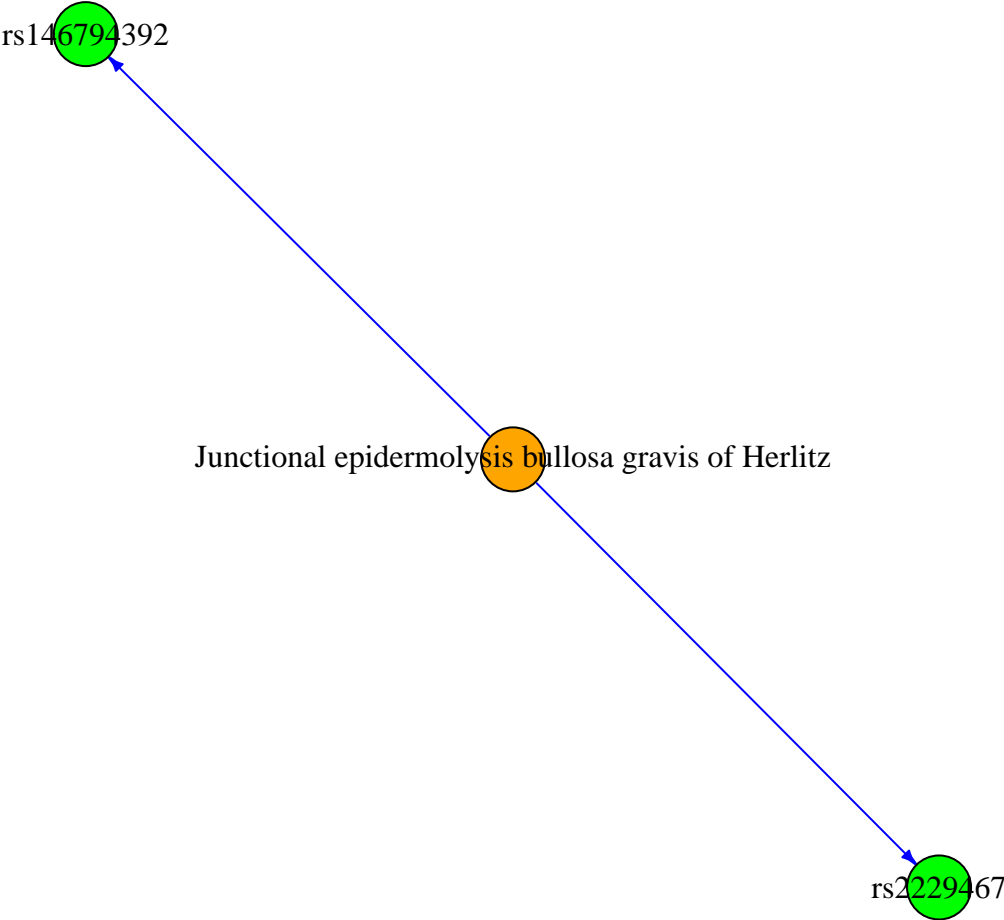

**Variant–Disease Network (Juvenile myoclonic epilepsy)**

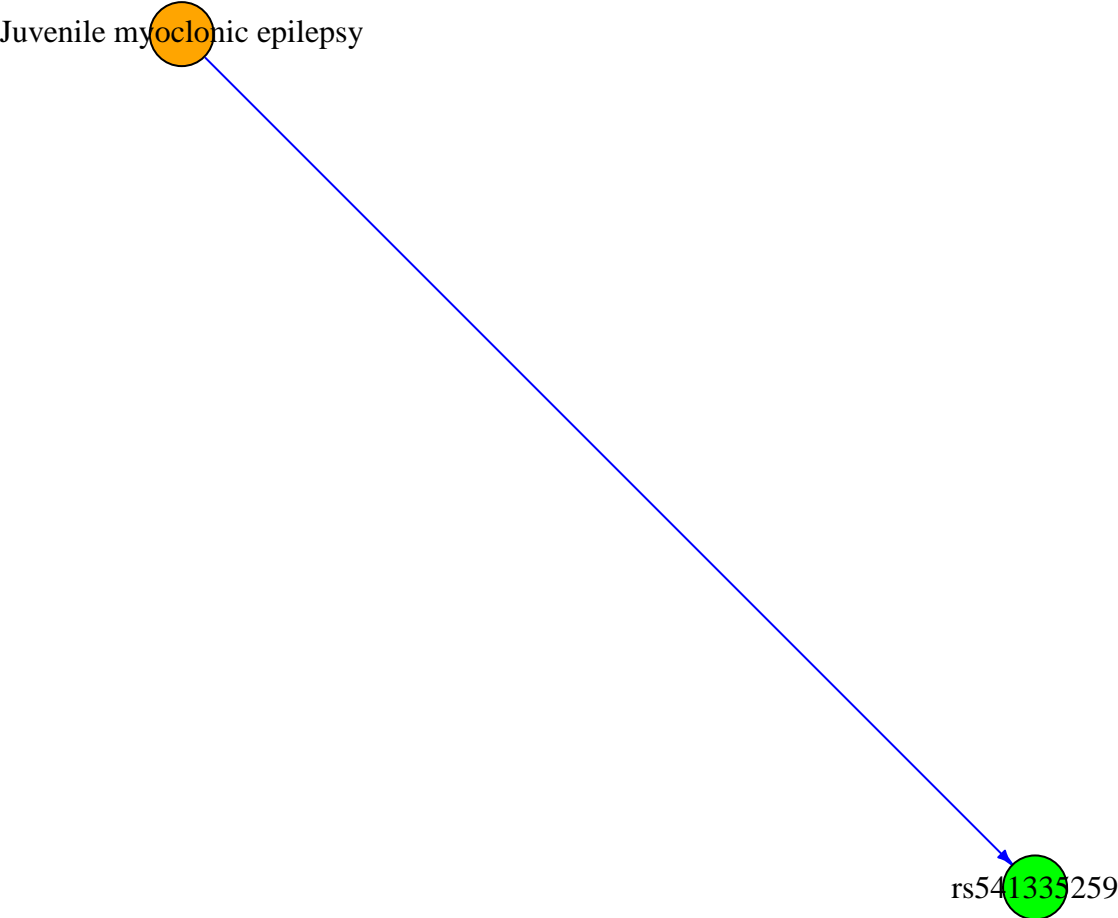

Variant–Disease Network (Juvenile nephropathic cystinosis)

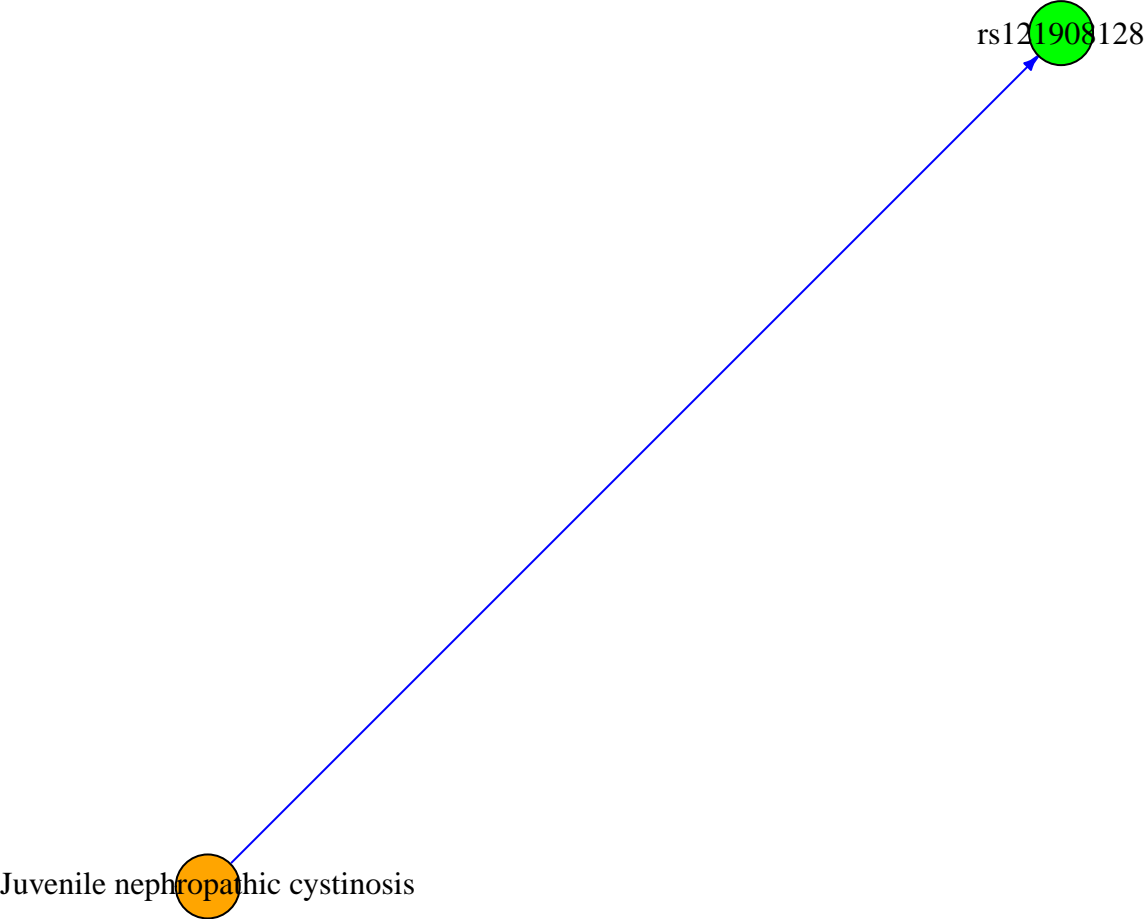

## Variant-Disease Network (Juvenile Polyposis)

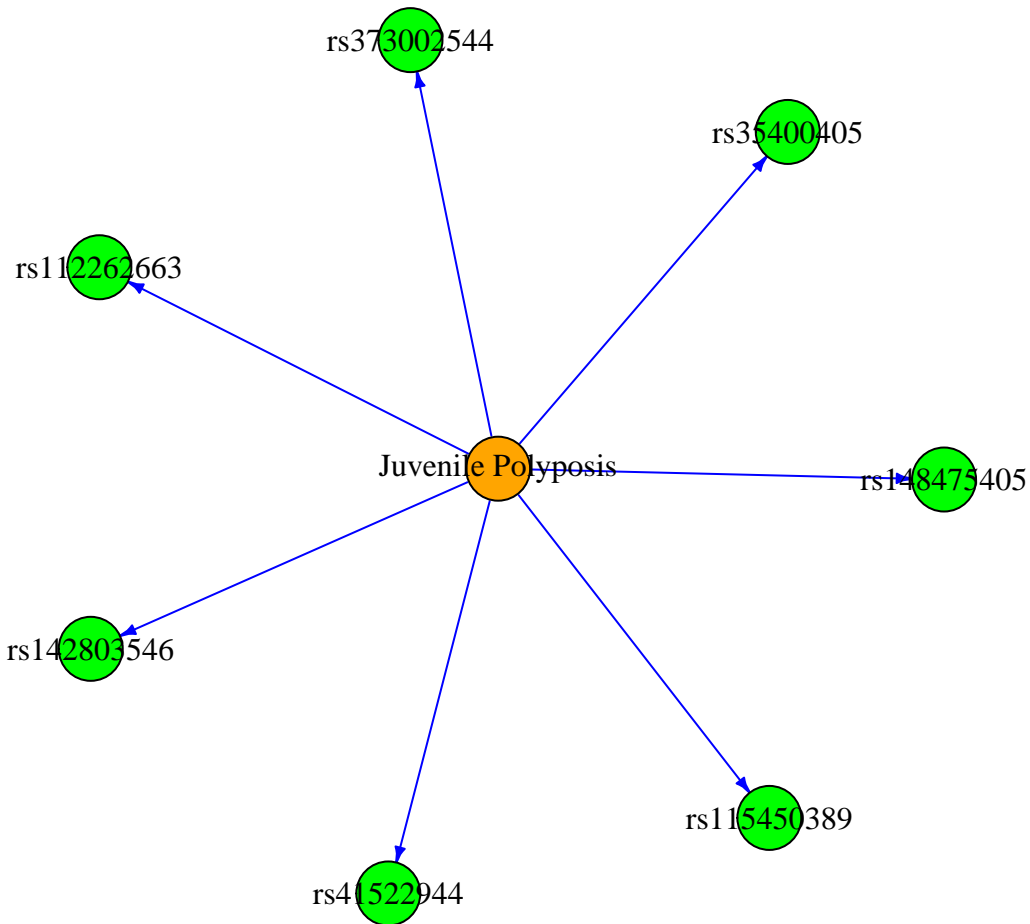

Variant–Disease Network (KCNQ1–Related Disorders)

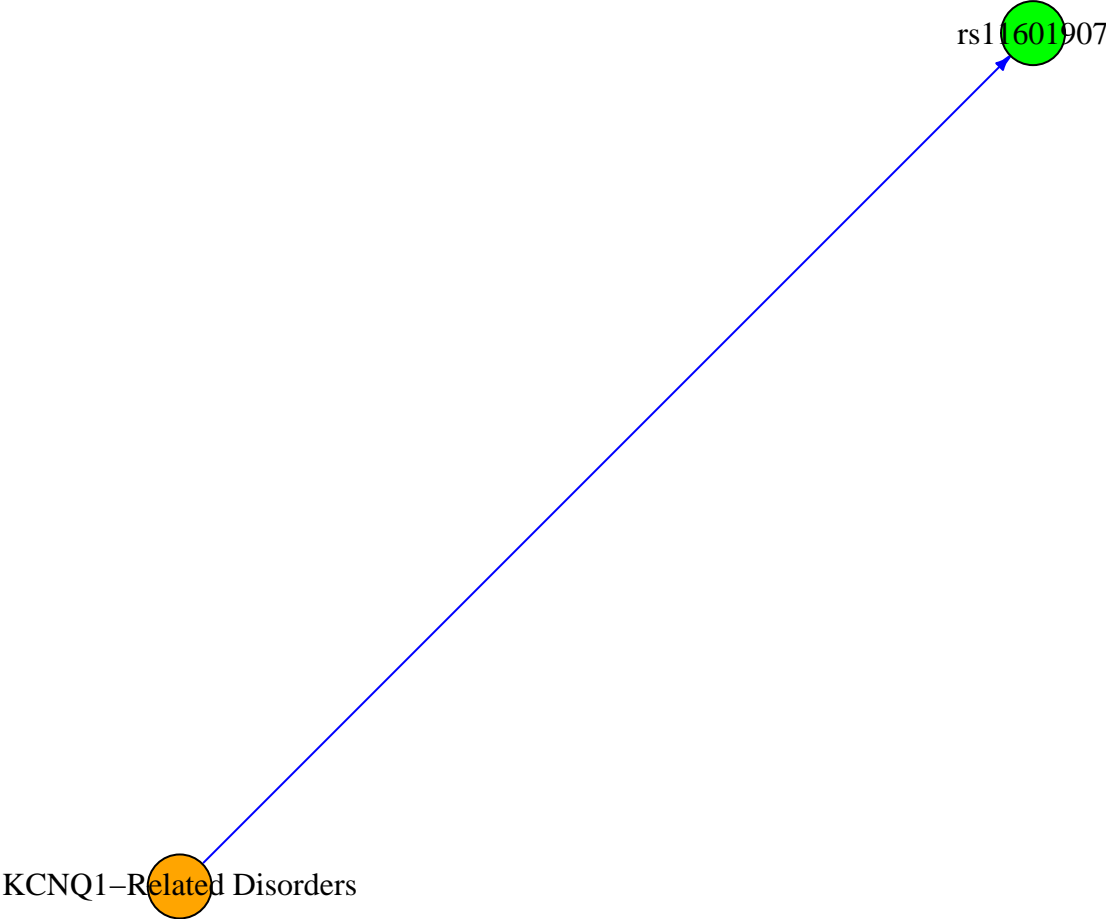

Variant–Disease Network (Keratosis follicularis)

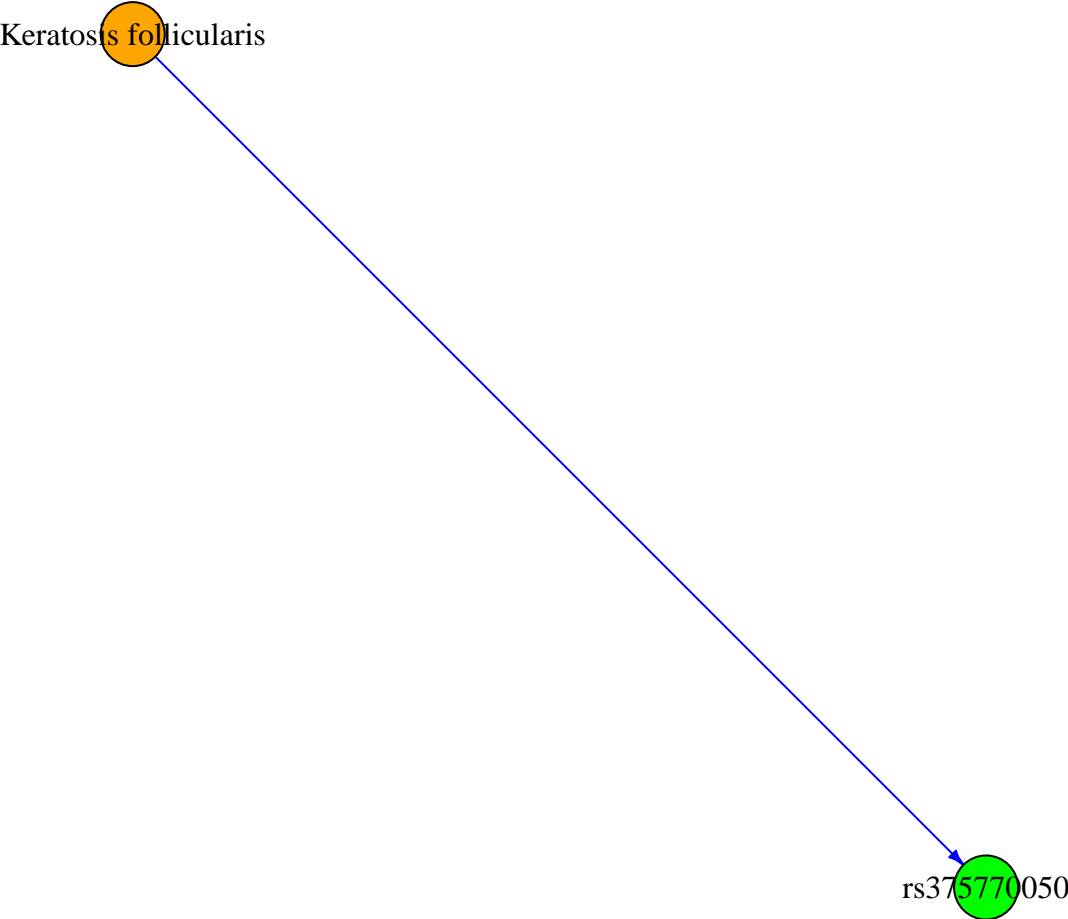

**Variant–Disease Network (Kindlers syndrome)**

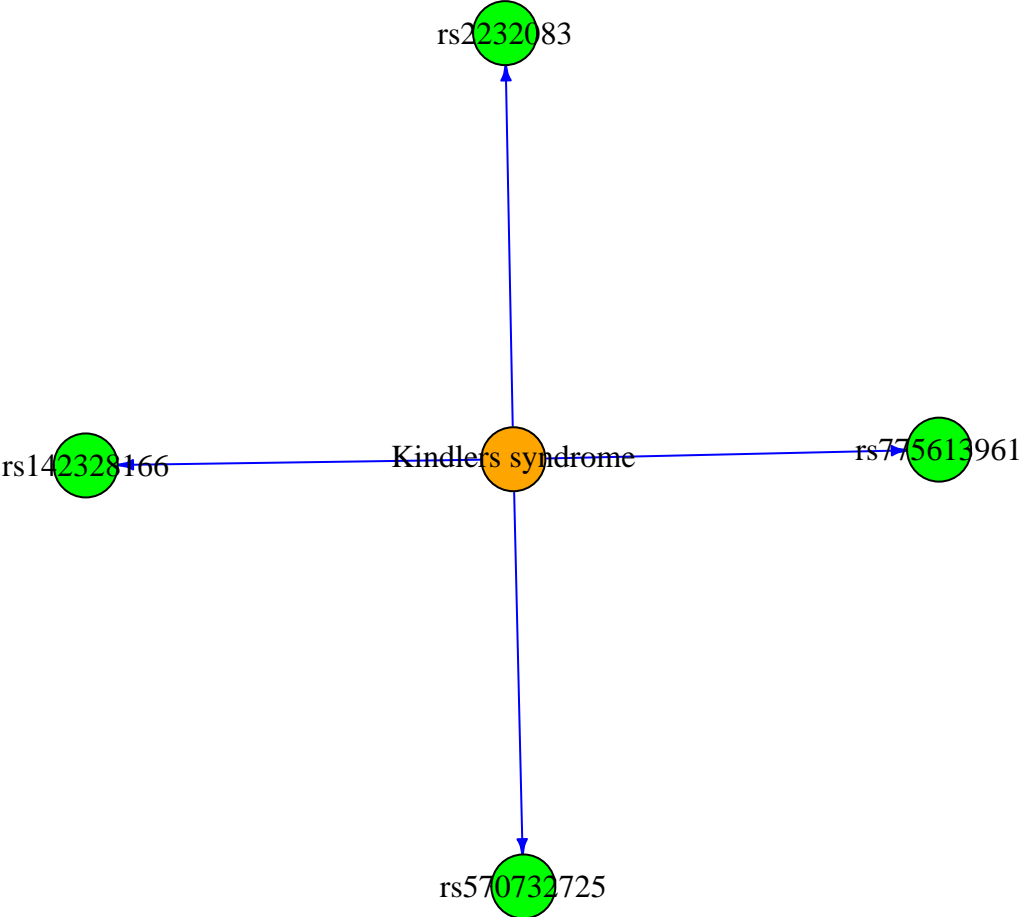

## Variant-Disease Network (Kleefstra syndrome 1)

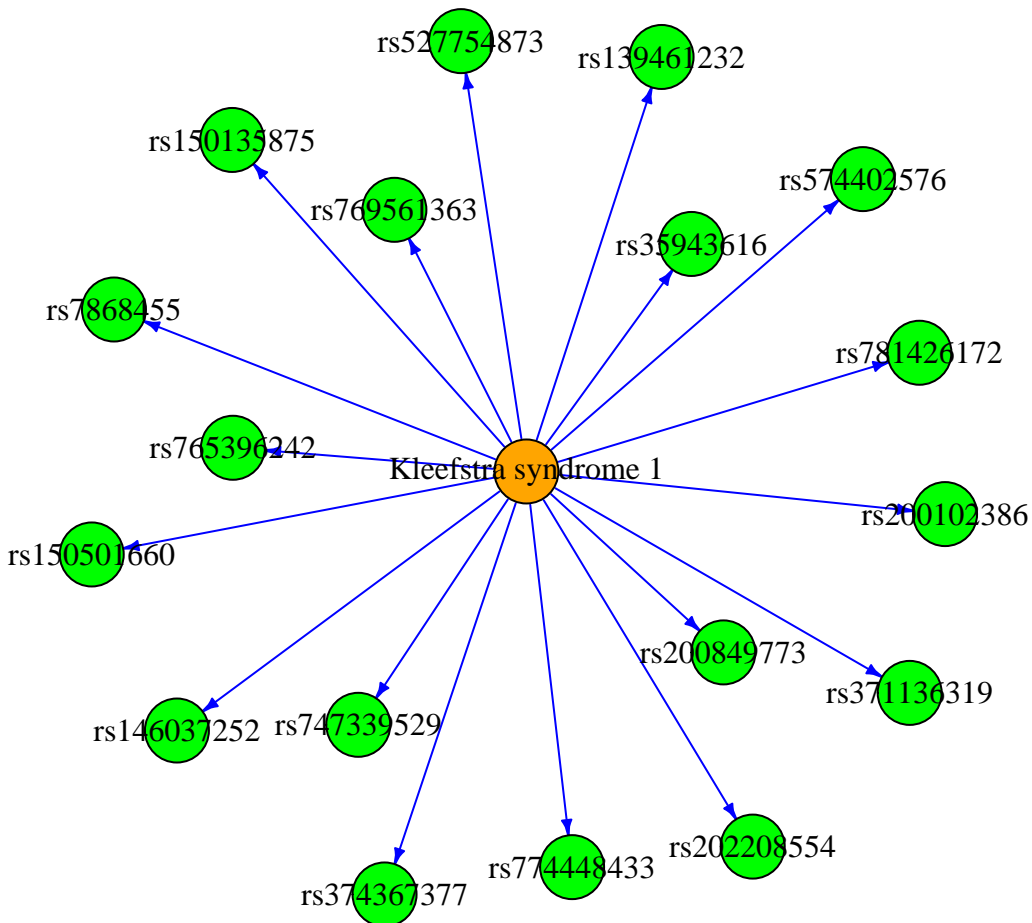



## Variant–Disease Network (Kniest dysplasia)

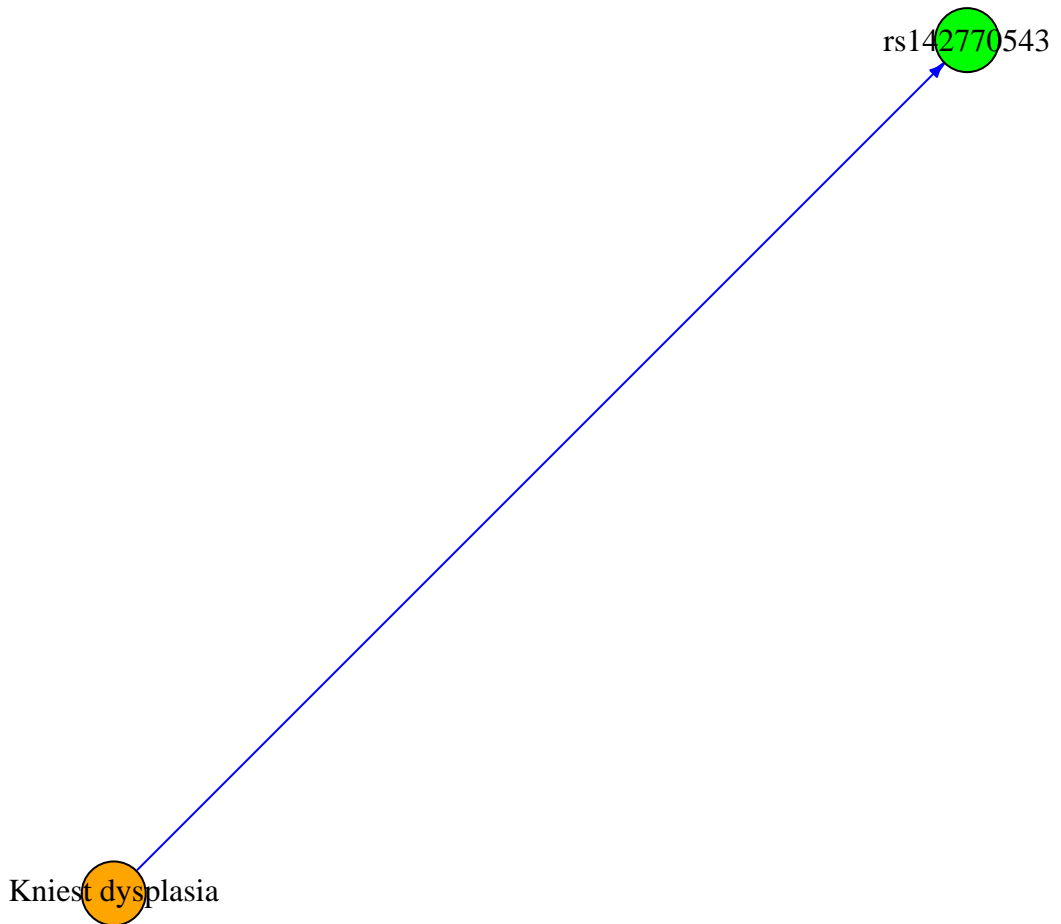

## Variant–Disease Network (Kohlschutters syndrome)

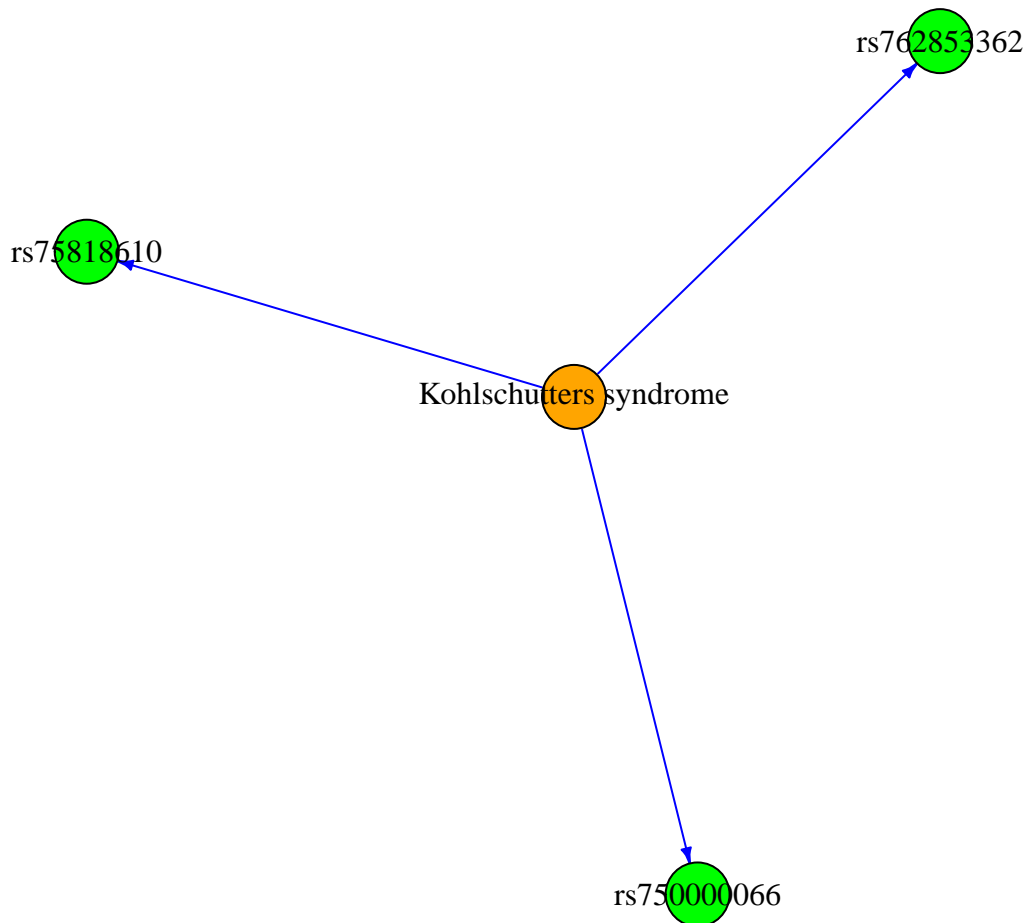

## Variant-Disease Network (Koolen-de Vries syndrome)

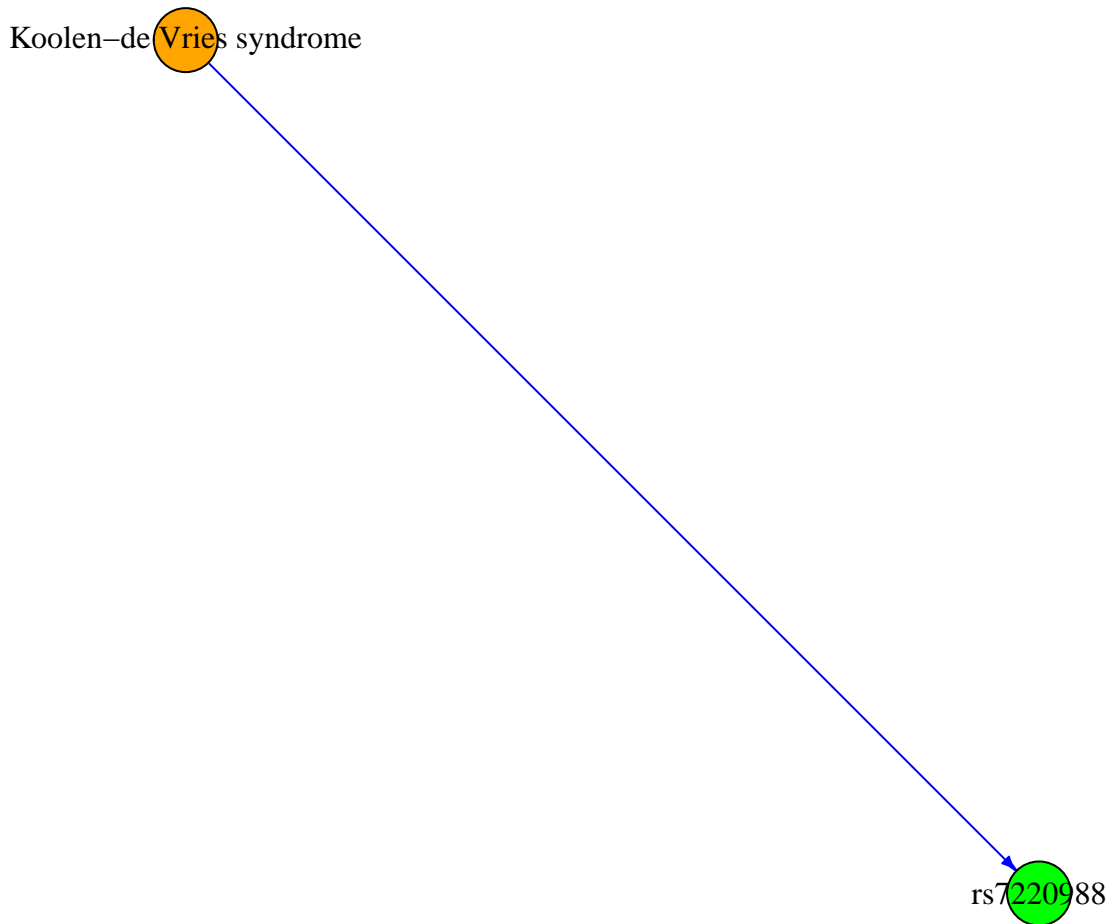

## Variant–Disease Network (Lactose intolerance)

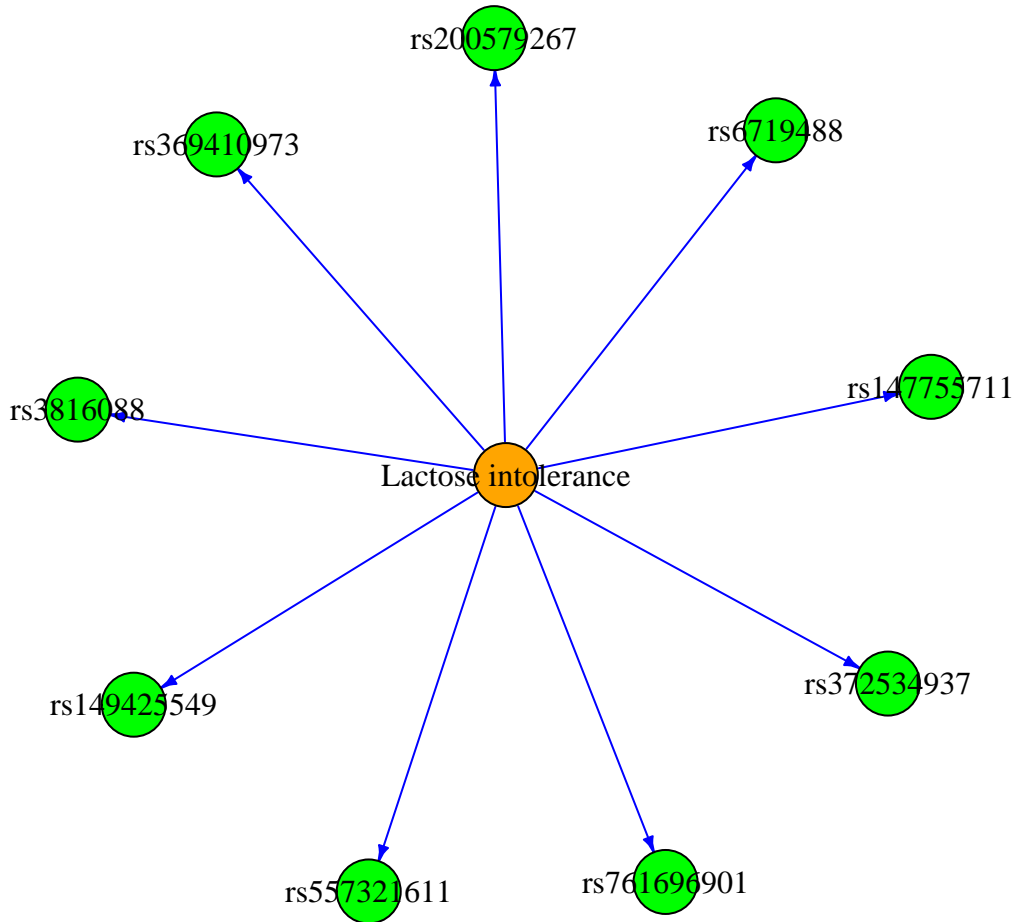

Variant–Disease Network (Lafora disease)

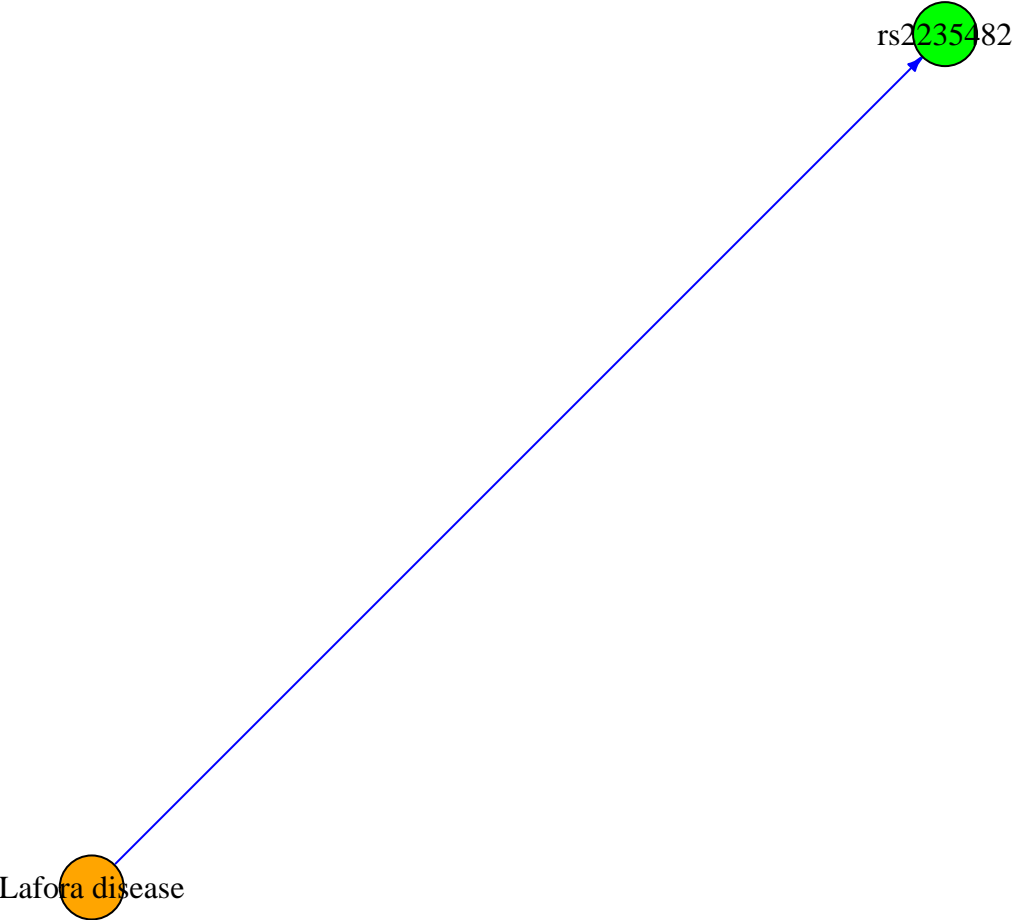

**Variant–Disease Network (Lamellar cataract)**

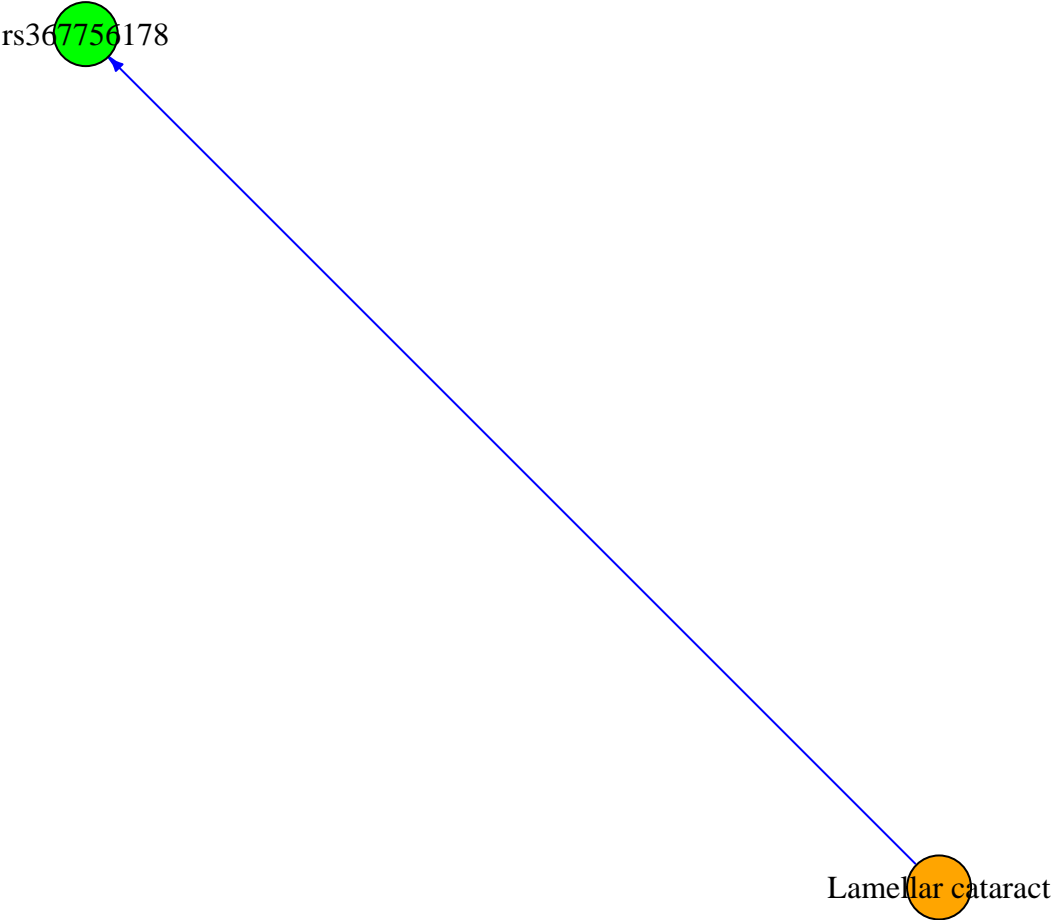

**Variant–Disease Network (Langer–Giedion syndrome)**

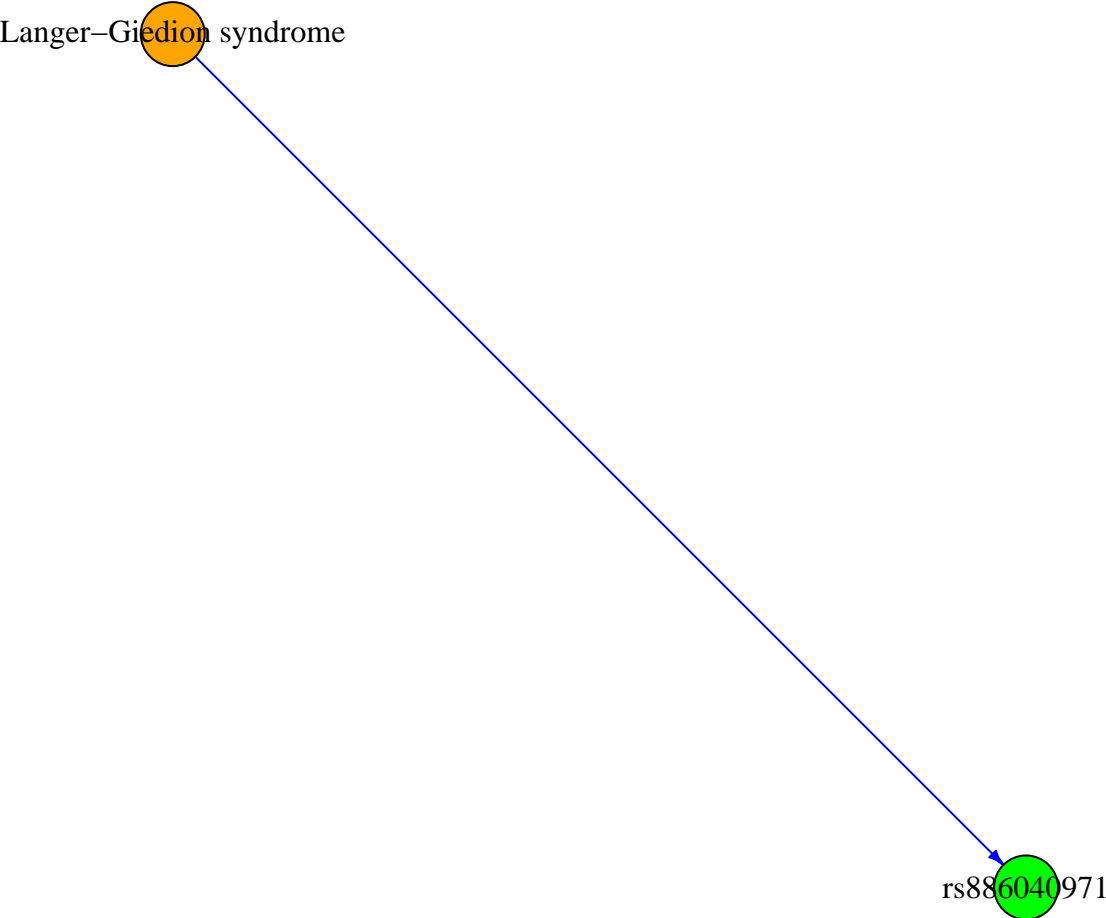

## Variant-Disease Network (Larsen syndrome)

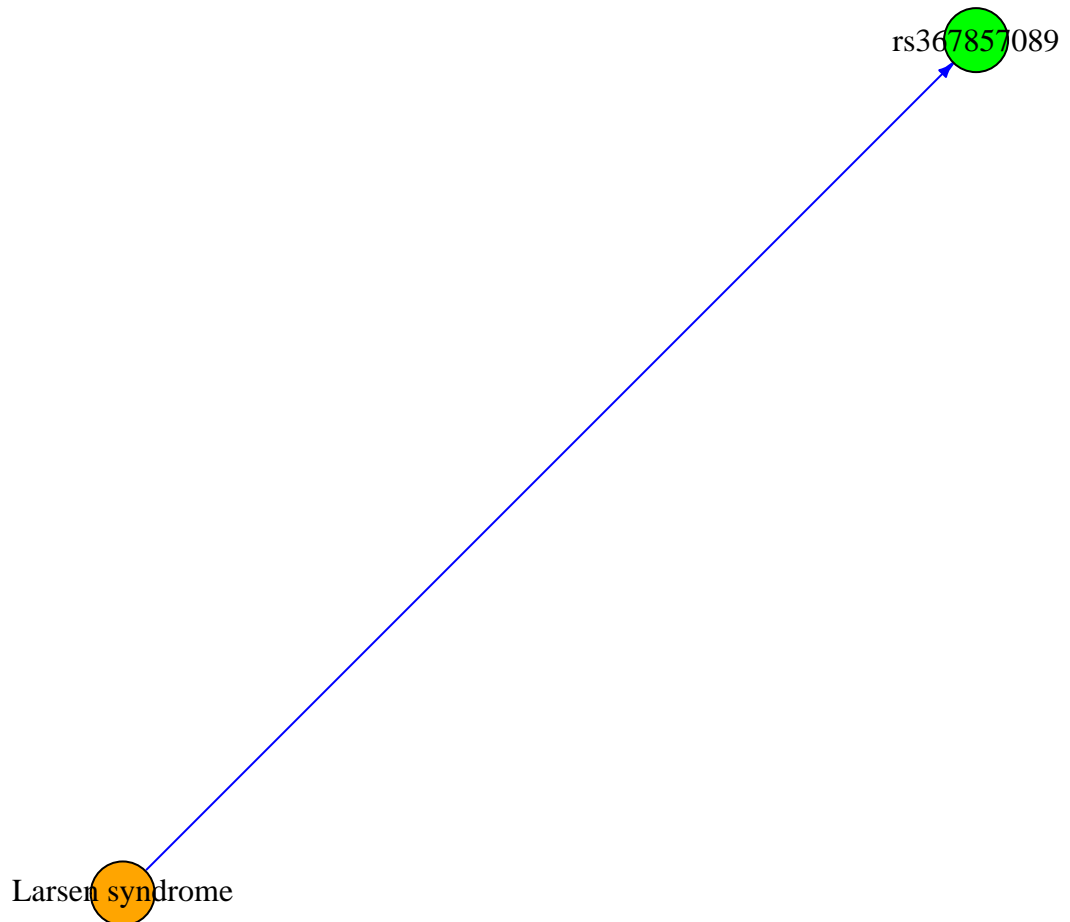



# Variant–Disease Network (Laryngoonychocutaneous syndrome)

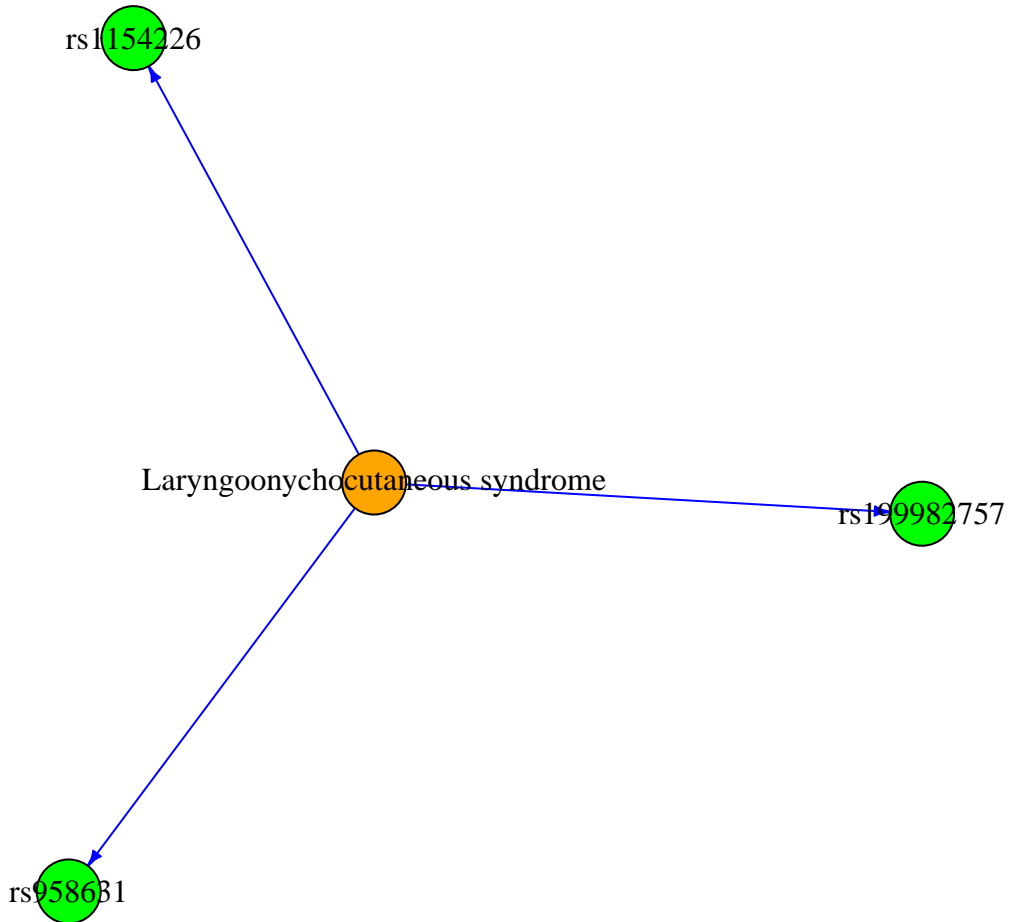

Variant–Disease Network (Leber congenital amaurosis)

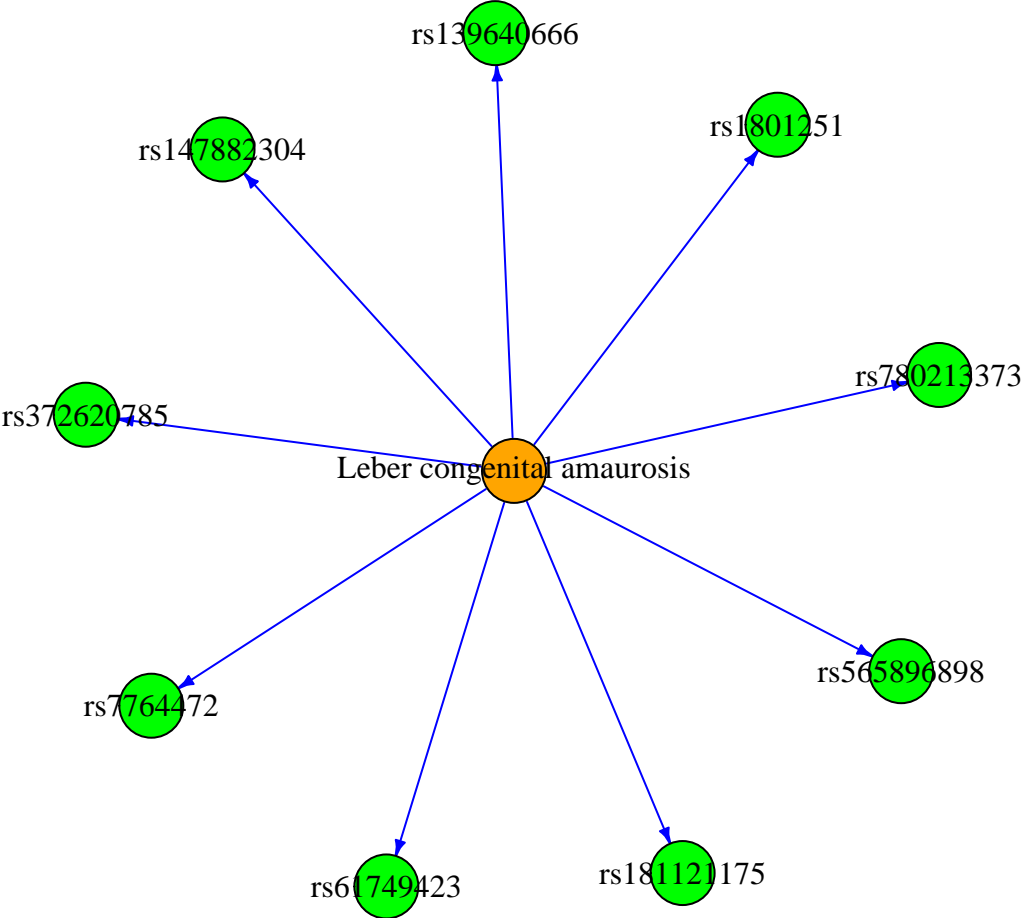

Variant–Disease Network (Left ventricular noncompaction 10)

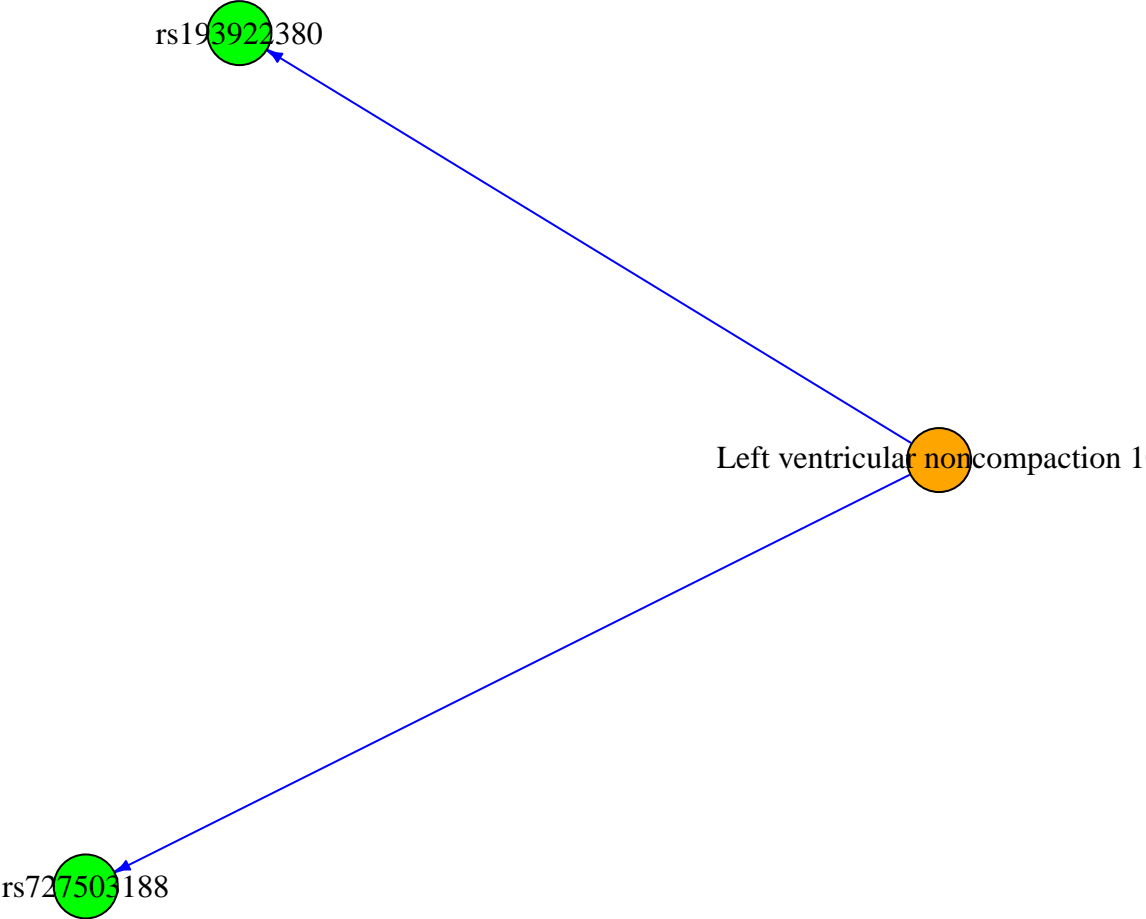

Variant–Disease Network (Left ventricular noncompaction 6)

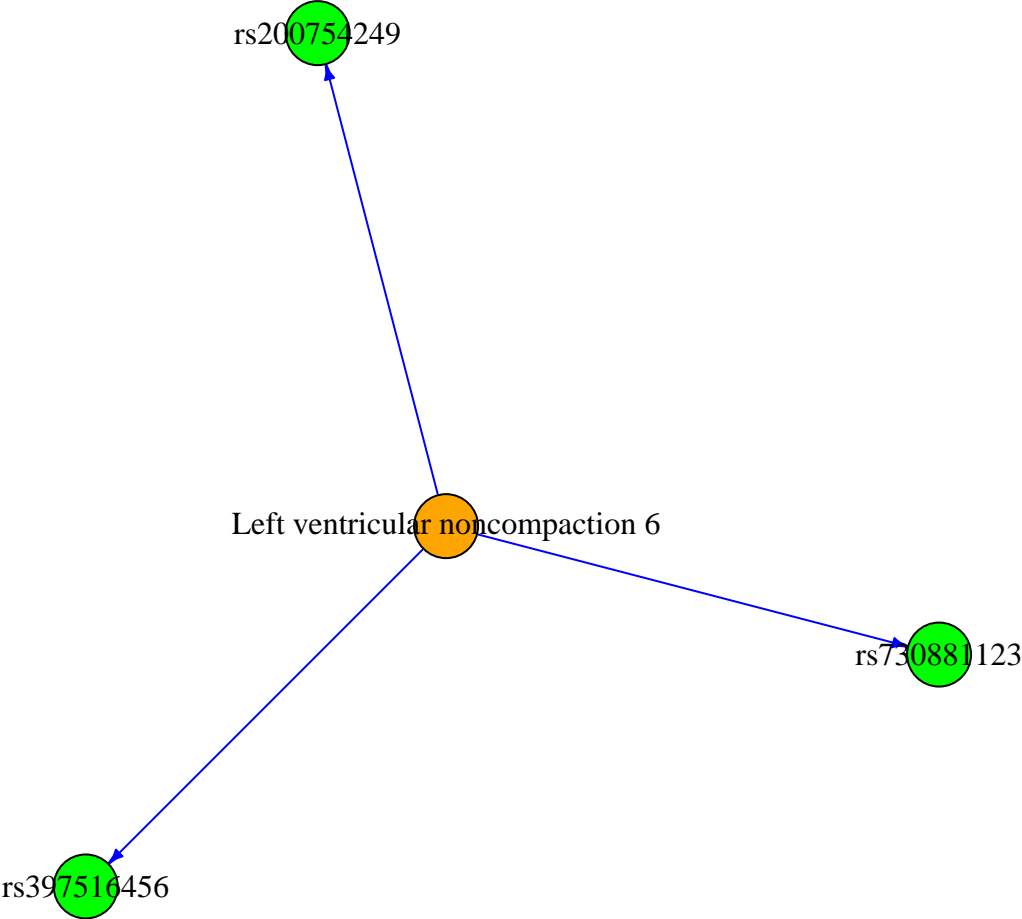

**Variant–Disease Network (Left ventricular noncompaction 7)**

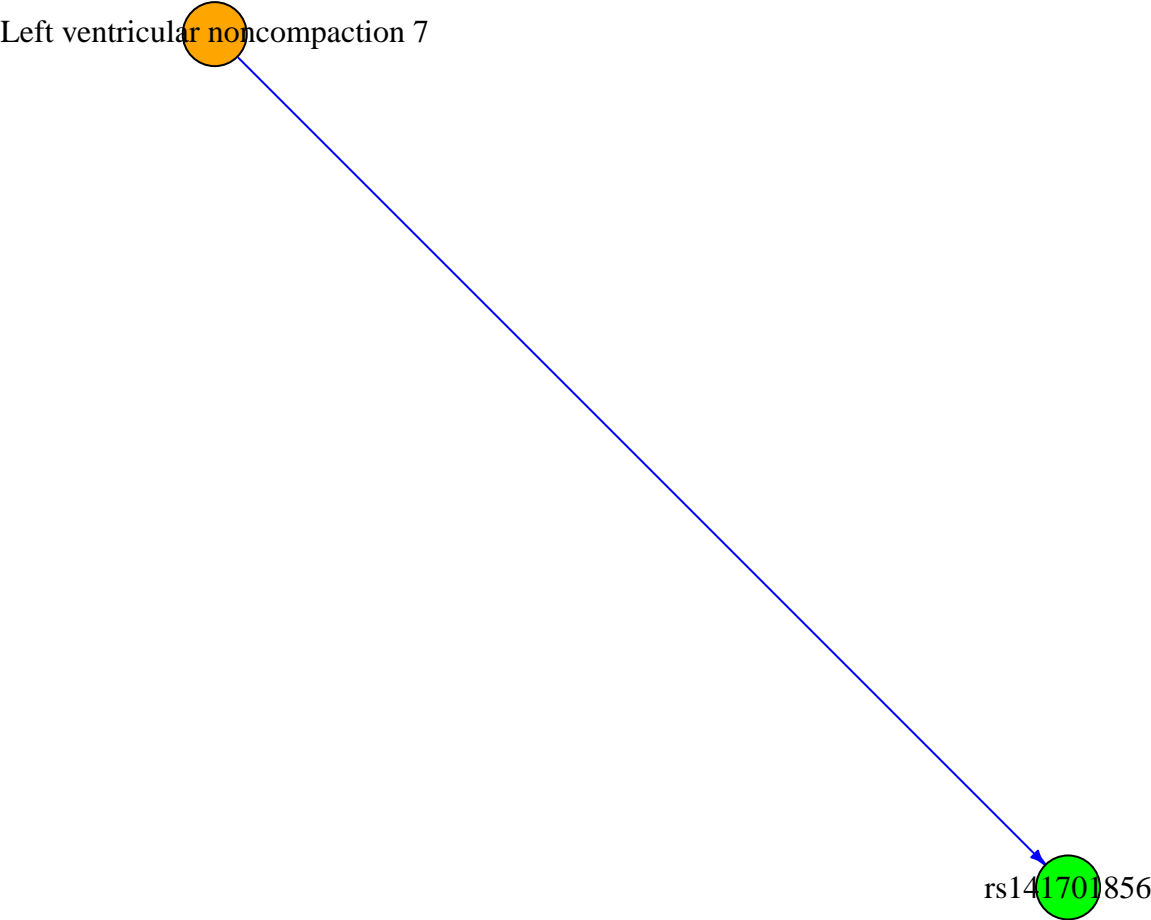

**Variant–Disease Network (Left ventricular noncompaction 8)**

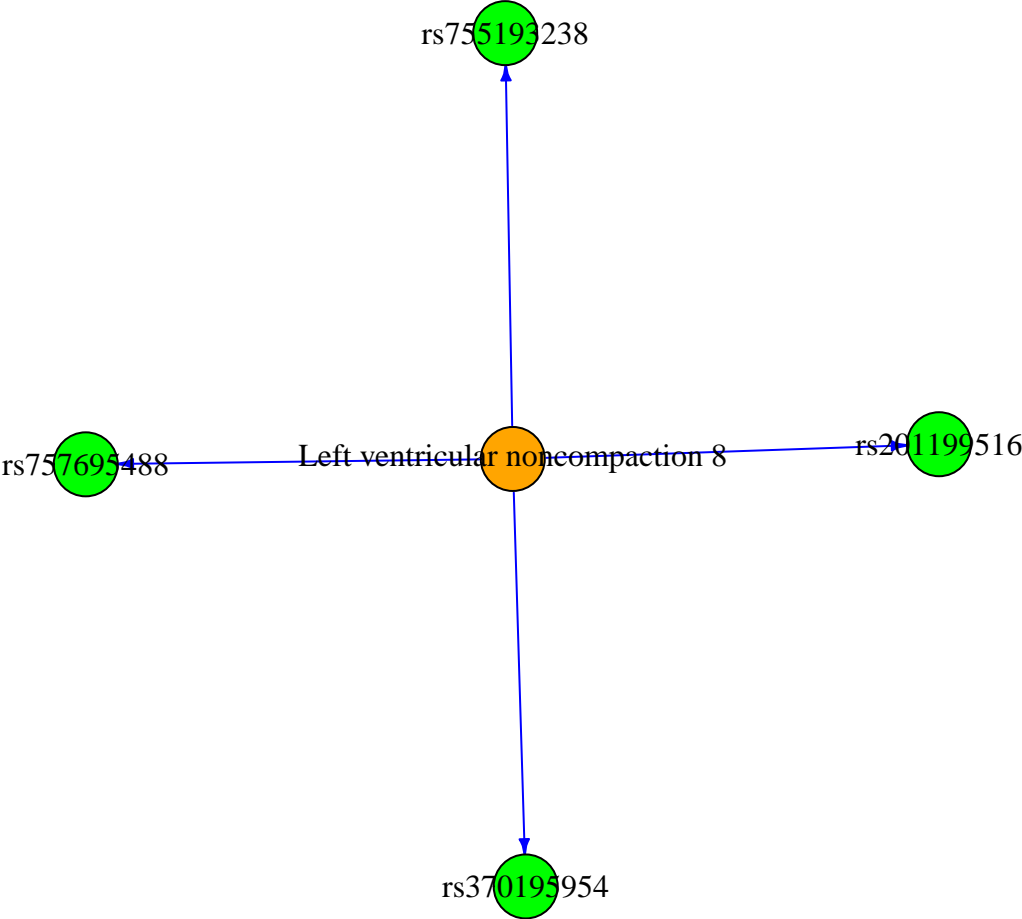

Variant–Disease Network (Left ventricular noncompaction cardiomyopath

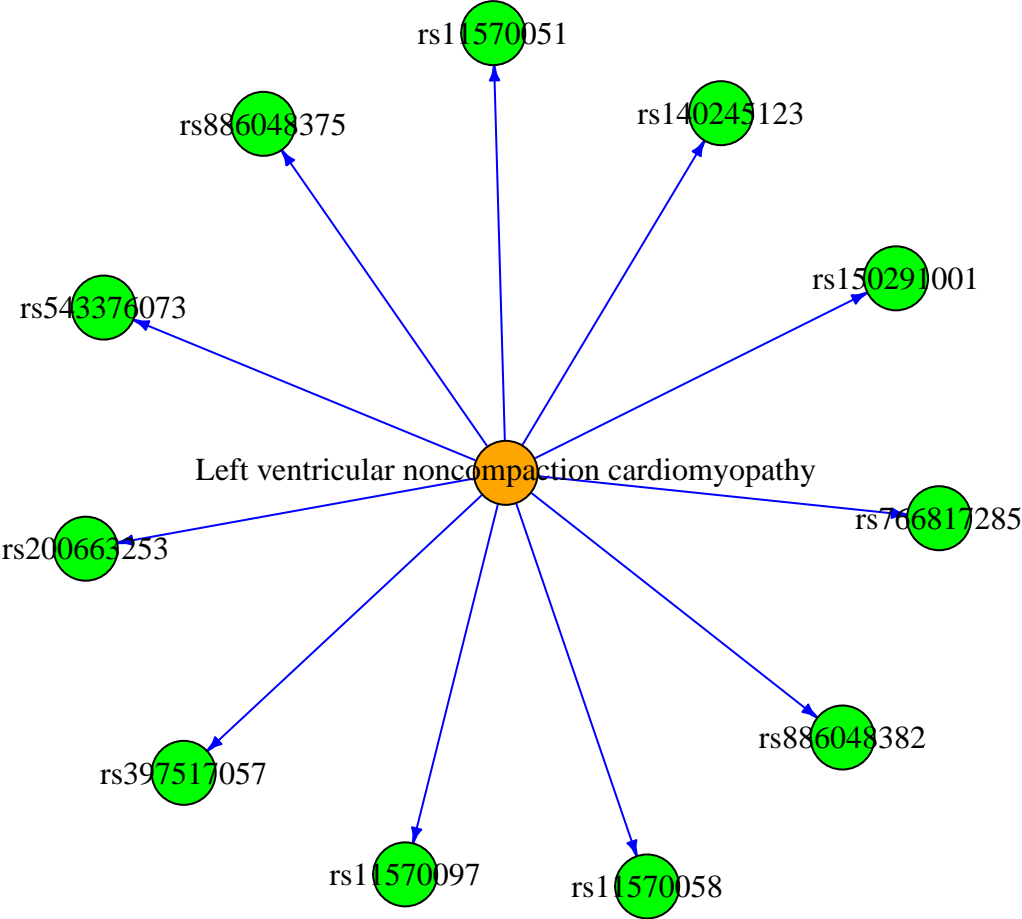

**Variant–Disease Network (Left–right axis malformations)**

Left–right axis malformations

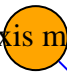

rs370508860

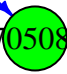



Variant–Disease Network (Leigh syndrome)

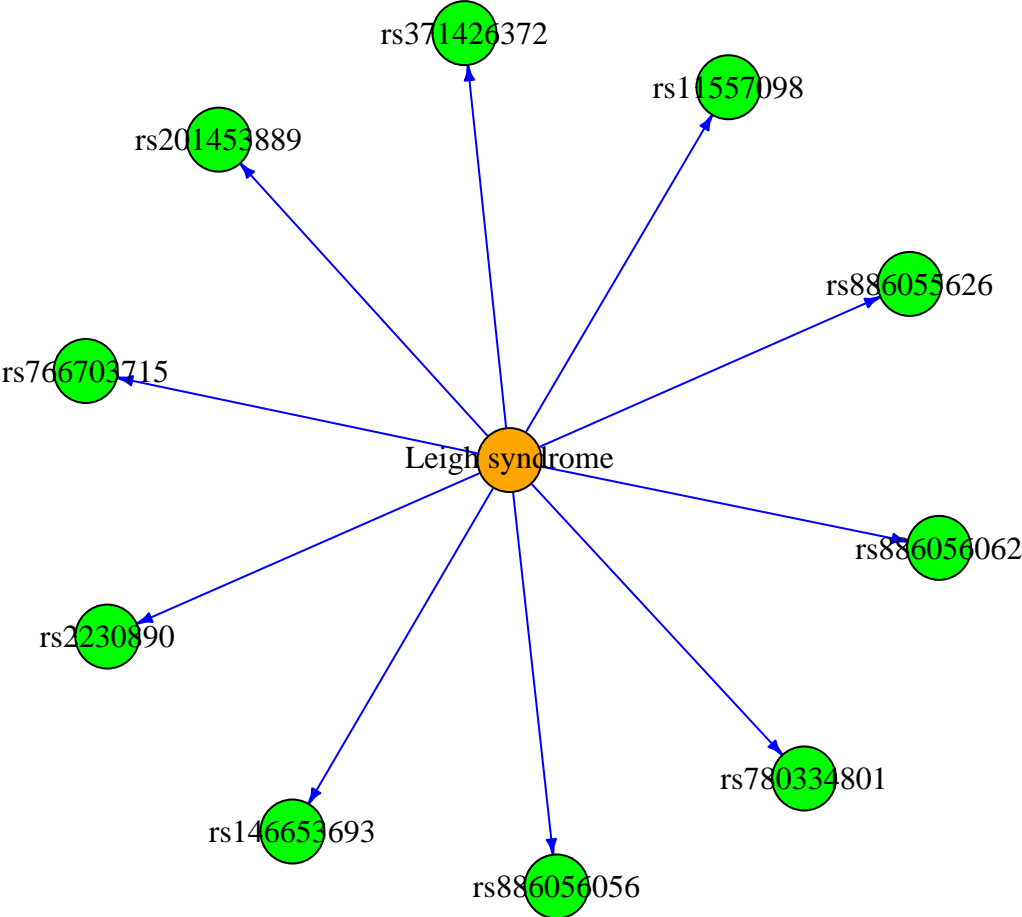

**Variant–Disease Network (Lethal congenital contracture syndrome 11)**

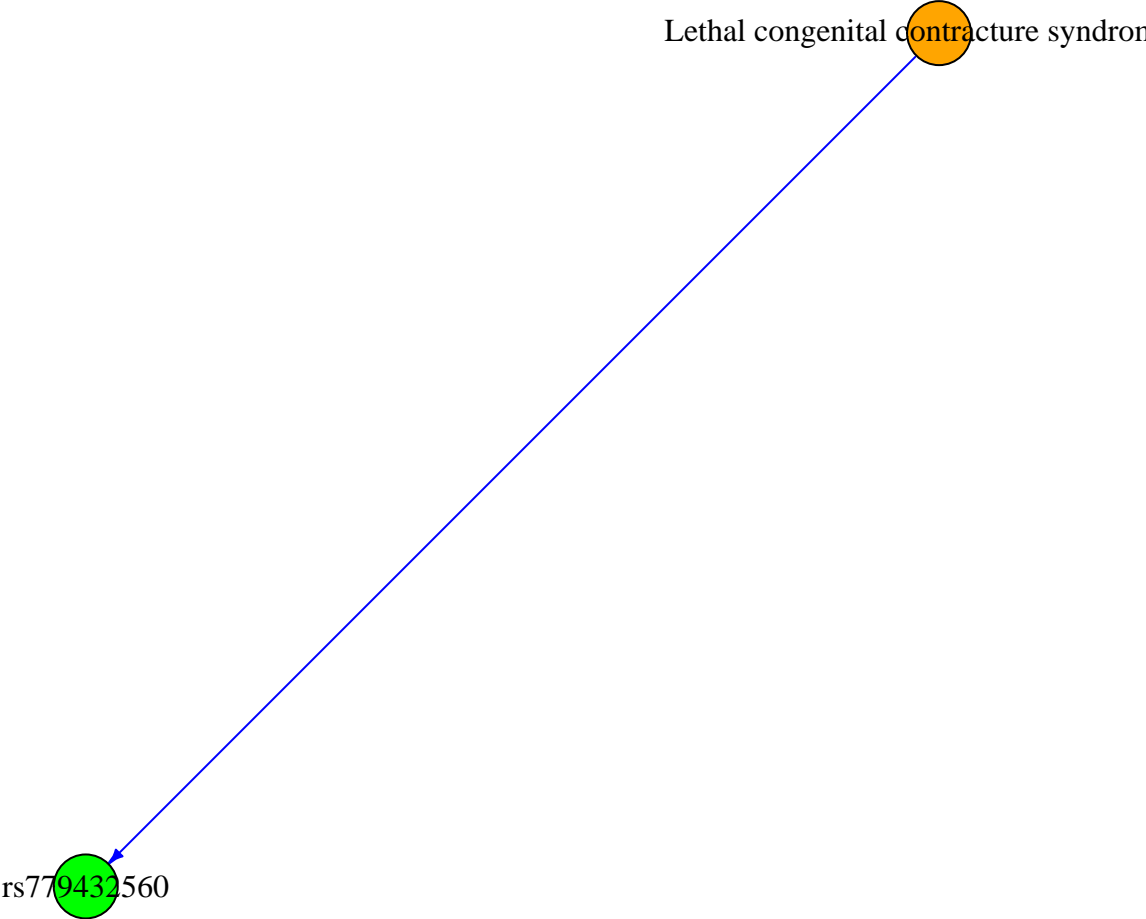

**Variant–Disease Network (Lethal congenital contracture syndrome 9)**

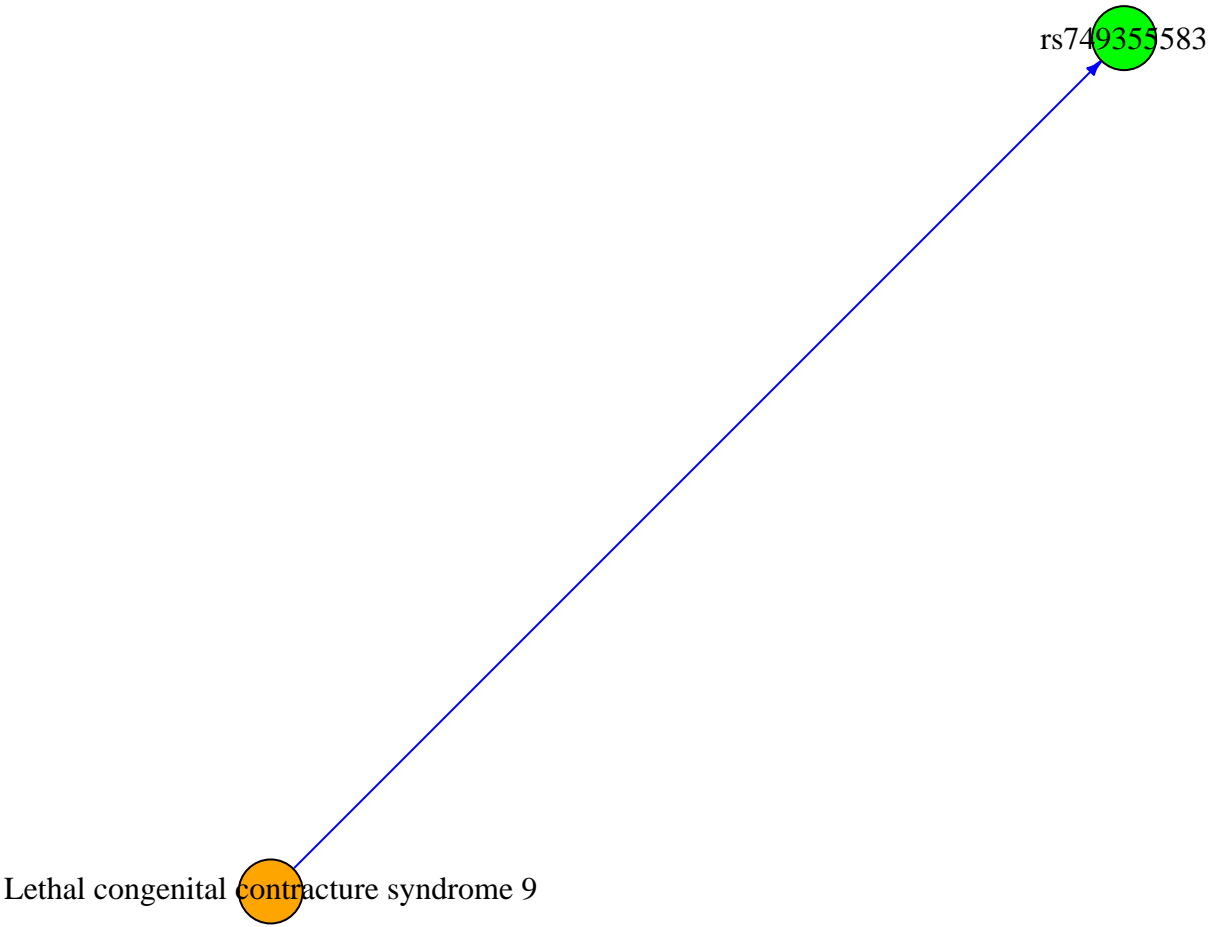

# Variant-Disease Network (Lethal Encephalopathy)

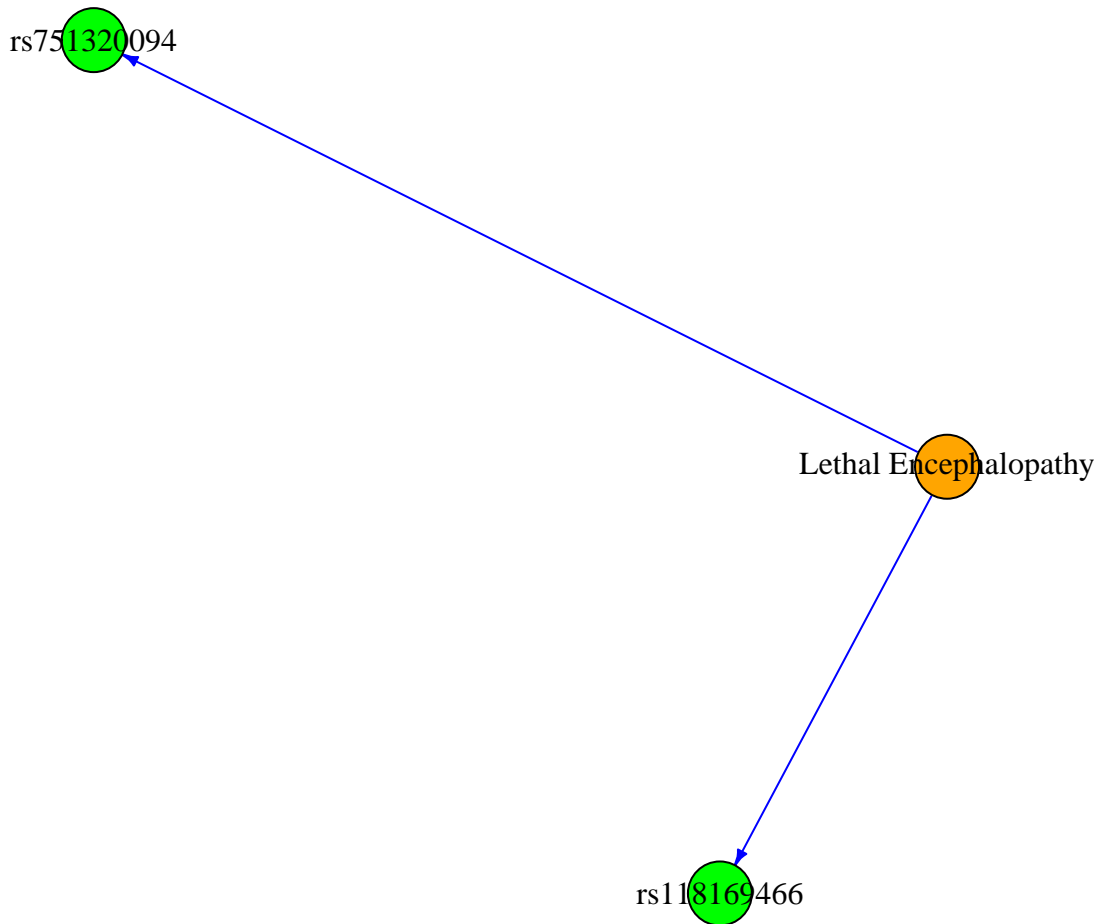

Variant–Disease Network (Lethal multiple pterygium syndrome)

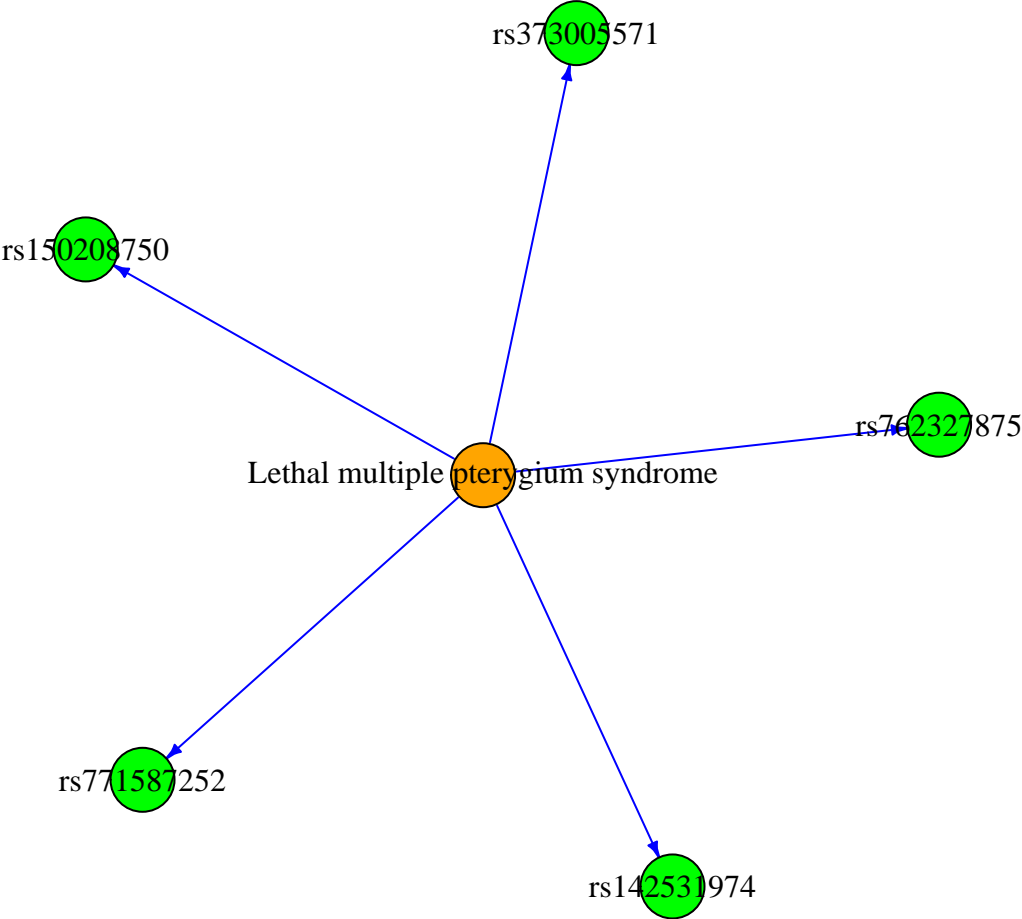

Variant–Disease Network (Lethal tight skin contracture syndrome)

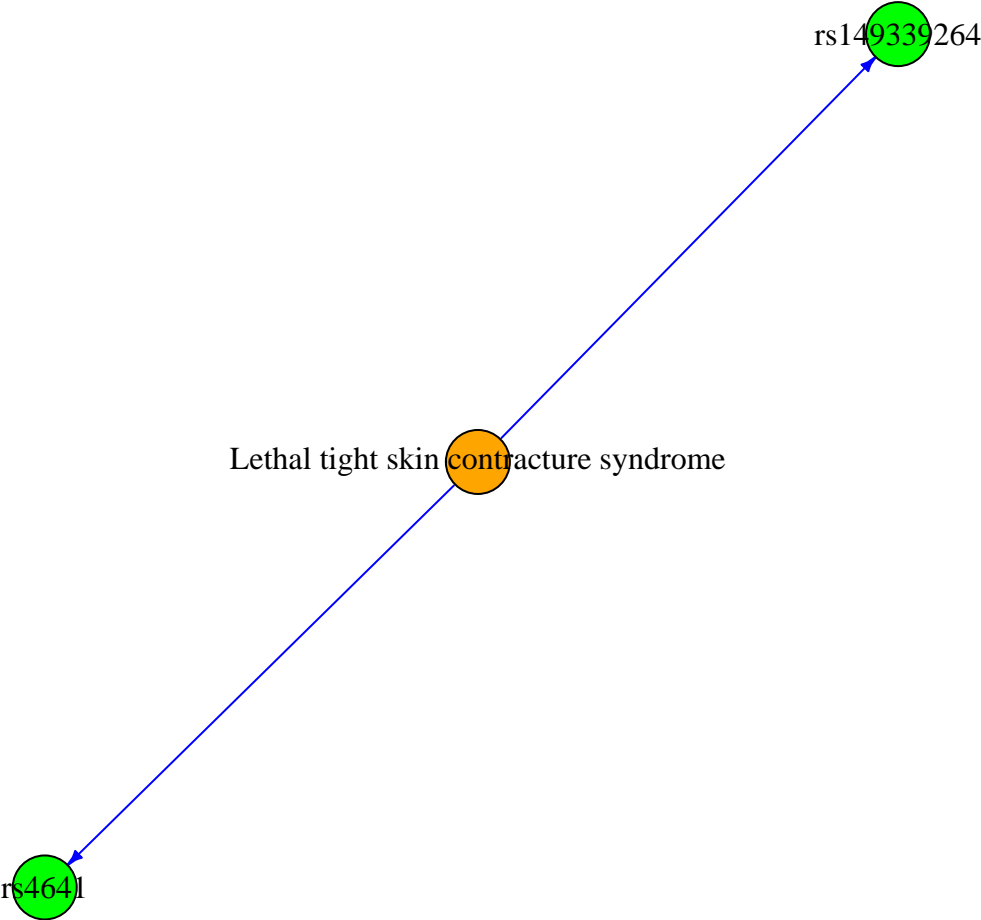

Variant–Disease Network (Leukodystrophy)

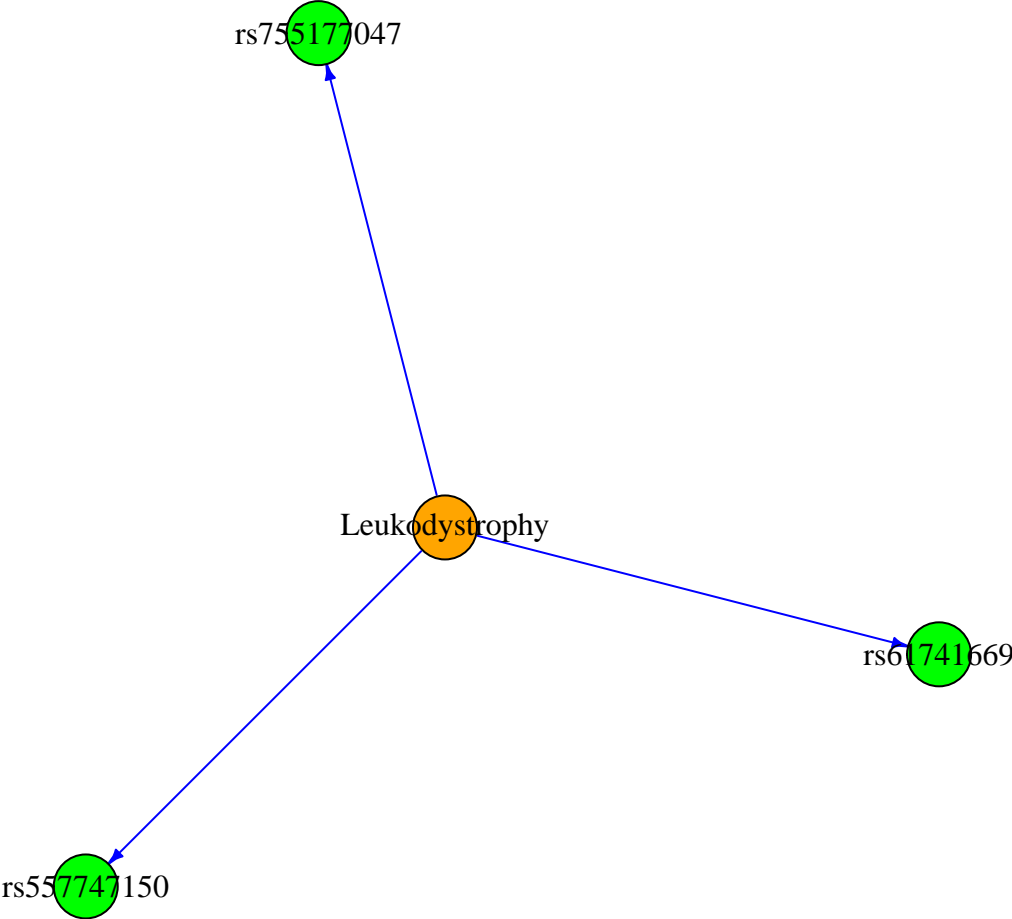

**Variant–Disease Network (Leukoencephalopathy with ataxia)**

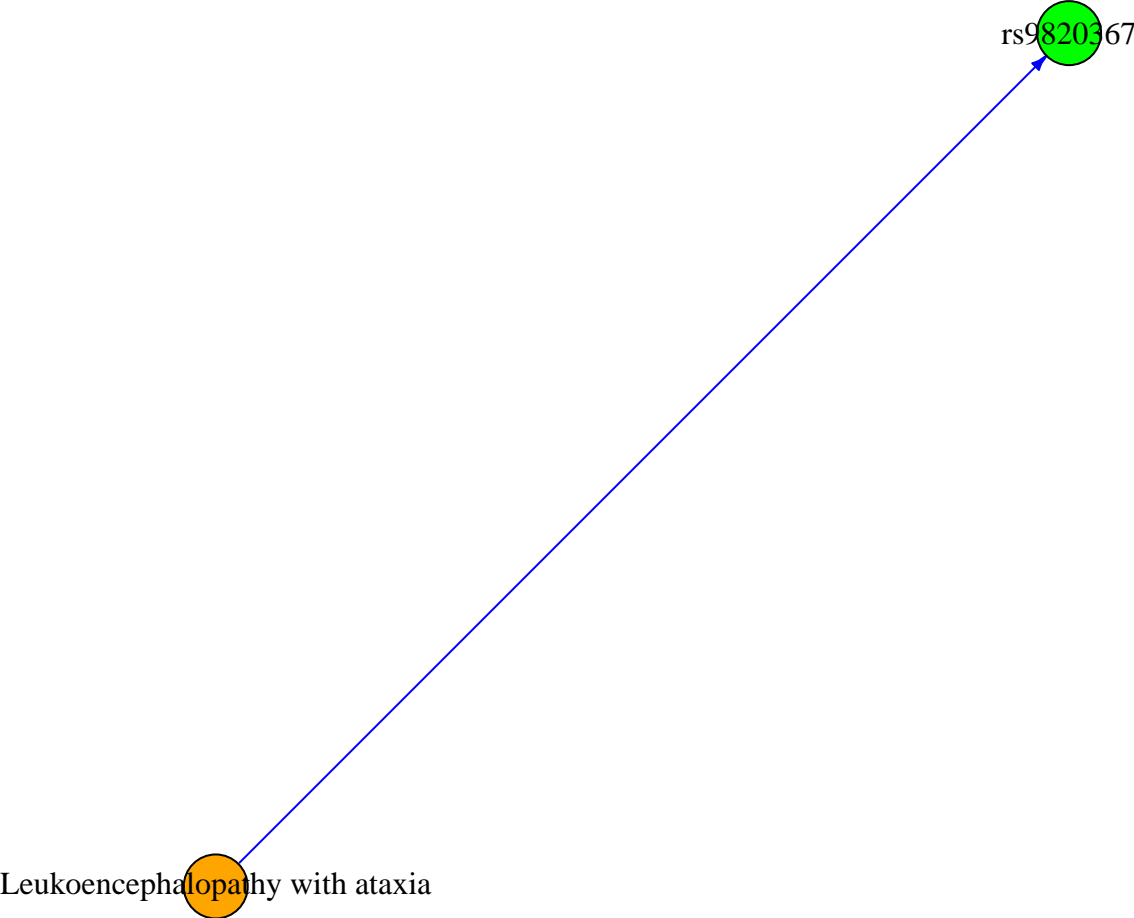



Variant–Disease Network (Leukoencephalopathy with vanishing white matter)

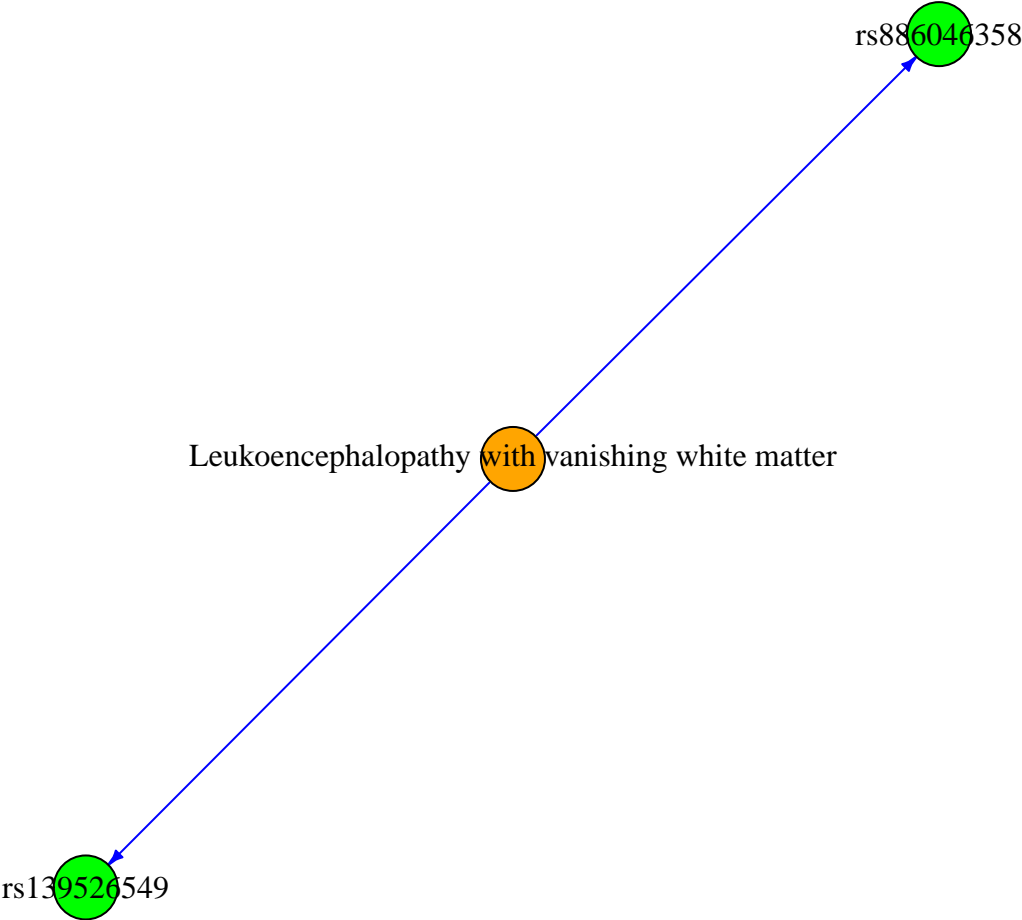

# Variant–Disease Network (Levy–Hollister syndrome)

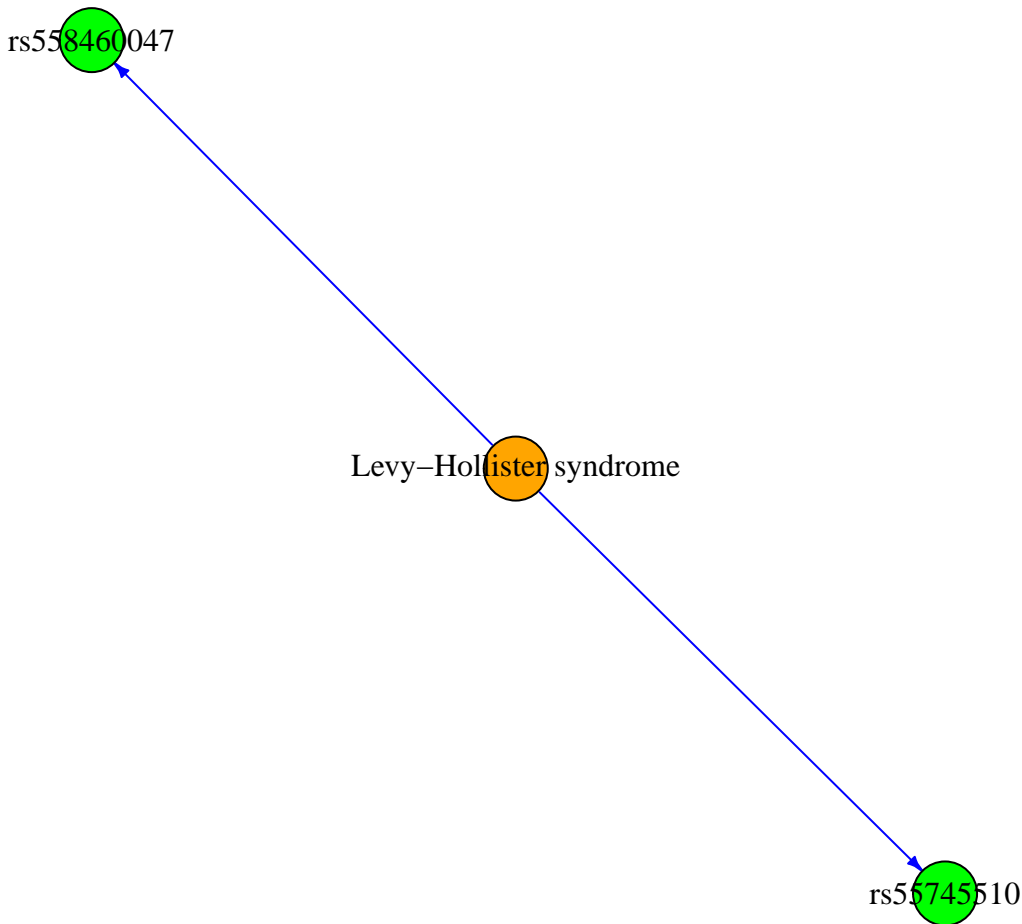

## Variant–Disease Network (Liddle syndrome 1)

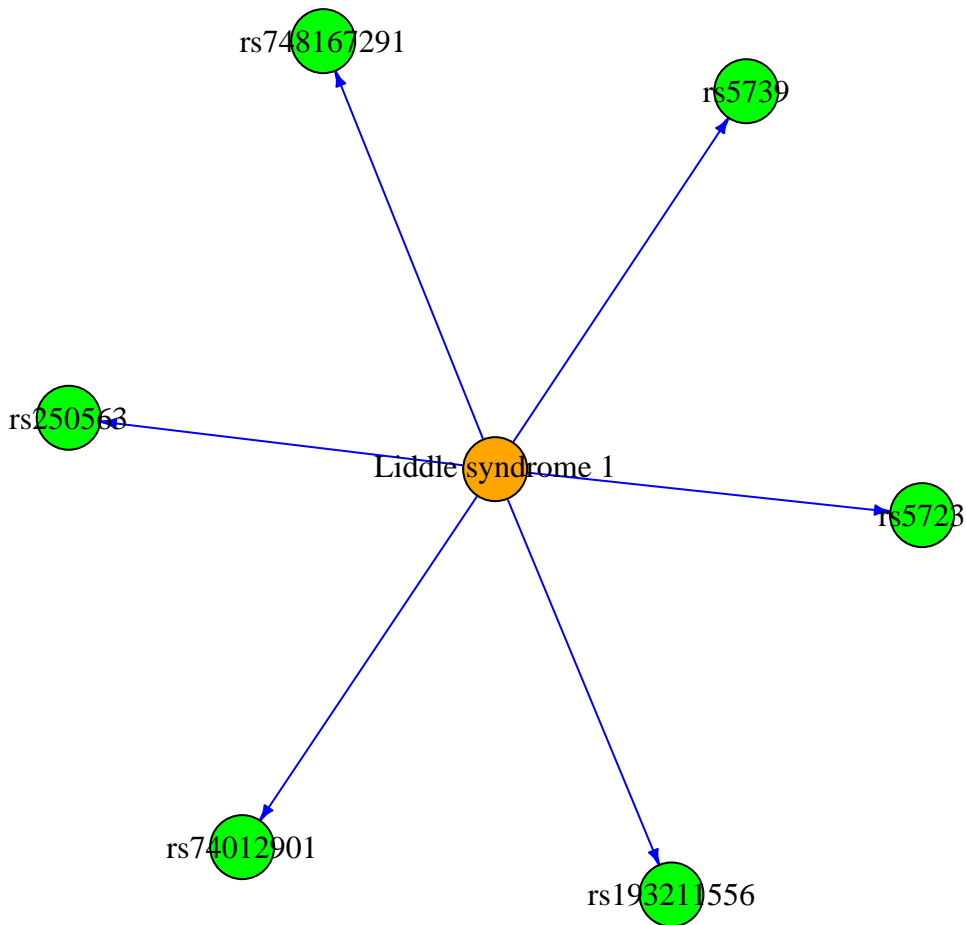

## Variant–Disease Network (Lig4 syndrome)

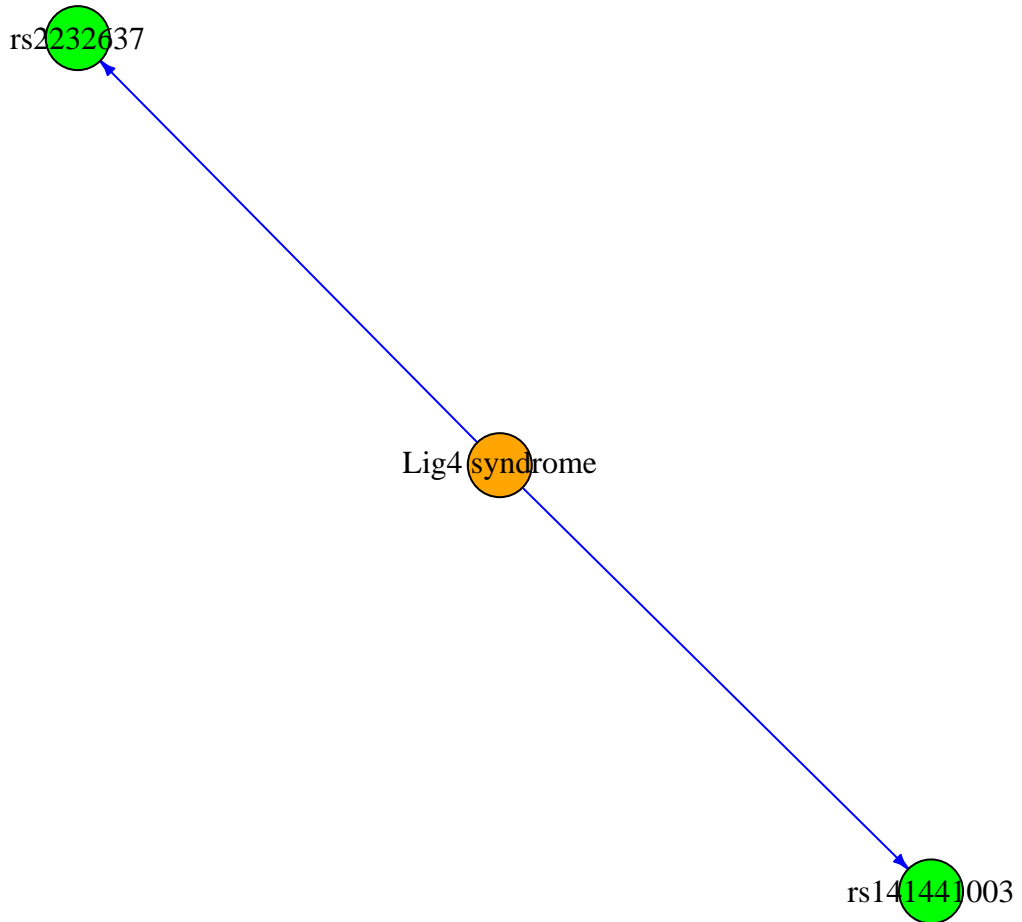

Variant–Disease Network (Limb–Girdle Muscular Dystrophy)

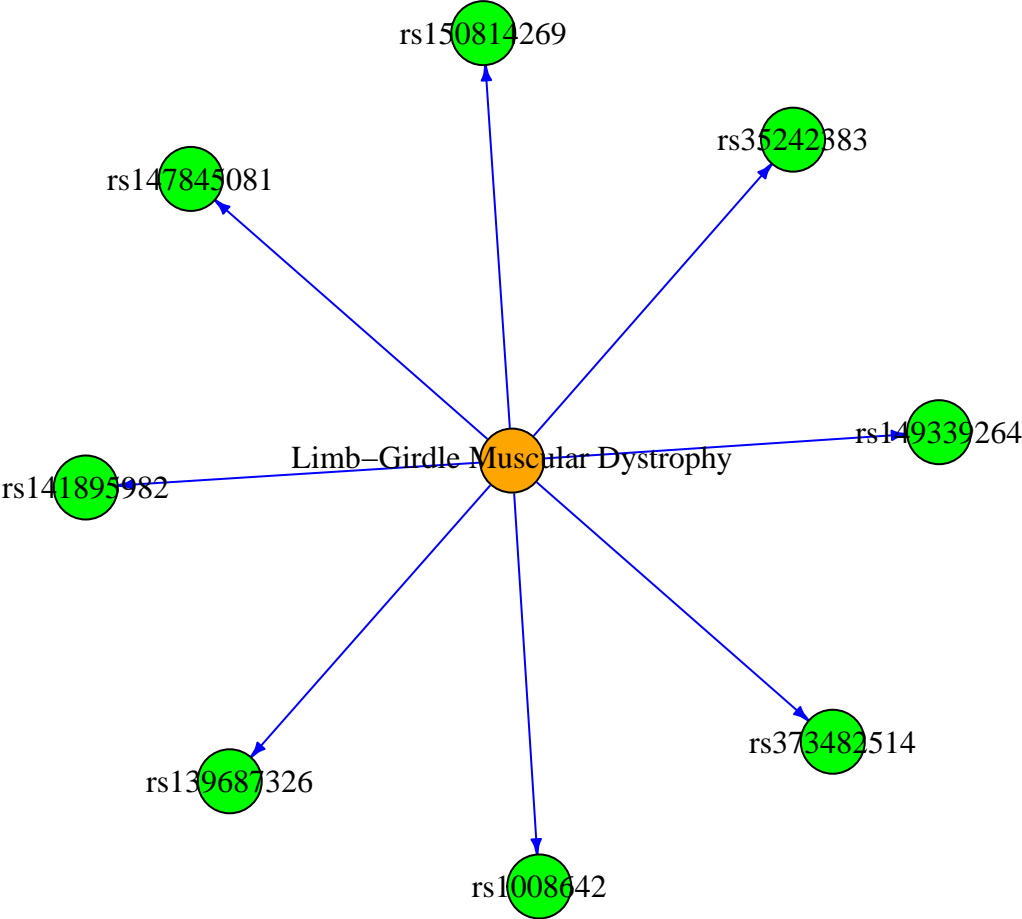

# Variant-Disease Network (Limb-girdle muscular dystrophy-dystroglycanopathy)

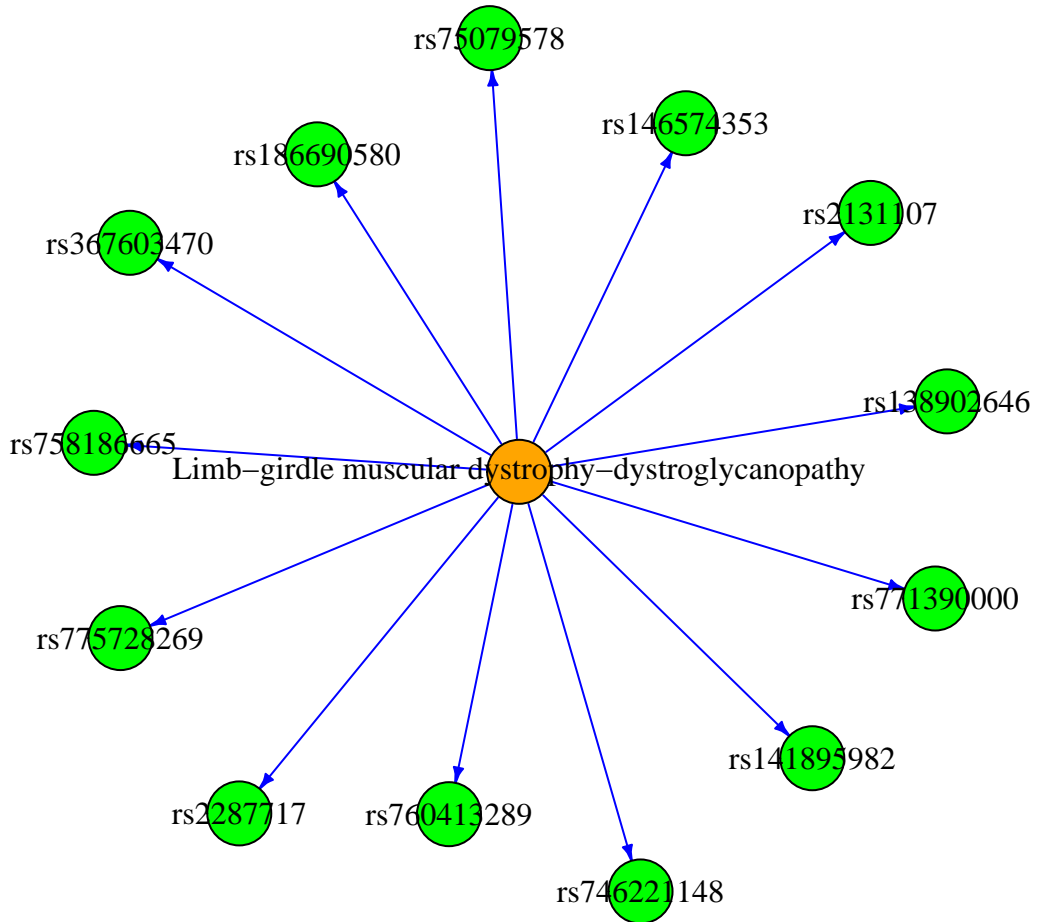

# Variant–Disease Network (Lipoatrophy with Diabetes)

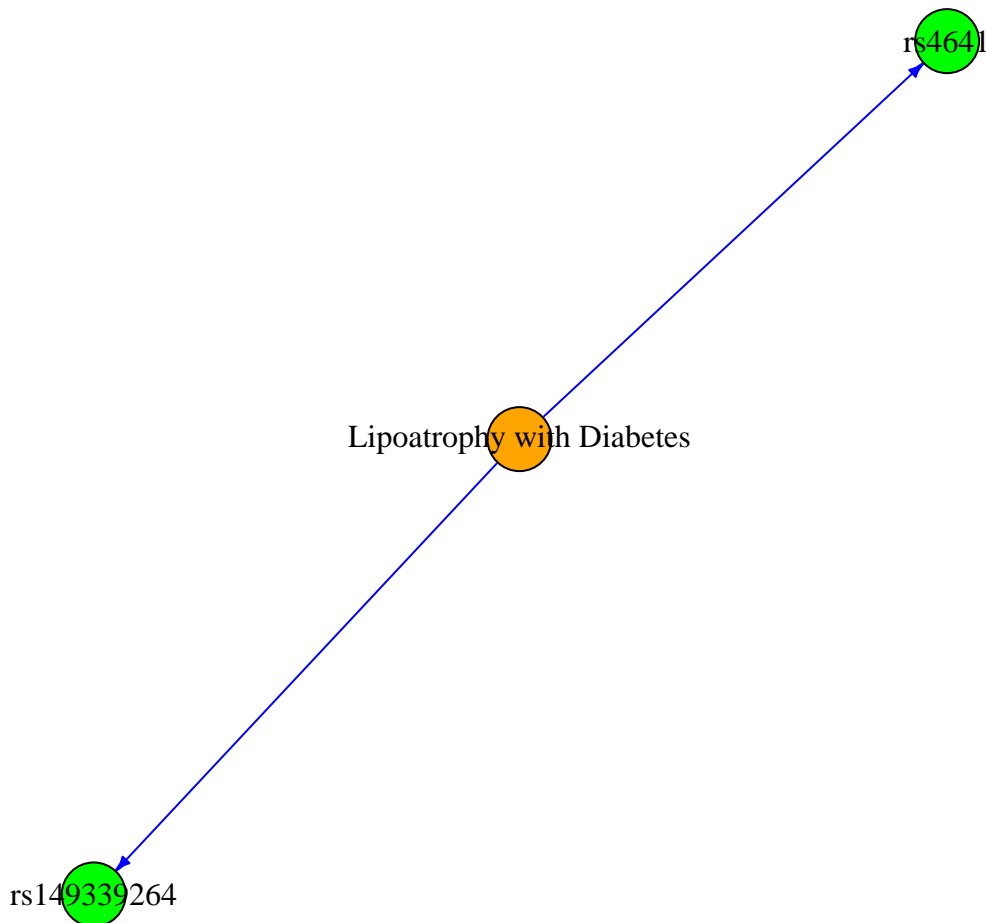

Variant–Disease Network (Lissencephaly)

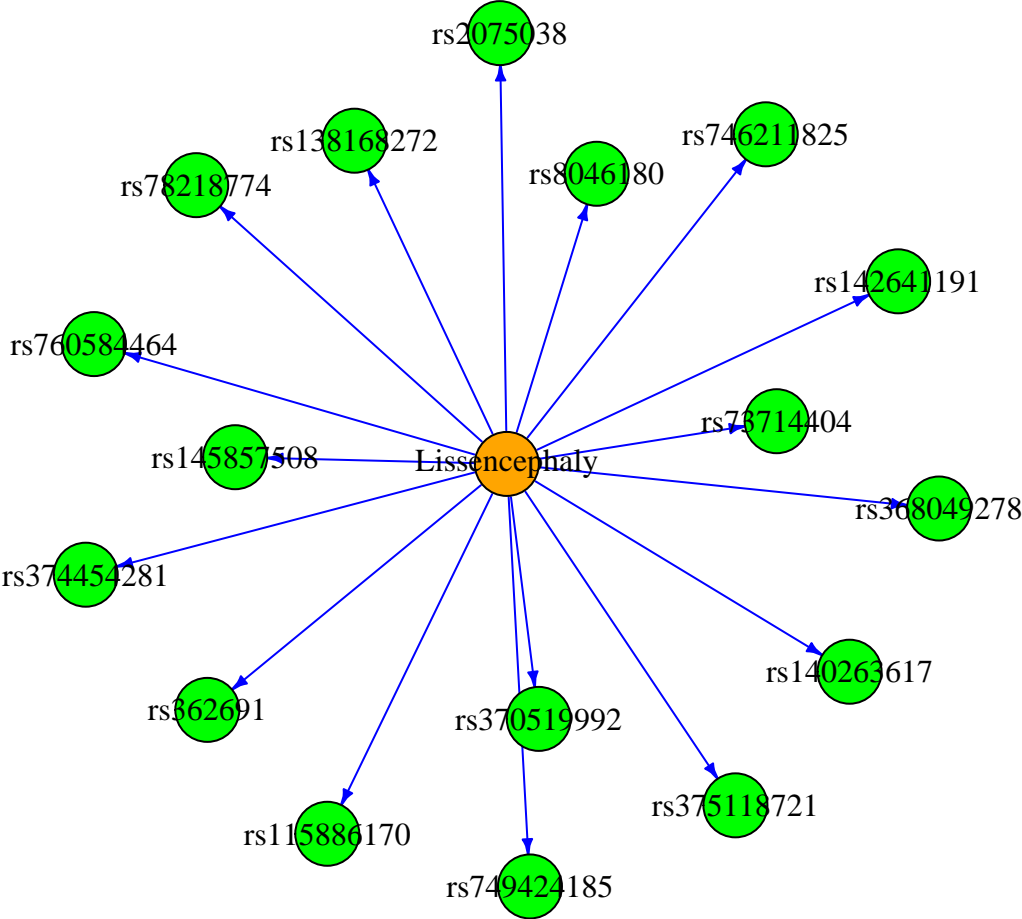



Variant–Disease Network (Lissencephaly 1)

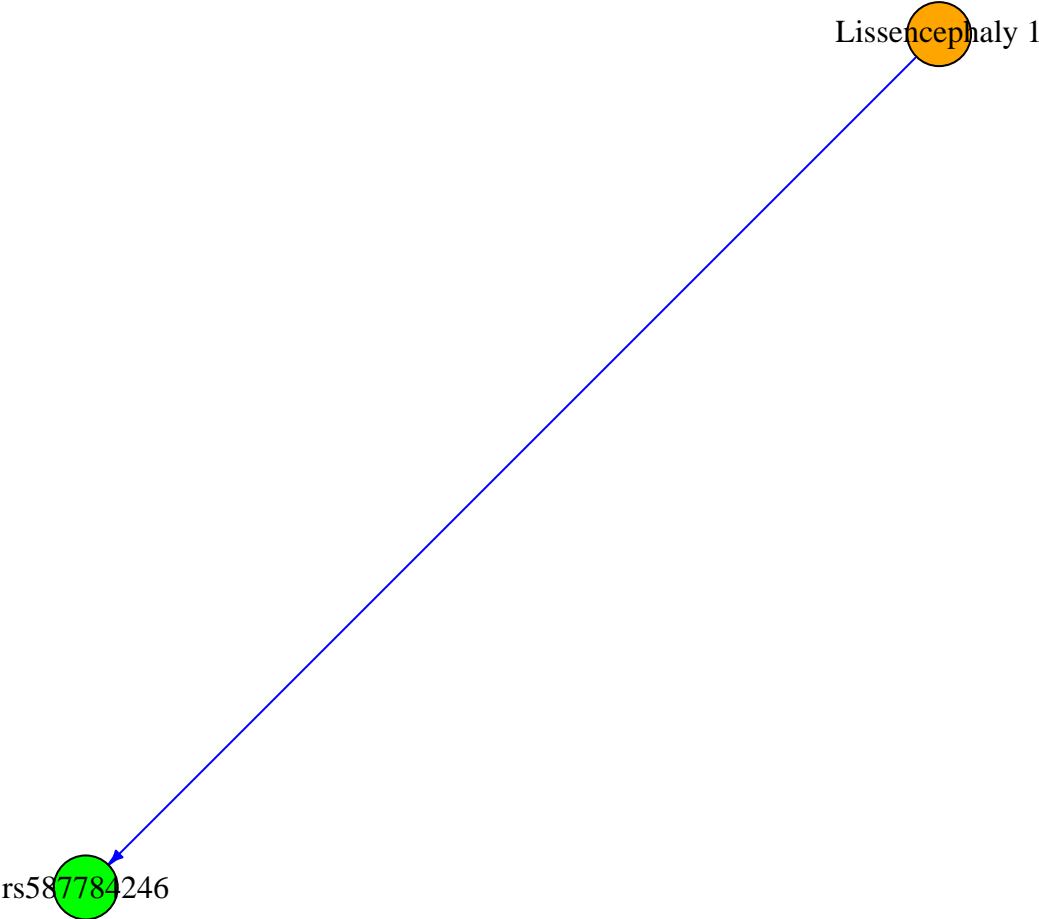

Variant–Disease Network (Lissencephaly 2)

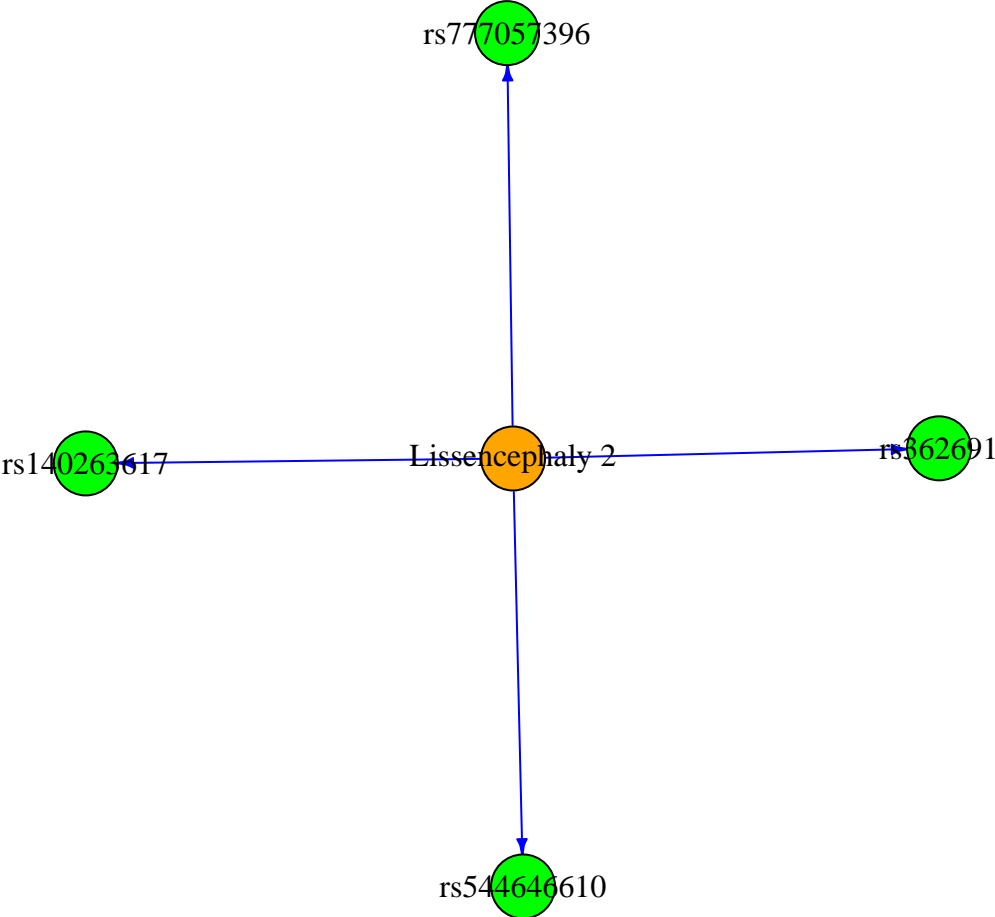

Variant–Disease Network (Lissencephaly 3)

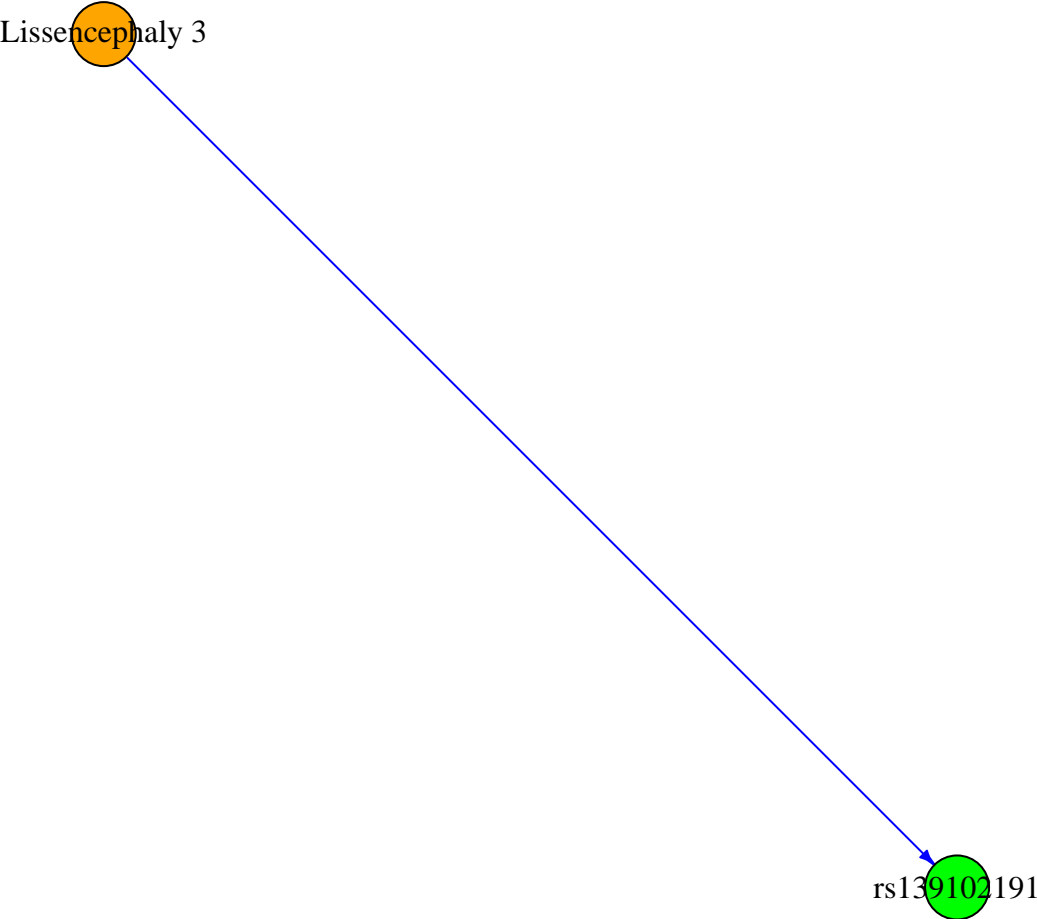

**Variant–Disease Network (Lissencephaly/Subcortical Band Heterotopia)**

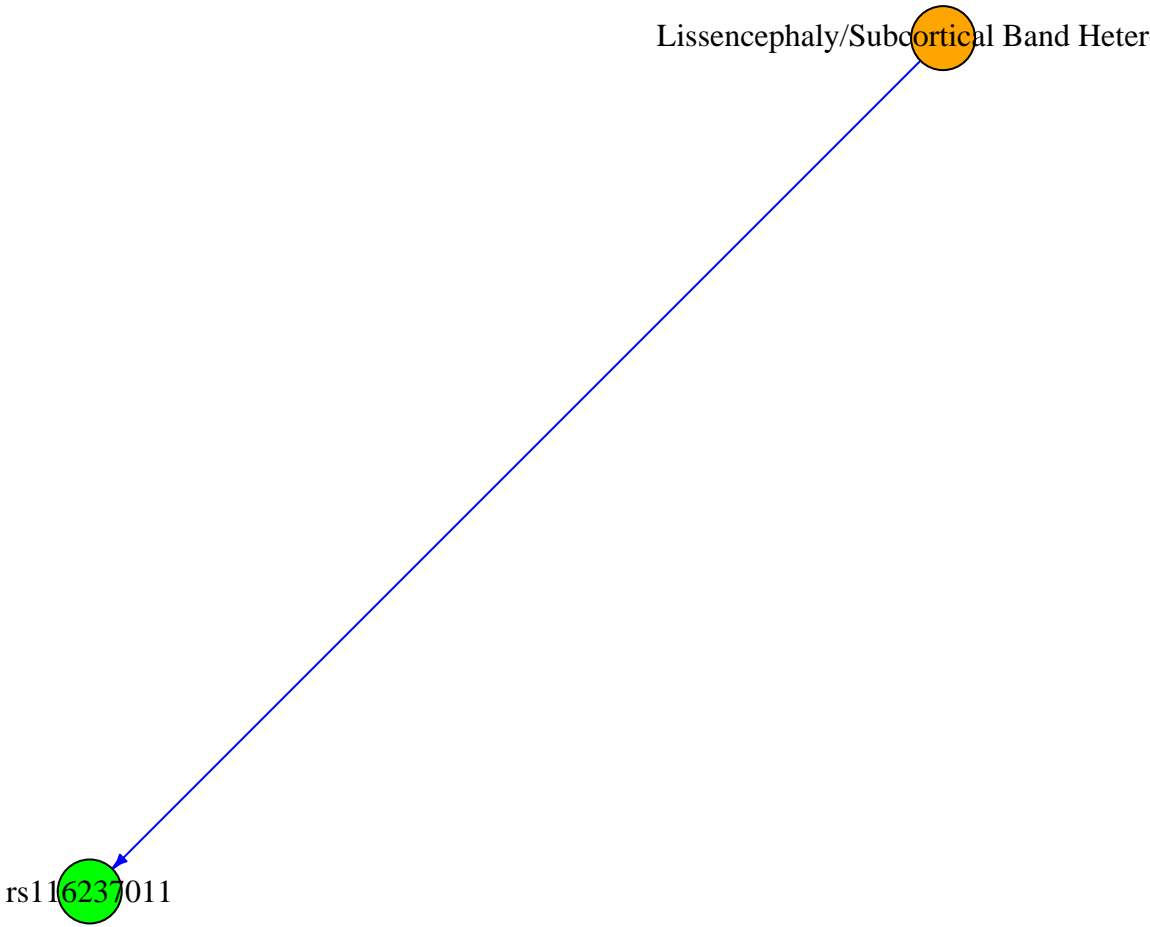

**Variant–Disease Network (Liver failure acute infantile)**

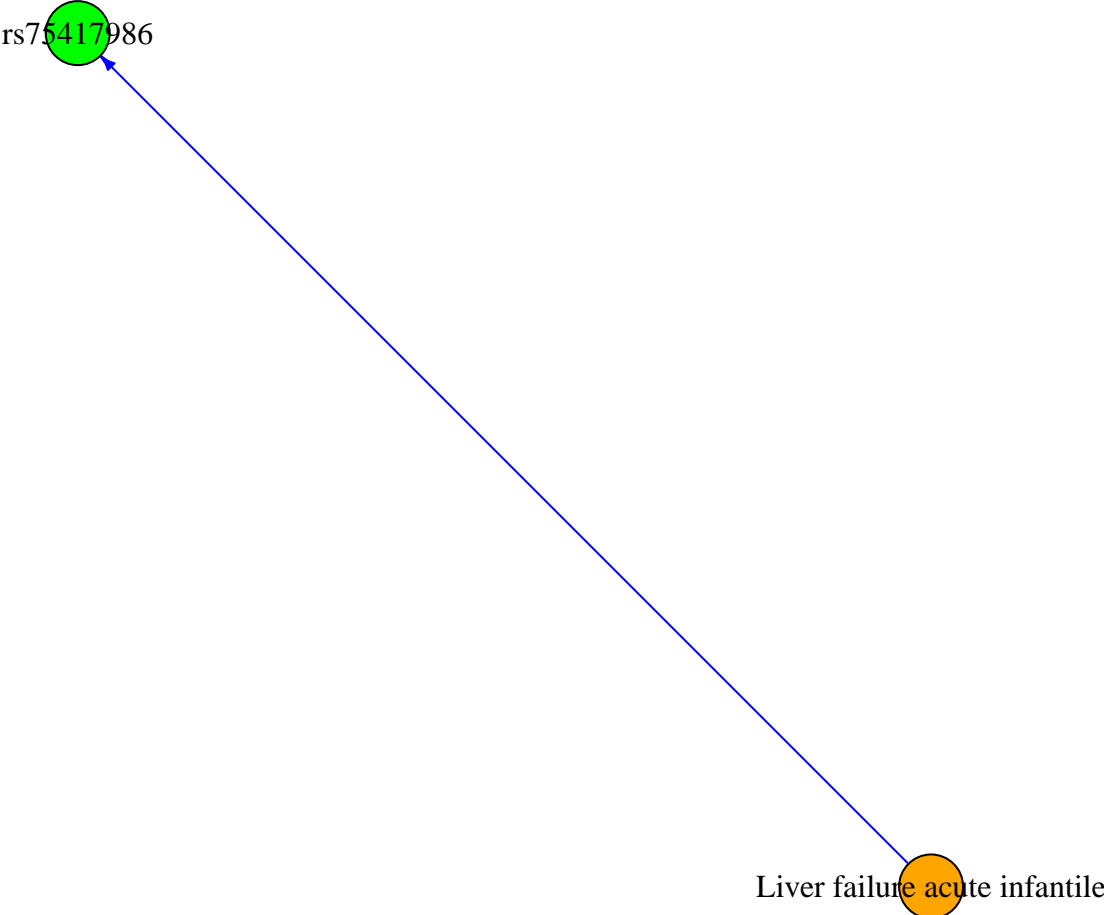

Variant–Disease Network (Localized AR Hypotrichosis)

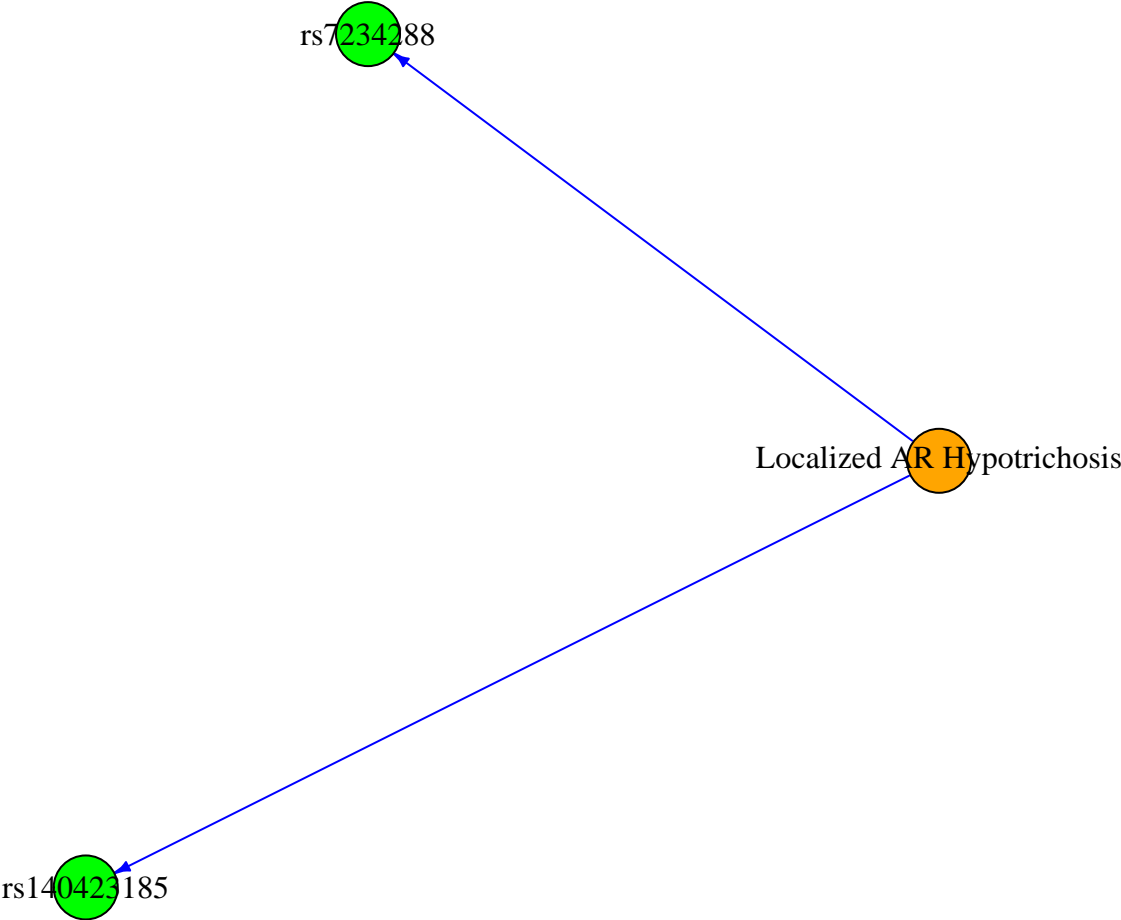

## Variant-Disease Network (Loeys-Dietz syndrome)

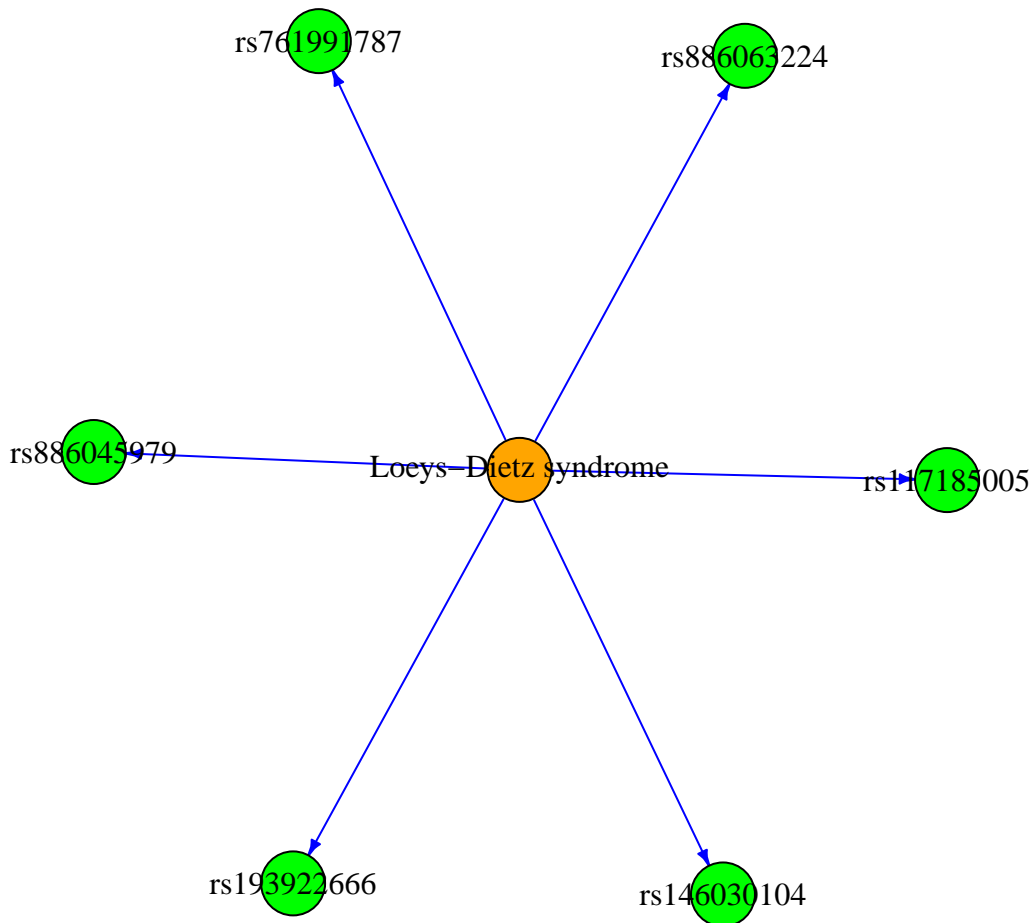

## Variant–Disease Network (Loeys–Dietz syndrome 1)

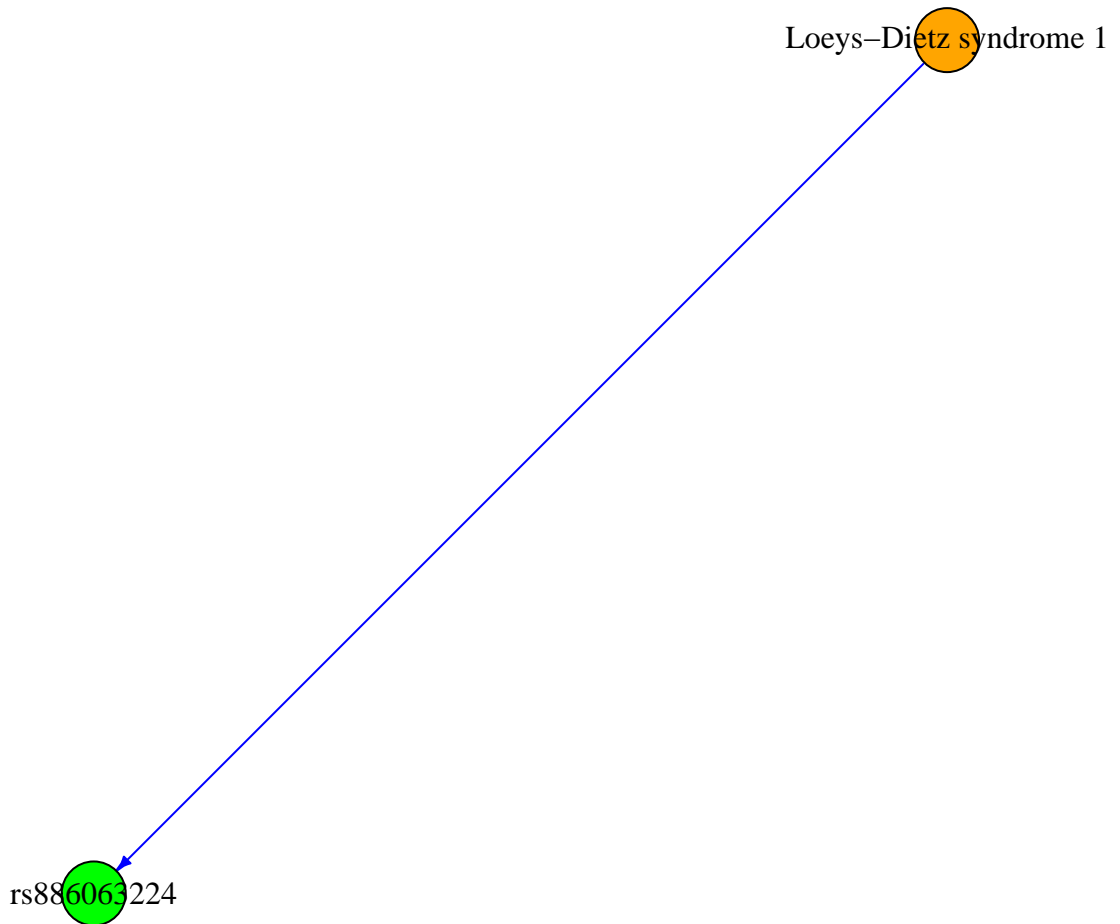



## Variant–Disease Network (Loeys–Dietz syndrome 2)

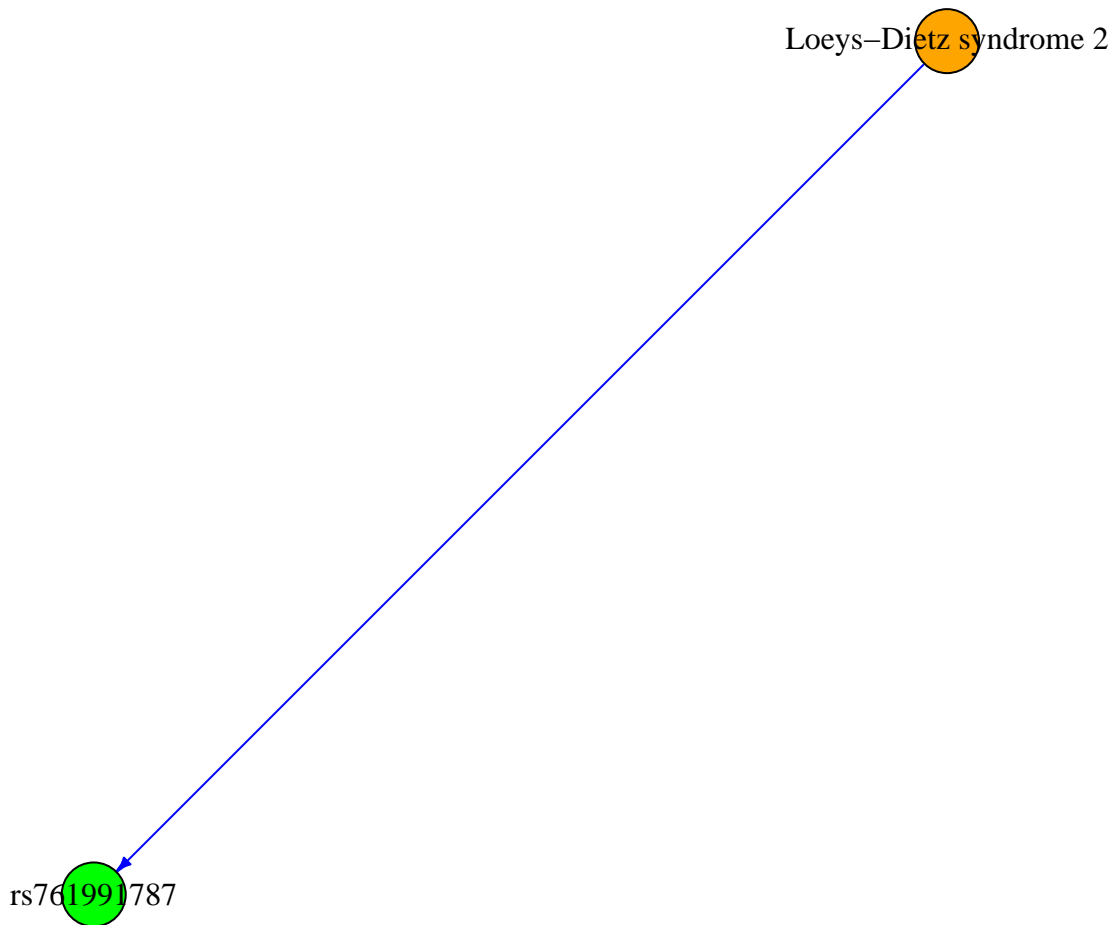

## Variant-Disease Network (Loeys-Dietz syndrome 3)

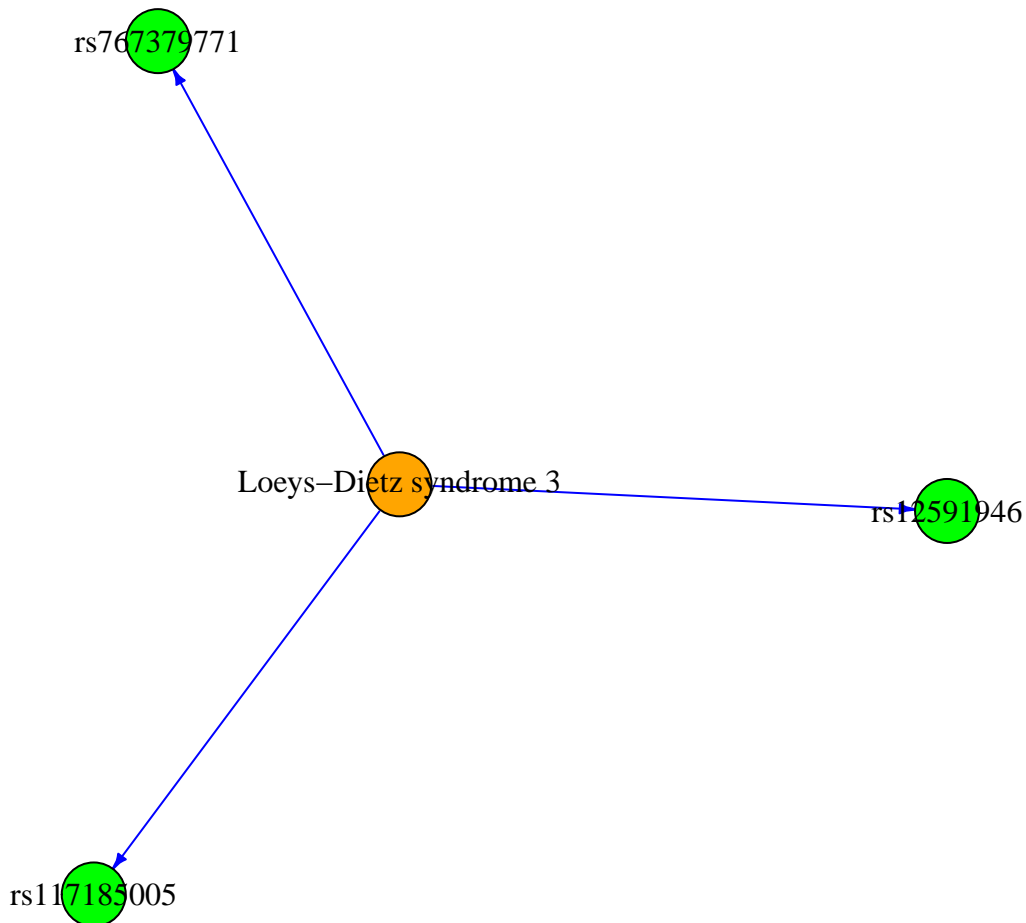

## Variant–Disease Network (Loeys–Dietz syndrome 4)

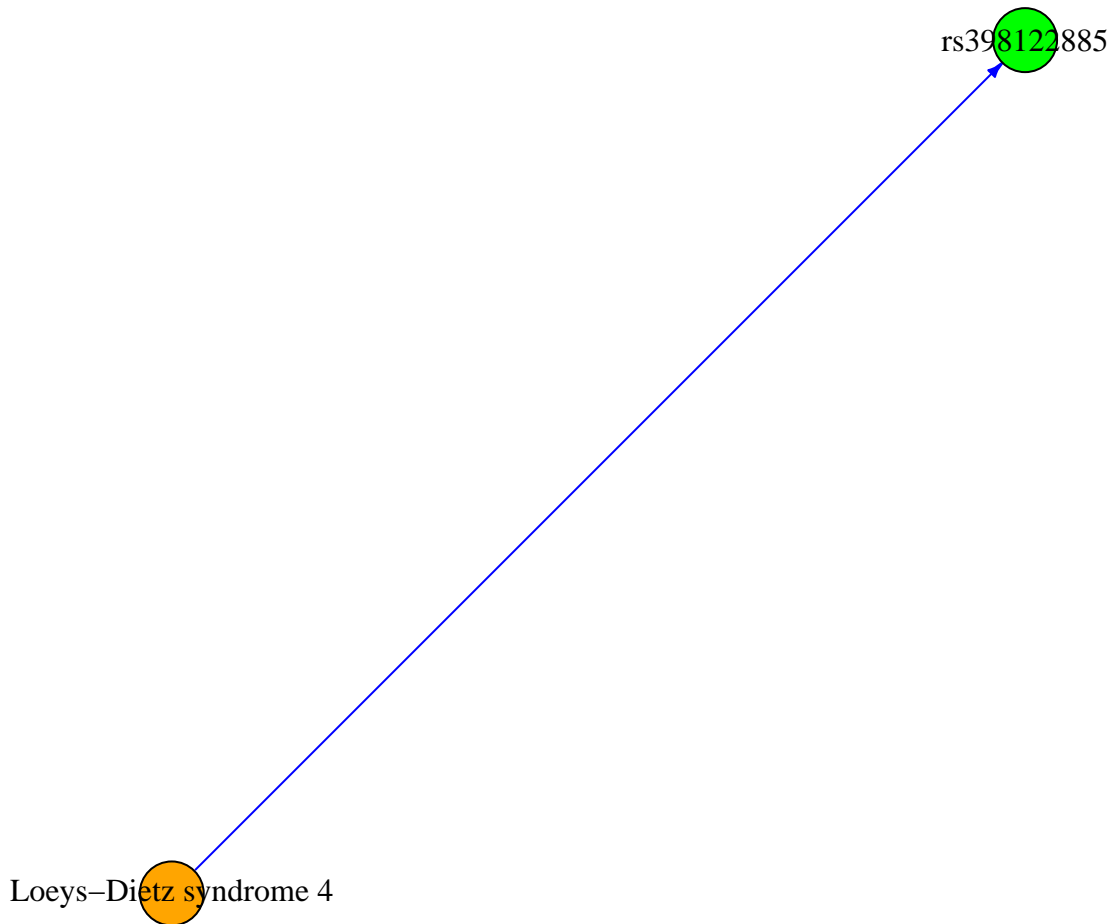

## Variant–Disease Network (Long QT syndrome)

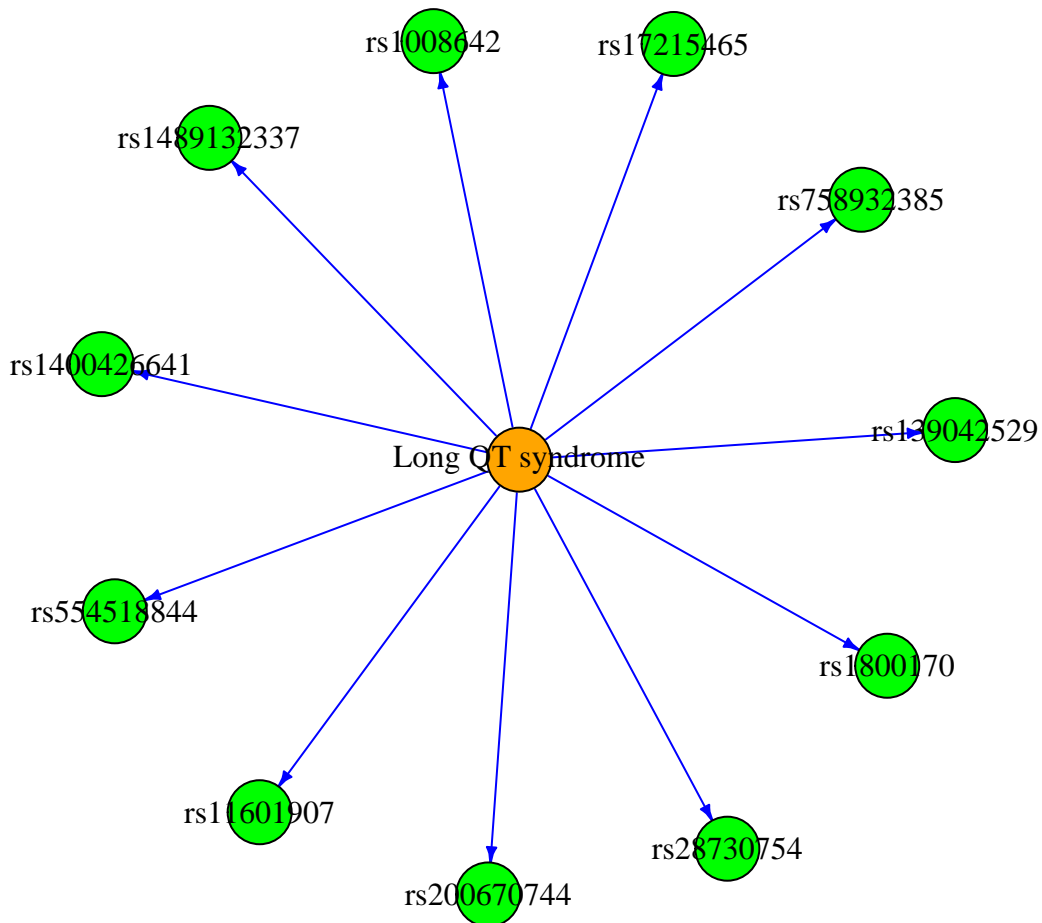

## Variant–Disease Network (Long QT syndrome 1)

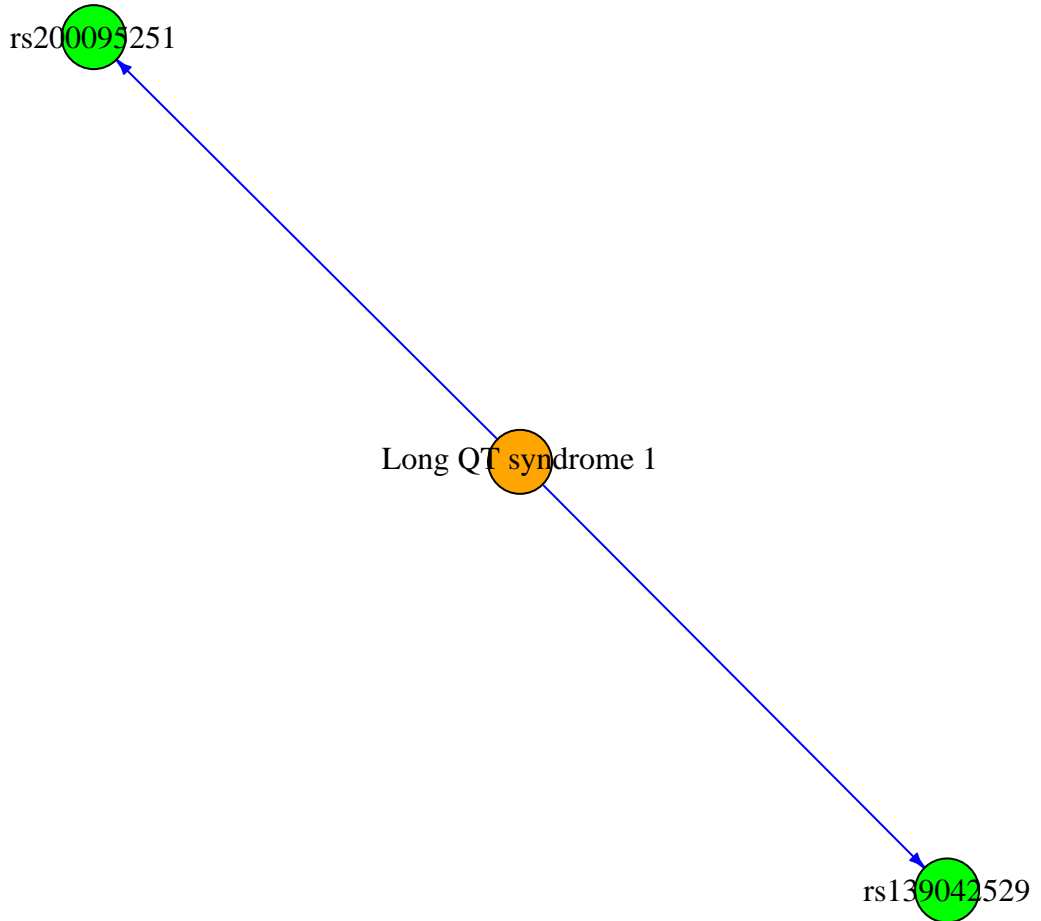

## Variant–Disease Network (Lowe syndrome)

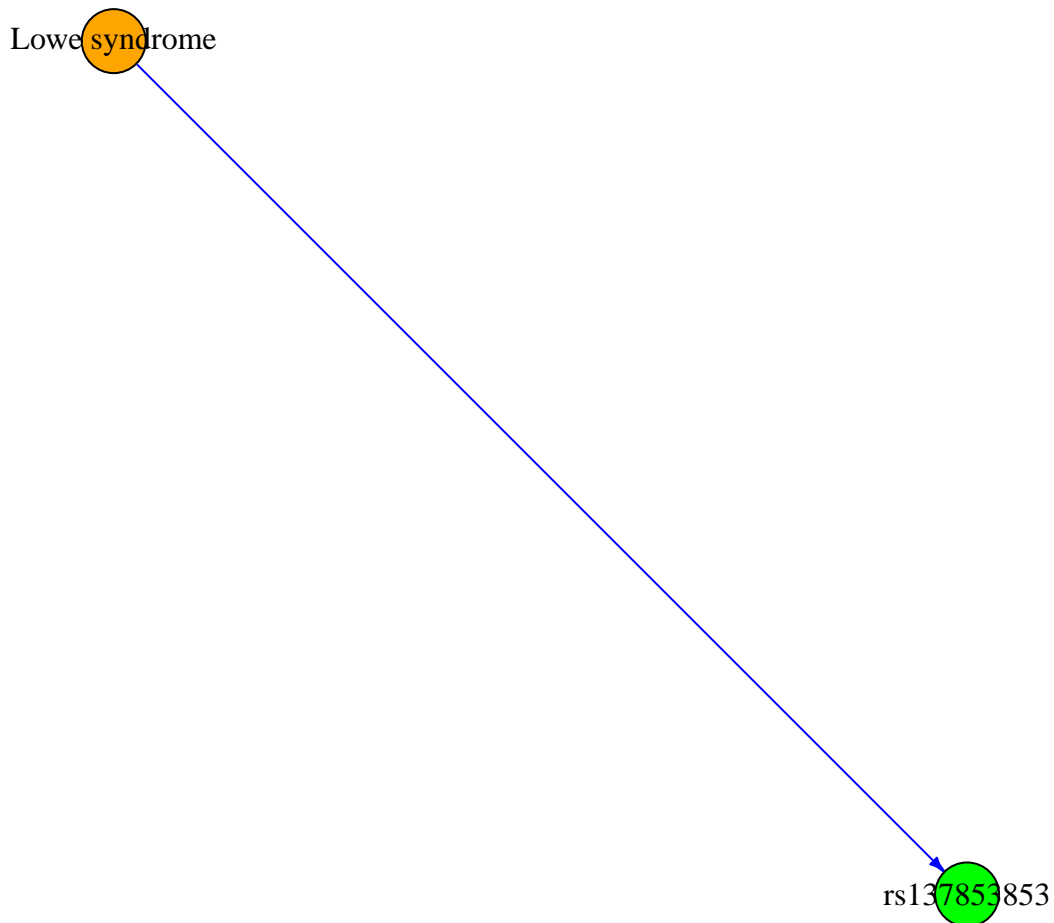

## Variant–Disease Network (Lung adenocarcinoma)

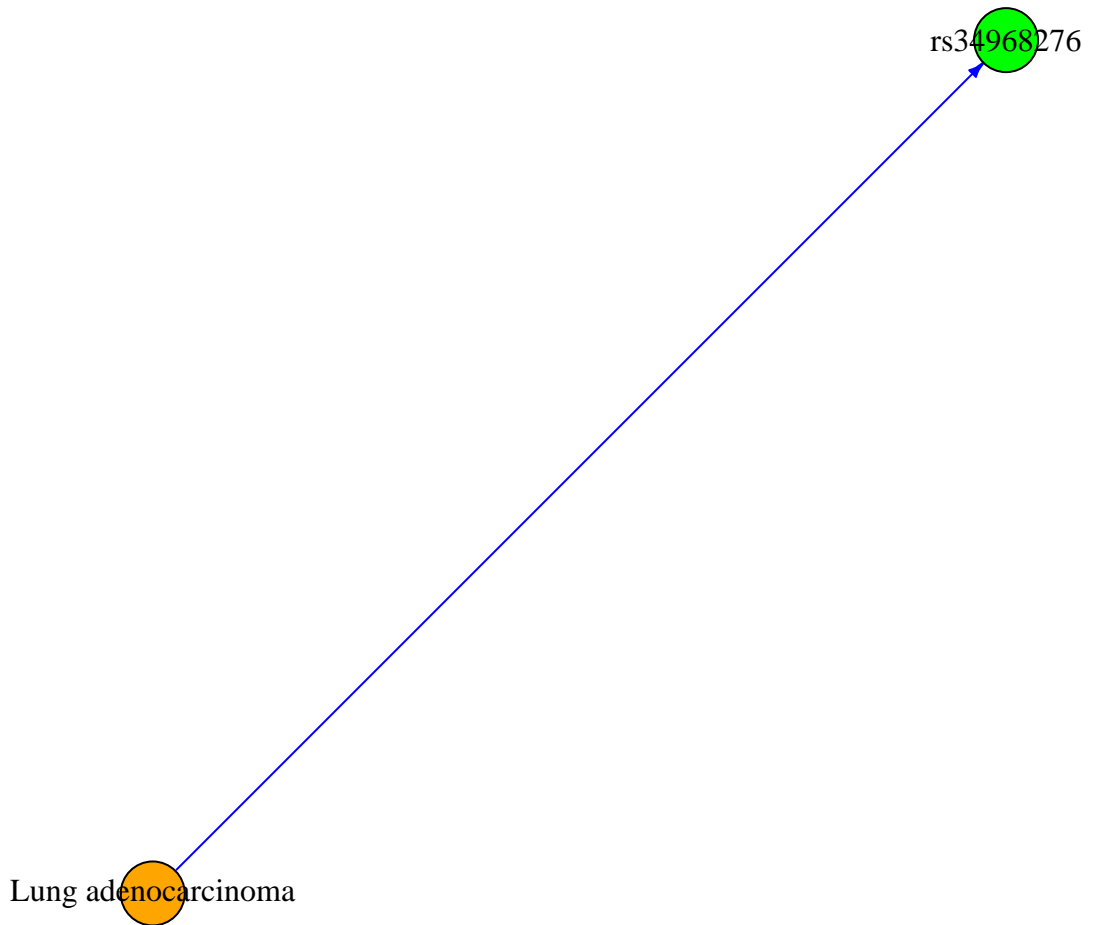

## Variant–Disease Network (Lung cancer)

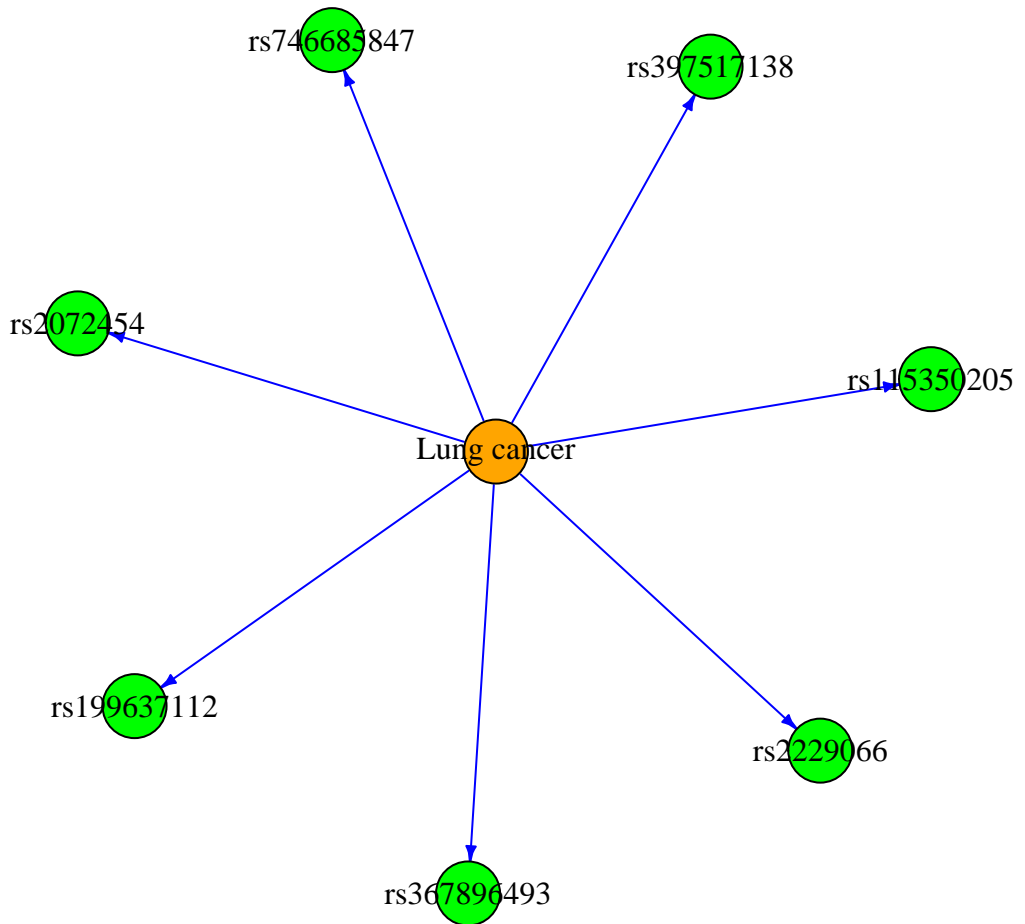



## Variant-Disease Network (Lung disease)

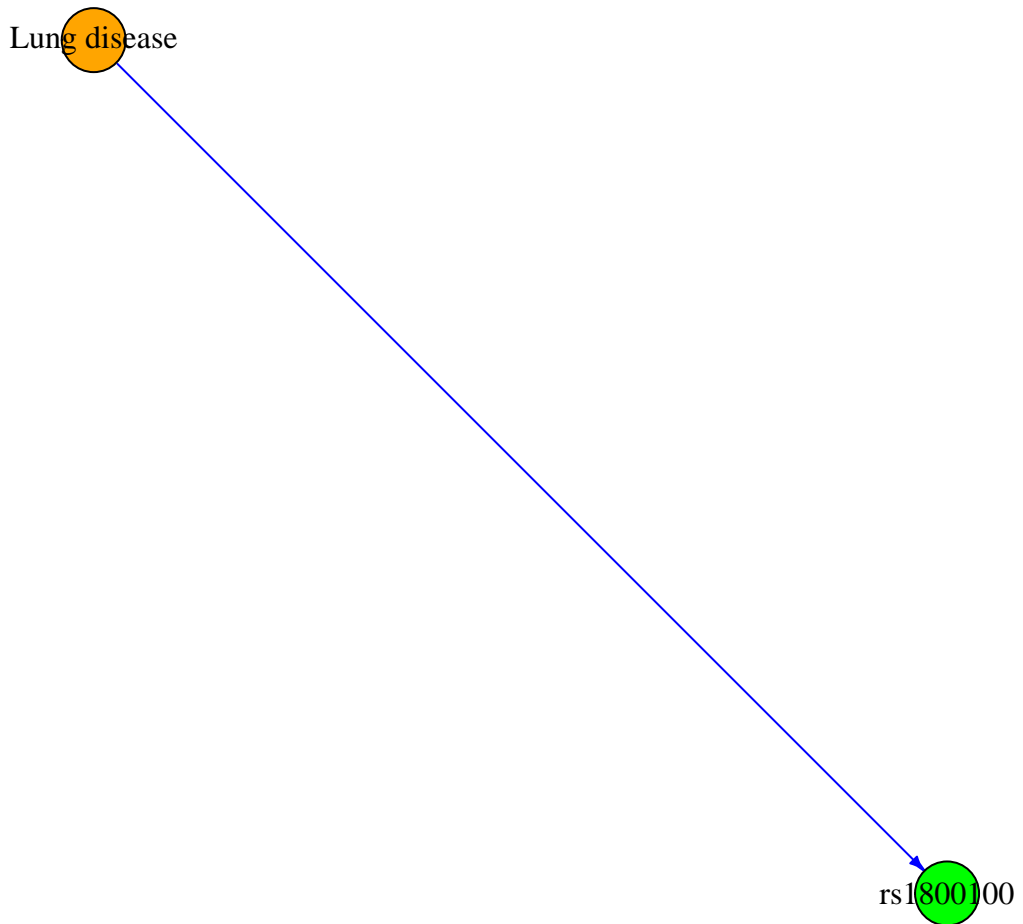

## Variant–Disease Network (Luscan–lumish syndrome)

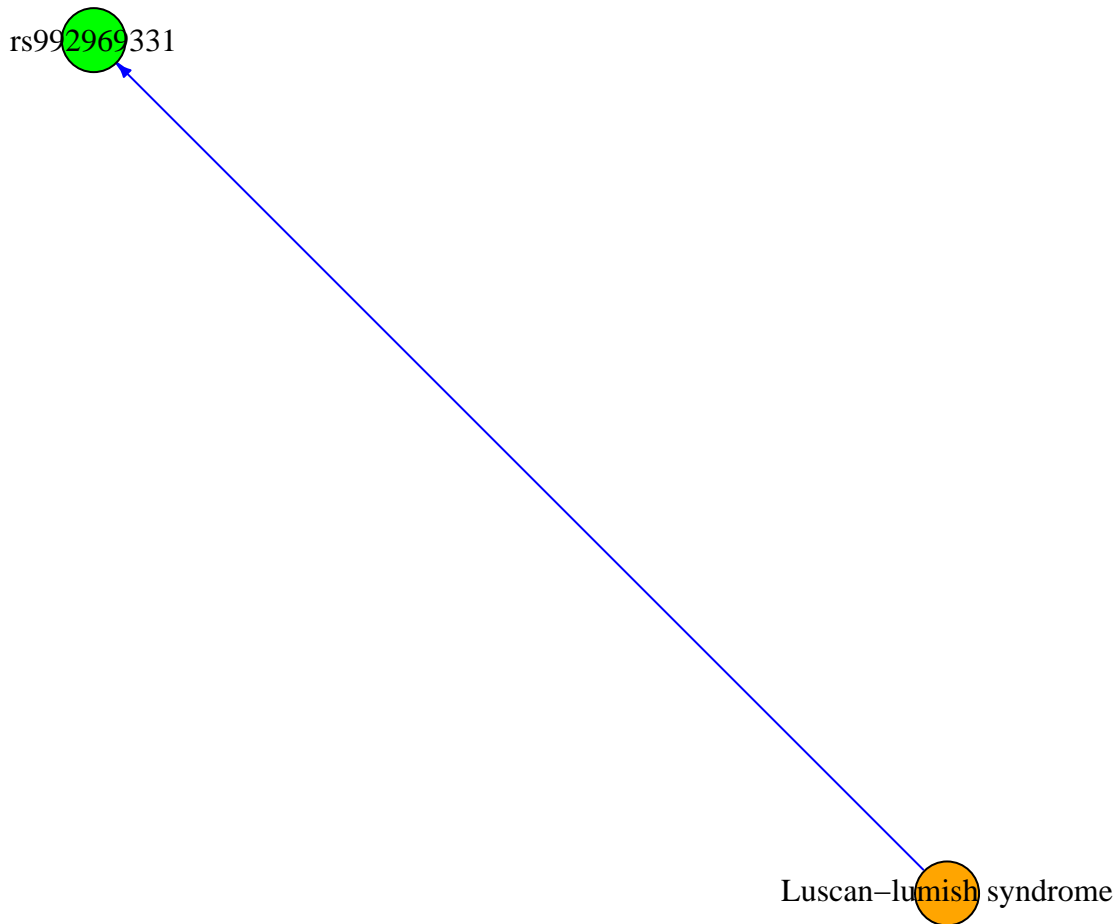

Variant–Disease Network (Lymphangiomyomatosis)

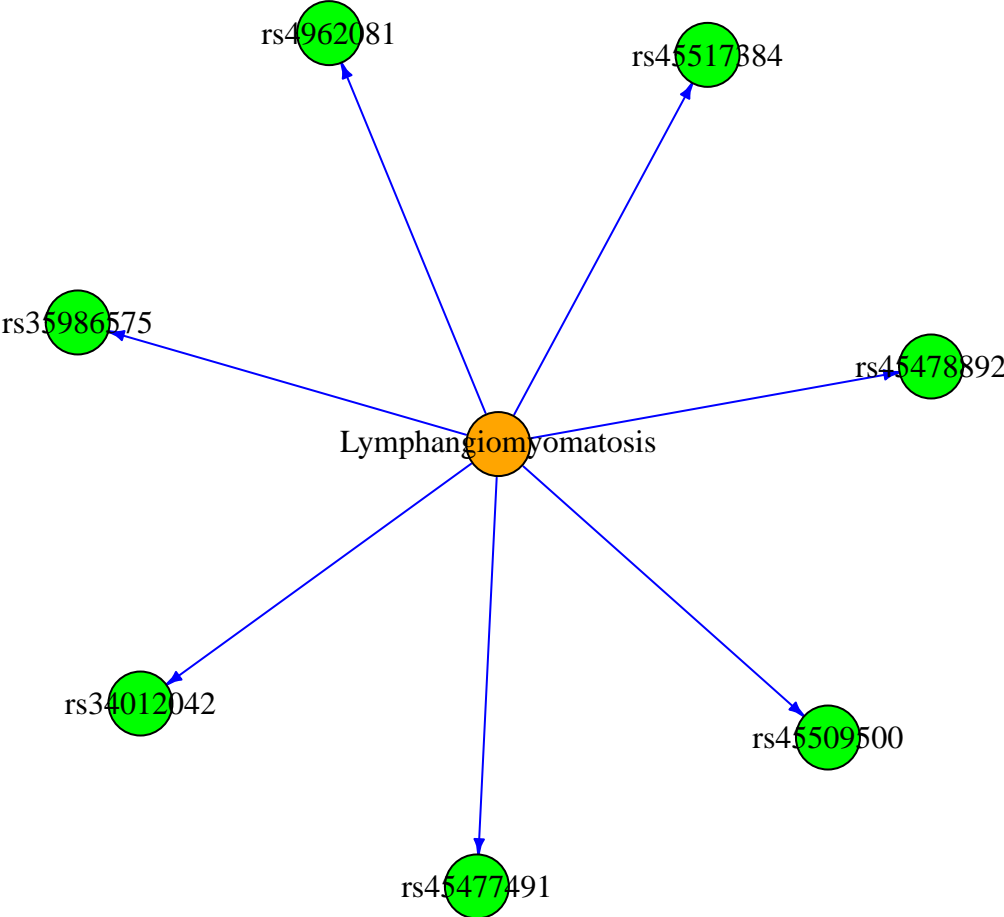

## Variant-Disease Network (Lymphedema)

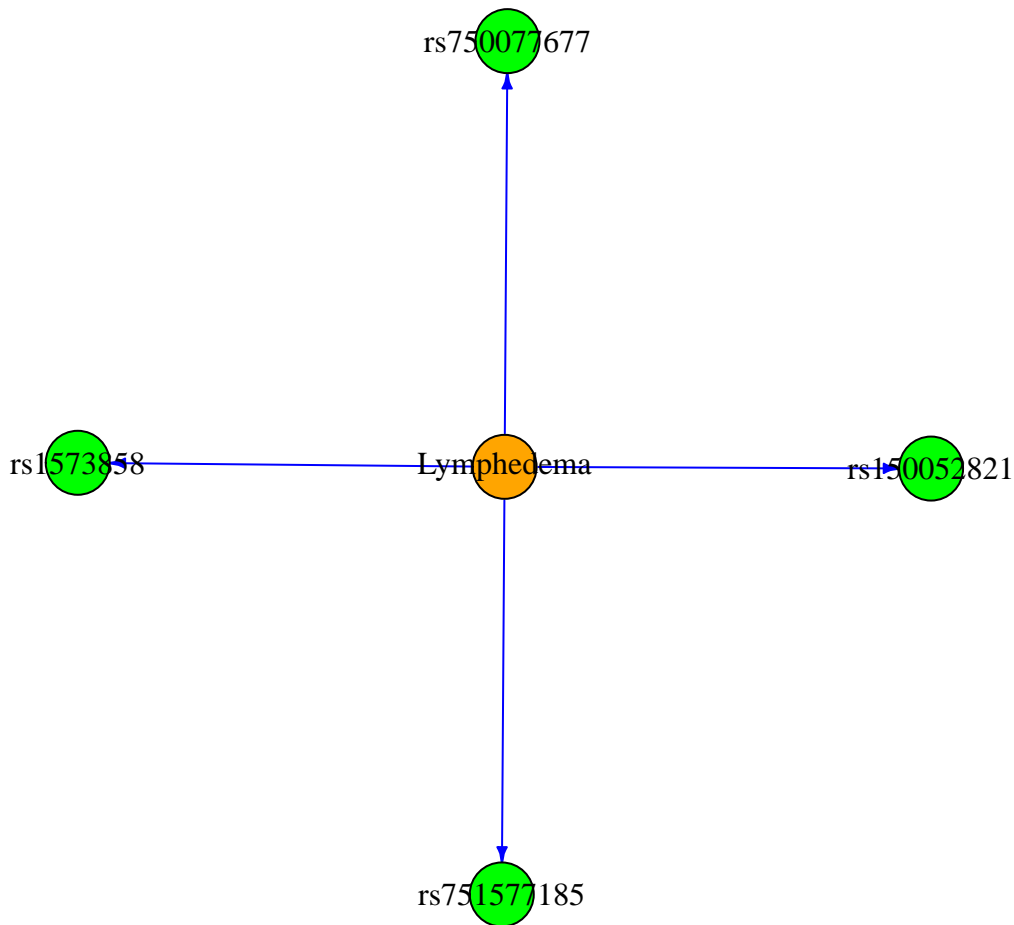

## Variant–Disease Network (Lymphoproliferative syndrome)

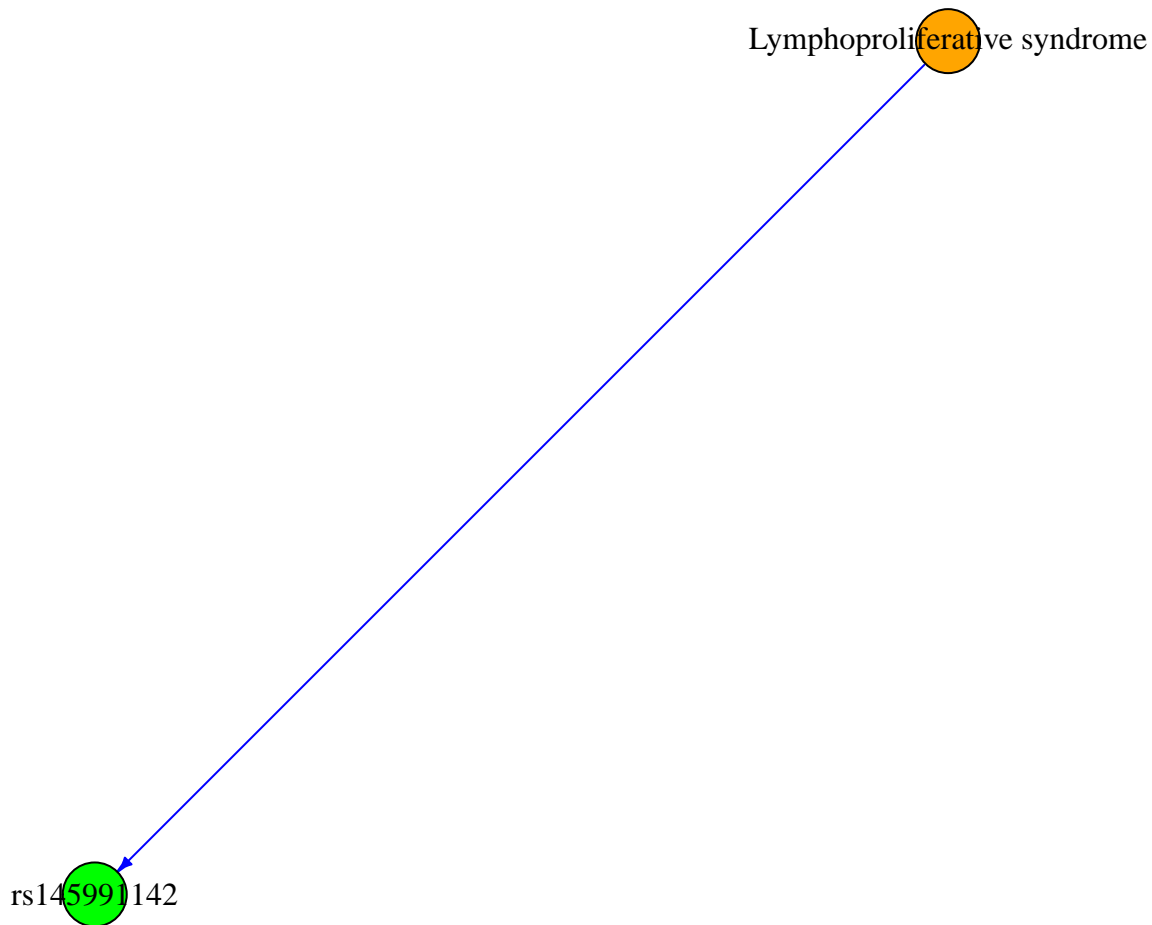

# Variant–Disease Network (Lymphoproliferative syndrome 1)

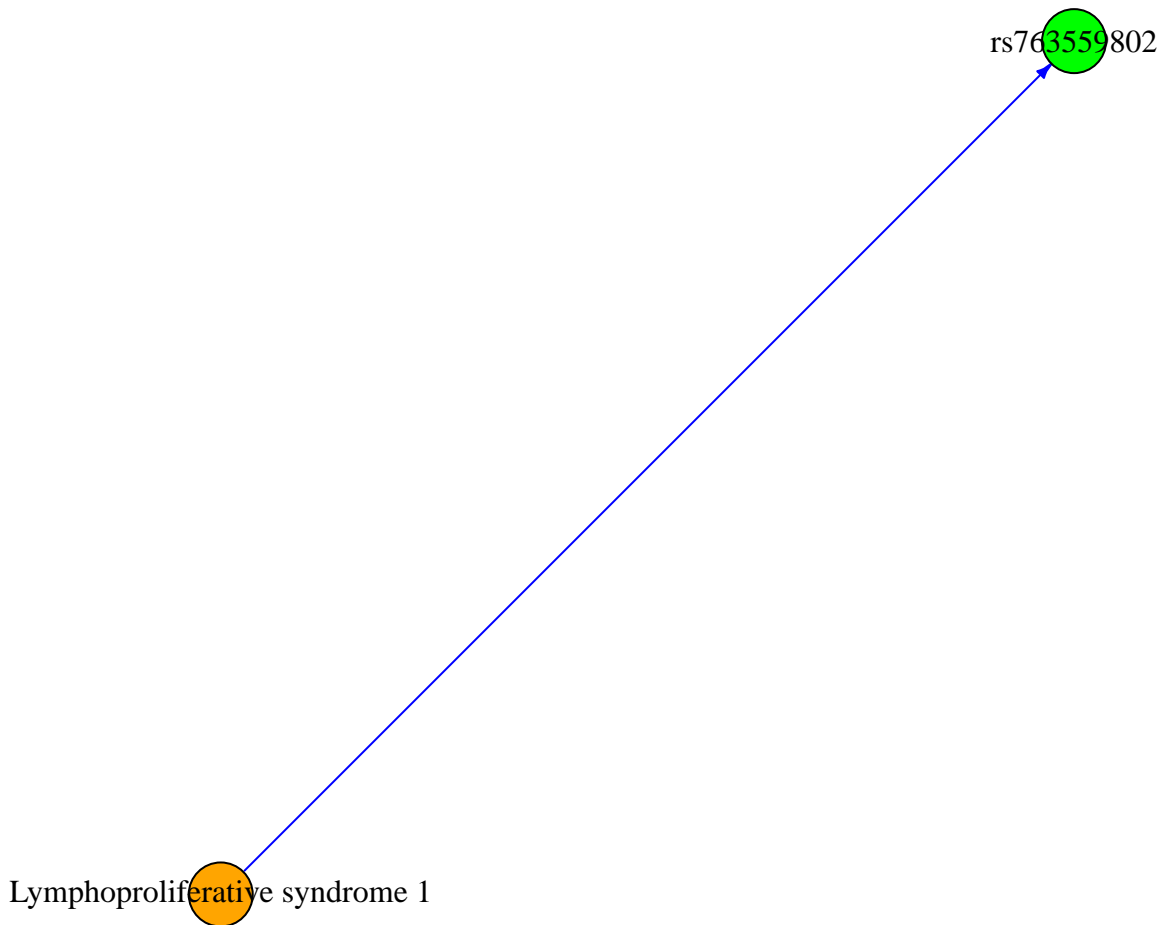

## Variant–Disease Network (Lynch syndrome)

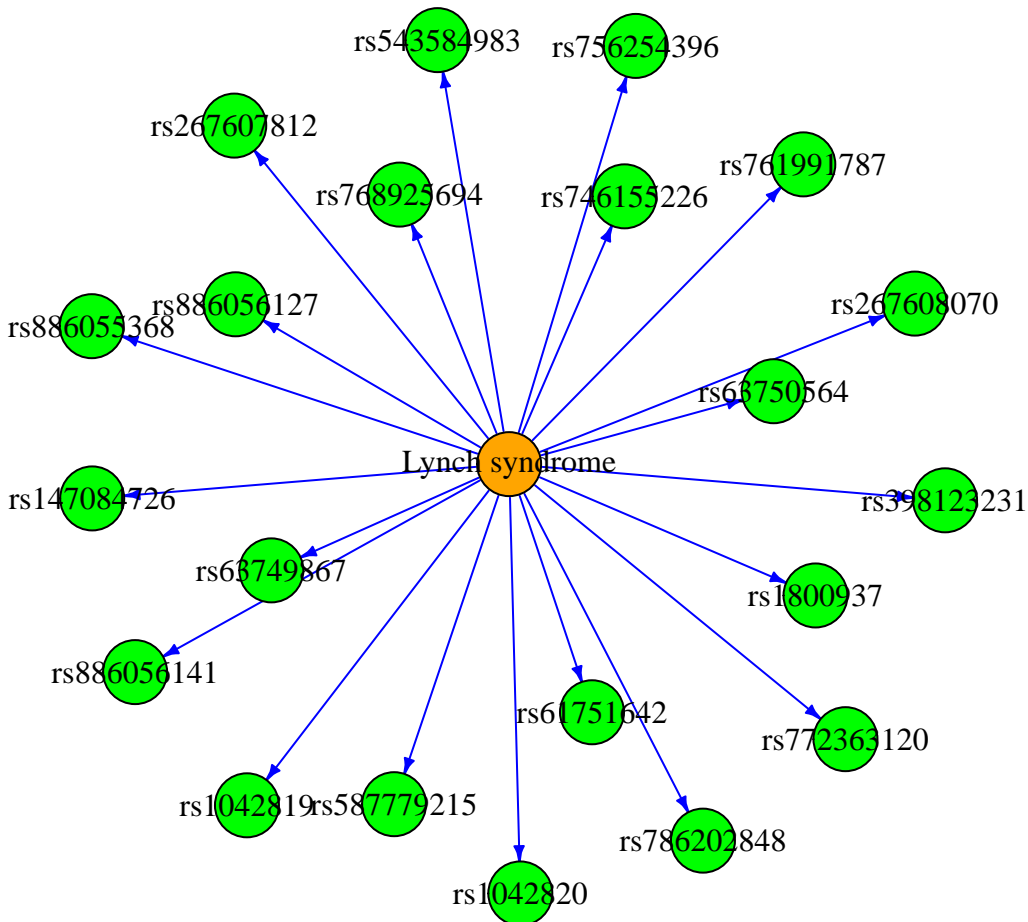

## Variant–Disease Network (Lynch syndrome II)

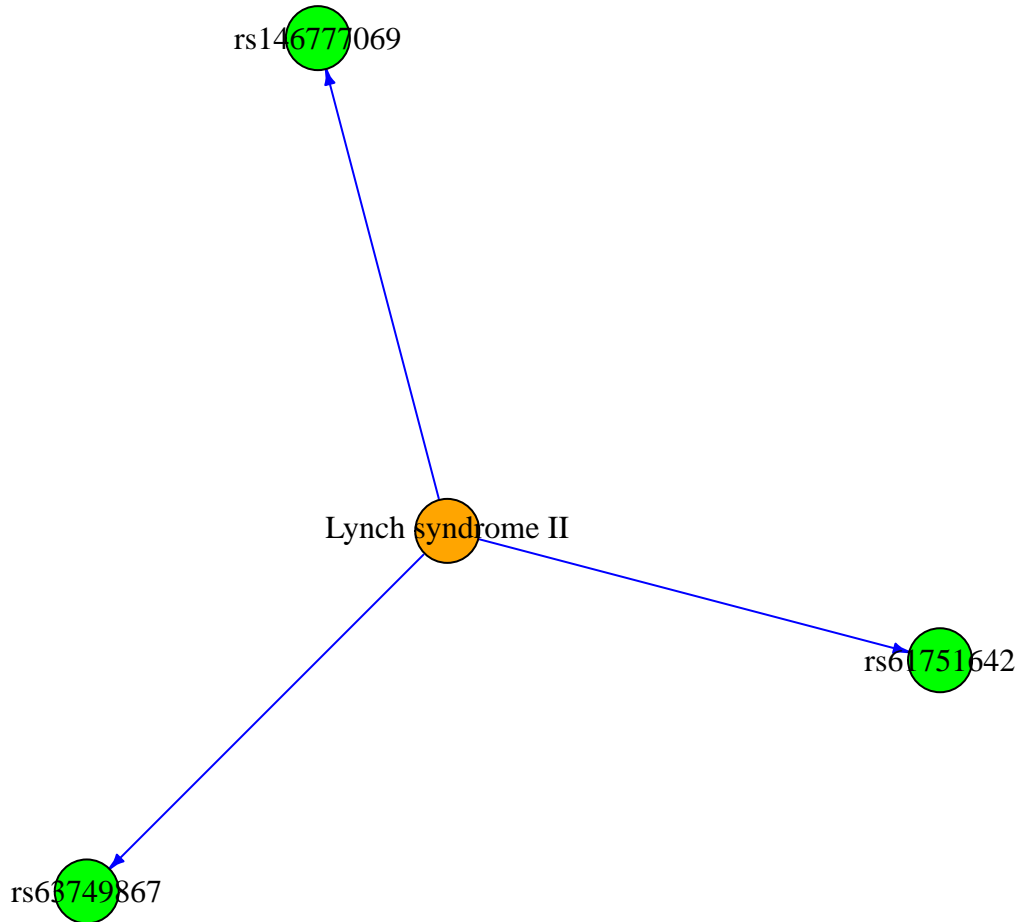



## Variant–Disease Network (Lysinuric protein intolerance)

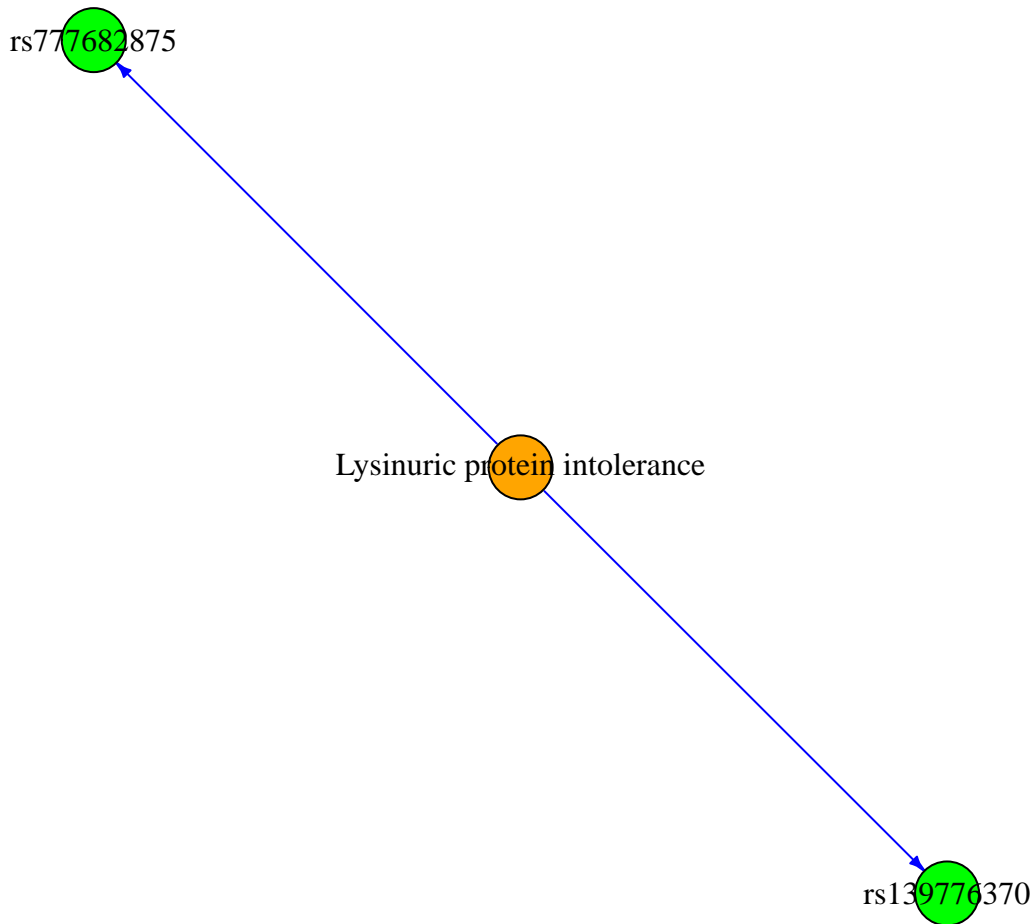

## Variant–Disease Network (Macular degeneration)

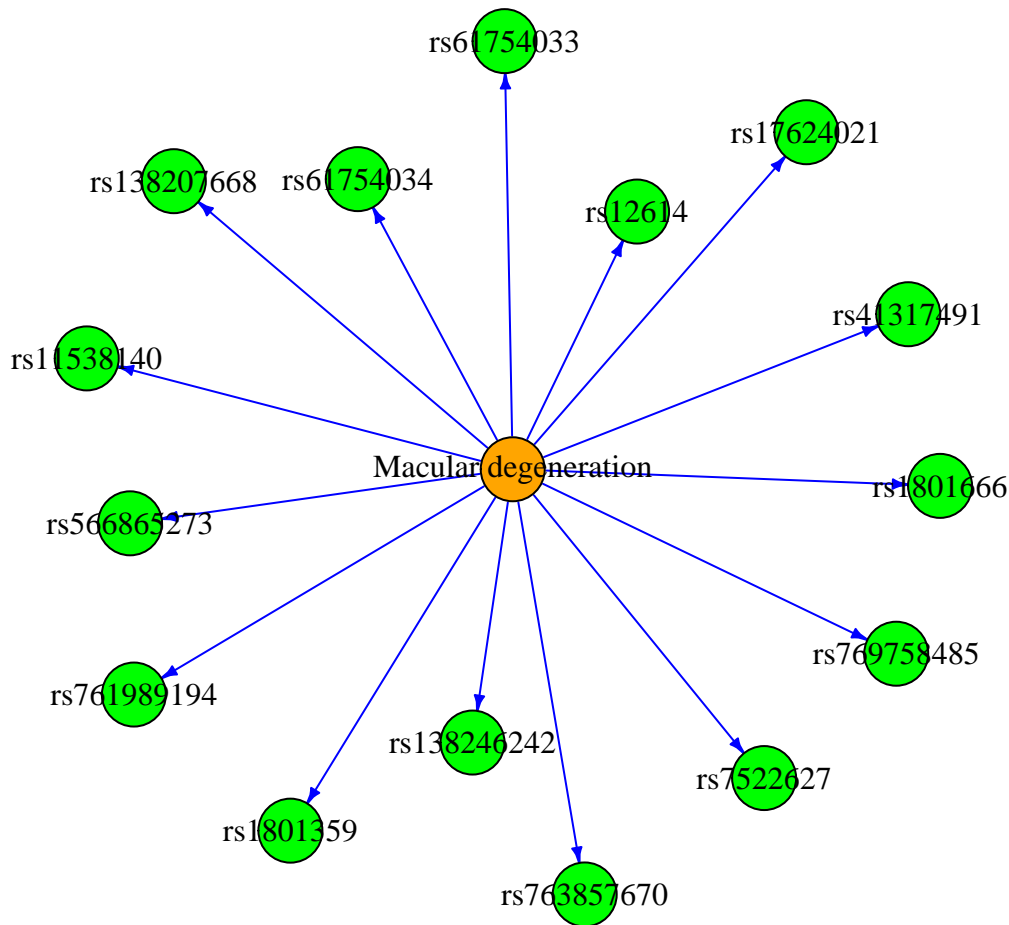

## Variant–Disease Network (Majeed syndrome)

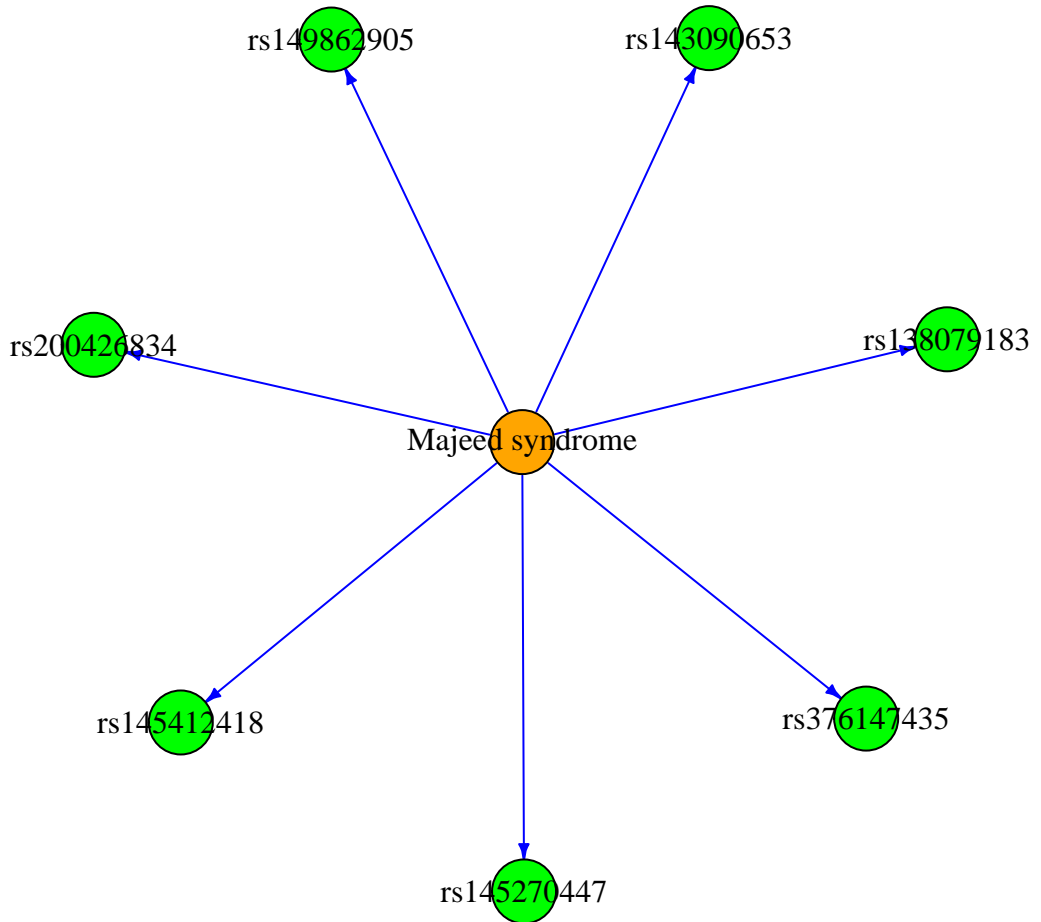

**Variant–Disease Network (Malignant melanoma of skin)**

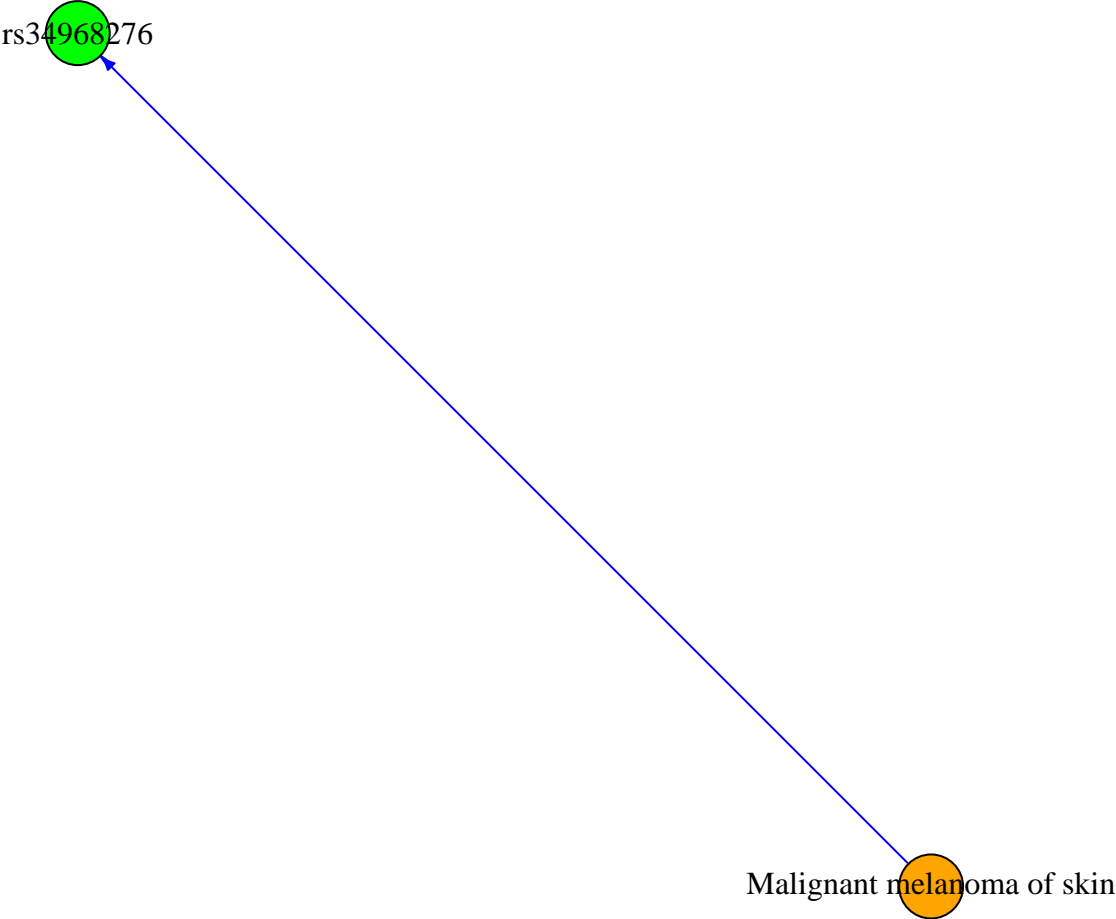

## Variant–Disease Network (Malignant tumor of esophagus)

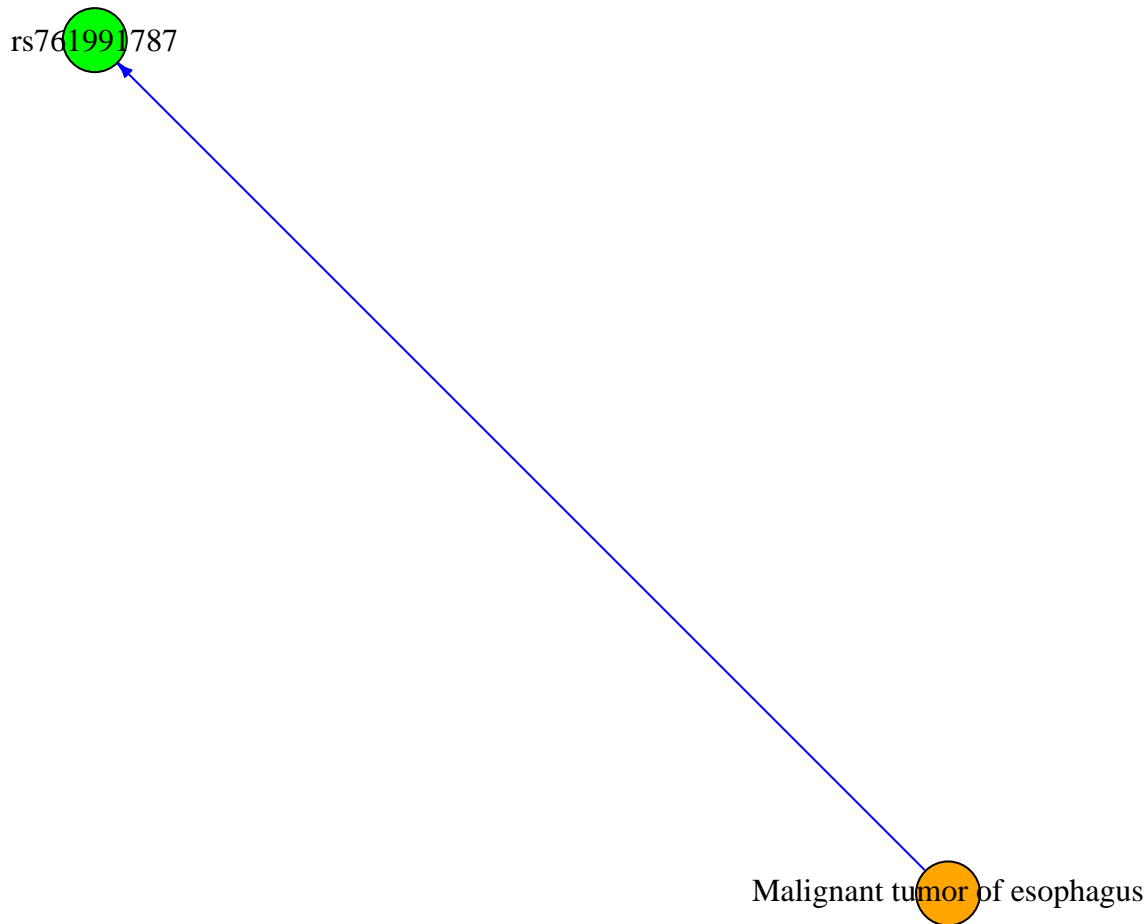

# Variant–Disease Network (Malignant tumor of prostate)

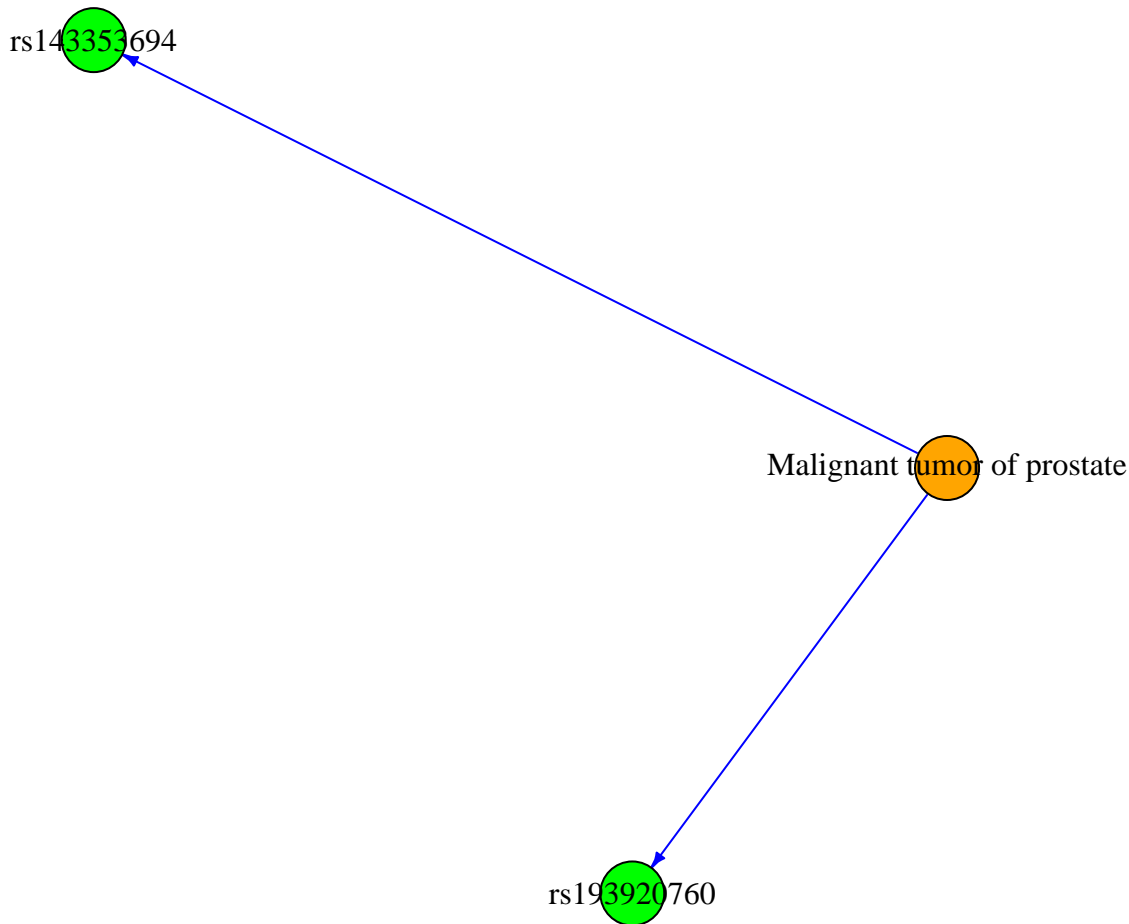

## Variant–Disease Network (Mandibuloacral dysplasia)

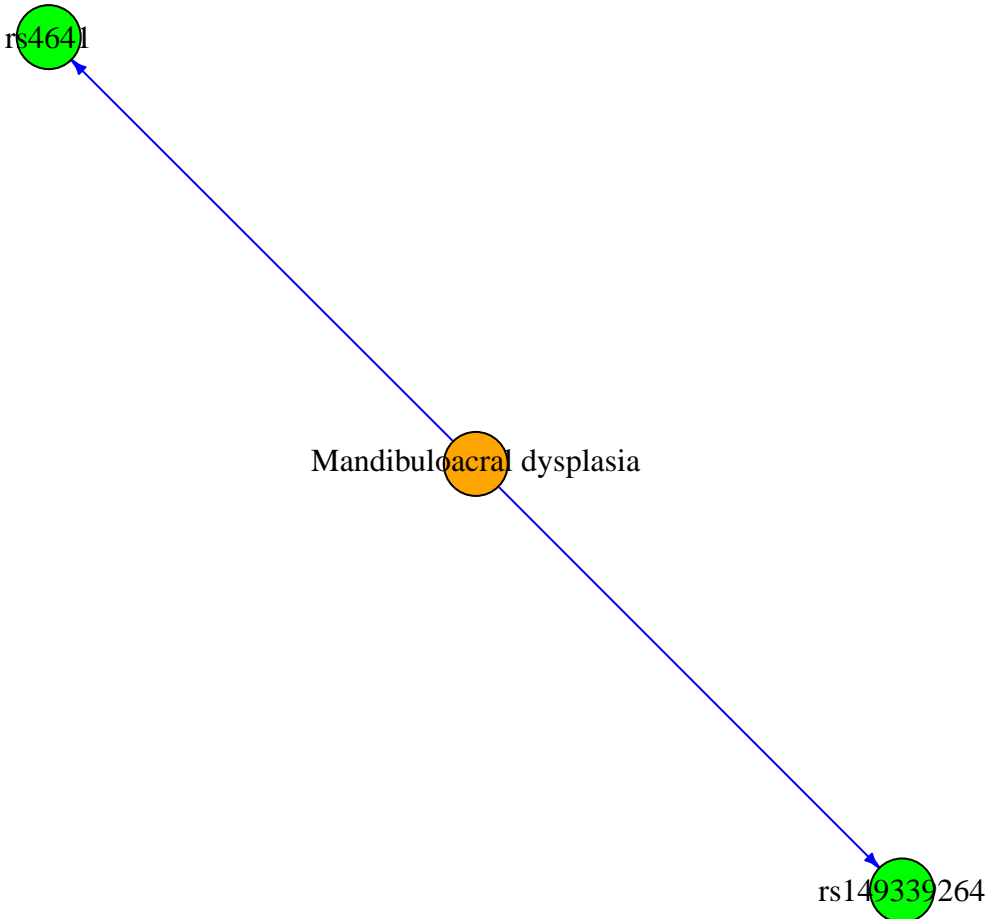

Variant–Disease Network (Mandibuloacral dysplasia with type A lipodystrophy)

Mandibuloacral dysplasia with type A lipodystrophy

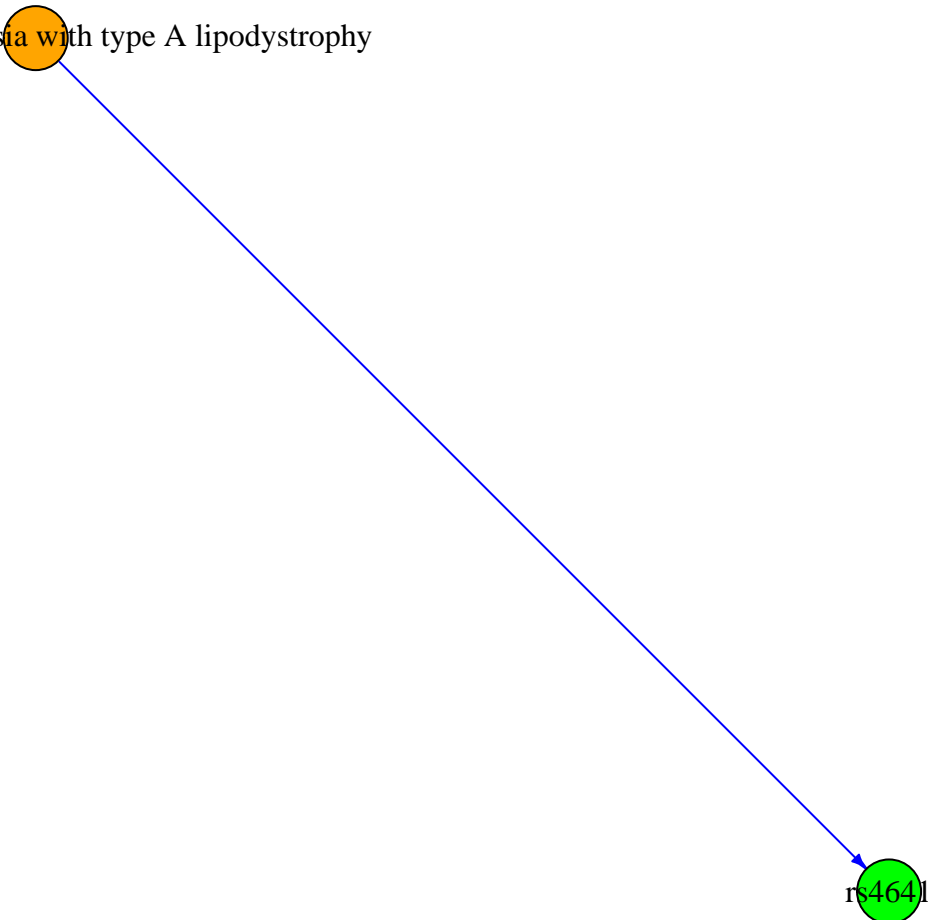



## Variant-Disease Network (Maple syrup urine disease)

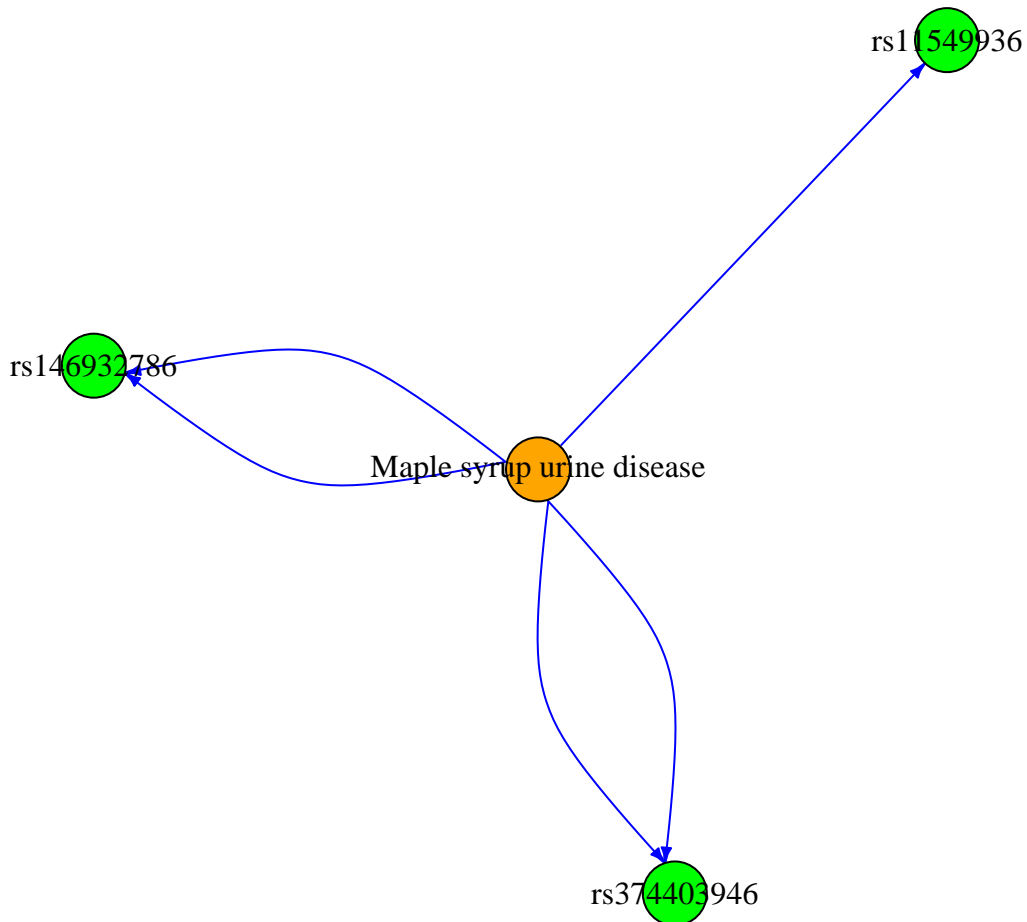

# Variant–Disease Network (MAPT–Related Spectrum Disorders)

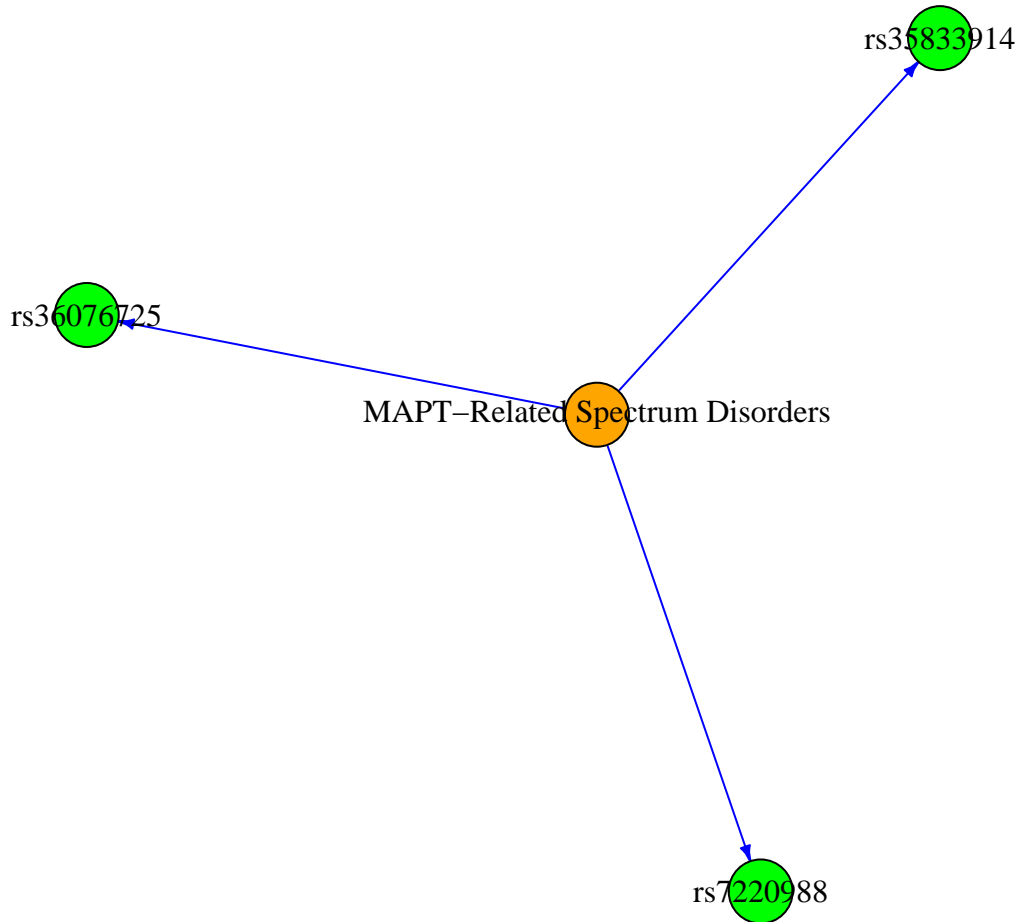

## Variant–Disease Network (Marfan lipodystrophy syndrome)

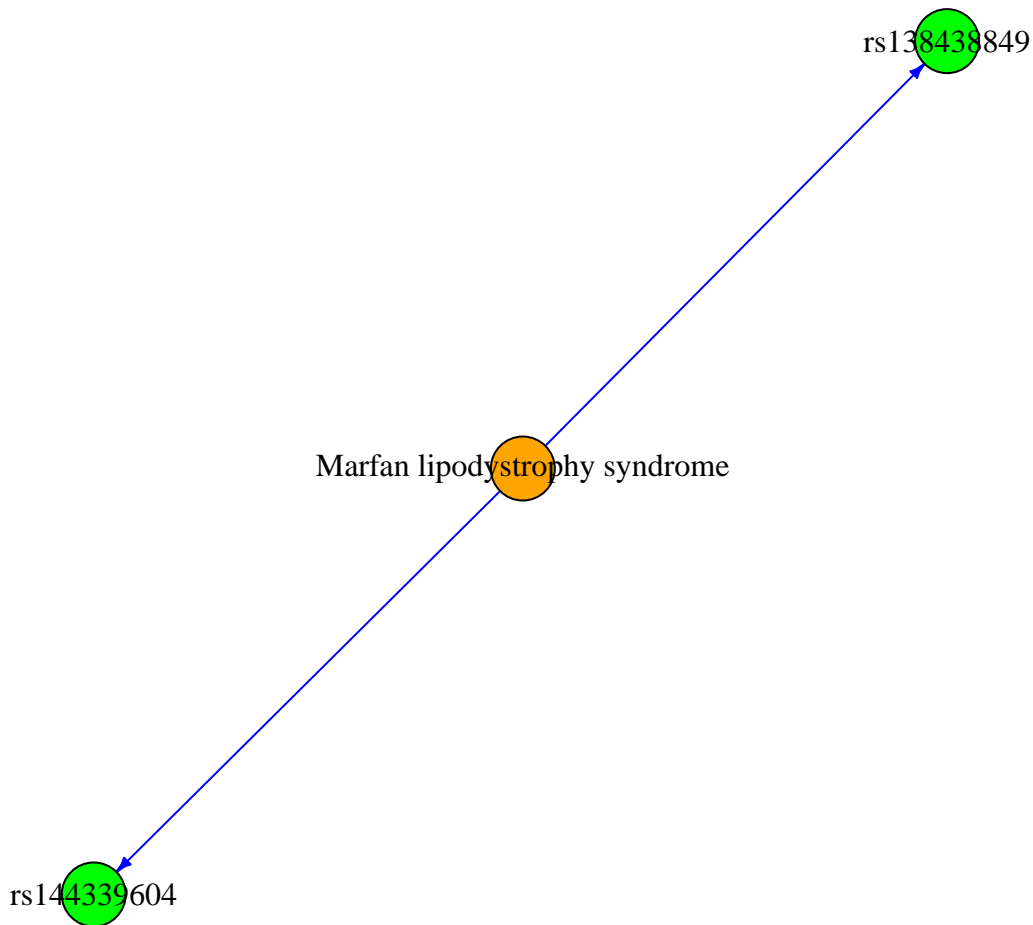

Variant–Disease Network (Marfan syndrome)

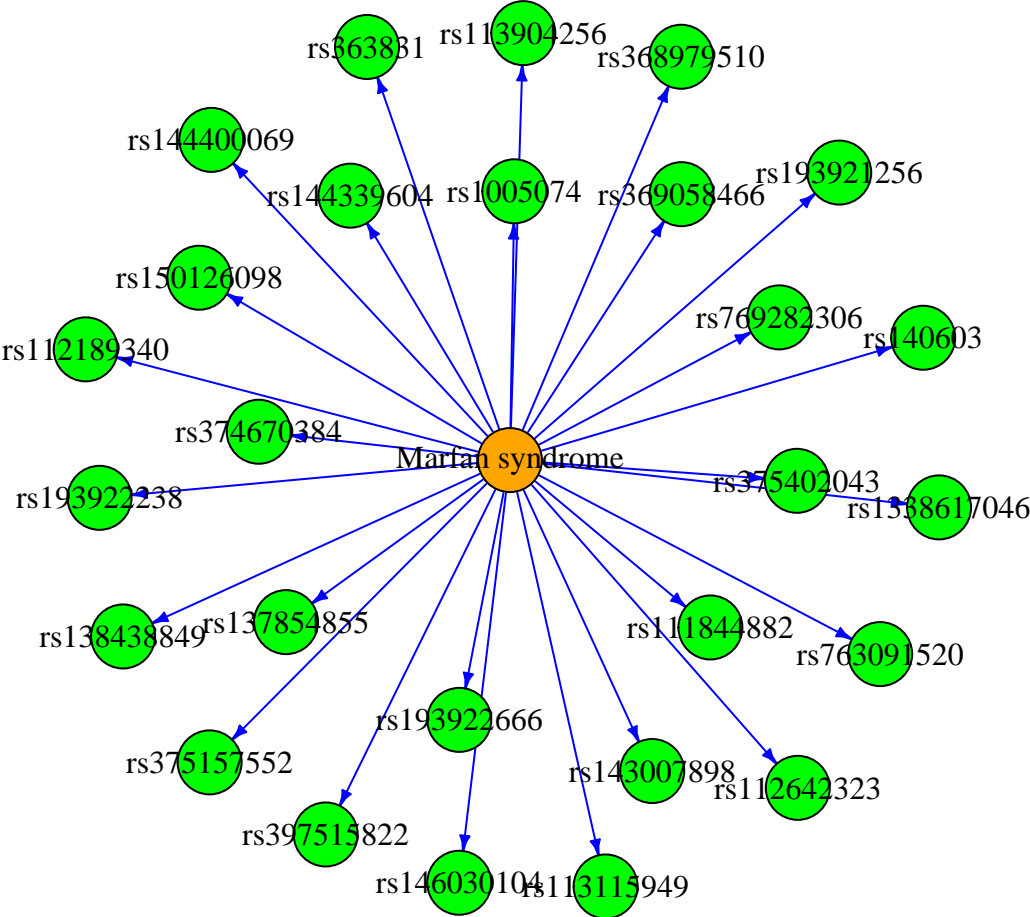

# work (Marfan Syndrome/Loeys–Dietz Syndrome/Familial Thoracic Aortic Aneurysms and Dissections)

Dietz Syndrome/Familial Thoracic Aortic Aneurysms and Dissections

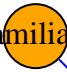

rs193921256

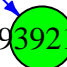

## Variant–Disease Network (Martsolf syndrome)

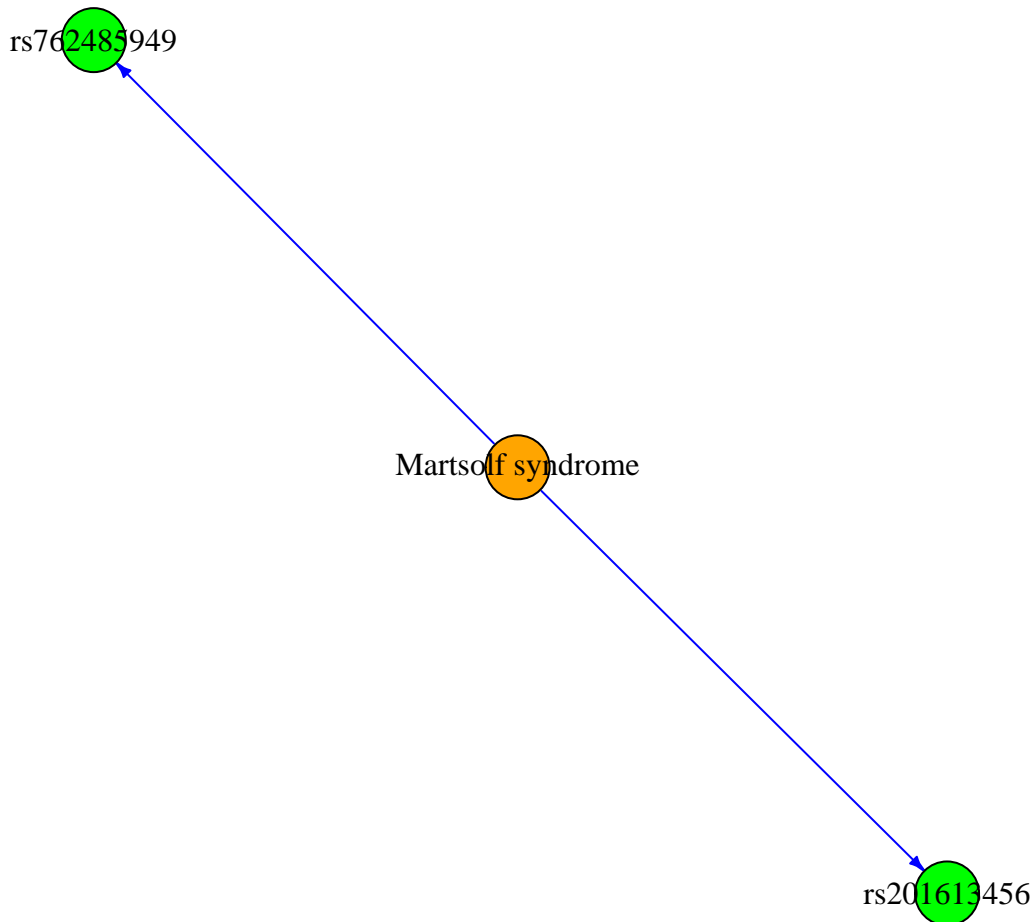

## Variant–Disease Network (MASP2 deficiency)

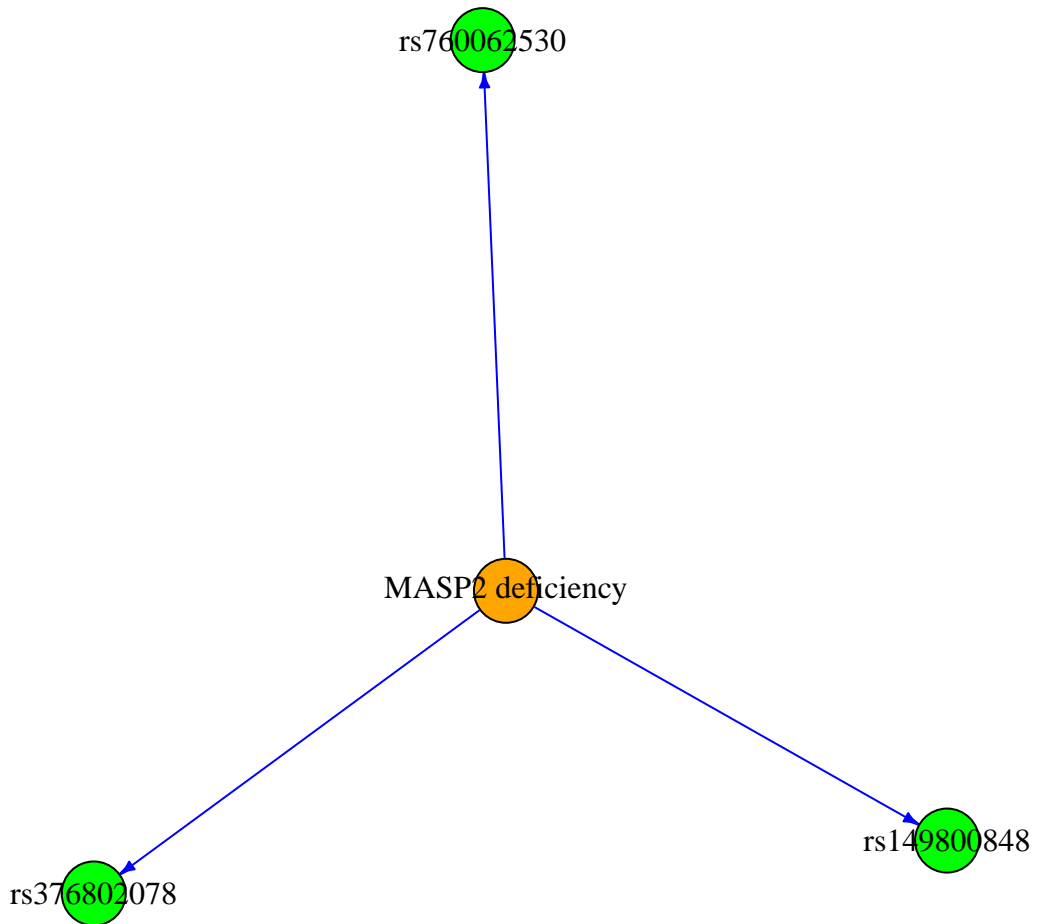

## Variant-Disease Network (MASS syndrome)

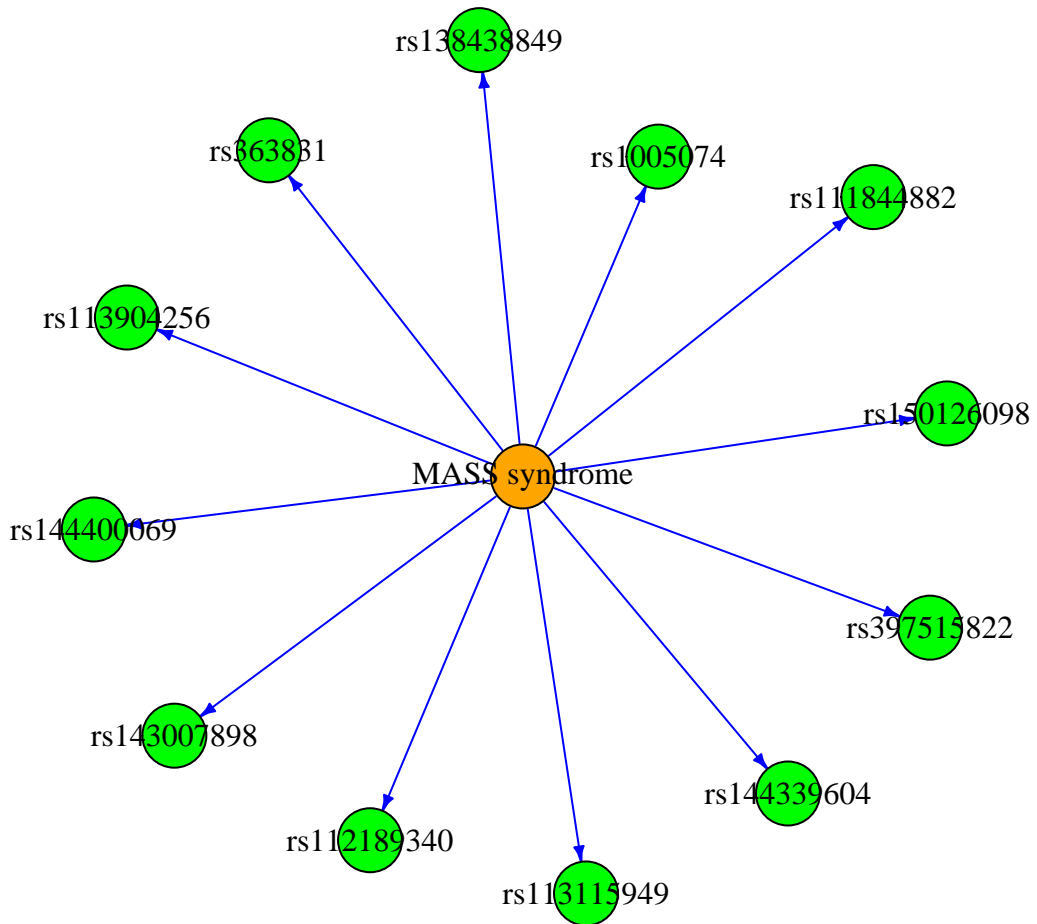



## Variant-Disease Network (Mastocytosis)

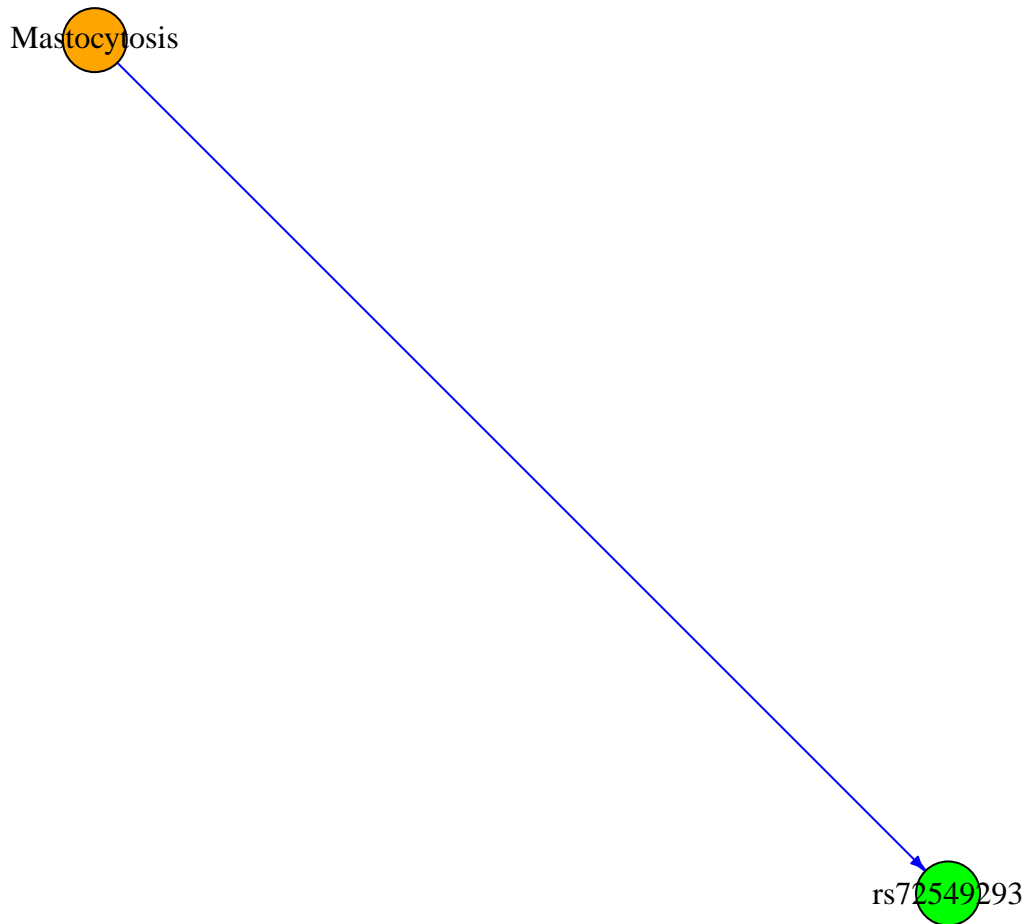

**Variant–Disease Network (Maturity onset diabetes mellitus in young)**

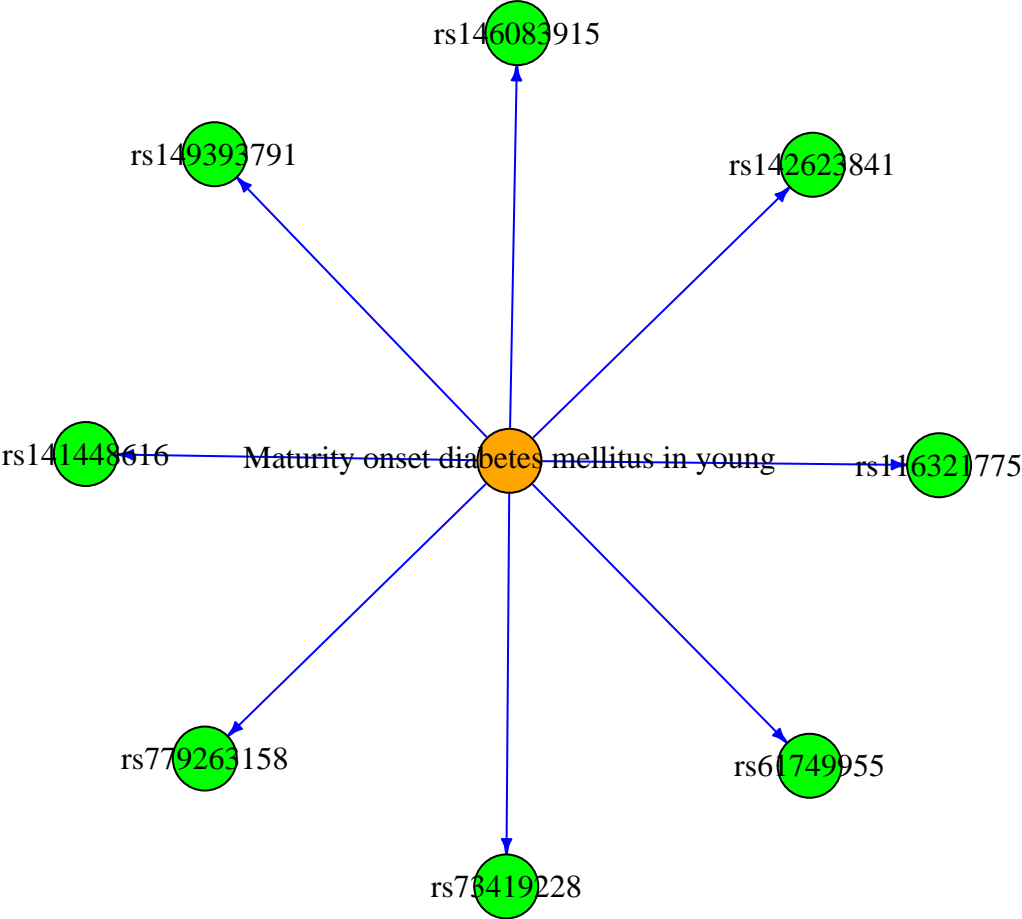

Variant–Disease Network (Maturity–onset diabetes of the young)

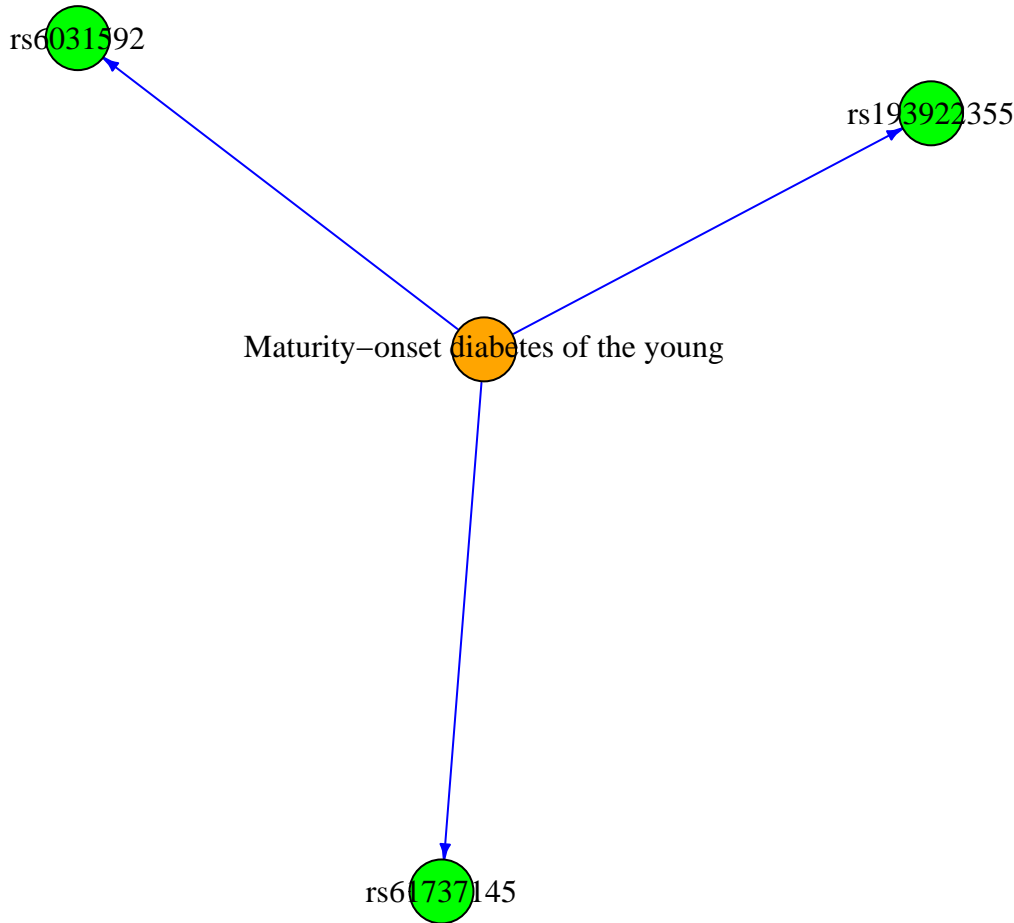

**Variant–Disease Network (McKusick Kaufman syndrome)**

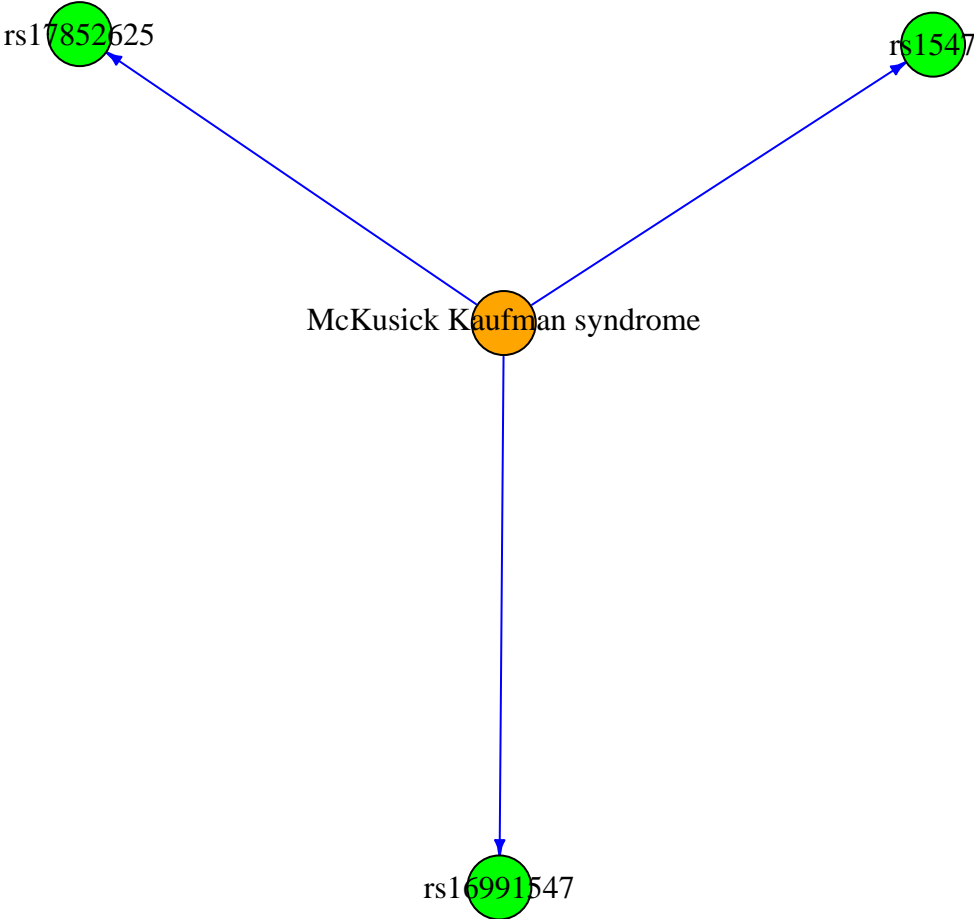

## Variant–Disease Network (Meacham syndrome)

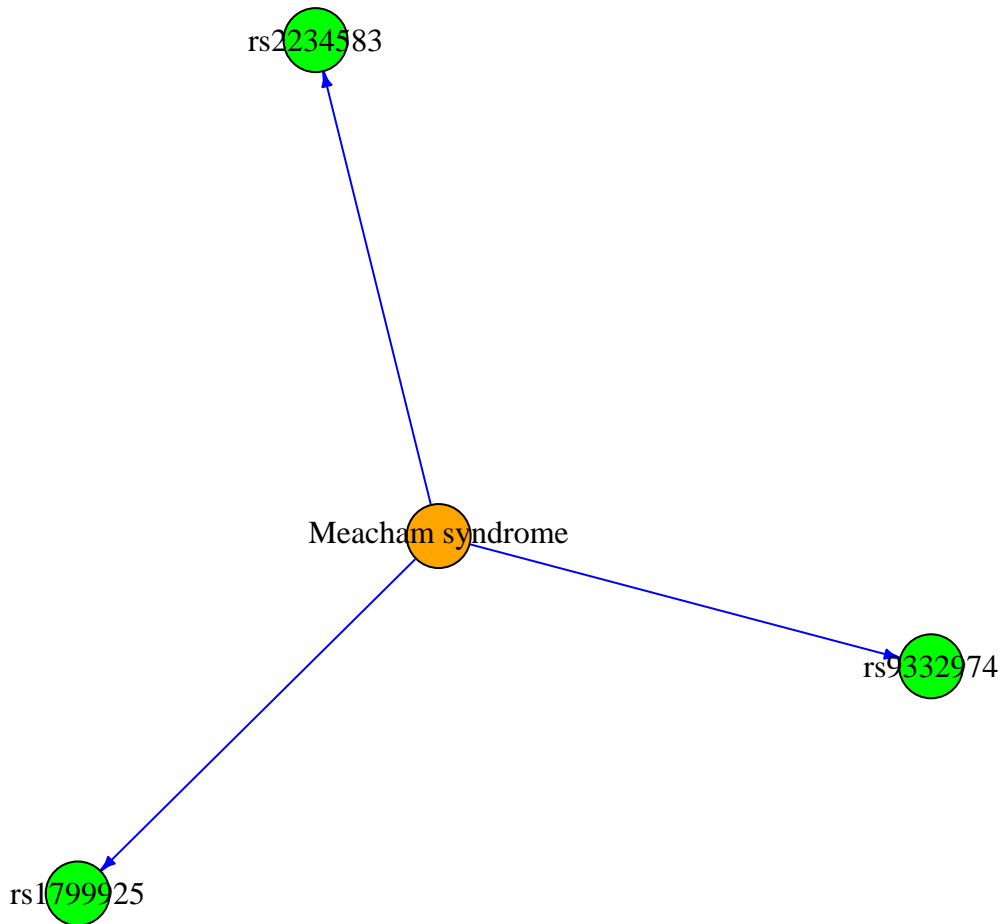

## Variant–Disease Network (Meckel–Gruber syndrome)

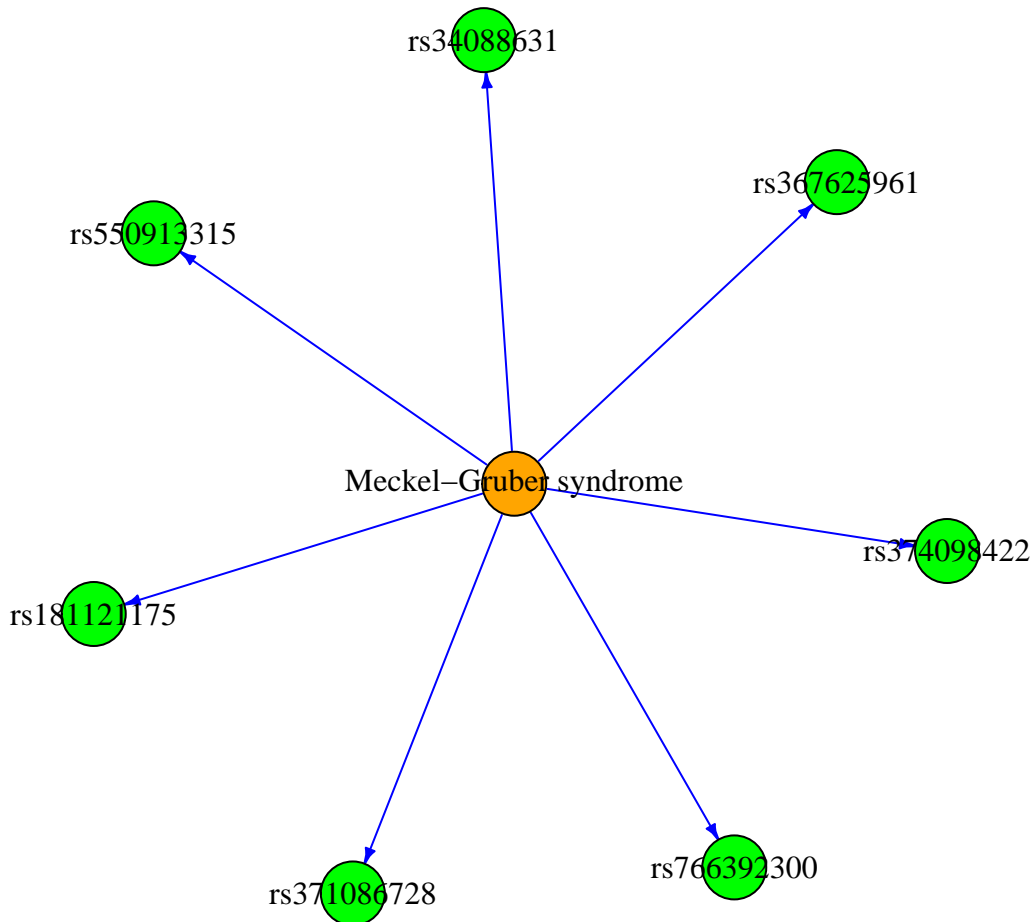

**Variant–Disease Network (Medullary cystic kidney disease 2)**

rs78691203

Medullary cystic kidney disease 2



# ant-Disease Network (Megalencephalic leukoencephalopathy with subcortical

rs777480834

Megalencephalic leukoencephalopathy with subcortical cysts

rs201011094

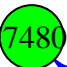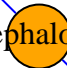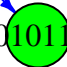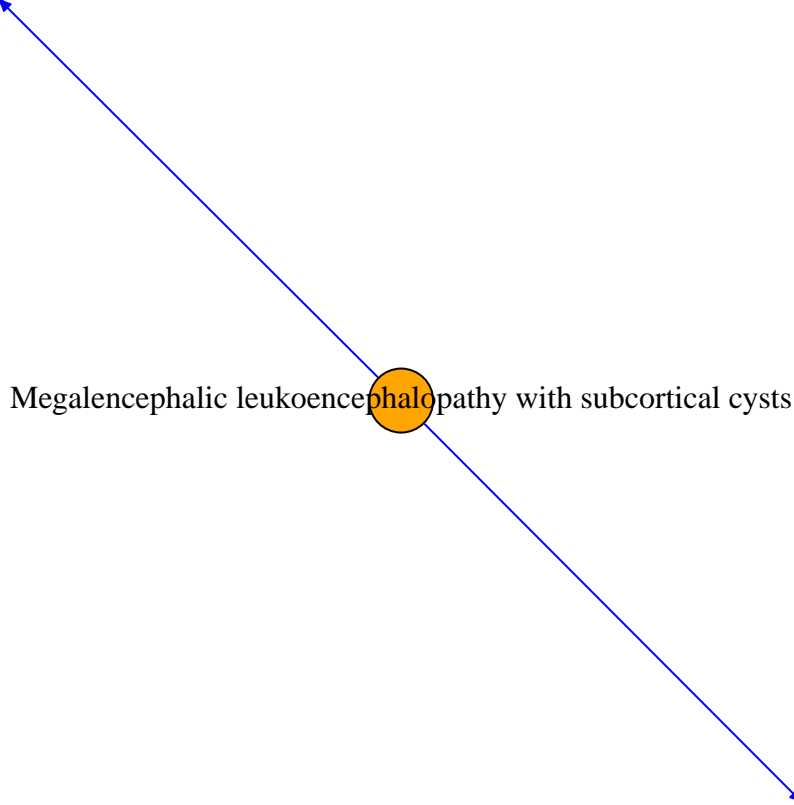



# Disease Network (Megalencephaly-polymicrogyria-polydactyly-hydrocephalus)

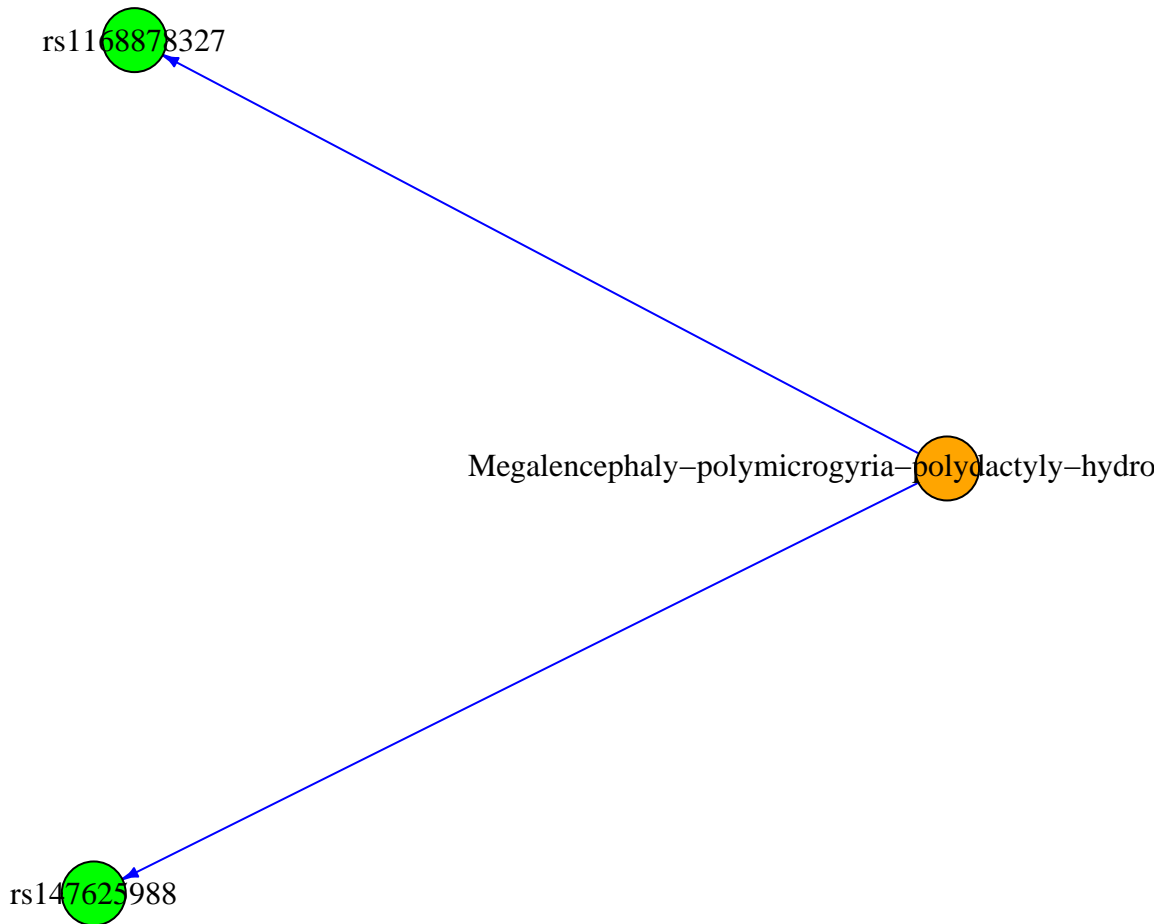

# sease Network (Megalencephaly-polymicrogyria-polydactyly-hydrocephalus)

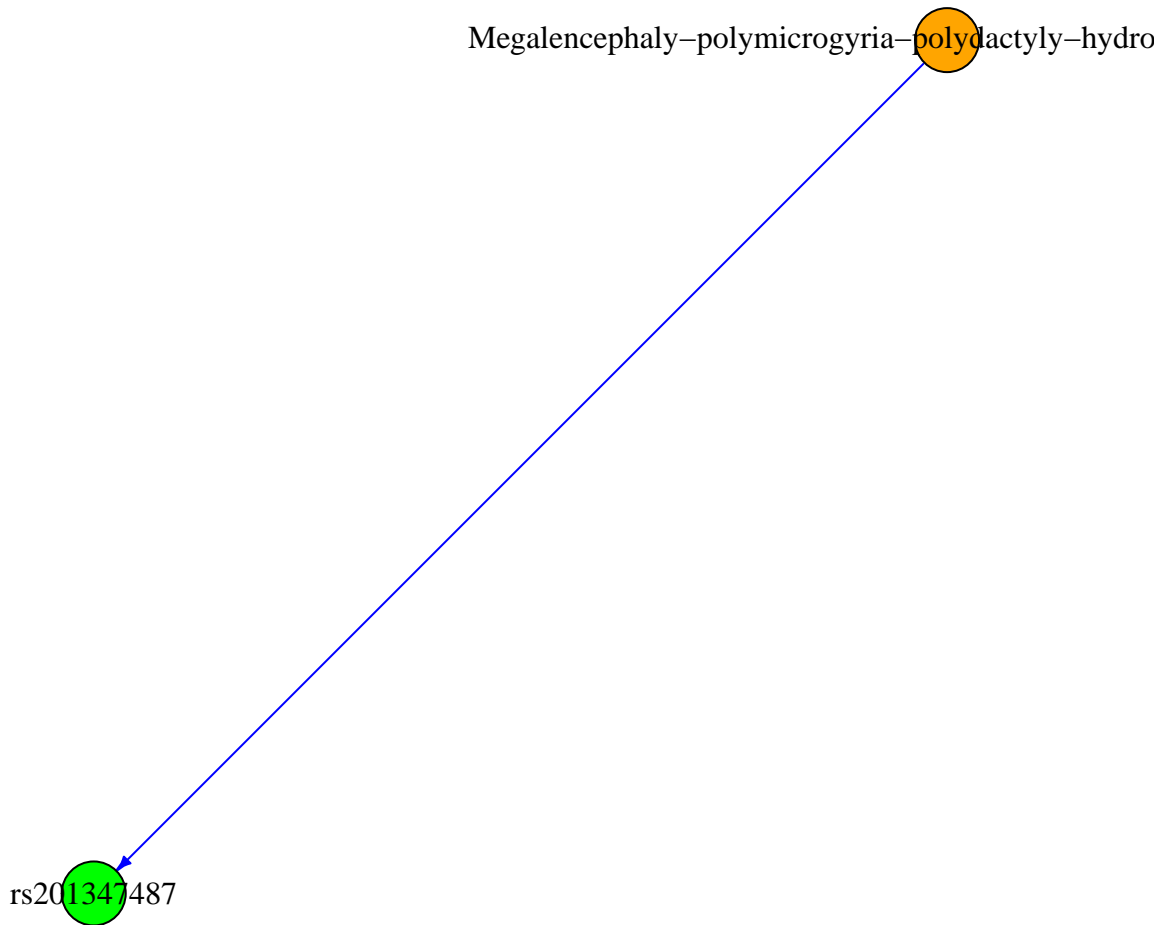

## Variant–Disease Network (Megaloblastic anemia)

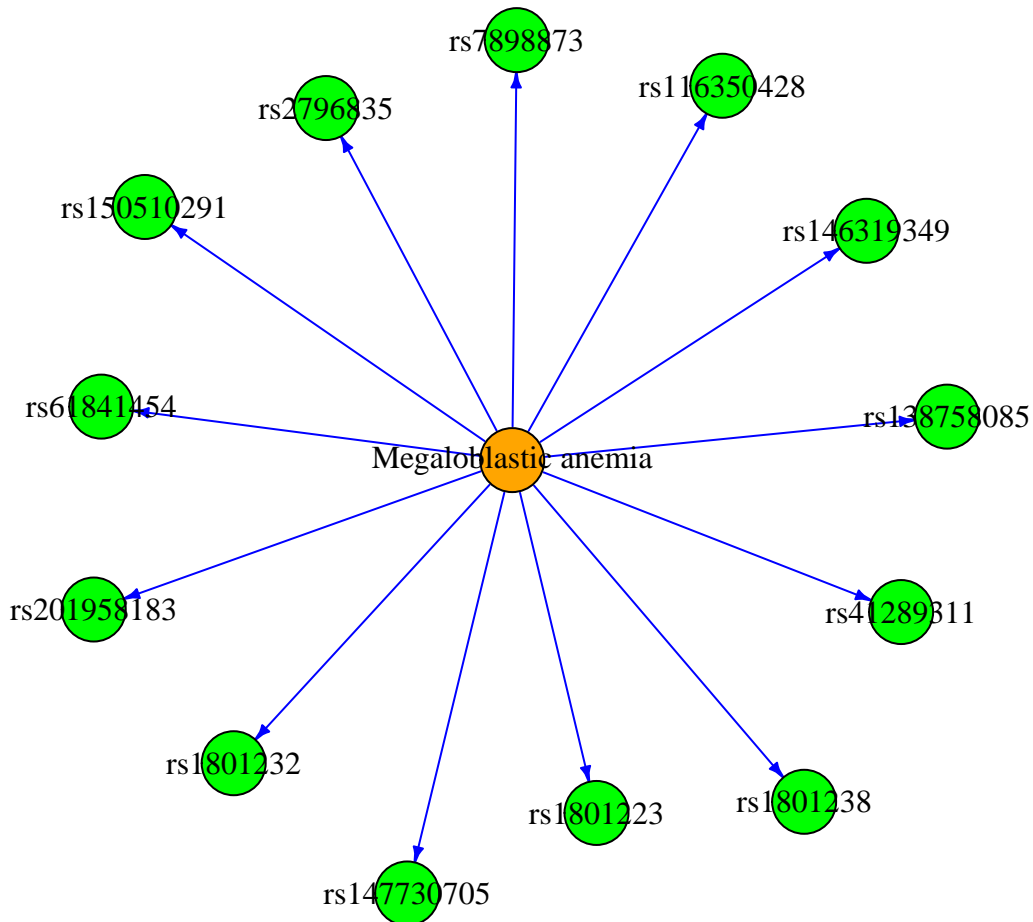

# Variant-Disease Network (Megaloblastic anemia due to inborn errors of metab

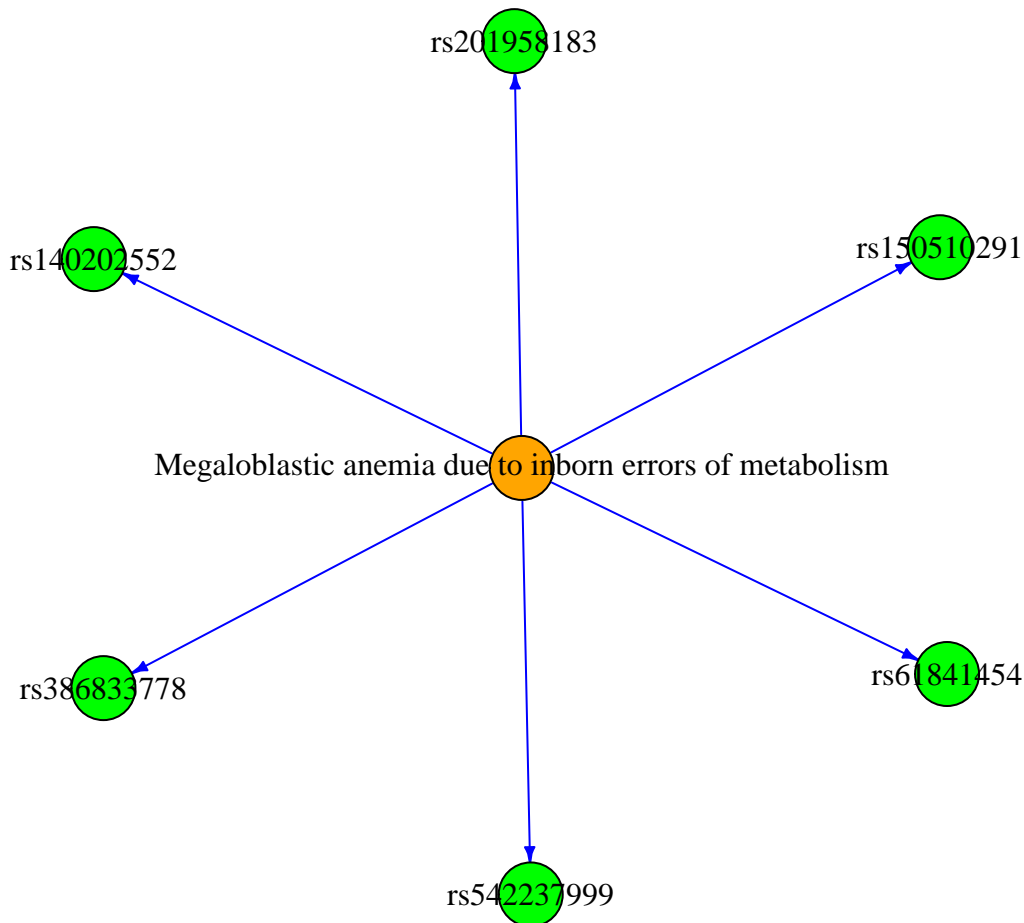

Variant–Disease Network (Meier–gorlin syndrome 7)

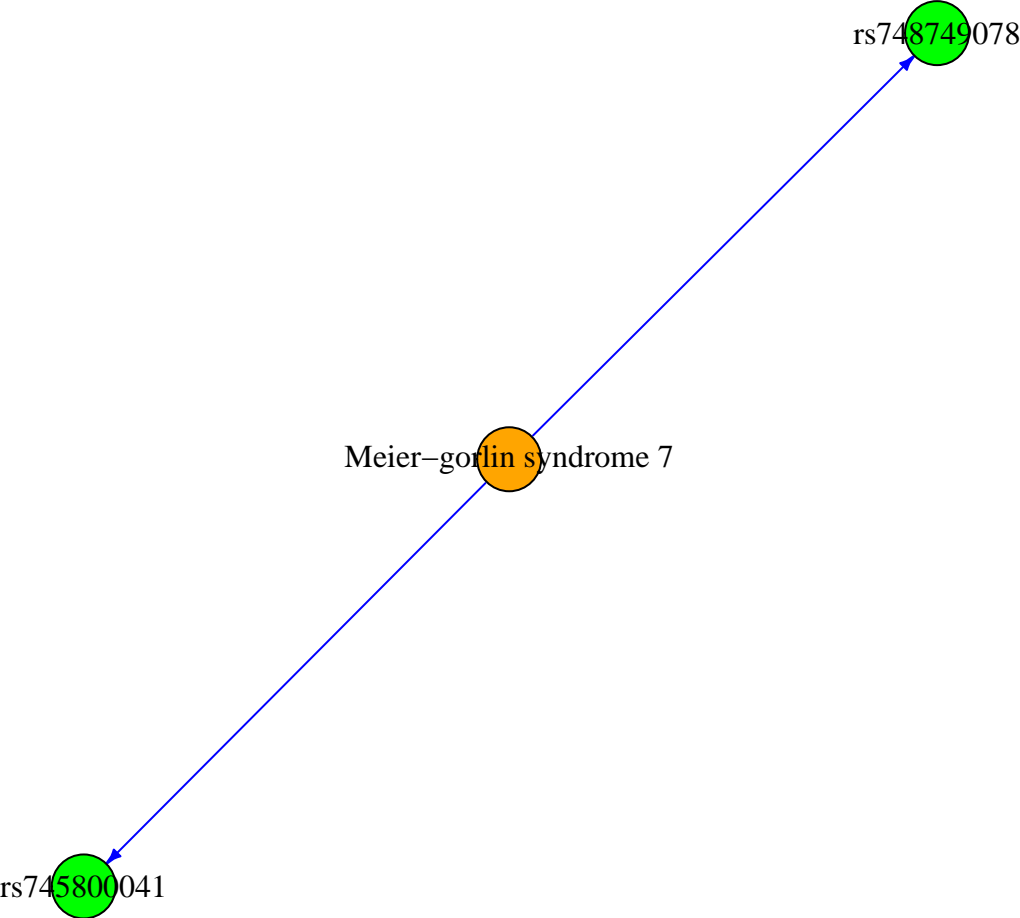

## Variant-Disease Network (Melanoma)

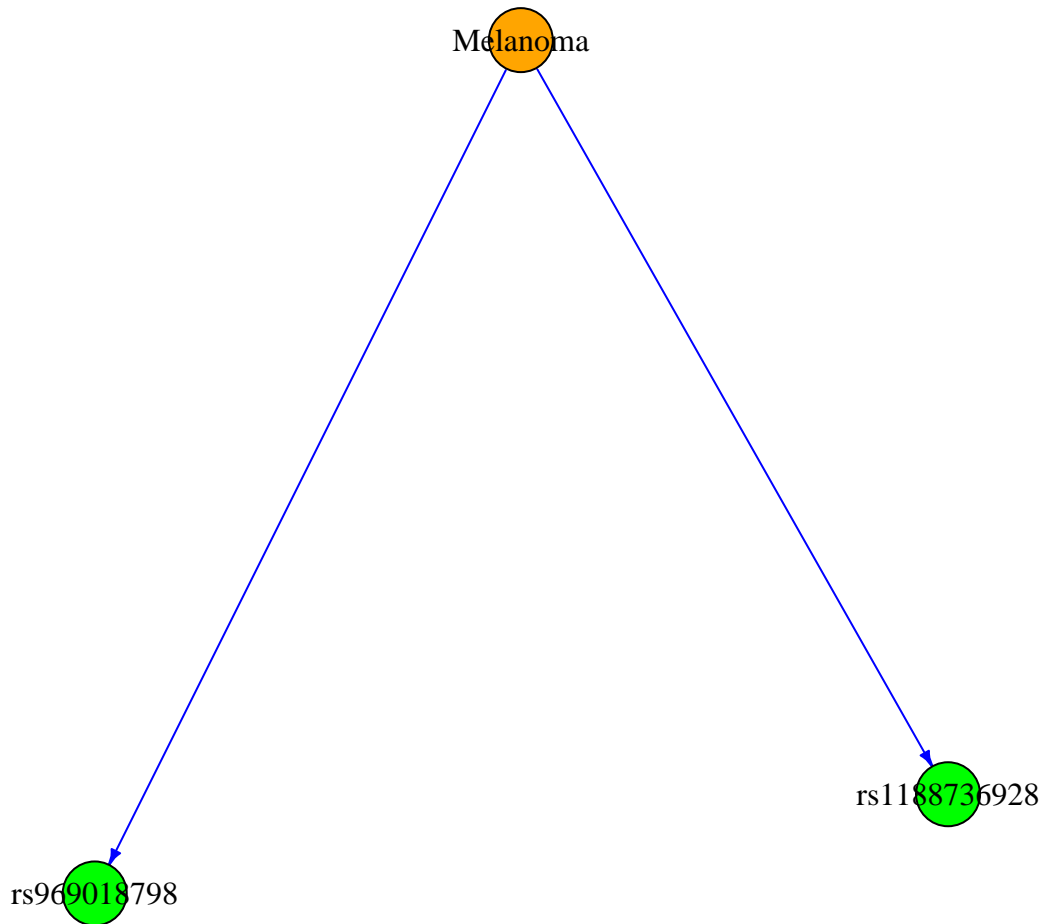

# Variant–Disease Network (Melanoma–pancreatic cancer syndrome)

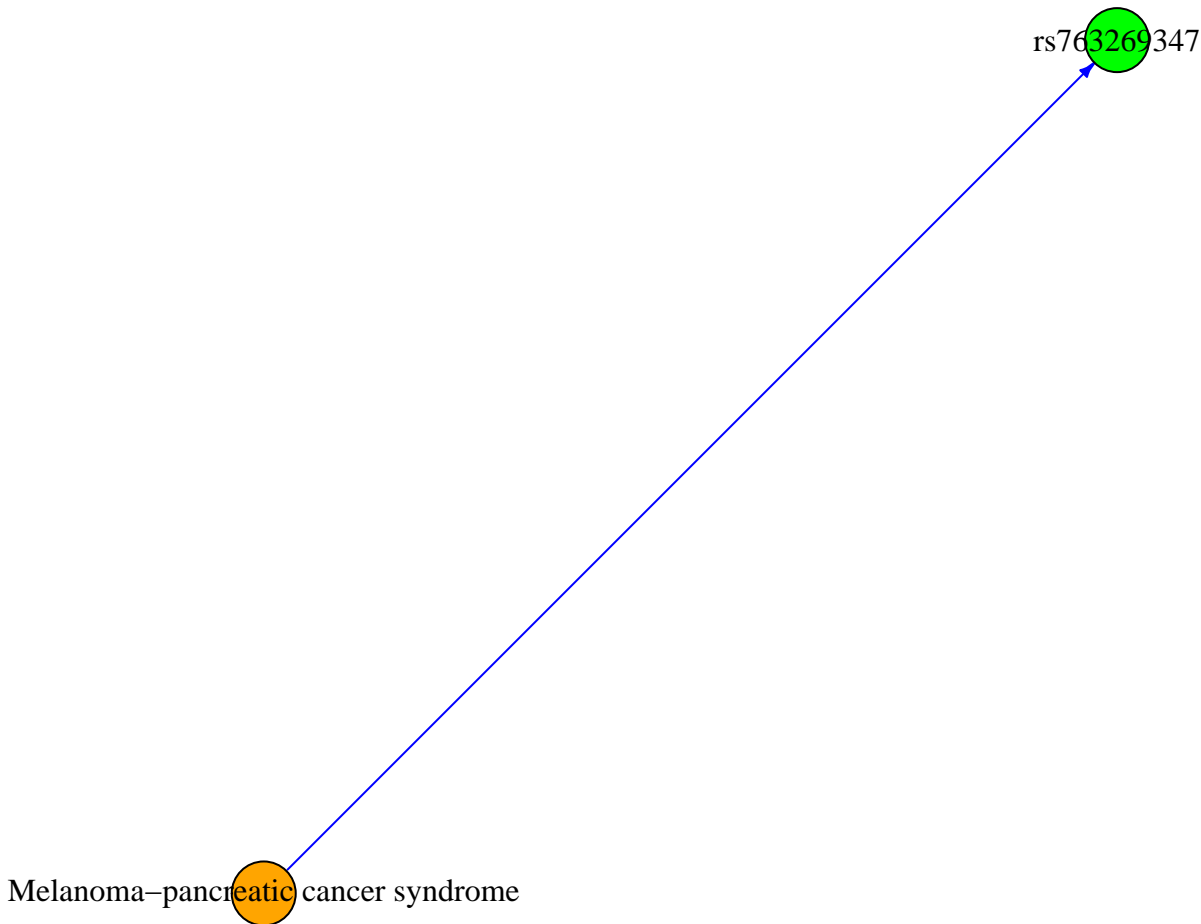

## Variant–Disease Network (Melnick–Needles syndrome)

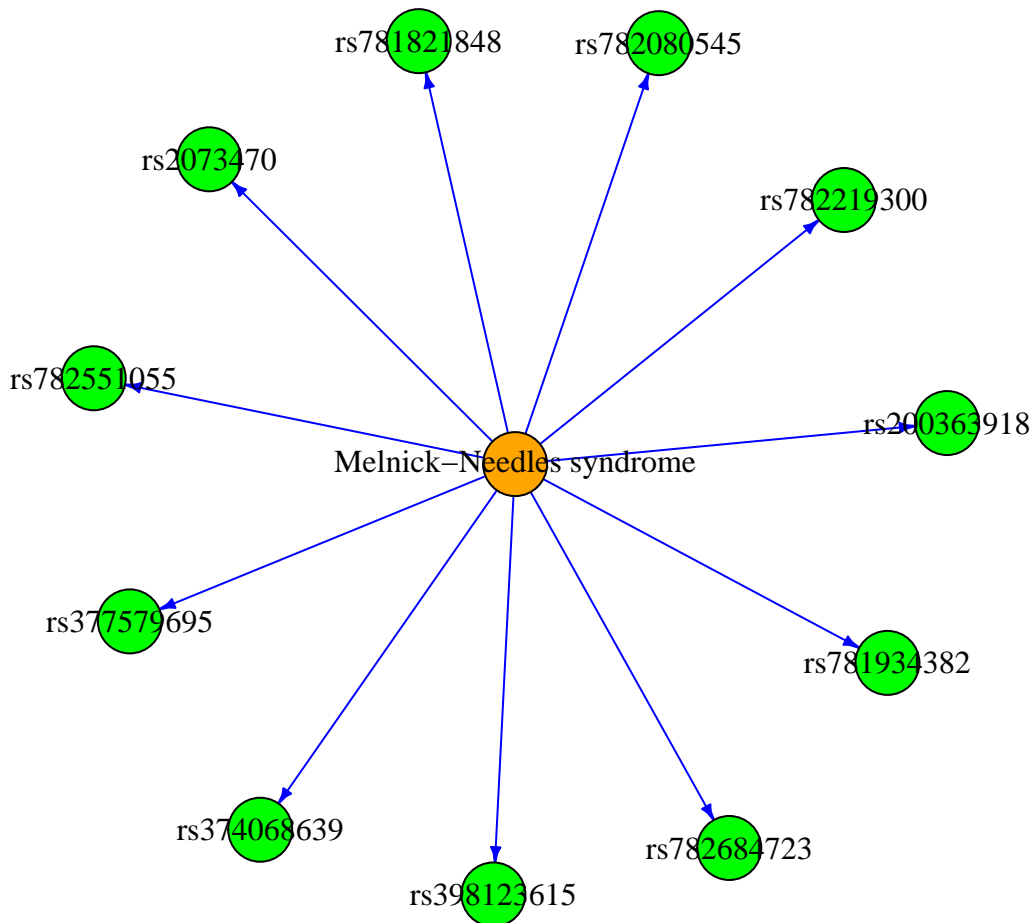



## Variant–Disease Network (Mental retardation)

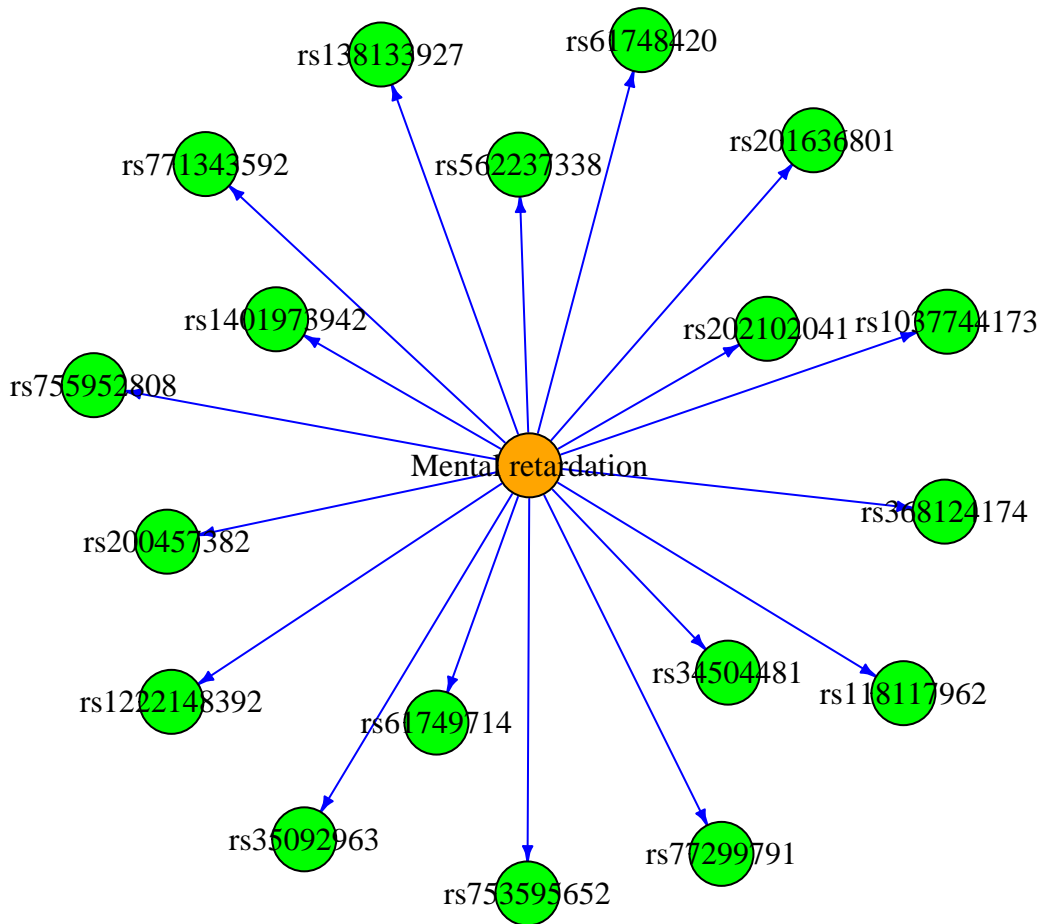

# Disease Network (Mental retardation and microcephaly with pontine and cerebellar hypoplasia)

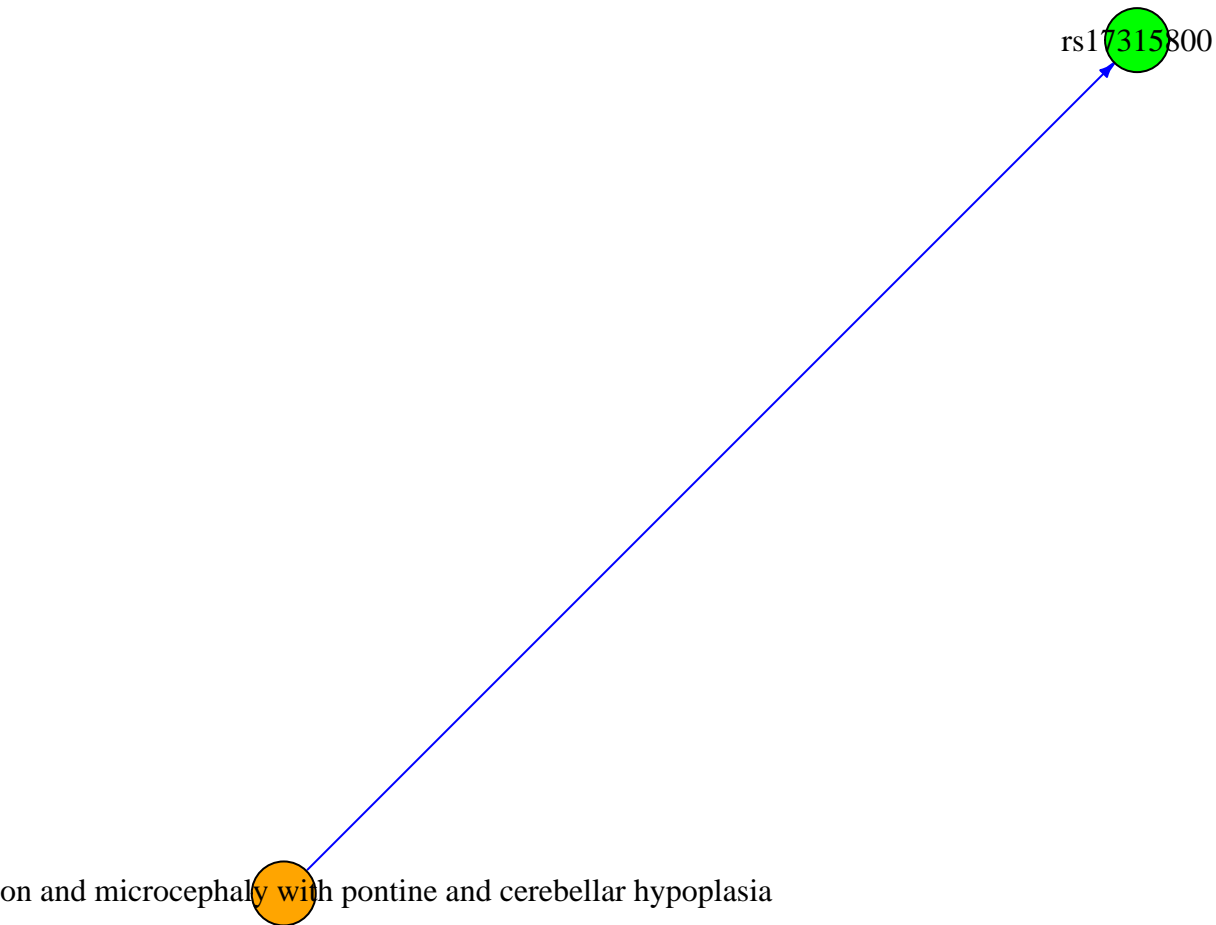

# Variant–Disease Network (Metaphyseal anadysplasia)

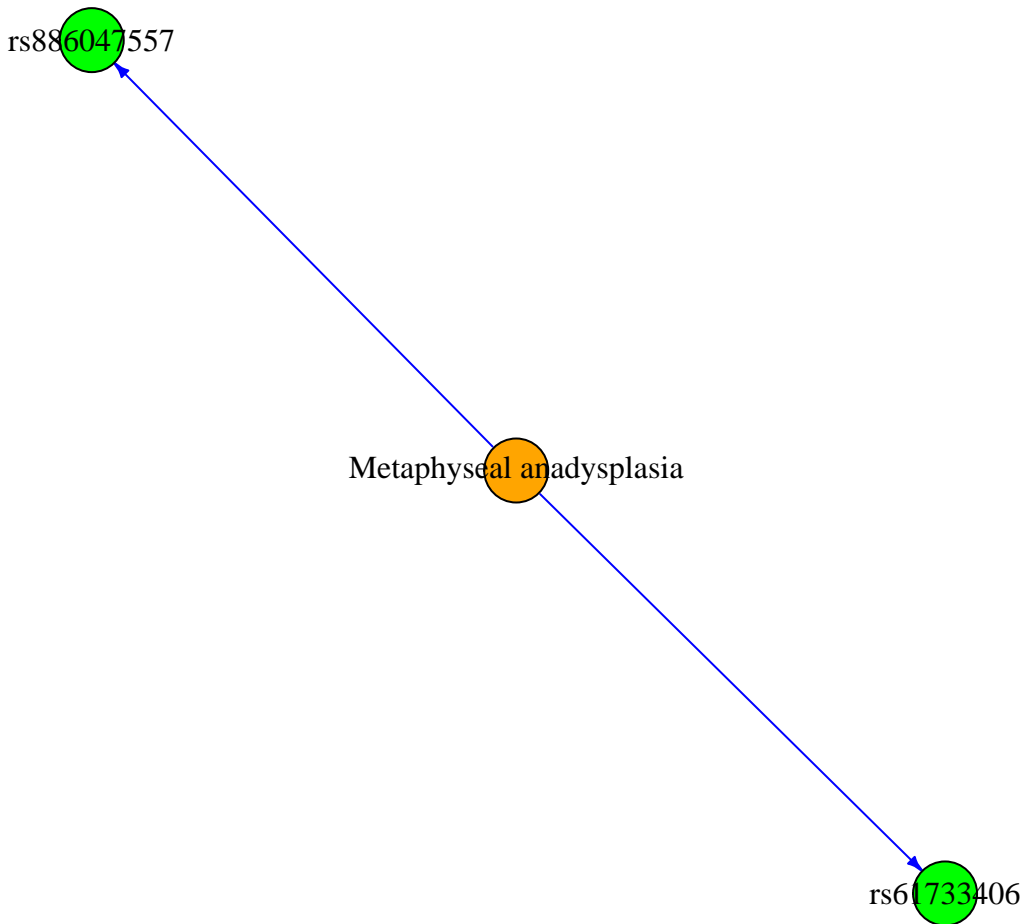

Variant–Disease Network (Metaphyseal chondrodysplasia)

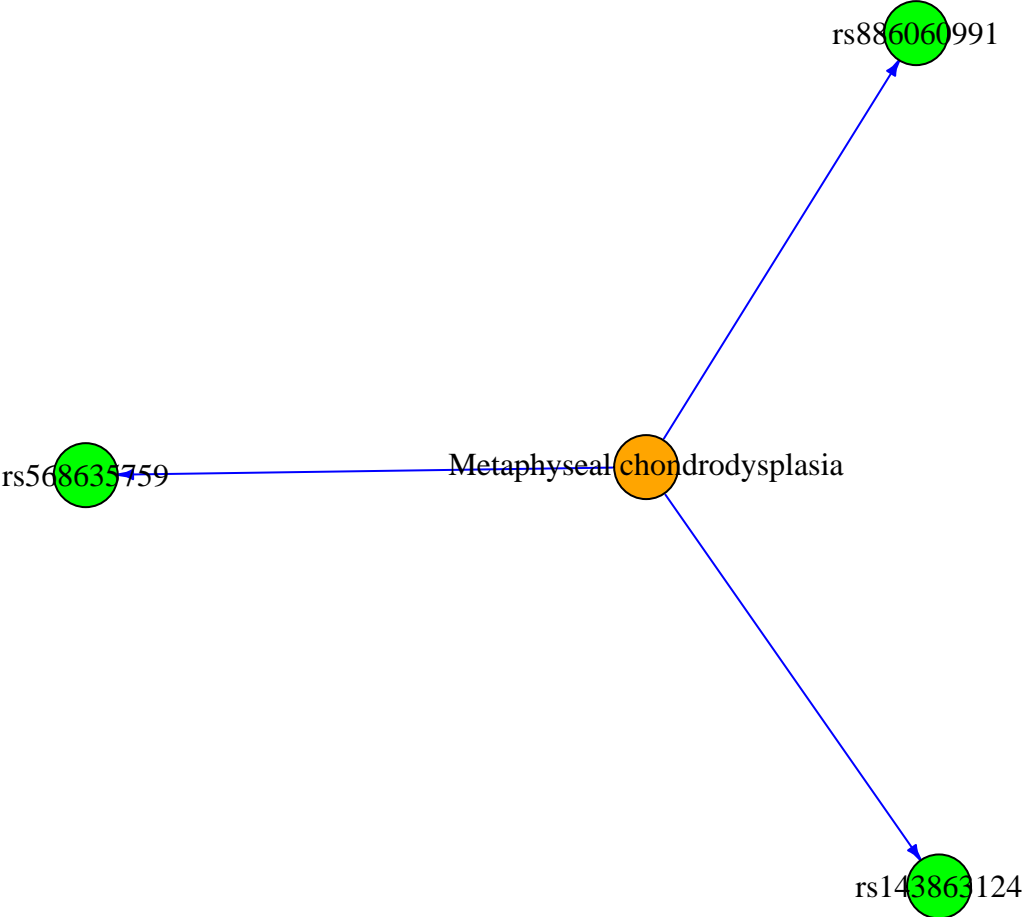

## Variant–Disease Network (Methylmalonic acidemia)

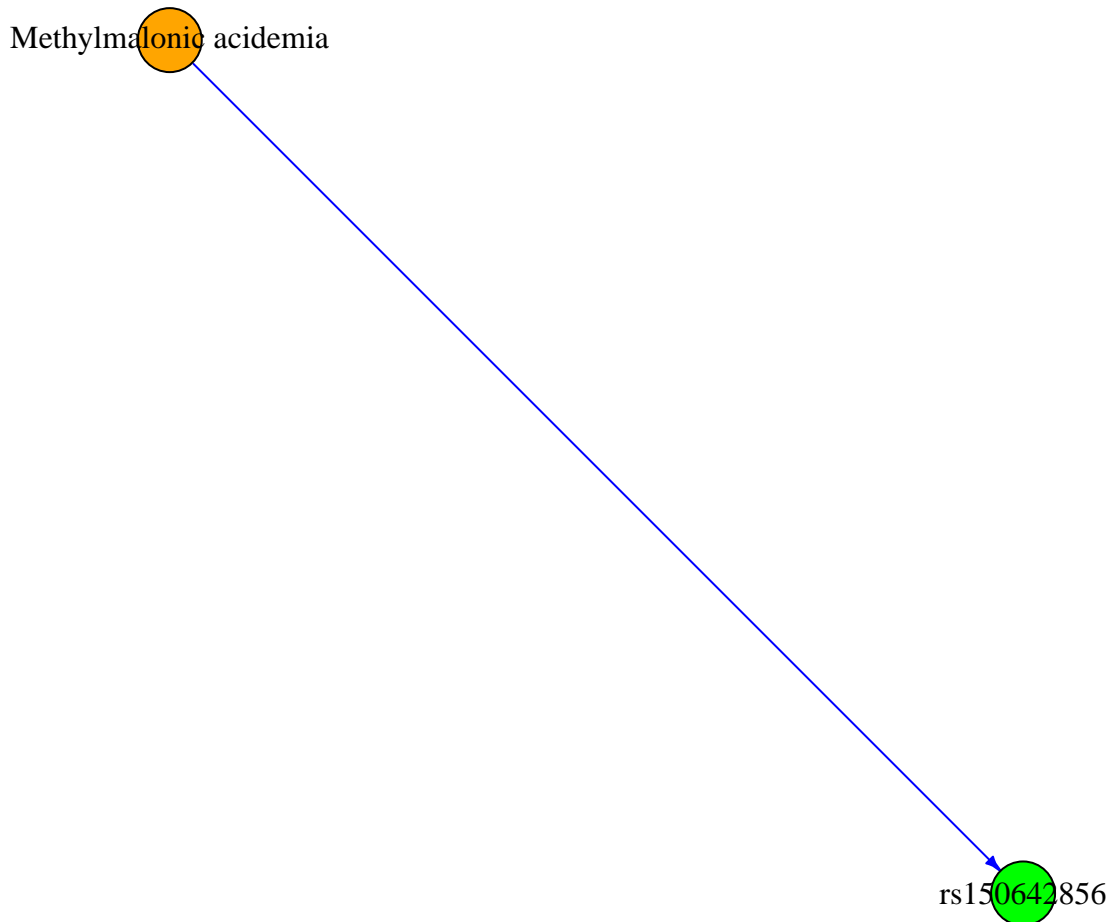

**Variant–Disease Network (Methylmalonic acidemia with homocystinuria)**

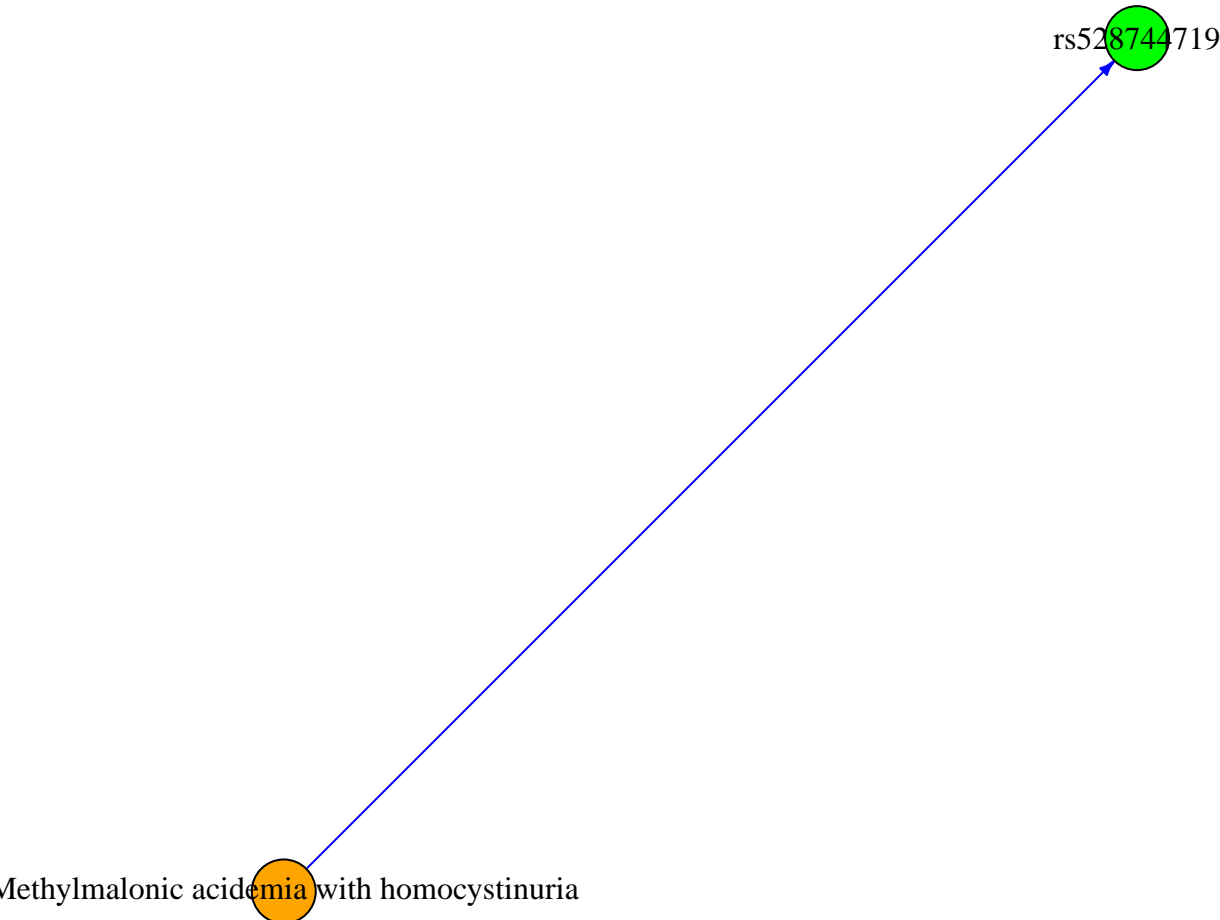

# Disease Network (Methylmalonic aciduria due to methylmalonyl-CoA mutase

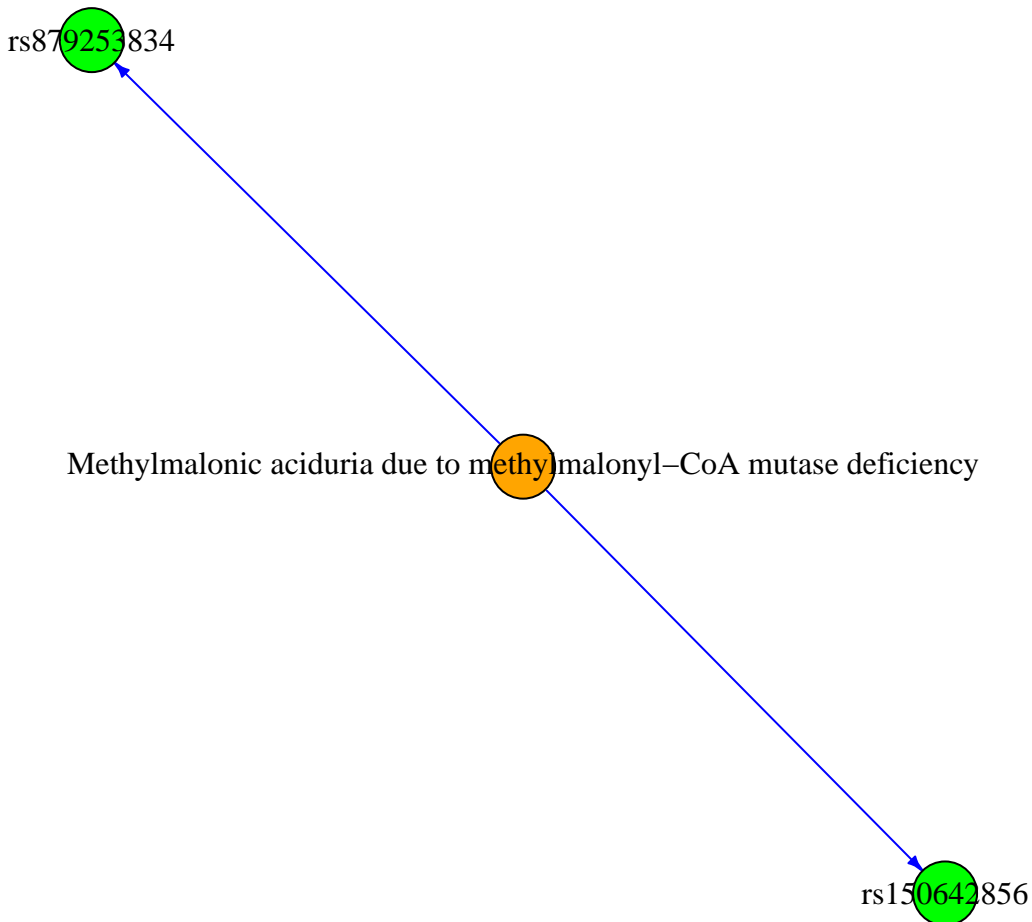

## Variant-Disease Network (Microcephaly)

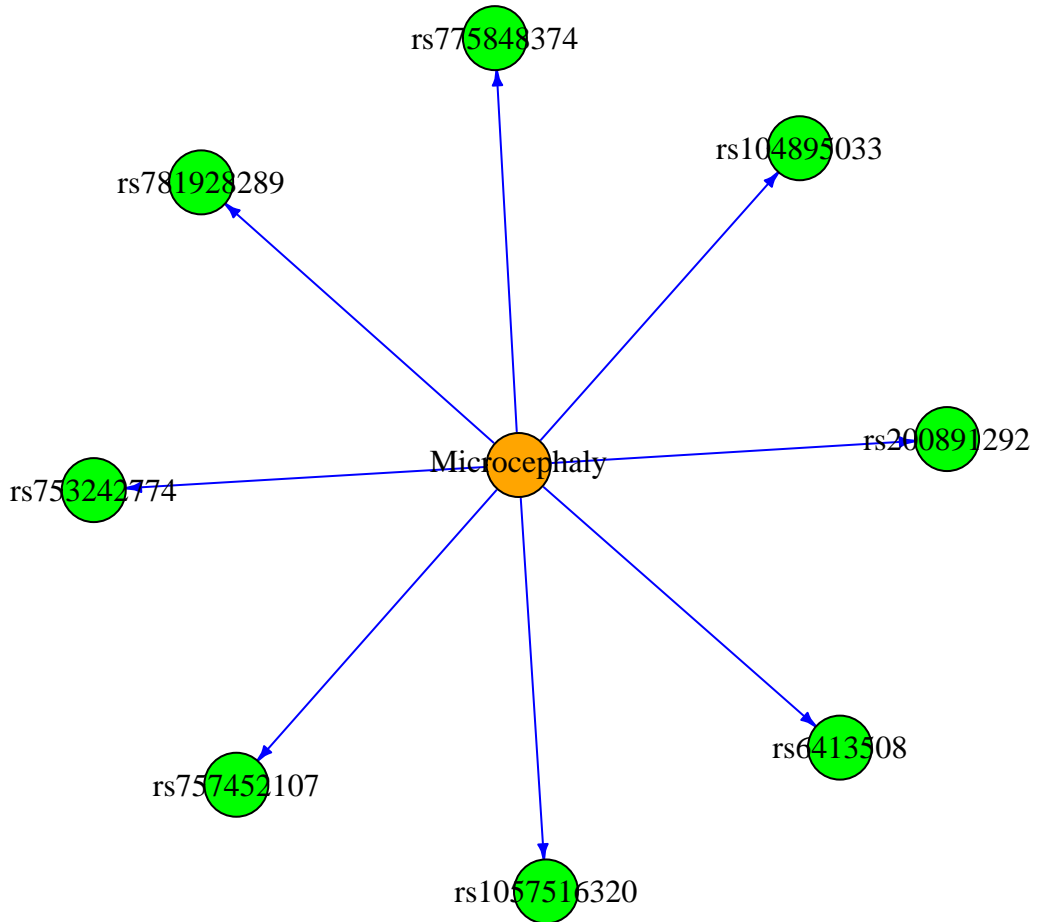



# Variant-Disease Network (Microcephaly with mental retardation and digital anomalies)

Microcephaly with mental retardation and digital anomalies

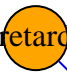

rs34372414

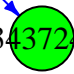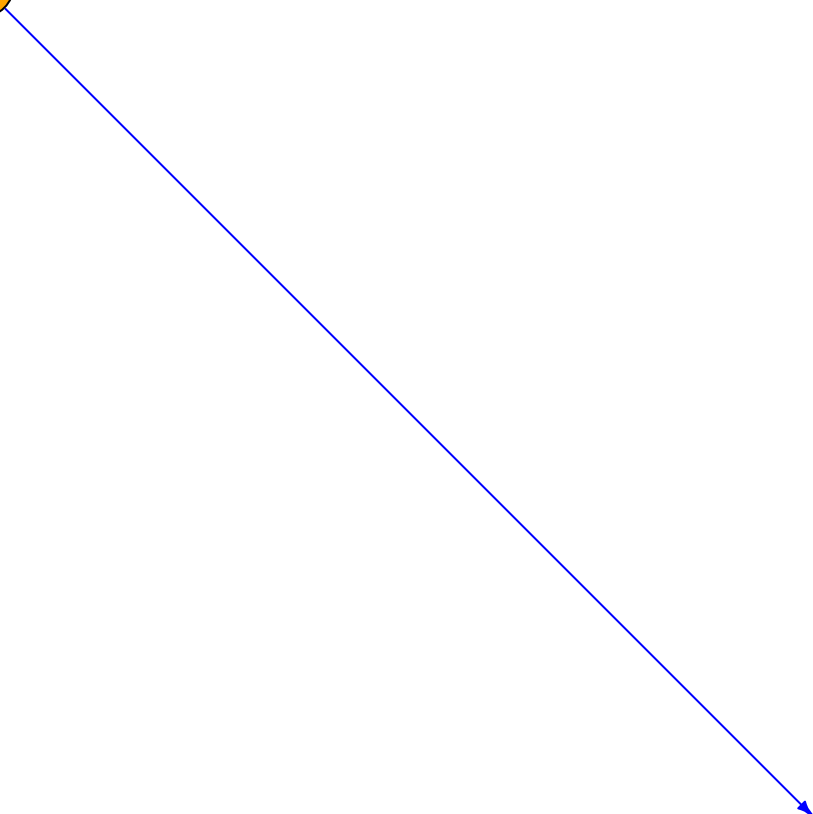

Variant–Disease Network (Microcephaly–capillary malformation syndrome)

Microcephaly–capillary malformation syndrome

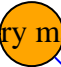

rs587784445

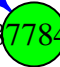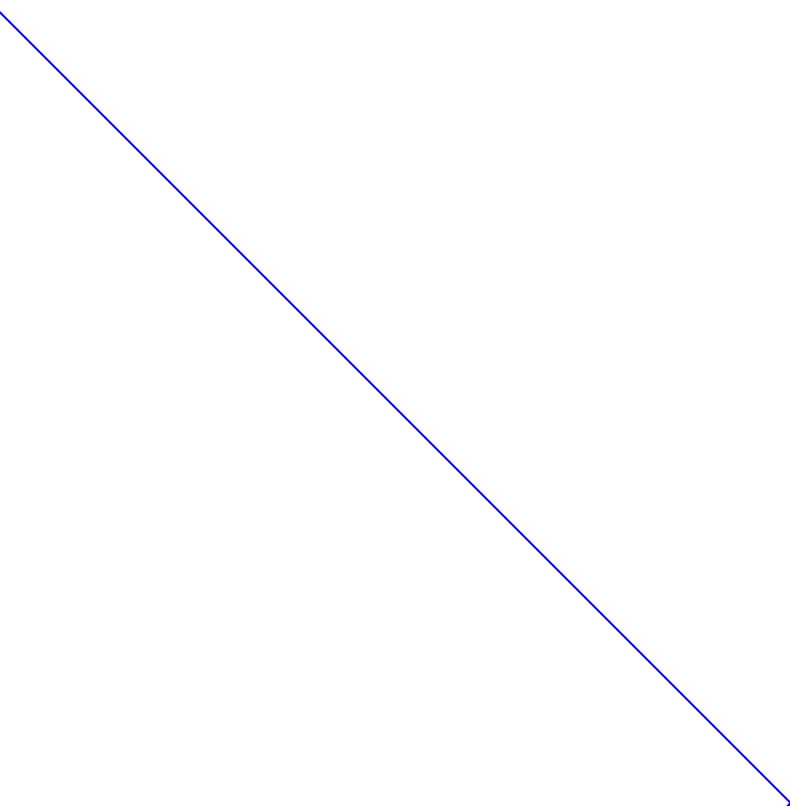

## Variant–Disease Network (Microcytic anemia)

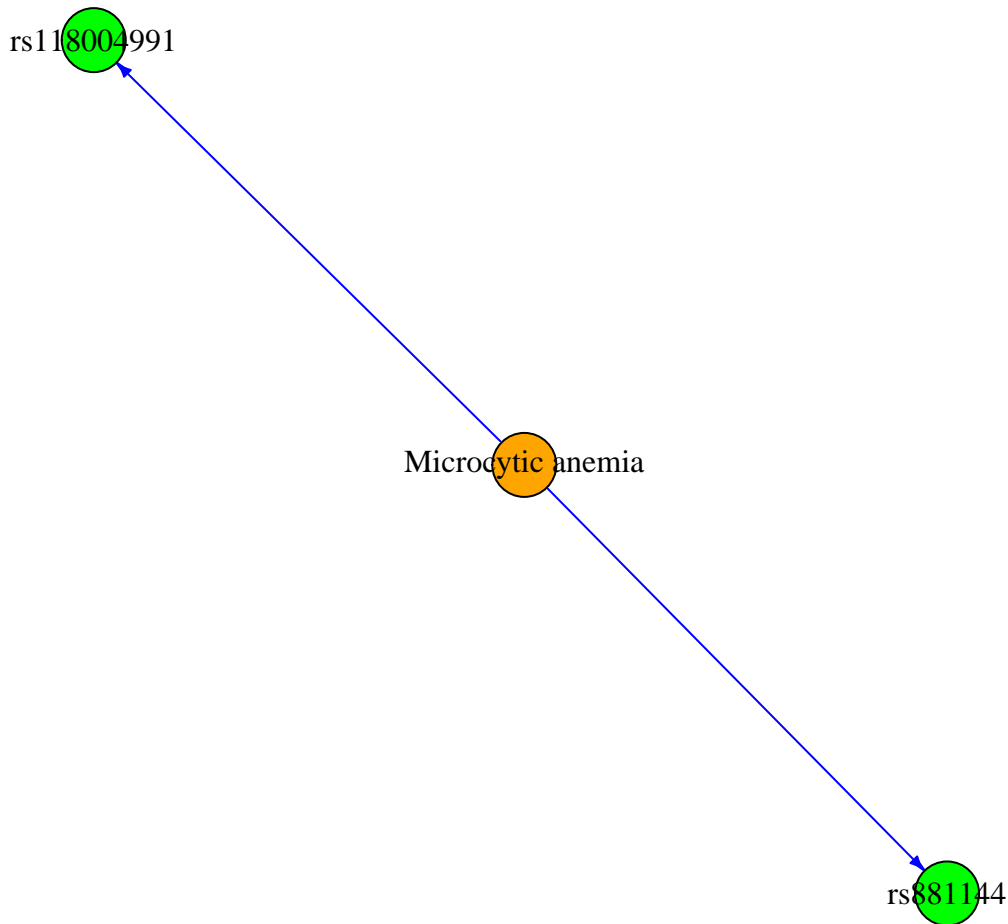

## Variant–Disease Network (Microtia)

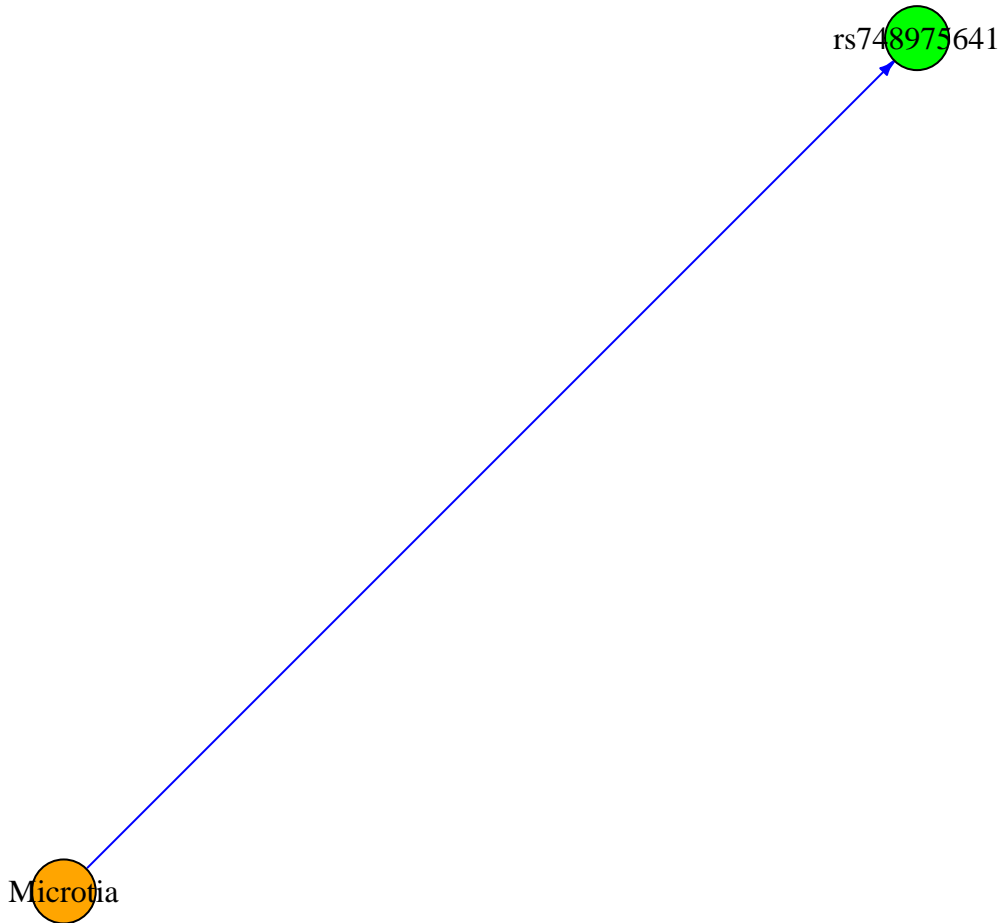

## Variant–Disease Network (Miller syndrome)

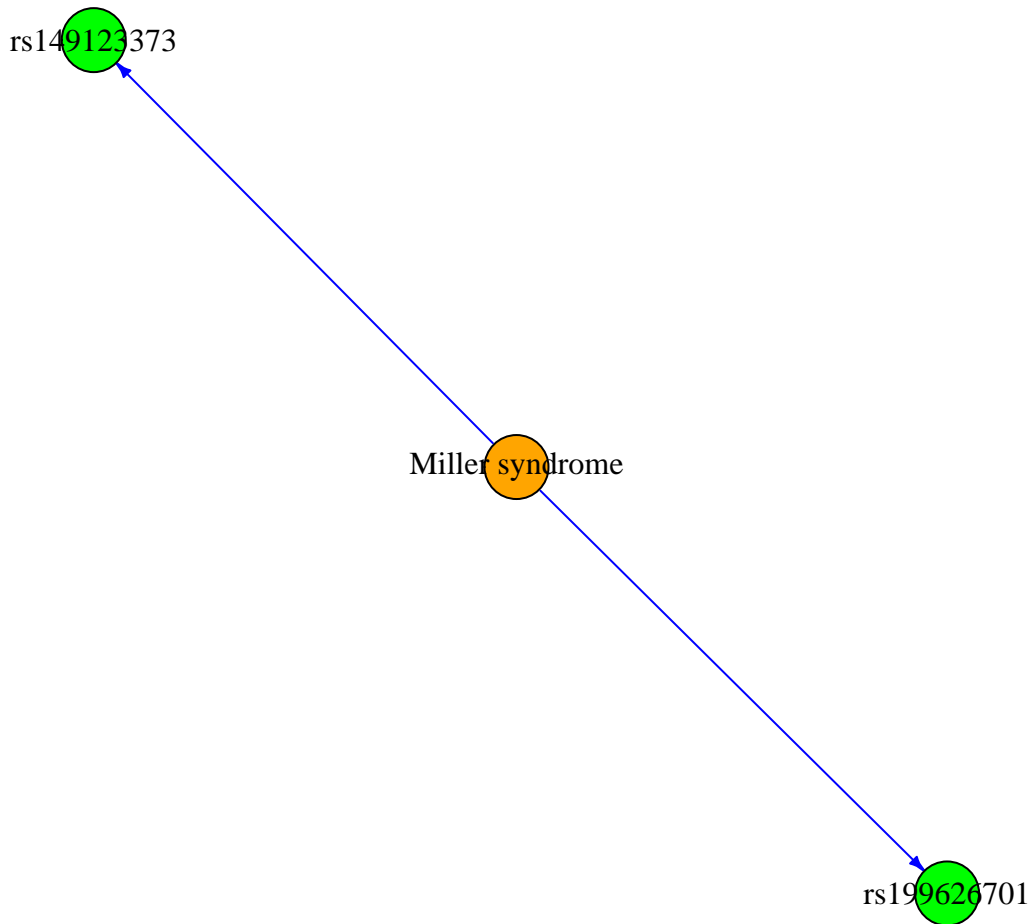

## Variant–Disease Network (Mitchell–Riley syndrome)

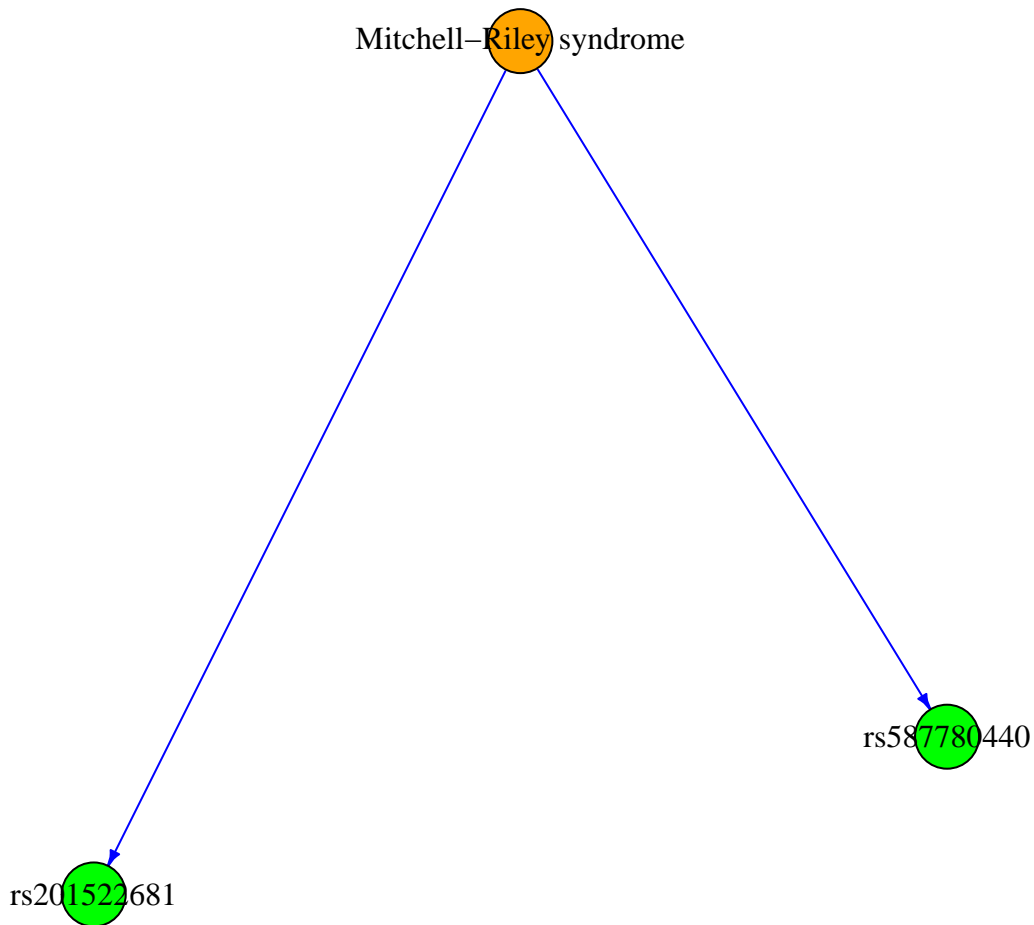

# Variant–Disease Network (Mitochondrial complex I deficiency)

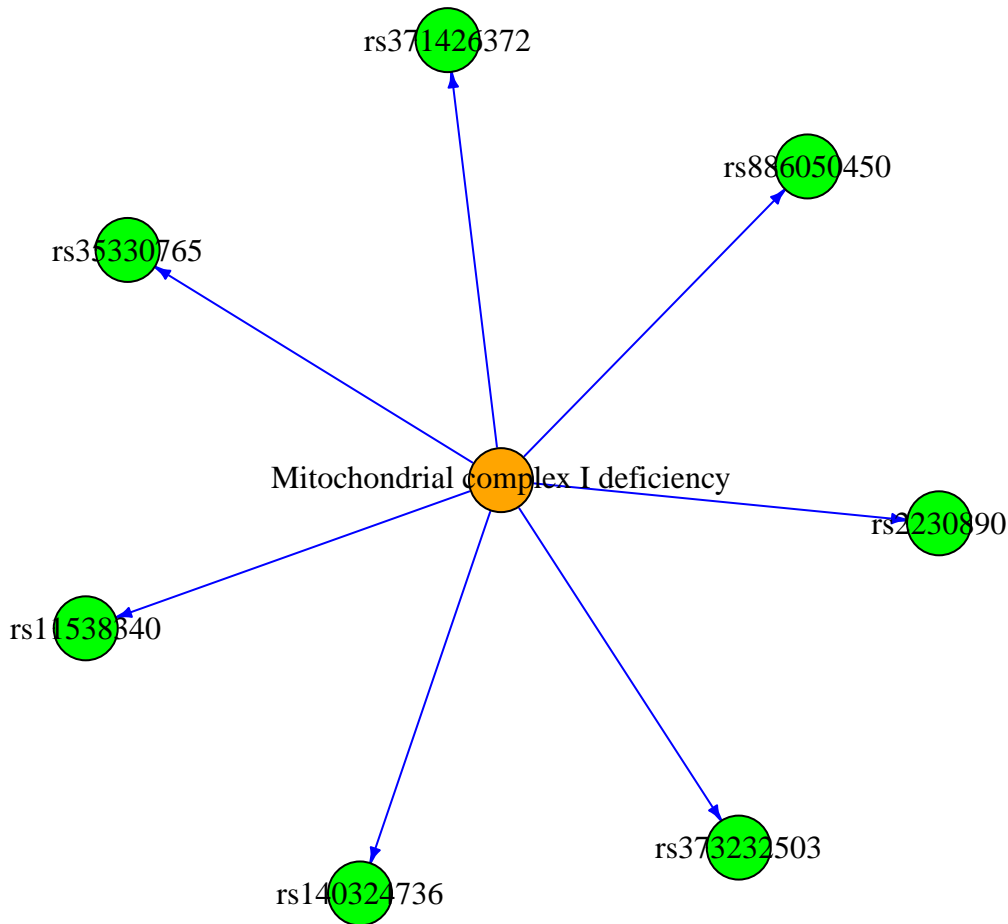

# Variant–Disease Network (Mitochondrial complex II deficiency)

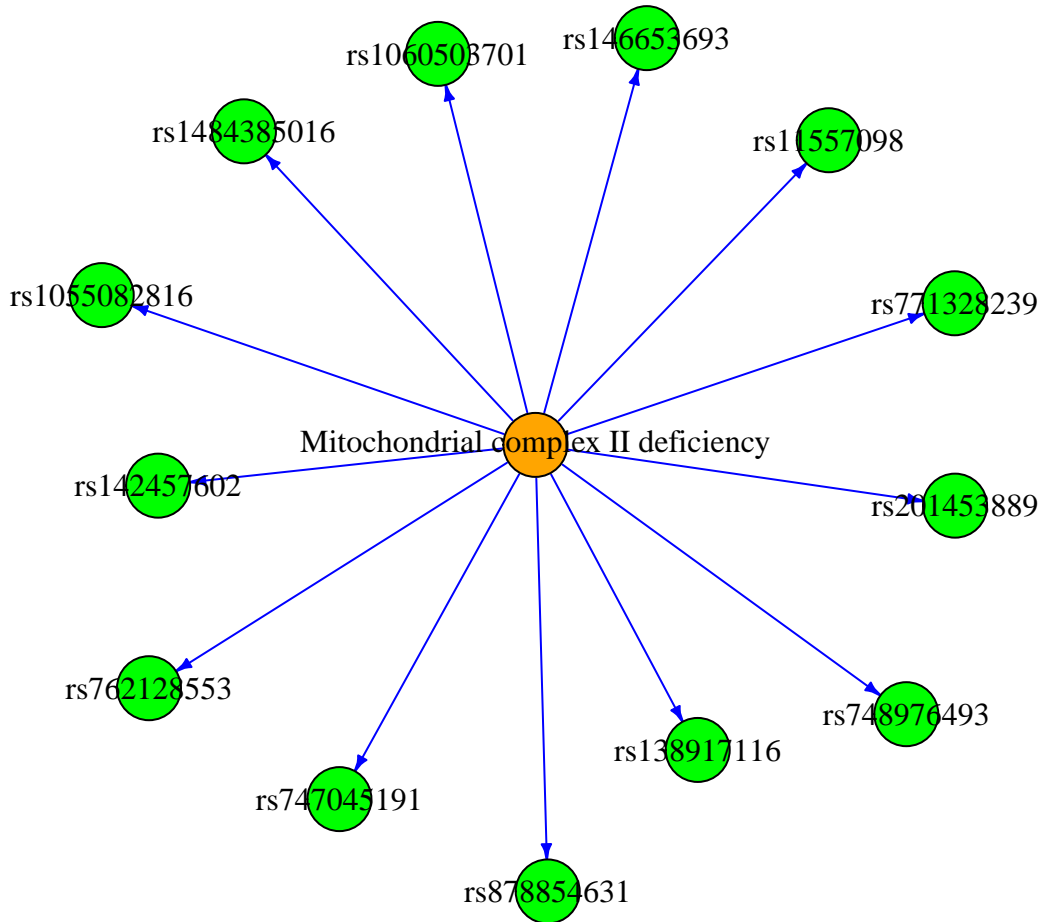



**Variant–Disease Network (Mitochondrial complex III deficiency)**

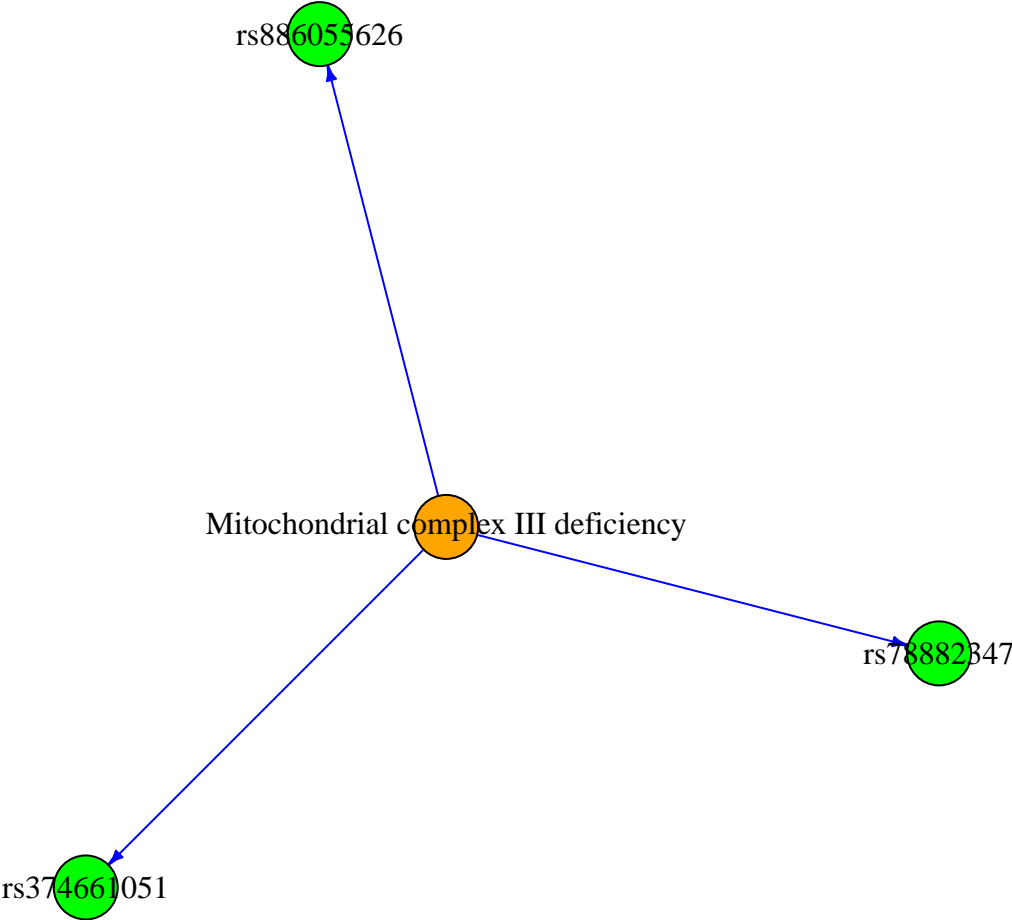

# Variant–Disease Network (Mitochondrial Complex V (ATP Synthase) Deficiency)

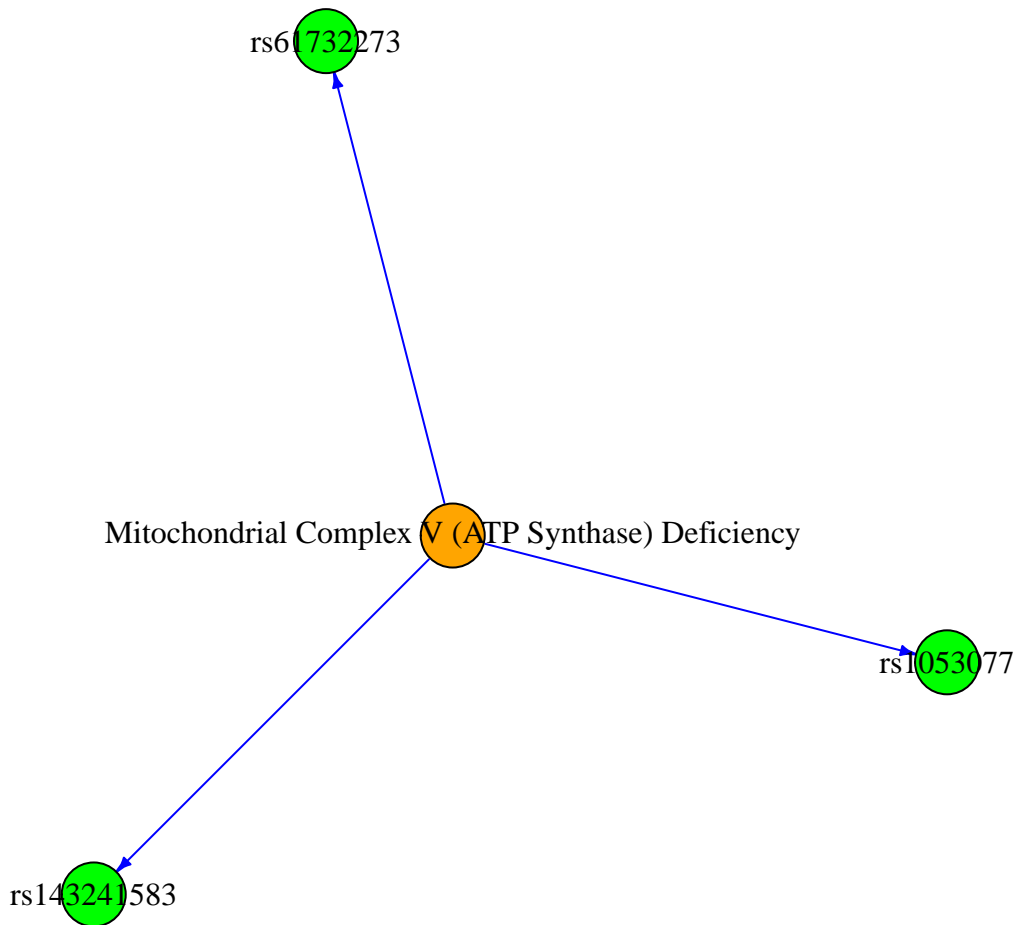

# Variant–Disease Network (Mitochondrial DNA depletion syndrome)

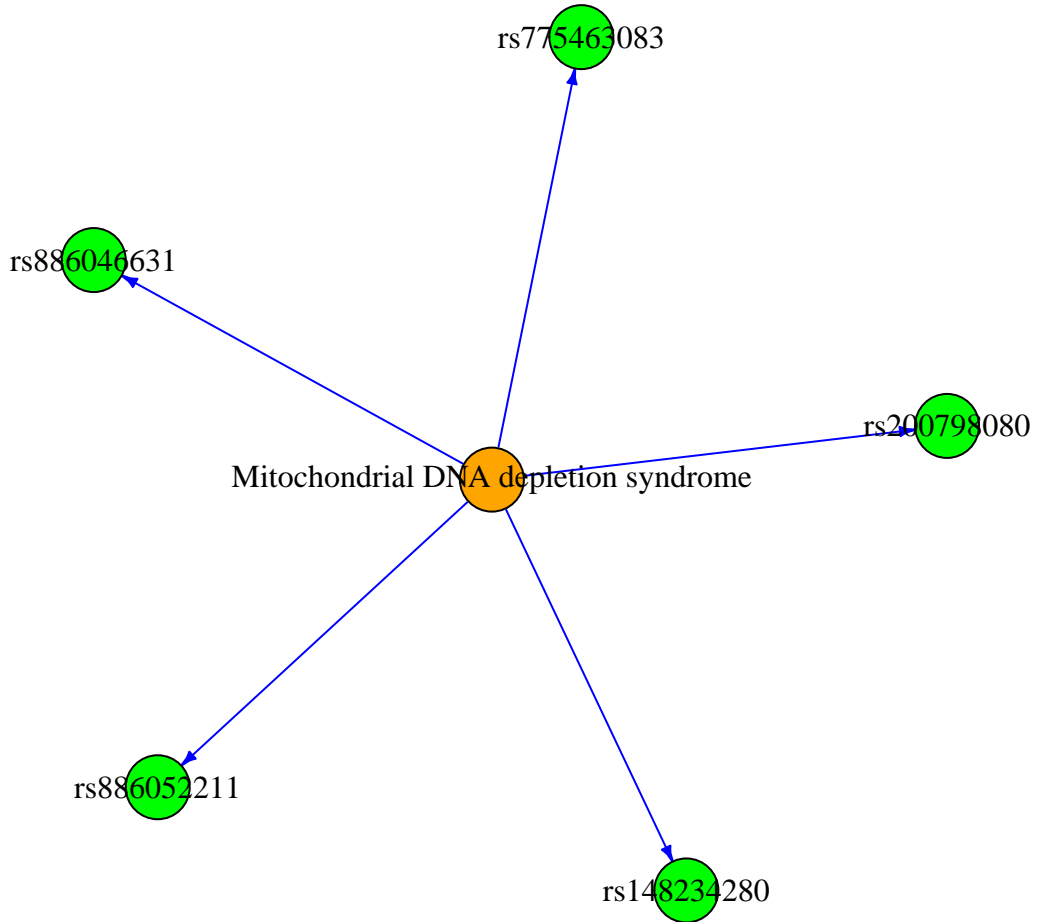

# Disease Network (Mitochondrial DNA depletion syndrome 13 (encephalomyopathy type 13))

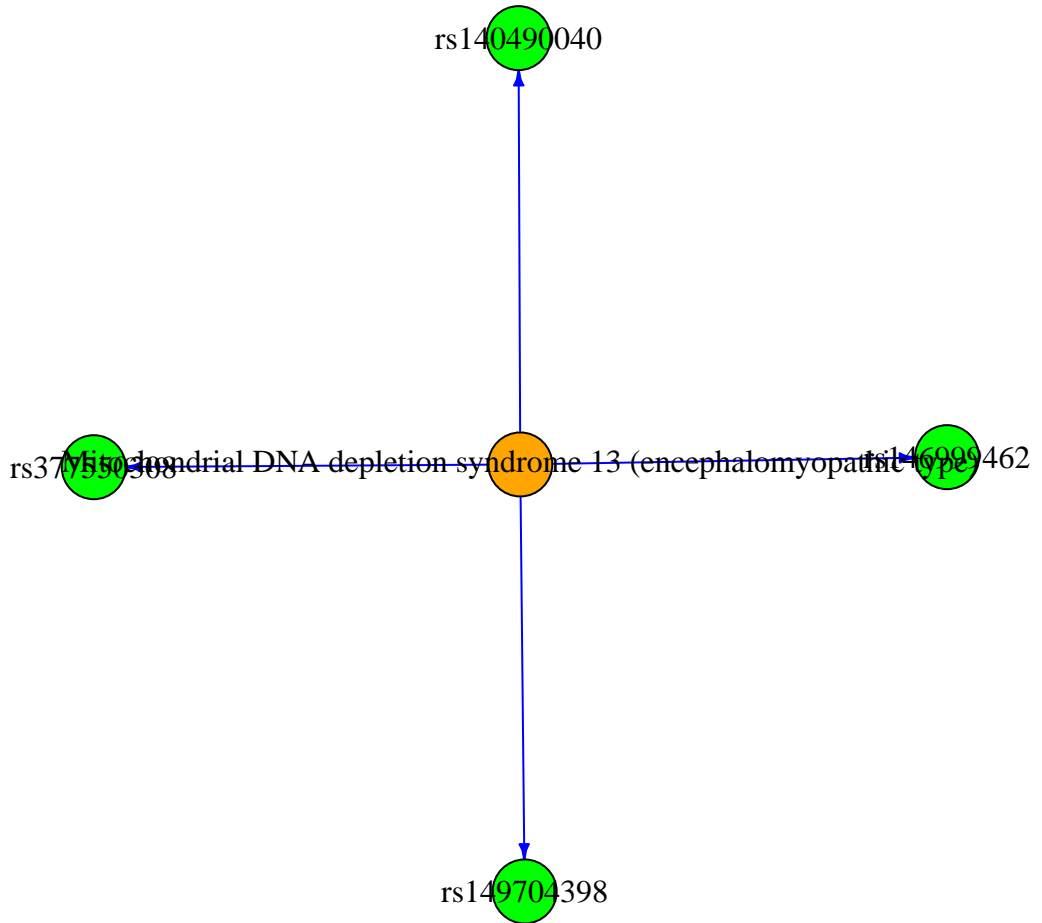

## Variant–Disease Network (Mitochondrial DNA depletion syndrome 4B)

rs199759055

Mitochondrial DNA depletion syndrome

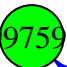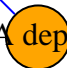

Variant–Disease Network (Mitochondrial myopathy and sideroblastic anemia)

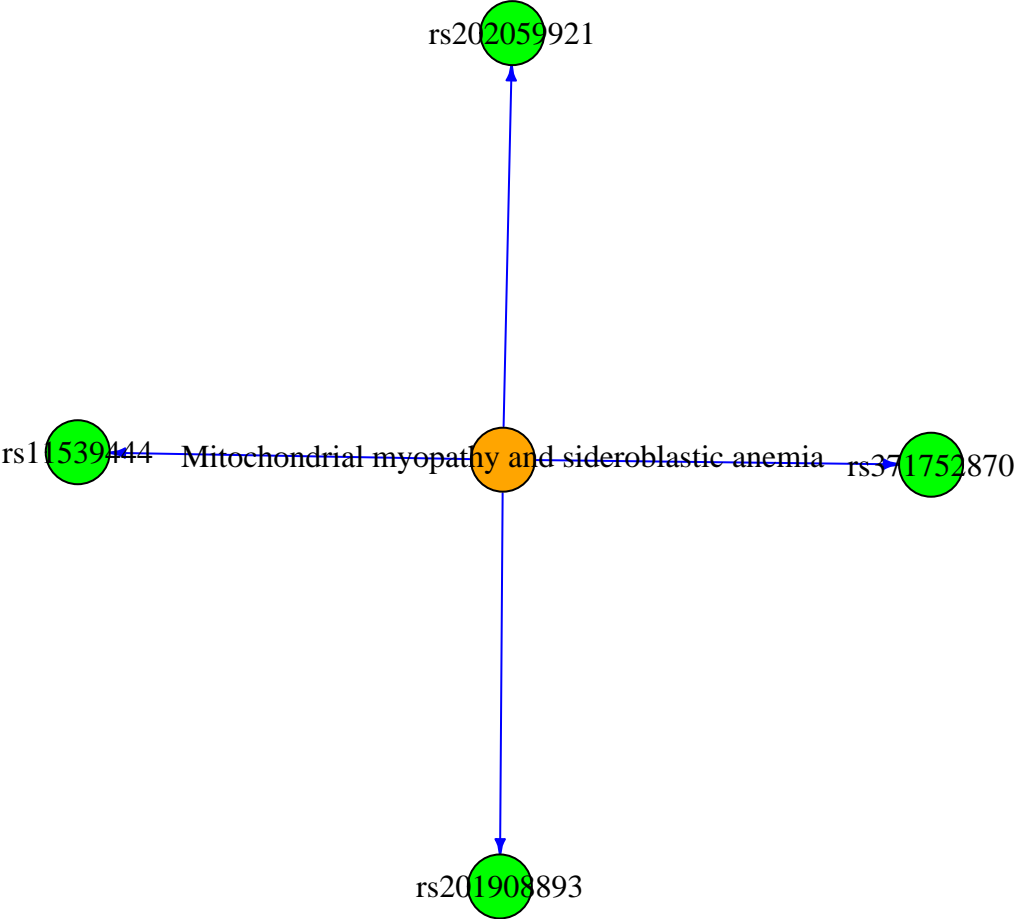

**Variant–Disease Network (Mitochondrial trifunctional protein deficiency)**

Mitochondrial trifunctional protein deficiency

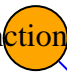

rs374569092

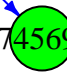

**Variant–Disease Network (Monocarboxylate transporter 1 deficiency)**

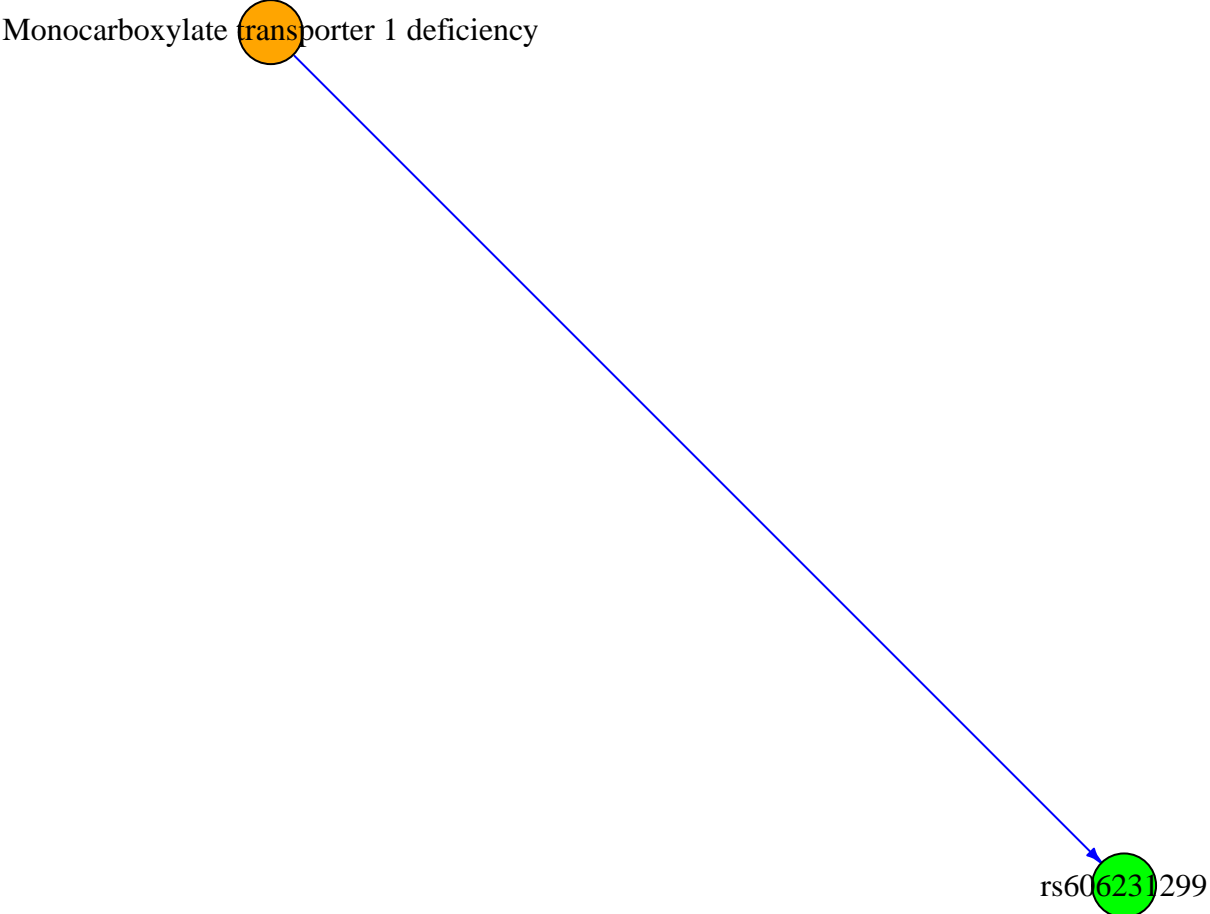



## Variant–Disease Network (Monogenic diabetes)

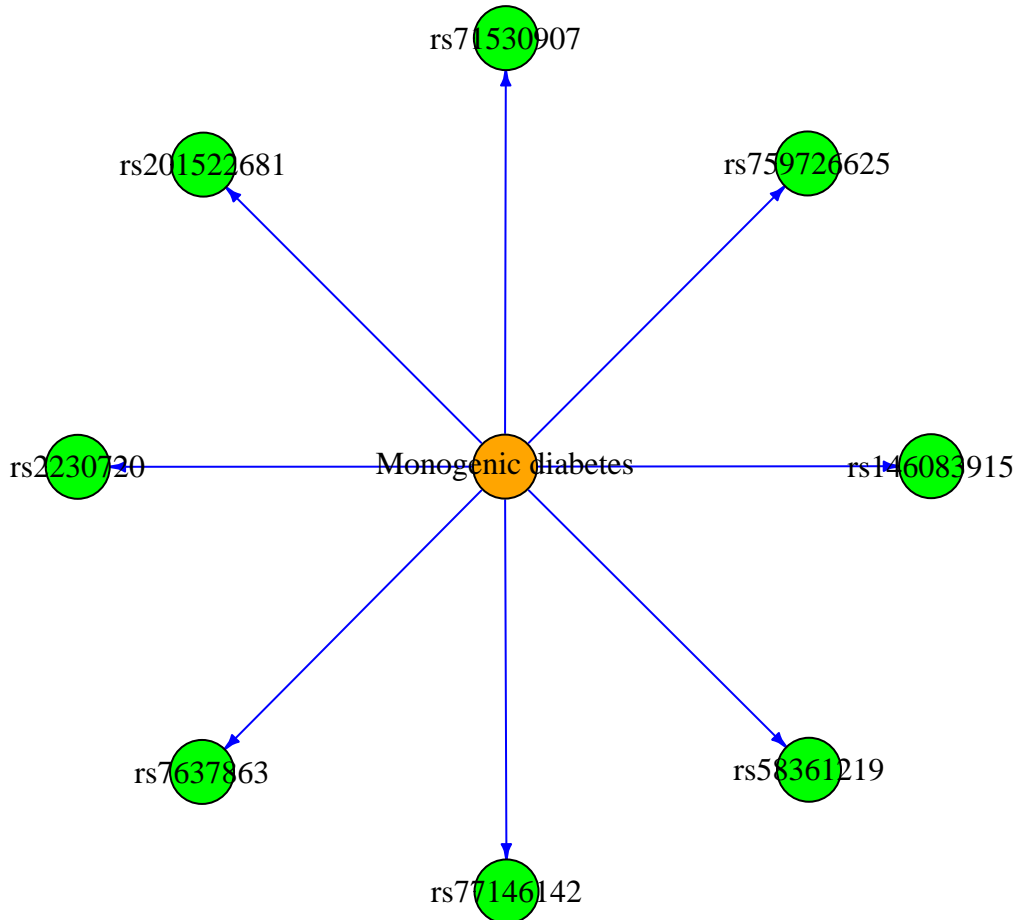

Variant–Disease Network (Monogenic Non–Syndromic Obesity)

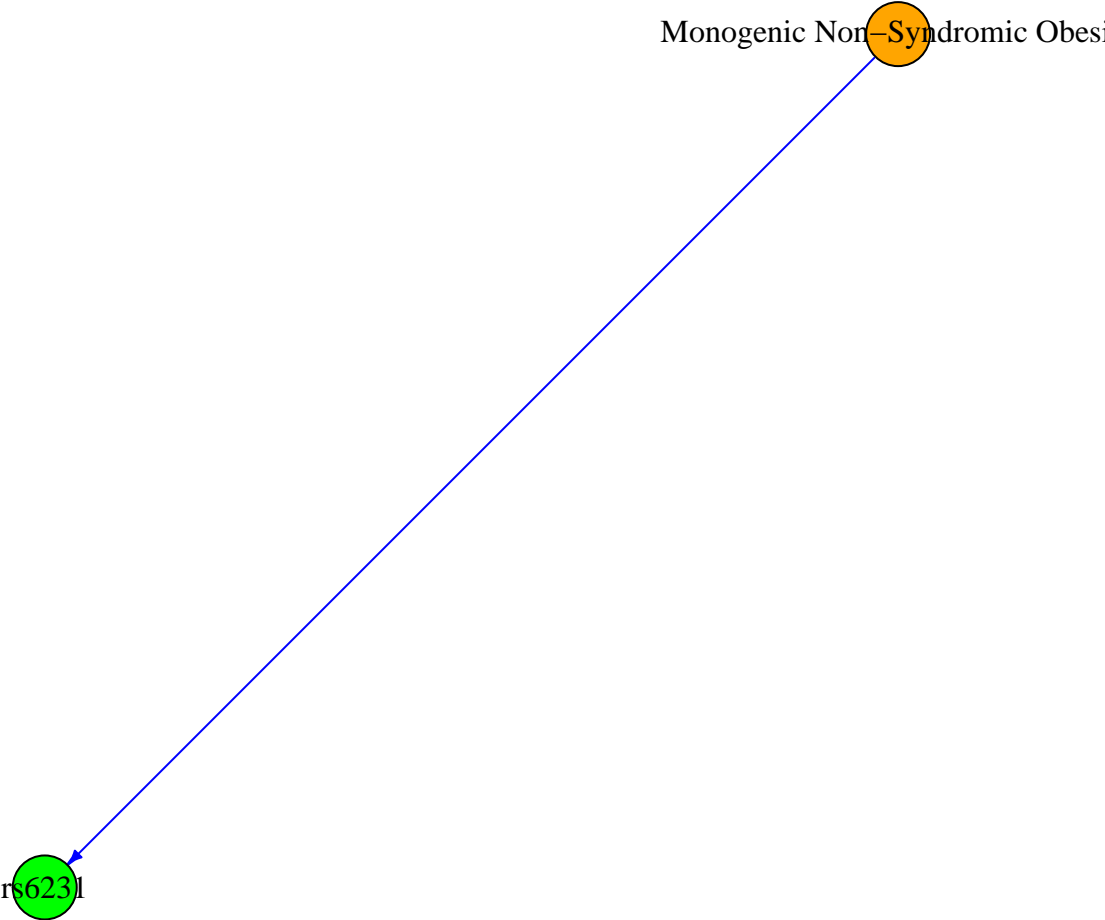

Variant–Disease Network (Mononeuropathy of the Median Nerve)

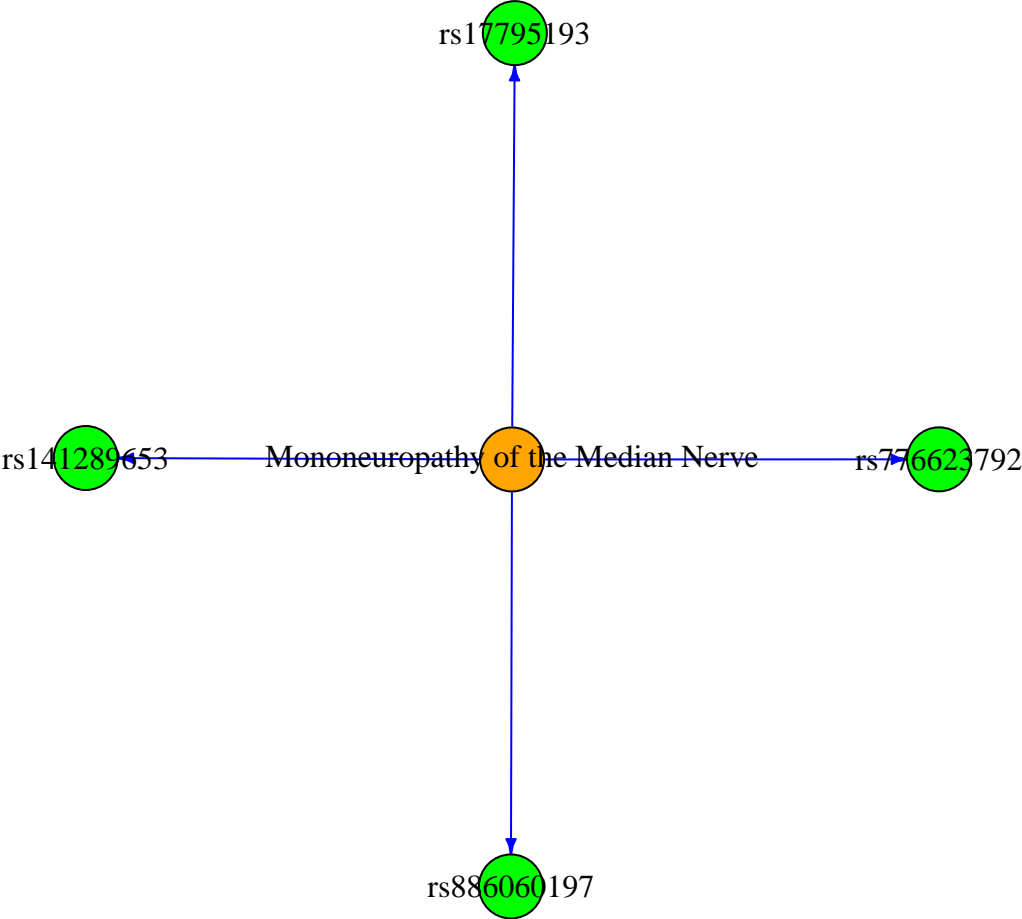

## Variant–Disease Network (Morquio syndrome)

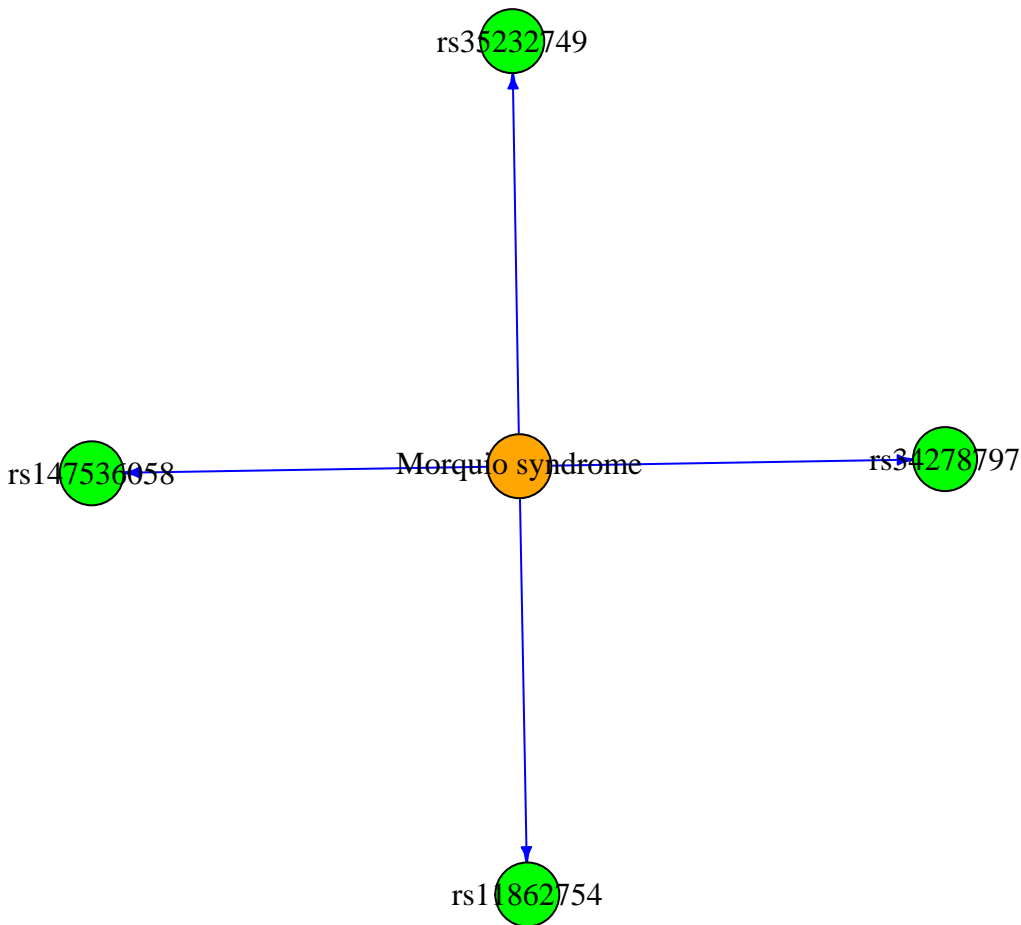

Variant–Disease Network (Mosaic variegated aneuploidy syndrome)

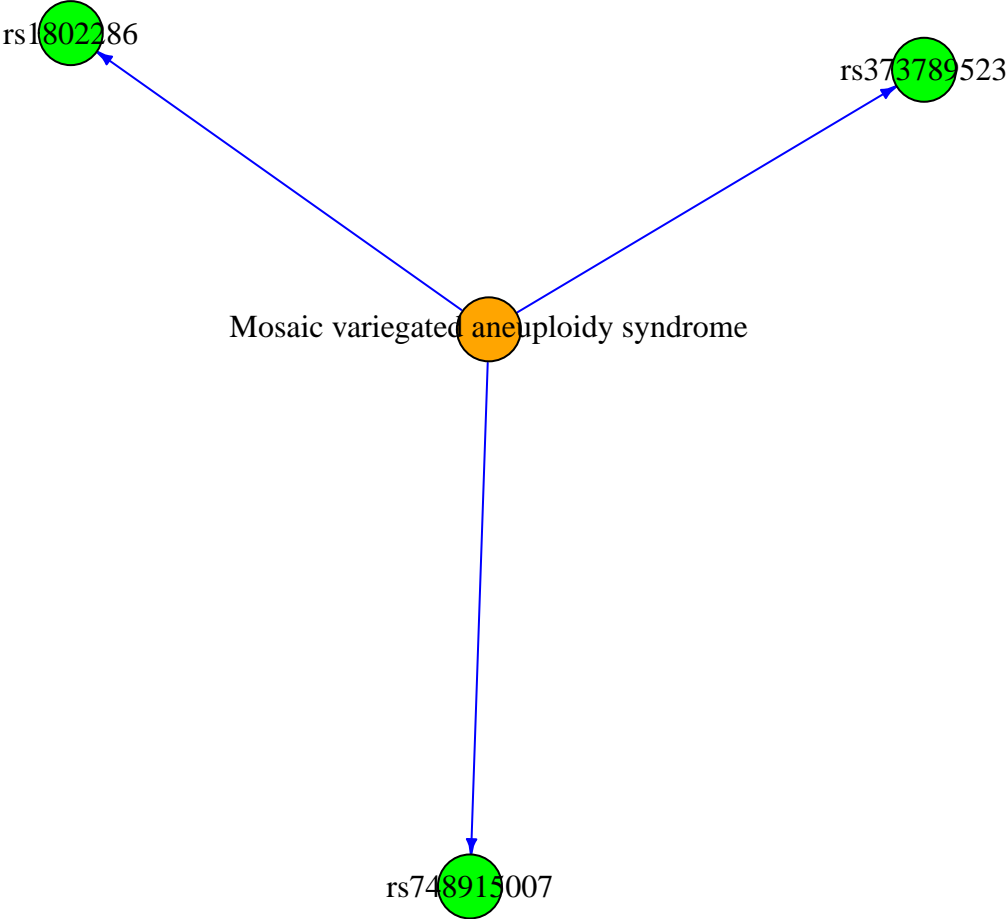

Variant–Disease Network (Mosaic variegated aneuploidy syndrome 2)

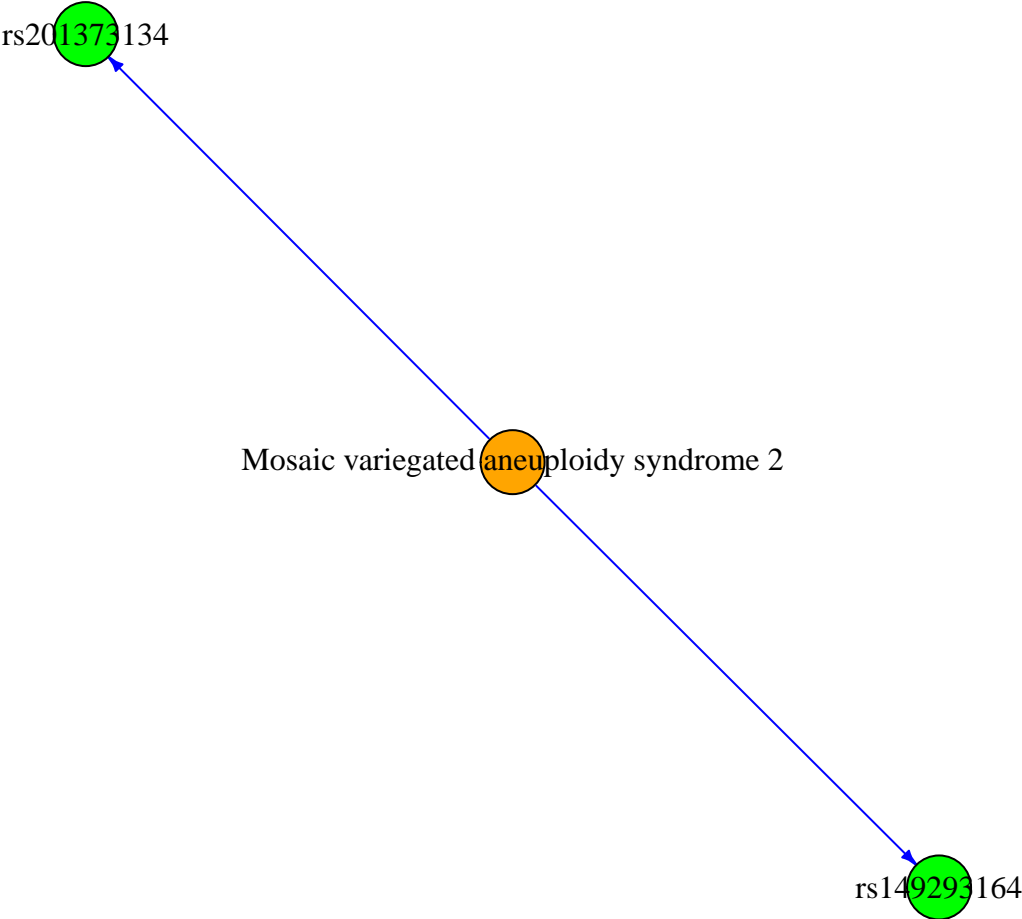

## Variant–Disease Network (Mowat–Wilson syndrome)

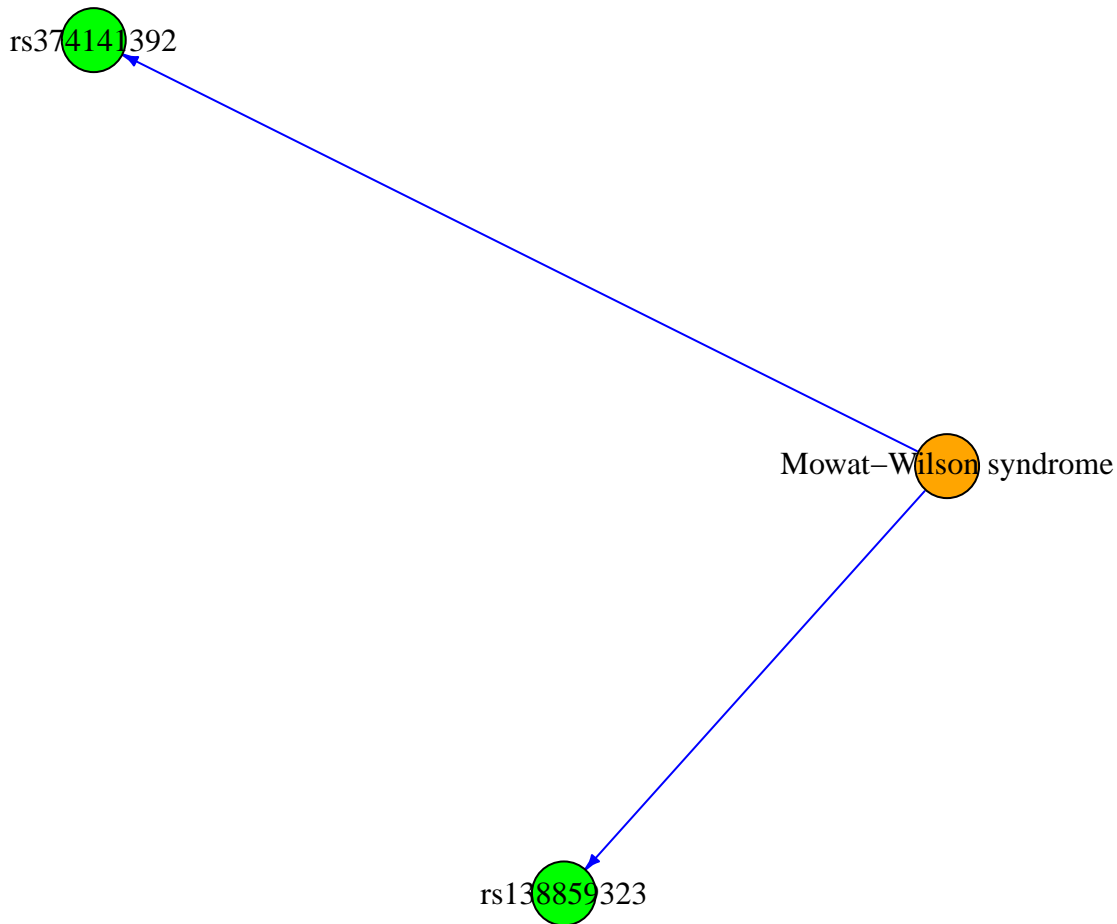

Variant–Disease Network (Mucopolipidosis III Gamma)

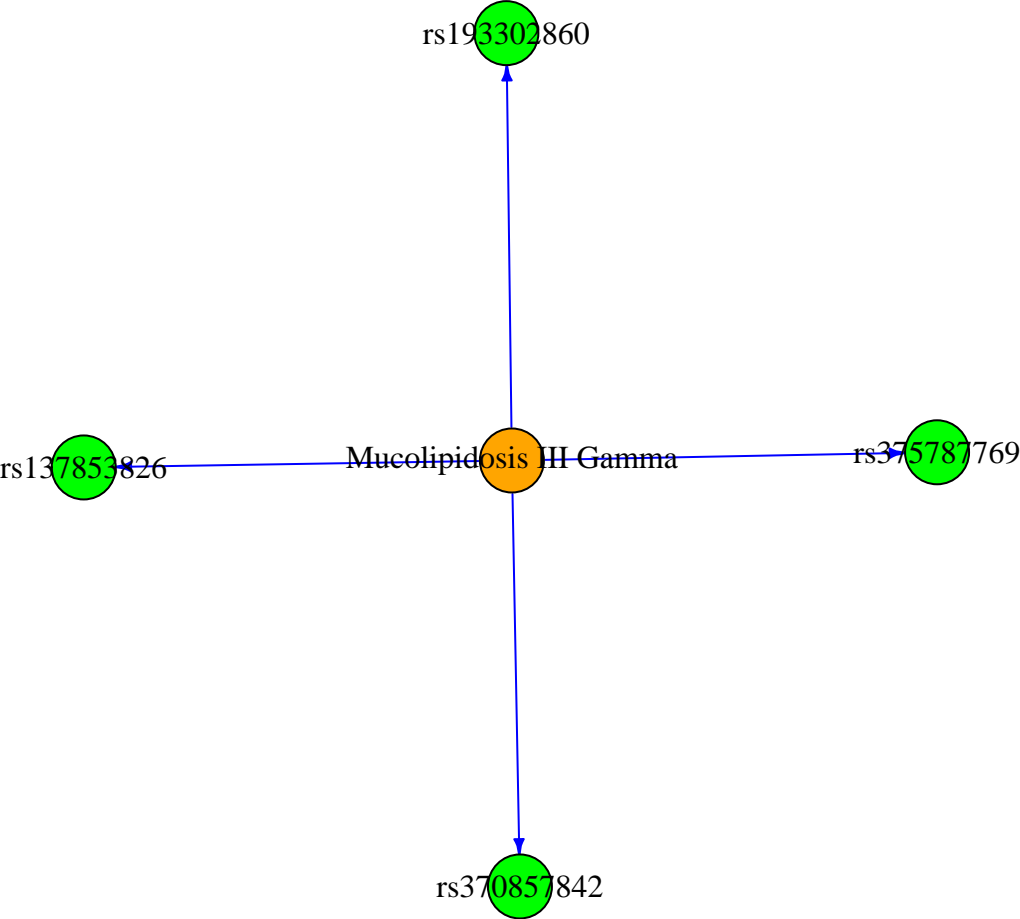



## Variant–Disease Network (Mucopolipidosis type IV)

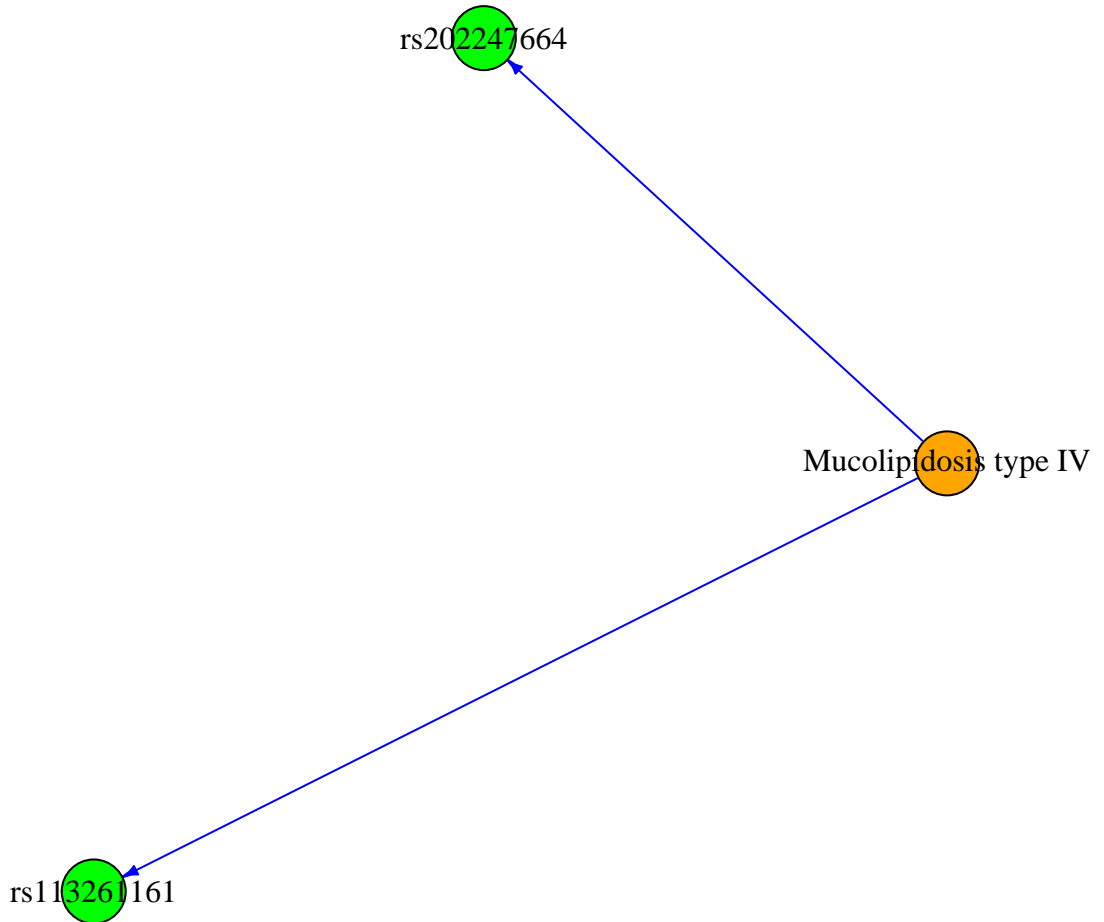

Variant–Disease Network (Mucopolysaccharidosis)

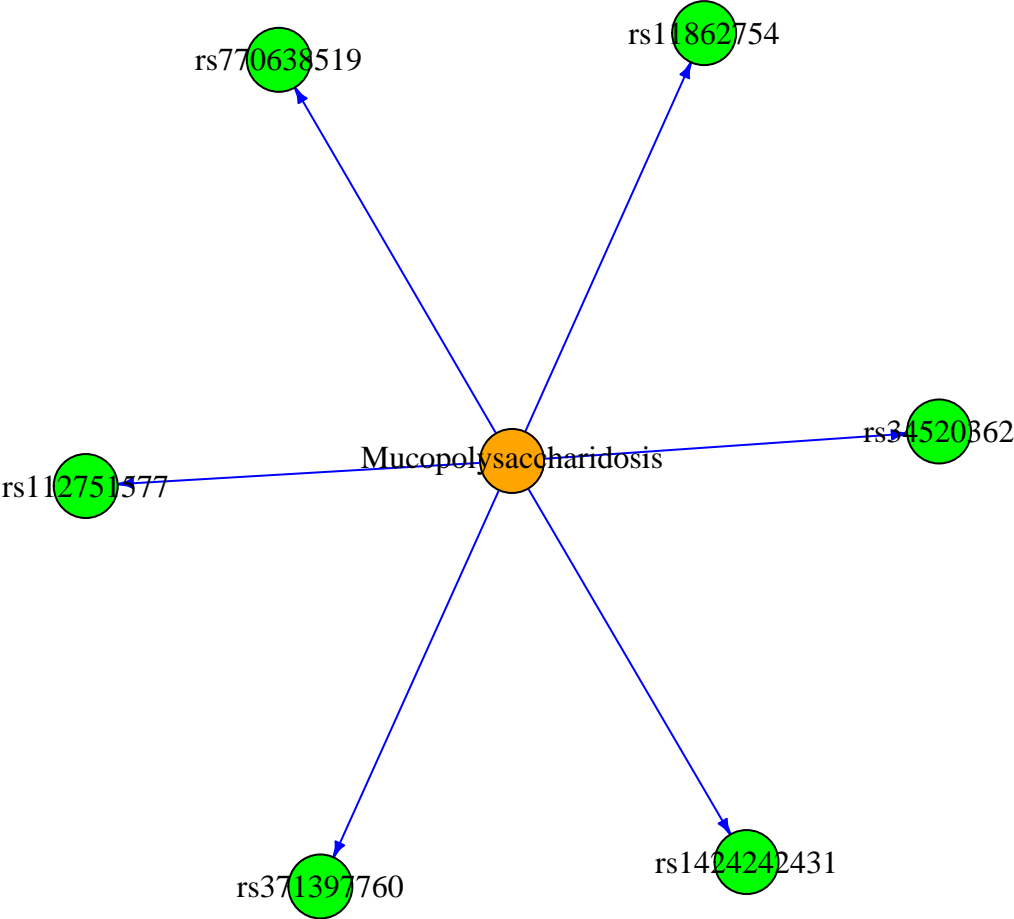

Variant–Disease Network (Mucopolysaccharidosis type I)

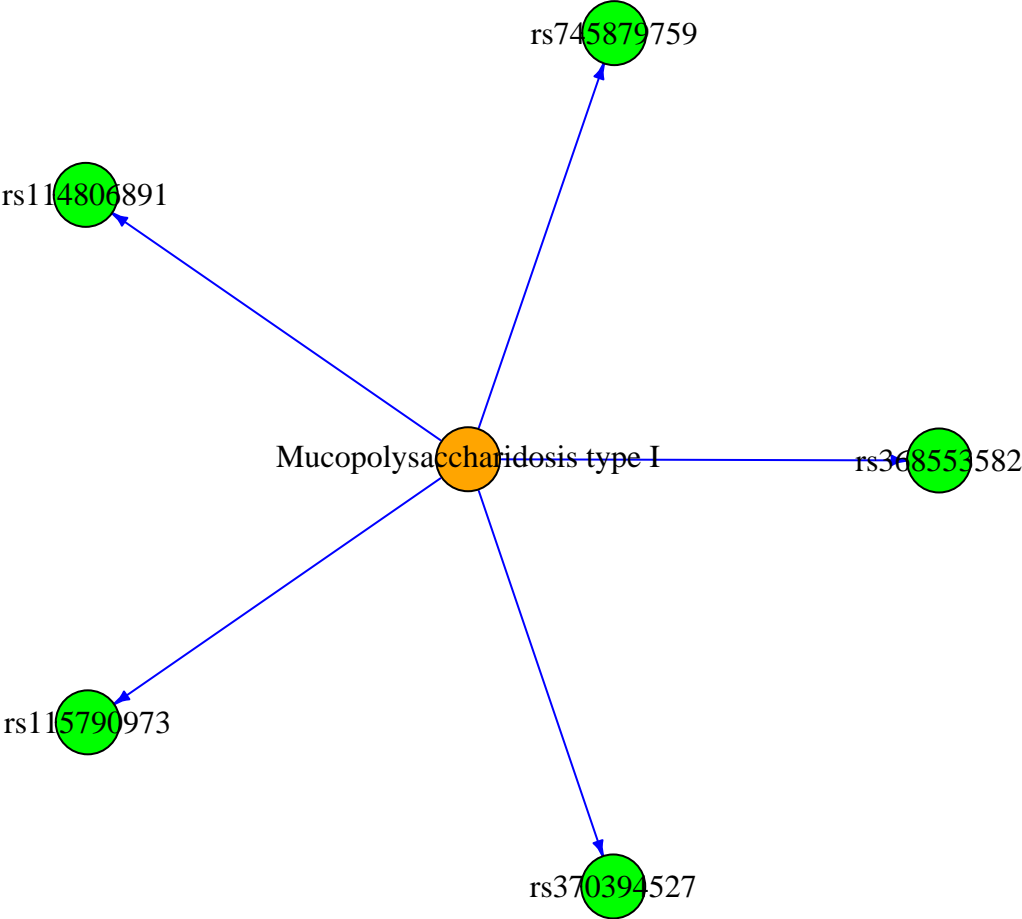

## Variant–Disease Network (Mulibrey nanism syndrome)

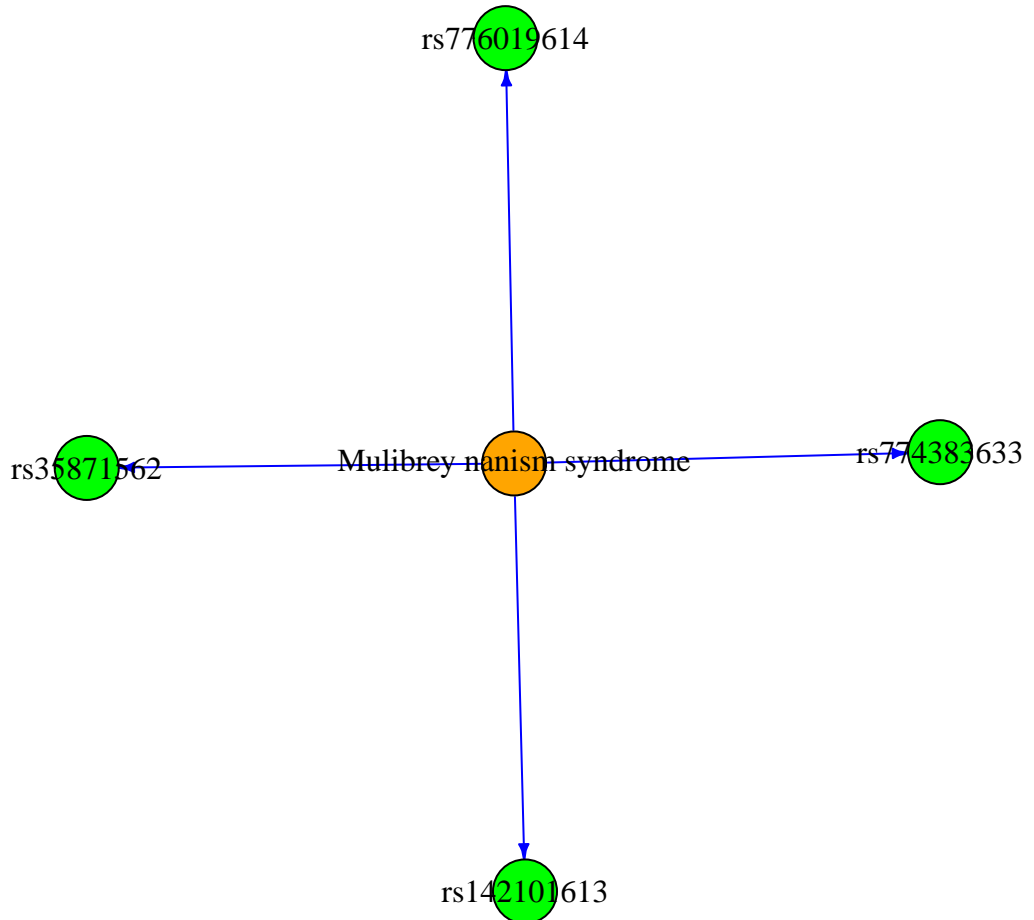

# Disease Network (Multicentric Osteolysis–Nodulosis–Arthropathy (MONA) Spec

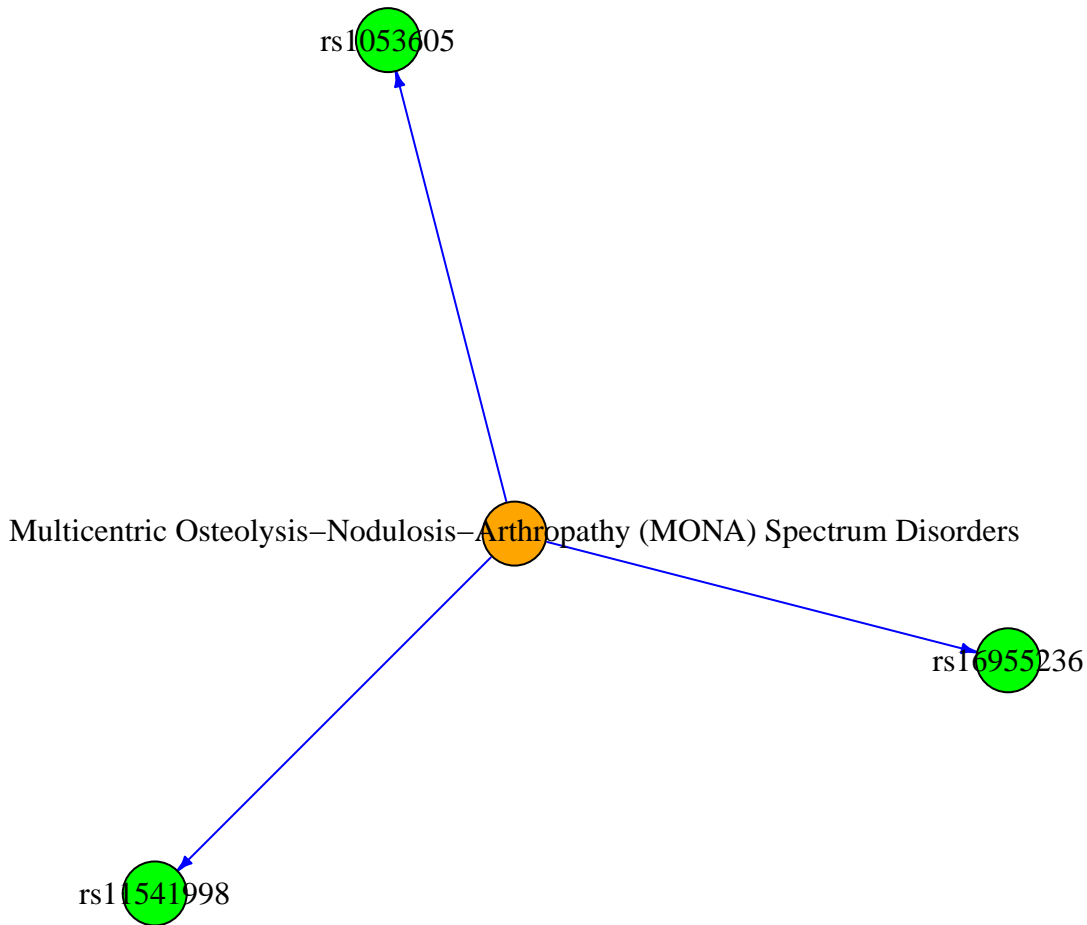

# nt-Disease Network (Multiple congenital anomalies–hypotonia–seizures syn

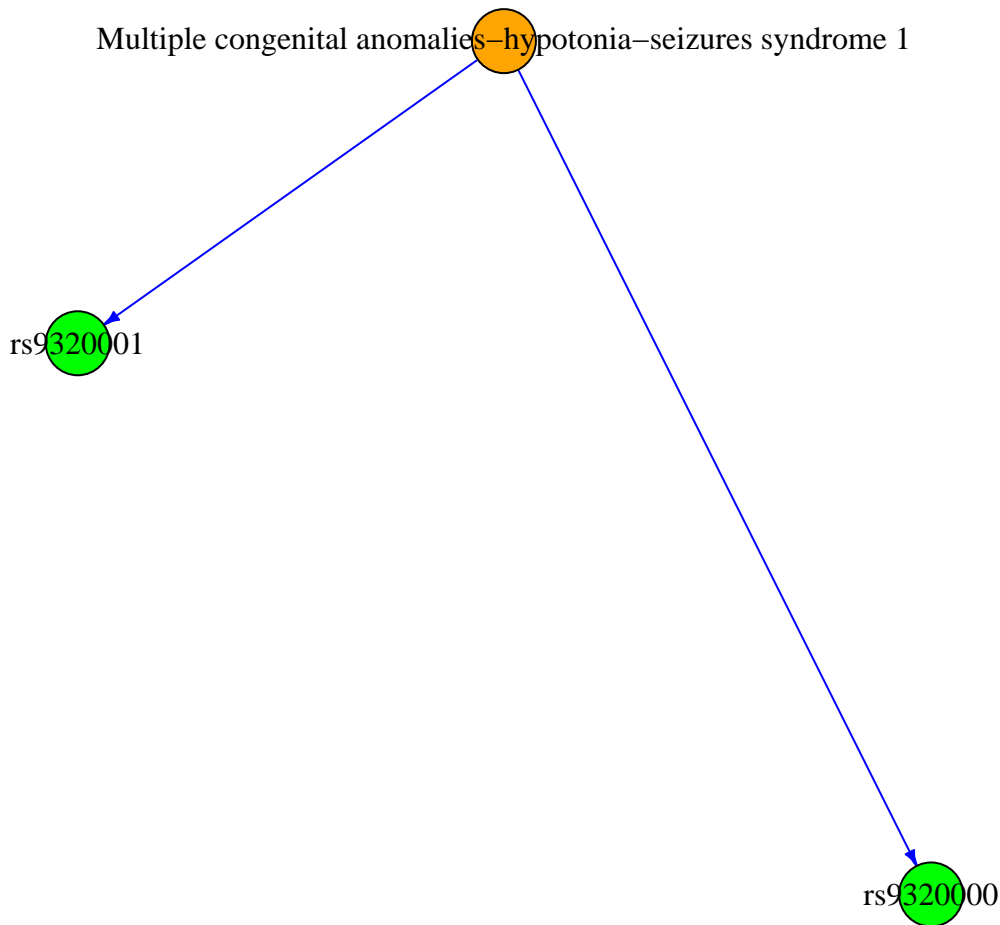

# nt-Disease Network (Multiple congenital anomalies–hypotonia–seizures syn

congenital anomalies–hypotonia–seizures syndrome 2

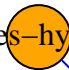

rs387906726

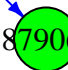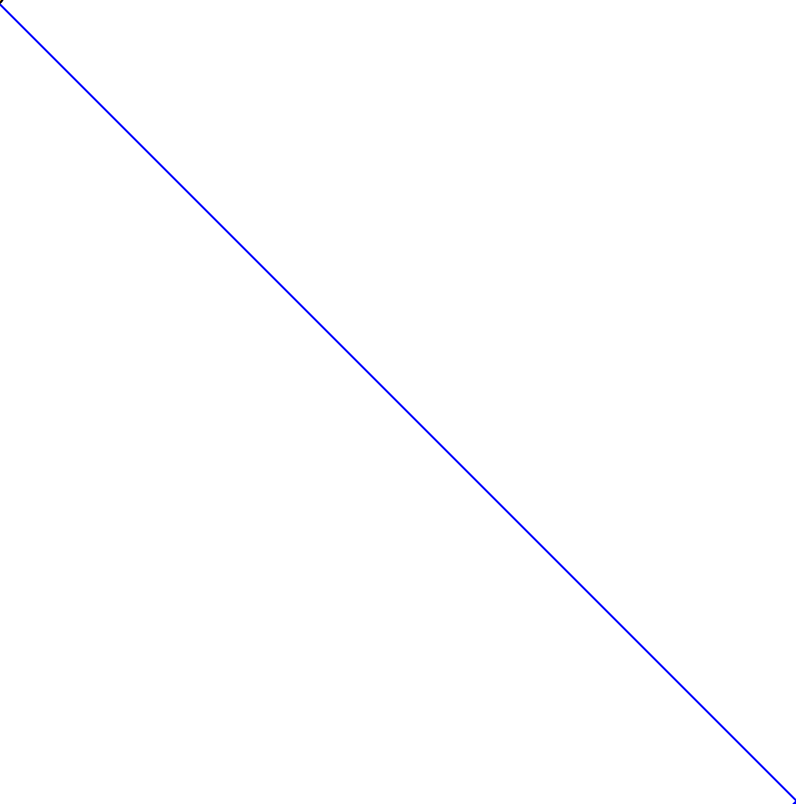

# Variant-Disease Network (Multiple Cutaneous and Mucosal Venous Malformations)

rs76223779

Multiple Cutaneous and Mucosal Venous Malformations

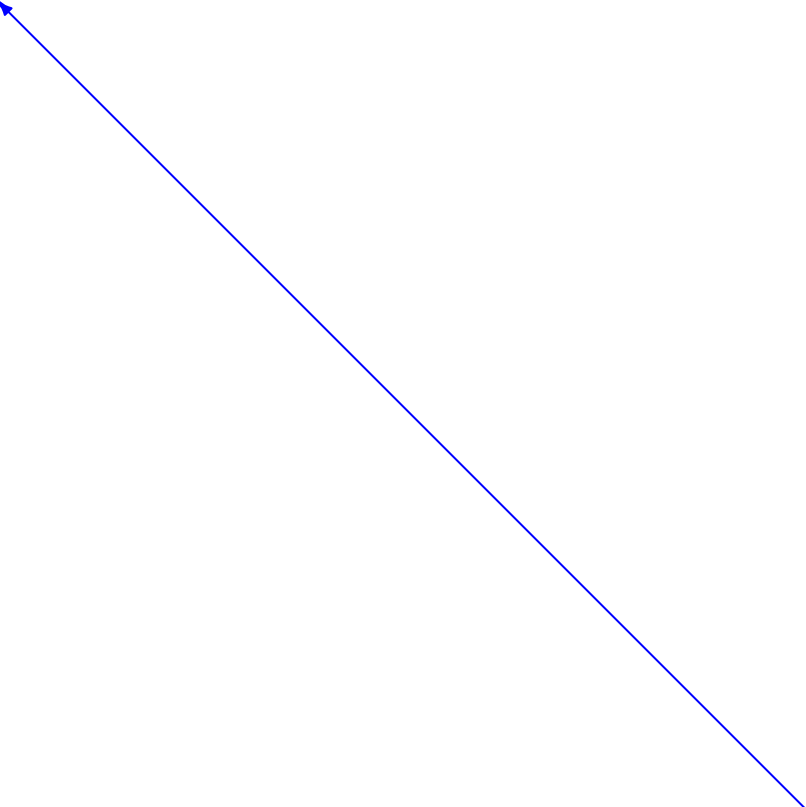



**Variant–Disease Network (Multiple Cutaneous and Uterine Leiomyomas)**

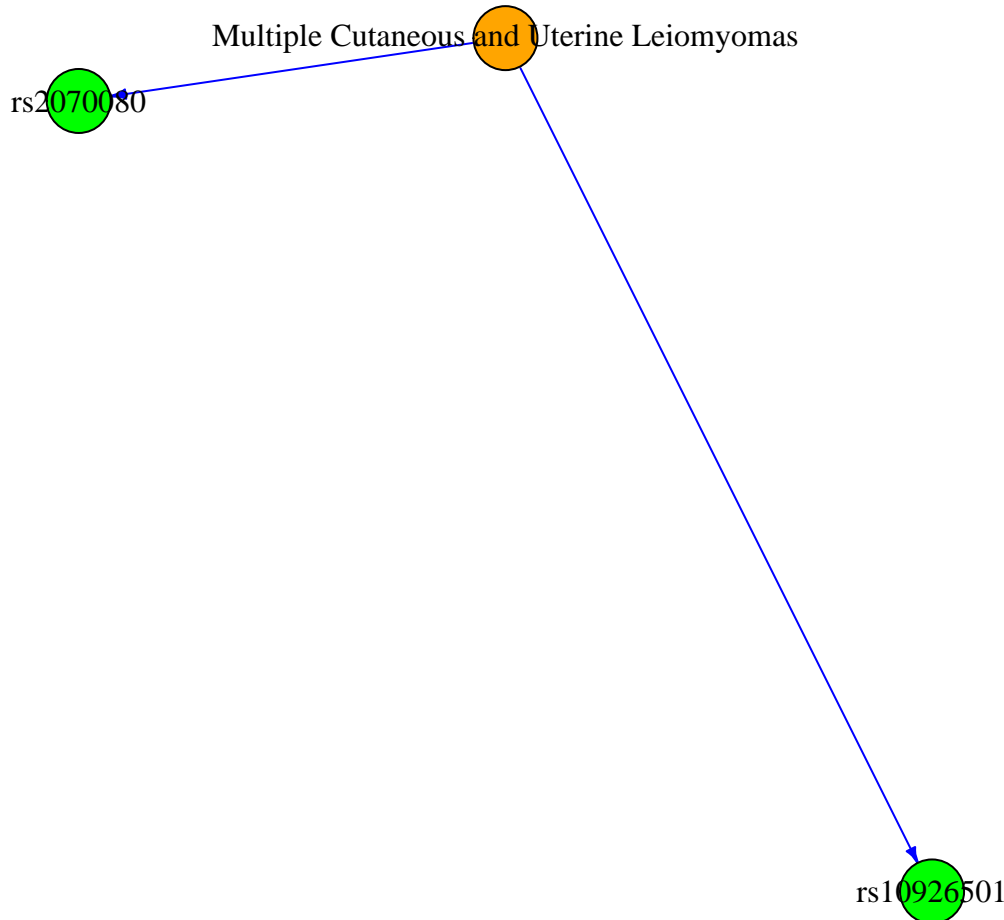

## Variant–Disease Network (Multiple cutaneous leiomyomas)

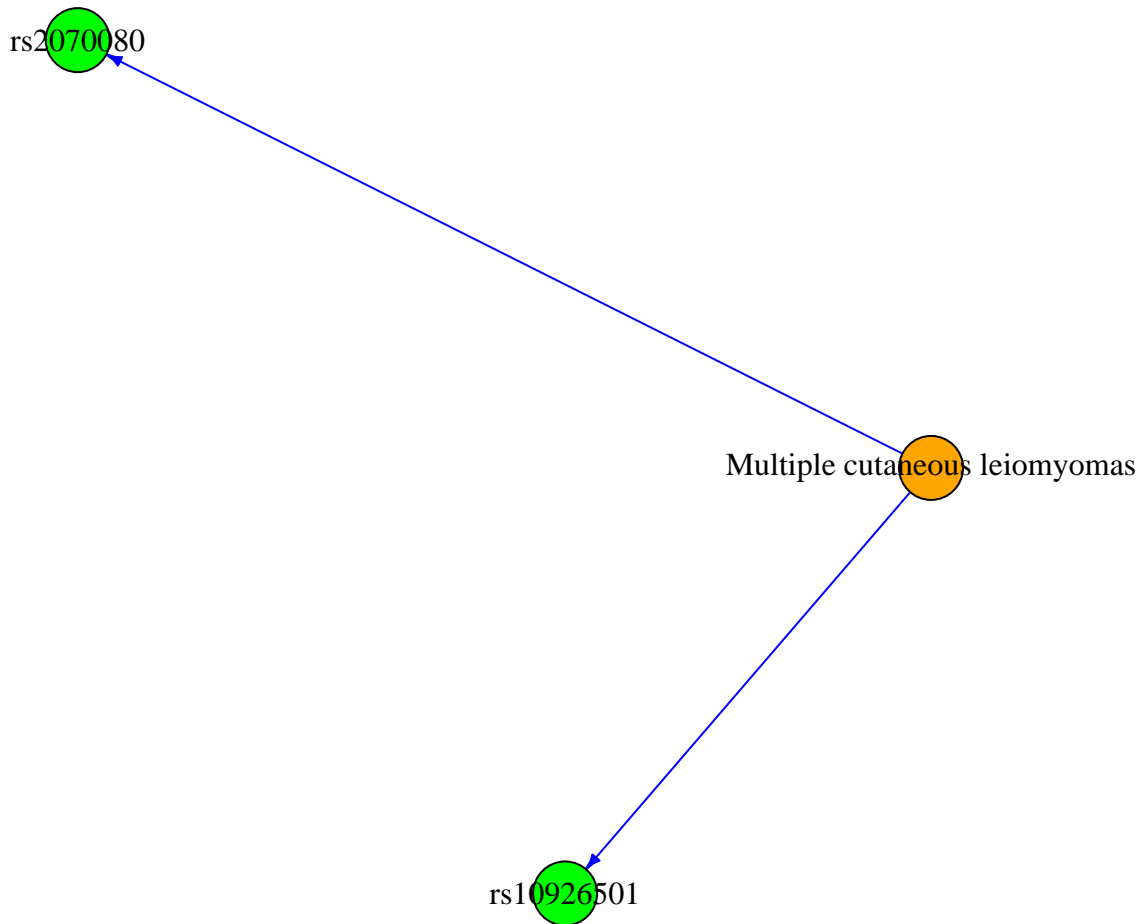

**Variant–Disease Network (Multiple endocrine neoplasia)**

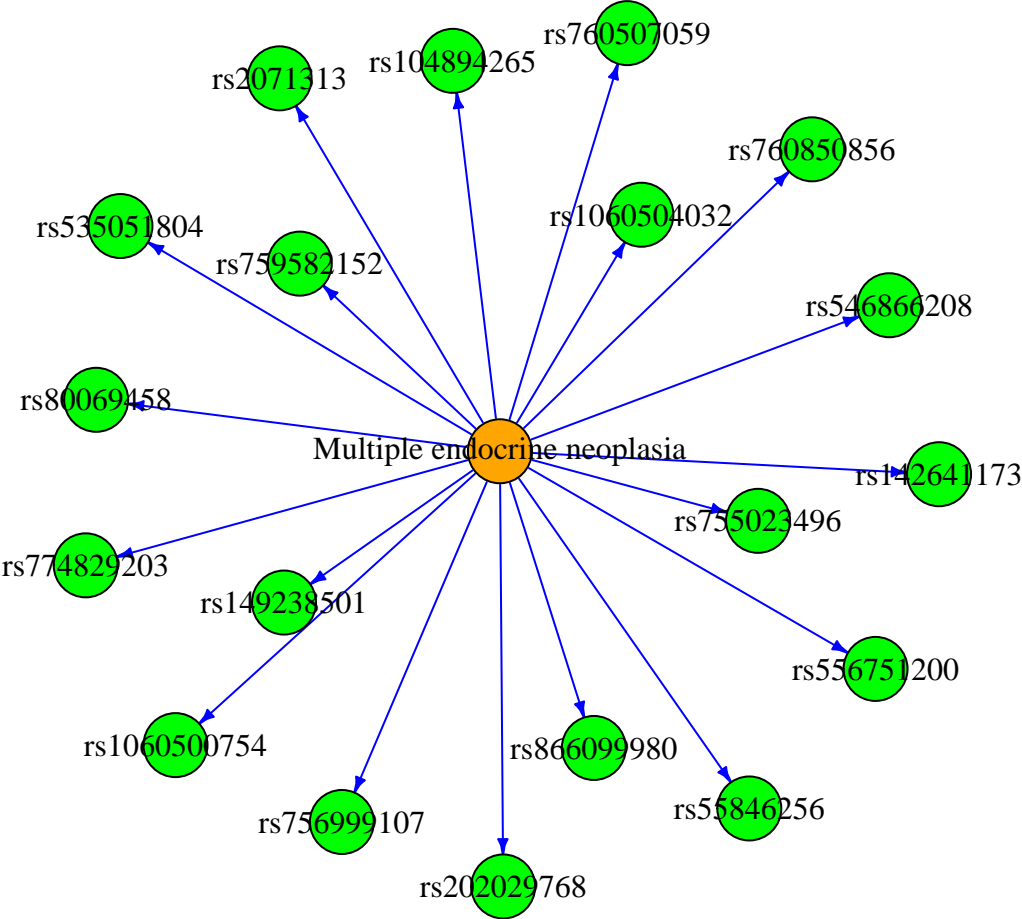

**Variant–Disease Network (Multiple Epiphyseal Dysplasia)**

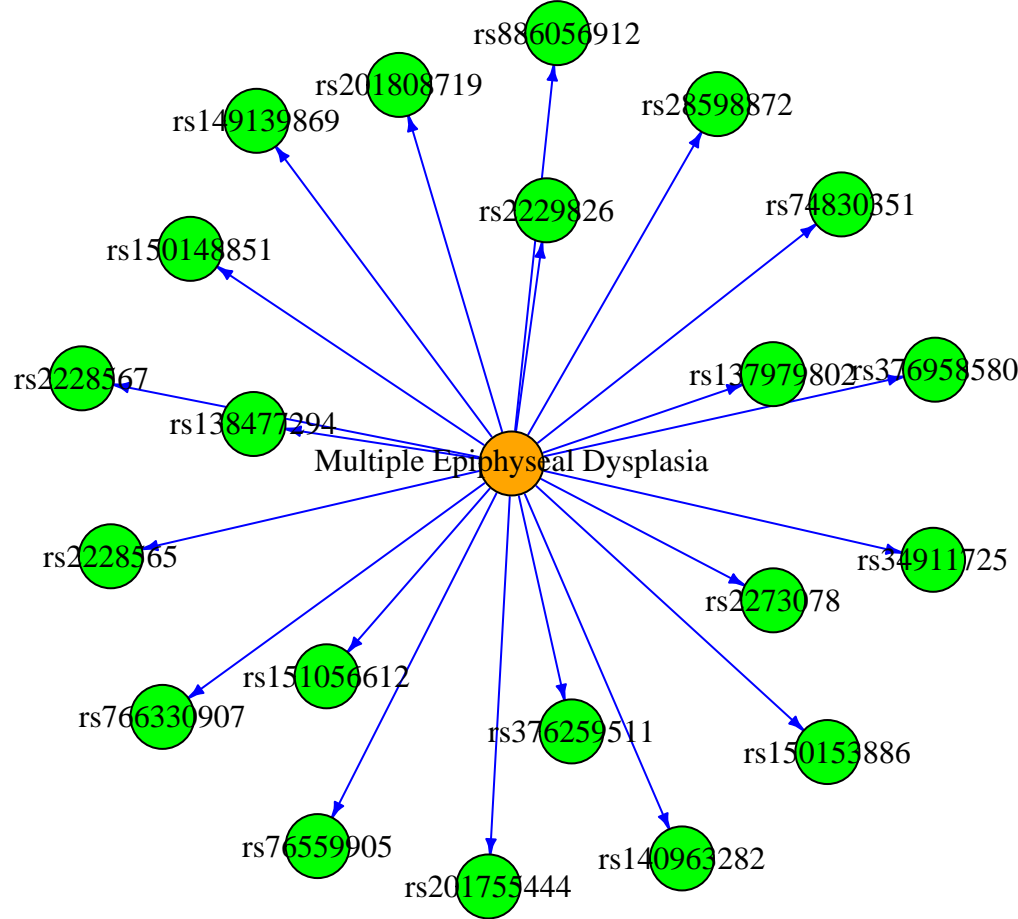

## Variant–Disease Network (Multiple exostoses type 1)

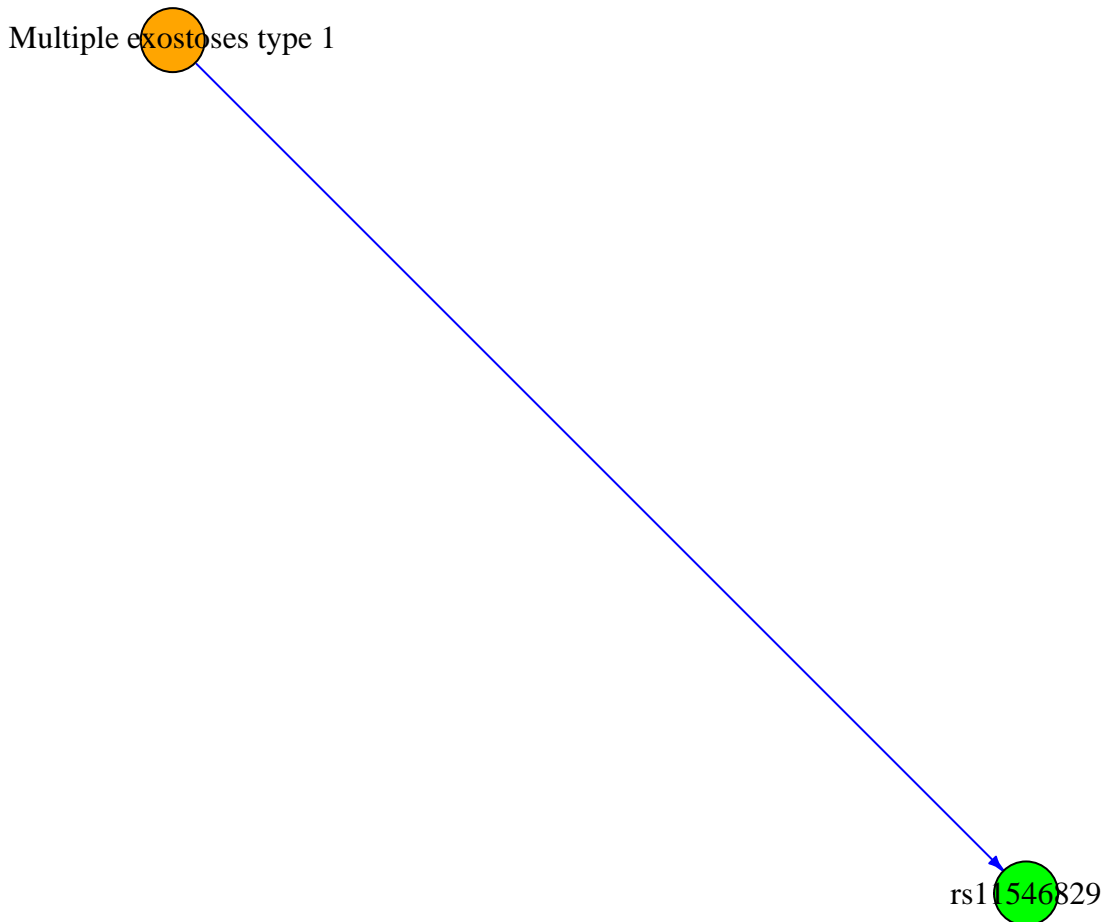

**Variant–Disease Network (Multiple gastrointestinal atresias)**

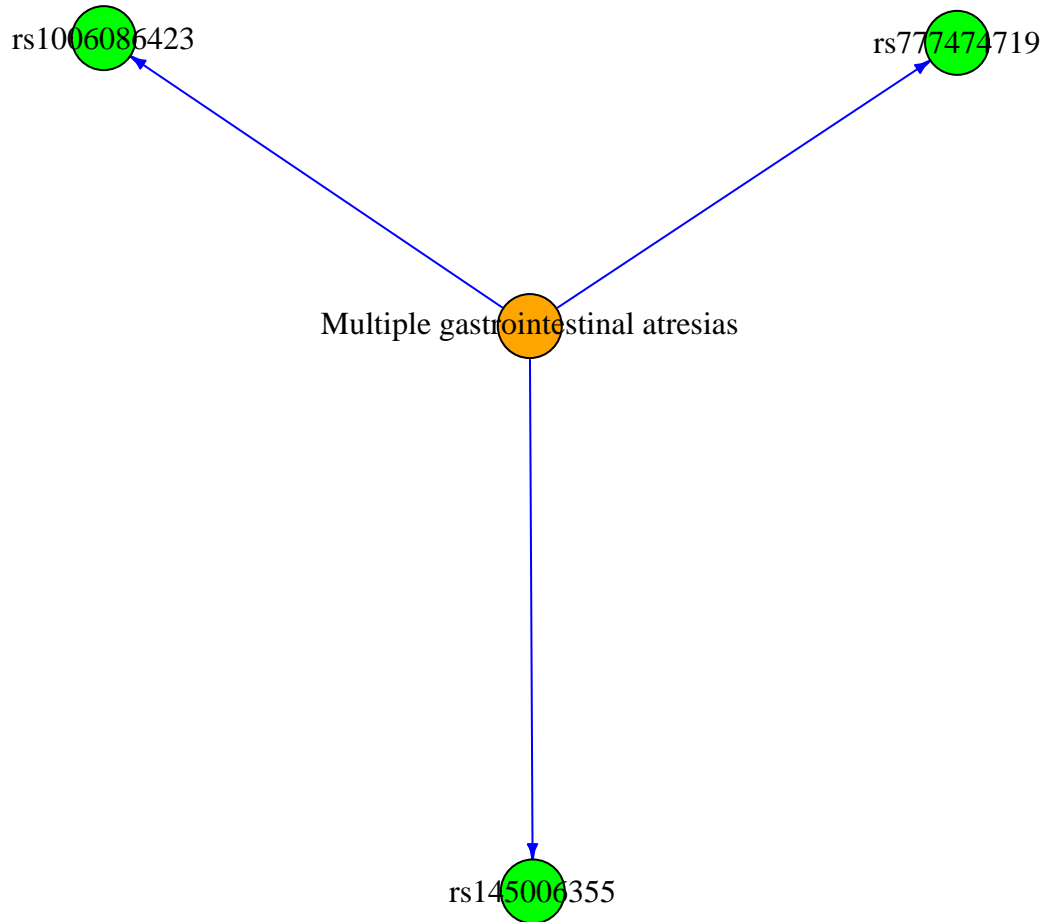

**Variant–Disease Network (Multiple pterygium syndrome Escobar type)**

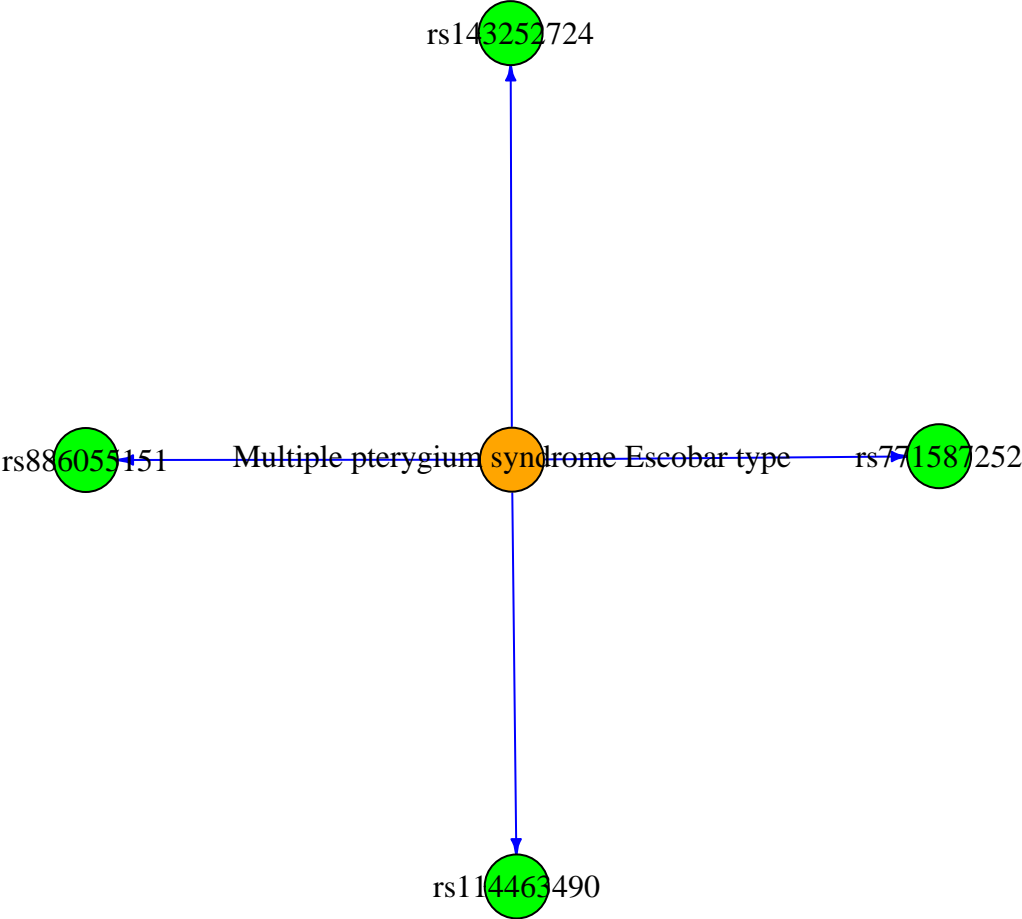

**Variant–Disease Network (Muscle AMP deaminase deficiency)**

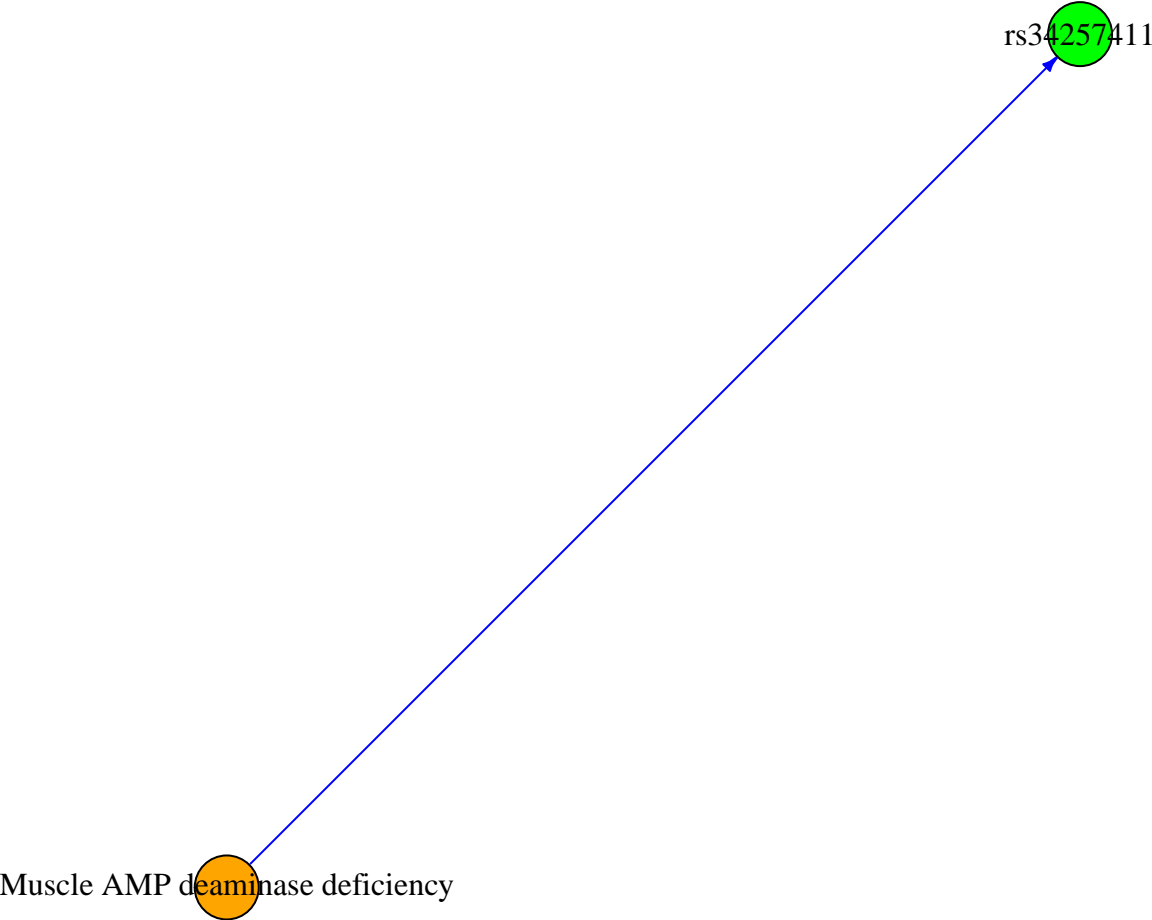



## Variant–Disease Network (Muscular dystrophy)

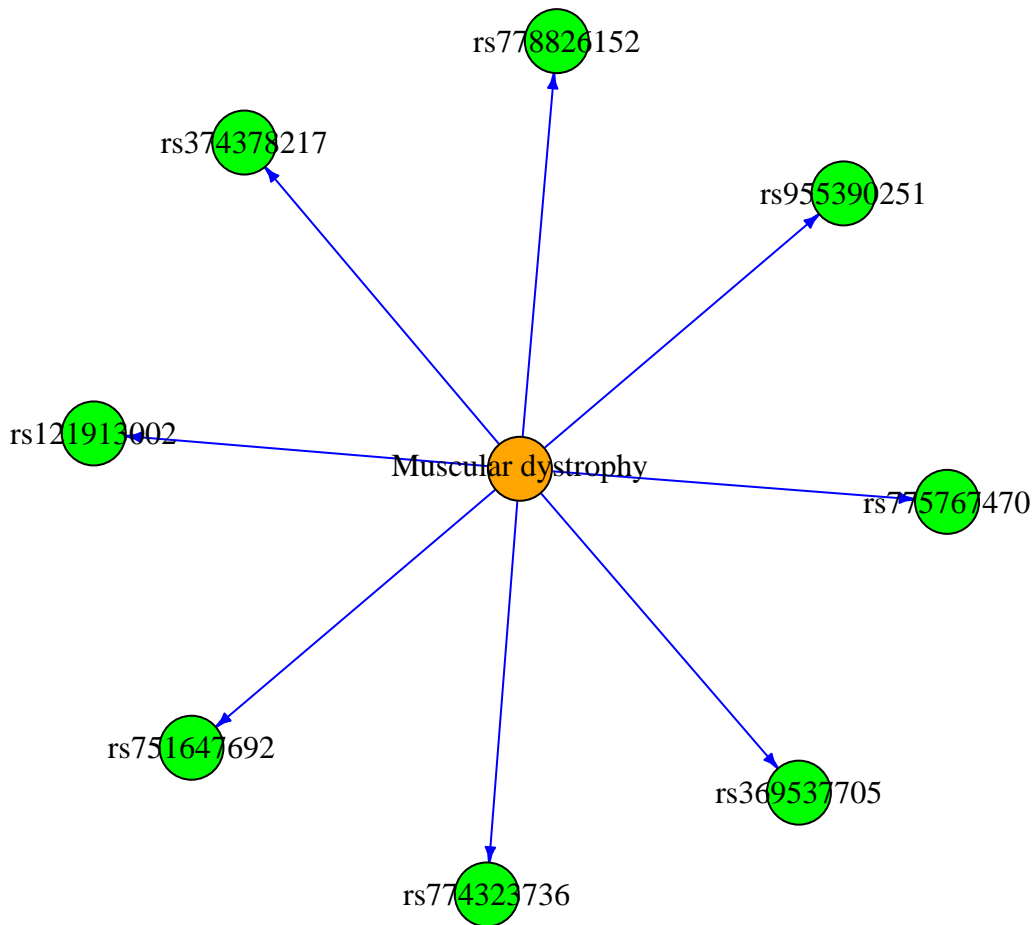

# e Network (Muscular dystrophy–dystroglycanopathy (congenital with brain a

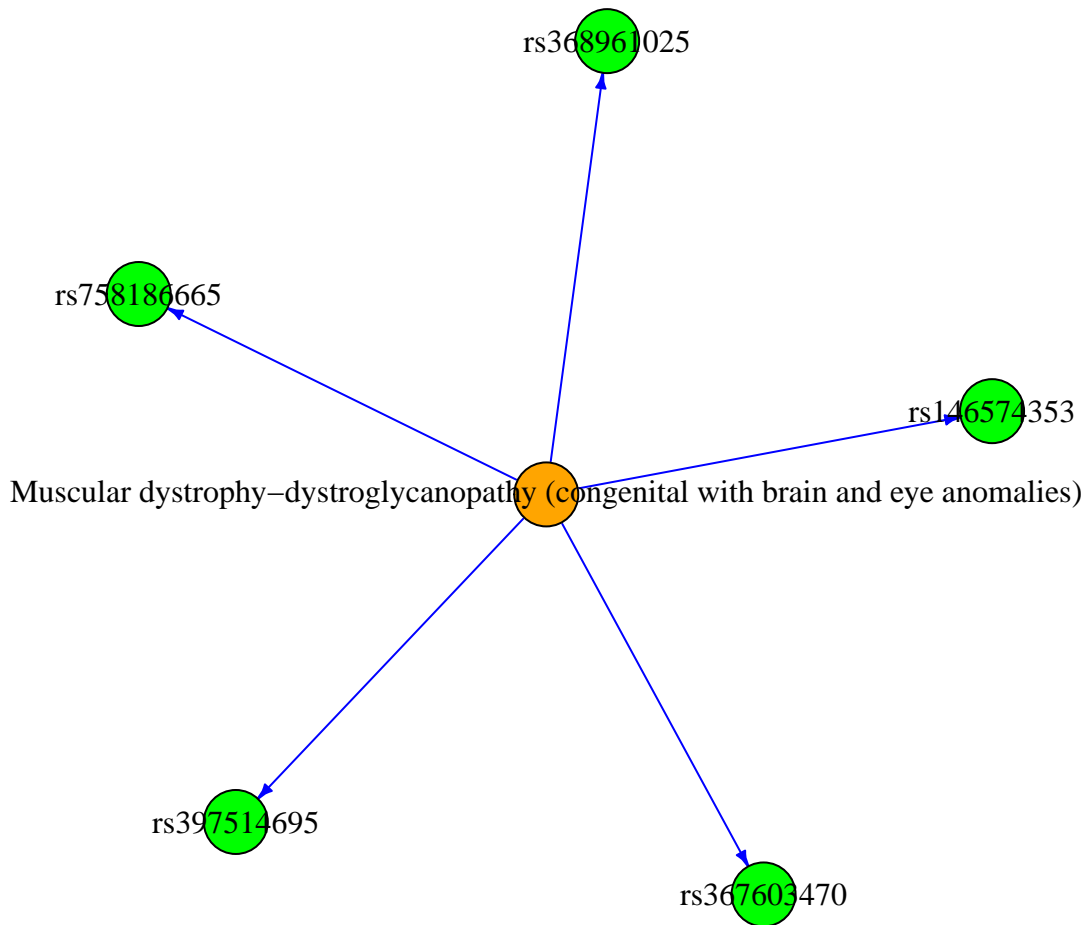

Variant–Disease Network (MUTYH–associated polyposis)

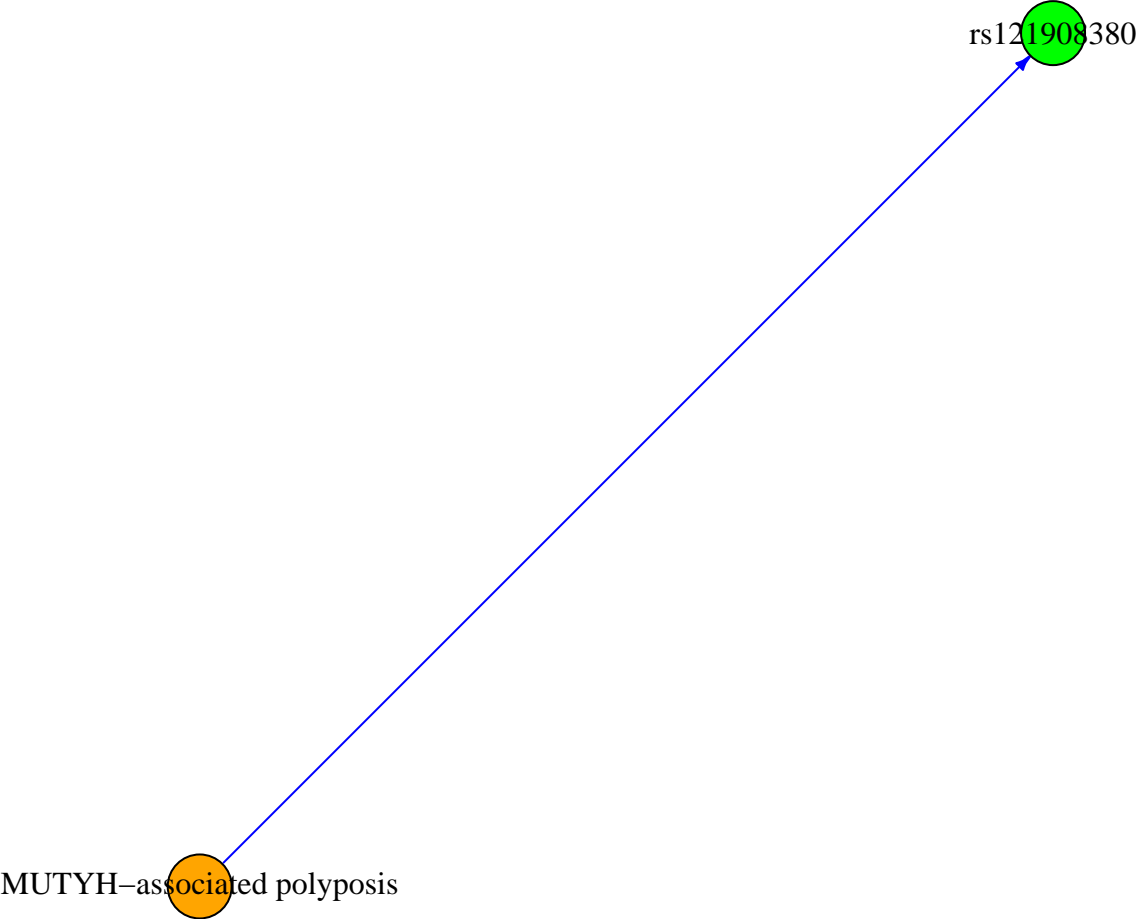

Variant–Disease Network (Myasthenia)

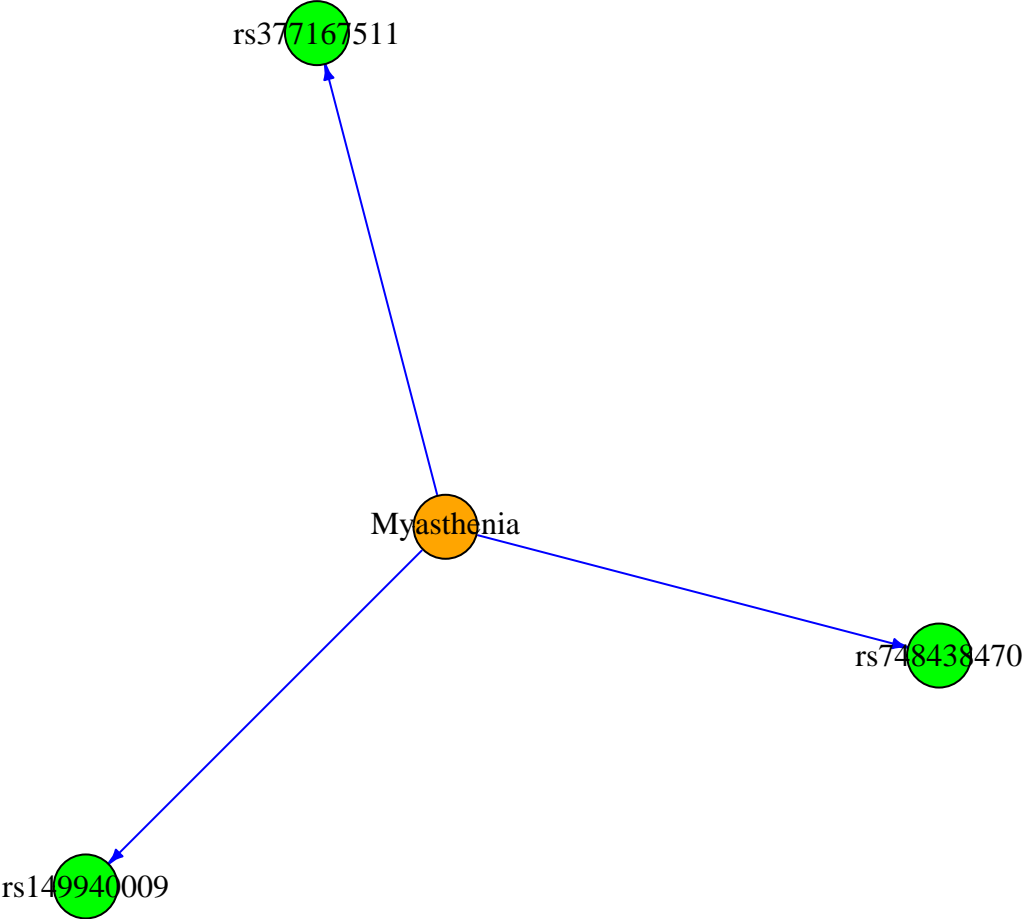

**Variant–Disease Network (Myasthenic syndrome)**

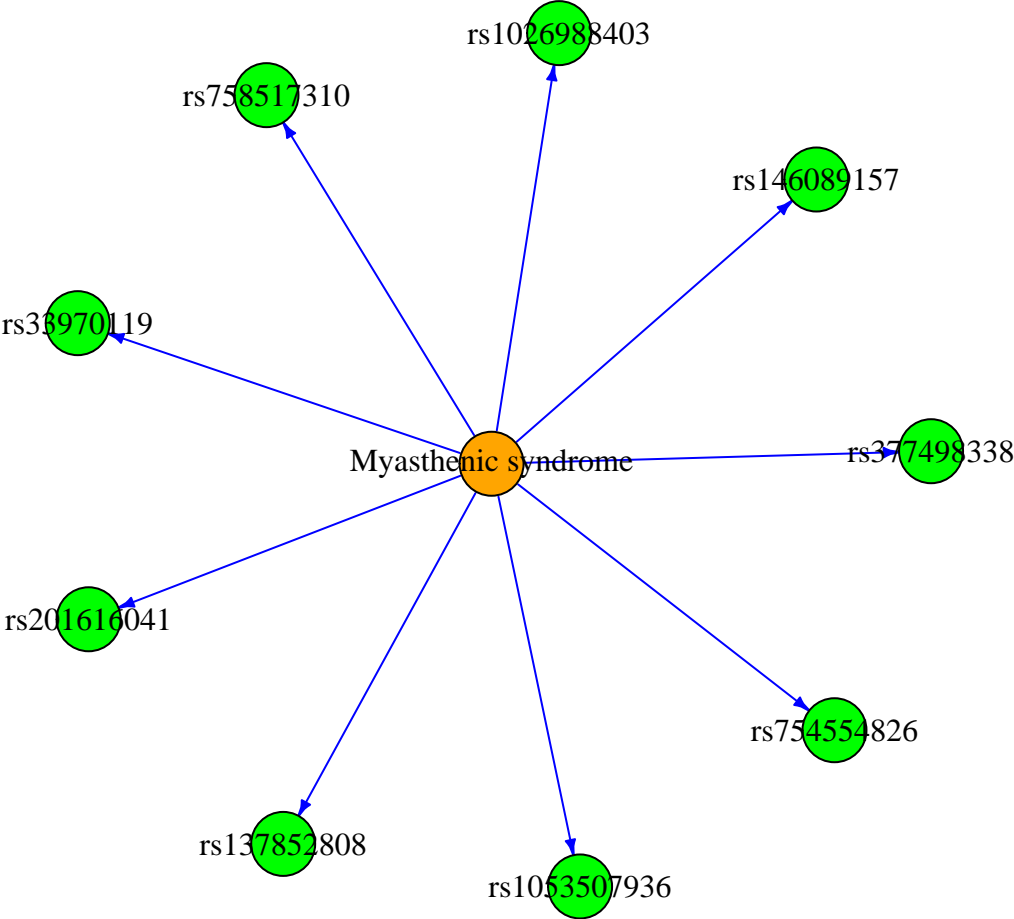

# Variant-Disease Network (Myelocerebellar disorder)

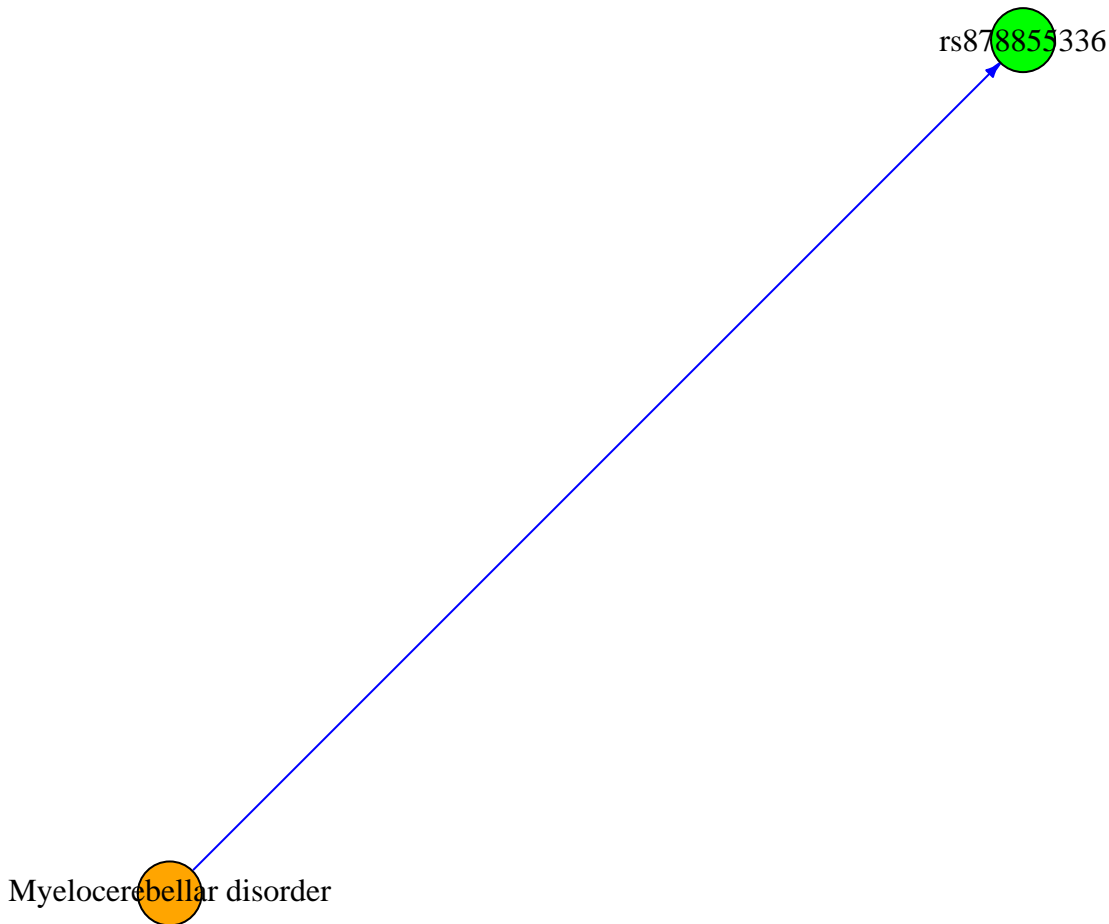

## Variant–Disease Network (MYH-associated polyposis)

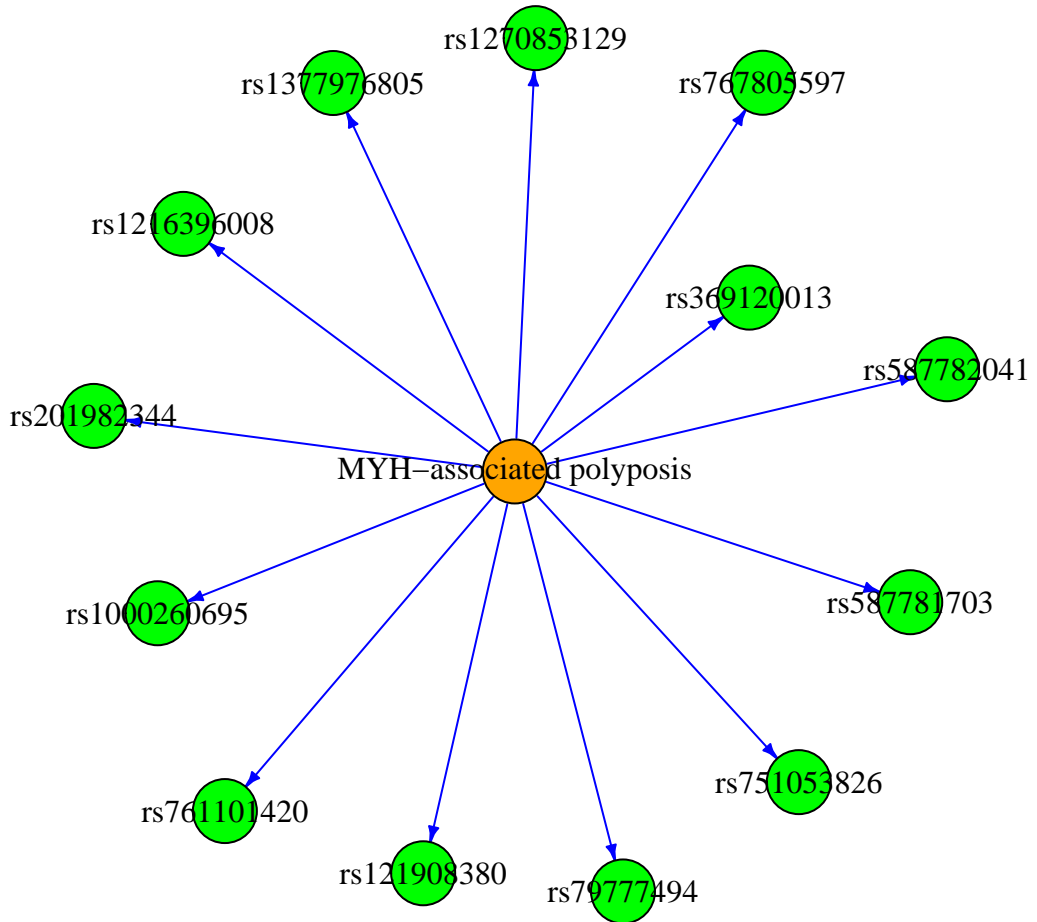

## Variant–Disease Network (Myoclonic epilepsy)

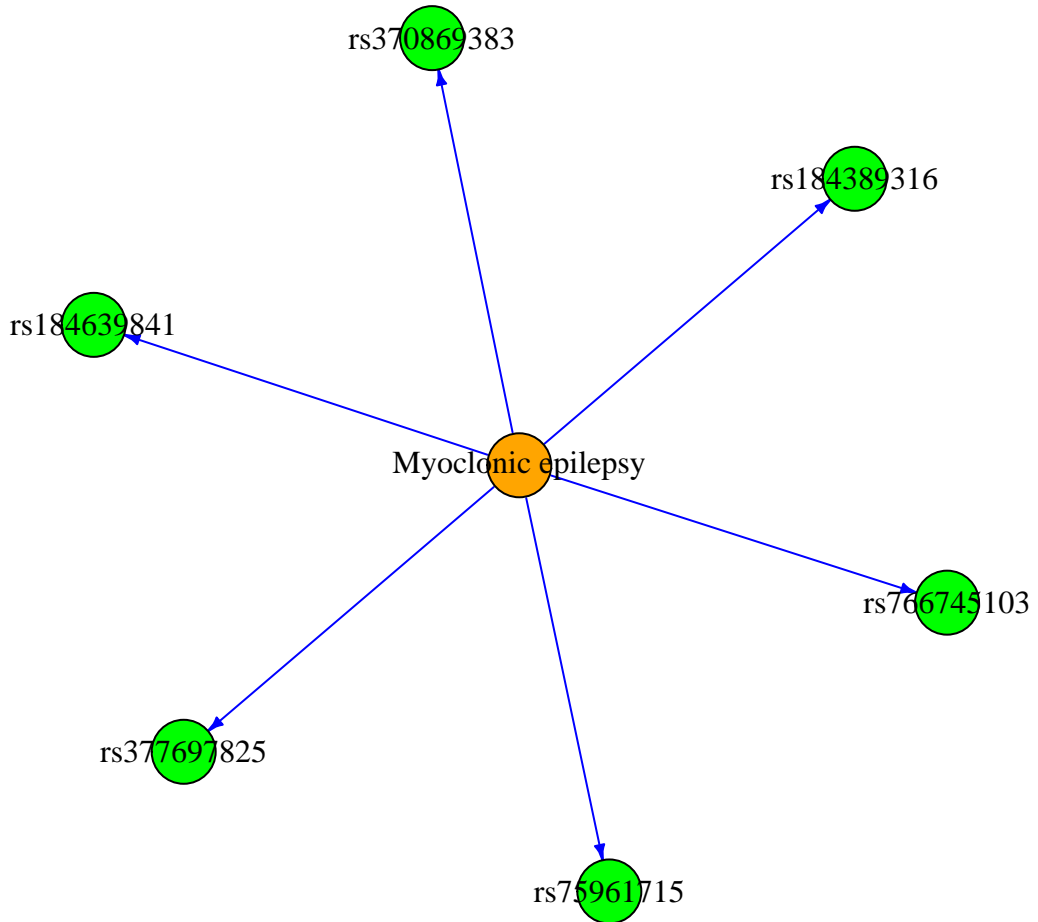



## Variant–Disease Network (Myofibrillar myopathy)

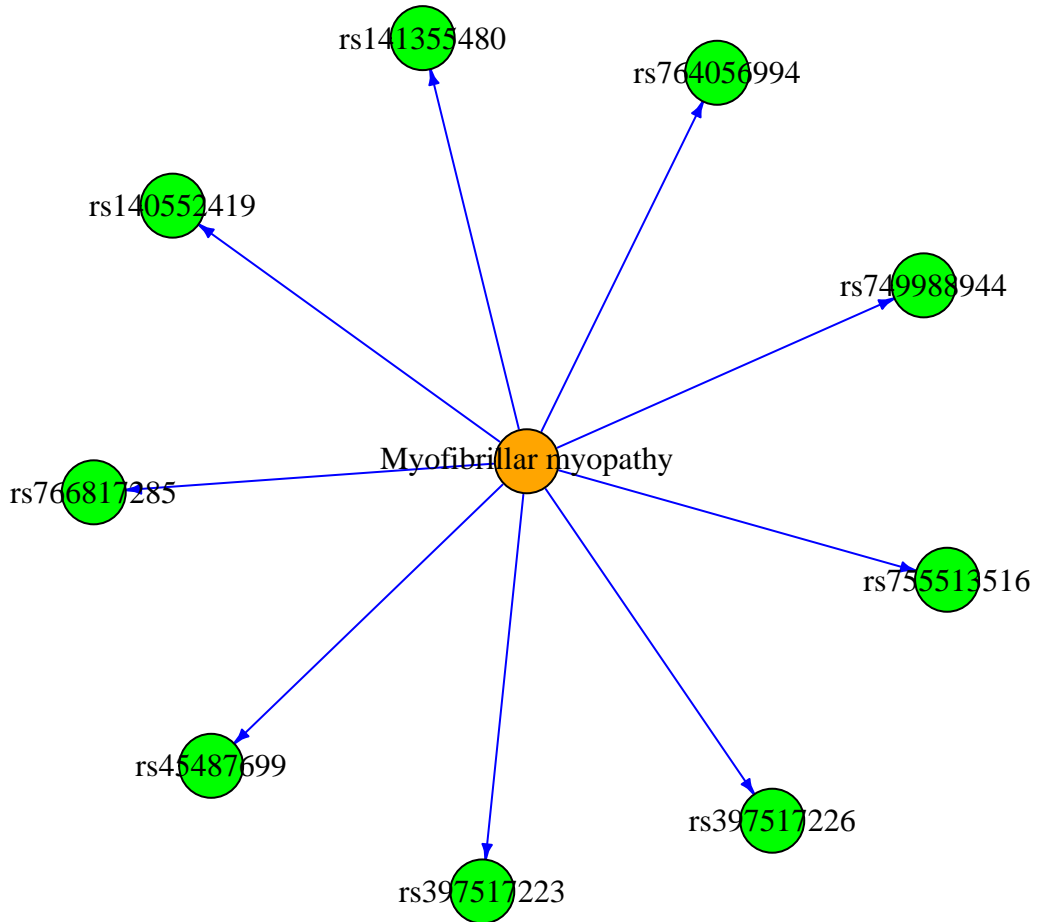

Variant–Disease Network (Myofibrillar myopathy 1)

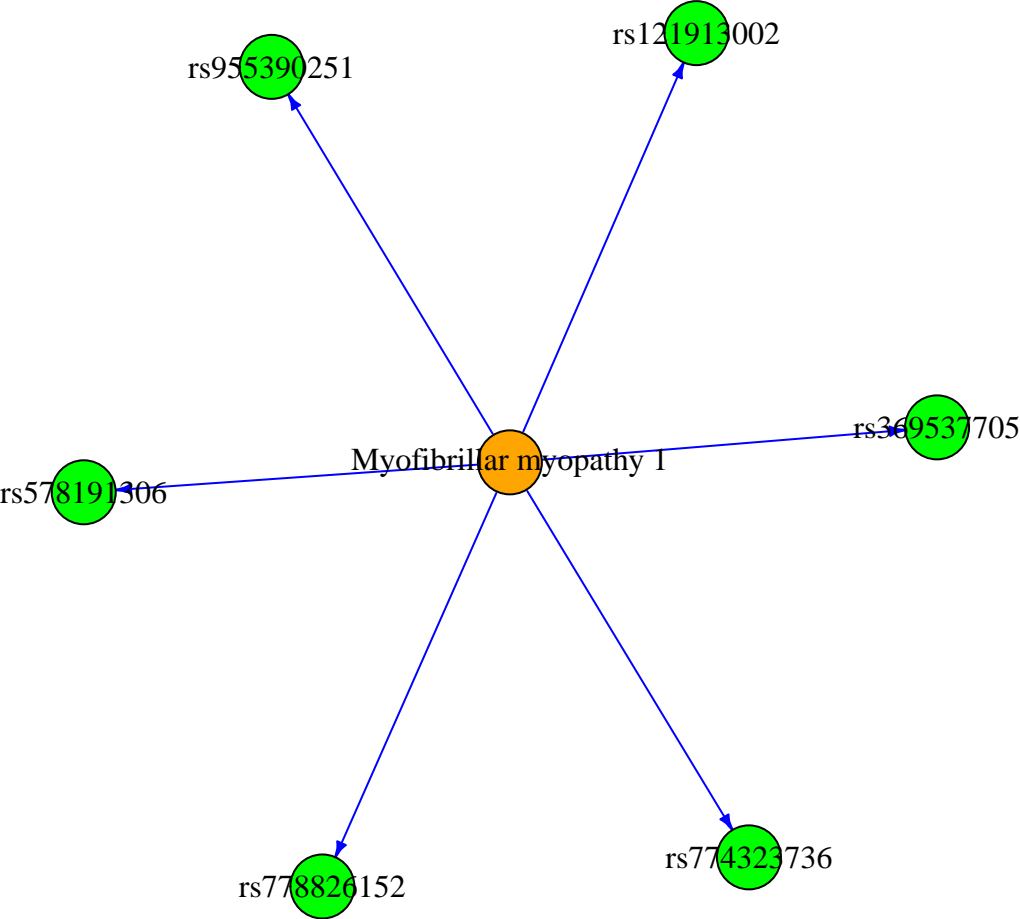

# Variant-Disease Network (Myopathy)

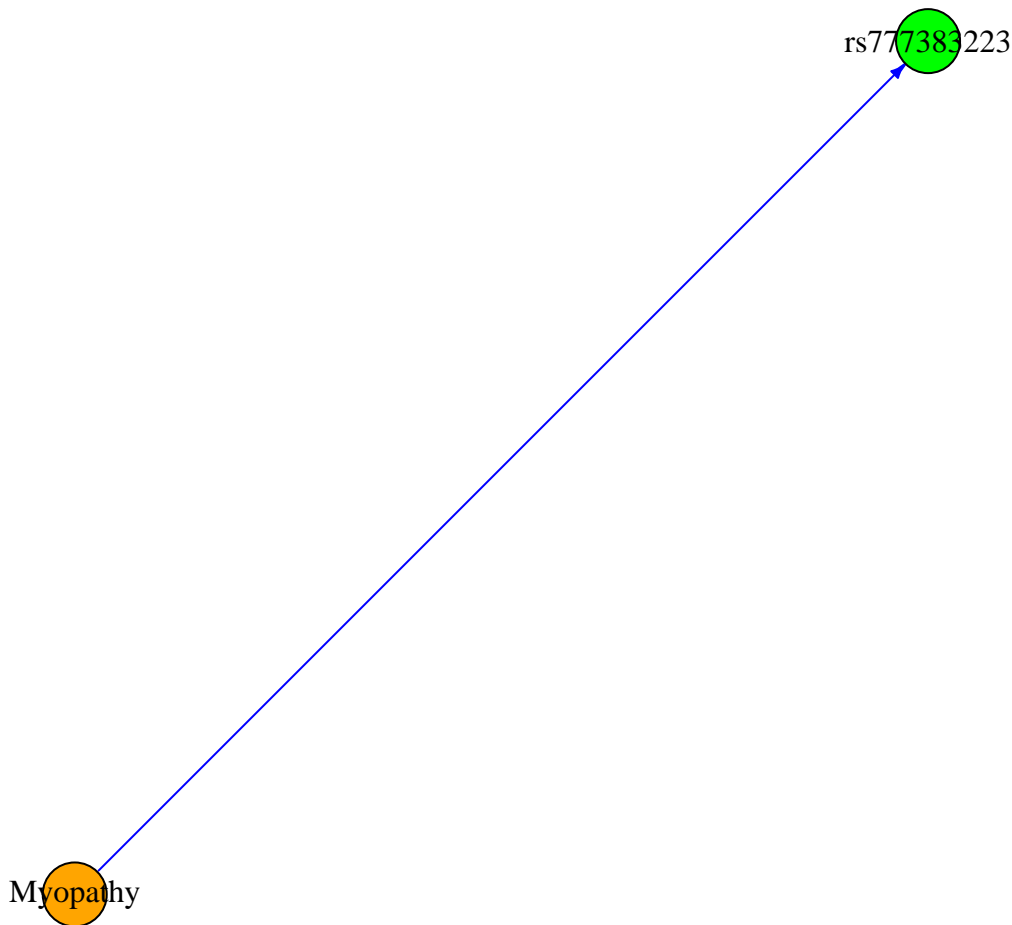

## Variant–Disease Network (Myopia)

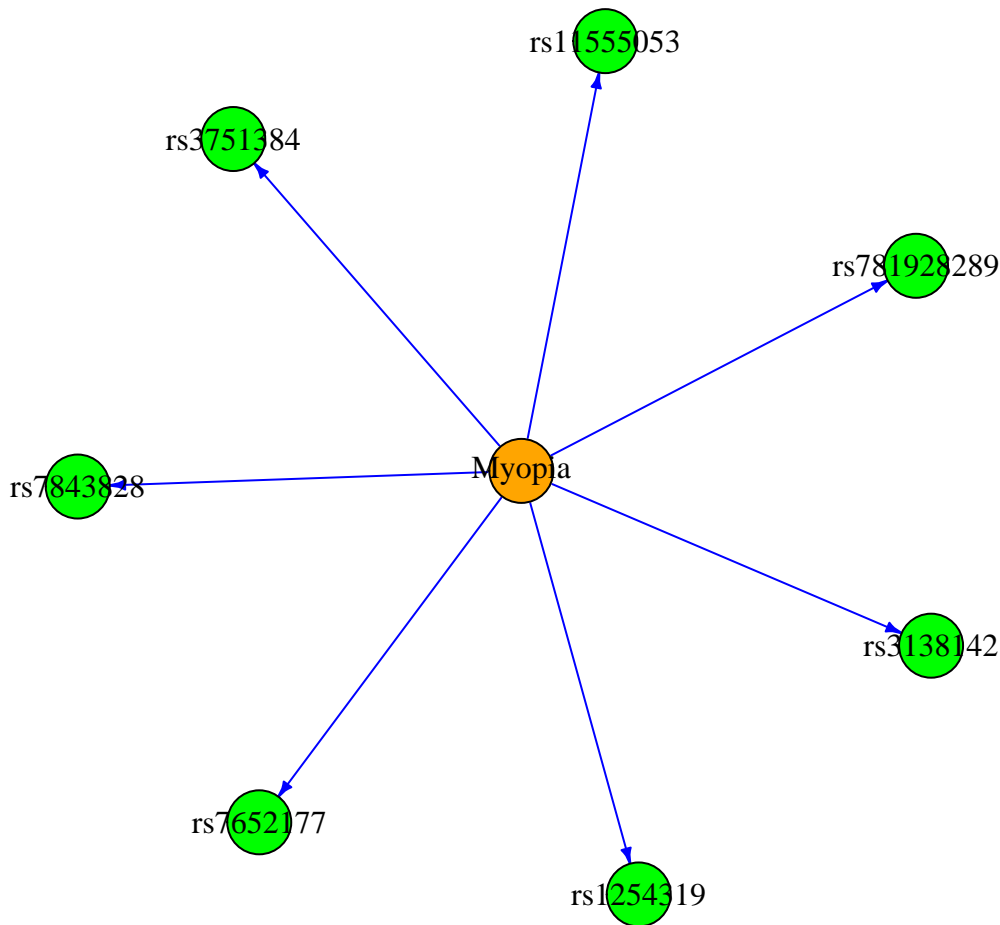

Variant–Disease Network (Myopia 24)

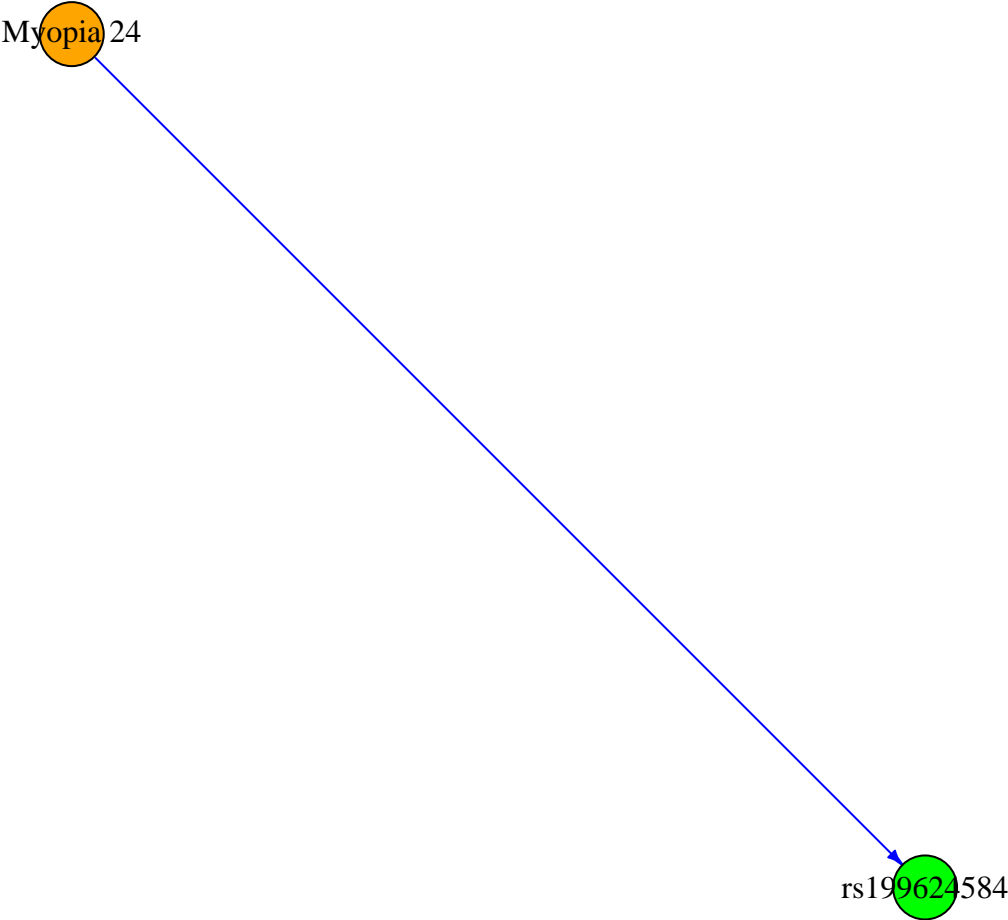

# Variant–Disease Network (Myostatin–related muscle hypertrophy)

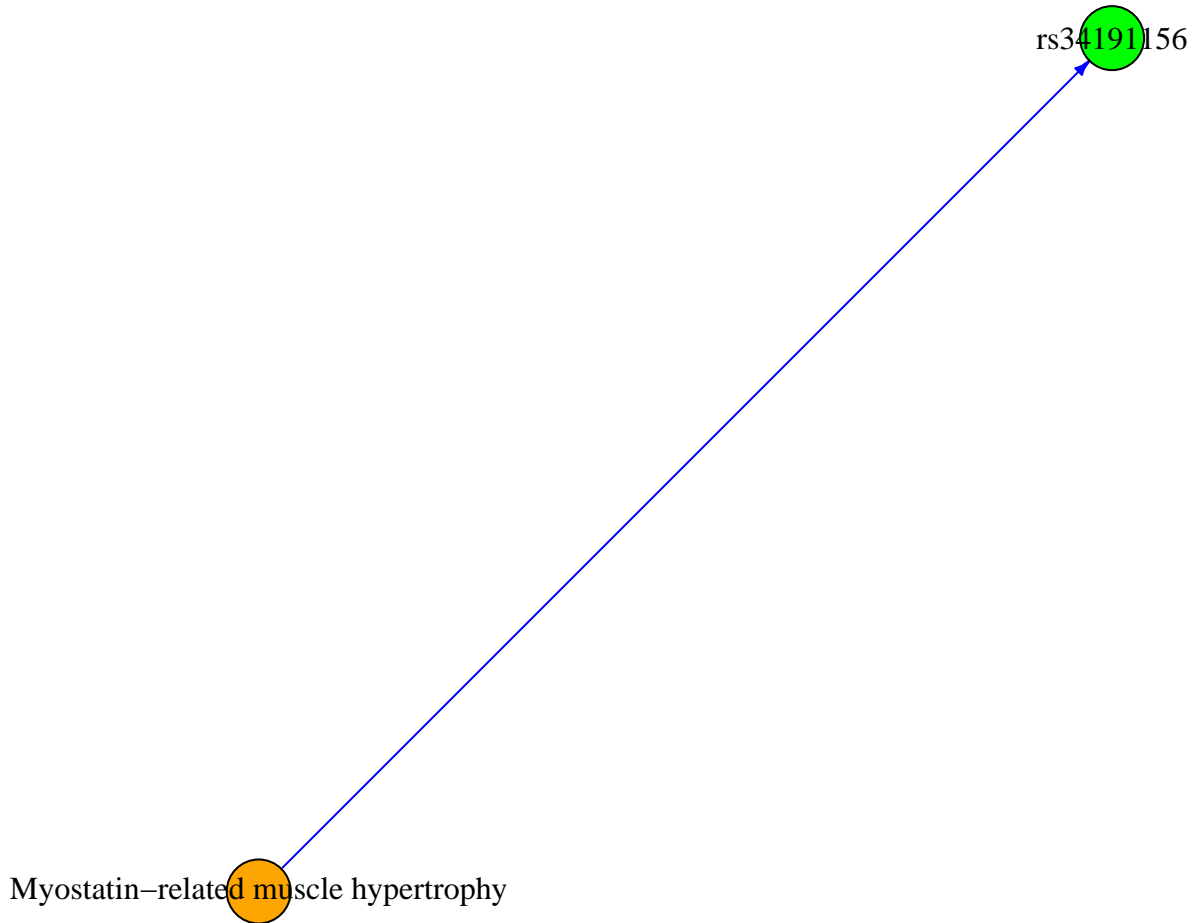

## Variant–Disease Network (Myotonia congenita)

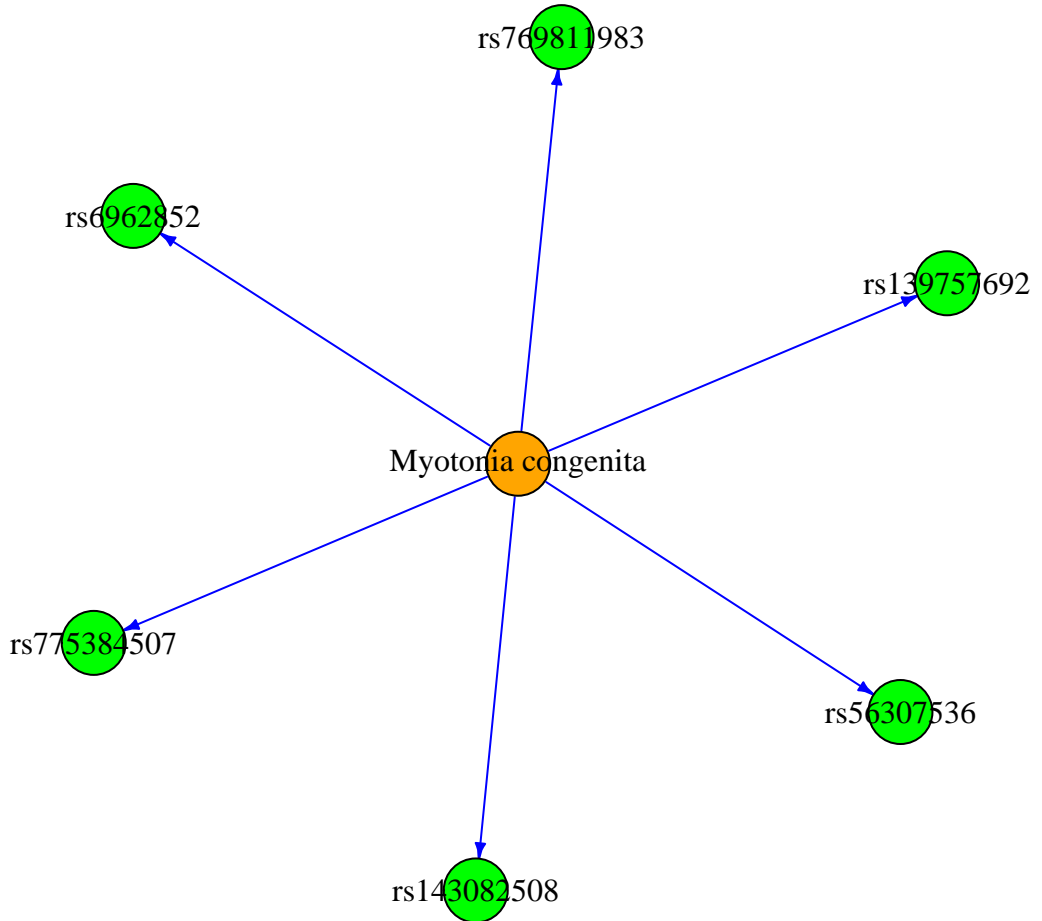

## Variant–Disease Network (Nager syndrome)

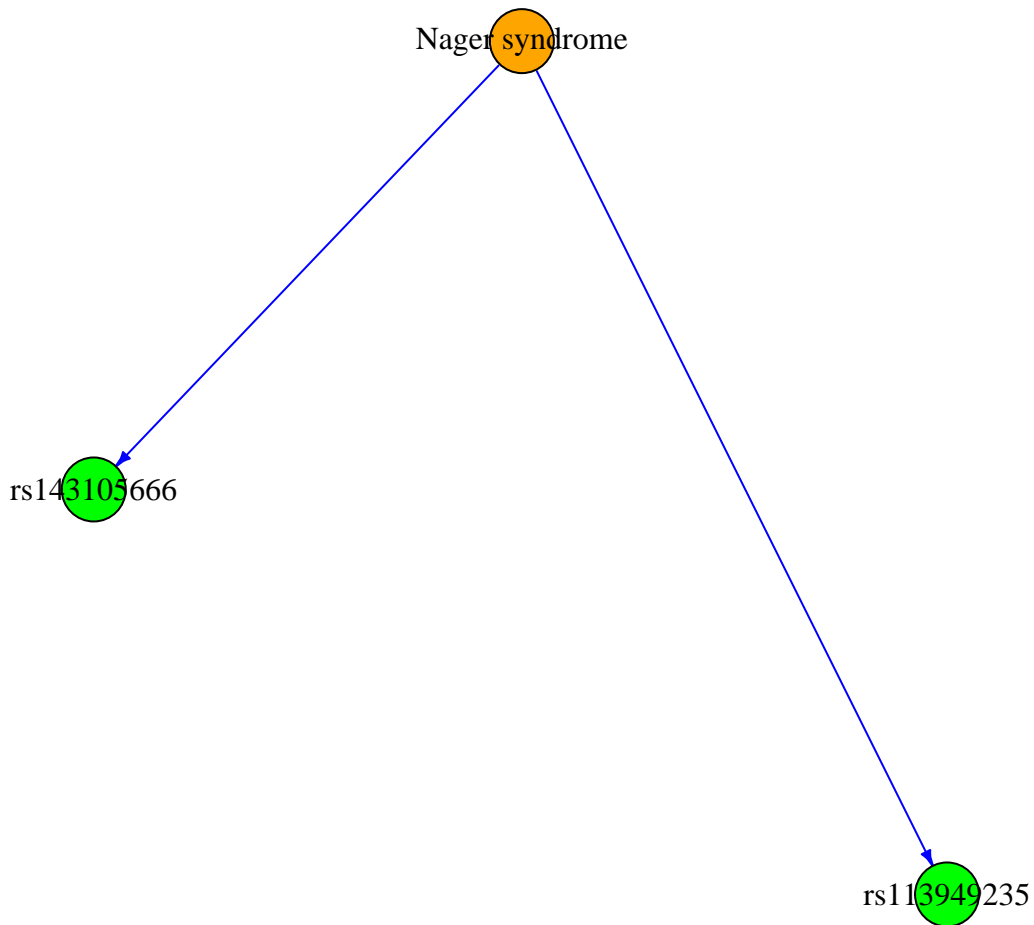



## Variant–Disease Network (Nail–patella syndrome)

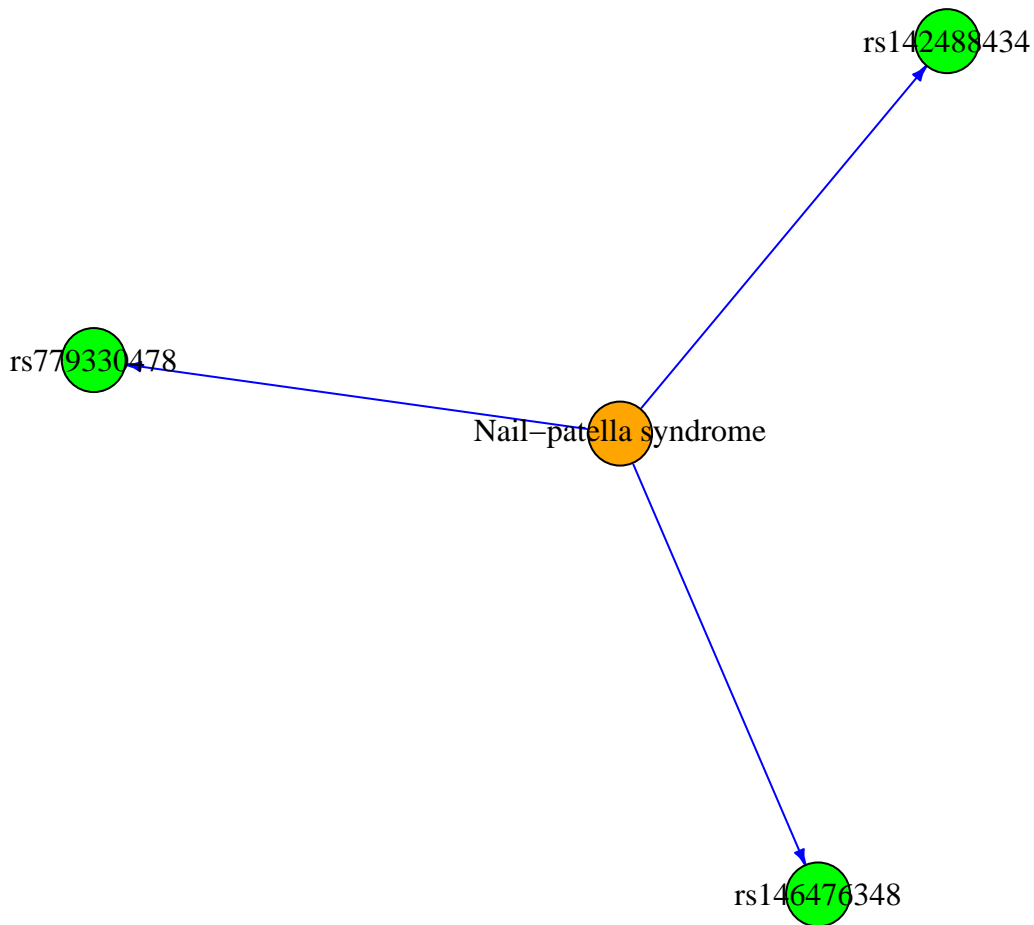

Variant–Disease Network (Naxos disease)

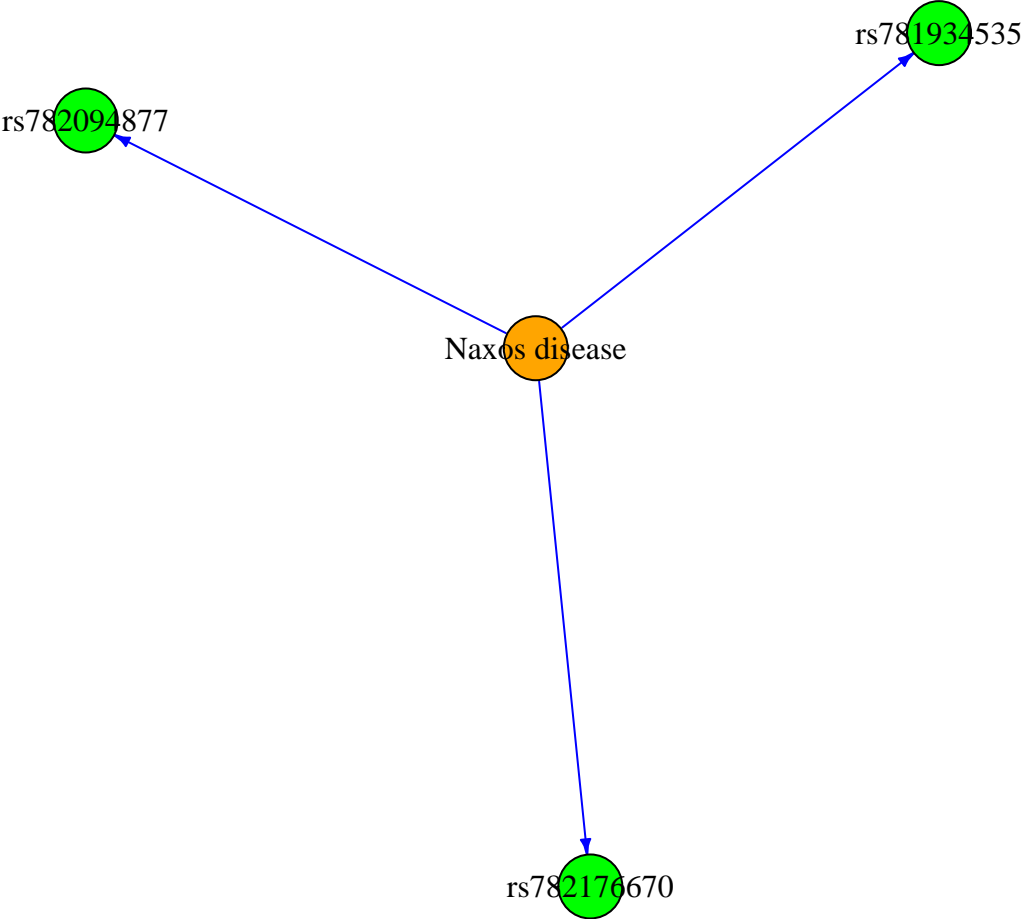

## Variant–Disease Network (Nemaline myopathy)

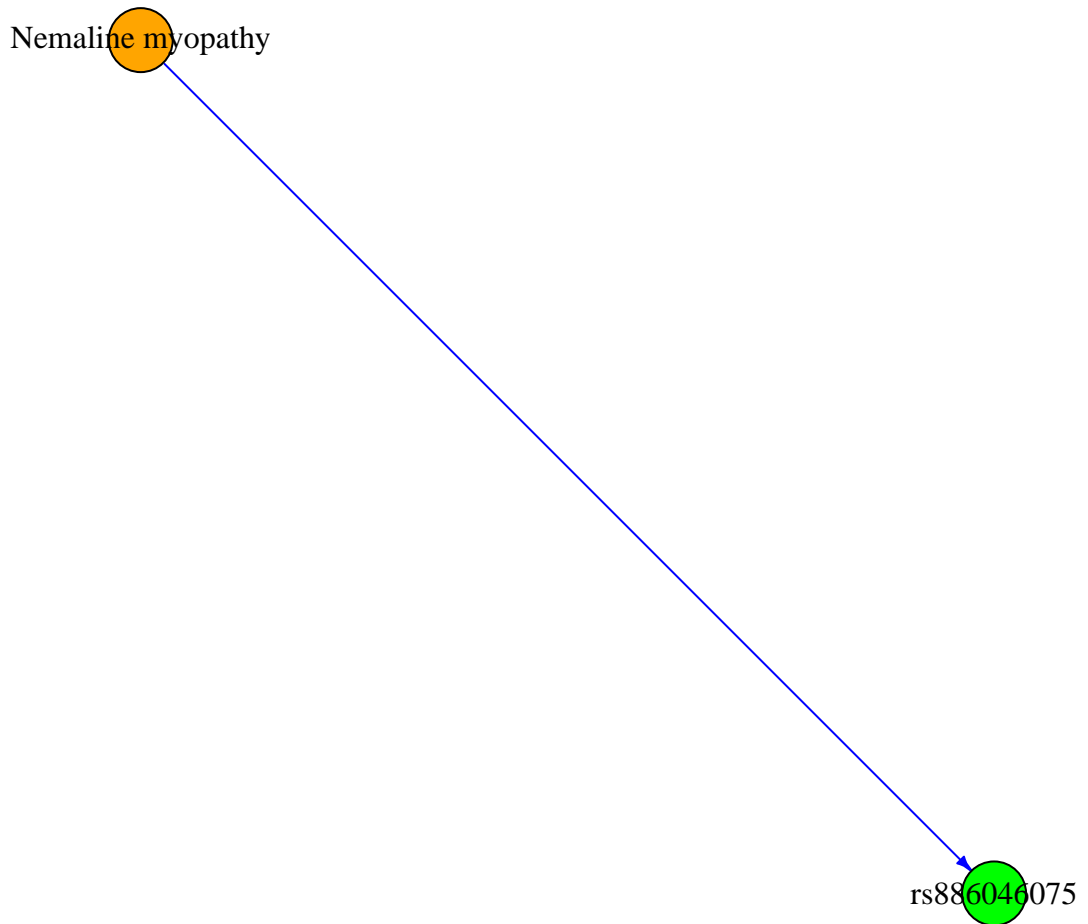

## Variant–Disease Network (Nemaline myopathy 8)

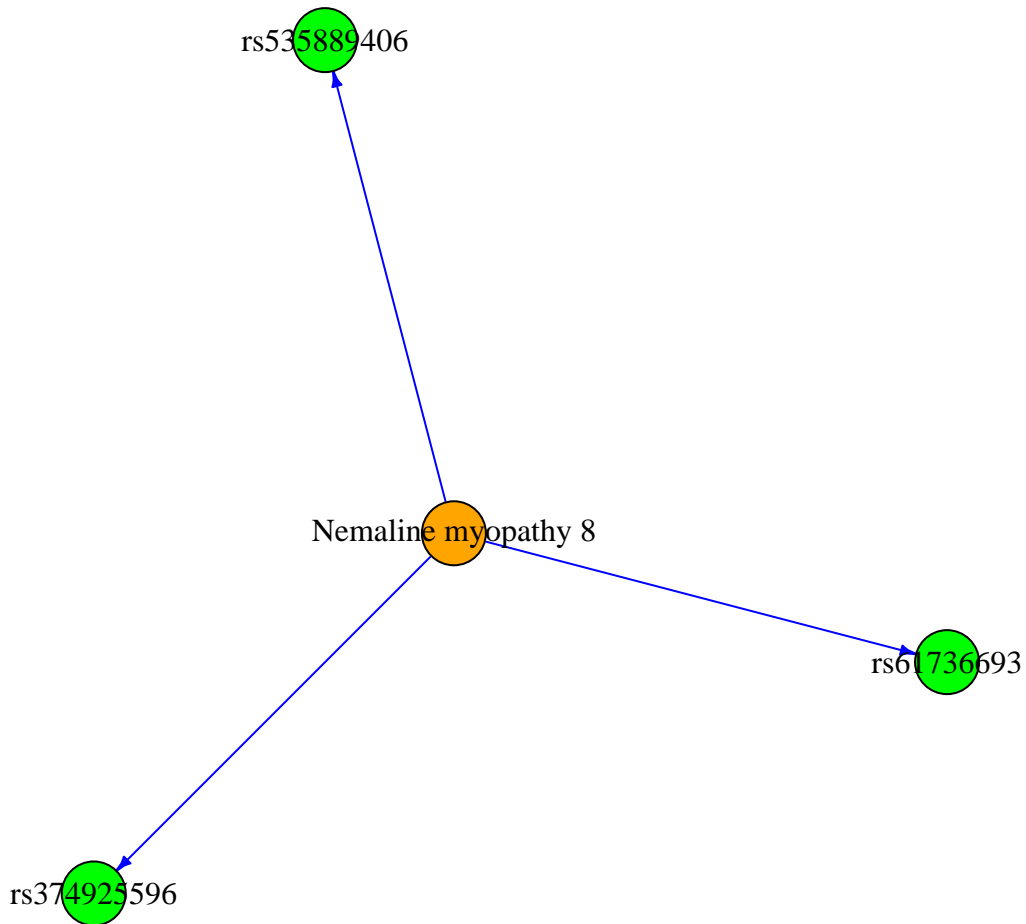

# ant-Disease Network (Neonatal intrahepatic cholestasis caused by citrin de

rs879255502

Neonatal intrahepatic cholestasis caused by cit

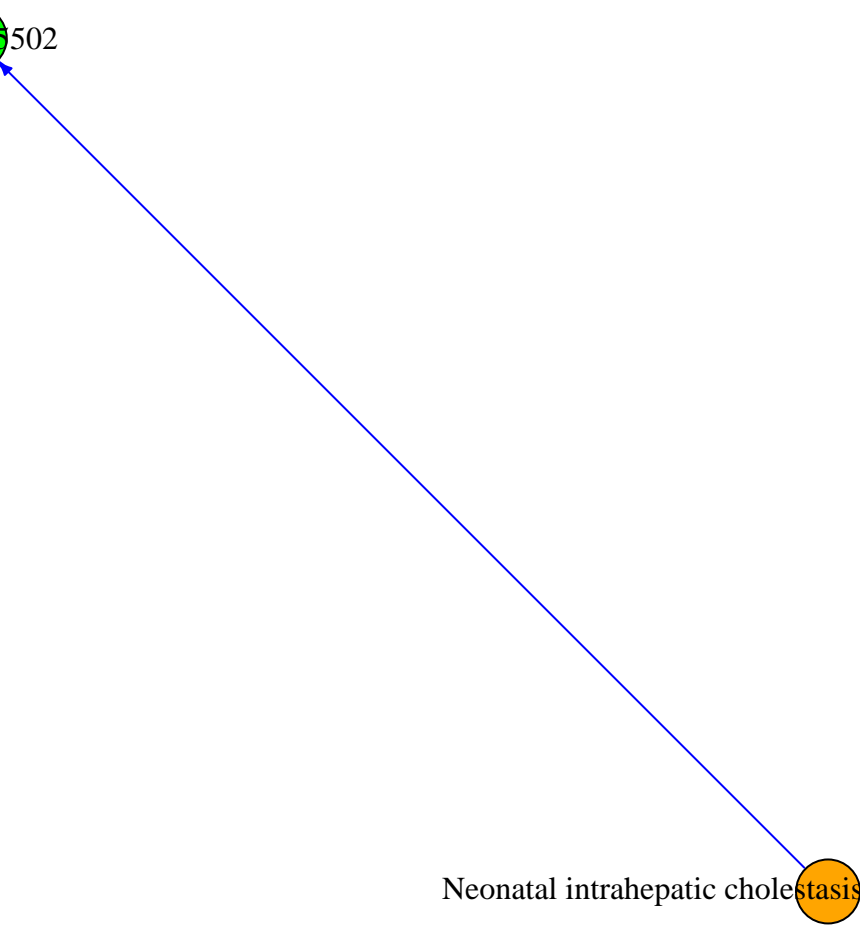

## Variant-Disease Network (Neoplasm)

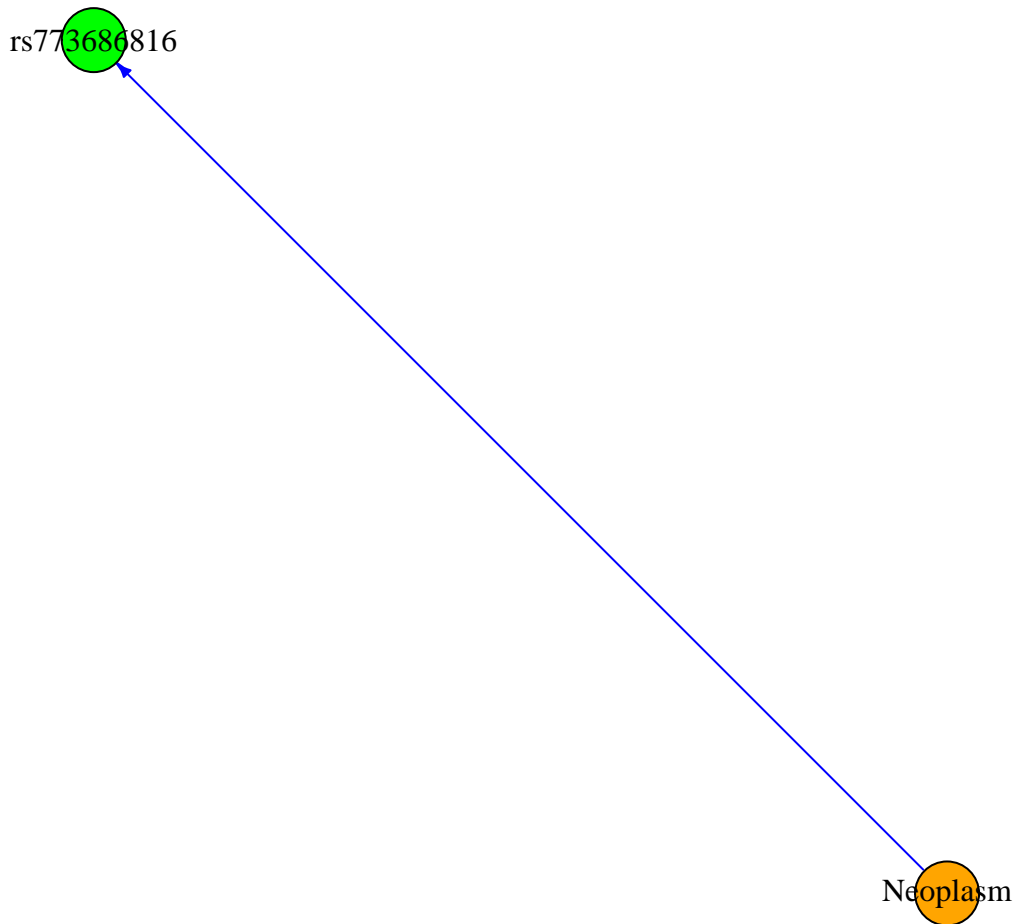

## Variant–Disease Network (Neoplasm of ovary)

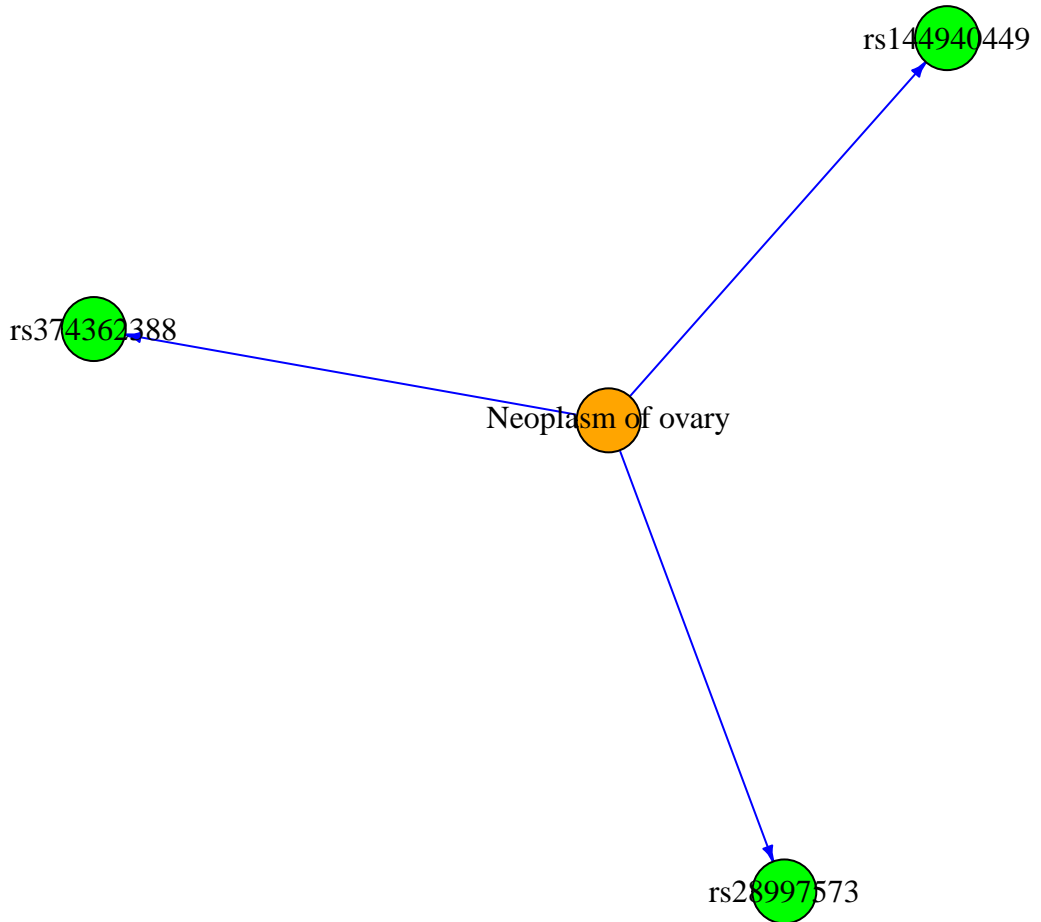

## Variant–Disease Network (Neoplasm of stomach)

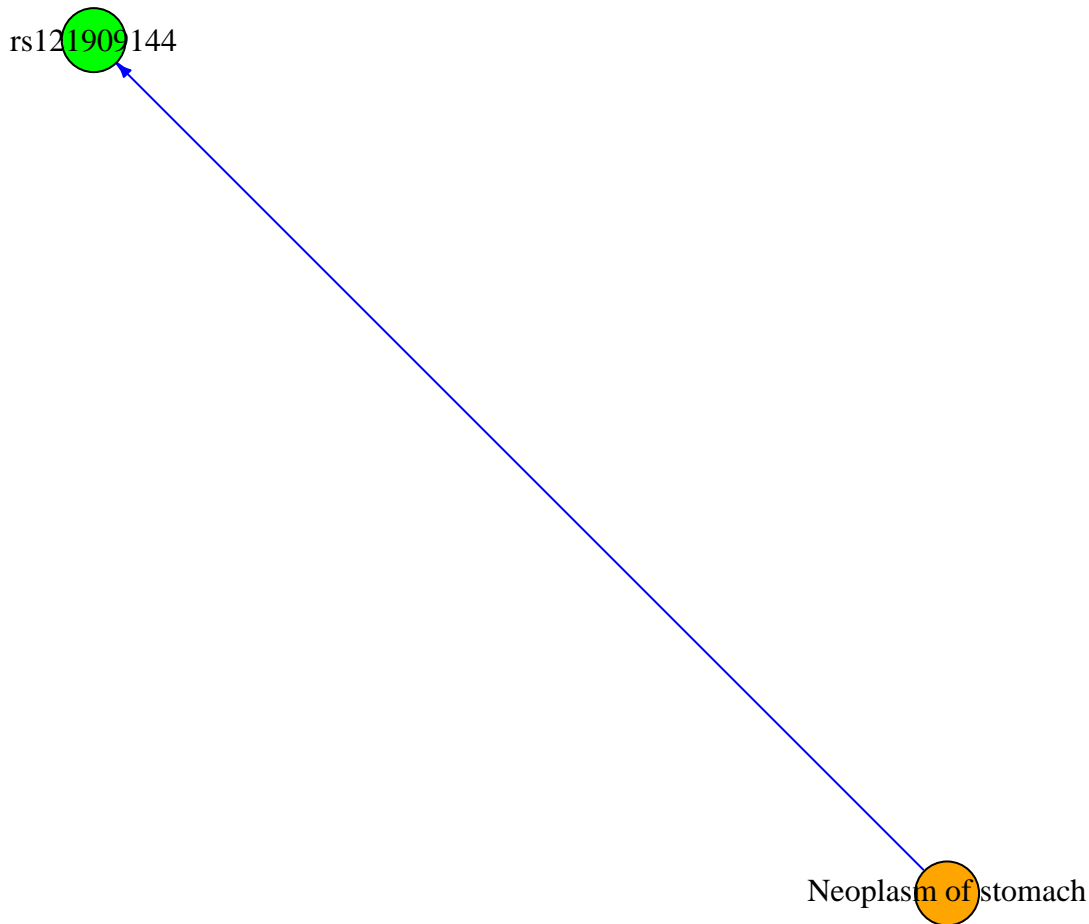



## Variant–Disease Network (Nephrogenic diabetes insipidus)

rs143886391

Nephrogenic diabetes insipidus

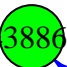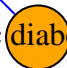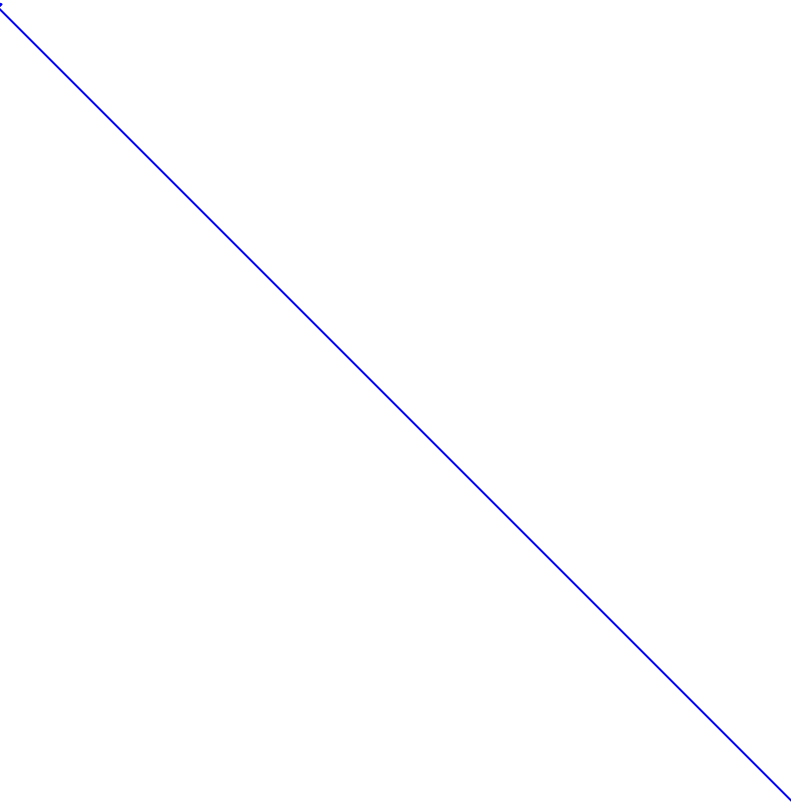

## Variant–Disease Network (Nephronophthisis)

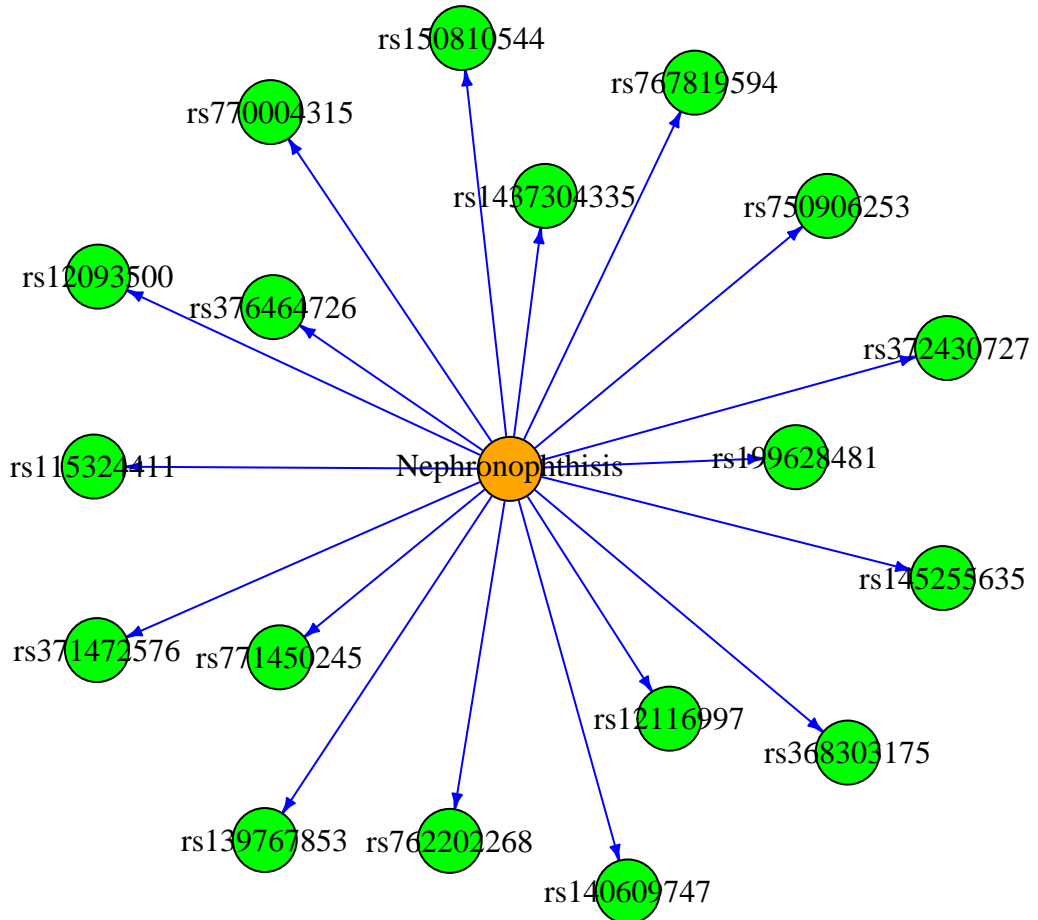

Variant–Disease Network (Nephronophthisis 14)

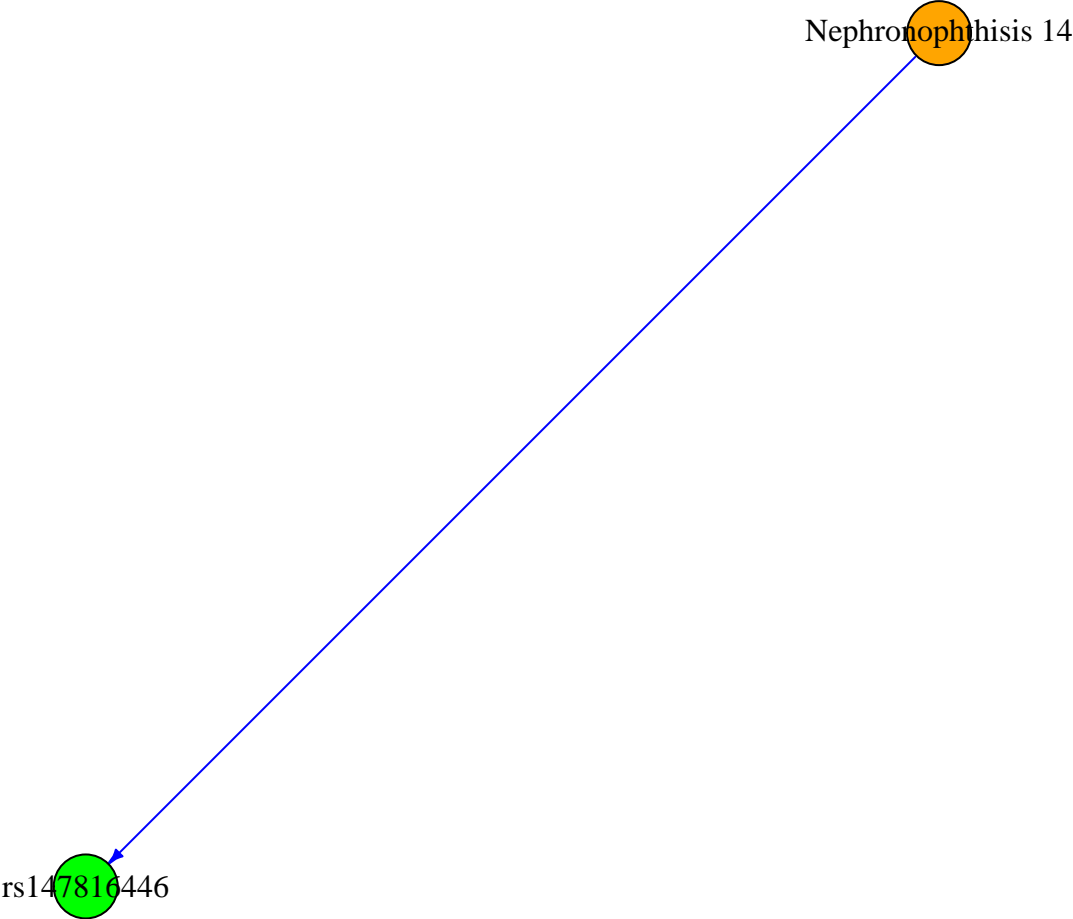

## Variant–Disease Network (Nephronophthisis 4)

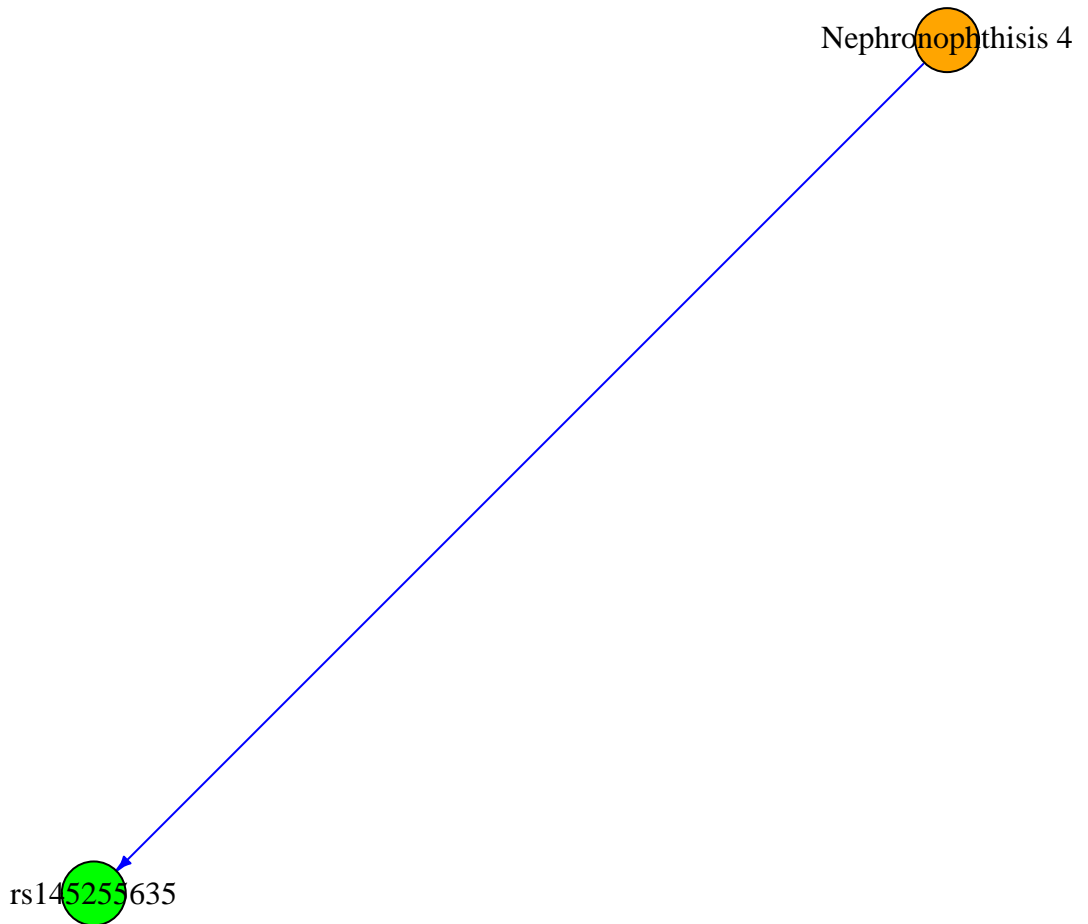

## Variant-Disease Network (Nephropathic cystinosis)

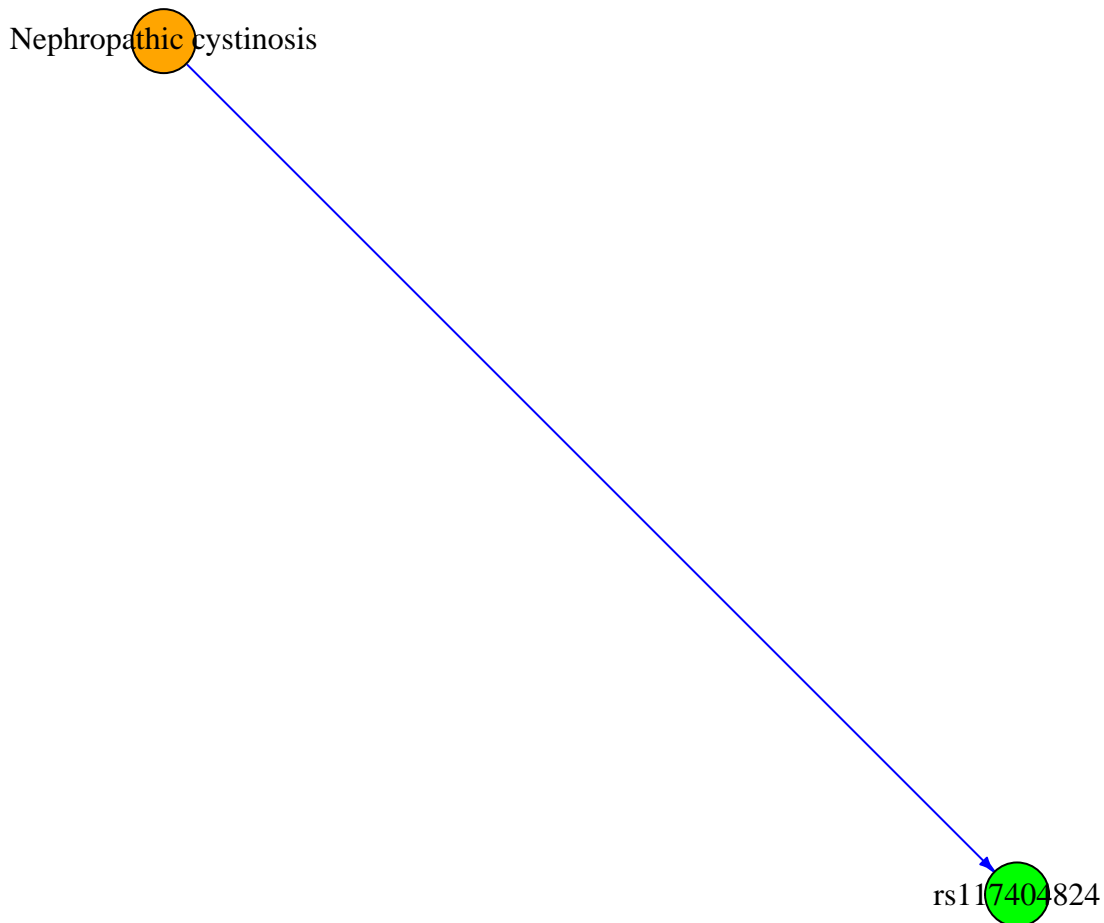

Variant–Disease Network (Nephrotic syndrome)

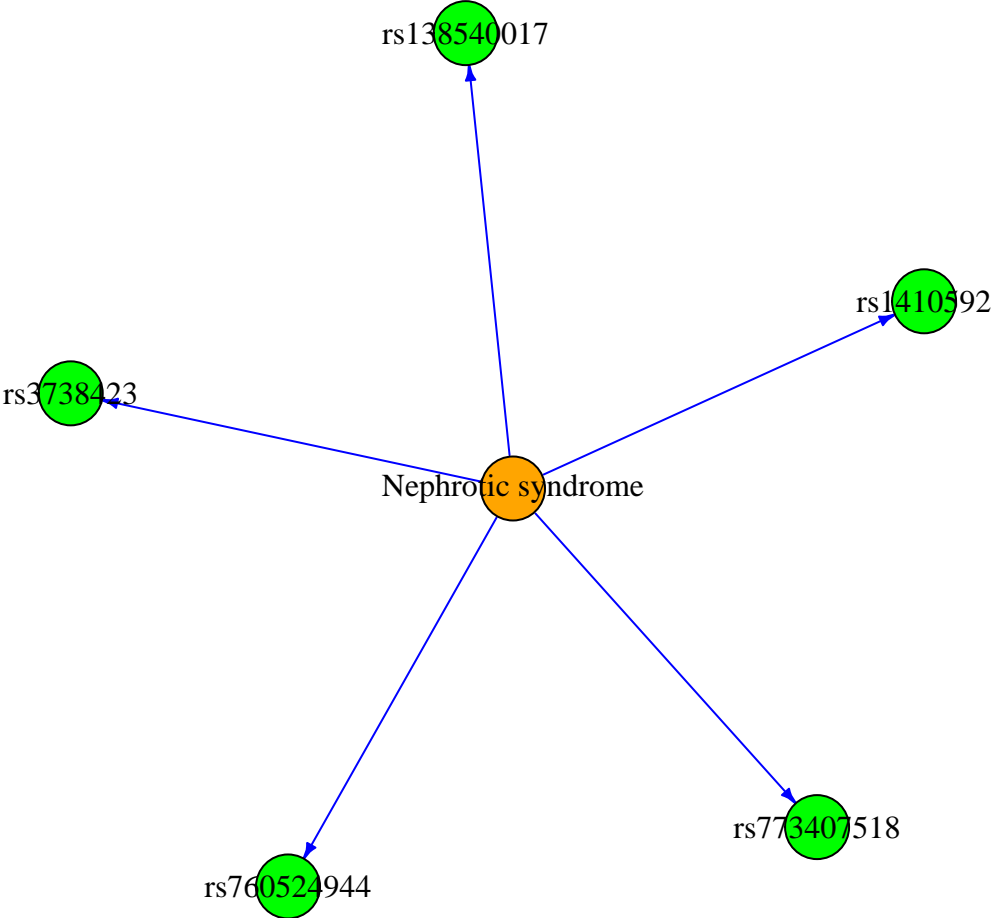

## Variant–Disease Network (Neural tube defect)

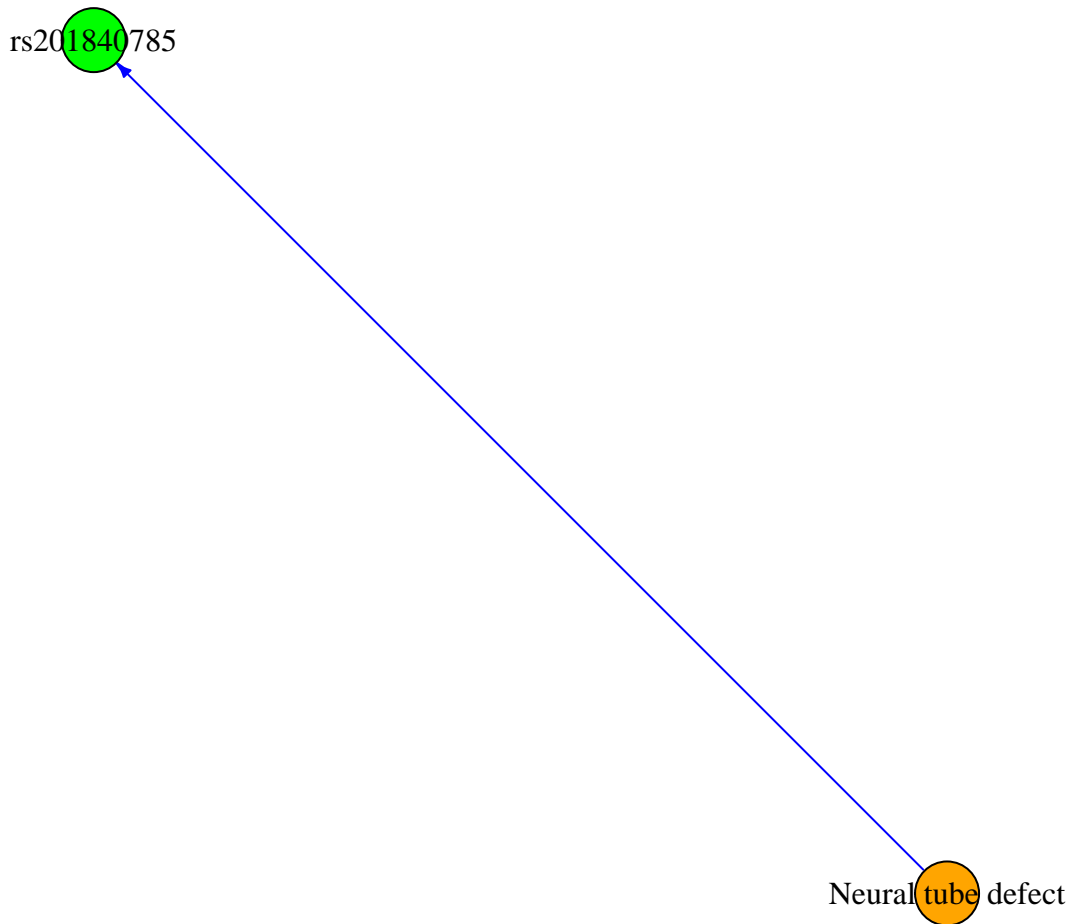

## Variant–Disease Network (Neural tube defects)

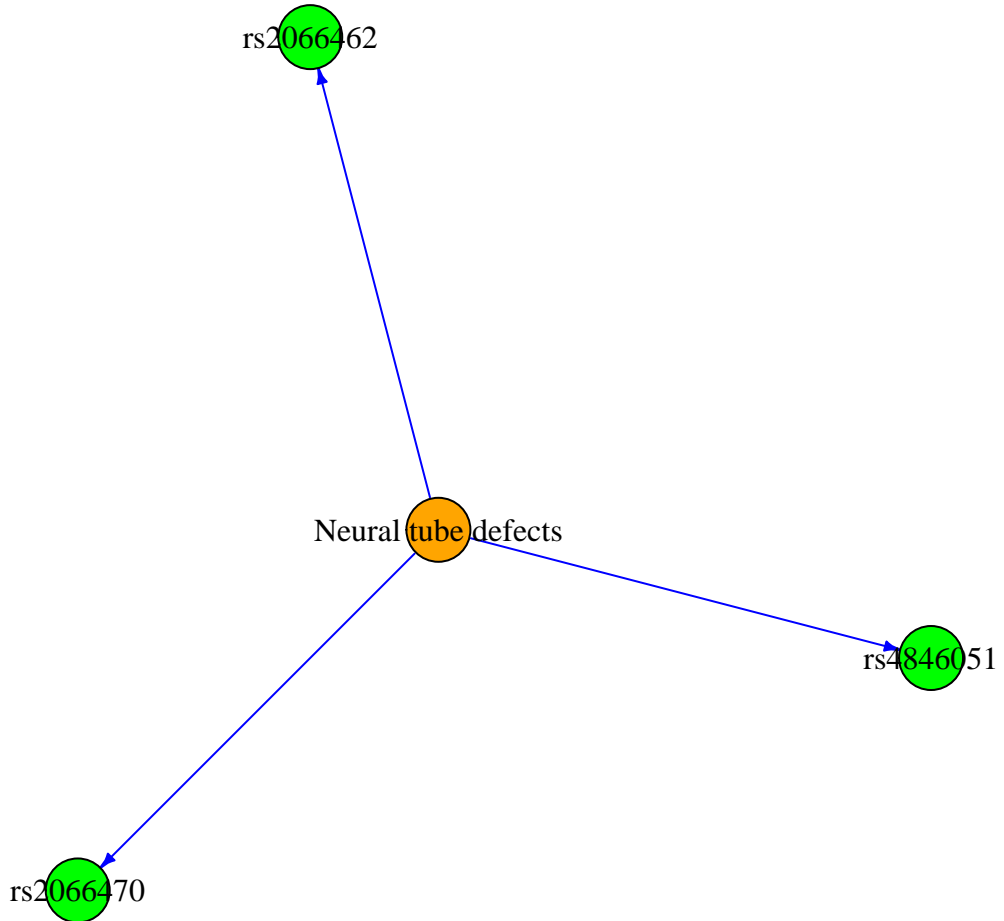



# Variant-Disease Network (Neuroblastoma)

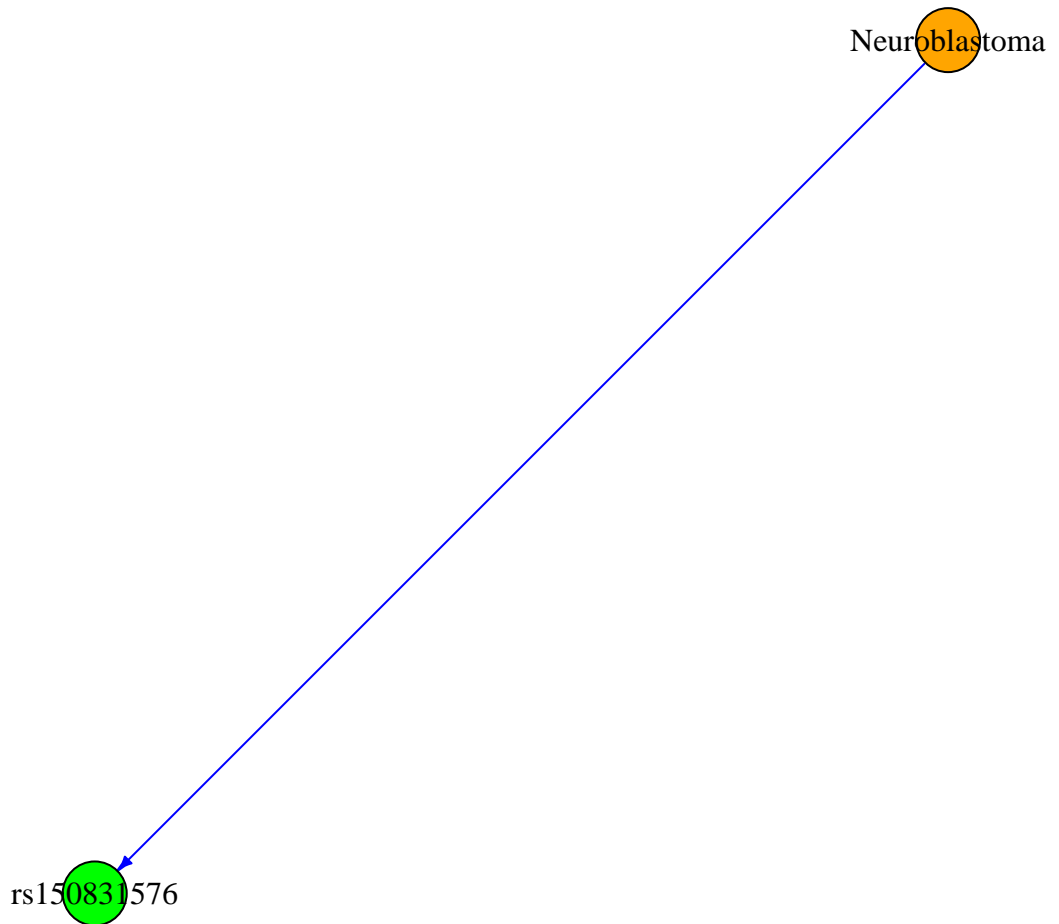

## Variant-Disease Network (Neuroblastoma 3)

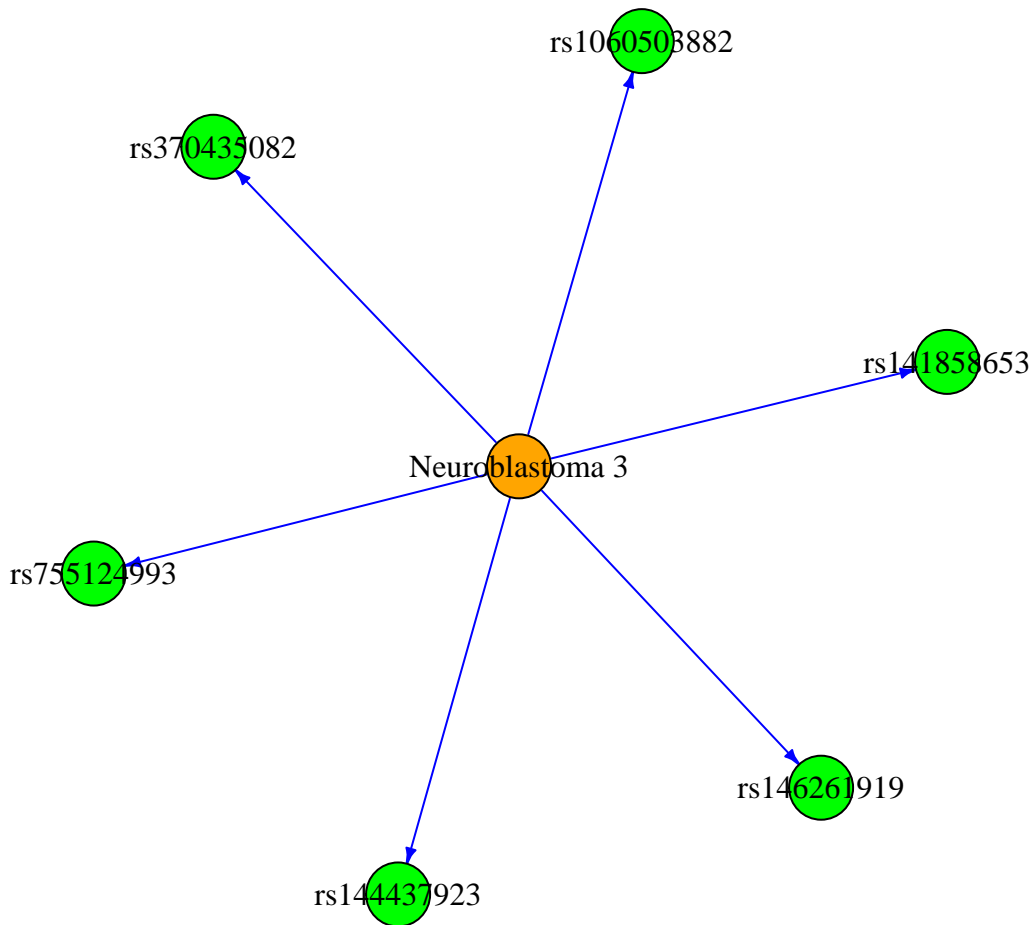

**Variant–Disease Network (Neuroblastoma Susceptibility)**

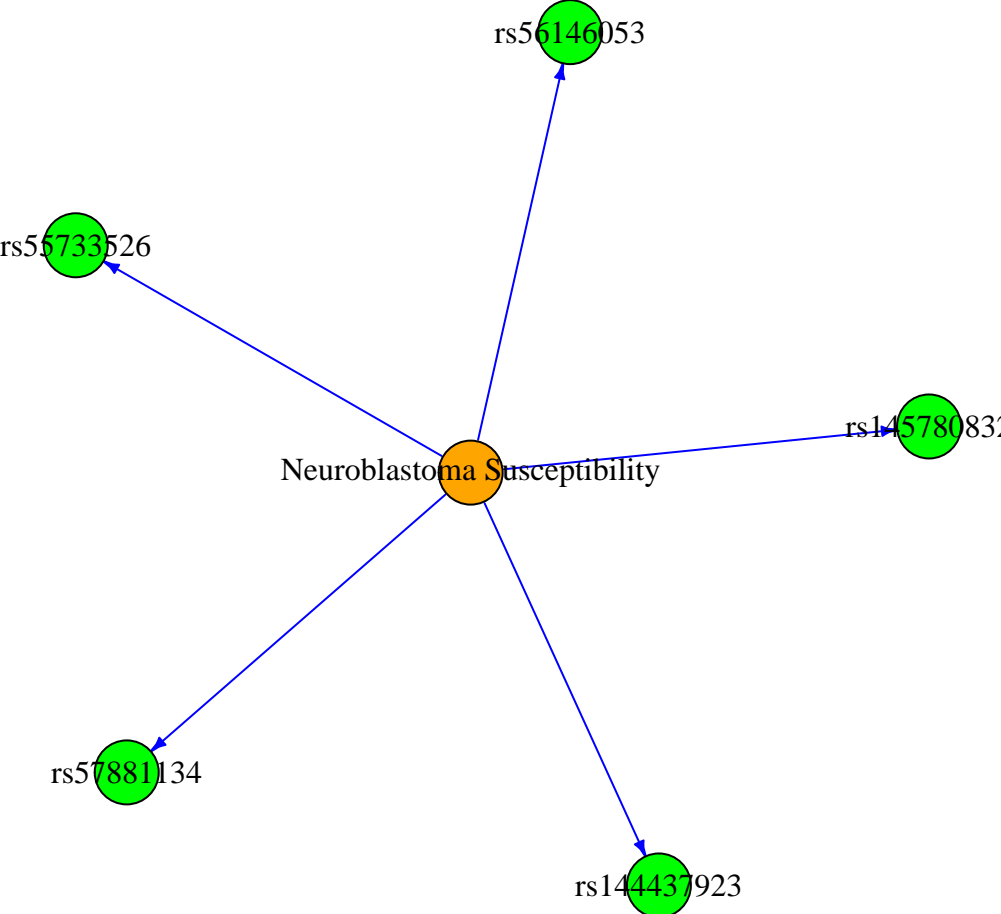

Variant–Disease Network (Neurodegeneration with brain iron accumulation

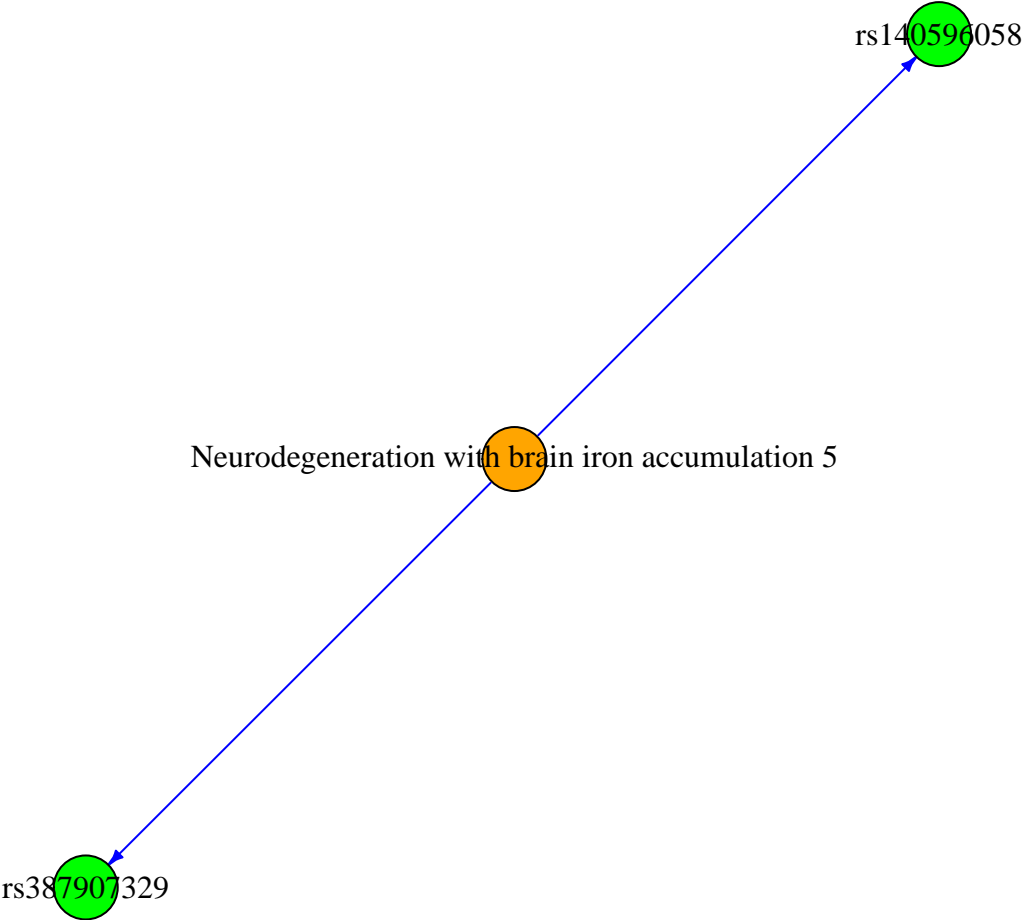

Variant–Disease Network (Neurodegeneration with brain iron accumulation)

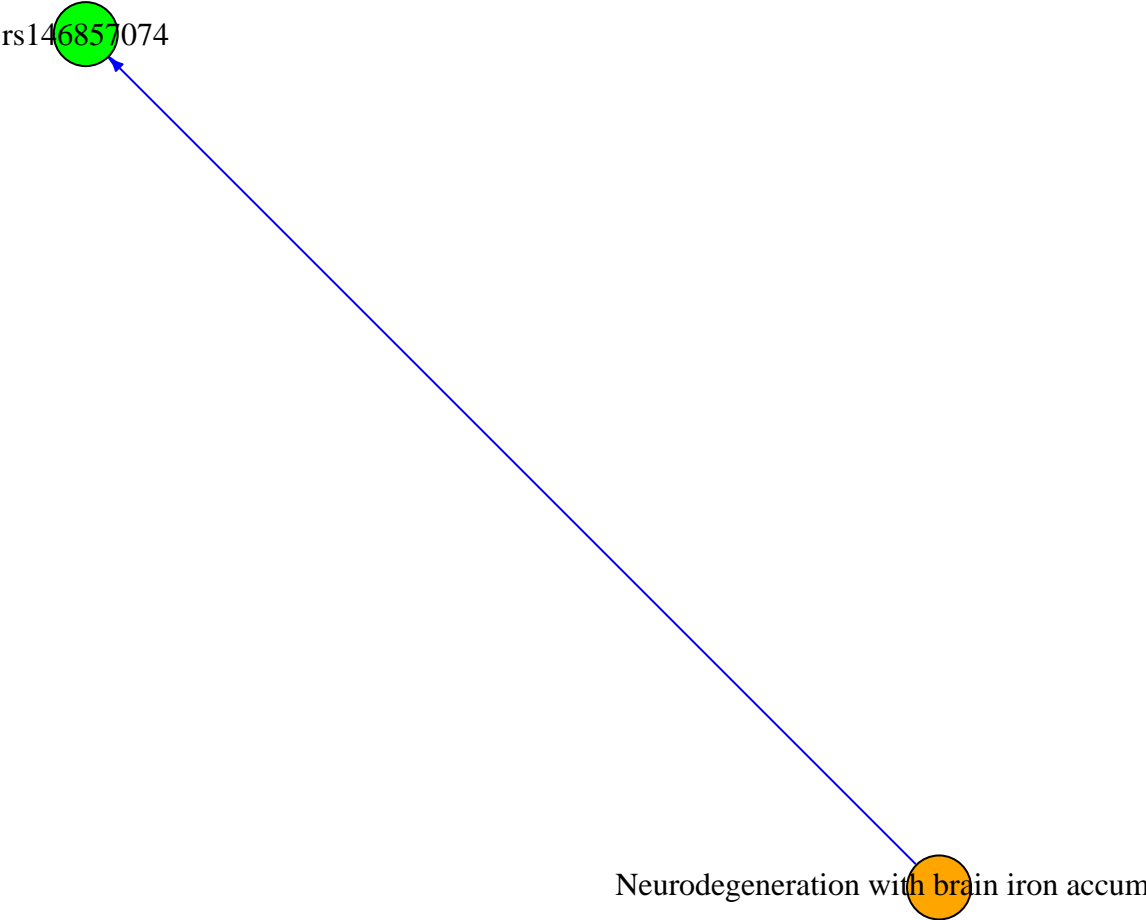

# e Network (Neurodevelopmental disorder with or without hyperkinetic movement)

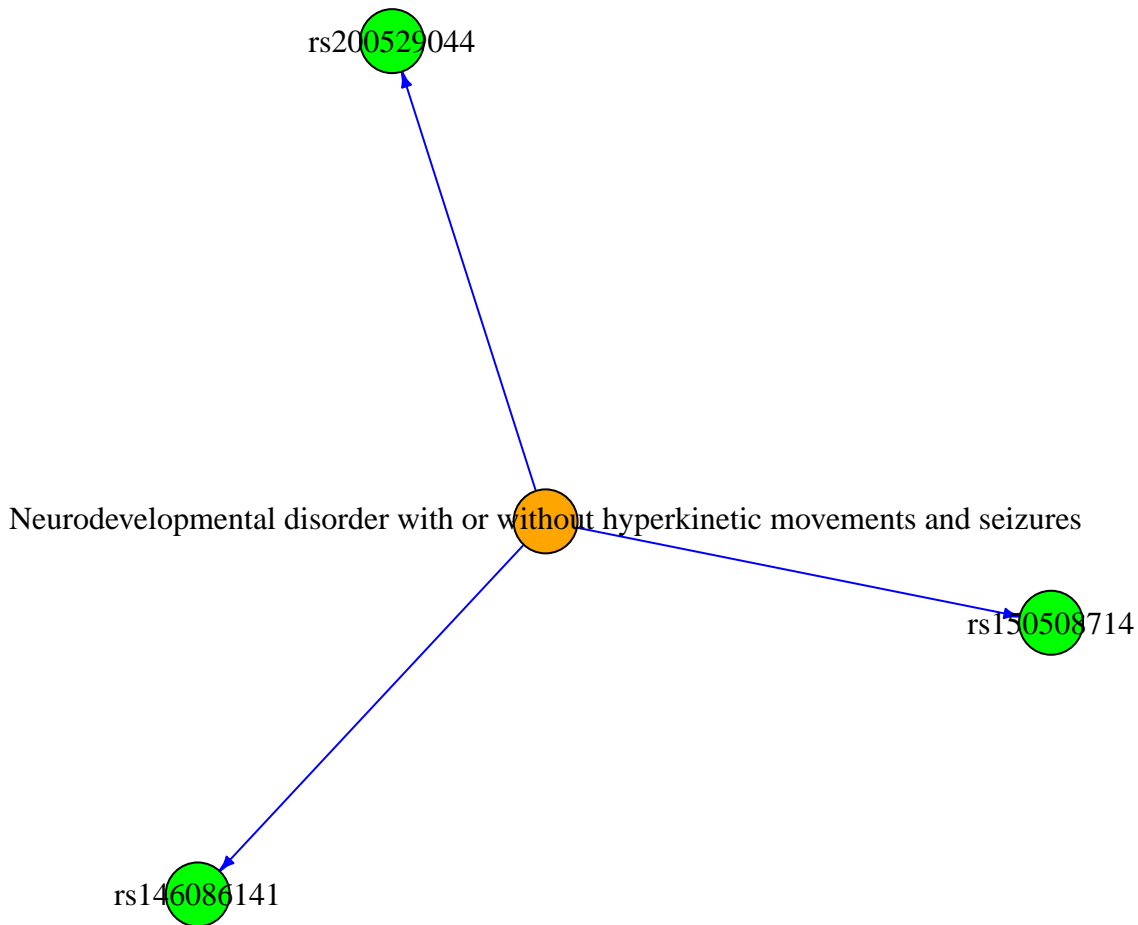

# rs753242774 (NEURODEVELOPMENTAL DISORDER WITH SEVERE MOTOR IMPAIRMENT)

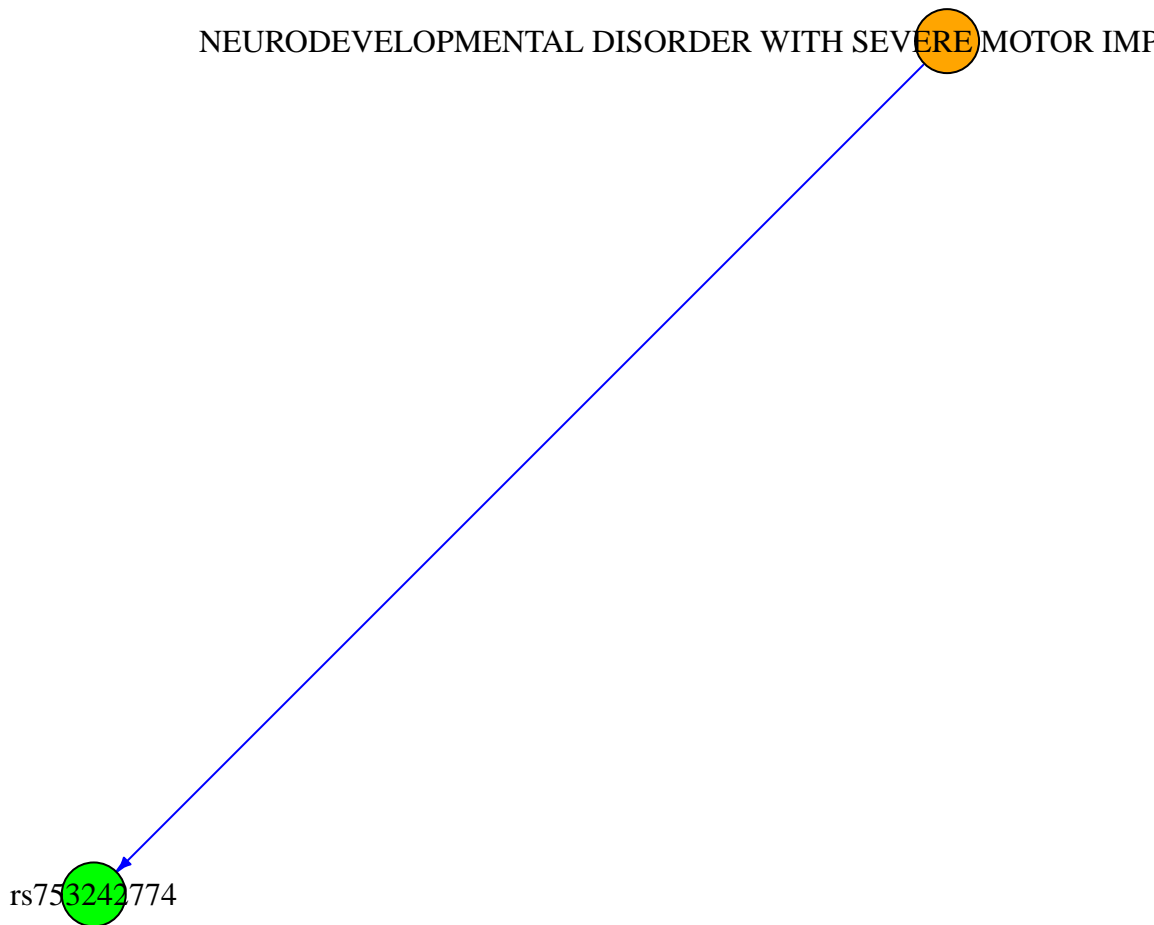

## Variant–Disease Network (Neuroferritinopathy)

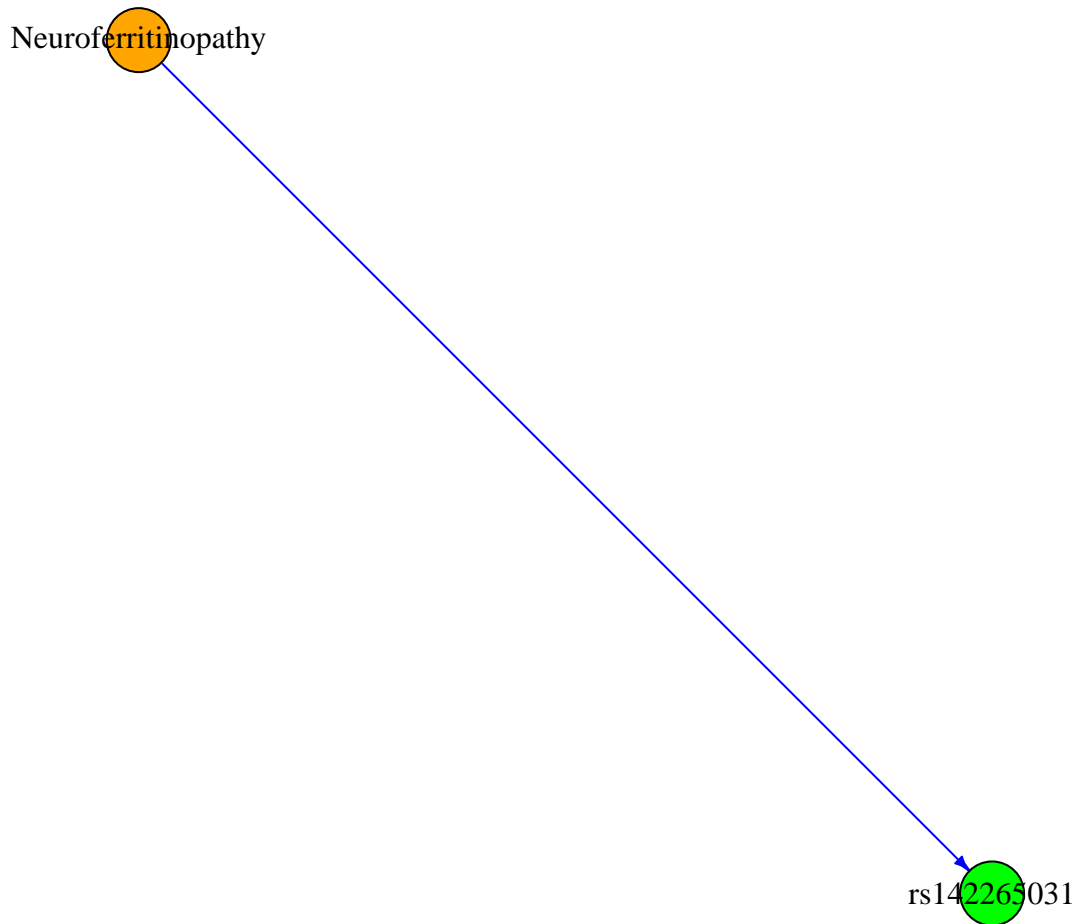



# Variant–Disease Network (Neurofibromatosis)

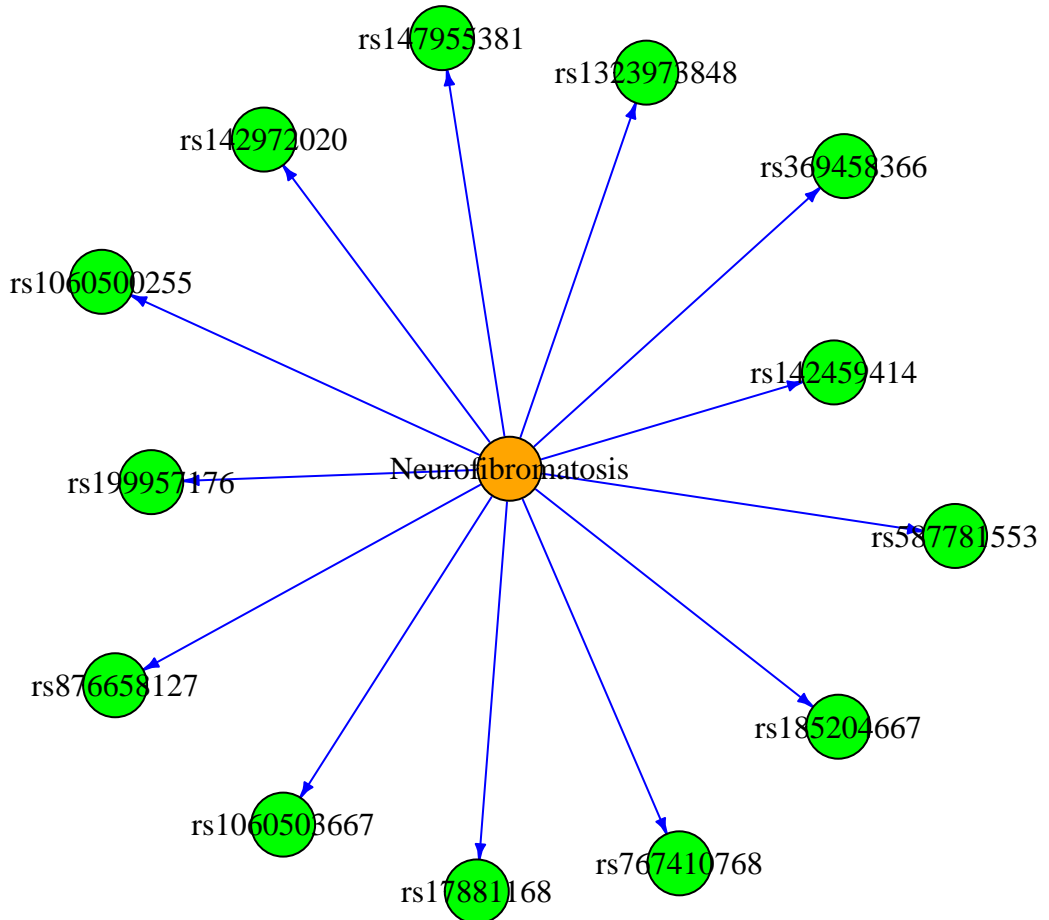

# Variant–Disease Network (Neurofibromatosis–Noonan syndrome)

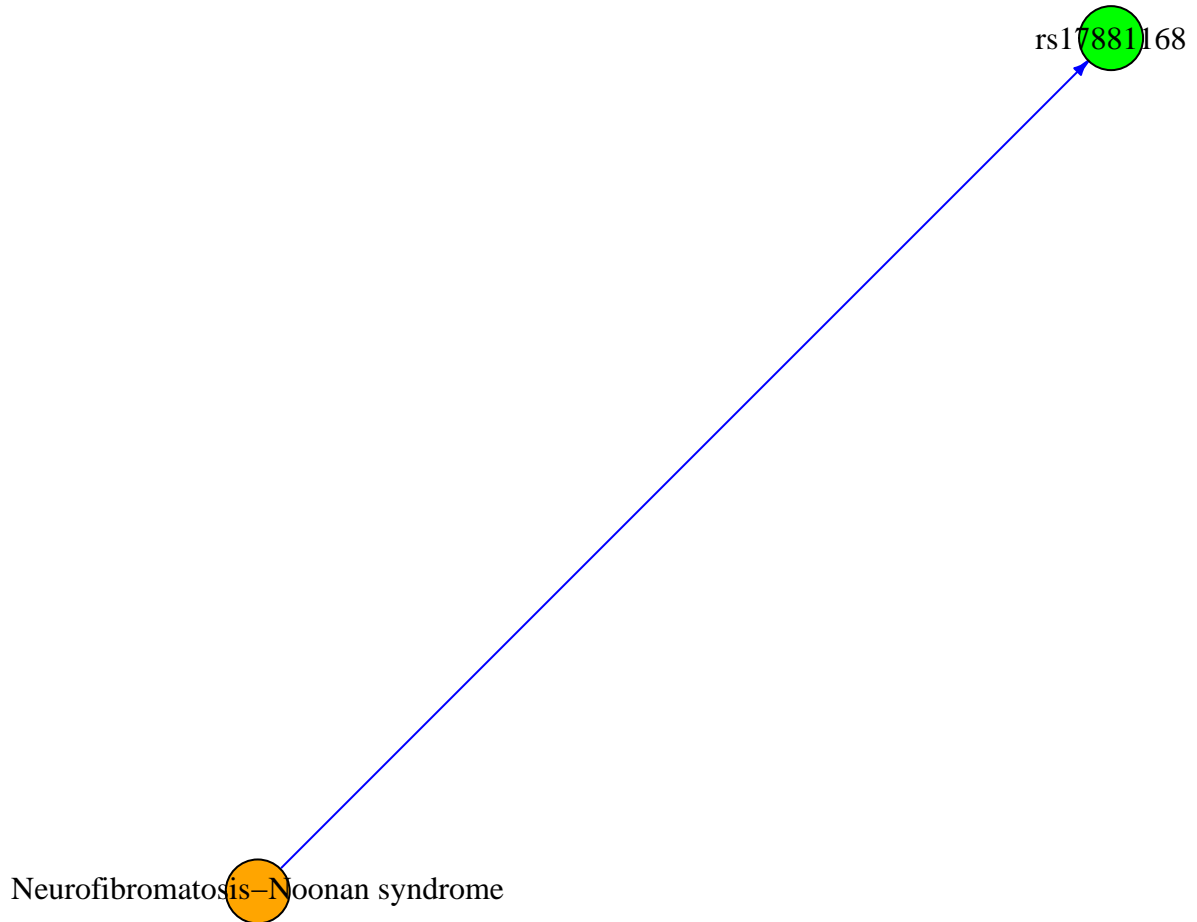

## Variant–Disease Network (Neuronal ceroid lipofuscinosis)

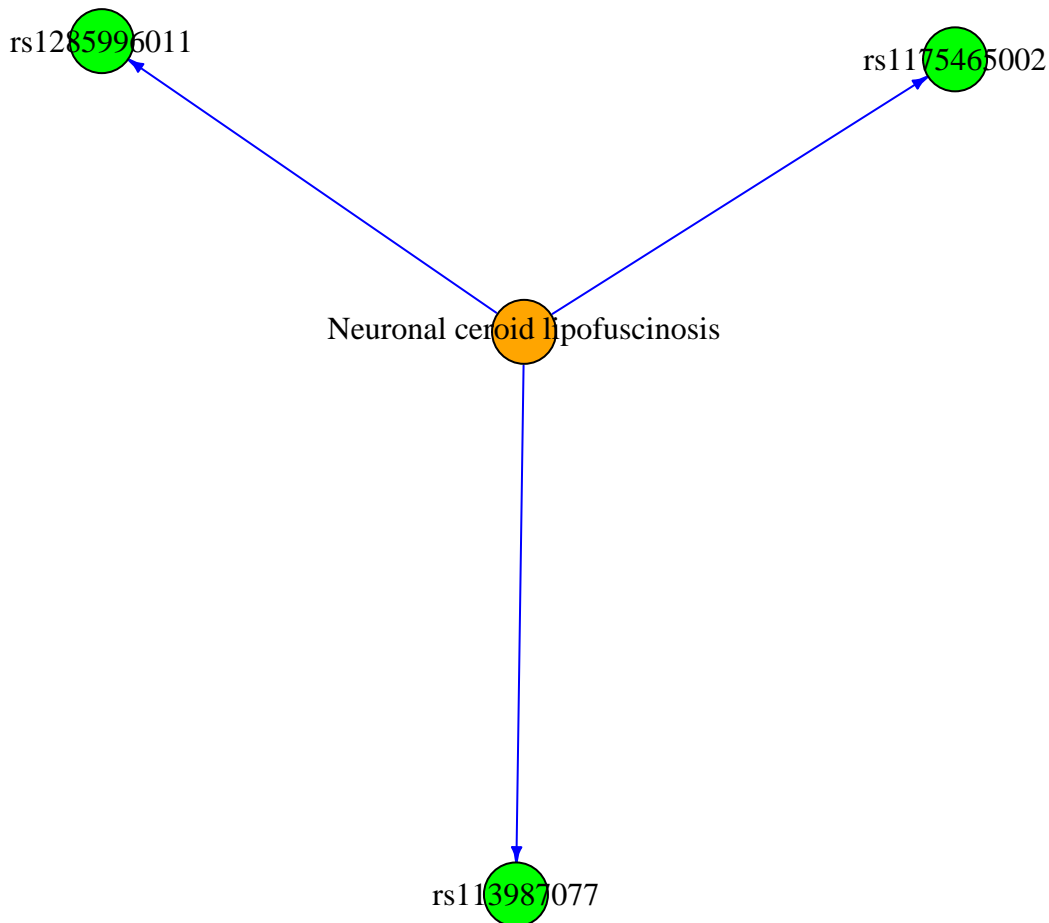

# Variant–Disease Network (Neuronal Ceroid–Lipofuscinosis)

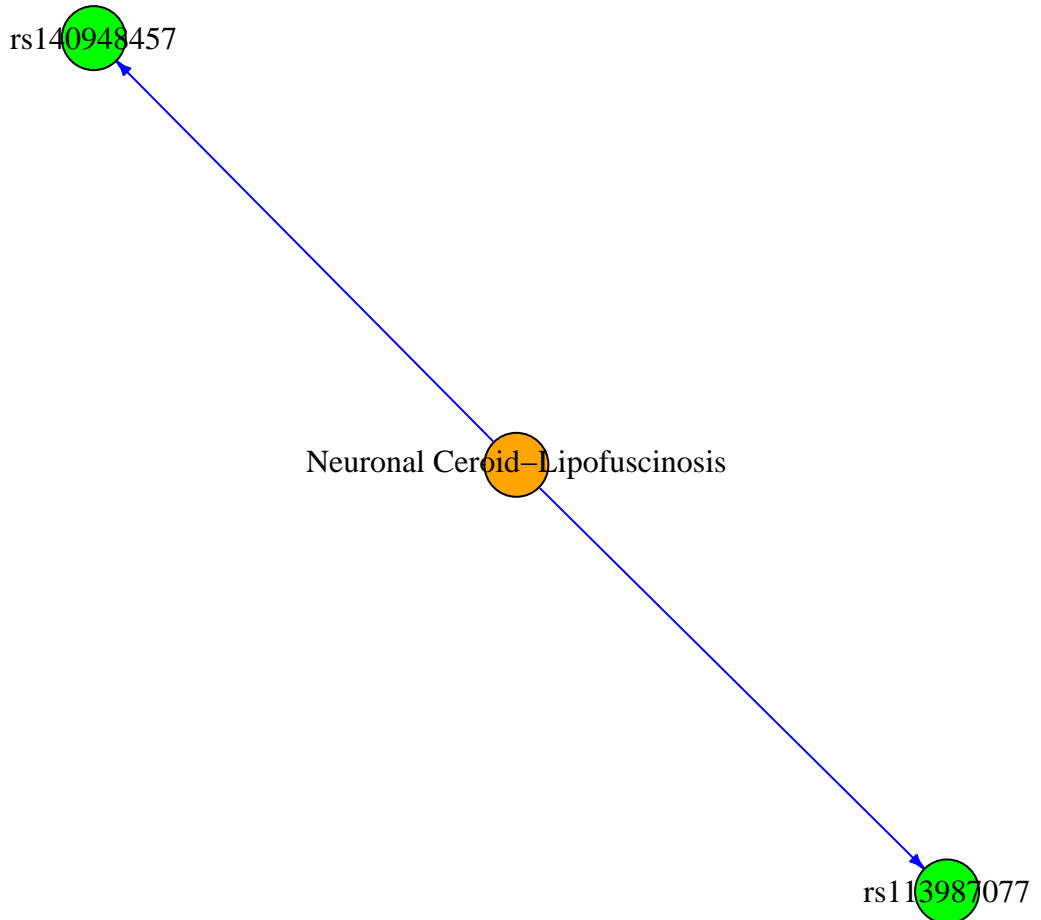

## Variant–Disease Network (Neuronopathy)

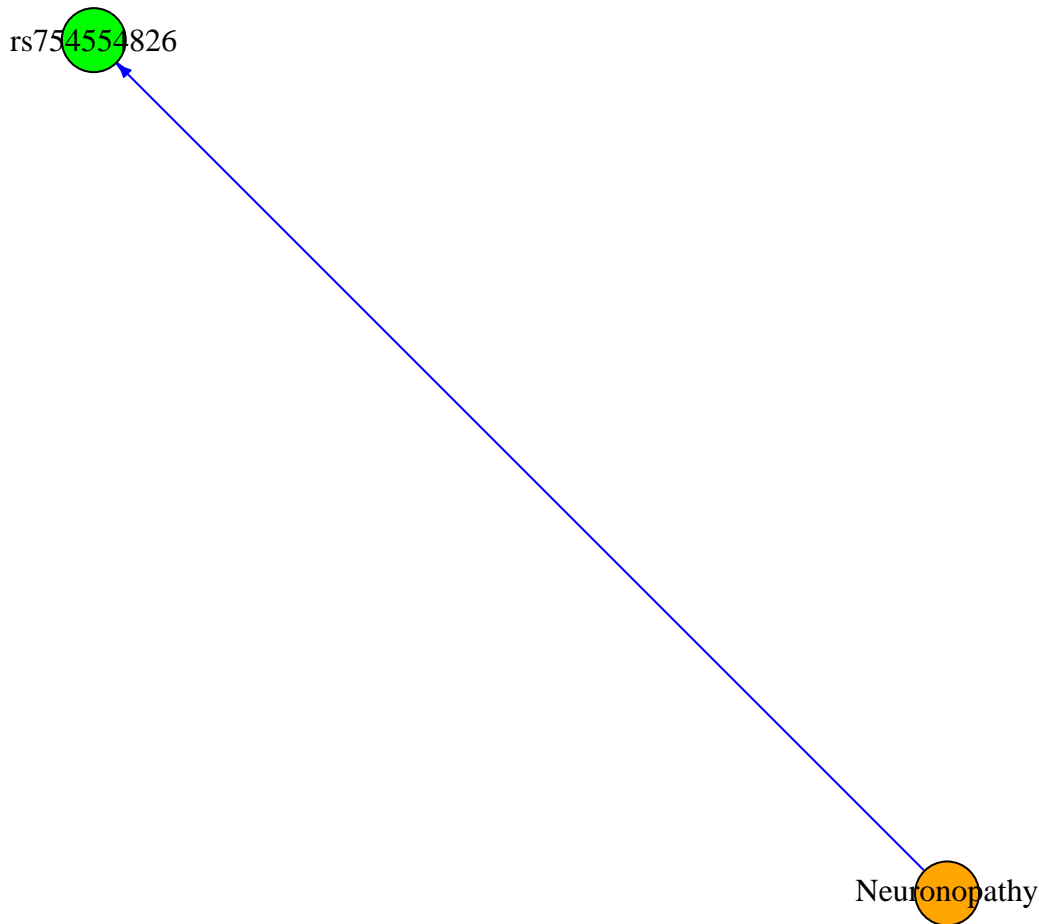

**Variant–Disease Network (Neutral lipid storage disease with myopathy)**

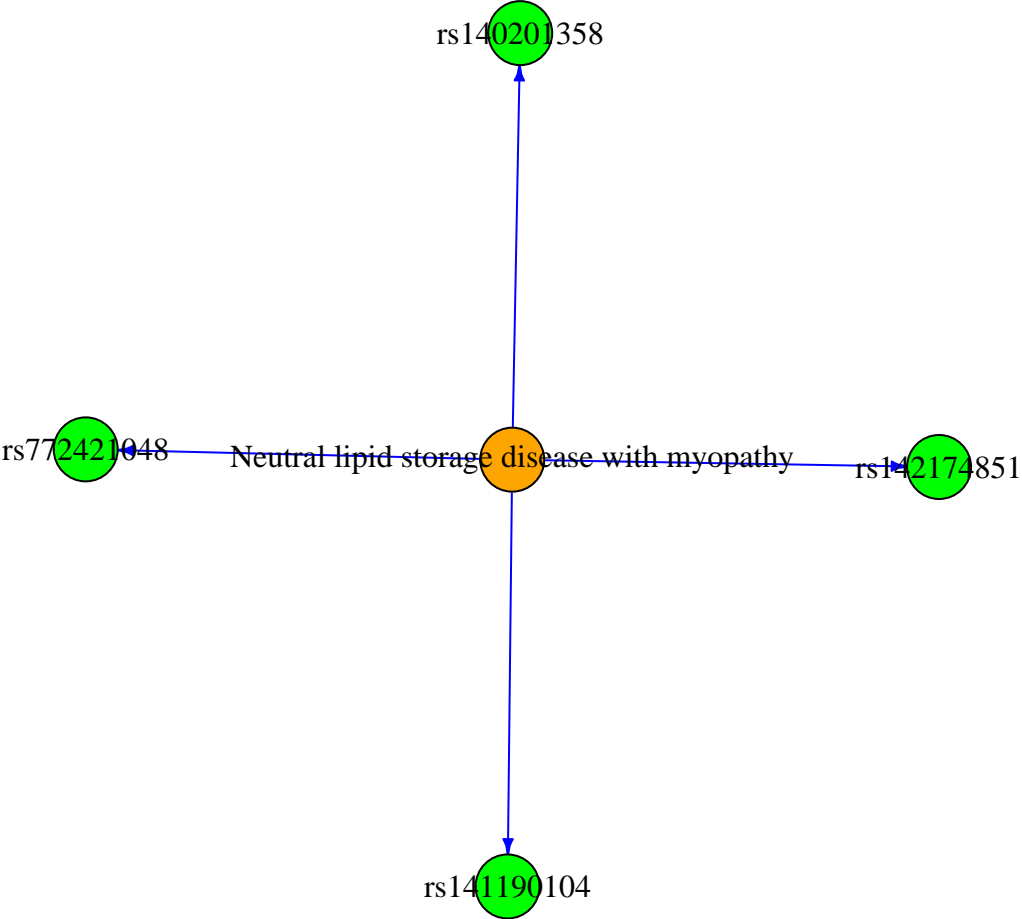

## Variant–Disease Network (Newfoundland rod–cone dystrophy)

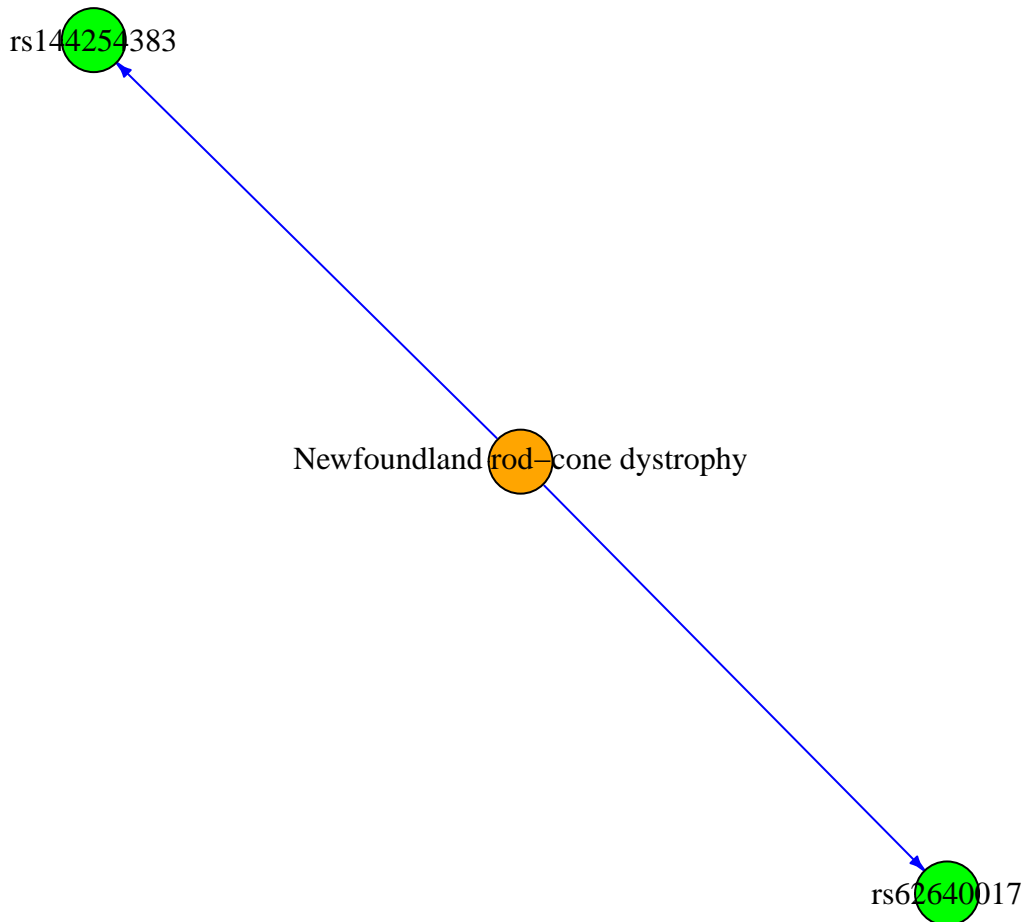

## Variant–Disease Network (Niemann–Pick disease)

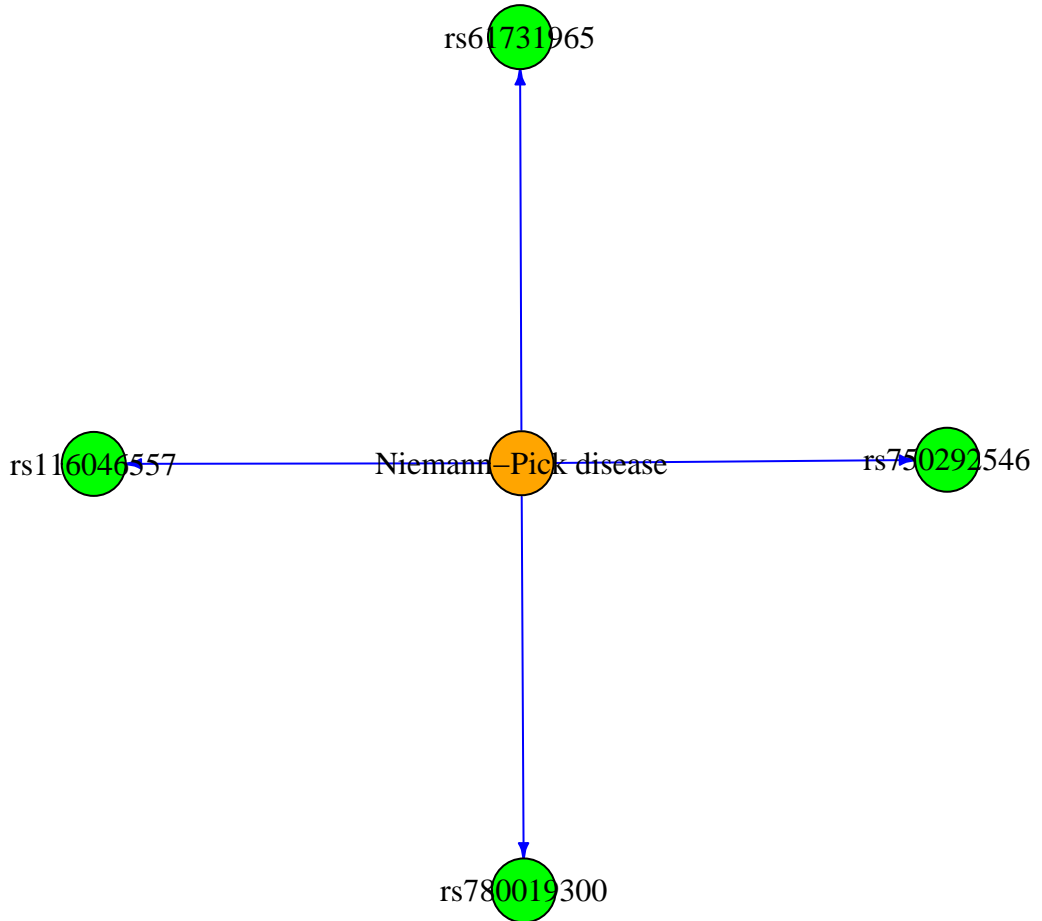



# Variant–Disease Network (Niemann–Pick disease type C1)

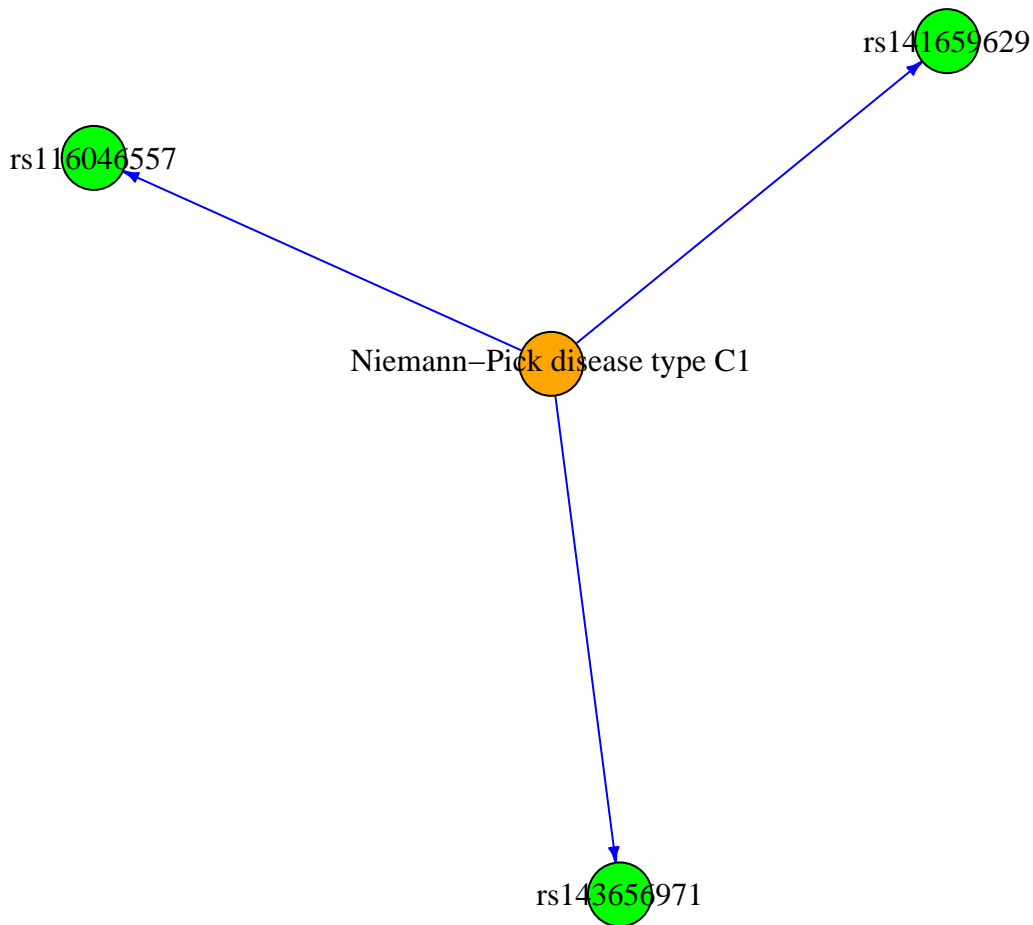

**Variant–Disease Network (Nijmegen breakage syndrome–like disorder)**

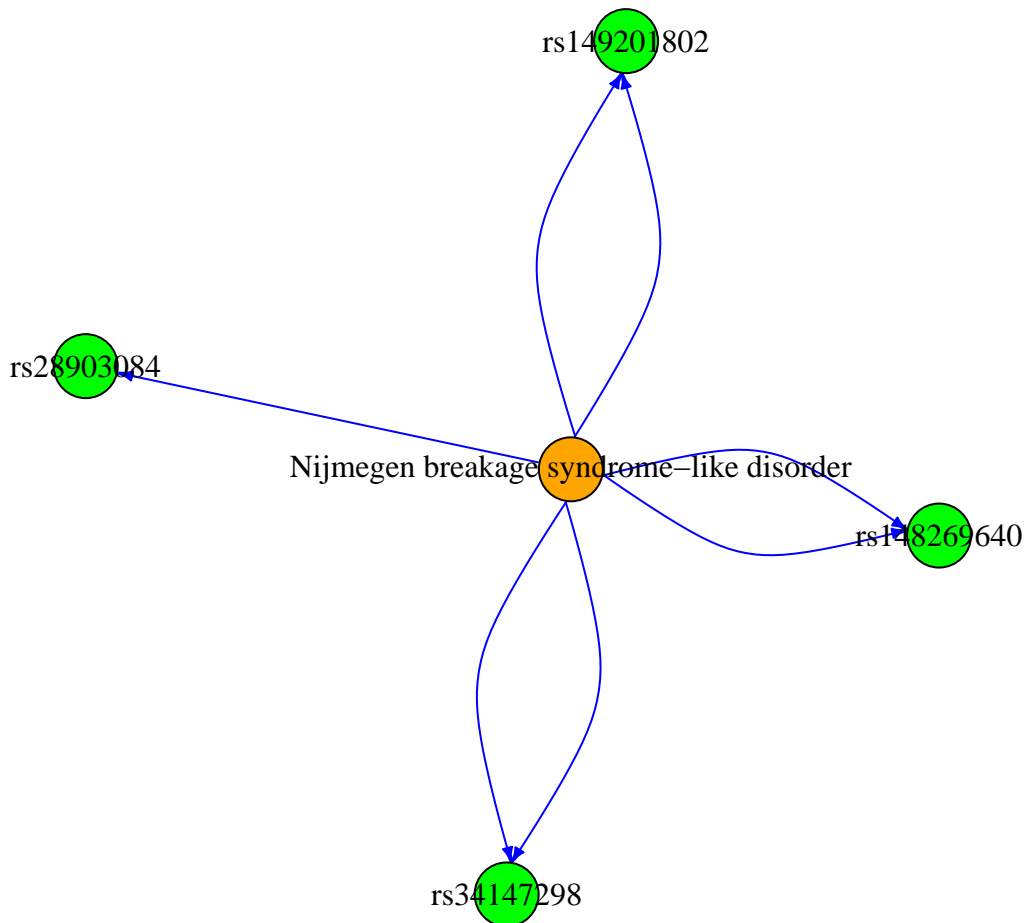

## Variant–Disease Network (Nocturnal frontal lobe epilepsy)

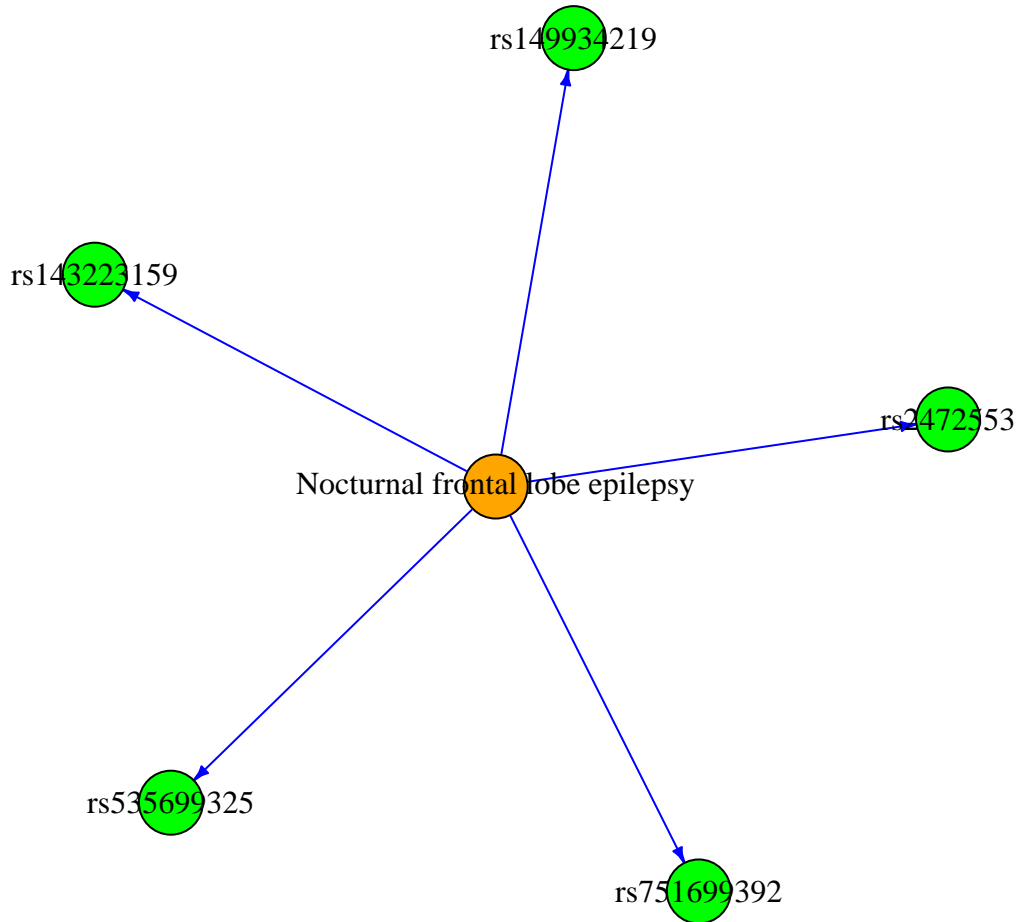

**Variant–Disease Network (Nonepidermolytic palmoplantar keratoderma)**

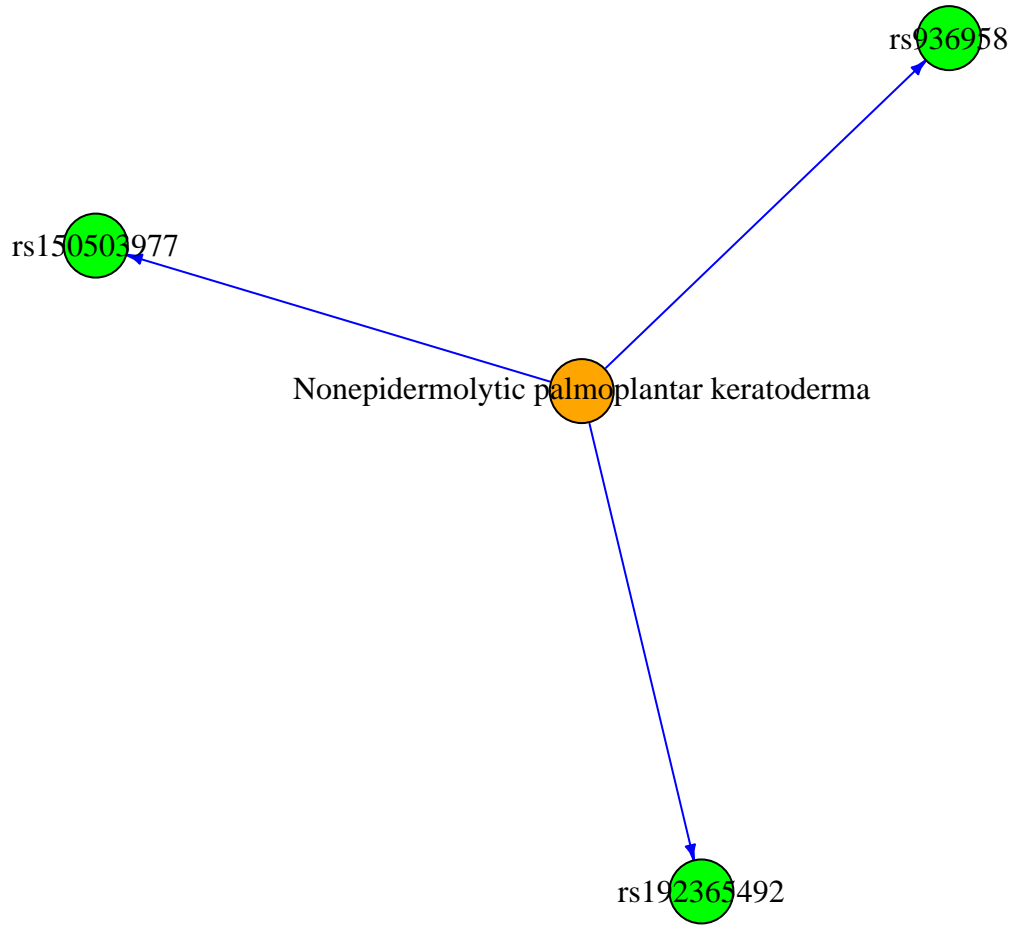

# Variant–Disease Network (Non-immune hydrops fetalis)

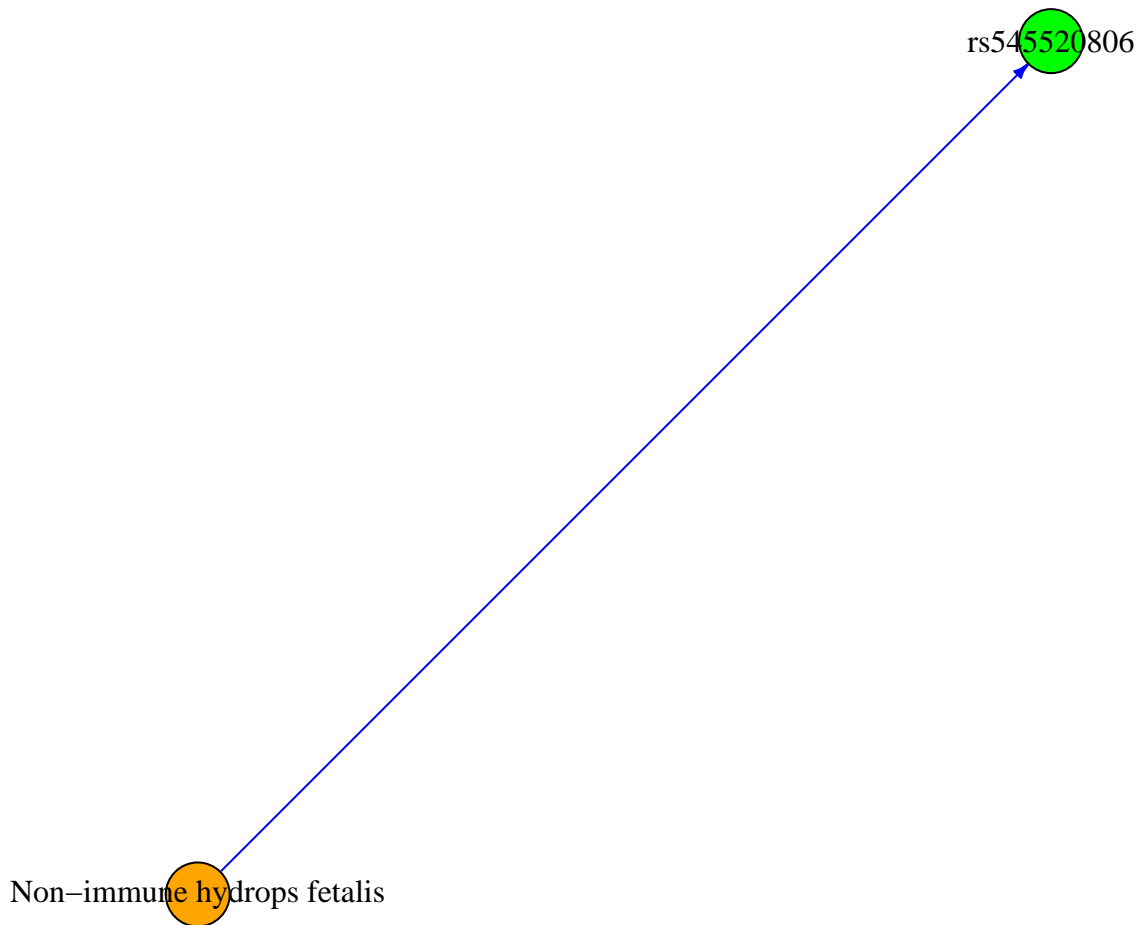

# Variant–Disease Network (Non–ketotic hyperglycinemia)

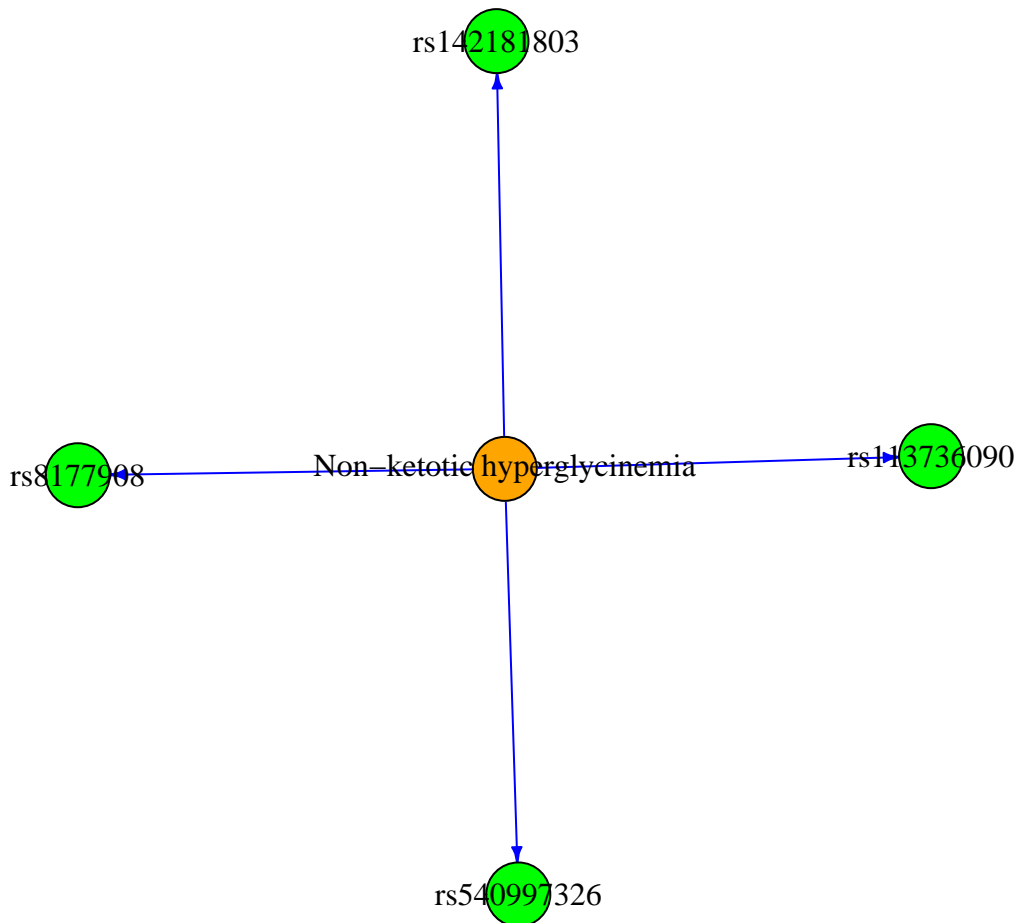

## Variant–Disease Network (Nonsyndromic Hearing Loss)

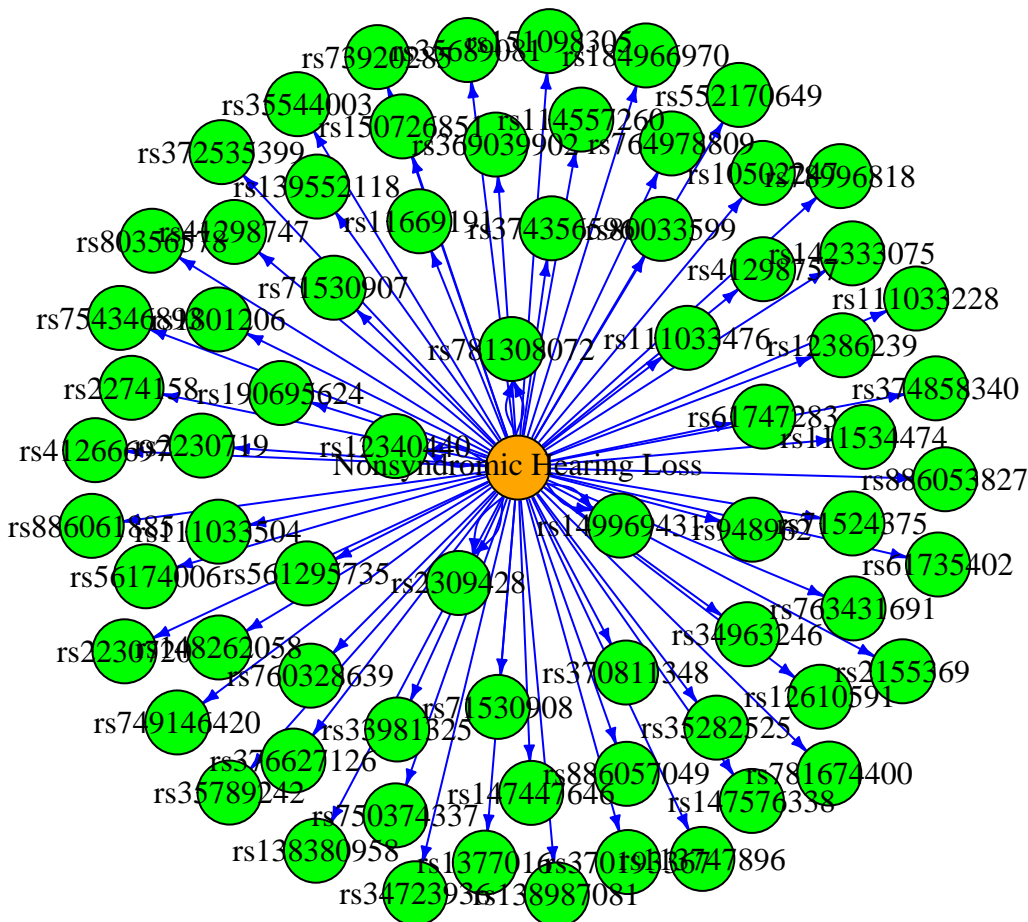

# Variant–Disease Network (Nonsyndromic Oculocutaneous Albinism)

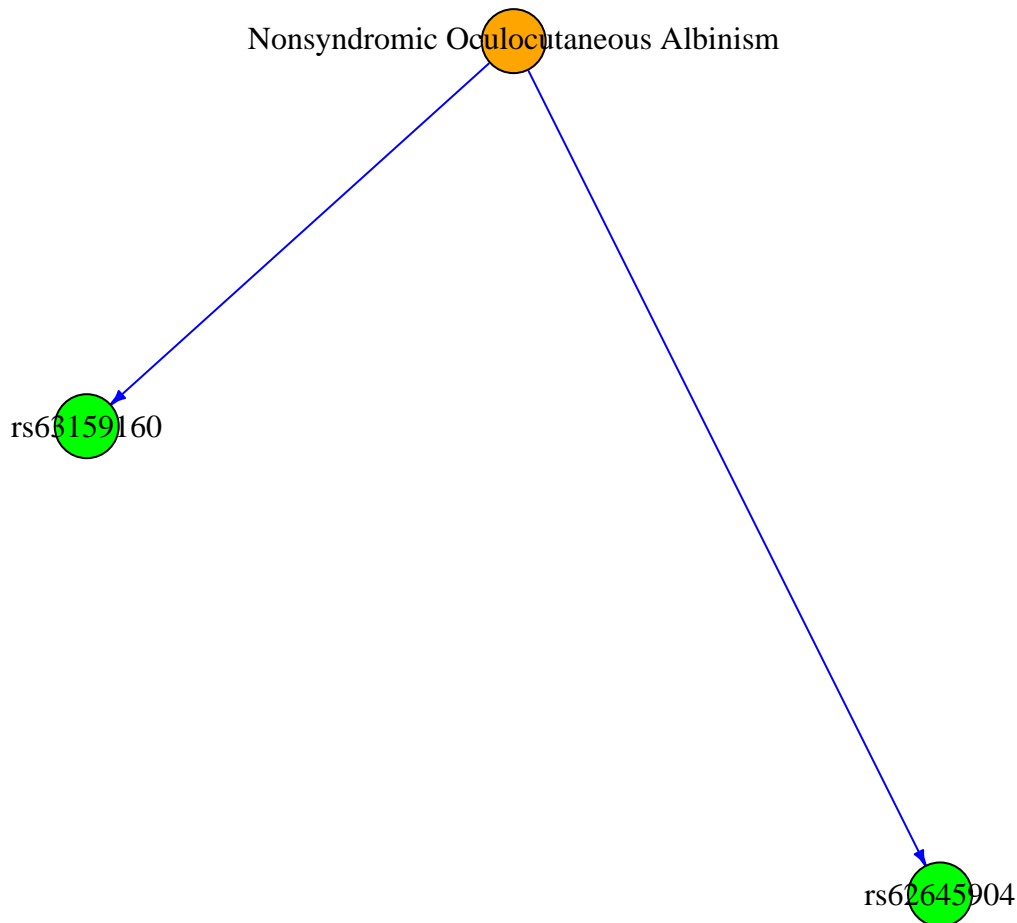



# Variant–Disease Network (Nonsyndromic Trigonocephaly)

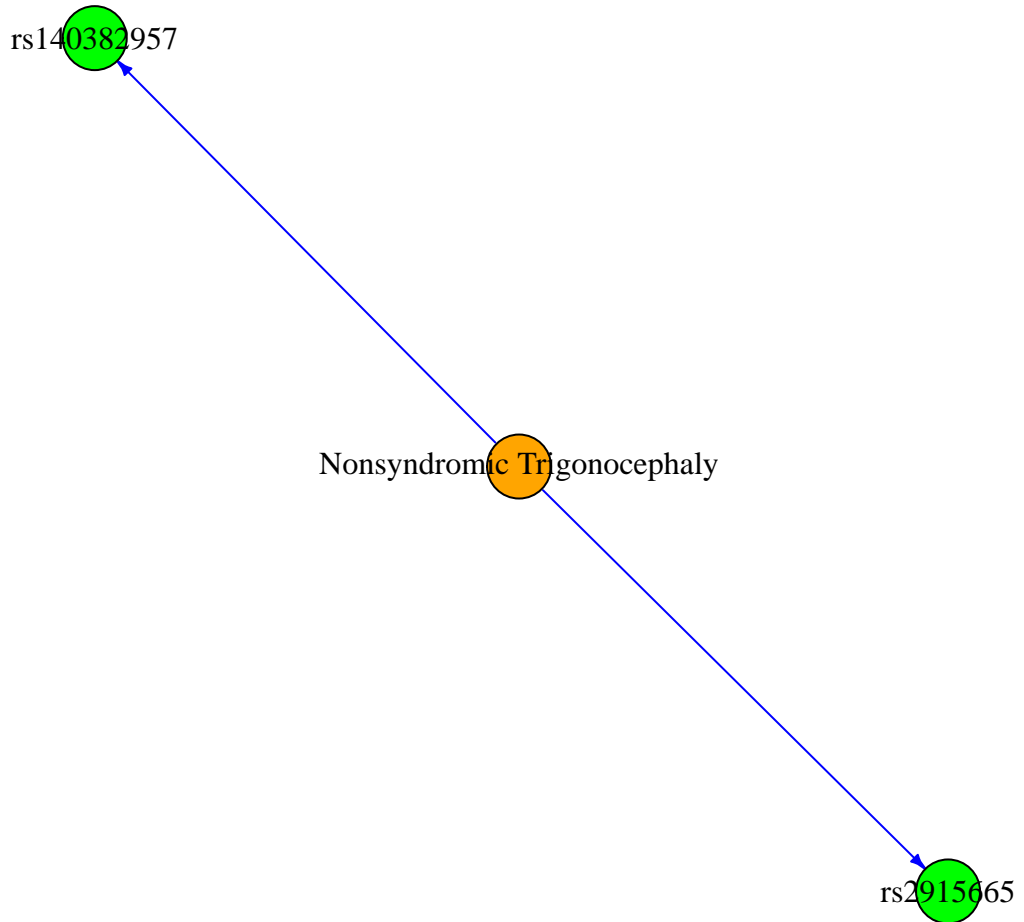

Variant–Disease Network (Non–syndromic X–linked intellectual disability)

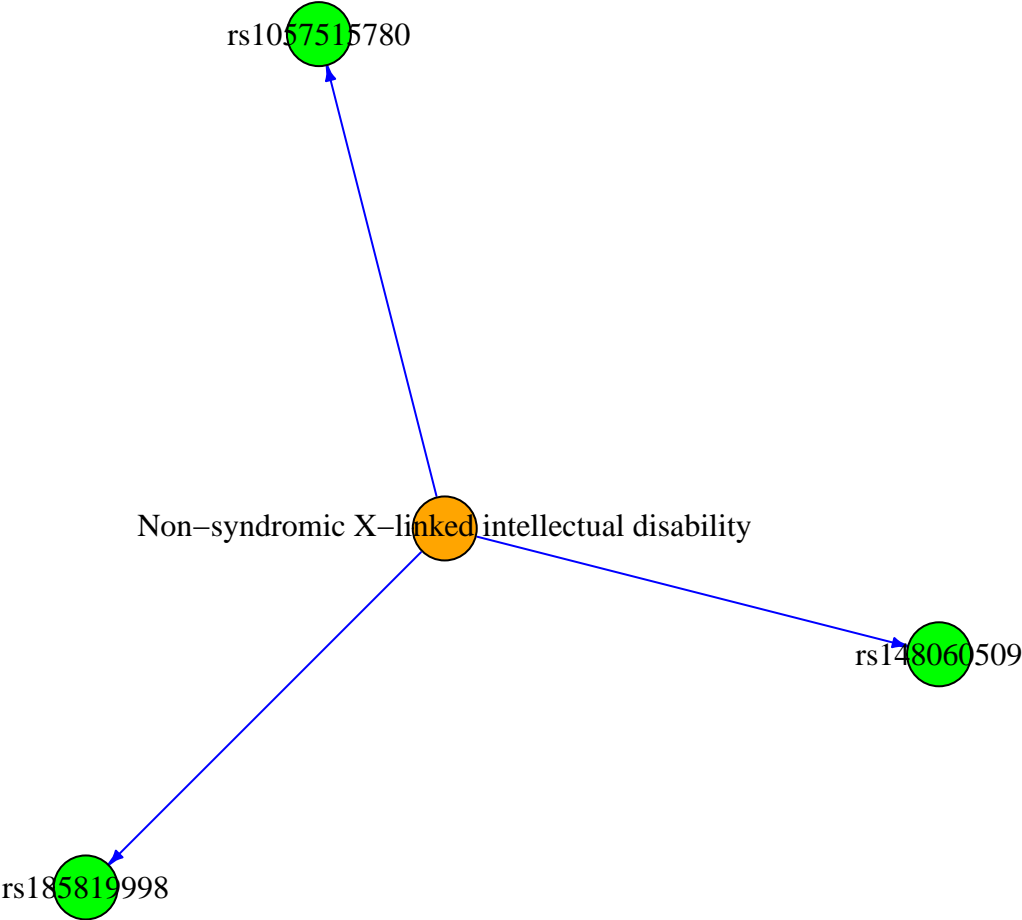

## Variant–Disease Network (Noonan syndrome)

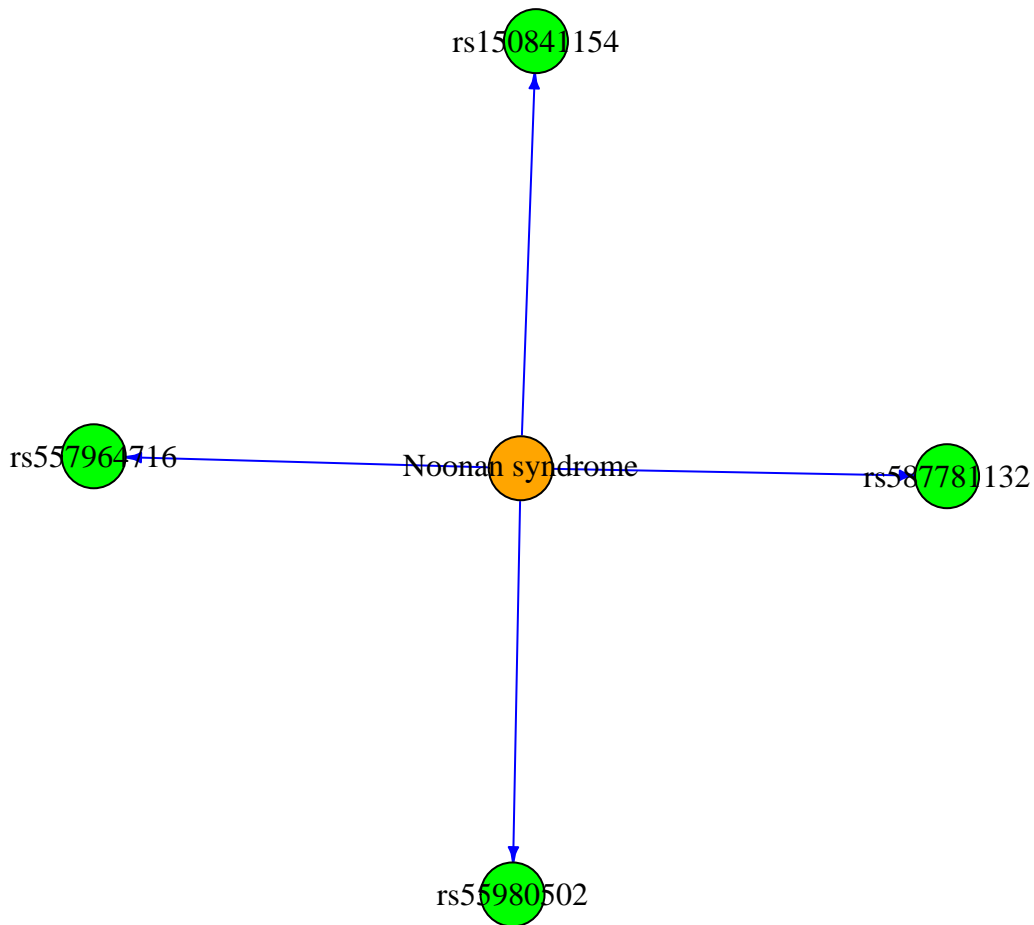

Variant–Disease Network (Noonan syndrome and Noonan–related syndromes)

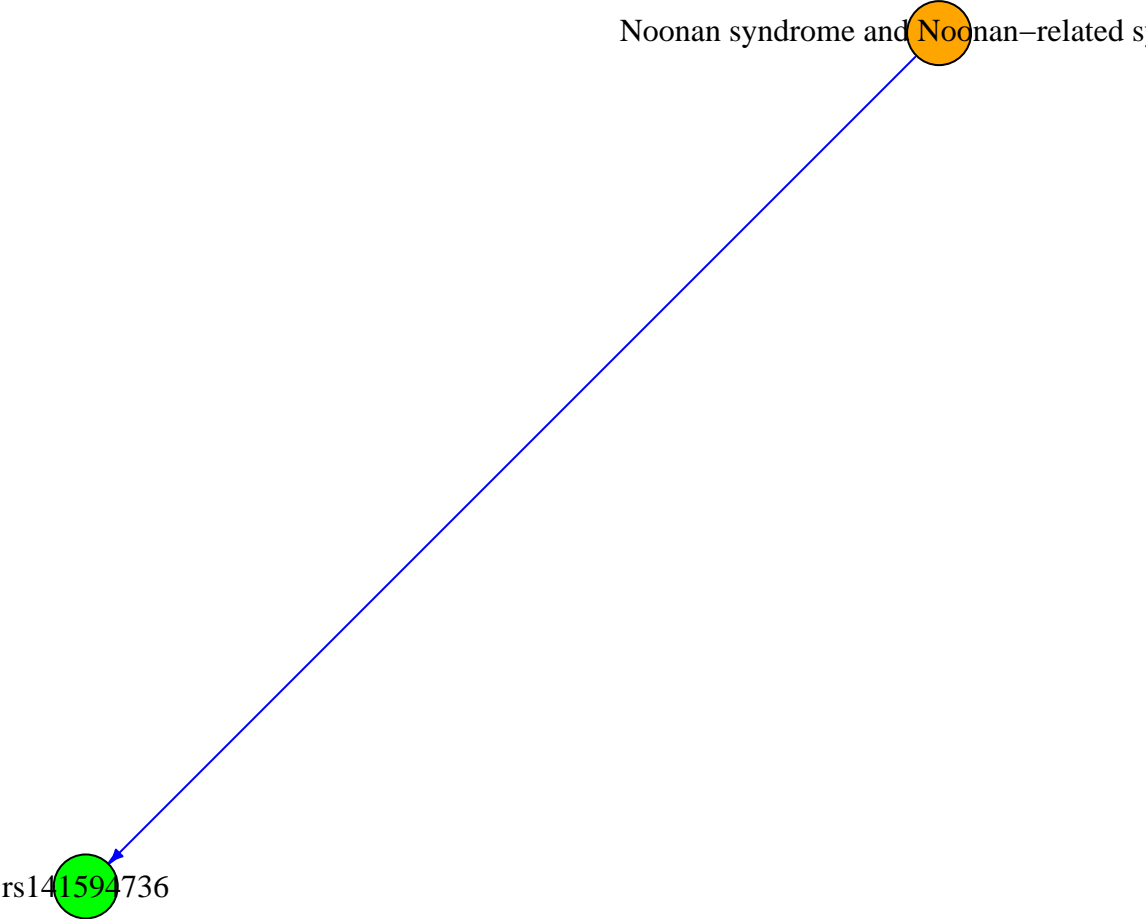

# Variant–Disease Network (Noonan–Like Syndrome Disorder)

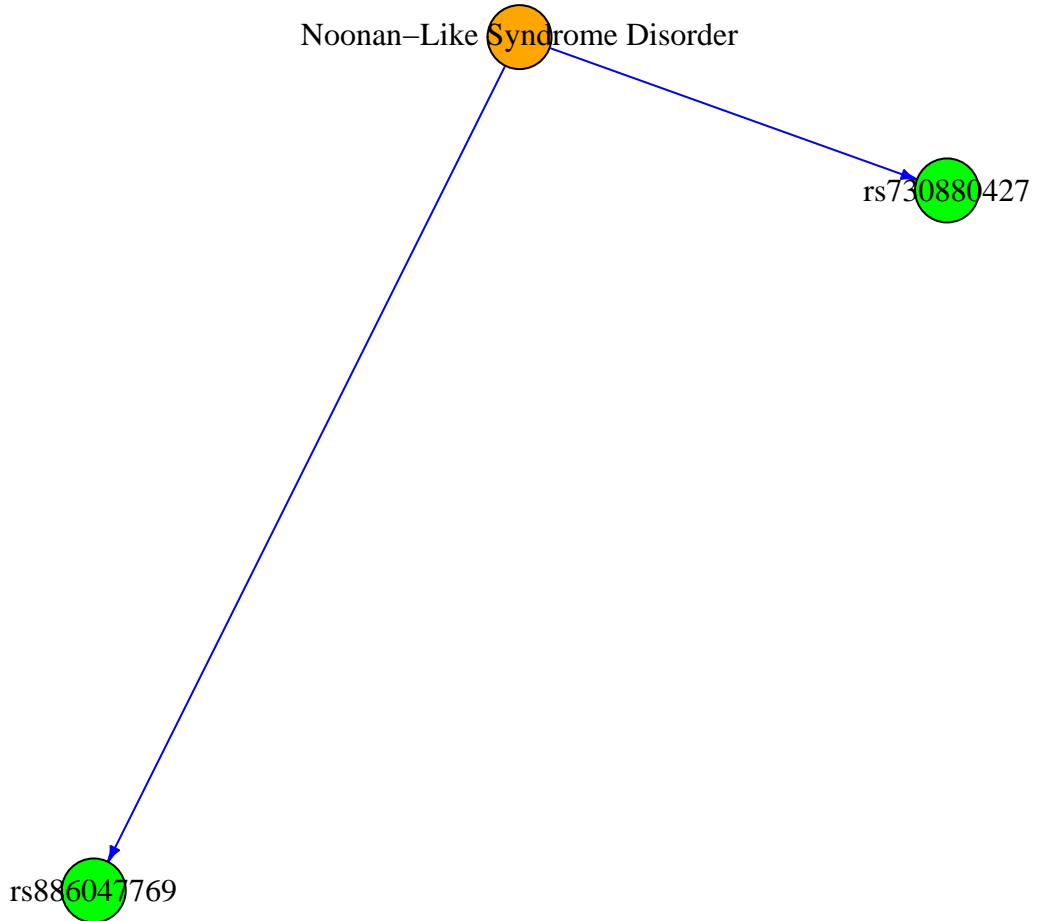

## Variant–Disease Network (Norum disease)

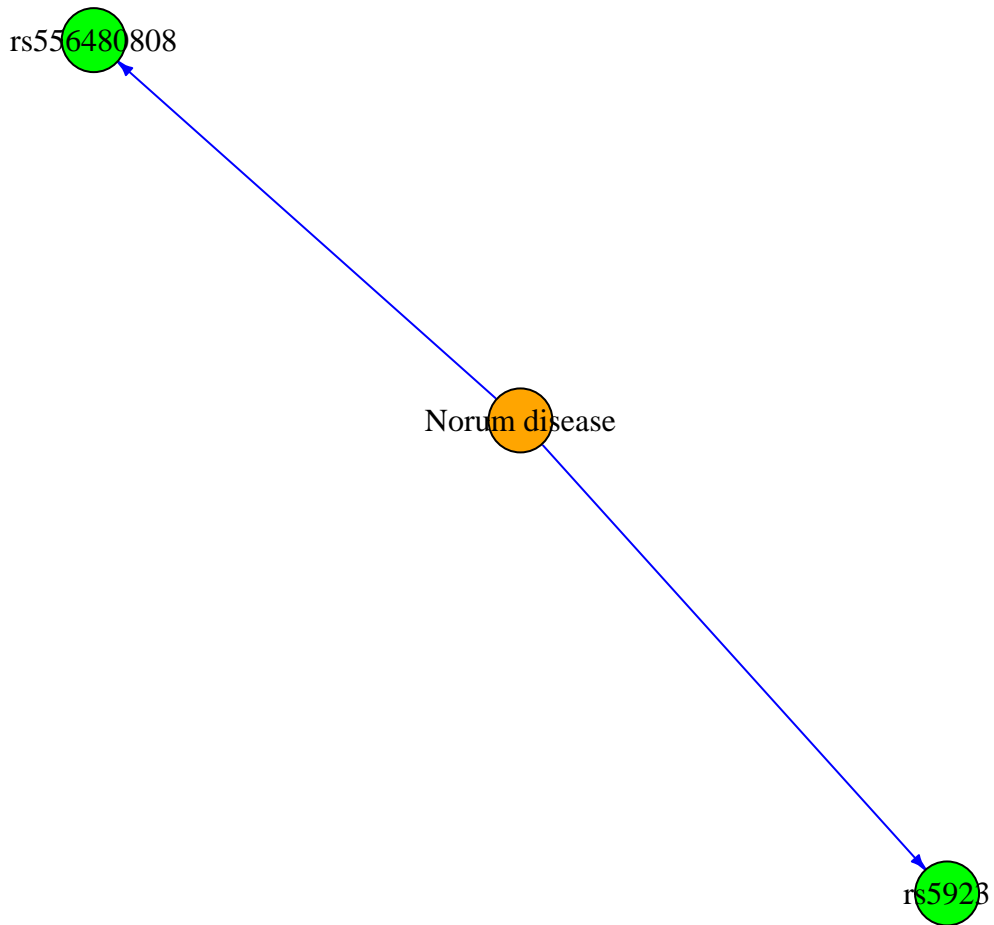

# Disease Network (Nuclearly-encoded mitochondrial complex V (ATP synthase

Nuclearly-encoded mitochondrial complex V (ATP synthase) deficiency 2

rs61732273

rs387907070

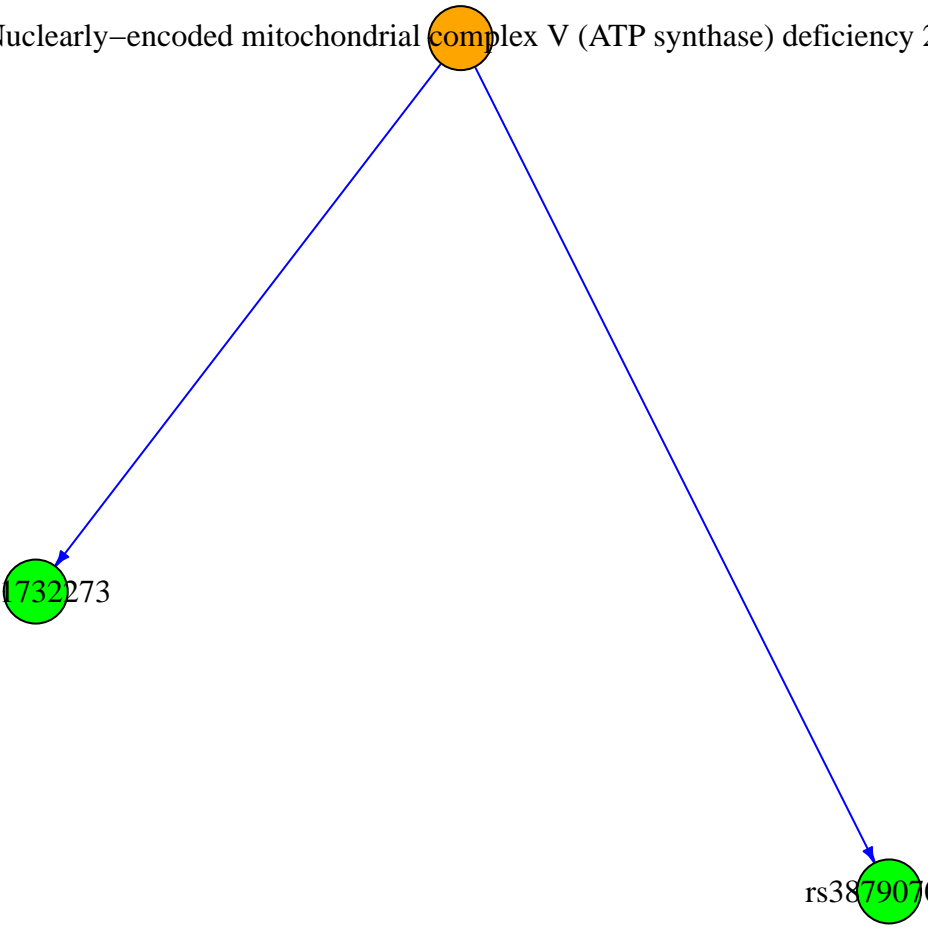

## Variant–Disease Network (Obesity)

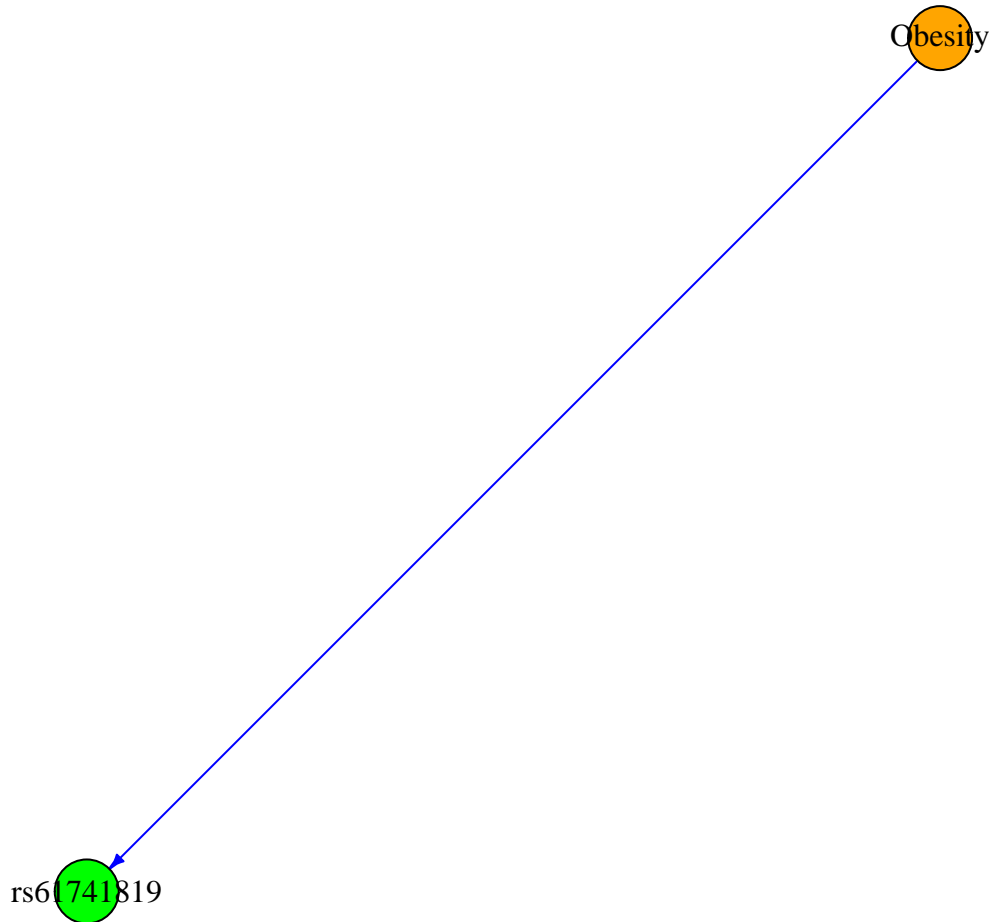



## Variant–Disease Network (Oculocutaneous albinism)

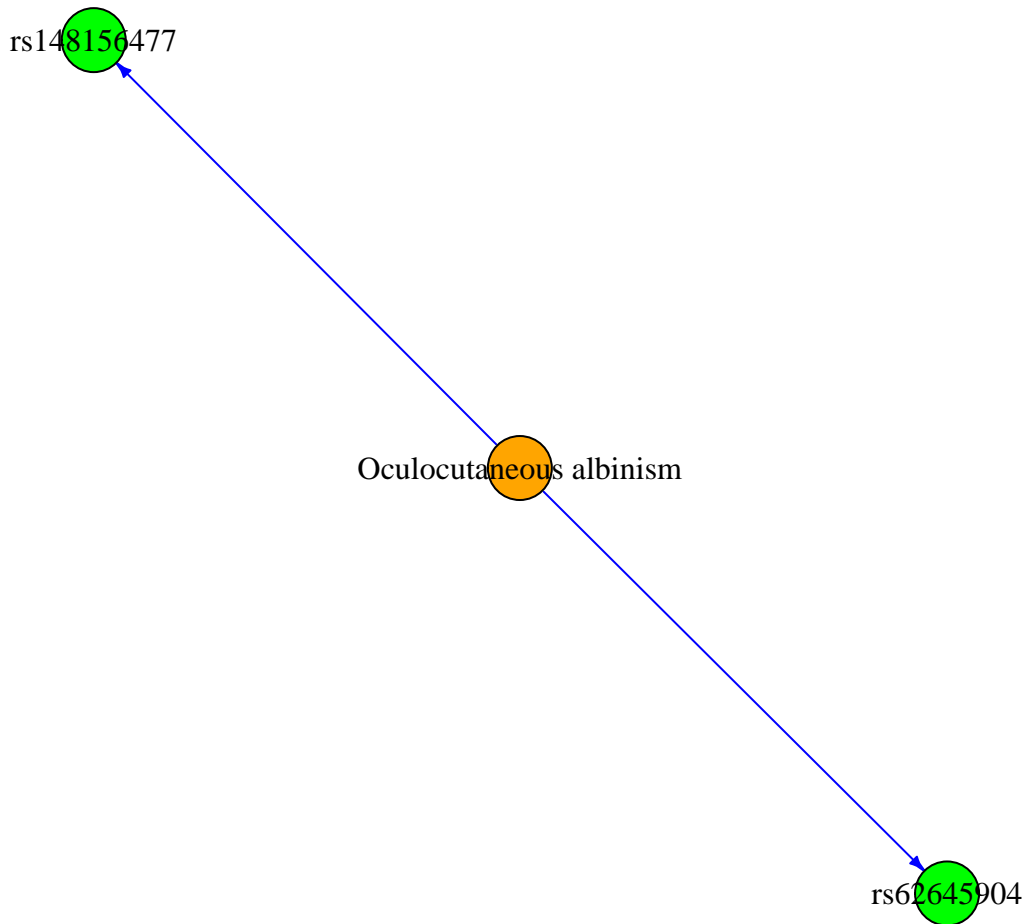

# Variant–Disease Network (Oculocutaneous albinism type 1B)

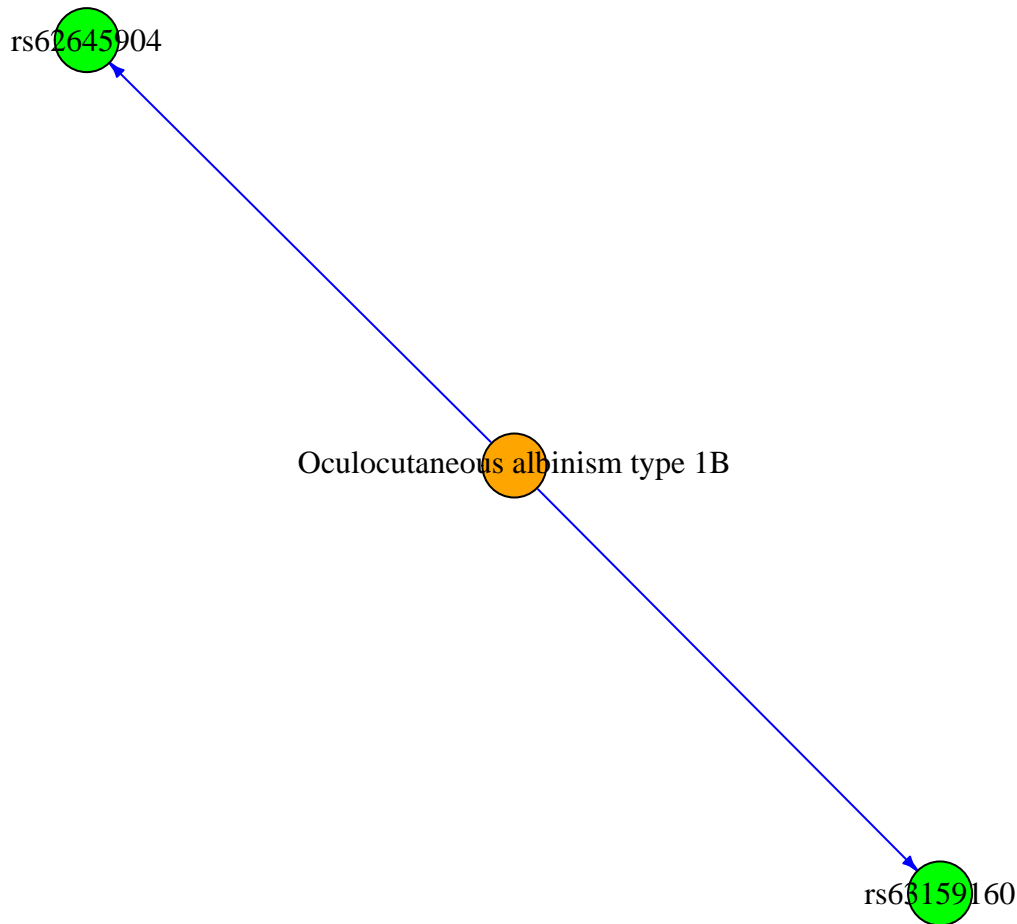

## Variant-Disease Network (Odontoonychodermal dysplasia)

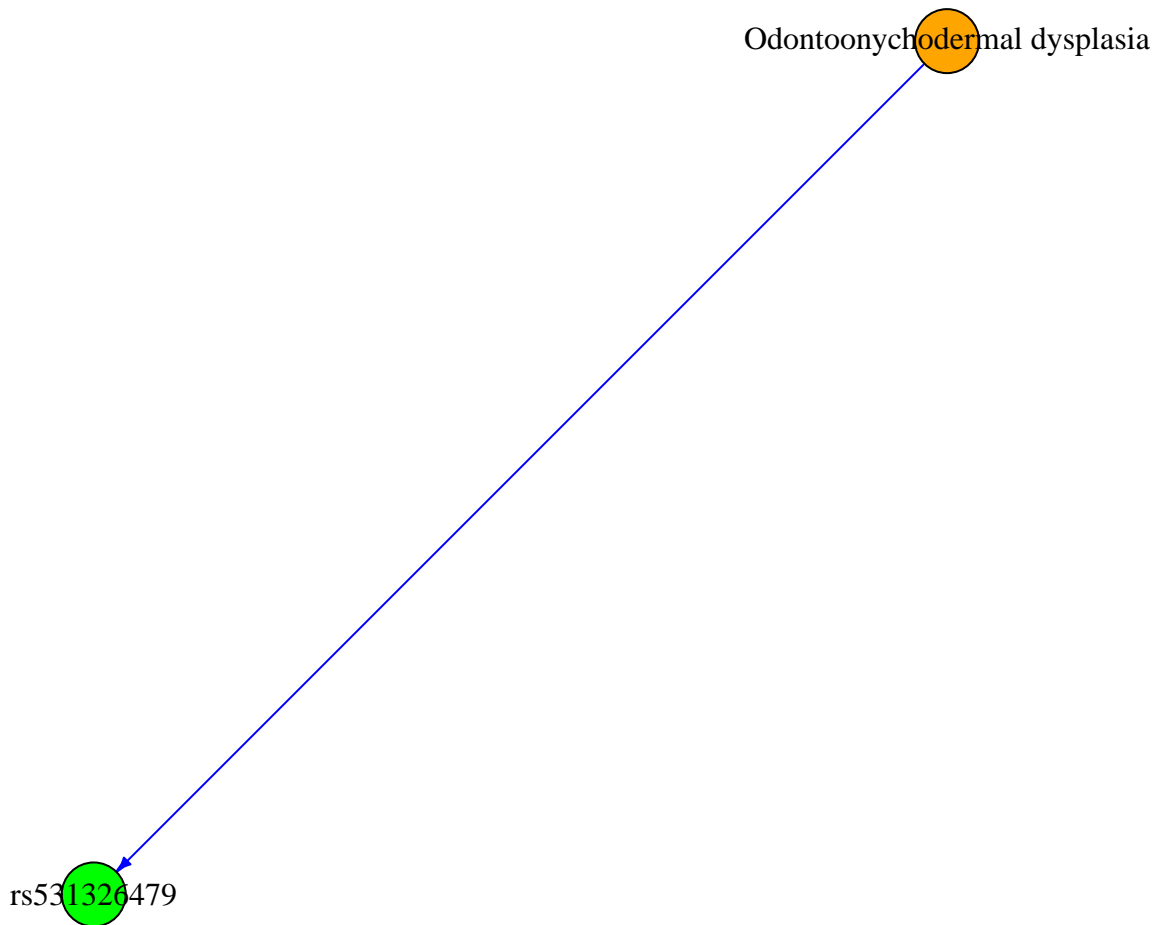

## Variant–Disease Network (Oguchis disease)

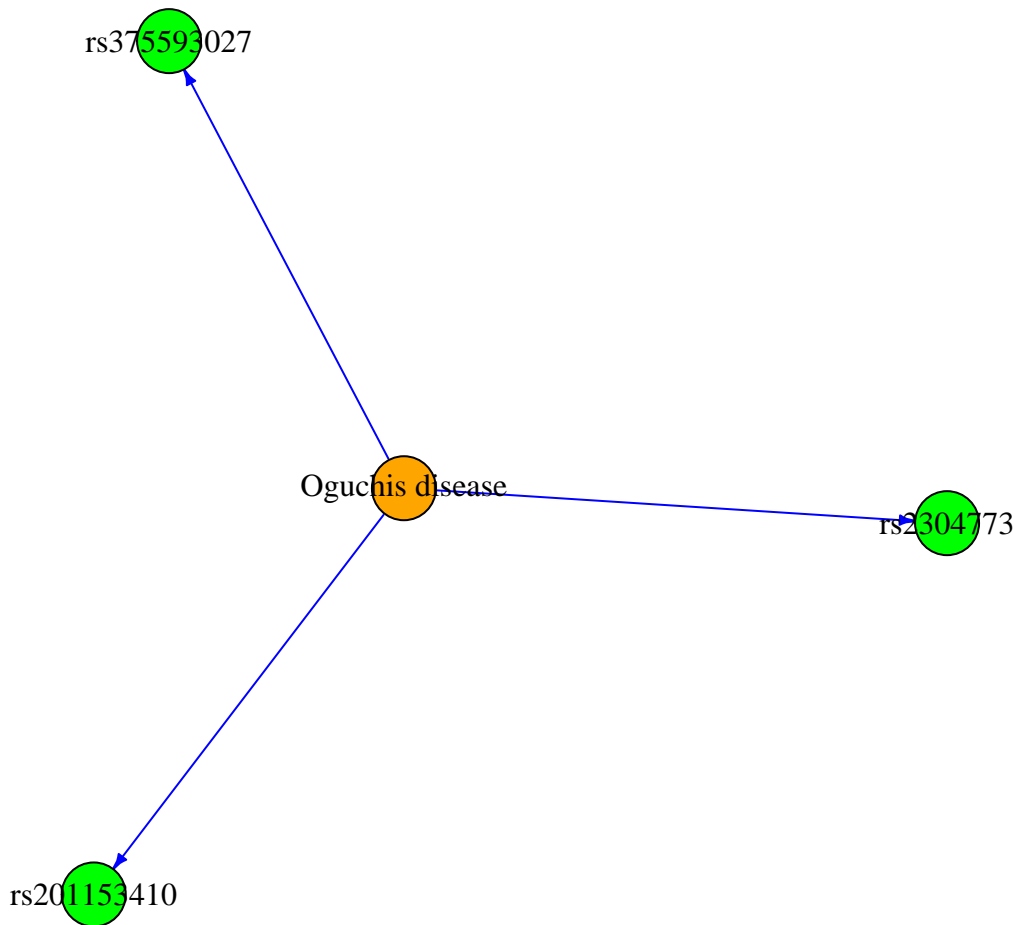

# Variant–Disease Network (Oligodontia–colorectal cancer syndrome)

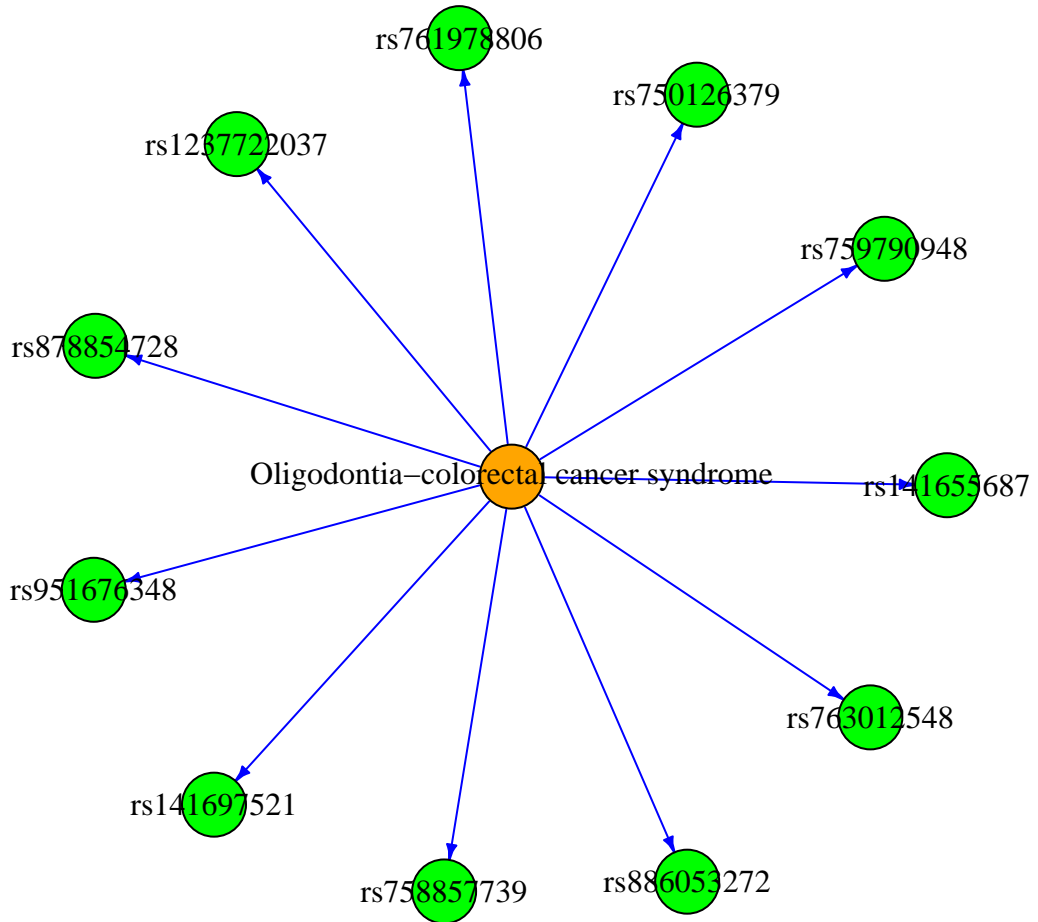

Variant–Disease Network (Omodysplasia)

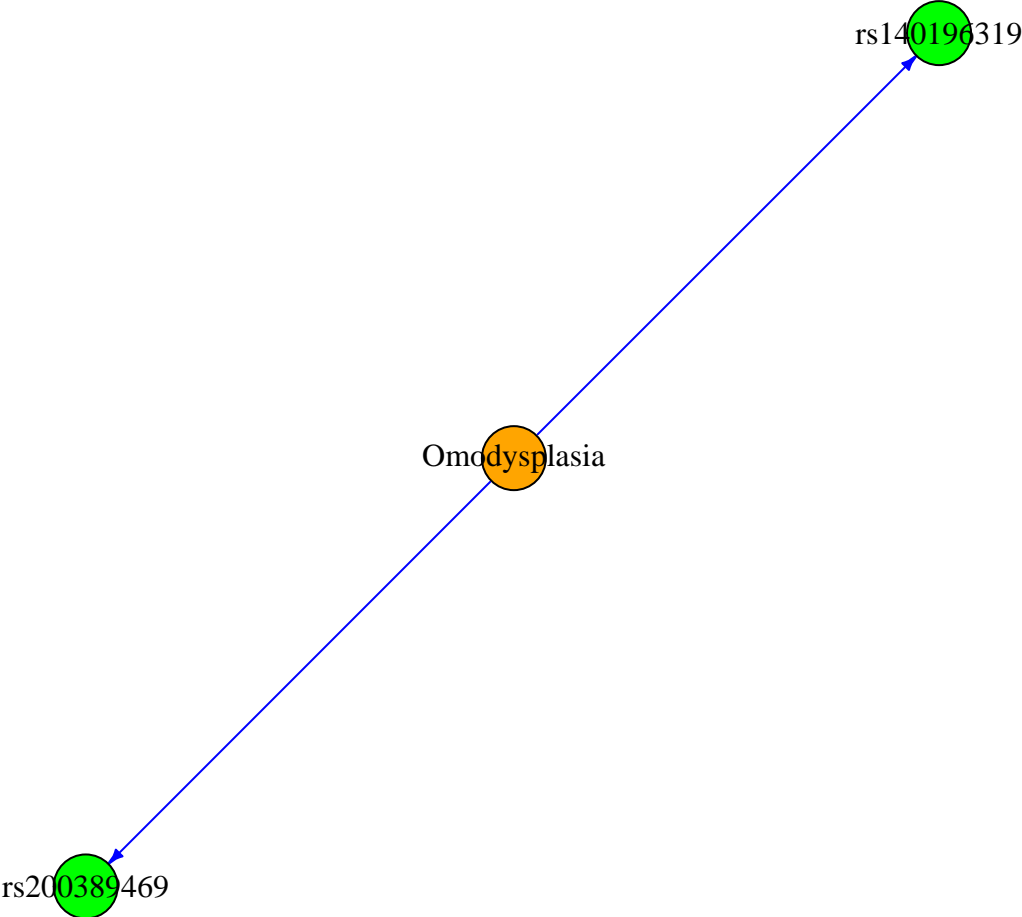

## Variant-Disease Network (Optic Atrophy)

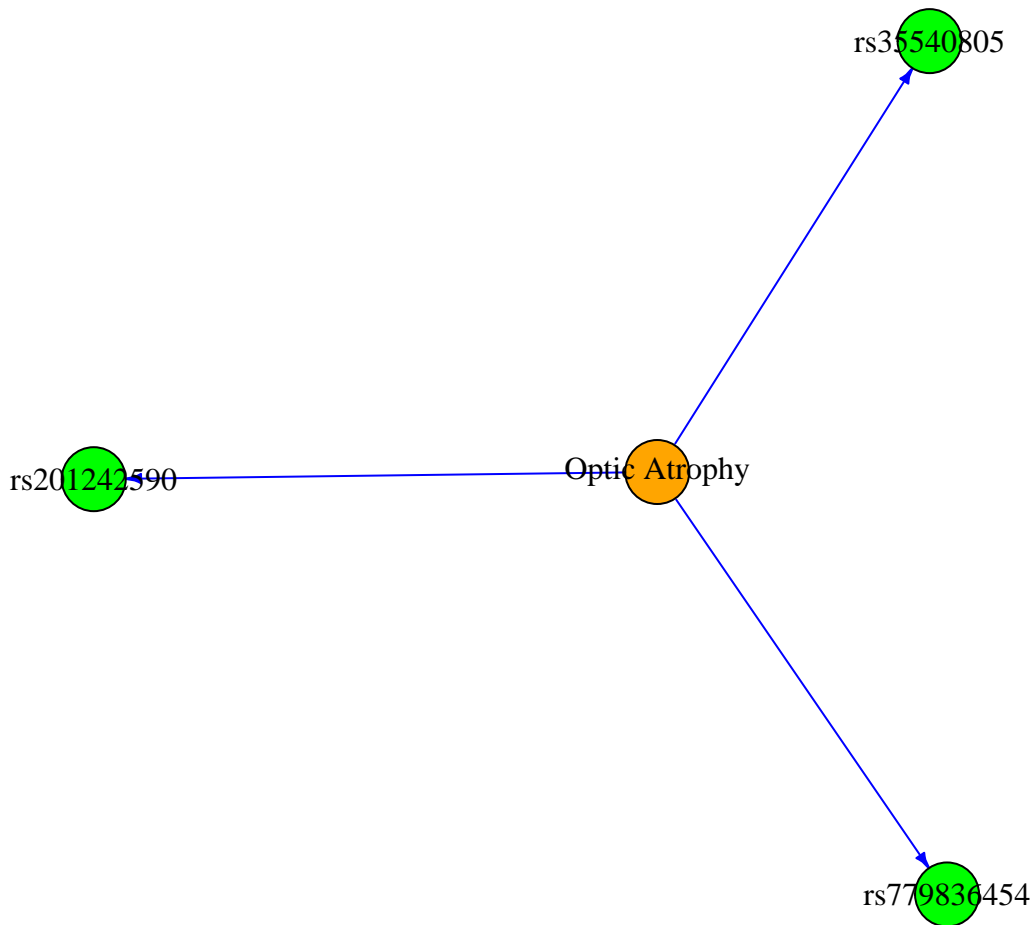

# Variant–Disease Network (Ornithine aminotransferase deficiency)

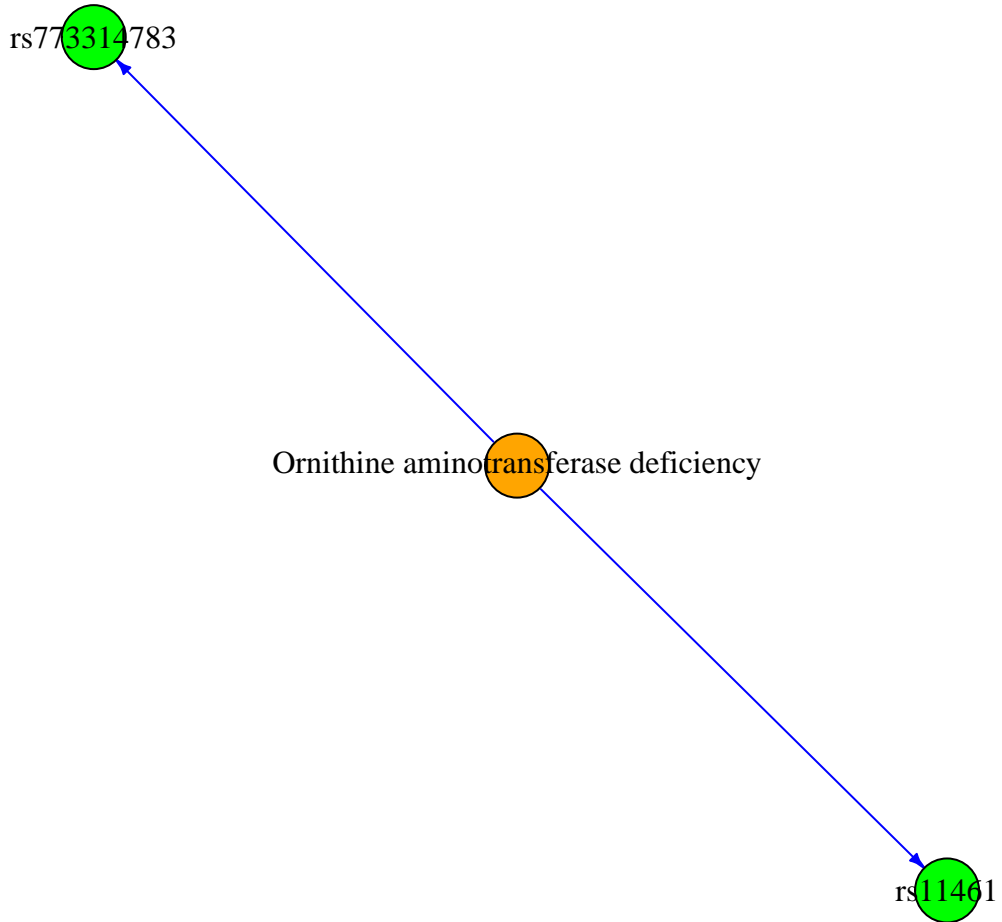



## Variant–Disease Network (Ornithine carbamoyltransferase deficiency)

Ornithine carbamoyltransferase deficiency

rs72558415

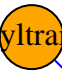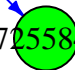

## Variant–Disease Network (Orofaciodigital syndrome 6)

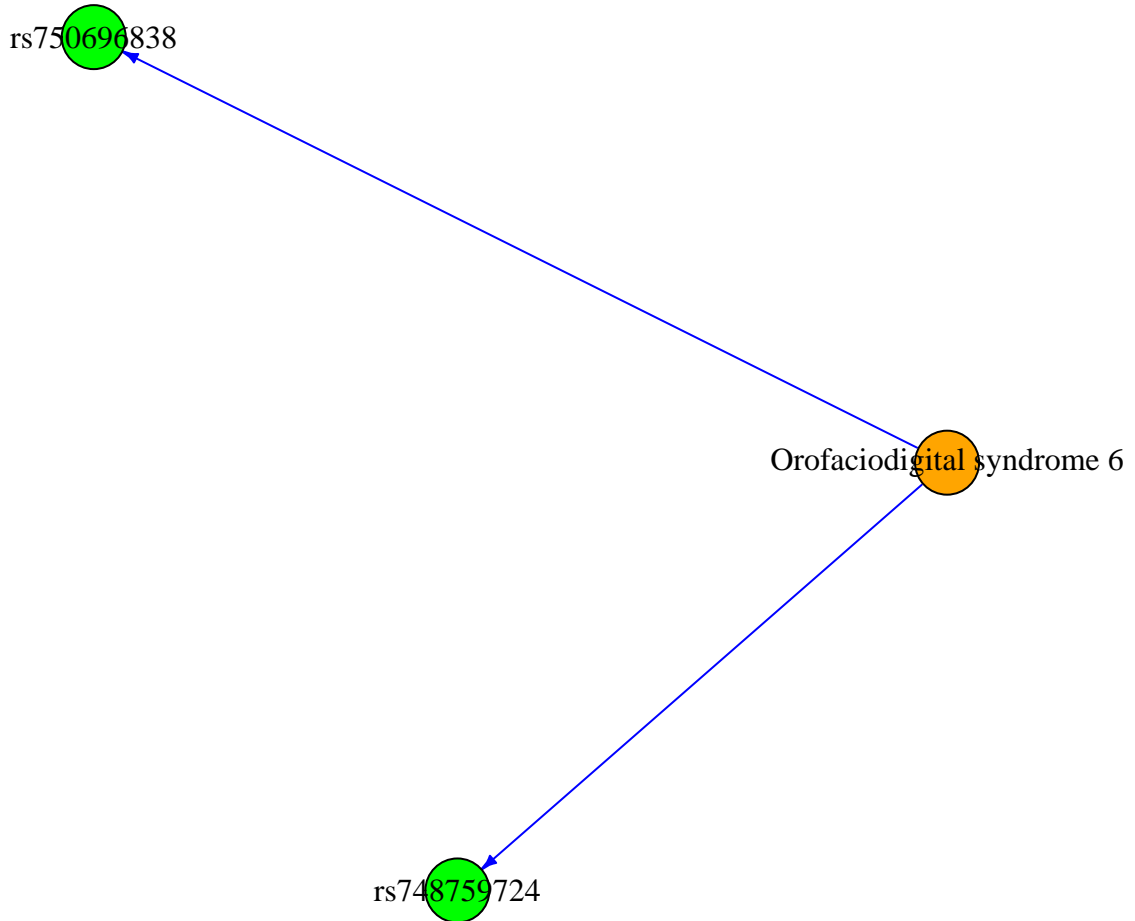

**Variant–Disease Network (Orofaciodigital syndrome I)**

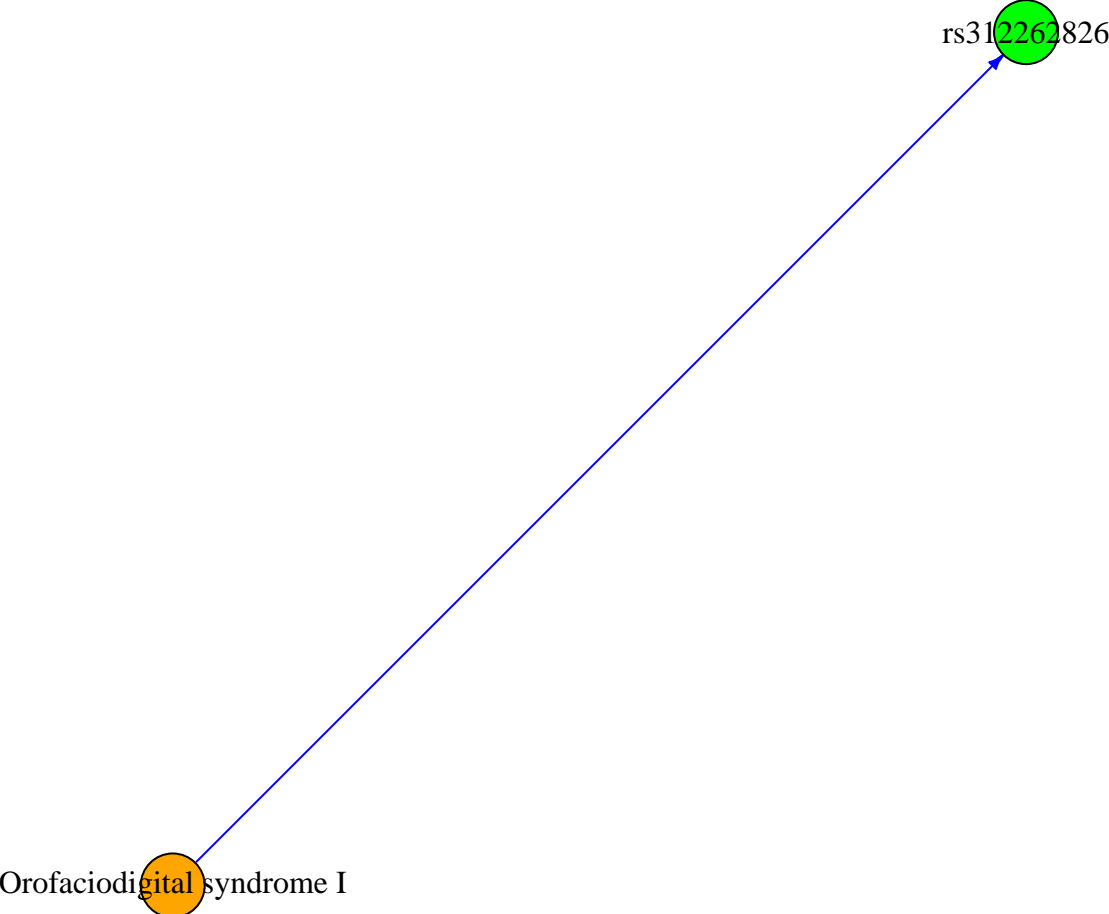

Variant–Disease Network (Orotic aciduria)

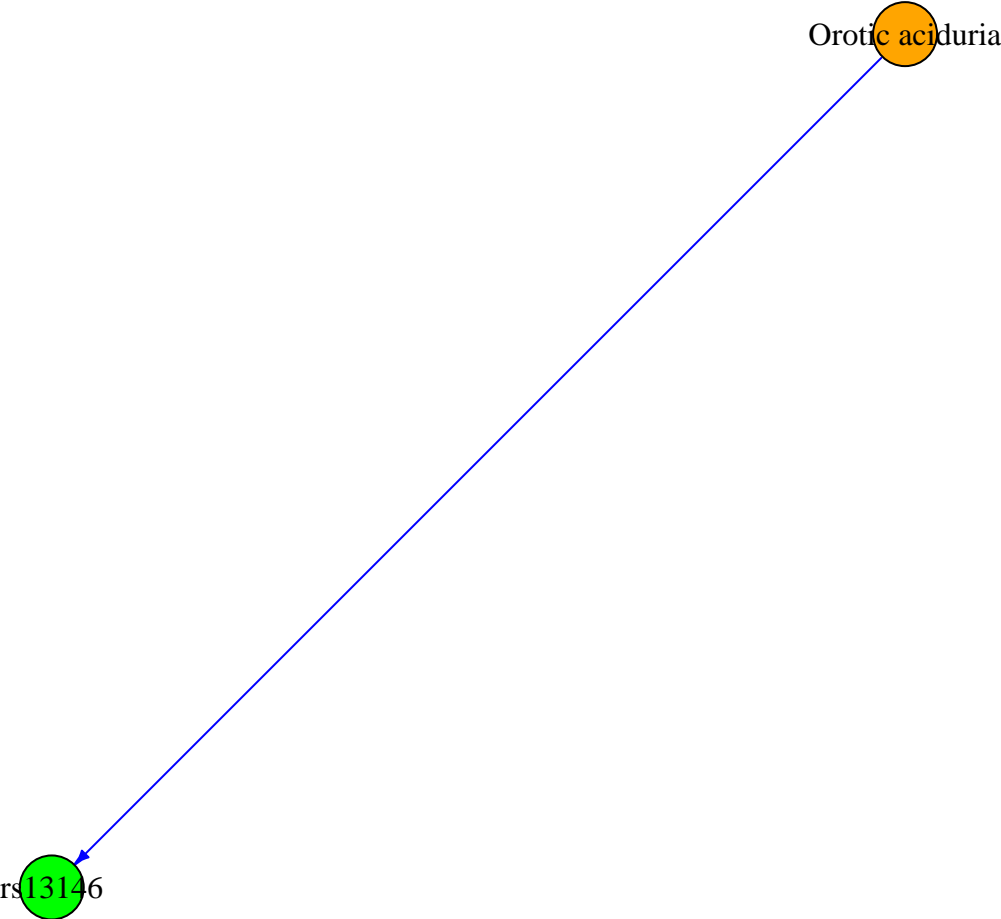

## Variant–Disease Network (Orthostatic hypotension 1)

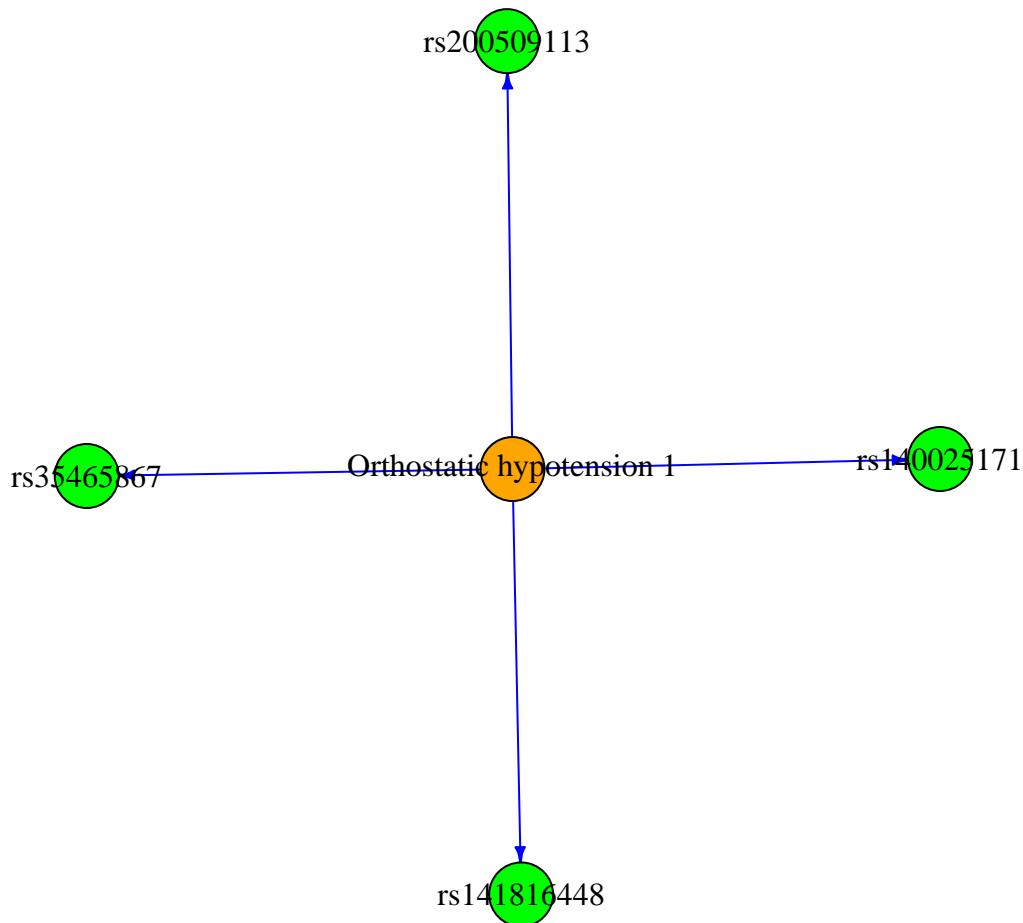

## Variant–Disease Network (Orthostatic intolerance)

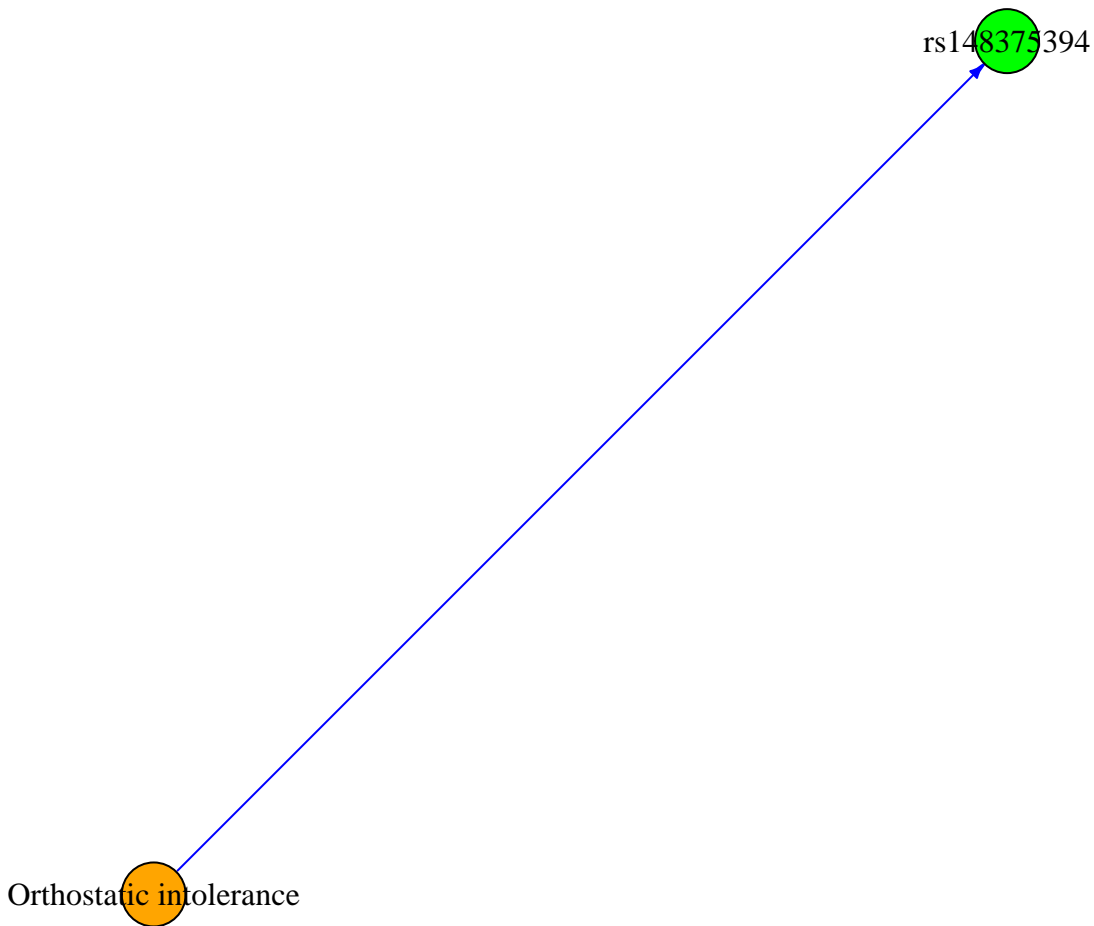

Variant–Disease Network (Osteoarthritis with mild chondrodysplasia)

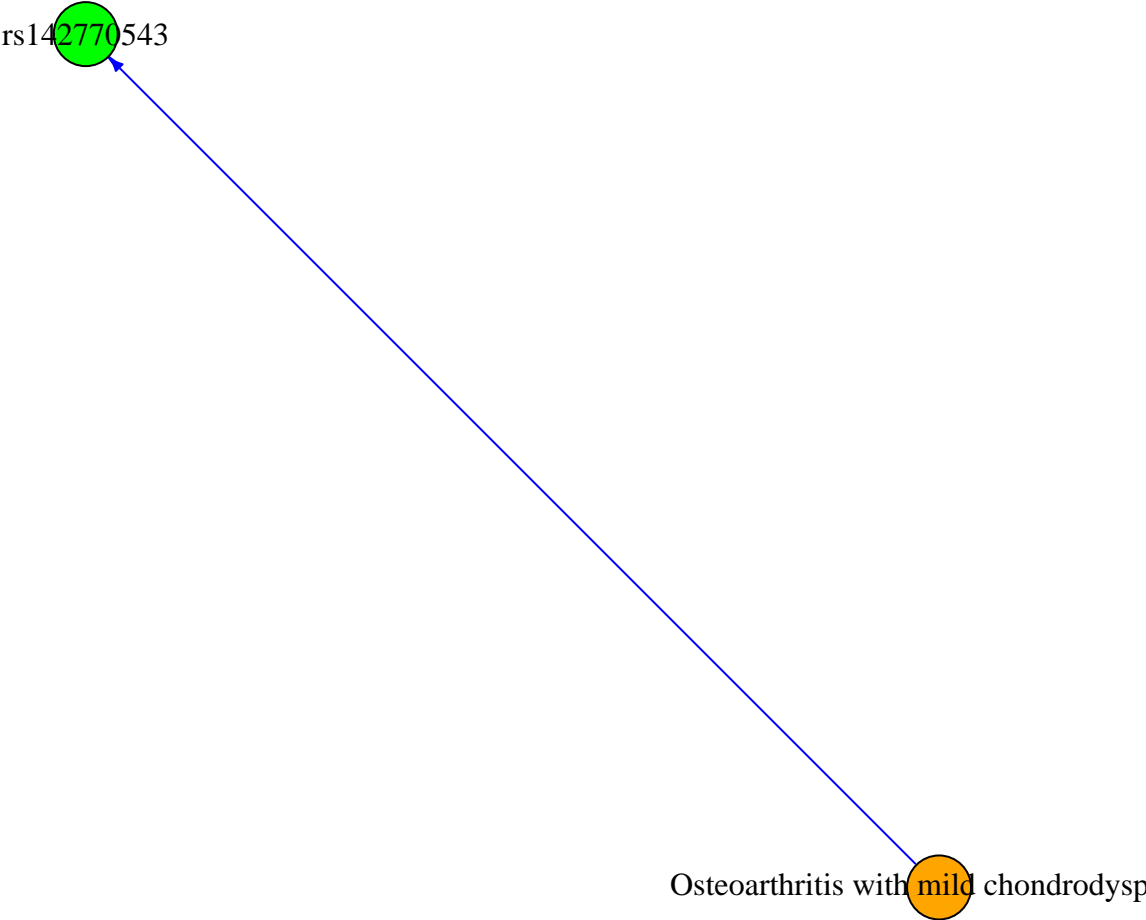

Variant–Disease Network (Osteogenesis Imperfecta)

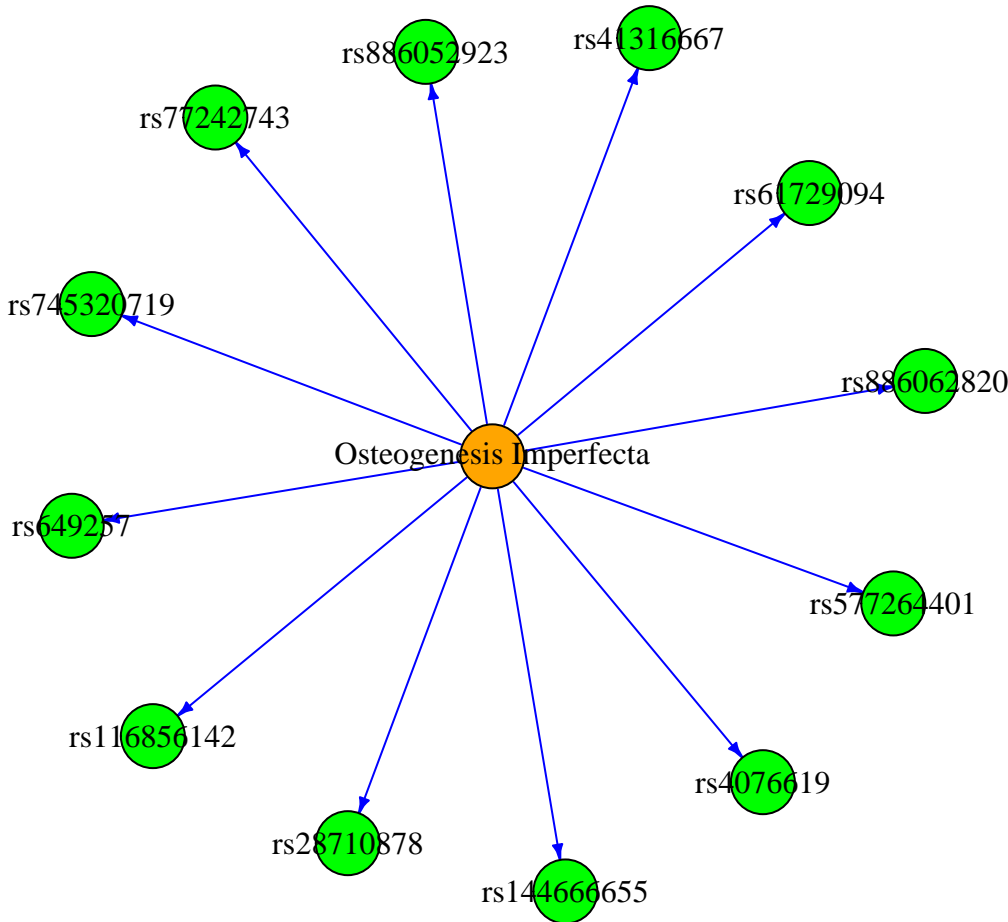



Variant–Disease Network (Osteogenesis imperfecta type 7)

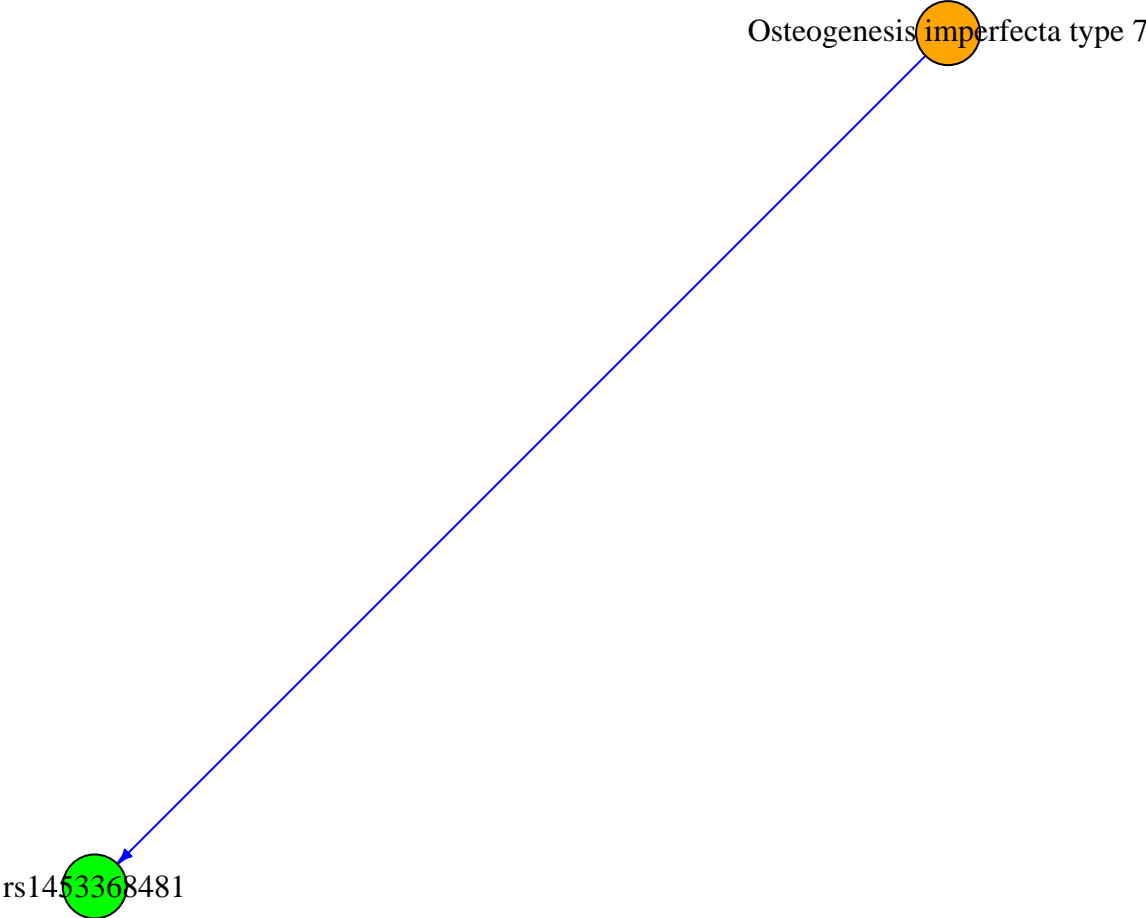

Variant–Disease Network (Osteogenesis imperfecta type I)

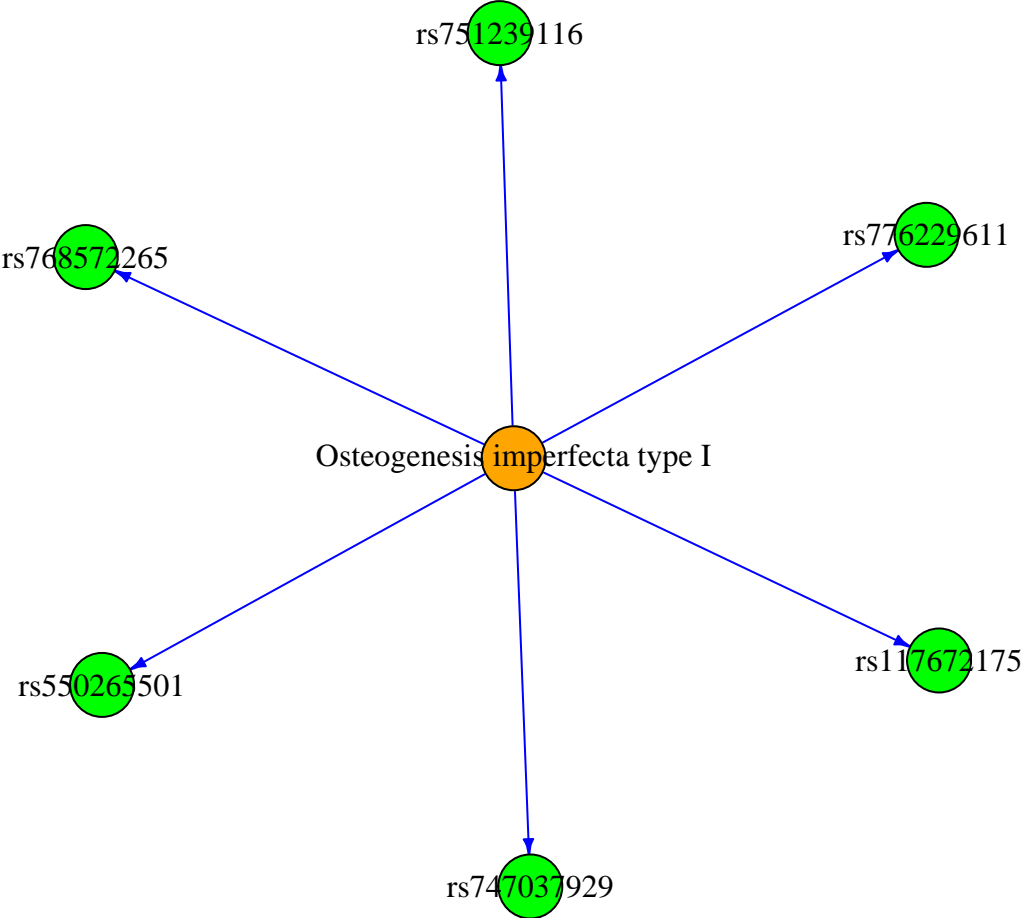

Variant–Disease Network (Osteogenesis imperfecta with normal sclerae)

rs34940368

Osteogenesis imperfecta with normal s

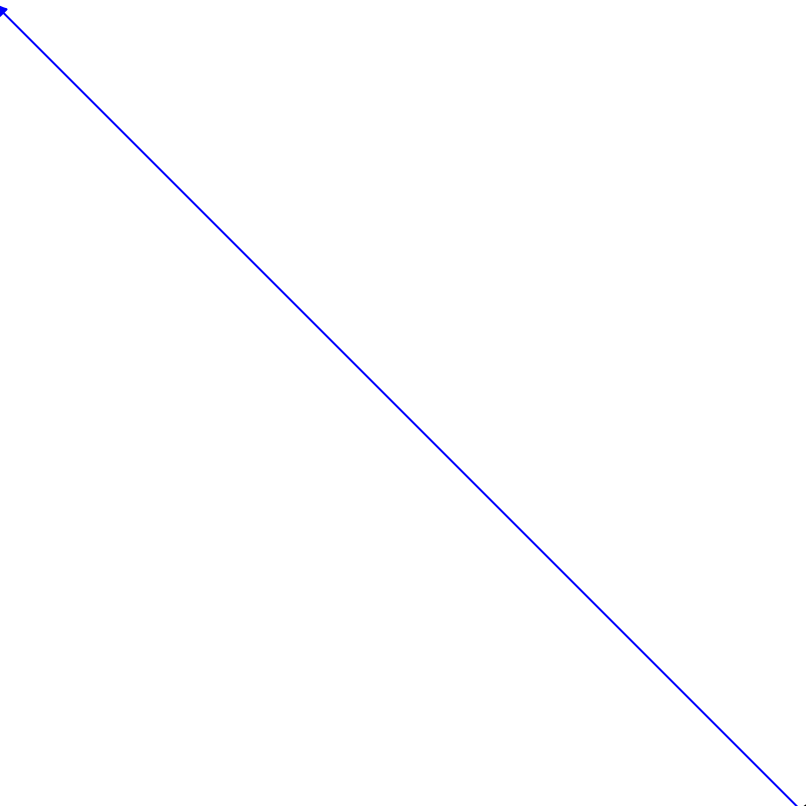

## Variant–Disease Network (Osteoglophonic dysplasia)

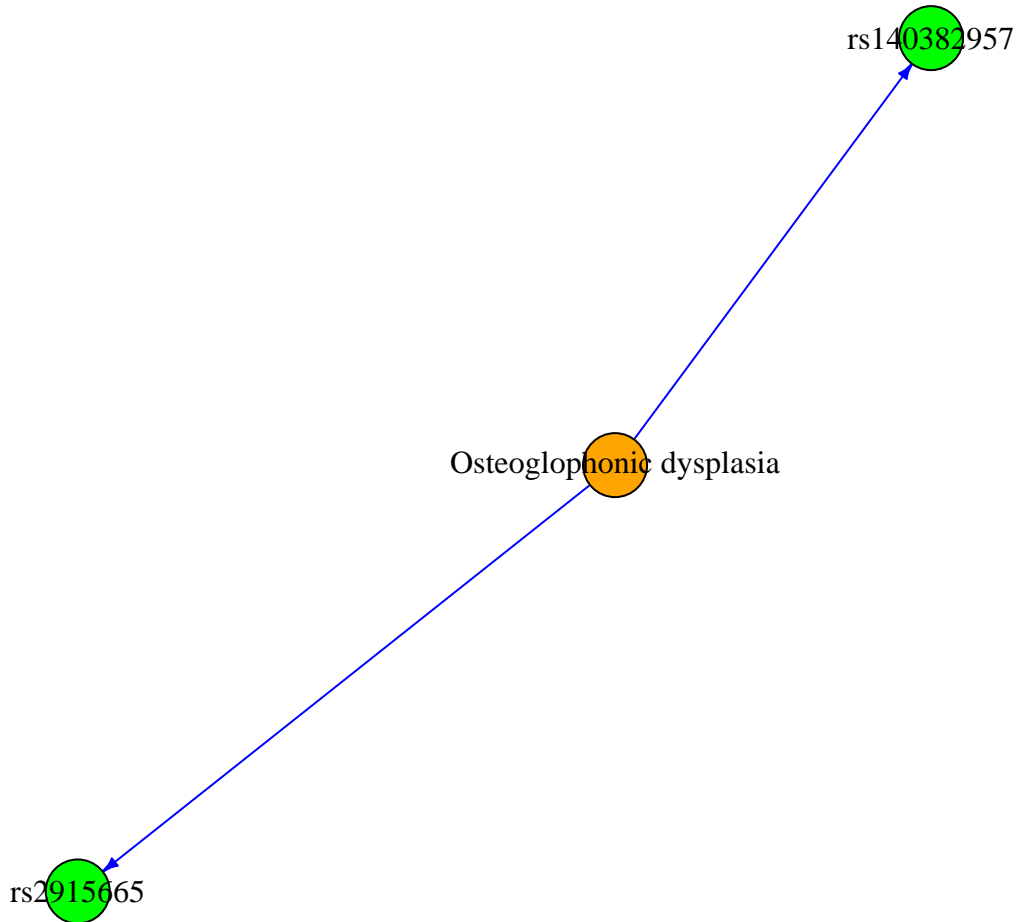

## Variant–Disease Network (Osteopetrosis)

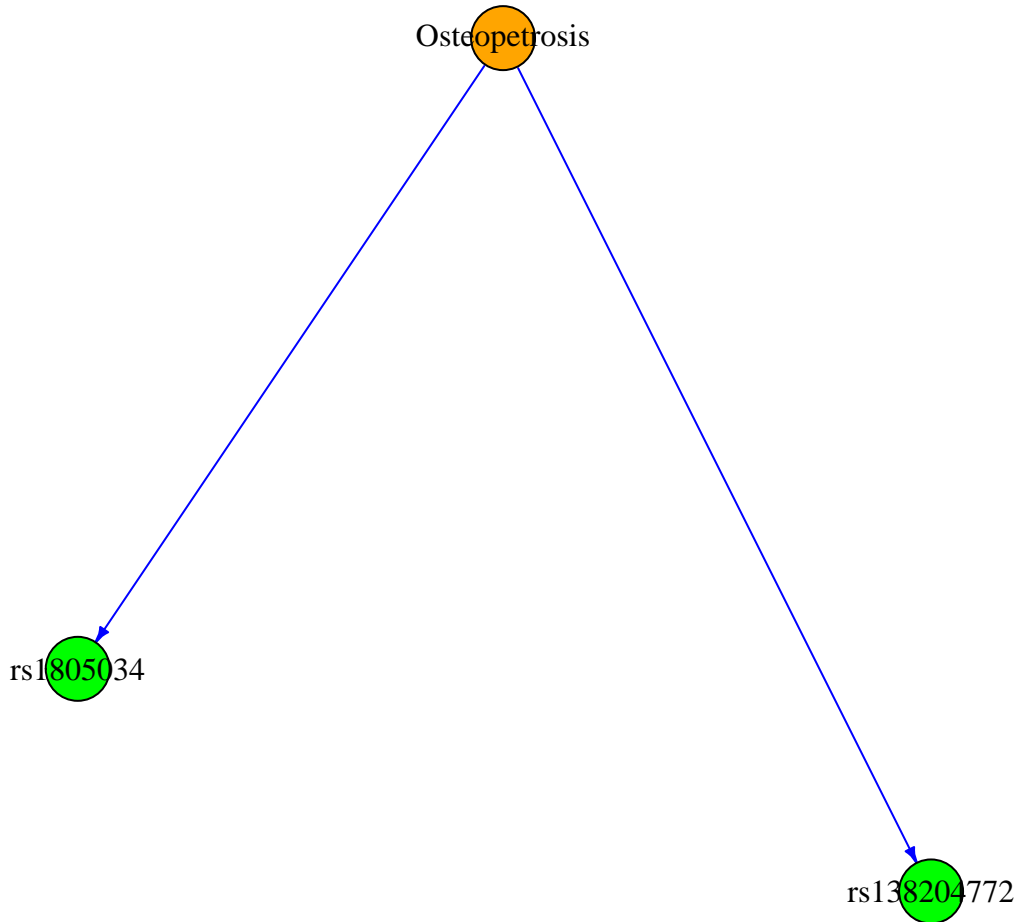

# Variant–Disease Network (Osteopetrosis with renal tubular acidosis)

Osteopetrosis with renal tubular acidosis

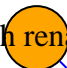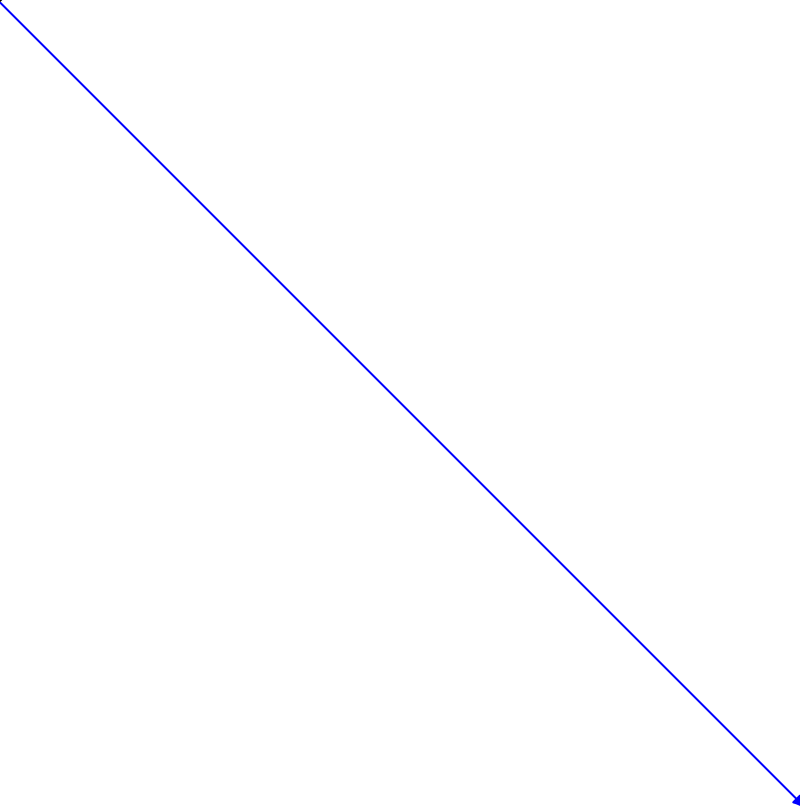

rs376387073

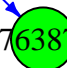

# Variant–Disease Network (Oto–palato–digital syndrome)

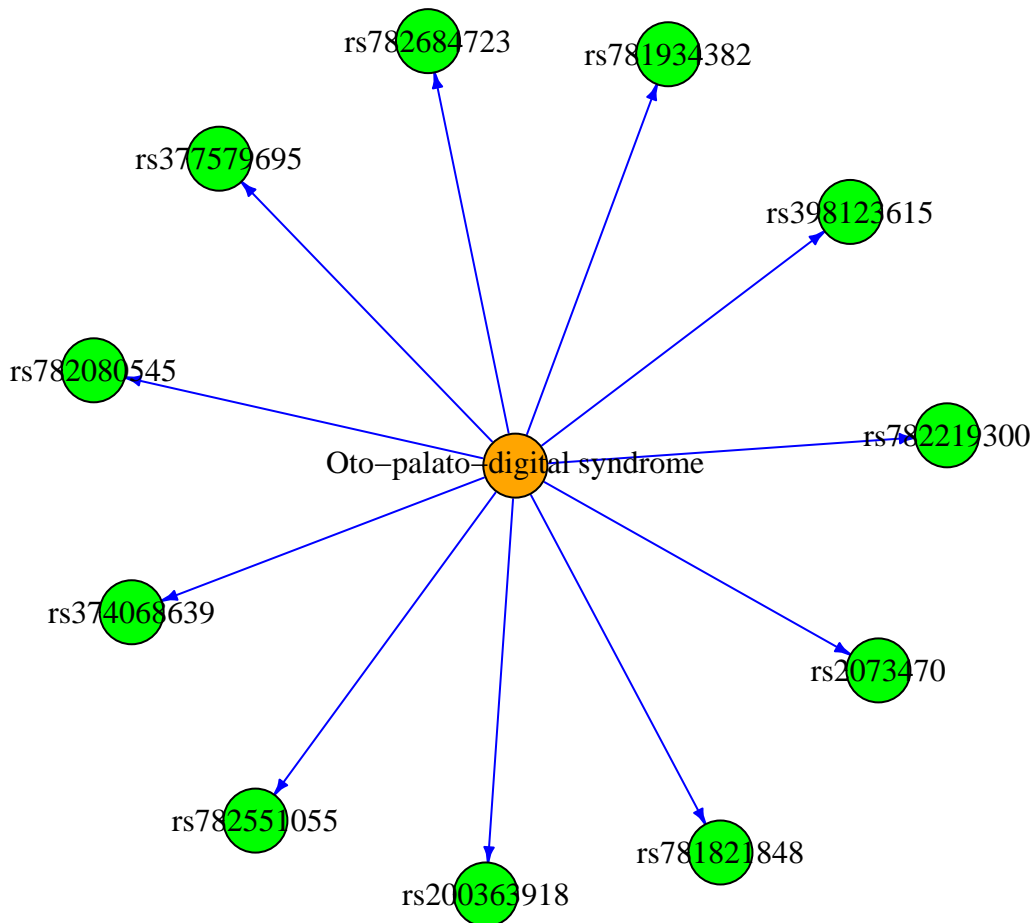

# Variant–Disease Network (Otospondylomegapiphyseal dysplasia)

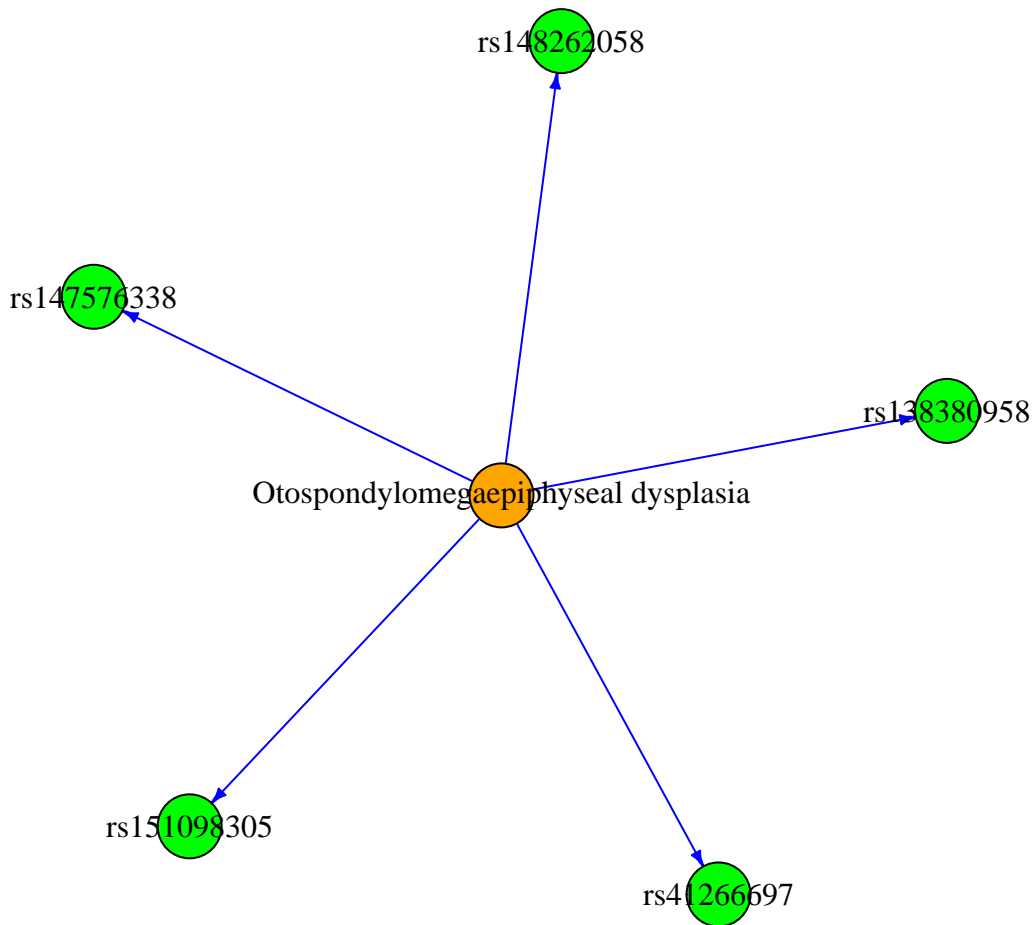



## Variant–Disease Network (Ovarian dysgenesis)

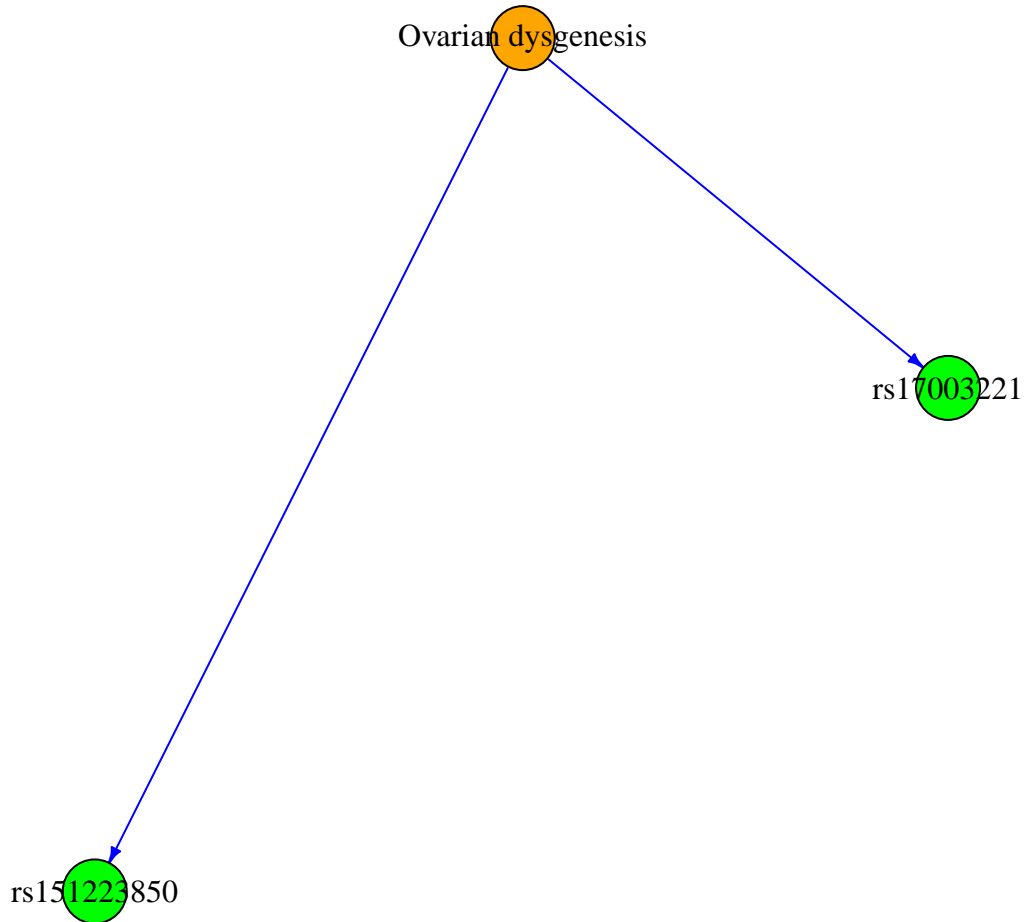

## Variant–Disease Network (Ovarian Neoplasms)

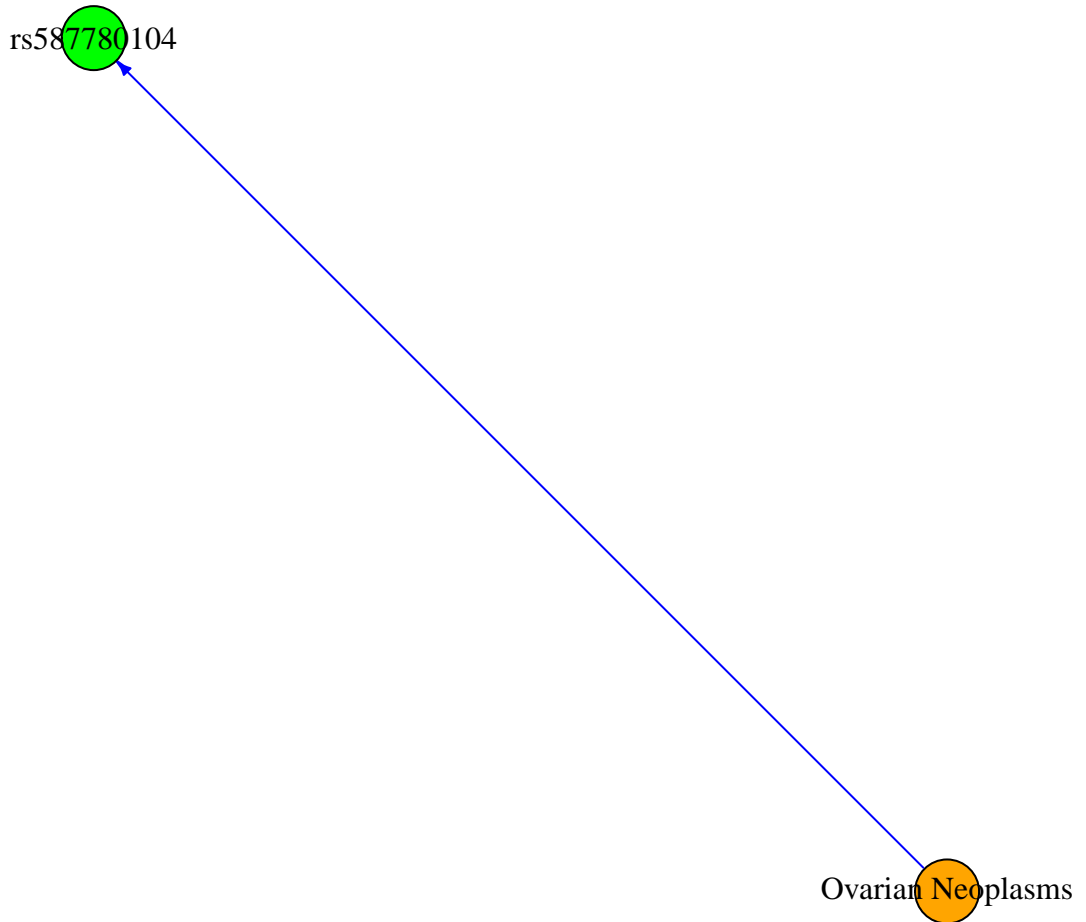

## Variant–Disease Network (p phenotype)

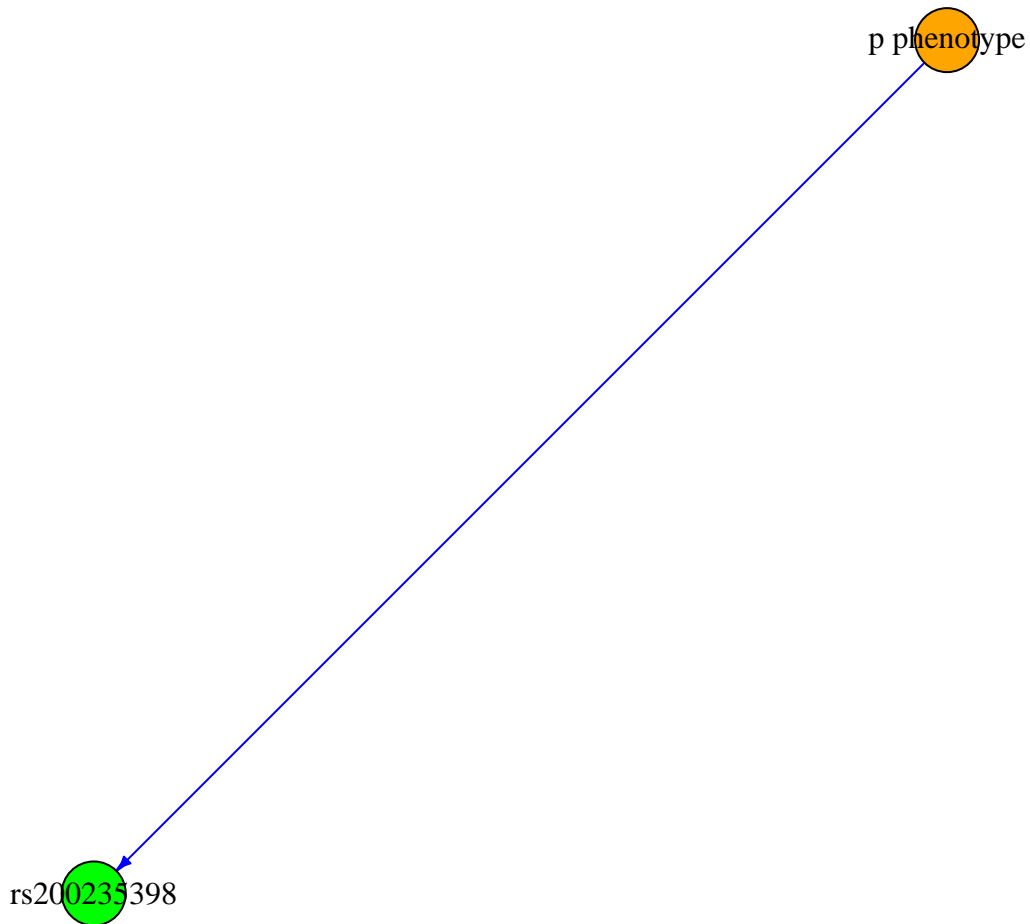

## Variant–Disease Network (Paget disease of bone)

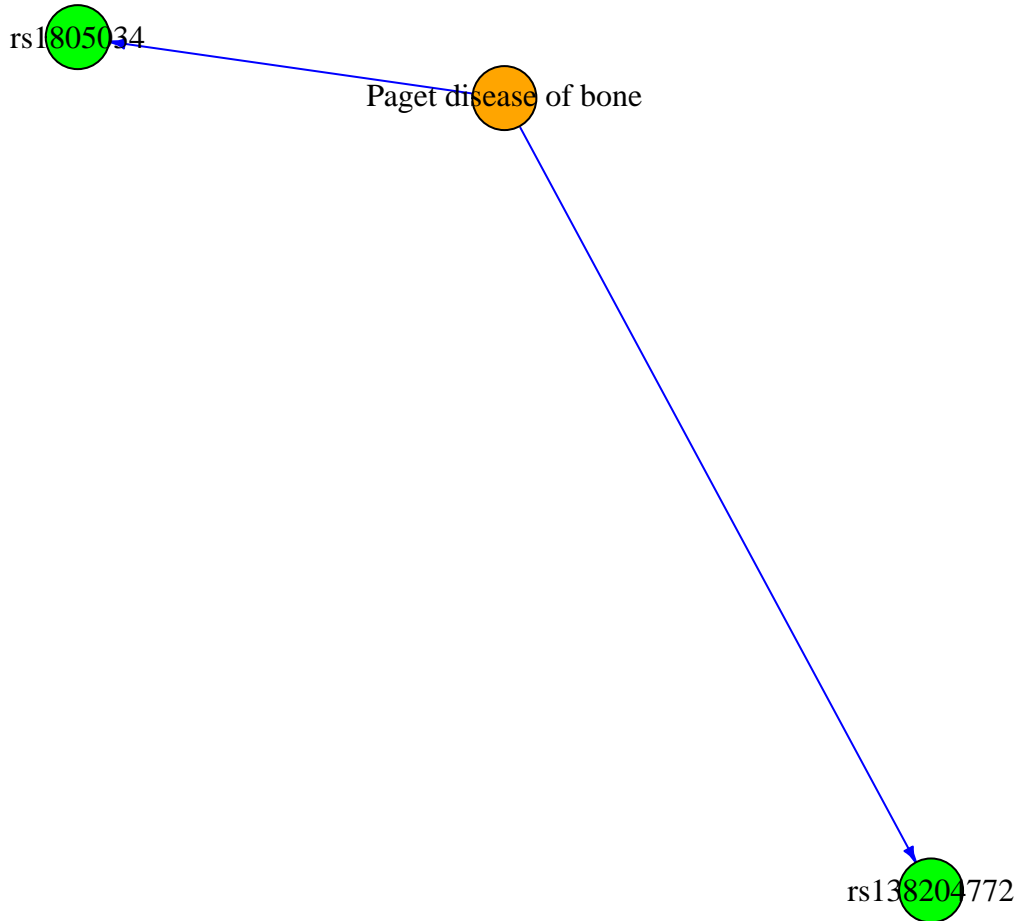

## Variant–Disease Network (Pallister–Hall syndrome)

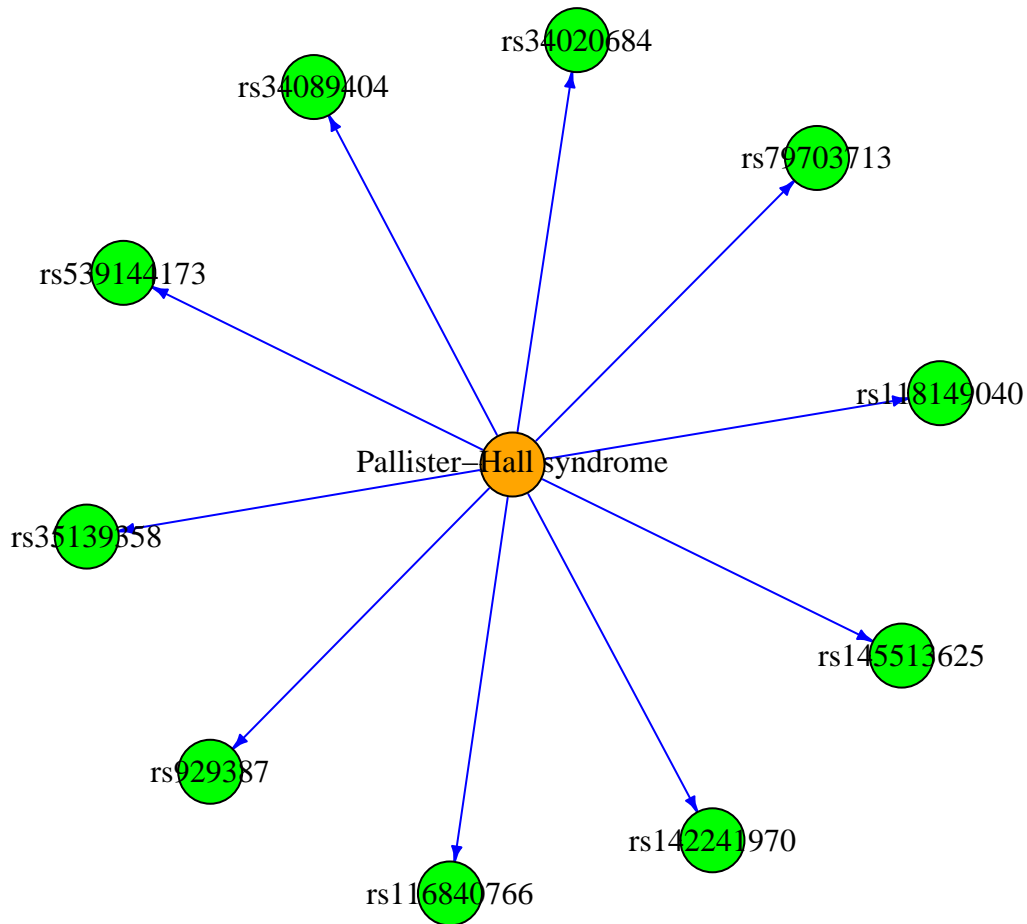

# Variant–Disease Network (Palmoplantar keratoderma)

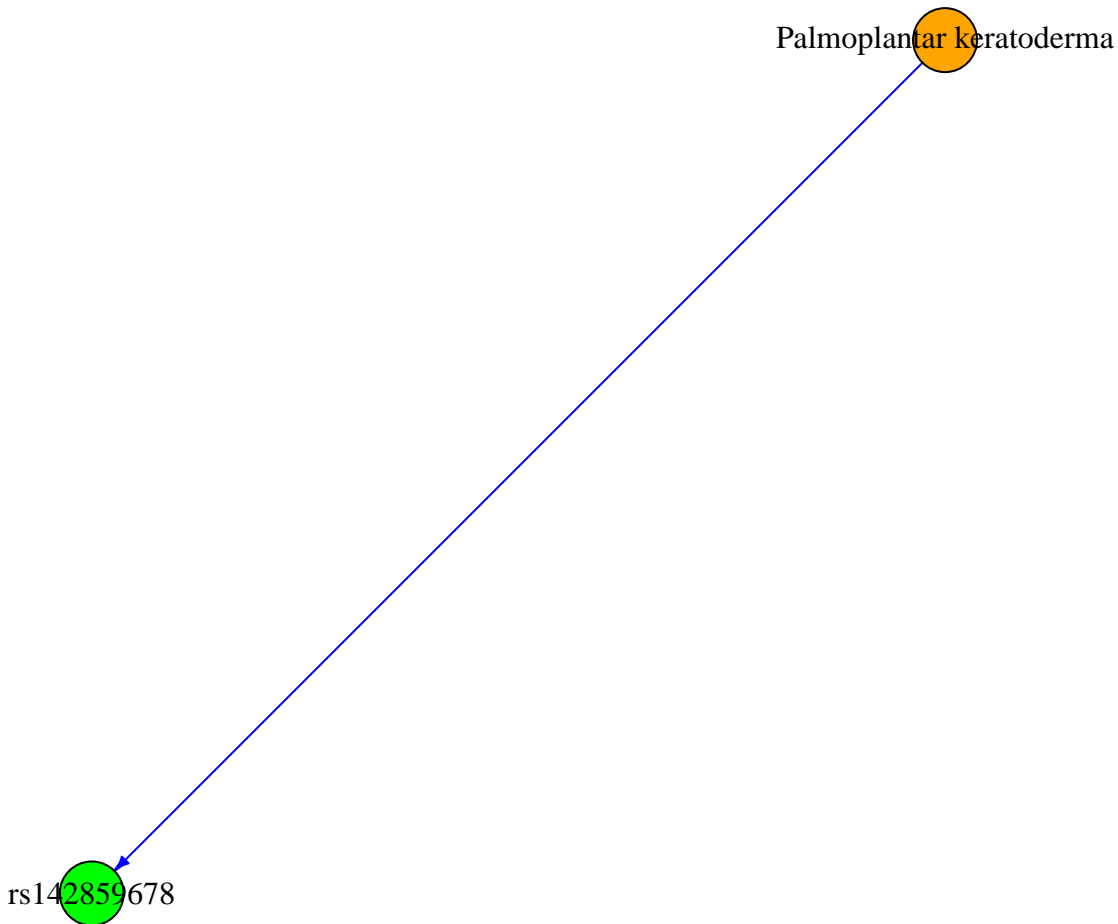

# Variant–Disease Network (Pancreatic adenocarcinoma)

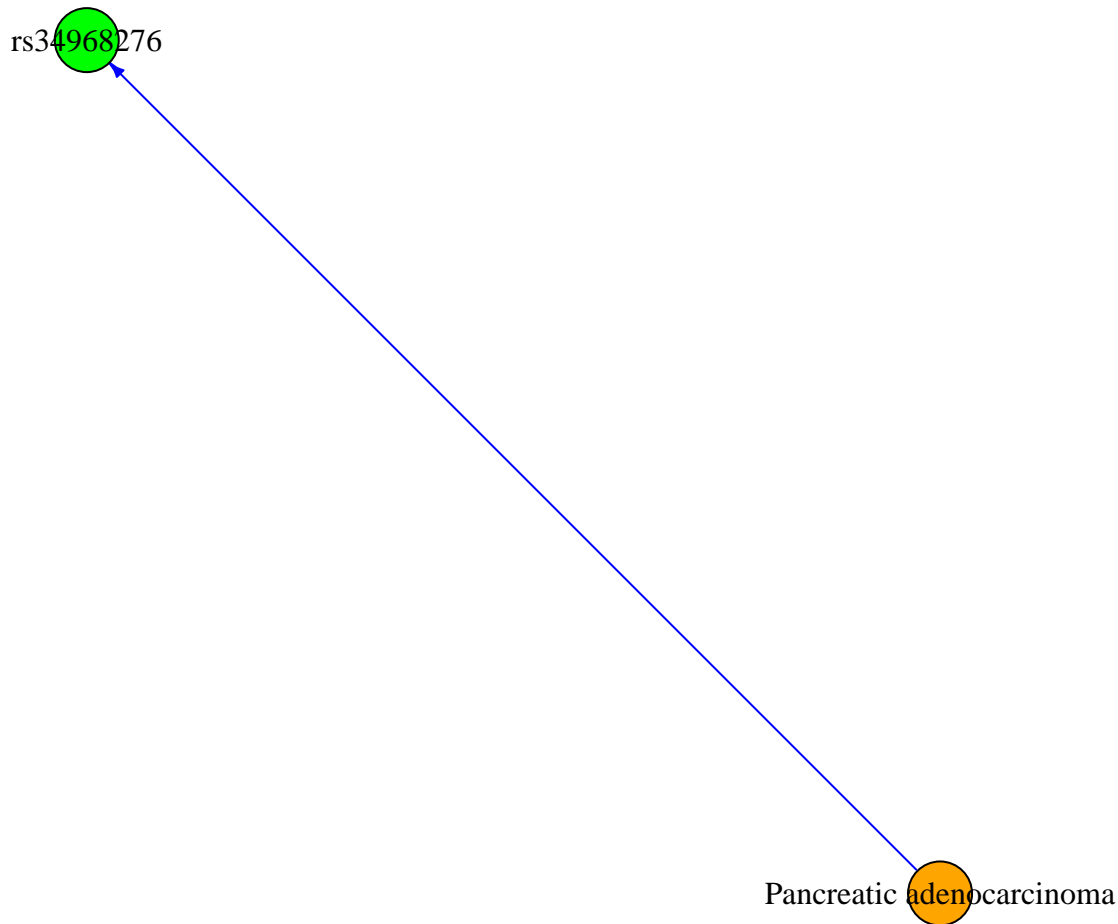

# Variant–Disease Network (Paraganglioma and gastric stromal sarcoma)

Paraganglioma and gastric stromal sarcoma

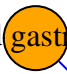

rs2746462

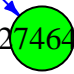



## Variant–Disease Network (Paragangliomas 4)

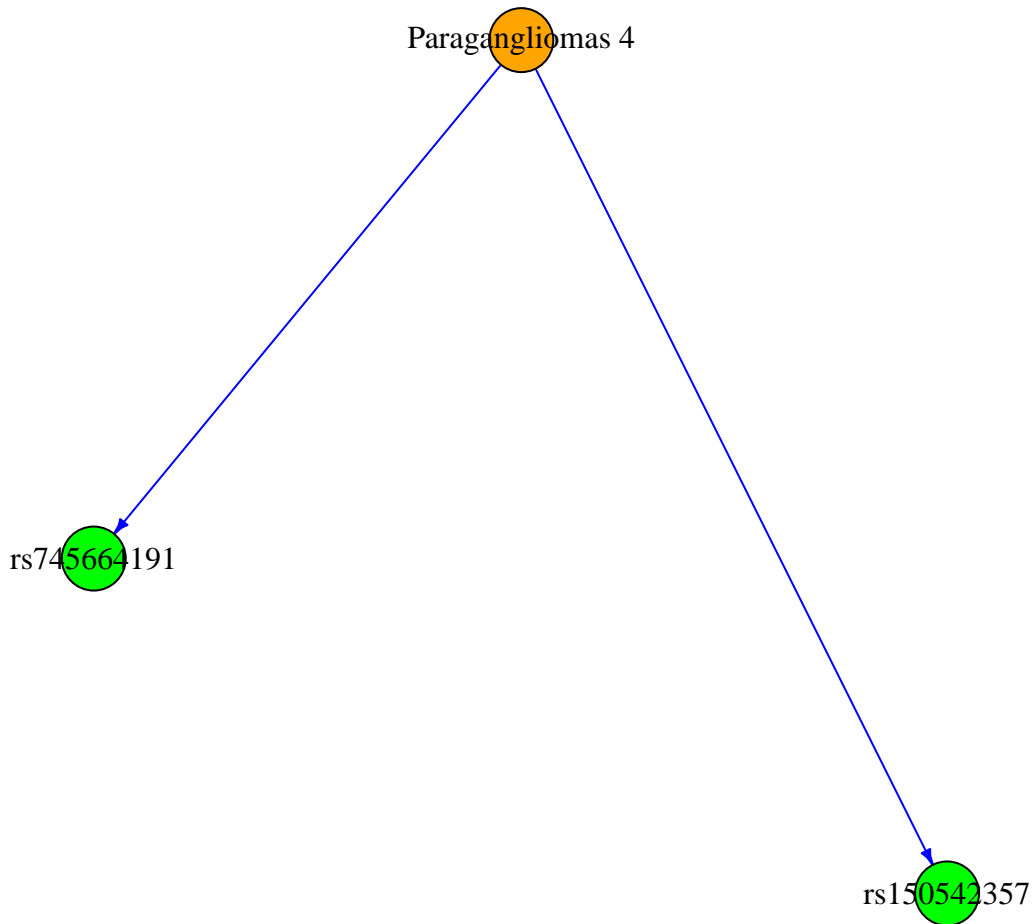

Variant–Disease Network (Paragangliomas 5)

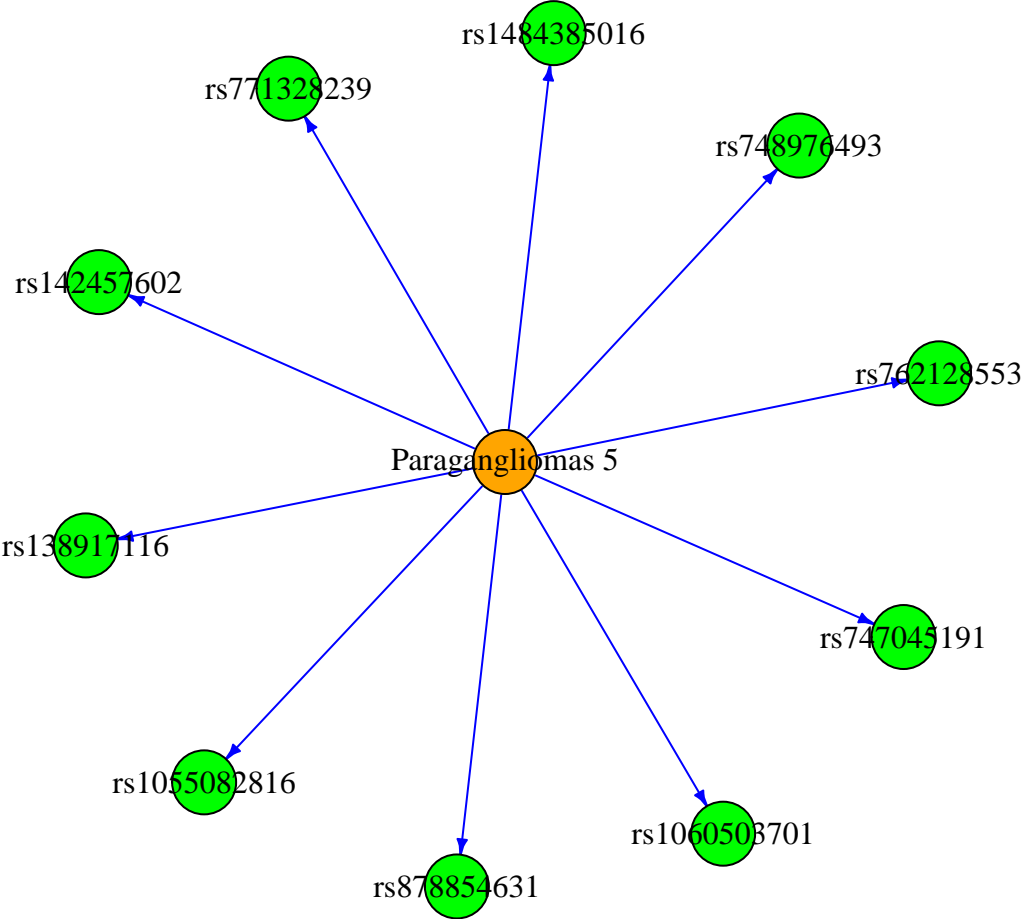

**Variant–Disease Network (Paramyotonia congenita of von Eulenburg)**

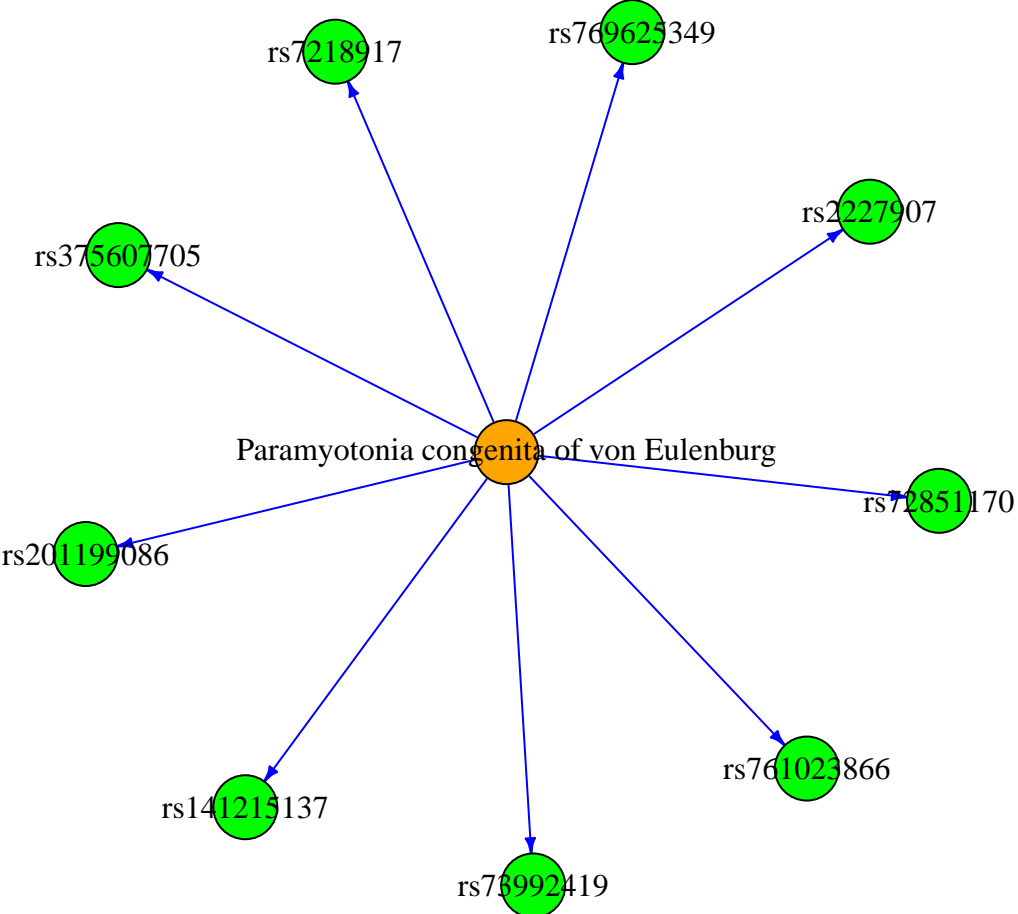

## Variant-Disease Network (Parathyroid carcinoma)

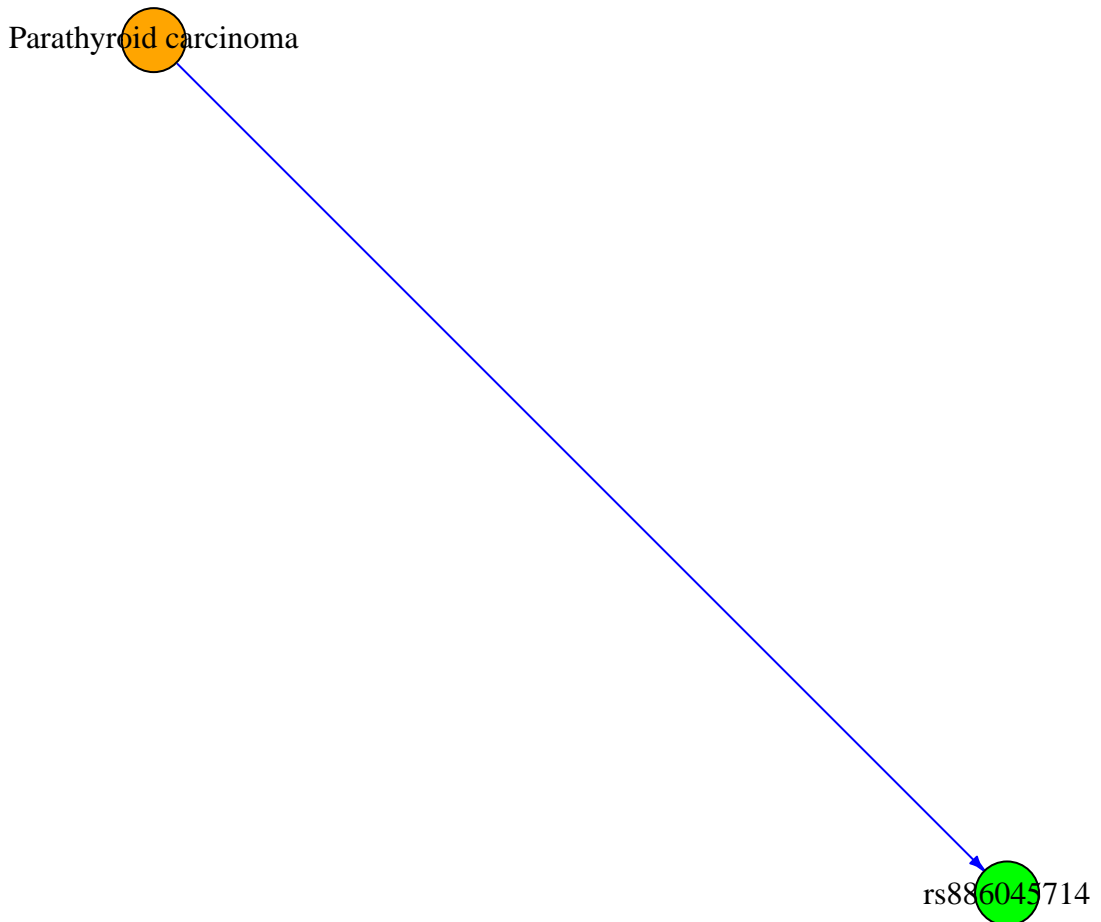

## Variant–Disease Network (Parkinson Disease)

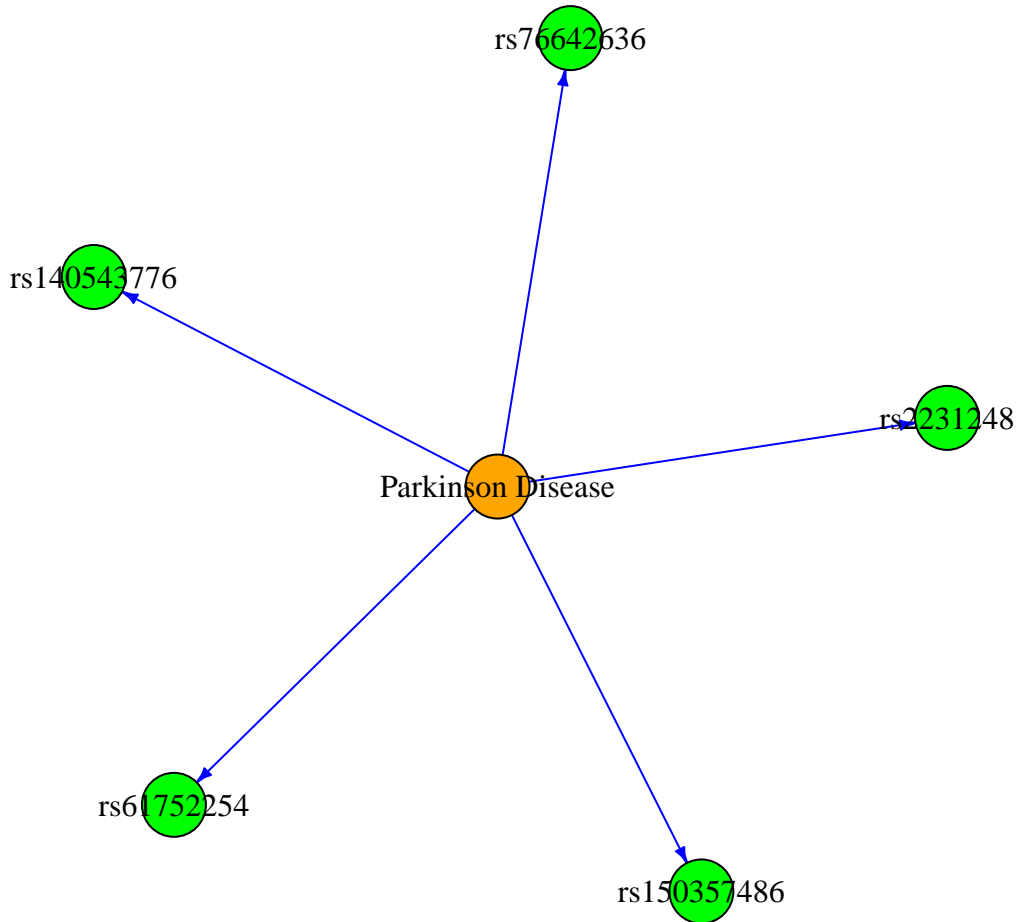

## Variant–Disease Network (Parkinson disease 15)

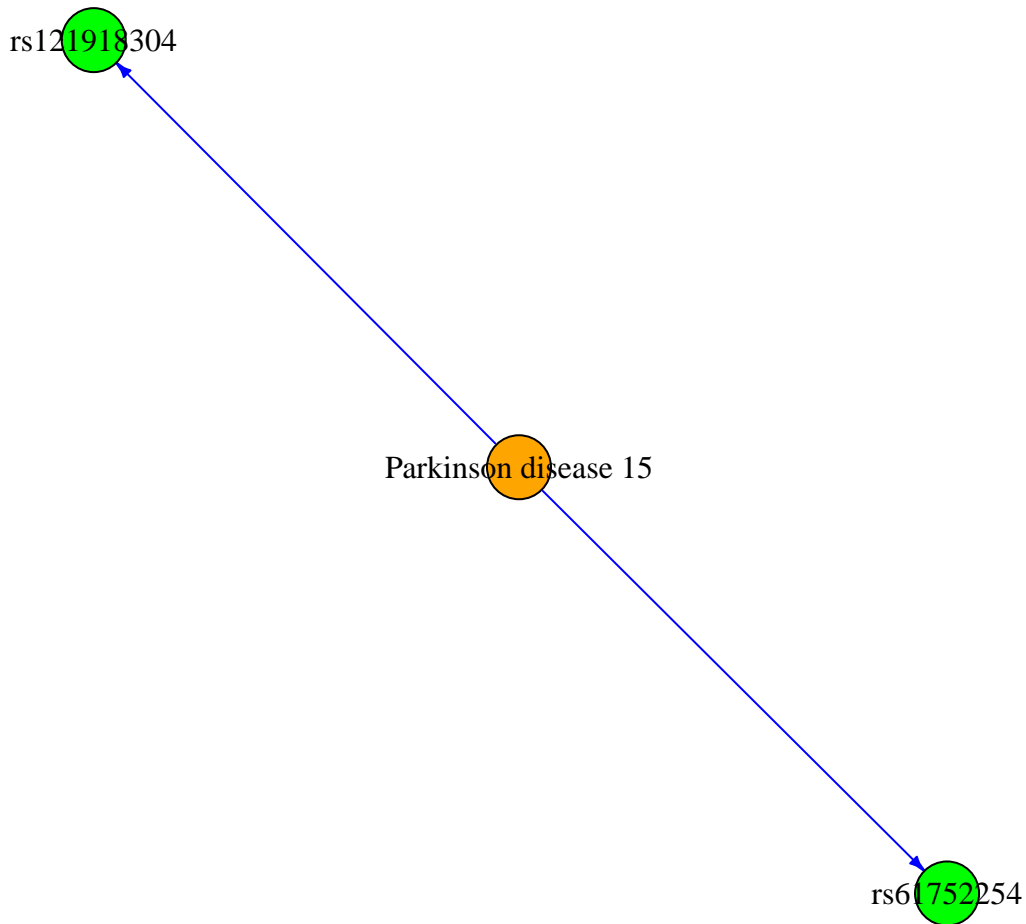

## Variant–Disease Network (Parkinson disease 17)

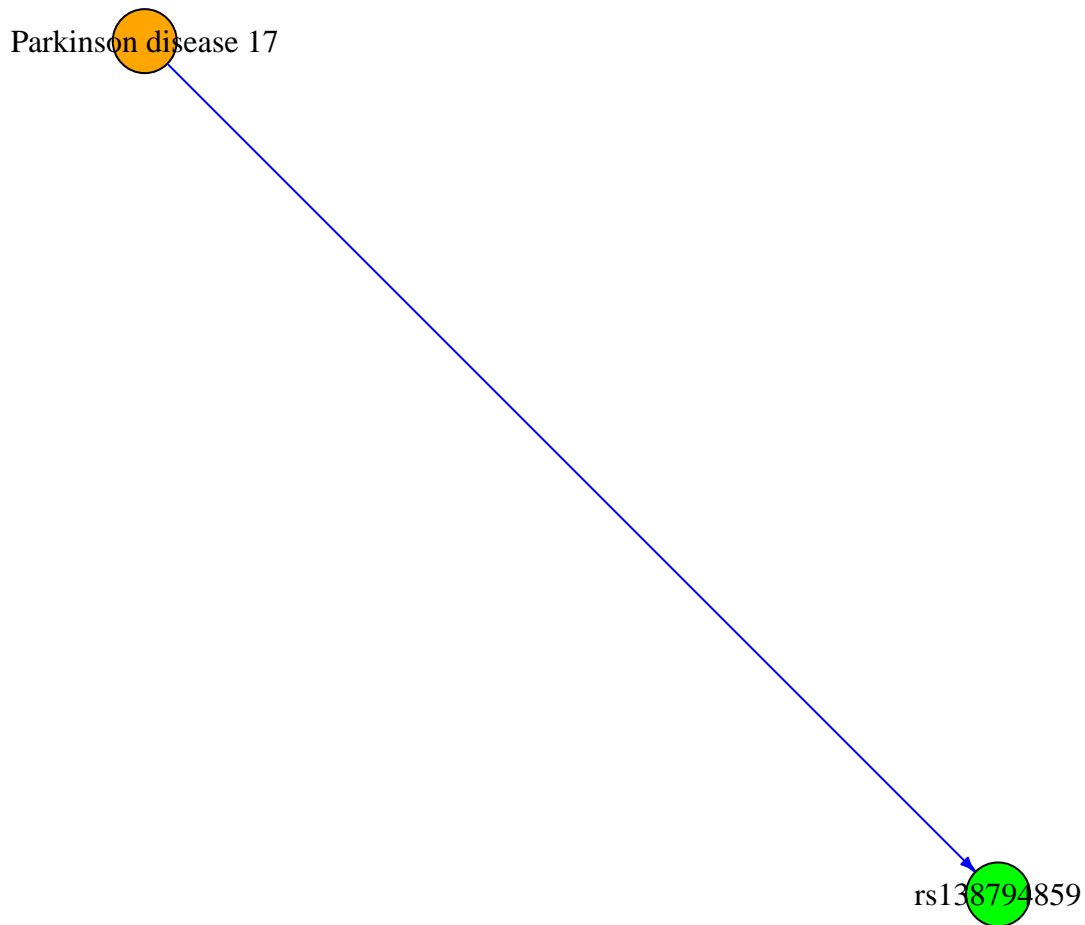

## Variant–Disease Network (Parkinson disease 19a)

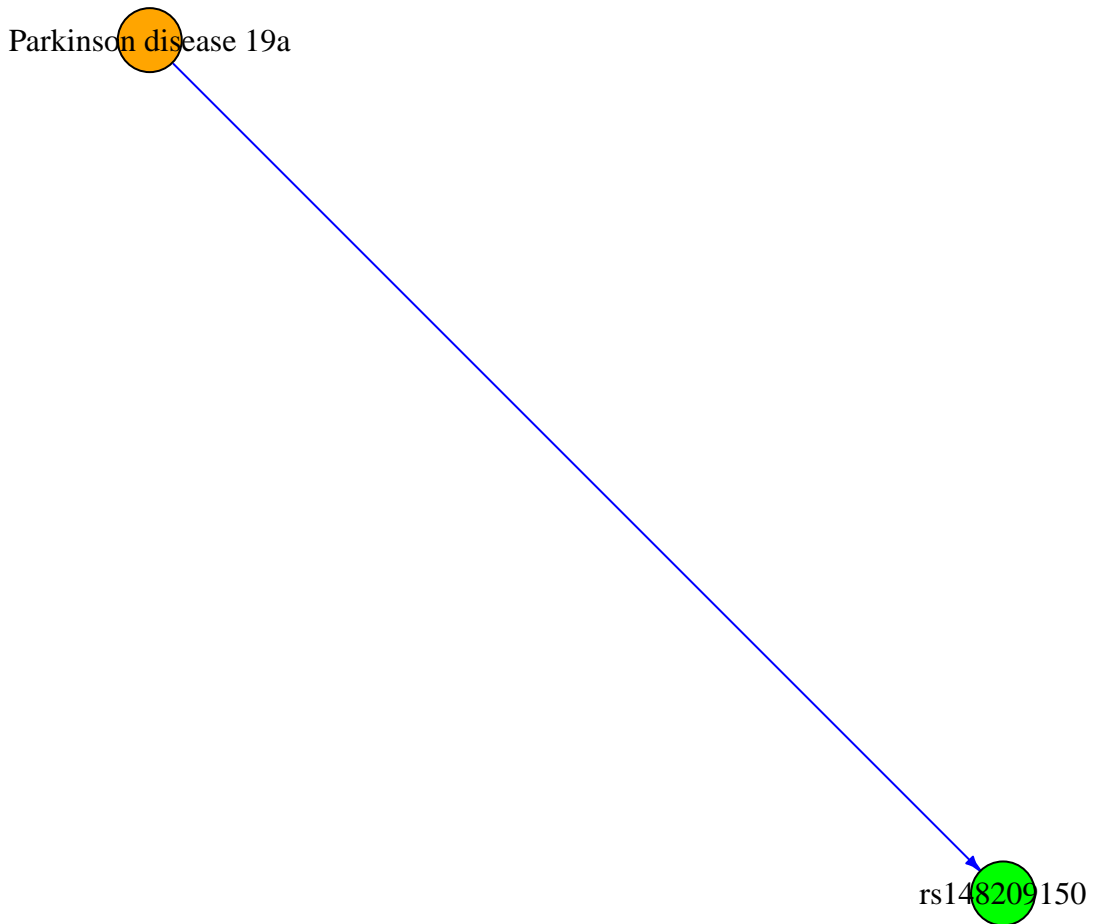



## Variant-Disease Network (Parkinson disease 5)

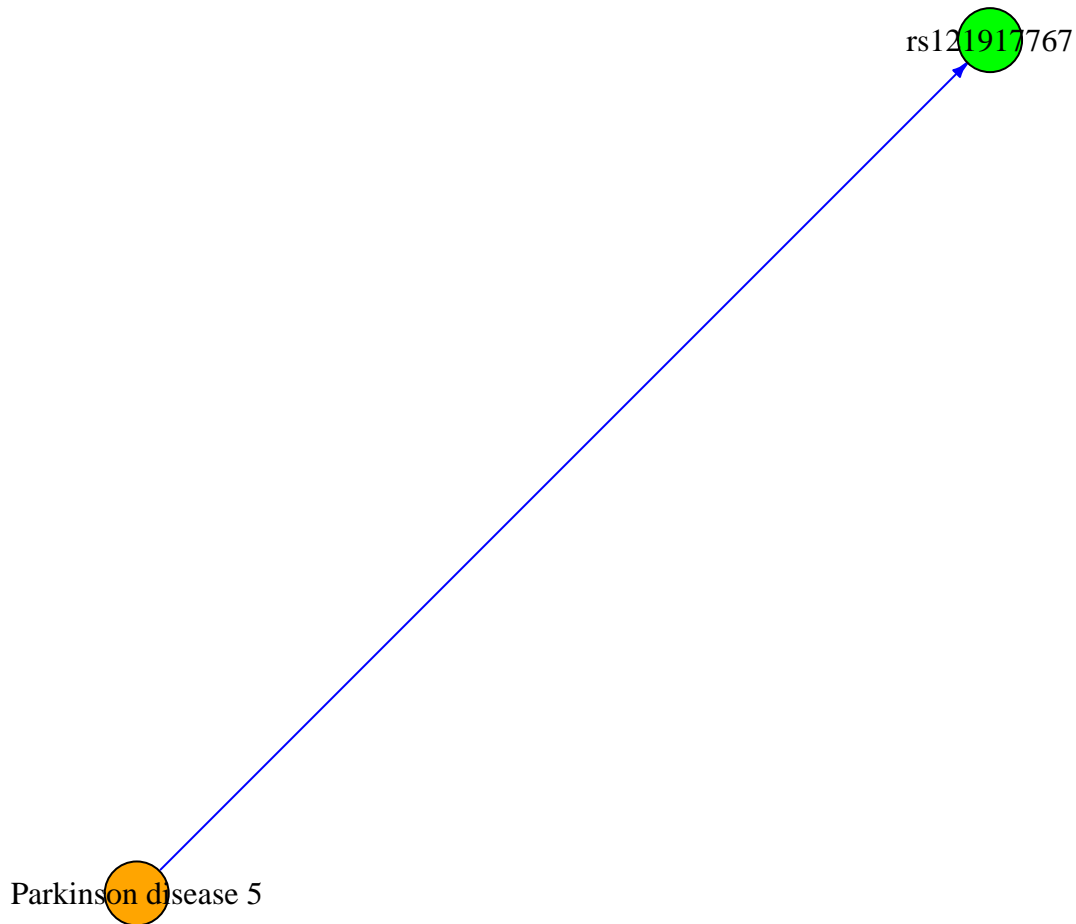

## Variant-Disease Network (Parkinson disease 8)

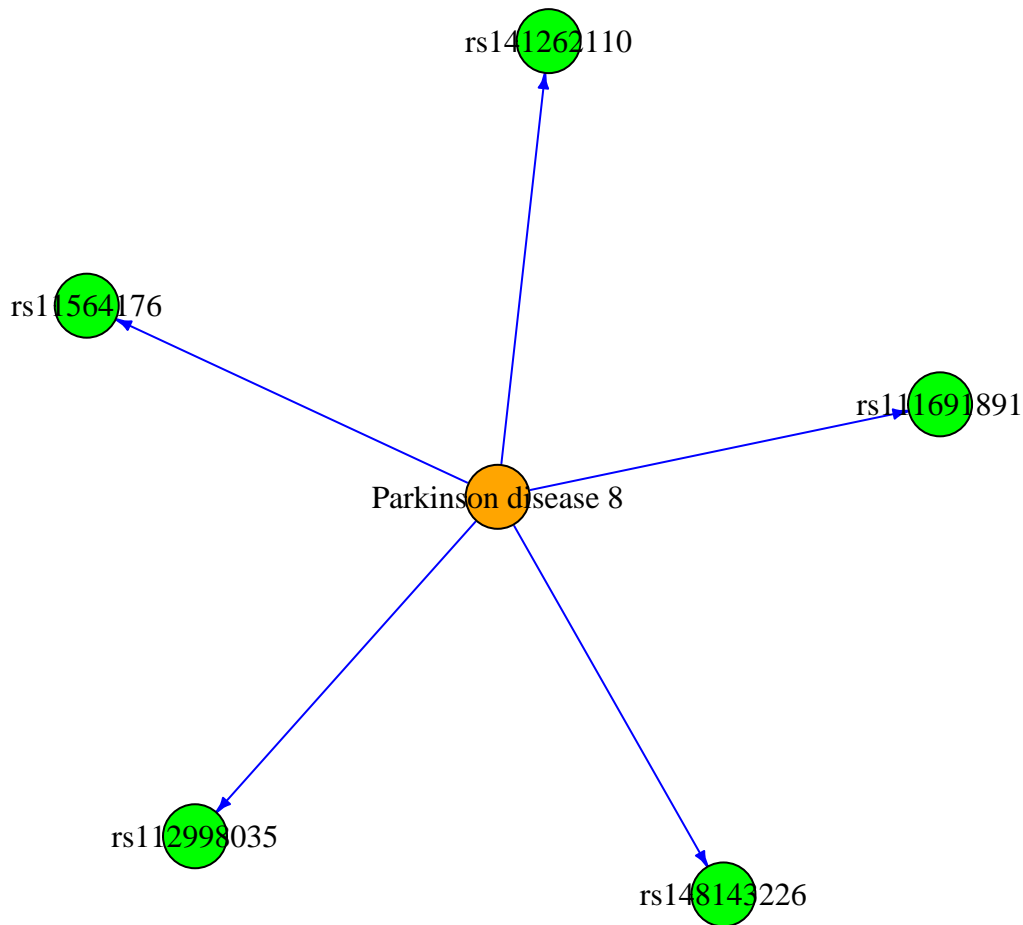

## Variant–Disease Network (Parkinson disease 9)

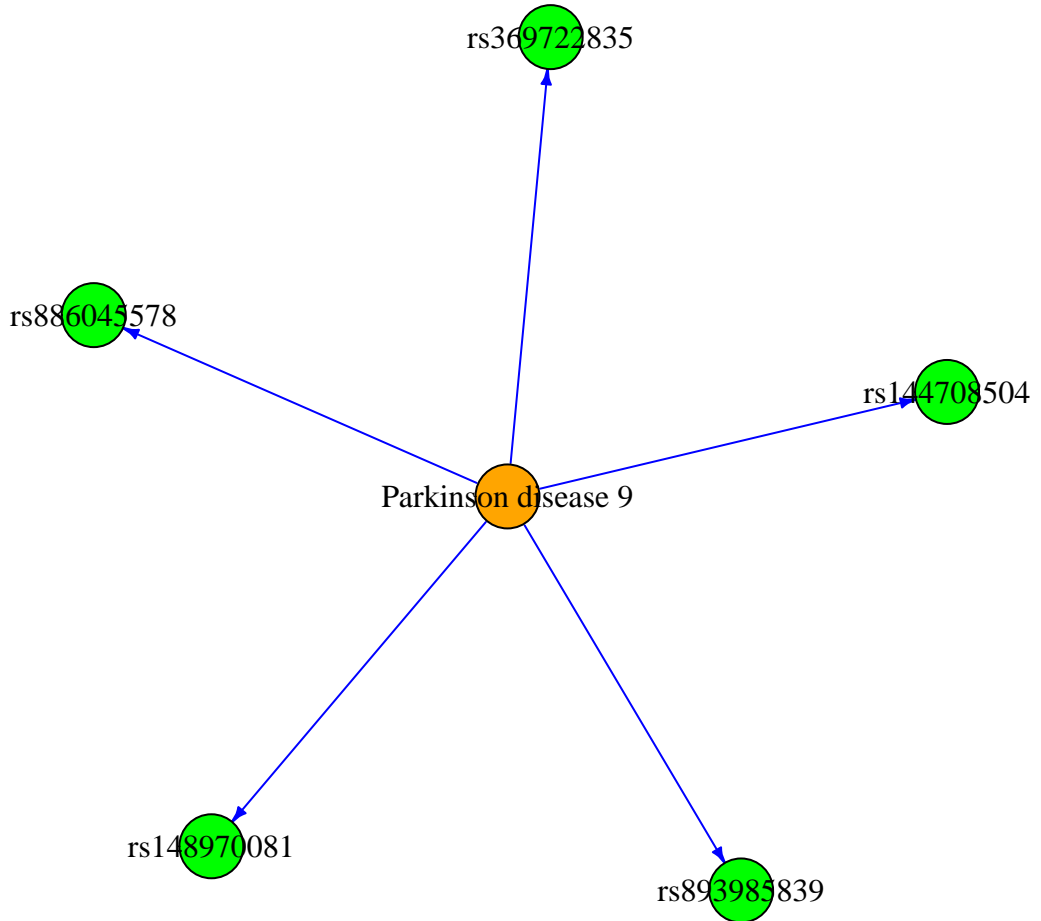

**Variant–Disease Network (Parkinsonism–dystonia)**

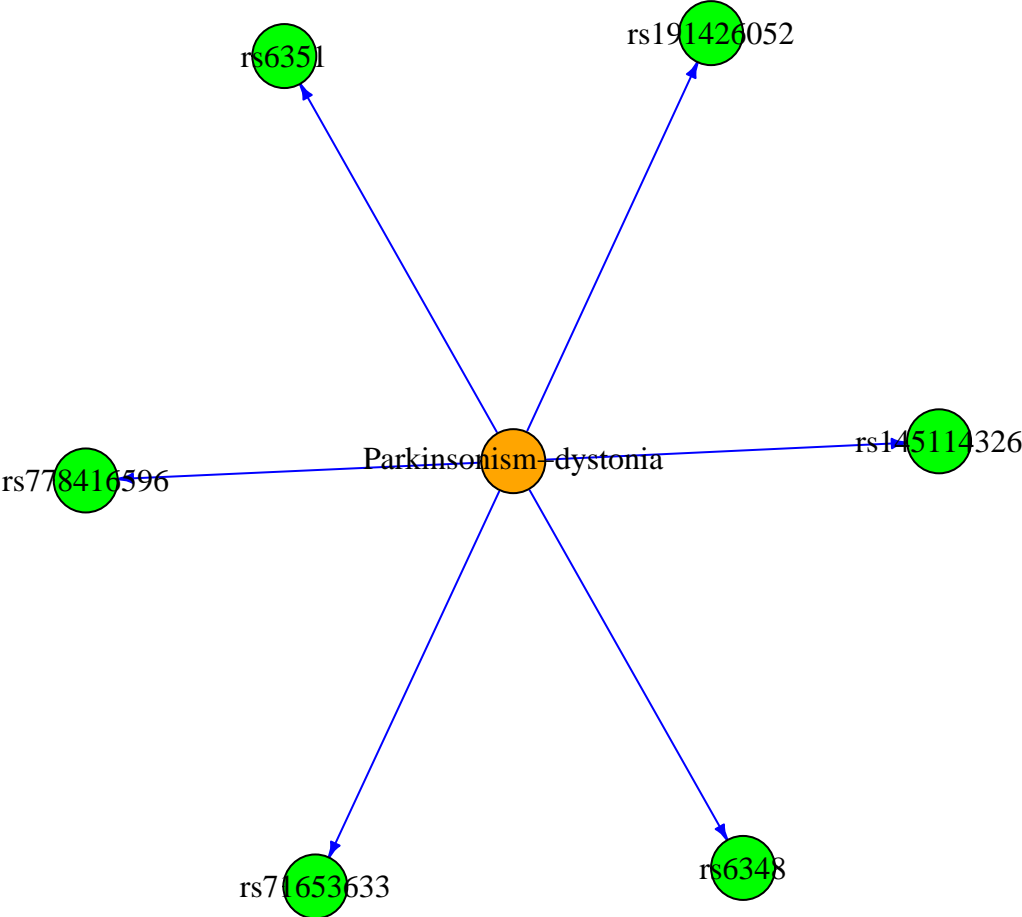

## Variant–Disease Network (Paroxysmal kinesigenic dyskinesia)

rs1166058009

Paroxysmal kinesigenic dyskinesia



**Variant–Disease Network (Paroxysmal nonkinesigenic dyskinesia 1)**

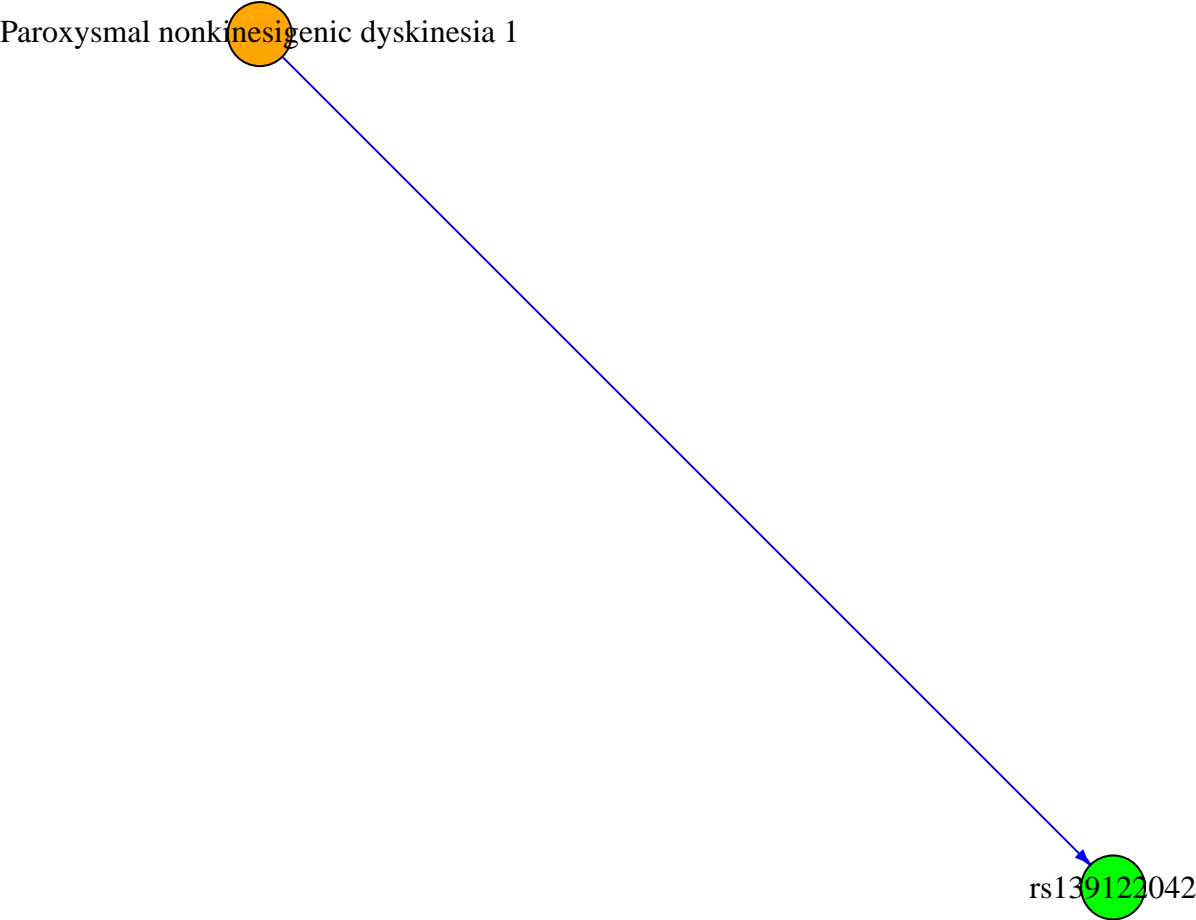

## Variant-Disease Network (Partial albinism)

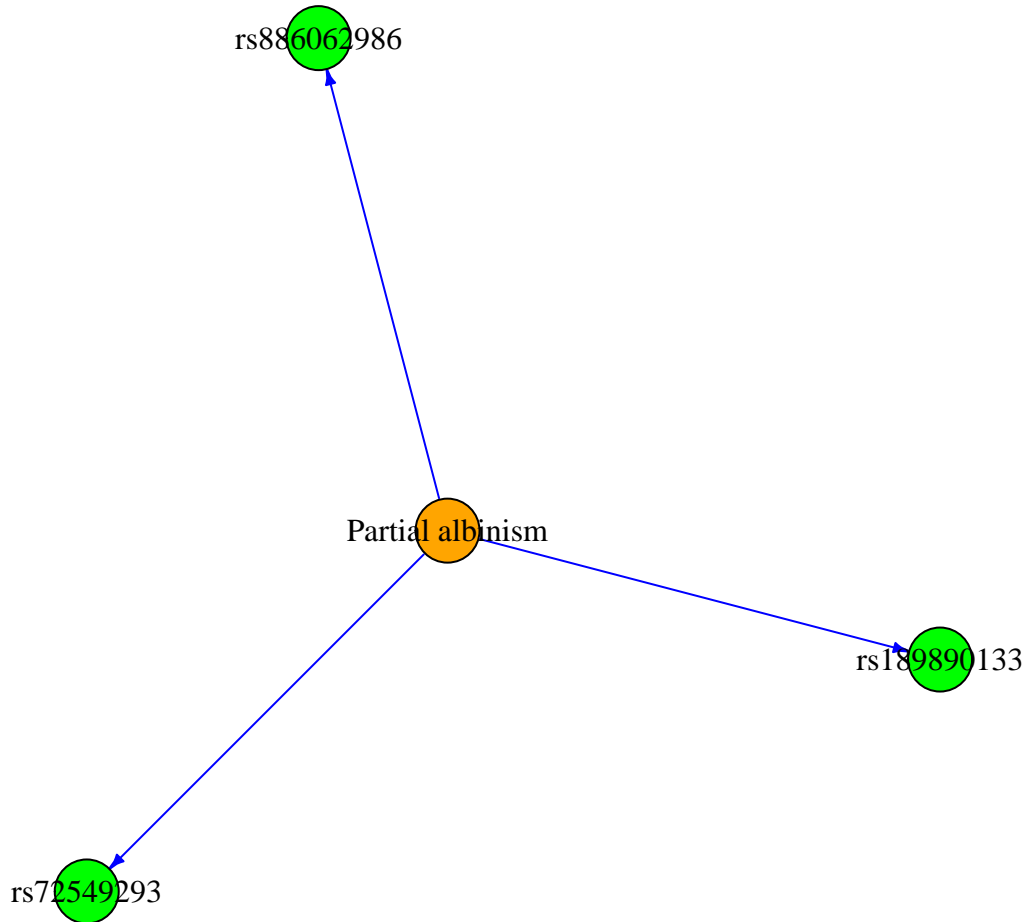

**Variant–Disease Network (Peeling skin syndrome 1)**

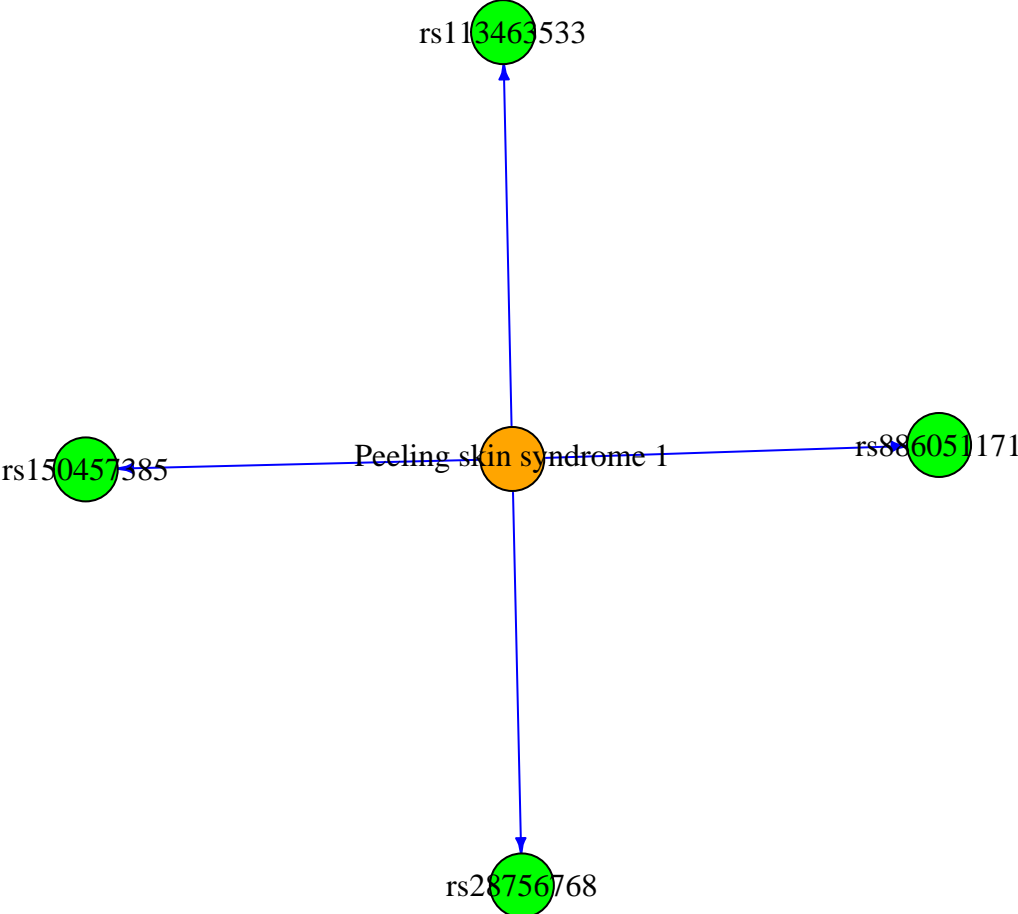



## Variant-Disease Network (Peeling skin syndrome 2)

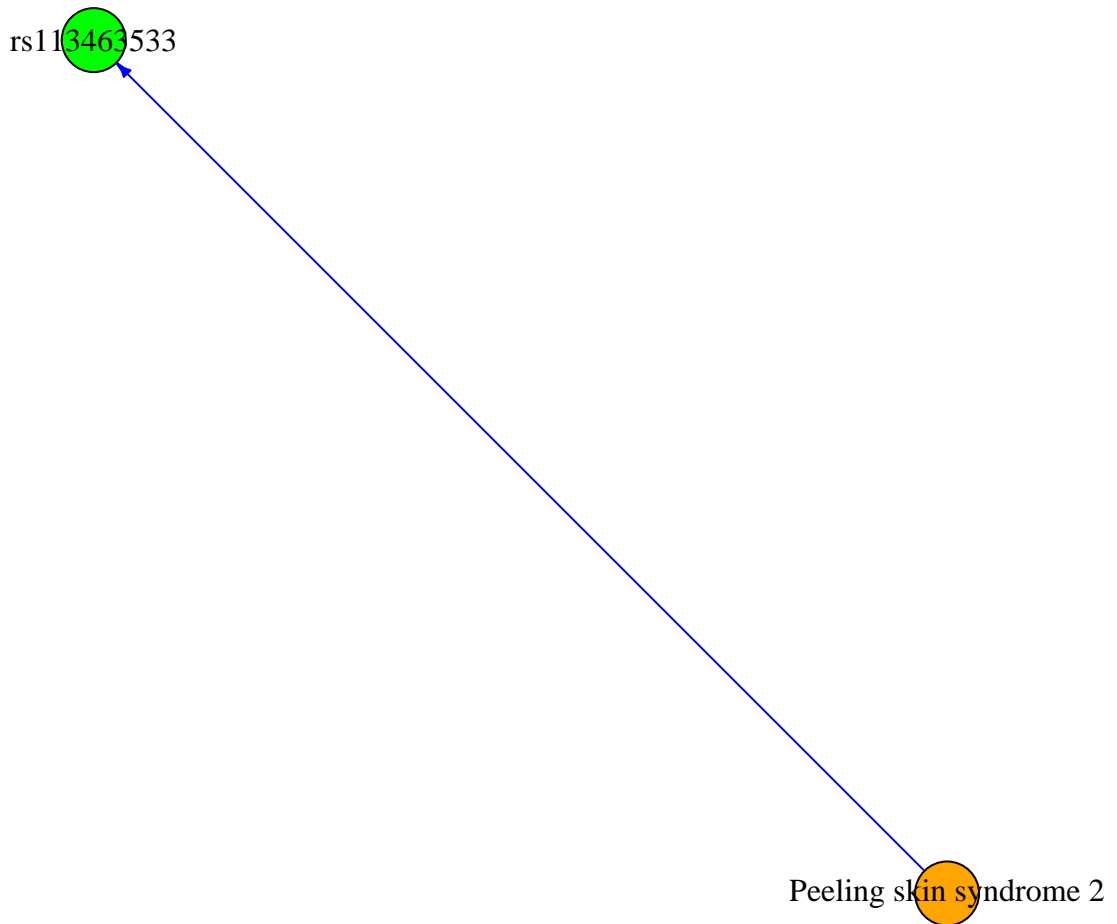

**Variant–Disease Network (Pena–Shokeir syndrome type I)**

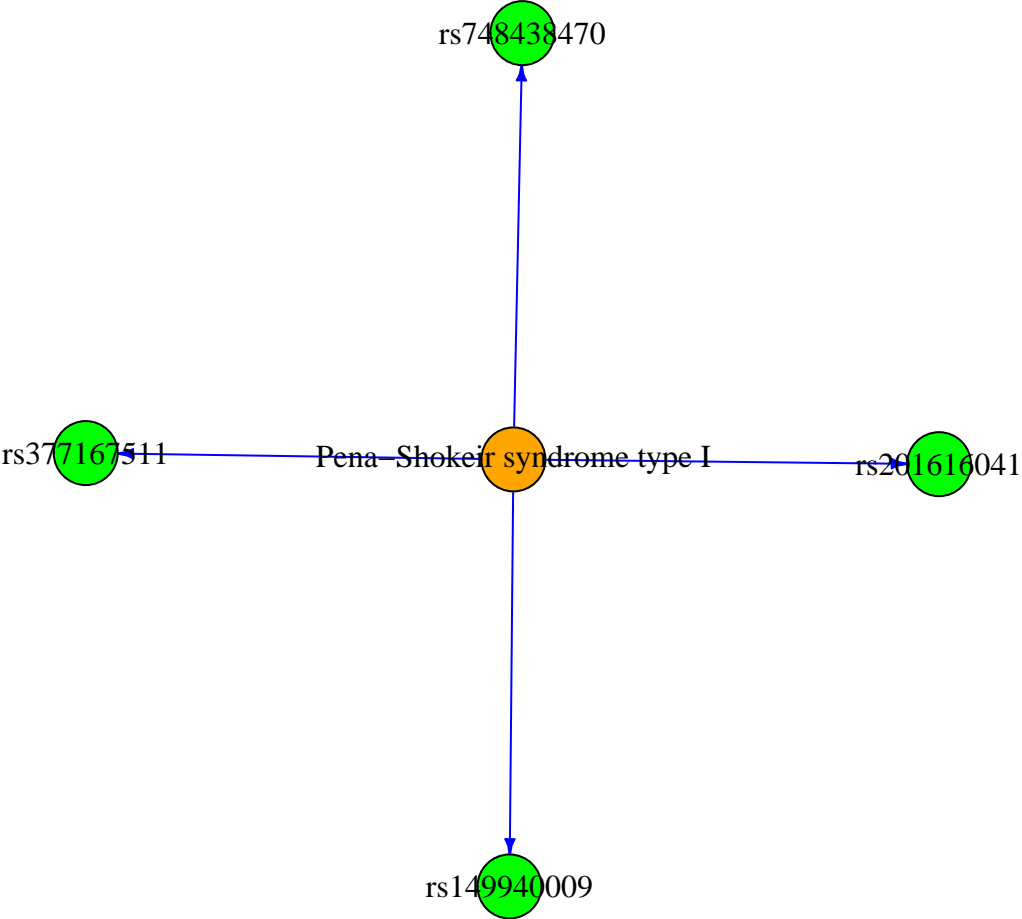

## Variant–Disease Network (Pendred syndrome)

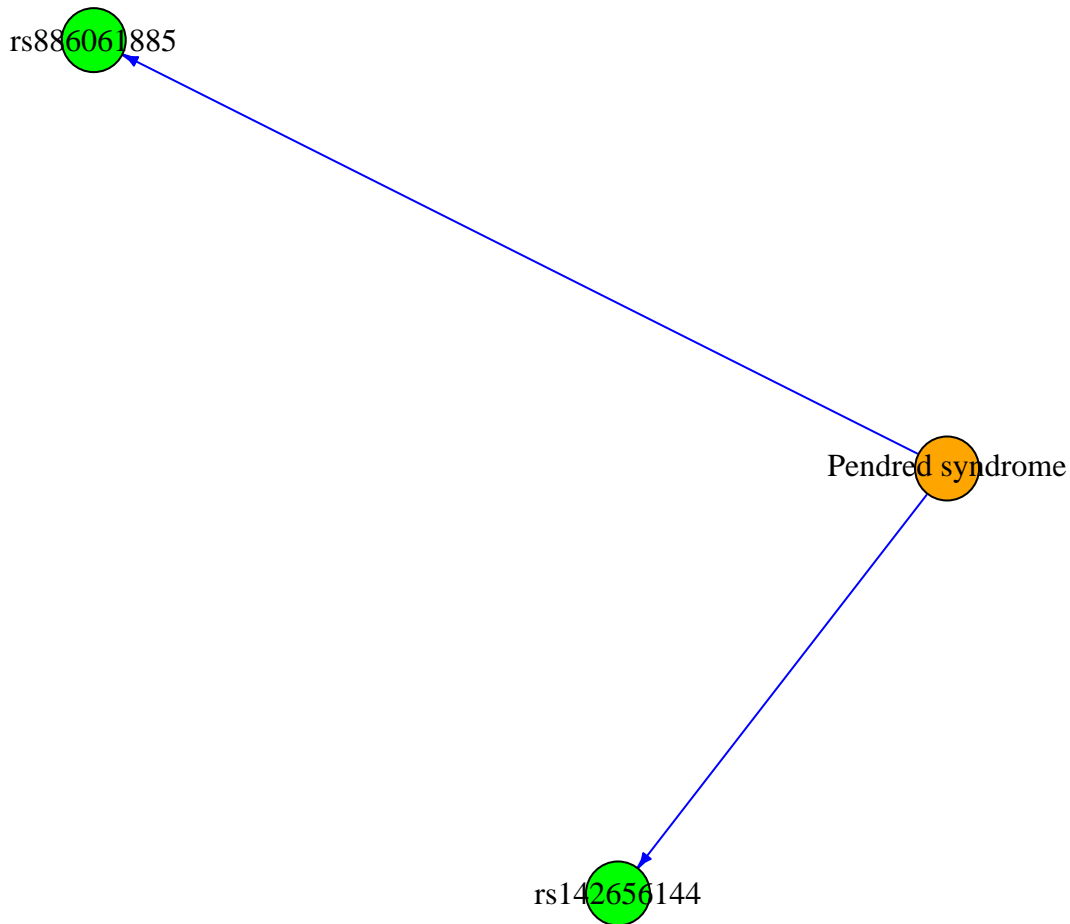

## Variant–Disease Network (PERCHING syndrome)

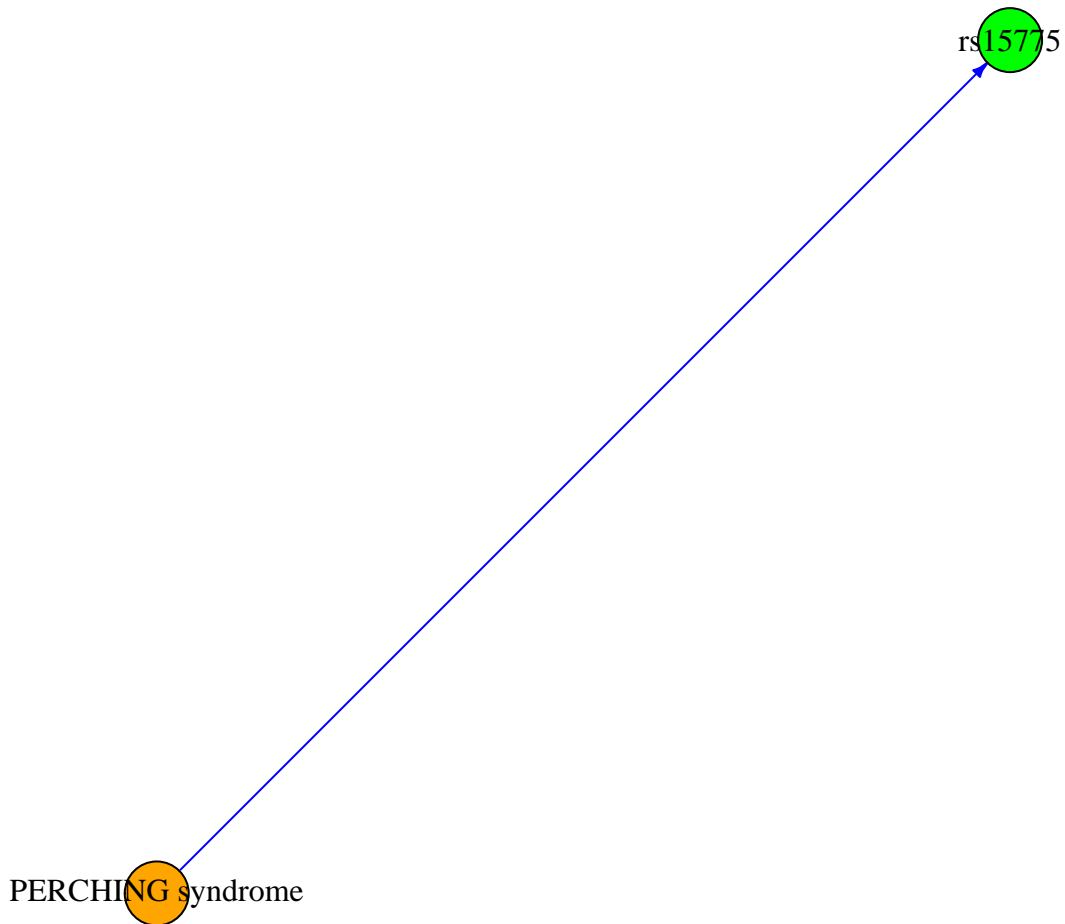

**Variant–Disease Network (Peripheral axonal neuropathy)**

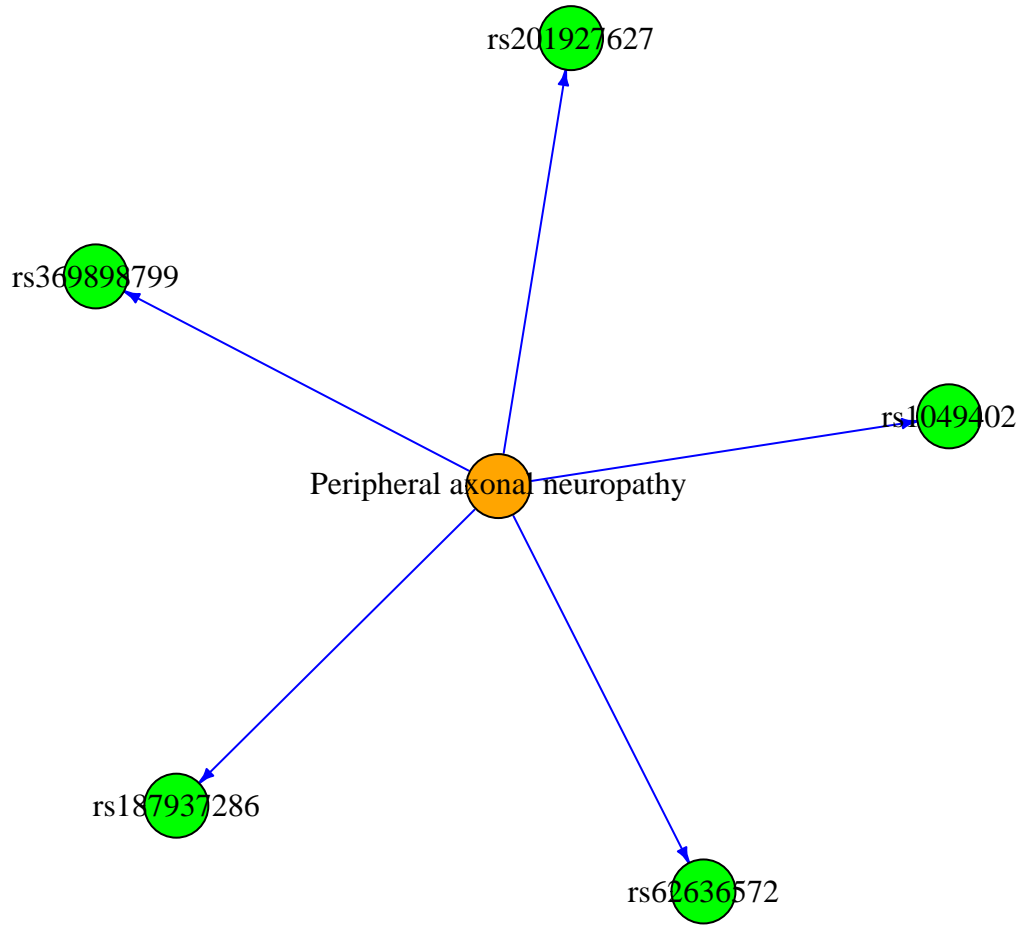

## Variant–Disease Network (Peripheral neuropathy)

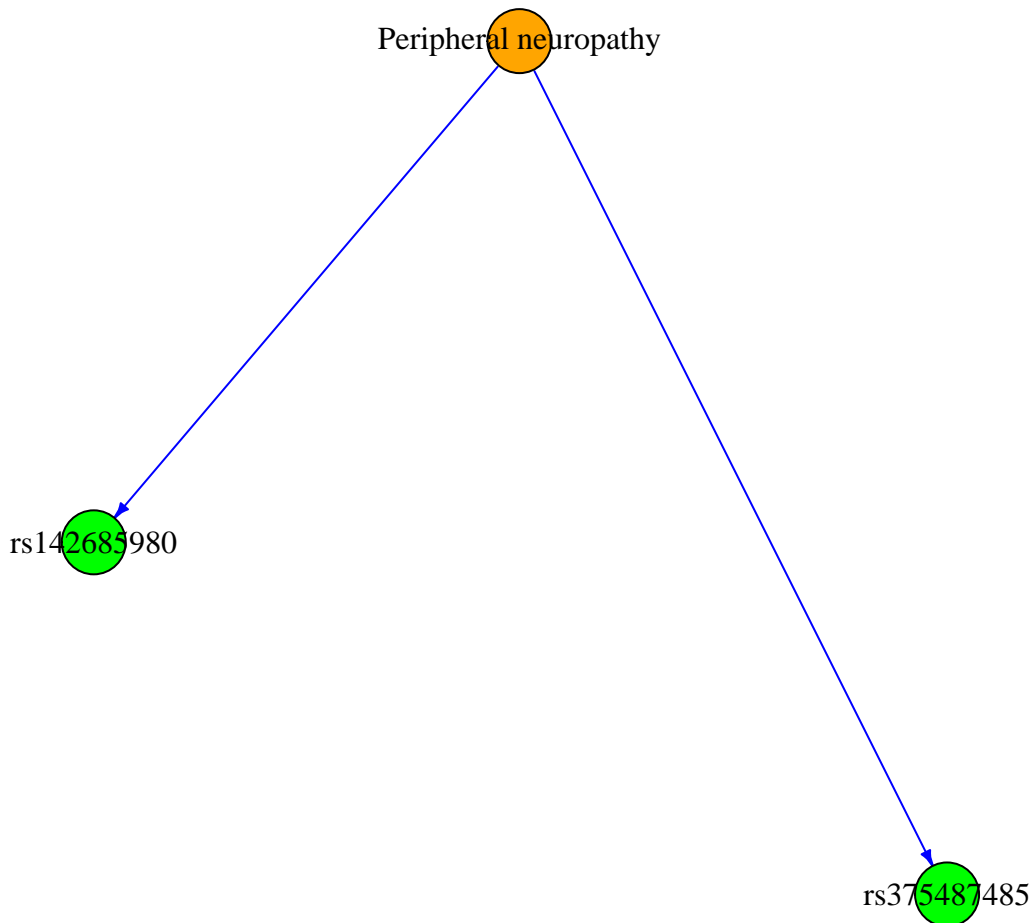

## Variant–Disease Network (Periventricular Heterotopia)

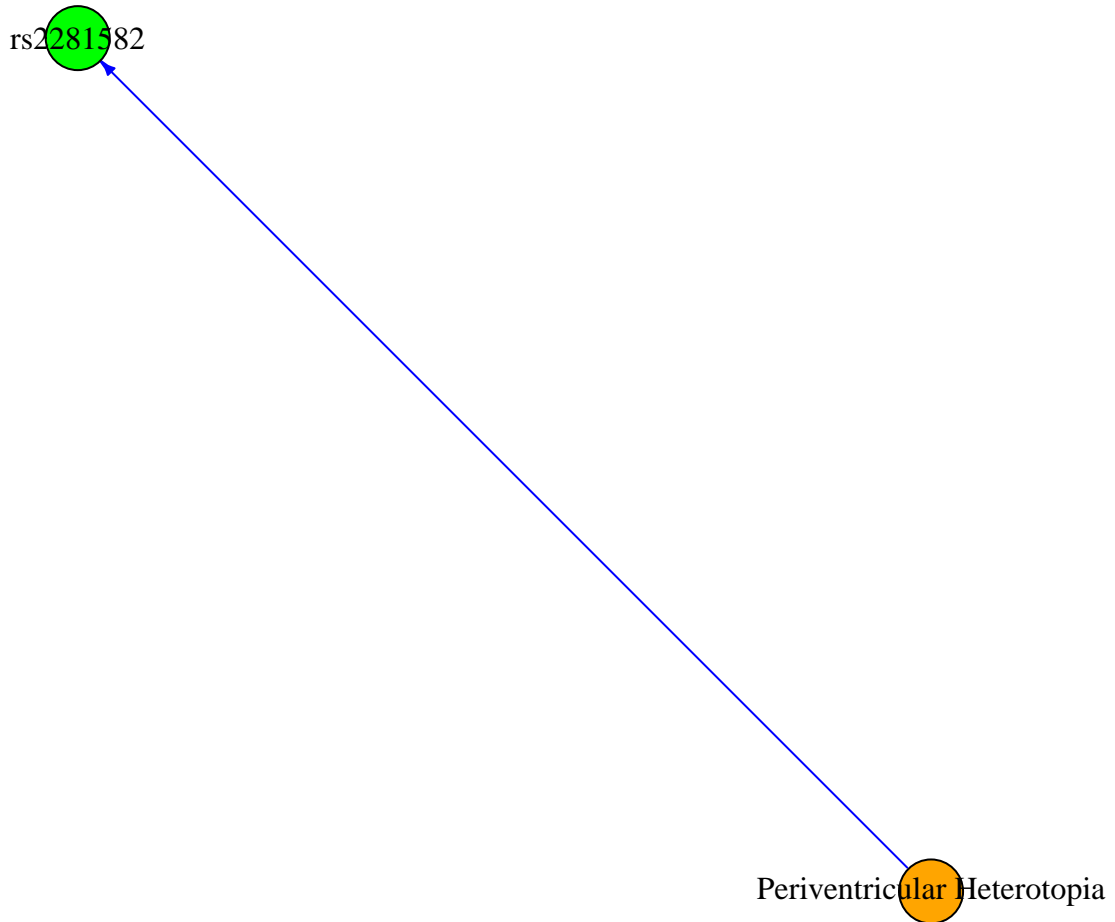

# Variant–Disease Network (Periventricular nodular heterotopia 1)

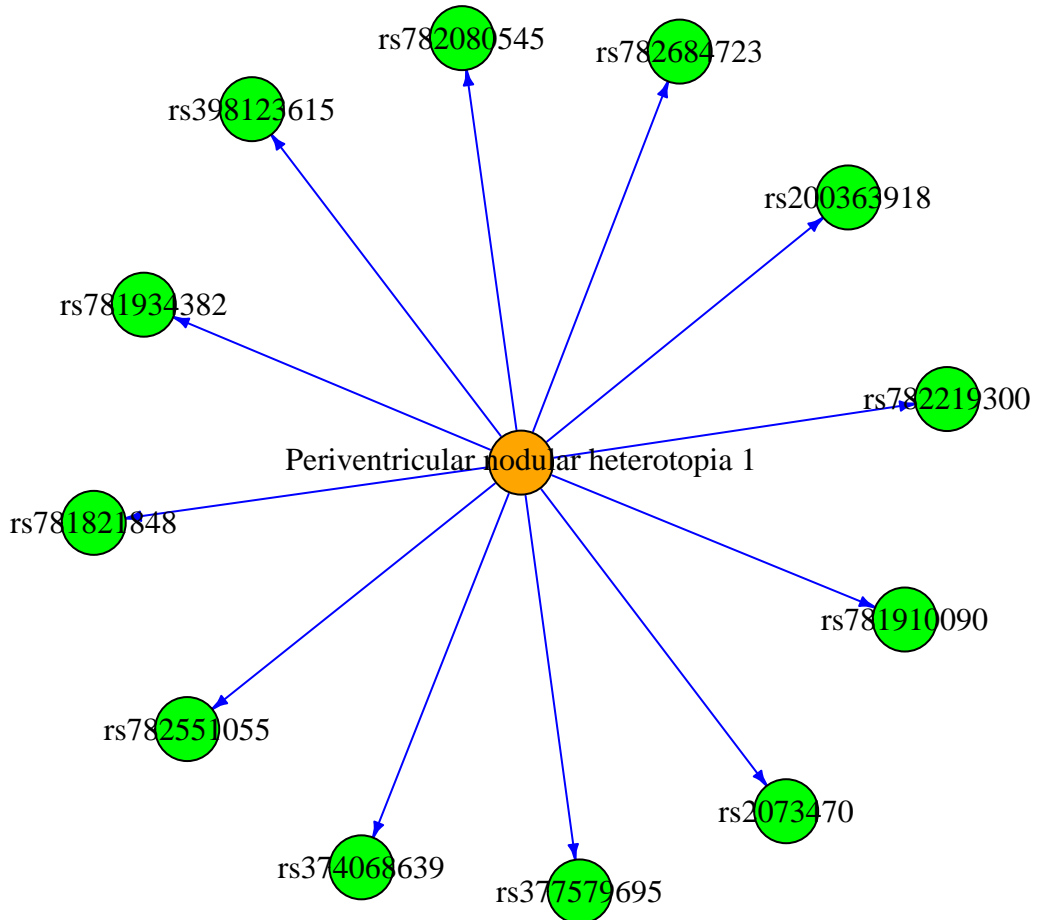



Variant–Disease Network (Permanent neonatal diabetes mellitus)

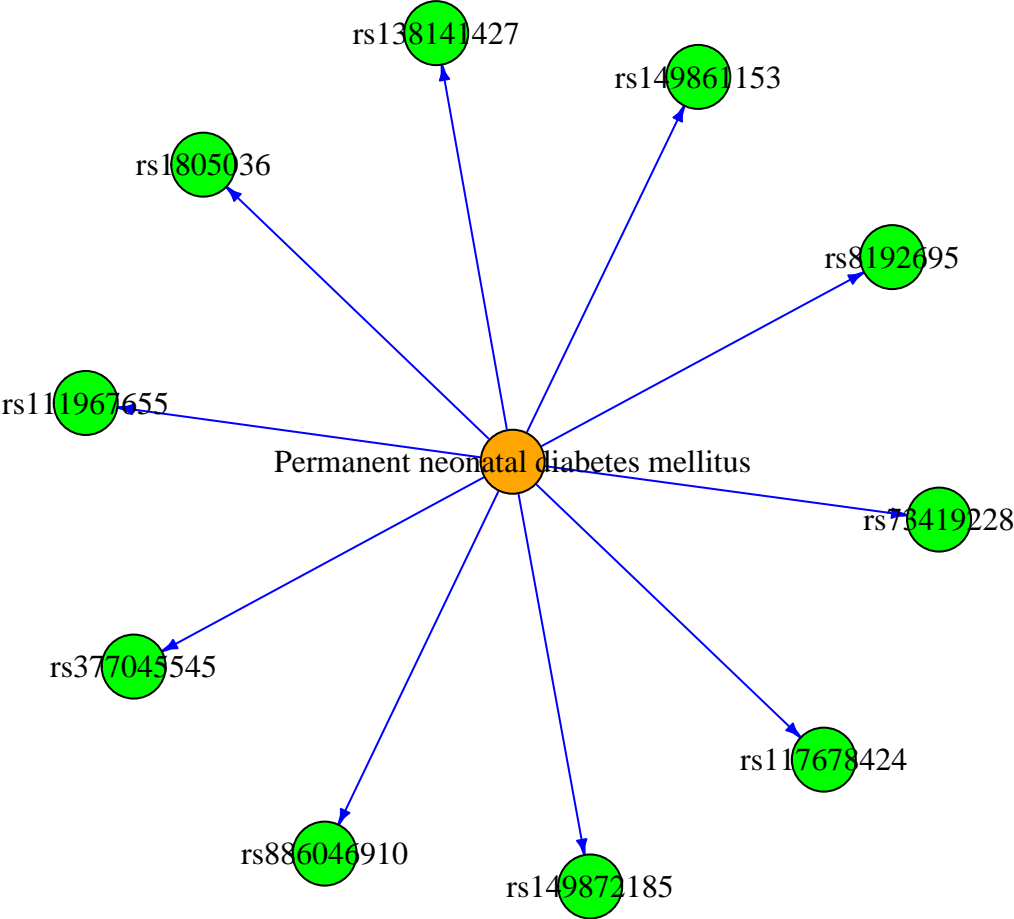

**Variant–Disease Network (Peroxisome biogenesis disorder 1A (Zellweger**

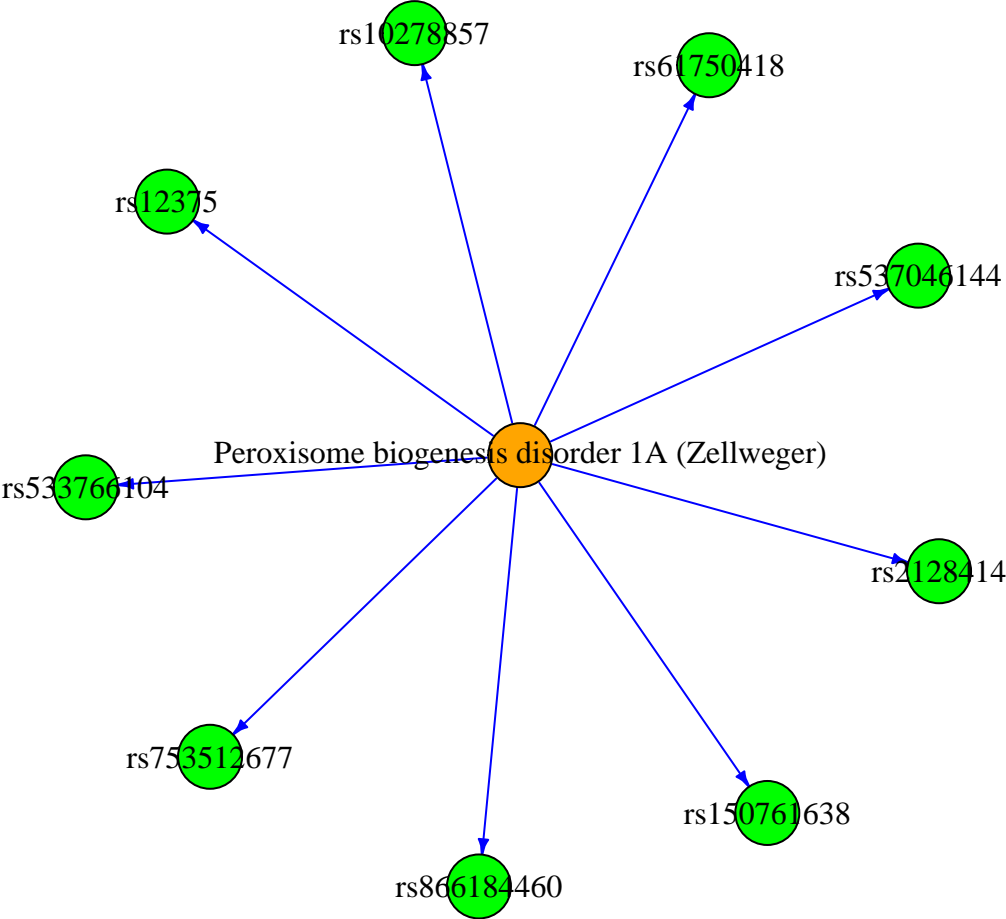

Variant–Disease Network (Peroxisome biogenesis disorder 1B)

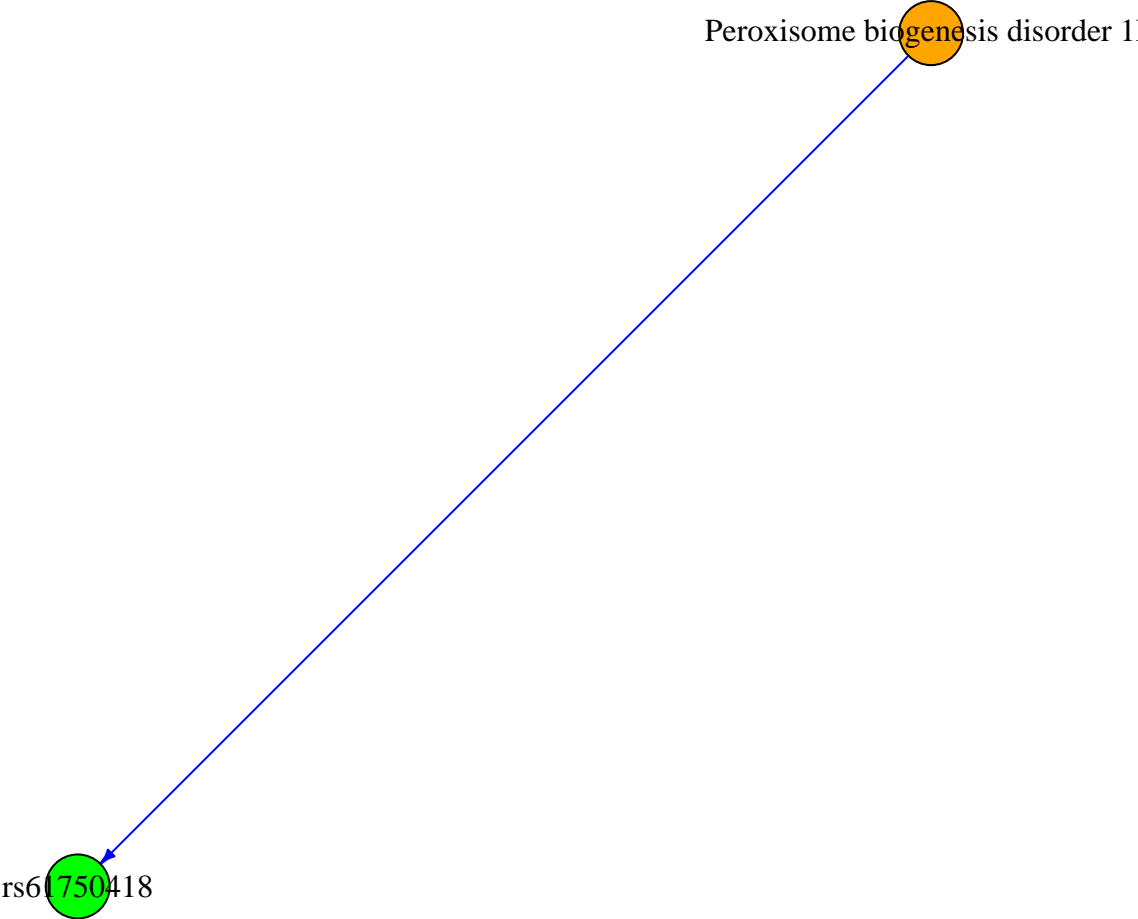

## Variant–Disease Network (Perrault syndrome)

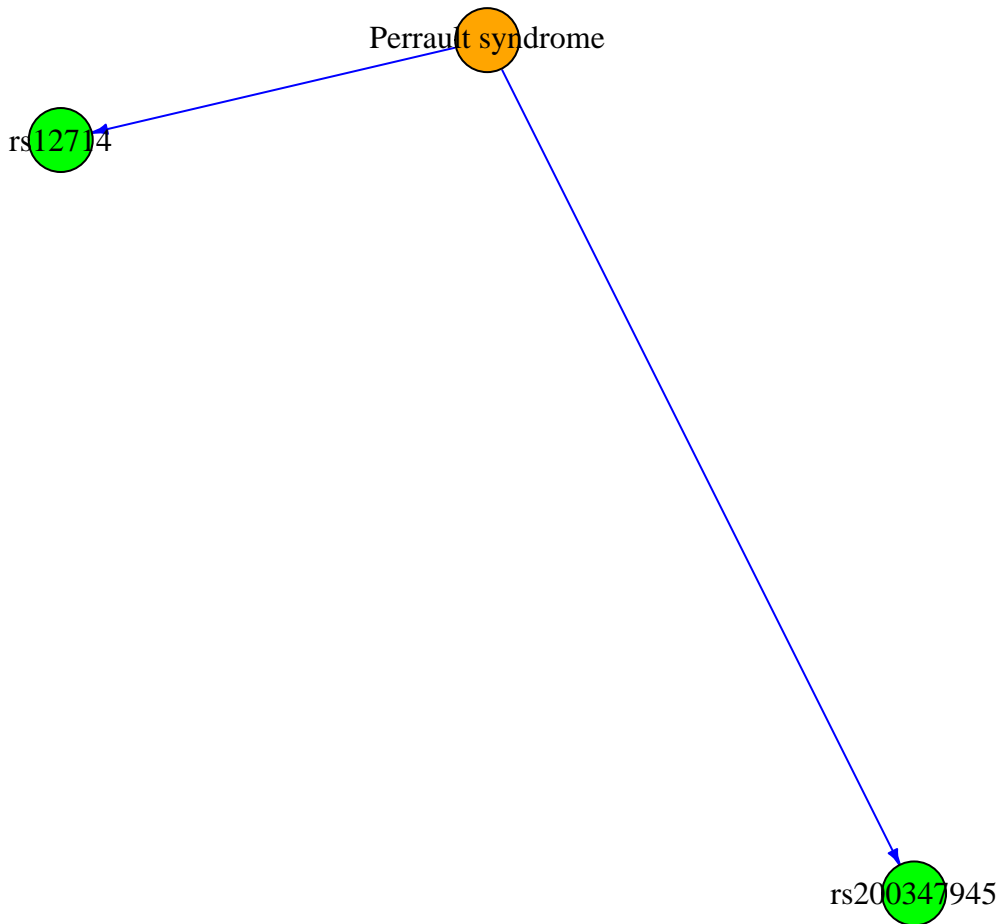

## Variant–Disease Network (Perrault syndrome 1)

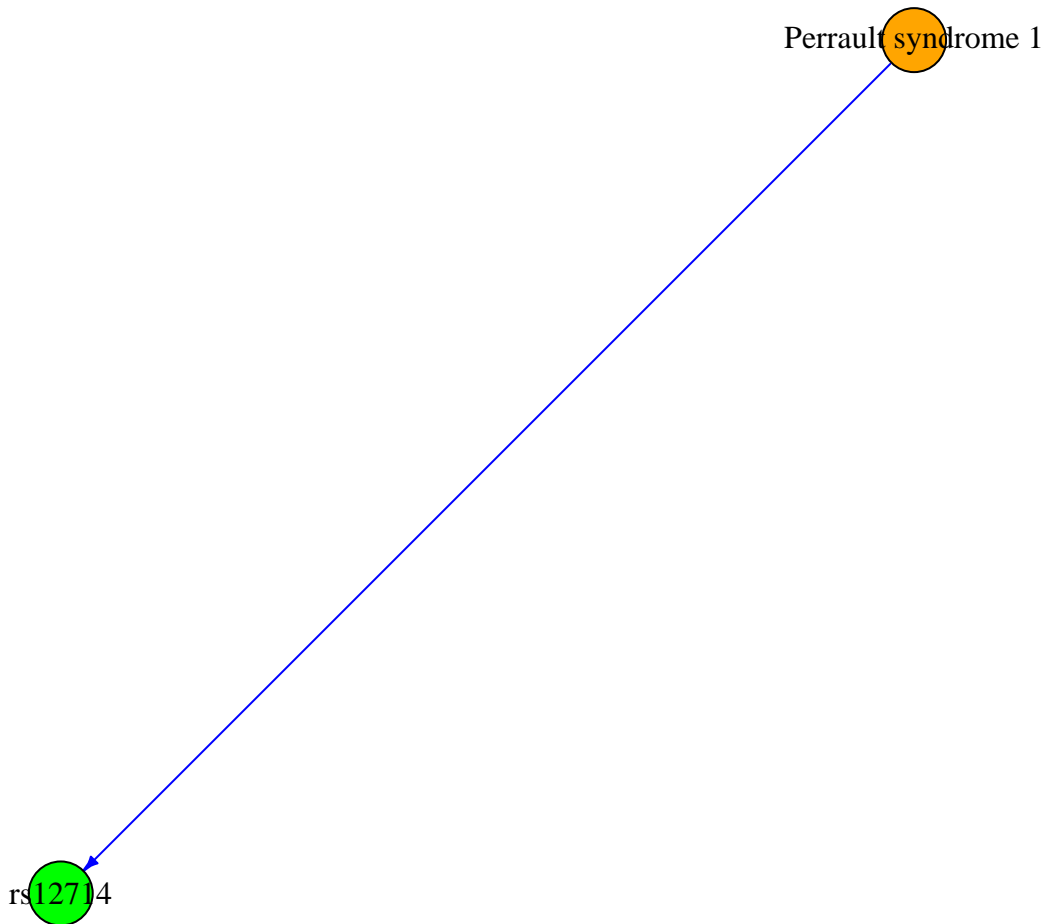

## Variant–Disease Network (Perrault syndrome 4)

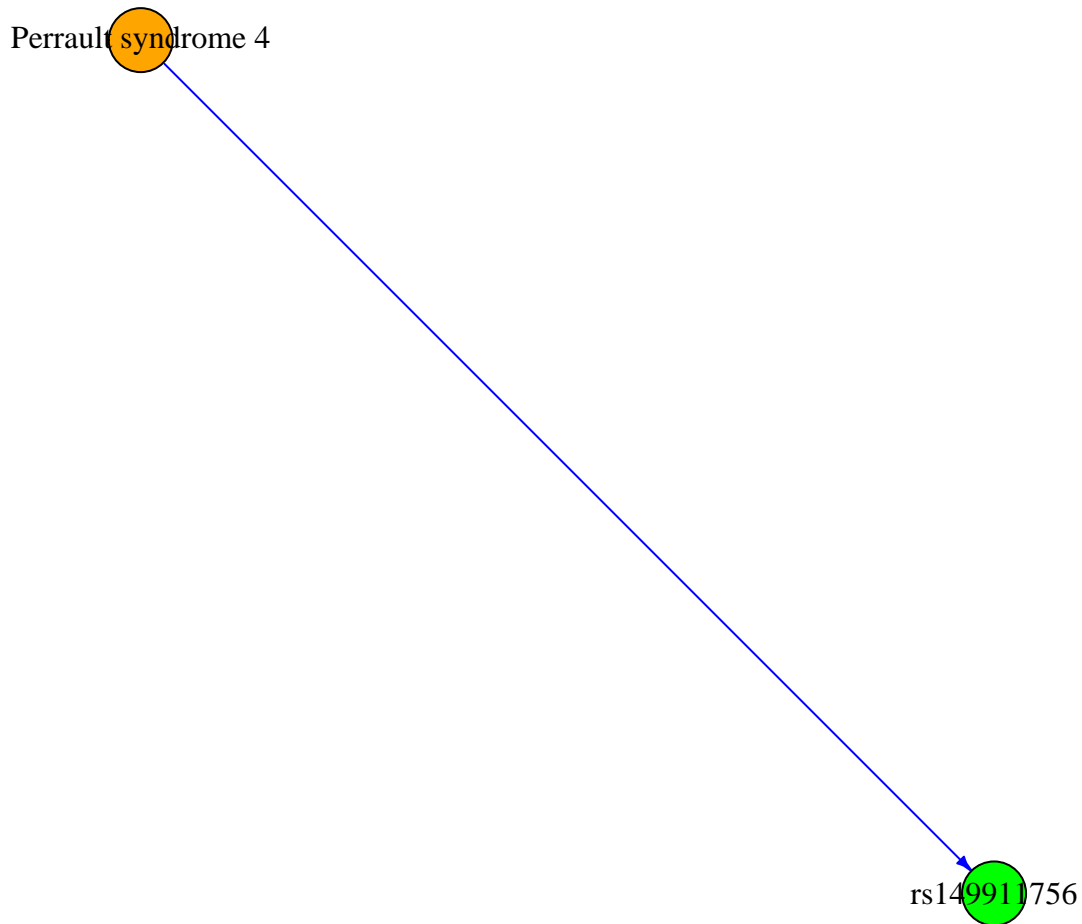

Variant–Disease Network (Perry syndrome)

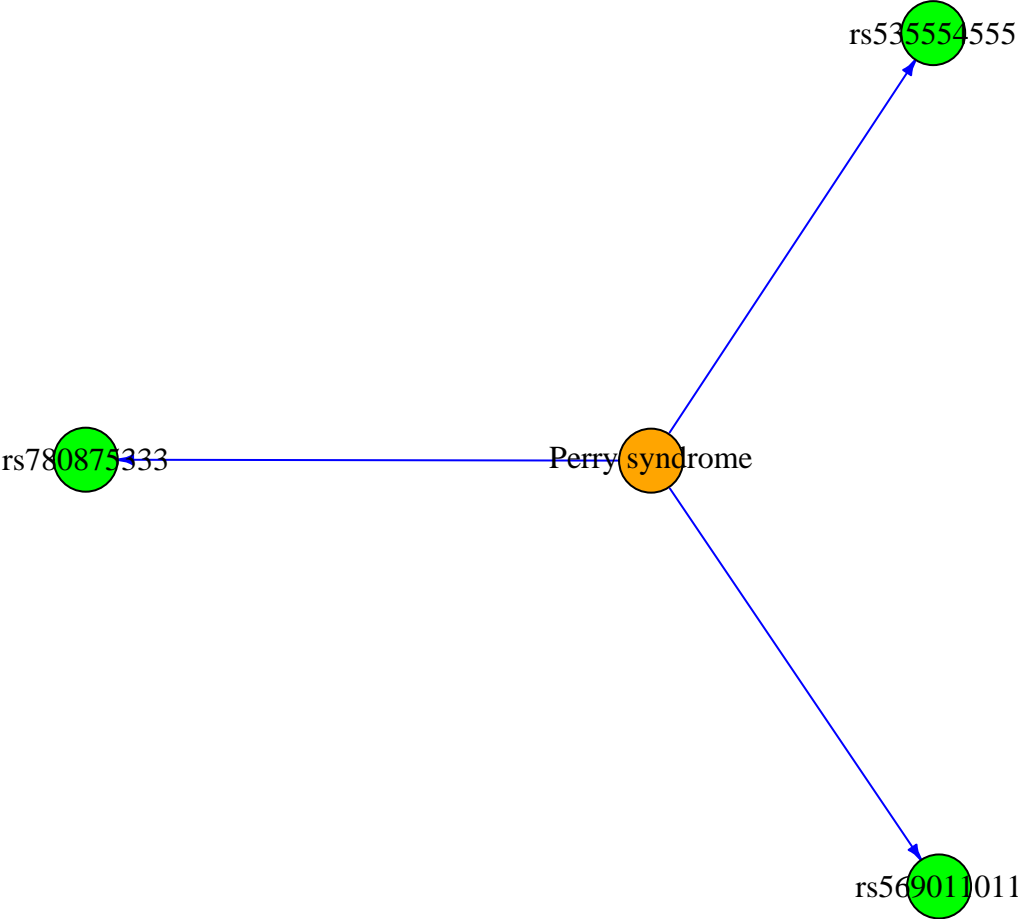

**Variant–Disease Network (Peutz–Jeghers syndrome)**

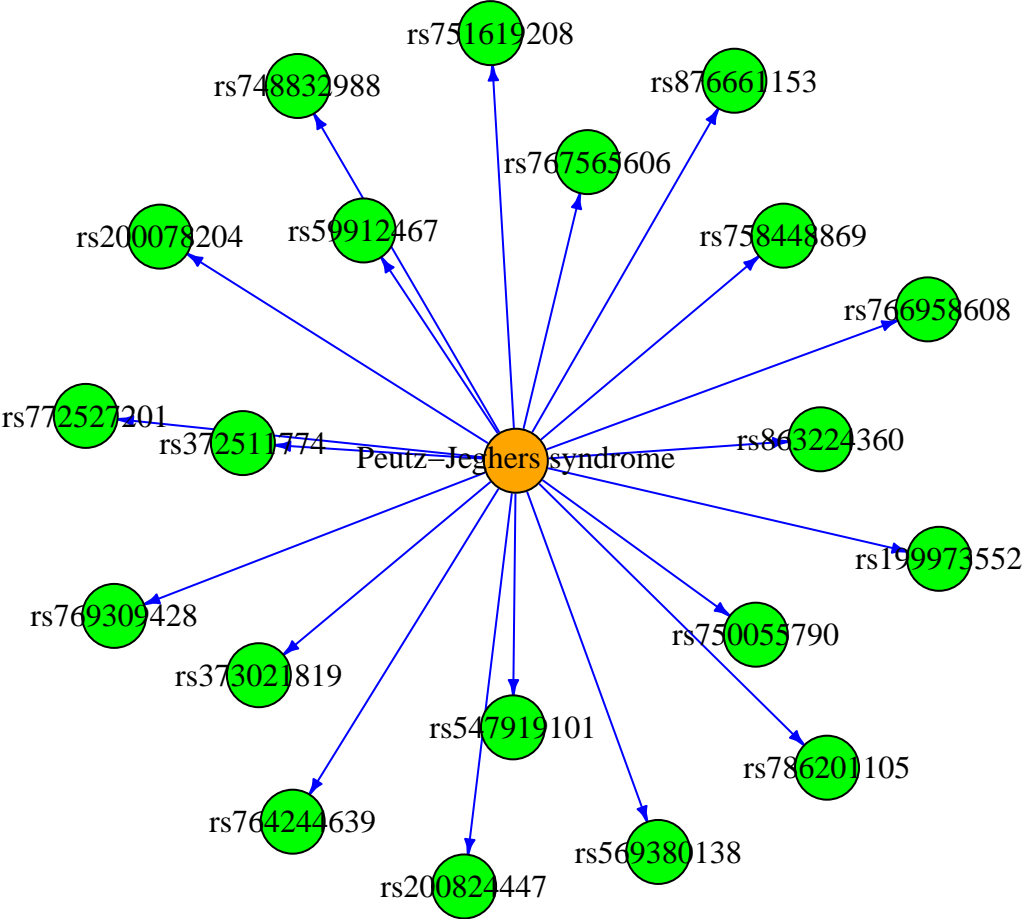



Variant–Disease Network (Pfeiffer syndrome)

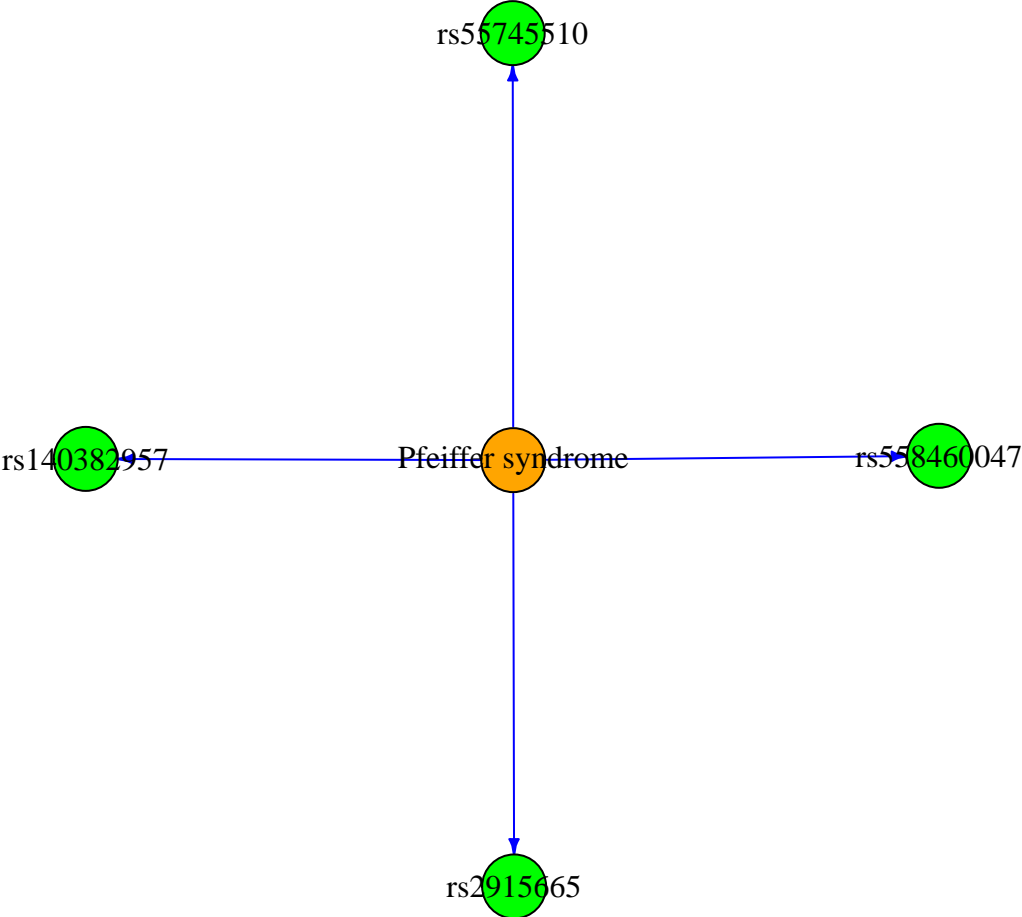

## Variant-Disease Network (Phenylketonuria)

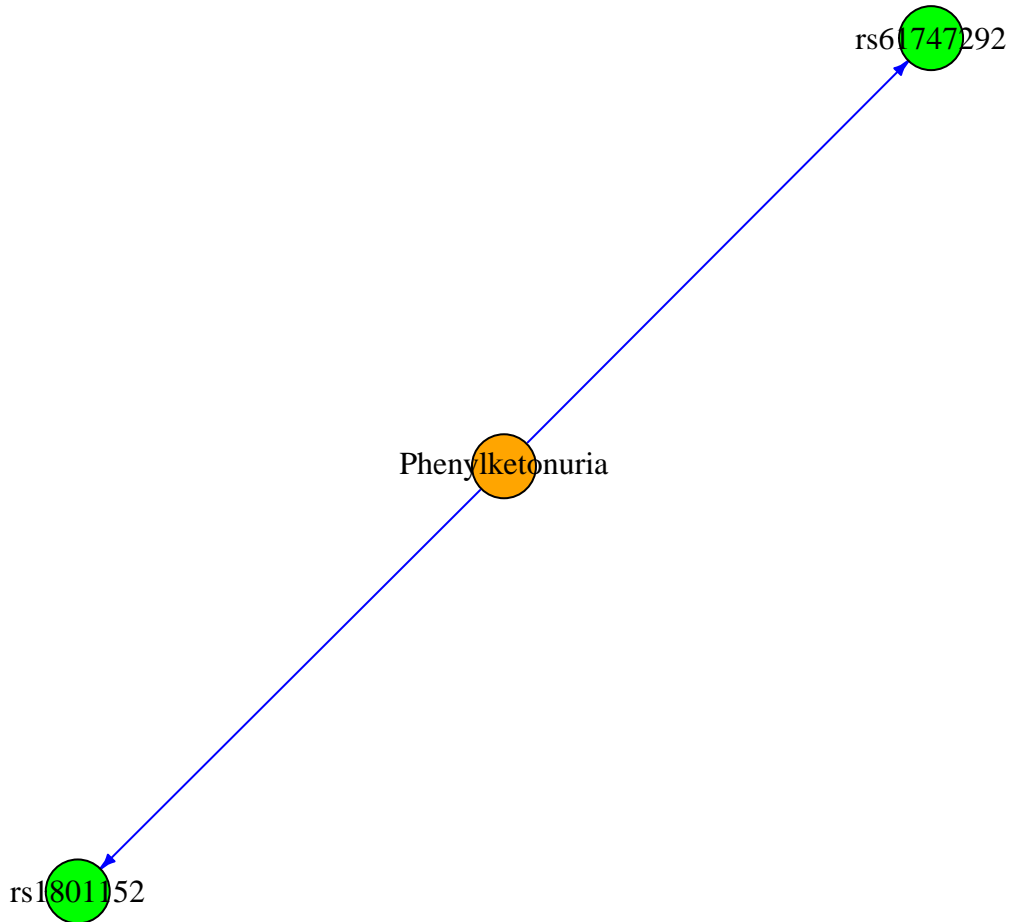

## Variant-Disease Network (Pheochromocytoma)

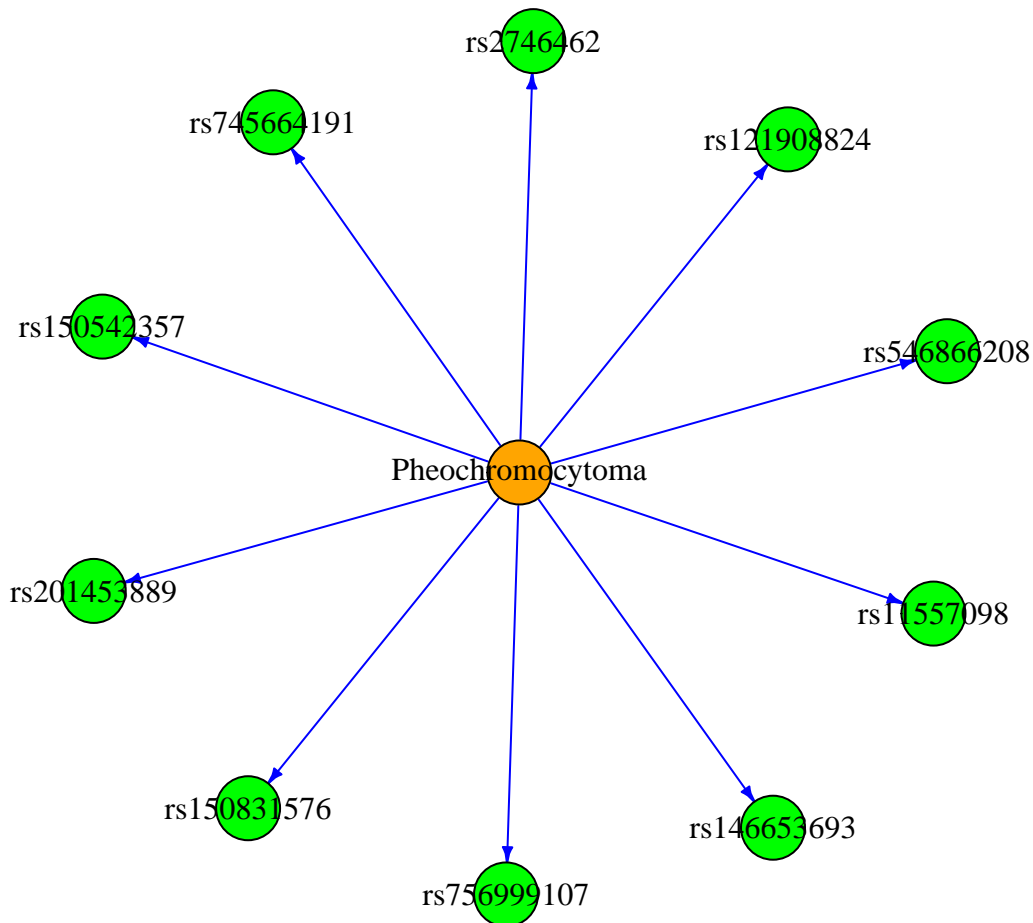

# Variant-Disease Network (Phosphoenolpyruvate carboxykinase (GTP) deficiency)

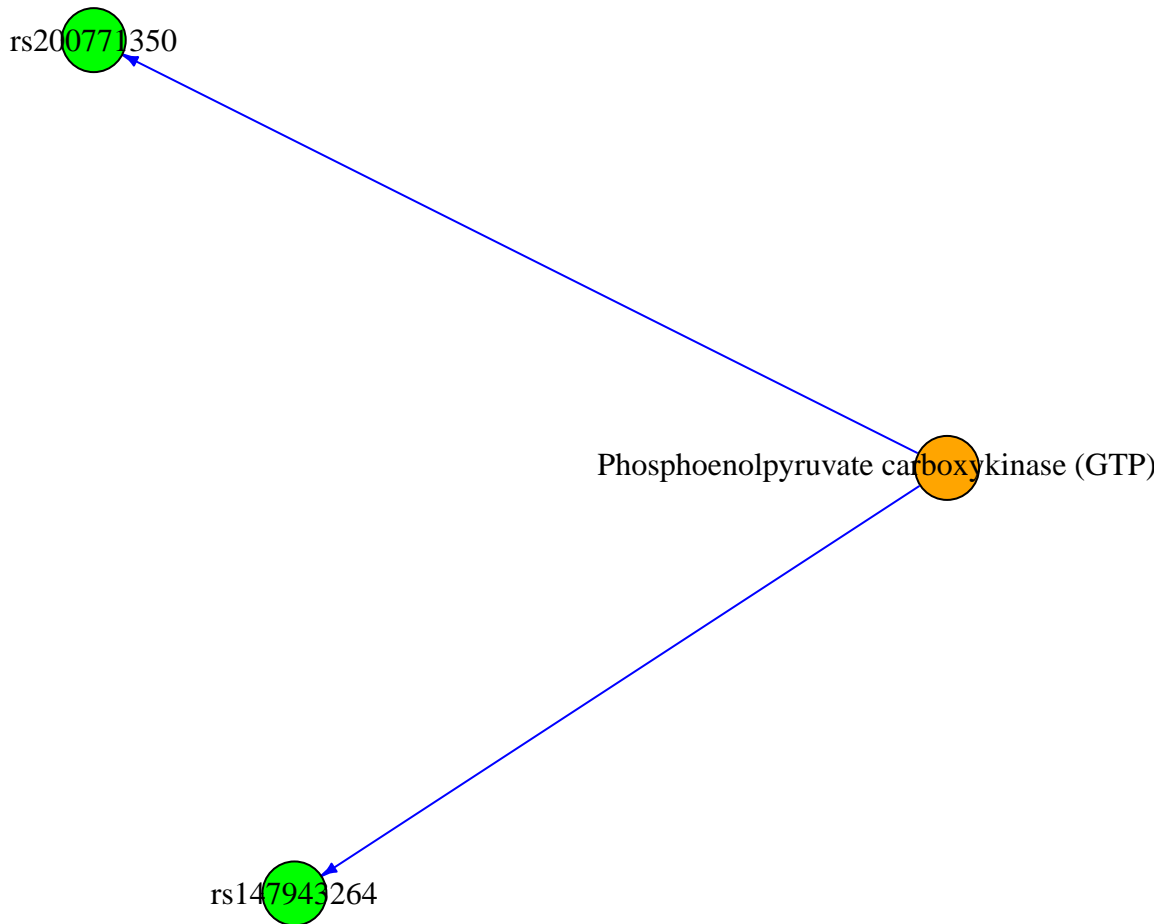

**Variant–Disease Network (Phosphoglycerate dehydrogenase deficiency)**

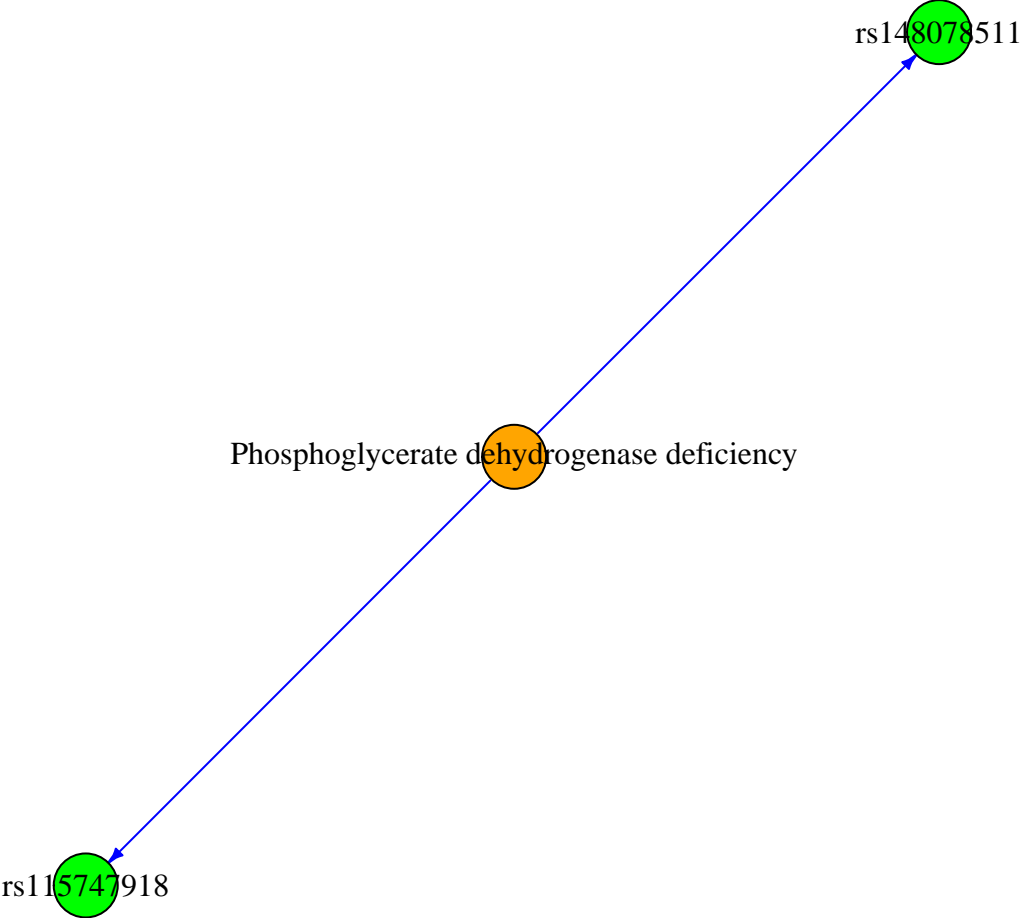

# Variant–Disease Network (Phosphoserine aminotransferase deficiency)

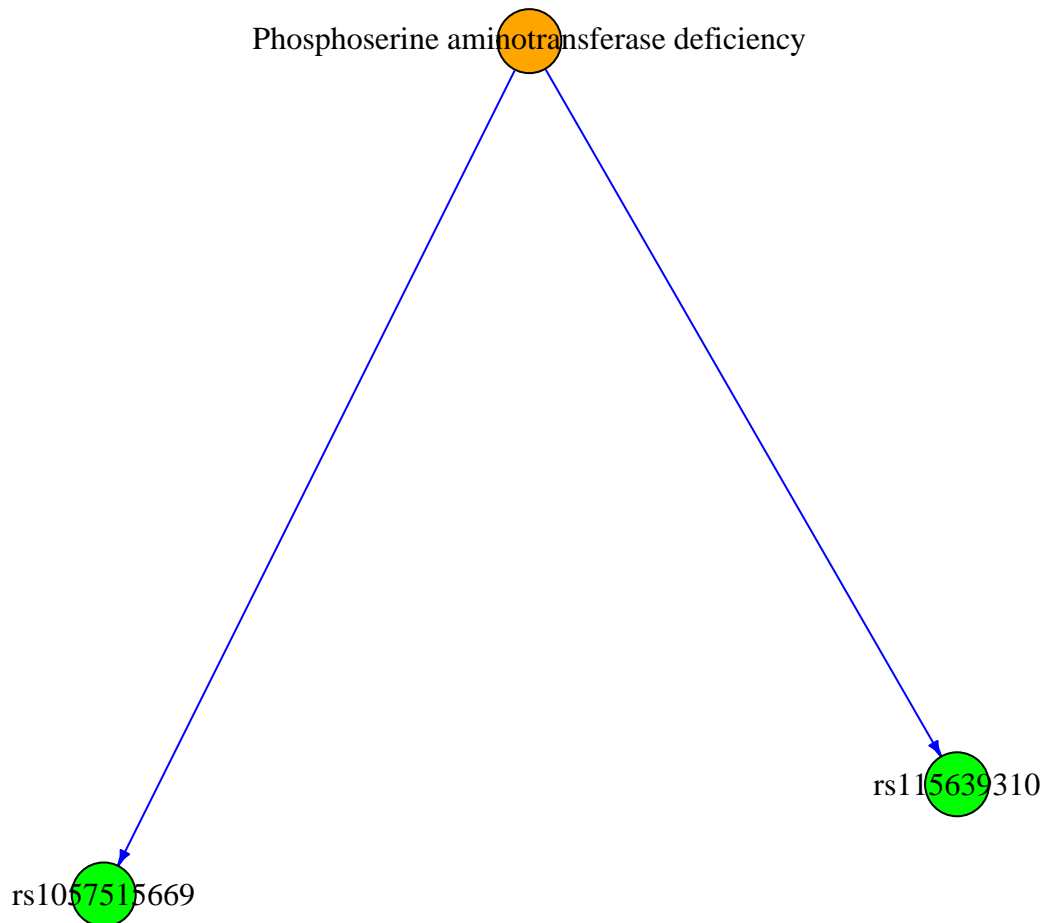

**Variant–Disease Network (Phytanic acid storage disease)**

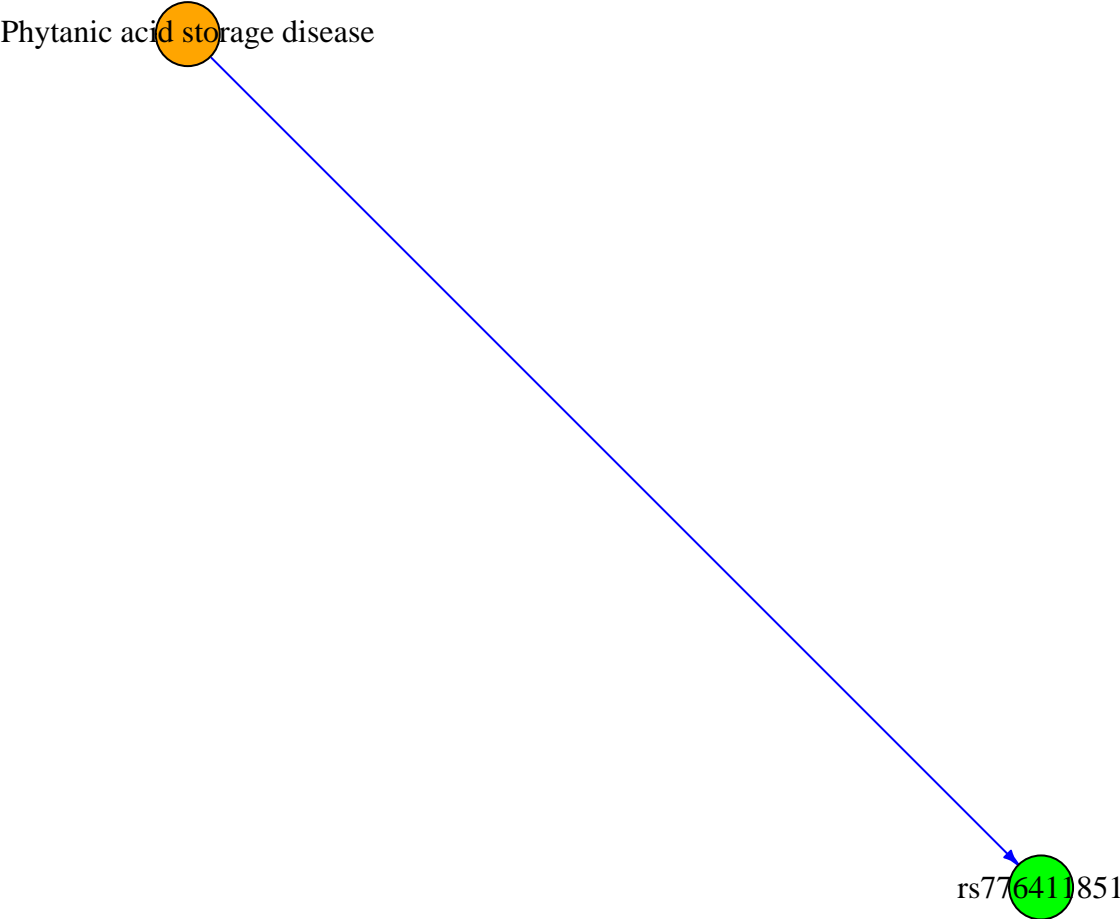

## Variant–Disease Network (Pierson syndrome)

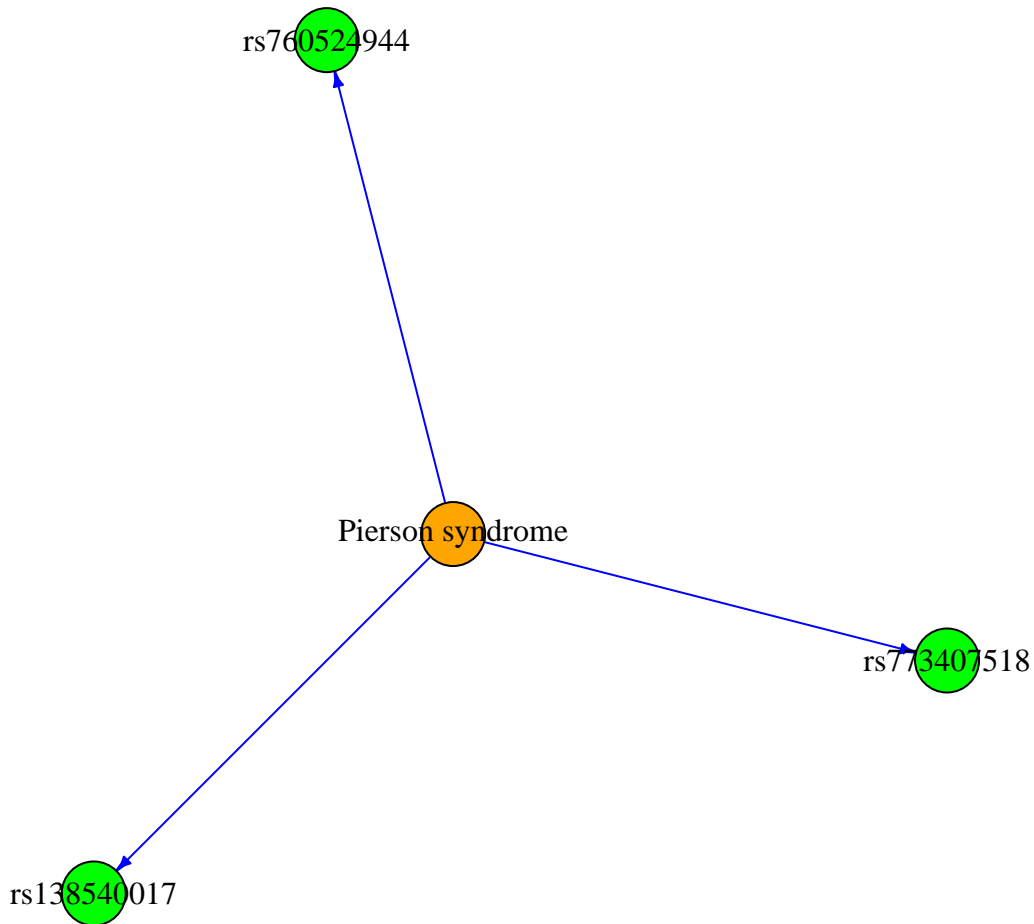



Variant–Disease Network (Pigmentary pallidal degeneration)

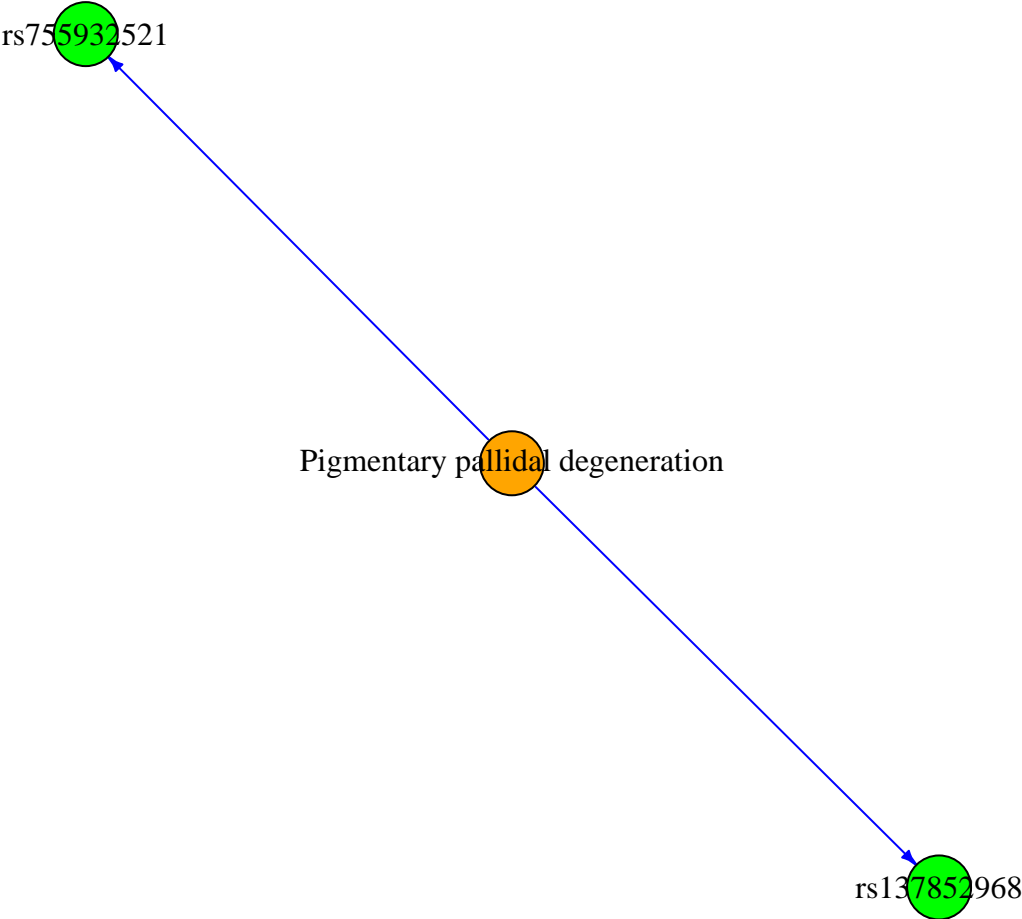

## Variant–Disease Network (Pigmentary retinal dystrophy)

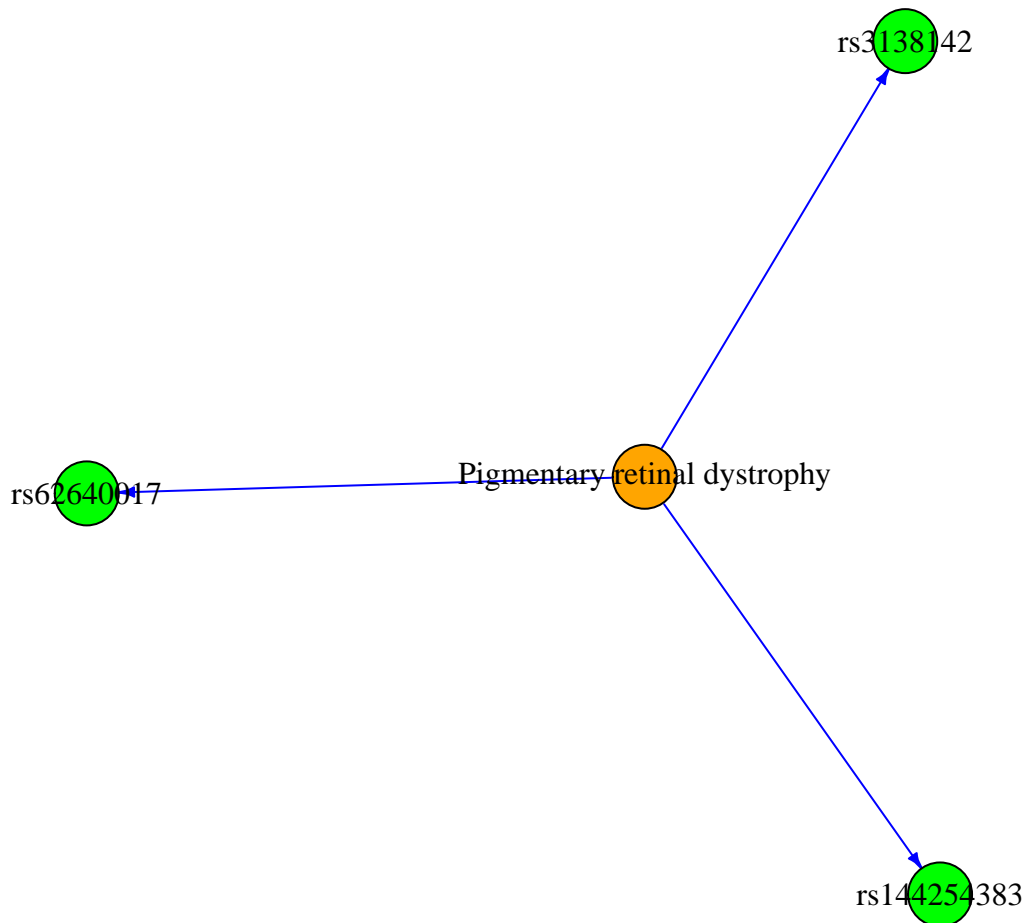

## Variant–Disease Network (Pitt–Hopkins–like syndrome)

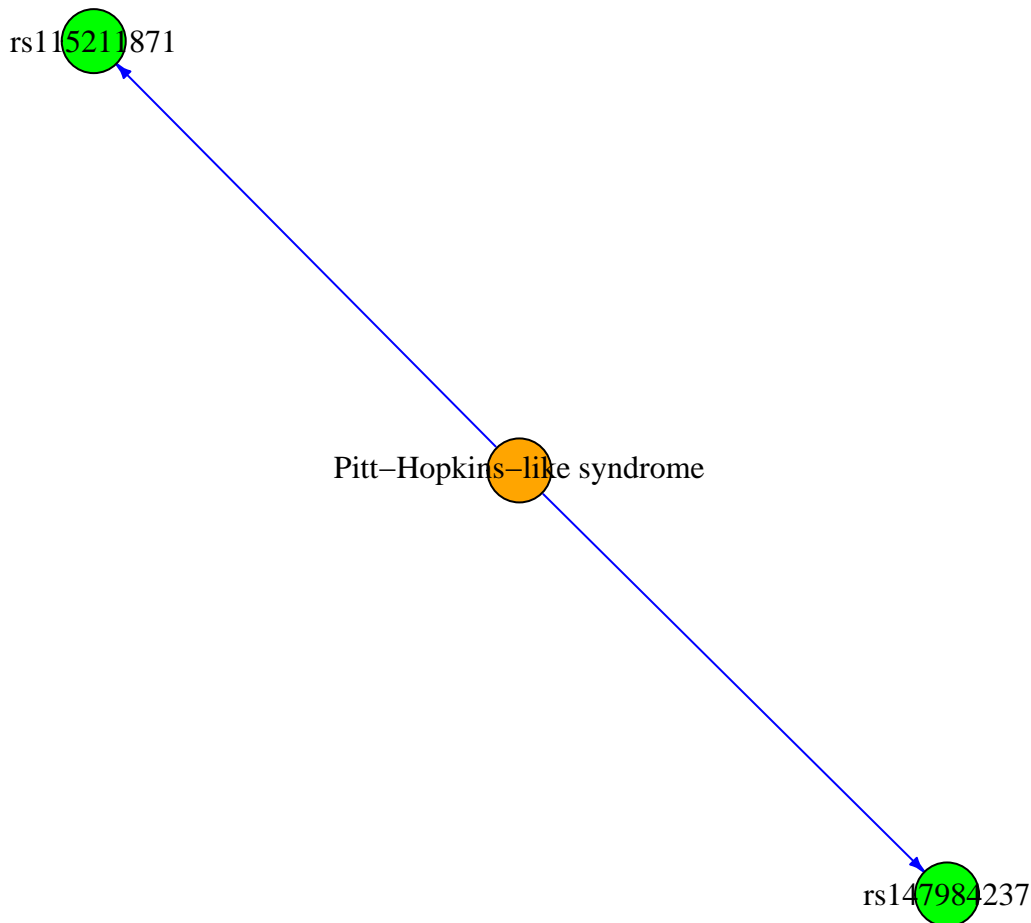

Variant–Disease Network (Pitt–Hopkins–like syndrome 2)

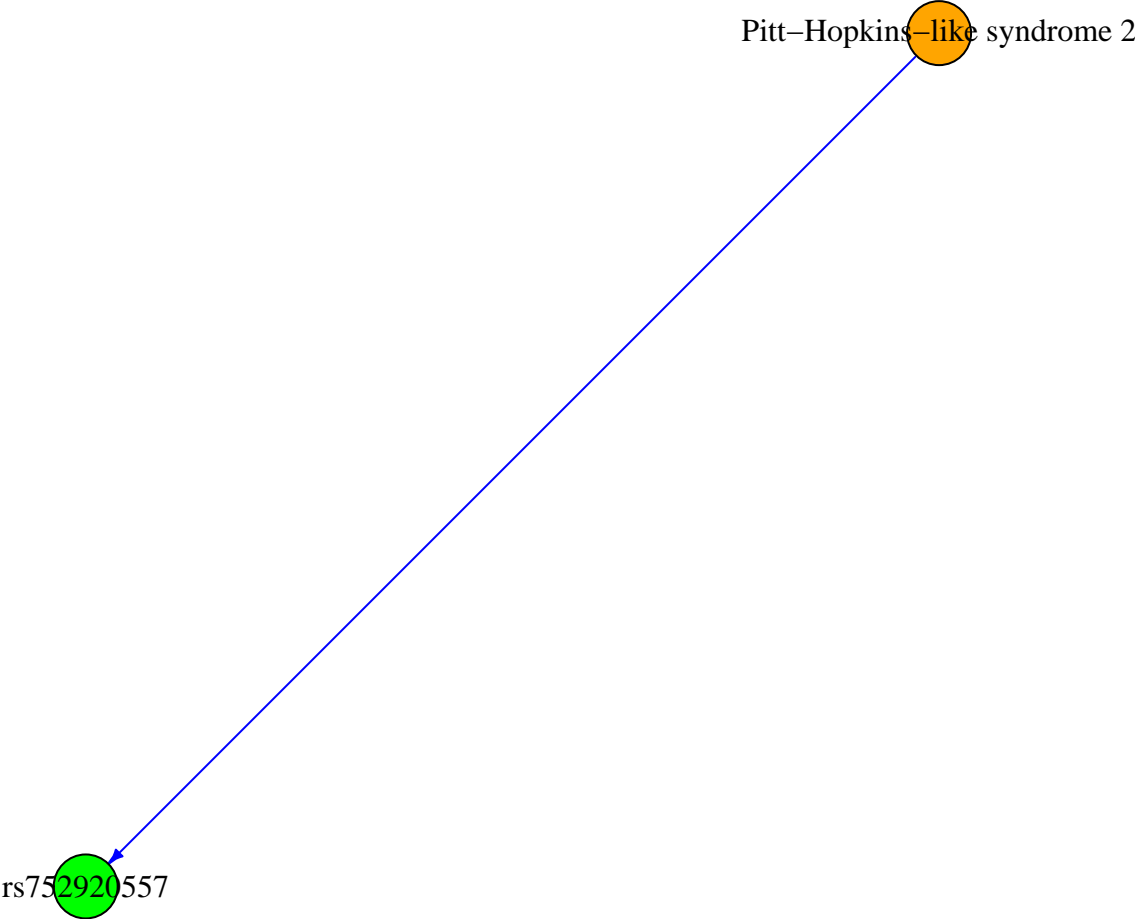

## Variant–Disease Network (Pityriasis rubra pilaris)

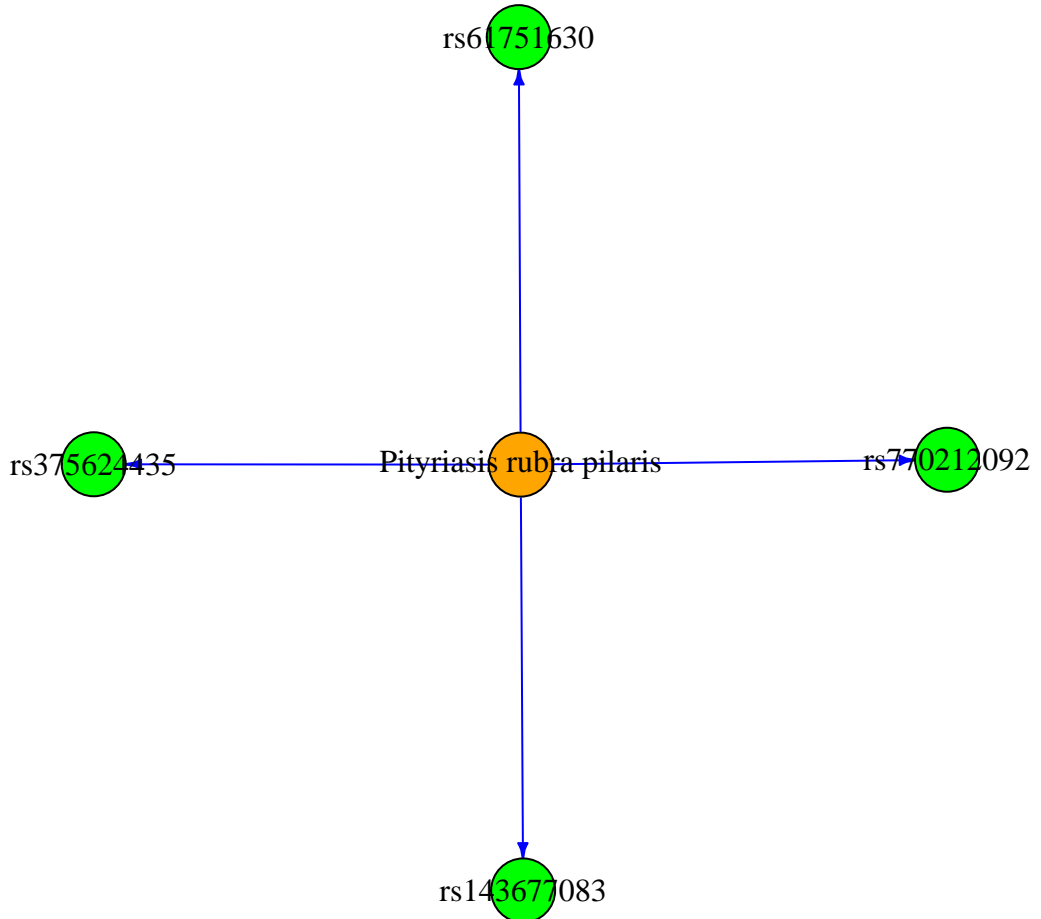

Variant–Disease Network (Plasminogen activator inhibitor type 1 deficiency)

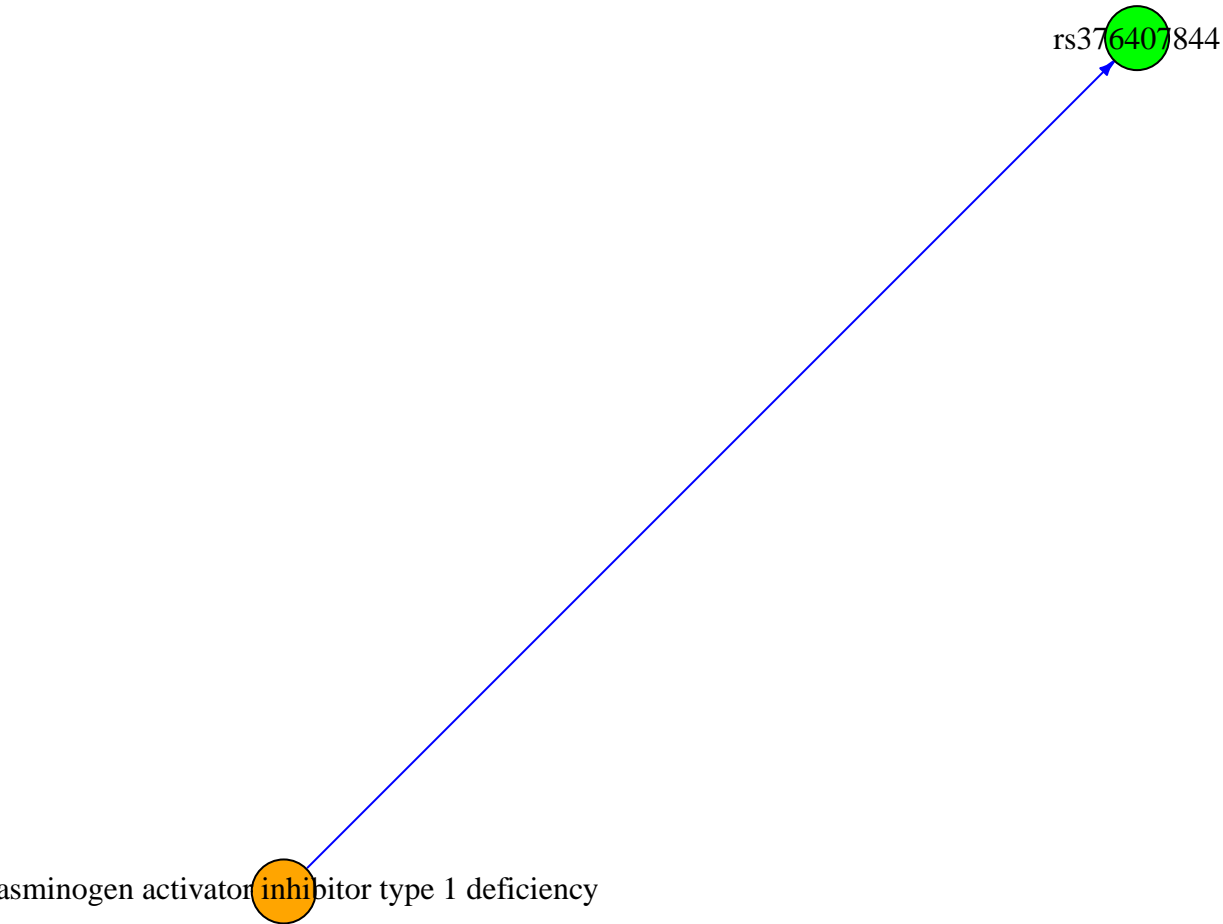

**Variant–Disease Network (Platelet–type bleeding disorder 9)**

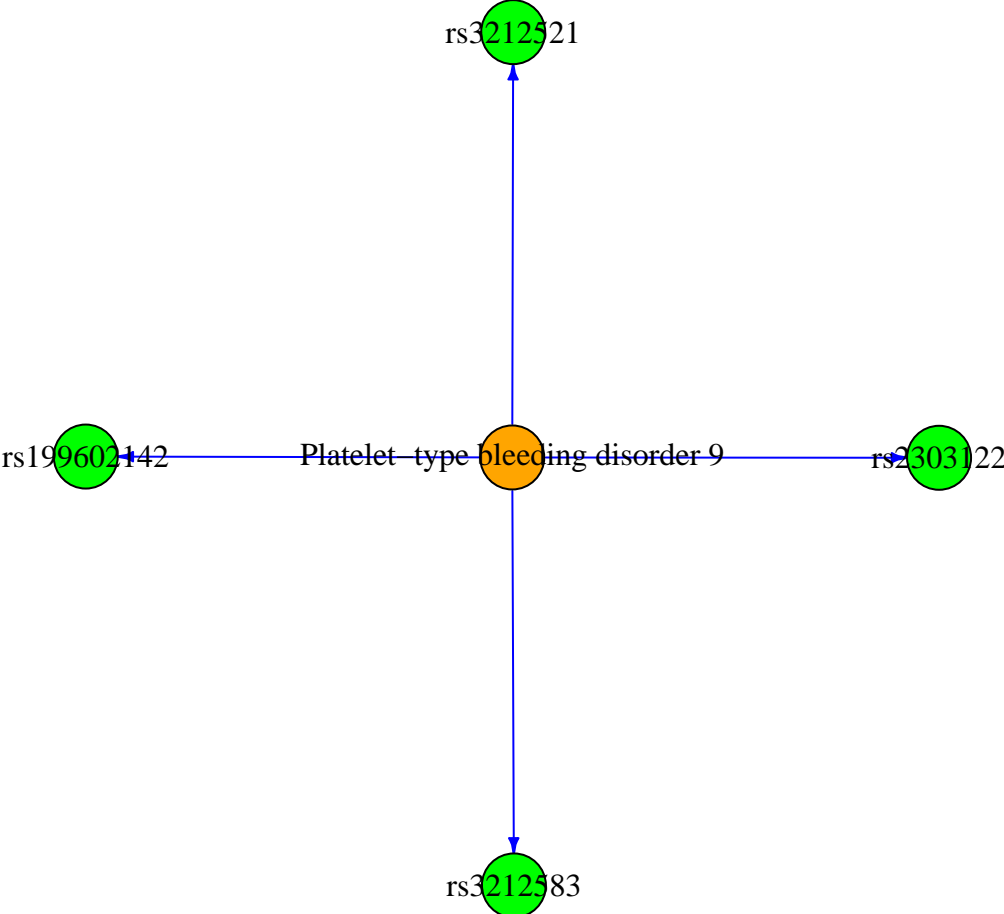

# Variant-Disease Network (Platyspondylic lethal skeletal dysplasia Torrance t

rs142770543

Platyspondylic lethal skeletal dysplasia Tor





## Variant–Disease Network (Pleuropulmonary blastoma)

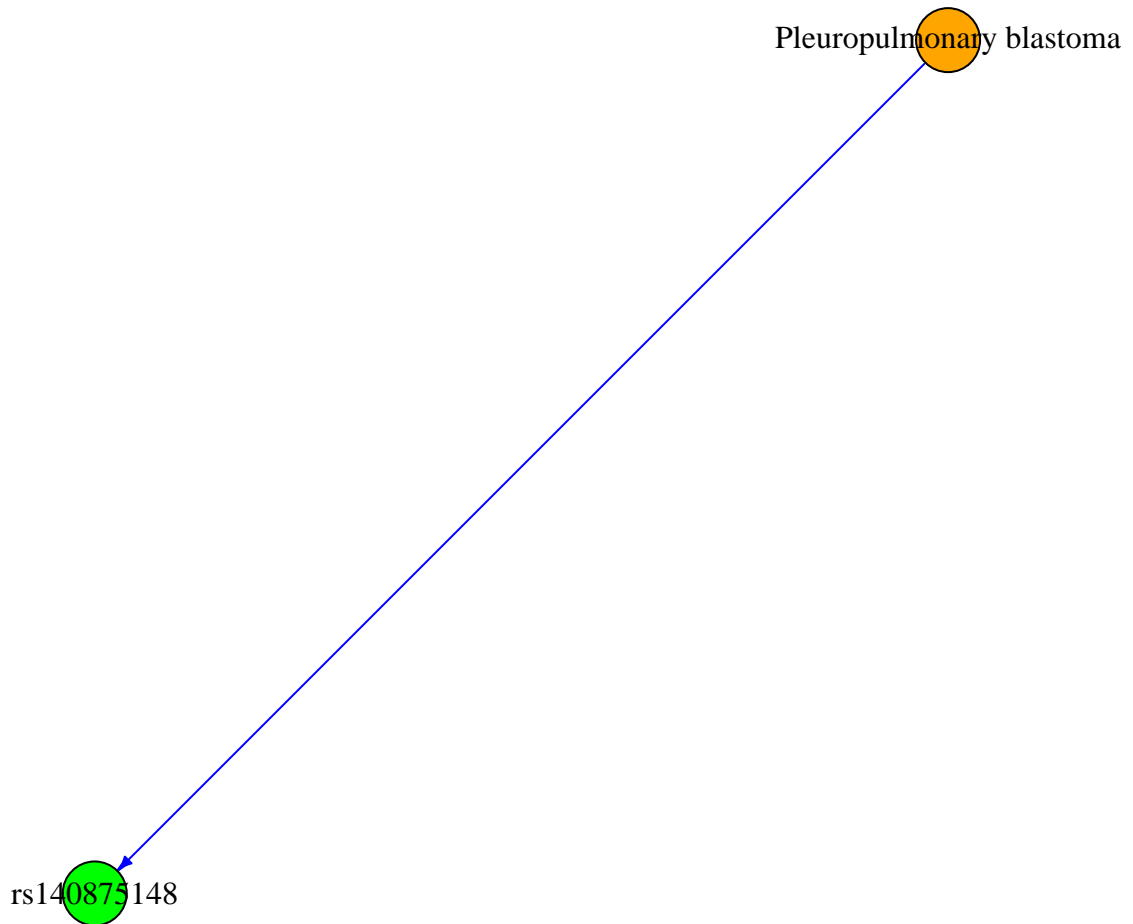

**Variant–Disease Network (Pol III–related leukodystrophy)**

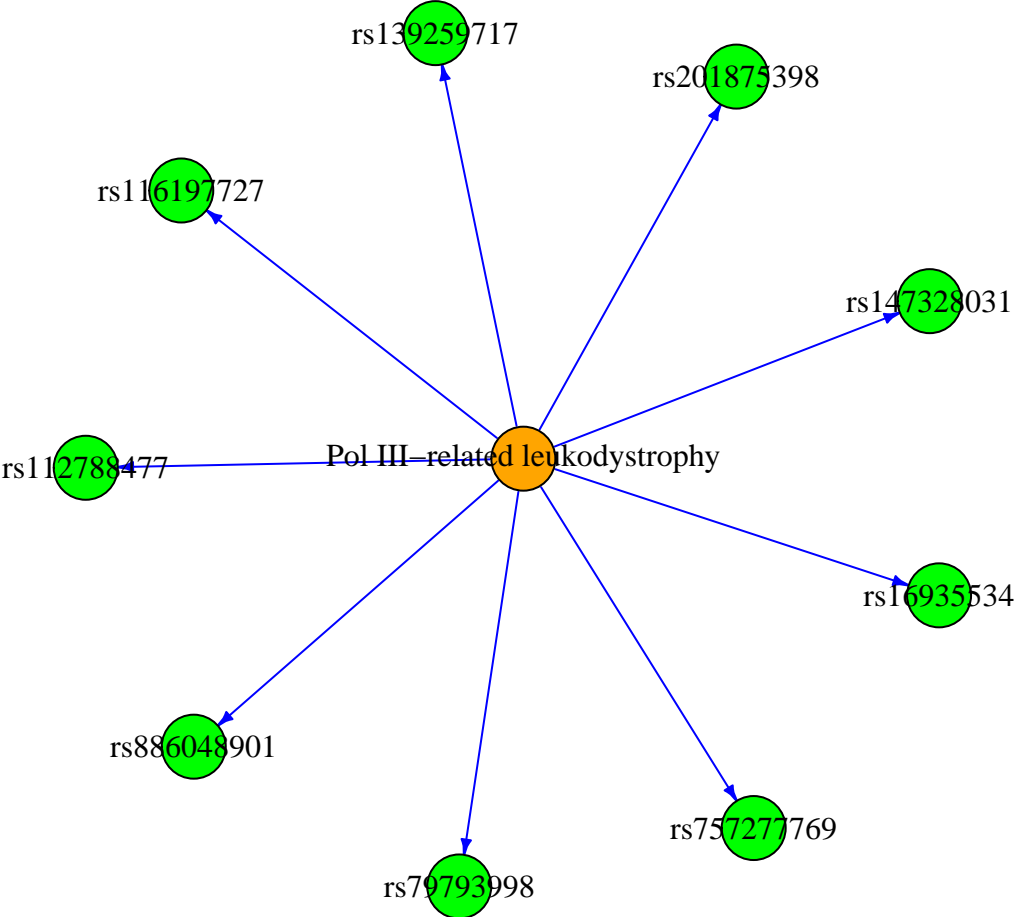

Variant–Disease Network (POLG–Related Spectrum Disorders)

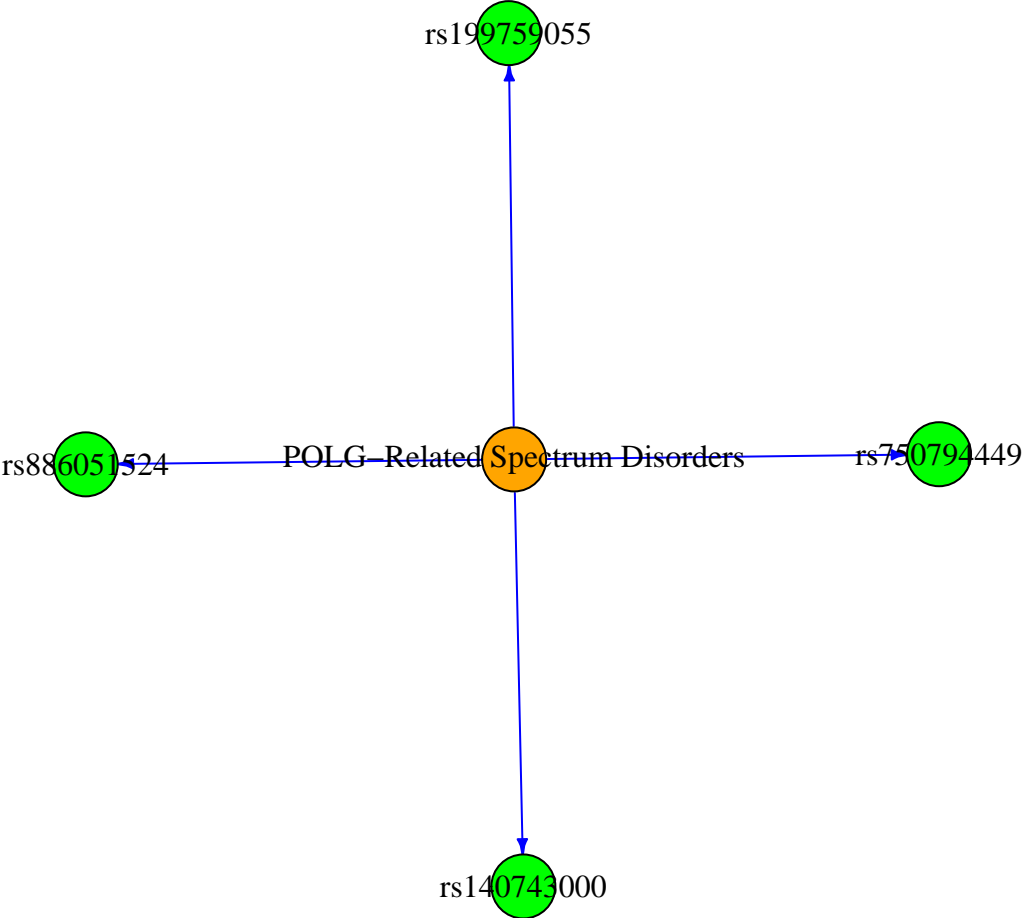

## Variant–Disease Network (Polycystic kidney disease)

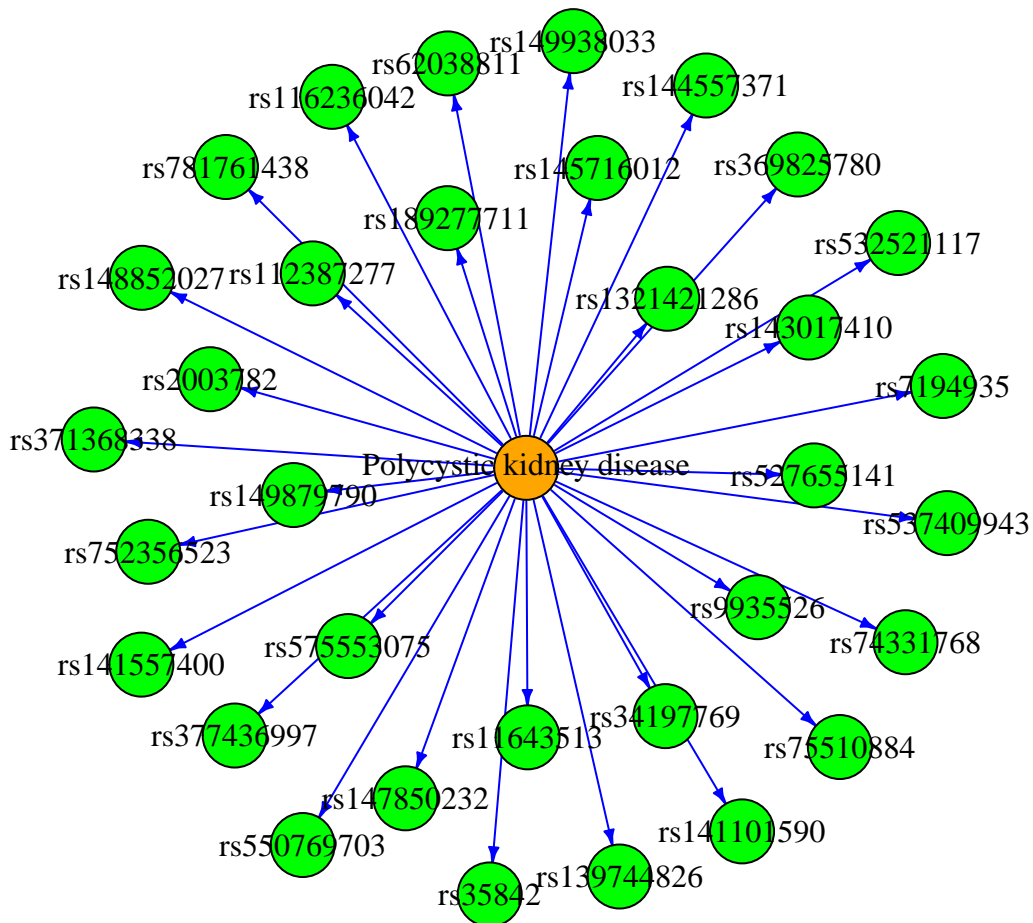

## Variant–Disease Network (Polycystic kidney disease 2)

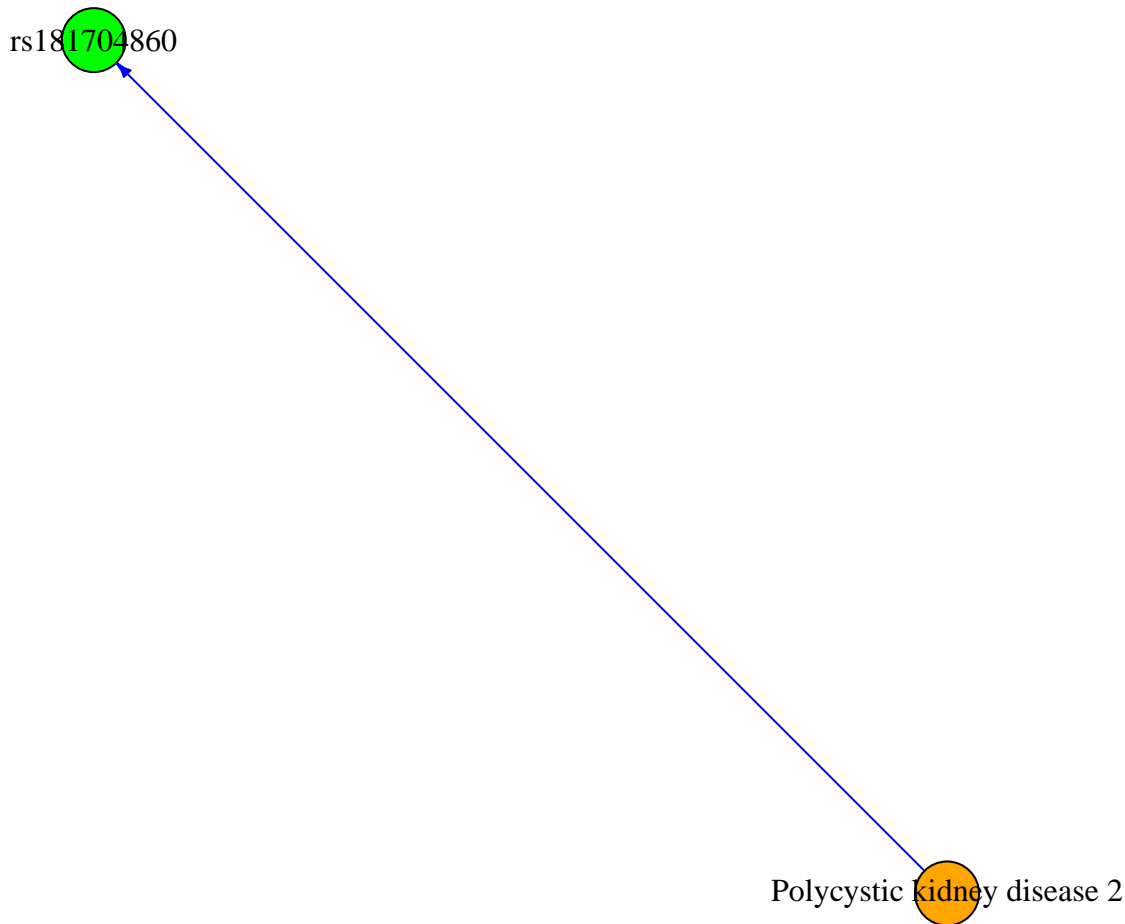

**Variant–Disease Network (Polycystic liver disease 1)**

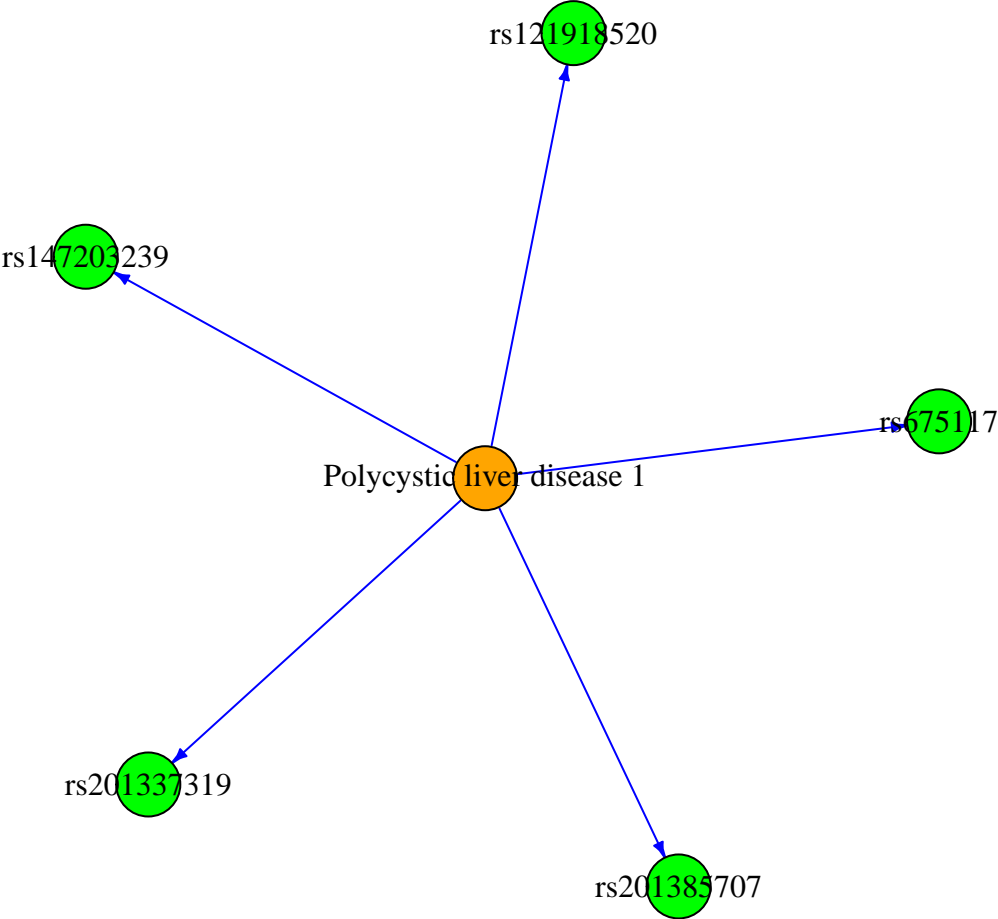

Variant–Disease Network (Polydactyly)

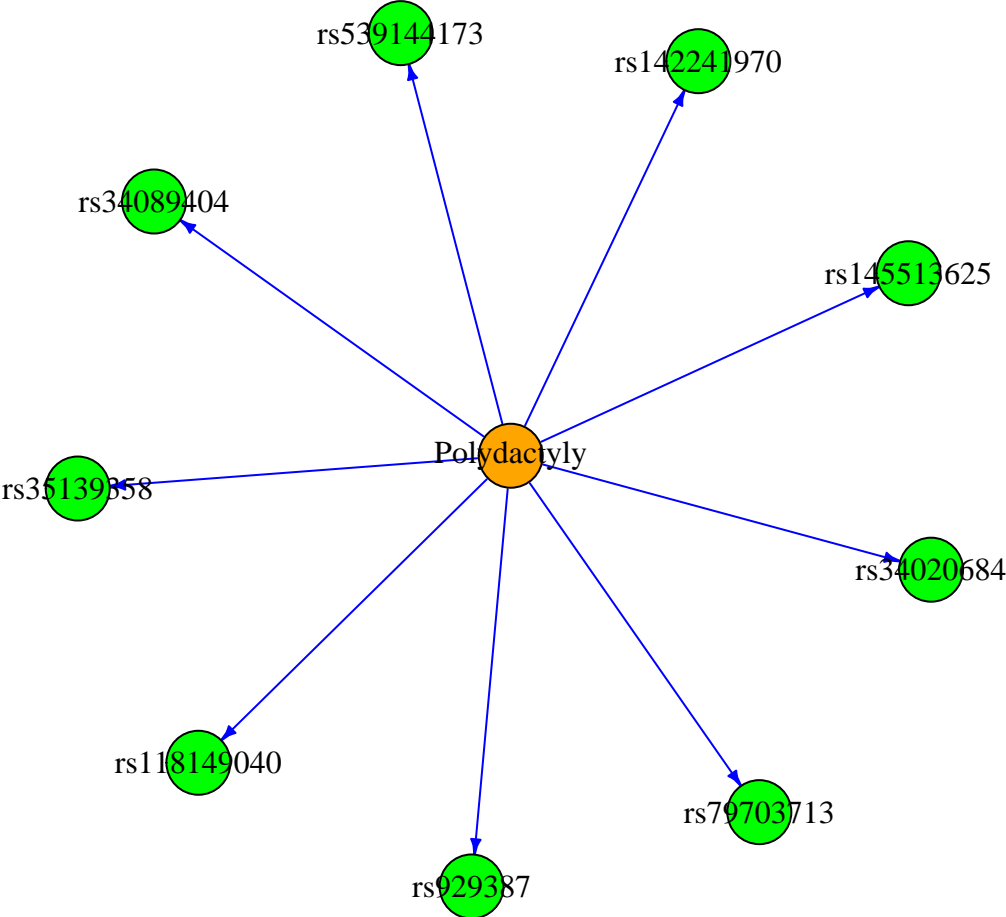

Variant–Disease Network (Polyglandular autoimmune syndrome)

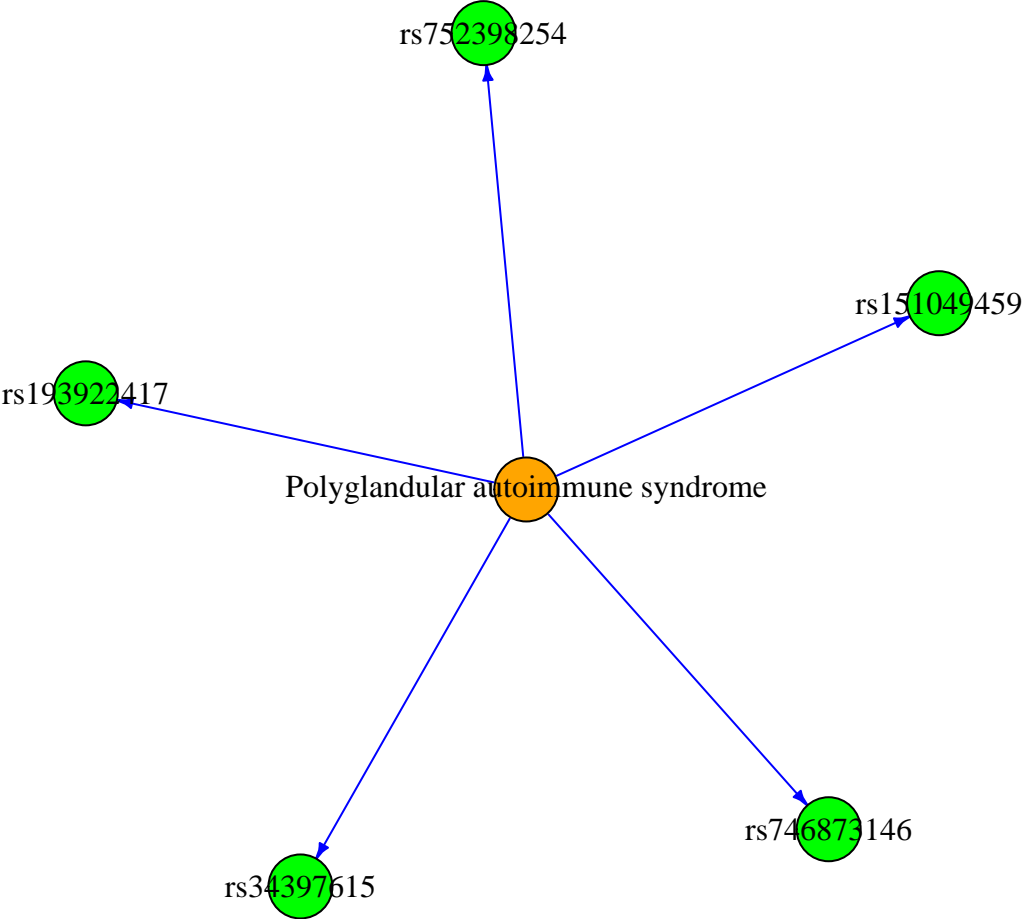



## Variant–Disease Network (Polyglucosan body disease)

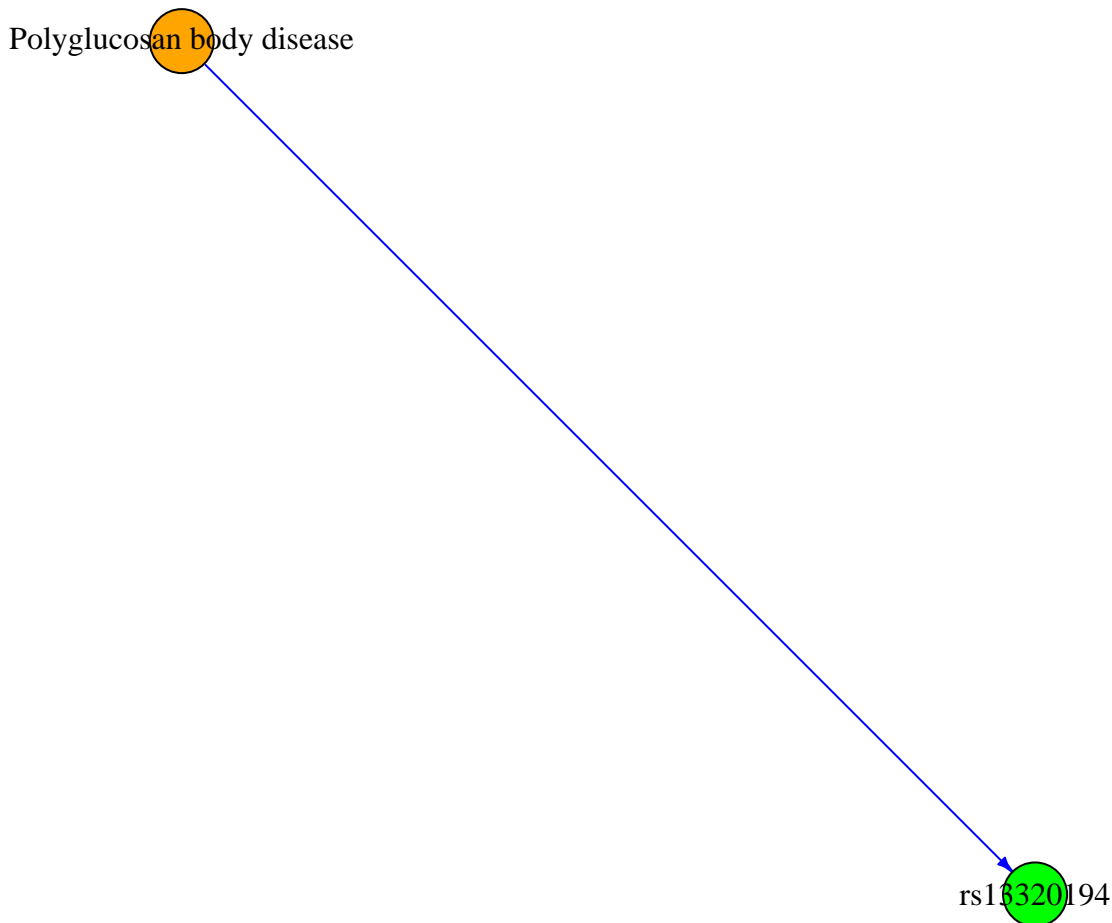

# Network-Disease Network (Polyglucosan body myopathy 1 with or without immunodeficiency)

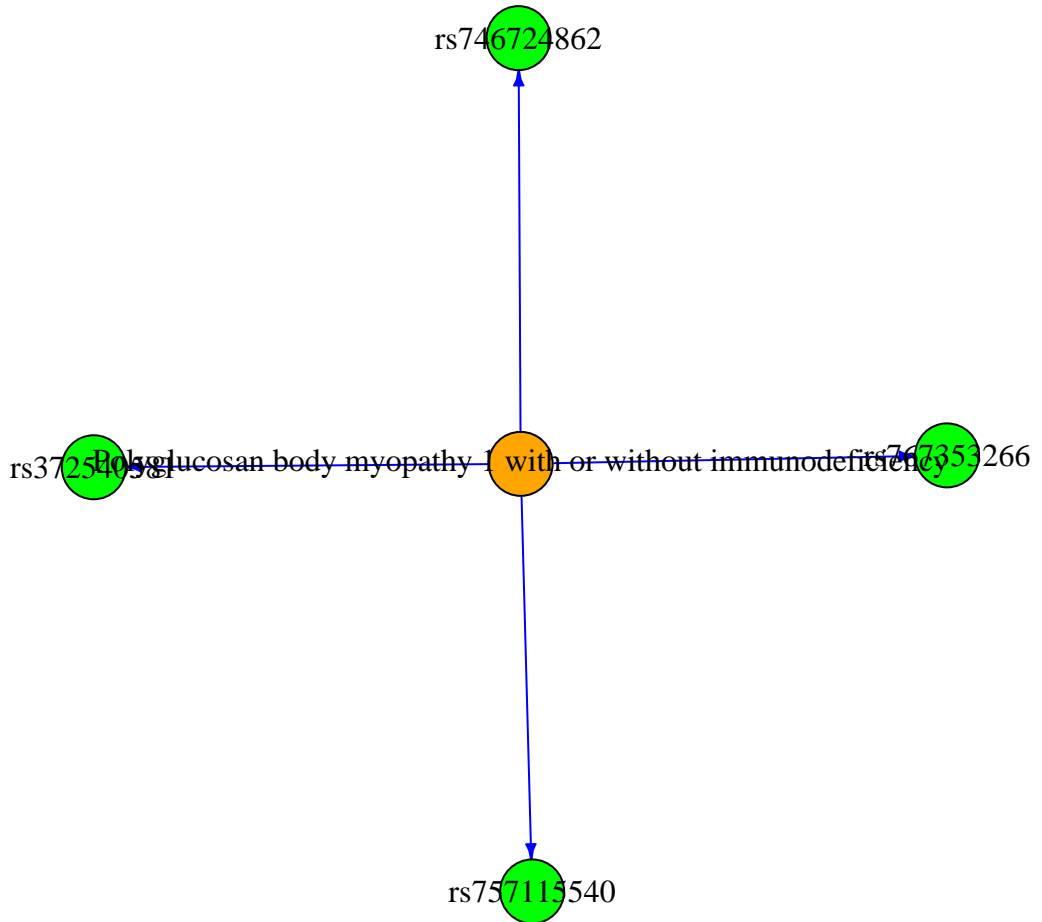

## Variant–Disease Network (Polymicrogyria)

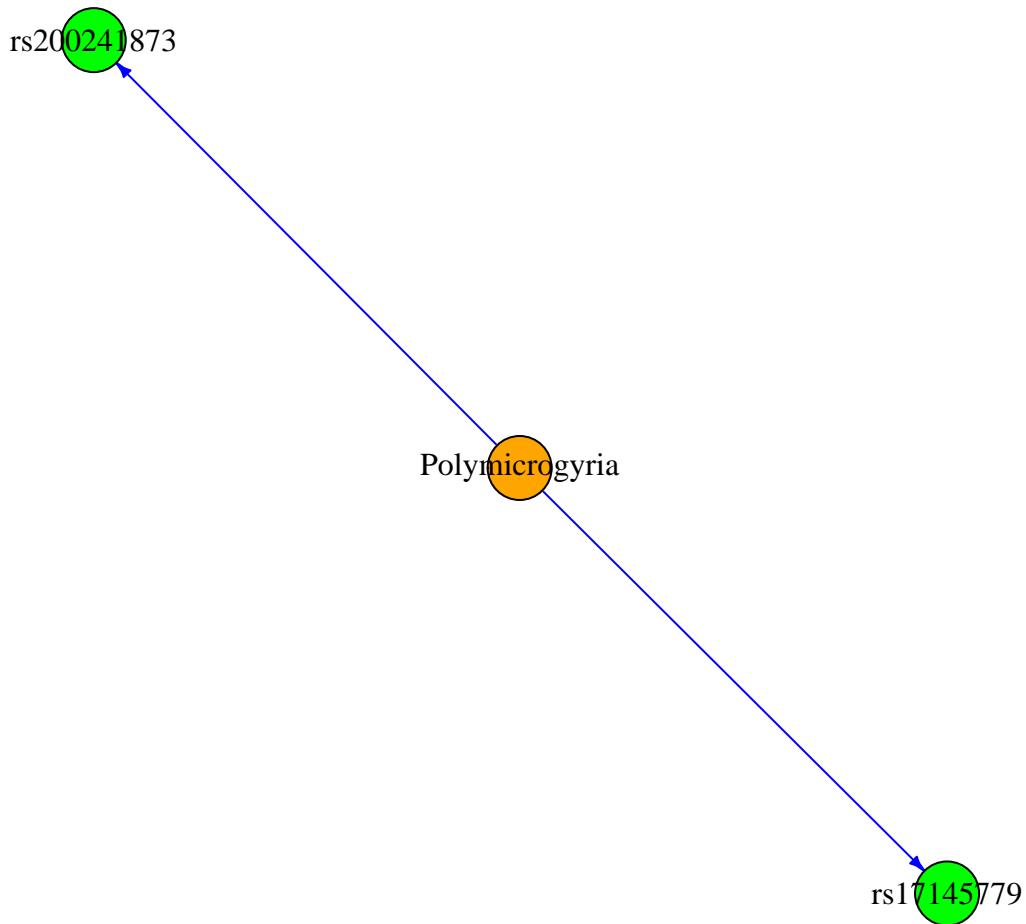

Variant–Disease Network (Polyneuropathy)

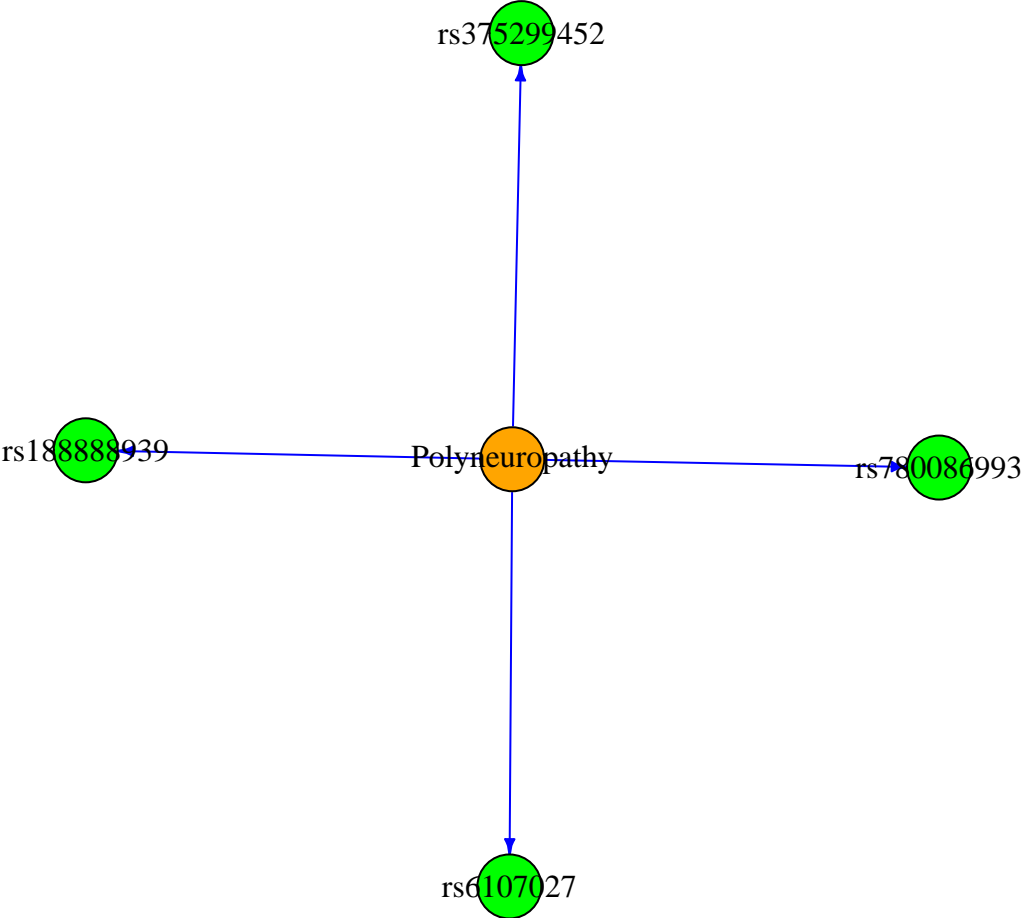

**Variant–Disease Network (Pontocerebellar hypoplasia type 1)**

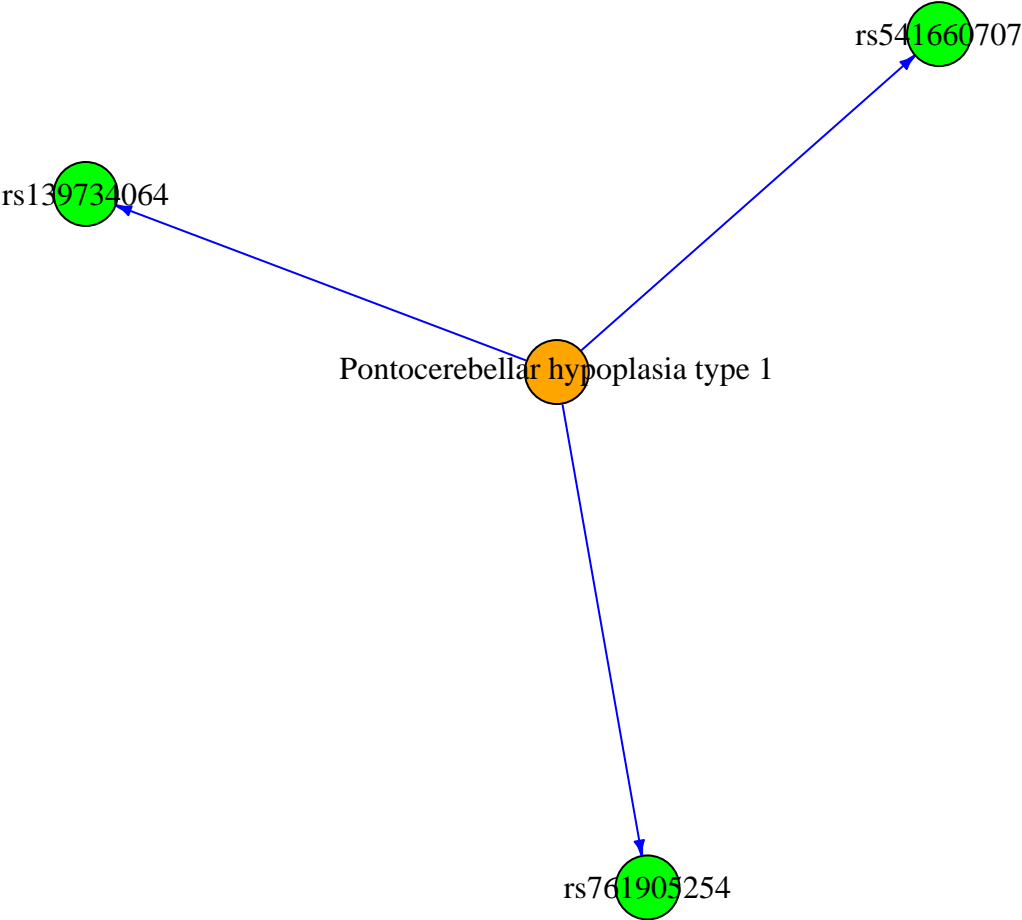

Variant–Disease Network (Pontocerebellar hypoplasia)

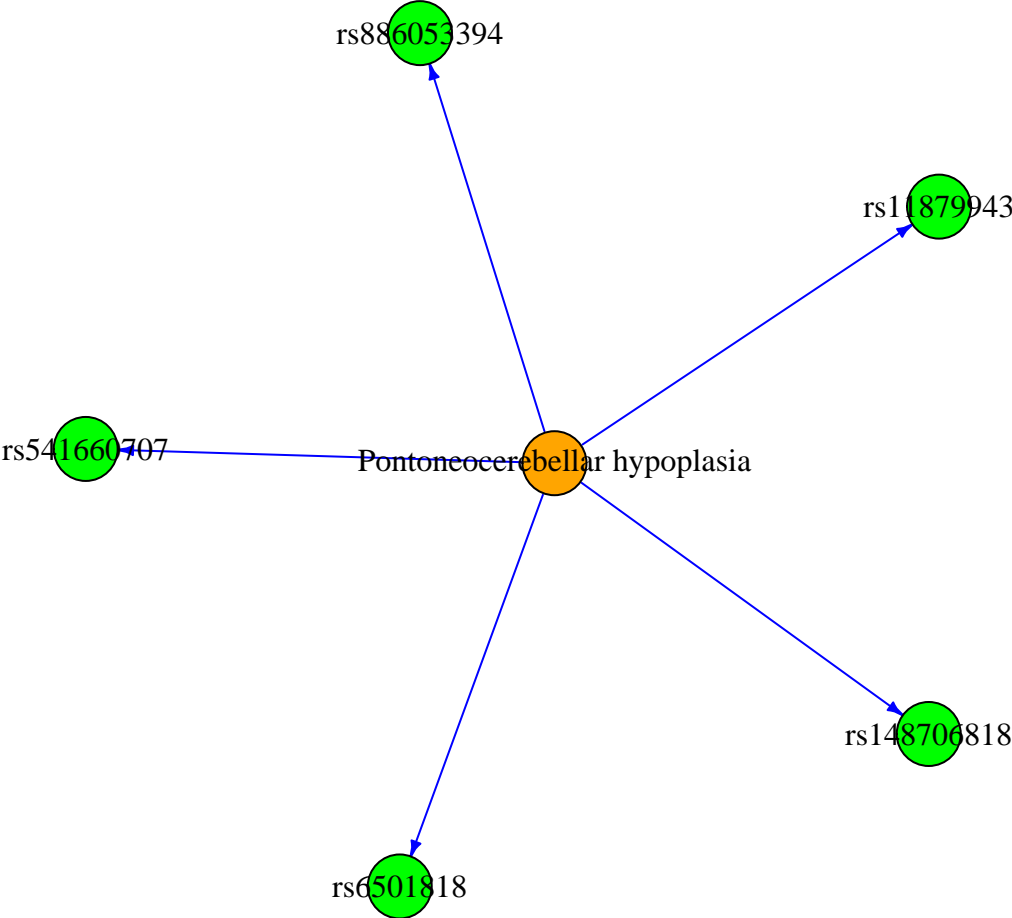

Variant–Disease Network (Popliteal pterygium syndrome)

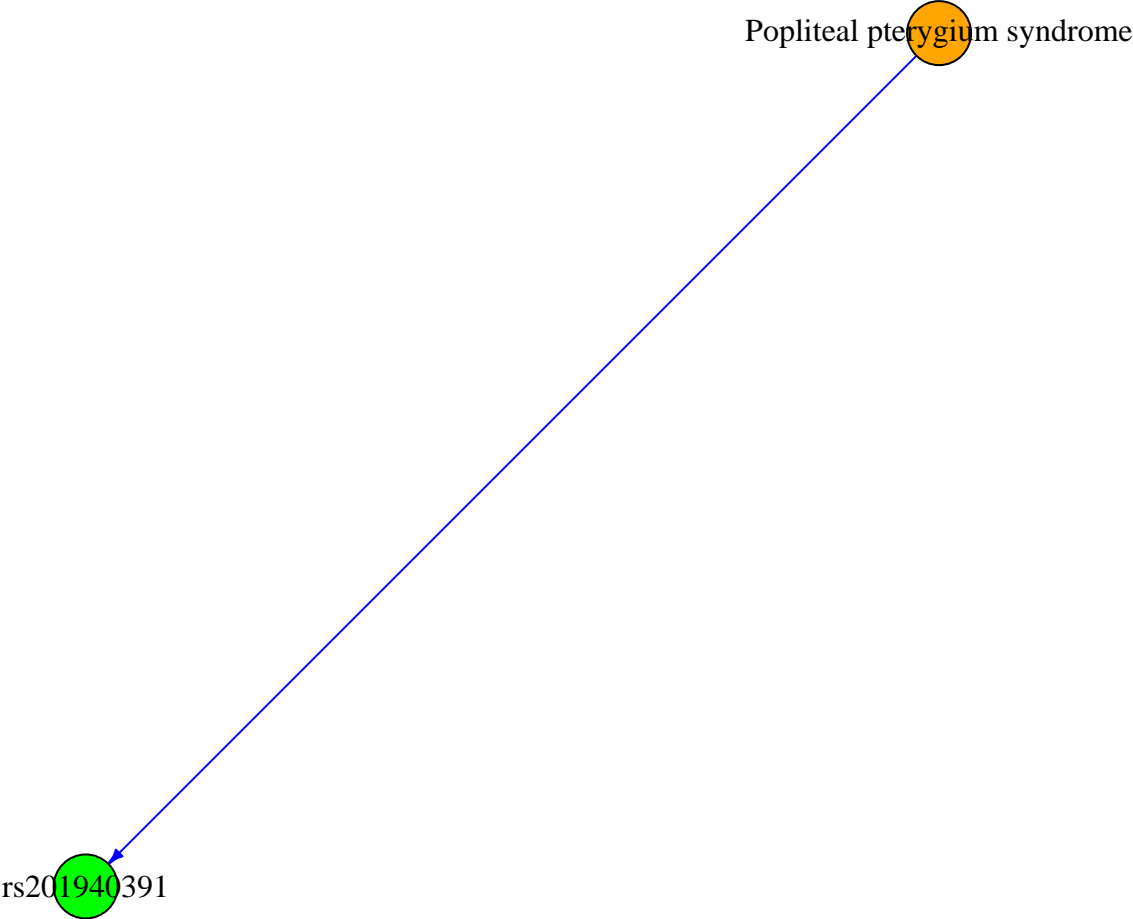

## Variant-Disease Network (Porencephalic cyst)

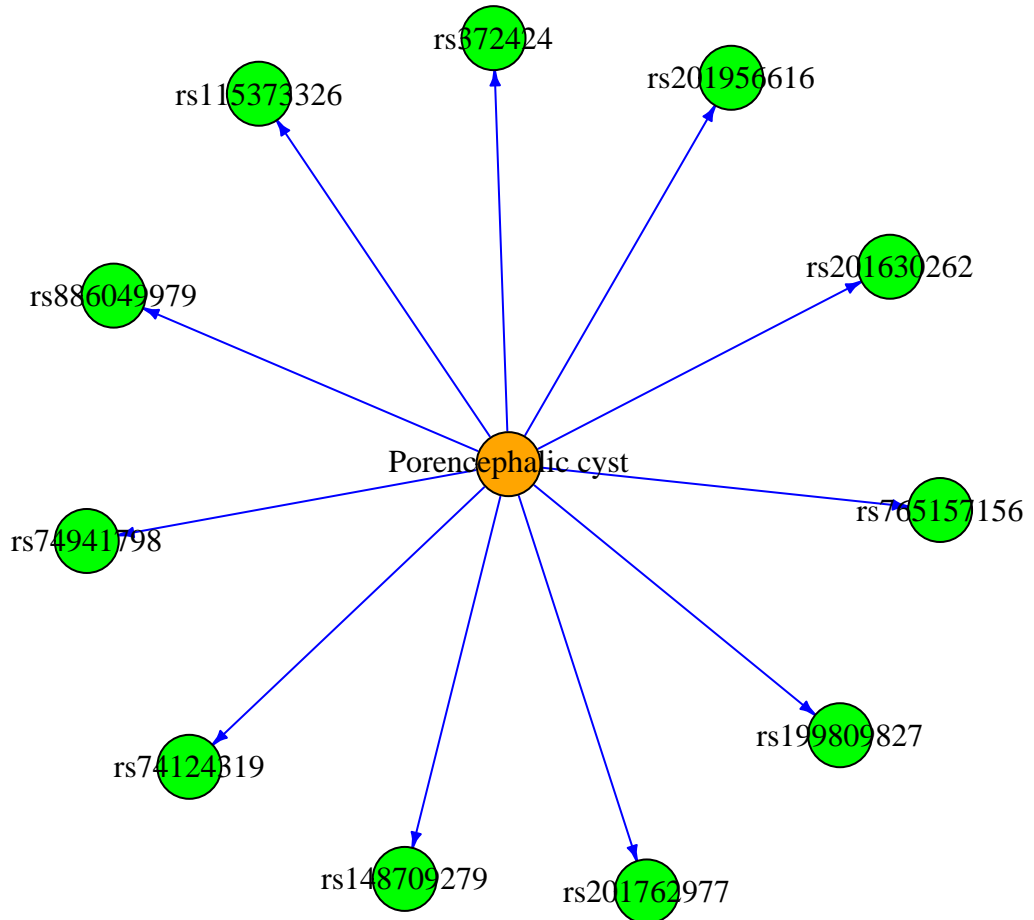



Variant–Disease Network (Porphobilinogen synthase deficiency)

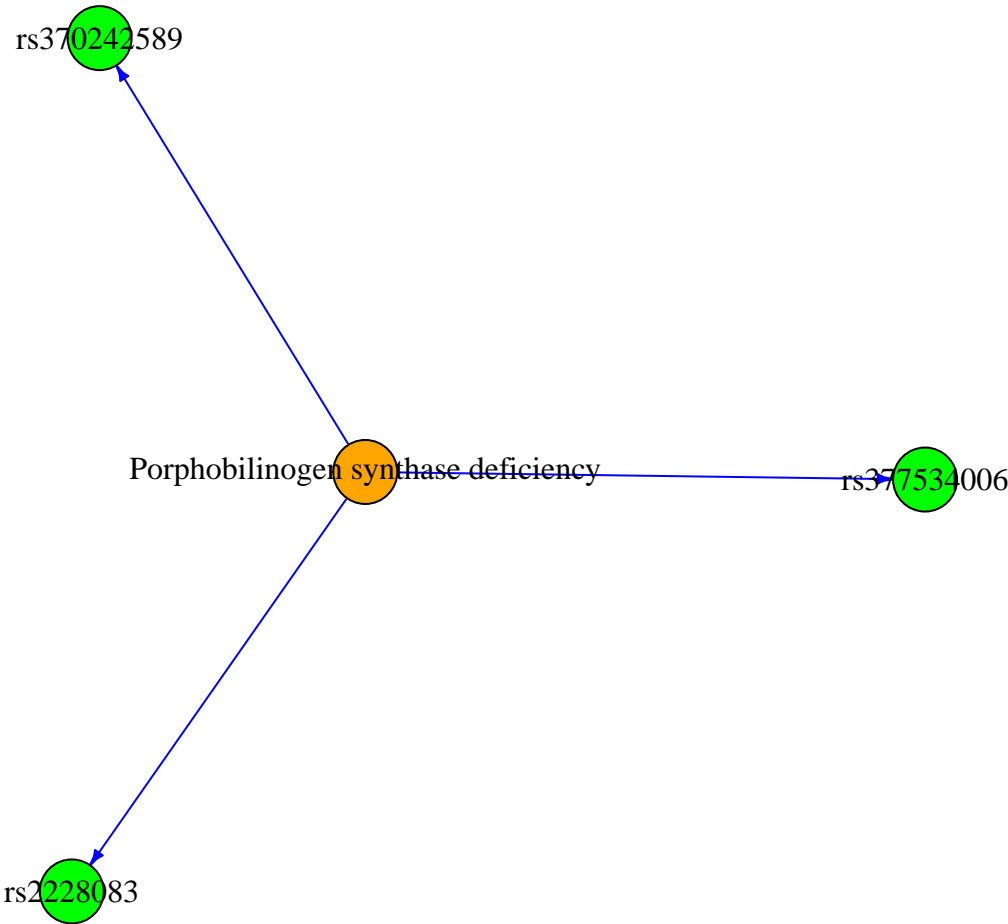

## Variant-Disease Network (Porphyria)

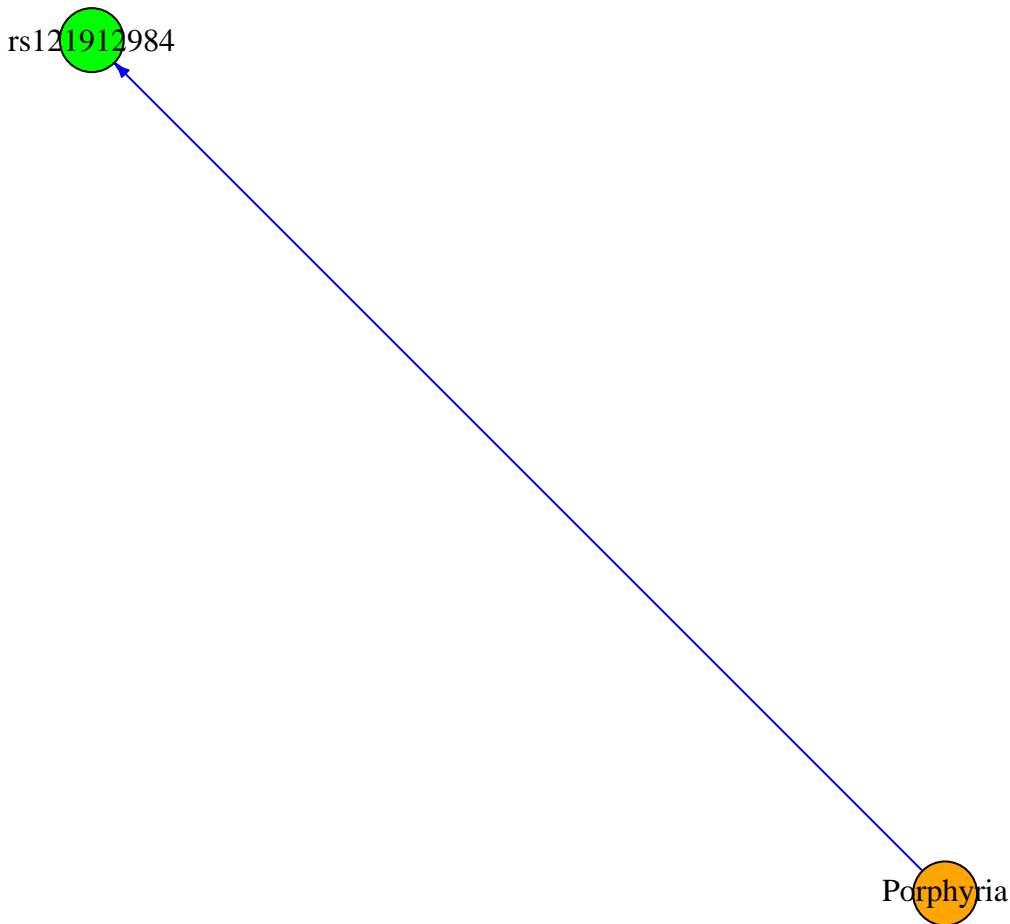

Variant–Disease Network (Porphyria cutanea tarda)

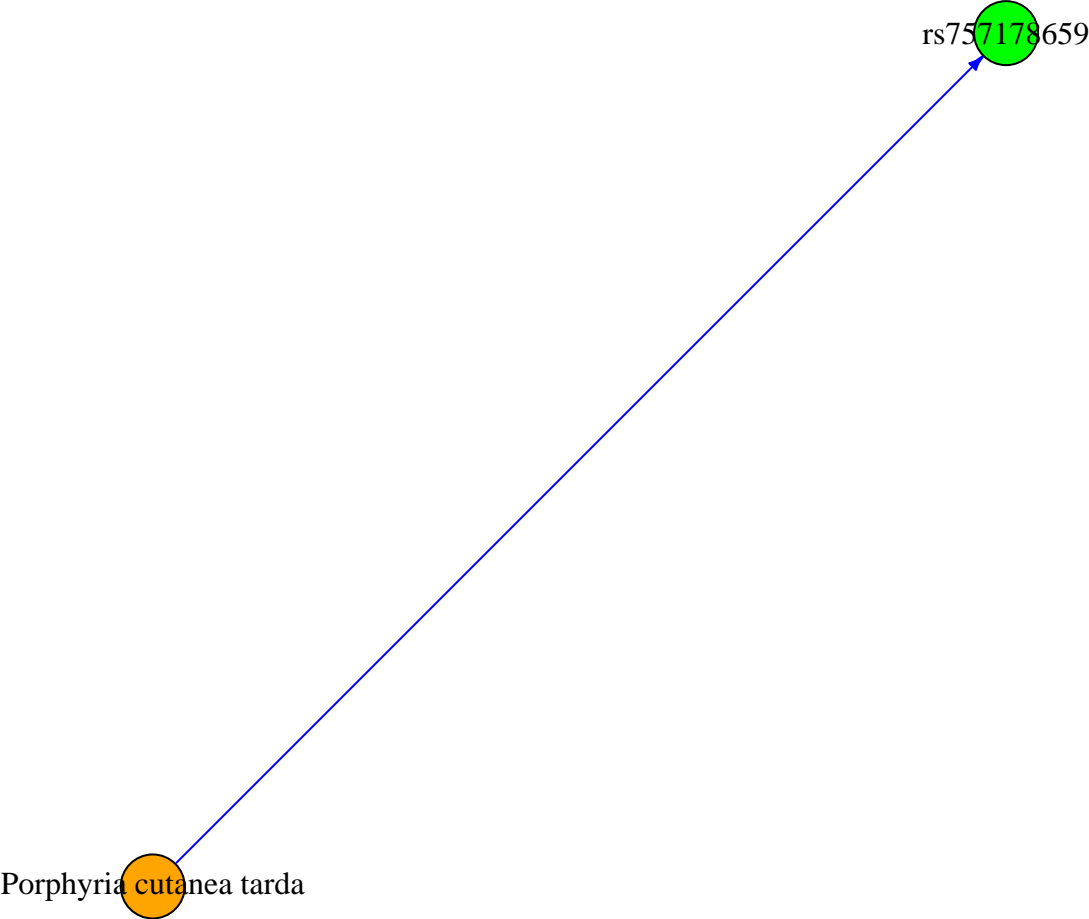

## Variant–Disease Network (Posterior polar cataract)

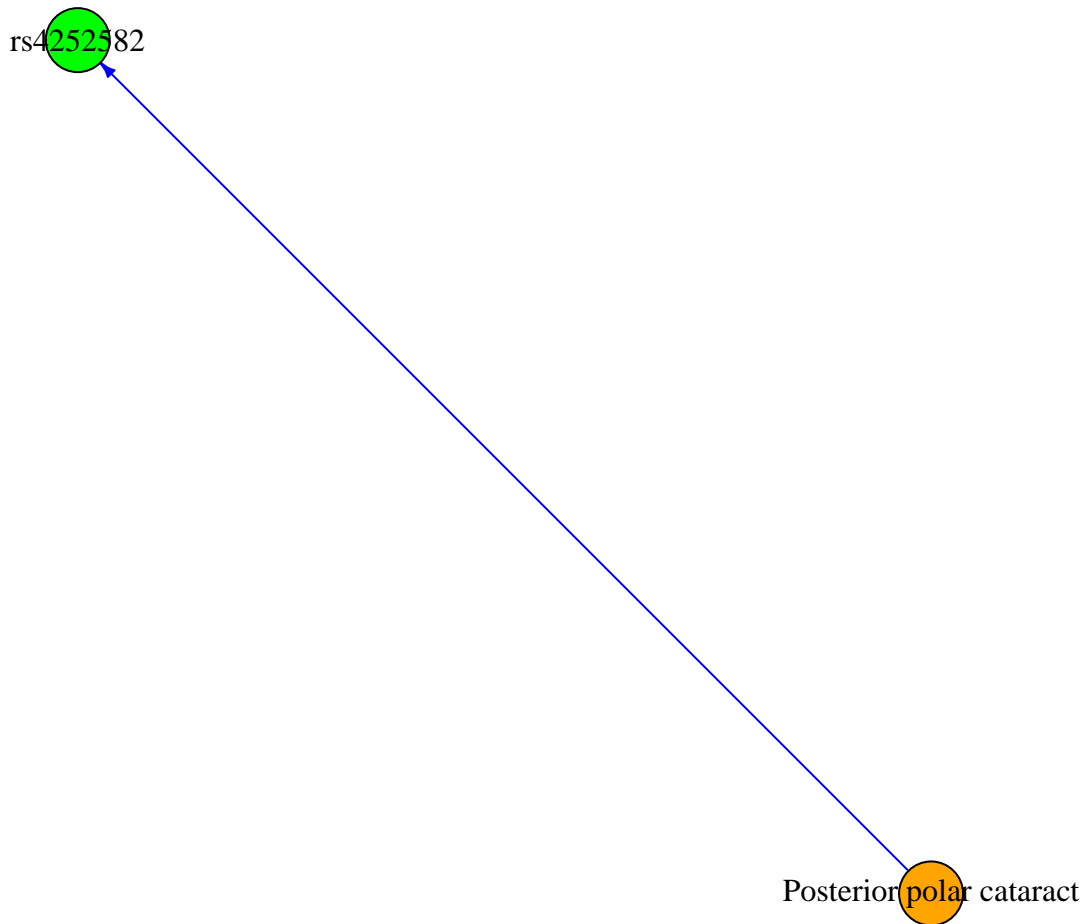

## Variant–Disease Network (Potassium aggravated myotonia)

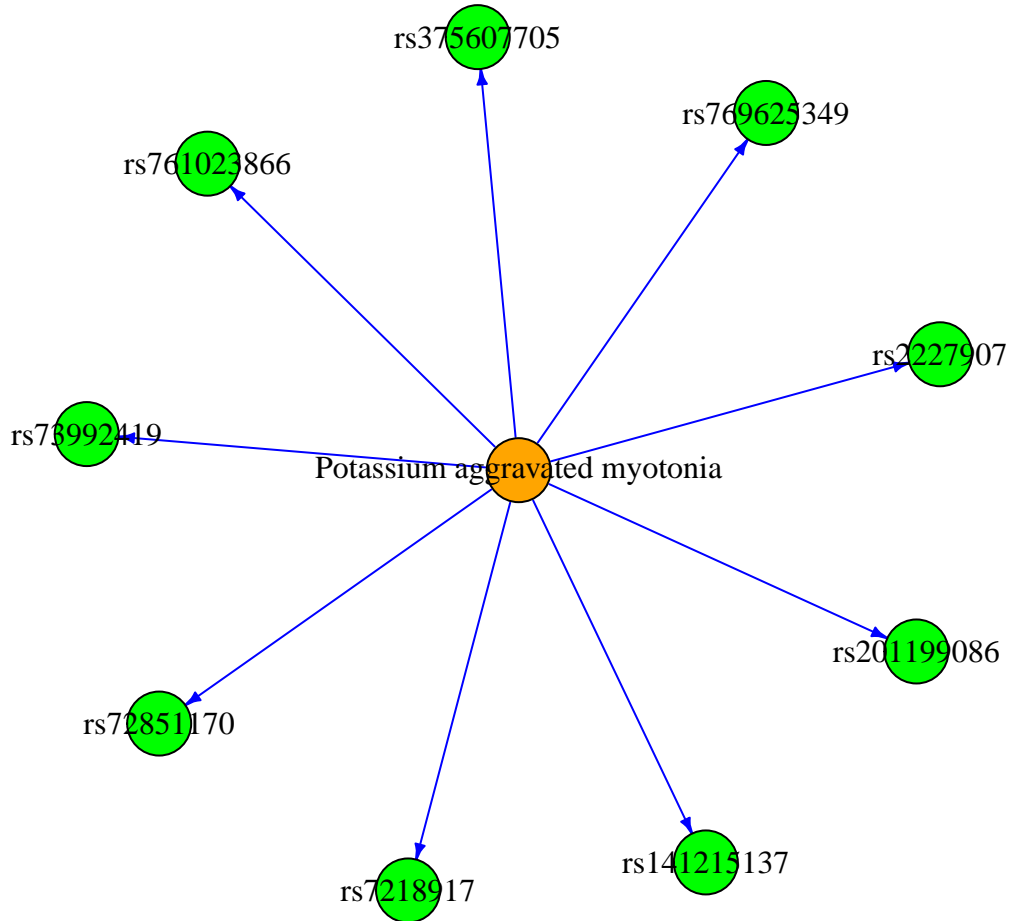

Variant–Disease Network (Premature ovarian failure 2b)

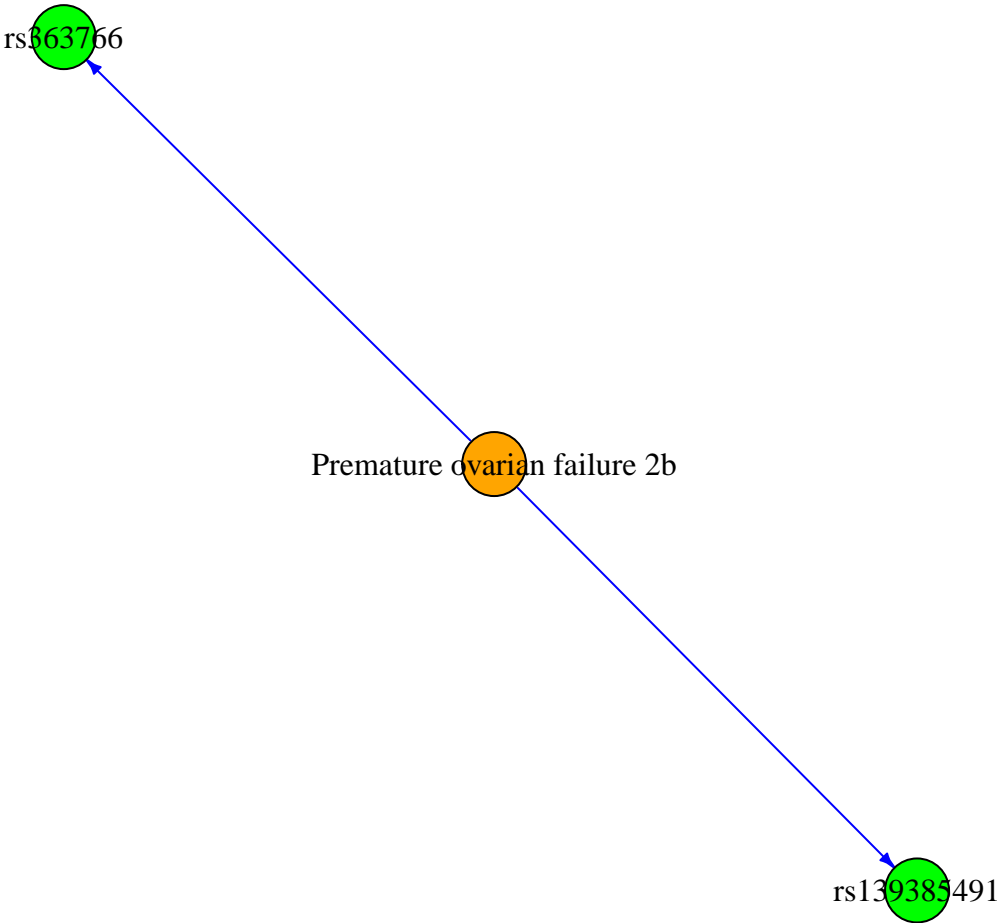

**Variant–Disease Network (Primary autosomal recessive microcephaly 2)**

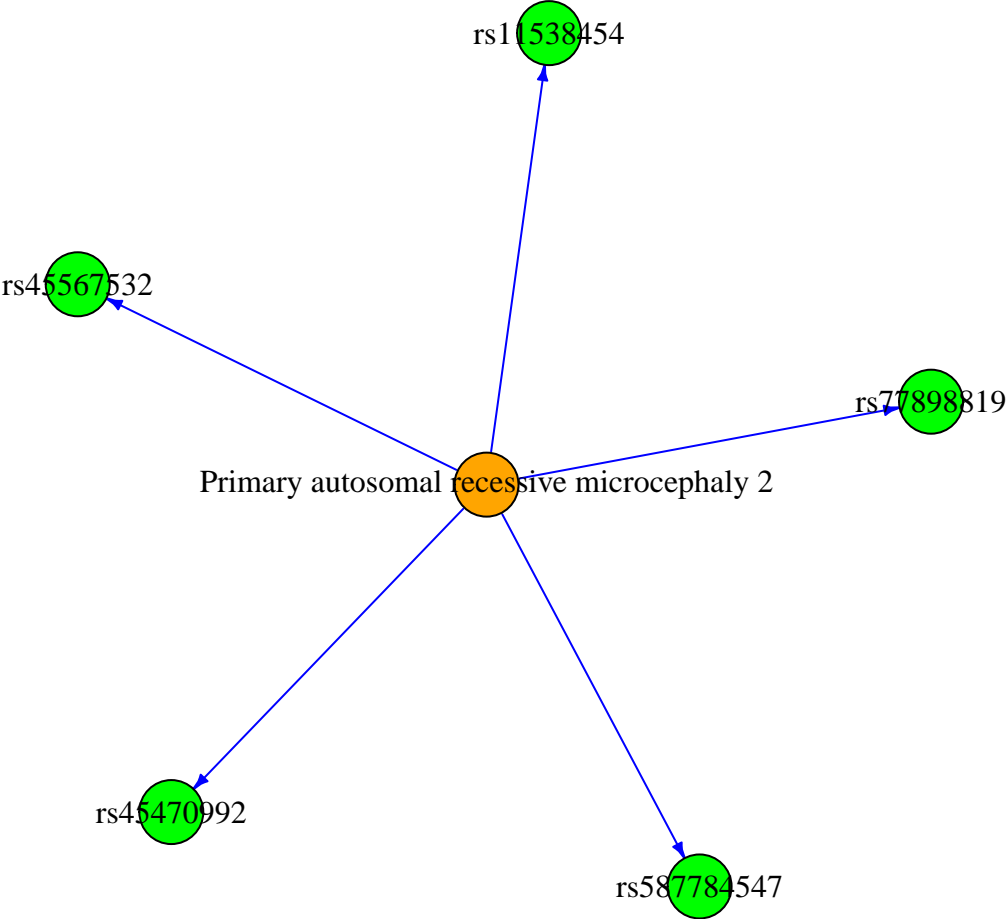

## Variant–Disease Network (Primary ciliary dyskinesia)

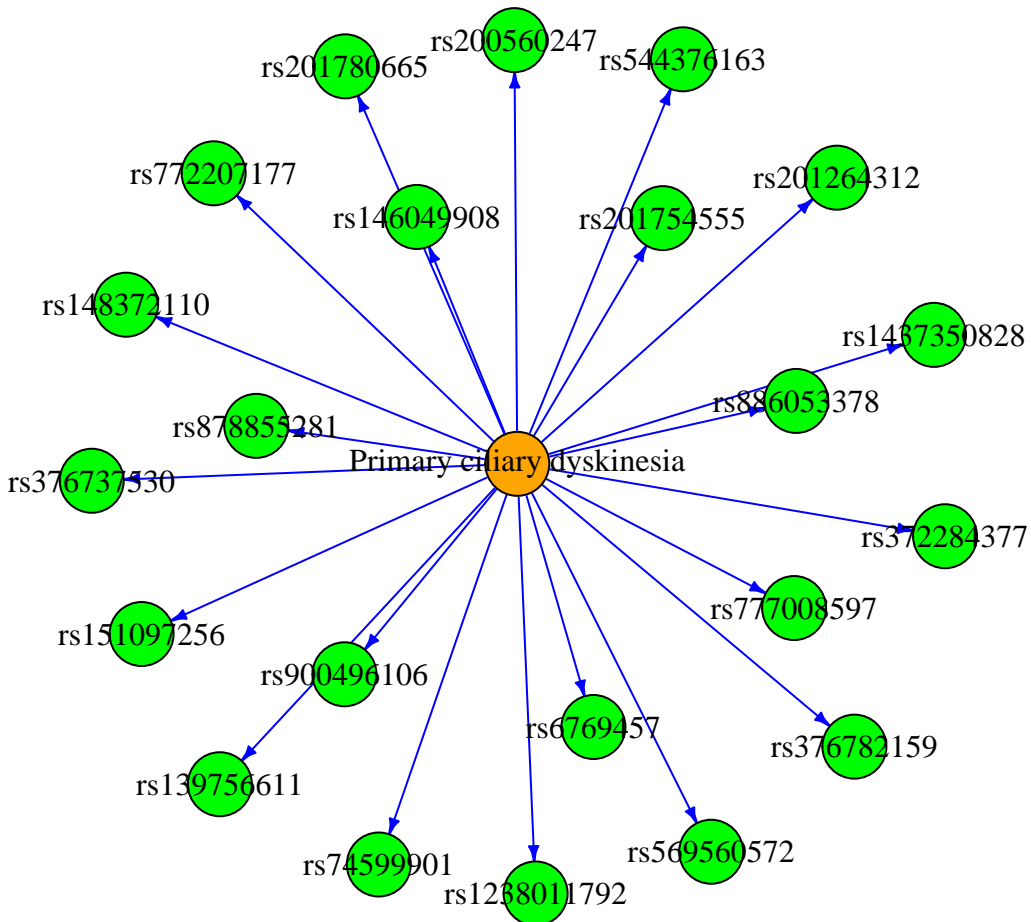



## Variant–Disease Network (Primary ciliary dyskinesia 23)

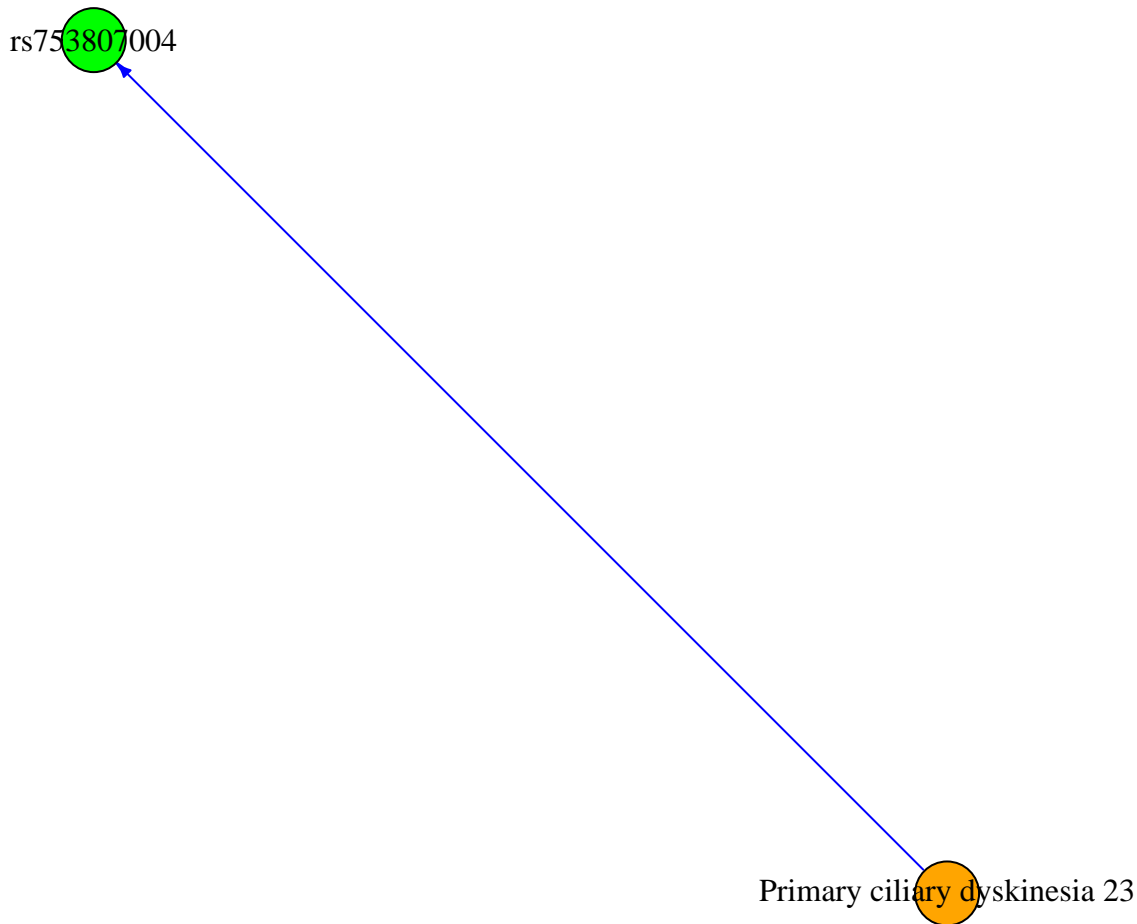

## Variant–Disease Network (Primary congenital glaucoma)

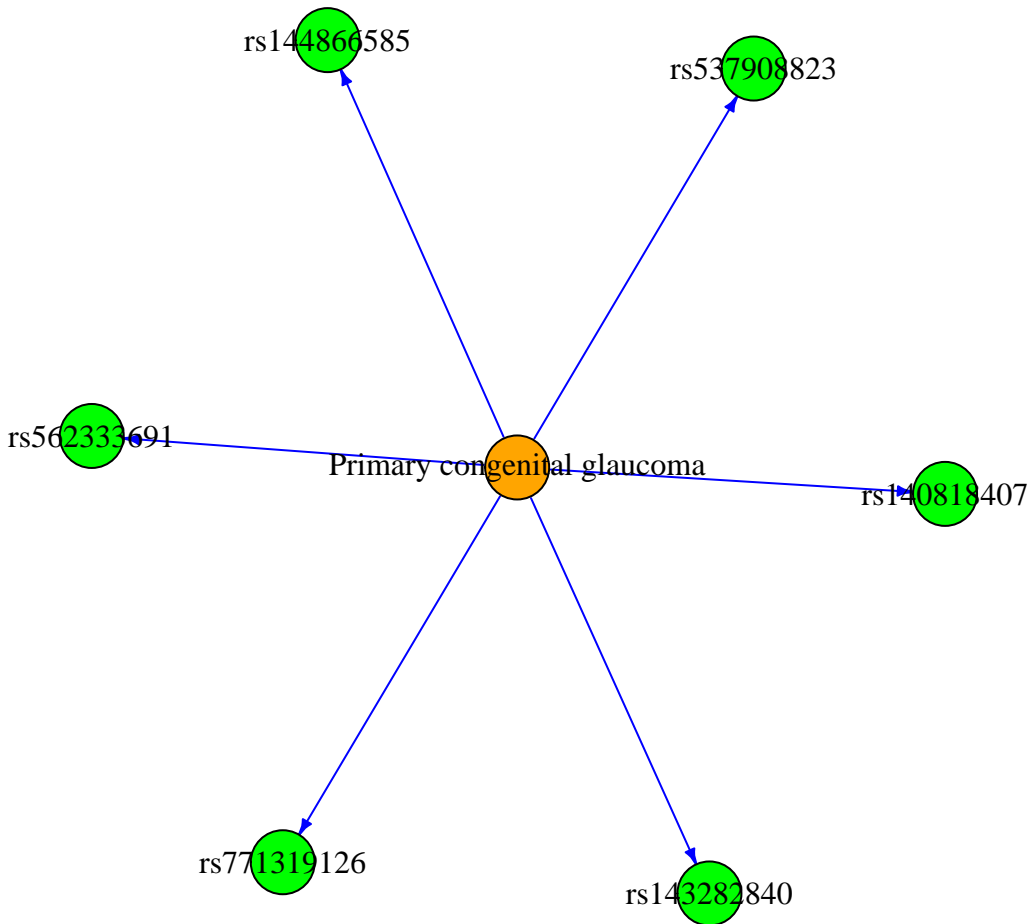

## Variant–Disease Network (Primary dilated cardiomyopathy)

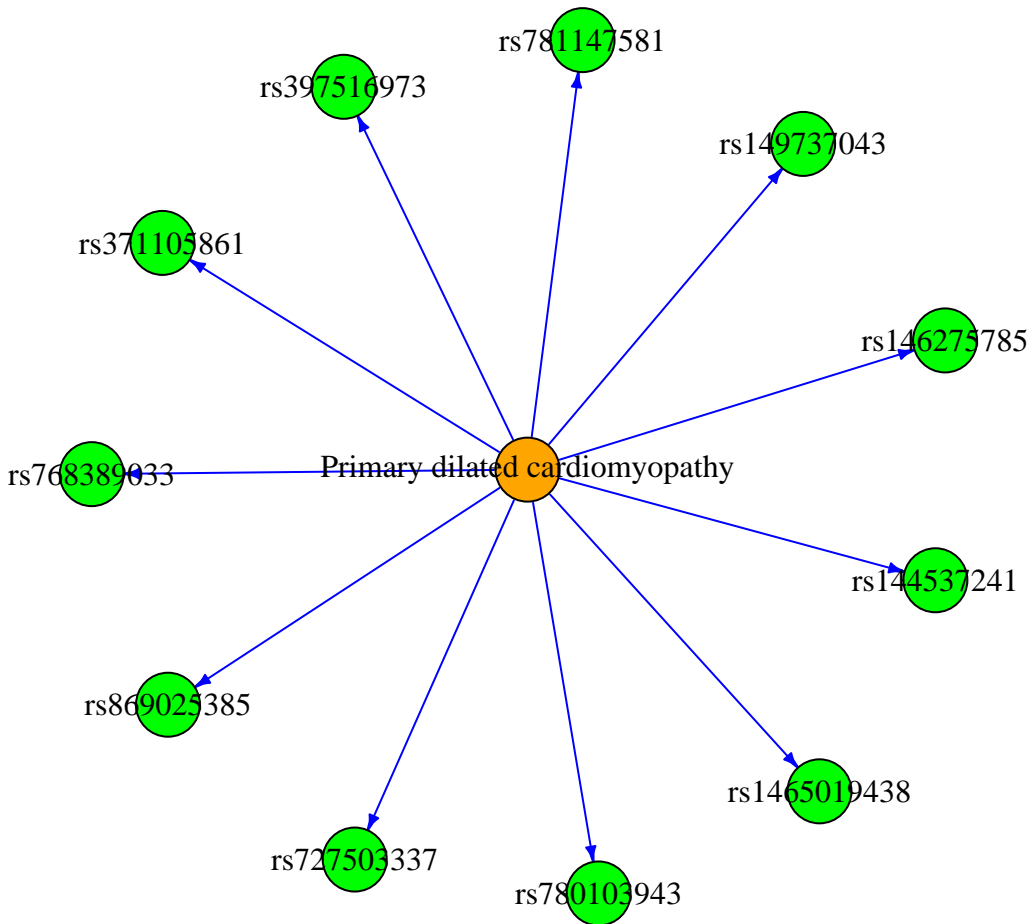

Variant–Disease Network (Primary familial hypertrophic cardiomyopathy)

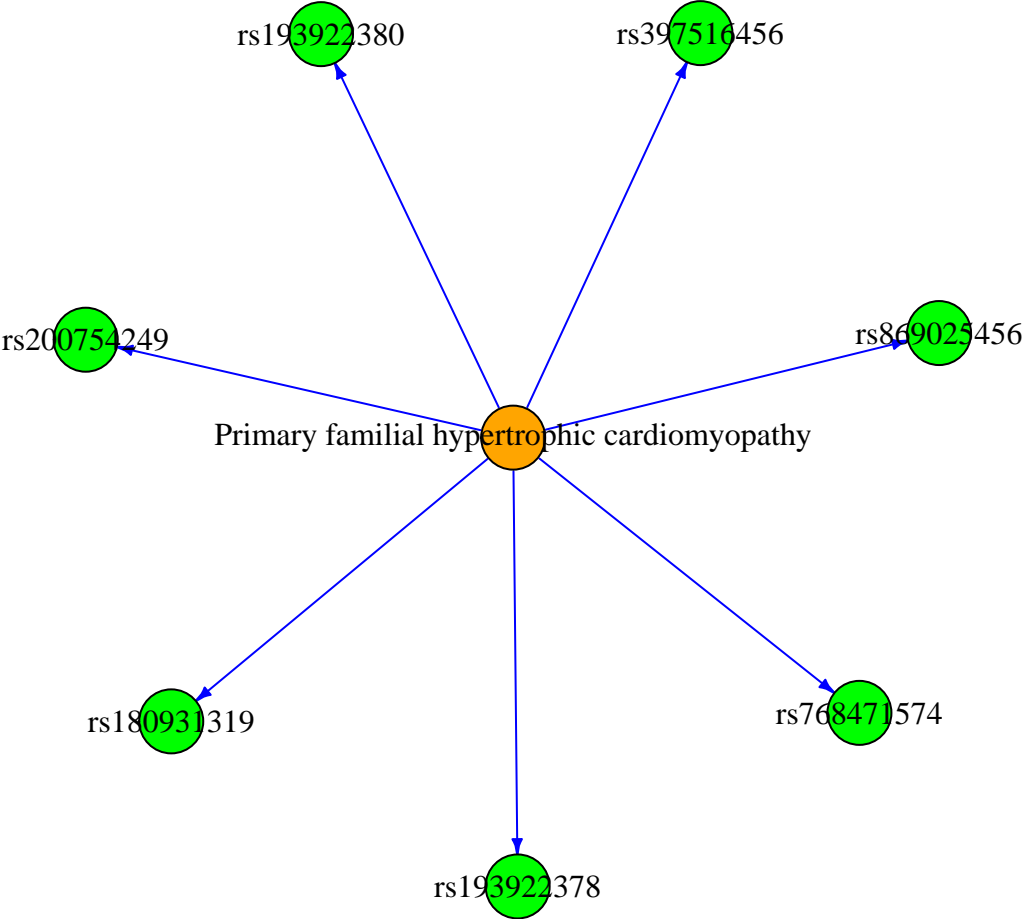

## Variant–Disease Network (Primary hyperoxaluria)

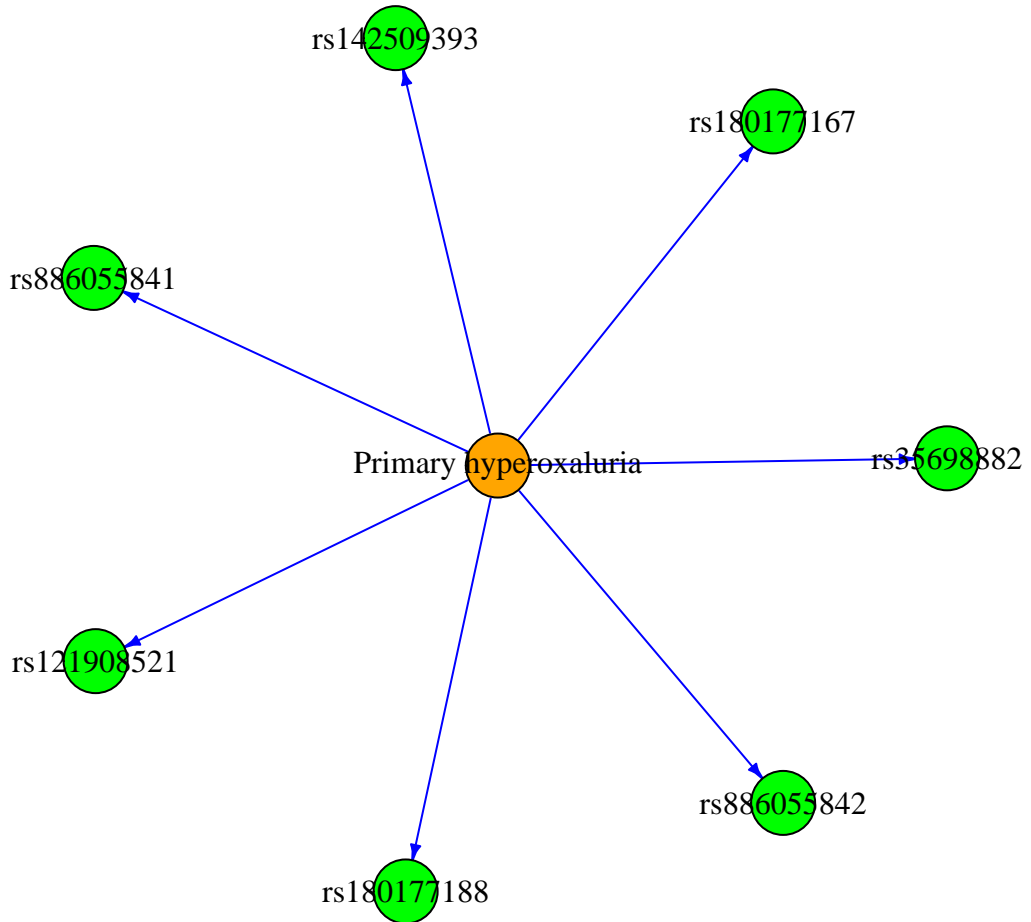

# nt-Disease Network (Primary Microcephaly 2 With or Without Cortical Malfo

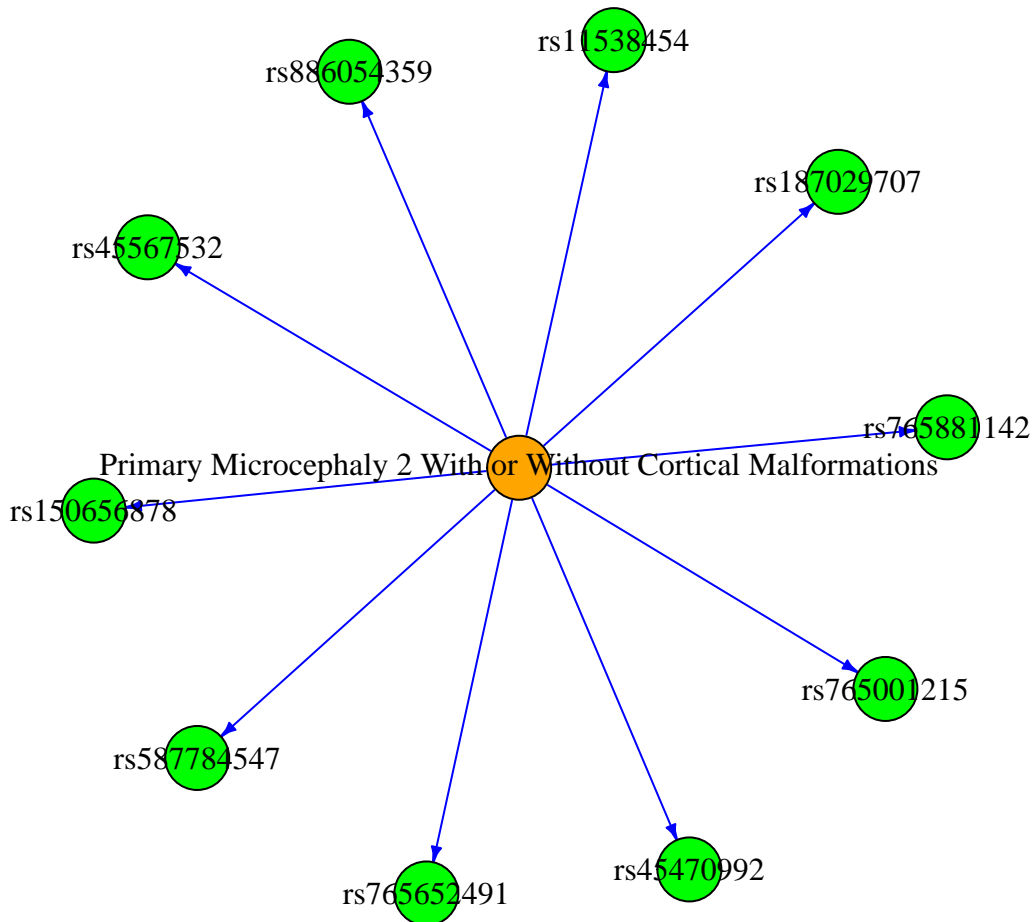

**Variant–Disease Network (Primary open angle glaucoma)**

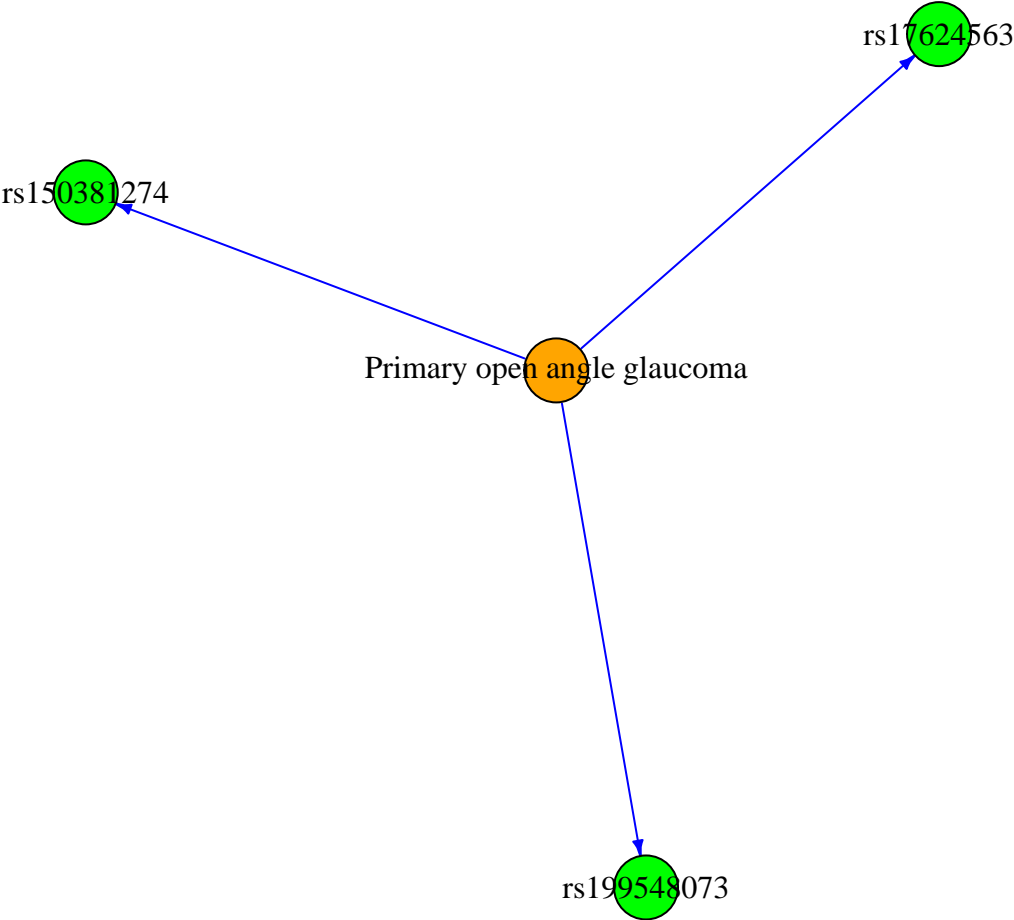

**Variant–Disease Network (Primary pulmonary hypertension)**

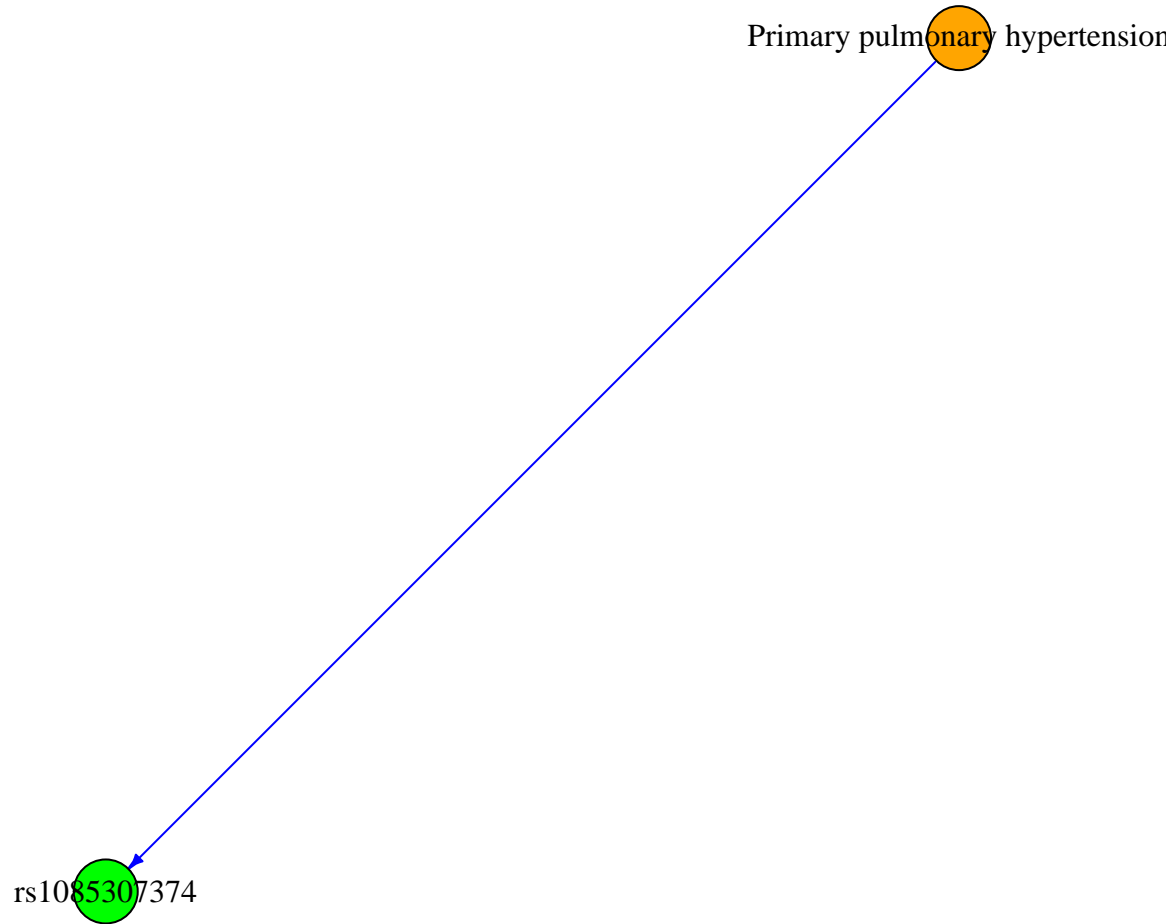



# Disease Network (Progressive External Ophthalmoplegia with Mitochondrial D

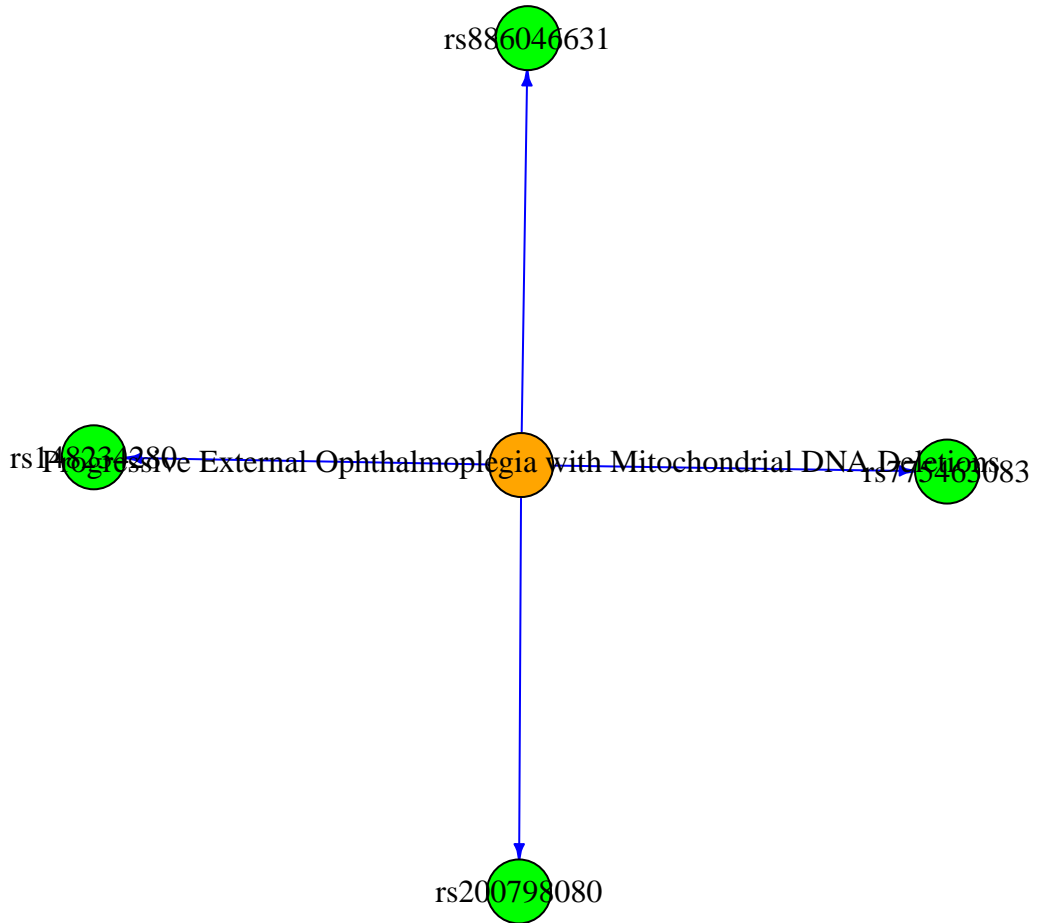

**Variant–Disease Network (Progressive familial heart block)**

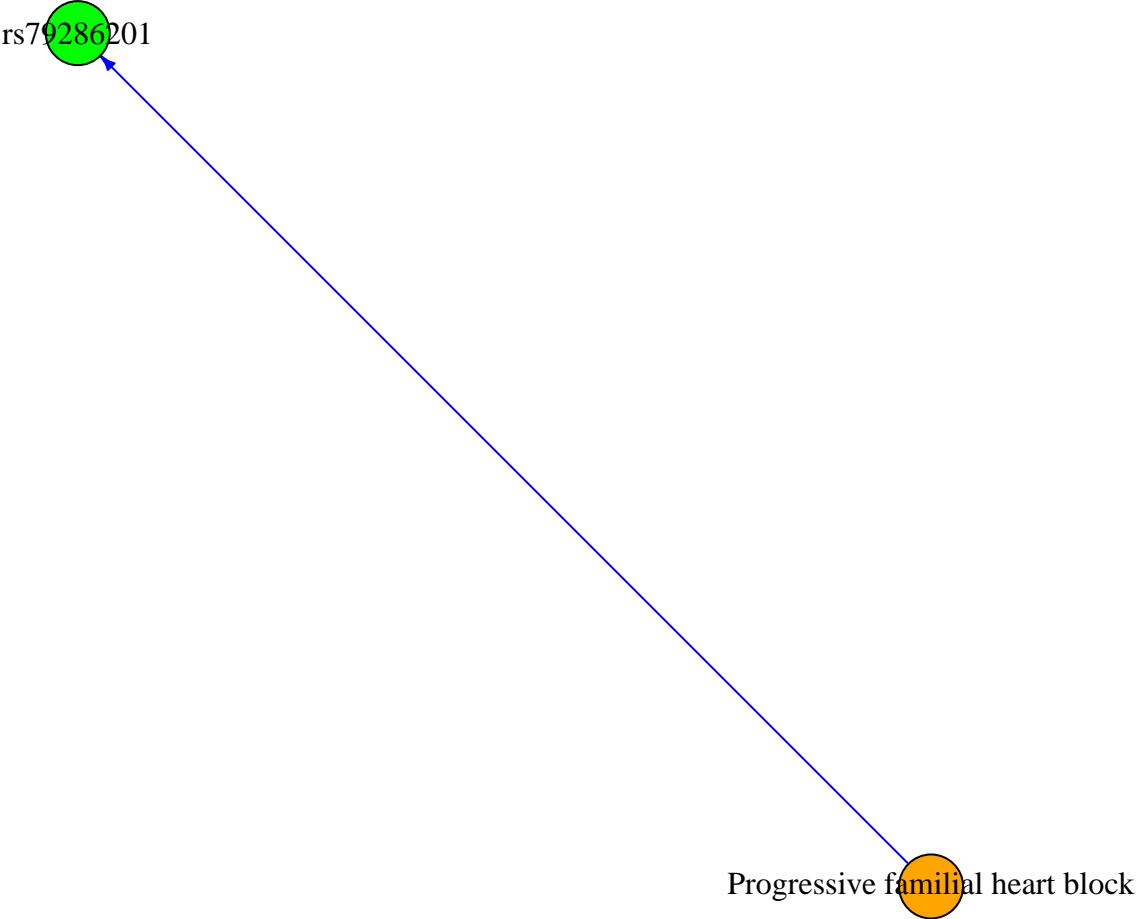

# Variant–Disease Network (Progressive familial heart block type 1B)

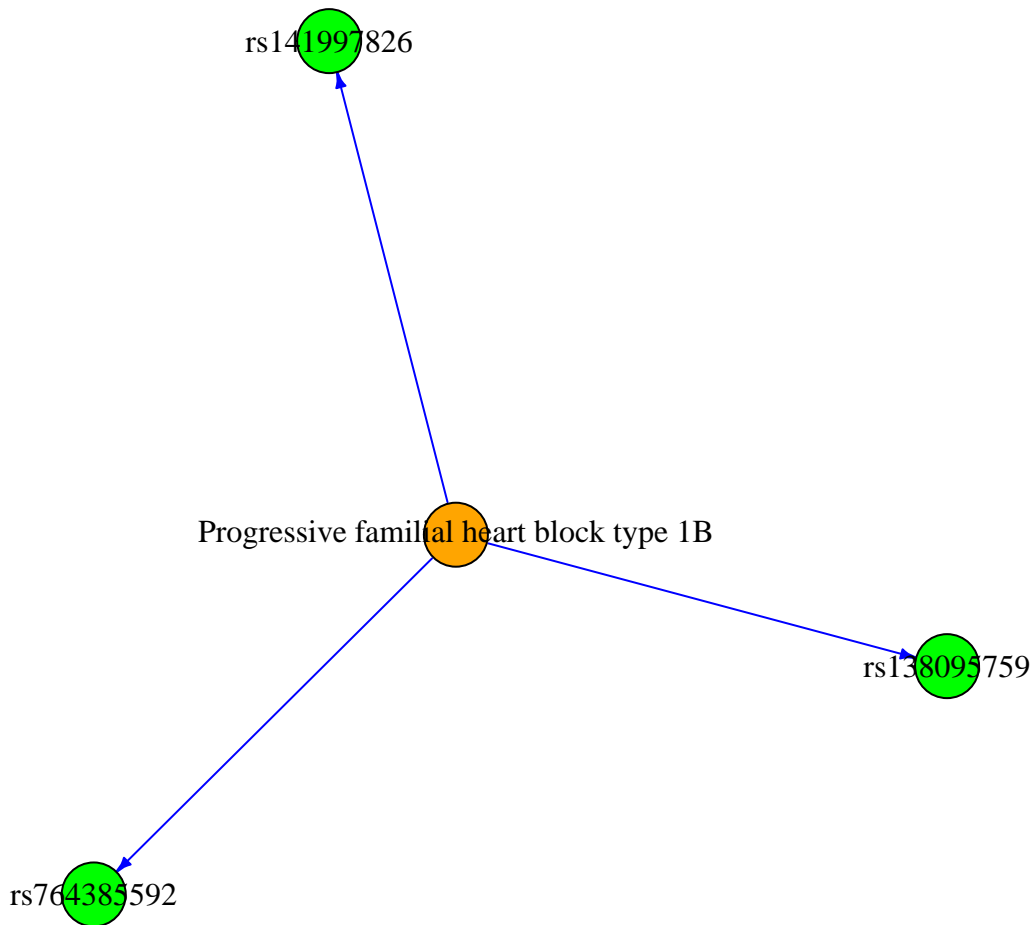

# Variant–Disease Network (Progressive familial intrahepatic cholestasis)

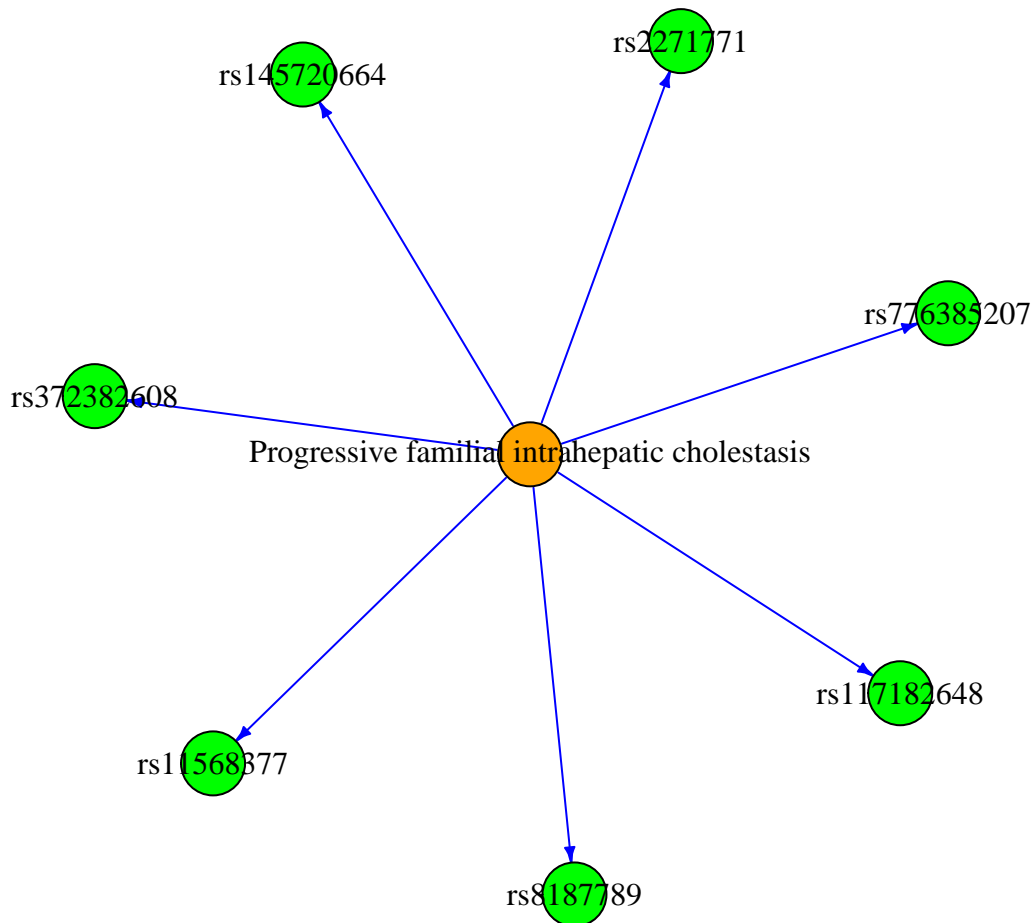

Variant–Disease Network (Progressive familial intrahepatic cholestasis 3

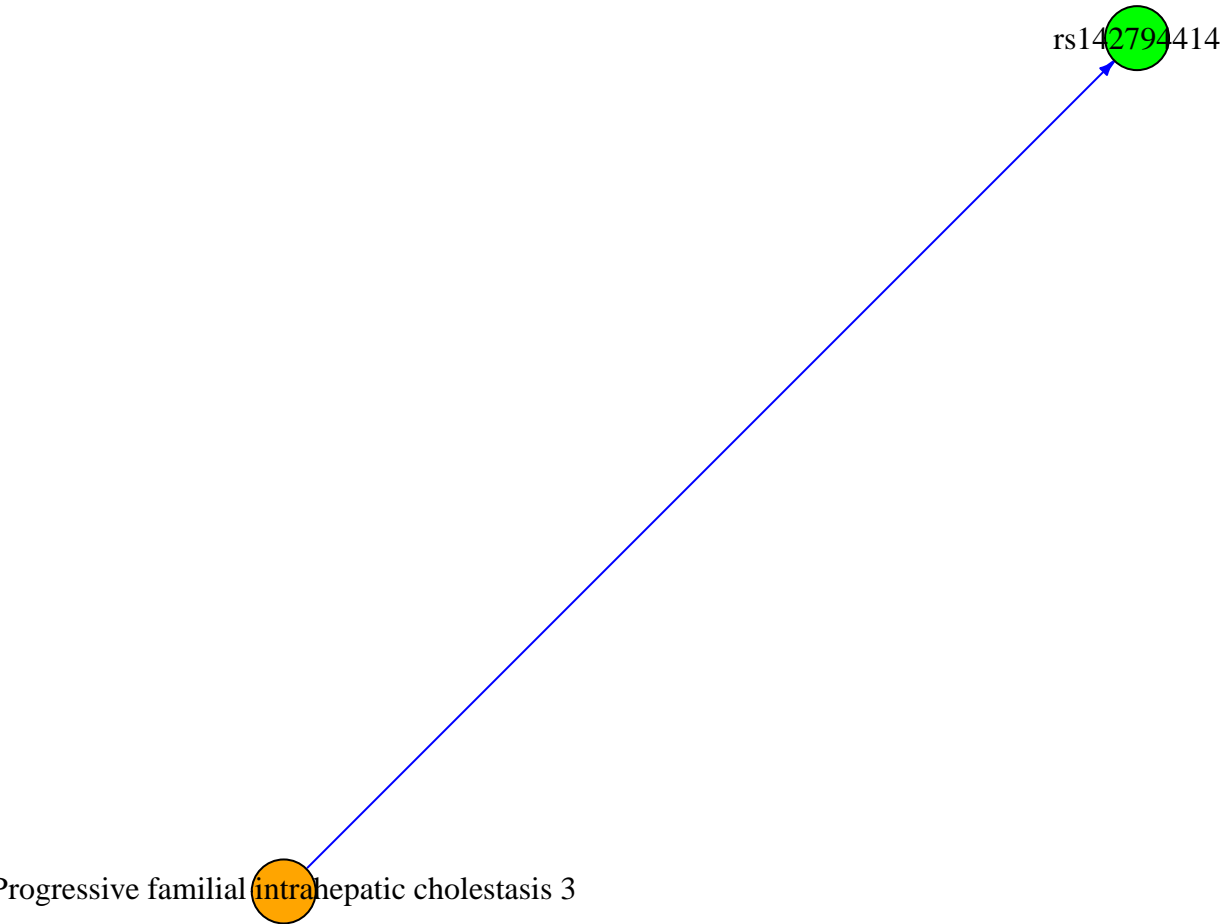

# Variant–Disease Network (Progressive myoclonic epilepsy)

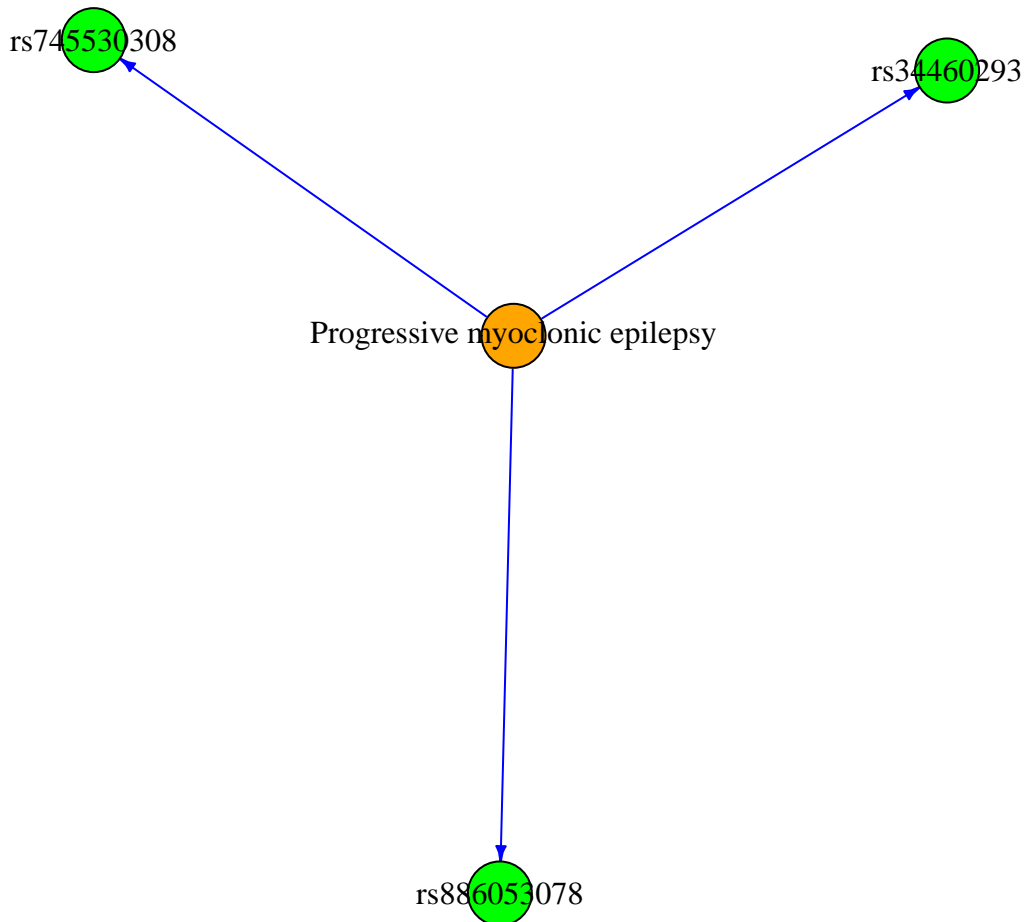

# Variant–Disease Network (Progressive myoclonus epilepsy with ataxia)

Progressive myoclonus epilepsy with ataxia

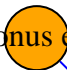

rs139421676

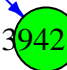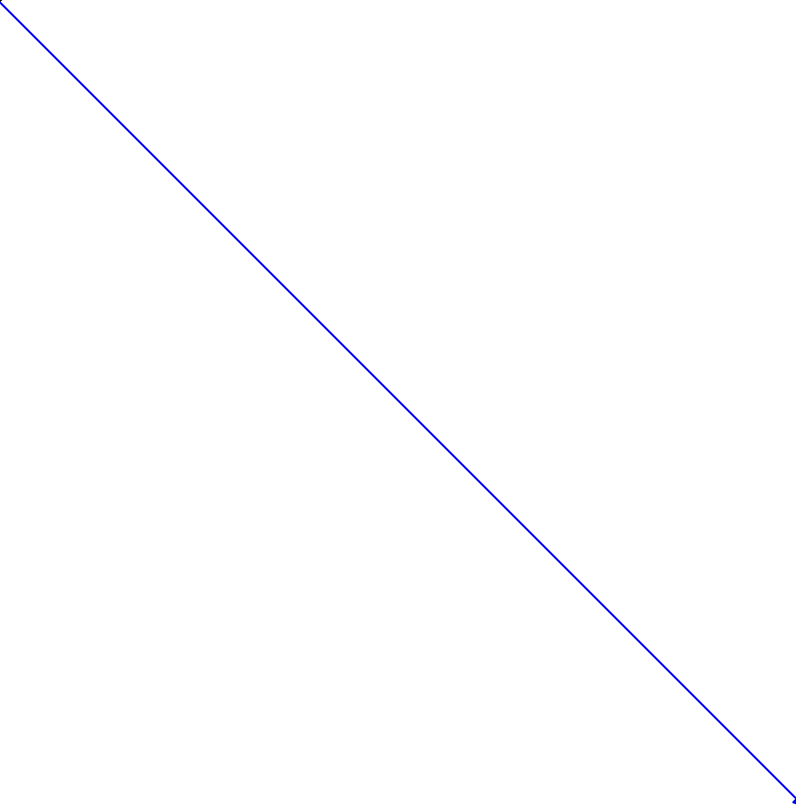

# Variant-Disease Network (Progressive myositis ossificans)

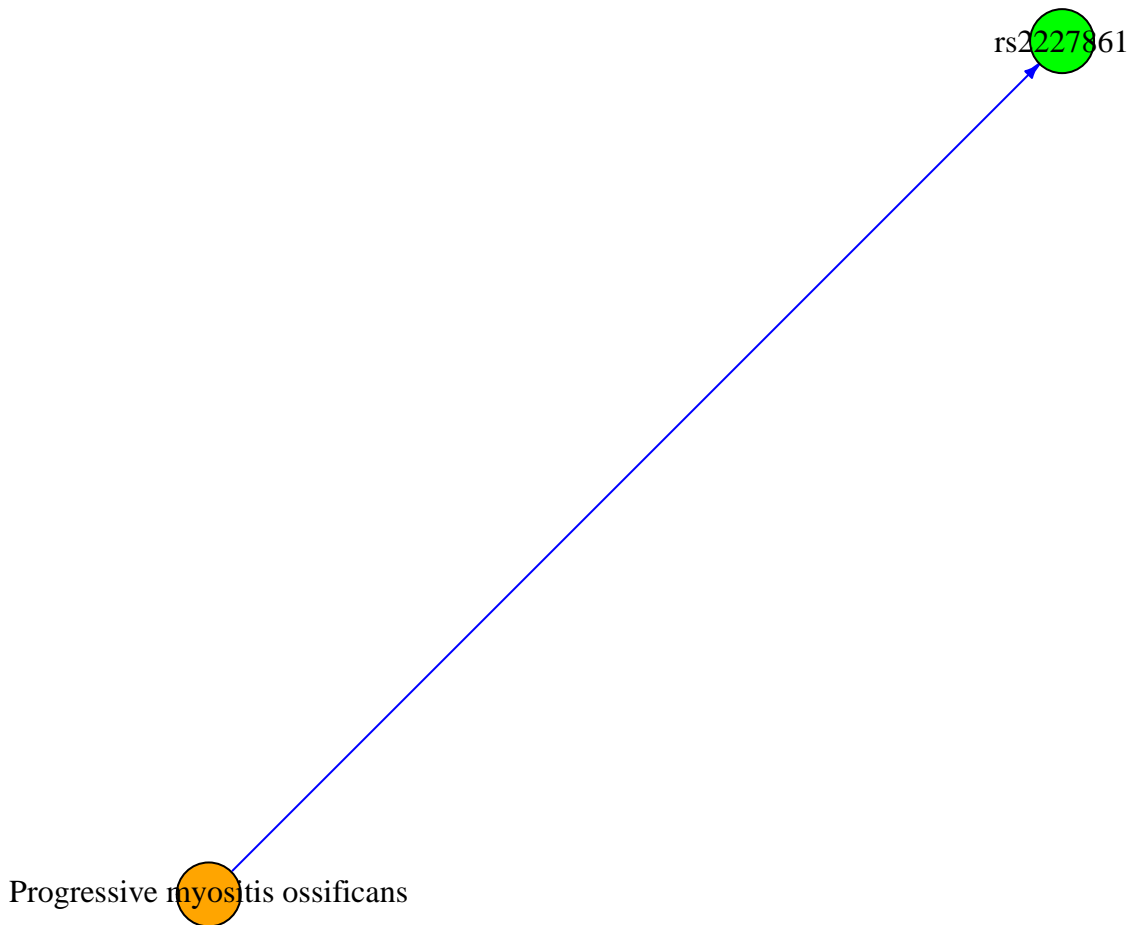



**Variant–Disease Network (Progressive sclerosing poliodystrophy)**

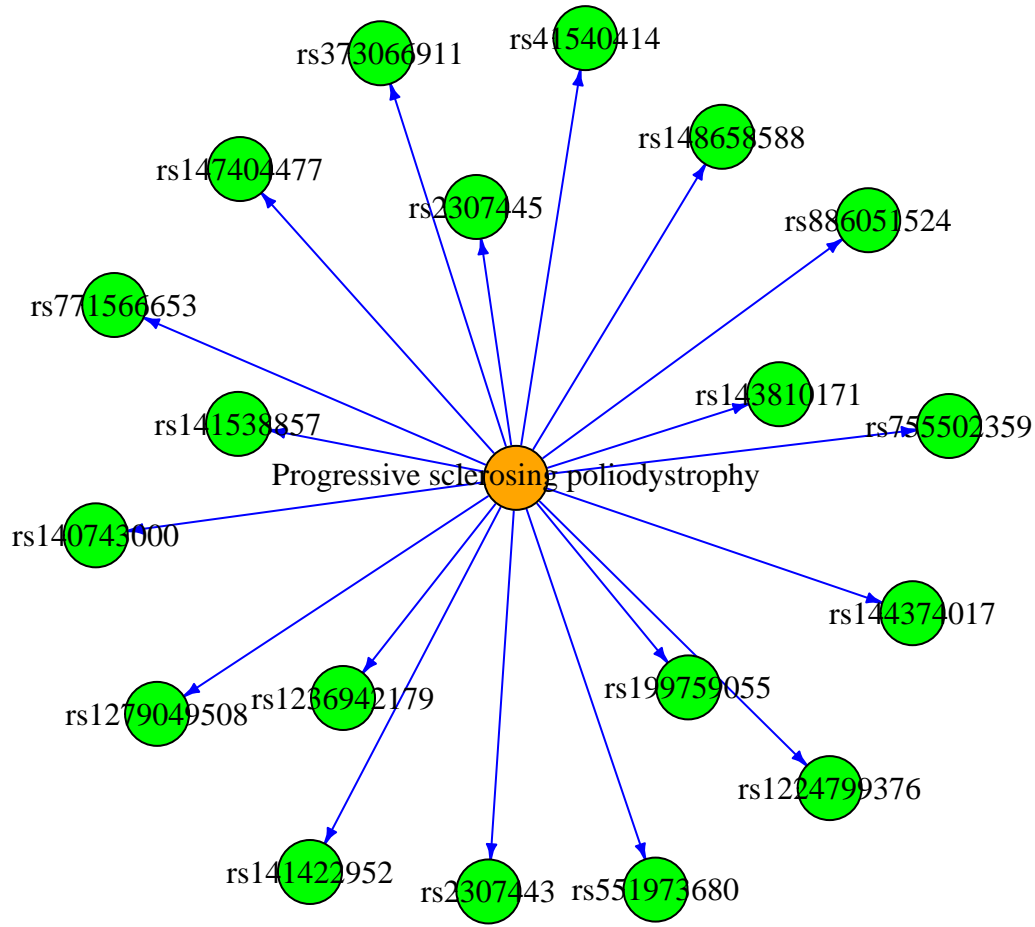

**Variant–Disease Network (Proline dehydrogenase deficiency)**

rs5992333



Proline dehydrogenase deficiency

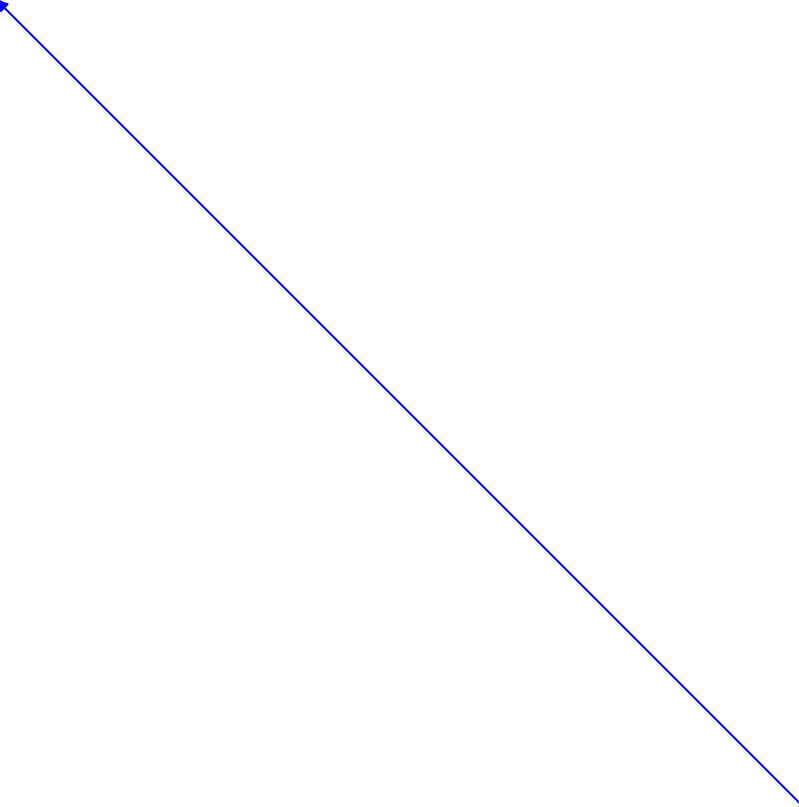

**Variant–Disease Network (Propionyl–CoA carboxylase deficiency)**

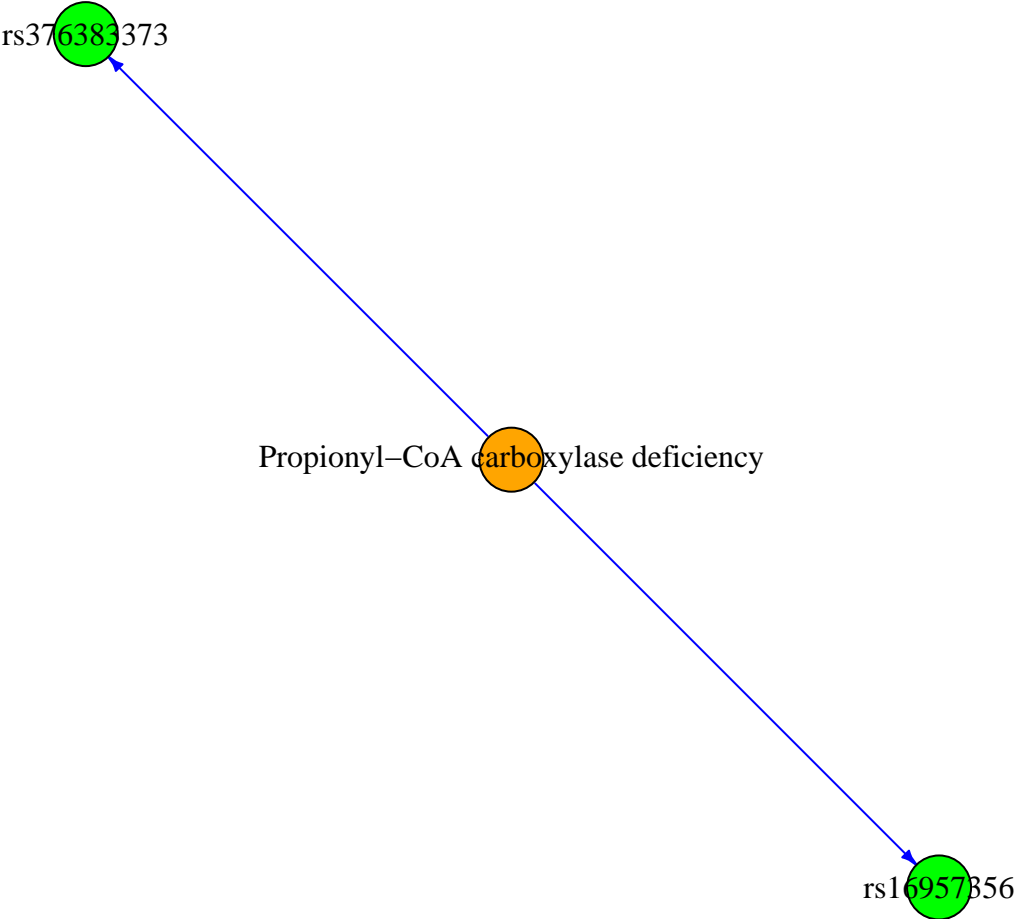

# Variant–Disease Network (Proprotein convertase 1/3 deficiency)

rs6231



```
graph TD; A((rs6231)) <--> B((Proprotein convertase 1/3 deficiency));
```

Proprotein convertase 1/3 deficiency

## Variant–Disease Network (Protein S deficiency)

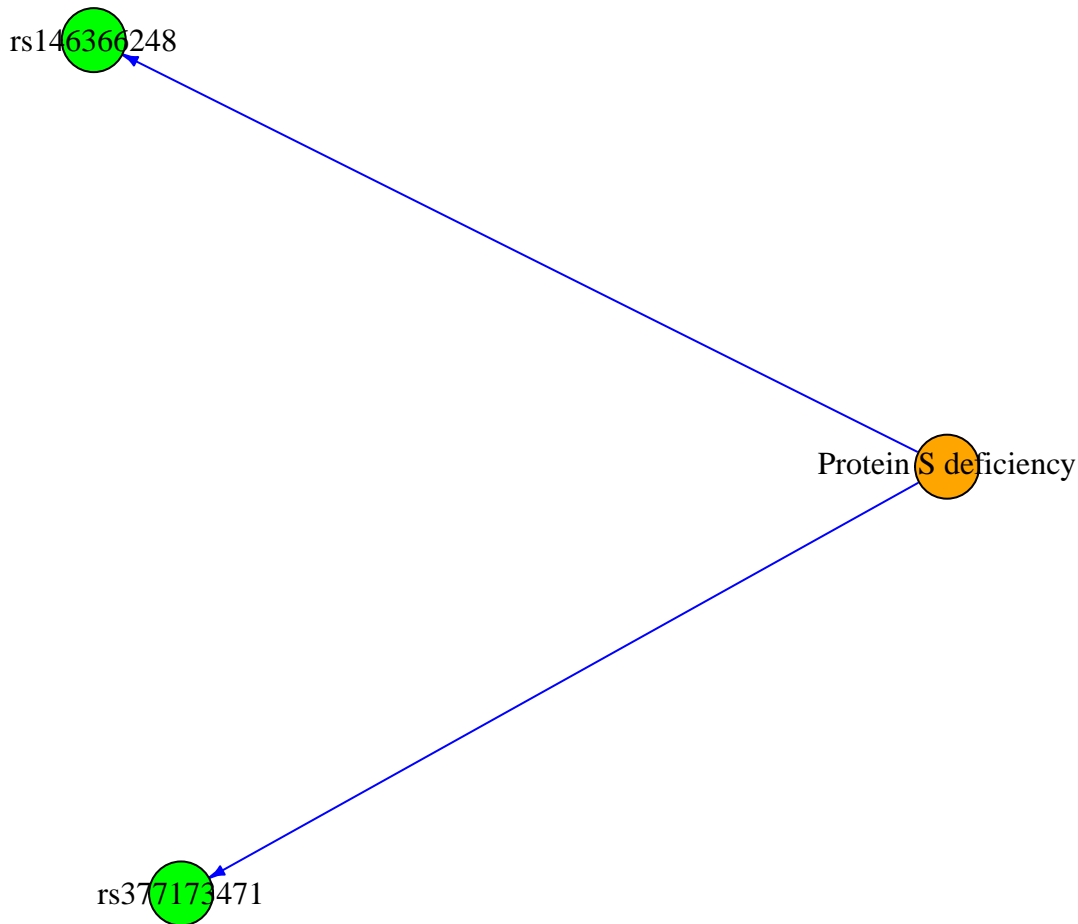

## Variant–Disease Network (Protoporphyrria)

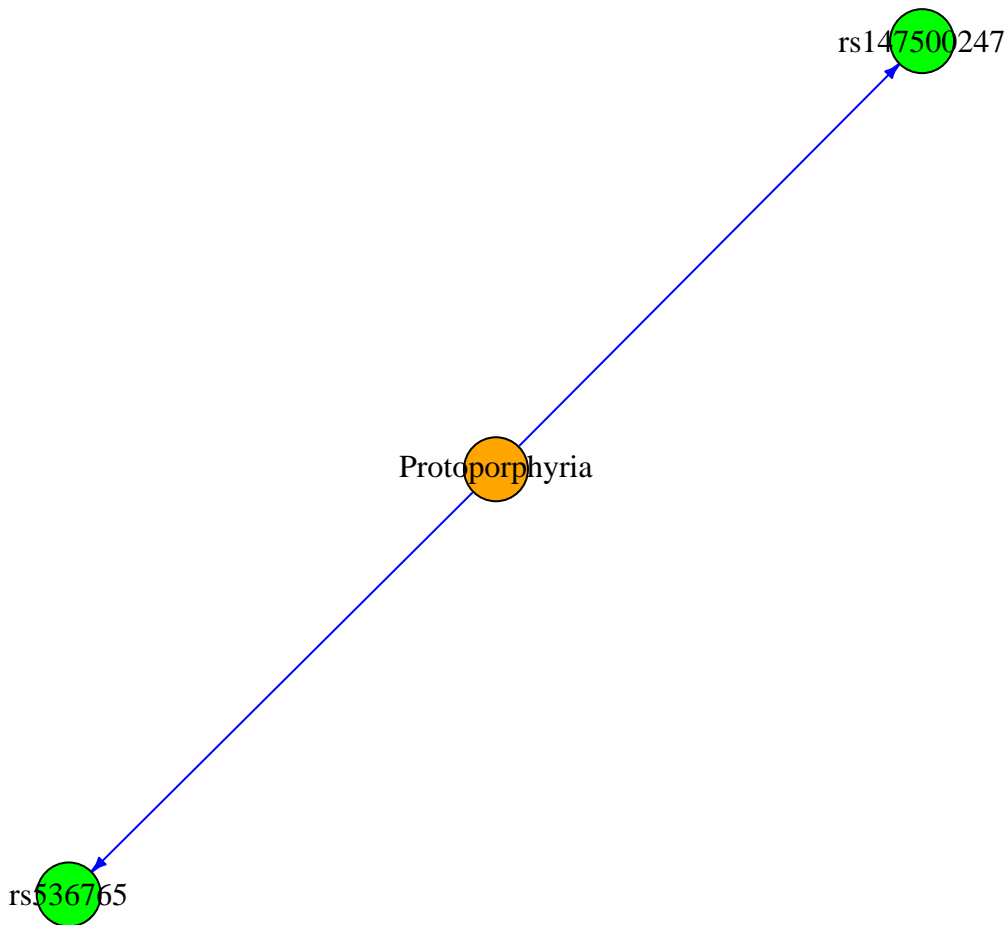

# Variant-Disease Network (Pseudohypoaldosteronism type 1 autosomal dominant)

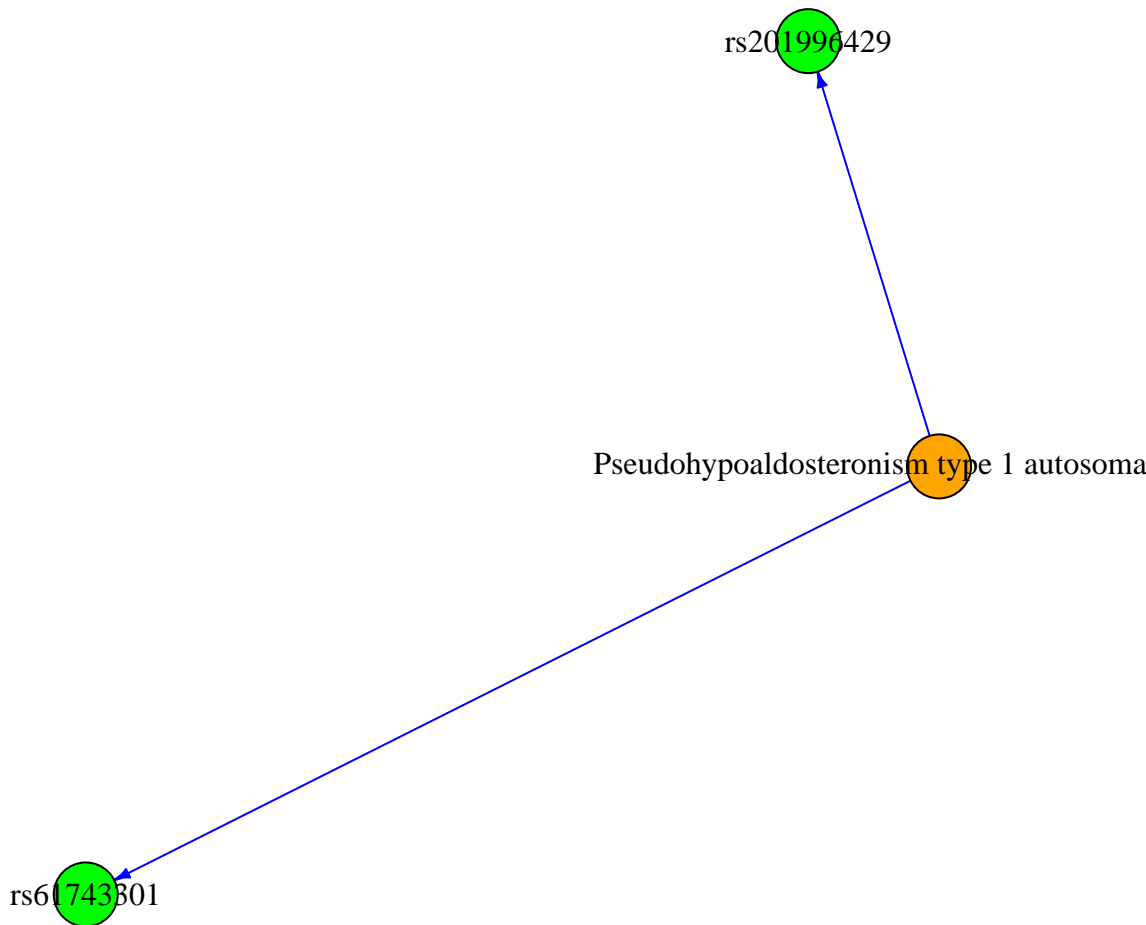

# Variant-Disease Network (Pseudohypoaldosteronism type 1 autosomal recessive)

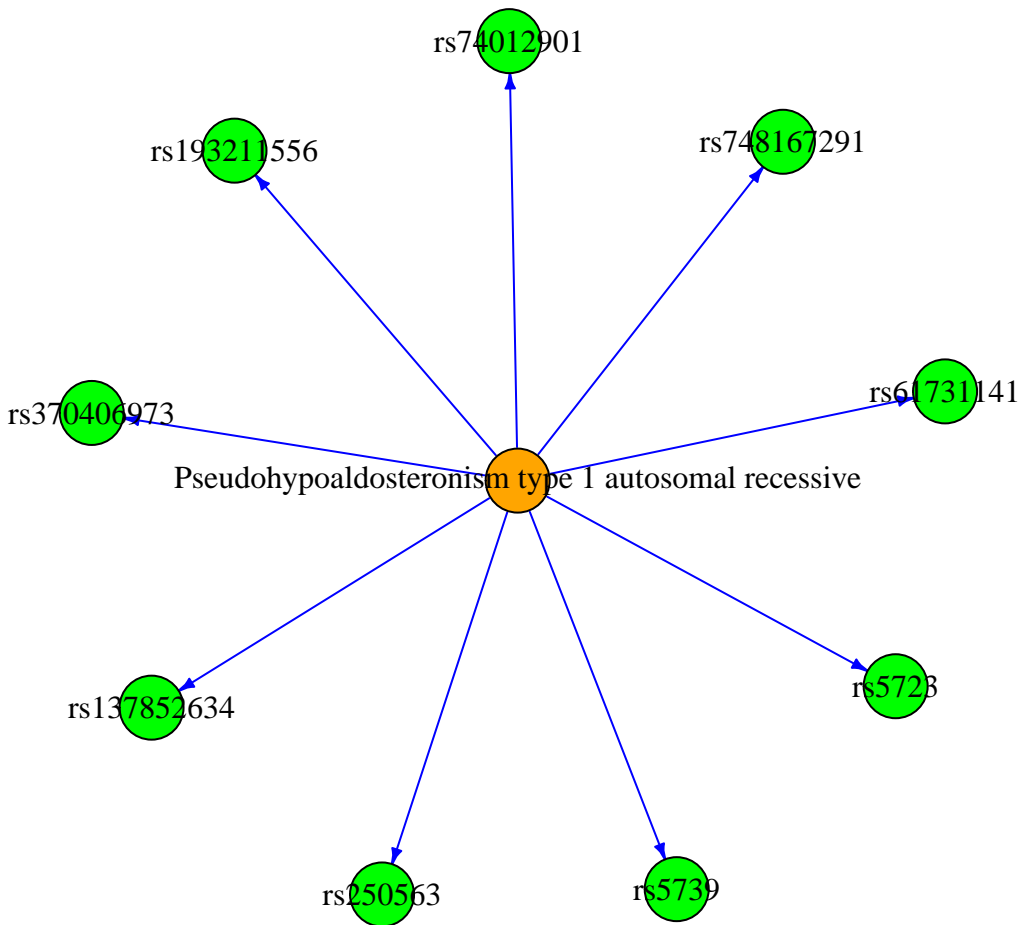



**Variant–Disease Network (Pseudoinflammatory fundus dystrophy)**

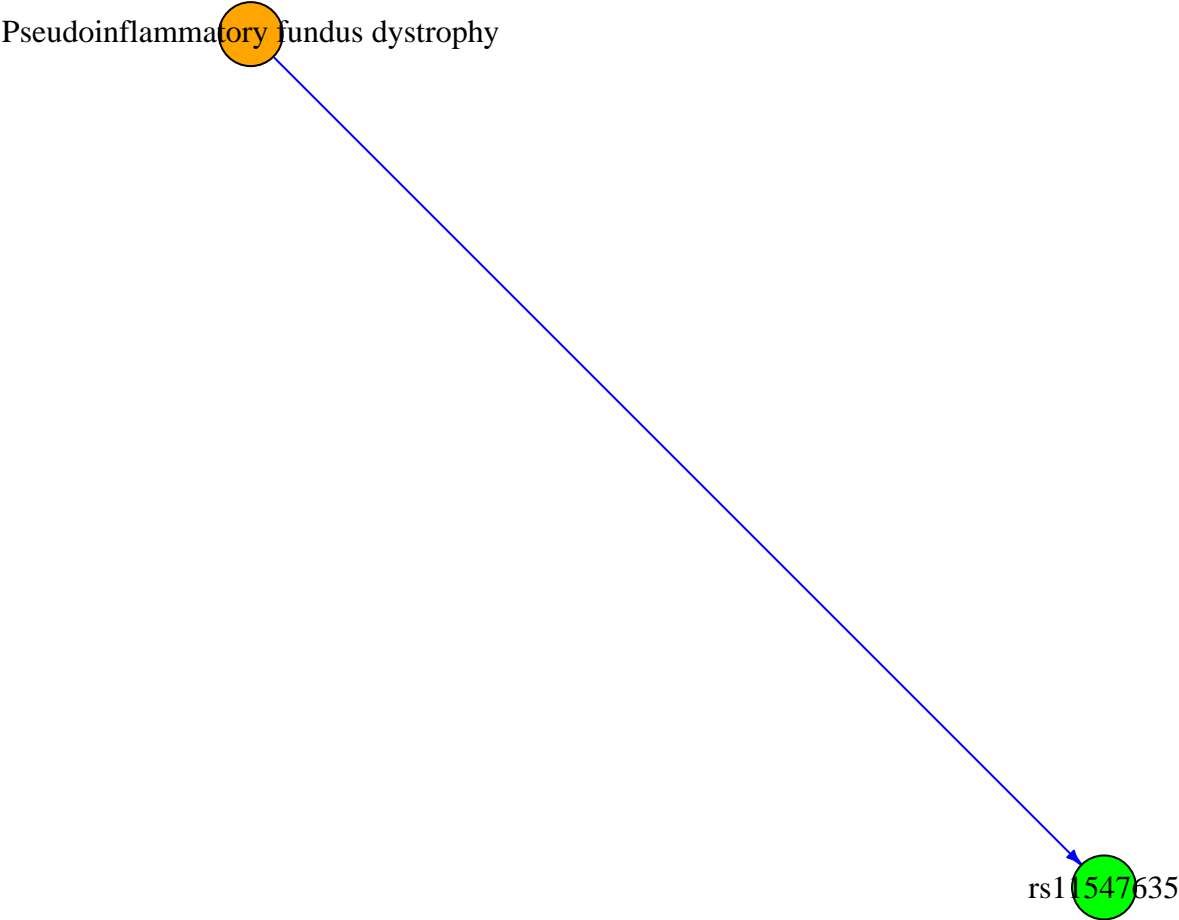

**Variant–Disease Network (Pseudoneonatal adrenoleukodystrophy)**

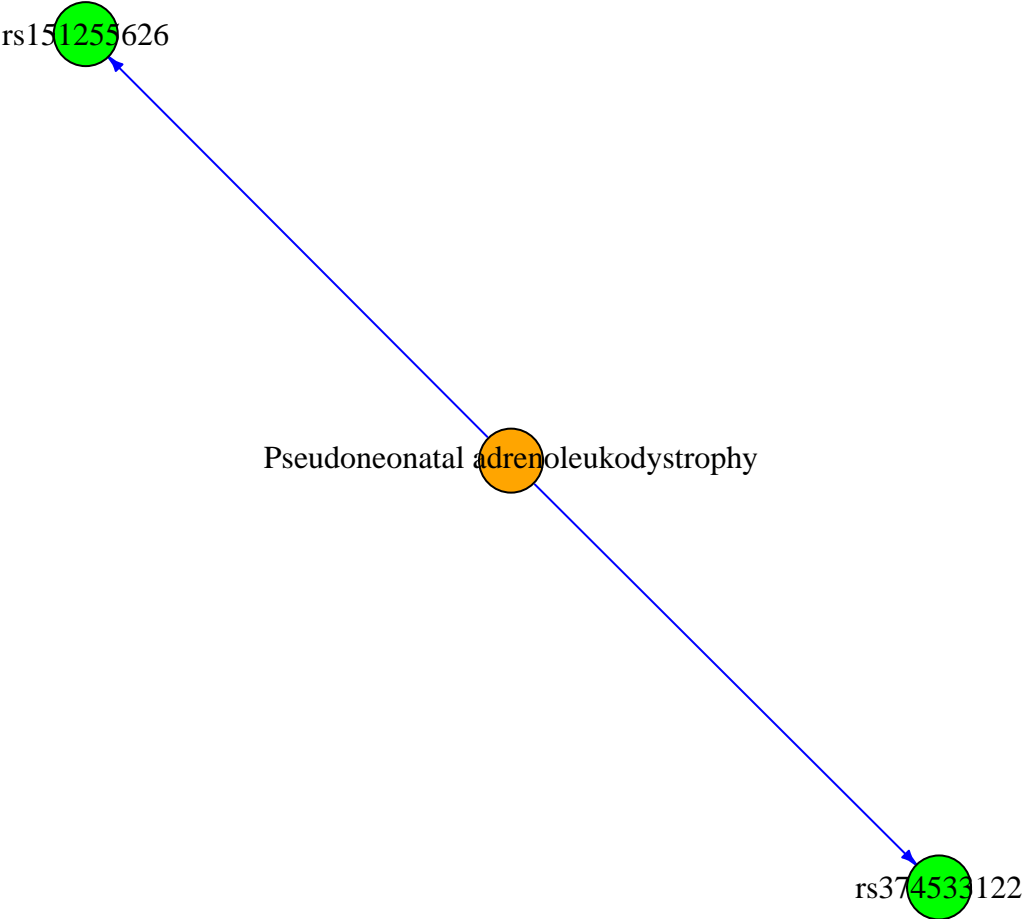

**Variant–Disease Network (Psoriasis susceptibility 2)**

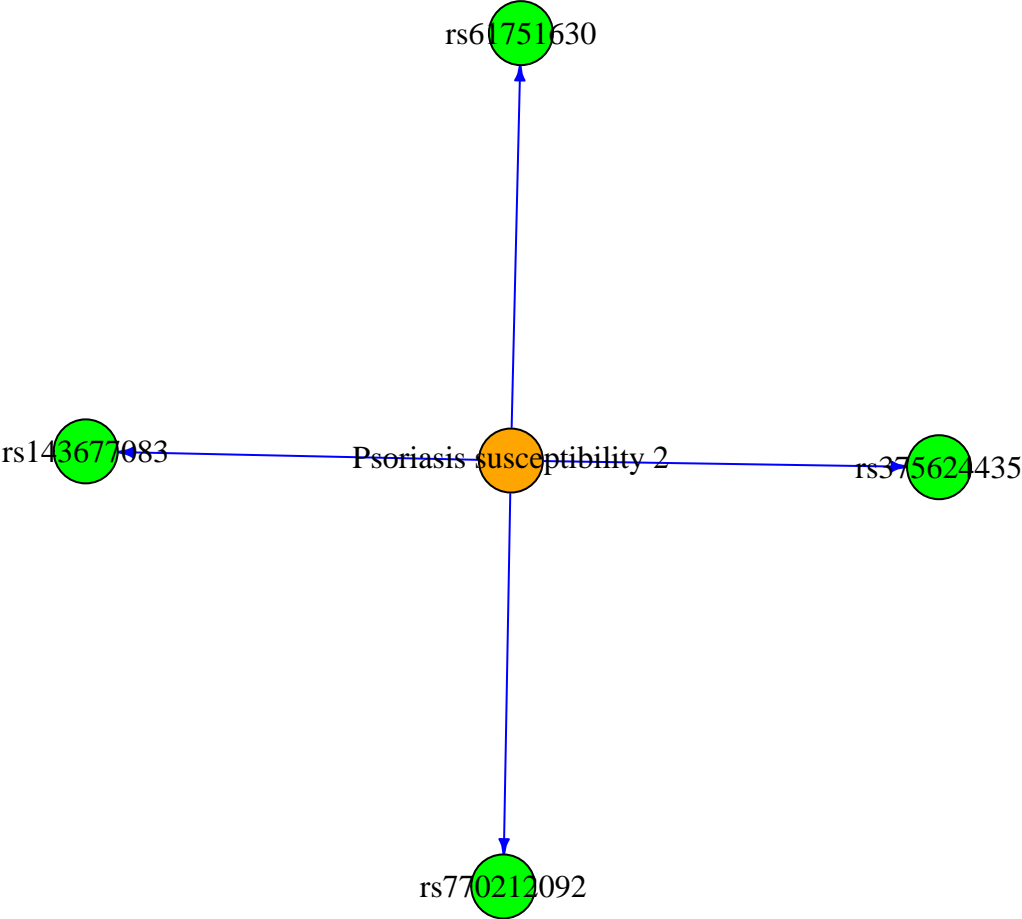

# Variant–Disease Network (PTEN hamartoma tumor syndrome)

PTEN hamartoma tumor syndrome

rs150651961

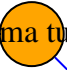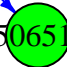

# se Network (Pulmonary arterial hypertension related to hereditary hemorrhagic telangiectasia)

rs28936401

Pulmonary arterial hypertension related to hereditary hemorrhagic telangiectasia



Variant–Disease Network (Pulmonary Surfactant Metabolism Dysfunction

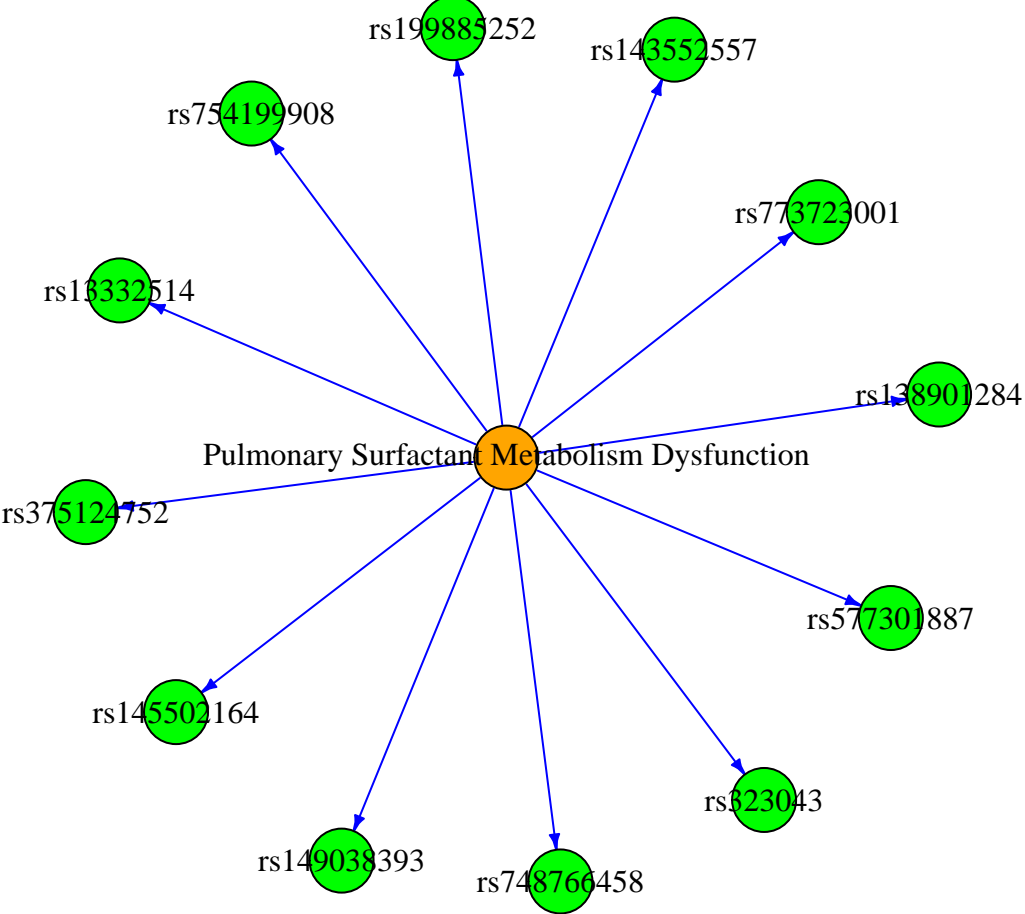

# Variant–Disease Network (Pyridoxal 5'–phosphate–dependent epilepsy)

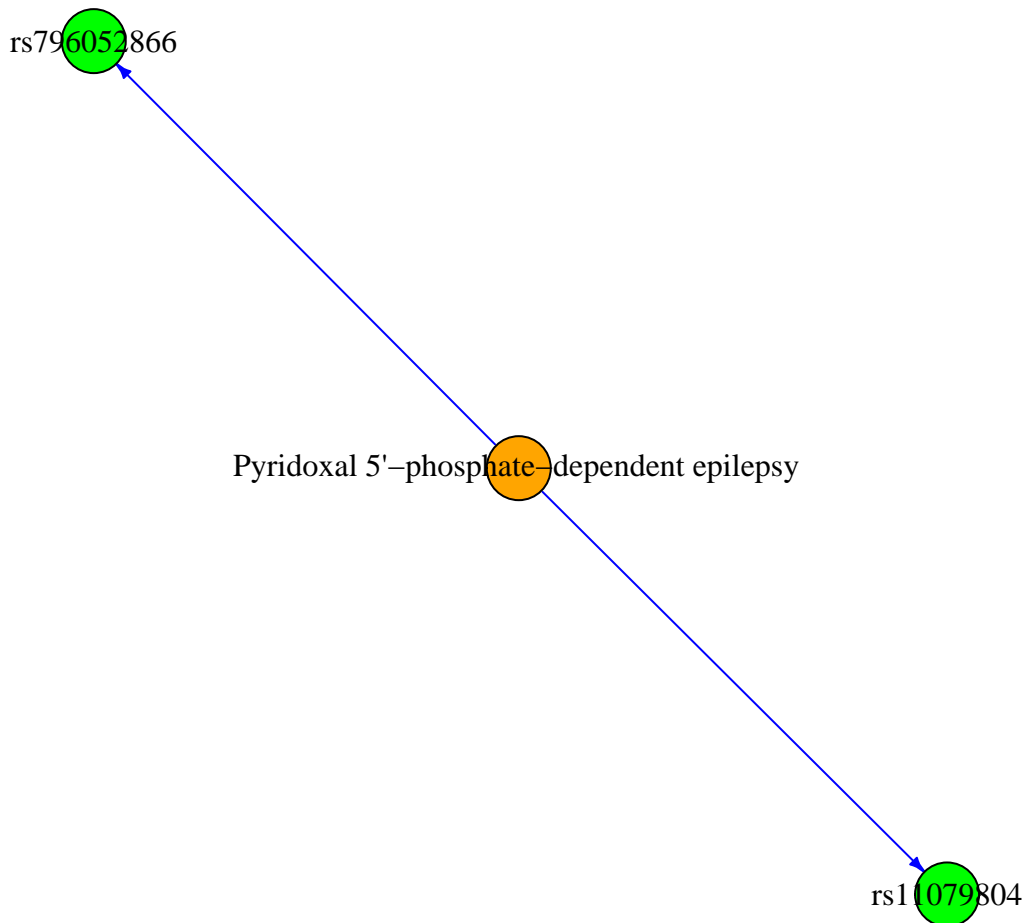

Variant–Disease Network (Pyridoxine–dependent epilepsy)

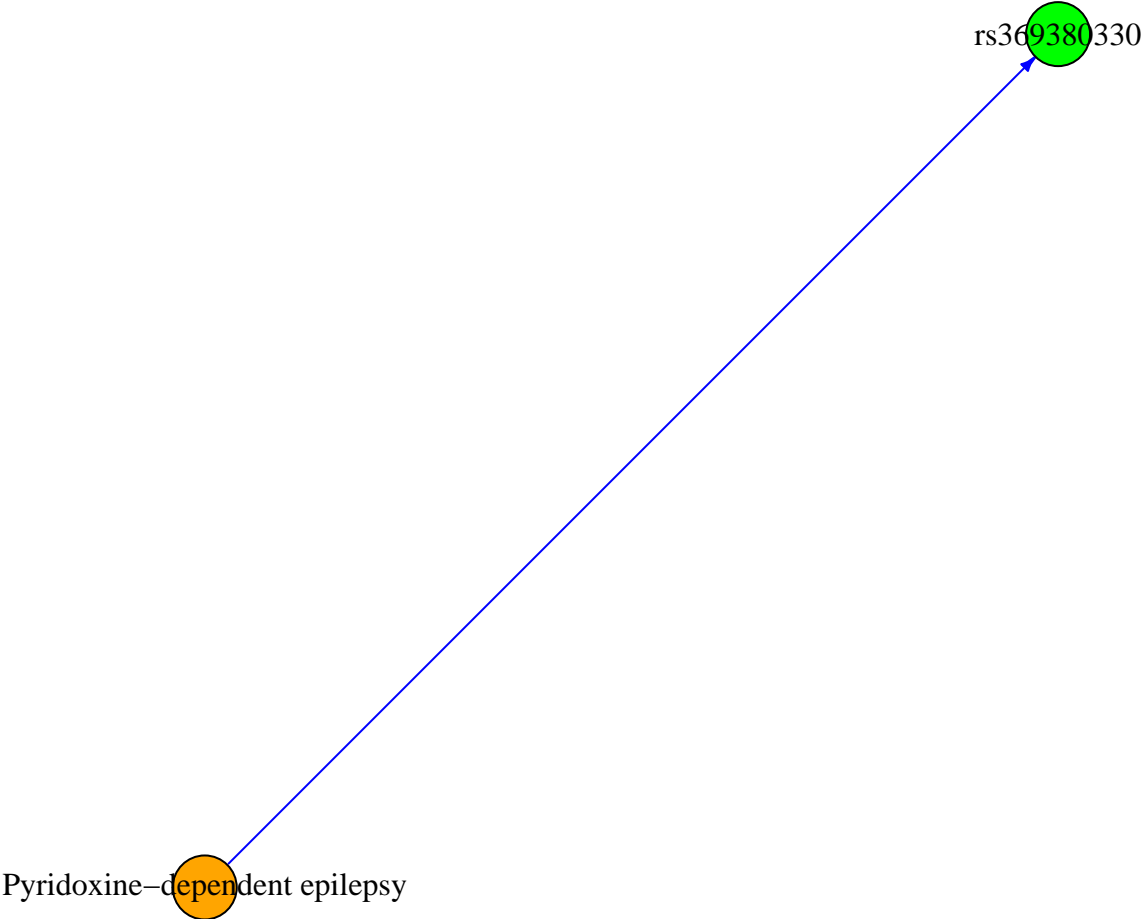



## Variant–Disease Network (Pyruvate carboxylase deficiency)

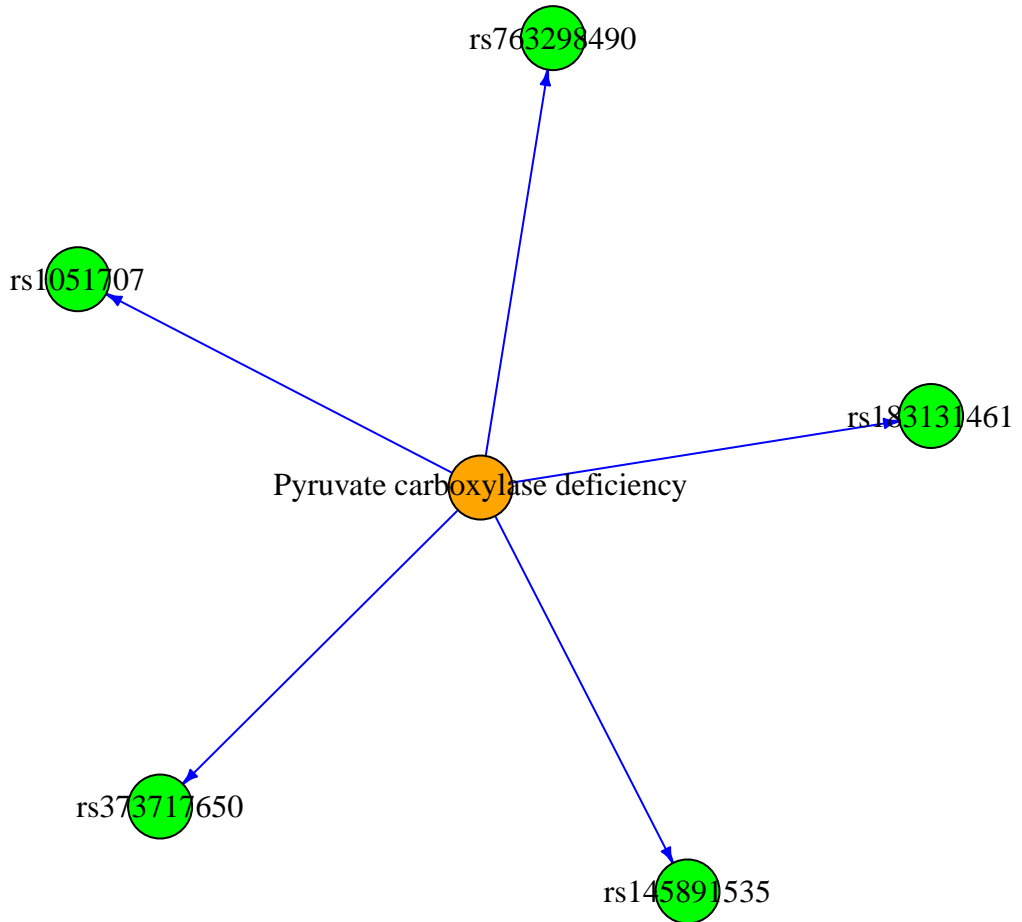

**Variant–Disease Network (Pyruvate dehydrogenase complex deficiency)**

Pyruvate dehydrogenase complex deficiency

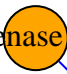

rs2303436

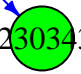

Variant–Disease Network (Pyruvate dehydrogenase phosphatase deficiency)

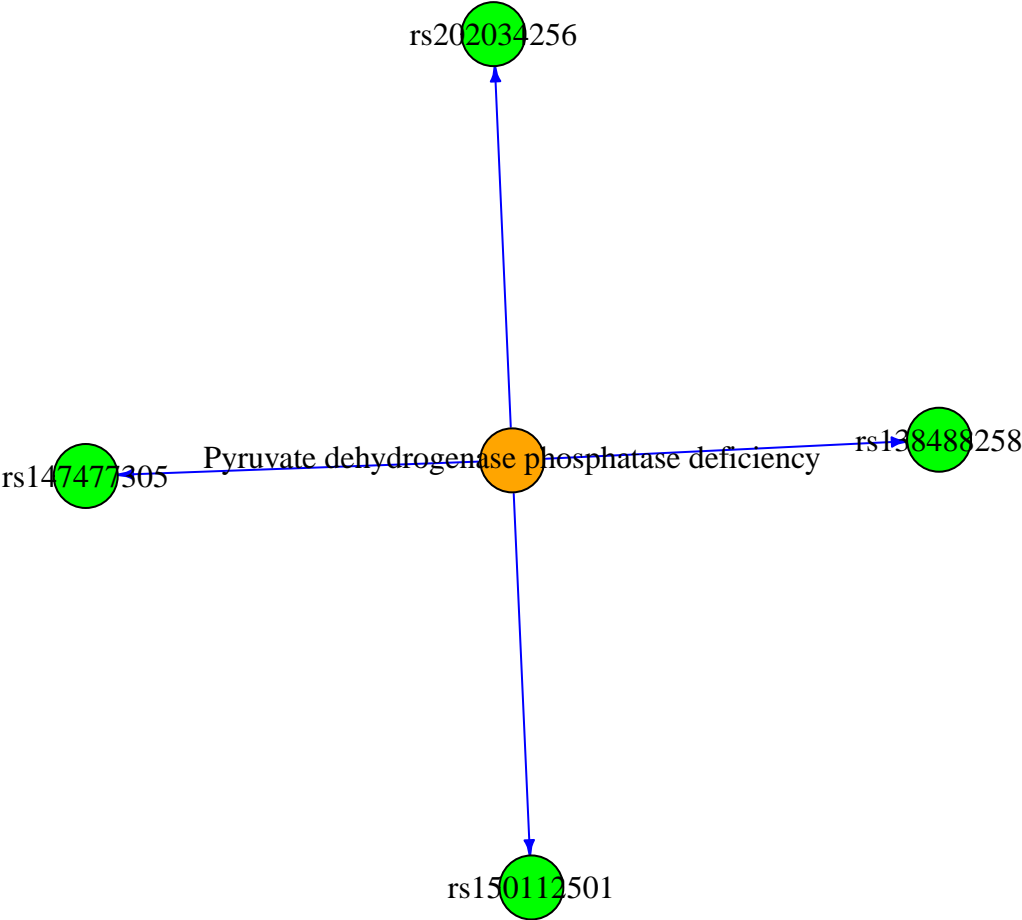

## Variant–Disease Network (Pyruvate kinase deficiency of red cells)

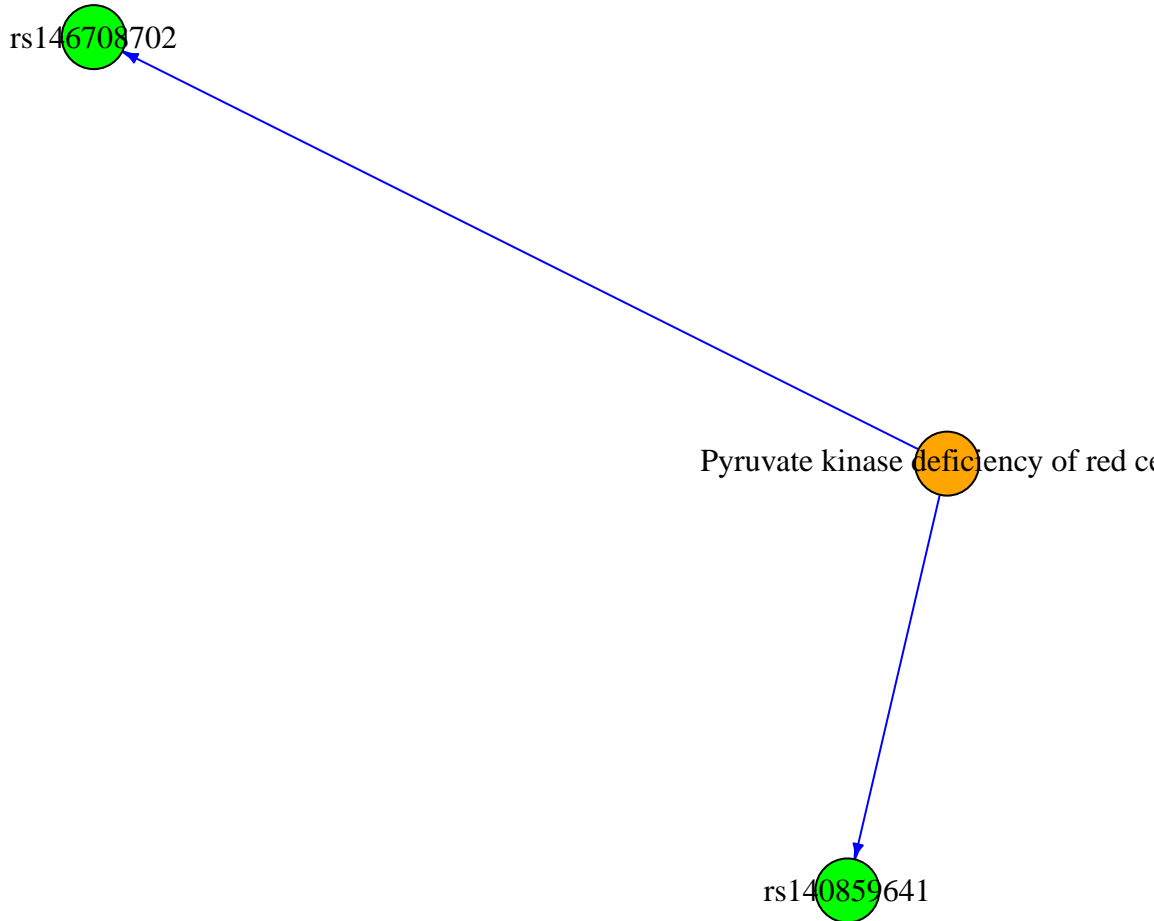

## Variant-Disease Network (Radioulnar synostosis)

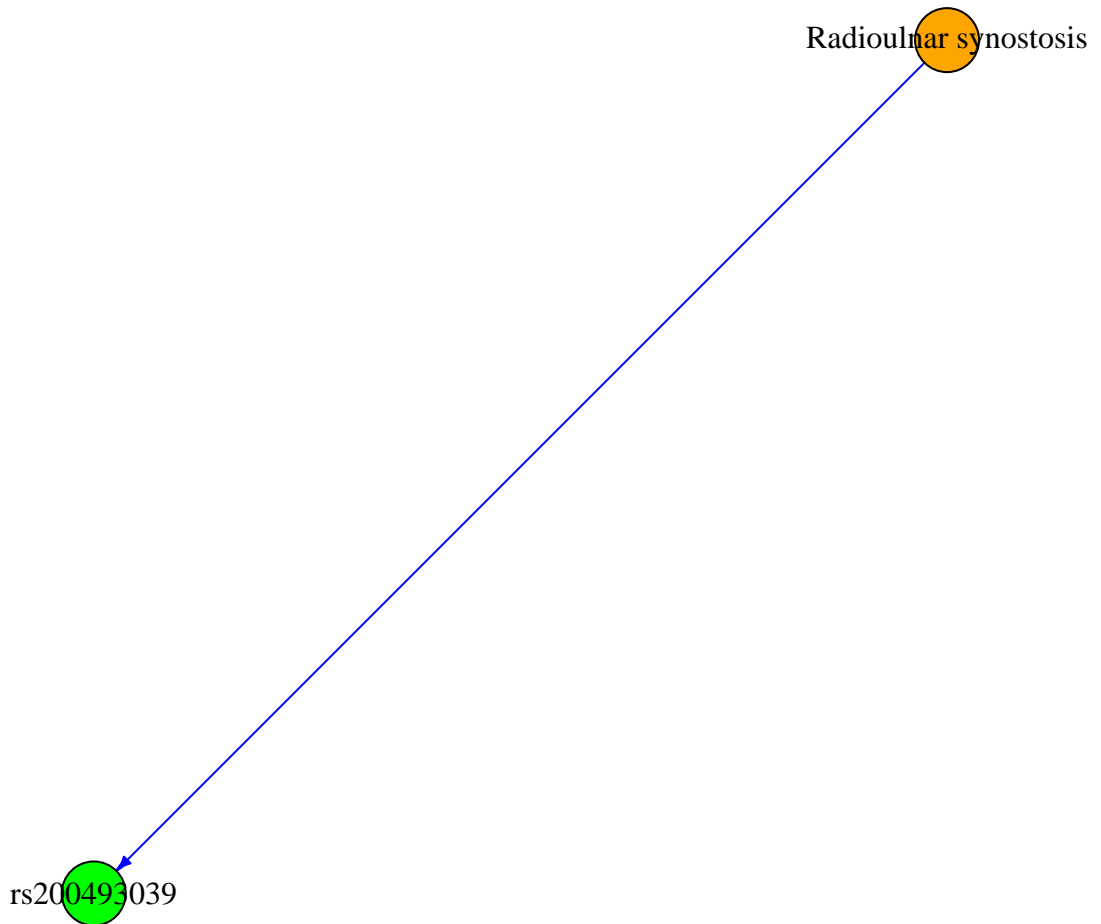

## Variant–Disease Network (Rare genetic deafness)

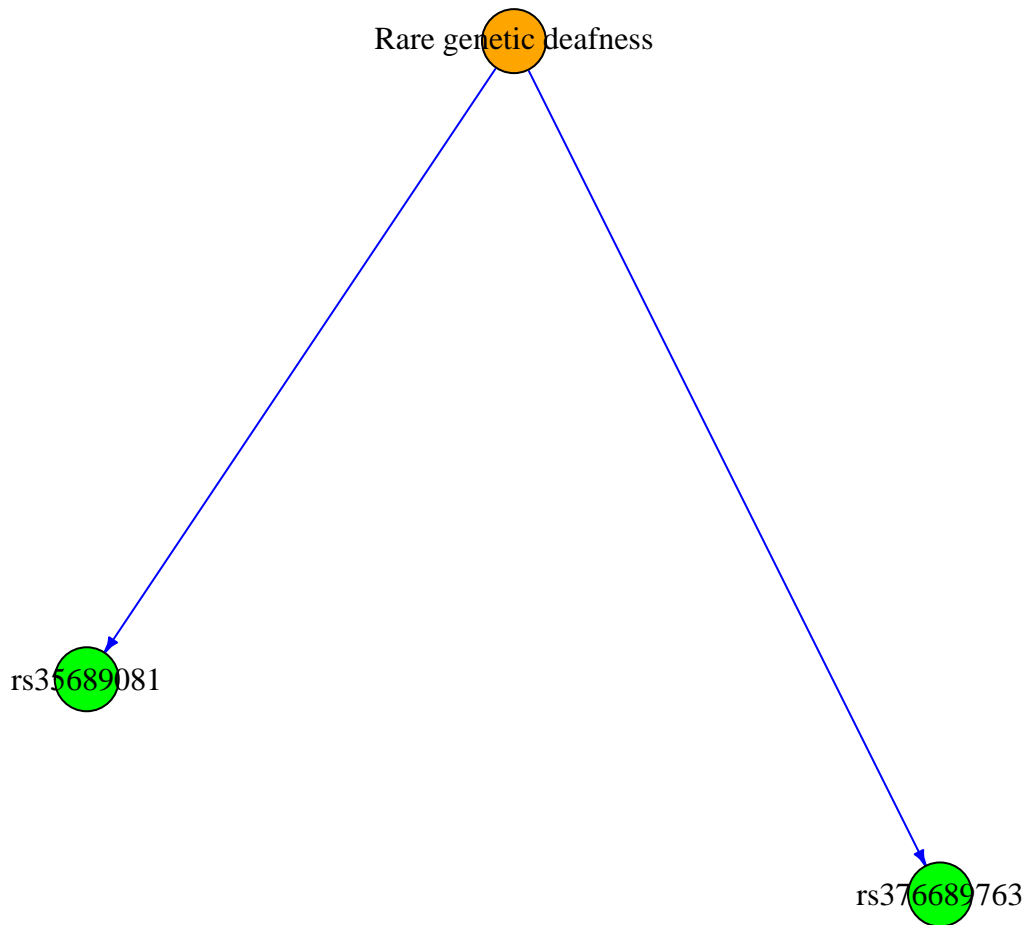

## Variant–Disease Network (Rasopathy)

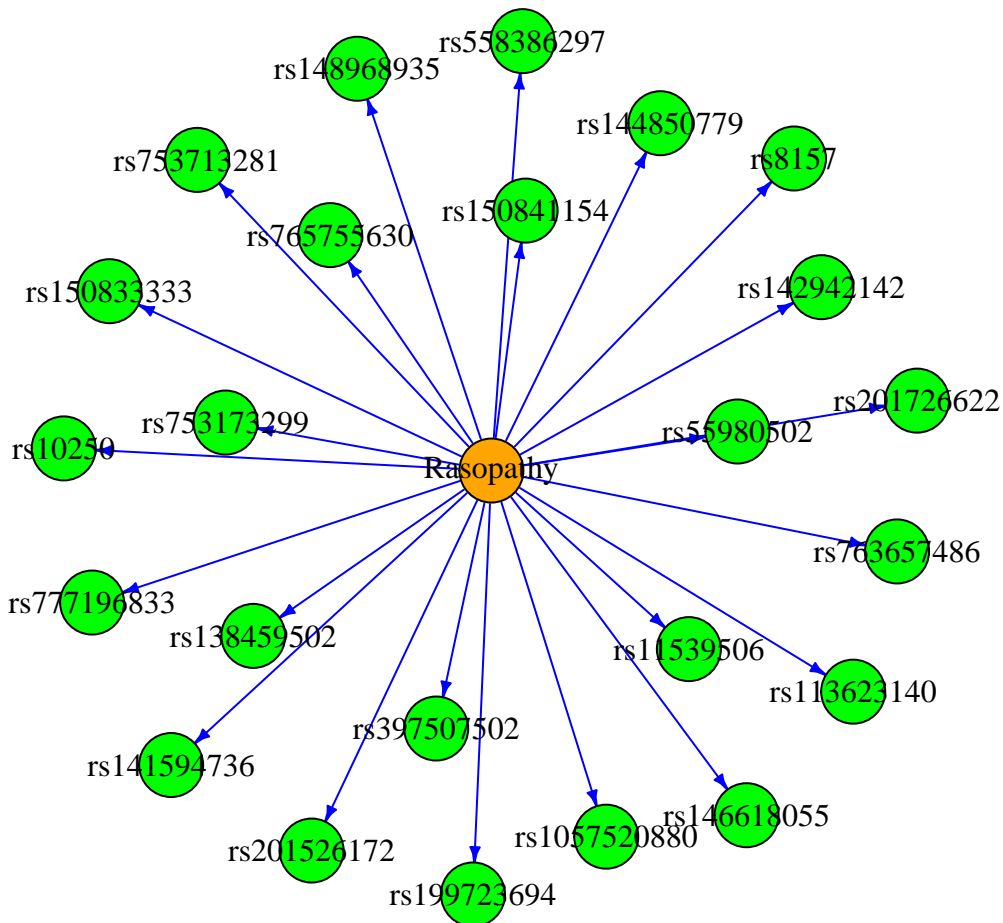

# Variant–Disease Network (Reduced antithrombin III activity)

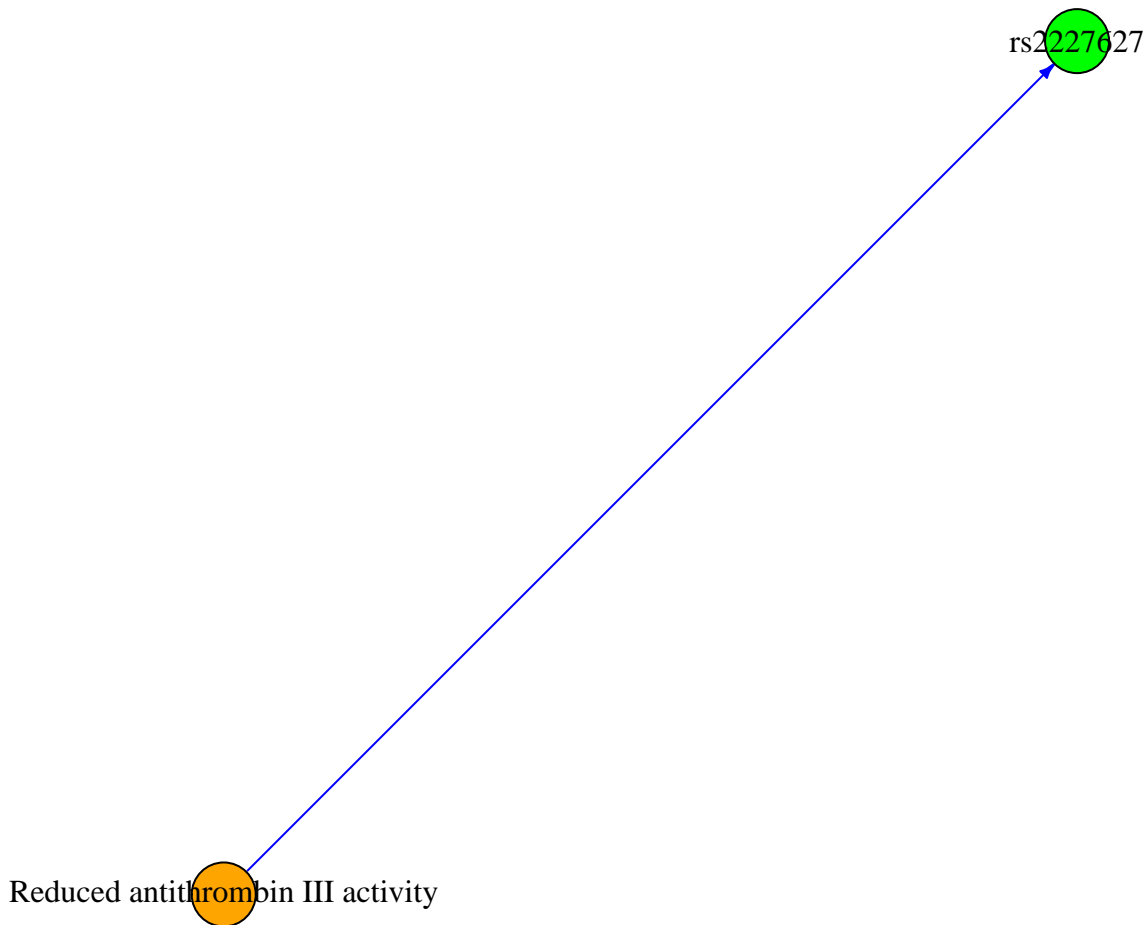



**Variant–Disease Network (Reduced protein C activity)**

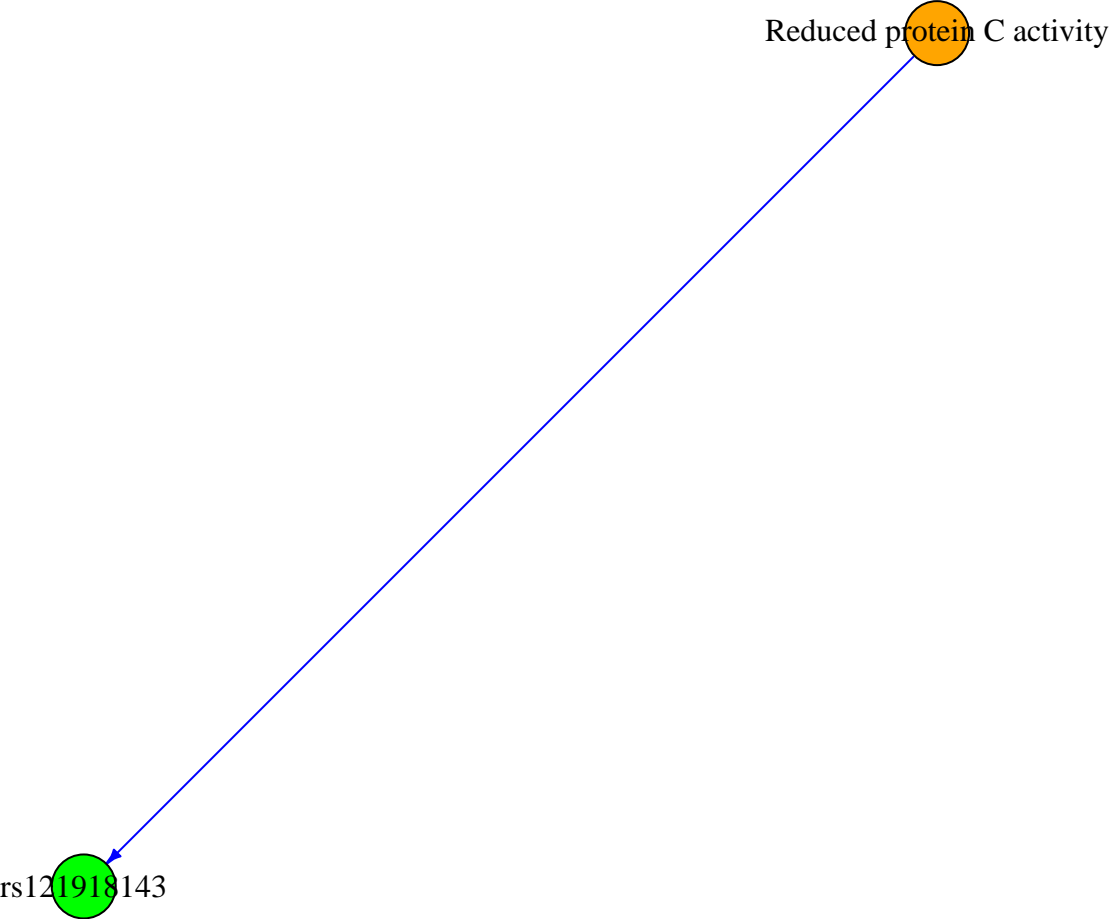

**Variant–Disease Network (Renal carnitine transport defect)**

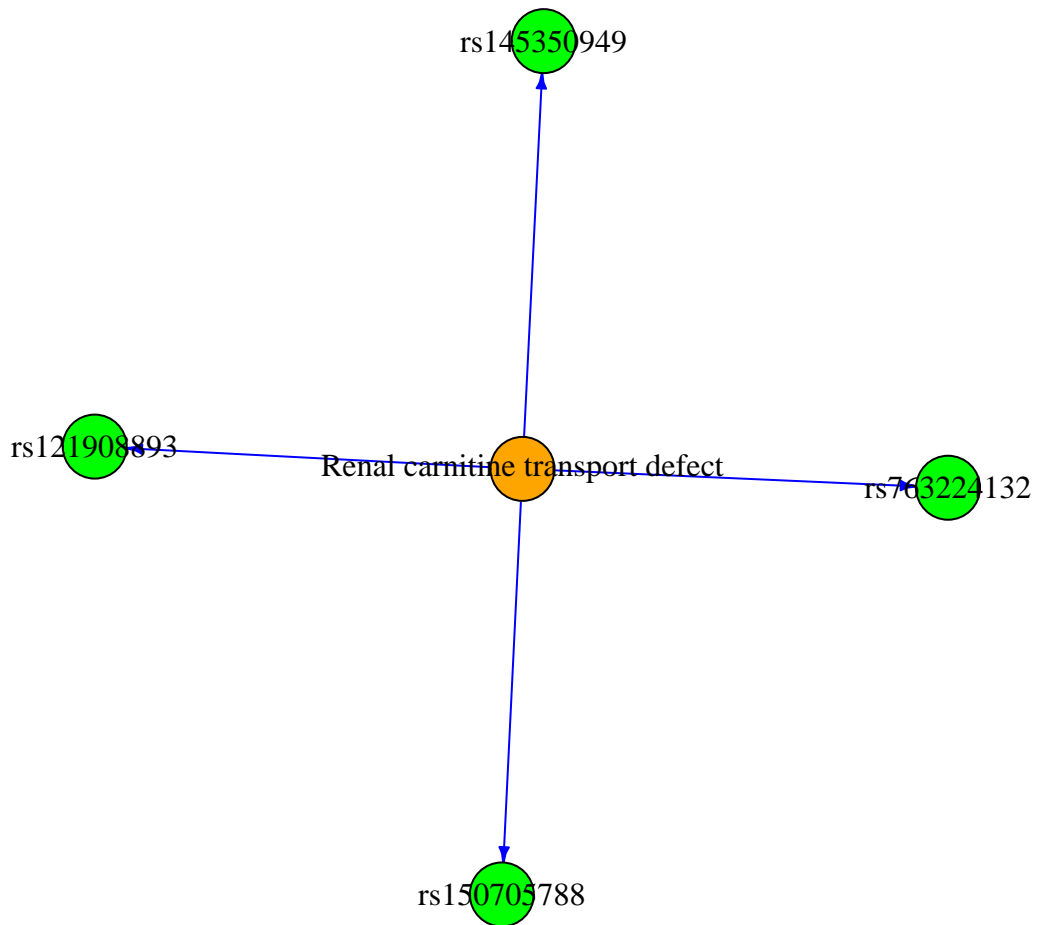

## Variant–Disease Network (Renal dysplasia)

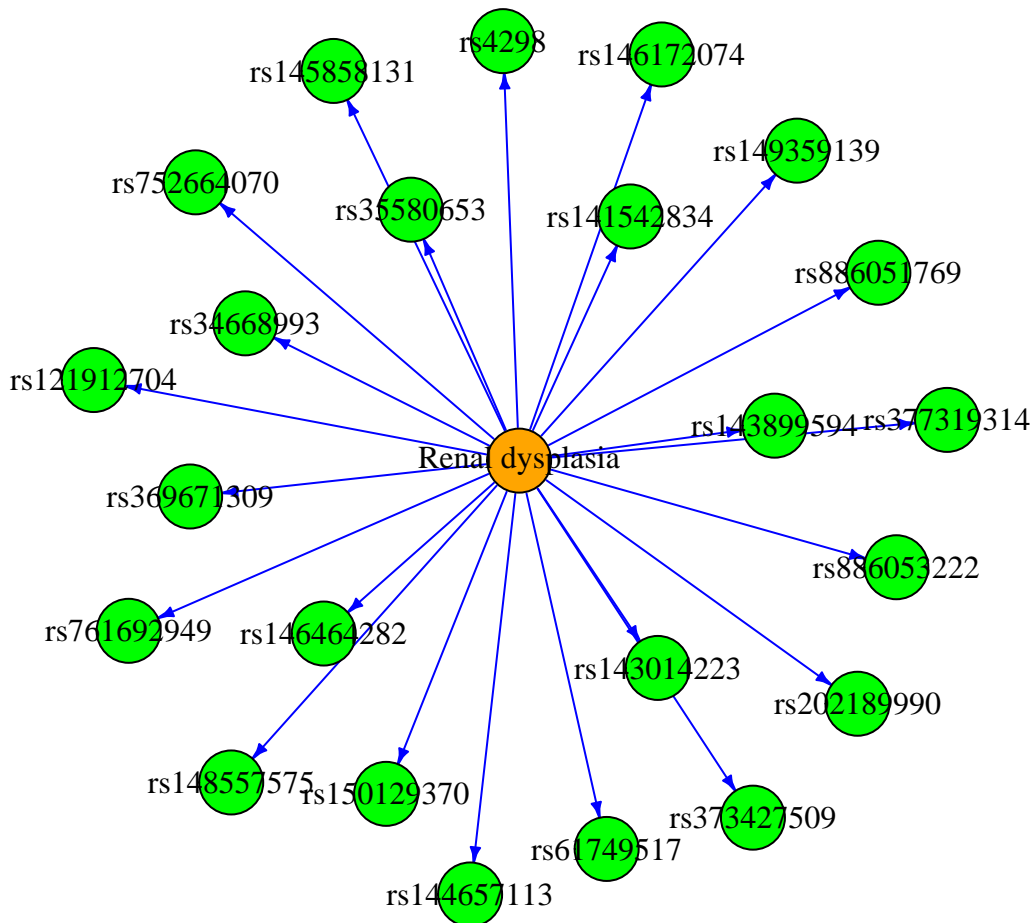

## Variant–Disease Network (Renal dysplasia and retinal aplasia)

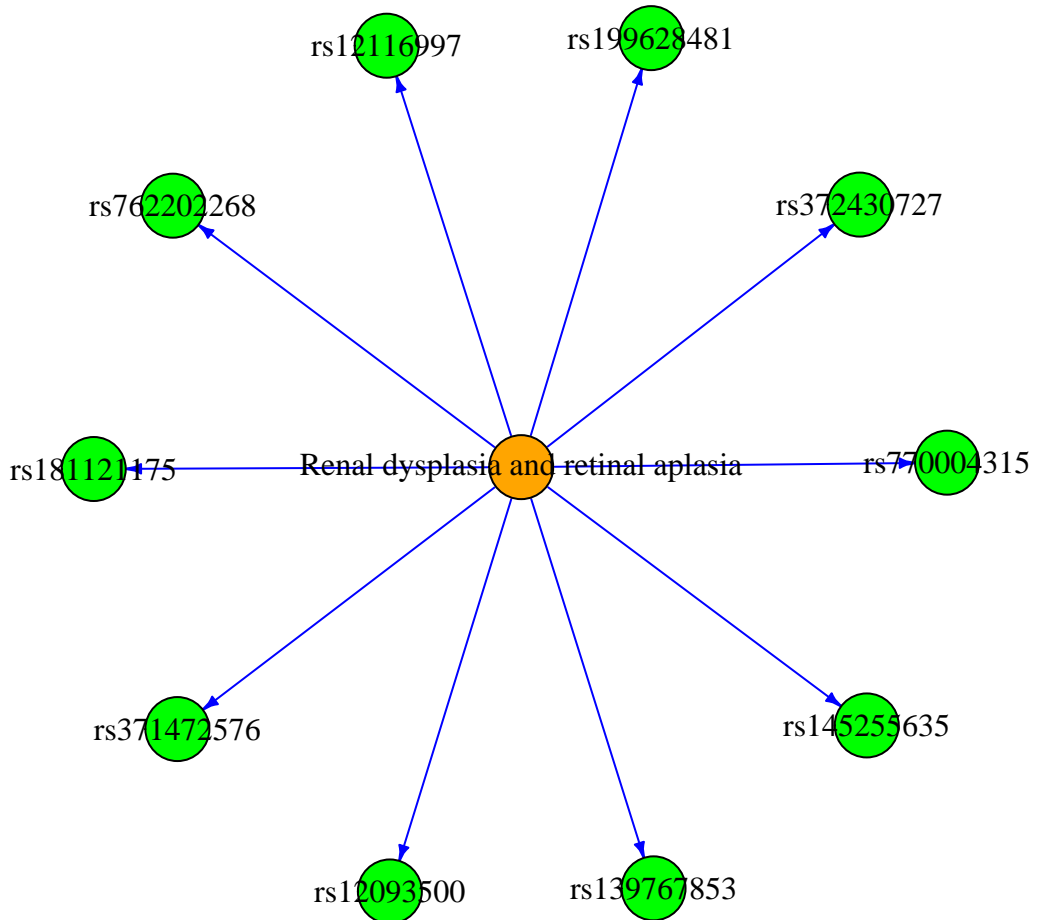

# ant-Disease Network (Renal hamartomas nephroblastomatosis and fetal gigantism)

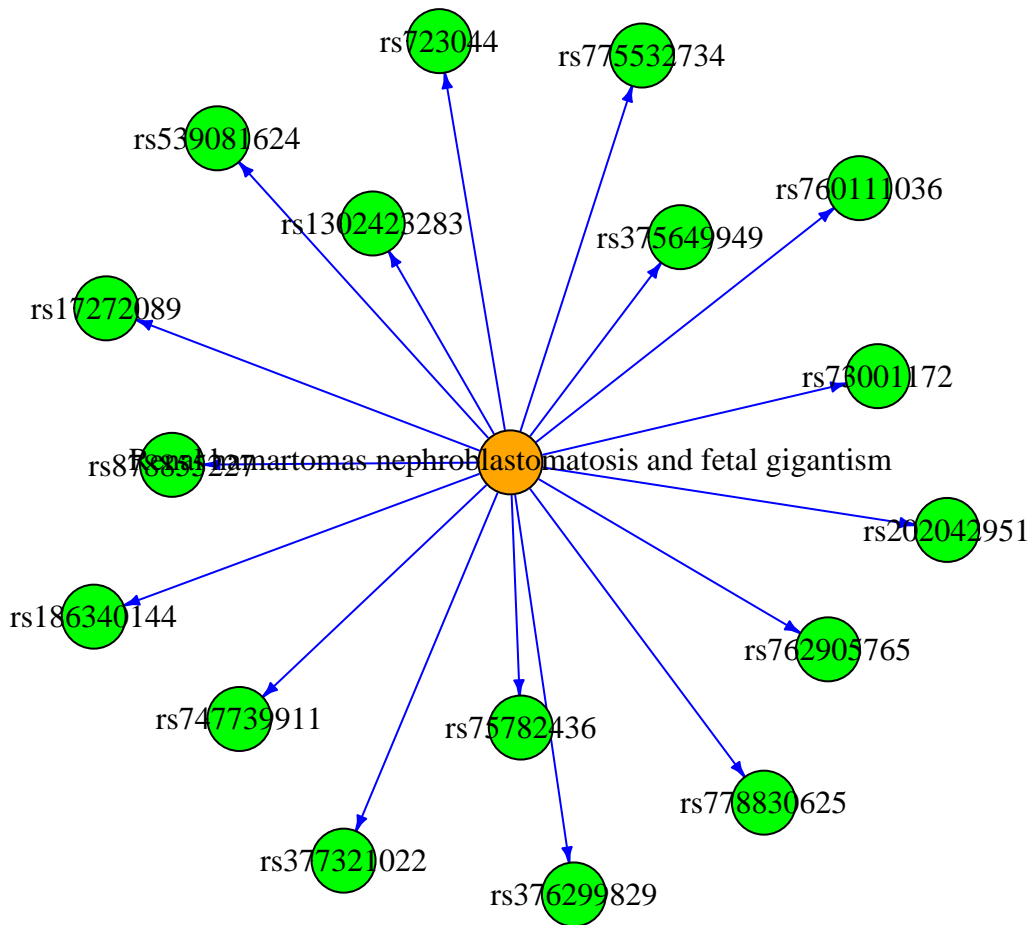

## Variant–Disease Network (Renal hypodysplasia/aplasia 1)

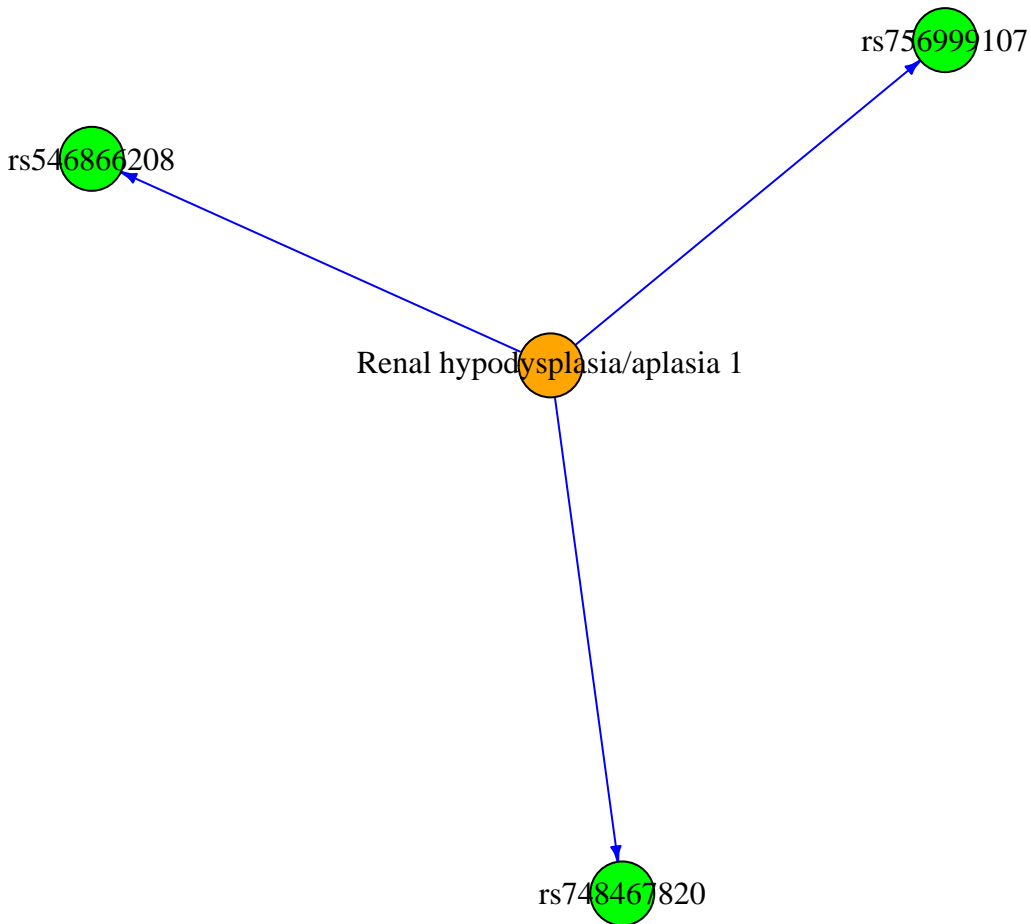

## Variant–Disease Network (Renal Hypomagnesemia)

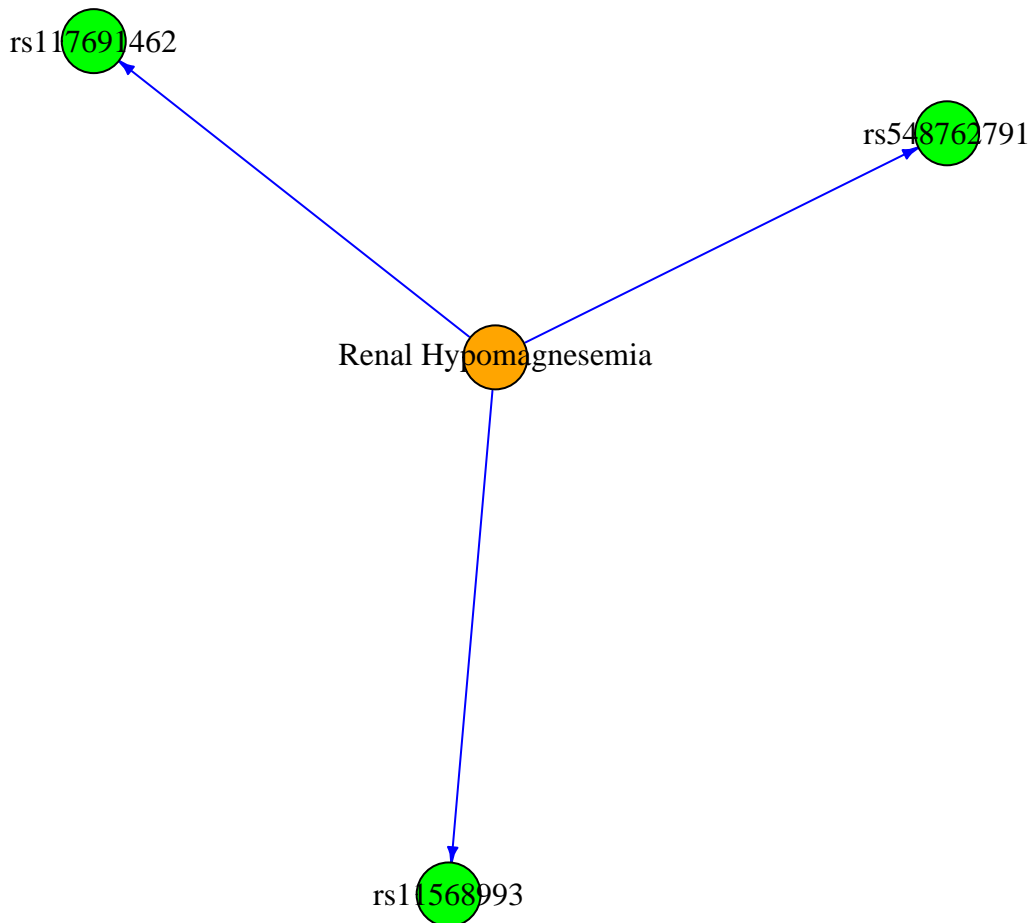

## Variant–Disease Network (Renal tubular acidosis)

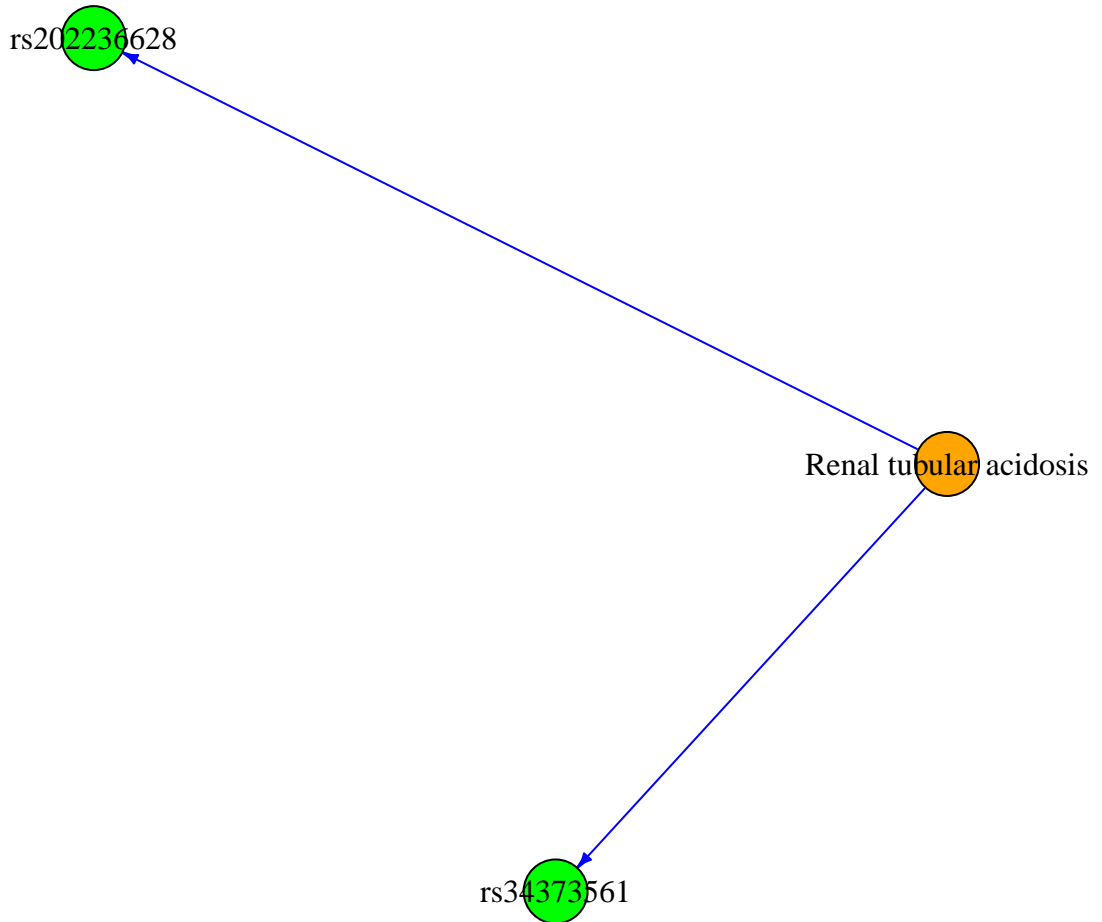



# Variant-Disease Network (Renal tubular acidosis with progressive nerve deafness)

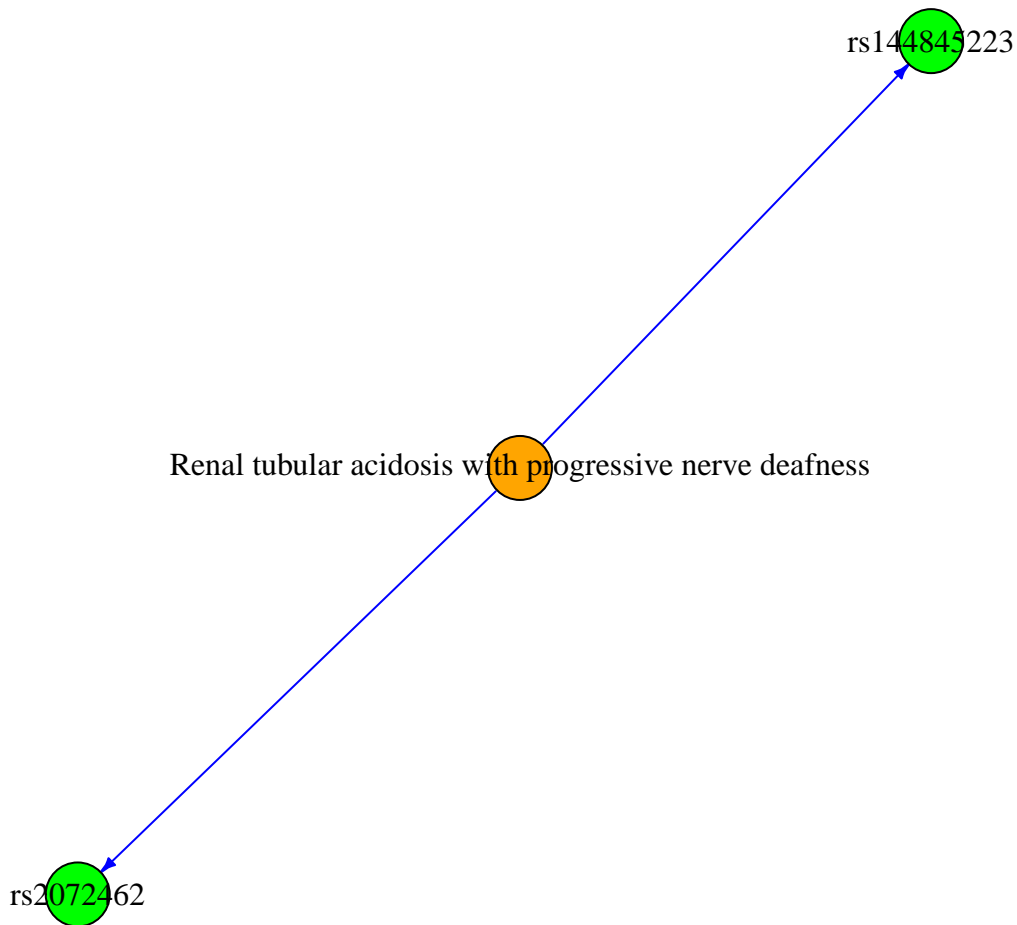

## Variant-Disease Network (Reticular dysgenesis)

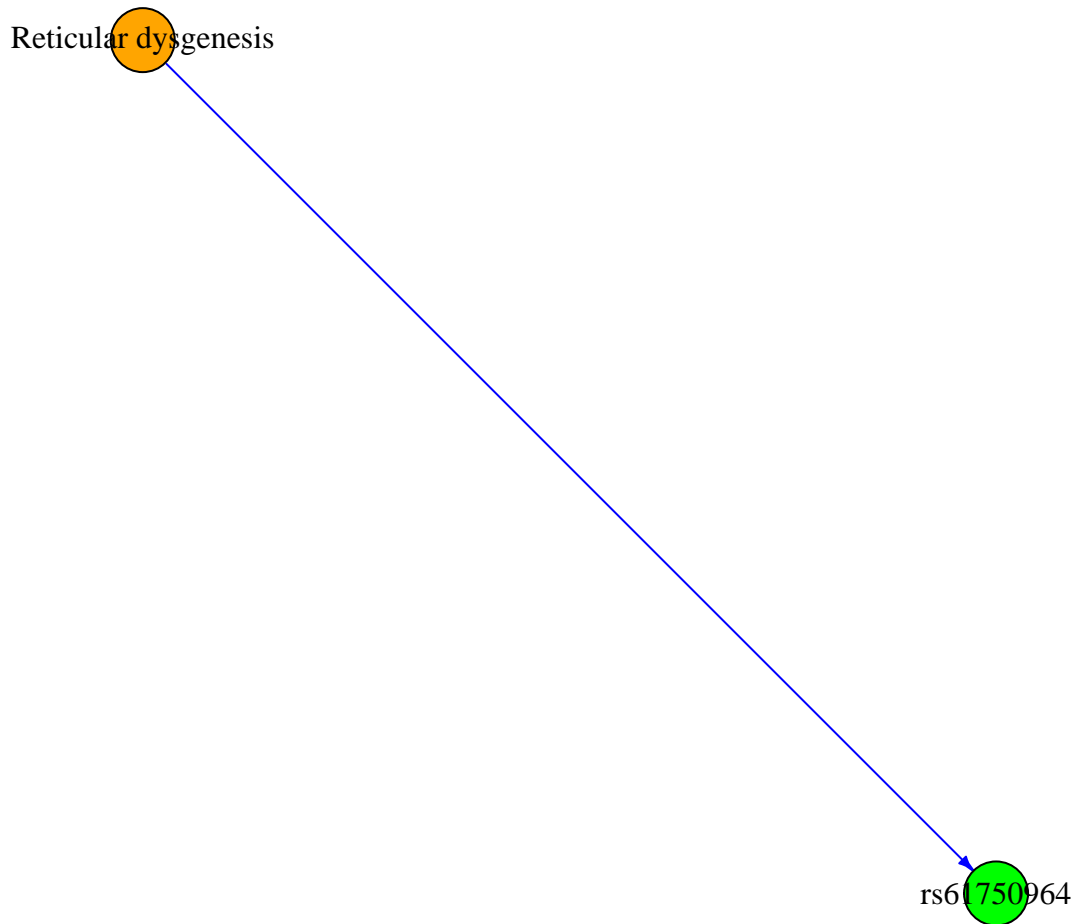

## Variant–Disease Network (Retinal cone dystrophy 4)

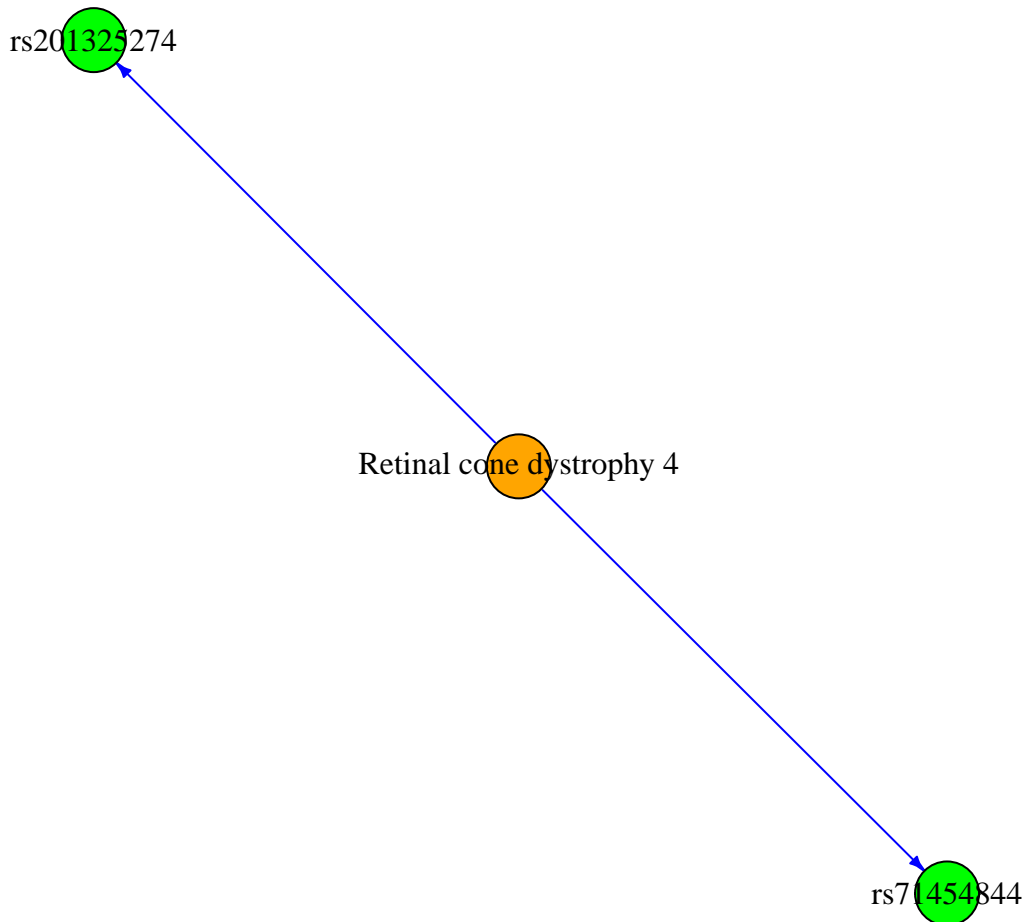

## Variant–Disease Network (Retinal dystrophy)

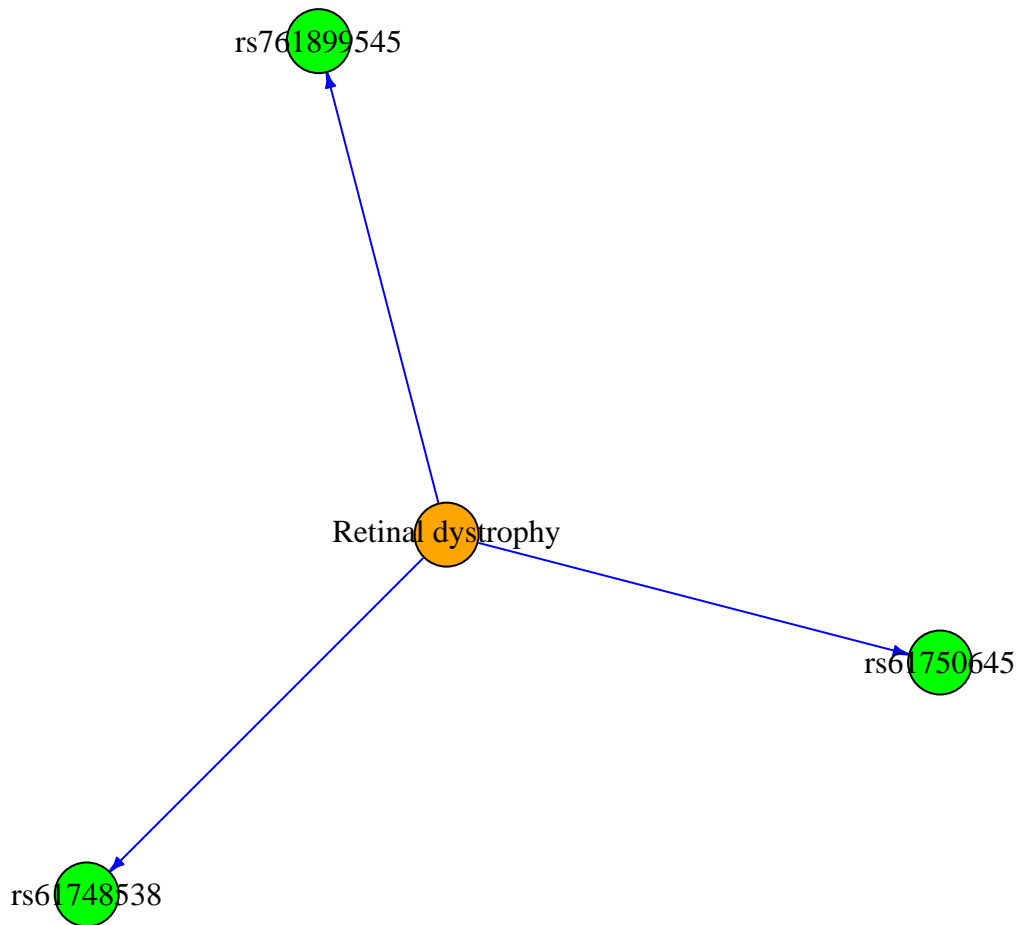

Variant–Disease Network (Retinitis pigmentosa)

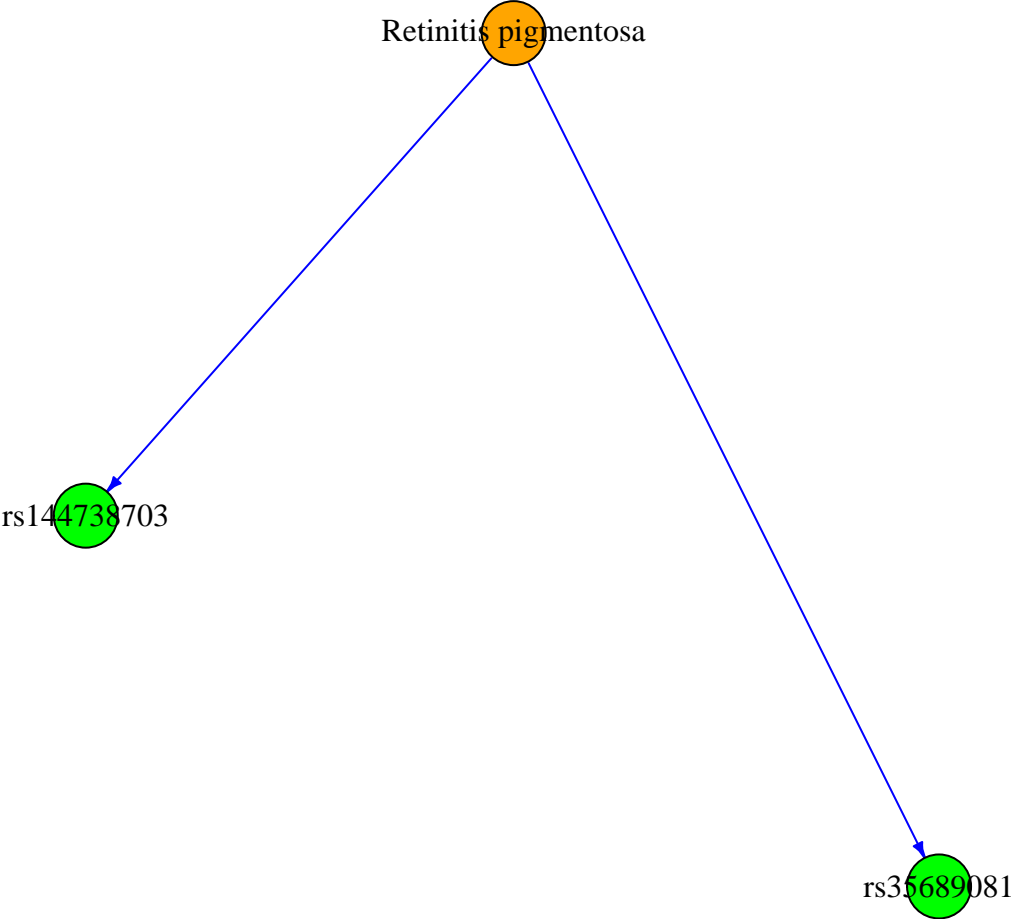

**Variant–Disease Network (Retinitis pigmentosa 11)**

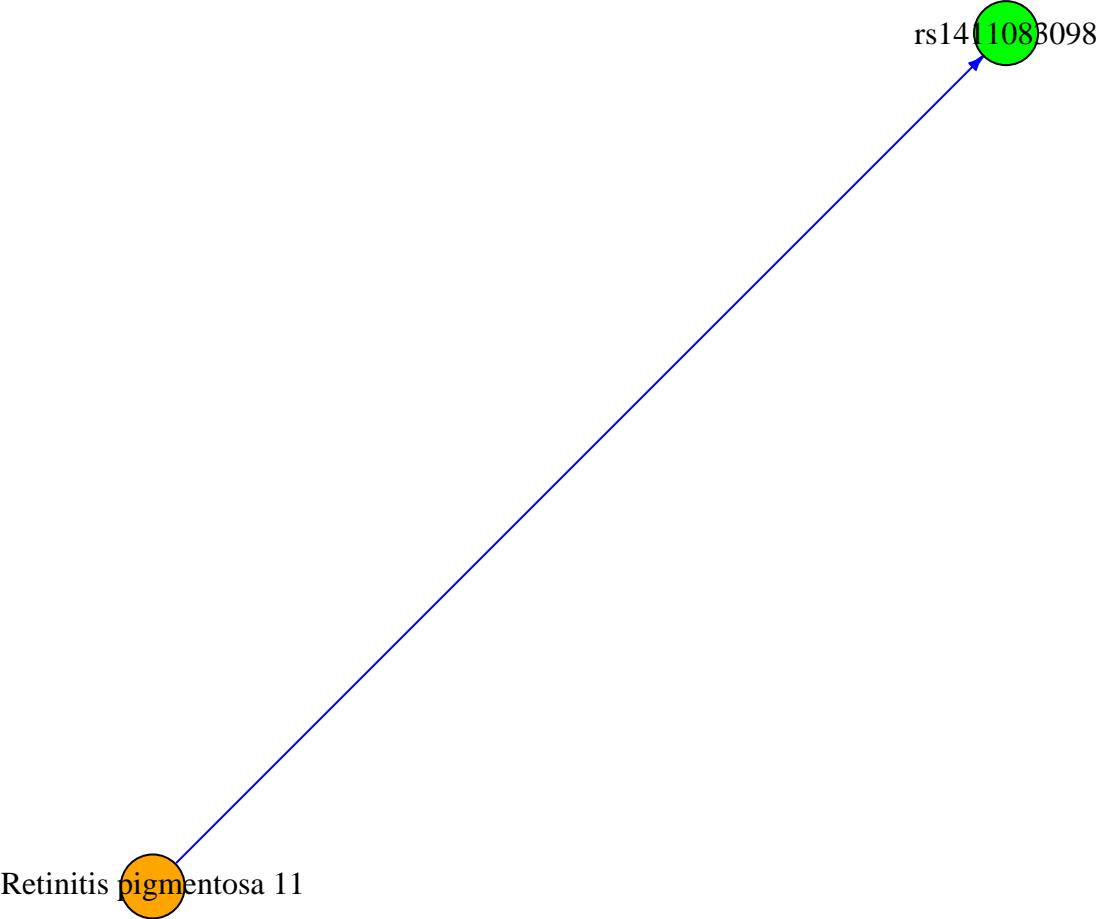

## Variant–Disease Network (Retinitis pigmentosa 30)

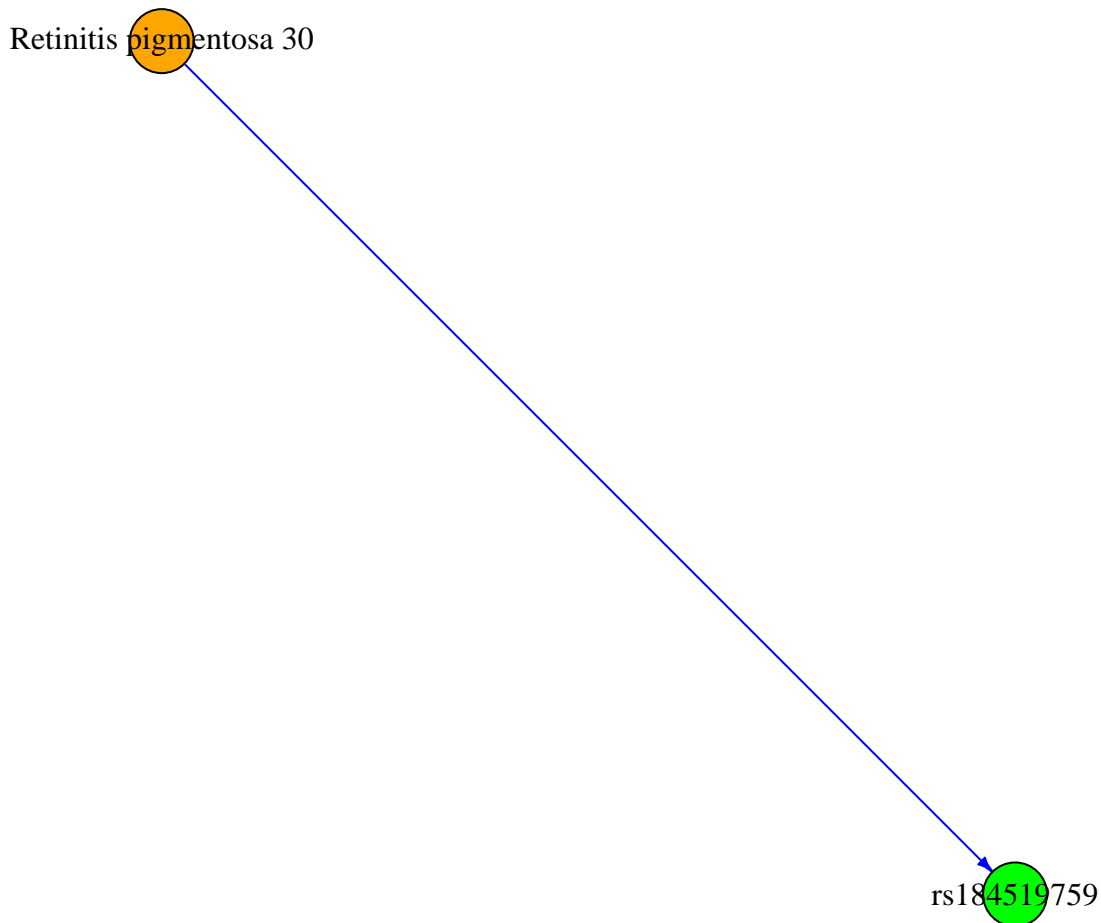

Variant–Disease Network (Retinitis pigmentosa 37)

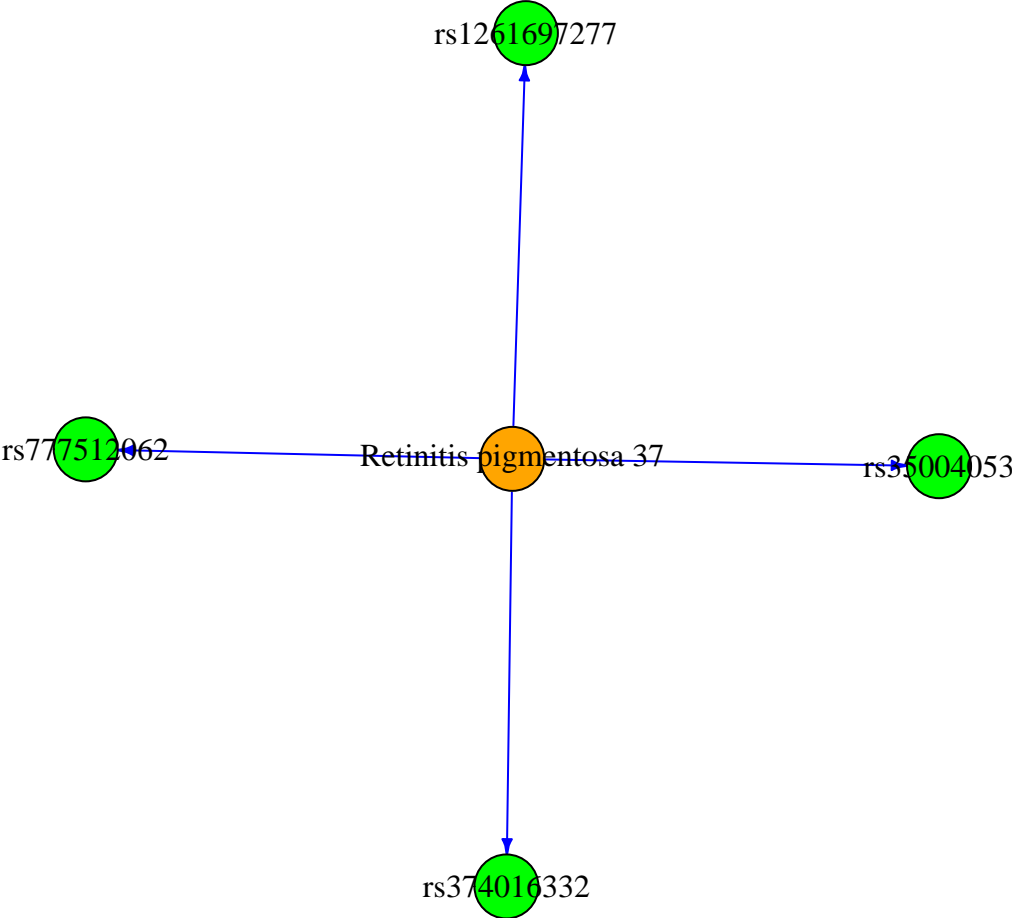



## Variant–Disease Network (Retinitis pigmentosa 54)

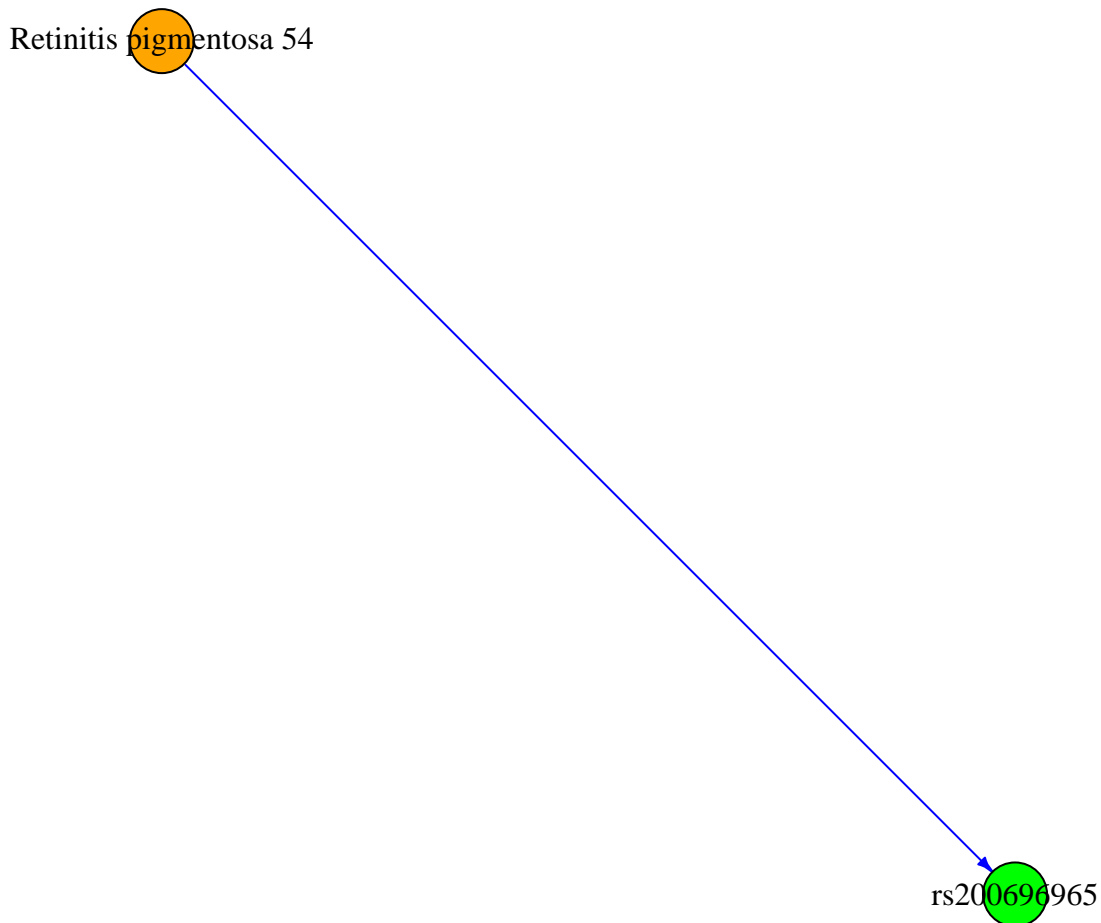

# Variant–Disease Network (Retinitis pigmentosa–deafness syndrome)

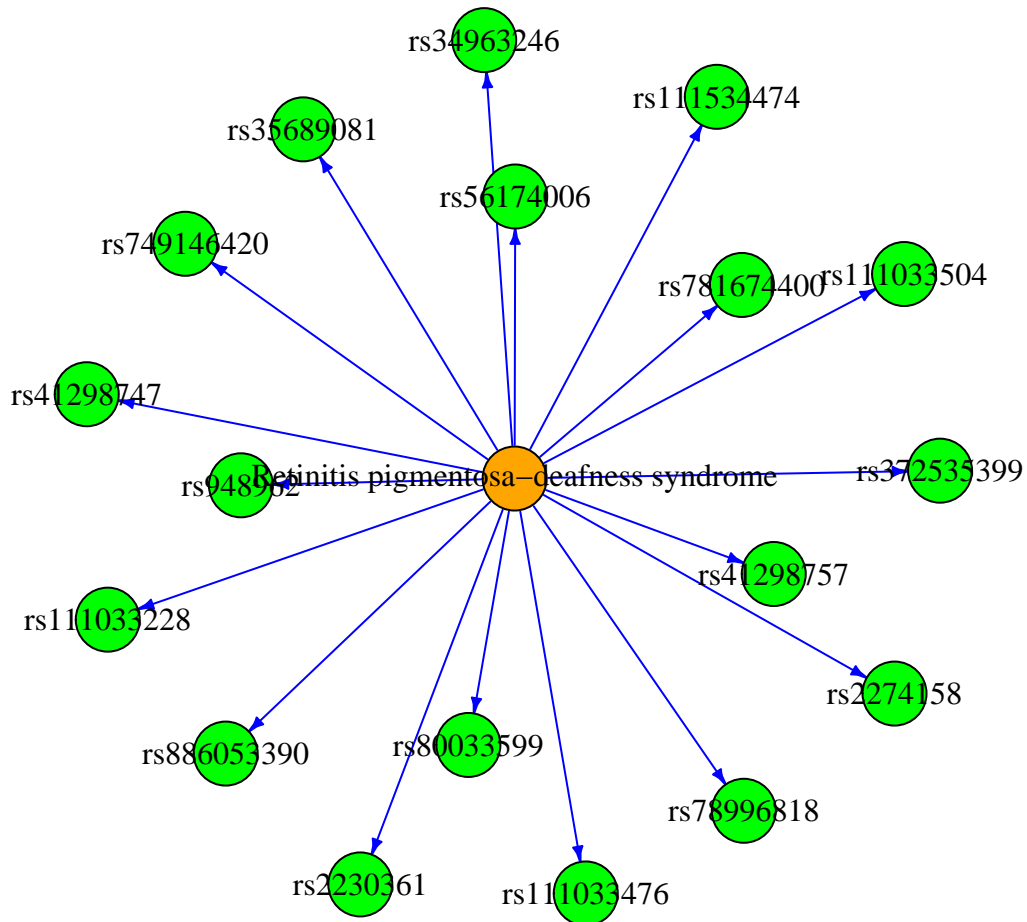

Variant–Disease Network (Retinoblastoma)

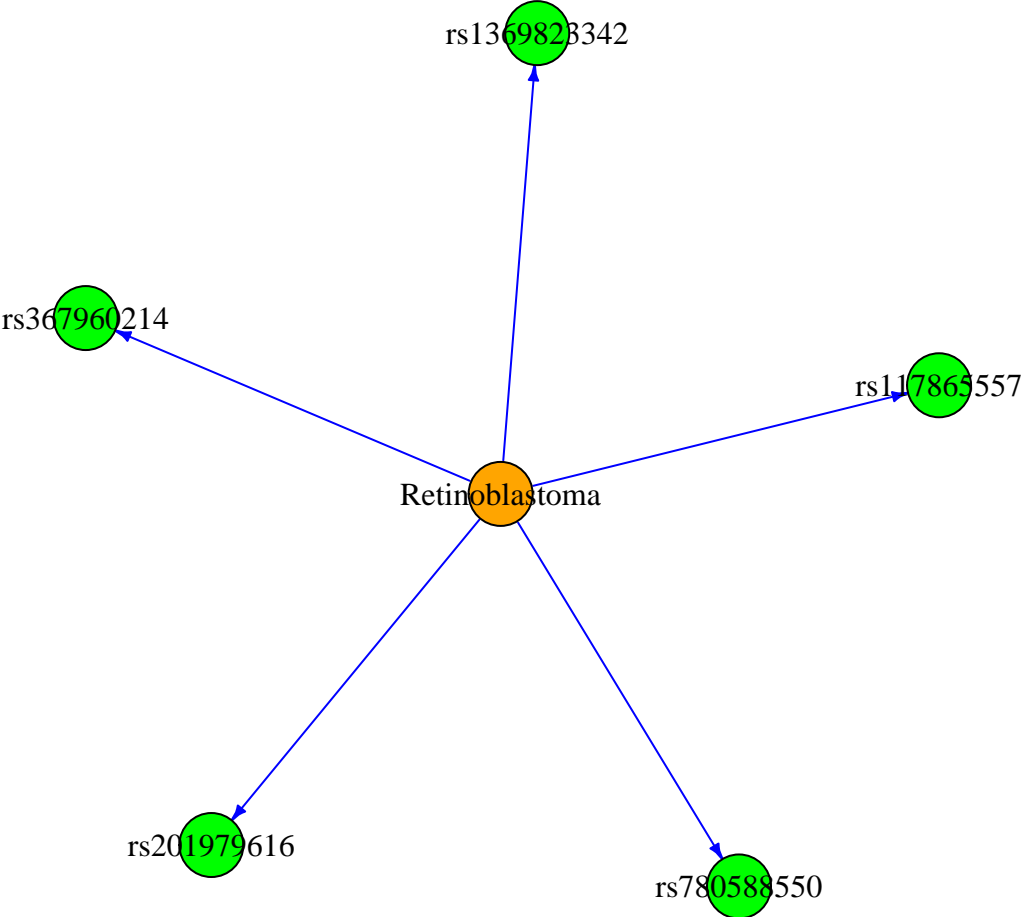

Variant–Disease Network (Rett syndrome)

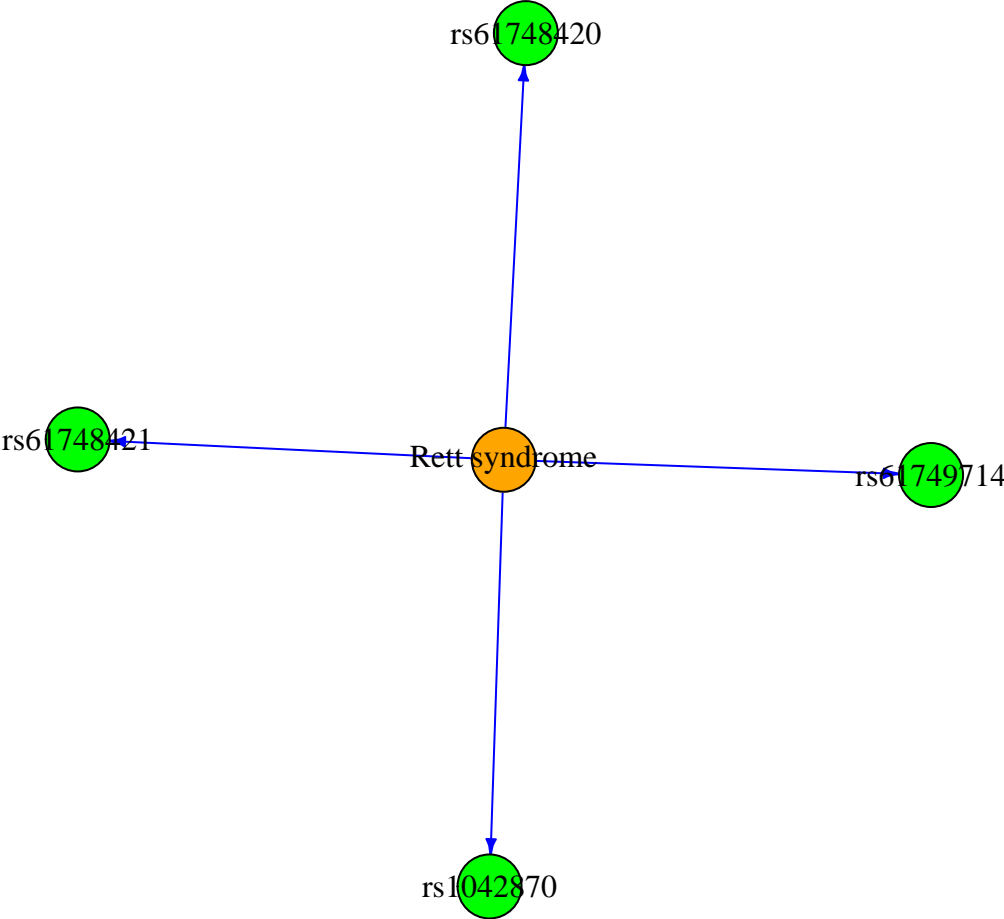

## Variant–Disease Network (Revesz syndrome)

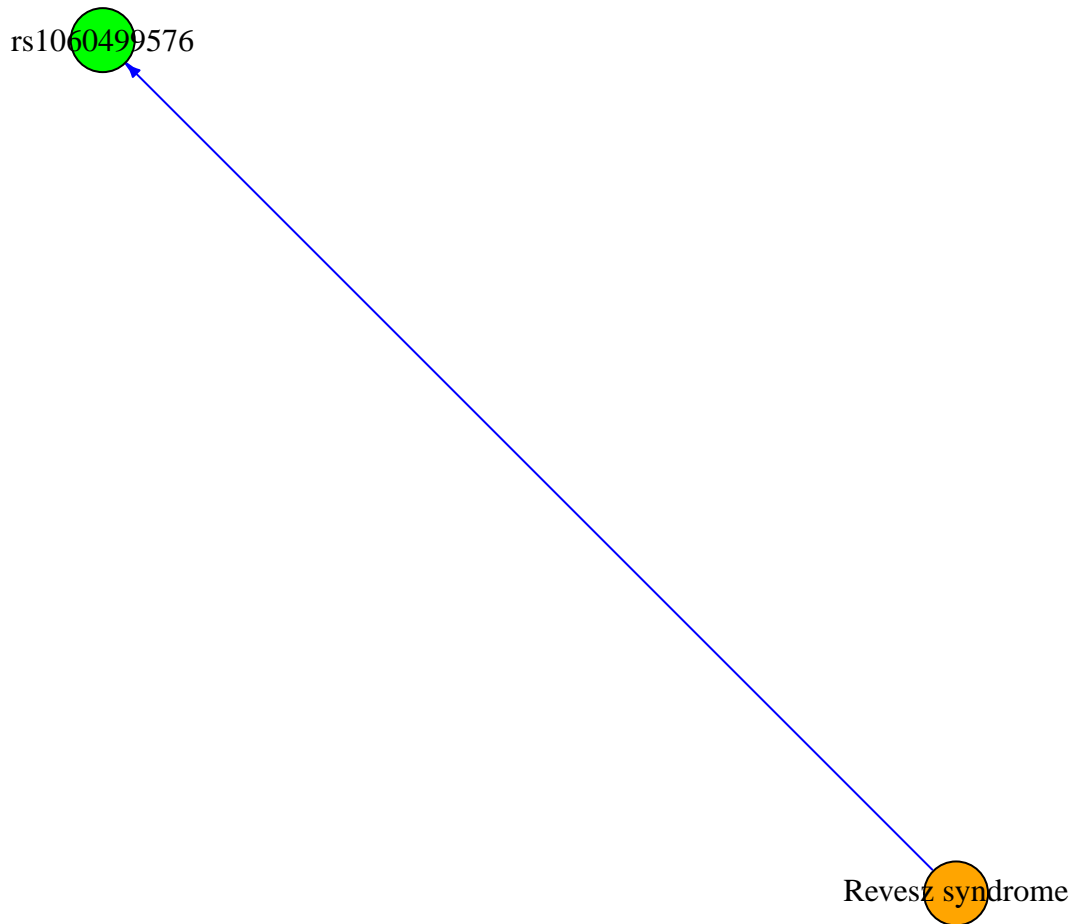

Variant–Disease Network (Rhabdoid tumor)

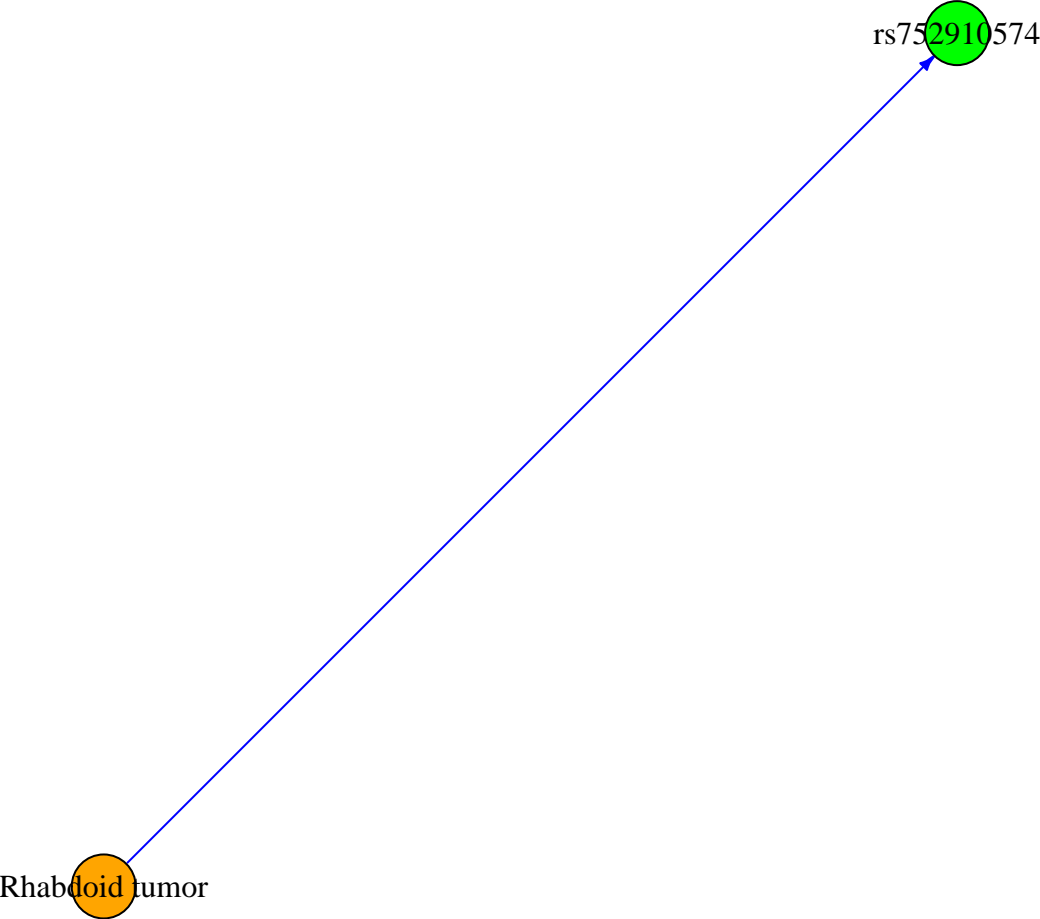

**Variant–Disease Network (Rhabdoid tumor predisposition syndrome 1)**

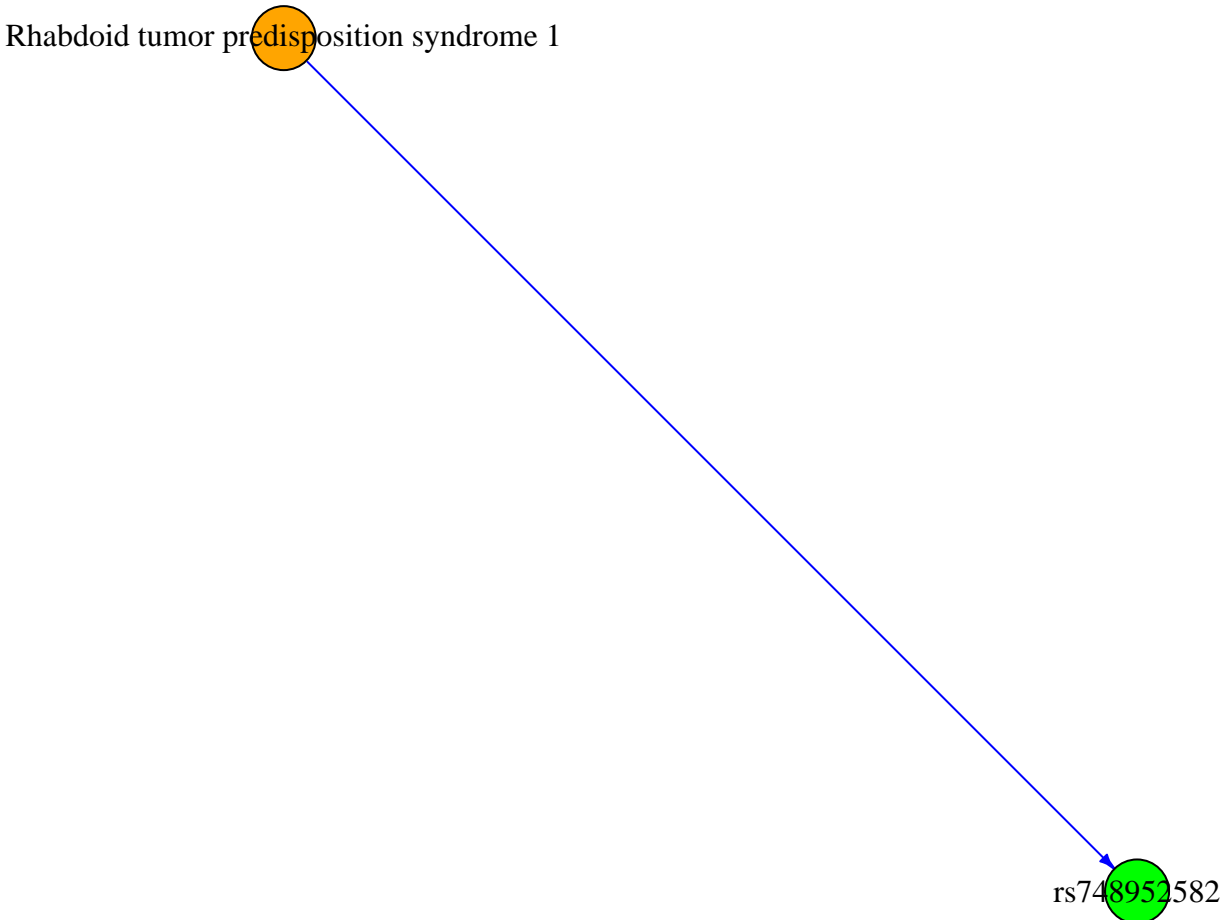

Variant–Disease Network (Rhizomelic chondrodysplasia punctata)

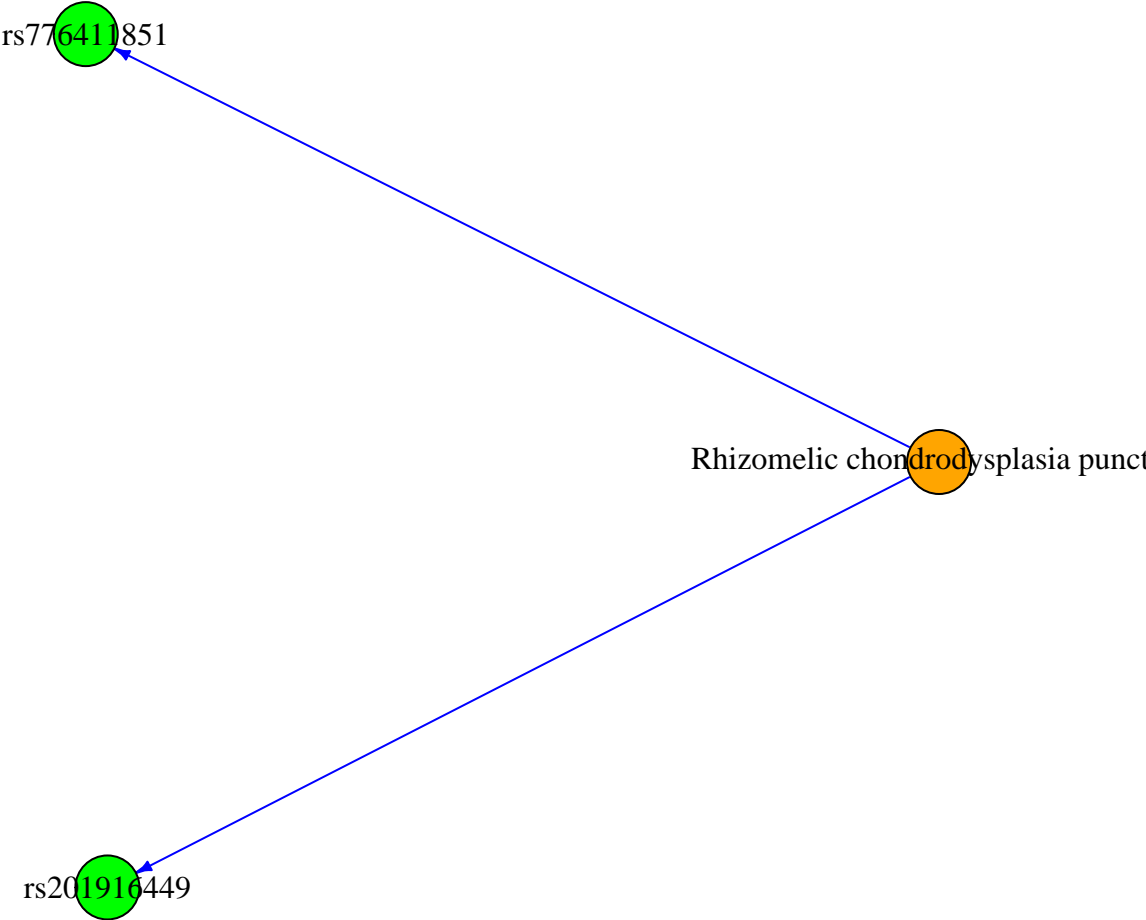



## Variant-Disease Network (Rippling muscle disease 2)

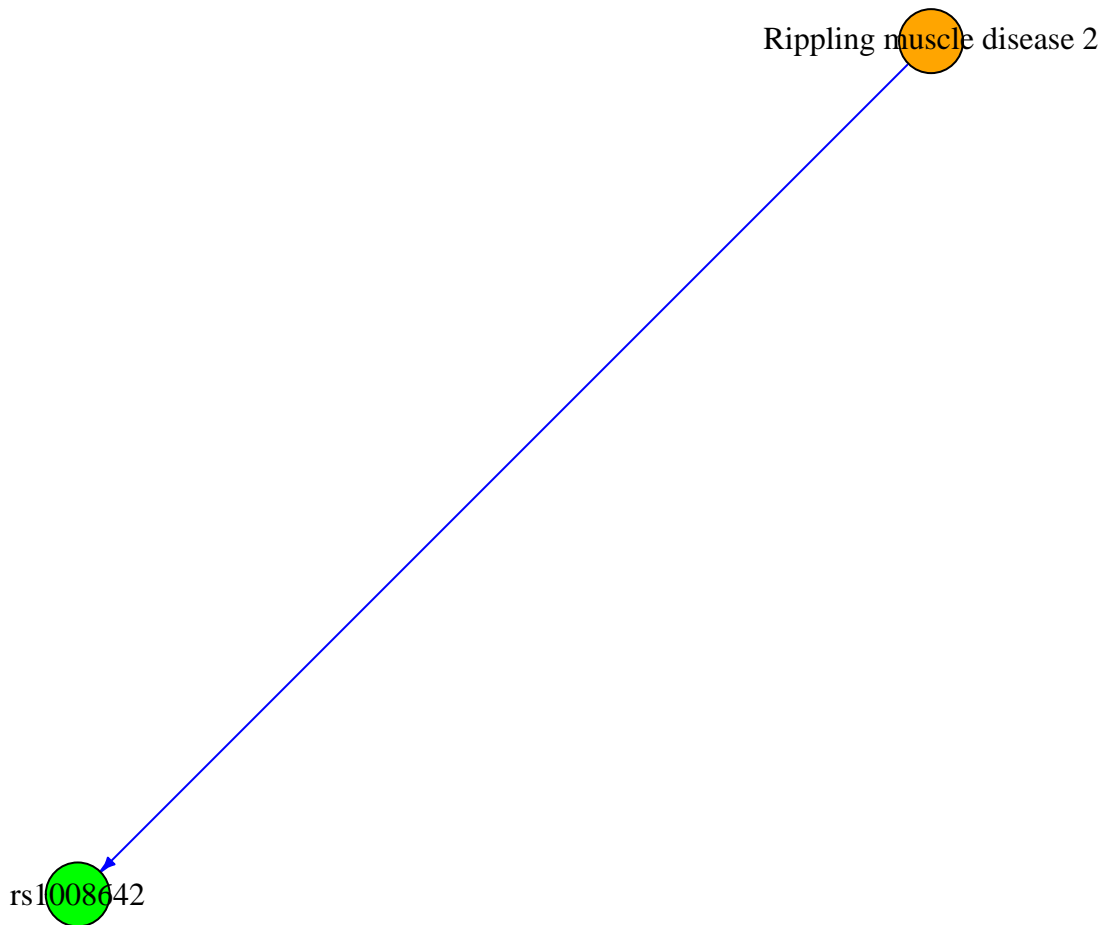

## Variant–Disease Network (Robinow syndrome)

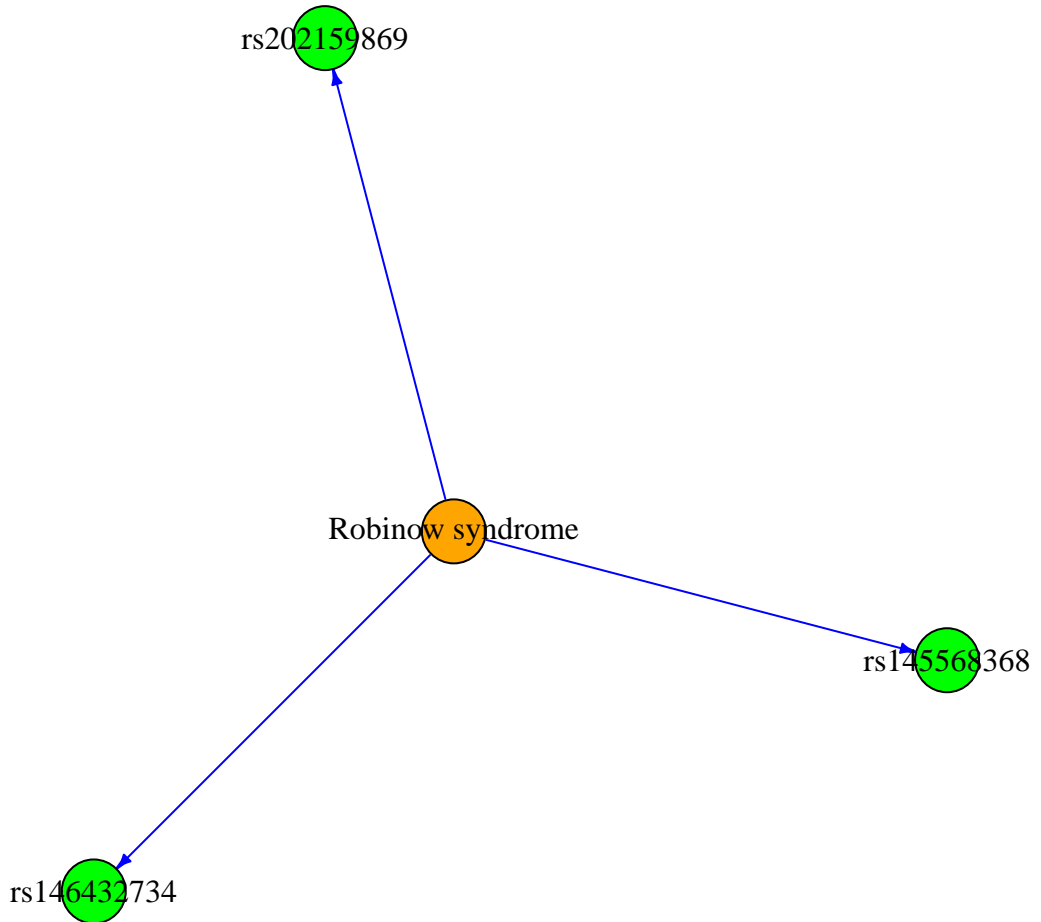

# nt-Disease Network (Rolandic epilepsy with mental retardation and speech c

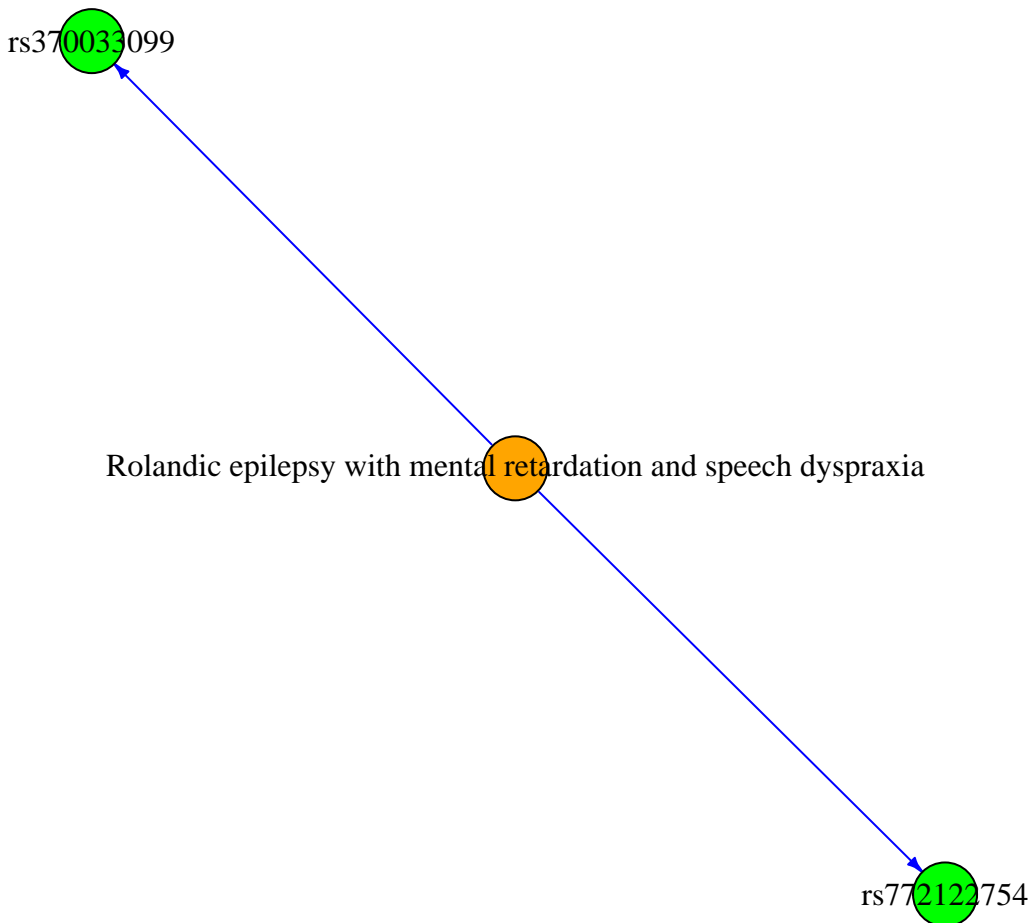

**Variant–Disease Network (Romano–Ward syndrome)**

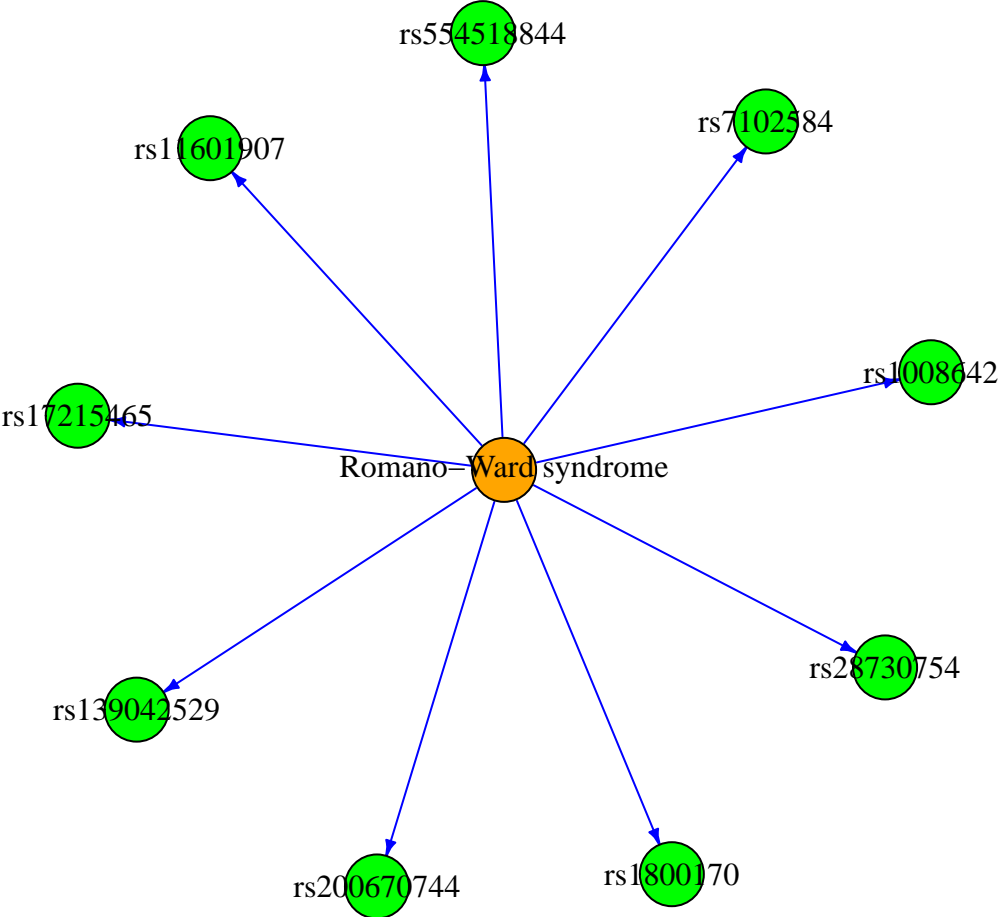

Variant–Disease Network (Rotor syndrome)

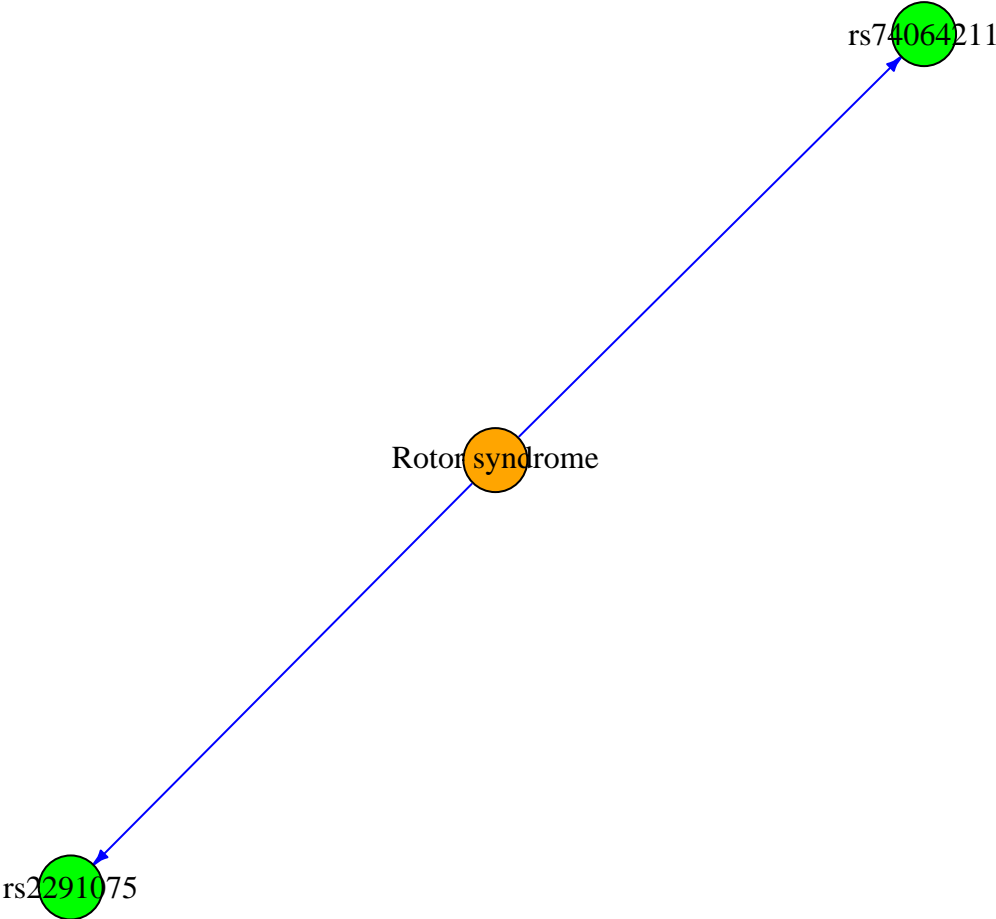

**Variant–Disease Network (Rubinstein–Taybi syndrome 1)**

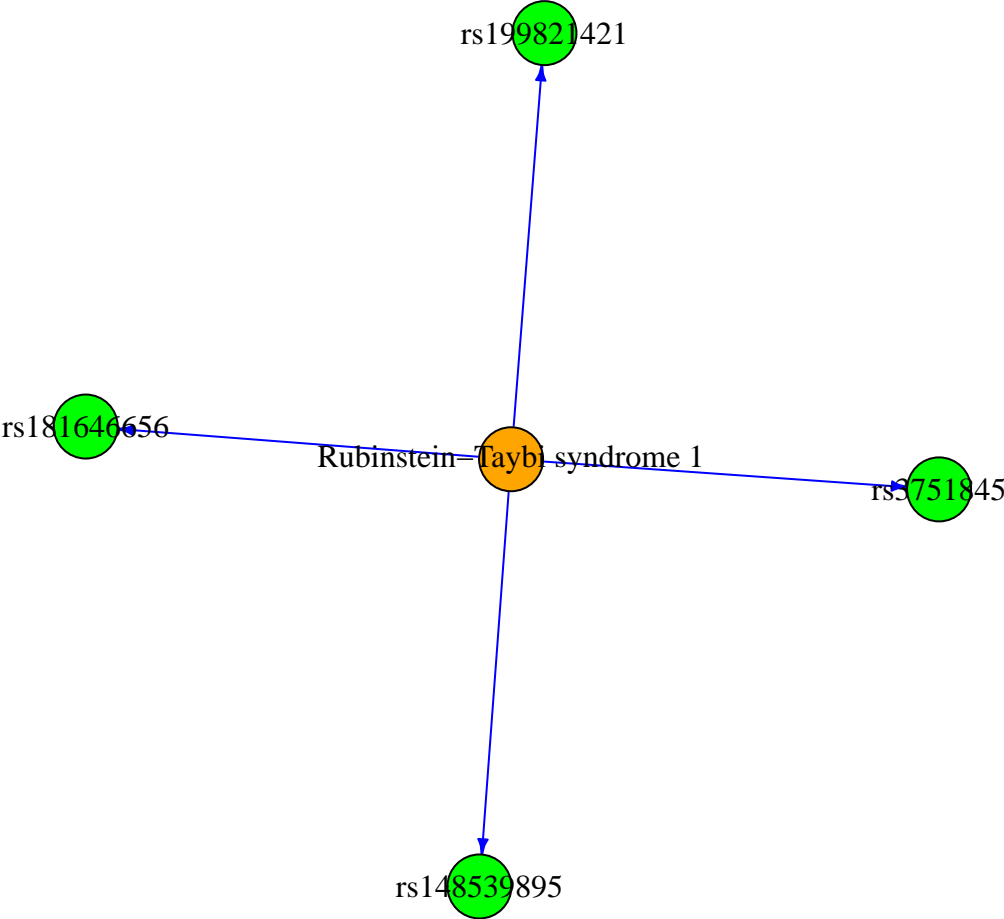

# Variant–Disease Network (Saethre–Chotzen syndrome)

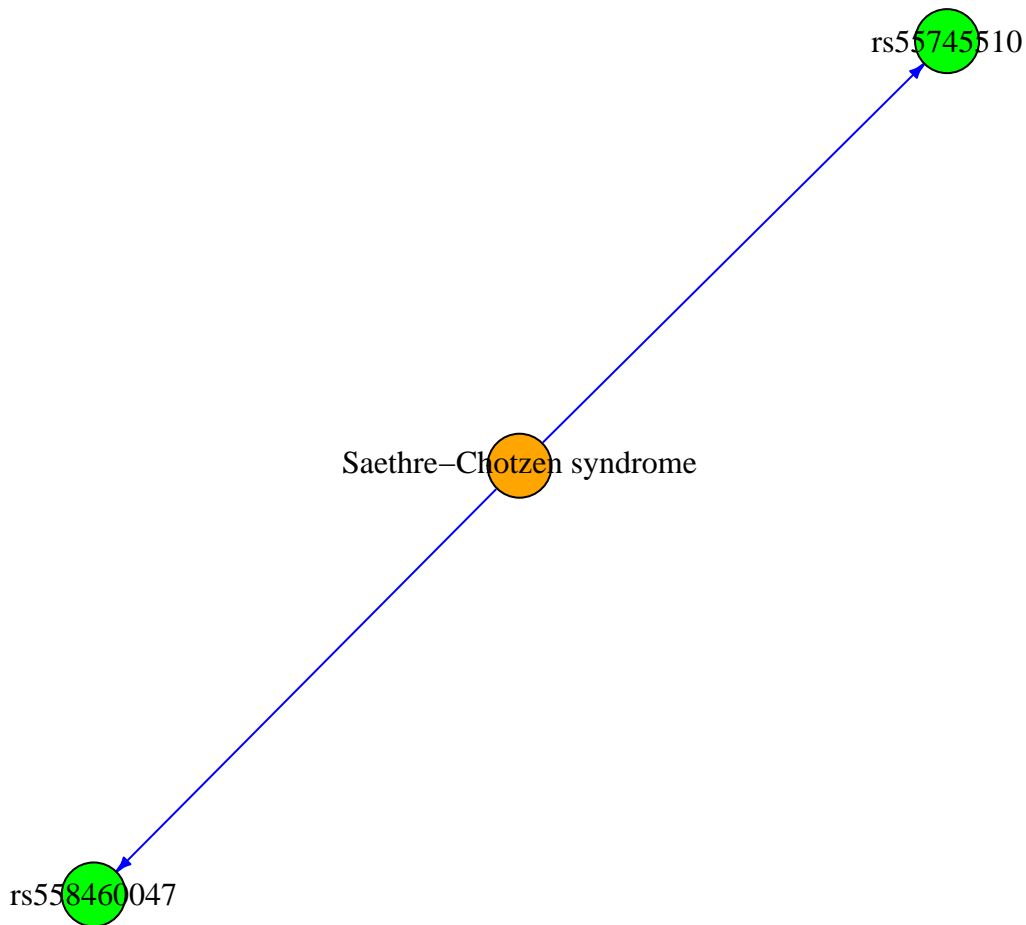

# Variant–Disease Network (Salt and pepper developmental regression syndrome)

and pepper developmental regression syndrome

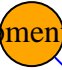

rs149801673

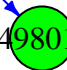



## Variant-Disease Network (Sanfilippo syndrome)

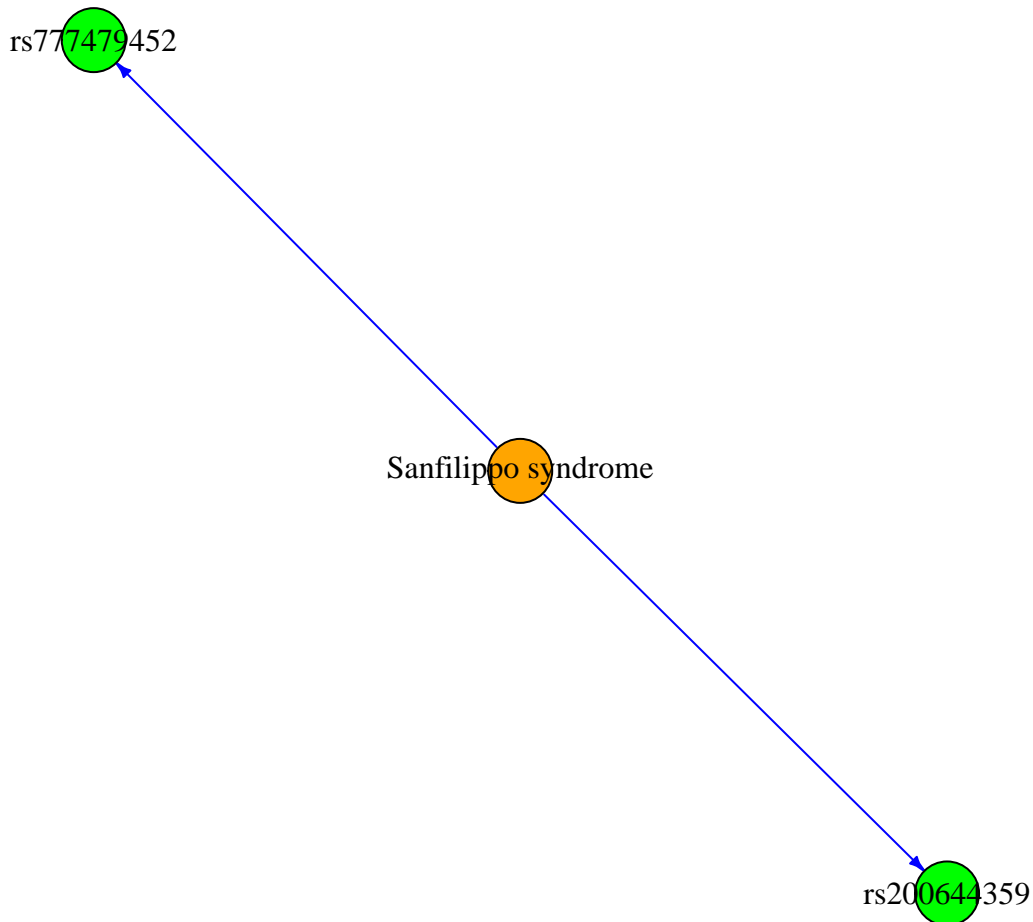

## Variant–Disease Network (Scapuloperoneal weakness)

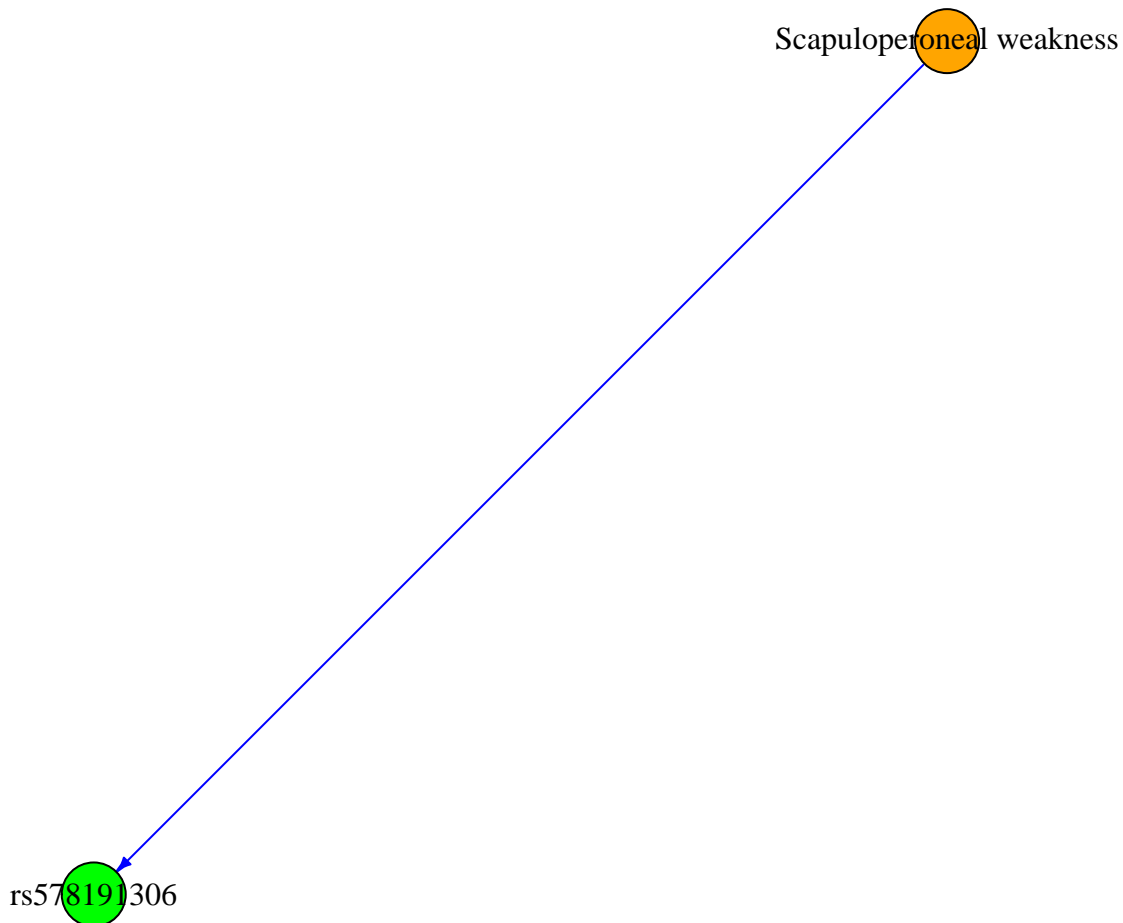

# Variant–Disease Network (Schaaf–yang syndrome)

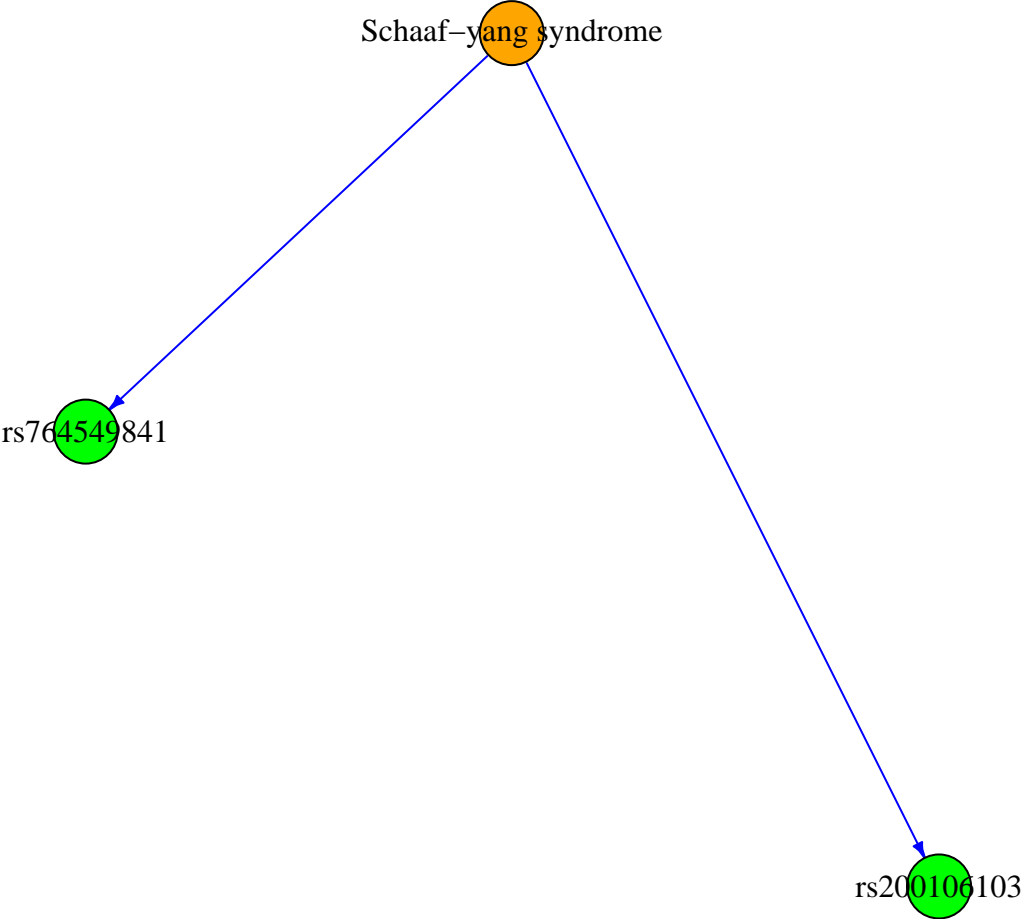

Variant–Disease Network (Schimke immunoosseous dysplasia)

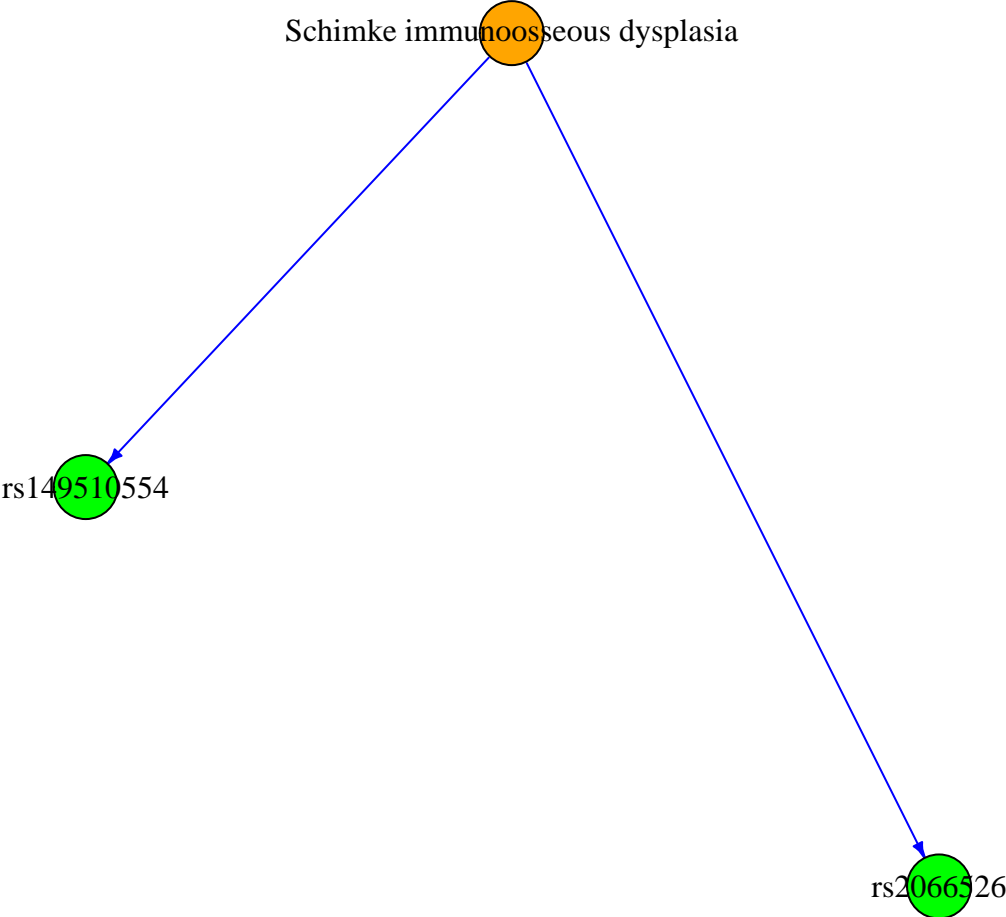

Variant–Disease Network (Schinzel–Giedion syndrome)

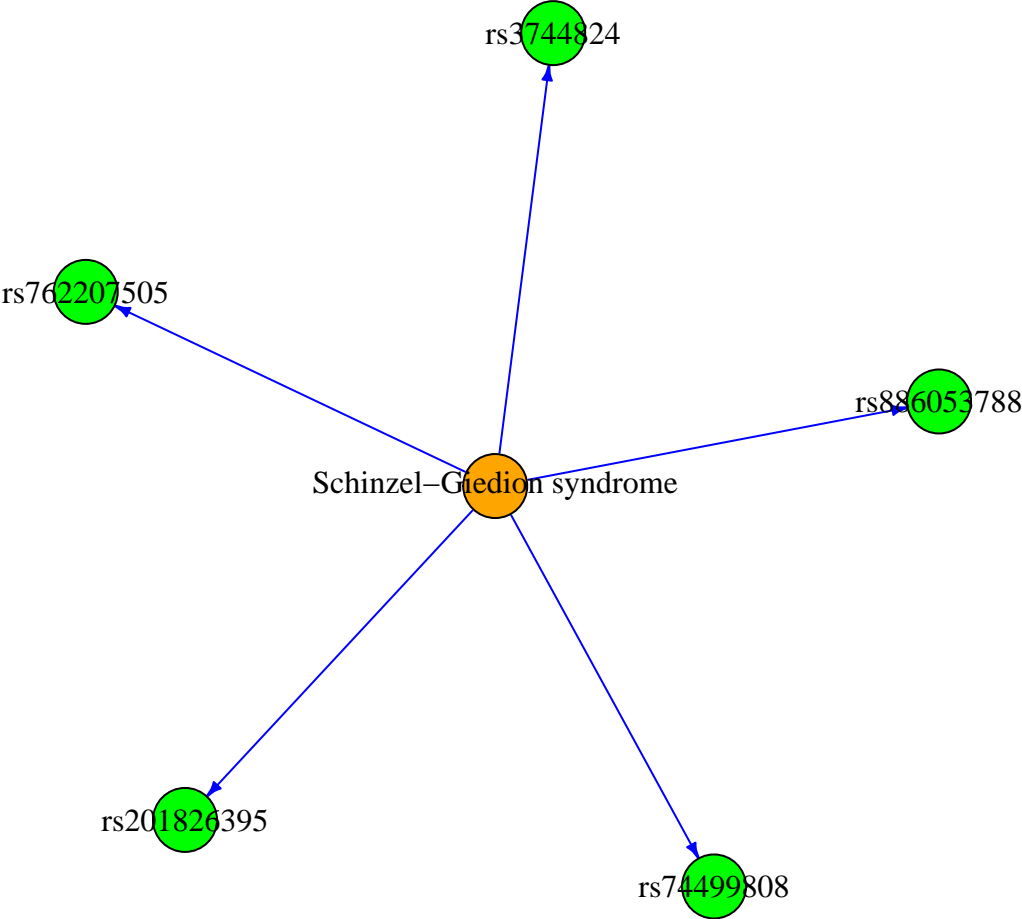

## Variant-Disease Network (Schneckenbecken dysplasia)

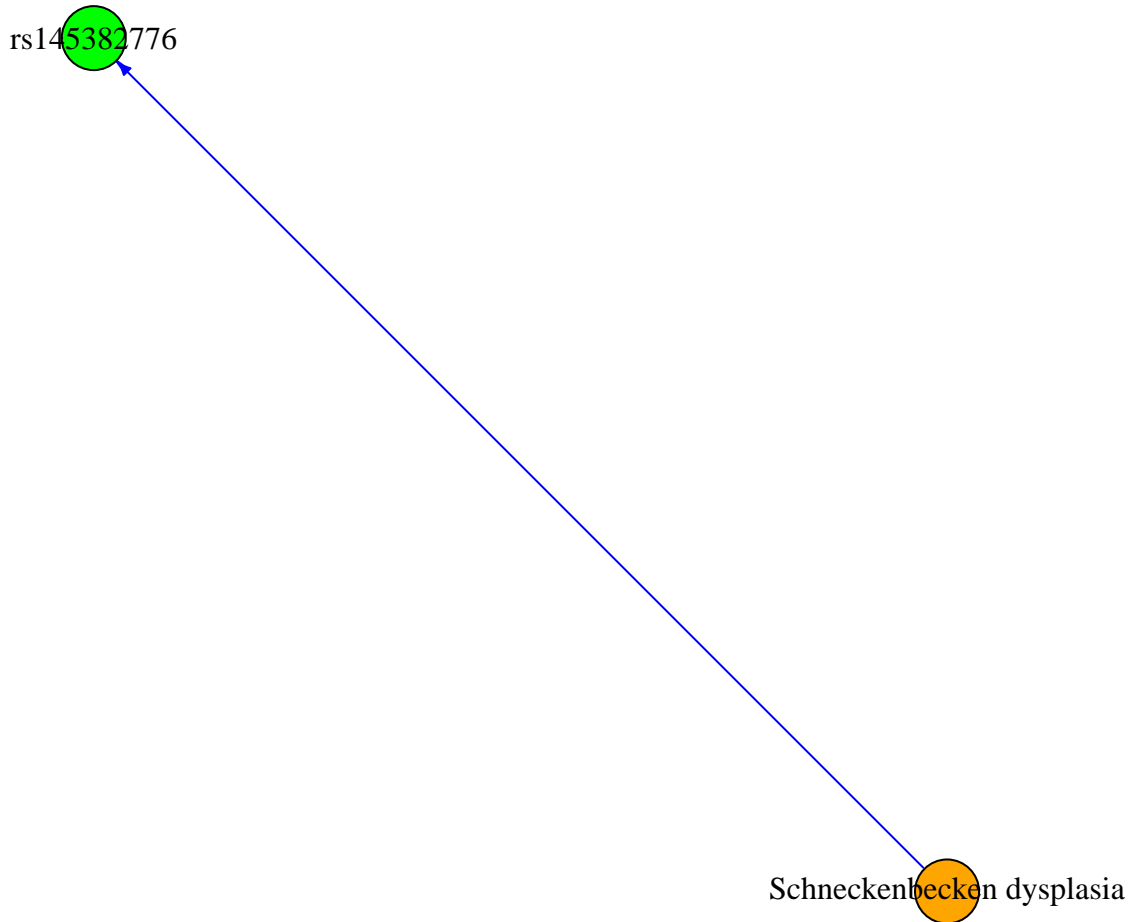

Variant–Disease Network (Schnyder crystalline corneal dystrophy)

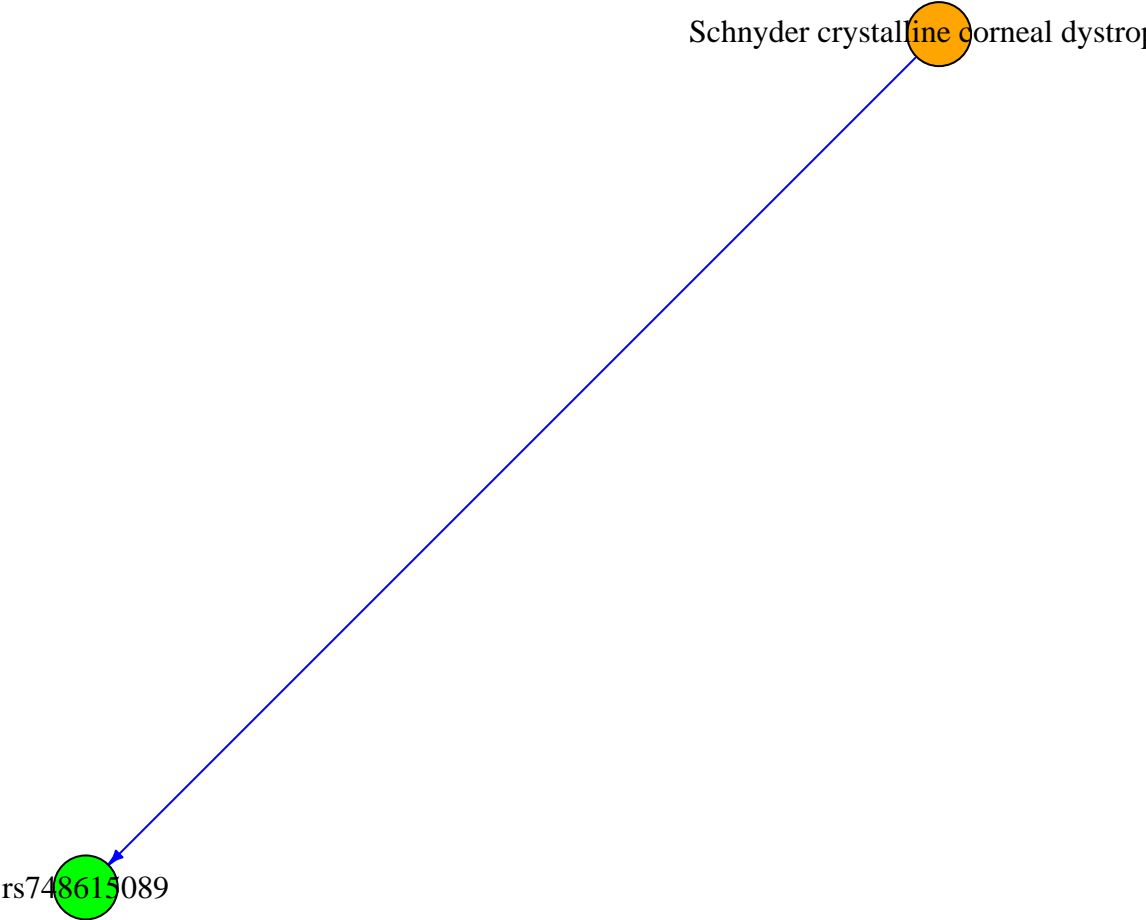

Variant–Disease Network (Schopf–Schulz–Passarge syndrome)

Schopf–Schulz–Passarge syndrome

rs531326479

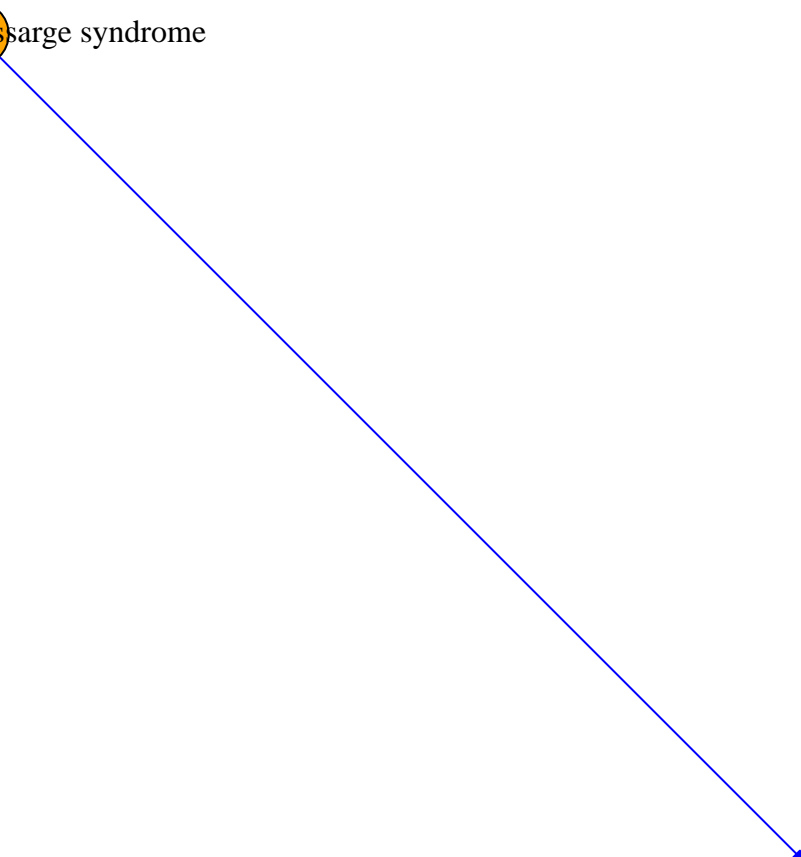



## Variant–Disease Network (Schwannomatosis)

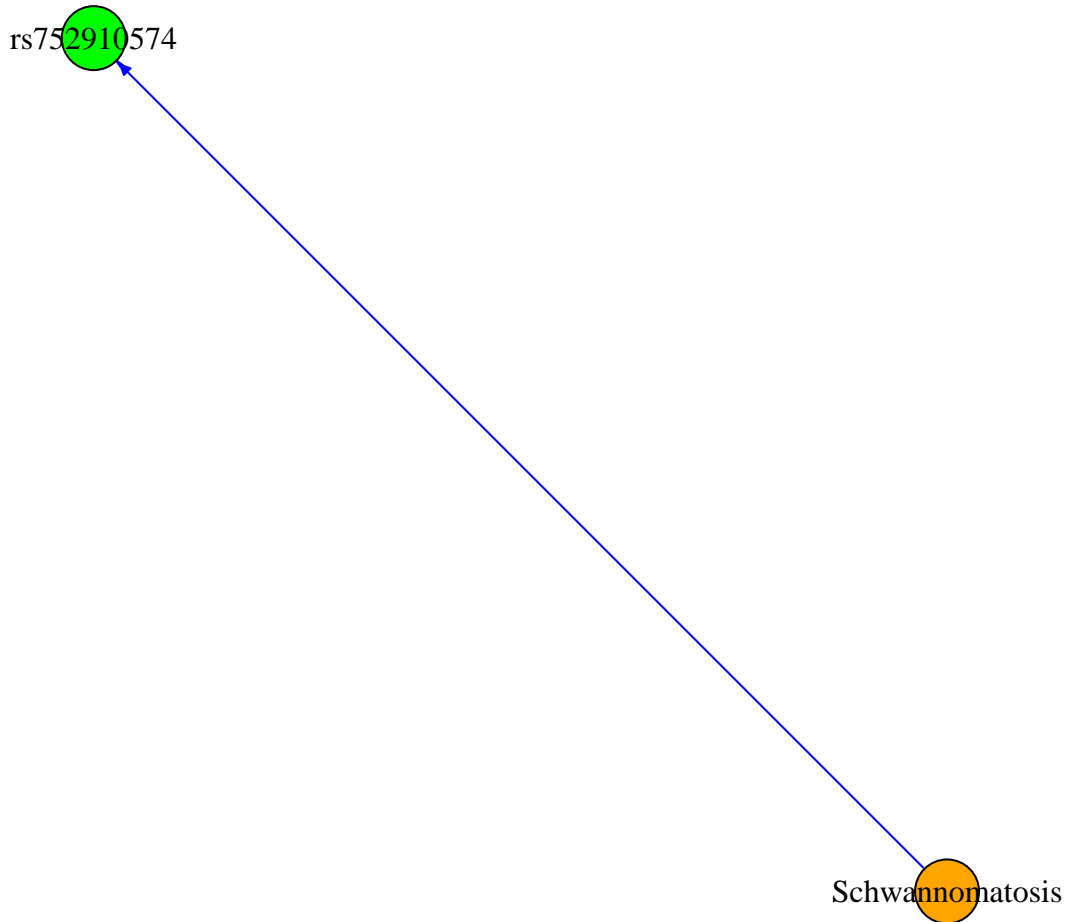

Variant–Disease Network (Schwartz Jampel syndrome type 1)

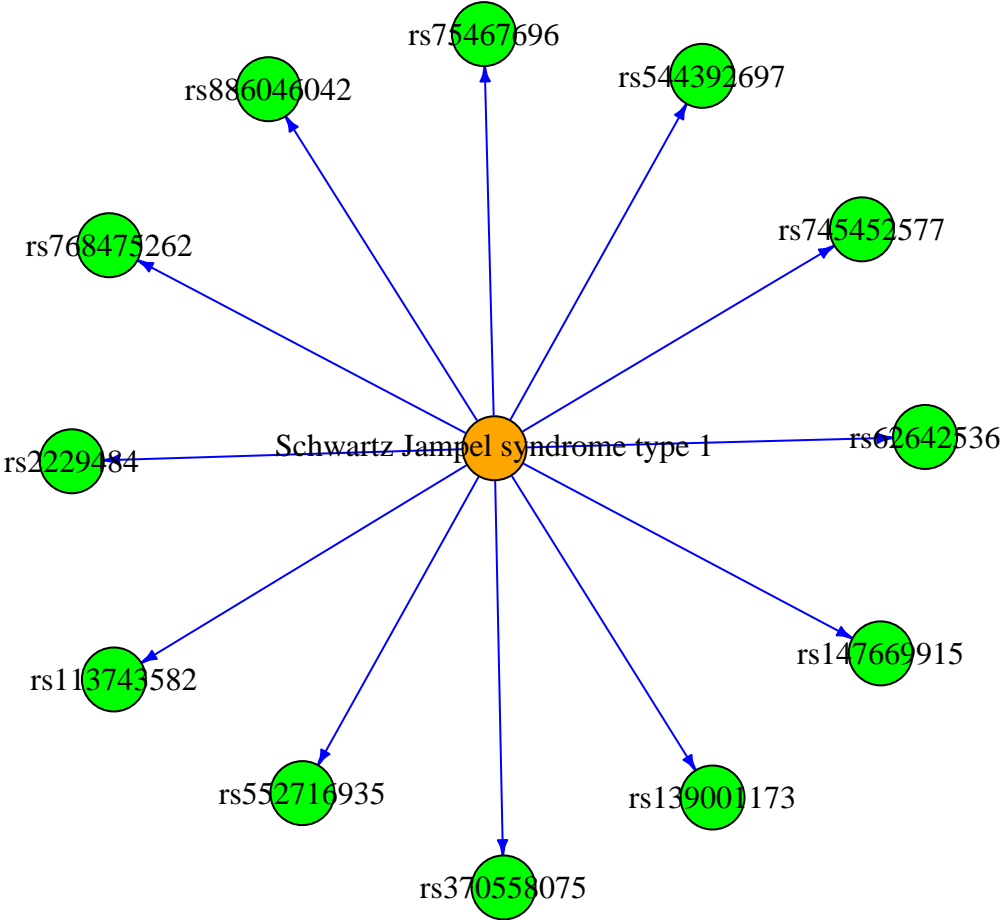

## Variant-Disease Network (Seckel syndrome)

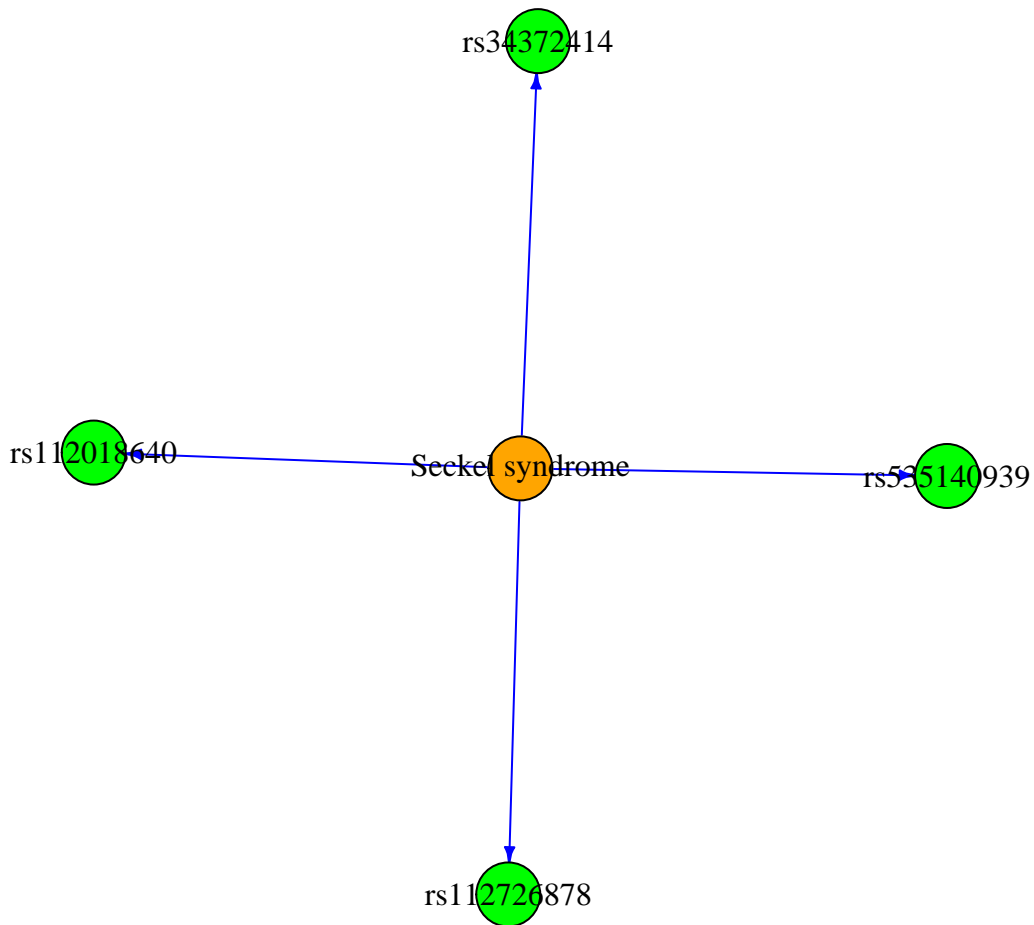

## Variant–Disease Network (Seizures)

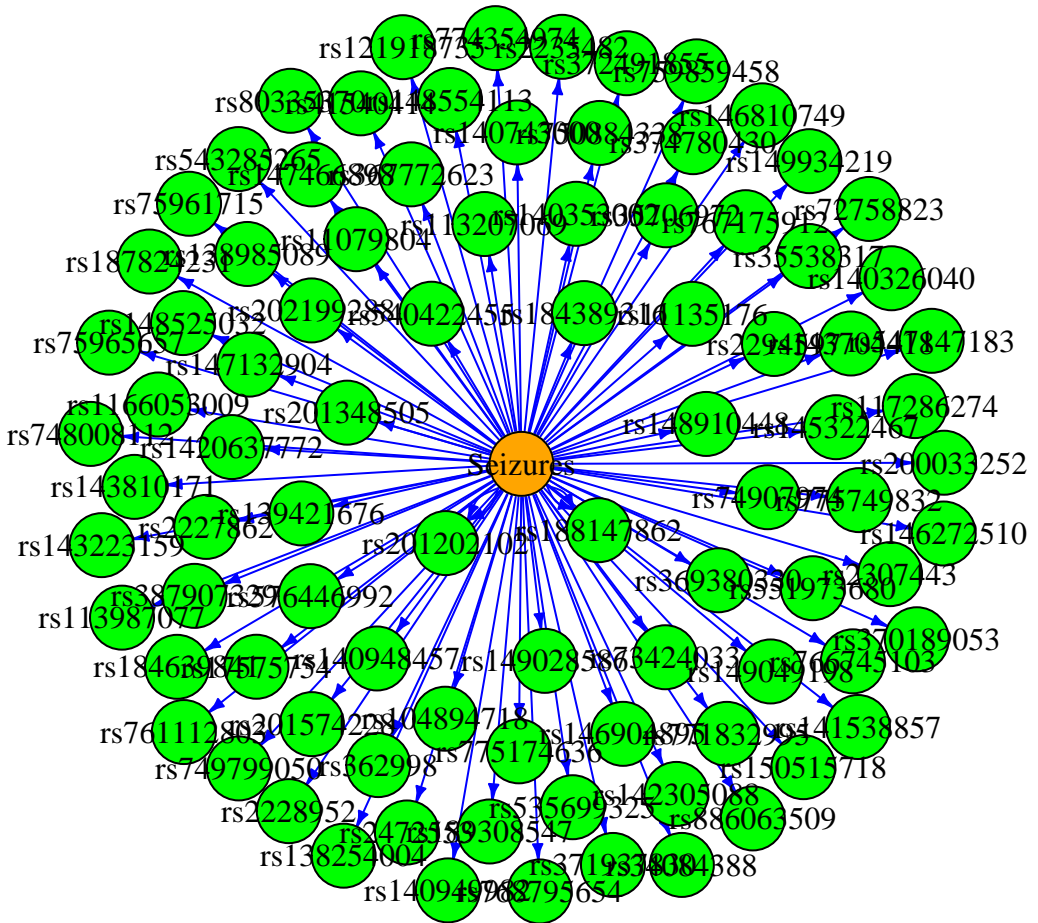

## Variant–Disease Network (Selective tooth agenesis)

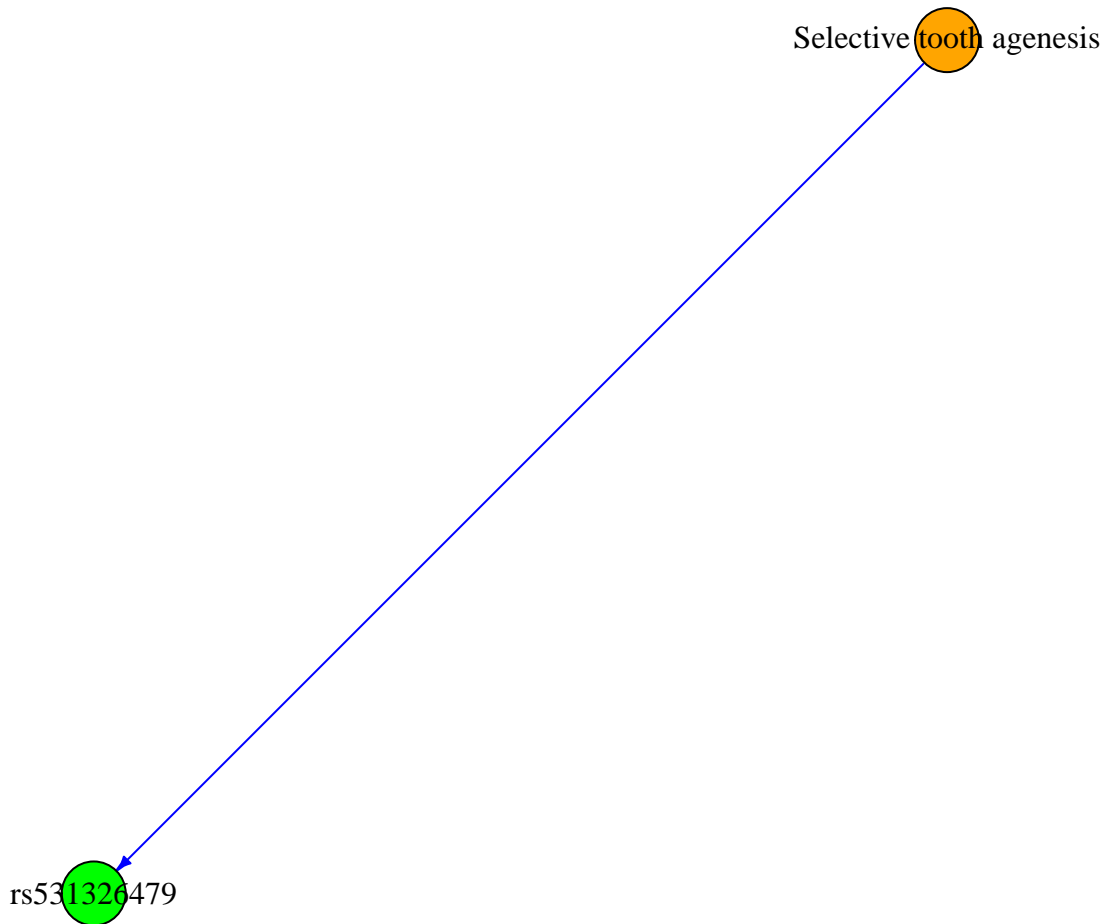

## Variant–Disease Network (Sensorineural hearing loss)

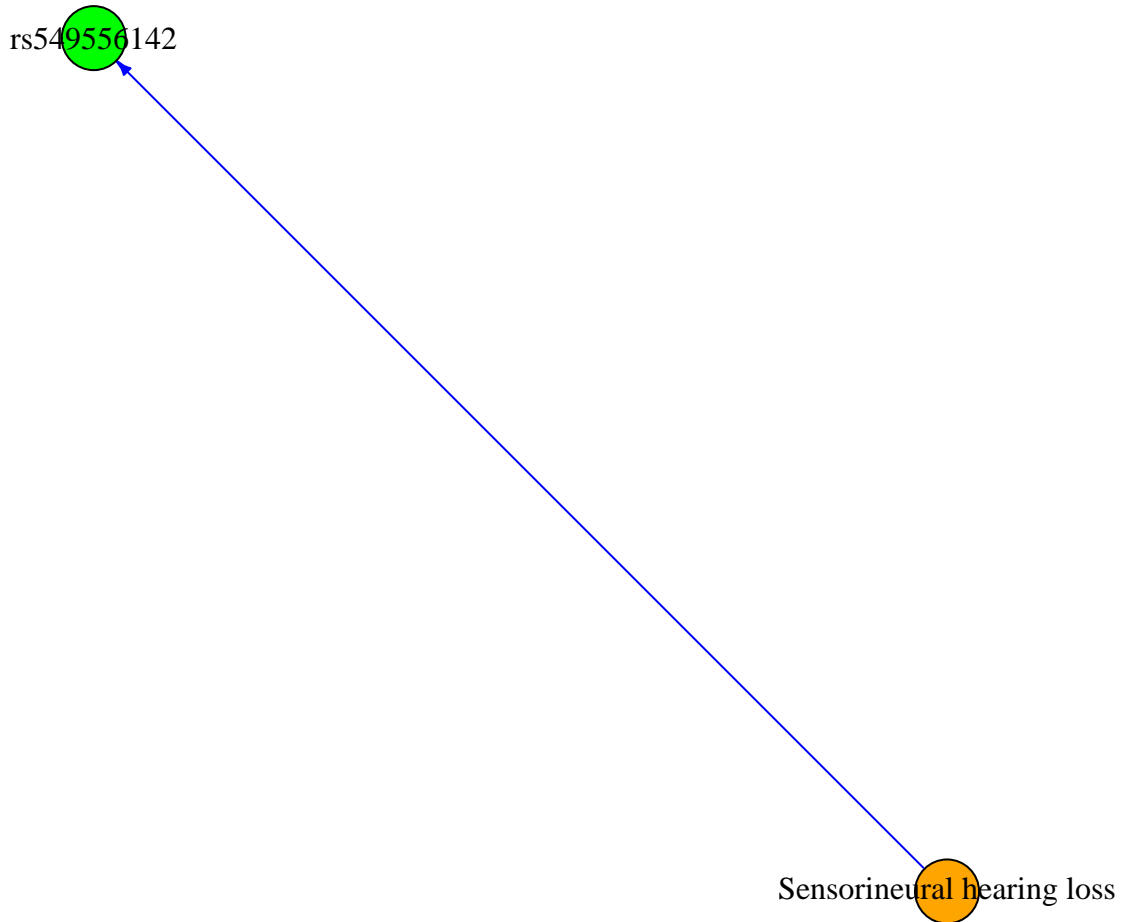

## Variant–Disease Network (Sensory ataxic neuropathy)

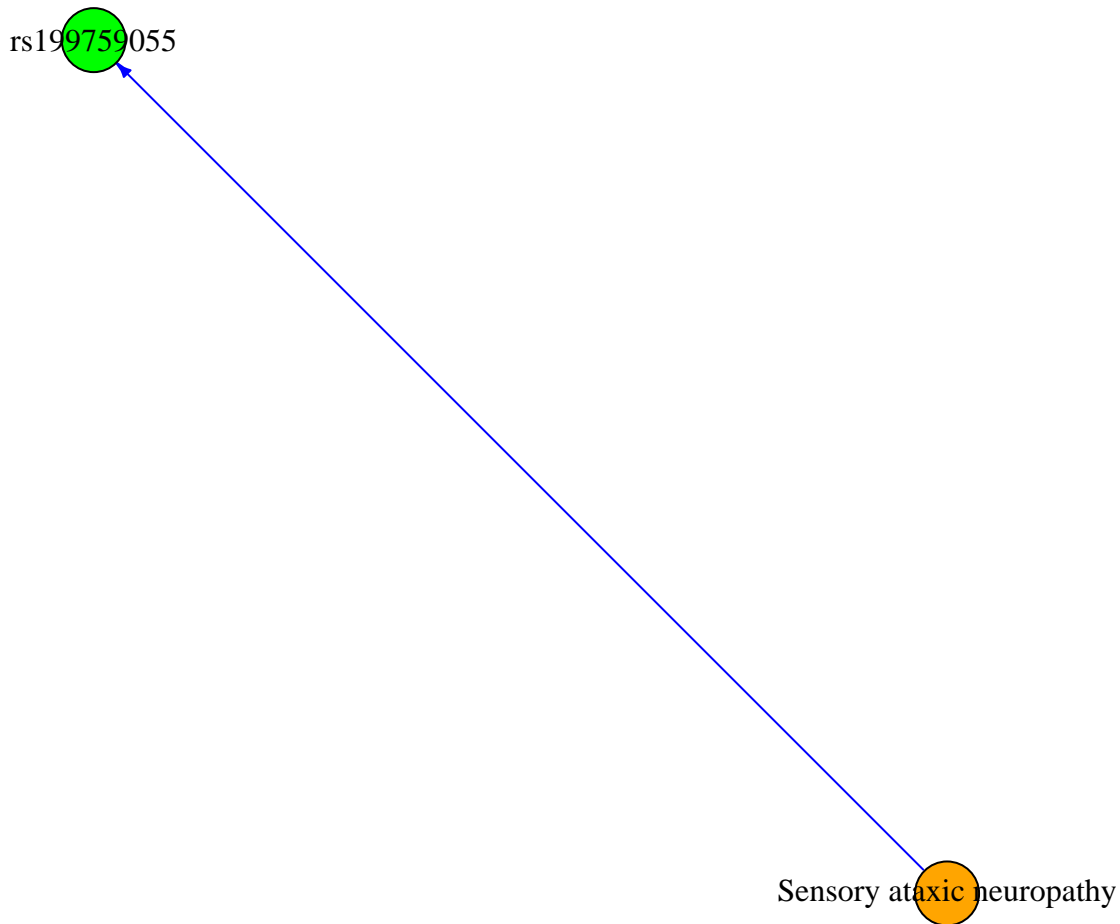

**Variant–Disease Network (Sensory Neuropathy with Spastic Paraplegia)**

Sensory Neuropathy with Spastic Paraplegia

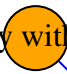

rs754143874

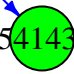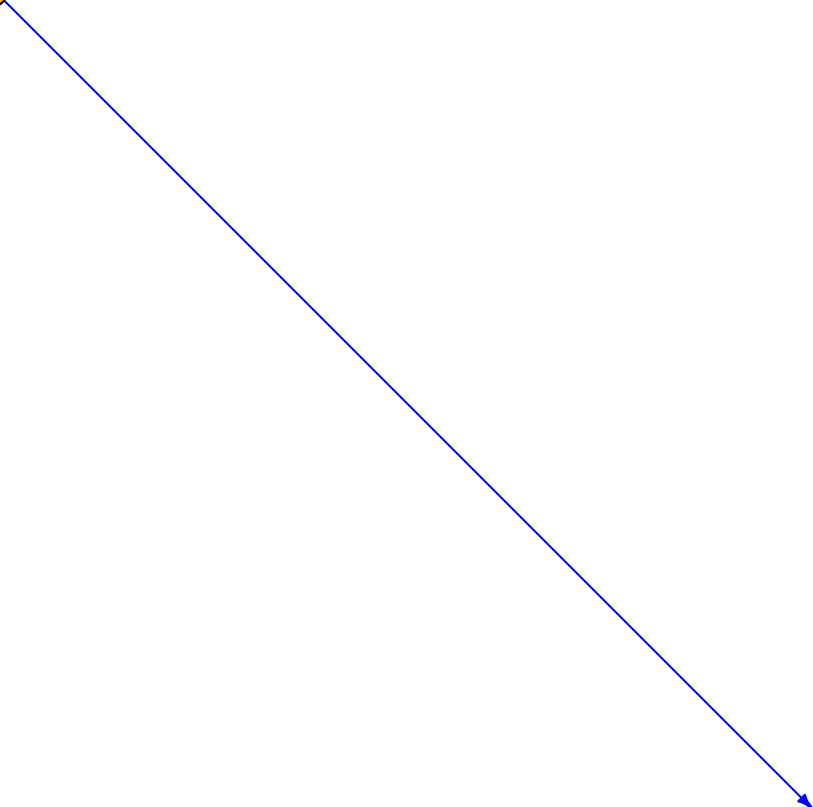



## Variant–Disease Network (SeSAME syndrome)

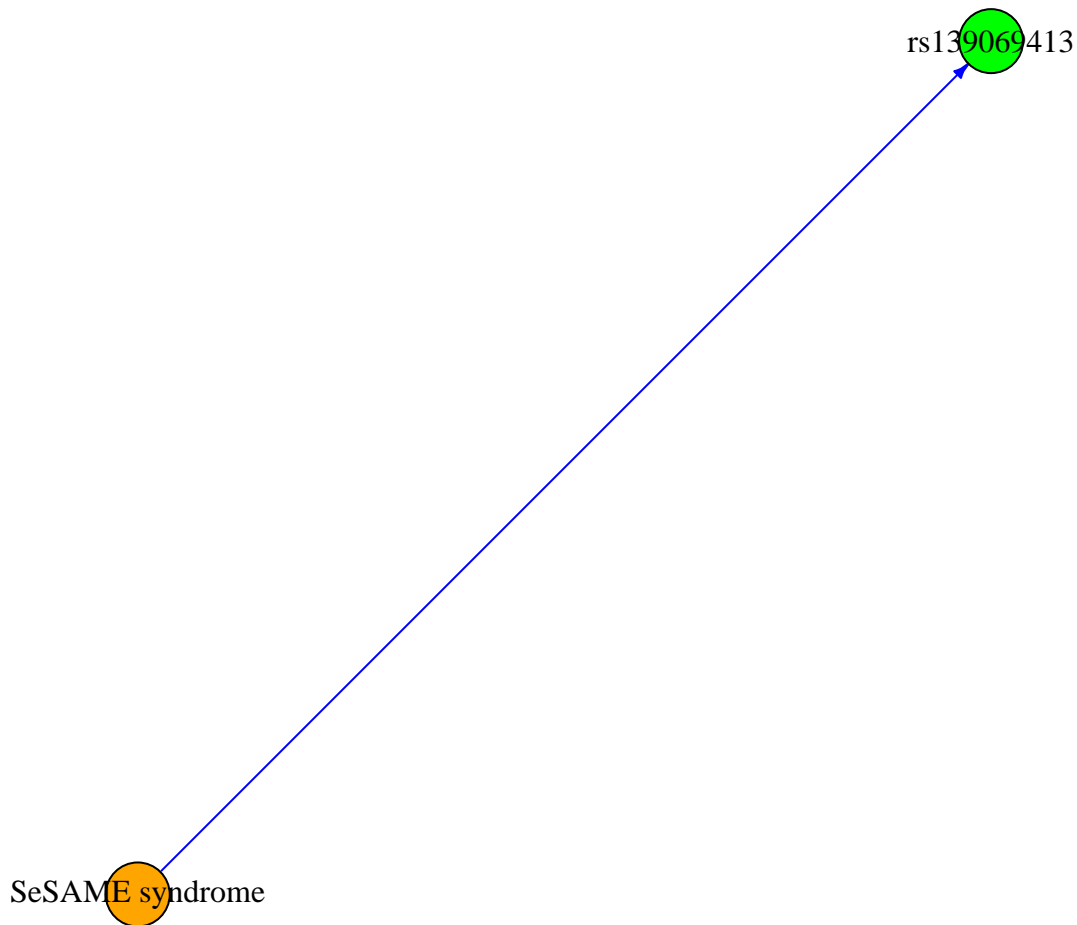

# Variant–Disease Network (Severe combined immunodeficiency)

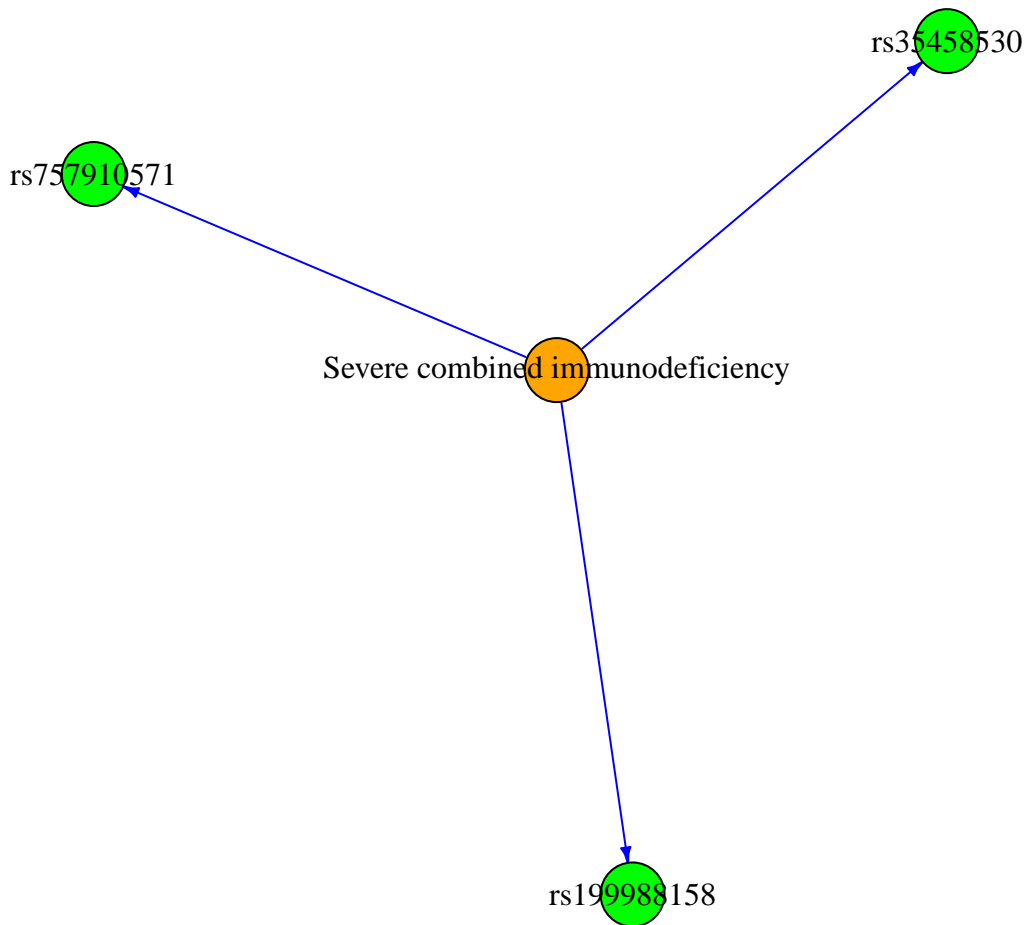

**Variant–Disease Network (Severe combined immunodeficiency disease)**

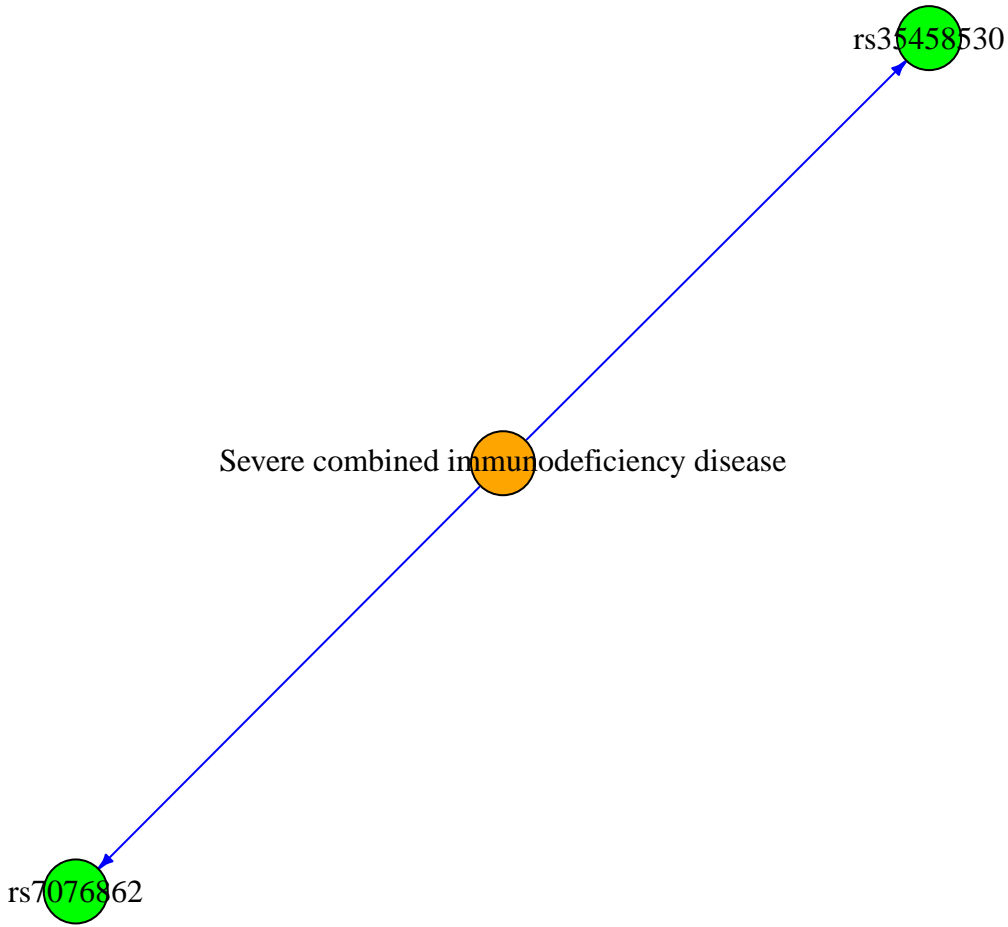

# Variant-Disease Network (Severe combined immunodeficiency due to ADA deficiency)

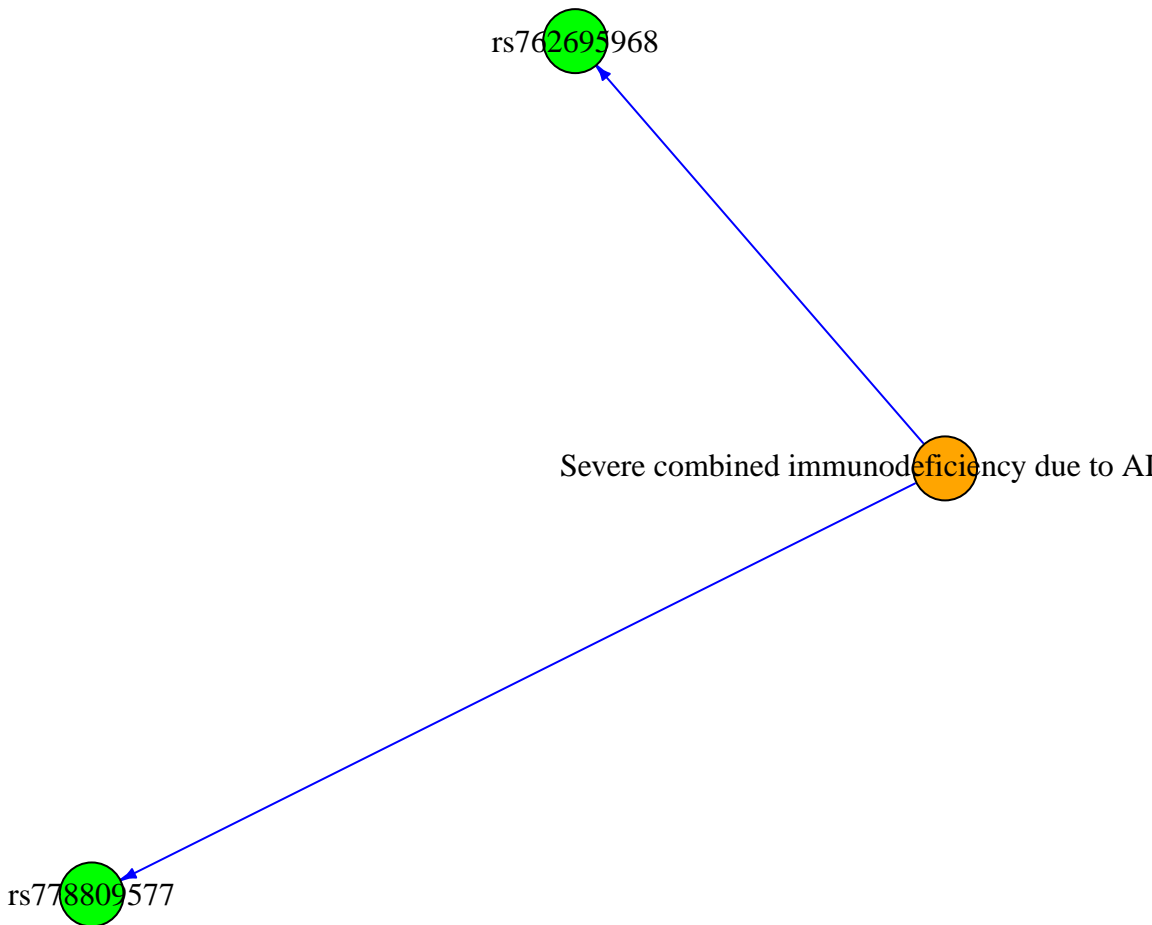

# Disease Network (Severe combined immunodeficiency with sensitivity to ionizing radiation)

rs232637

Severe combined immunodeficiency with sensitivity to ionizing radiation

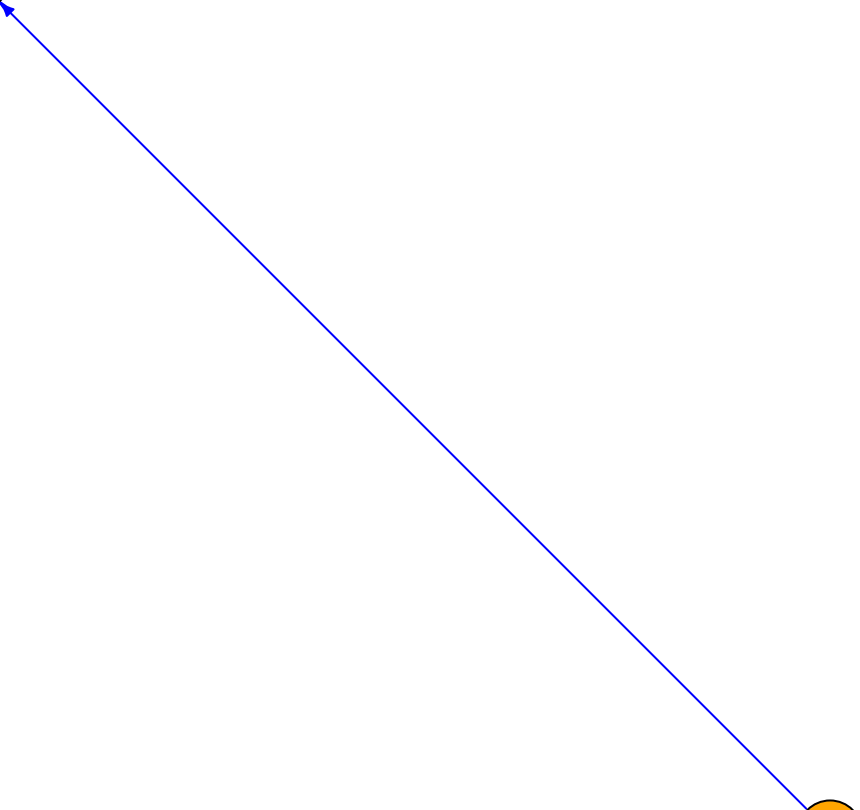

# Variant–Disease Network (Severe myoclonic epilepsy in infancy)

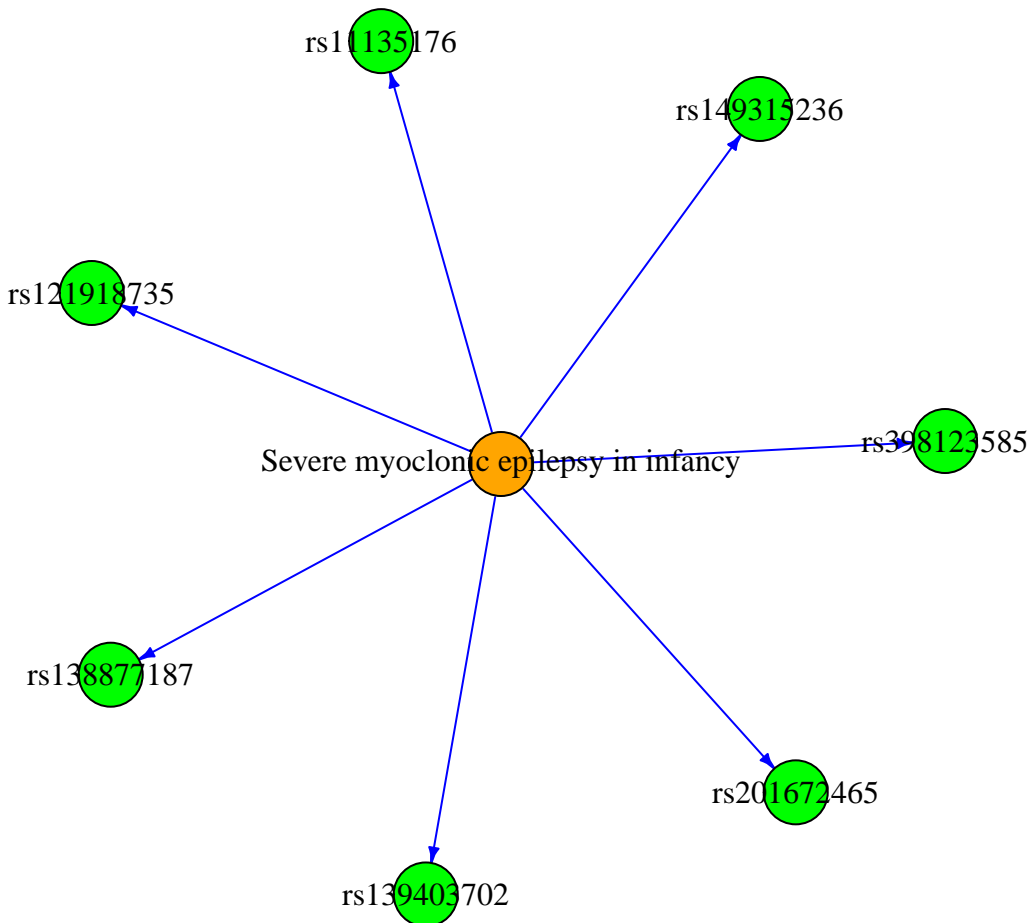

# Variant-Disease Network (Severe neonatal-onset encephalopathy with microcephaly)

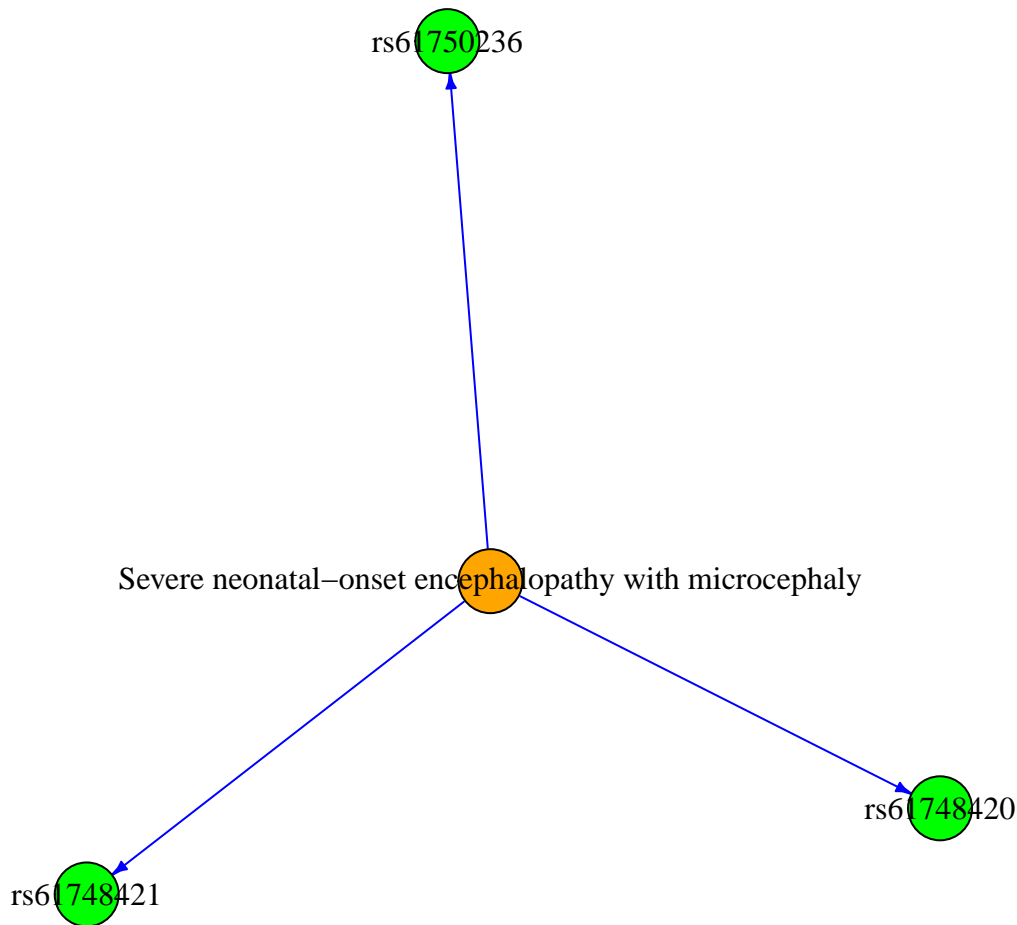

Variant–Disease Network (short QT syndrome)

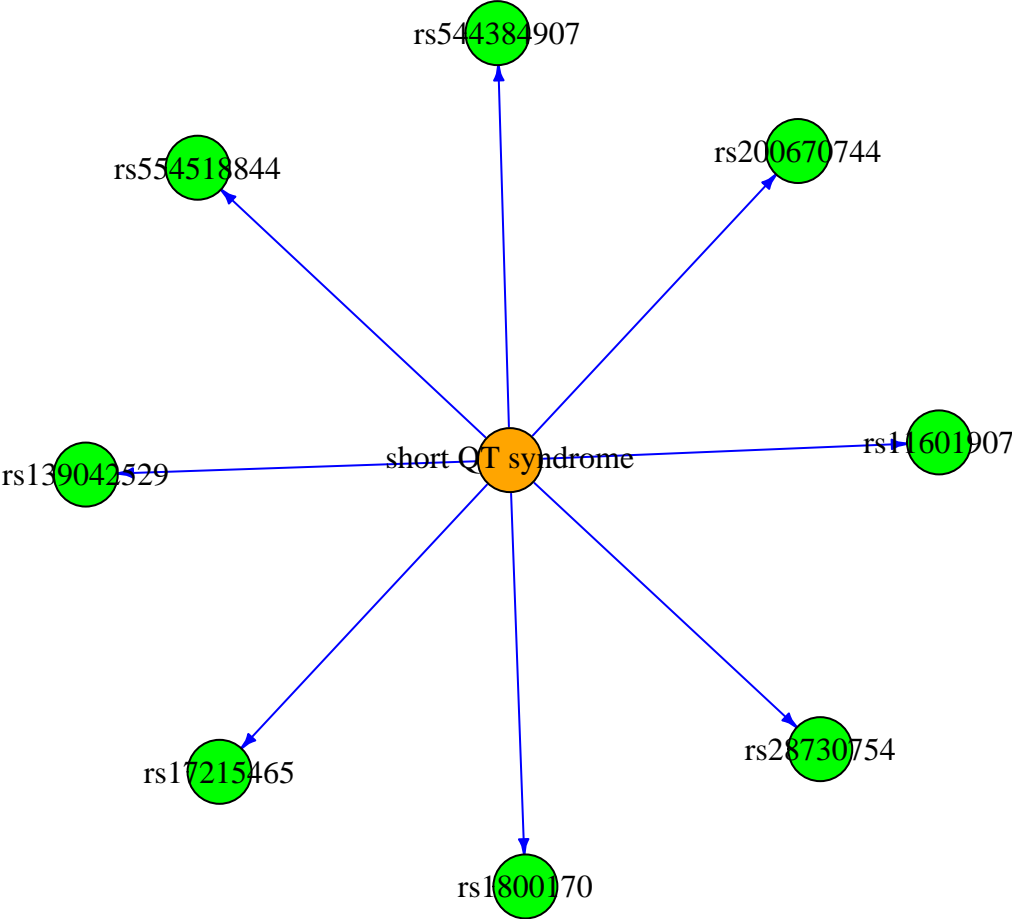



## Variant–Disease Network (Short QT syndrome 3)

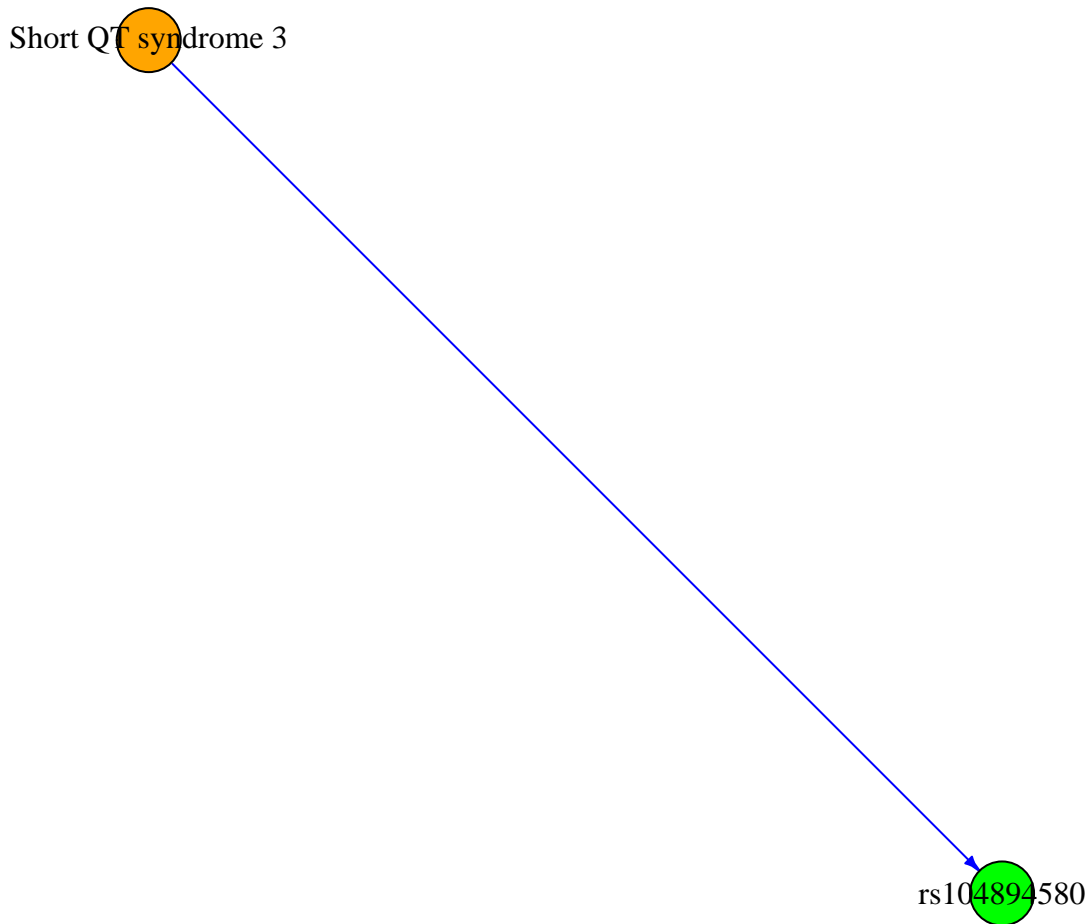

Variant–Disease Network (Short Rib Polydactyly Syndrome)

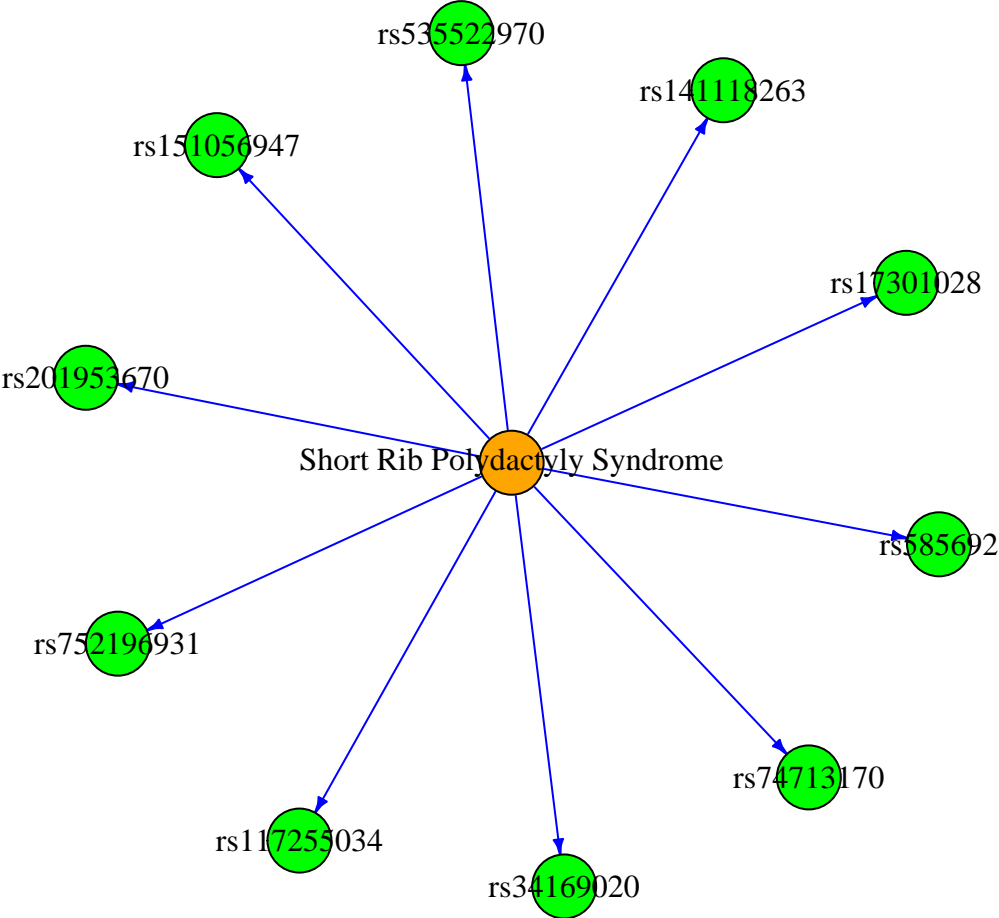

## Variant–Disease Network (Short rib polydactyly syndrome 5)

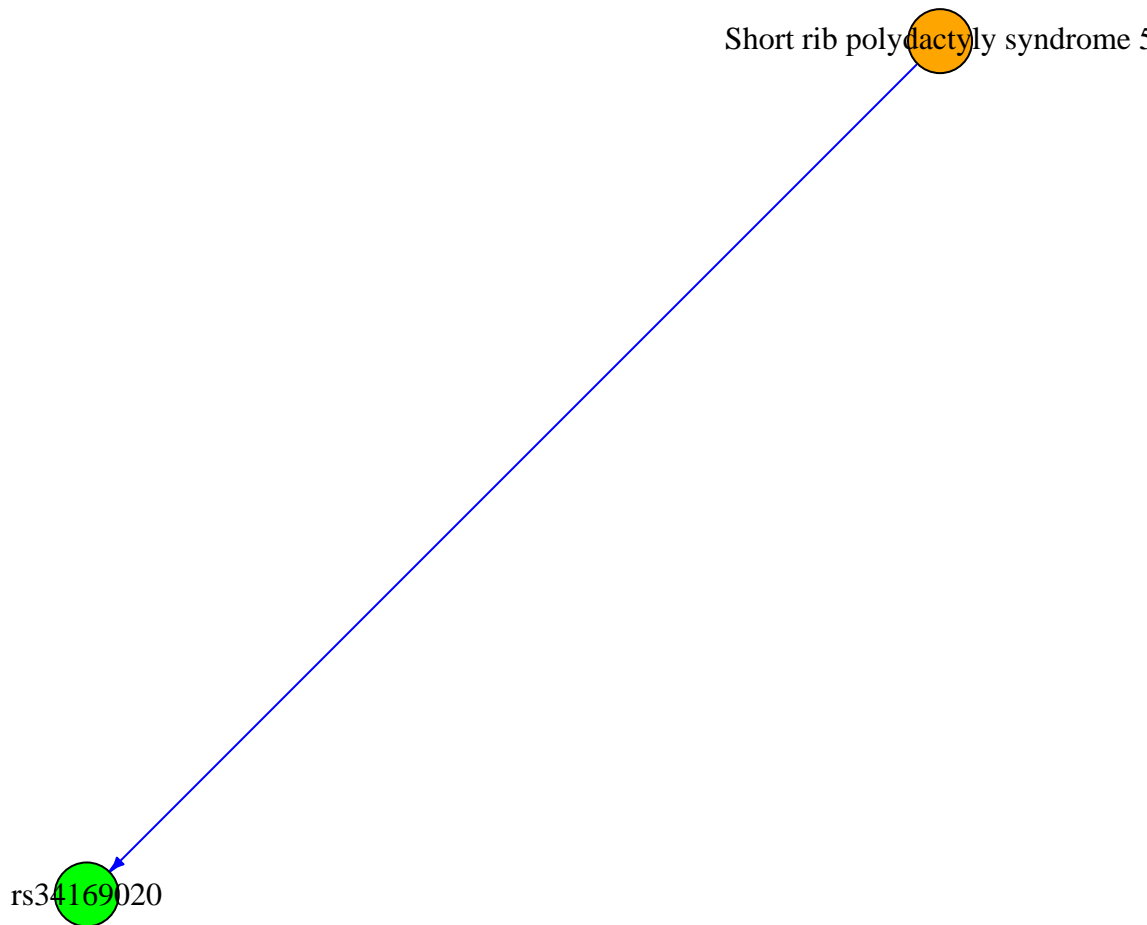

## Variant–Disease Network (Short stature)

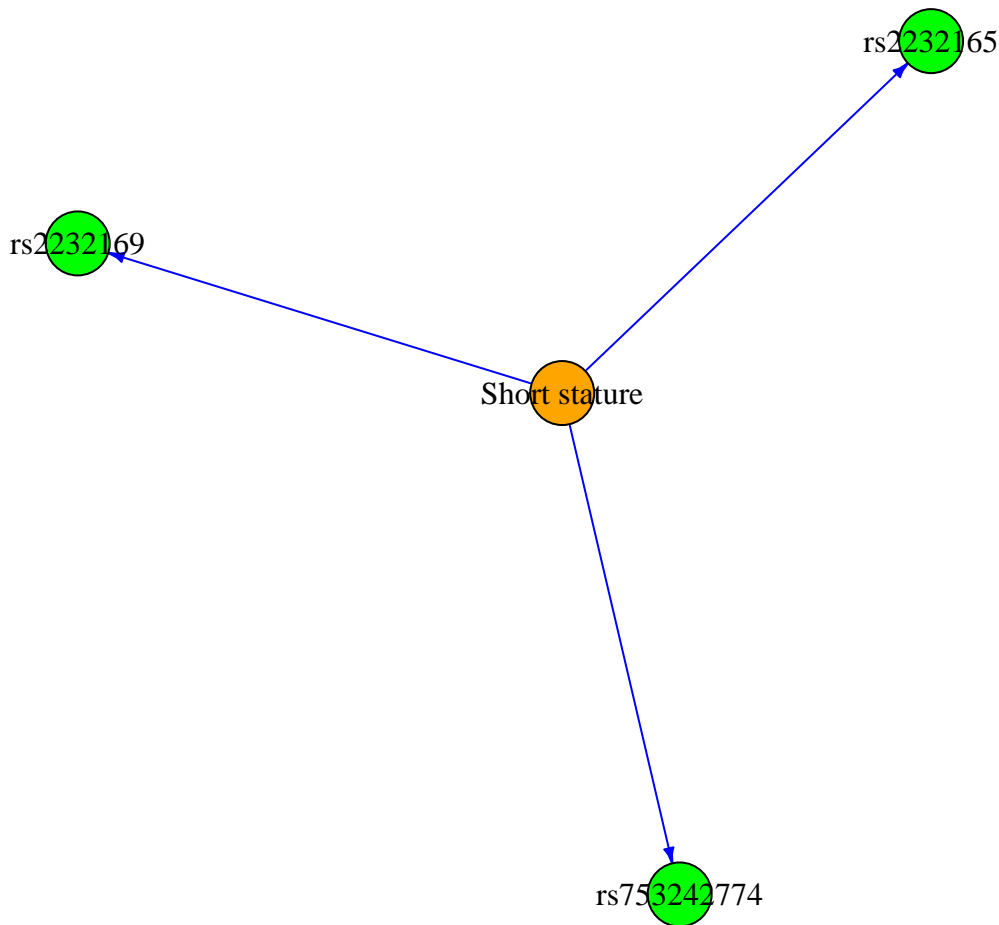

# Disease Network (Short stature due to growth hormone secretagogue receptor 1 deficiency)

rs148371213

Short stature due to growth hormone secretagogue receptor 1 deficiency

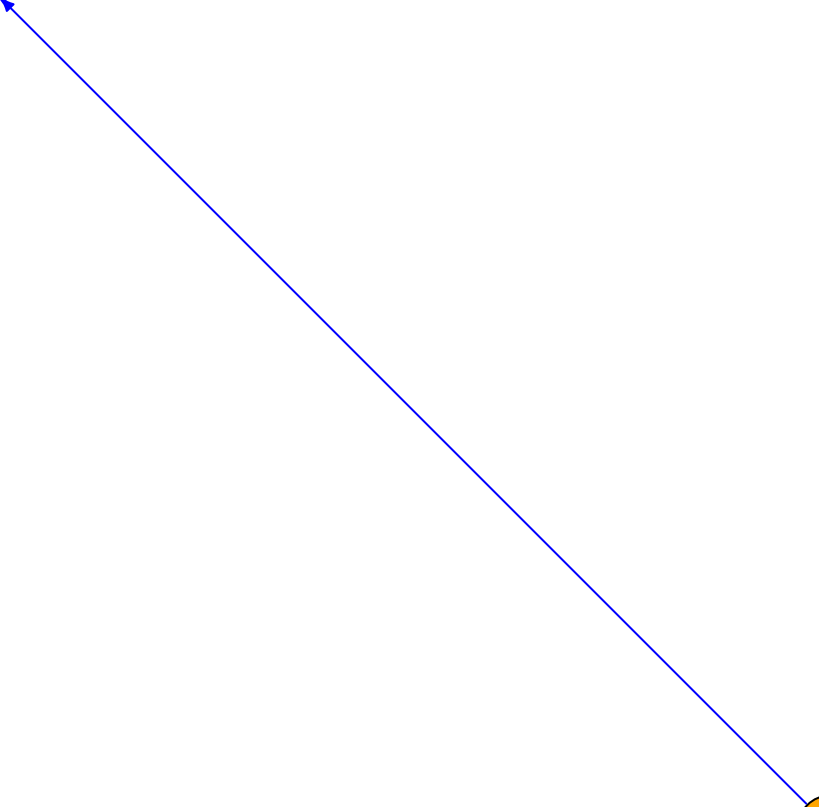

## Variant-Disease Network (Short-rib polydactyly syndrome type III)

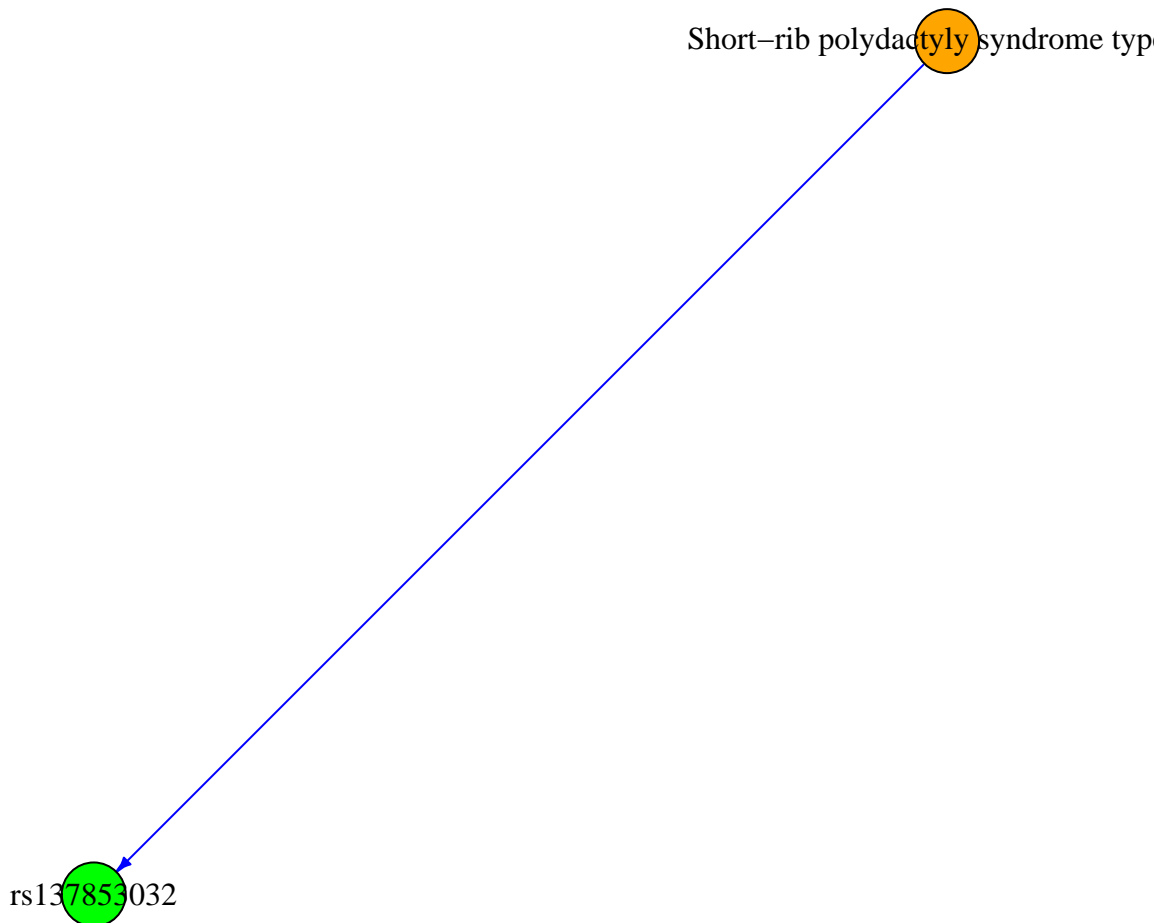

# Variant-Disease Network (Short-rib thoracic dysplasia 13 with or without polydactyly)

rs143893793

Short-rib thoracic dysplasia 13 with or without polydactyly



# Variant-Disease Network (Short-rib thoracic dysplasia 3 with or without polyd

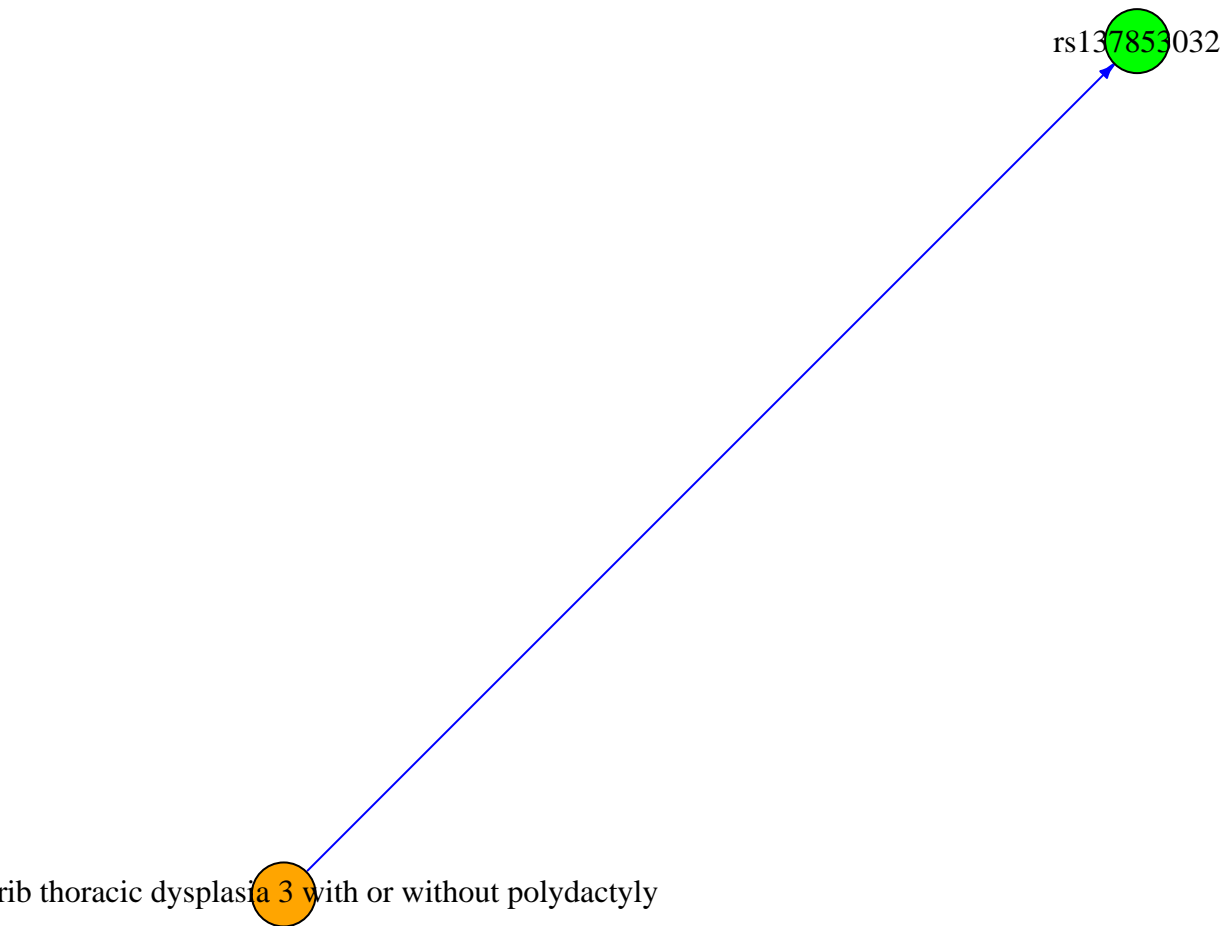



# Variant-Disease Network (Short-rib thoracic dysplasia 8 with or without polyd

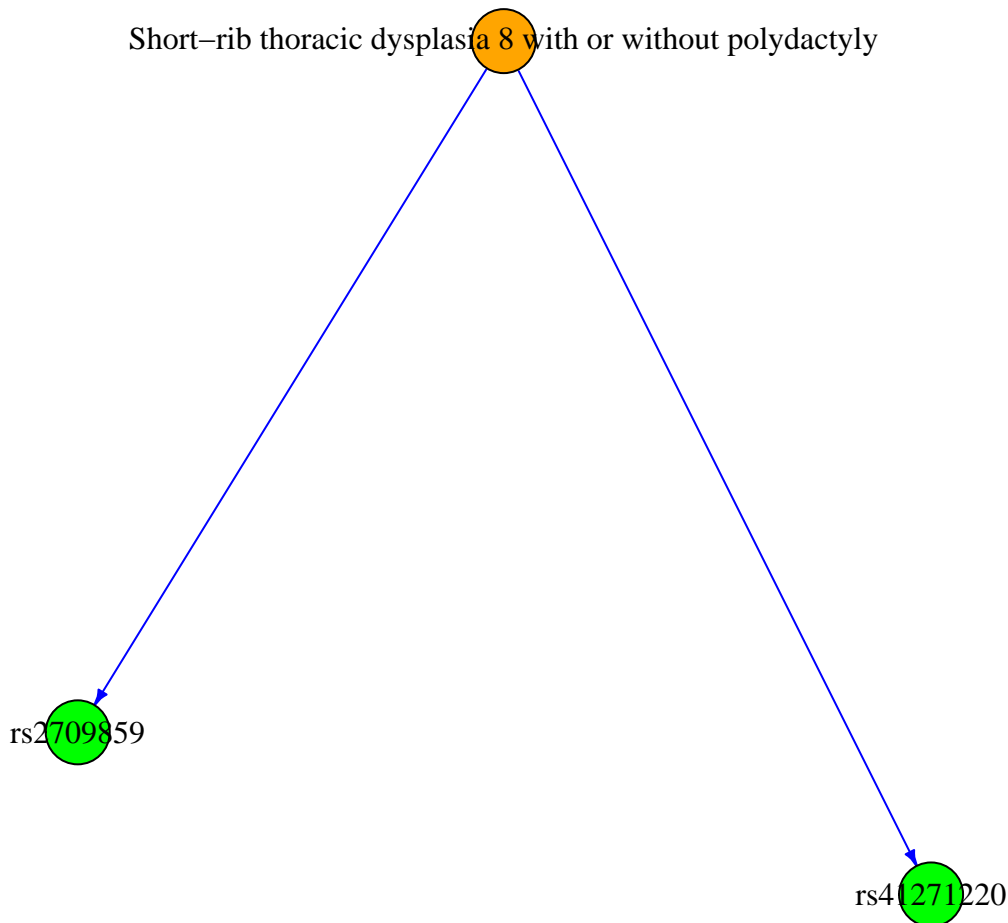

## Variant–Disease Network (Shprintzen–Goldberg syndrome)

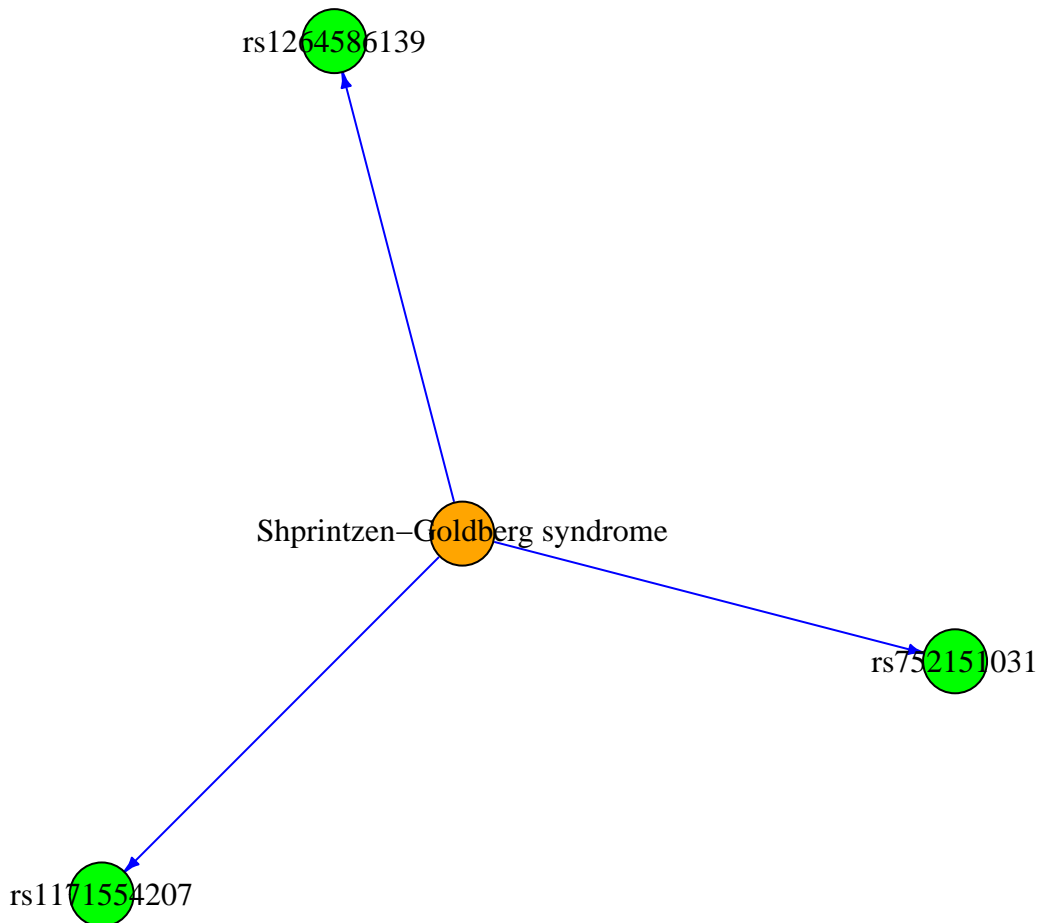

## Variant–Disease Network (Shwachman–Diamond syndrome 1)

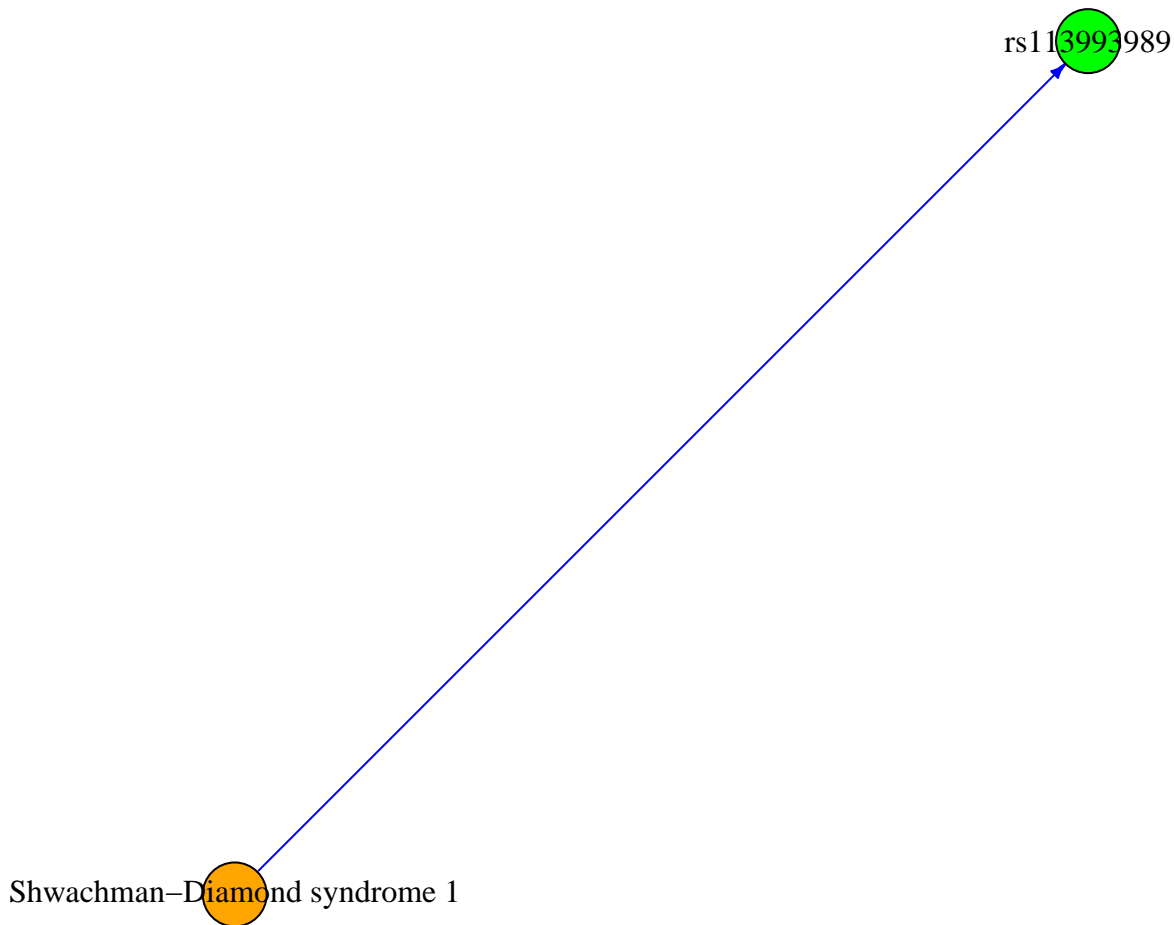

## Variant–Disease Network (Sialuria)

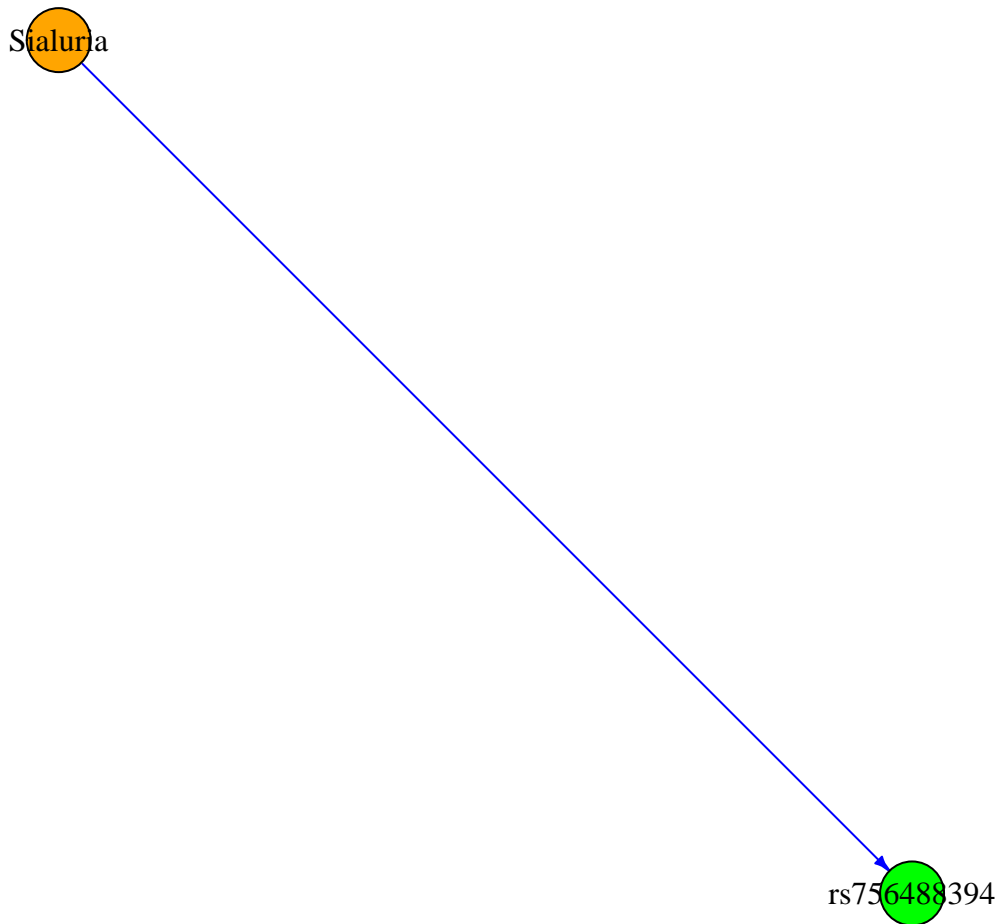

**Variant–Disease Network (Sideroblastic Anemia and Ataxia)**

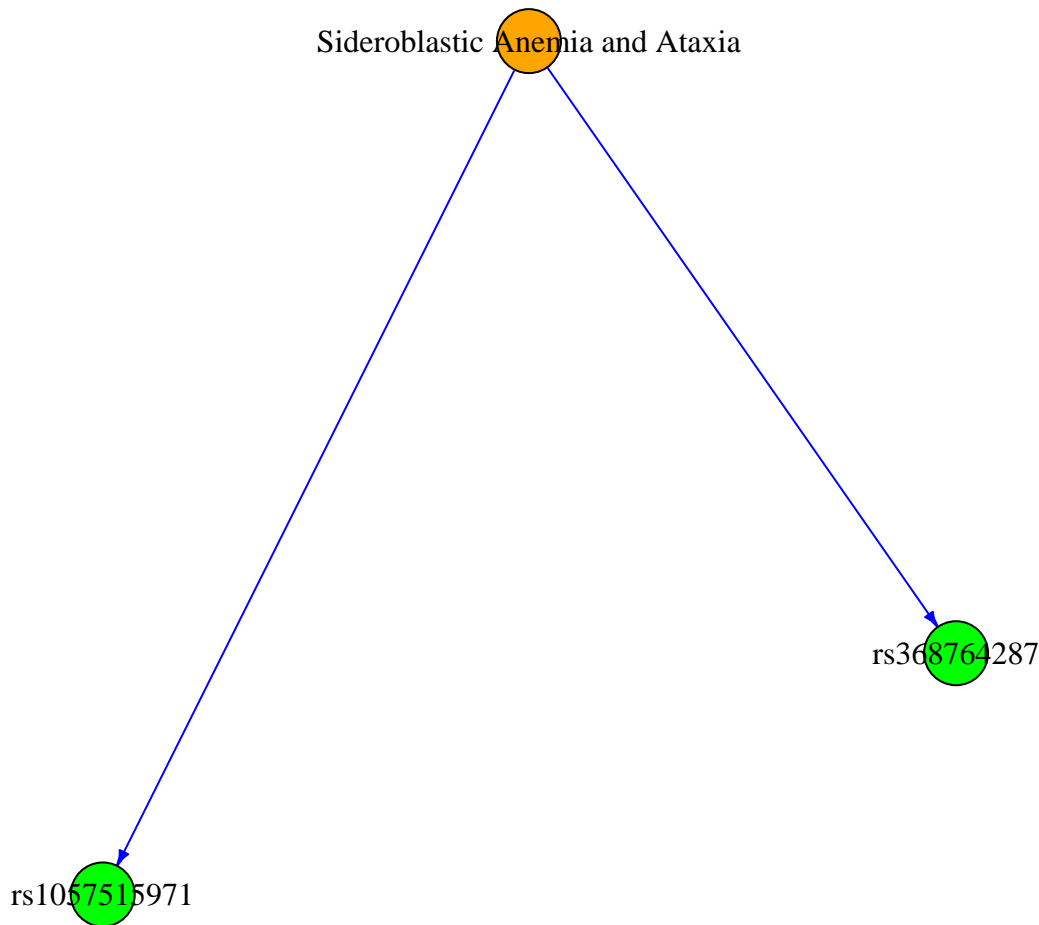

Variant–Disease Network (Sideroblastic anemia with B–cell immunodeficiency)

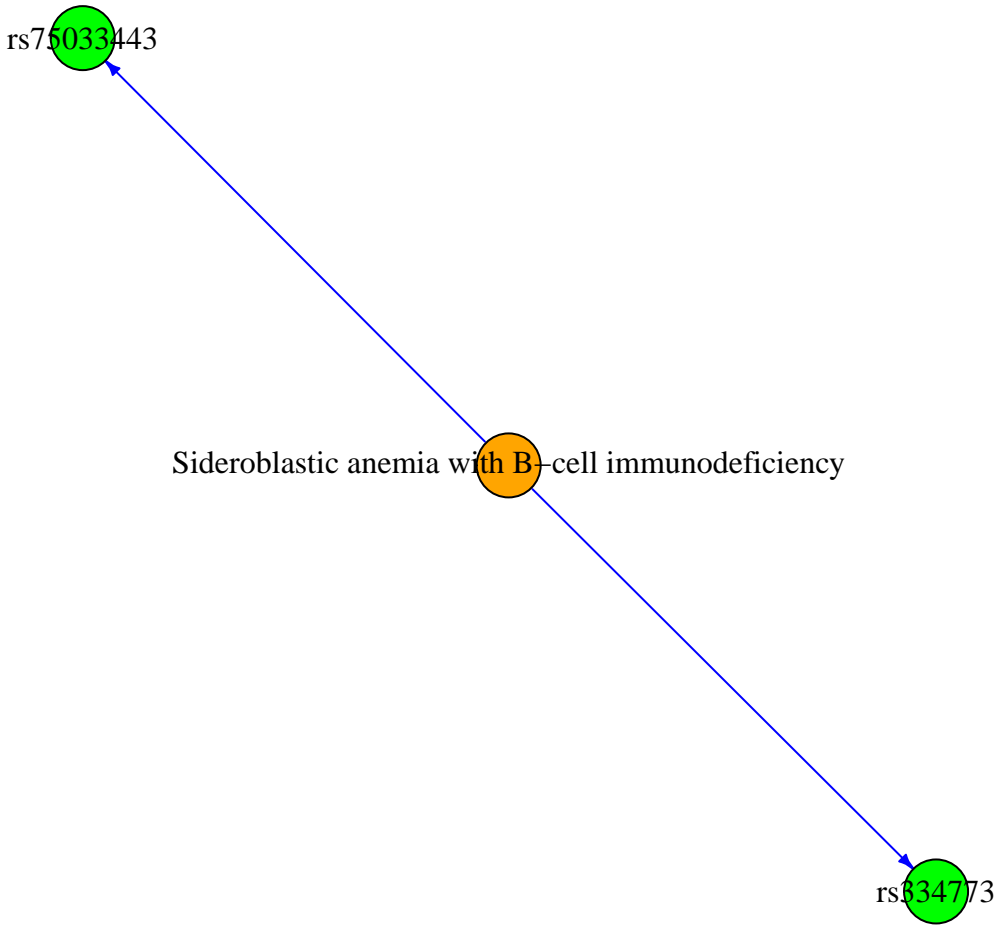

Variant–Disease Network (Singleton–Merten syndrome 1)

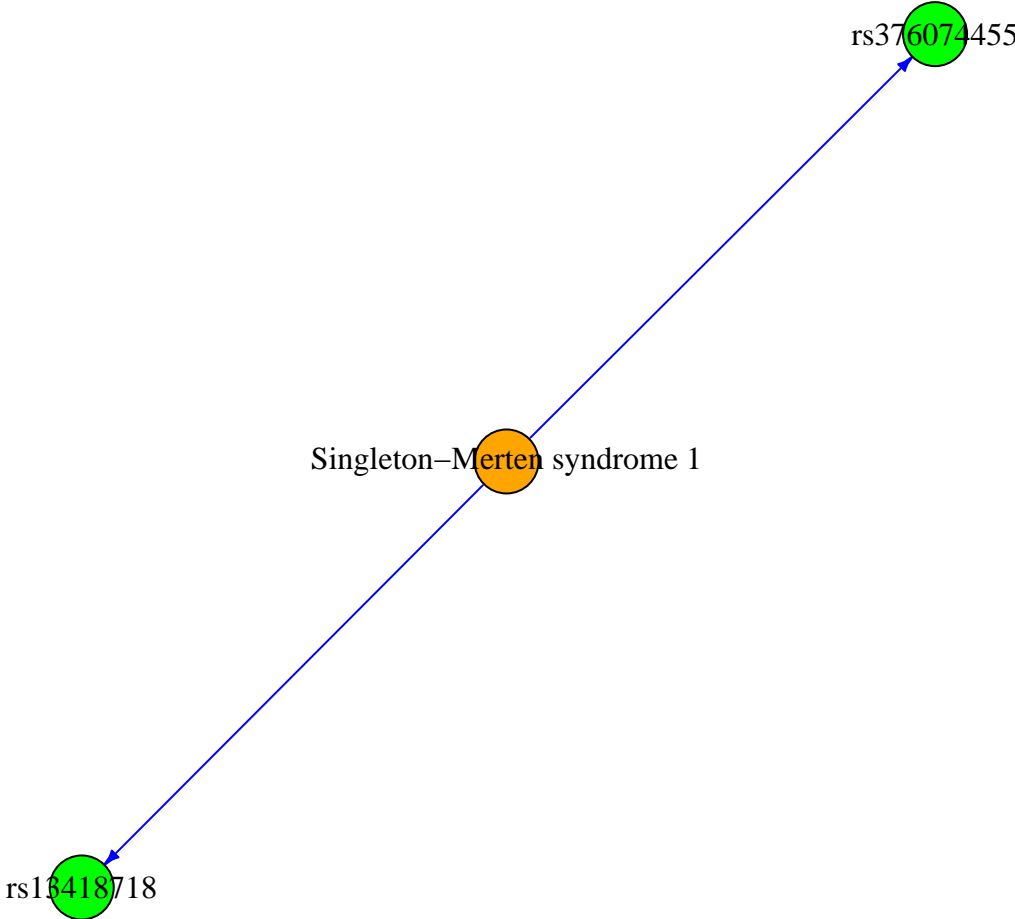

Variant–Disease Network (Sitosterolemia)

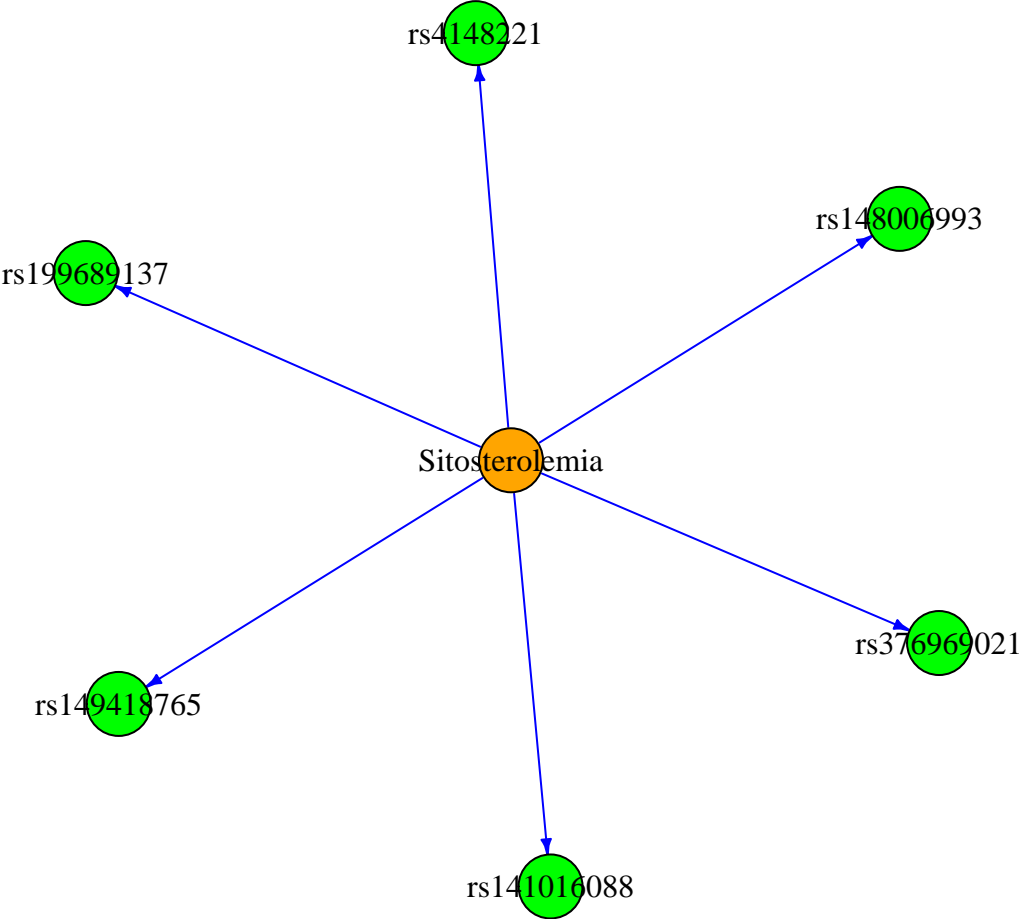



## Variant–Disease Network (SITOSTEROLEMIA 2)

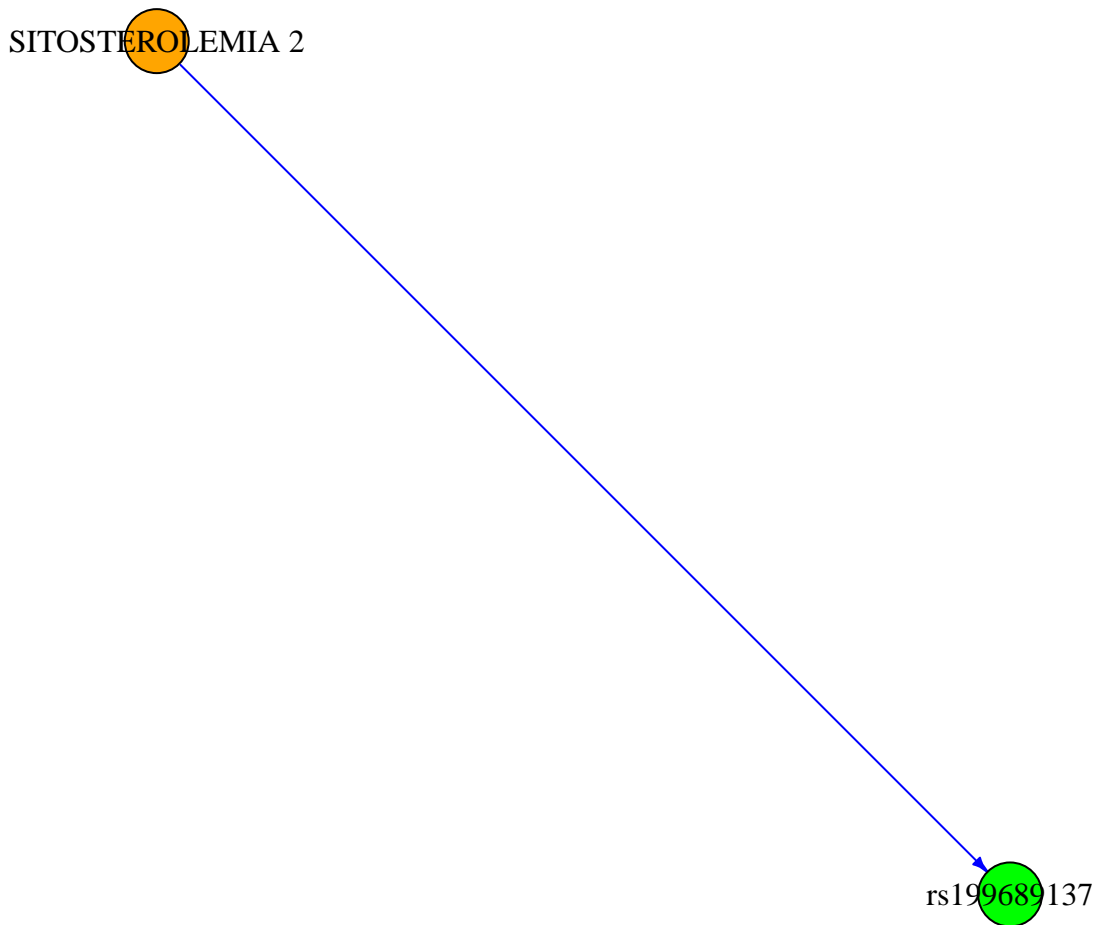

## Variant–Disease Network (Sjögren–Larsson syndrome)

## Variant–Disease Network (Skeletal dysplasia)

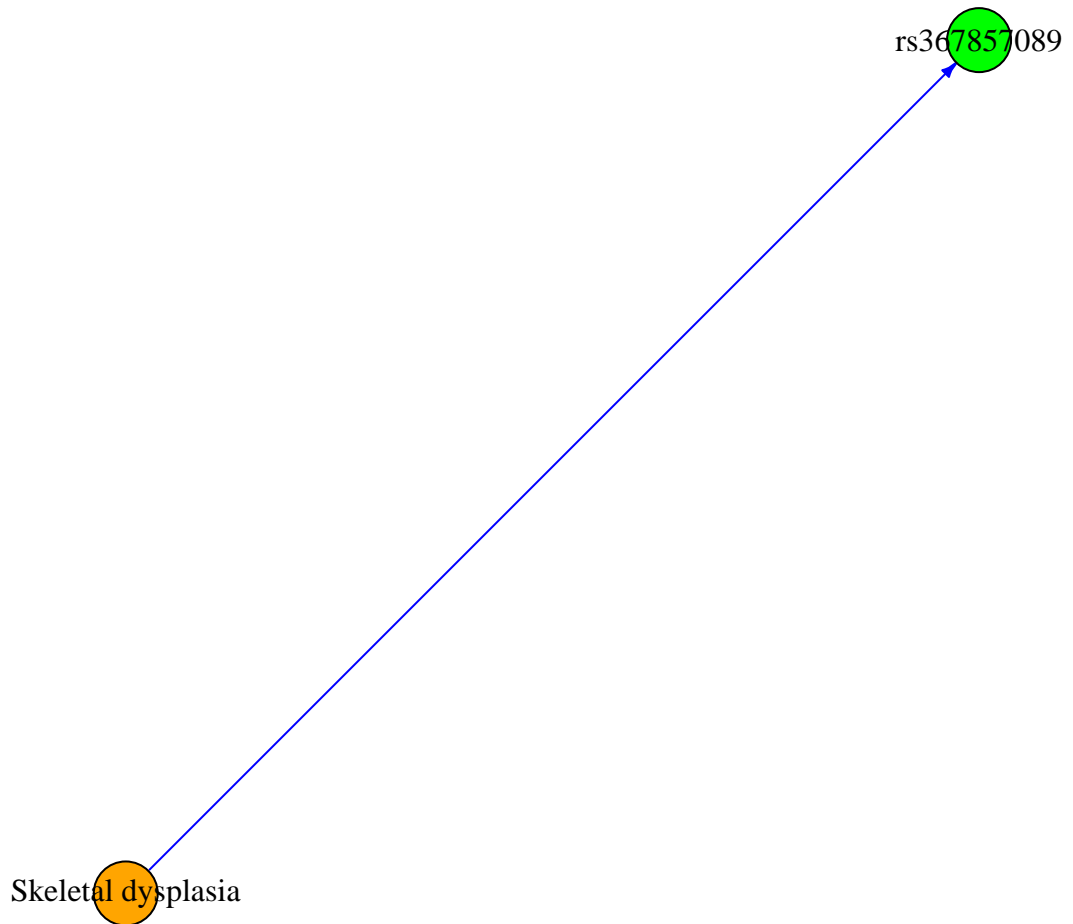

# Variant–Disease Network (Skin fragility woolly hair syndrome)

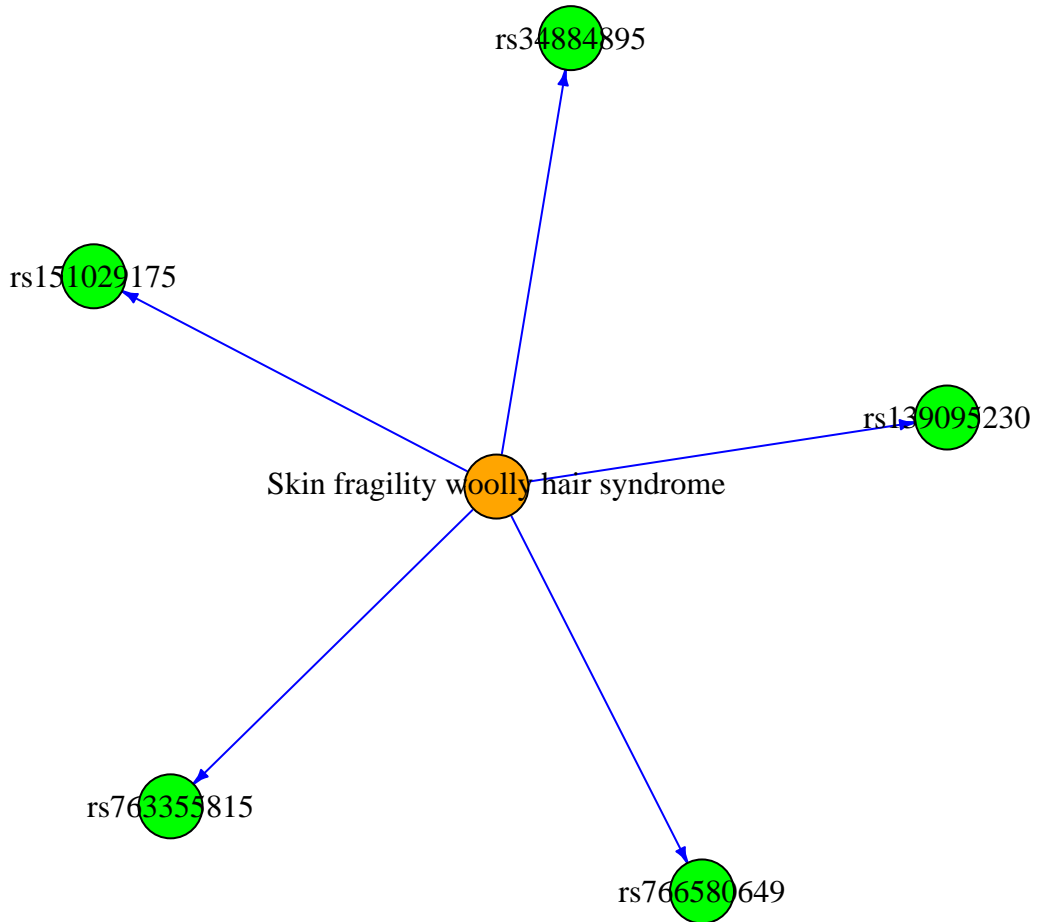

**Variant–Disease Network (Skin/hair/eye pigmentation)**

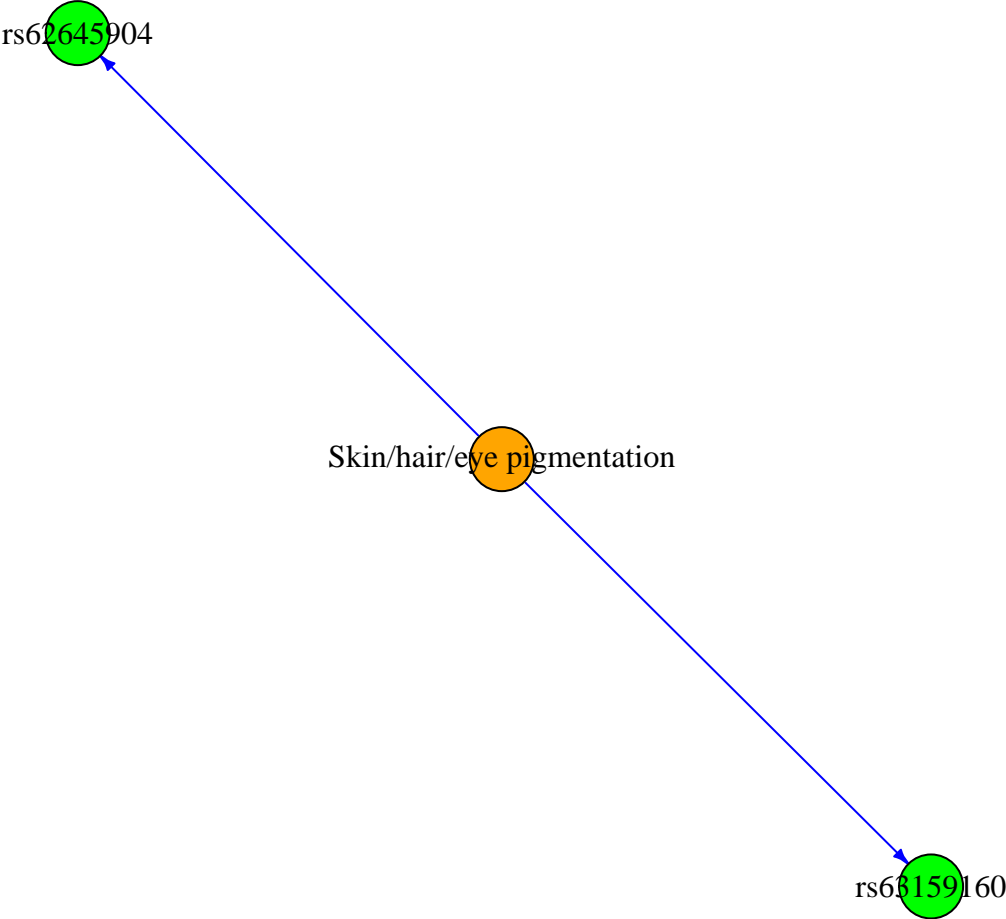

## Variant–Disease Network (Smith–McCort dysplasia)

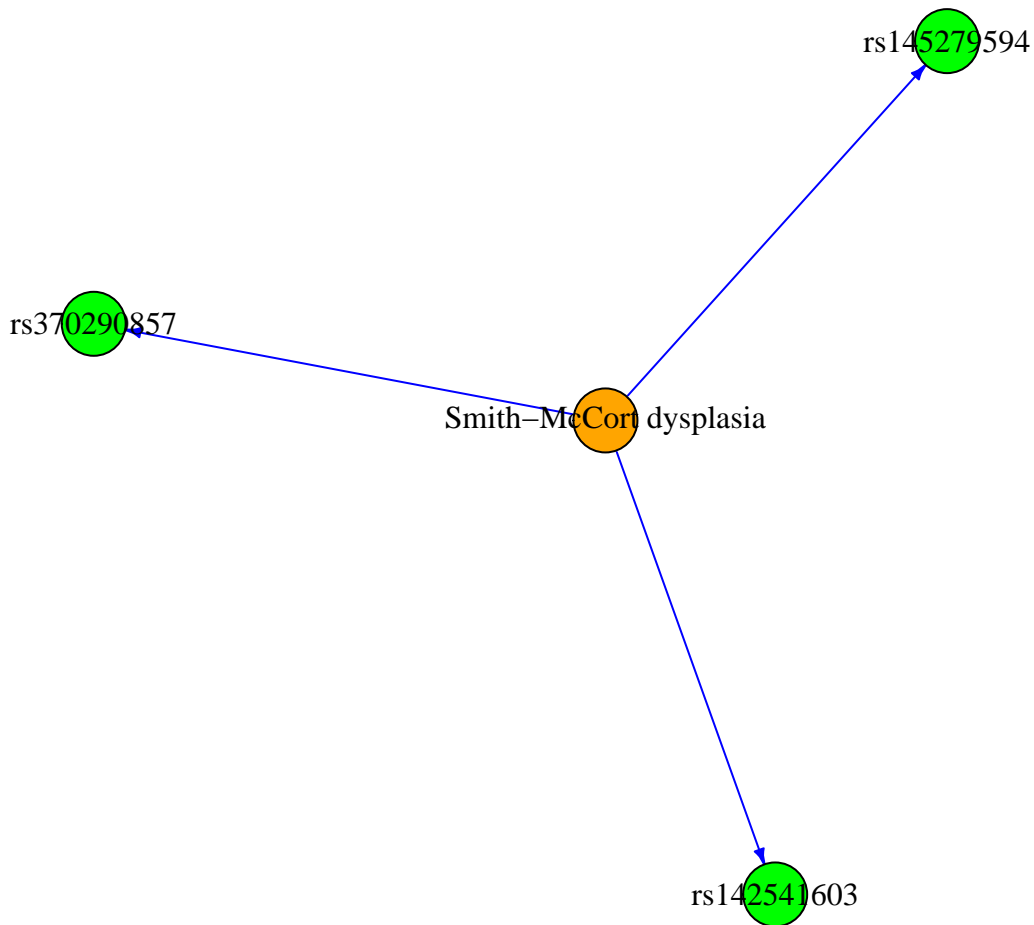

## Variant-Disease Network (Somatotroph adenoma)

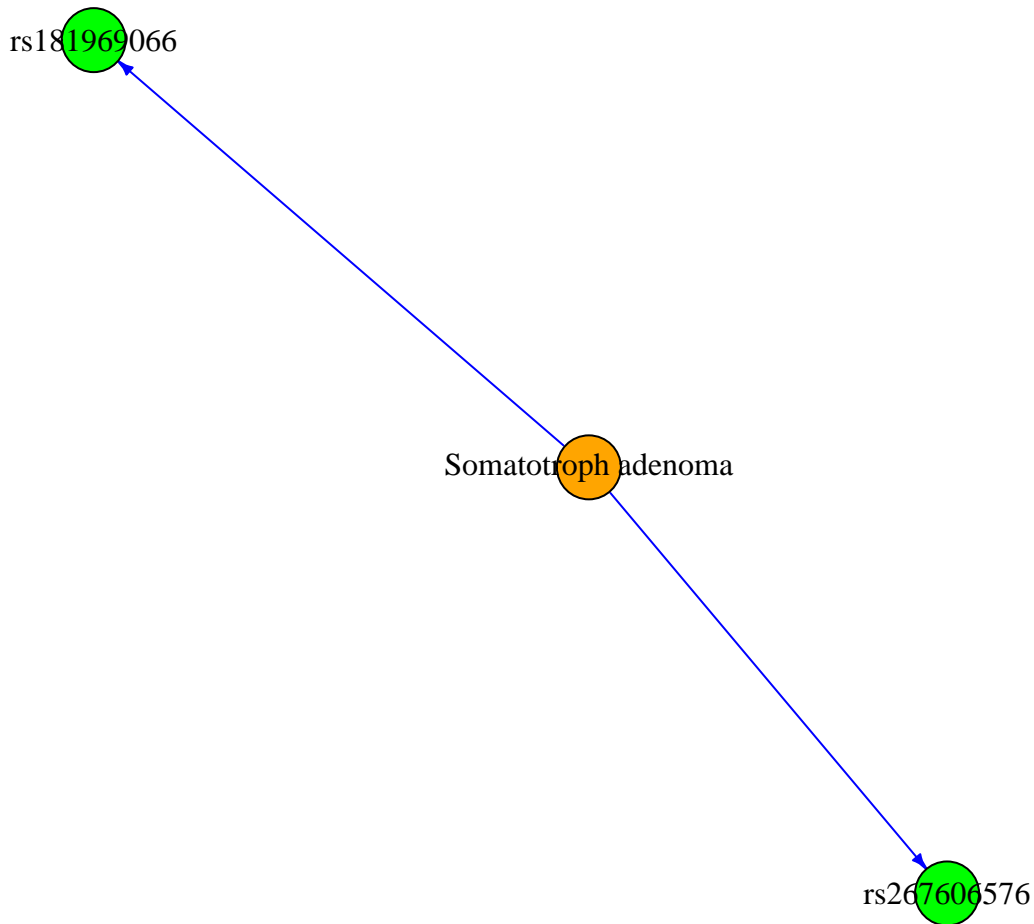

## Variant-Disease Network (Sotos syndrome)

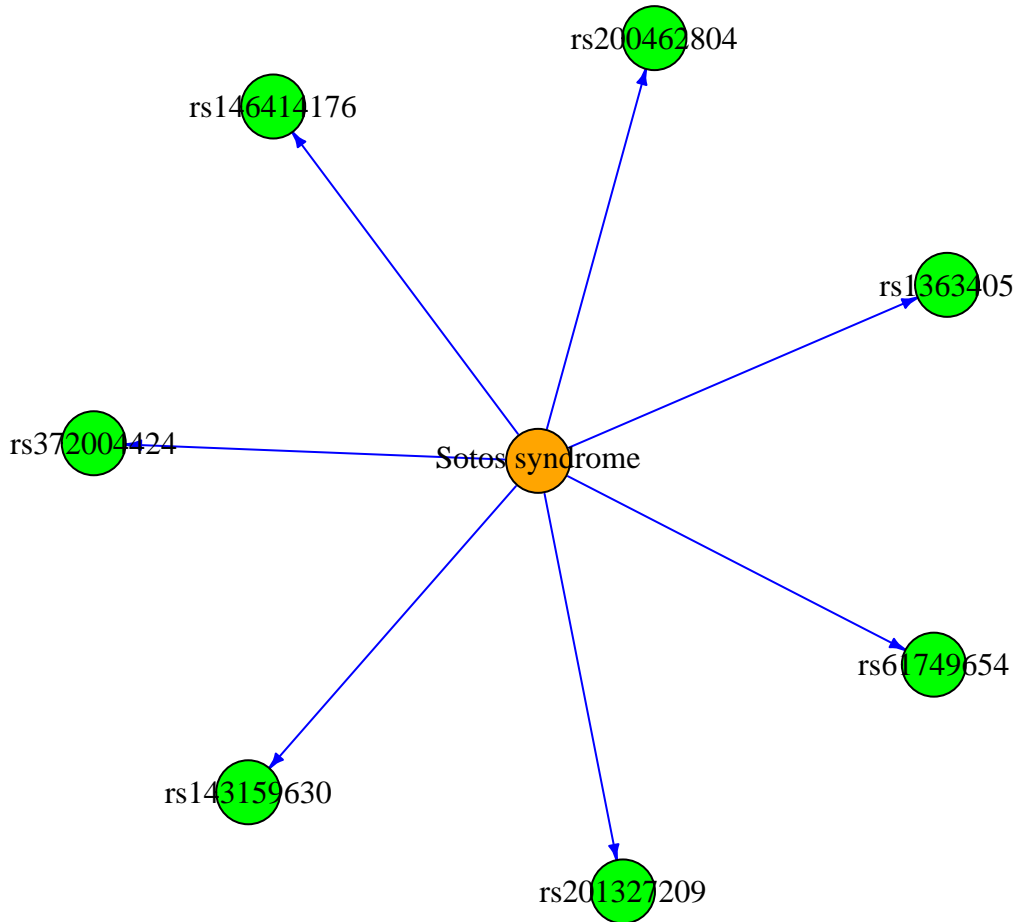



## Variant–Disease Network (Sotos syndrome 1)

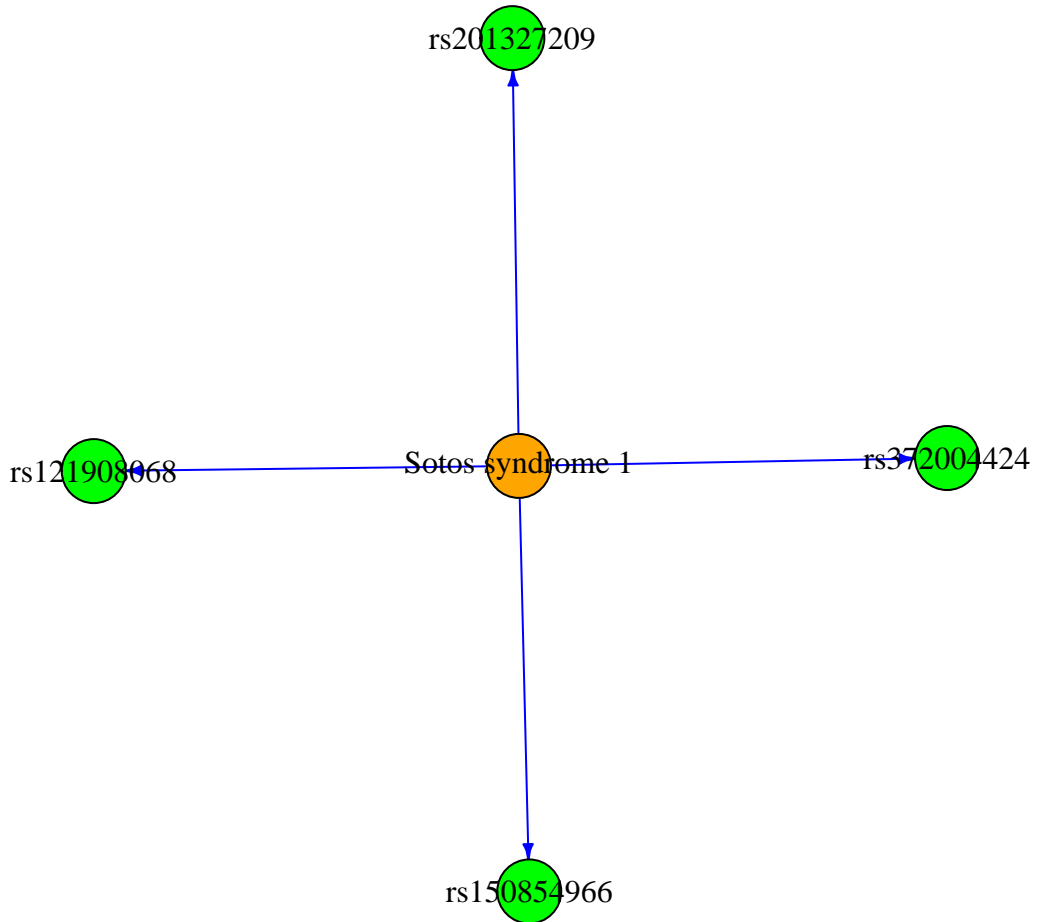

**Variant–Disease Network (Spastic ataxia Charlevoix–Saguenay type)**

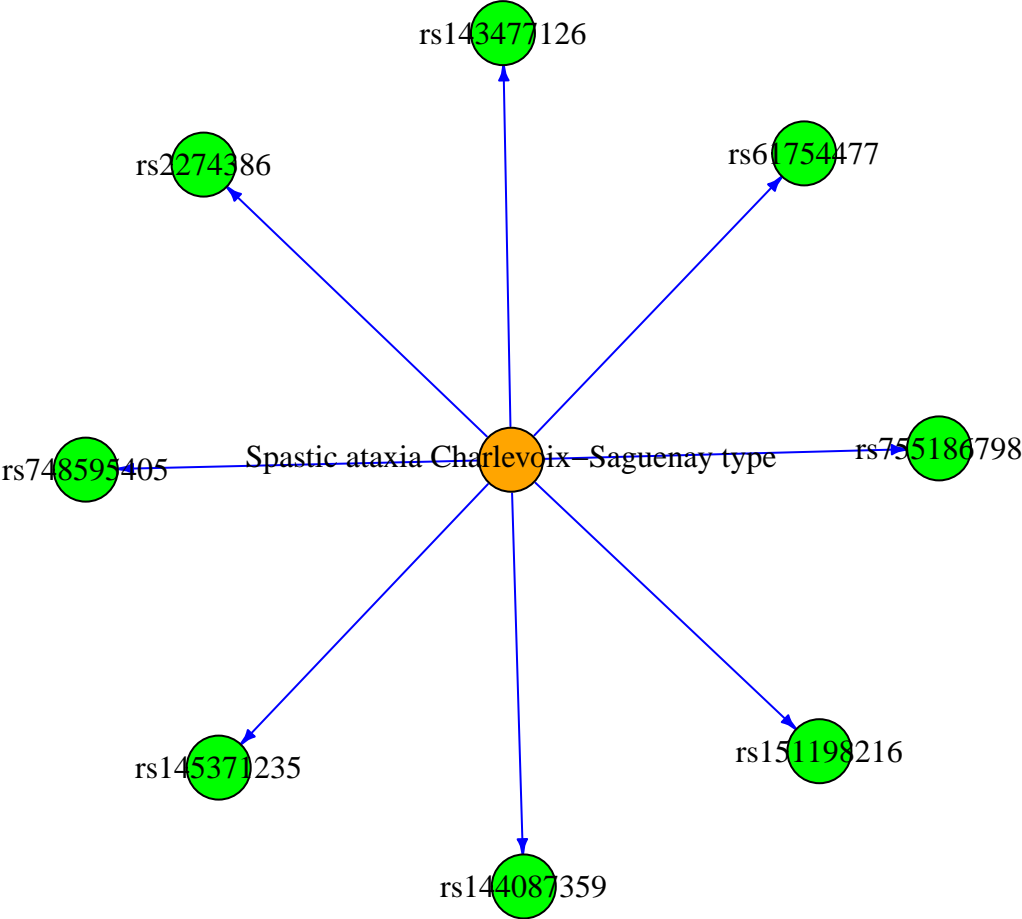

## Variant–Disease Network (Spastic paraplegia)

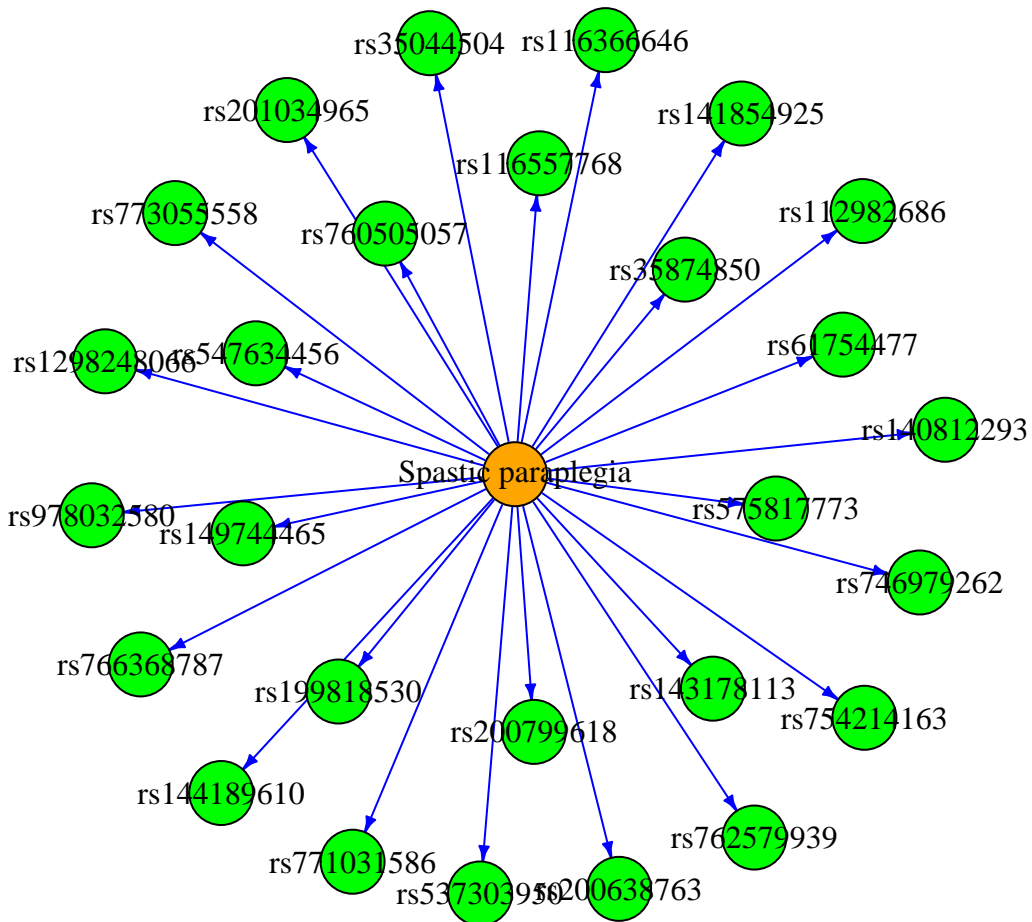

## Variant–Disease Network (Spastic paraplegia 1)

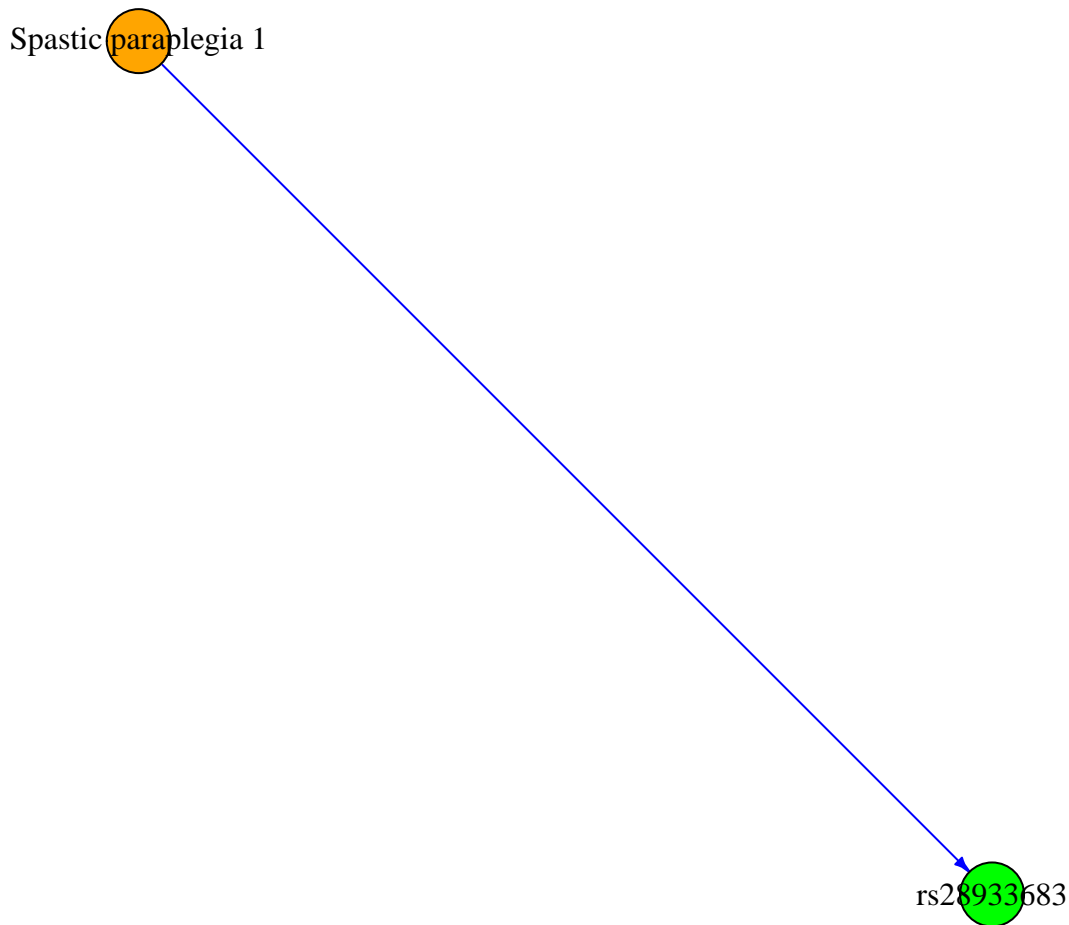

## Variant–Disease Network (Spastic paraplegia 11)

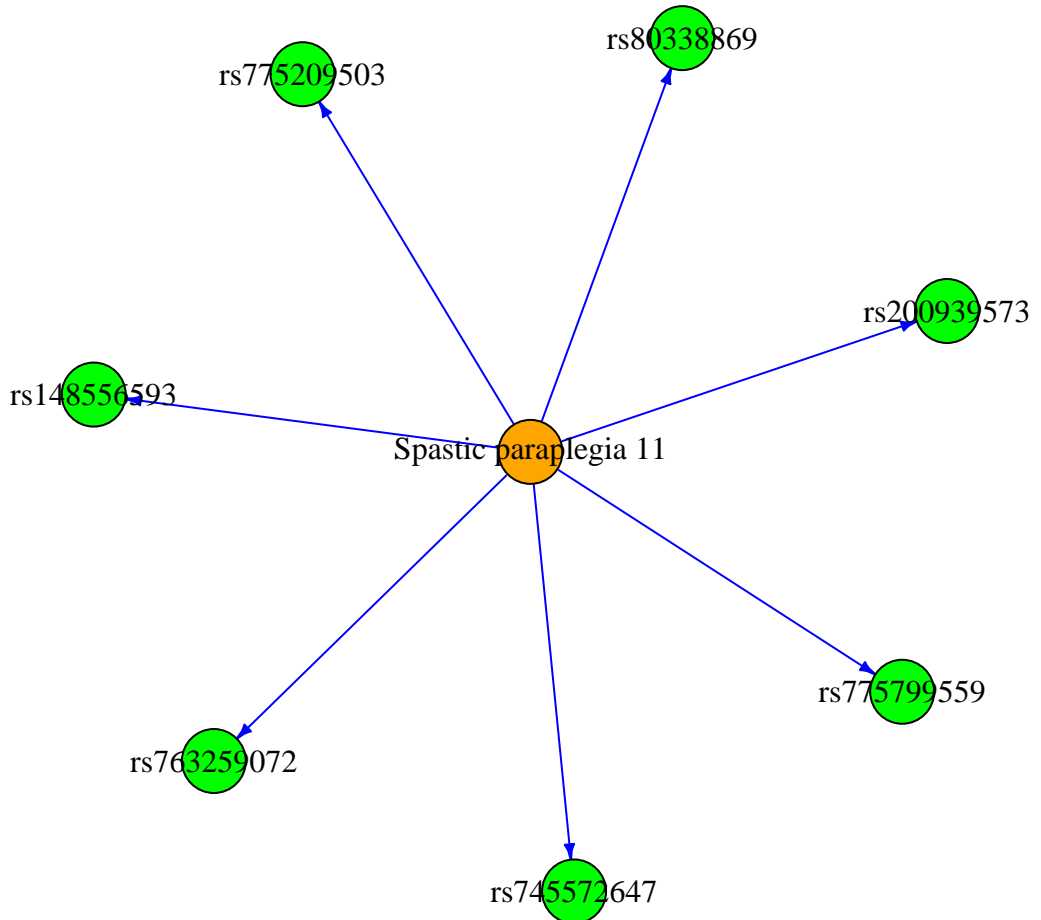

## Variant–Disease Network (Spastic paraplegia 15)

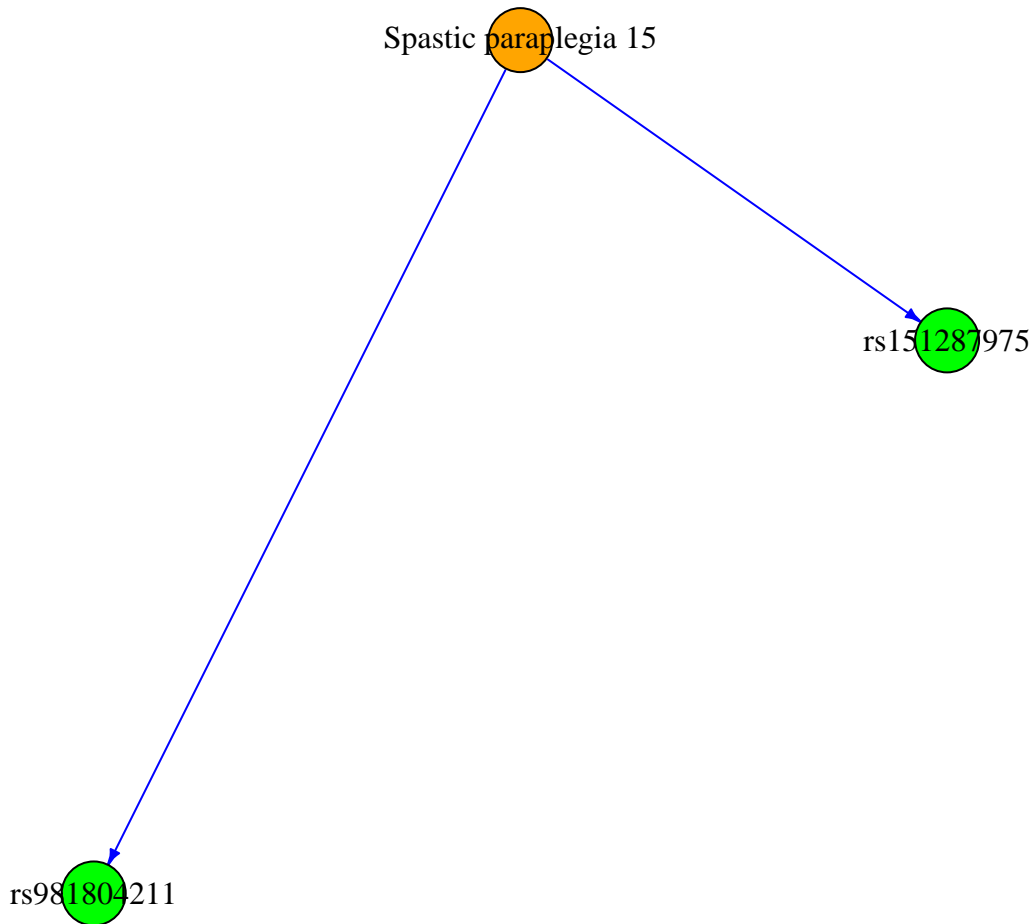

## Variant–Disease Network (Spastic paraplegia 33)

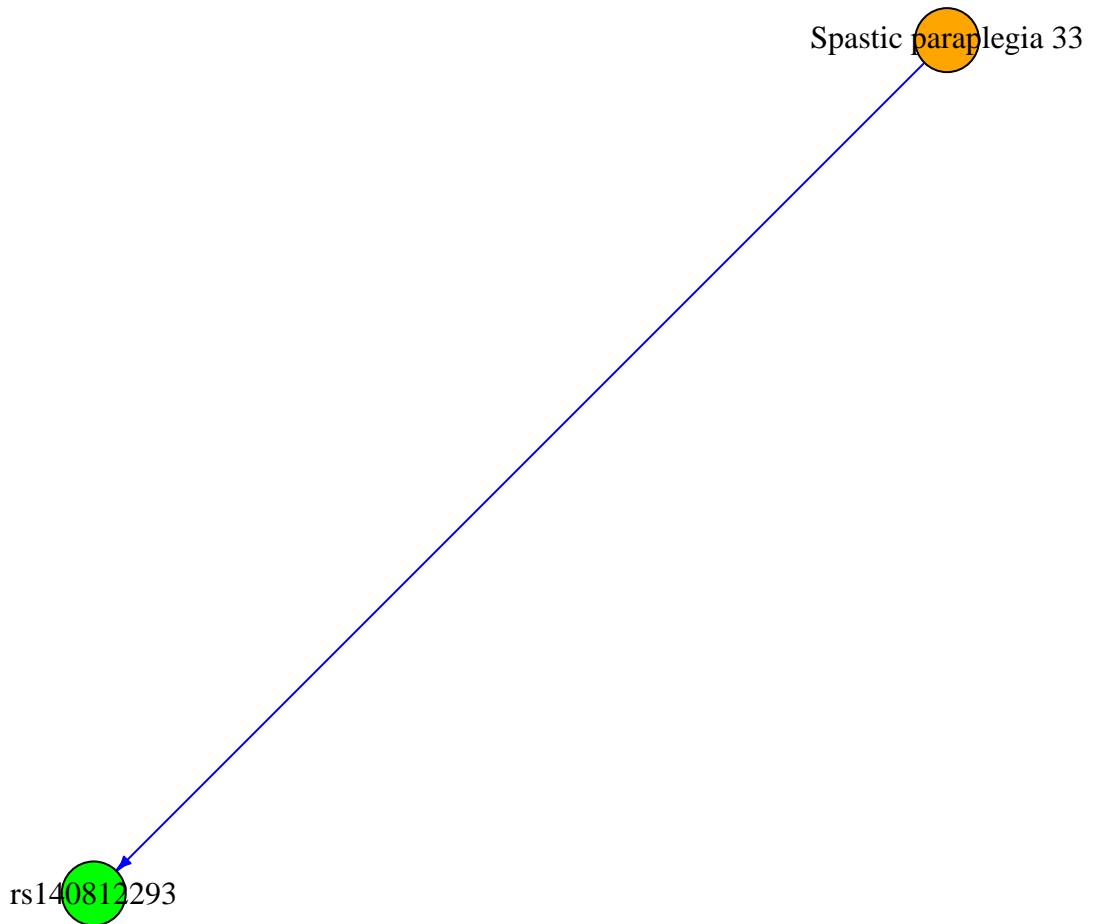

## Variant–Disease Network (Spastic paraplegia 35)

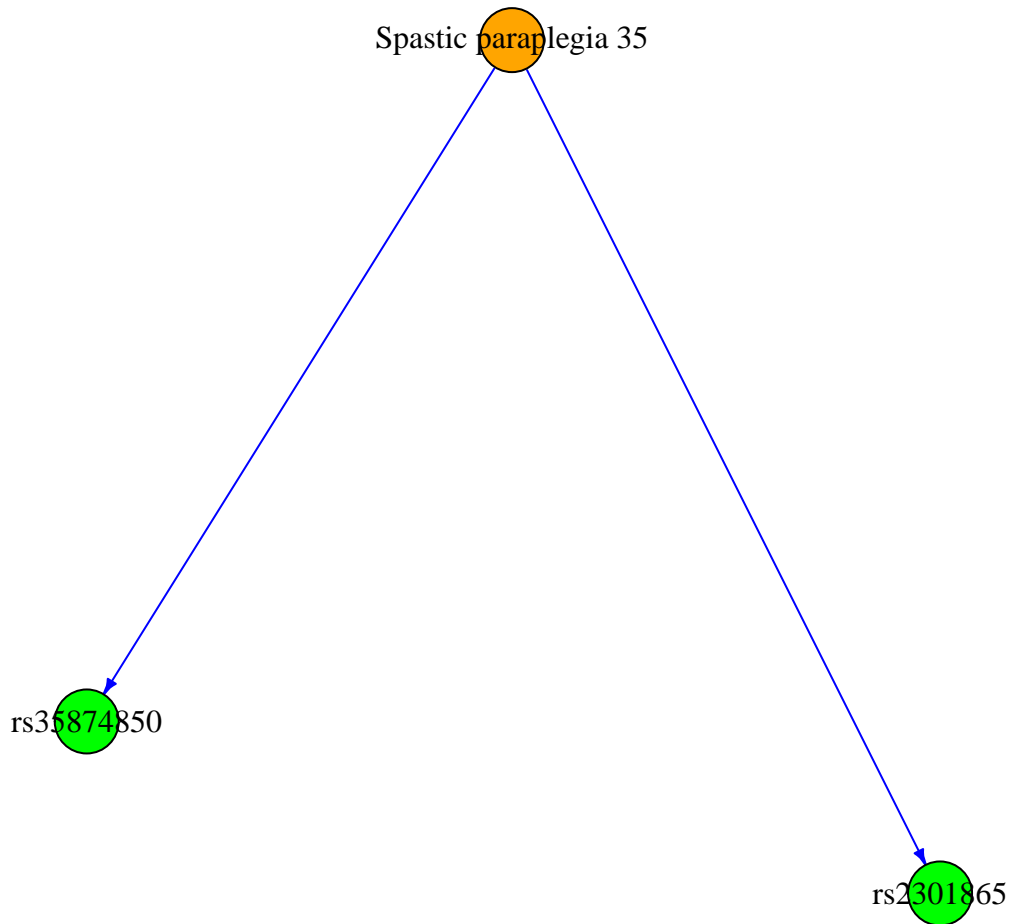



## Variant–Disease Network (Spastic paraplegia 4)

Spastic paraplegia 4

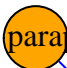

rs781516235

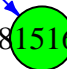

## Variant–Disease Network (Spastic paraplegia 44)

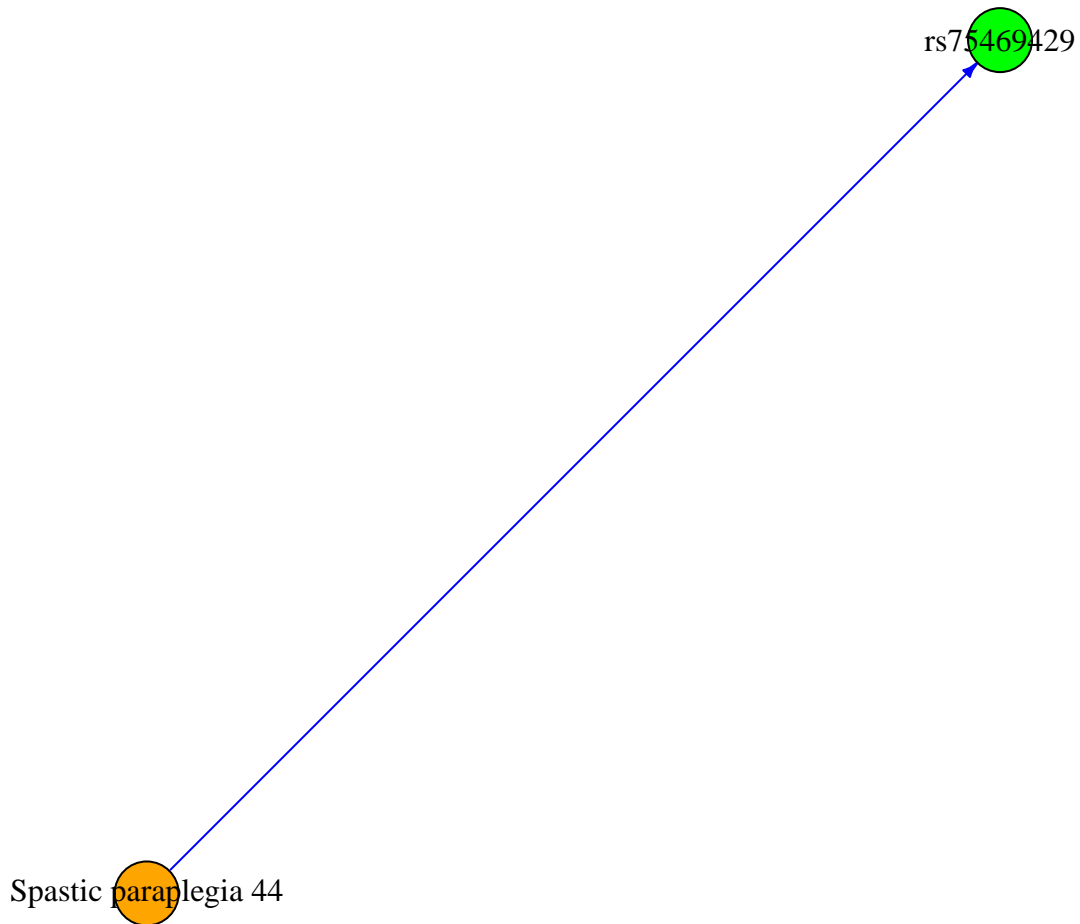

## Variant–Disease Network (Spastic paraplegia 50)

rs140843407

Spastic paraplegia 50

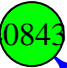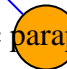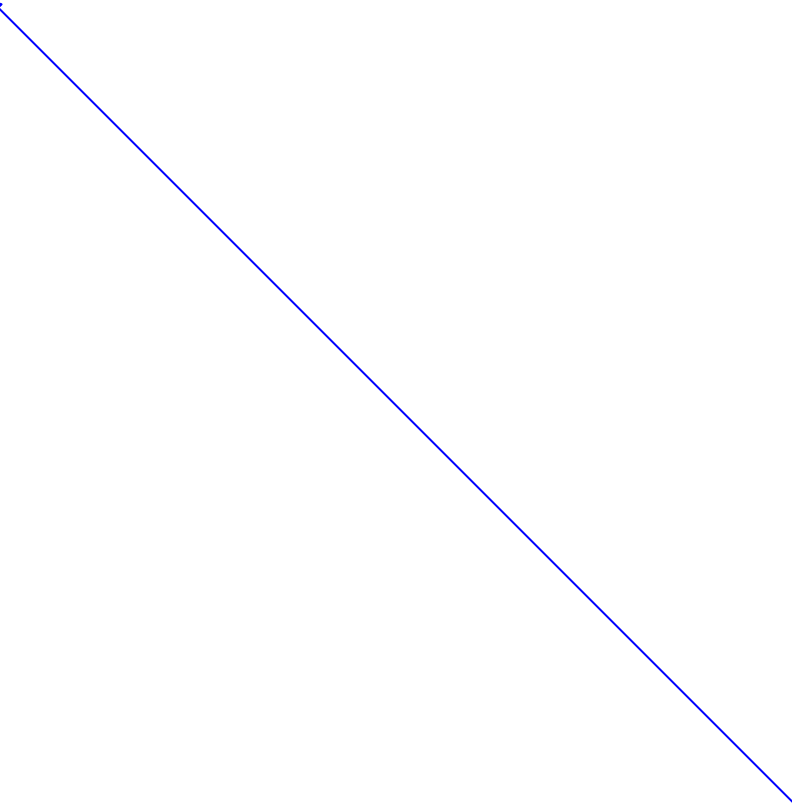

## Variant–Disease Network (Spastic paraplegia 53)

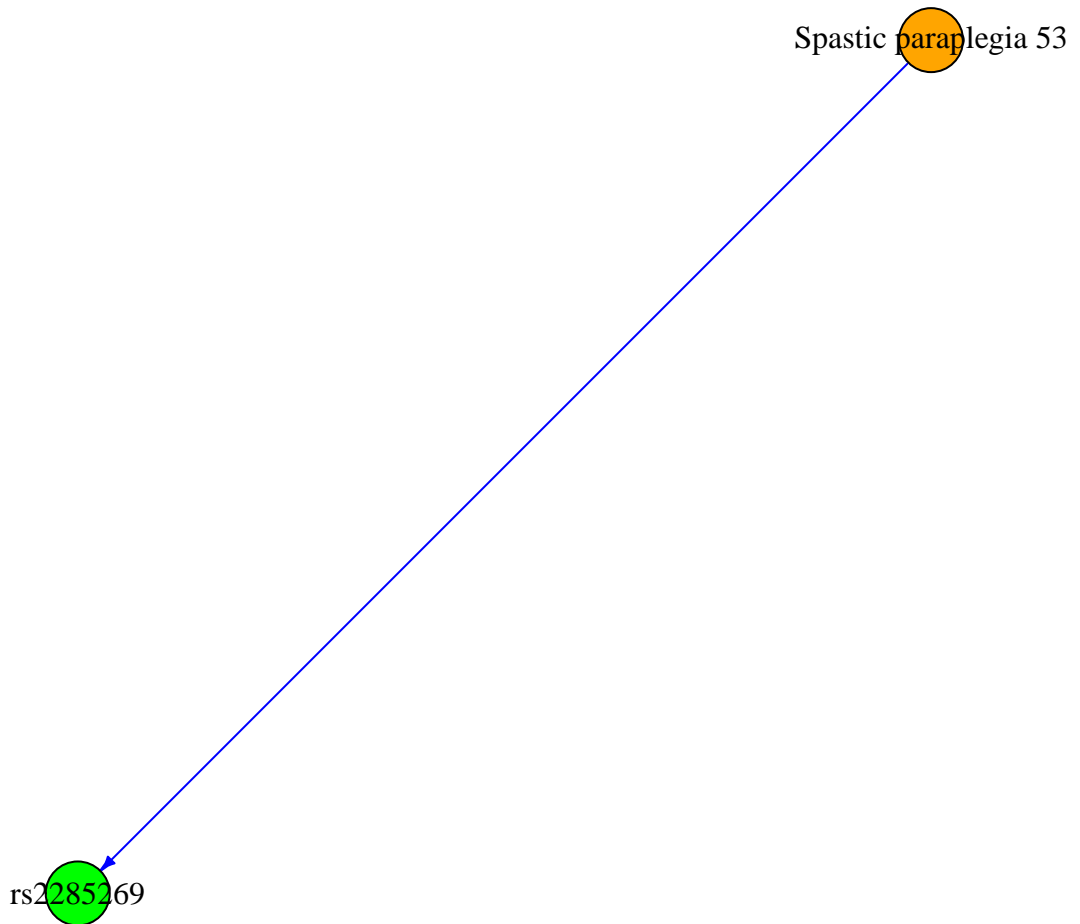

## Variant–Disease Network (Spastic paraplegia 54)

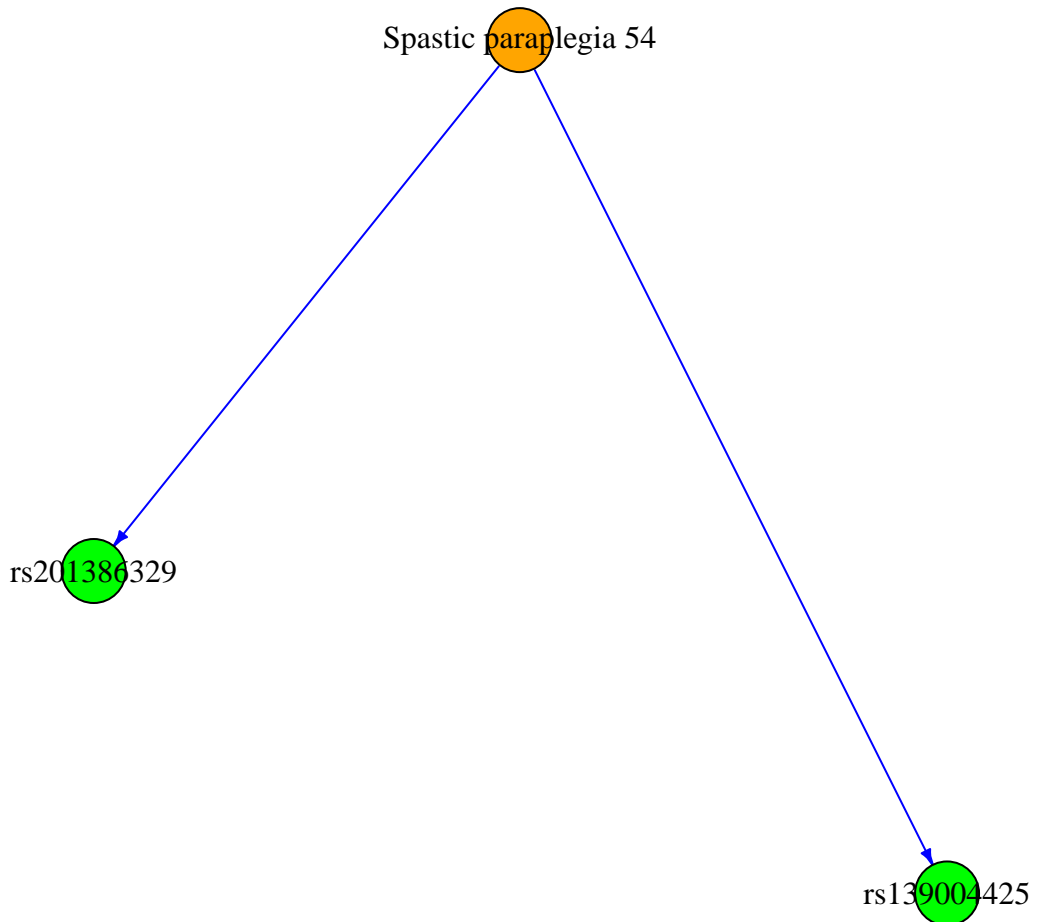

## Variant–Disease Network (Spastic paraplegia 6)

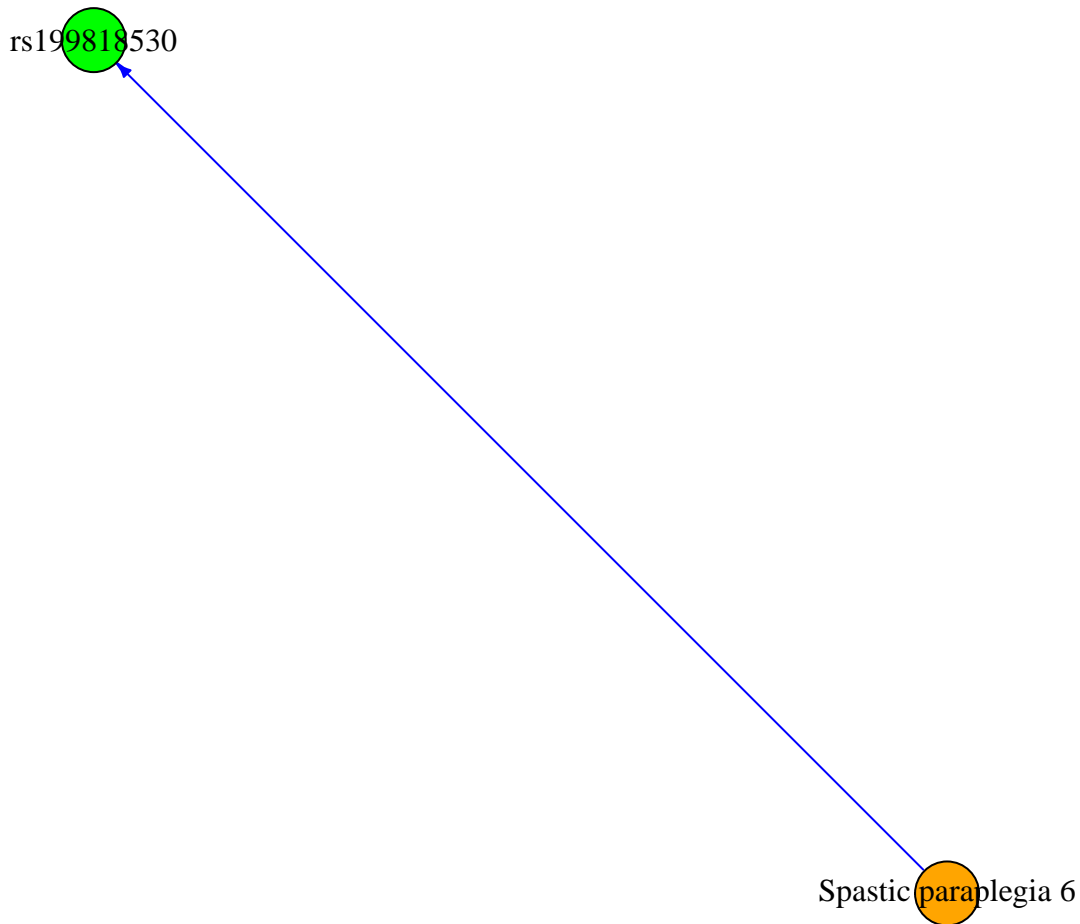

## Variant–Disease Network (Spastic paraplegia 7)

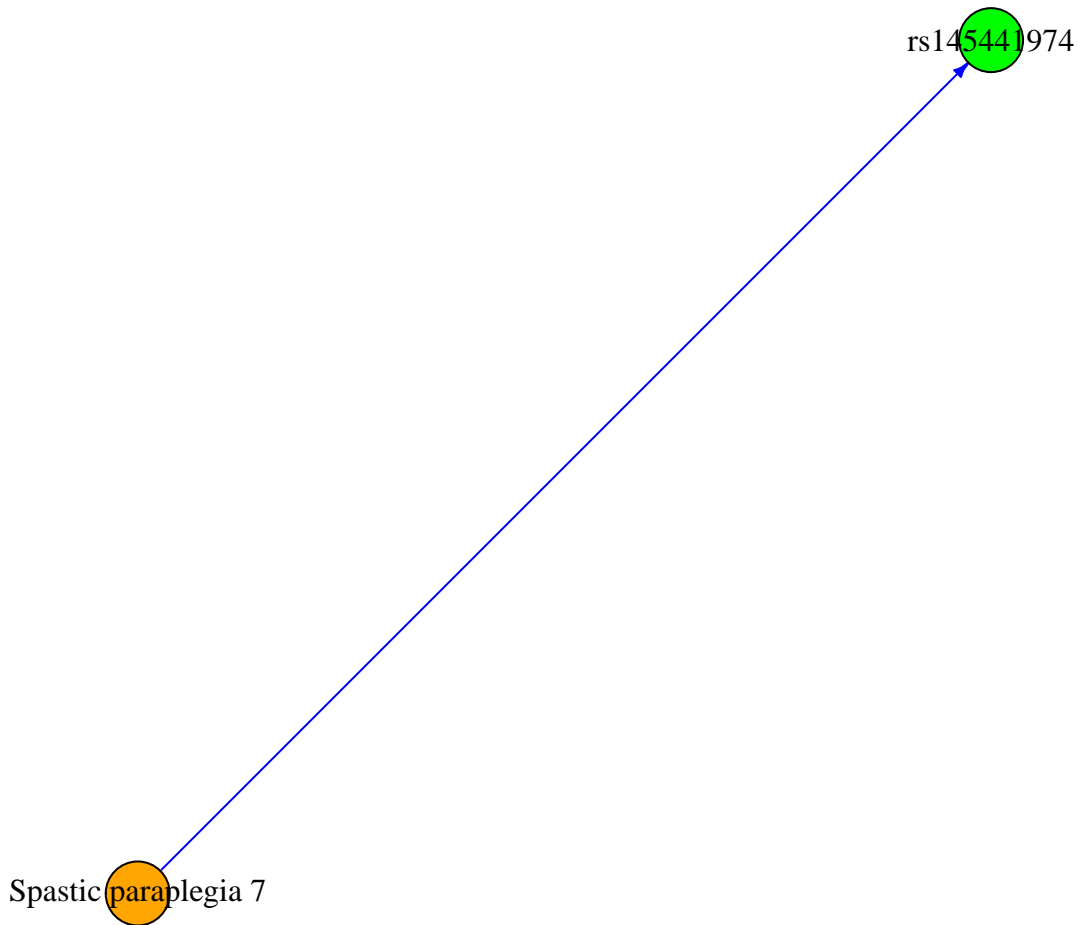

## Variant–Disease Network (Spastic paraplegia 73)

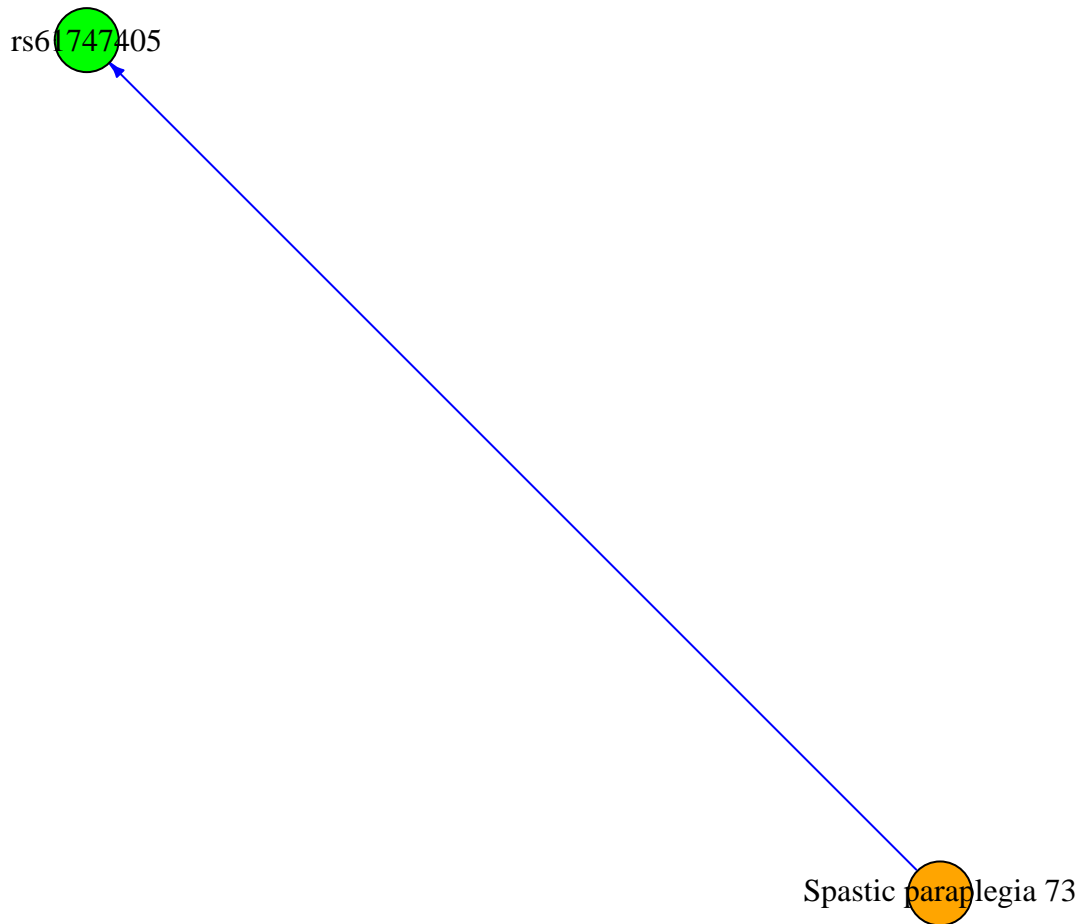



## Variant–Disease Network (Spastic paraplegia 78)

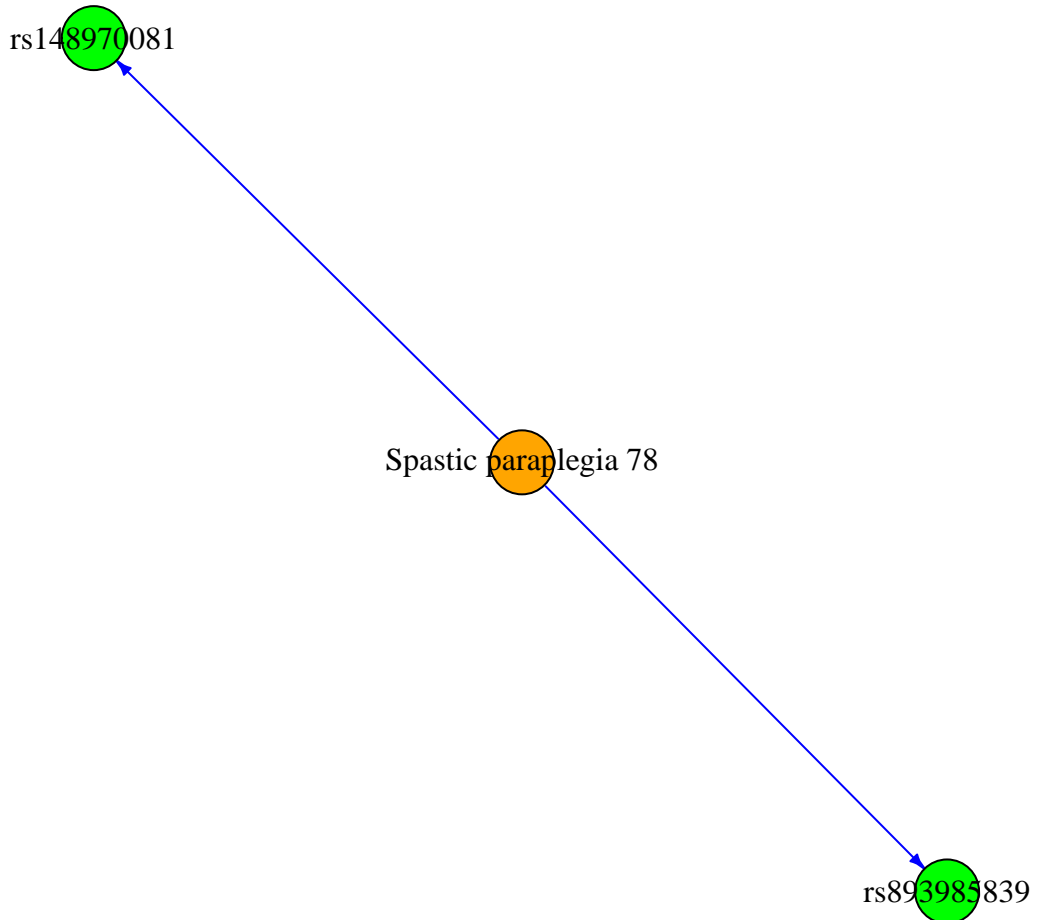

## Variant–Disease Network (Spastic paraplegia 9)

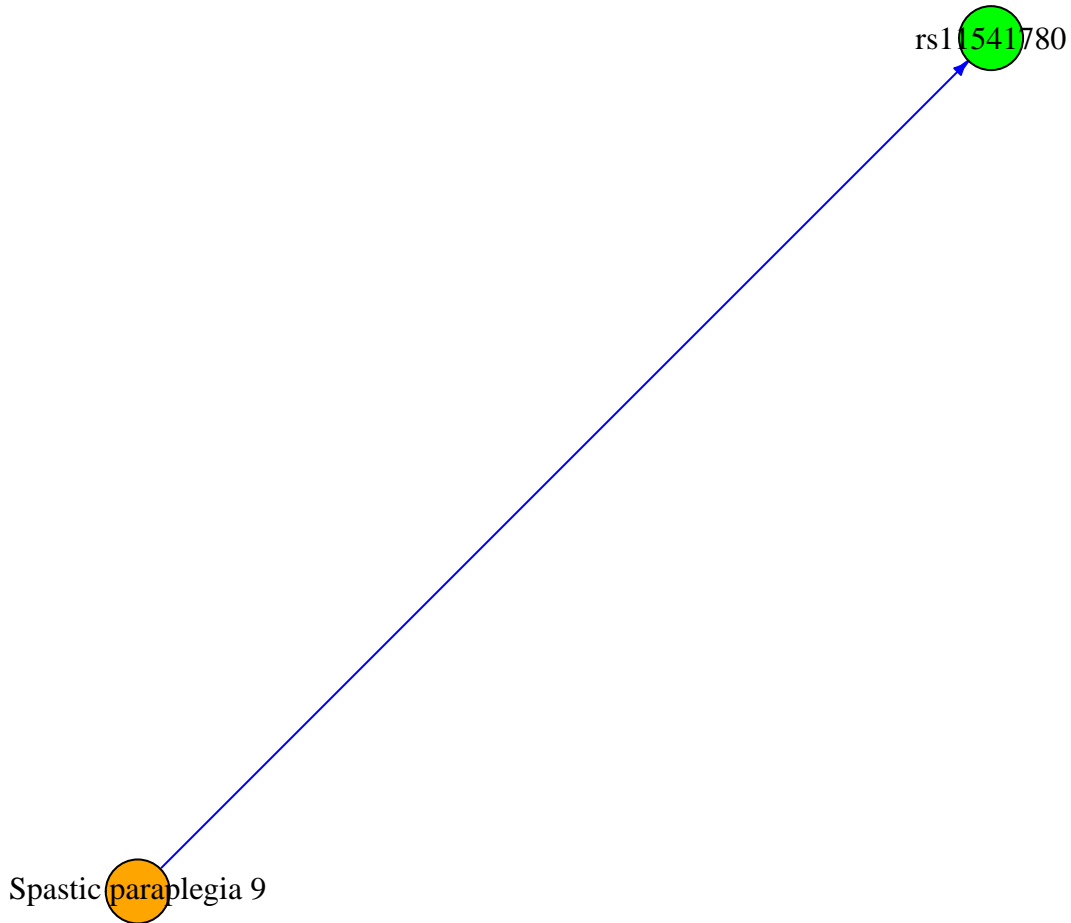

## Variant–Disease Network (Speech–language disorder 1)

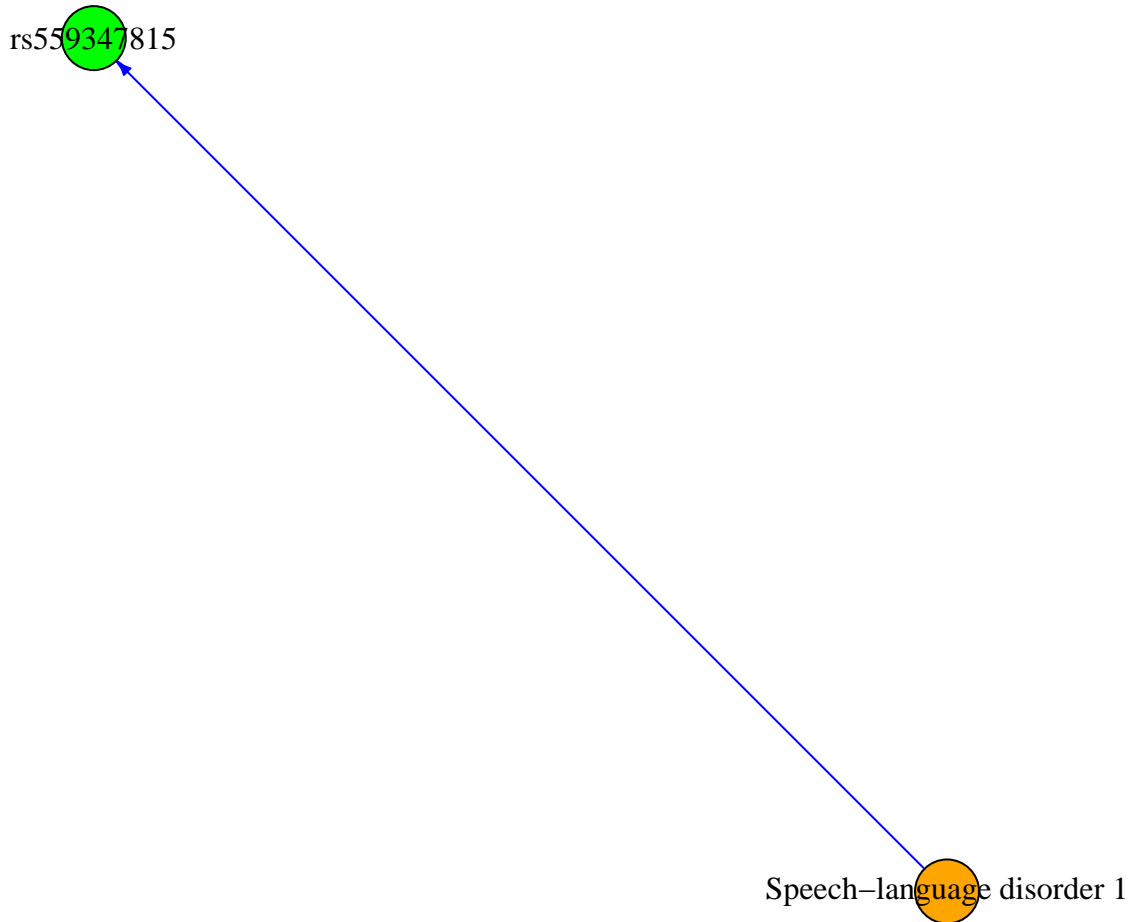

**Variant–Disease Network (Spermatogenic failure 13)**

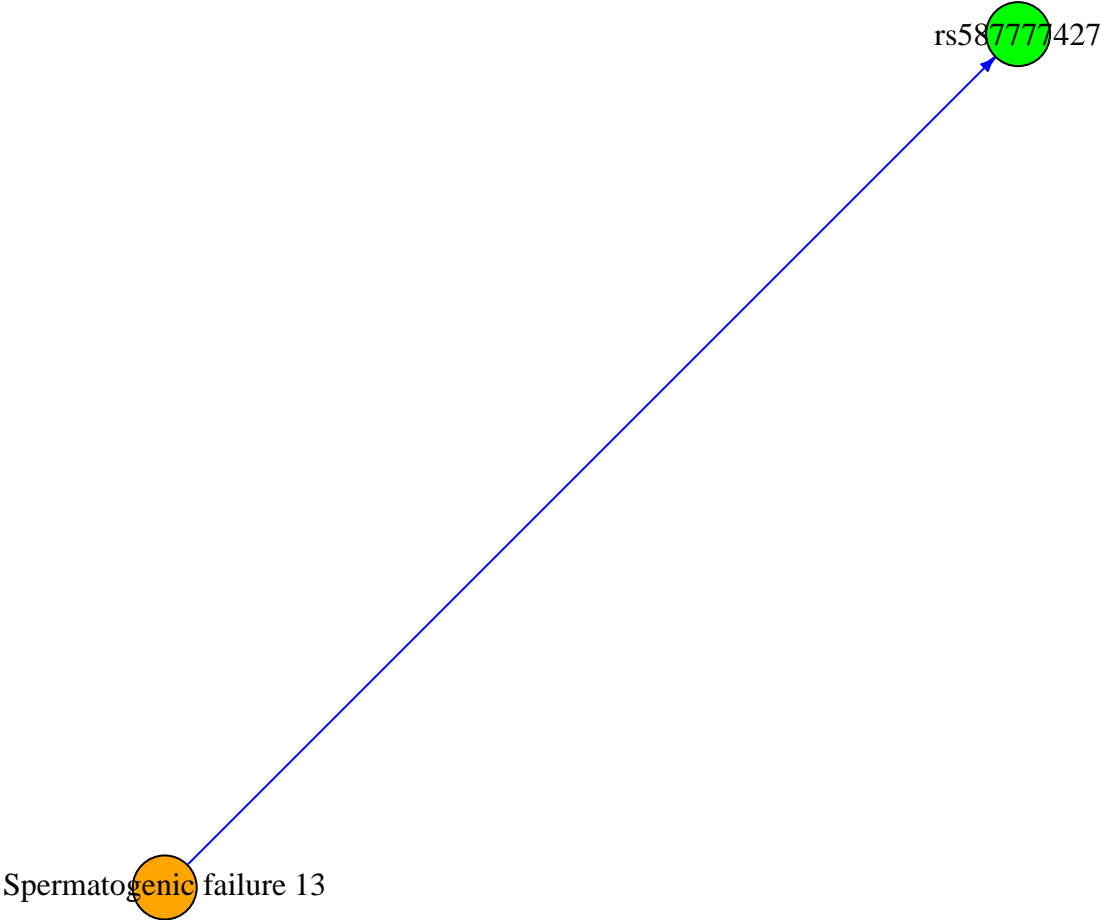

**Variant–Disease Network (Spherocytosis)**

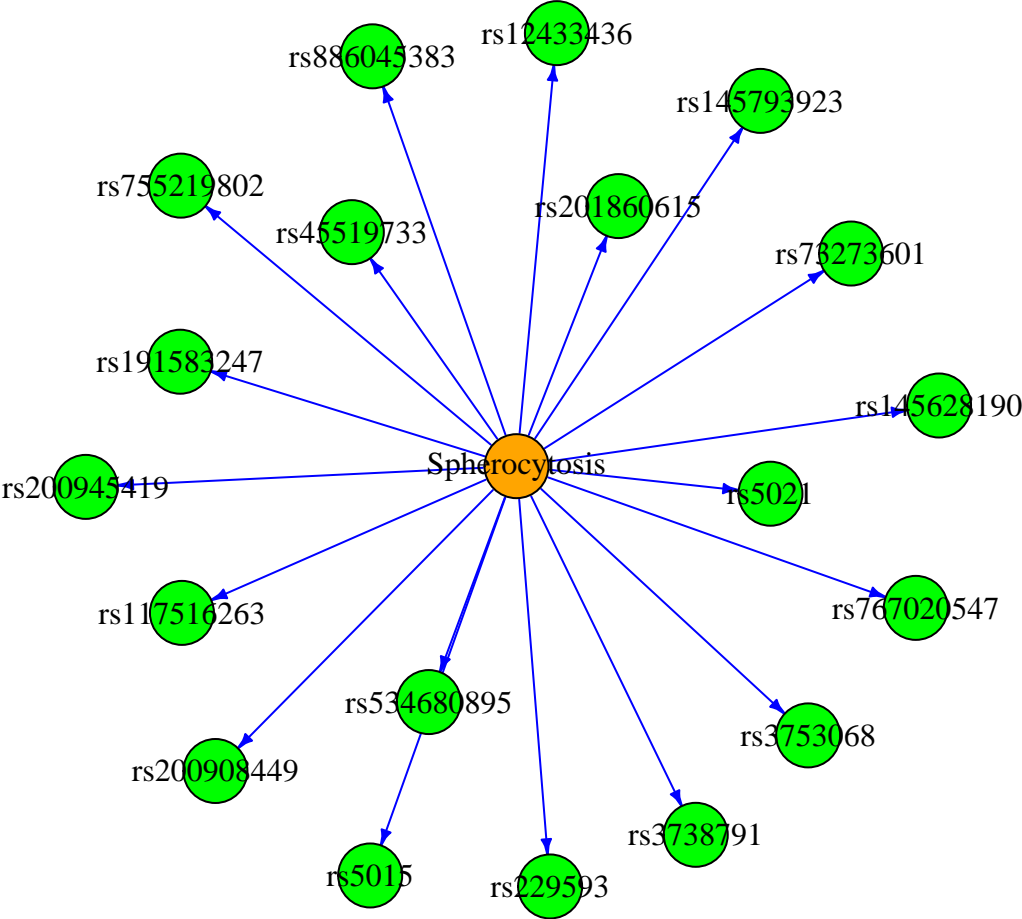

Variant–Disease Network (Sphingomyelin/cholesterol lipidosis)

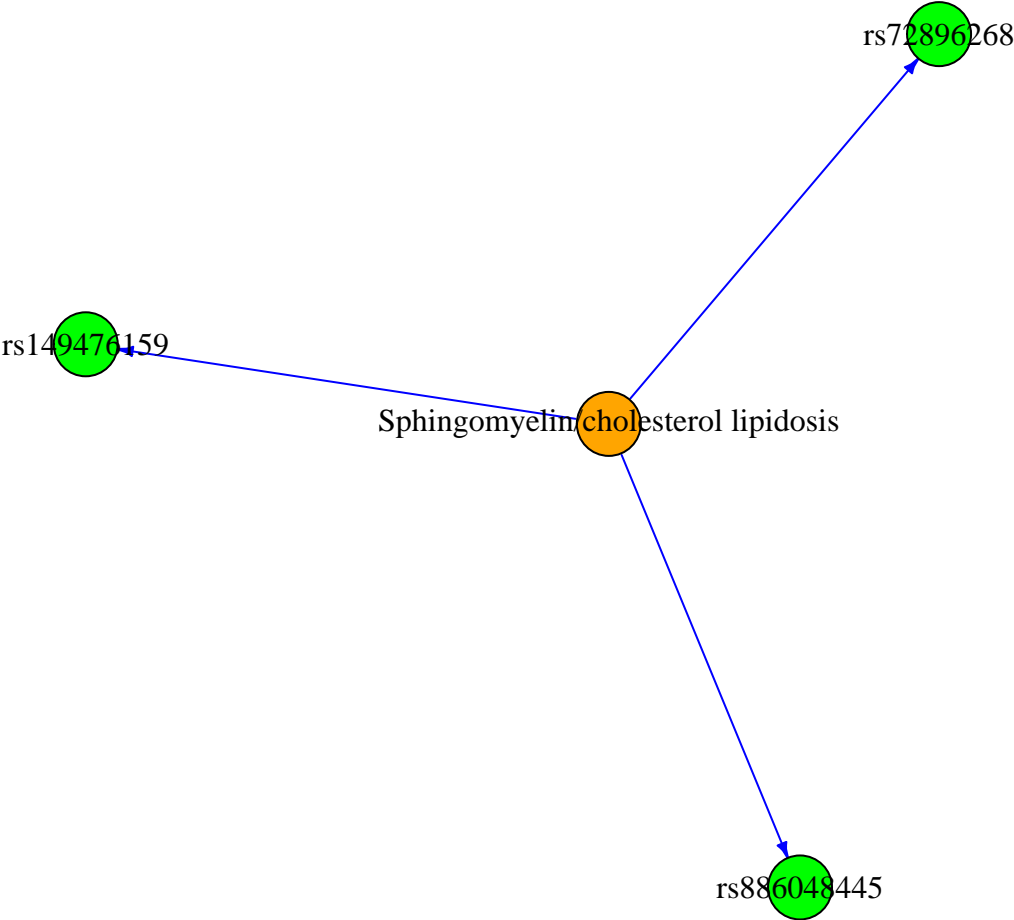

## Variant–Disease Network (Spiegler–Brooke syndrome)

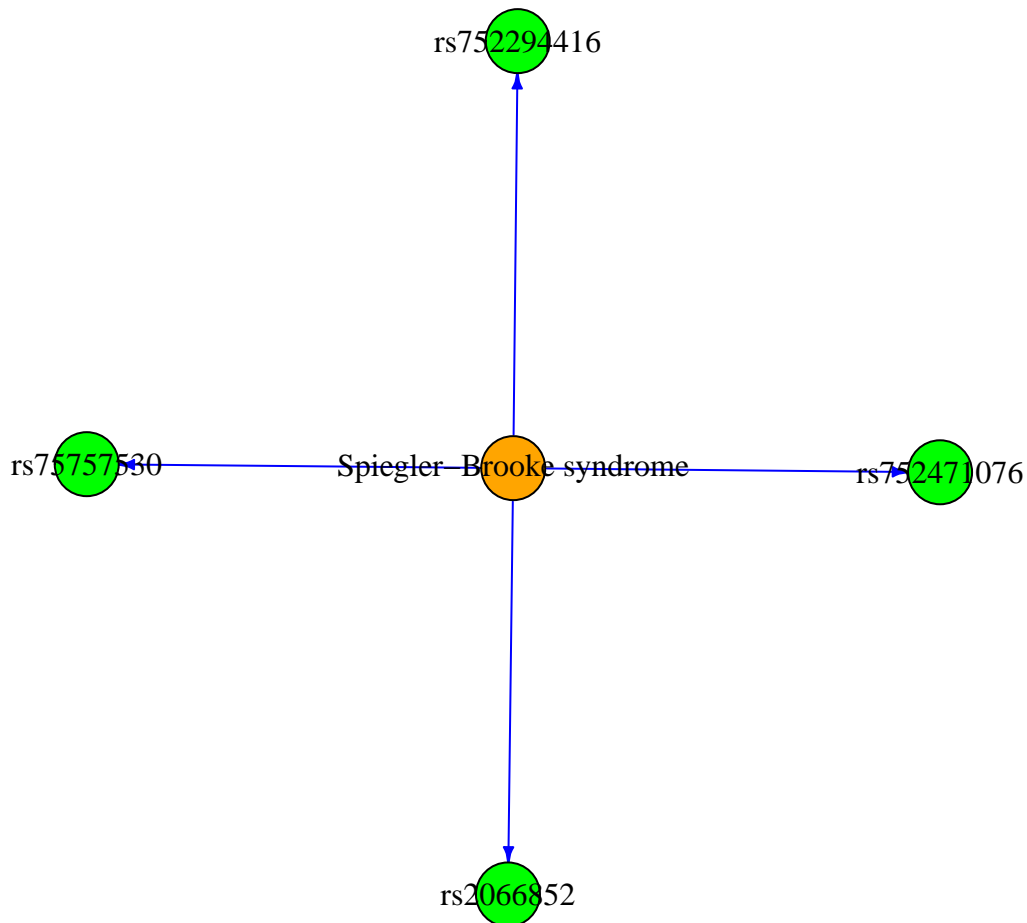

## Variant–Disease Network (Spinal muscular atrophy)

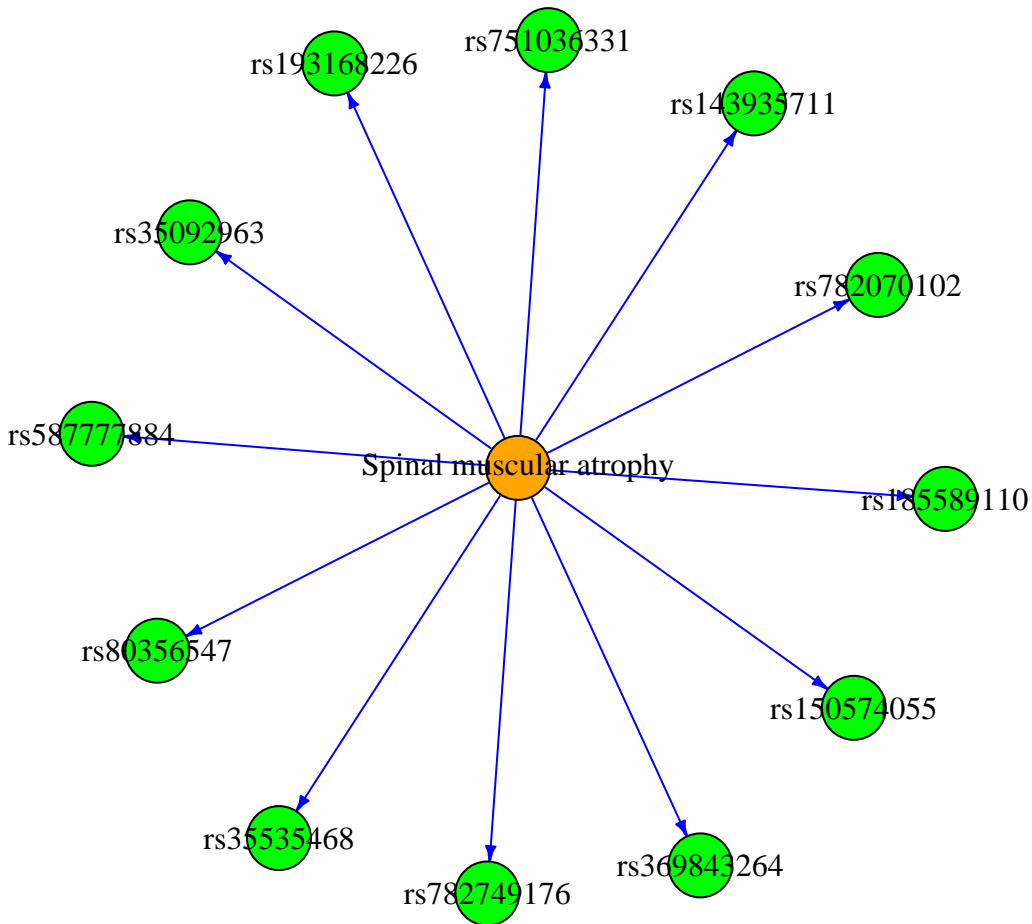



## Variant–Disease Network (Spinocerebellar ataxia)

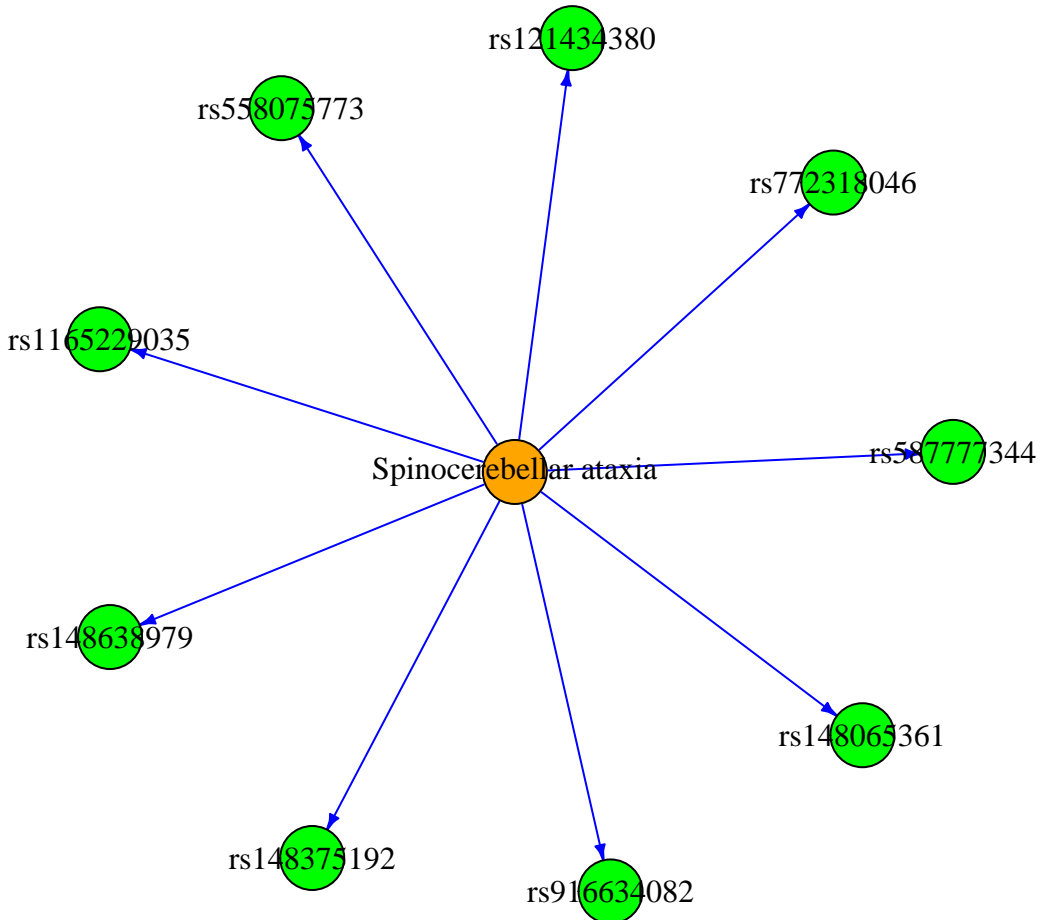

Variant–Disease Network (Spinocerebellar ataxia 13)

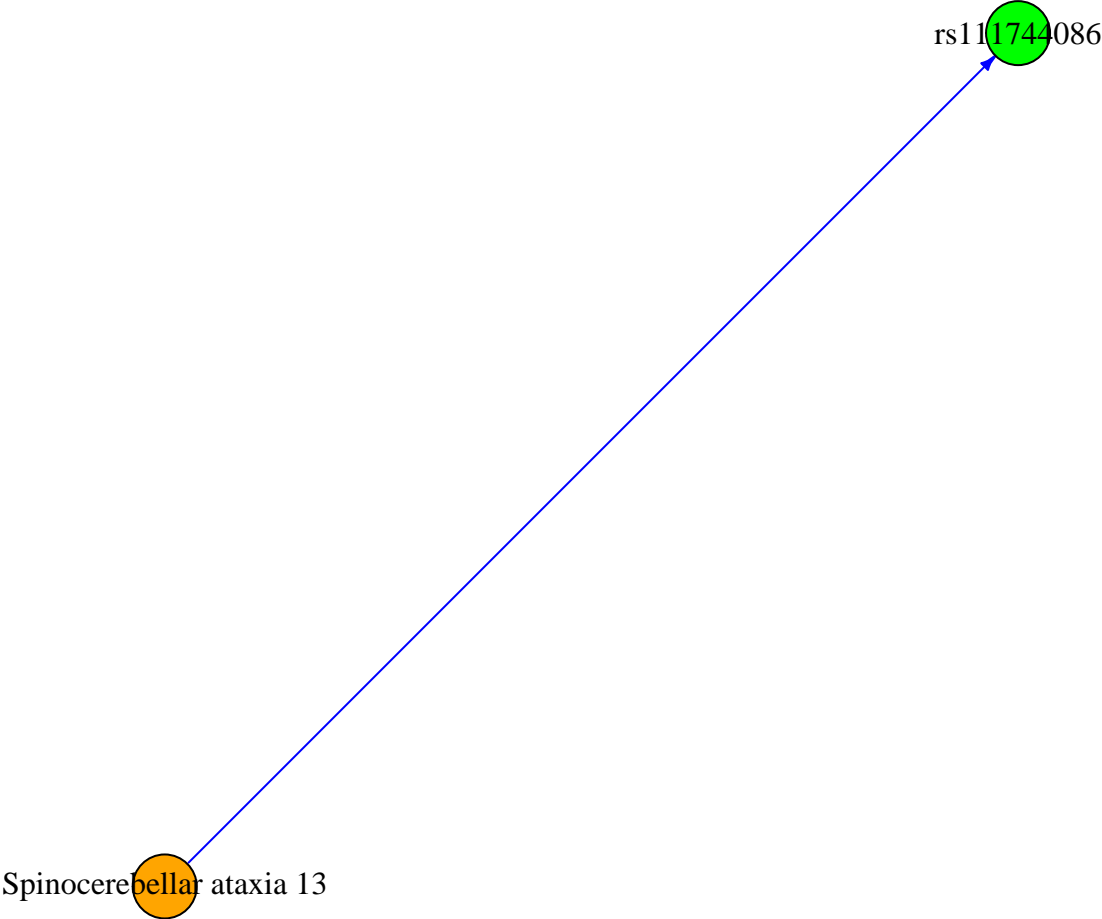

Variant–Disease Network (Spinocerebellar ataxia 15)

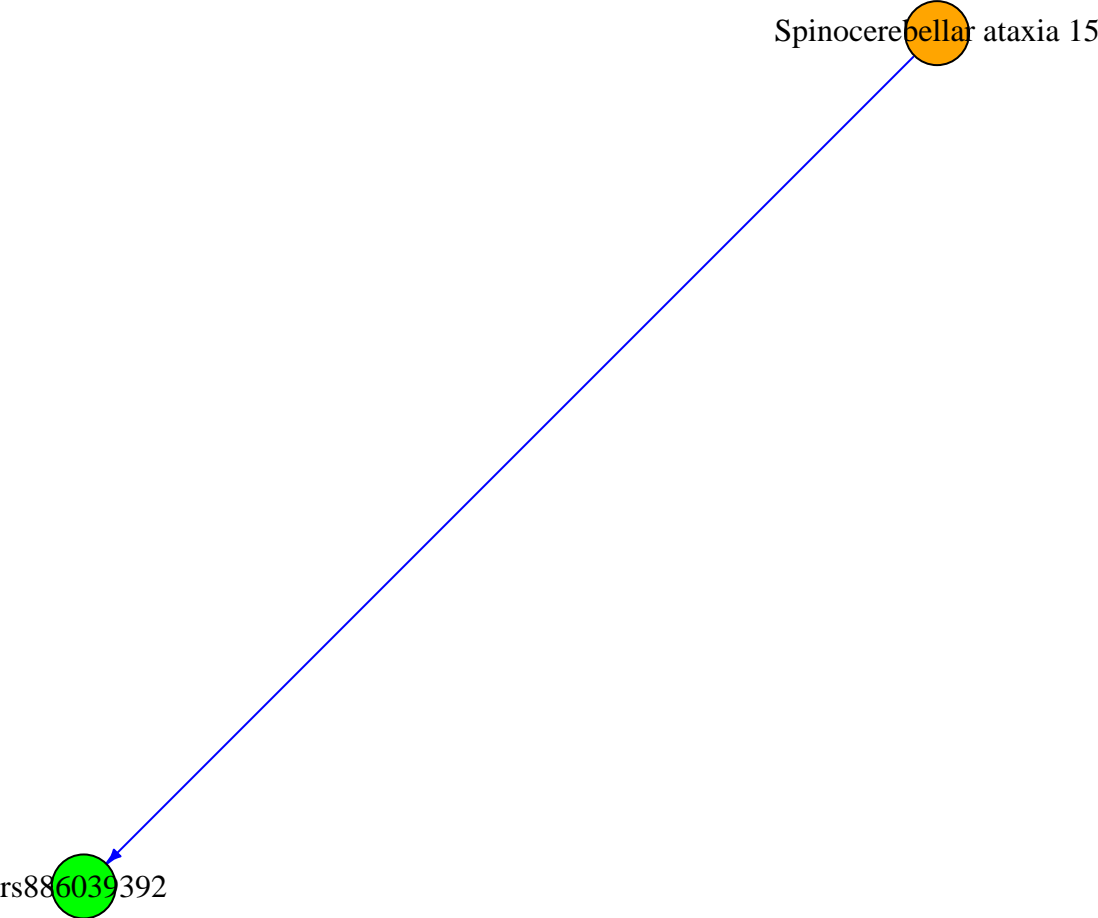

Variant–Disease Network (Spinocerebellar ataxia 29)

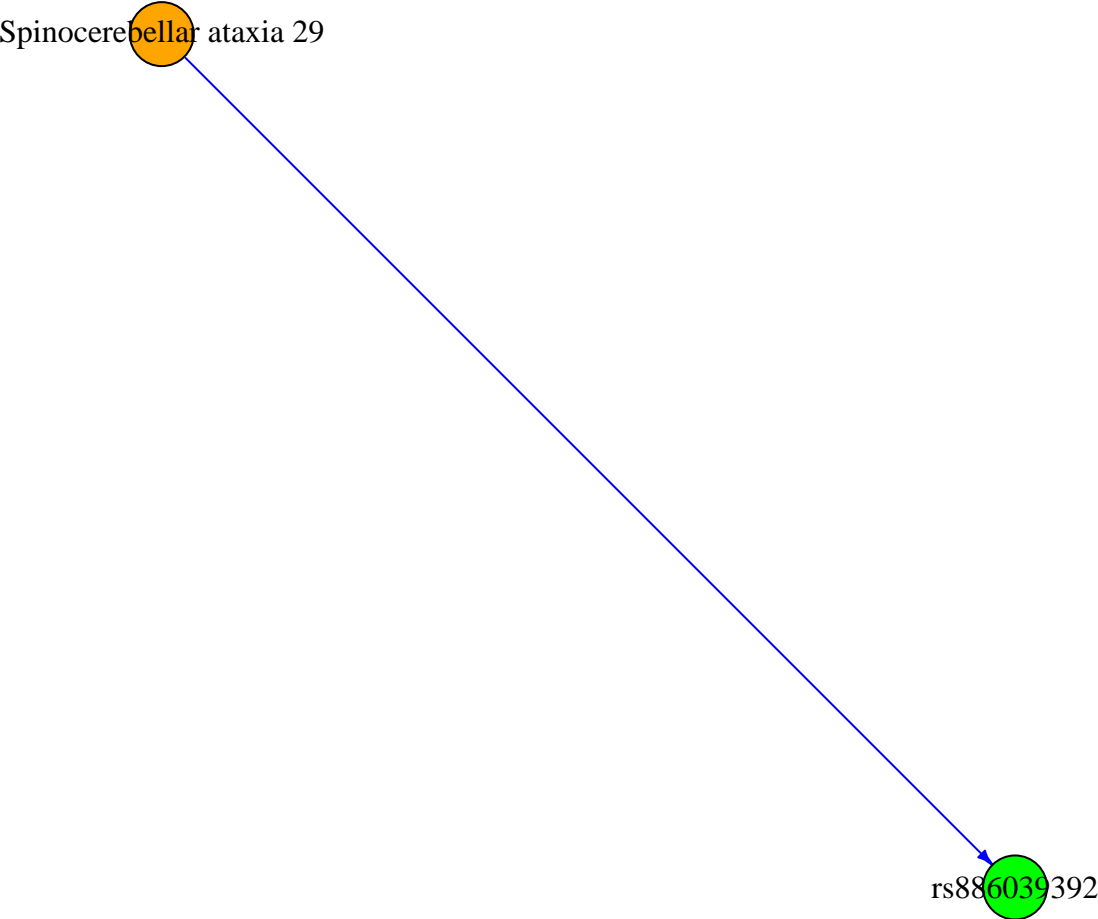

## Variant–Disease Network (Spinocerebellar ataxia 5)

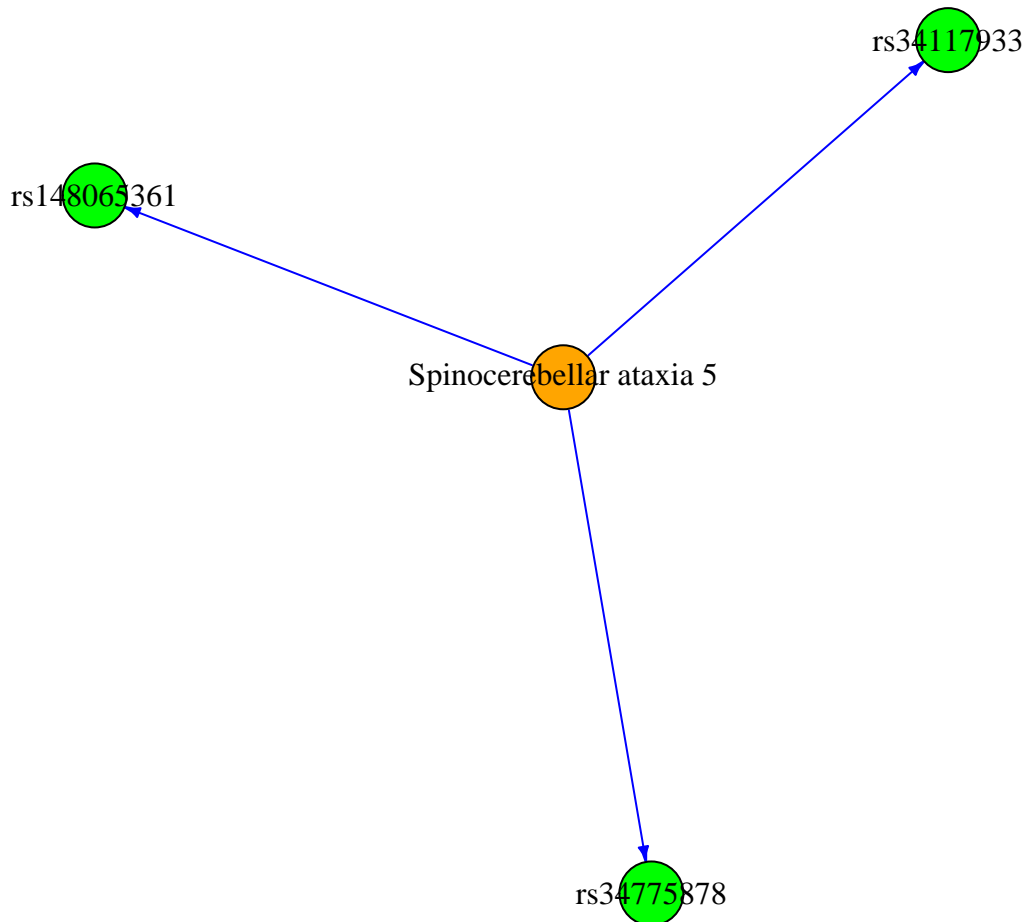

# Variant–Disease Network (Split–hand/foot malformation)

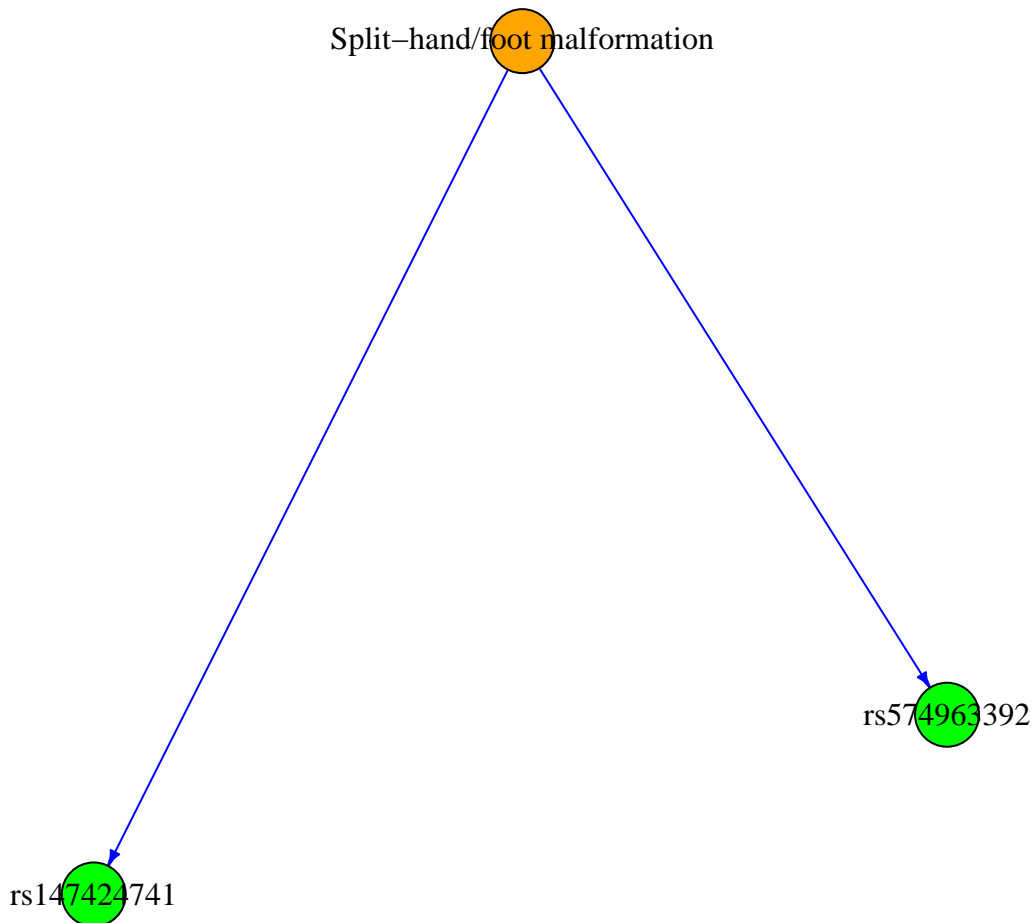

## Variant–Disease Network (Spondylocostal dysostosis 1)

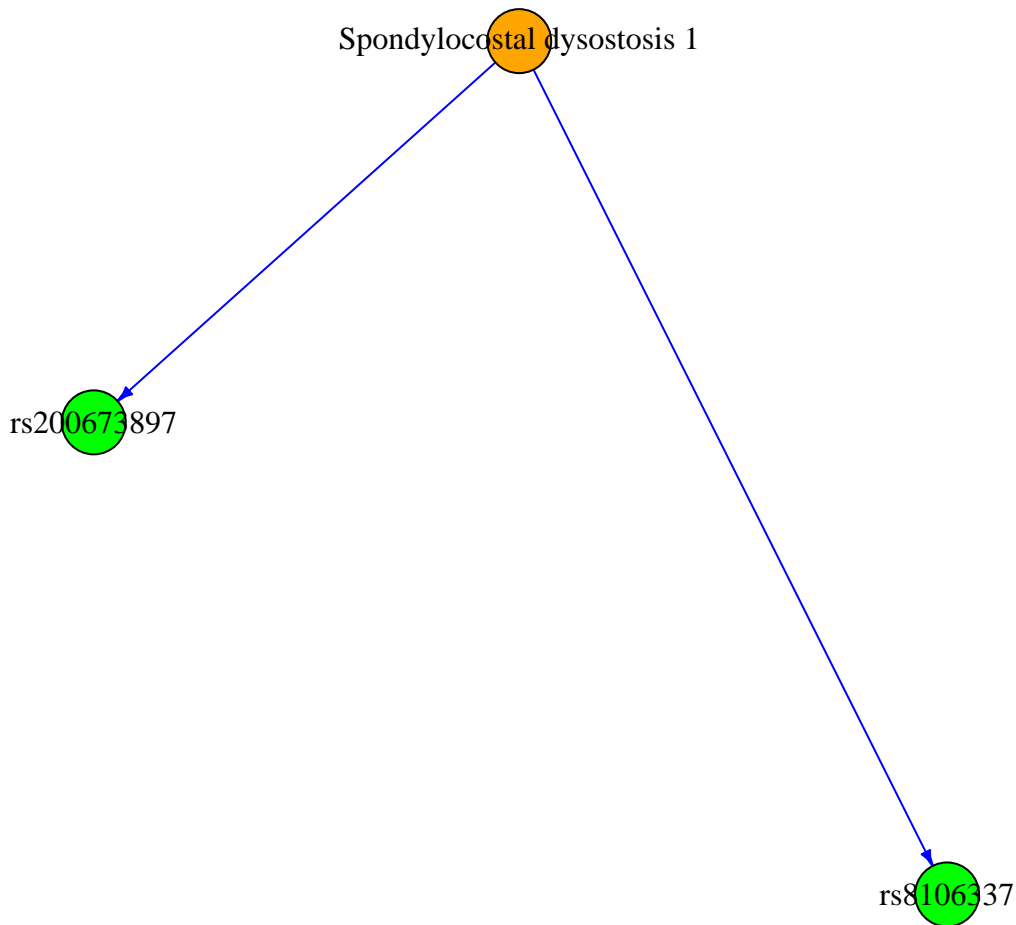

# Variant-Disease Network (Spondyloenchondrodysplasia with immune dysregulation)

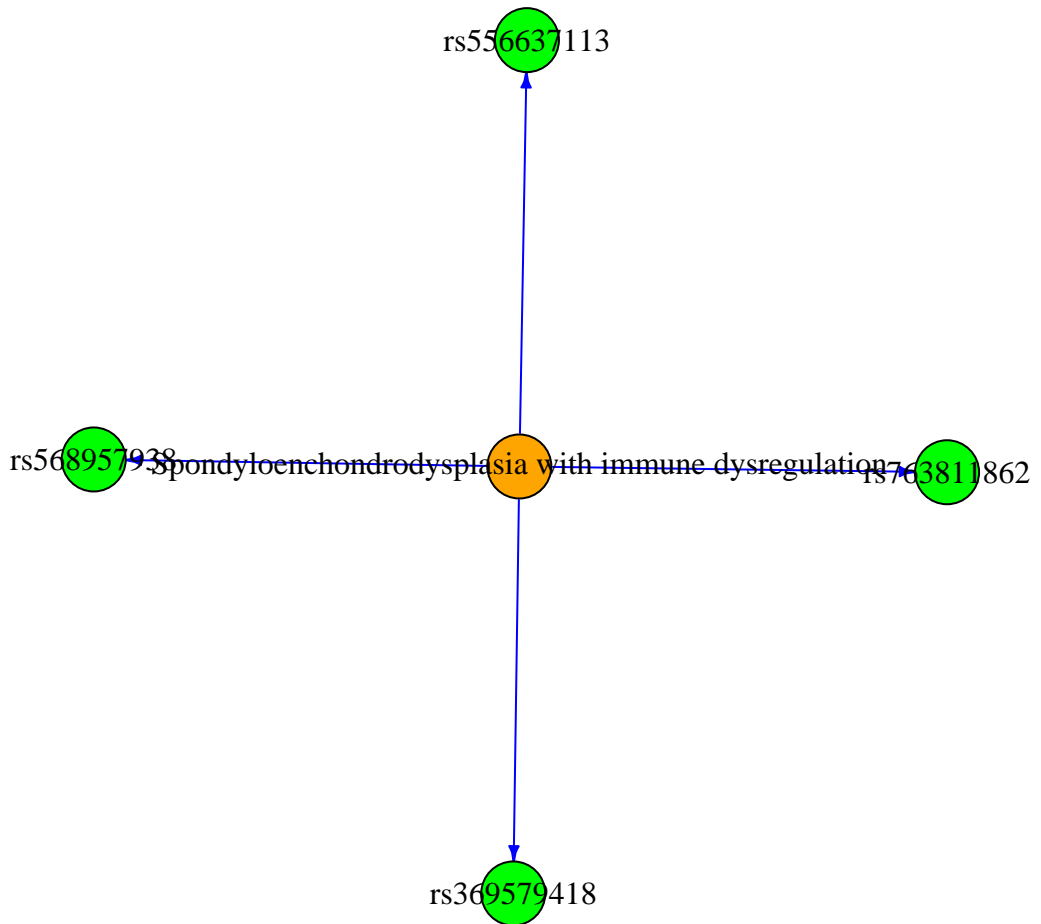



# Variant–Disease Network (Spondyloepimetaphyseal dysplasia)

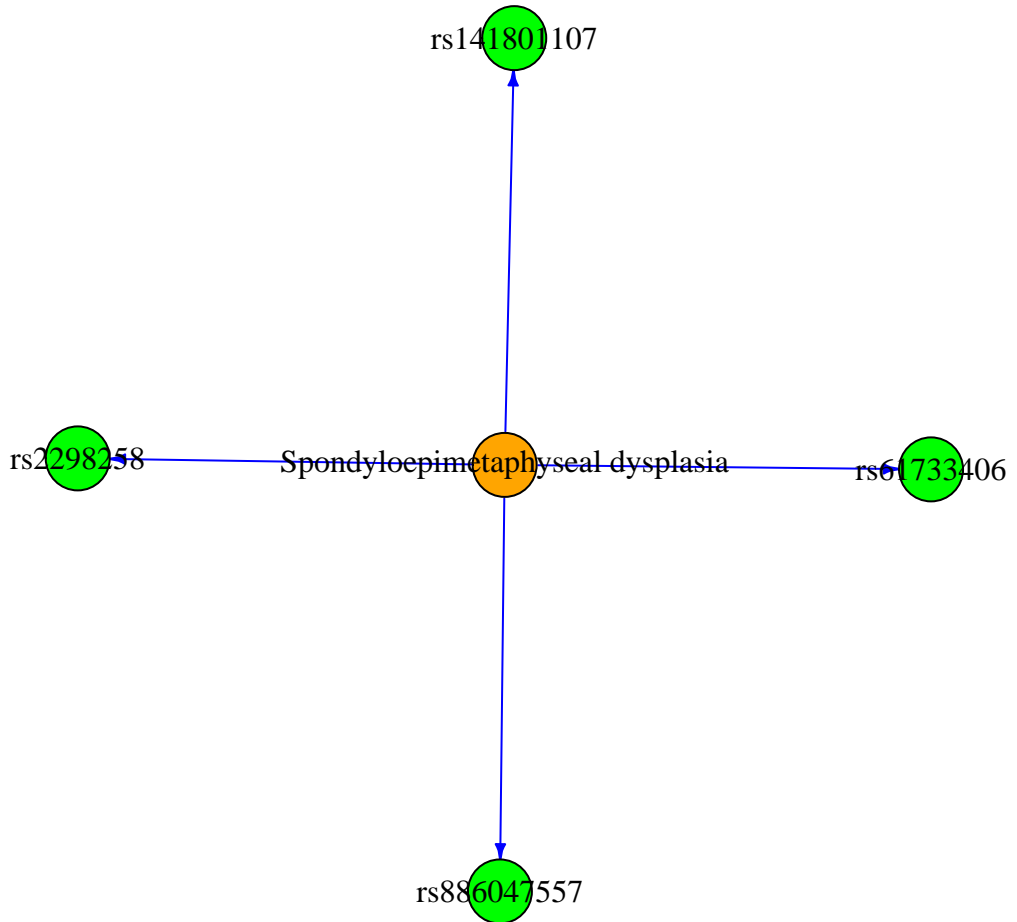

**Variant–Disease Network (Spondyloepiphyseal dysplasia)**

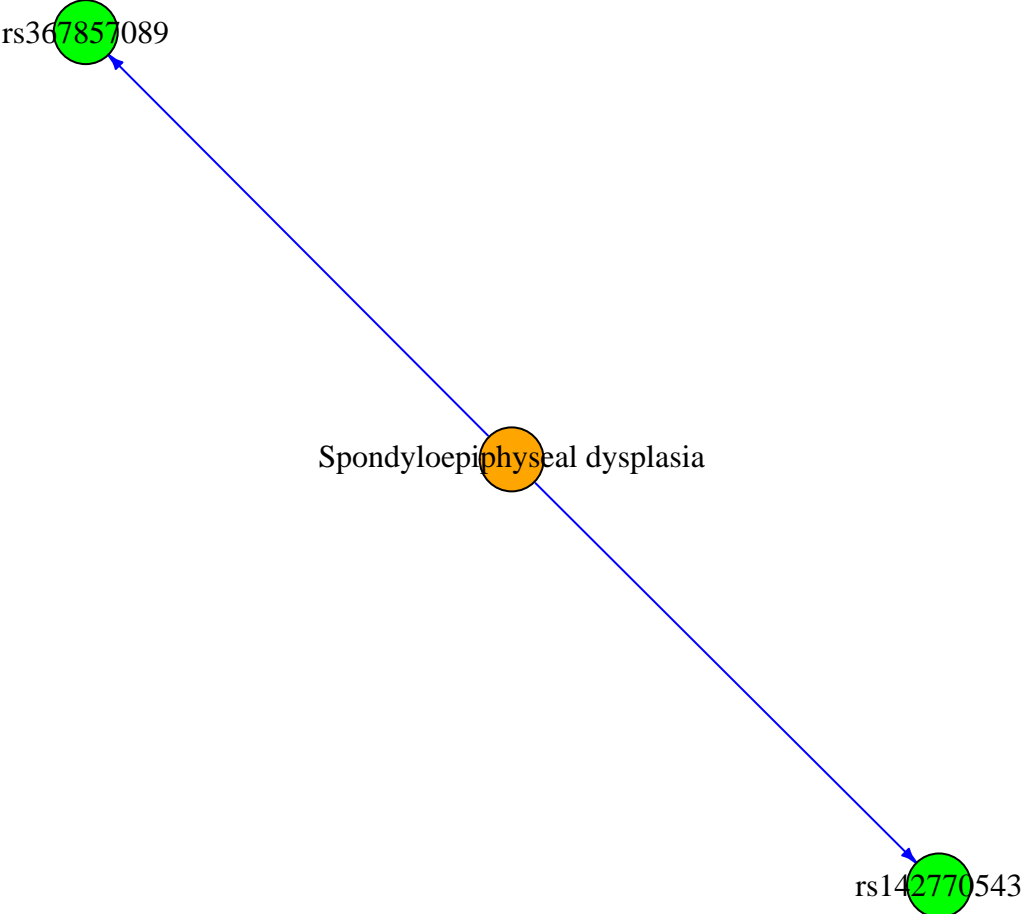

# nt-Disease Network (Spondyloepiphyseal dysplasia with congenital joint dis

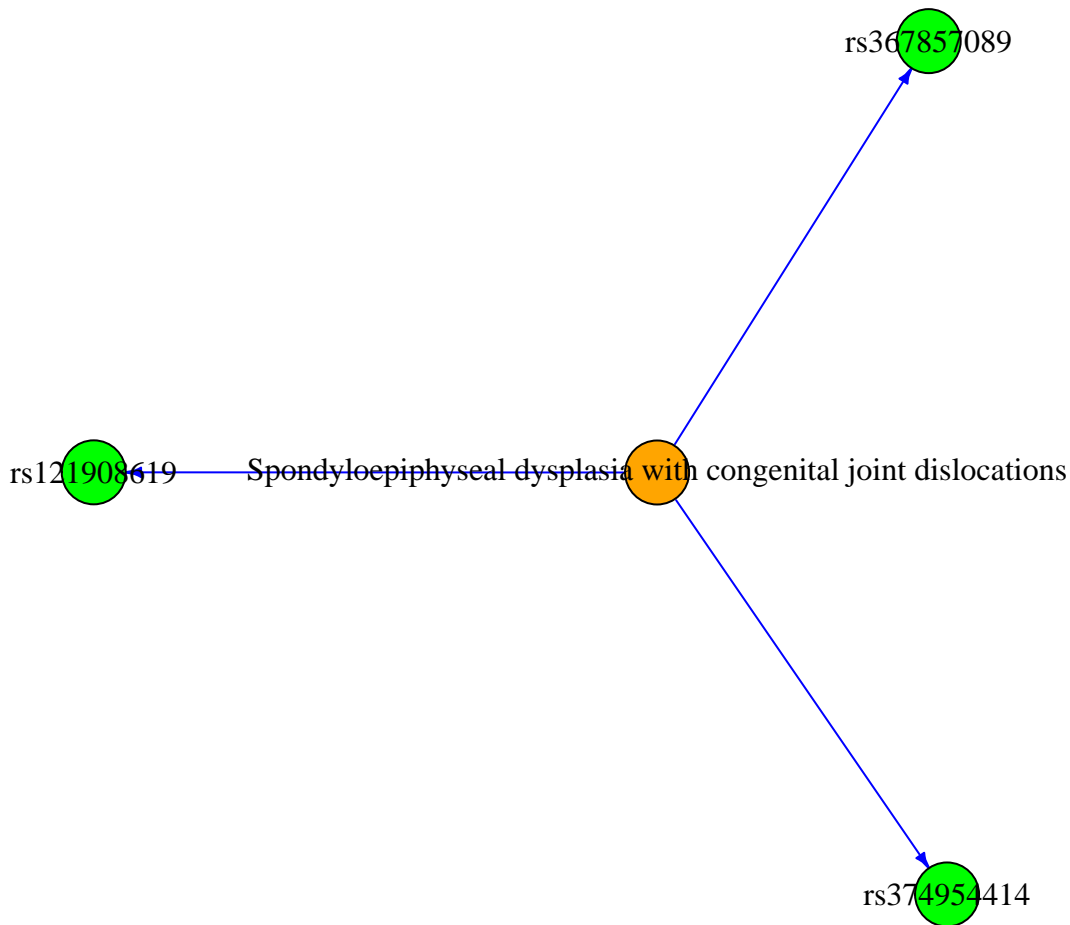

# Variant–Disease Network (Spondylometaphyseal dysplasia)

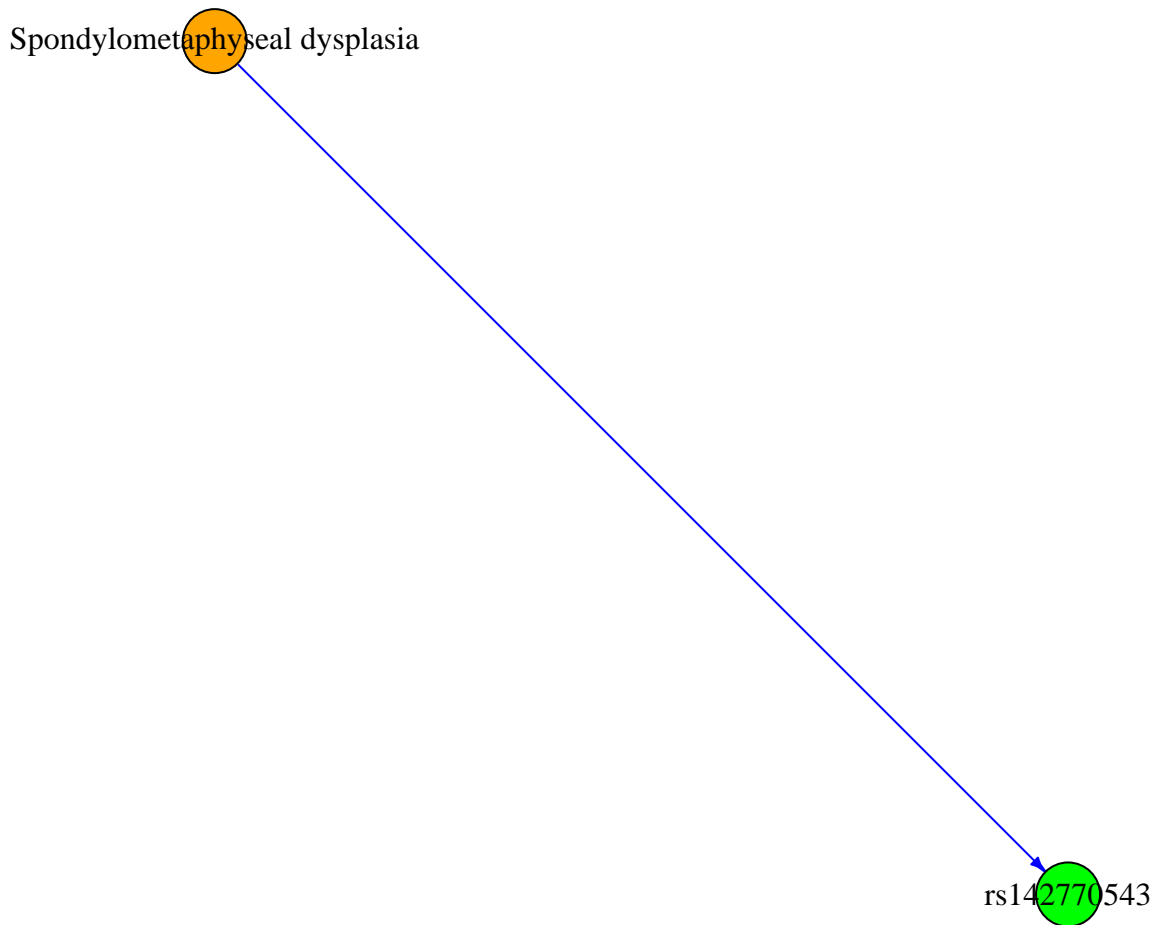

**Variant–Disease Network (Spondyloperipheral dysplasia)**

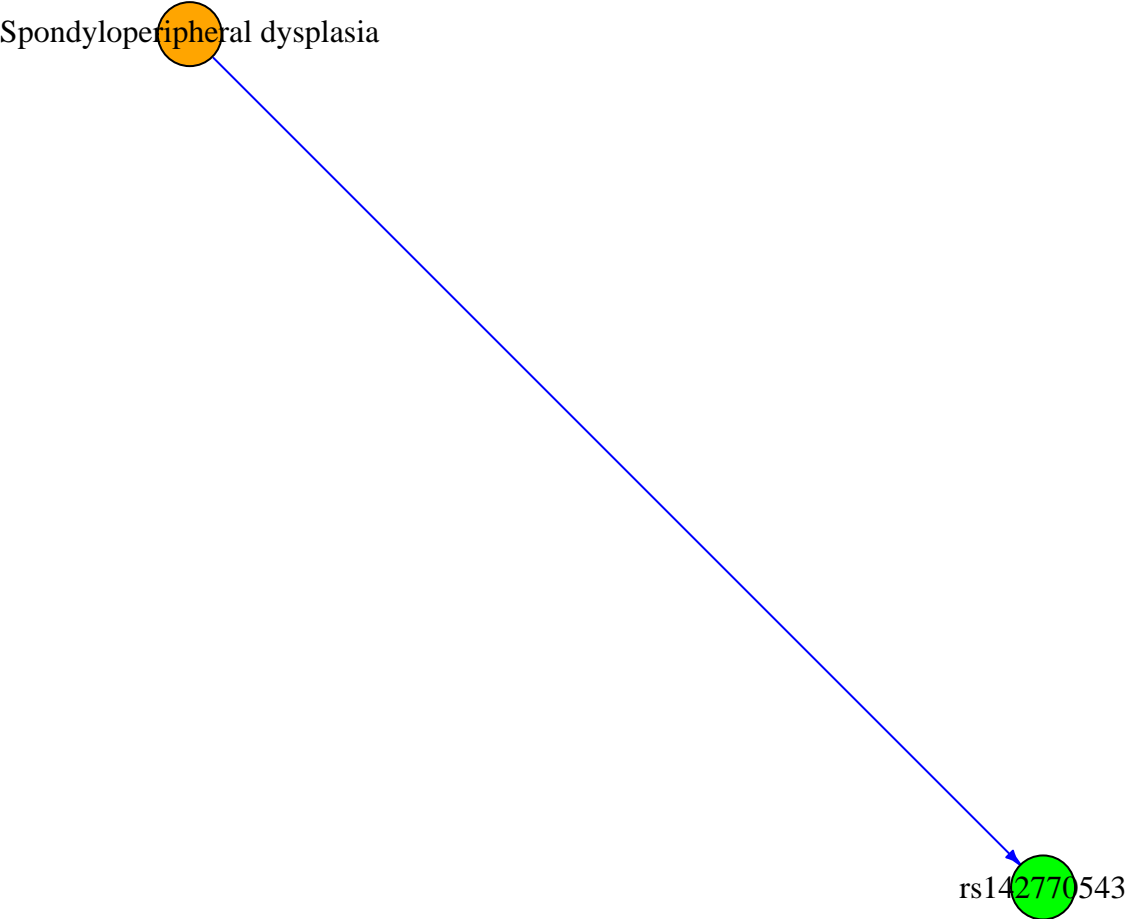

Variant–Disease Network (Spongy degeneration of central nervous system)

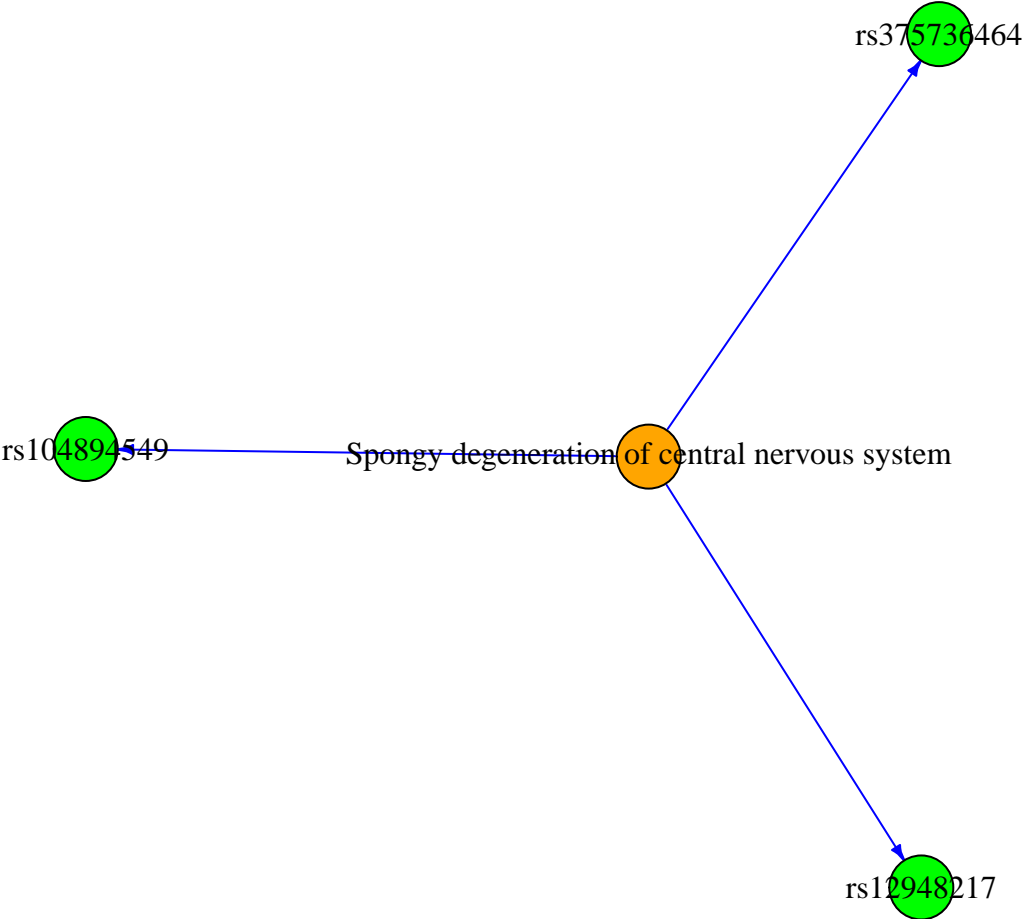

Variant–Disease Network (Squamous cell carcinoma of the head and neck)

Squamous cell carcinoma of the head and neck

rs34968276

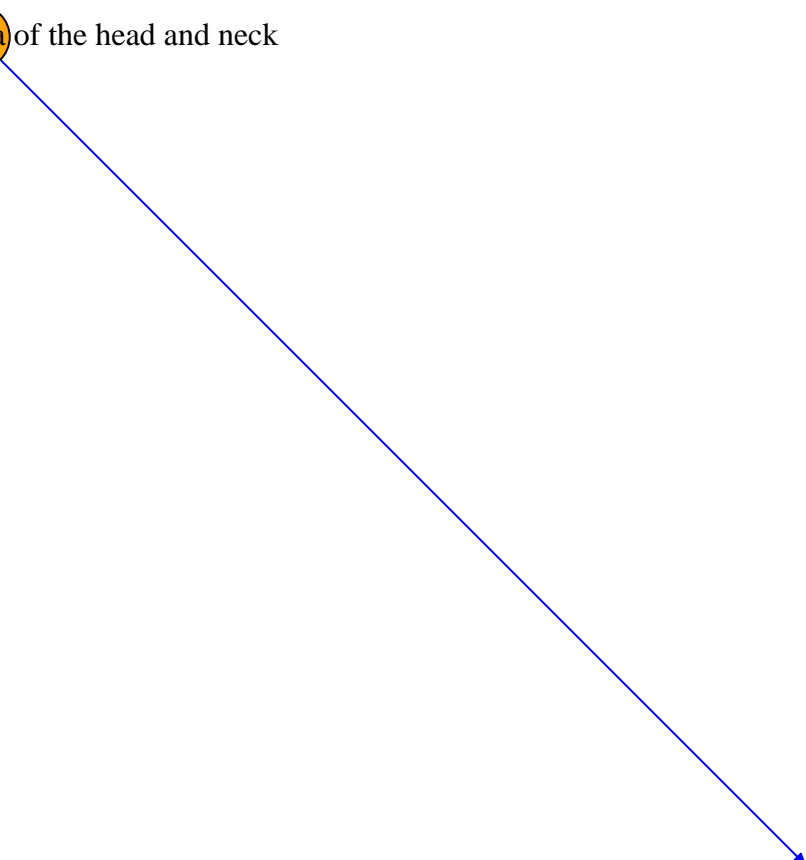

# Variant-Disease Network (Squamous cell carcinoma of the skin)

rs34968276

Squamous cell carcinoma of the skin

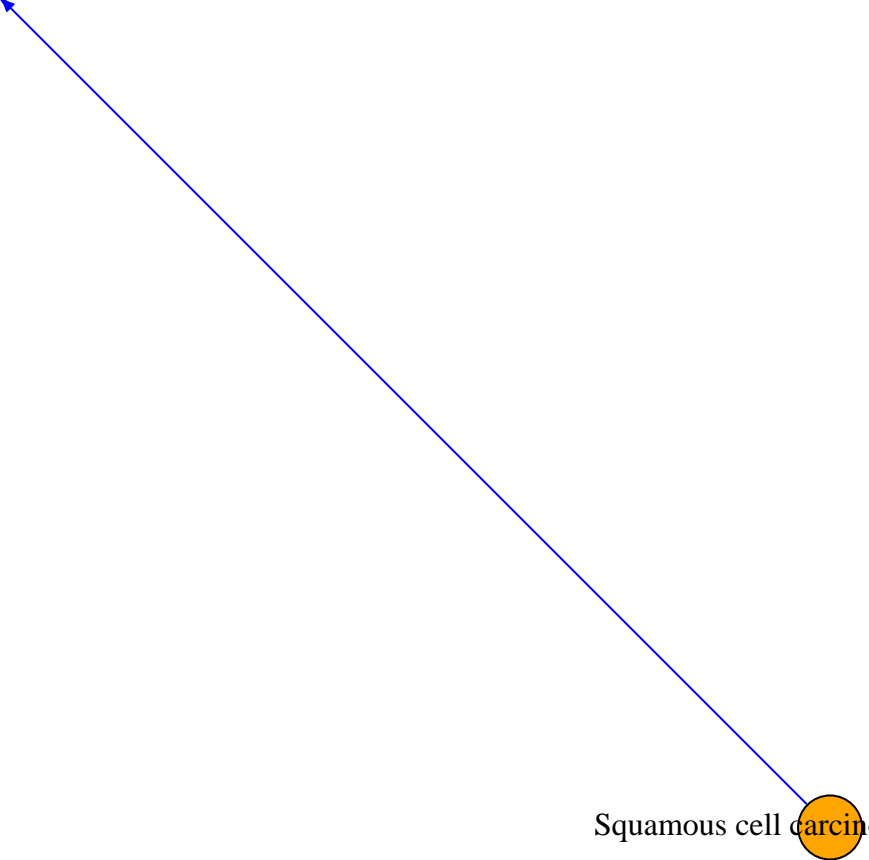



## Variant-Disease Network (Stargardt disease)

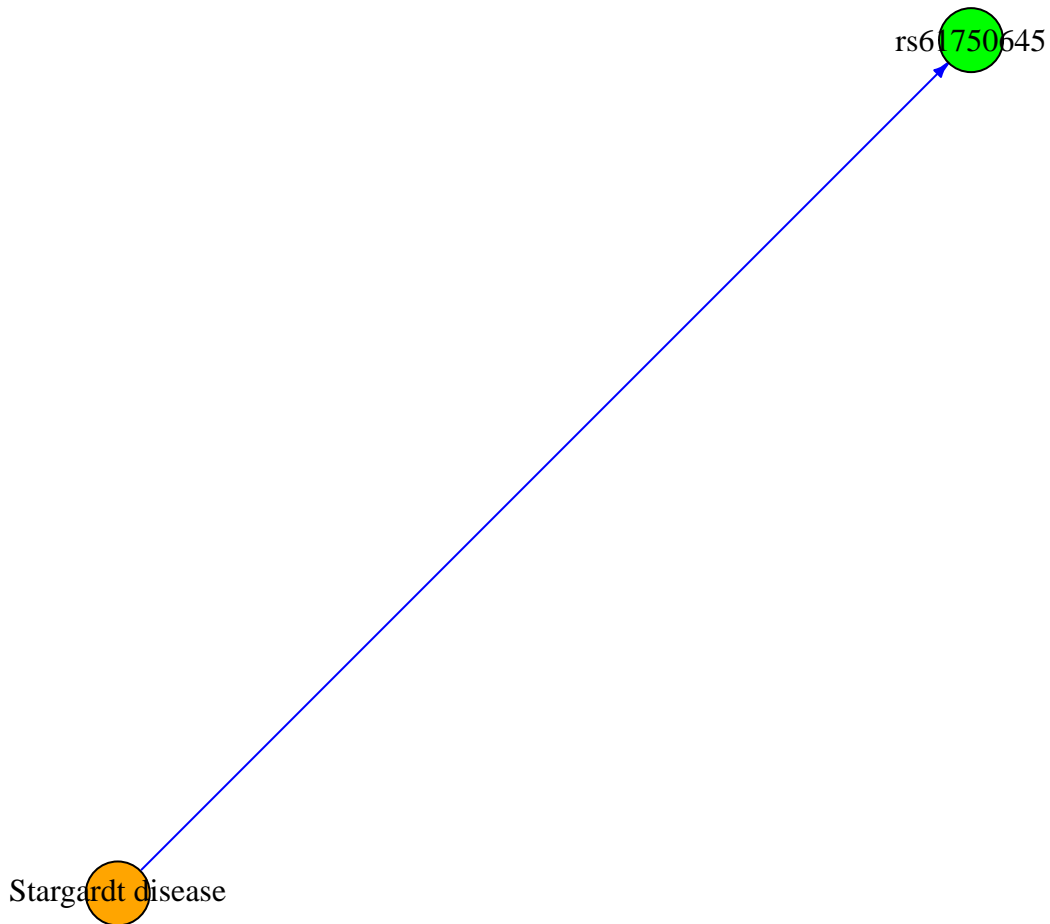

## Variant-Disease Network (Stargardt disease 1)

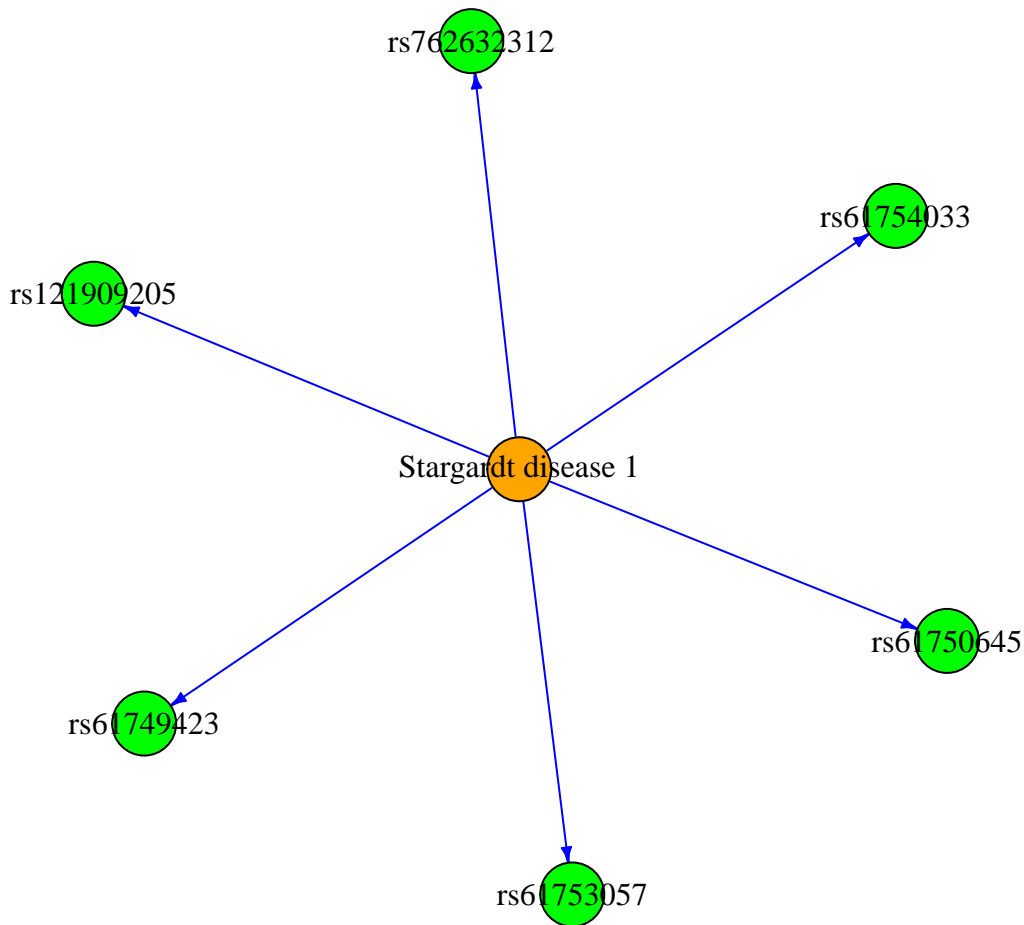

# Variant–Disease Network (Steroid-resistant nephrotic syndrome)

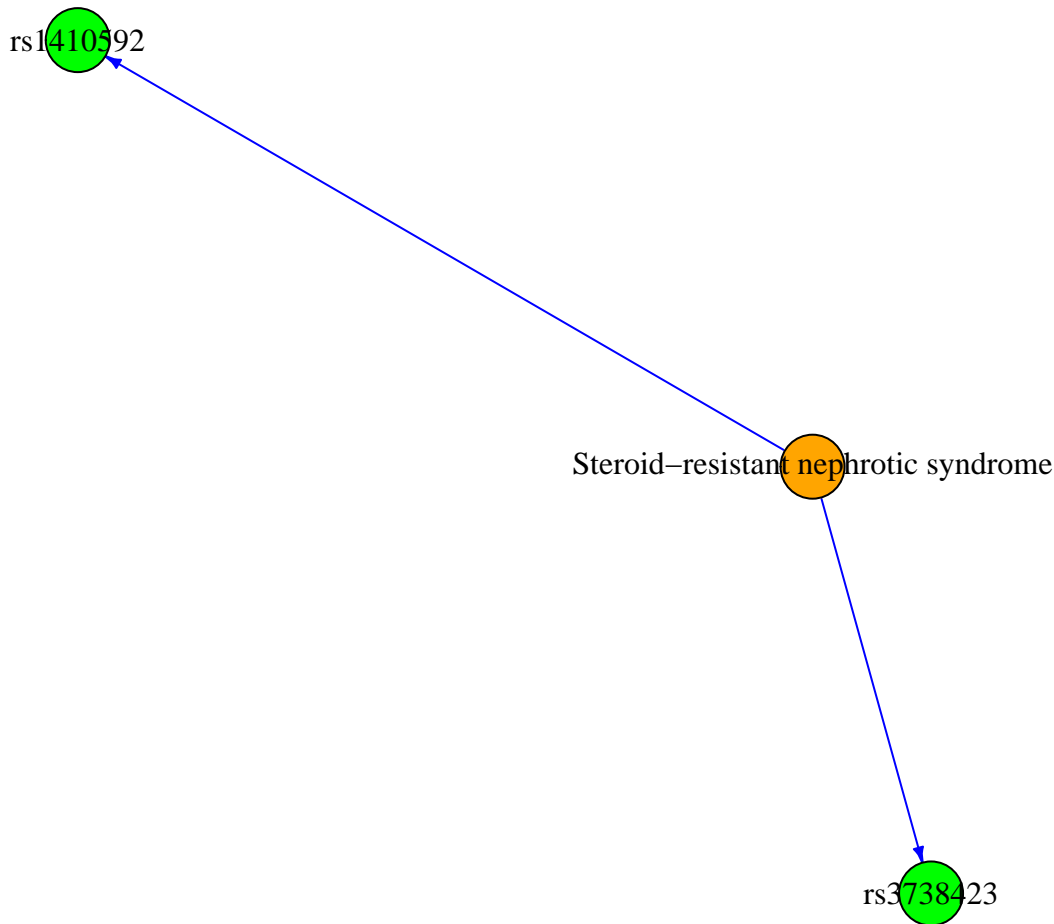

## Variant–Disease Network (Stickler syndrome)

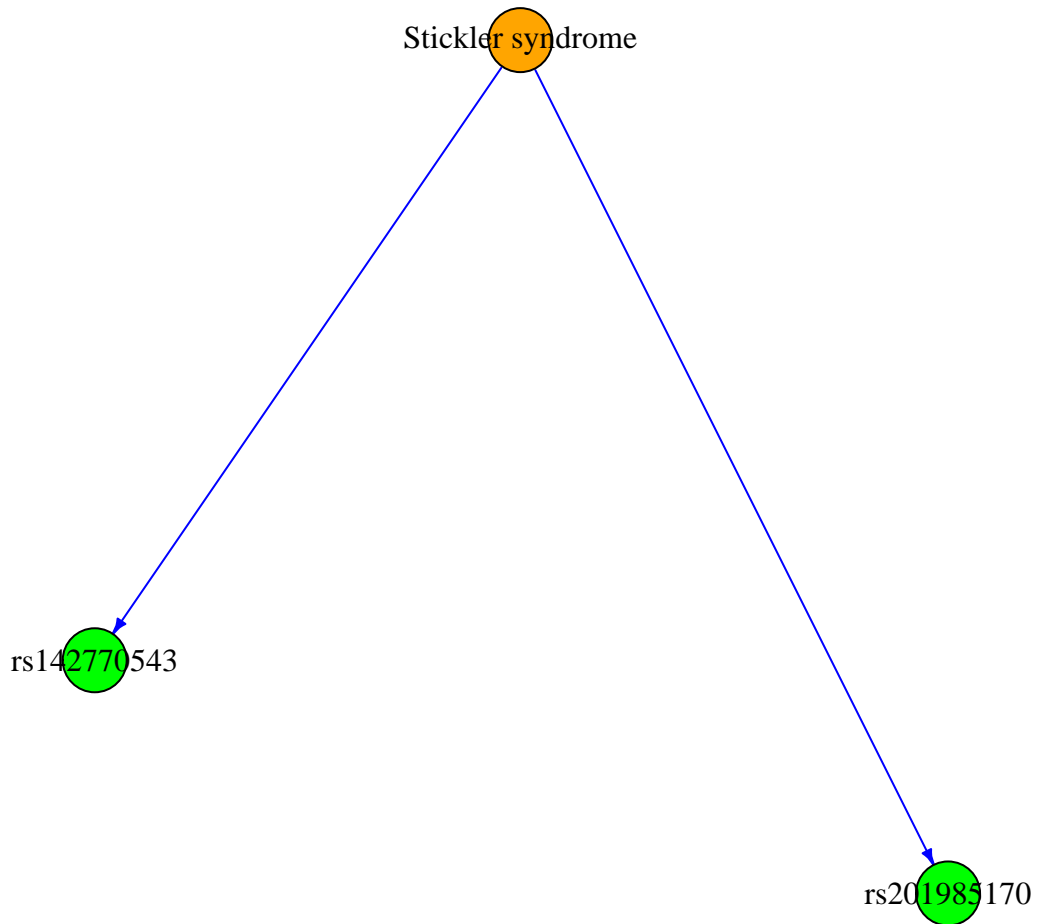

# Variant–Disease Network (Stickler syndrome type 1)

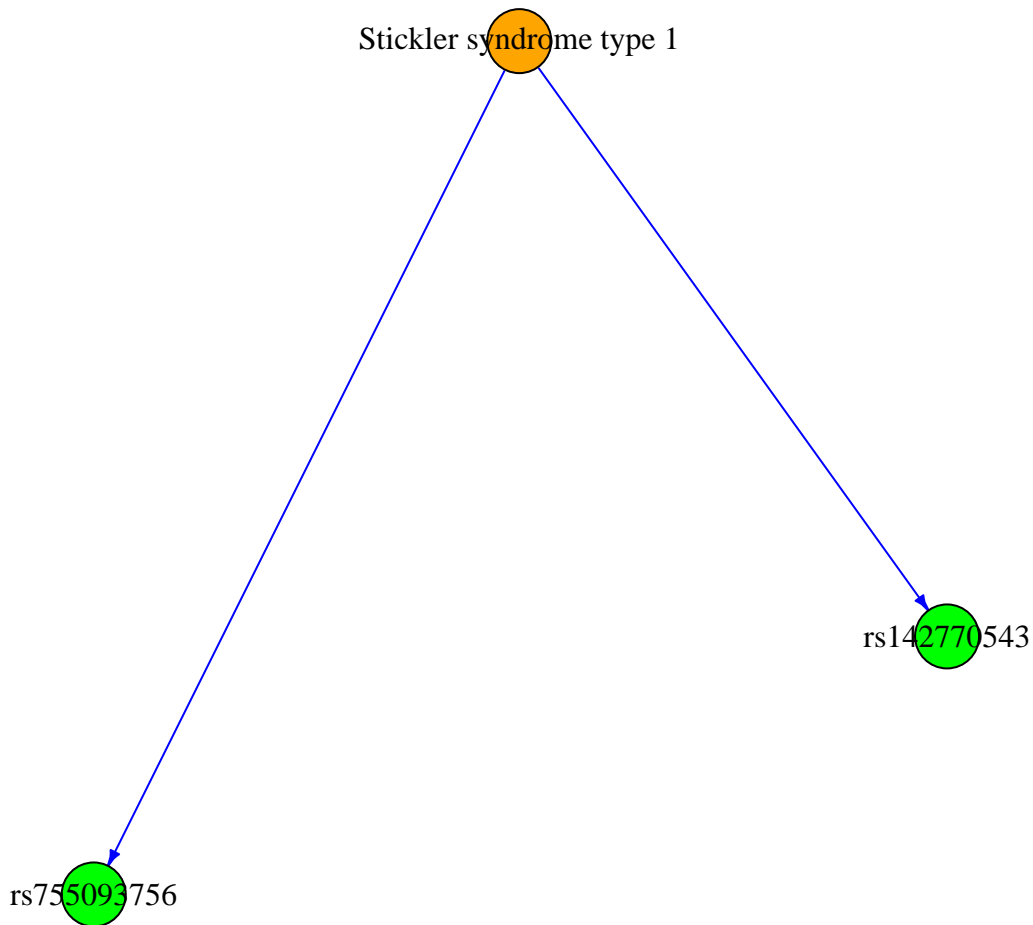

## Variant–Disease Network (Stiff skin syndrome)

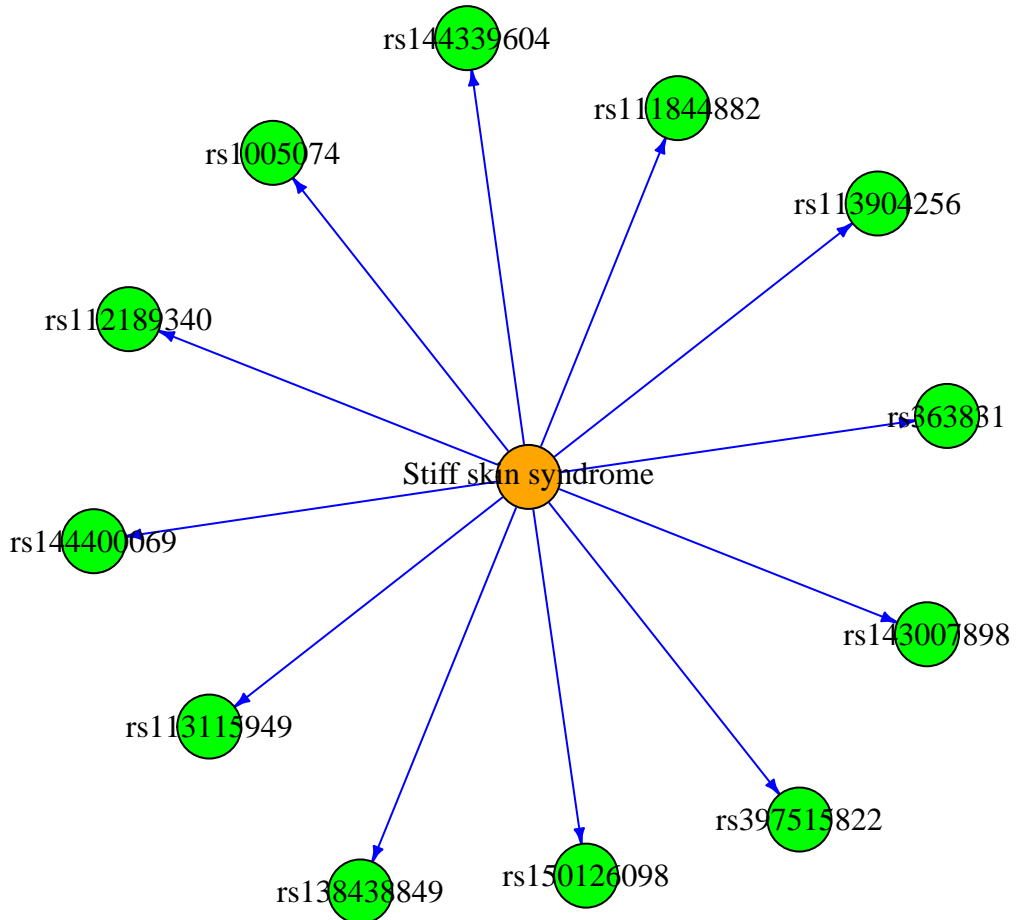

## Variant–Disease Network (Sting-associated vasculopathy)

Sting-associated vasculopathy

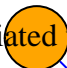

rs1490896074

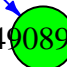

## Variant-Disease Network (Striatal Degeneration)

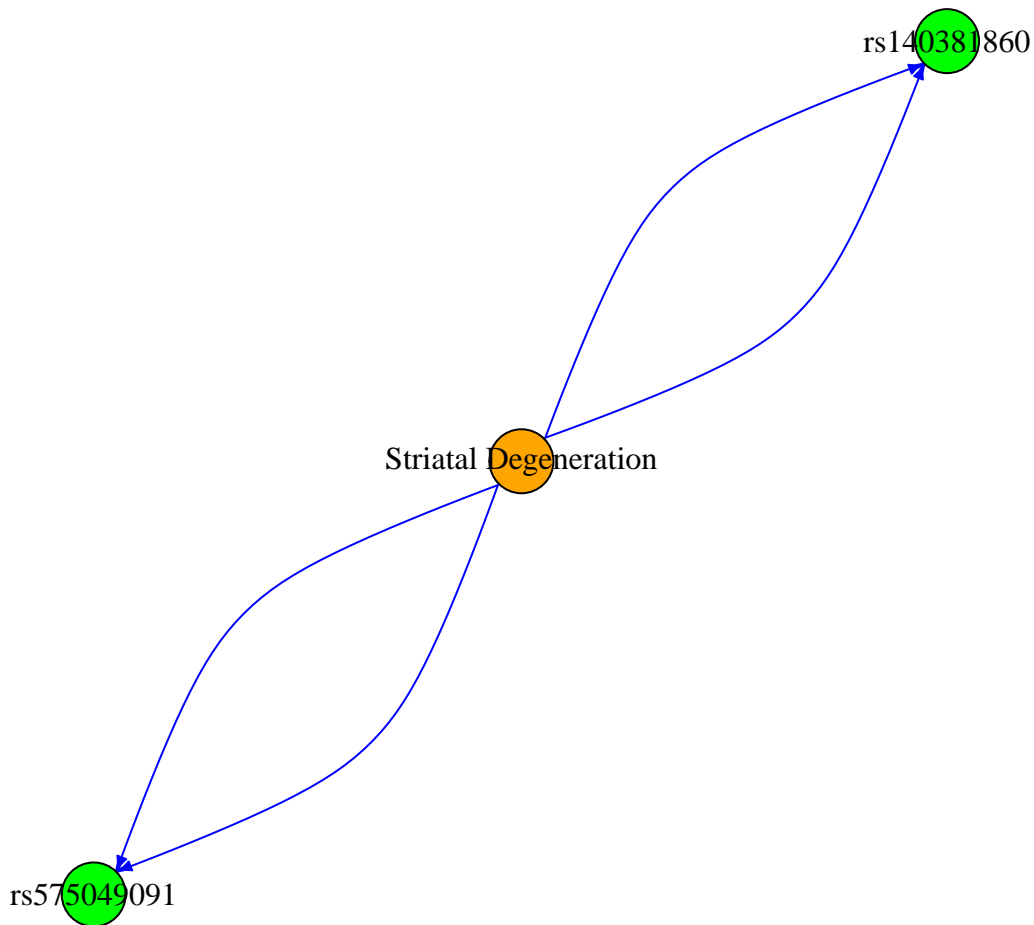



# Variant–Disease Network (Stuve–Wiedemann syndrome)

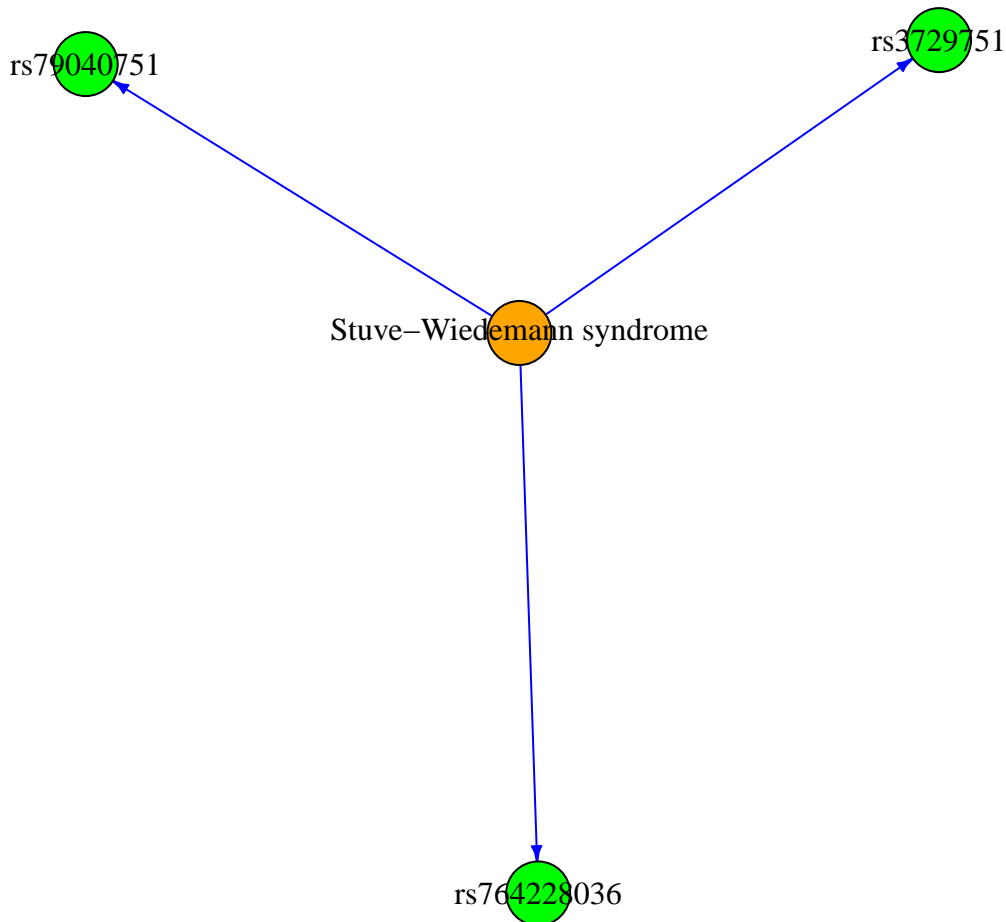

Variant–Disease Network (Sucrase–isomaltase deficiency)

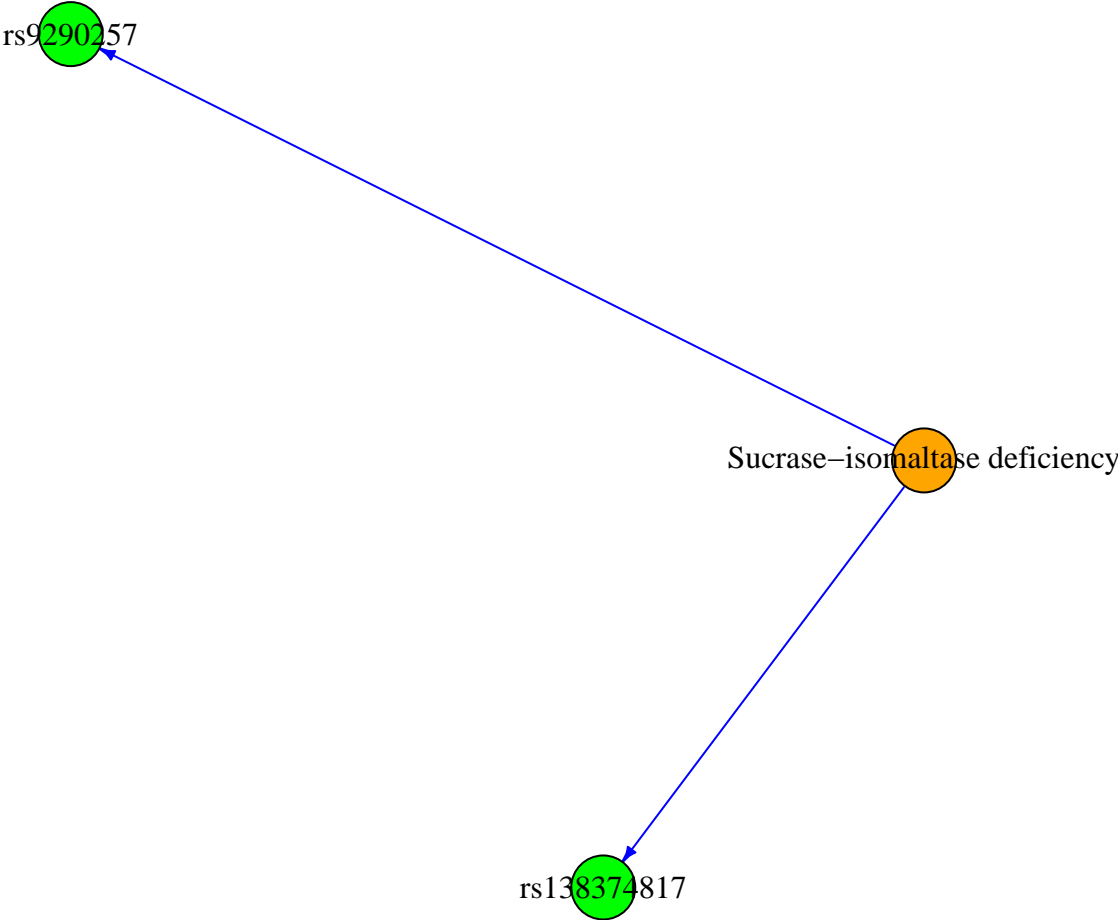

## Variant–Disease Network (Sudden cardiac death)

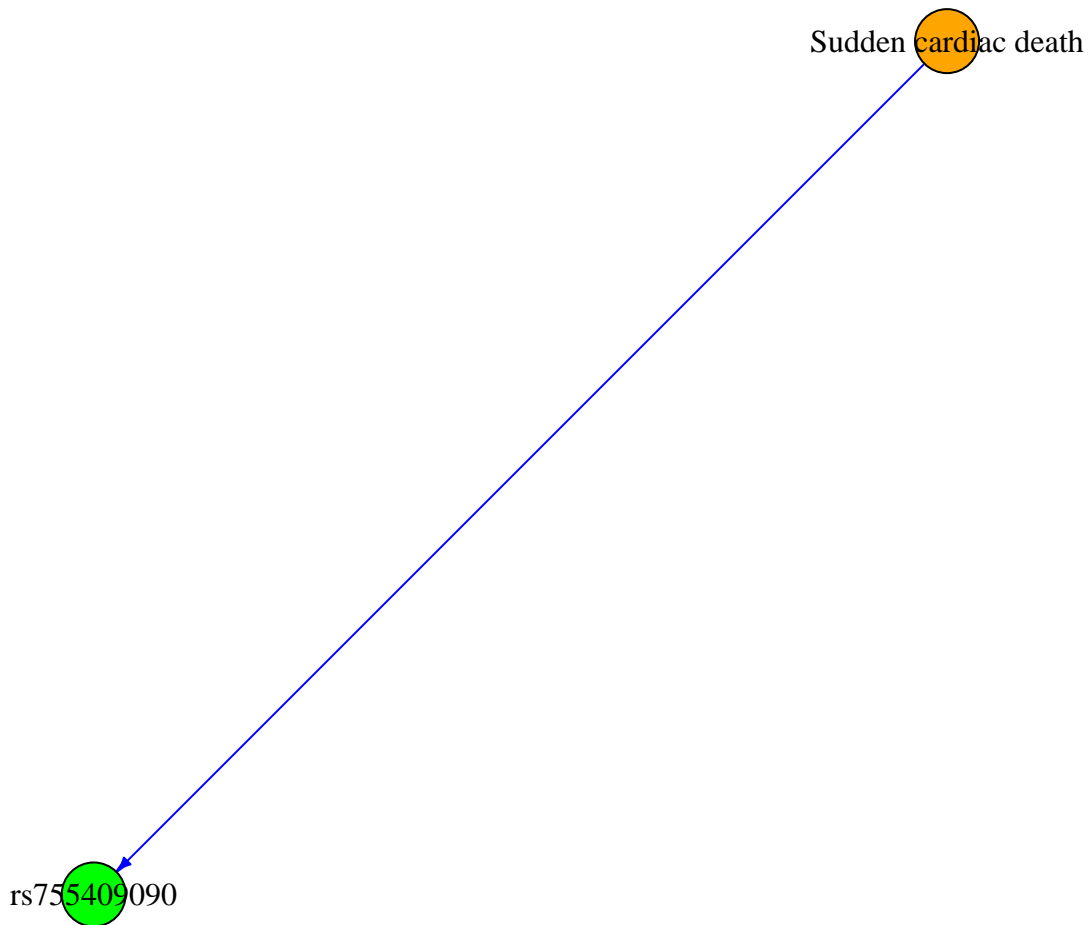

## Variant–Disease Network (Sulfite oxidase deficiency)

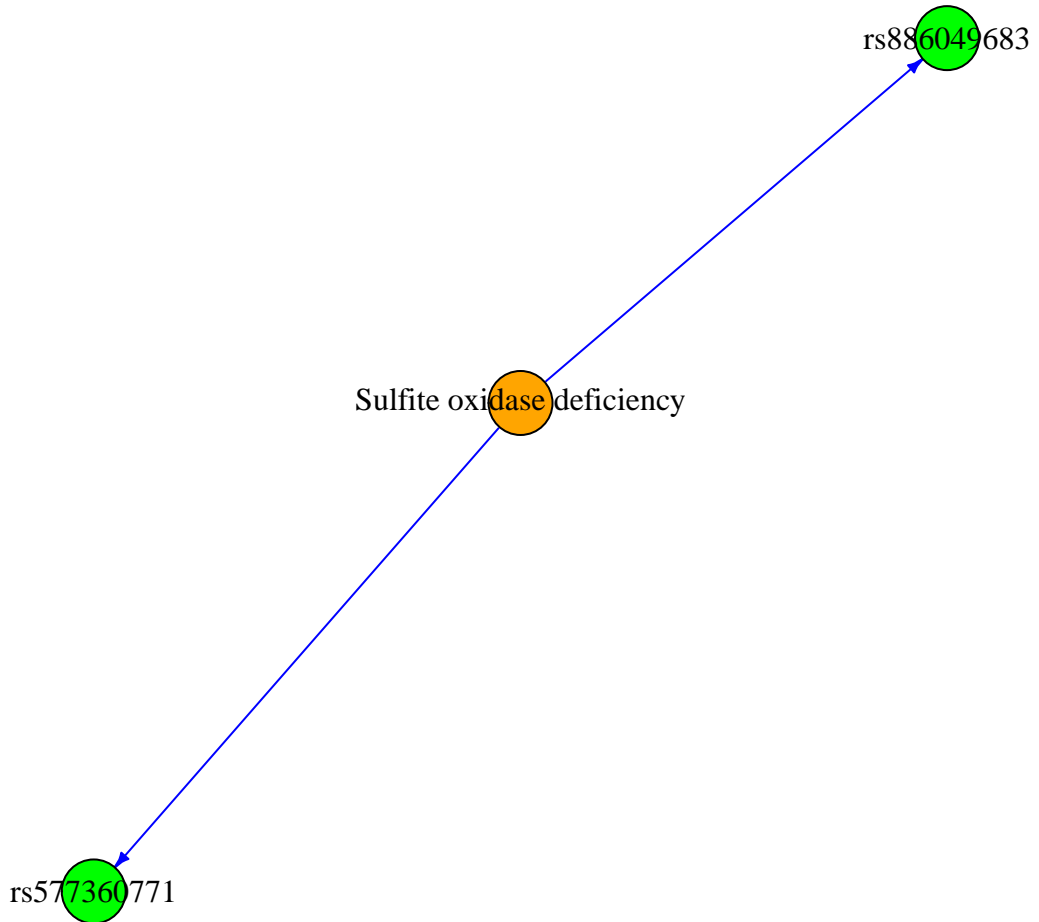

## Variant–Disease Network (Supraventricular tachycardia)

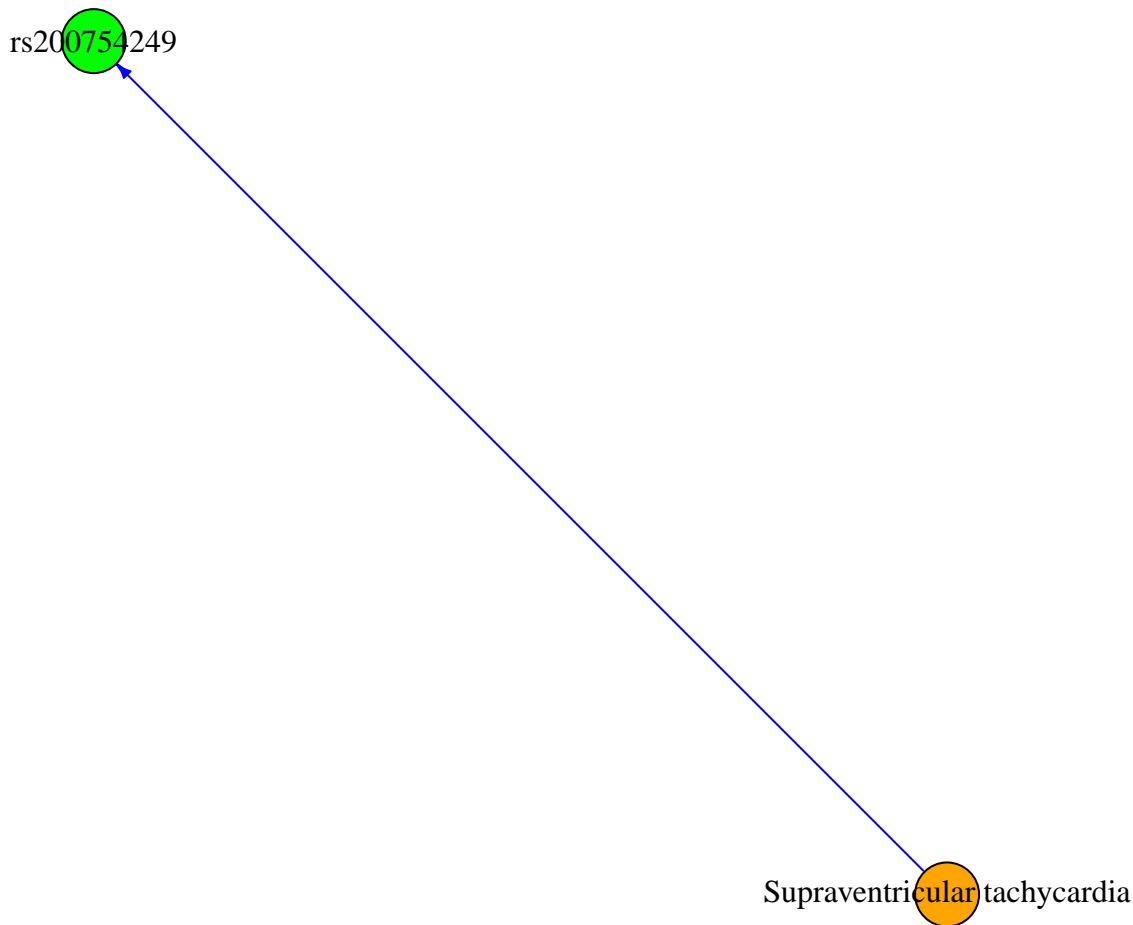

## Variant–Disease Network (Surfactant metabolism dysfunction)

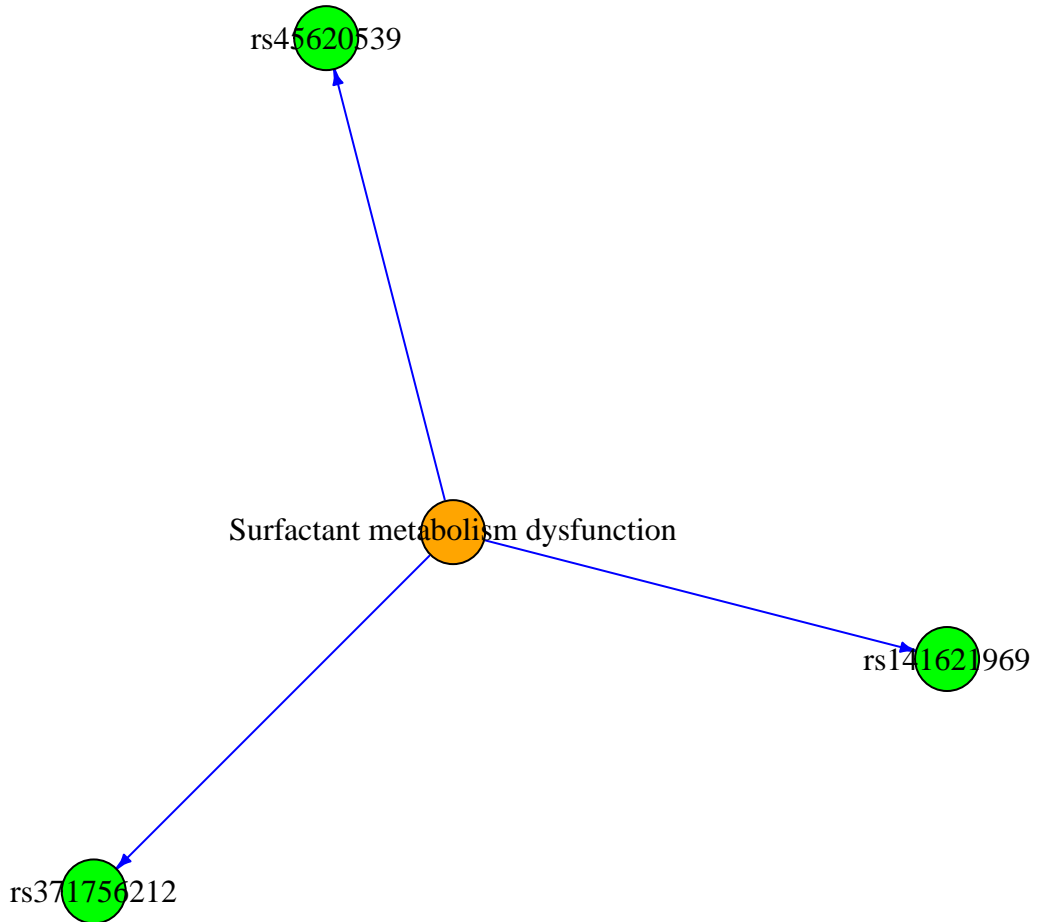

## Variant–Disease Network (Sveinsson chorioretinal atrophy)

rs148823826

Sveinsson chorioretinal atrophy

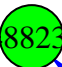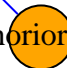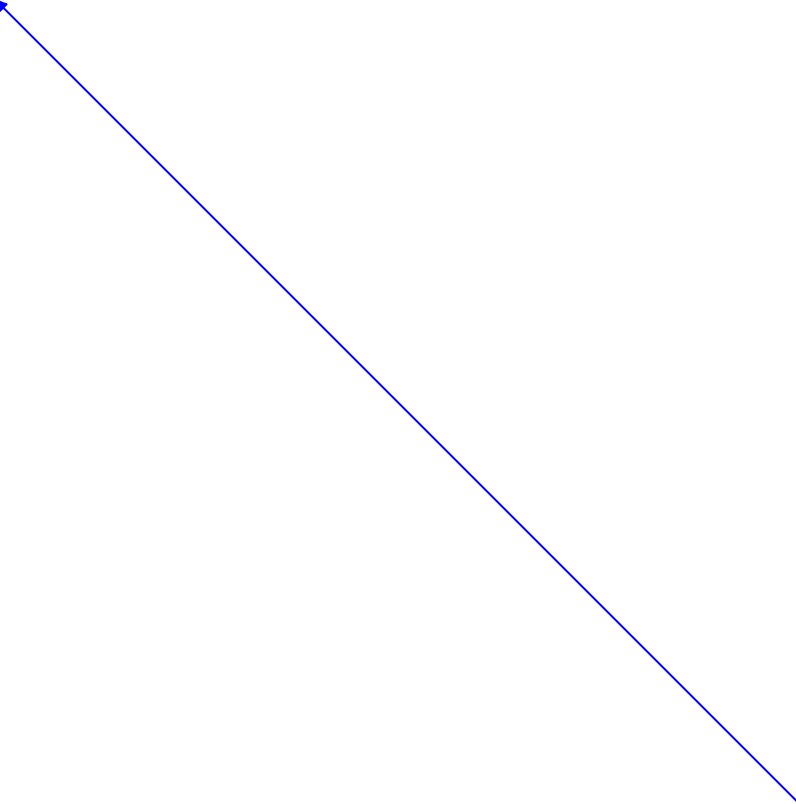

**Variant–Disease Network (Symmetrical dyschromatosis of extremities)**

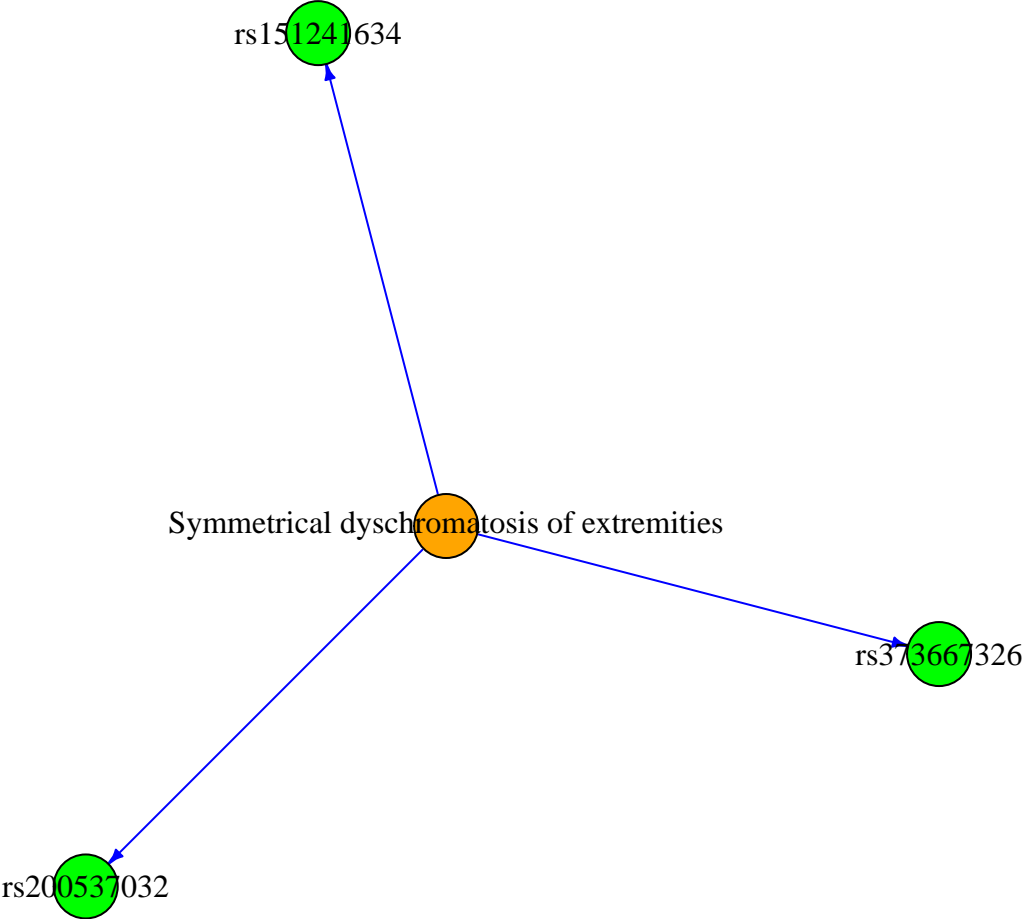



**Variant–Disease Network (Symphalangism–brachydactyly syndrome)**

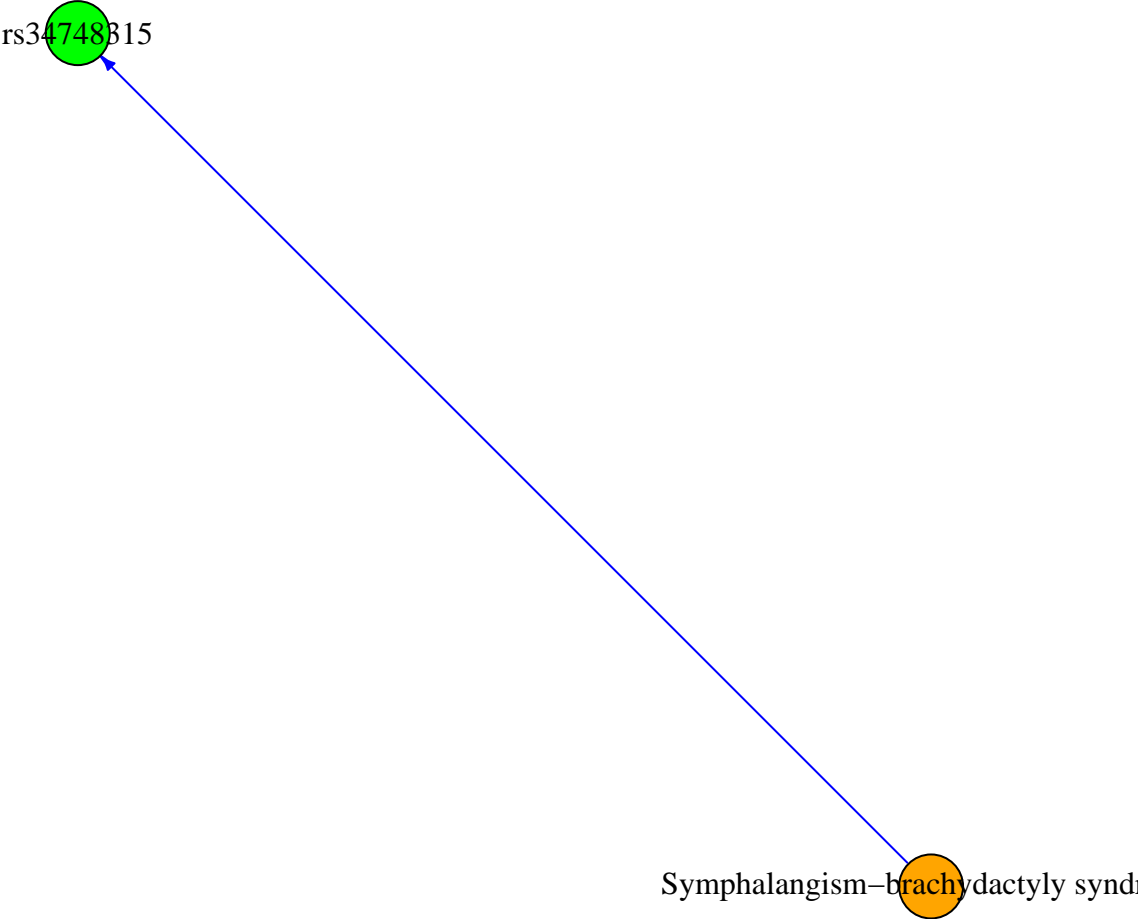

## Variant–Disease Network (Syndactyly)

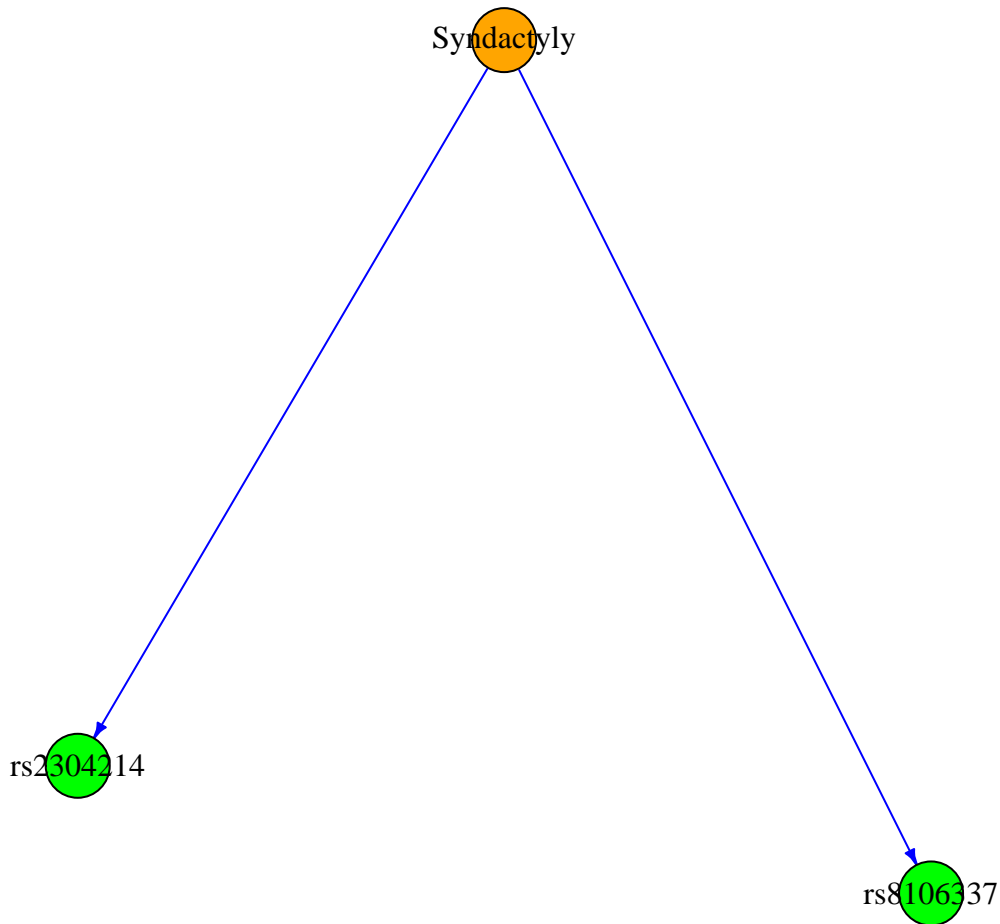

# Variant–Disease Network (Syndromic intellectual disability)

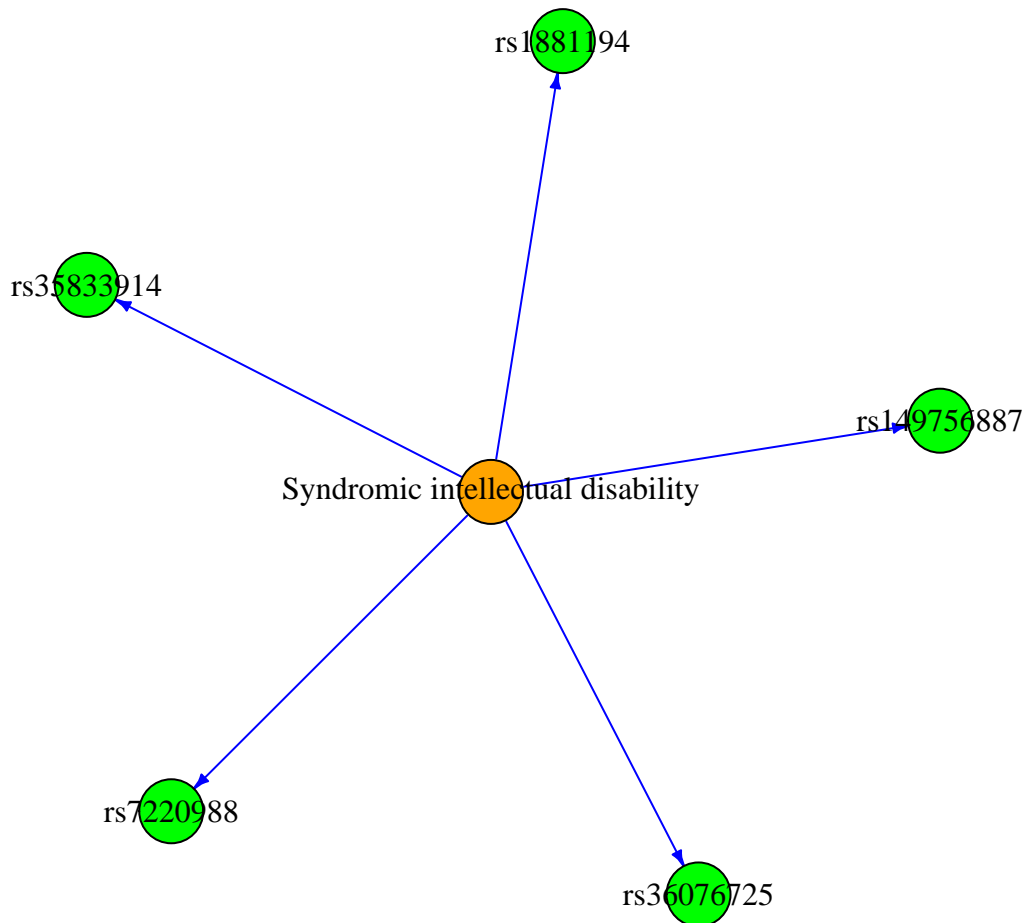

## Variant–Disease Network (Syndromic Microphthalmia)

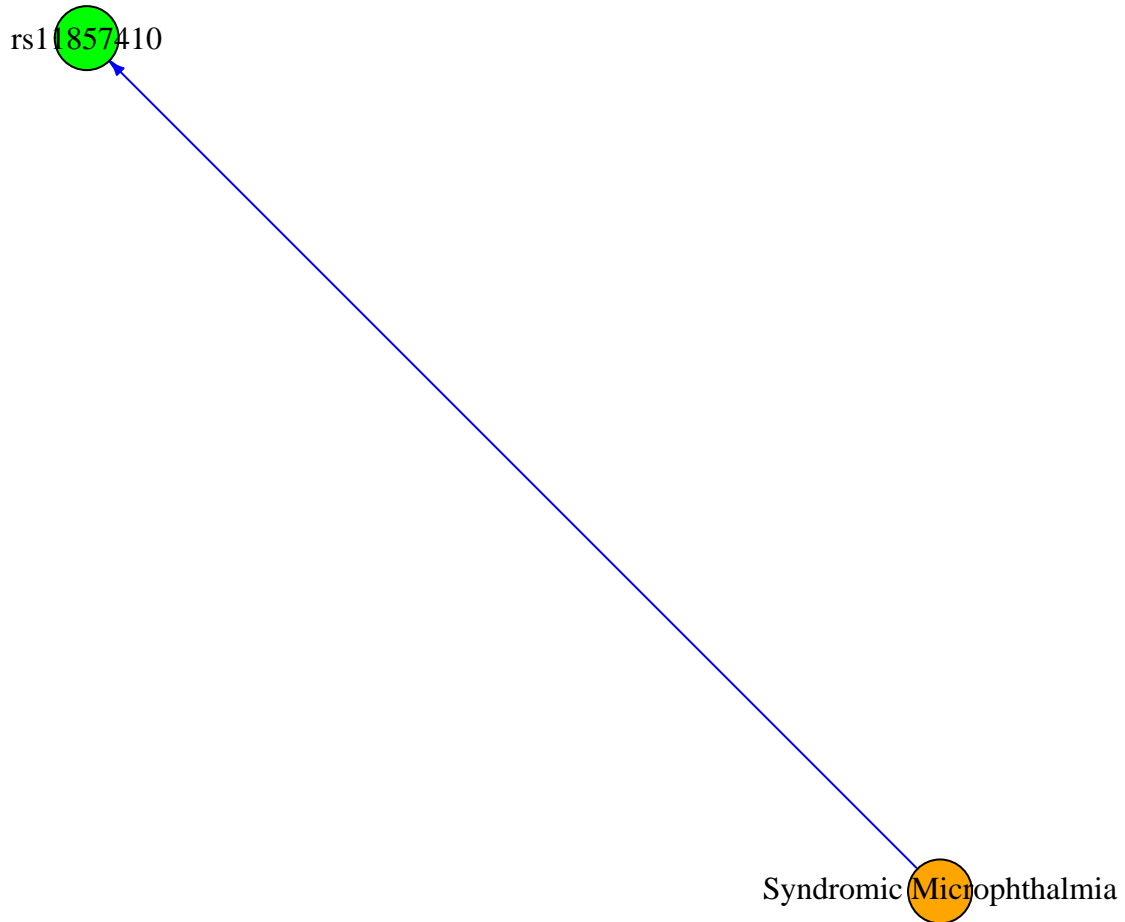

Variant–Disease Network (Tangier disease)

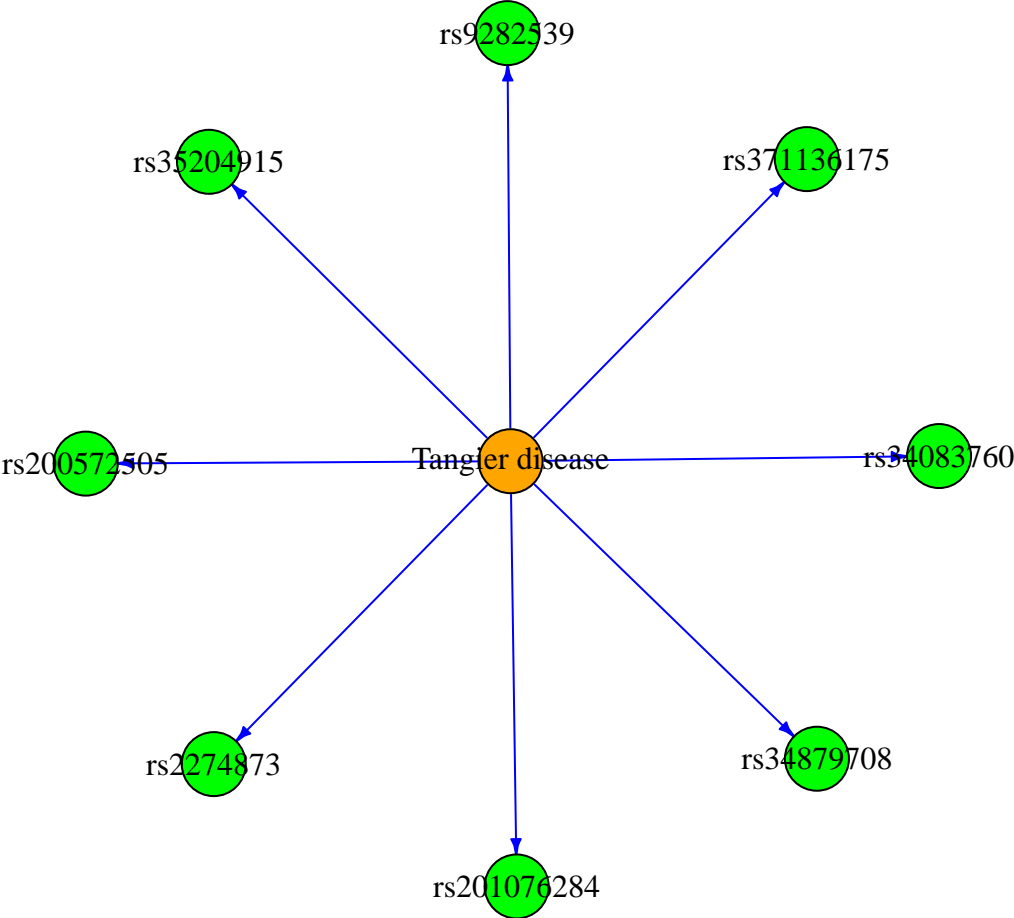

Variant-Disease Network (Tay-Sachs disease)

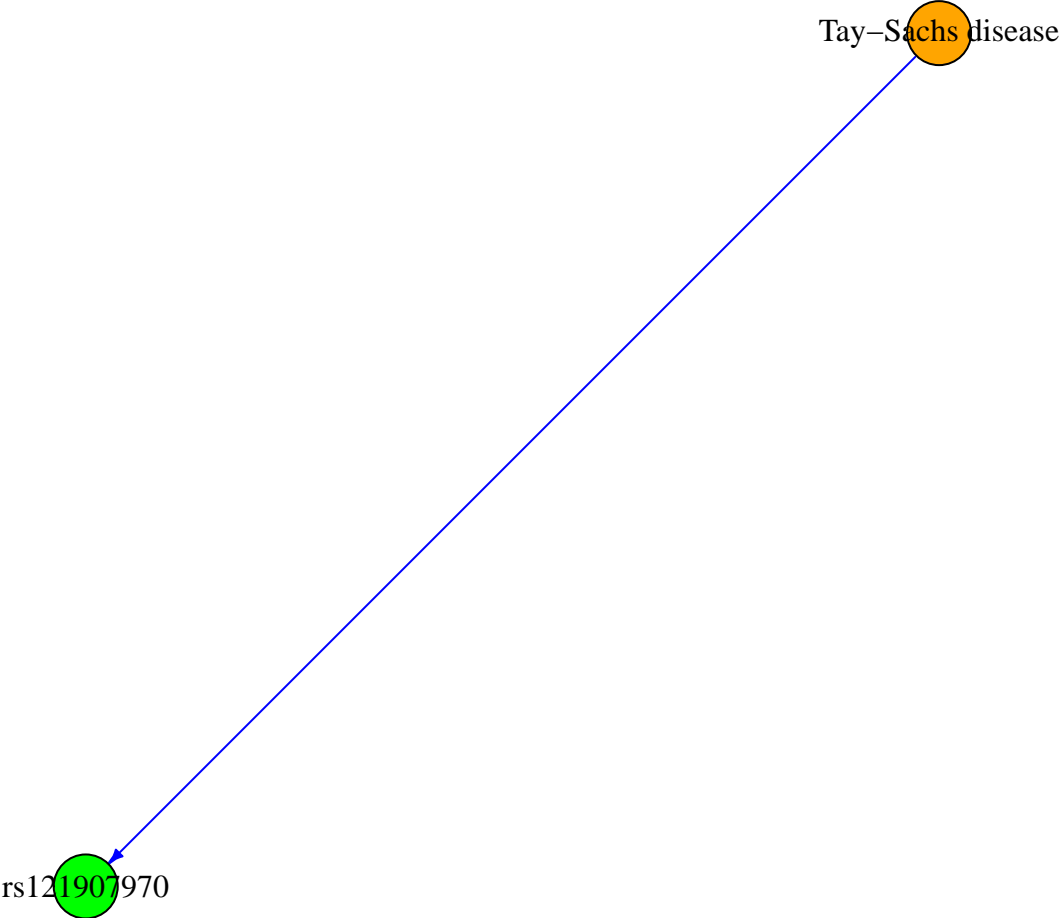

Variant–Disease Network (T–cell immunodeficiency)

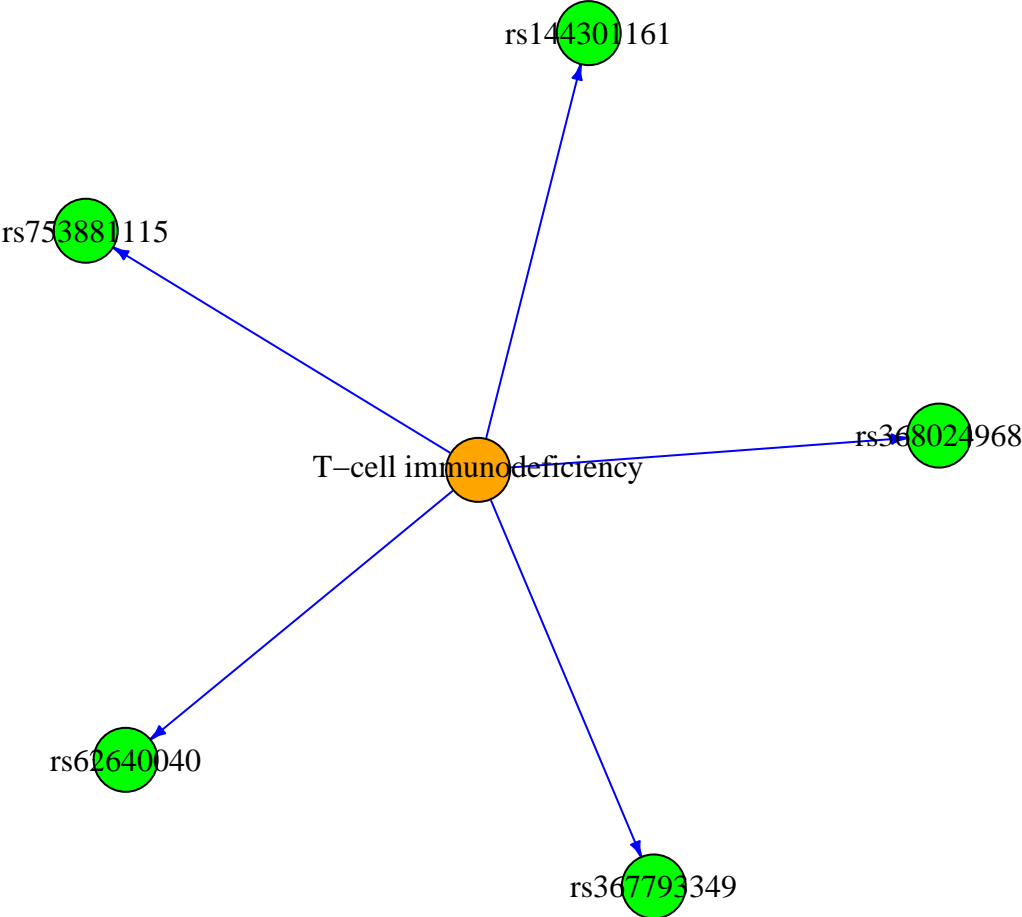

# nt-Disease Network (T-cell immunodeficiency with epidermodysplasia verru

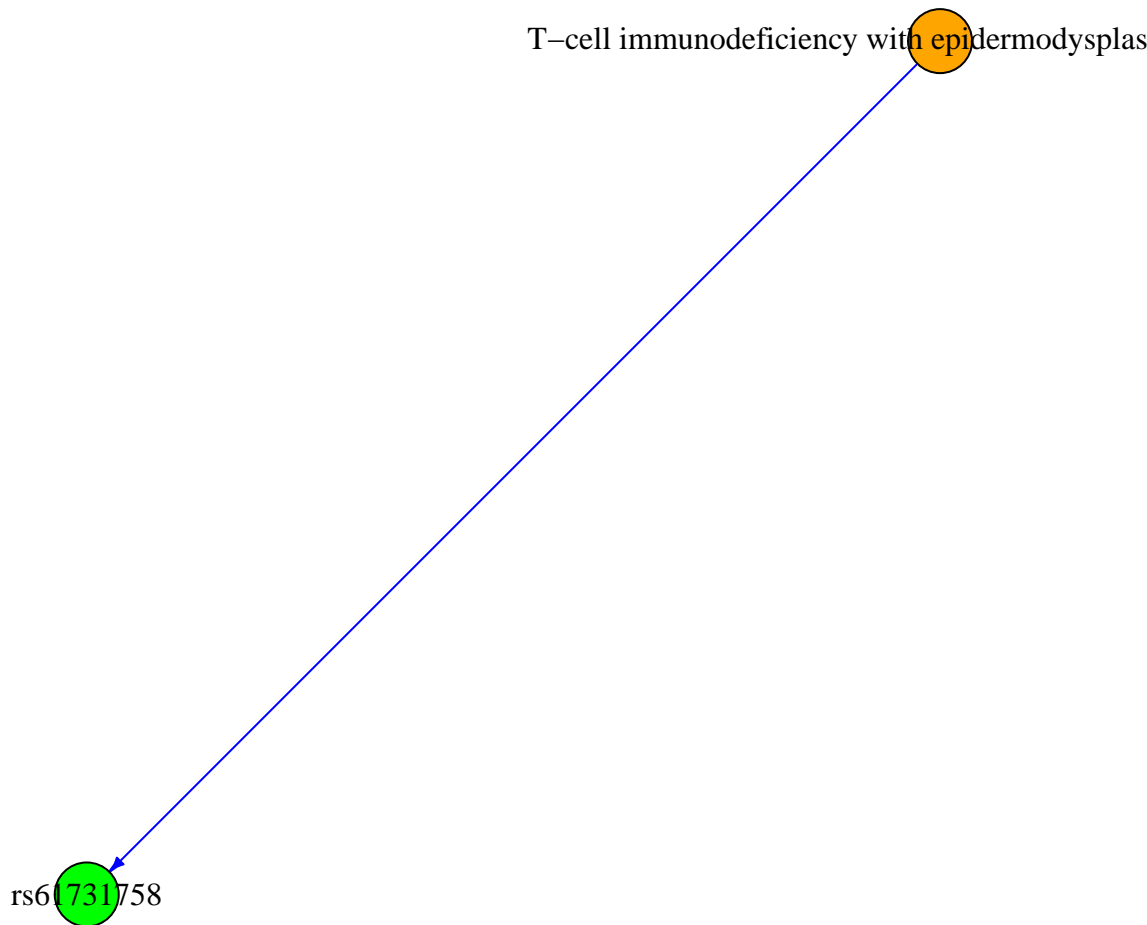



Variant–Disease Network (Telangiectasia)

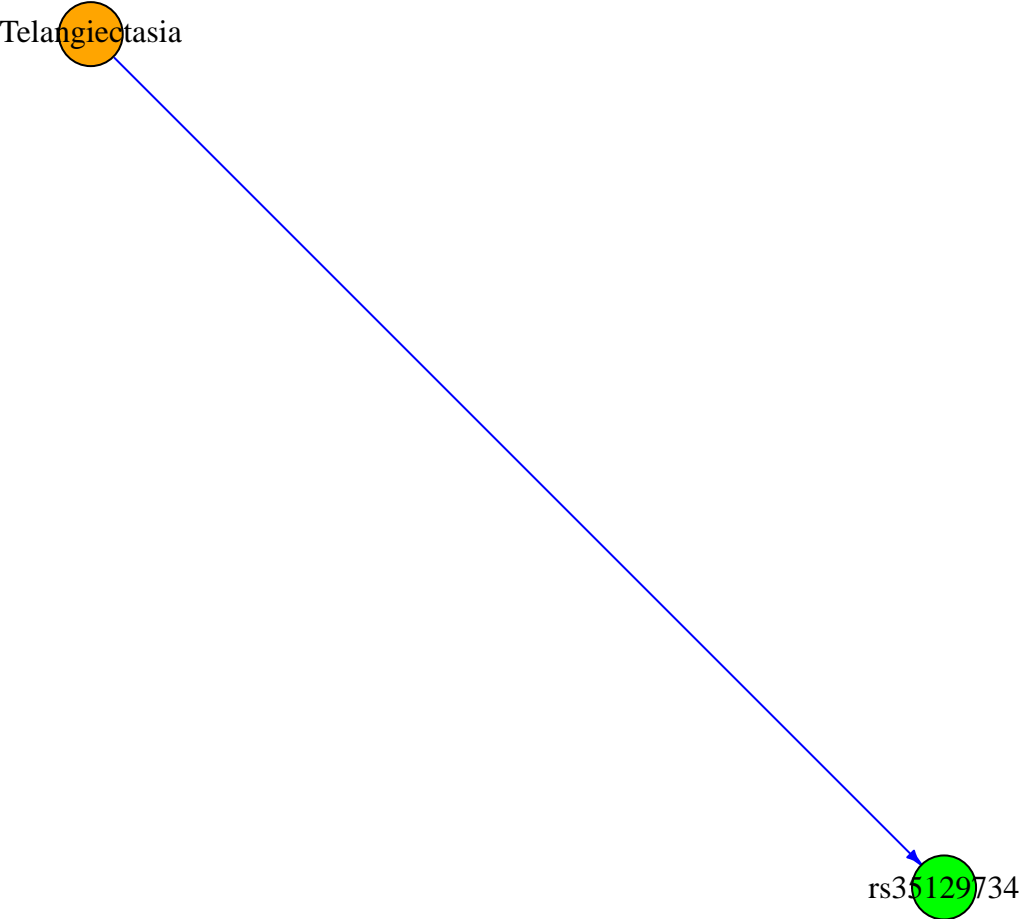

**Variant–Disease Network (Temtamy preaxial brachydactyly syndrome)**

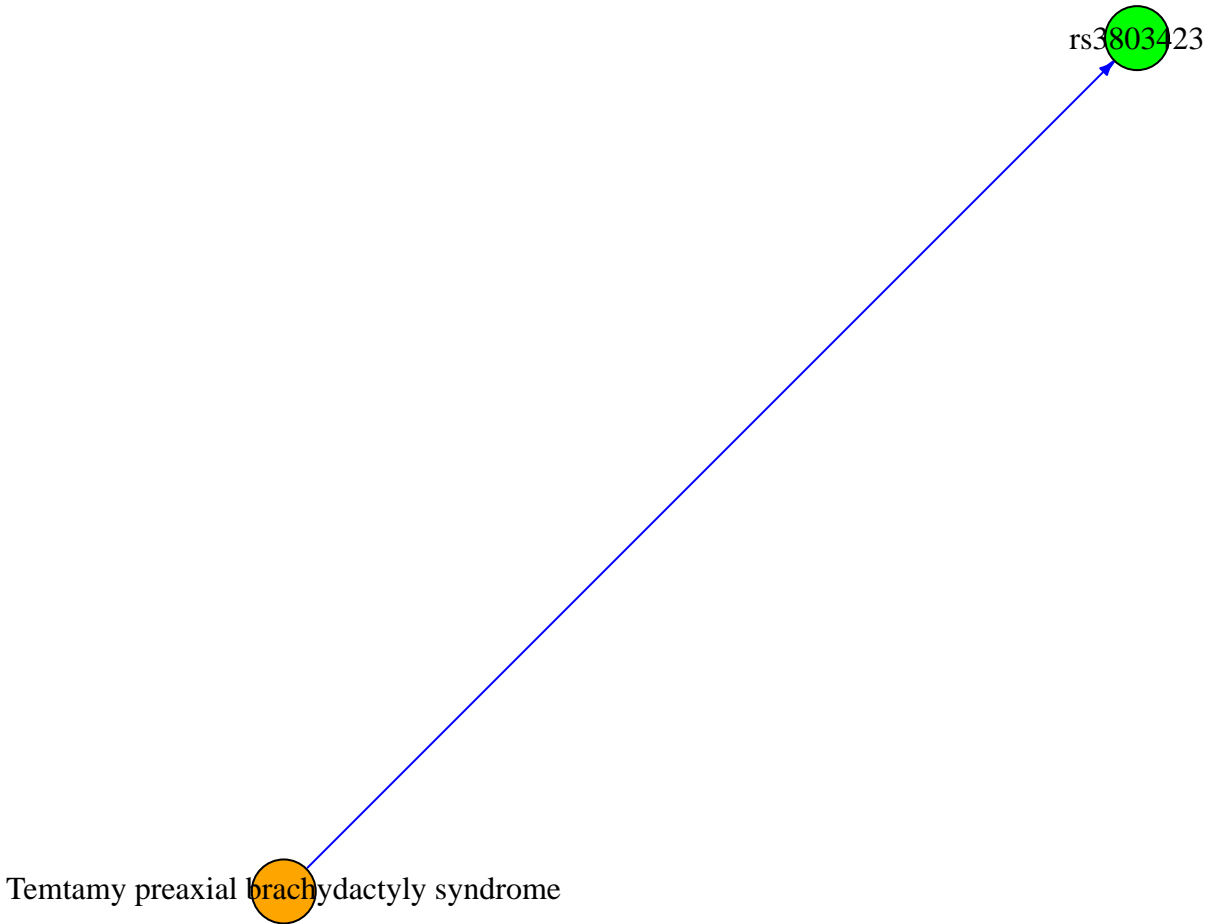

## Variant–Disease Network (Temtamy syndrome)

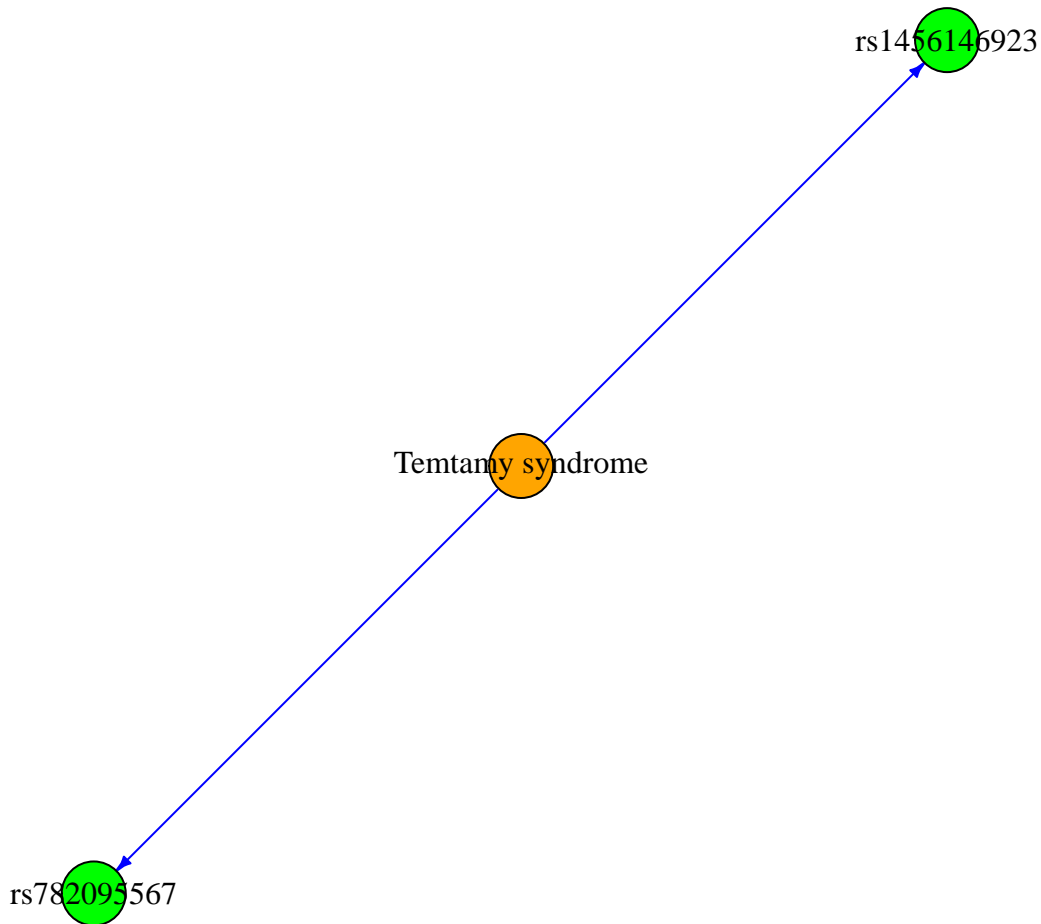

## Variant-Disease Network (Thoracic aortic aneurysm and aortic dissection)

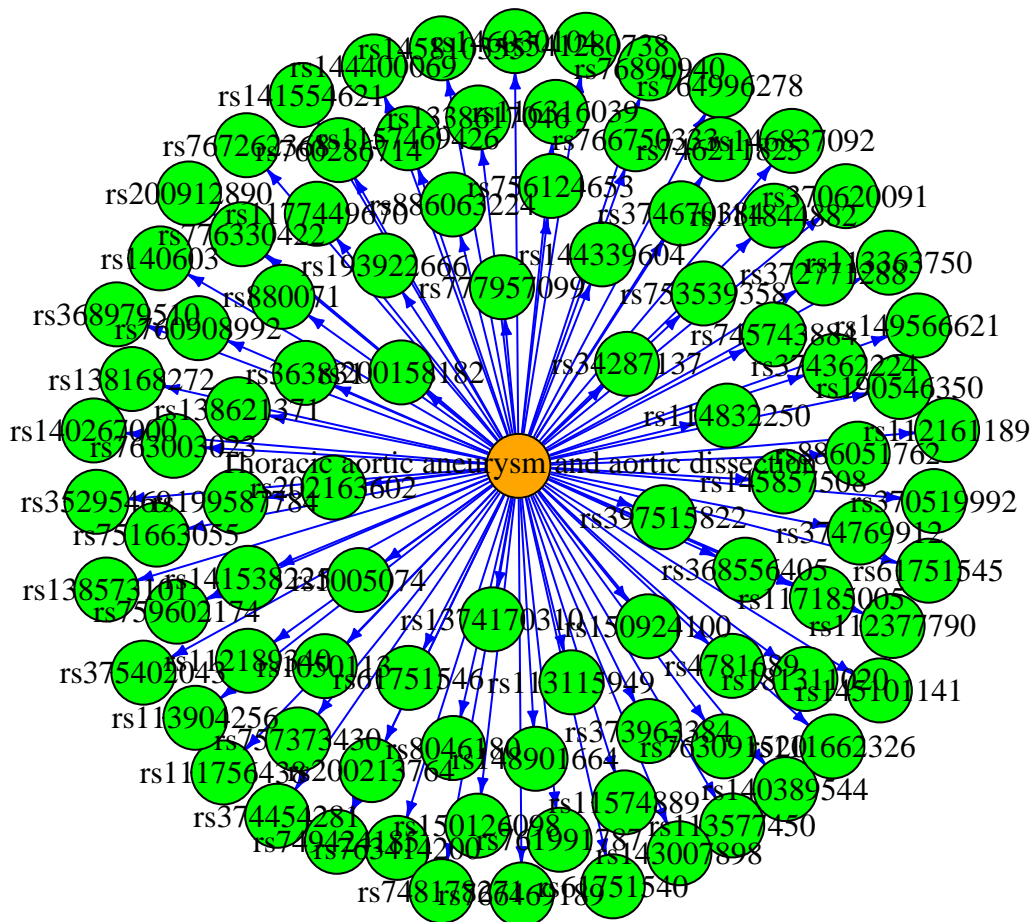

## Variant–Disease Network (Three M syndrome)

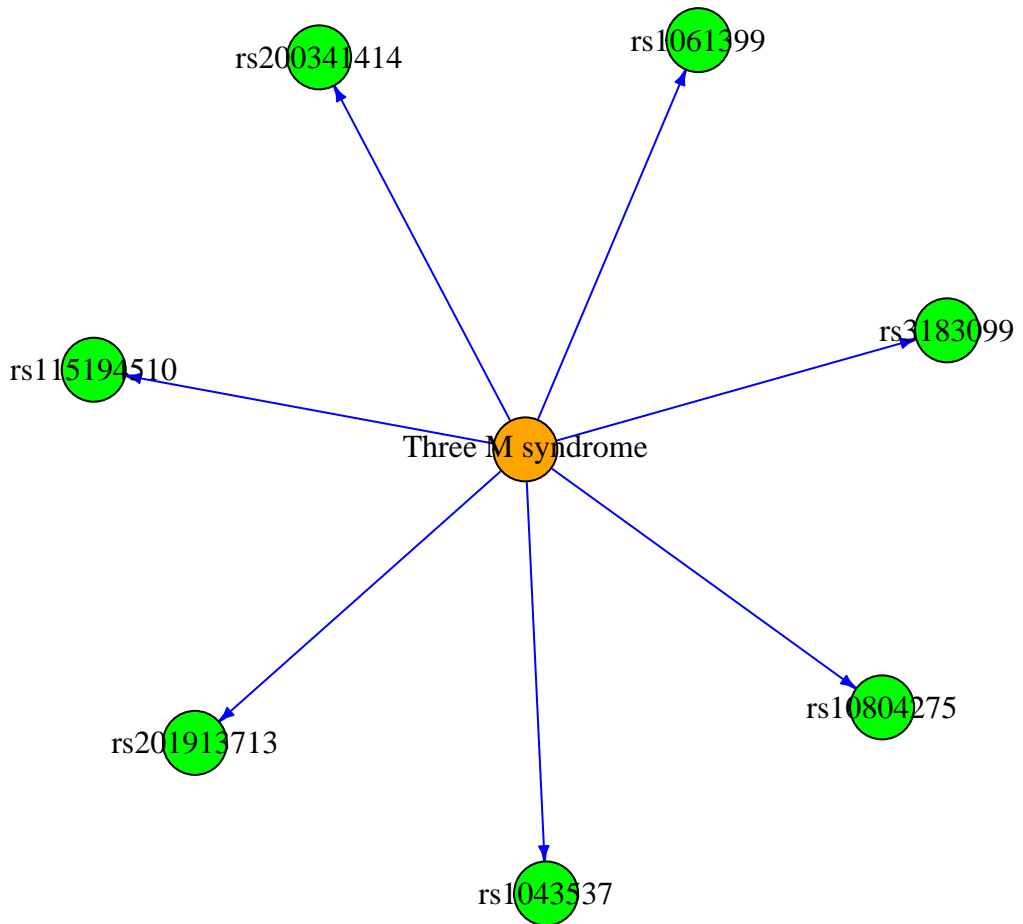

## Variant-Disease Network (Thrombocythemia 1)

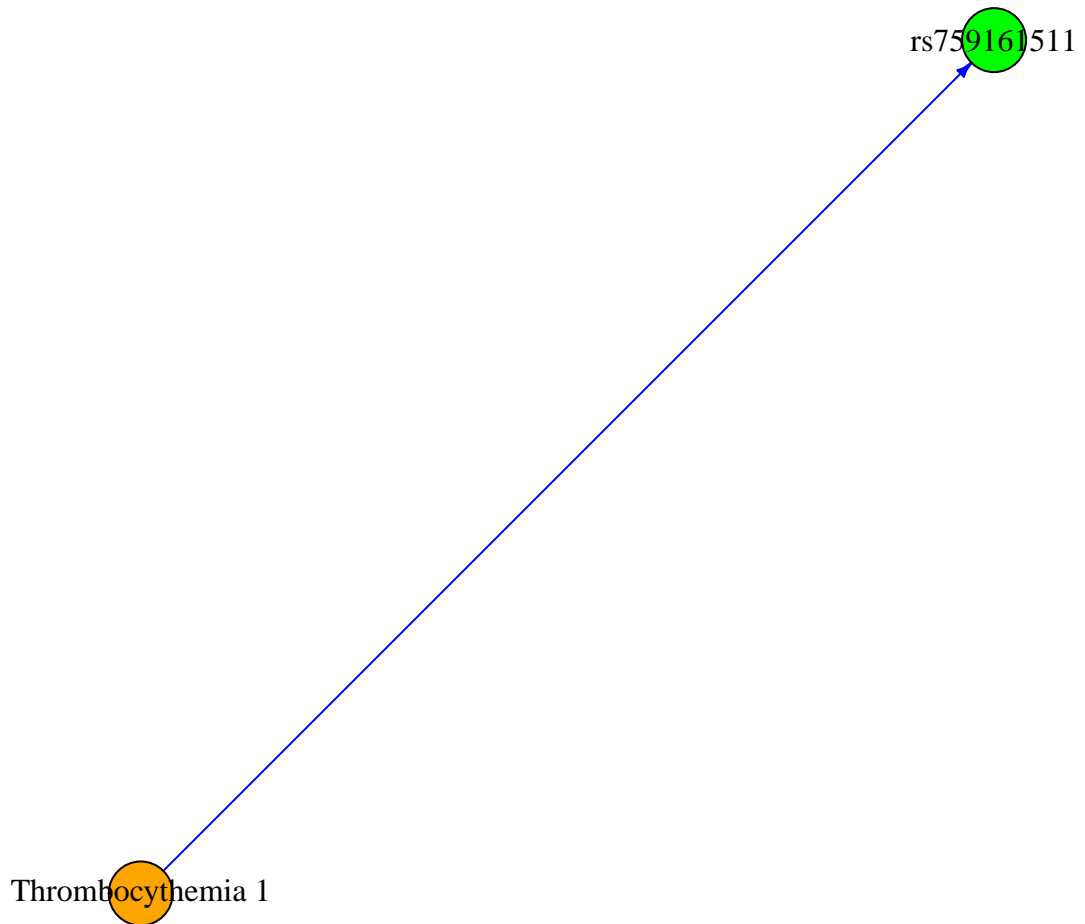

Variant–Disease Network (Thrombophilia)

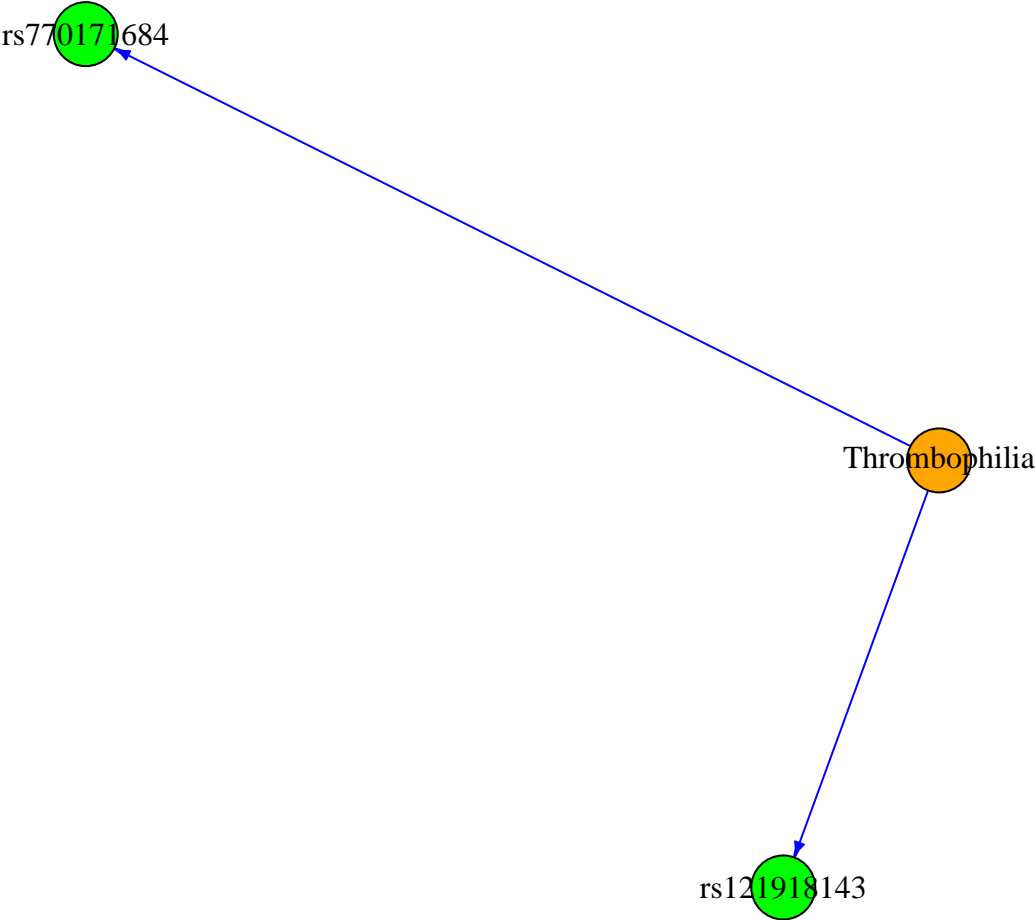

**Variant–Disease Network (Thrombophilia due to protein S deficiency)**

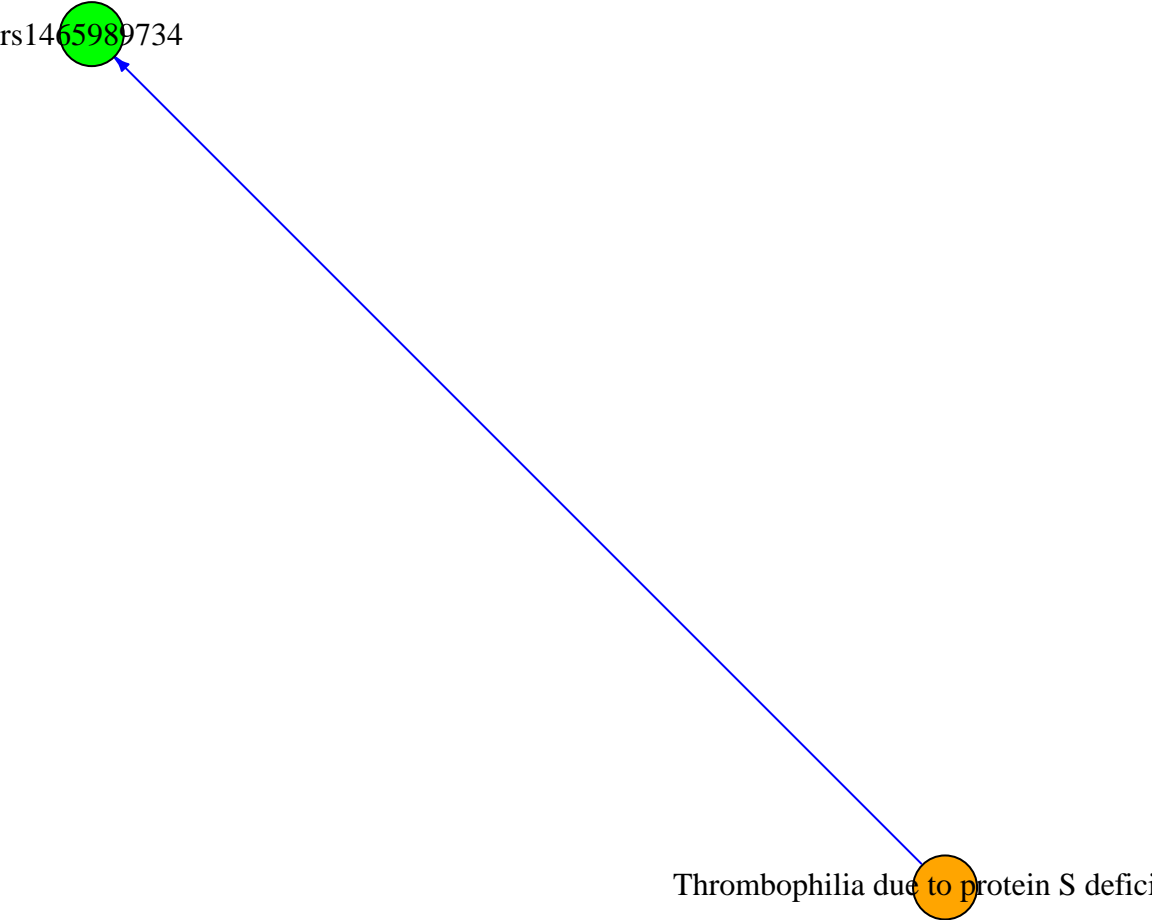



## Variant–Disease Network (Thyroid dysmorphogenesis)

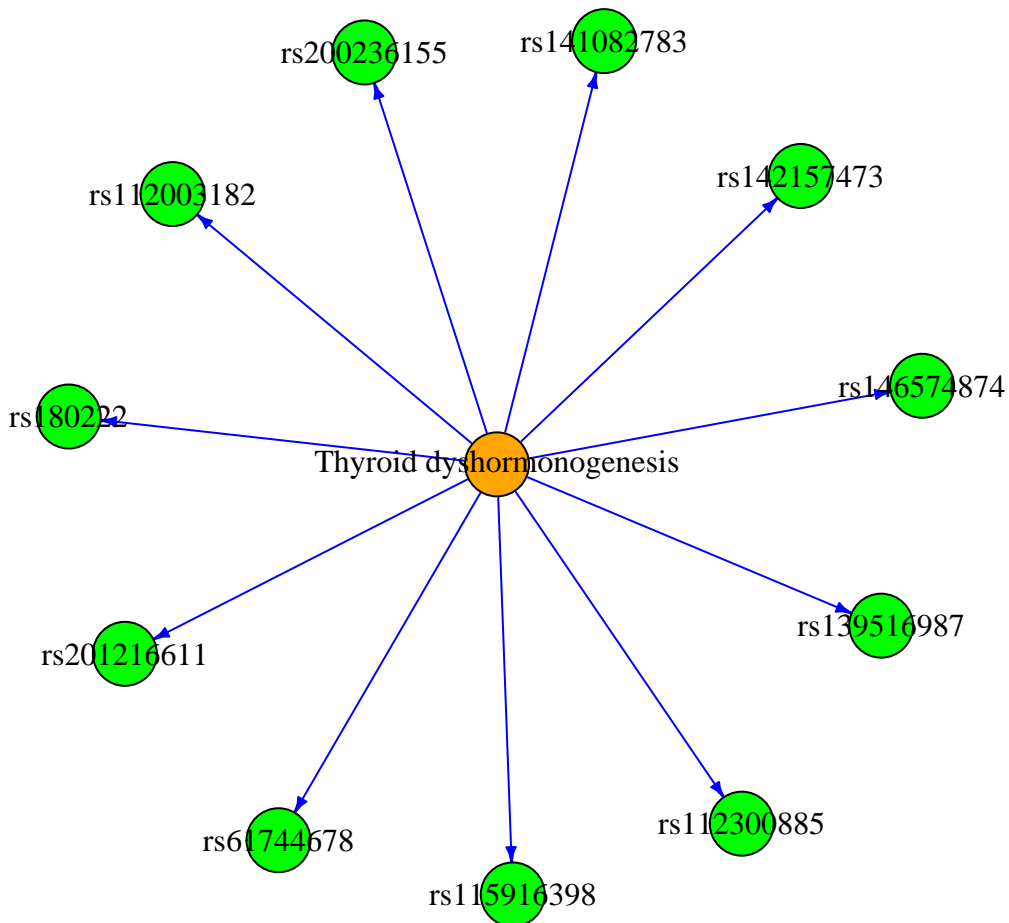

# Variant–Disease Network (Thyroid Hormone Resistance)

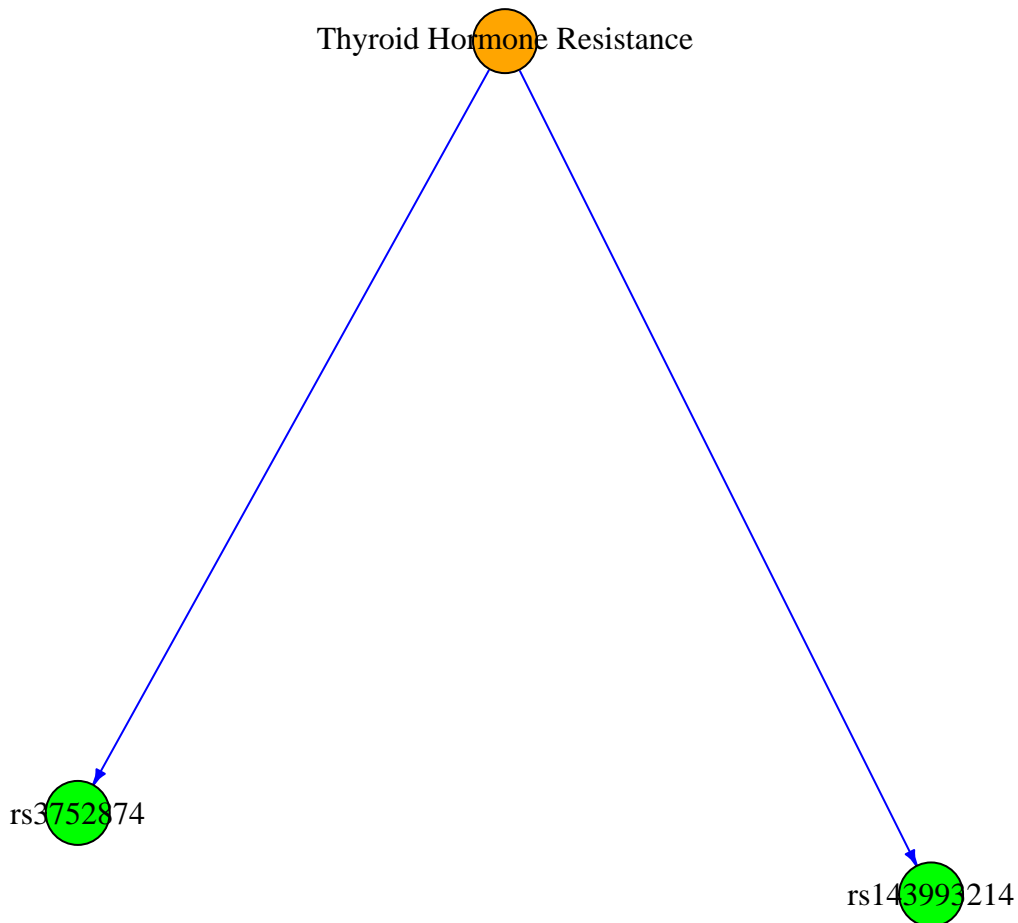

## Variant–Disease Network (Tobacco addiction)

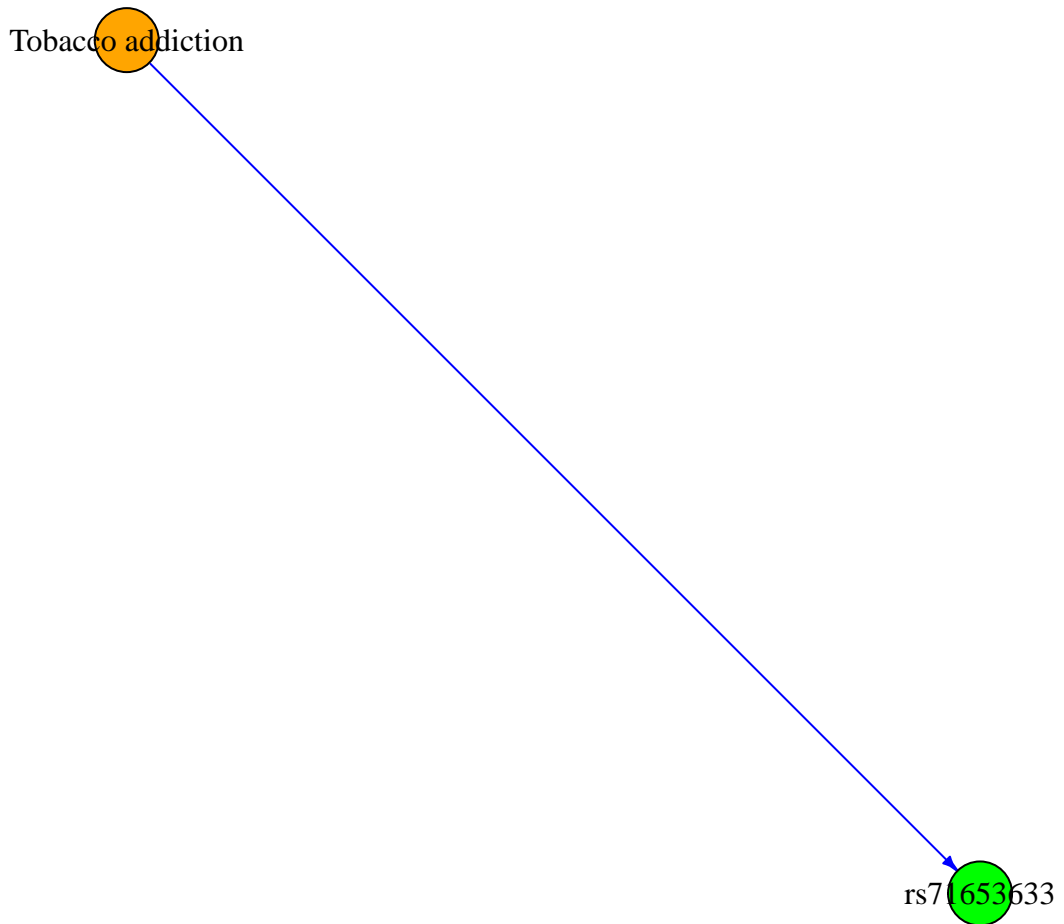

Variant–Disease Network (Transient Neonatal Diabetes)

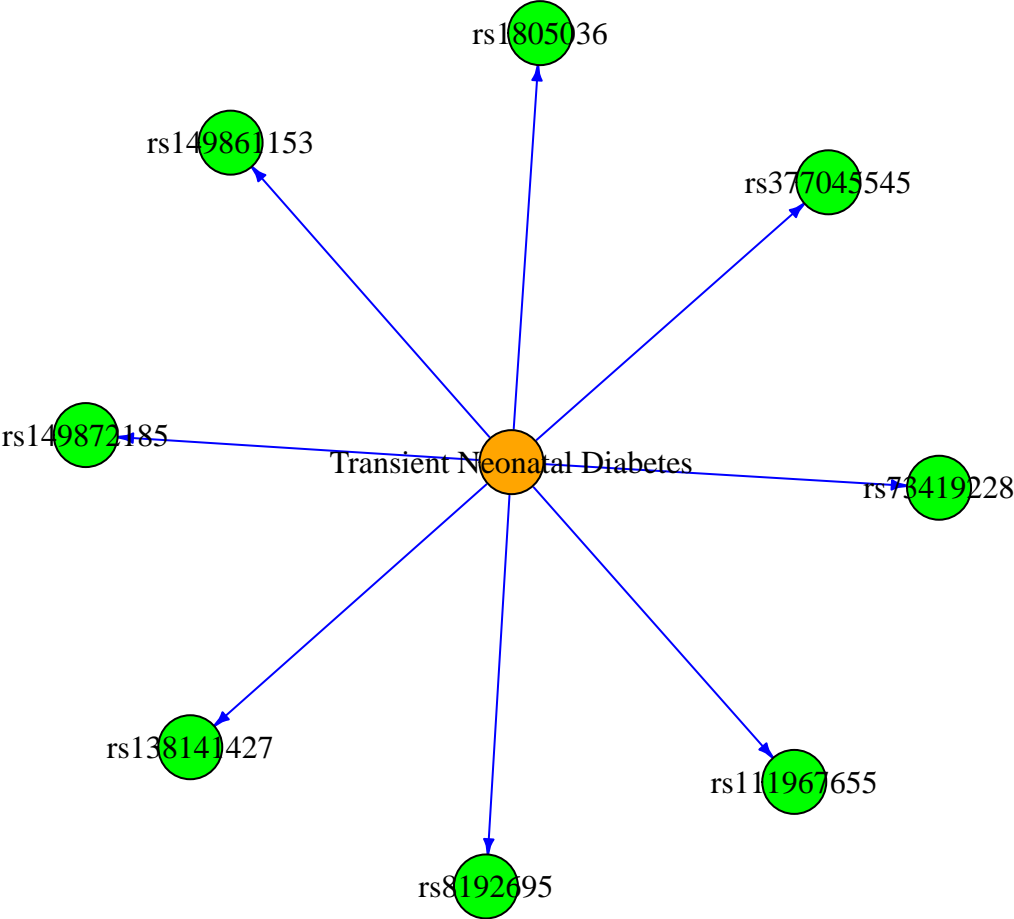

# Variant–Disease Network (Transitional cell carcinoma of the bladder)

rs34968276

Transitional cell carcinoma of the bladder

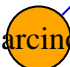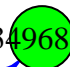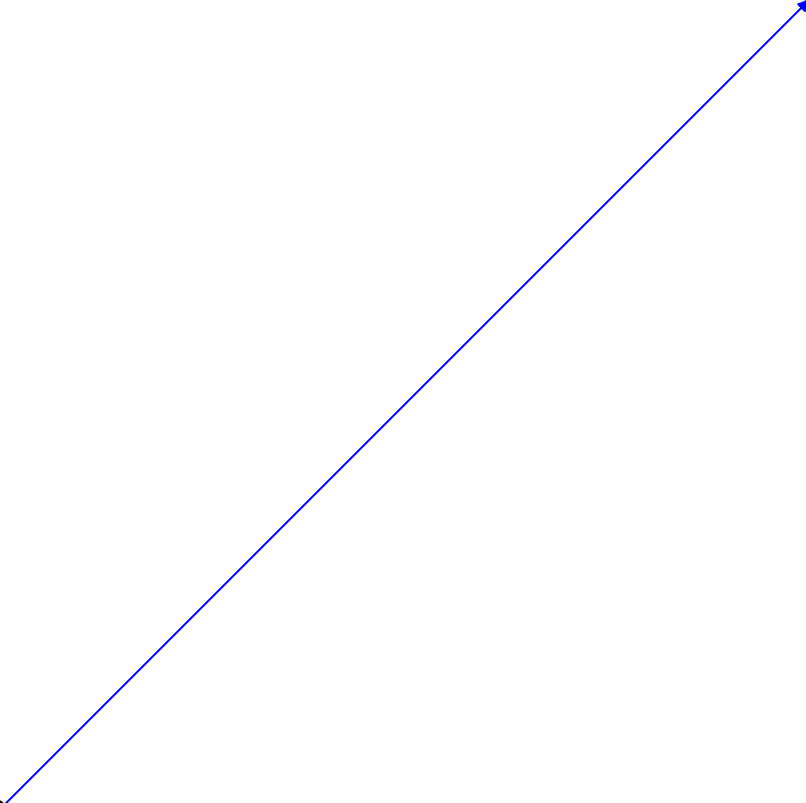

**Variant–Disease Network (Transposition of the great arteries)**

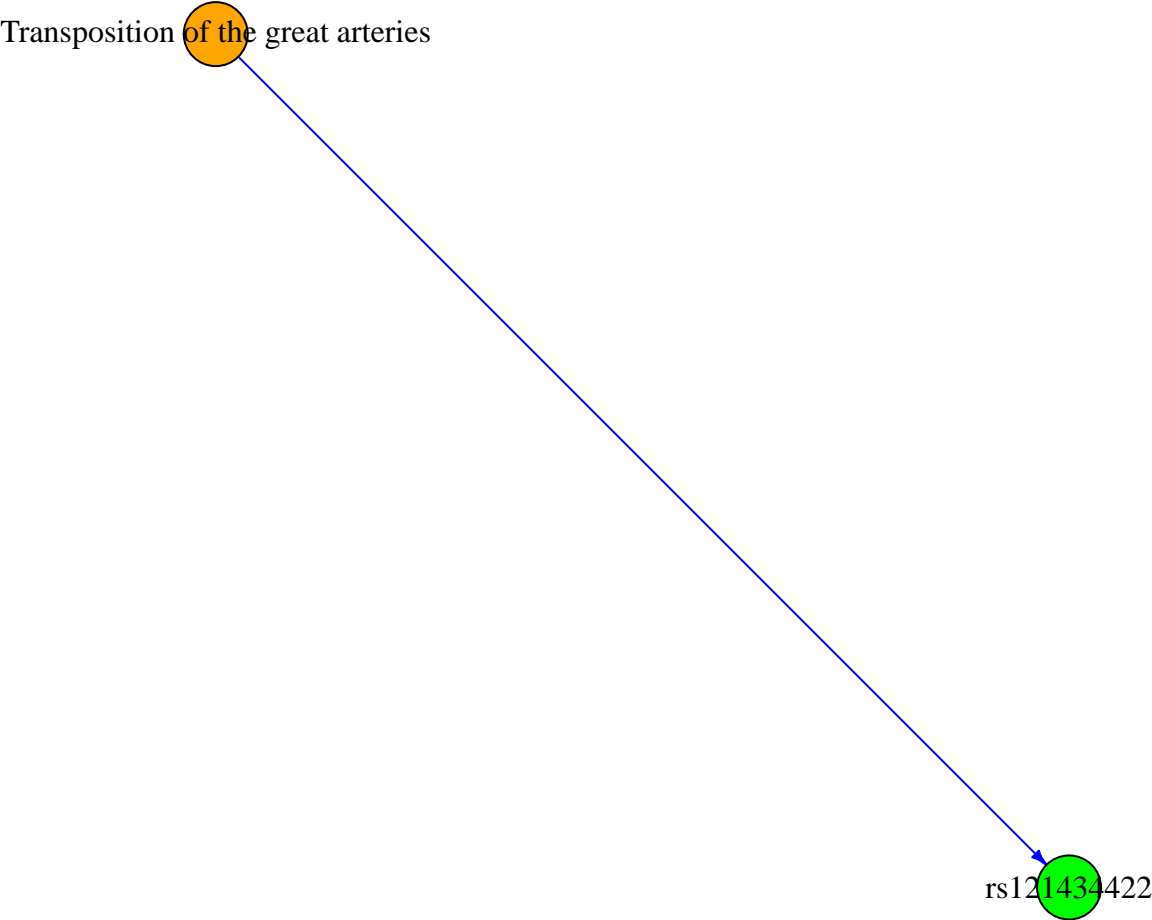

## Variant–Disease Network (Treacher Collins Syndrome)

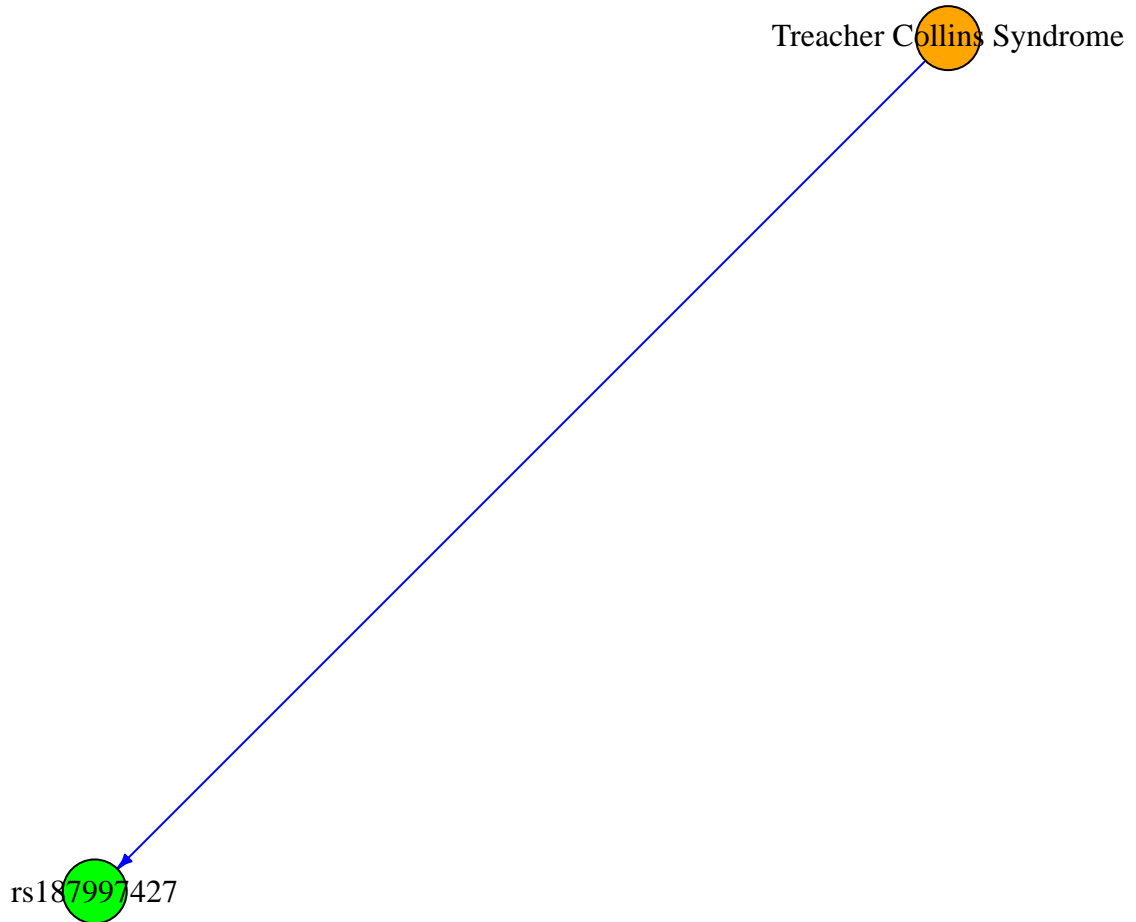

Variant–Disease Network (Trichoepithelioma multiple familial 2)

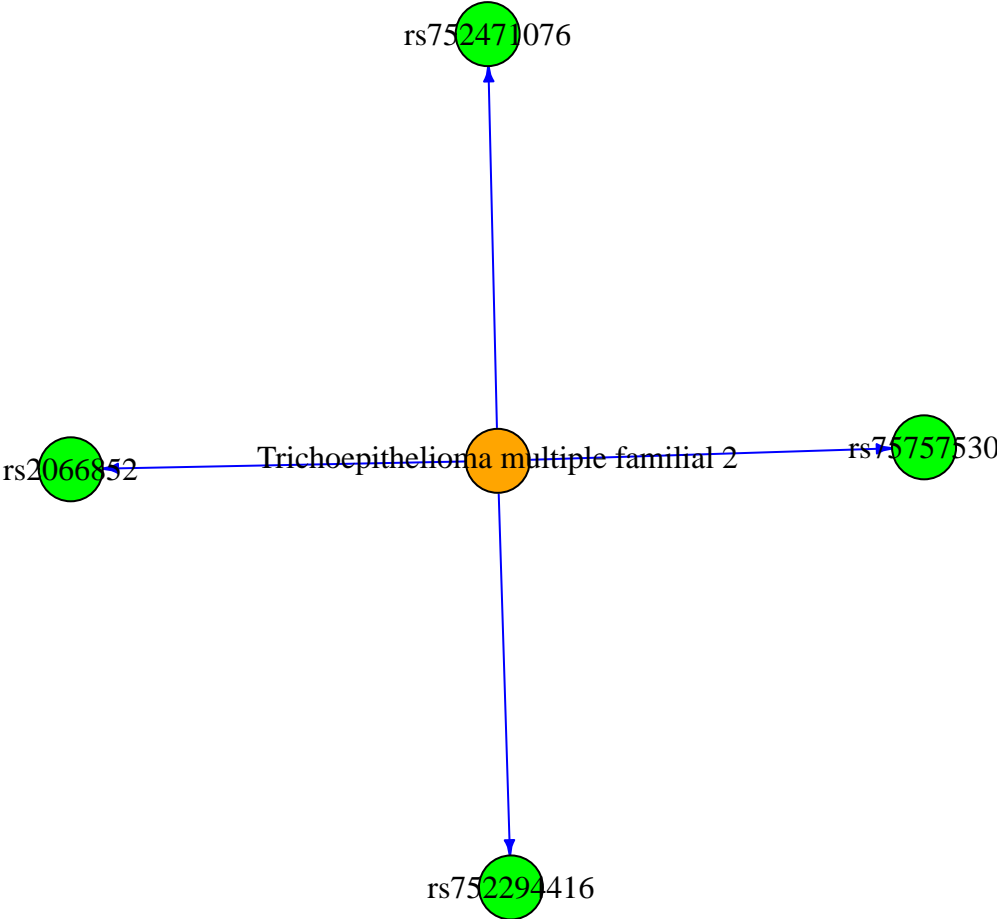



**Variant–Disease Network (Trichohepatoenteric syndrome)**

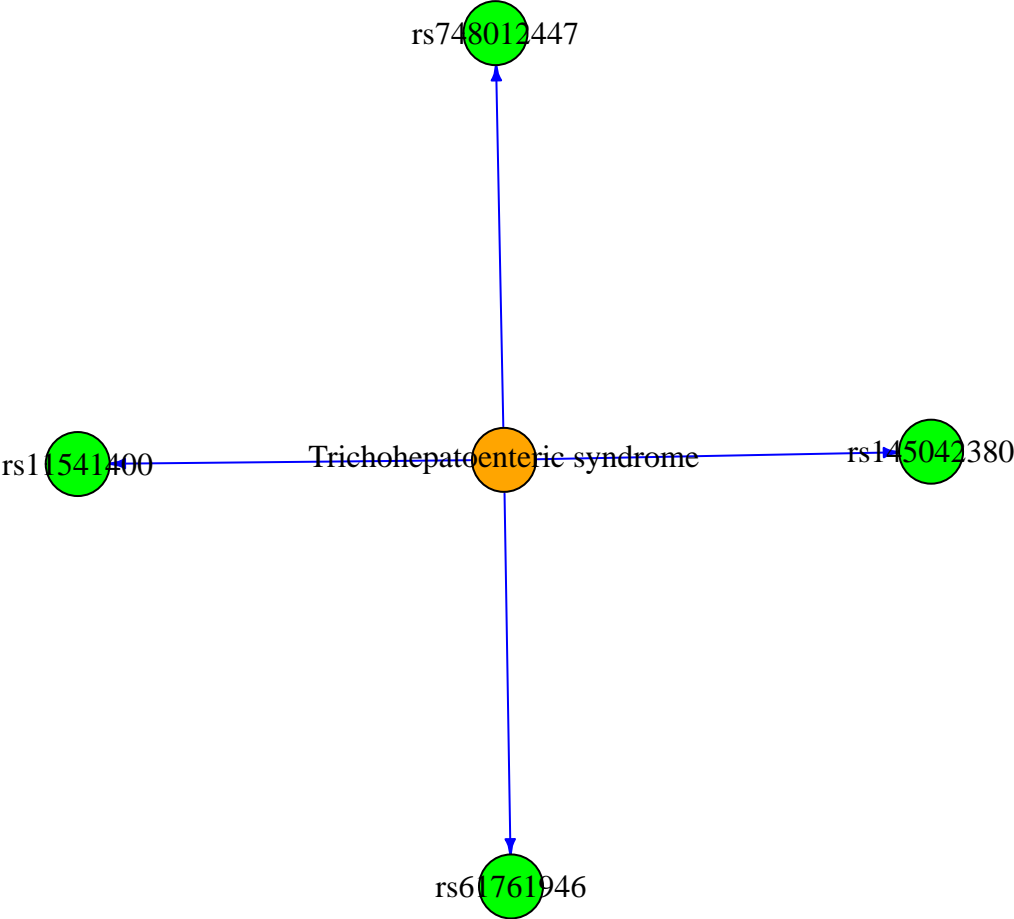

**Variant–Disease Network (Trichorhinophalangeal dysplasia type I)**

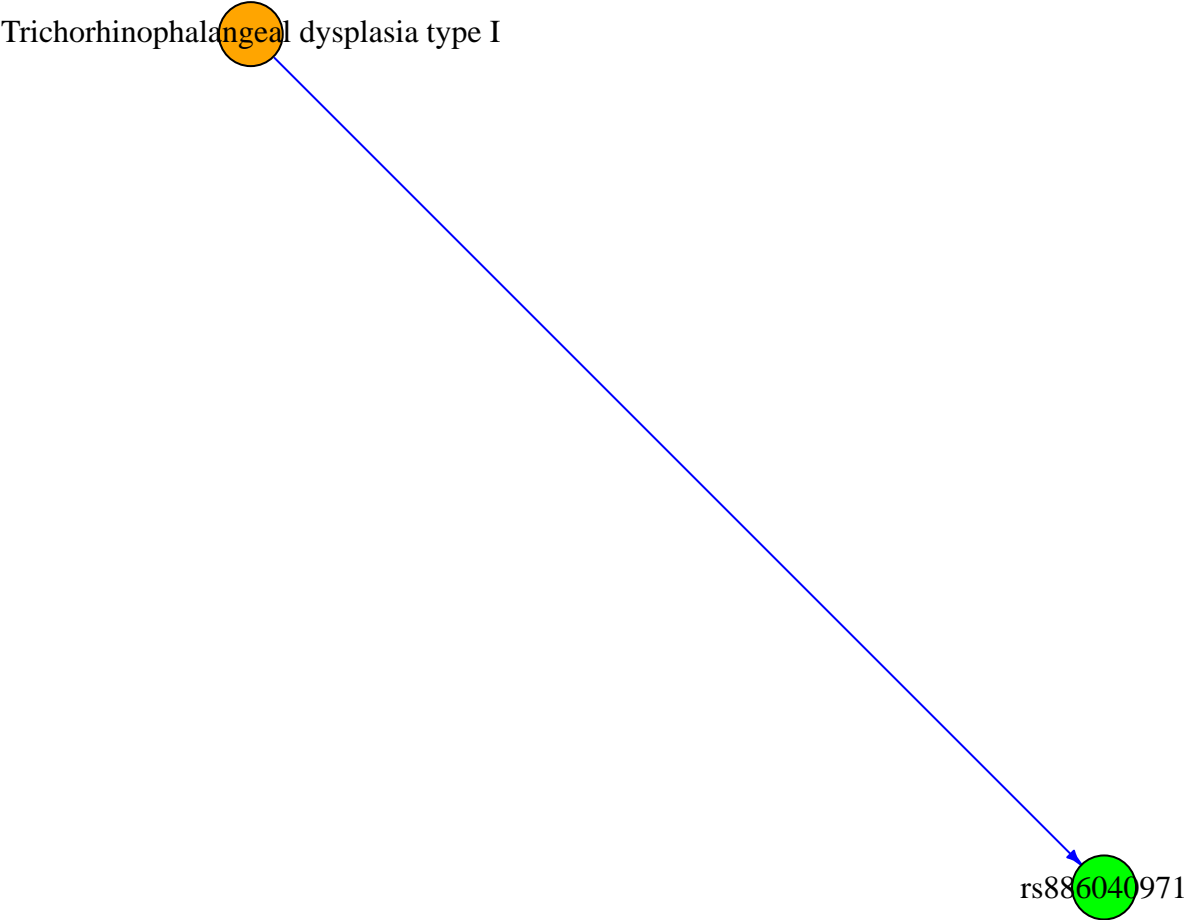

# Variant–Disease Network (Trichorhinophalangeal Syndrome)

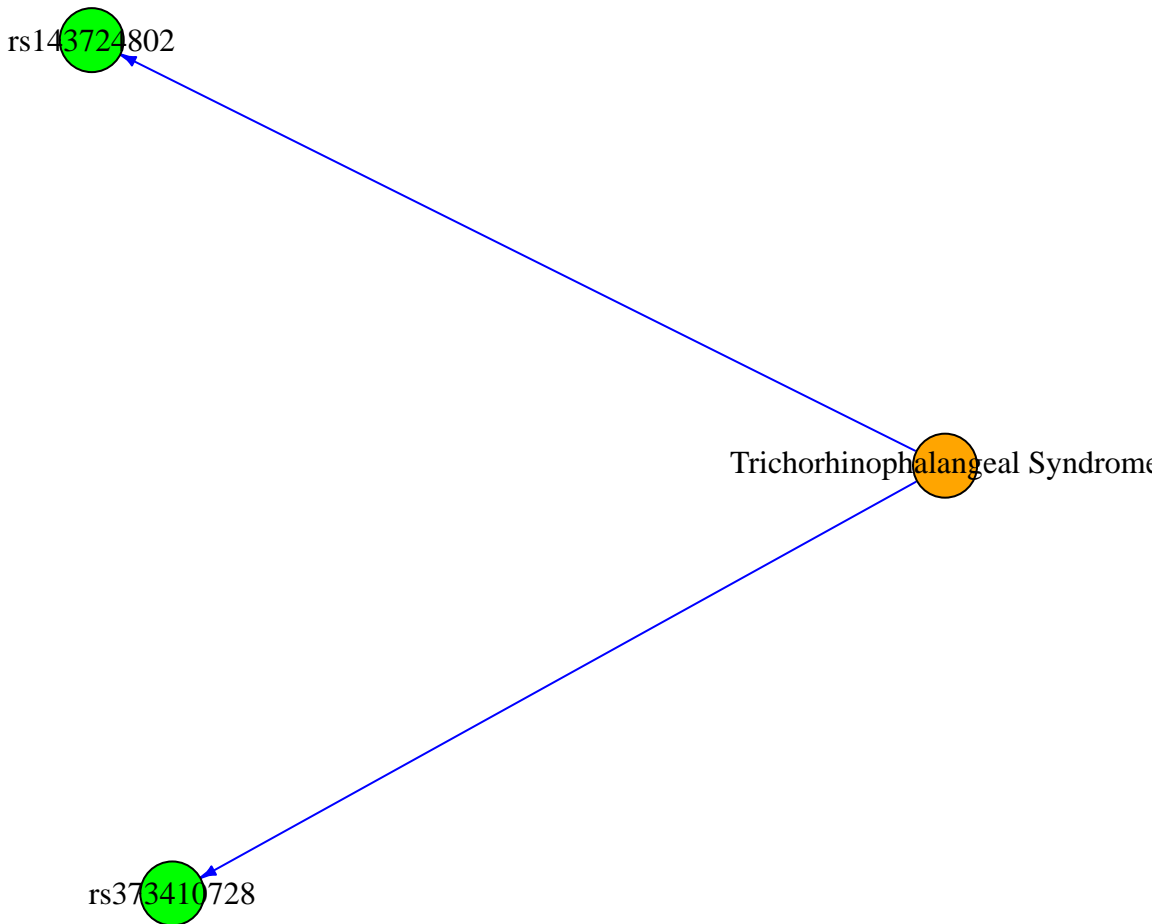

# Variant–Disease Network (Trichorhinophalangeal syndrome type 3)

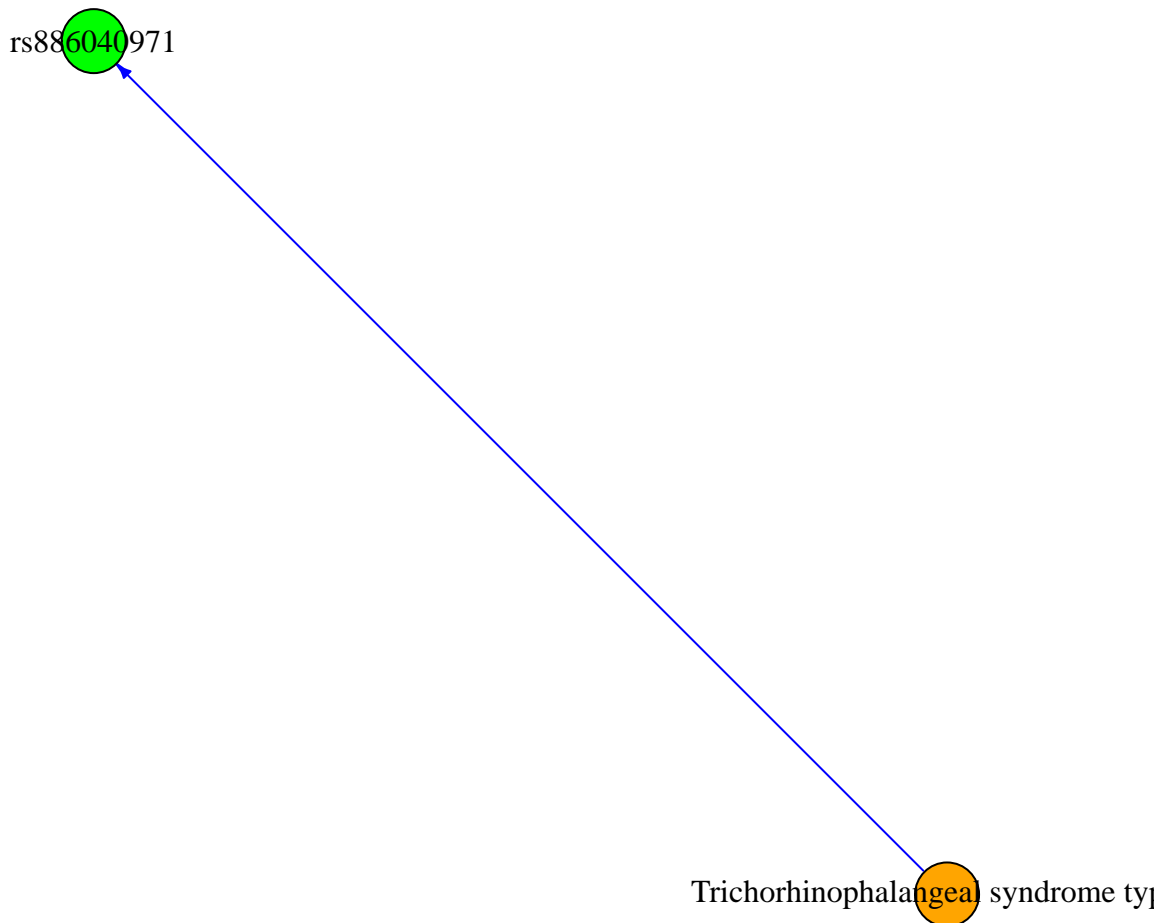

## Variant–Disease Network (Trimethylaminuria)

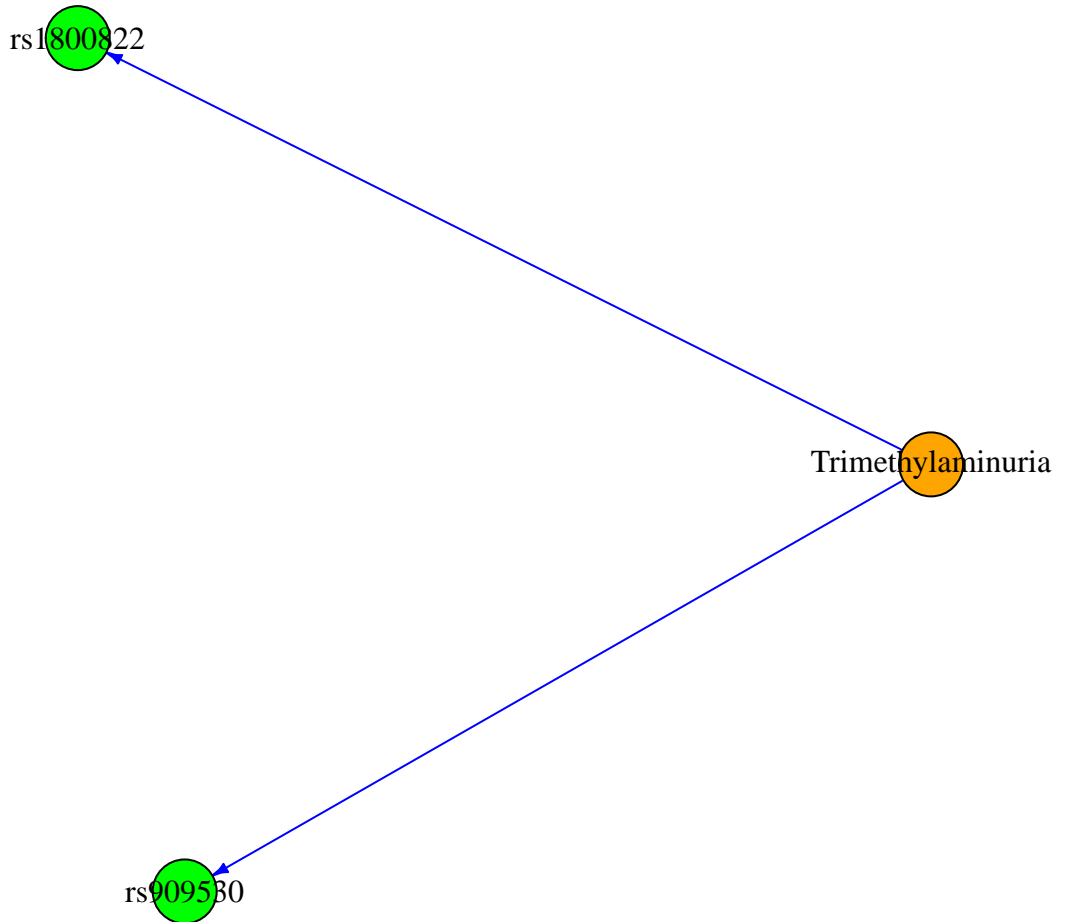

Variant–Disease Network (Tuberous sclerosis 1)

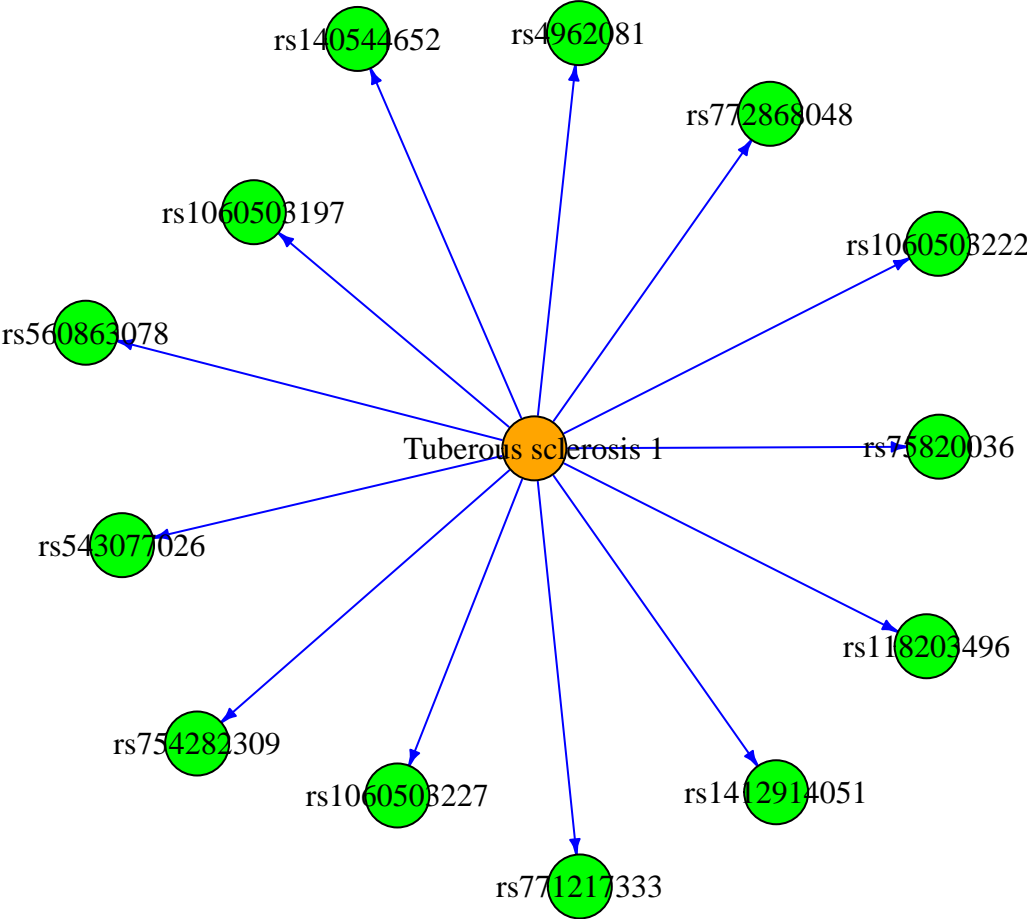

## Variant-Disease Network (Tuberous sclerosis 2)

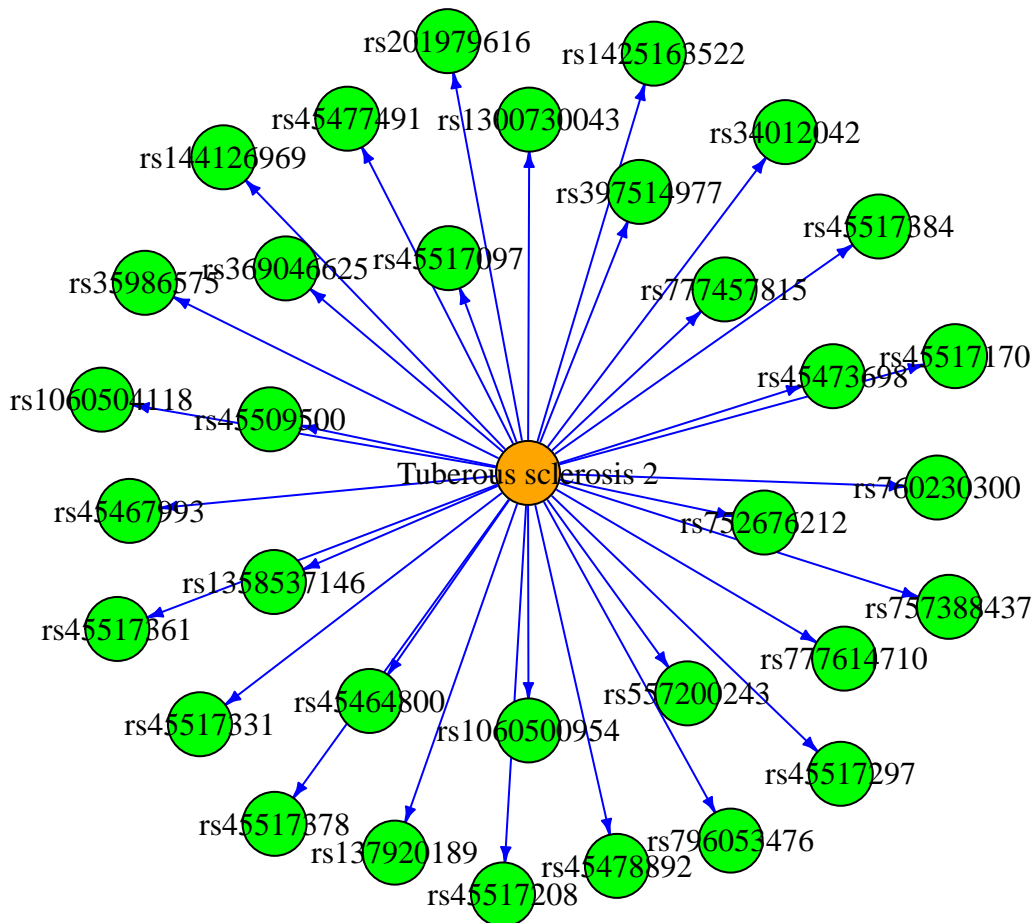

**Variant–Disease Network (Tuberous sclerosis syndrome)**

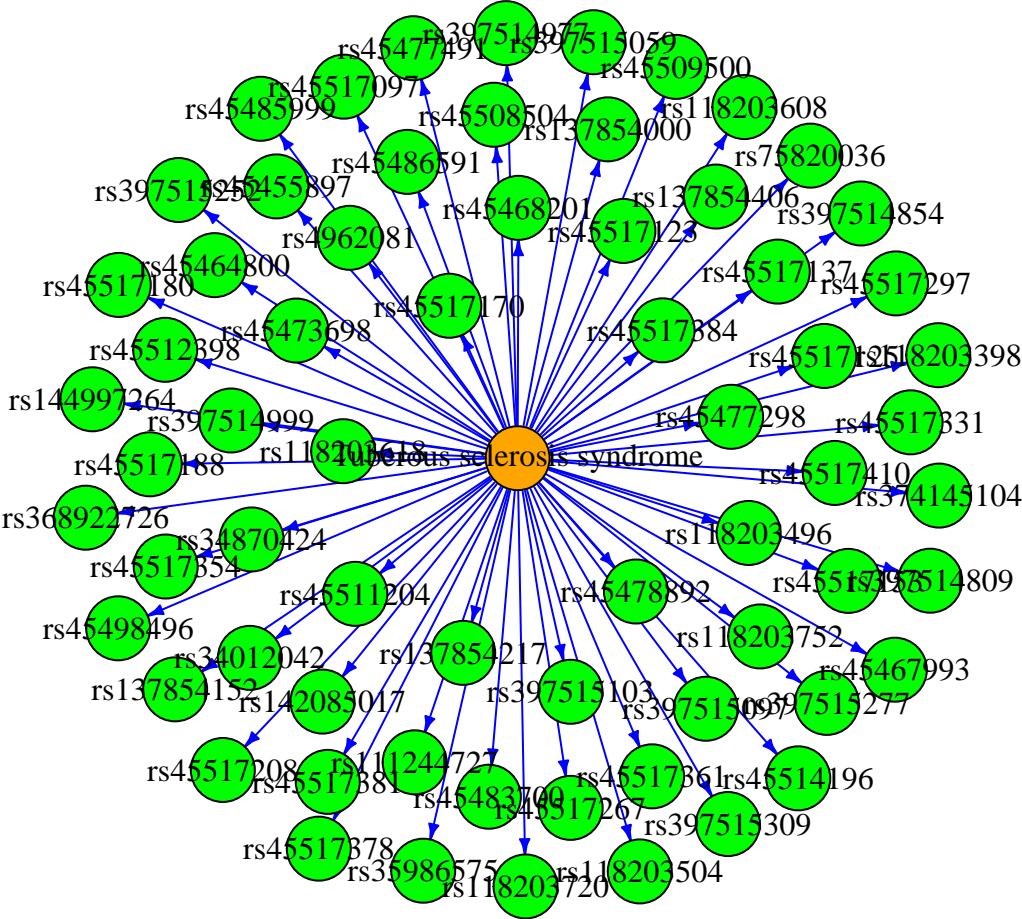



# Variant-Disease Network (Tumor susceptibility linked to germline BAP1 mutations)

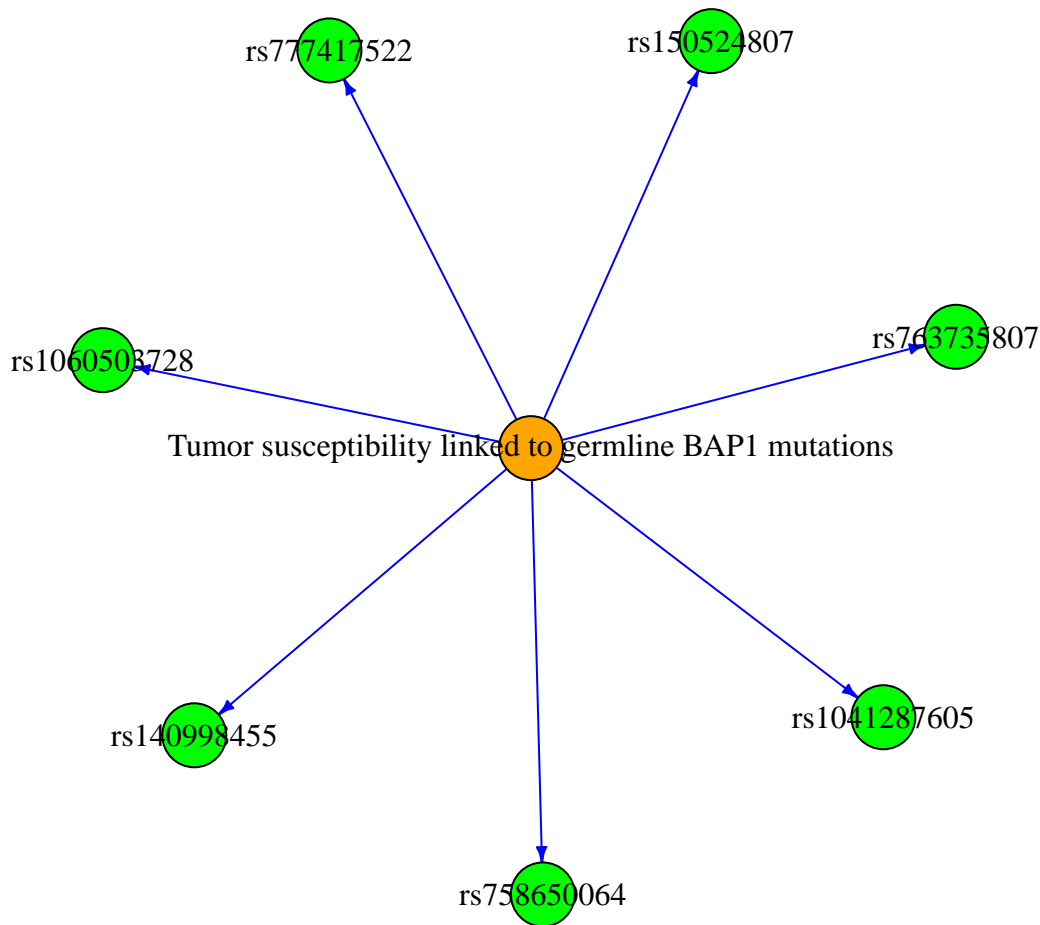

## Variant-Disease Network (Turcot syndrome)

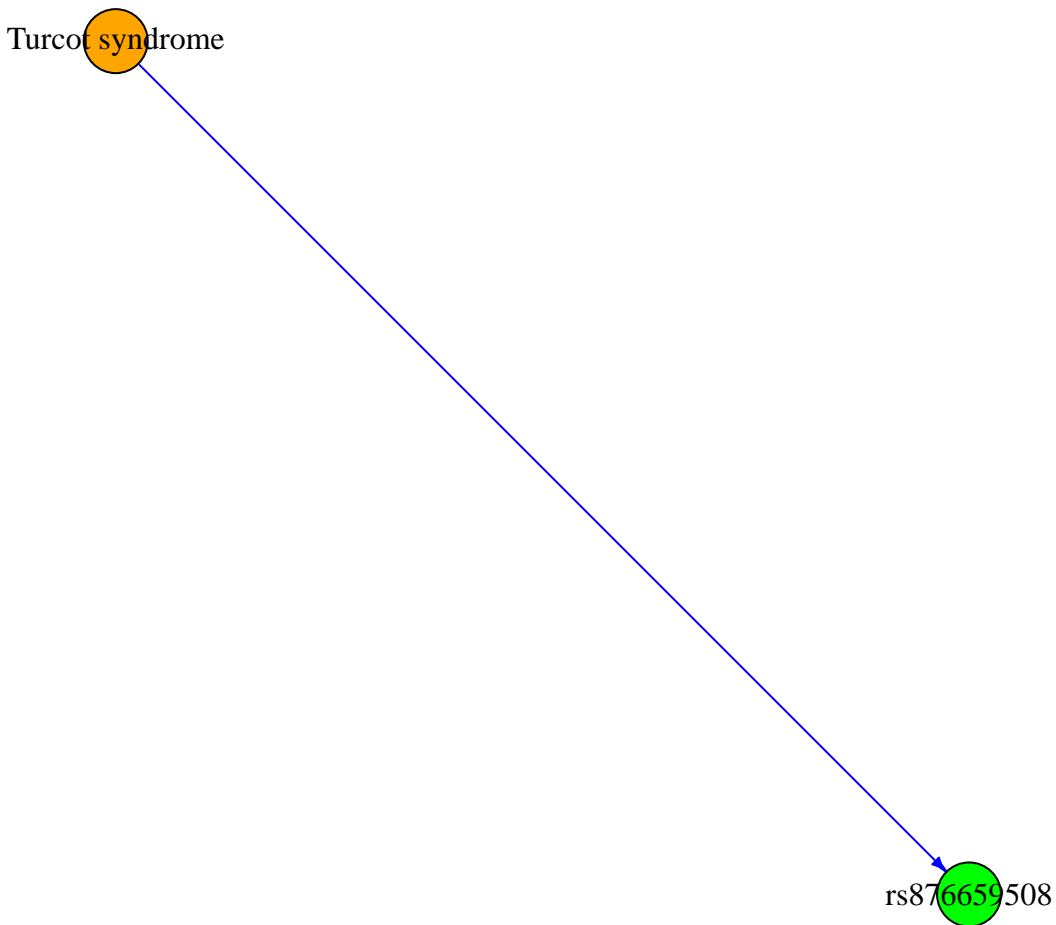

## Variant–Disease Network (Type II Collagenopathies)

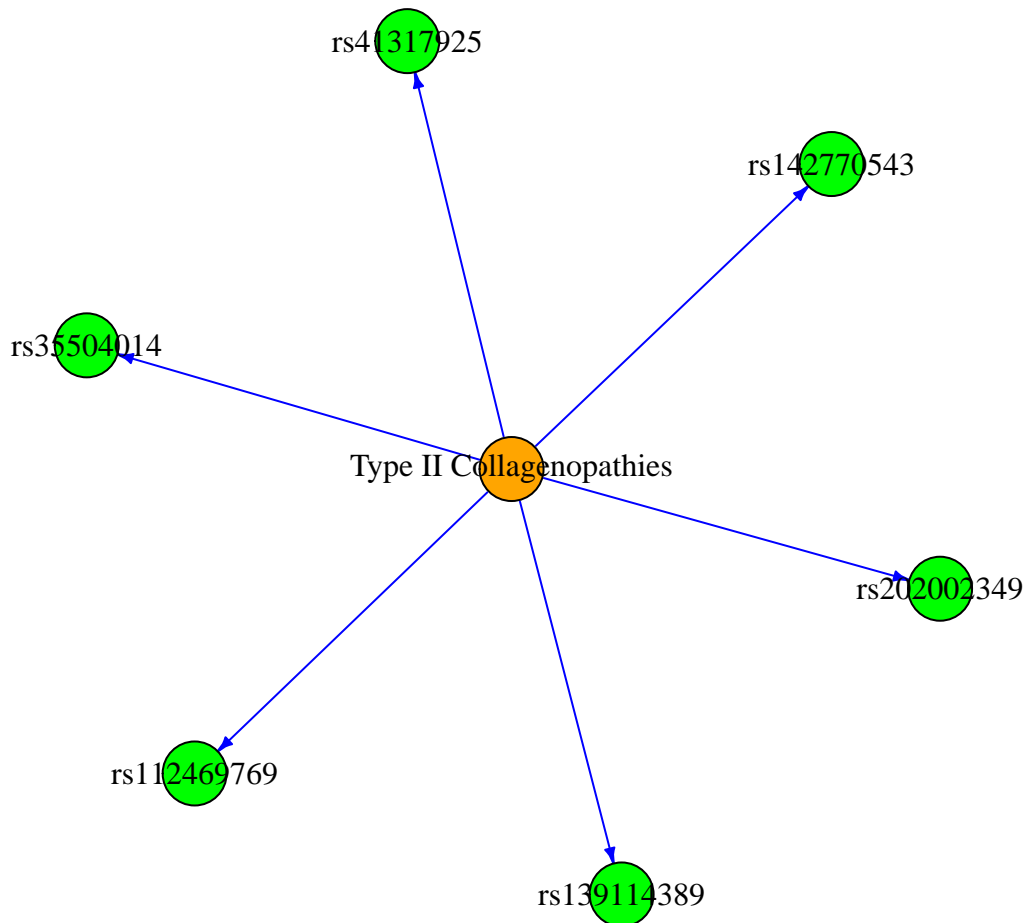

Variant–Disease Network (Tyrosinase–negative oculocutaneous albinism

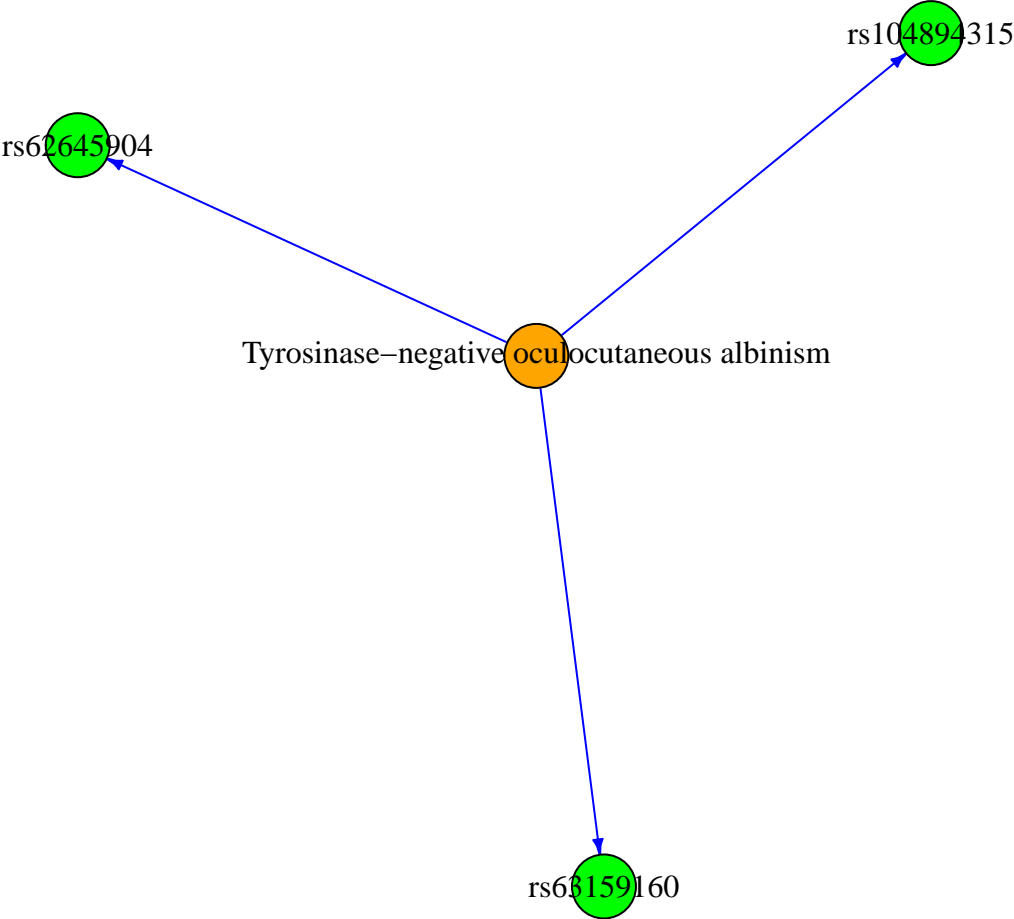

## Variant-Disease Network (Tyrosine kinase 2 deficiency)

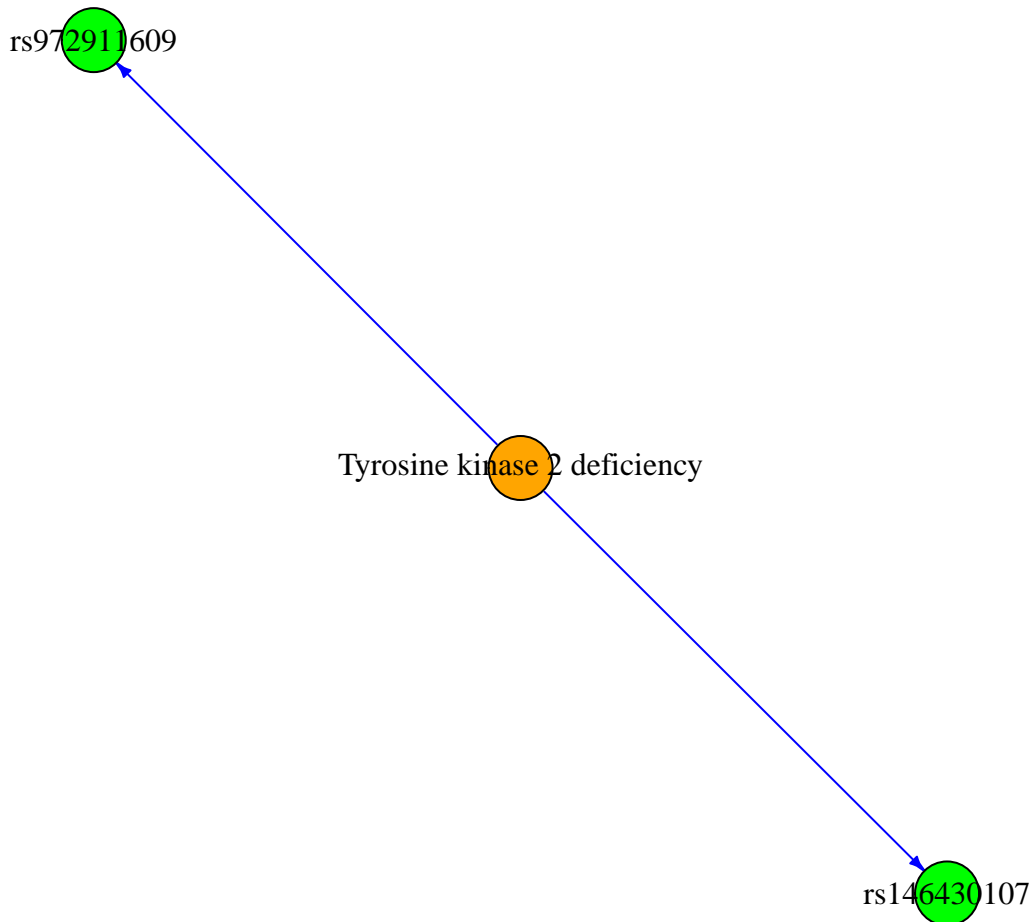

## Variant–Disease Network (Tyrosinemia type I)

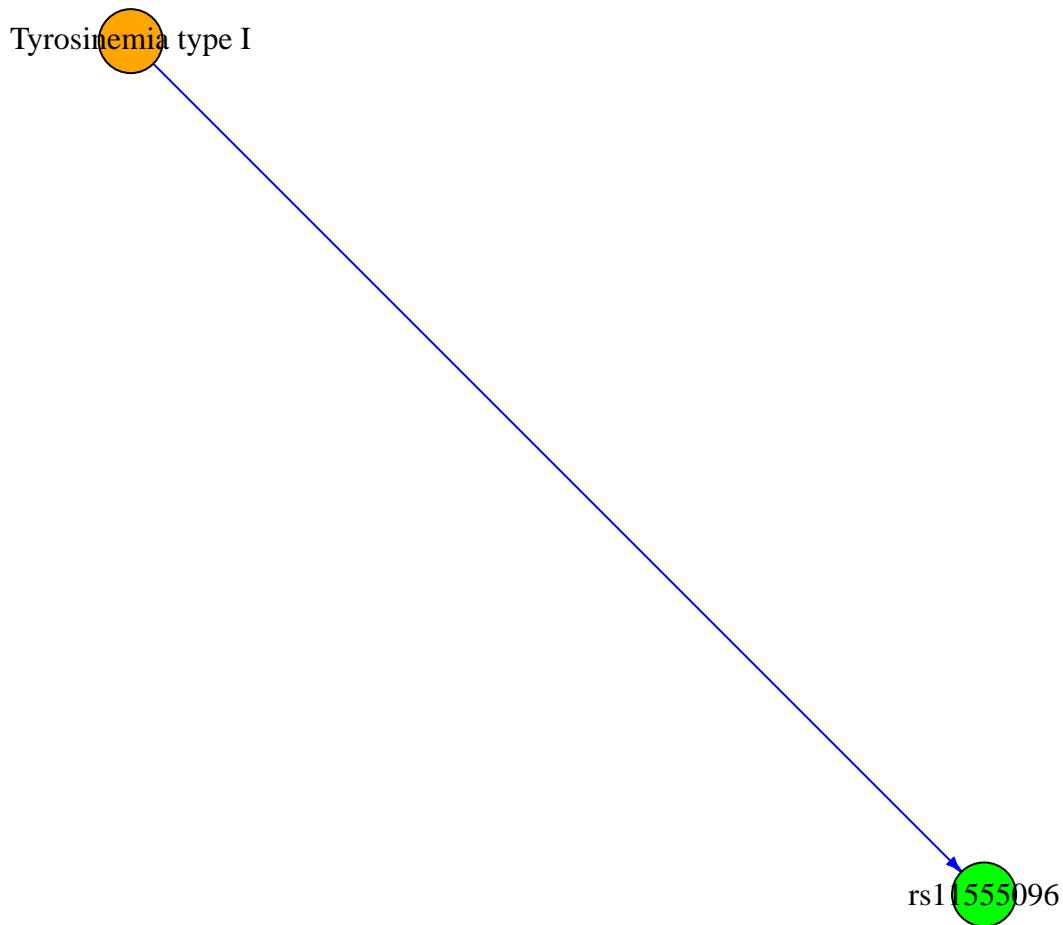

# Variant–Disease Network (Ullrich congenital muscular dystrophy 2)

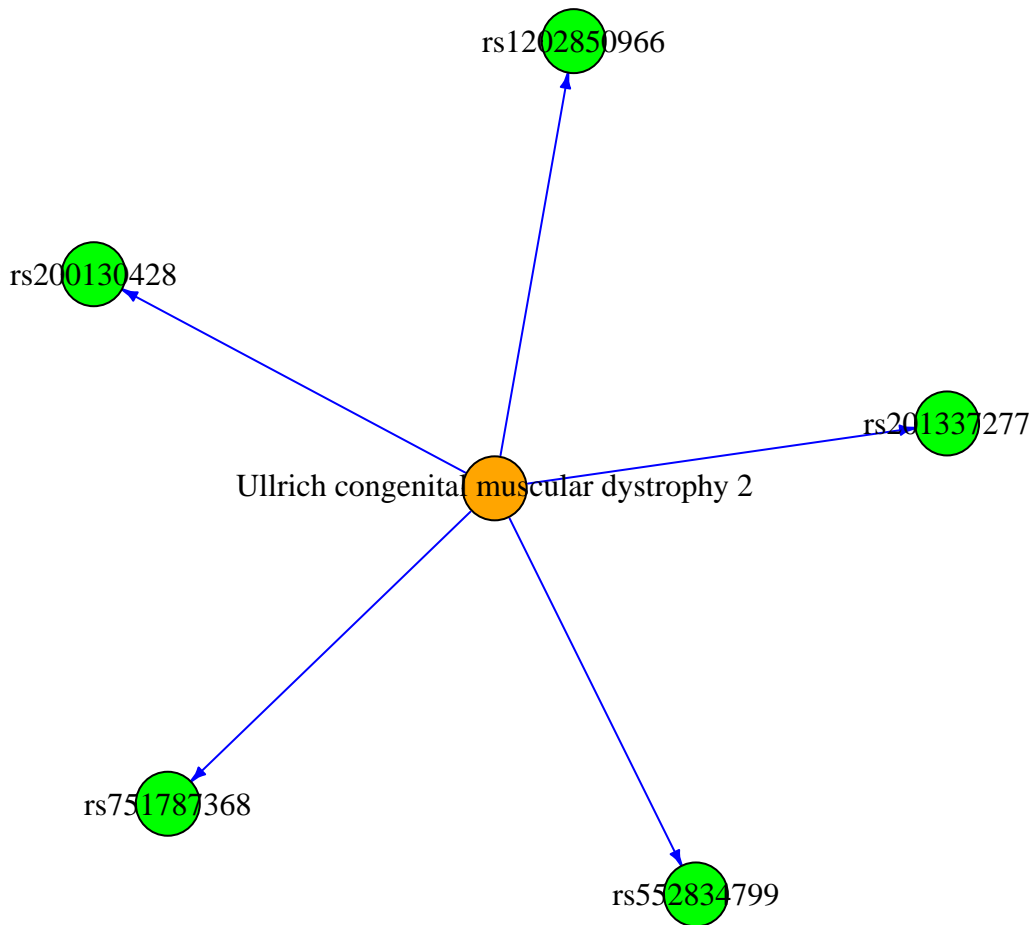

**Variant–Disease Network (Upshaw–Schulman syndrome)**

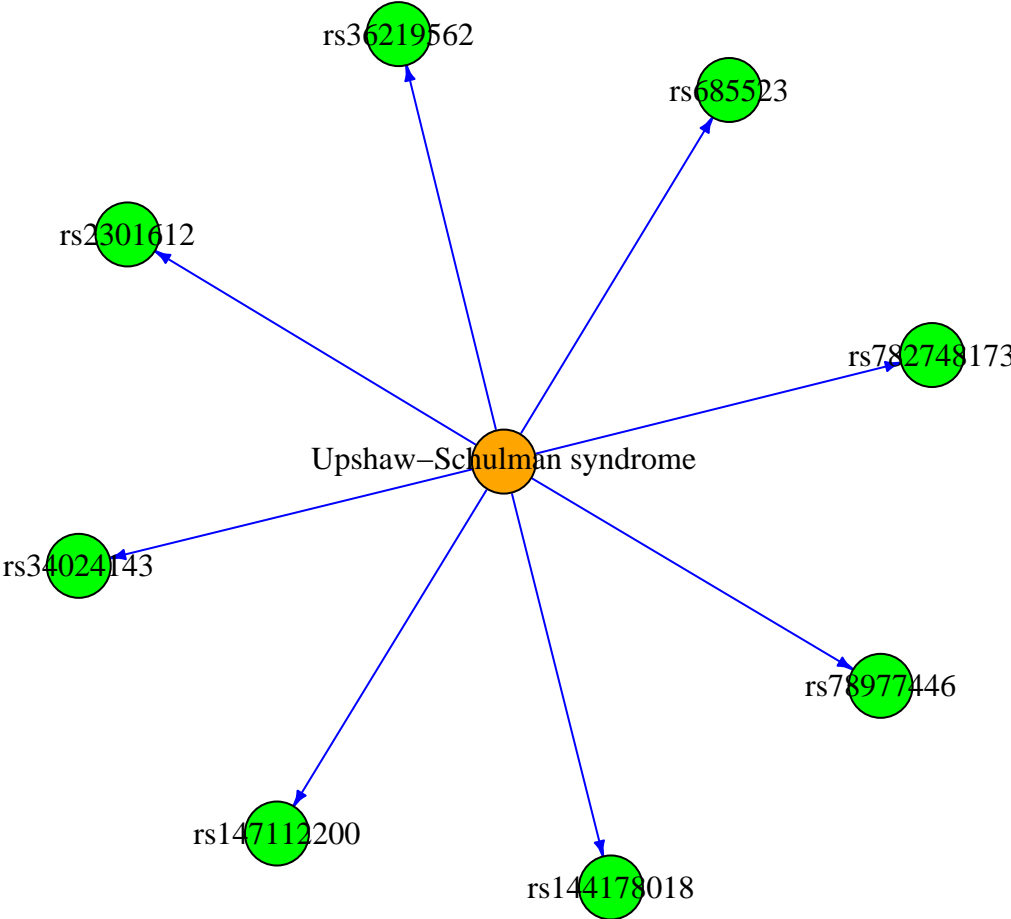



## Variant–Disease Network (Uromodulin–associated kidney disease)

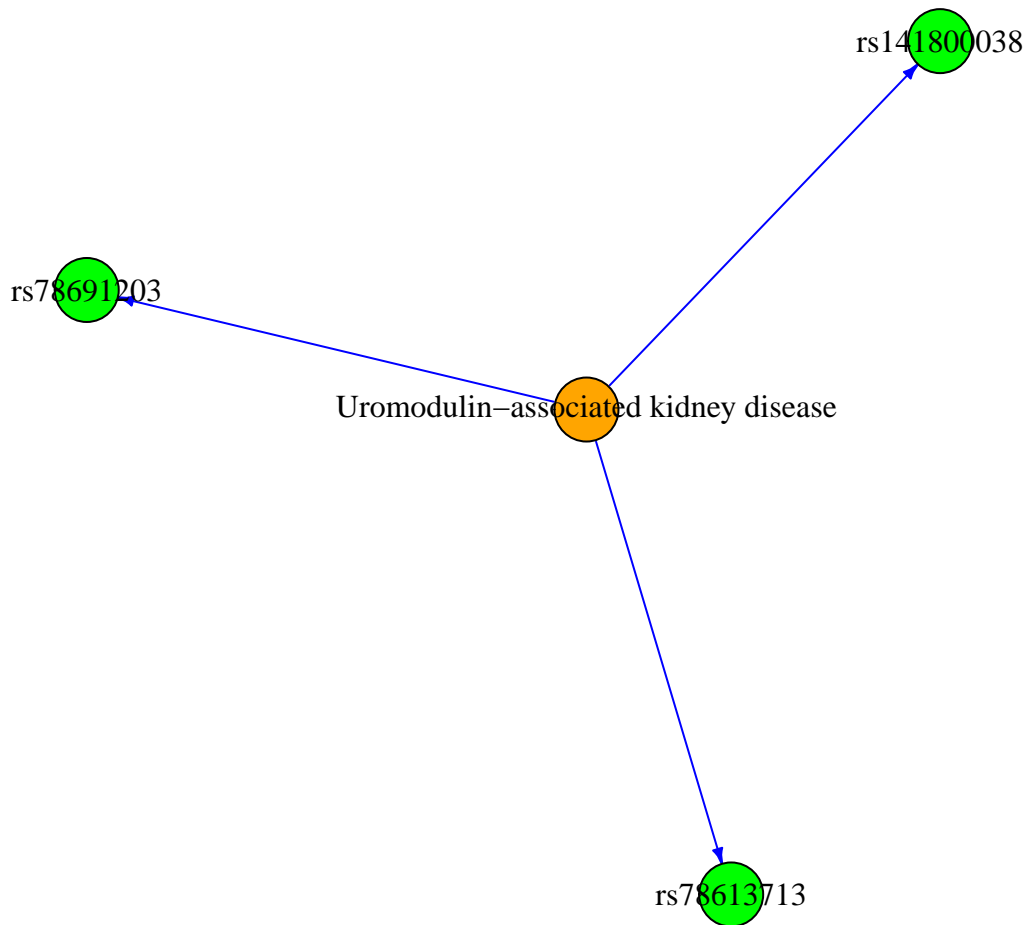

## Variant-Disease Network (Usher syndrome)

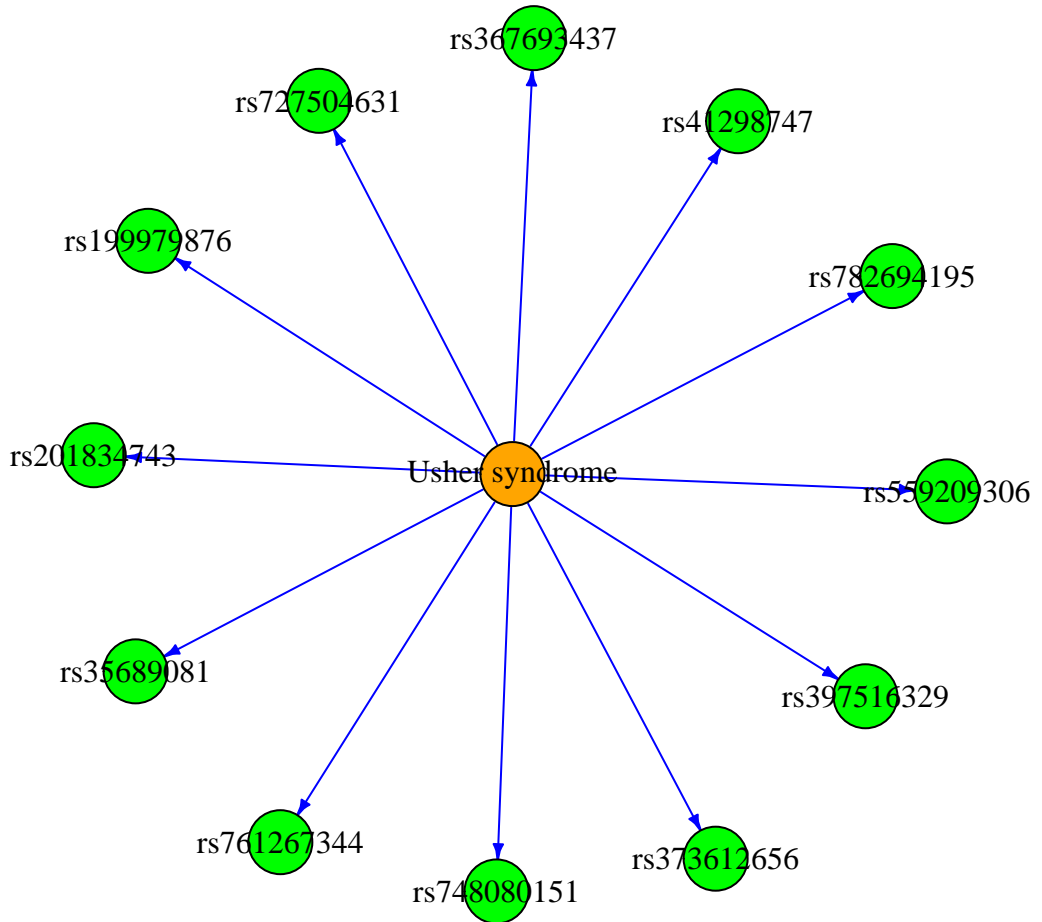

Variant–Disease Network (VACTERL association with hydrocephaly)

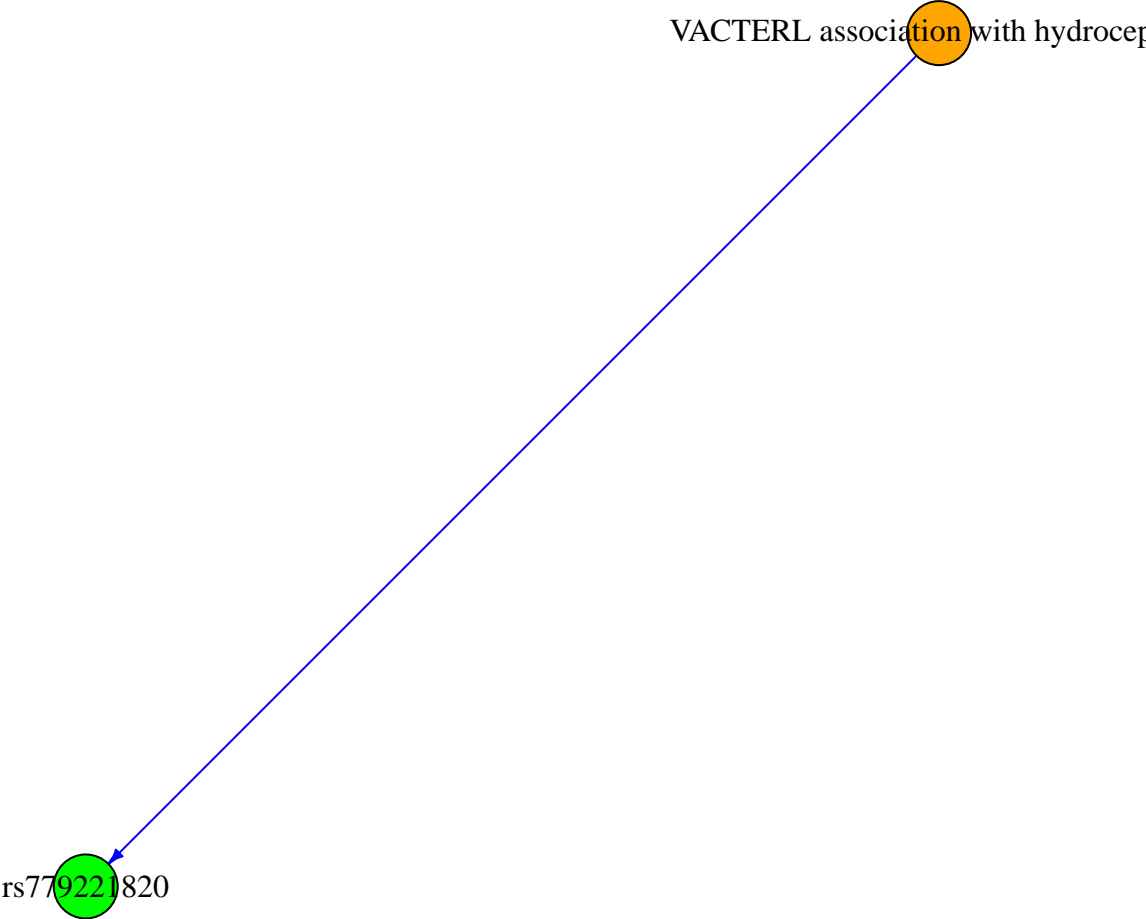

## Variant–Disease Network (Van der Woude syndrome)

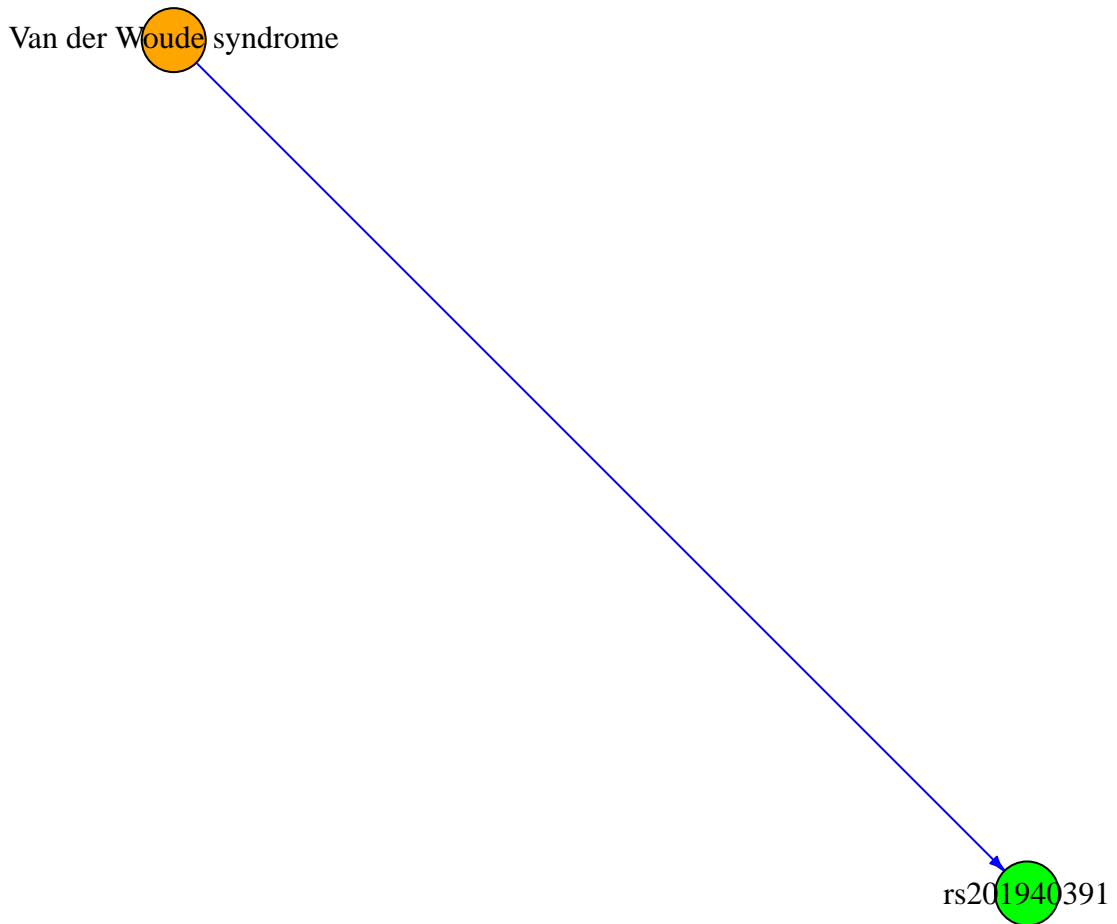

## Variant–Disease Network (Venous thrombosis)

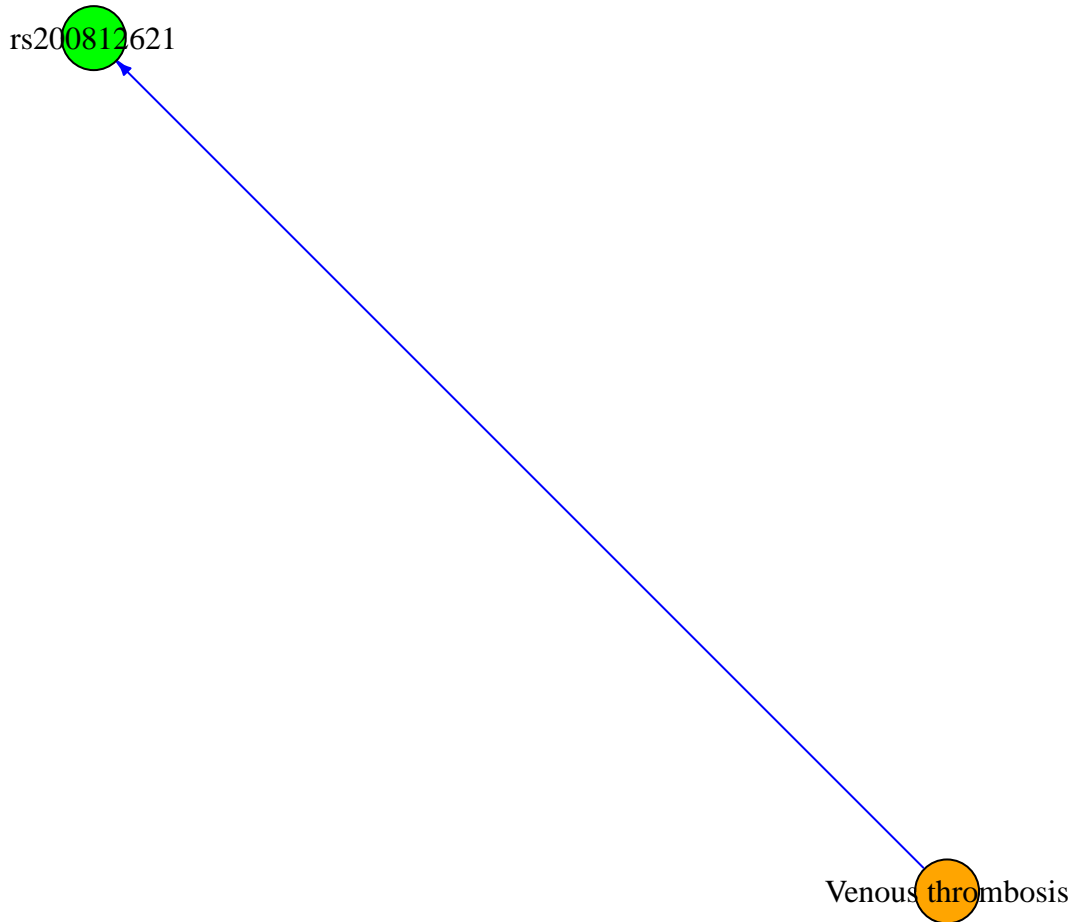

## Variant–Disease Network (Ventricular septal defect)

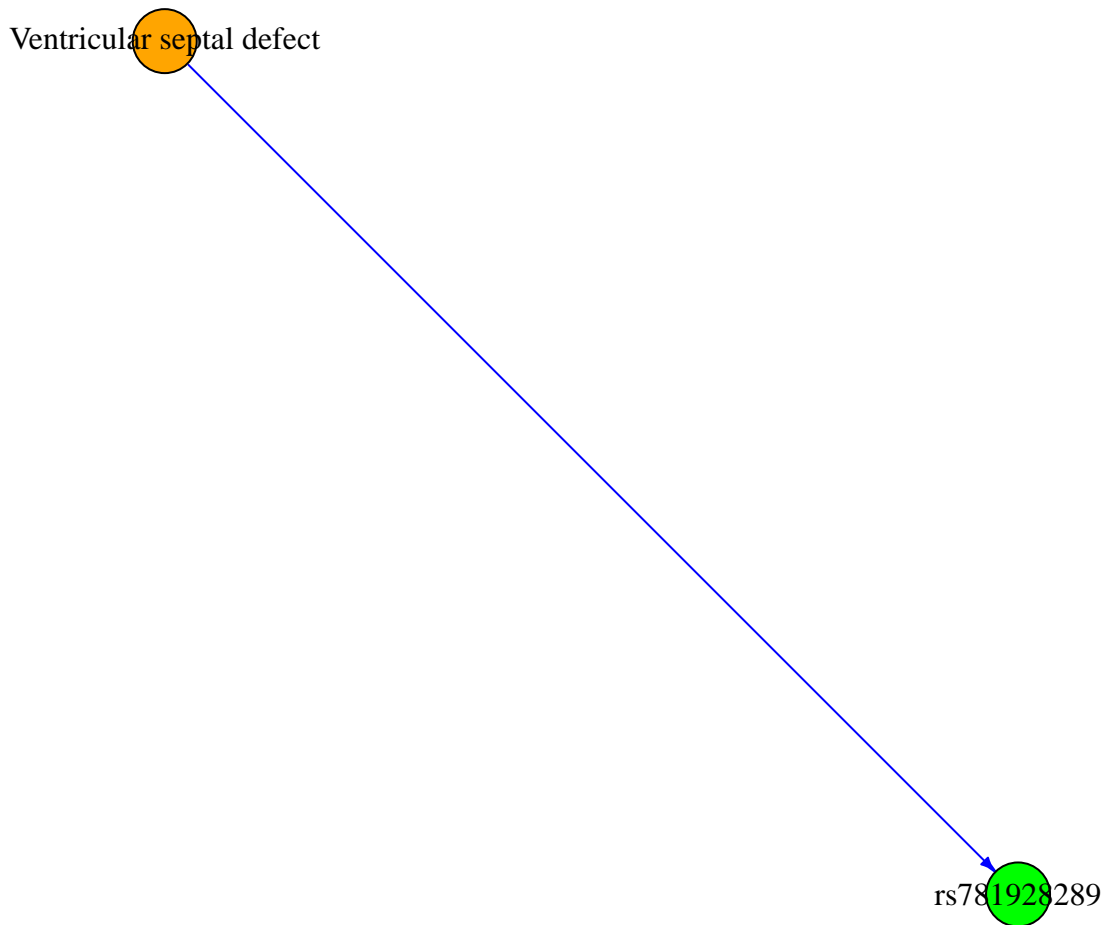

## Variant–Disease Network (Vertical talus)

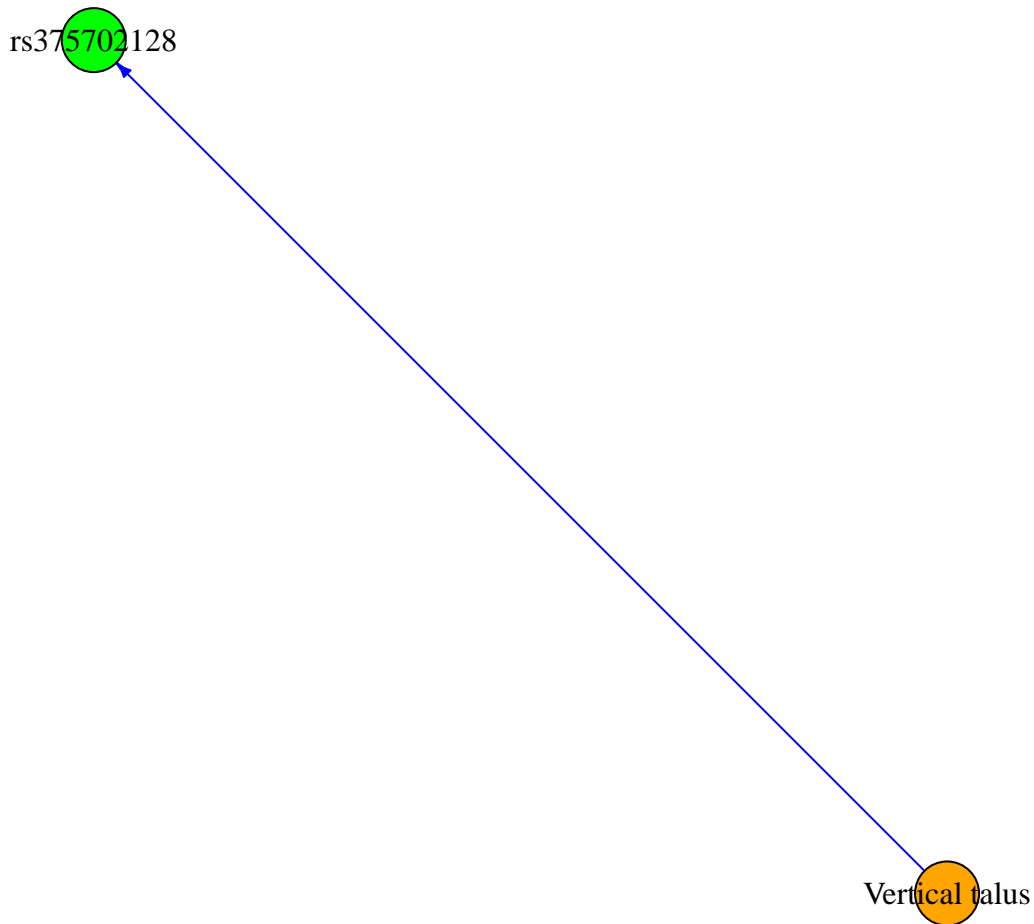

Variant–Disease Network (Vesicoureteral reflux)

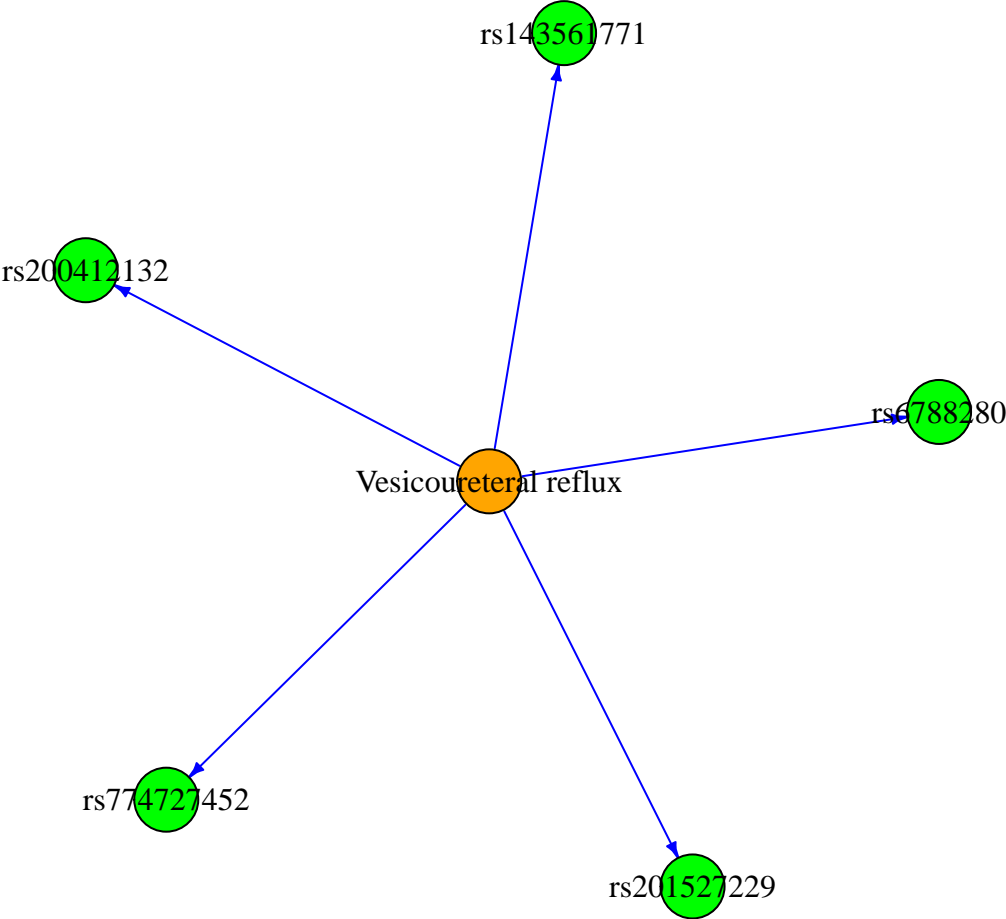



# Variant–Disease Network (Vici syndrome)

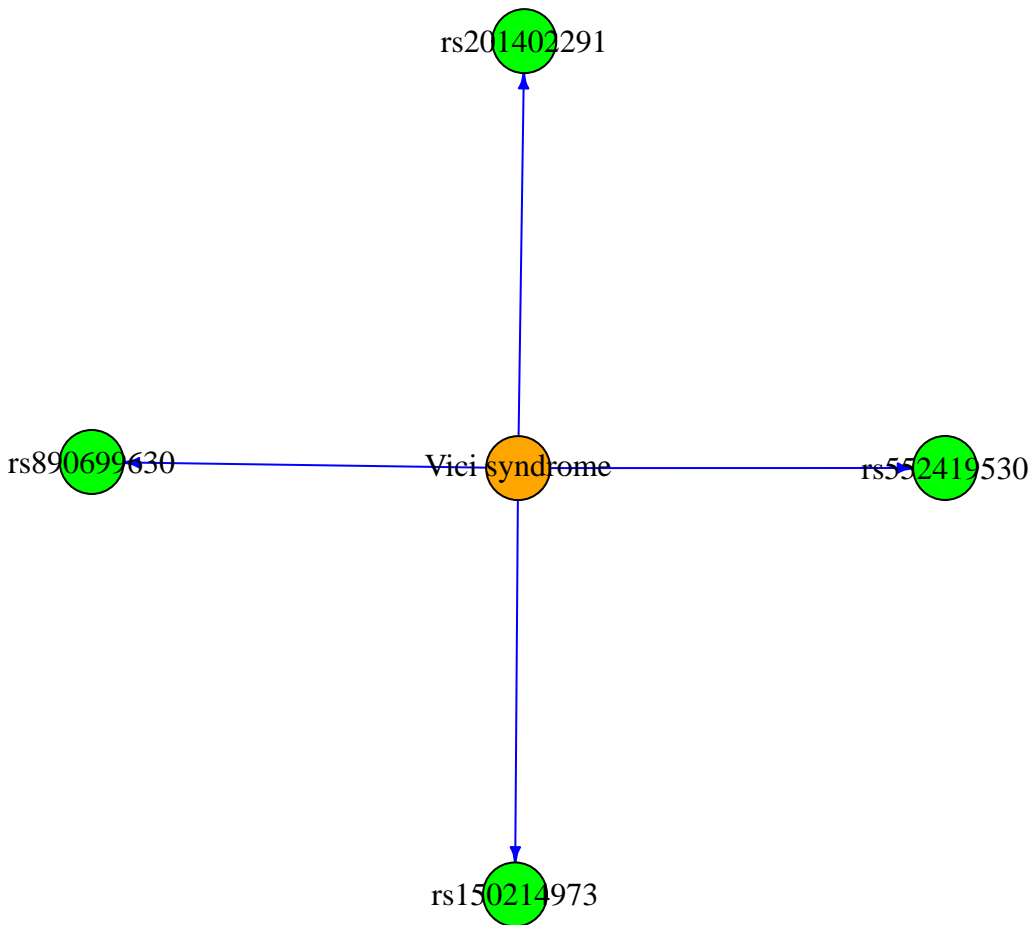

Variant–Disease Network (Vitamin D–Dependent Rickets)

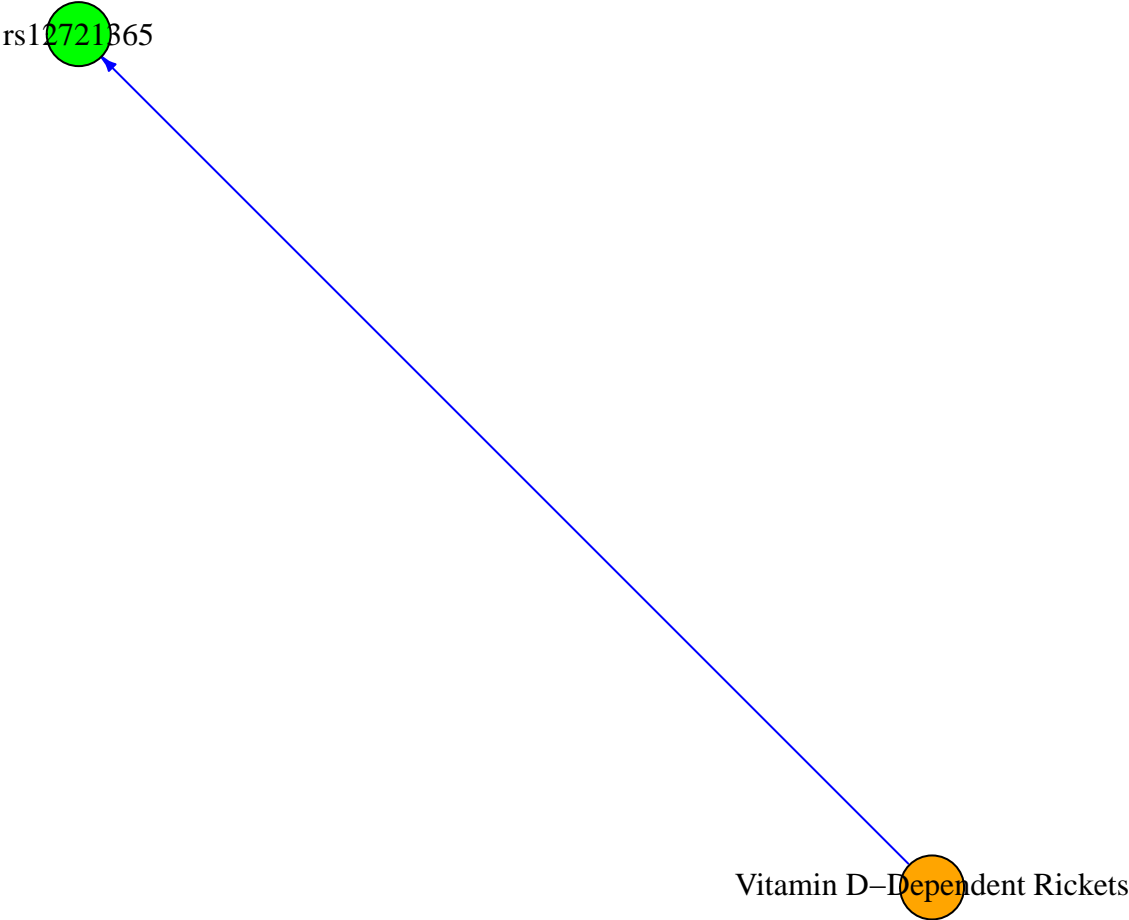

Variant–Disease Network (Vitelliform macular dystrophy type 2)

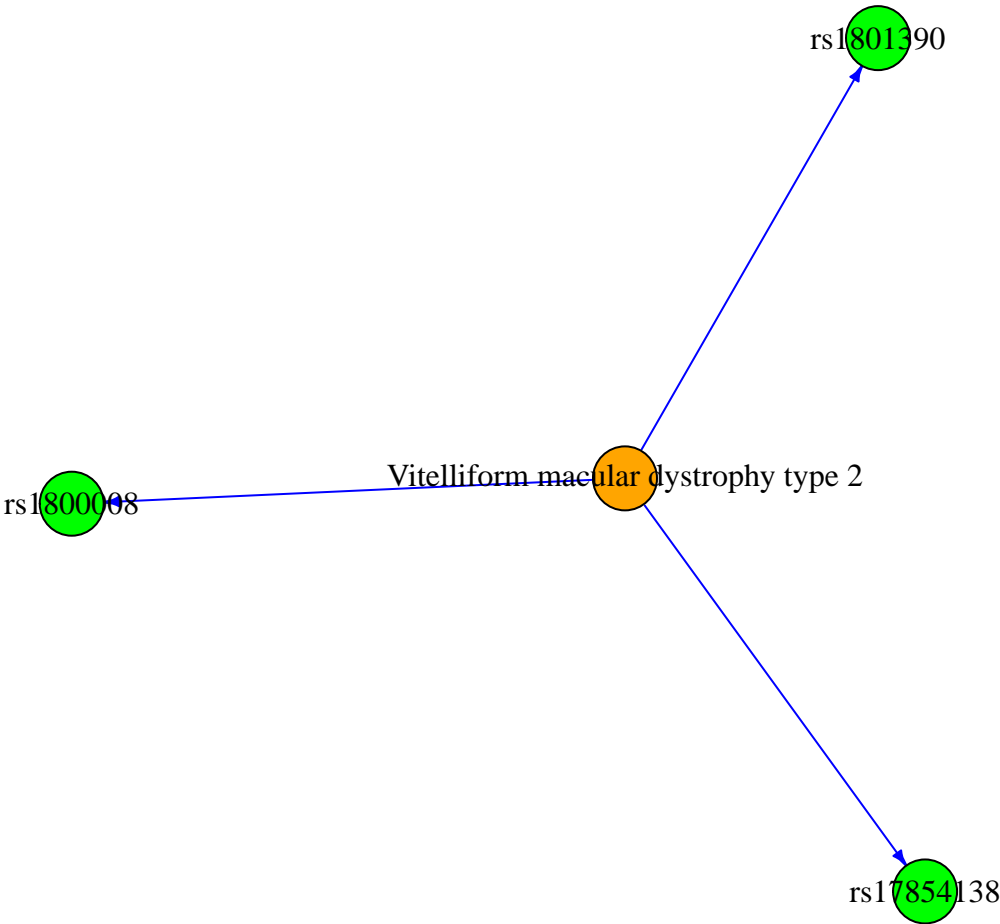

## Variant–Disease Network (Vitreoretinopathology)

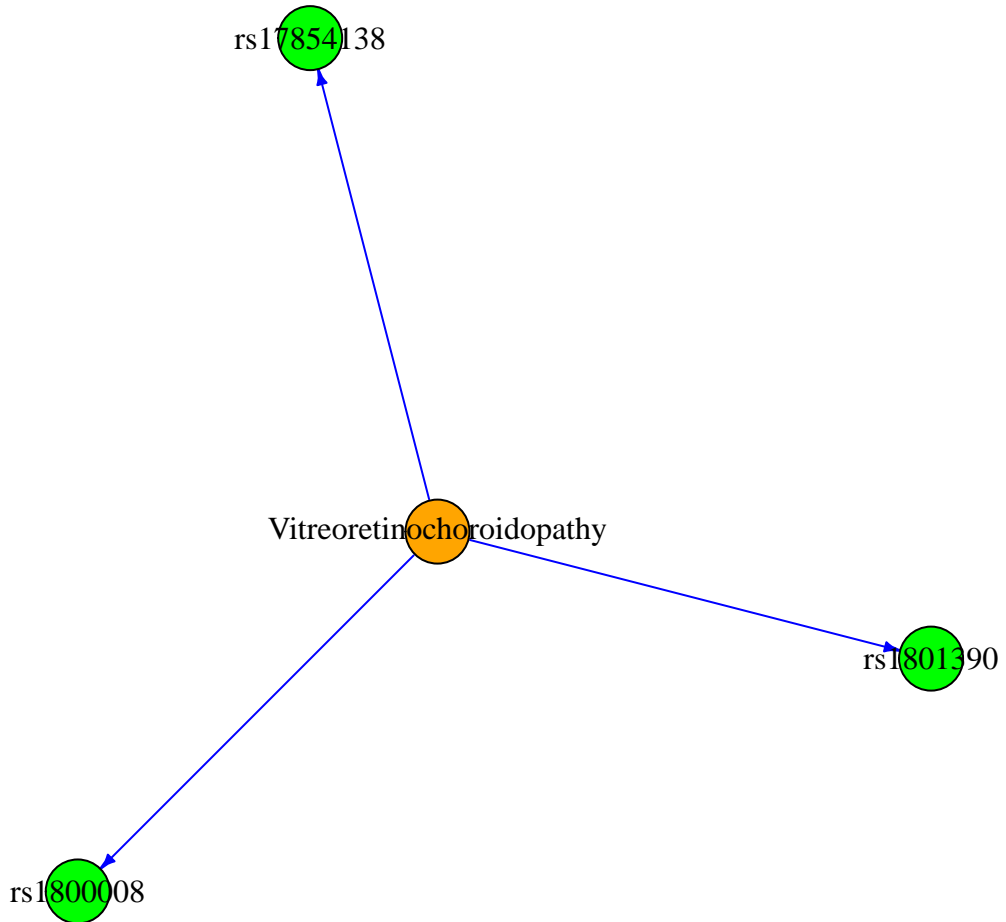

Variant–Disease Network (Vitreoretinopathy)

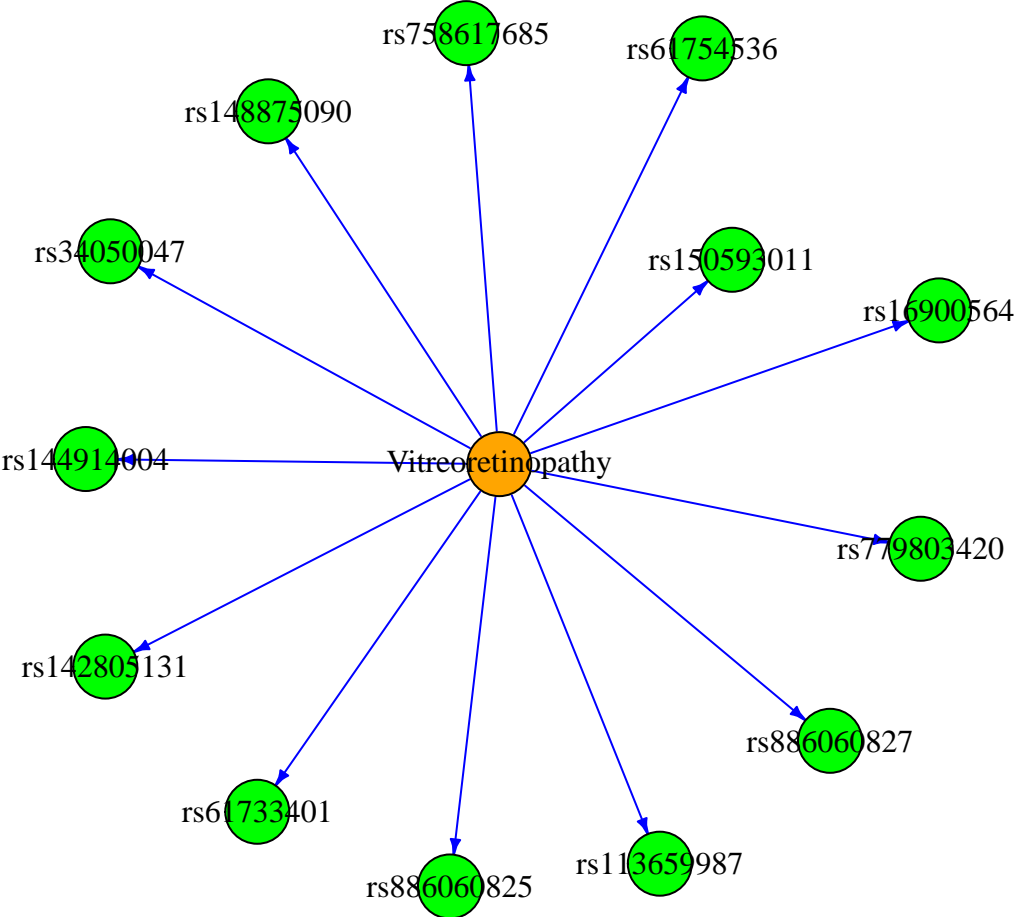

# Variant–Disease Network (Von Hippel–Lindau syndrome)

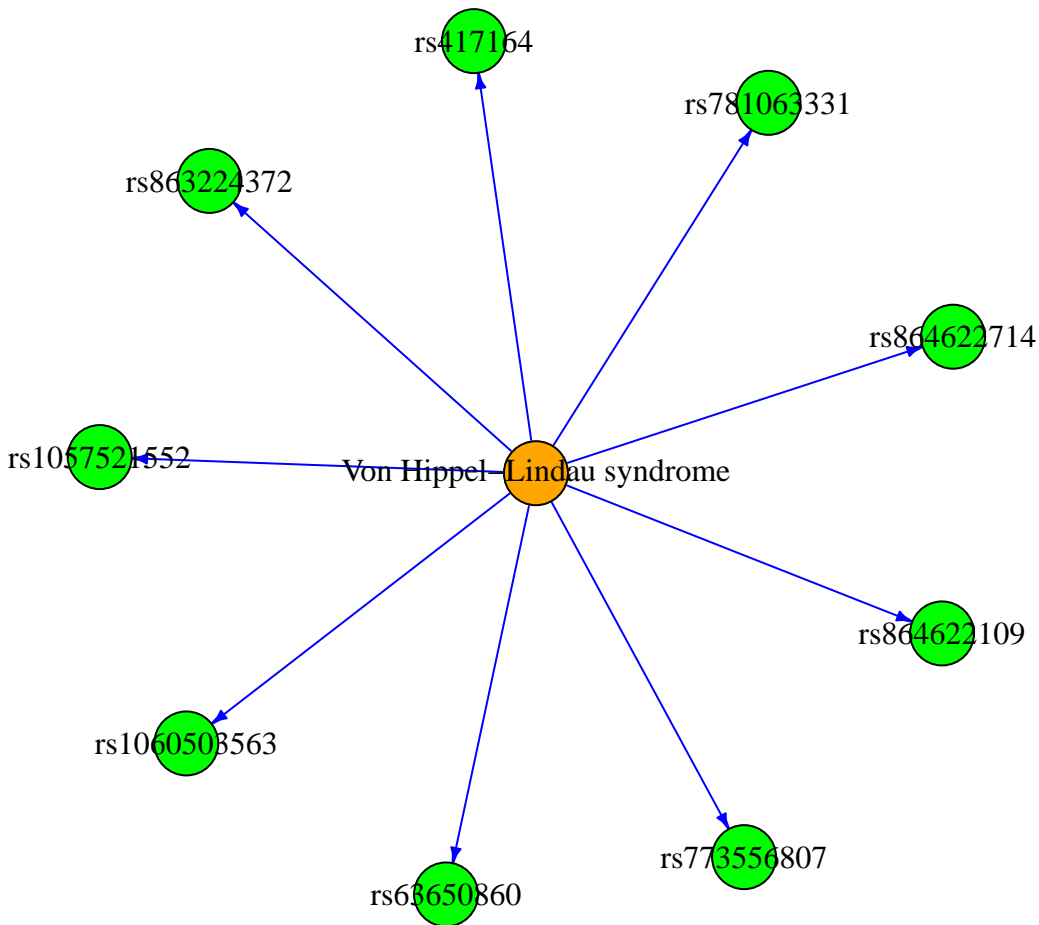

**Variant–Disease Network (Von Willebrand disease)**

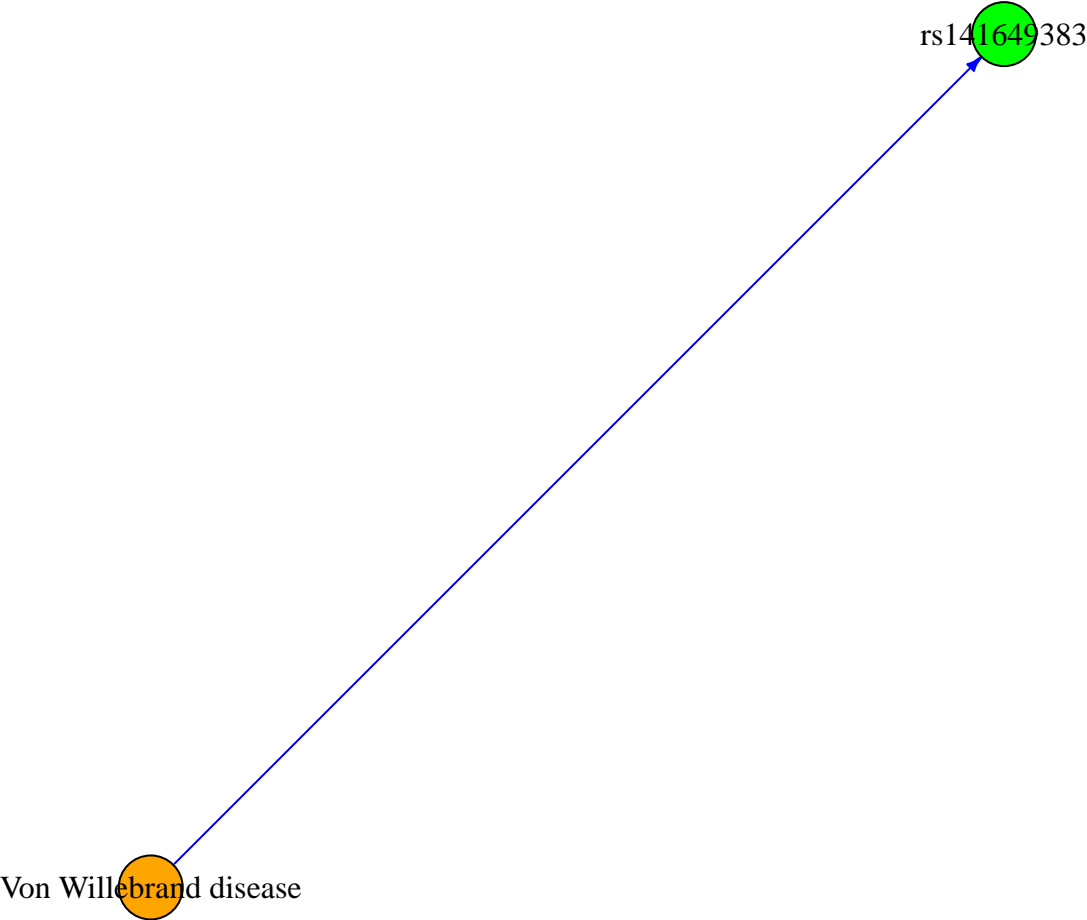

**Variant–Disease Network (von Willebrand disease type 1)**

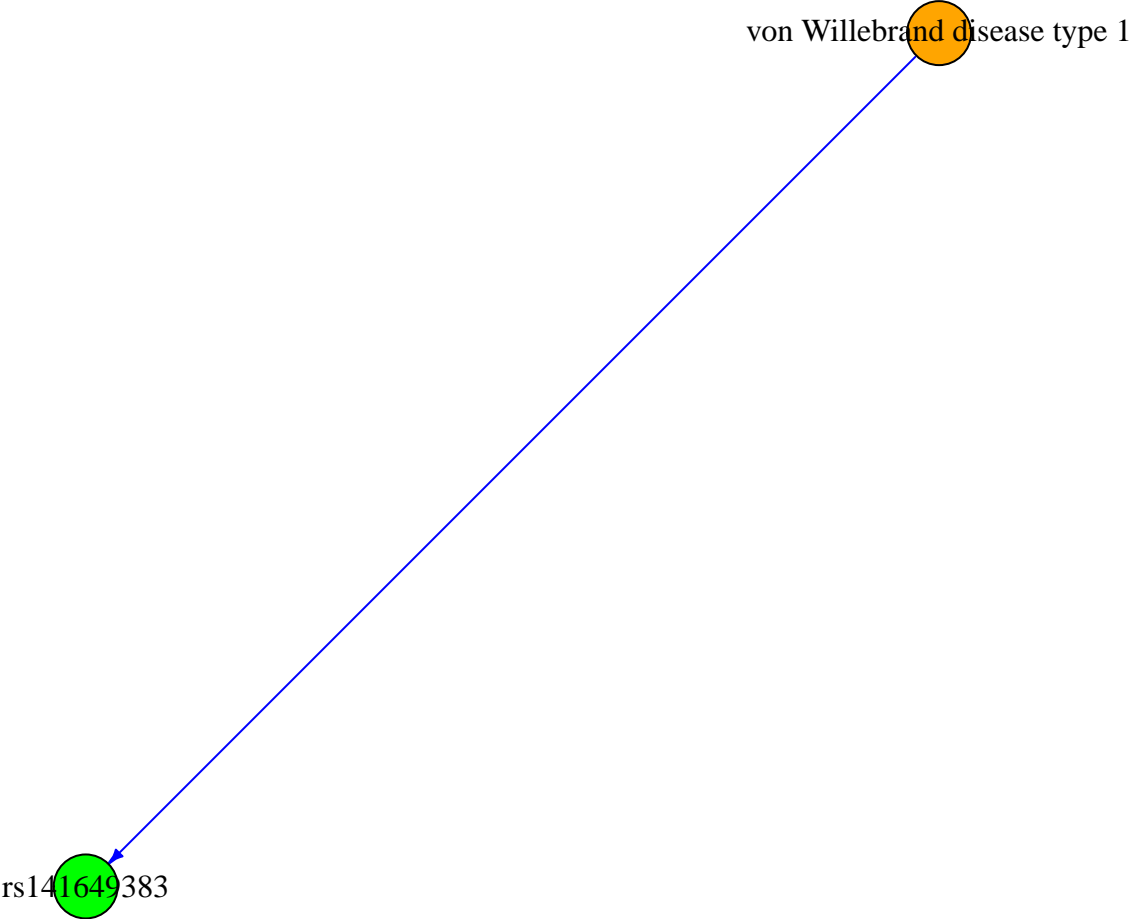



Variant–Disease Network (von Willebrand disease type 2)

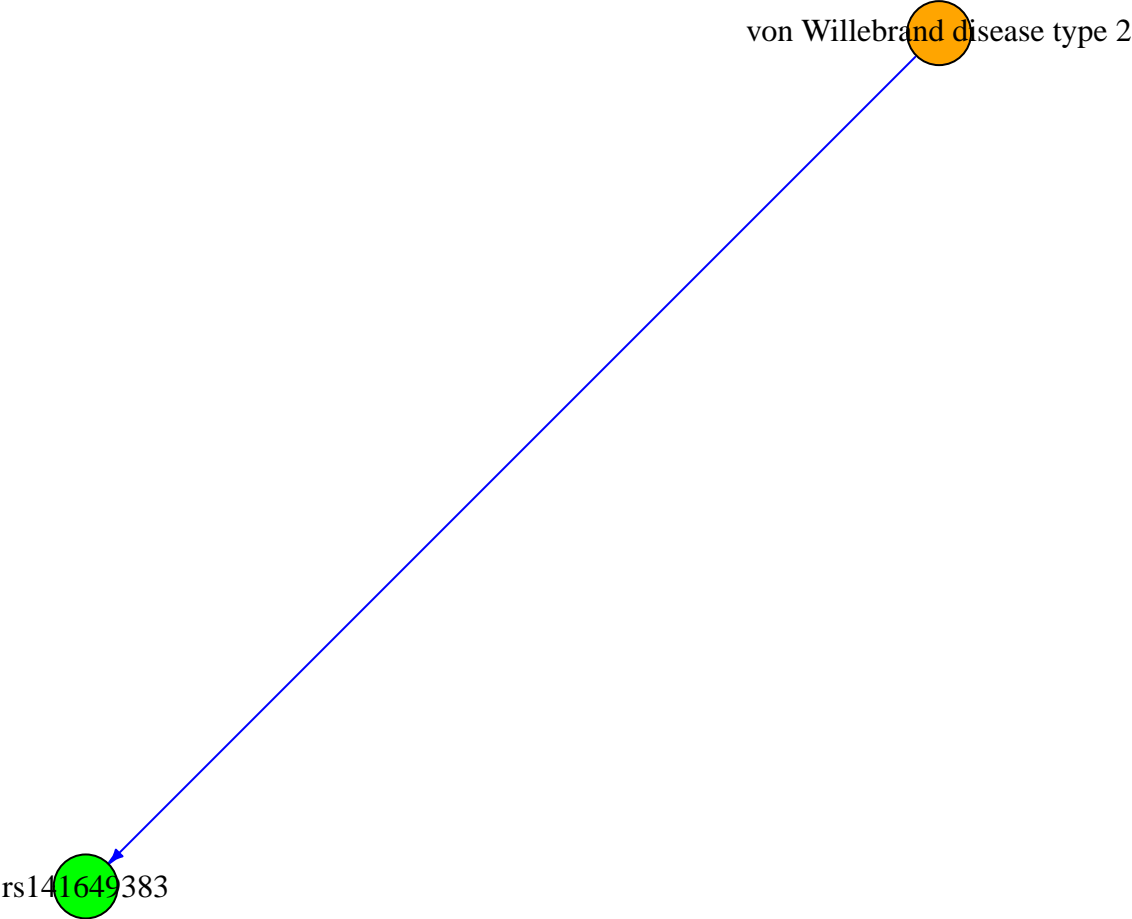

## Variant–Disease Network (von Willebrand disorder)

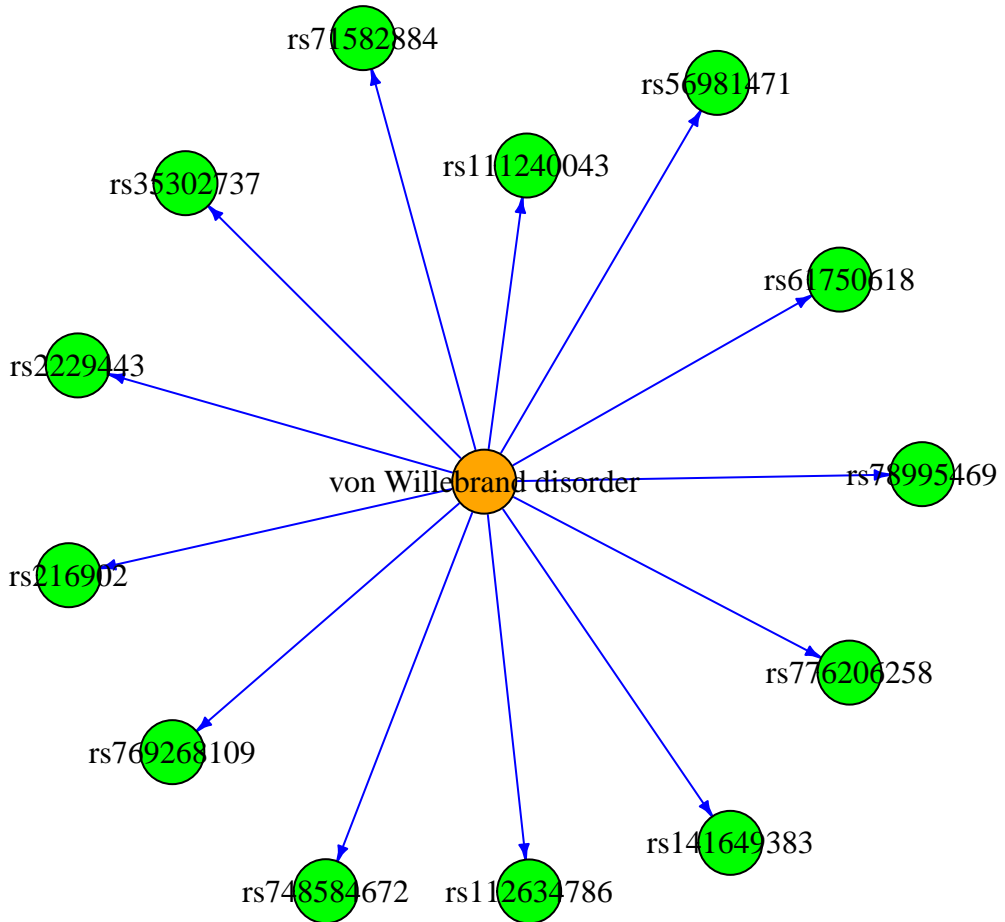

## Variant–Disease Network (Waardenburg syndrome)

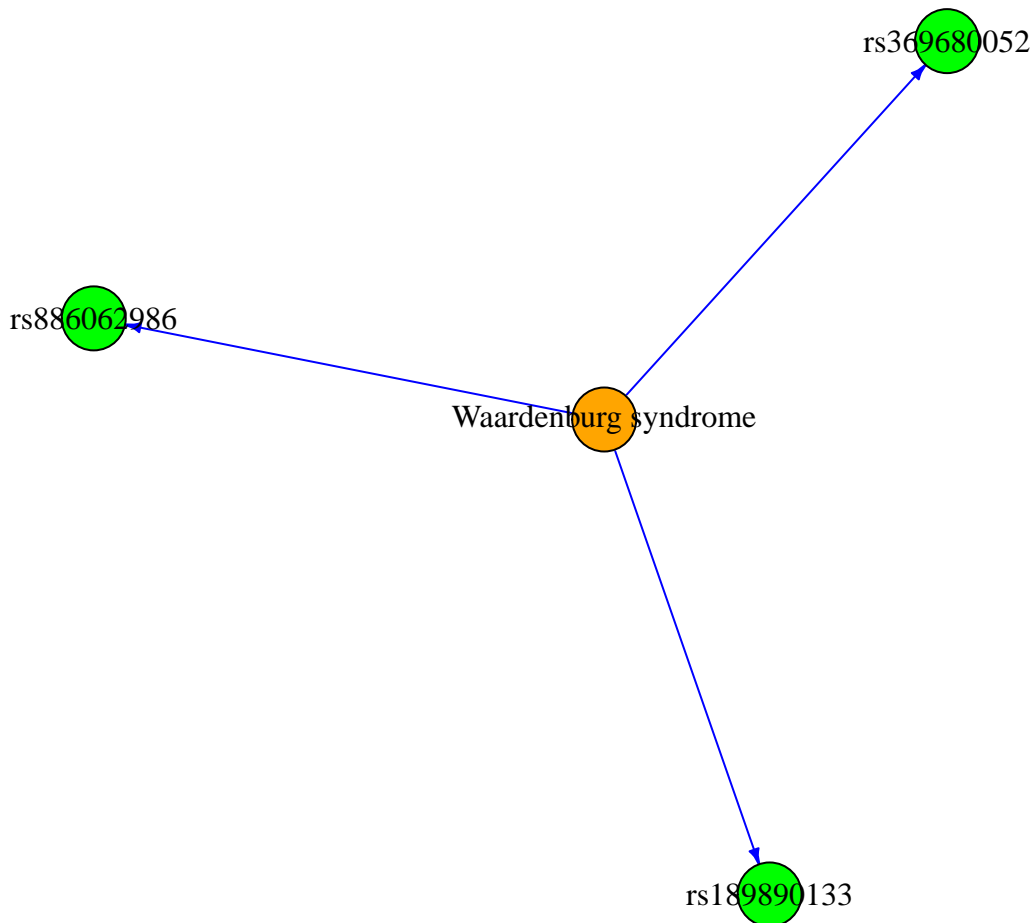

# Variant–Disease Network (Waardenburg syndrome type 4A)

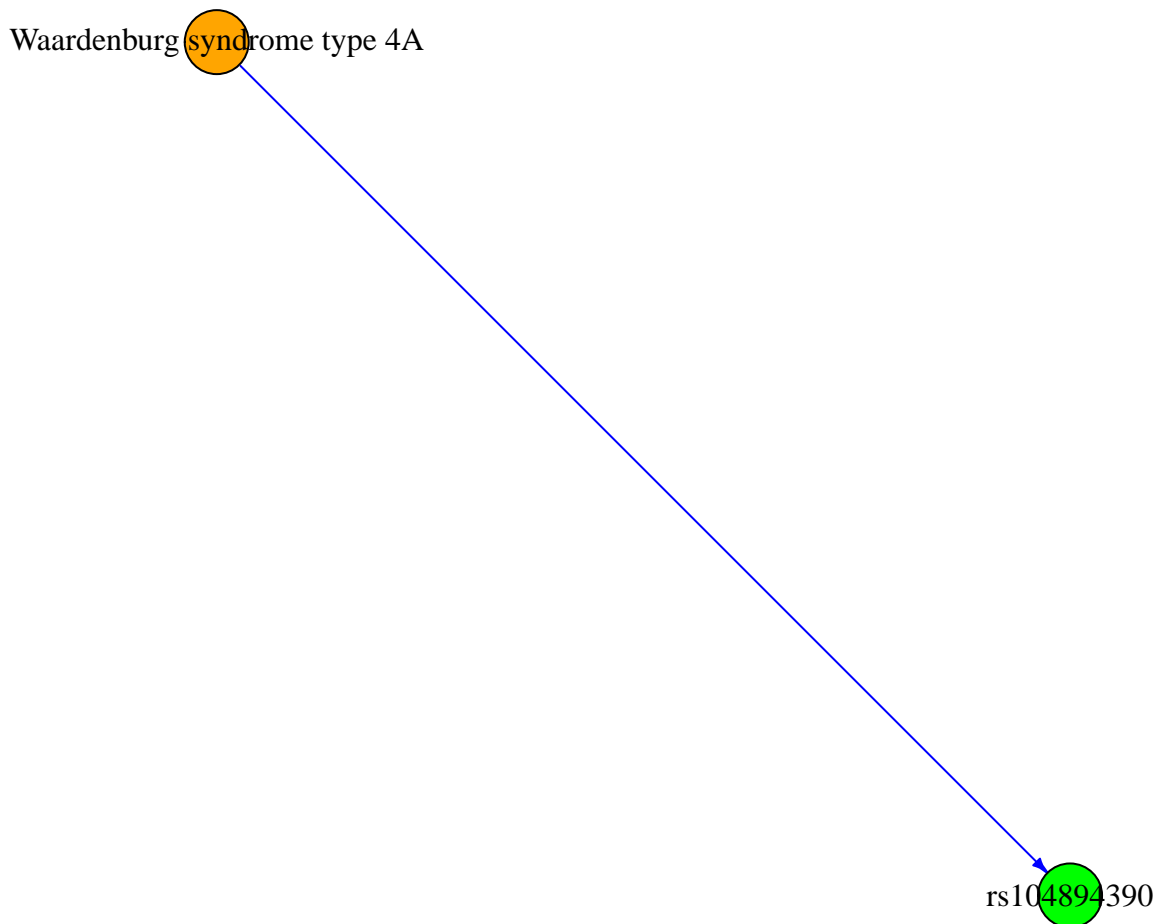

## Variant–Disease Network (Wagner syndrome)

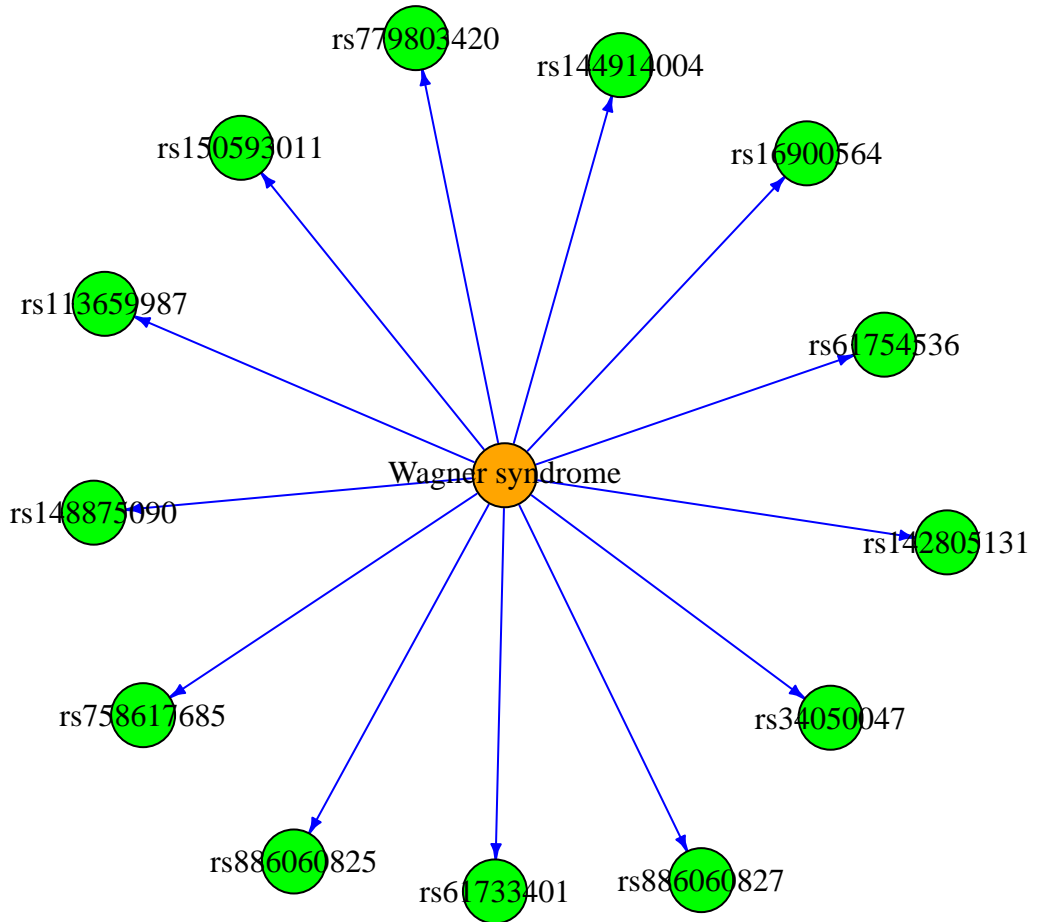

Variant–Disease Network (Walker–Warburg congenital muscular dystrophy)

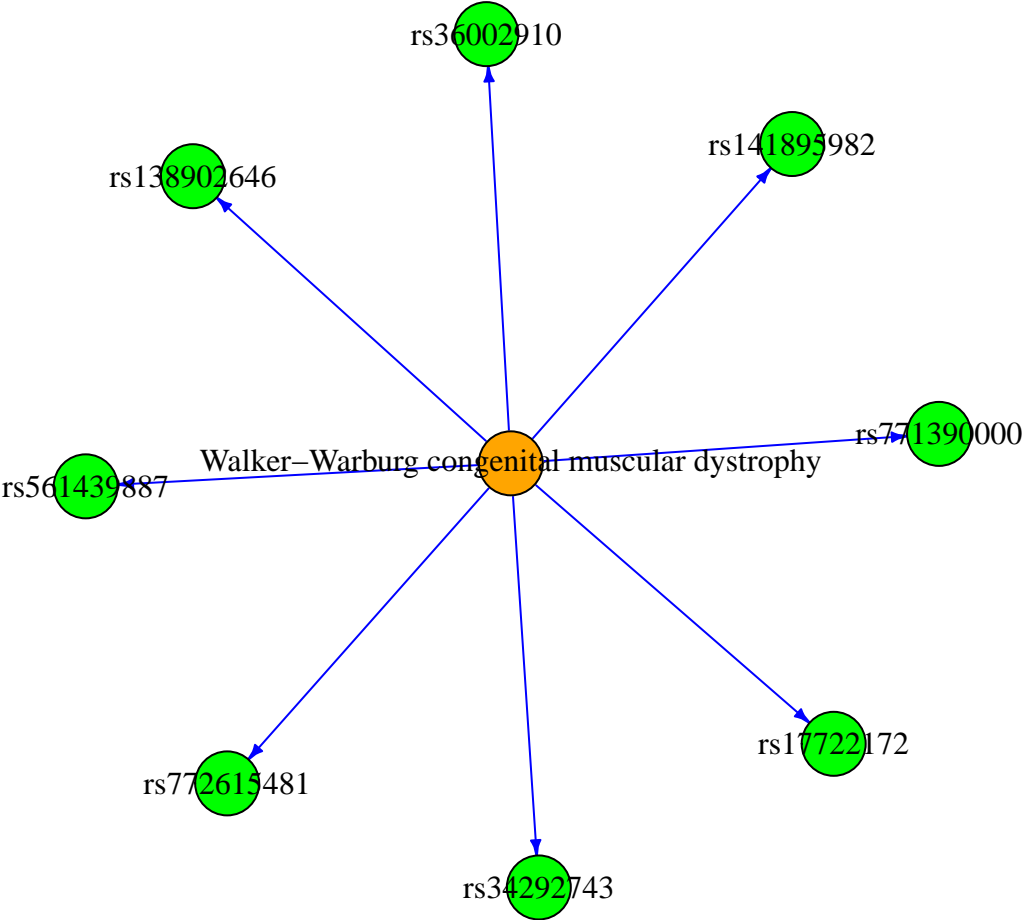

## Variant–Disease Network (Warburg micro syndrome)

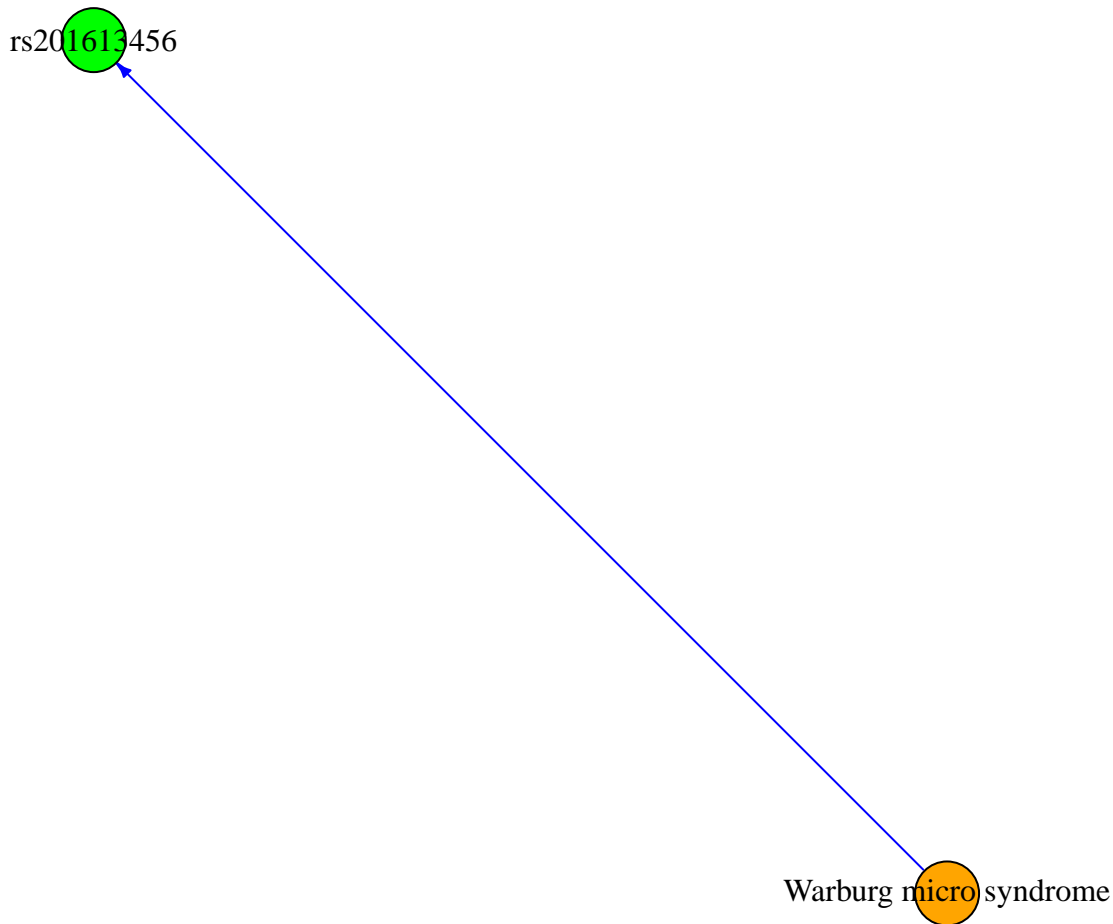

## Variant–Disease Network (Warburg micro syndrome 2)

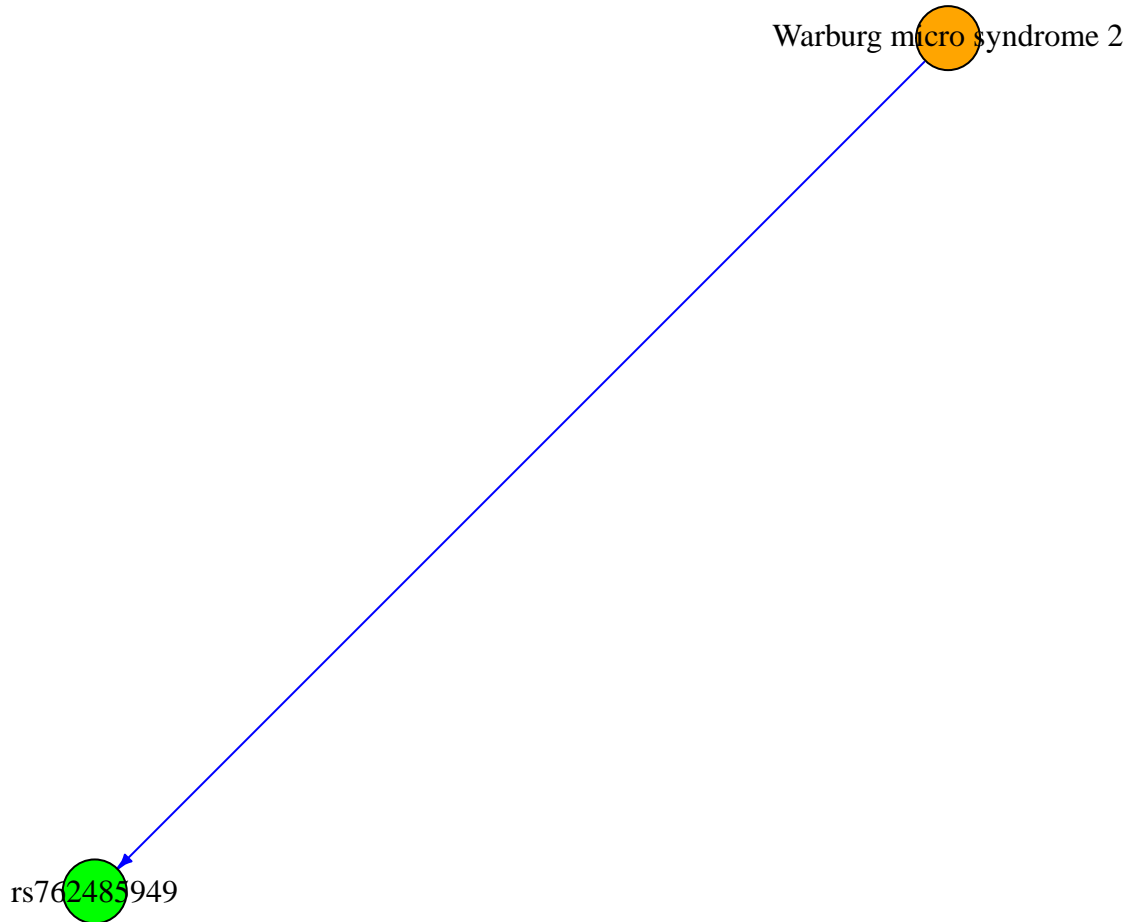



## Variant–Disease Network (Warfarin response)

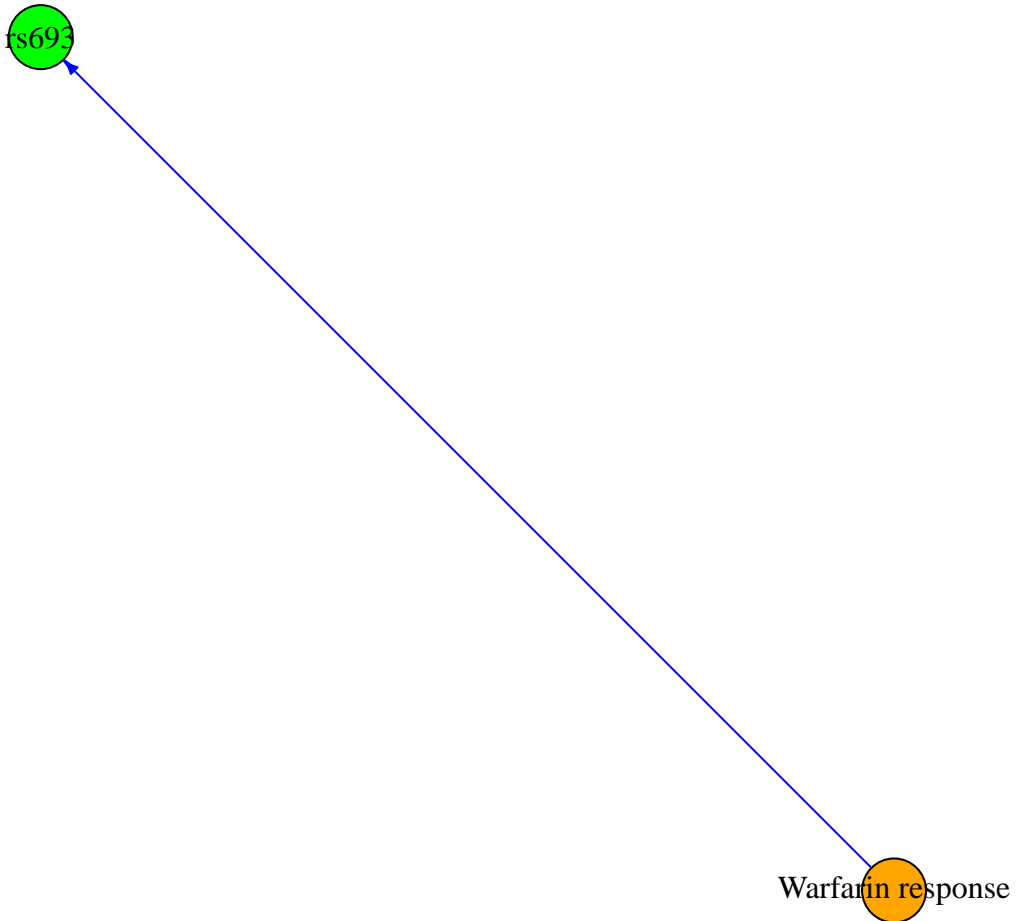

## Variant–Disease Network (Warsaw breakage syndrome)

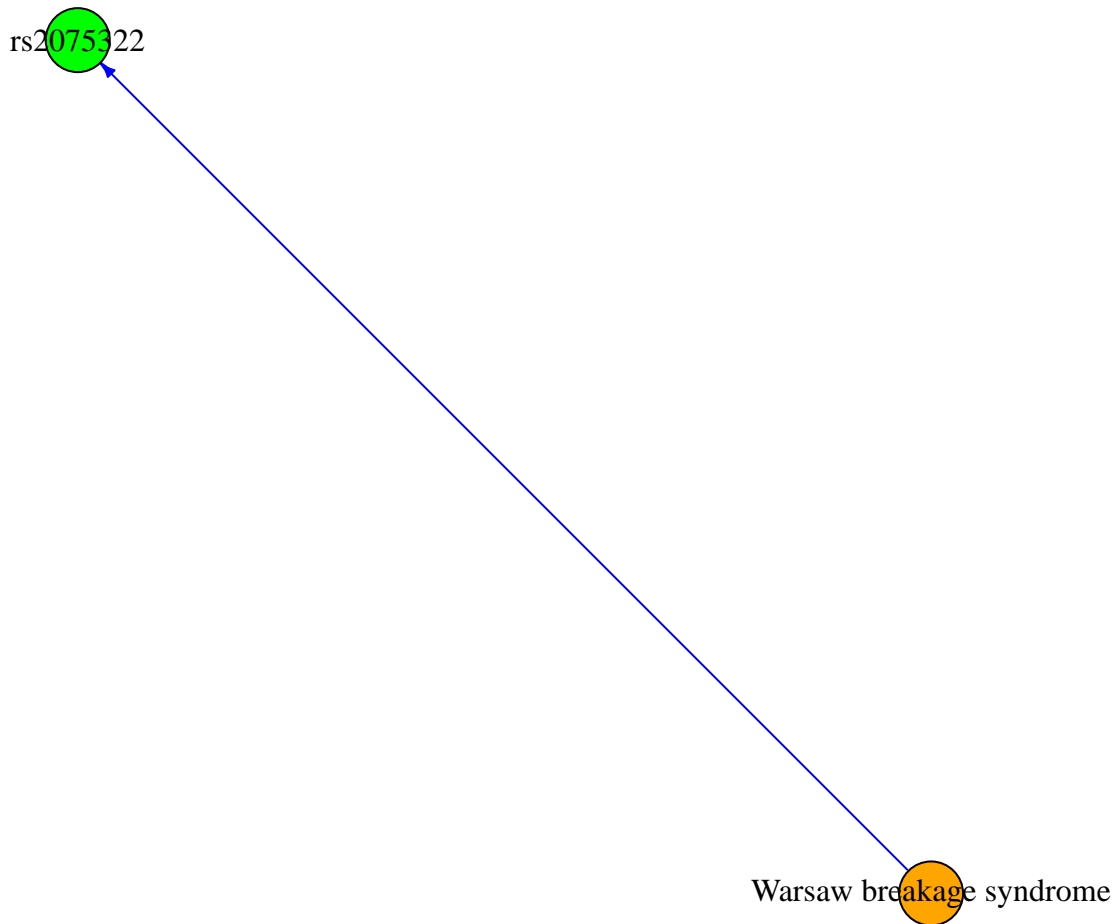

## Variant–Disease Network (Weaver syndrome)

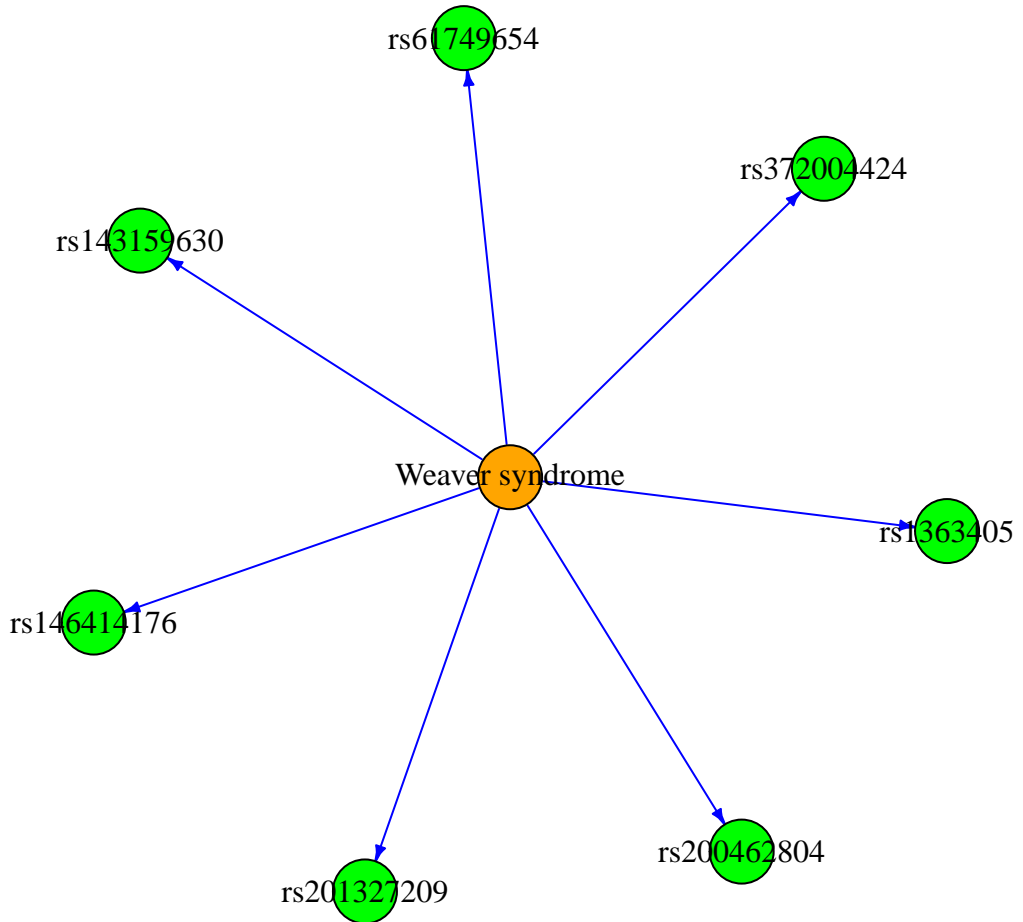

**Variant–Disease Network (Weill–Marchesani syndrome)**

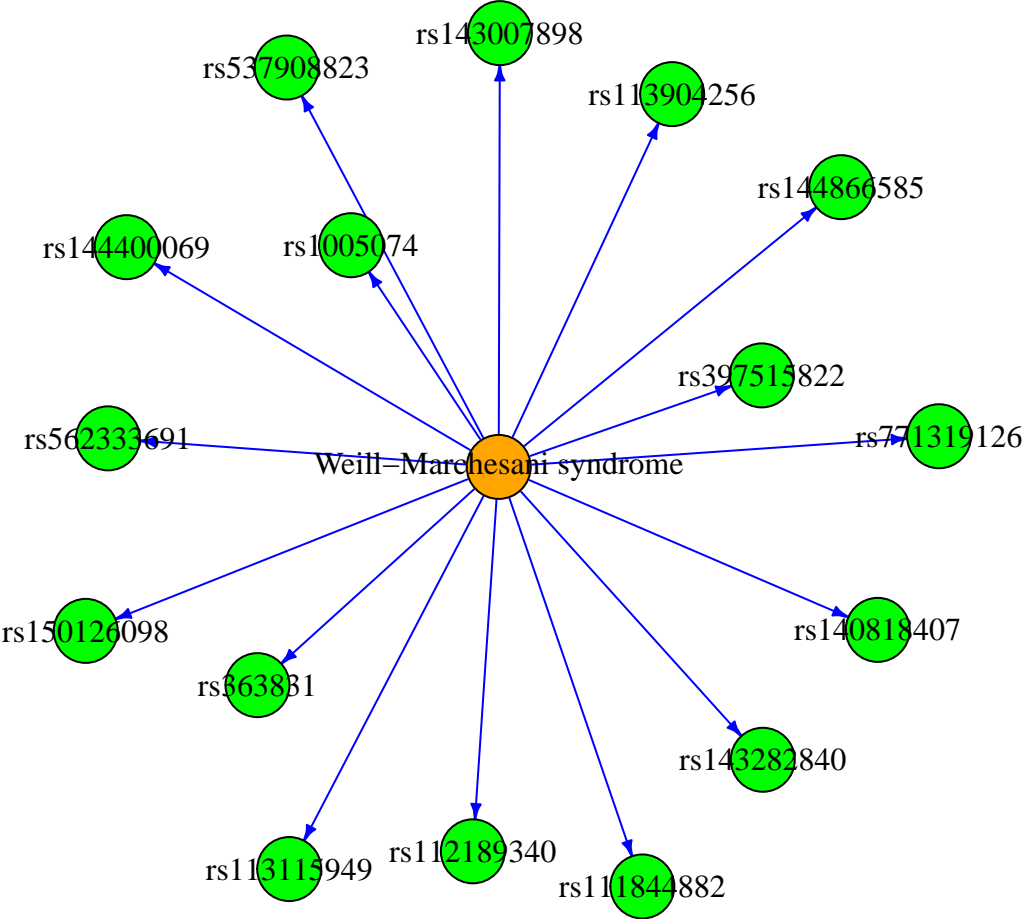

Variant–Disease Network (Weill–Marchesani syndrome 2)

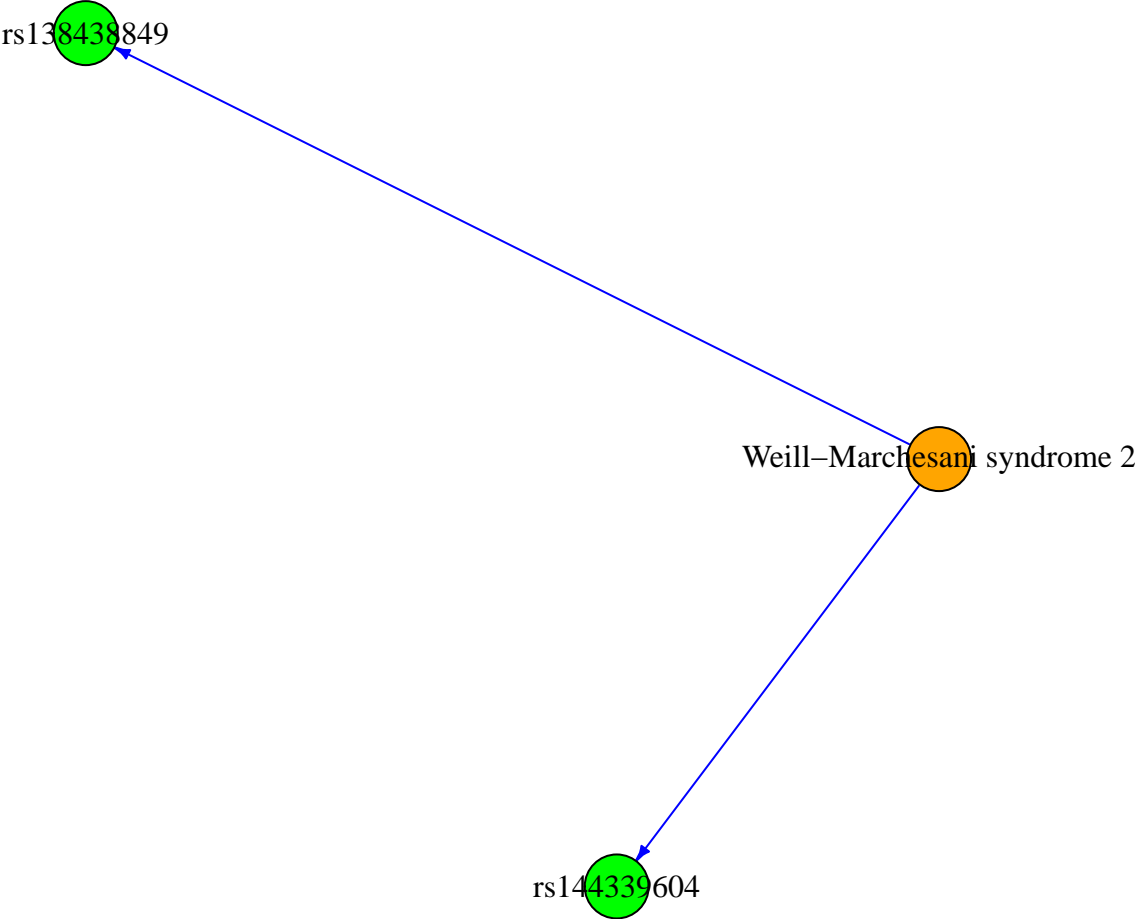

Variant–Disease Network (Weill–Marchesani syndrome 3)

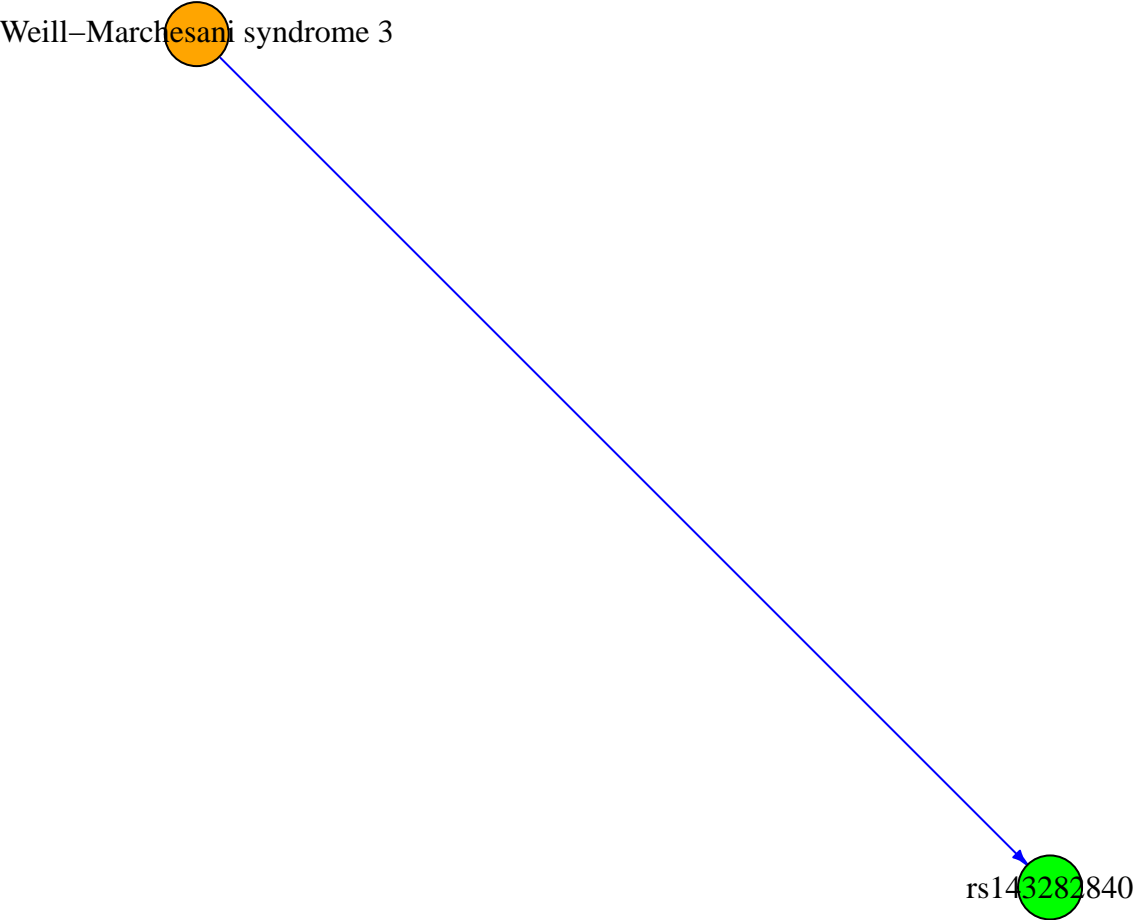

Variant–Disease Network (Weill–Marchesani syndrome 4)

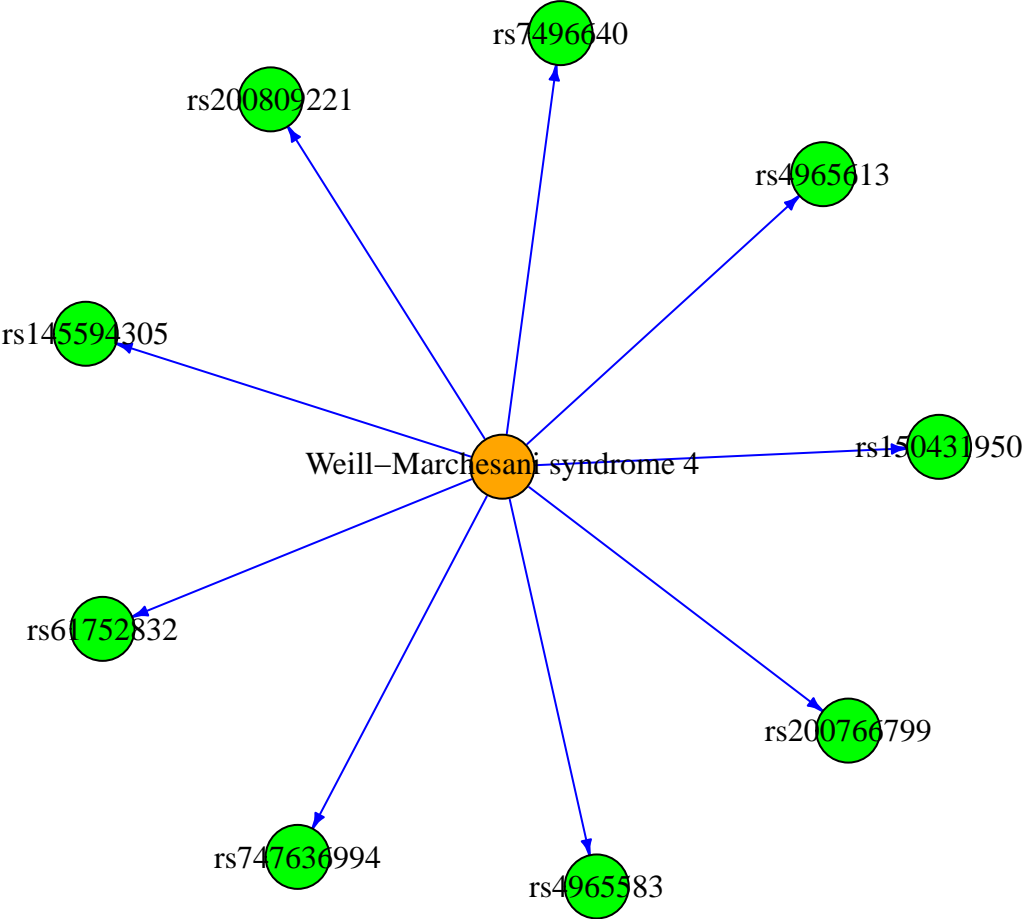

Variant–Disease Network (Werner syndrome)

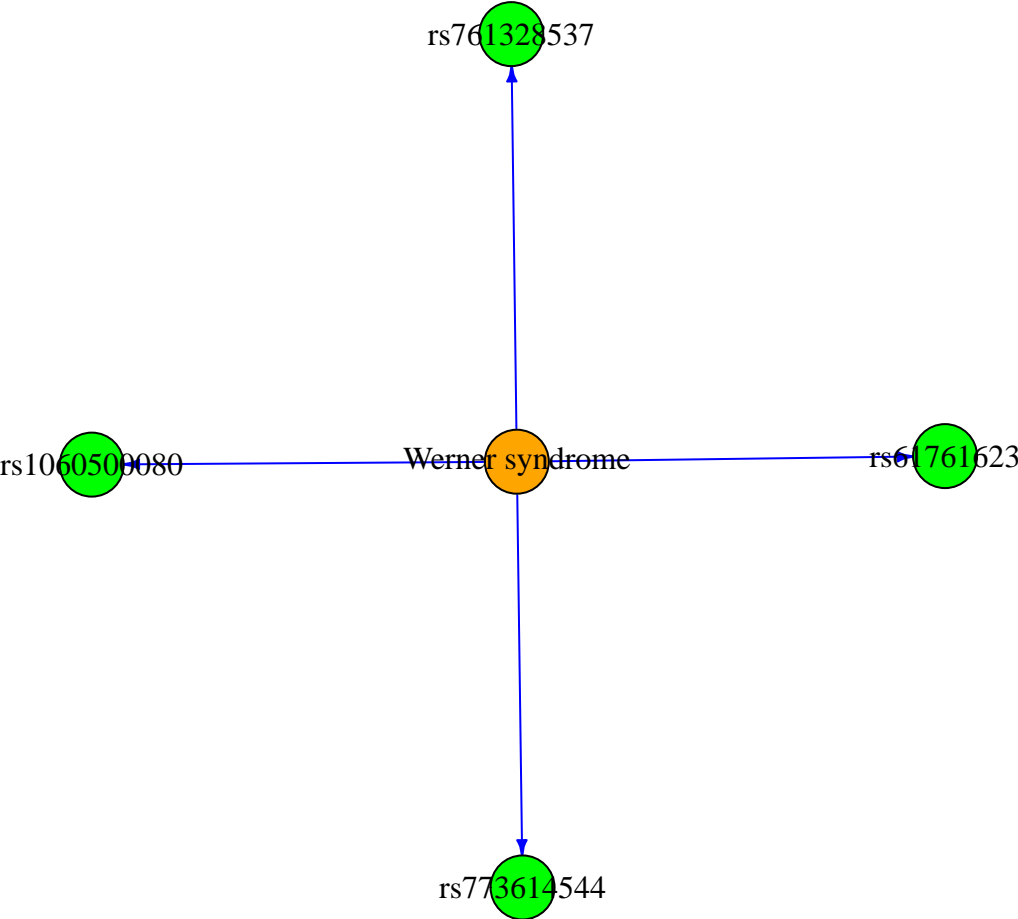



# Variant–Disease Network (WFS1–Related Spectrum Disorders)

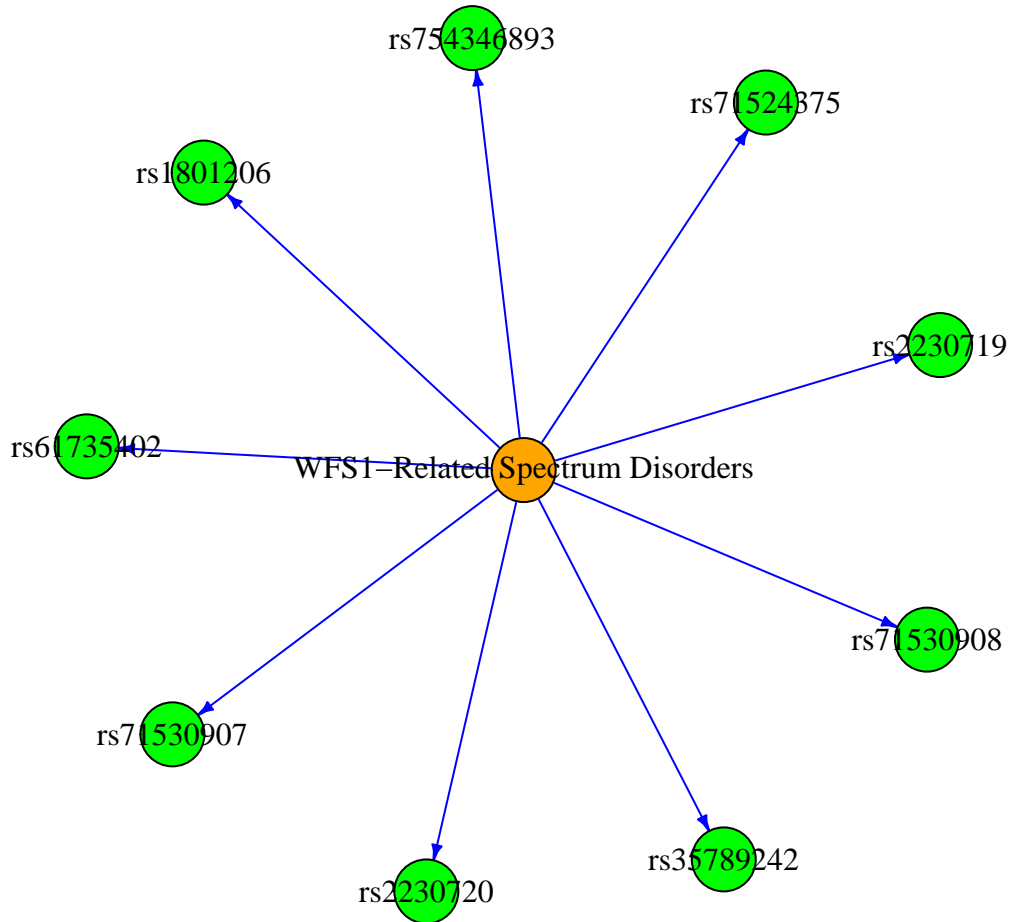

**Variant–Disease Network (Wilms tumor)**

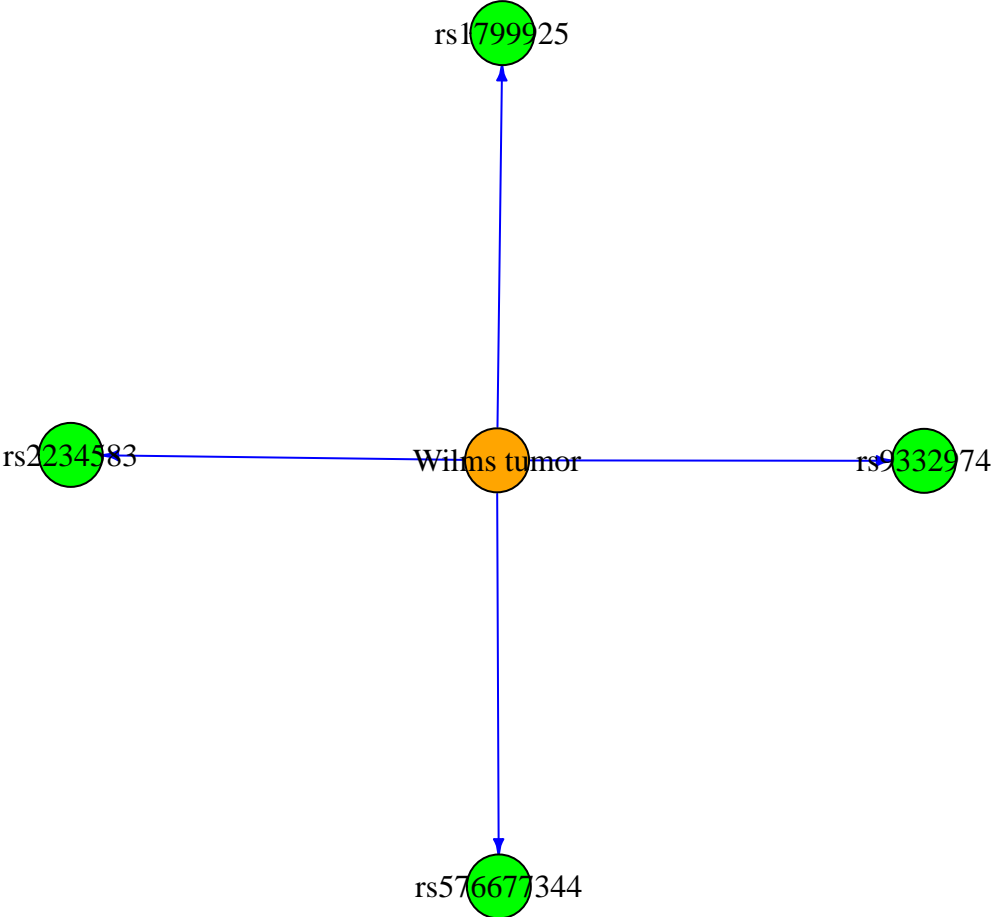

Variant–Disease Network (Wilms tumor 1)

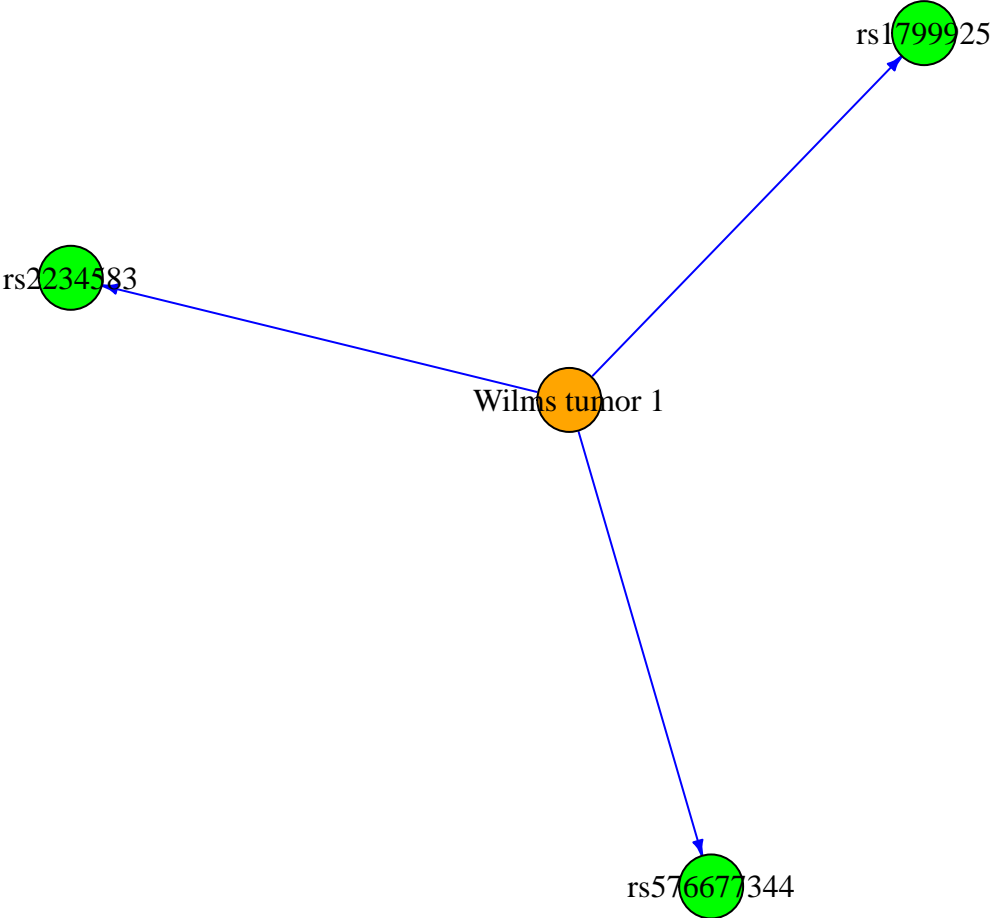

**Variant–Disease Network (Wiskott–Aldrich syndrome)**

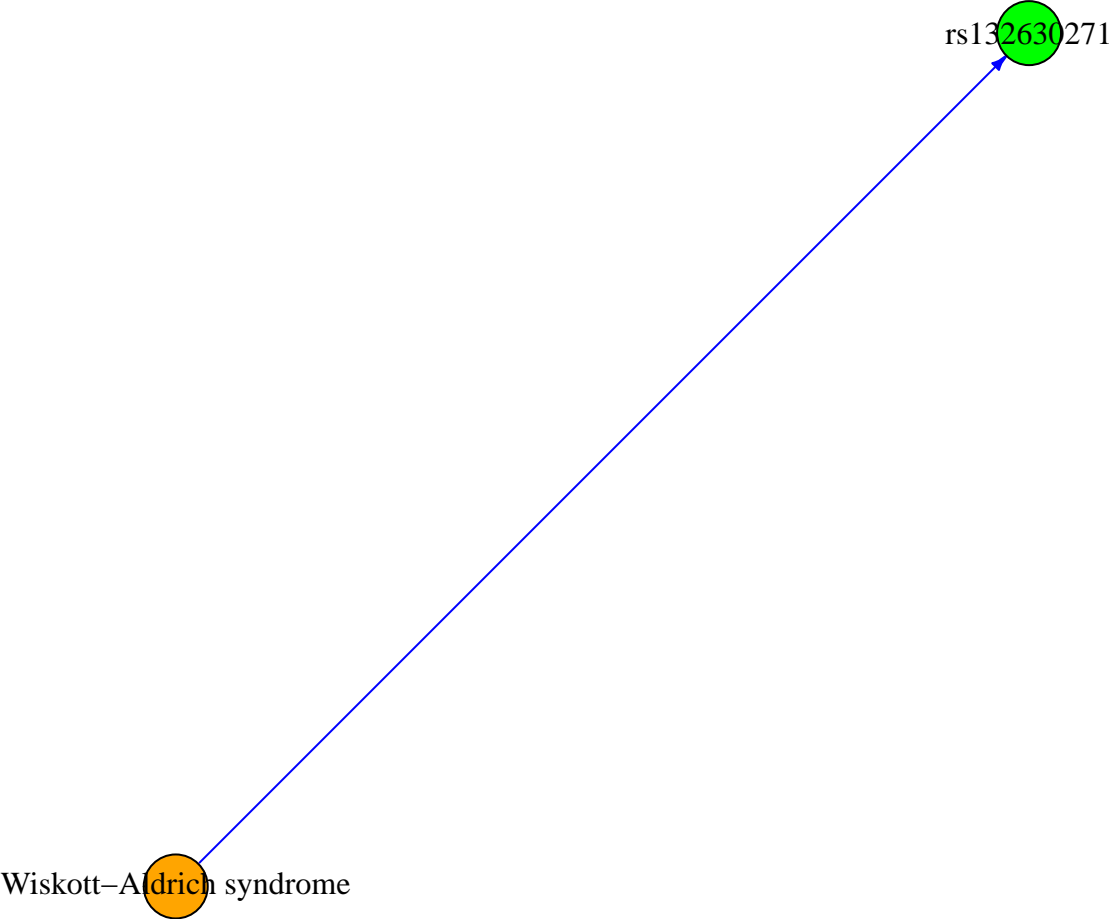

**Variant–Disease Network (Wolff–Parkinson–White syndrome)**

Wolff–Parkinson–White syndrome

rs397517263



**Variant–Disease Network (Wolfram syndrome)**

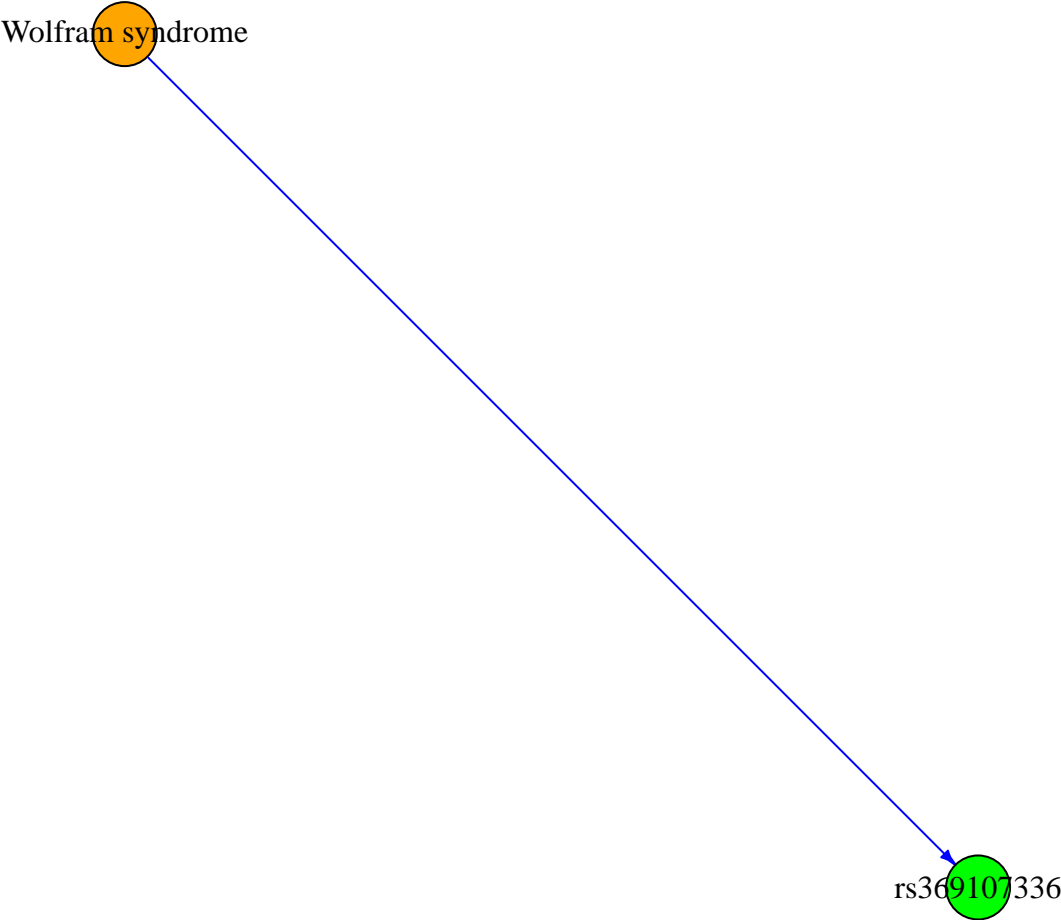

## Variant-Disease Network (Wolman disease)

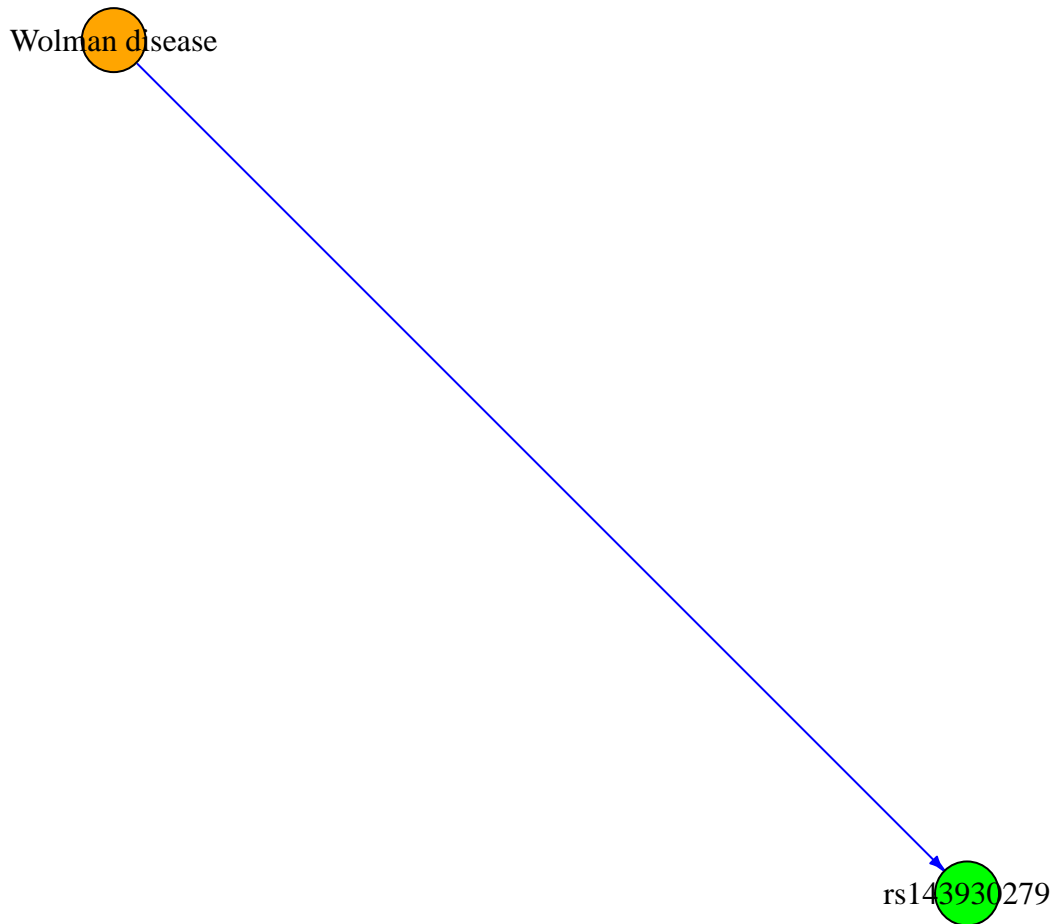

## Variant–Disease Network (Worster Drought syndrome)

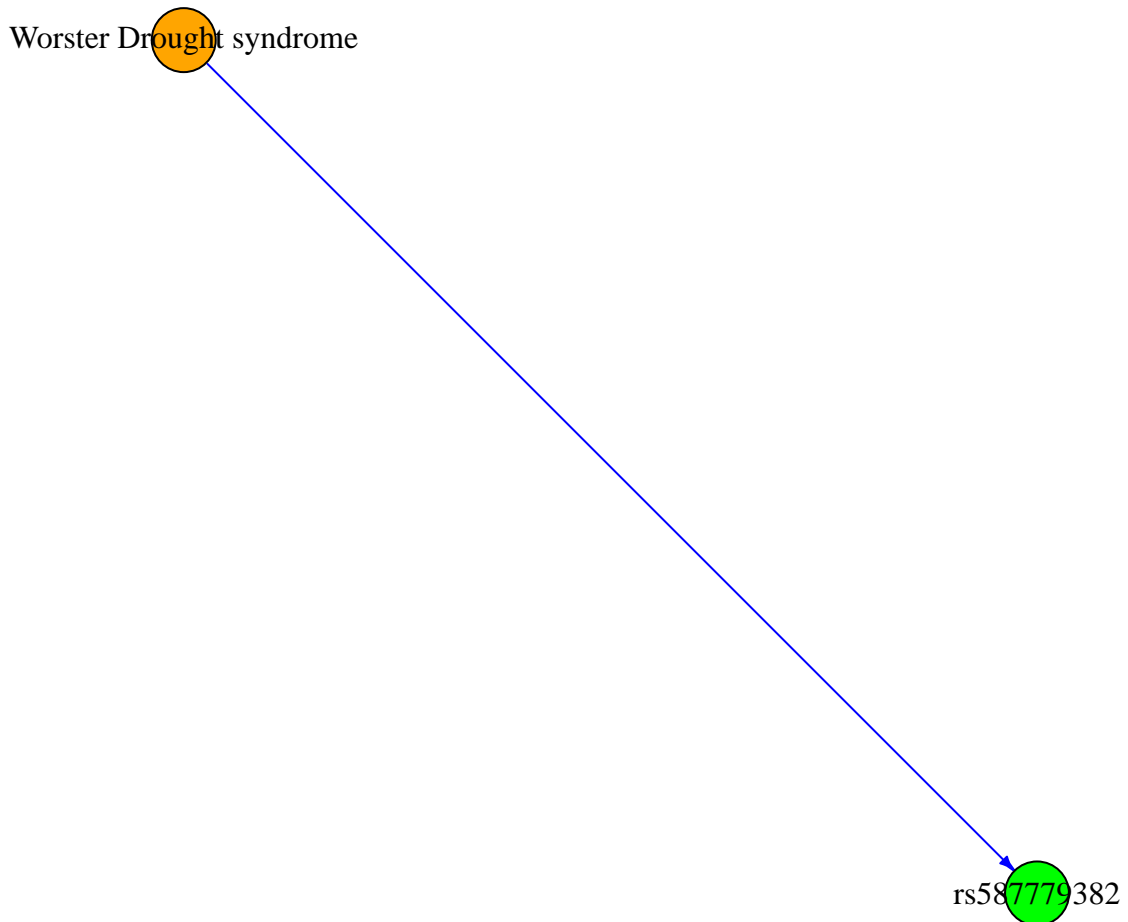



Variant–Disease Network (Xanthinuria)

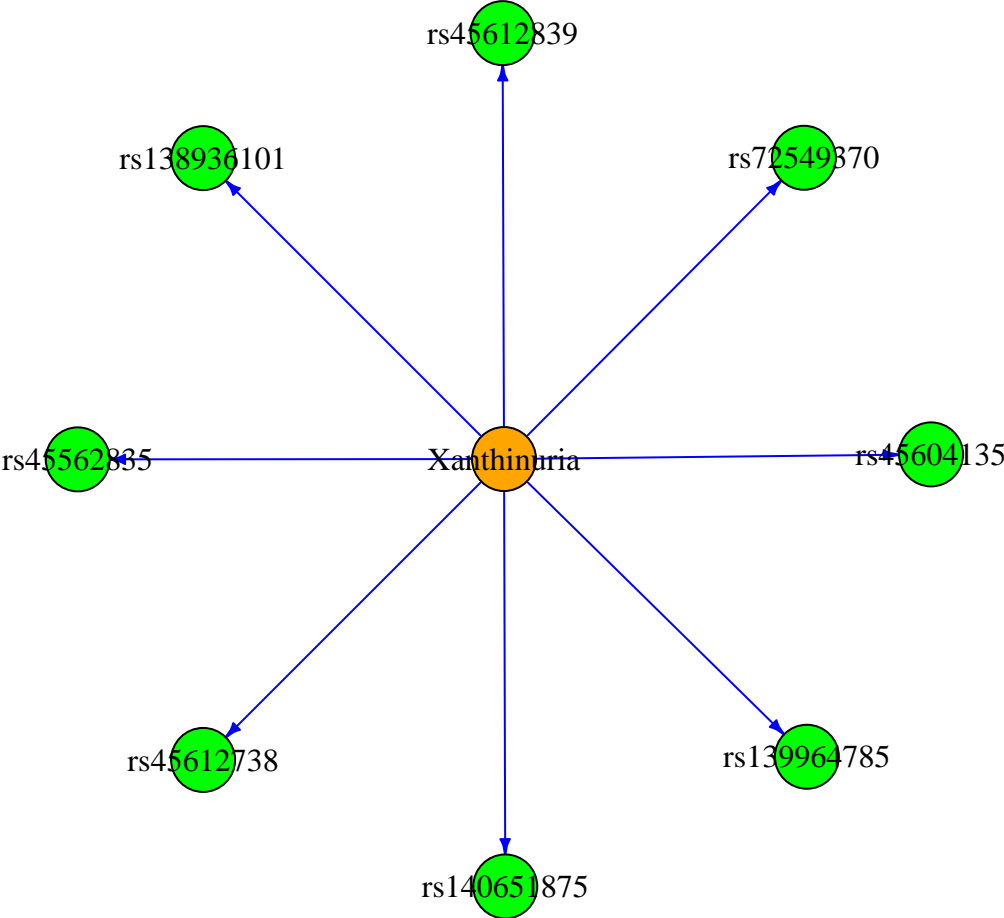

## Variant–Disease Network (Xanthinuria type 2)

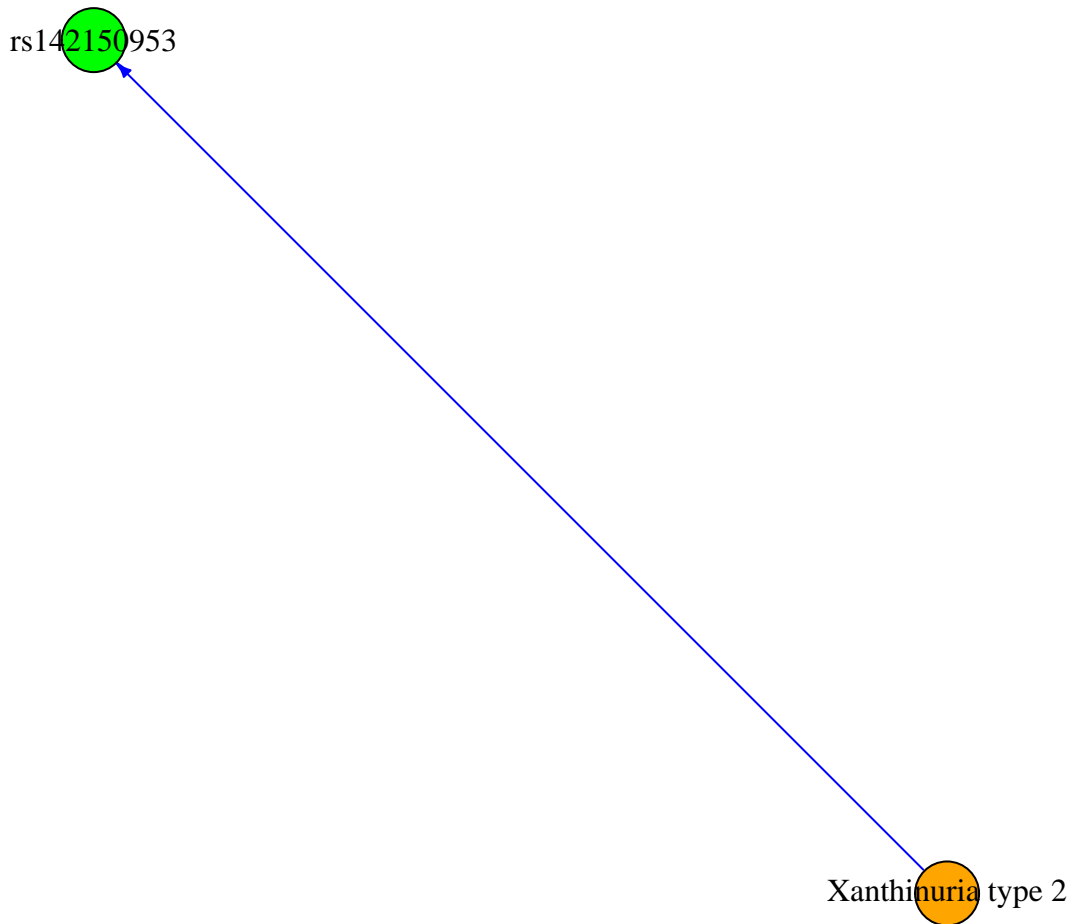

**Variant–Disease Network (Xeroderma pigmentosum)**

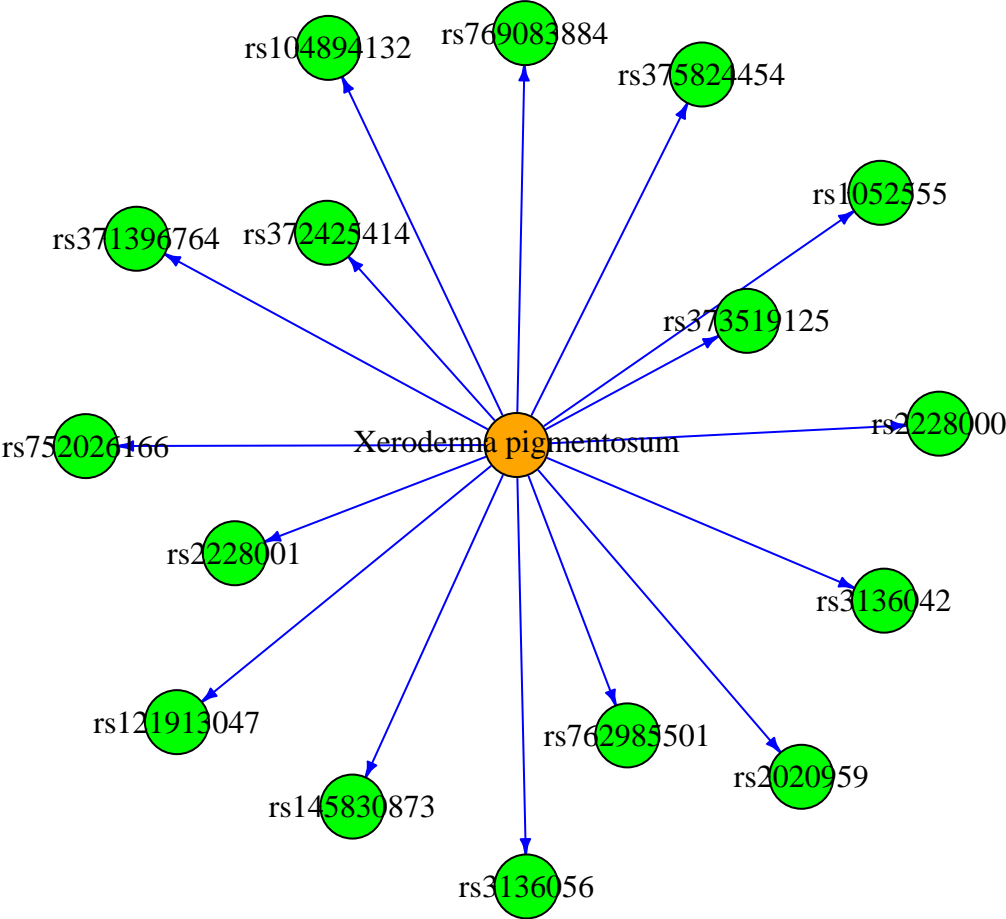

## Variant–Disease Network (X-linked agammaglobulinemia)

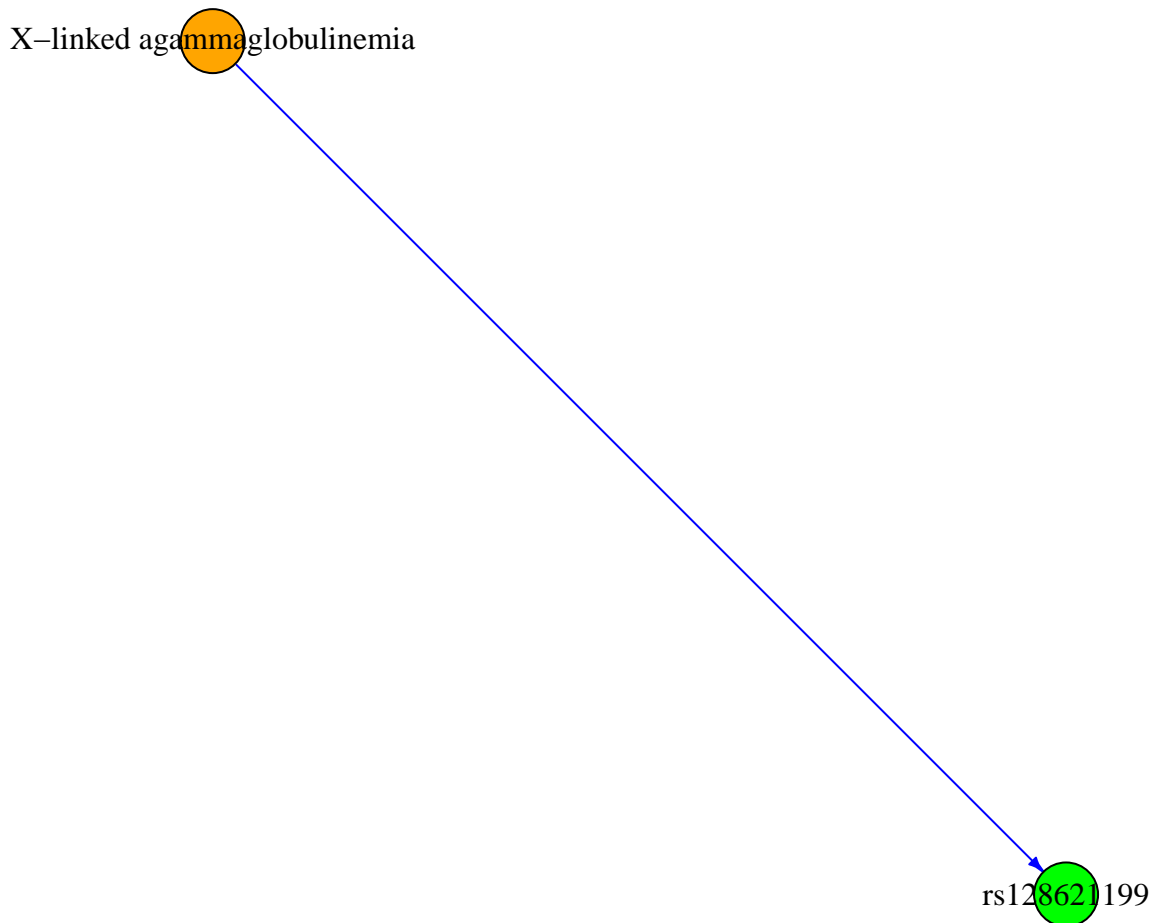

# nt-Disease Network (X-linked agammaglobulinemia with growth hormone d

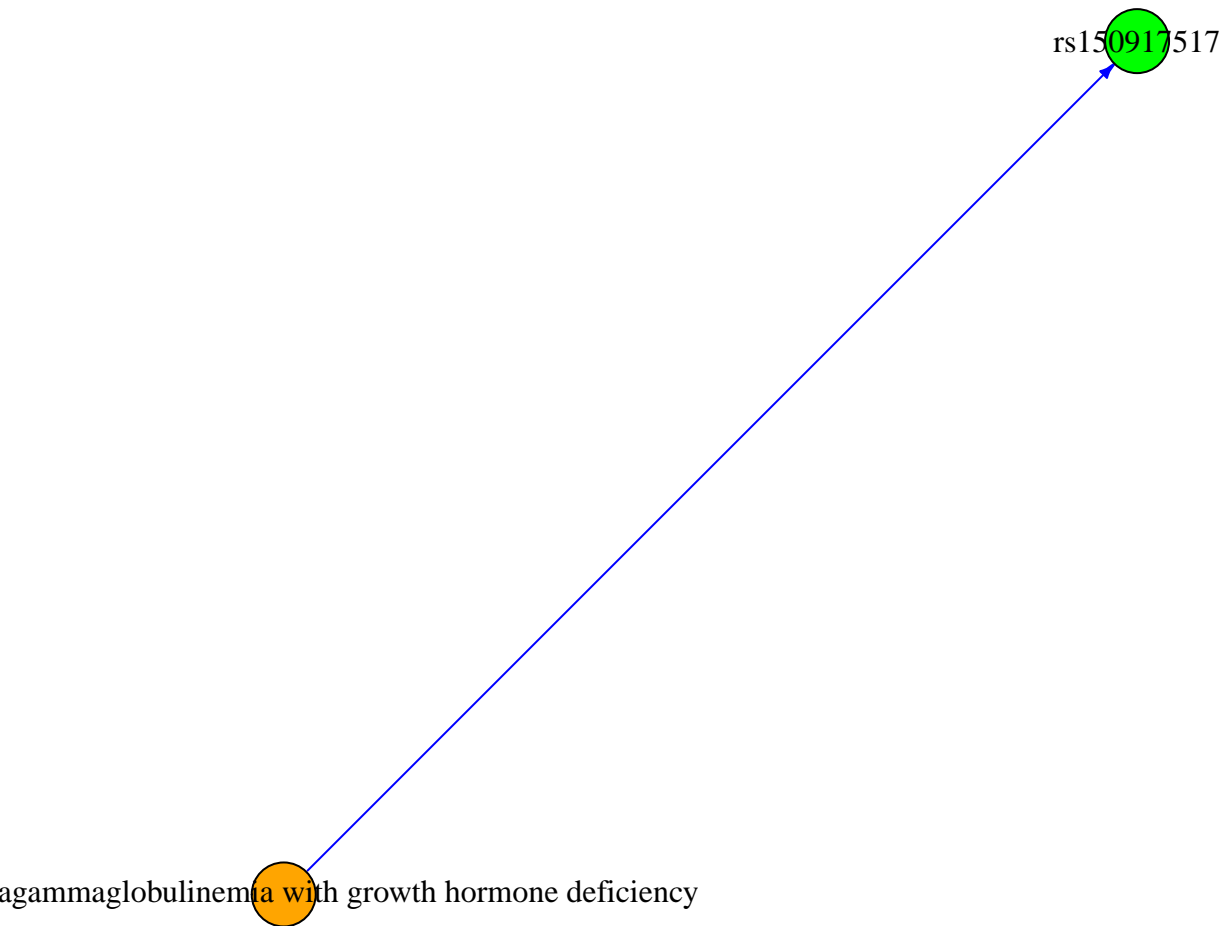

## Variant-Disease Network (XY sex reversal)

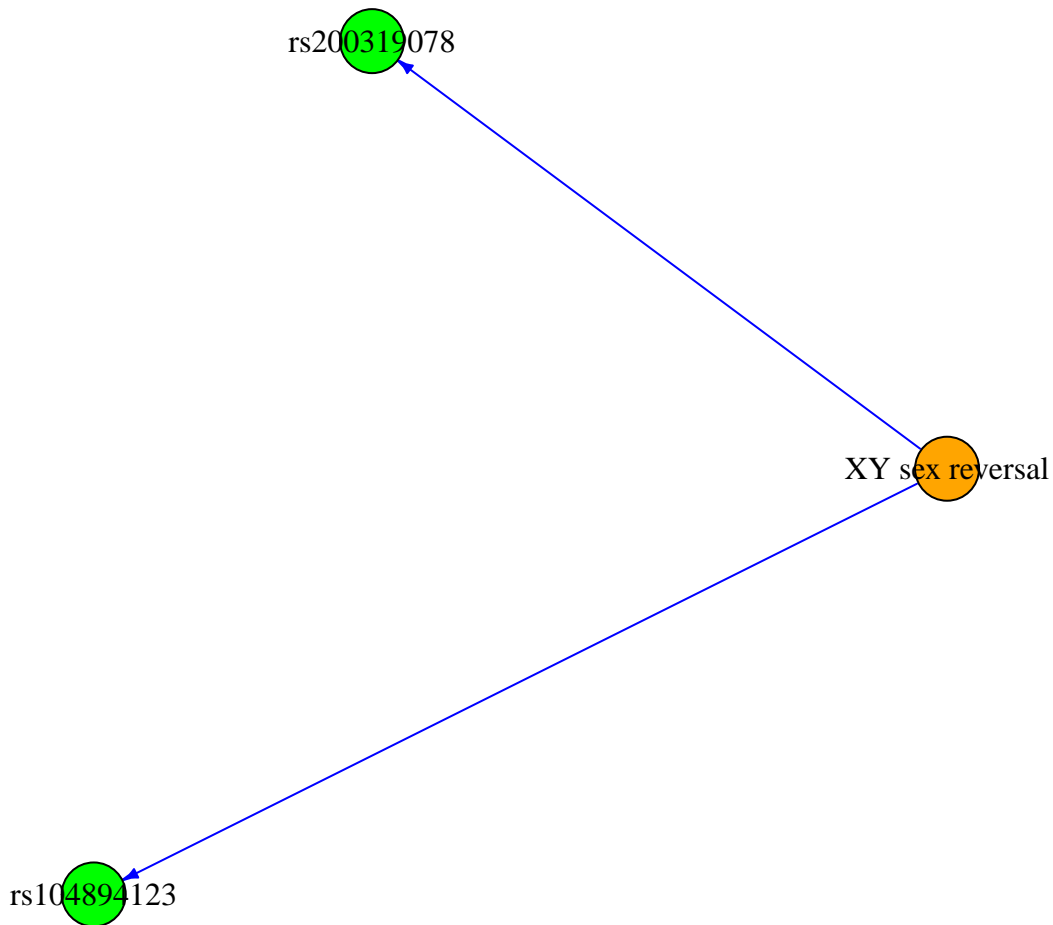

# Variant–Disease Network (Zonular Pulverulent Cataract)

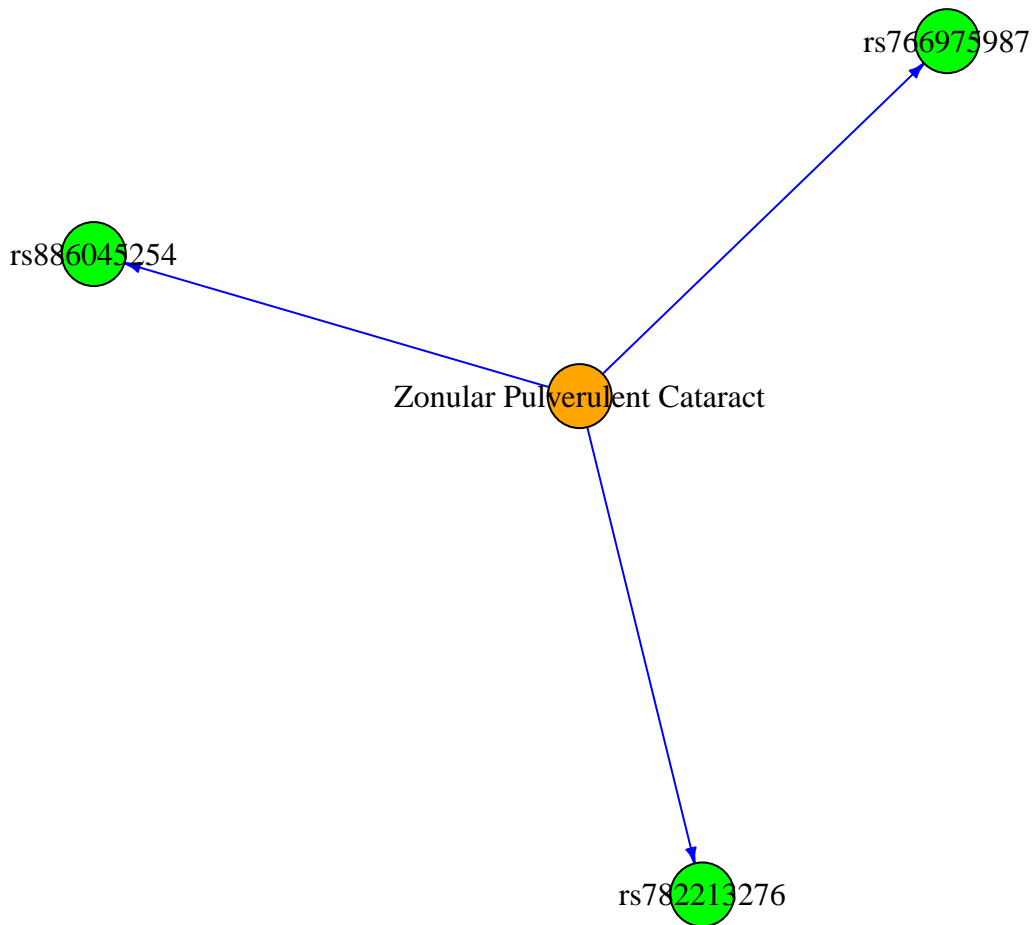

Variant–Disease Network (Zonular pulverulent cataract 3)

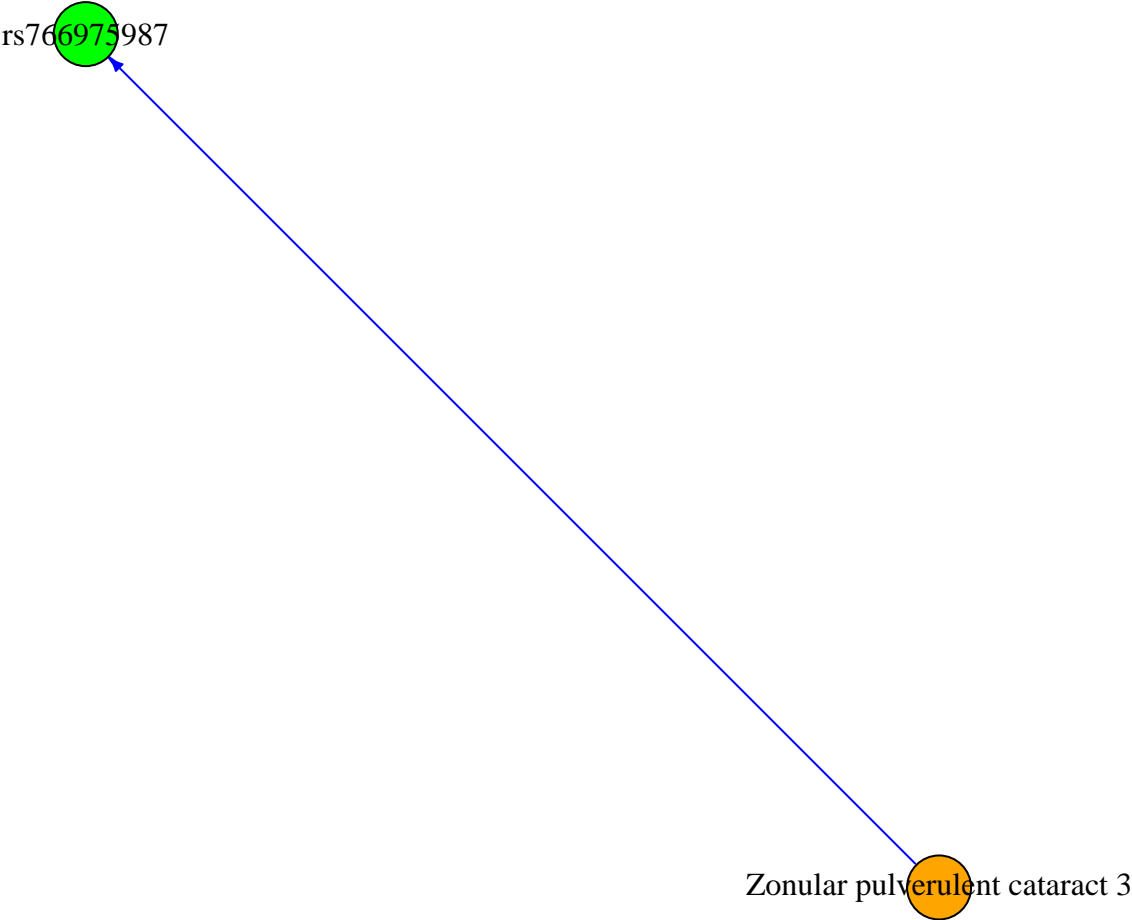



## Variant-Disease Network (Adventurousness)

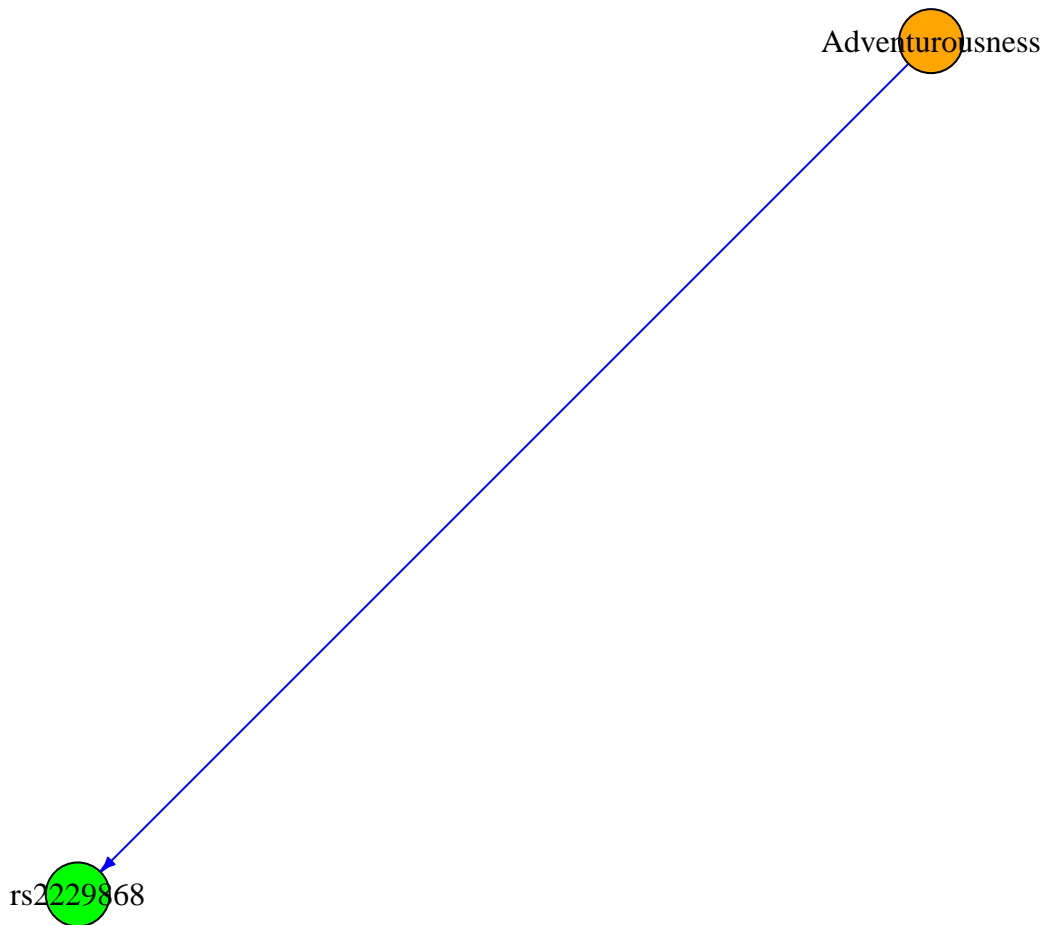

## Variant–Disease Network (Alcohol consumption)

rs7640



```
graph LR; A((Alcohol consumption)) --> B((rs7640))
```

A green circular node with a black outline, containing the text 'rs7640'.

Alcohol consumption



An orange circular node with a black outline, containing the text 'Alcohol consumption'.

Variant–Disease Network (Alcoholic chronic pancreatitis)

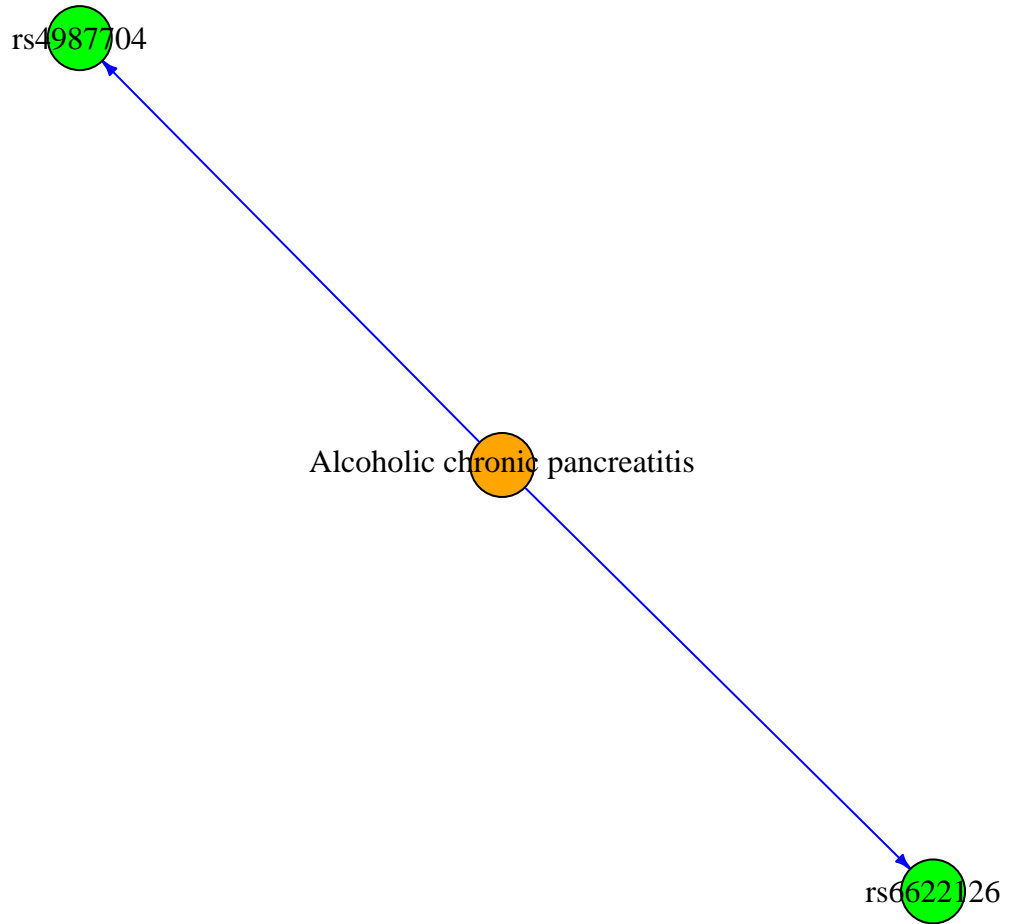

## Variant-Disease Network (Alzheimers disease)

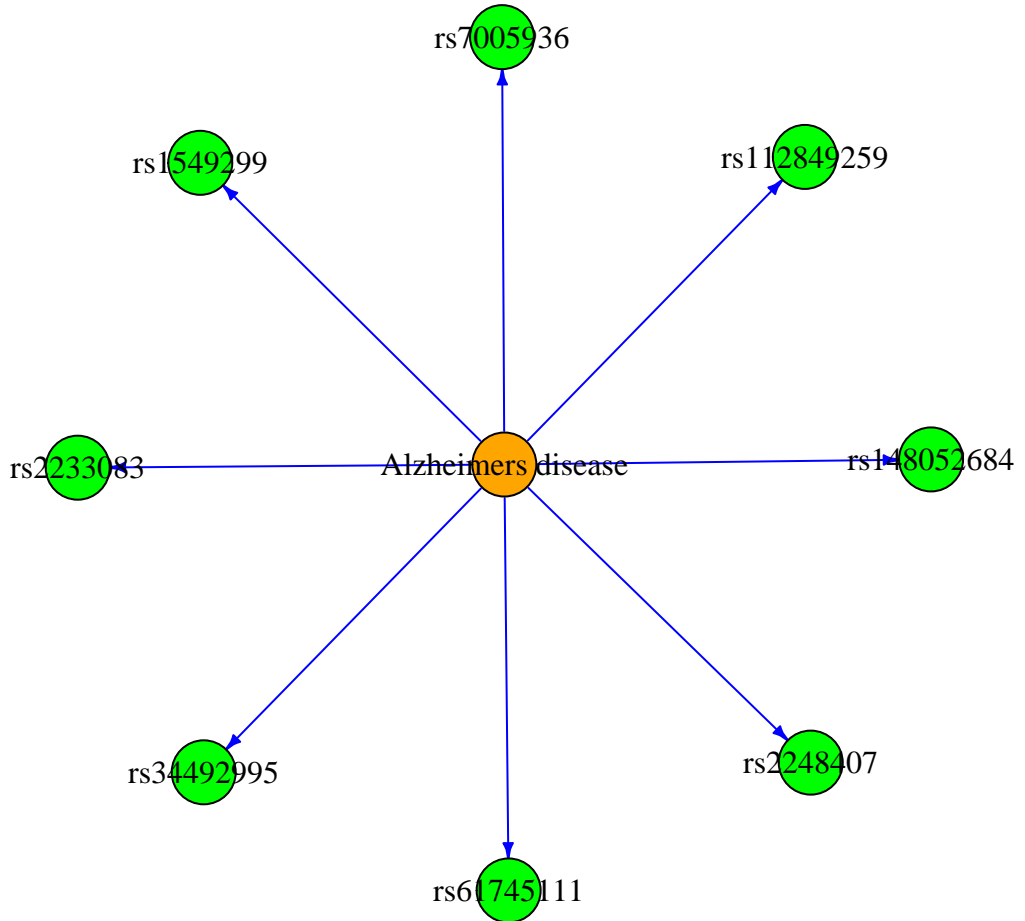

## Variant–Disease Network (Apolipoprotein A1 levels)

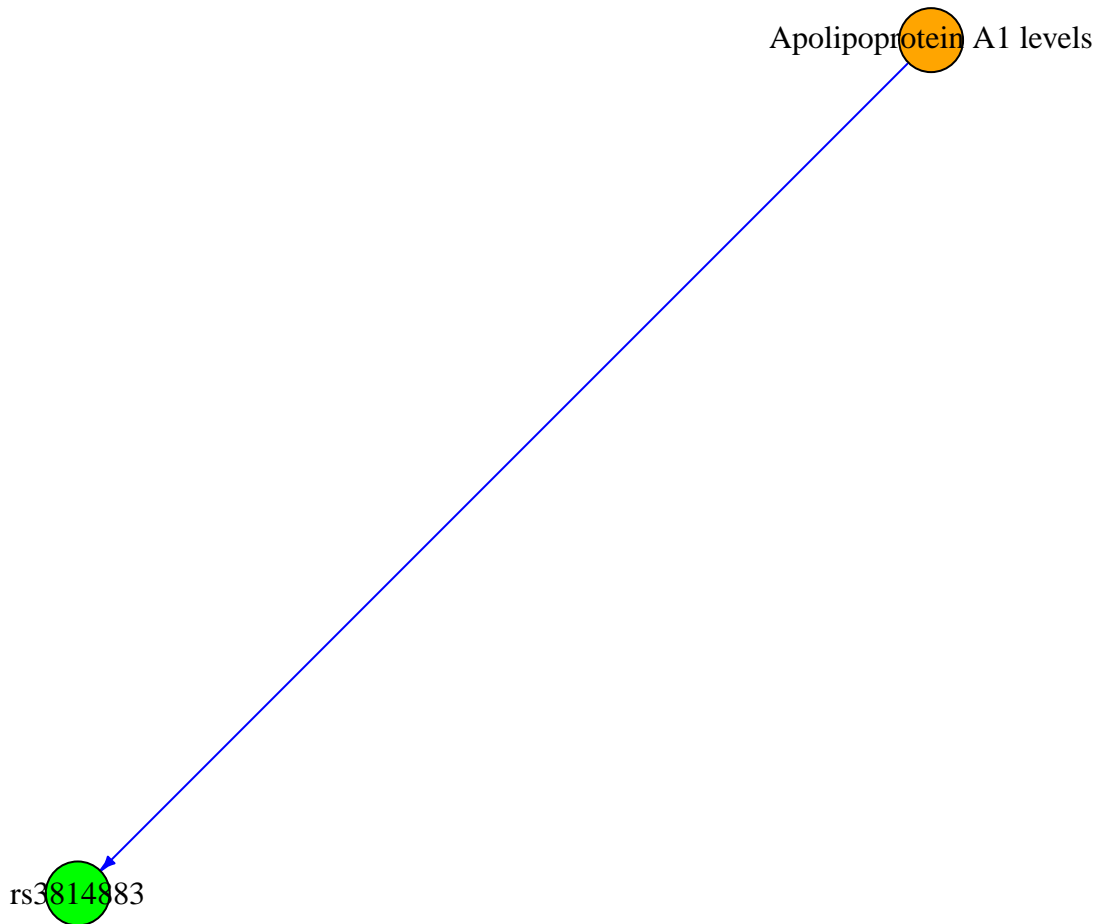

**Variant–Disease Network (Autism spectrum disorder or schizophrenia)**

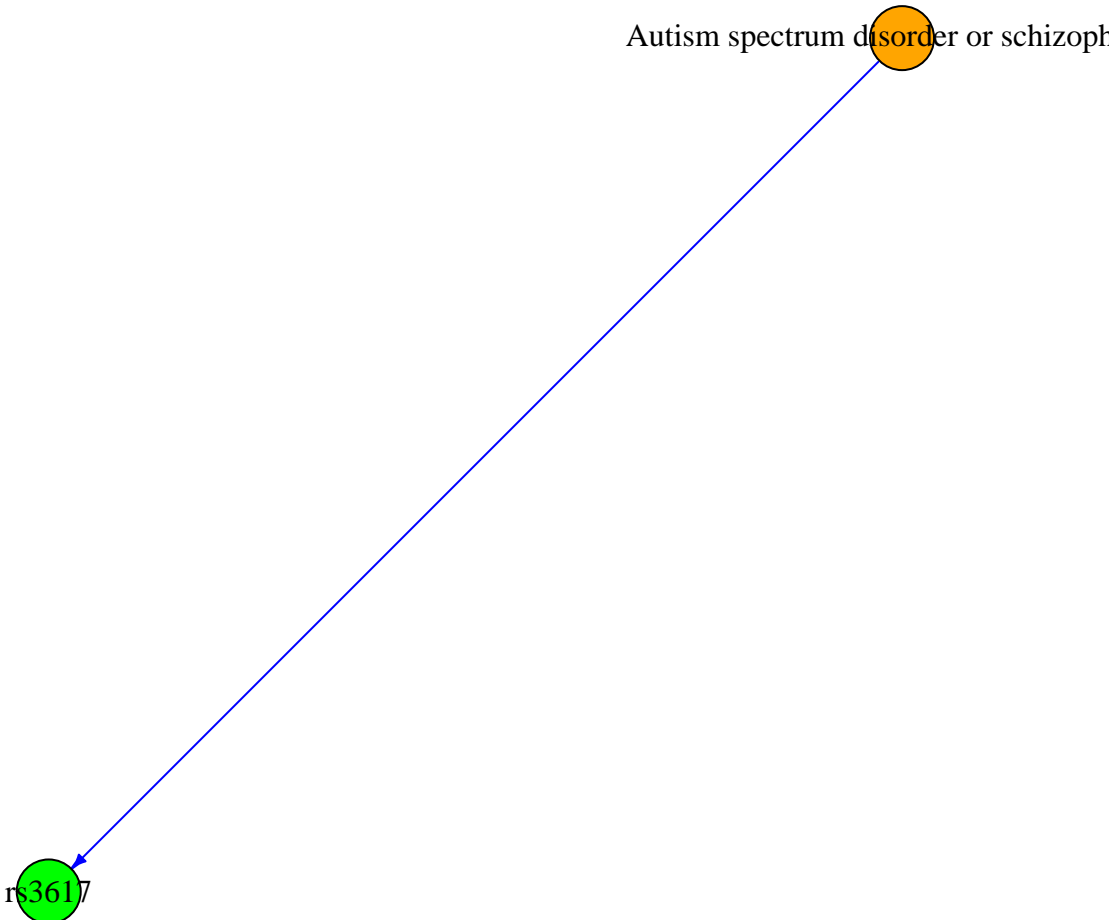

**Variant–Disease Network (Balding type 1)**

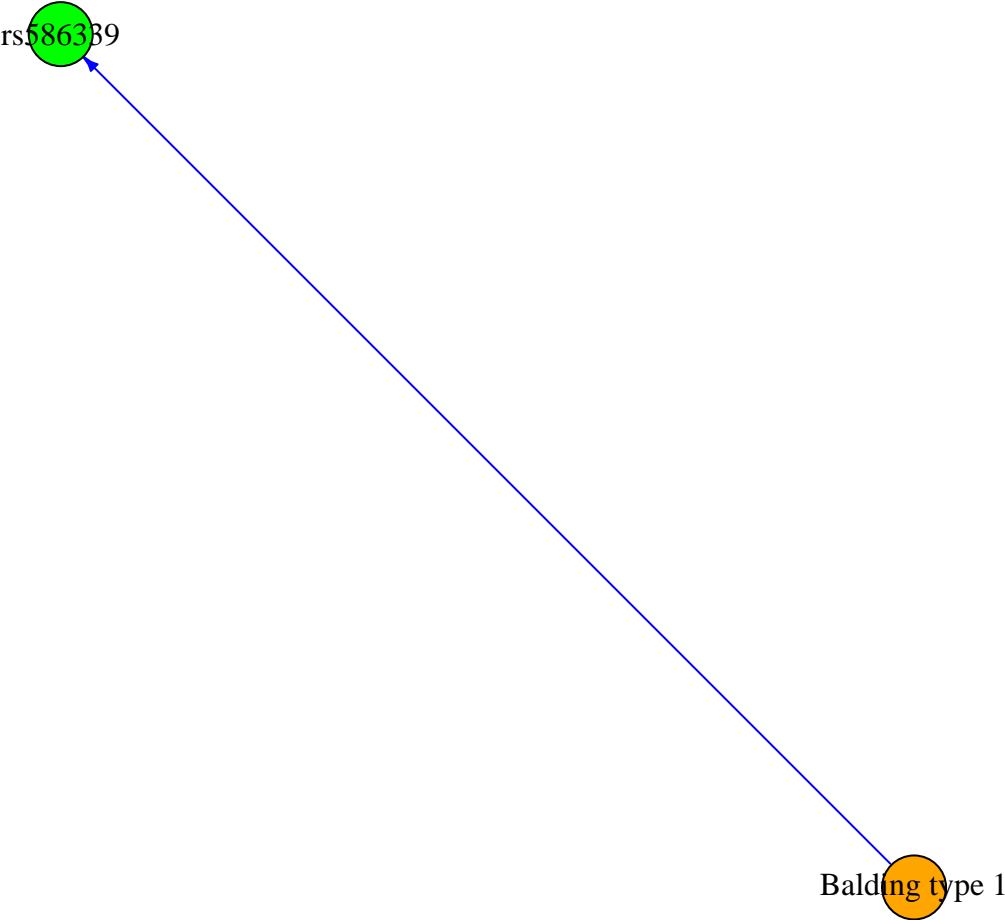

## Variant-Disease Network (Basal cell carcinoma)

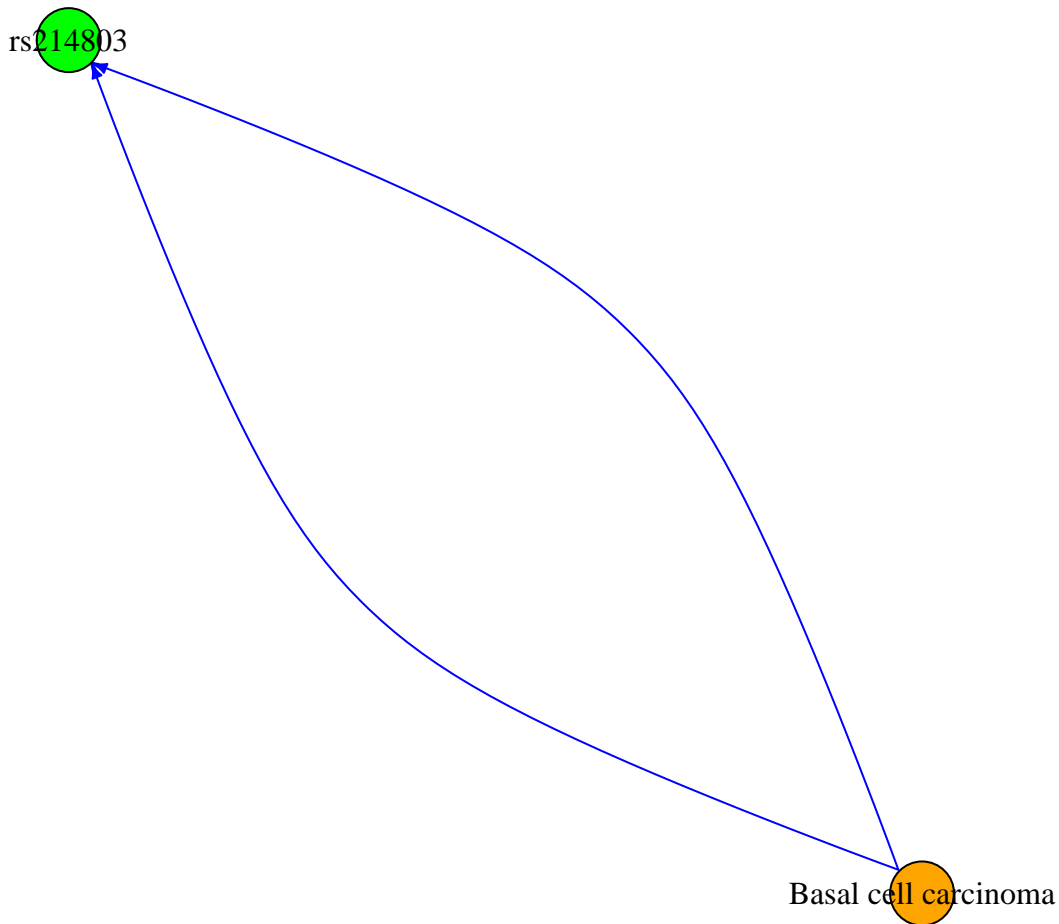



## Variant-Disease Network (Birth weight)

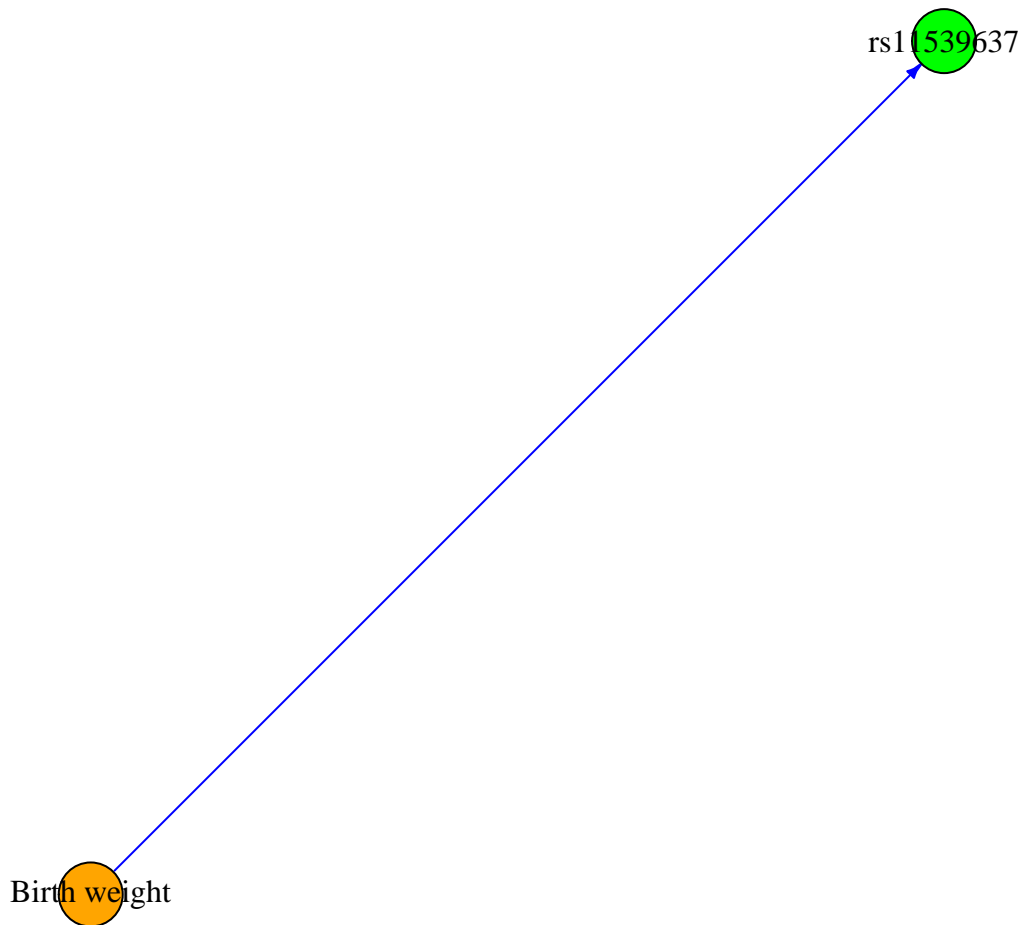

# Variant–Disease Network (Blond vs. brown/black hair color)

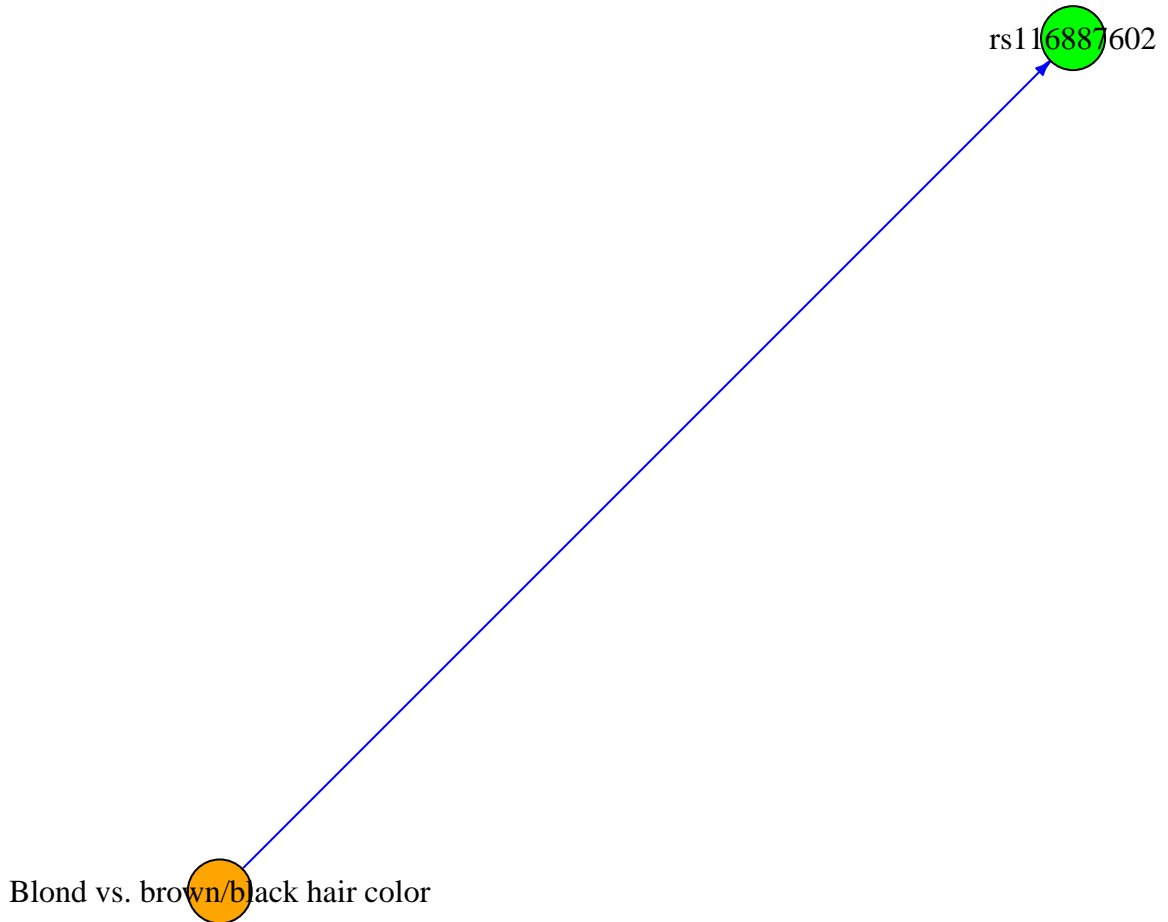

Variant–Disease Network (Blood metabolite ratios)

Blood metabolite ratios

rs1046080

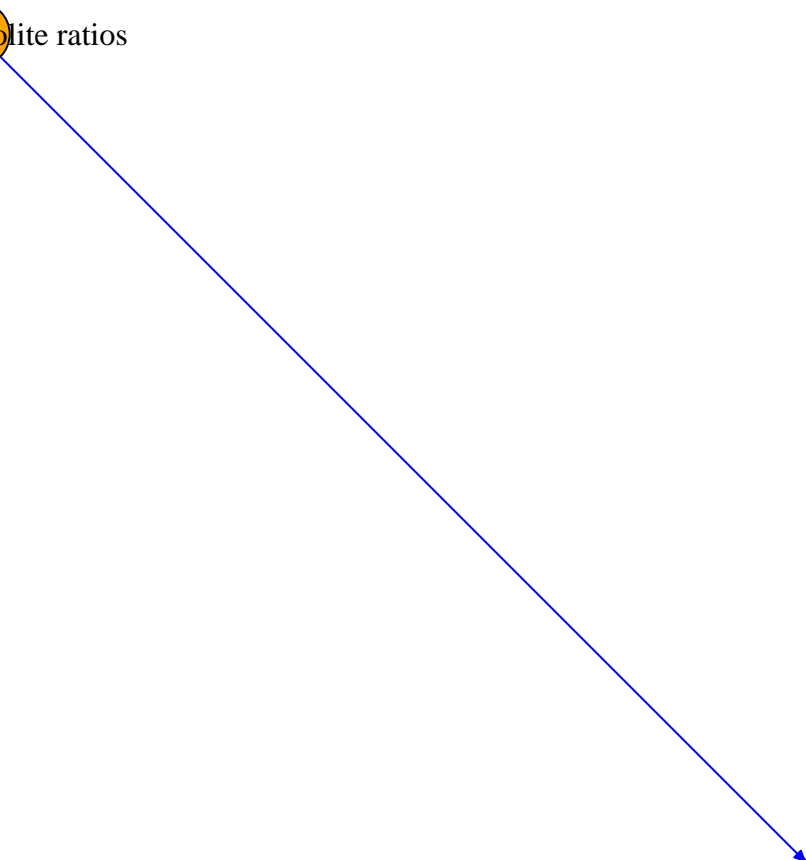

## Variant–Disease Network (Blood protein levels)

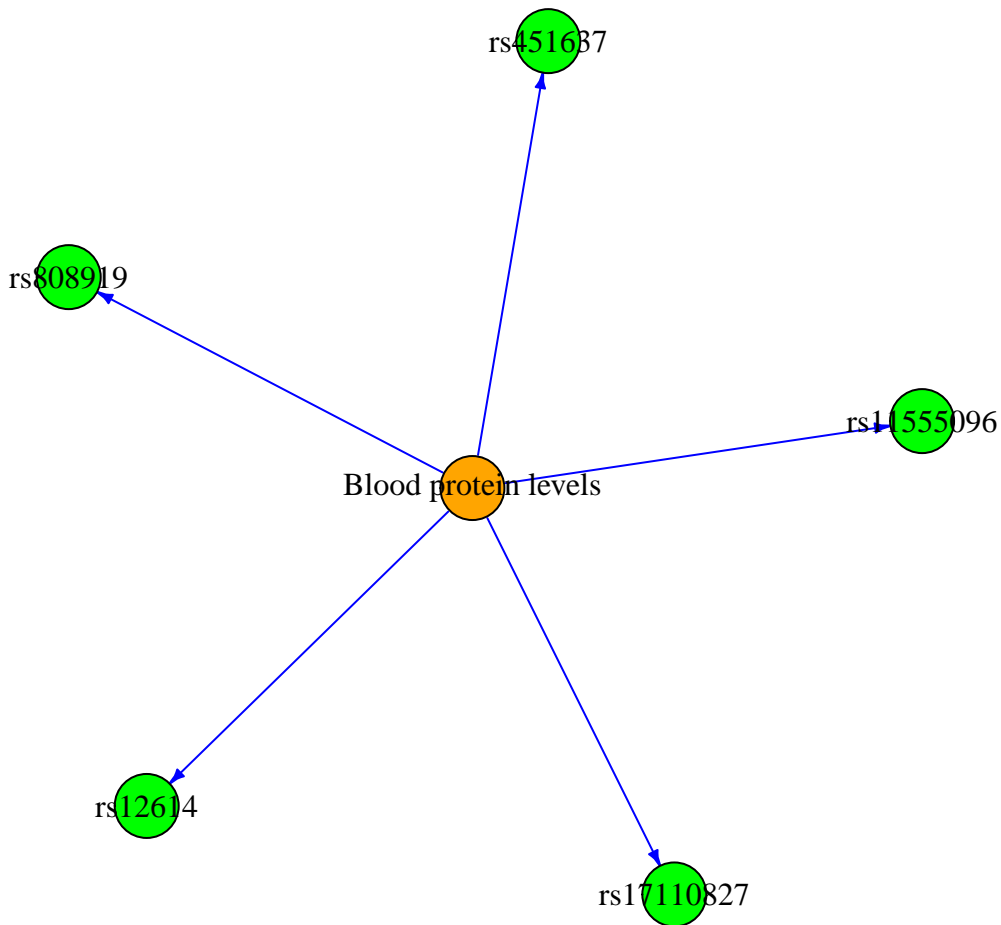

## Variant–Disease Network (Body fat percentage)

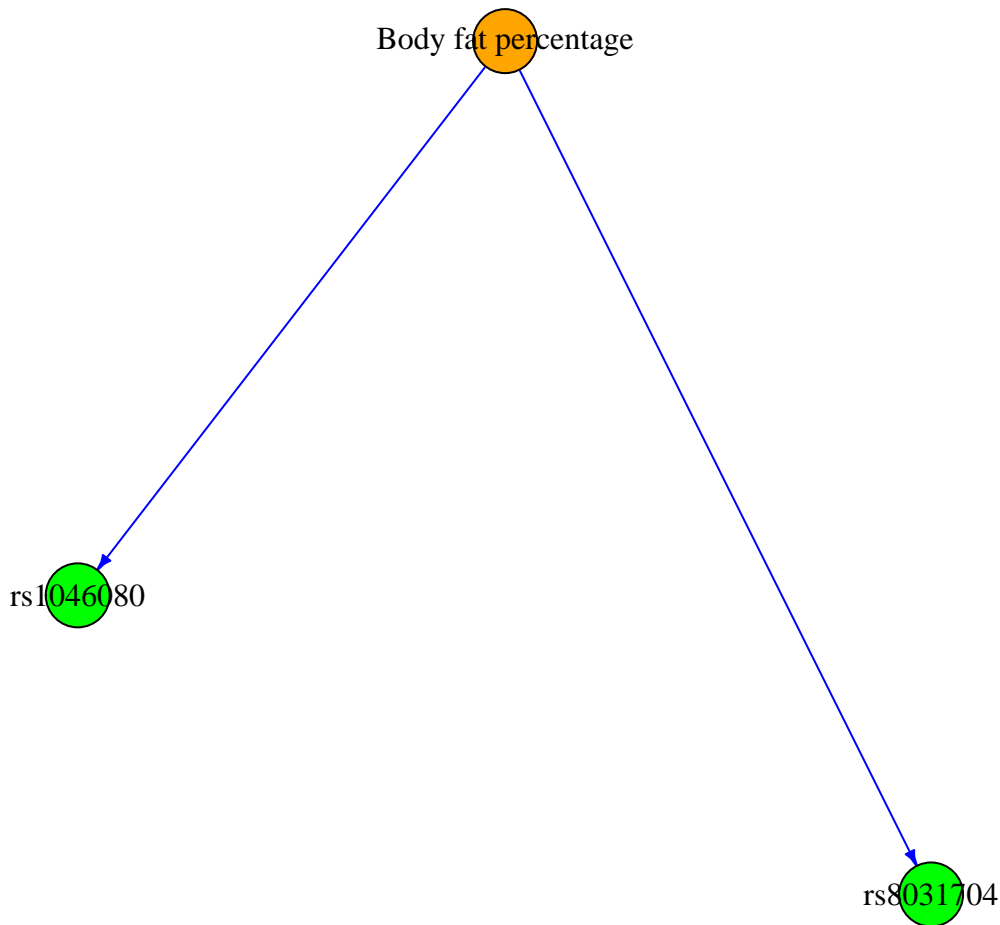

## Variant-Disease Network (Body mass index)

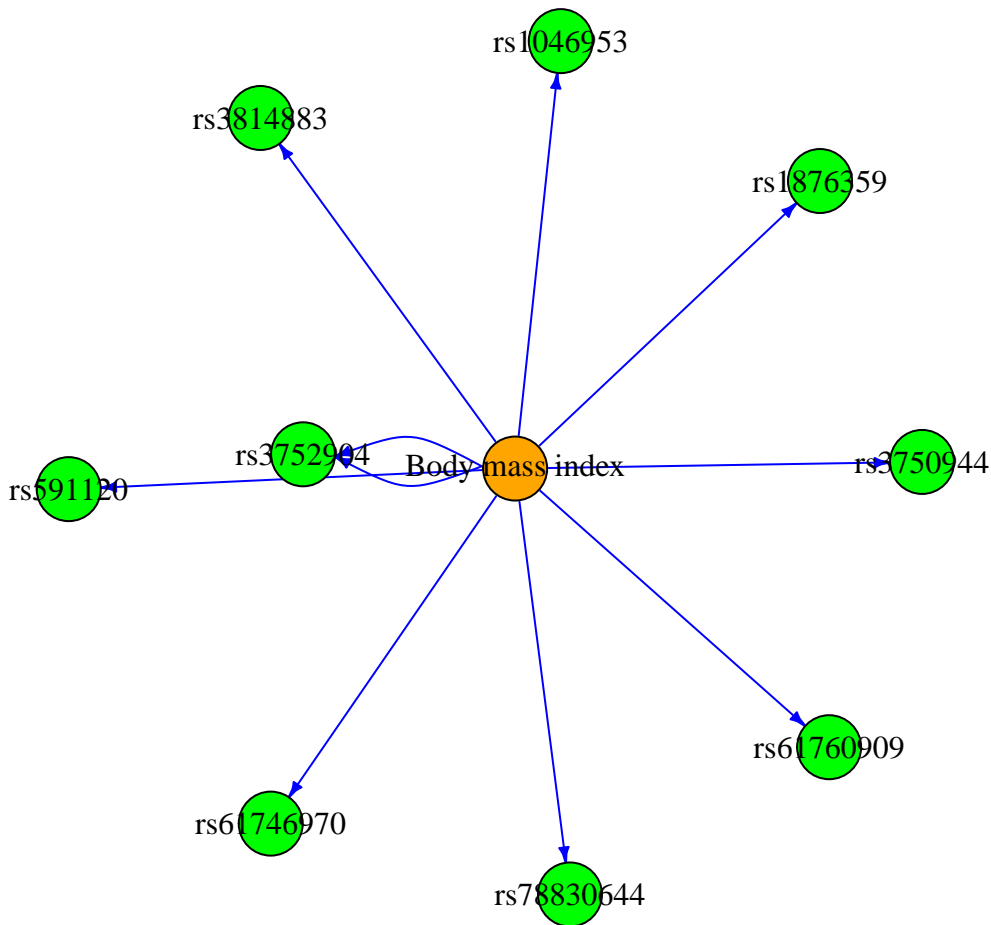

## Variant–Disease Network (Body mass index )

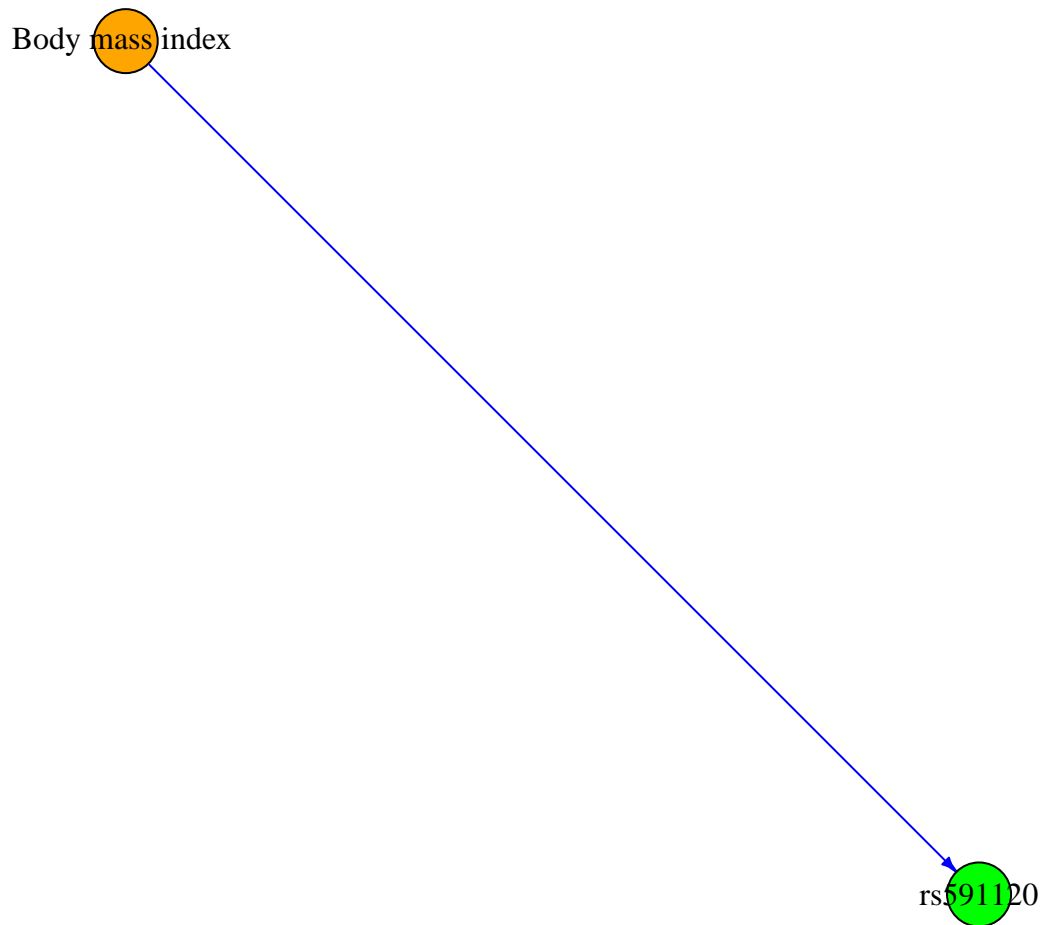

# Variant–Disease Network (Body mass index x sex x age interaction )

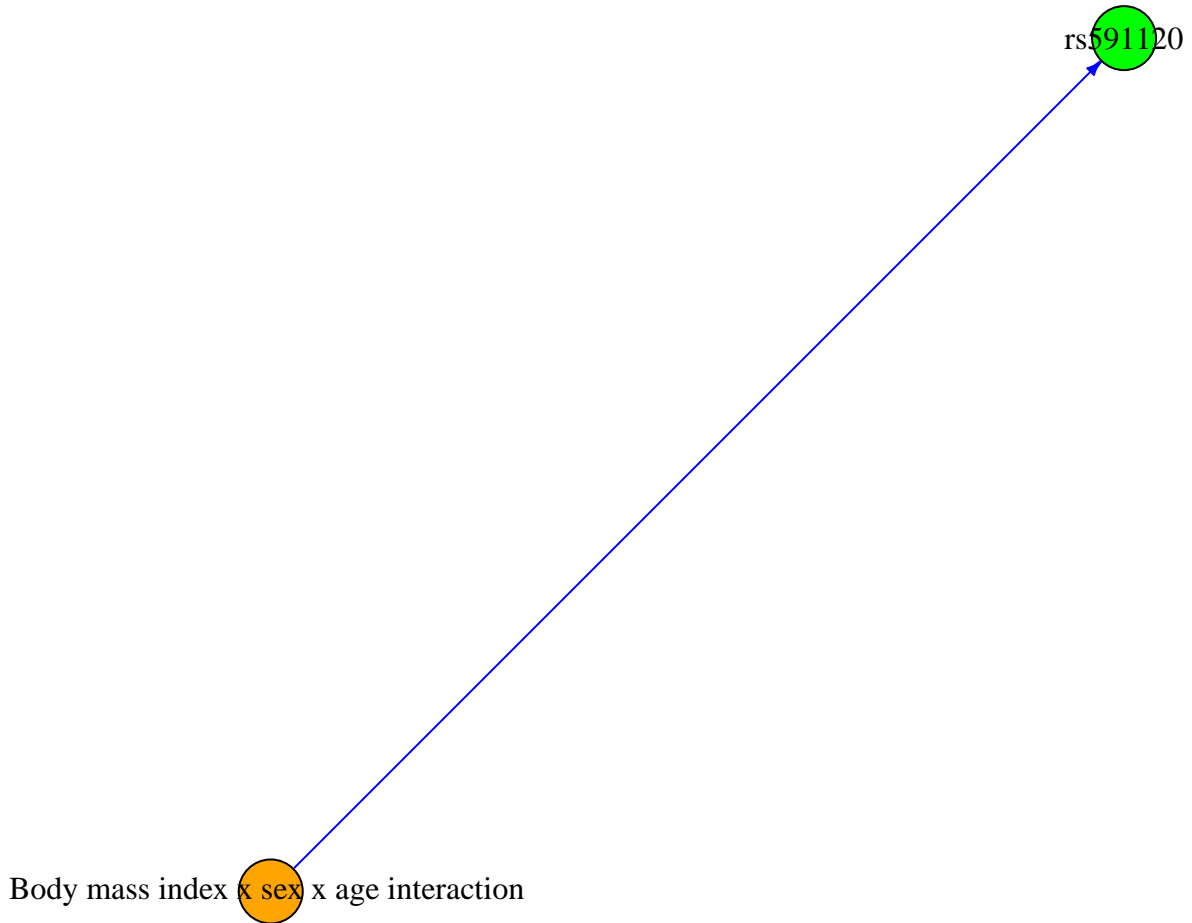



## Variant–Disease Network (Bone mineral content)

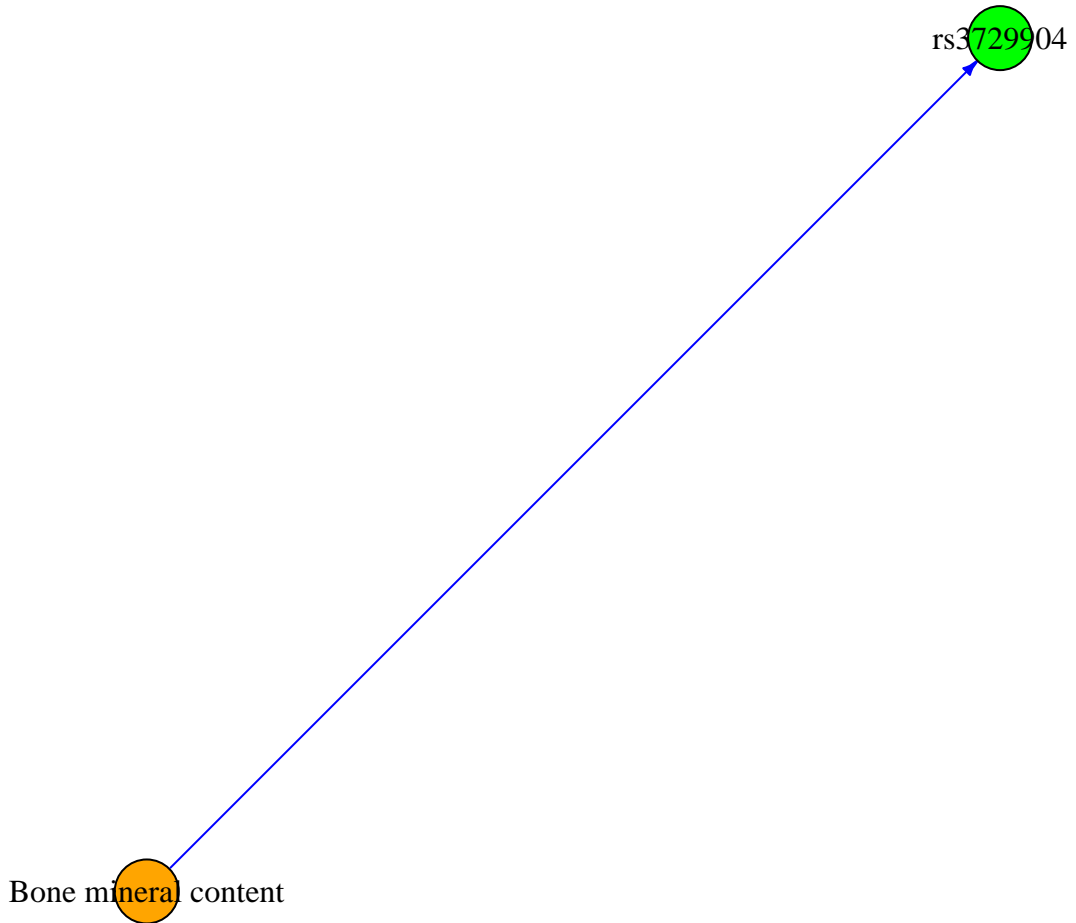

## Variant–Disease Network (Brain region volumes)

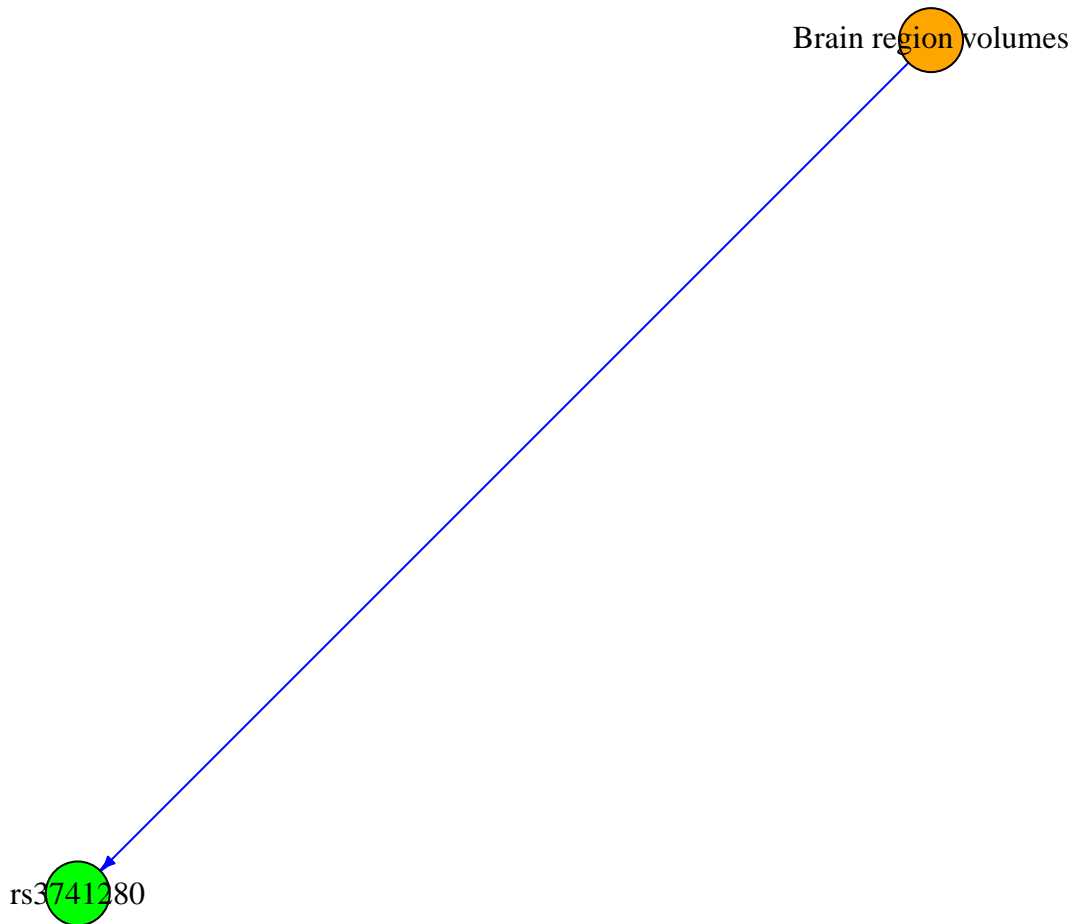

Variant–Disease Network (Breast cancer specific mortality in breast cancer)

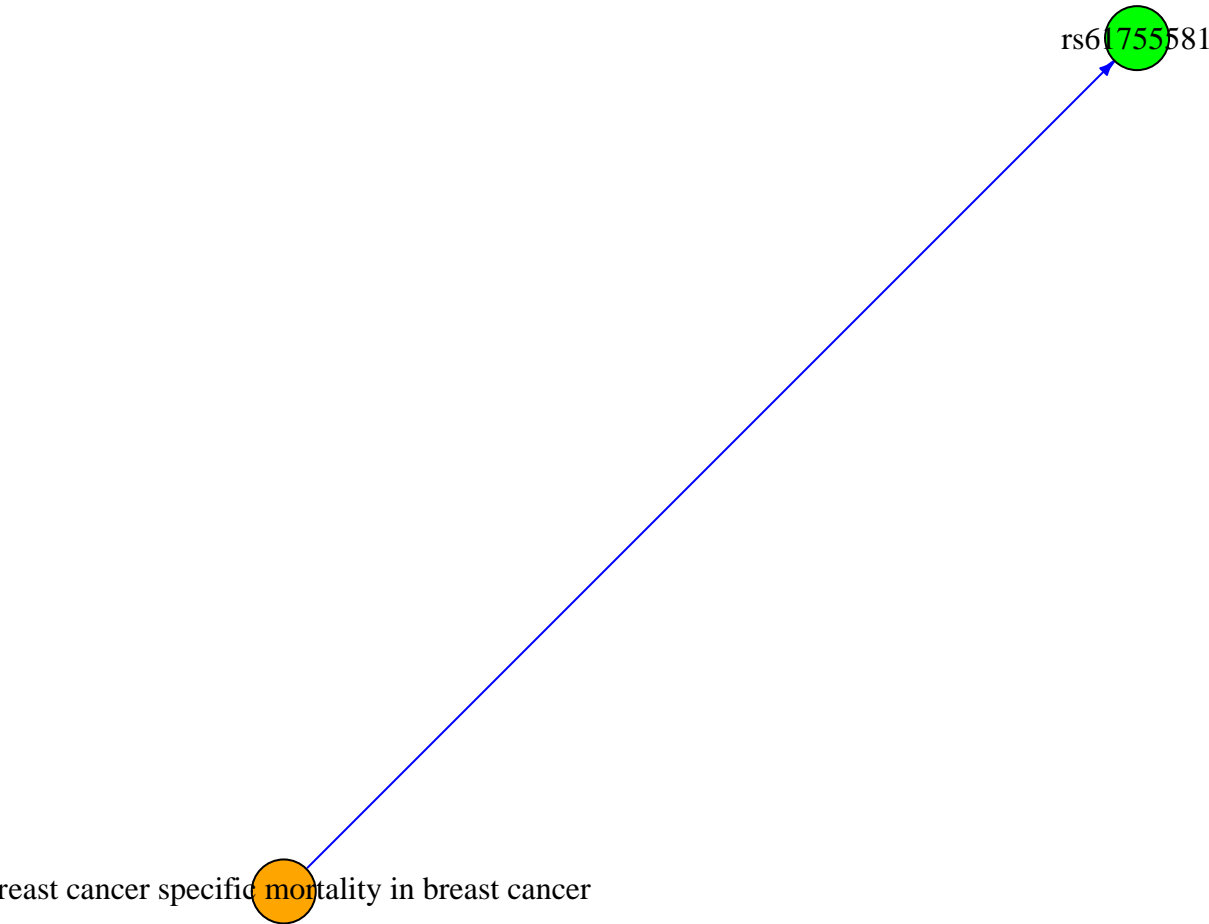

## Variant-Disease Network (Cataracts )

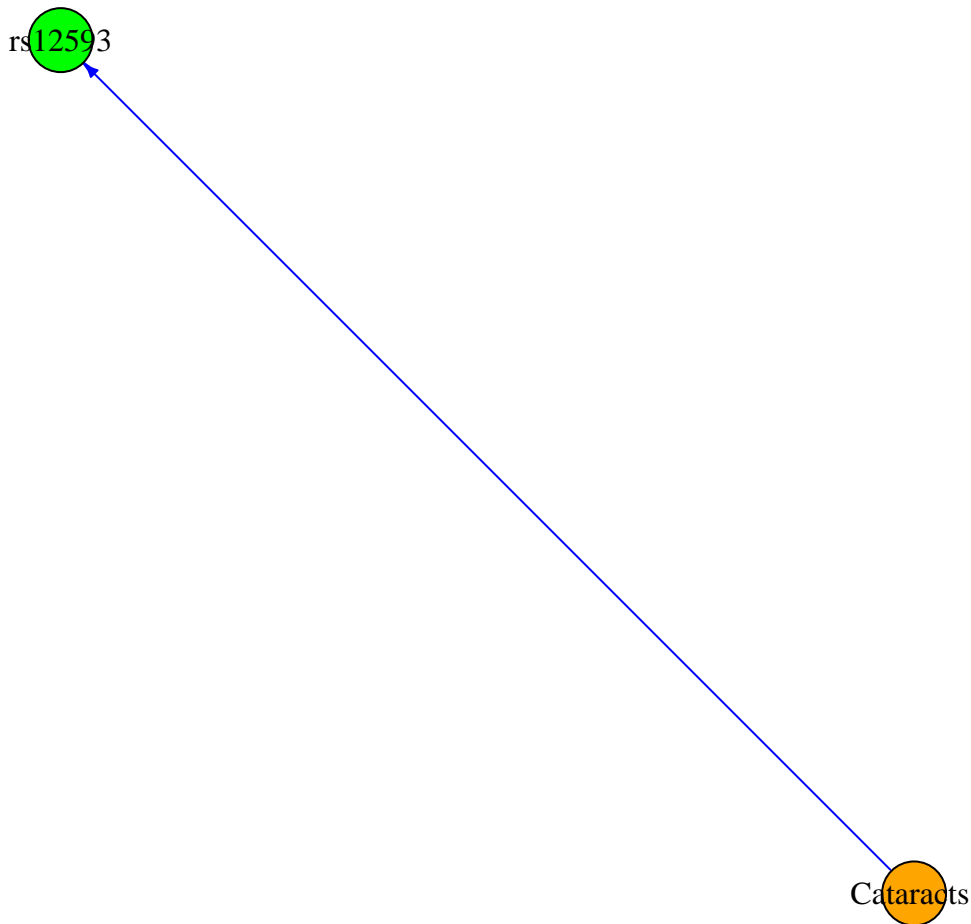

Variant–Disease Network (Cerebrospinal AB1–42 levels in normal cognition

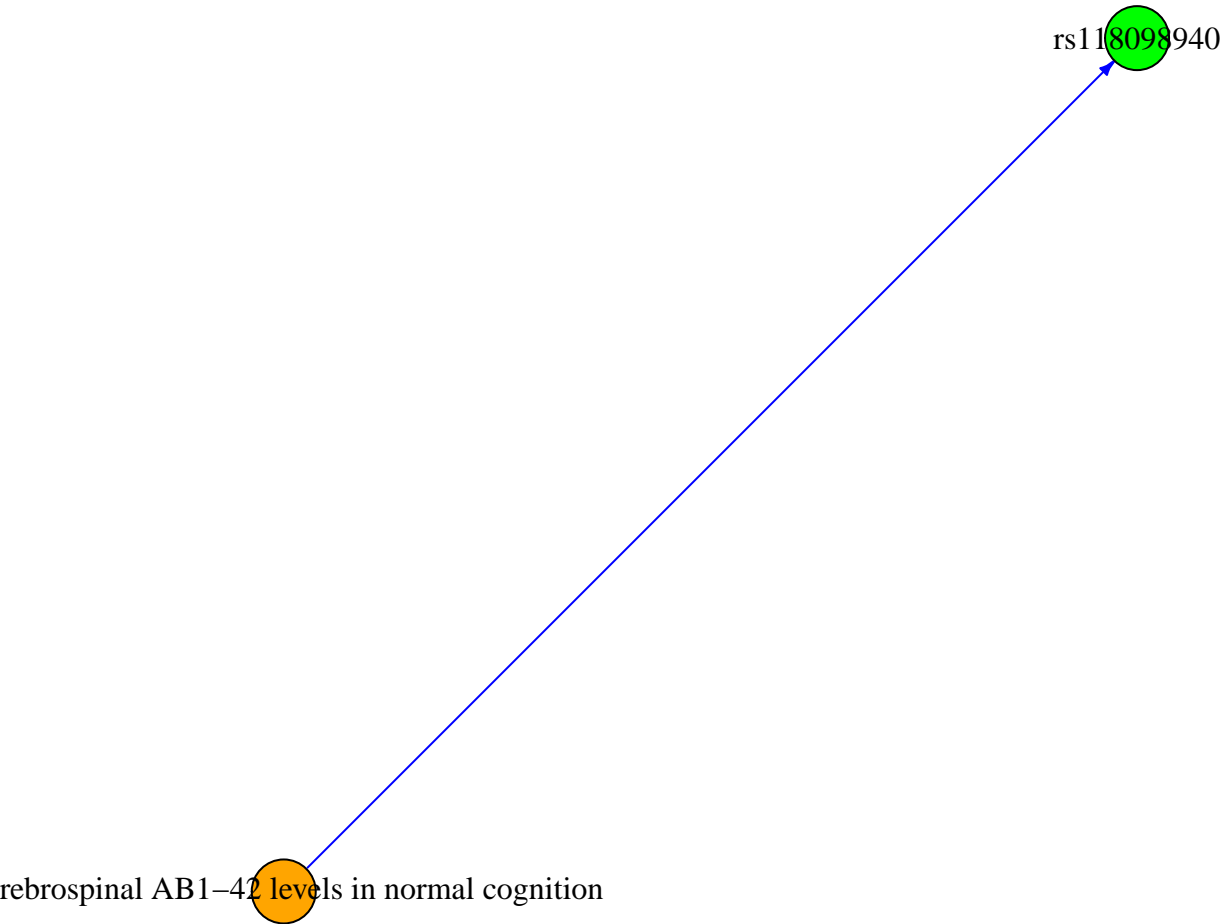

Variant–Disease Network (Cerebrospinal fluid biomarker levels)

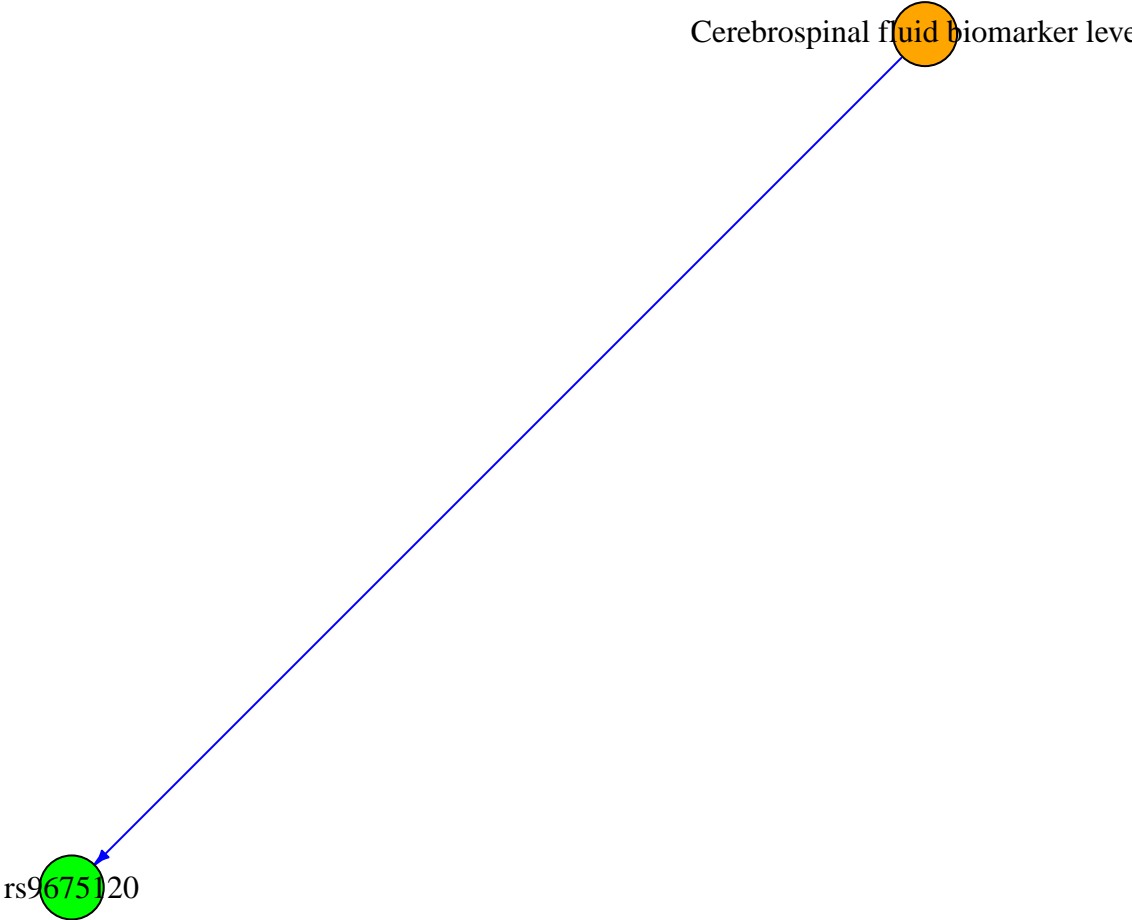

# Variant–Disease Network (Cerebrospinal fluid t-tau:AB1–42 ratio)

rs2280301

Cerebrospinal fluid t-tau:AB1–42 r



Variant–Disease Network (Cholesterol)

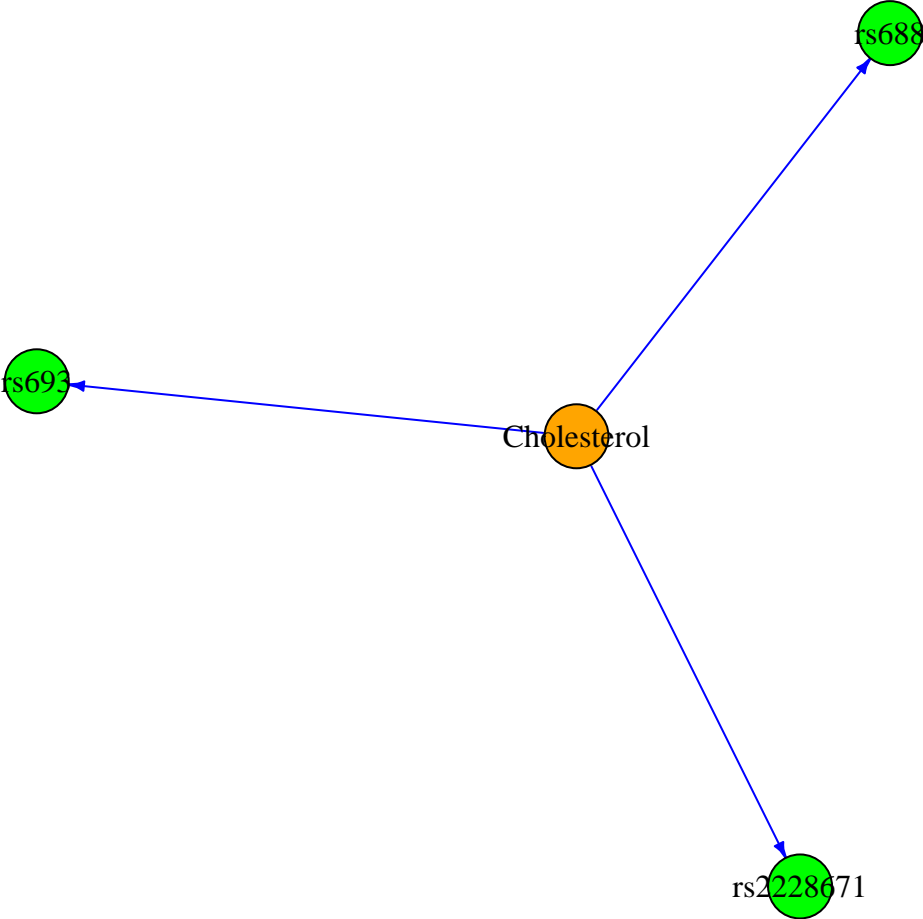



## Variant–Disease Network (Chronic hepatitis B infection)

rs12614



```
graph LR; A((Chronic hepatitis B infection)) --> B((rs12614))
```

Chronic hepatitis B infection

# Variant–Disease Network (Chronic inflammatory diseases )

rs35074907

Chronic inflammatory diseases

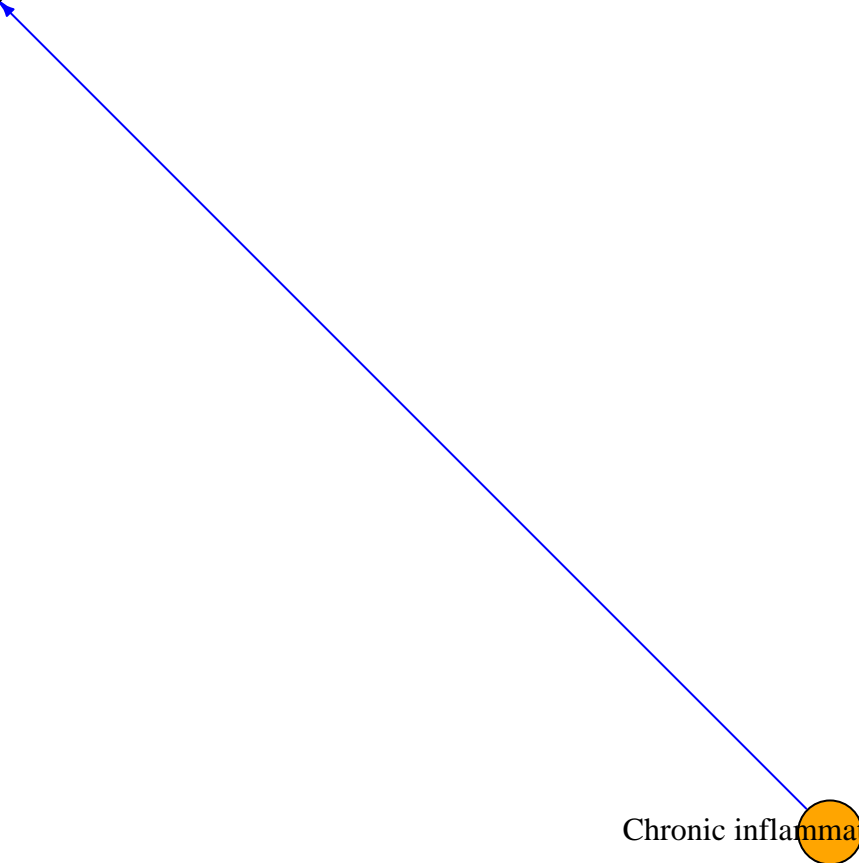

# -Disease Network (Cognitive ability, years of educational attainment or schizophrenia)

bility, years of educational attainment or schizophrenia

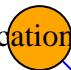

rs3814883

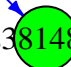

## Variant–Disease Network (Cognitive function)

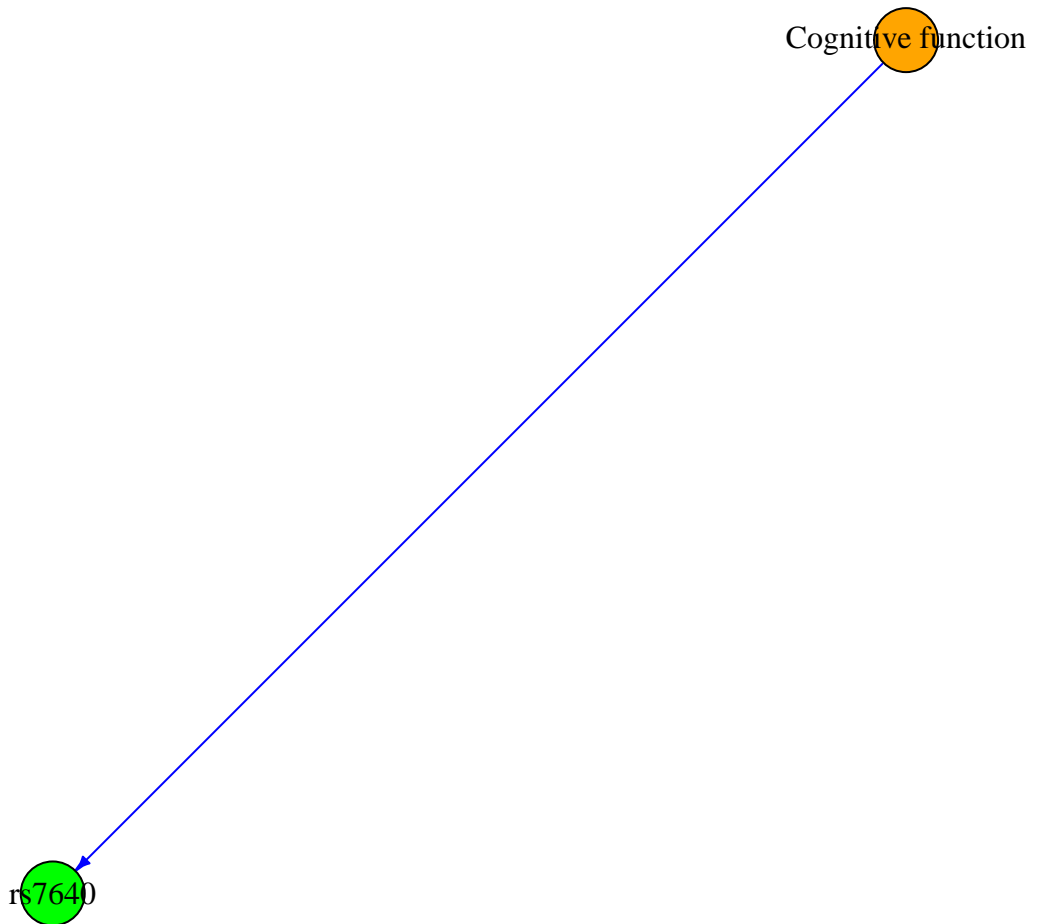

## Variant-Disease Network (Cognitive performance)

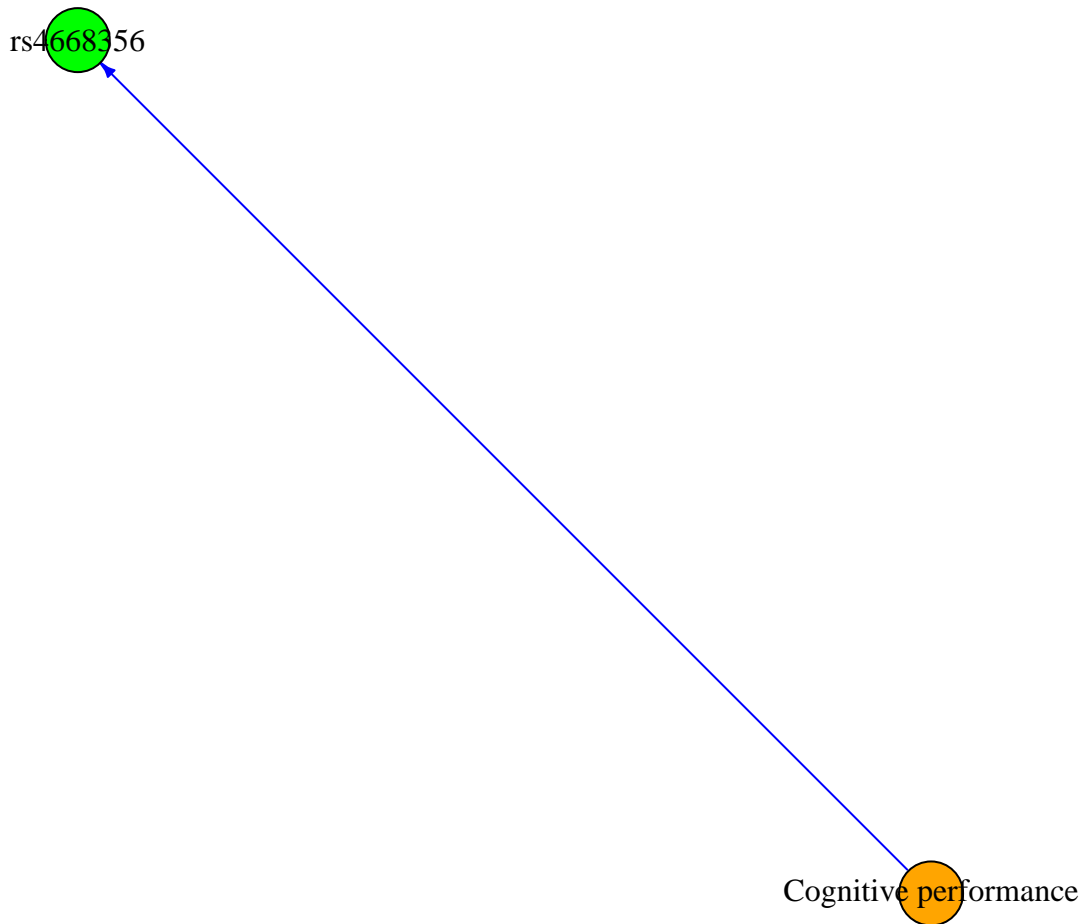

## Variant-Disease Network (Coronary artery disease)

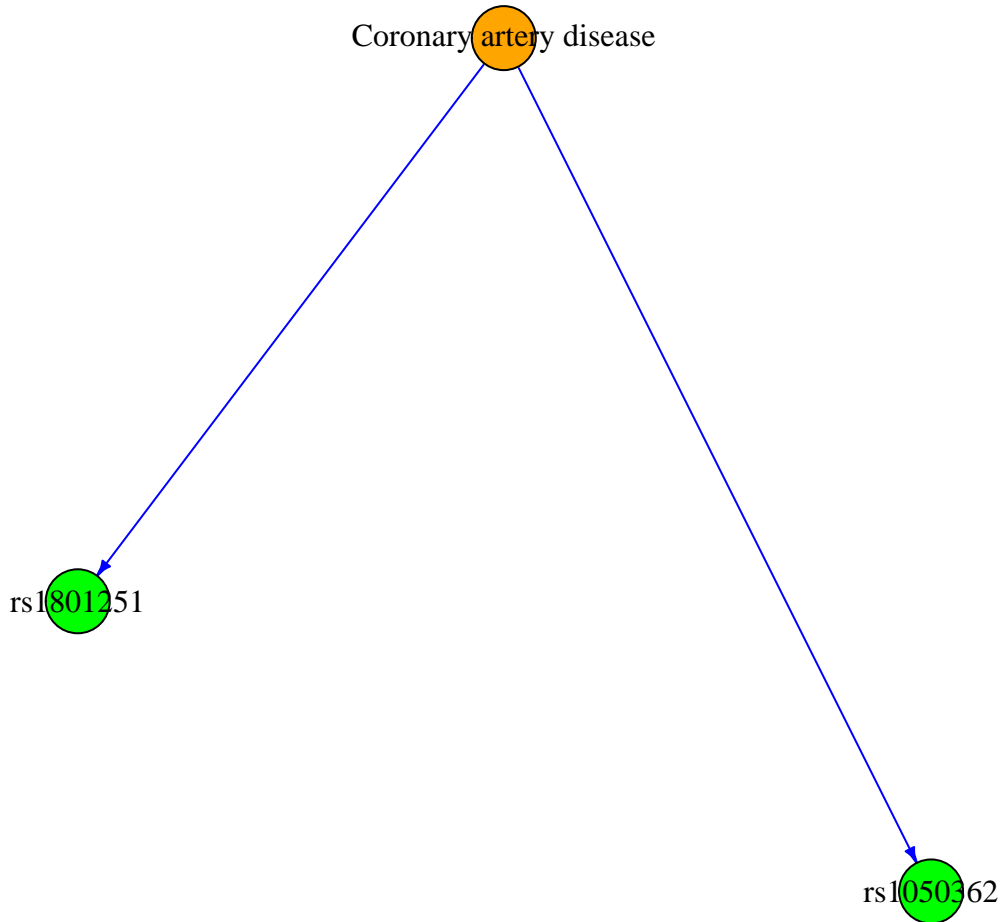

## Variant–Disease Network (Creatinine levels)

Creatinine levels

rs2279238



## Variant-Disease Network (Diastolic blood pressure)

Diastolic blood pressure

rs12790427





## Variant–Disease Network (Educational attainment )

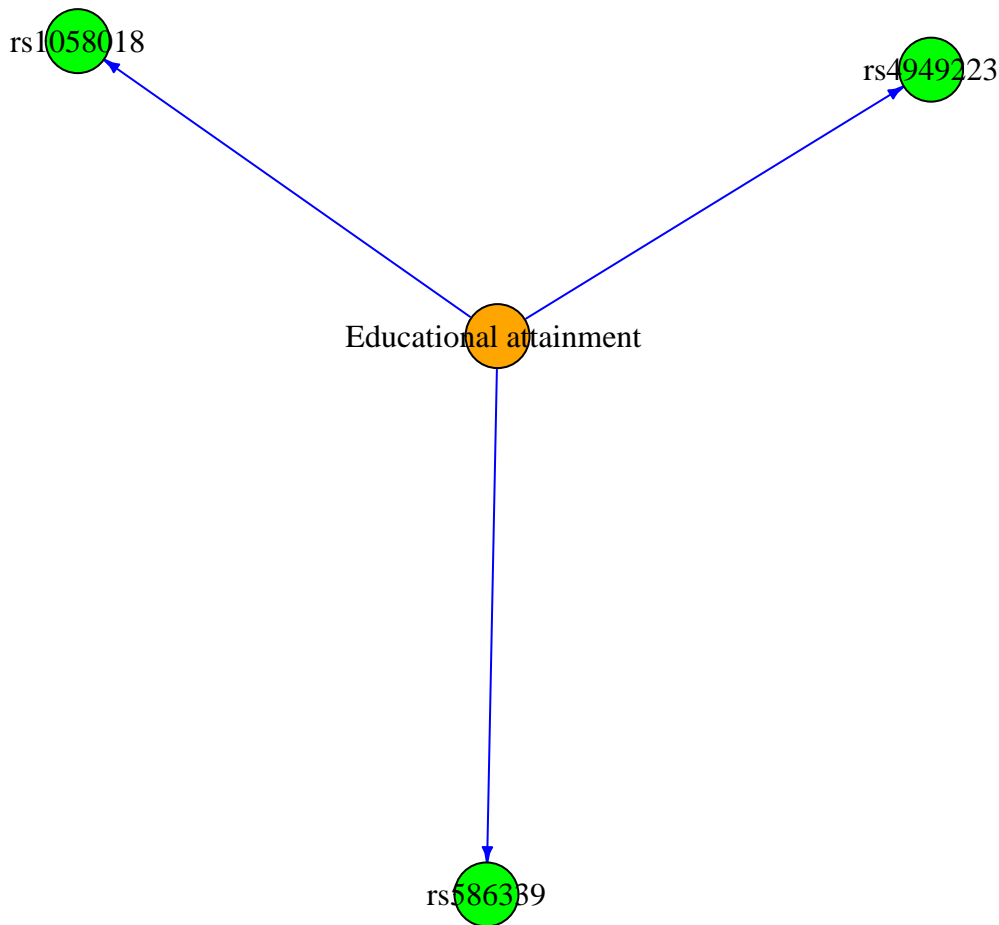

# nt-Disease Network (Elevated serum prostate-specific antigen levels in healthy men)

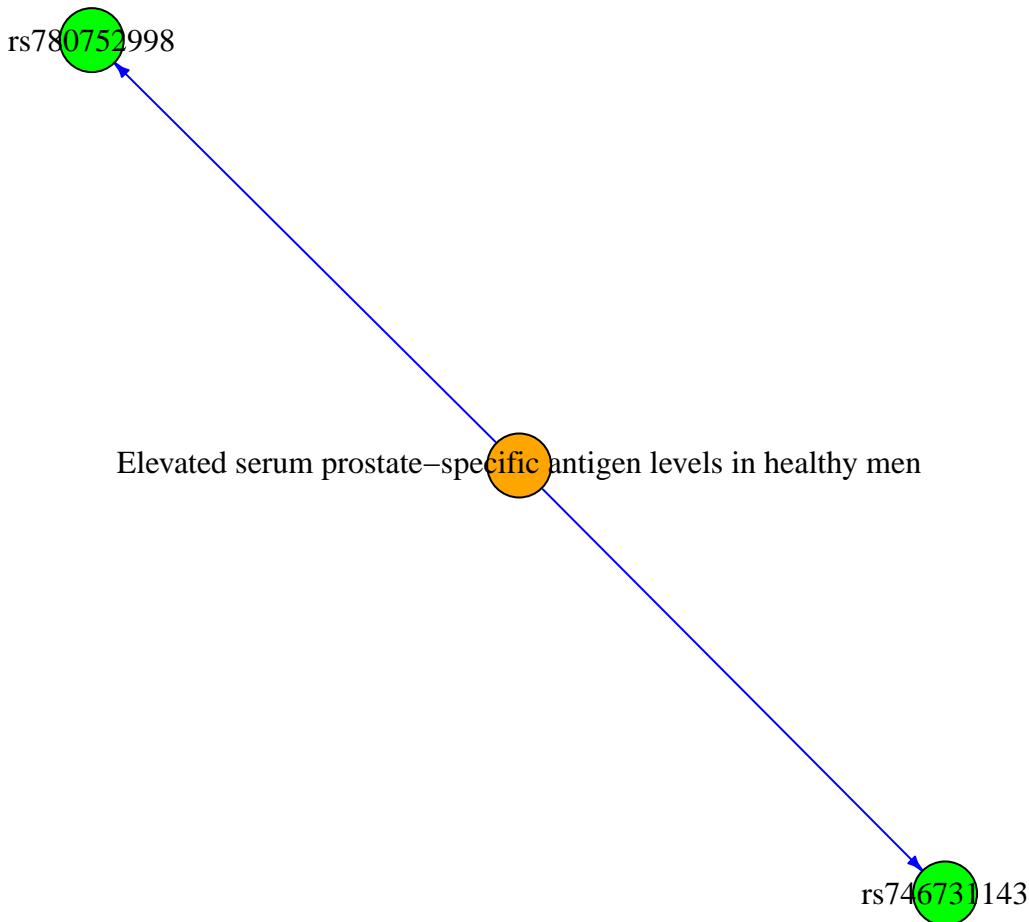

## Variant-Disease Network (Endometrial cancer)

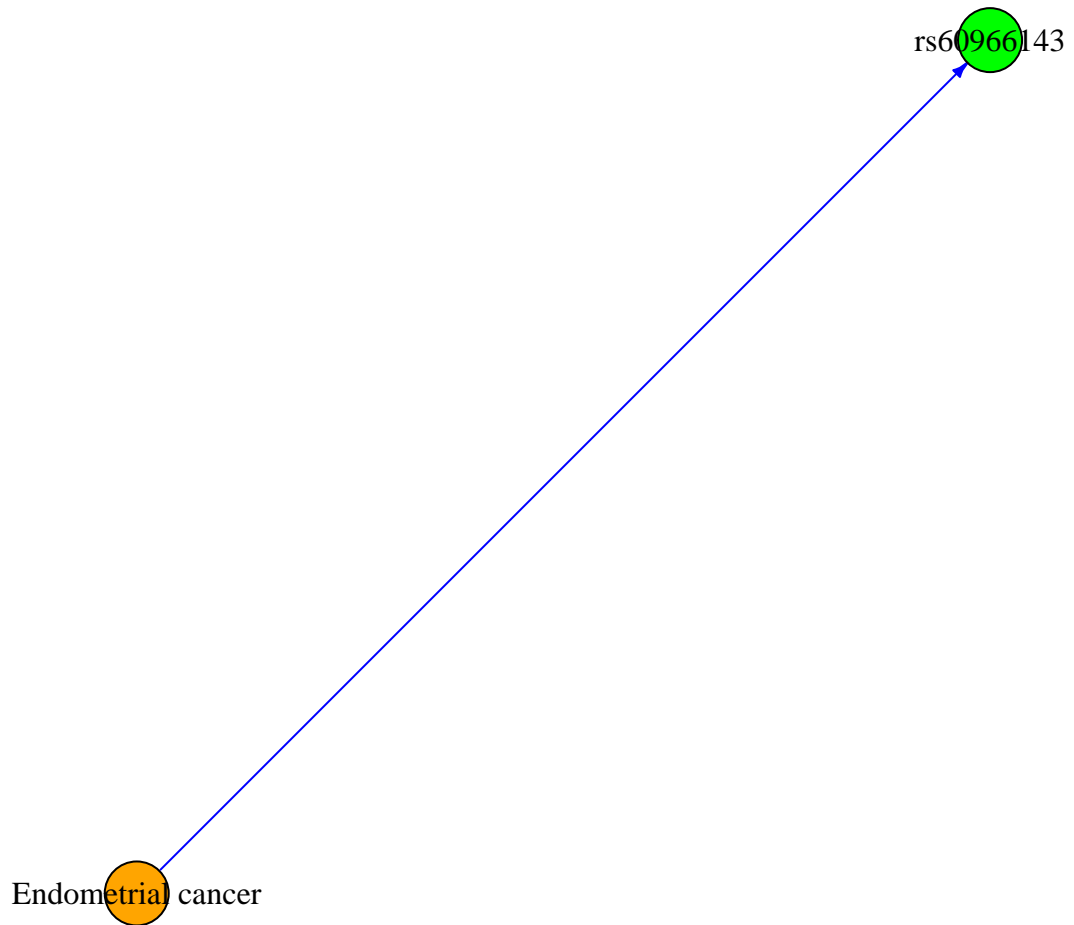

## Variant–Disease Network (Endometrial cancer )

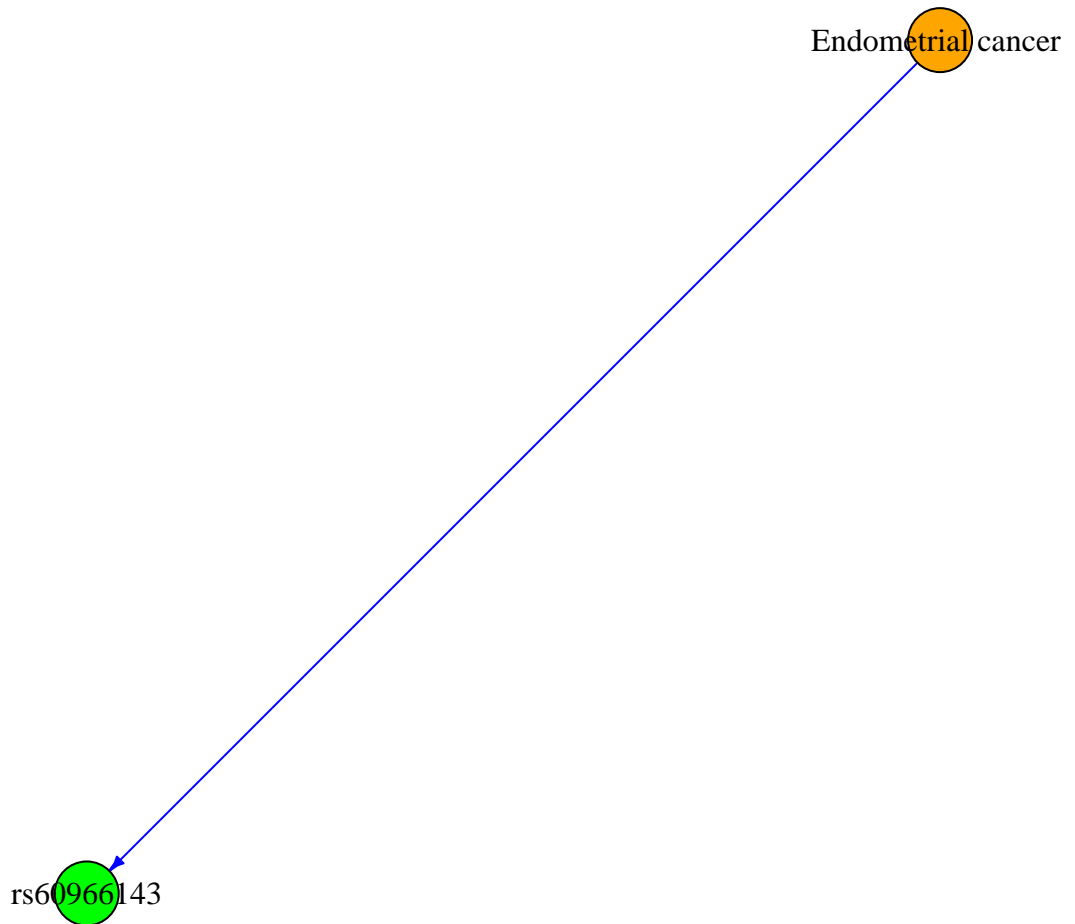

Variant–Disease Network (Erosive tooth wear )

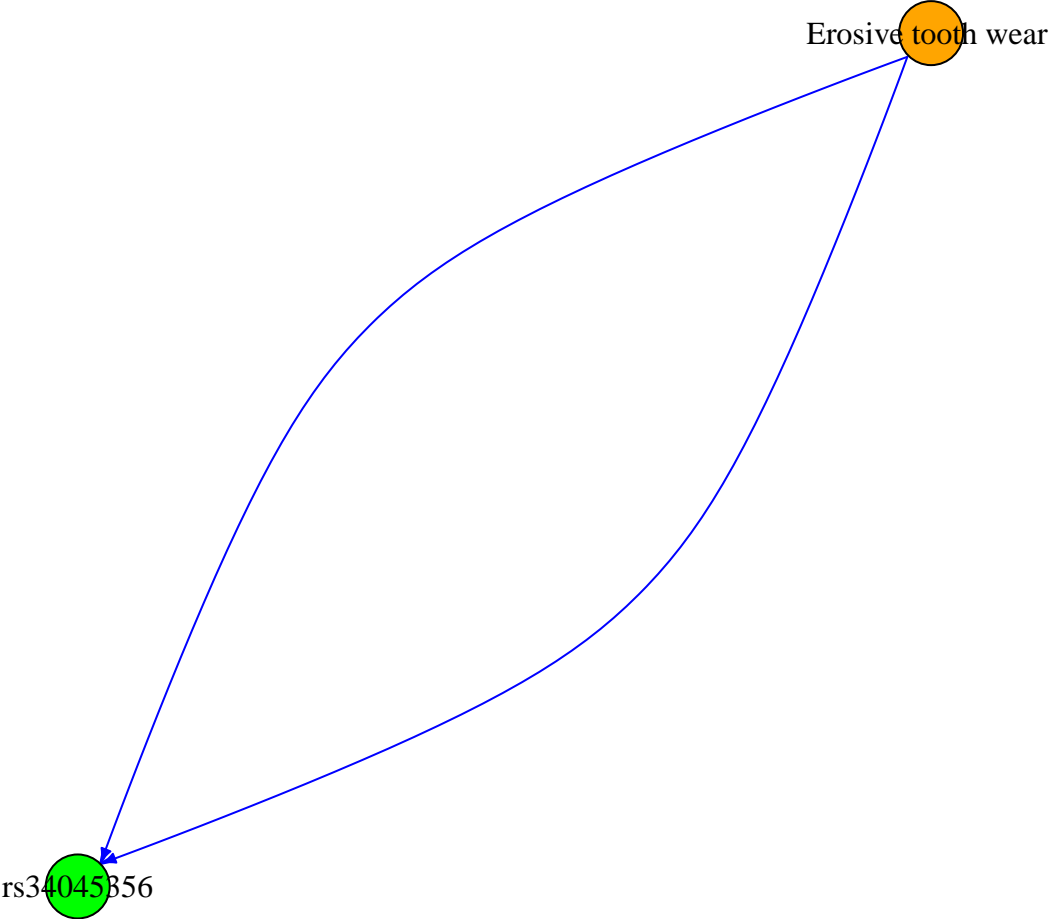

## Variant–Disease Network (Esophageal squamous cell cancer )

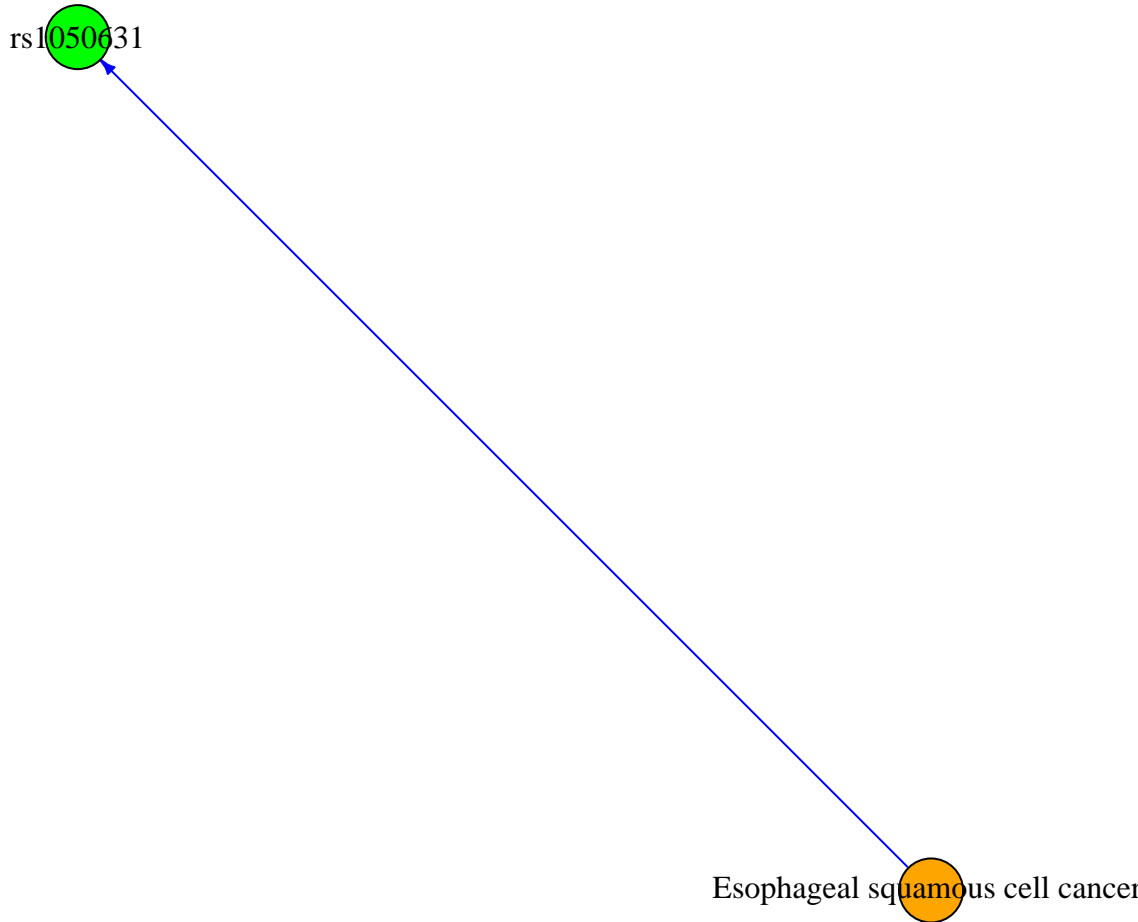

# Variant–Disease Network (Estimated glomerular filtration rate)

rs883541

Estimated glomerular filtration rate

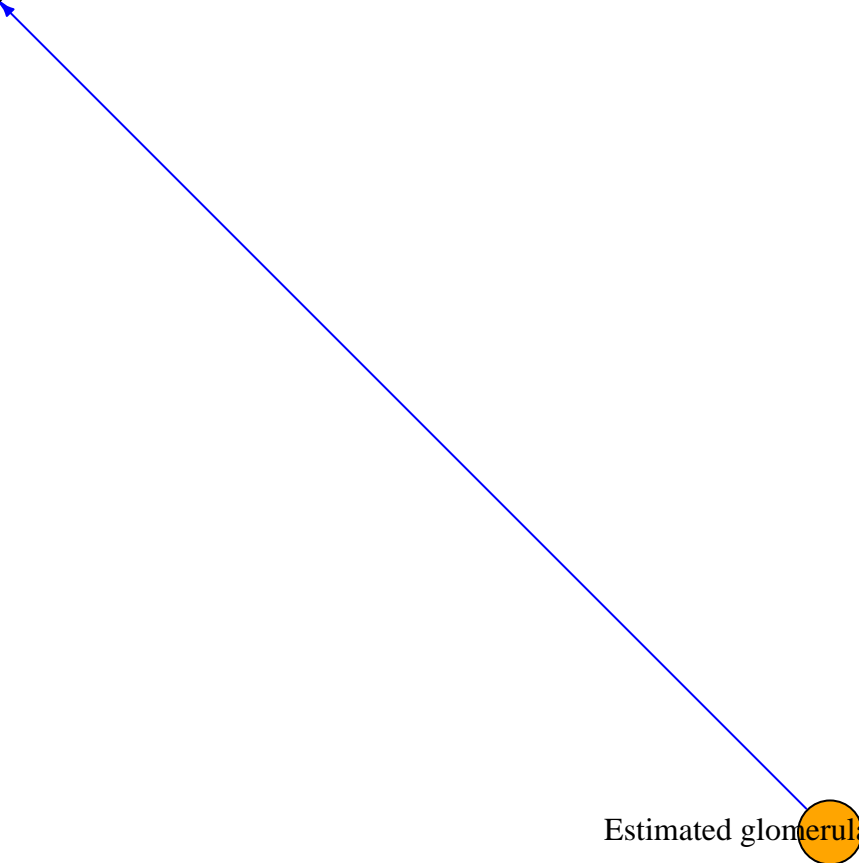

## Variant-Disease Network (Feeling guilty)

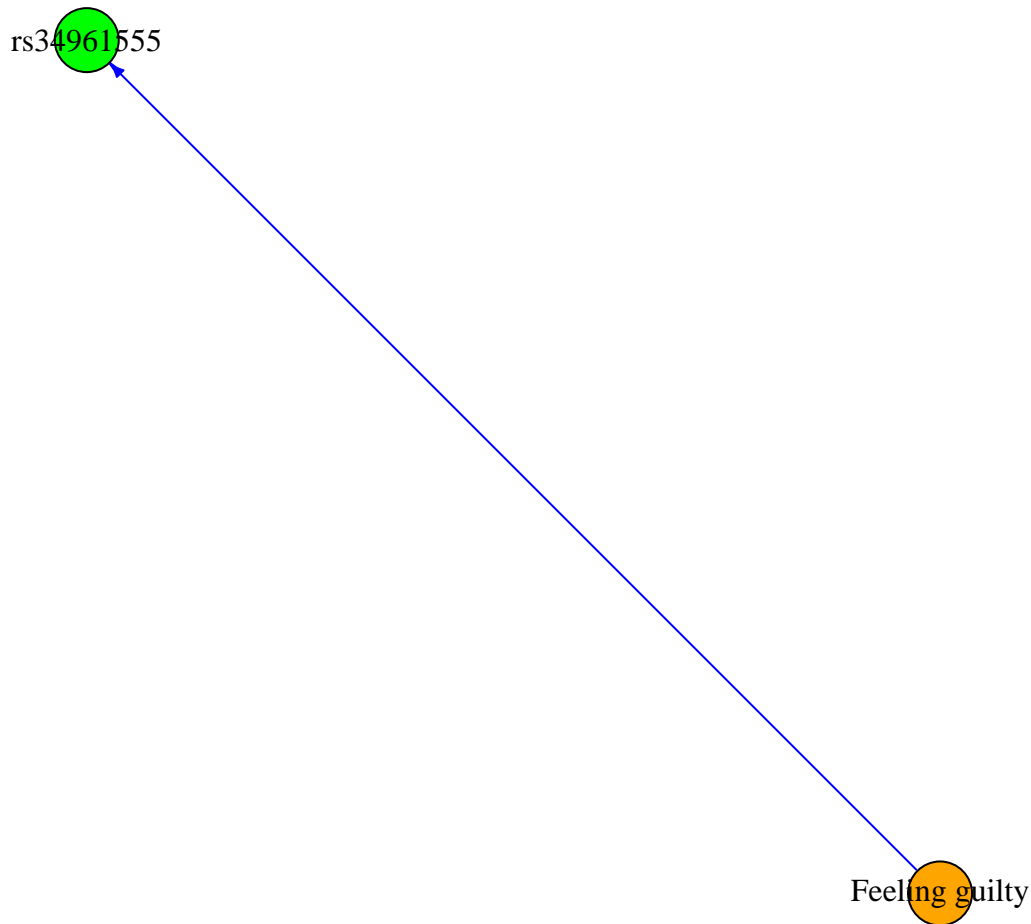



## Variant-Disease Network (Fibrinogen levels)

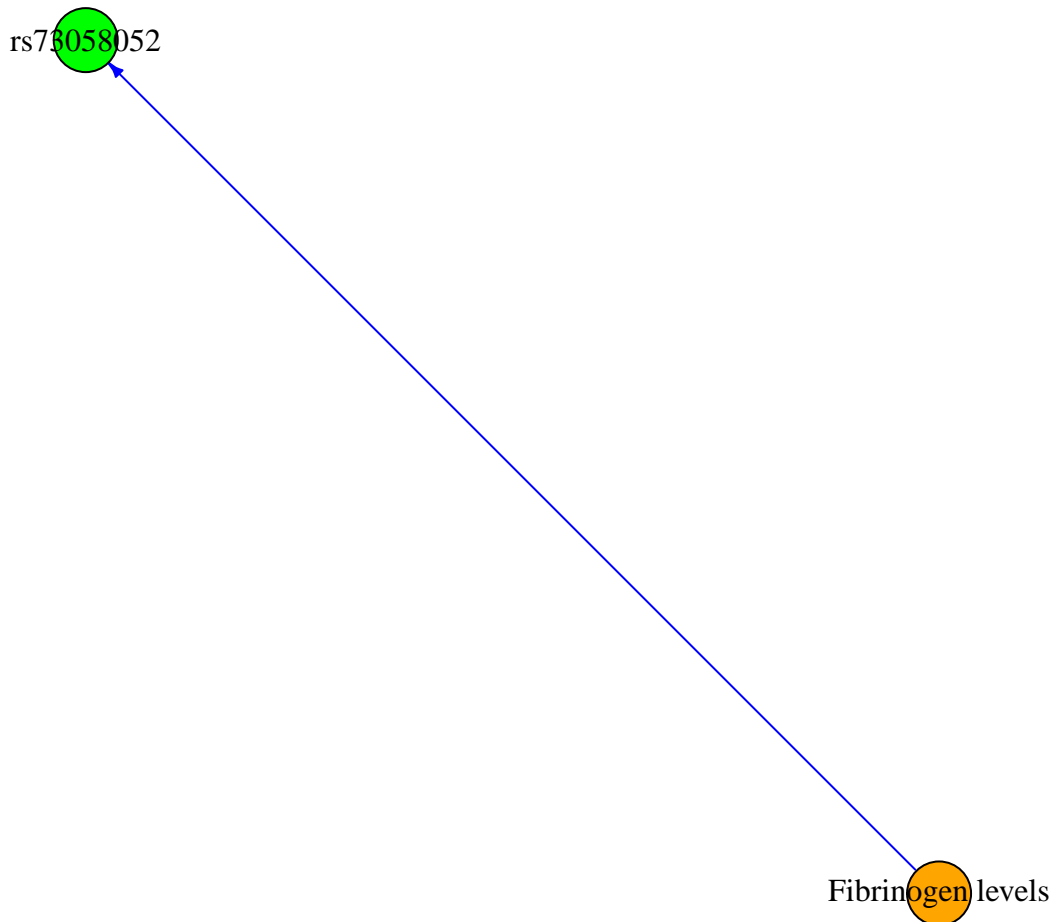

Variant–Disease Network (Fish– and plant–related diet)

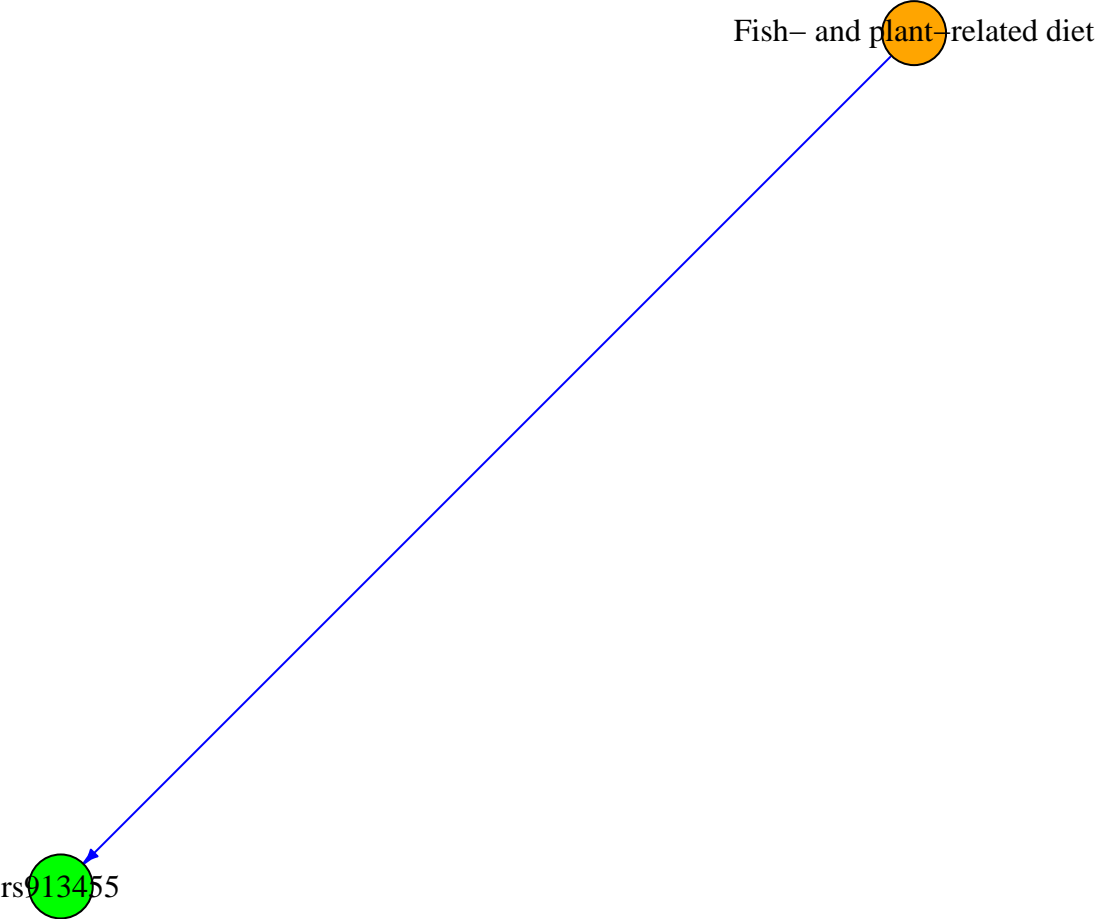

## Variant–Disease Network (General cognitive ability)

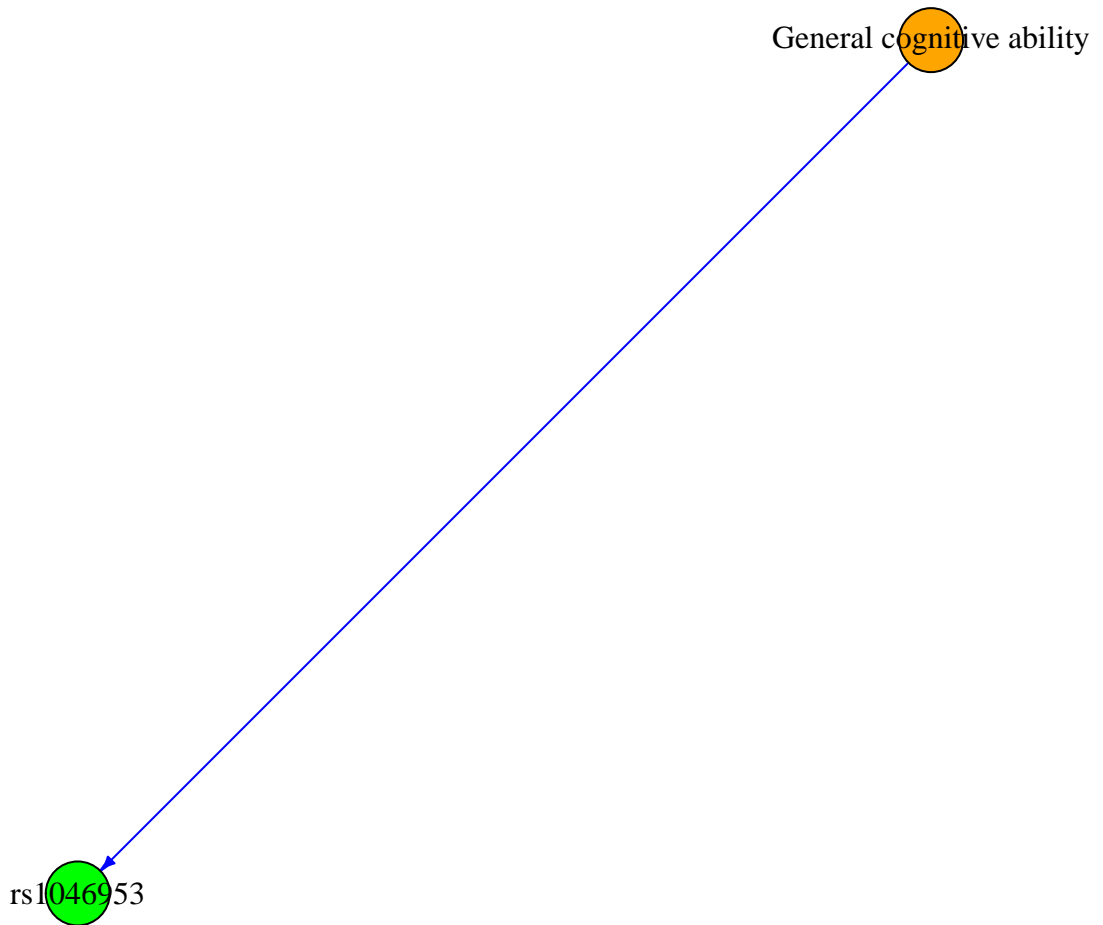

# Variant–Disease Network (General factor of neuroticism)

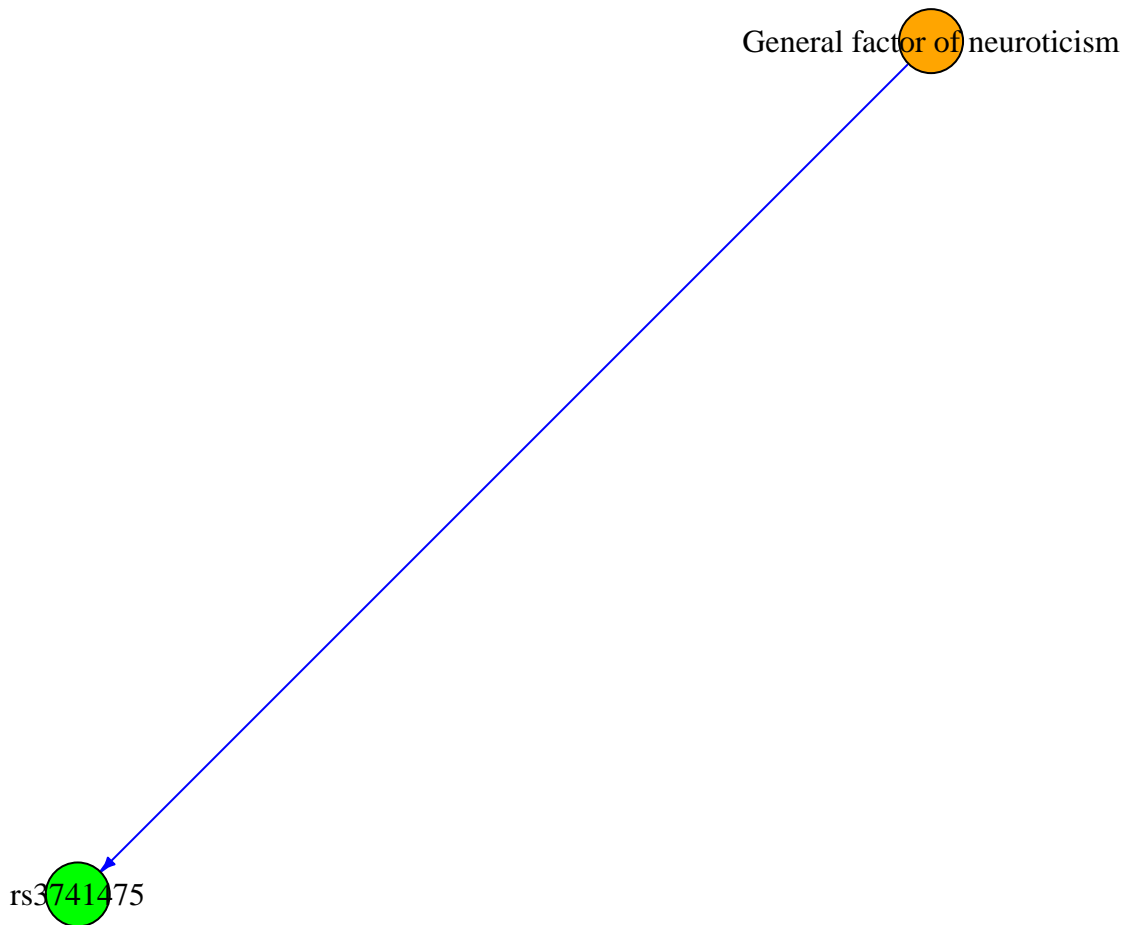

## Variant–Disease Network (Gut microbiota )

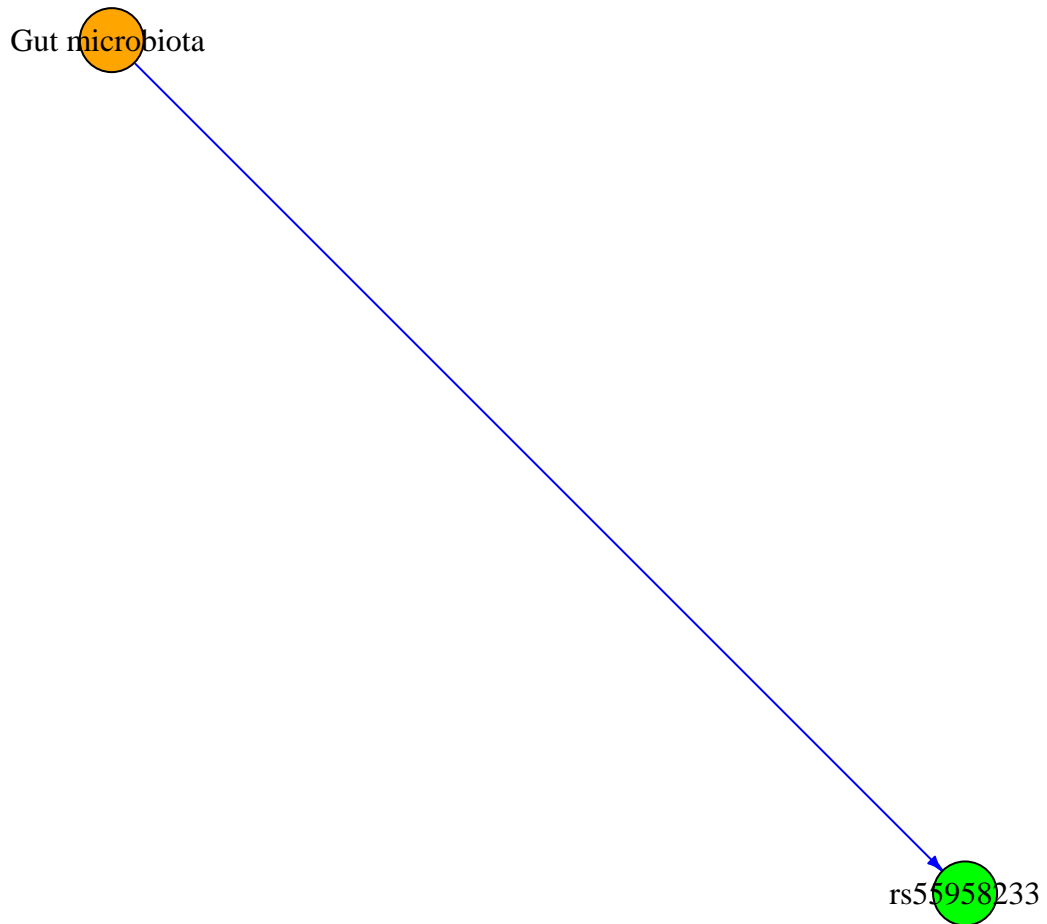

## Variant–Disease Network (HDL cholesterol levels)

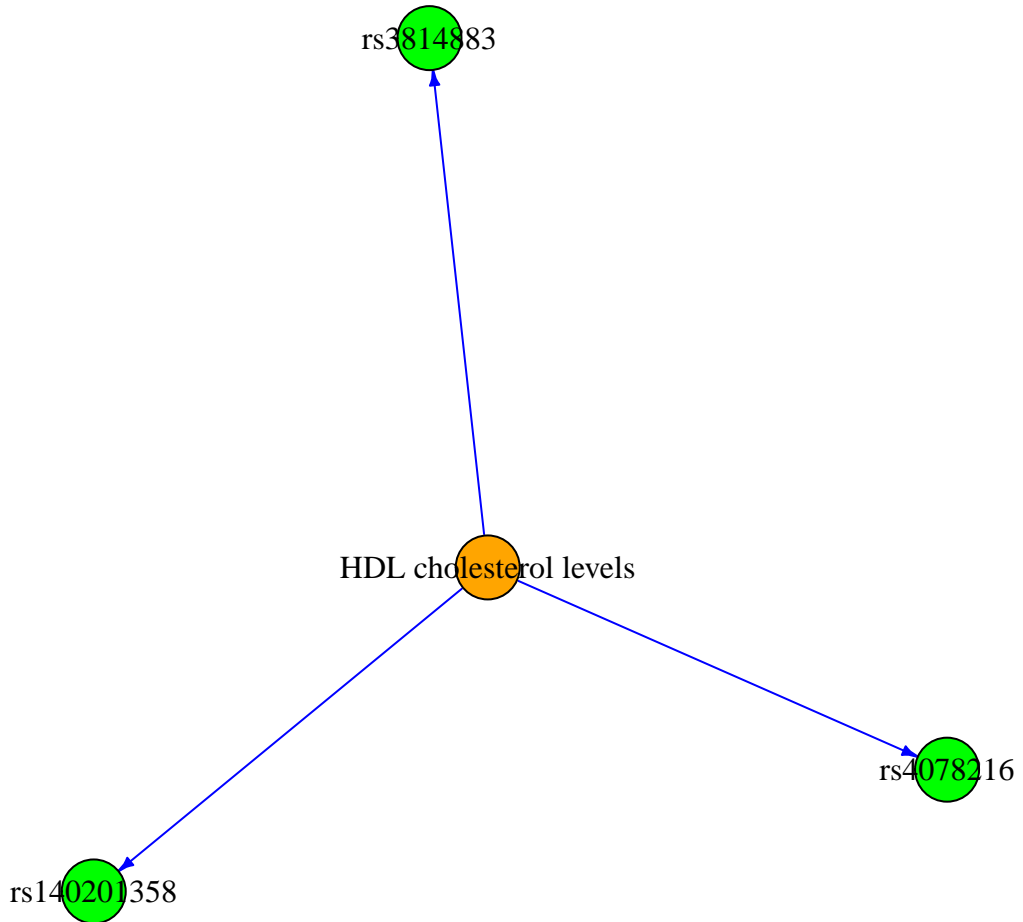

## Variant–Disease Network (Heel bone mineral density)

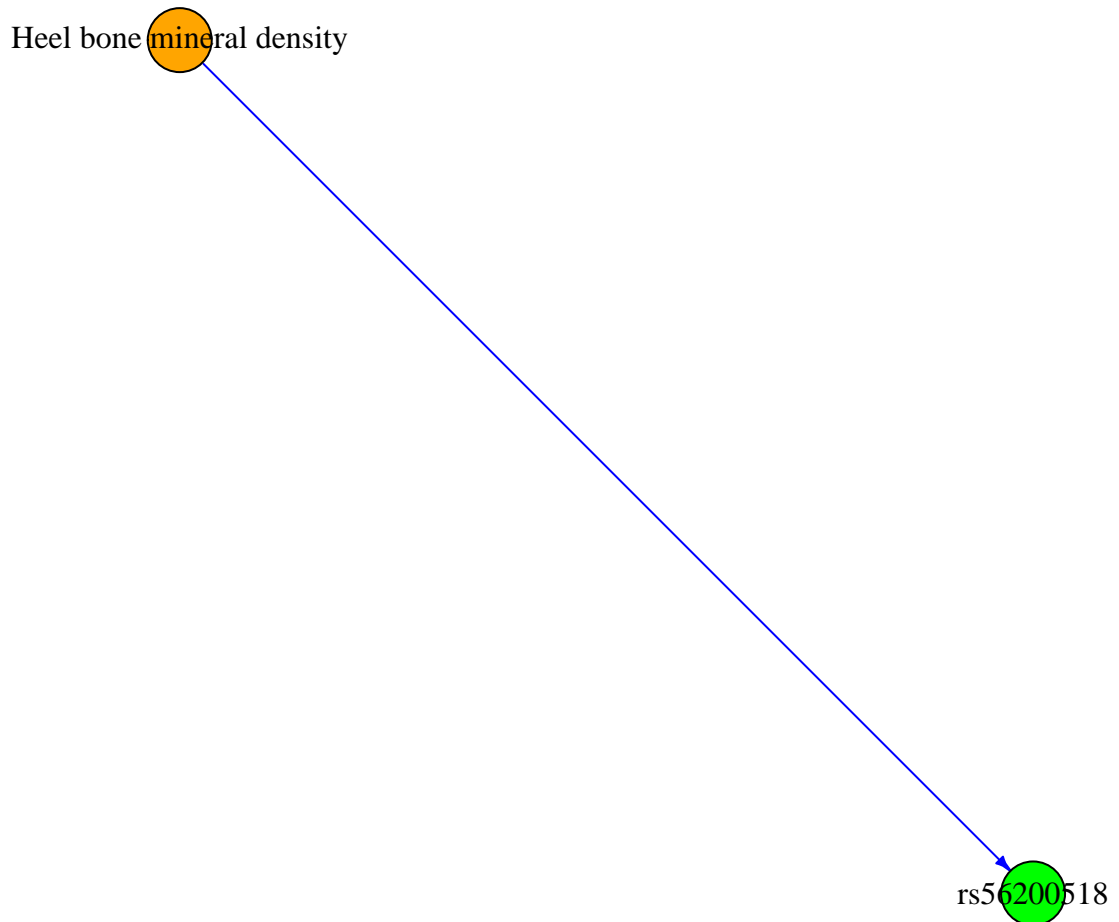

## Variant-Disease Network (Height)

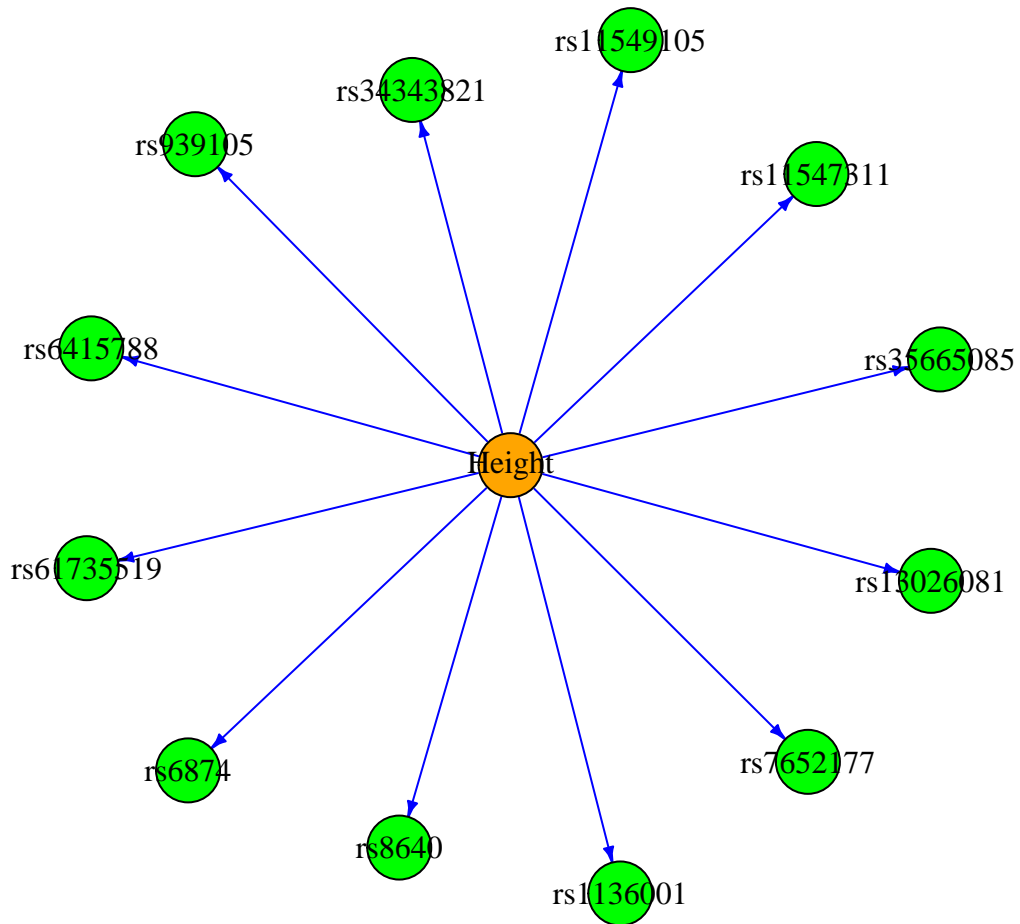



## Variant–Disease Network (Hematocrit)

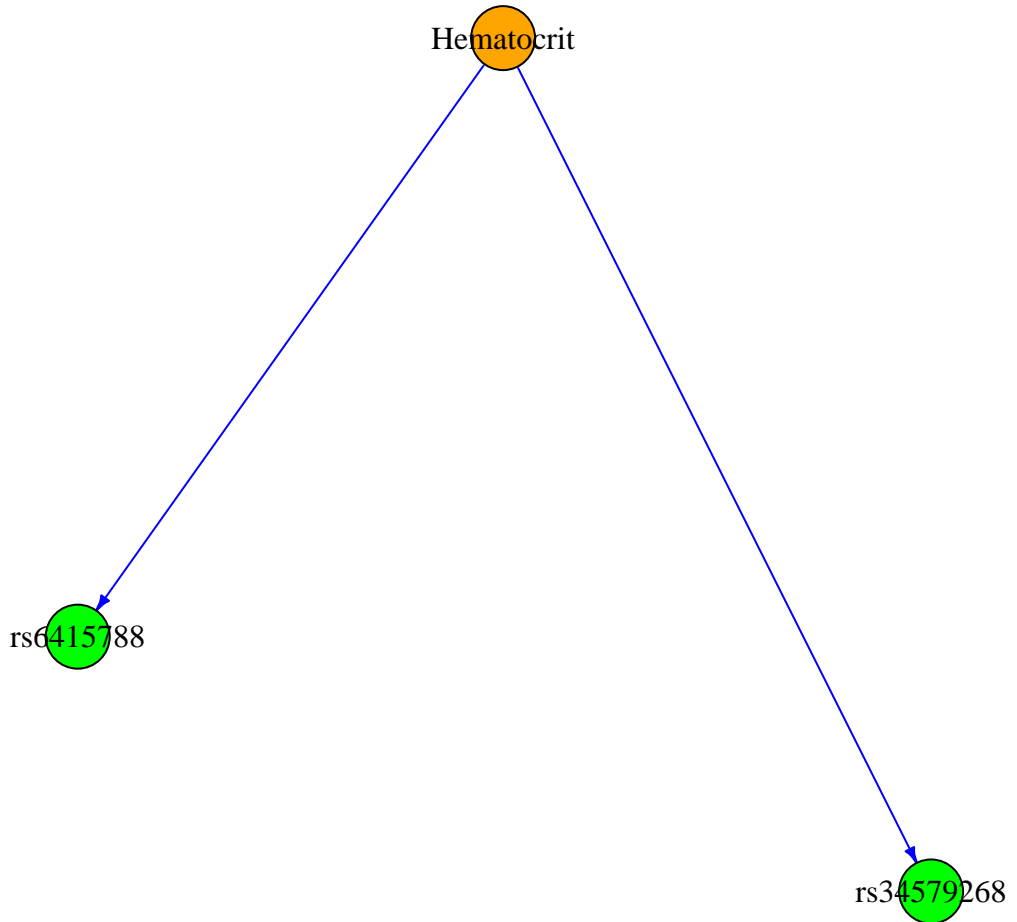

**Variant–Disease Network (Hemoglobin concentration)**

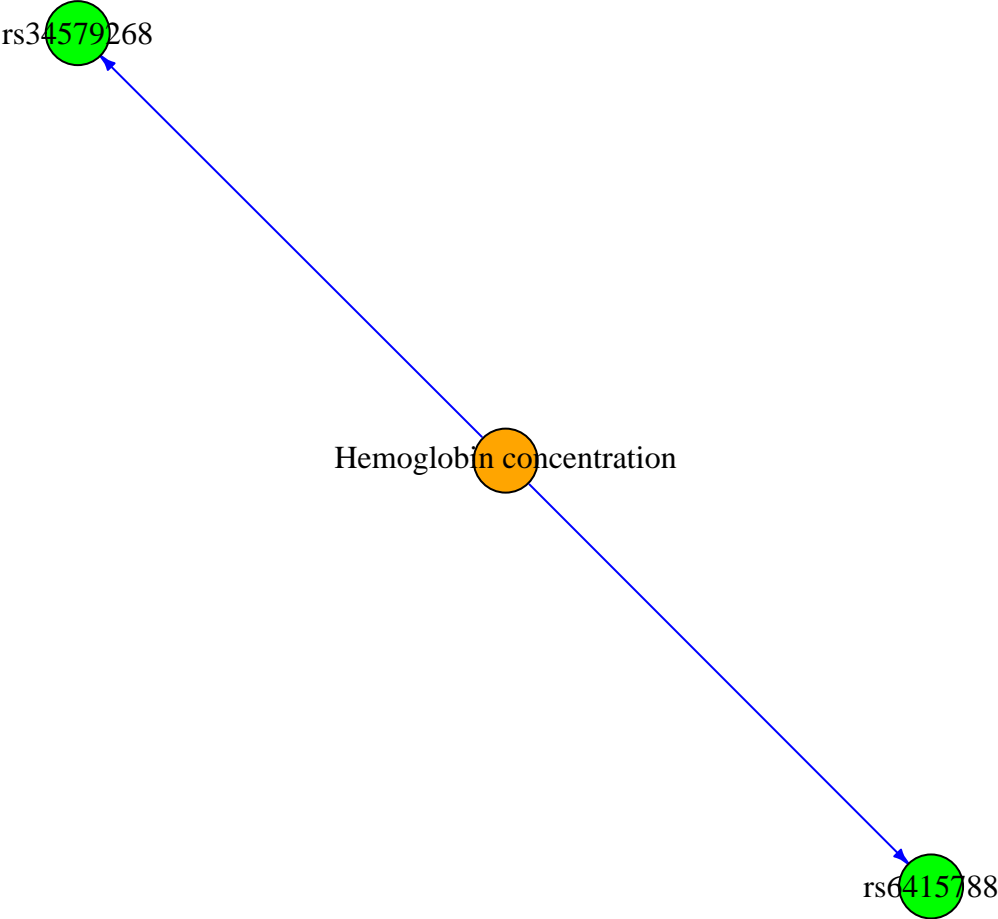

## Variant–Disease Network (Hemoglobin levels)

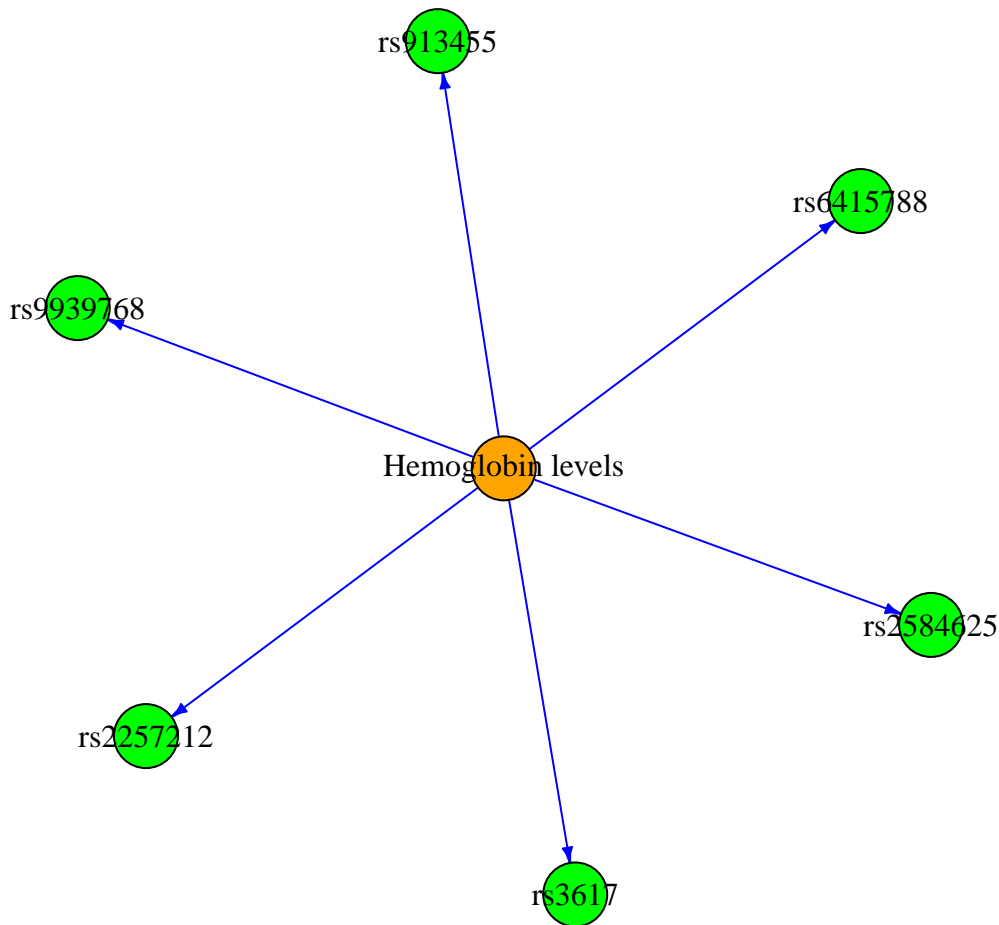

**Variant–Disease Network (High density lipoprotein cholesterol levels)**

rs693

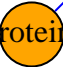

High density lipoprotein cholesterol levels

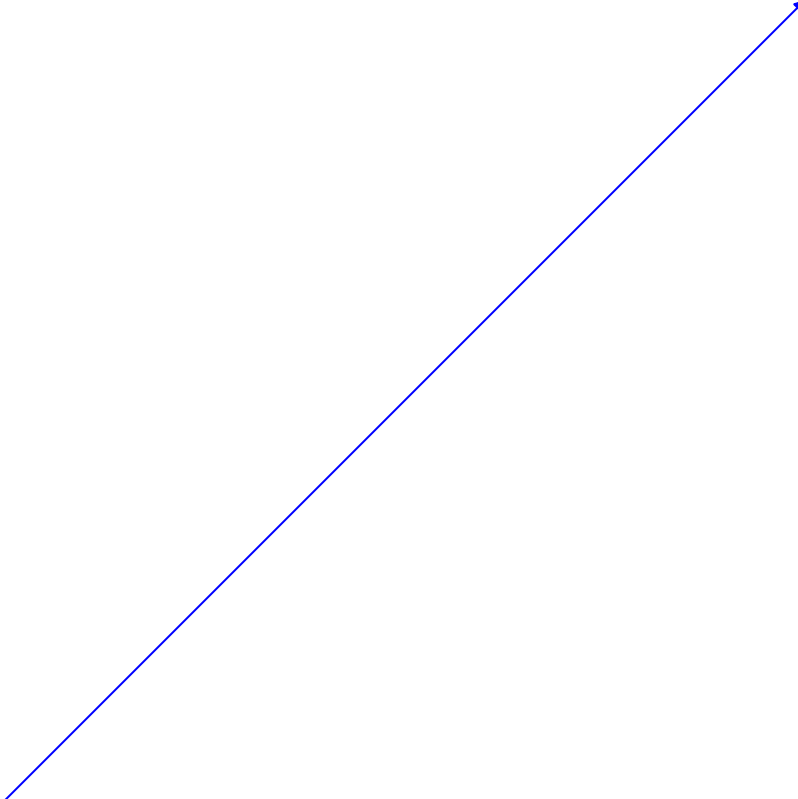

Variant–Disease Network (High light scatter reticulocyte count)

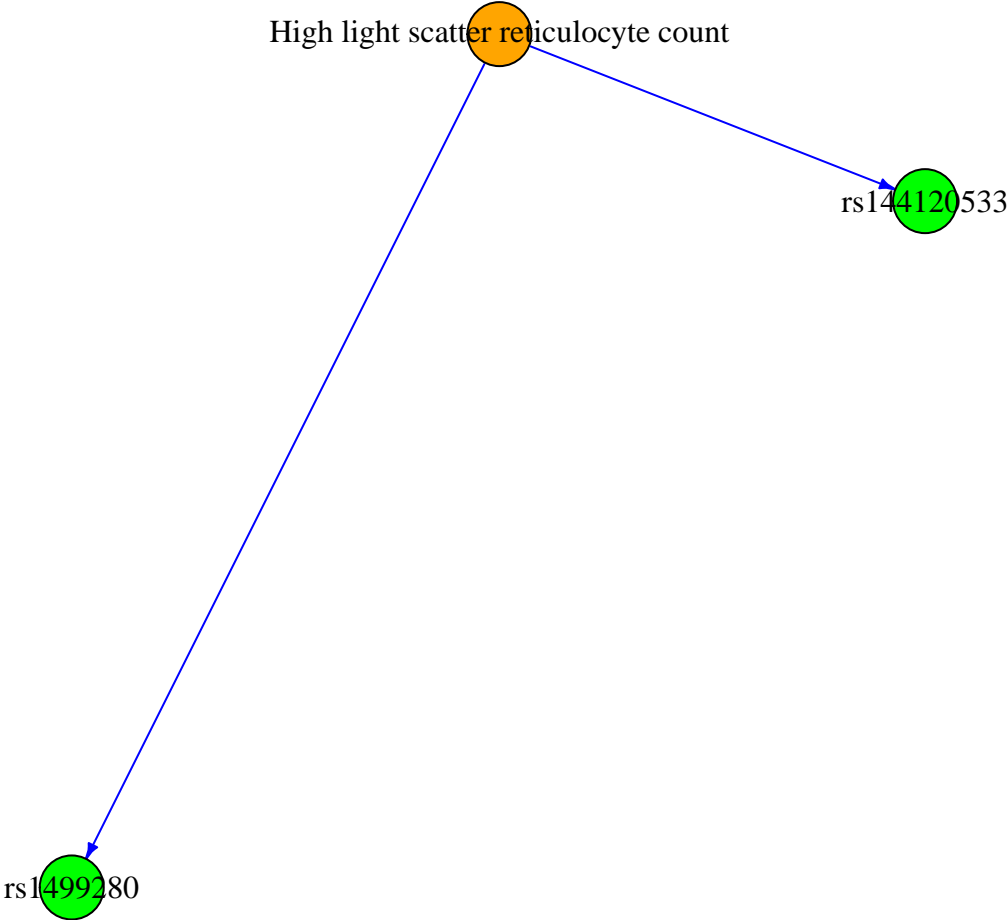

# Variant–Disease Network (High light scatter reticulocyte percentage of red c

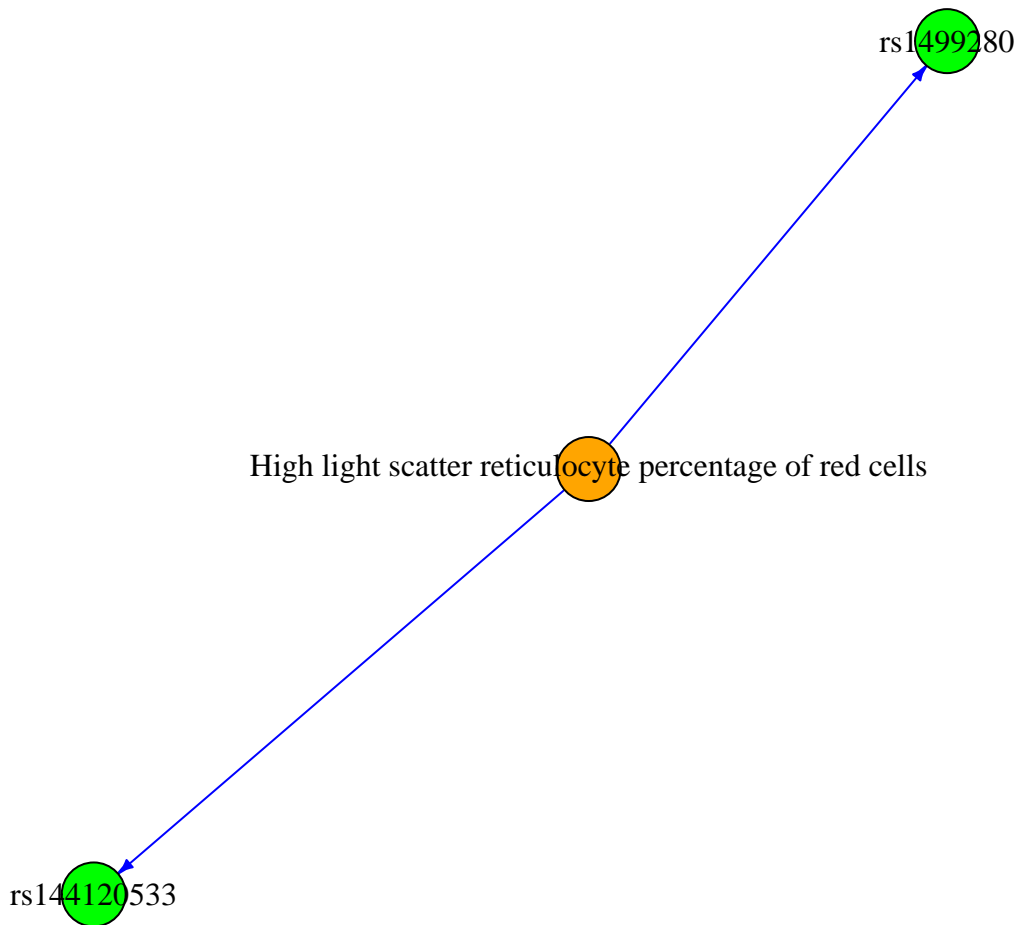

## Variant–Disease Network (High myopia)

High myopia

rs3138142



# Variant–Disease Network (Hip circumference adjusted for BMI)

rs3748656

Hip circumference adjusted for BMI





## Variant–Disease Network (Hypothyroidism)

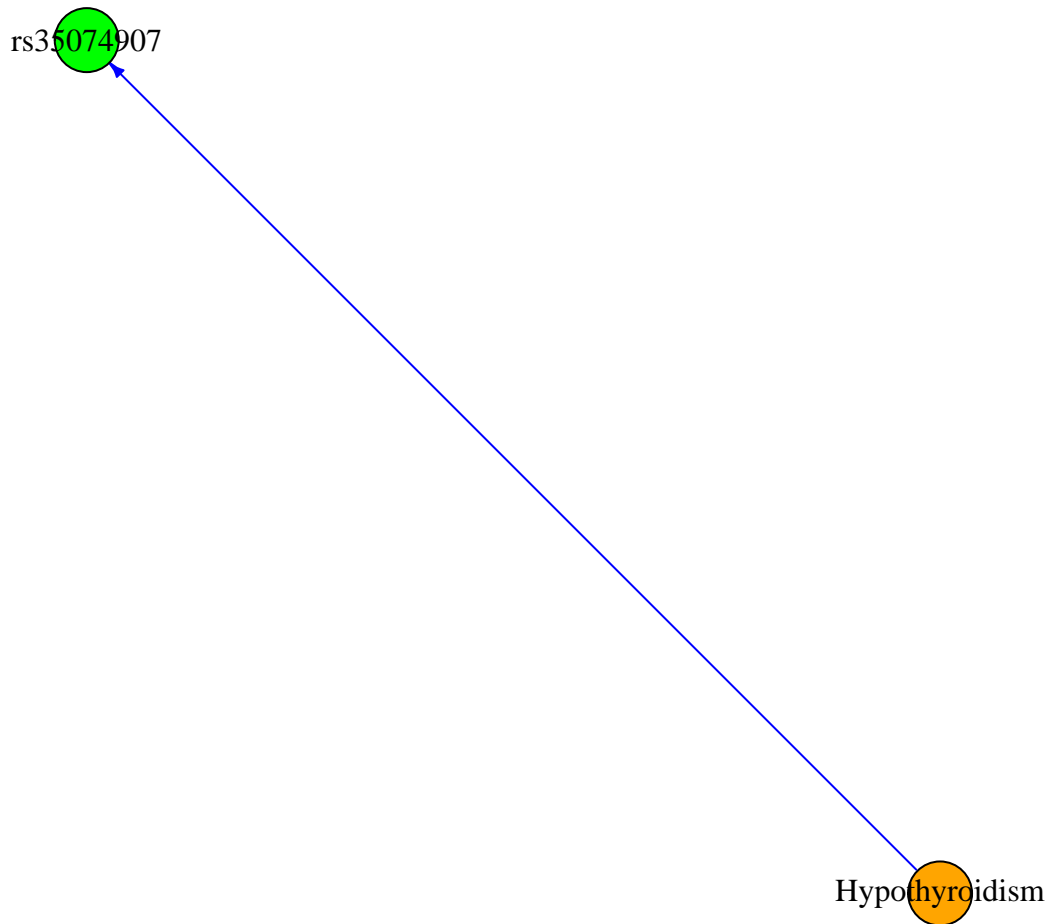

# Variant–Disease Network (Idiopathic dilated cardiomyopathy)

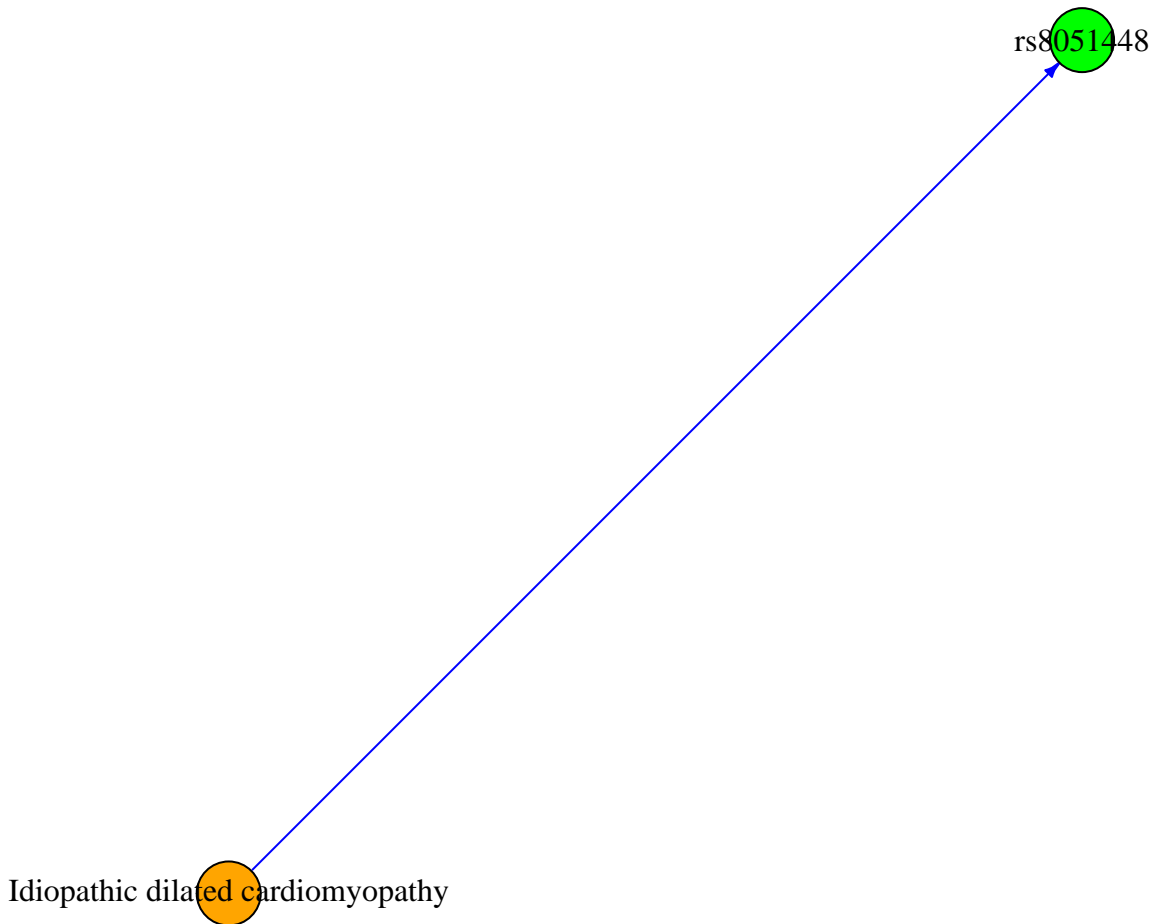

## Variant–Disease Network (IgG glycosylation)

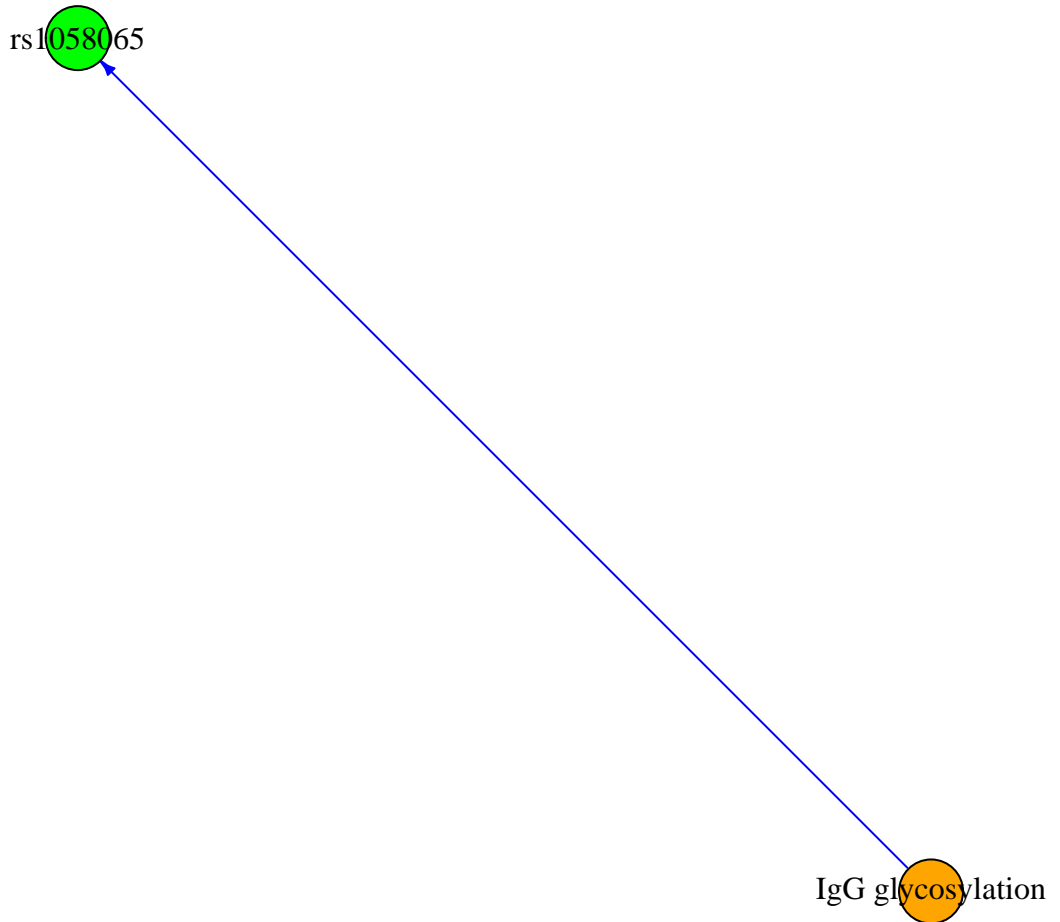

# Variant–Disease Network (Immature fraction of reticulocytes)

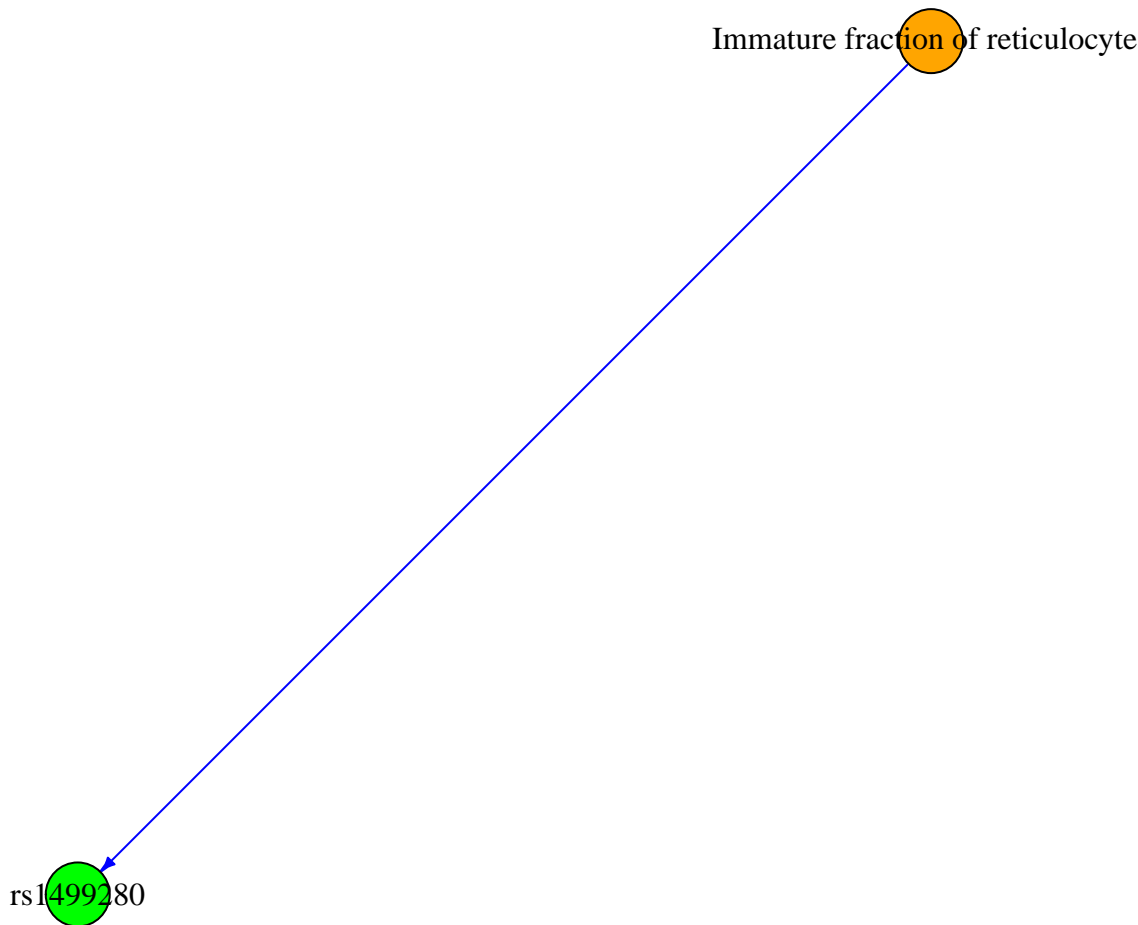

**Variant–Disease Network (Inflammatory bowel disease)**

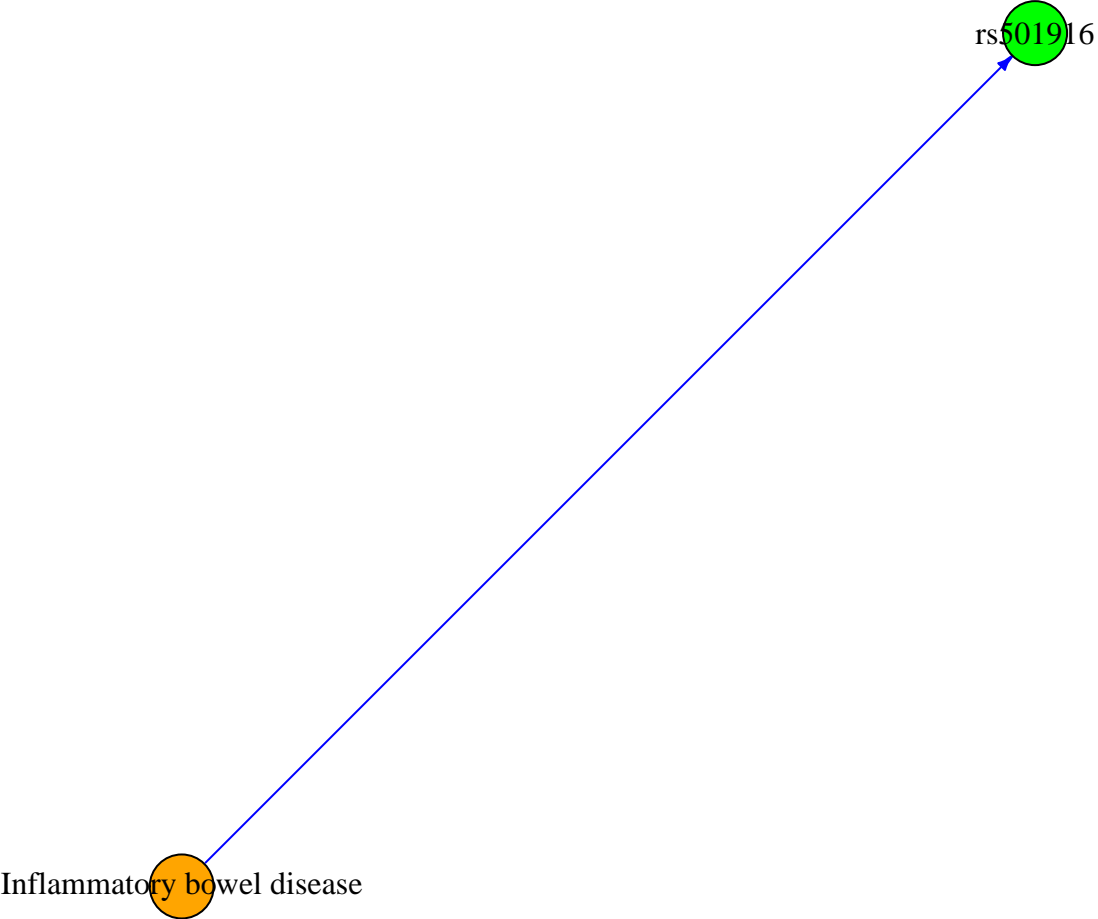

## Variant–Disease Network (Intelligence)

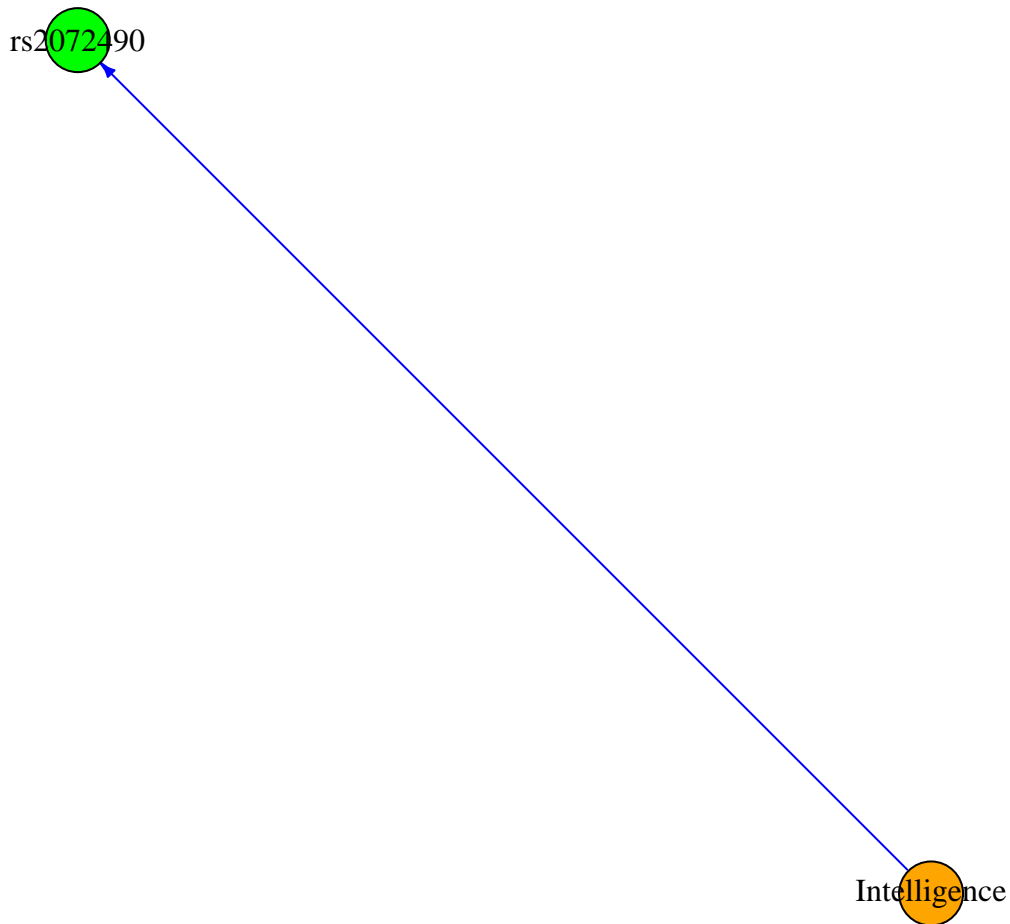

## Variant-Disease Network (Intelligence )

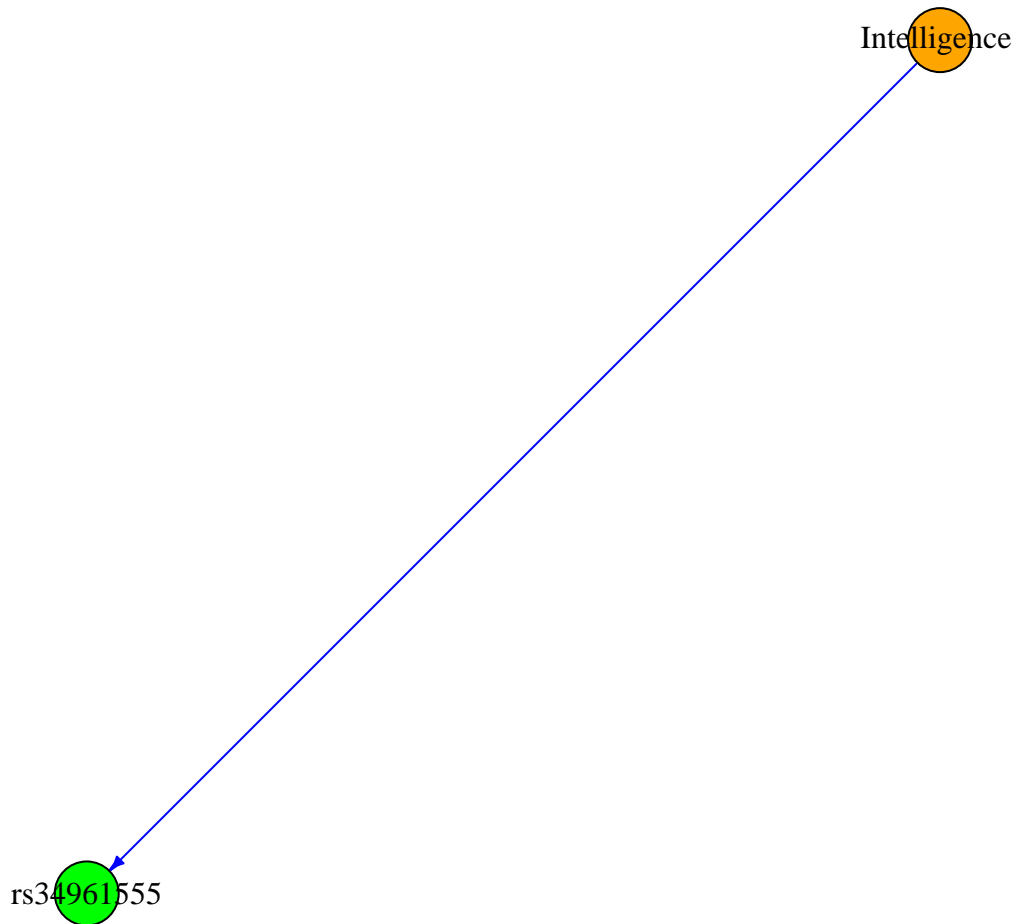

## Variant–Disease Network (Intracranial aneurysm)

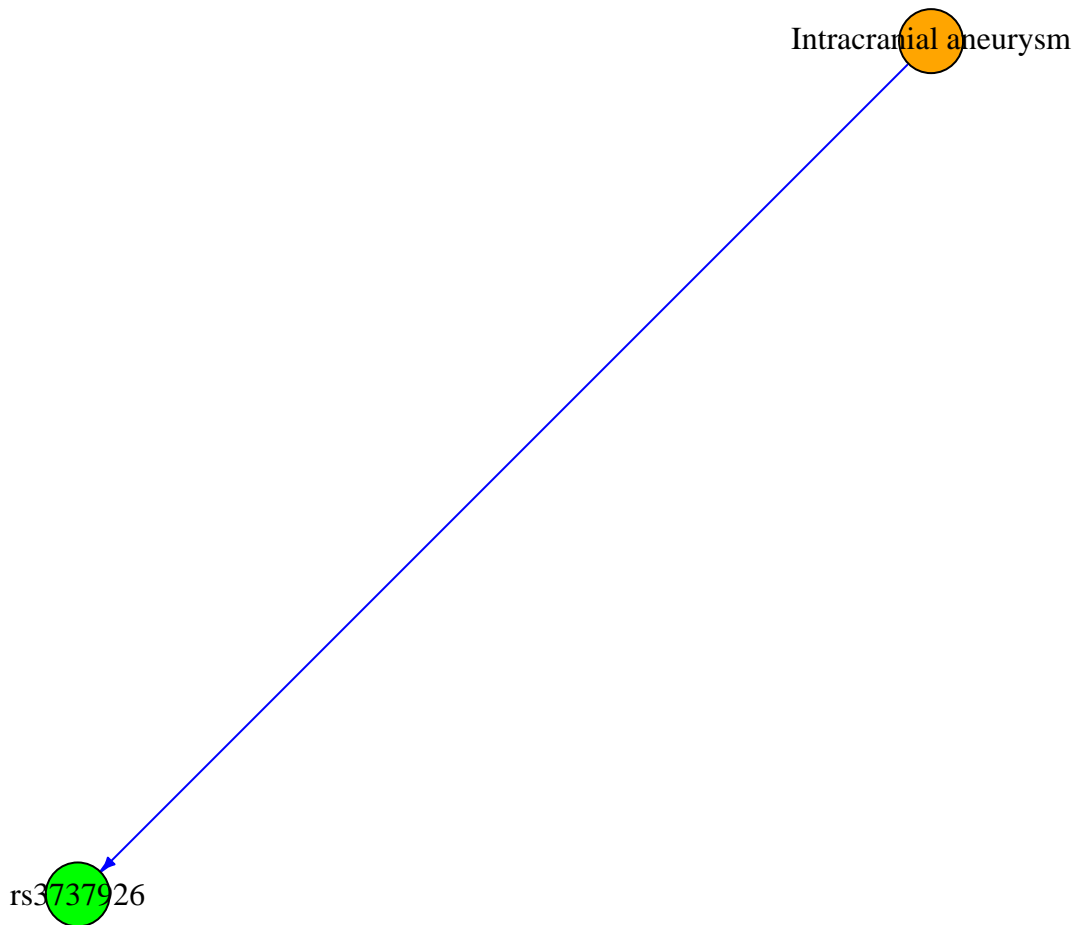



**Variant–Disease Network (Keratinocyte cancer )**

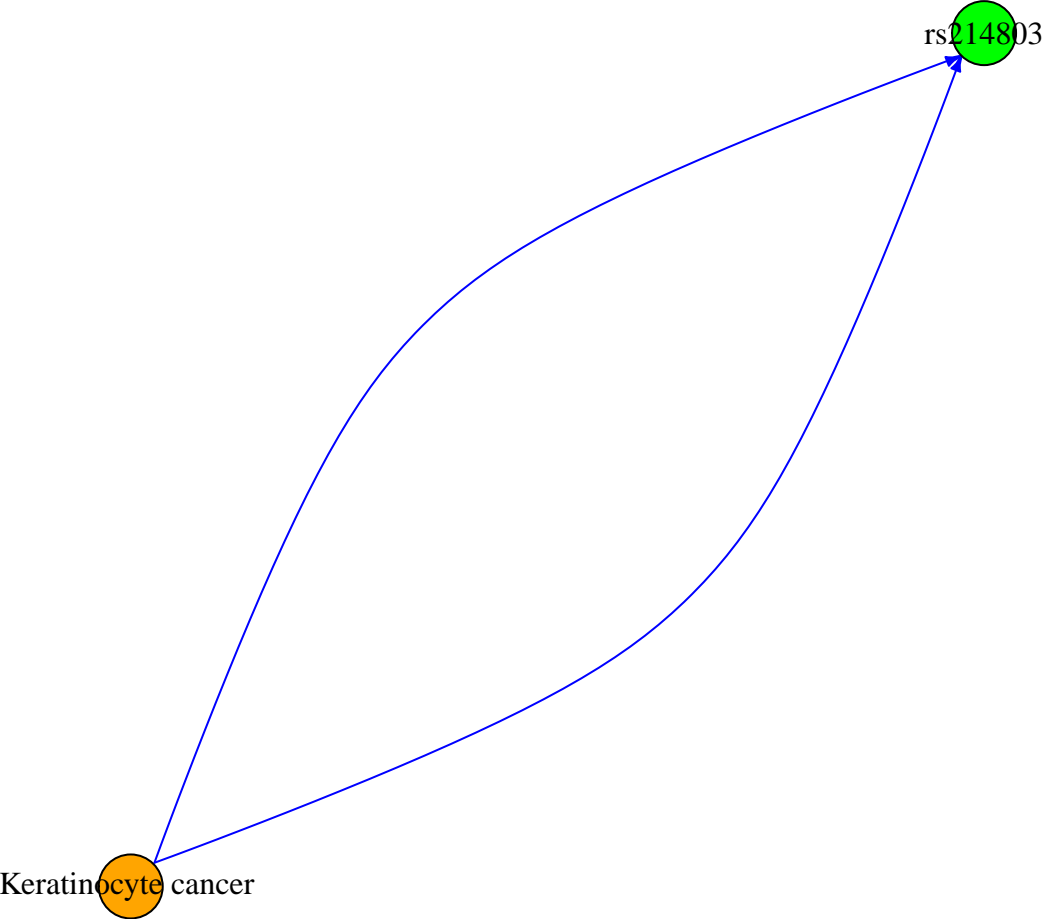

## Variant-Disease Network (LDL cholesterol)

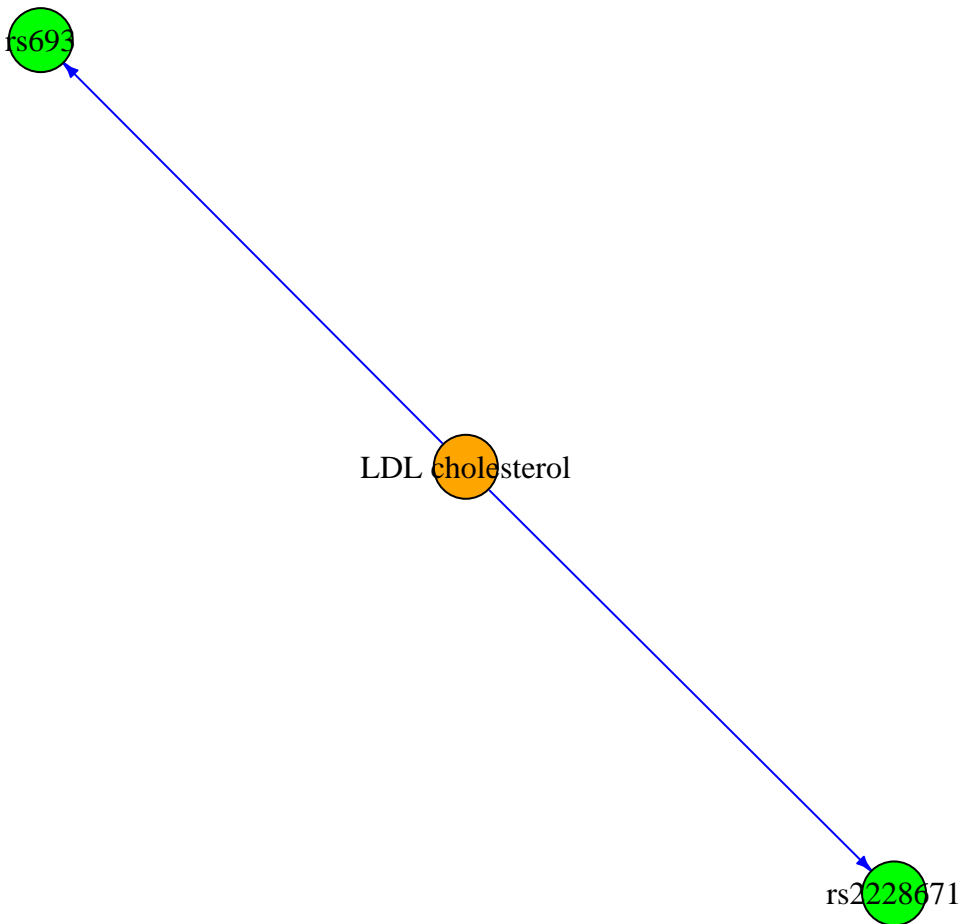

## Variant–Disease Network (LDL cholesterol levels)

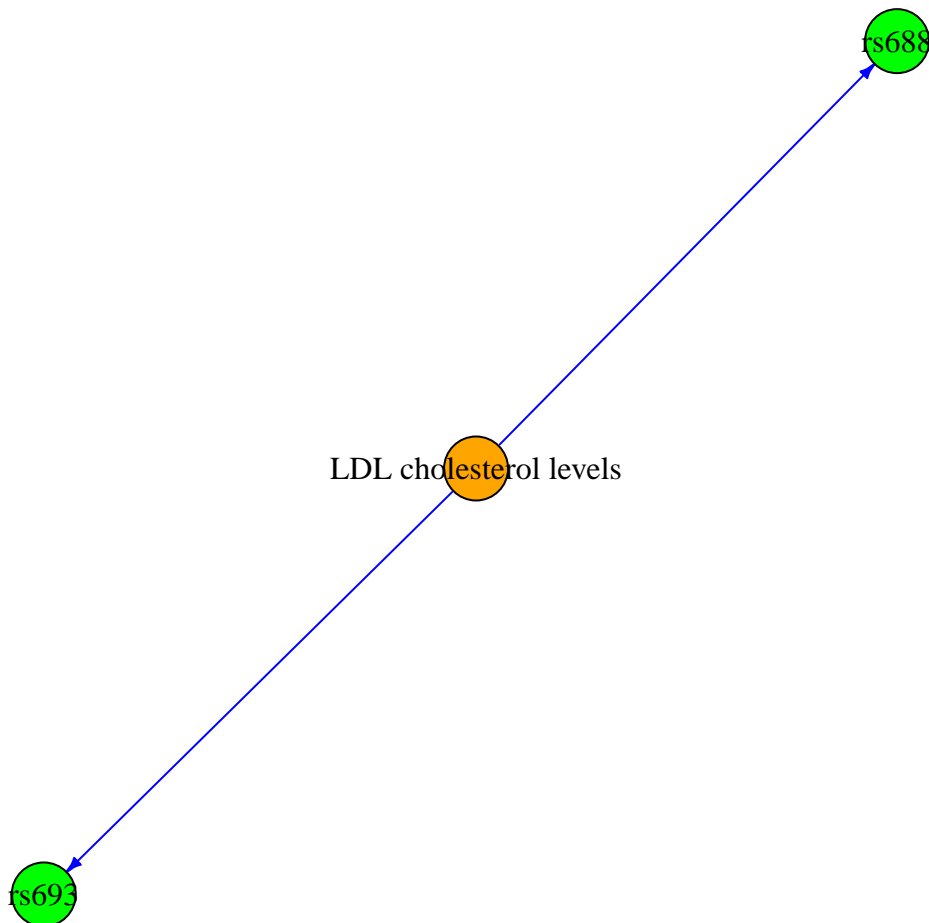

# Variant–Disease Network (Leisure sedentary behaviour )

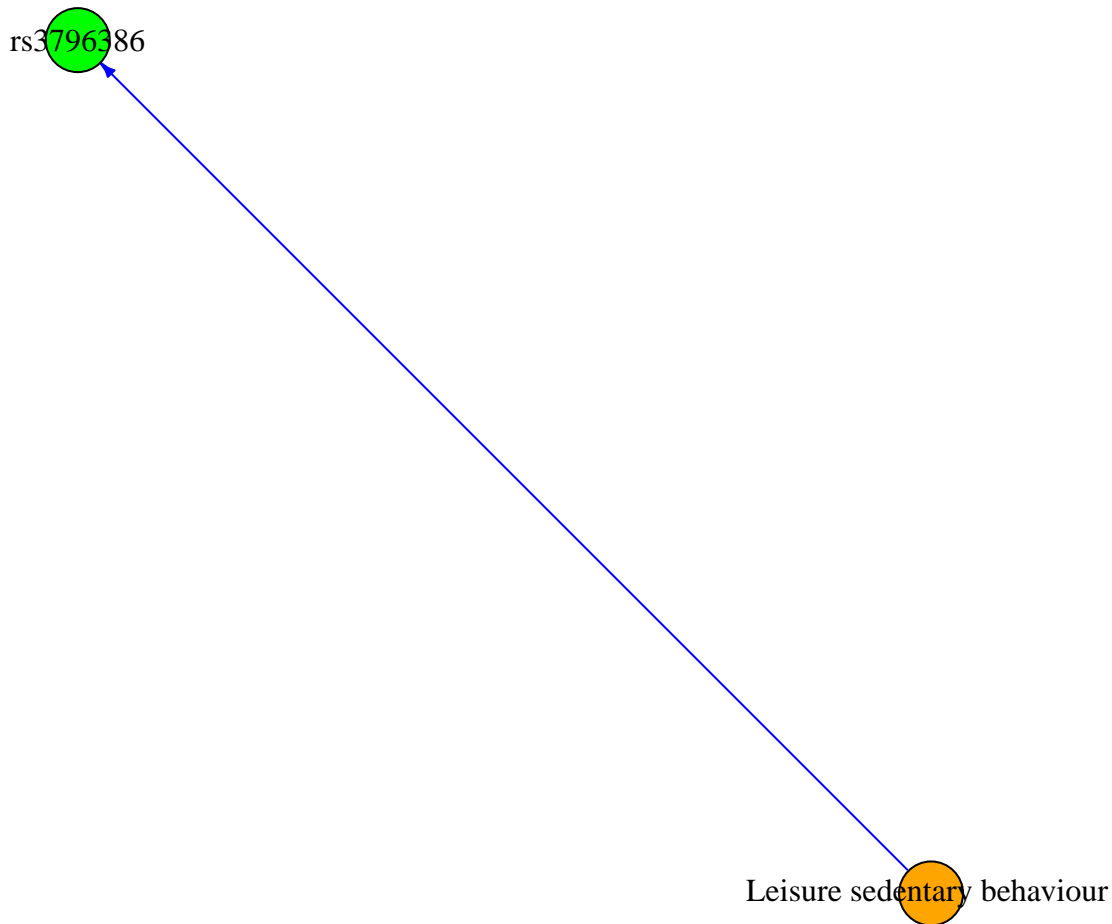

## Variant–Disease Network (Lipoprotein levels)

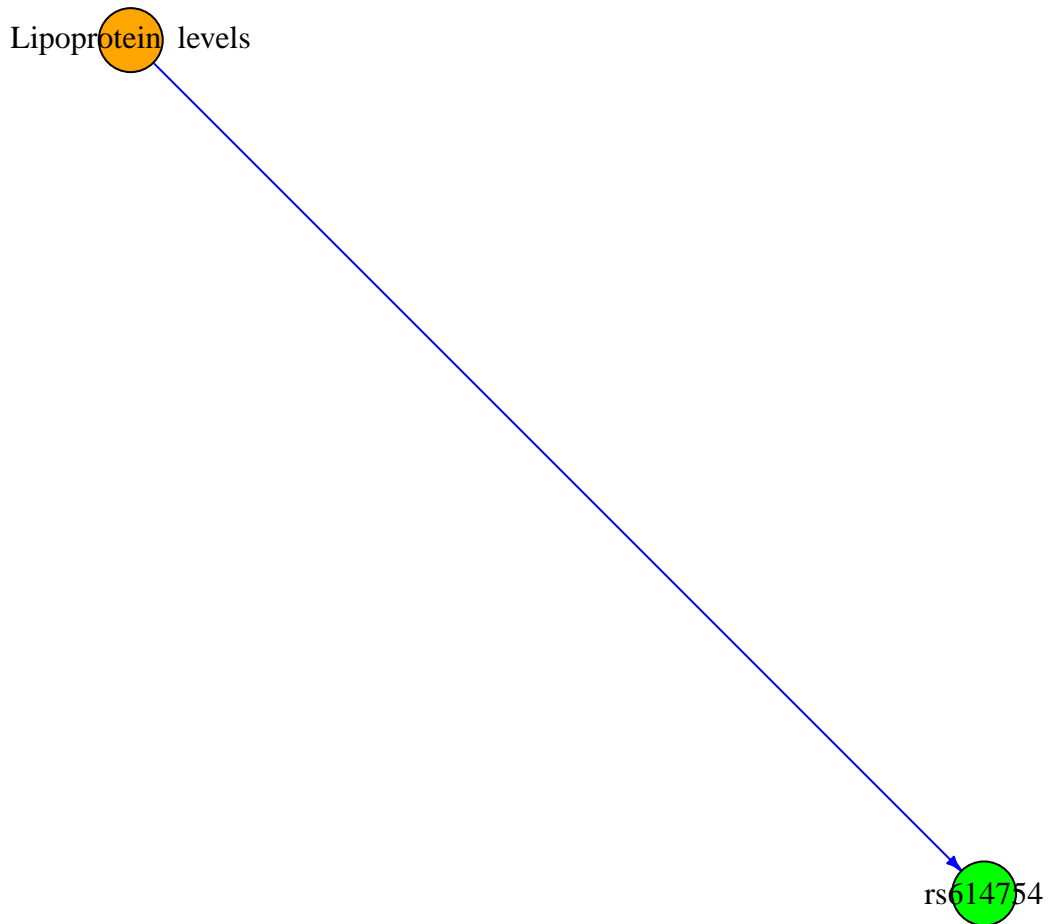

**Variant–Disease Network (Low density lipoprotein cholesterol levels)**

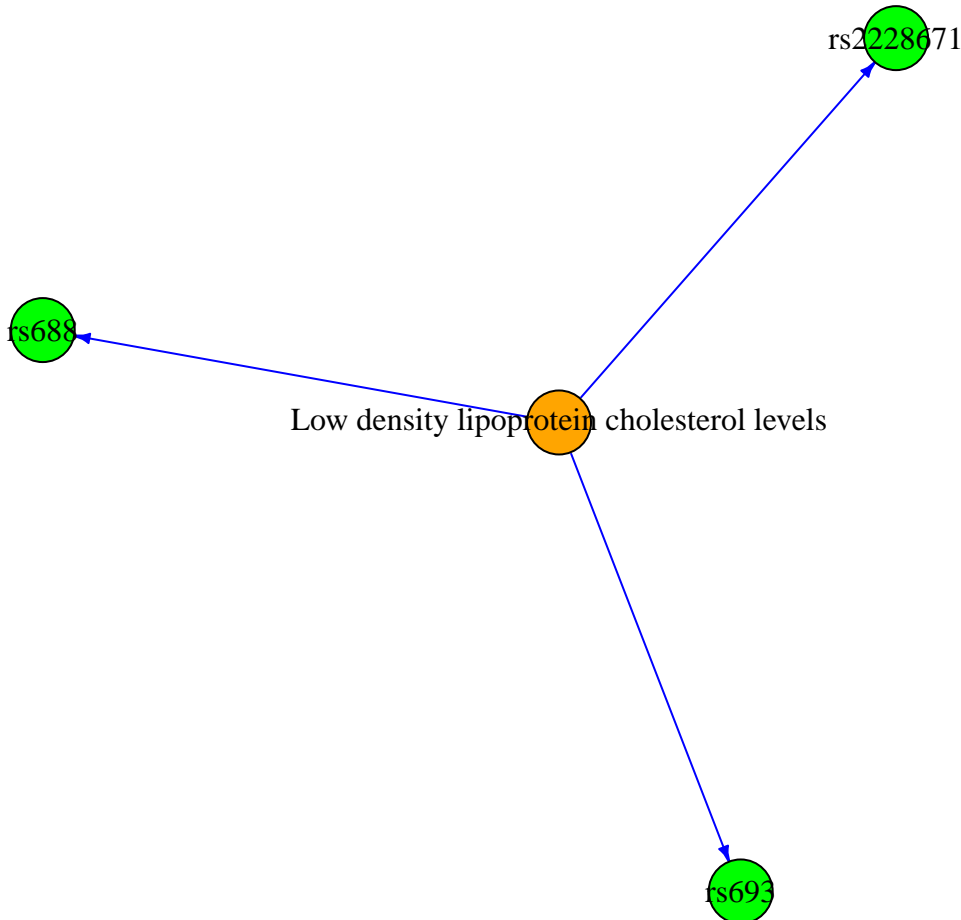

## Variant–Disease Network (Lymphocyte counts)

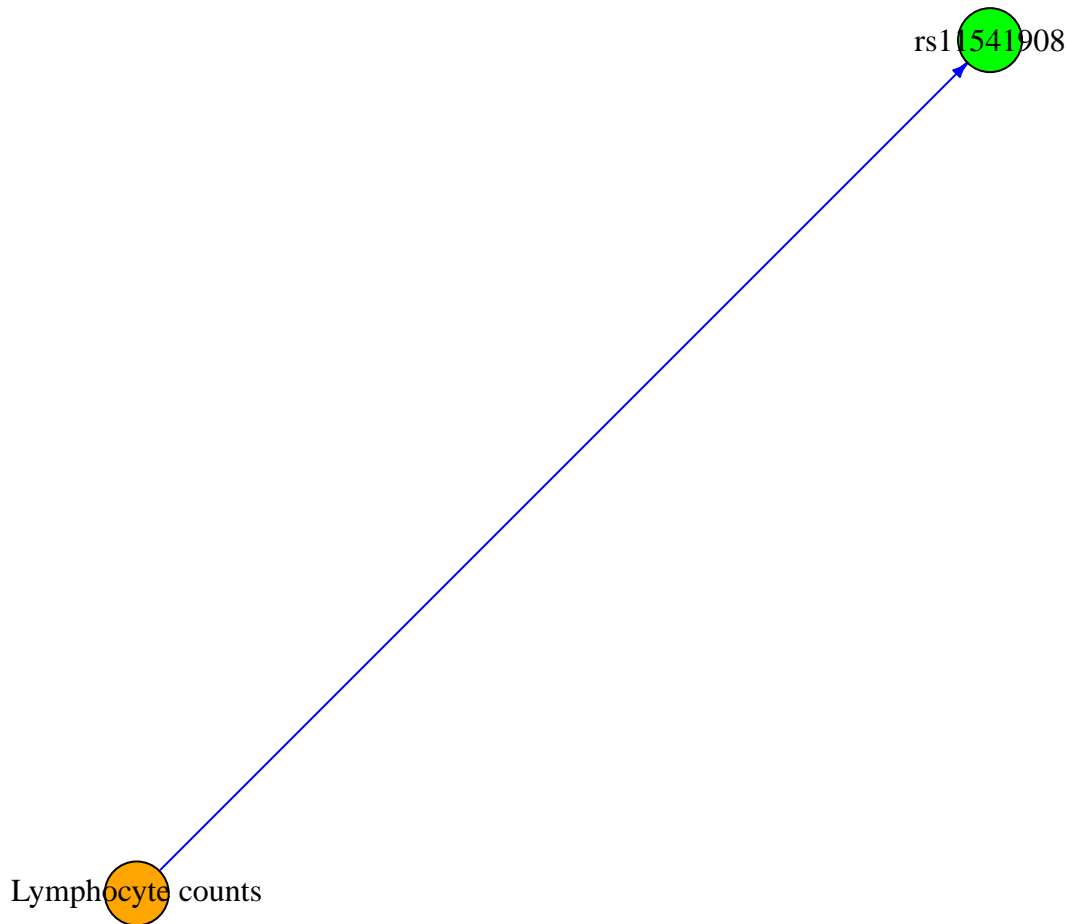

## Variant–Disease Network (Macular thickness)

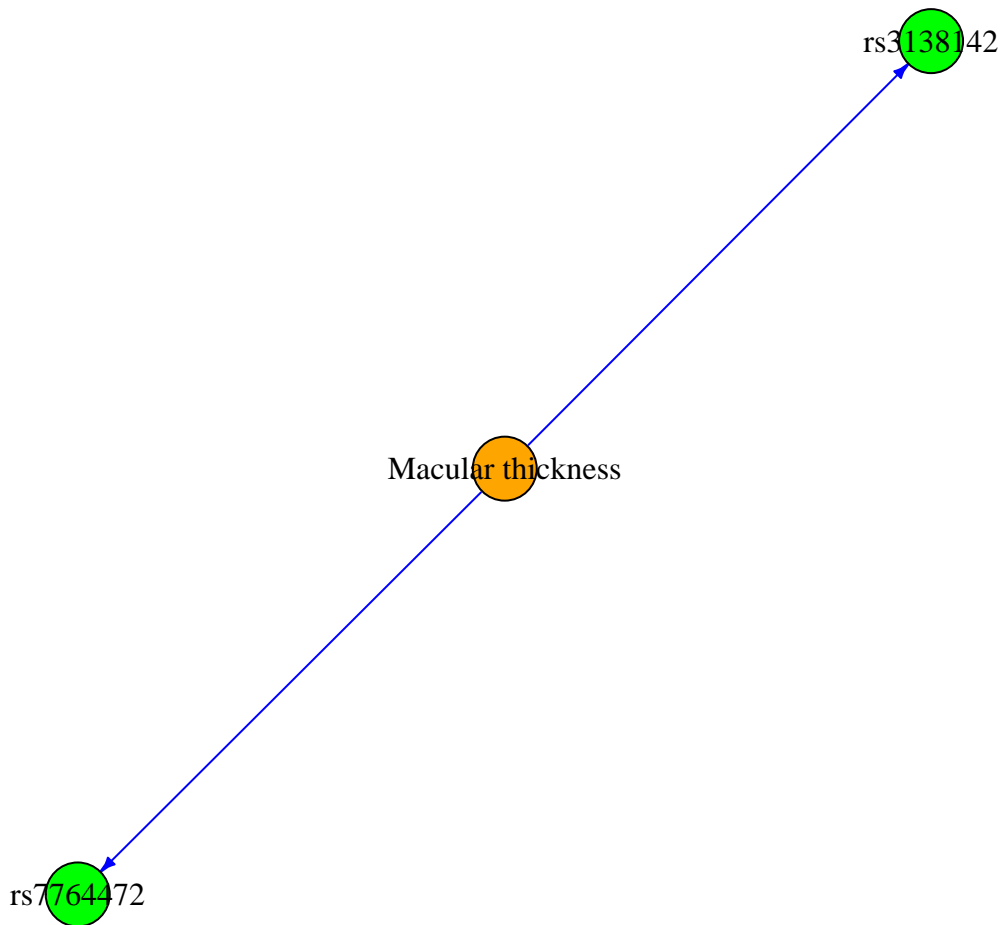



## Variant–Disease Network (Major depressive disorder)

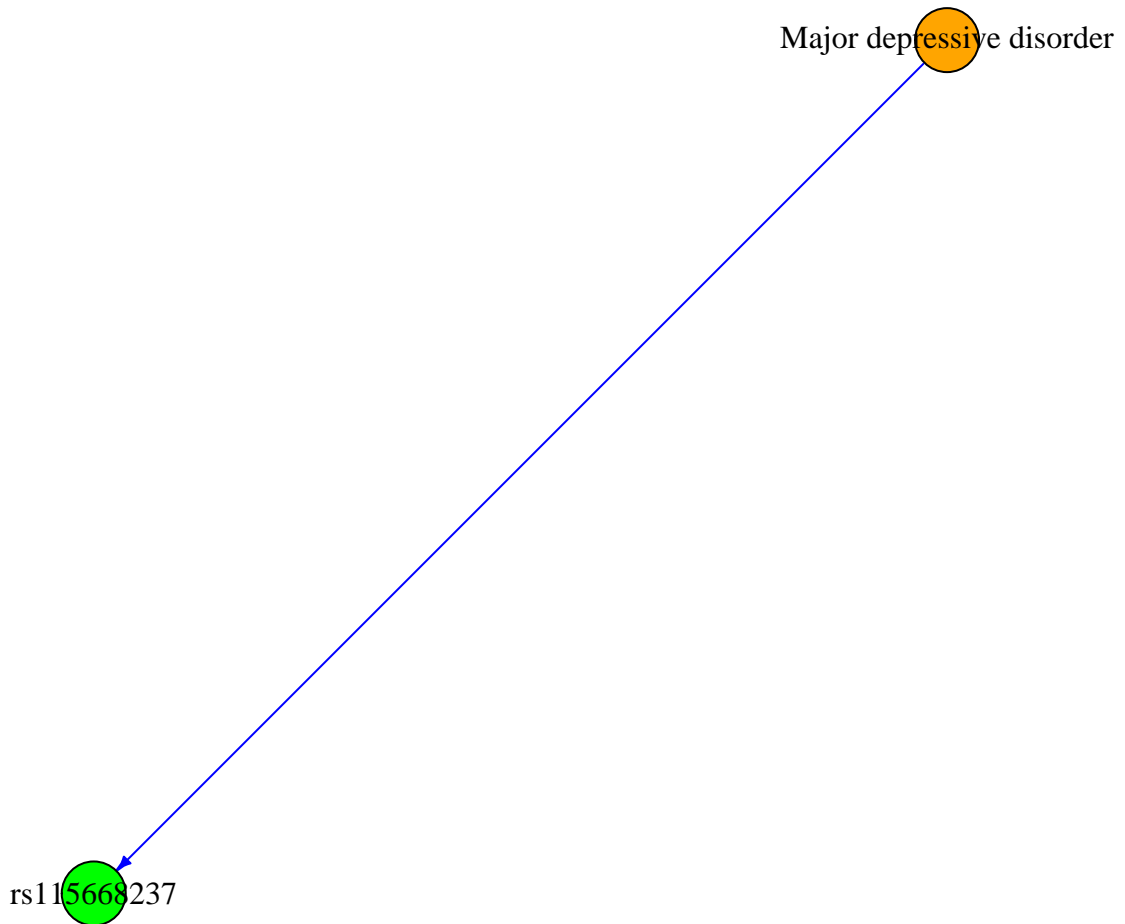

## Variant–Disease Network (Mean arterial pressure)

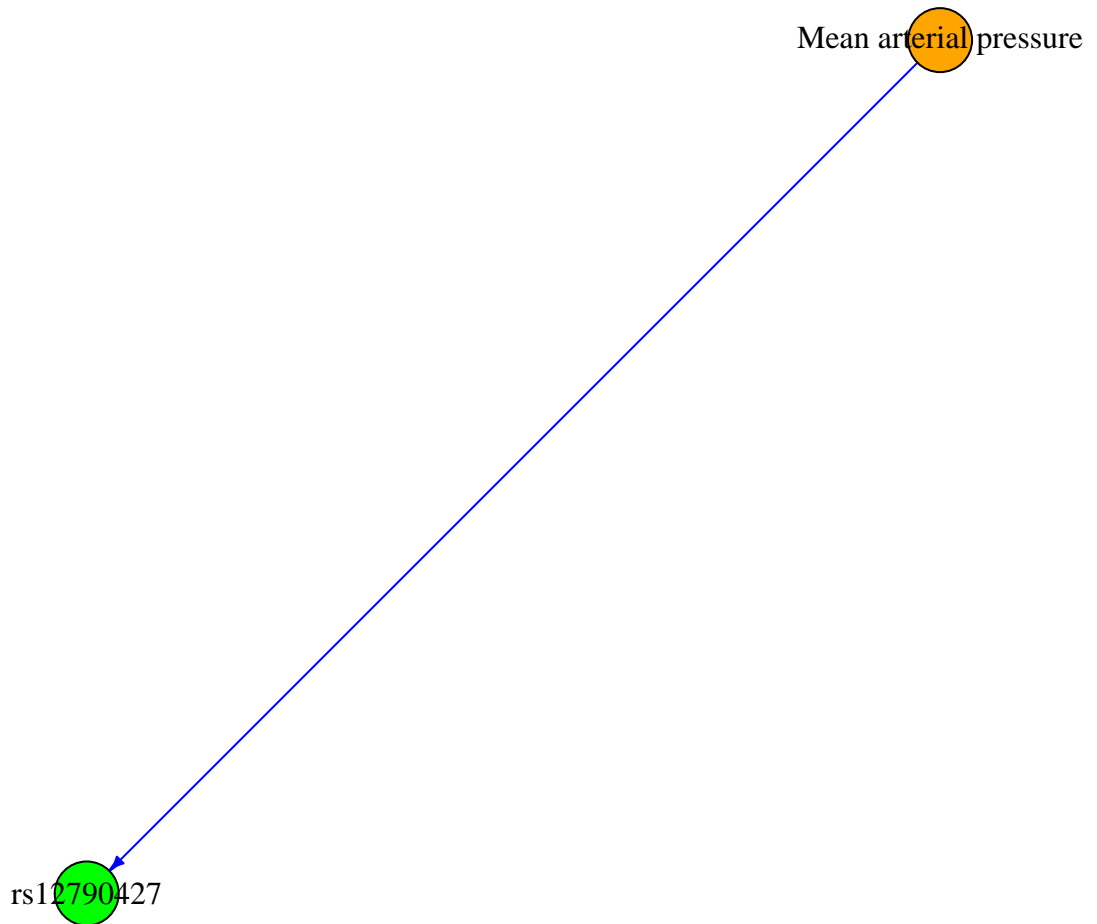

# Variant–Disease Network (Mean corpuscular hemoglobin)

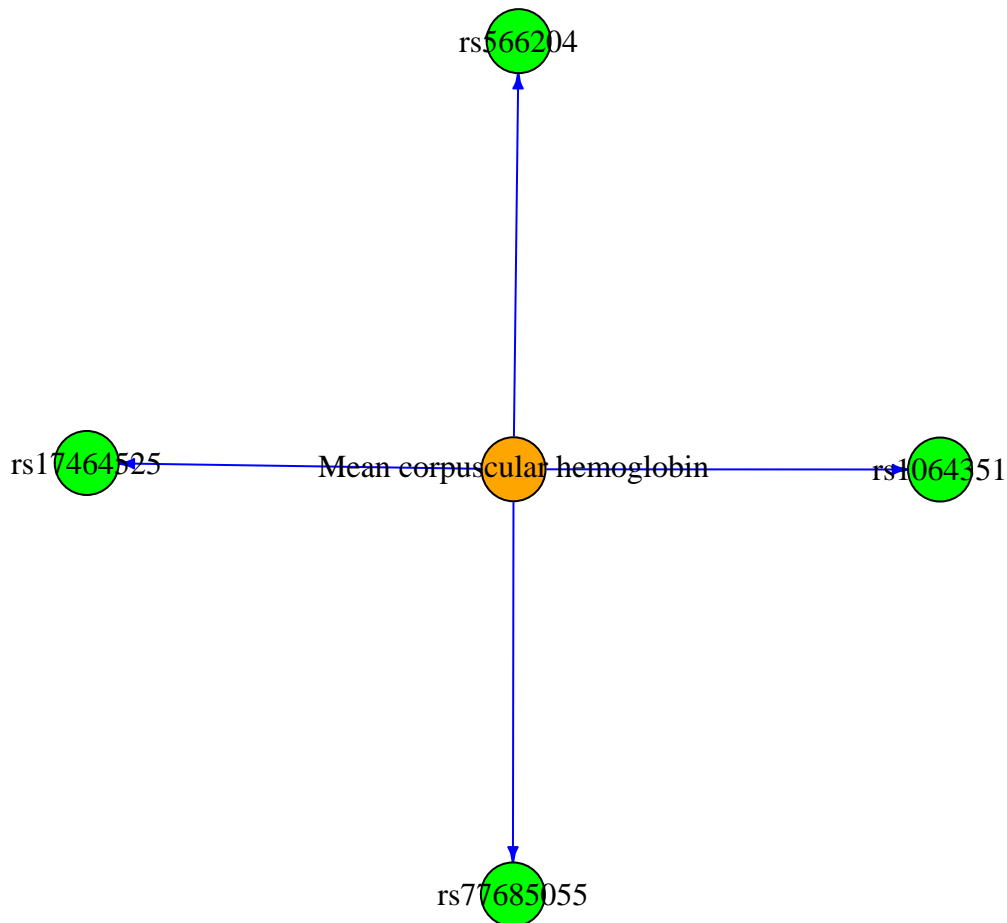

**Variant–Disease Network (Mean corpuscular hemoglobin concentration)**

Mean corpuscular hemoglobin concentration

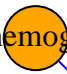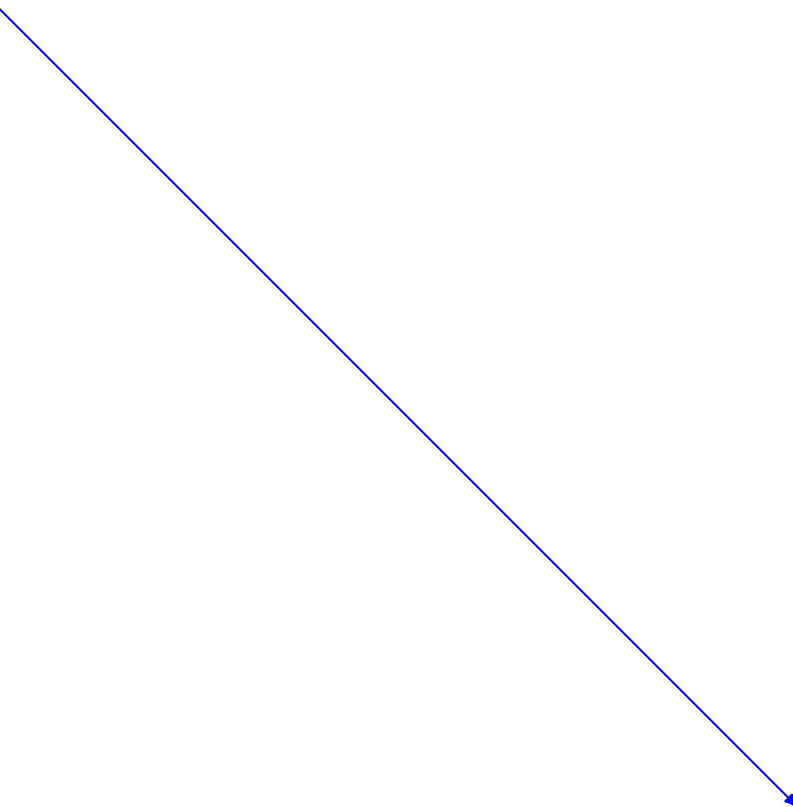

rs6599079

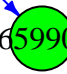

## Variant–Disease Network (Mean corpuscular volume)

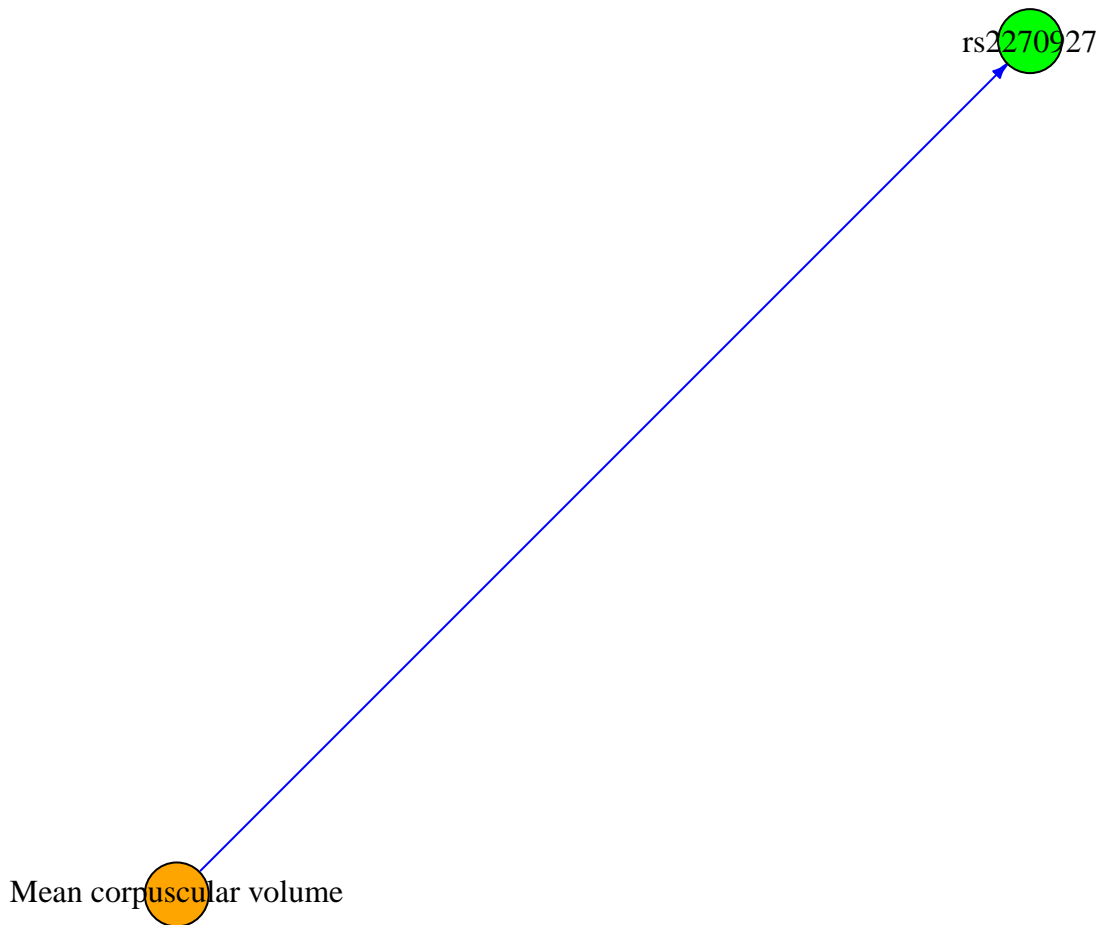

## Variant–Disease Network (Mean platelet volume)

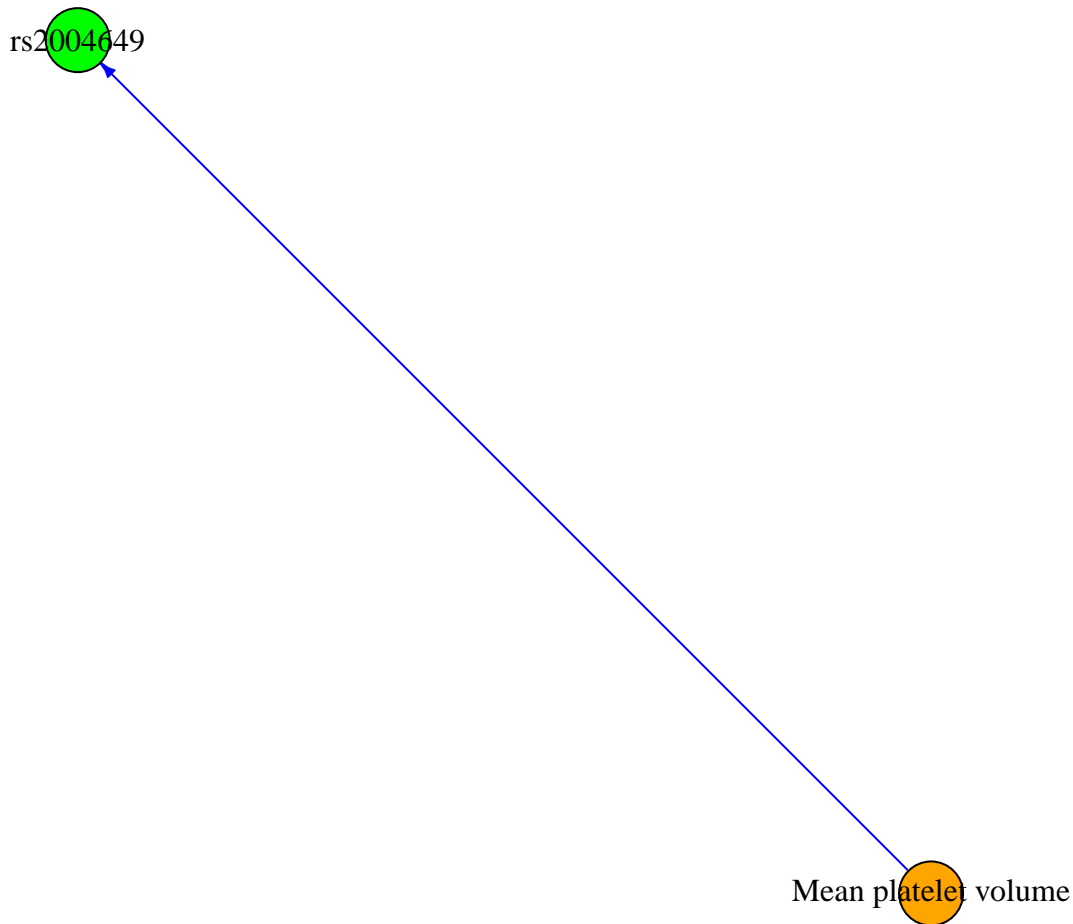

## Variant-Disease Network (Menarche )

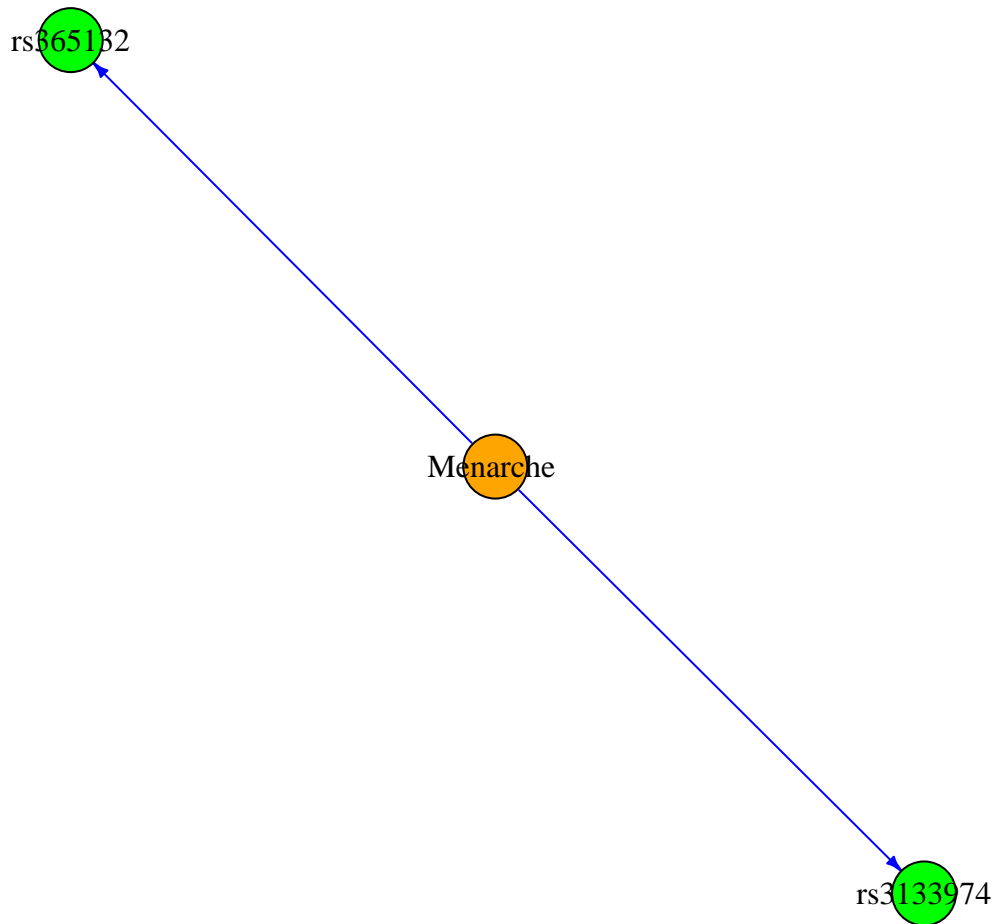

**Variant–Disease Network (Menarche and menopause )**

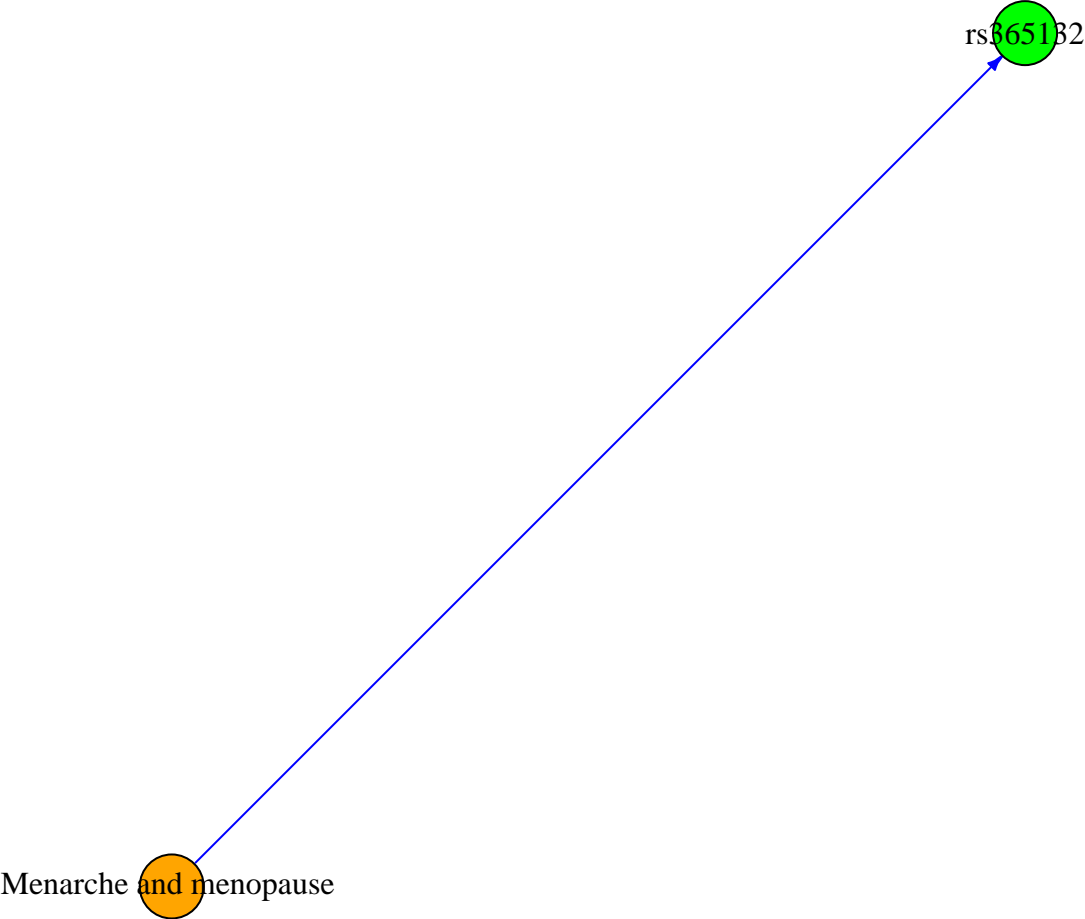



## Variant-Disease Network (Menopause )

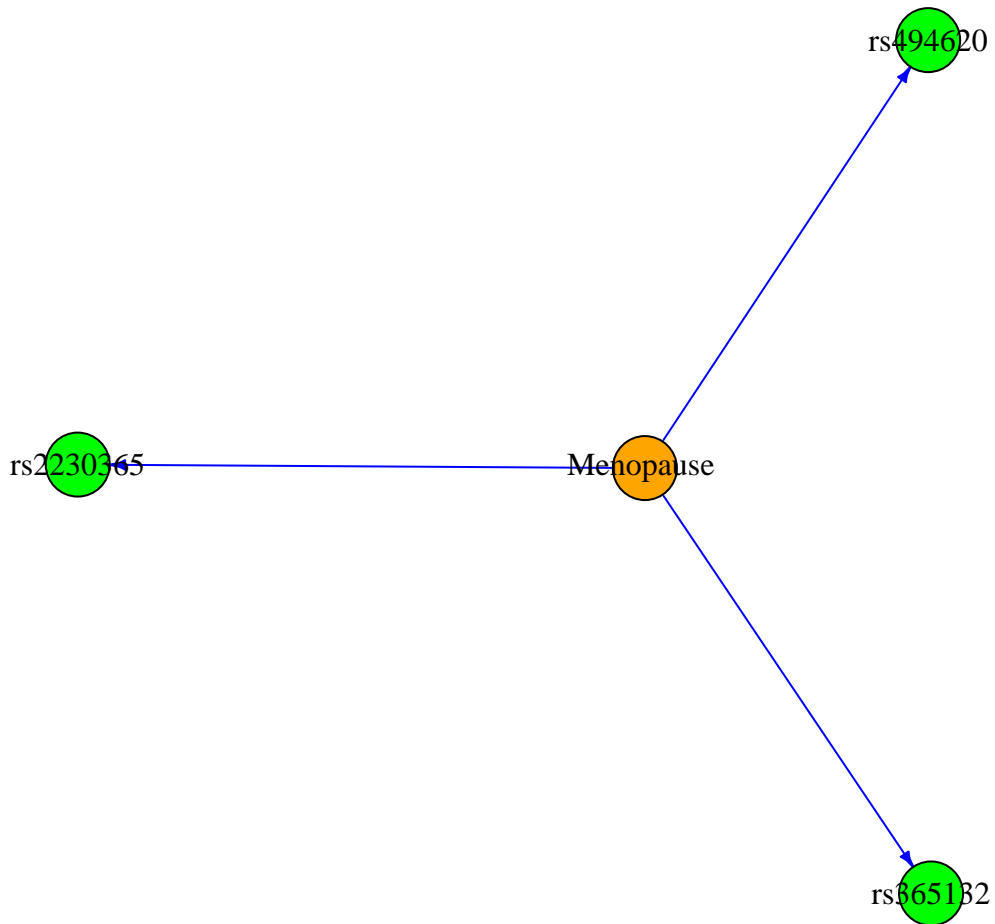

## Variant–Disease Network (Metabolic syndrome)

Metabolic syndrome

rs3814883

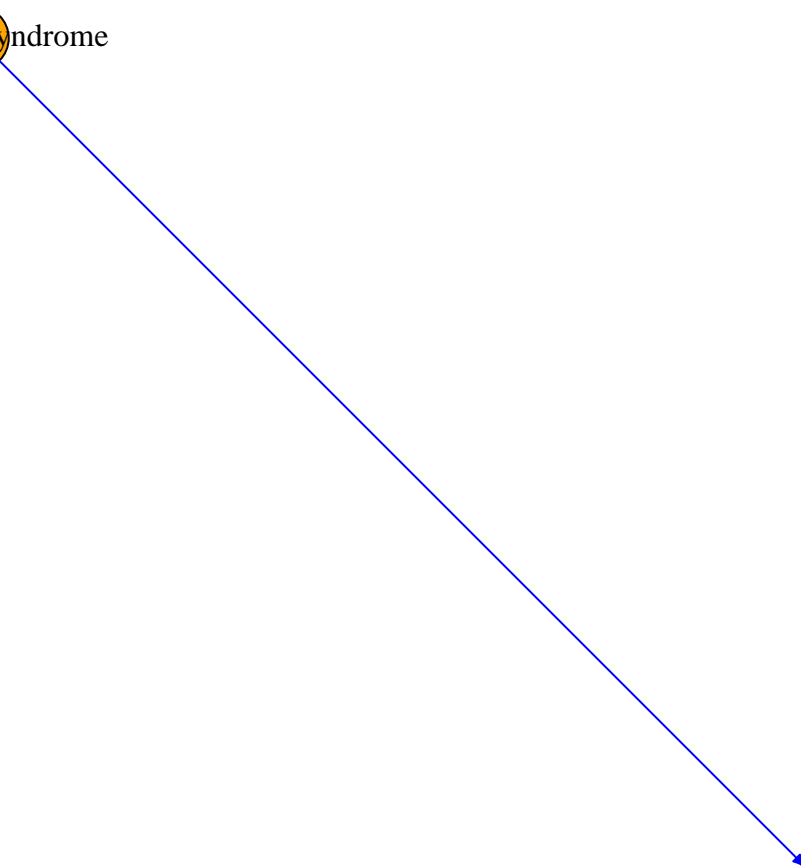

## Variant–Disease Network (Metabolite levels)

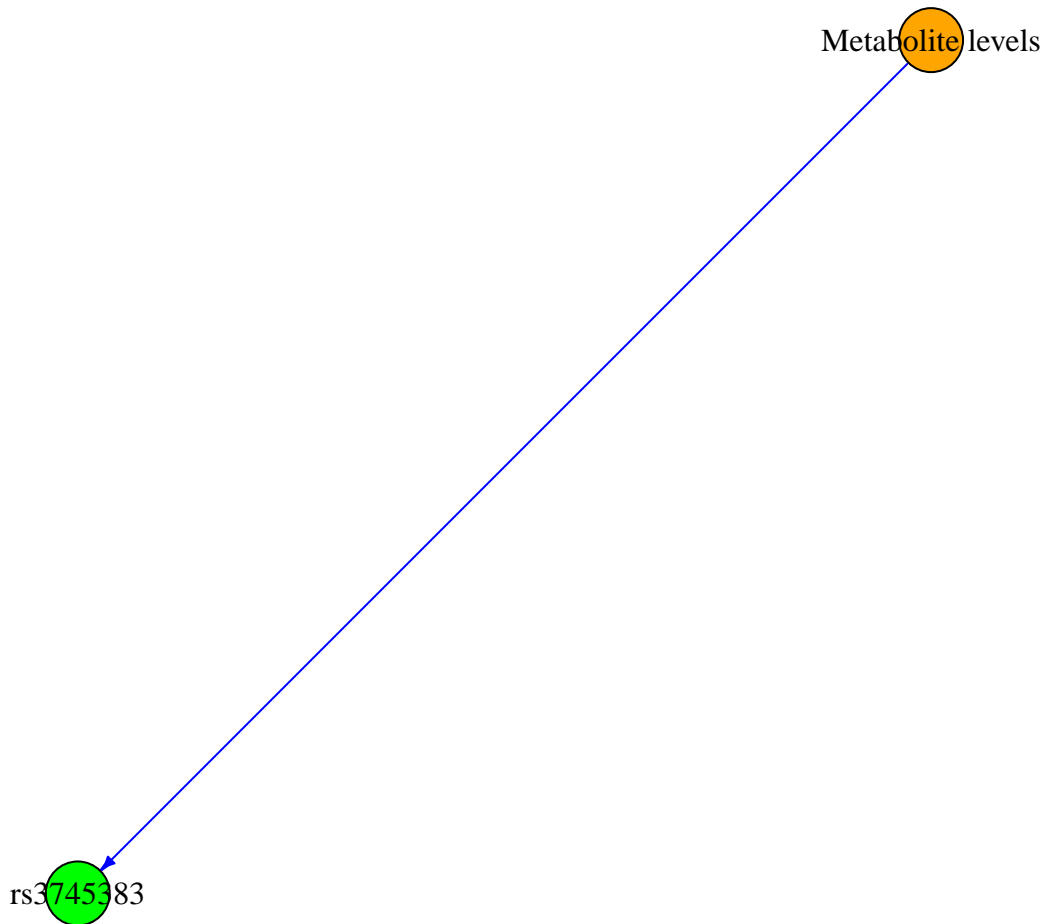

## Variant–Disease Network (Monocyte count)

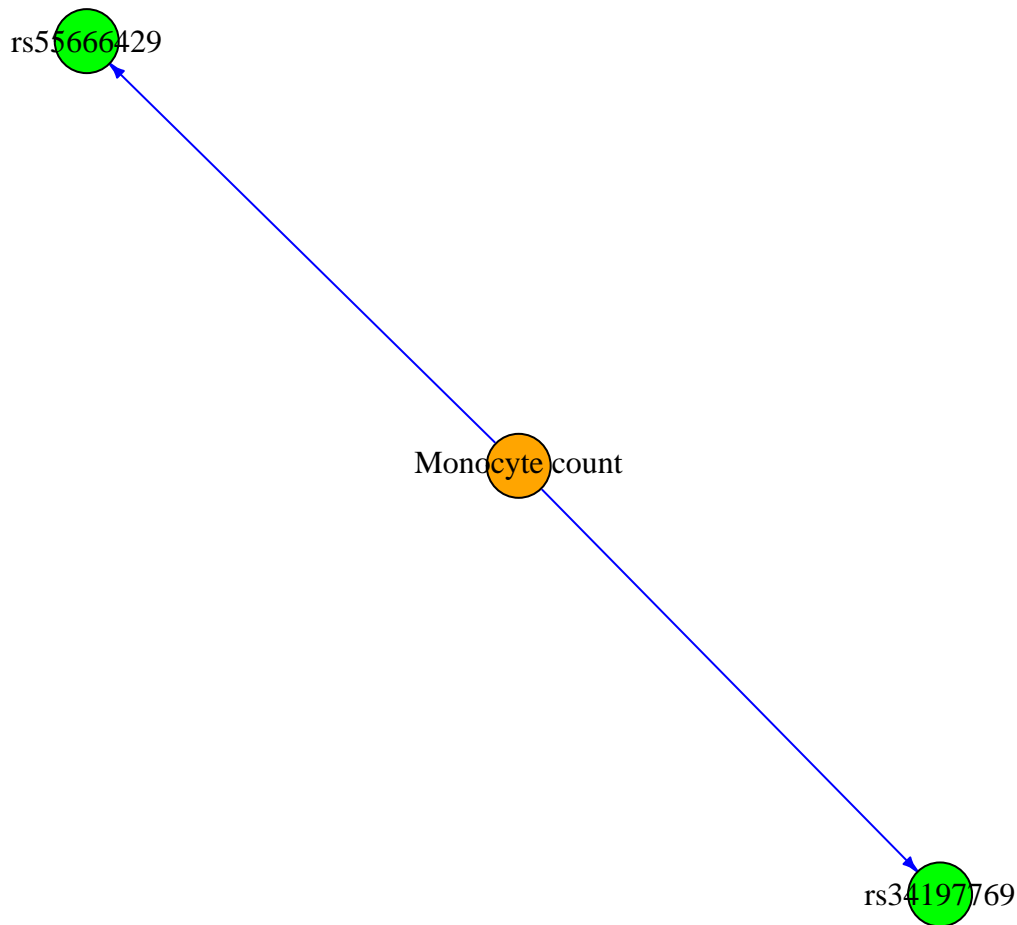

# Variant–Disease Network (Neonatal total 25–hydroxyvitamin D levels )

Neonatal total 25–hydroxyvitamin D levels

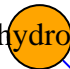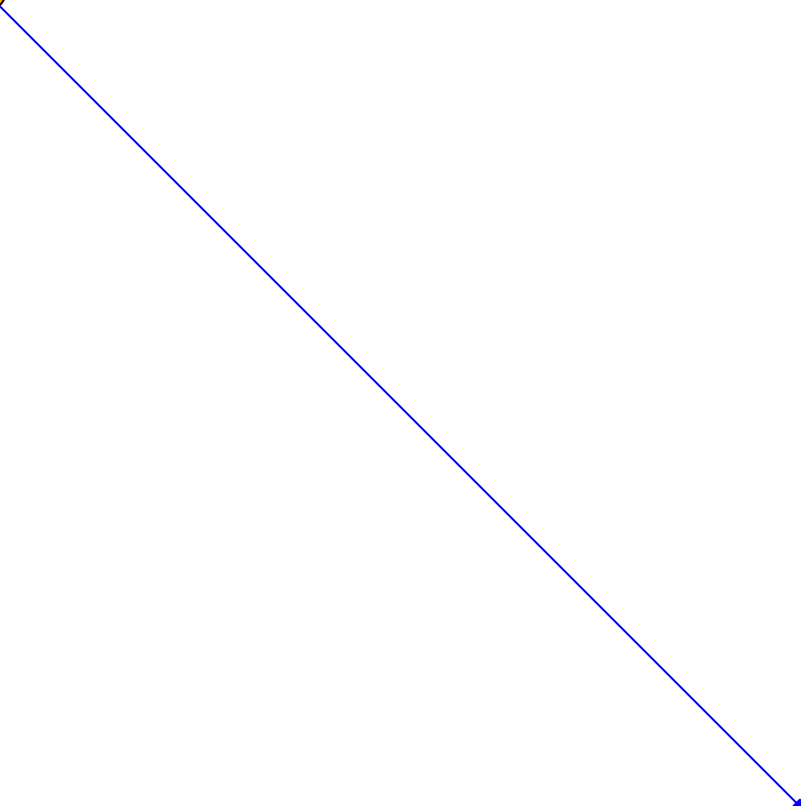

rs4588

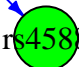

## Variant-Disease Network (Neurociticism)

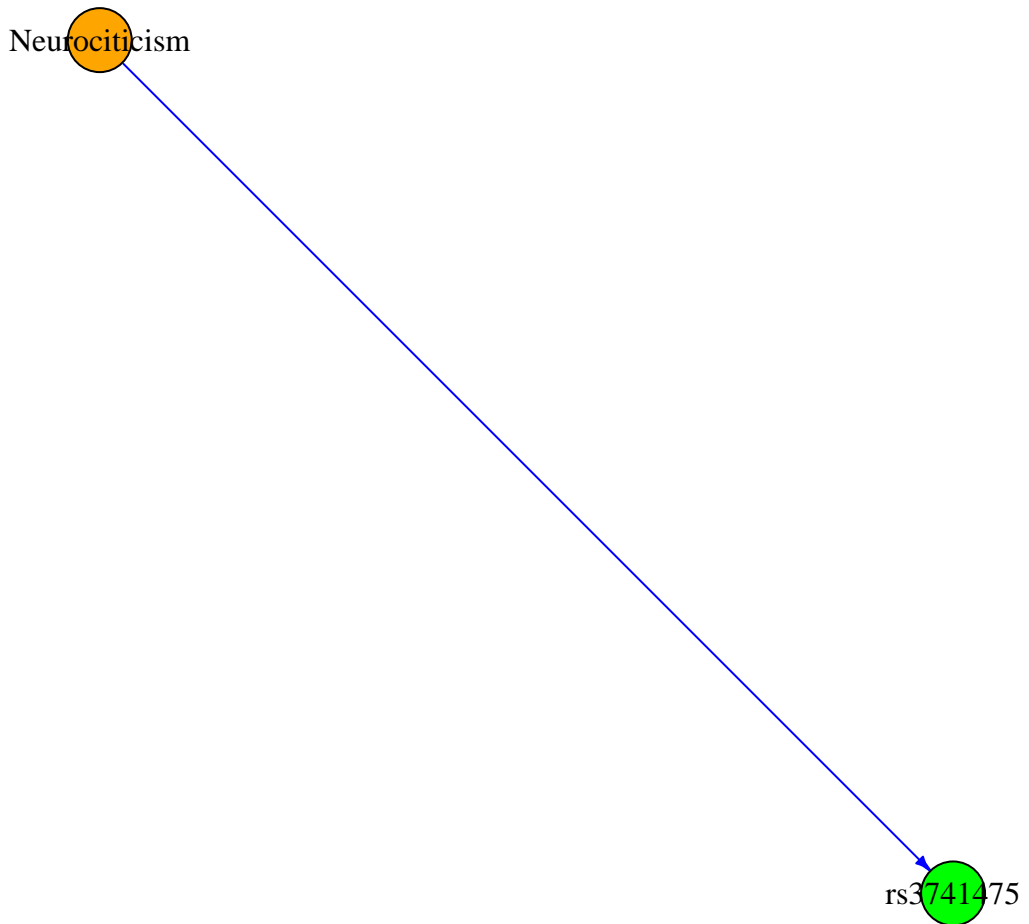

## Variant-Disease Network (Neuroticism)

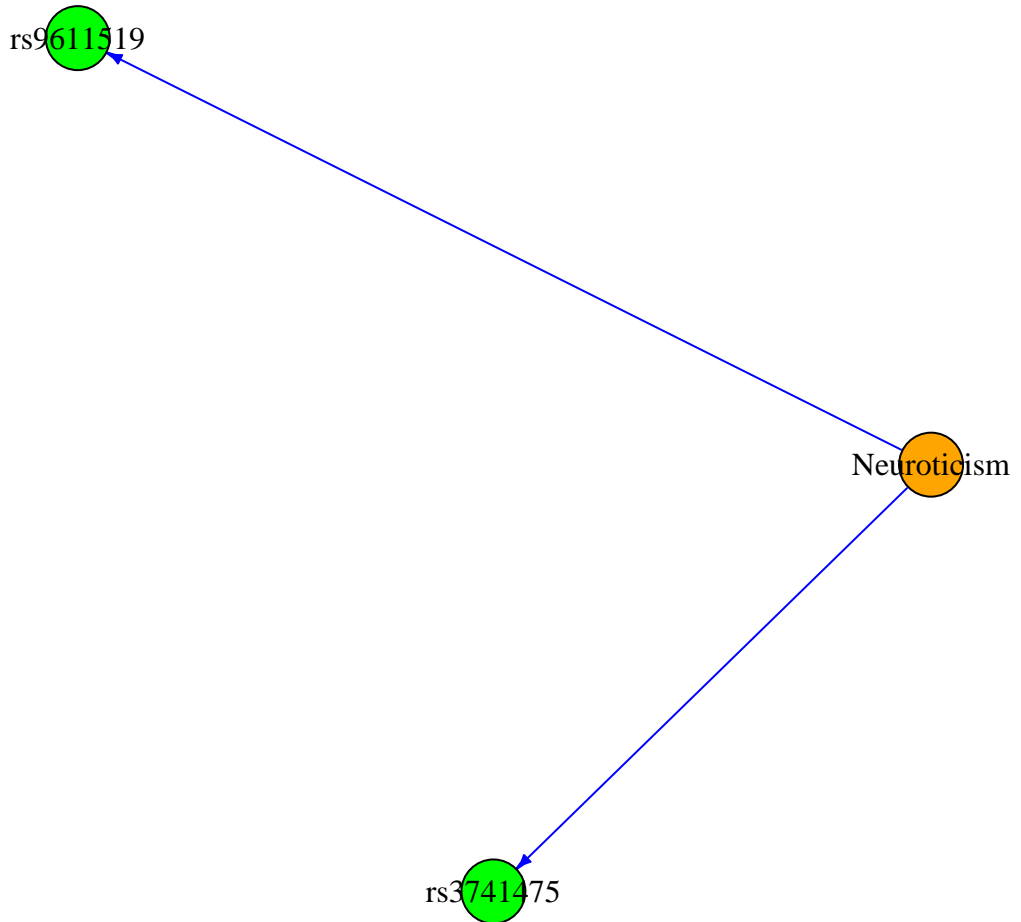

# Variant–Disease Network (Nonobstructive coronary artery disease)

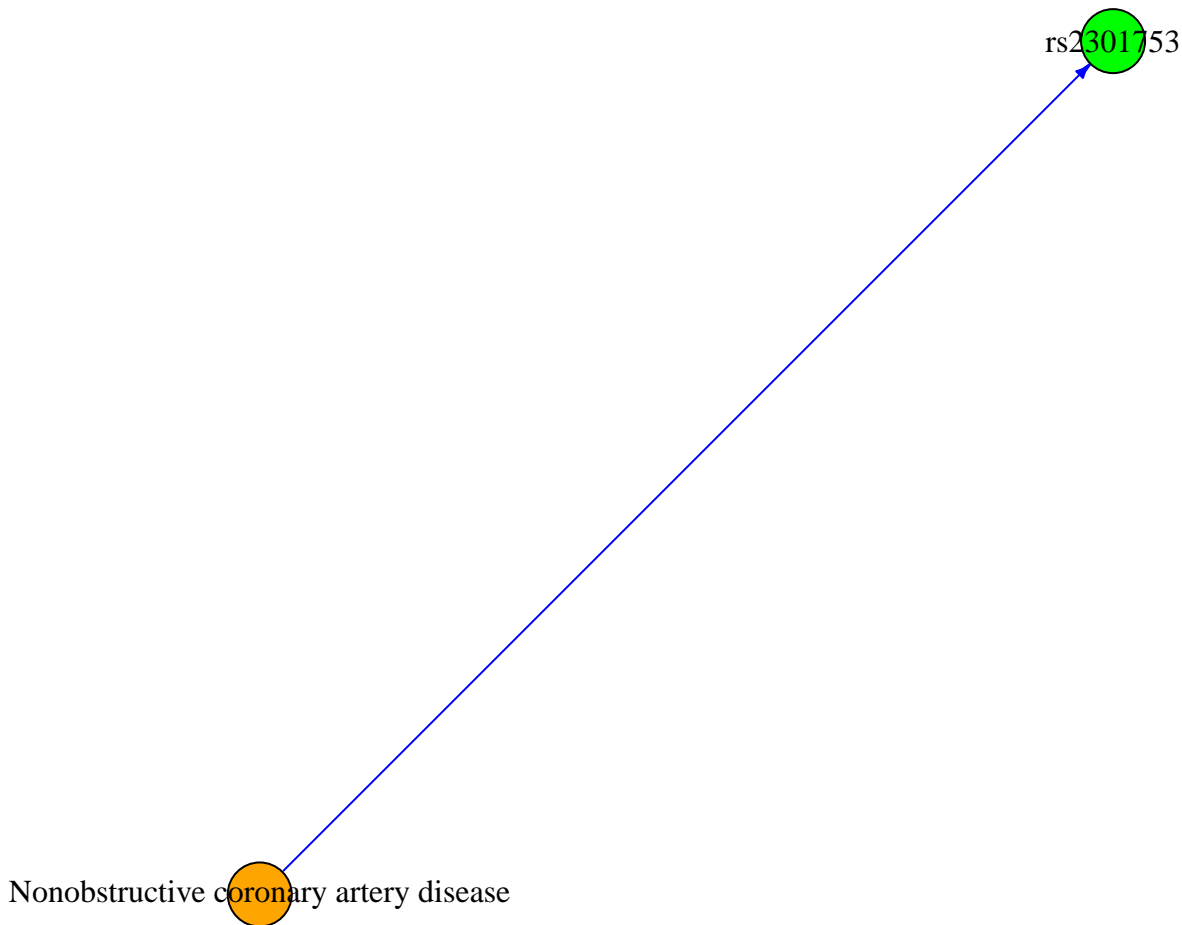



## Variant–Disease Network (Obesity–related traits)

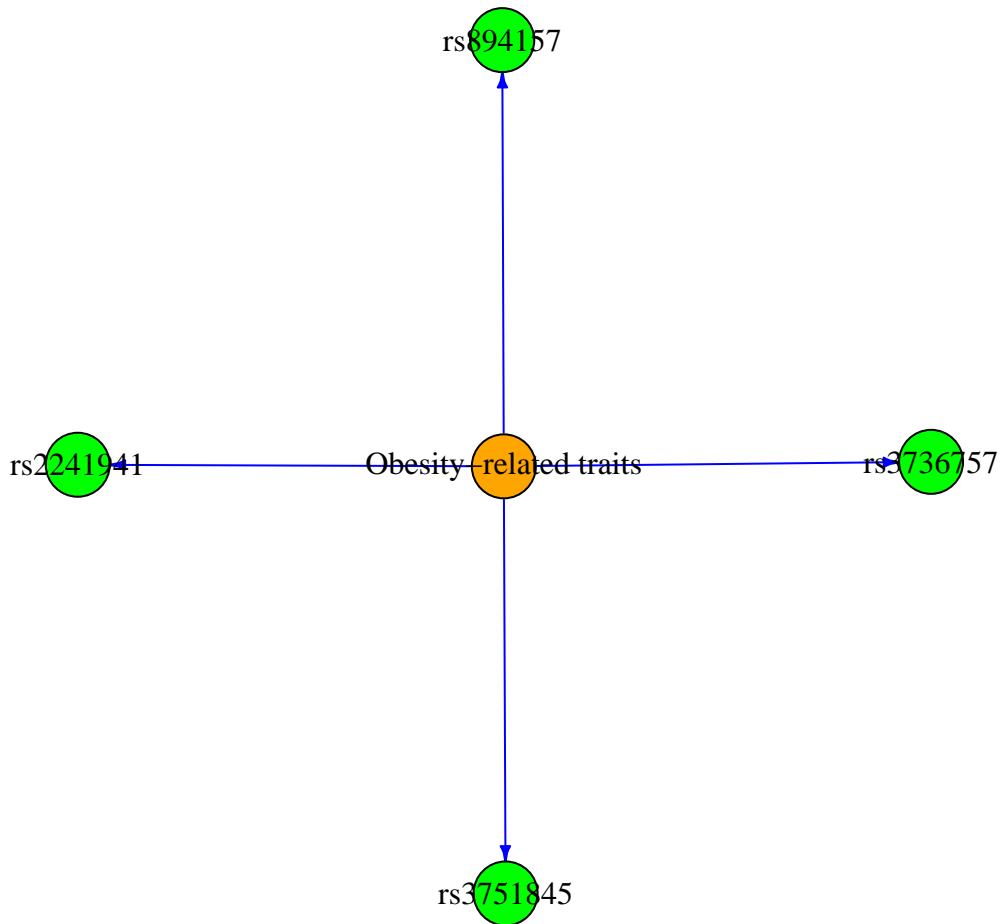

## Variant–Disease Network (Pancreatic cancer)

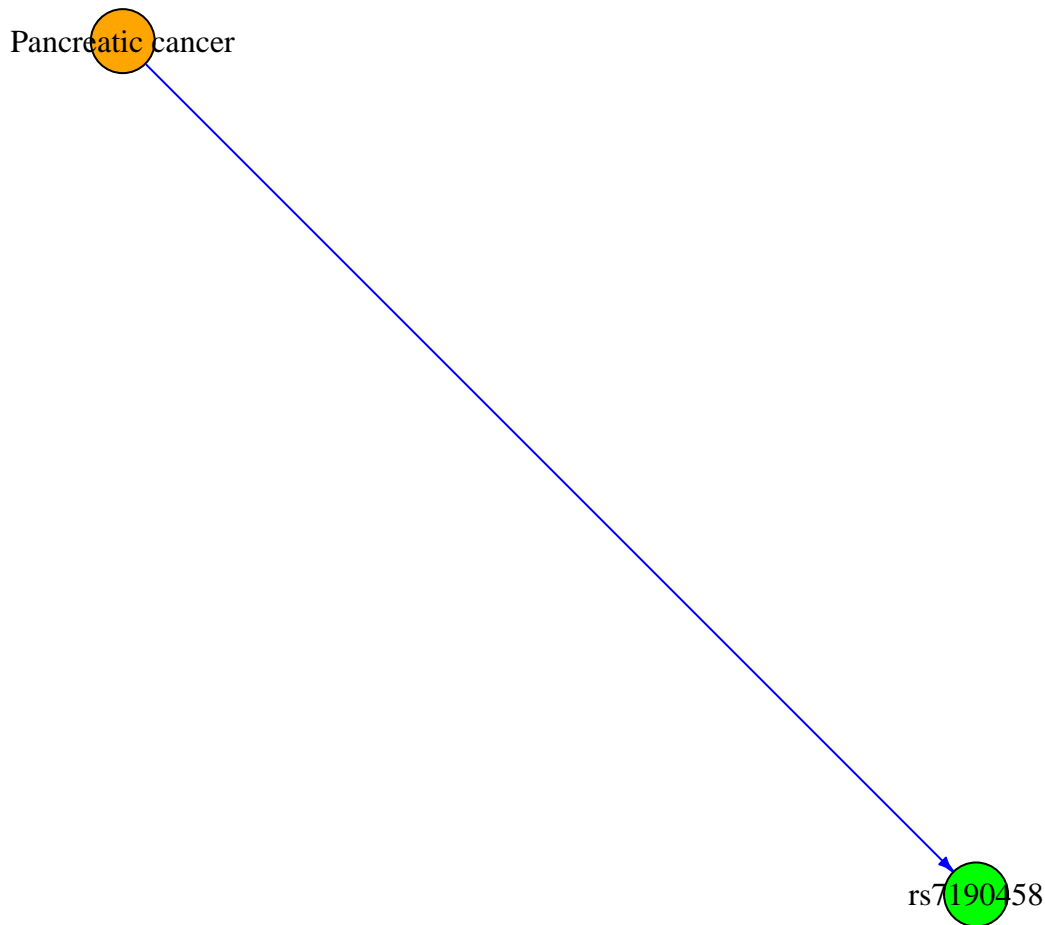

Variant–Disease Network (Plasma omega–6 polyunsaturated fatty acid level

rs1136001

Plasma omega–6 polyunsaturated fatty ac



## Variant–Disease Network (Platelet aggregation)

rs1052763

Platelet aggregation



## Variant–Disease Network (Post bronchodilator FEV1)

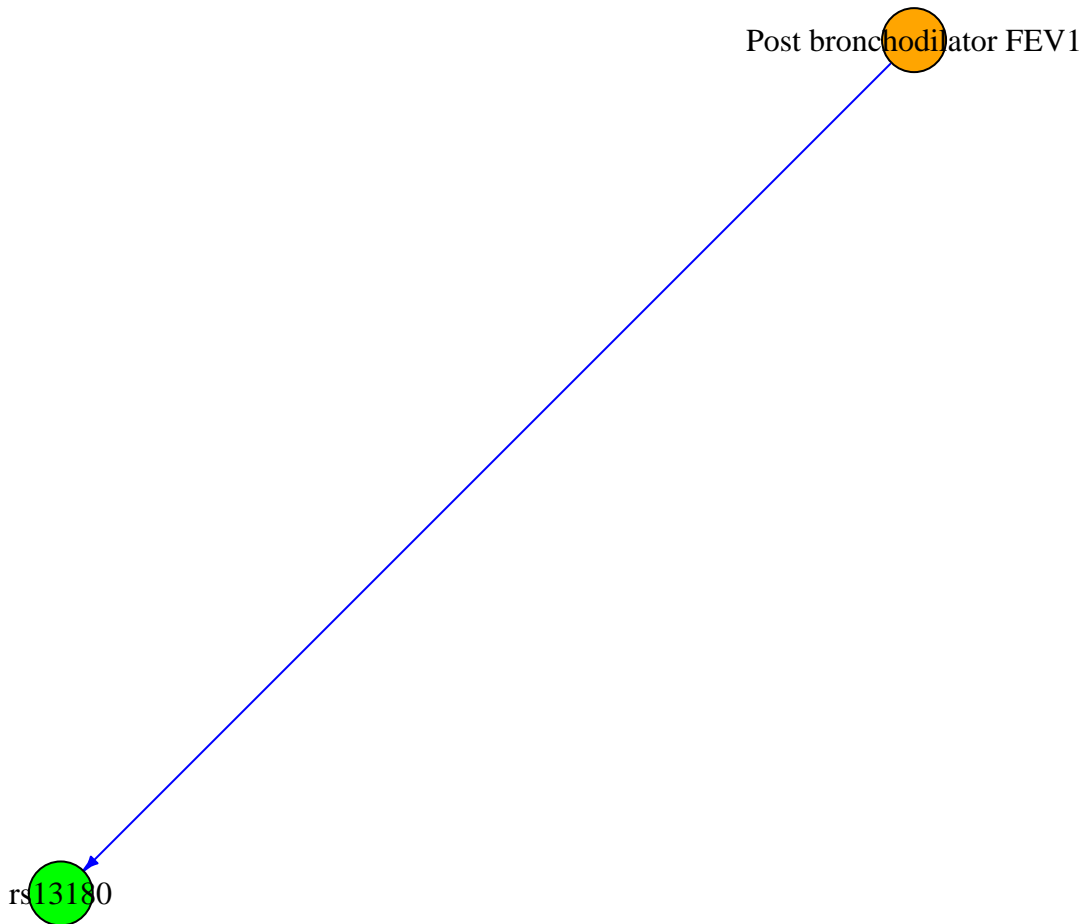

Variant–Disease Network (Post bronchodilator FEV1/FVC ratio)

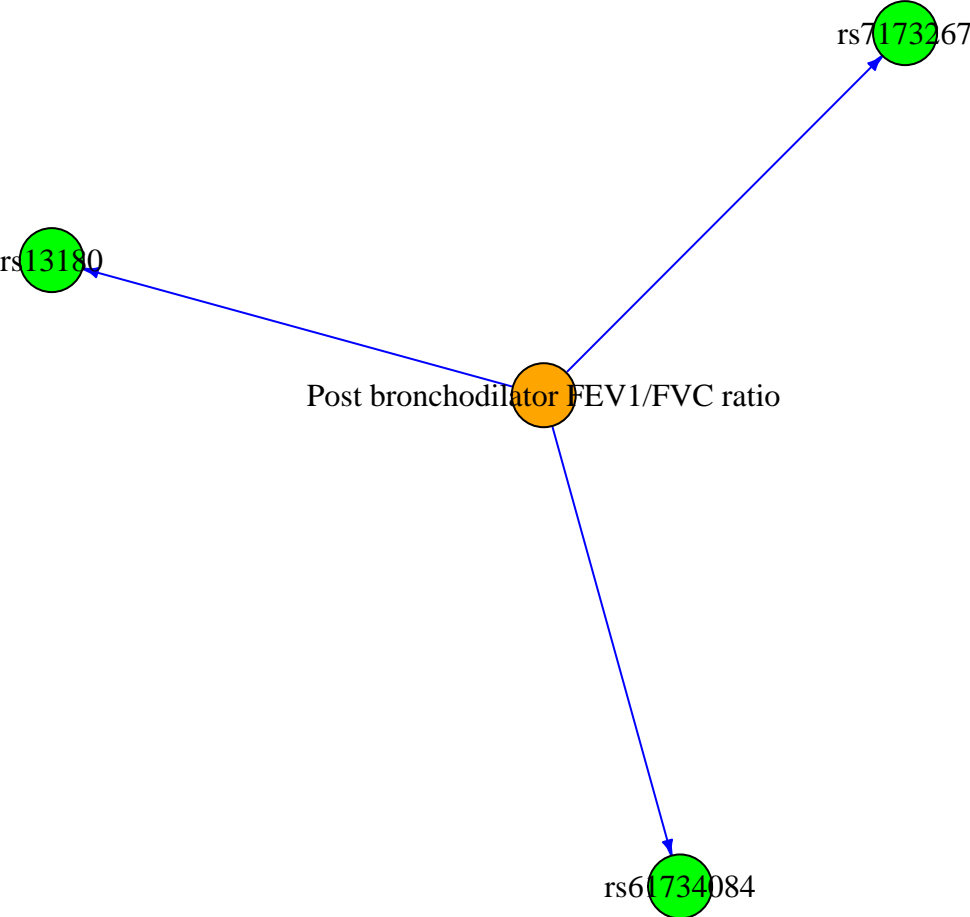

# Variant-Disease Network (Postoperative survival time in hepatocellular carcinoma)

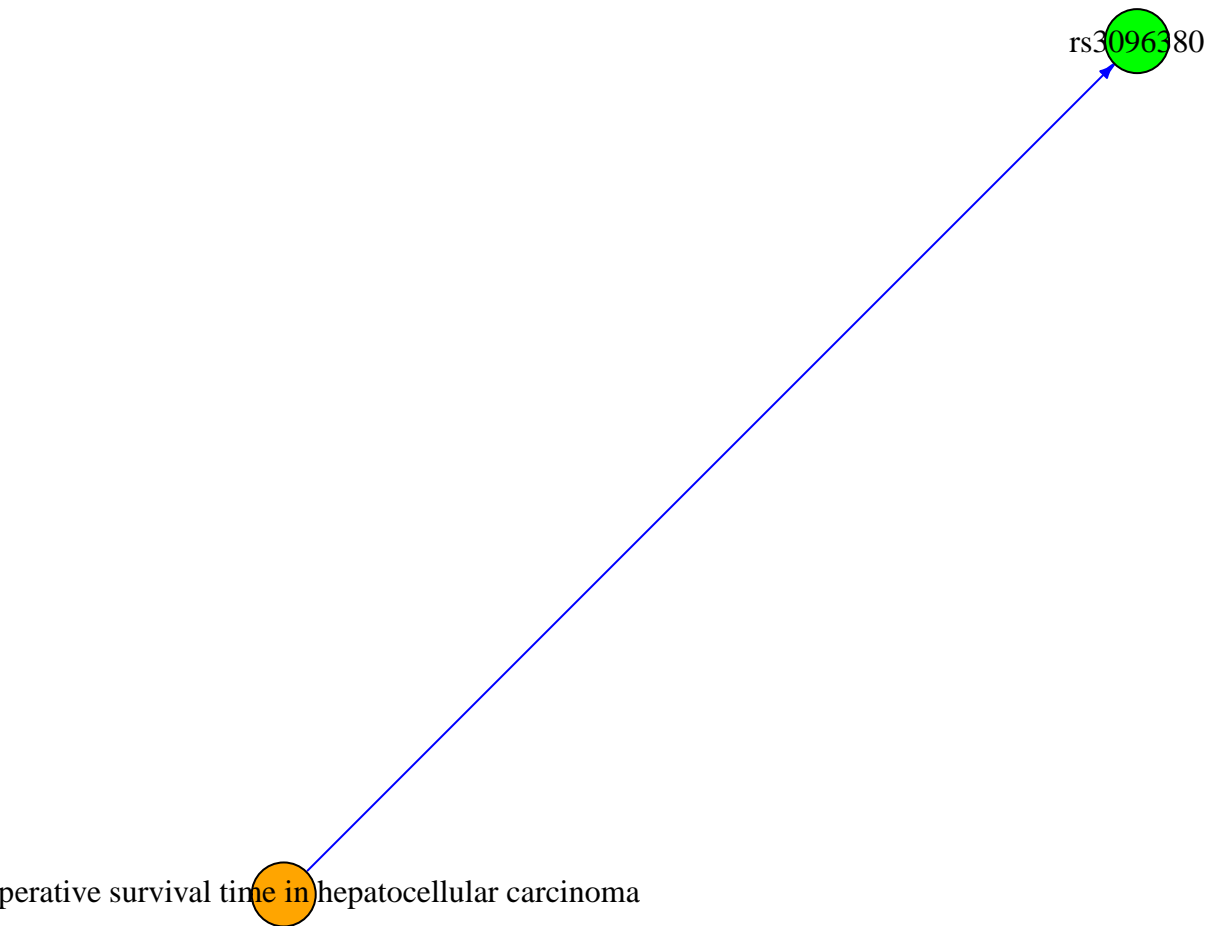

## Variant–Disease Network (Psoriasis)

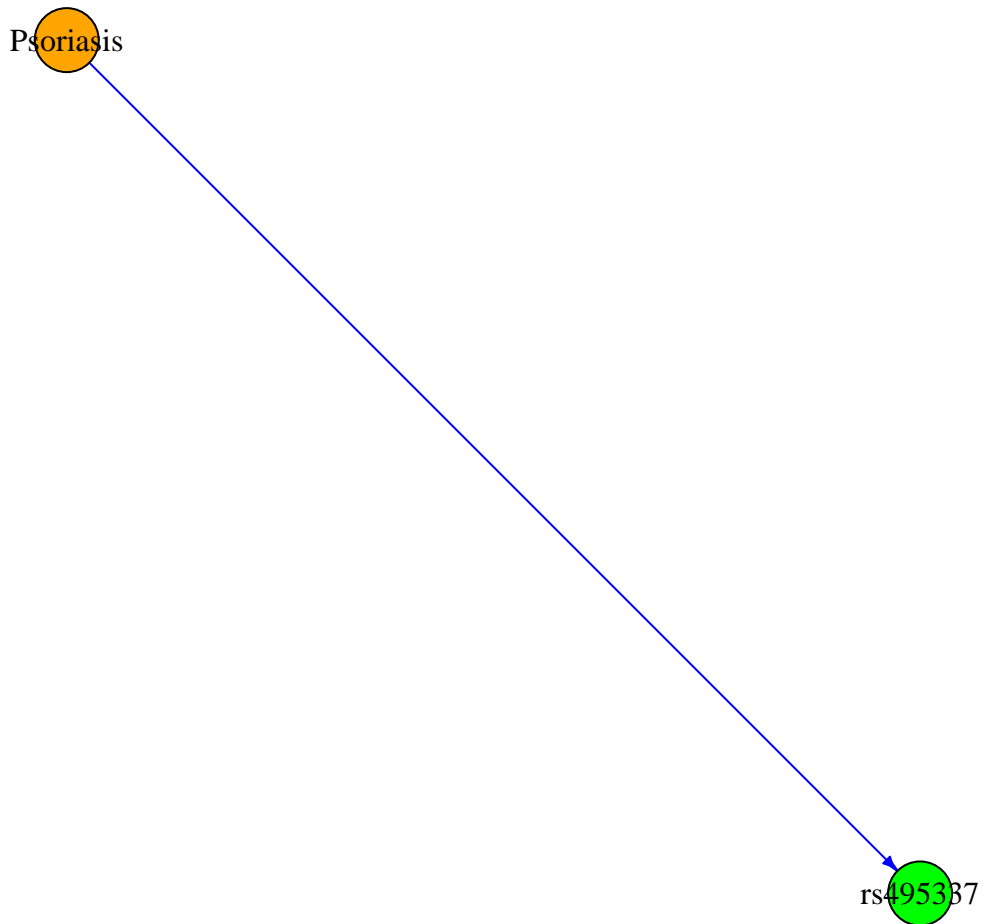



## Variant–Disease Network (Pulse pressure)

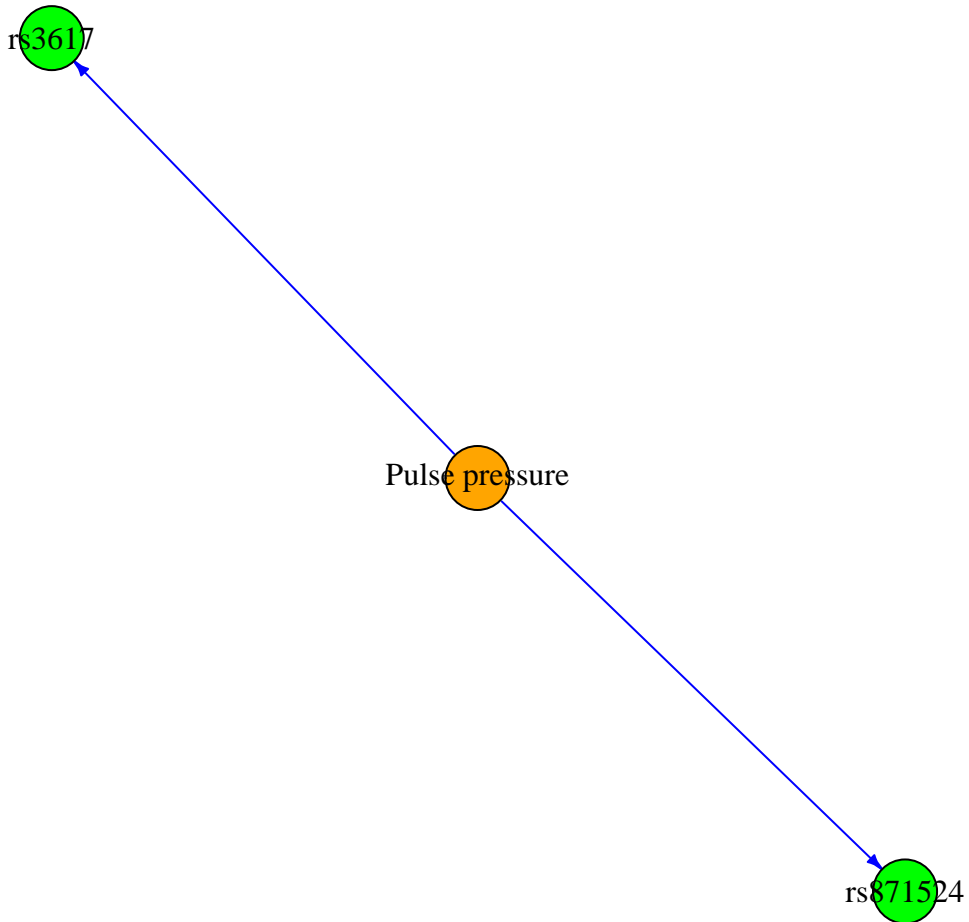

## Variant-Disease Network (QRS duration)

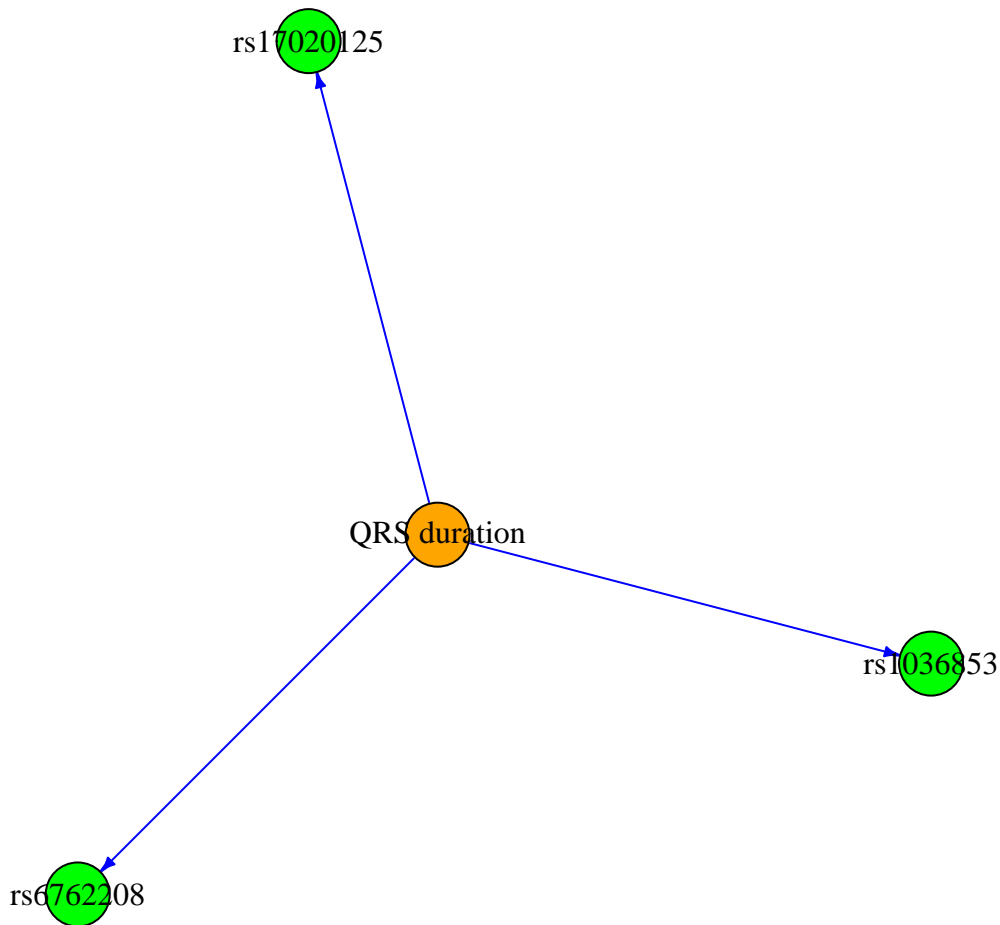

Variant–Disease Network (Rate of cognitive decline in Alzheimers disease)

rs641615

Rate of cognitive decline in Alzheimers

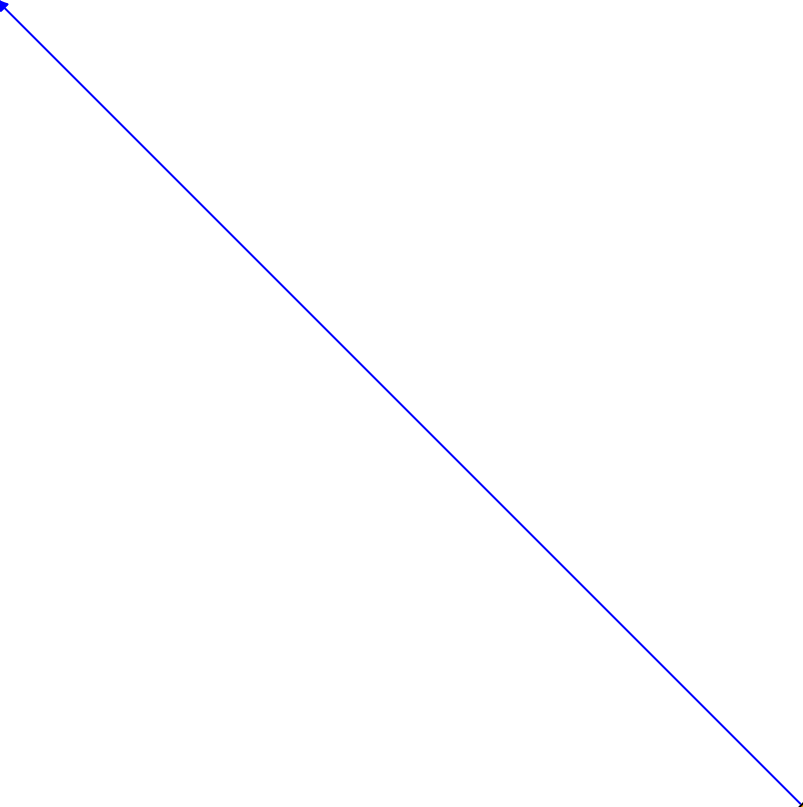

Variant–Disease Network (Red blood cell count)

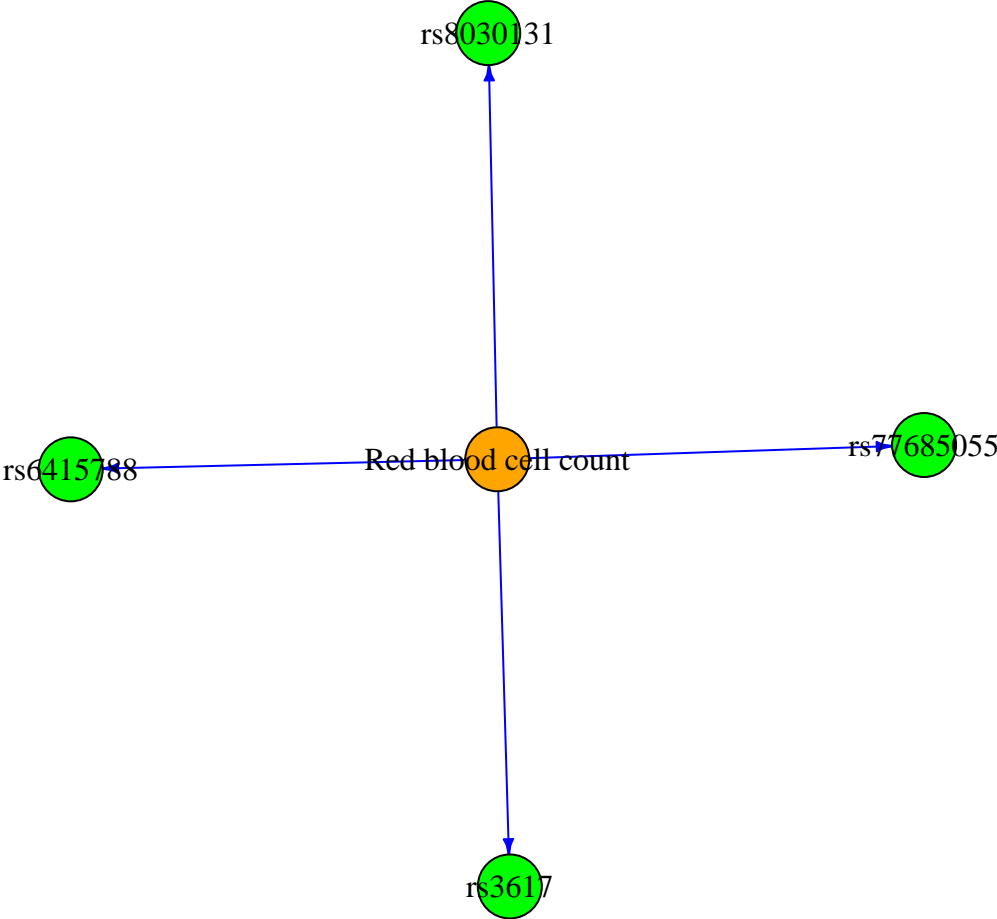

# Variant–Disease Network (Red cell distribution width)

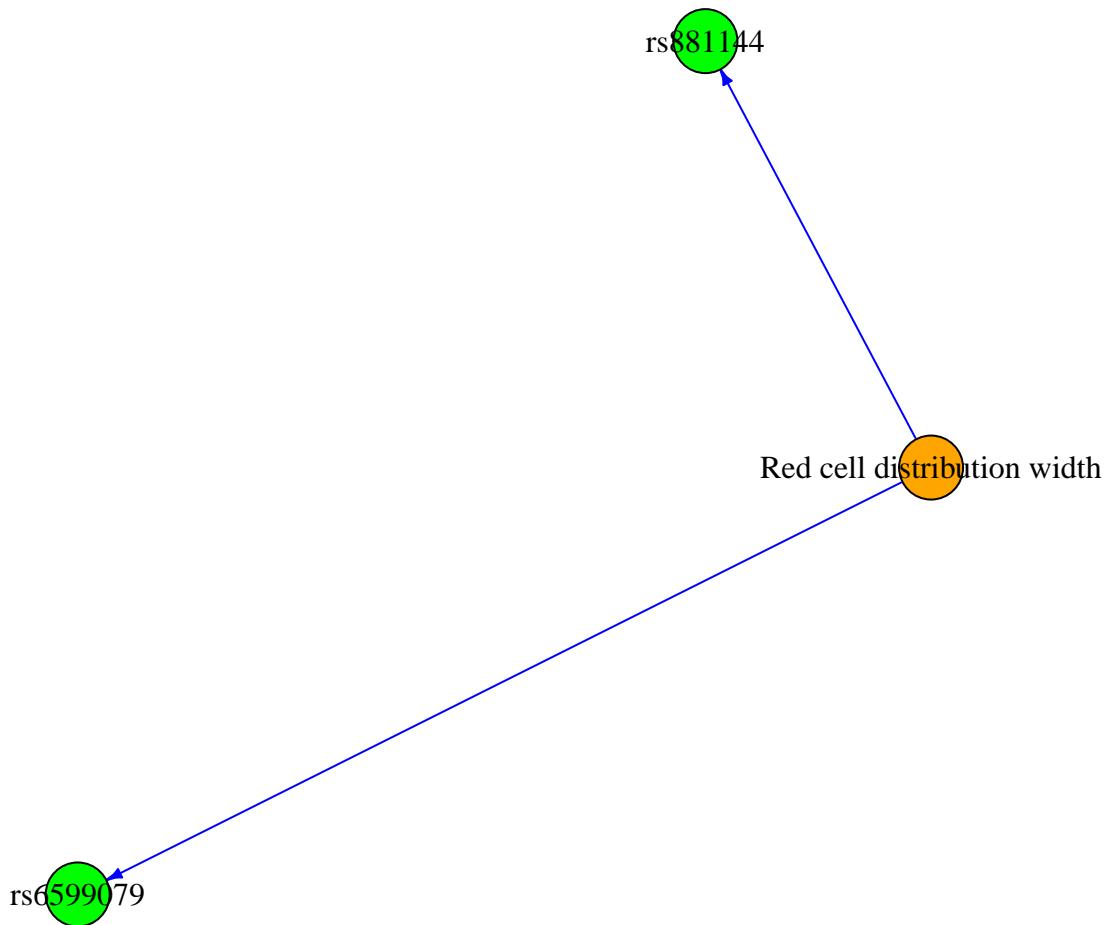

## Variant-Disease Network (Refractive error)

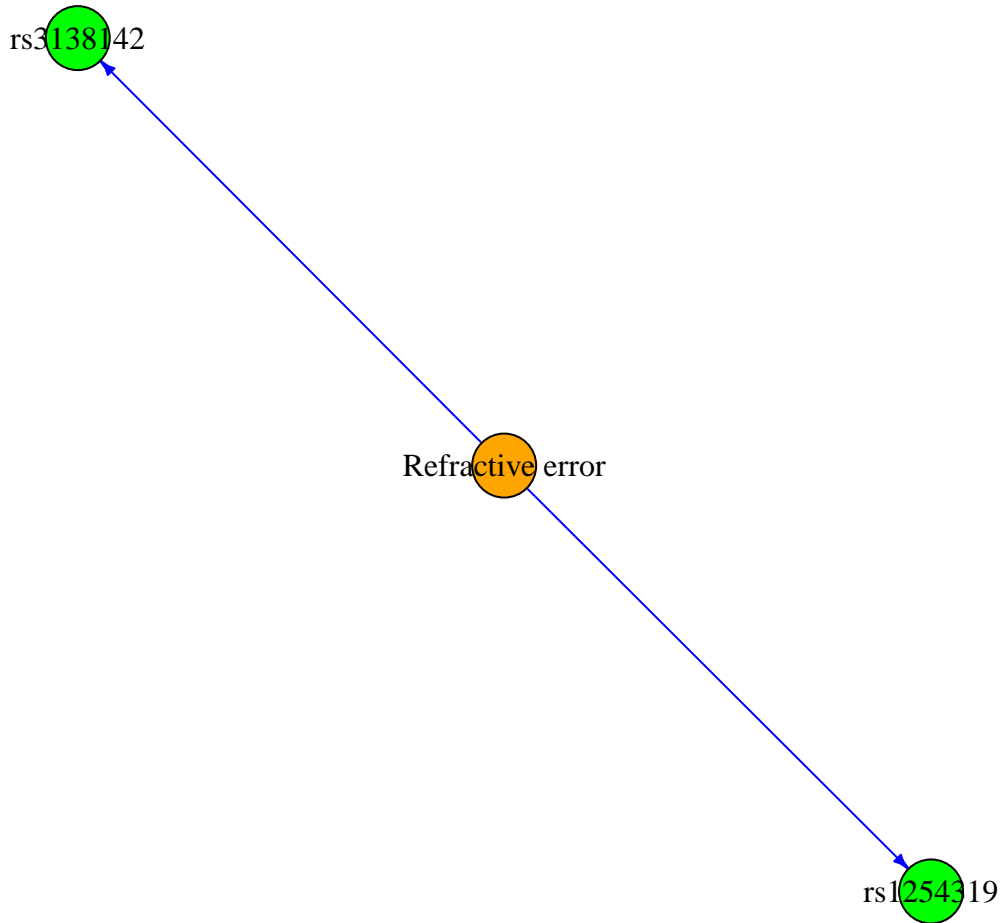

# Variant–Disease Network (Regular attendance at a religious group)

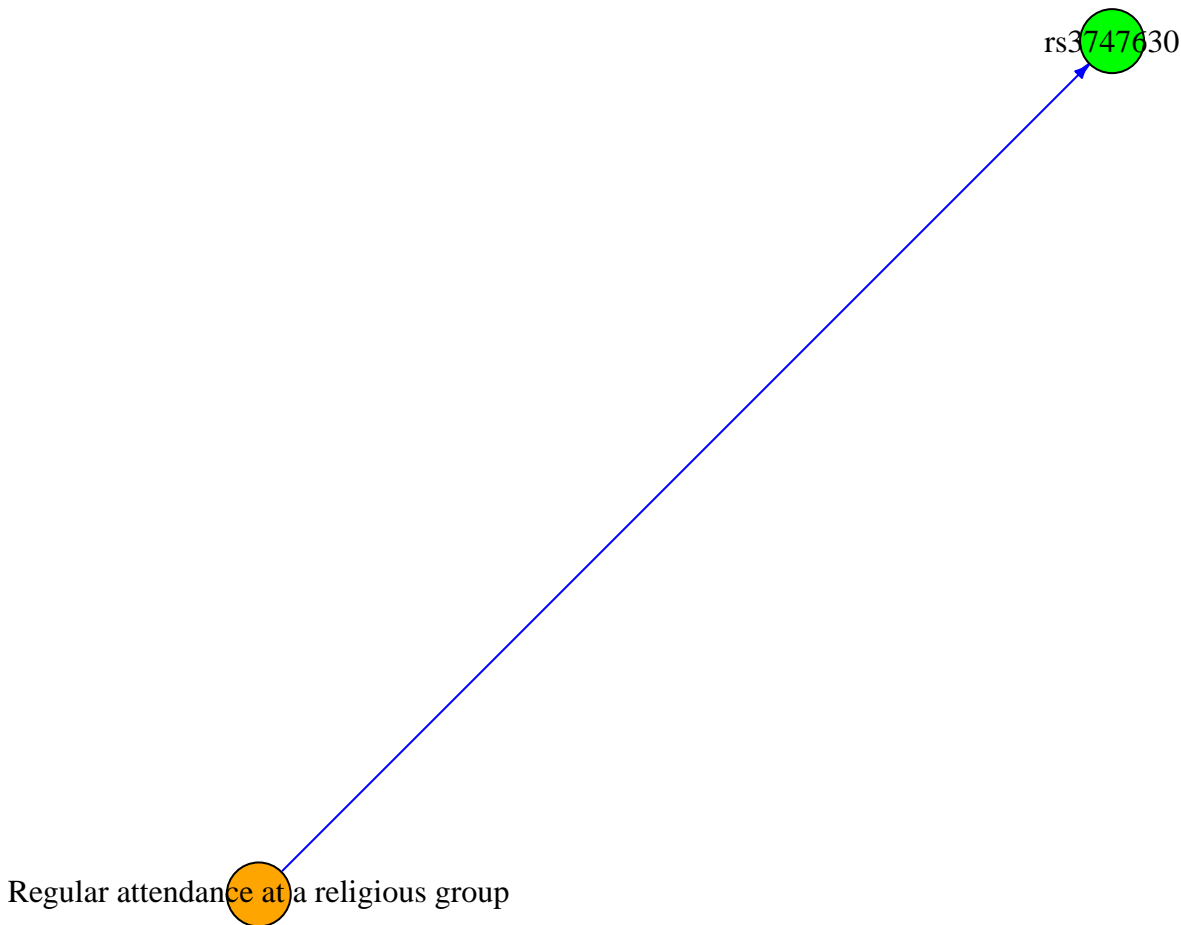

# nt-Disease Network (Response to cognitive-behavioural therapy in anxiety

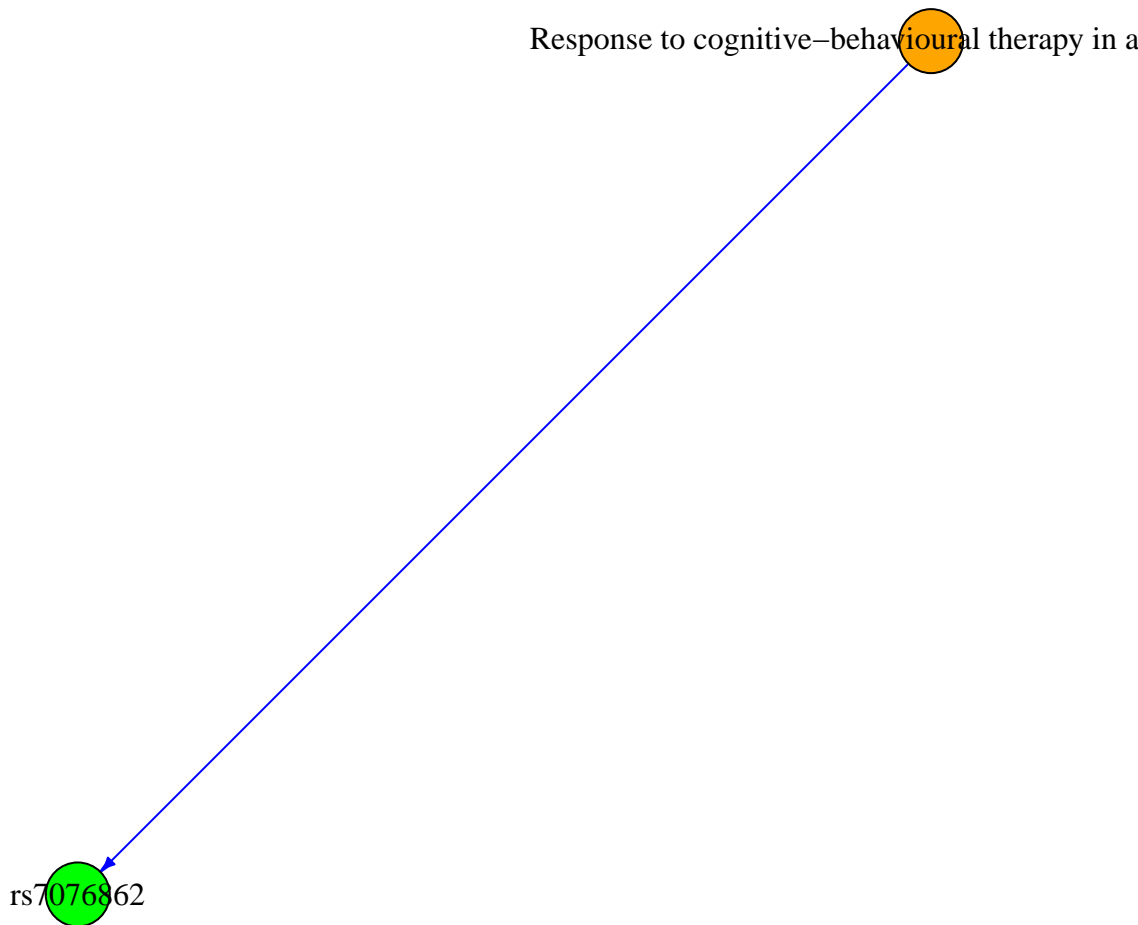



**Variant–Disease Network (Response to paliperidone in schizophrenia )**

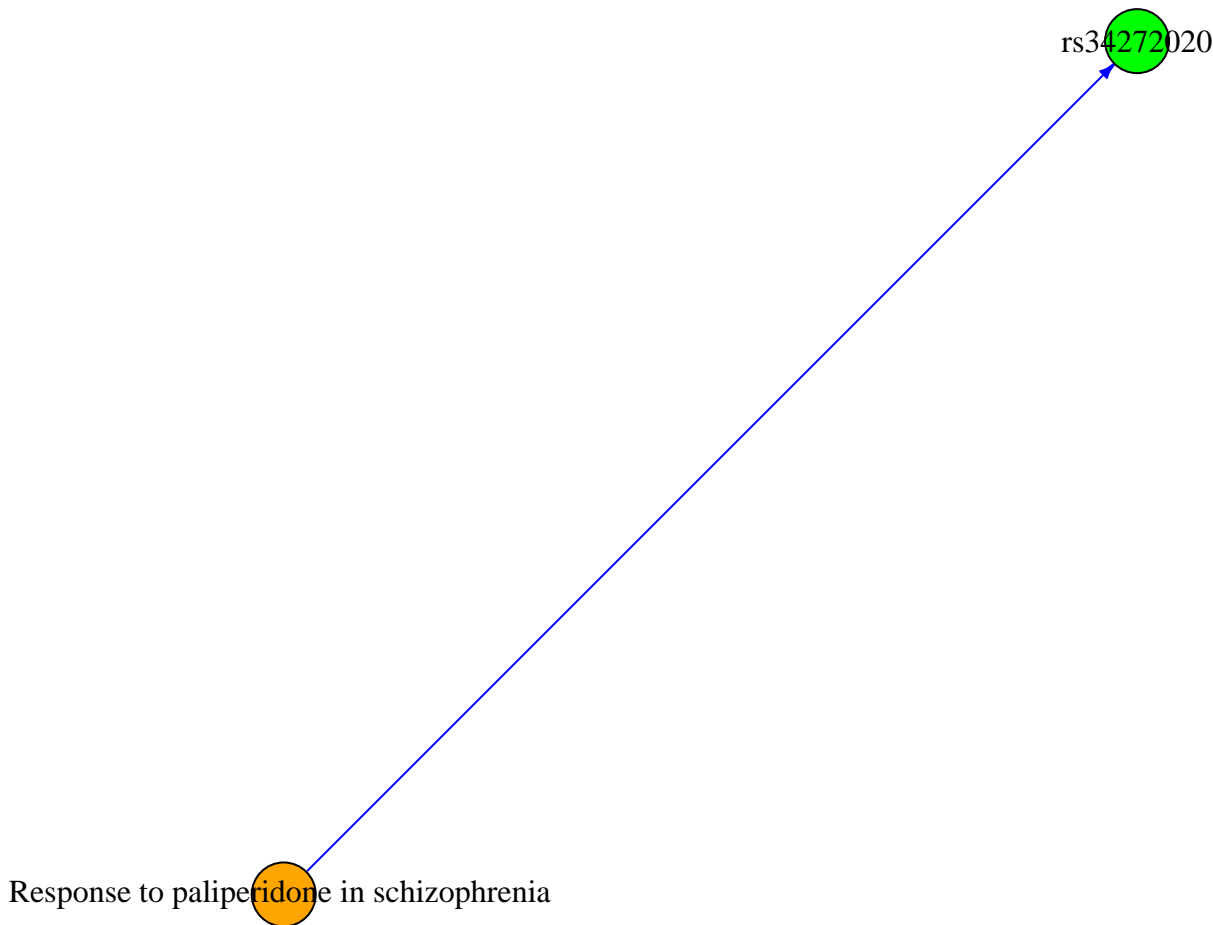

## Variant–Disease Network (Reticulocyte count)

Reticulocyte count

rs1499280

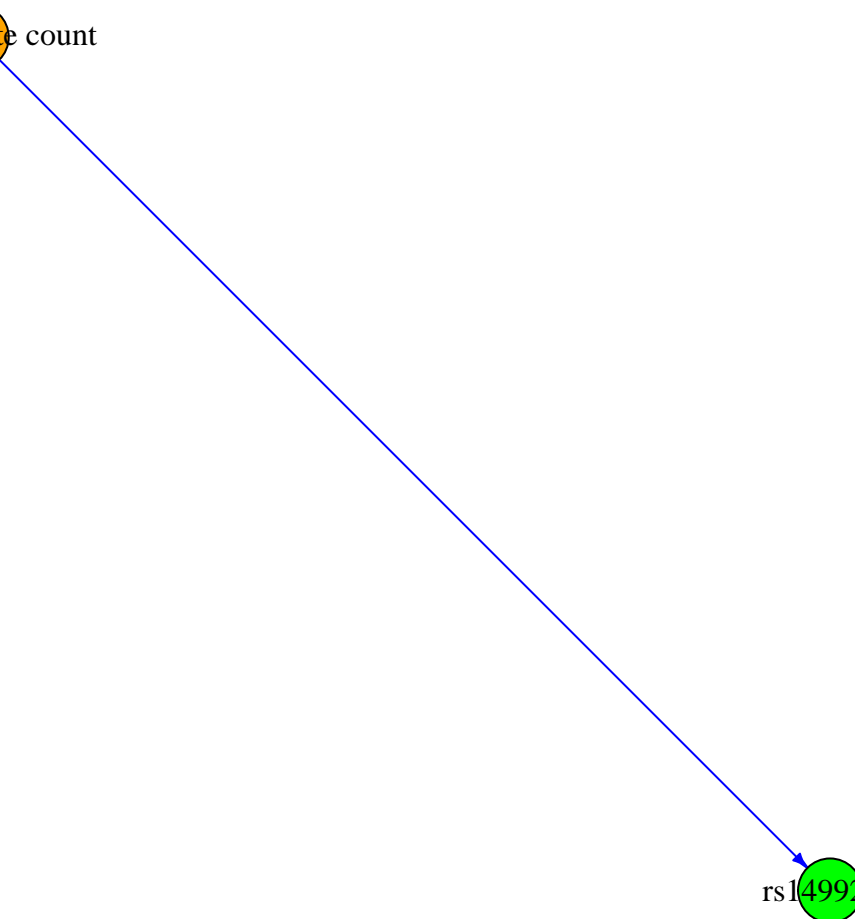

# Variant–Disease Network (Reticulocyte fraction of red cells)

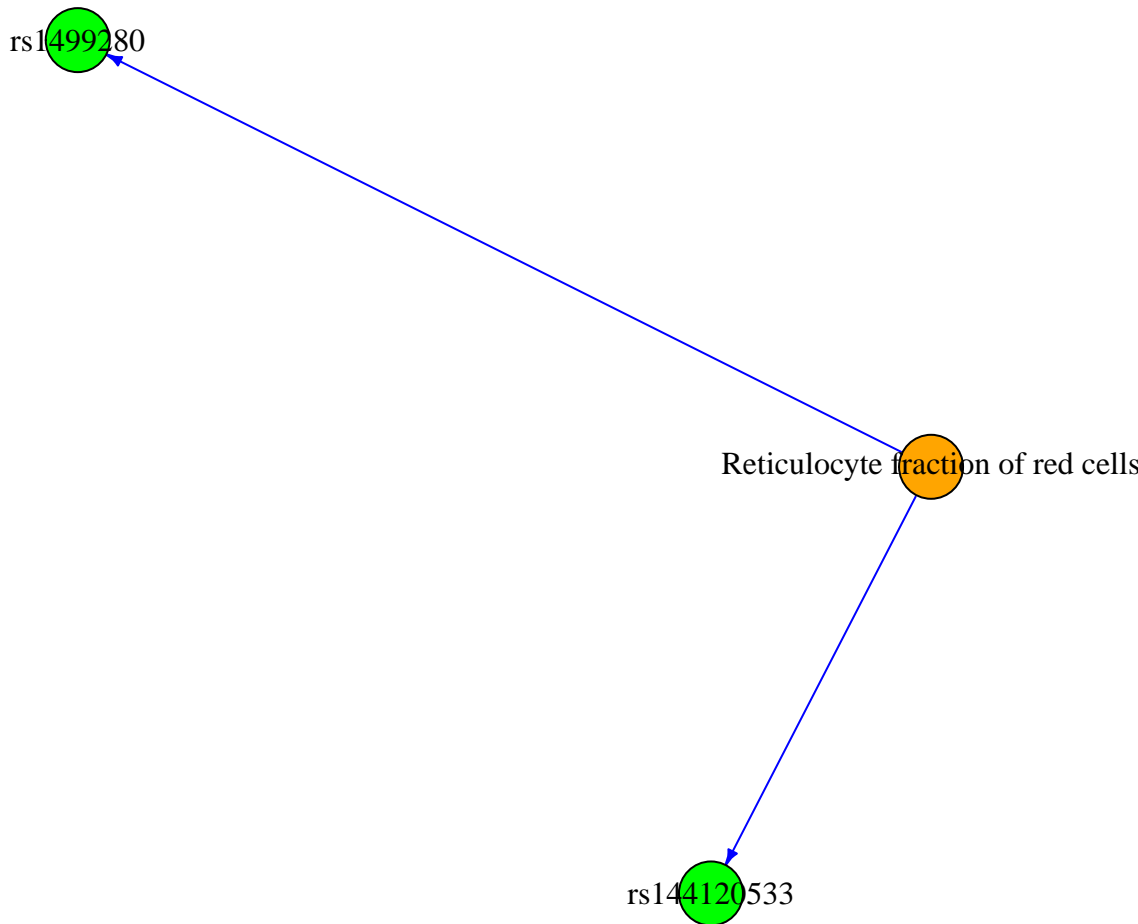

## Variant–Disease Network (Risk-taking tendency )

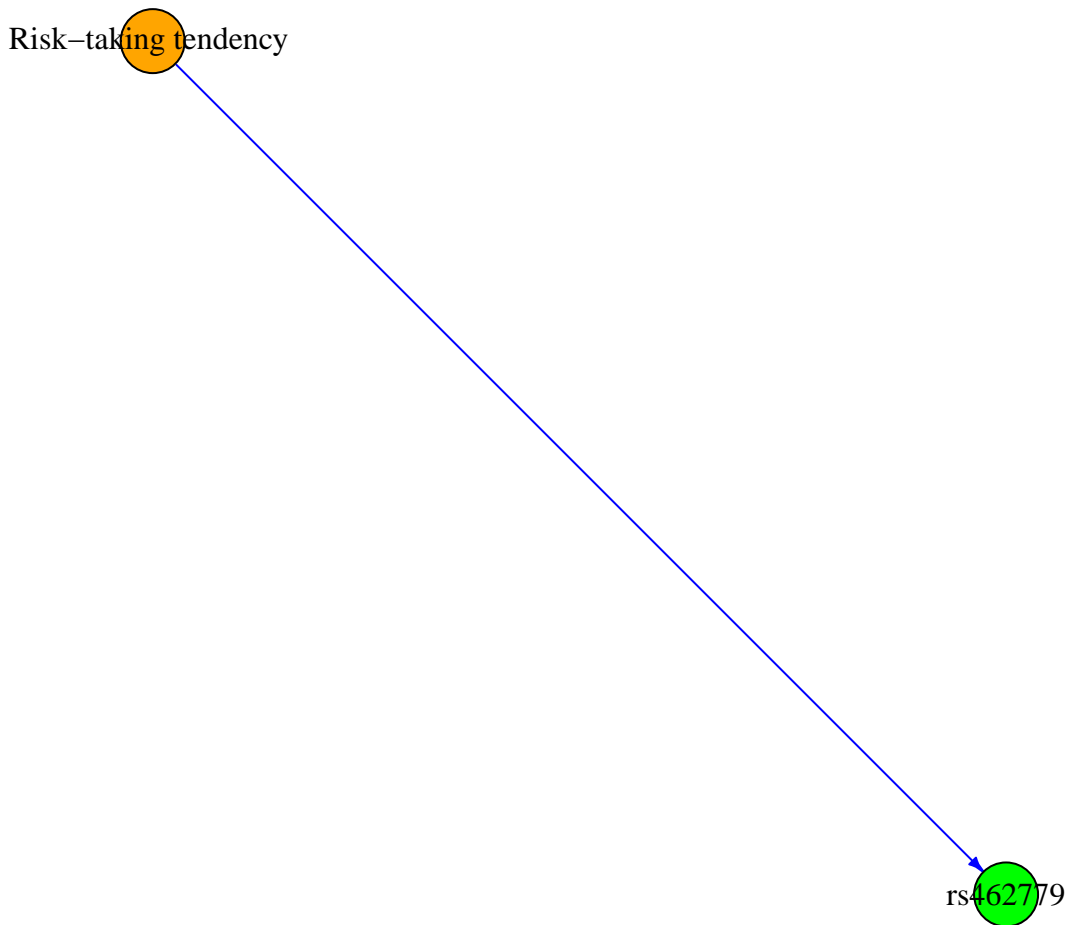

# Variant–Disease Network (Schizophrenia)

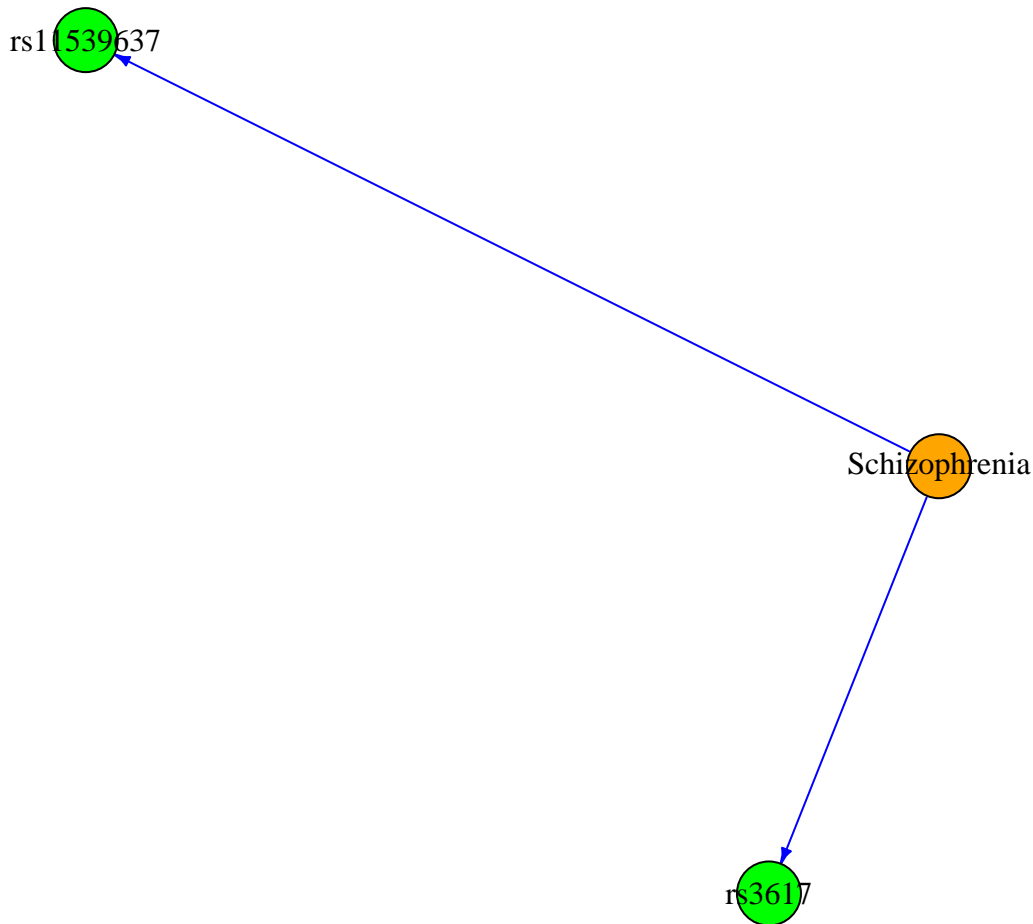

# Variant–Disease Network (Serum 25–Hydroxyvitamin D levels)

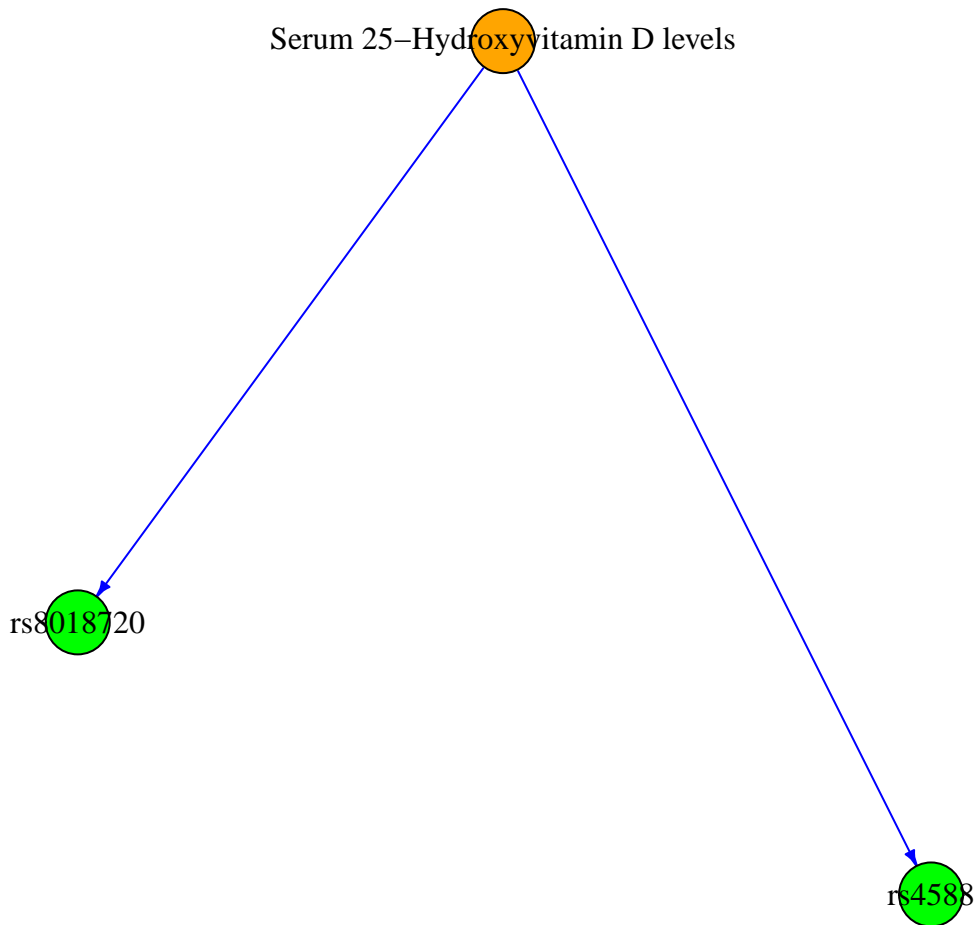

## Variant–Disease Network (Serum metabolite levels)

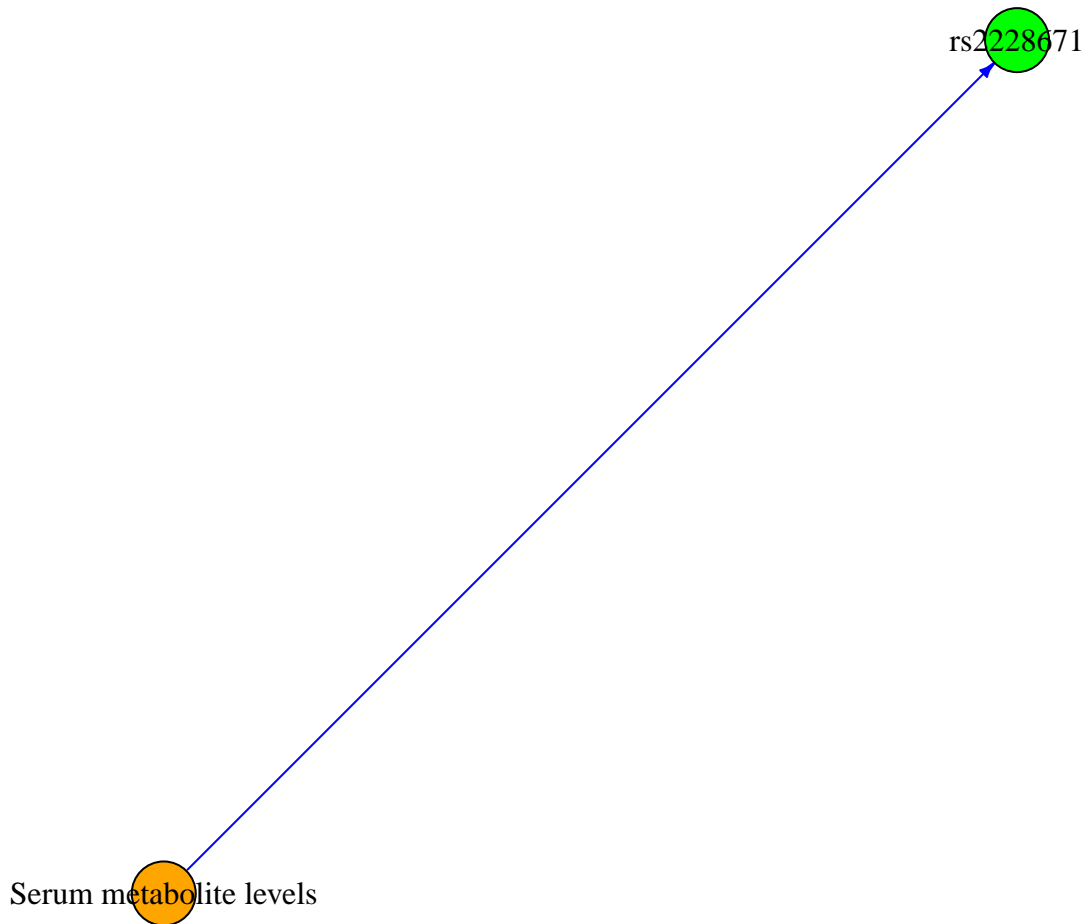

# Variant-Disease Network (Serum metabolite levels )

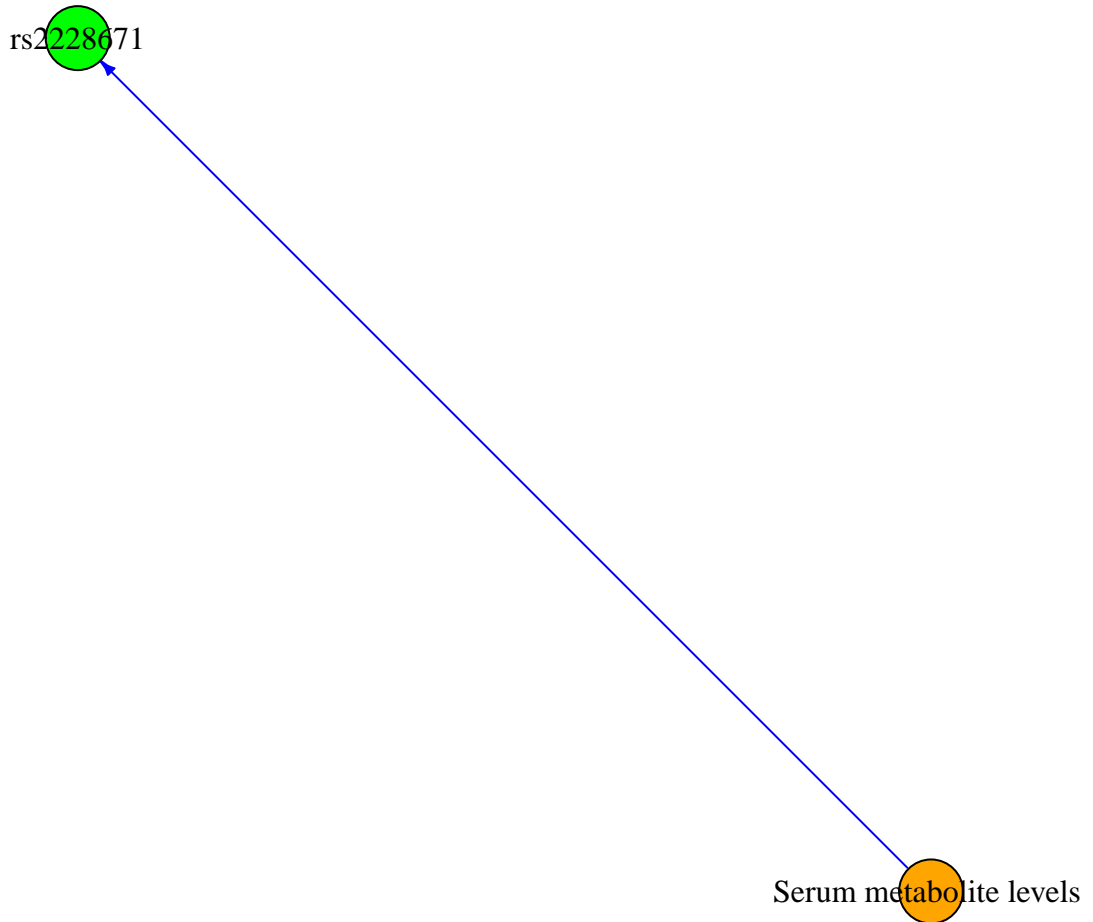



## Variant–Disease Network (Smoking initiation )

Smoking initiation

rs2304693



**Variant–Disease Network (Spherical equivalent)**

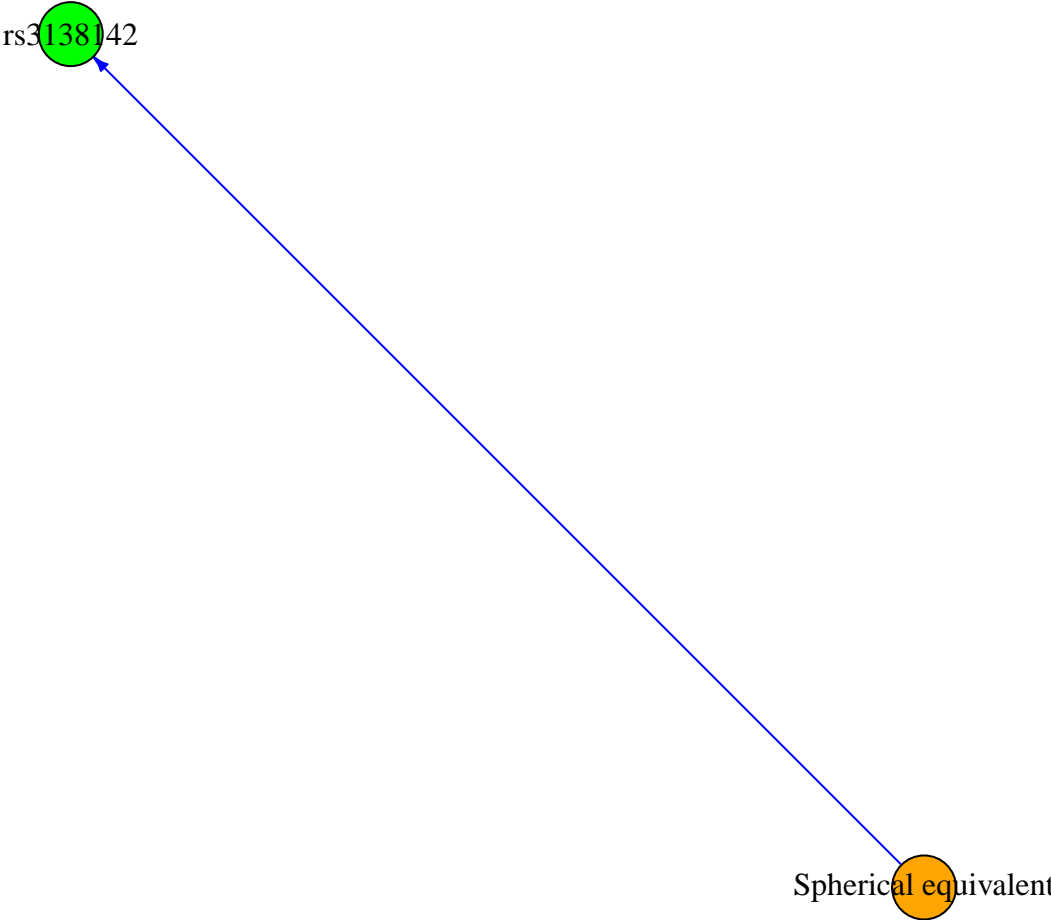

## Variant–Disease Network (Spherical equivalent )

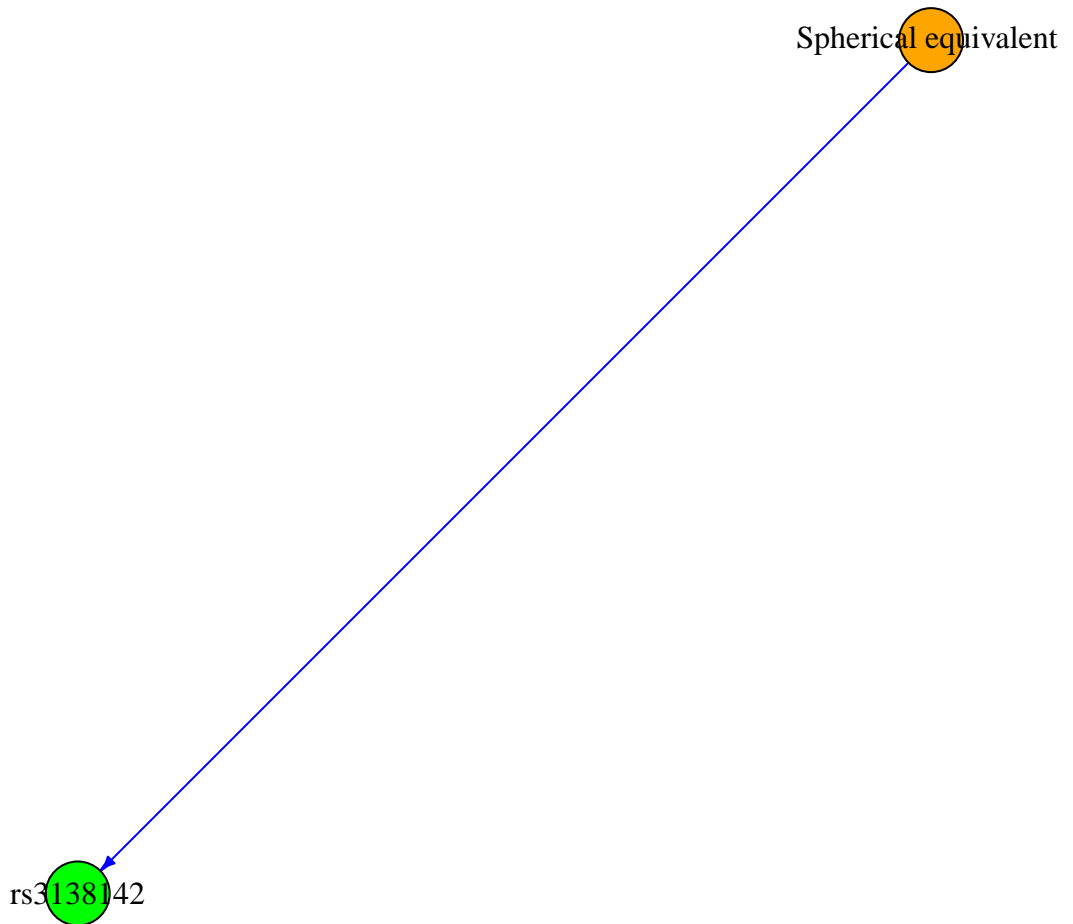

# Variant–Disease Network (Systemic lupus erythematosus)

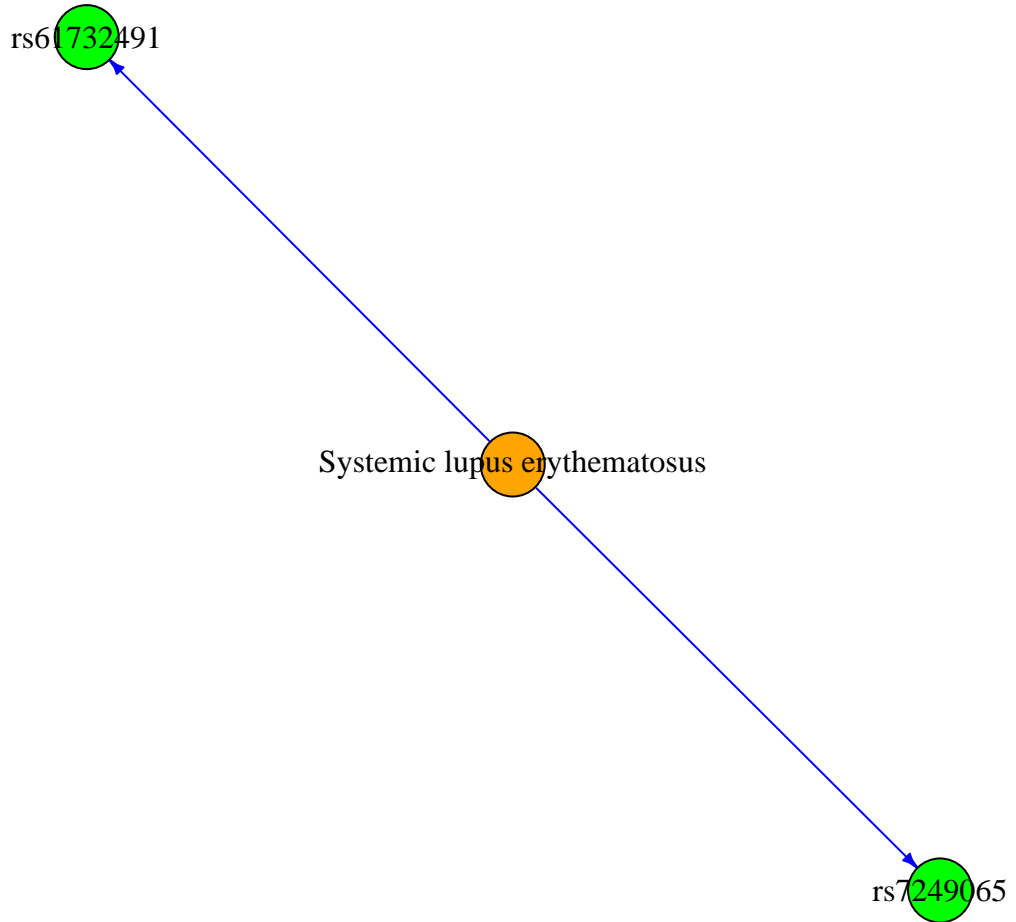

## Variant–Disease Network (Systolic blood pressure)

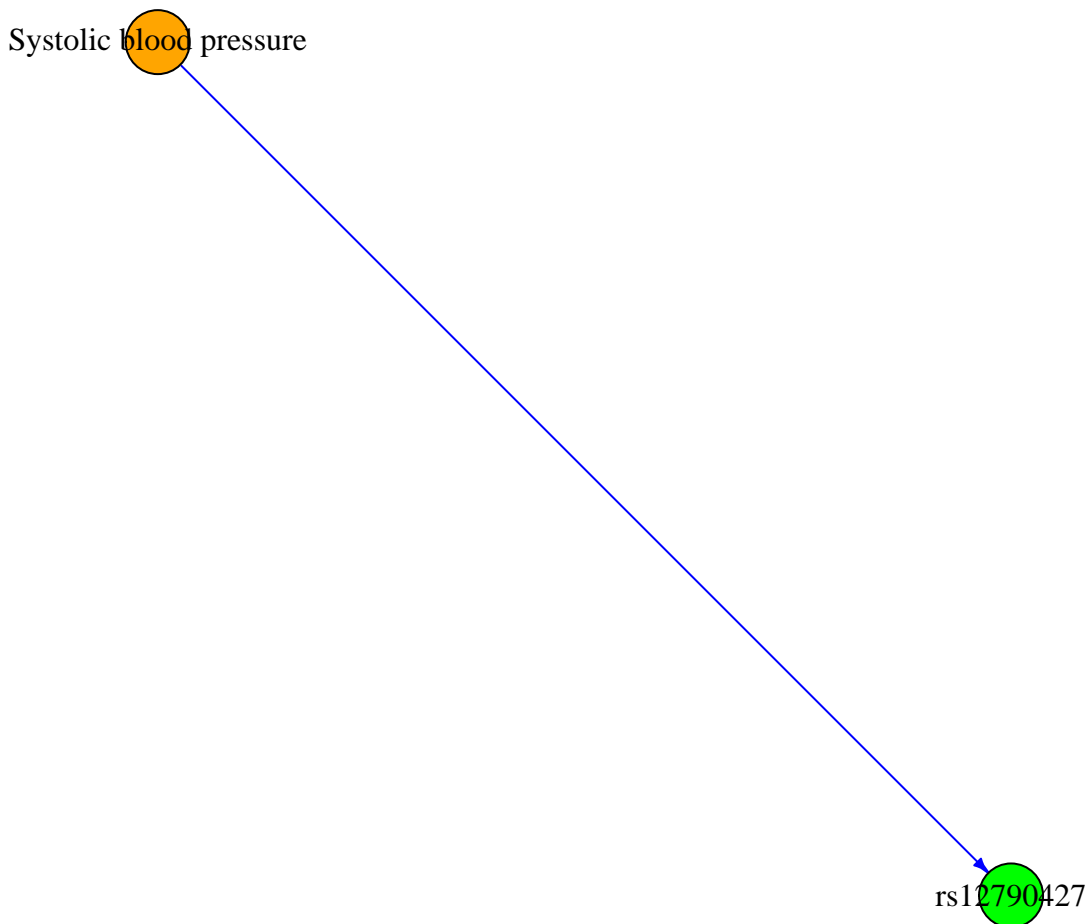

**Variant–Disease Network (Systolic blood pressure in sickle cell anemia)**

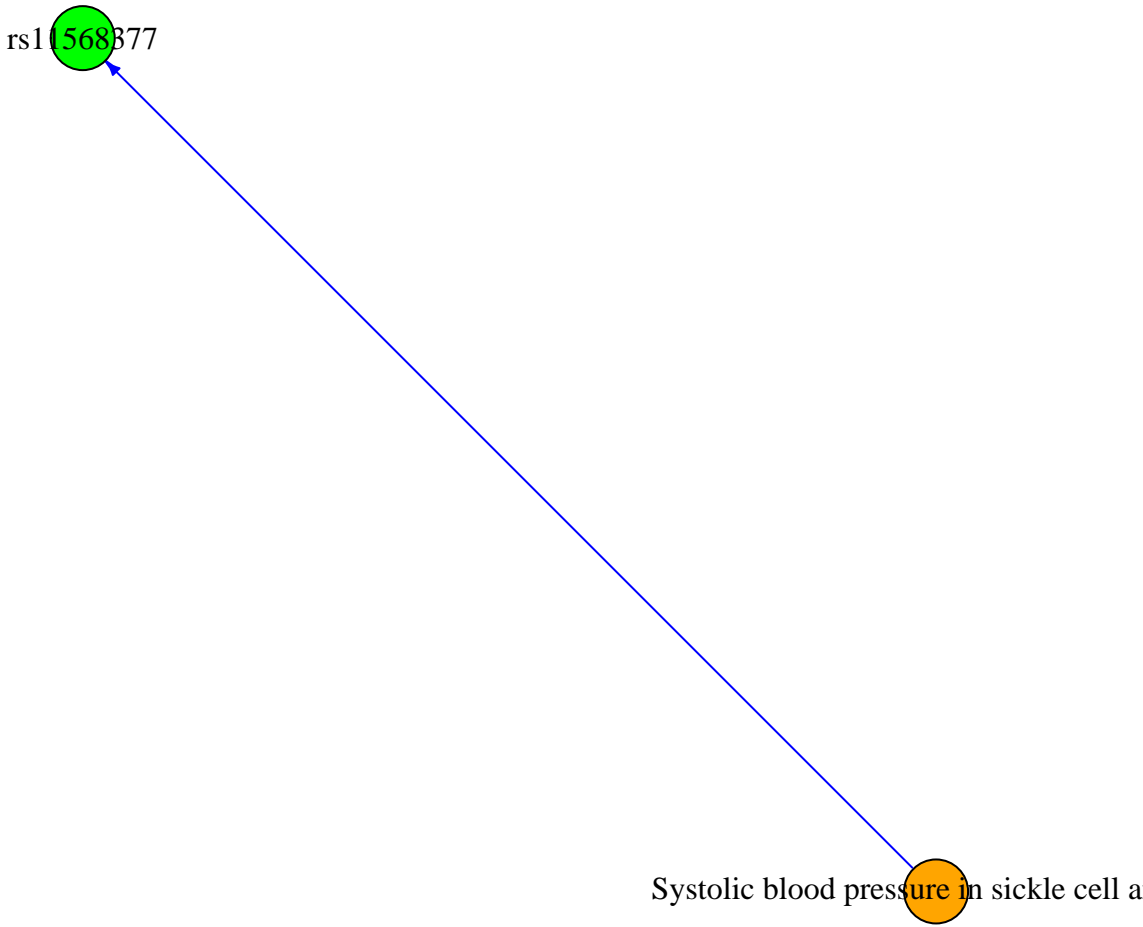

## Variant–Disease Network (Total cholesterol levels)

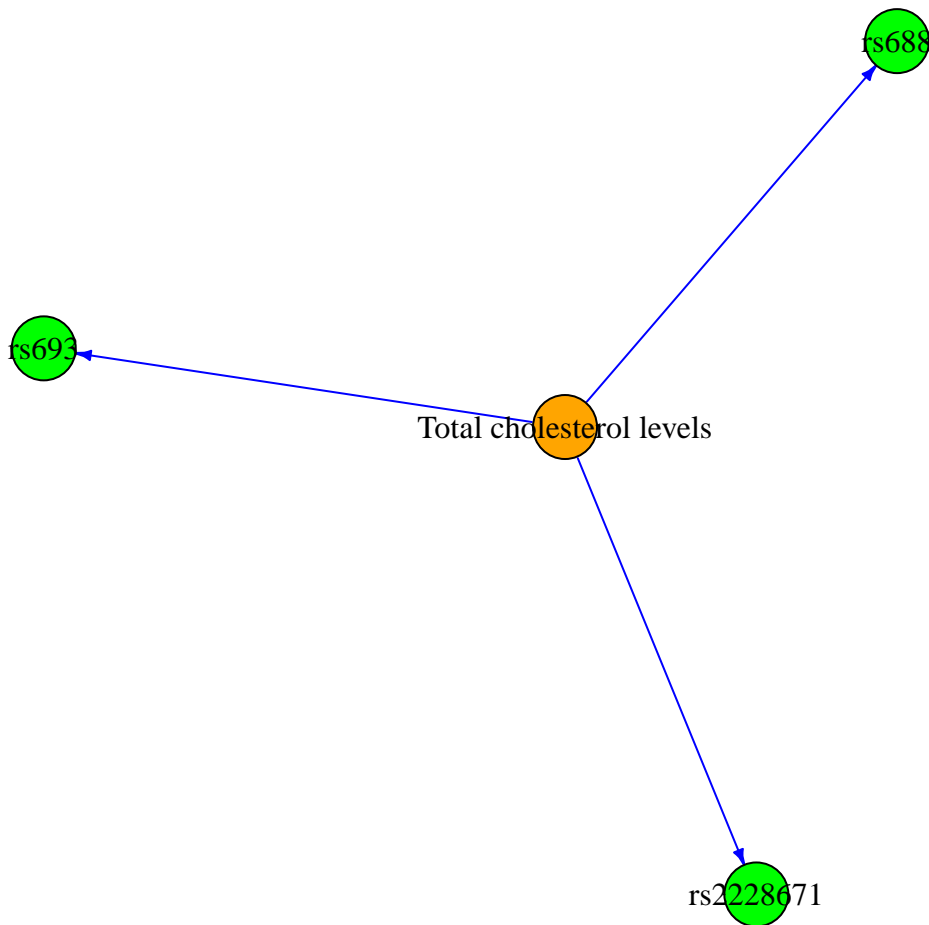

## Variant–Disease Network (Triglyceride levels)

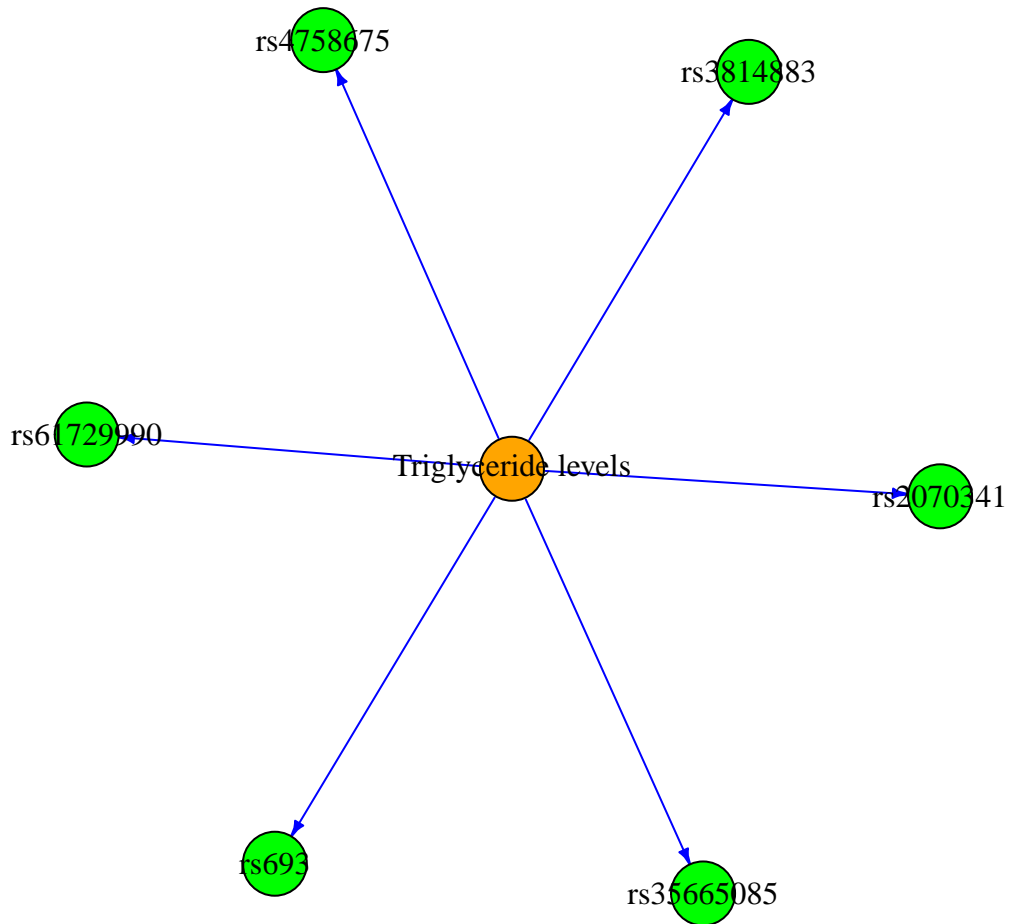



**Variant–Disease Network (Triglyceride levels in non smokers)**

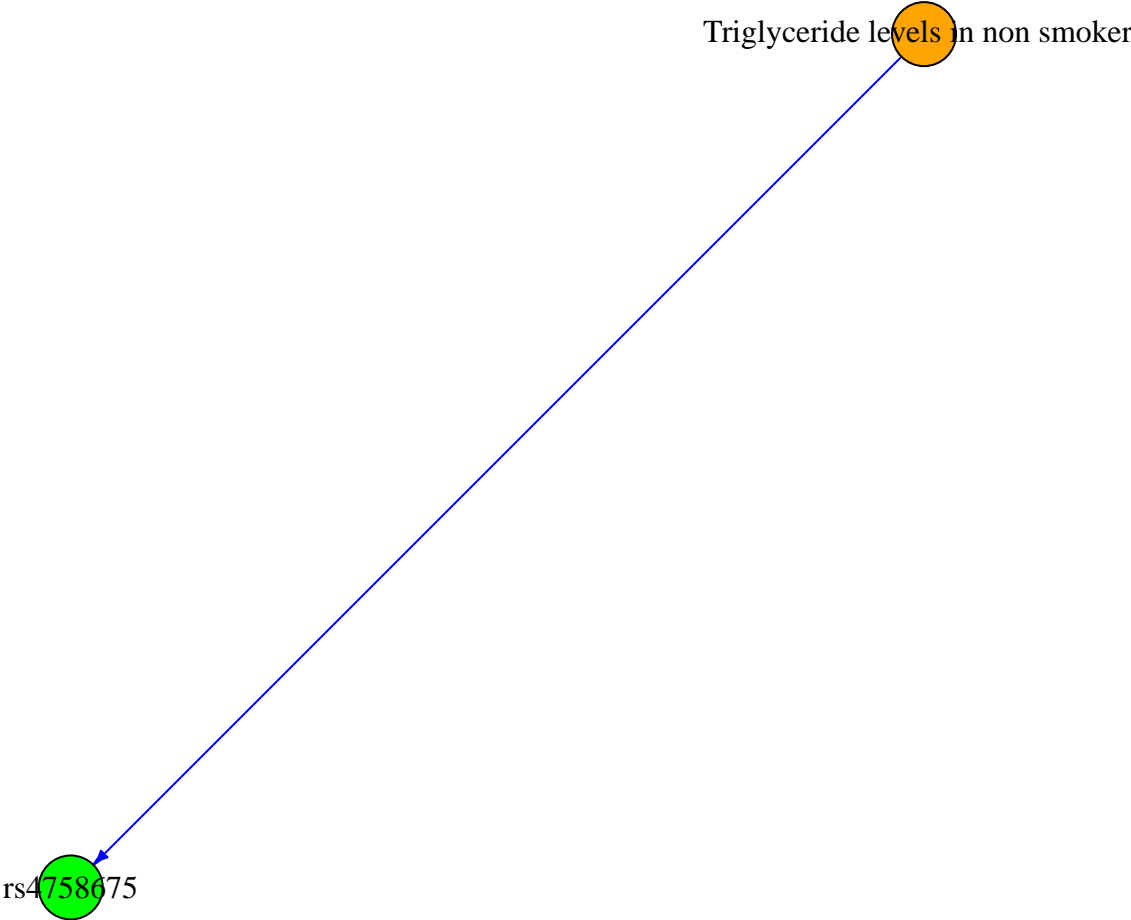

# Variant–Disease Network (Triglyceride levels x smoking interaction )

Triglyceride levels x smoking interaction

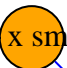

rs4758675

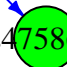

## Variant–Disease Network (Triglycerides)

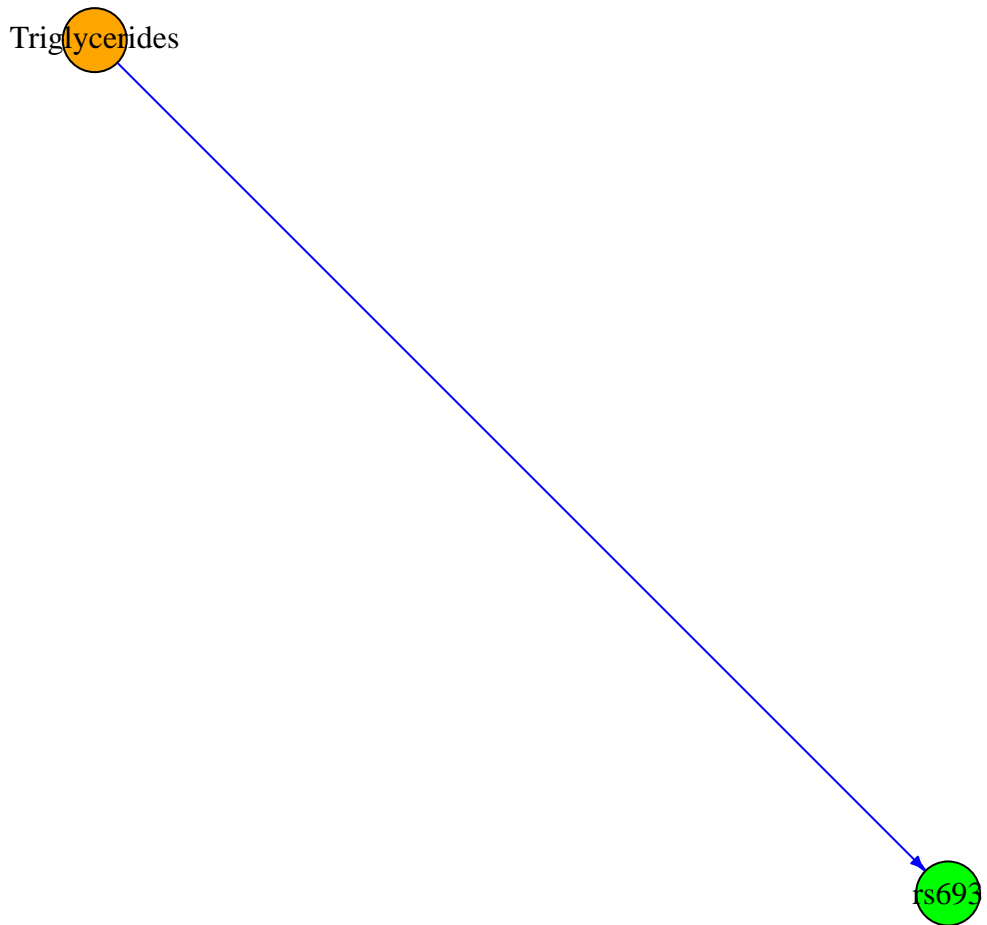

## Variant-Disease Network (Type 1 diabetes)

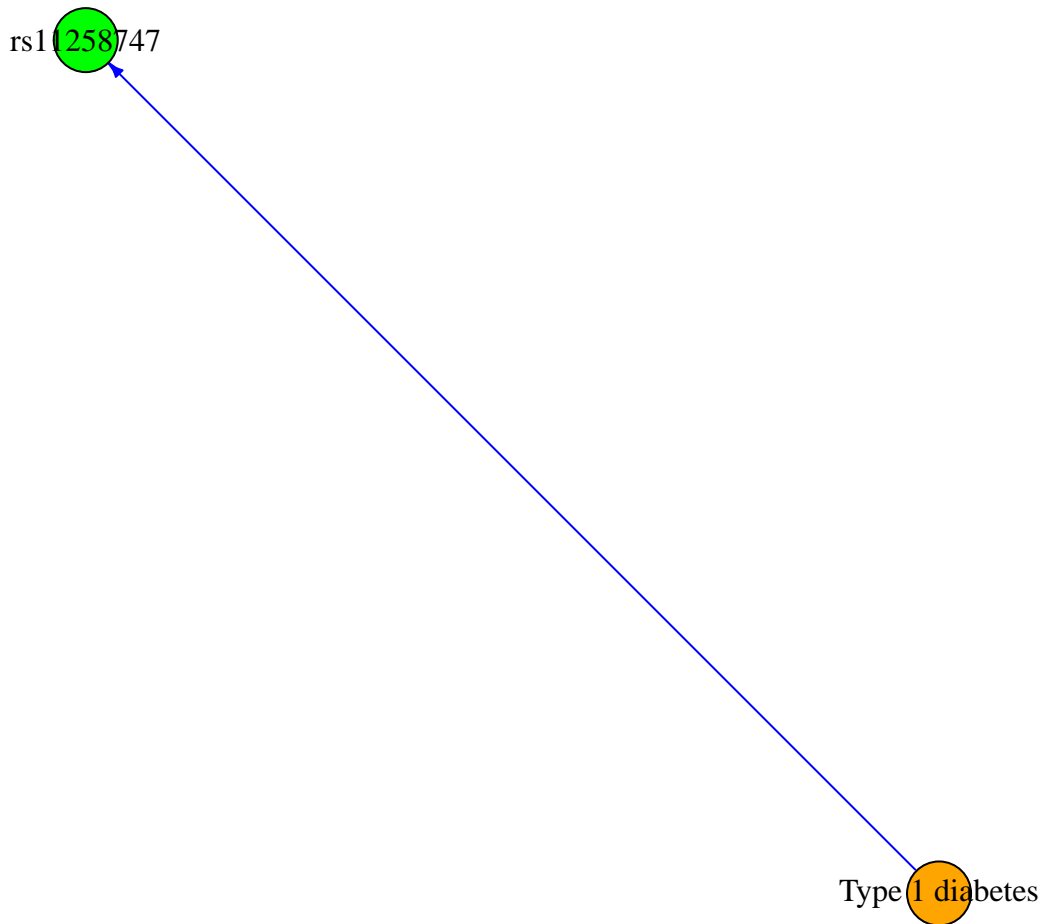

## Variant–Disease Network (Type 2 diabetes)

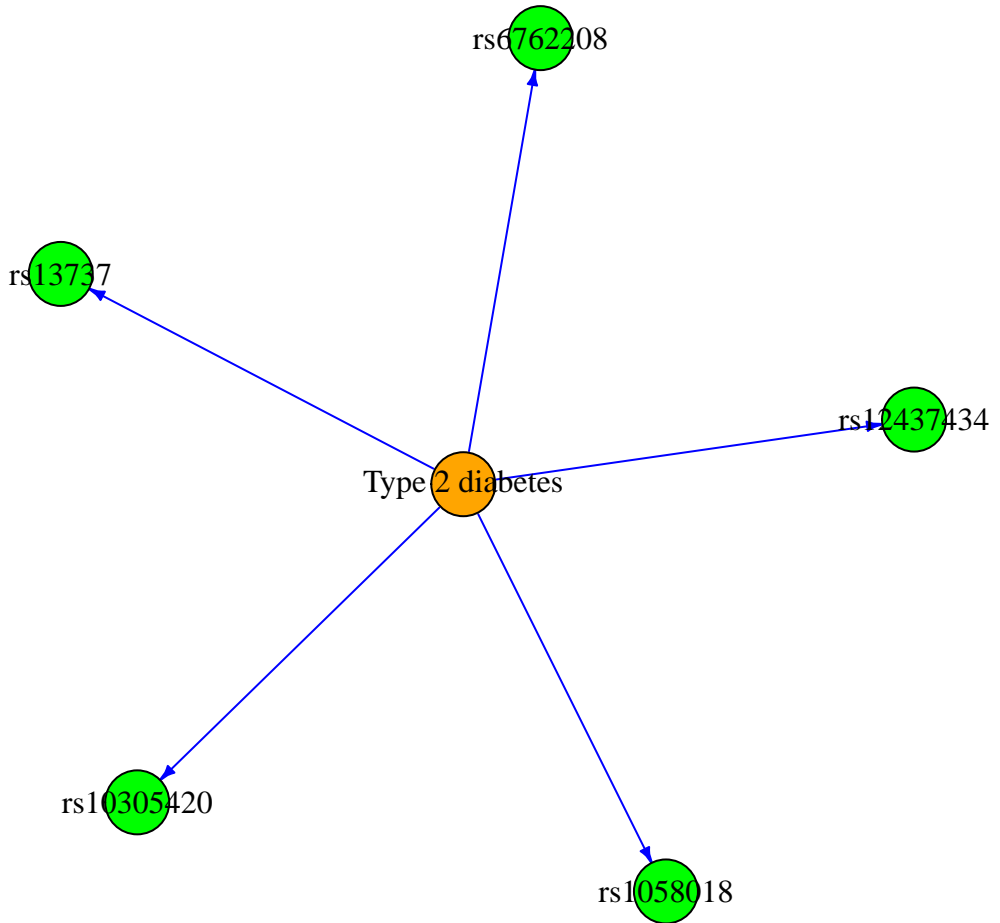

Variant–Disease Network (Type 2 diabetes )

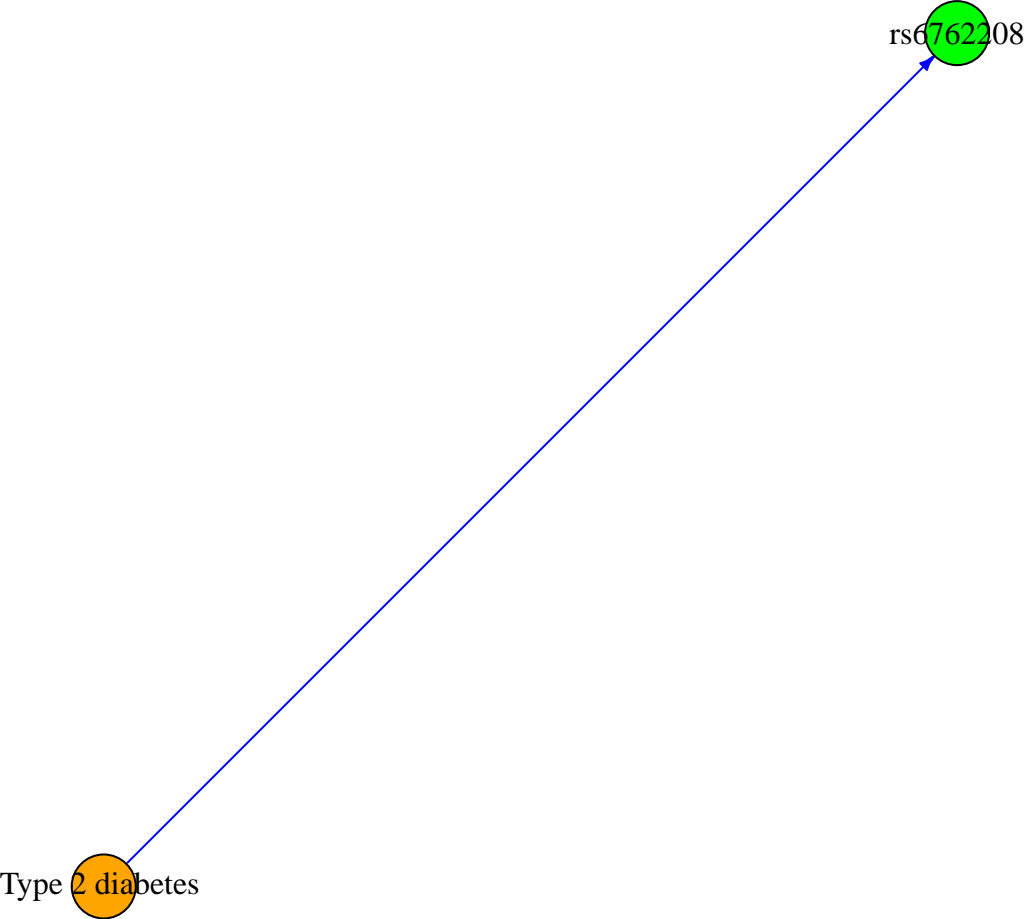

## Variant–Disease Network (Ulcerative colitis)

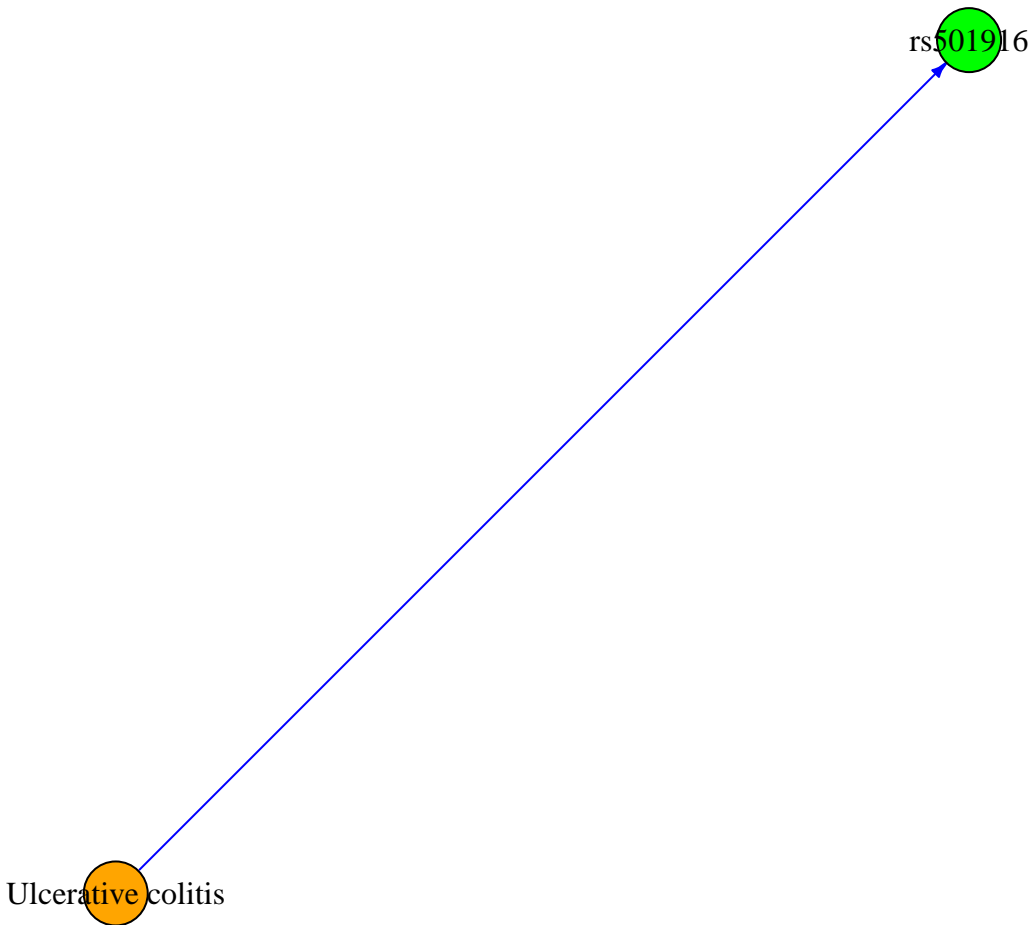

## Variant-Disease Network (Urate levels)

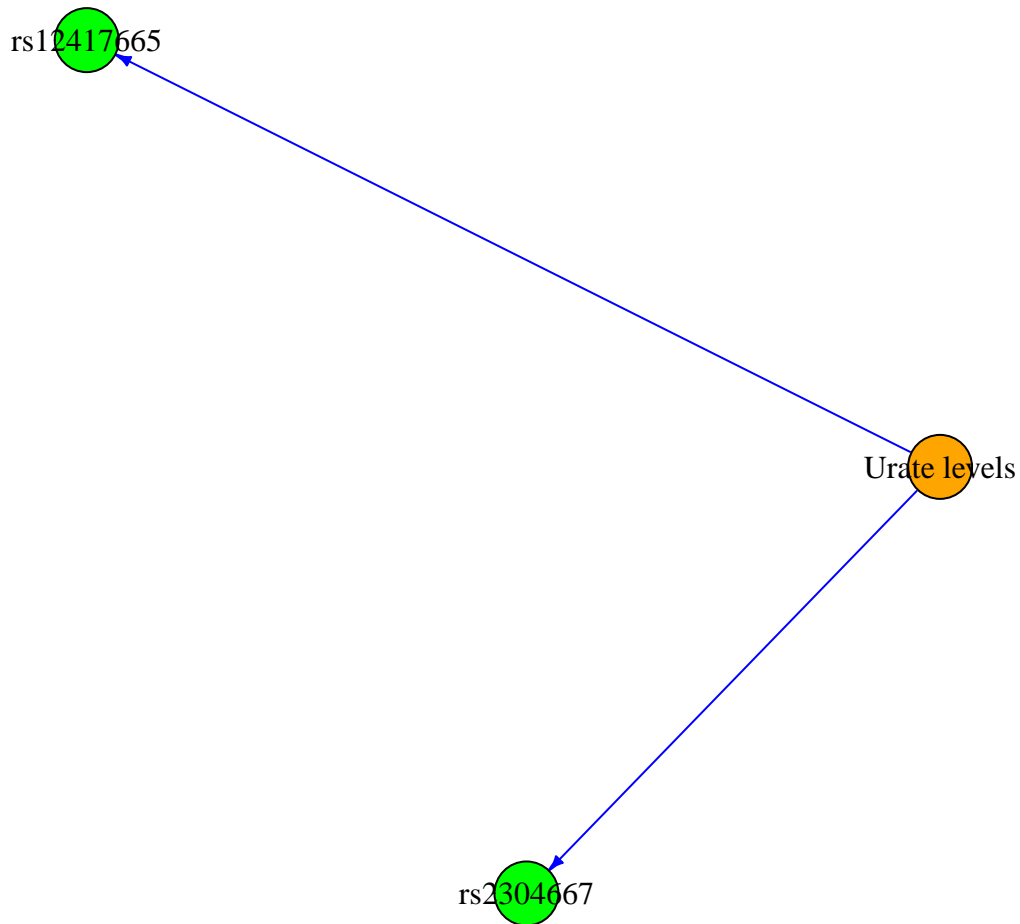



## Variant–Disease Network (Vitamin D levels)

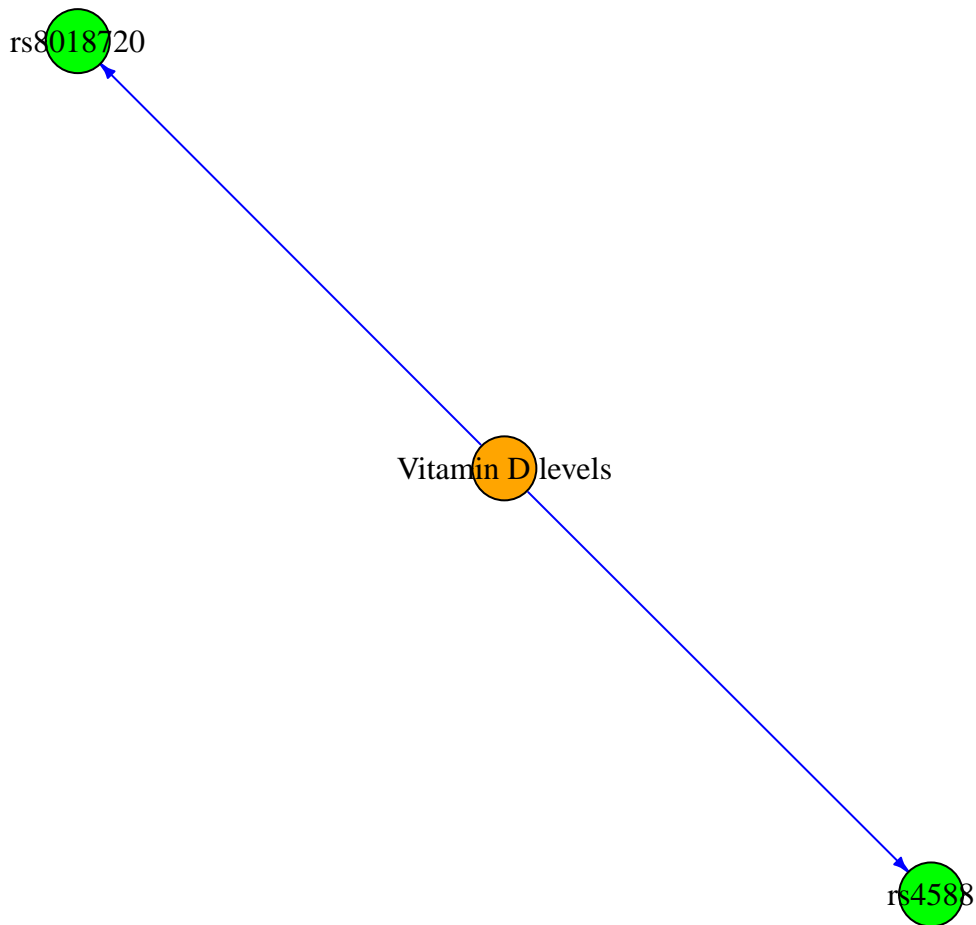

Variant–Disease Network (Waist circumference adjusted for body mass index)

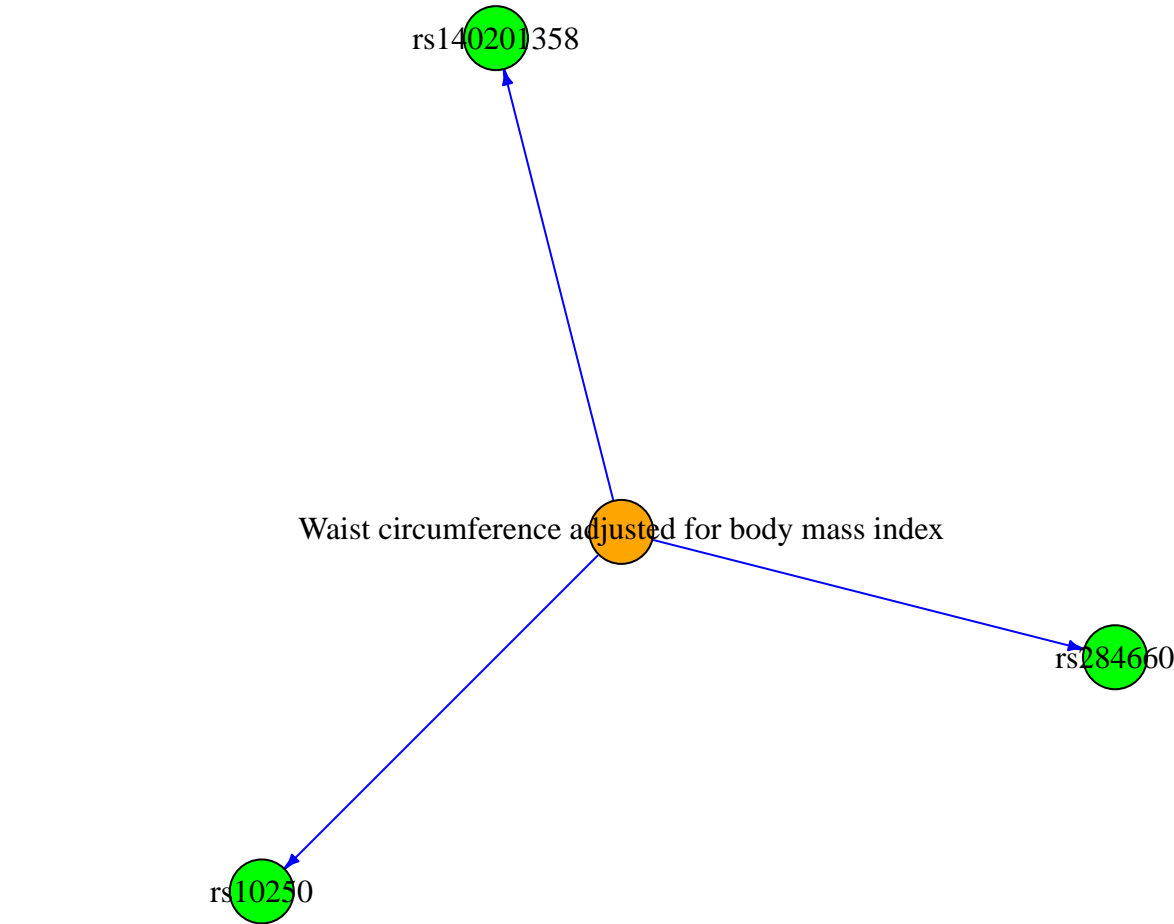

## Variant–Disease Network (Waist–hip ratio)

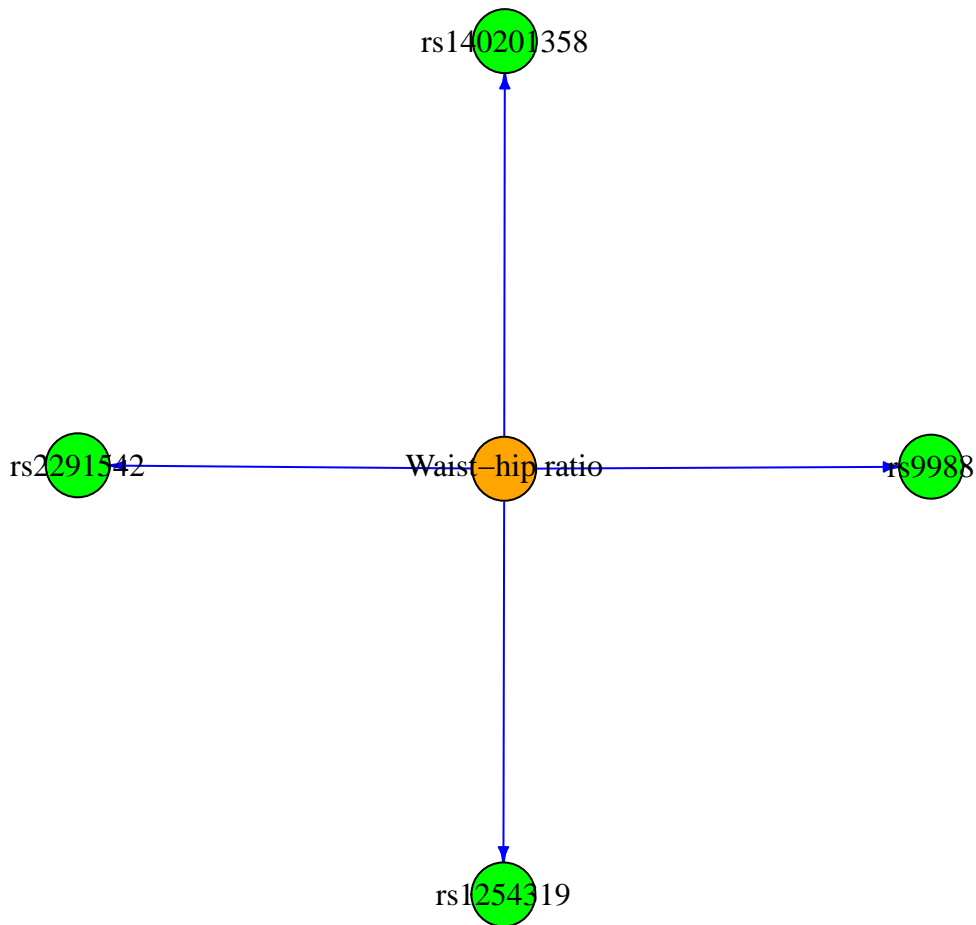

# Variant–Disease Network (Waist–to–hip ratio adjusted for BMI)

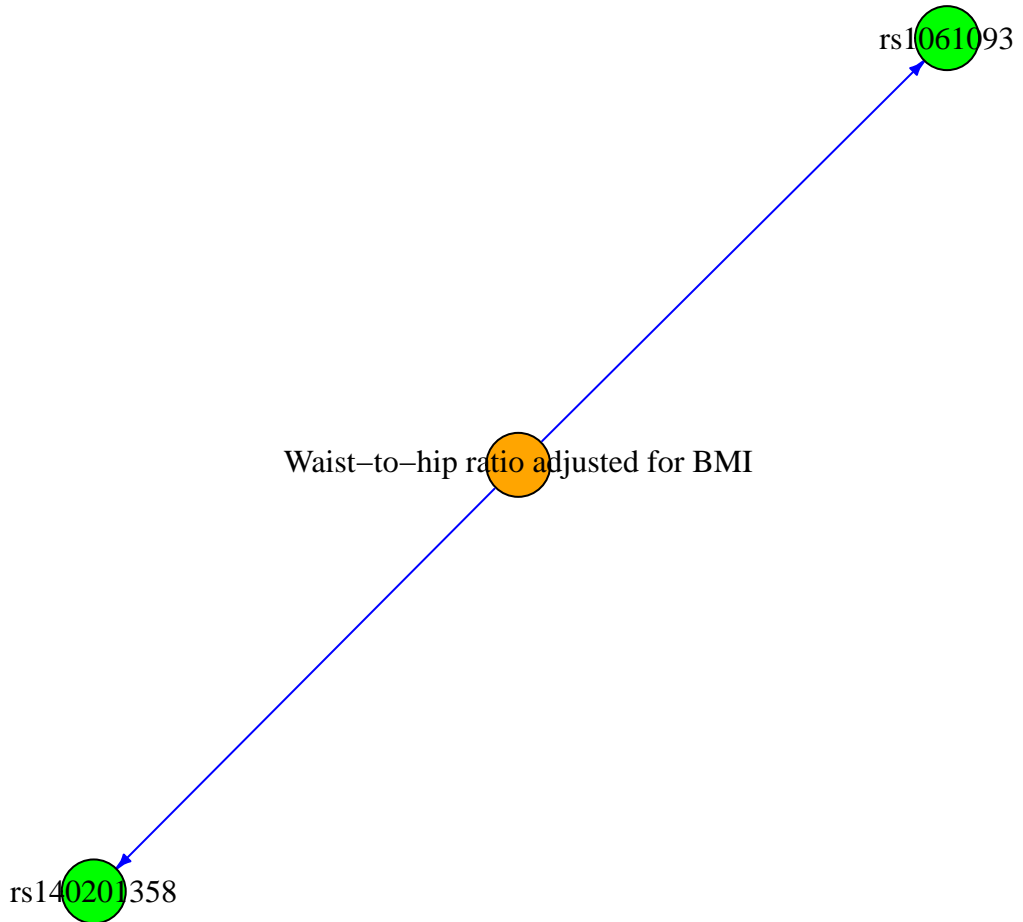

Variant–Disease Network (Waist–to–hip ratio adjusted for BMI )

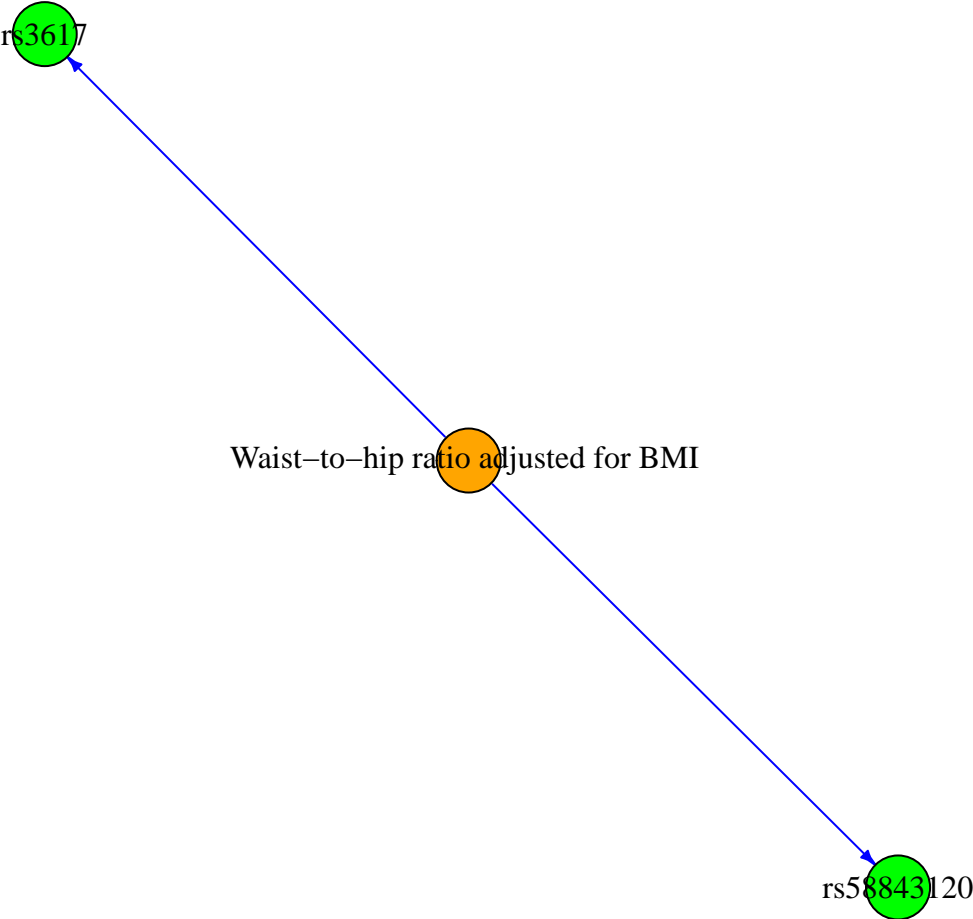

# Variant-Disease Network (Waist-to-hip ratio adjusted for BMI x sex x age interaction)

Waist-to-hip ratio adjusted for BMI x sex x age interaction

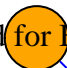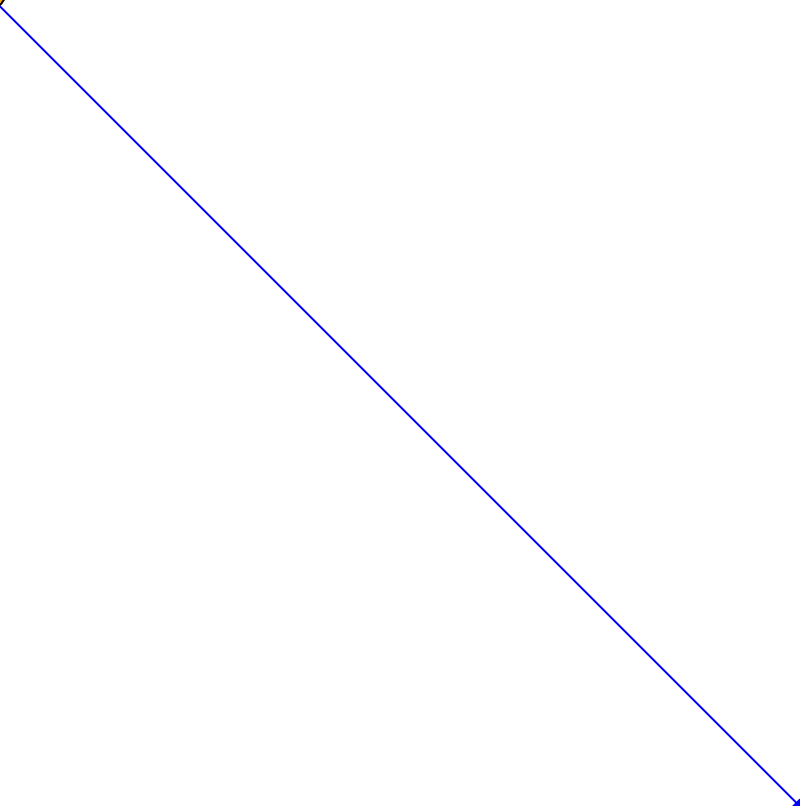

rs1061093

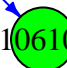

## Variant–Disease Network (White blood cell count)

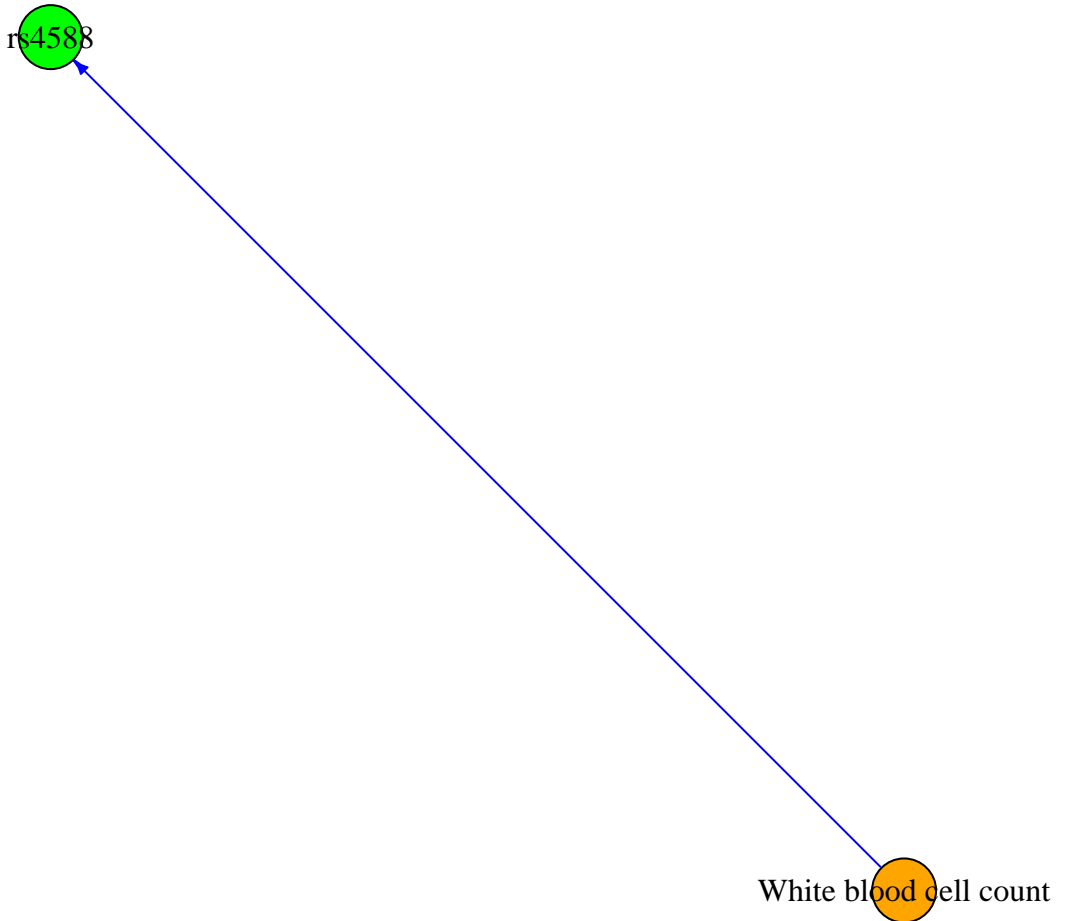

# Variant–Disease Network (tonsillectomy risk measurement)

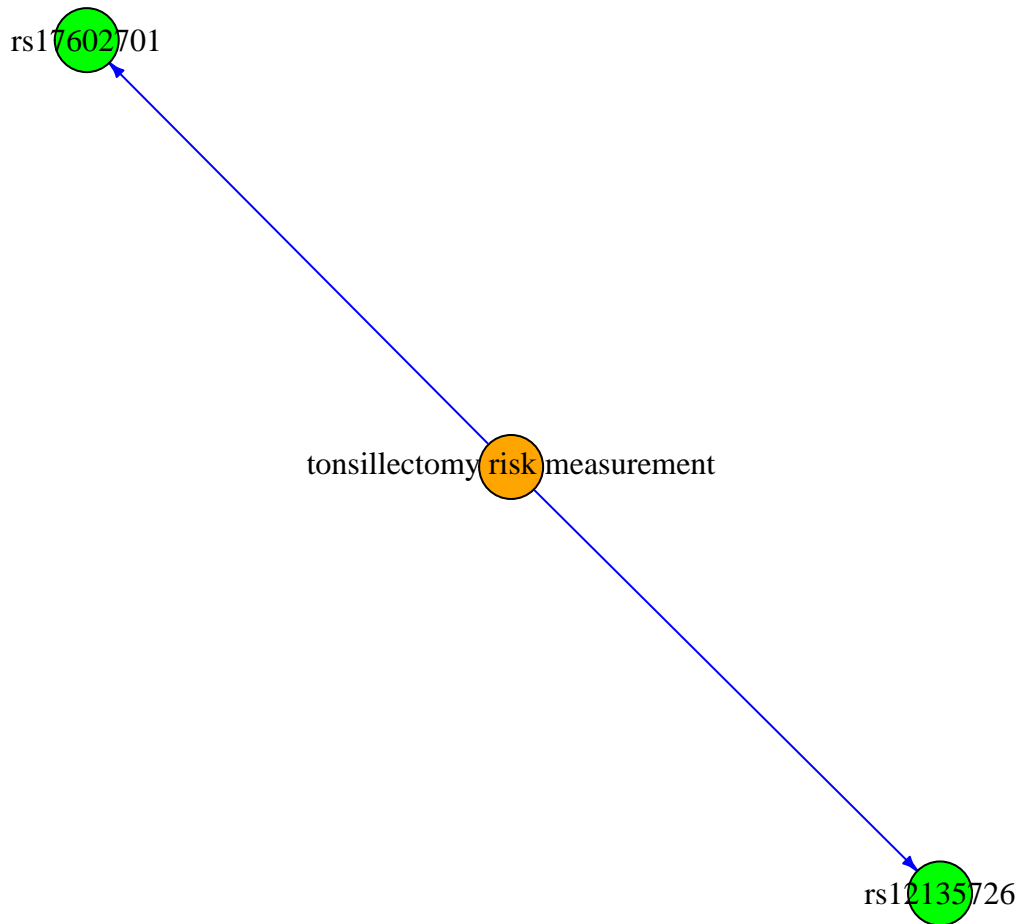



# Variant–Disease Network (attention deficit hyperactivity disorder)

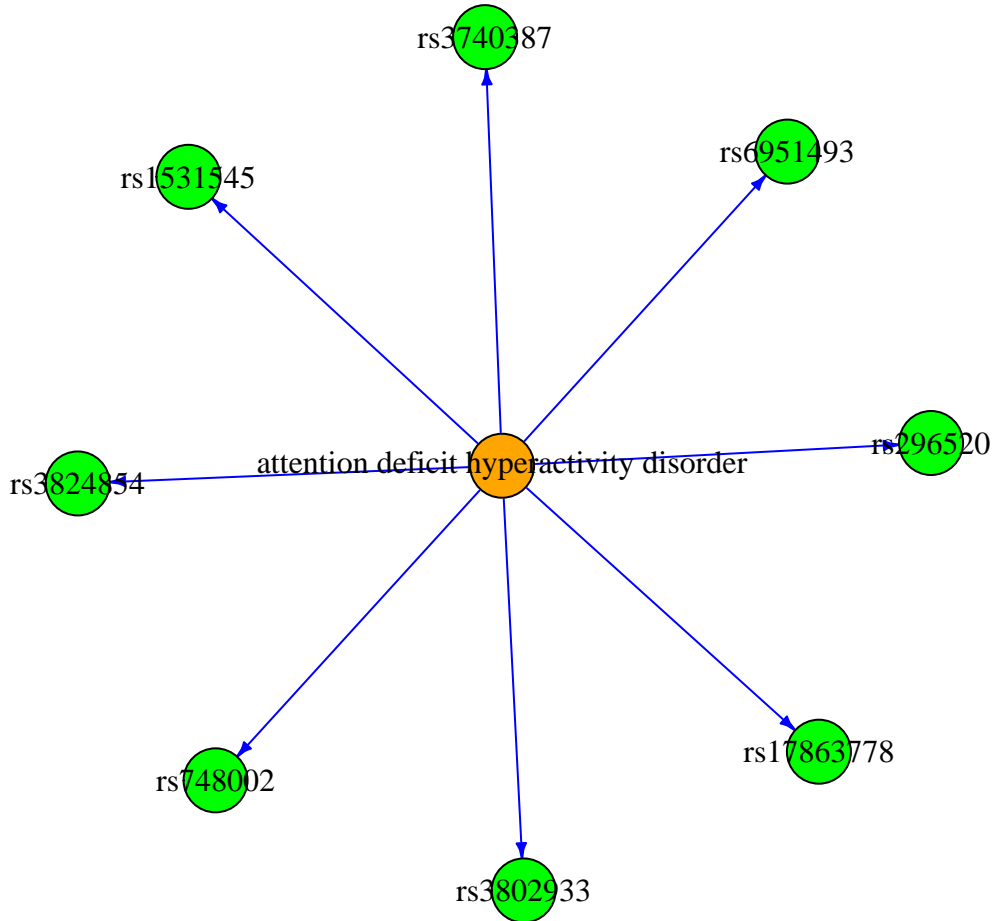

## Variant–Disease Network (bipolar disorder)

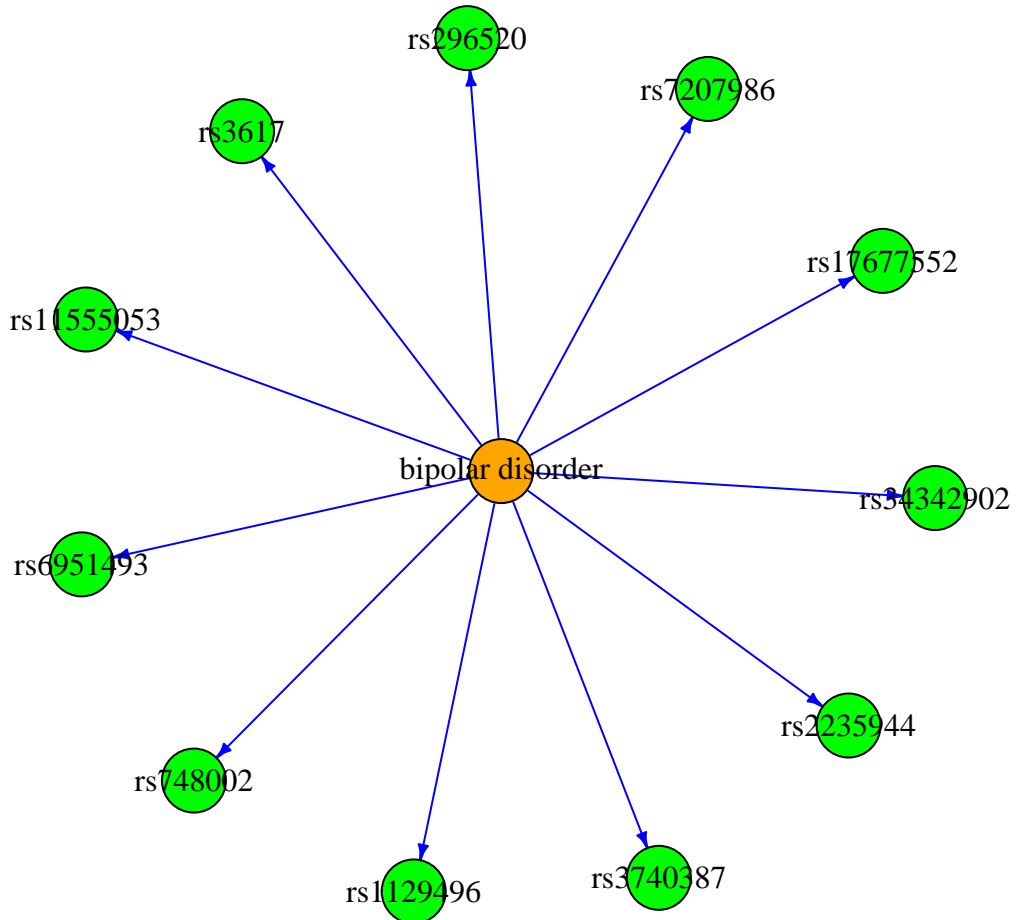

## Variant–Disease Network (unipolar depression)

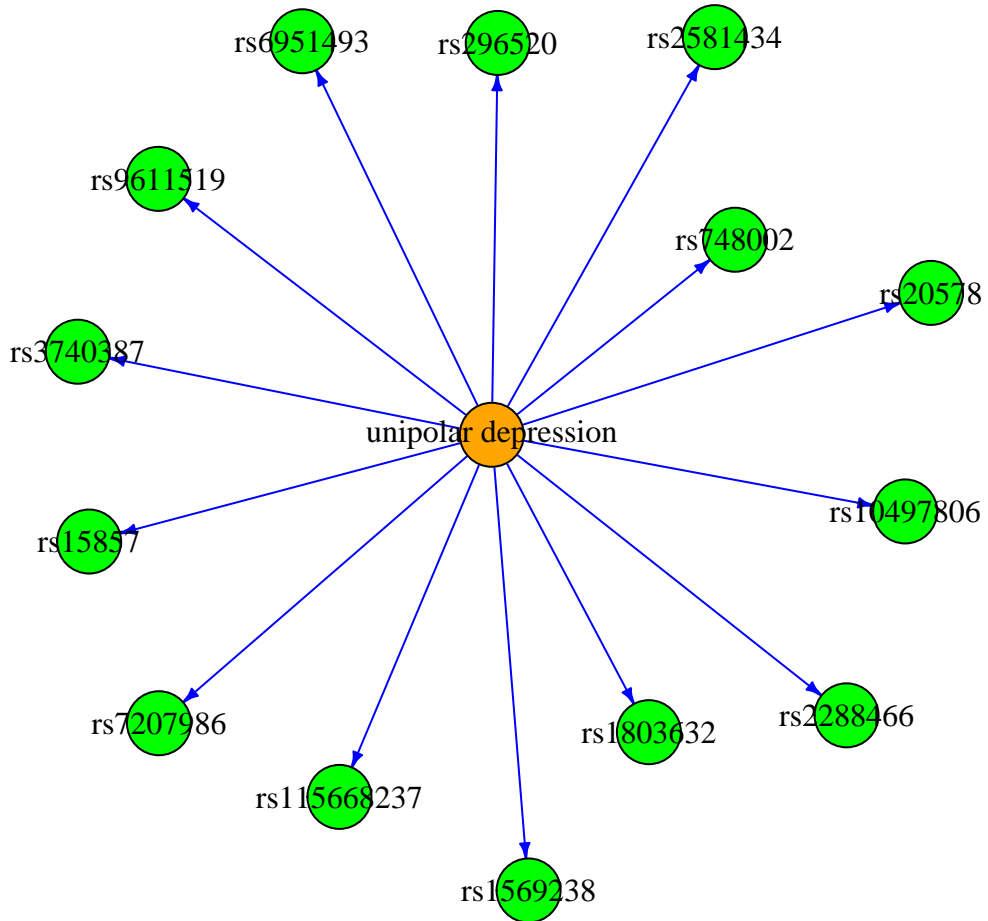

## Variant–Disease Network (response to statin)

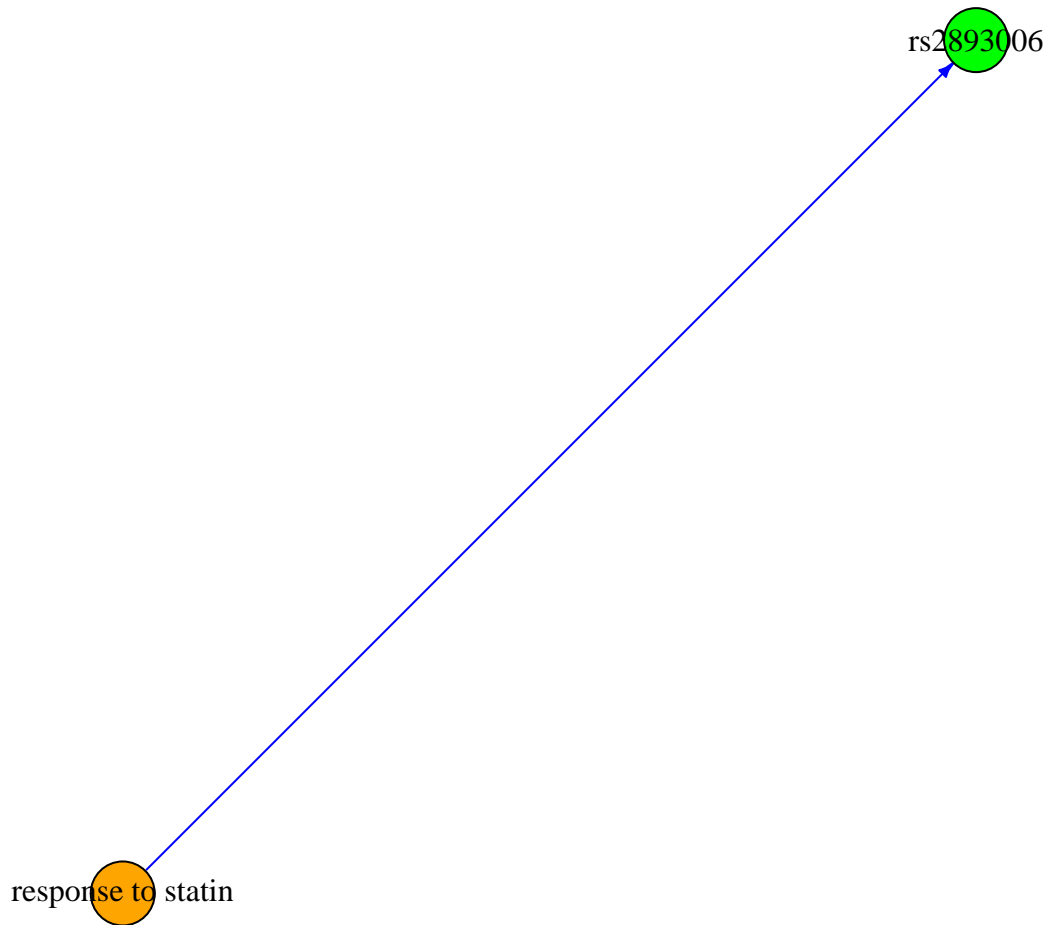

## Variant–Disease Network (igfbp–3 measurement)

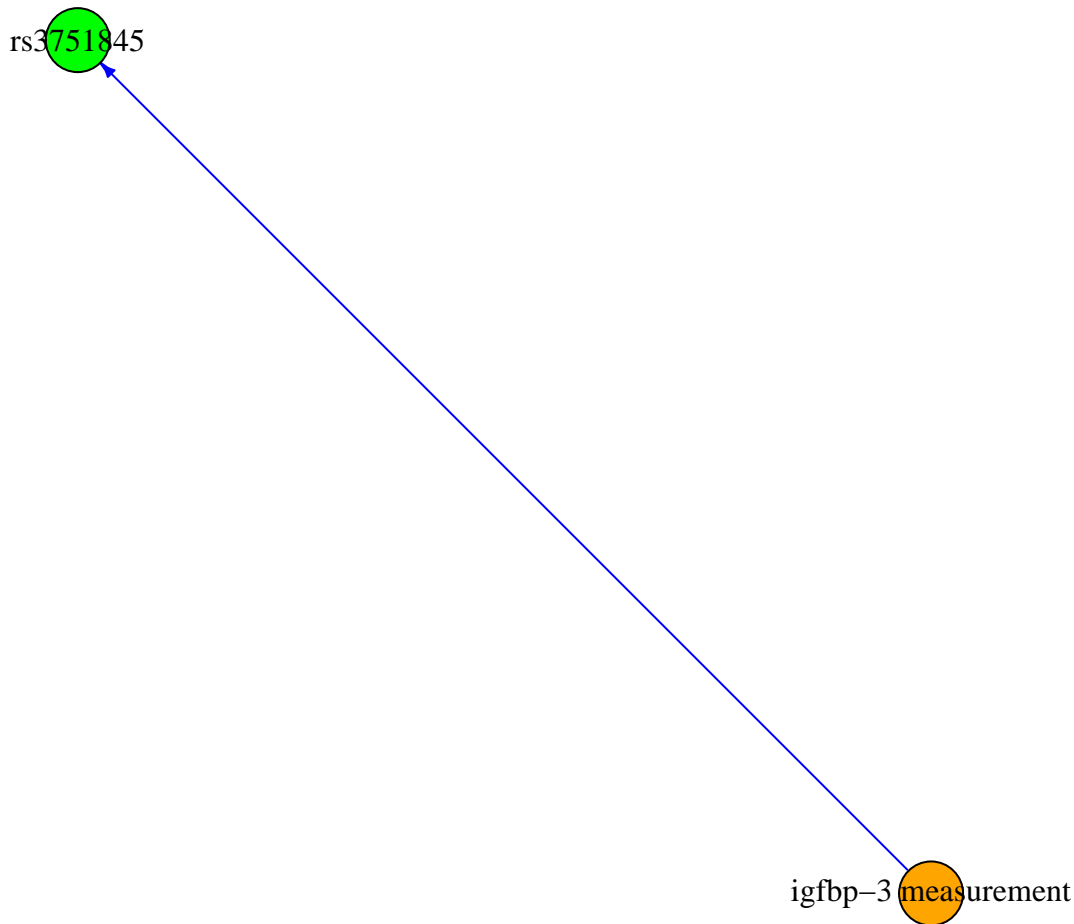

**Variant–Disease Network (joint hypermobility measurement)**

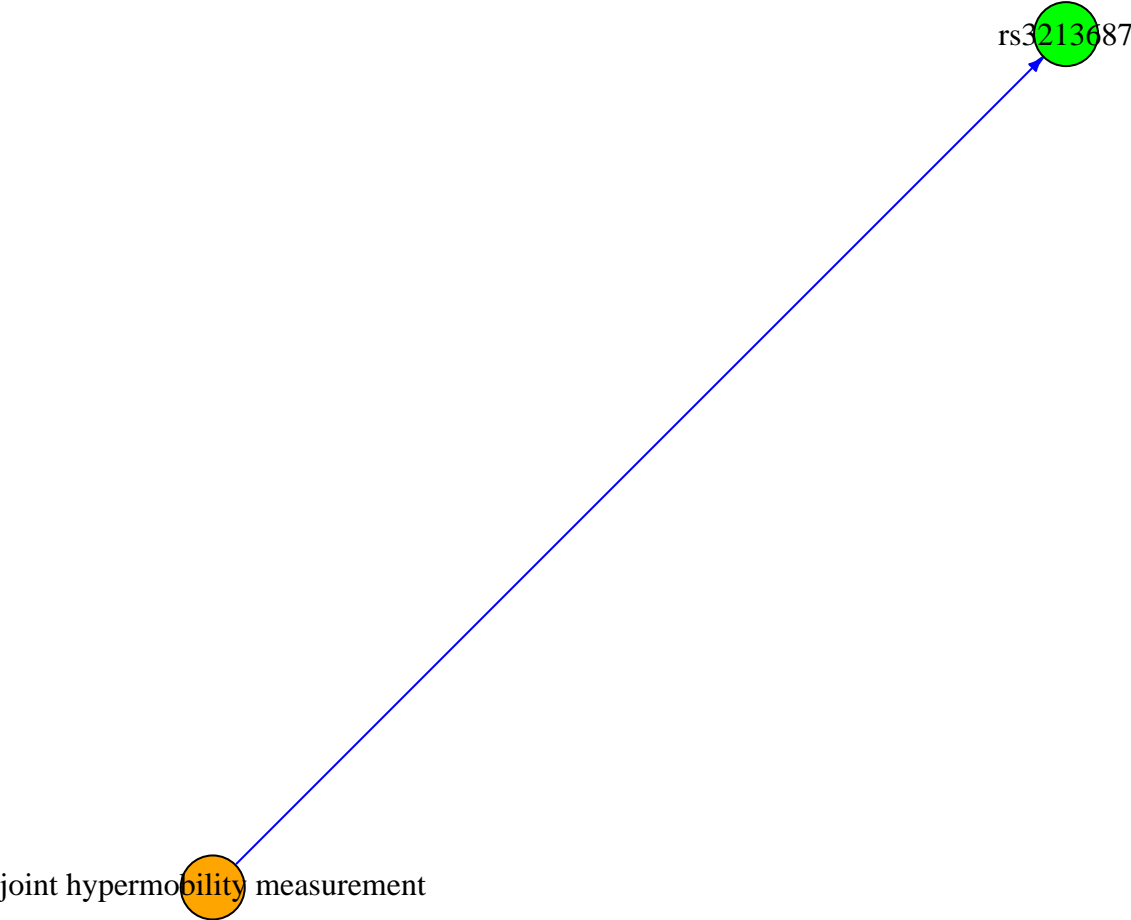

Variant–Disease Network (blood metabolite measurement)

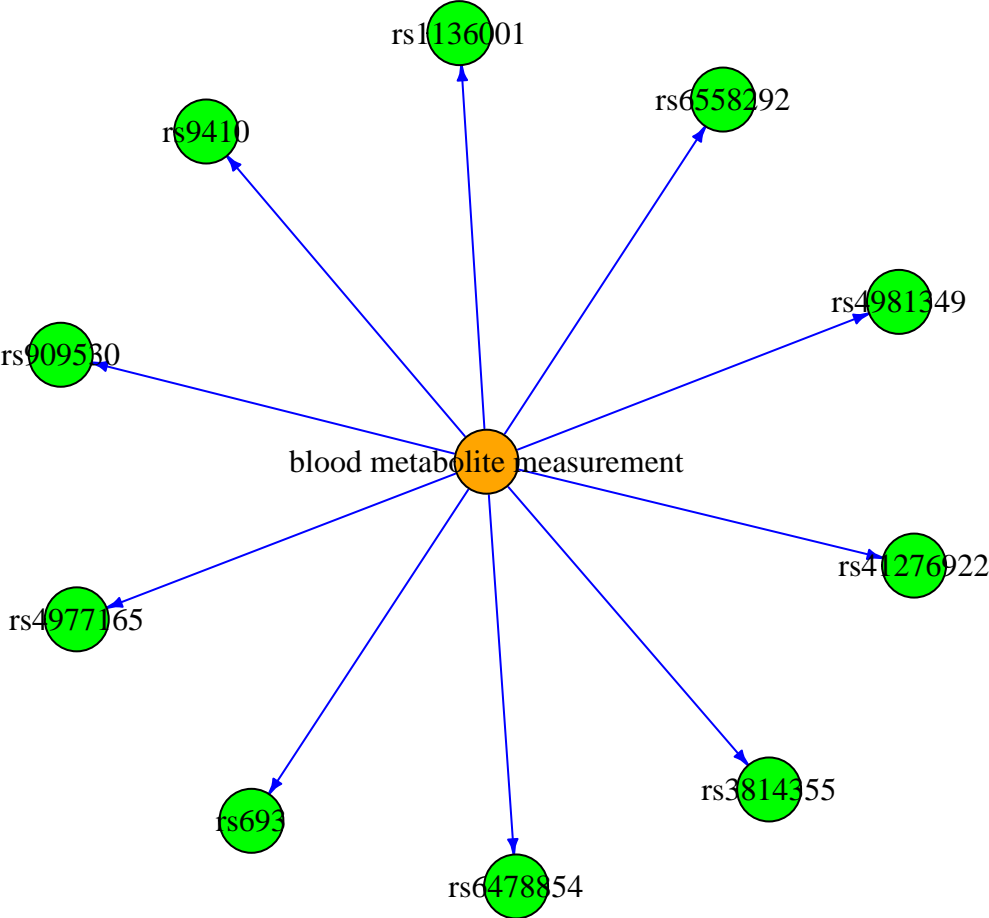

## Variant-Disease Network (QRS complex)

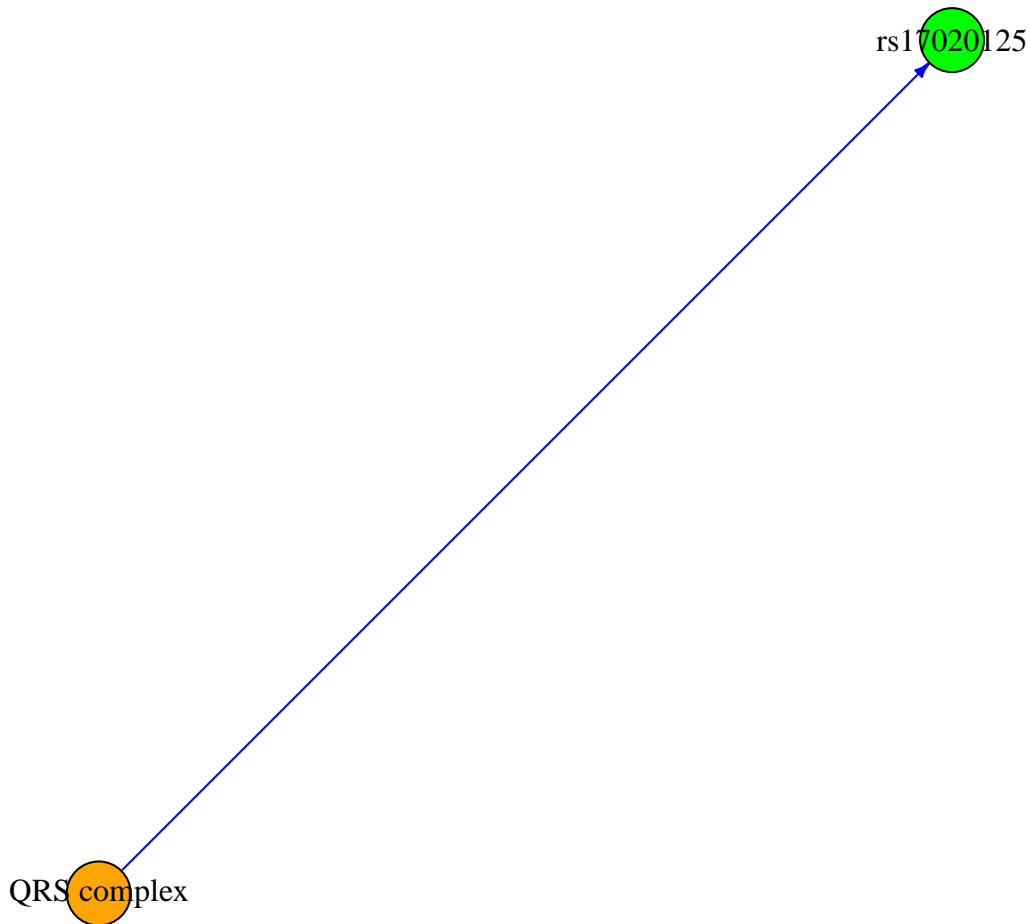



## Variant–Disease Network (cleft lip)

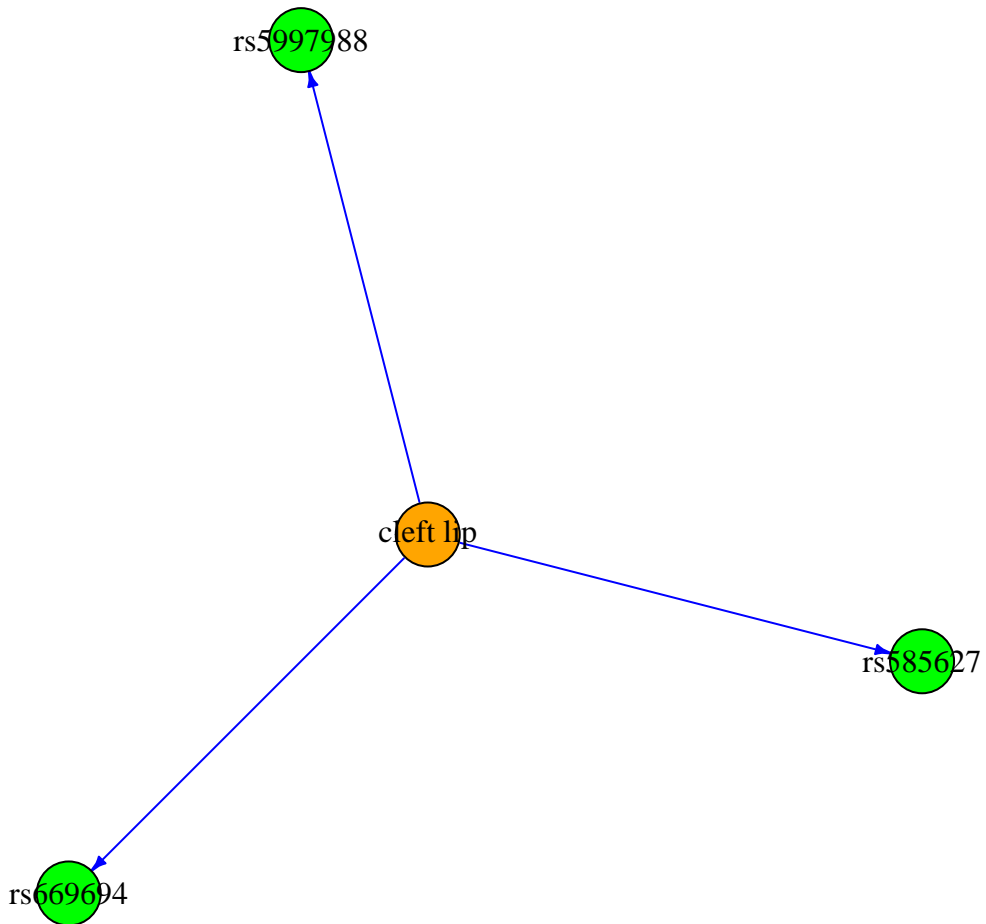

## Variant–Disease Network (progranulin measurement)

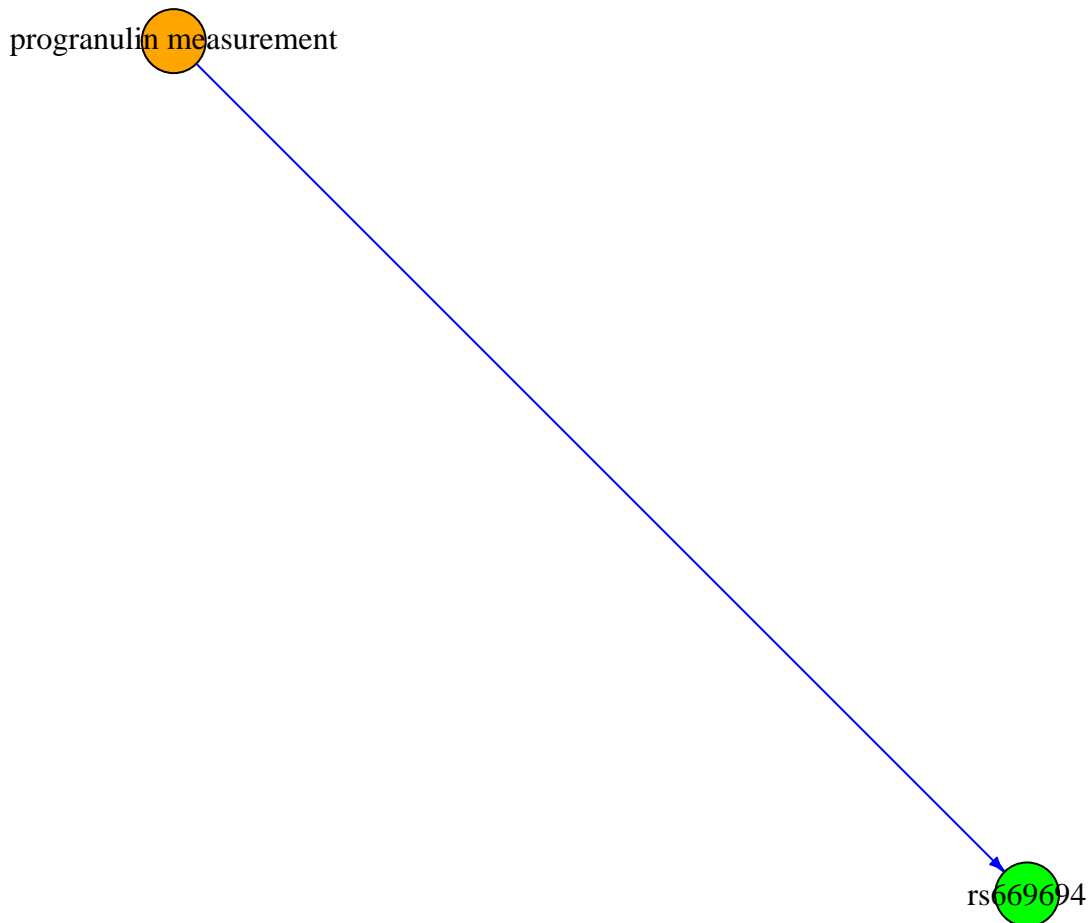

**Variant–Disease Network (helping behavior measurement)**

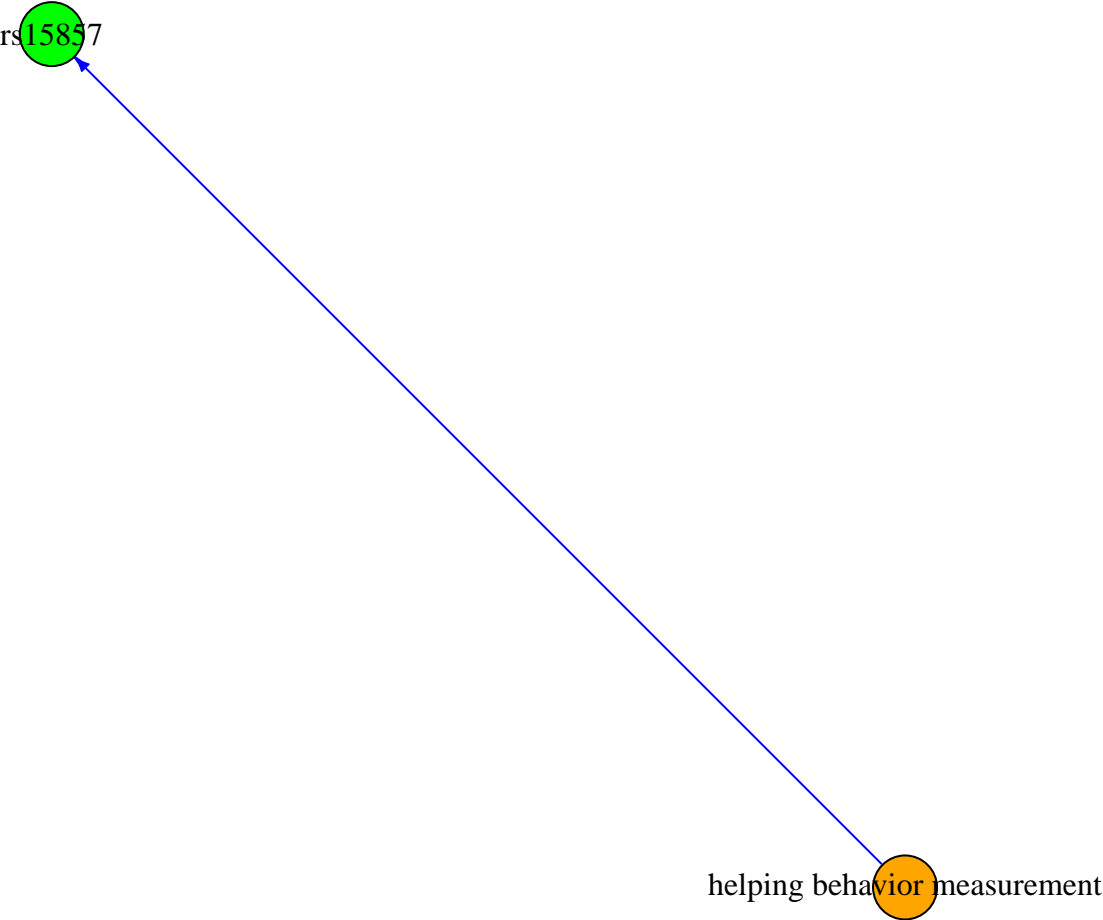

## Variant-Disease Network (crohns disease)

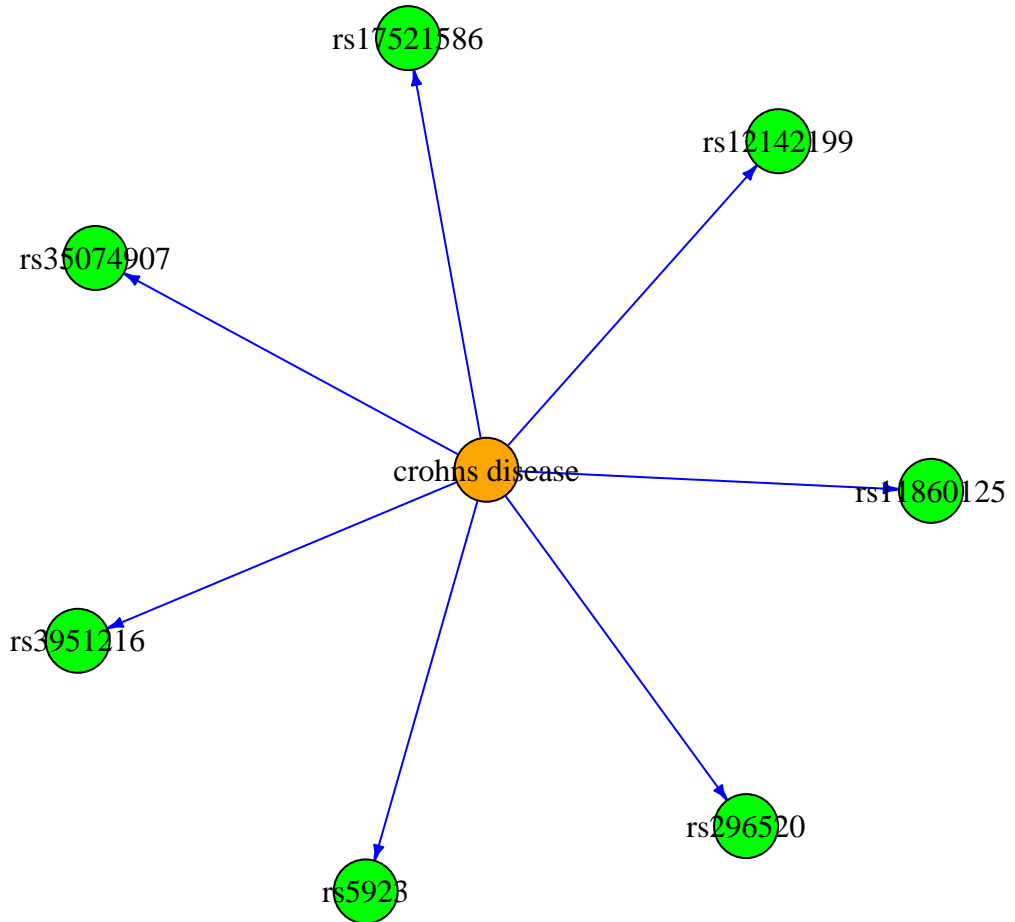

# Variant–Disease Network (cognitive function measurement)

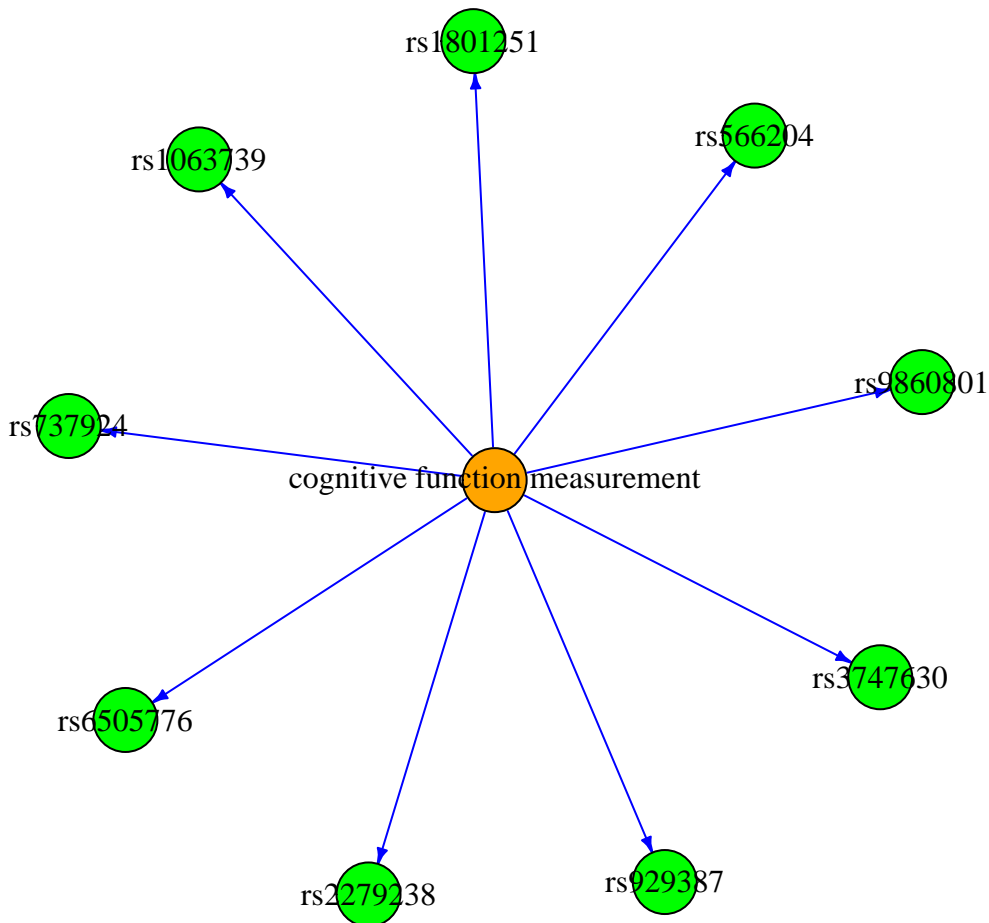

**Variant–Disease Network (corneal astigmatism)**

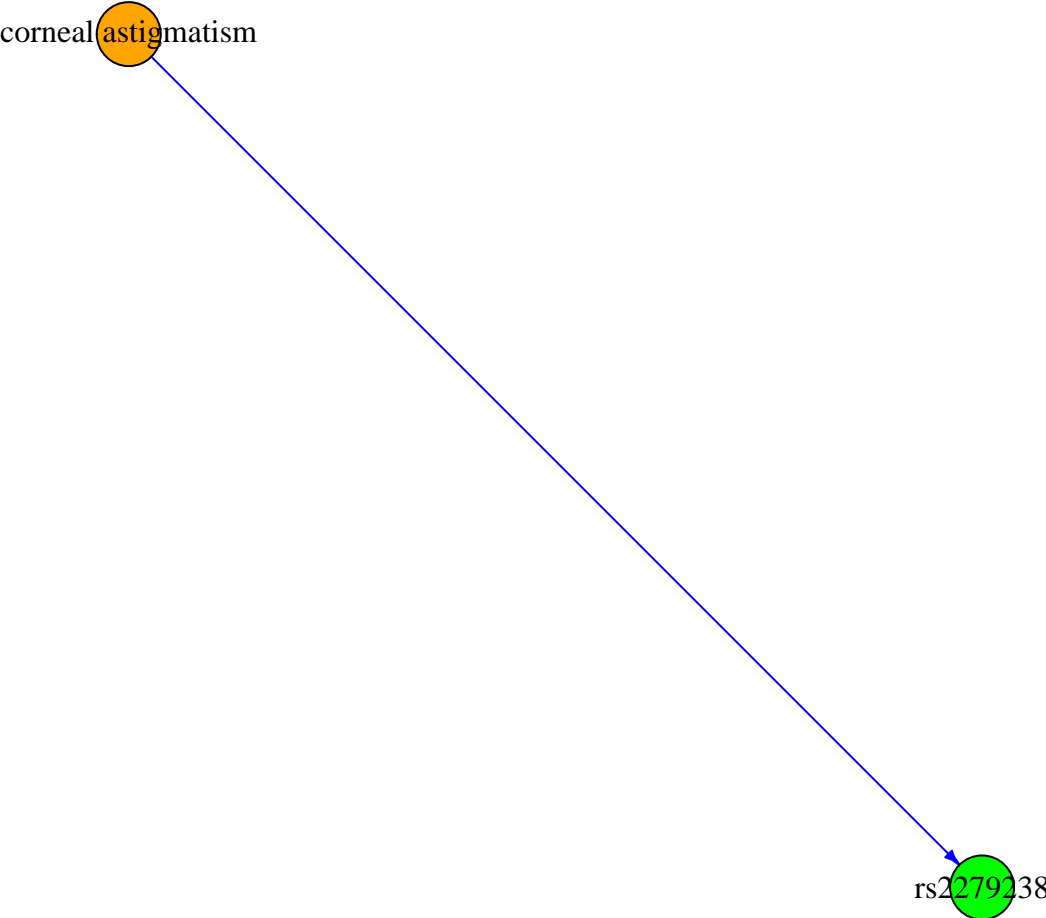

Variant–Disease Network (high density lipoprotein cholesterol measurement)

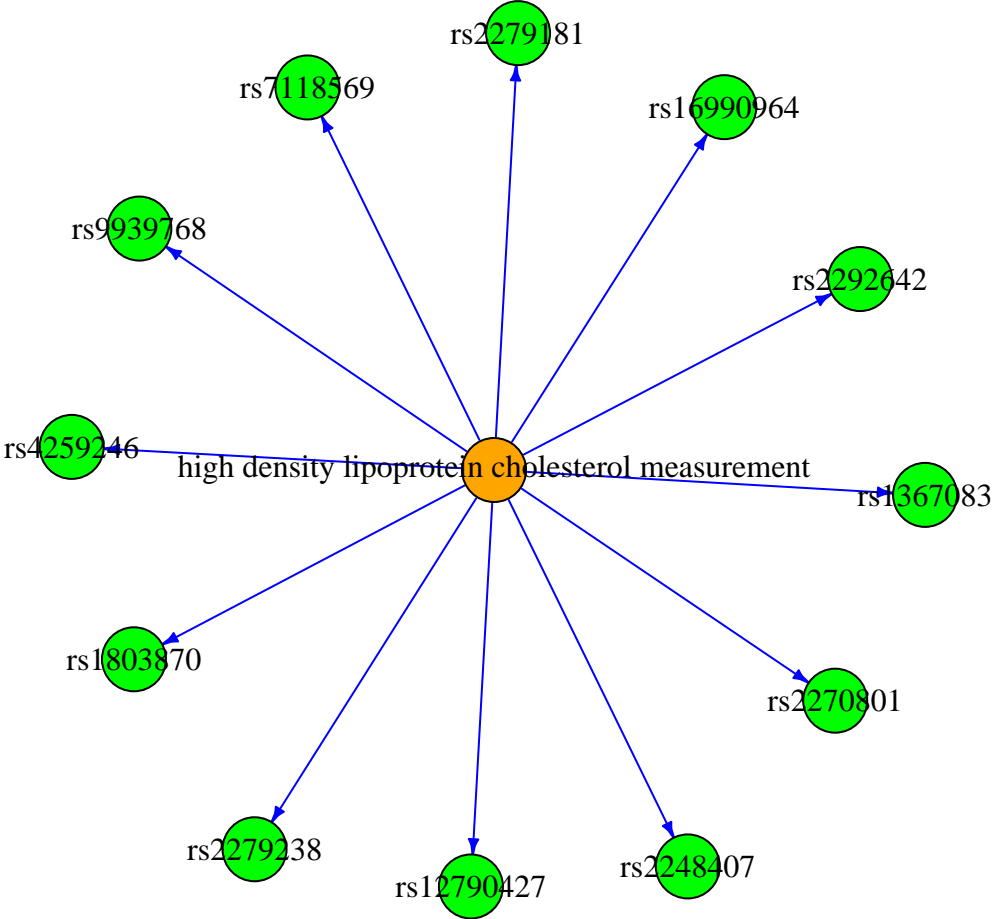

## Variant–Disease Network (insulin measurement)

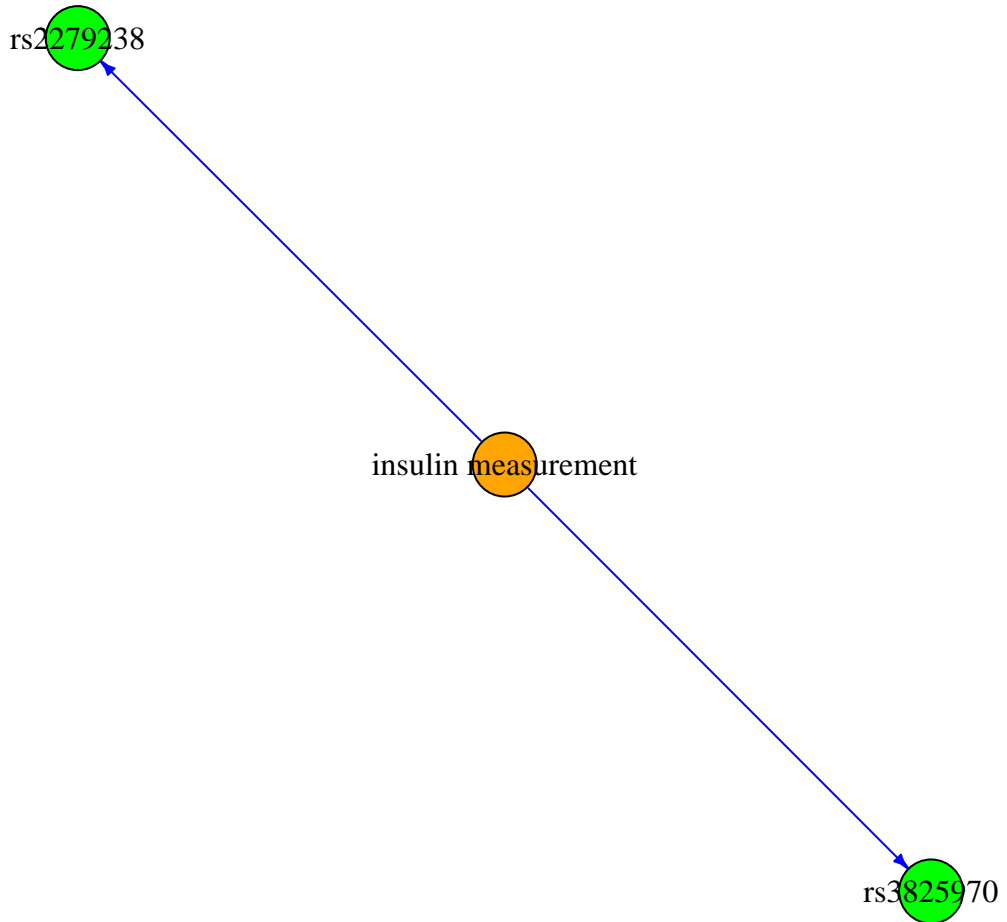



Variant–Disease Network (lymphocyte percentage of white cells)

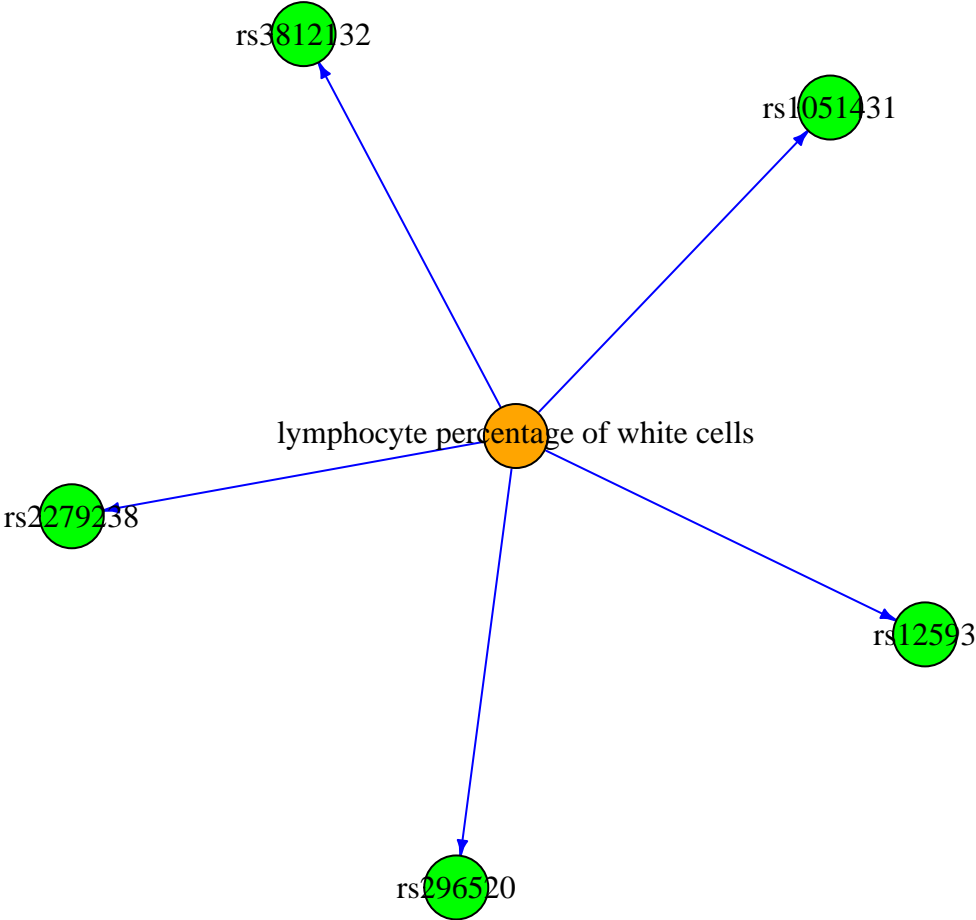

**Variant–Disease Network (serum creatinine measurement)**

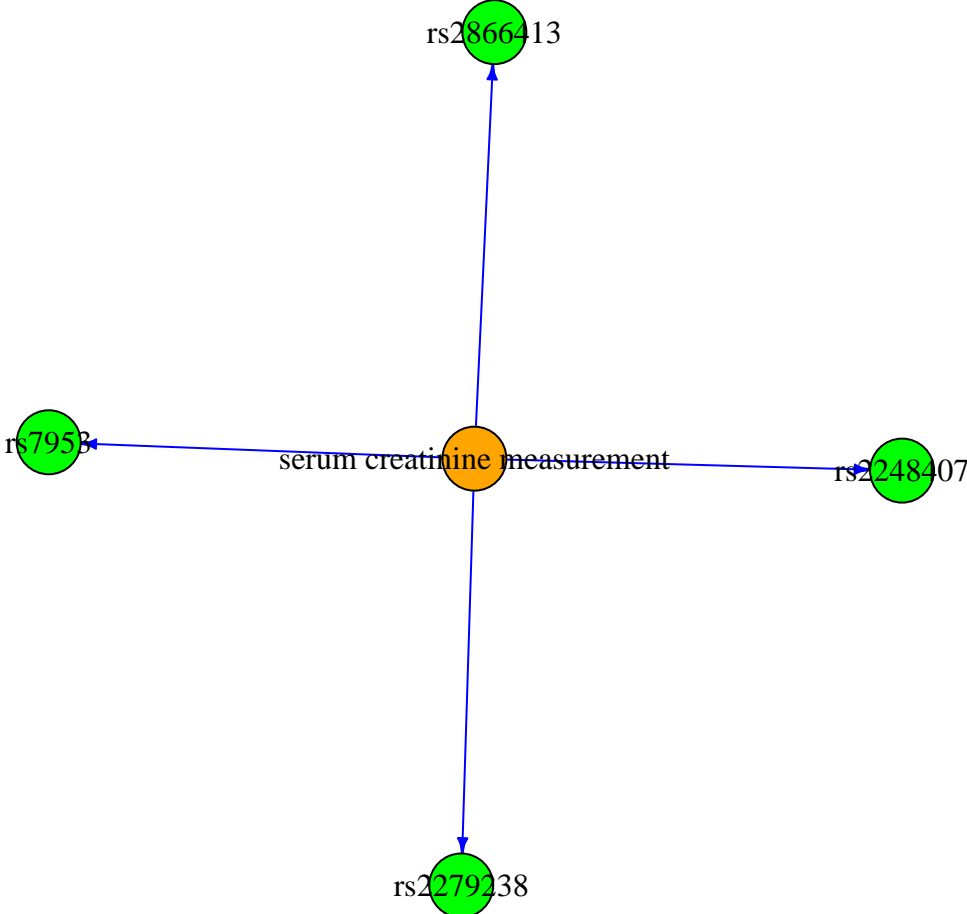

**Variant–Disease Network (red blood cell density measurement)**

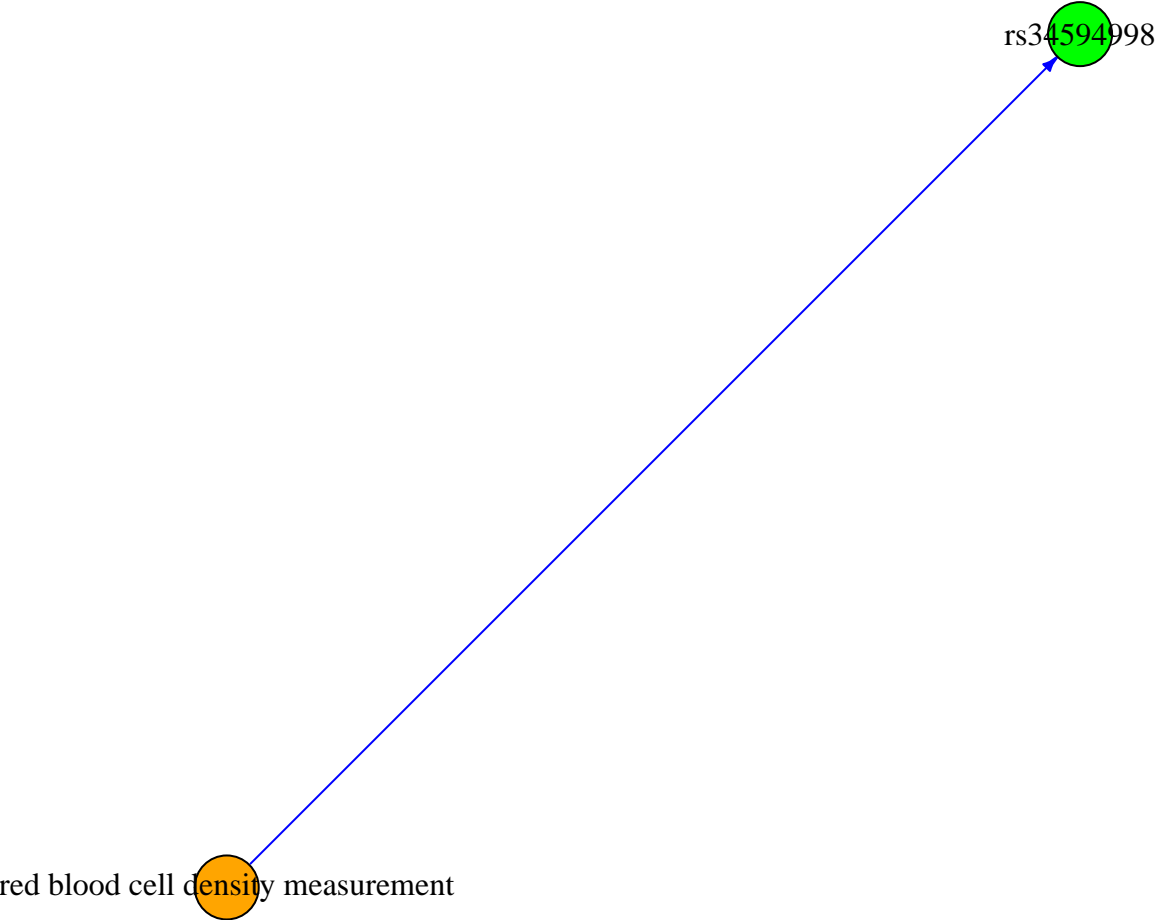

## Variant–Disease Network (sickle cell anemia)

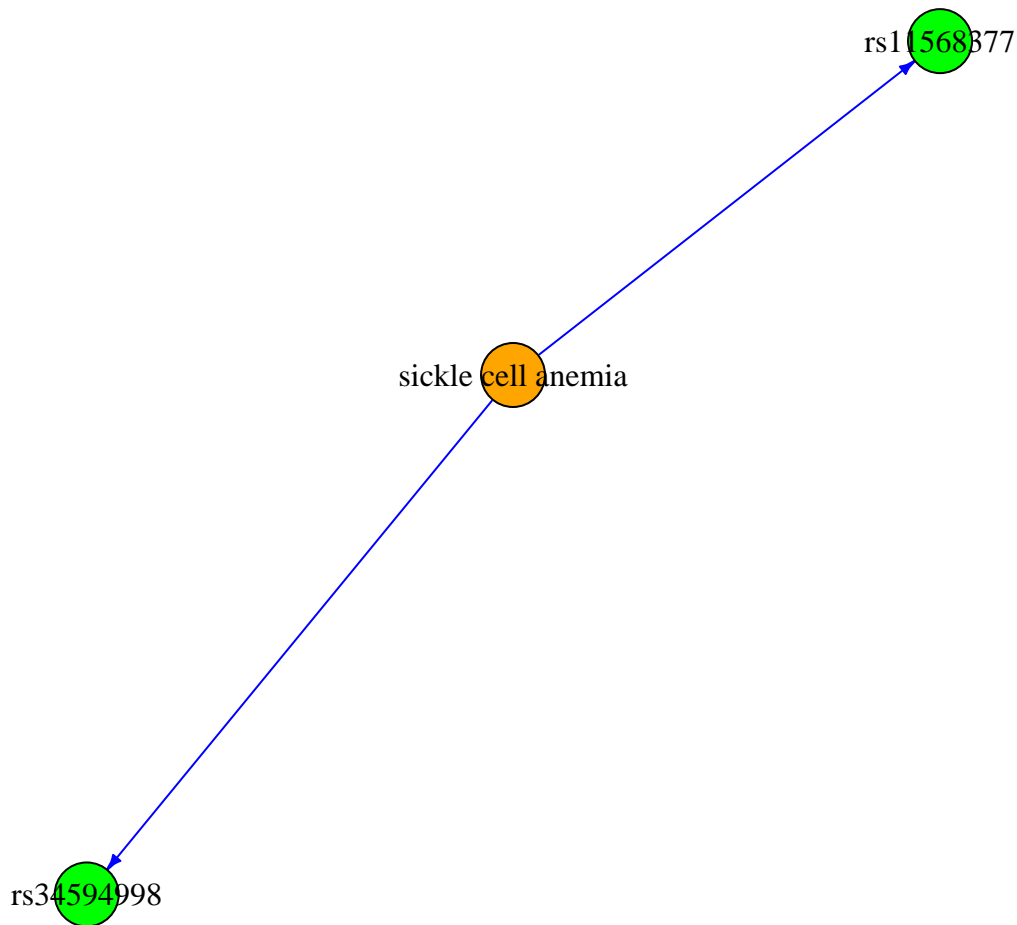

## Variant–Disease Network (age at menarche)

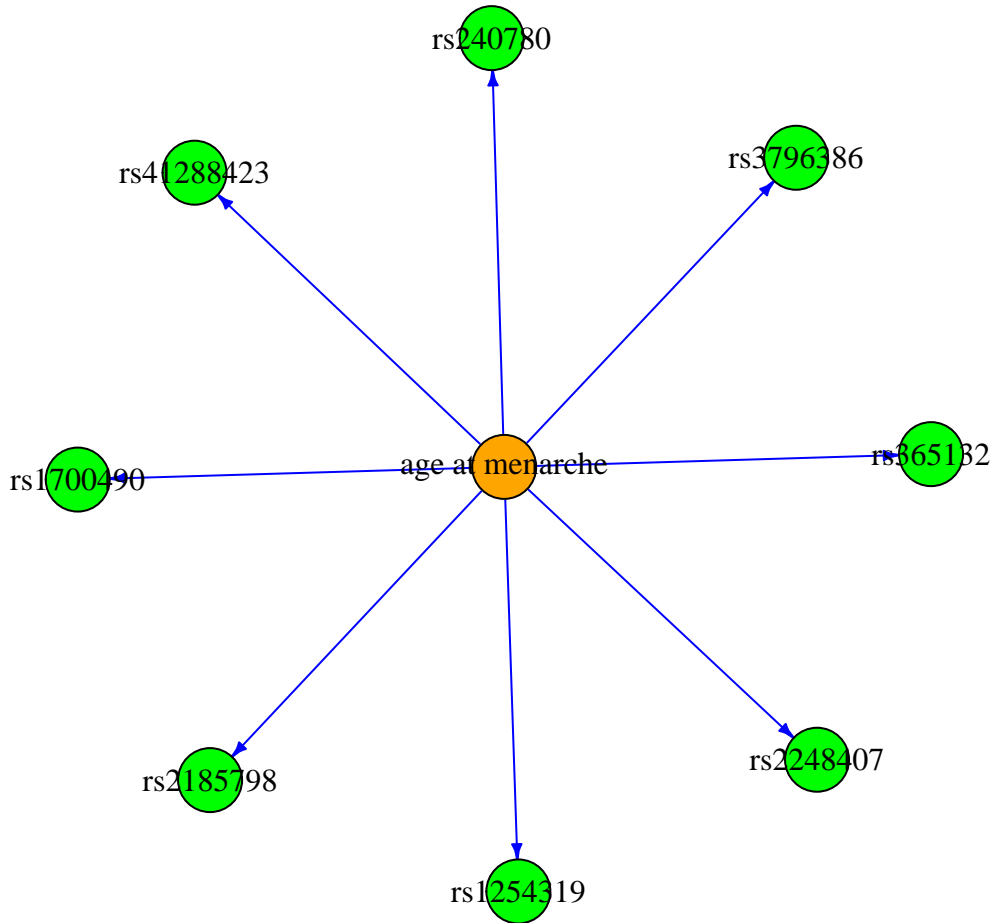

**Variant–Disease Network (creatine kinase measurement)**

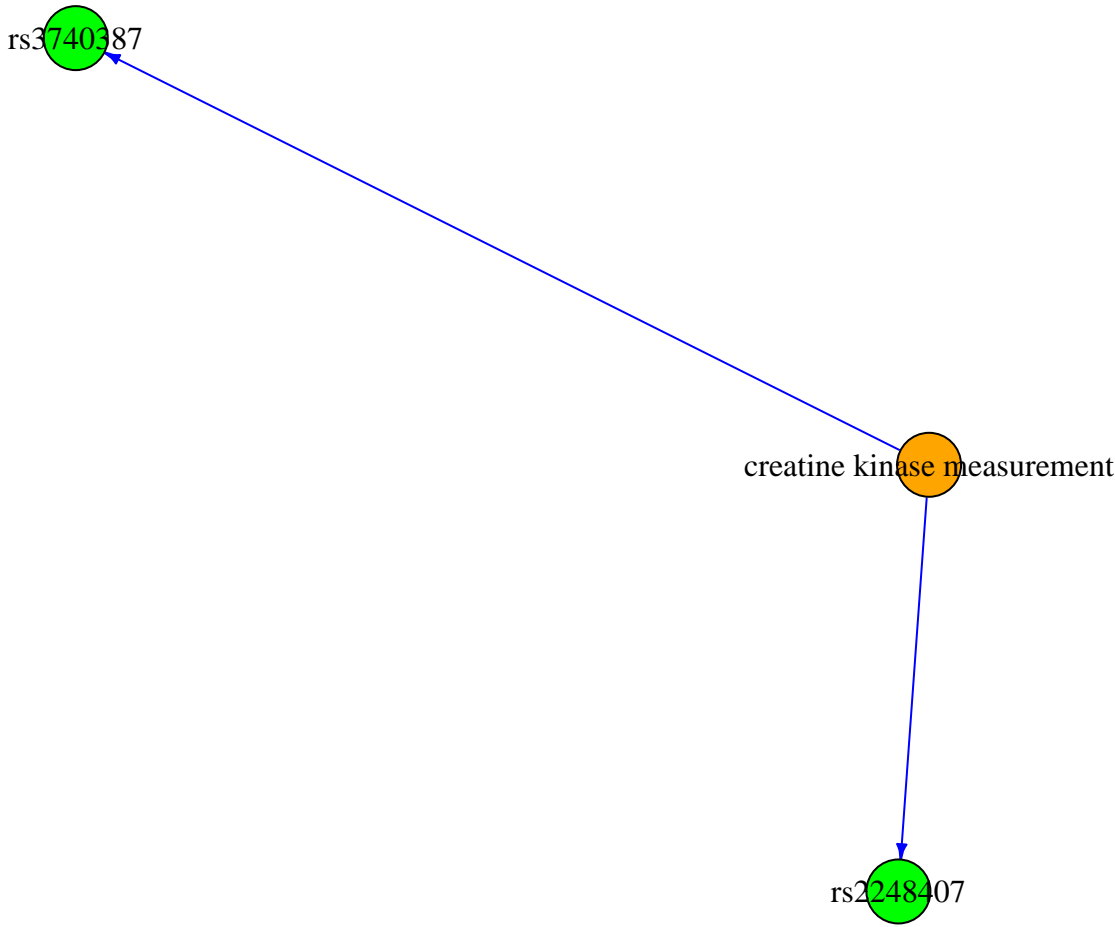

## Variant–Disease Network (glomerular filtration rate)

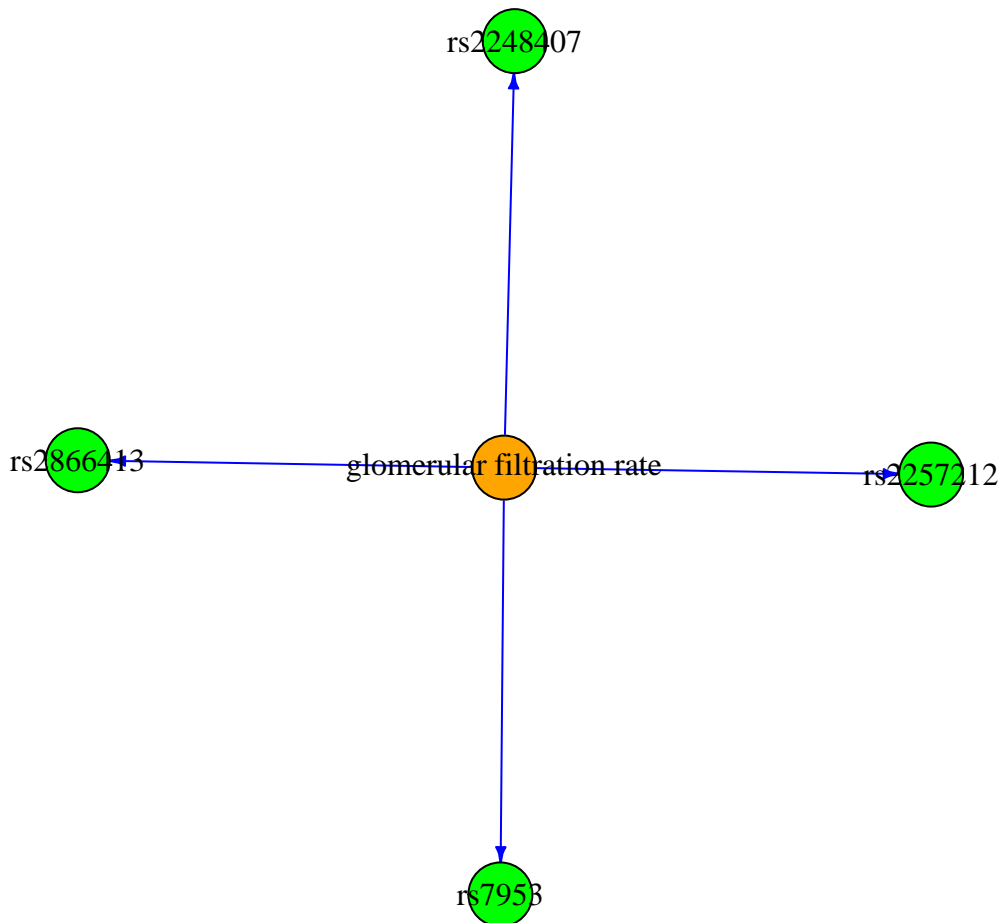

# Variant–Disease Network (hair colour measurement)

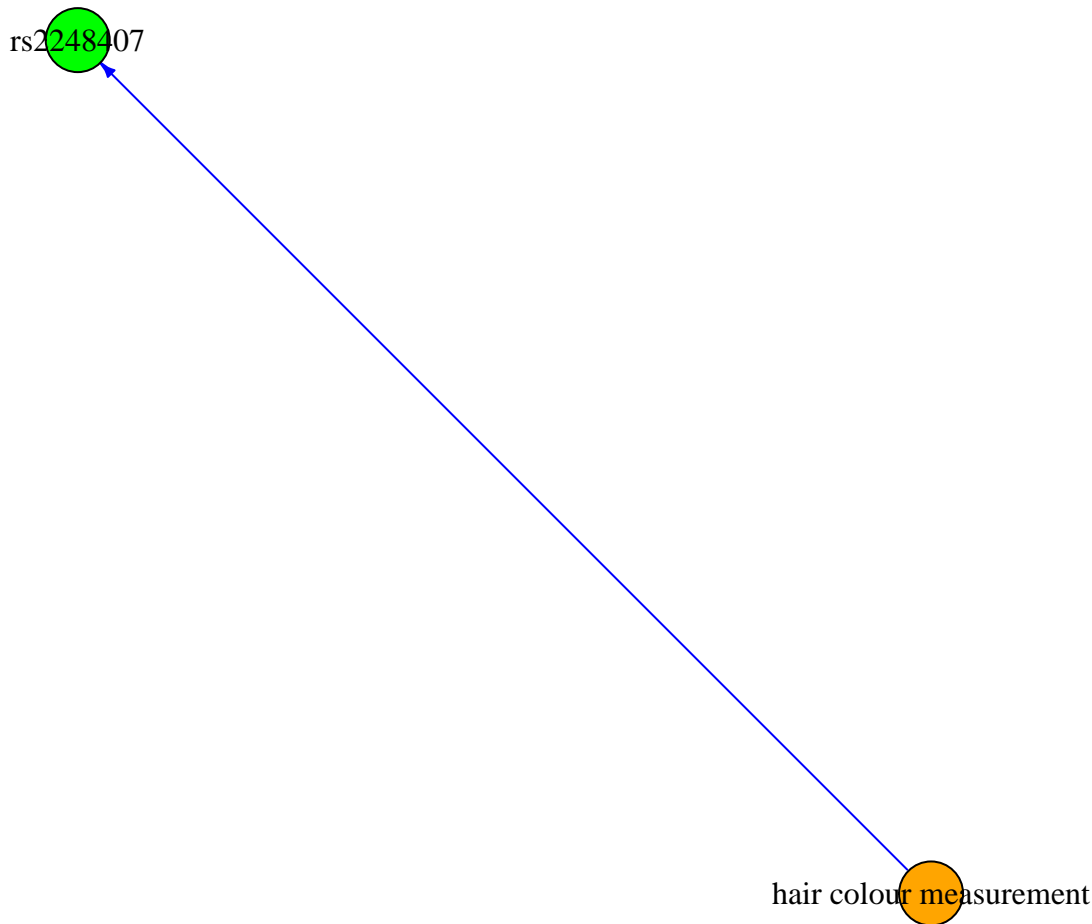



Variant–Disease Network (intraocular pressure measurement)

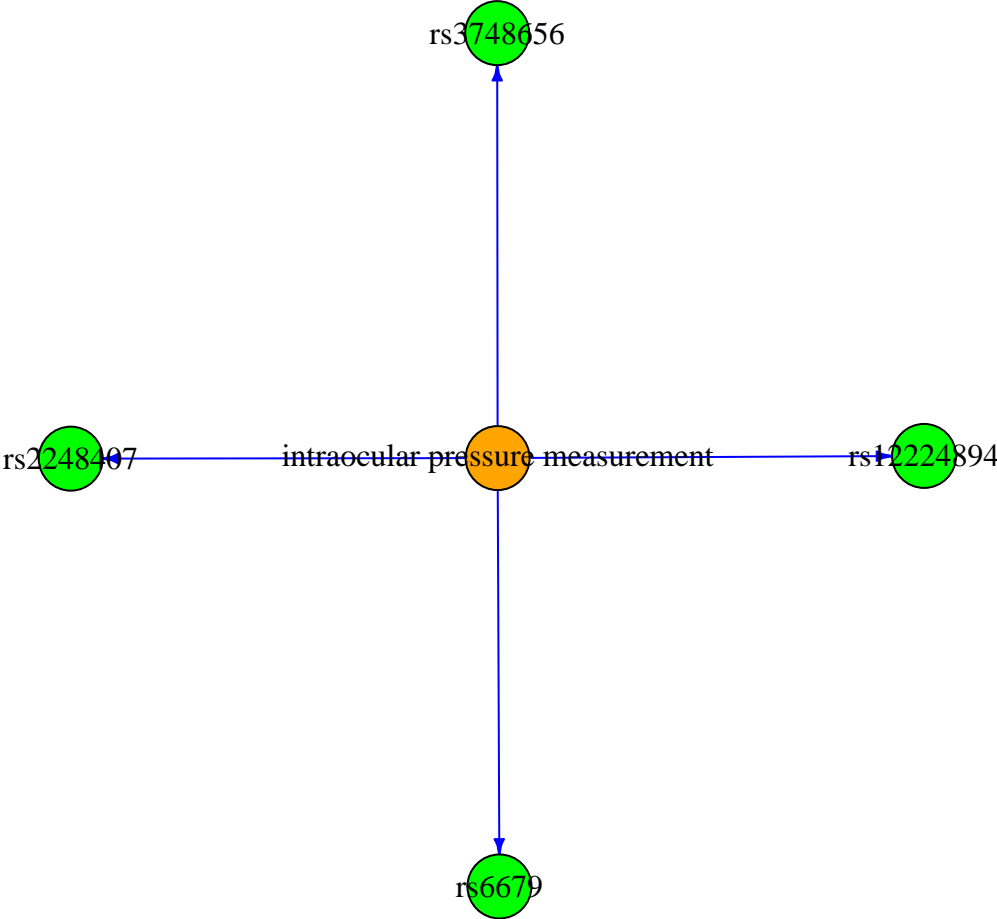

# Variant–Disease Network (l lactate dehydrogenase measurement)

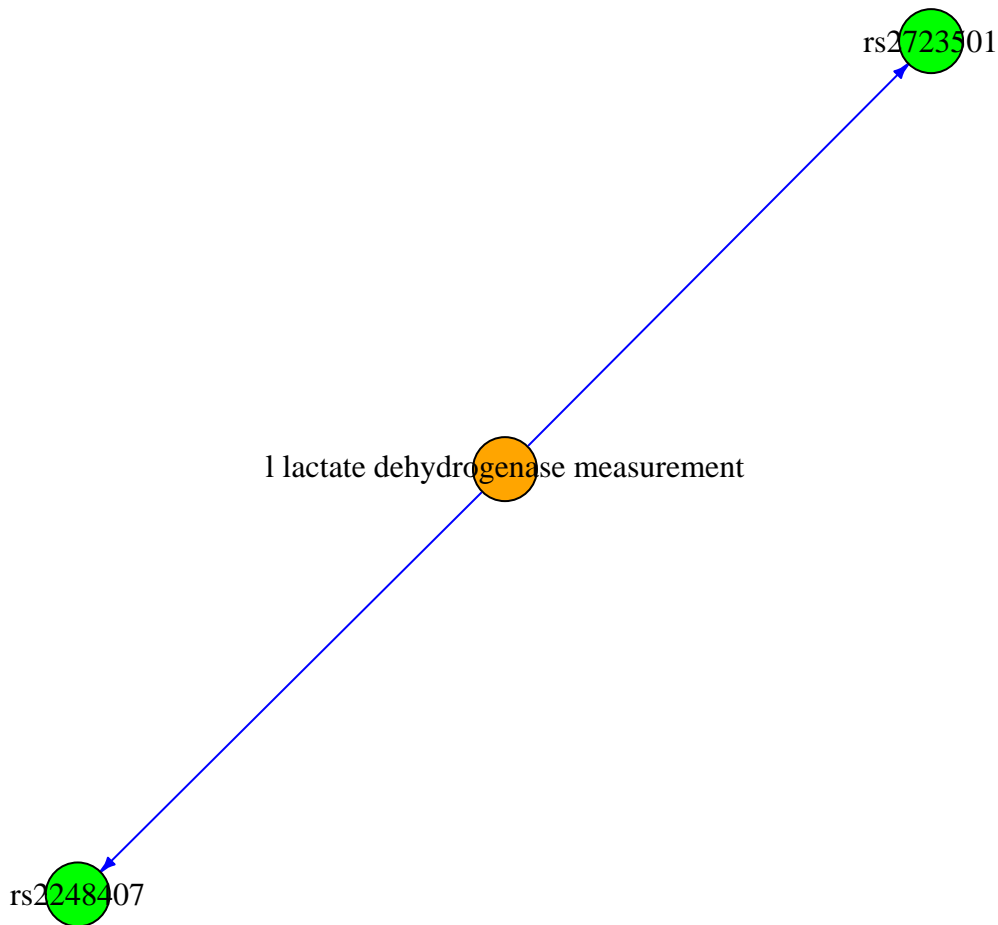

Variant–Disease Network (low density lipoprotein cholesterol measurement

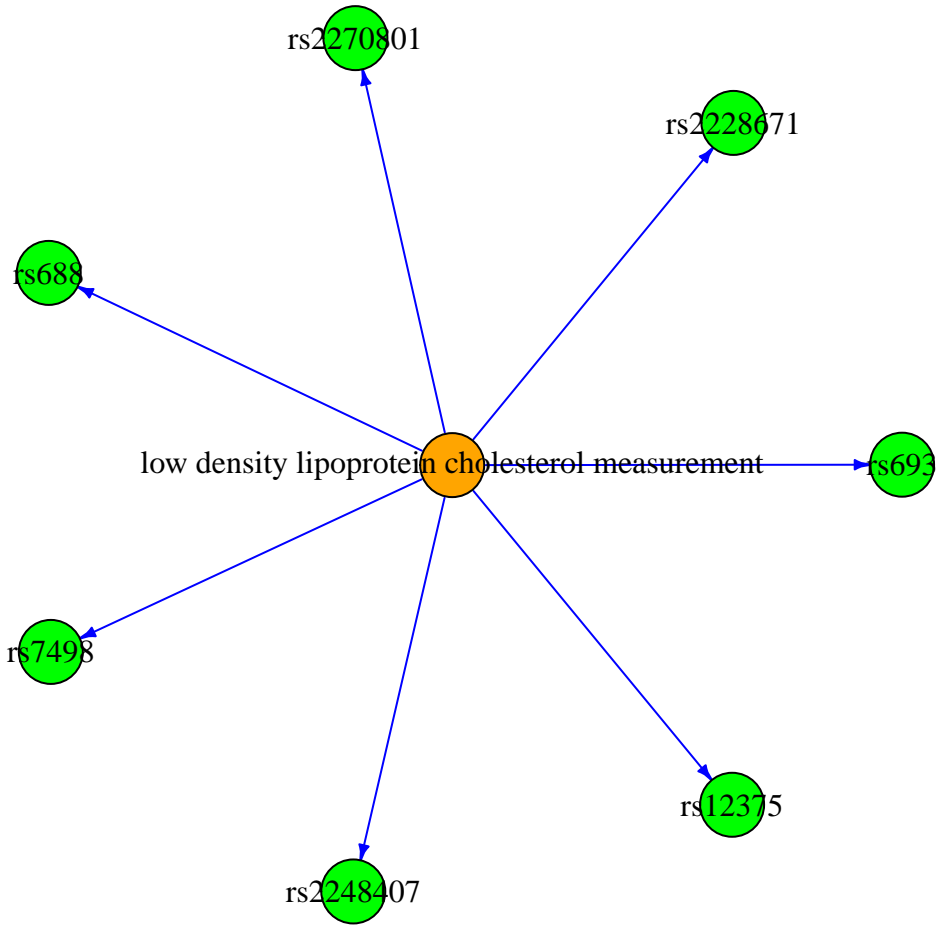

## Variant–Disease Network (Testicular Germ Cell Tumor)

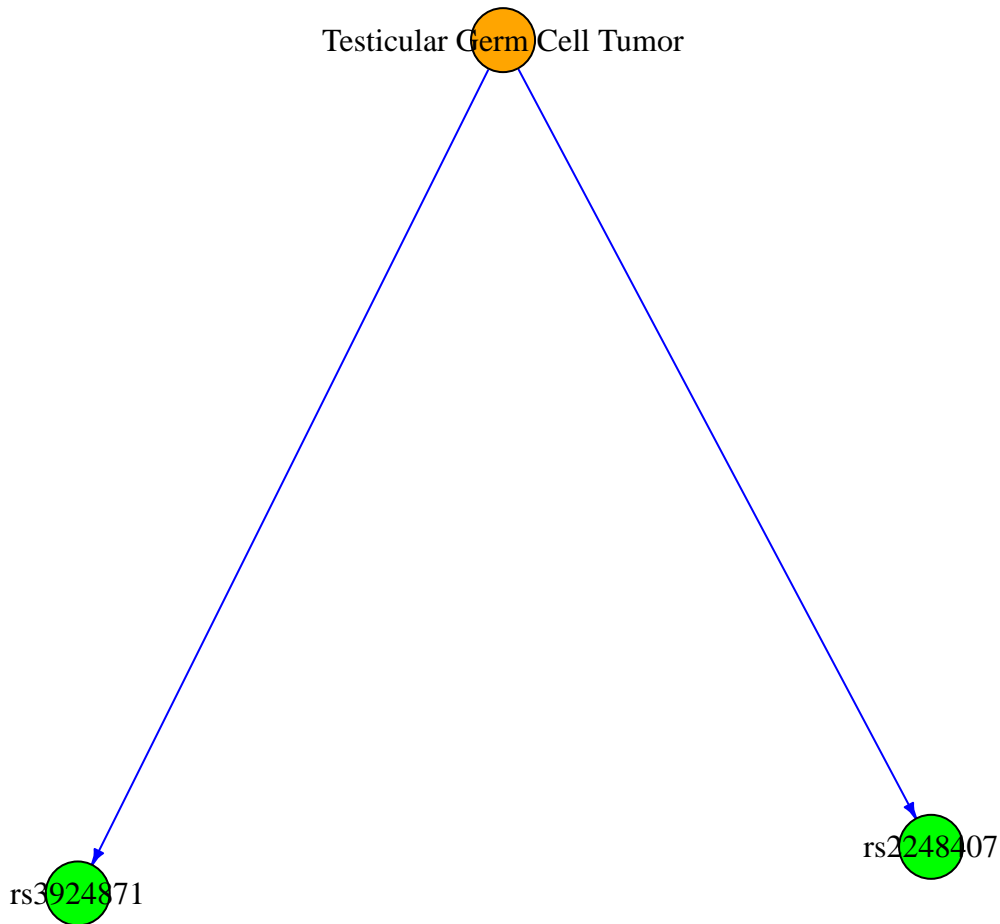

## Variant–Disease Network (total cholesterol measurement)

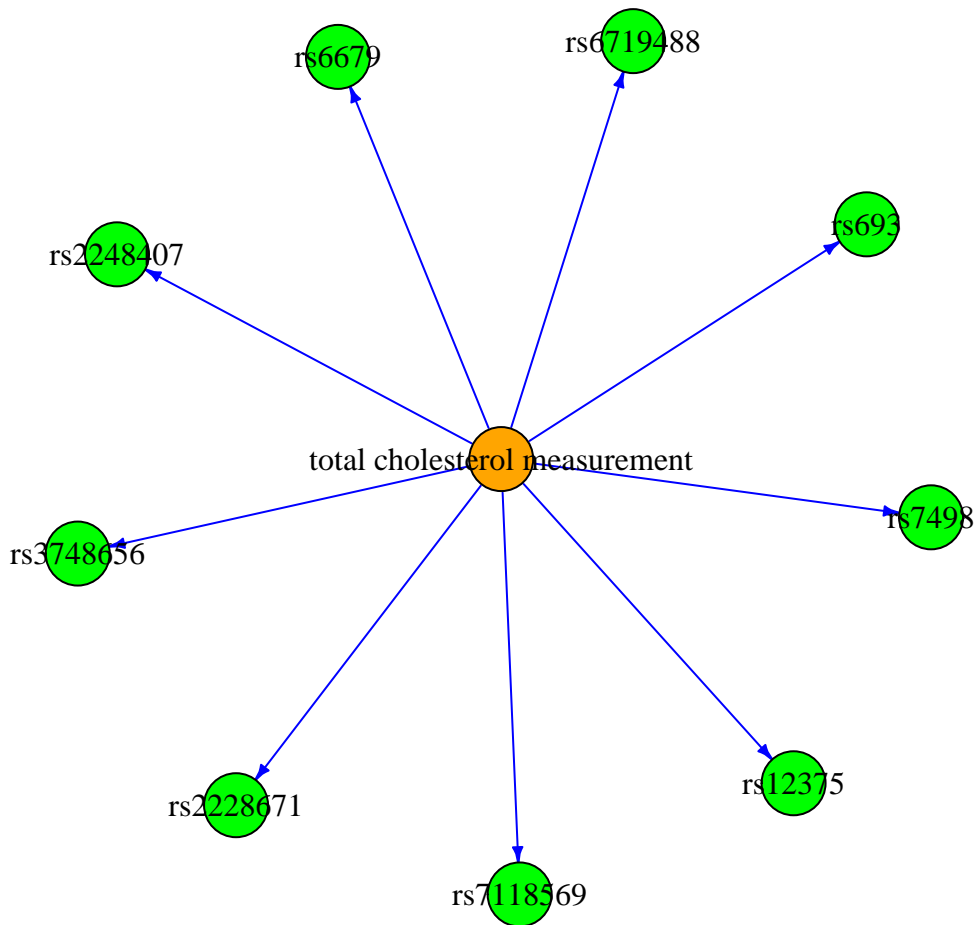

## Variant–Disease Network (triglyceride measurement)

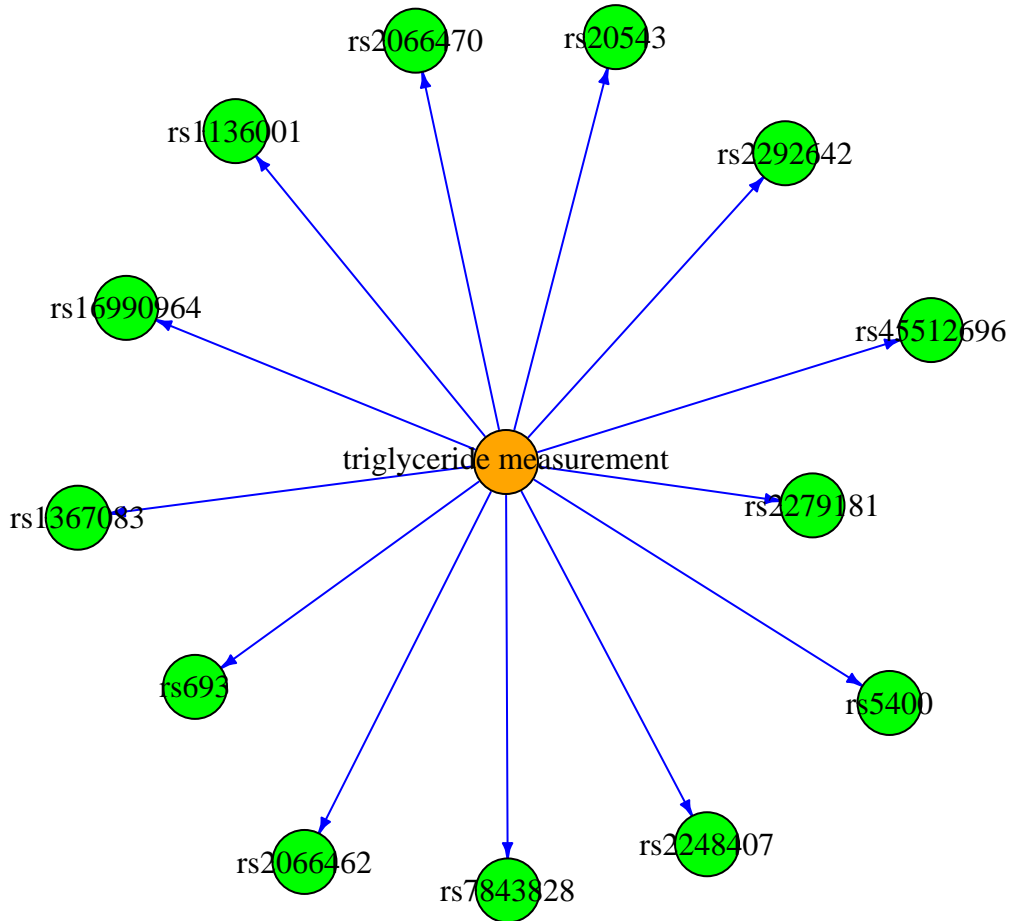

Variant–Disease Network (systolic blood pressure change measurement

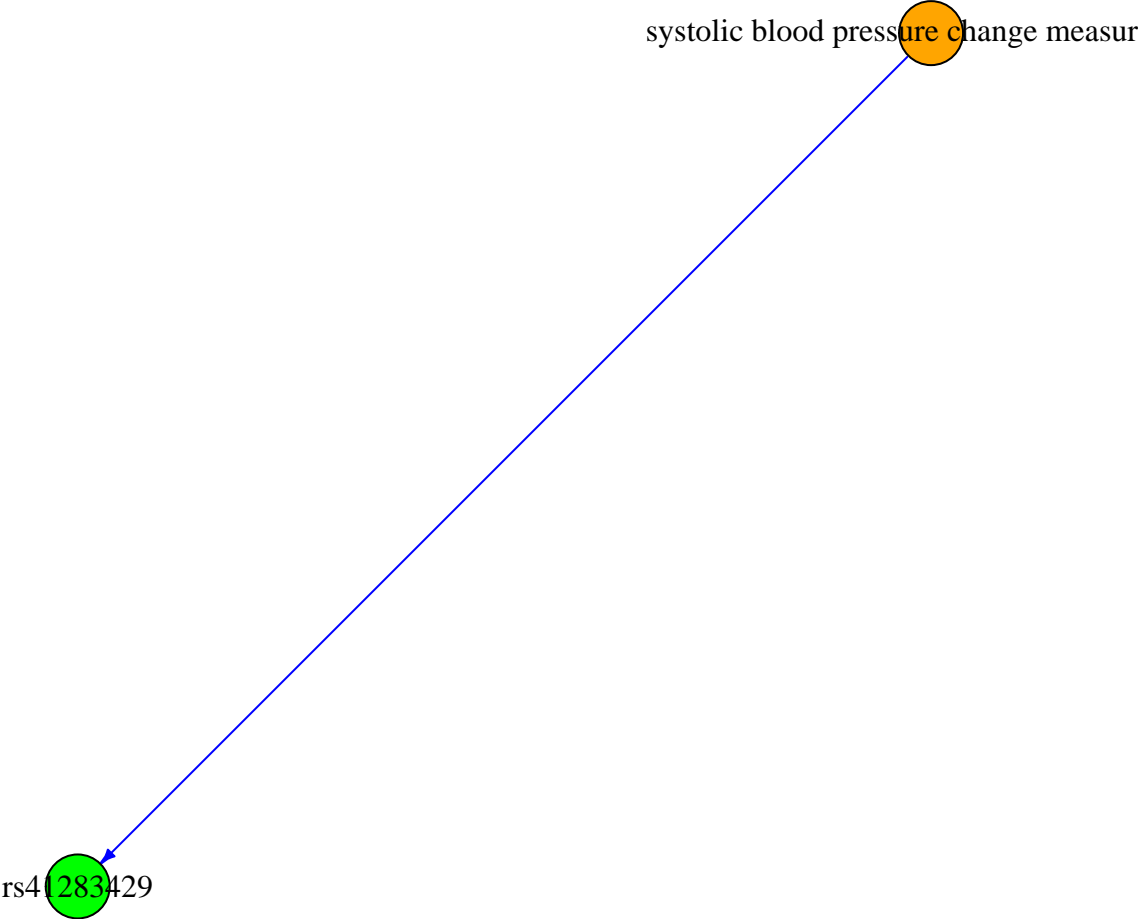

**Variant–Disease Network (smoking status measurement)**

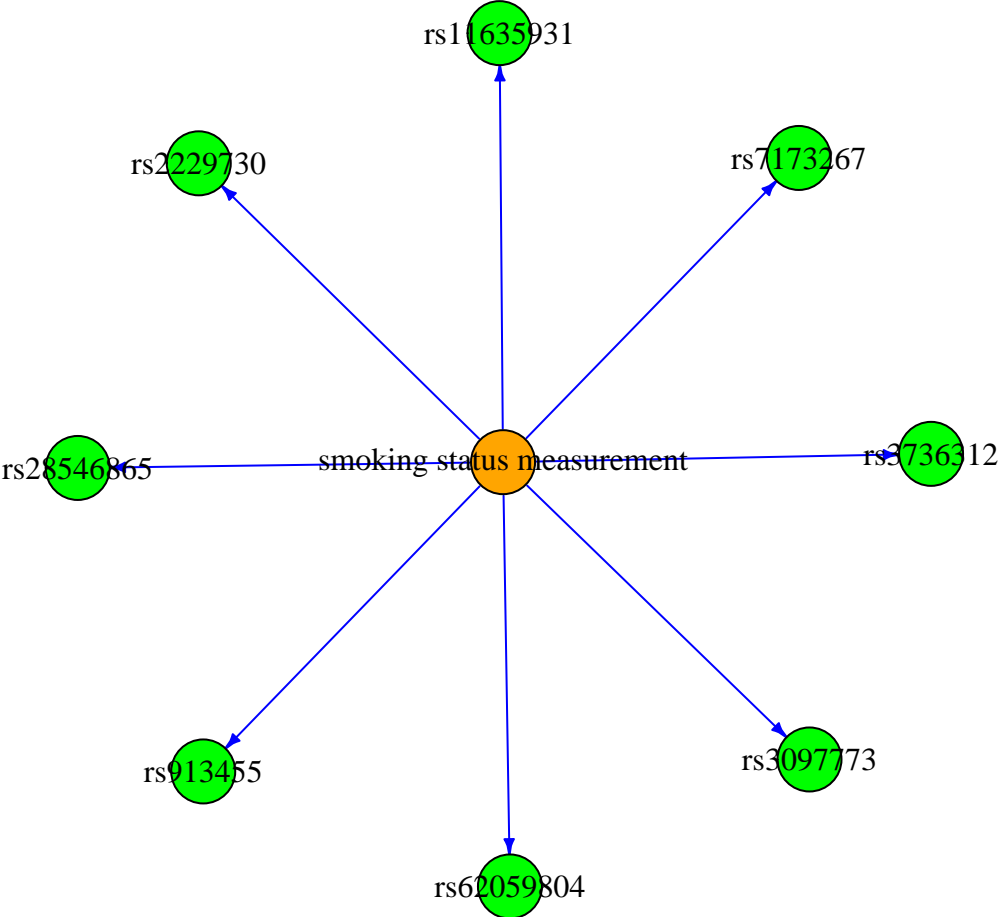



## Variant–Disease Network (diverticulitis)

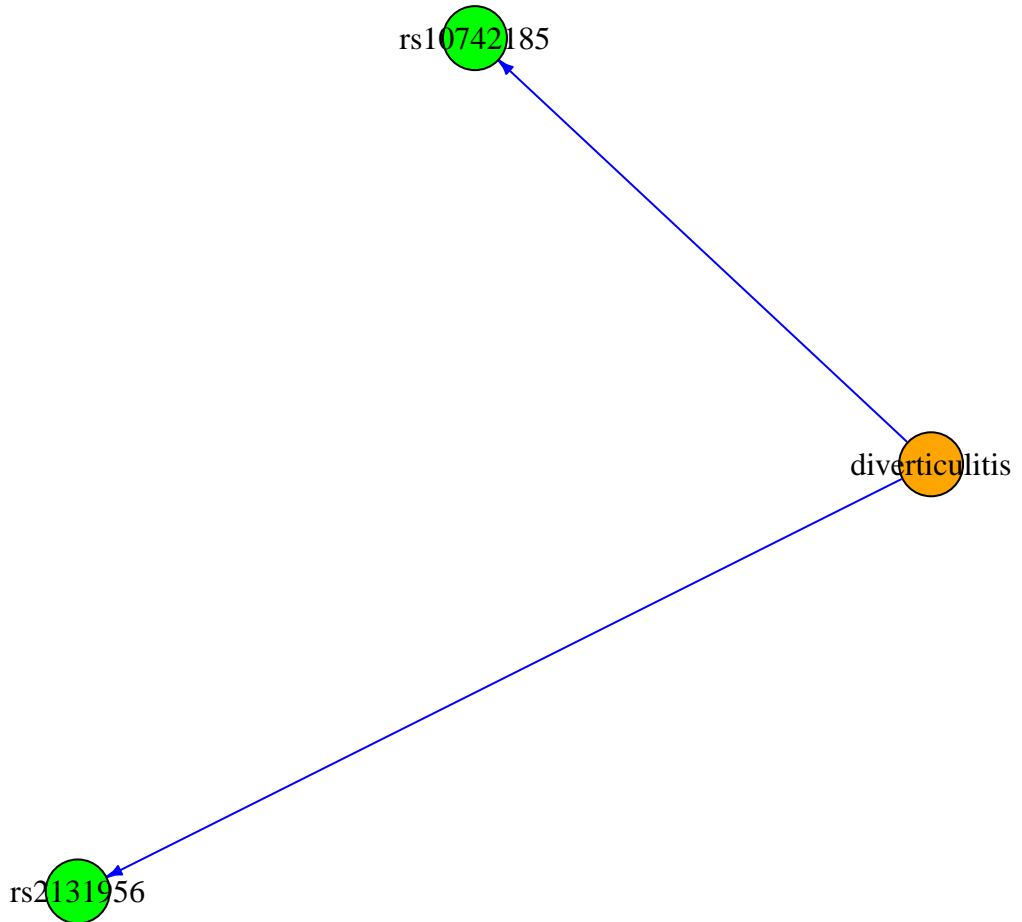

**Variant–Disease Network (susceptibility to pneumonia measurement)**

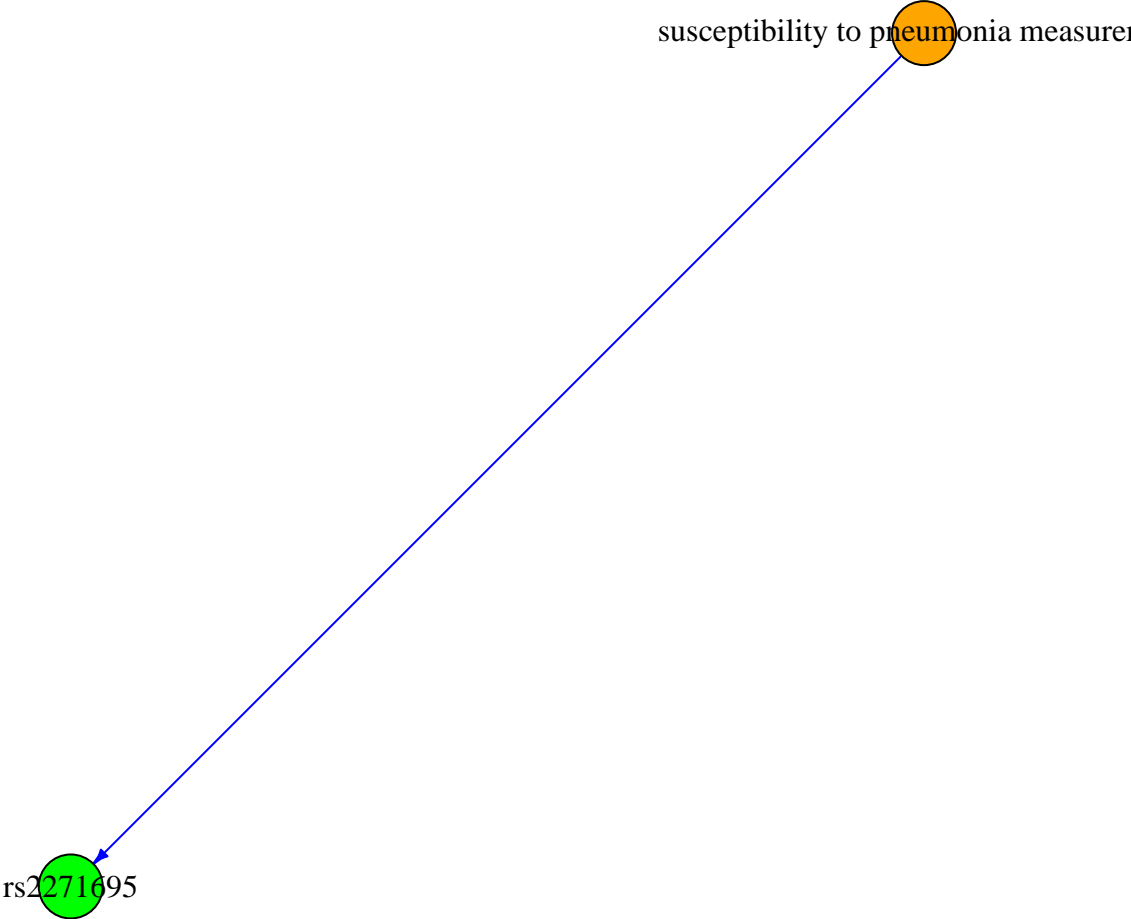

## Variant–Disease Network (parathyroid hormone measurement)

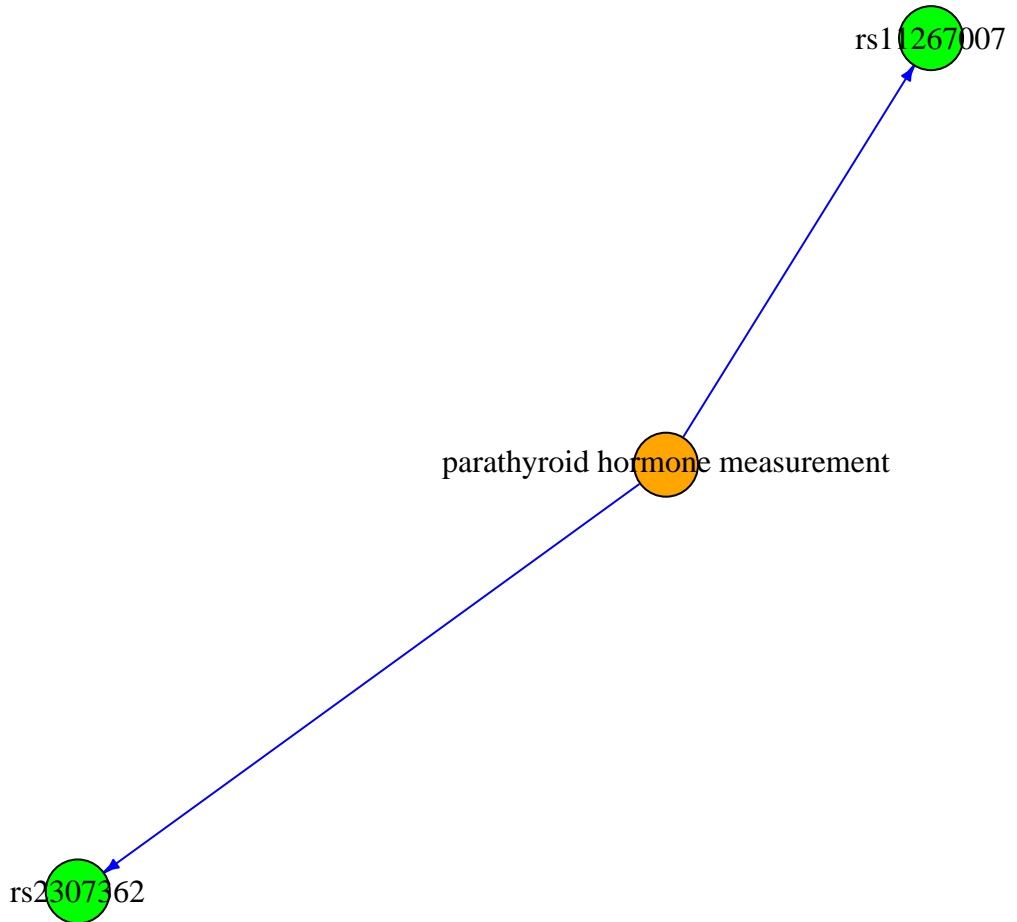

## Variant–Disease Network (pancreatic carcinoma)

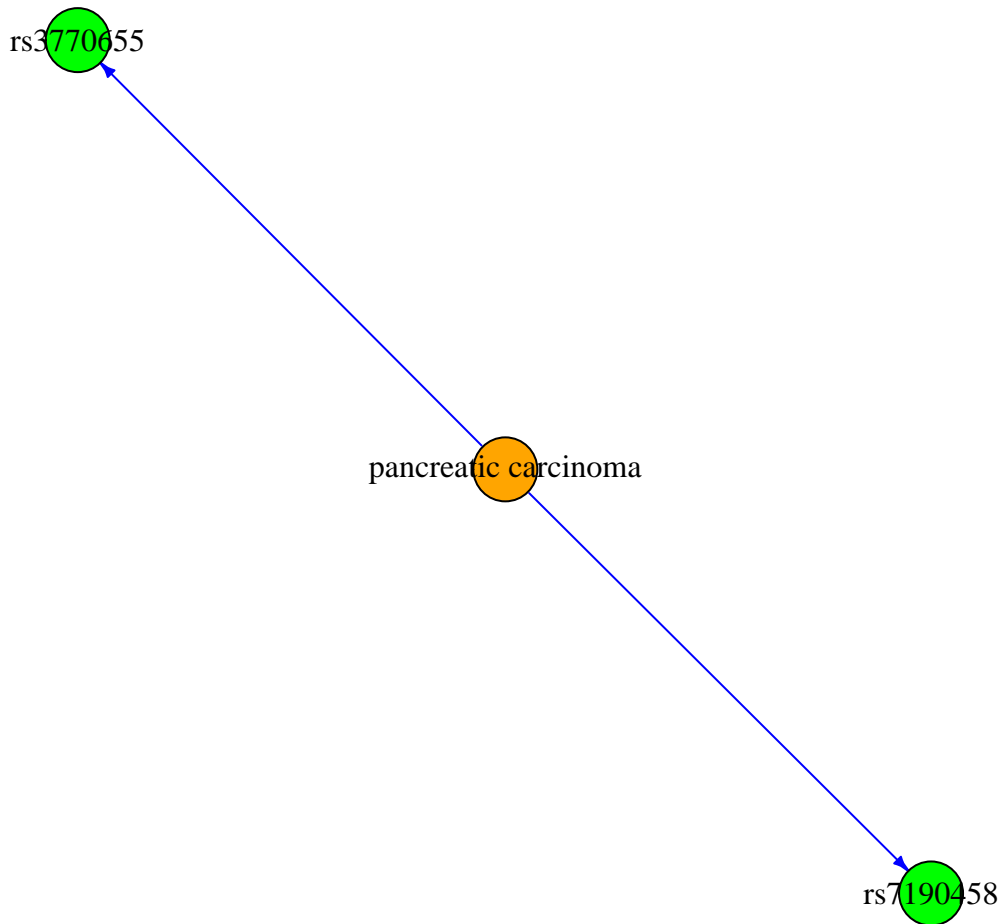

# Variant–Disease Network (albumin:globulin ratio measurement)

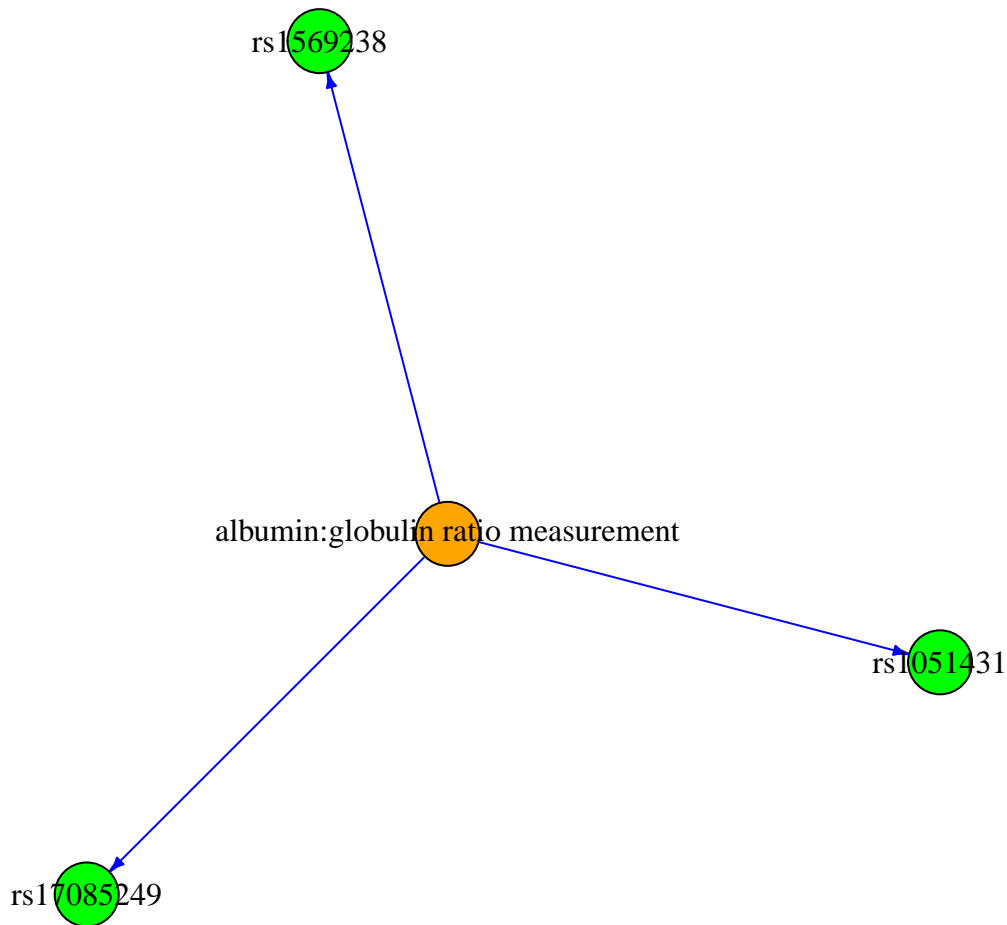

Variant–Disease Network (allergic rhinitis)

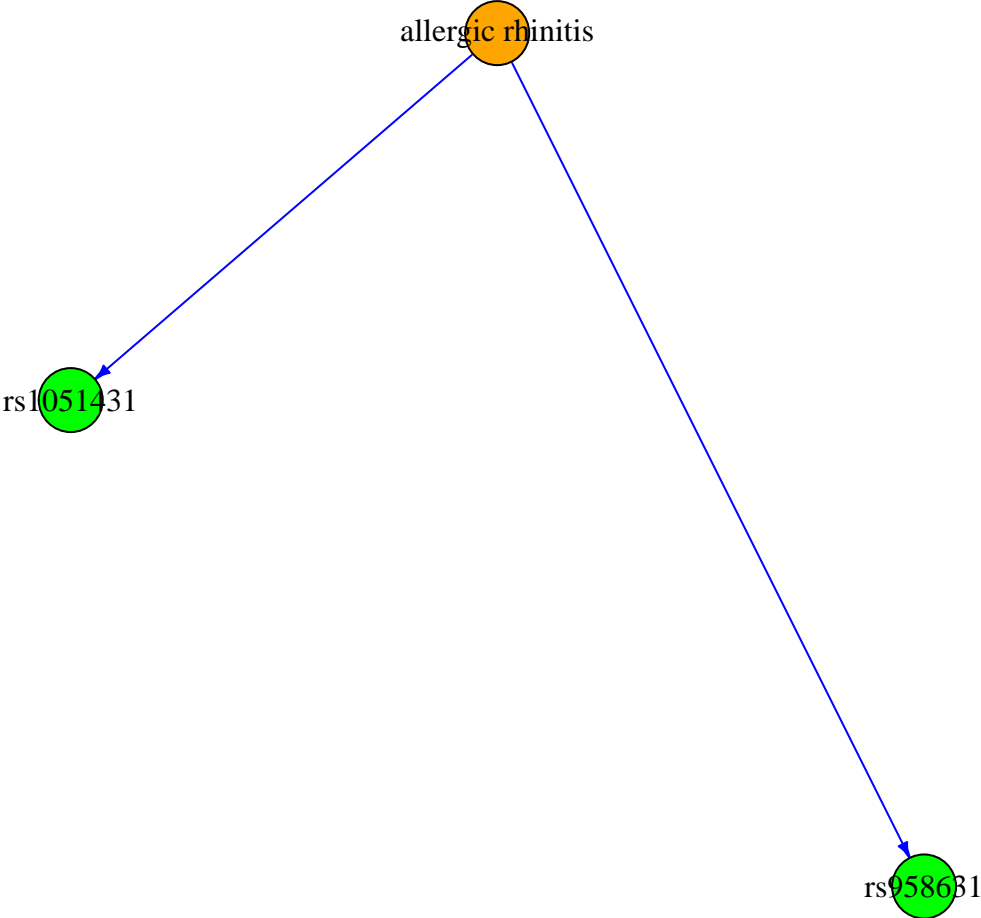

## Variant-Disease Network (allergy)

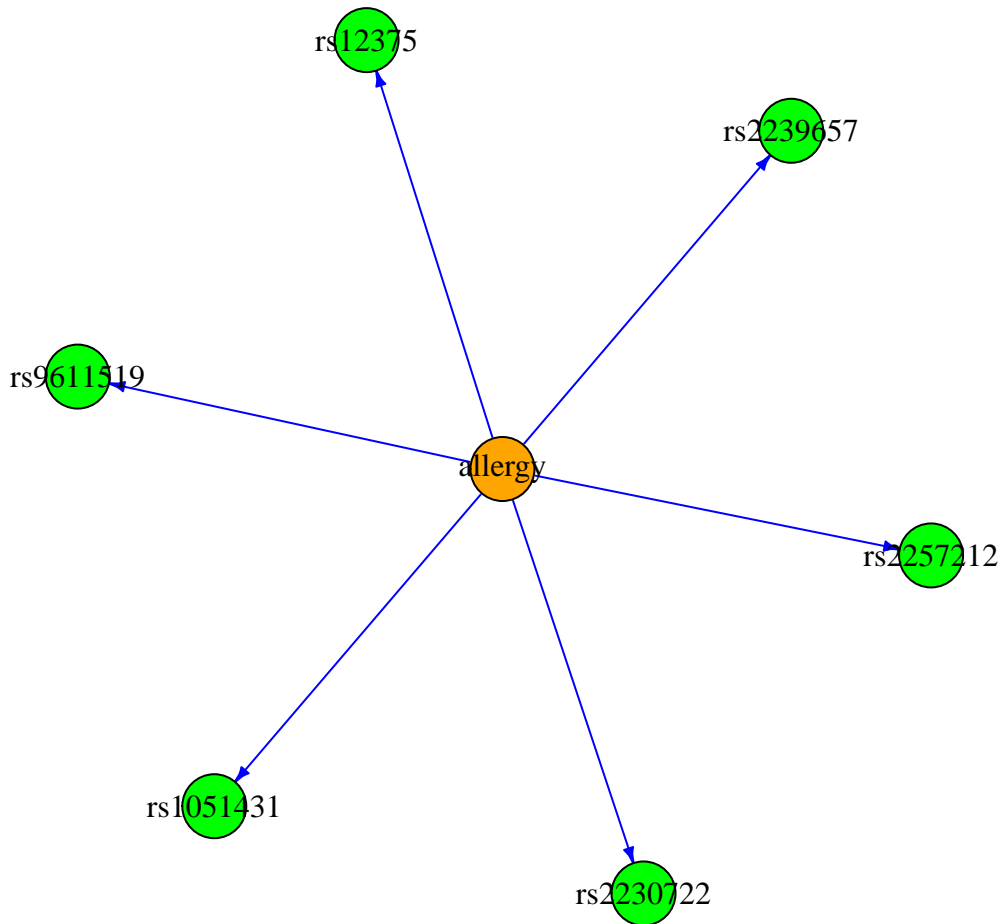

## Variant-Disease Network (body height)

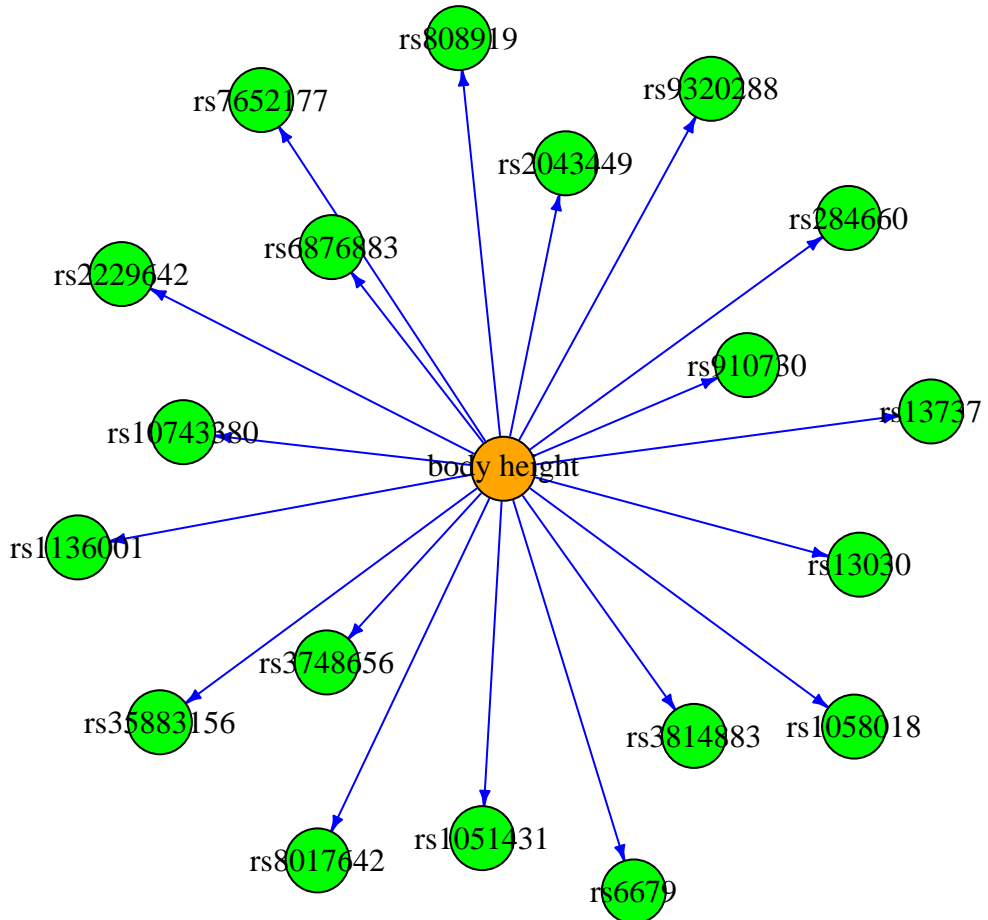



## Variant–Disease Network (hip circumference)

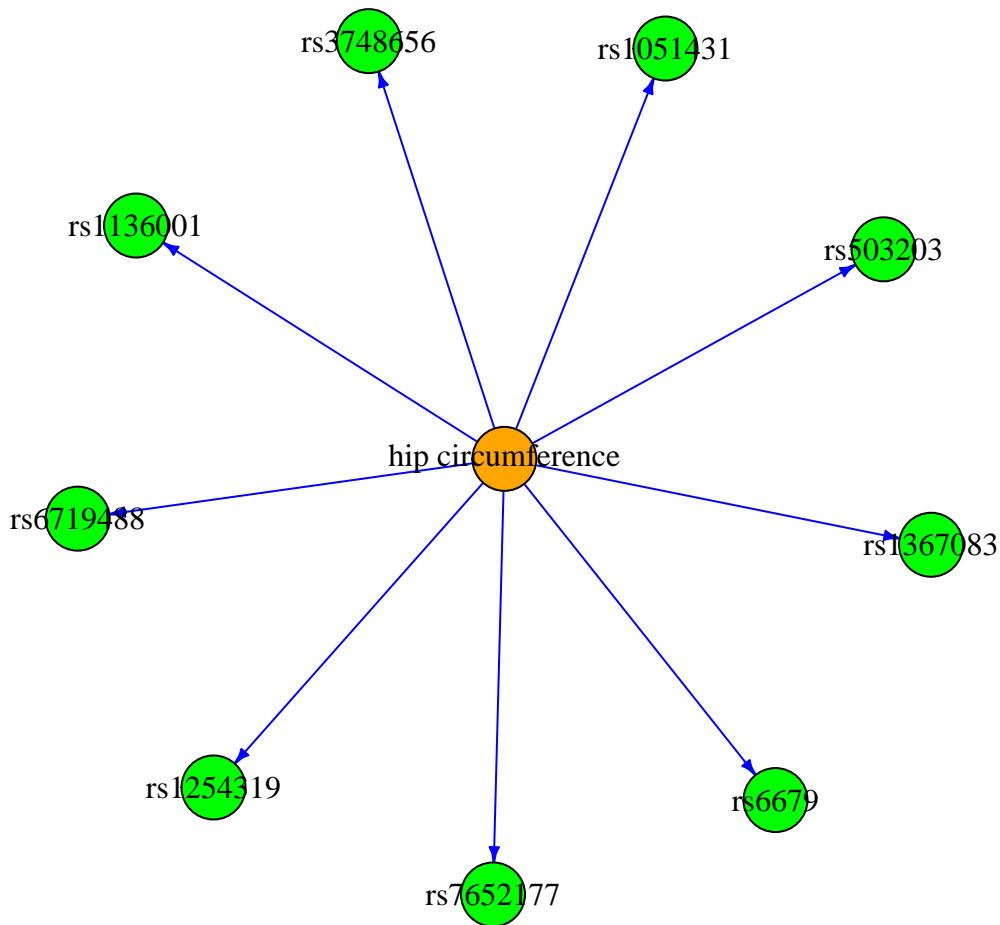

## Variant–Disease Network (infant head circumference)

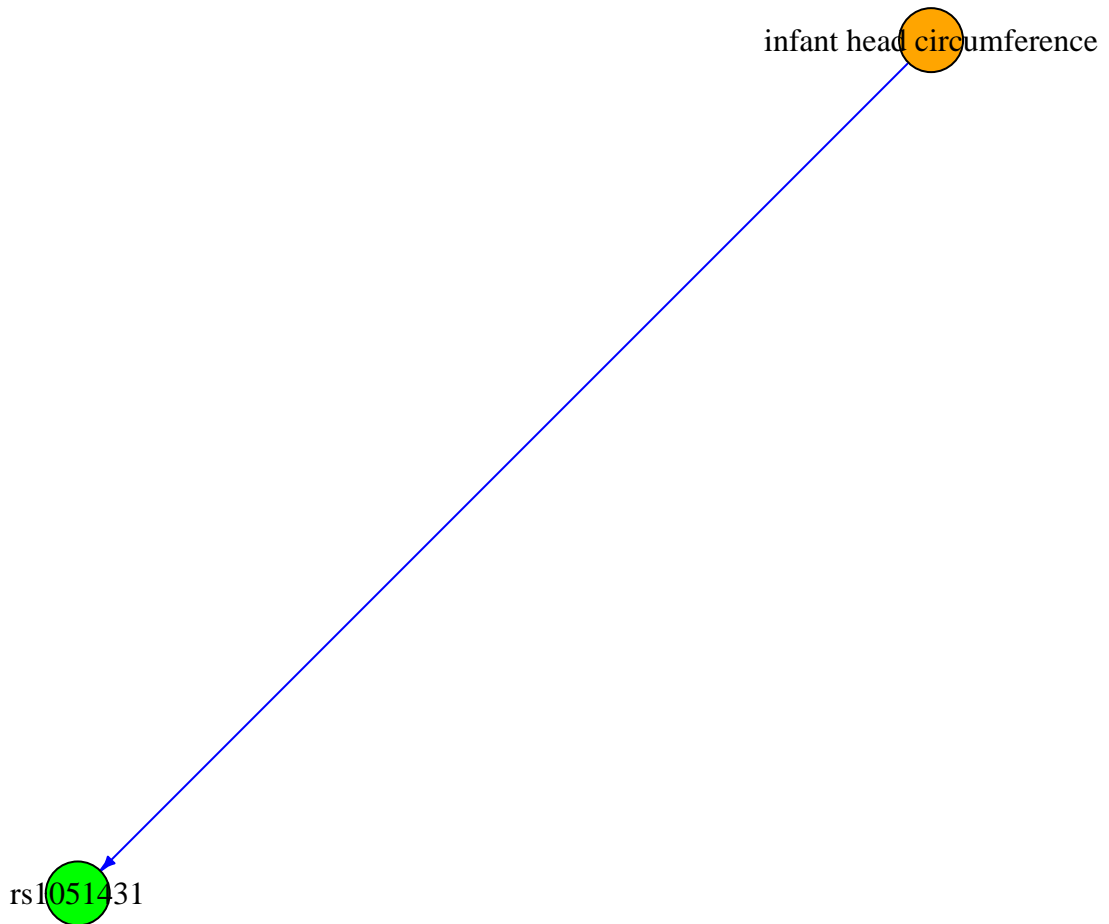

## Variant-Disease Network (multiple sclerosis)

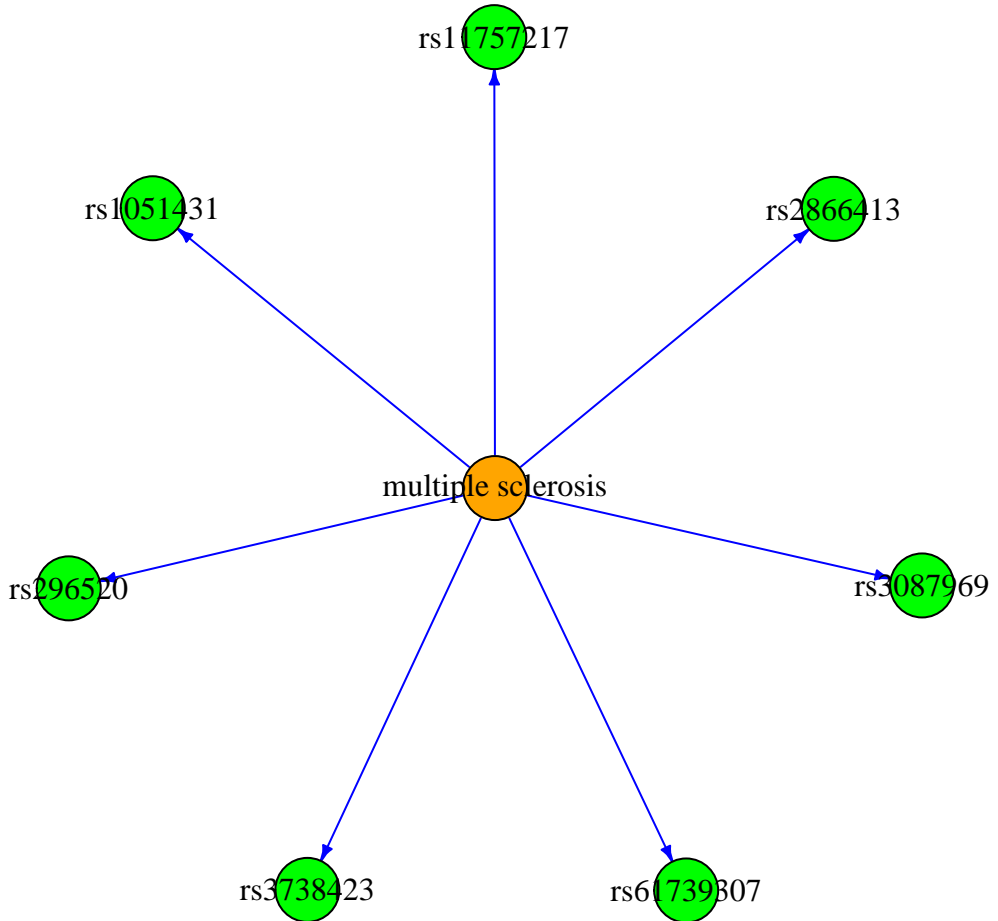

## Variant-Disease Network (platelet count)

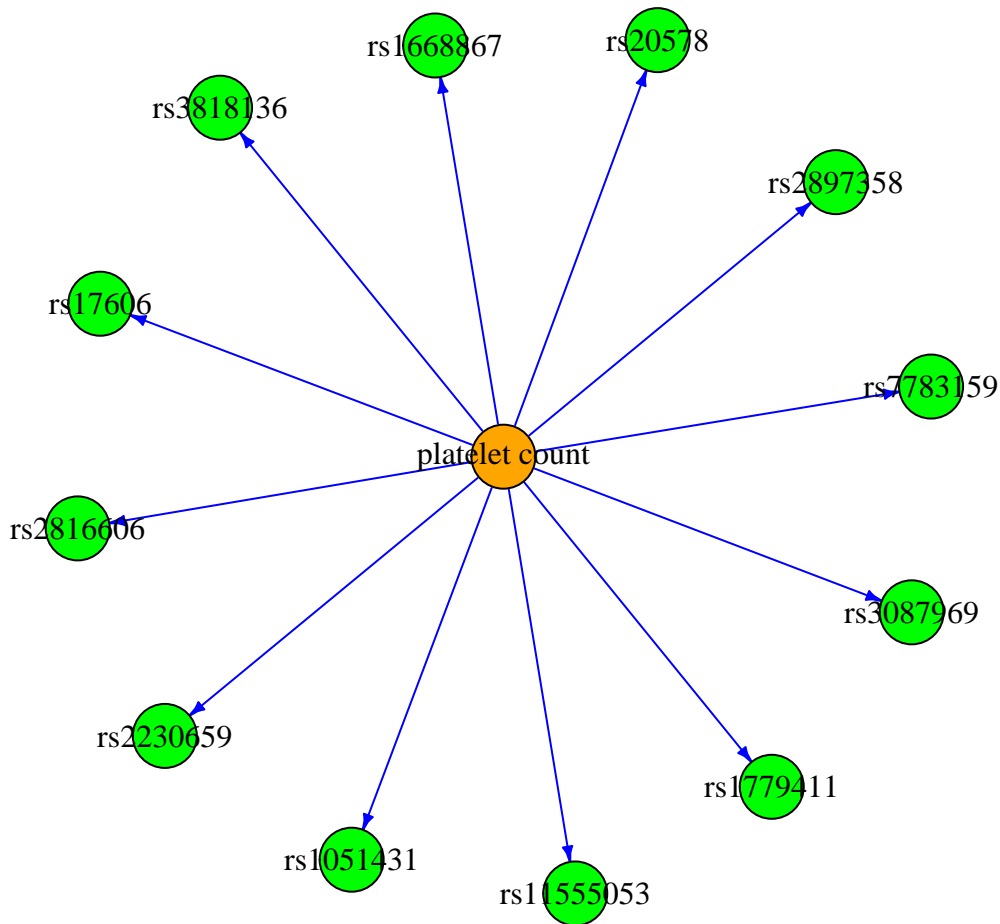

## Variant–Disease Network (plateletcrit)

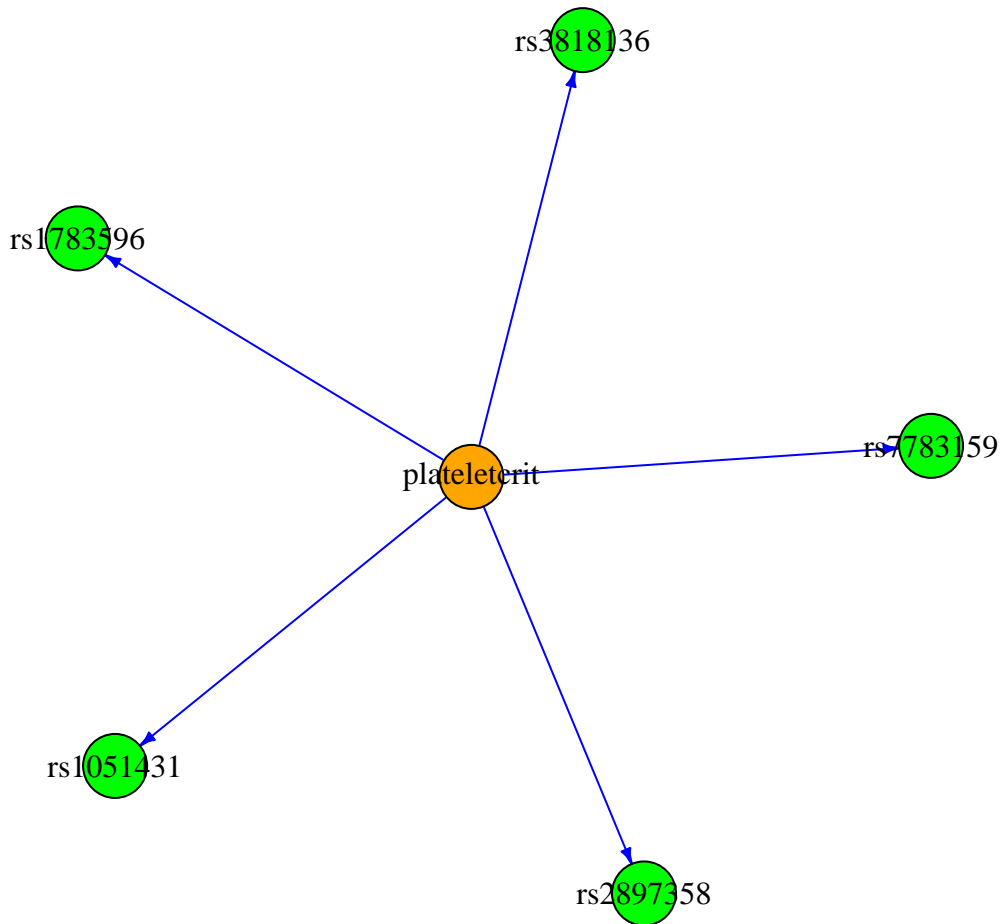

## Variant–Disease Network (type ii diabetes mellitus)

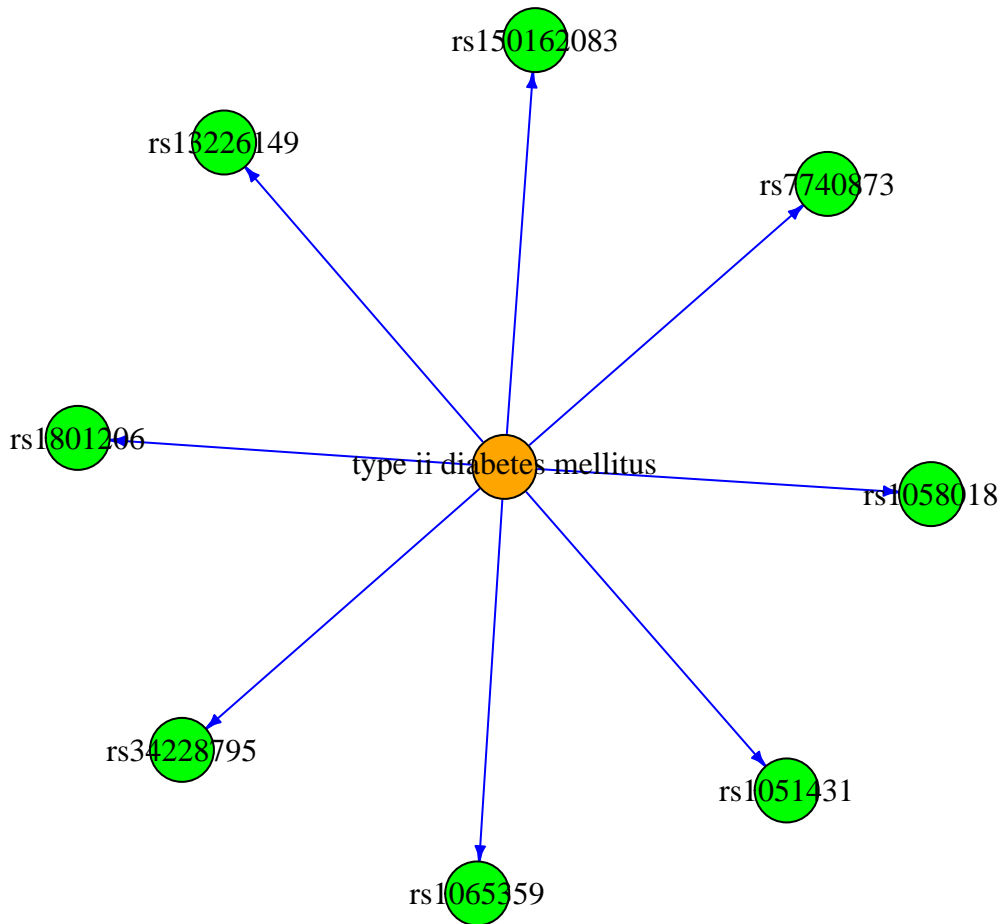

Variant–Disease Network (granulocyte percentage of myeloid white cells)

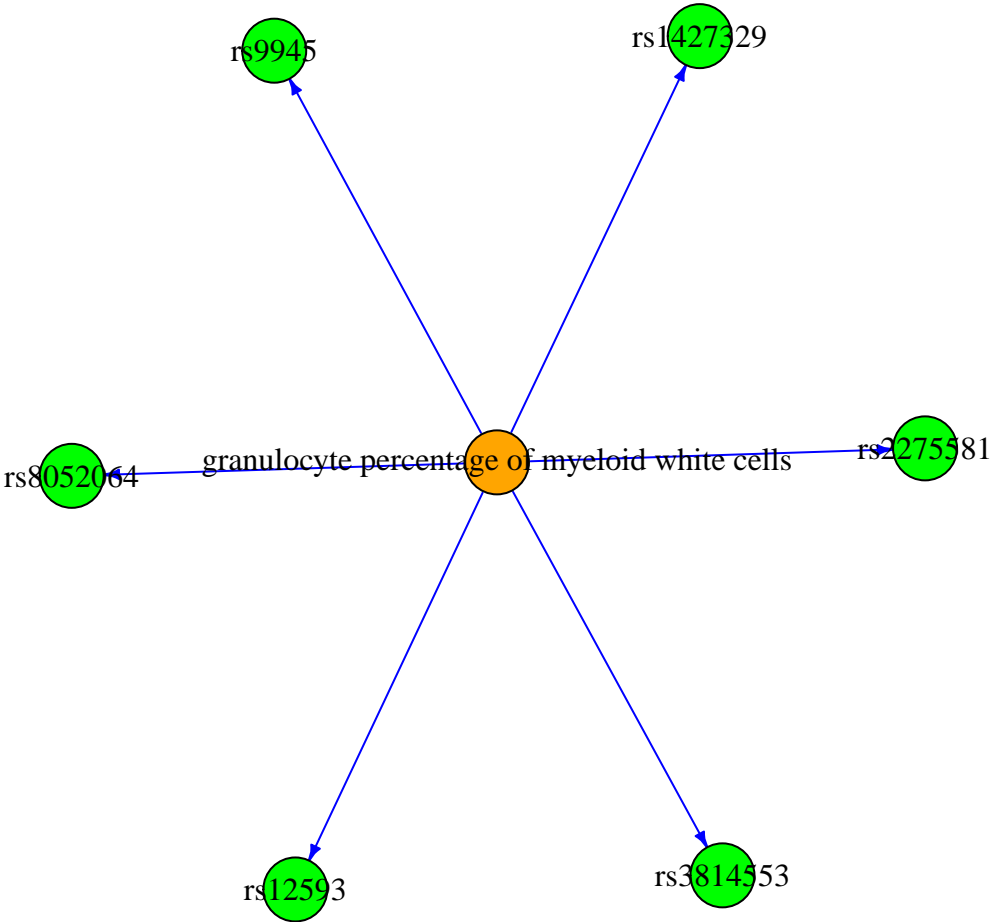

# Variant–Disease Network (monocyte percentage of white cells)

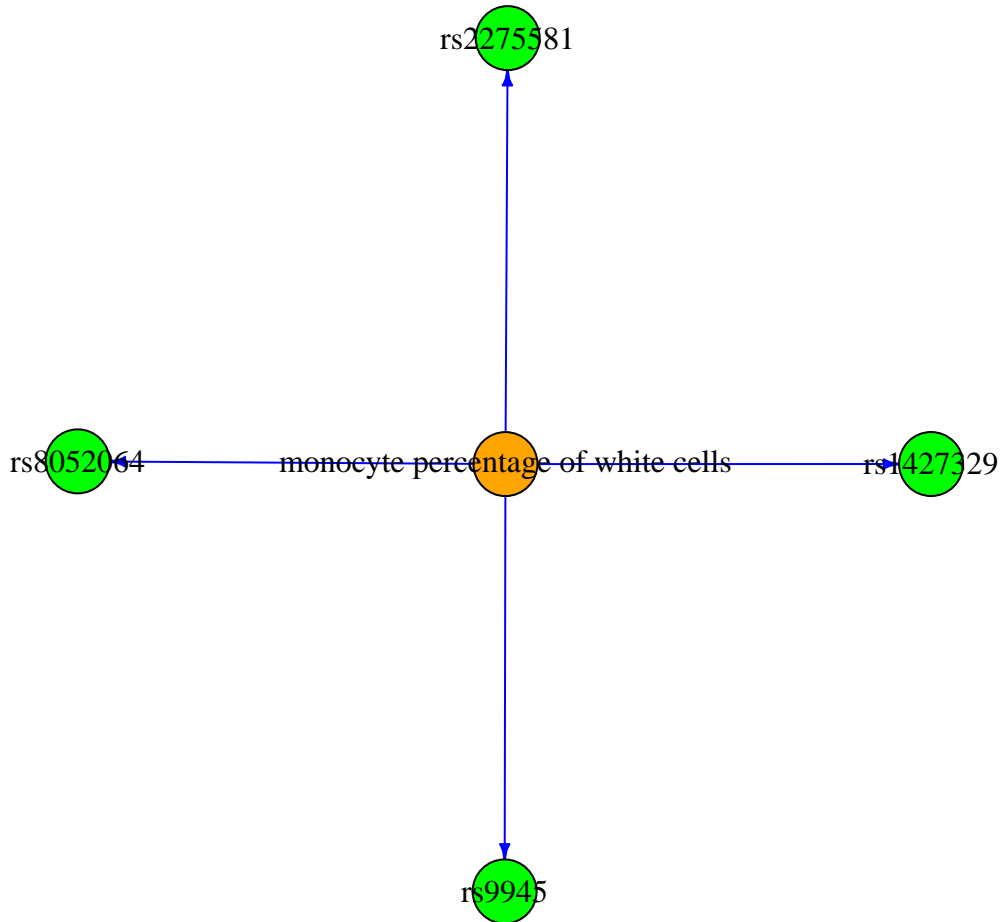



# Variant–Disease Network (susceptibility to strep throat measurement)

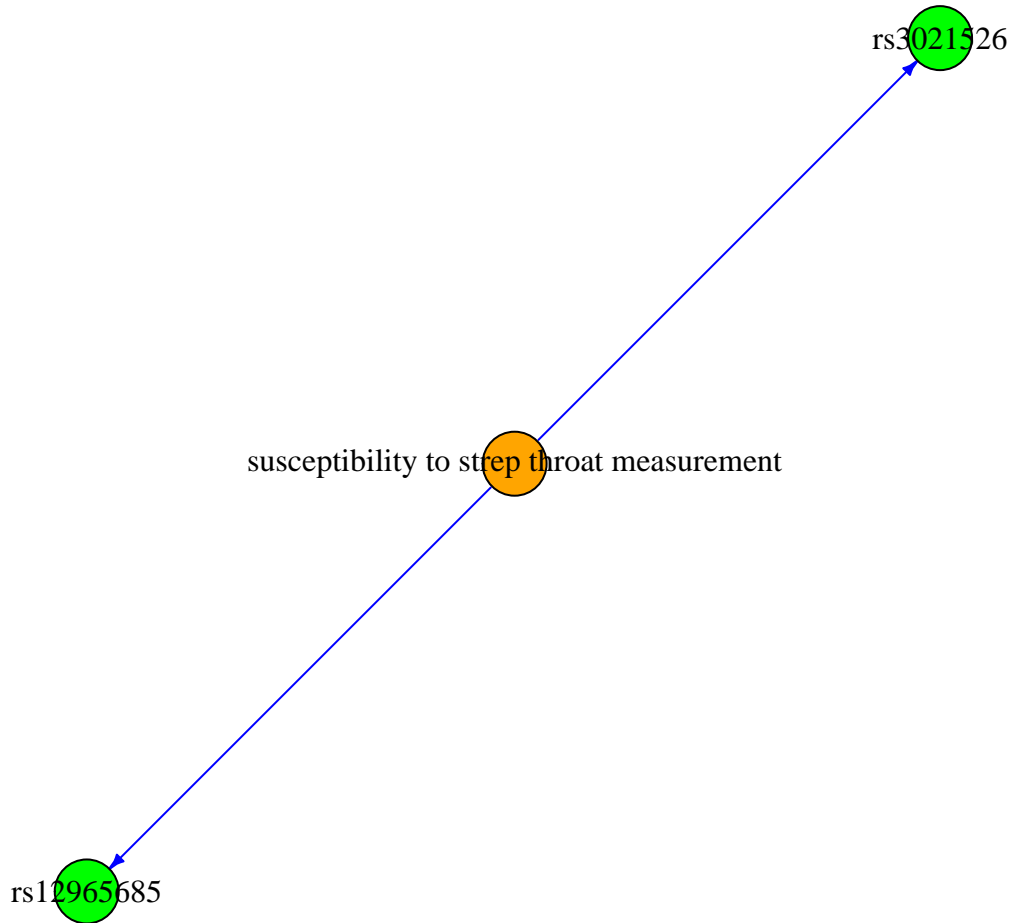

**Variant–Disease Network (cranial vault morphology measurement)**

cranial vault morphology measurement

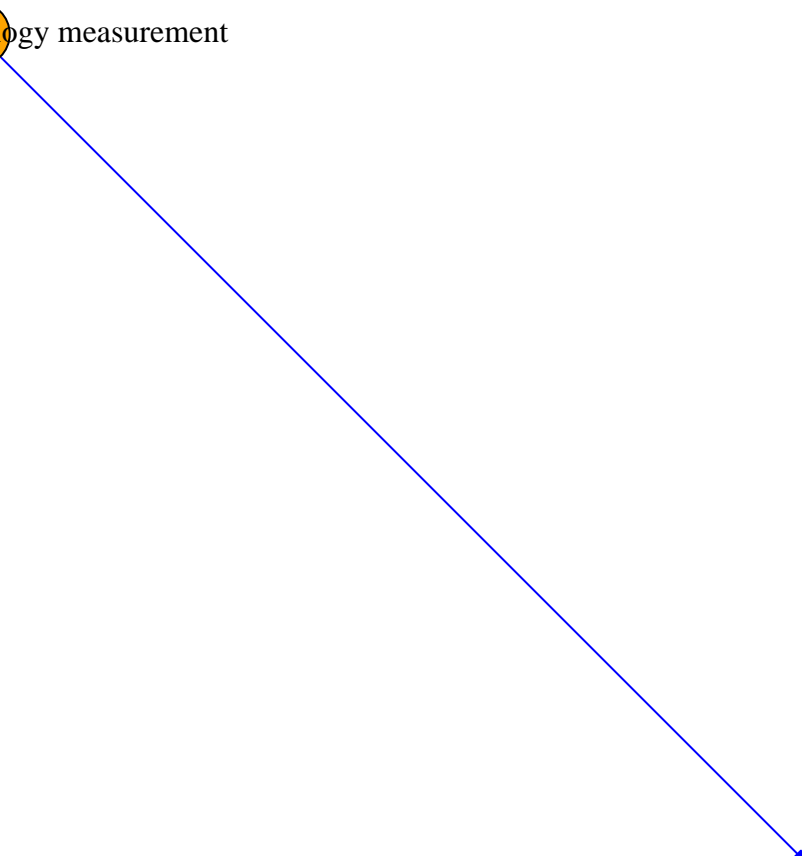

rs958631

## Variant–Disease Network (ovarian carcinoma)

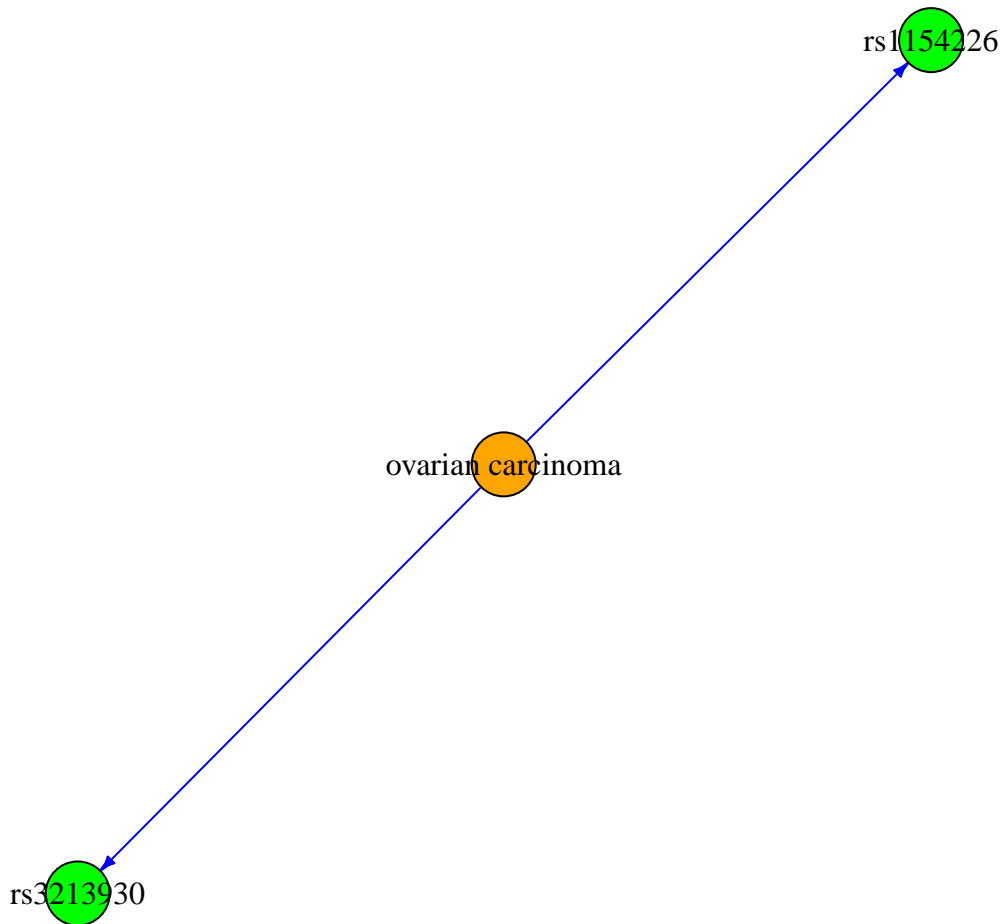

## Variant–Disease Network (ovarian serous carcinoma)

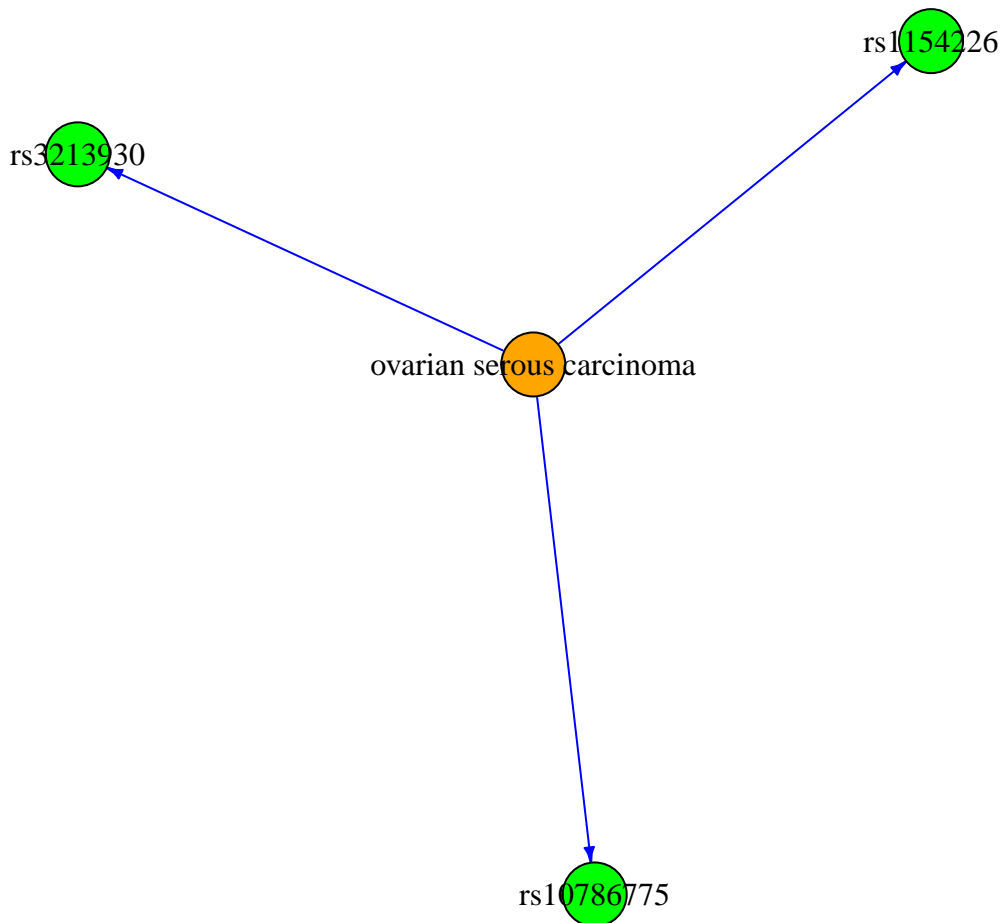

## Variant–Disease Network (erythema nodosum)

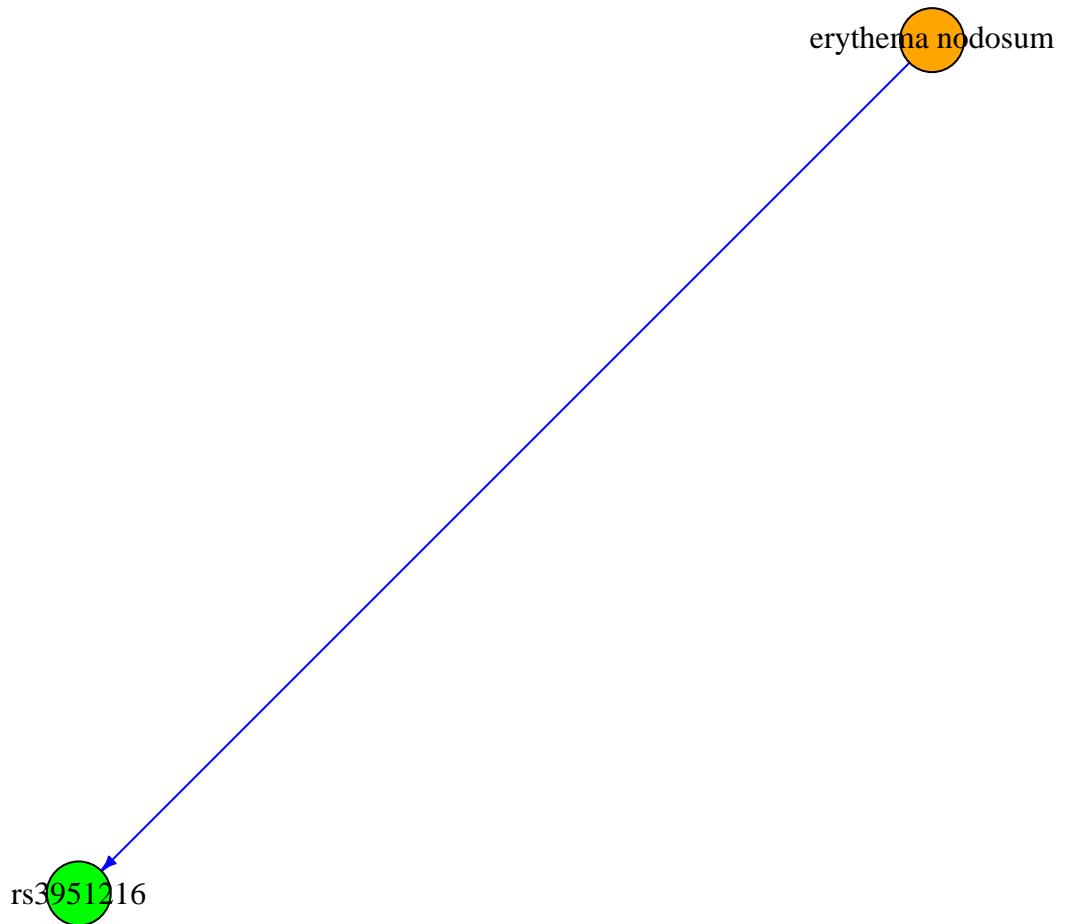

## Variant–Disease Network (leukocyte count)

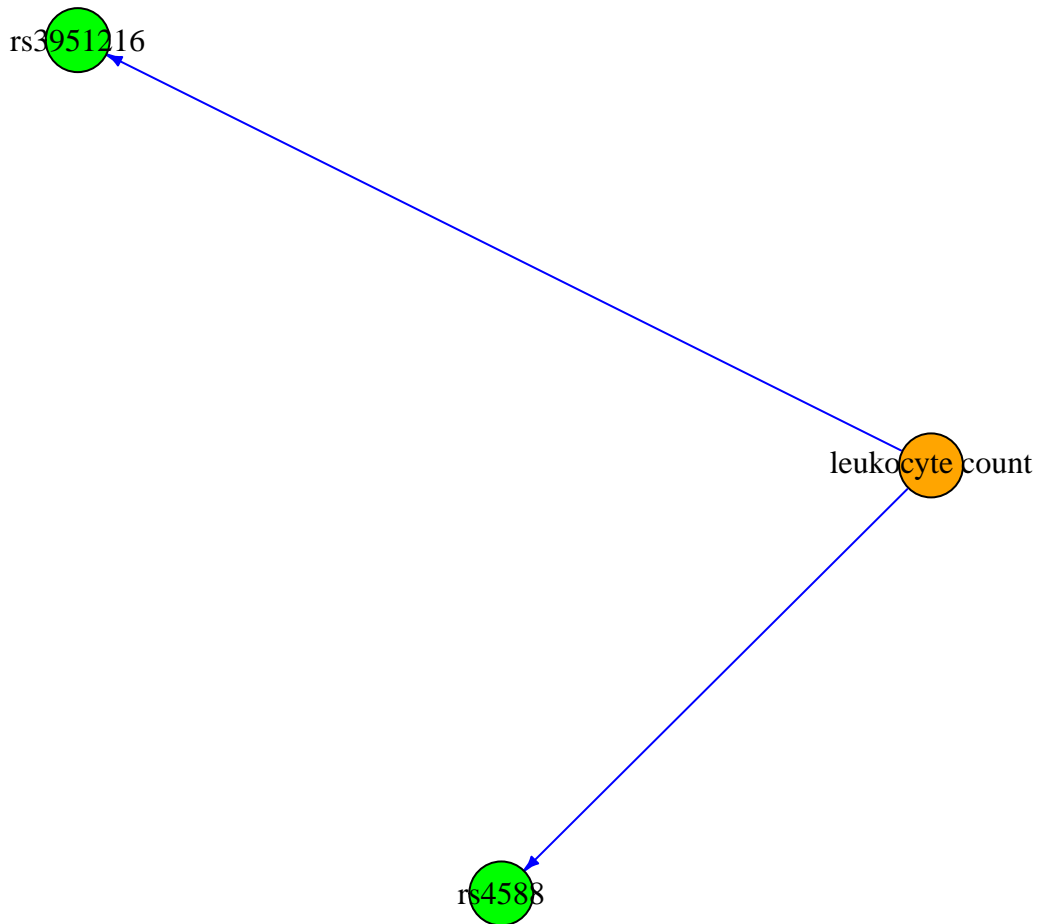

## Variant–Disease Network (head and neck squamous cell carcinoma)

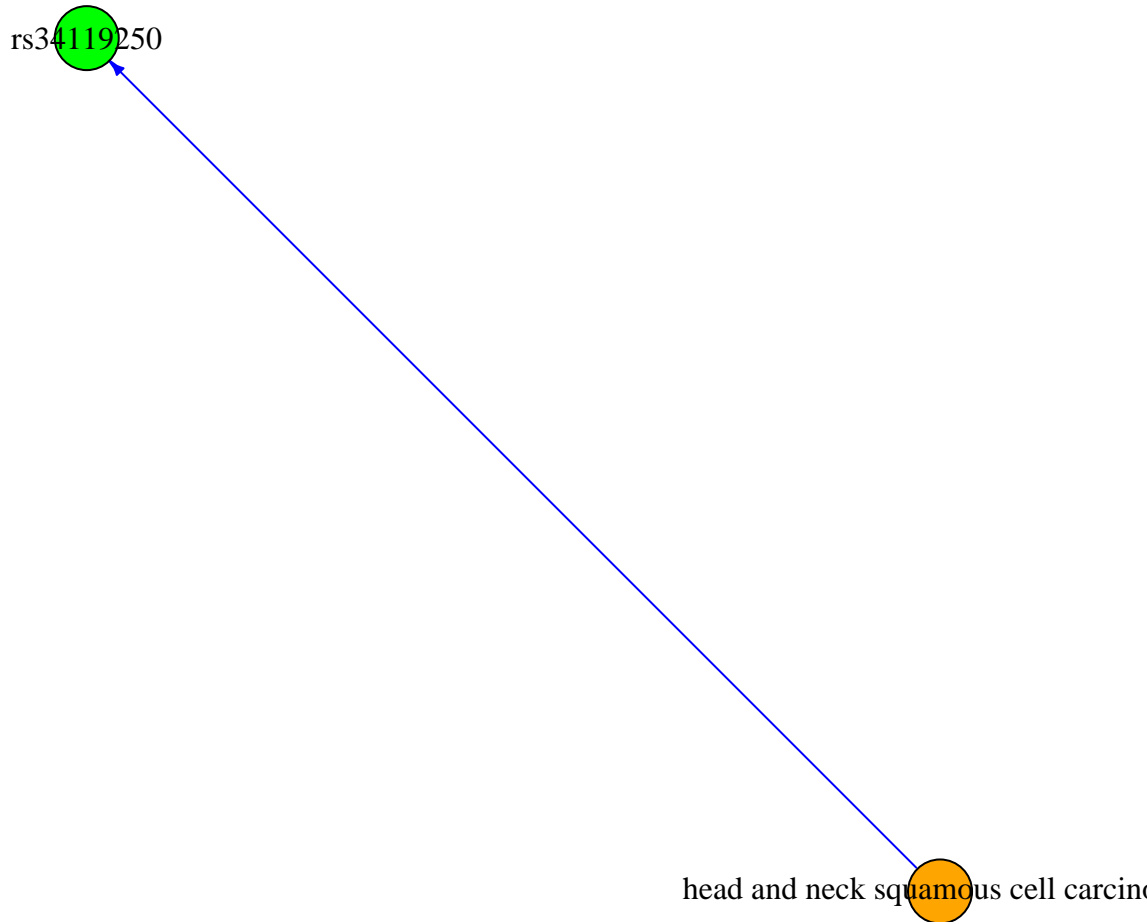

## Variant-Disease Network (pain)

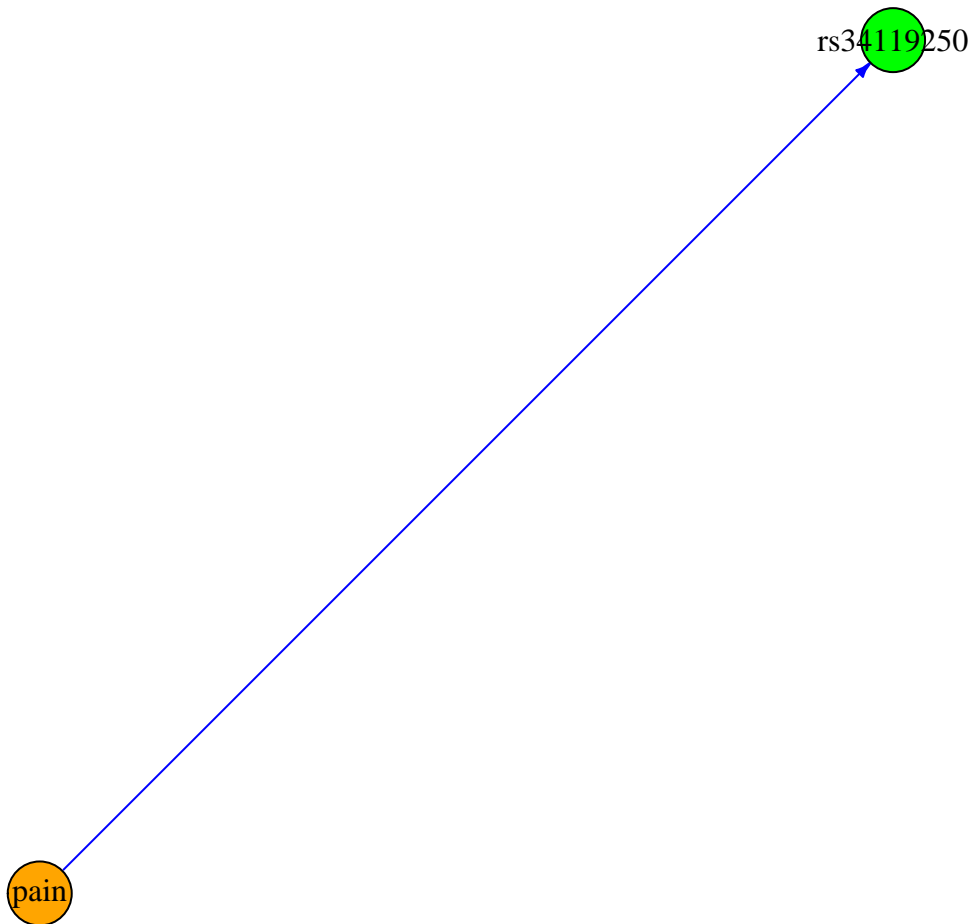



## Variant-Disease Network (immune system disease)

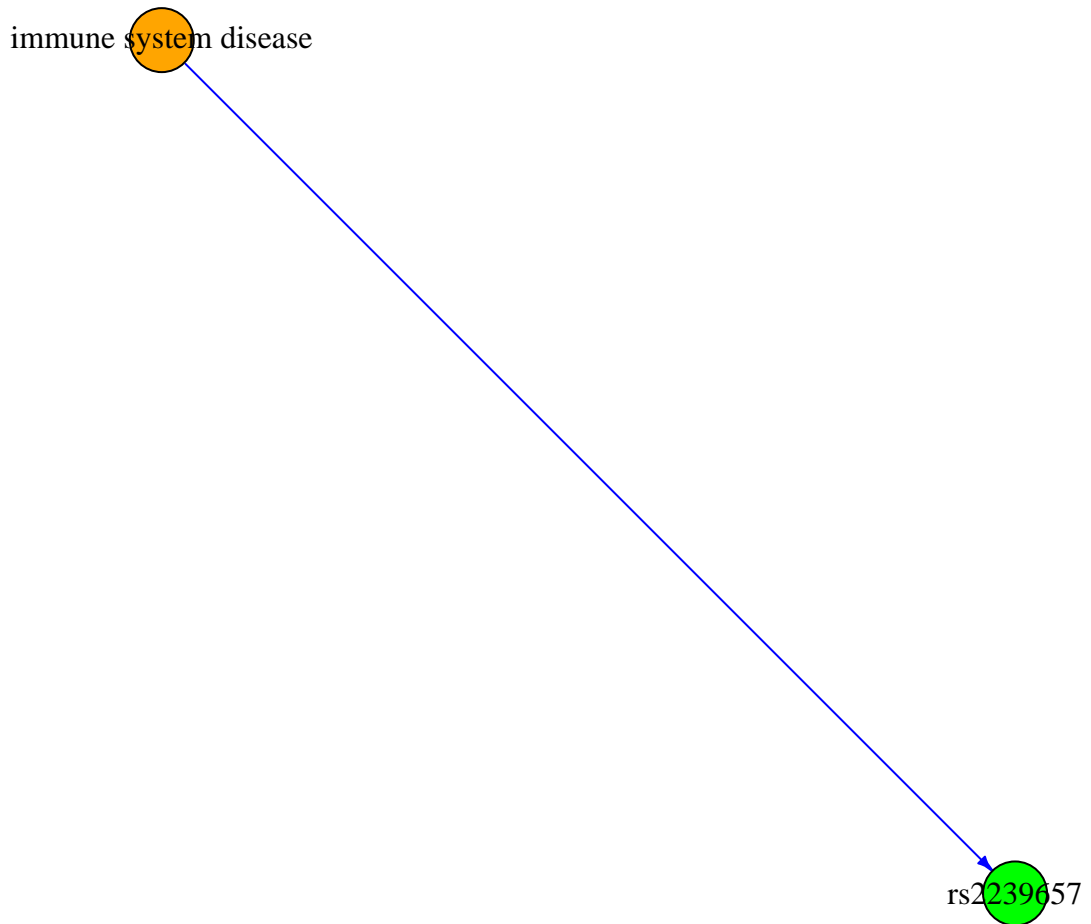

## Variant–Disease Network (lymphocyte count)

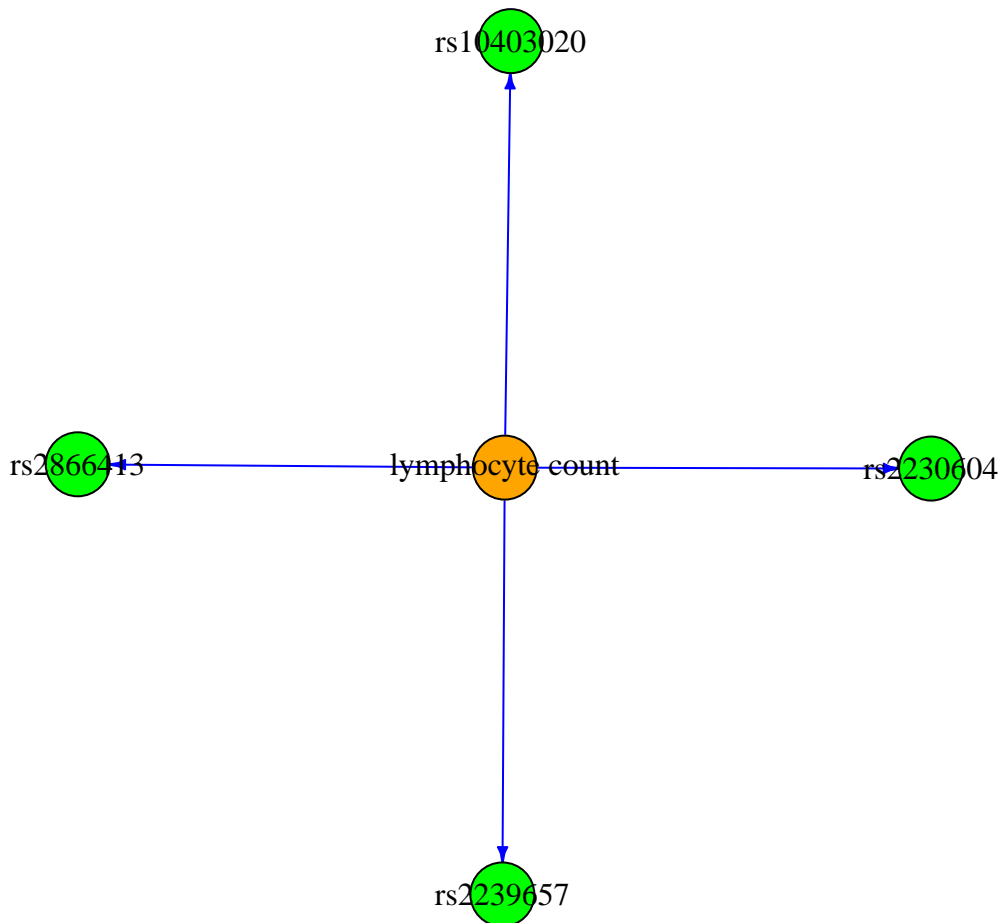

**Variant–Disease Network (prostate specific antigen measurement)**

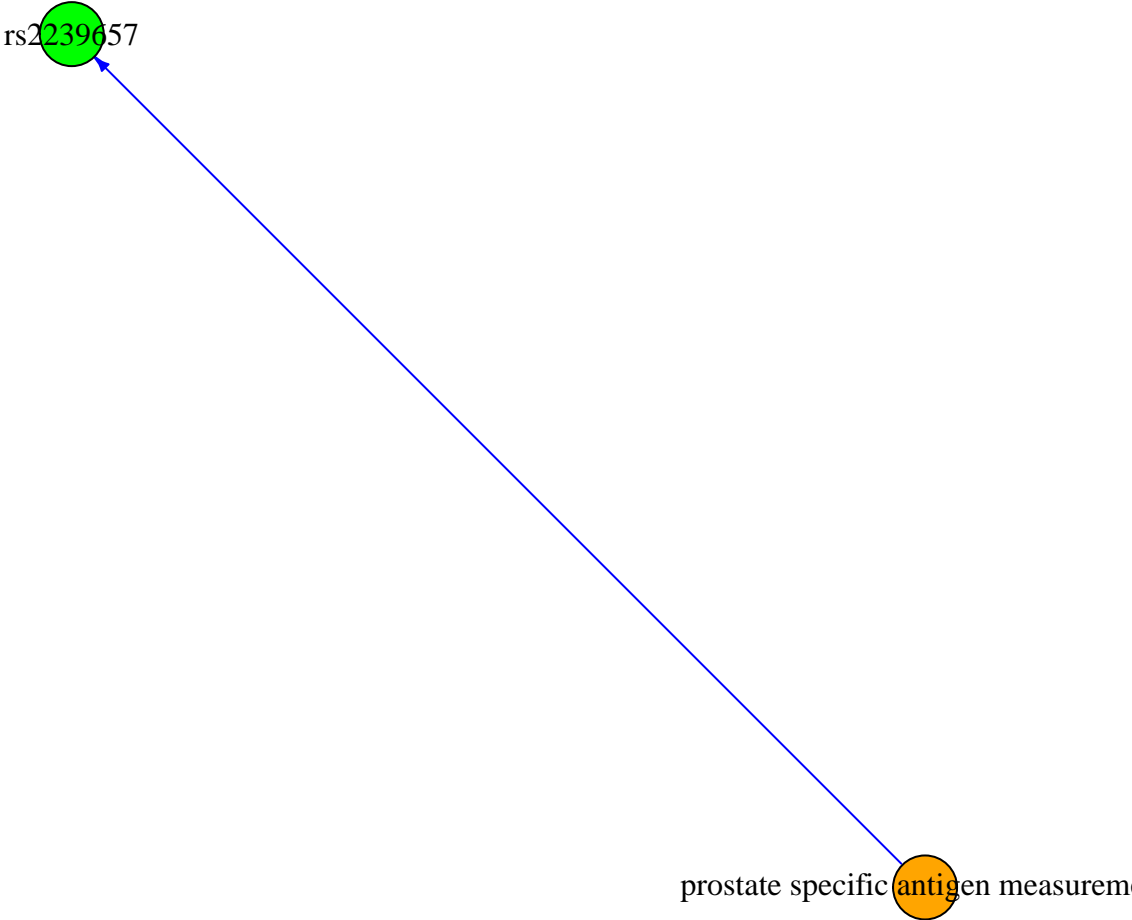

## Variant–Disease Network (pulse pressure measurement)

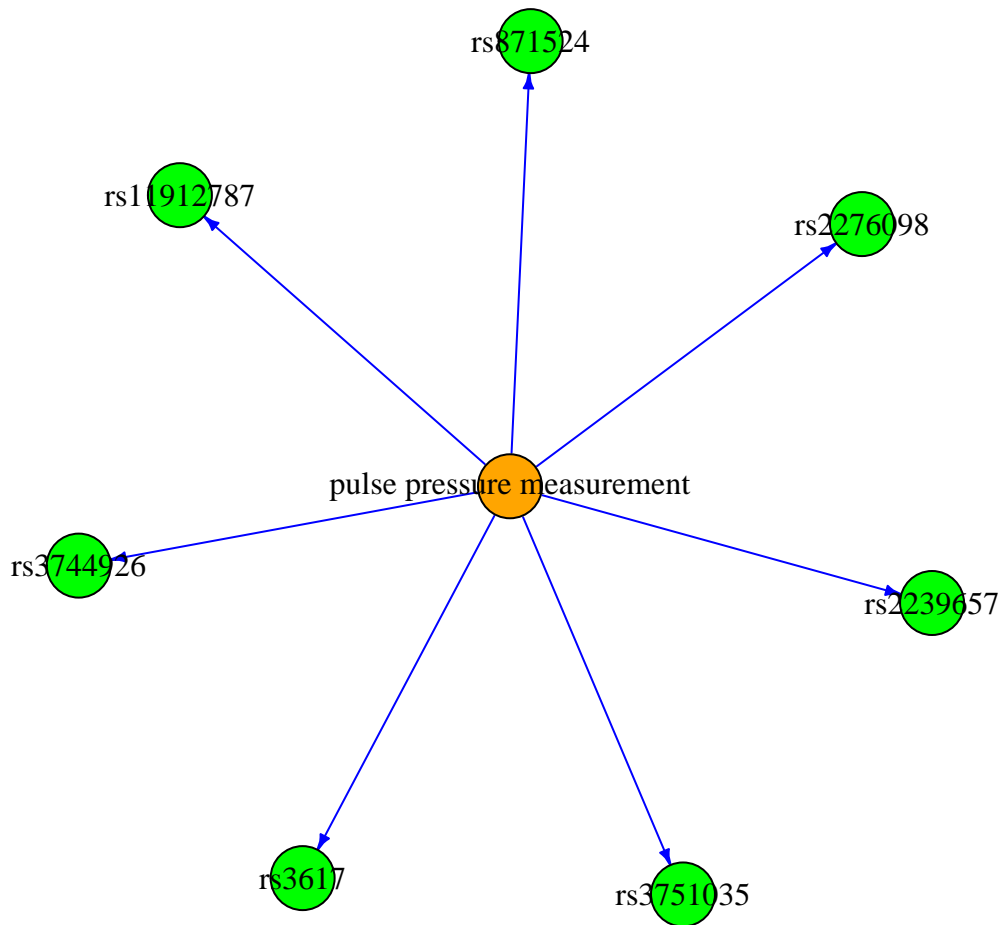

## Variant–Disease Network (rheumatoid arthritis)

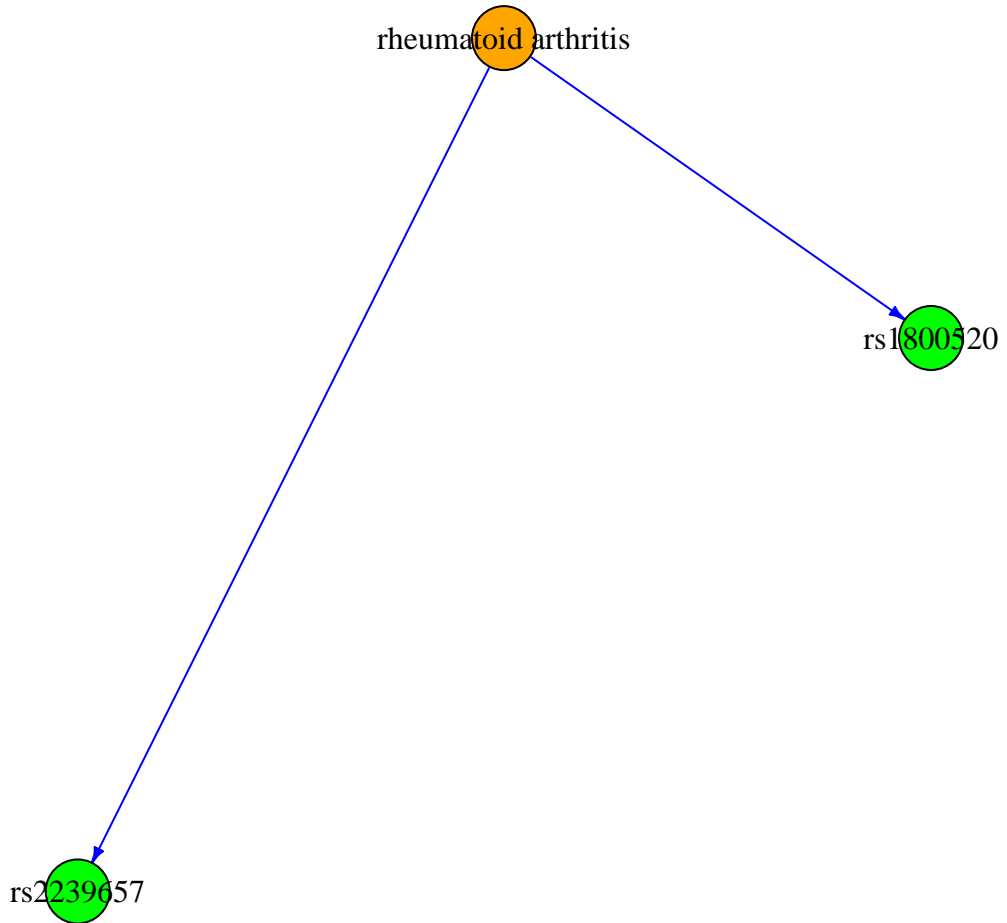

## Variant–Disease Network (a1c measurement)

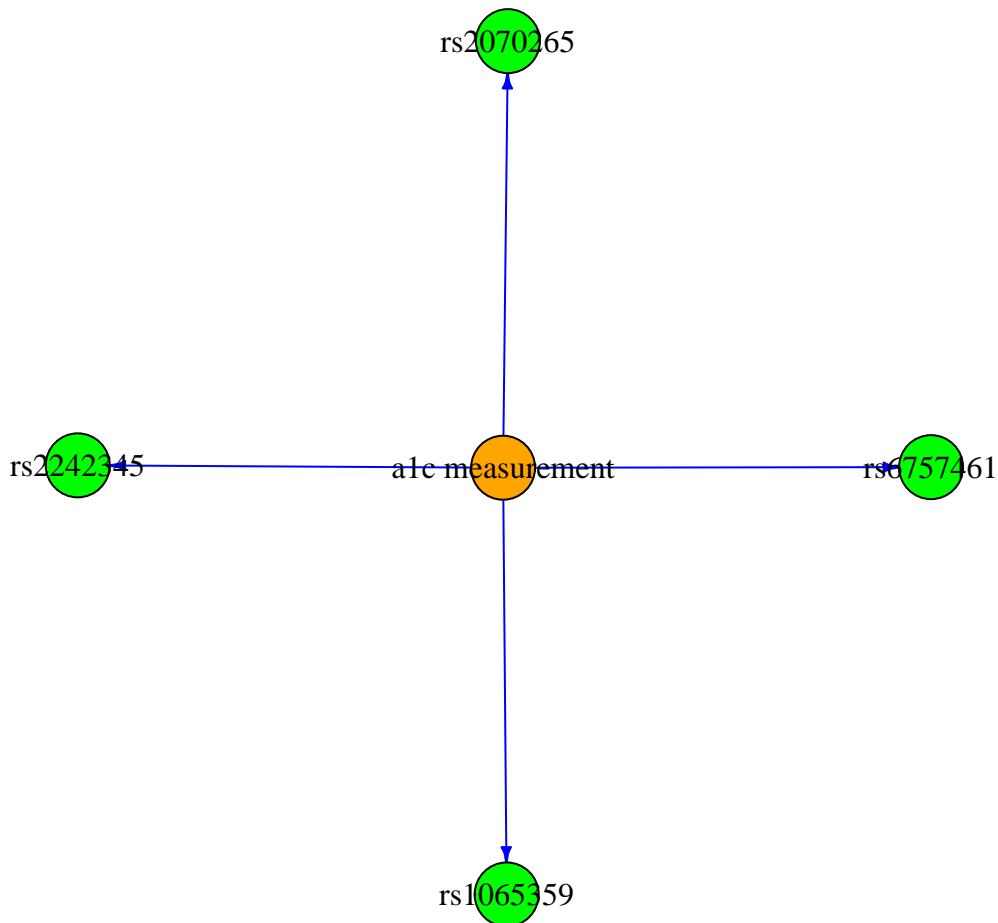

## Variant–Disease Network (HIV–1 infection)

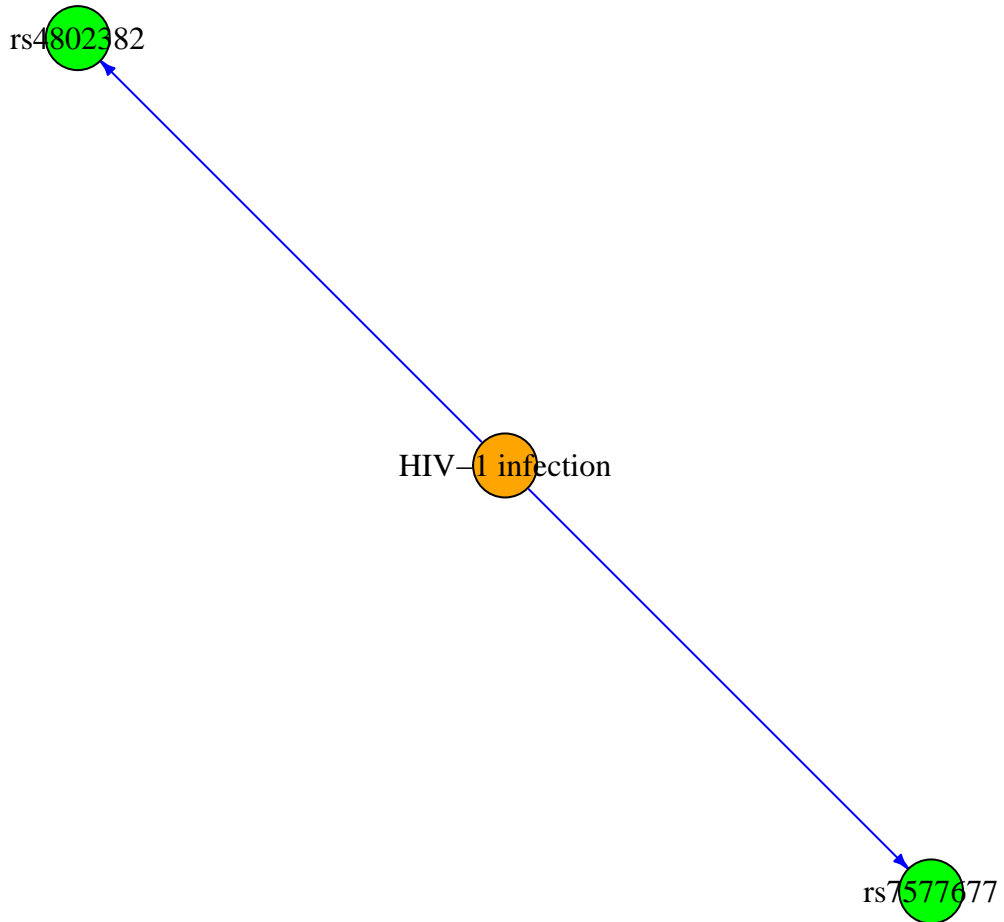

Variant–Disease Network (susceptibility to viral and mycobacterial infection)

ceptibility to viral and mycobacterial infections

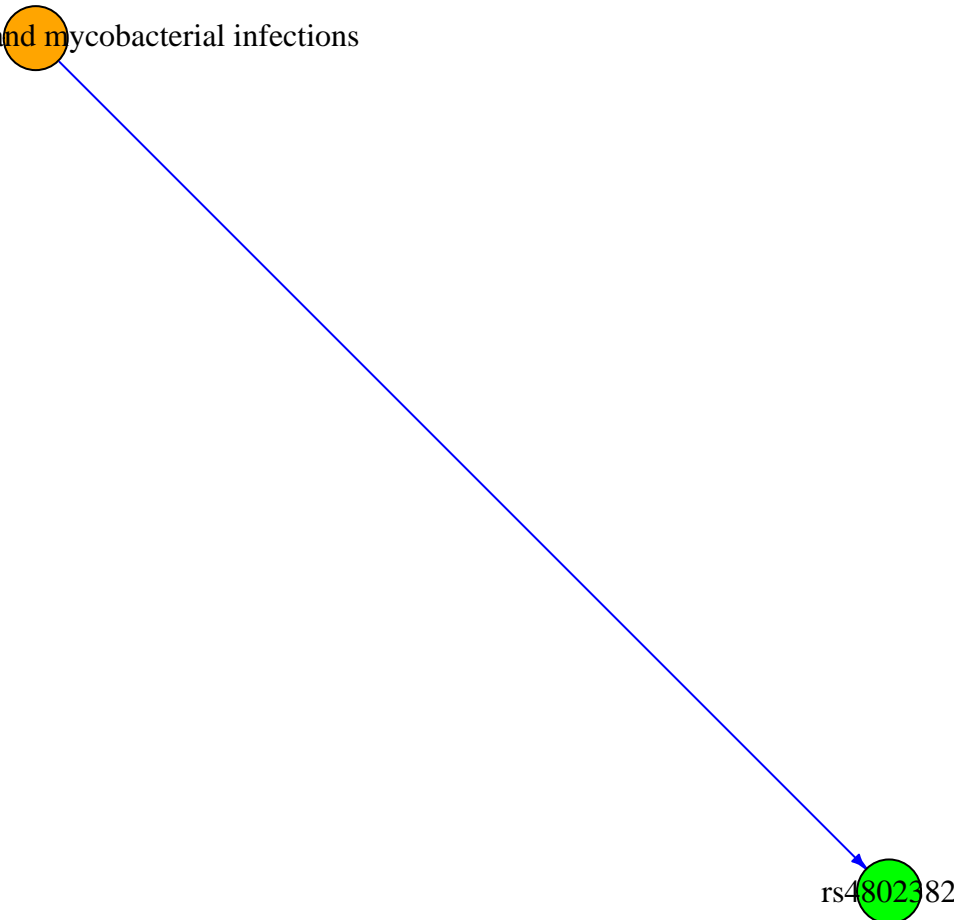



**Variant–Disease Network (response to paliperidone)**

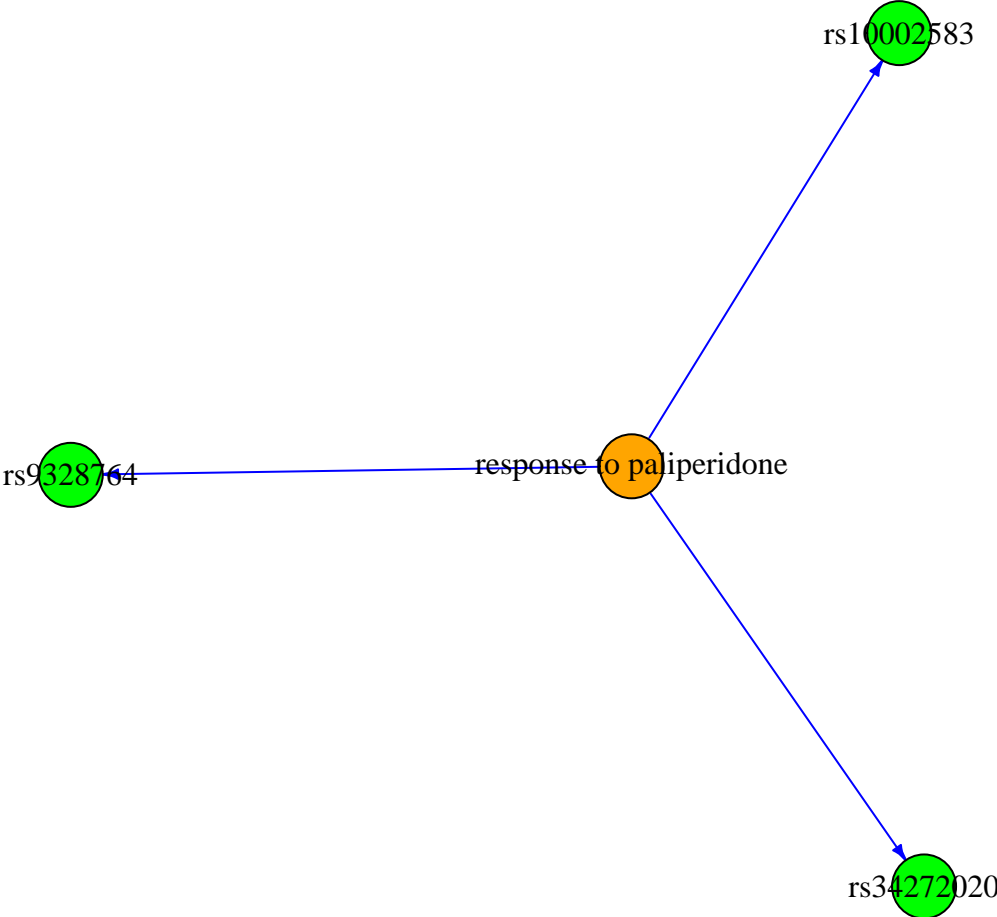

Variant–Disease Network (schizophrenia symptom severity measurement)

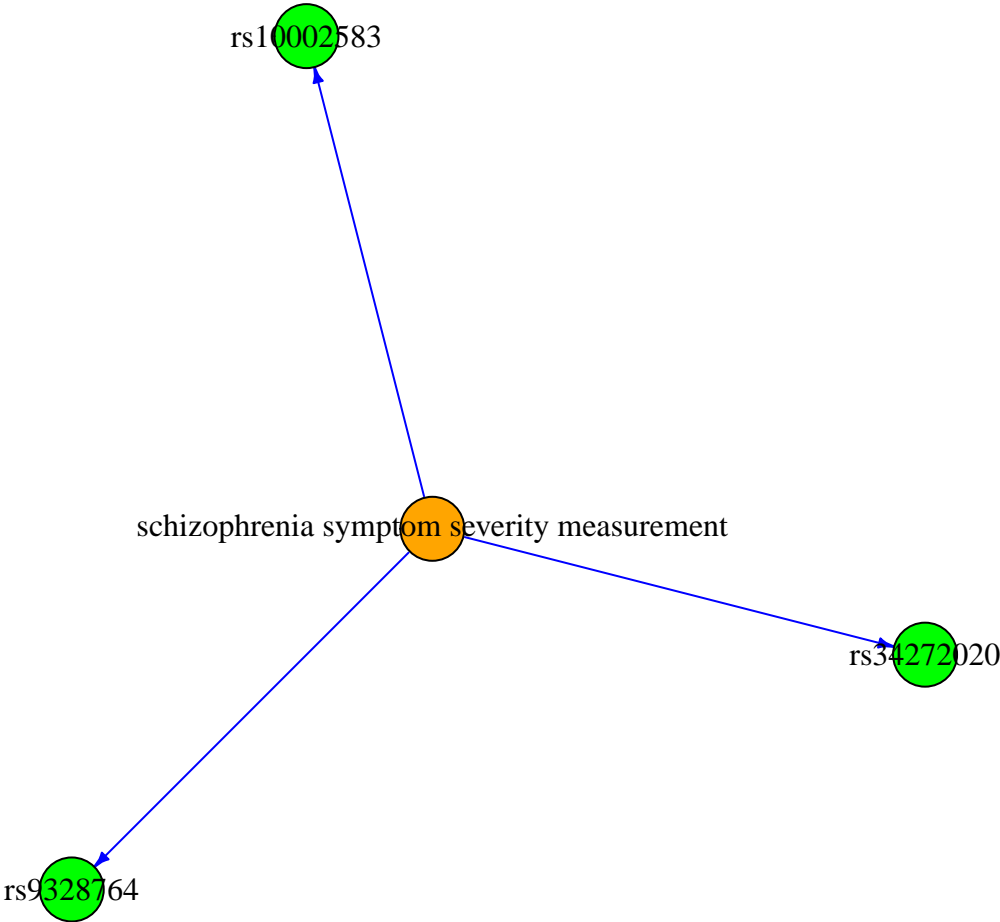

Variant–Disease Network (3–hydroxypropylmercapturic acid measurement

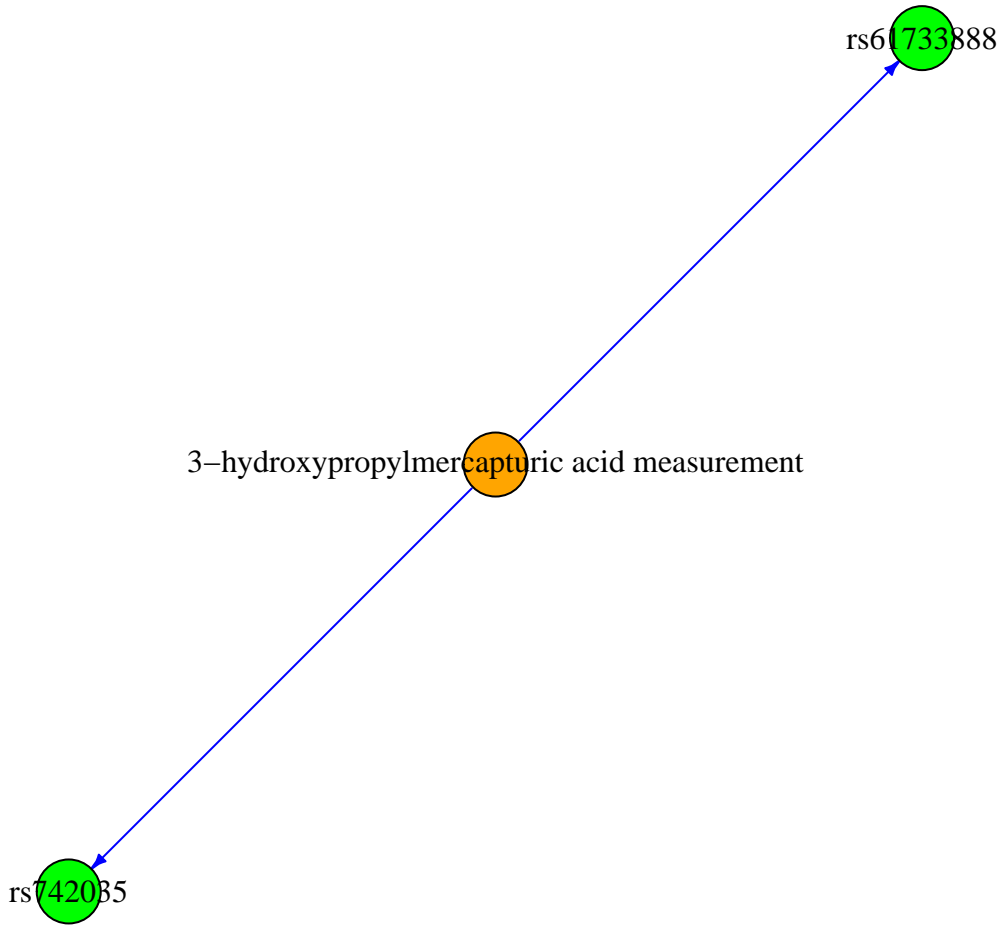

## Variant–Disease Network (smoking behavior)

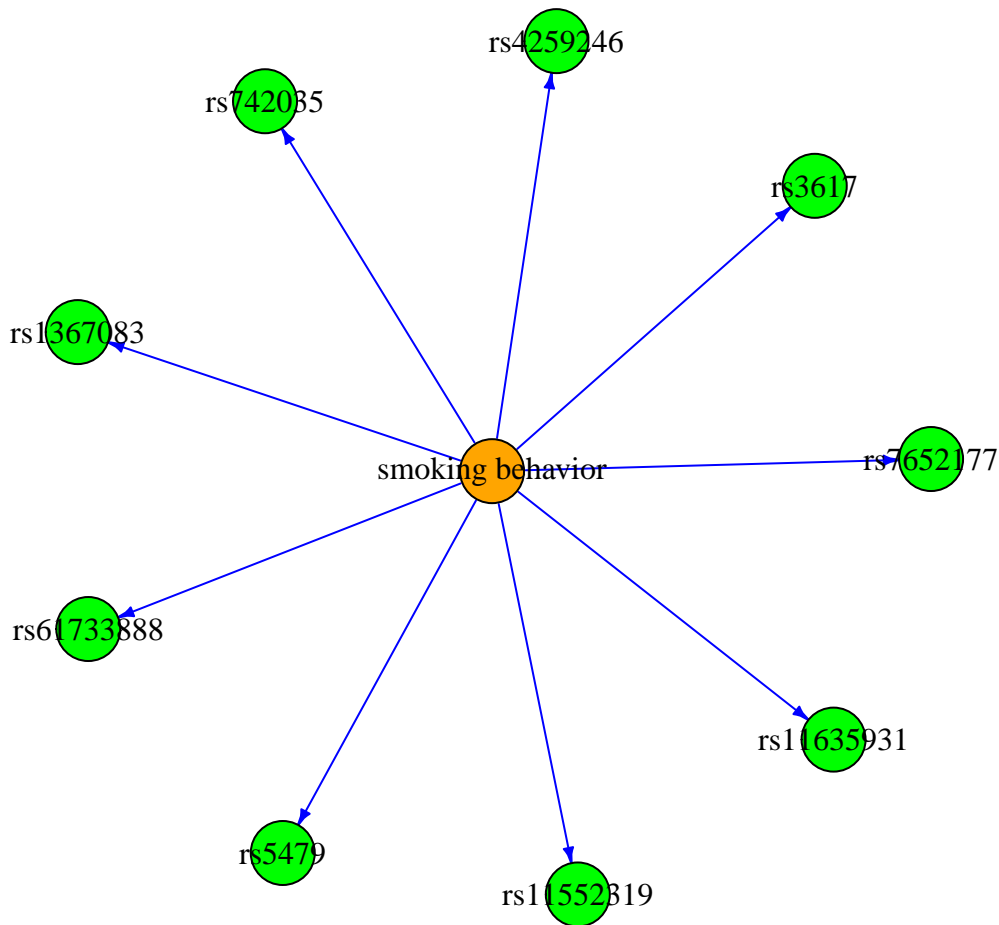

## Variant–Disease Network (grip strength measurement)

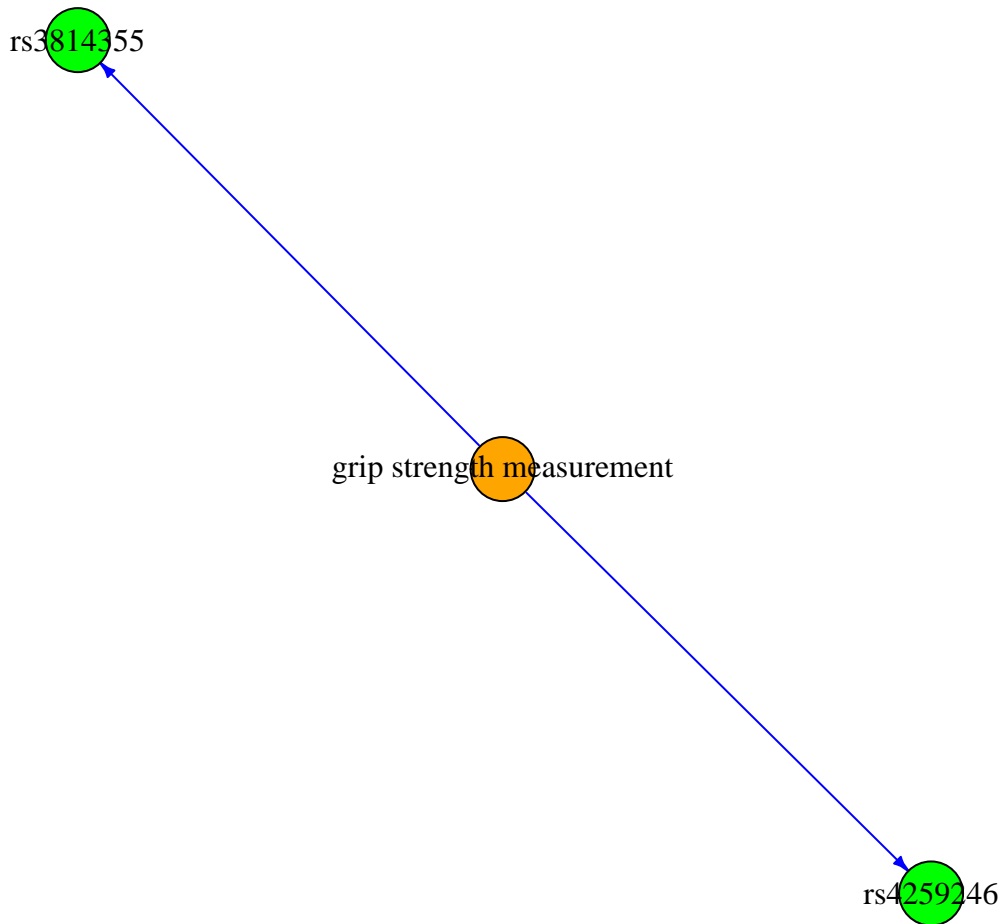

## Variant–Disease Network (type i diabetes mellitus)

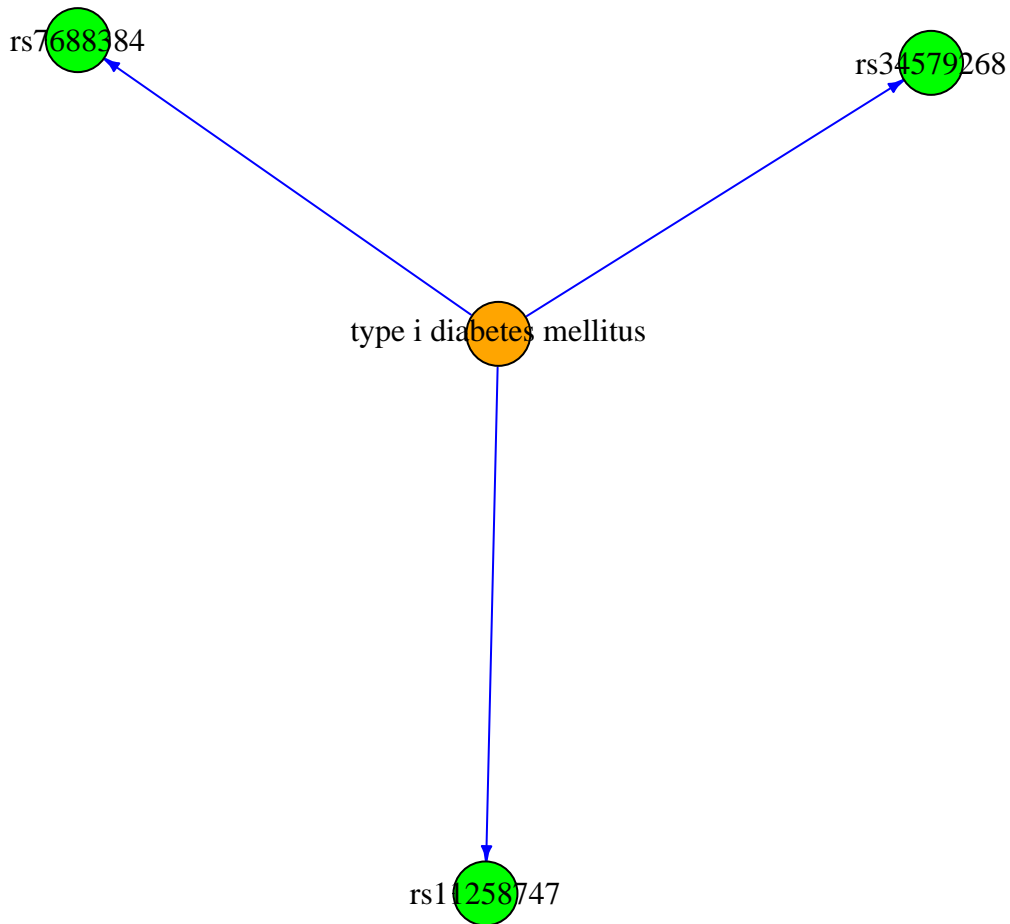

## Variant–Disease Network (lobe attachment)

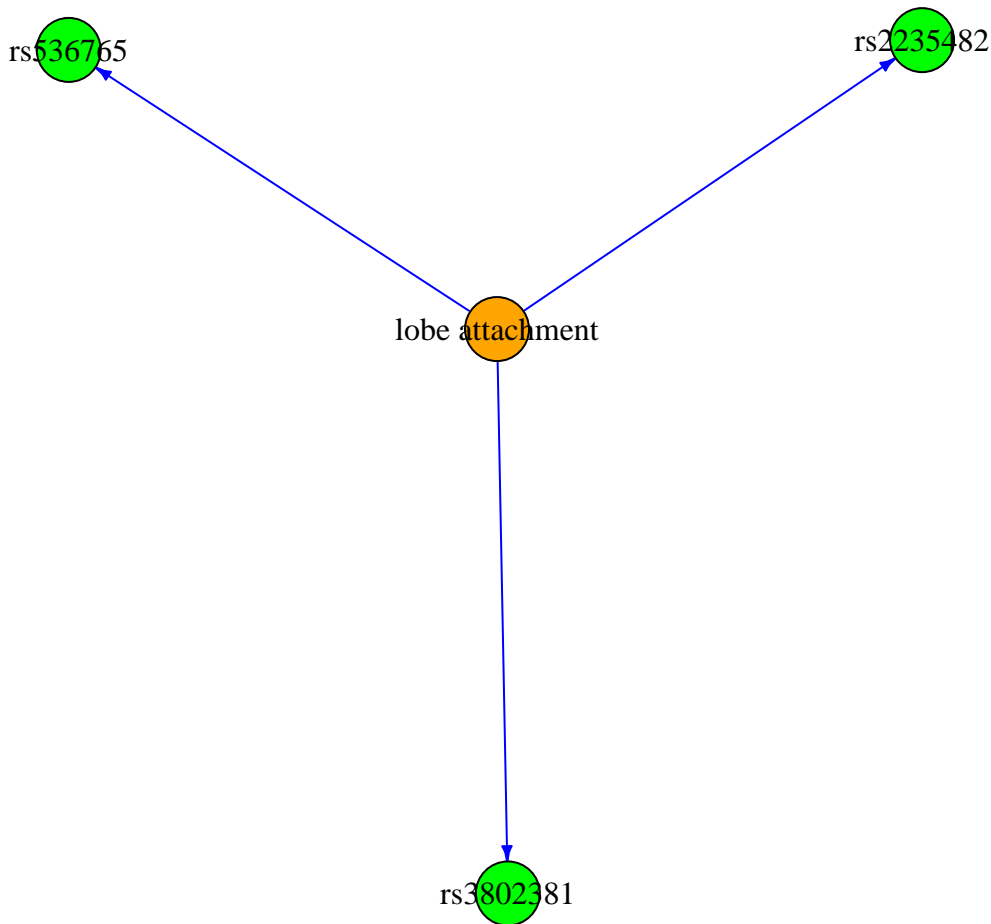

**Variant–Disease Network (facial emotion recognition measurement)**

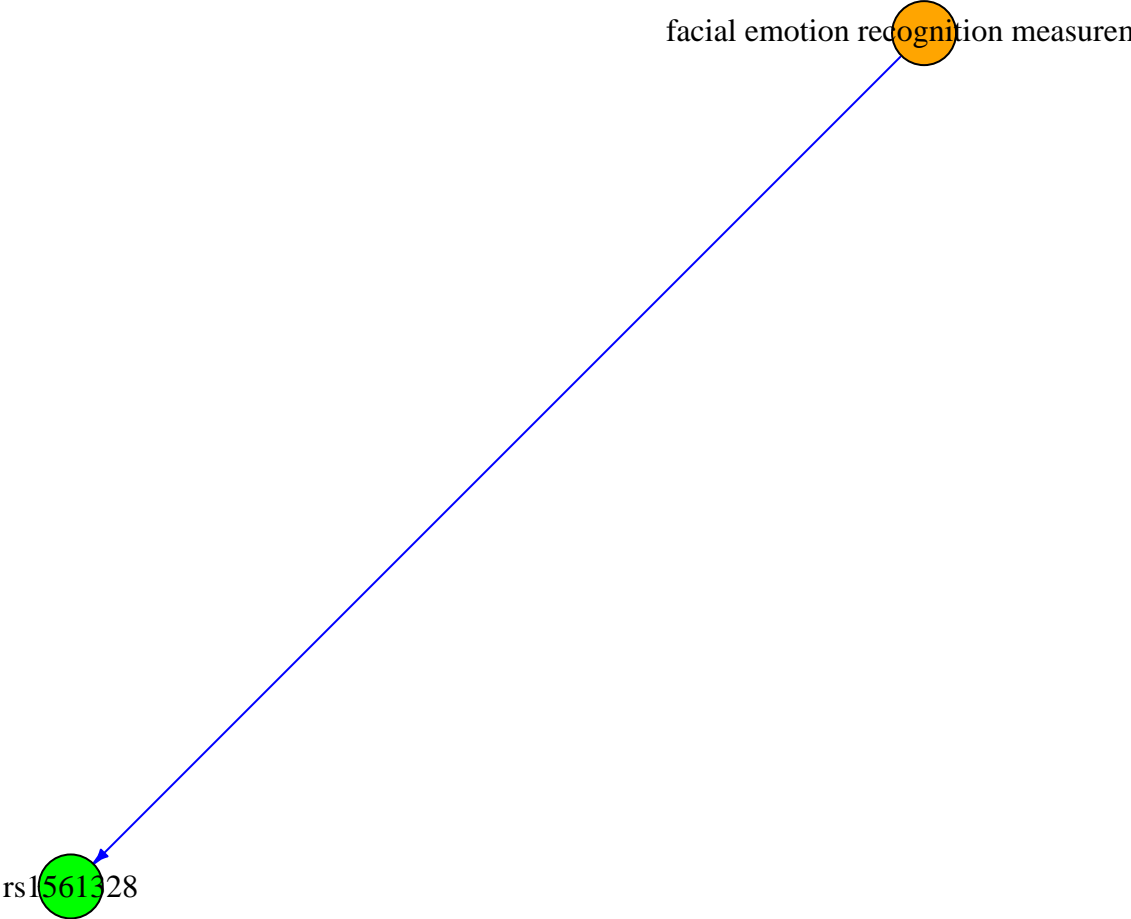



# Variant–Disease Network (response to methylphenidate)

response to methylphenidate

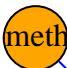

rs1561328

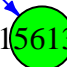

## Variant–Disease Network (parkinsons disease)

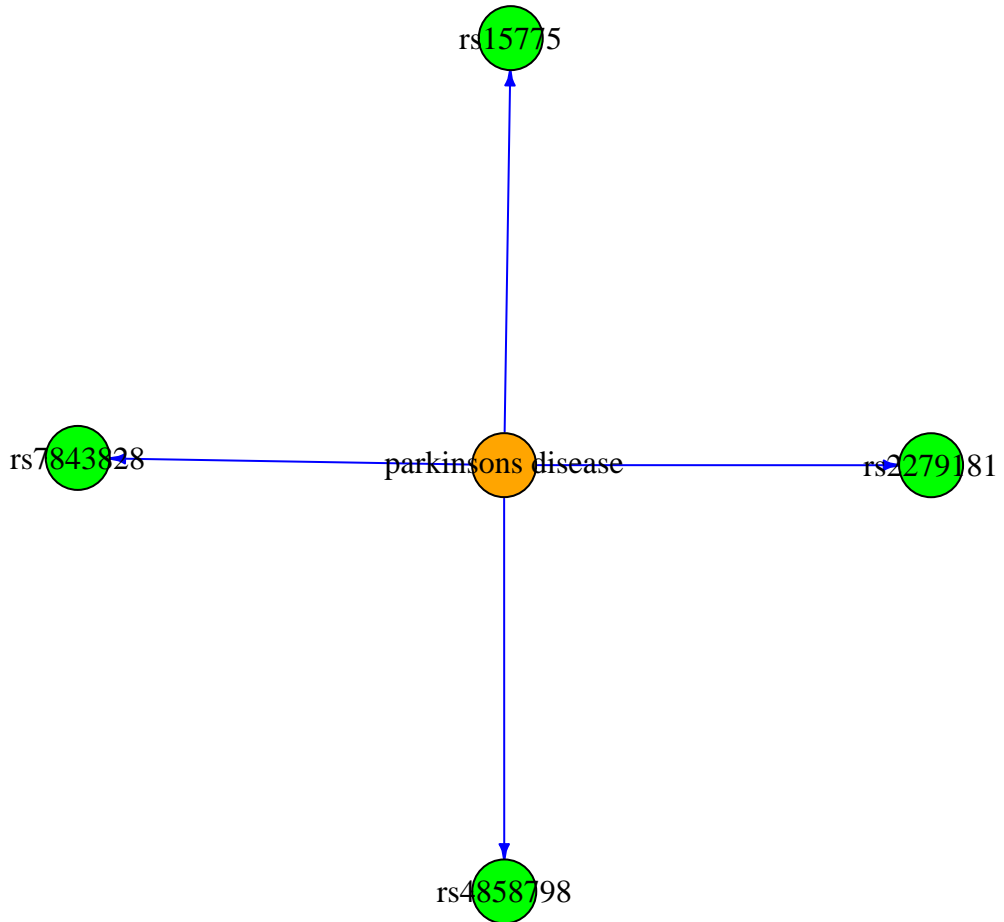

## Variant–Disease Network (late-onset Alzheimers disease)

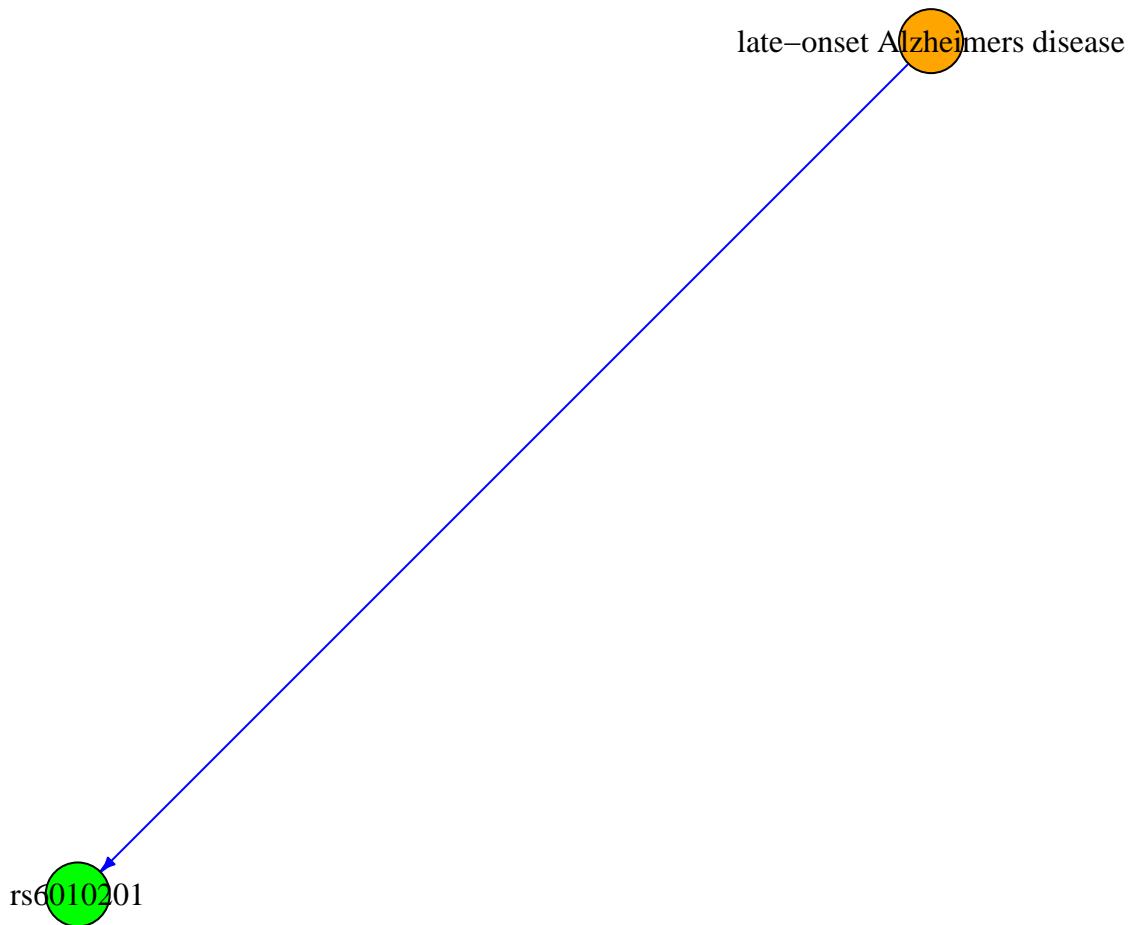

**Variant–Disease Network (functional impairment measurement)**

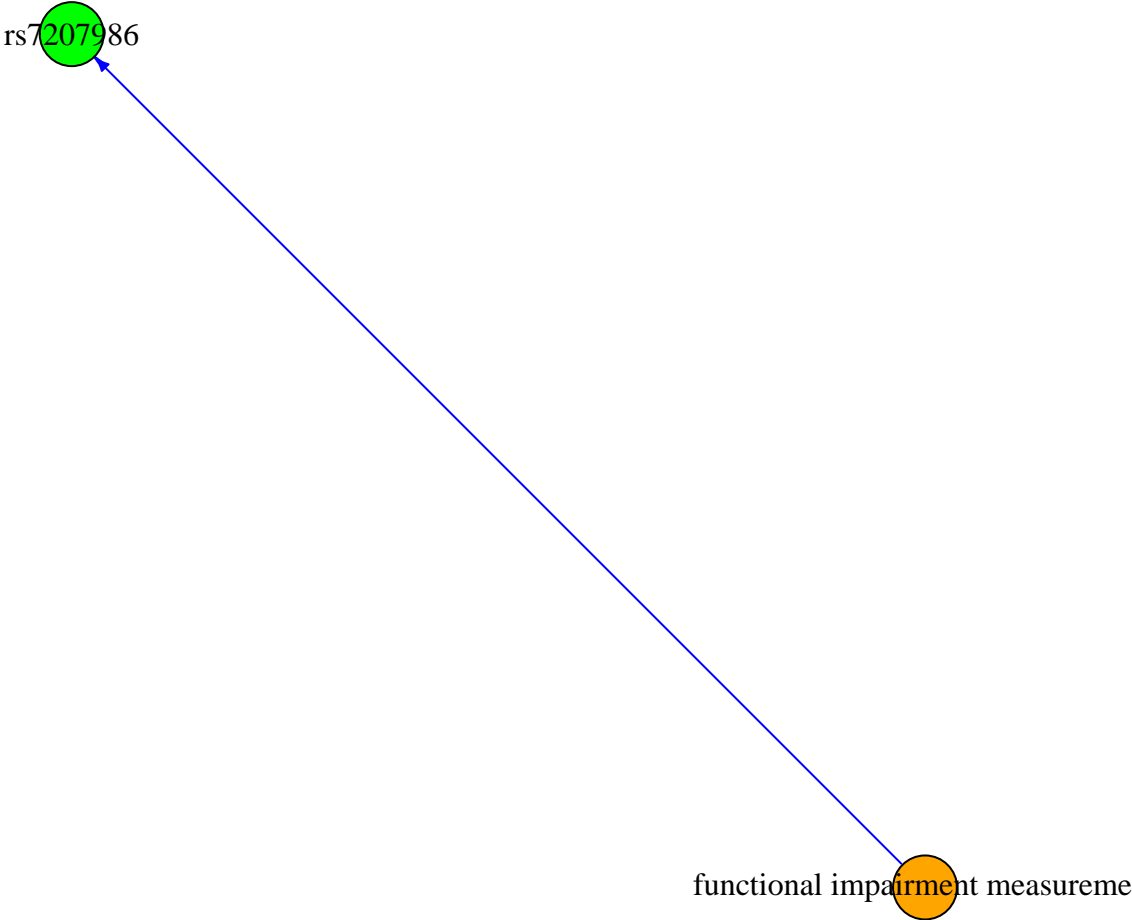

## Variant–Disease Network (neuroticism measurement)

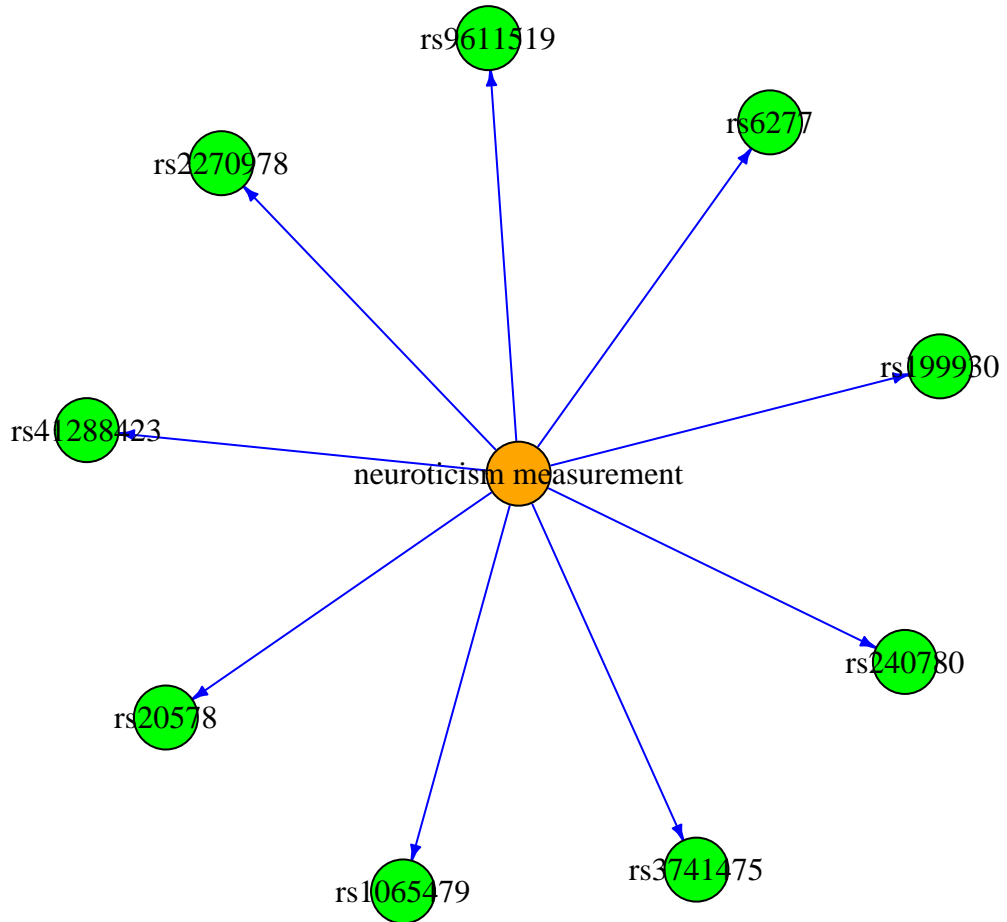

## Variant–Disease Network (age at onset)

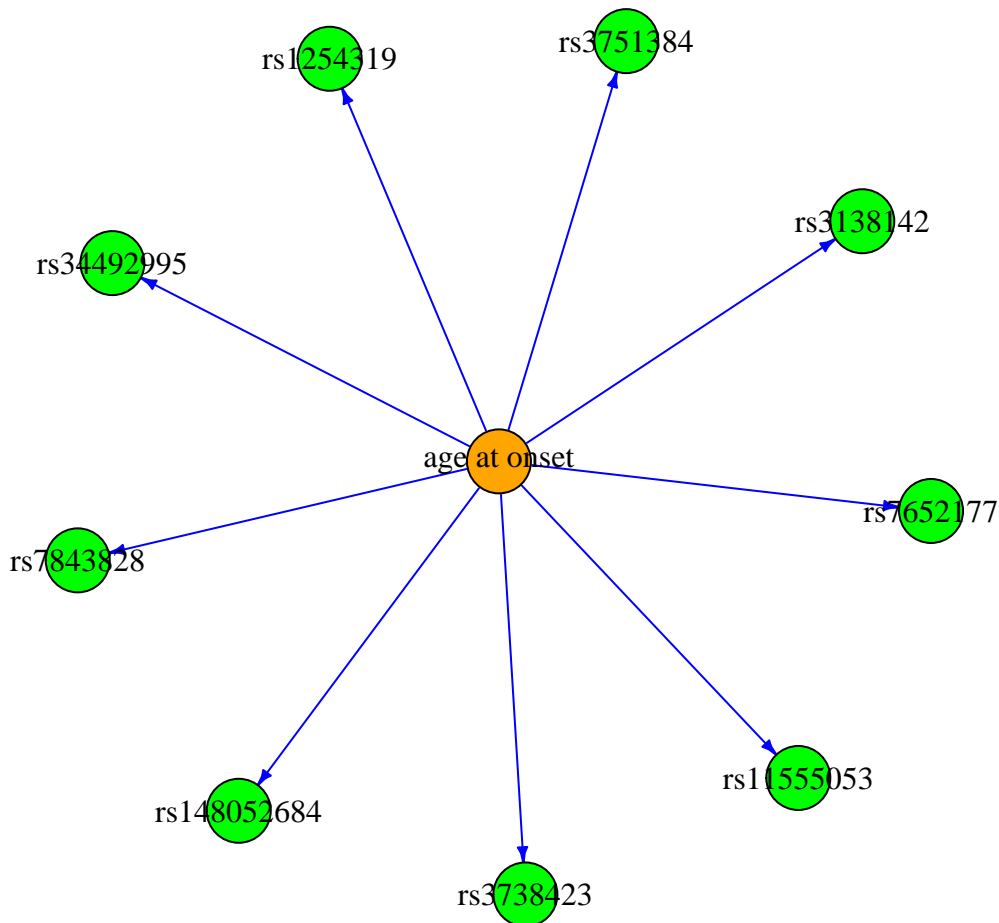

**Variant–Disease Network (BMI-adjusted waist circumference)**

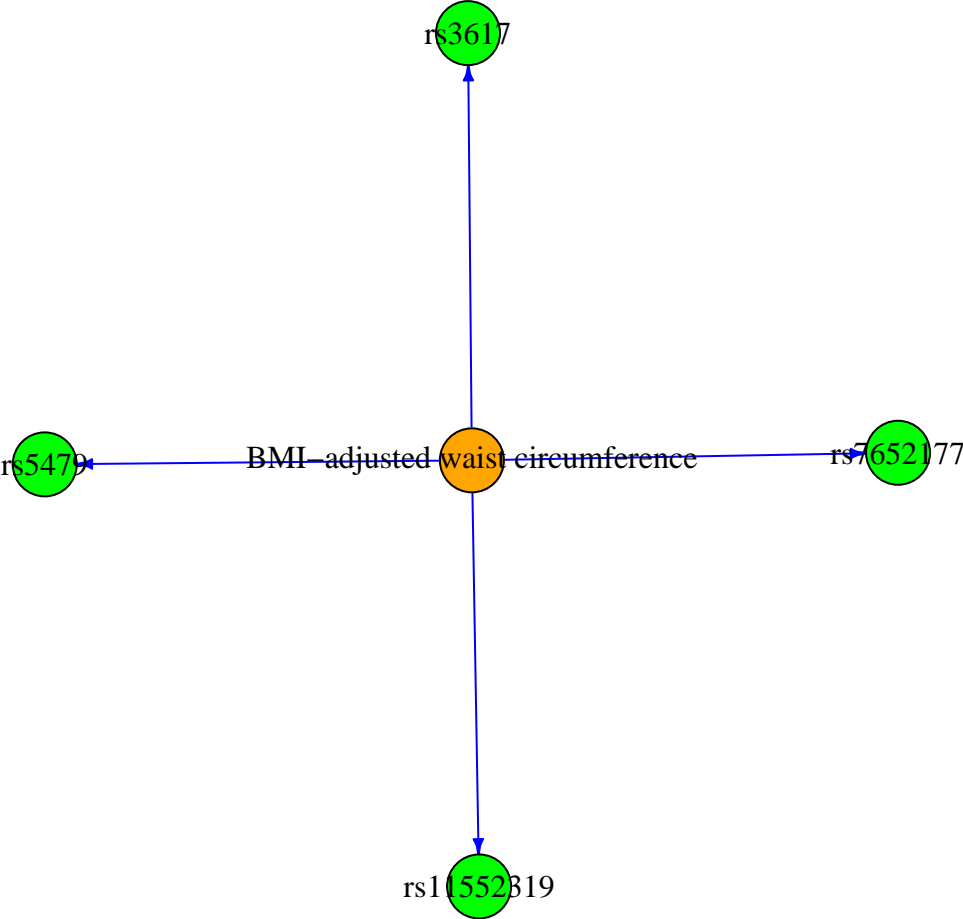

## Variant–Disease Network (physical activity measurement)

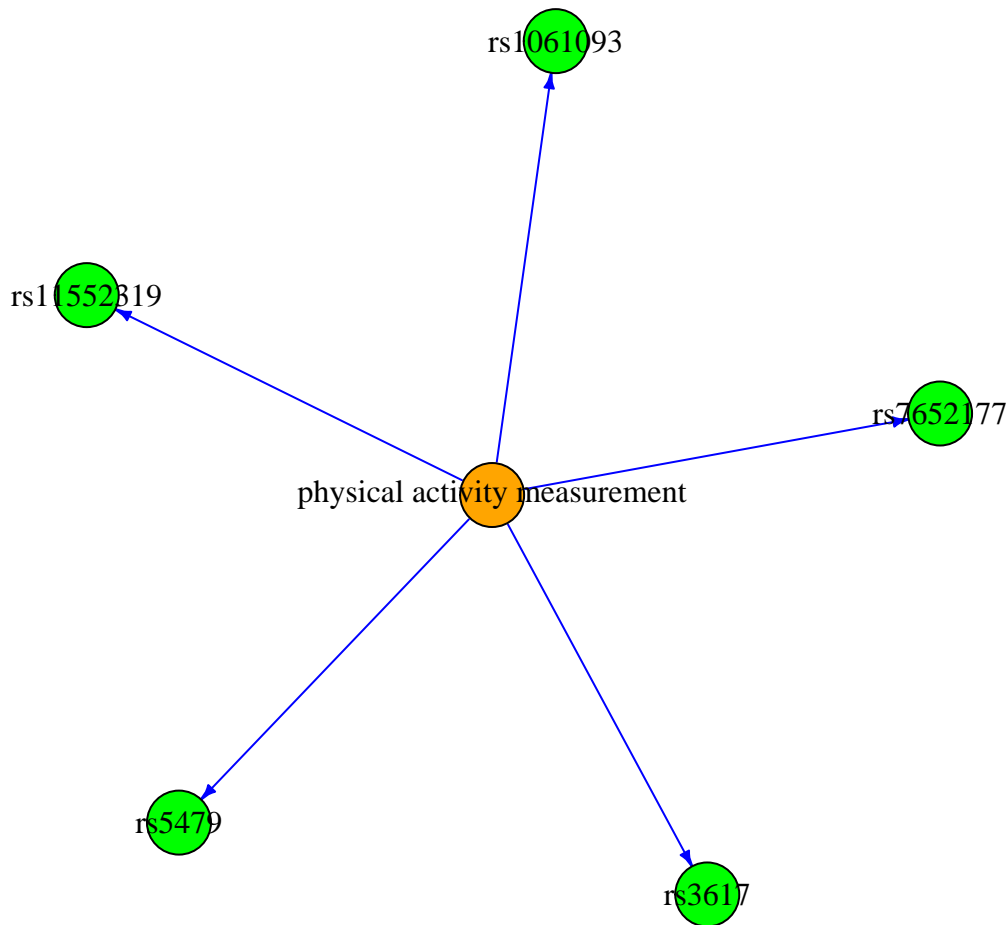



# Variant–Disease Network (refractive error measurement)

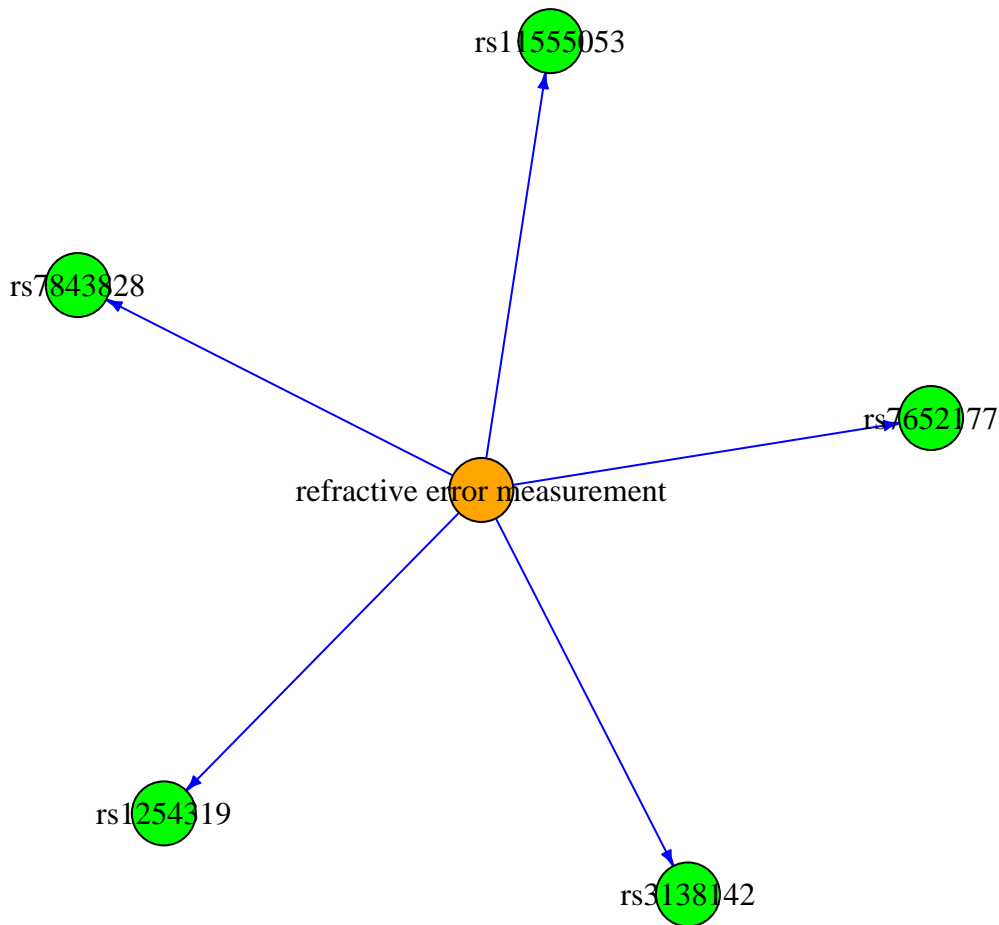

## Variant–Disease Network (waist circumference)

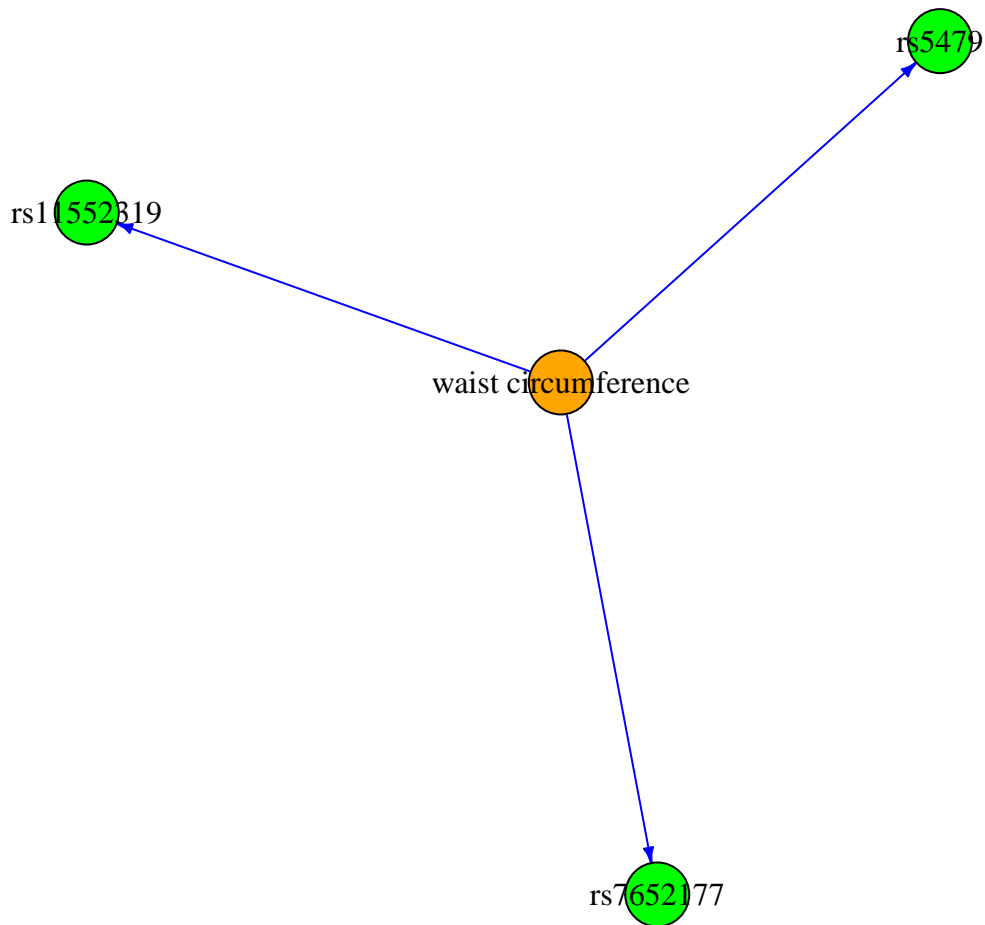

**Variant–Disease Network (testosterone measurement)**

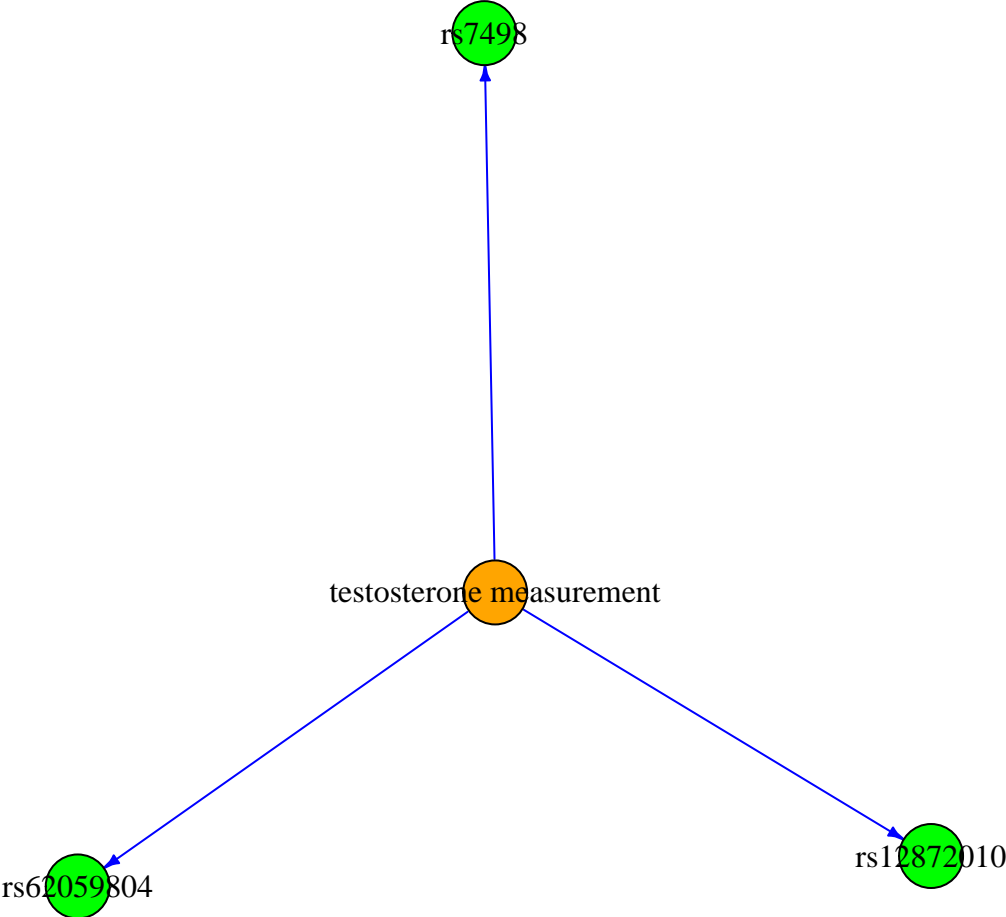

## Variant–Disease Network (dental caries)

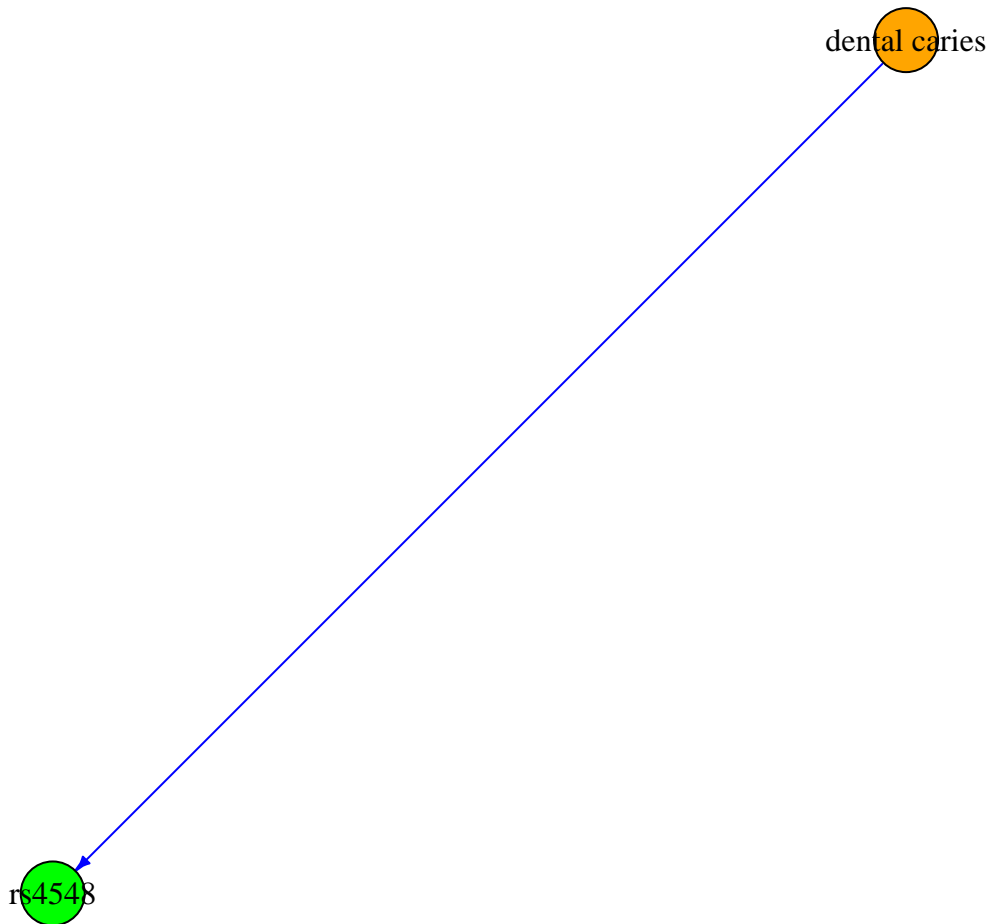

**Variant–Disease Network (fatty acid measurement)**

fatty acid measurement

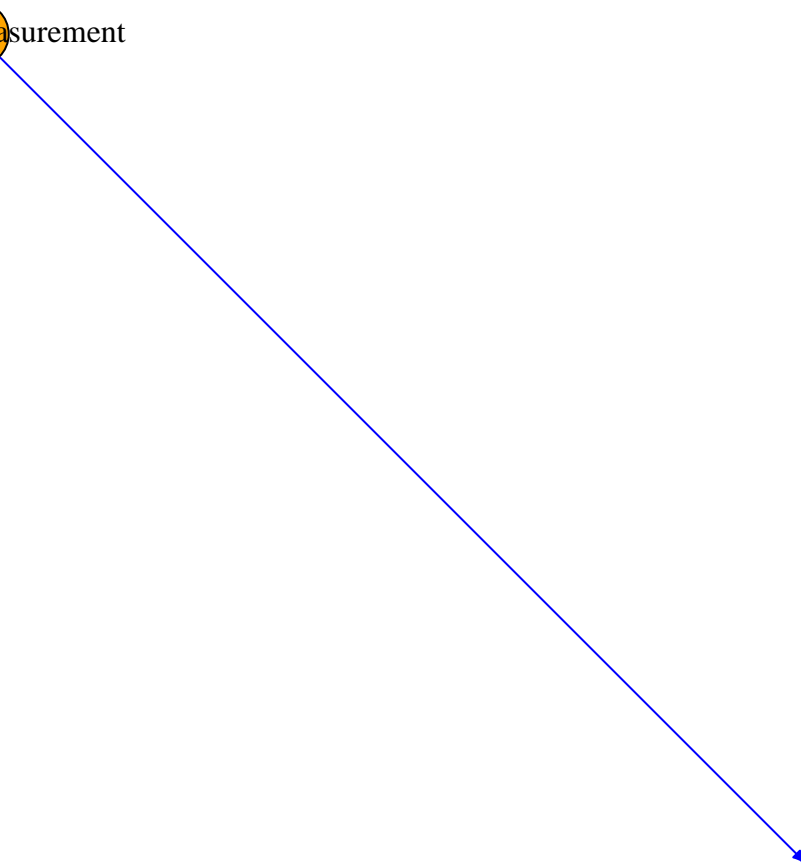

rs2295772

Variant–Disease Network (palmitoleic acid measurement)

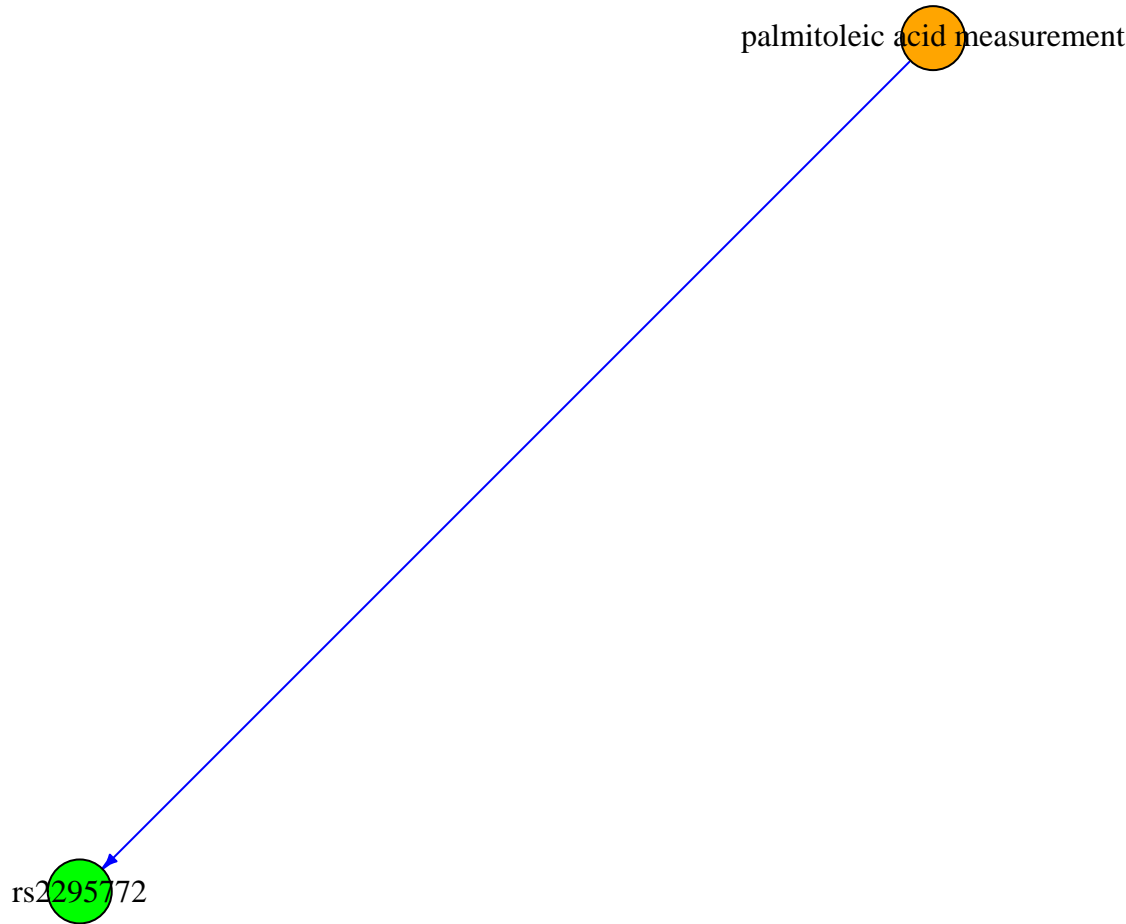

## Variant–Disease Network (erythrocyte count)

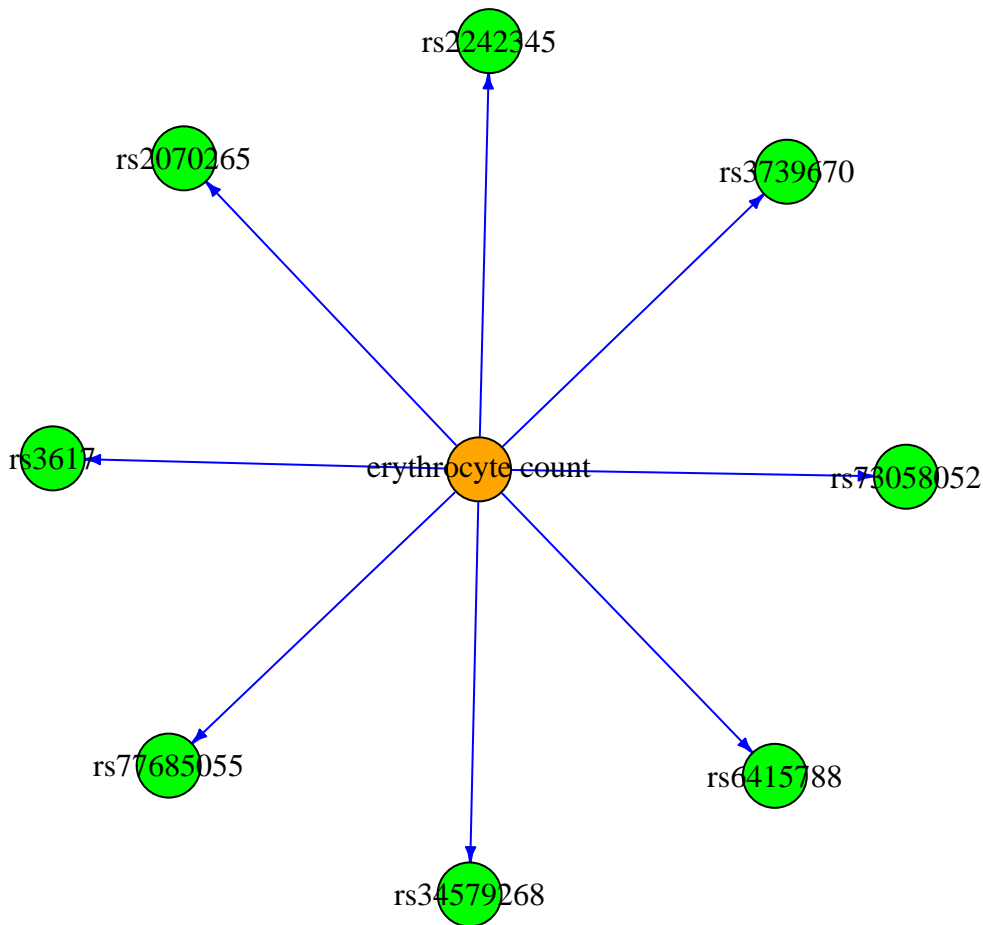

# Variant–Disease Network (red blood cell distribution width)

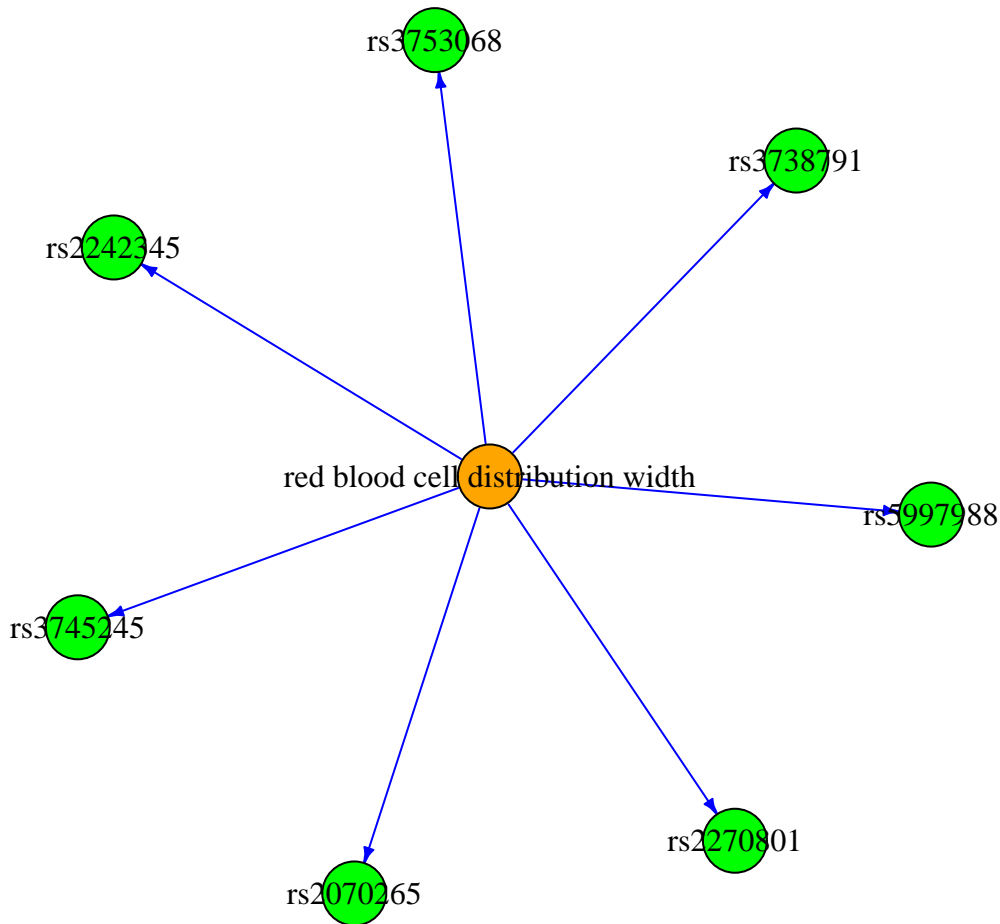



## Variant–Disease Network (anxiety)

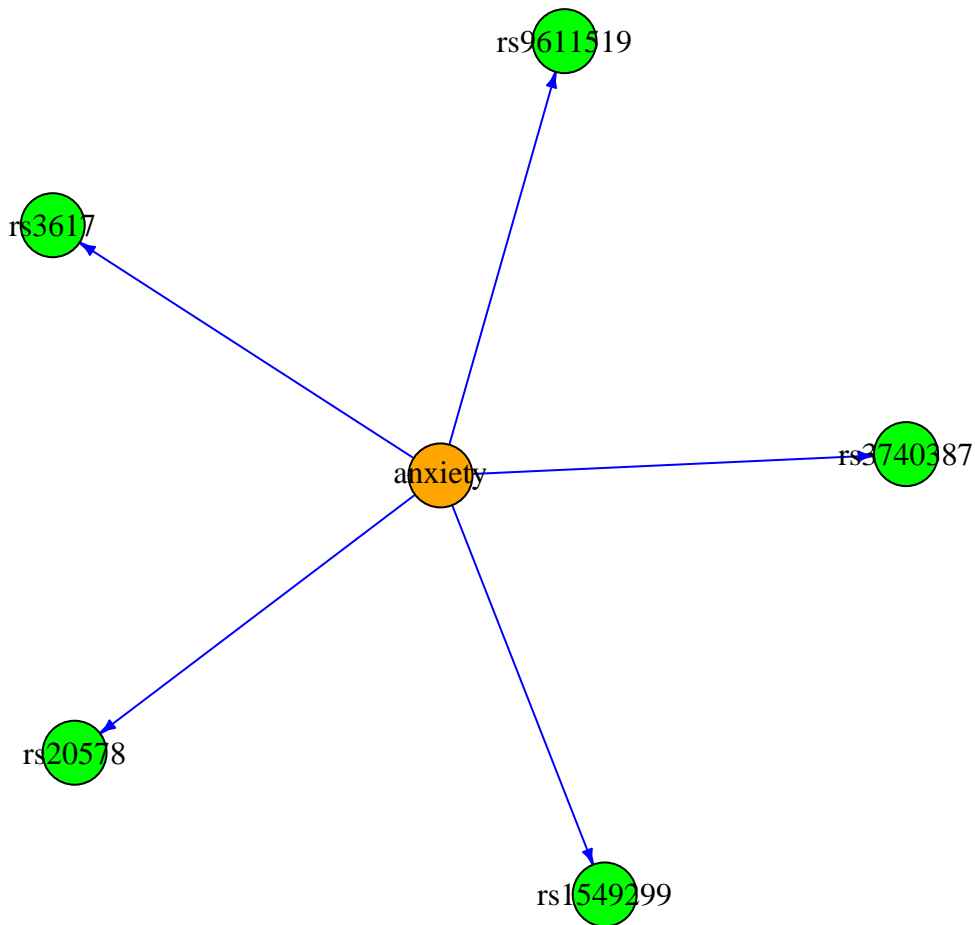

## Variant–Disease Network (migraine disorder)

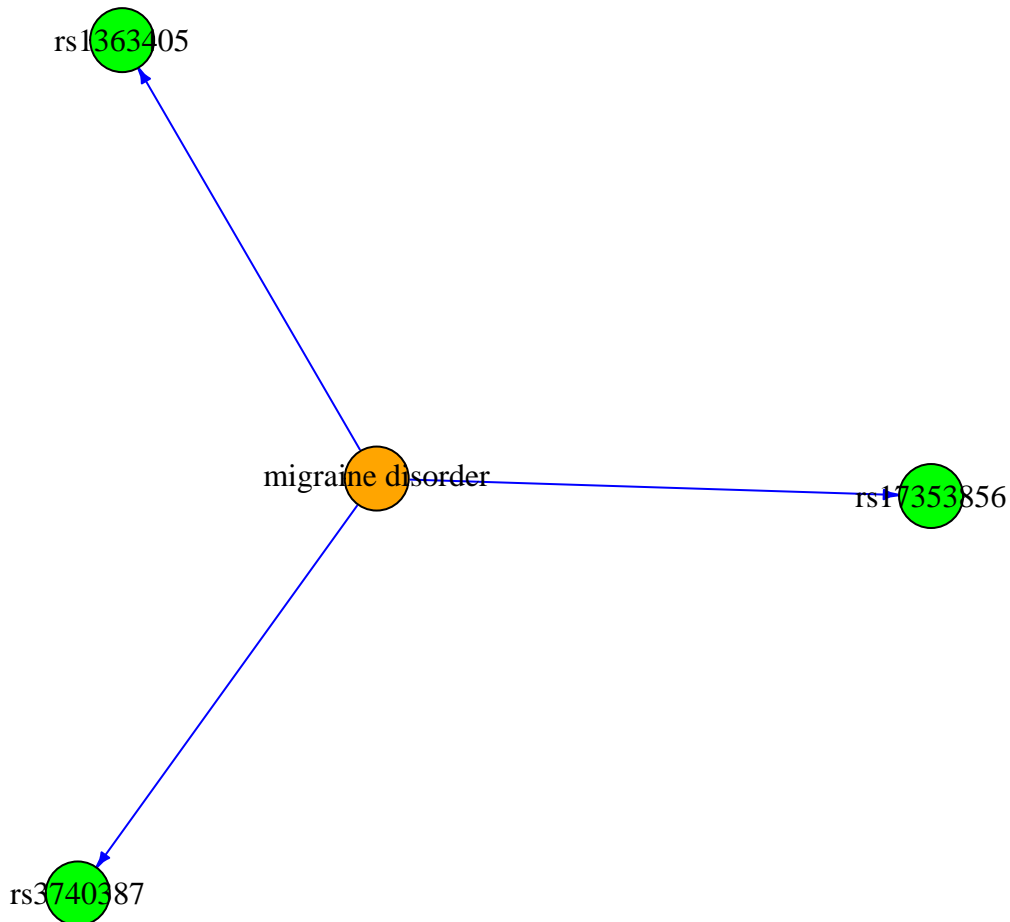

Variant–Disease Network (white matter lesion progression measurement)

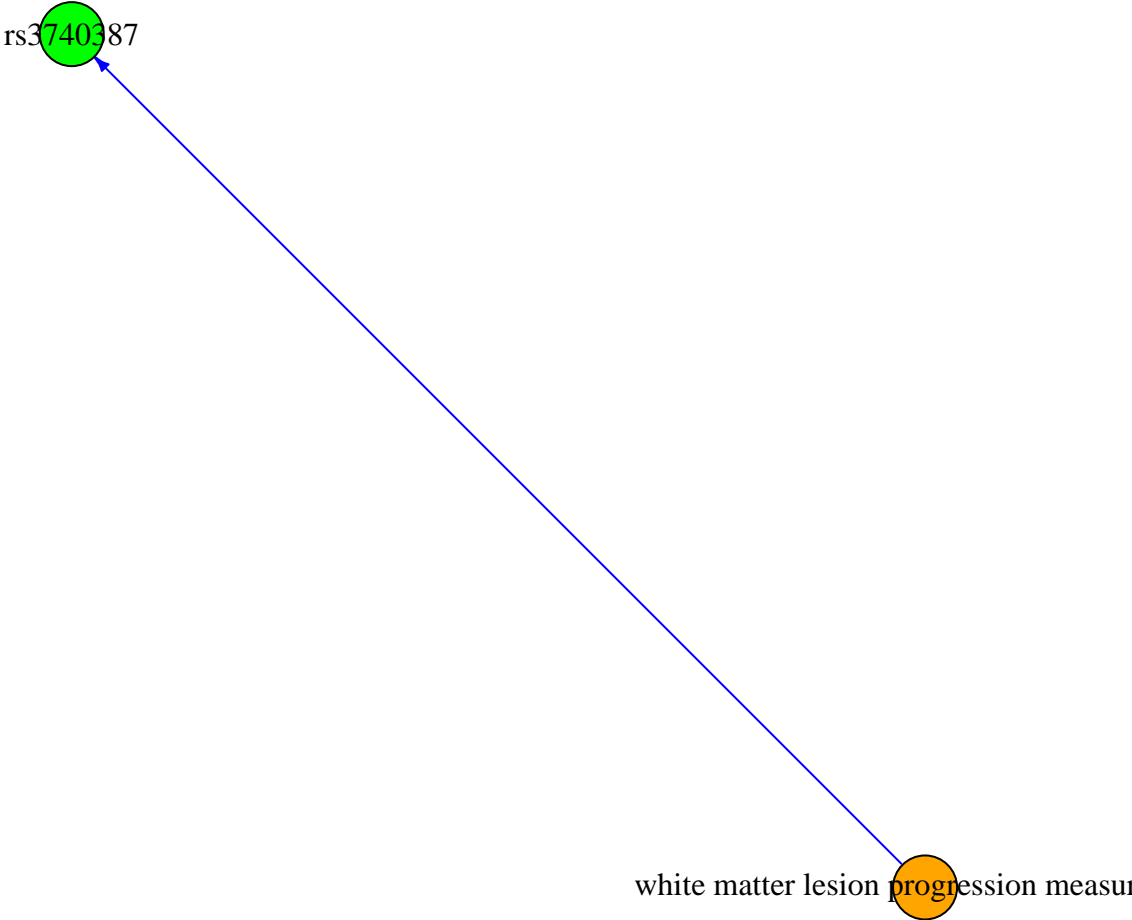

# Variant-Disease Network (head and neck malignant neoplasia)

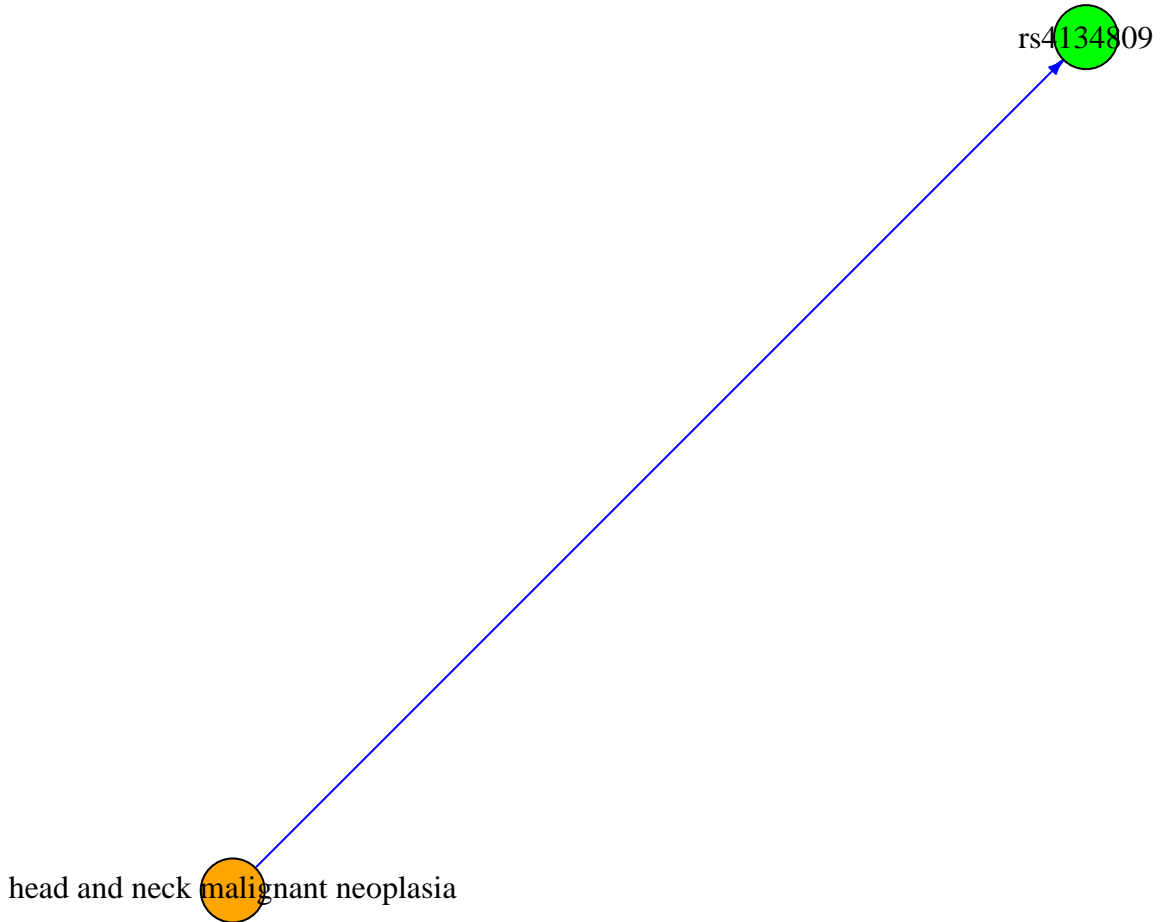

## Variant-Disease Network (neuropathic pain)

neuropathic pain

rs4134809

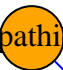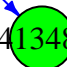

**Variant–Disease Network (adolescent idiopathic scoliosis)**

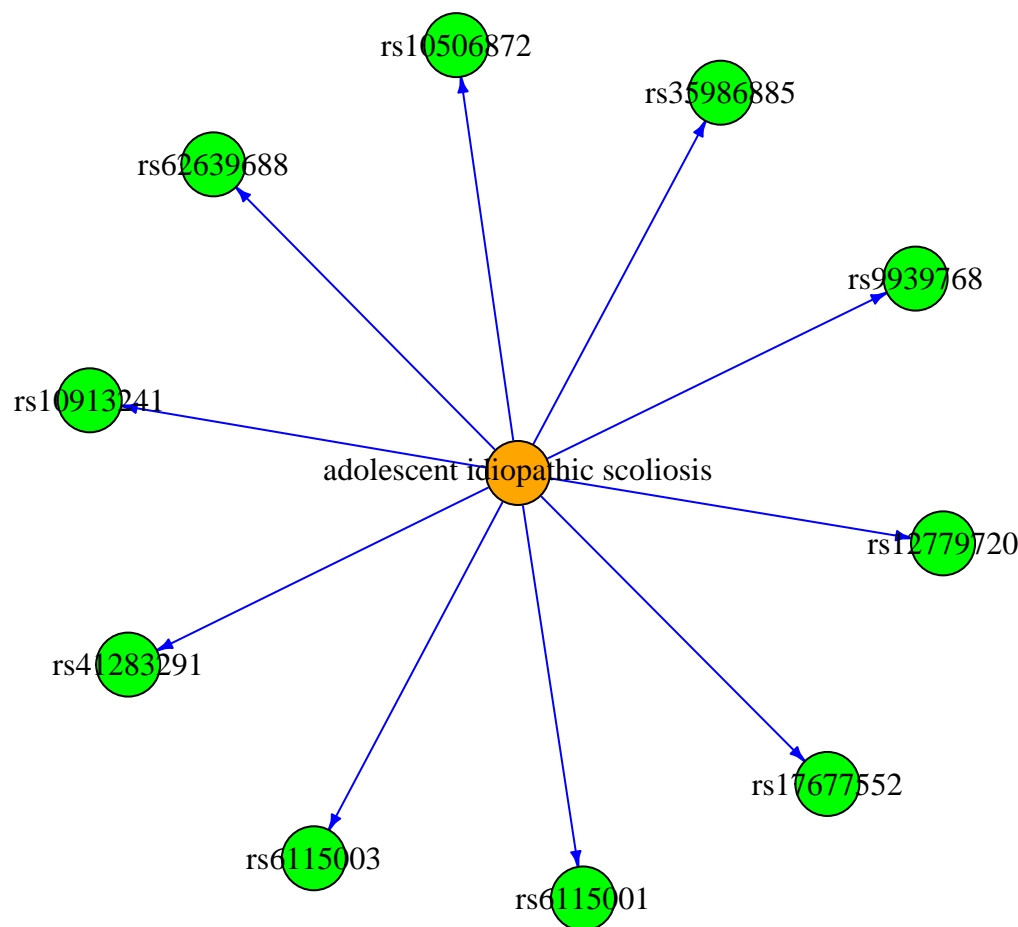

# Variant–Disease Network (parental genotype effect measurement)

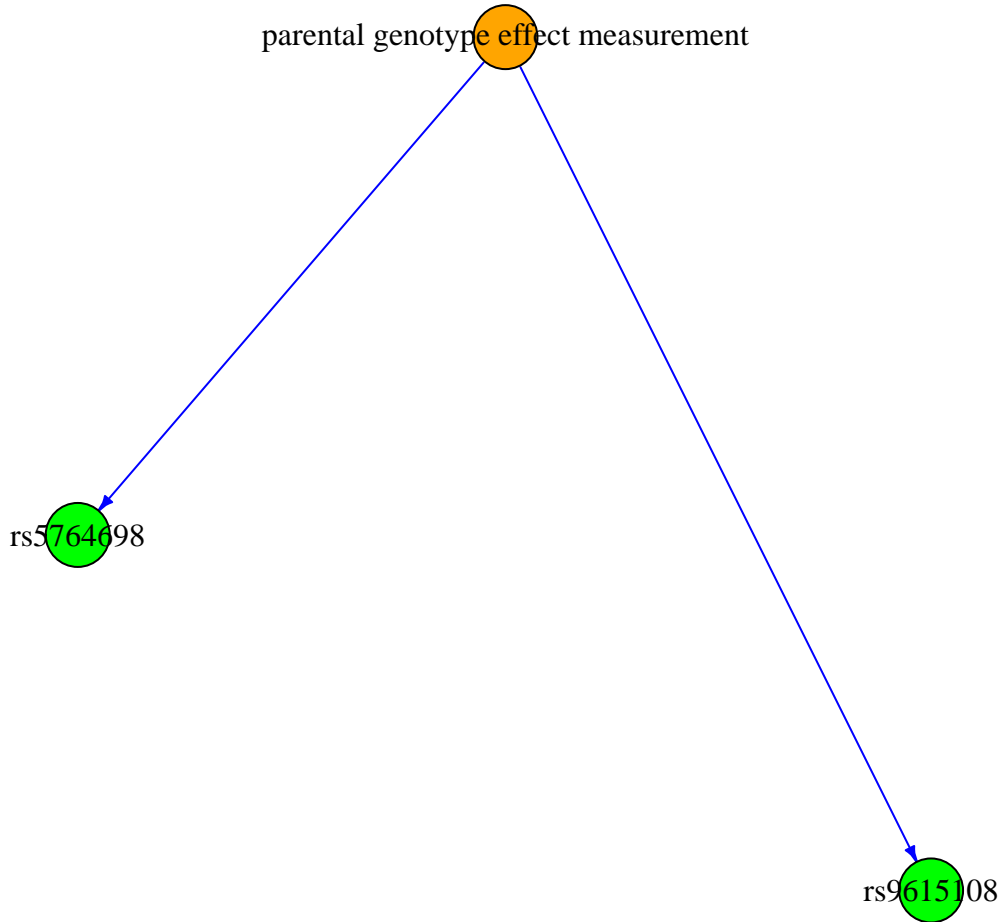

Variant–Disease Network (peanut allergy measurement)

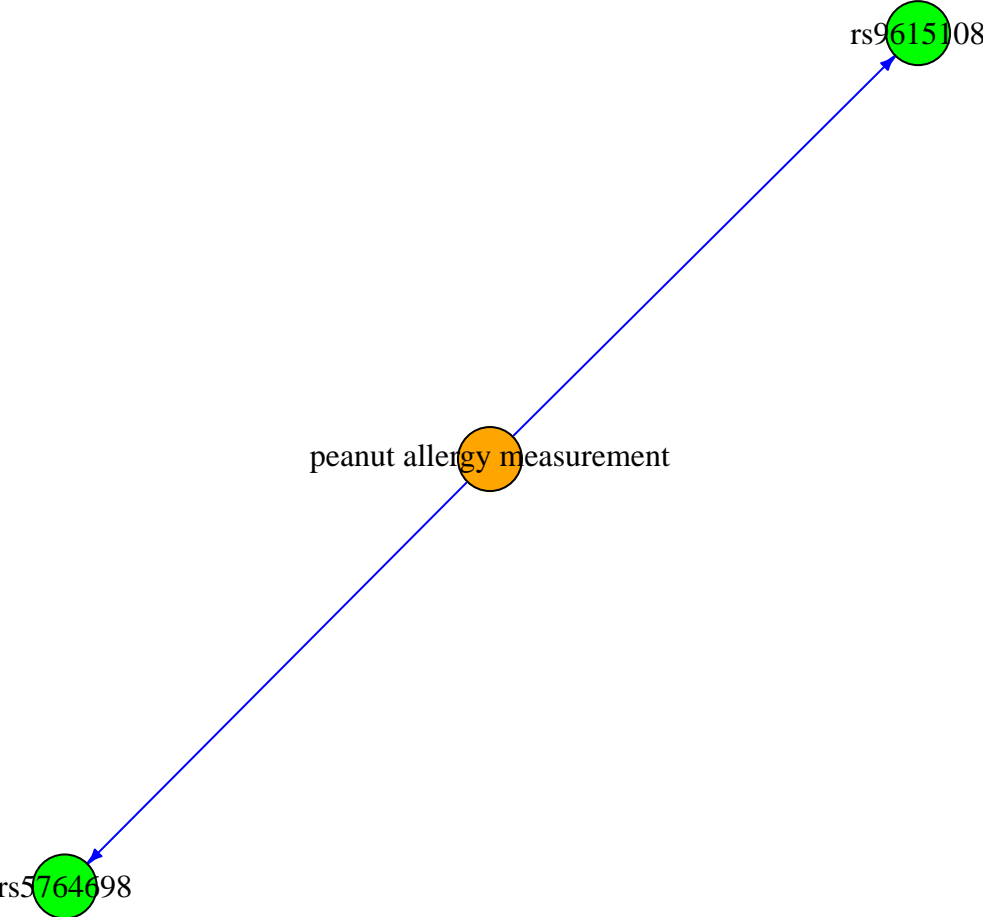



**Variant–Disease Network (age–related macular degeneration)**

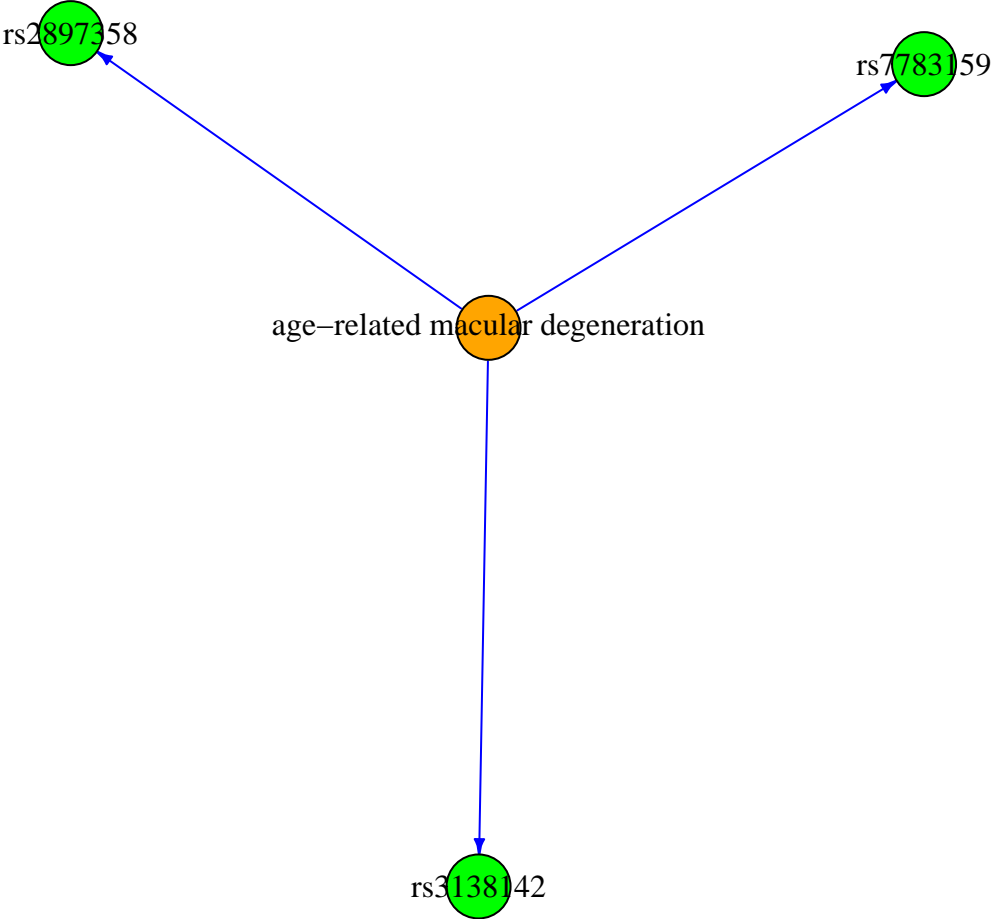

## Variant–Disease Network (atrophic macular degeneration)

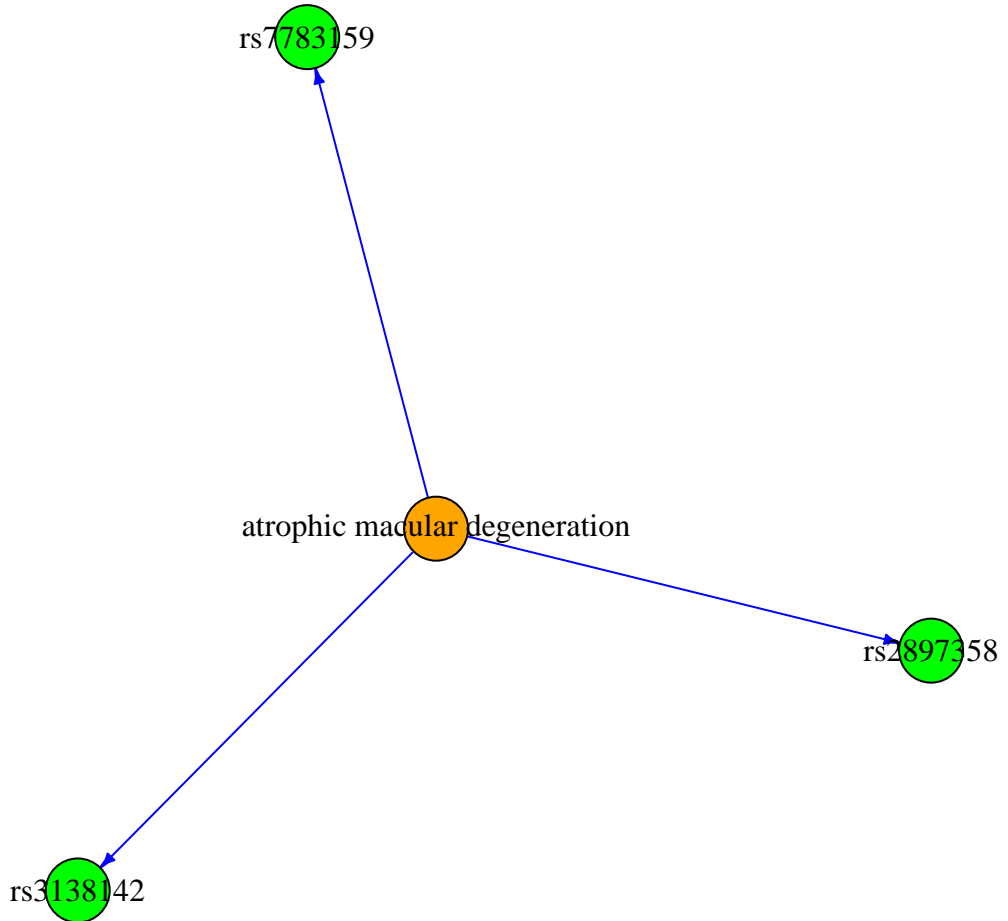

## Variant–Disease Network (platelet distribution width)

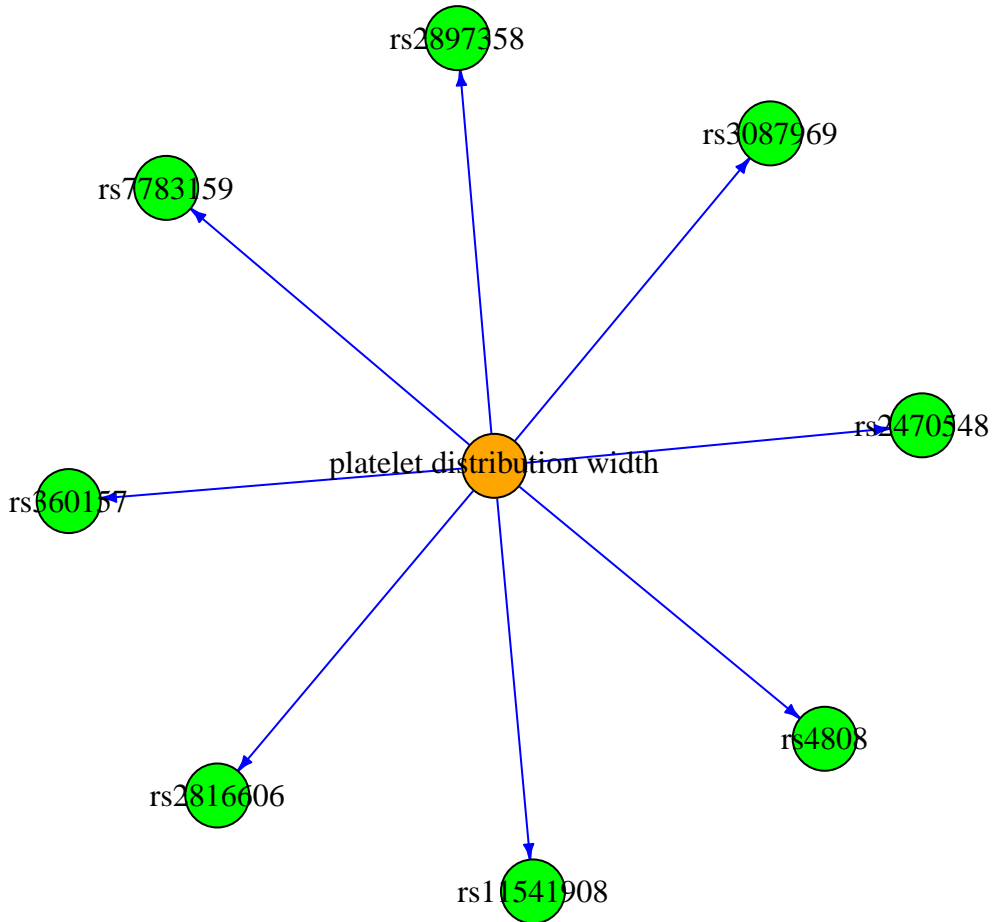

## Variant–Disease Network (wet macular degeneration)

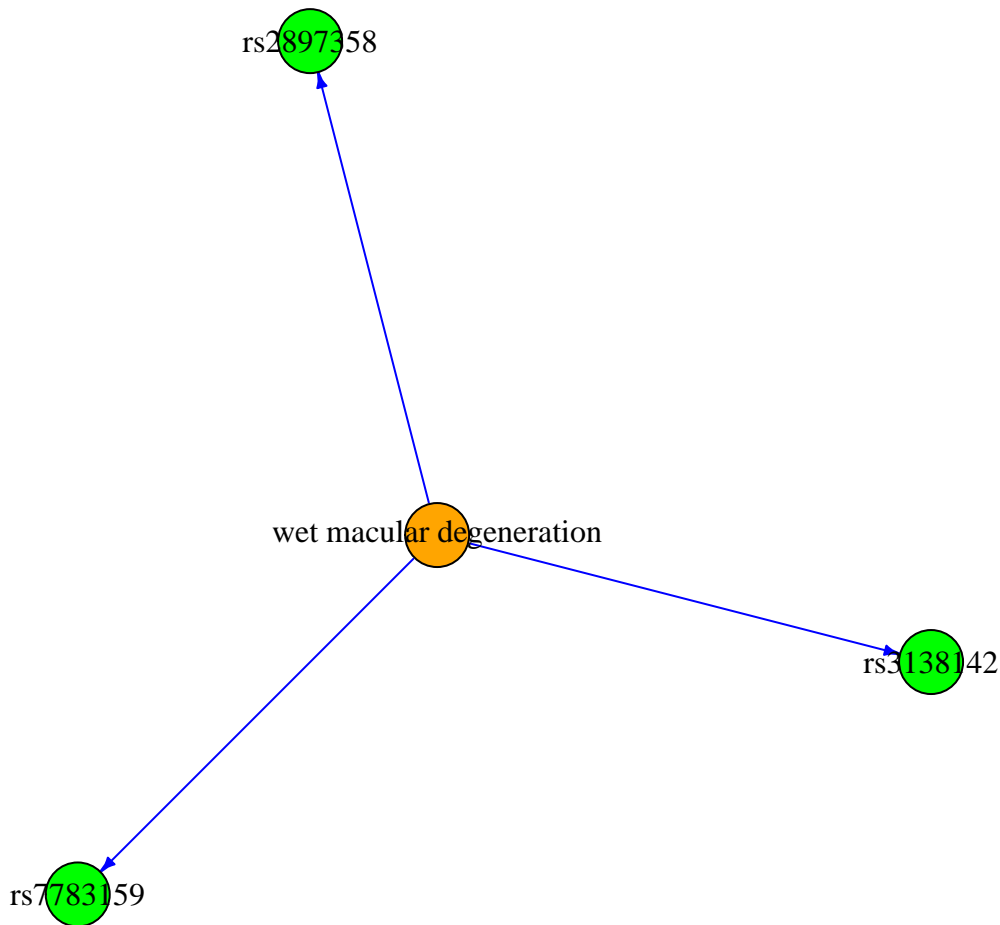

## Variant–Disease Network (D dimer measurement)

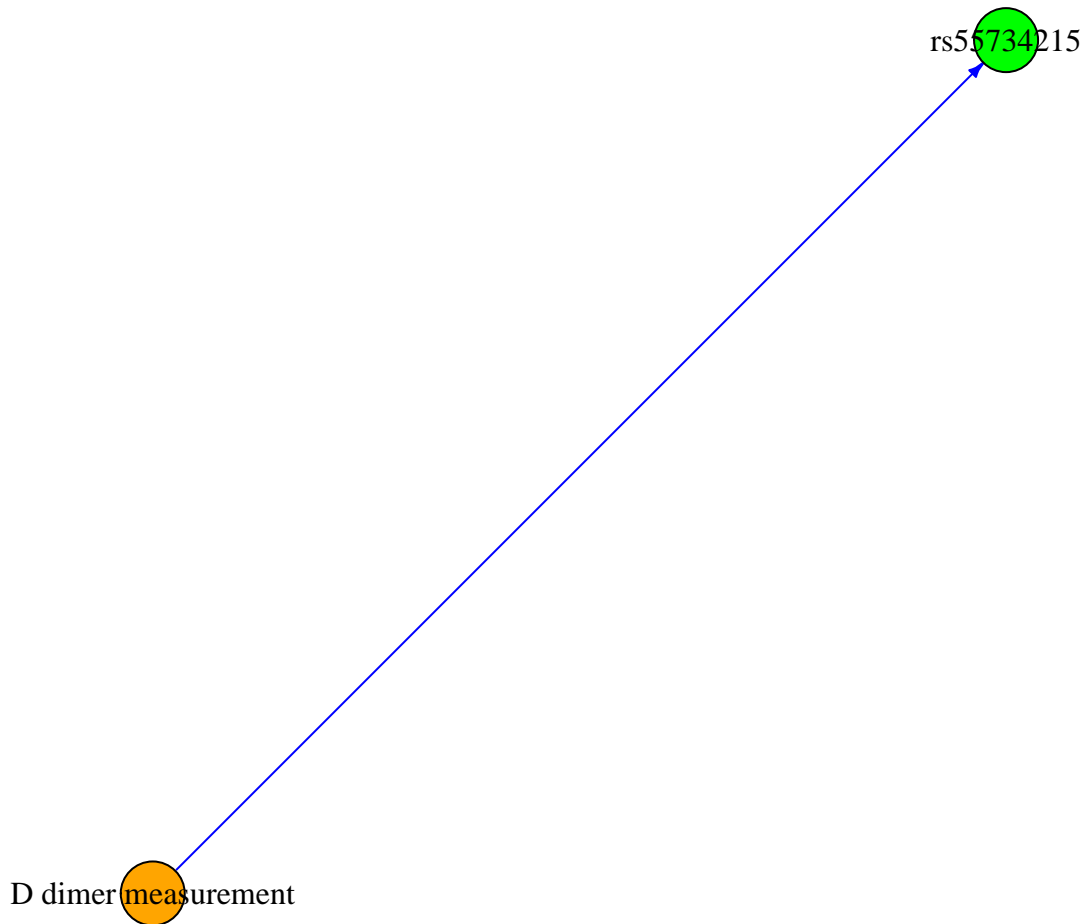

# Variant–Disease Network (factor VII measurement)

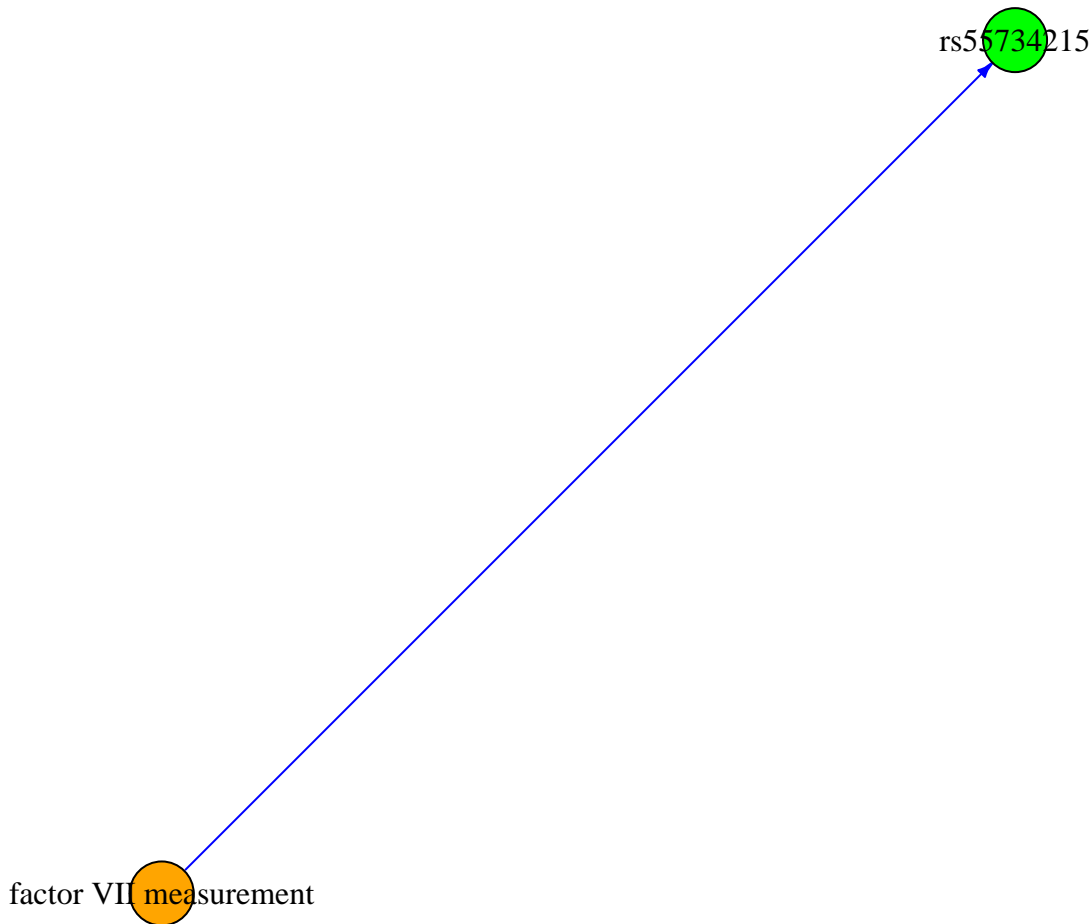

## Variant-Disease Network (hematological measurement)

hematological measurement

rs55734215



## Variant–Disease Network (protein c measurement)

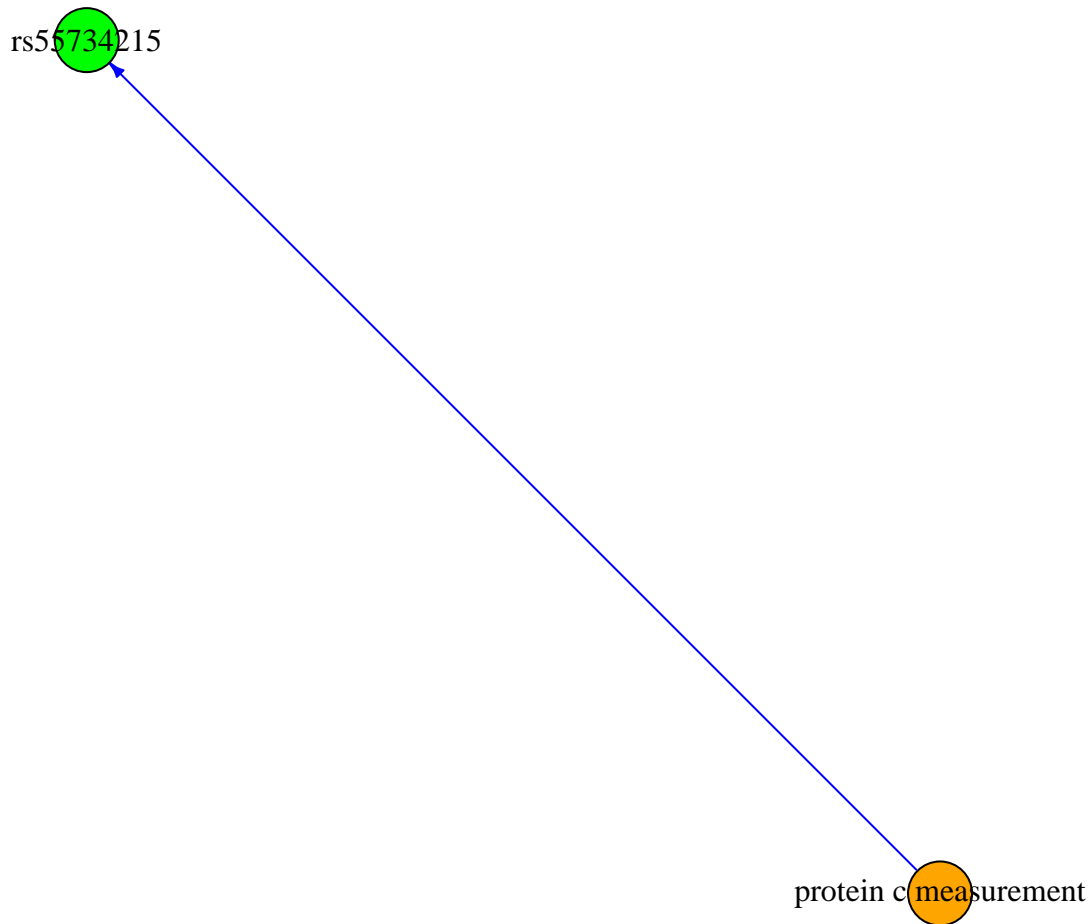



## Variant–Disease Network (prothrombin time measurement)

prothrombin time measurement

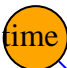

rs55734215

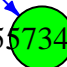

# Variant–Disease Network (sporadic amyotrophic lateral sclerosis)

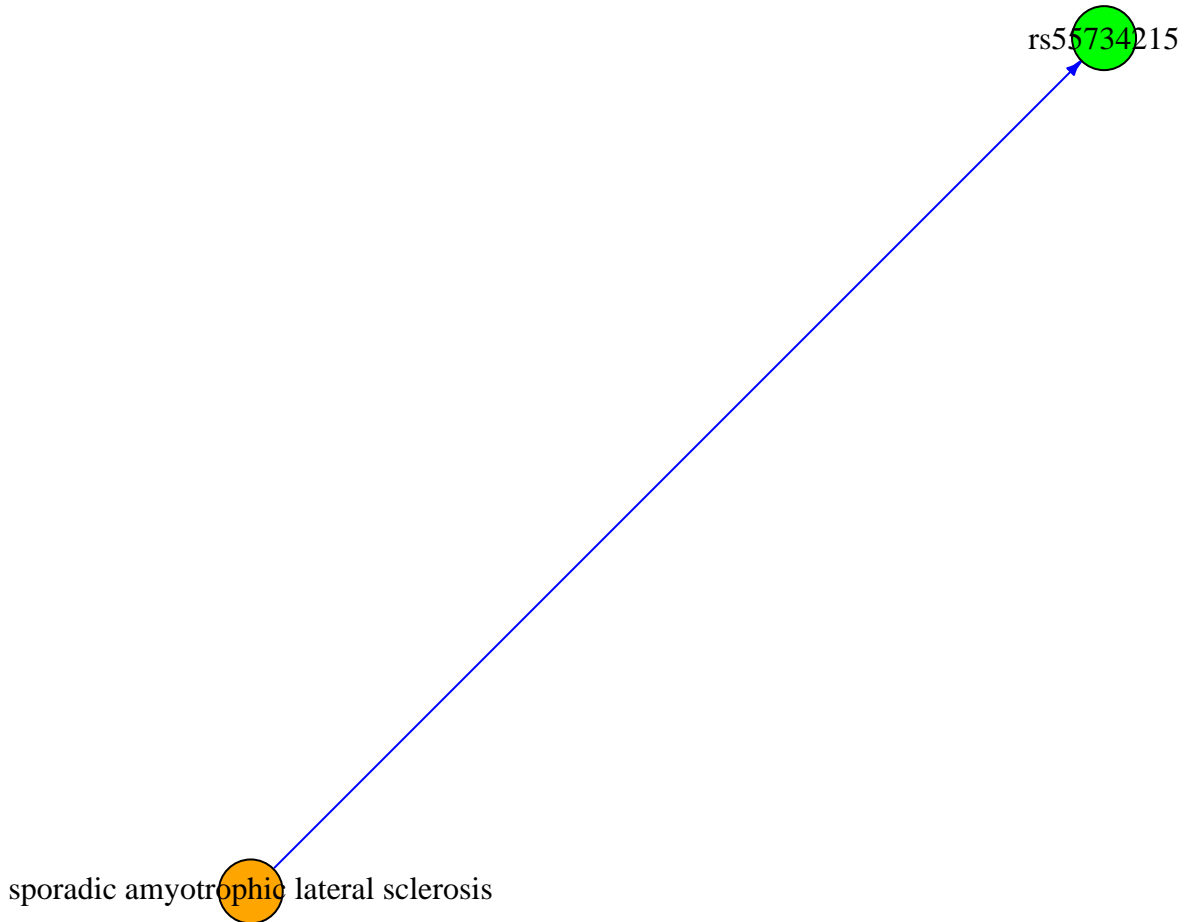

Variant–Disease Network (vitamin K–dependent protein C measurement)

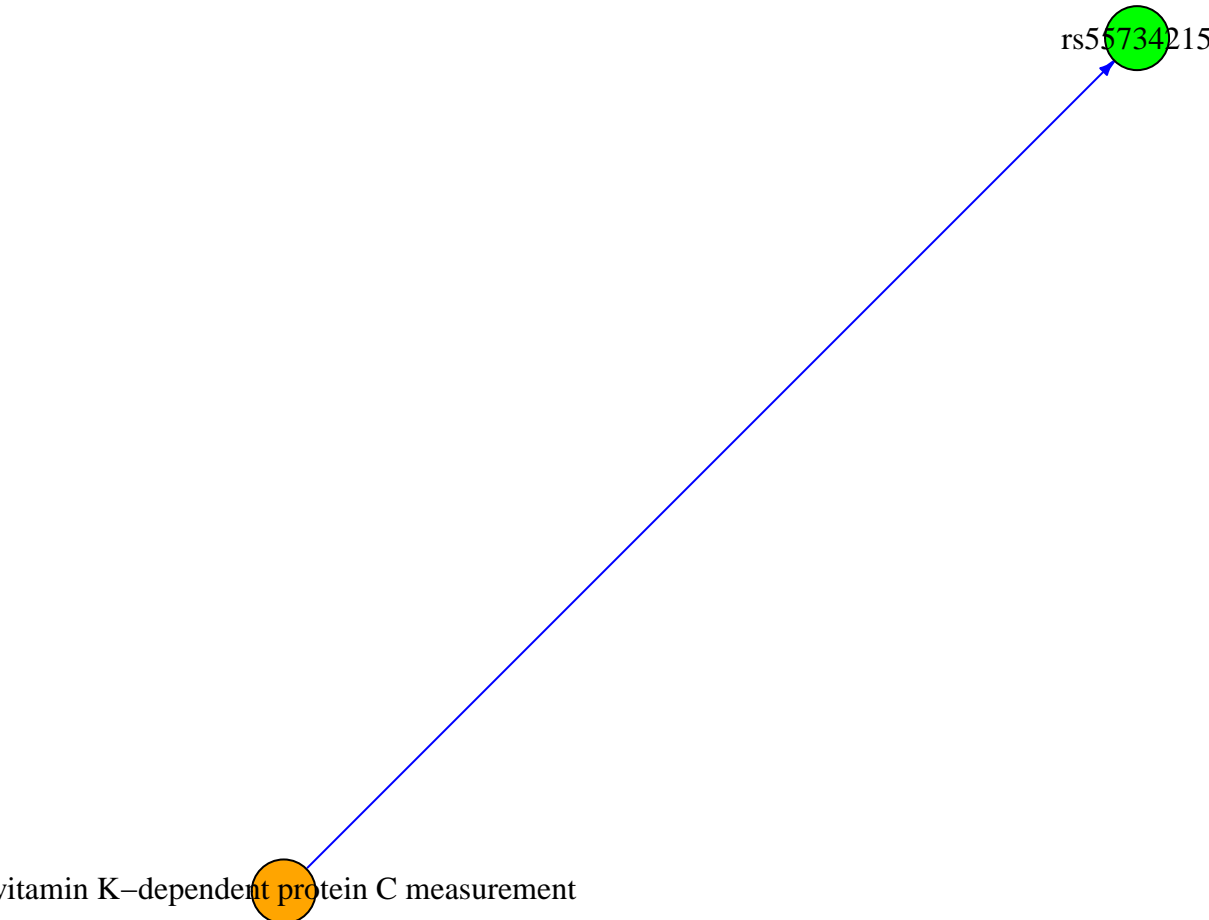

## Variant–Disease Network (squamous cell lung carcinoma)

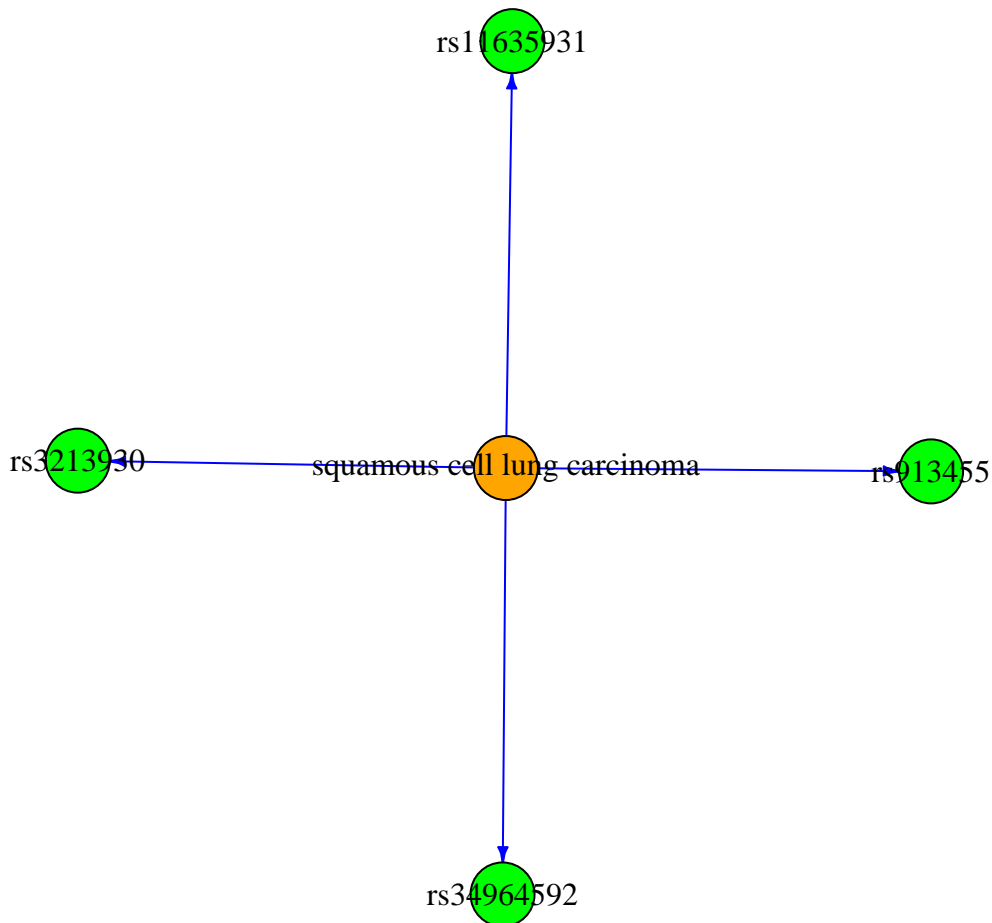

## Variant-Disease Network (ankylosing spondylitis)

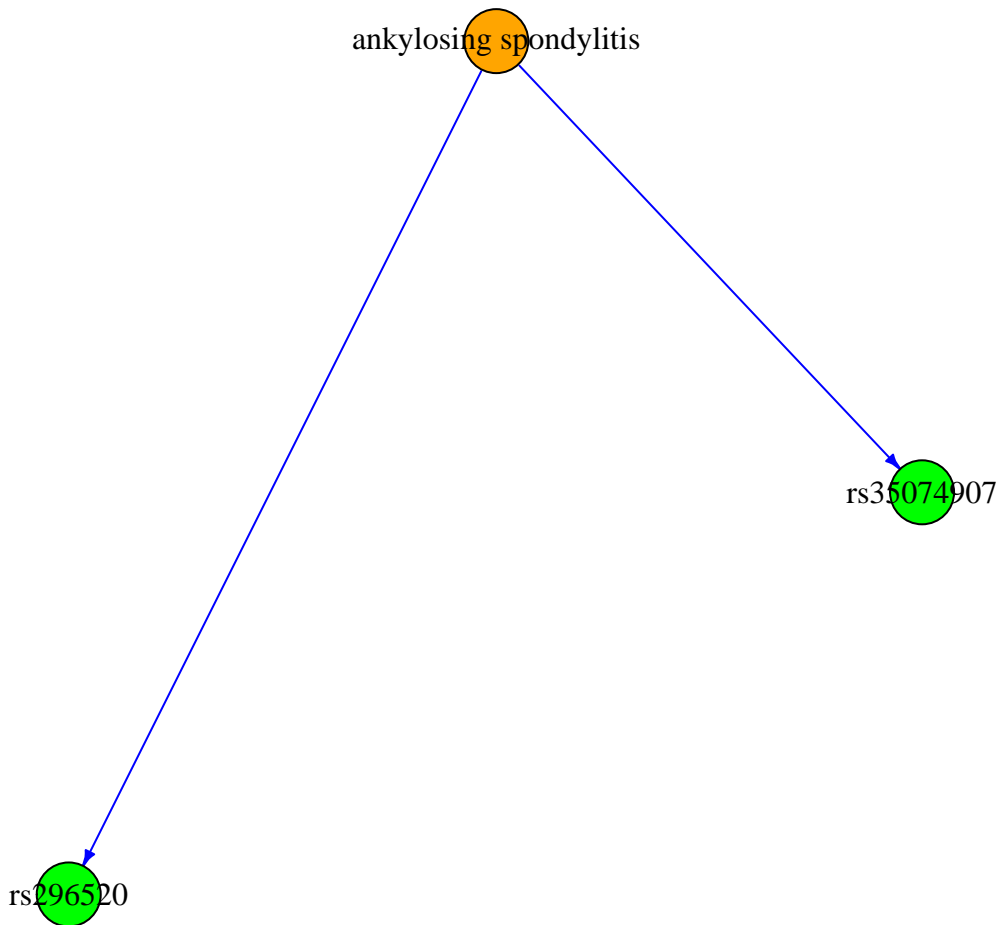

## Variant–Disease Network (sclerosing cholangitis)

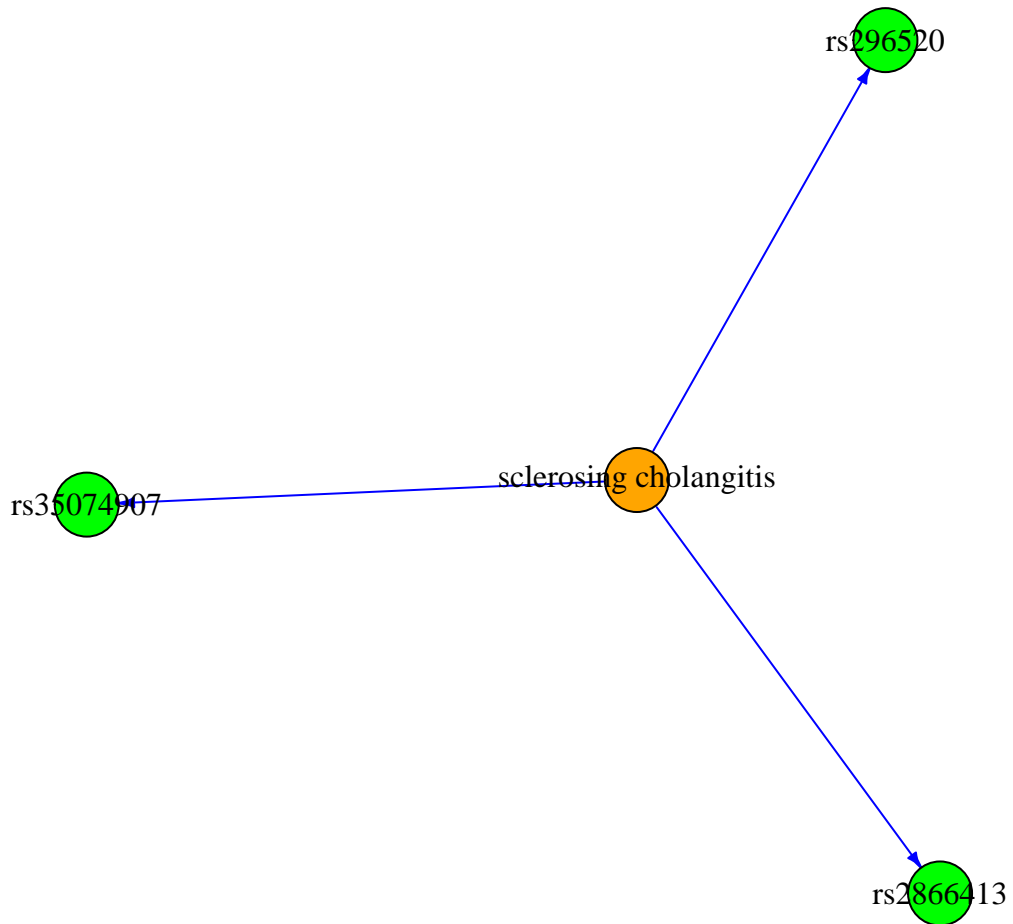

## Variant–Disease Network (asthma)

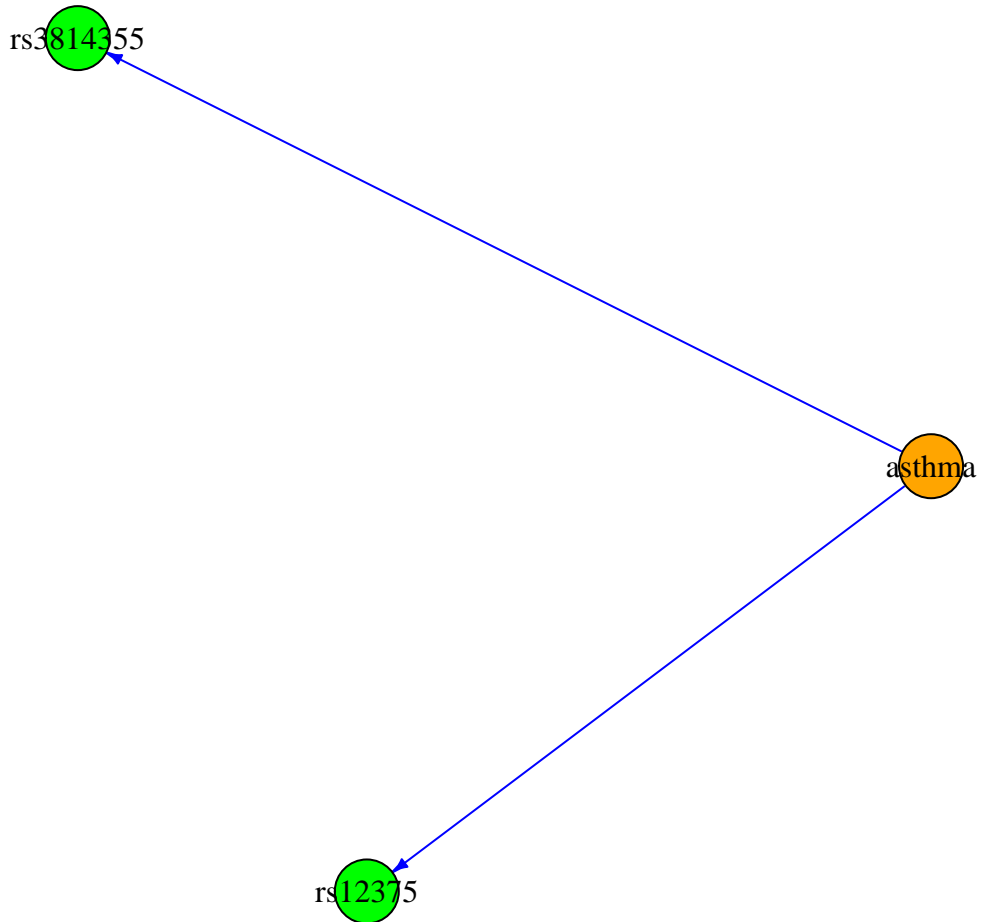

## Variant–Disease Network (response to diisocyanate)

response to diisocyanate

rs3814355





## Variant–Disease Network (reaction time measurement)

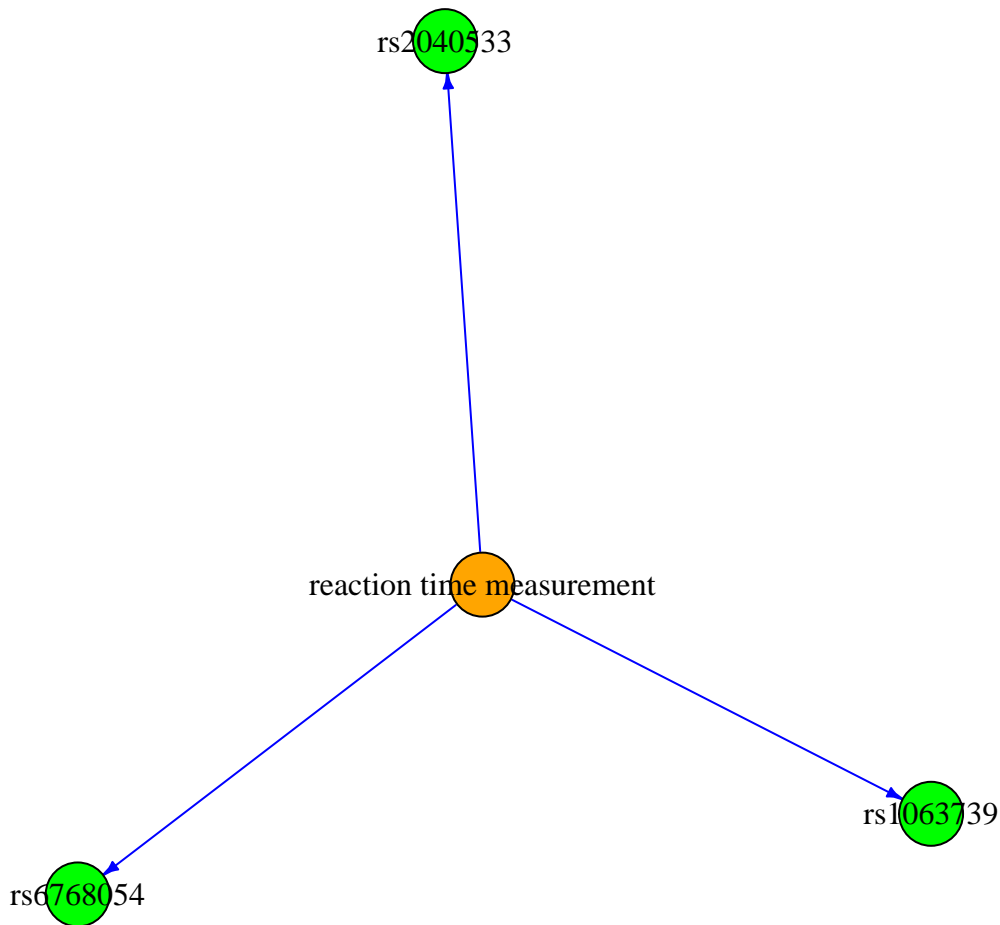

## Variant–Disease Network (small cell lung carcinoma)

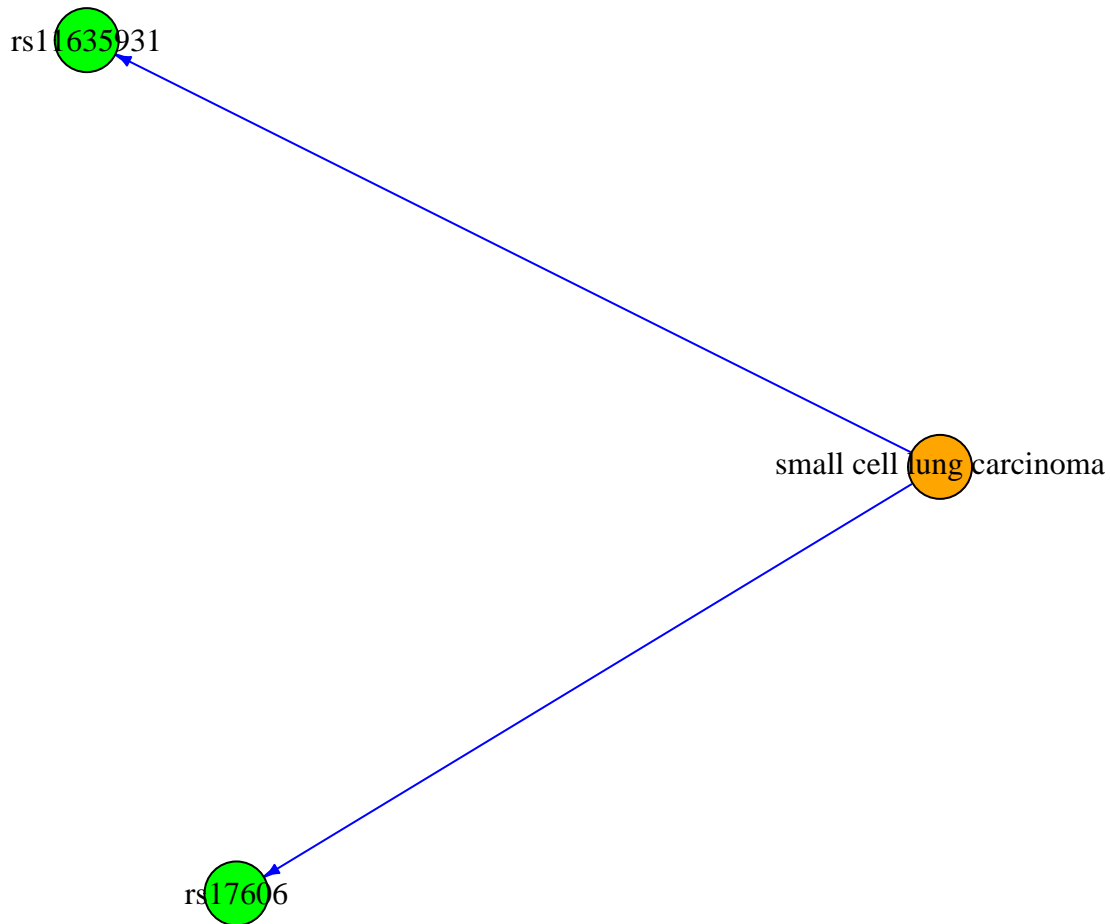

**Variant–Disease Network (lipoprotein measurement)**

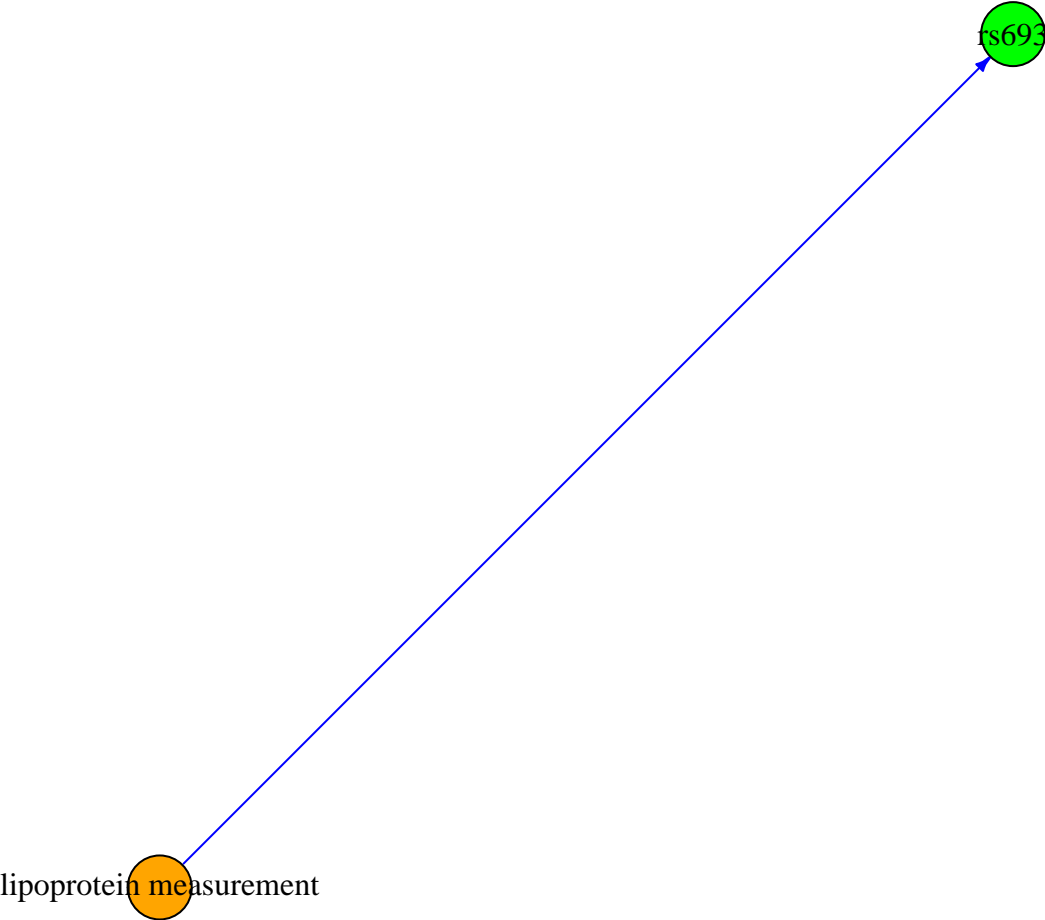

**Variant–Disease Network (homocysteine measurement)**

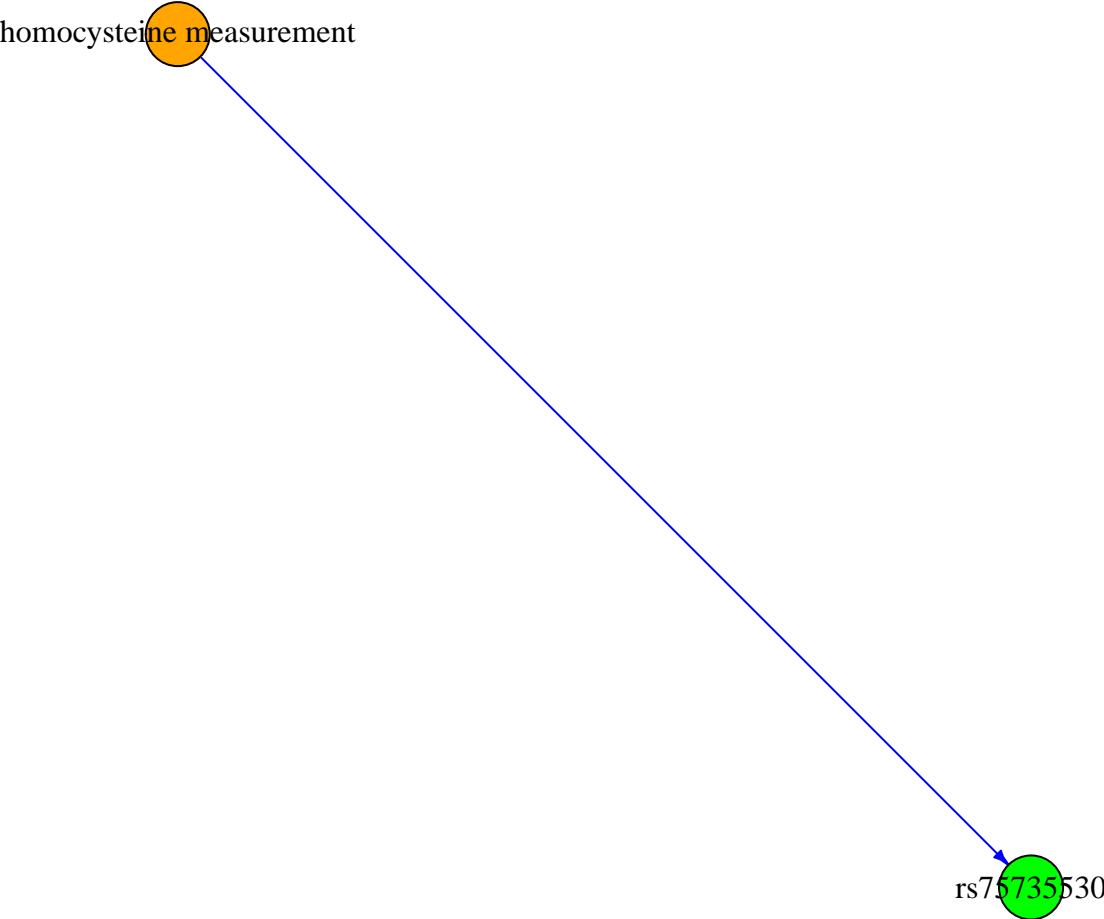

## Variant–Disease Network (age at menopause)

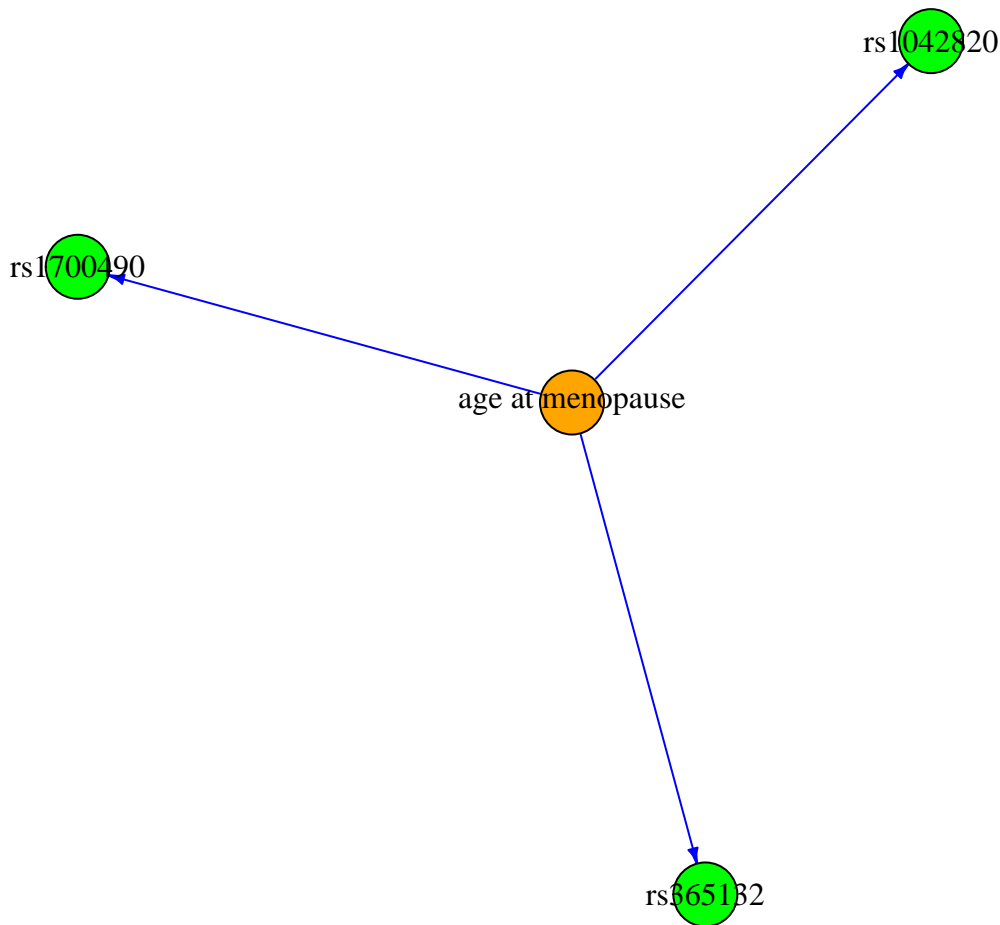

## Variant–Disease Network (uterine fibroid)

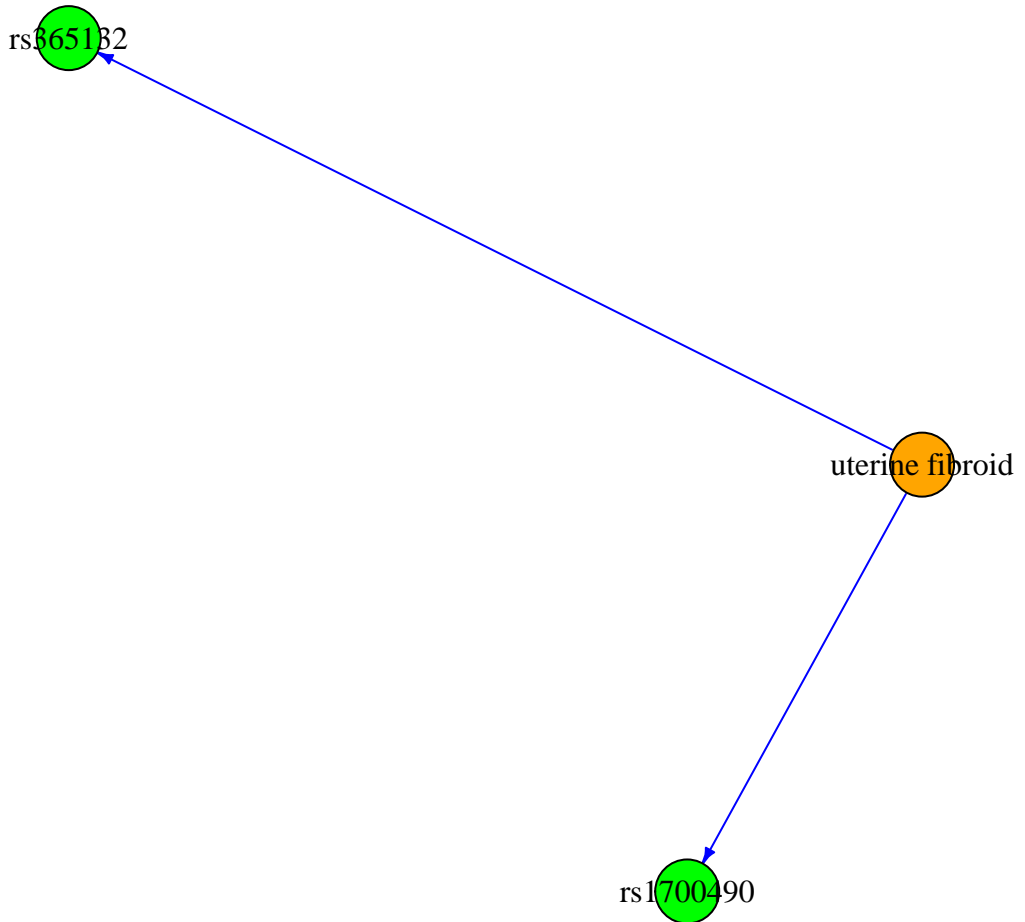

# Variant–Disease Network (depressive symptom measurement)

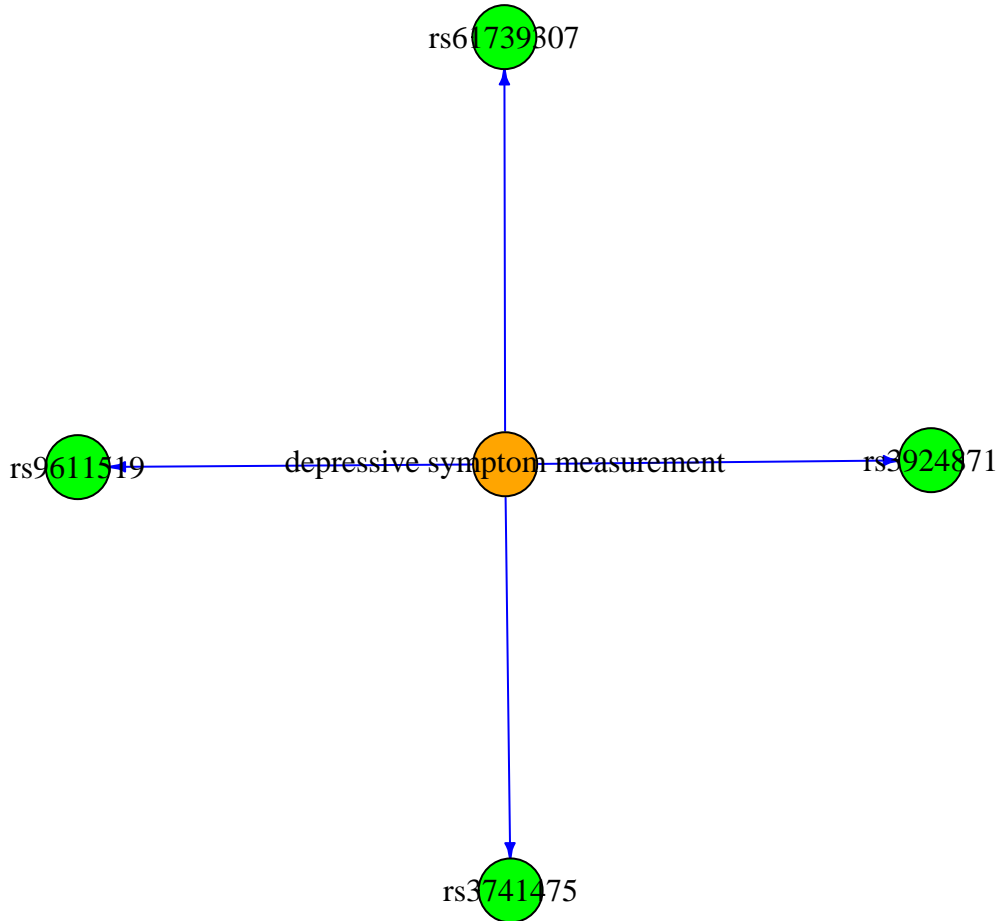

# Variant–Disease Network (1,5 anhydroglucitol measurement)

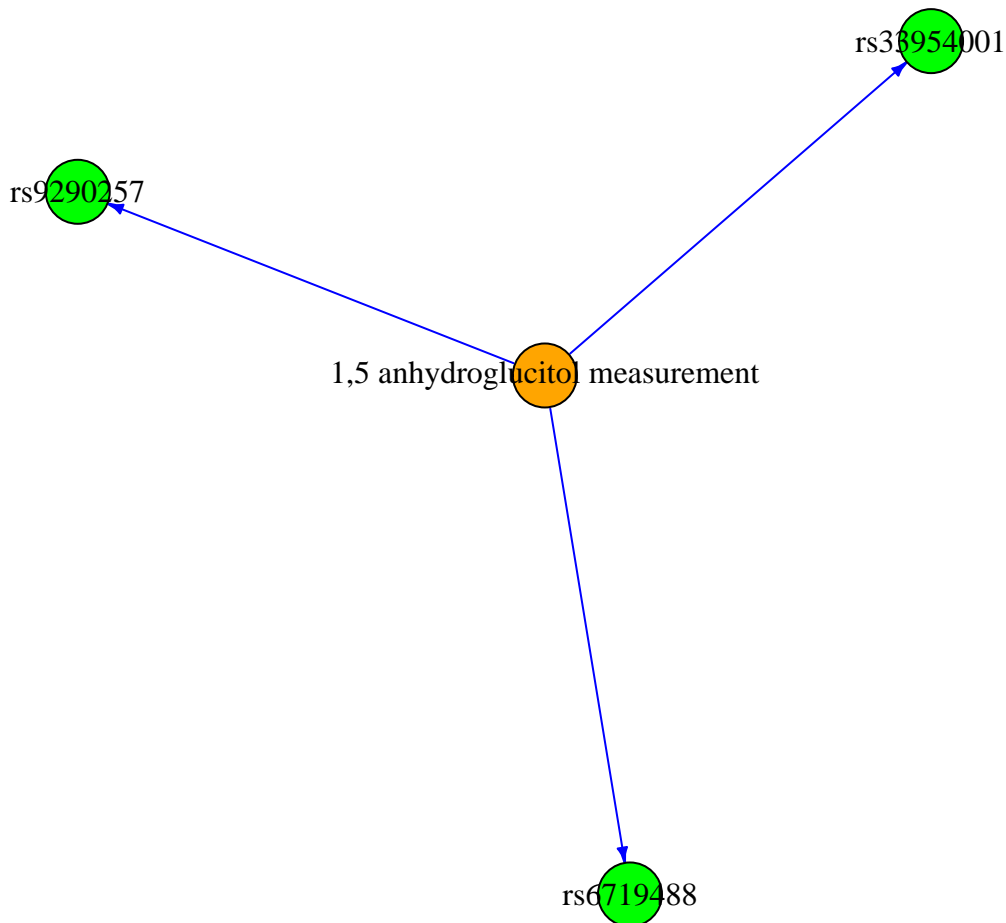



## Variant–Disease Network (age at assessment)

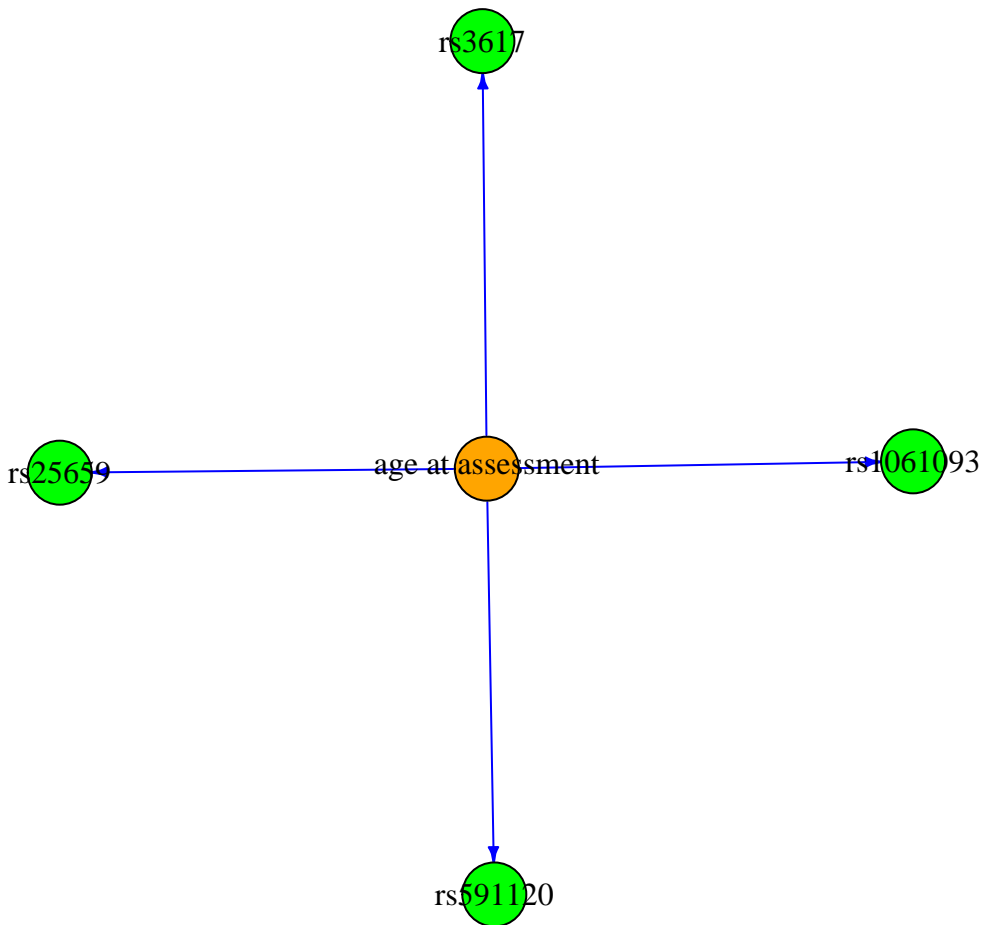

# Variant–Disease Network (BMI-adjusted waist–hip ratio)

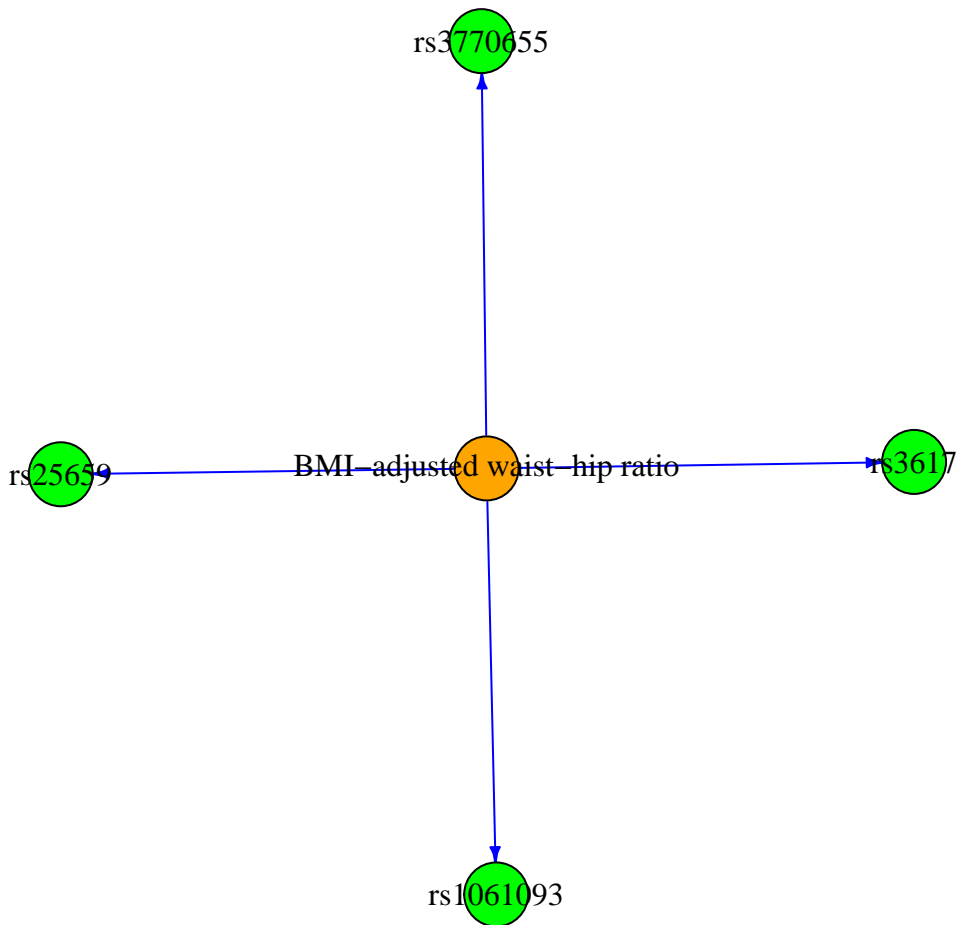

# Variant–Disease Network (sex interaction measurement)

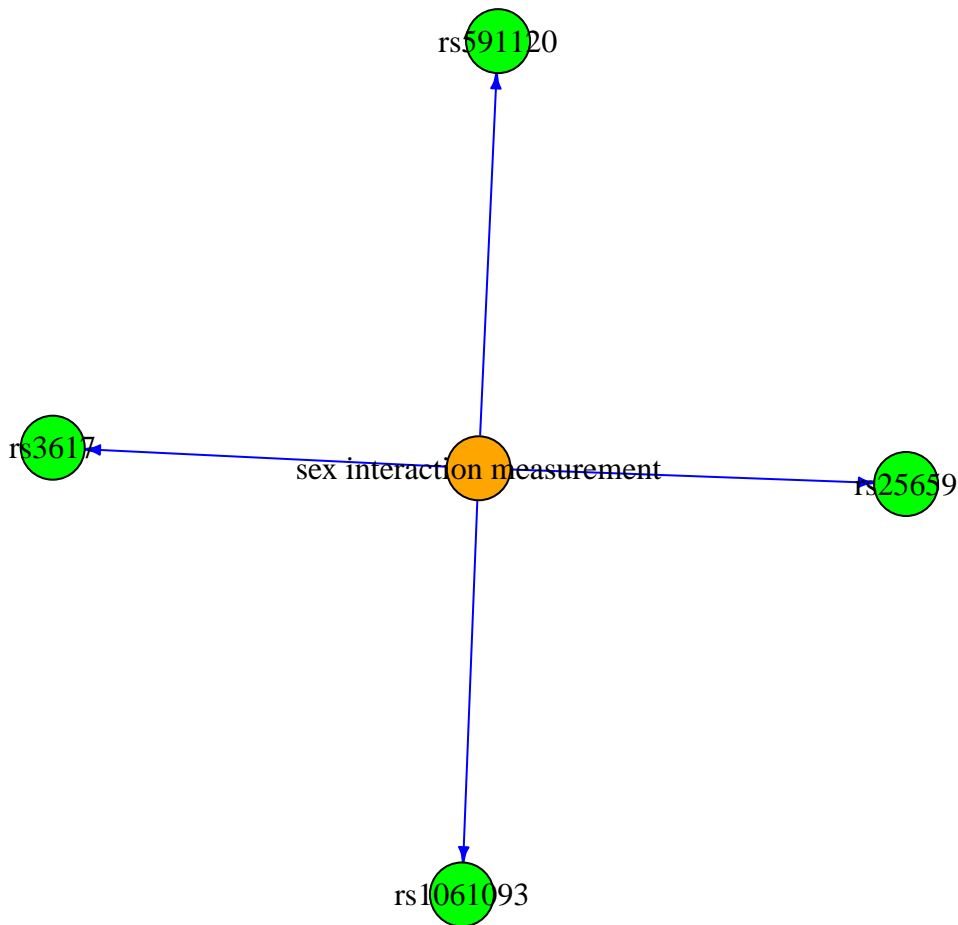

## Variant-Disease Network (age-related hearing impairment)

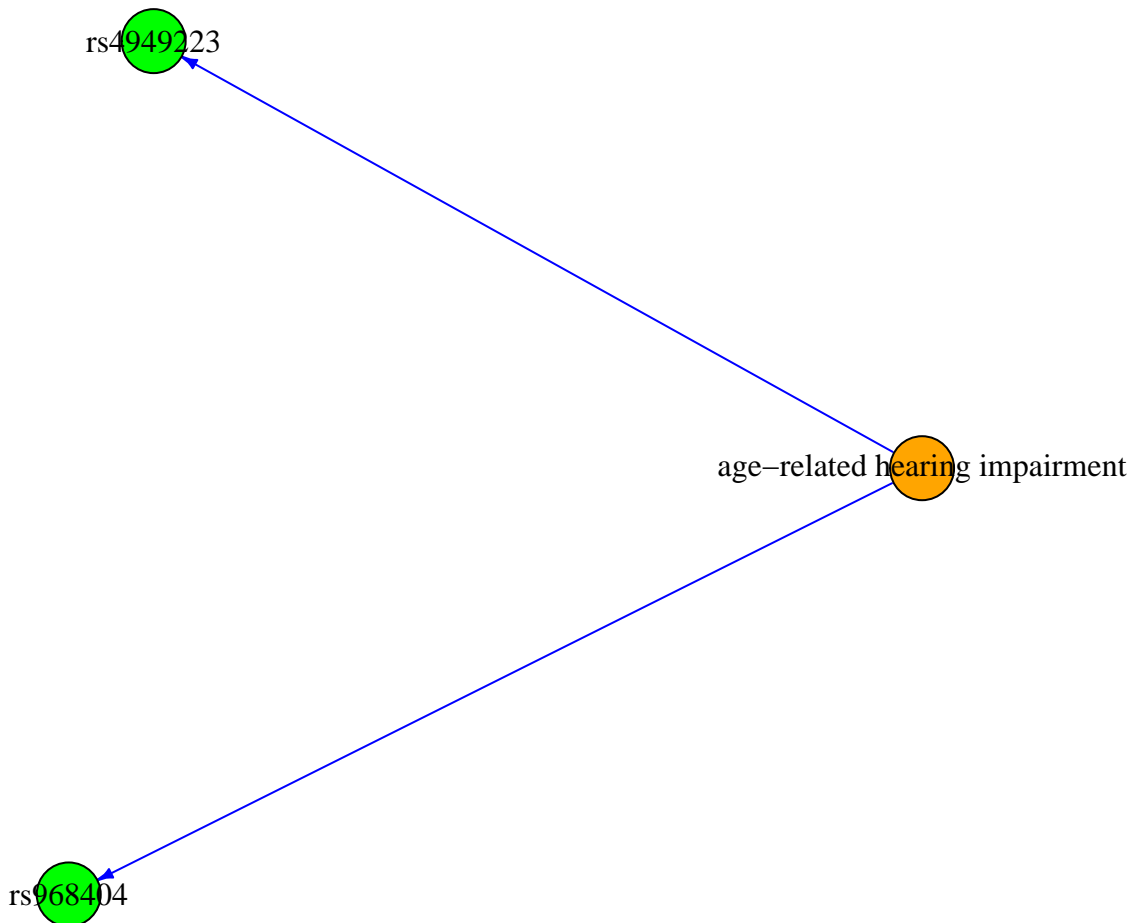

## Variant–Disease Network (coronary heart disease)

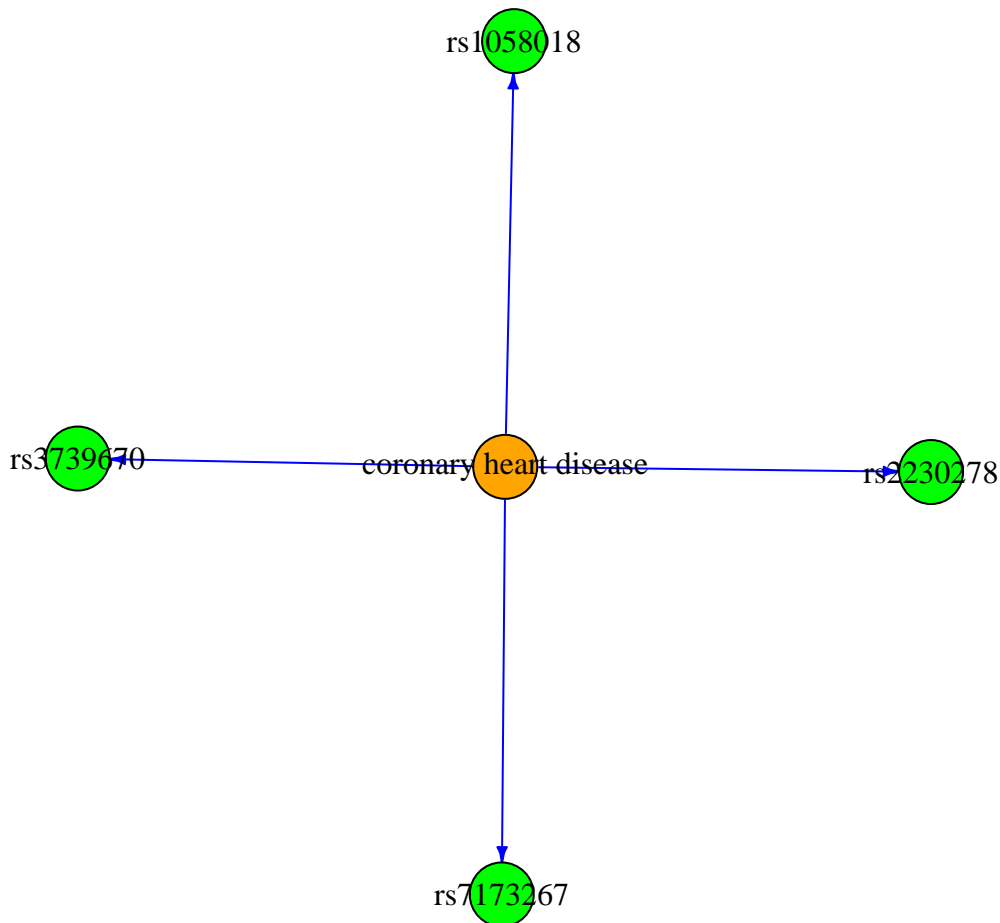

## Variant–Disease Network (interleukin–6 measurement)

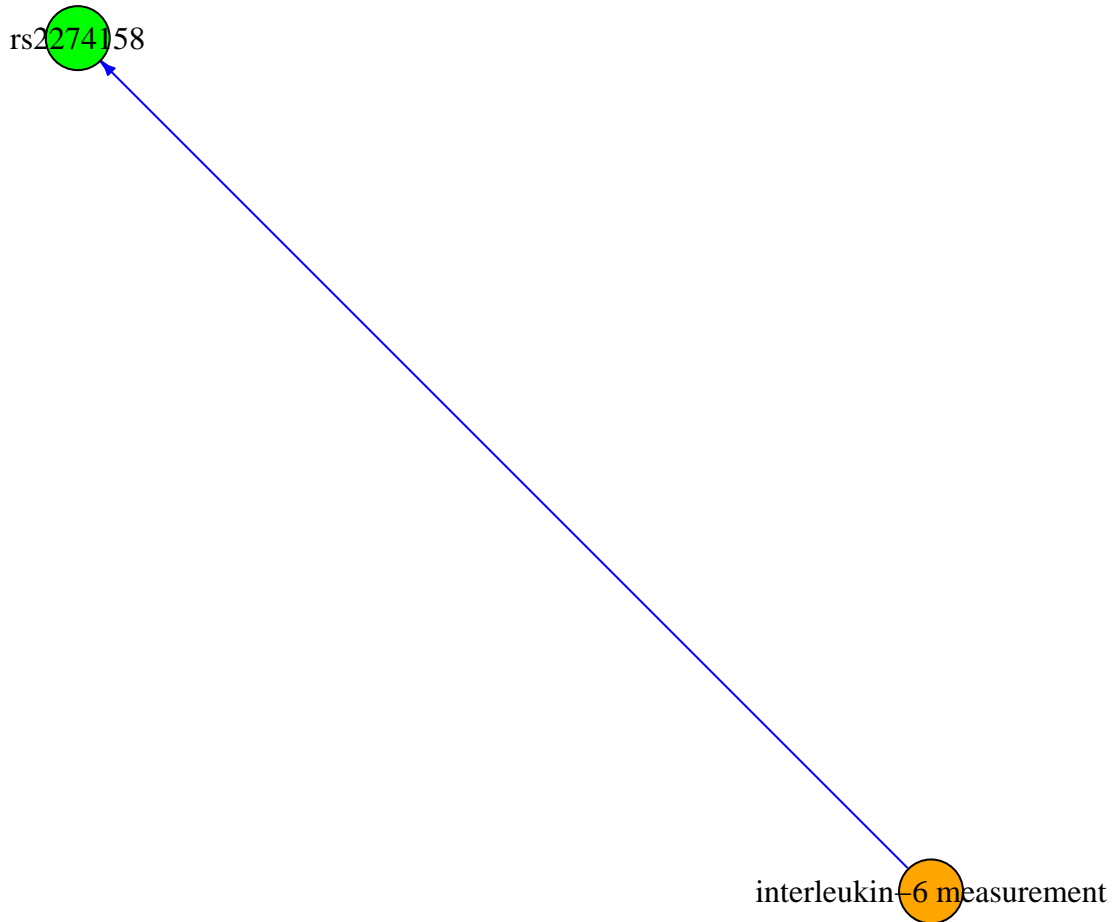

## Variant–Disease Network (basophil count)

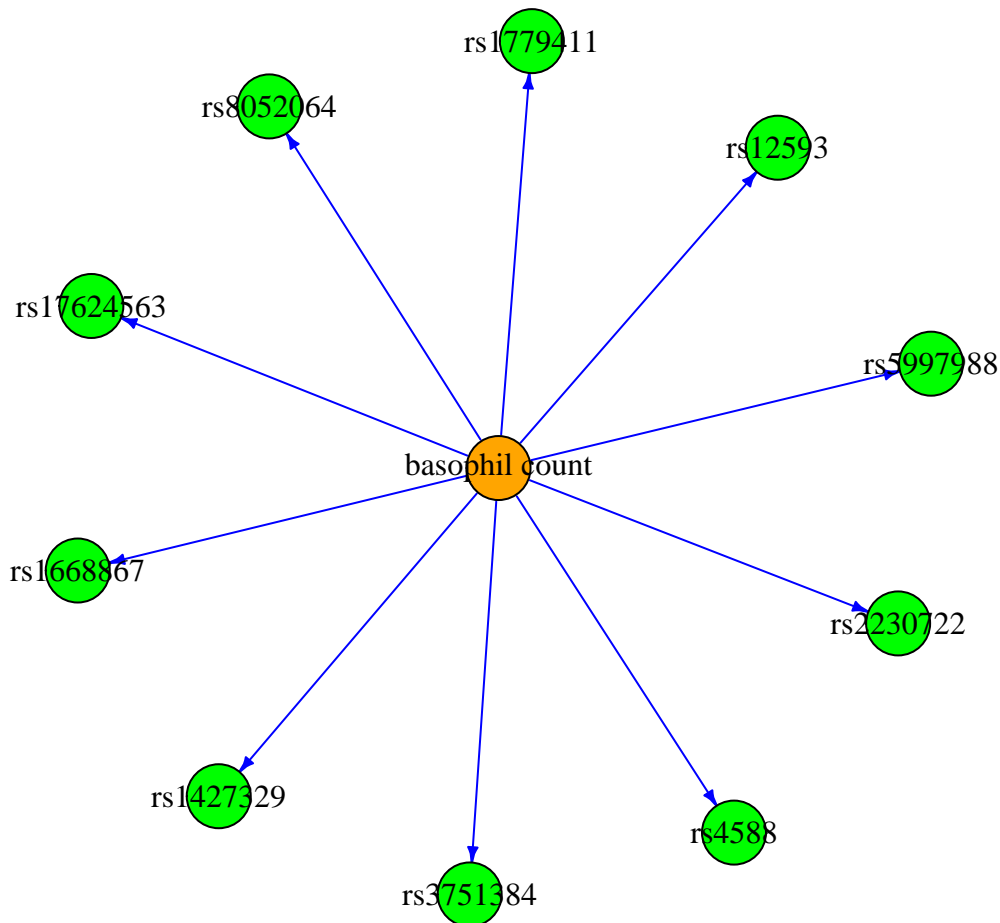

## Variant-Disease Network (eosinophil count)

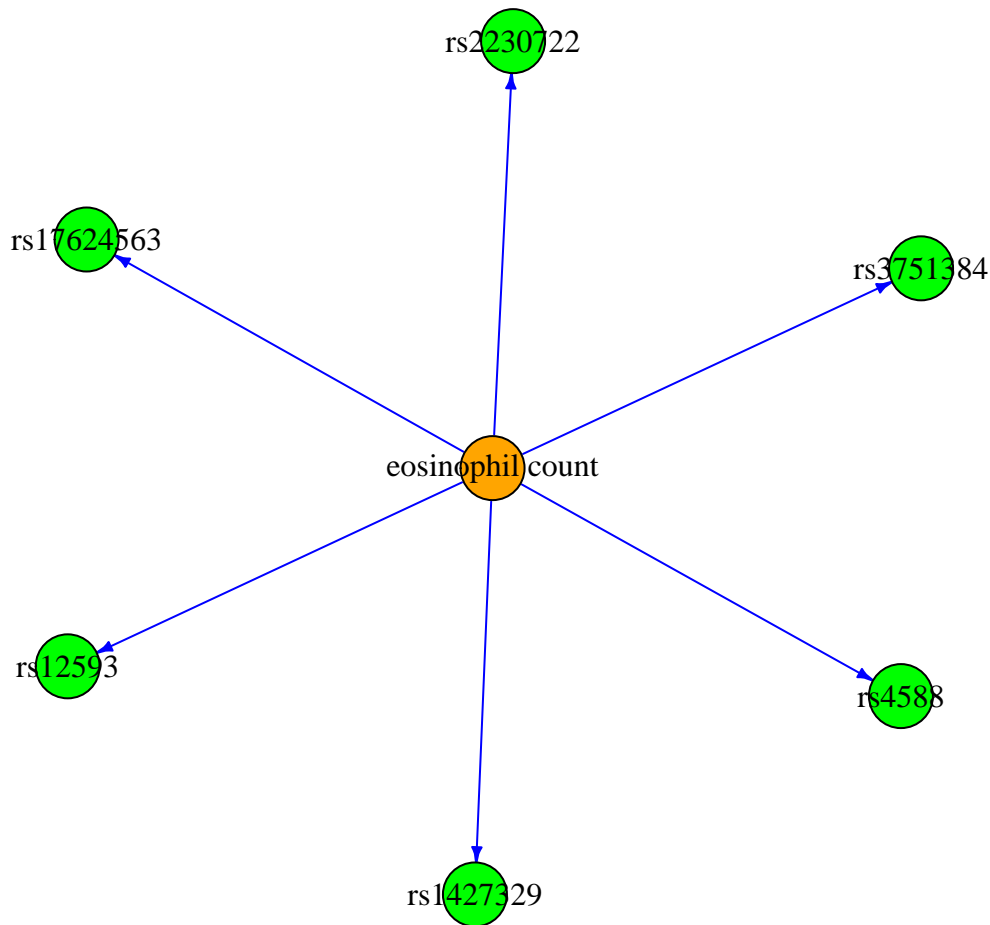



**Variant–Disease Network (myeloproliferative disorder)**

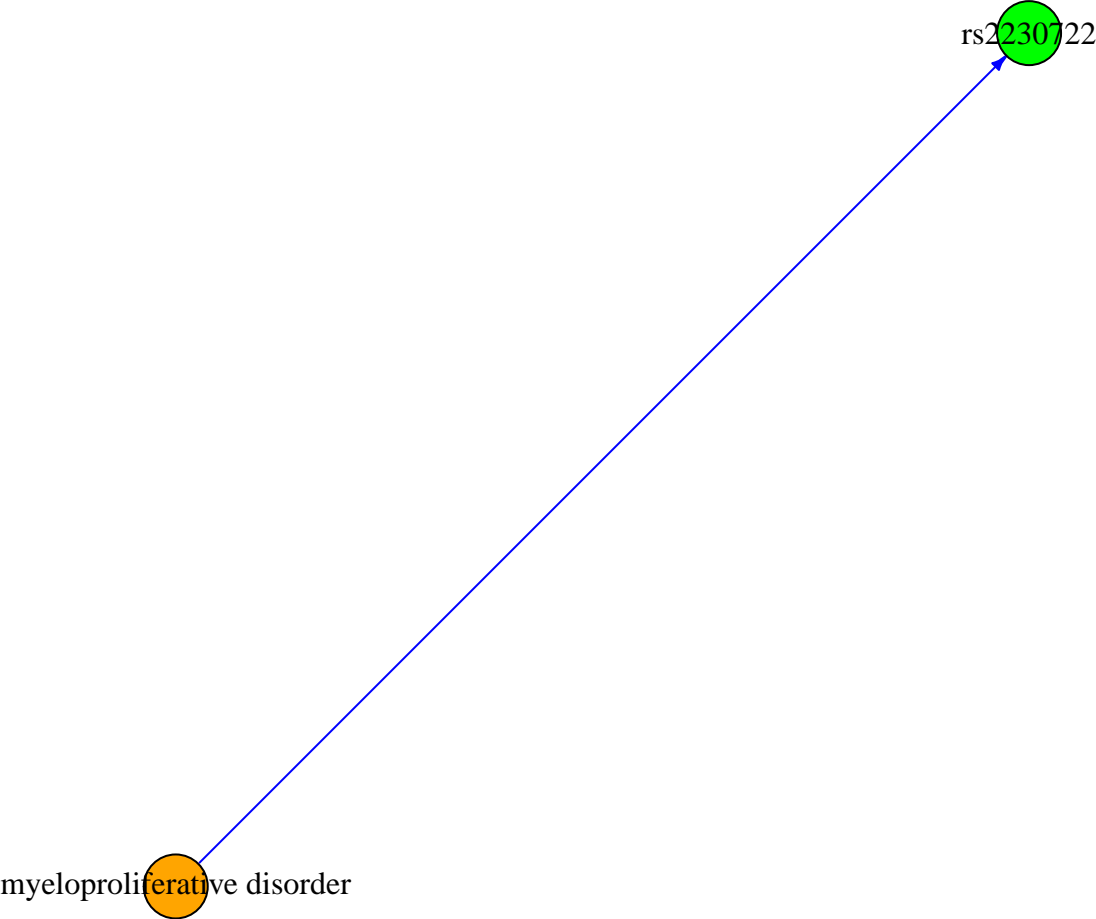

## Variant–Disease Network (creatinine clearance measurement)

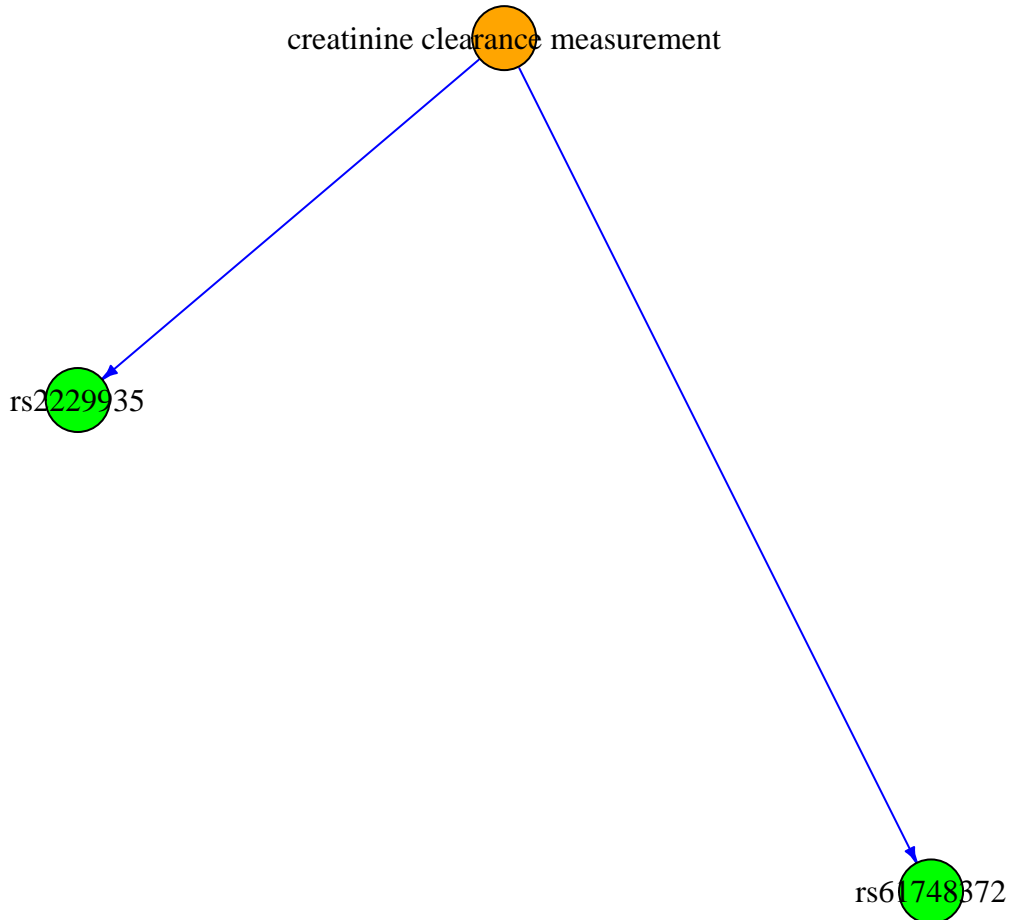

## Variant–Disease Network (HIV infection)

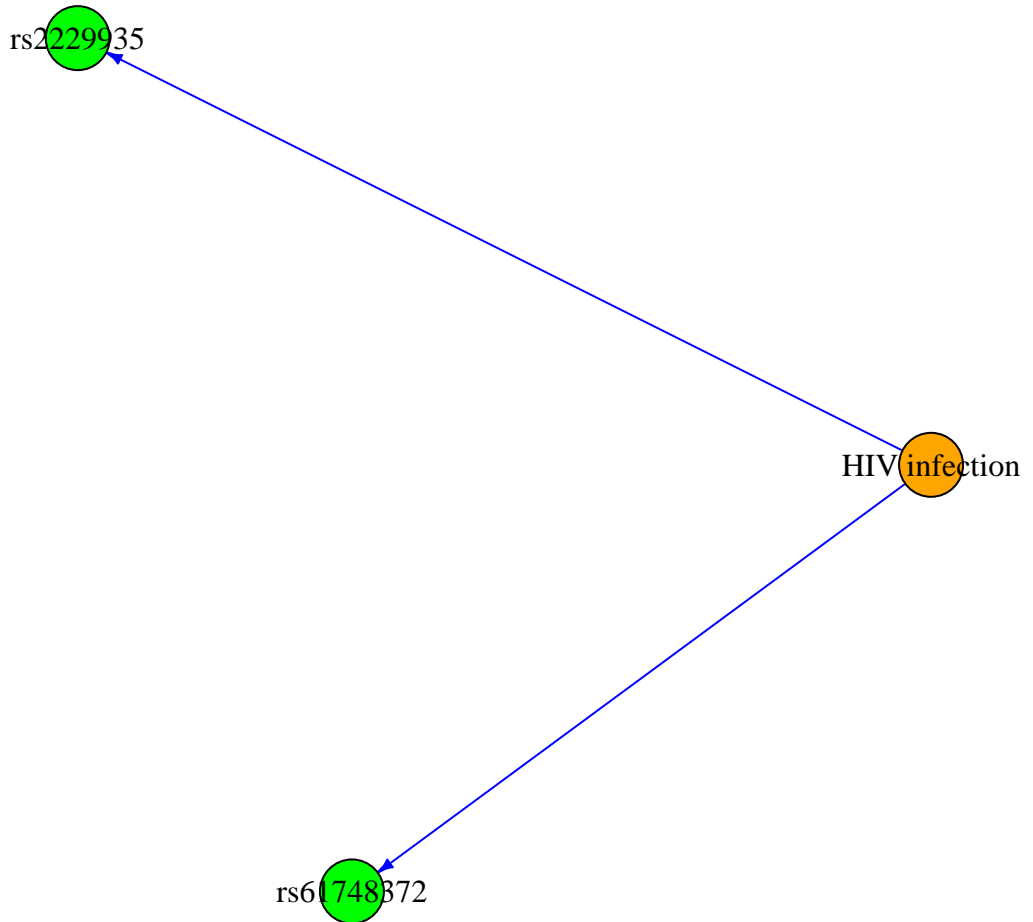

## Variant–Disease Network (response to tenofovir)

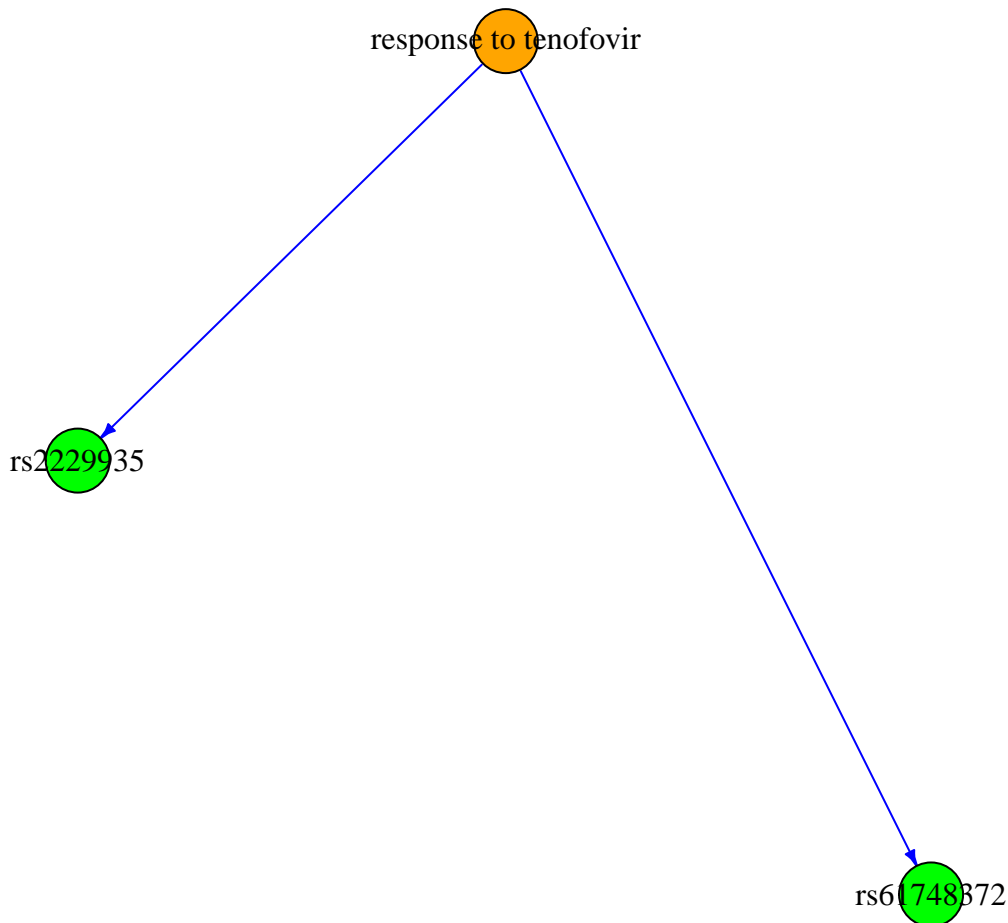

**Variant–Disease Network (brain serotonin transporter measurement)**

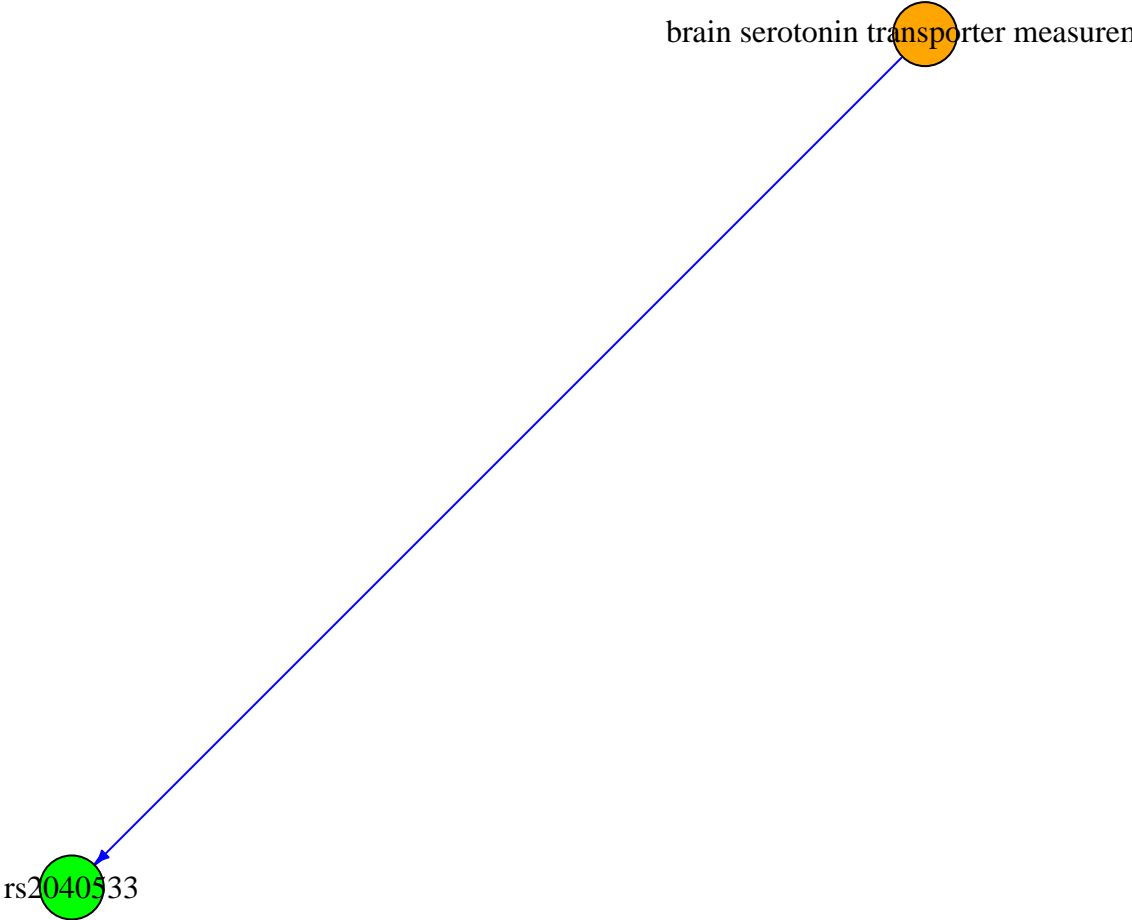

## Variant–Disease Network (diabetic nephropathy)

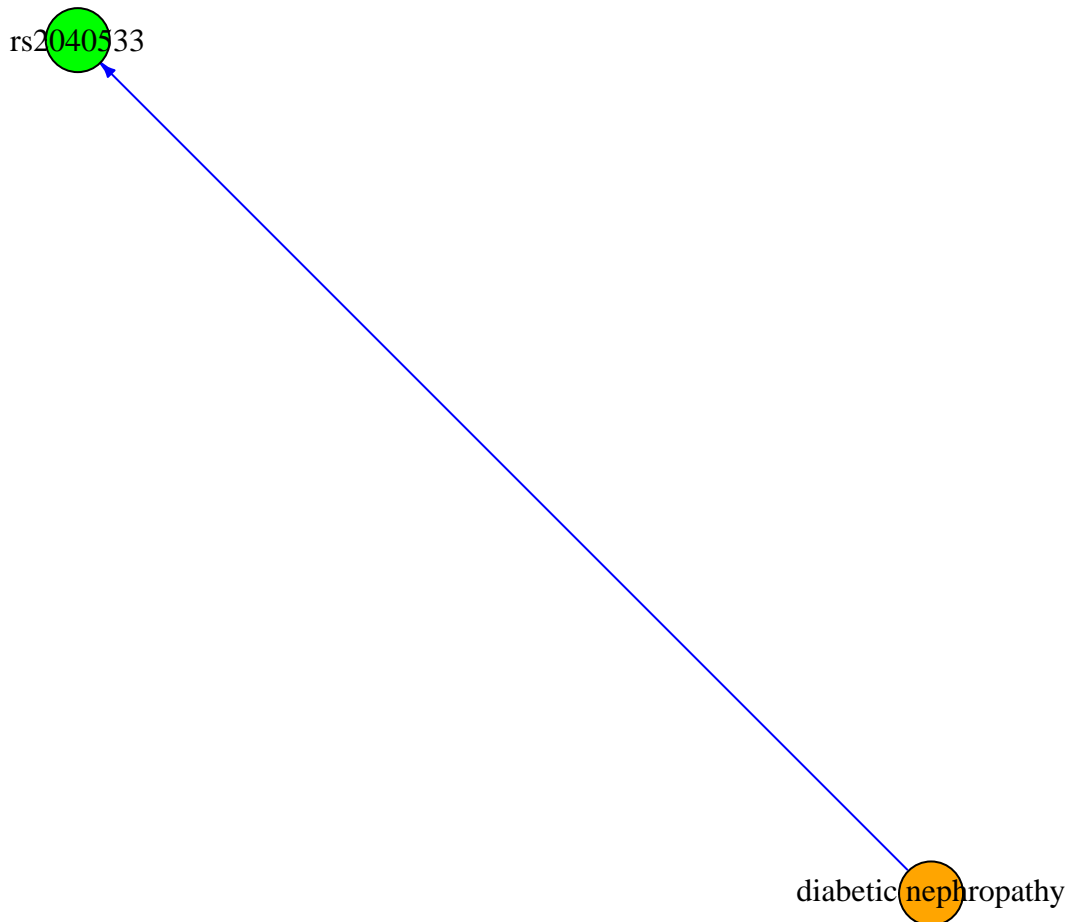

## Variant–Disease Network (response to paclitaxel)

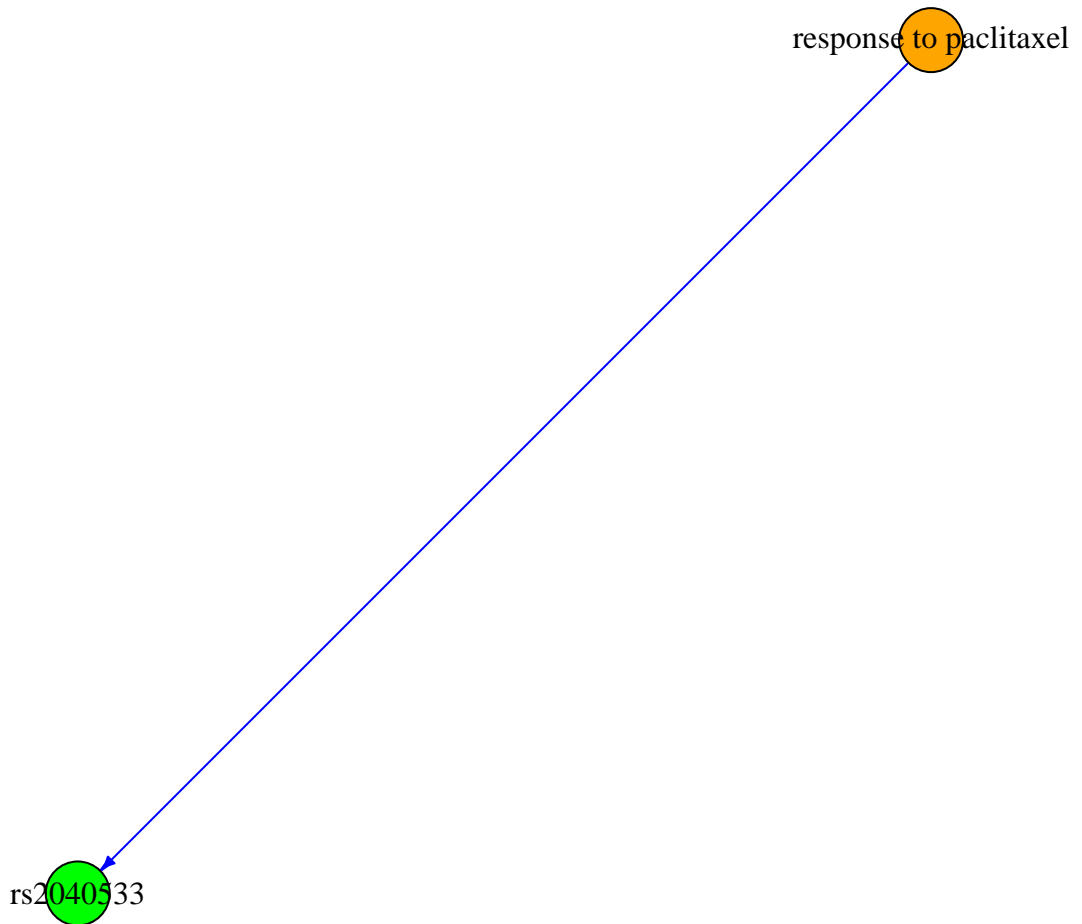

**Variant–Disease Network (glucagon–like peptide–1 measurement)**

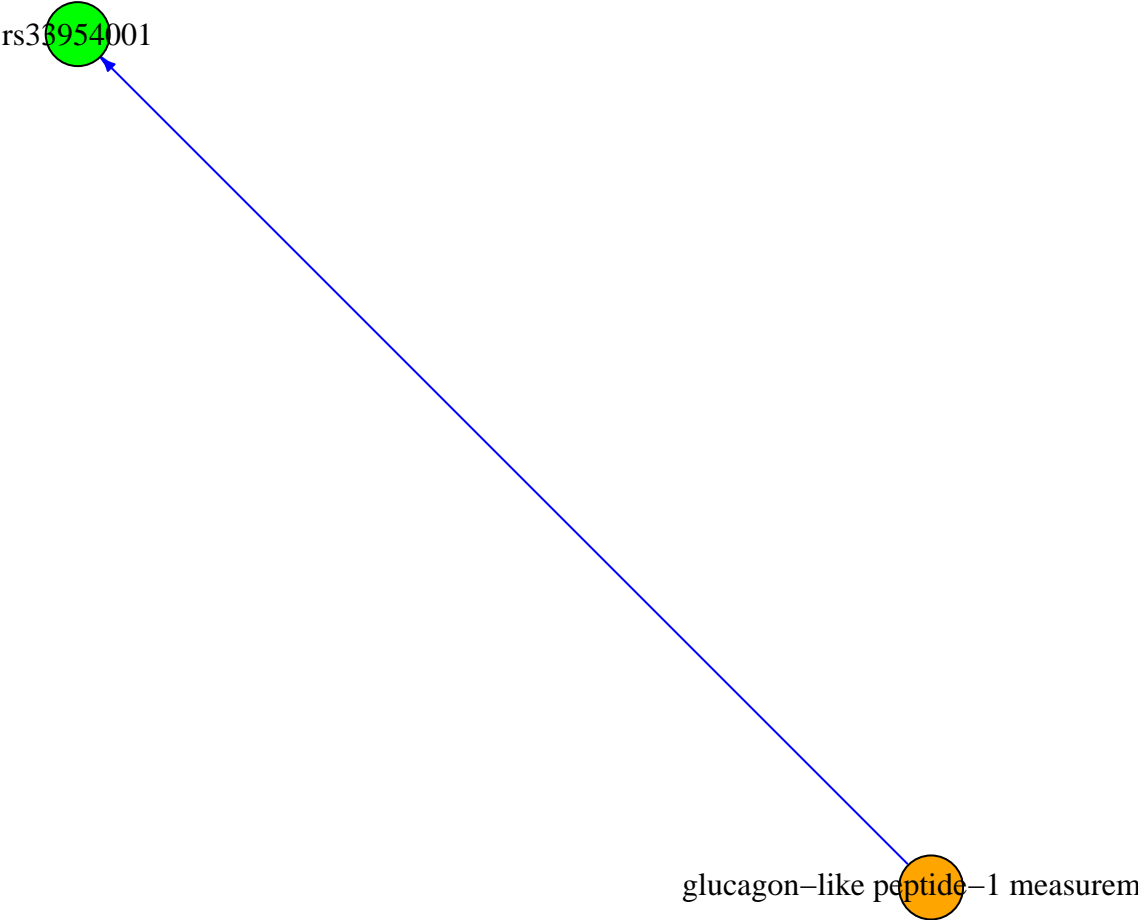



# ant-Disease Network (glucose-dependent insulintropic peptide (GIP) meas

rs31954001

glucose-dependent insulintropic peptide (GIP

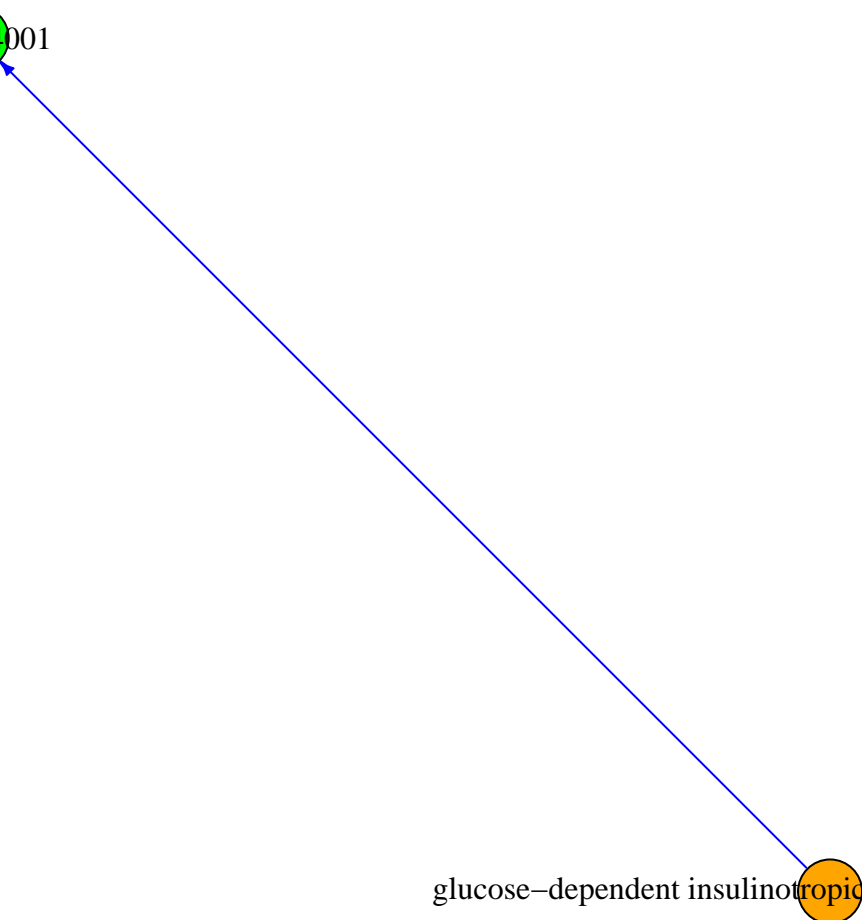

## Variant–Disease Network (glucose tolerance test)

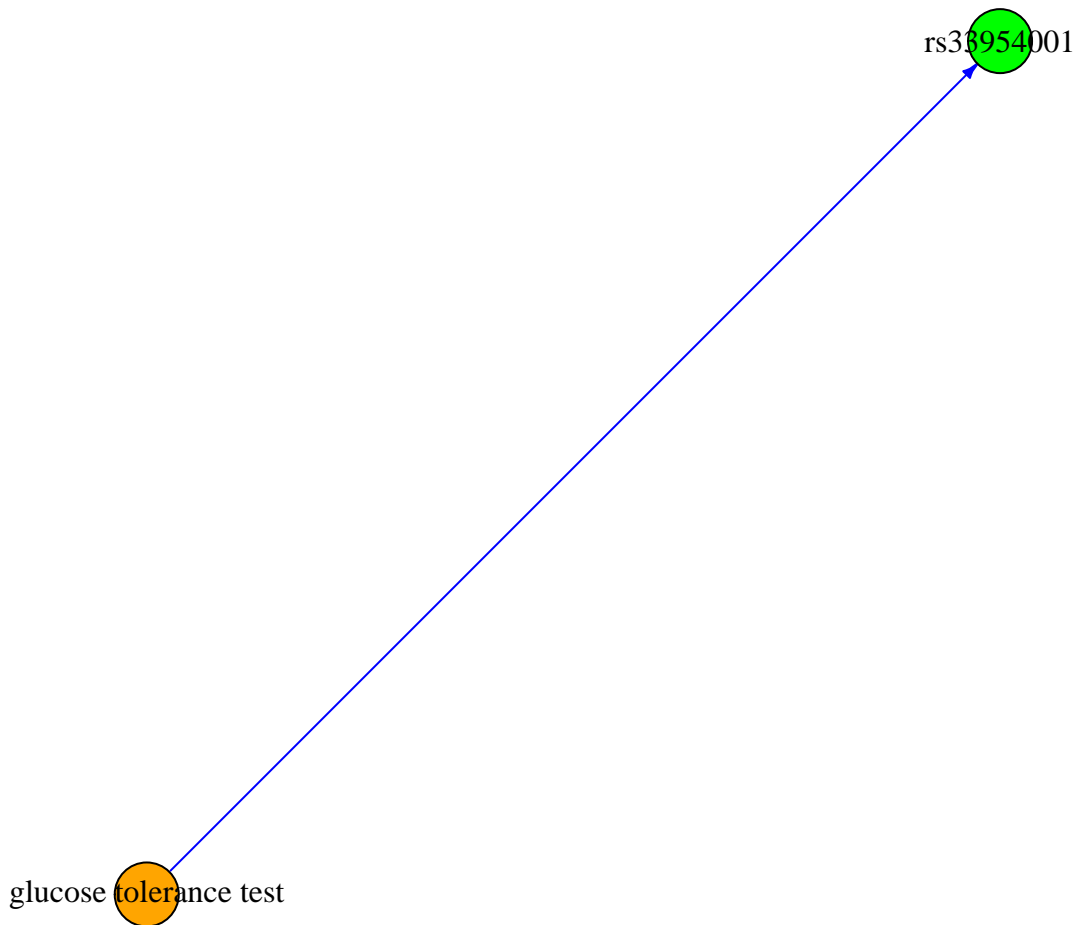

# Variant–Disease Network (non–alcoholic fatty liver disease)

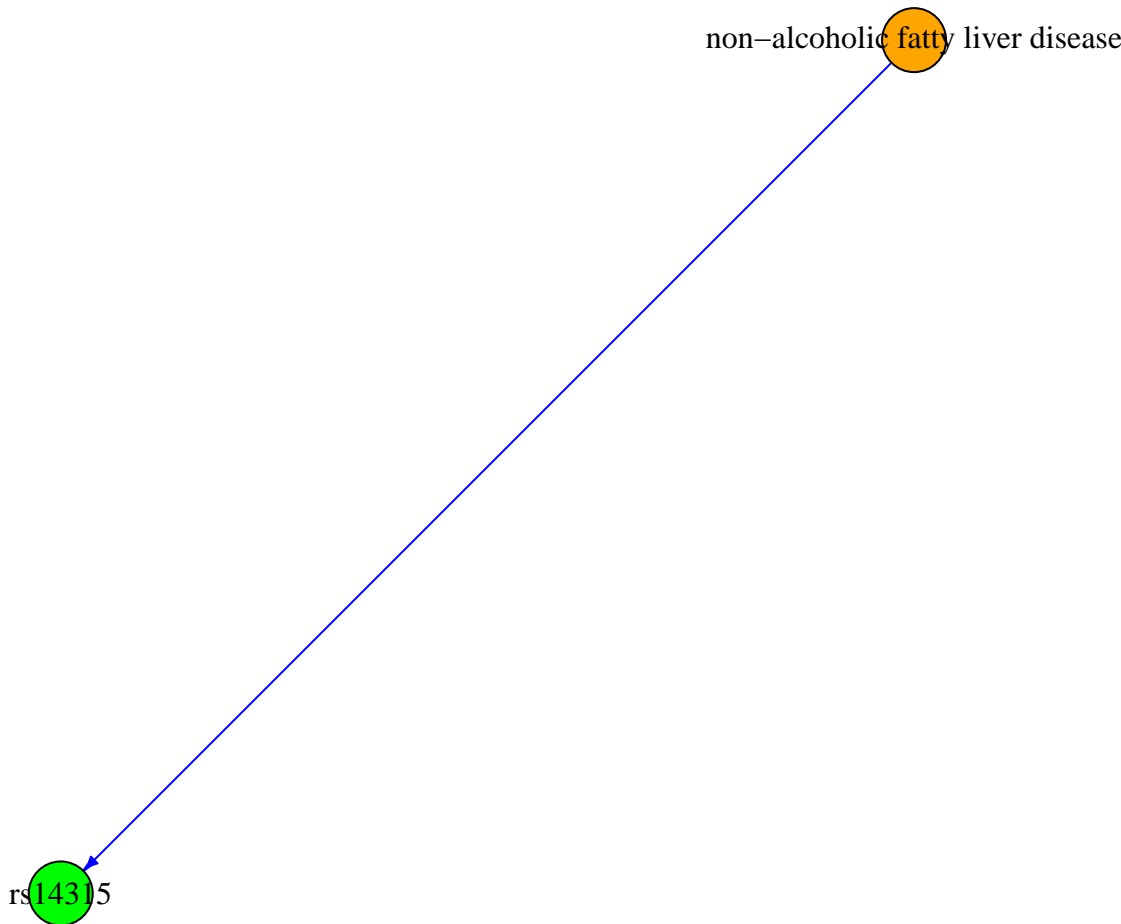

## Variant–Disease Network (vitamin D measurement)

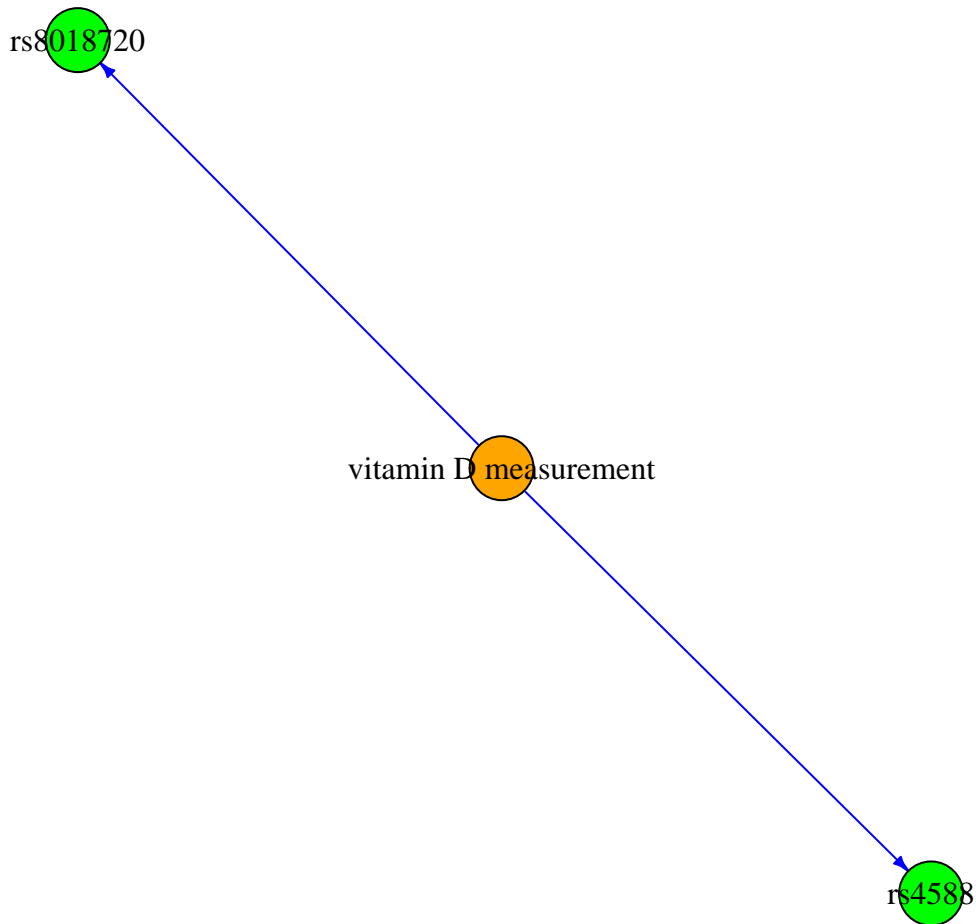

## Variant-Disease Network (telomere length)

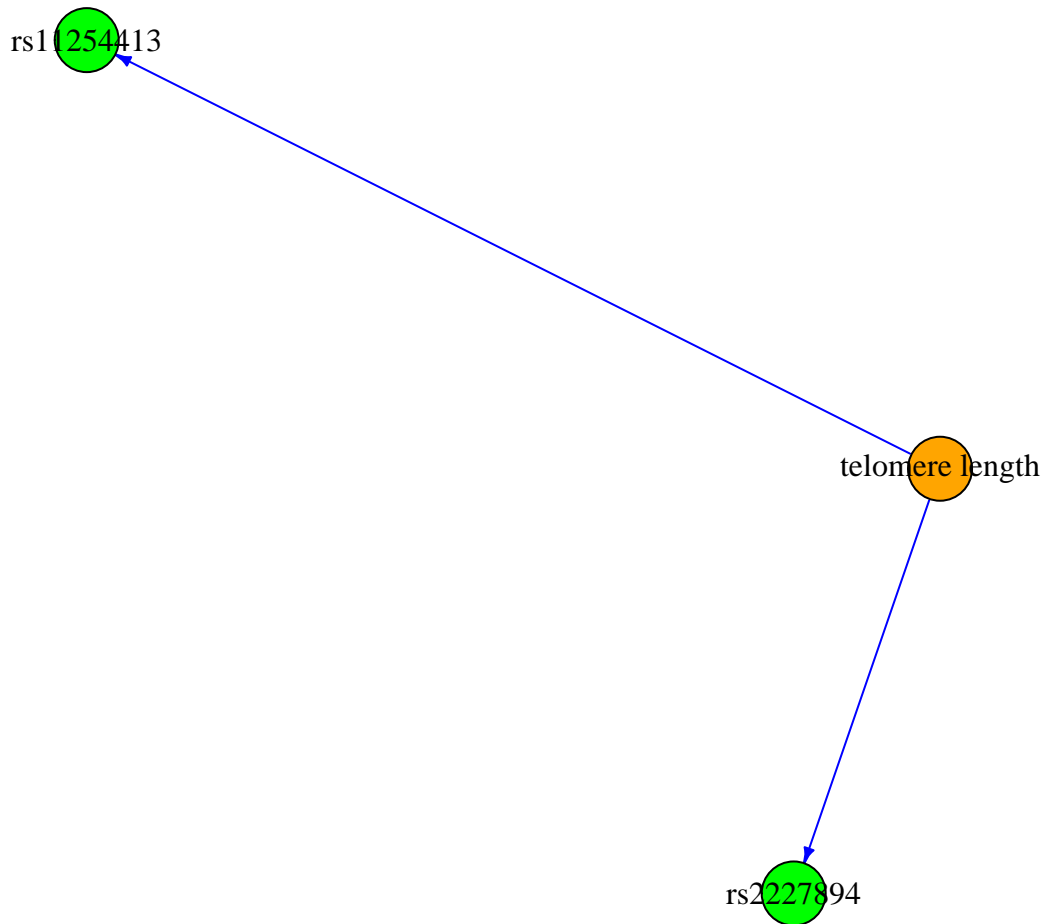

## Variant–Disease Network (alkaline phosphatase measurement)

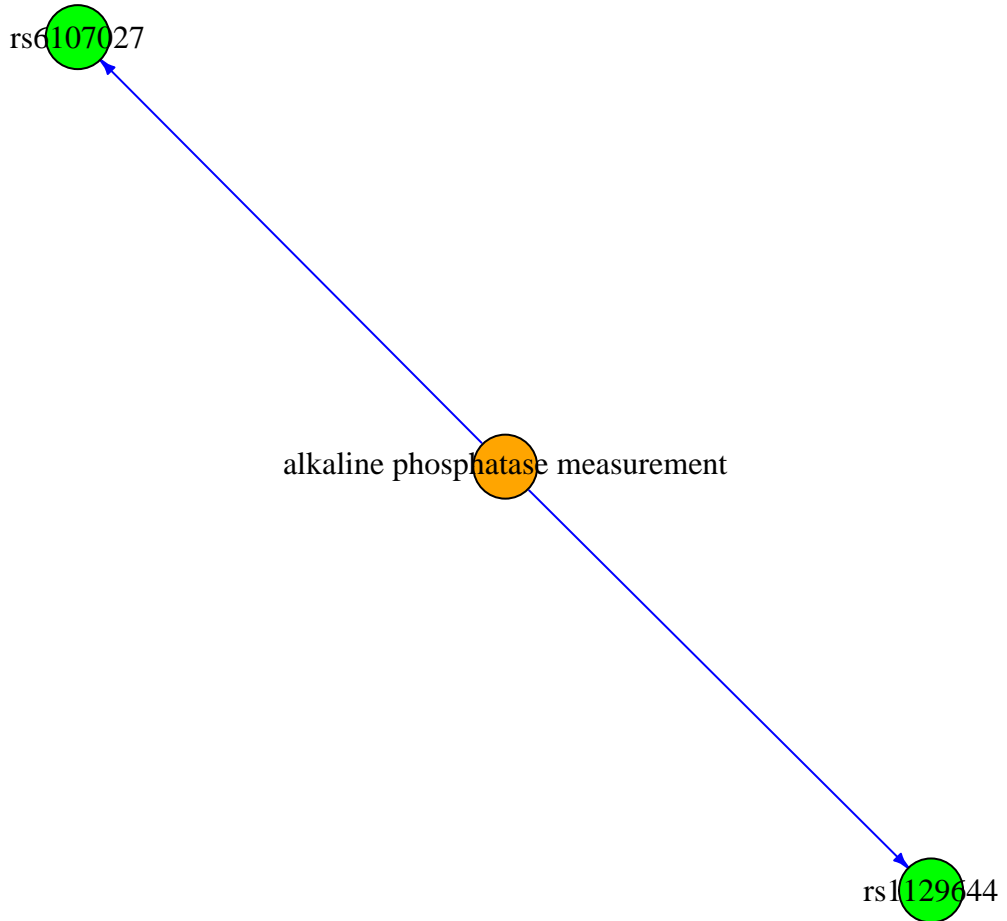

## Variant-Disease Network (eating disorder)

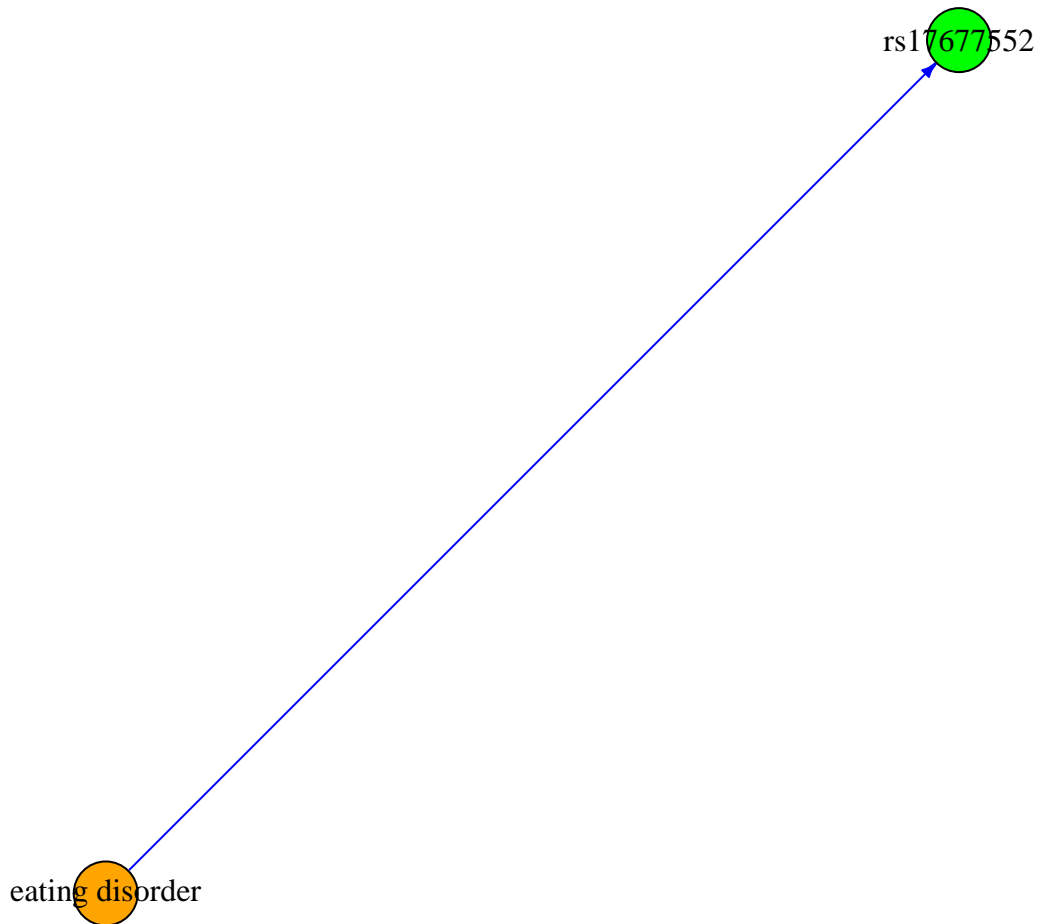

Variant–Disease Network (anti–neutrophil antibody associated vasculitis

rs9525984

anti–neutrophil antibody associated vas

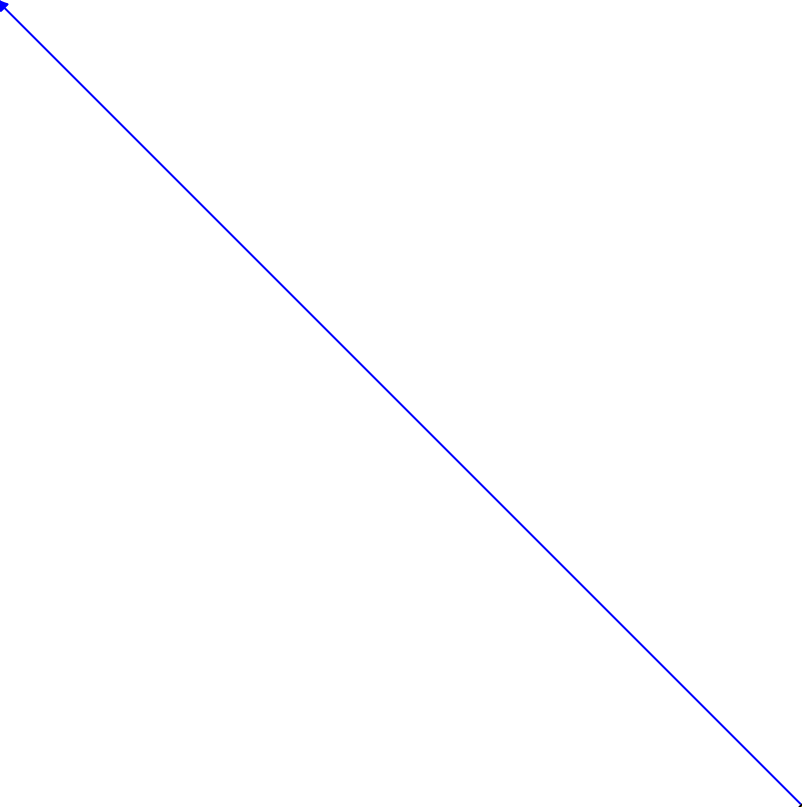



## Variant–Disease Network (disease progression measurement)

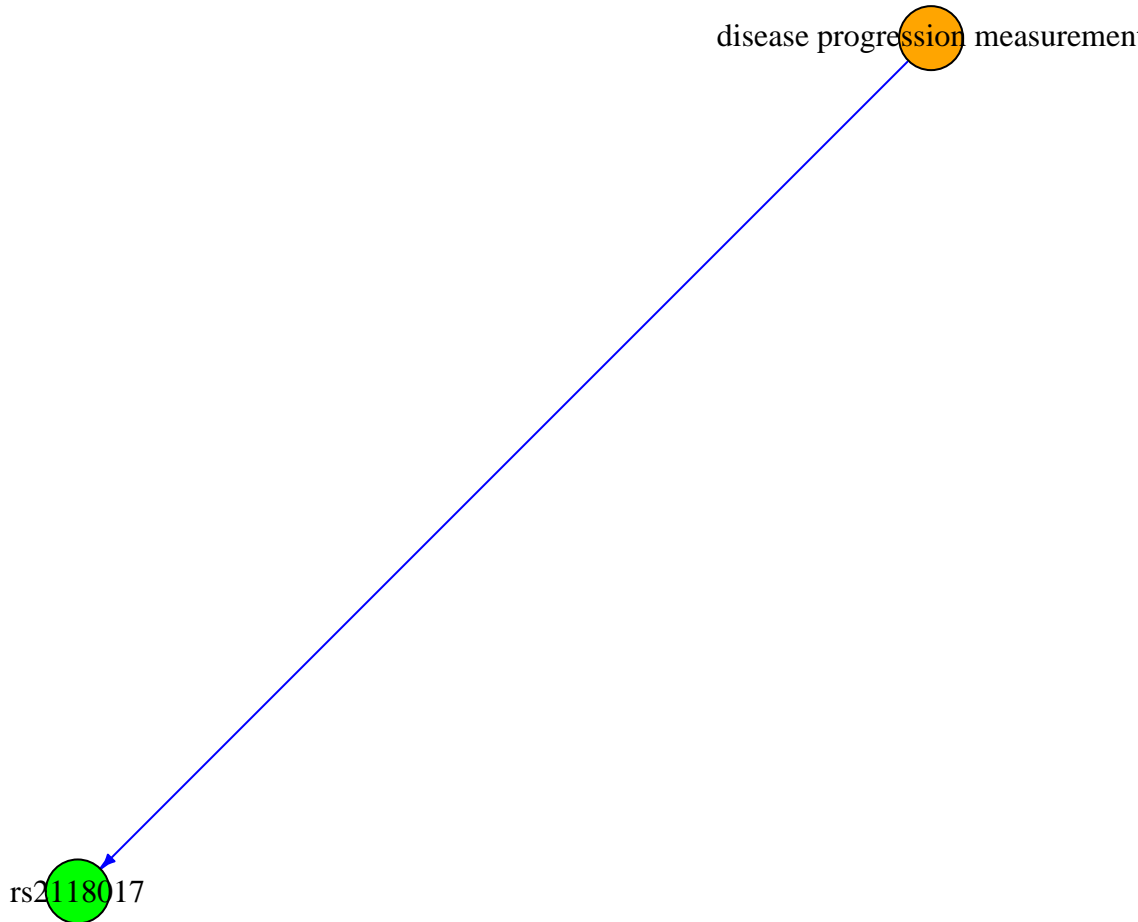

## Variant–Disease Network (response to mTOR inhibitor)

response to mTOR inhibitor

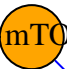

rs4553618

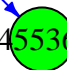

**Variant–Disease Network (egg allergy measurement)**

egg allergy measurement

rs2073951

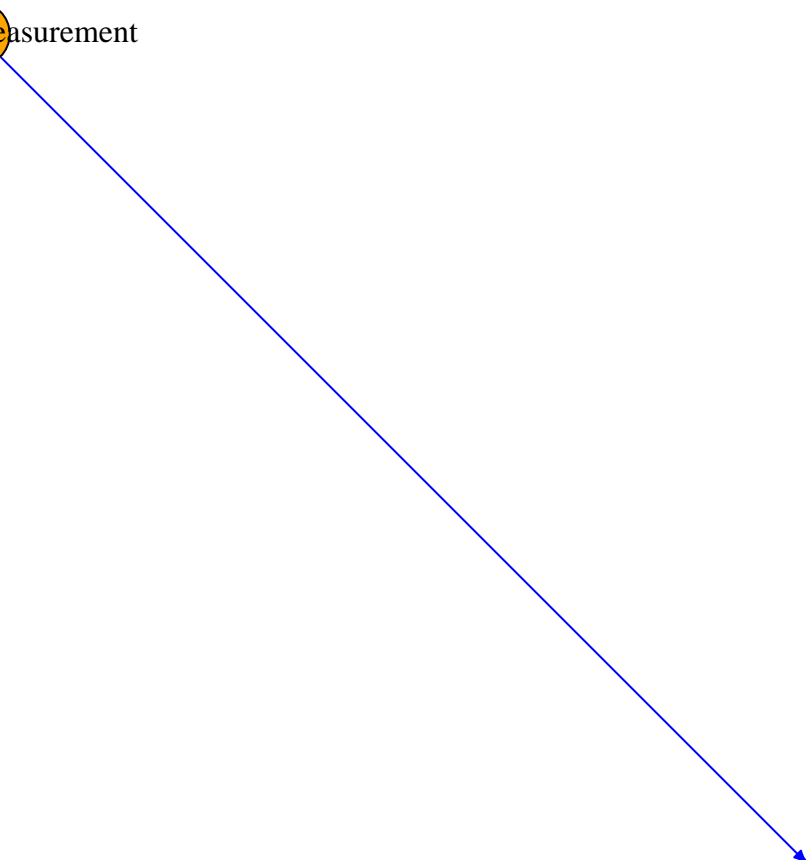

## Variant-Disease Network (emphysema)

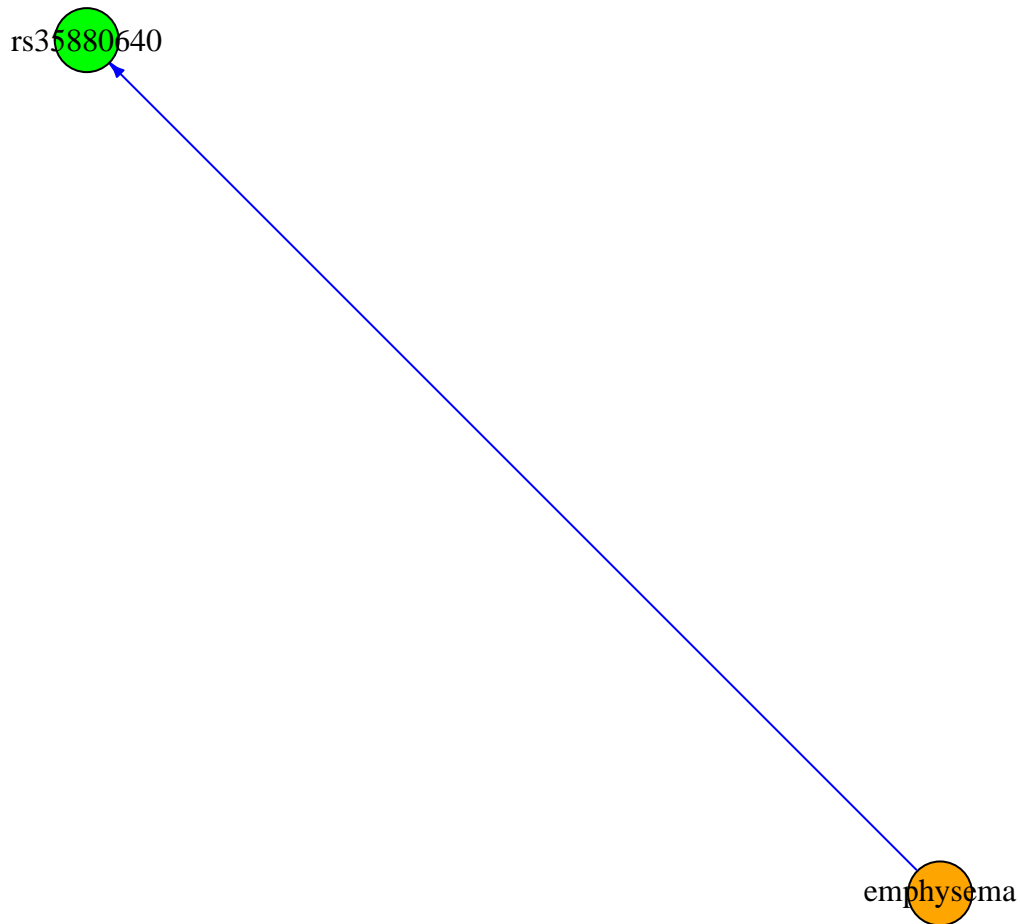

# Variant–Disease Network (serum albumin measurement)

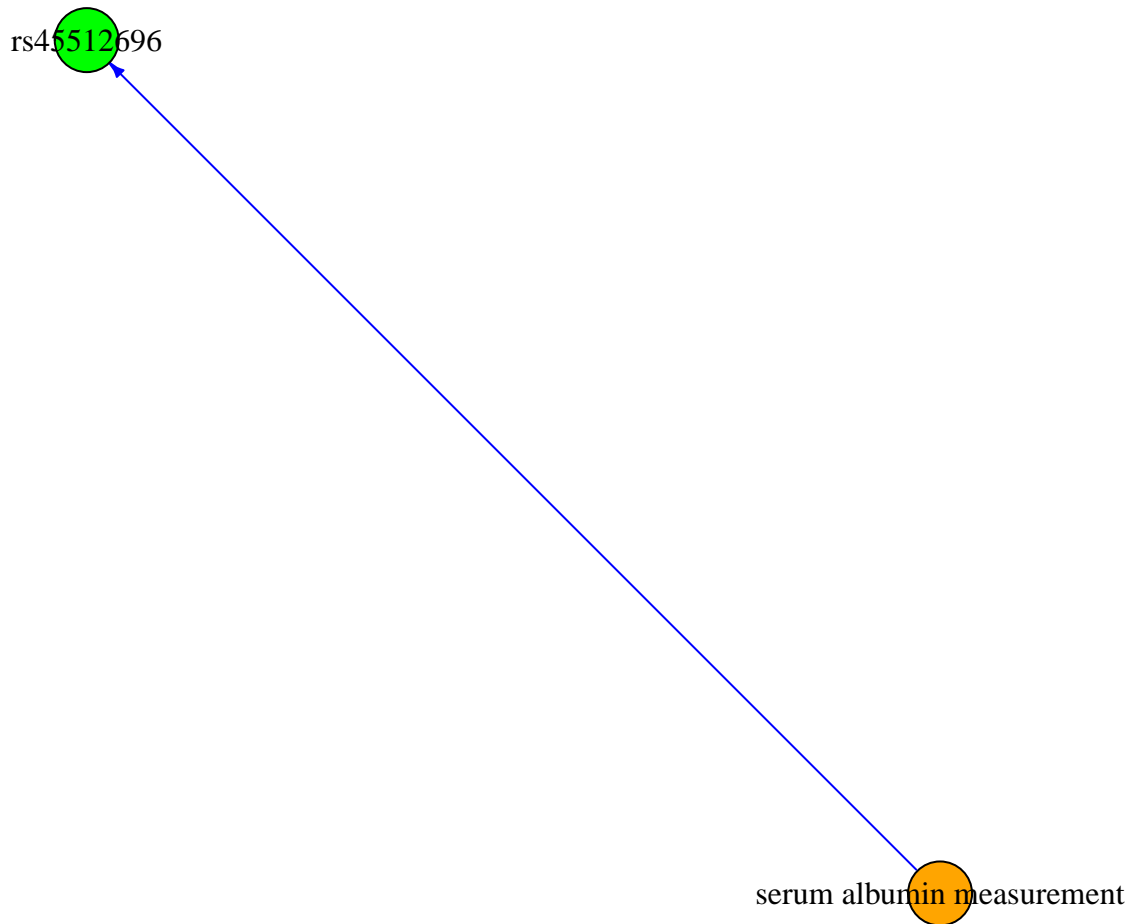

# Variant-Disease Network (Yu-Zhi constitution type)

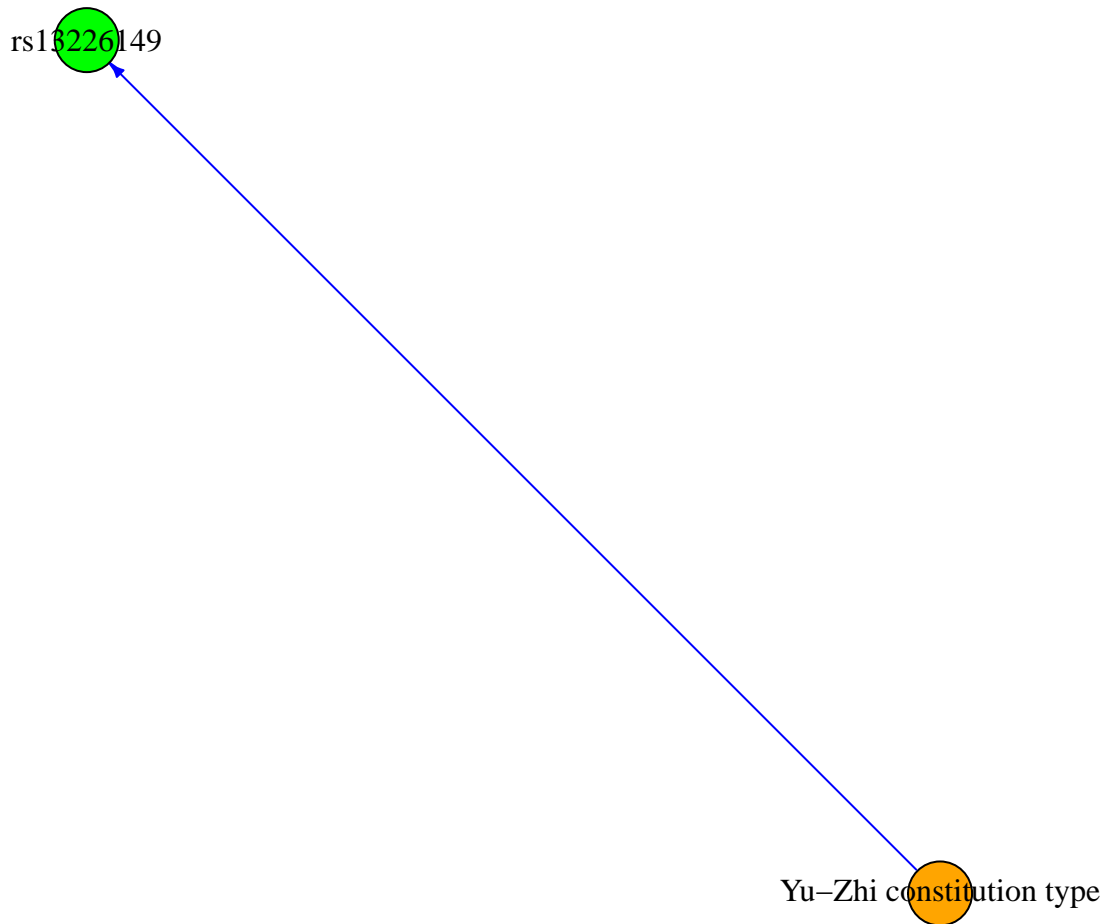

**Variant–Disease Network (erosive tooth wear measurement)**

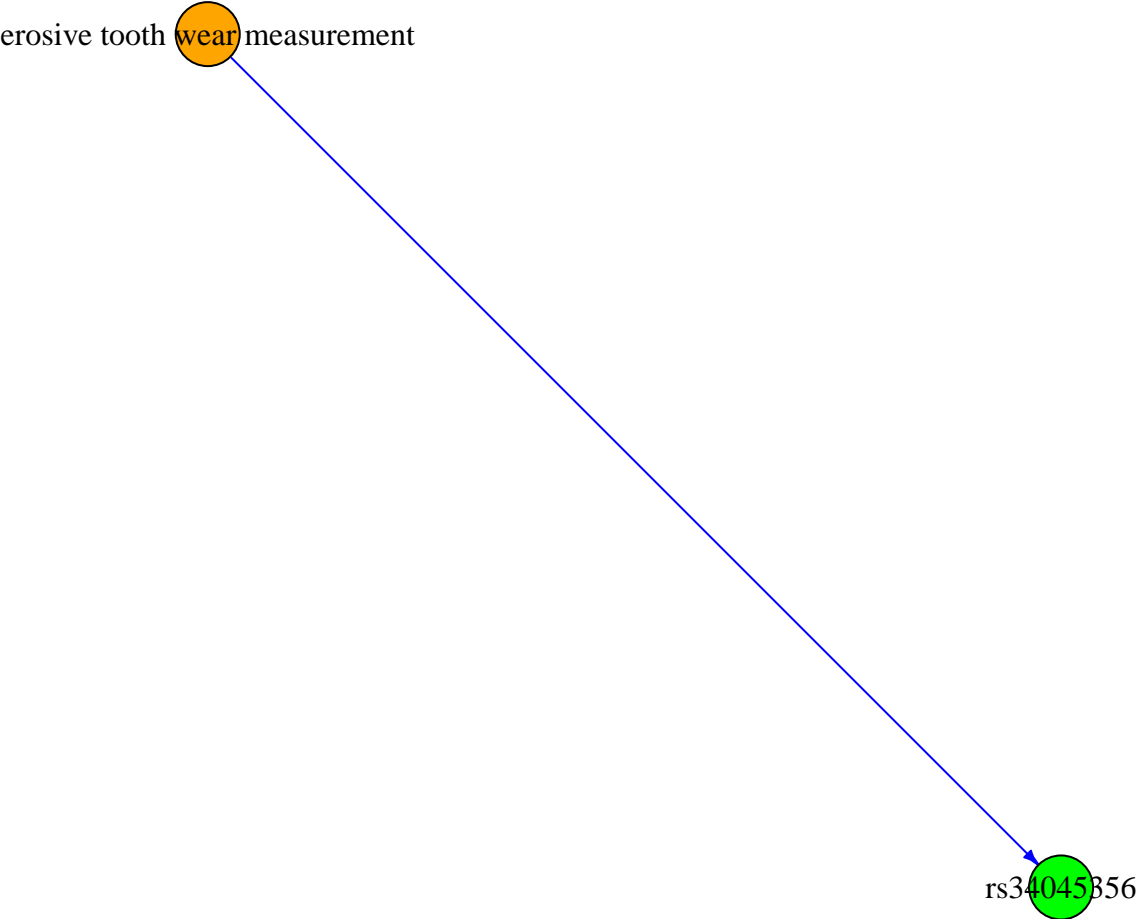

## Variant–Disease Network (clostridium difficile infection)

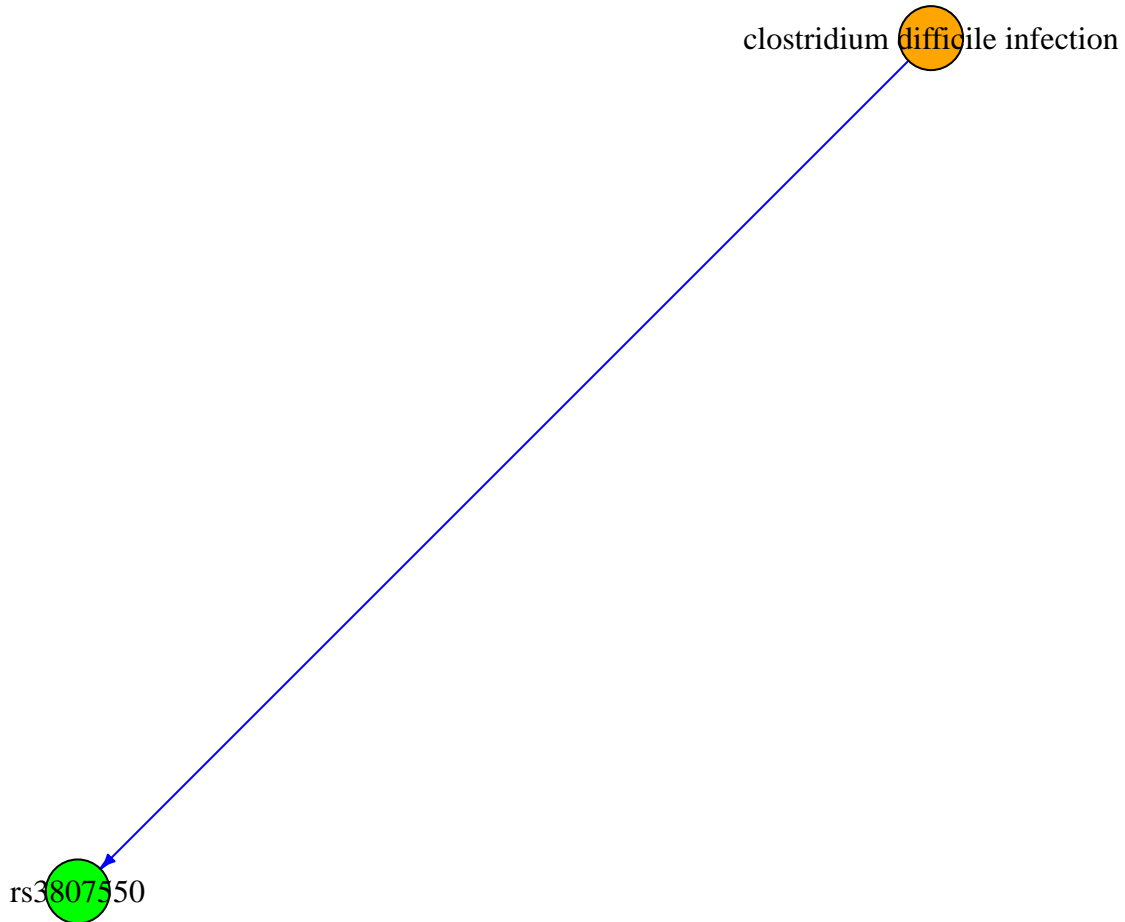



## Variant-Disease Network (multiple myeloma)

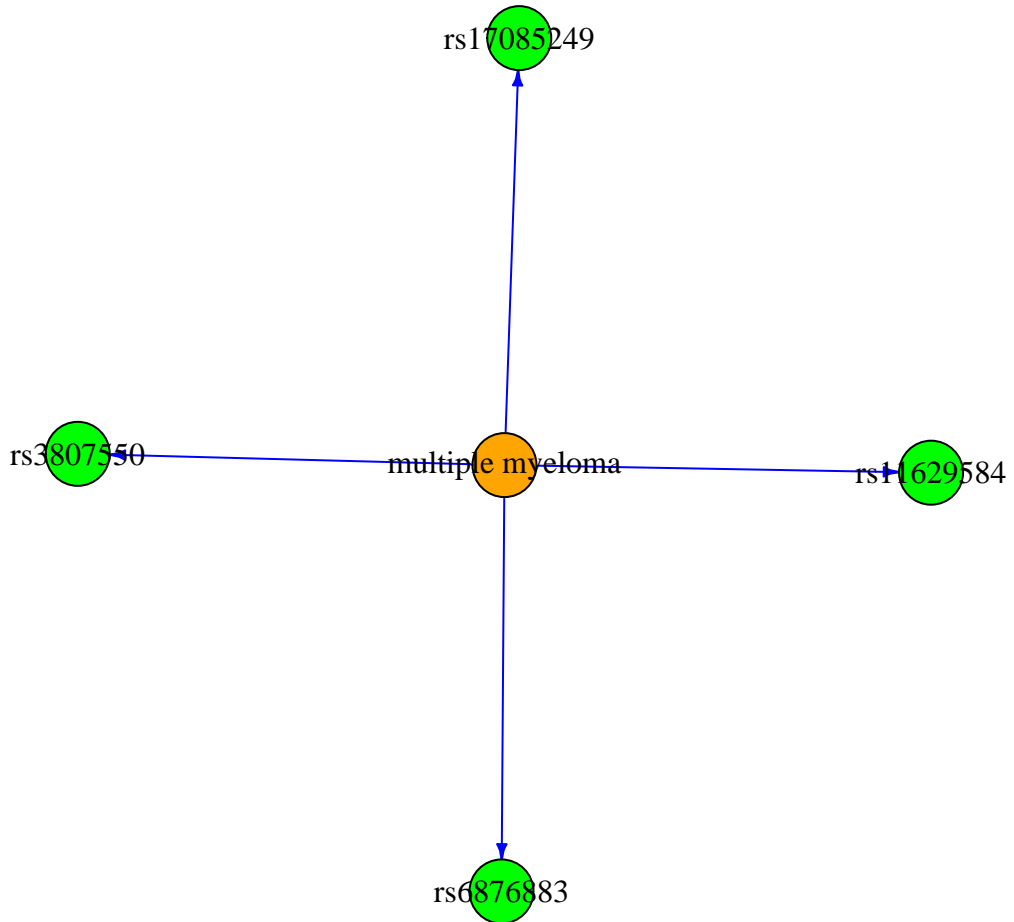

## Variant–Disease Network (serum metabolite measurement)

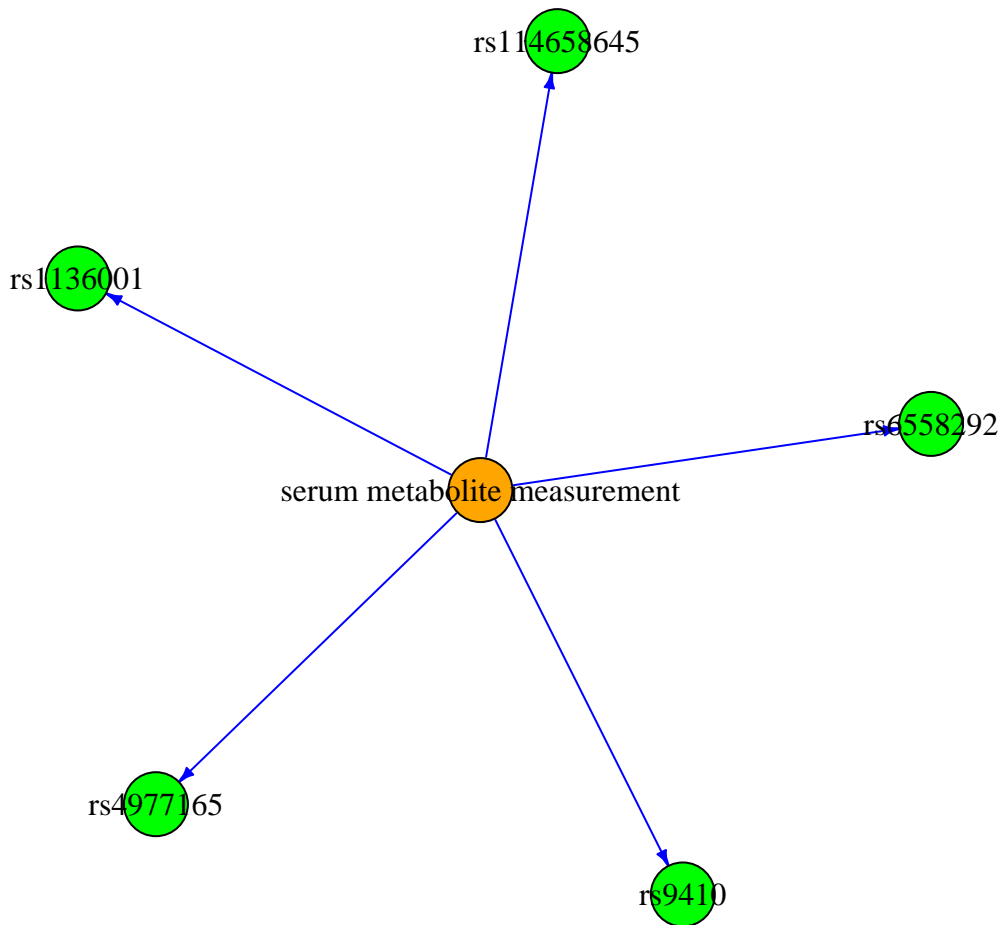

# Variant–Disease Network (seasonal gut microbiome composition measurement)

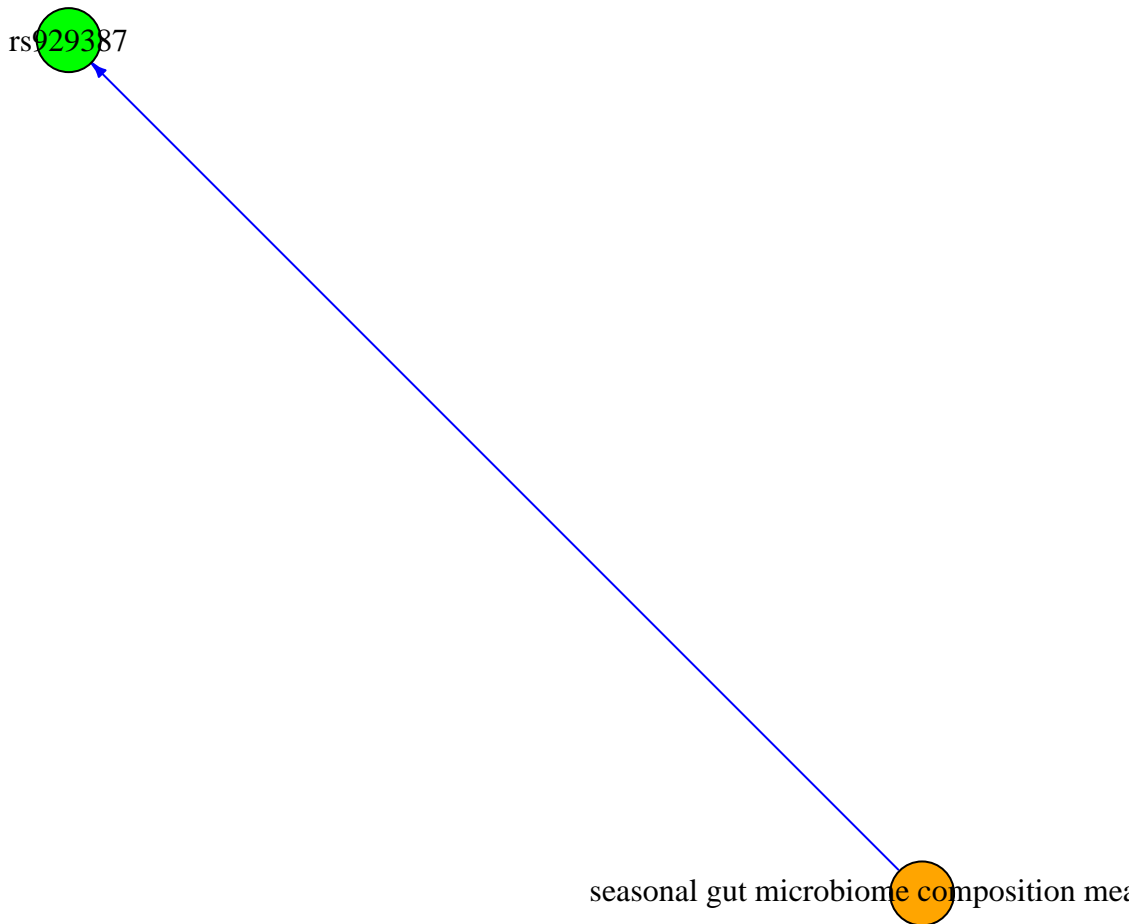

## Variant–Disease Network (hemoglobin measurement)

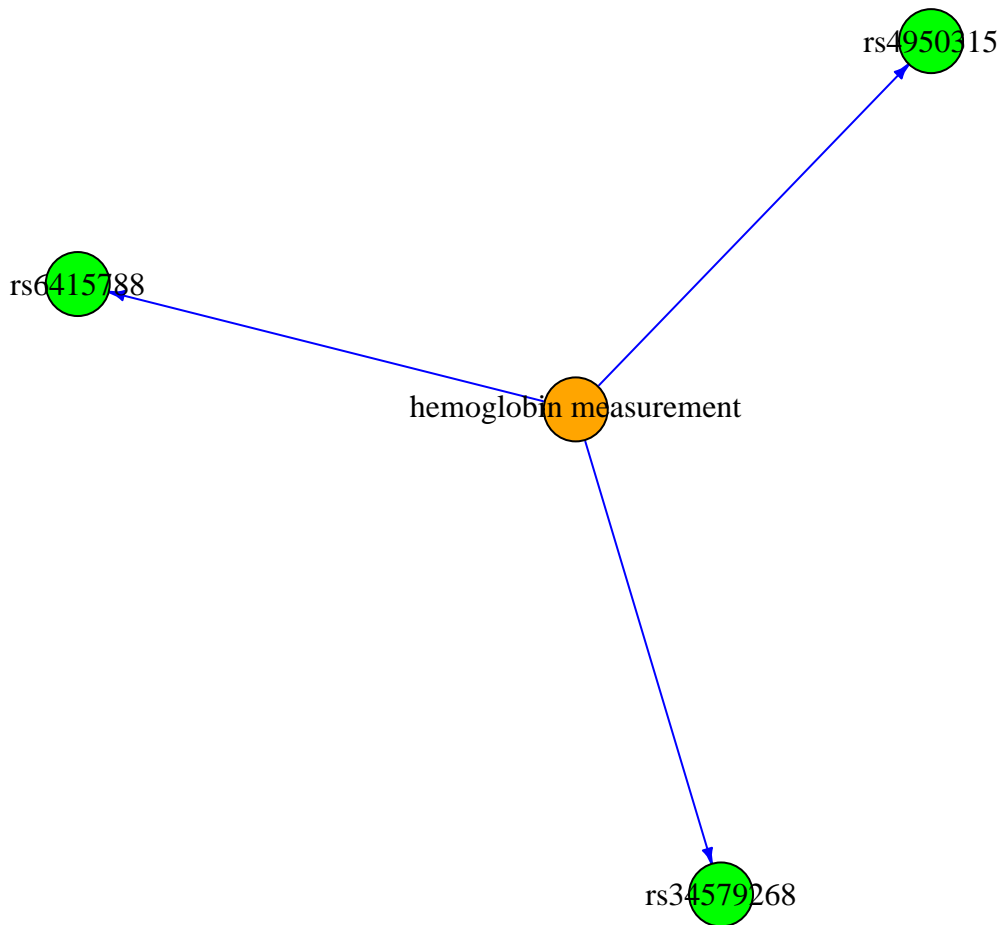

## Variant–Disease Network (cutaneous melanoma)

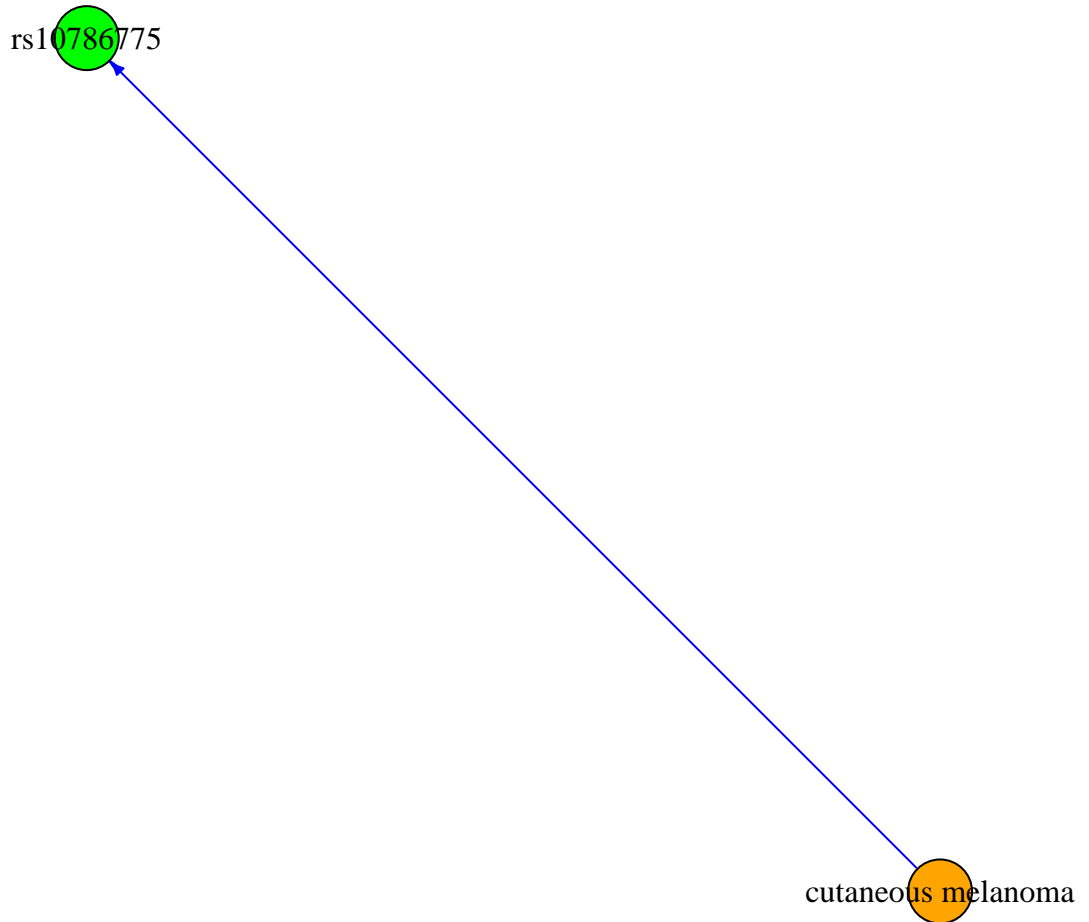

**Variant–Disease Network (lip morphology measurement)**

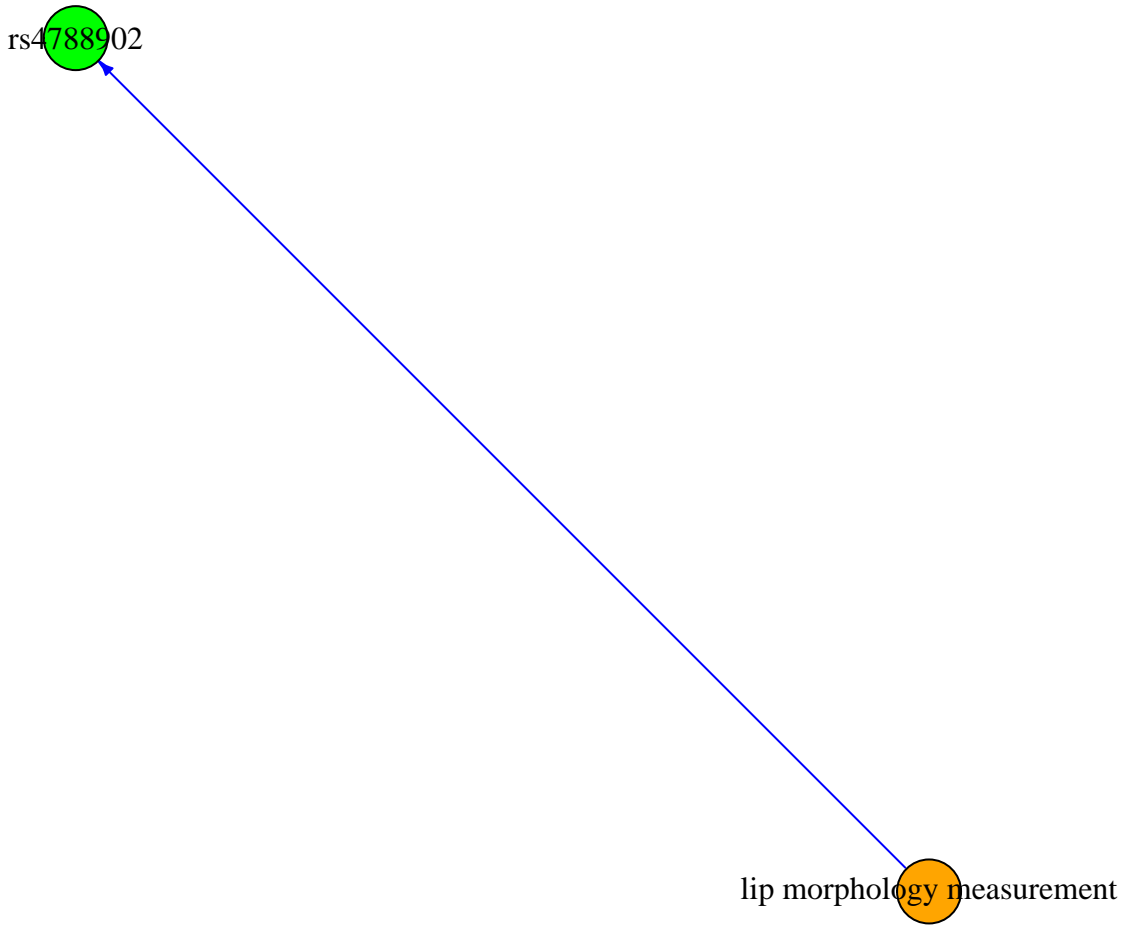

## Variant-Disease Network (rotator cuff tear)

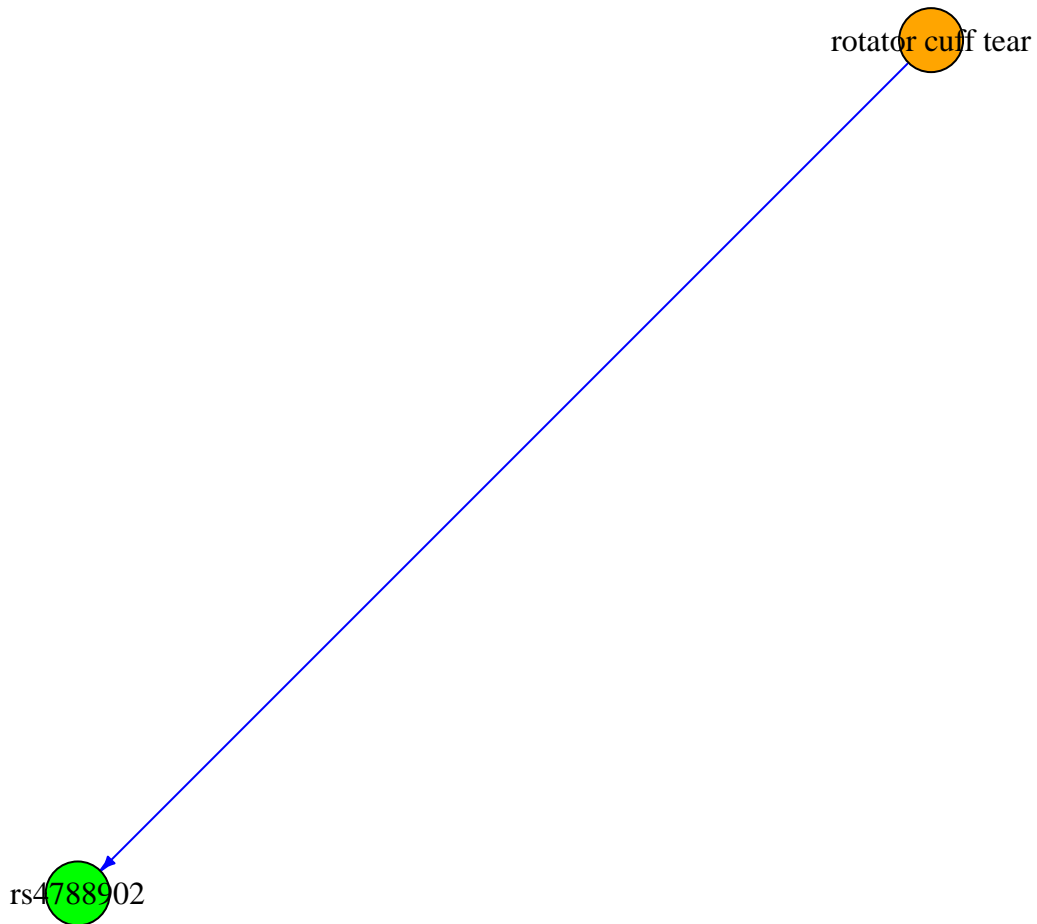

## Variant–Disease Network (diet measurement)

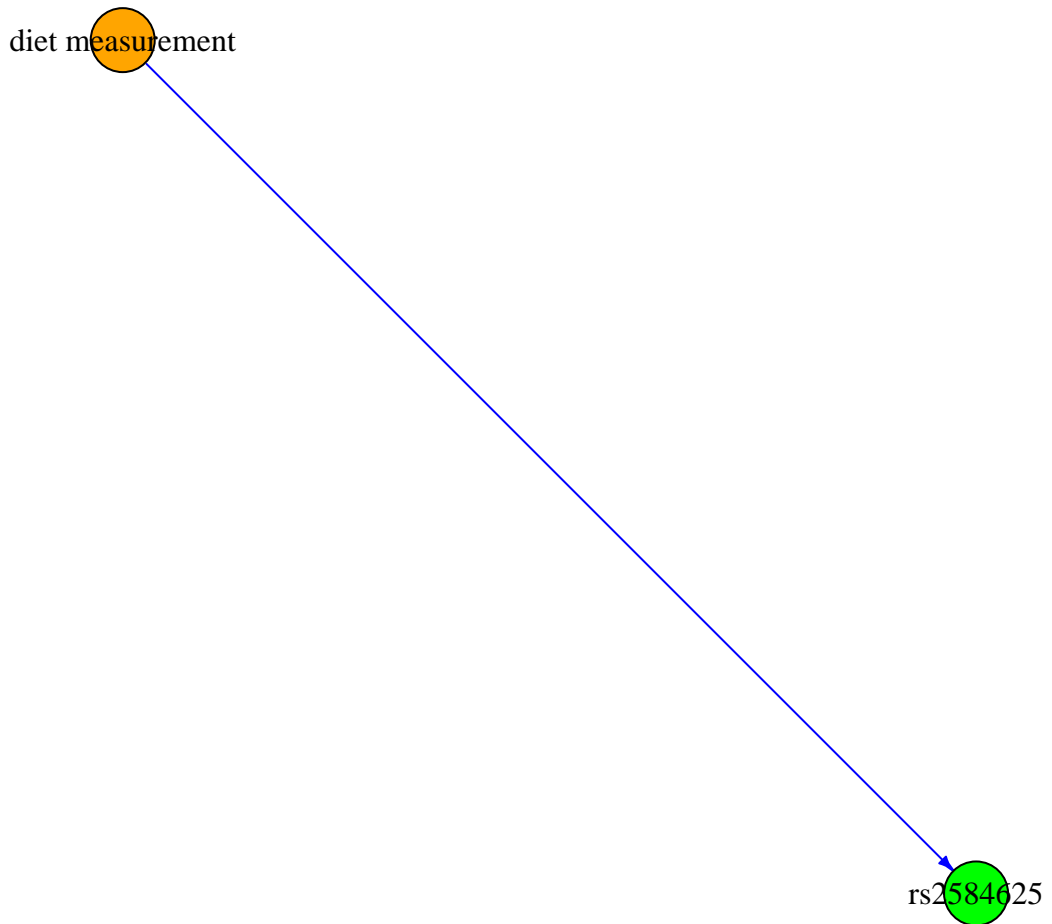



**Variant–Disease Network (biliary liver cirrhosis)**

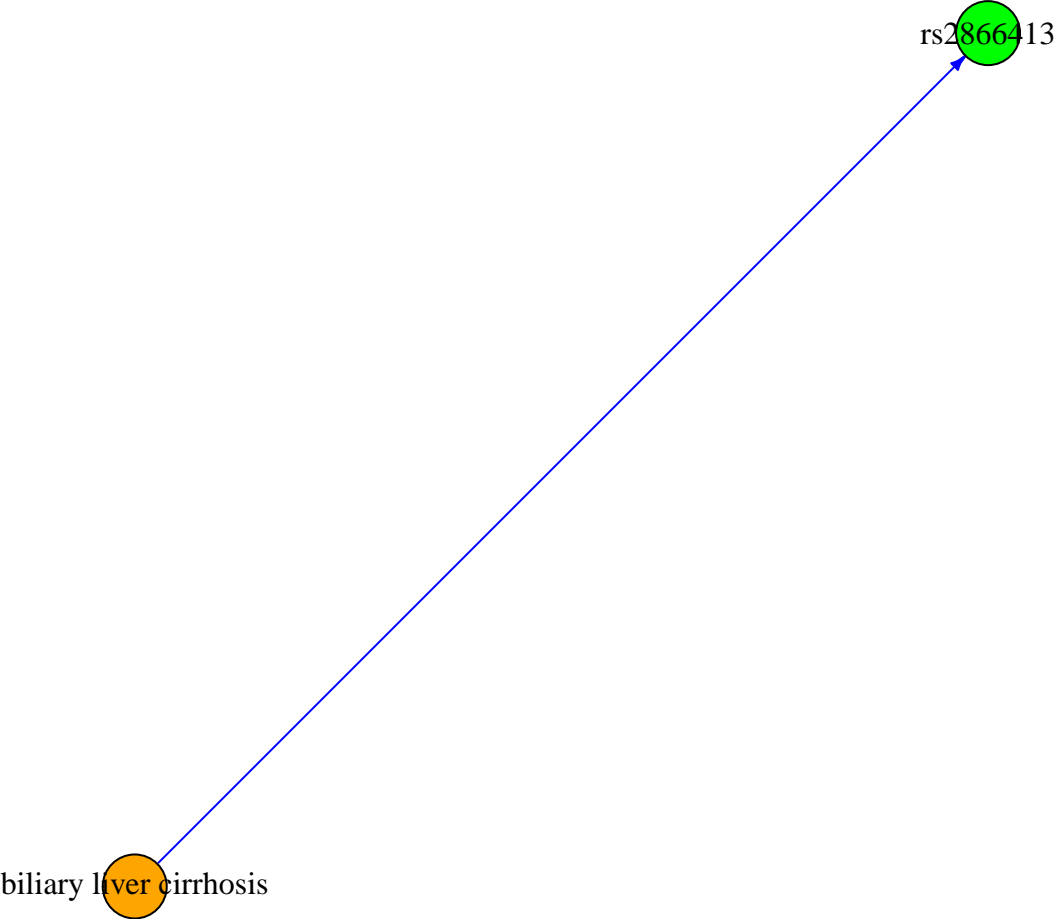

## Variant–Disease Network (primary biliary cirrhosis)

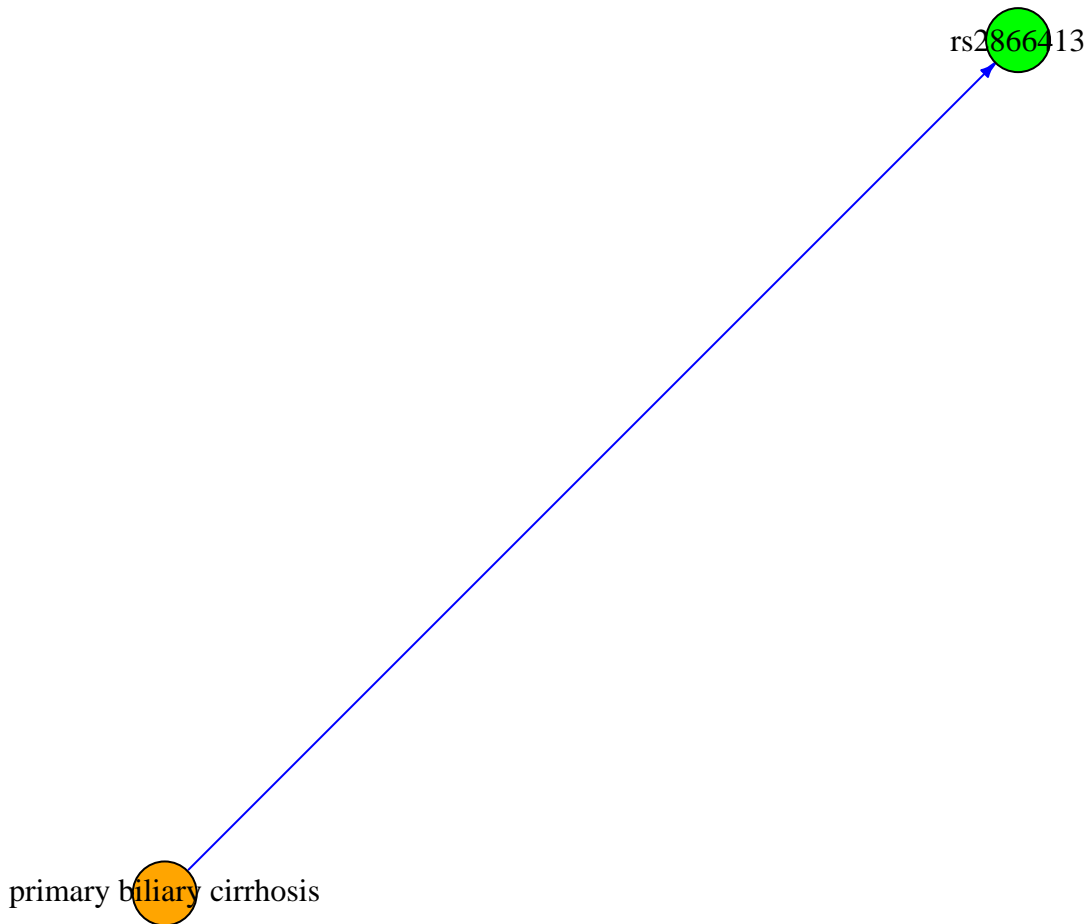

## Variant–Disease Network (autoantibody measurement)

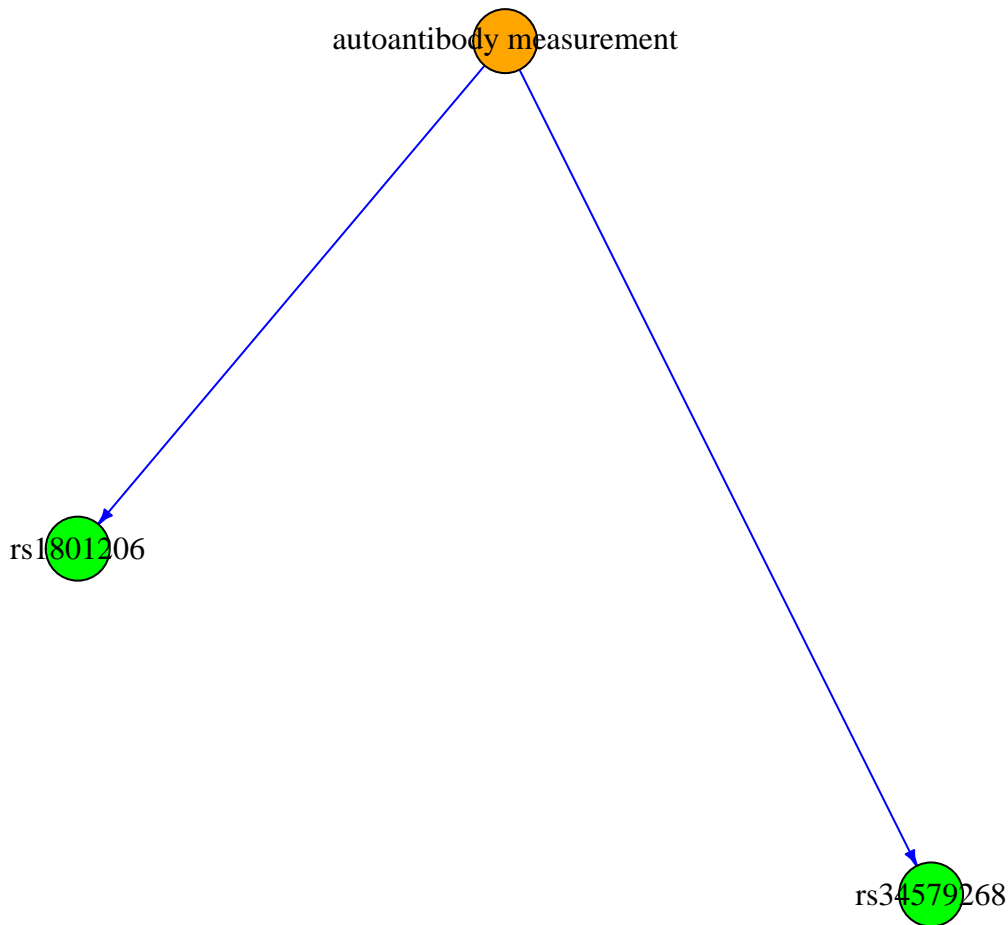

## Variant–Disease Network (optic disc area measurement)

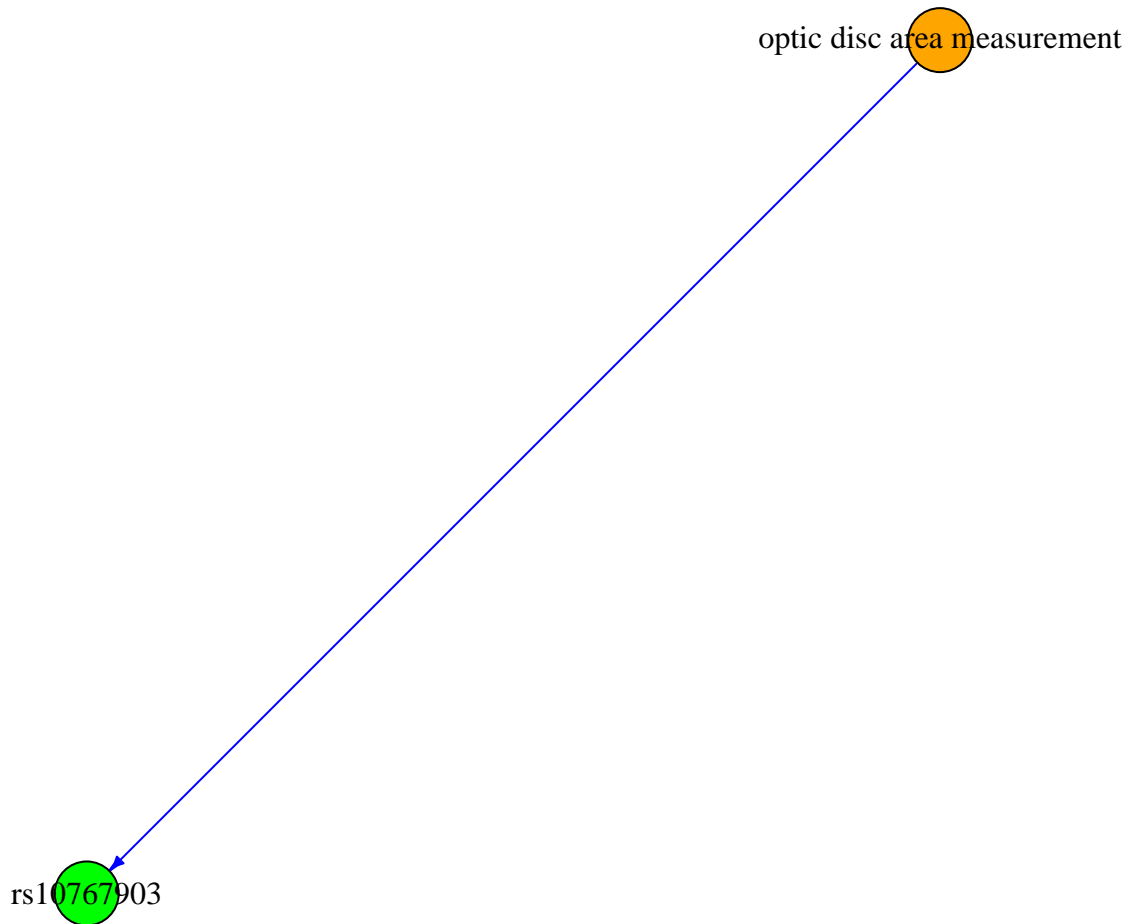

## Variant–Disease Network (attempted suicide)

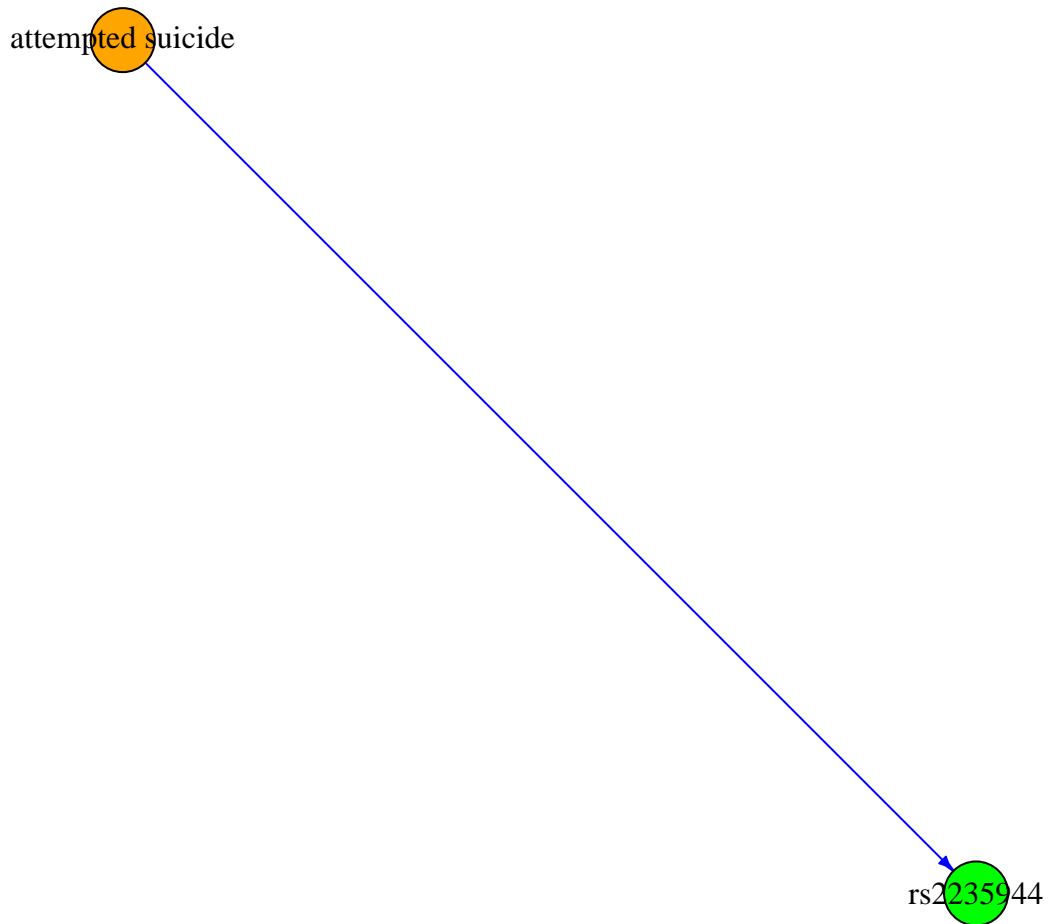

## Variant–Disease Network (pathological myopia)

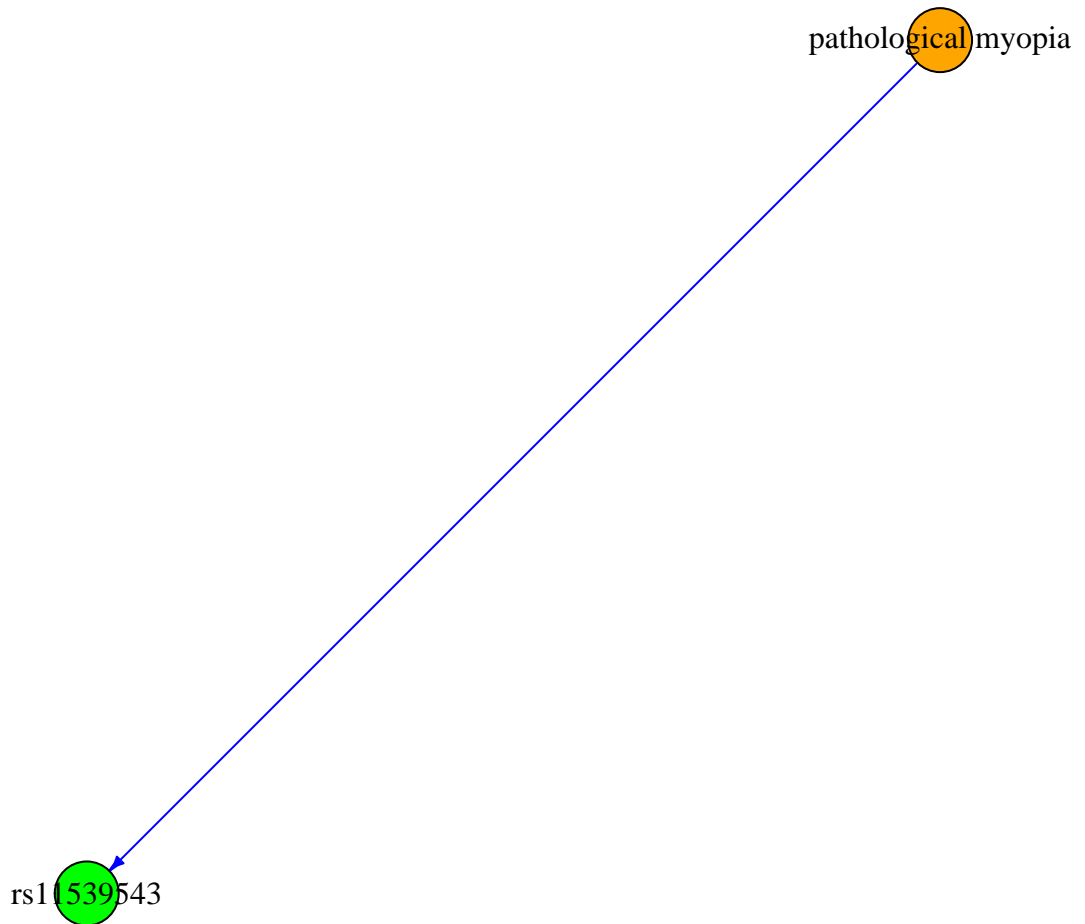

## Variant–Disease Network (cirrhosis of liver)

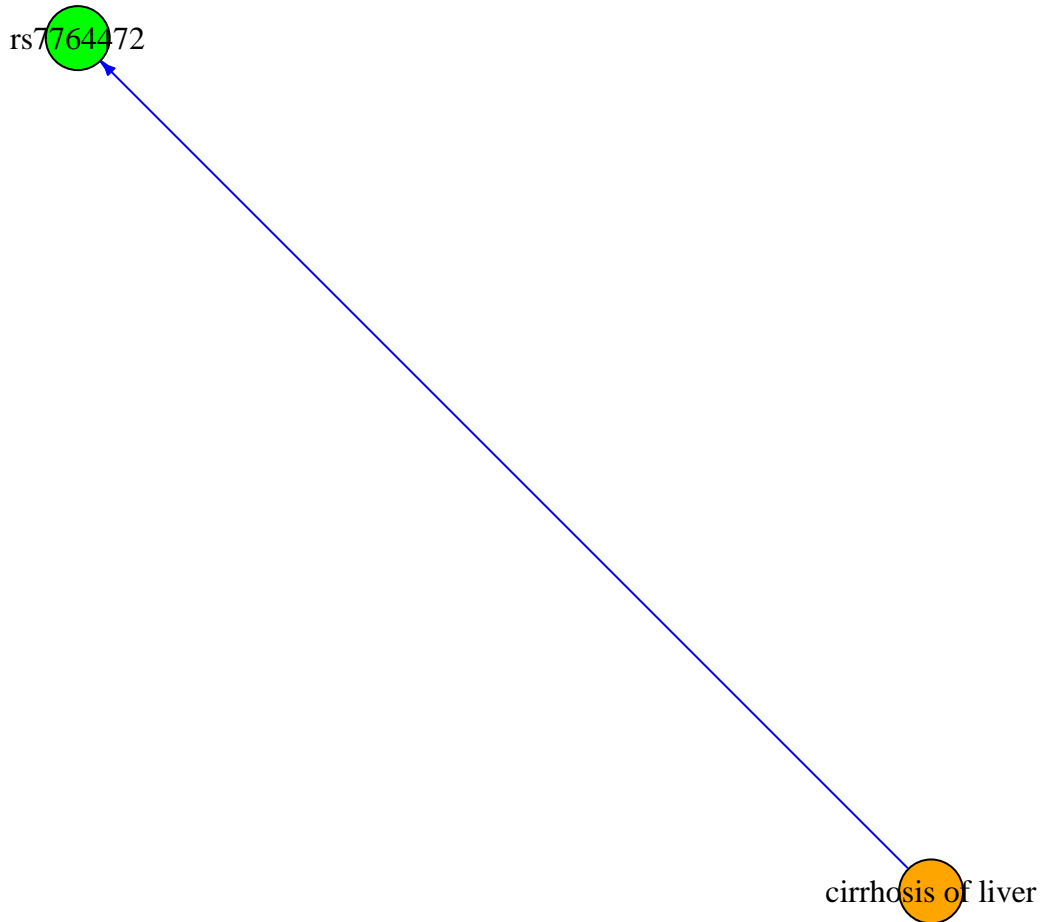

## Variant–Disease Network (hepatitis C infection)

hepatitis C infection

rs7764472

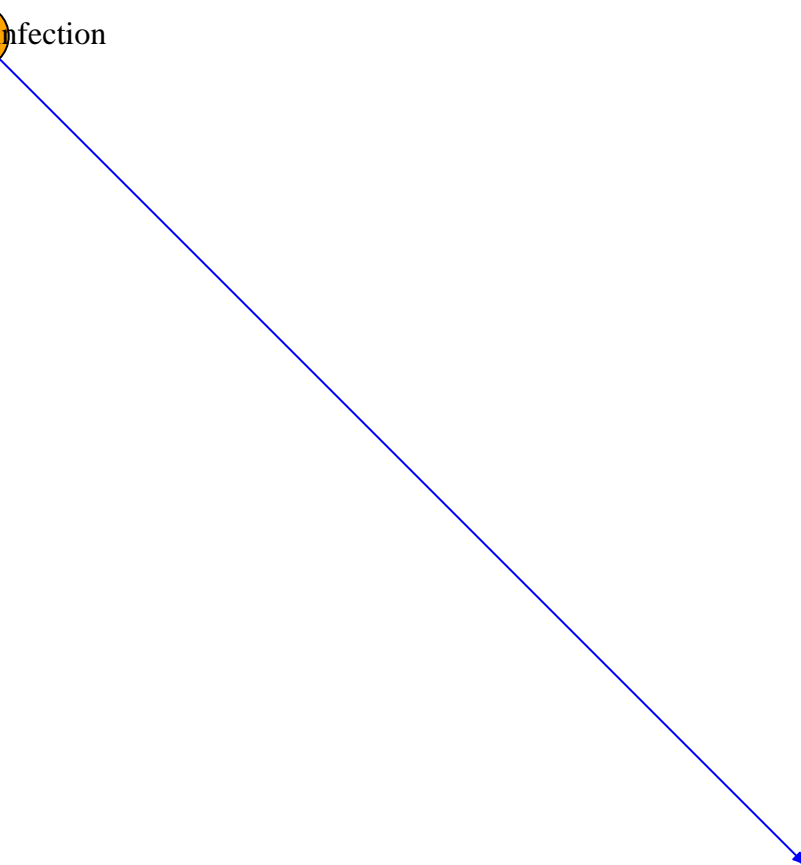



# Variant–Disease Network (response to sulfonylurea)

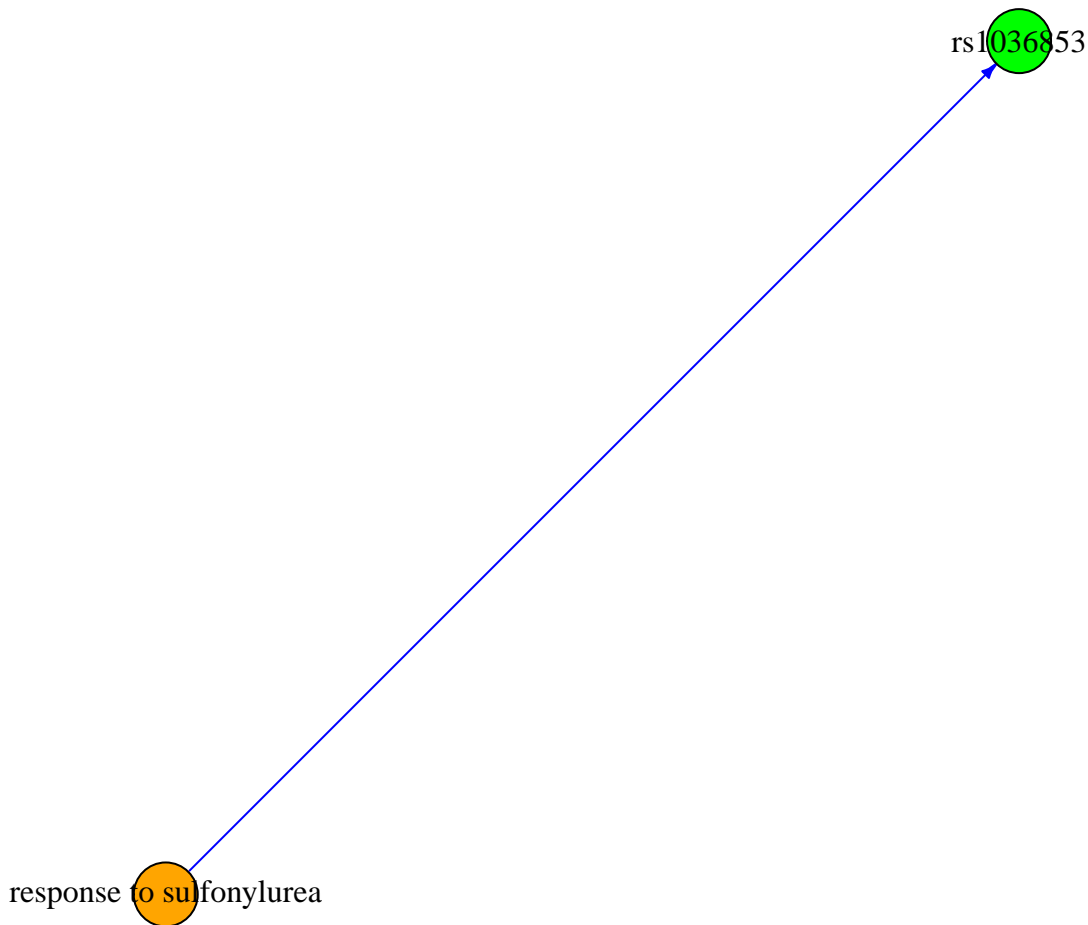

# Variant-Disease Network (venous thromboembolism)

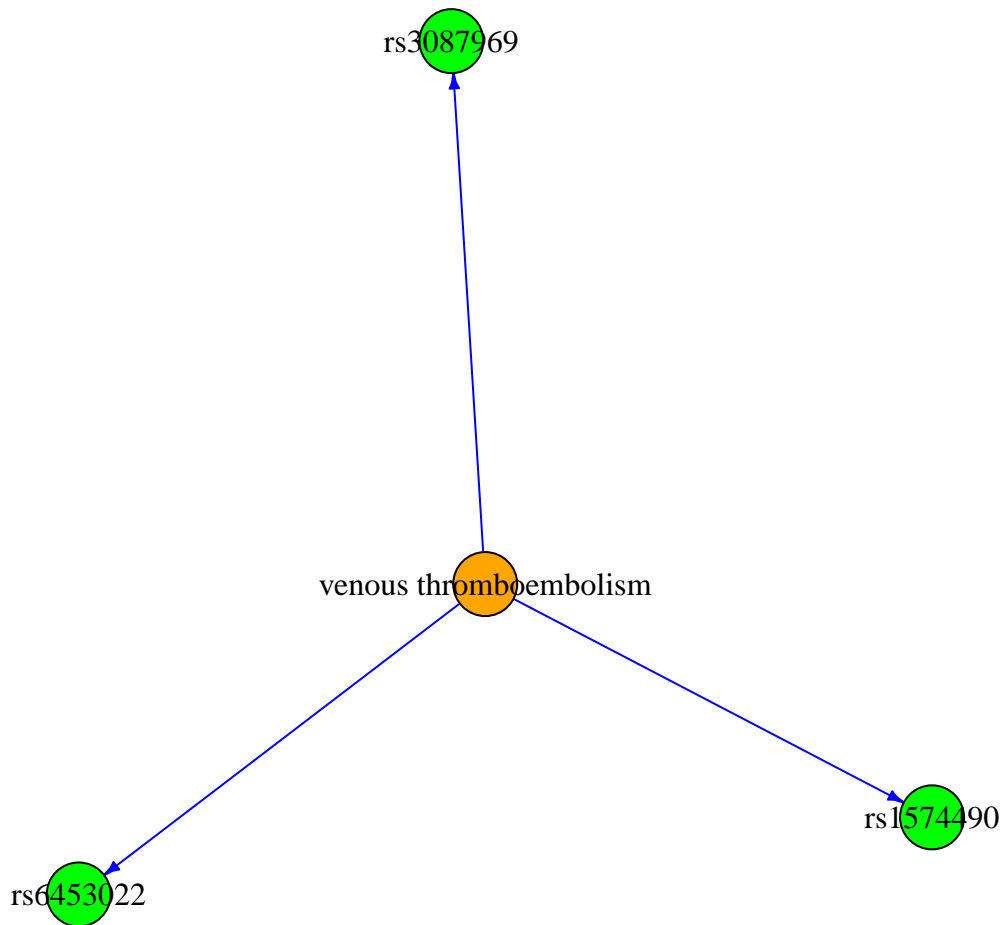

# Variant–Disease Network (mosquito bite reaction size measurement)

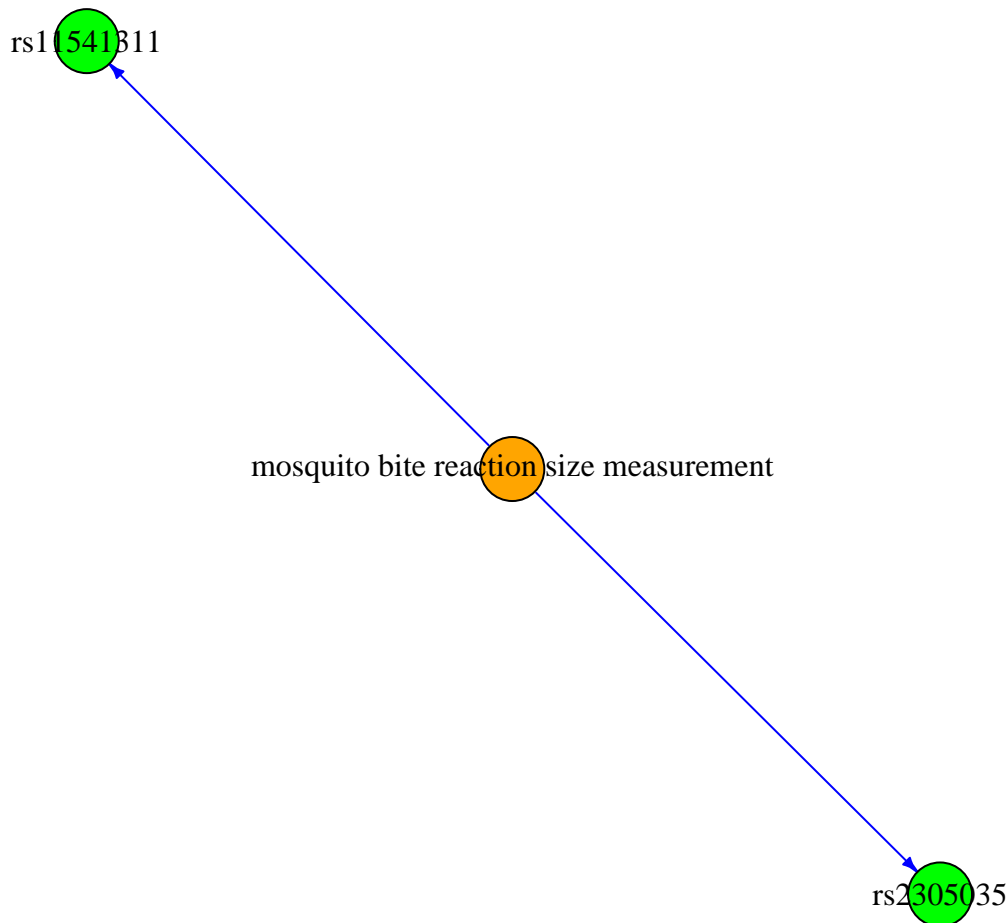

## Variant–Disease Network (functional laterality)

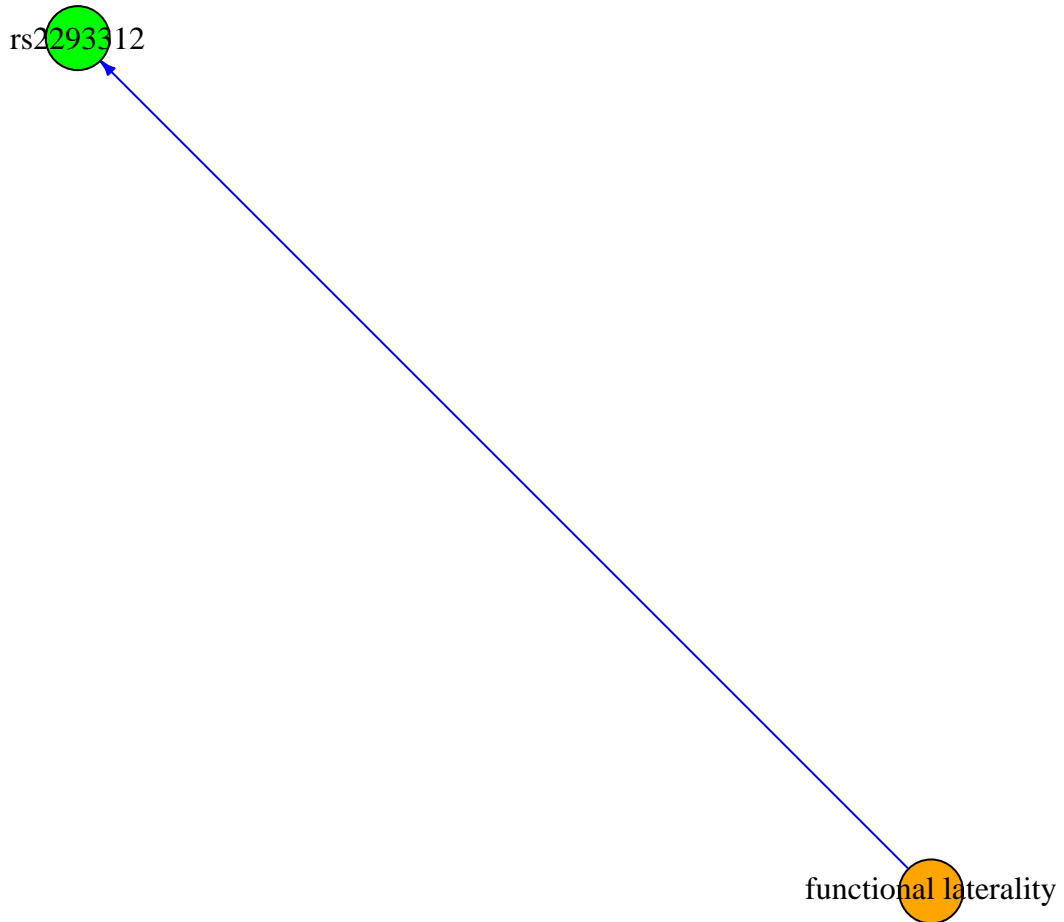

**Variant–Disease Network (serum IgG glycosylation measurement)**

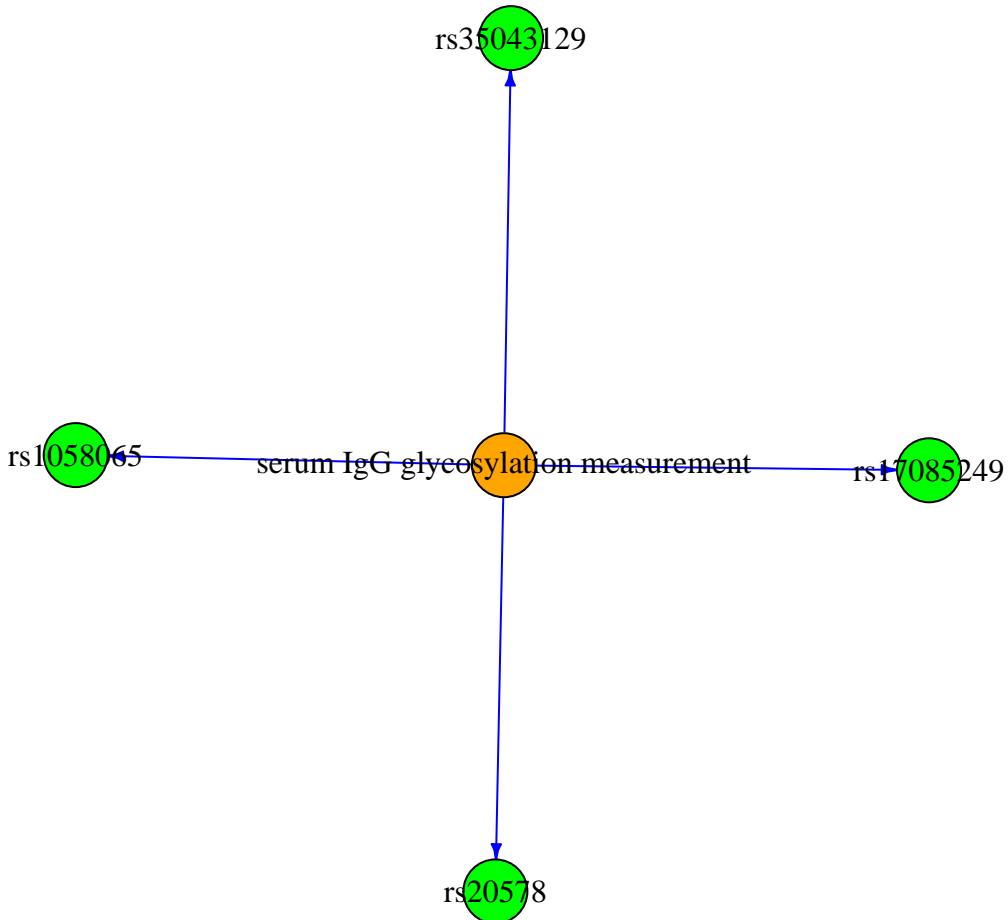

## Variant–Disease Network (neuropsychological test)

rs4668356

neuropsychological test



## Variant–Disease Network (alpha linolenic acid measurement)

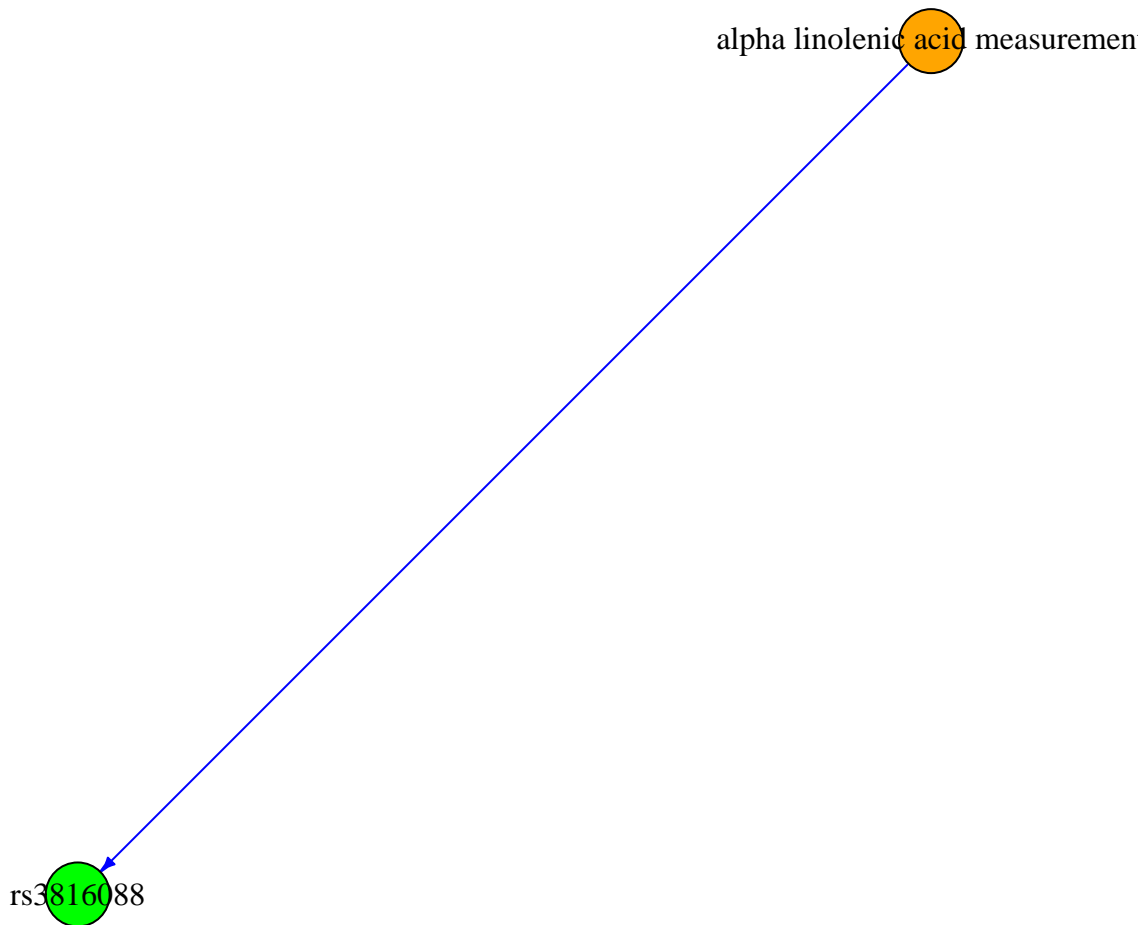

## Variant-Disease Network (osteoarthritis)

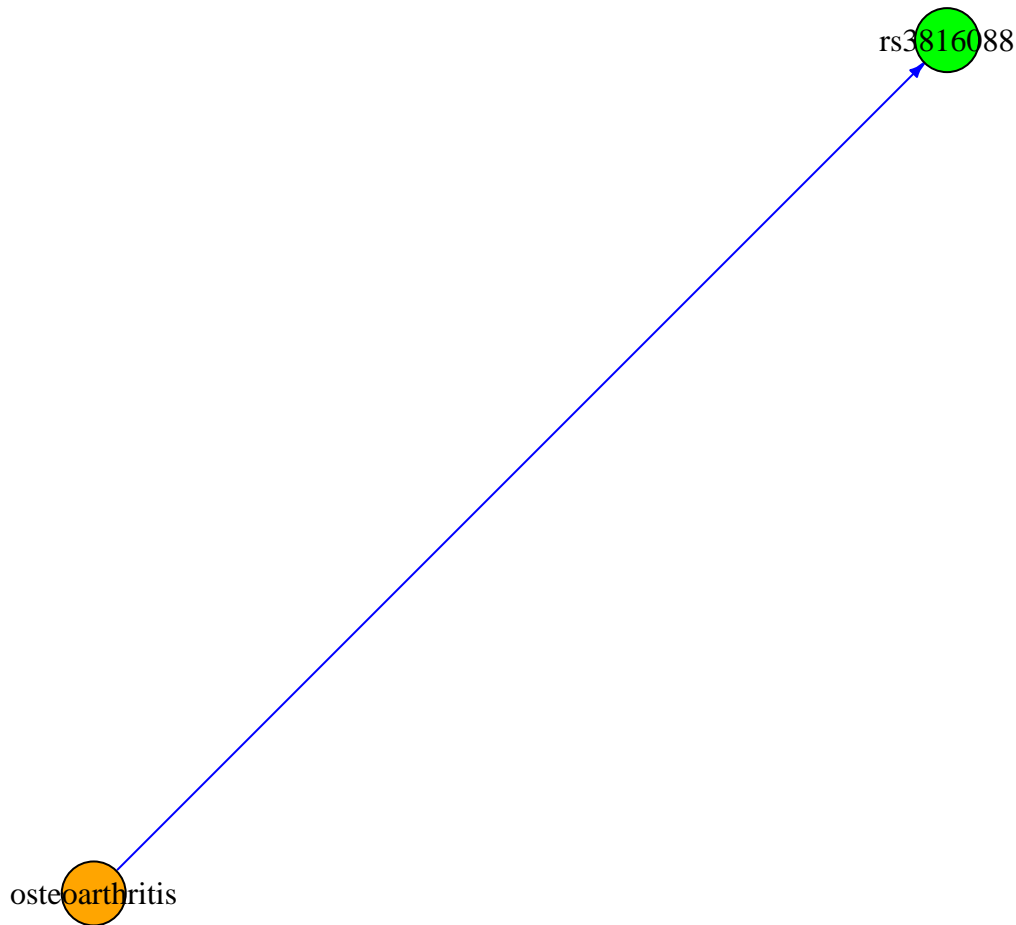



## Variant–Disease Network (cytotoxicity measurement)

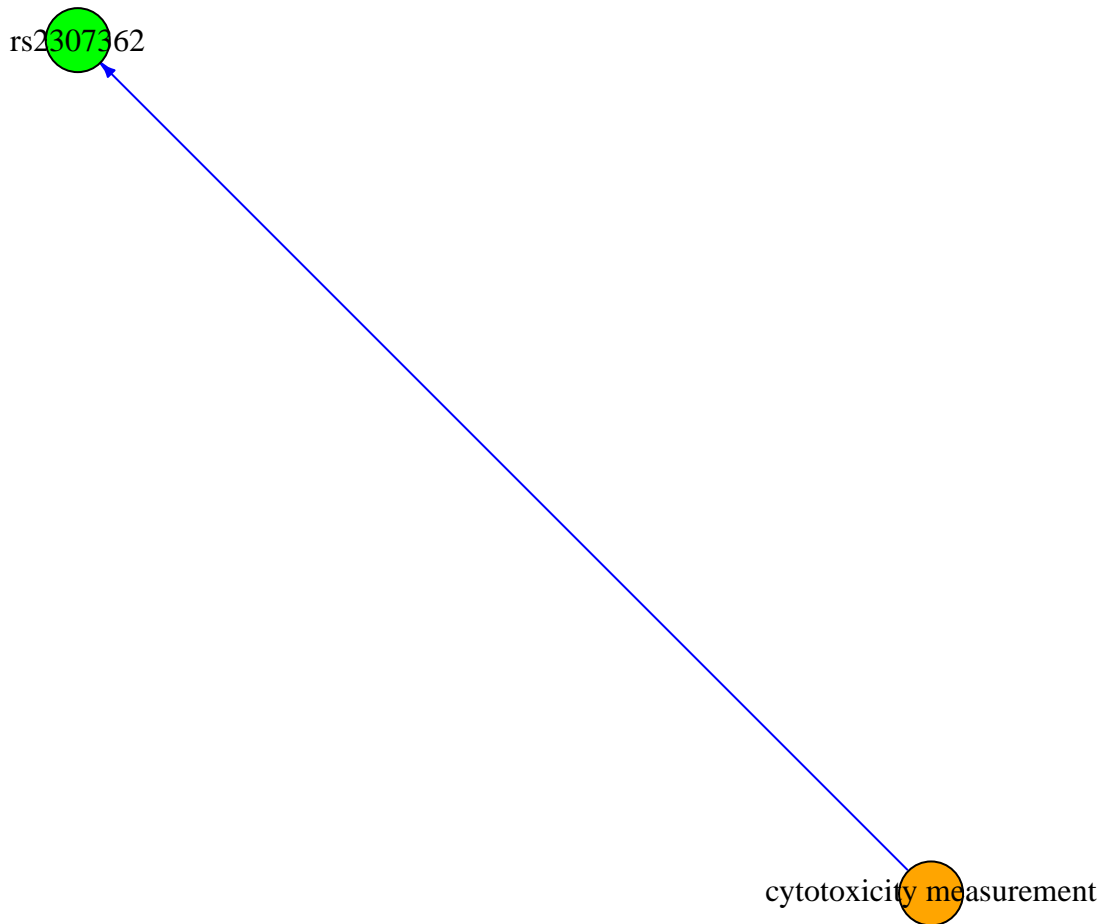

# Variant–Disease Network (outer ear morphology trait)

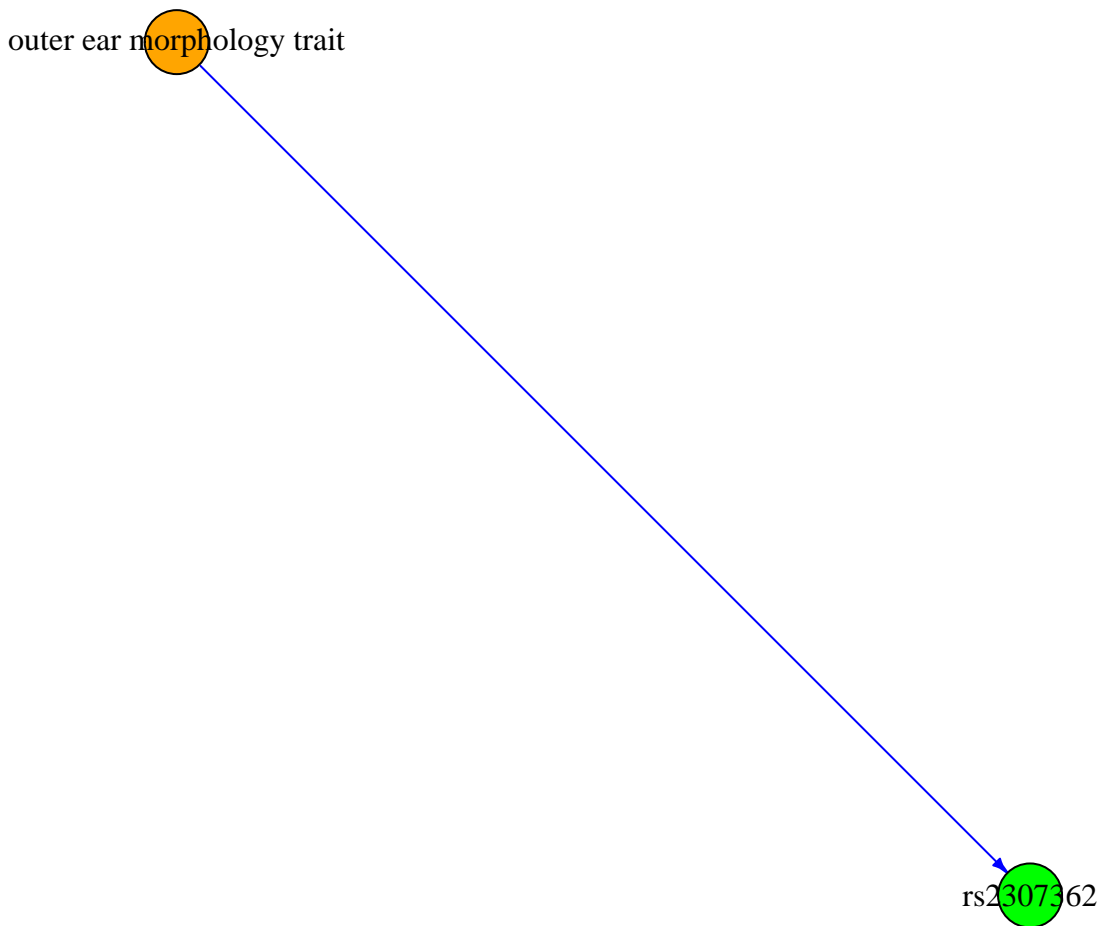

## Variant–Disease Network (QT interval)

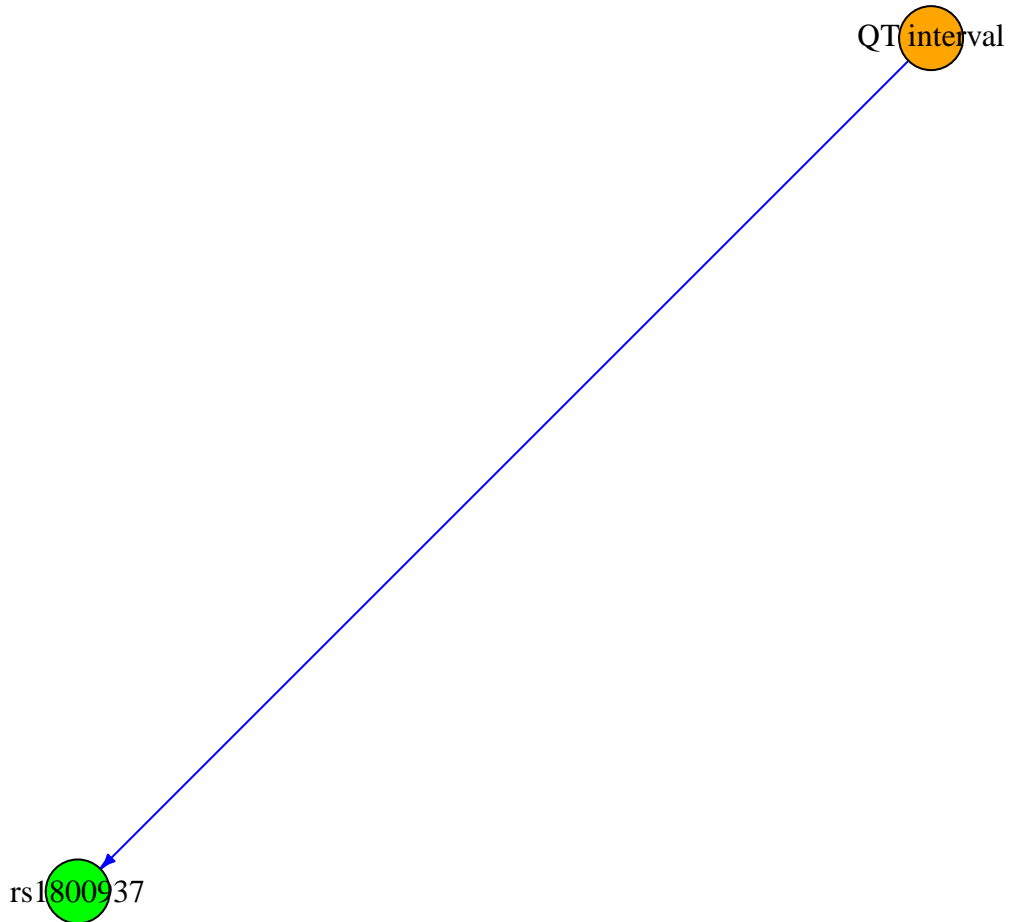

## Variant–Disease Network (Trypanosoma cruzi seropositivity)

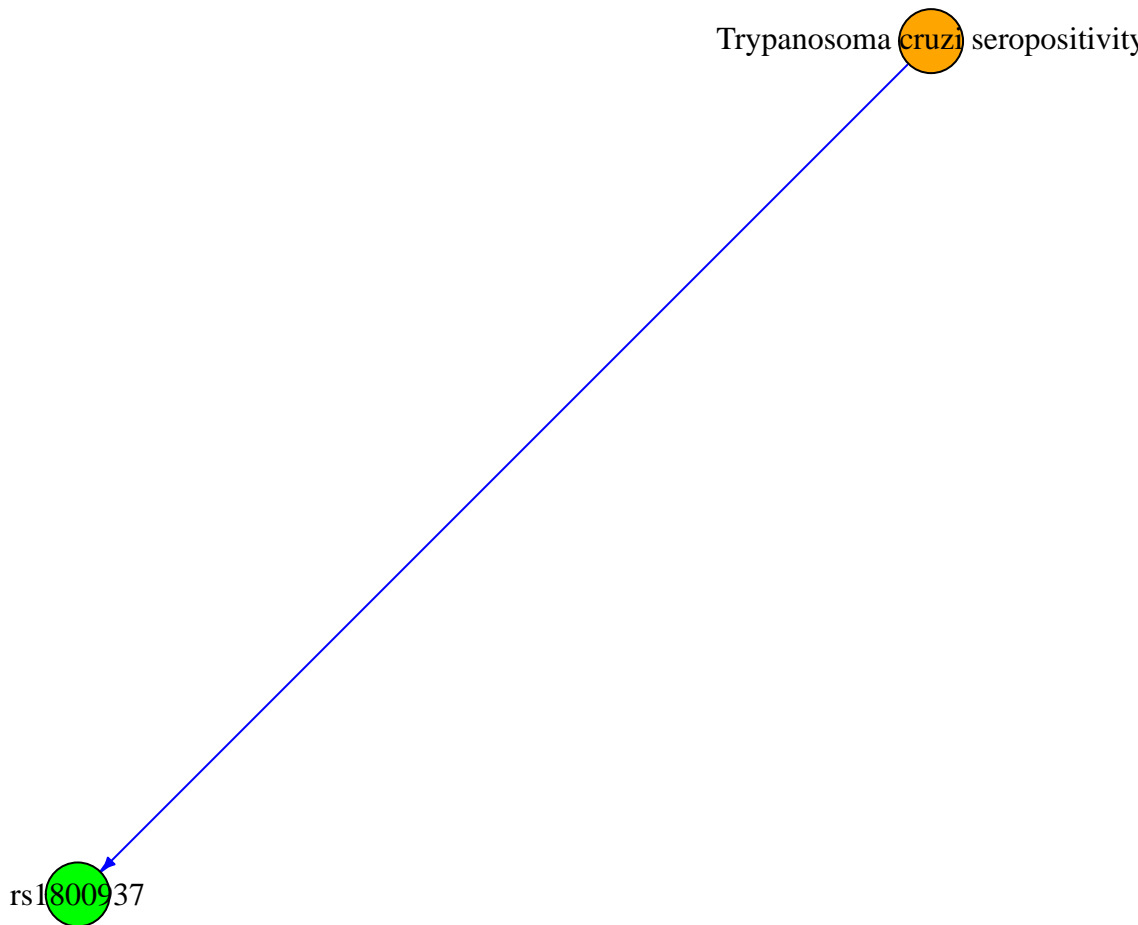

## Variant–Disease Network (coronary artery bypass)

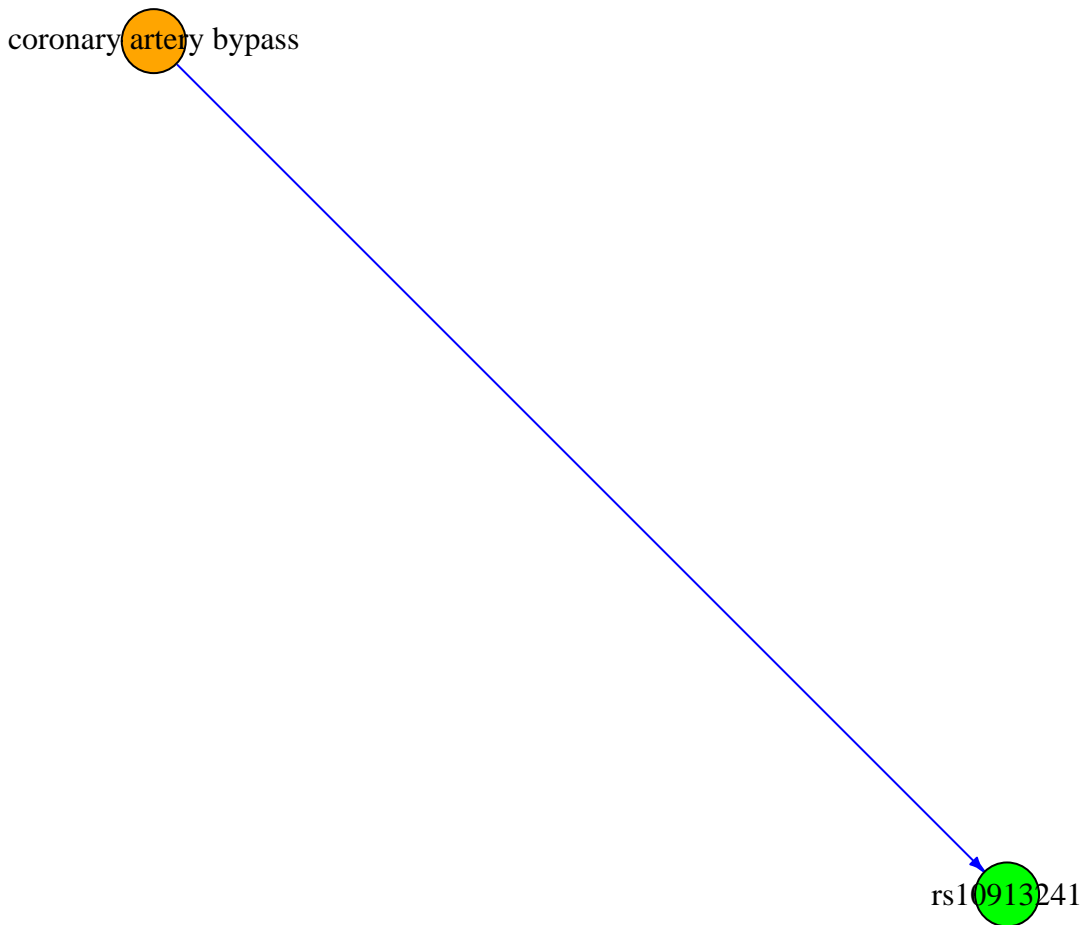

## Variant–Disease Network (myocardial infarction)

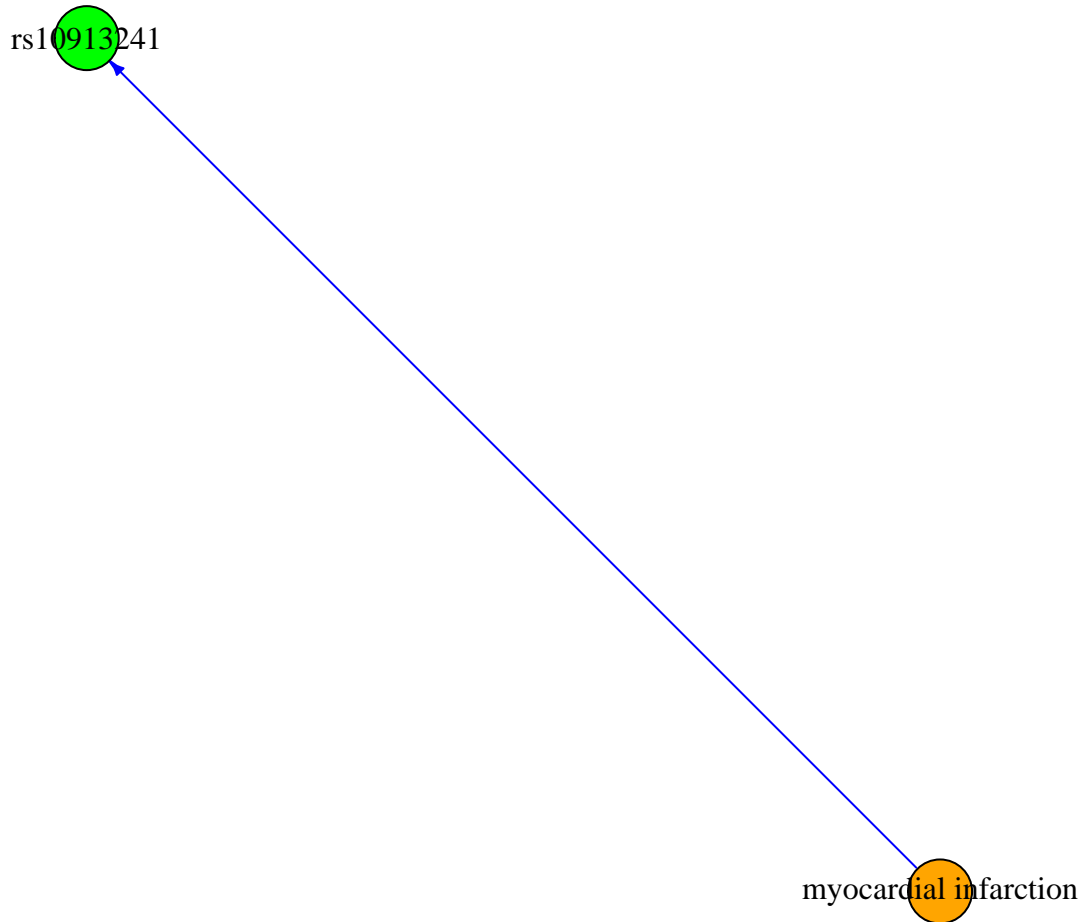

# Variant–Disease Network (susceptibility to measles measurement)

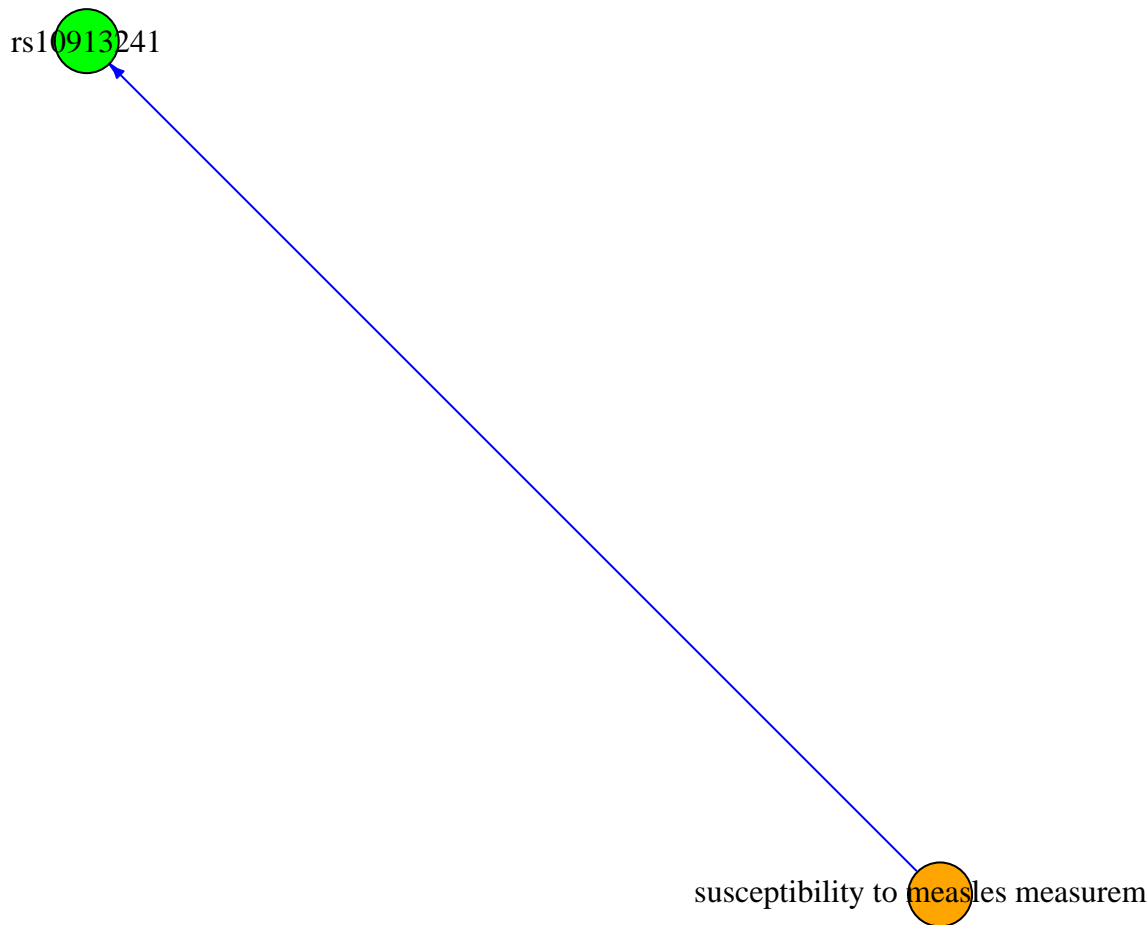

# Variant–Disease Network (body composition measurement)

rs3736757

body composition measurement

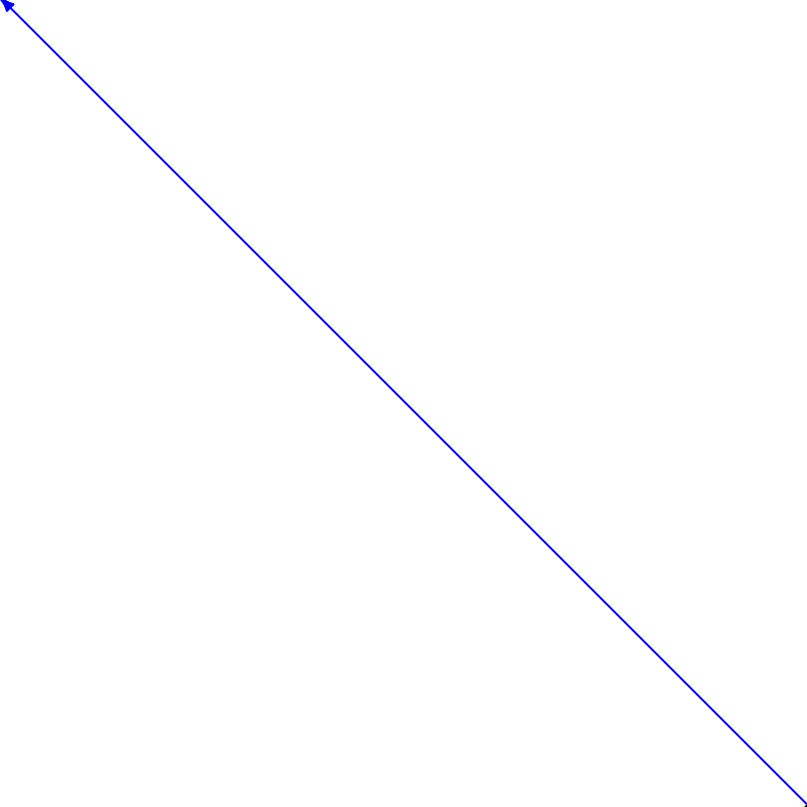



# Variant–Disease Network (haptoglobin measurement)

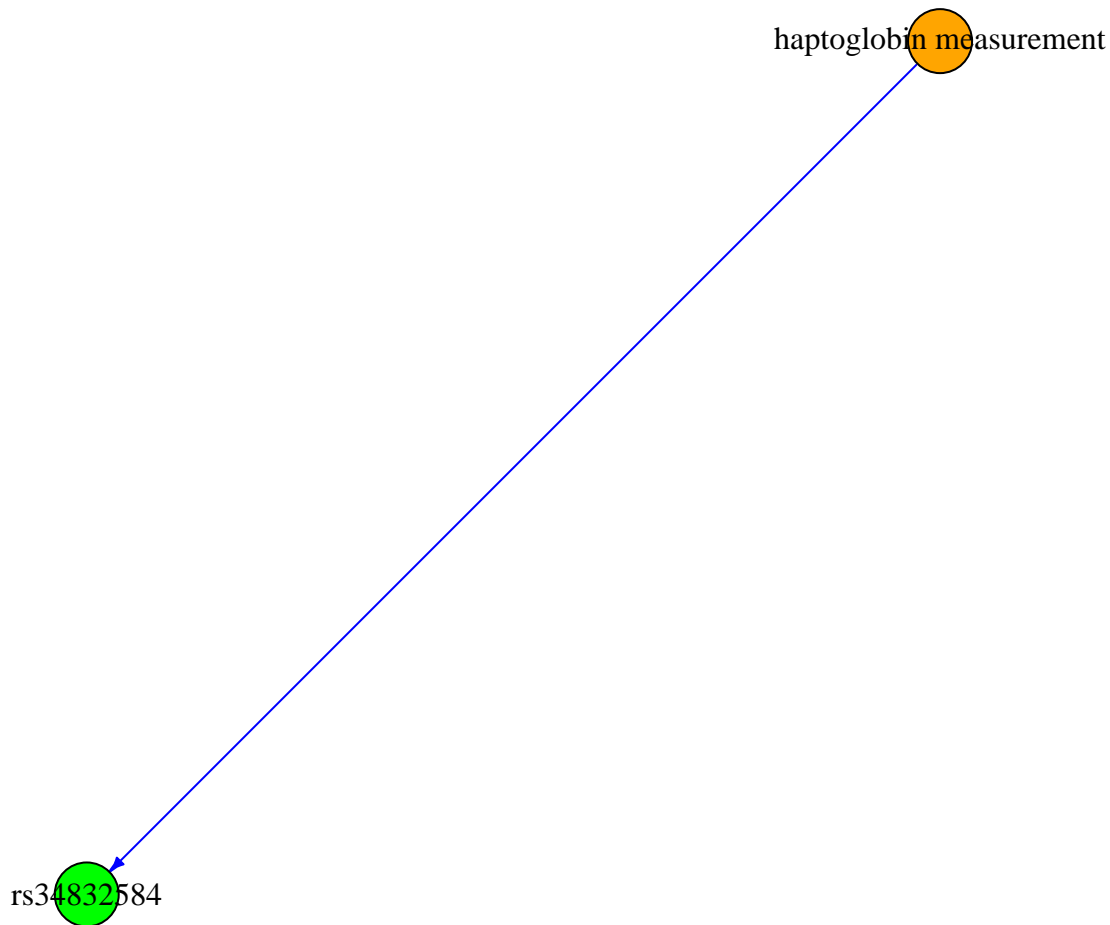

**Variant–Disease Network (chronic lymphocytic leukemia)**

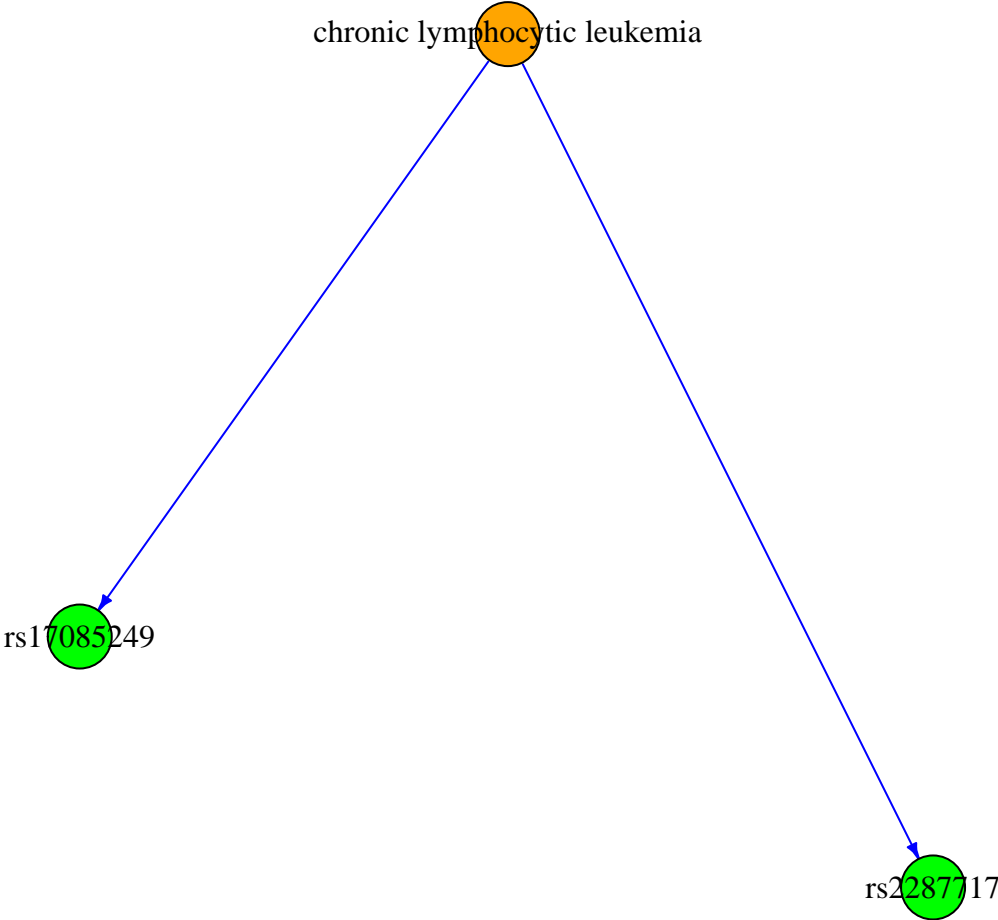

**Variant–Disease Network (hodgkins lymphoma)**

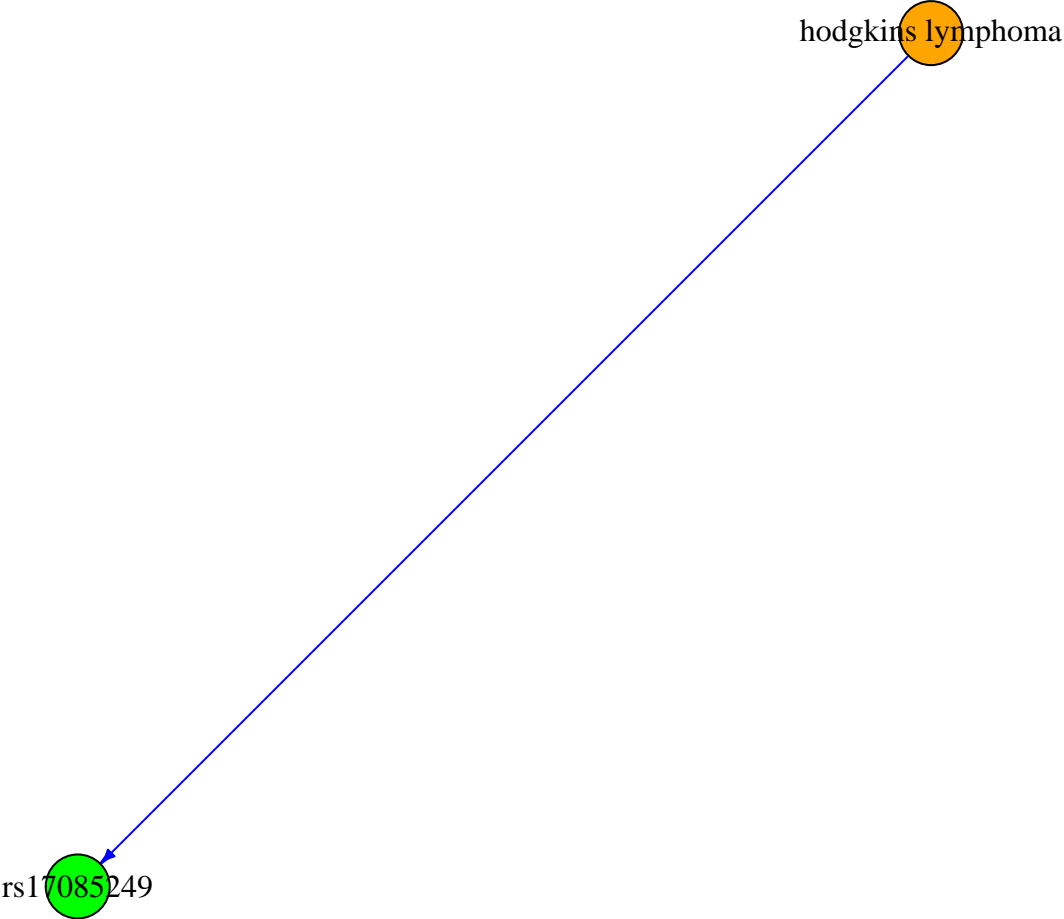

# Variant–Disease Network (IgG digalactosylation measurement)

IgG digalactosylation measurement

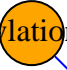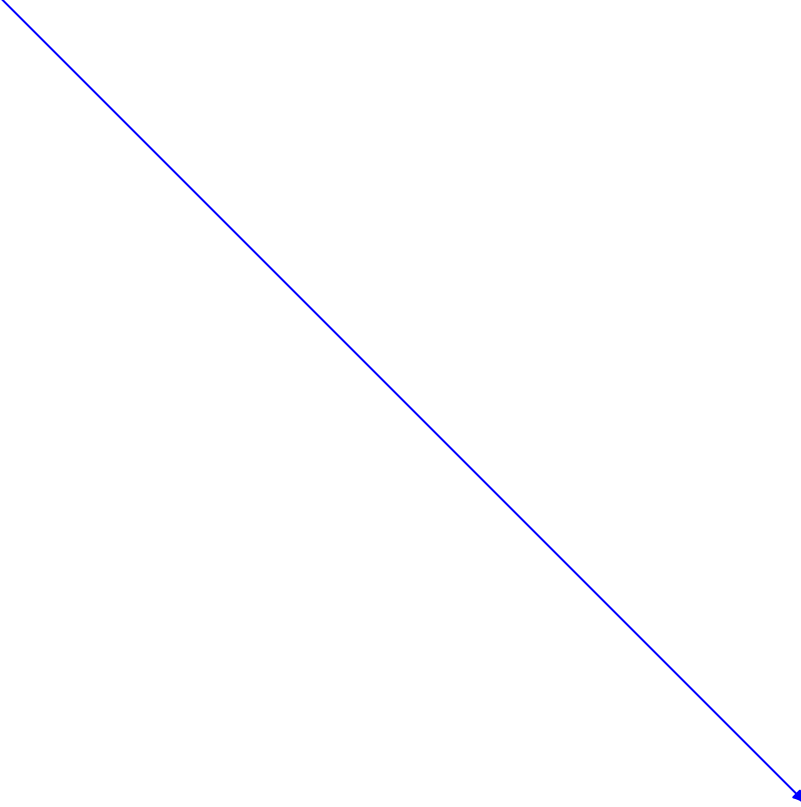

rs17085249

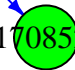

## Variant–Disease Network (IgG sialylation measurement)

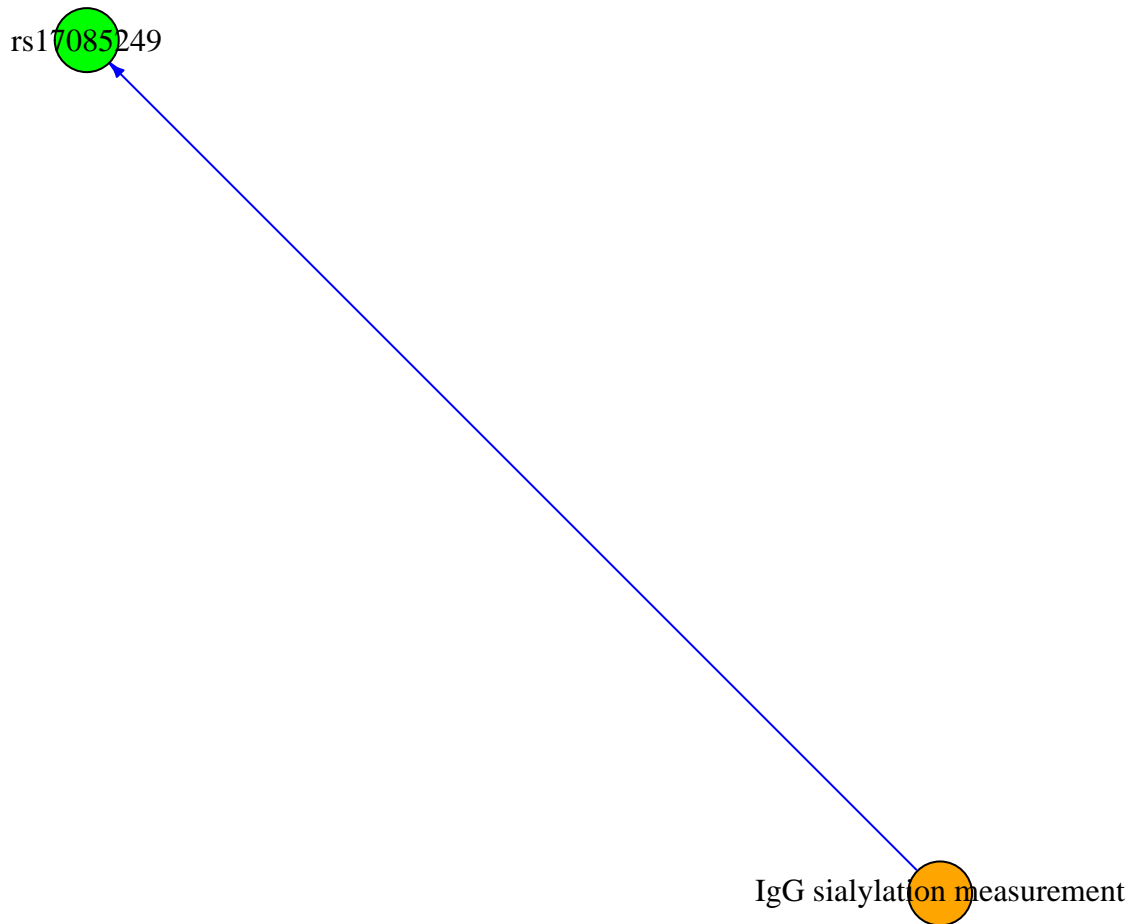

## Variant–Disease Network (monoclonal gammopathy)

rs17085249

monoclonal gammopathy

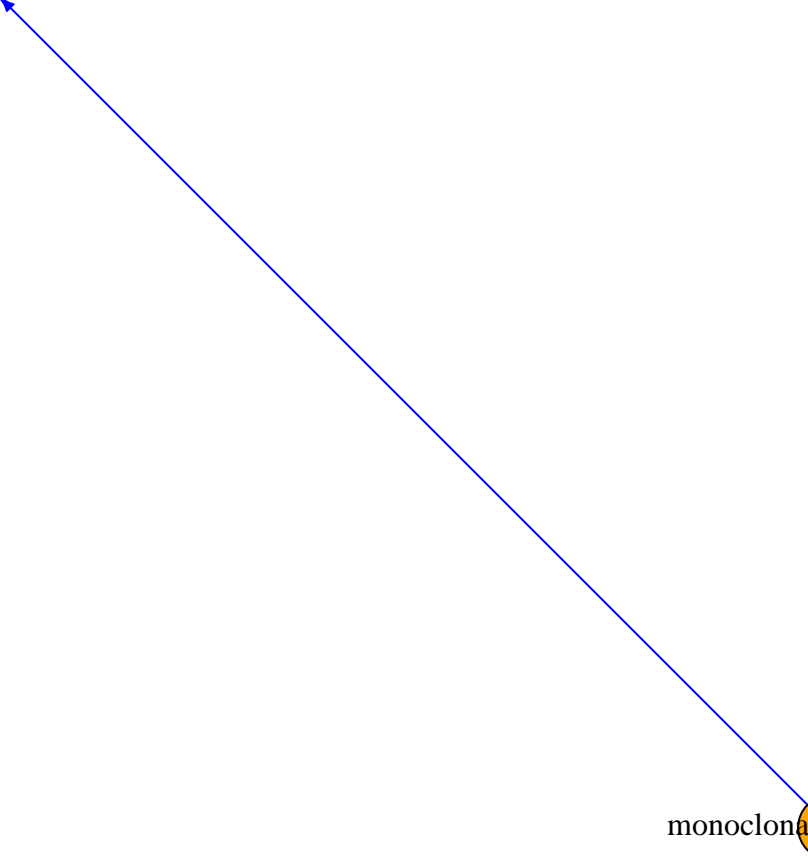

**Variant–Disease Network (total blood protein measurement)**

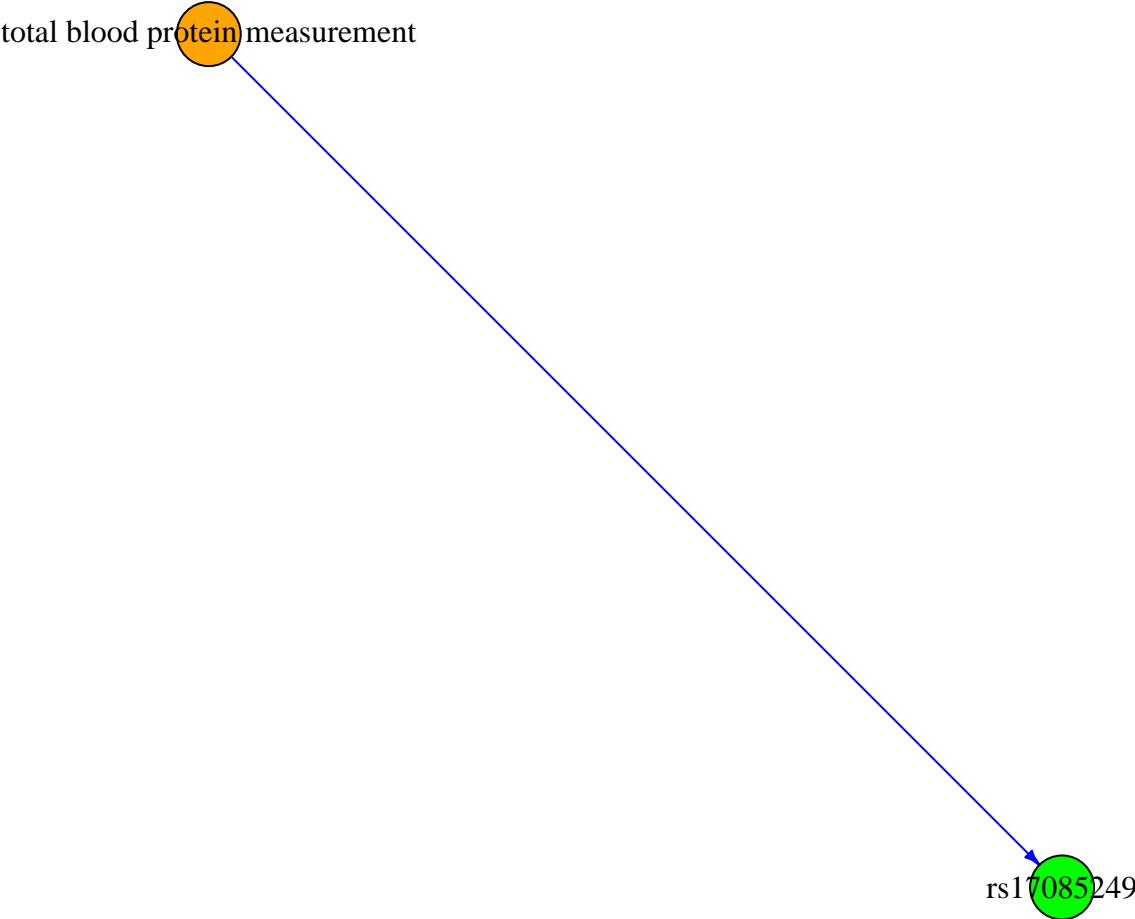

## Variant-Disease Network (sleep quality)

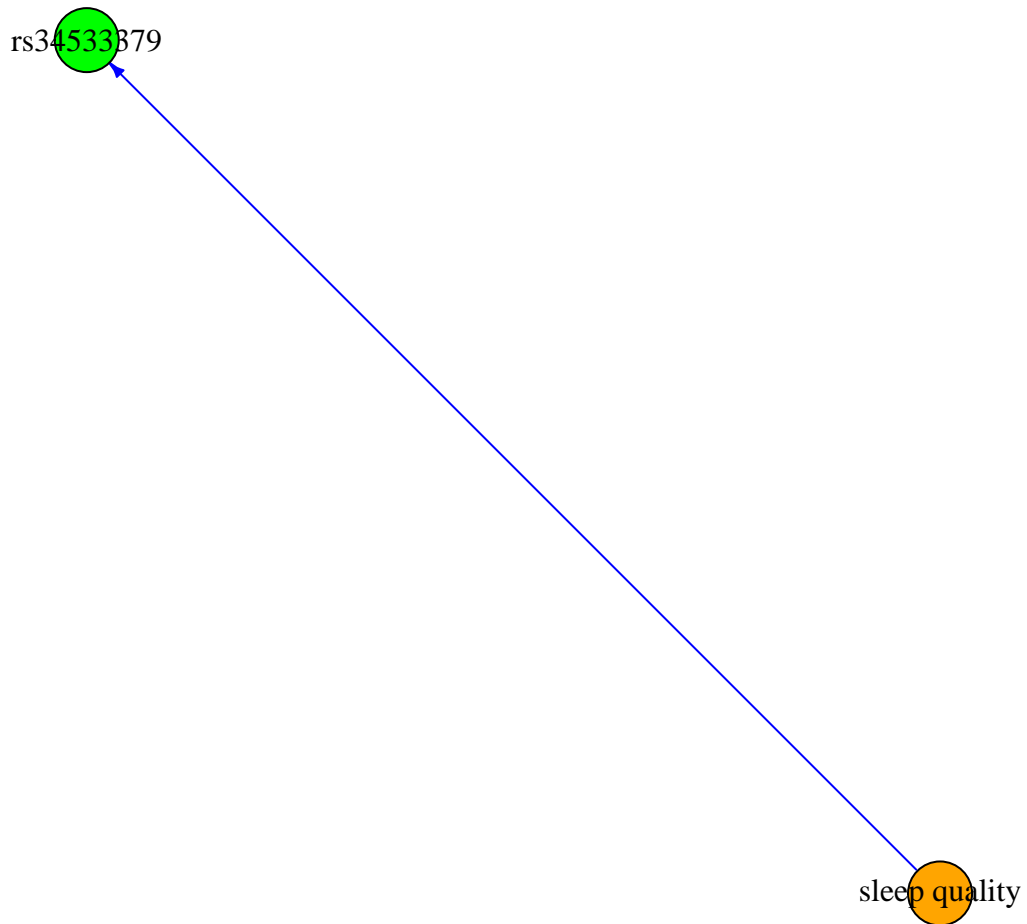



Variant–Disease Network (mood disorder)

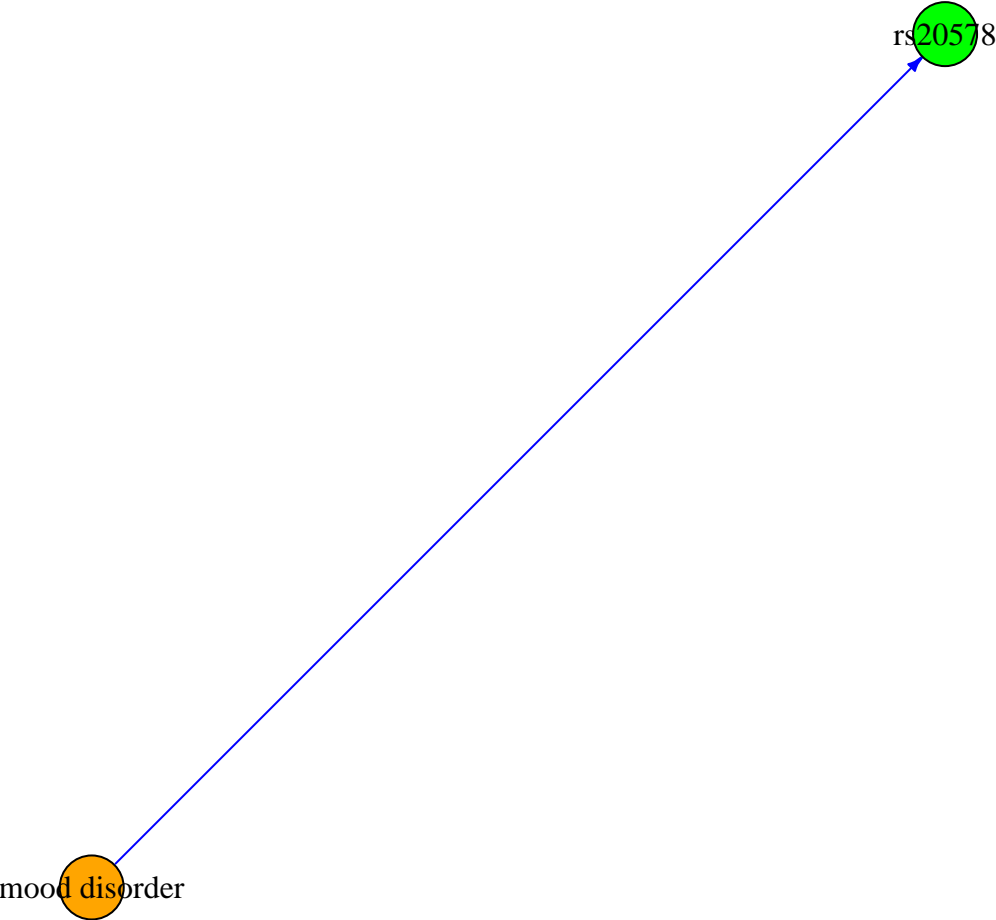

## Variant–Disease Network (parental longevity)

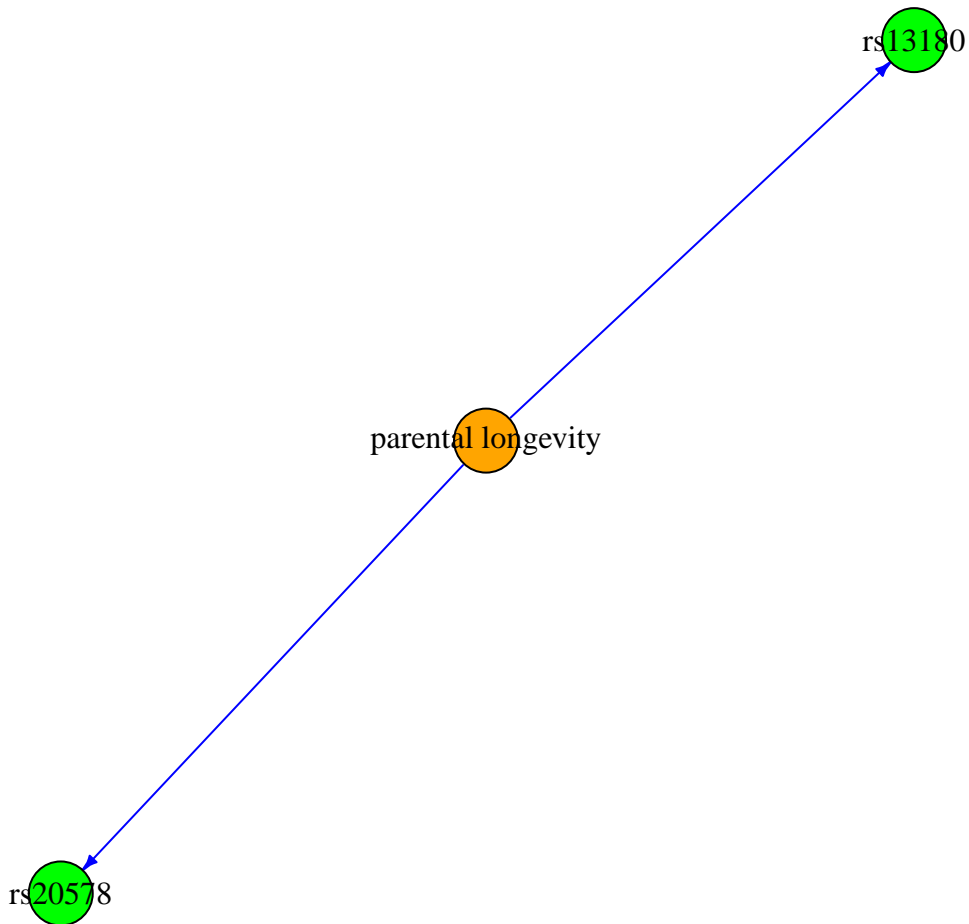

## Variant–Disease Network (brain measurement)

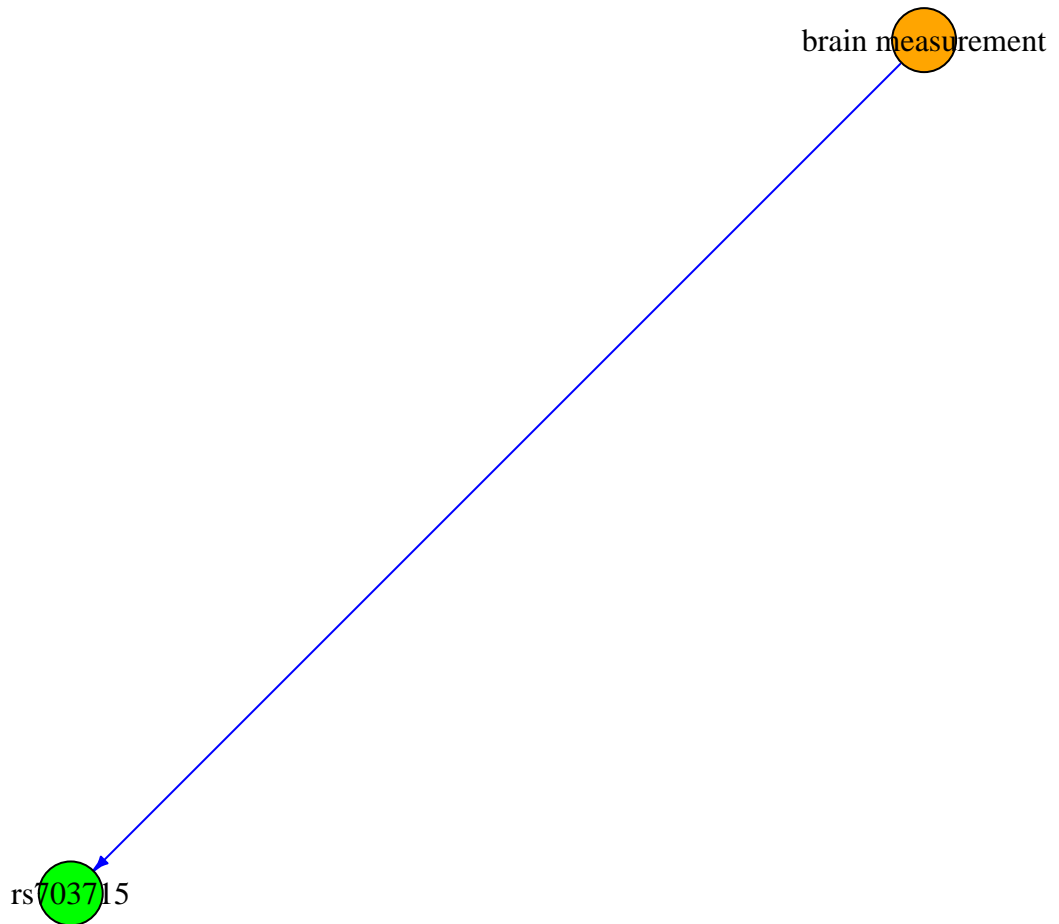

## Variant–Disease Network (hippocampal volume)

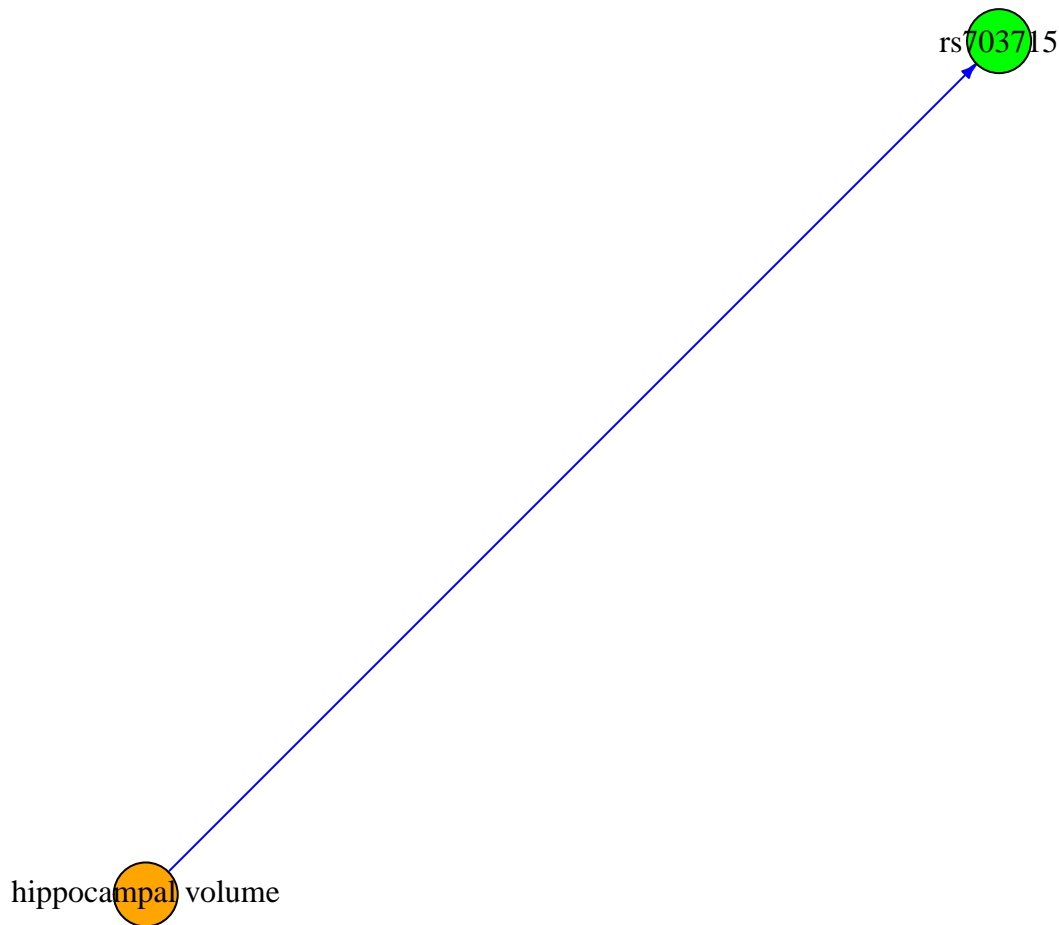

## Variant-Disease Network (catalase measurement)

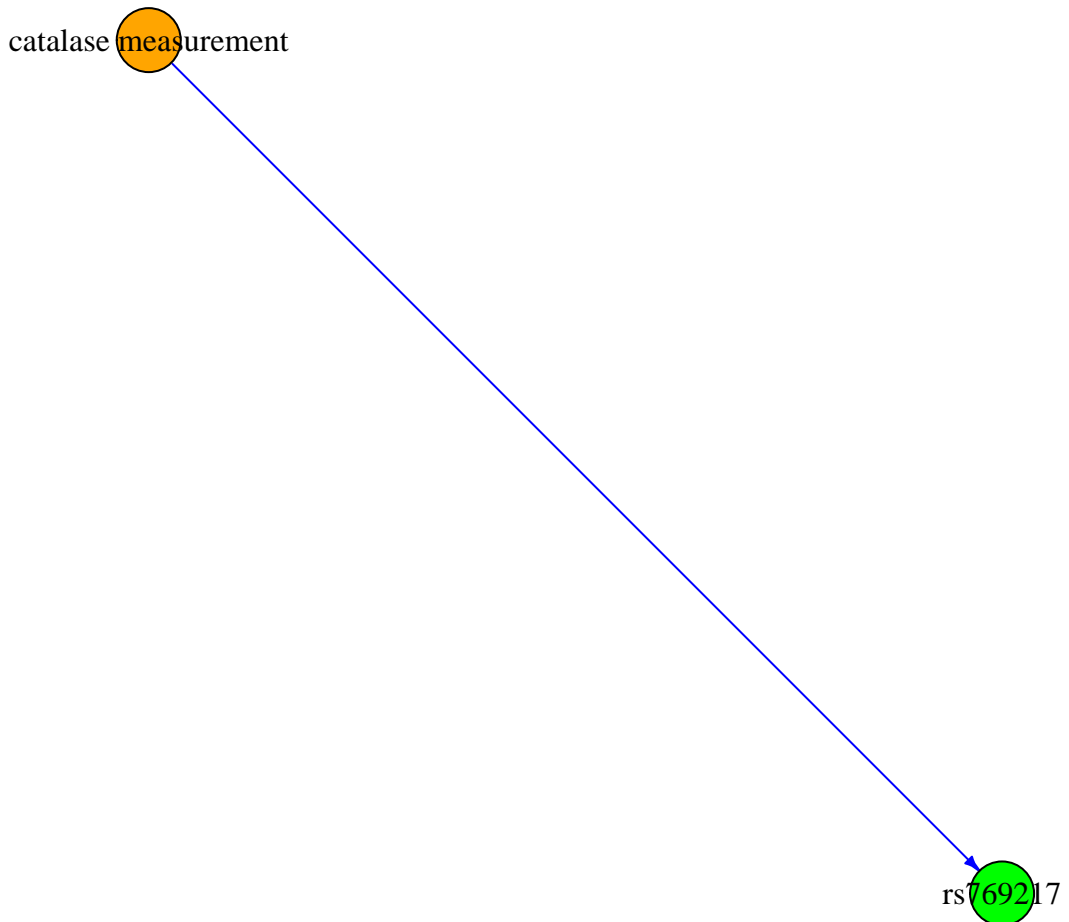

Variant–Disease Network (transmembrane glycoprotein NMB measurement

transmembrane glycoprotein NMB measurement

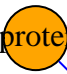

rs15775

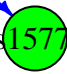

**Variant–Disease Network (beta–amyloid 1–42 measurement)**

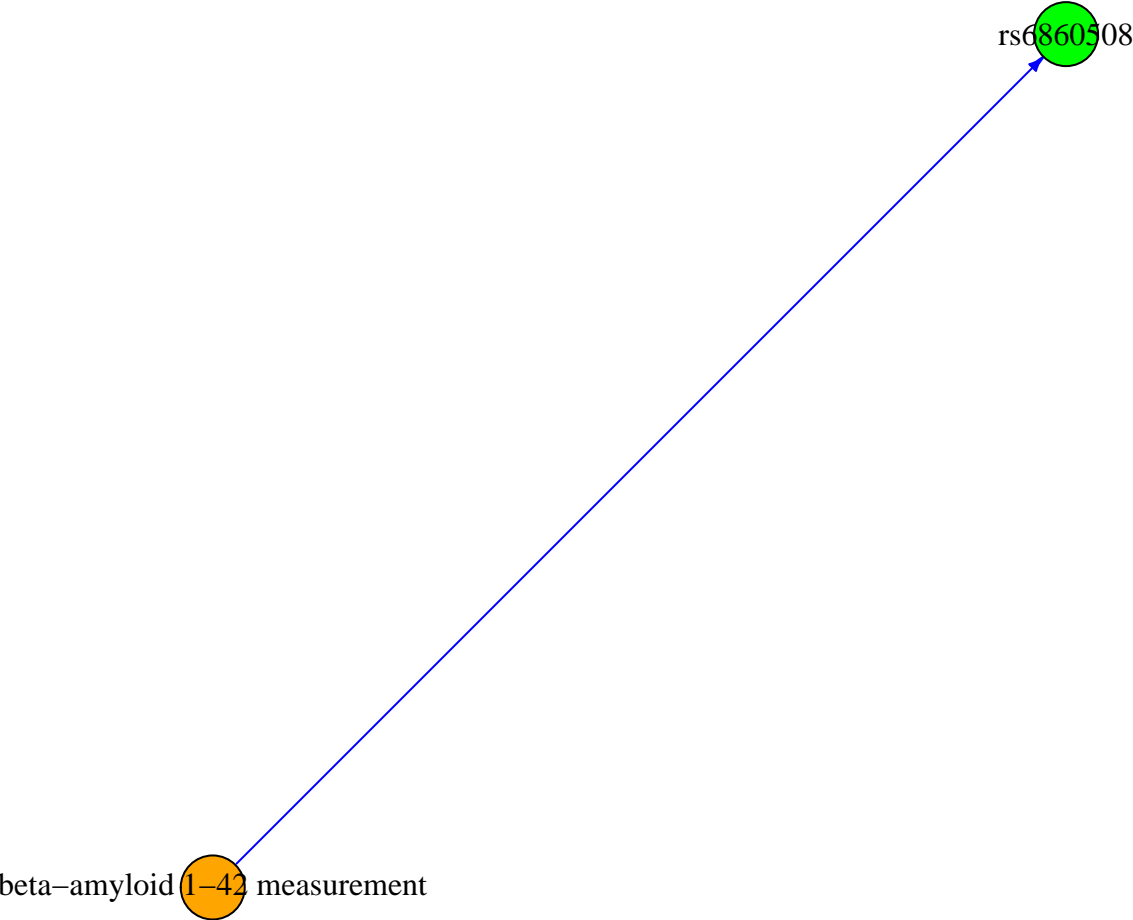

**Variant–Disease Network (left ventricular structural measurement)**

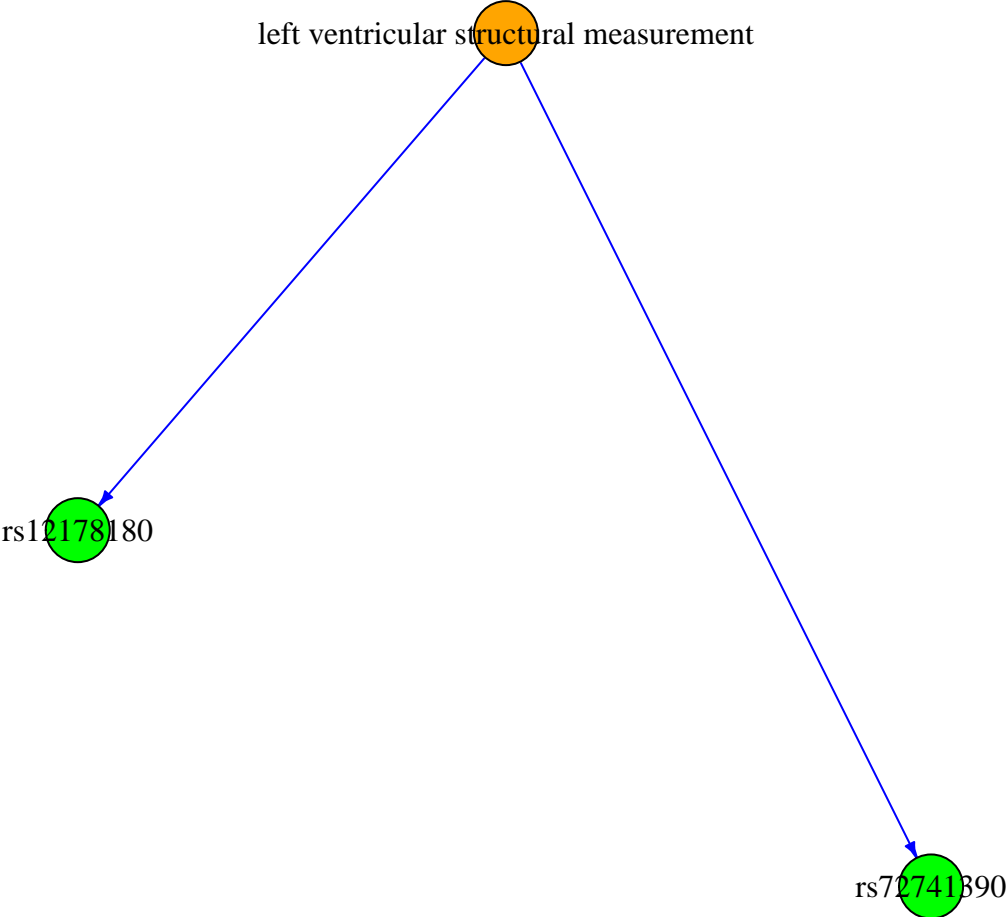



## Variant–Disease Network (serum selenium measurement)

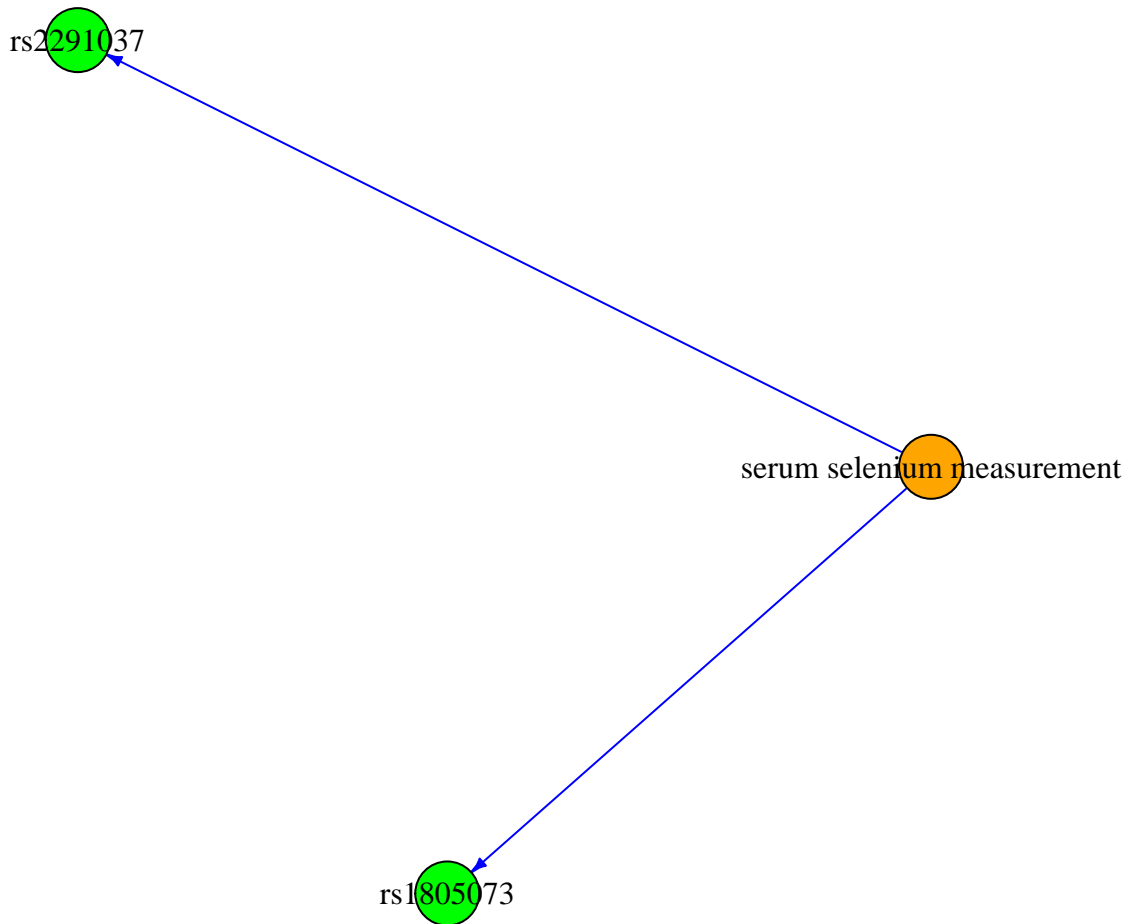

## Variant–Disease Network (gastric carcinoma)

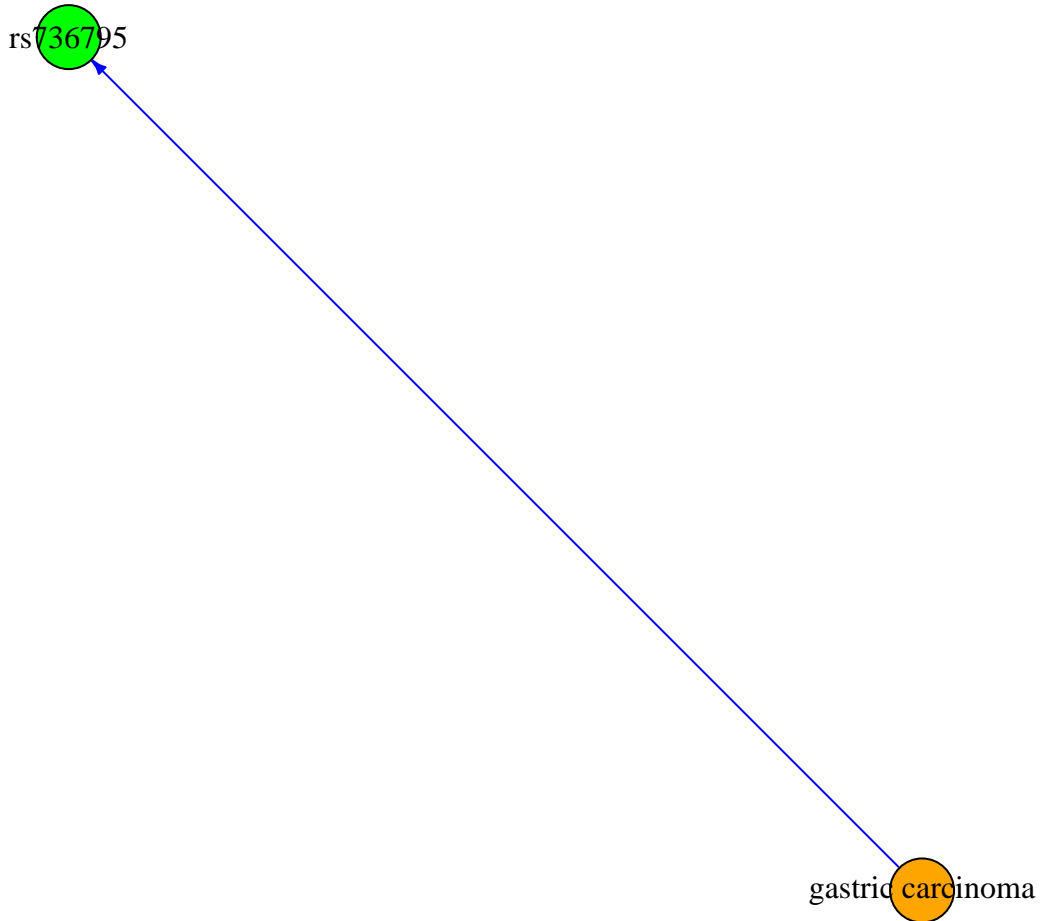

# Variant-Disease Network (hair shape measurement)

hair shape measurement

rs578483

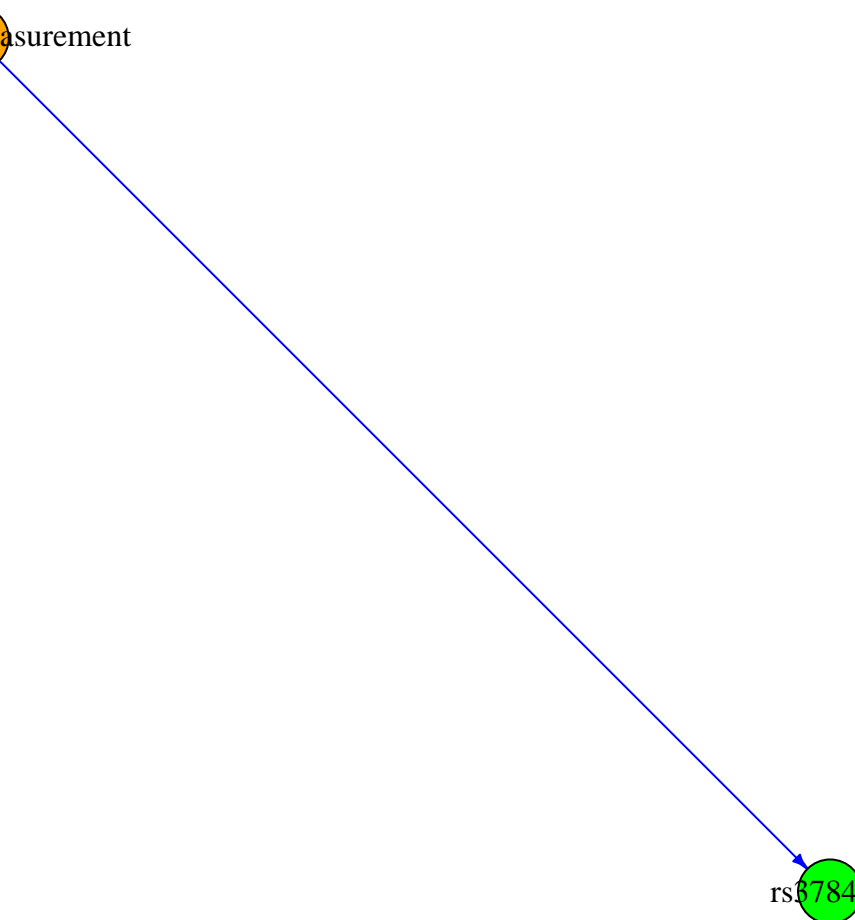

## Variant-Disease Network (non-melanoma skin carcinoma)

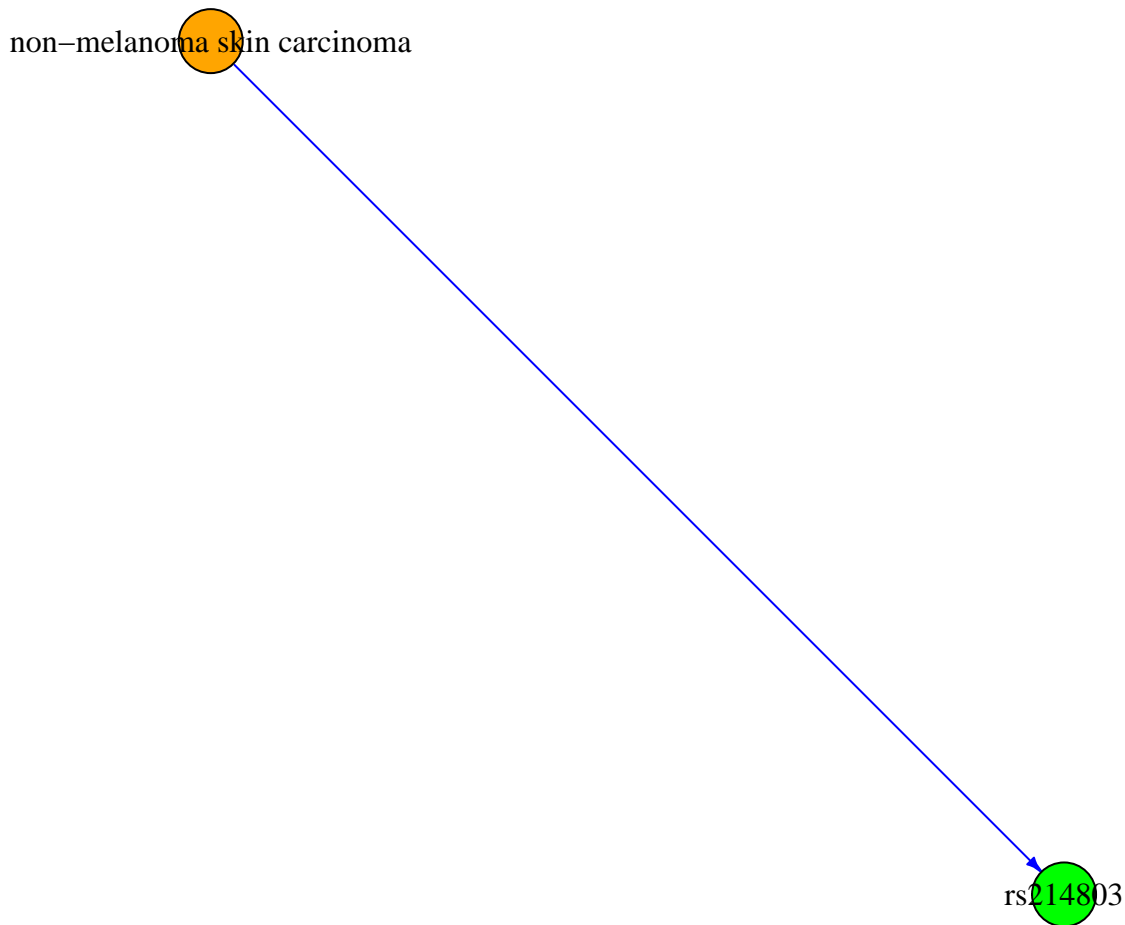

# Variant–Disease Network (fibrinogen measurement)

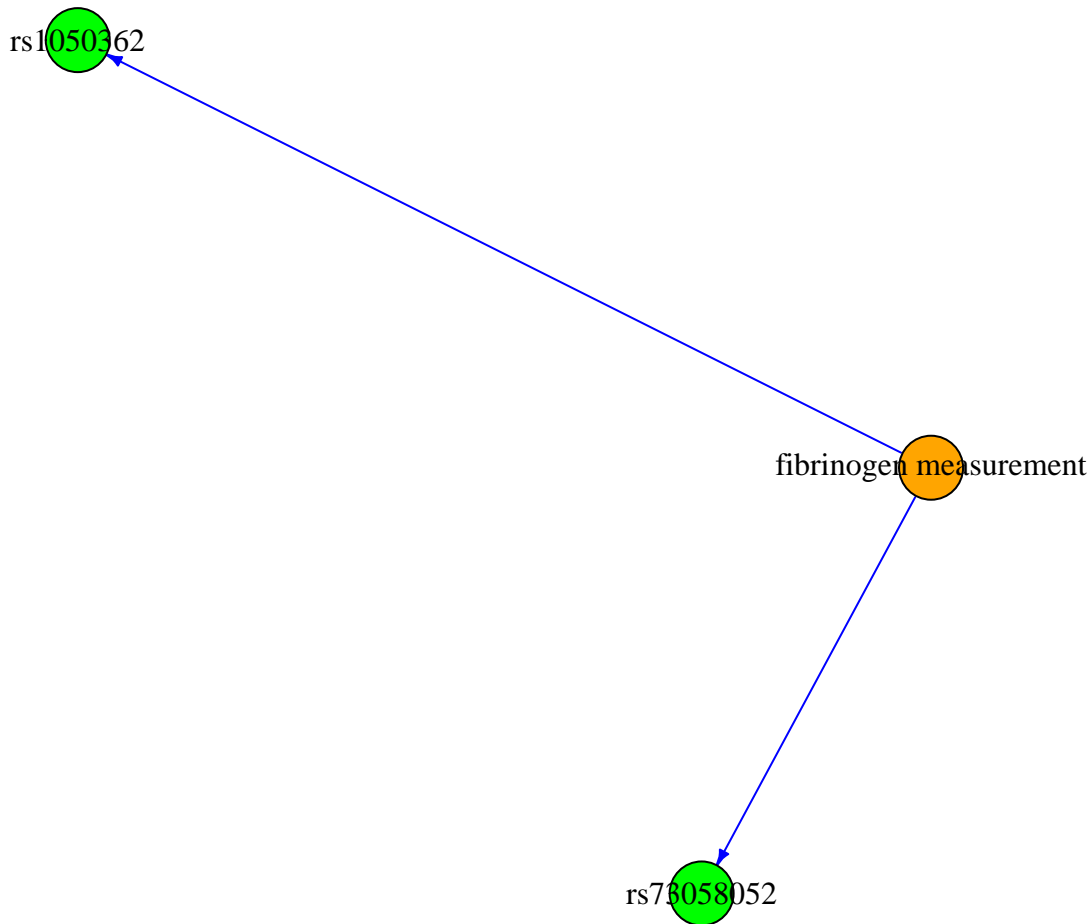

## Variant–Disease Network (DNA methylation)

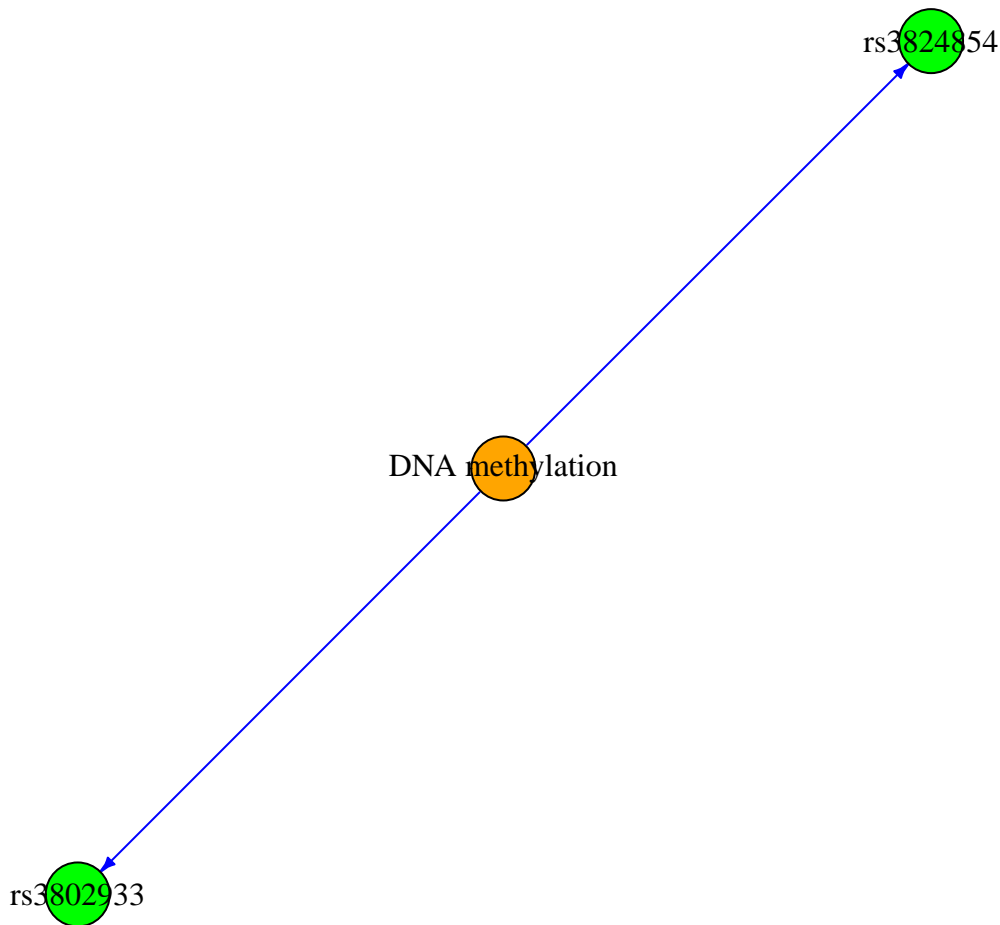

## Variant–Disease Network (bone density)

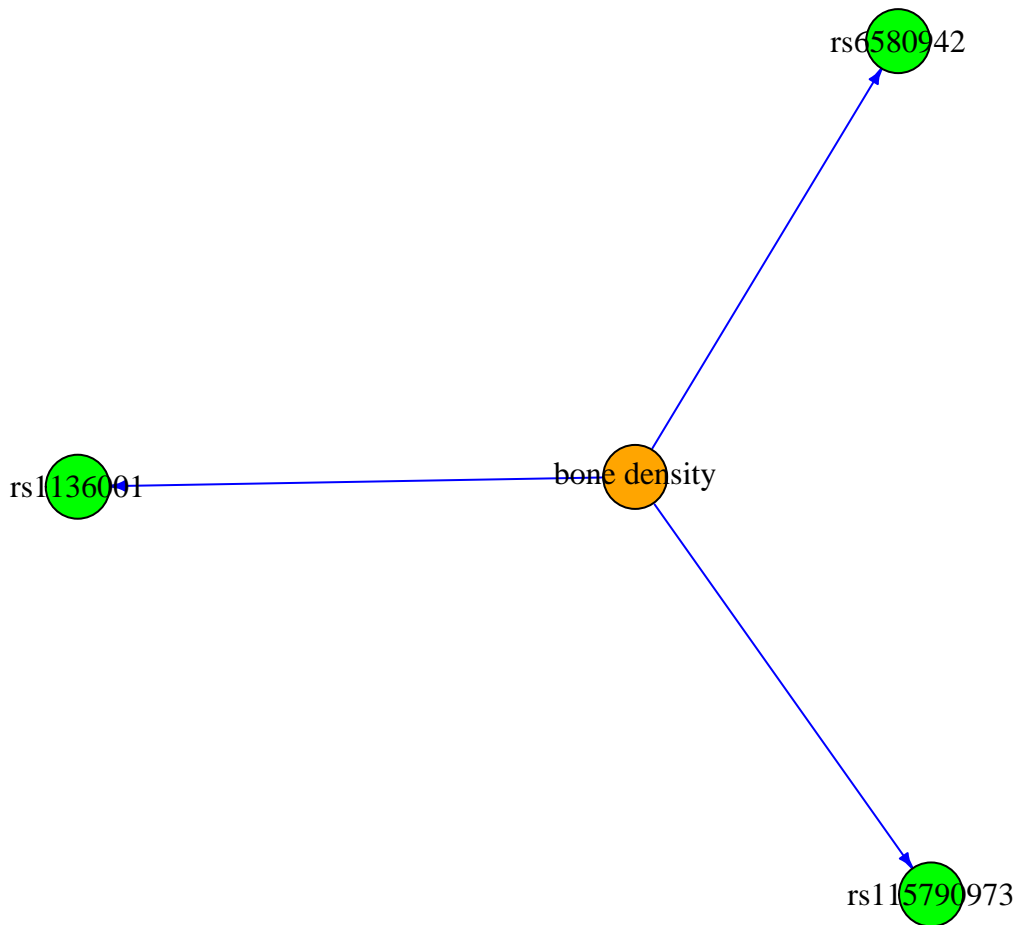

# Variant–Disease Network (pursuit maintenance gain measurement)

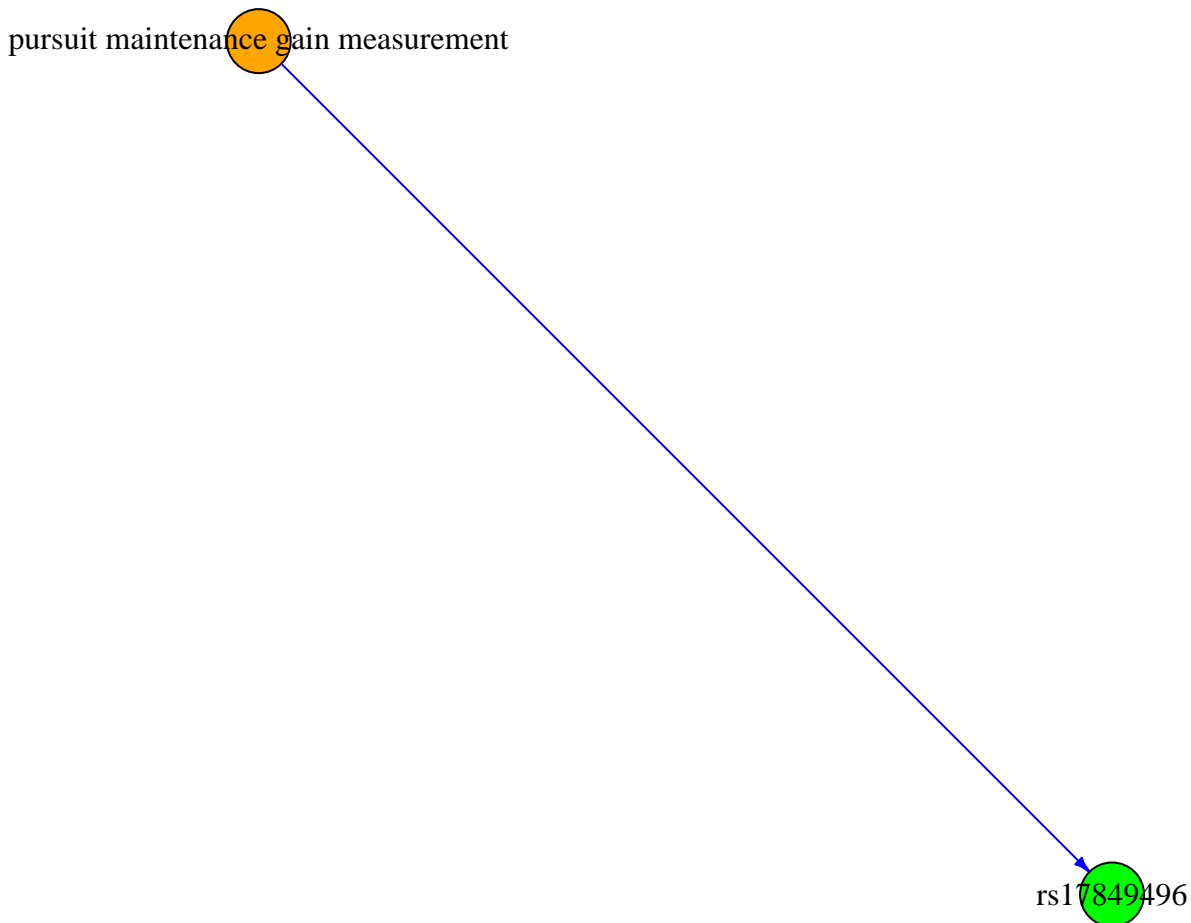



Variant–Disease Network (odontogenesis)

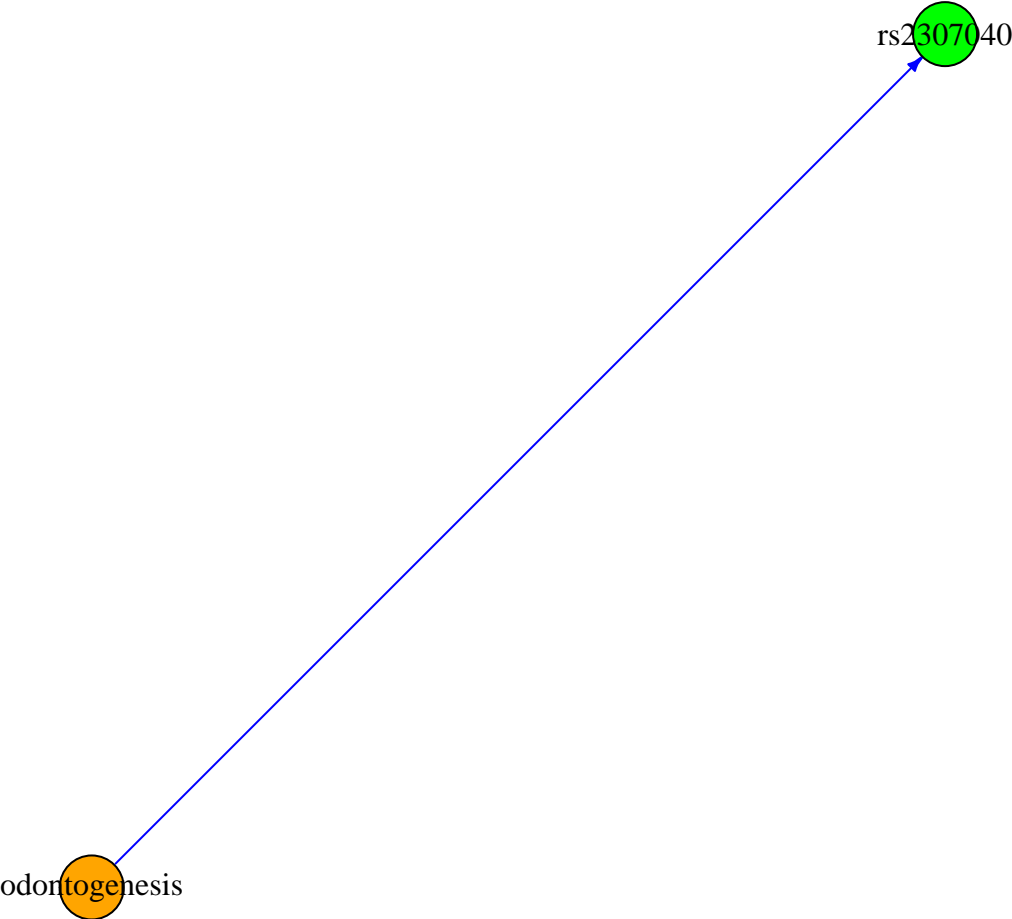

# Variant–Disease Network (tooth eruption)

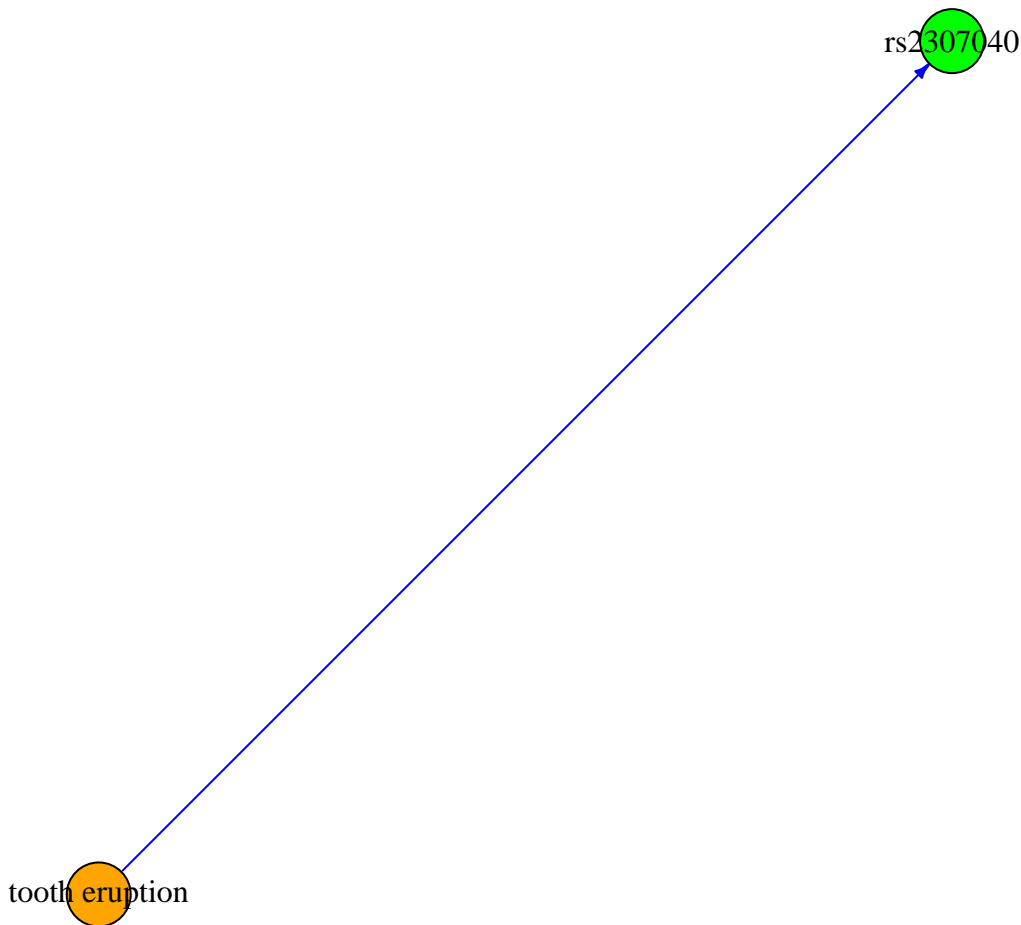

## **Variant–Disease Network (family history of Alzheimer’s disease)**

## Variant–Disease Network (abnormal thrombosis)

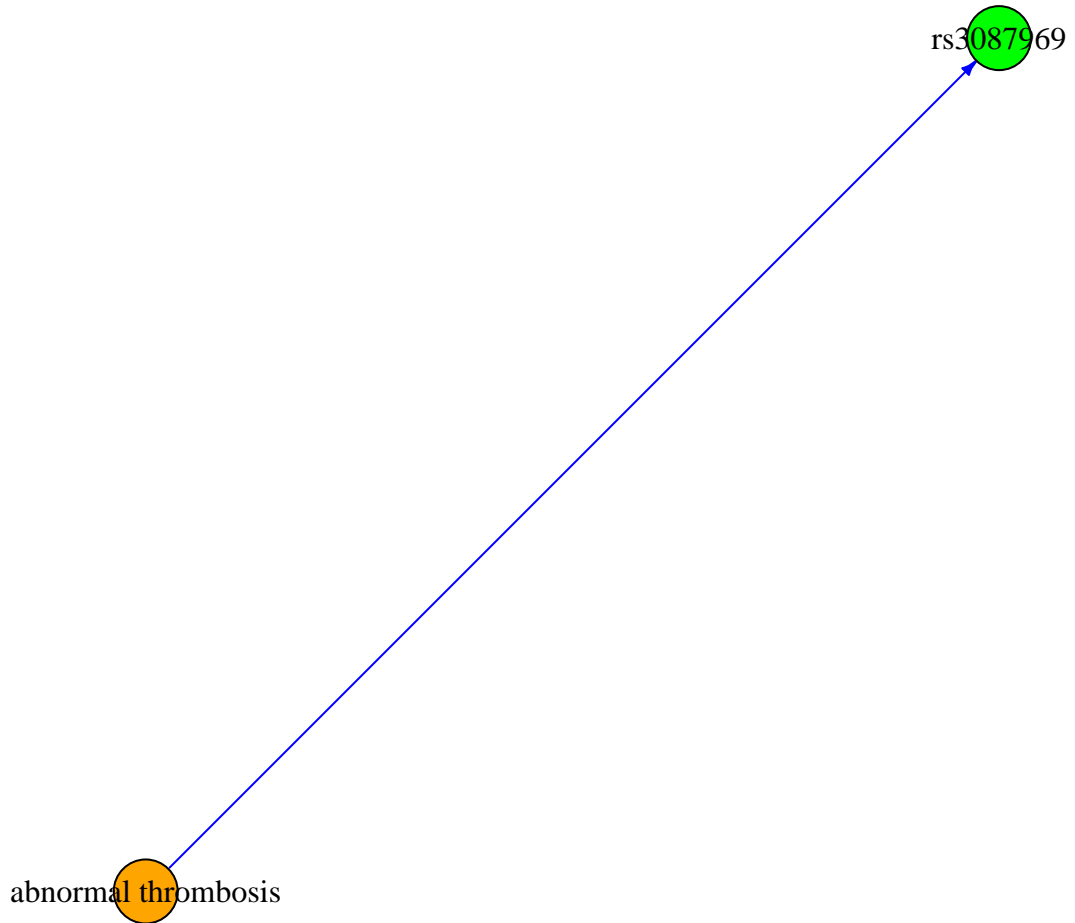

## Variant–Disease Network (deep vein thrombosis)

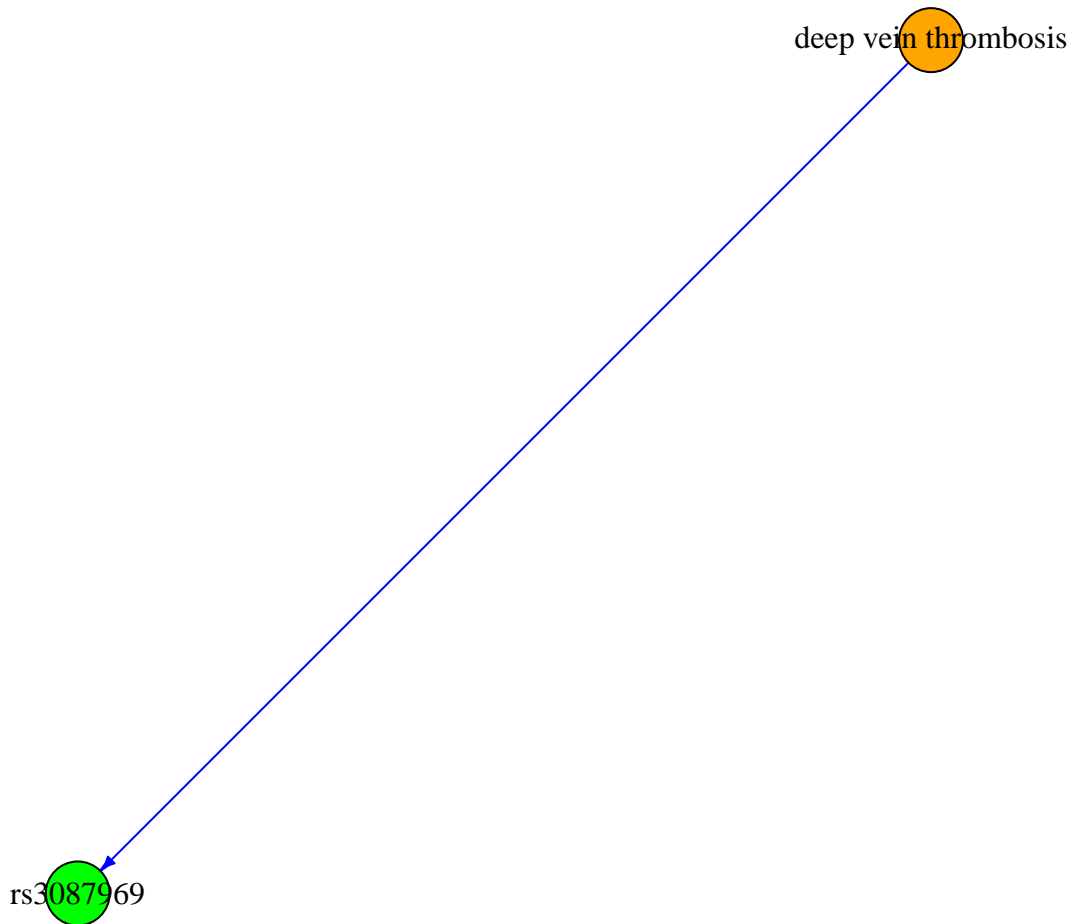

## Variant–Disease Network (Ischemic stroke)

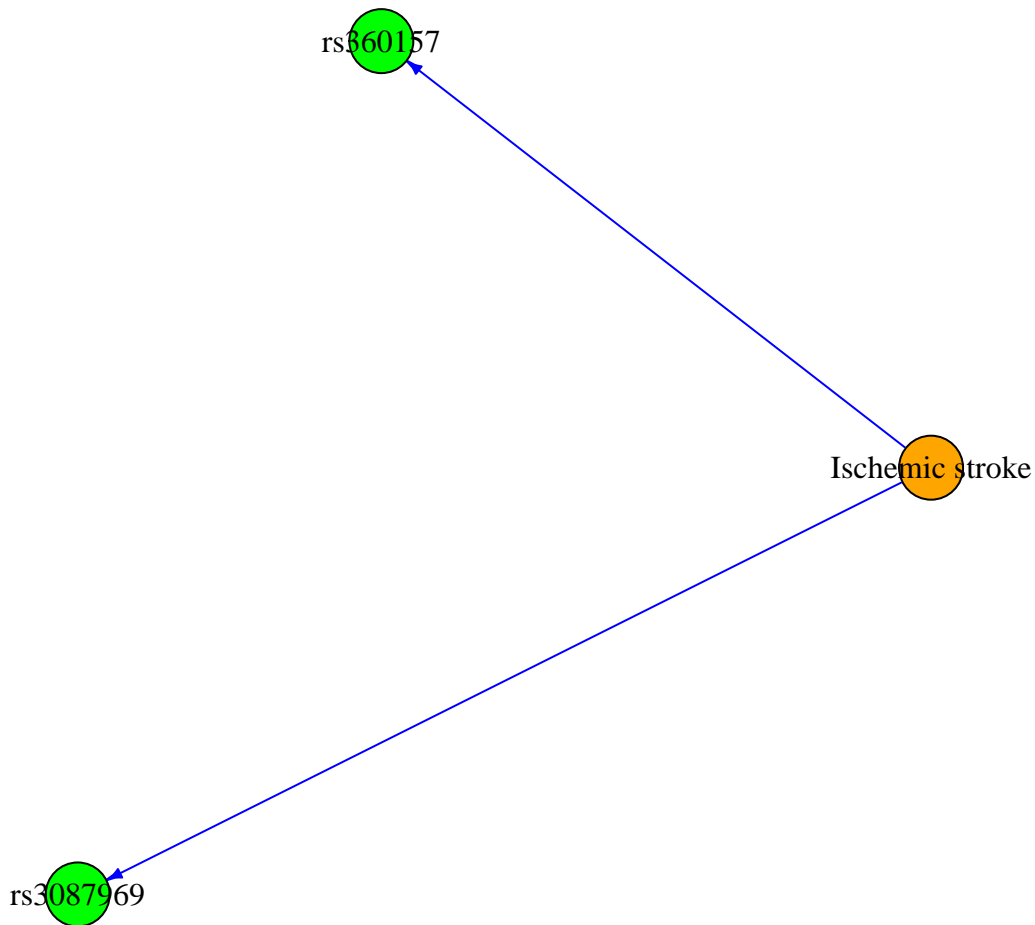

## Variant–Disease Network (pulmonary embolism)

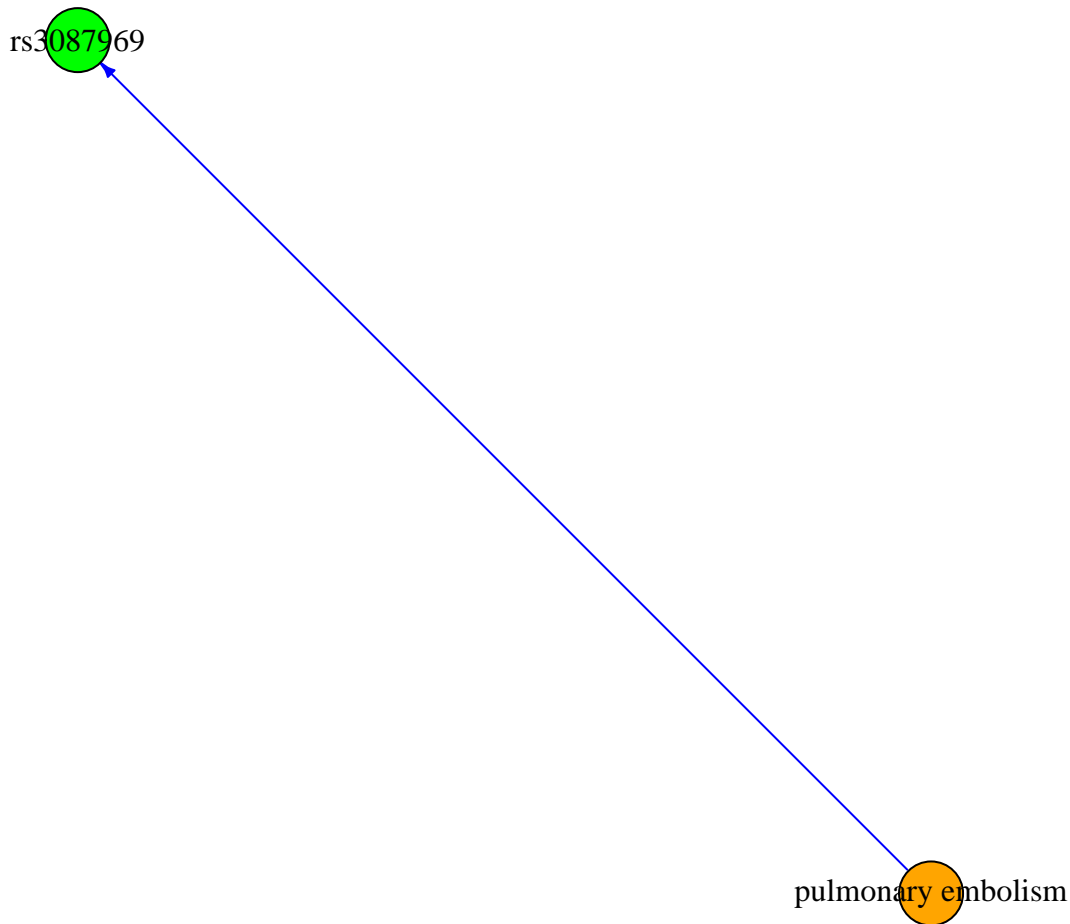

## Variant-Disease Network (stroke)

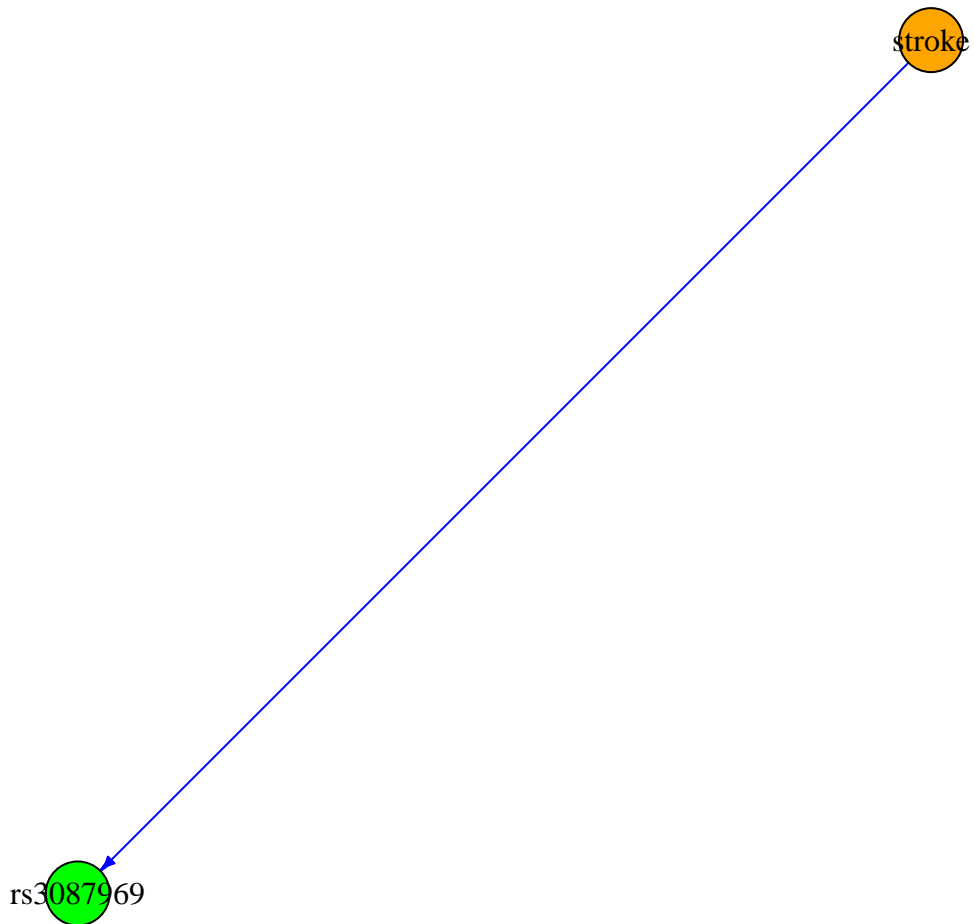



## Variant–Disease Network (cognitive decline)

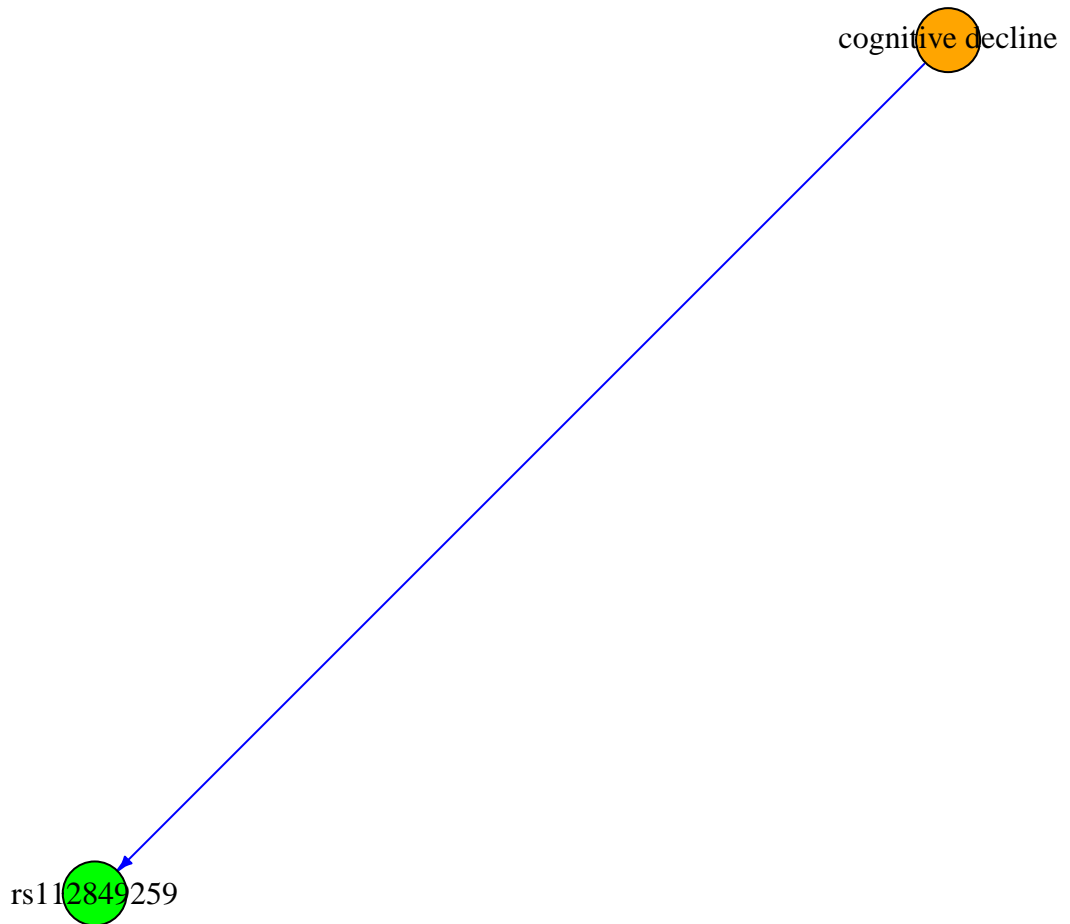

## Variant–Disease Network (bladder carcinoma)

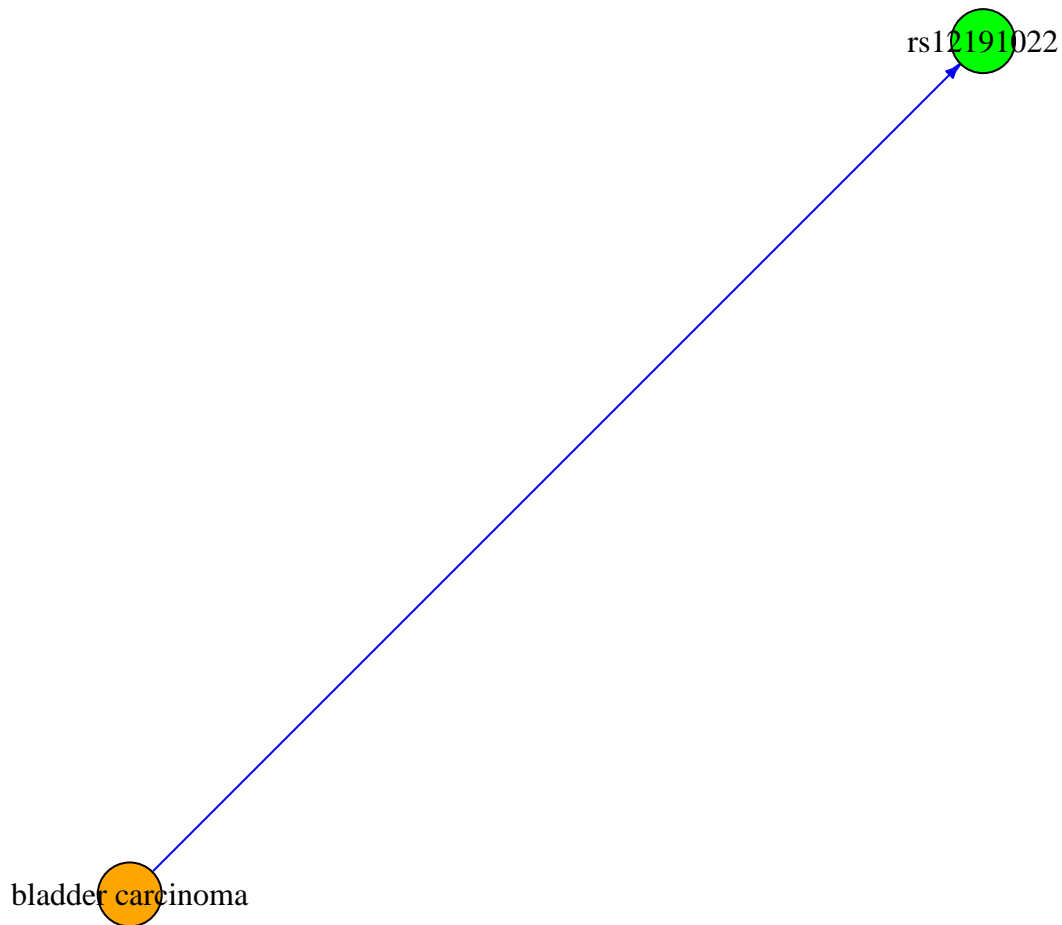

## Variant–Disease Network (t–tau:Ab1:42 ratio)

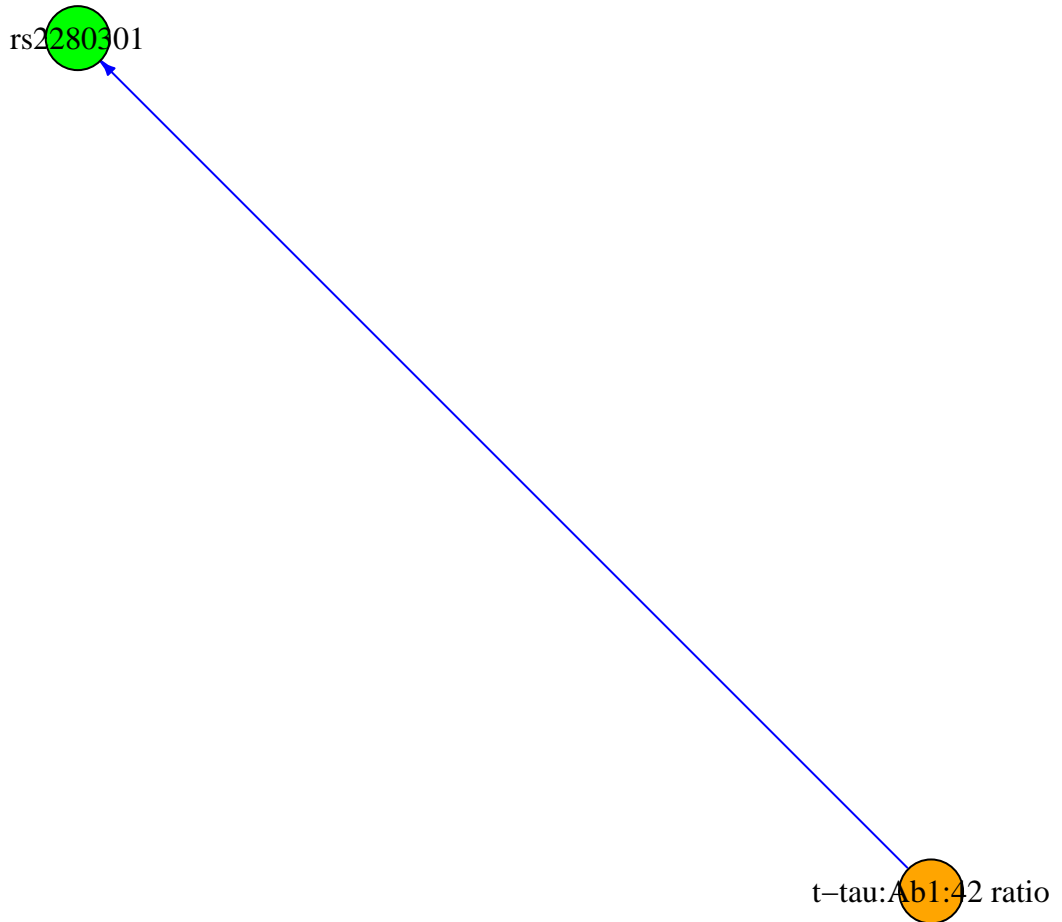

Variant–Disease Network (nicotine dependence symptom count)

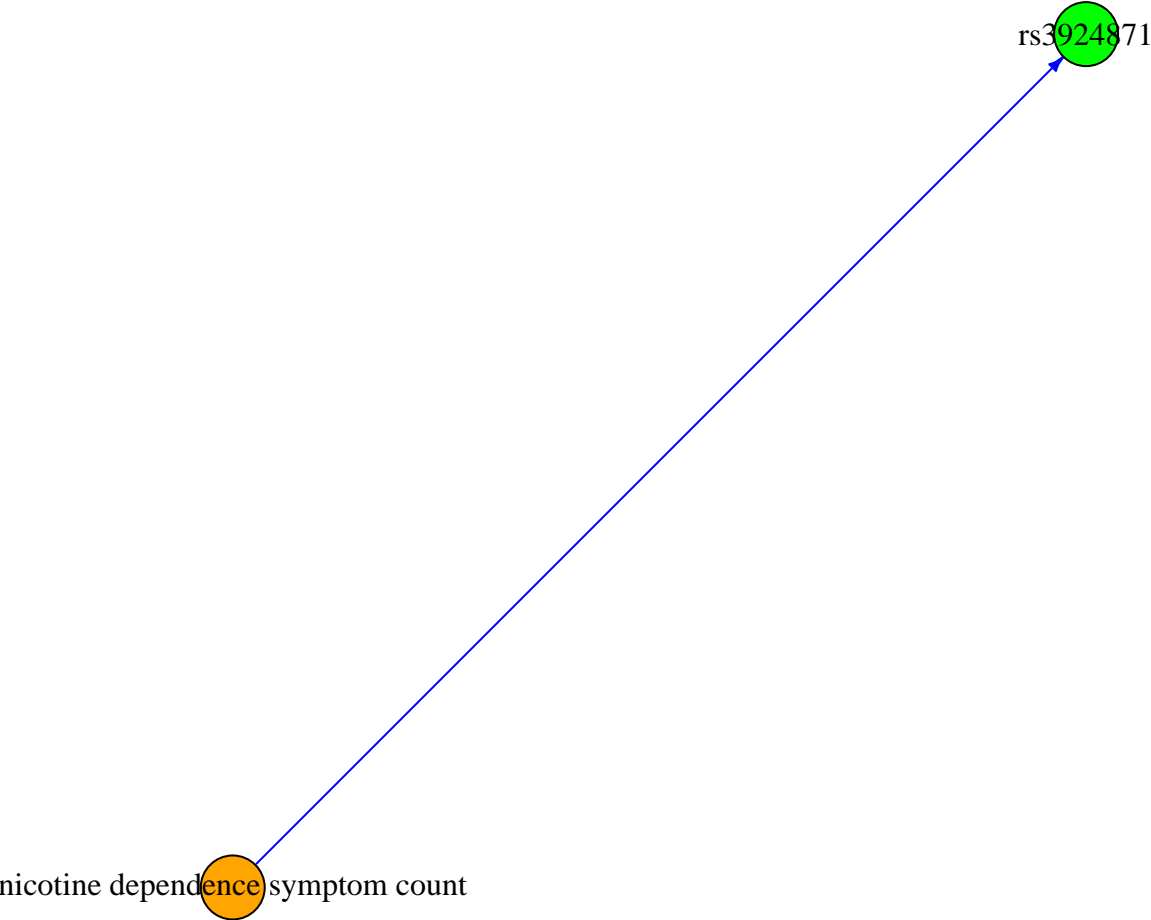

## Variant–Disease Network (endometrial neoplasm)

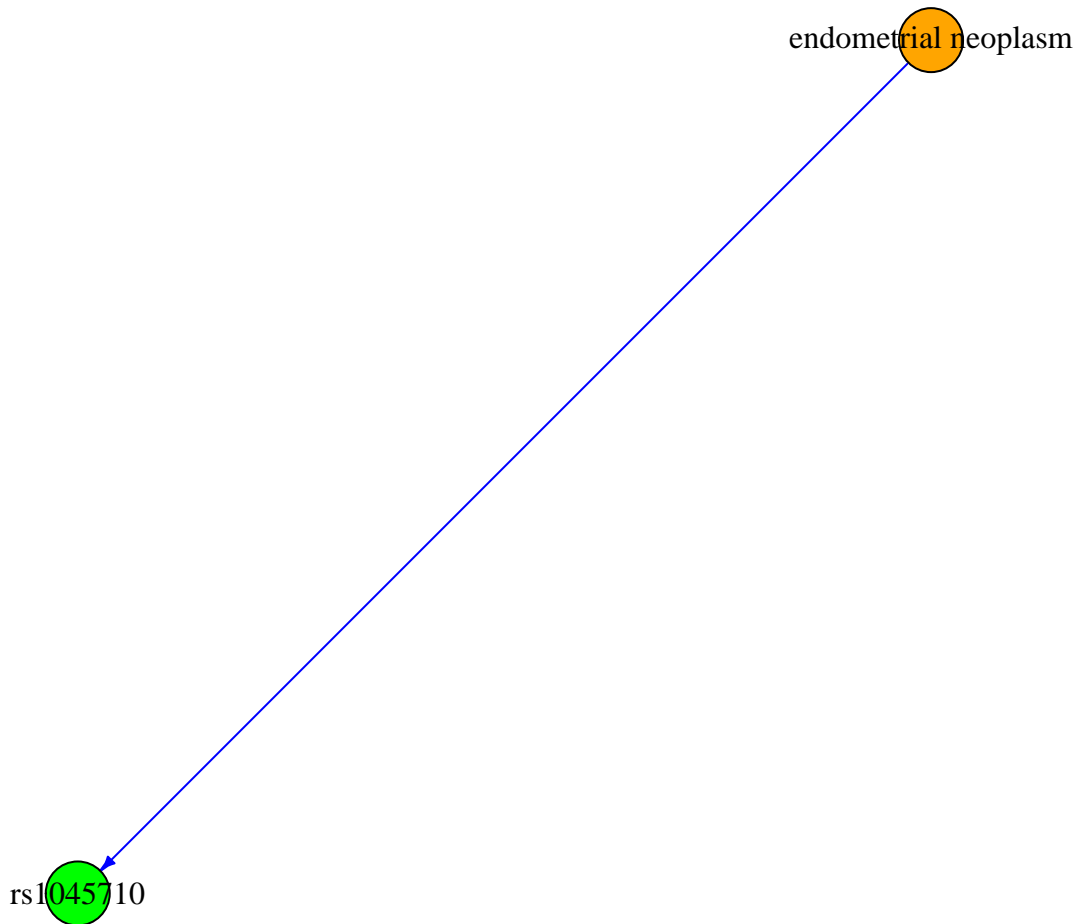

## Variant–Disease Network (resistin measurement)

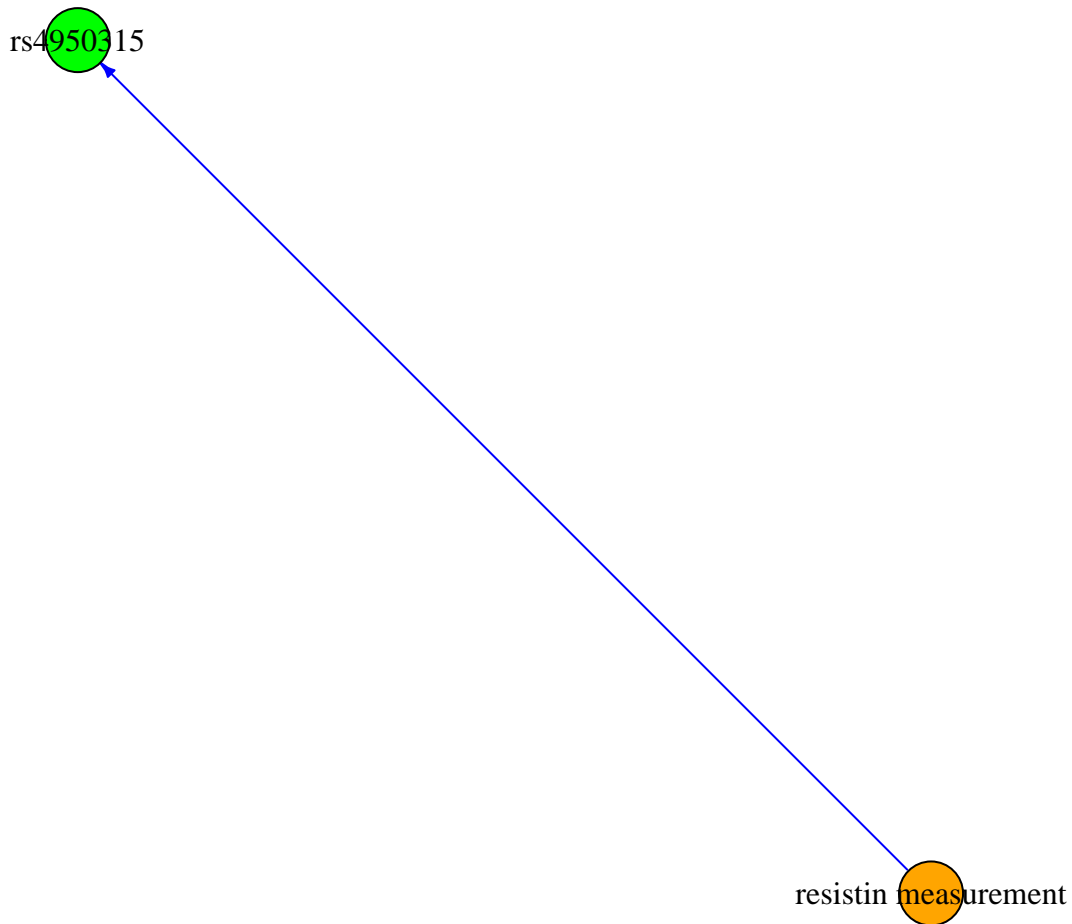

## Variant–Disease Network (Astigmatism)

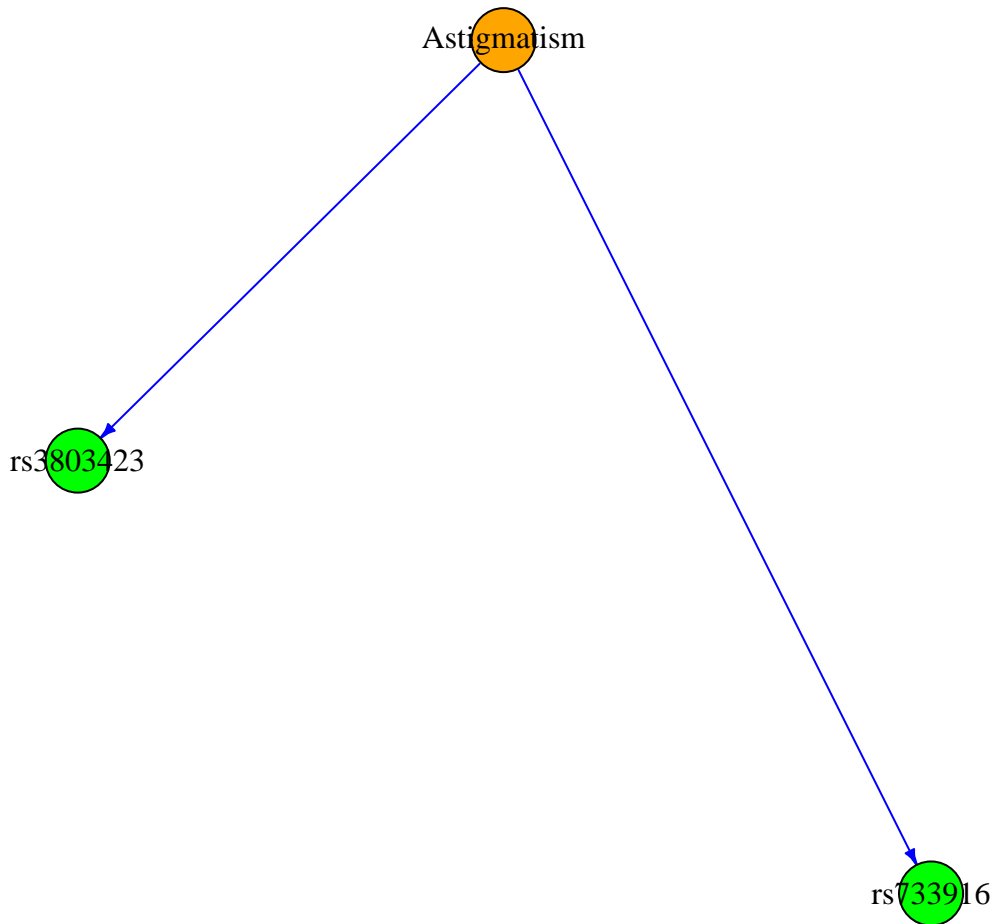

## Variant–Disease Network (selenium measurement)

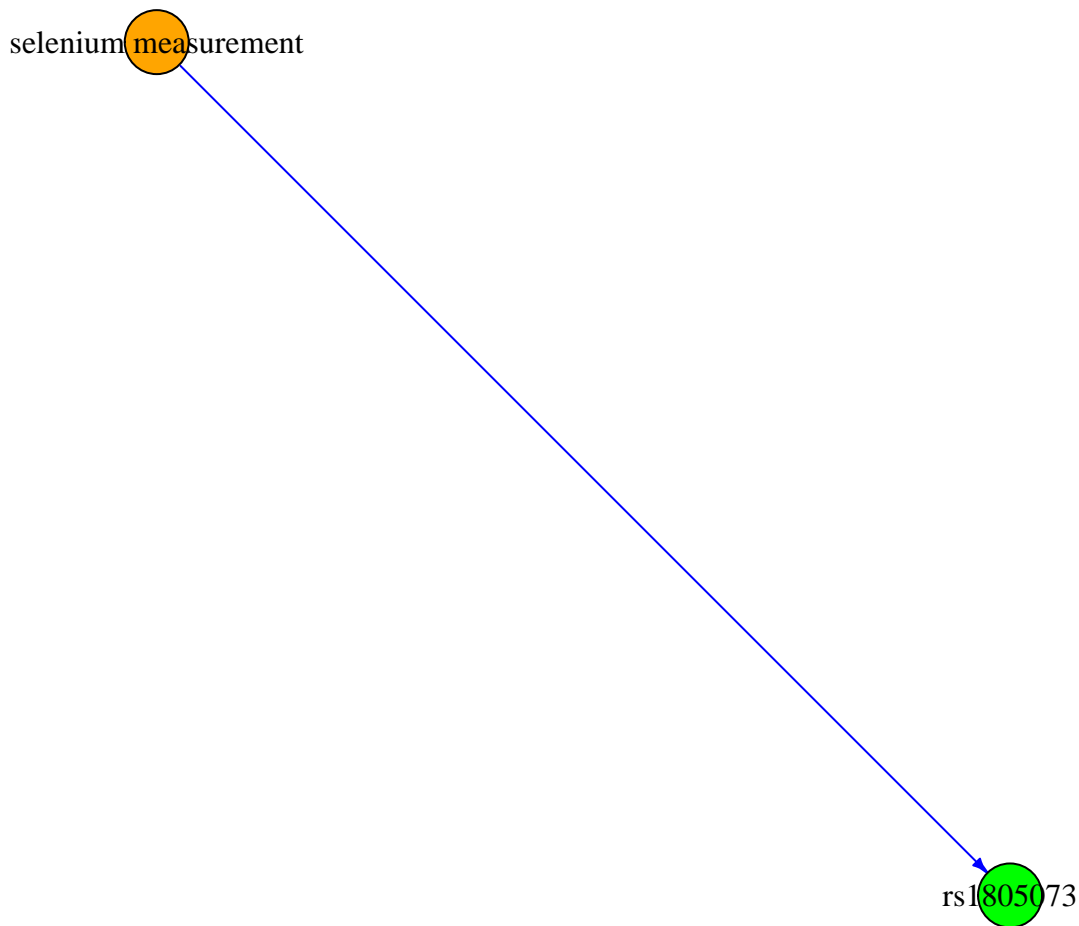



**Variant–Disease Network (basophil percentage of white cells)**

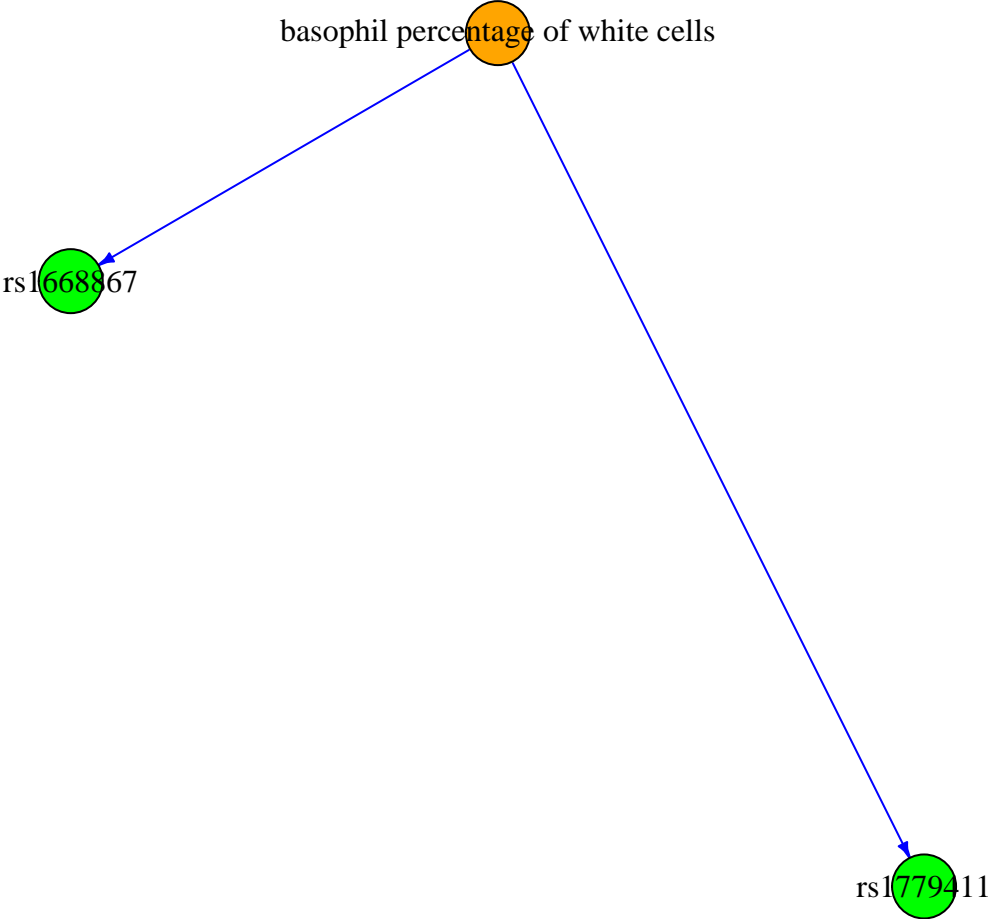

## Variant–Disease Network (alcoholic pancreatitis)

alcoholic pancreatitis

rs6622126

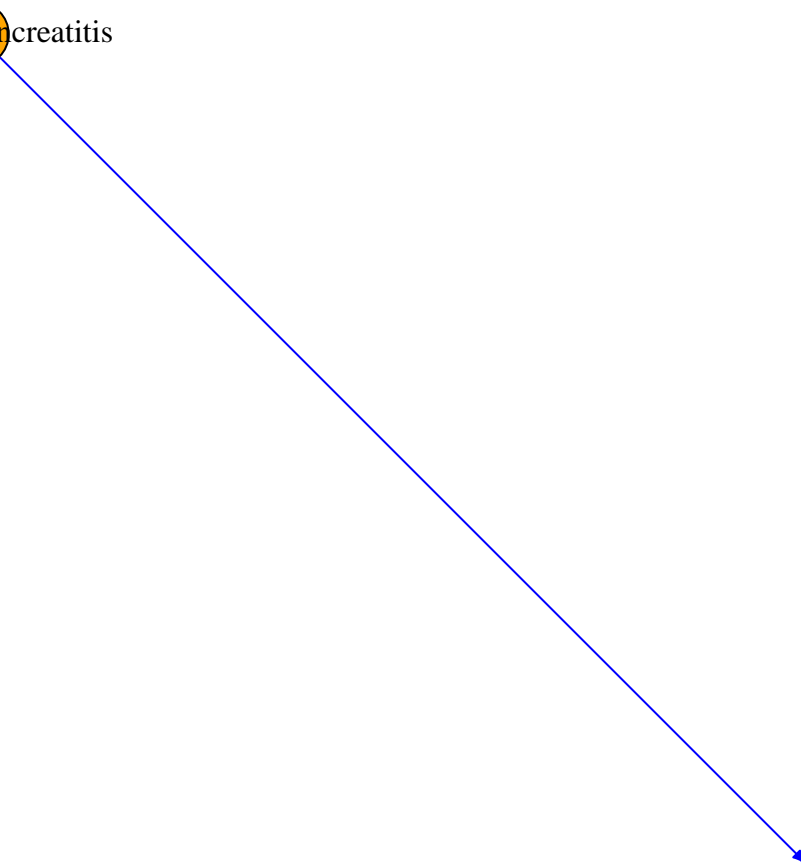

Variant–Disease Network (interleukin 6 receptor subunit beta measurement

interleukin 6 receptor subunit beta measurement

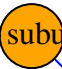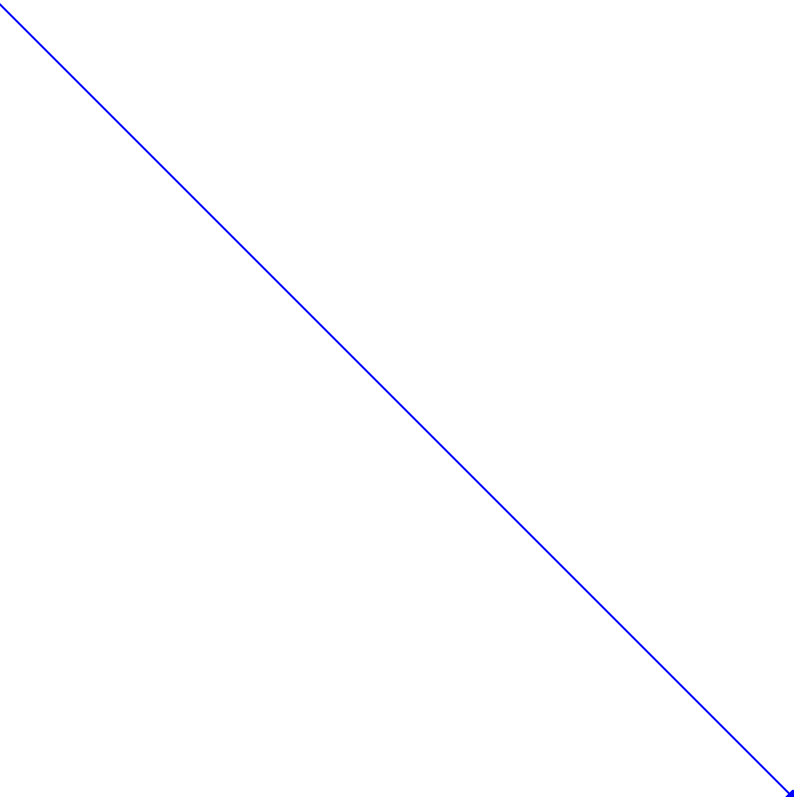

rs2228043

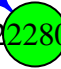

# Variant–Disease Network (eosinophil percentage of granulocytes)

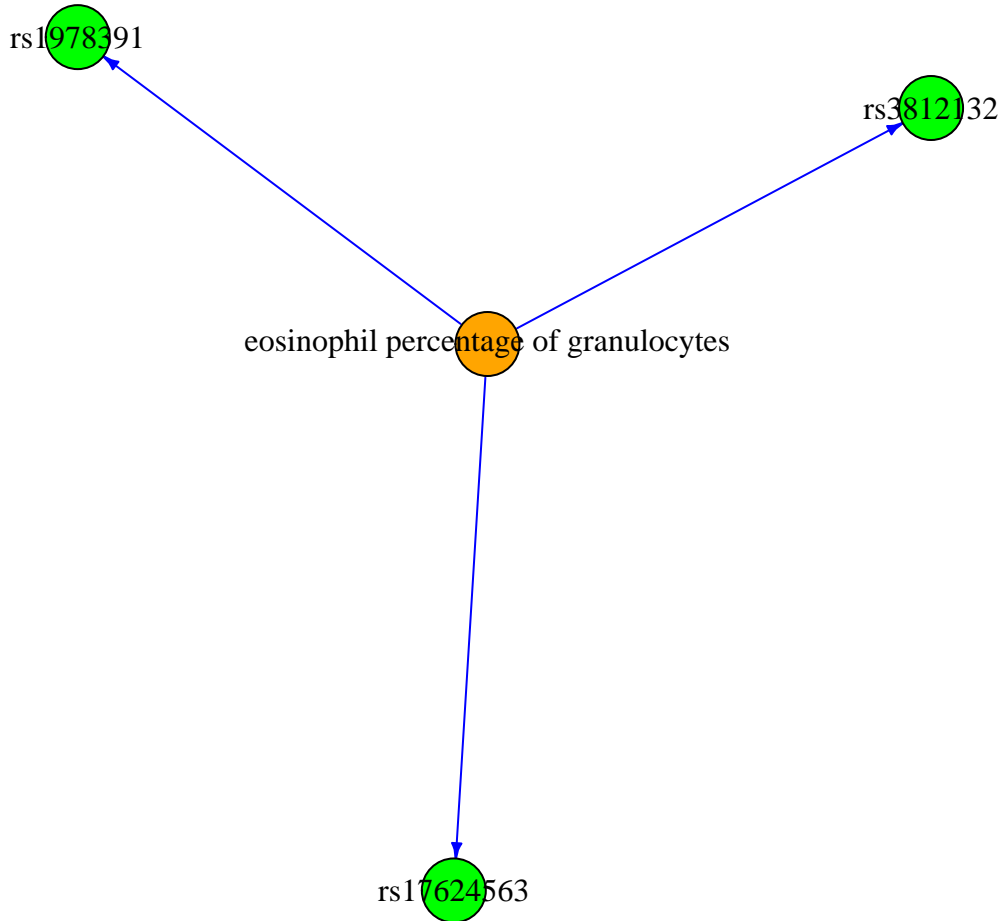

Variant–Disease Network (eosinophil percentage of white cells)

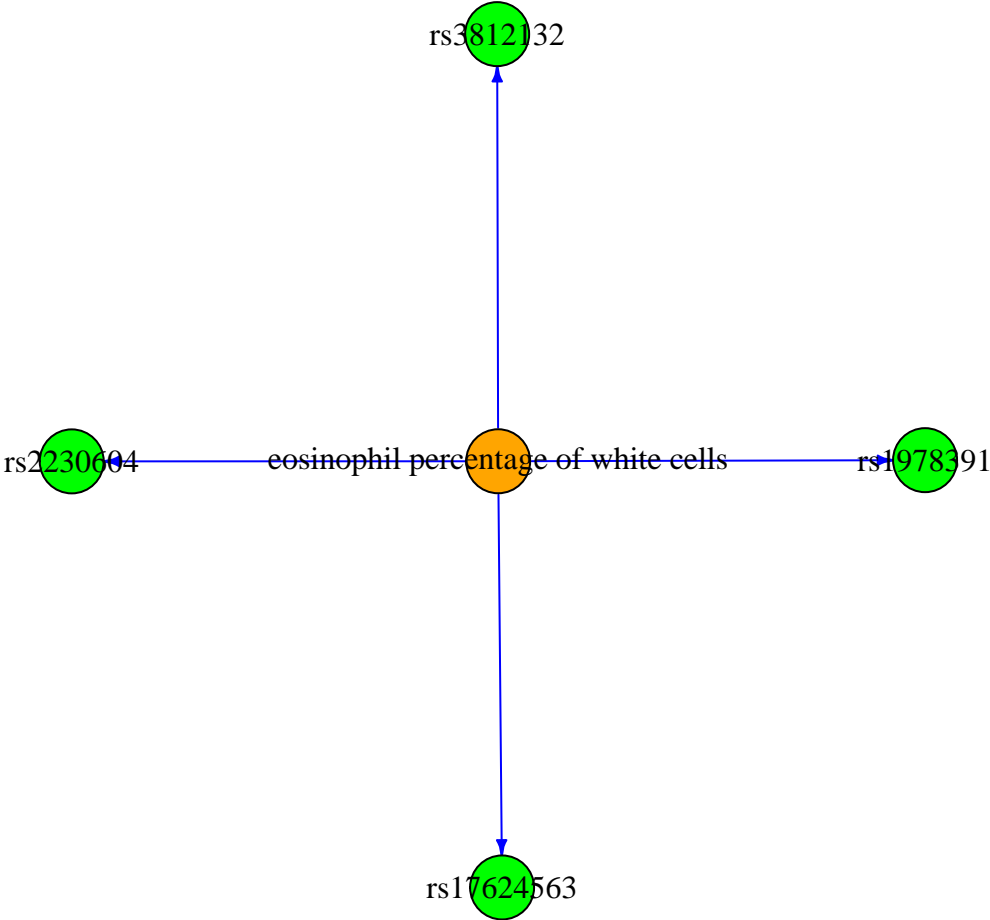

# Variant–Disease Network (neutrophil percentage of granulocytes)

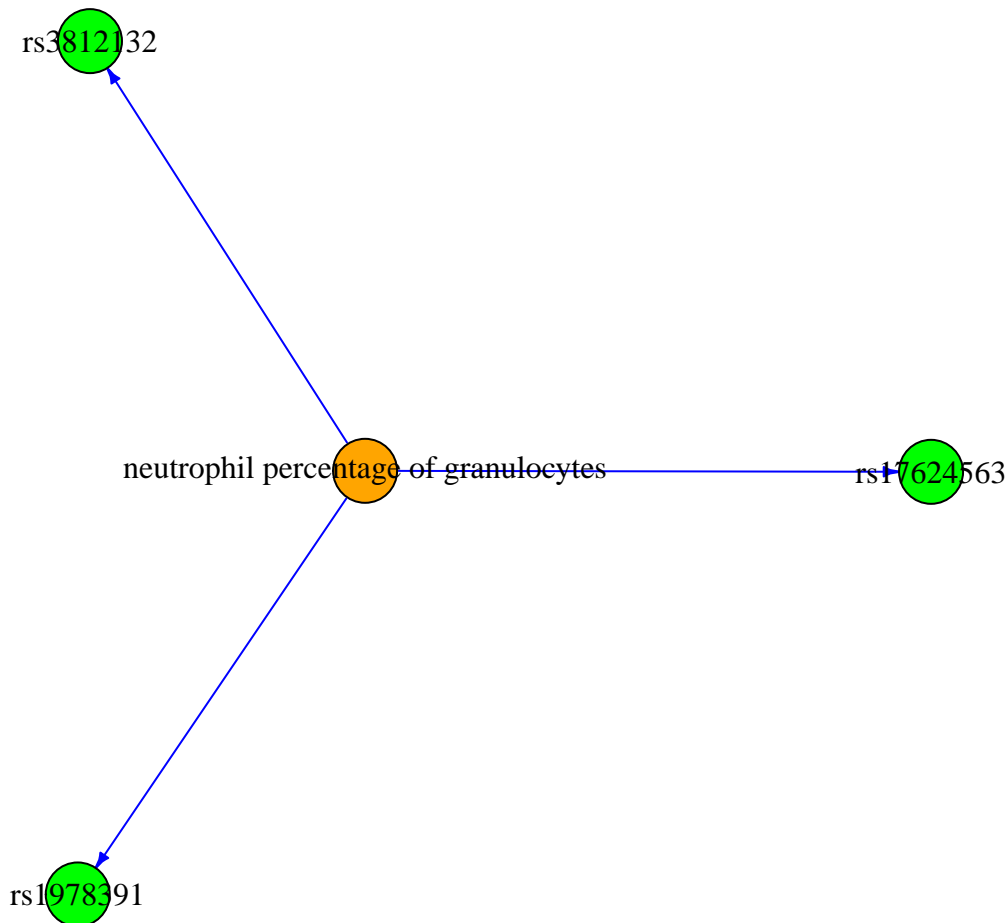

## Variant–Disease Network (chronic kidney disease)

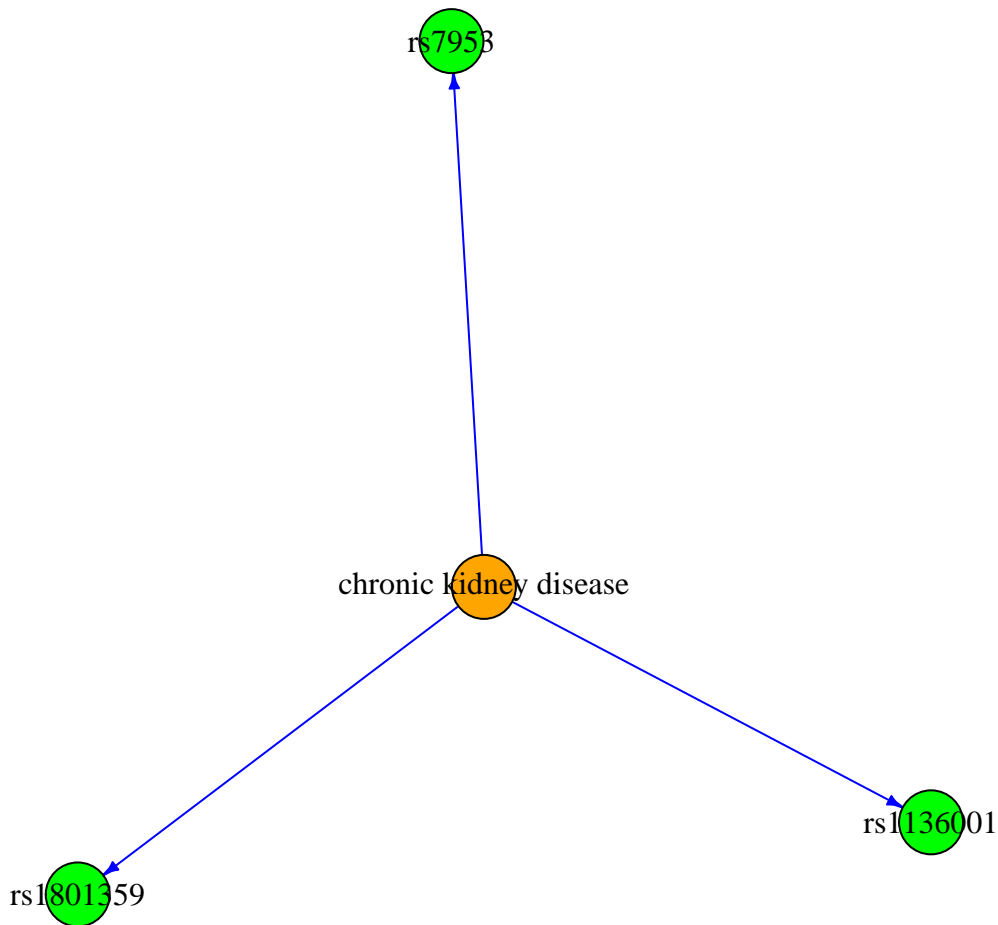

## Variant–Disease Network (colorectal health)

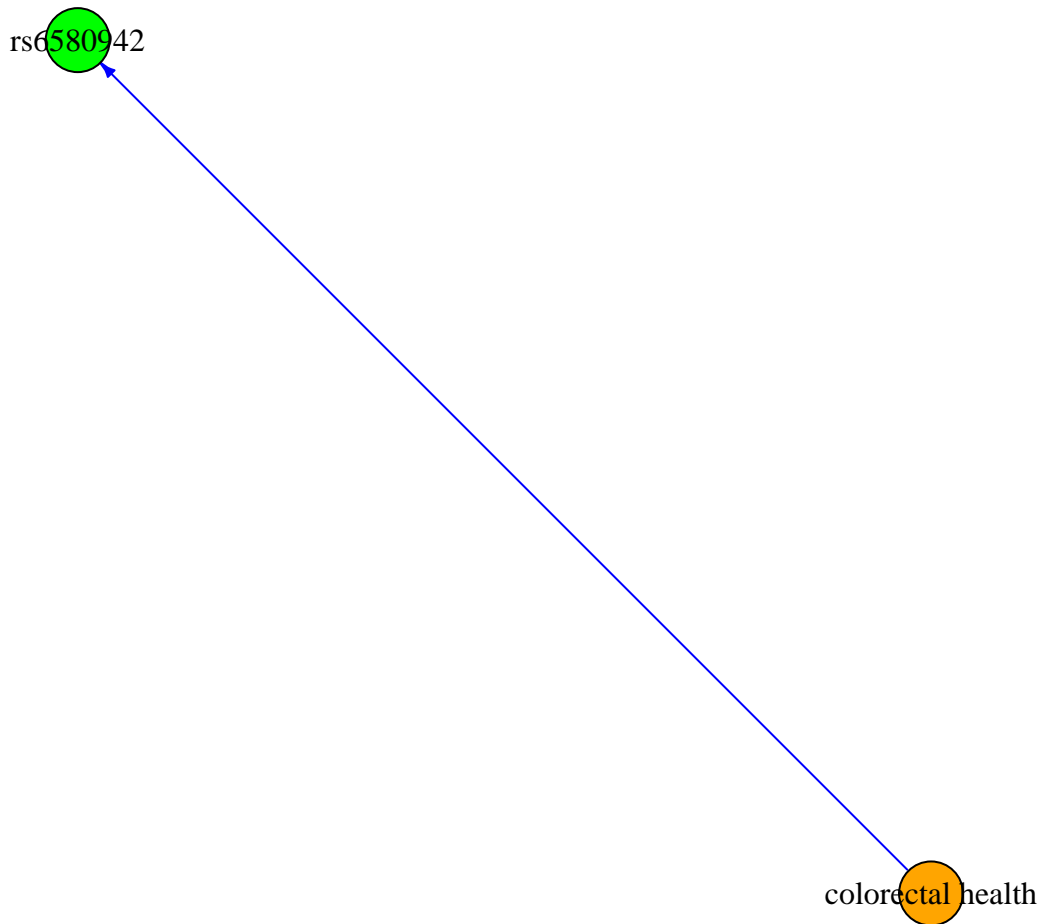



**Variant–Disease Network (femoral neck bone mineral density)**

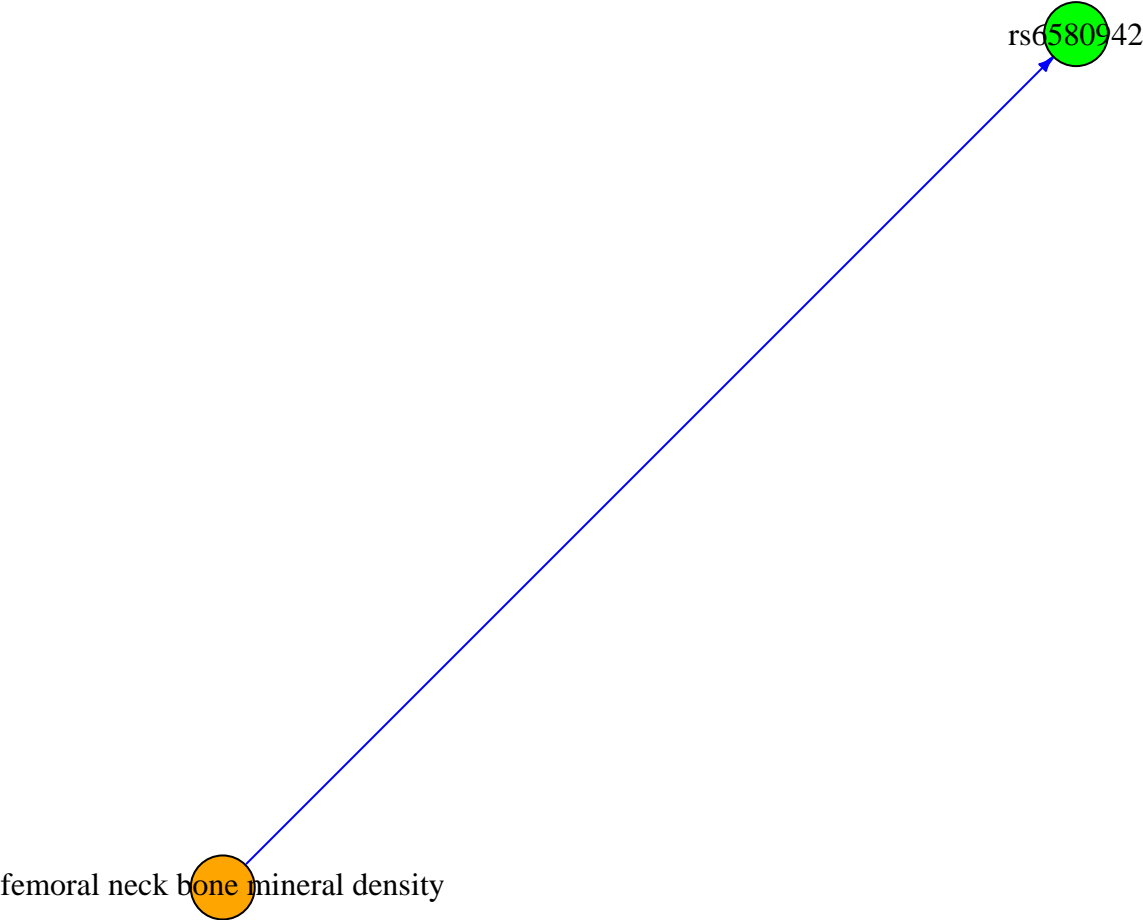

## Variant–Disease Network (spine bone mineral density)

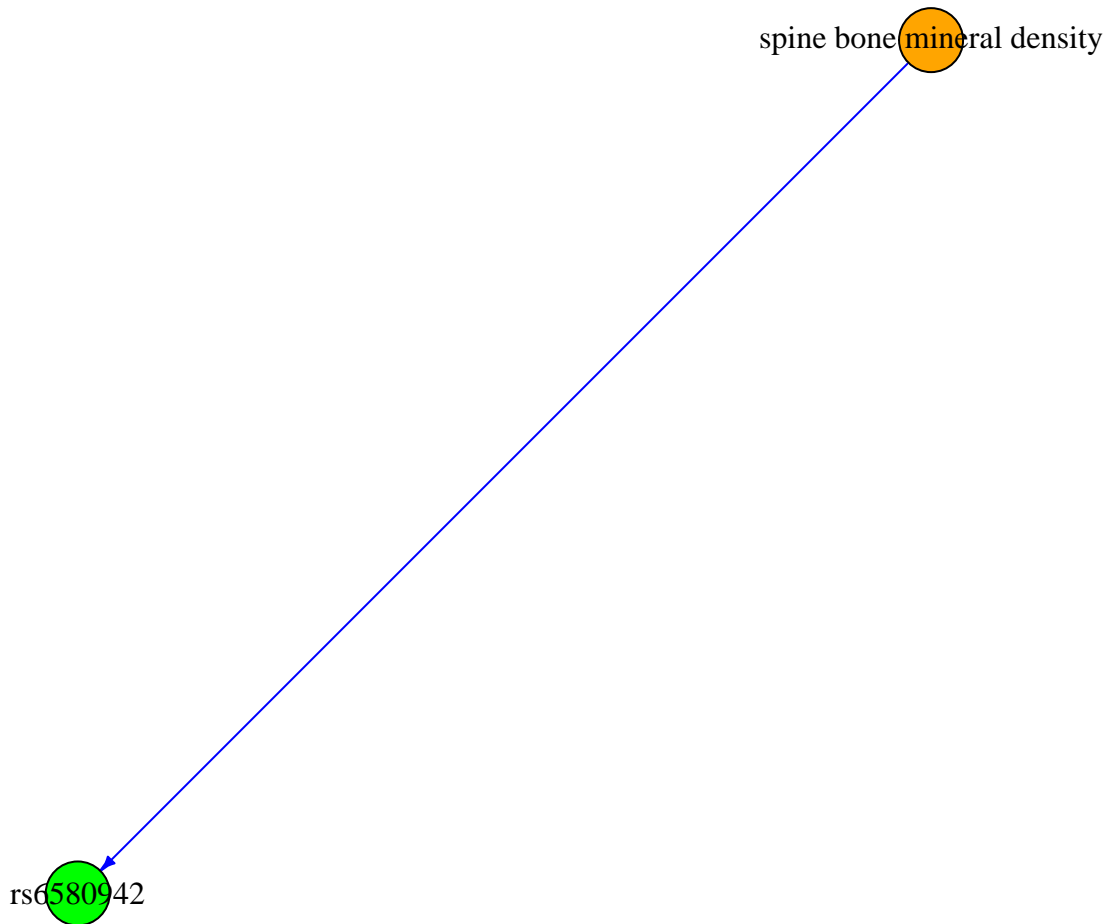

Variant–Disease Network (response to selective serotonin reuptake inhibi

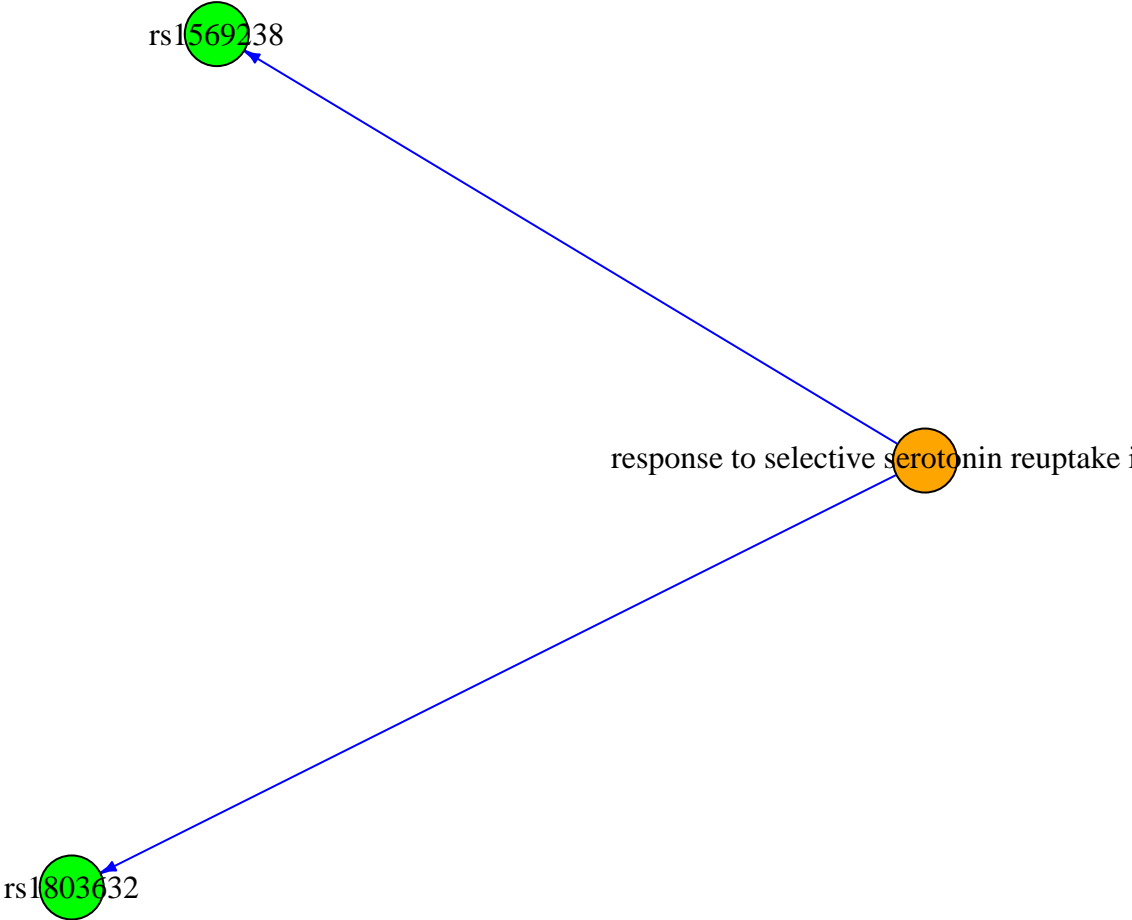

**Variant–Disease Network (serum non–albumin protein measurement)**

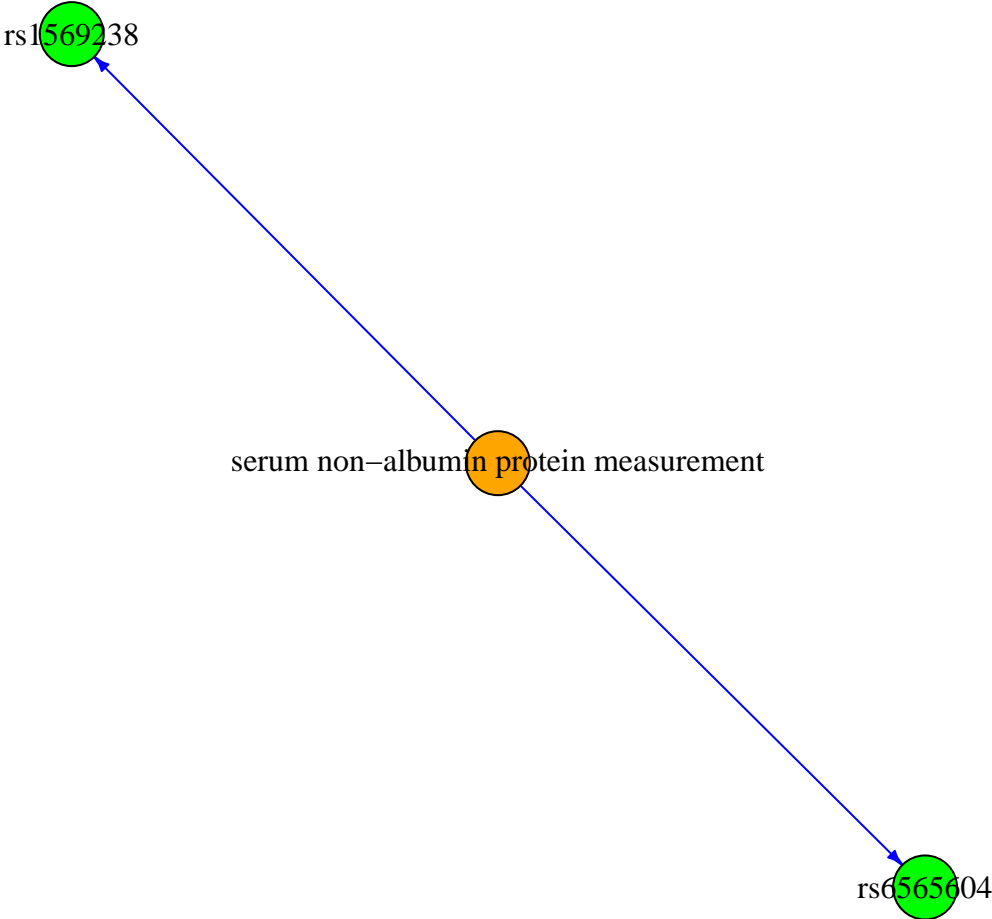

## Variant–Disease Network (granulocyte count)

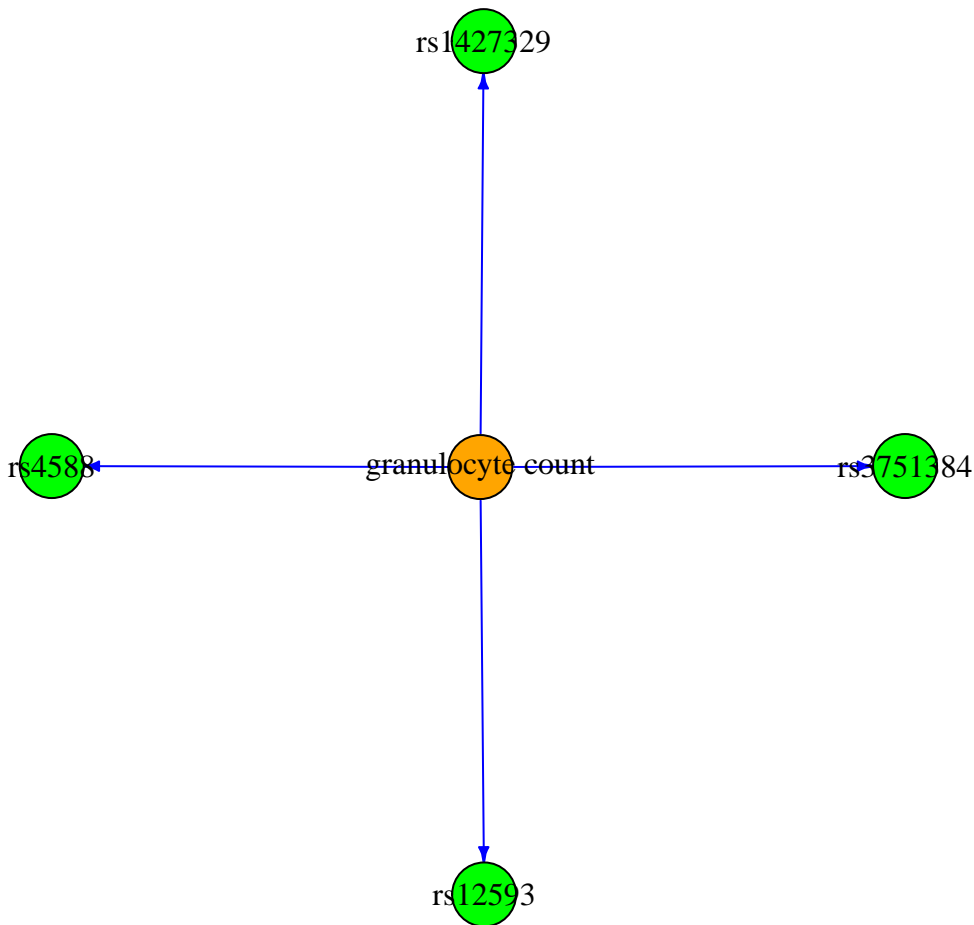

## Variant–Disease Network (myeloid white cell count)

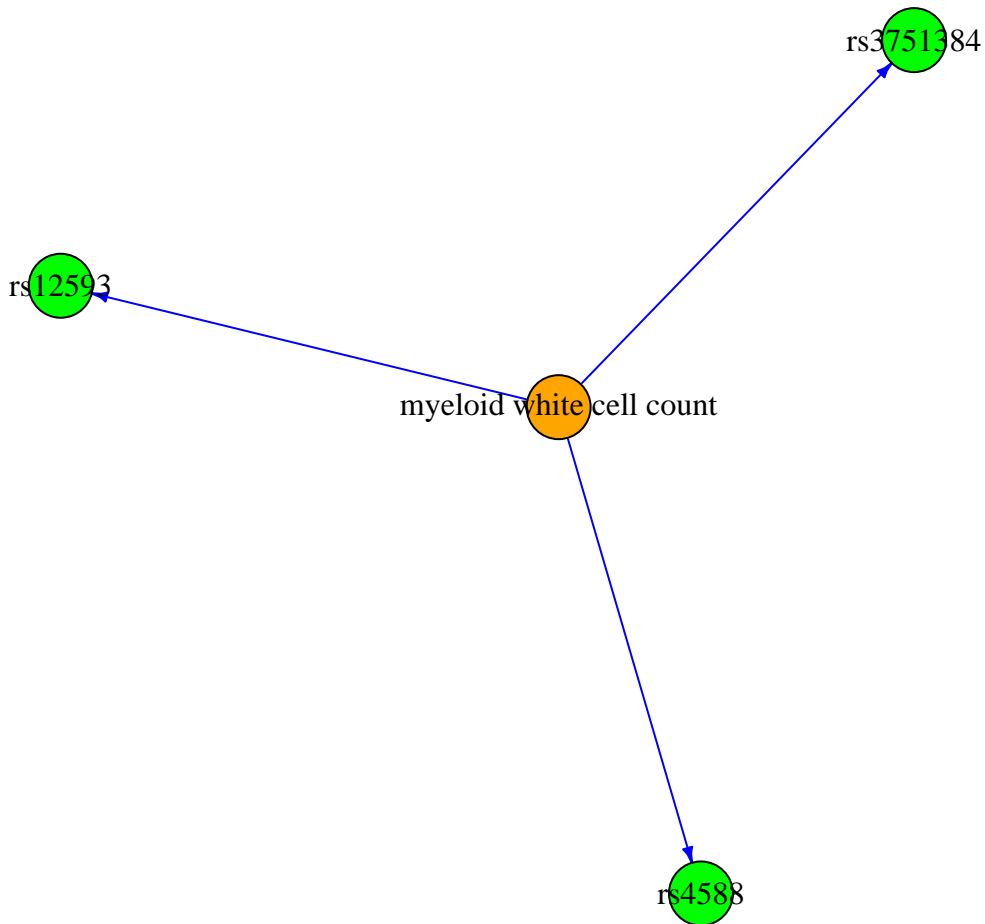

## Variant–Disease Network (neutrophil count)

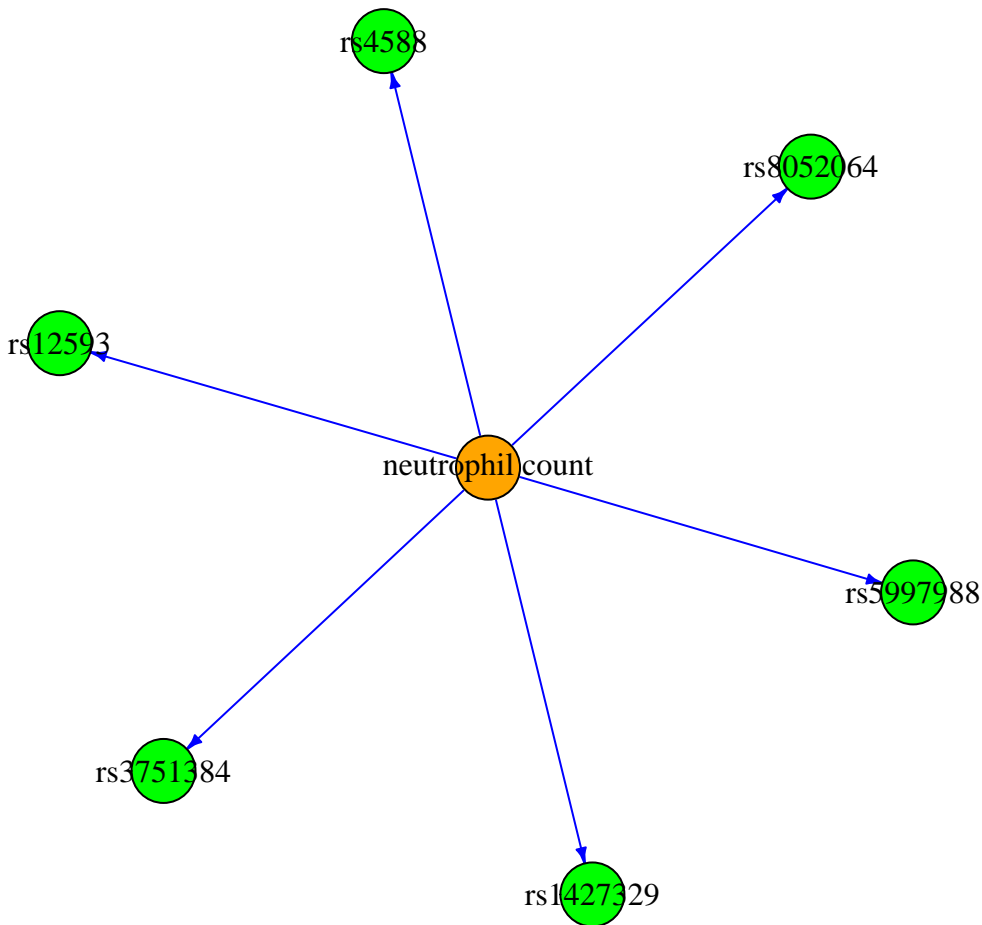

Variant–Disease Network (coronary artery calcification)

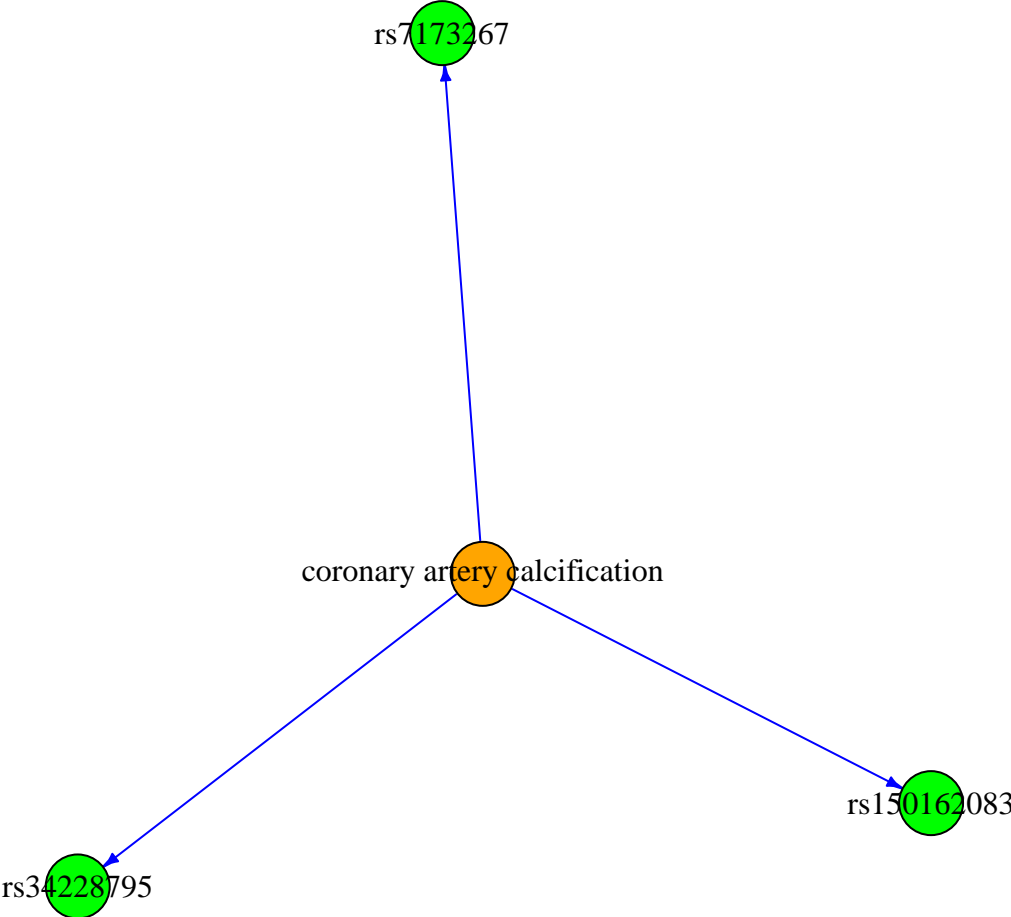



Variant–Disease Network (forced expiratory volume)

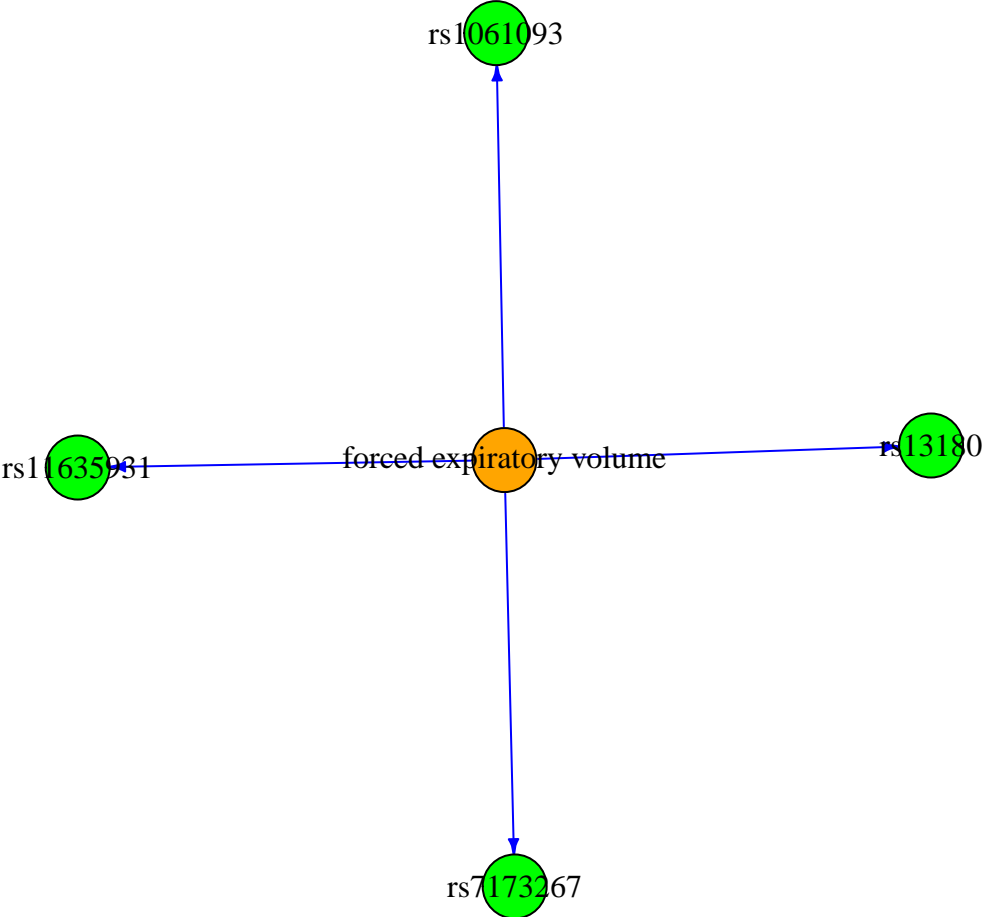

Variant–Disease Network (neutrophil percentage of white cells)

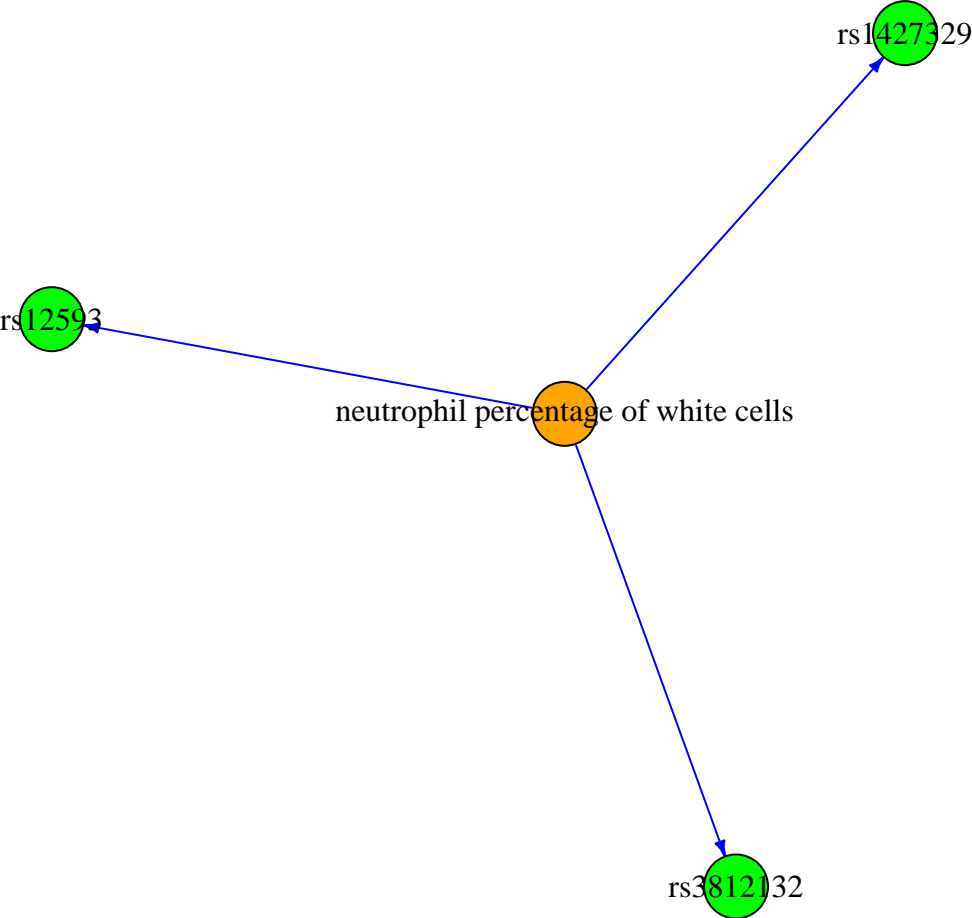

## Variant-Disease Network (suntan)

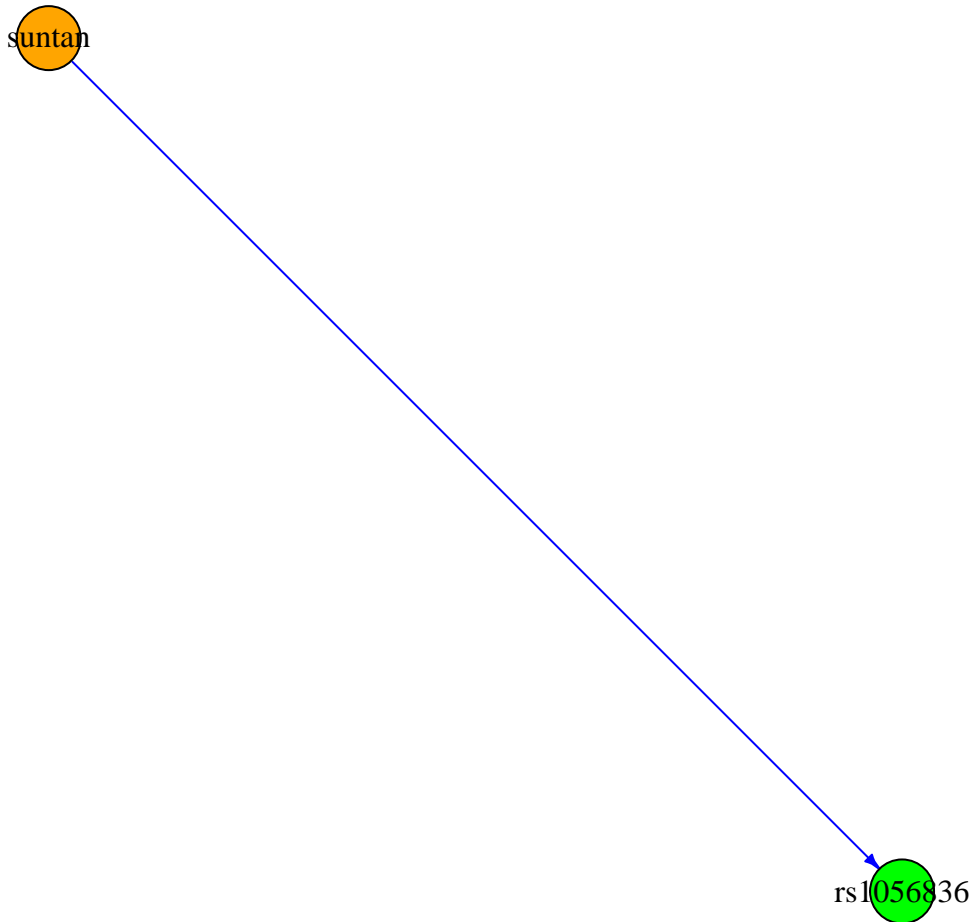

Variant–Disease Network (progressive supranuclear palsy)

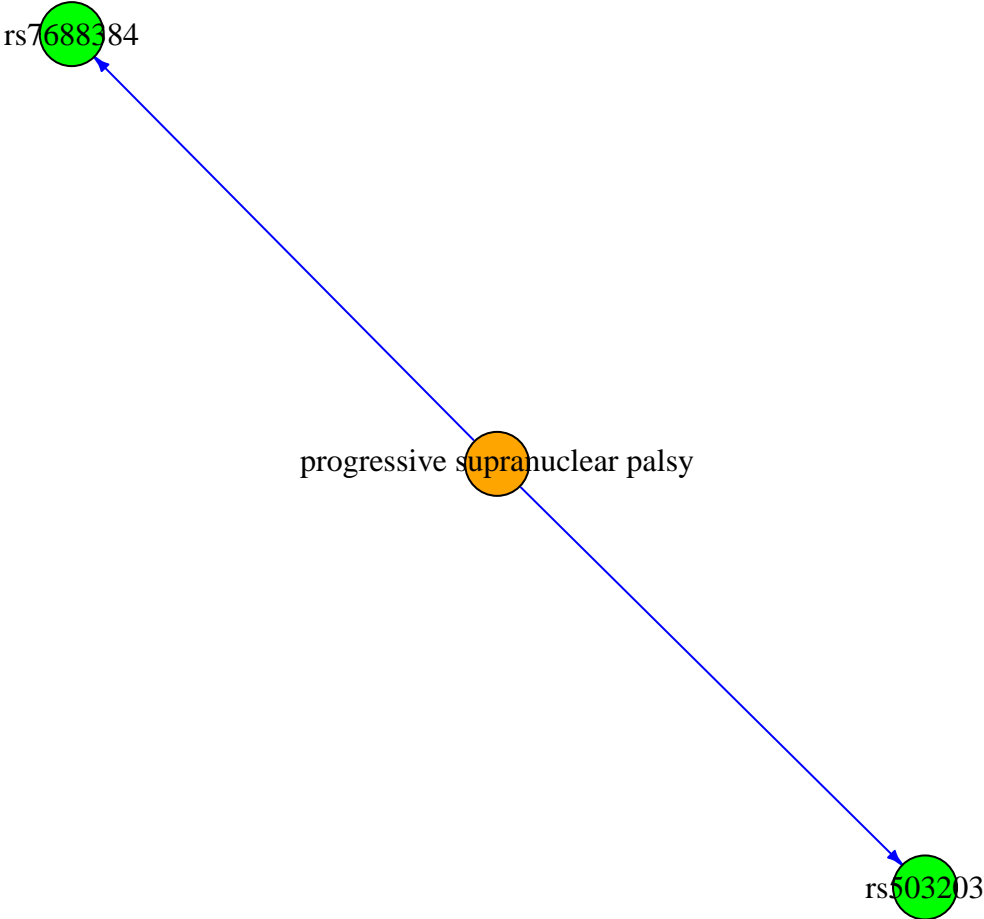

## Variant–Disease Network (psoriasis vulgaris)

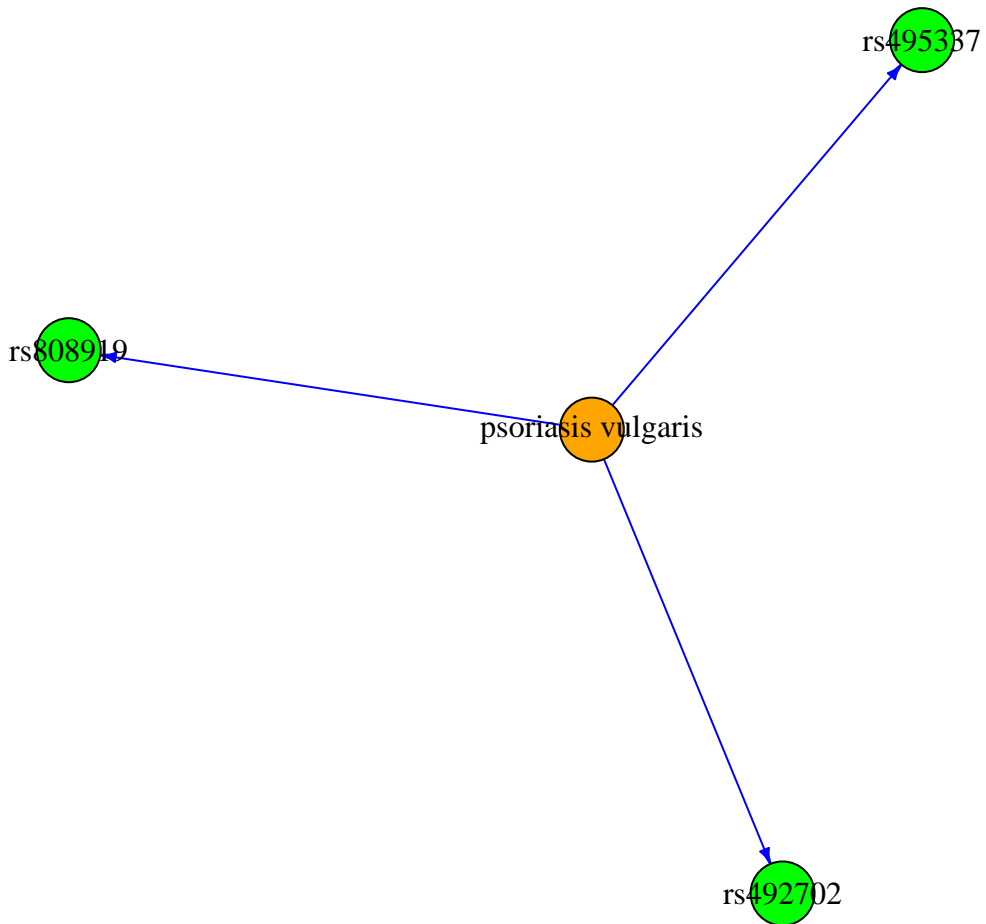

## Variant-Disease Network (psoriatic arthritis)

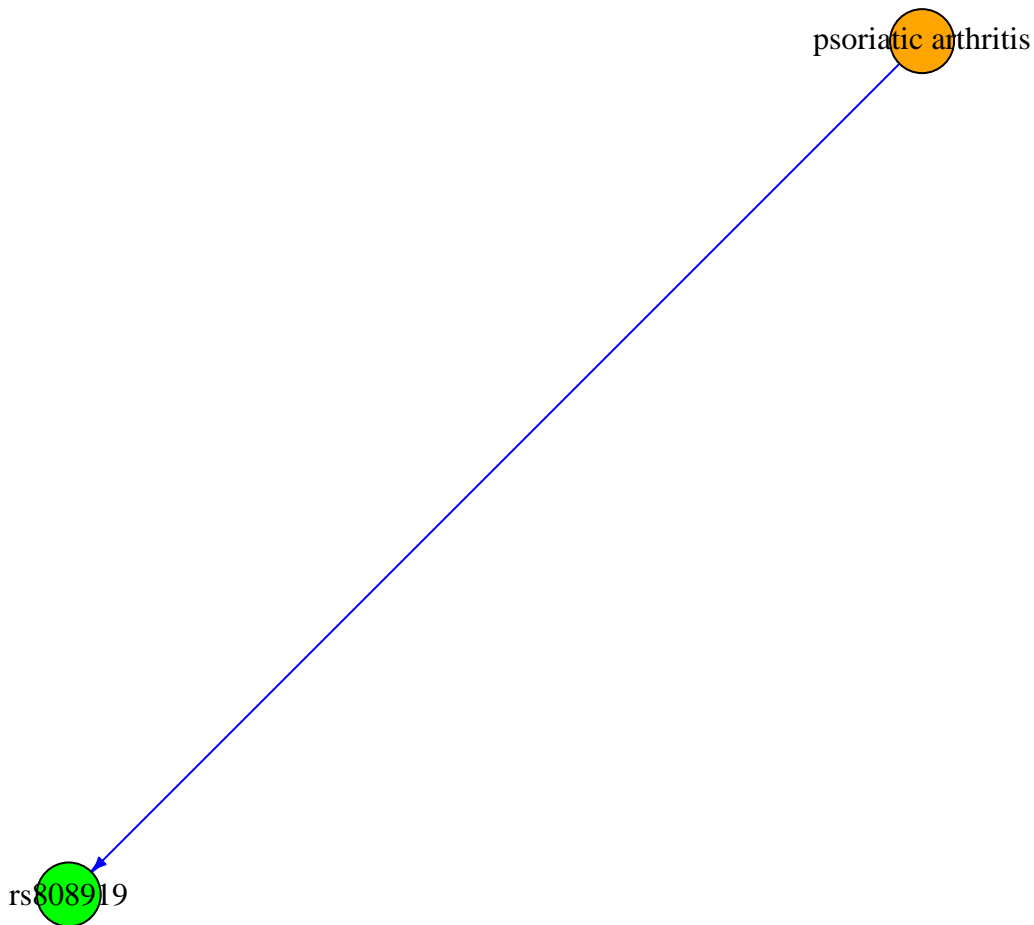

## Variant–Disease Network (lupus nephritis)

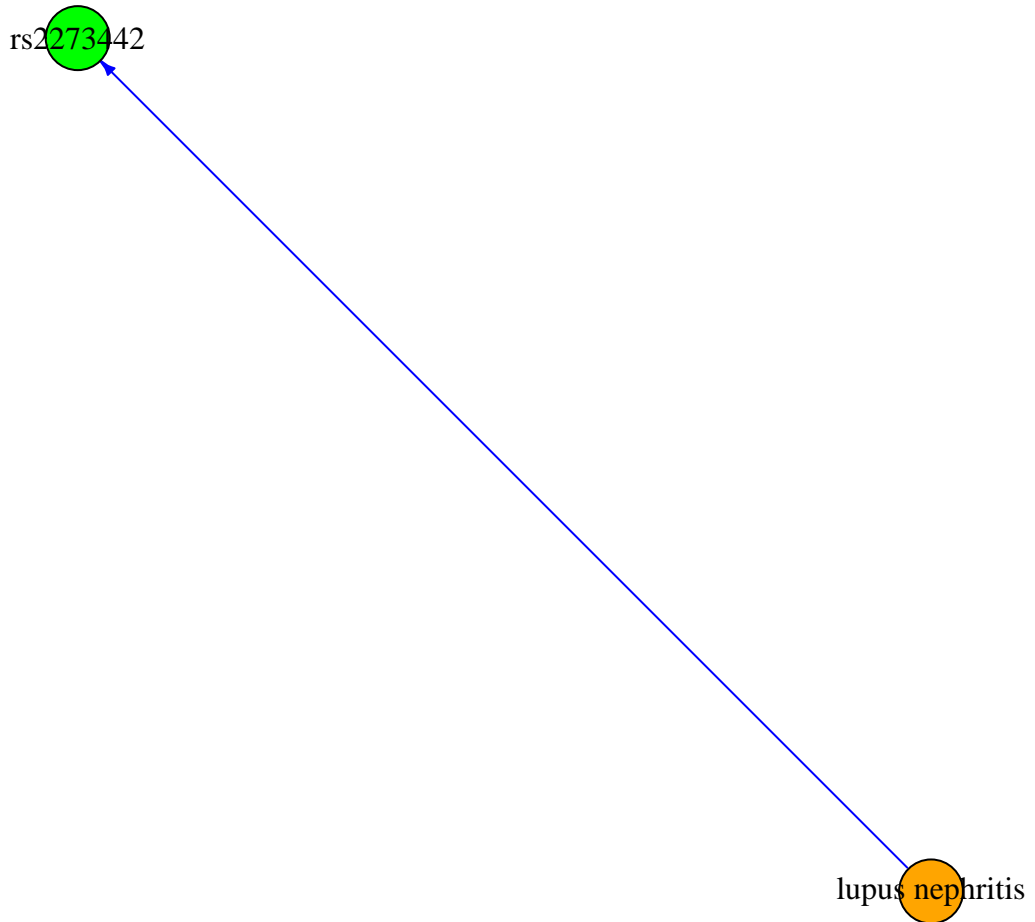

## Variant–Disease Network (IgF–1 measurement)

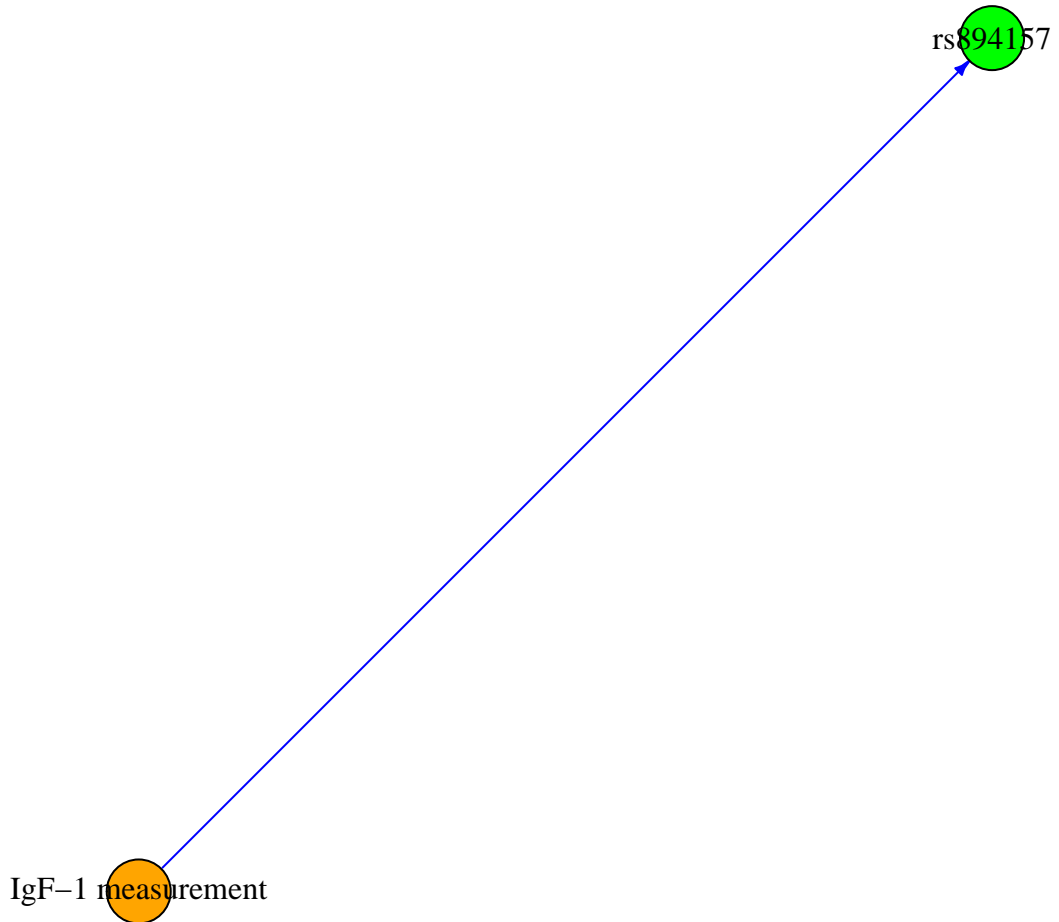



## Variant-Disease Network (esophageal carcinoma)

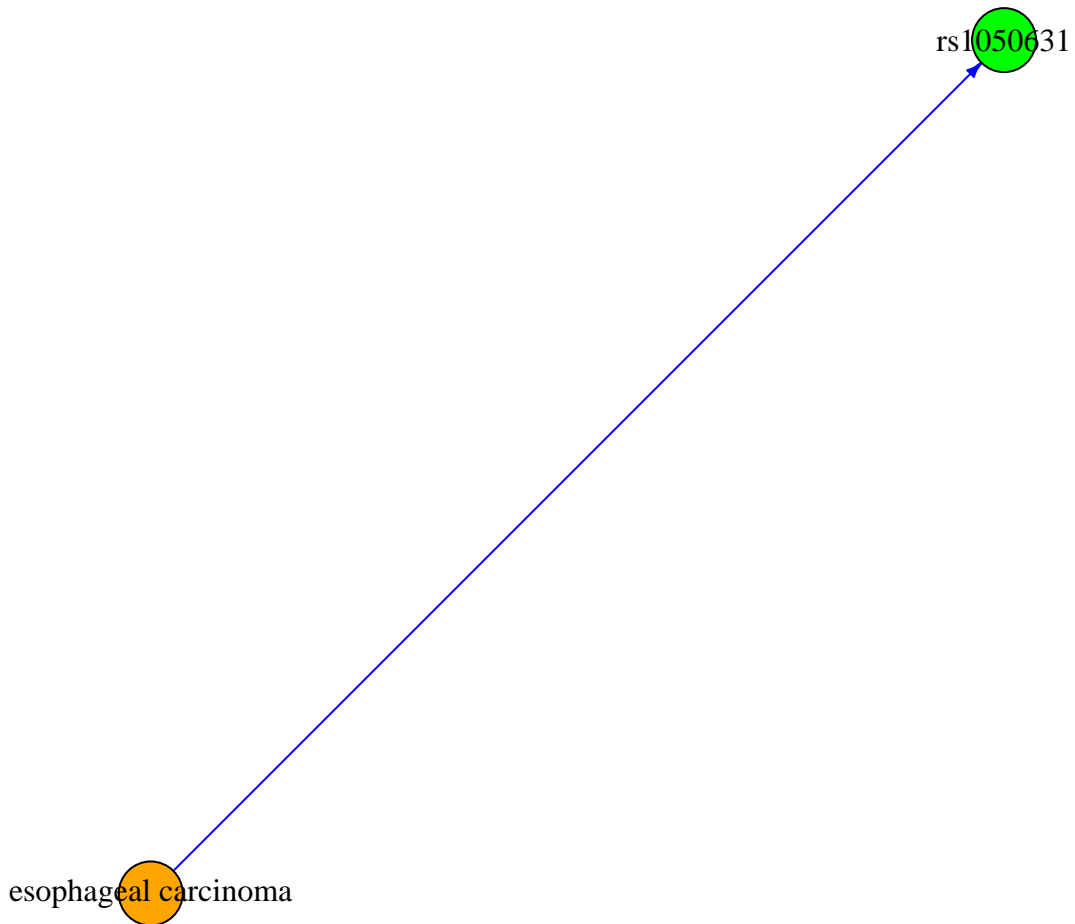

## Variant–Disease Network (squamous cell carcinoma)

squamous cell carcinoma

rs1050631



## Variant–Disease Network (fructosamine measurement)

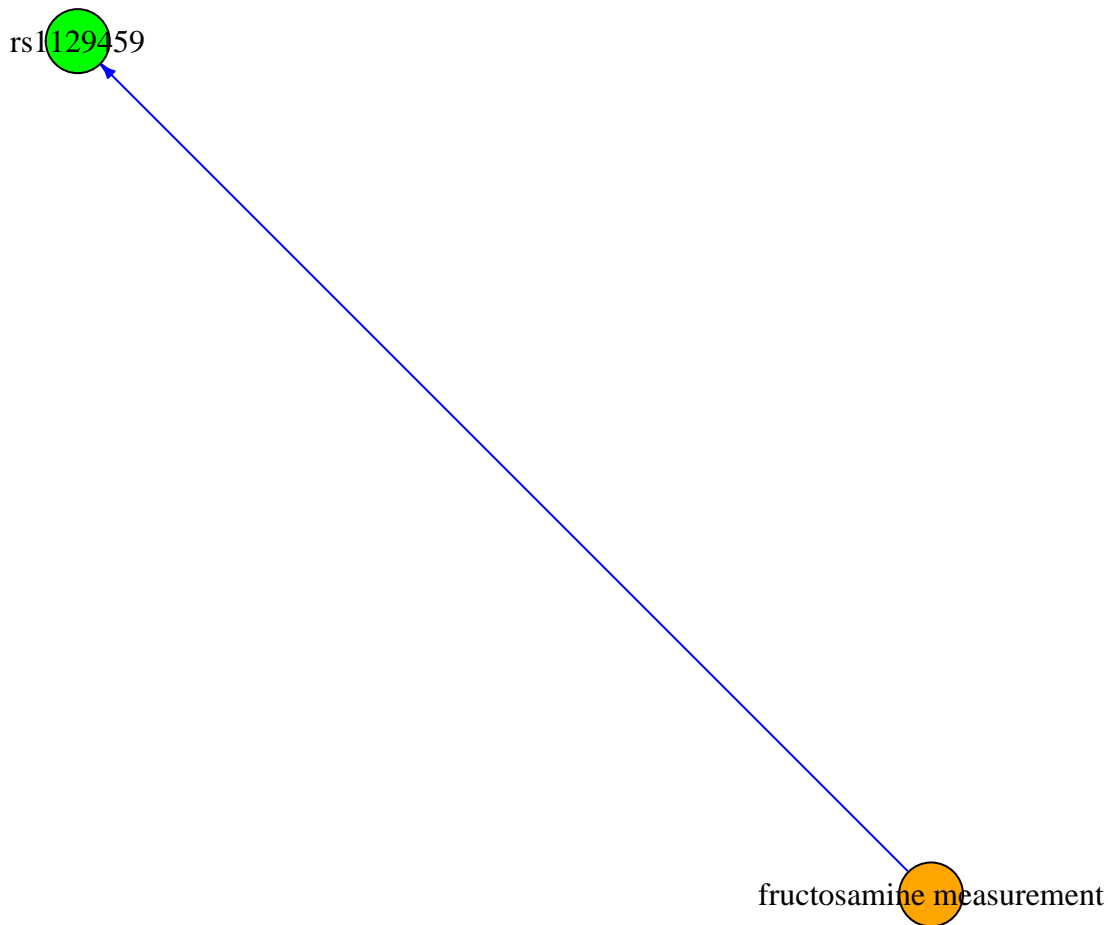

## Variant–Disease Network (total glycated albumin)

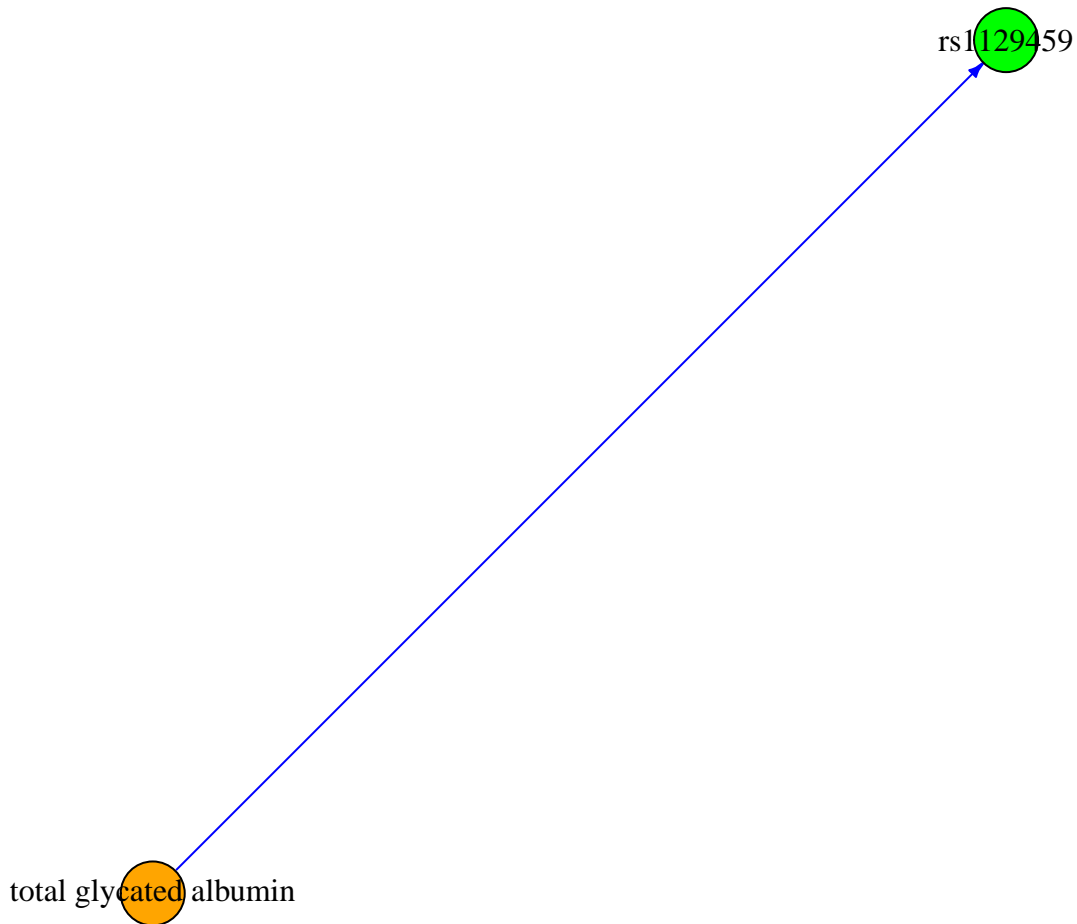

## Variant–Disease Network (breast size)

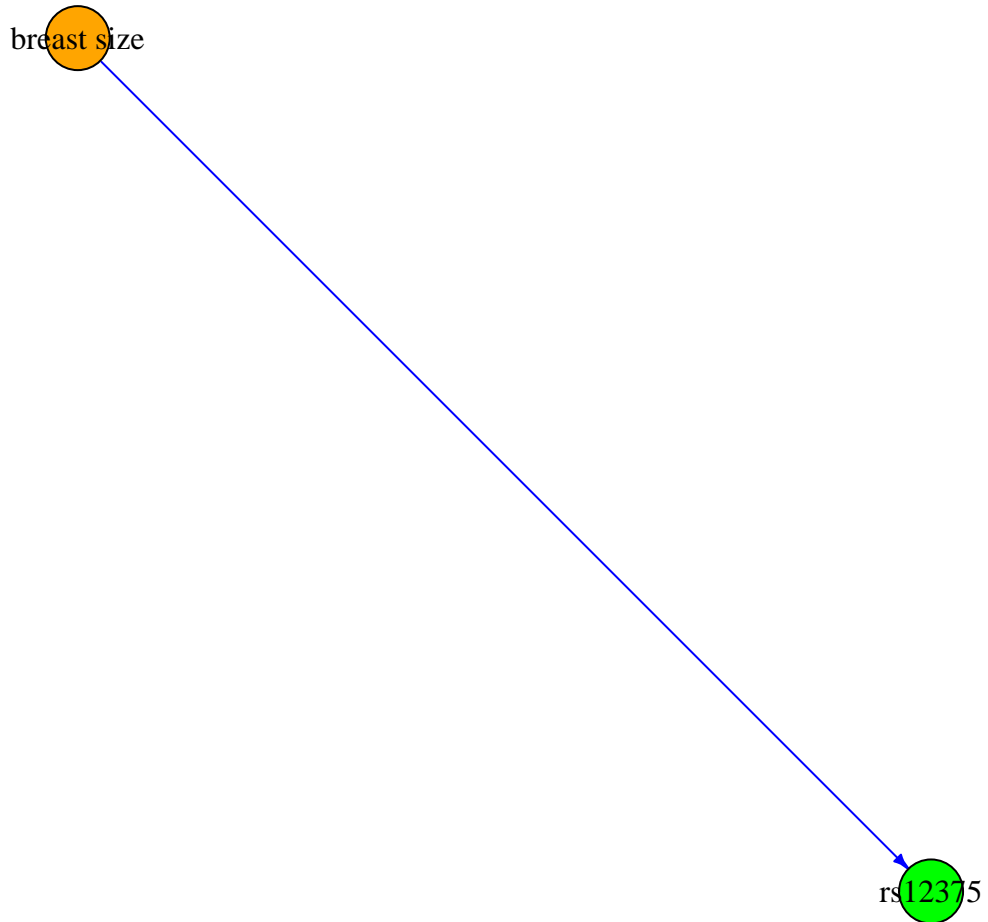

**Variant–Disease Network (estrogen receptor negative breast cancer)**

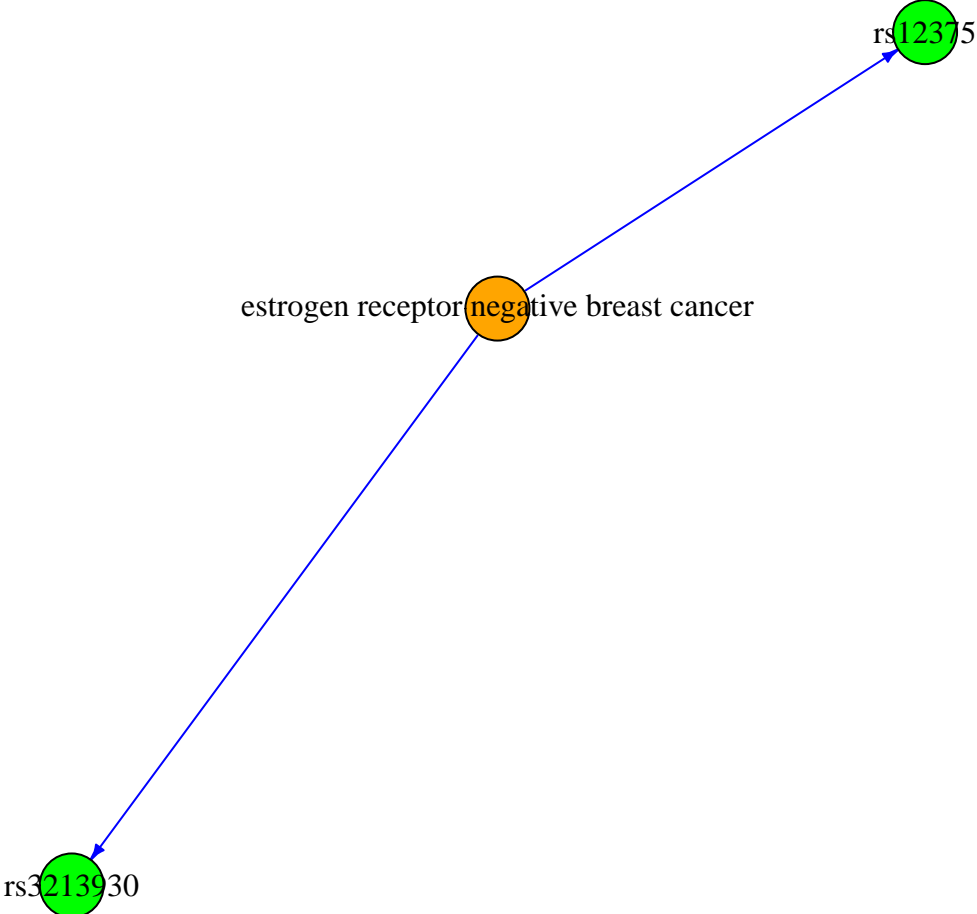

## Variant–Disease Network (Alopecia)

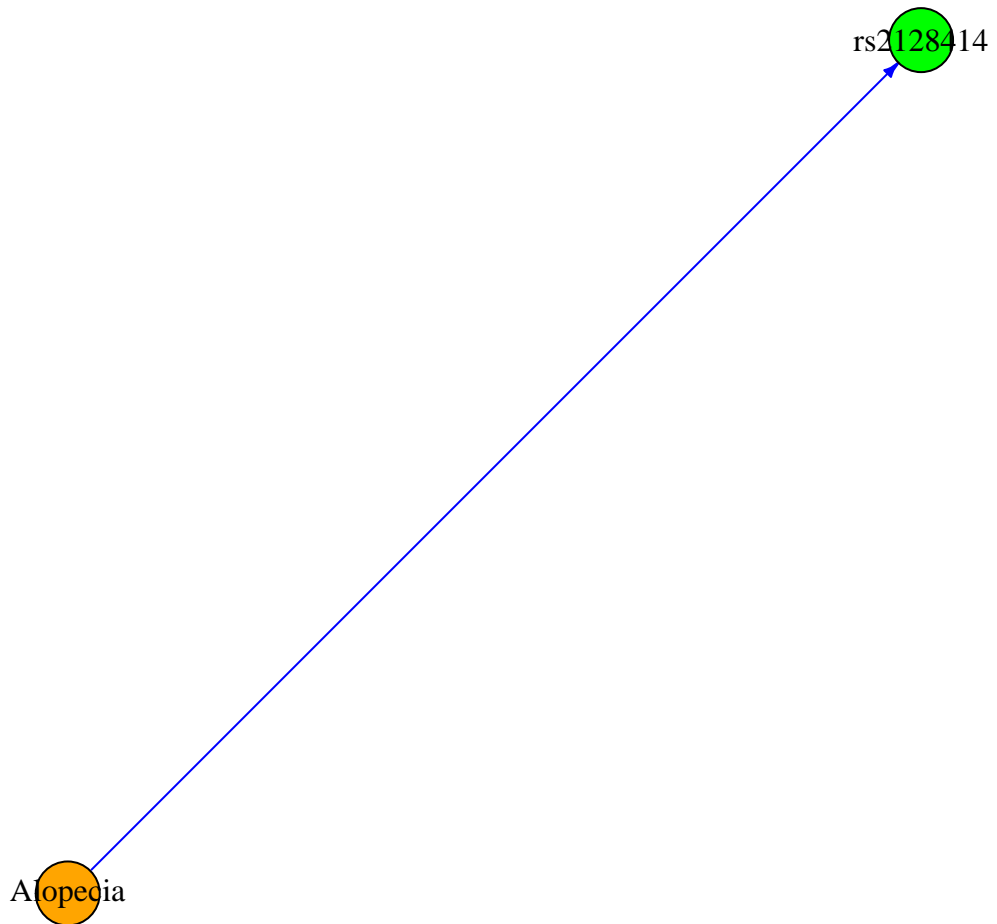

Variant–Disease Network (alpha-carotene measurement)

alpha-carotene measurement

rs1153936

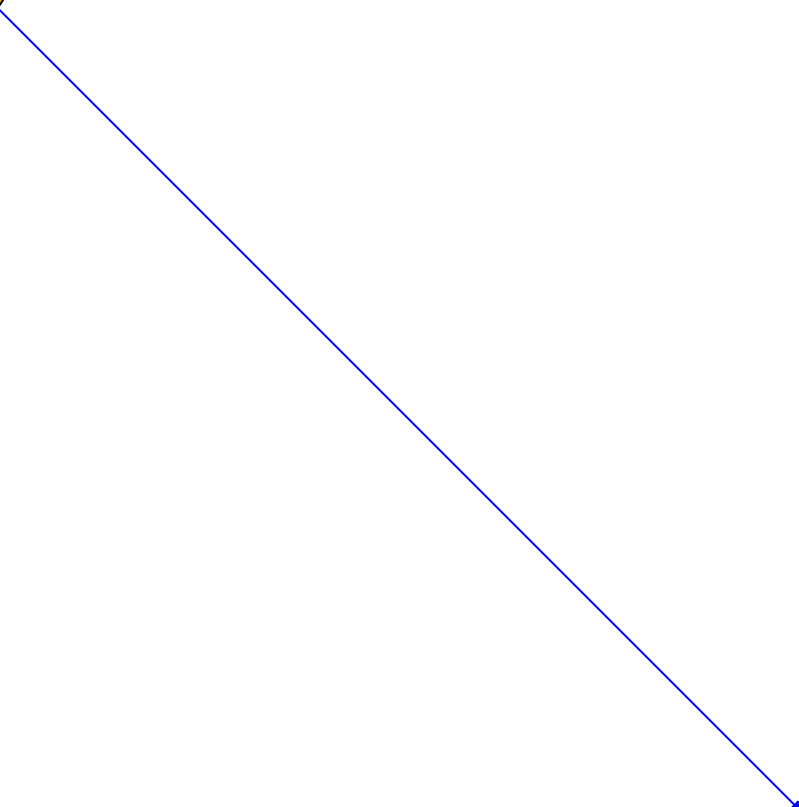



# Variant–Disease Network (amyloid plaque accumulation rate)

amyloid plaque accumulation rate

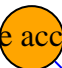

rs2303555

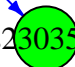

## Variant-Disease Network (microalbuminuria)

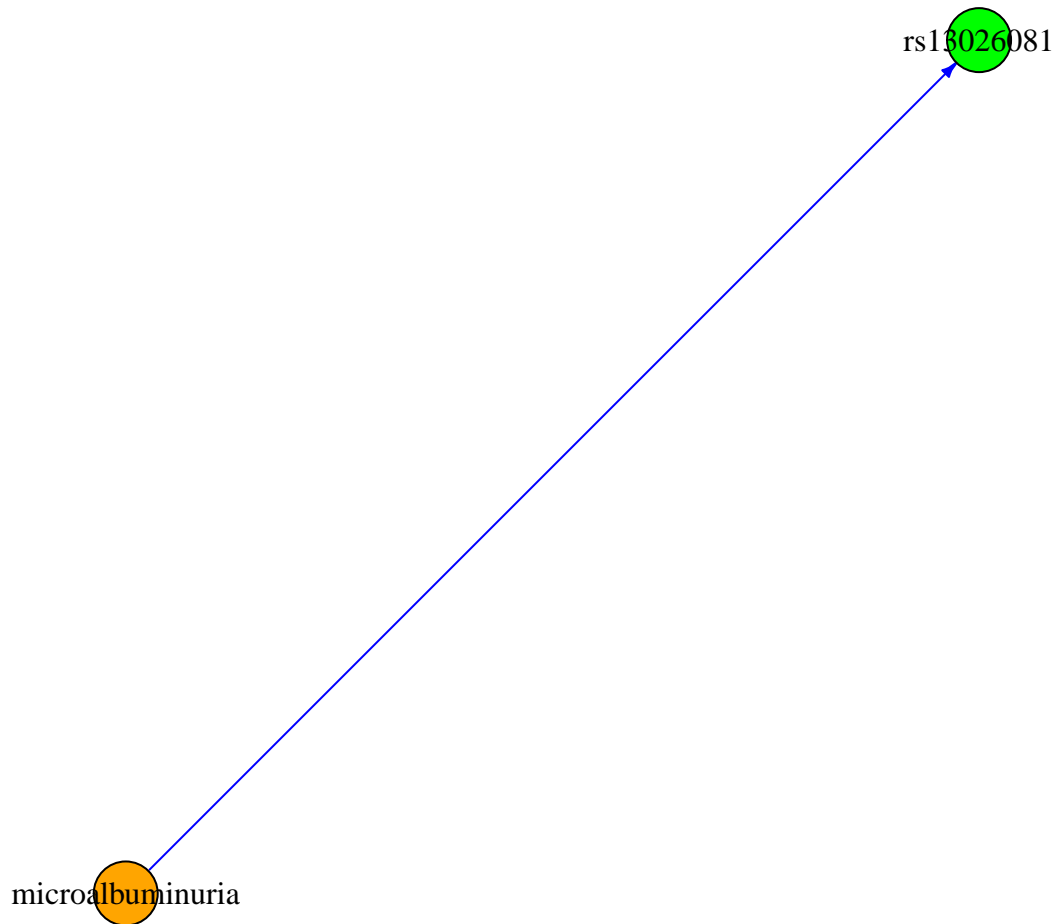

# Variant–Disease Network (urinary albumin to creatinine ratio)

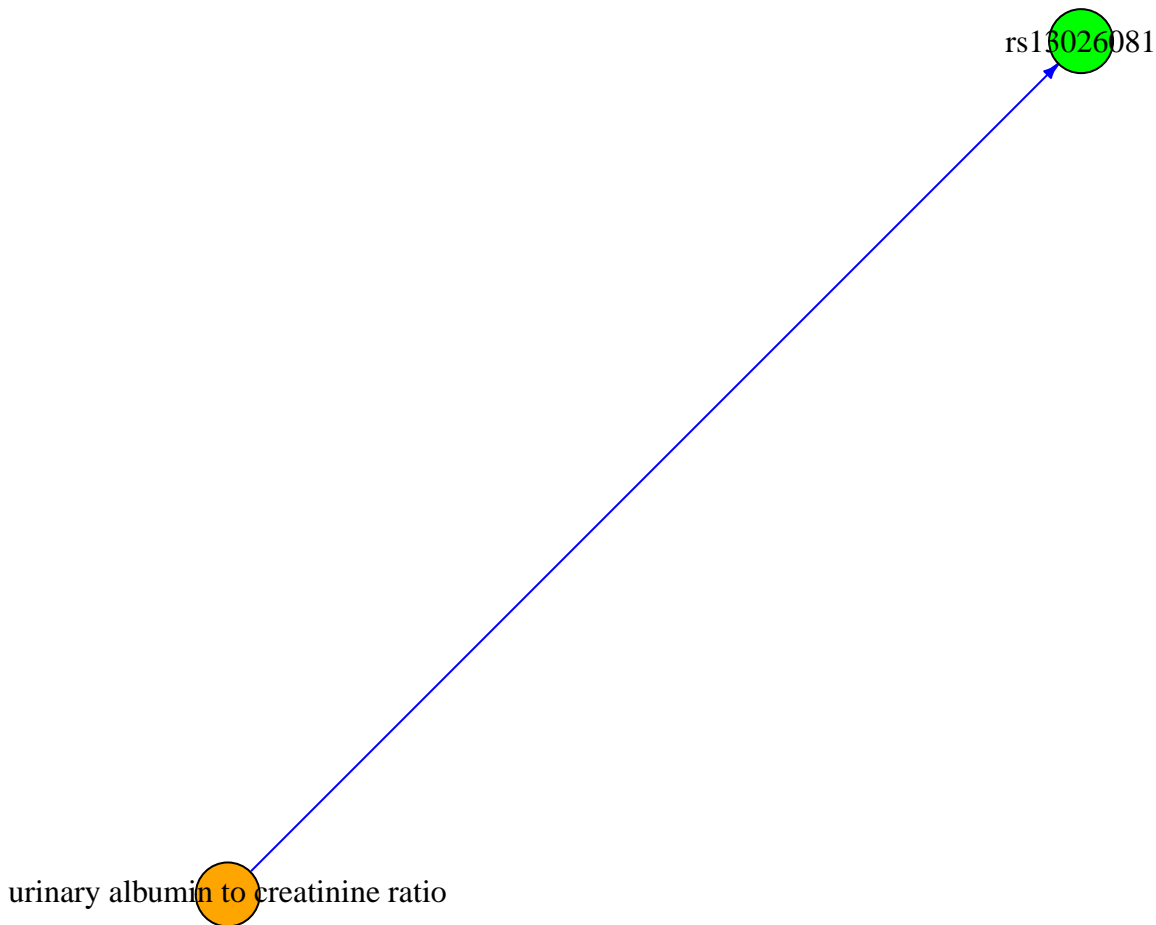

## Variant–Disease Network (maximal midexpiratory flow rate)

rs2903250

maximal midexpiratory flow rate

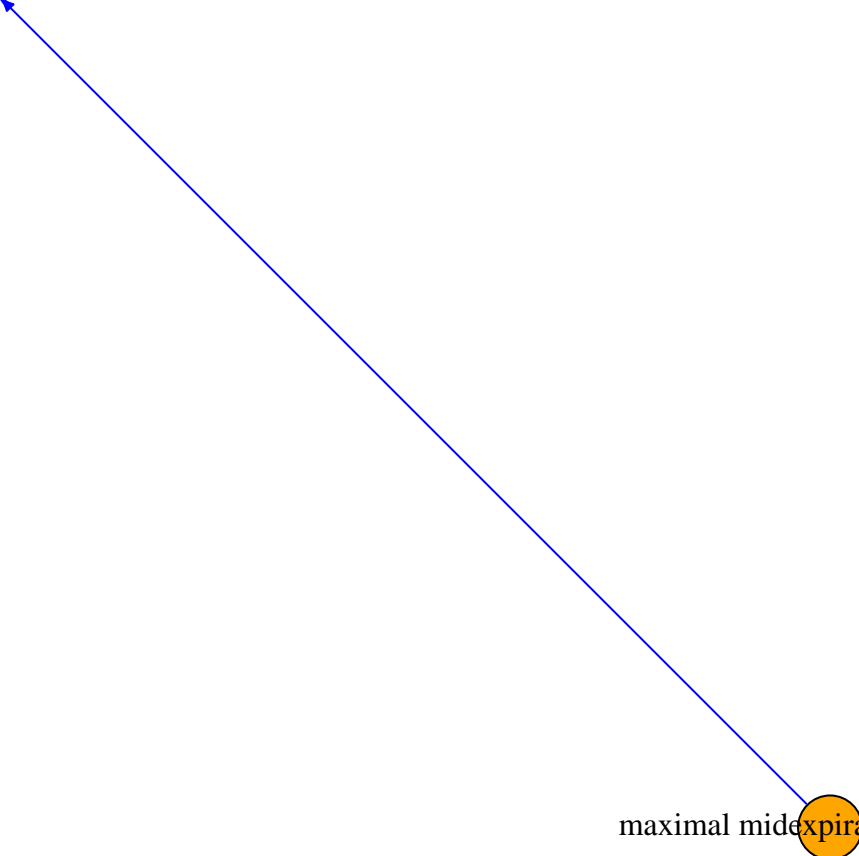

## Variant–Disease Network (vitamin D deficiency)

rs4588



vitamin D deficiency

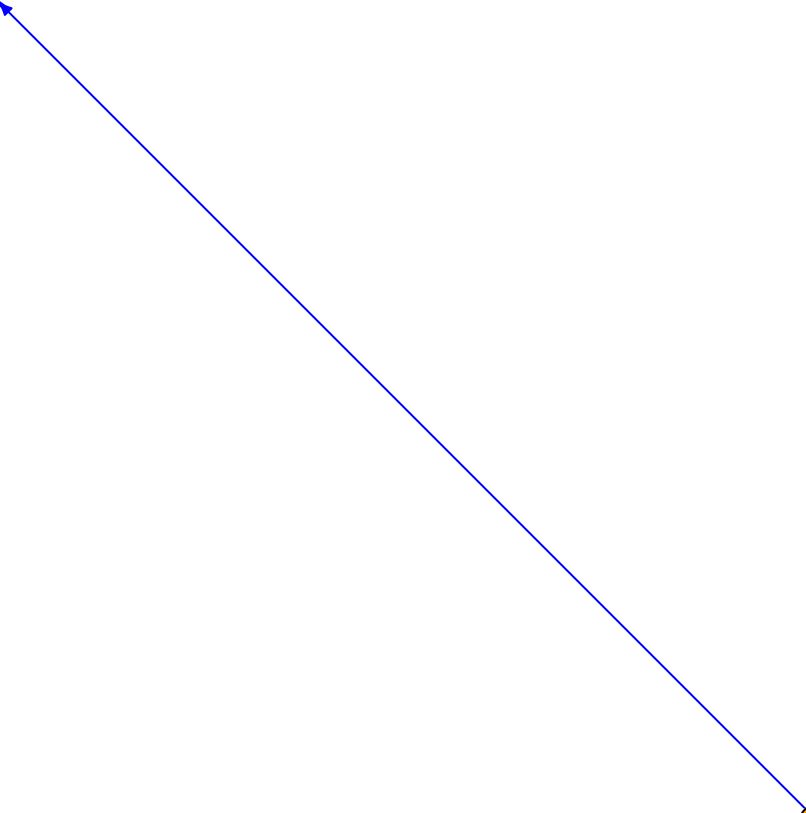

## Variant–Disease Network (vitamin D dietary intake measurement)

vitamin D dietary intake measurement

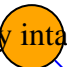

rs4588

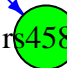

## Variant–Disease Network (congenital left–sided heart lesions)

congenital left–sided heart lesions

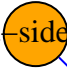

rs6962756

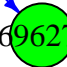

# Variant–Disease Network (mental or behavioural disorder)

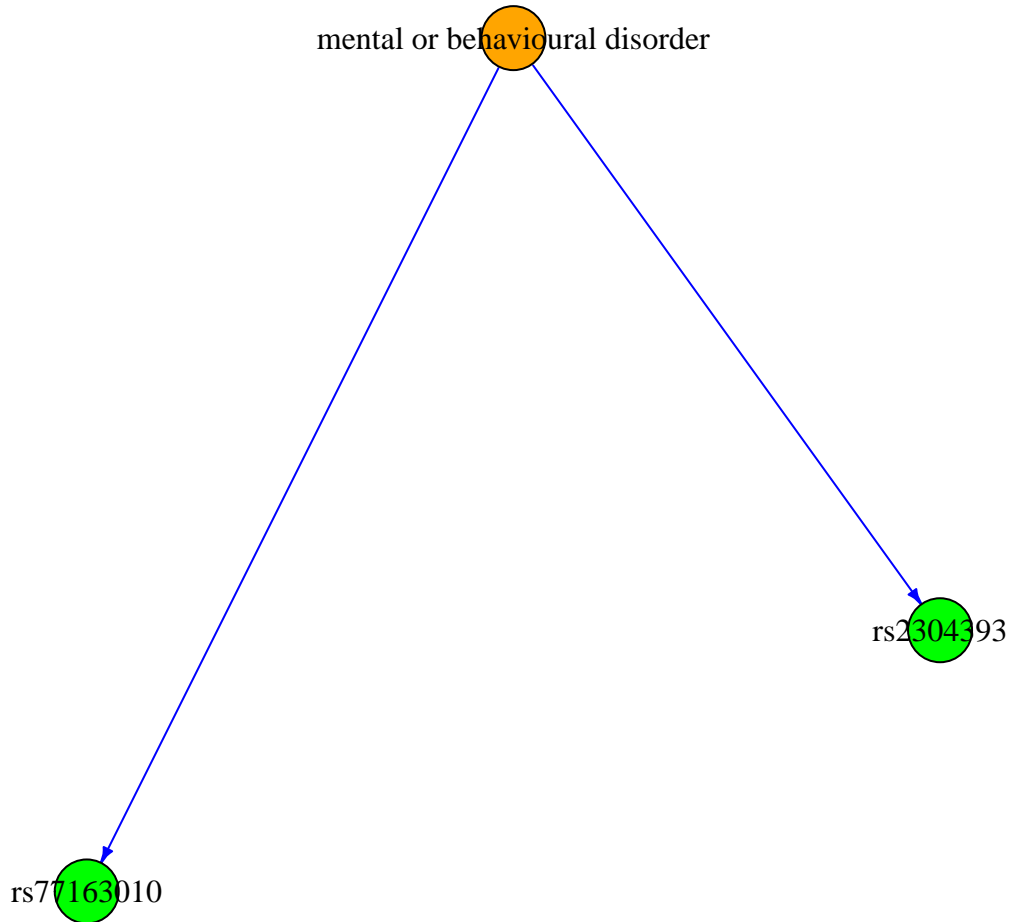



Variant–Disease Network (menstrual cycle measurement)

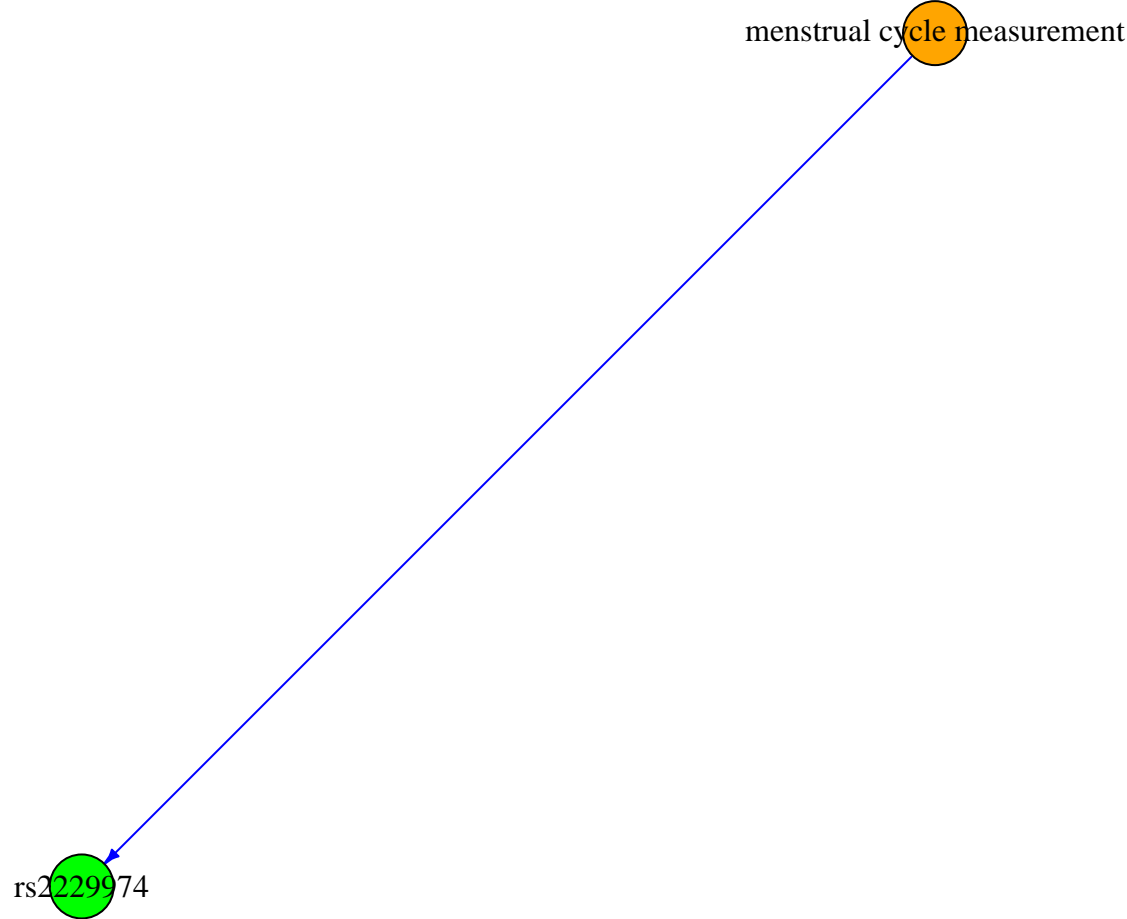

**Variant–Disease Network (information processing speed)**

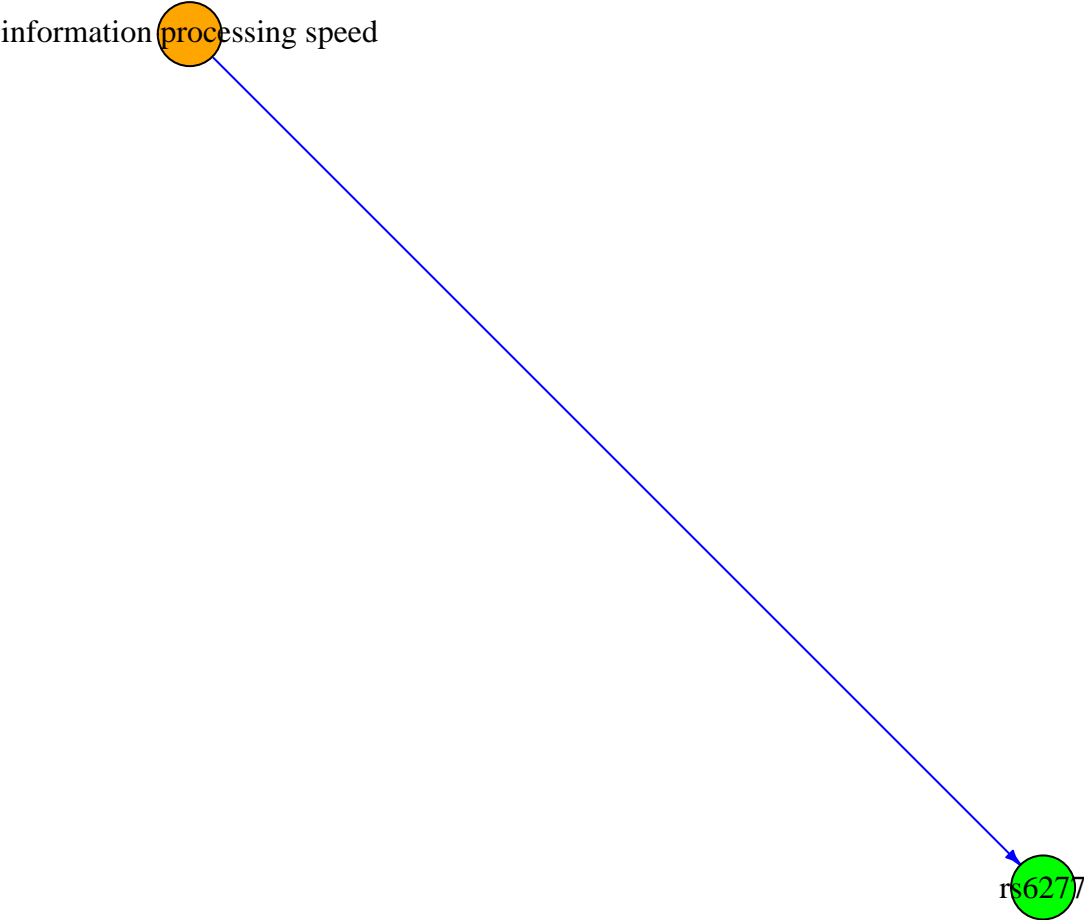

## Variant-Disease Network (birth measurement)

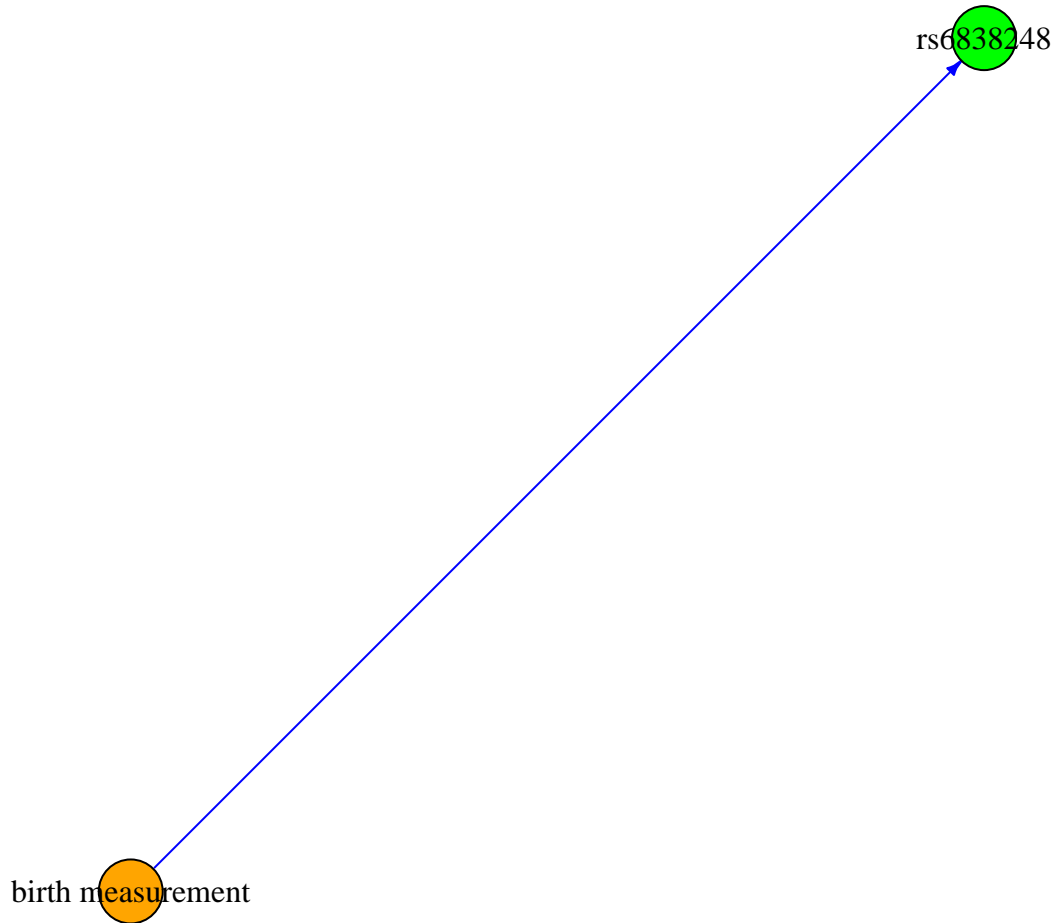

## Variant-Disease Network (gestational age)

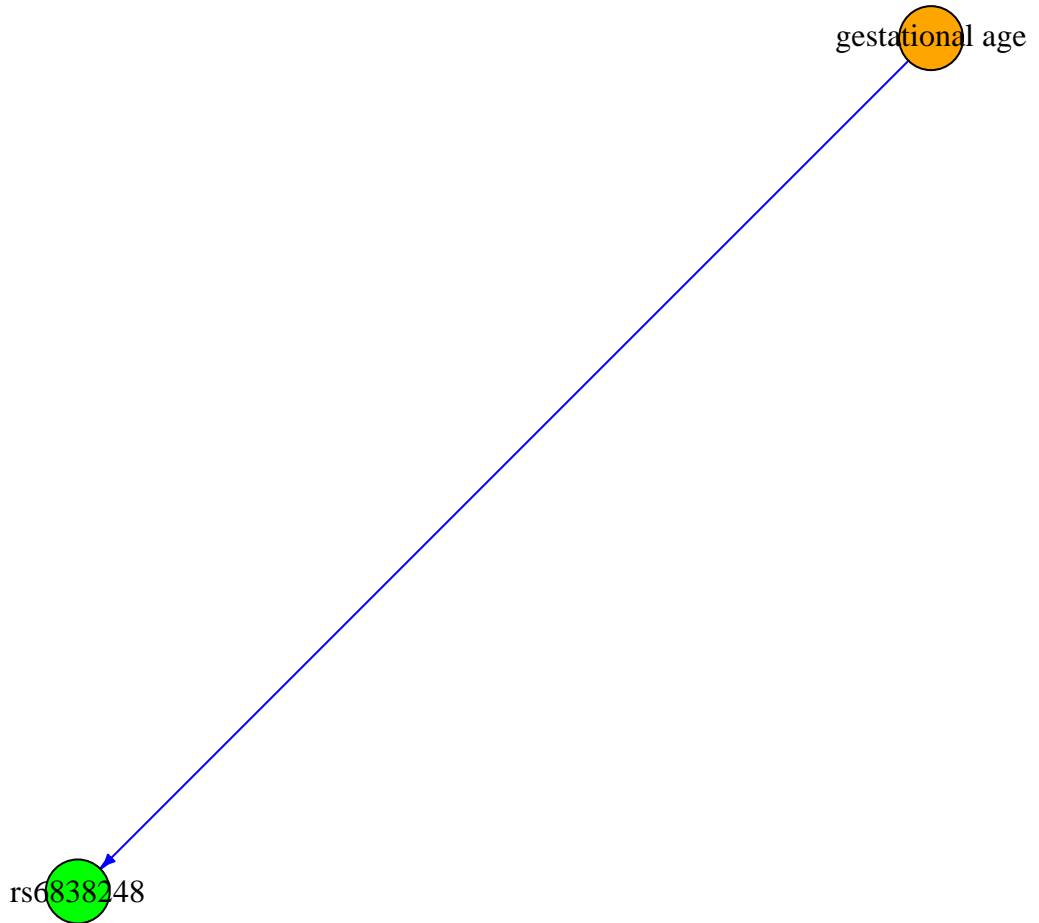

**Variant–Disease Network (obese body mass index status)**

obese body mass index status

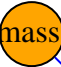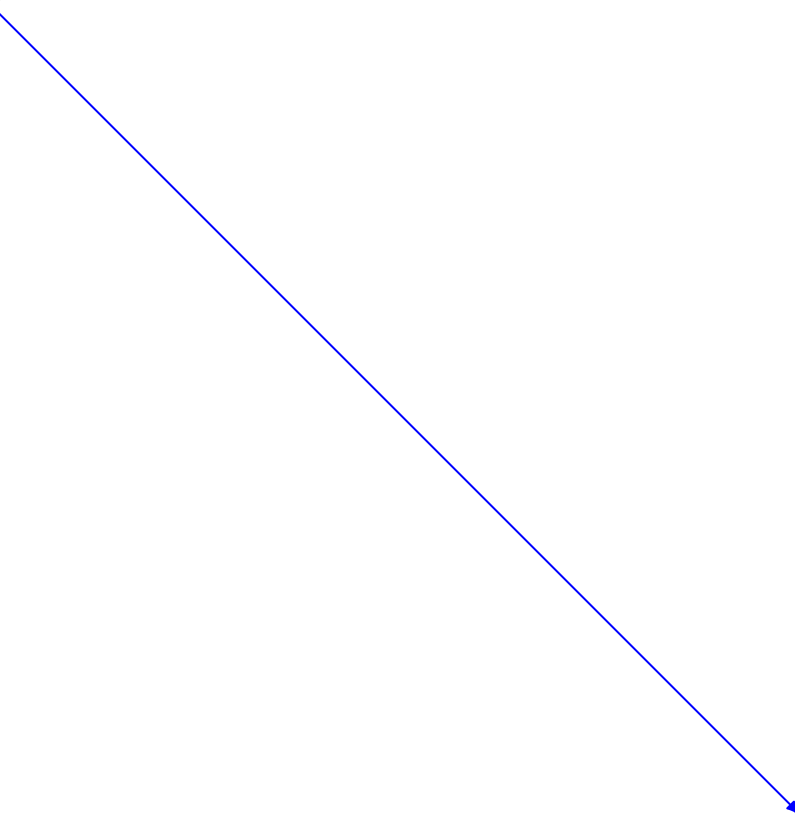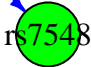

rs7548

## Variant–Disease Network (urate measurement)

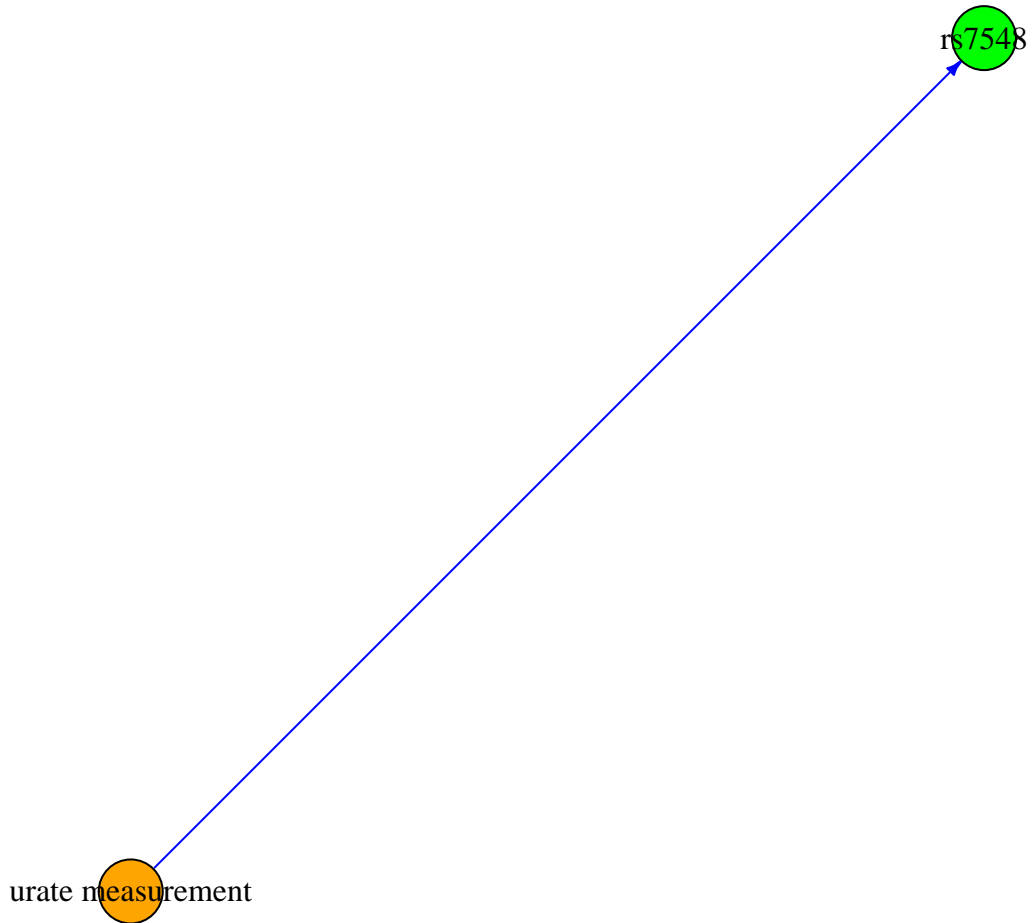

**Variant–Disease Network (acute lymphoblastic leukemia)**

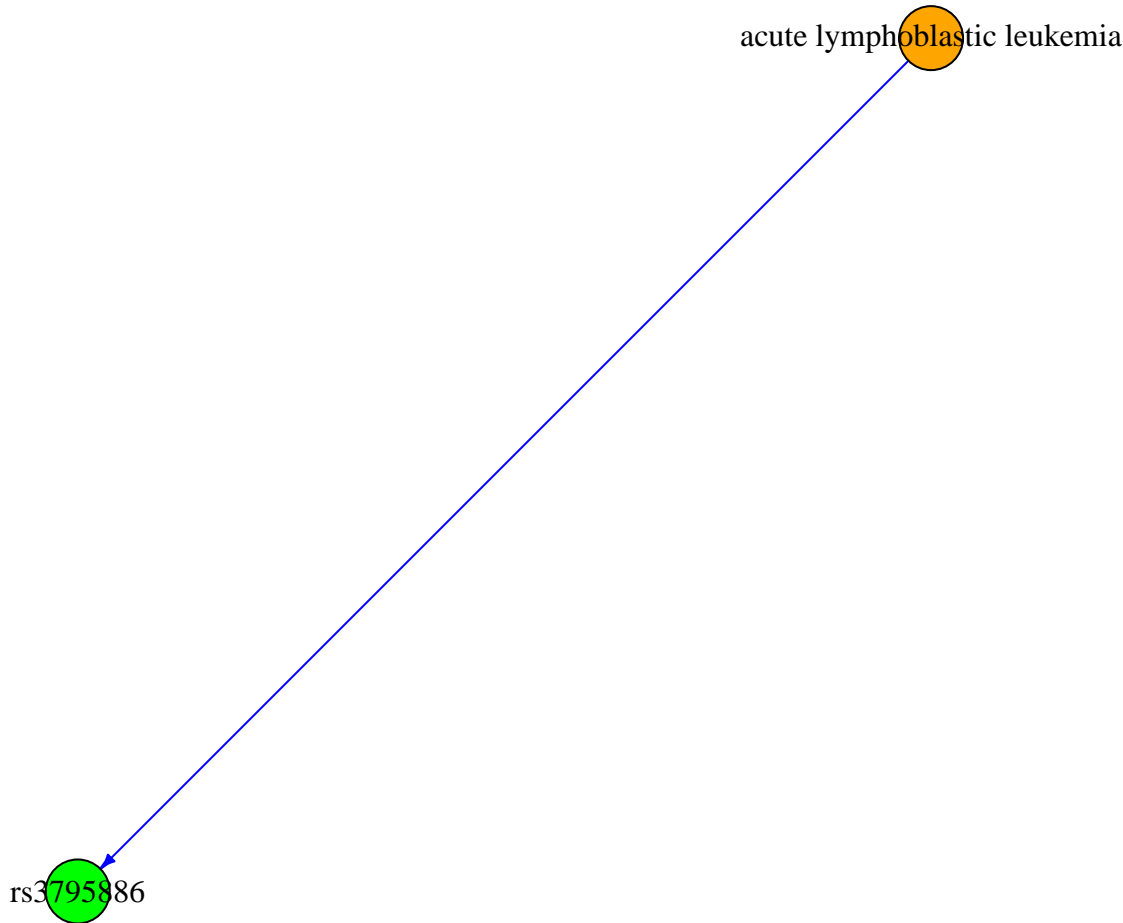

## Variant–Disease Network (calcium measurement)

calcium measurement

rs6453696

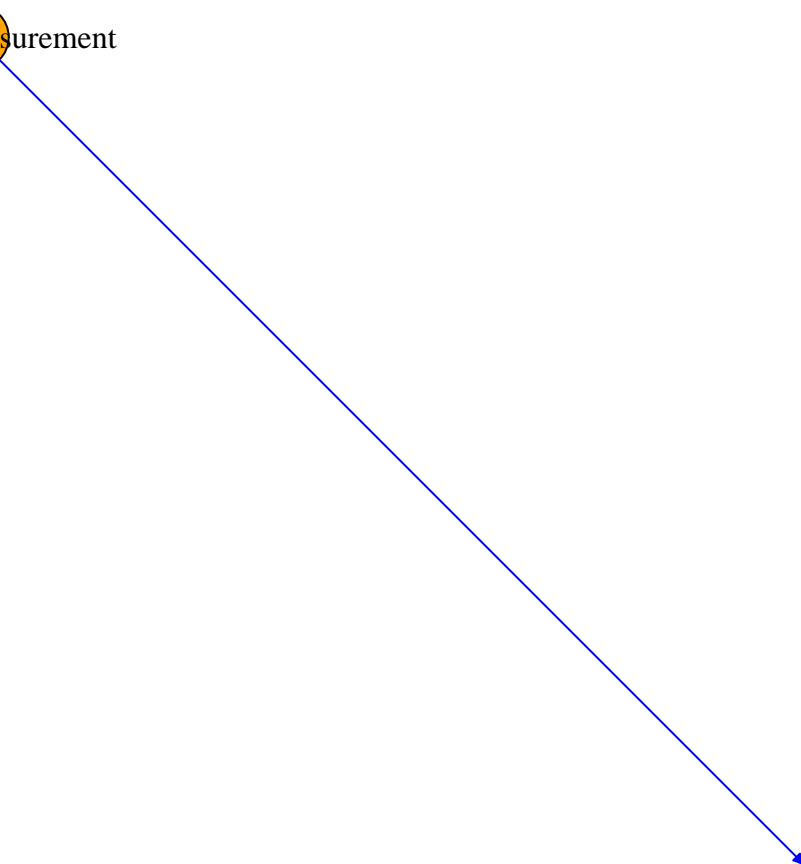



## Variant–Disease Network (CD109 antigen measurement)

CD109 antigen measurement

rs6453696

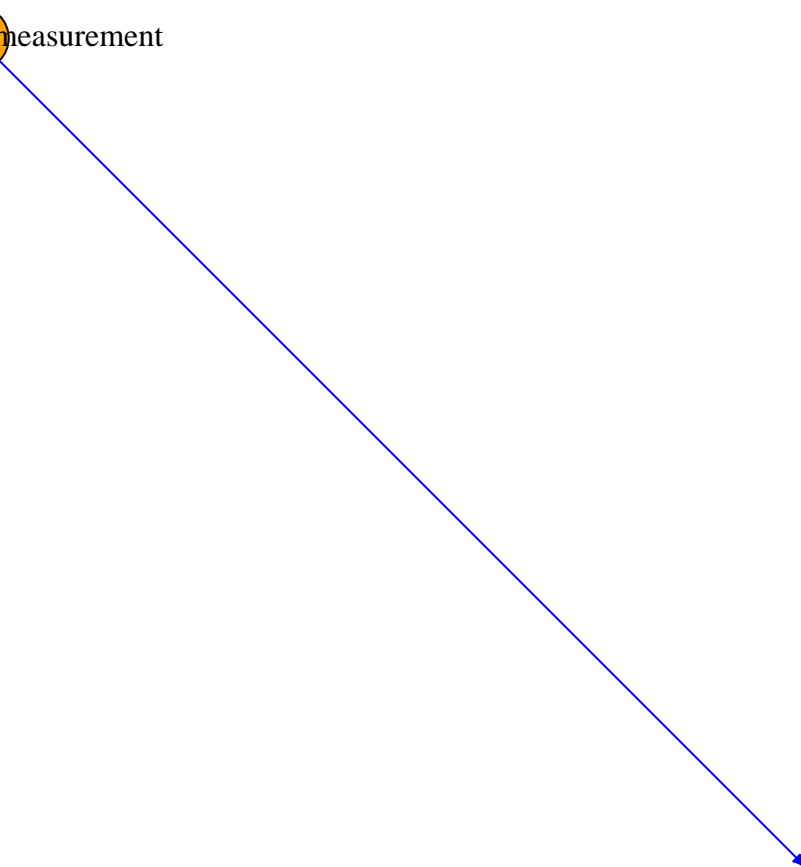

## Variant–Disease Network (glycerophospholipid measurement)

glycerophospholipid measurement

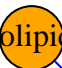

rs1136001

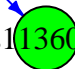

**Variant–Disease Network (metabolite measurement)**

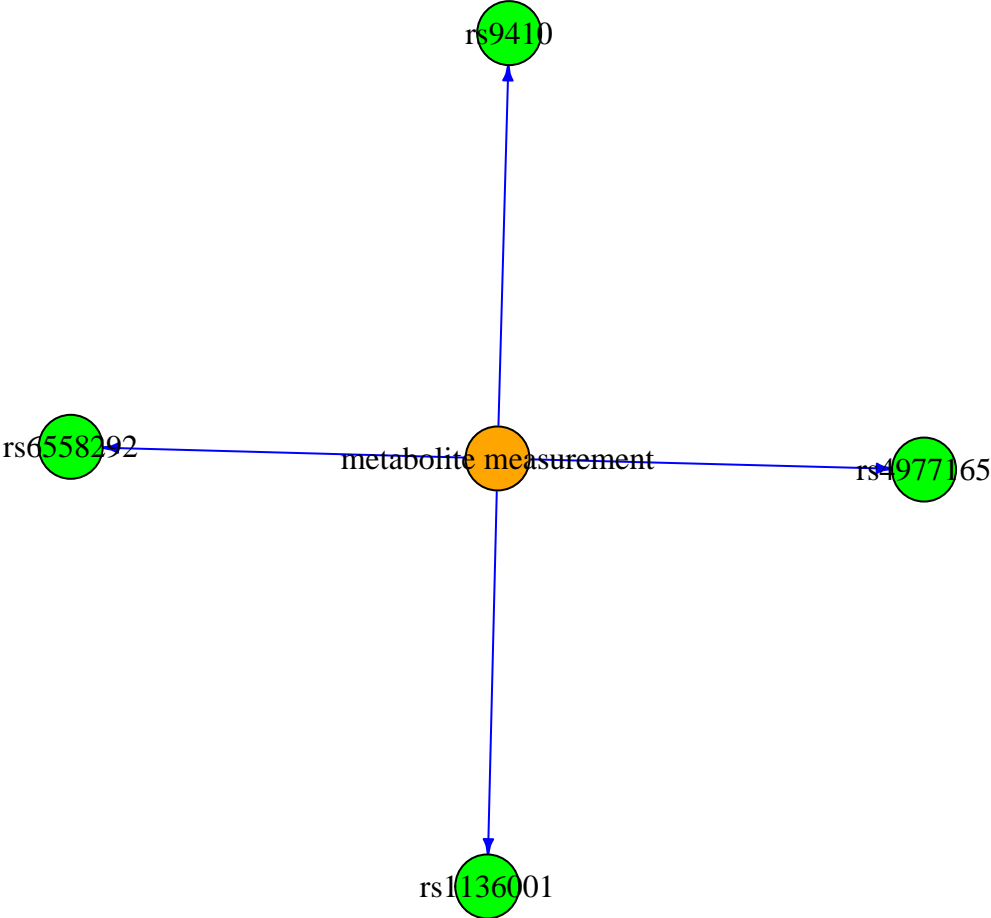

Variant–Disease Network (omega–6 polyunsaturated fatty acid measure

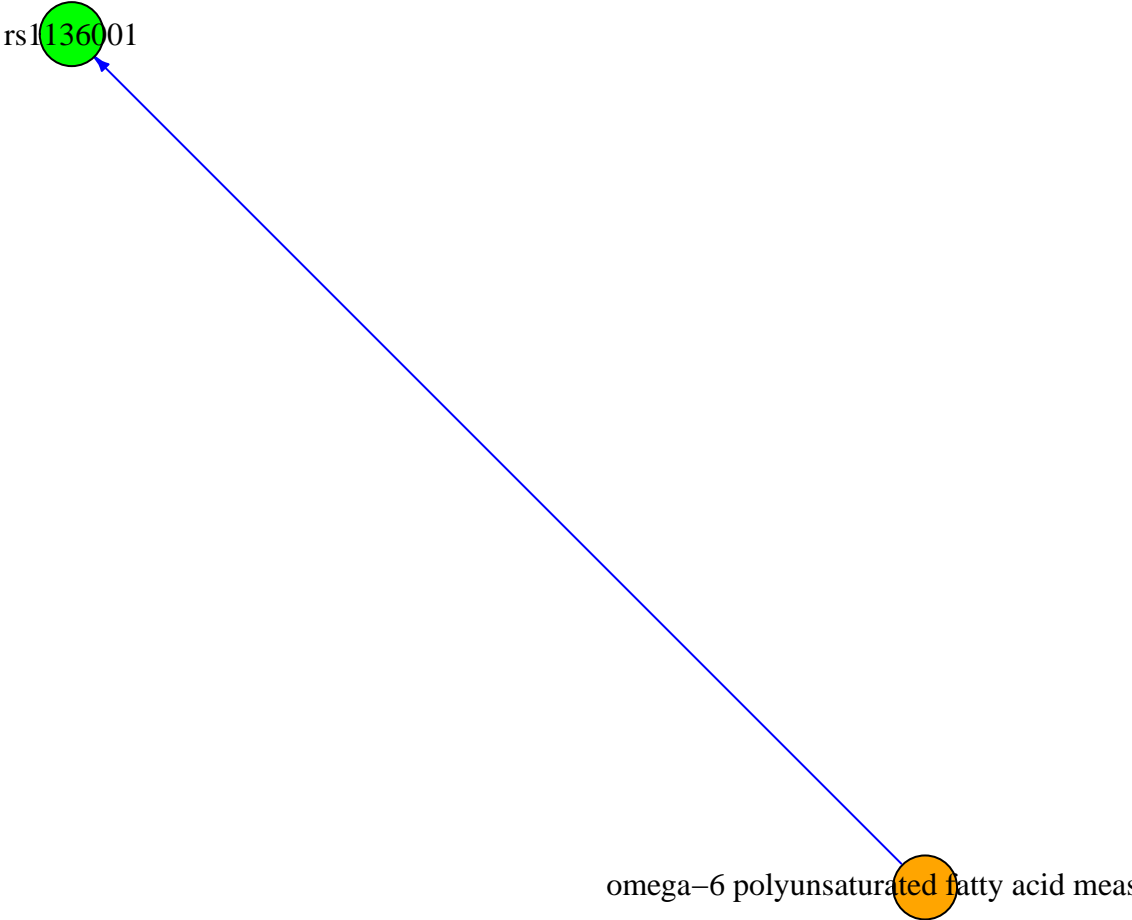

## Variant–Disease Network (phospholipid measurement)

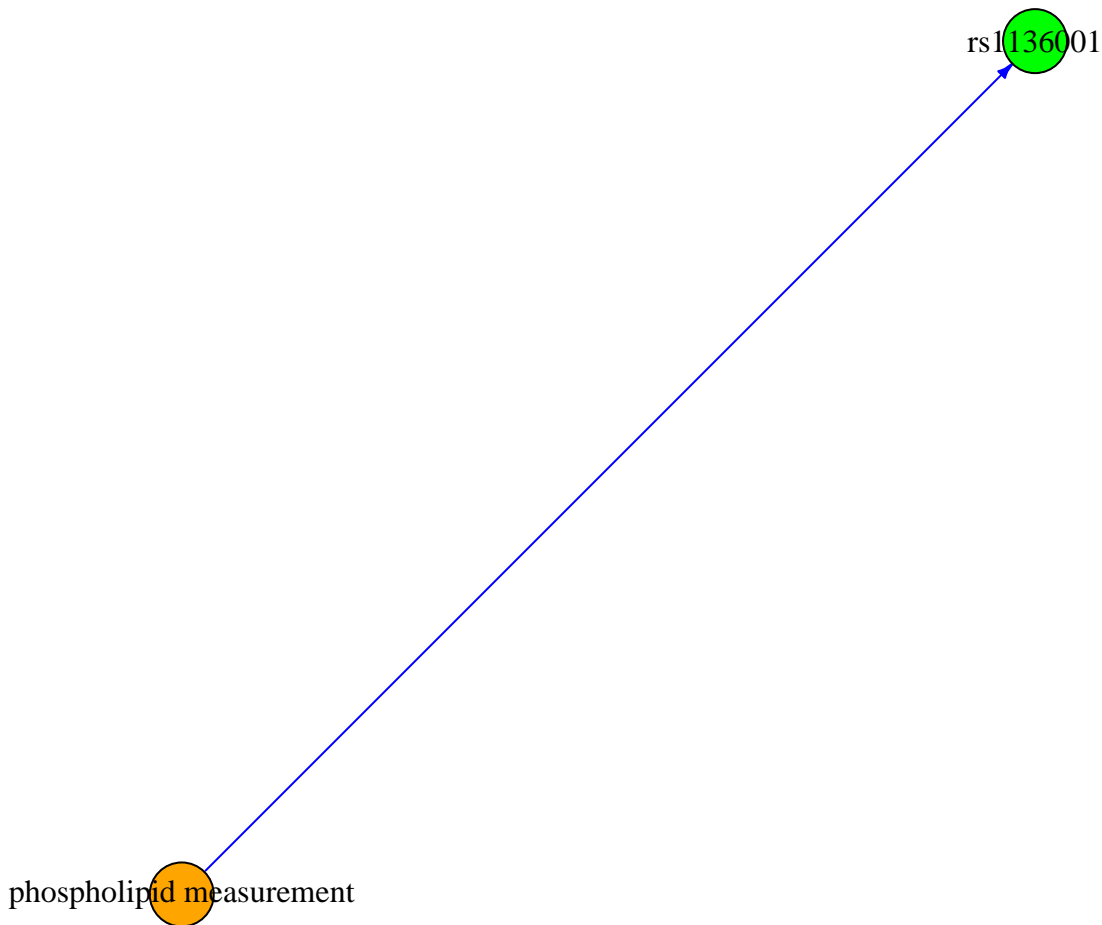

# Variant–Disease Network (exploratory eye movement measurement)

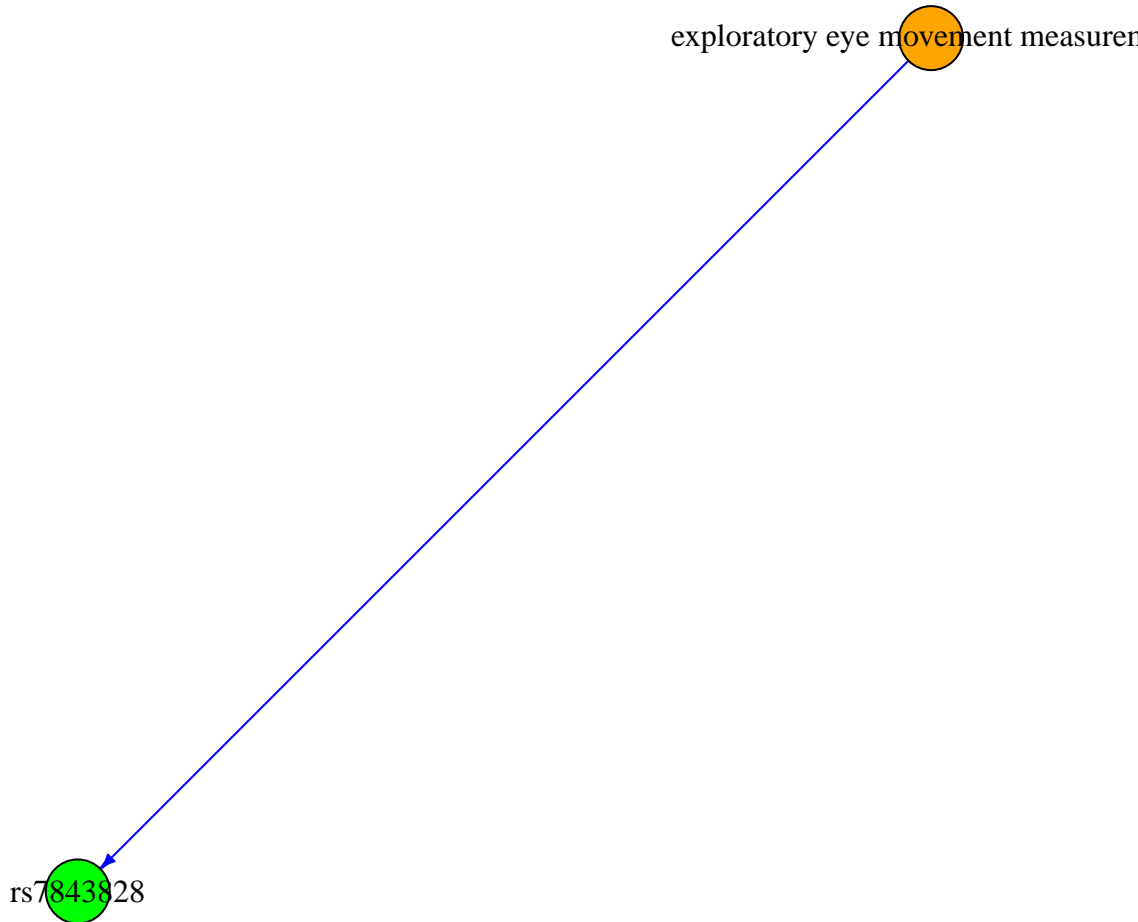

Variant–Disease Network (Agouti–related protein measurement)

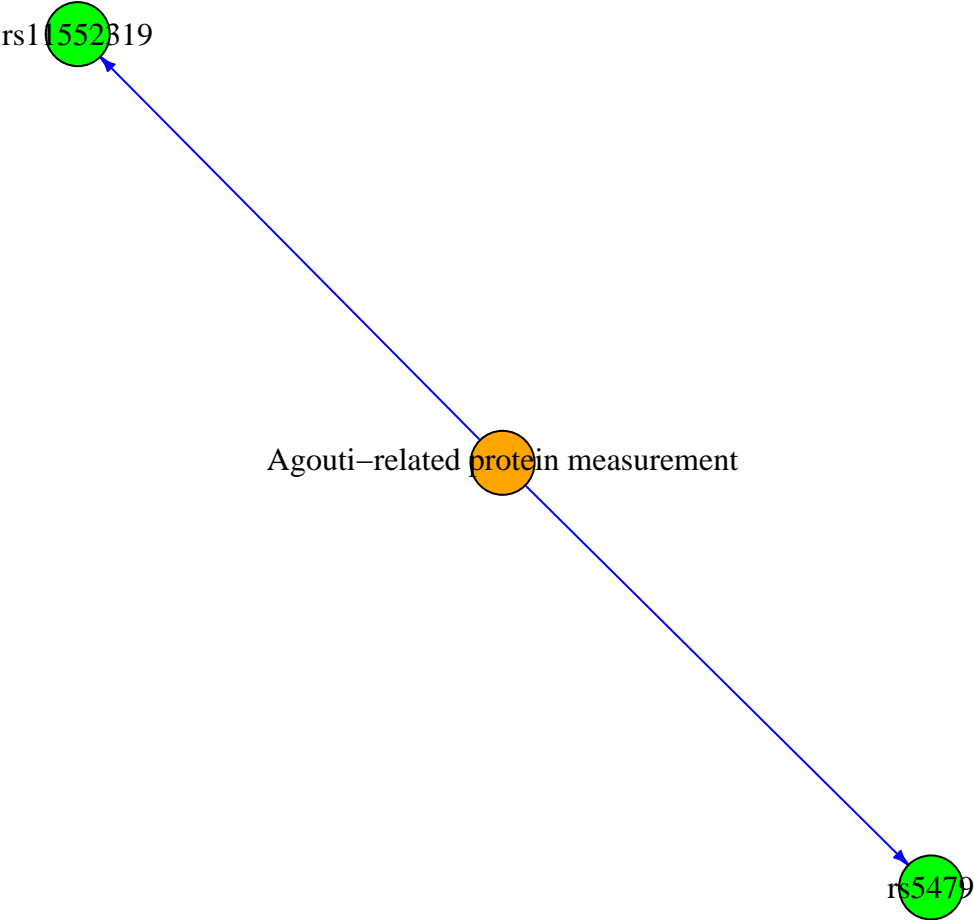

# Variant-Disease Network (serum IgM measurement)

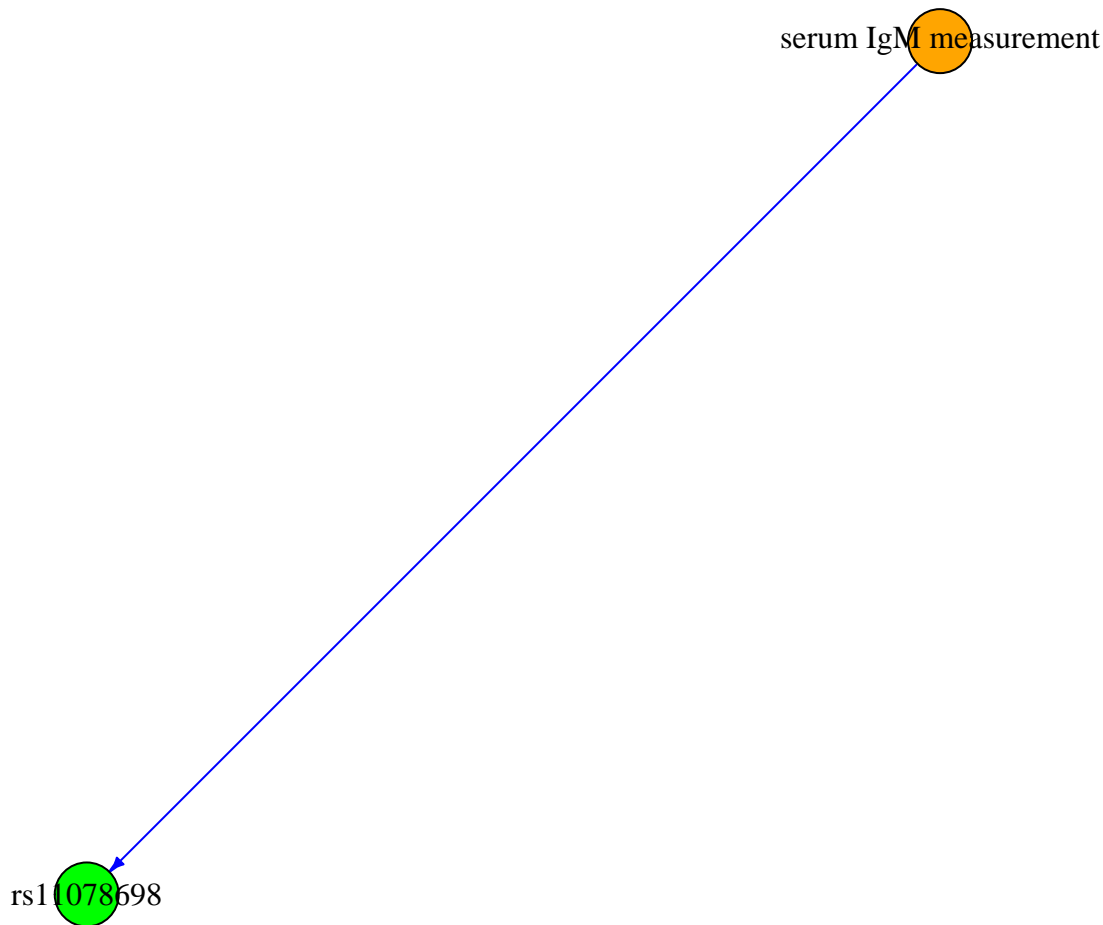



## Variant–Disease Network (cytokine measurement)

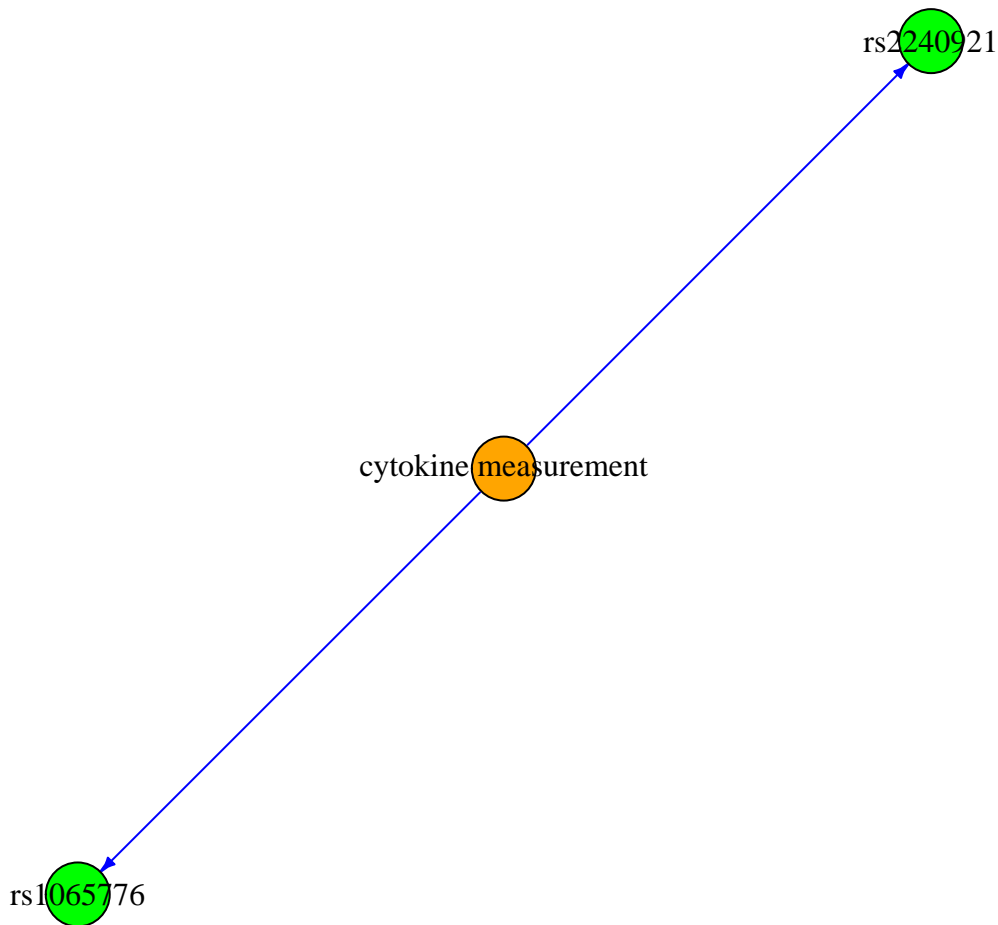

## Variant–Disease Network (response to vaccine)

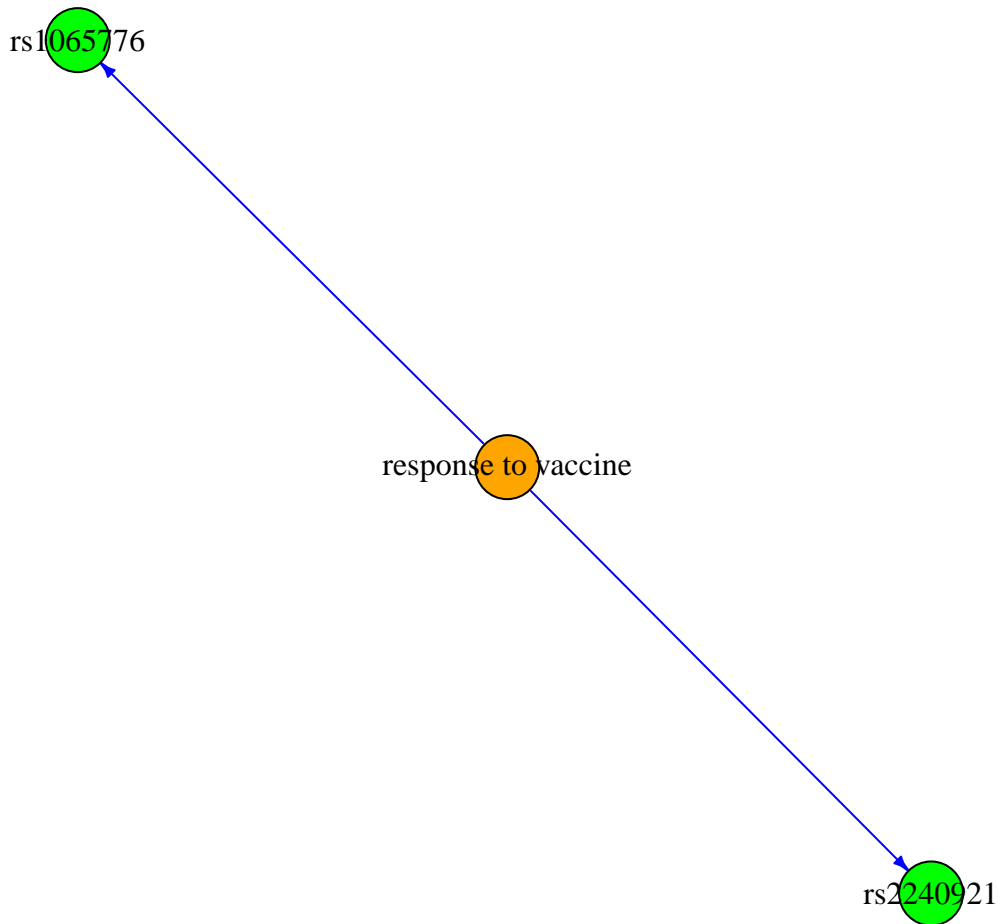

## Variant–Disease Network (adiponectin measurement)

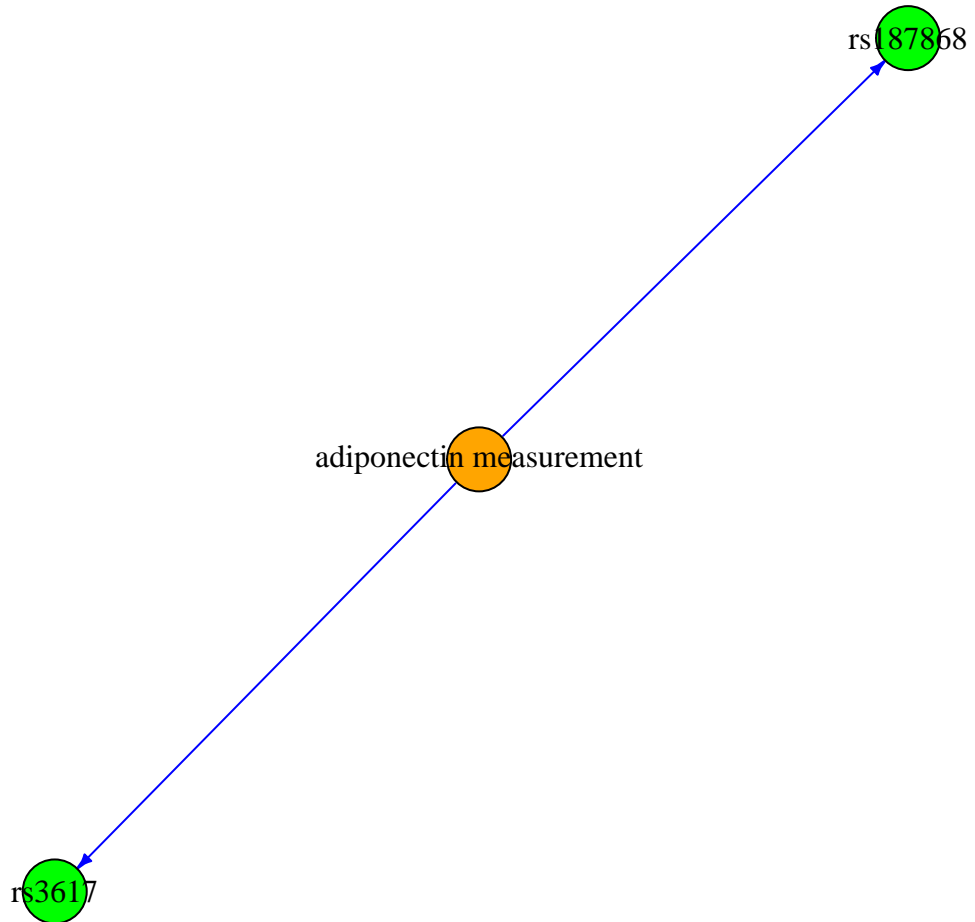

## Variant–Disease Network (open–angle glaucoma)

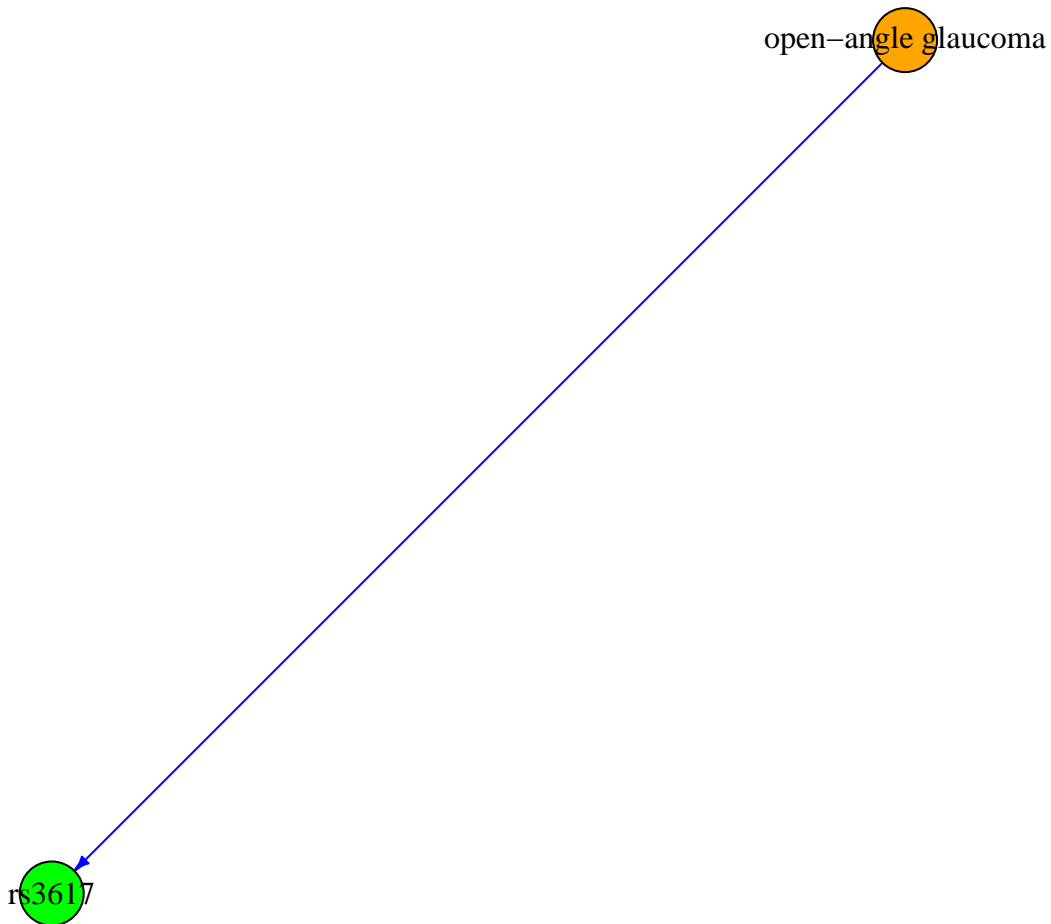

## Variant–Disease Network (schizoaffective disorder)

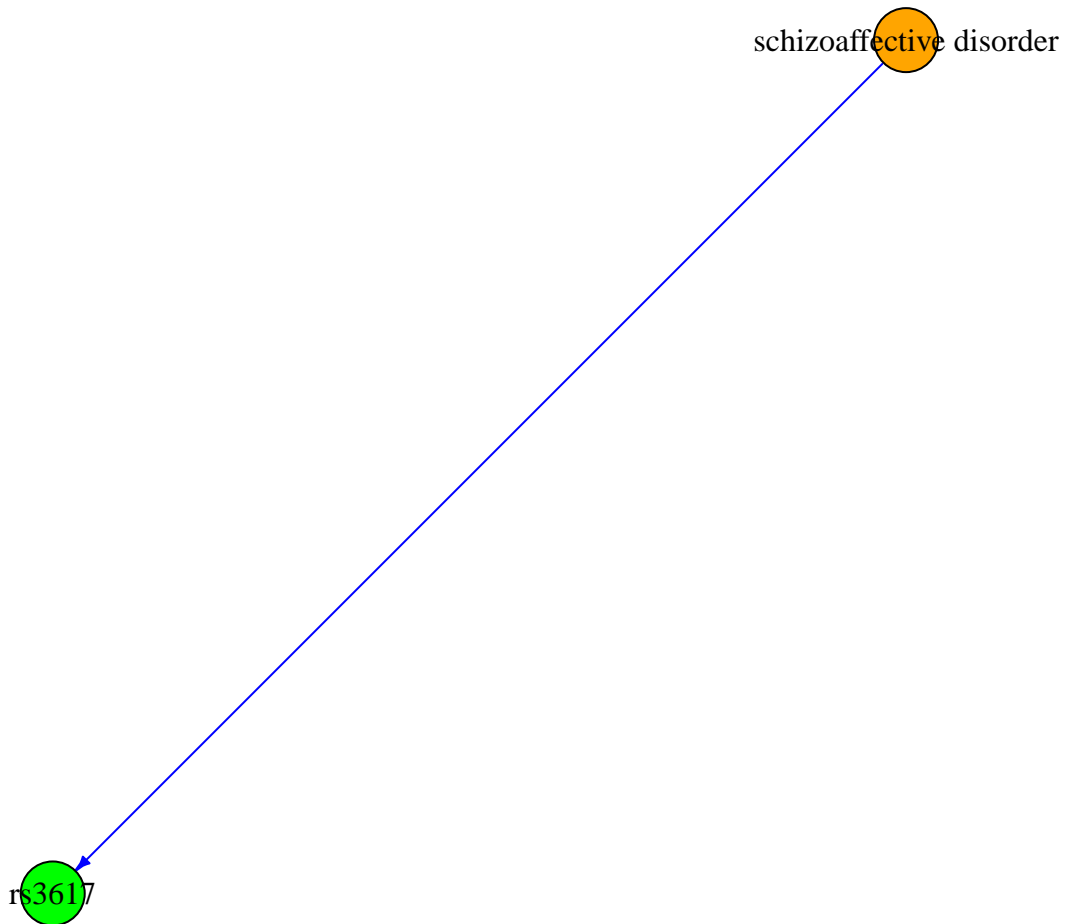

## Variant–Disease Network (openness measurement)

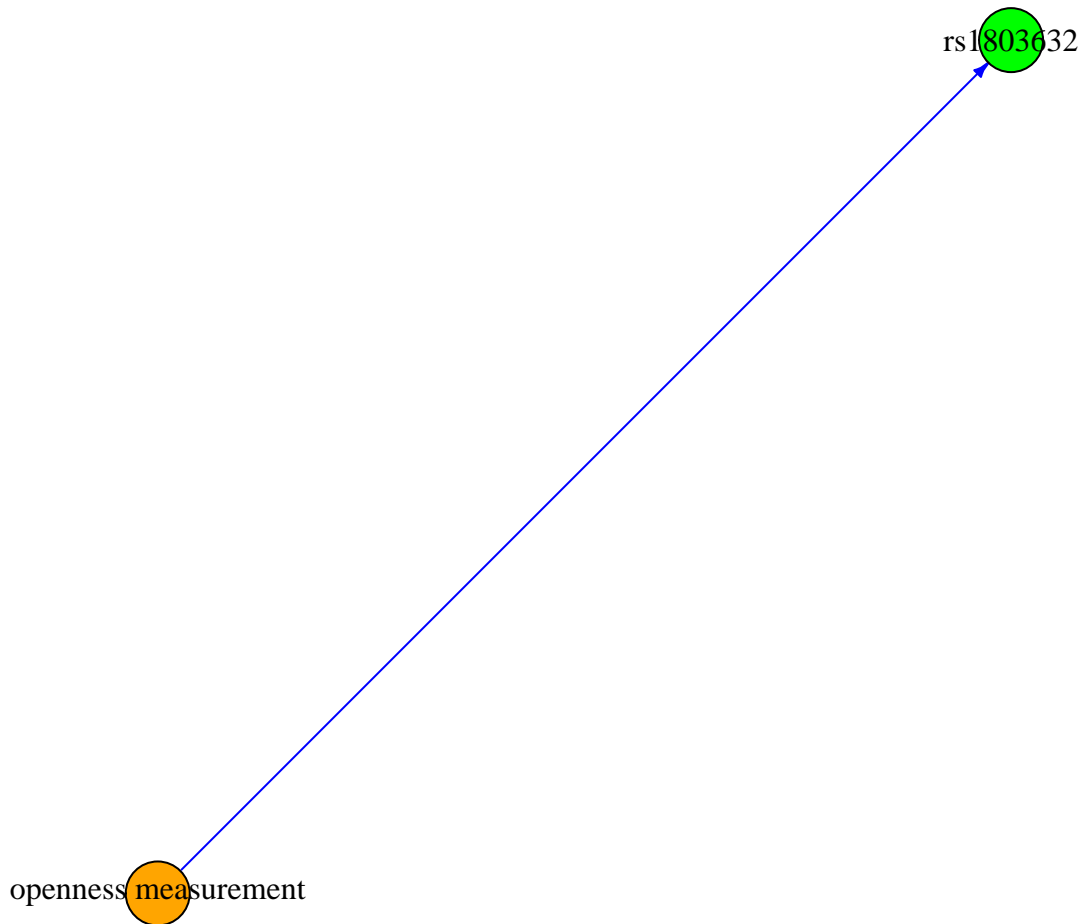

Variant–Disease Network (psychosocial stress measurement)

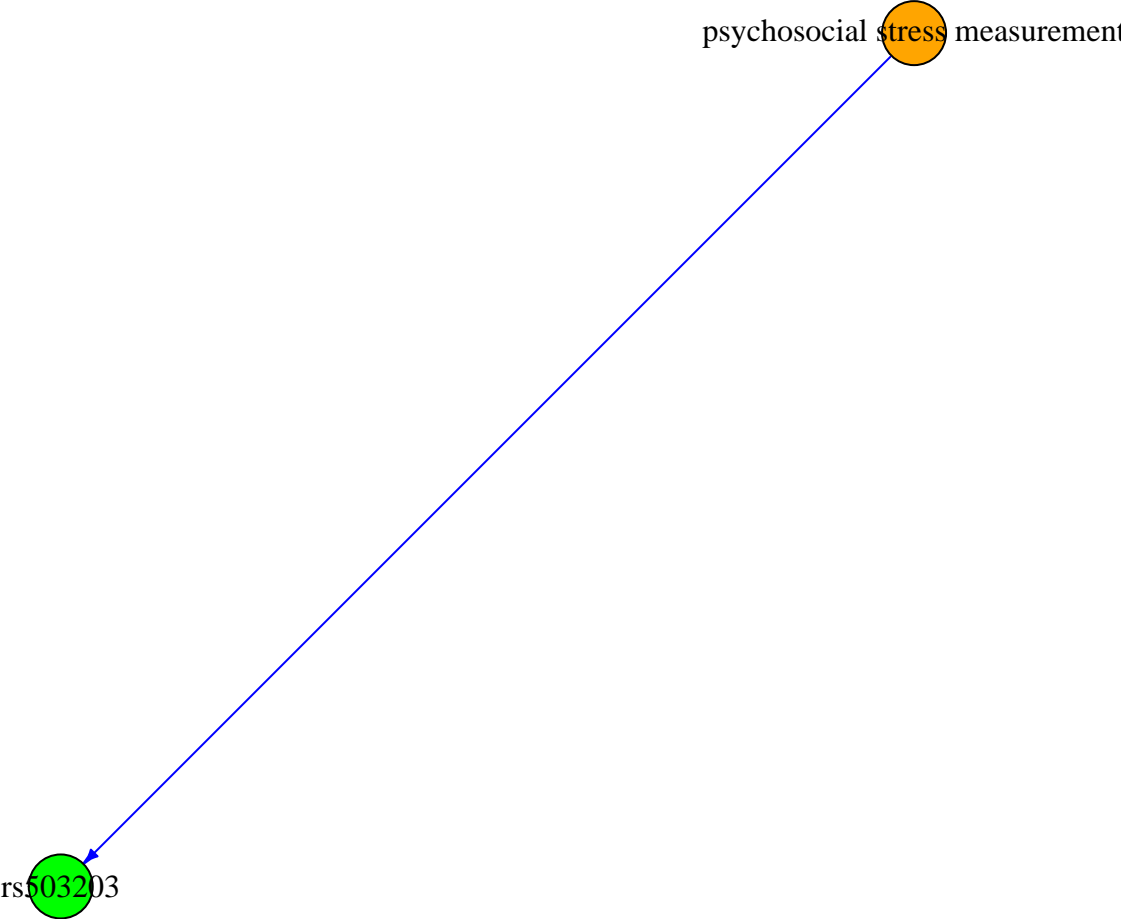

## Variant–Disease Network (alcohol dependence)

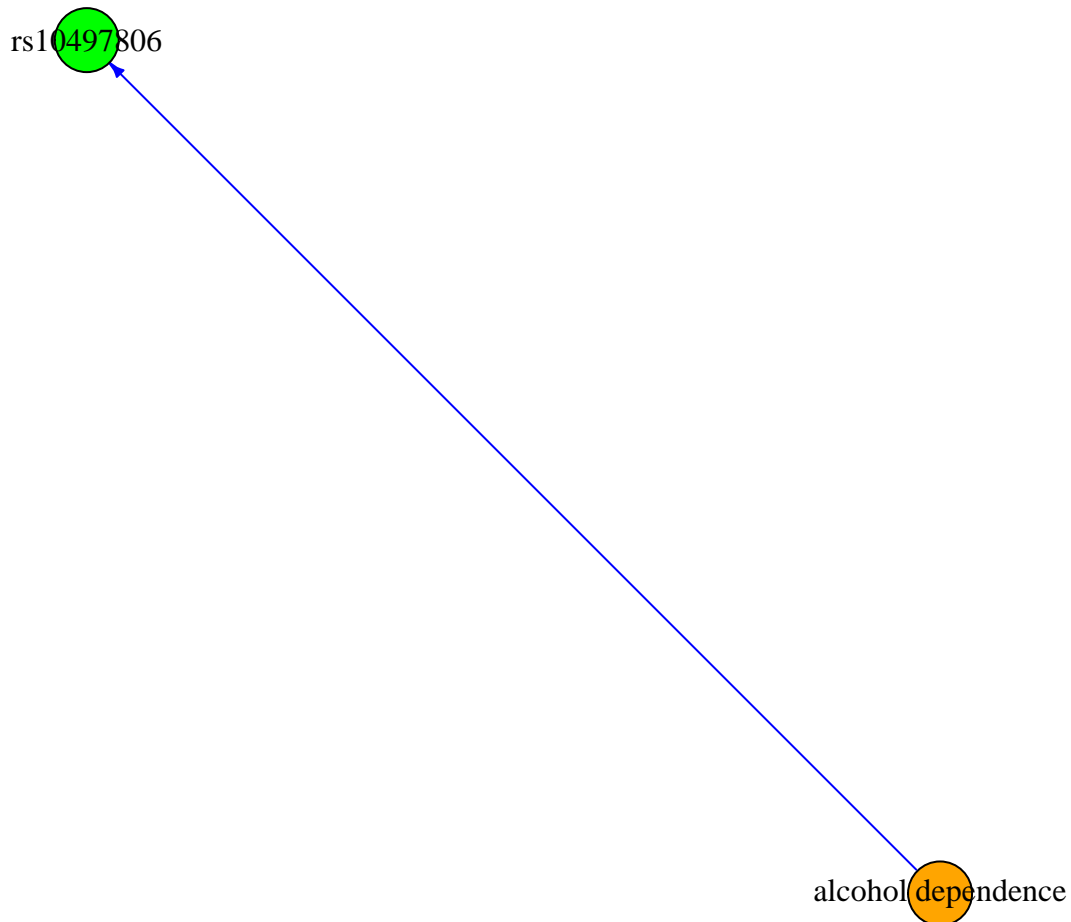



## Variant-Disease Network (brain aneurysm)

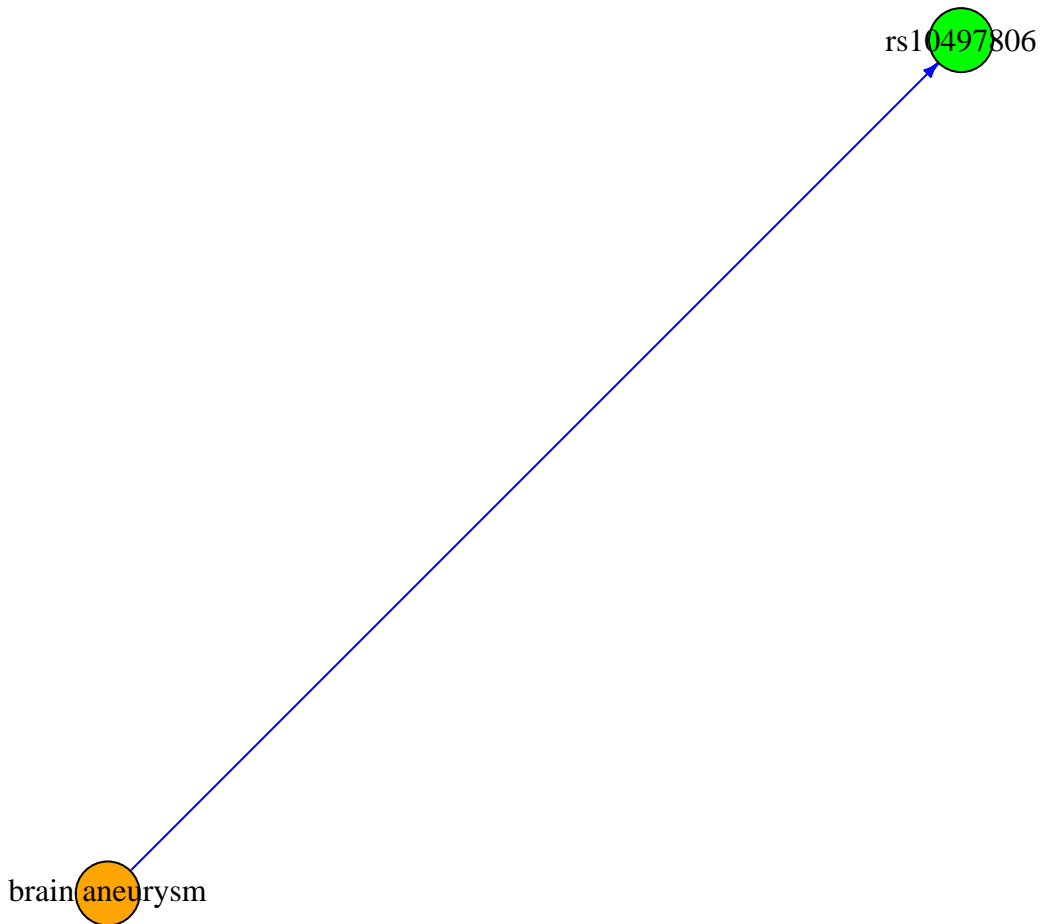

## Variant-Disease Network (celiac disease)

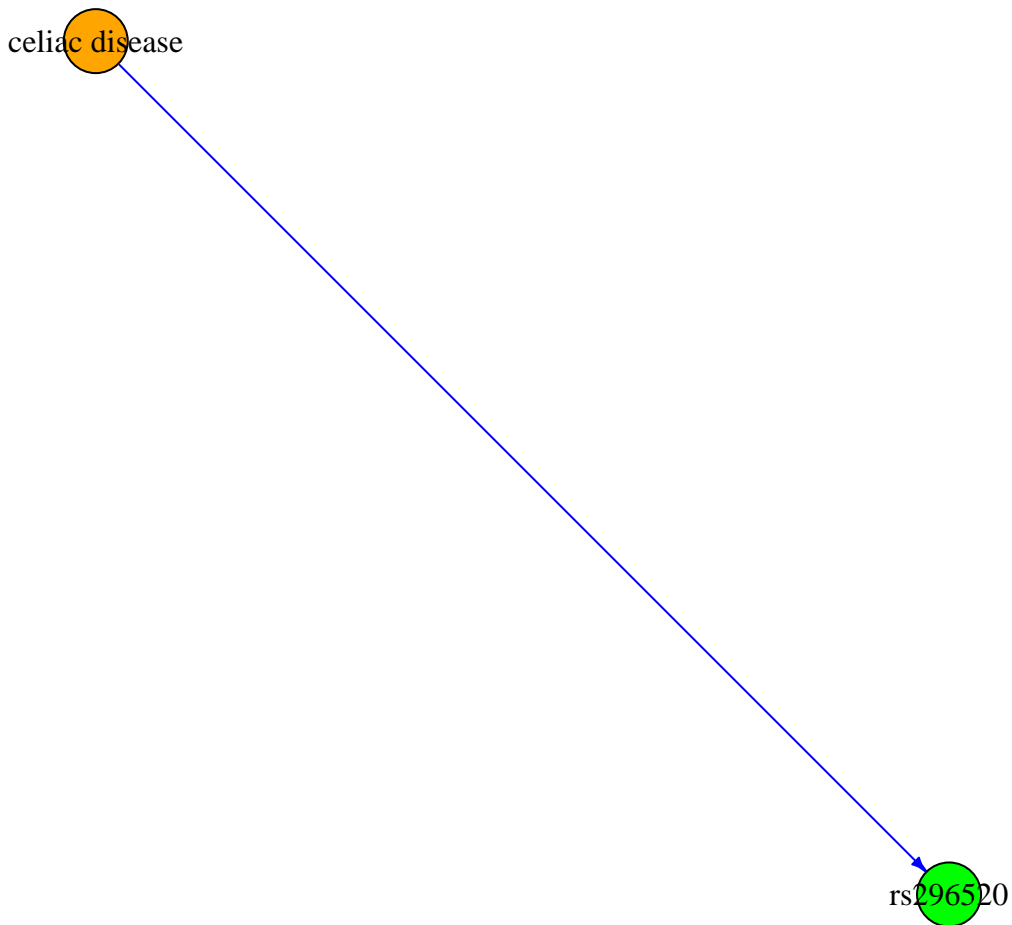

**Variant–Disease Network (blood urea nitrogen measurement)**

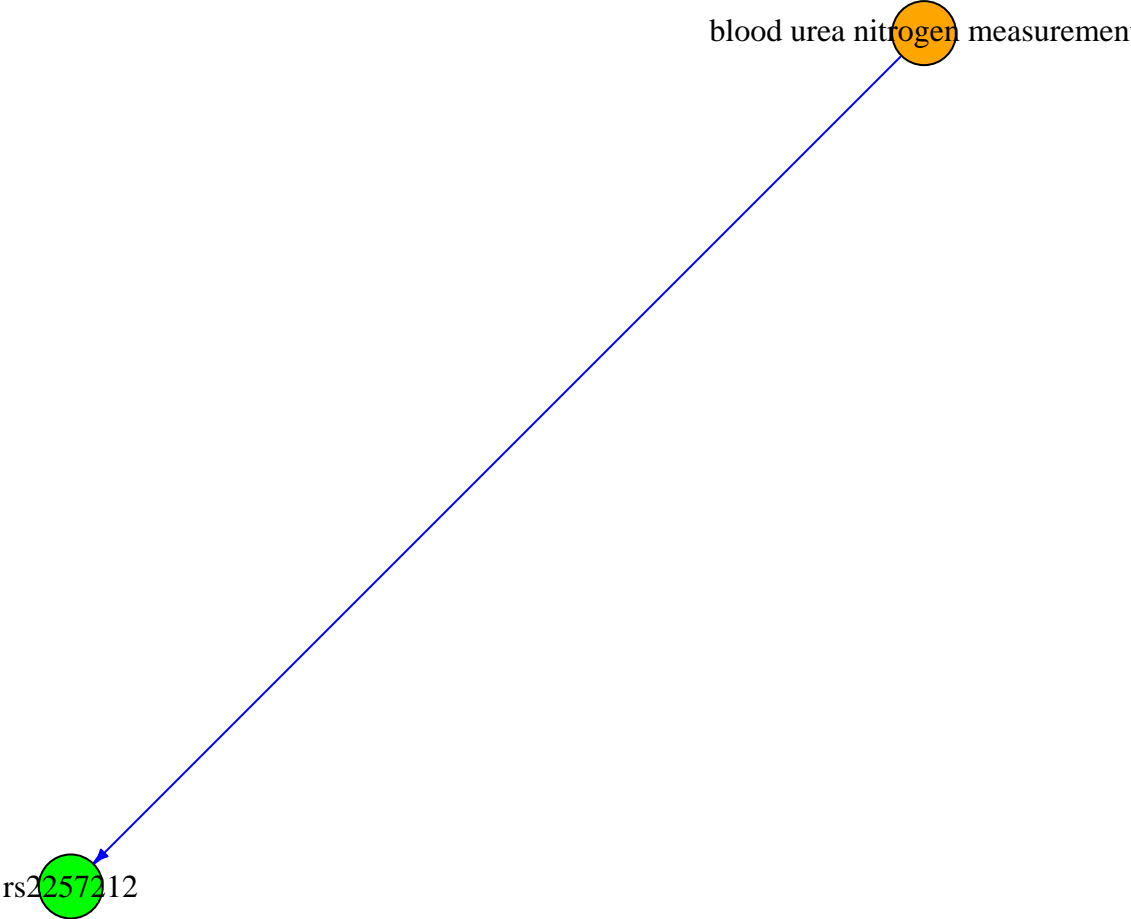

# Variant–Disease Network (ovarian endometrioid carcinoma)

ovarian endometrioid carcinoma

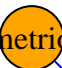

rs3213930

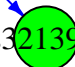

Variant–Disease Network (fasting blood glucose measurement)

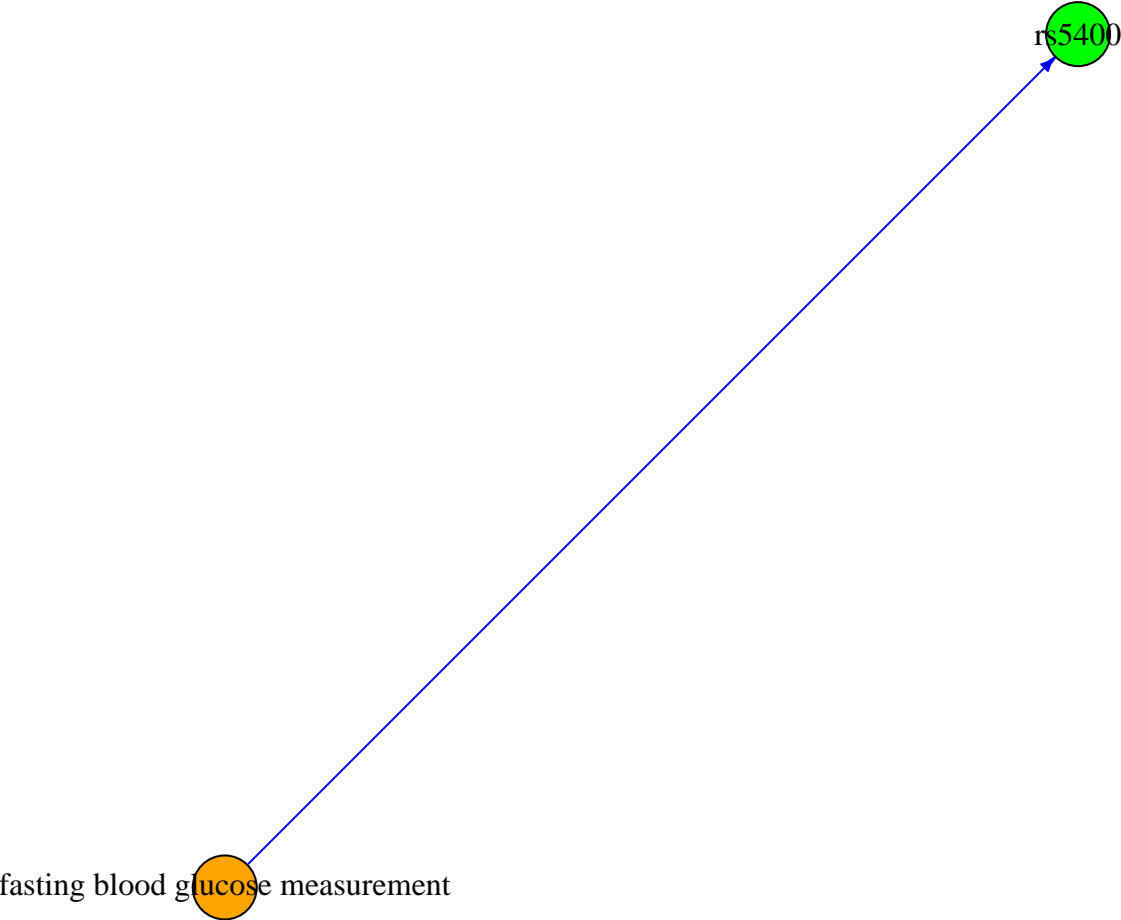

## Variant-Disease Network (HOMA-B)

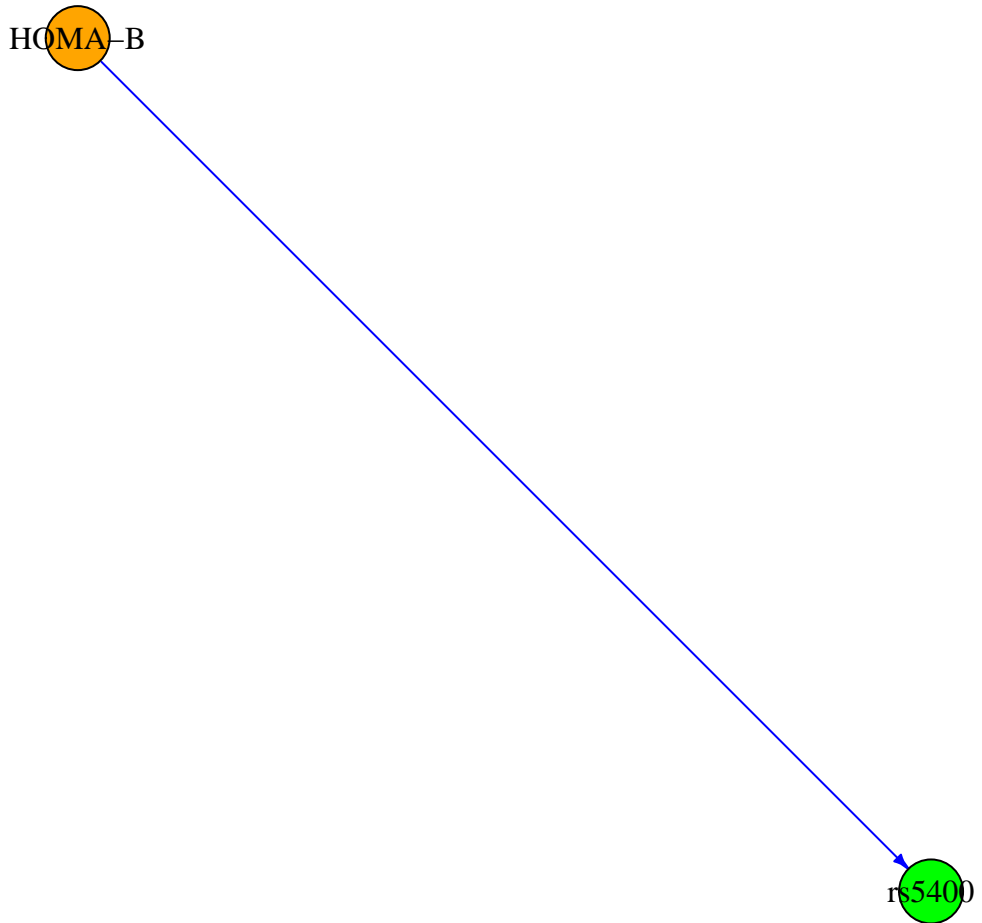

Variant–Disease Network (serum gamma–glutamyl transferase measurement)

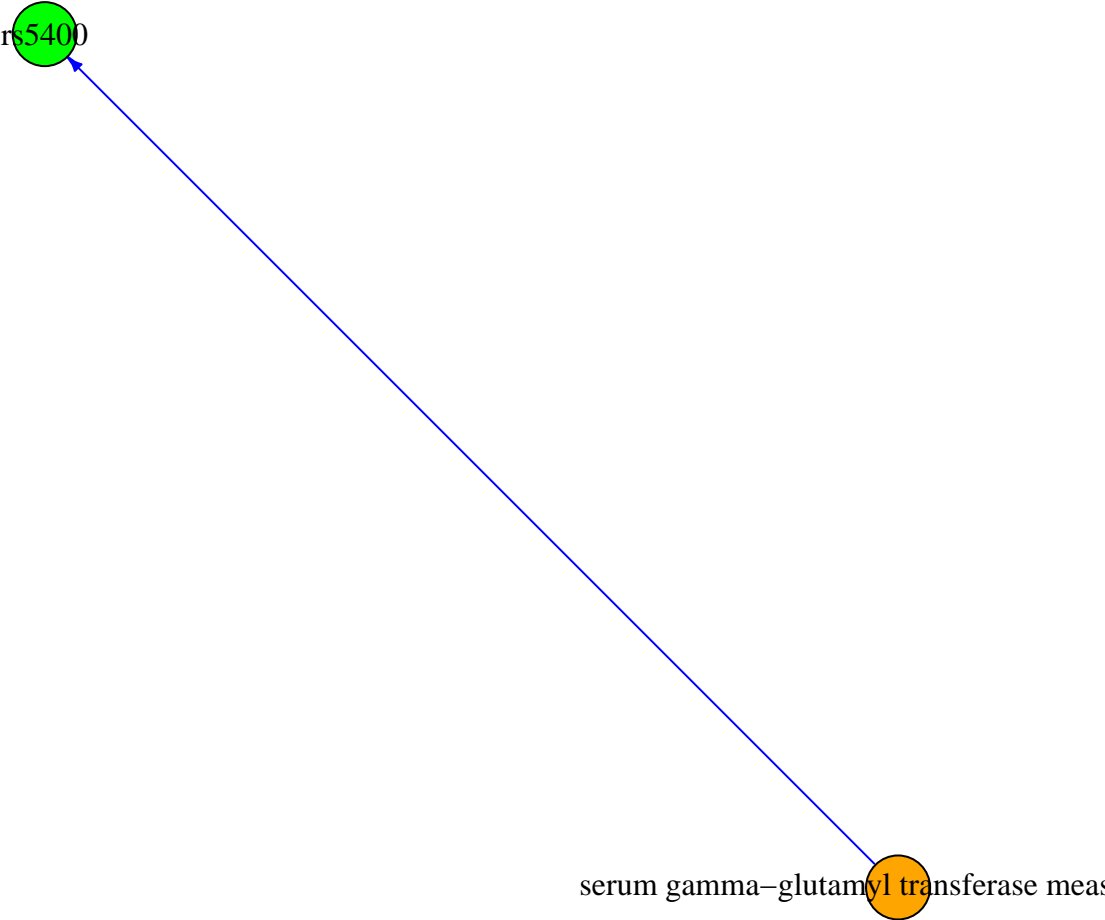

## Variant–Disease Network (seborrheic dermatitis)

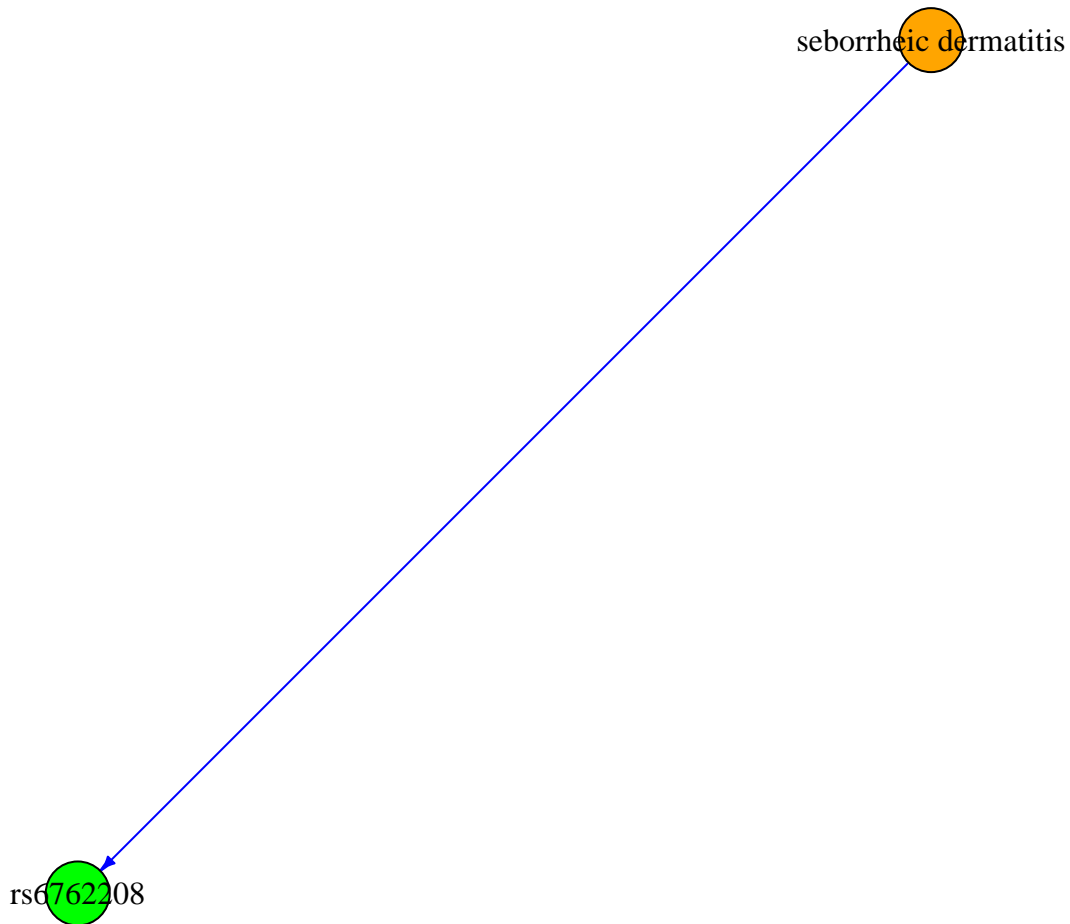



# Variant-Disease Network (resting heart rate)

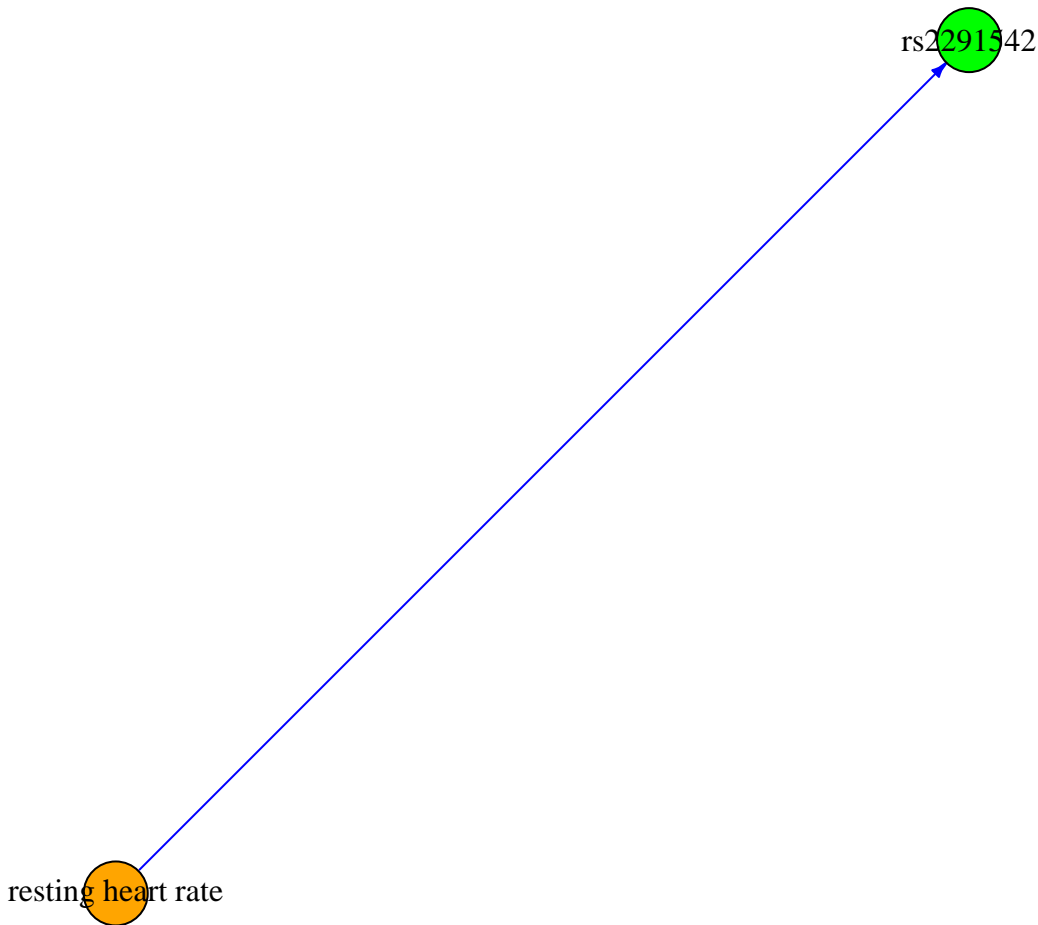

Variant–Disease Network (age at first birth measurement)

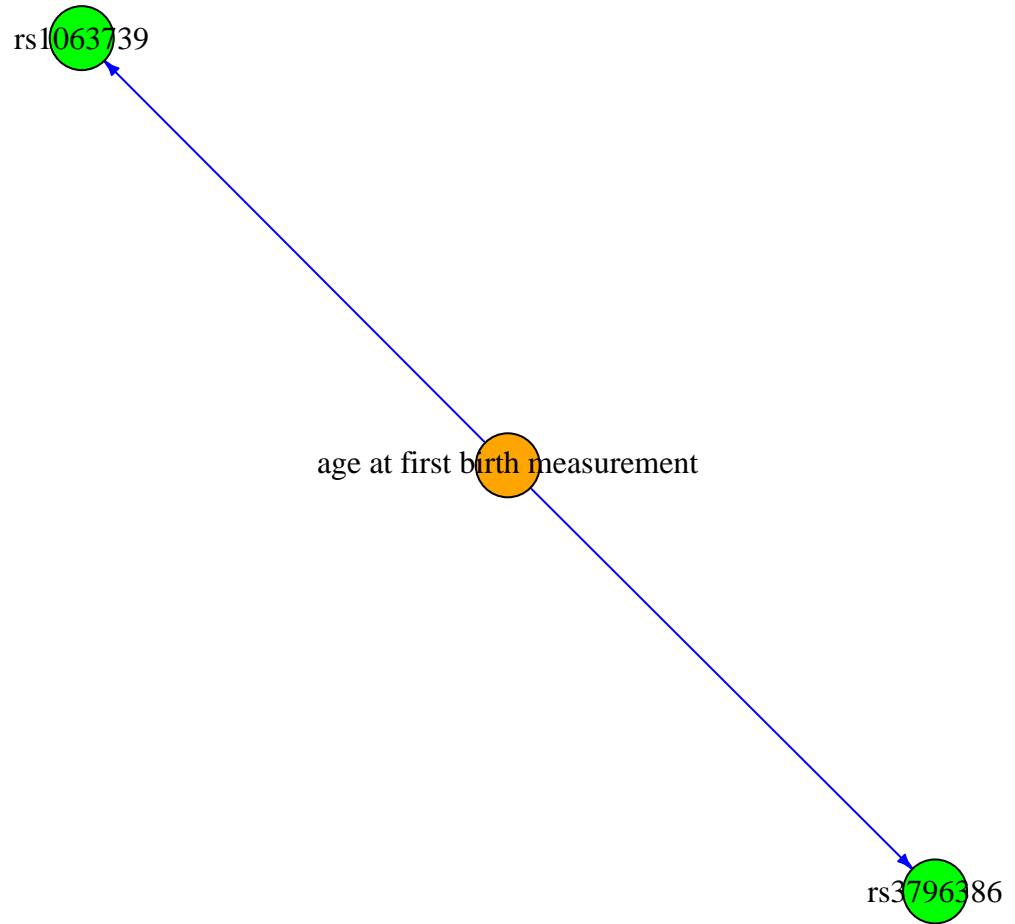

## Variant–Disease Network (physical activity)

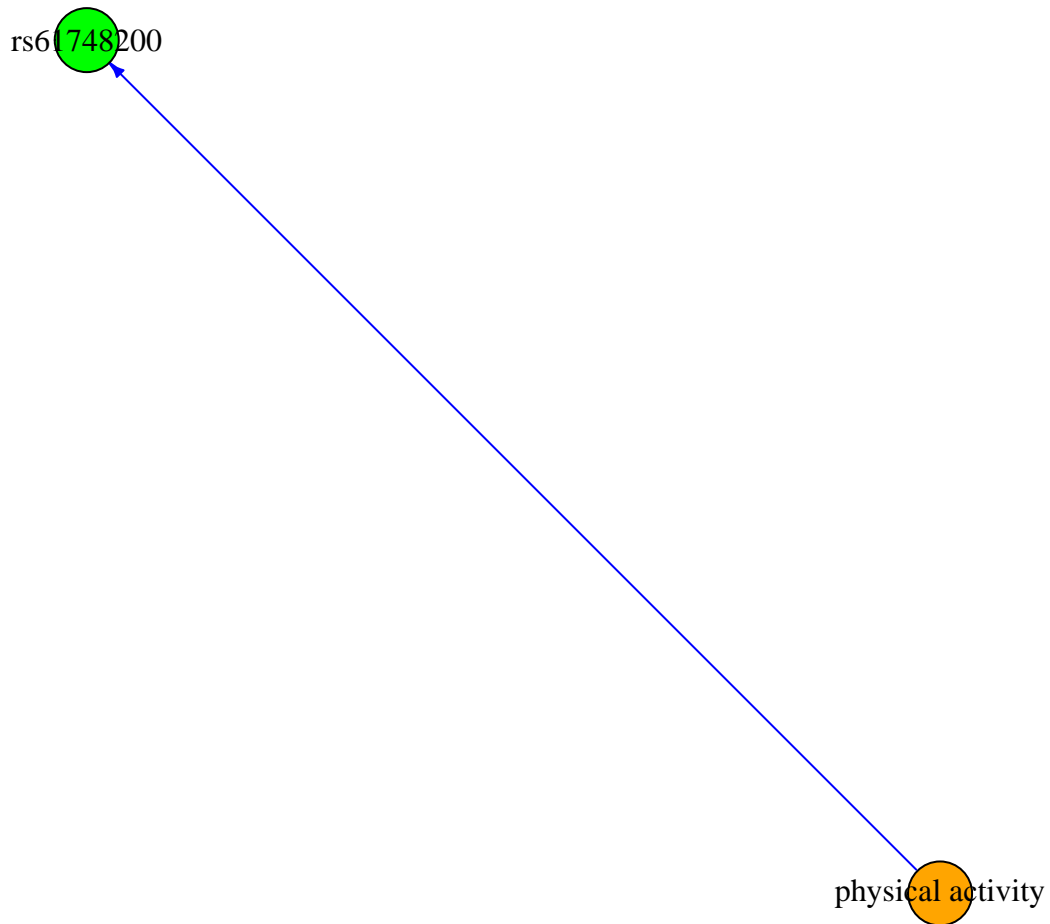

**Variant–Disease Network (abdominal aortic artery calcification)**

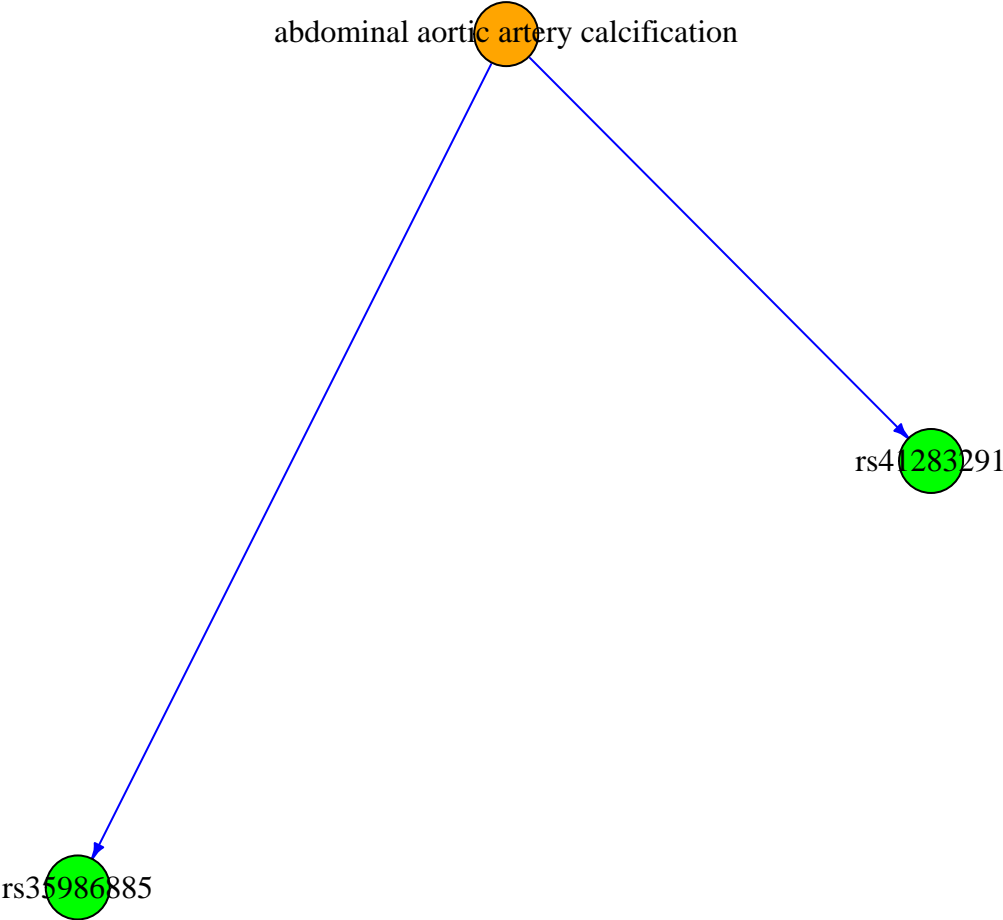

Variant–Disease Network (amino acid measurement)

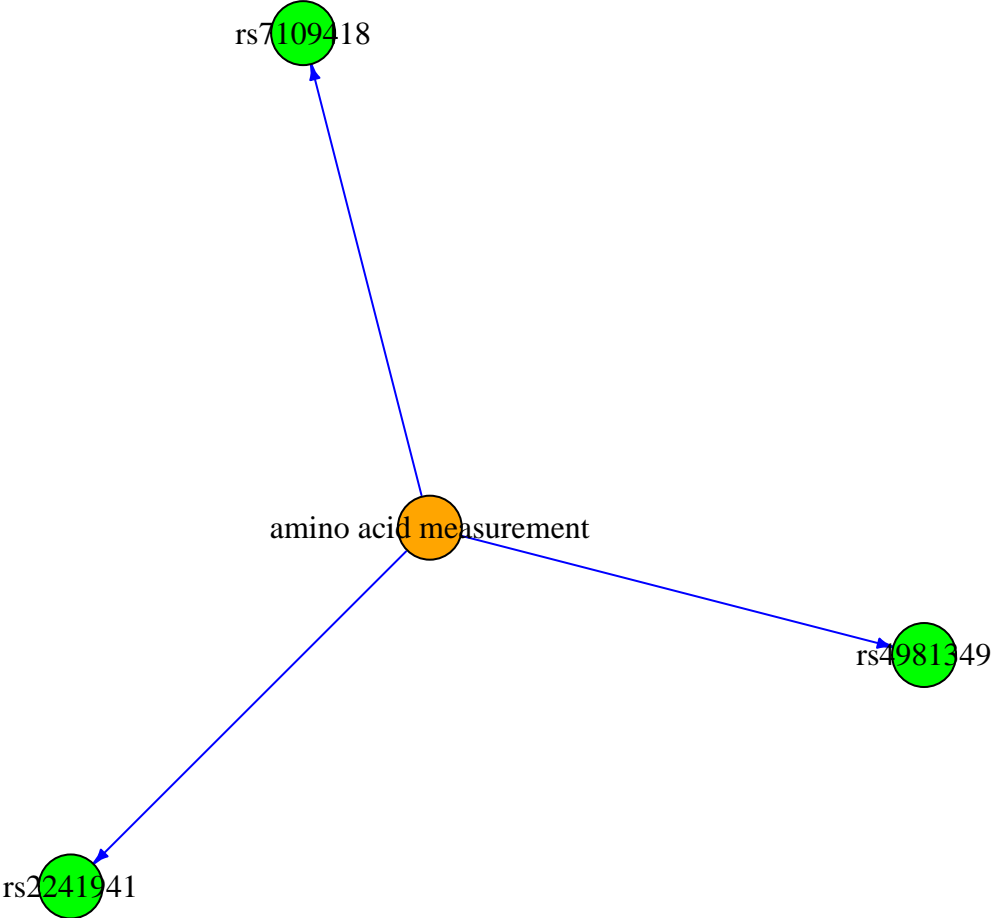

## Variant–Disease Network (protein measurement)

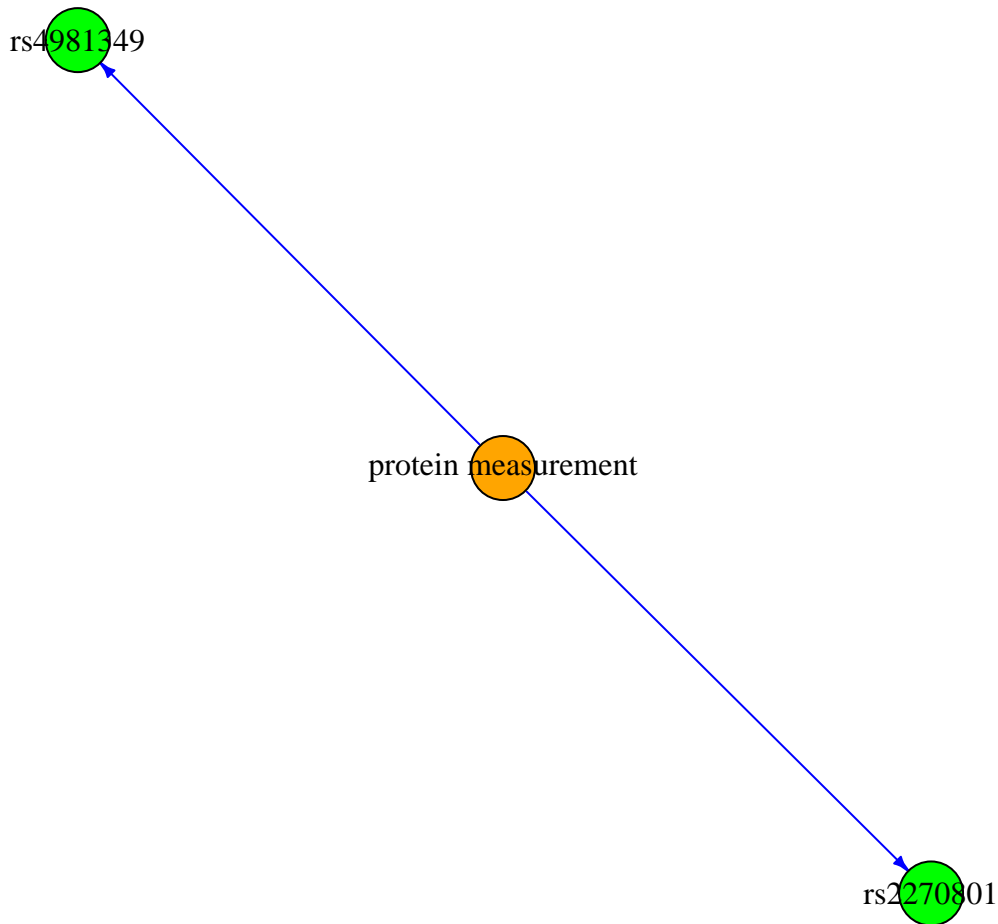

## Variant–Disease Network (coronary aneurysm)

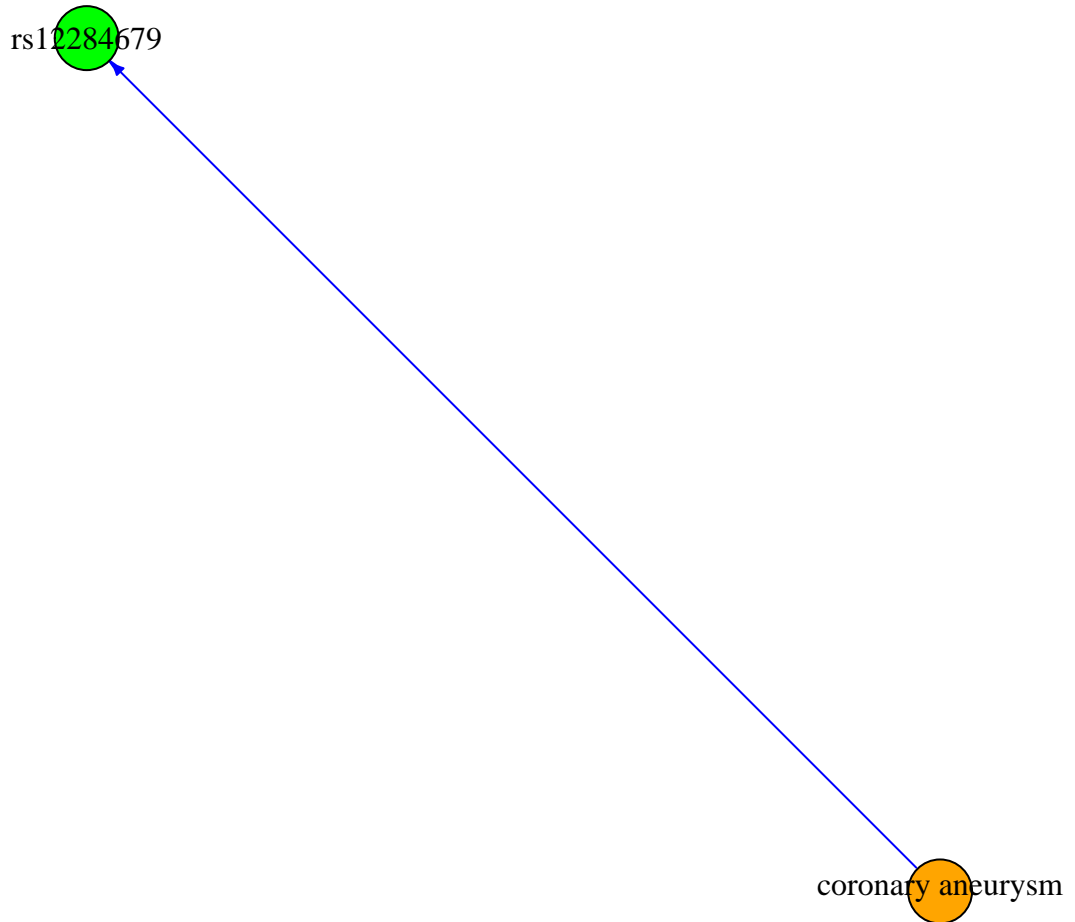

Variant–Disease Network (mucocutaneous lymph node syndrome)

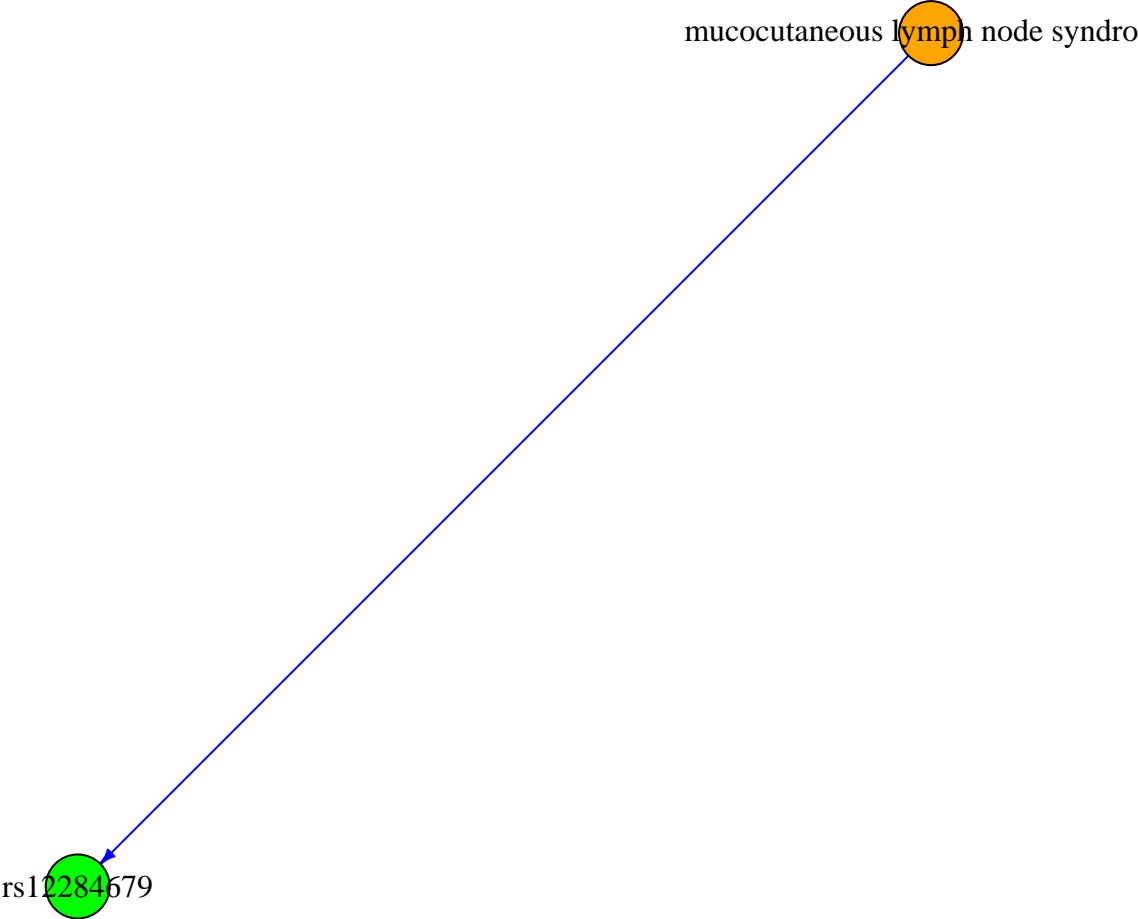



# Variant–Disease Network (response to tetracyclic antidepressant)

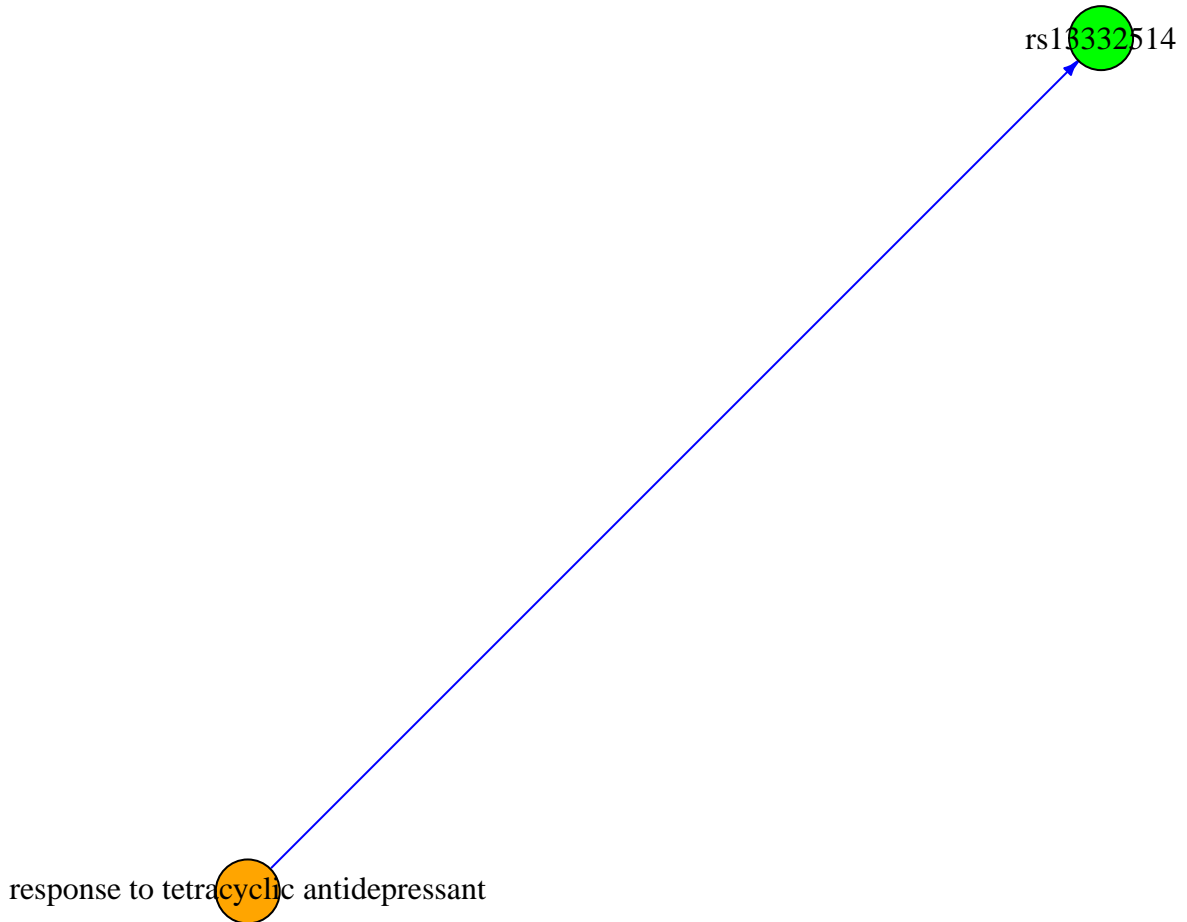

**Variant–Disease Network (response to tricyclic antidepressant)**

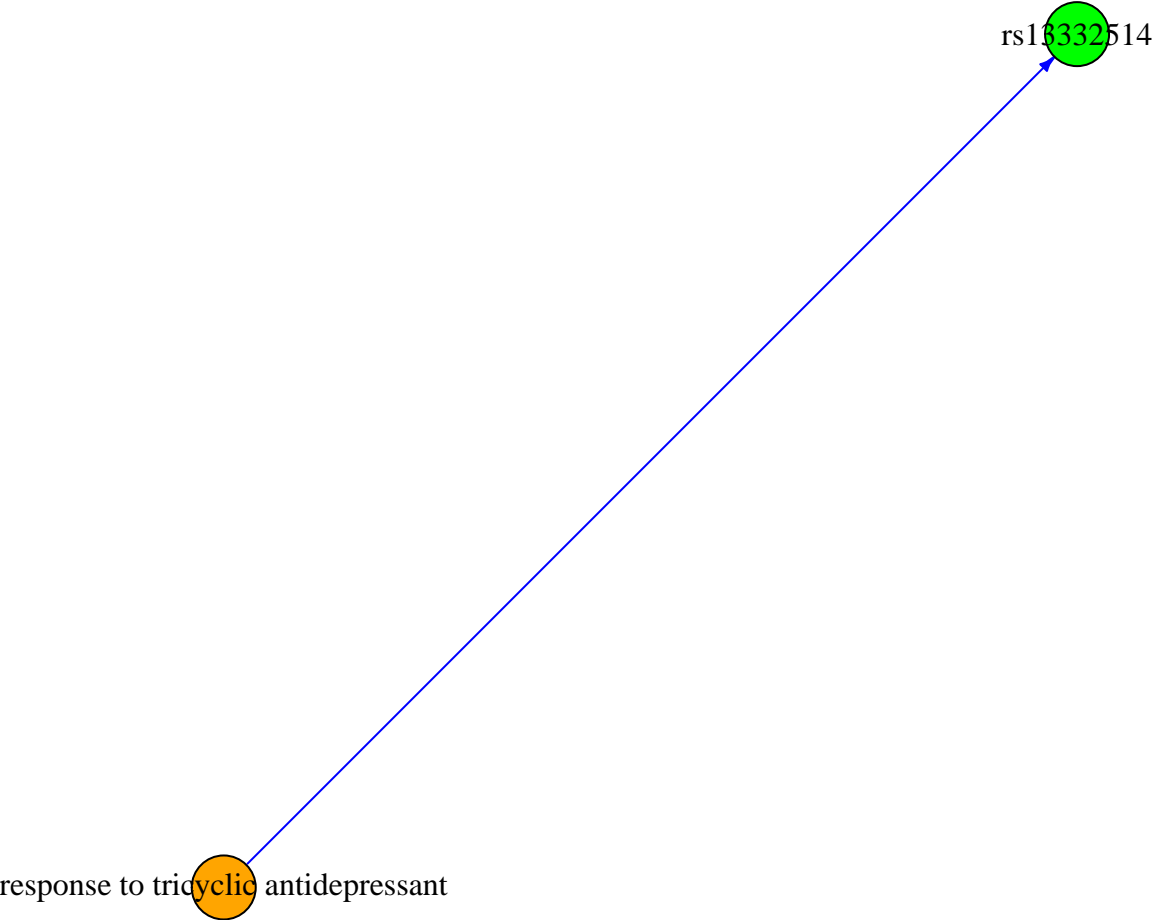

## Variant–Disease Network (RR interval)

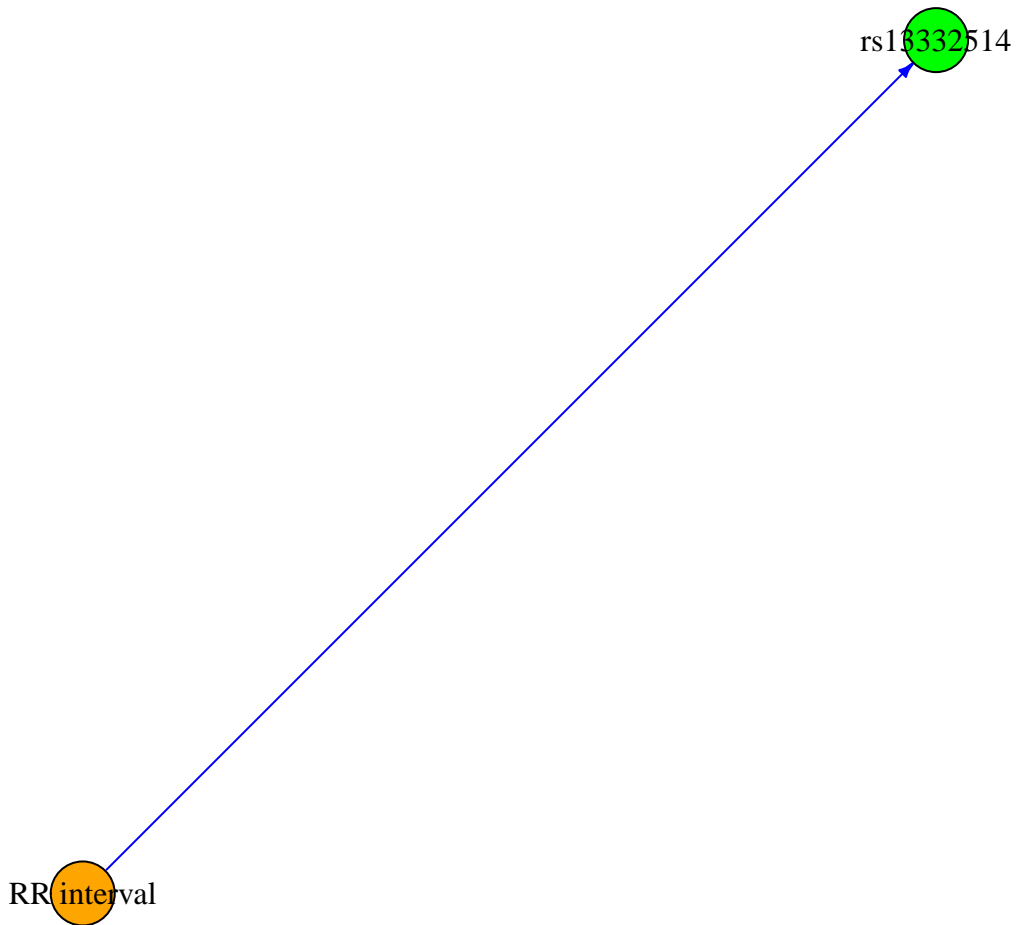

## Variant-Disease Network (carrier status)

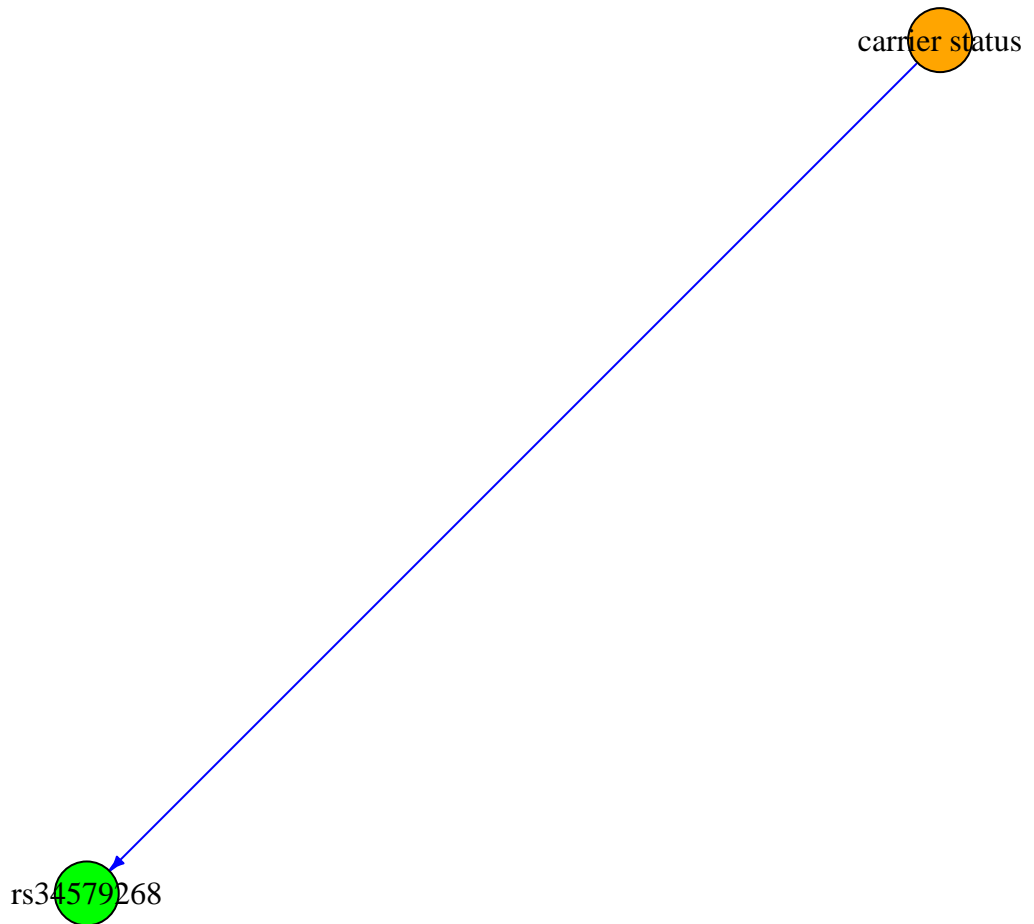

## Variant–Disease Network (event free survival time)

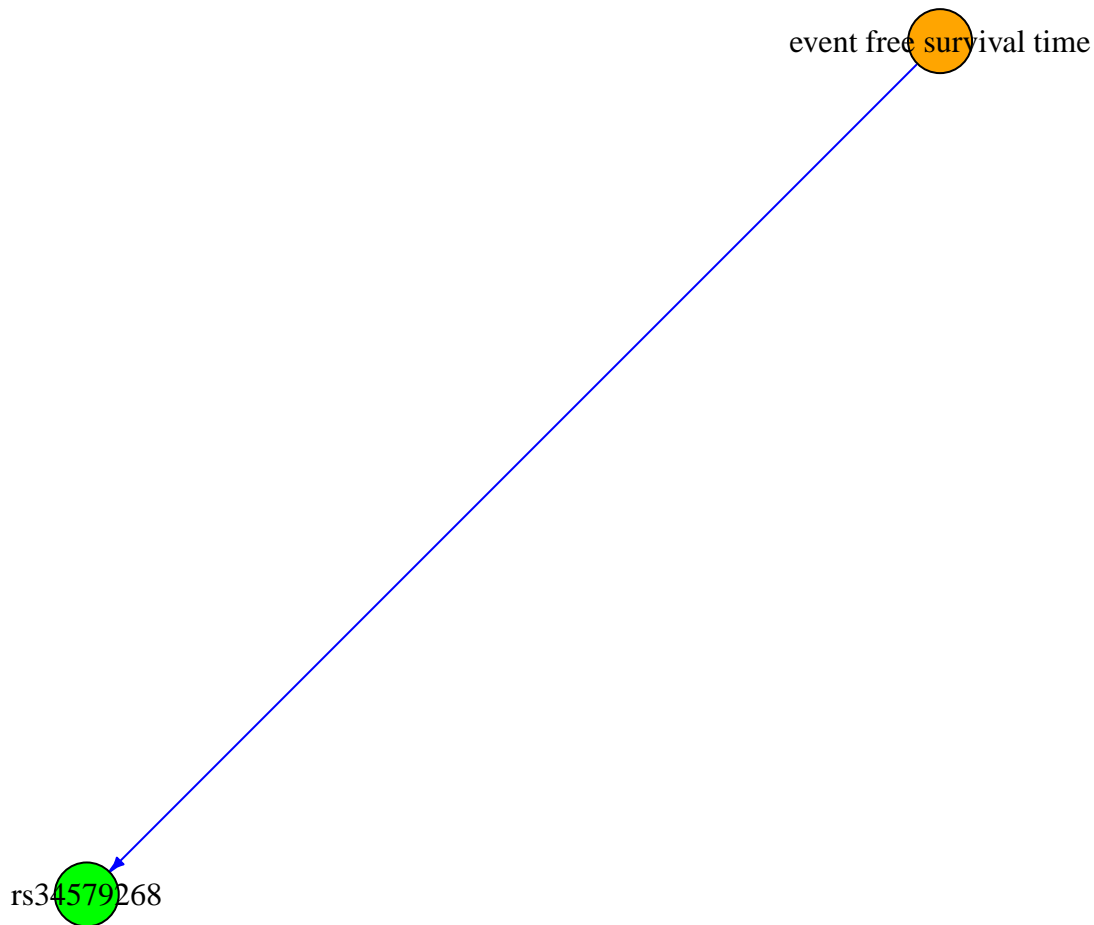

## Variant–Disease Network (body weight)

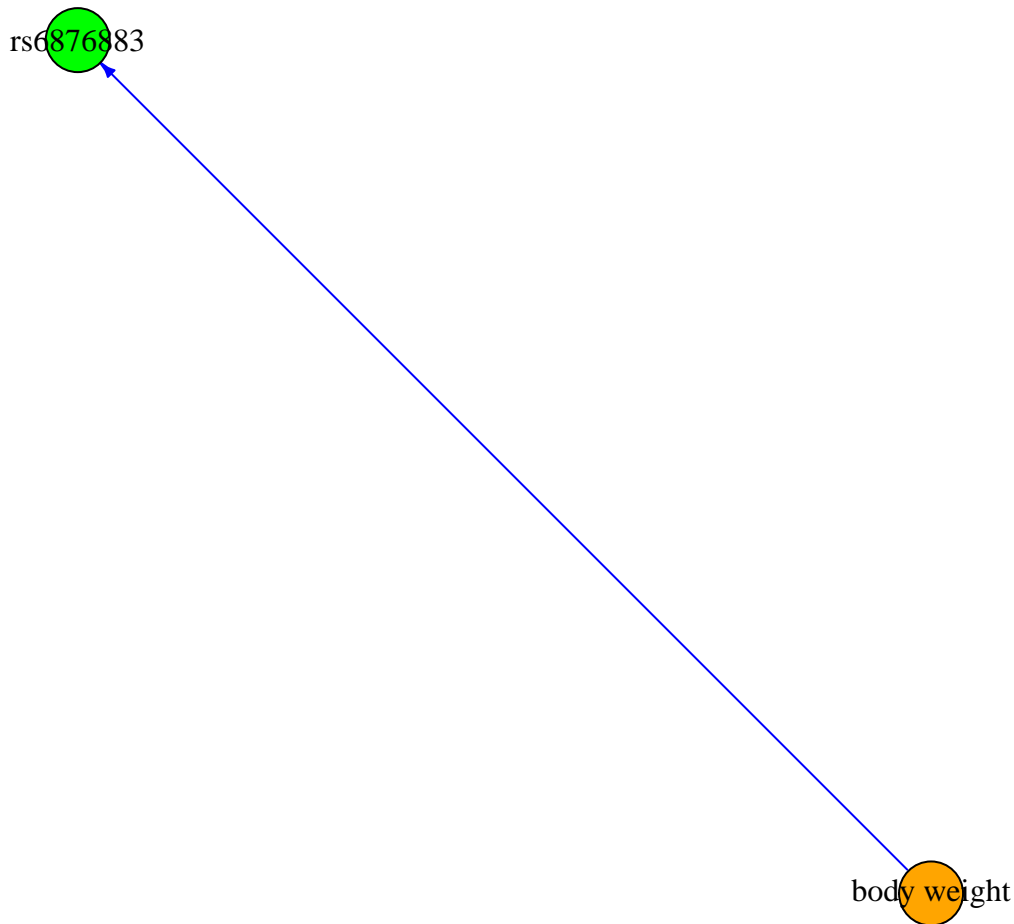

## Variant–Disease Network (PCSK9 protein measurement)

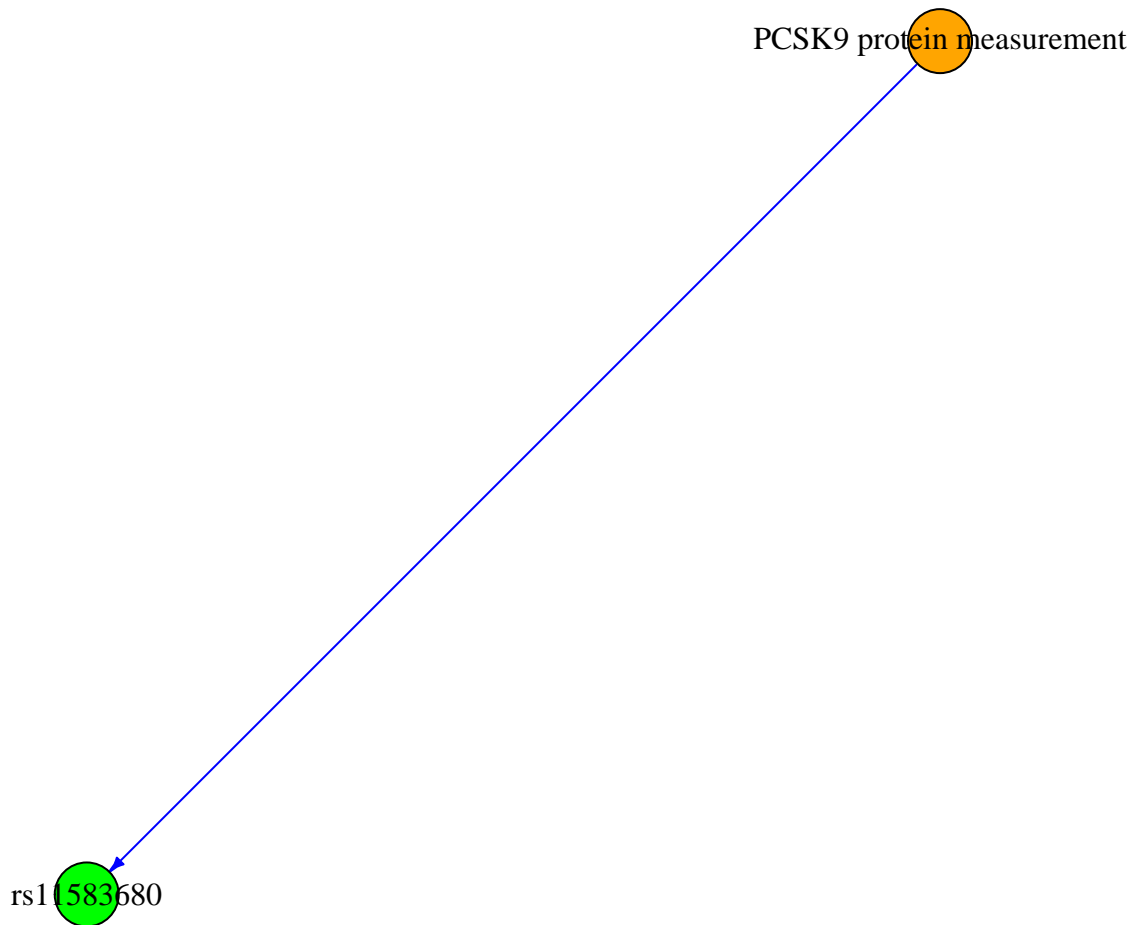

## Variant–Disease Network (beta wave measurement)

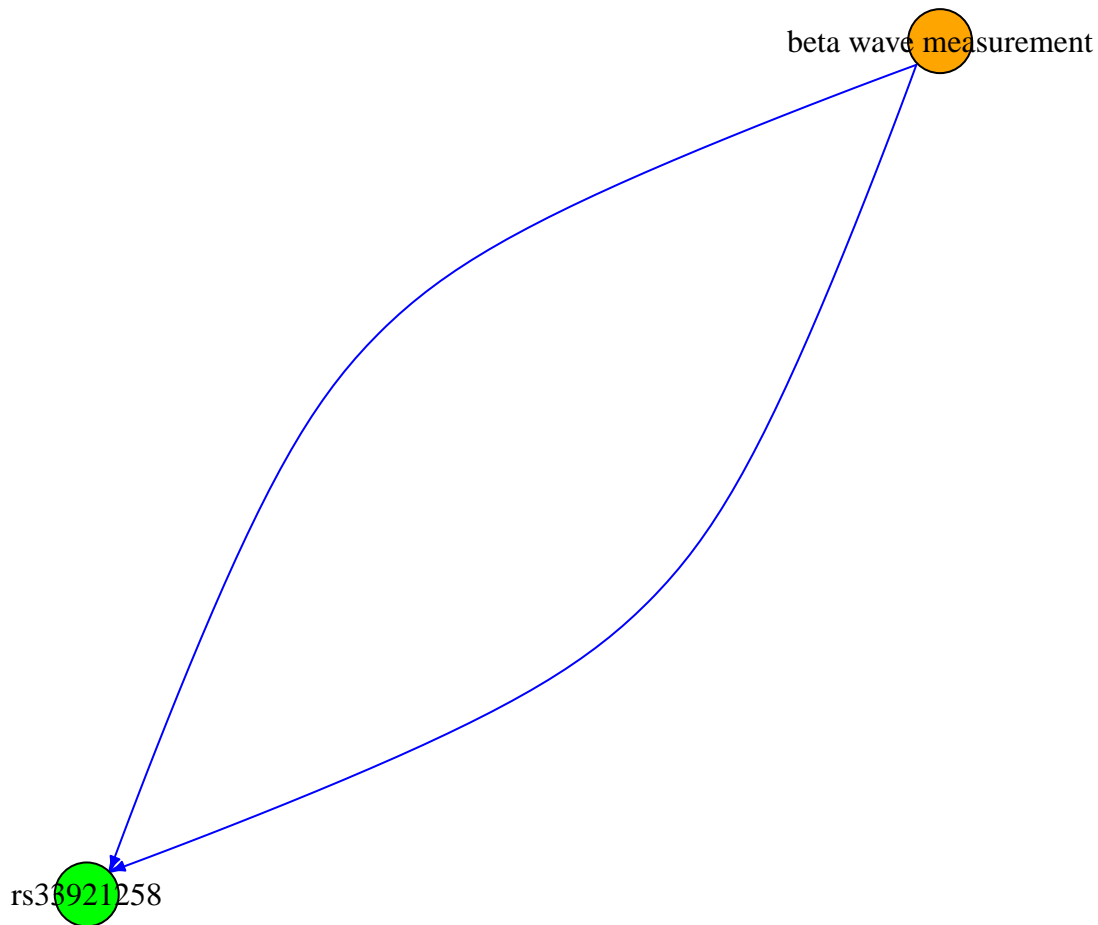



**Variant–Disease Network (electroencephalogram measurement)**

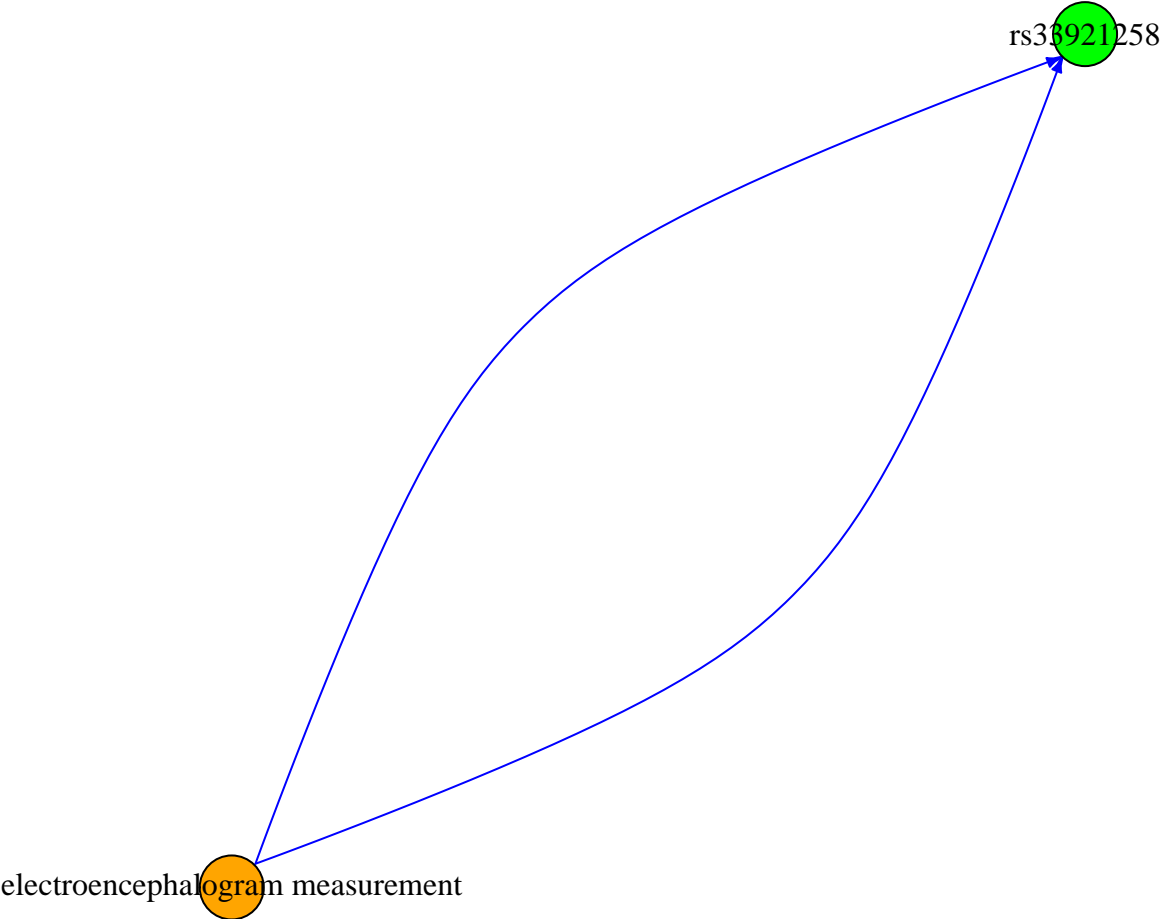

## Variant–Disease Network (acylcarnitine measurement)

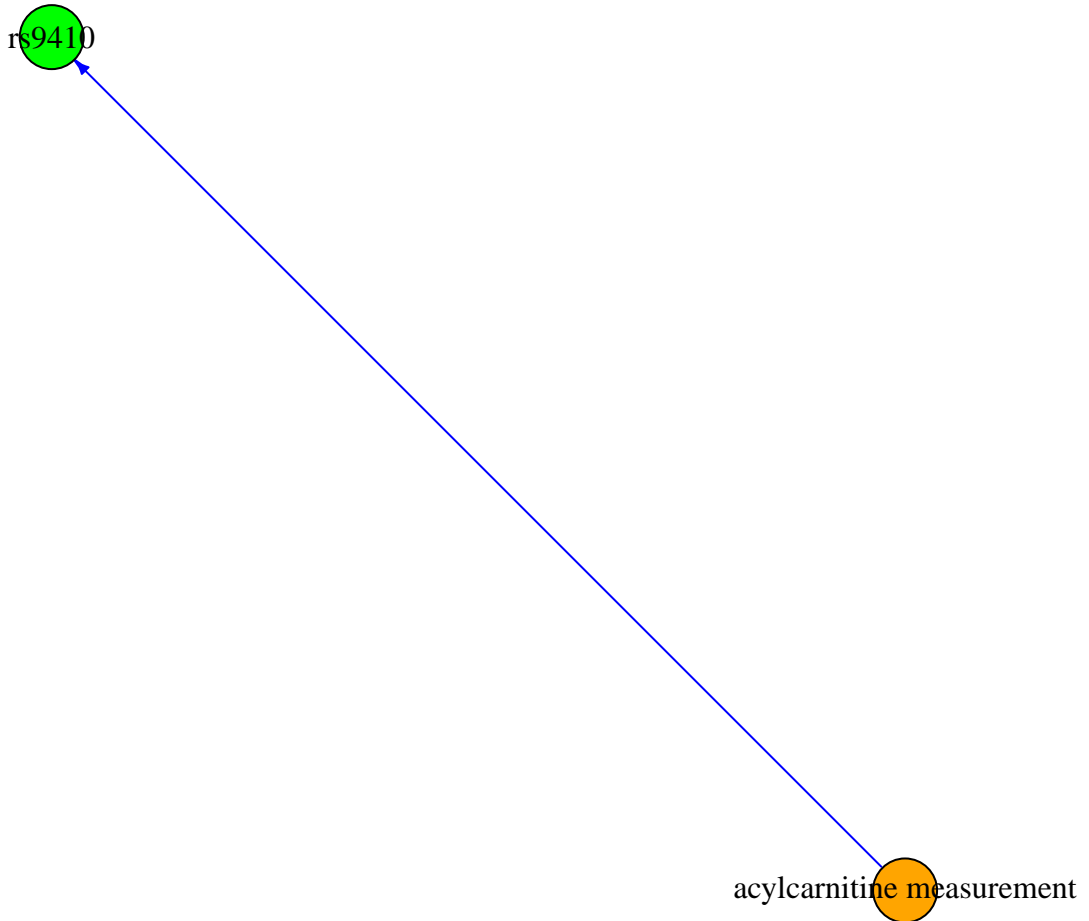

# Variant–Disease Network (peptidyl–prolyl cis–trans isomerase D measurement)

rs94110

peptidyl–prolyl cis–trans isomerase D measurement



**Variant–Disease Network (chronic hepatitis C infection)**

chronic hepatitis C infection

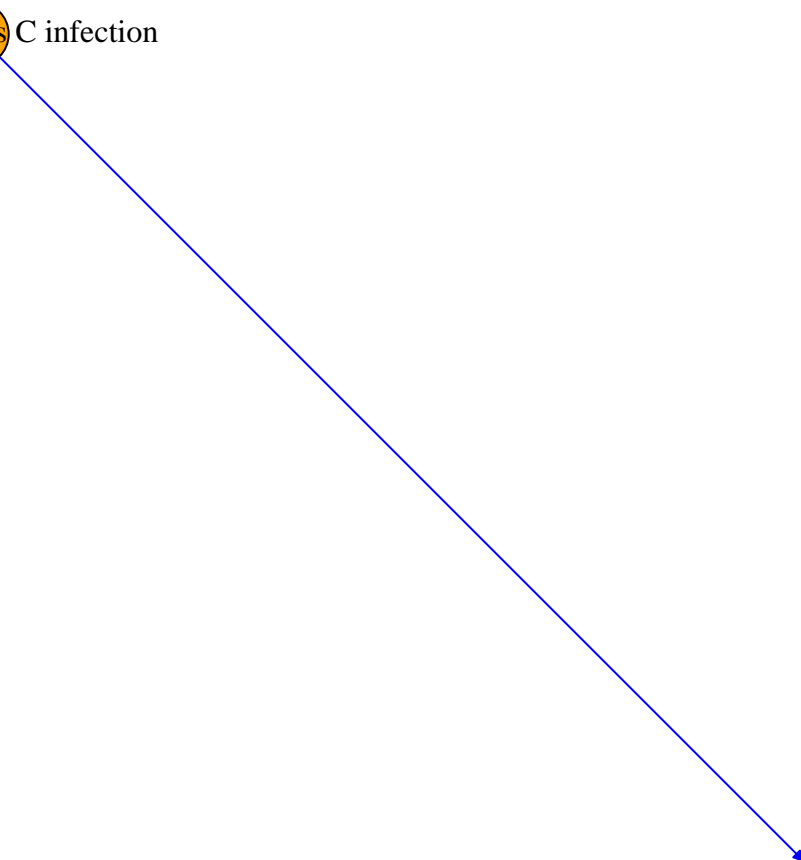

rs721283

## Variant-Disease Network (necrotizing enterocolitis)

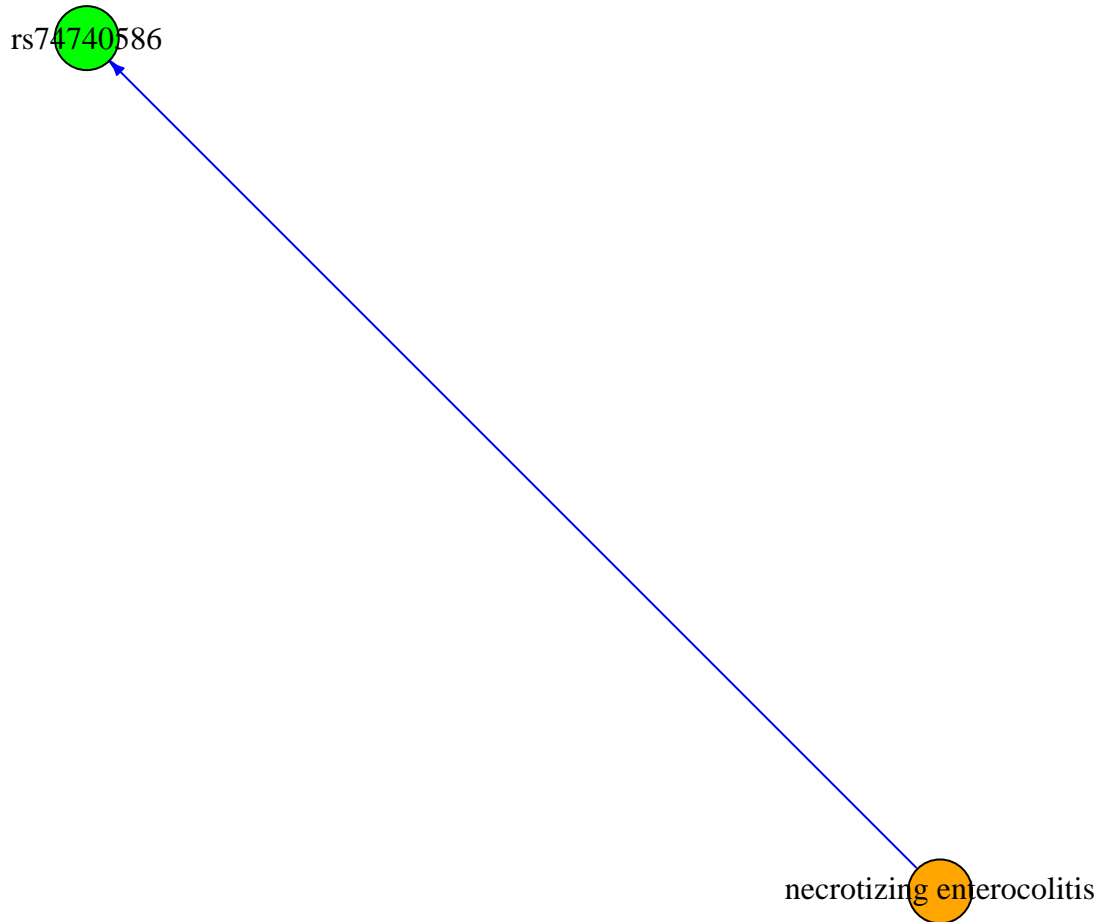

## Variant–Disease Network (premature birth)

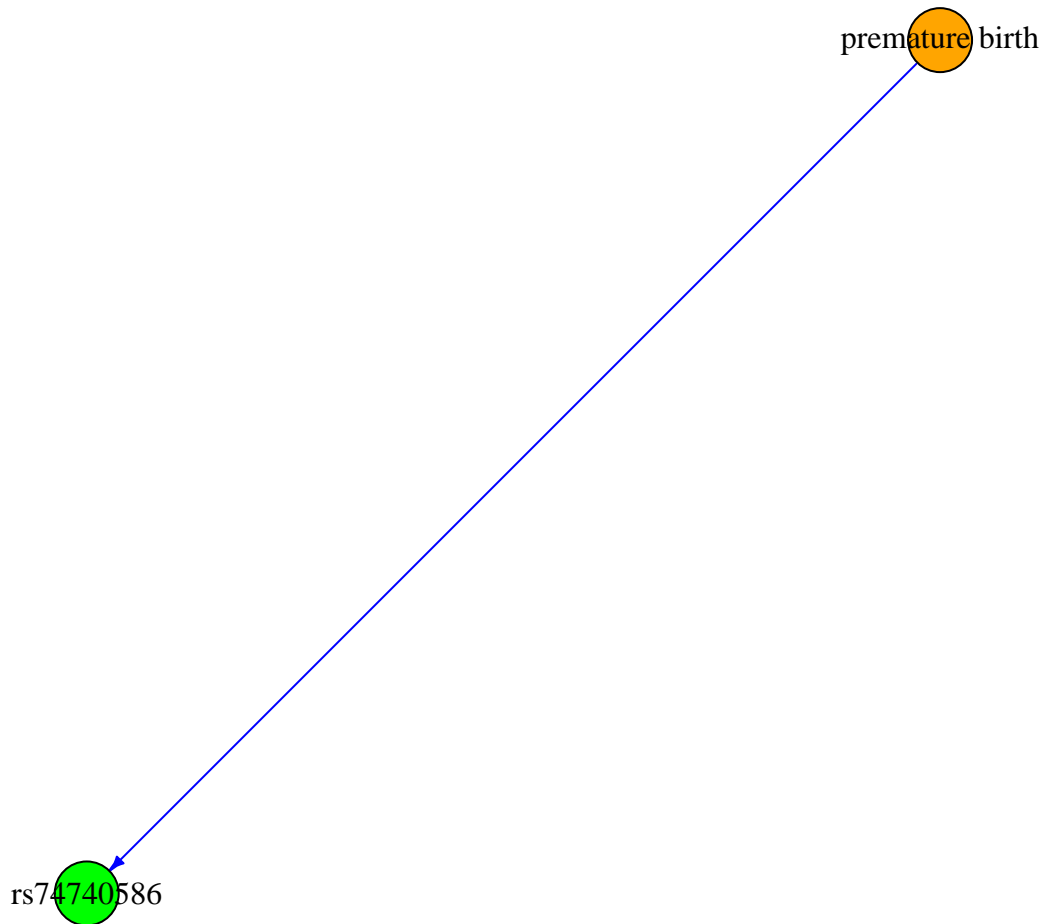

Variant–Disease Network (gut microbiome measurement)

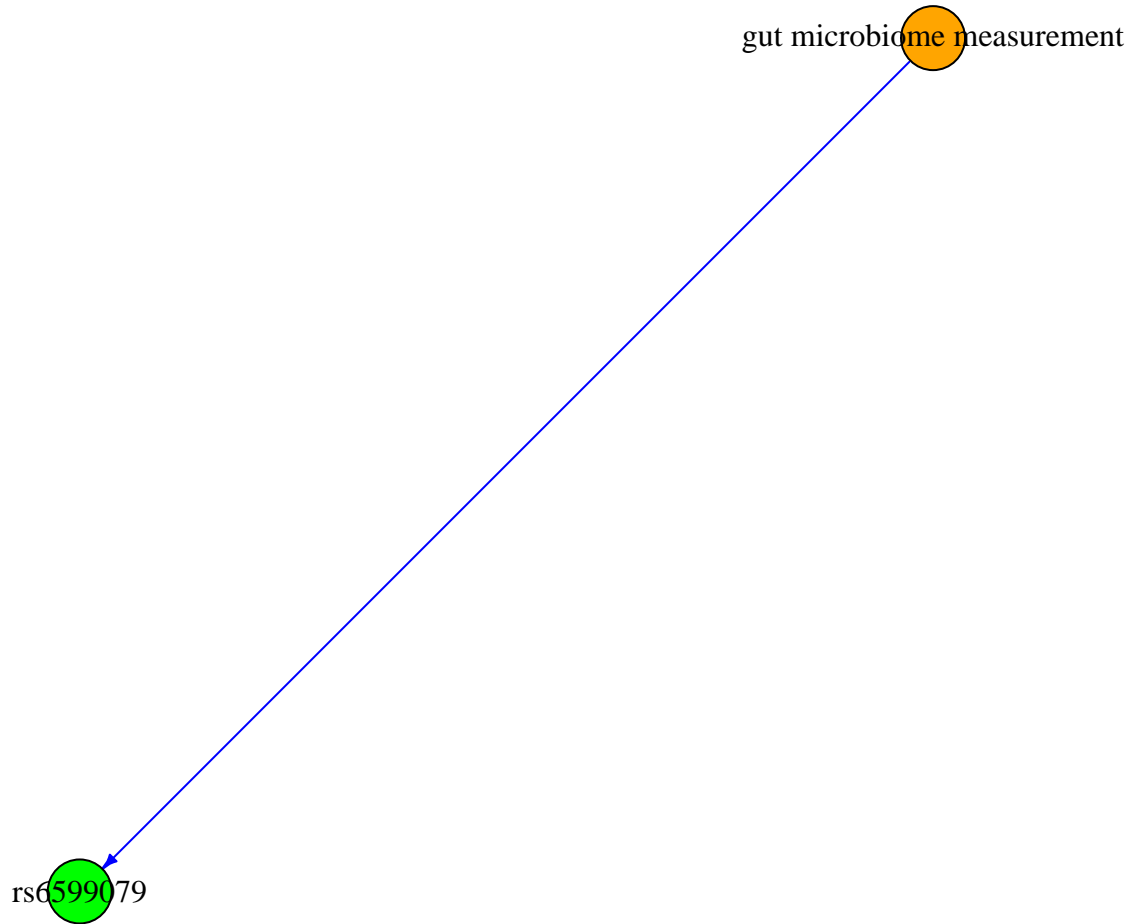

Variant–Disease Network (taxonomic microbiome measurement)

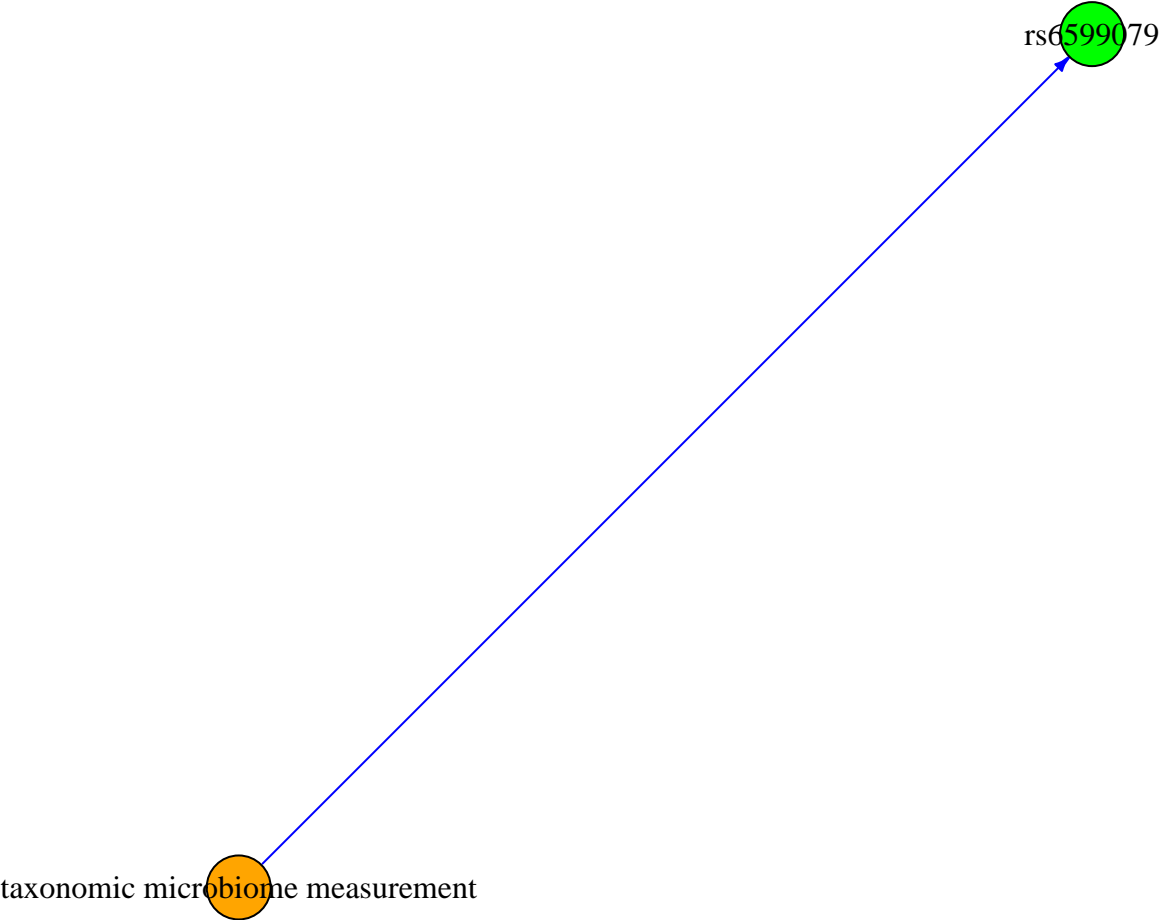



**Variant–Disease Network (fibroblast growth factor basic measurement)**

rs2004649

fibroblast growth factor basic measurement



**Variant–Disease Network (cerebrospinal fluid biomarker measurement)**

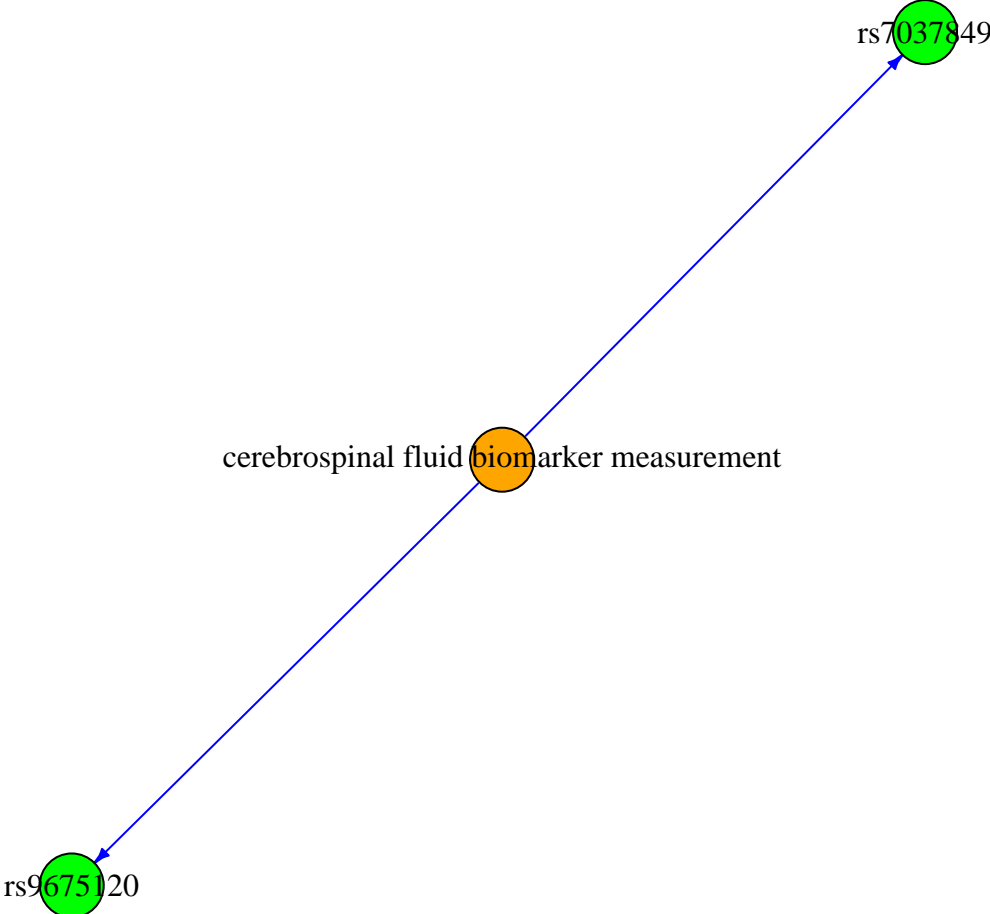

network (WAP, Kazal, immunoglobulin, Kunitz and NTR domain-containing p

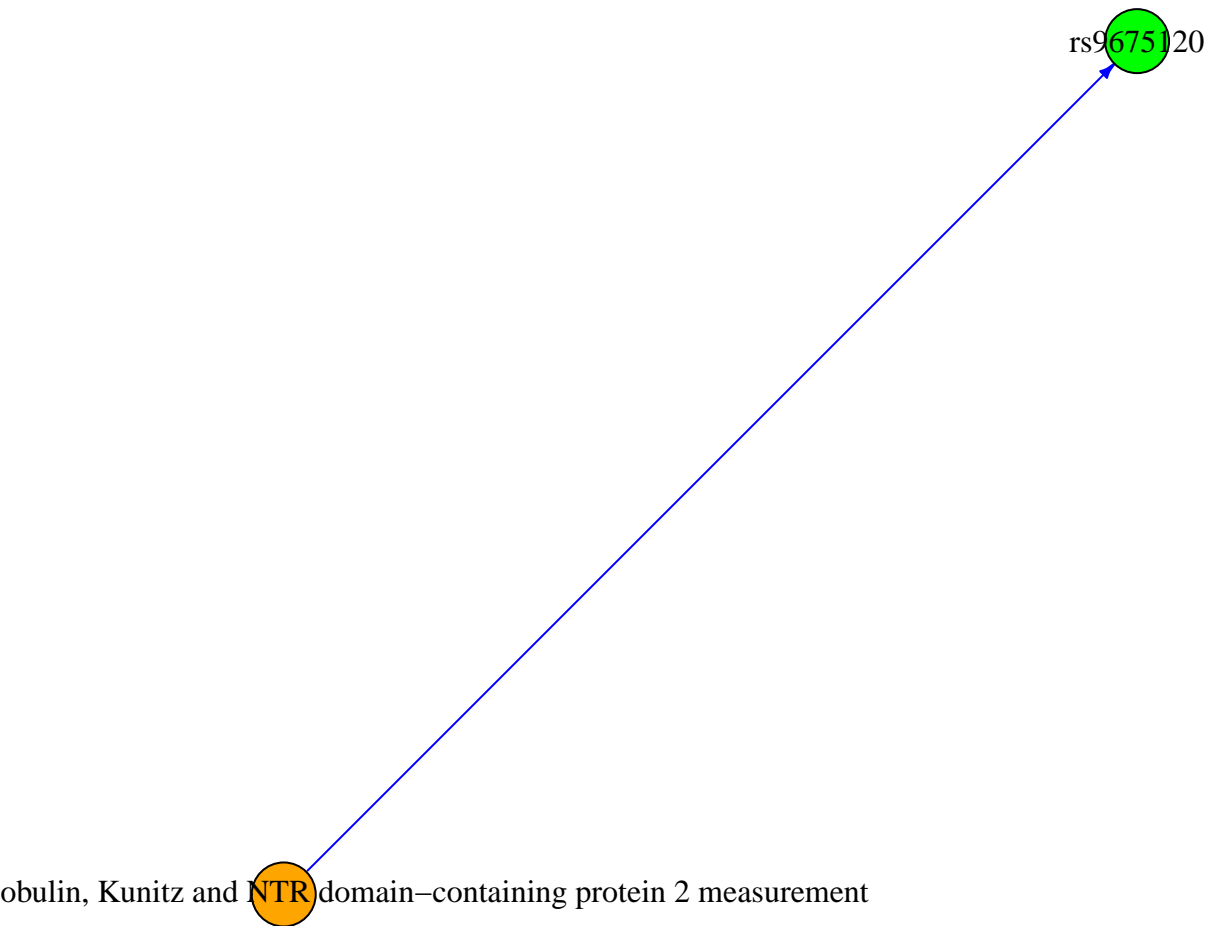

# Variant–Disease Network (beta–nerve growth factor measurement)

beta–nerve growth factor measurement

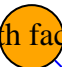

rs3749348

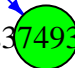

## Variant–Disease Network (alcohol consumption measurement)

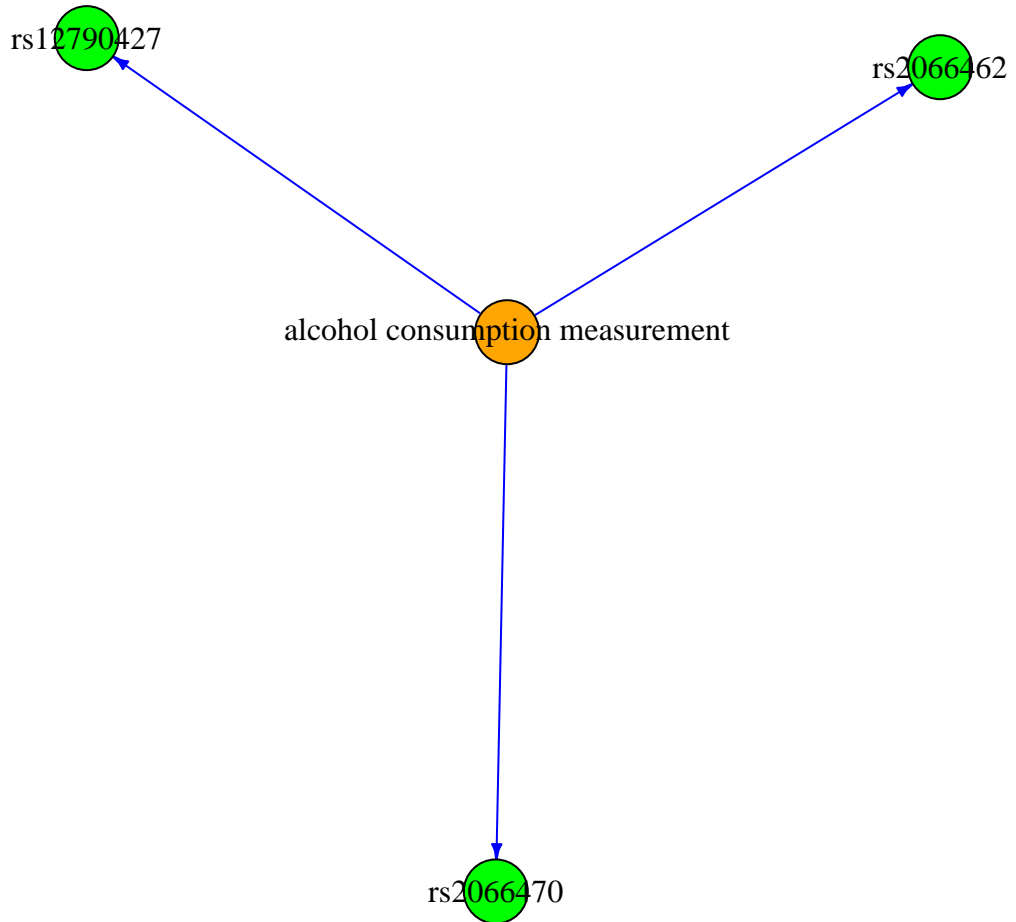

## Variant–Disease Network (alcohol drinking)

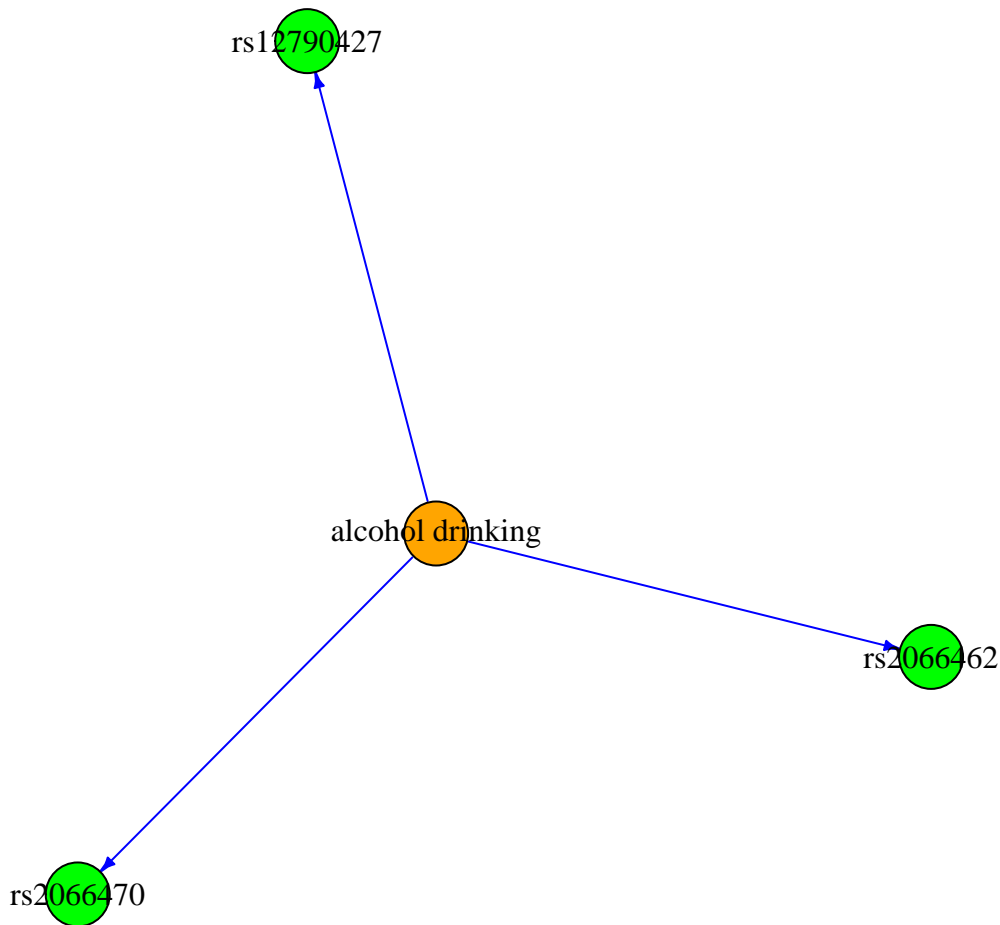

## Variant-Disease Network (response to drug)

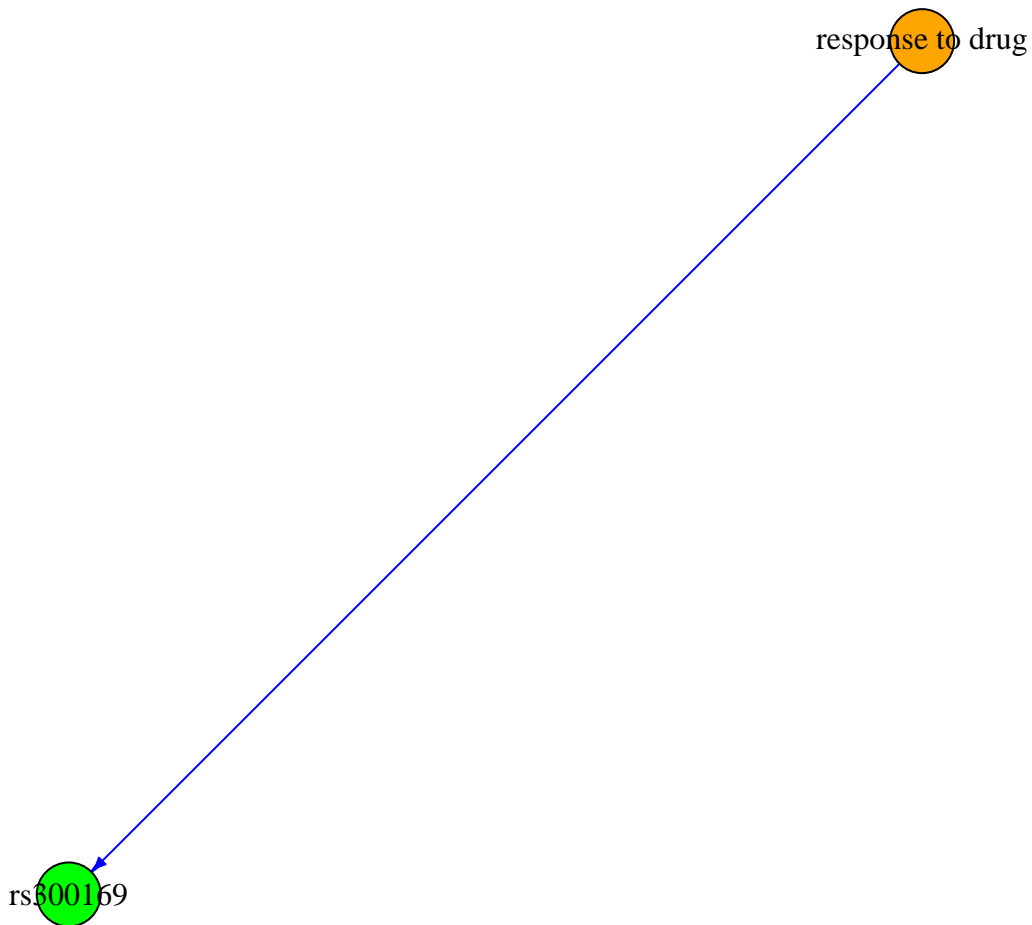

## Variant–Disease Network (alopecia areata)

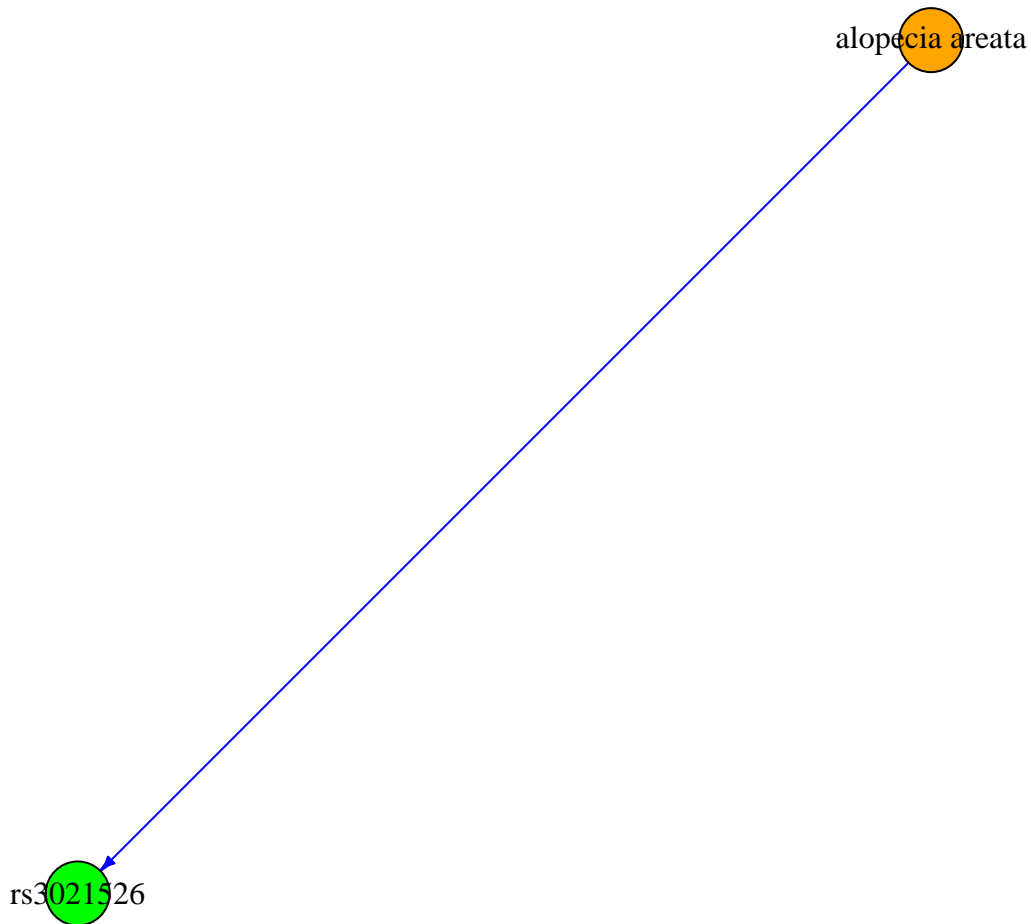



## Variant–Disease Network (oral cleft)

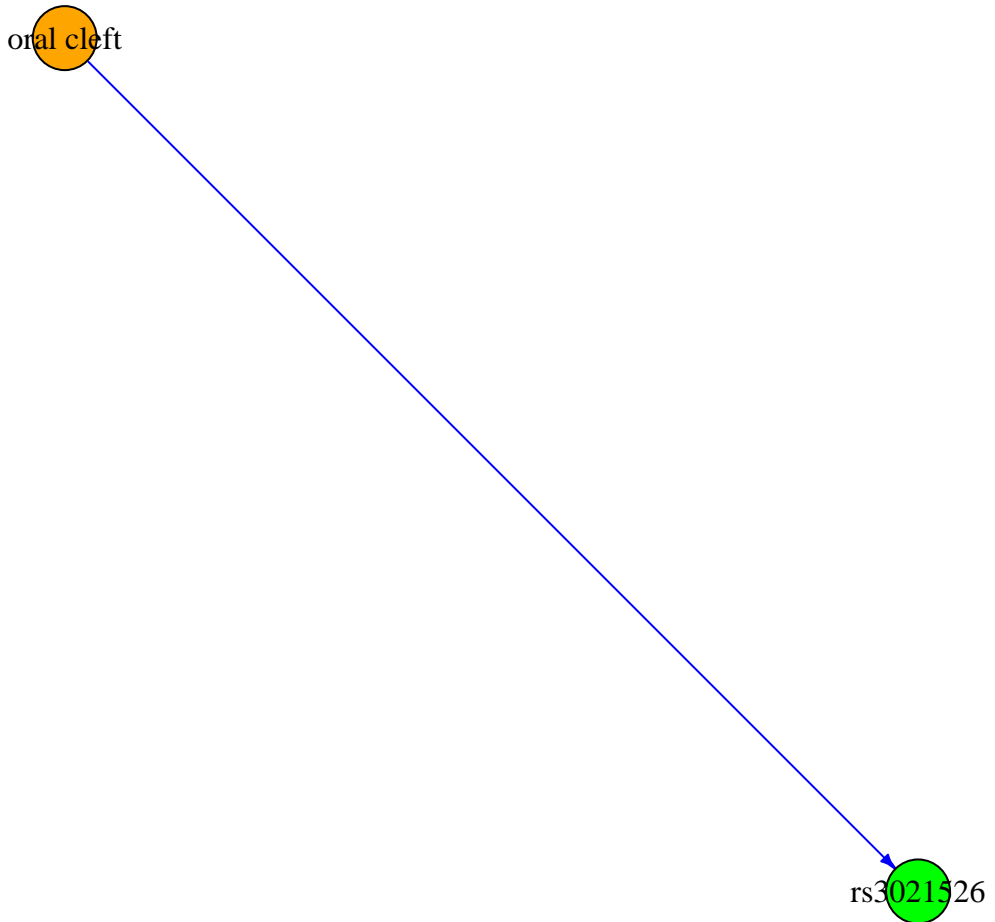

## Variant–Disease Network (thyroxine measurement)

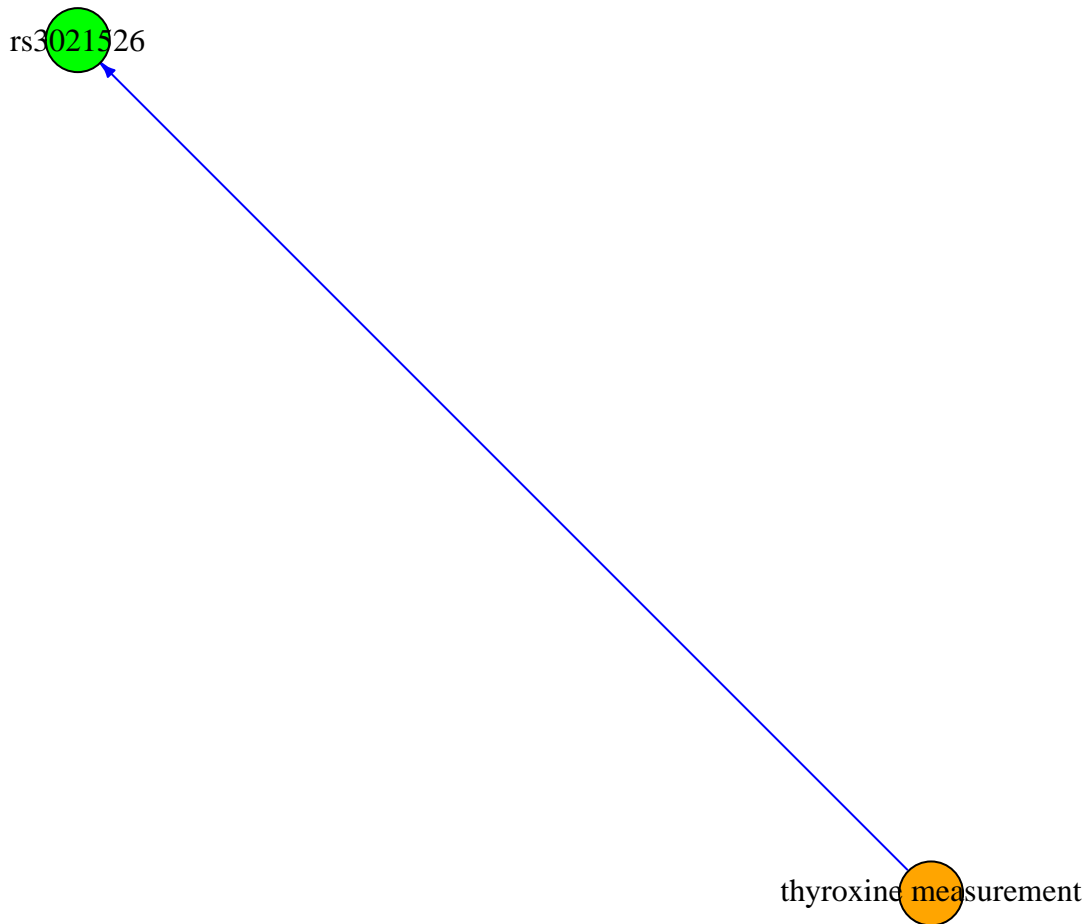

## Variant–Disease Network (Abnormality of refraction)

Abnormality of refraction

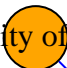

rs1254319

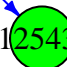

# Variant–Disease Network (estrone measurement)

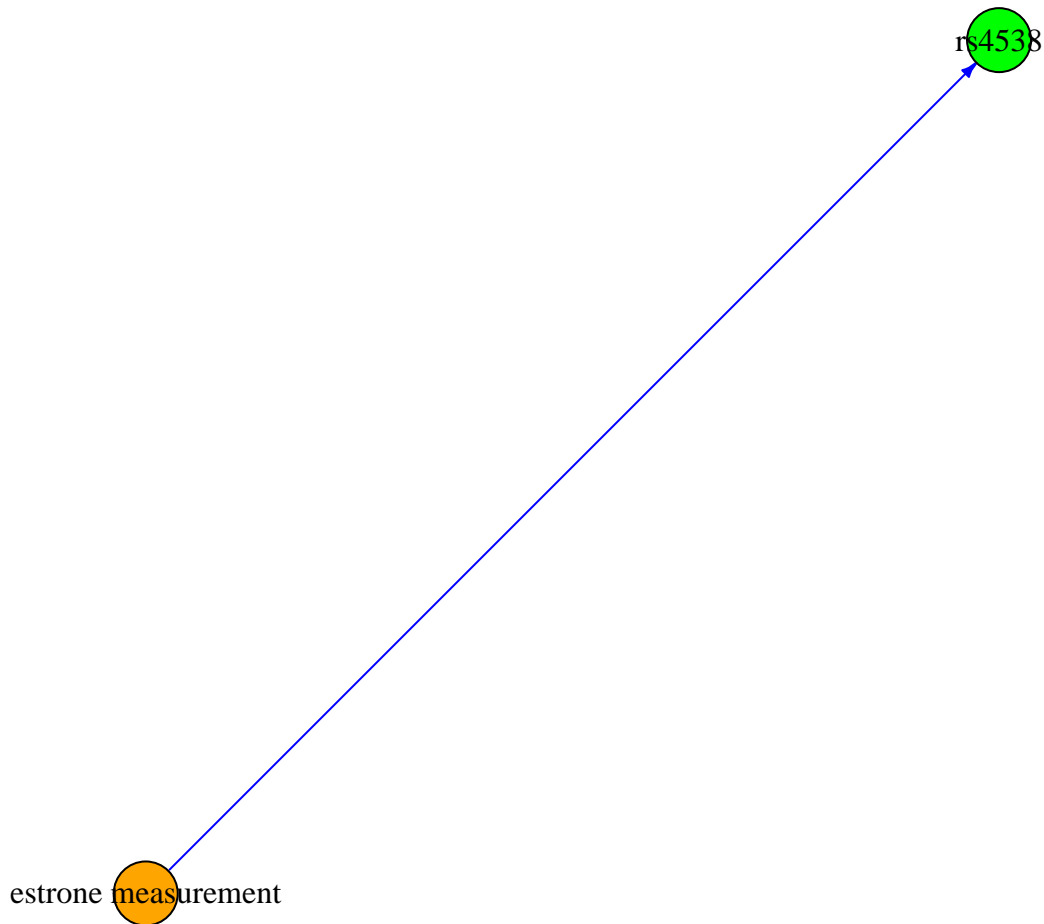

## Variant-Disease Network (eye color)

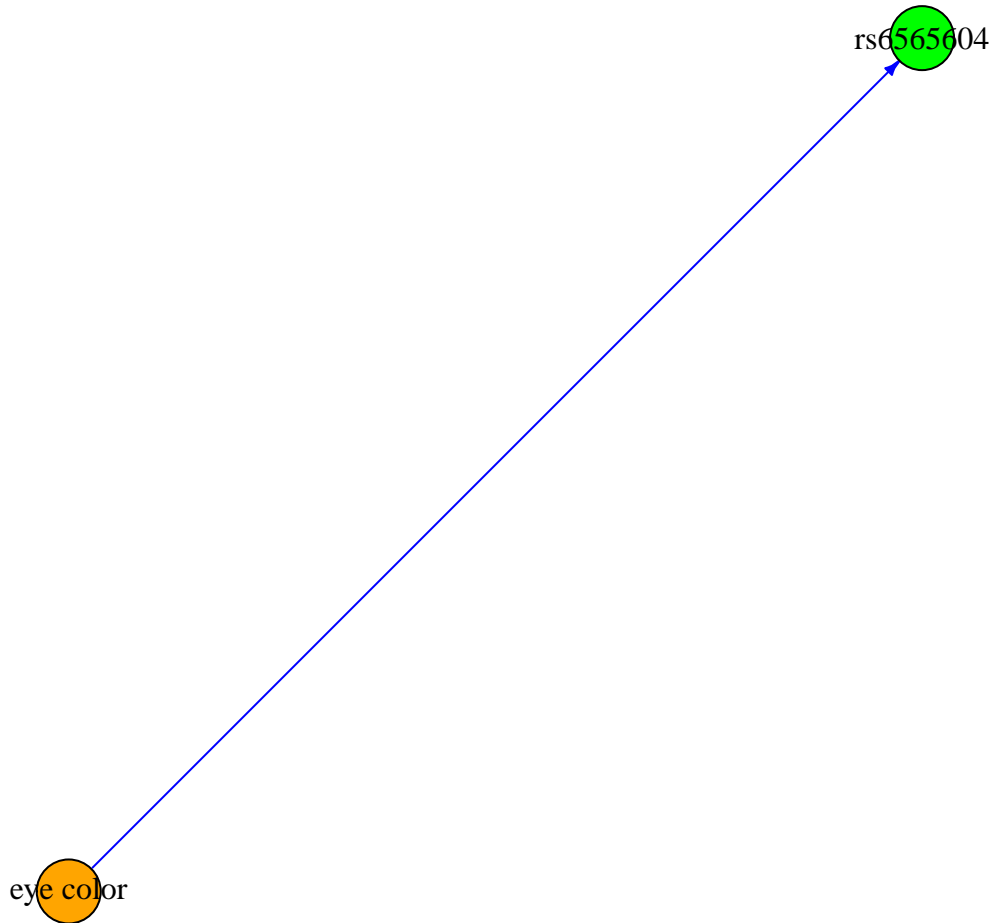

## Variant–Disease Network (bilirubin measurement)

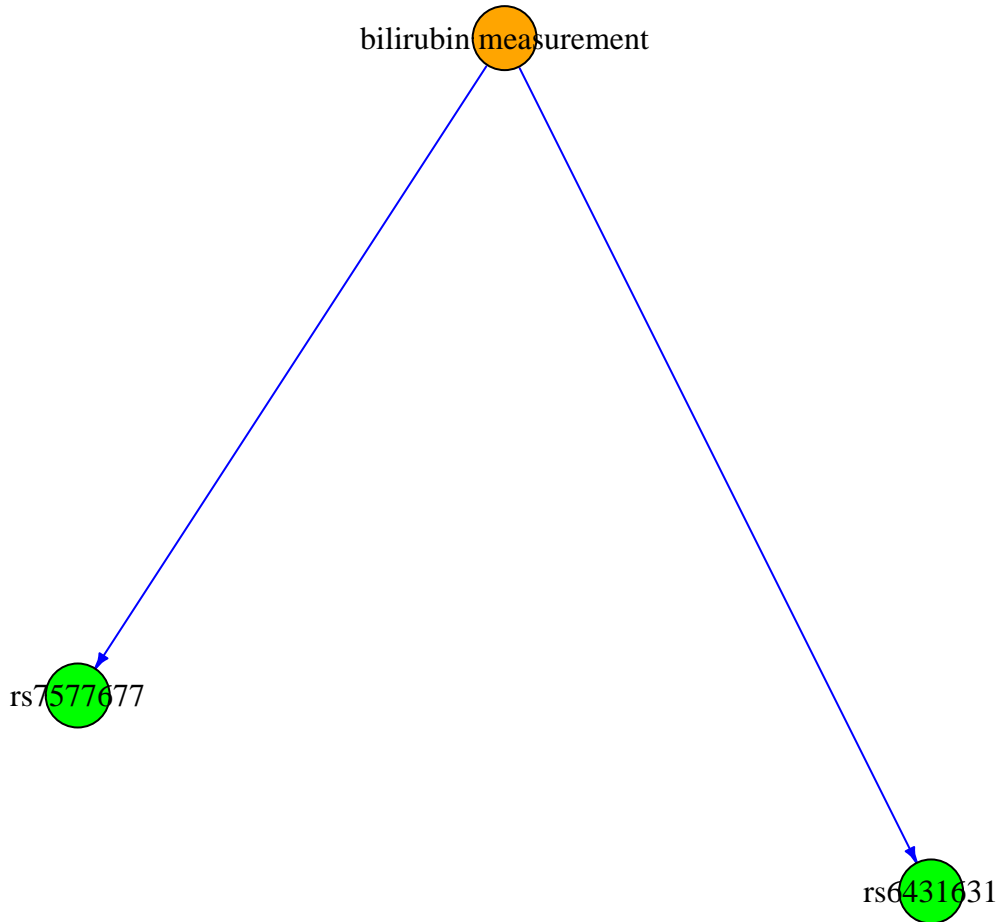

## Variant–Disease Network (sensory perception of smell)

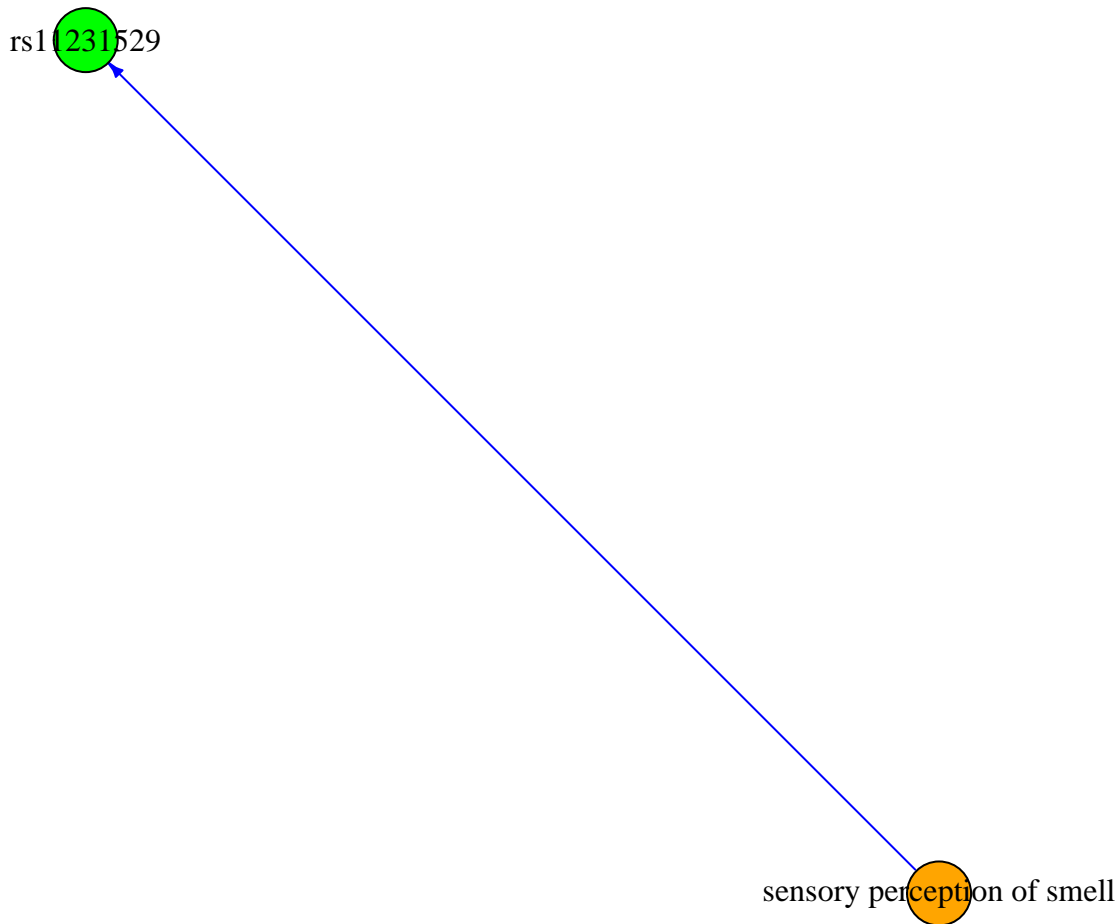

## Variant–Disease Network (lipoprotein A measurement)

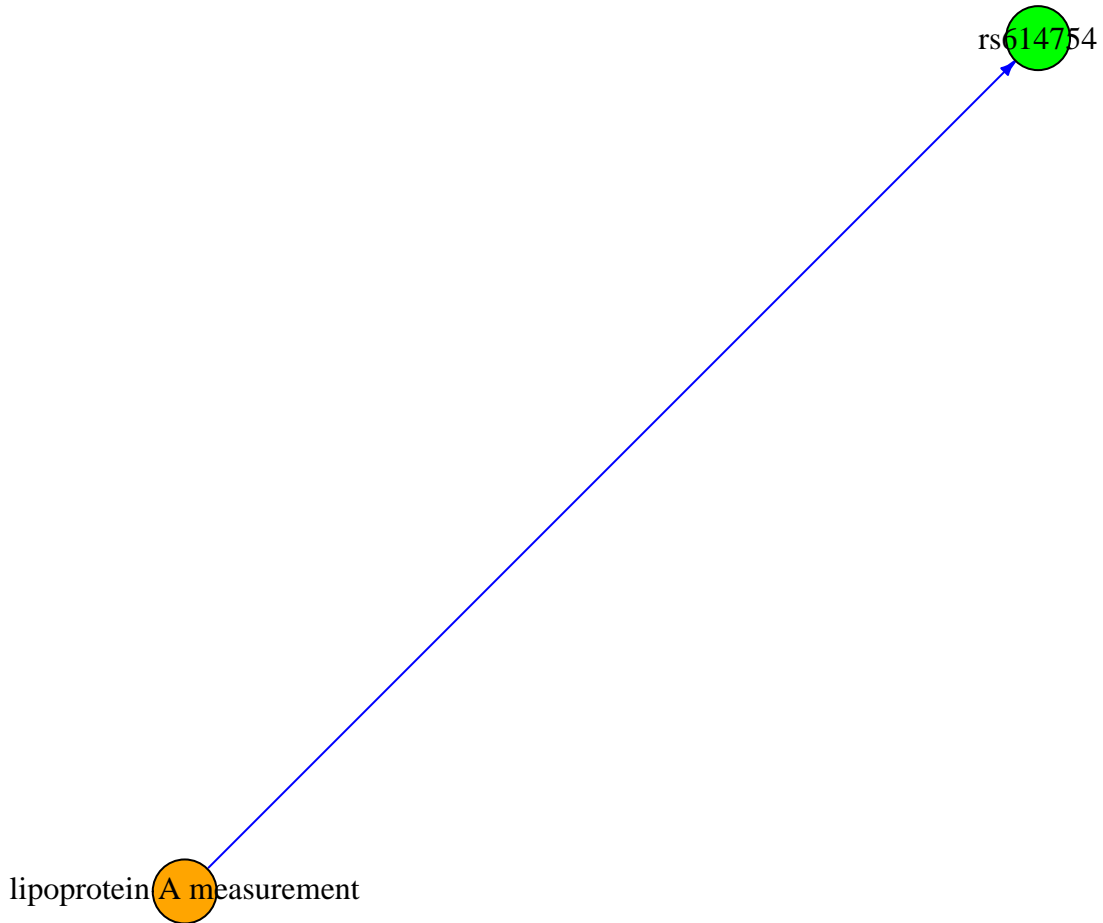



## Variant–Disease Network (response to alcohol)

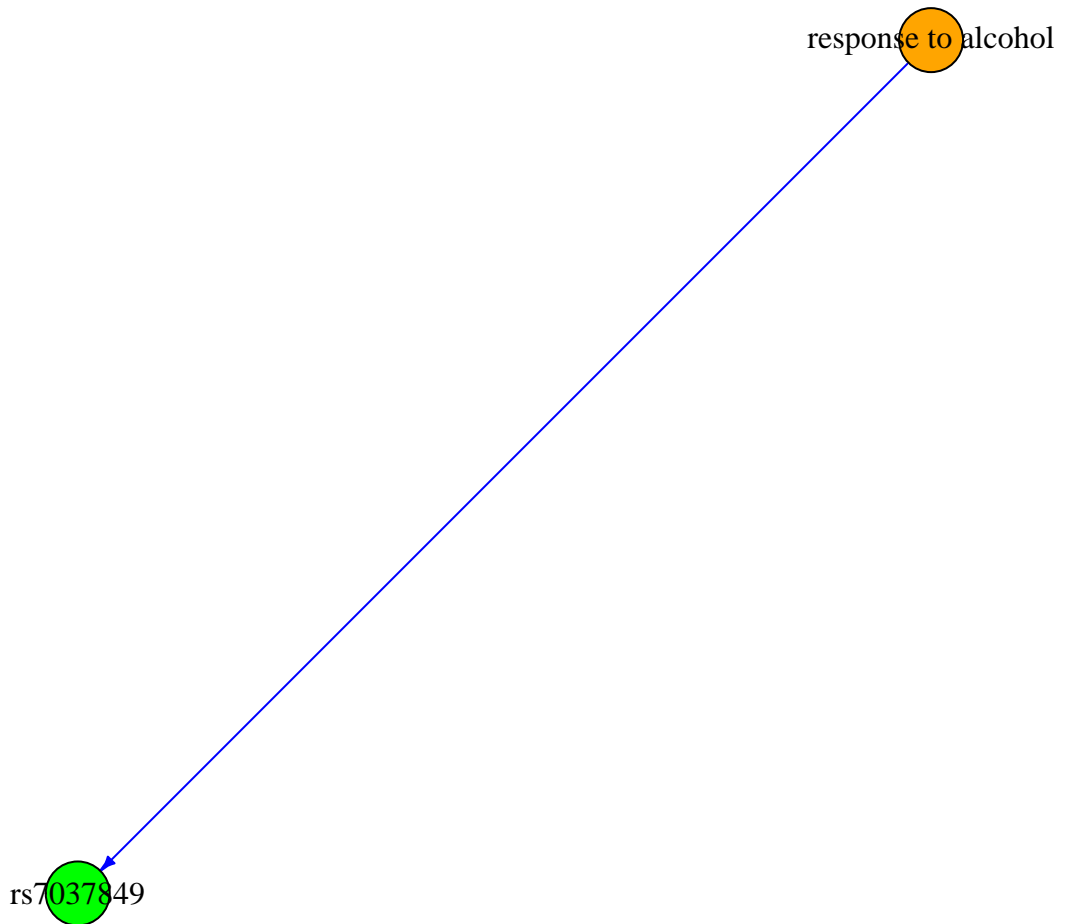

# Variant–Disease Network (synophrys measurement)

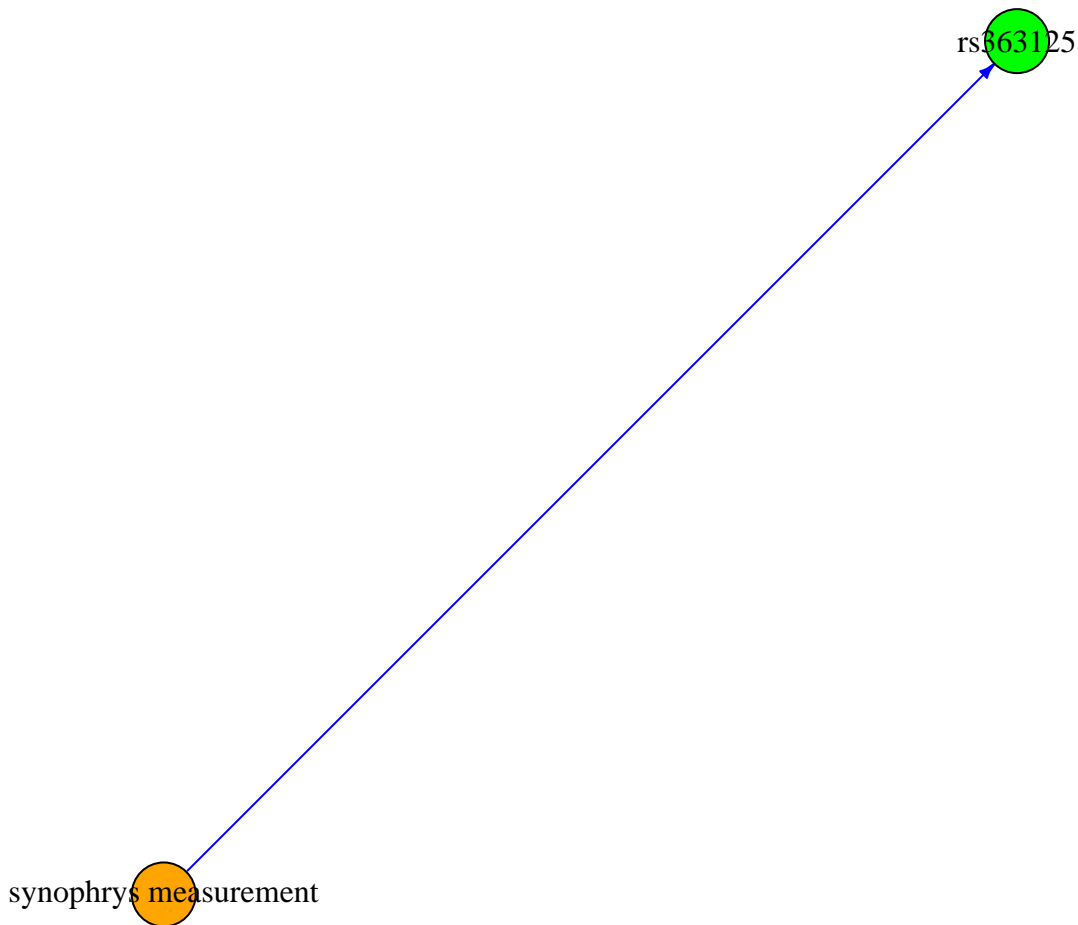

**Variant–Disease Network (response to antineoplastic agent)**

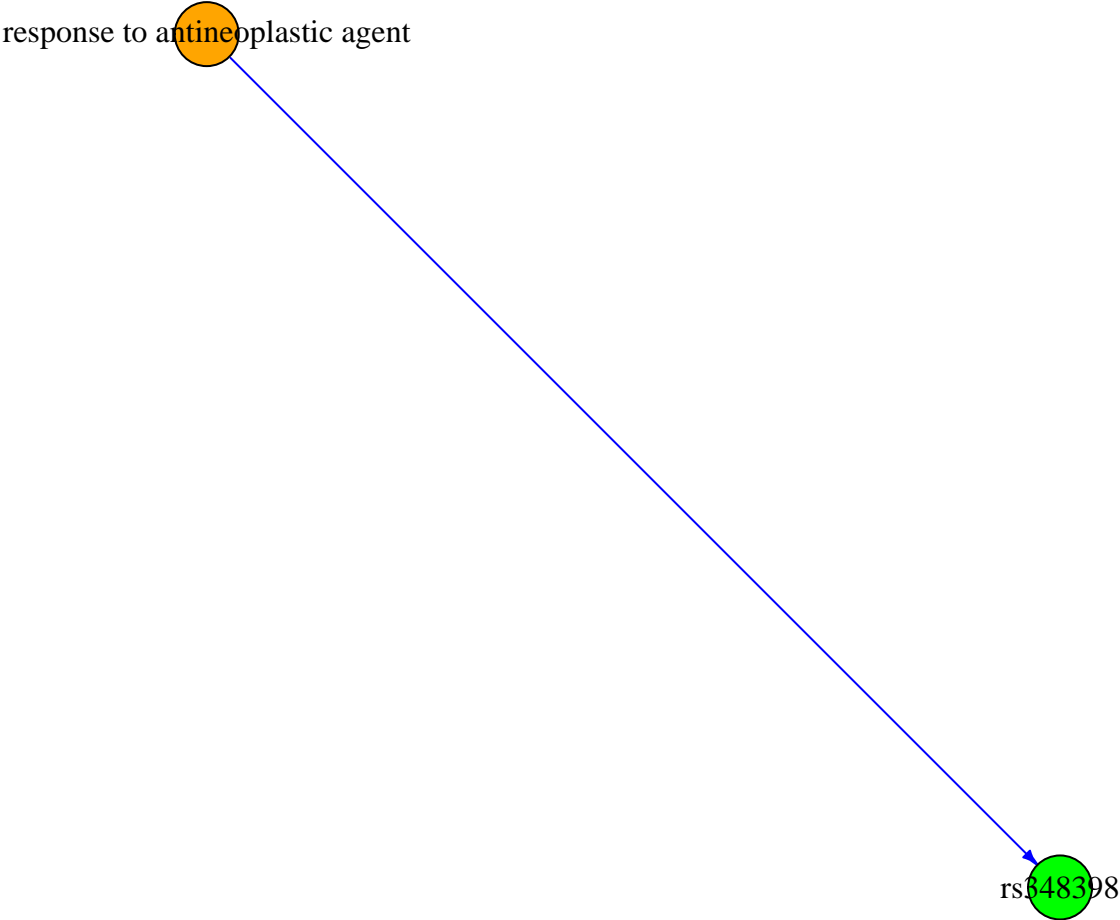

**Variant–Disease Network (response to cyclophosphamide)**

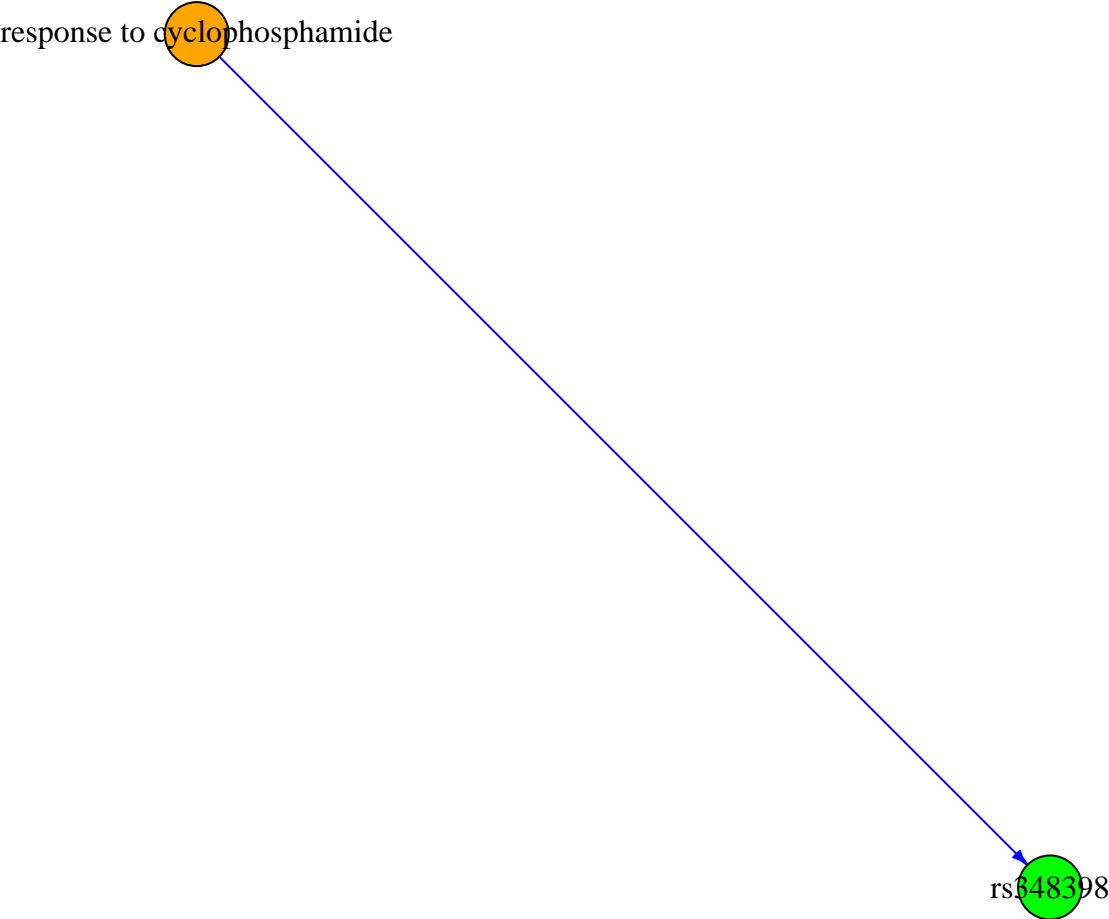

Variant–Disease Network (chin morphology measurement)

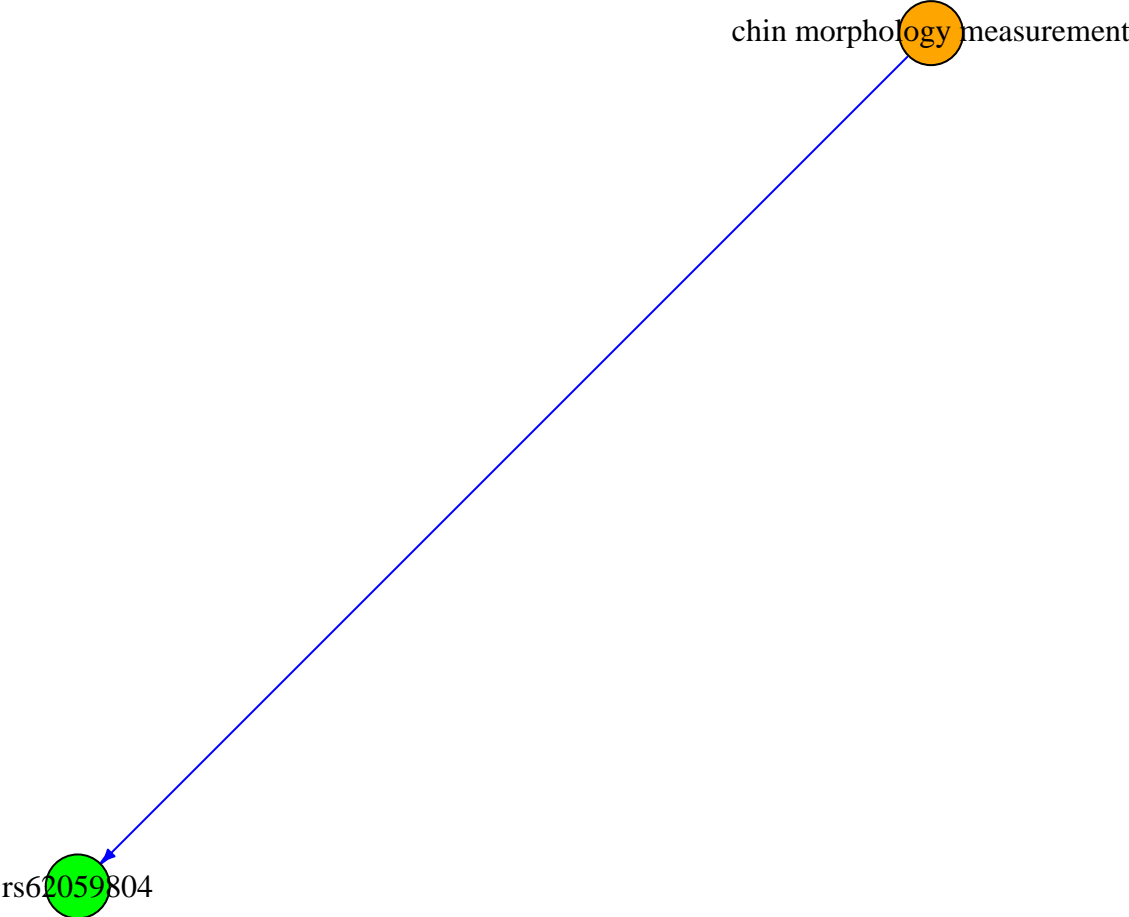

**Variant–Disease Network (sex hormone–binding globulin measurement)**

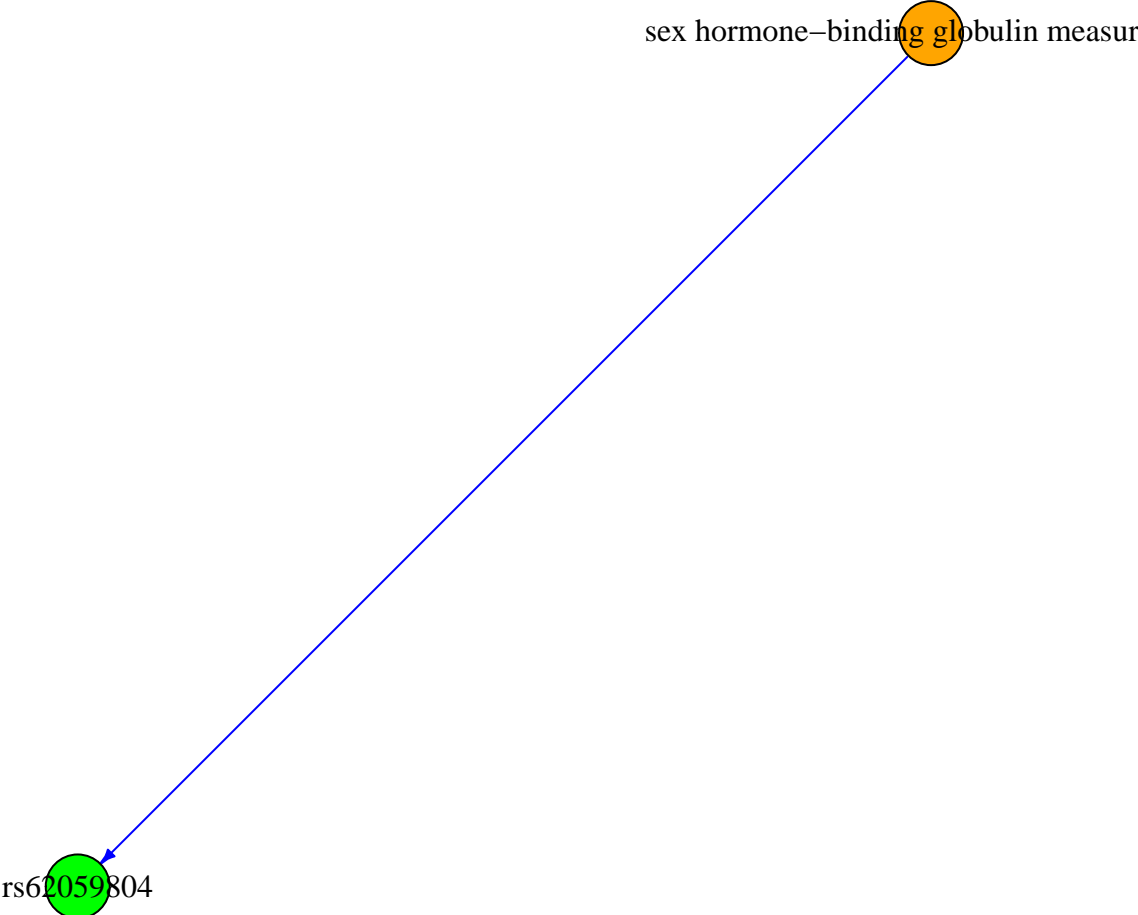

**Variant–Disease Network (C–C motif chemokine 21 measurement)**

C–C motif chemokine 21 measurement

rs2270801

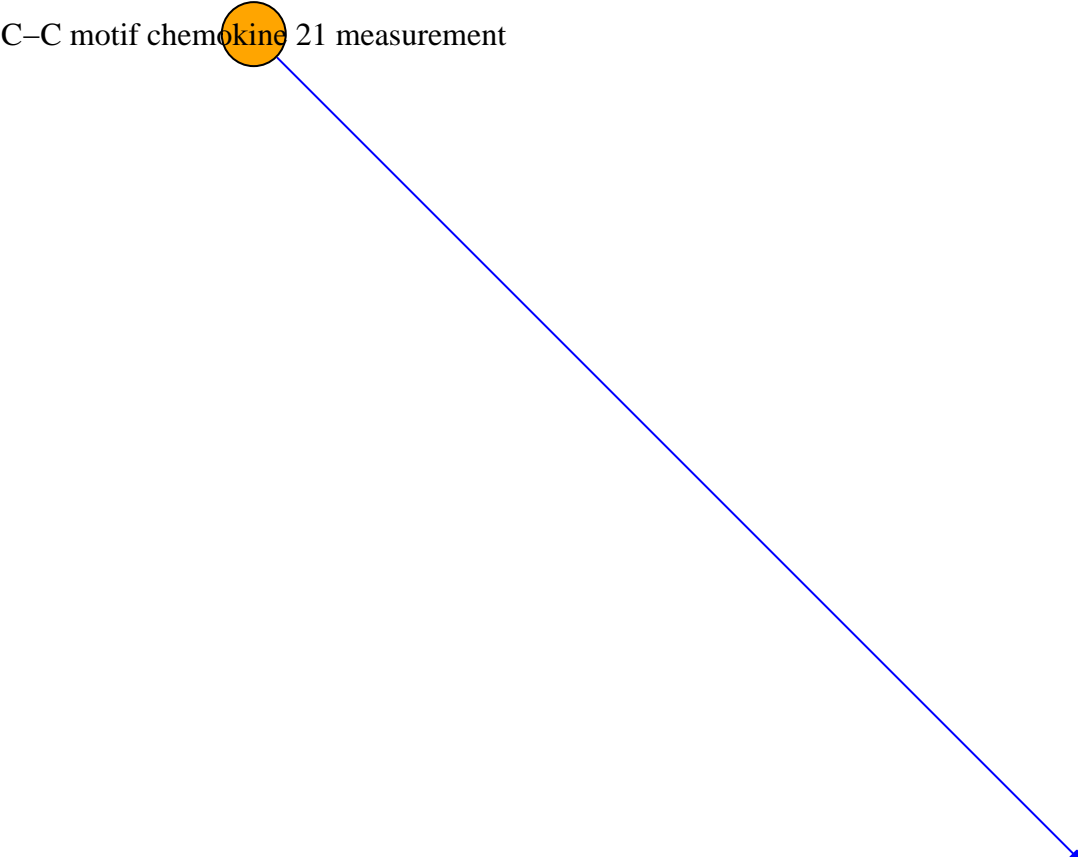

# Variant–Disease Network (fetal genotype effect measurement)

fetal genotype effect measurement

rs2270801





# Variant-Disease Network (cancer biomarker measurement)

rs3097773

cancer biomarker measurement

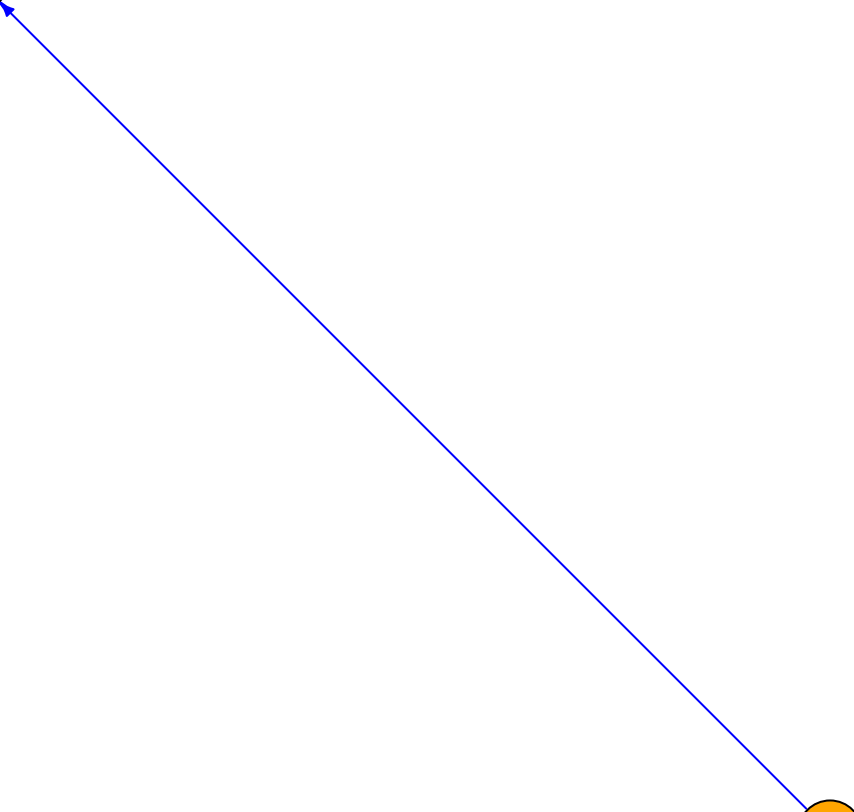

## Variant-Disease Network (oral cavity cancer)

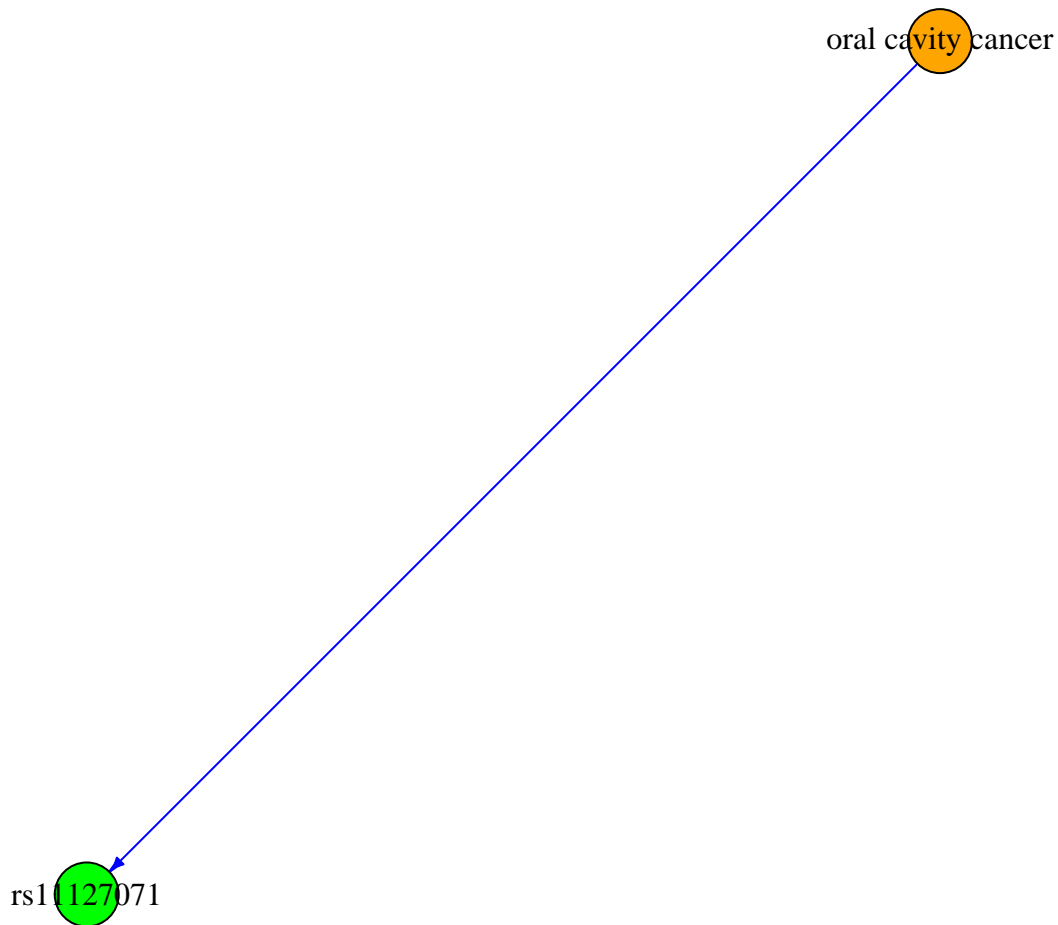

# Variant-Disease Network (melanoma-derived growth regulatory protein measu

rs2233156

melanoma-derived growth regulatory protein

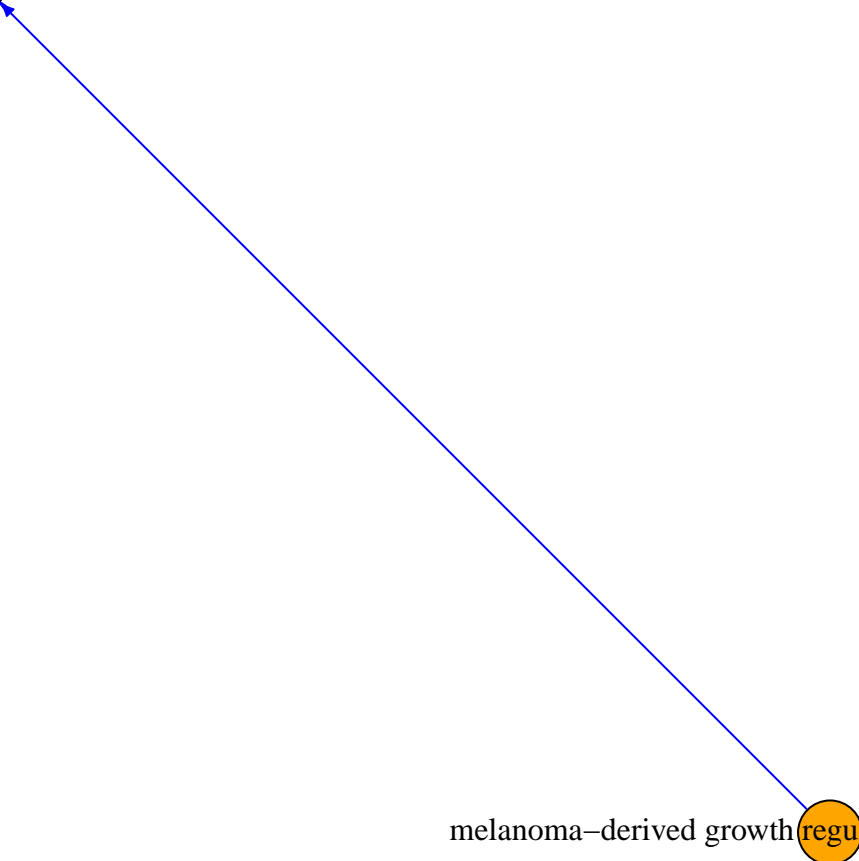

Supplement: Supplementary file 8 [file Supplementary_Fig_S6.pdf › Supplementary files/Supplementary_Fig_S6.pdf]
