# Supplementary material for: Evaluation of Five Mammalian Models for Human Disease Research Using Genomic and Bioinformatic Approaches
Source: Preprints.org preprint supplement (doi:10.20944/preprints202305.1816.v1), 2023-05-26

## Variant-Disease Network (liver carcinoma)

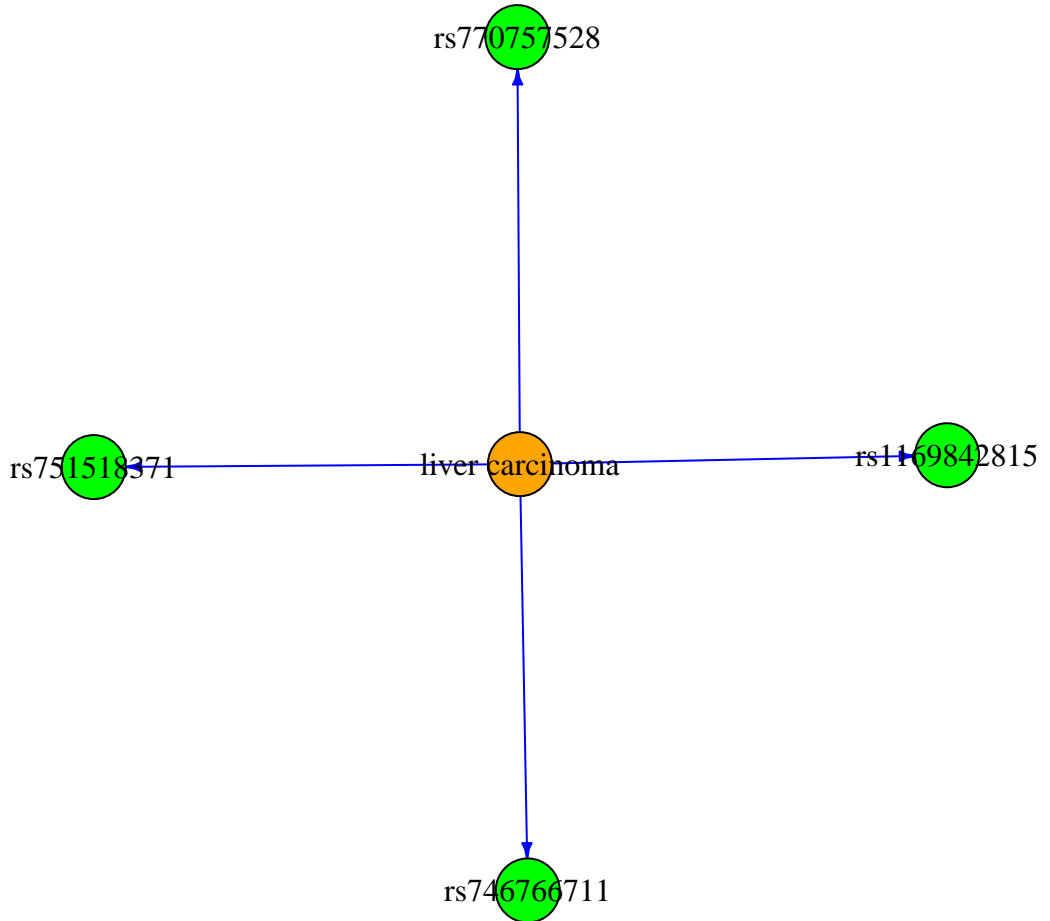

Variant–Disease Network (breast carcinoma)

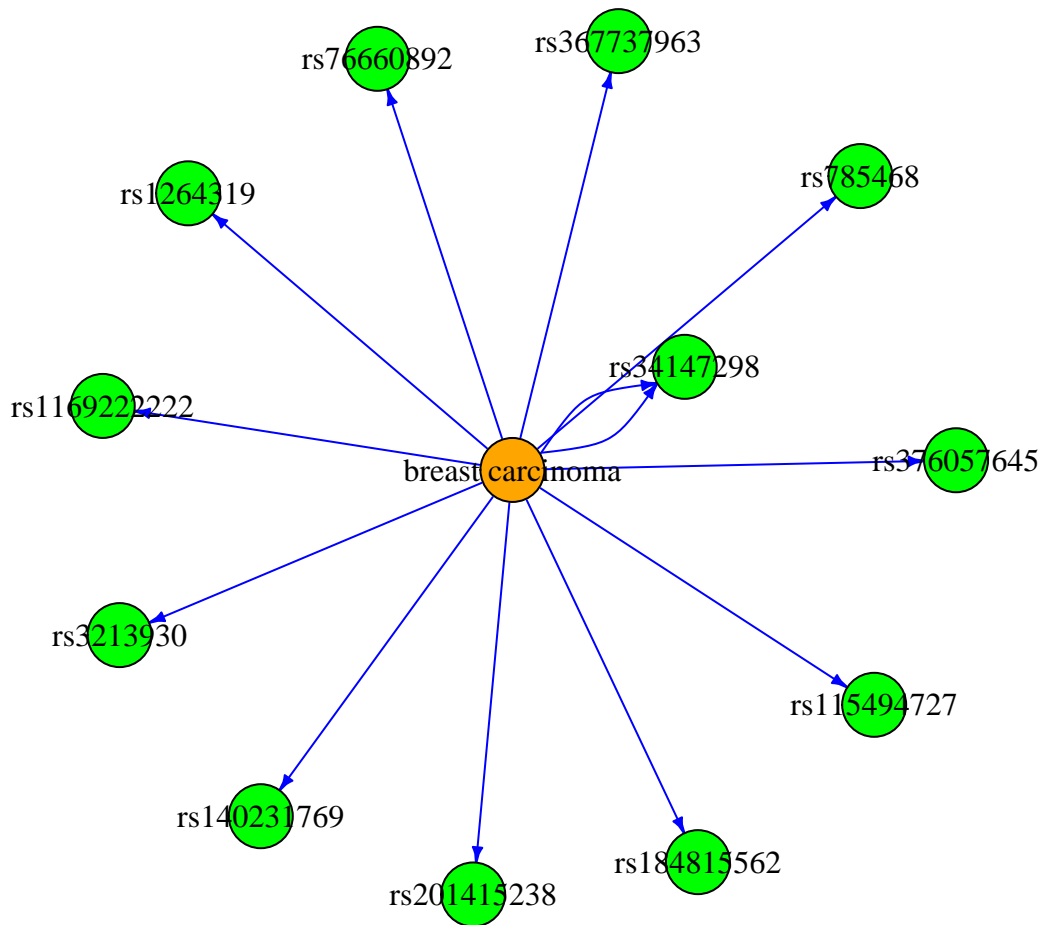

**Variant–Disease Network (large intestine carcinoma)**

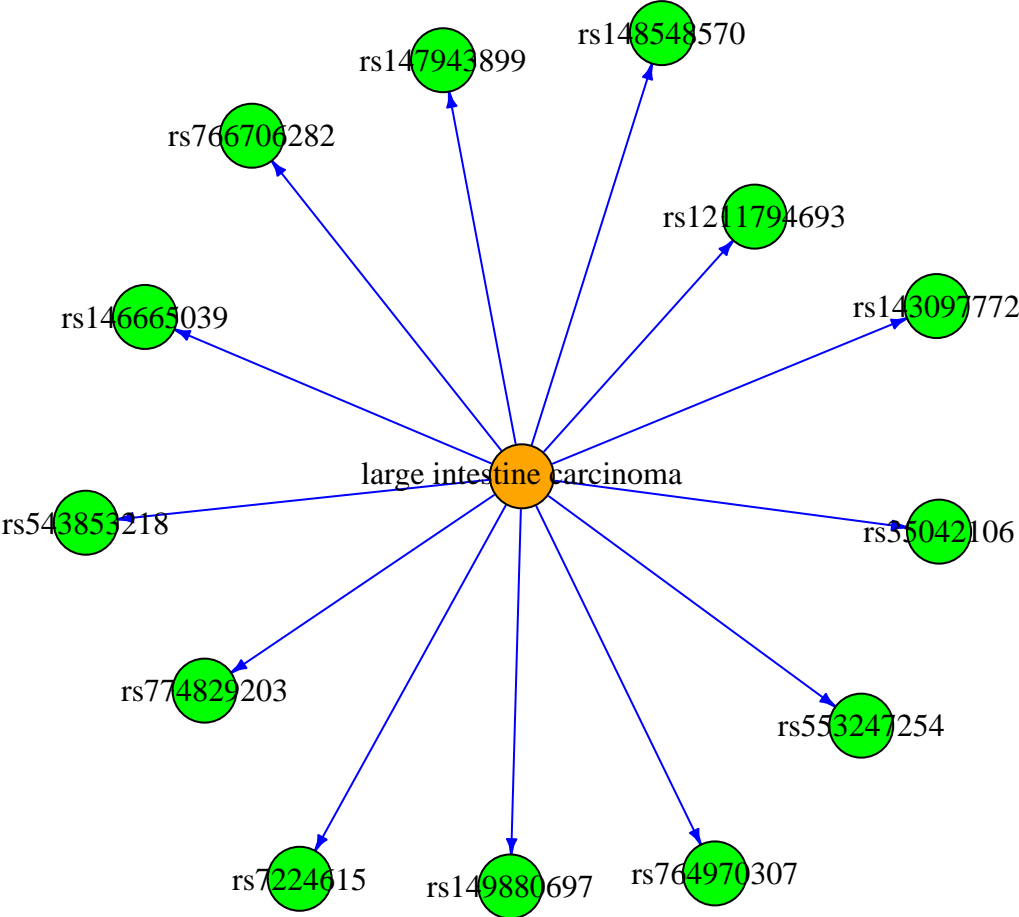

## Variant–Disease Network (thyroid carcinoma)

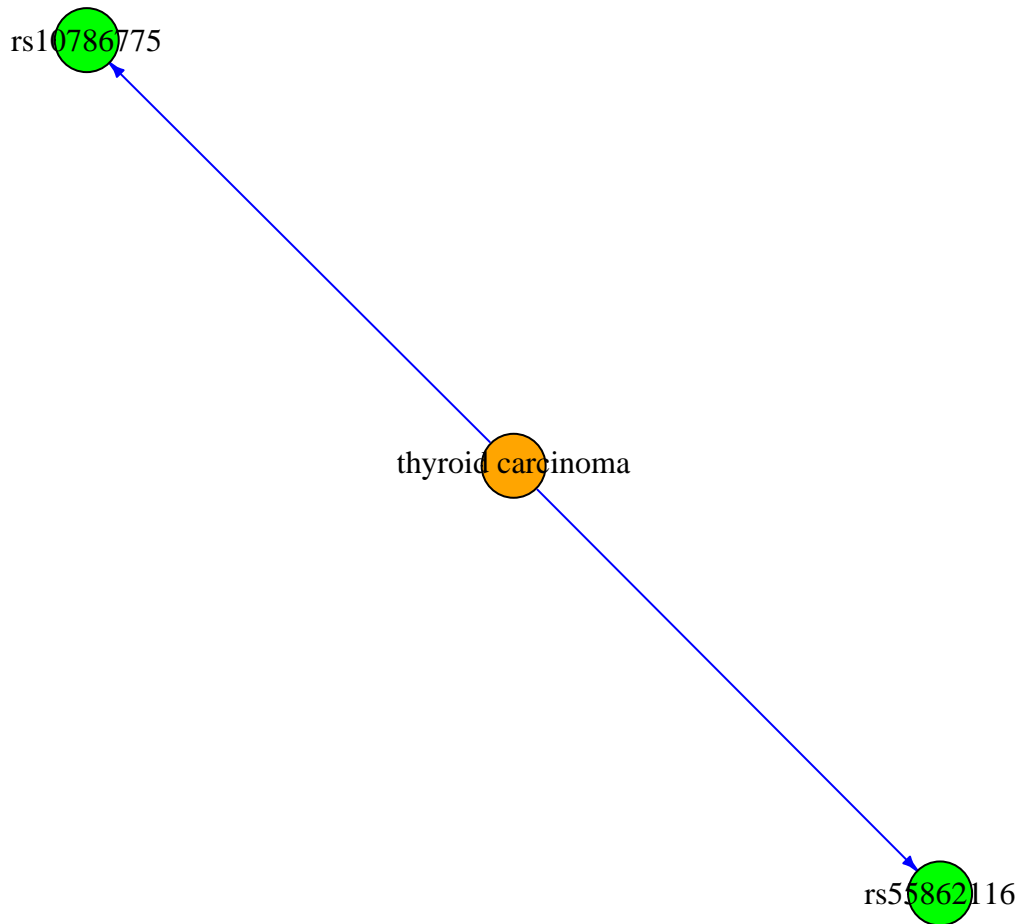

**Variant–Disease Network (oesophagus carcinoma)**

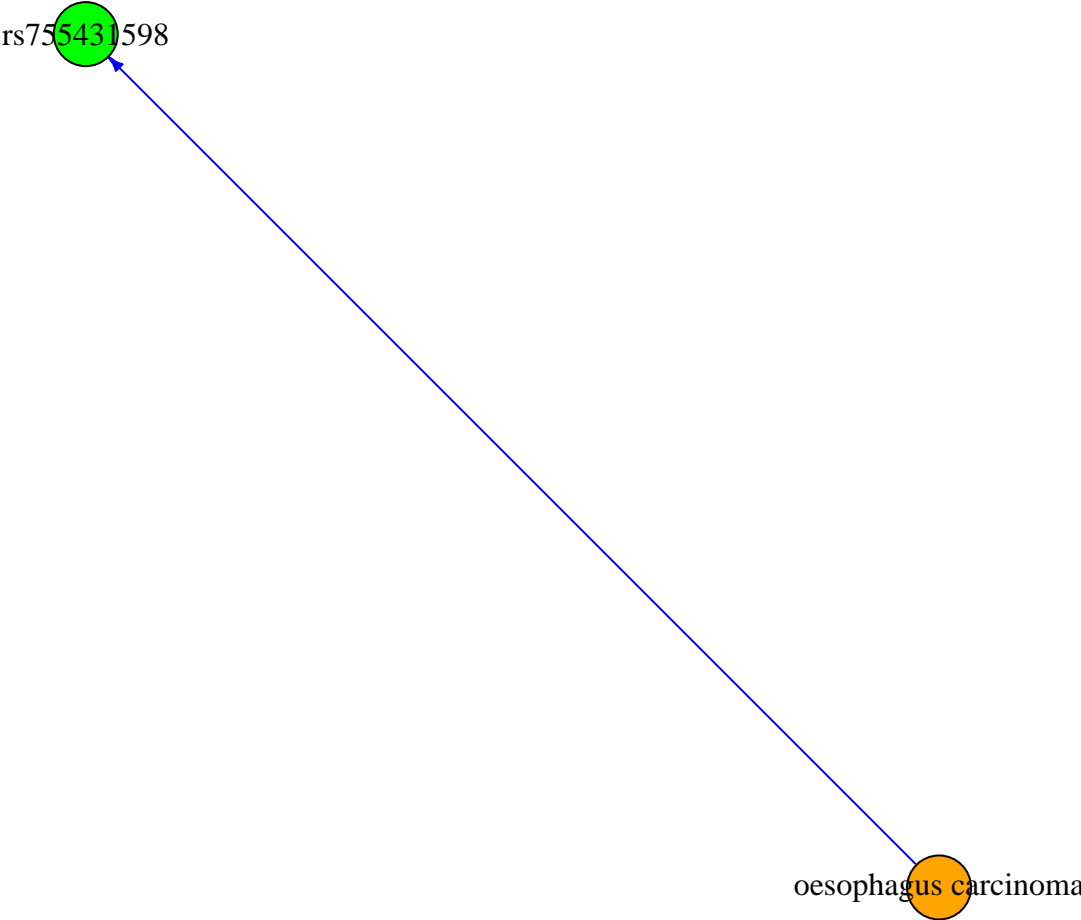

## Variant–Disease Network (ovary carcinoma)

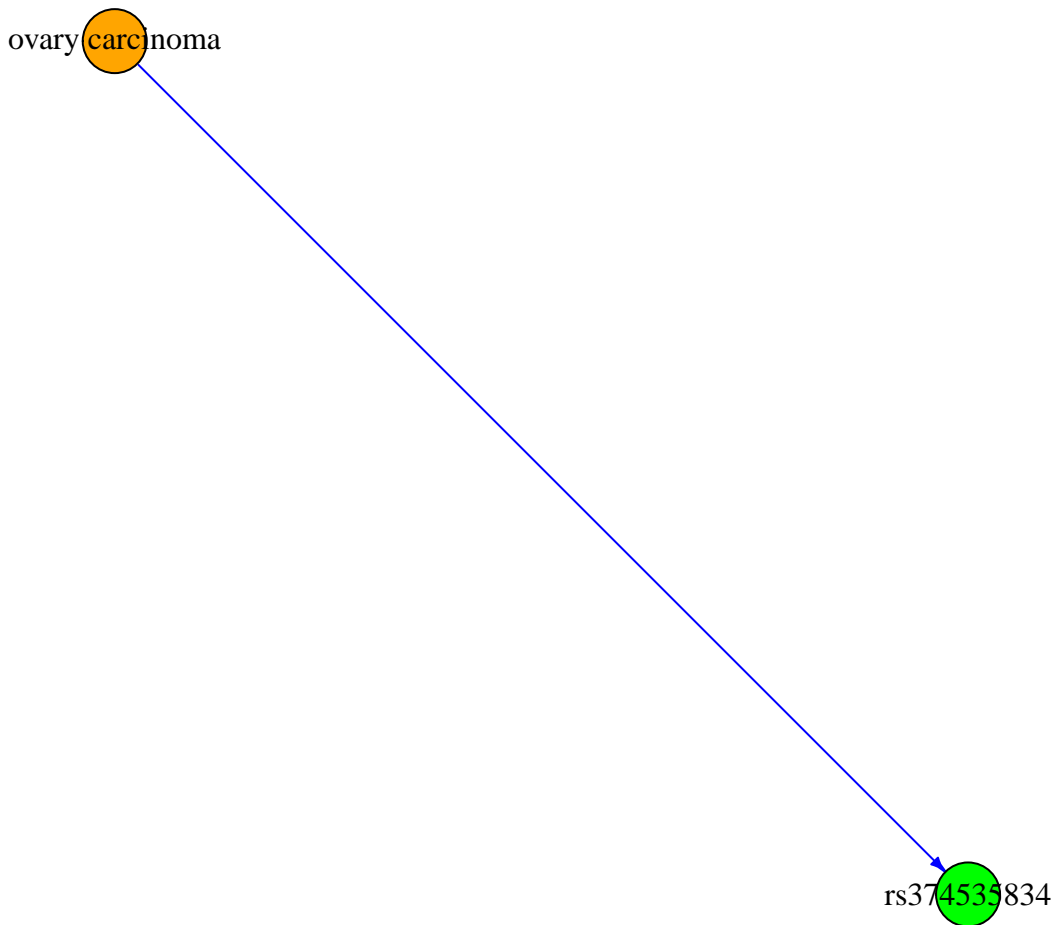

## Variant–Disease Network (pancreas carcinoma)

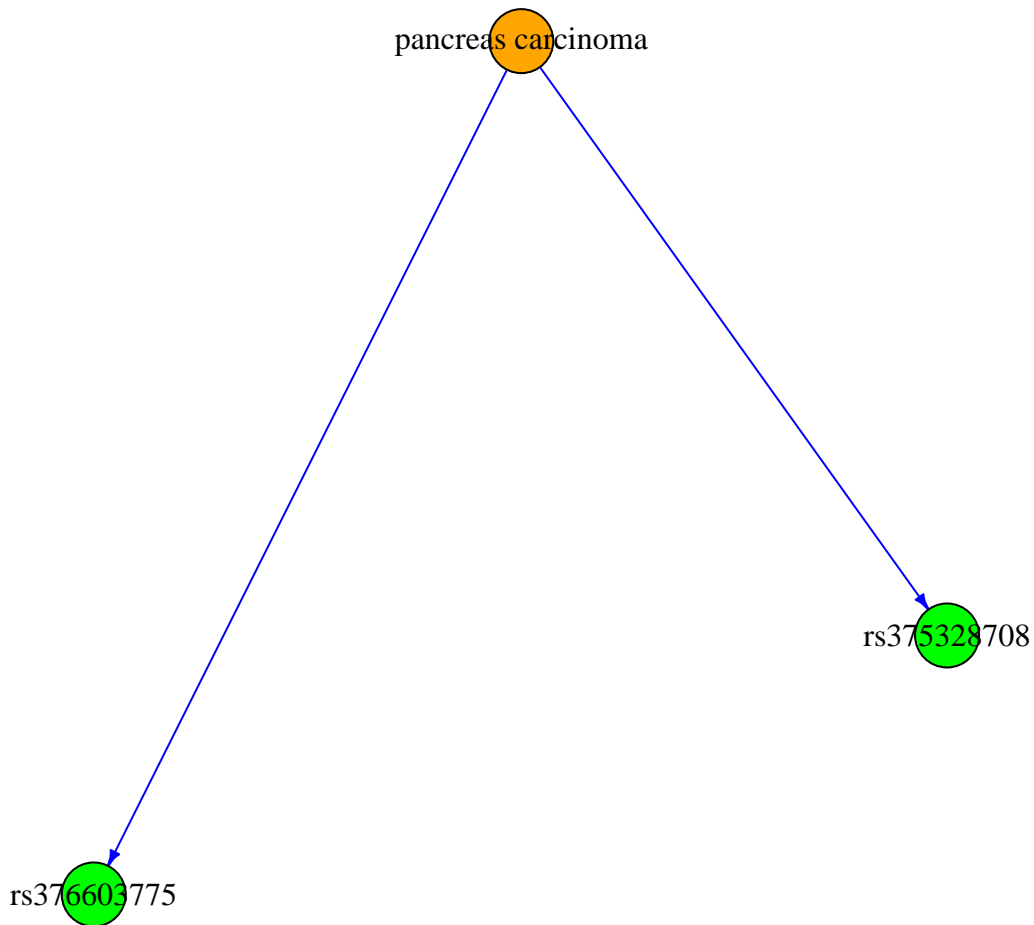

## Variant-Disease Network (lung carcinoma)

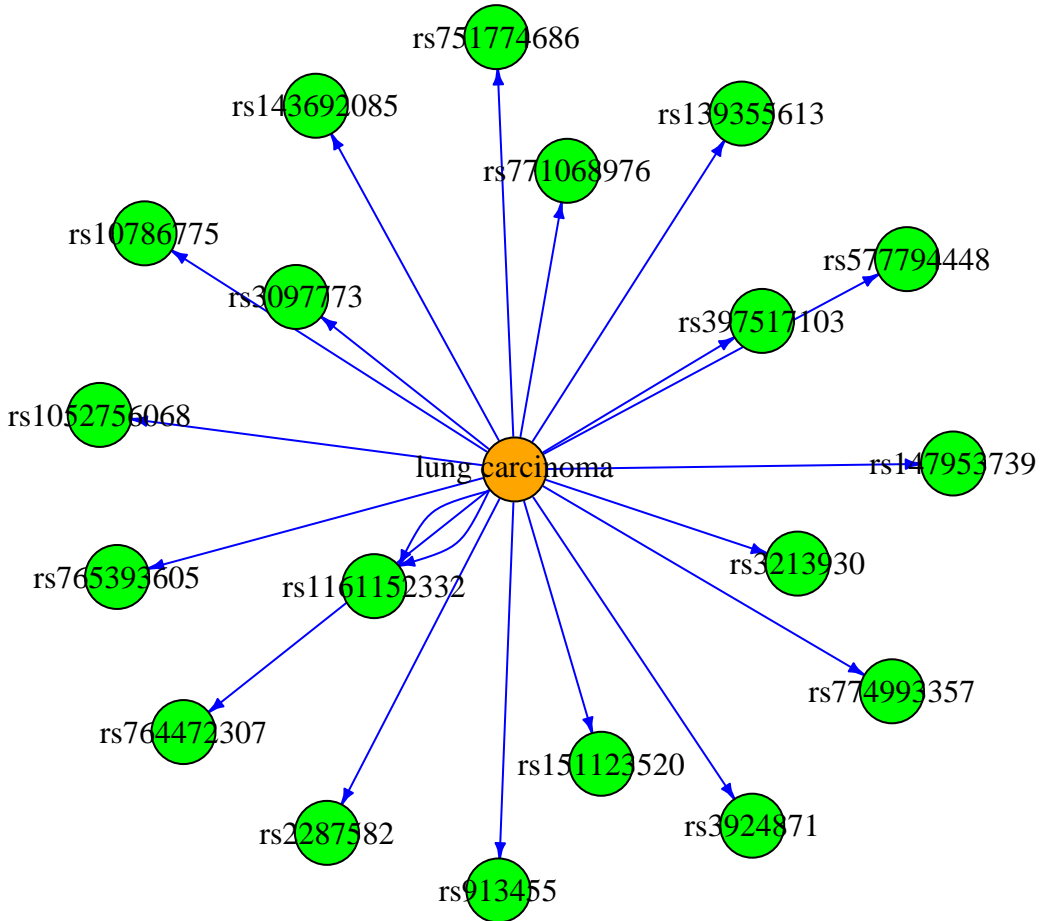



## Variant–Disease Network (stomach carcinoma)

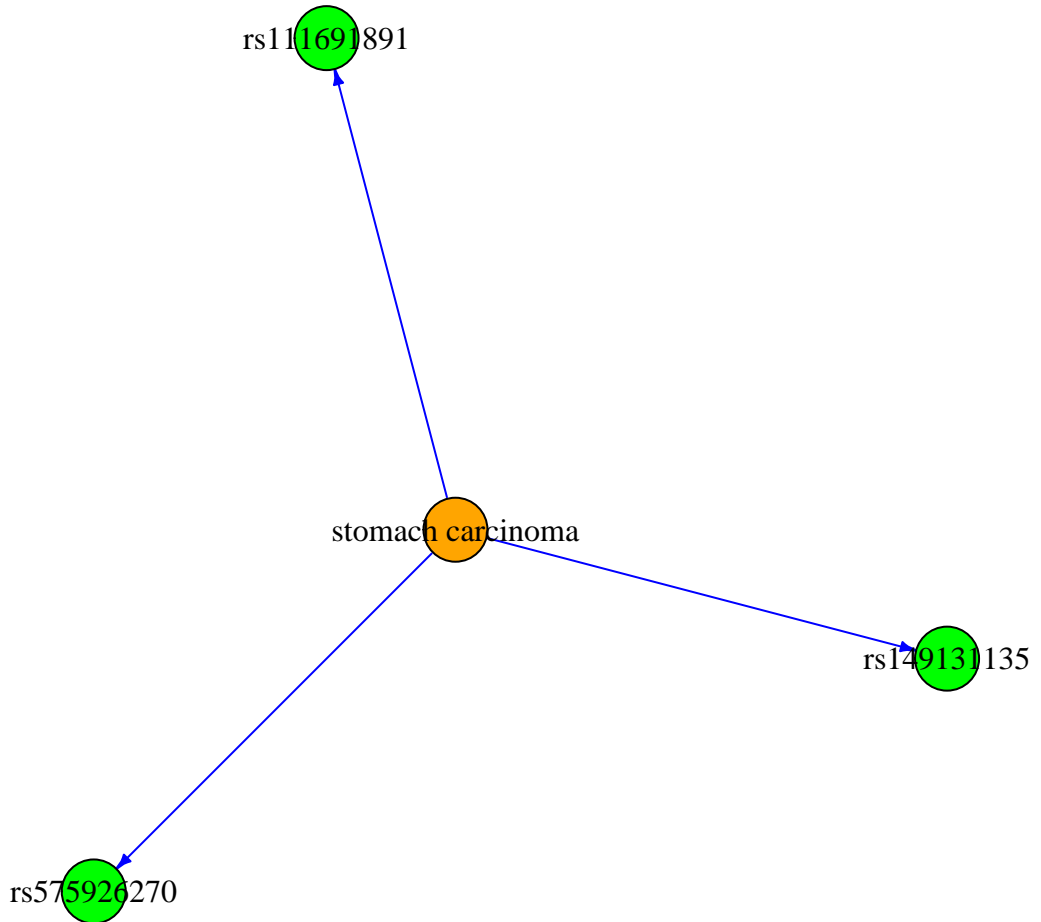

## Variant-Disease Network (endometrium carcinoma)

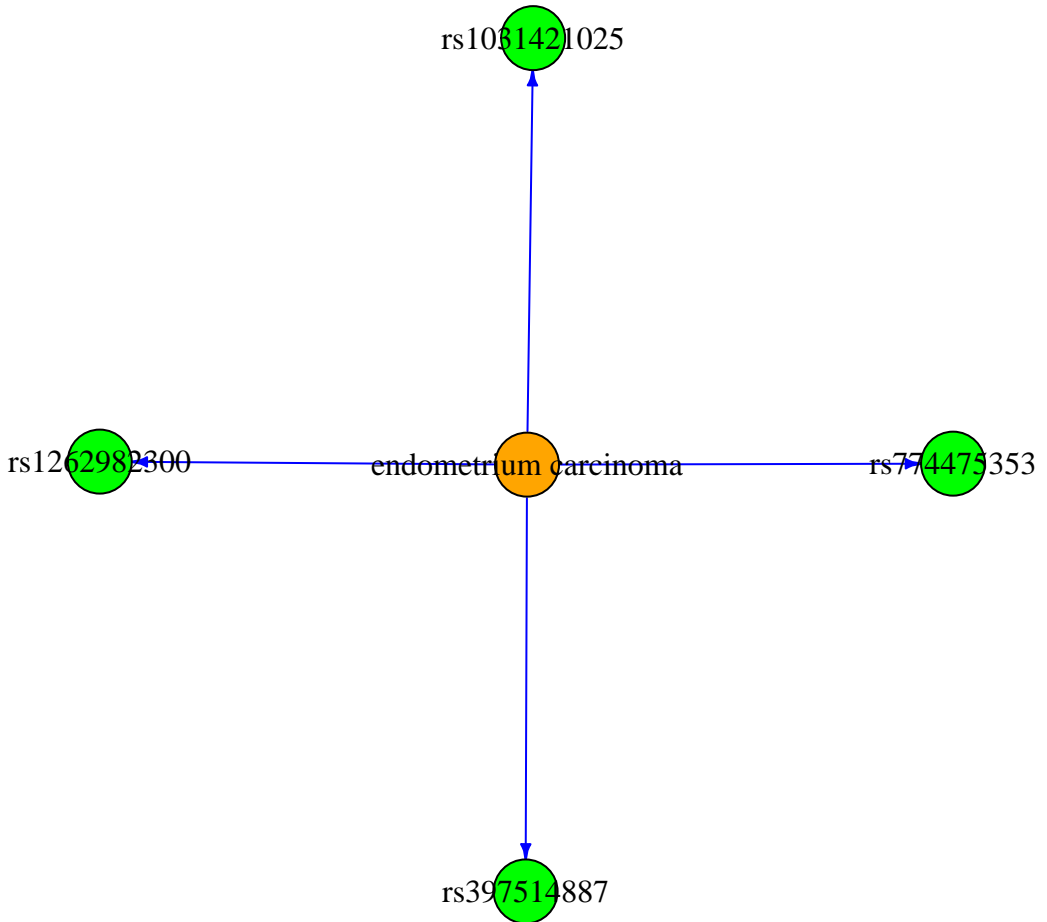

## Variant–Disease Network (prostate carcinoma)

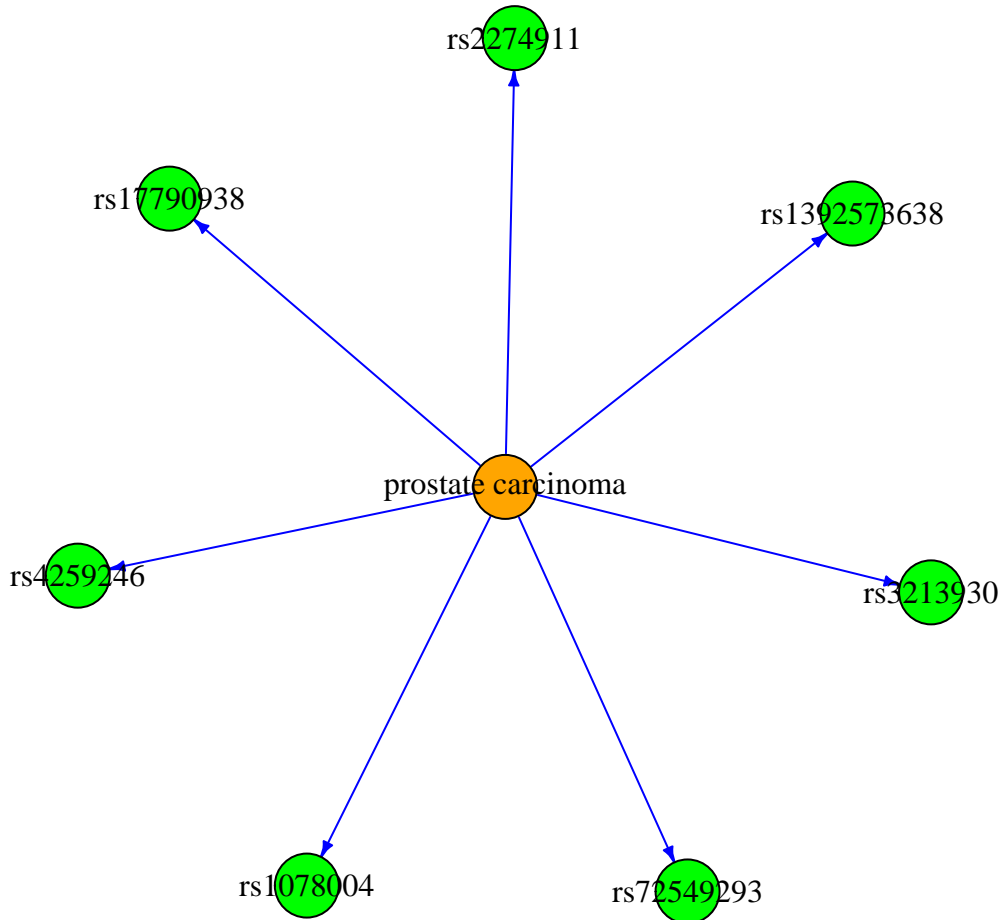

## Variant-Disease Network (skin carcinoma)

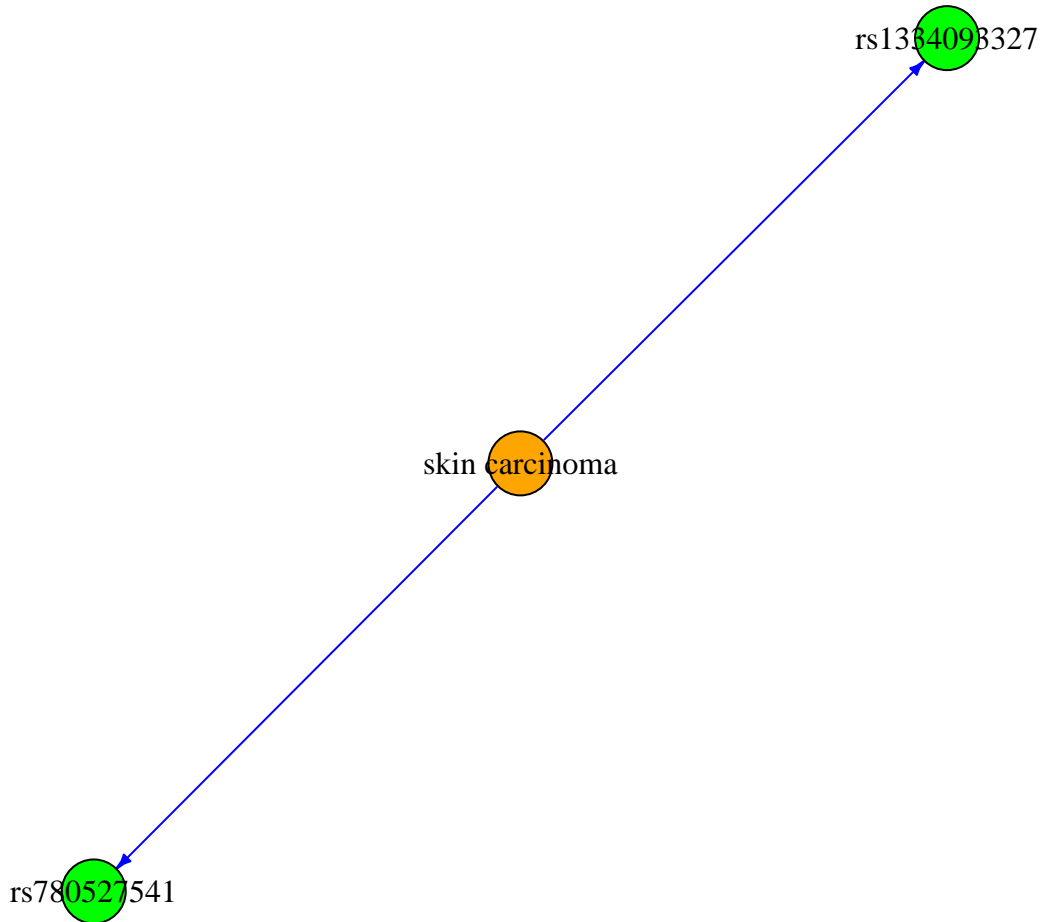

## Variant–Disease Network (kidney carcinoma)

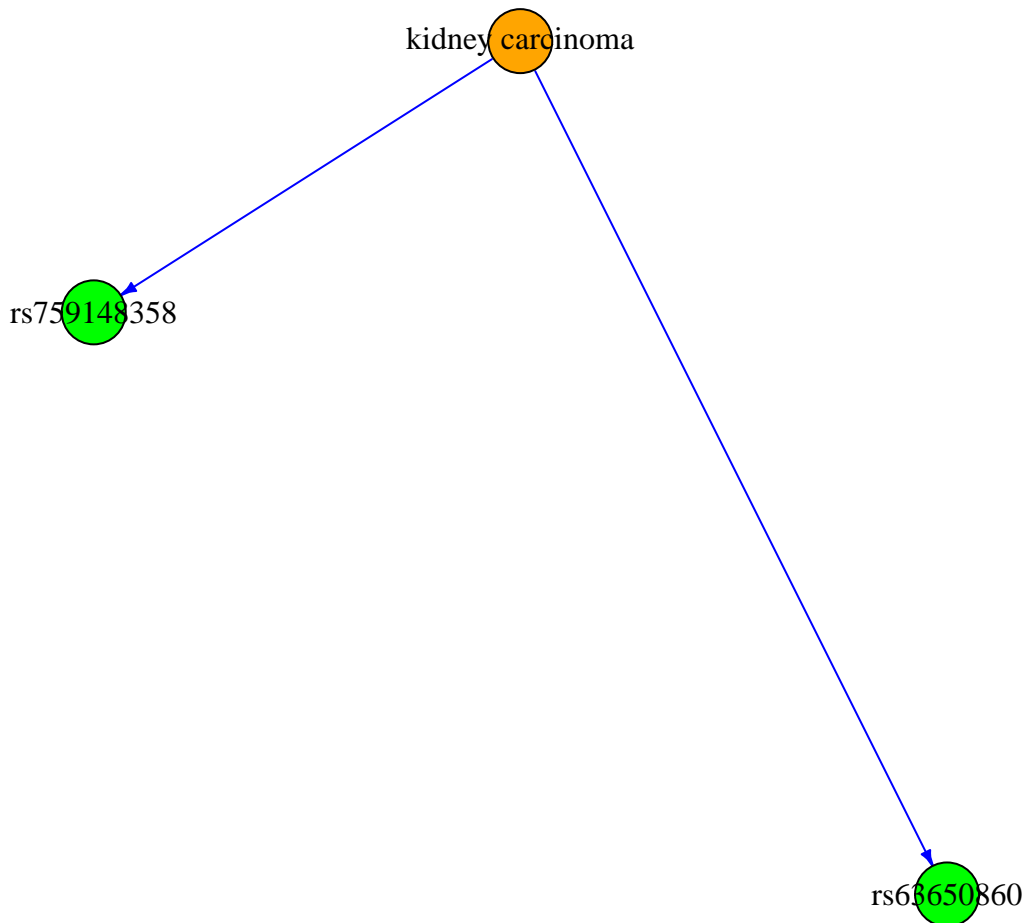

## Variant–Disease Network (urinary tract carcinoma)

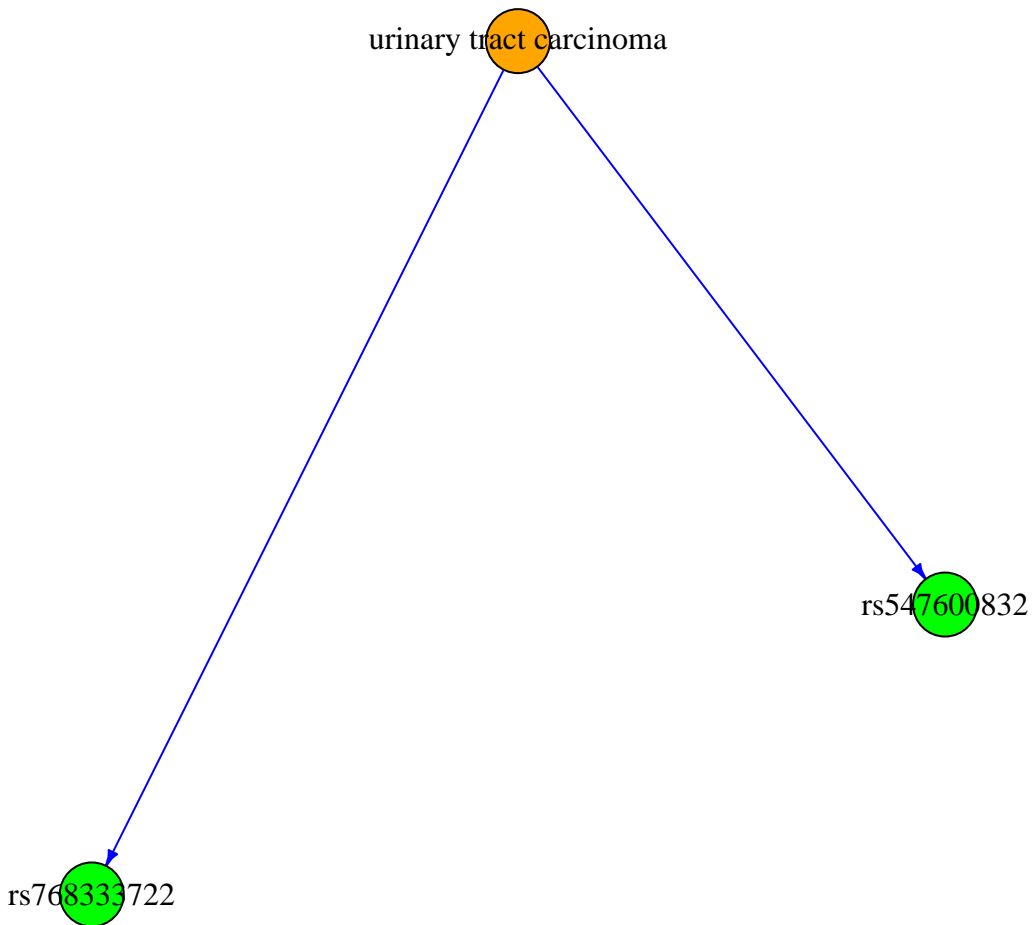

**Variant–Disease Network (upper aerodigestive tract carcinoma)**

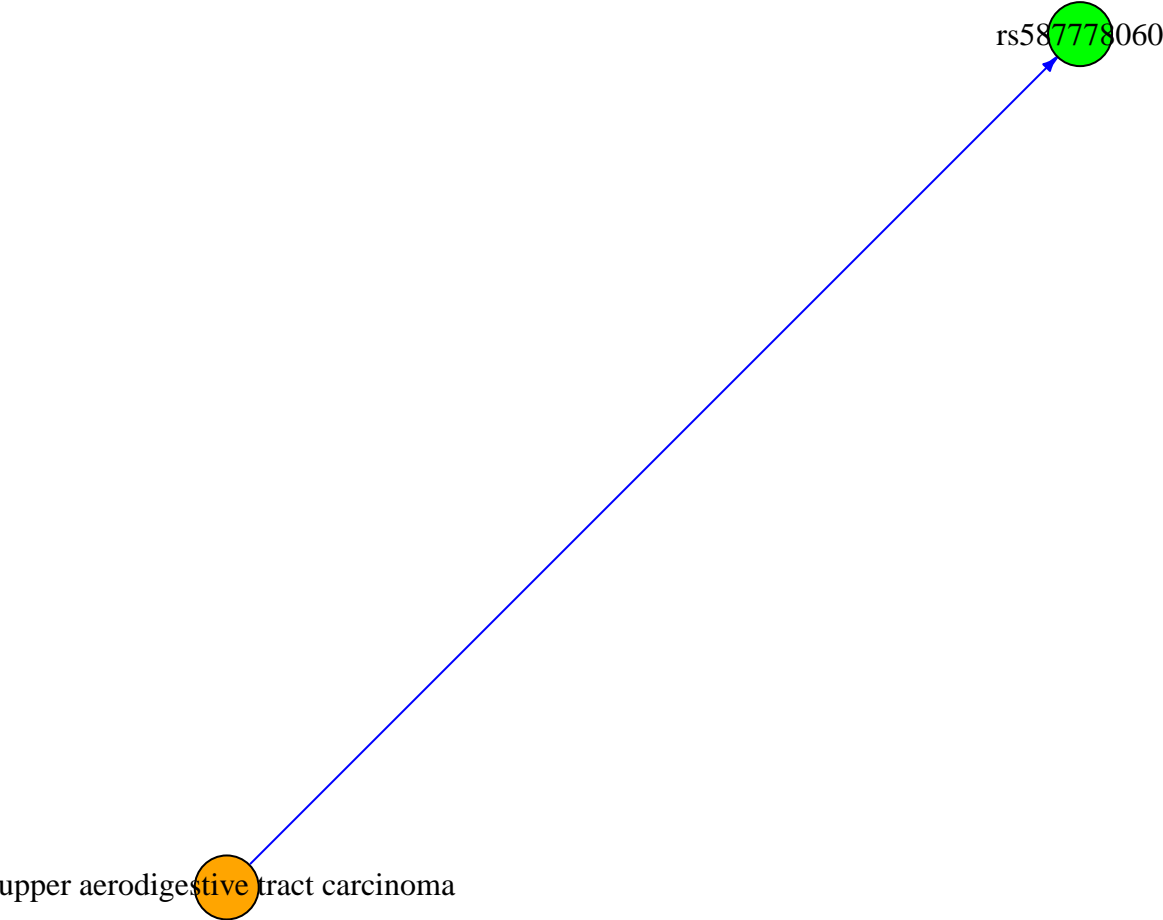

## Variant-Disease Network (cervix carcinoma)

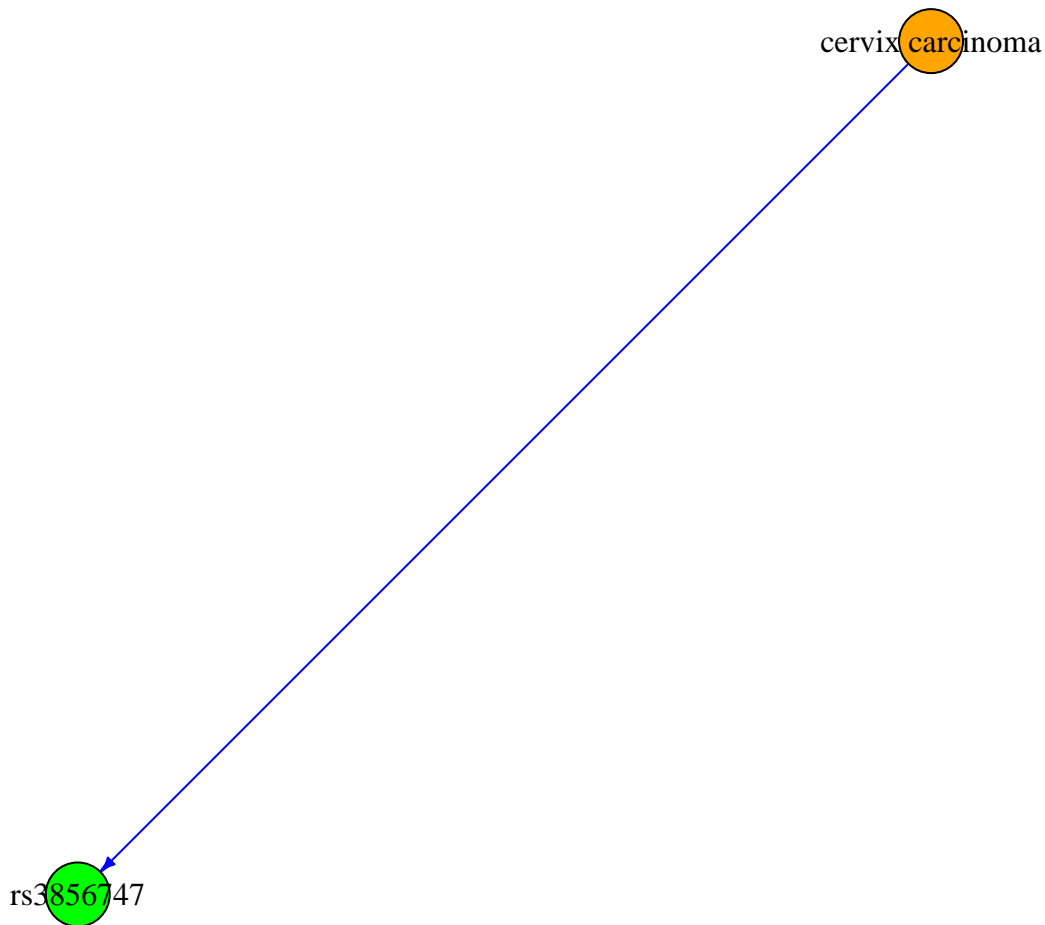



## Variant-Disease Network (germ cell tumour)

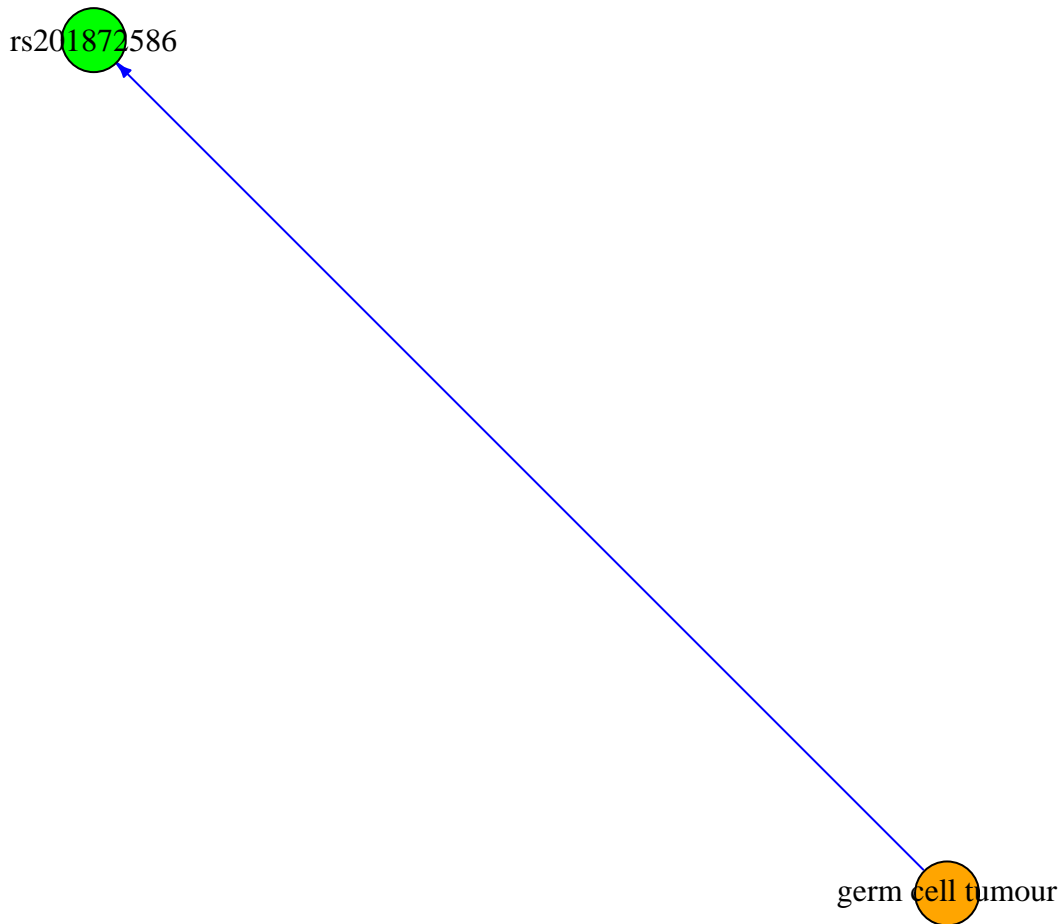

**Variant–Disease Network (glioma)**

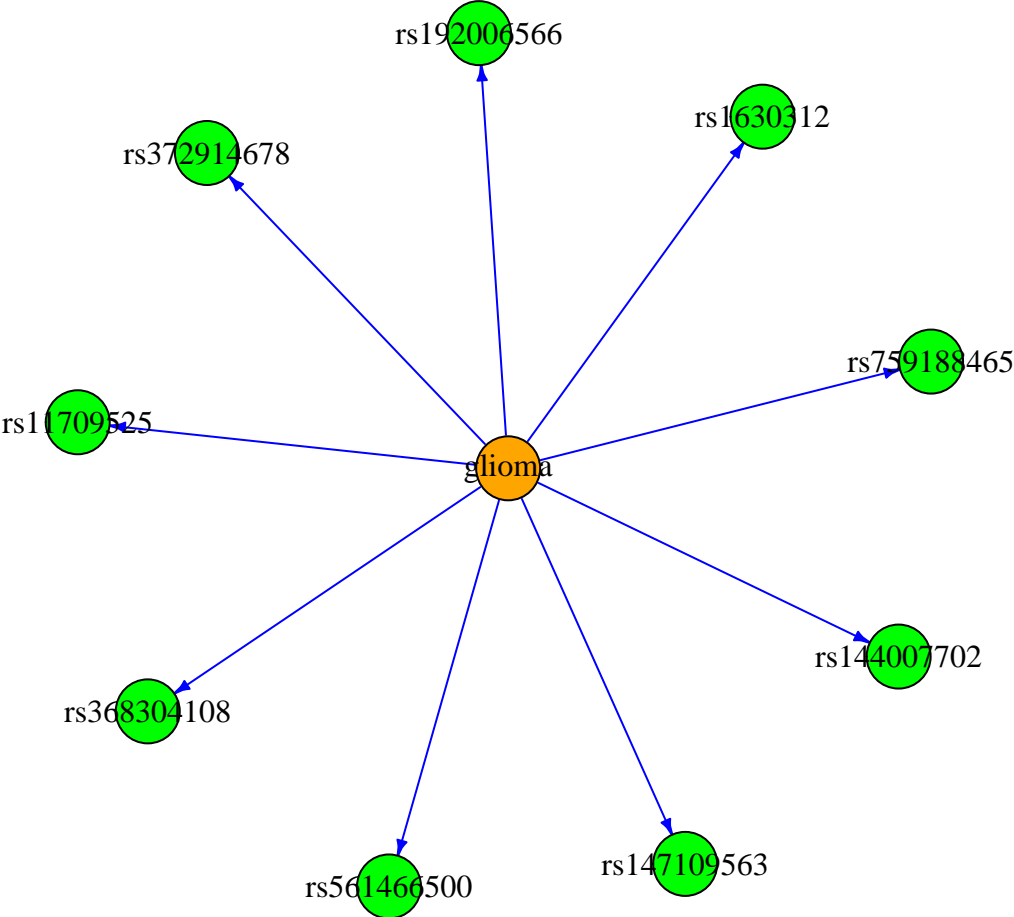

## Variant-Disease Network (haemangioblastoma)

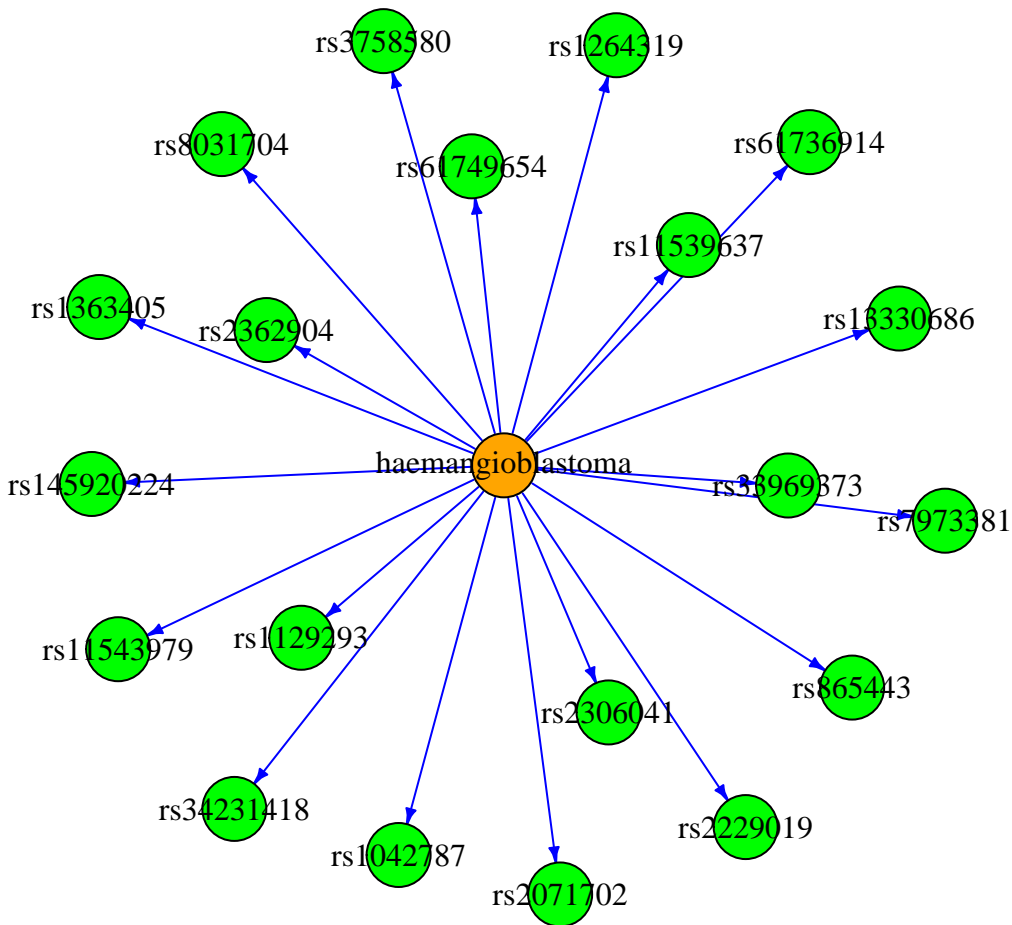

## Variant–Disease Network (haematopoietic neoplasm)

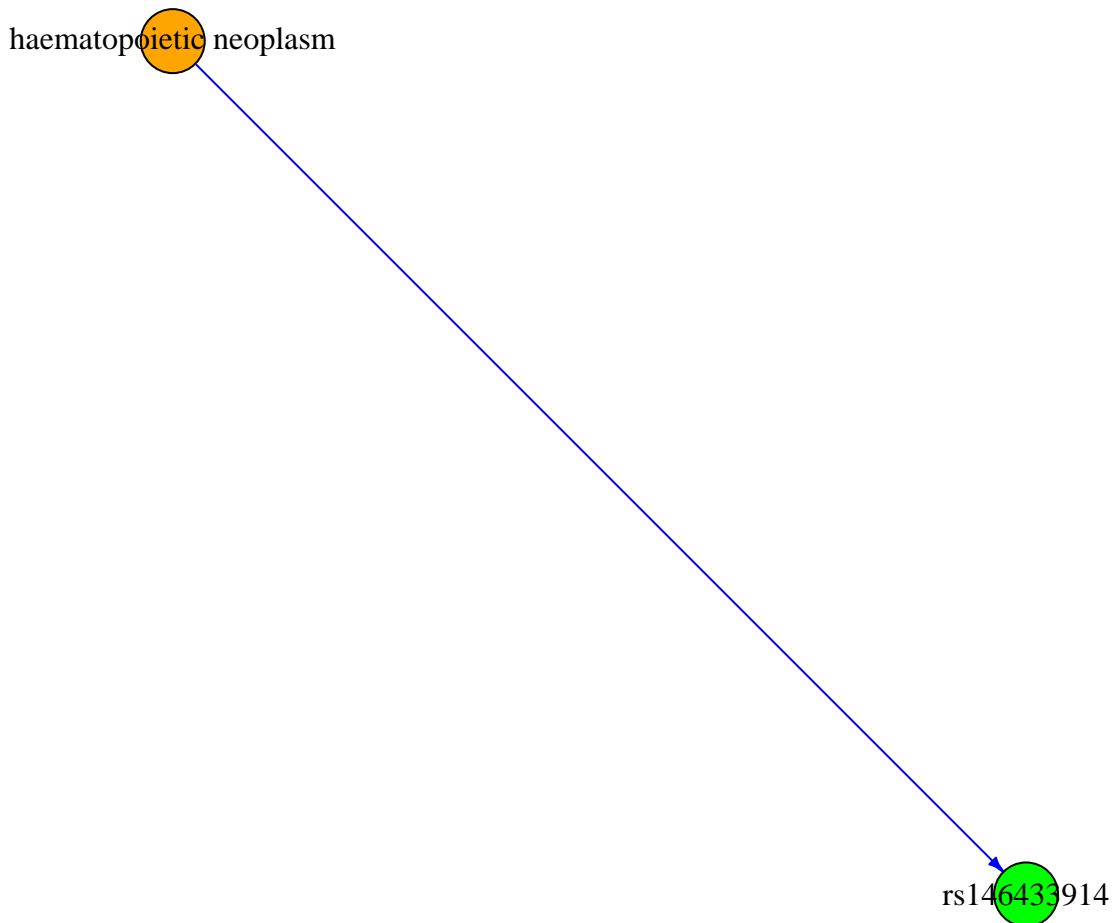

## Variant–Disease Network (lymphoid neoplasm)

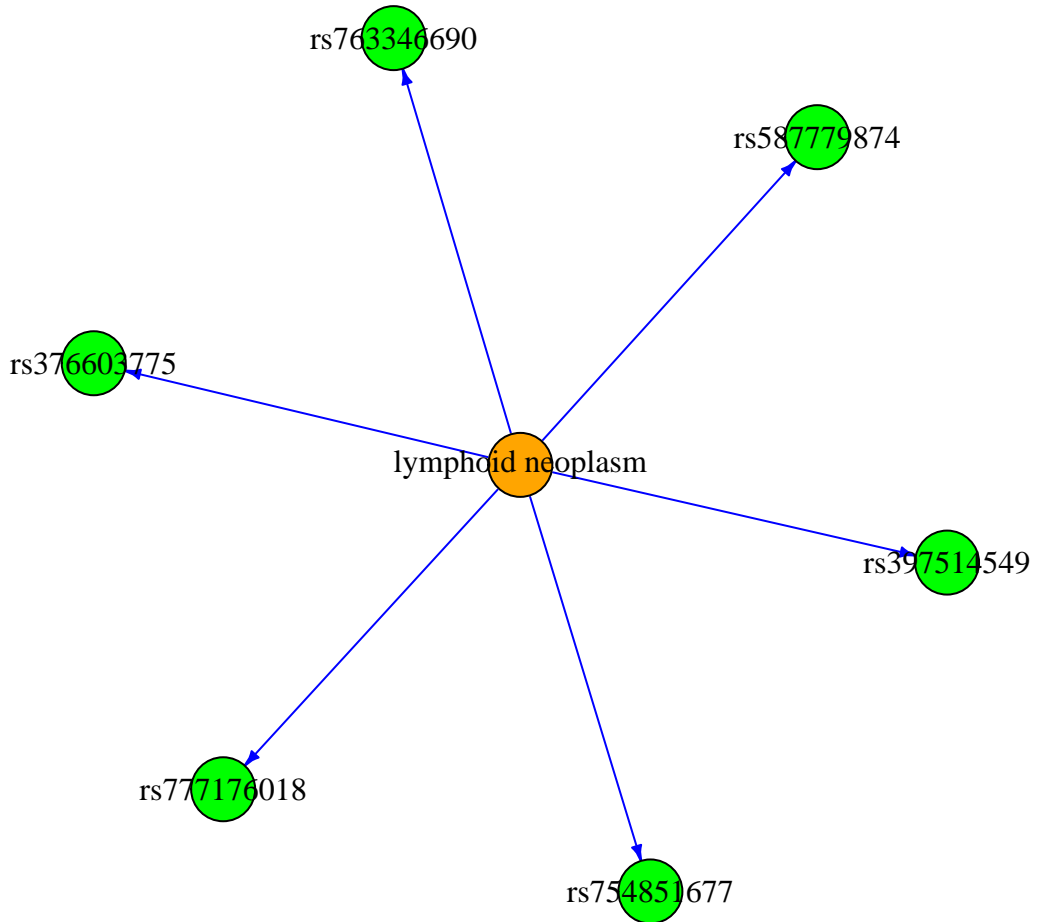

## Variant–Disease Network (malignant melanoma)

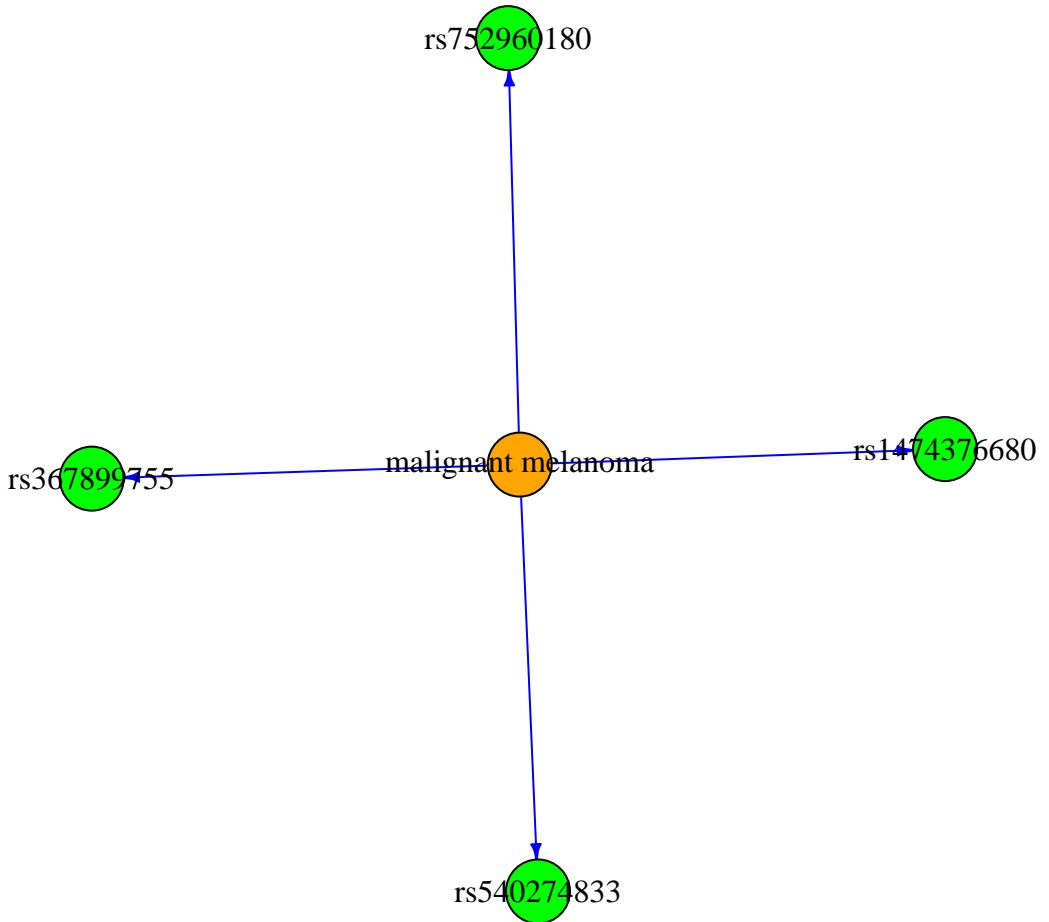

## Variant-Disease Network (mesothelioma)

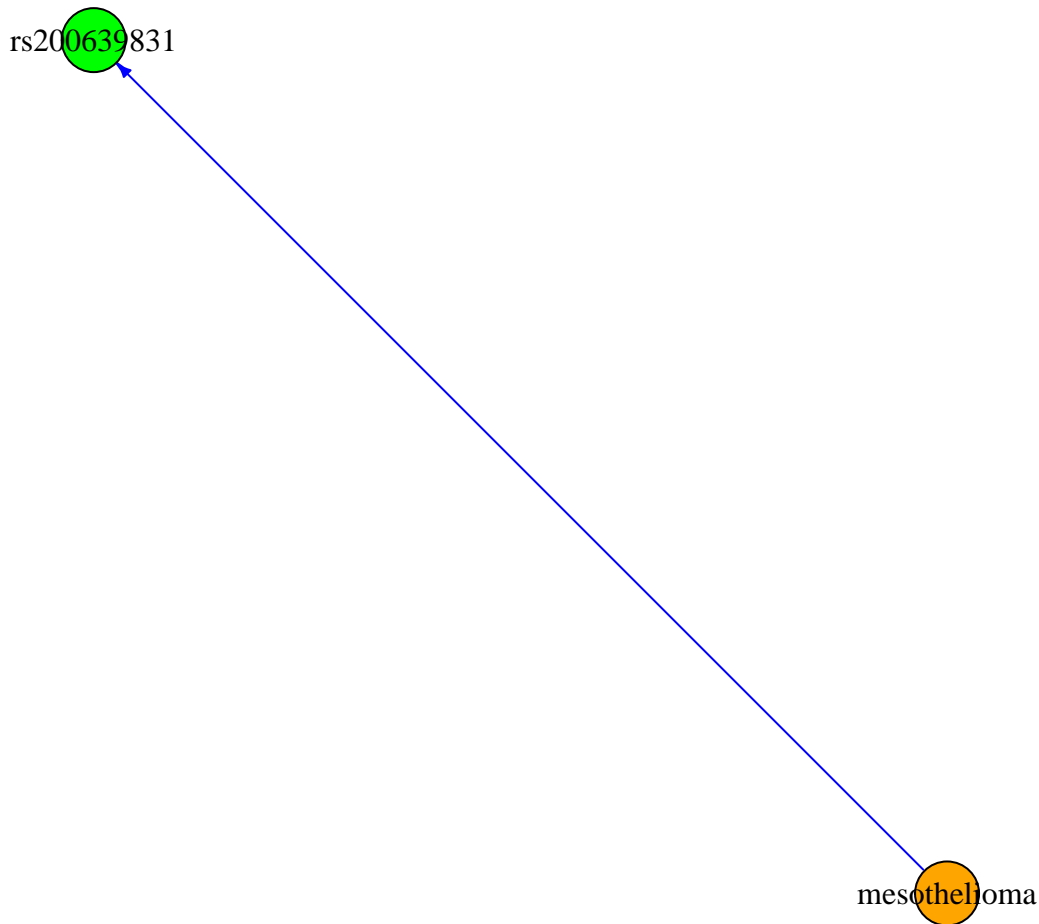

# Variant–Disease Network (primitive neuroectodermal tumour–medulloblastoma)

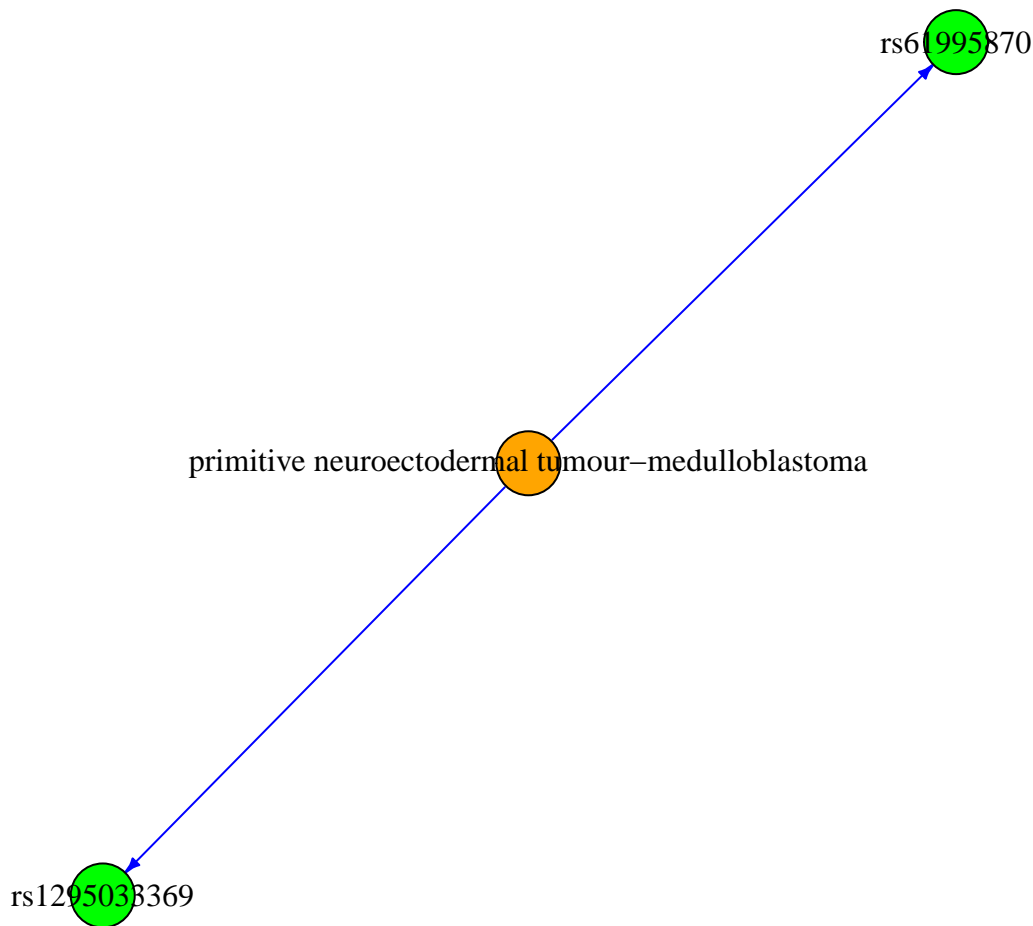



**Variant–Disease Network ( Autosomal Dominant)**

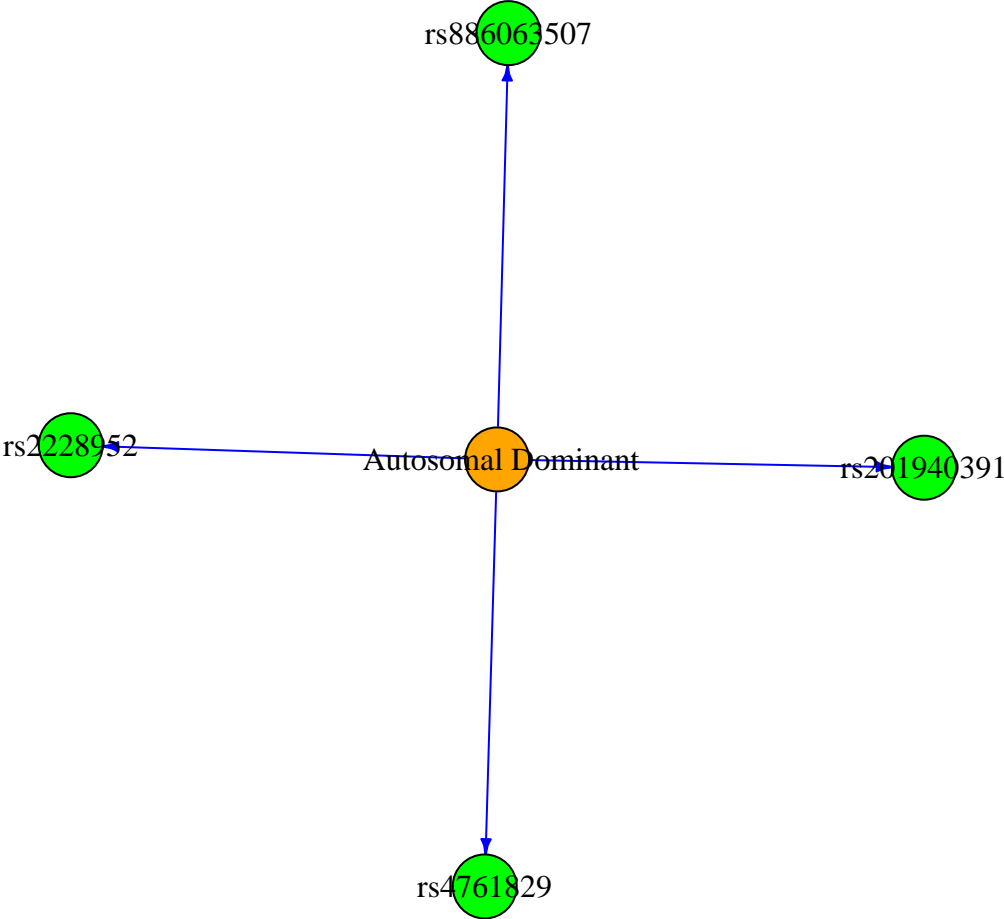

## Variant–Disease Network ( Autosomal Recessive)

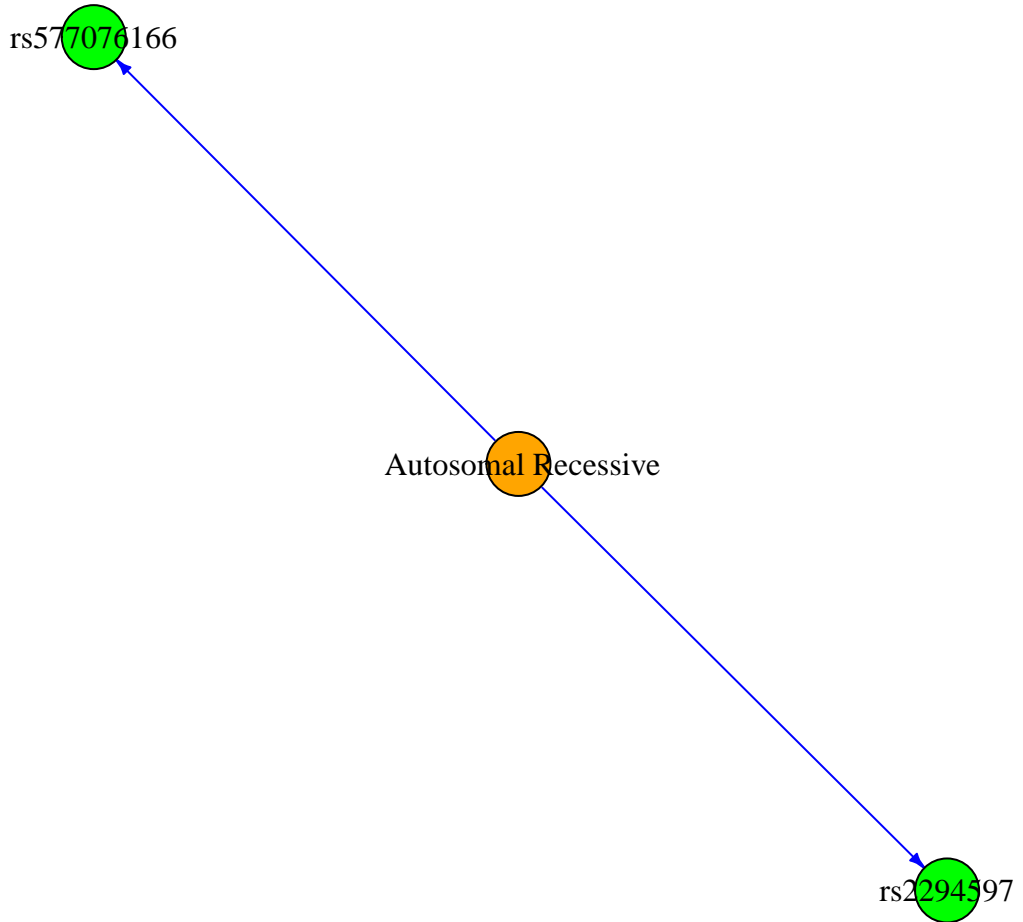

## Variant-Disease Network ( Deafness)

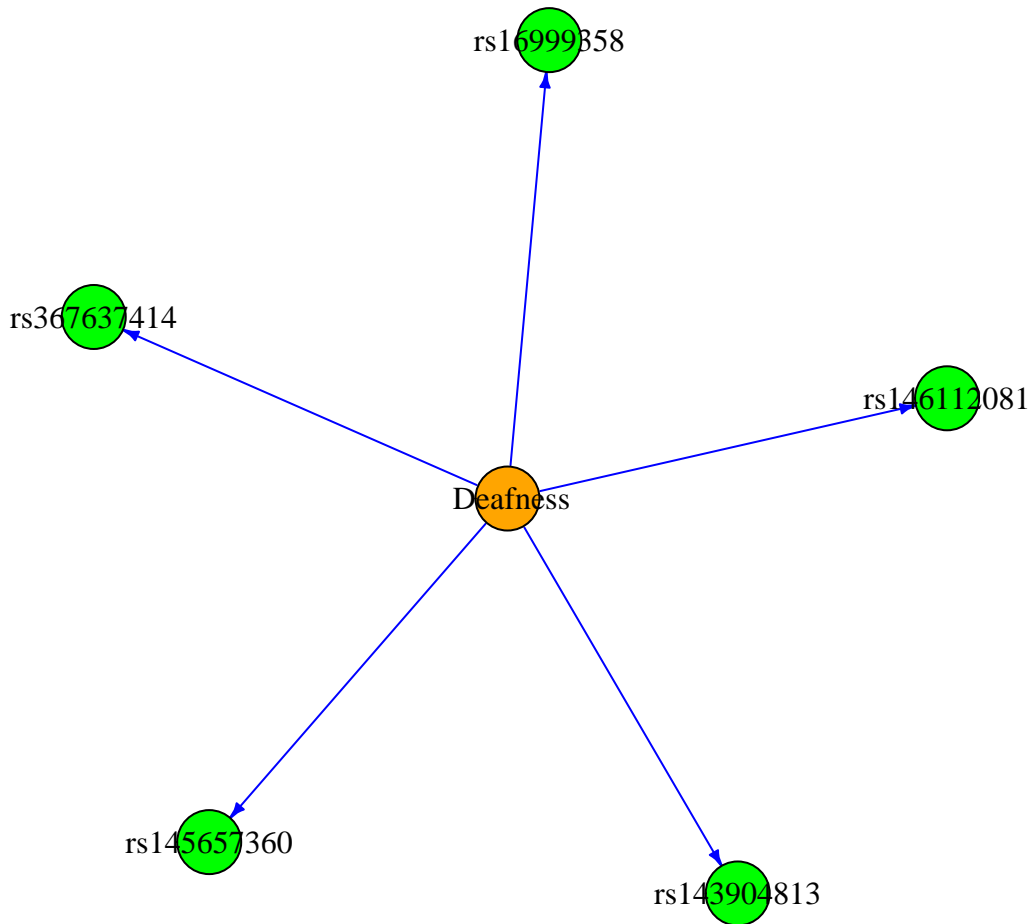

## Variant-Disease Network (Abetalipoproteinaemia)

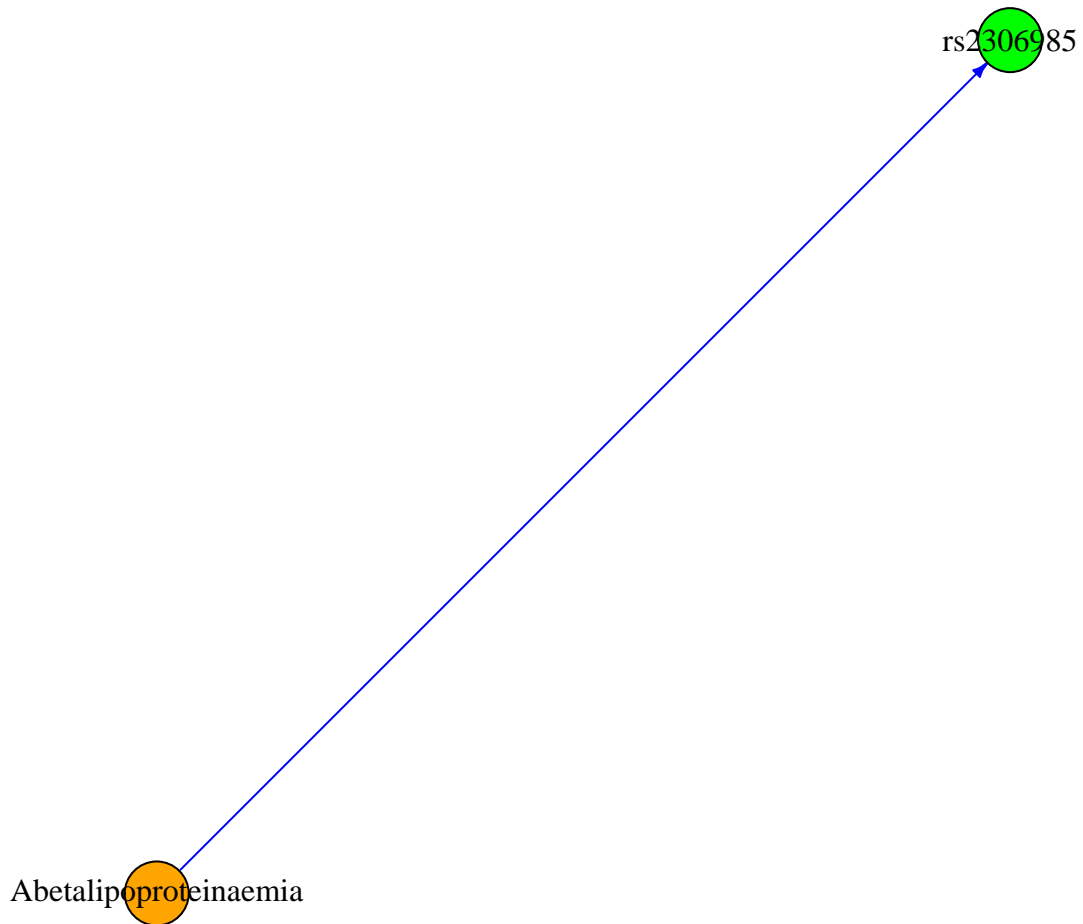

**Variant–Disease Network (Acrocephalosyndactyly type I)**

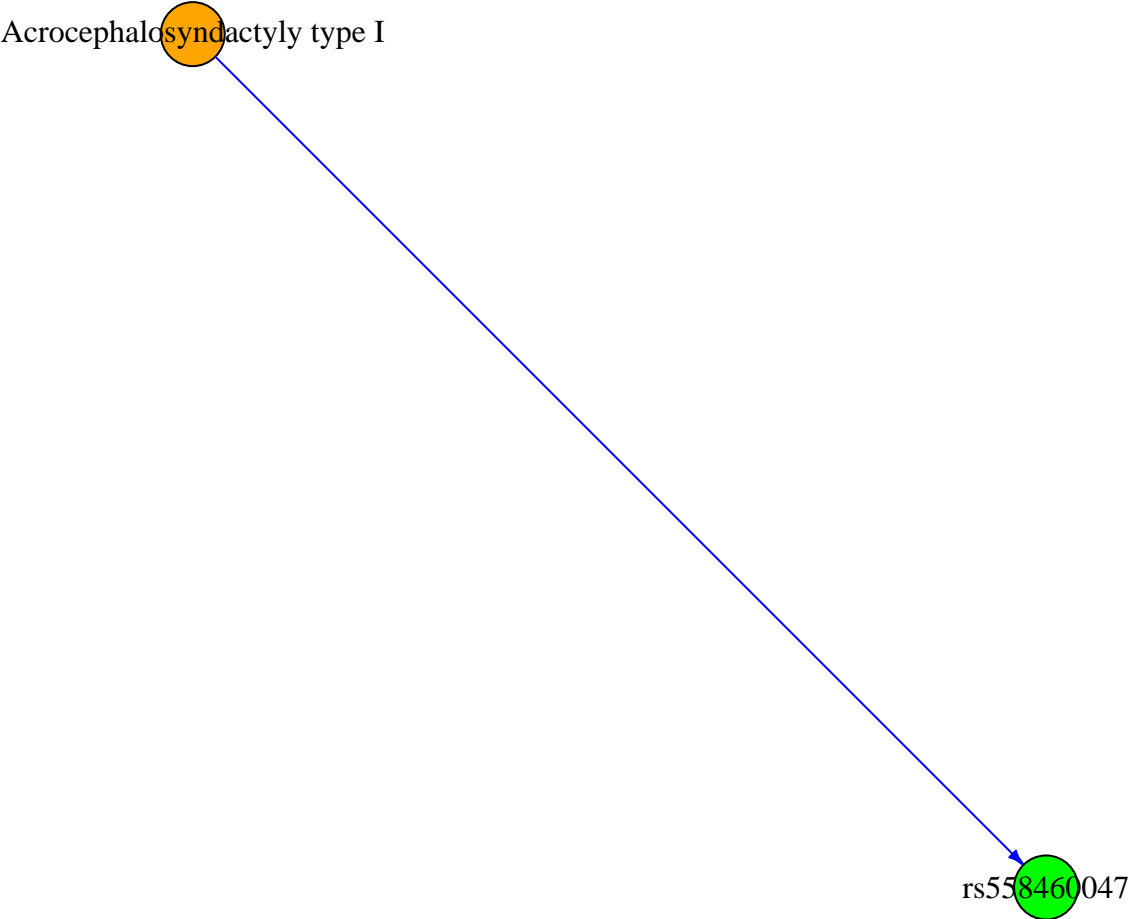

Variant–Disease Network (Acrodysostosis)

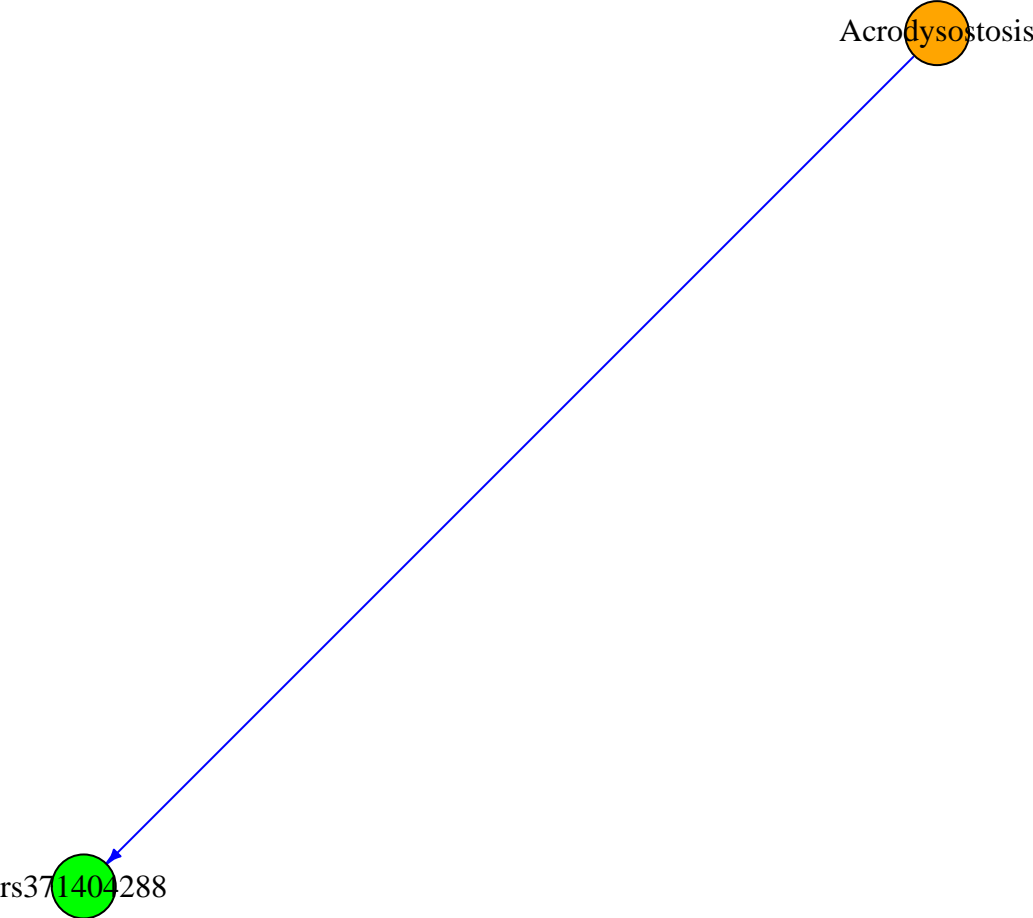

## Variant–Disease Network (Acromesomelic Dysplasia)

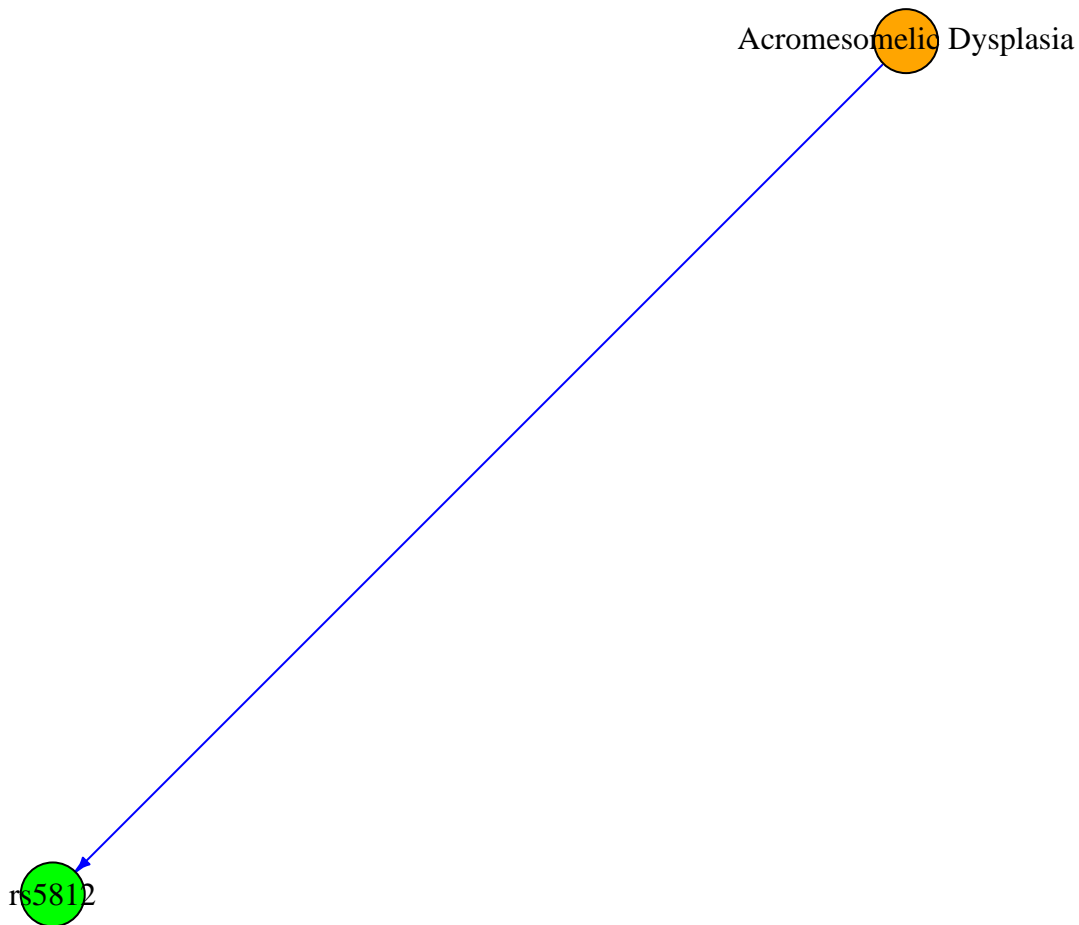

## Variant-Disease Network (Acromicric dysplasia)

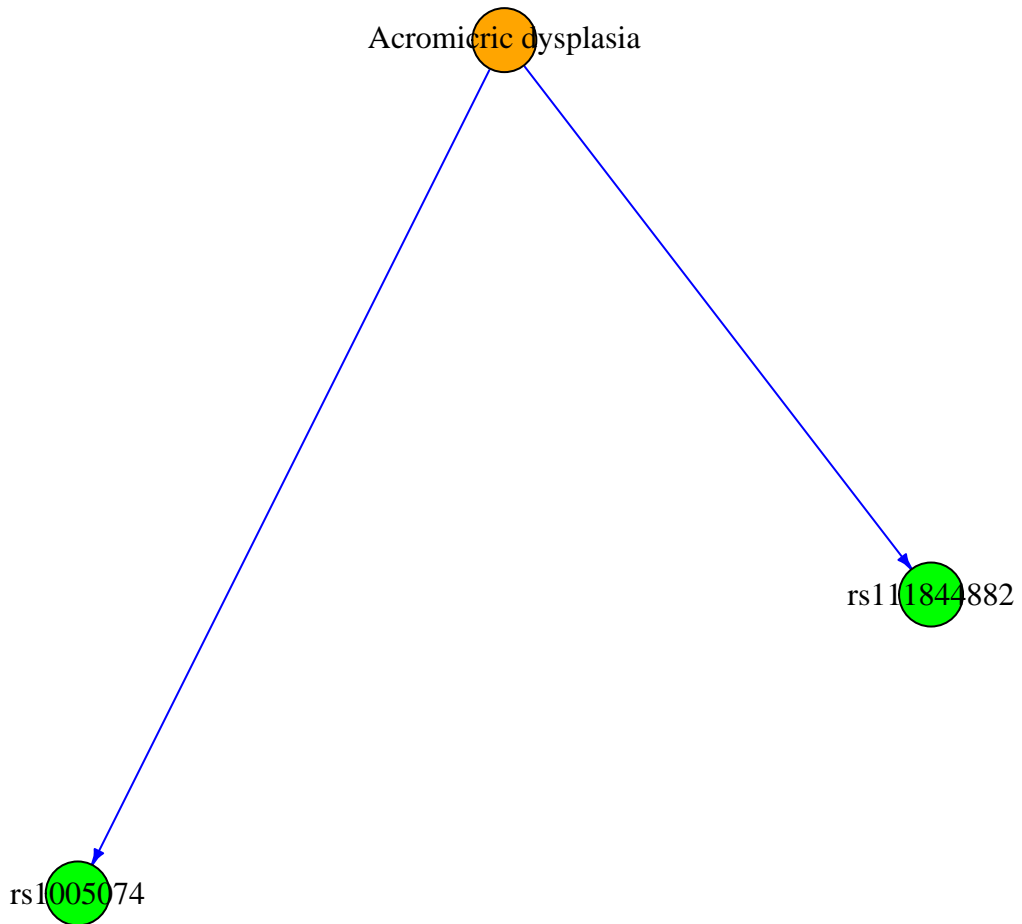



## Variant–Disease Network (Acute intermittent porphyria)

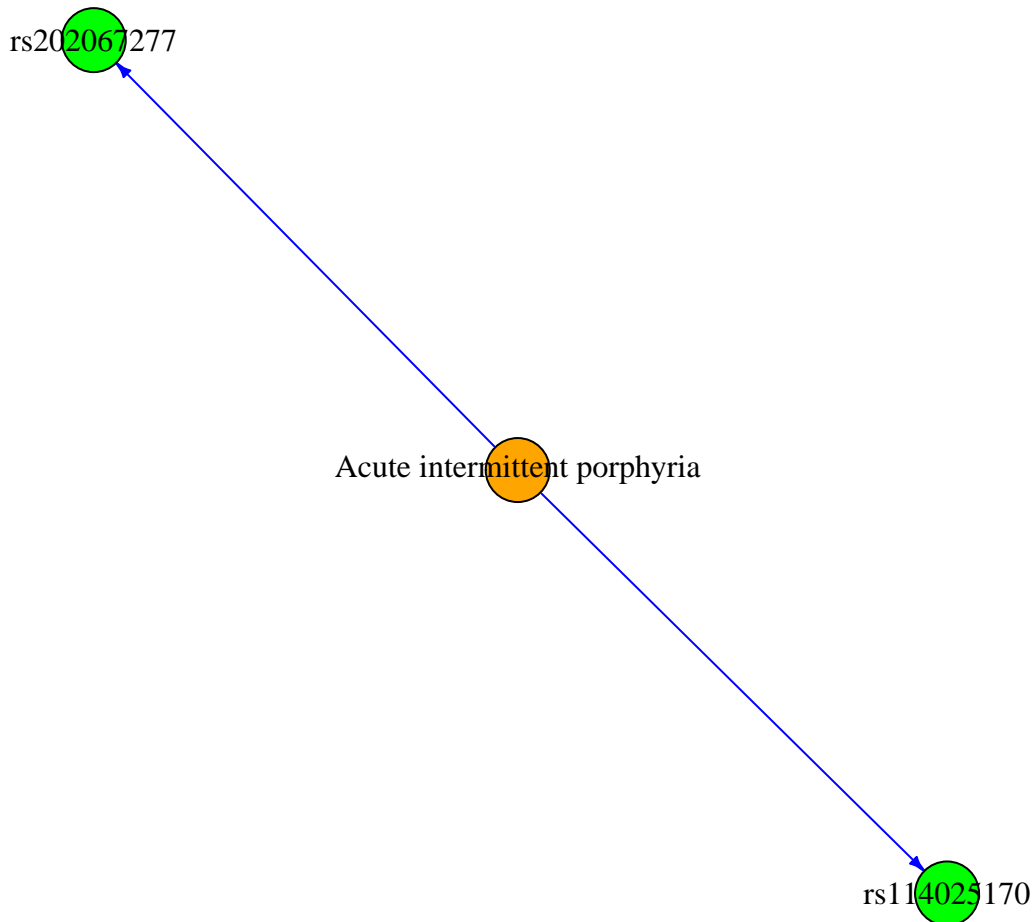

# Variant–Disease Network (Adenylosuccinate lyase deficiency)

Adenylosuccinate lyase deficiency

rs369069575

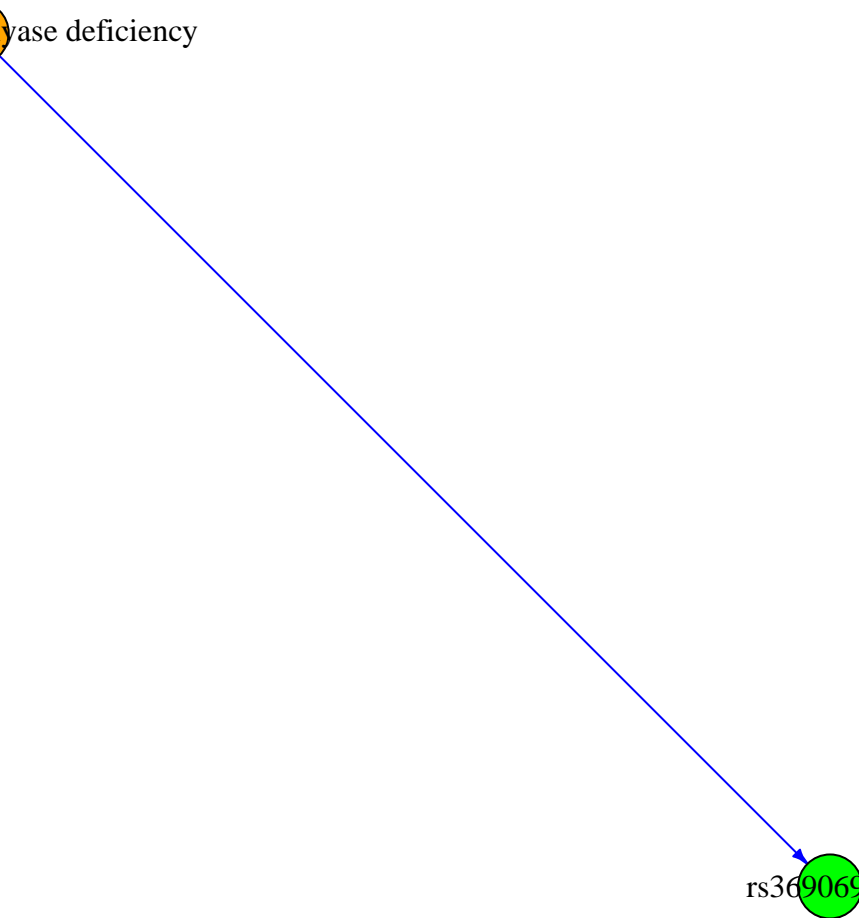

## Variant-Disease Network (Age-related cortical cataract)

Age-related cortical cataract

rs34753465

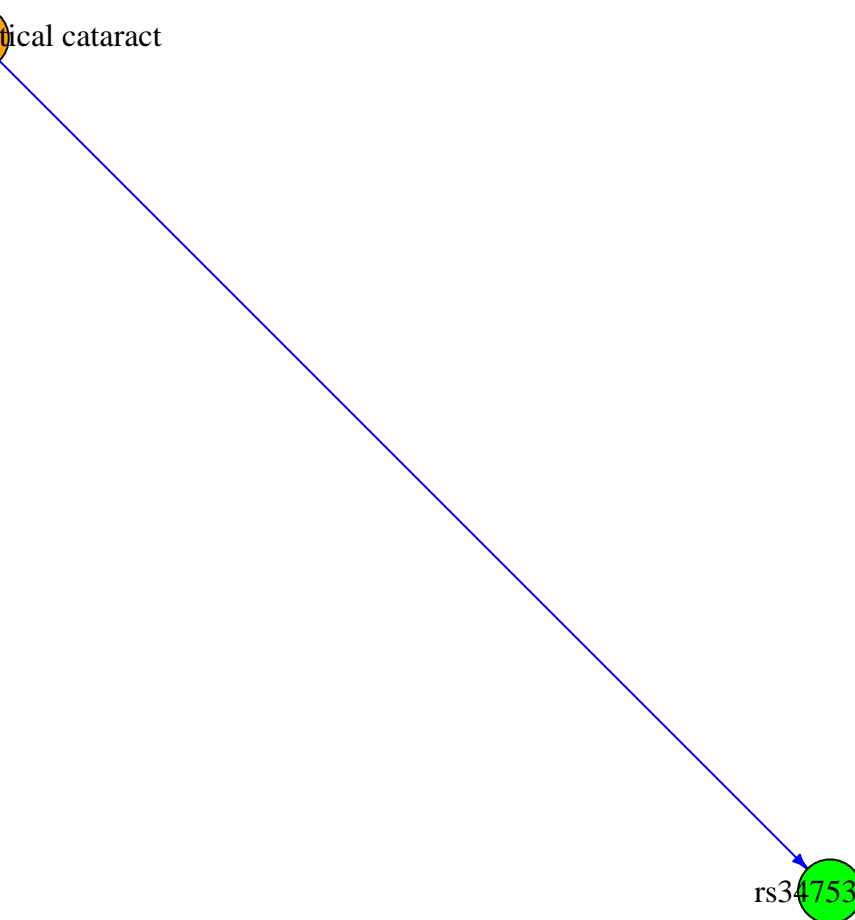

## Variant–Disease Network (Alopecia universalis)

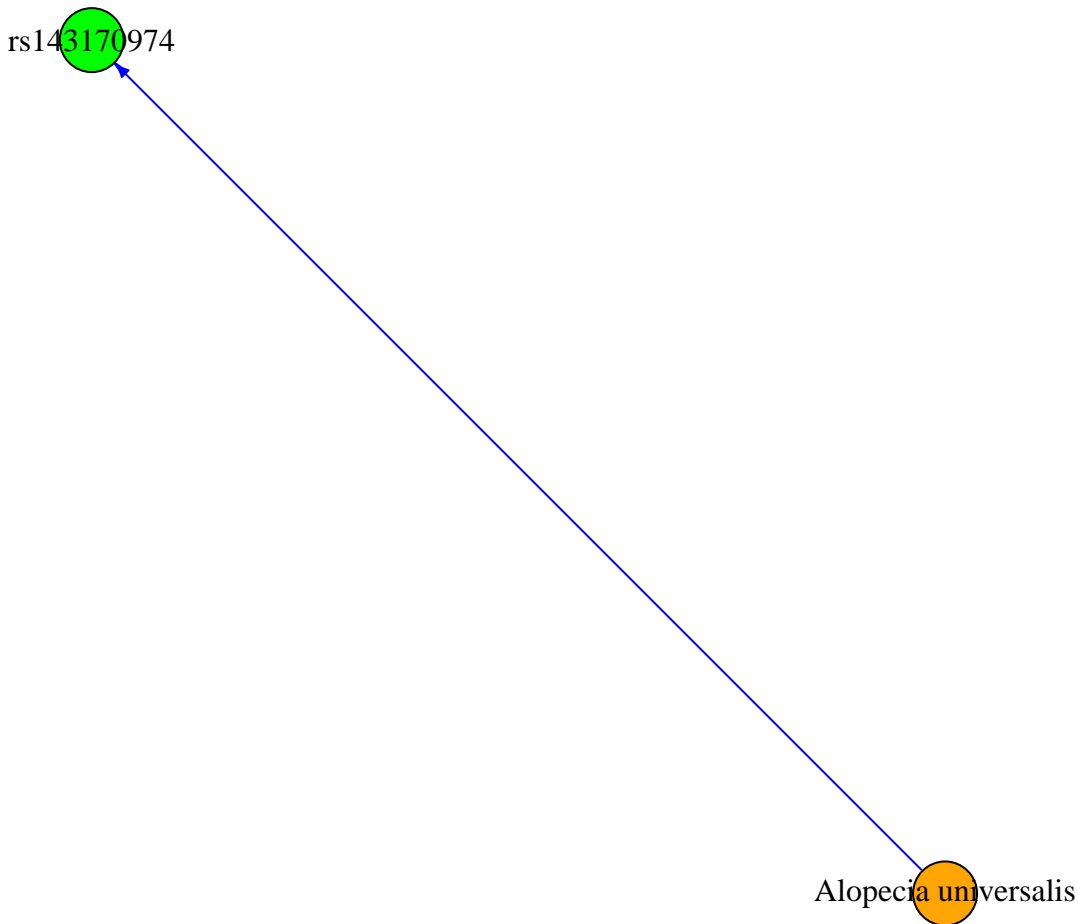

Variant–Disease Network (ALS2–Related Disorders)

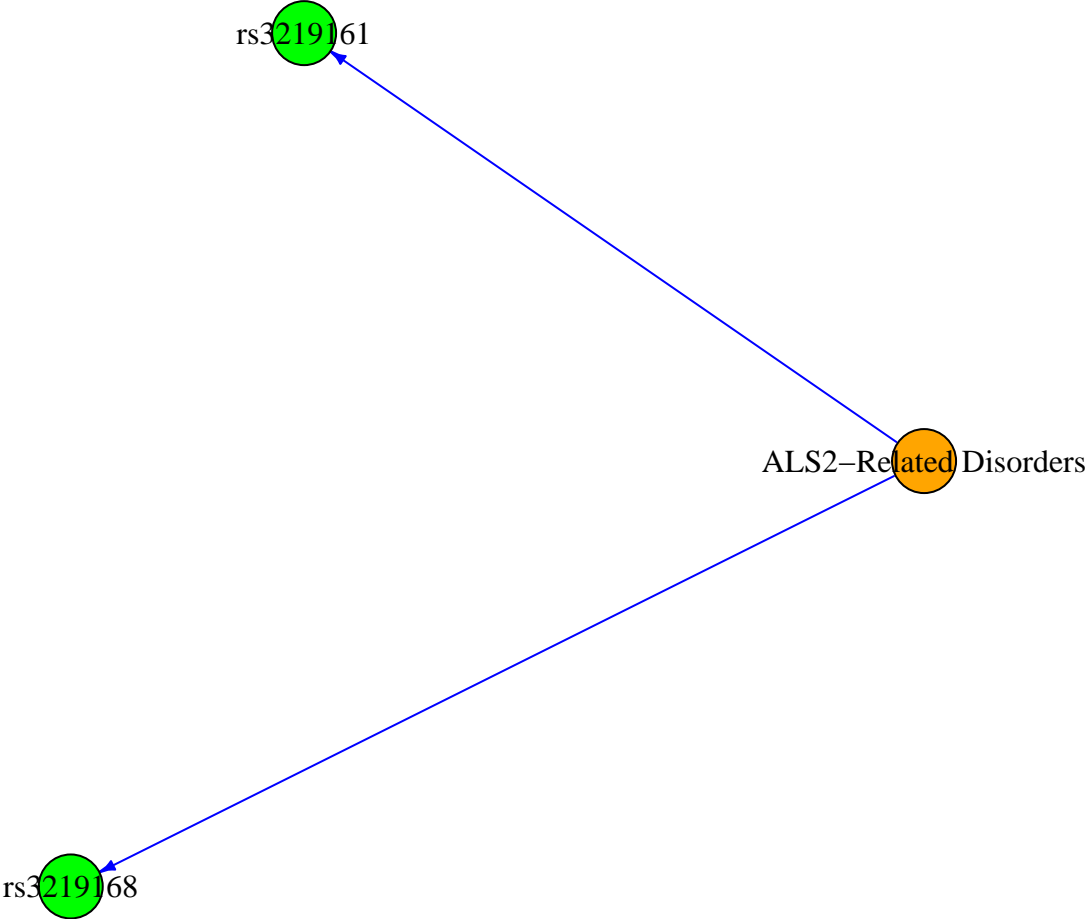

Variant–Disease Network (Amyotrophic Lateral Sclerosis)

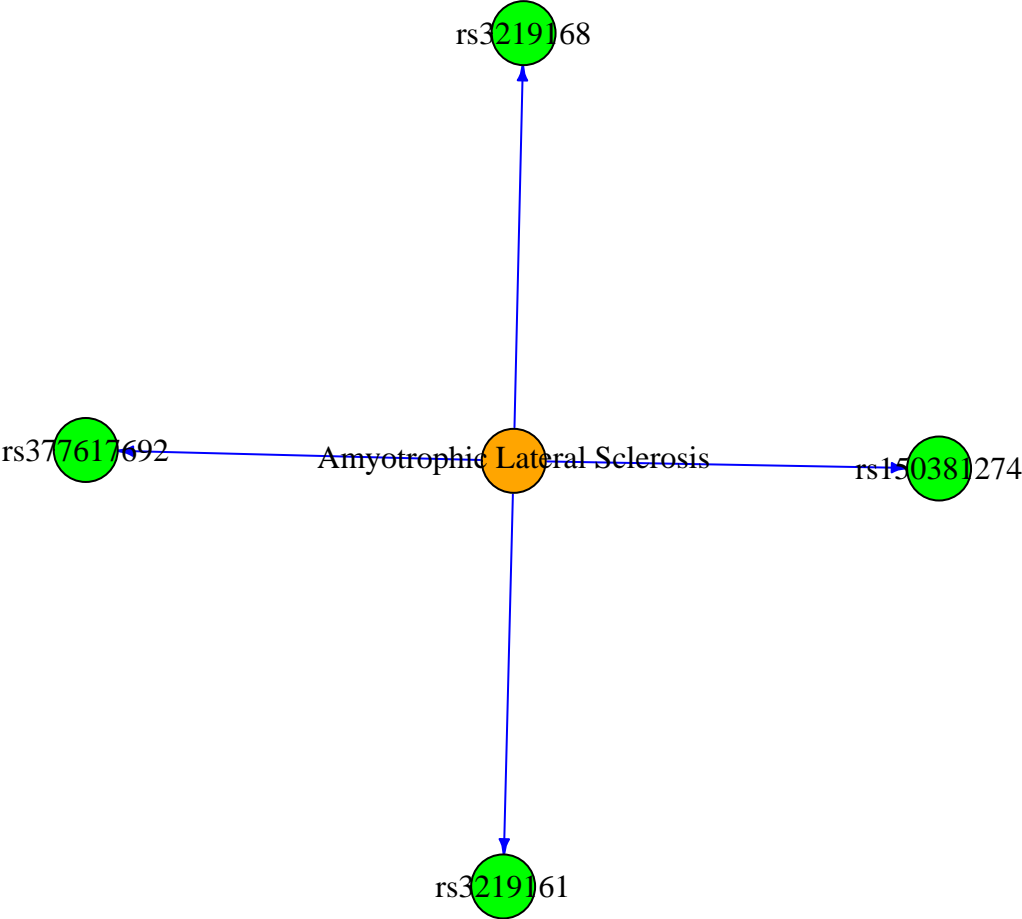

Variant–Disease Network (Amyotrophic lateral sclerosis type 1)

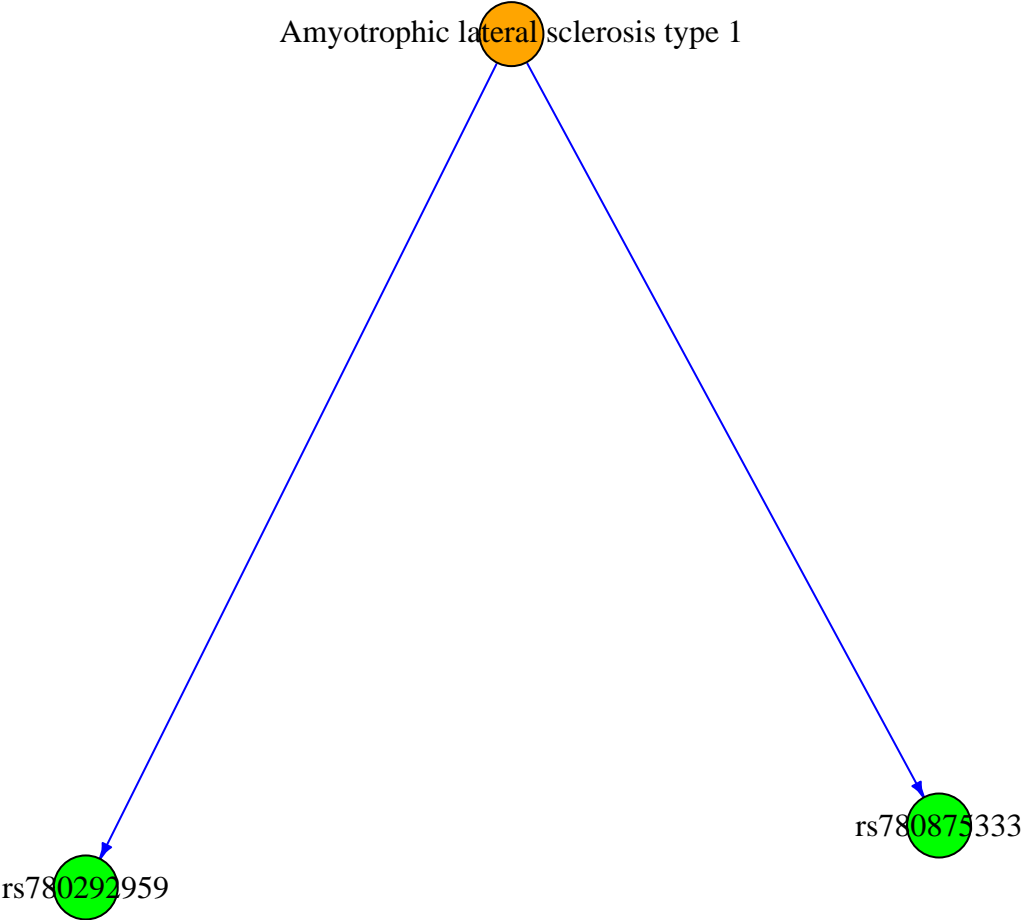

# Variant–Disease Network (Amyotrophic lateral sclerosis type 12)

rs150381274

Amyotrophic lateral sclerosis type

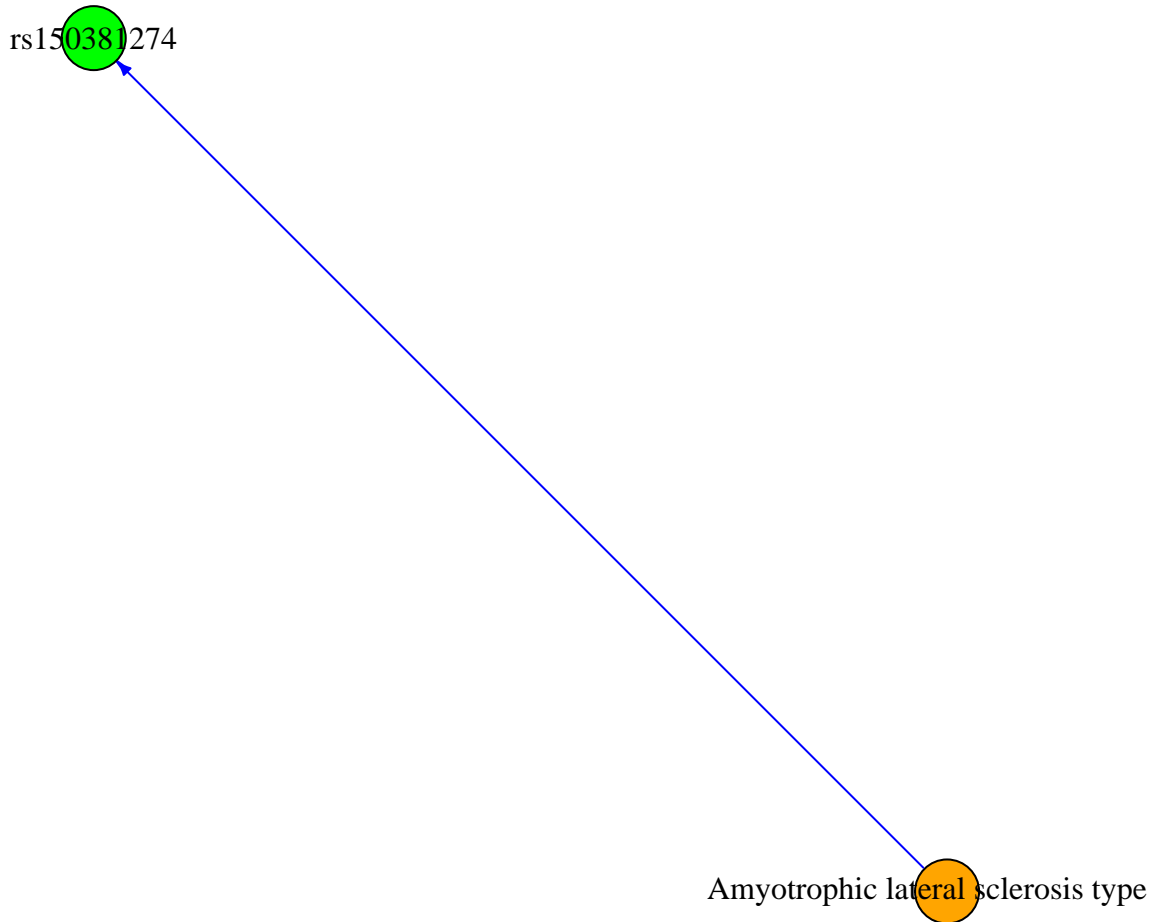



Variant–Disease Network (Amyotrophic lateral sclerosis type 4)

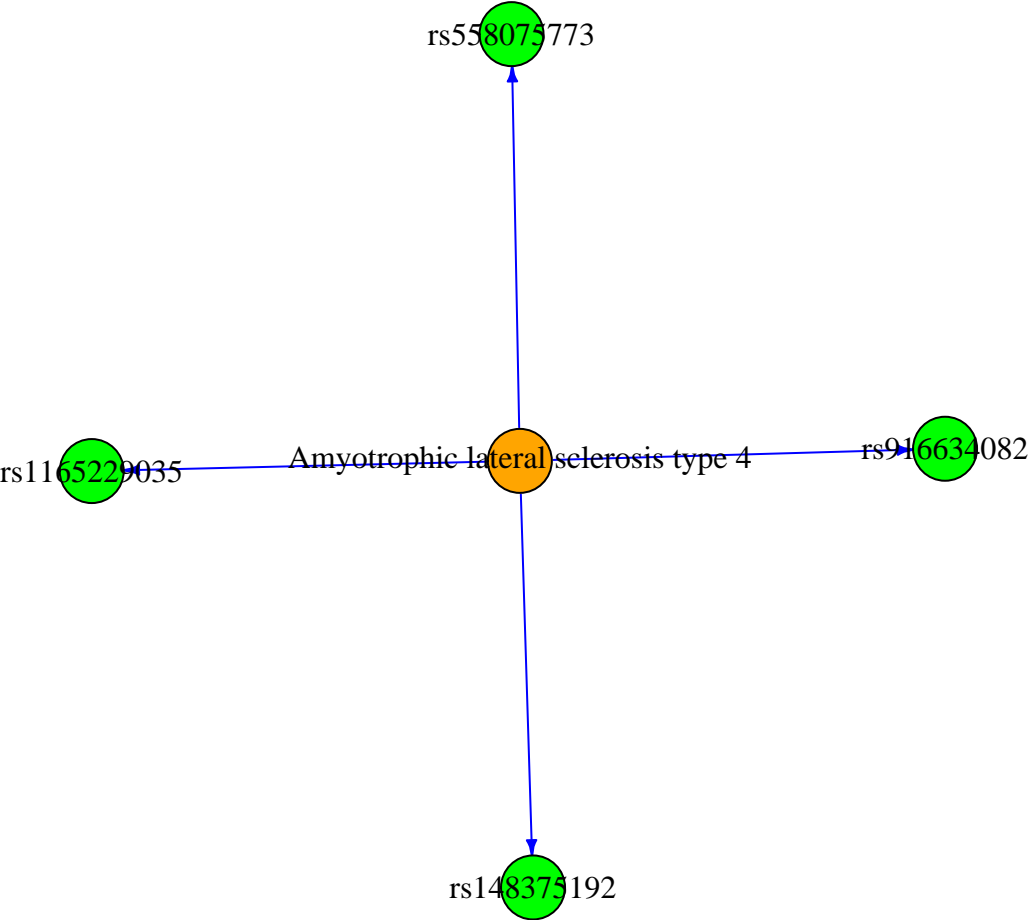

## Variant–Disease Network (Andermann syndrome)

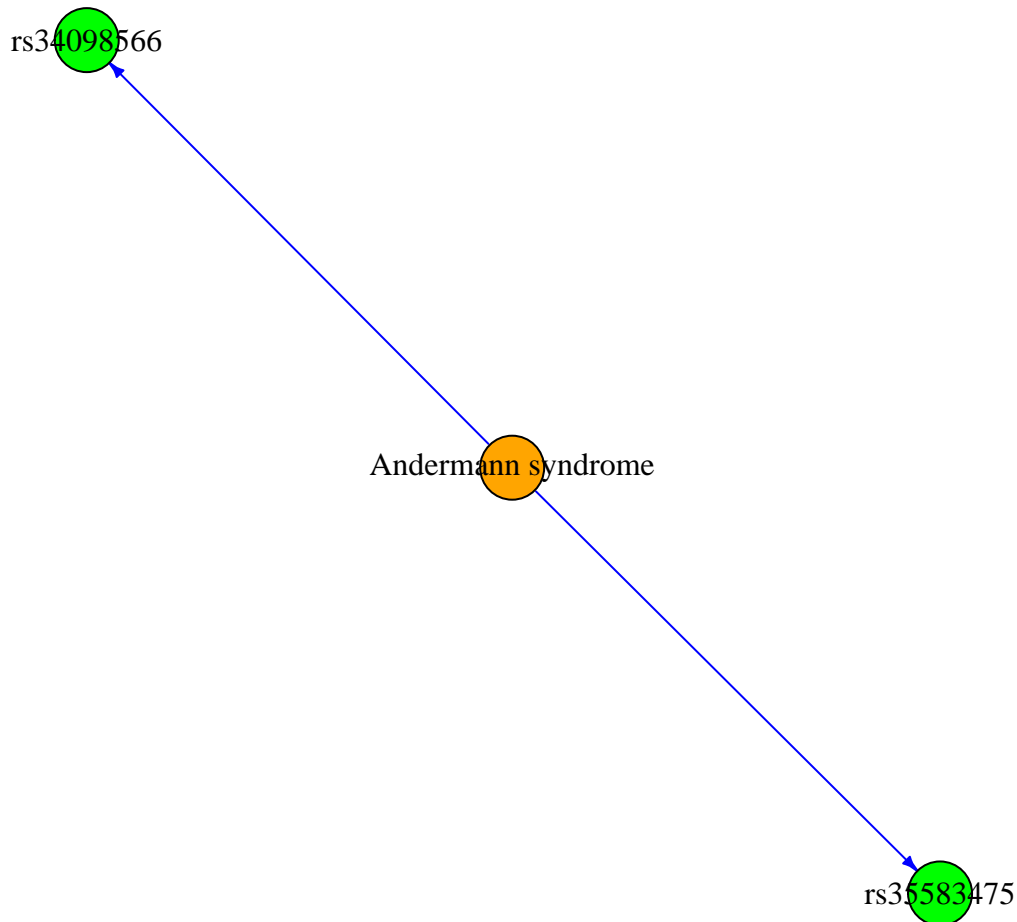

# ant-Disease Network (Angiokeratoma corporis diffusum with arteriovenous

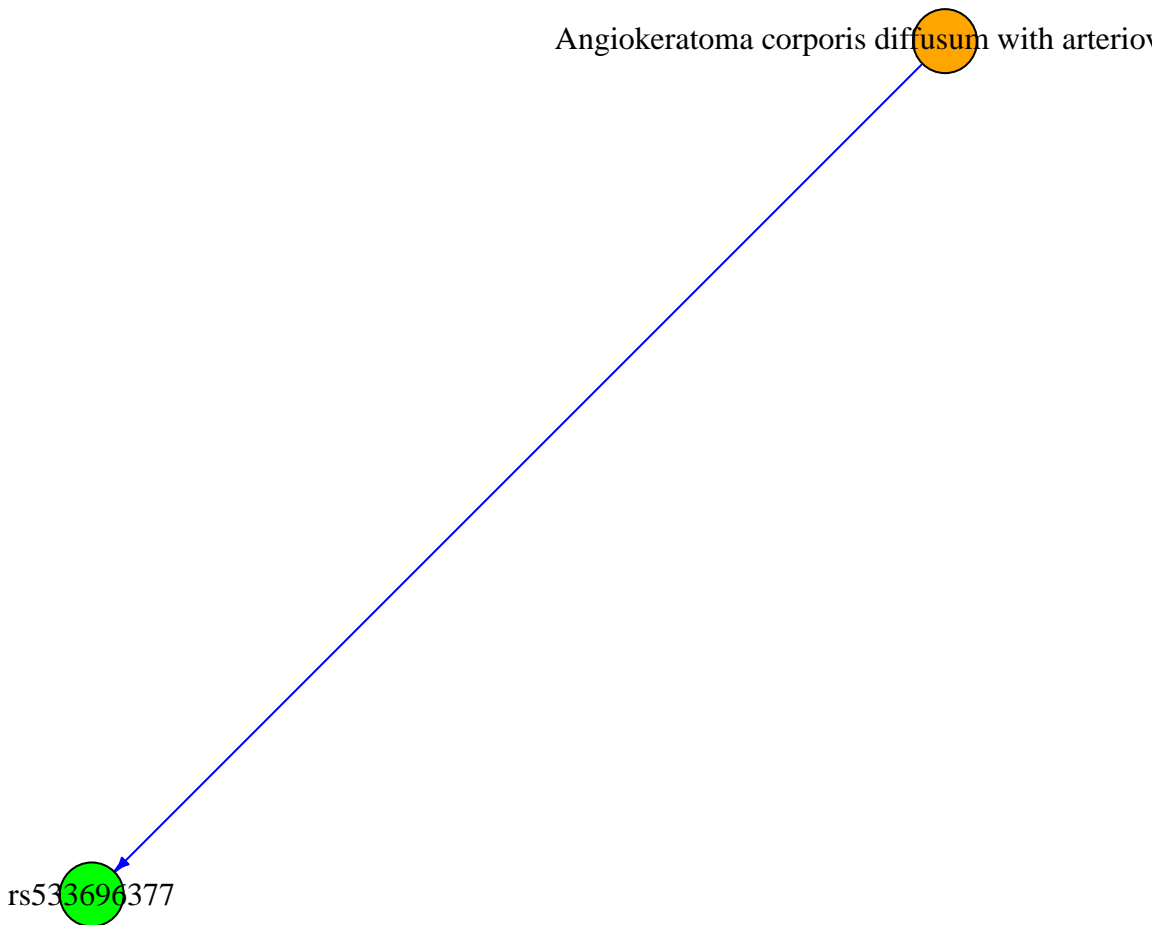

## Variant-Disease Network (Aniridia 1)

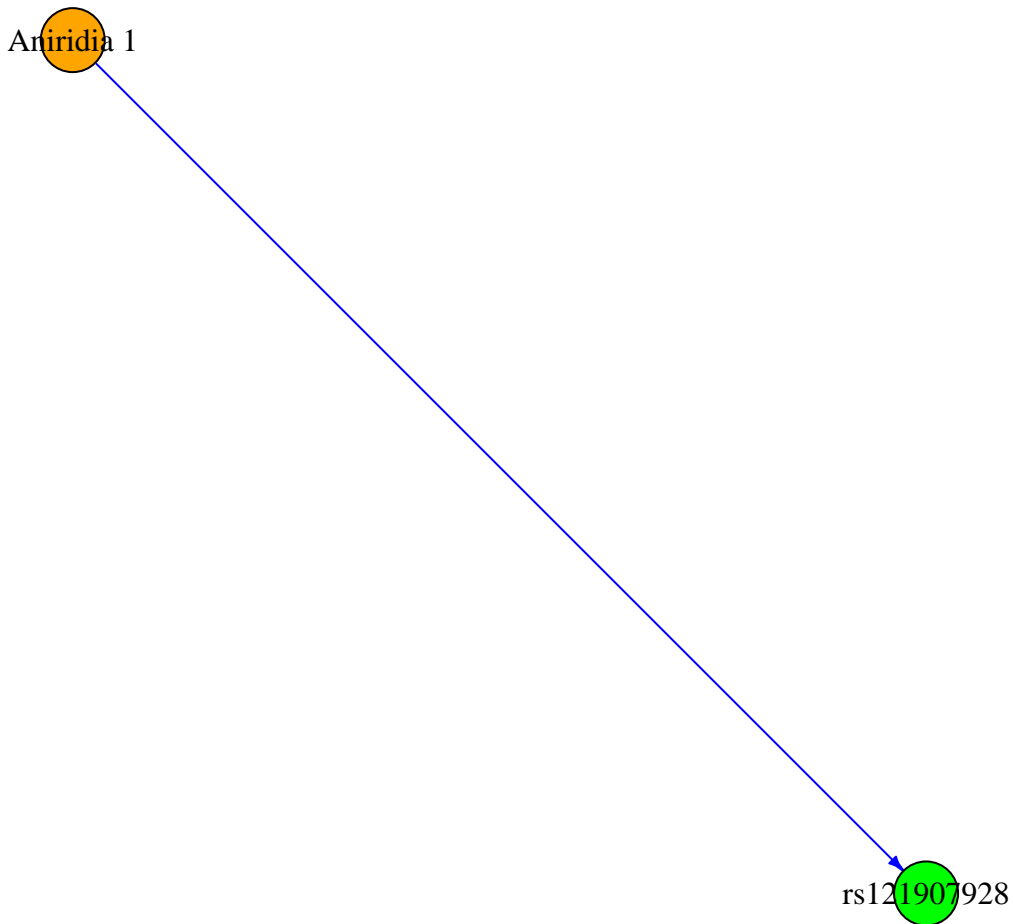

## Variant–Disease Network (Aortic aneurysm)

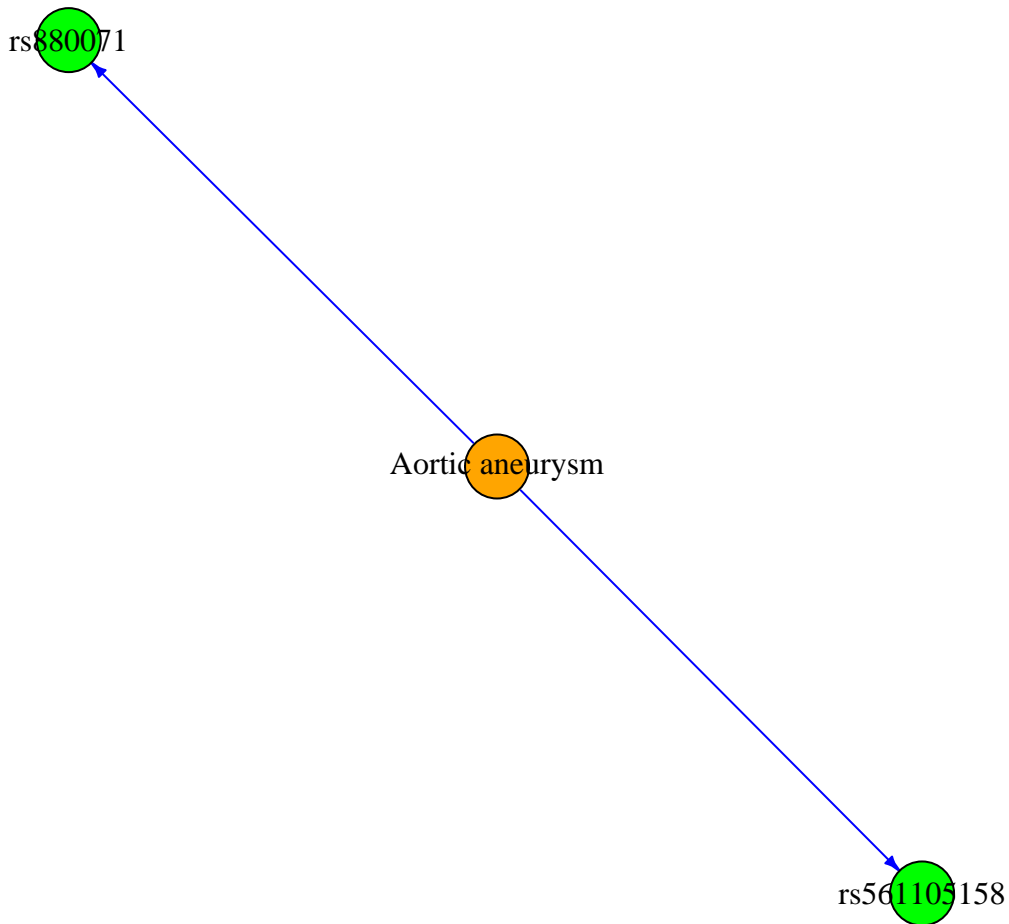

Variant–Disease Network (Arginine:glycine amidinotransferase deficiency)

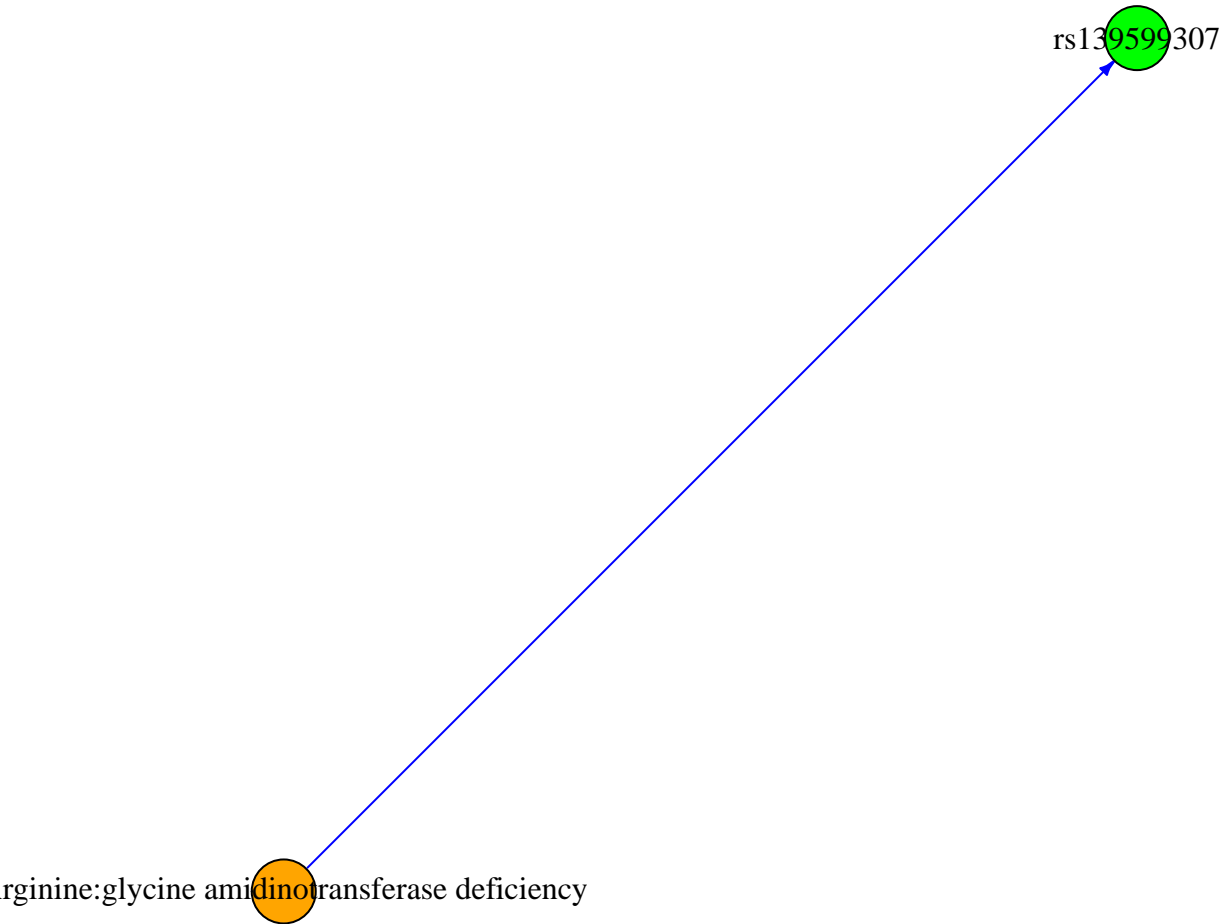

## Variant–Disease Network (Argininosuccinate lyase deficiency)

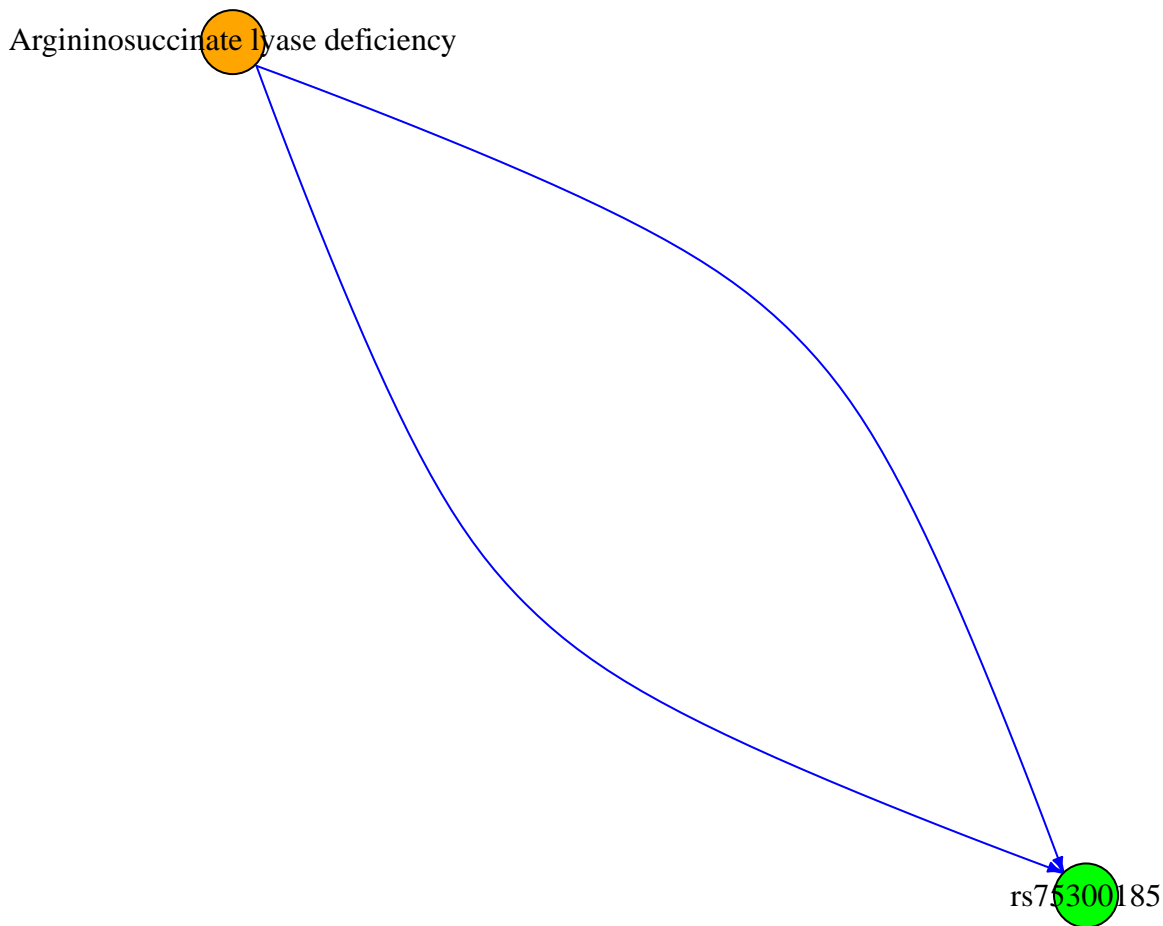

## Variant–Disease Network (Aromatase deficiency)

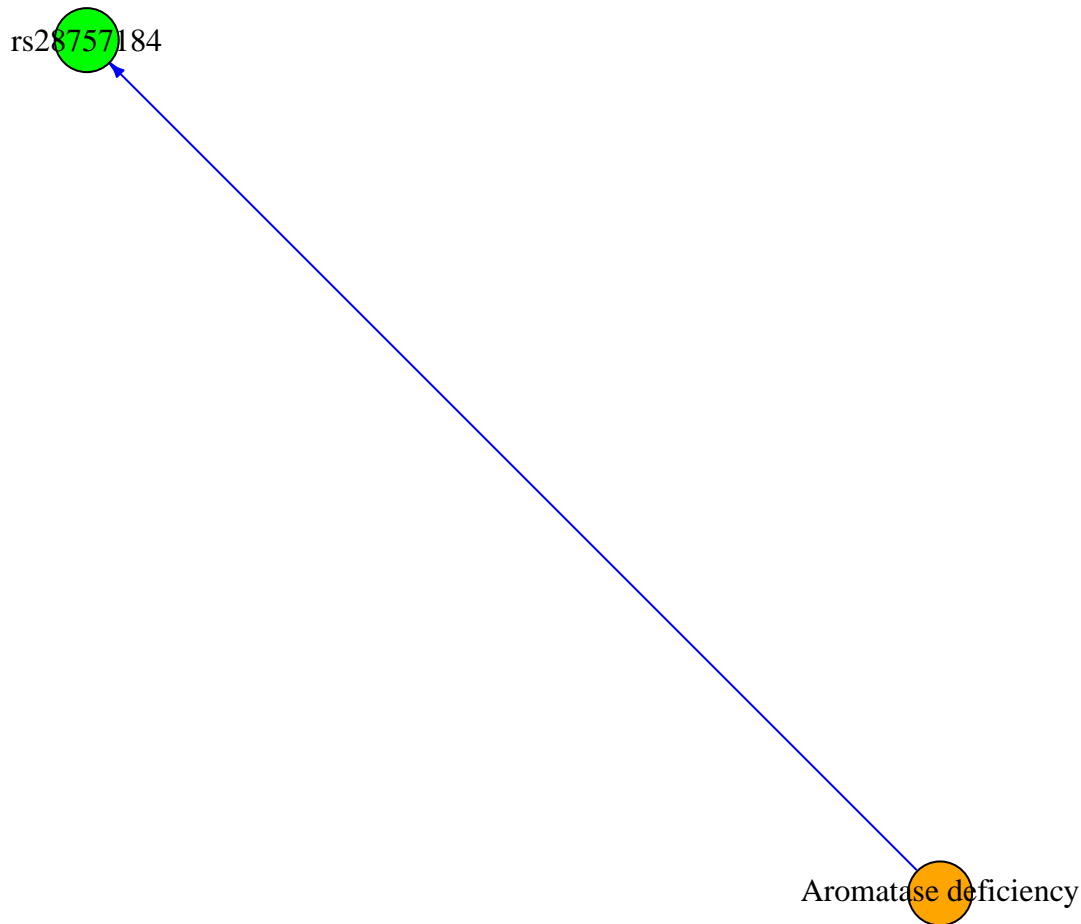



## Variant–Disease Network (Arrhythmia)

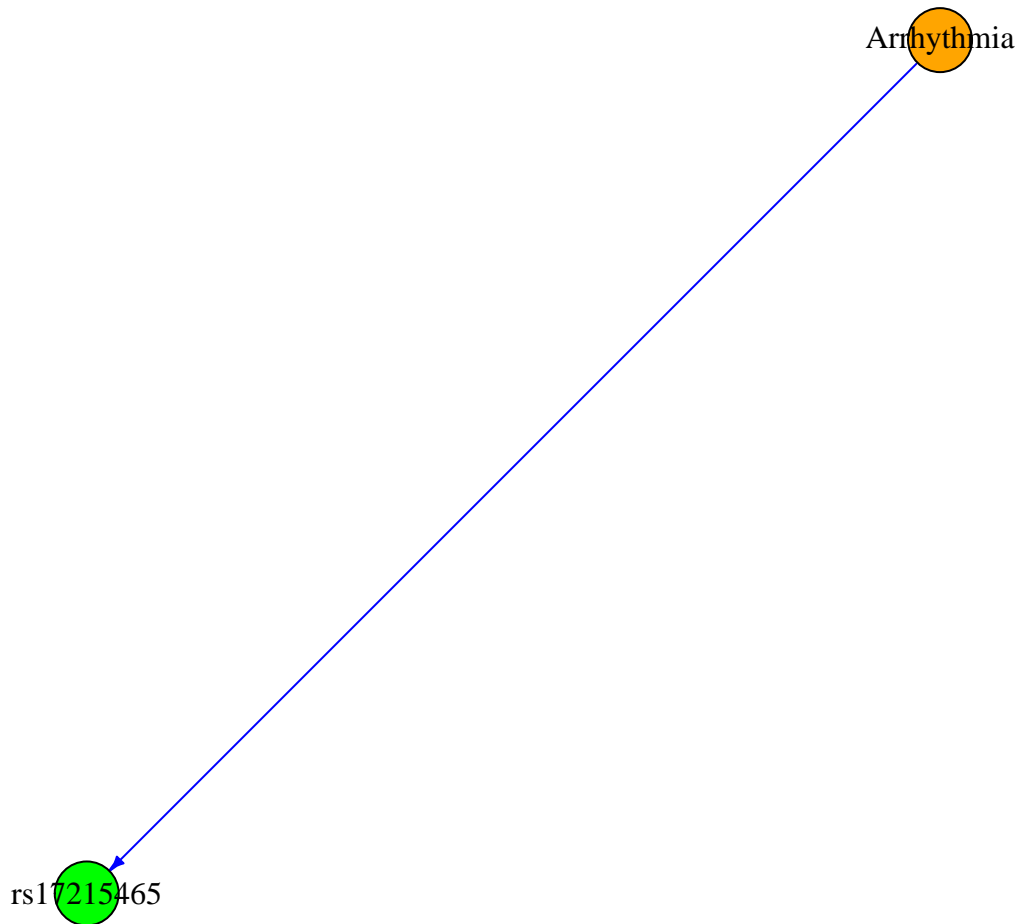

Variant–Disease Network (Arrhythmogenic right ventricular cardiomyopathy)

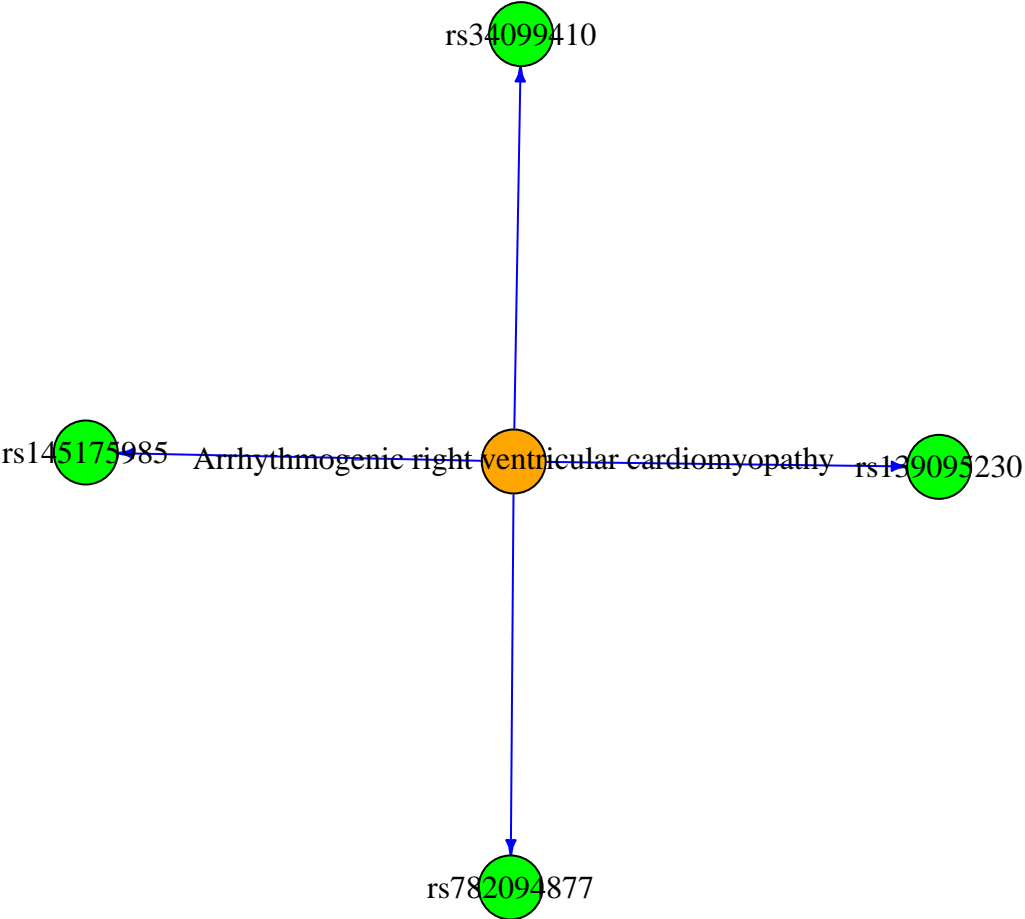

## Variant–Disease Network (Arterial calcification)

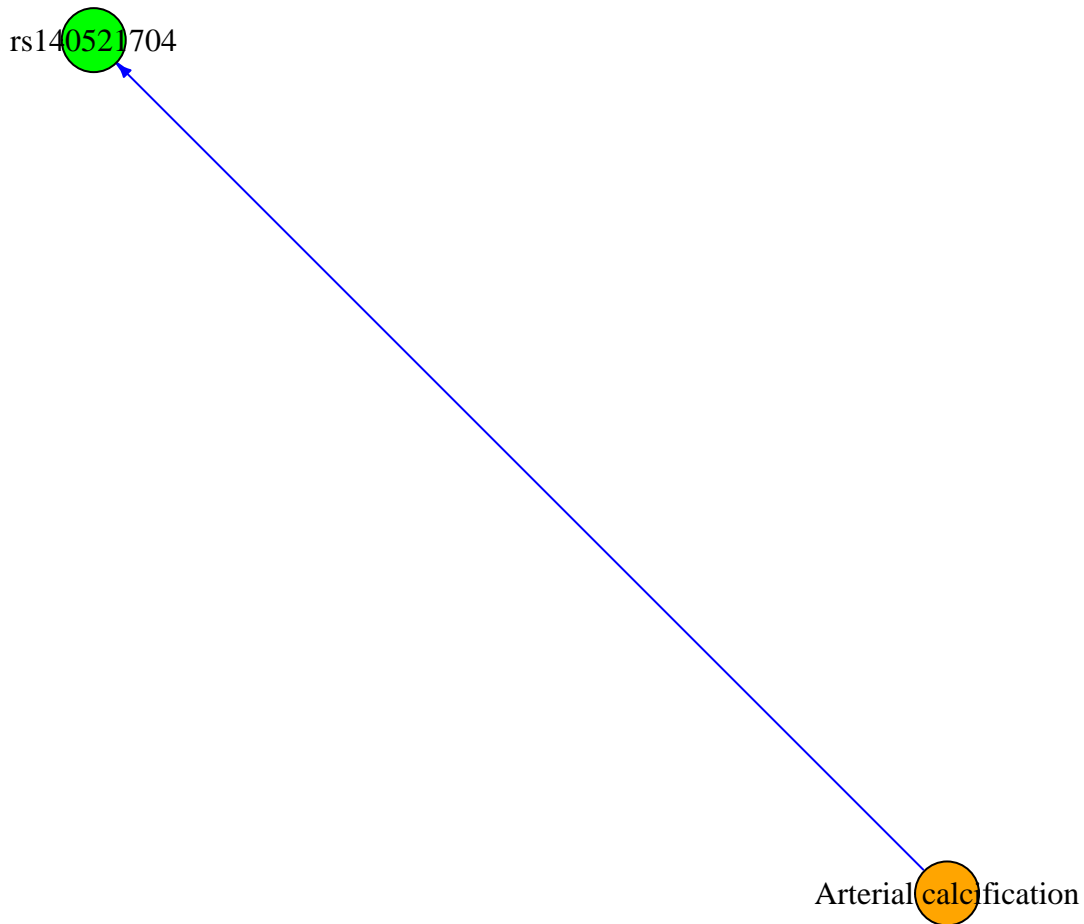

Variant–Disease Network (Arterial tortuosity syndrome)

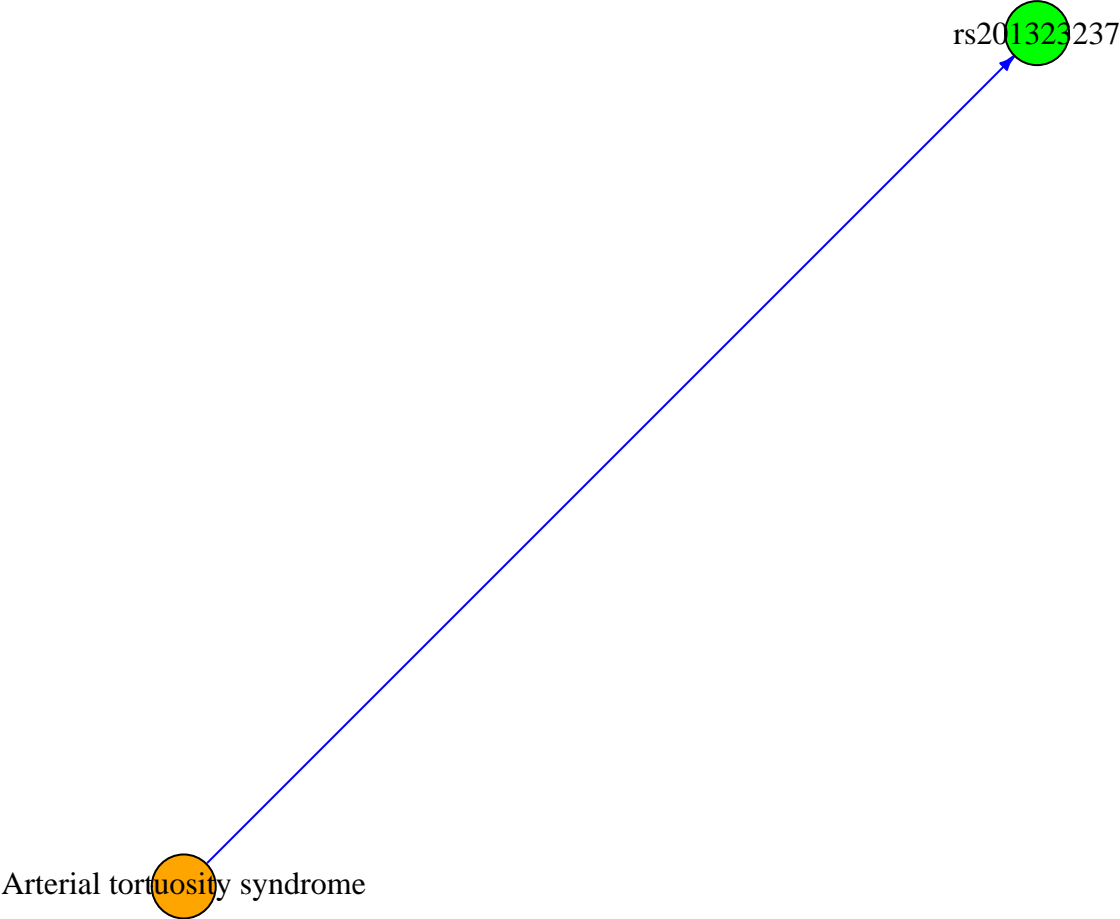

## Variant–Disease Network (Arteriohepatic dysplasia)

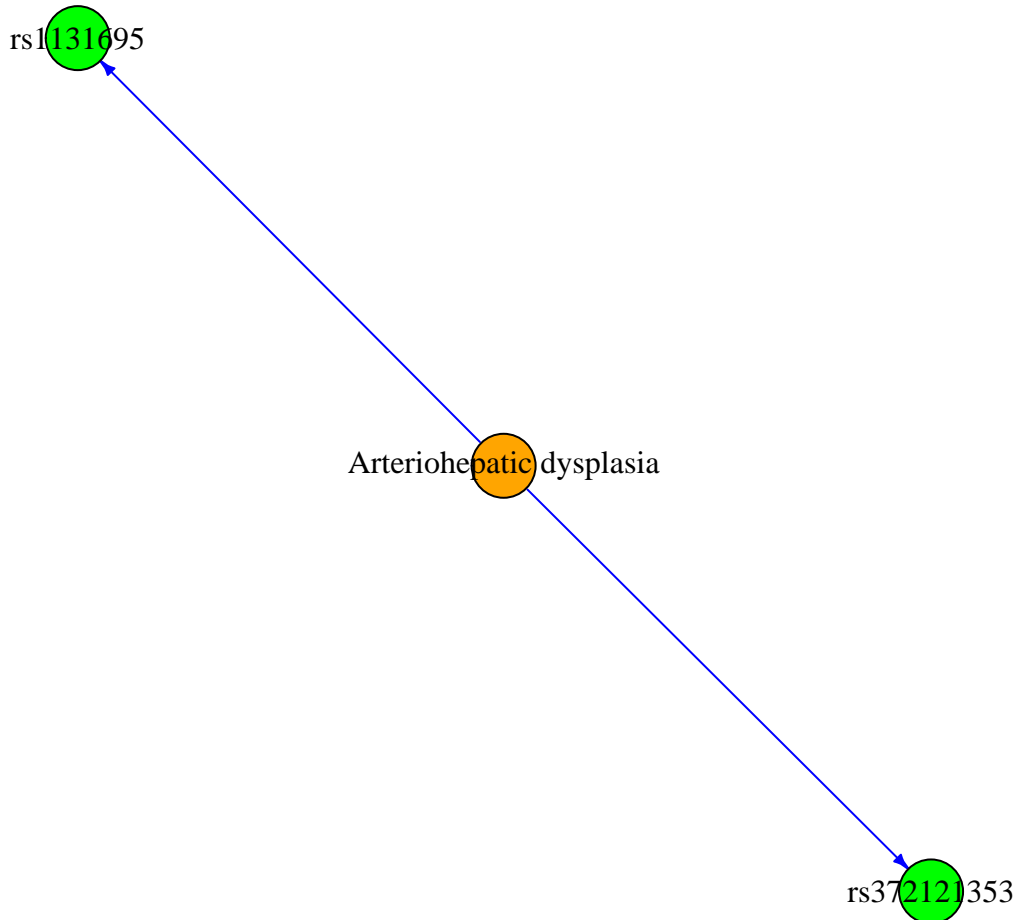

Variant–Disease Network (Arthrogryposis multiplex congenita)

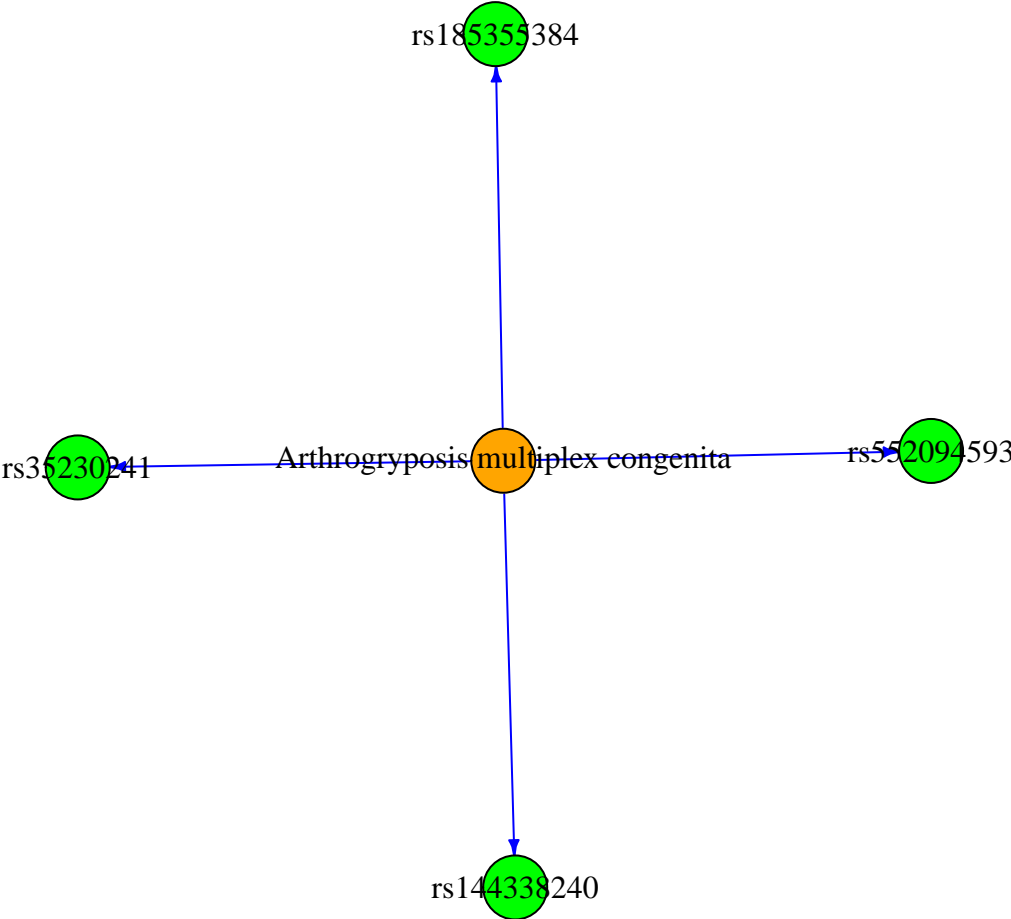

## Variant–Disease Network (Aspartylglucosaminuria)

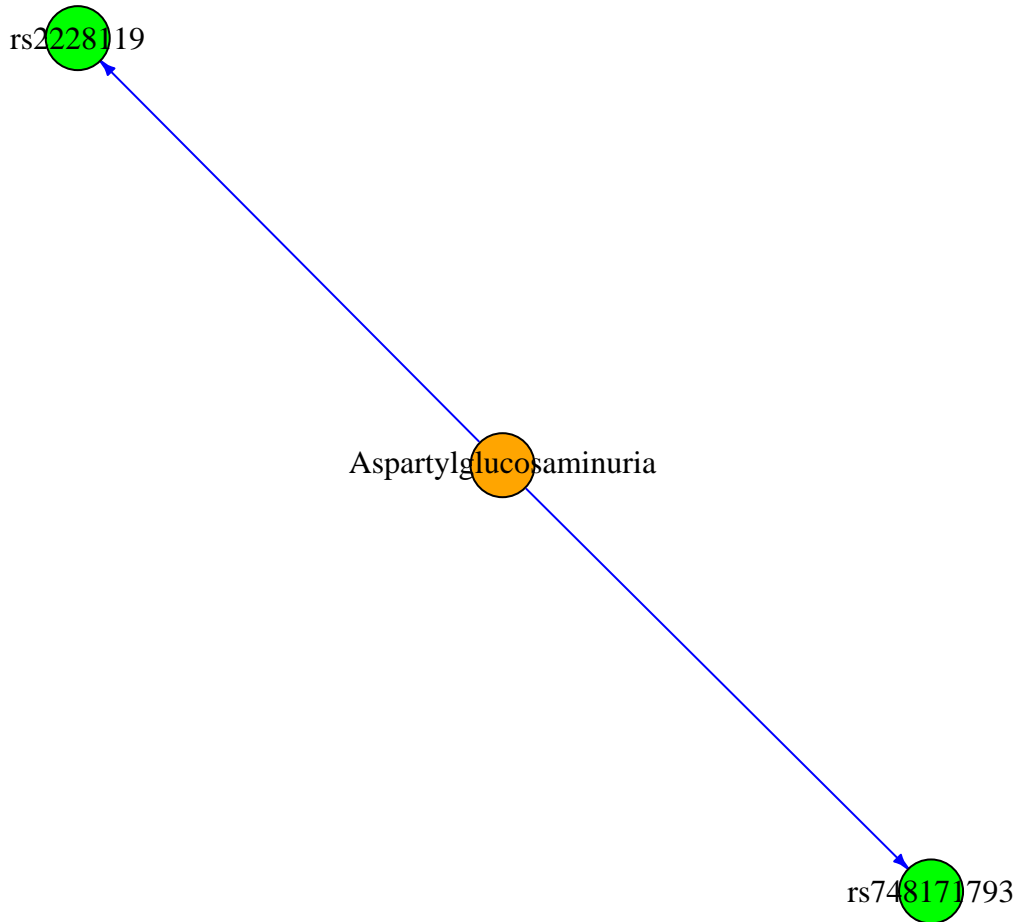

Variant–Disease Network (Ataxia Neuropathy Spectrum Disorders)

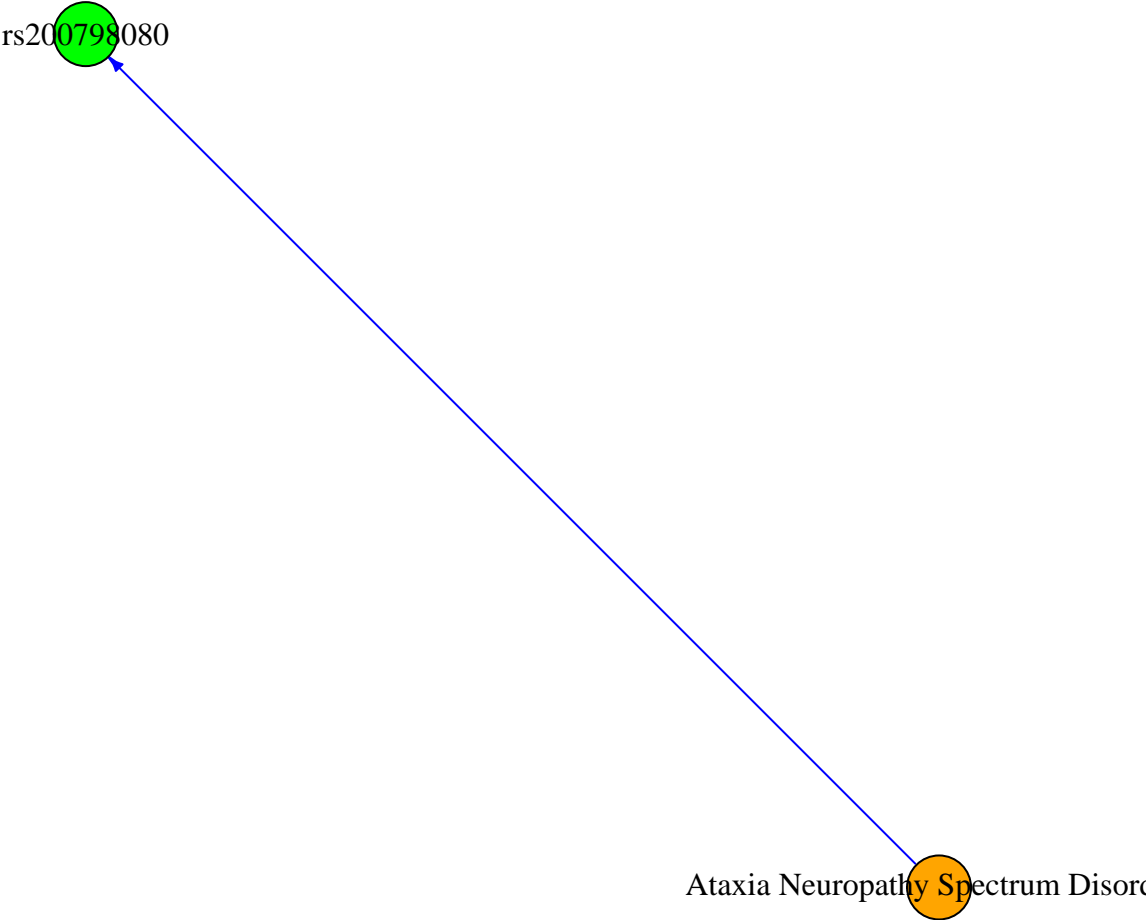



## Variant–Disease Network (Ataxia with Oculomotor Apraxia)

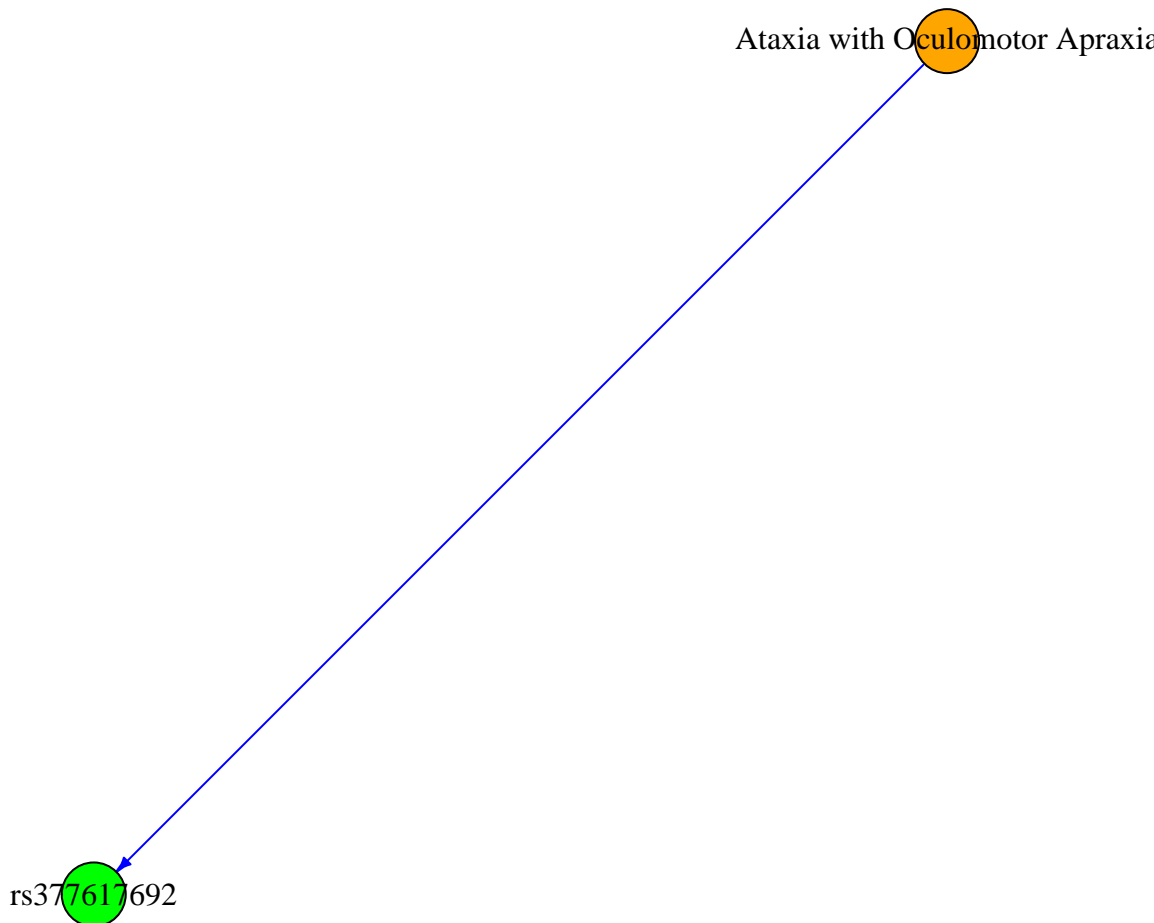

## Variant–Disease Network (Ataxia–telangiectasia syndrome)

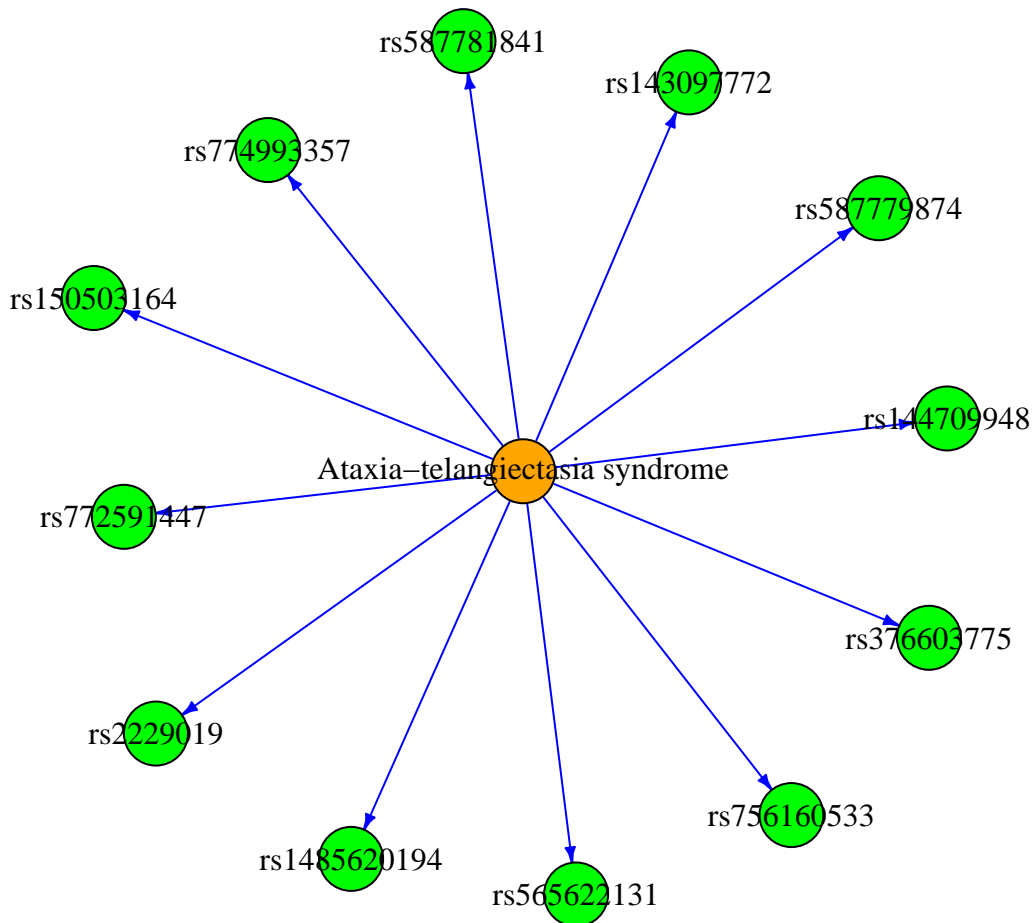

## Variant–Disease Network (Atrichia with papular lesions)

Atrichia with papular lesions

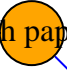

rs143170974

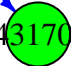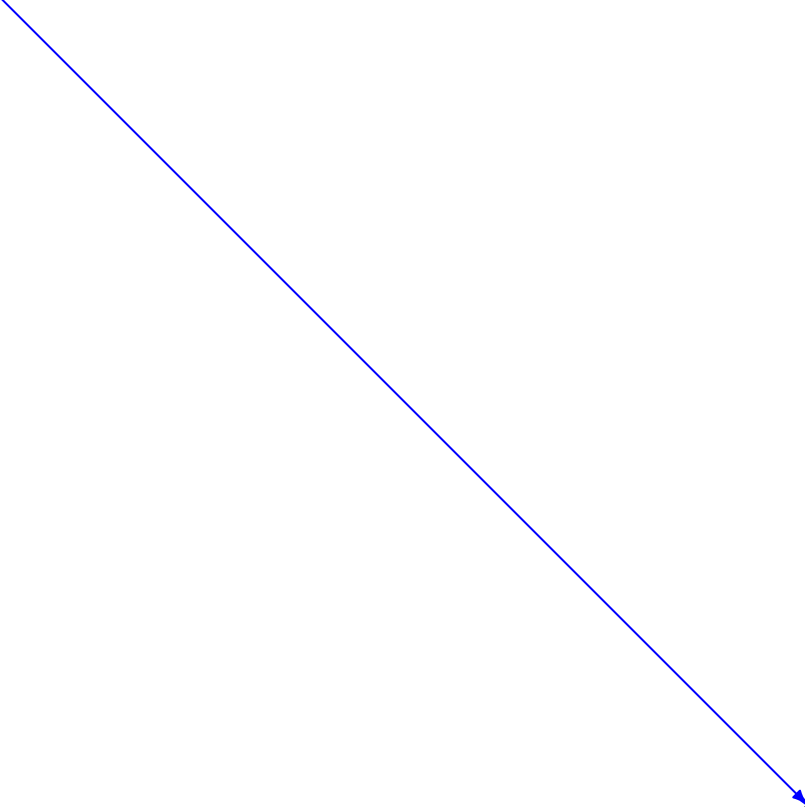

## Variant–Disease Network (Atrioventricular septal defect 4)

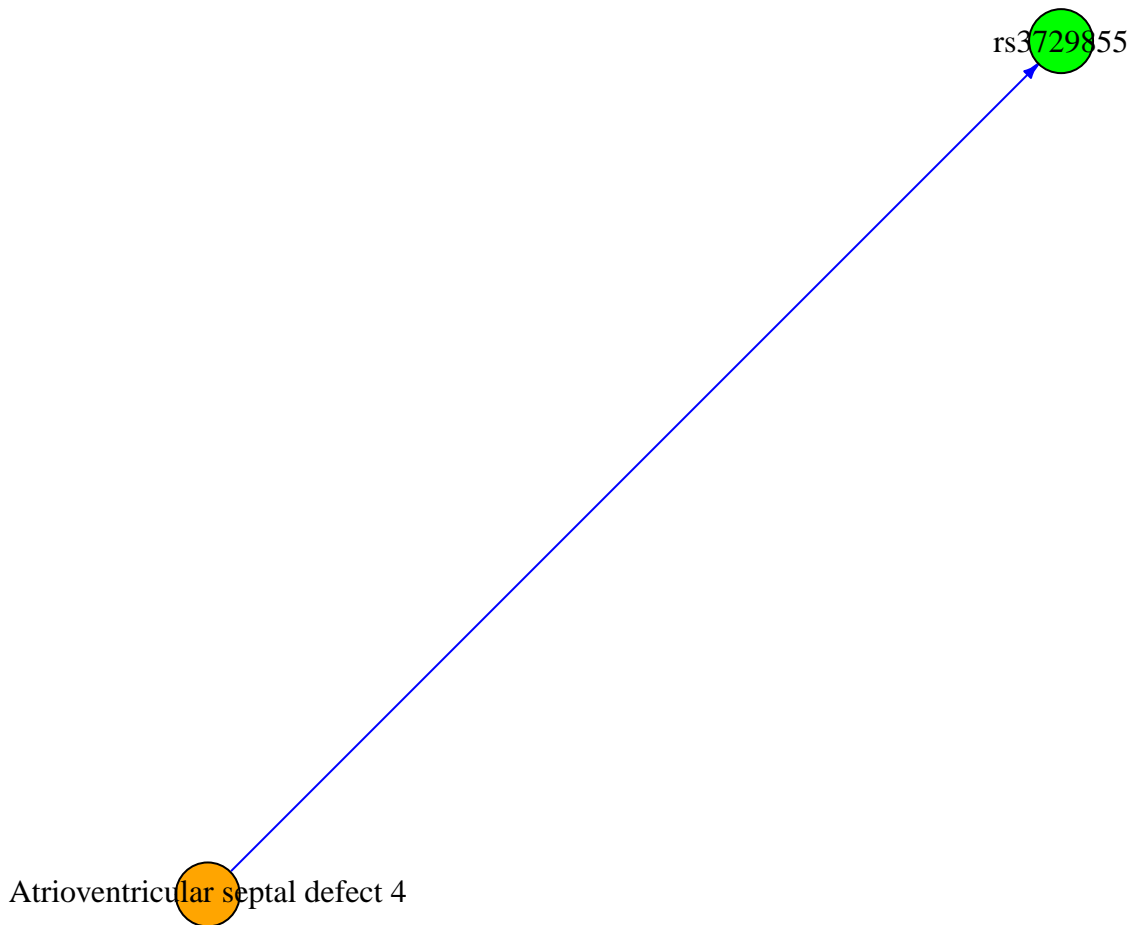

Variant–Disease Network (Atypical hemolytic uremic syndrome)

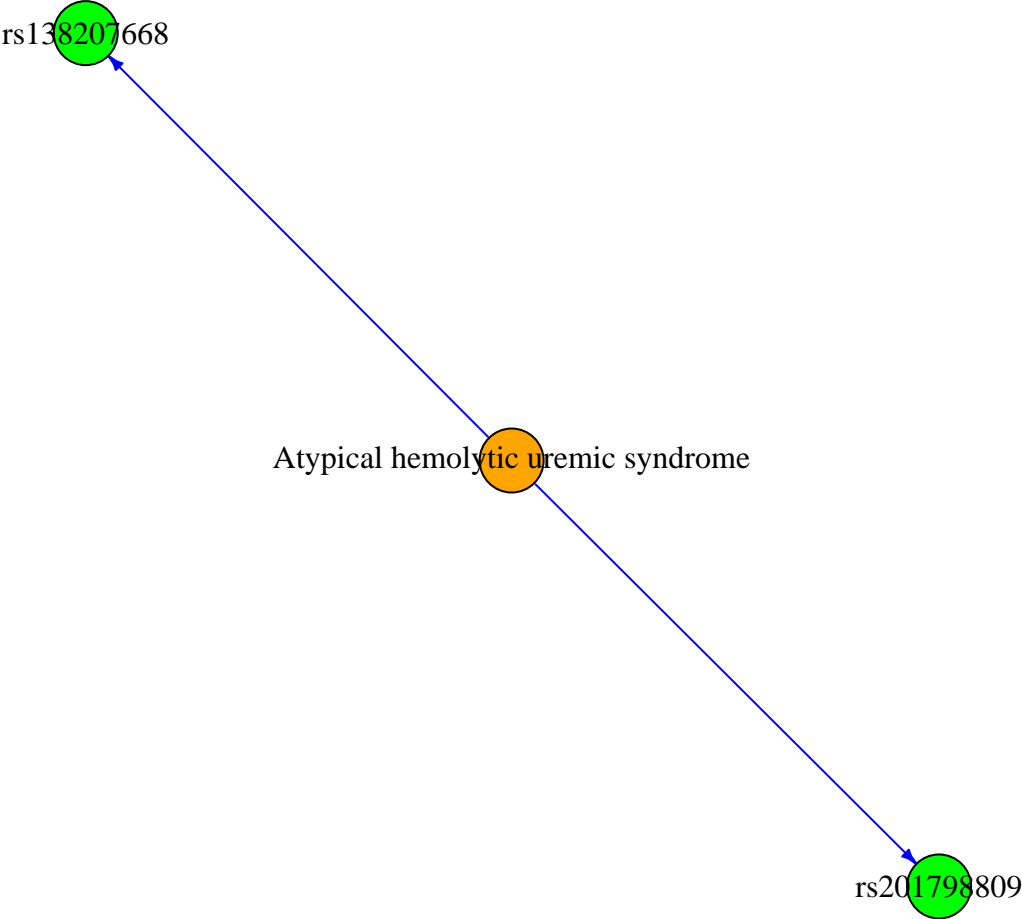

**Variant–Disease Network (Atypical hemolytic–uremic syndrome 4)**

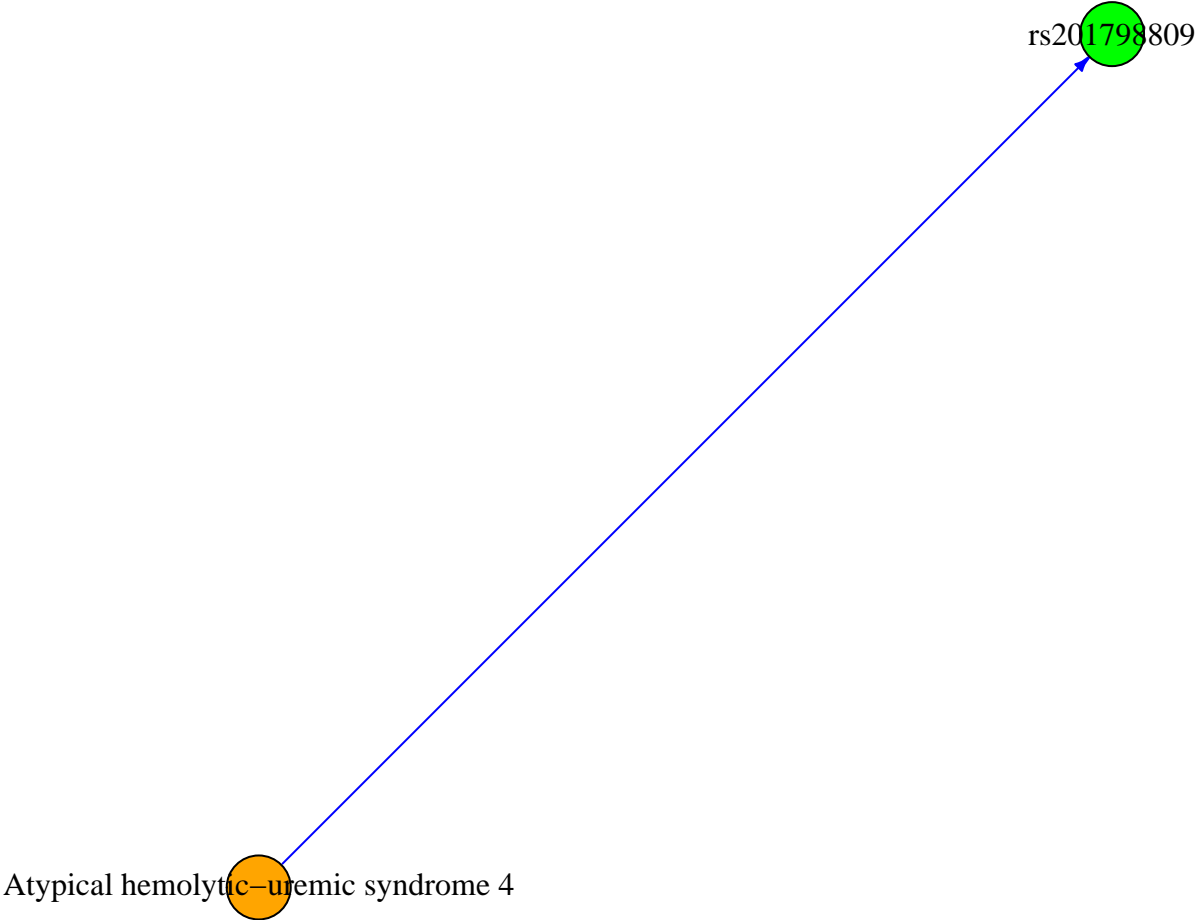

## Variant-Disease Network (Aural atresia)

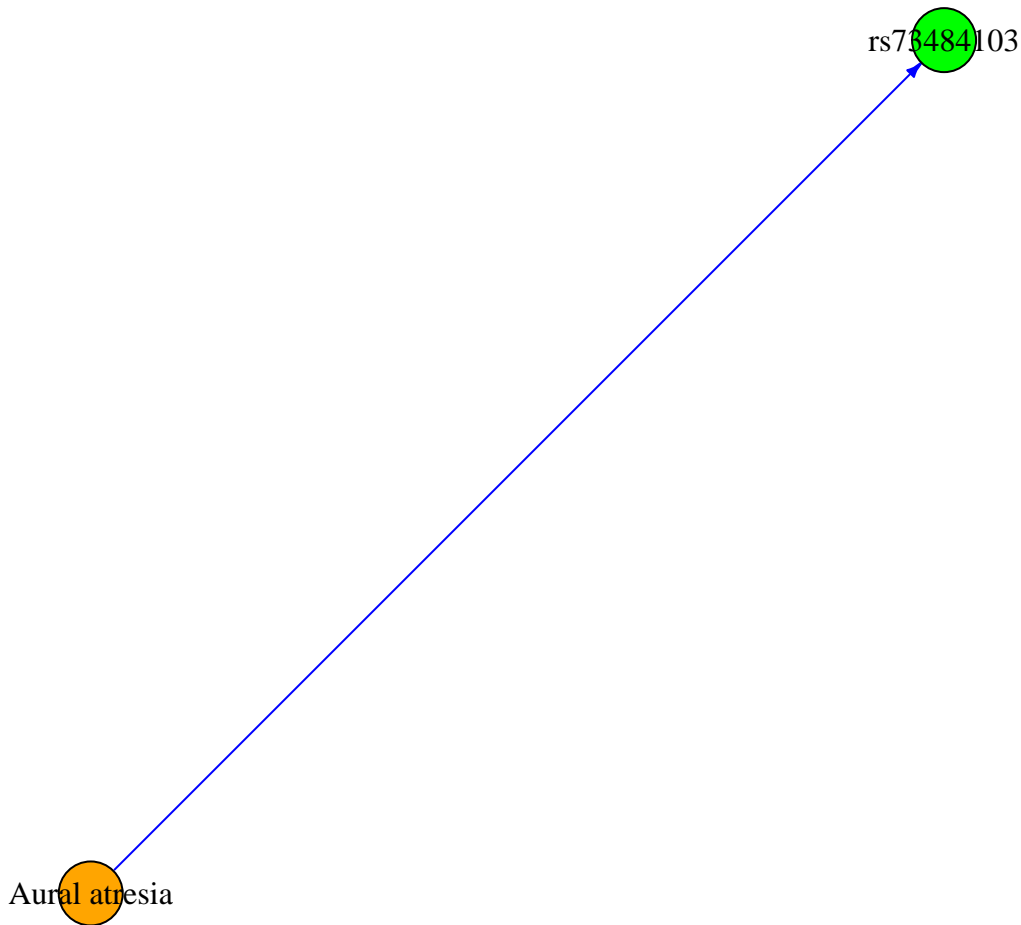

# Variant–Disease Network (Auriculocondylar syndrome)

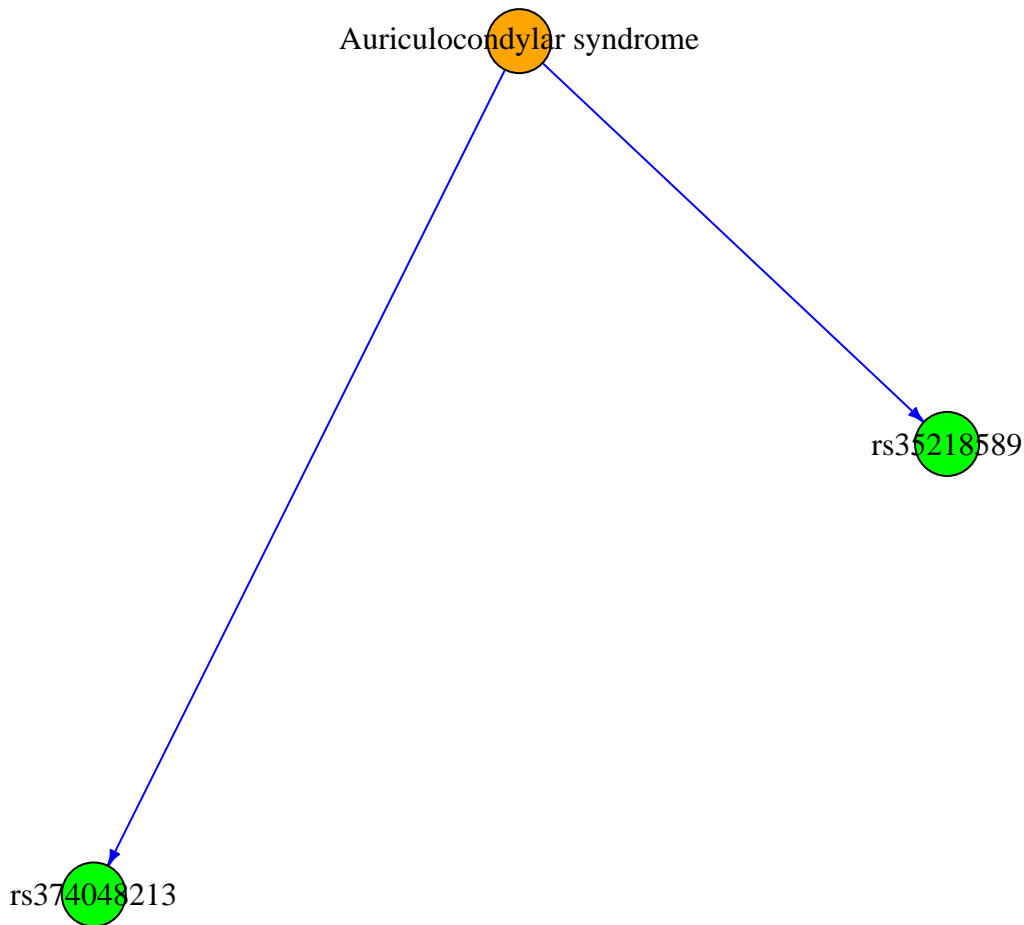



Variant–Disease Network (Autosomal recessive centronuclear myopathy)

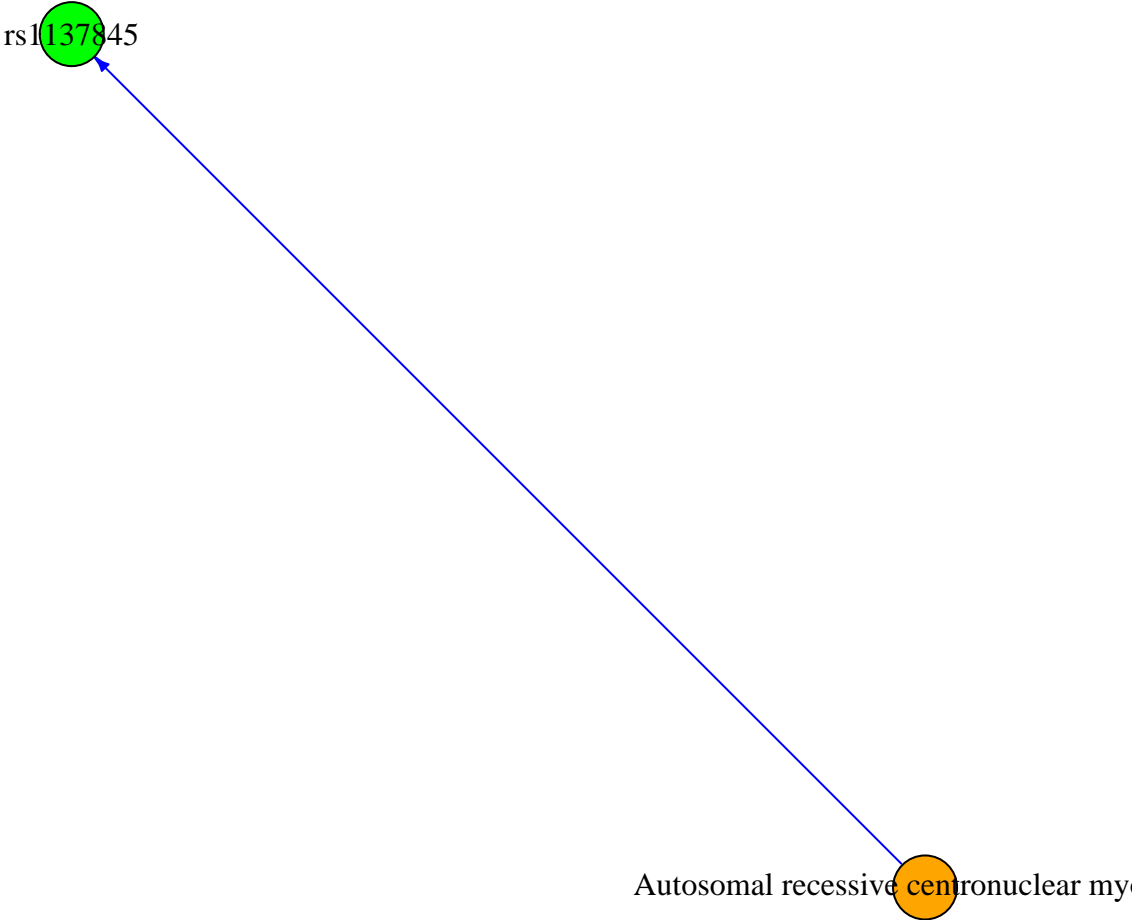

# Variant–Disease Network (Autosomal recessive cerebellar ataxia)

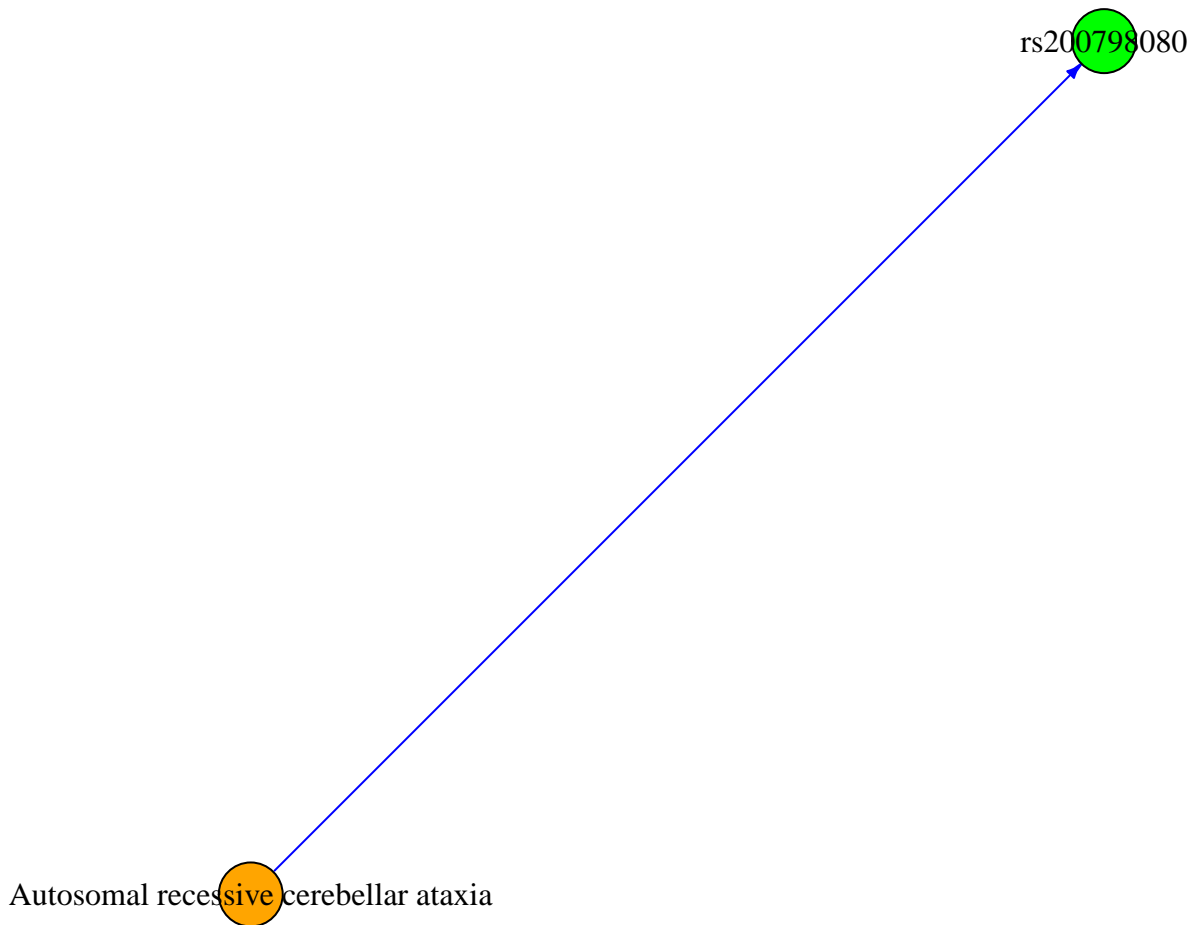

**Variant–Disease Network (Bardet–Biedl syndrome)**

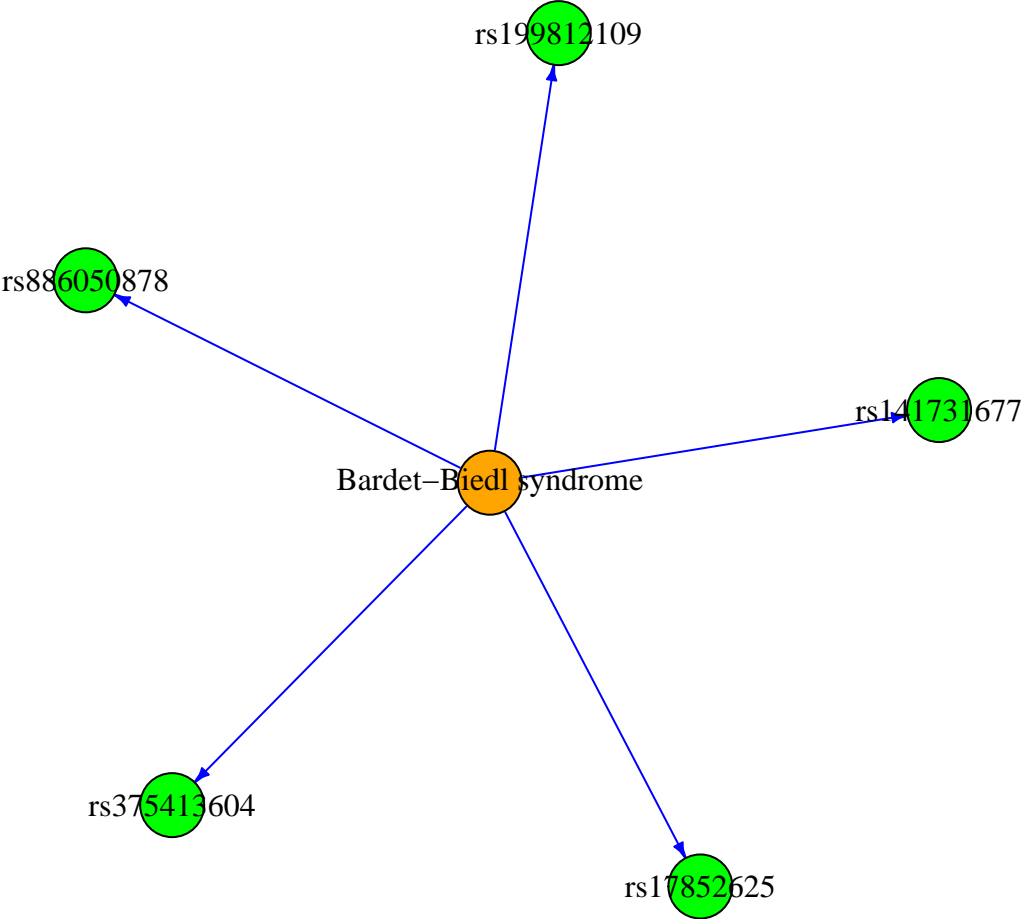

## Variant–Disease Network (Bardet–Biedl syndrome 1)

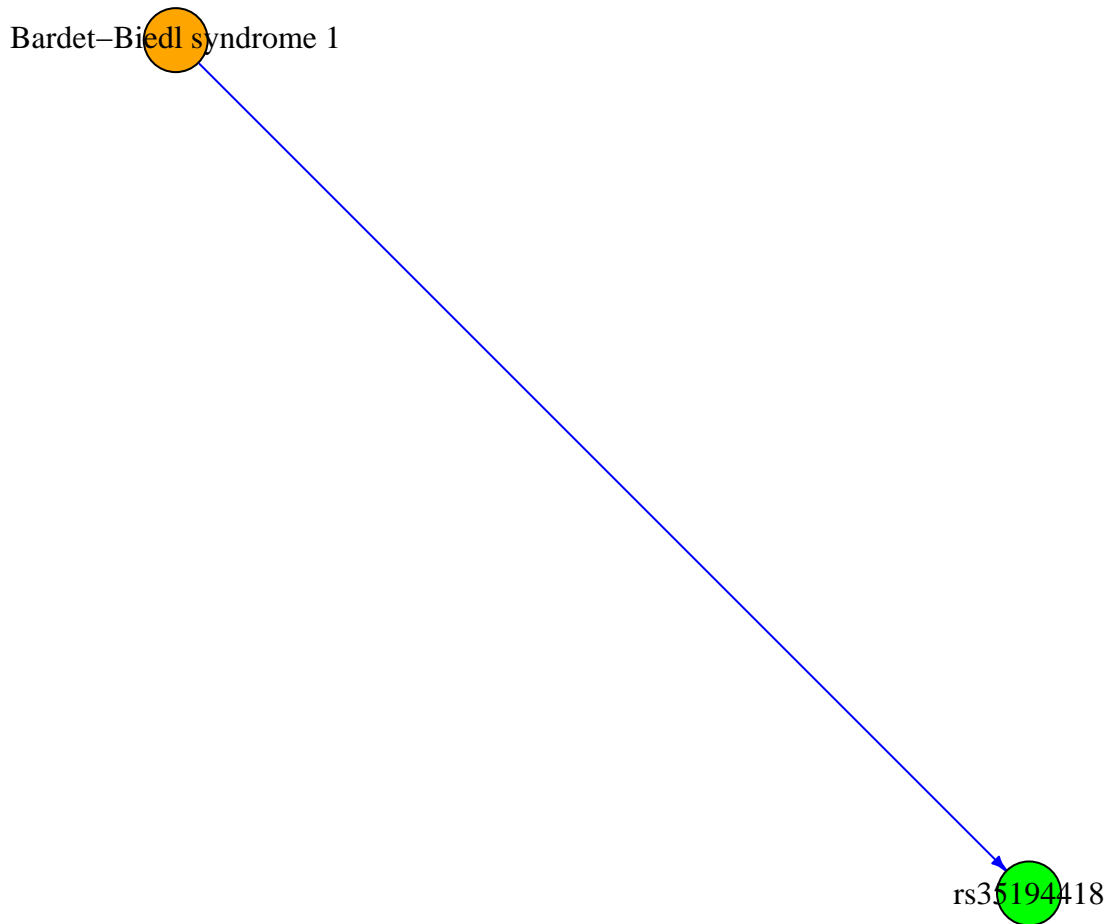

# Variant-Disease Network (Bardet-Biedl syndrome 10)

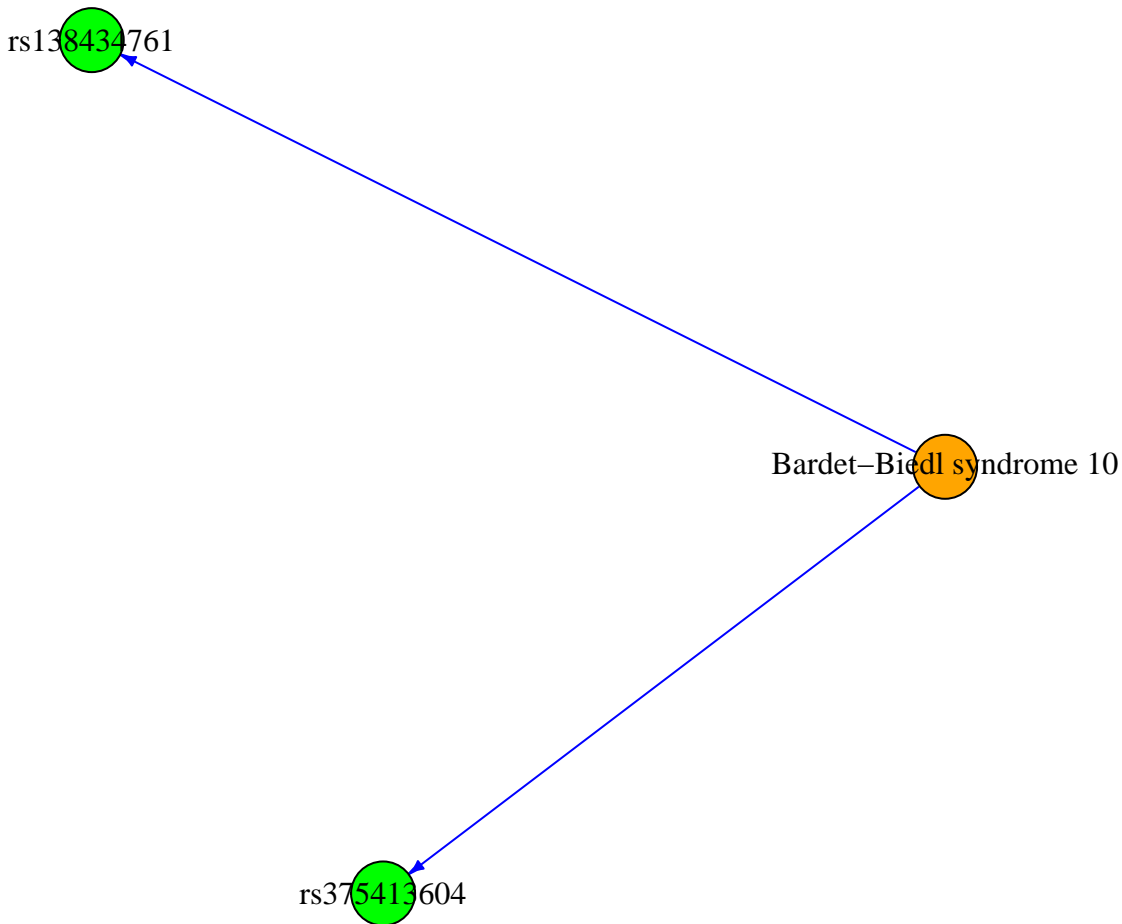

Variant–Disease Network (Bardet–Biedl syndrome 2)

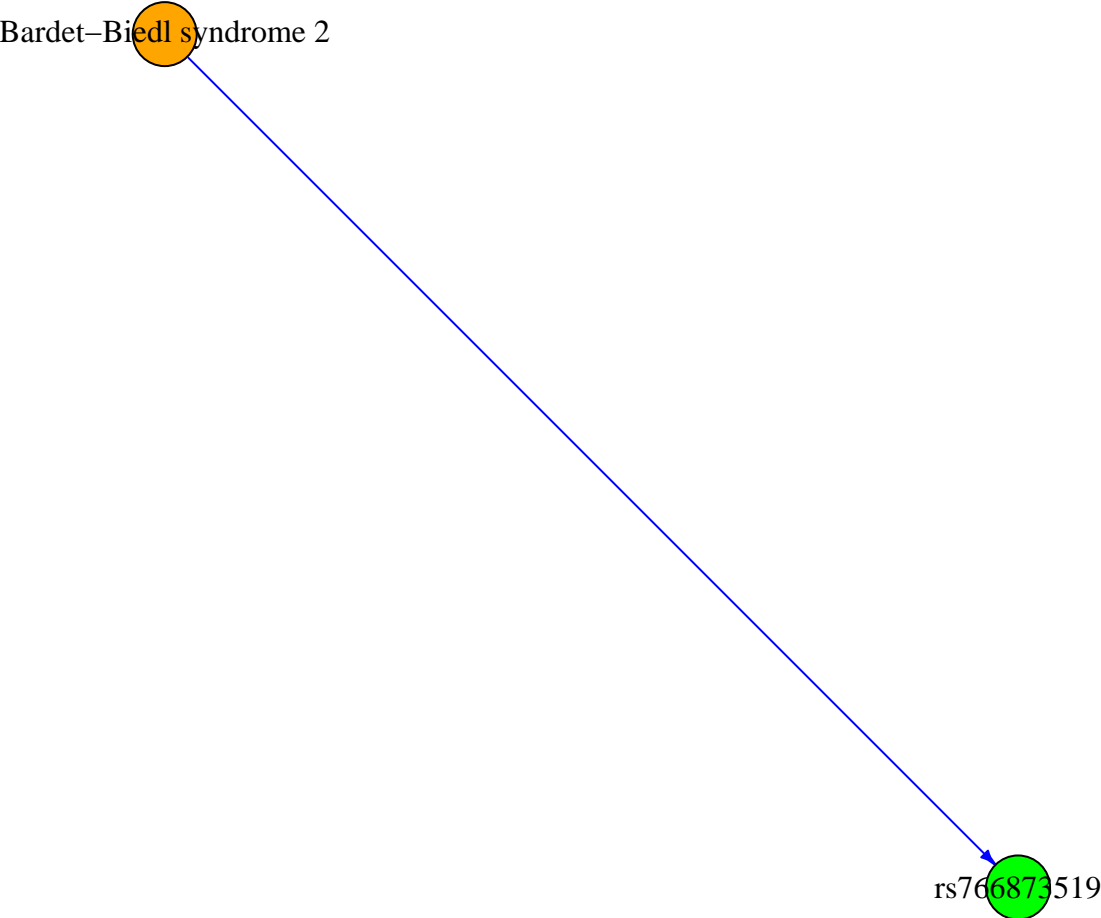

## Variant–Disease Network (Bare lymphocyte syndrome 2)

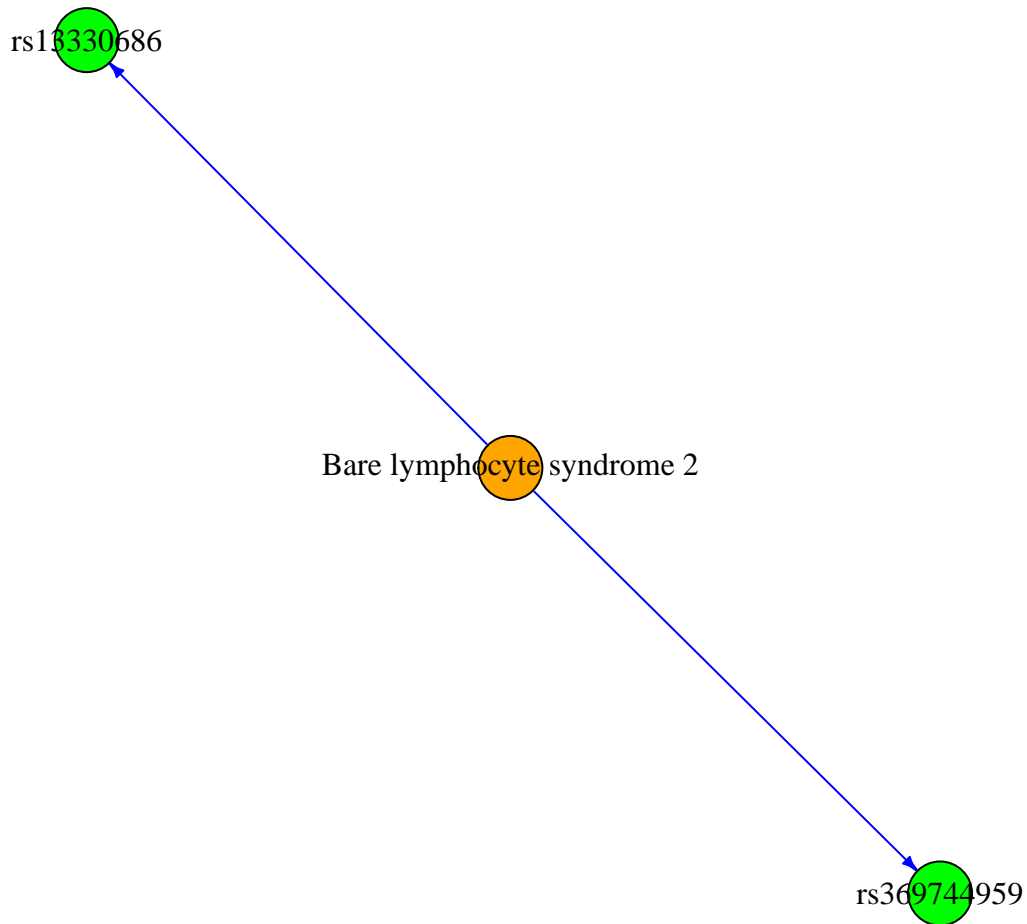

# Variant–Disease Network (Beaulieu–Boycott–Innes syndrome)

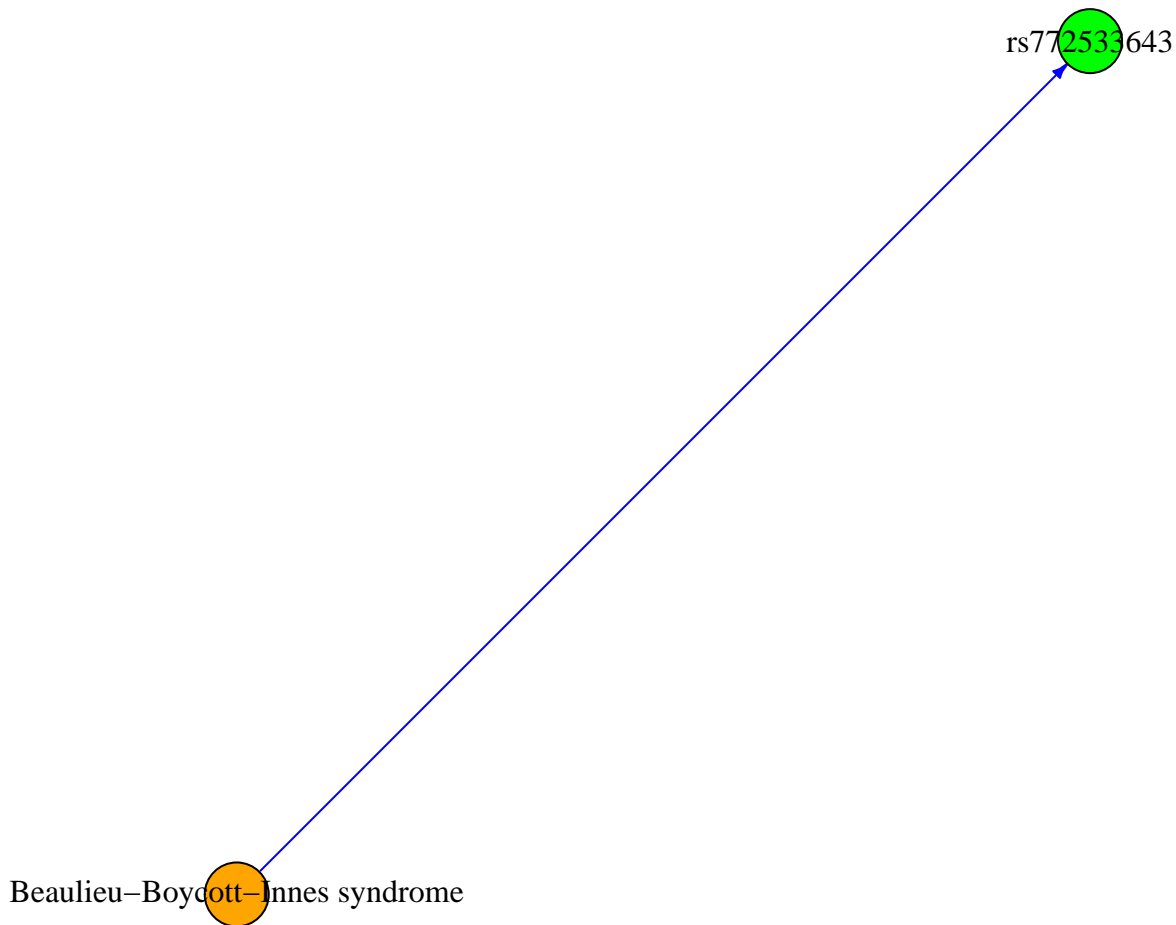



## Variant–Disease Network (Behavior disorder)

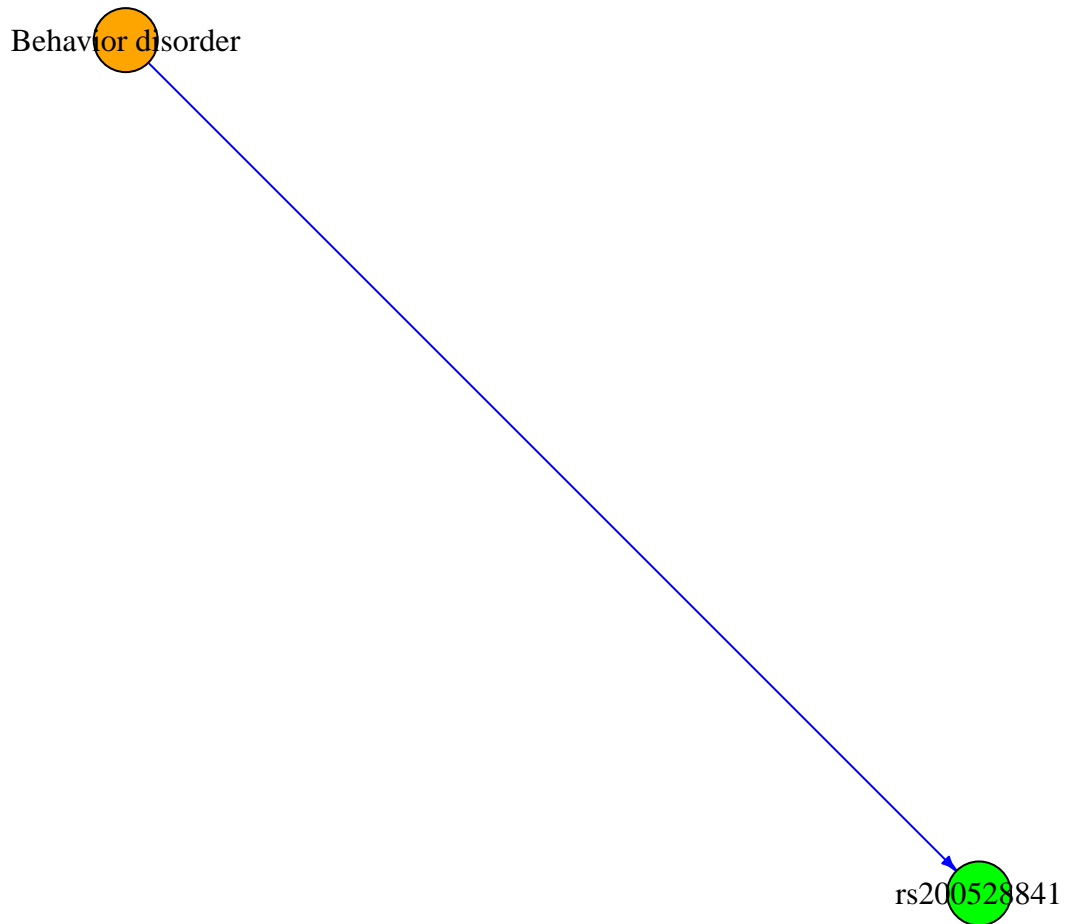

## Variant–Disease Network (Benign familial neonatal seizures)

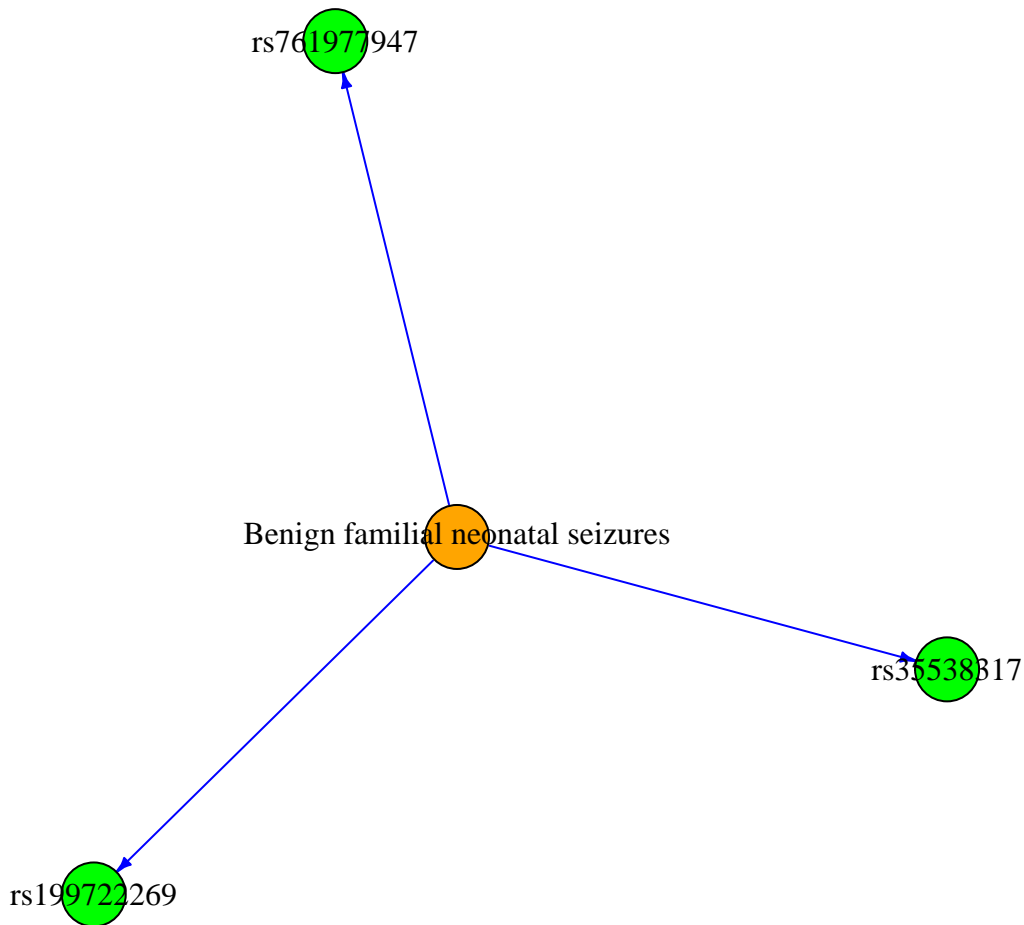

## Variant–Disease Network (Benign familial neonatal seizures 2)

rs375379466

Benign familial neonatal seizures

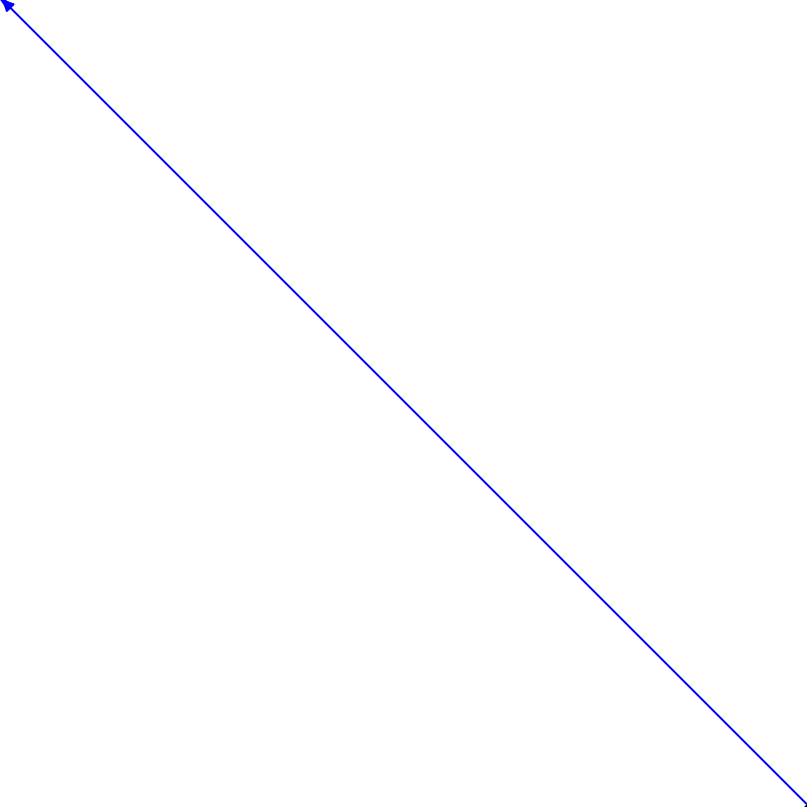

## Variant–Disease Network (Benign Neonatal Epilepsy)

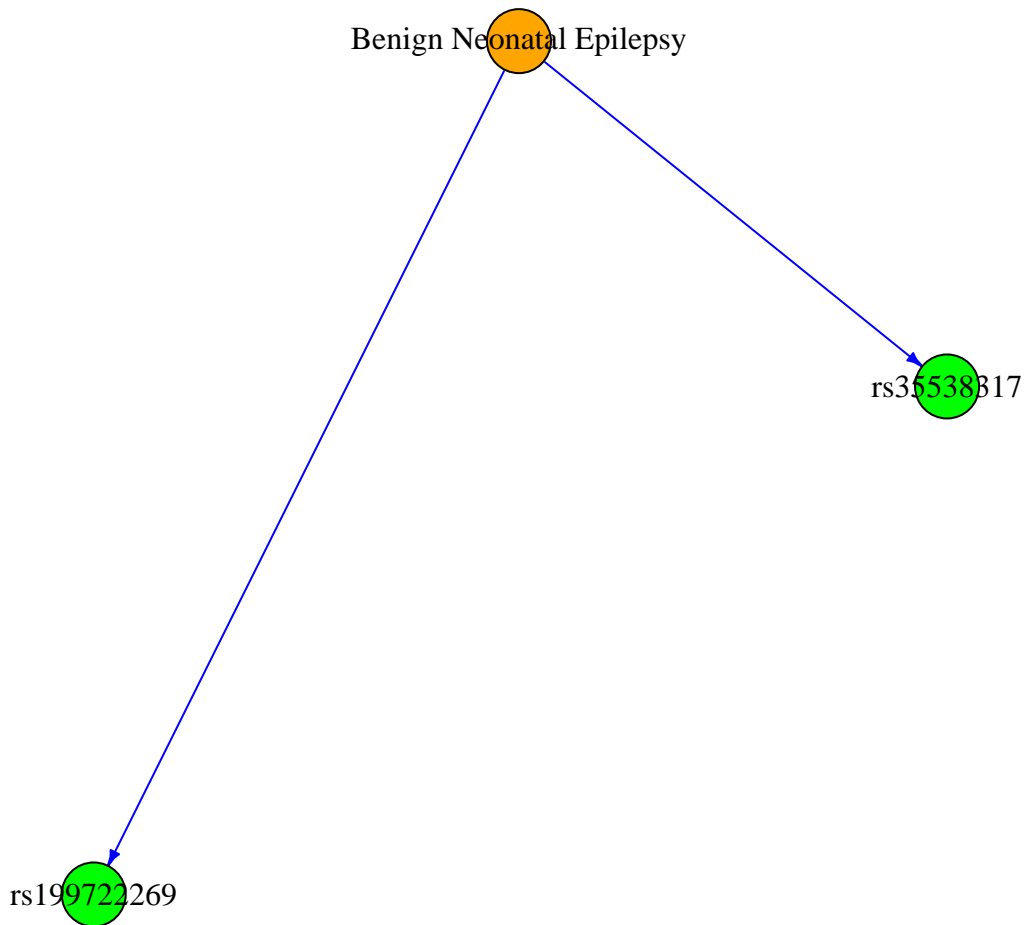

## Variant-Disease Network (Beta-D-mannosidosis)

Beta-D-mannosidosis

rs2866413

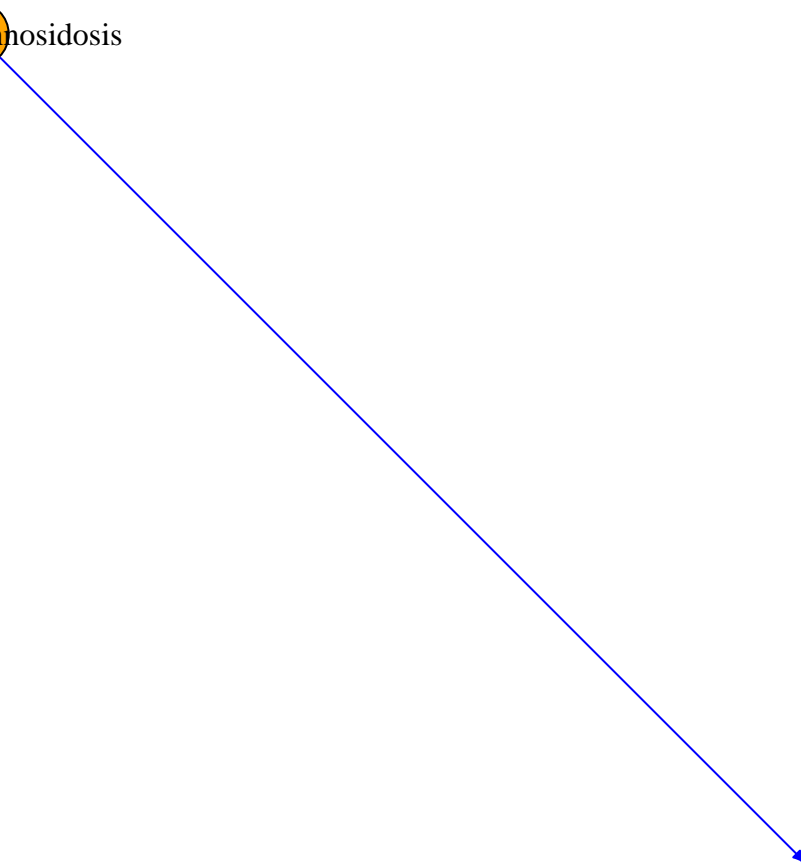

**Variant–Disease Network (Bethlem myopathy 2)**

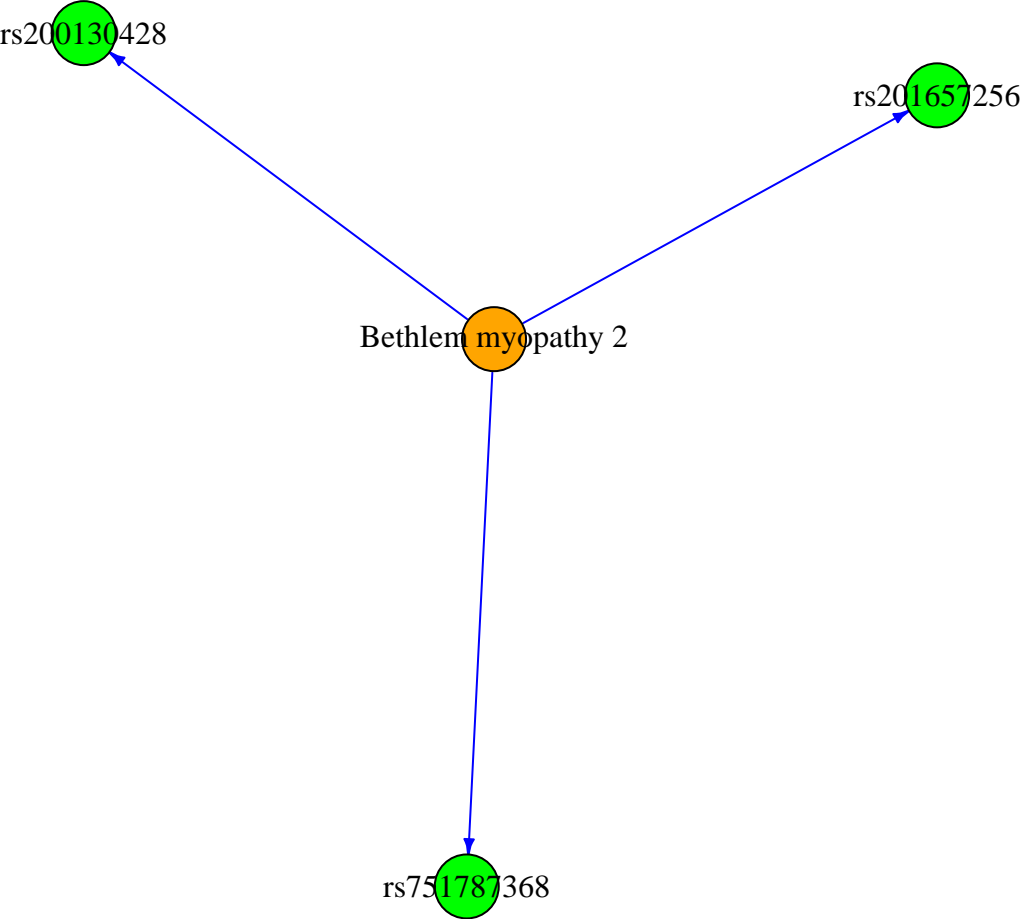

# Variant–Disease Network (Bifunctional peroxisomal enzyme deficiency)

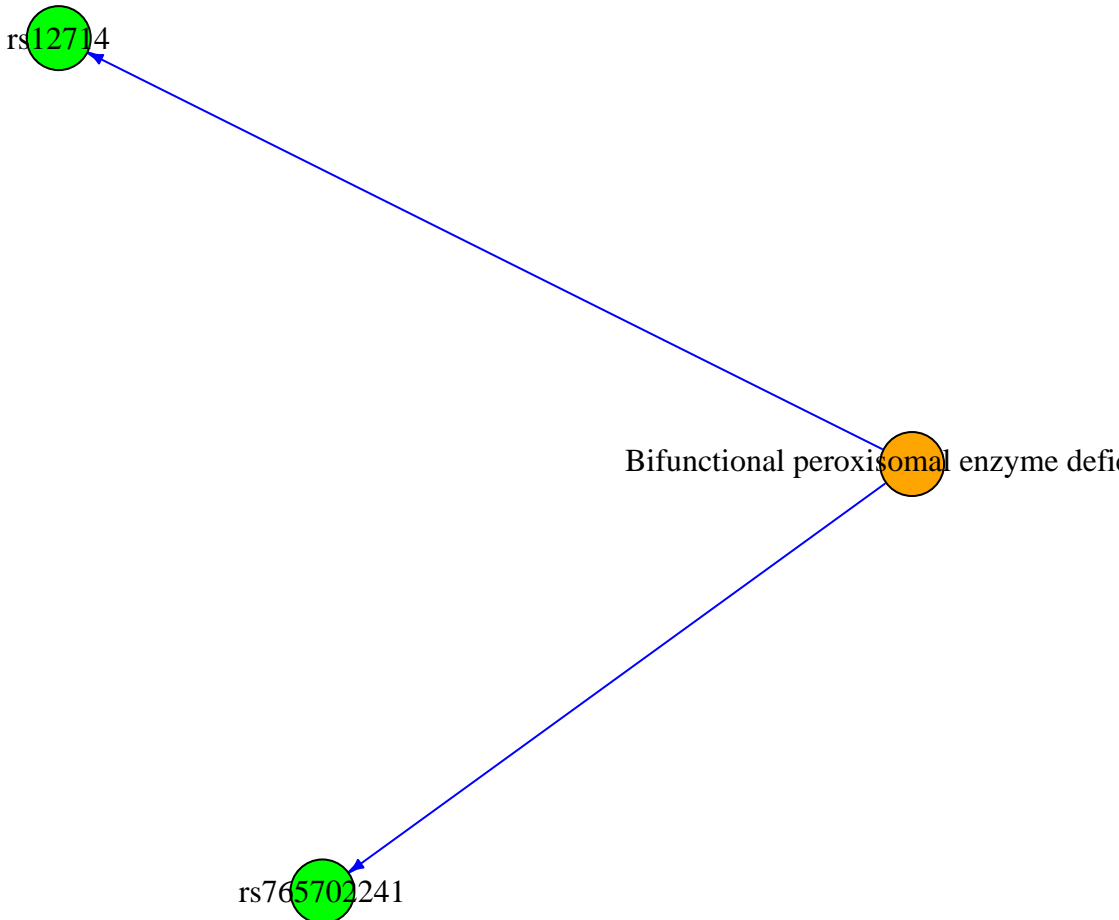

## Variant–Disease Network (Biotinidase deficiency)

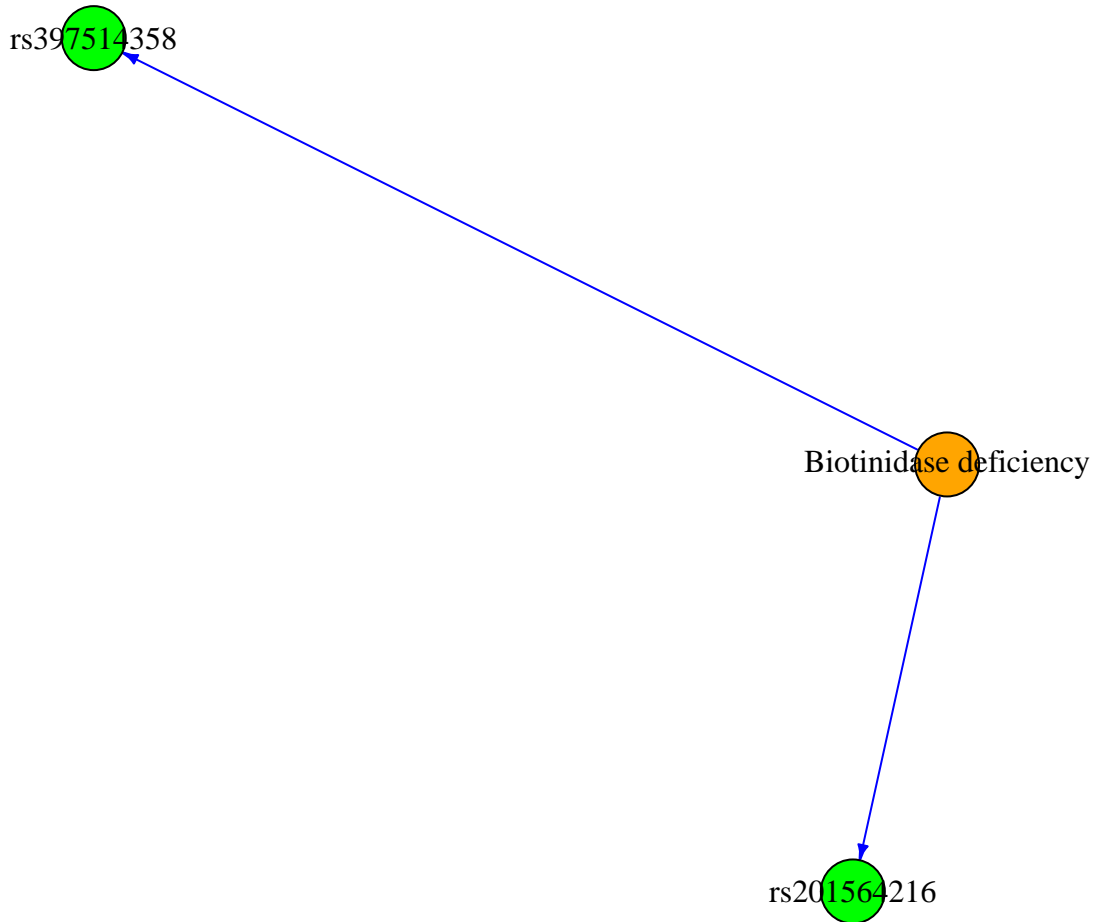



## Variant-Disease Network (Bladder cancer)

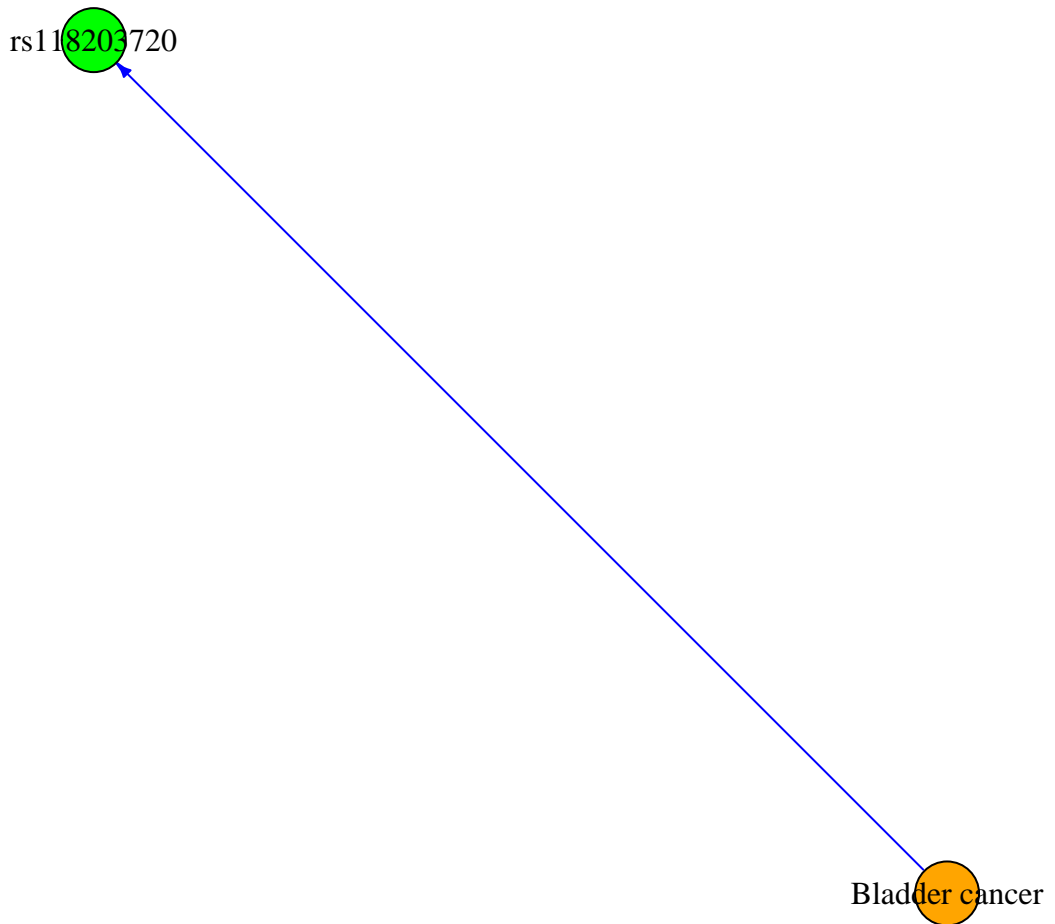

## Variant-Disease Network (Bloom syndrome)

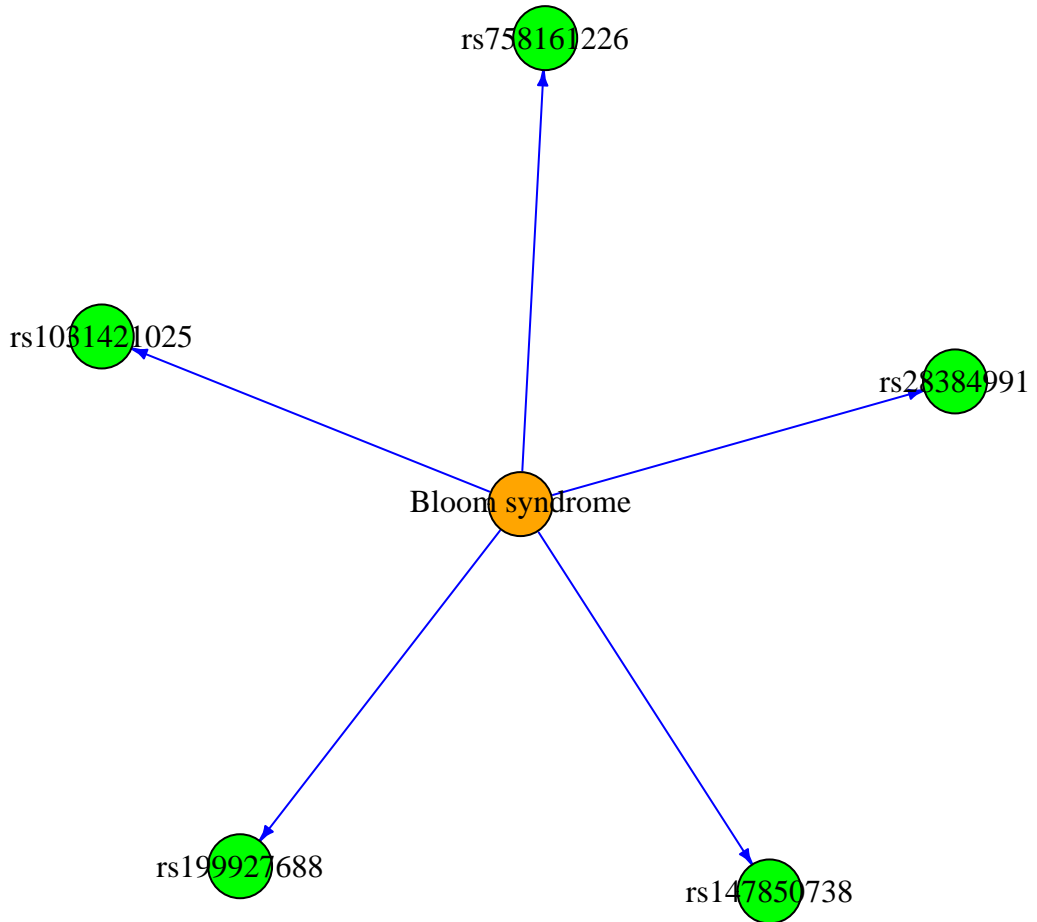

Variant–Disease Network (Bone fragility with contractures)

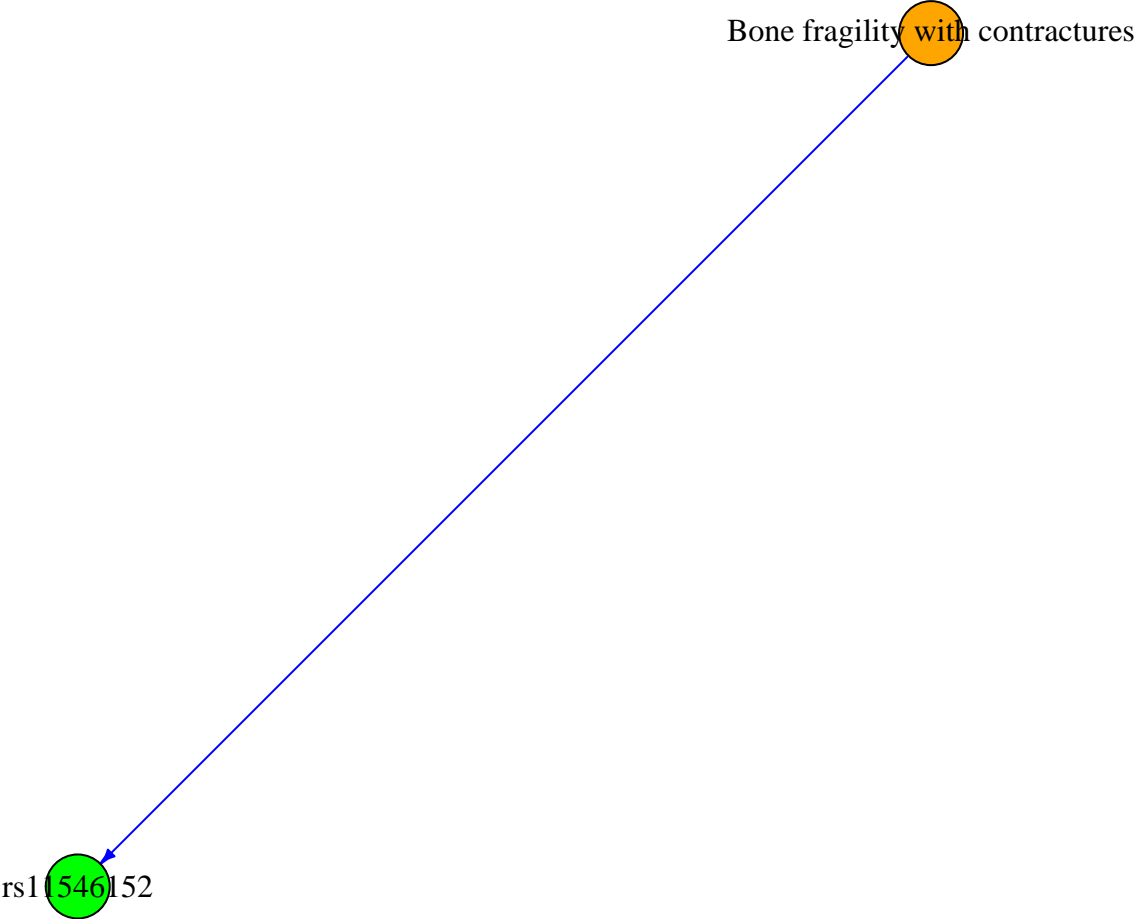

## Variant–Disease Network (Brachydactyly)

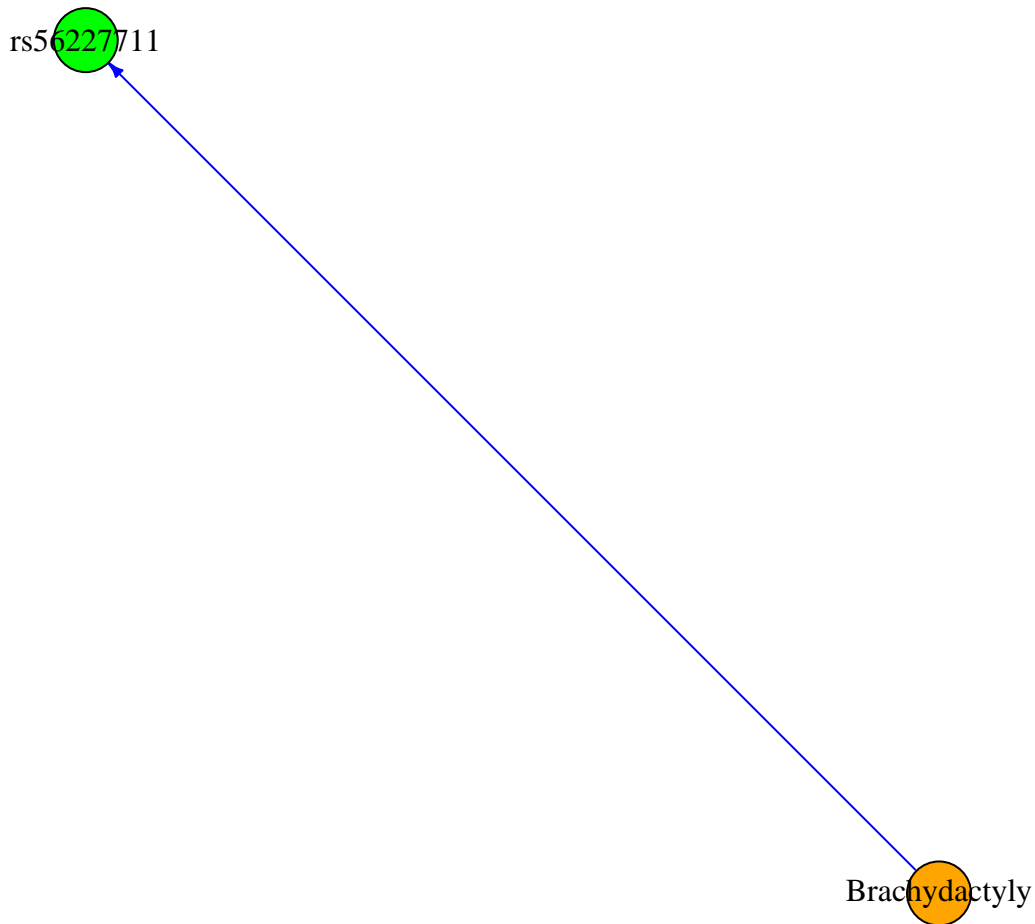

## Variant-Disease Network (breast cancer)

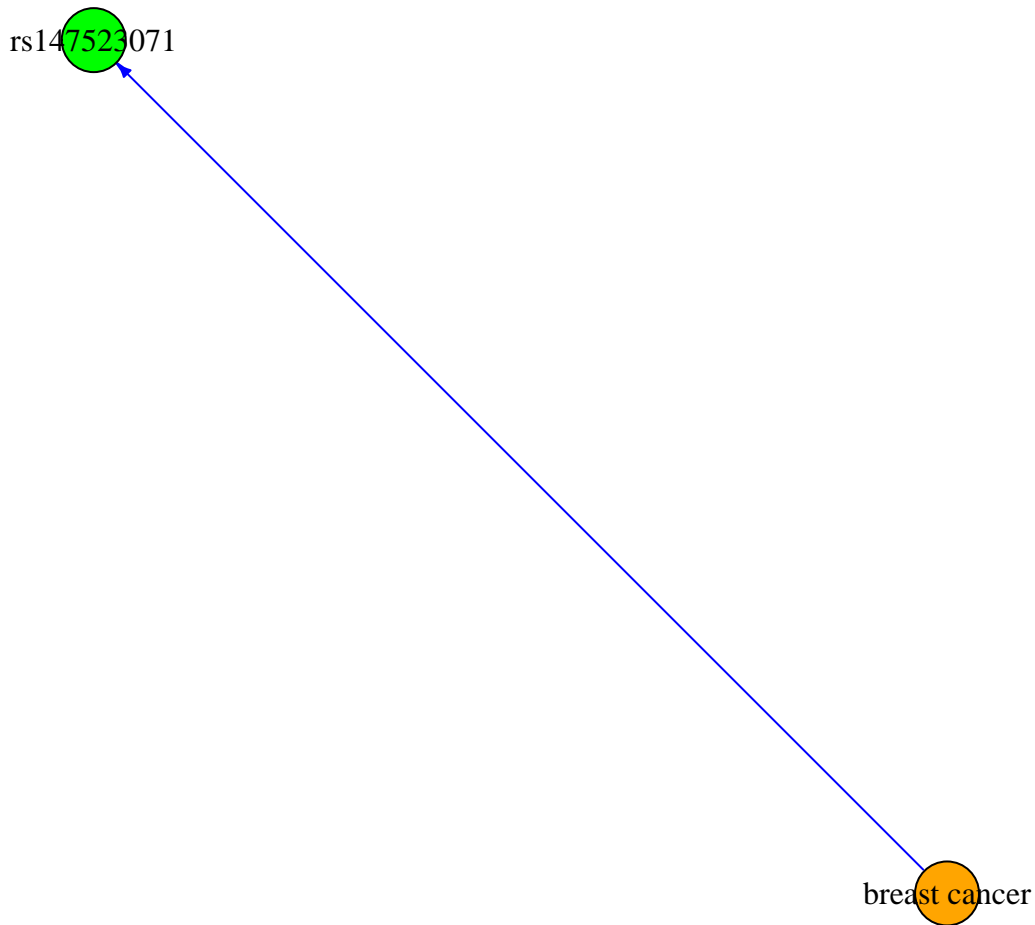

## Variant-Disease Network (Breast-ovarian cancer)

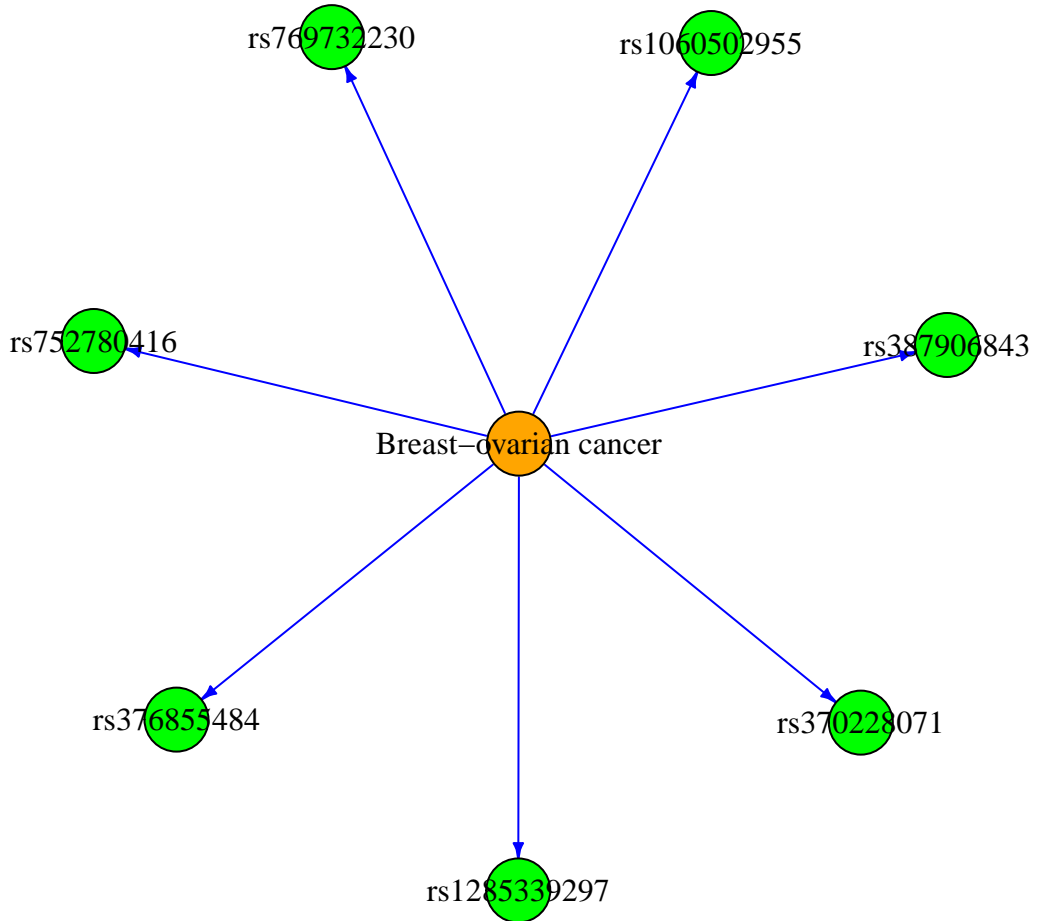

# Variant-Disease Network (Bronchiectasis with or without elevated sweat chloride)

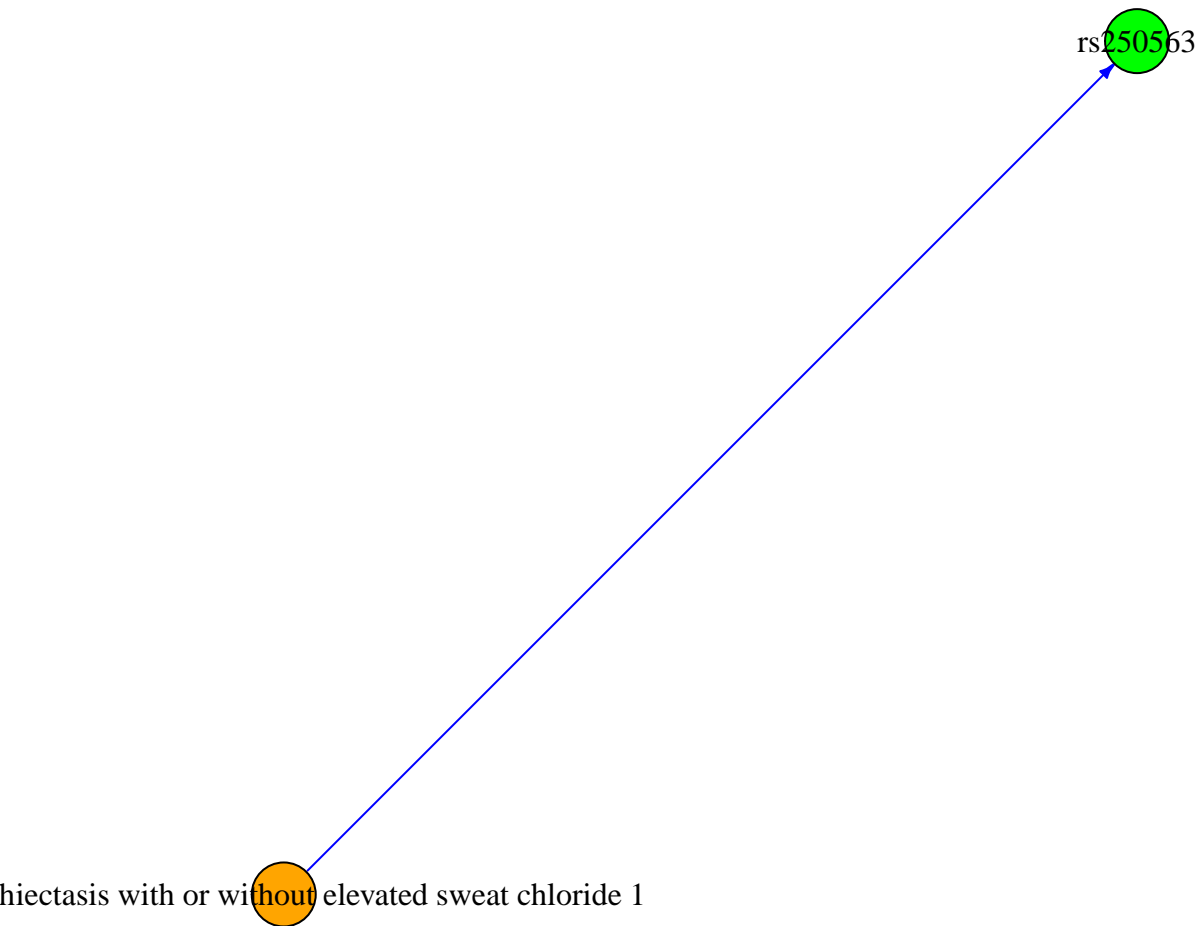

## Variant–Disease Network (Brugada syndrome)

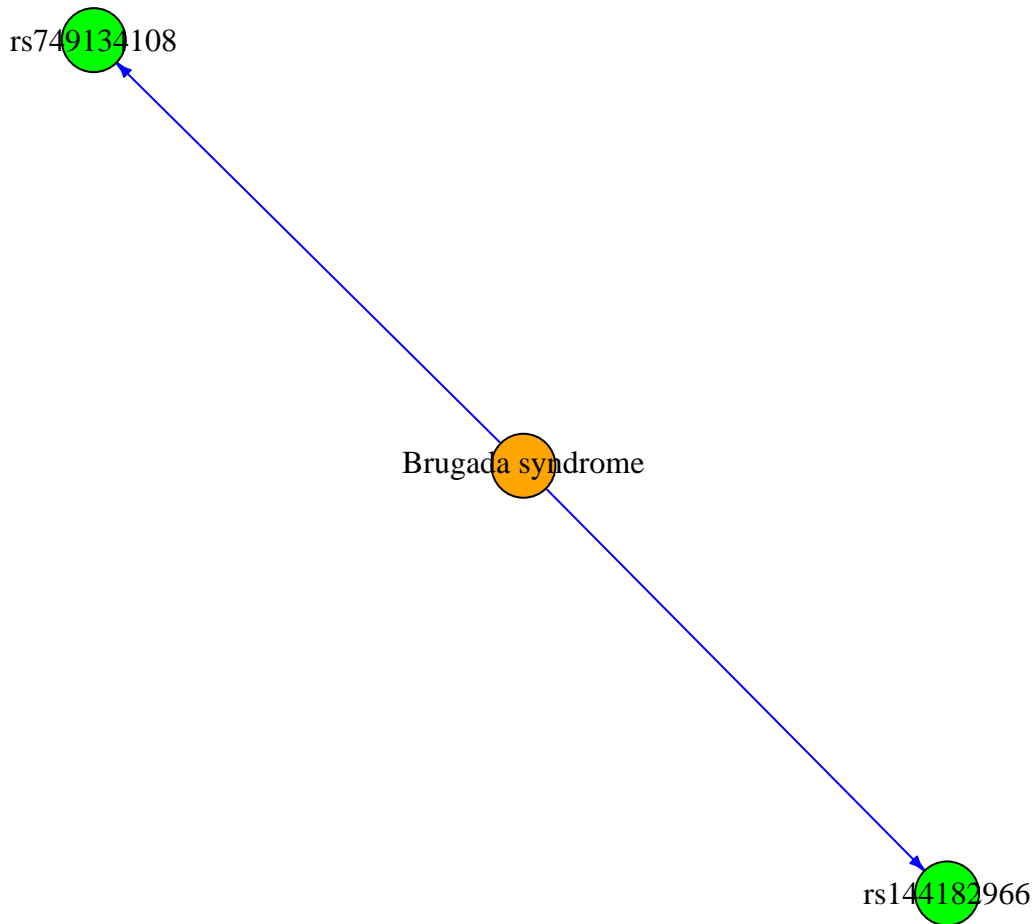



Variant–Disease Network (Brugada syndrome 5)

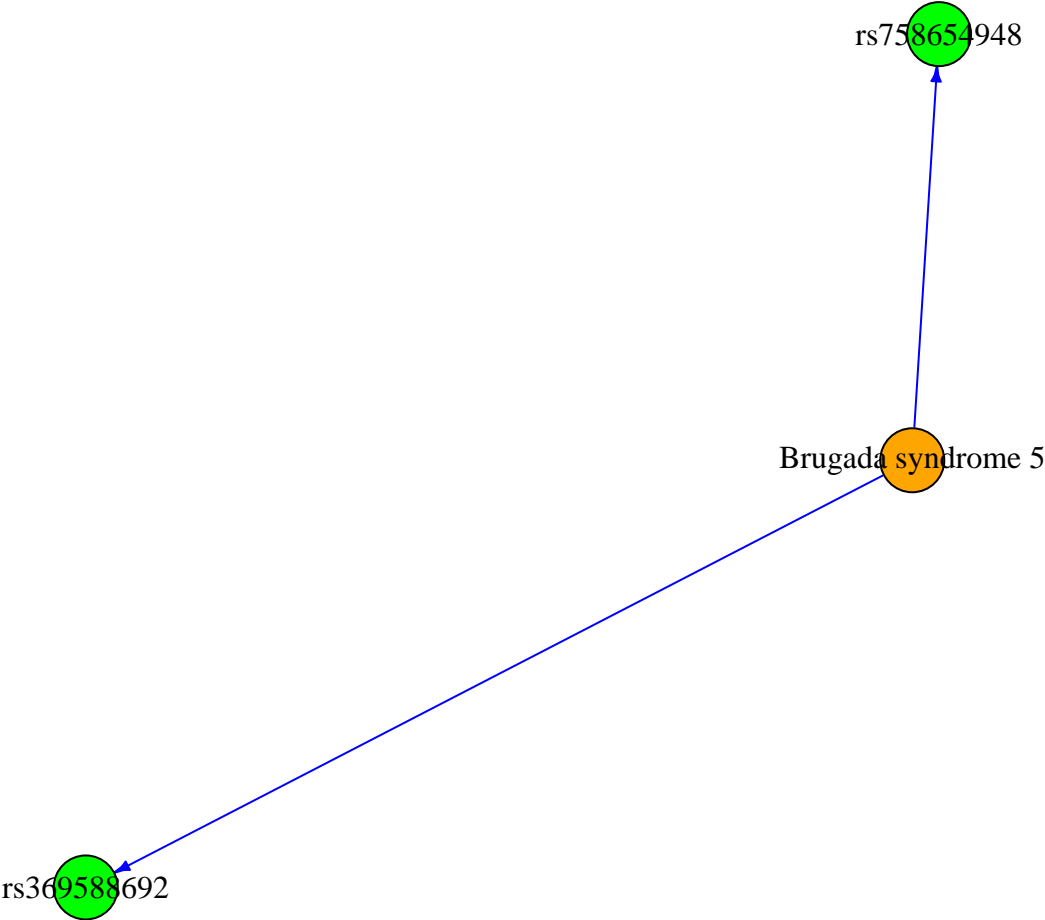

## Variant-Disease Network (Brugada syndrome 8)

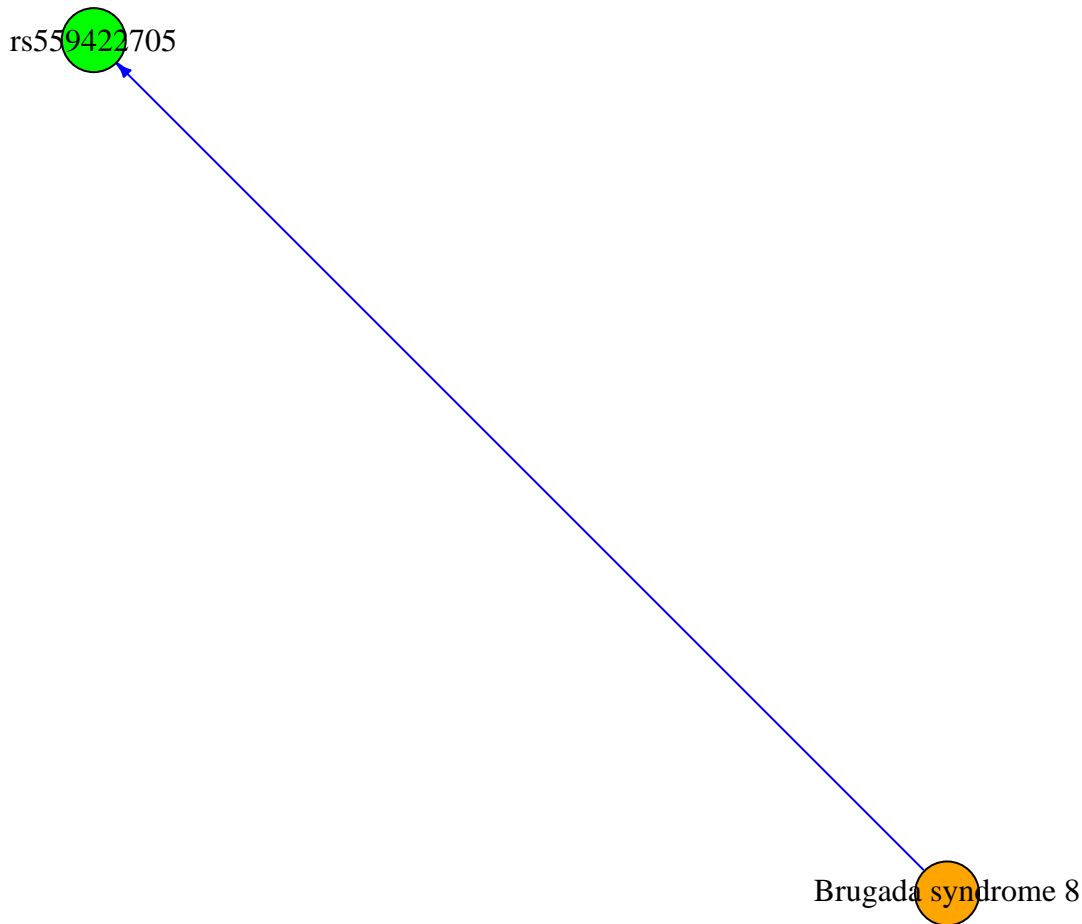

## Variant–Disease Network (Budd–Chiari syndrome)

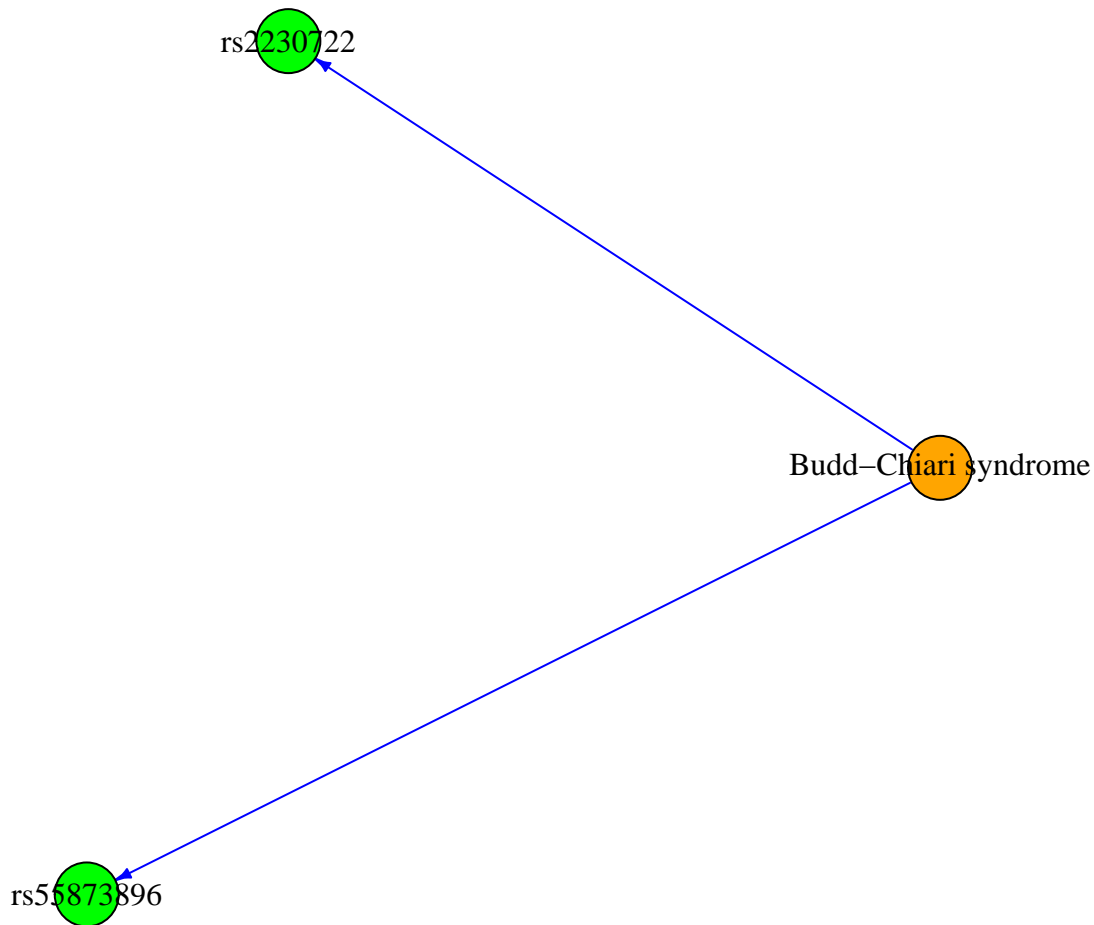

Variant–Disease Network (Bullous ichthyosiform erythroderma)

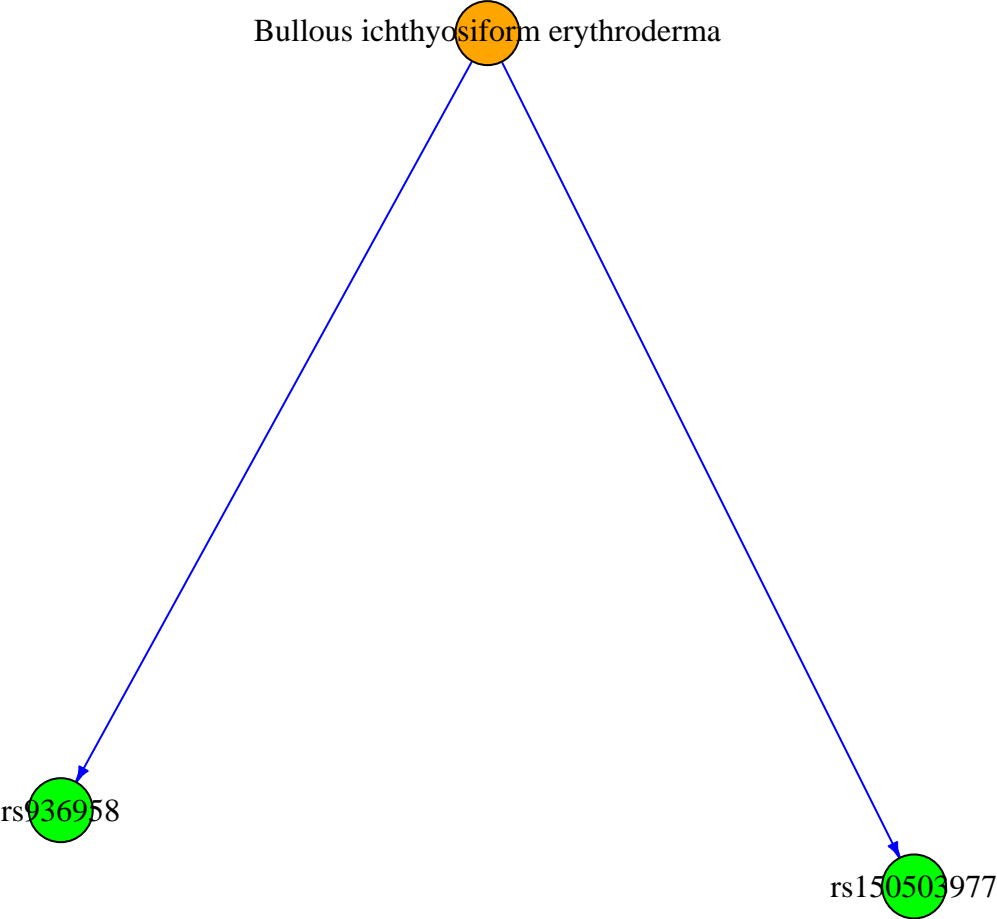

## Variant-Disease Network (Canavan Disease)

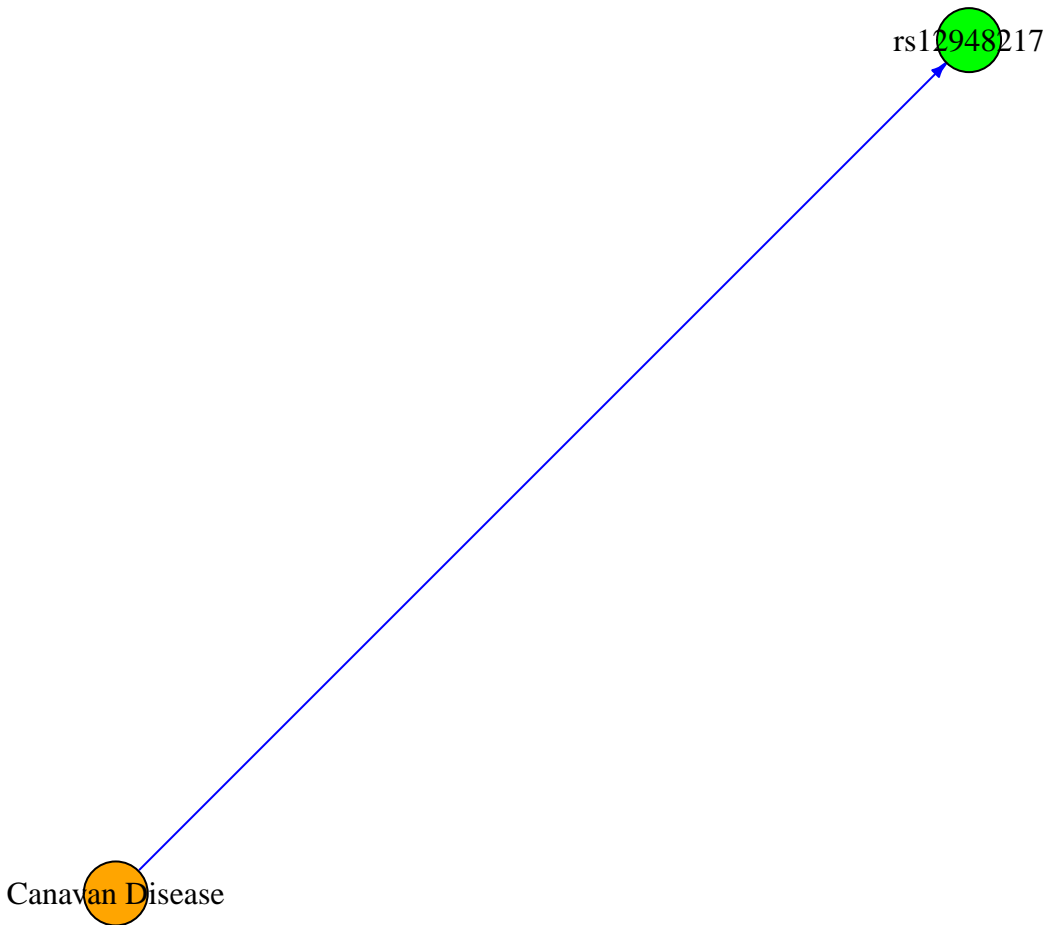

## Variant-Disease Network (Candidiasis)

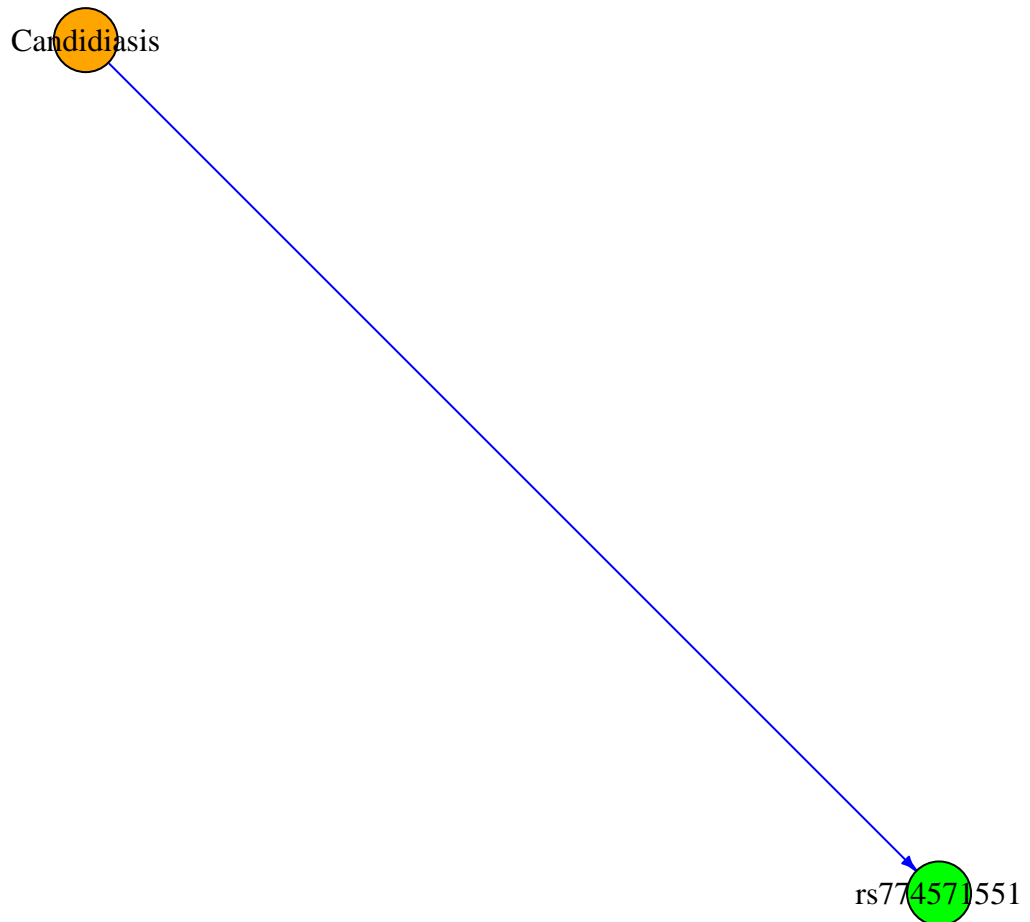

## Variant–Disease Network (Carcinoma of colon)

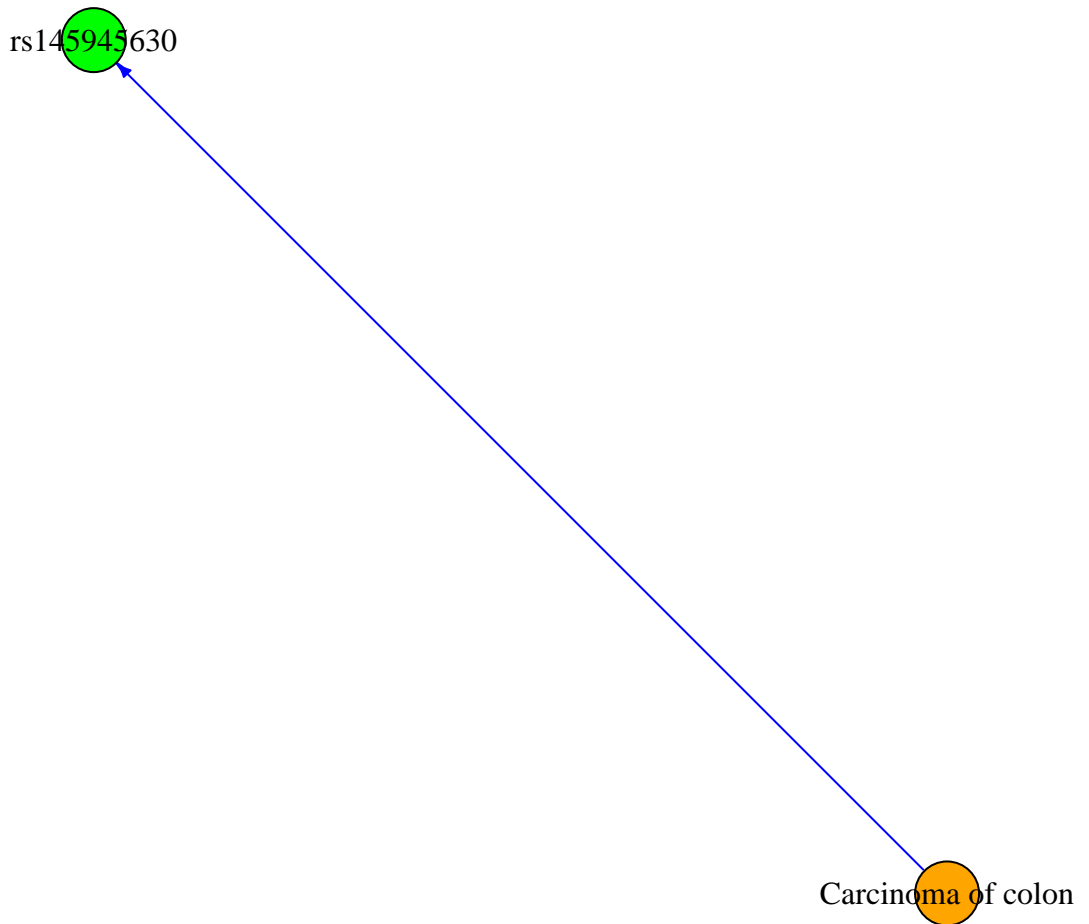

**Variant–Disease Network (Cardiofaciocutaneous syndrome 4)**

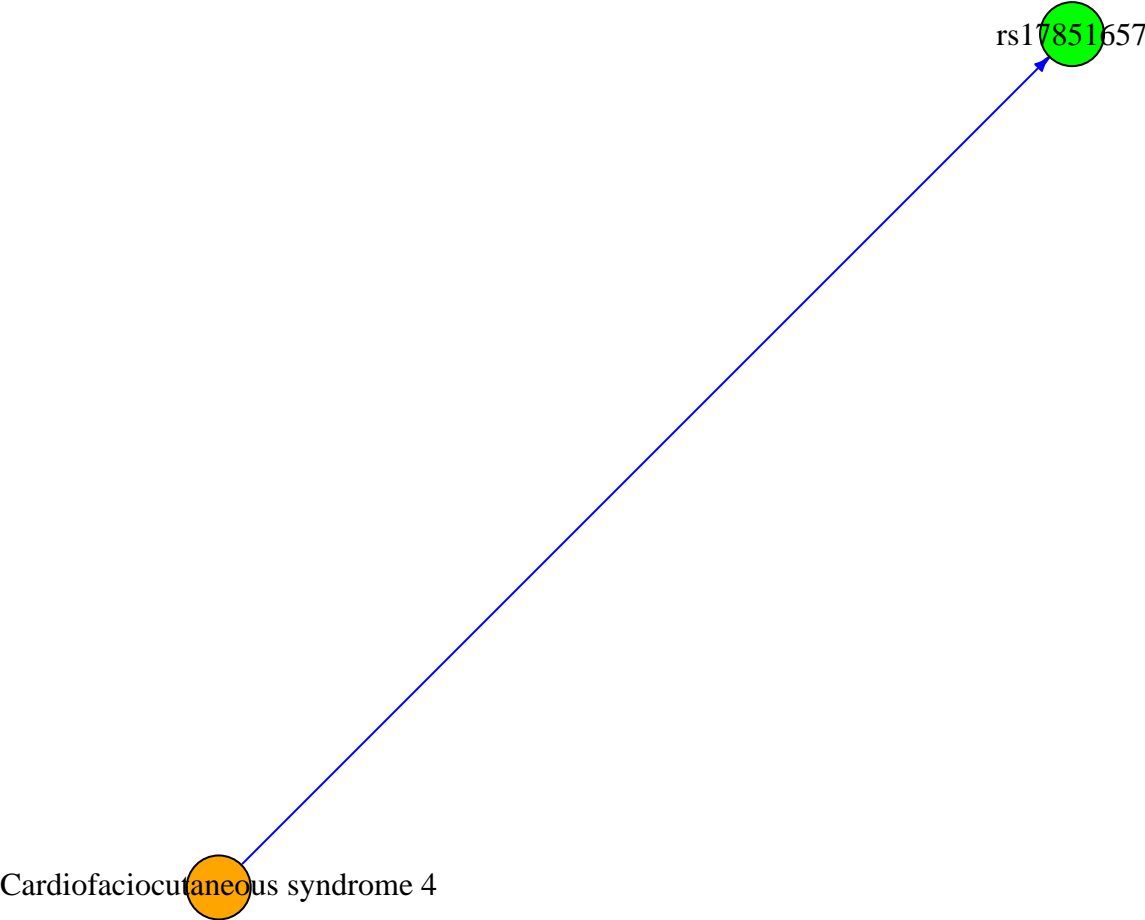



Variant–Disease Network (Cardiomyopathy)

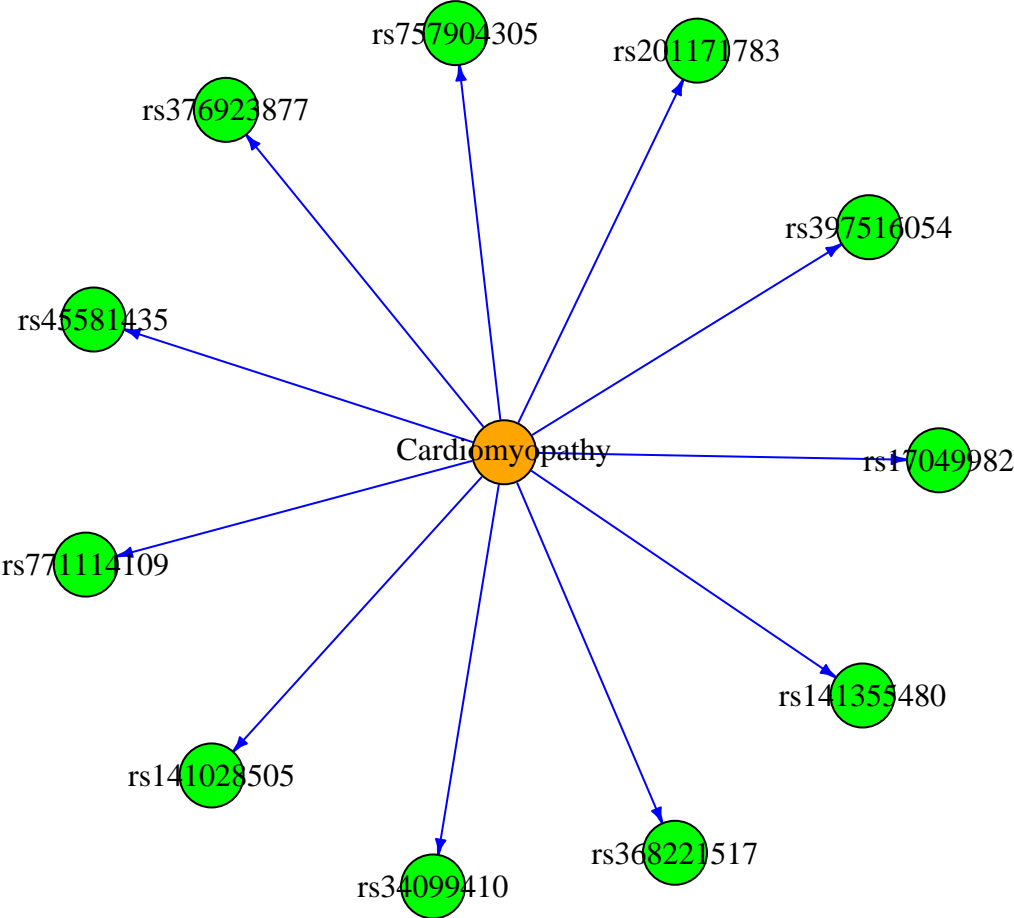

### Variant–Disease Network (Cardiovascular phenotype)

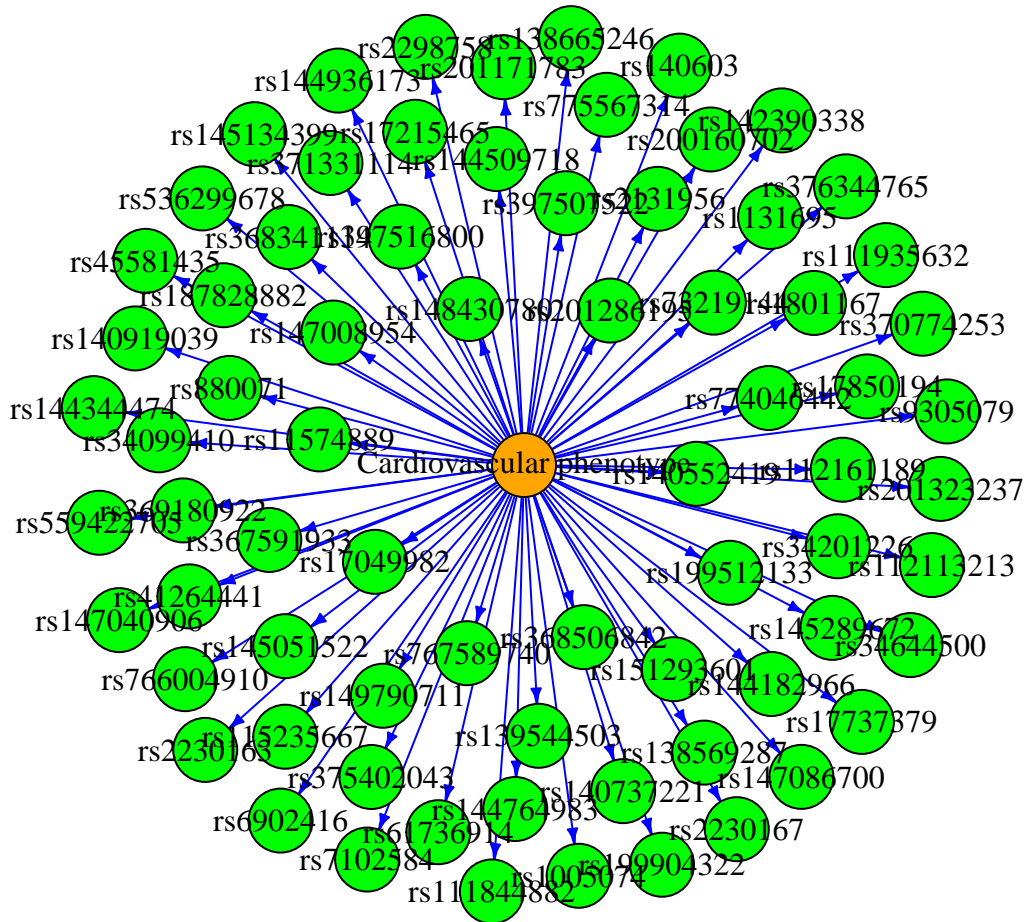

Variant–Disease Network (Carney complex)

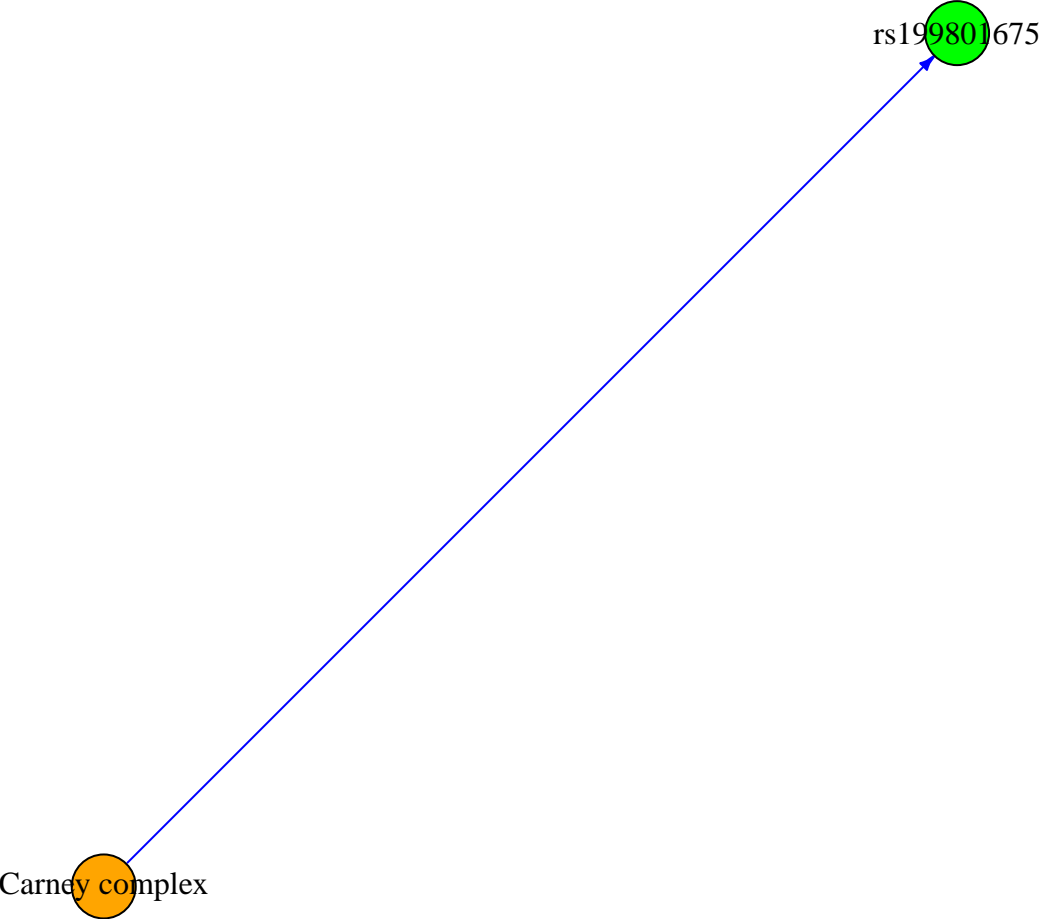

Variant–Disease Network (Cataract 33)

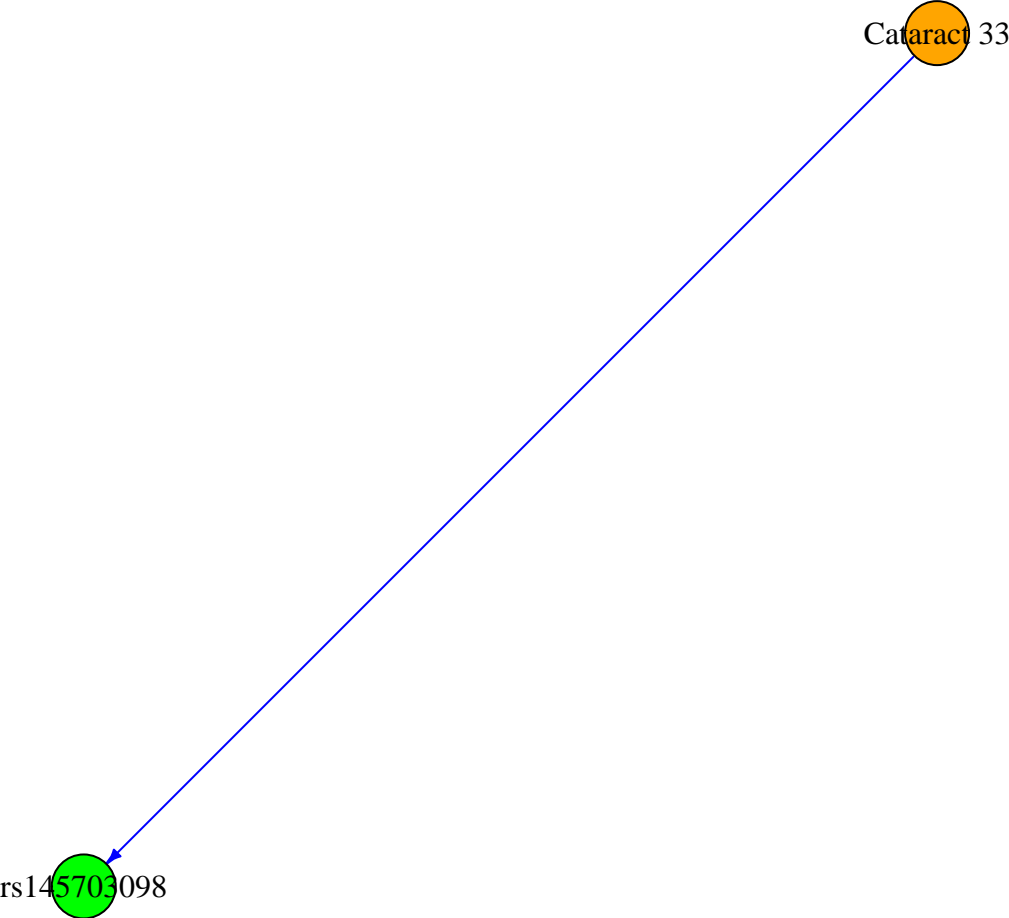

Variant–Disease Network (Cataract 6)

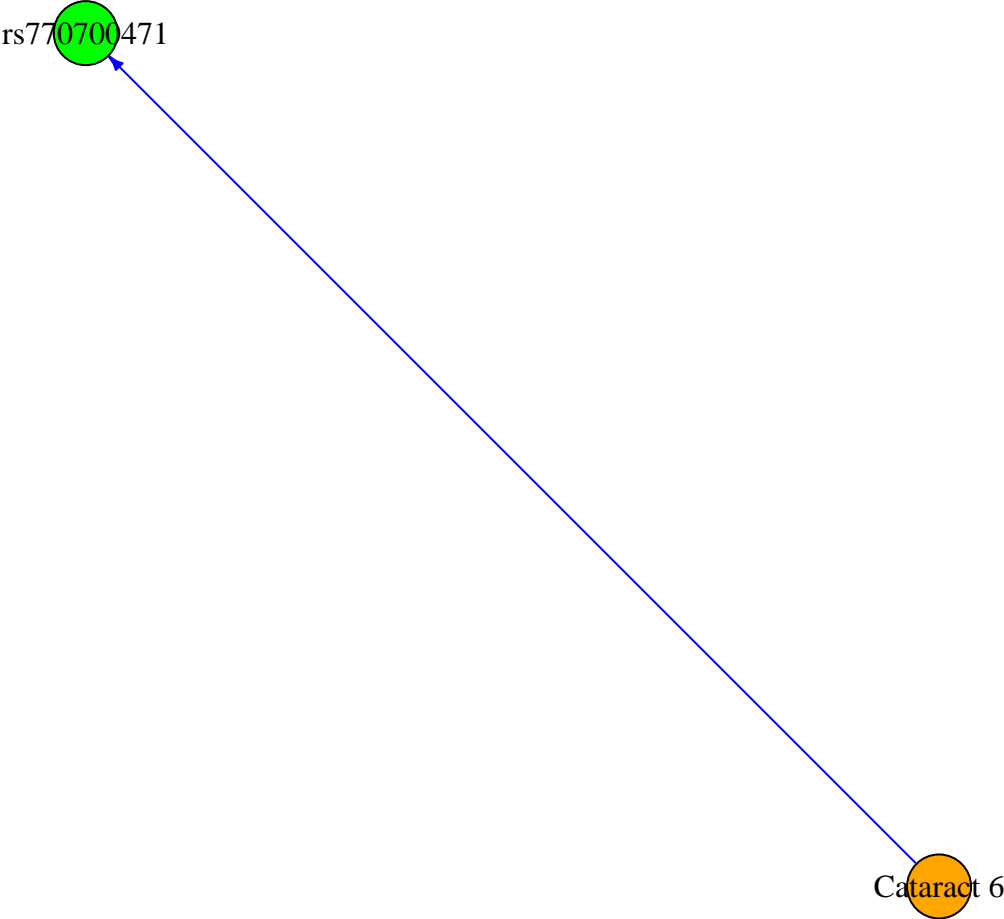

# Variant-Disease Network (Catecholaminergic polymorphic ventricular tachycardia)

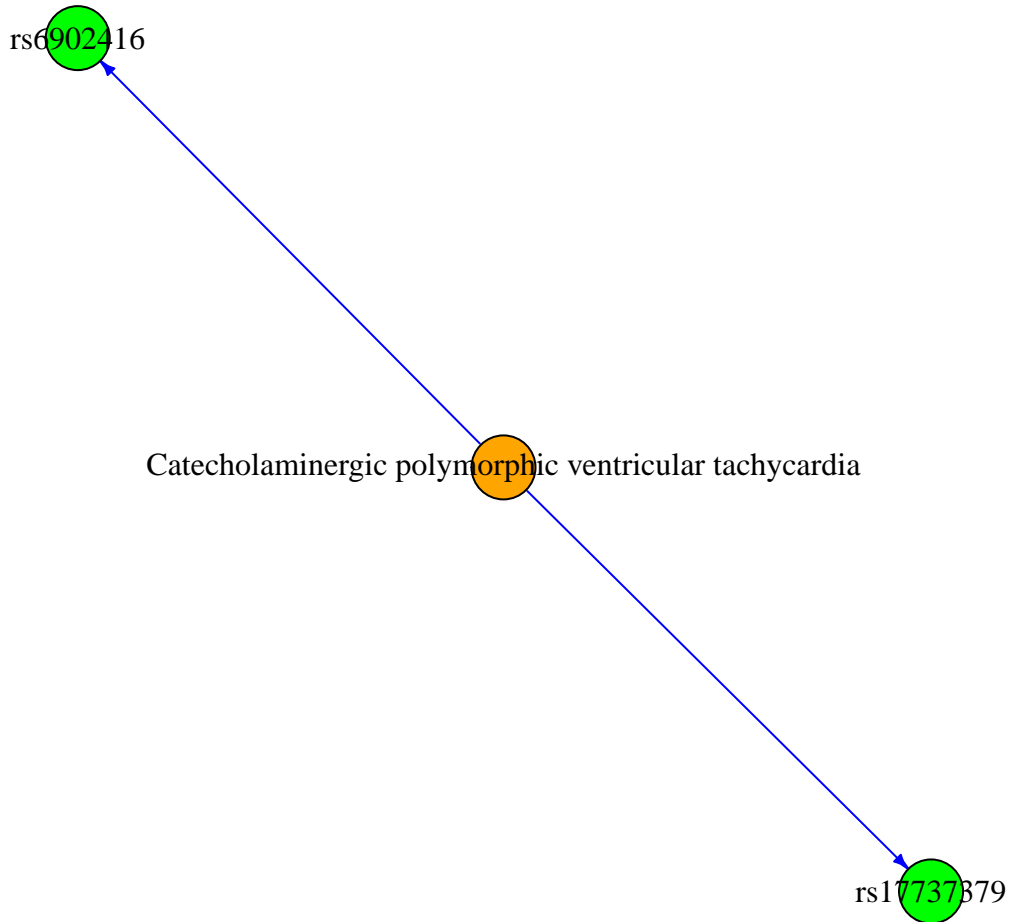

**Variant–Disease Network (Caudal dysgenesis syndrome)**

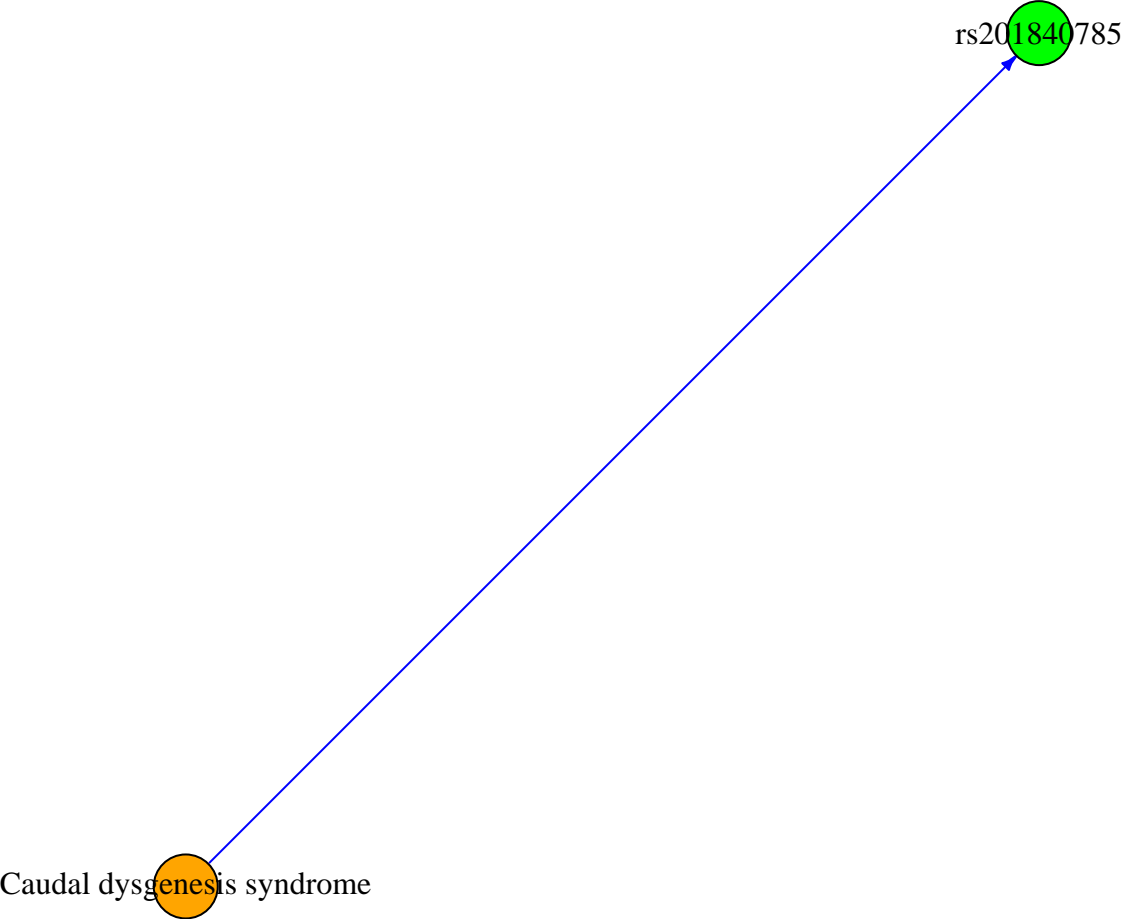

# Variant–Disease Network (CC2D2A–Related Disorders)

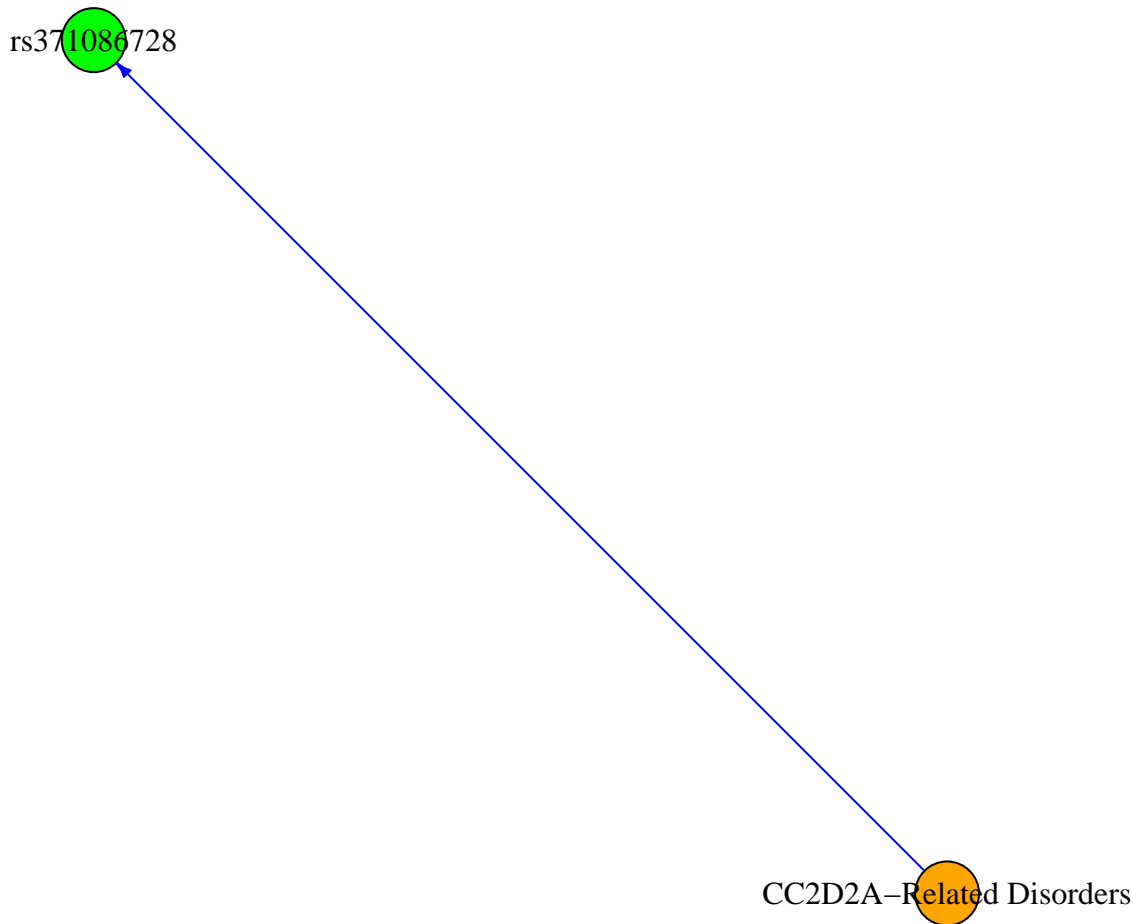



## Variant-Disease Network (Centronuclear Myopathy)

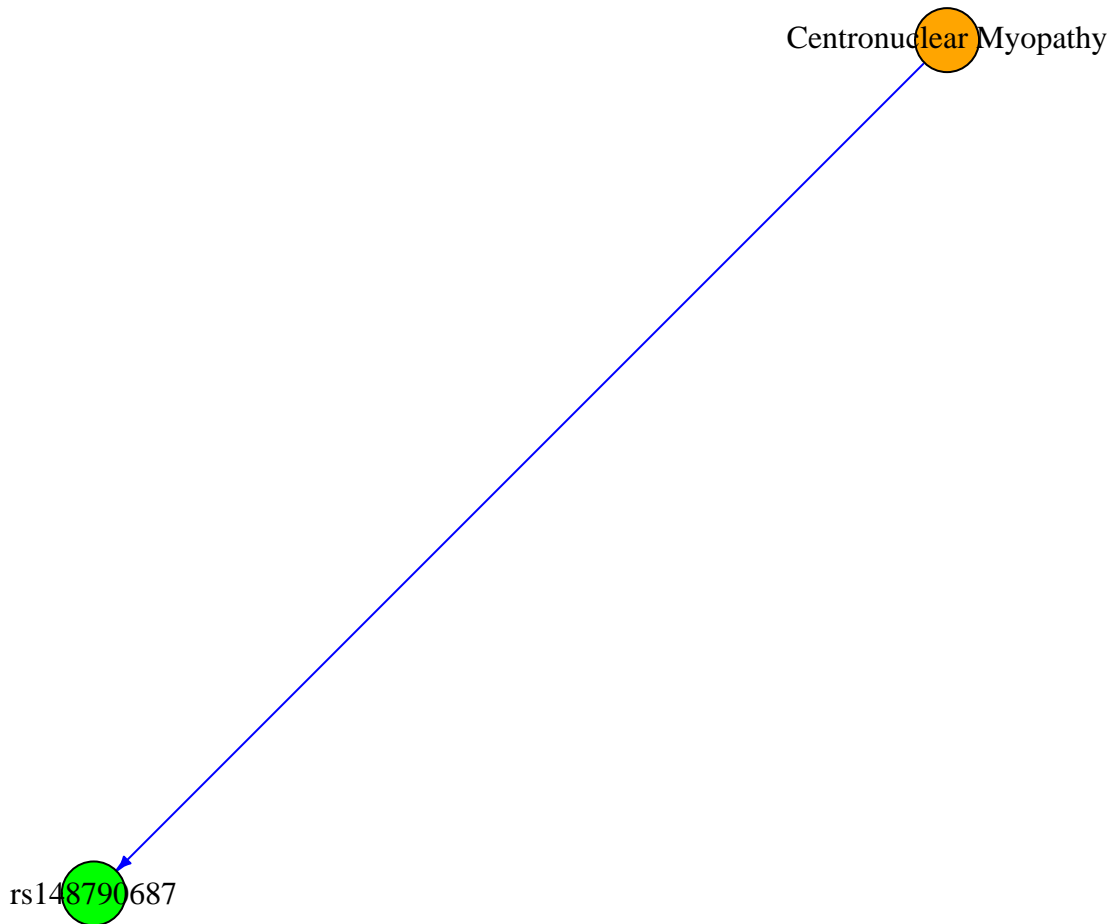

# rs148053028 (Cerebral autosomal dominant arteriopathy with subcortical infarcts and leukoencephalopathy type 1)

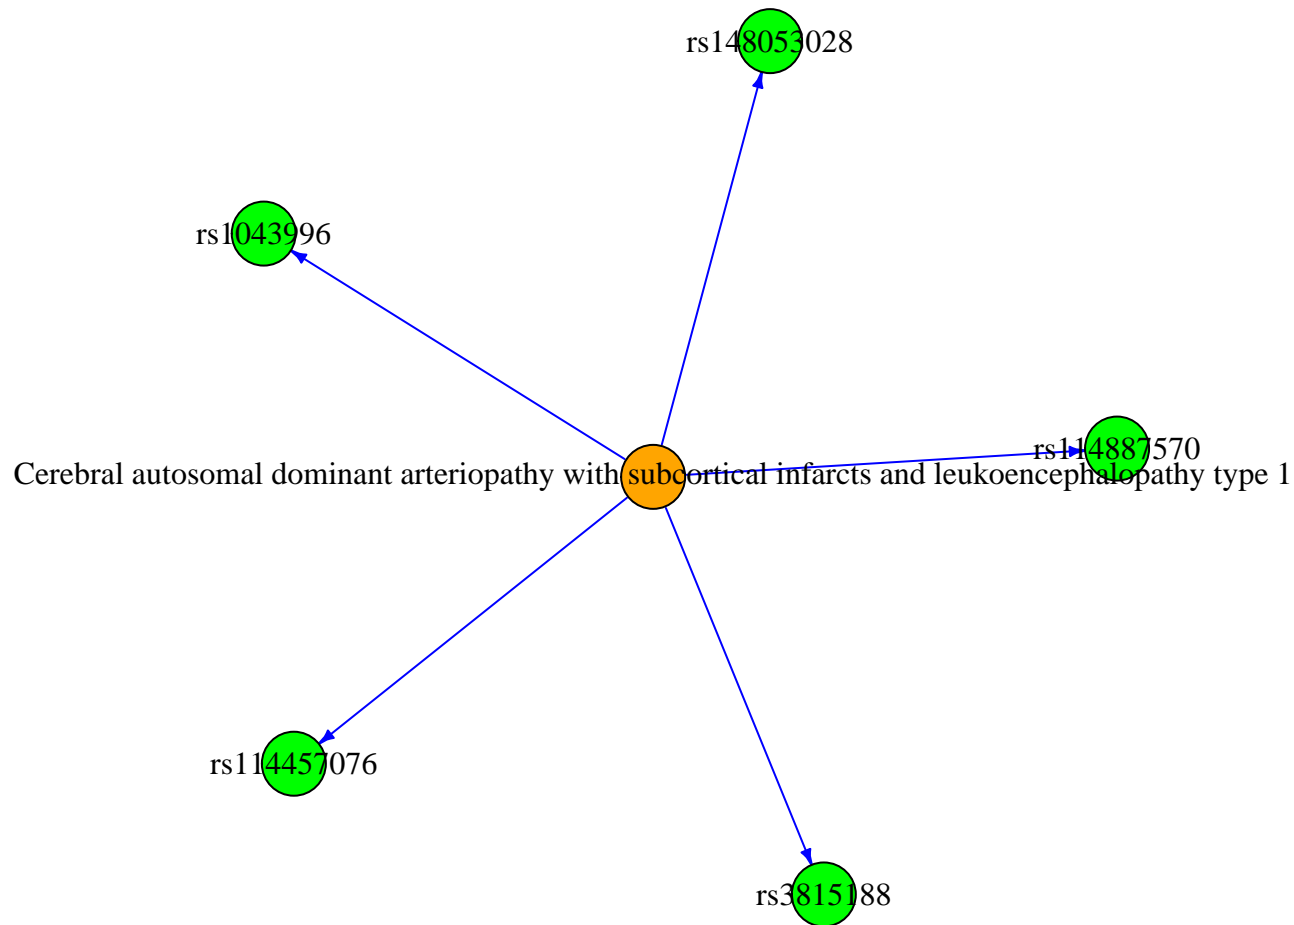

Variant–Disease Network (Cerebral cavernous malformation)

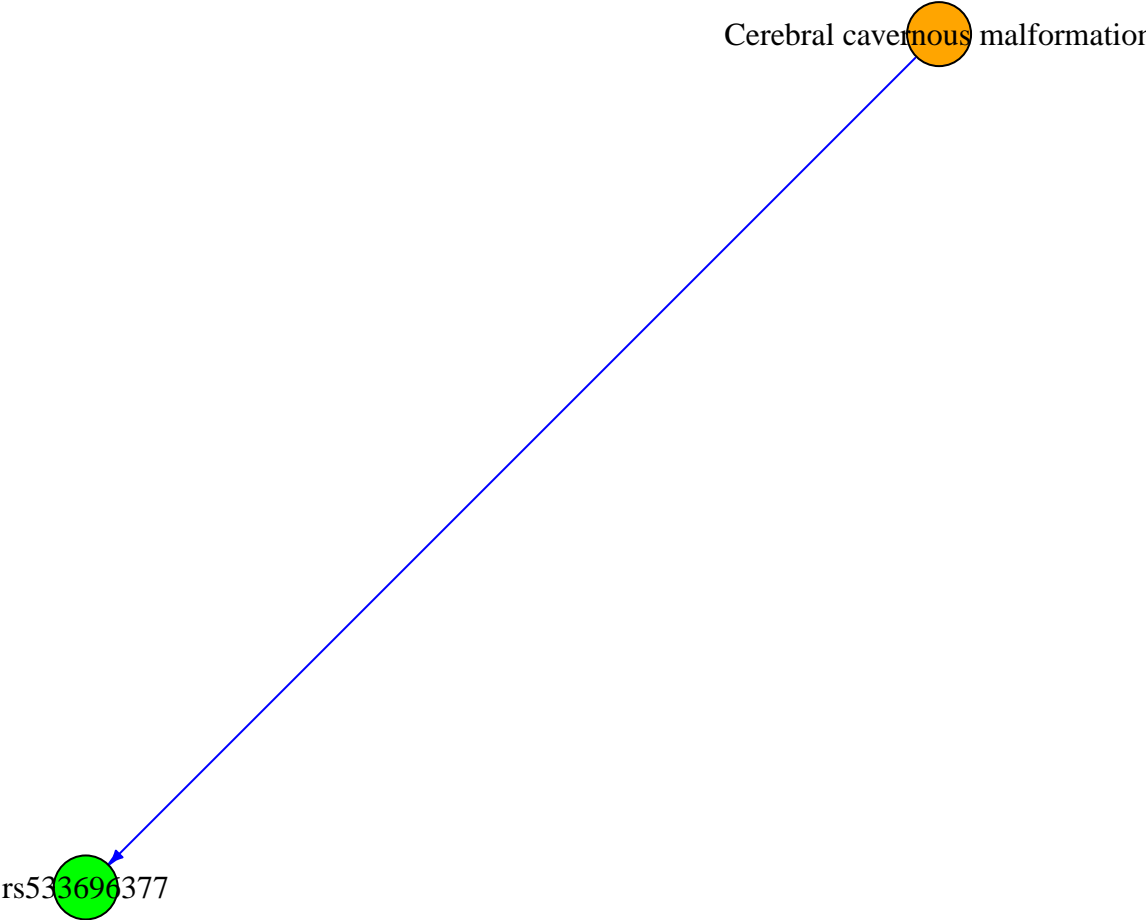

# Variant–Disease Network (Cerebral palsy spastic quadriplegic)

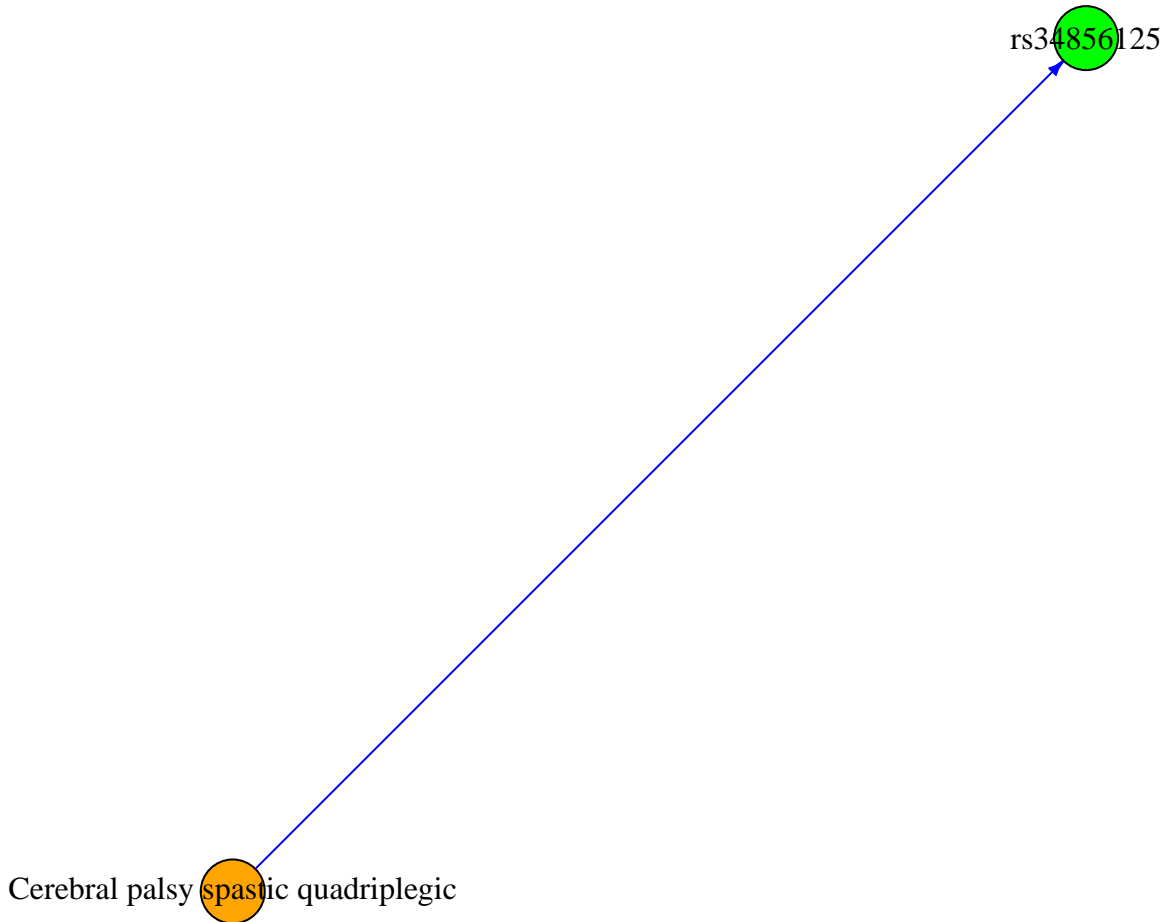

Variant–Disease Network (Ceroid lipofuscinosis neuronal 2)

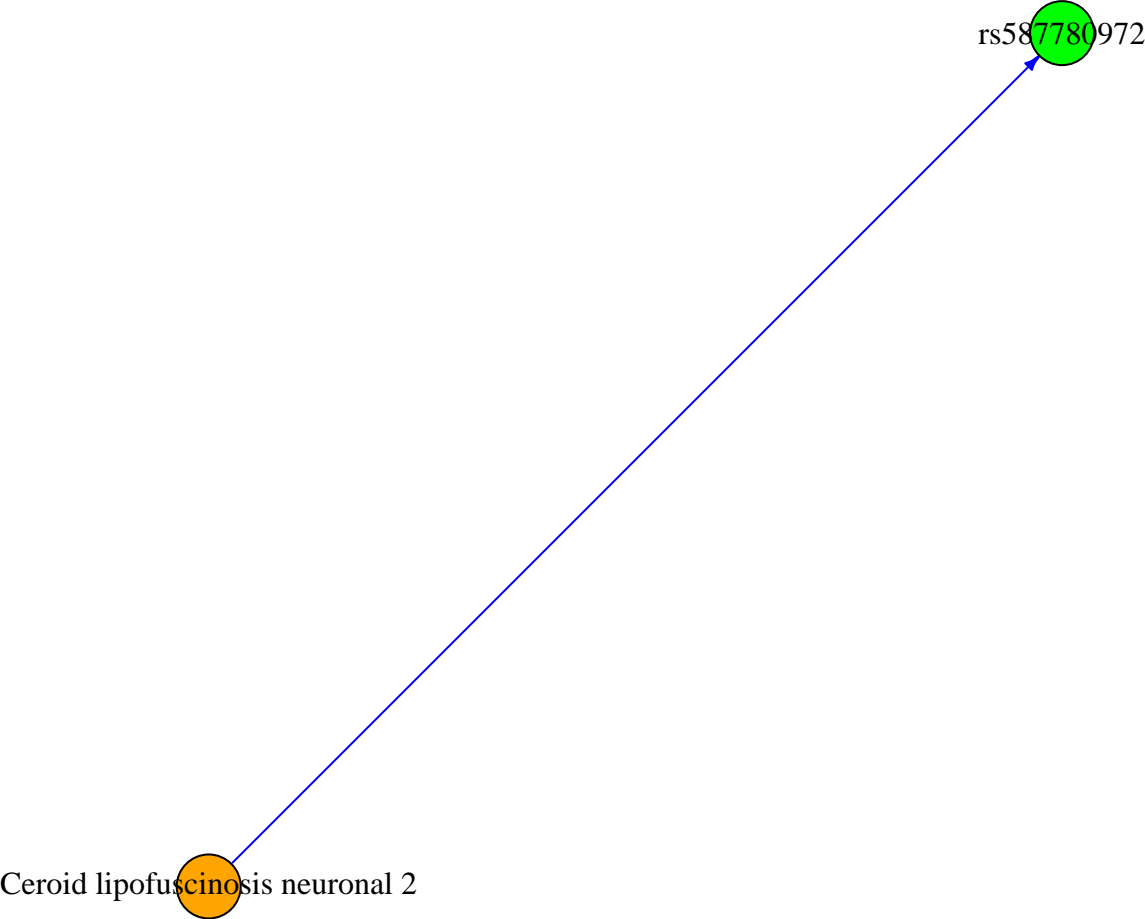

## Variant–Disease Network (Charcot–Marie–Tooth)

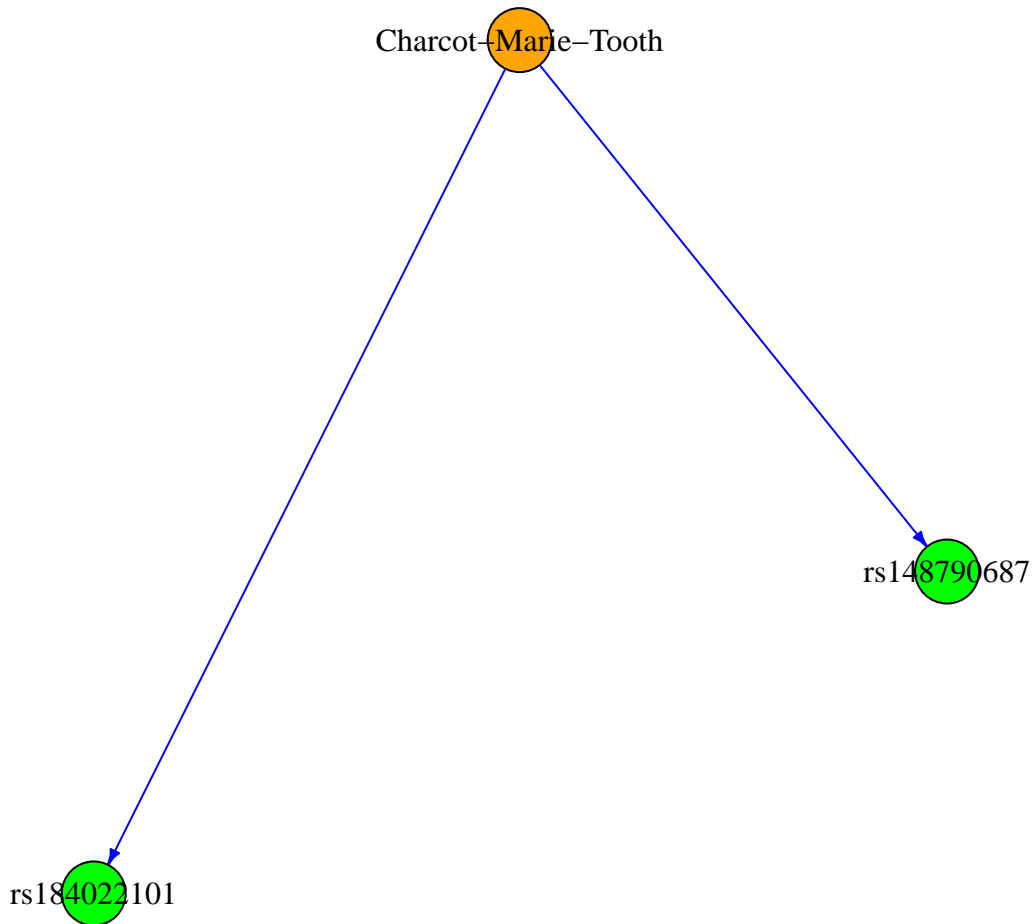

Variant–Disease Network (Charcot–Marie–Tooth disease)

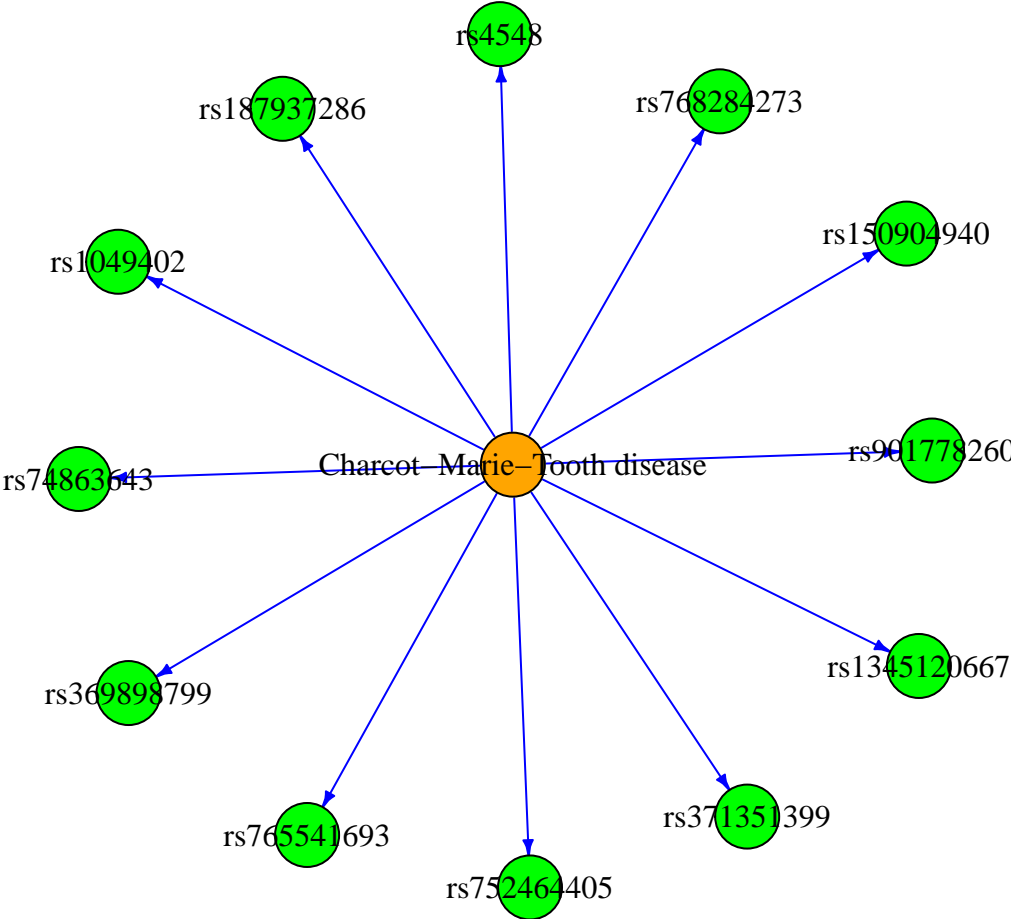

## Variant–Disease Network (Charcot–Marie–Tooth disease type 2D)

rs1049402

Charcot–Marie–Tooth disease type

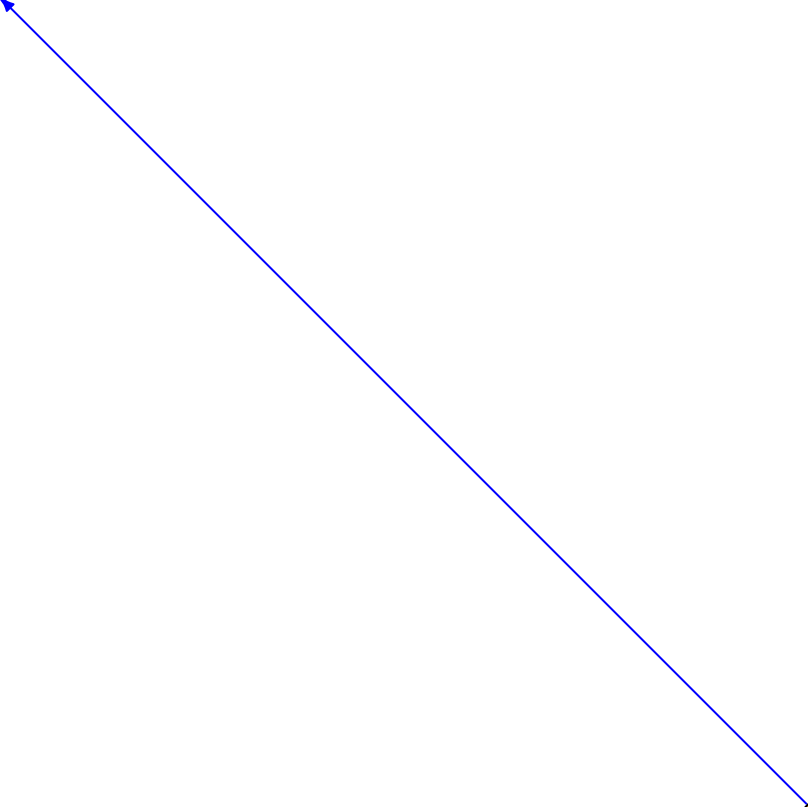



# Variant–Disease Network (Charcot–Marie–Tooth disease type 4)

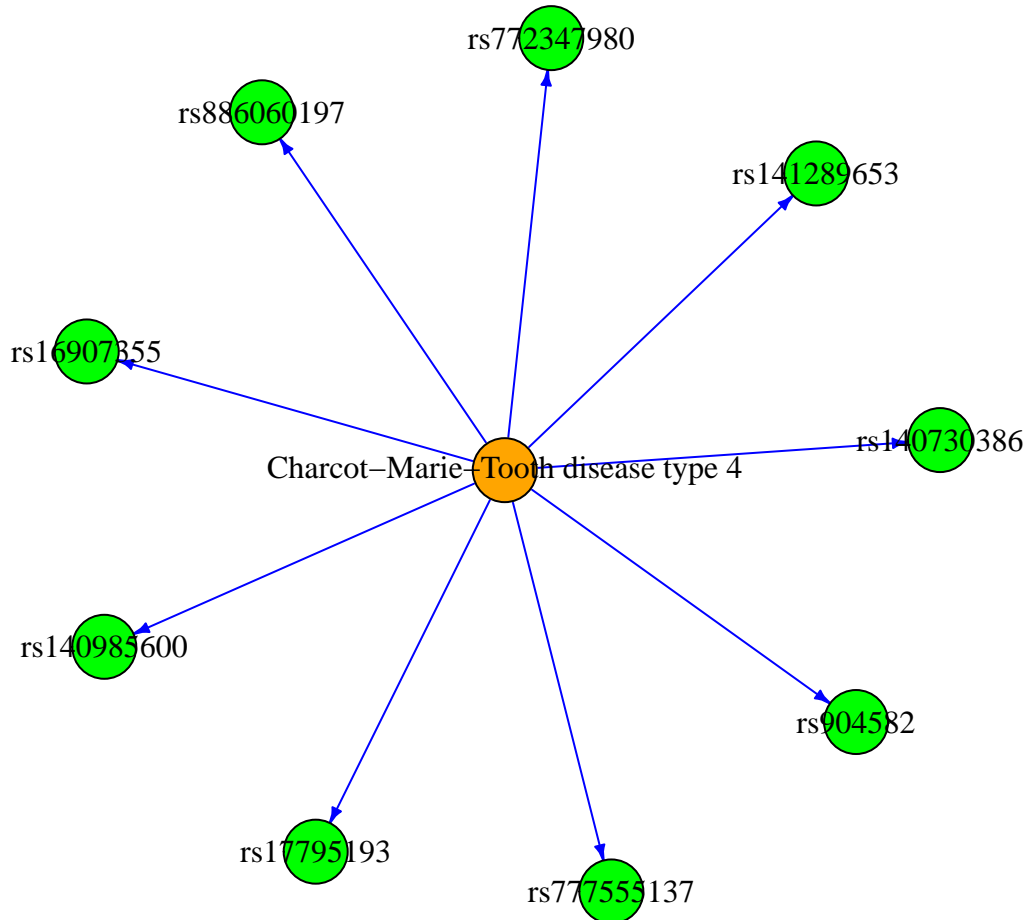

## Variant-Disease Network (Chitotriosidase deficiency)

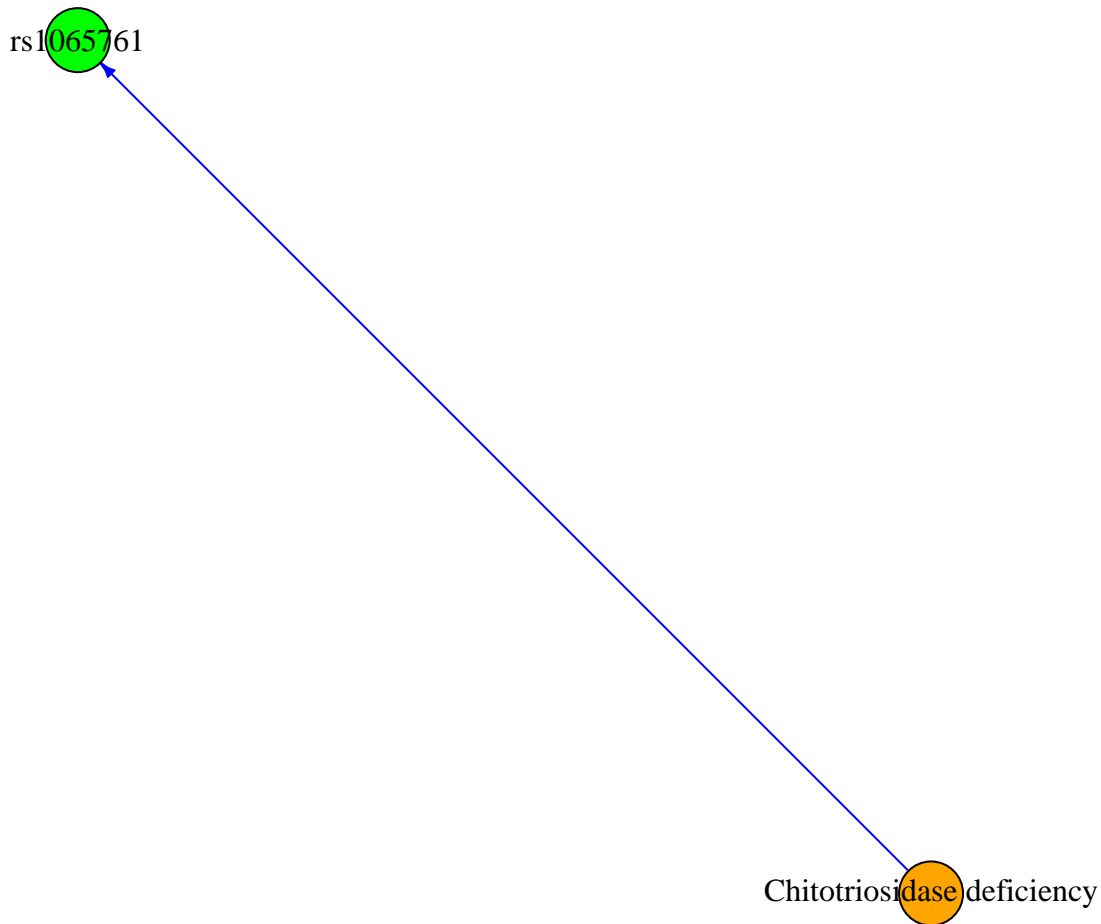

## Variant-Disease Network (Cholestasis)

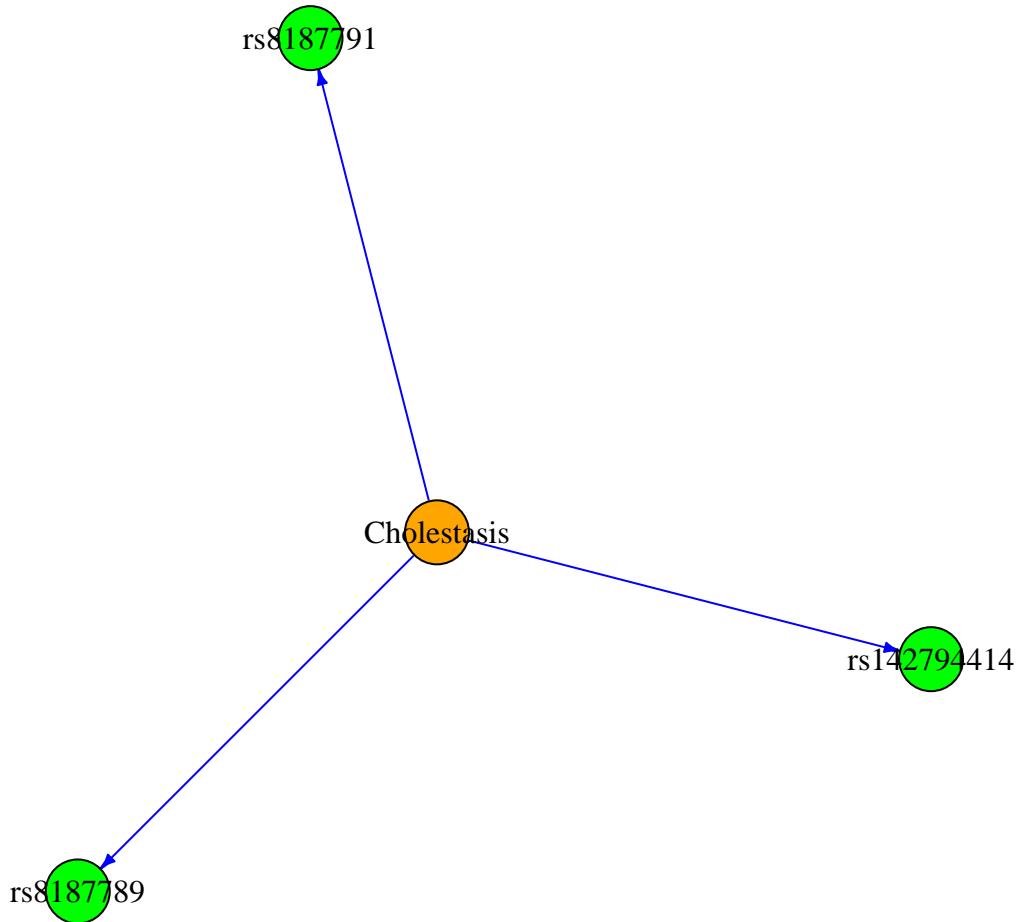

Variant–Disease Network (Chondrocalcinosis)

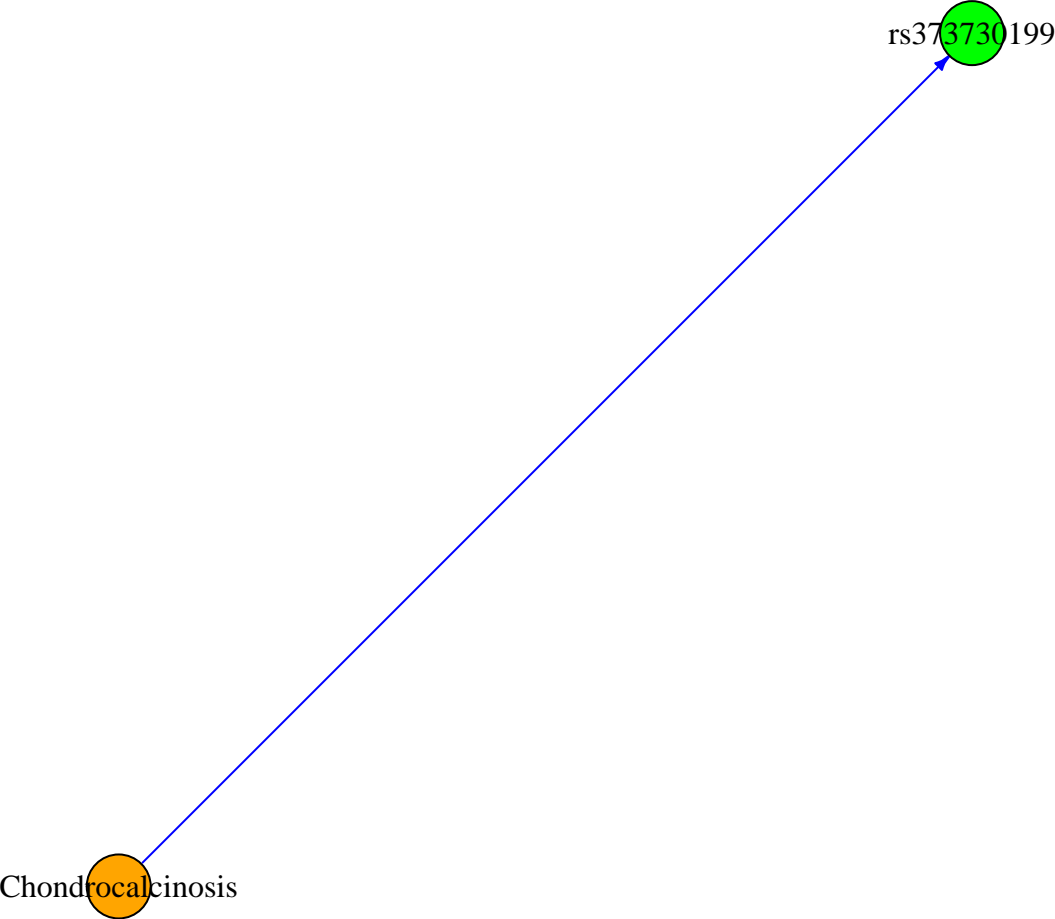

## Variant–Disease Network (Chondrodysplasia)

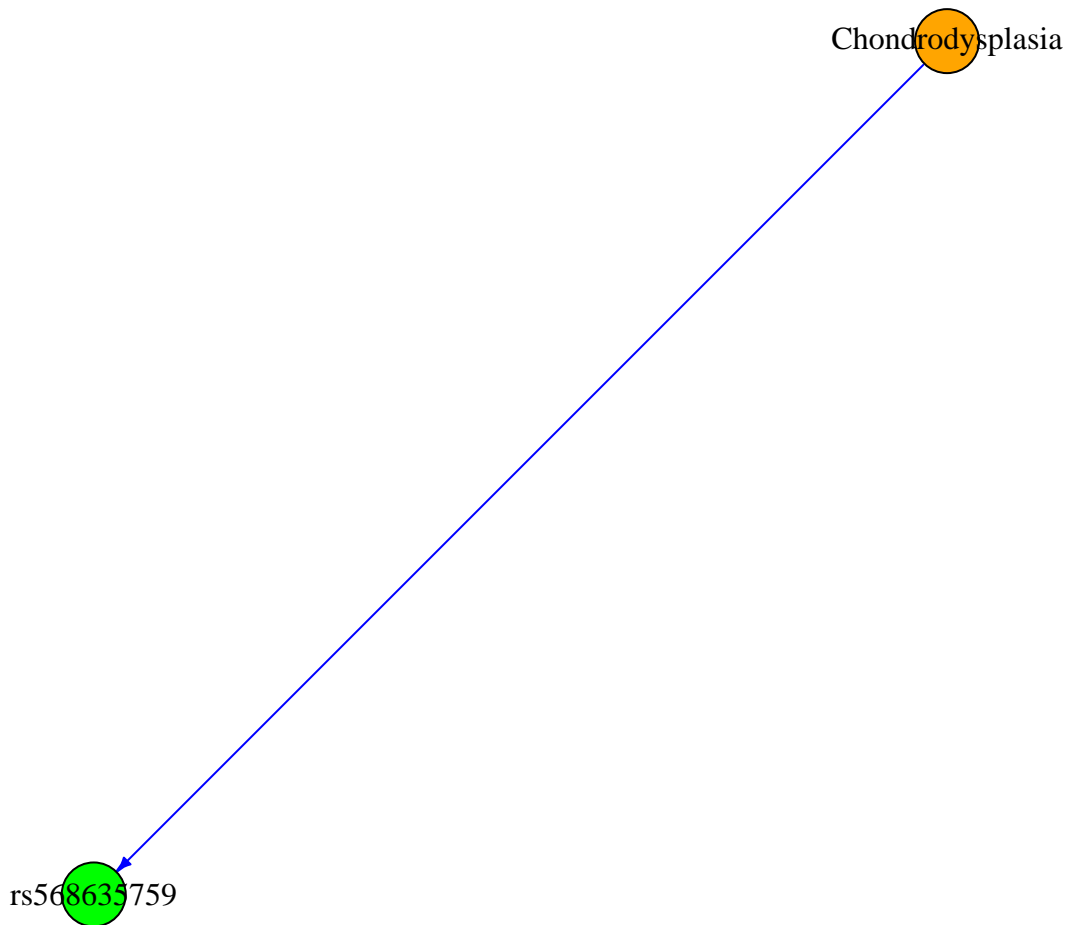

## Variant-Disease Network (Choreoacanthocytosis)

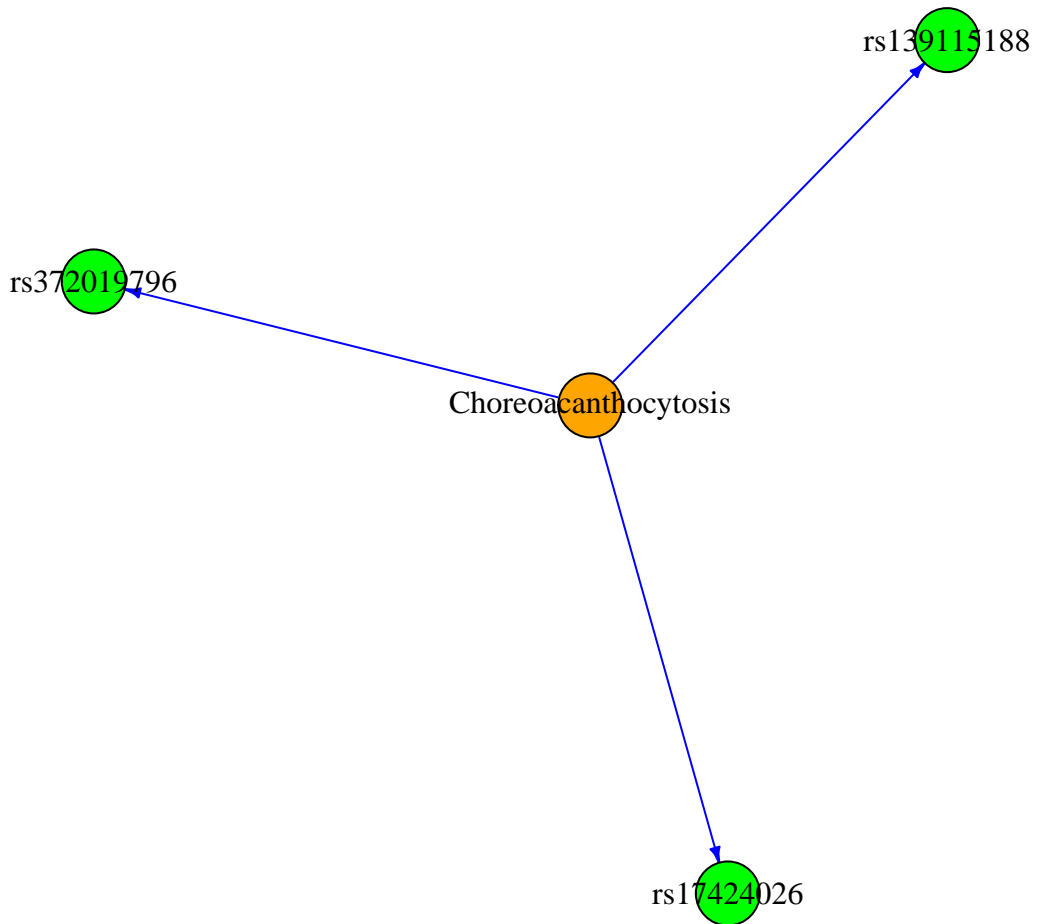

**Variant–Disease Network (Chronic infantile neurological)**

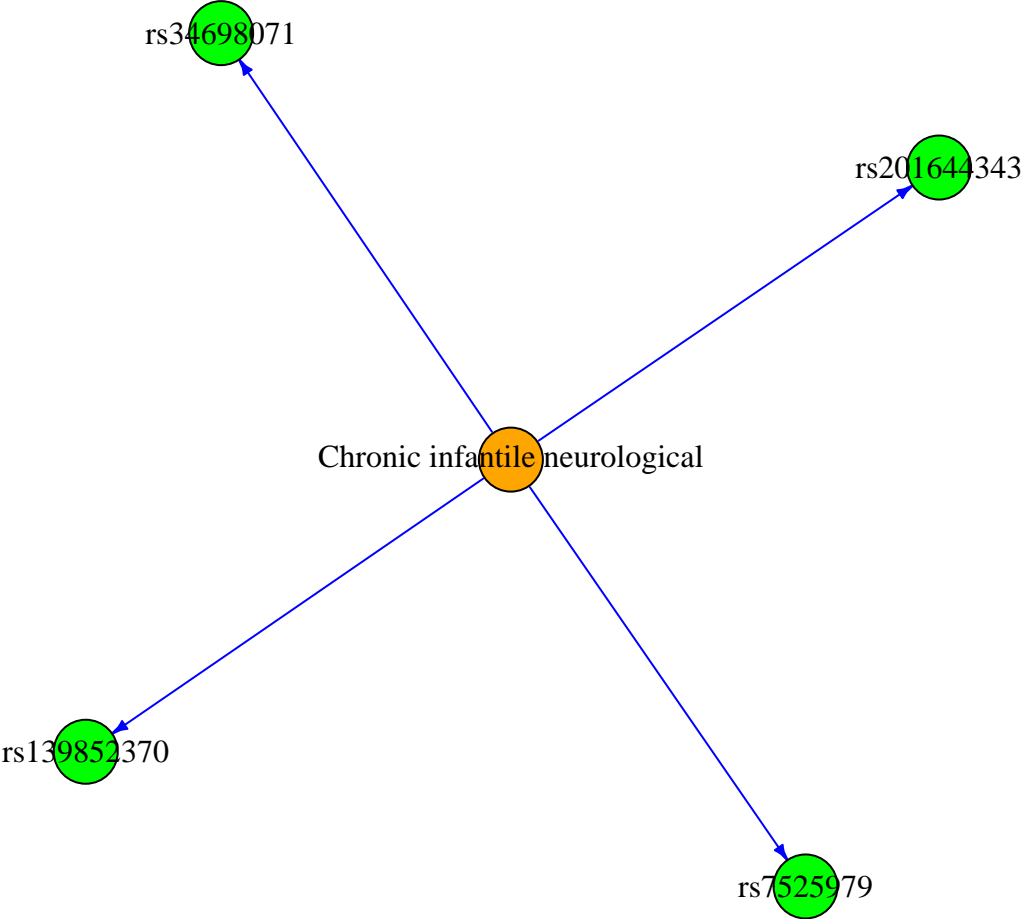

## Variant–Disease Network (Ciliary dyskinesia)

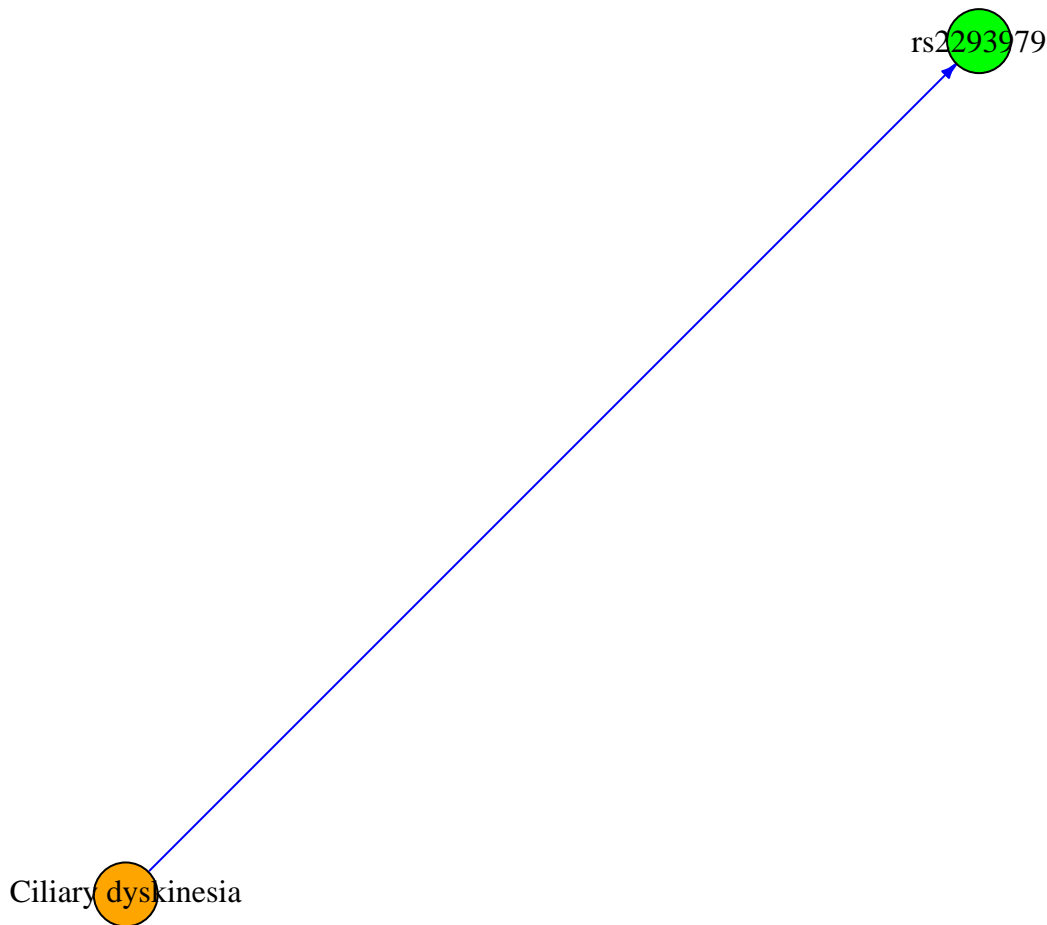



## Variant–Disease Network (Citrullinemia type I)

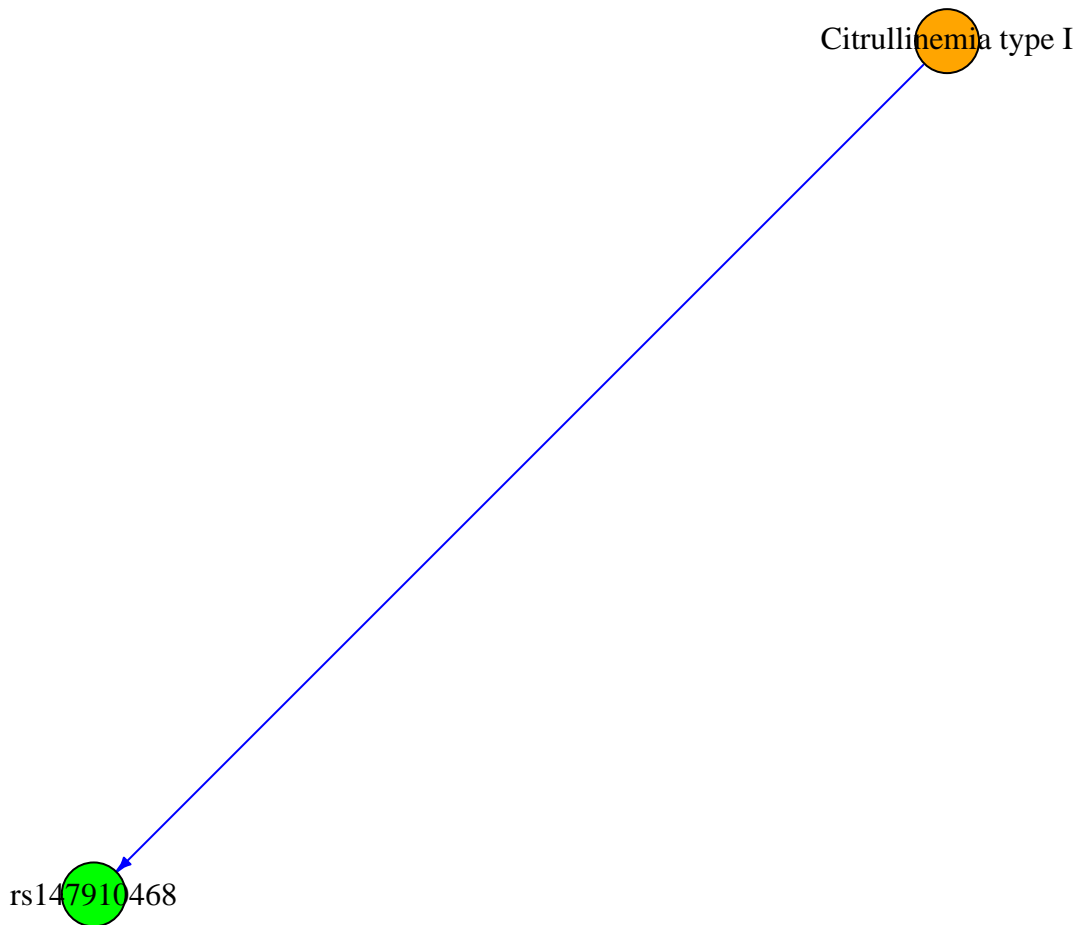

## Variant–Disease Network (Cleft Lip +/- Cleft Palate)

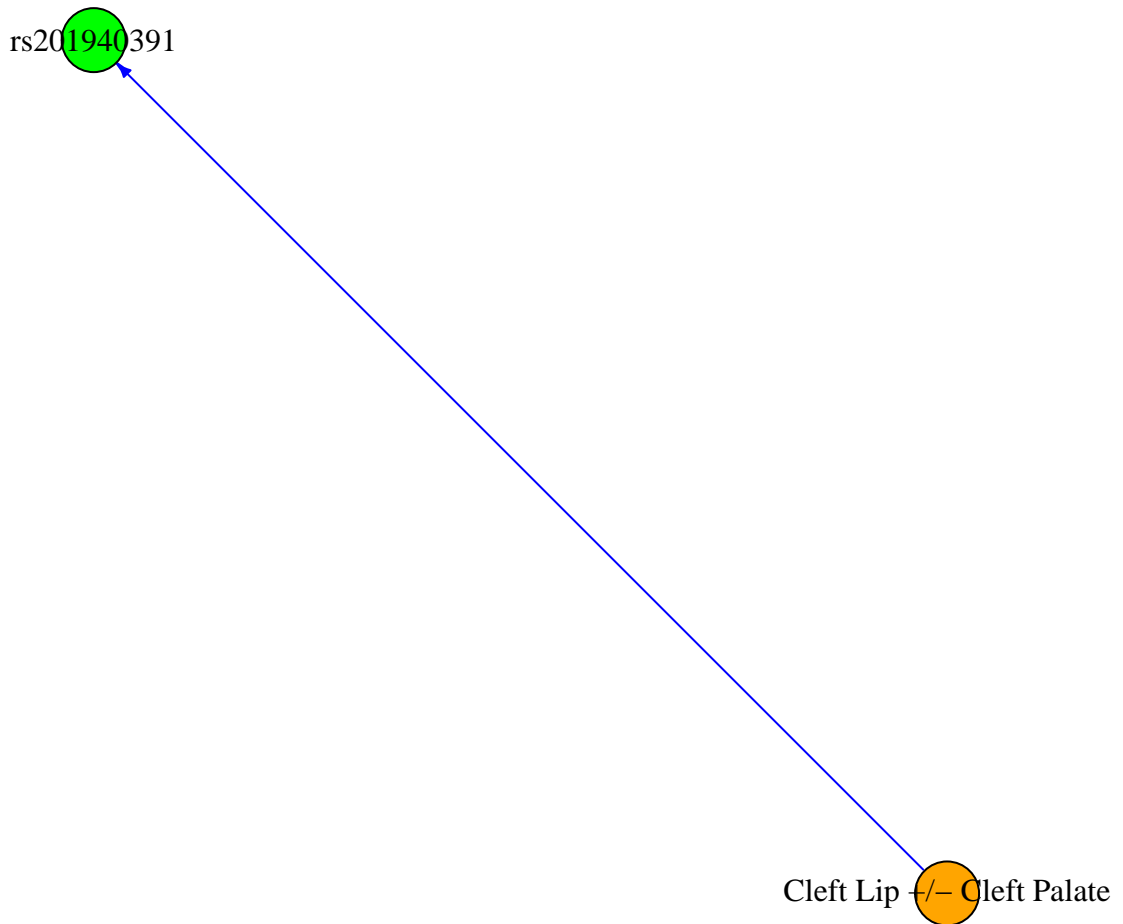

**Variant–Disease Network (Cleft palate)**

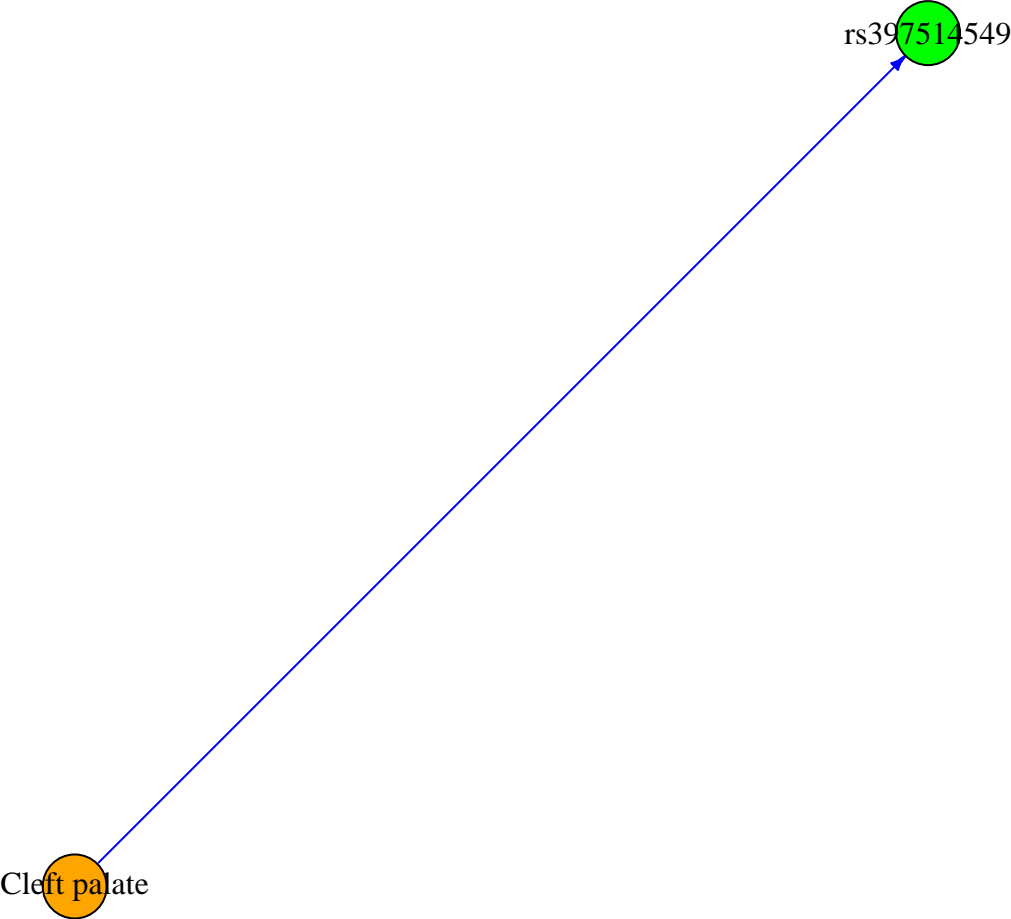

## Variant-Disease Network (C-like syndrome)

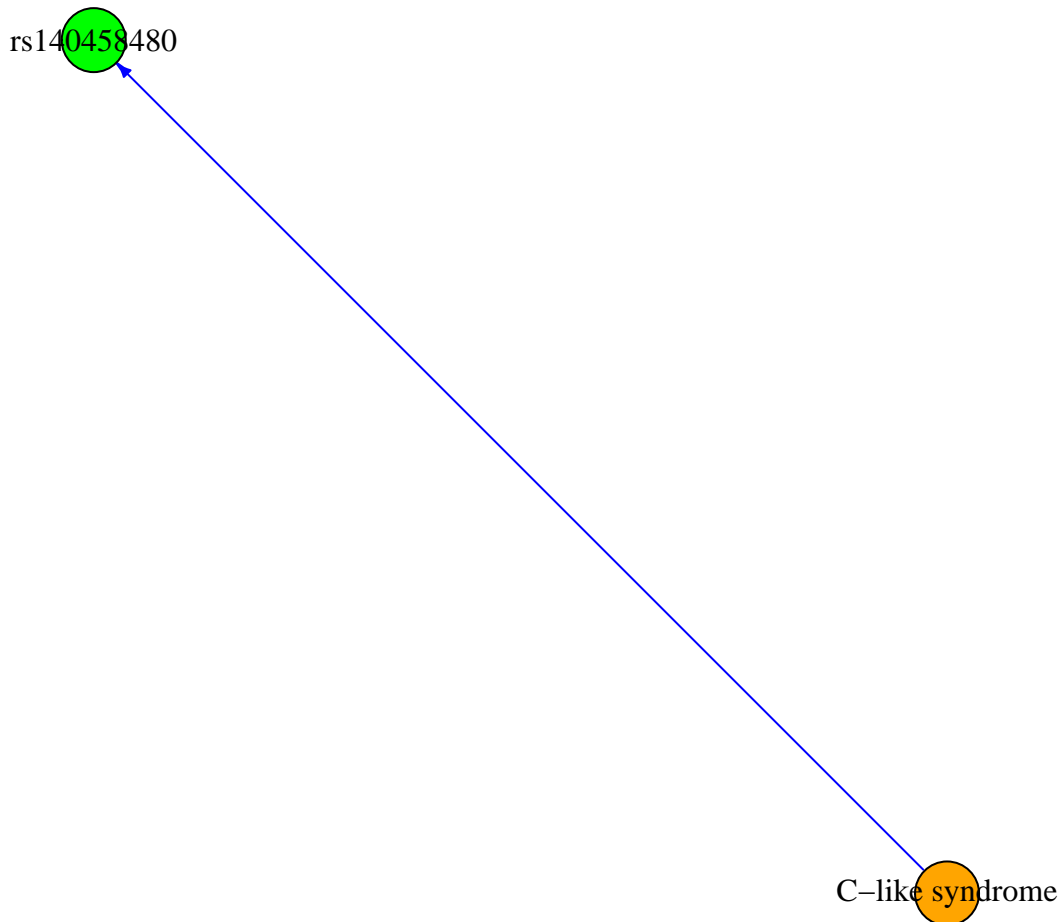

**Variant–Disease Network (COG7 congenital disorder of glycosylation)**

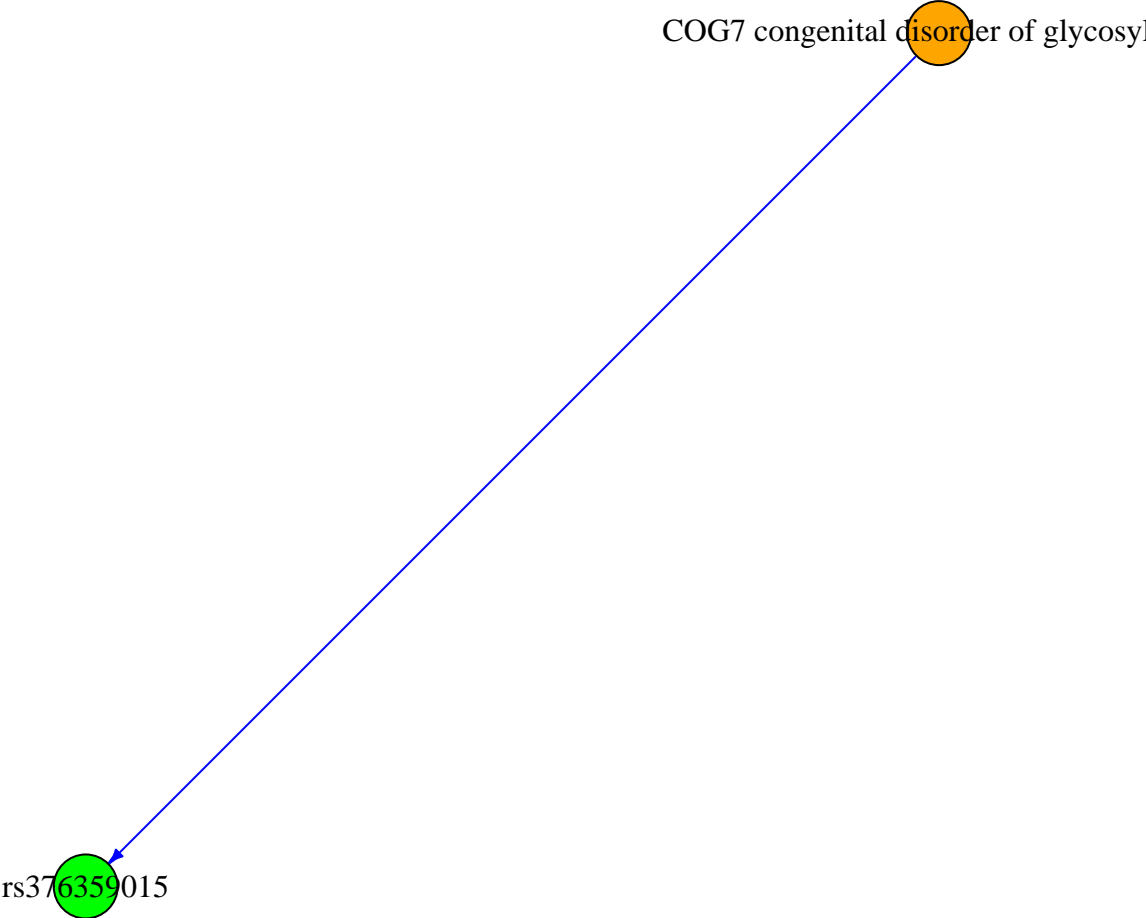

Variant–Disease Network (Collagen VI–related myopathy)

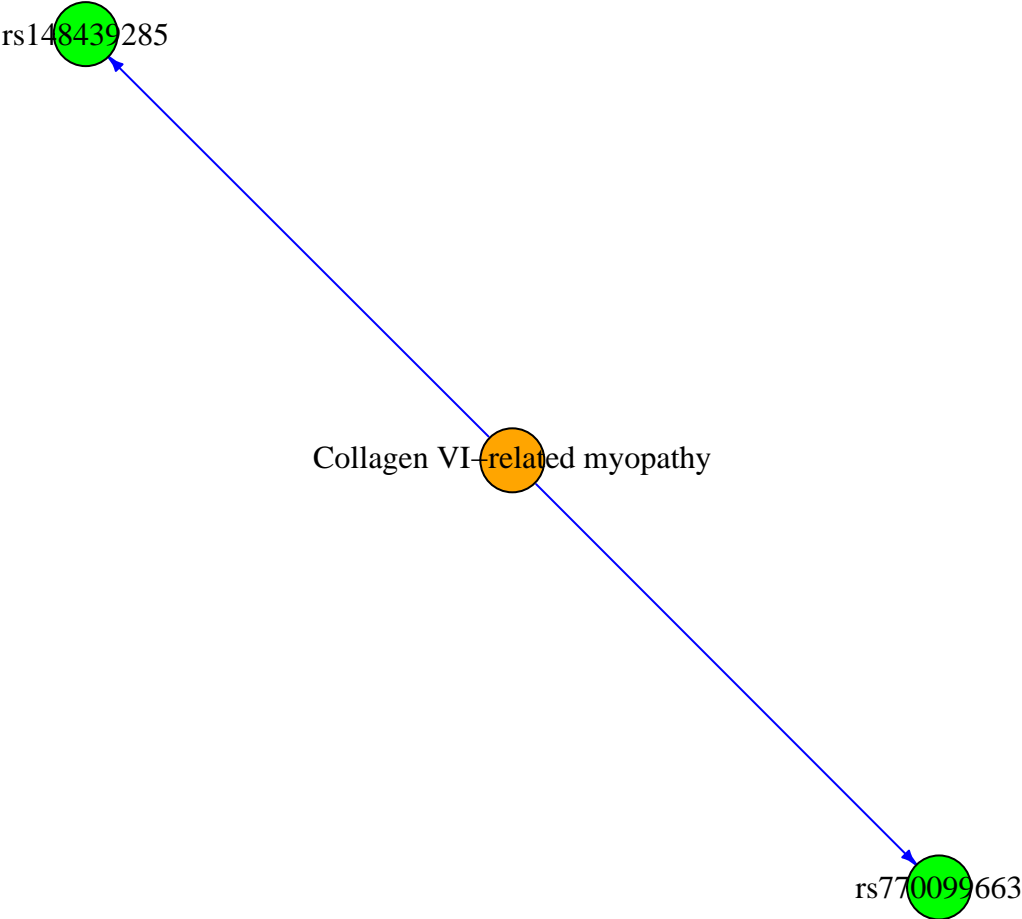

## Variant-Disease Network (Colorectal cancer)

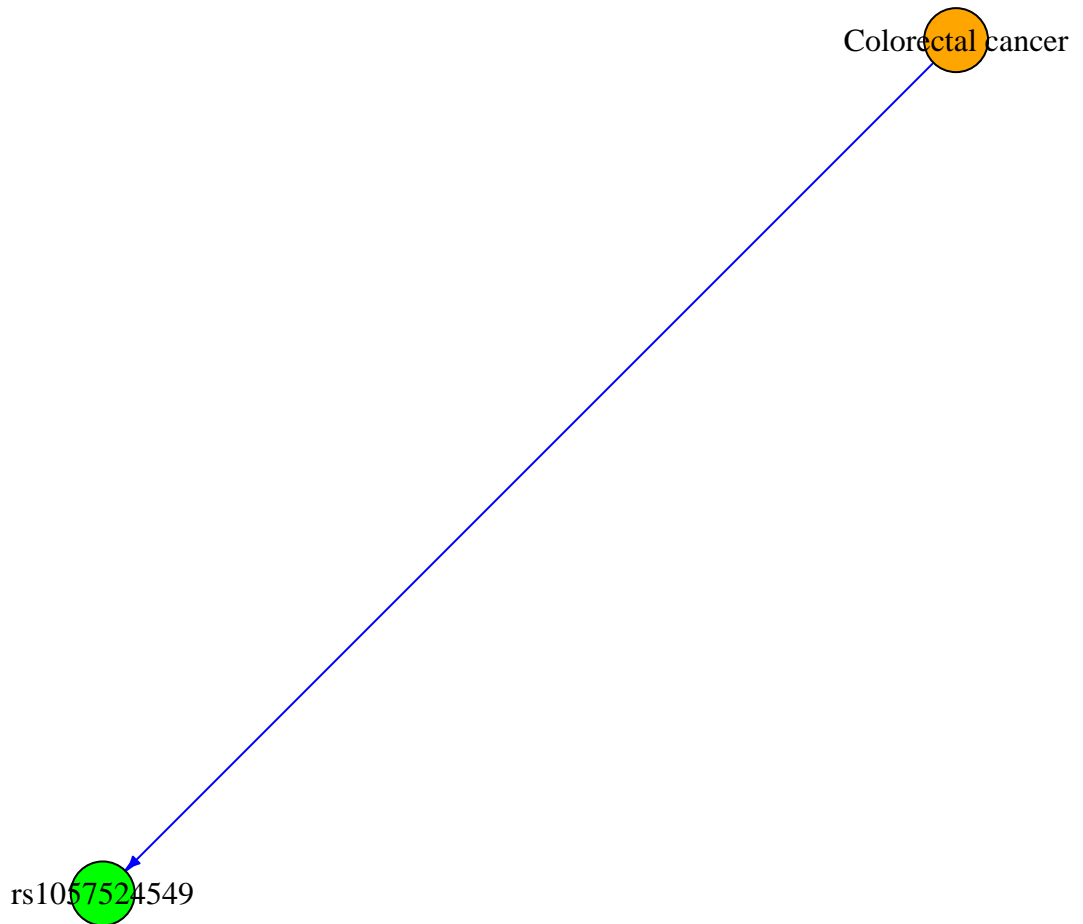

**Variant–Disease Network (Combined Pituitary Hormone Deficiency)**

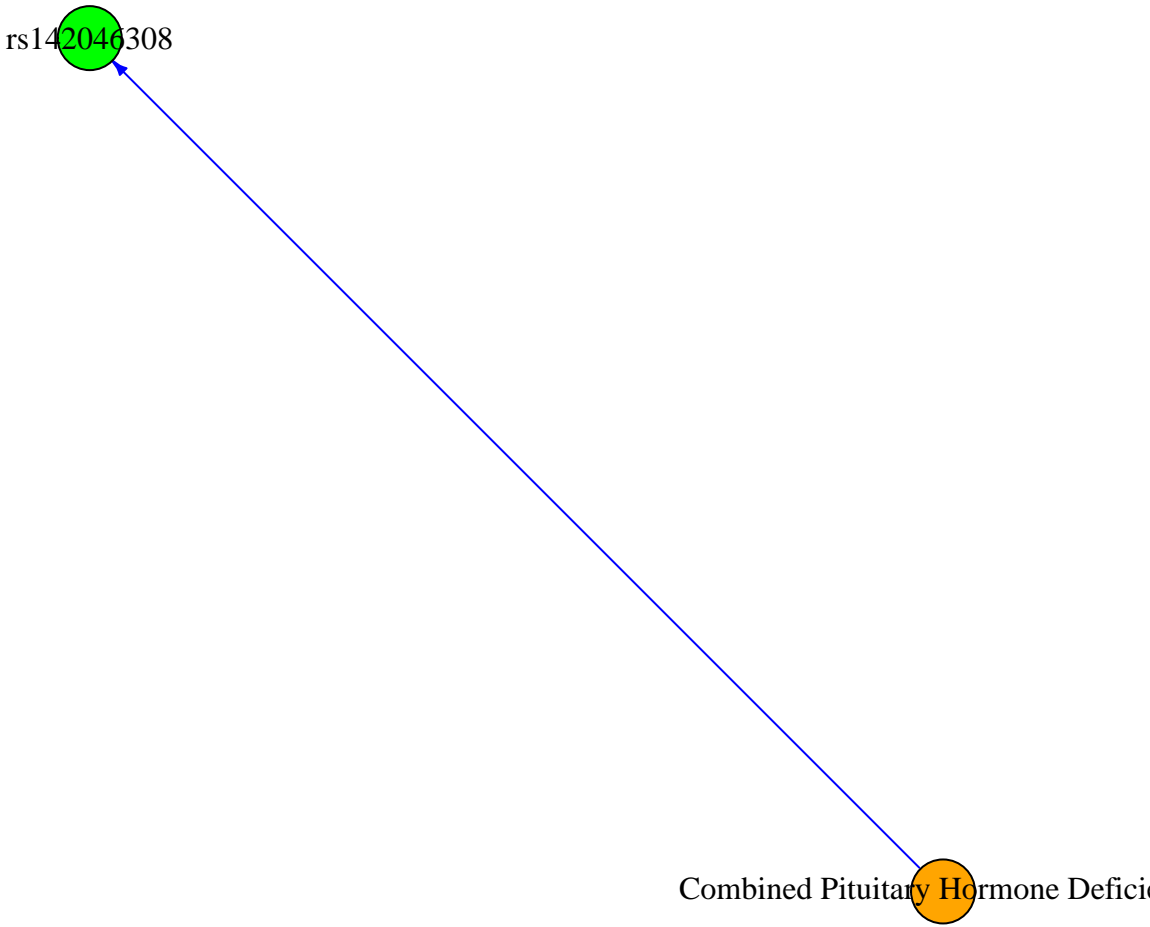



# Variant–Disease Network (Common variable immunodeficiency 7)

rs34349246

Common variable immunodeficiency



**Variant–Disease Network (Complement component 2 deficiency)**

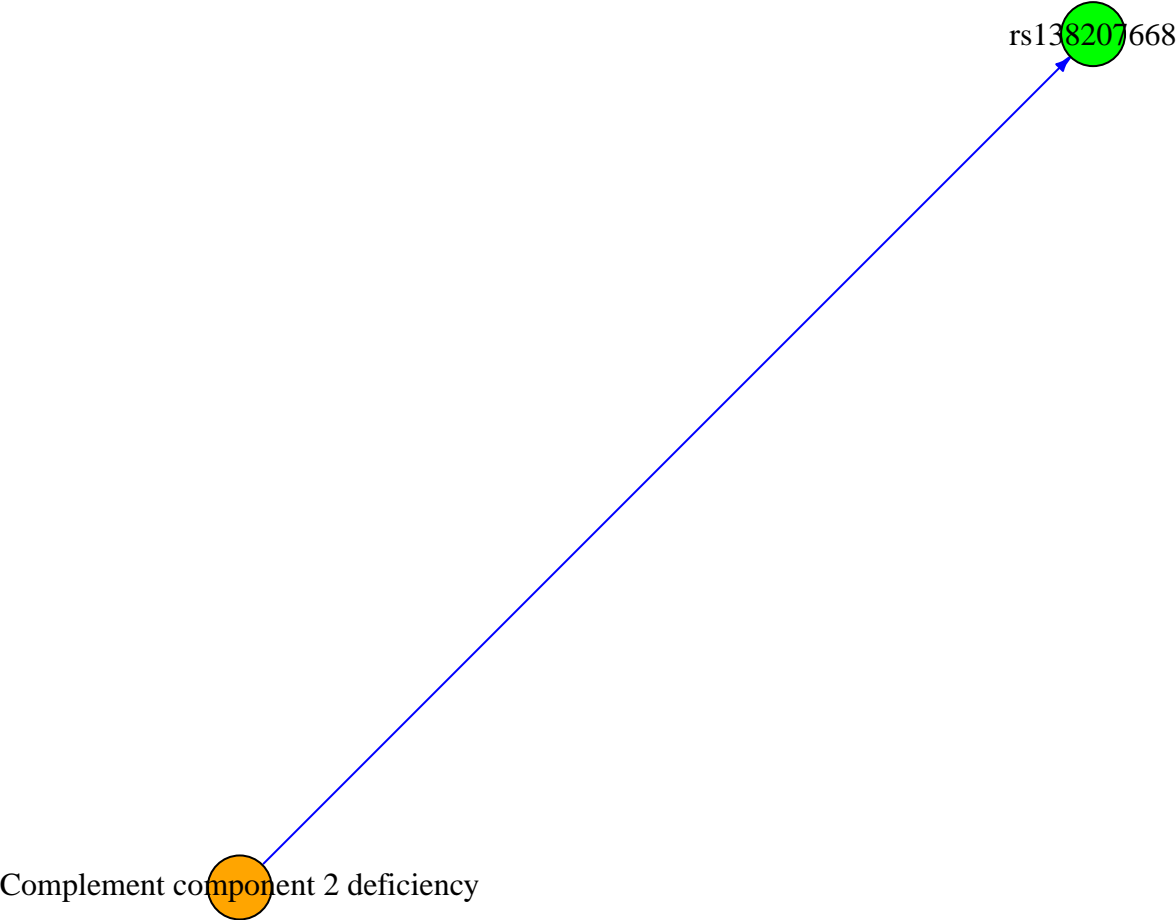

## Variant–Disease Network (Cone dystrophy 3)

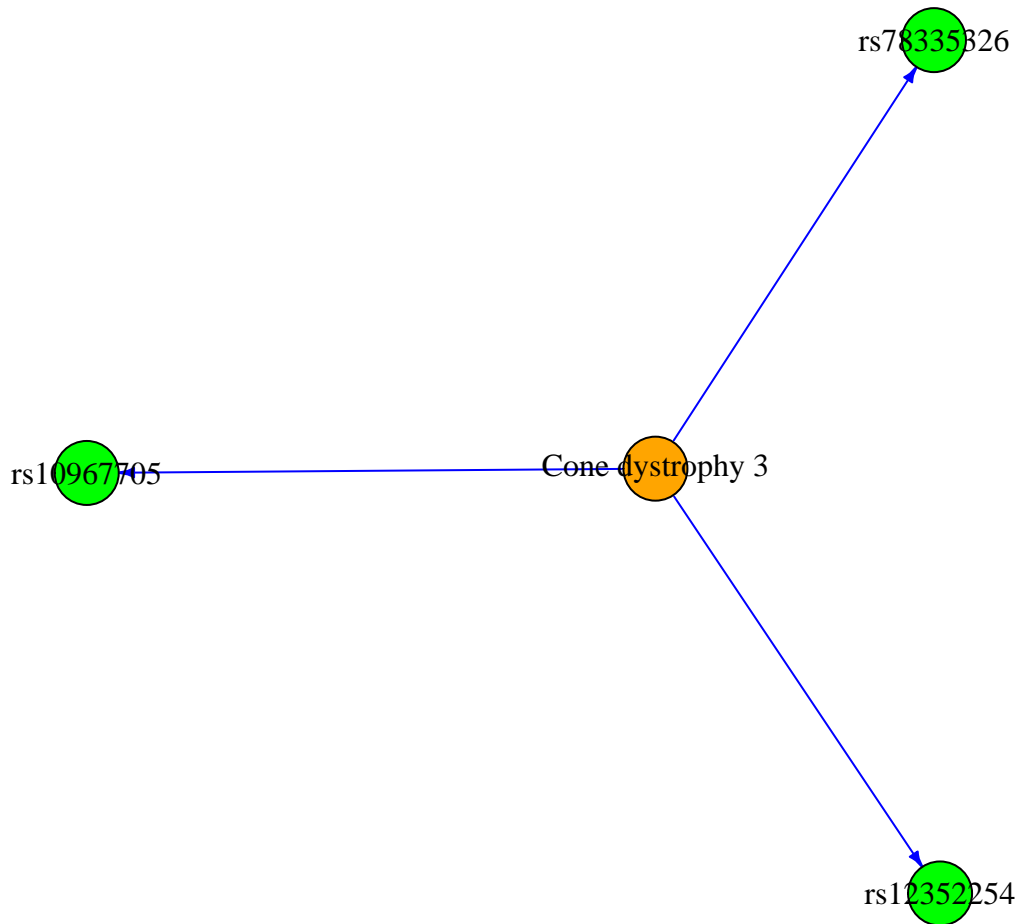

## Variant–Disease Network (Cone–Rod Dystrophy)

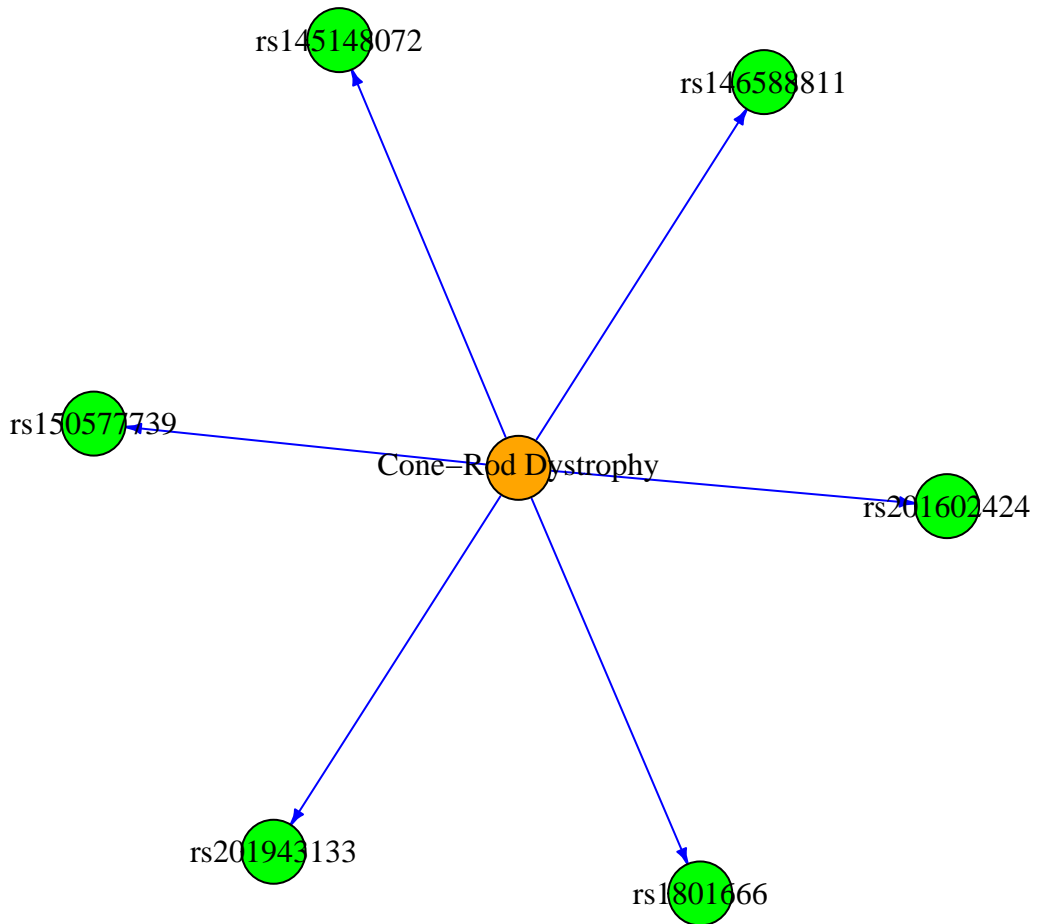

**Variant–Disease Network (Cone-rod dystrophy 15)**

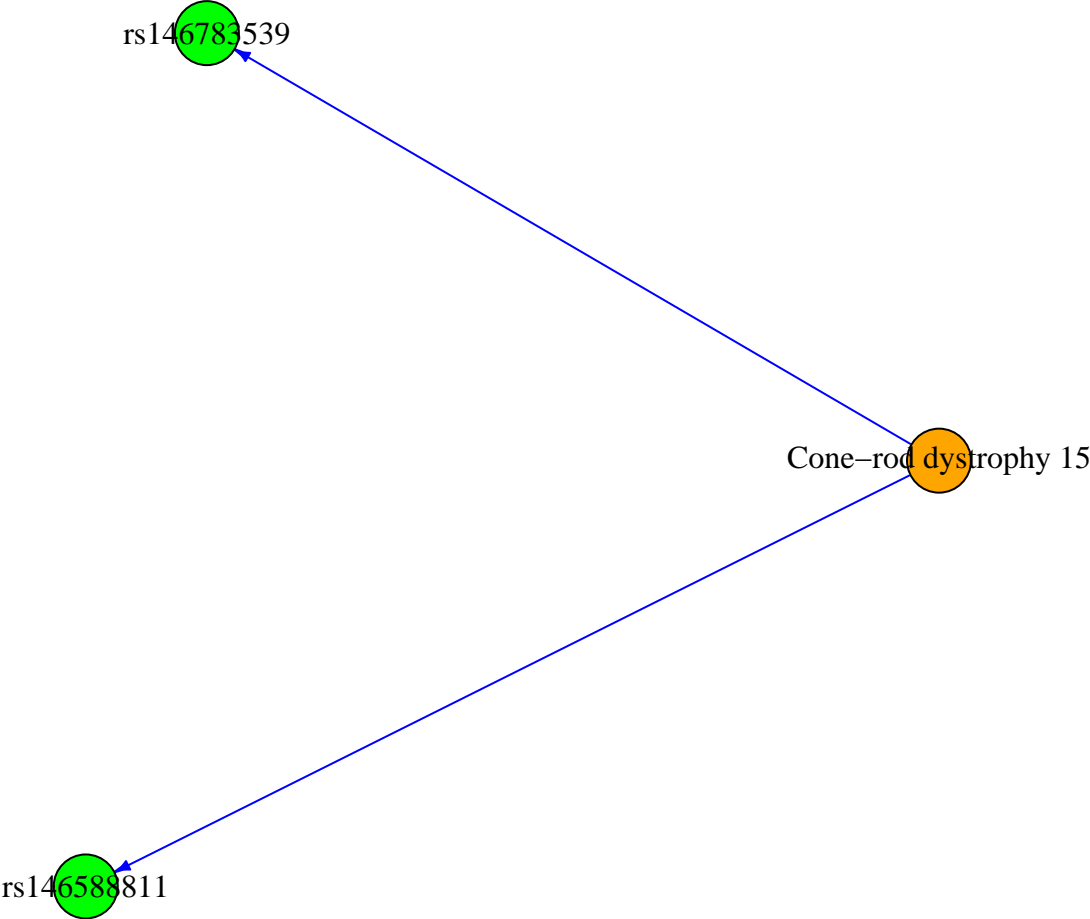

**Variant–Disease Network (Congenital contractural arachnodactyly)**

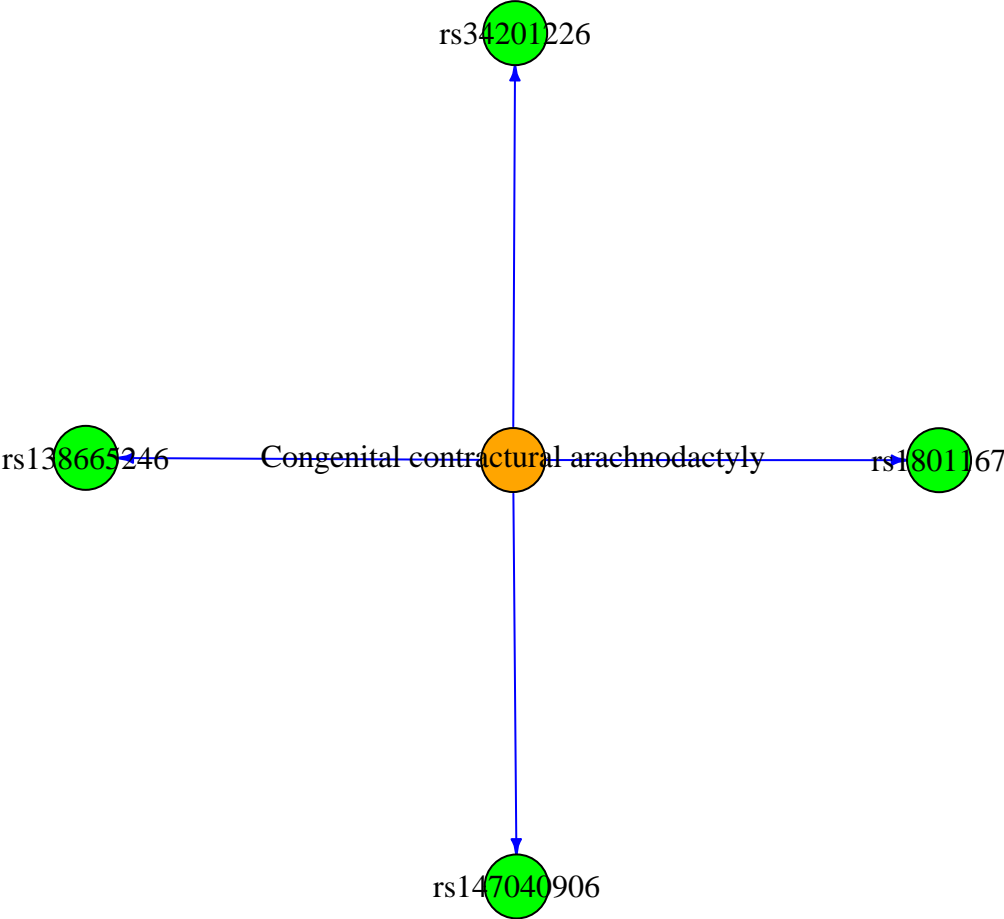

# Variant–Disease Network (Congenital disorder of glycosylation)

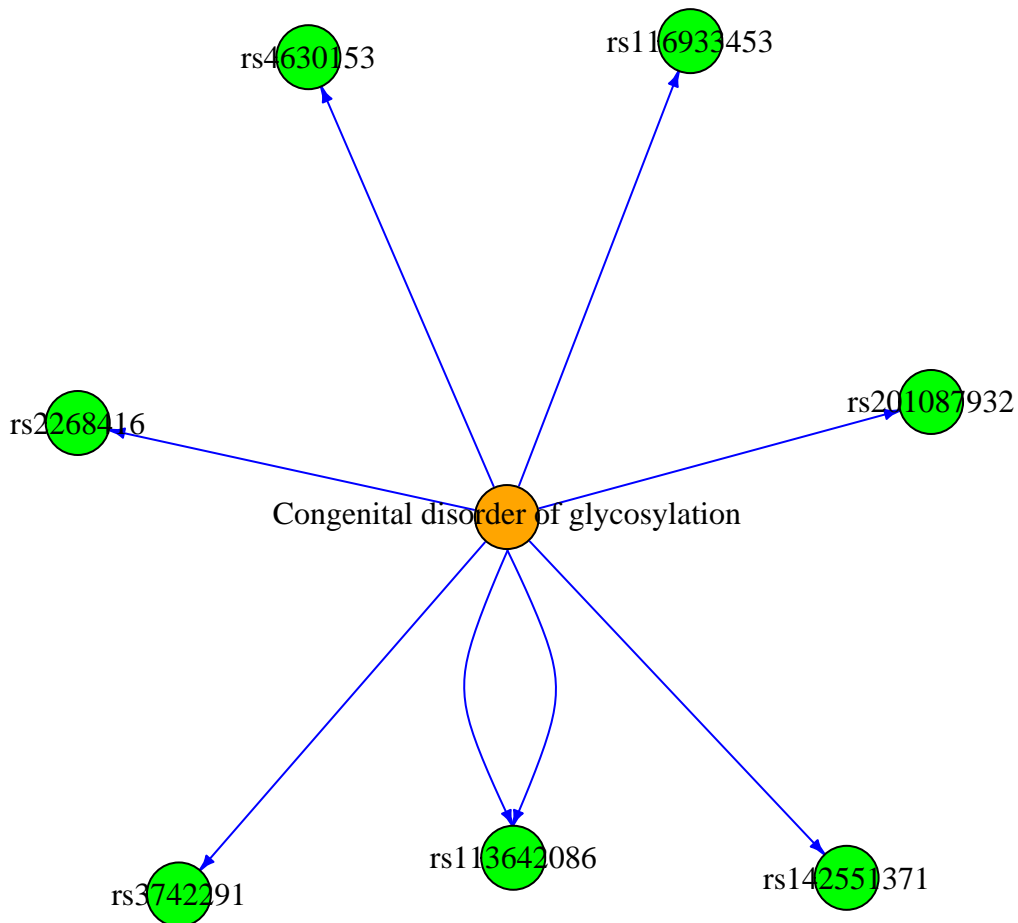

**Variant–Disease Network (Congenital disorder of glycosylation type 2B)**

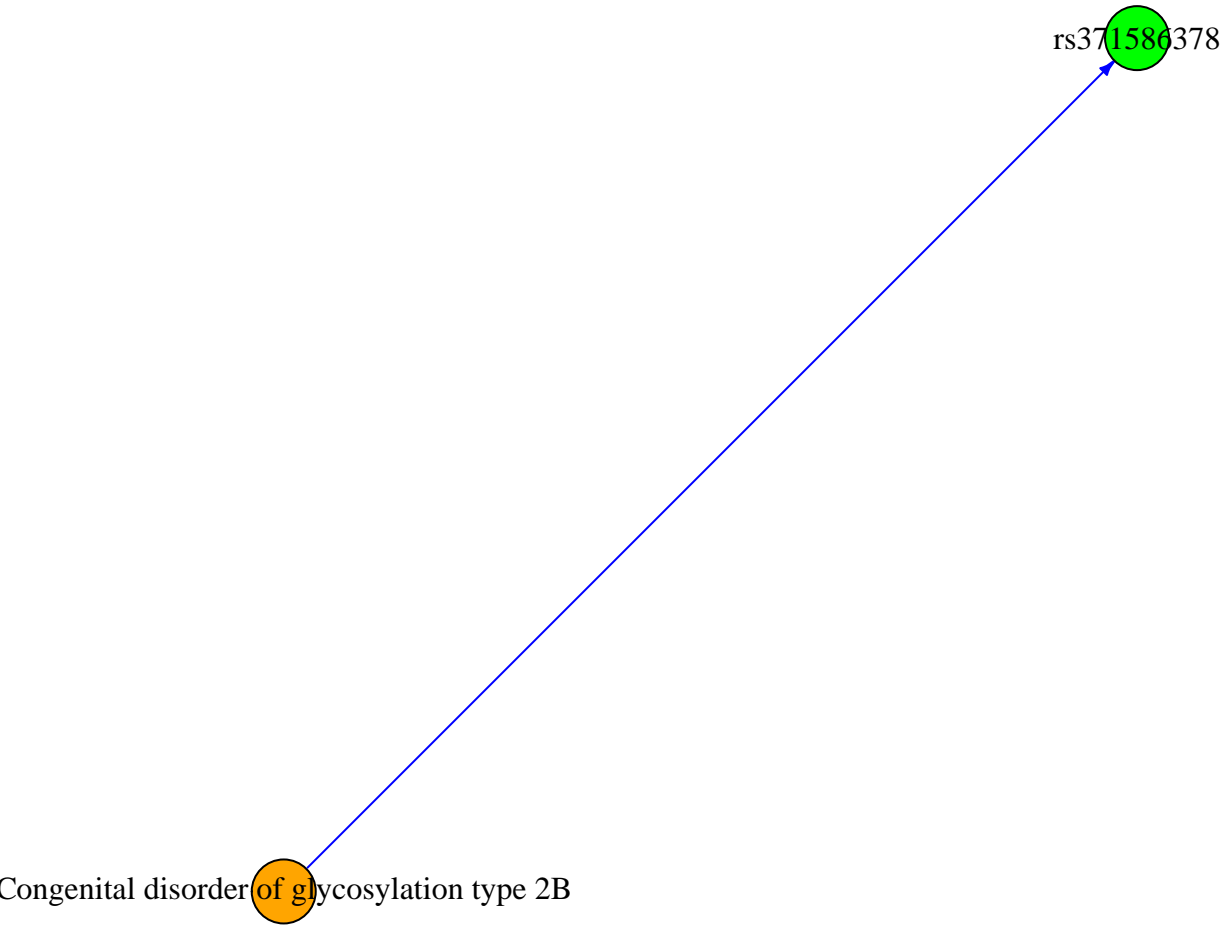



Variant–Disease Network (Congenital generalized lipodystrophy)

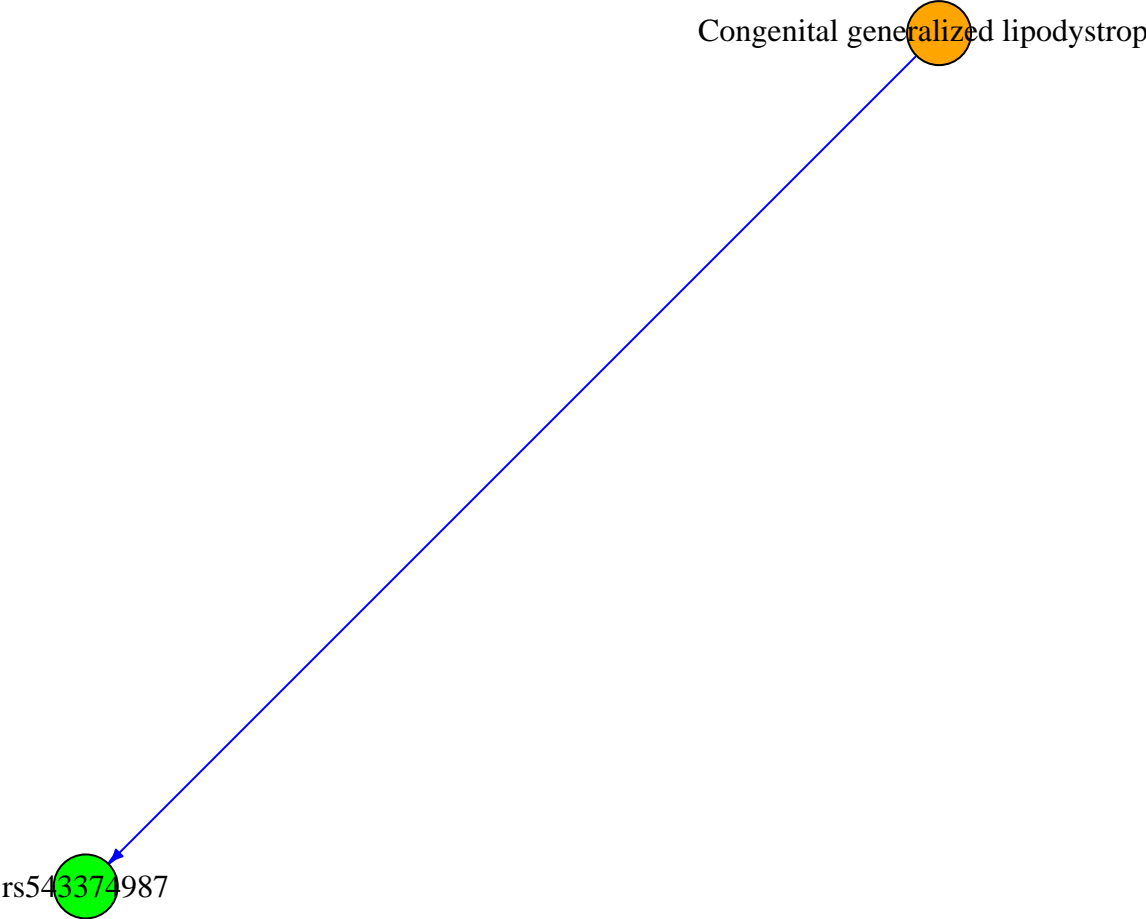

# Variant–Disease Network (Congenital generalized lipodystrophy type 1)

rs200656731

Congenital generalized lipodystrophy

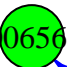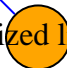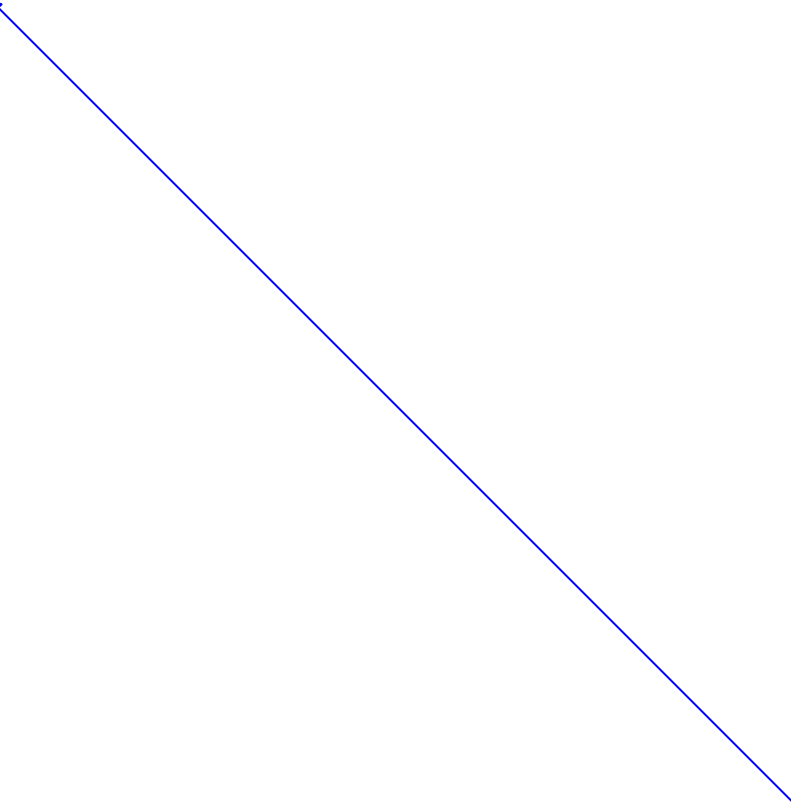

Variant–Disease Network (Congenital glucose–galactose malabsorption)

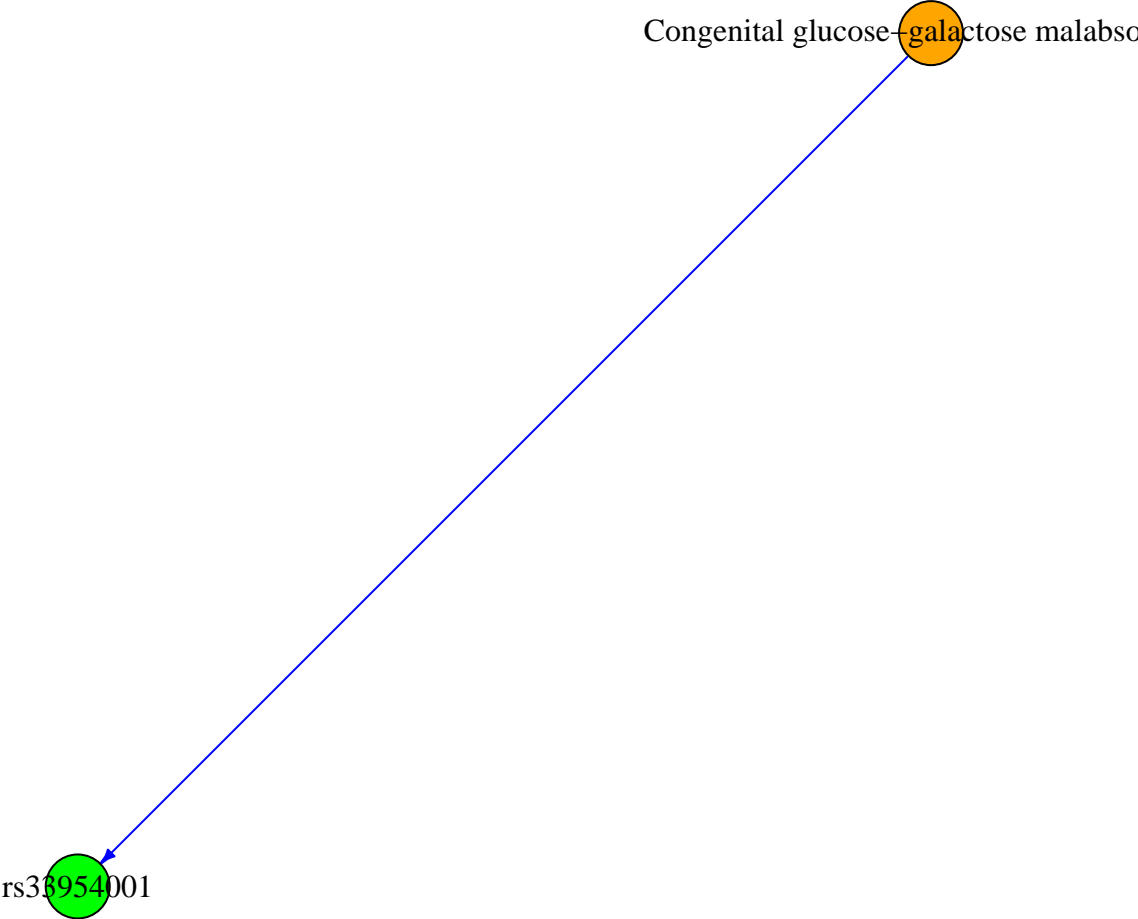

**Variant–Disease Network (Congenital hyperammonemia)**

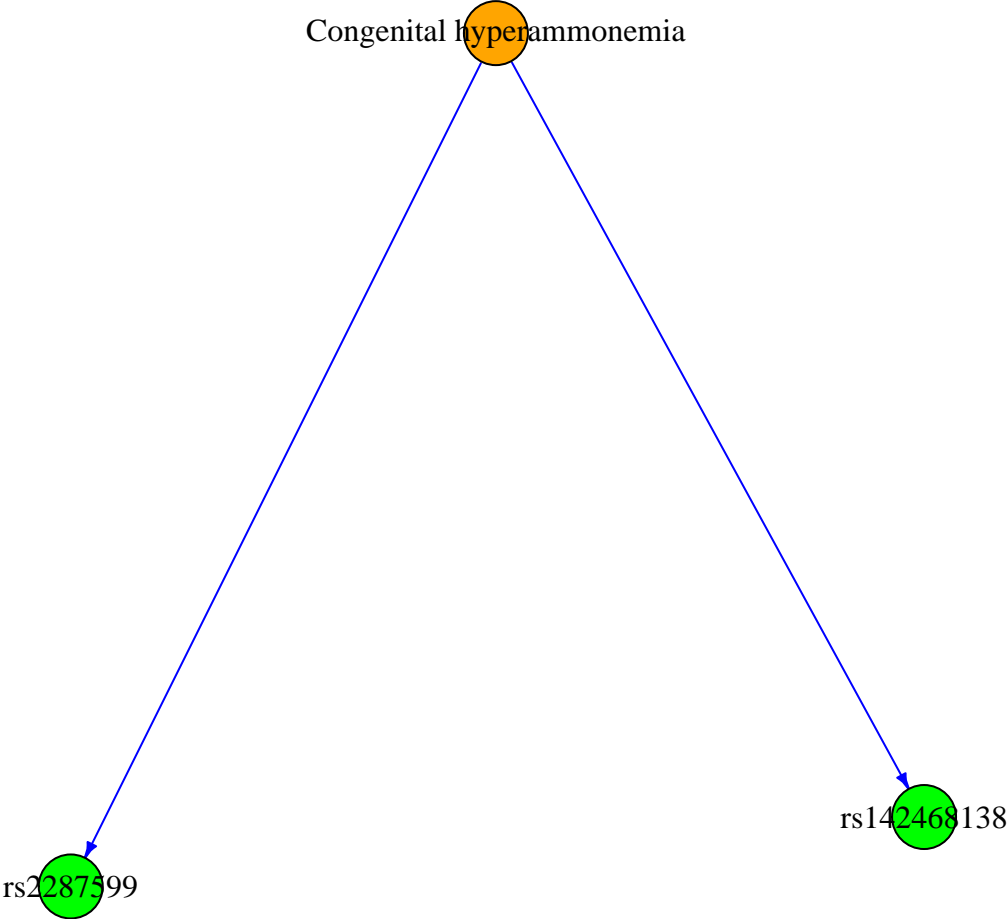

## Variant–Disease Network (Congenital hypothyroidism)

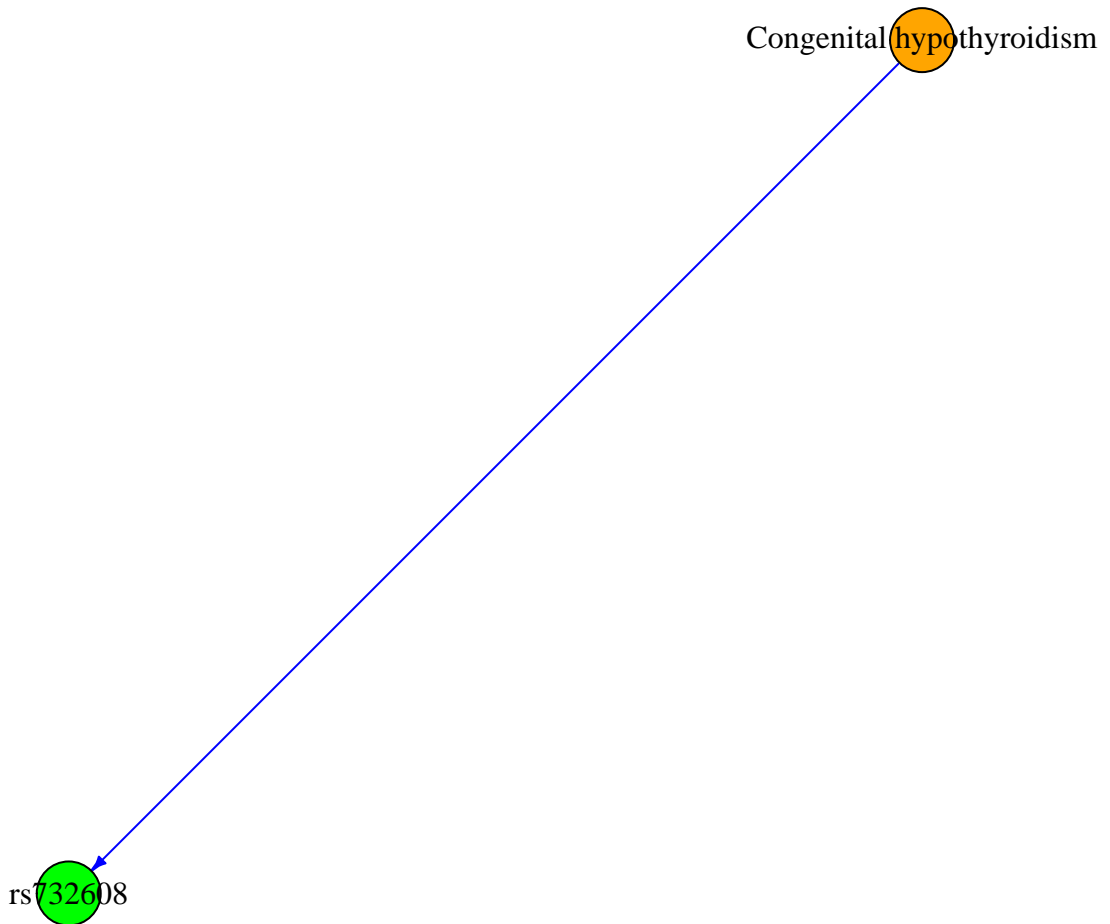

# Variant–Disease Network (Congenital ichthyosiform erythroderma)

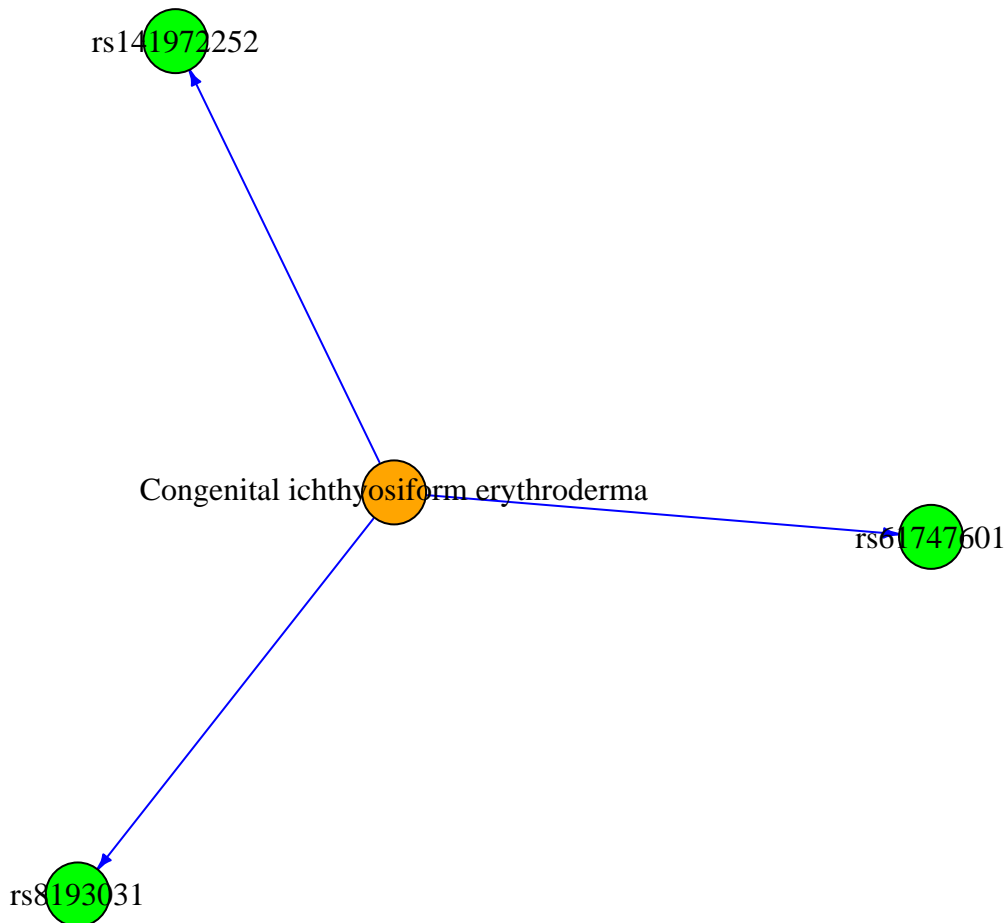

Variant–Disease Network (Congenital lactase deficiency)

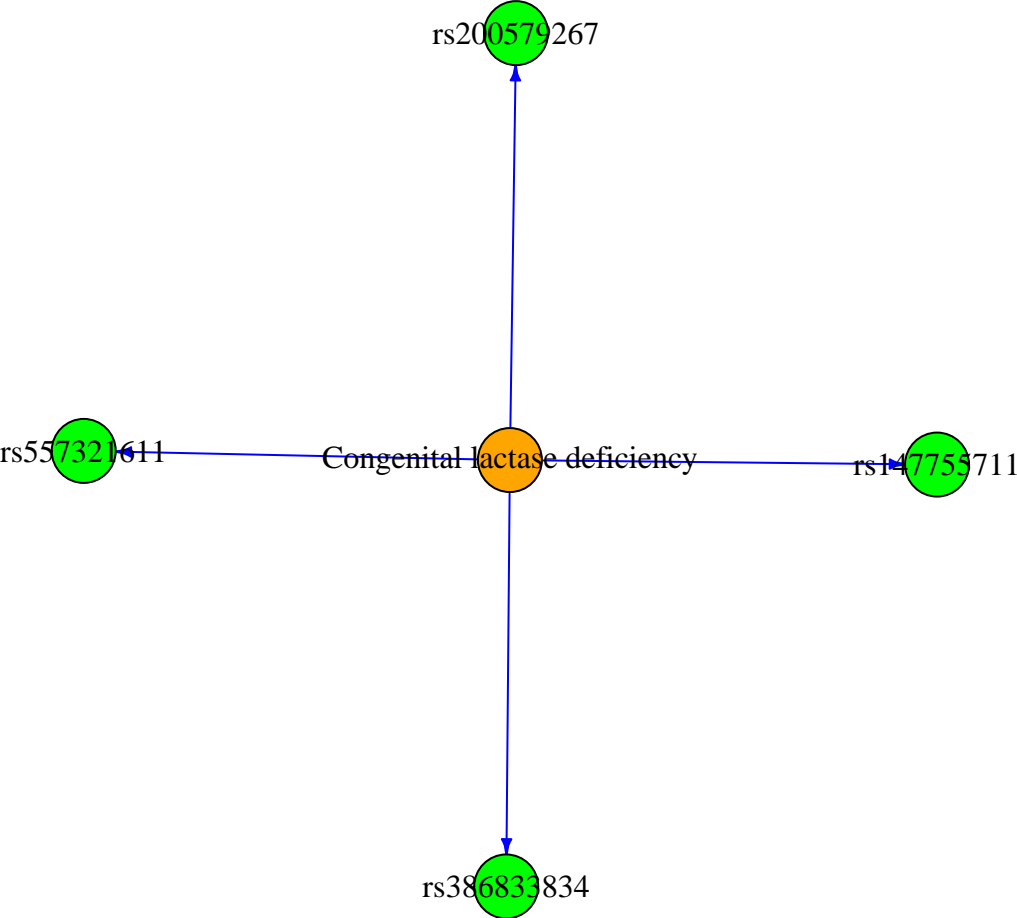

# se Network (Congenital muscular dystrophy–dystroglycanopathy with brain a

rs186690580

Congenital muscular dystrophy–dystroglycanopathy with

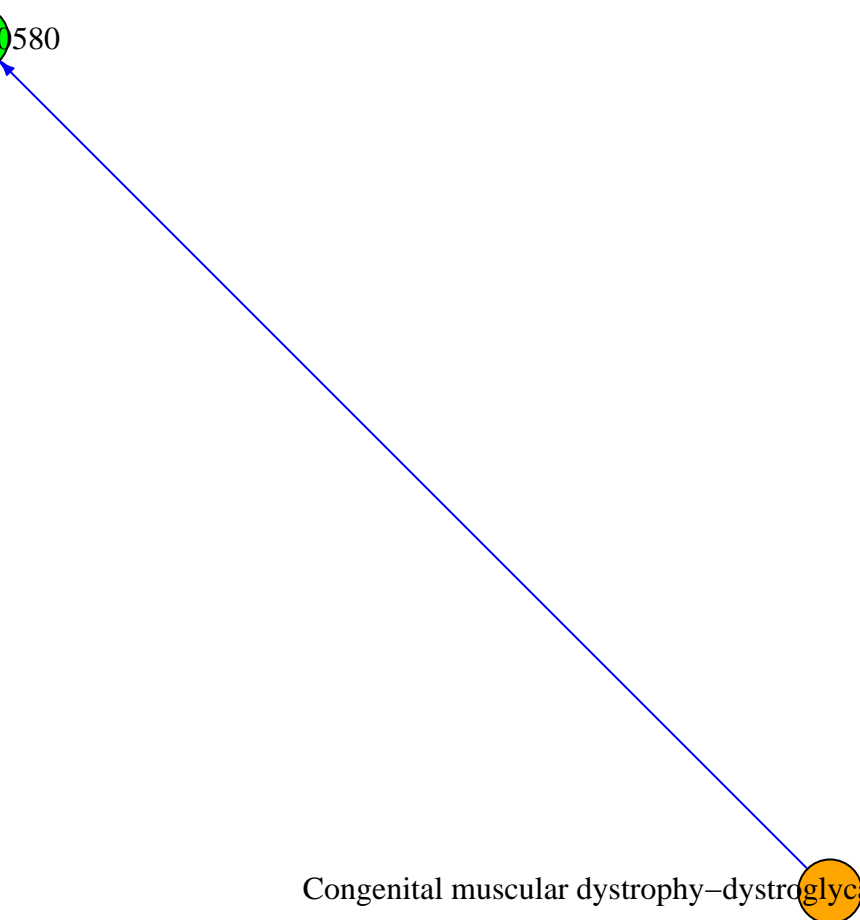



# Disease Network (Congenital muscular dystrophy–dystroglycanopathy with me

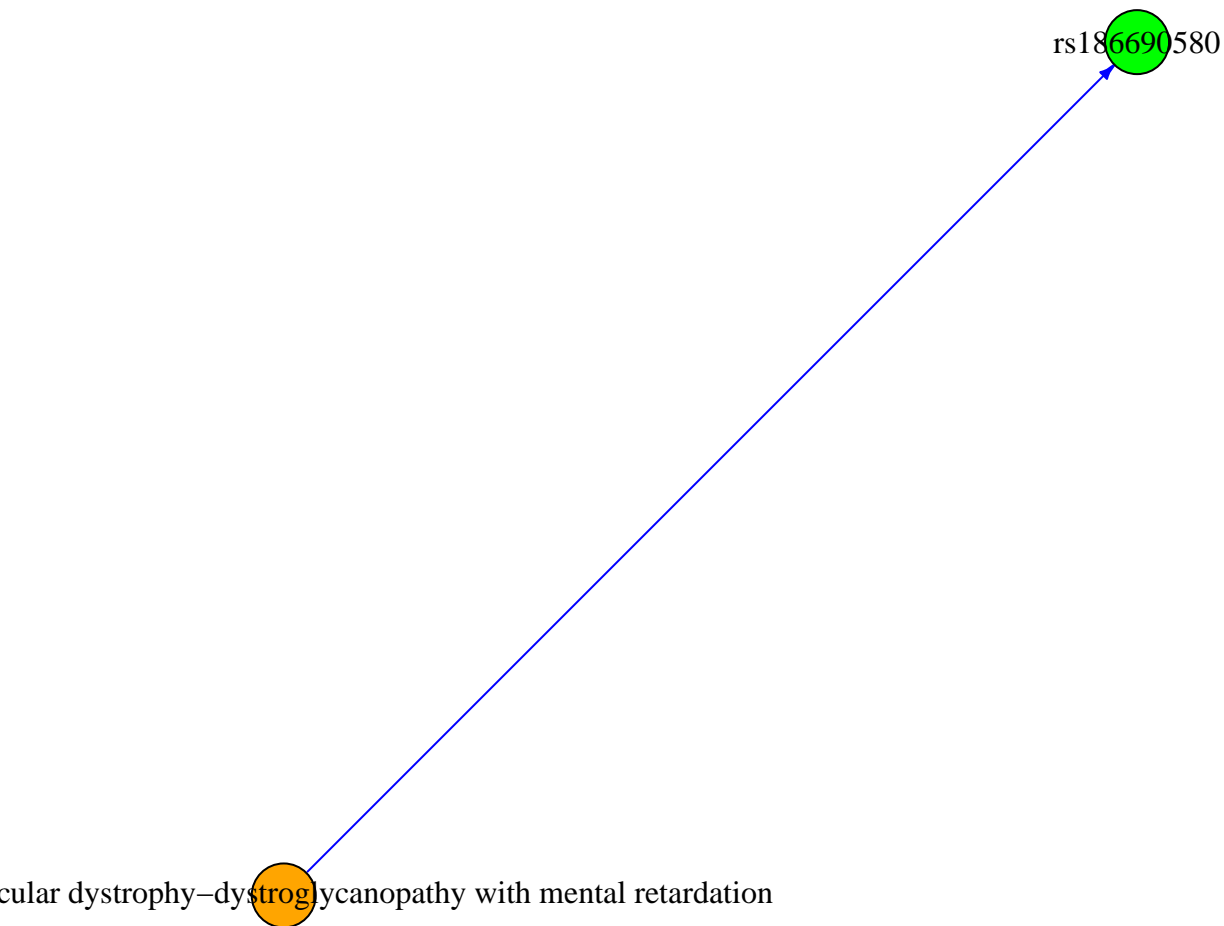

Variant–Disease Network (Congenital Myasthenic Syndrome)

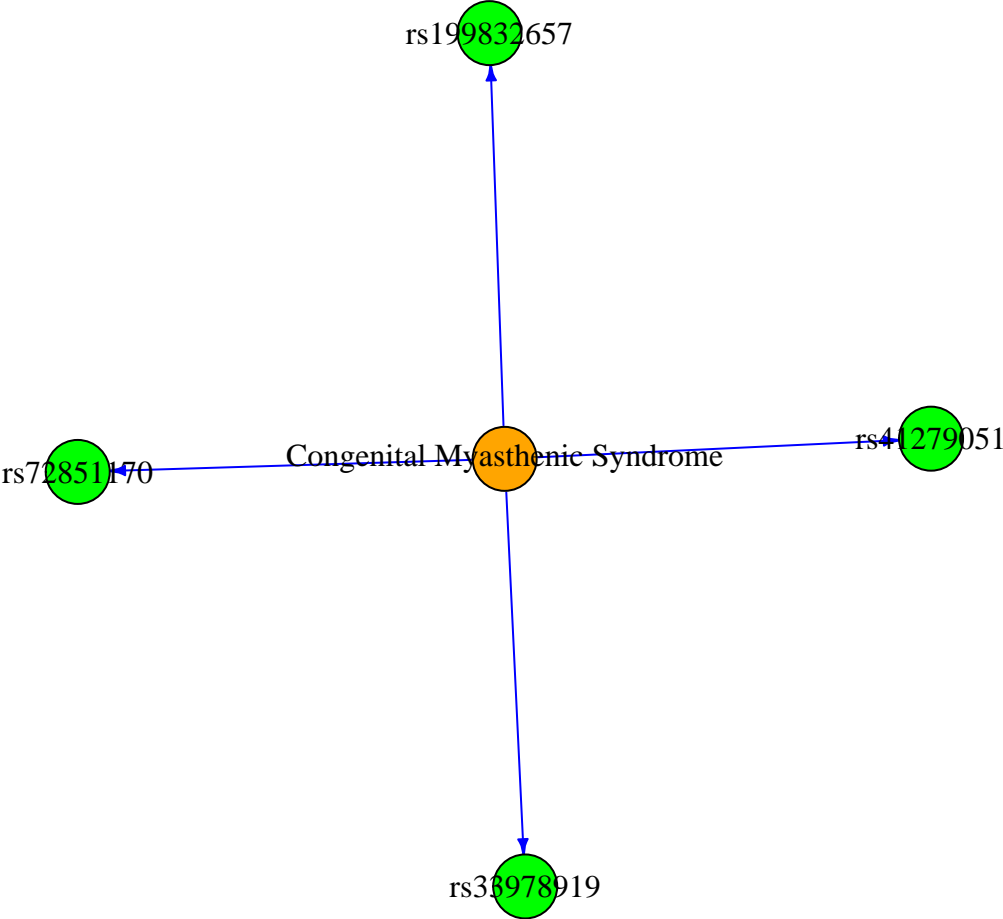

Variant–Disease Network (Congenital secretory diarrhea)

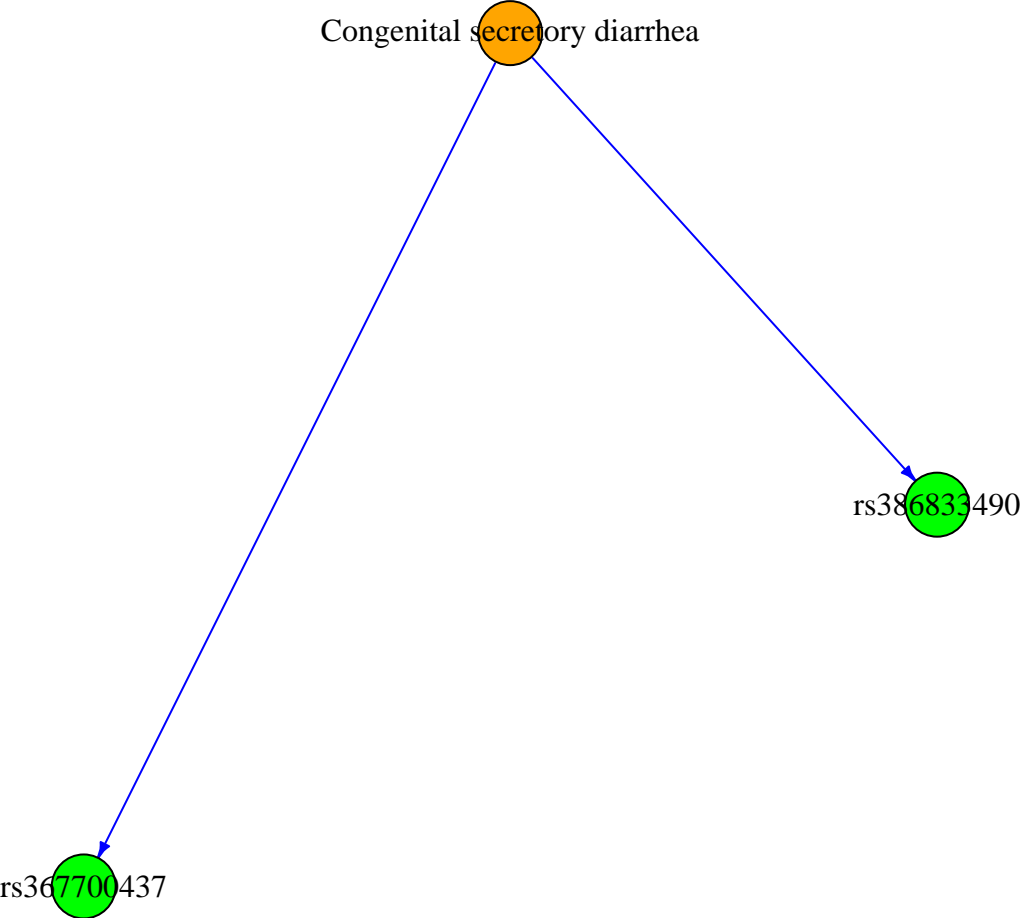

# Variant–Disease Network (Congenital Stationary Night Blindness)

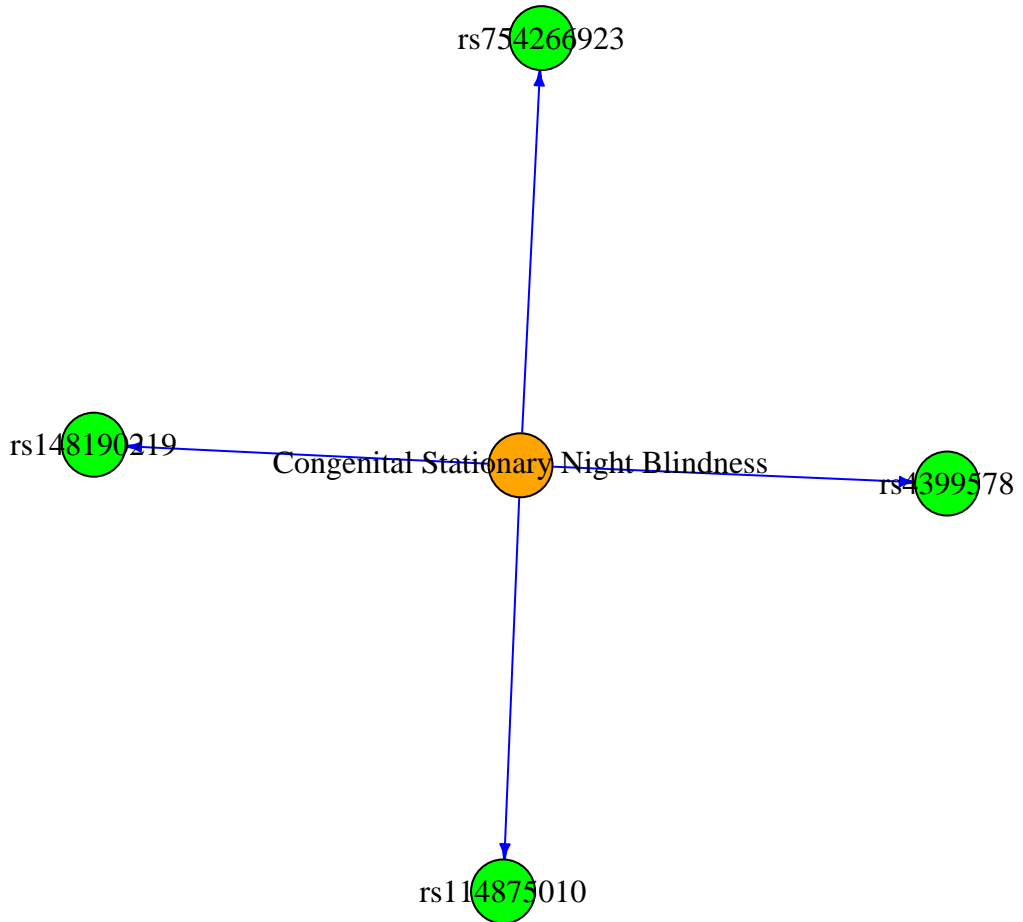

## Variant–Disease Network (Connective tissue disorder)

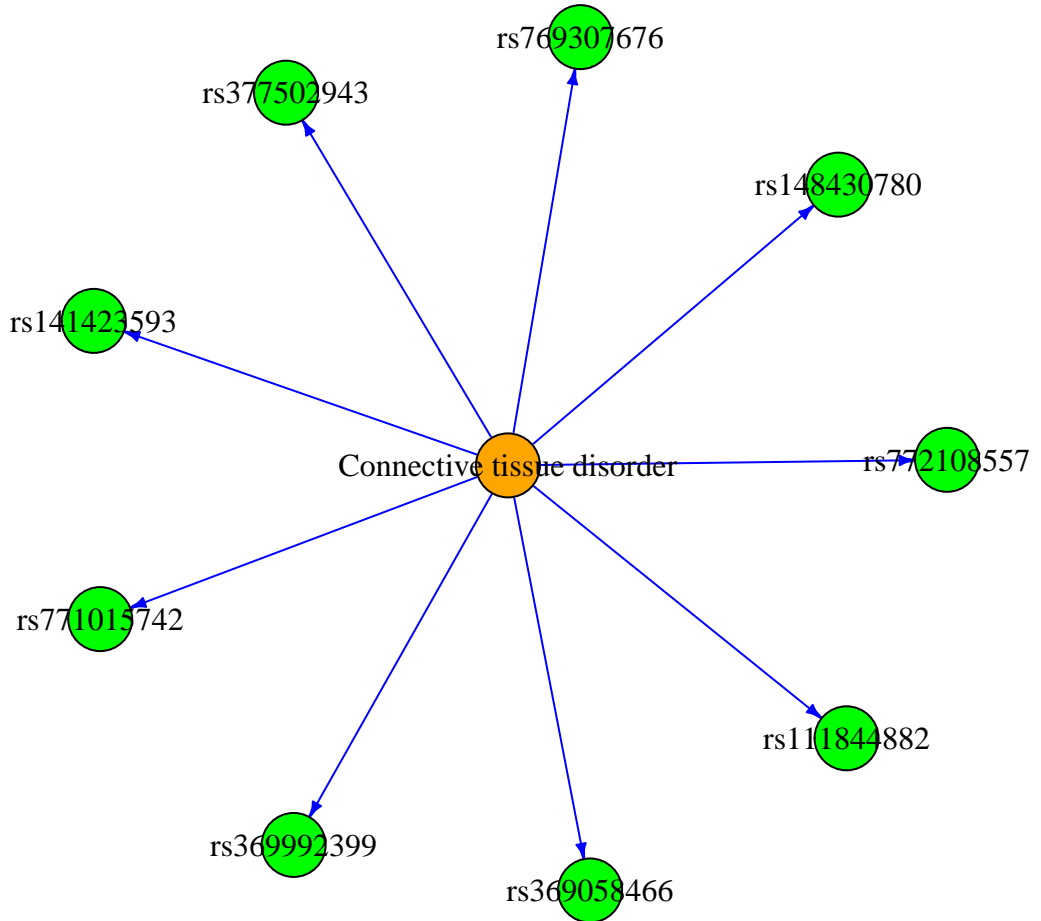

## Variant–Disease Network (Corneal Dystrophy)

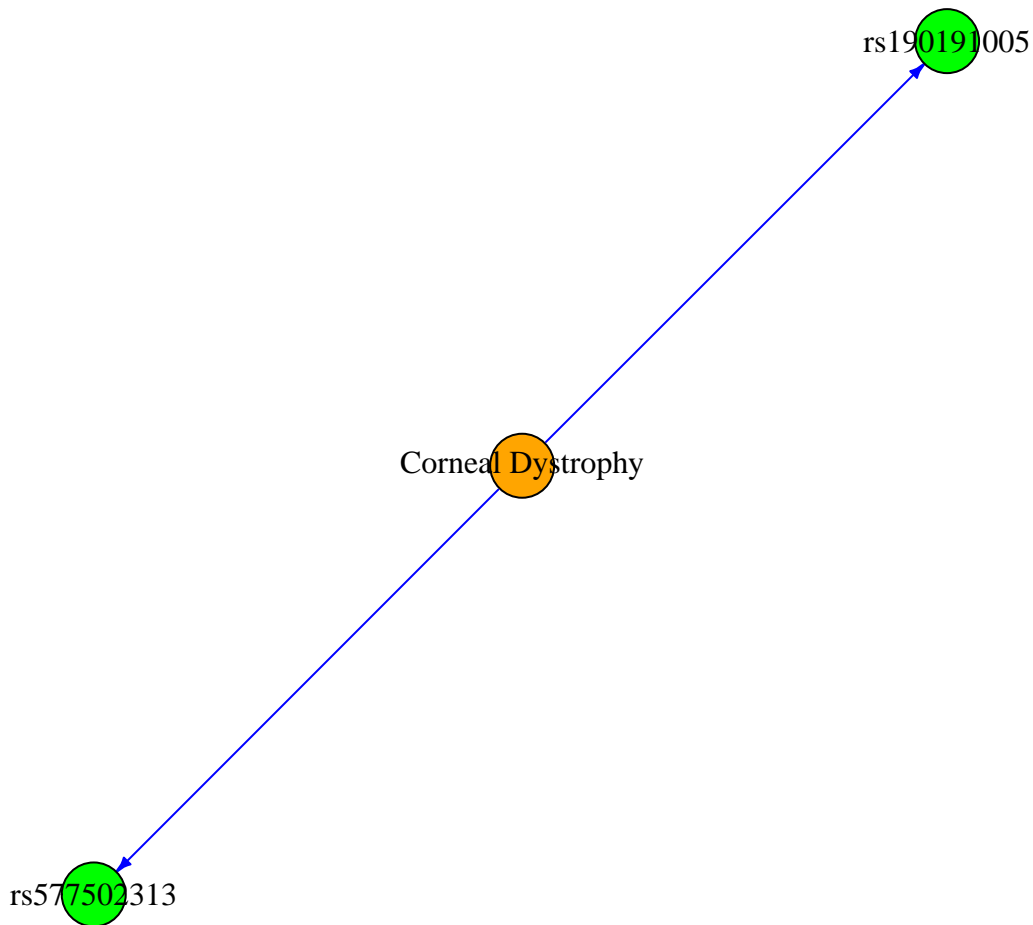

# Variant–Disease Network (Cornelia de Lange Syndrome)

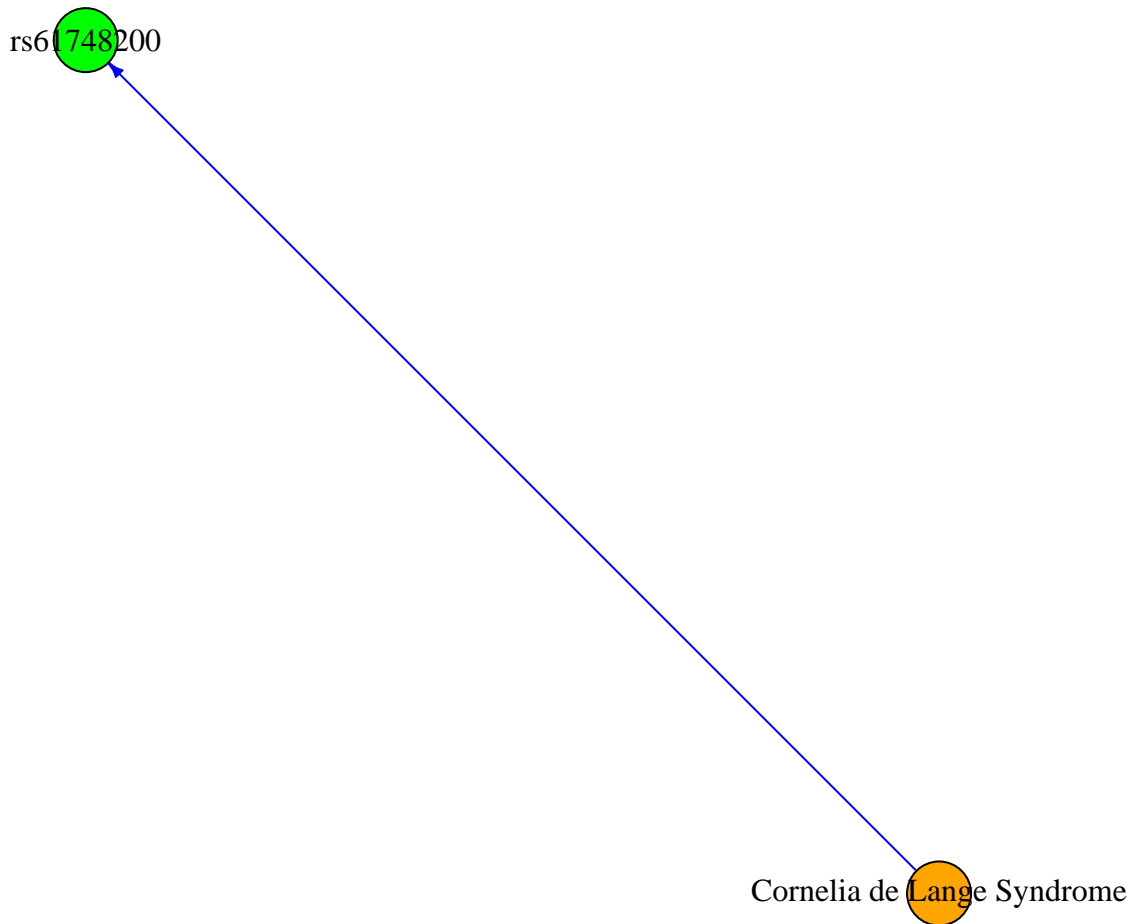

**Variant–Disease Network (Cornelia de Lange syndrome 3)**

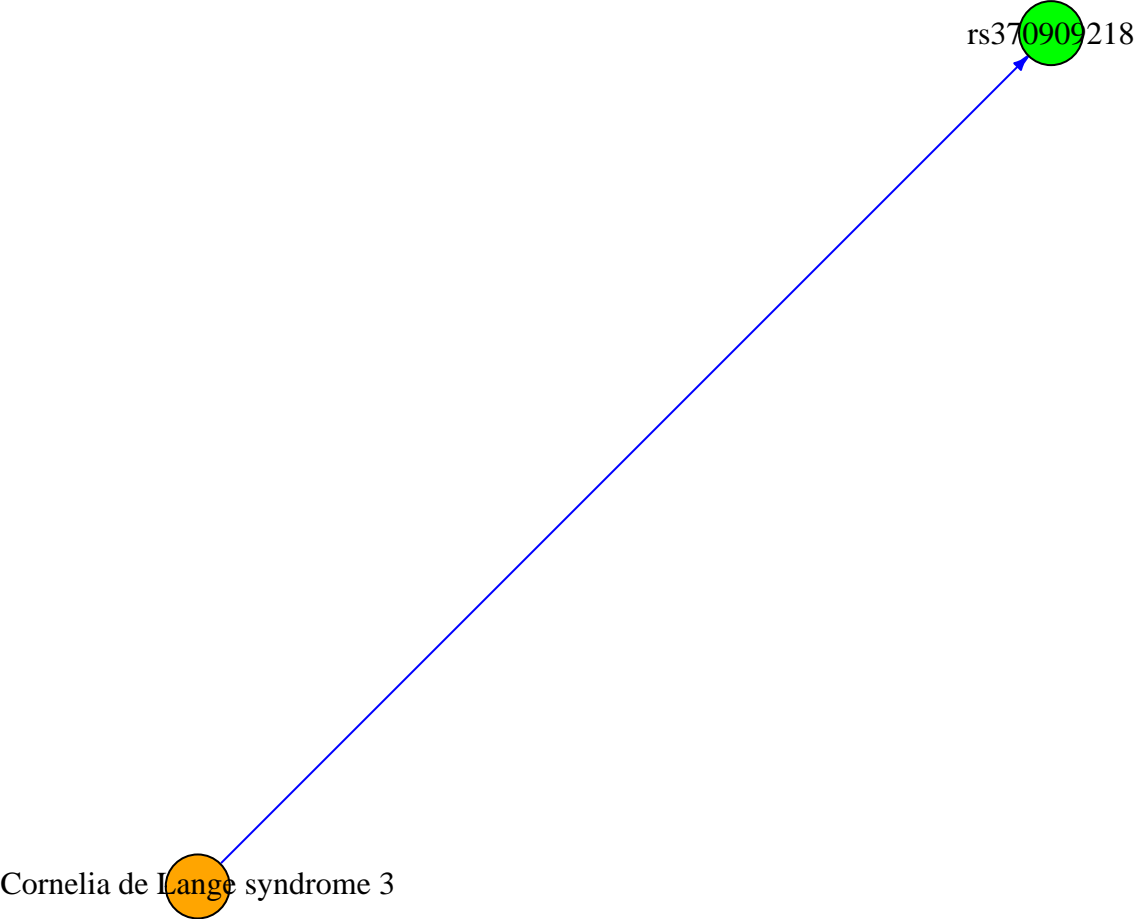



## Variant–Disease Network (Cortical malformations)

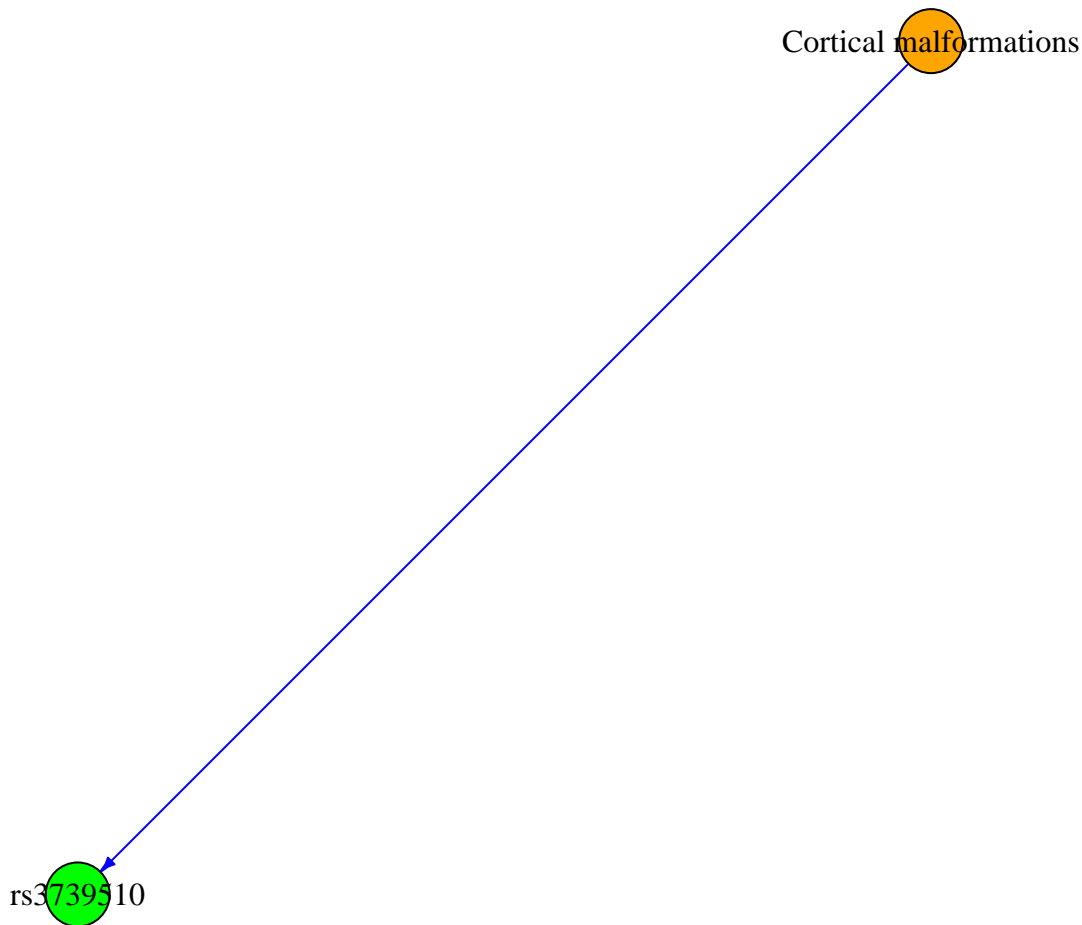

Variant–Disease Network (Corticosterone methyloxidase type 1 deficiency)

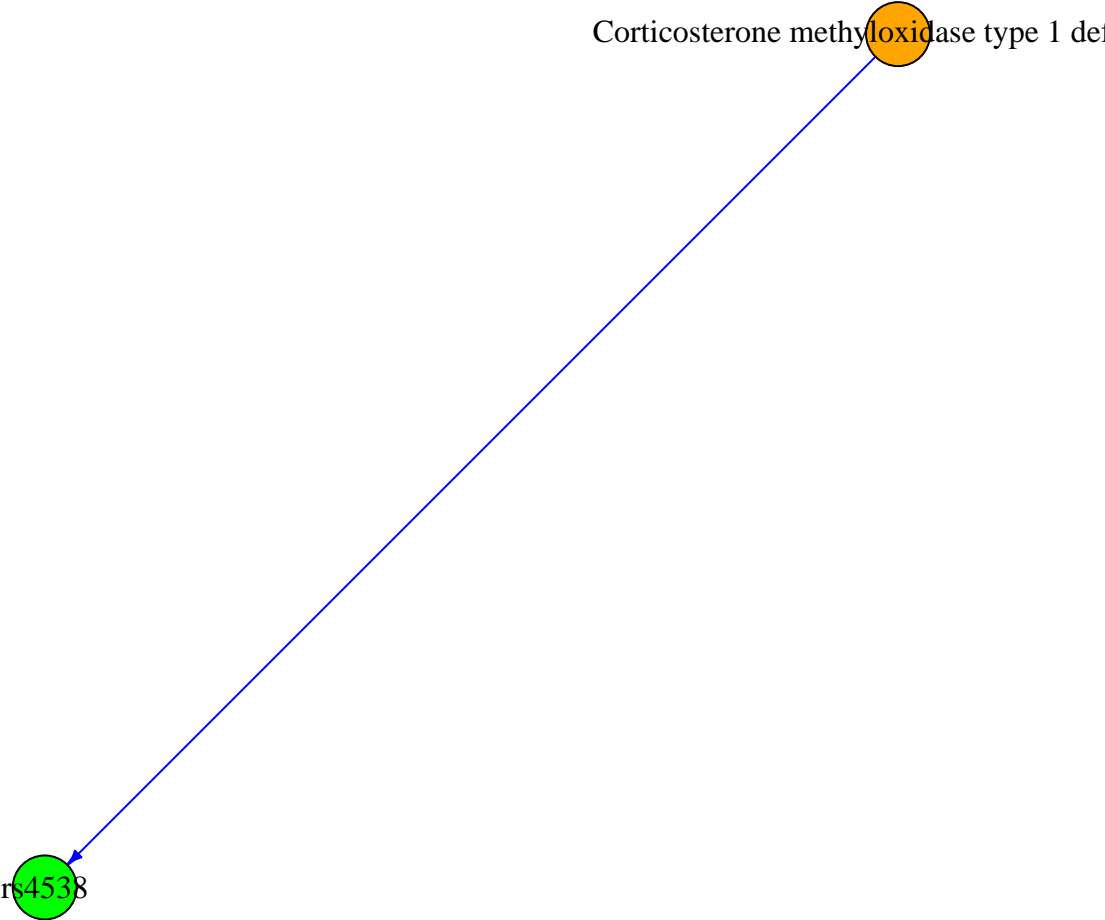

Variant–Disease Network (Corticosterone methyloxidase type 2 deficiency)

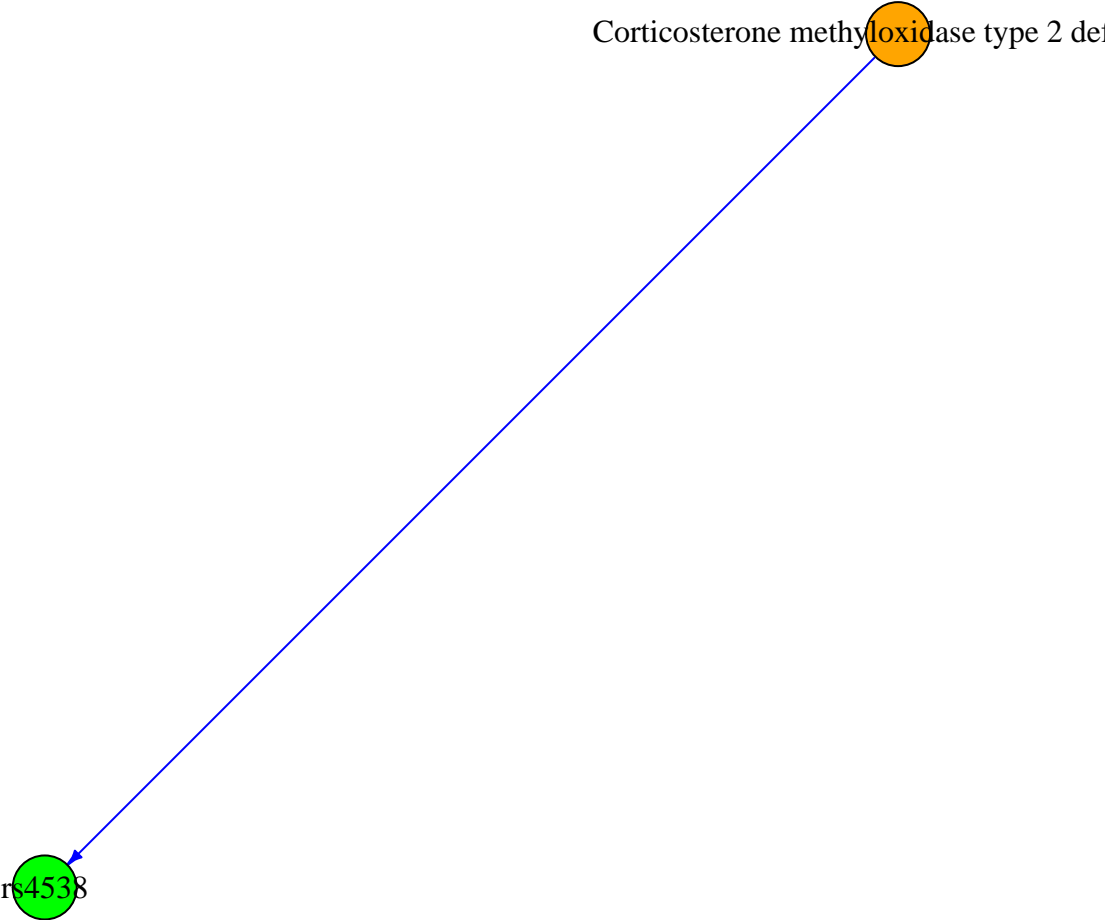

## Variant–Disease Network (Cowden syndrome)

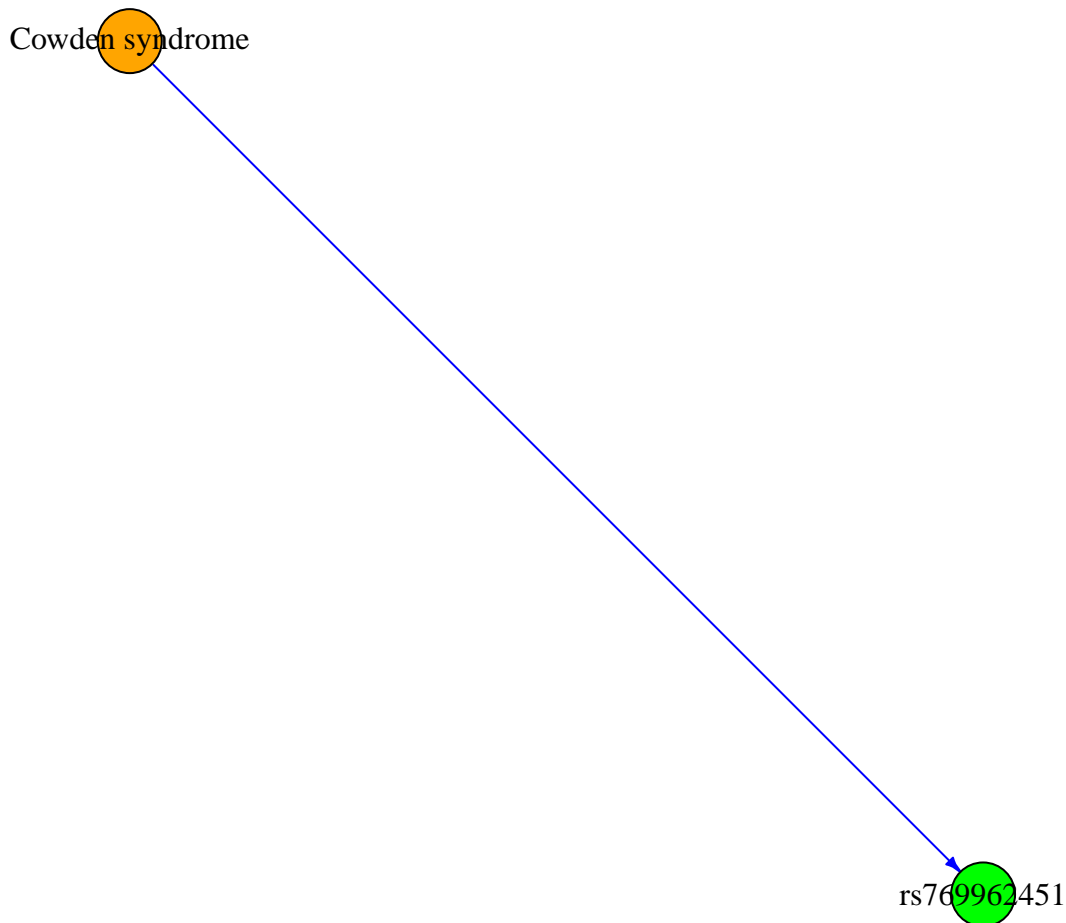

Variant–Disease Network (Cranioectodermal dysplasia)

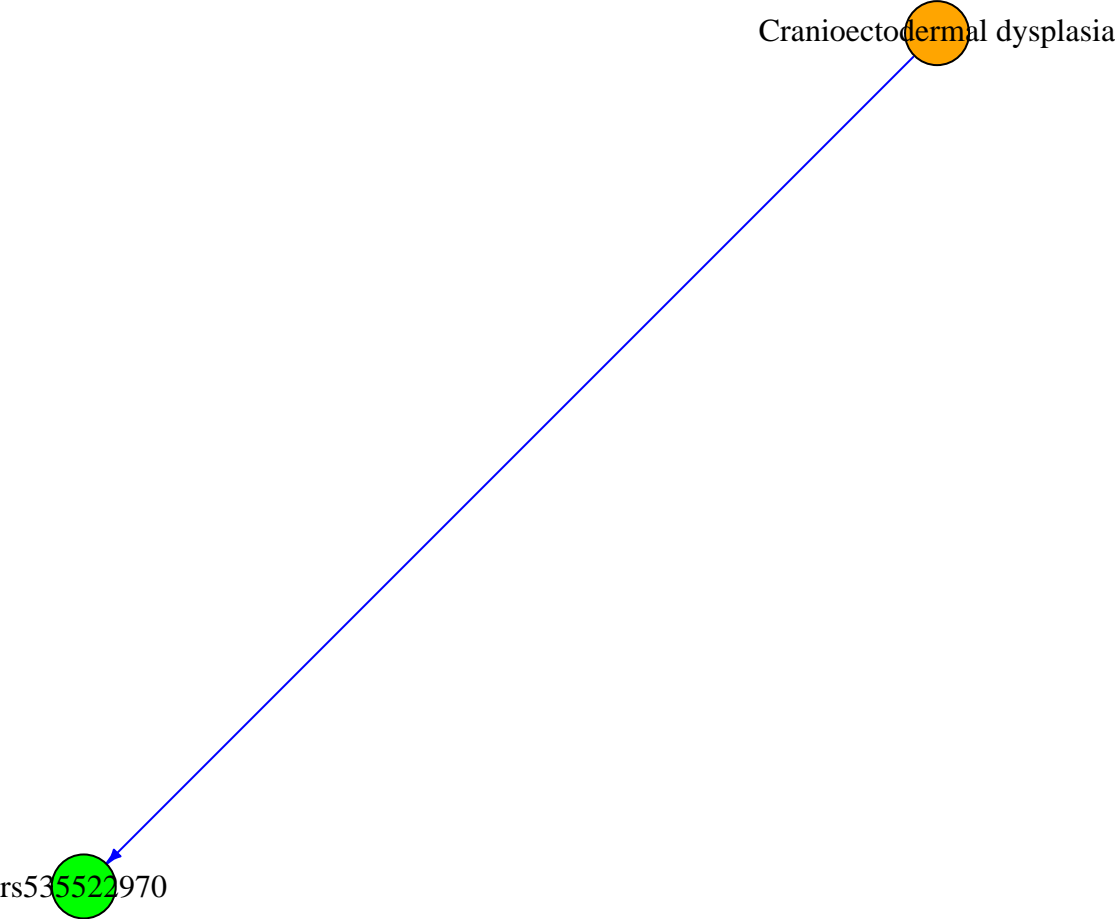

**Variant–Disease Network (Cranio metaphyseal dysplasia)**

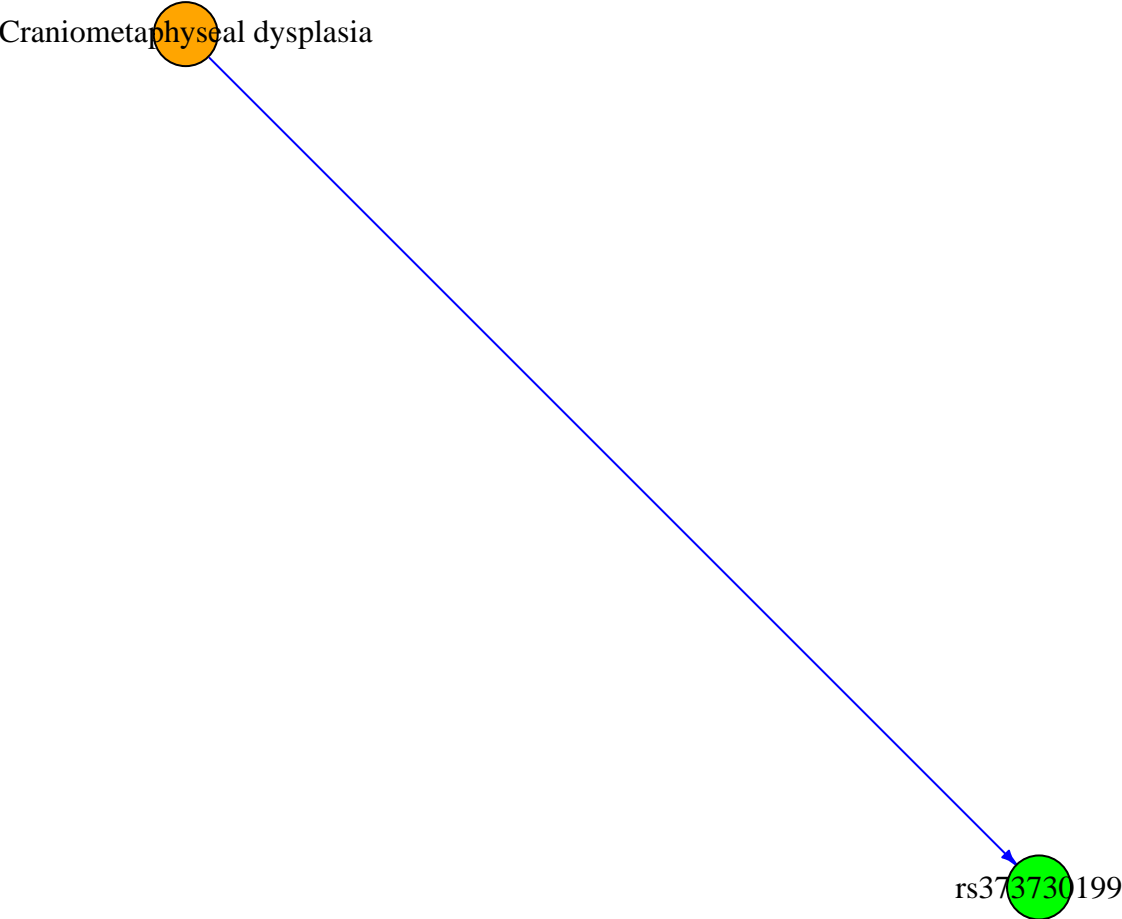

## Variant-Disease Network (Craniosynostosis)

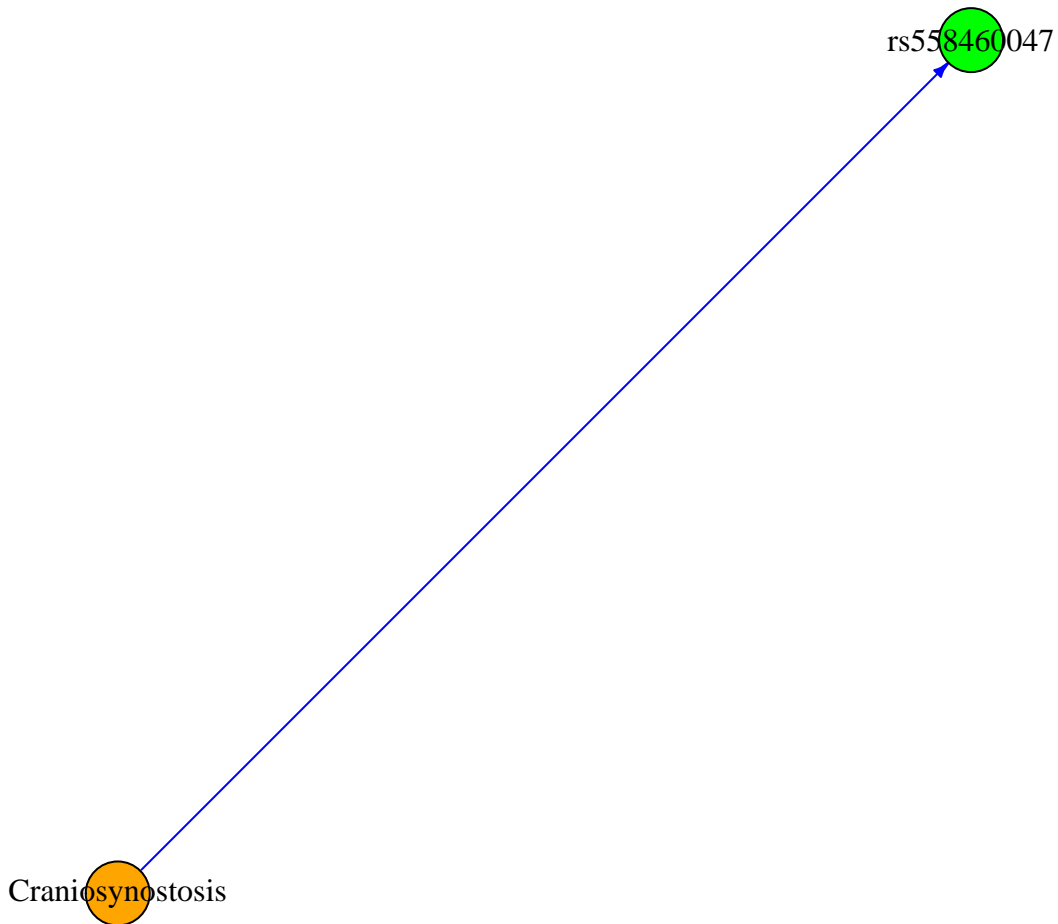

Variant–Disease Network (Crouzon syndrome)

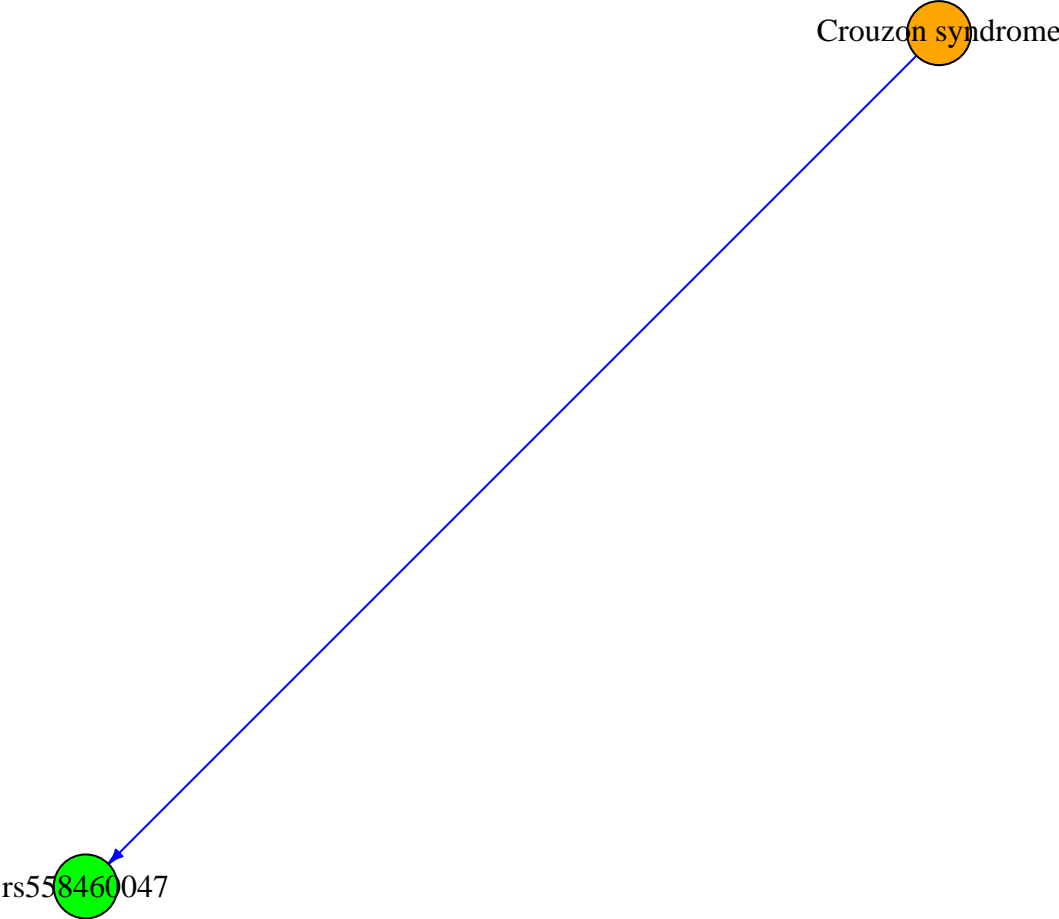



**Variant–Disease Network (Cutaneous malignant melanoma 3)**

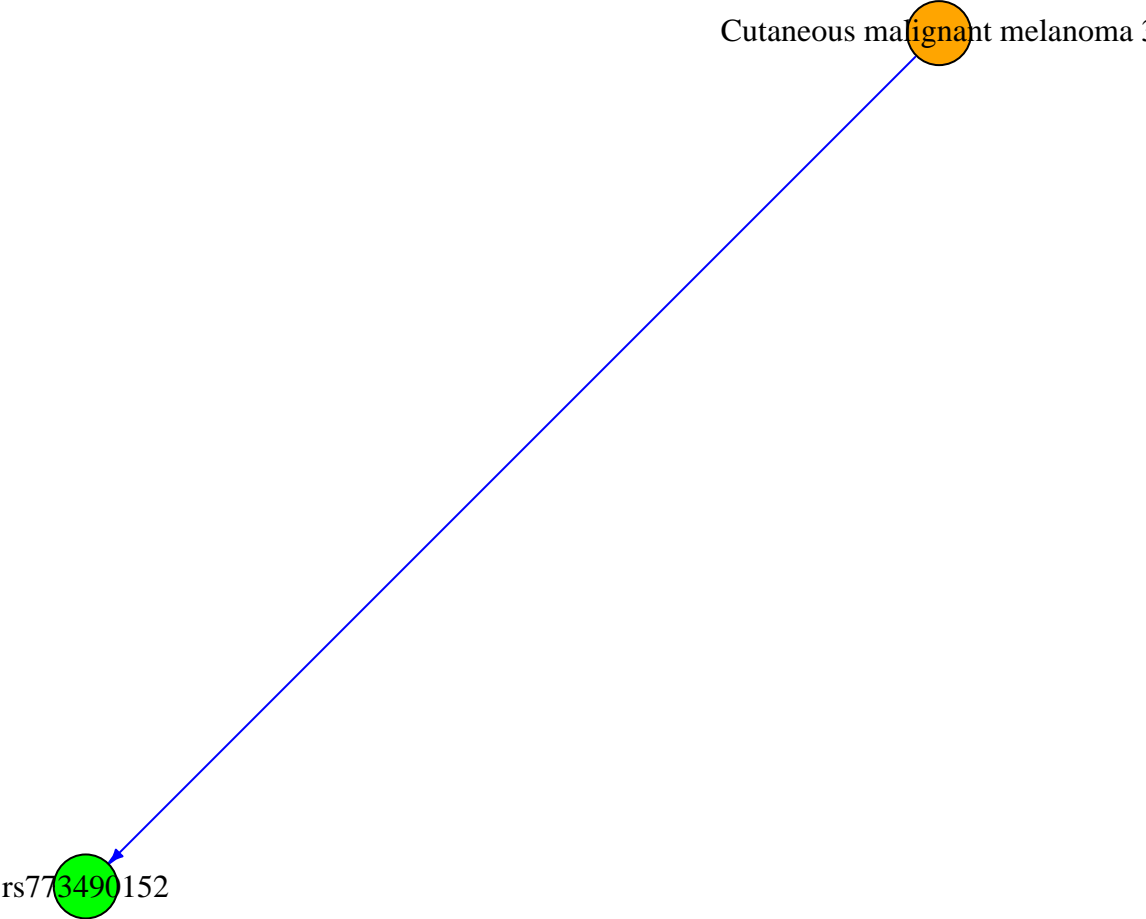

Variant–Disease Network (Cutis Gyrata syndrome of Beare and Stevenson)

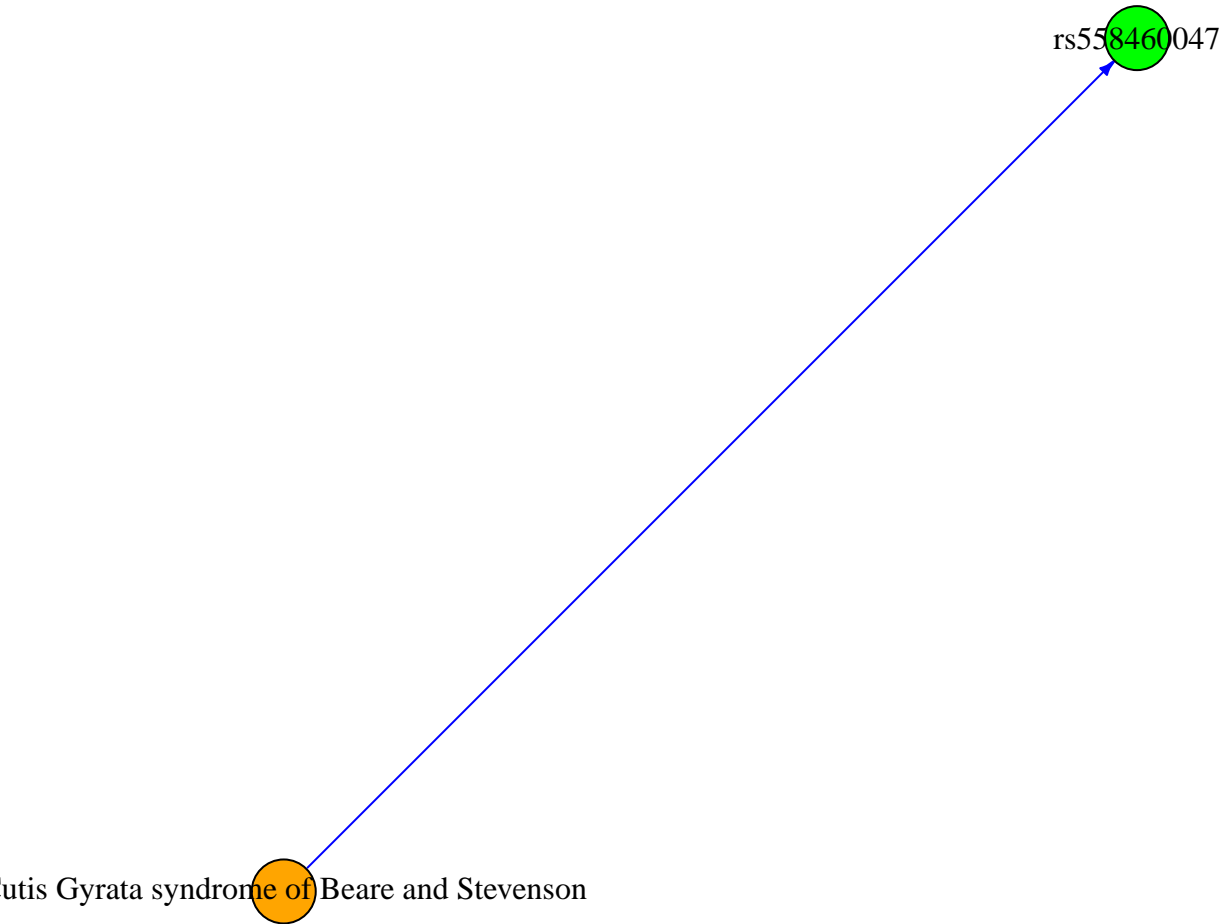

## Variant-Disease Network (Cutis laxa)

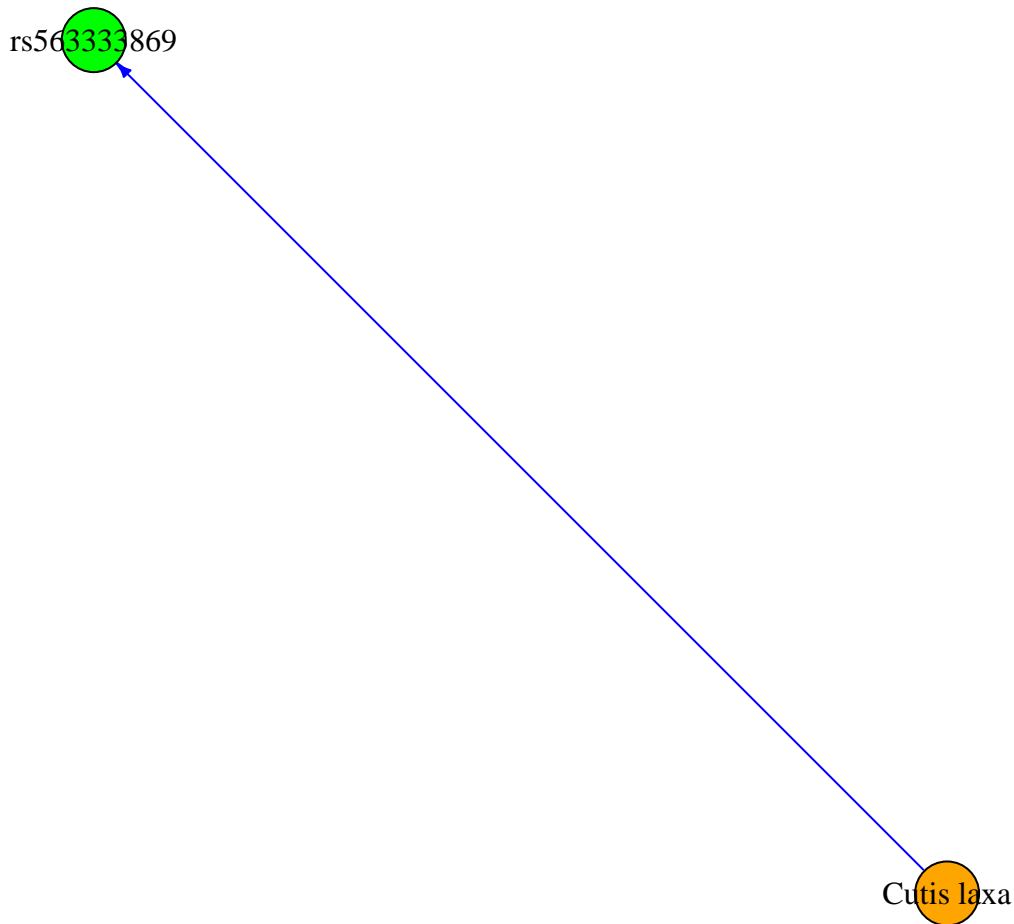

## Variant–Disease Network (Cutis laxa with severe pulmonary)

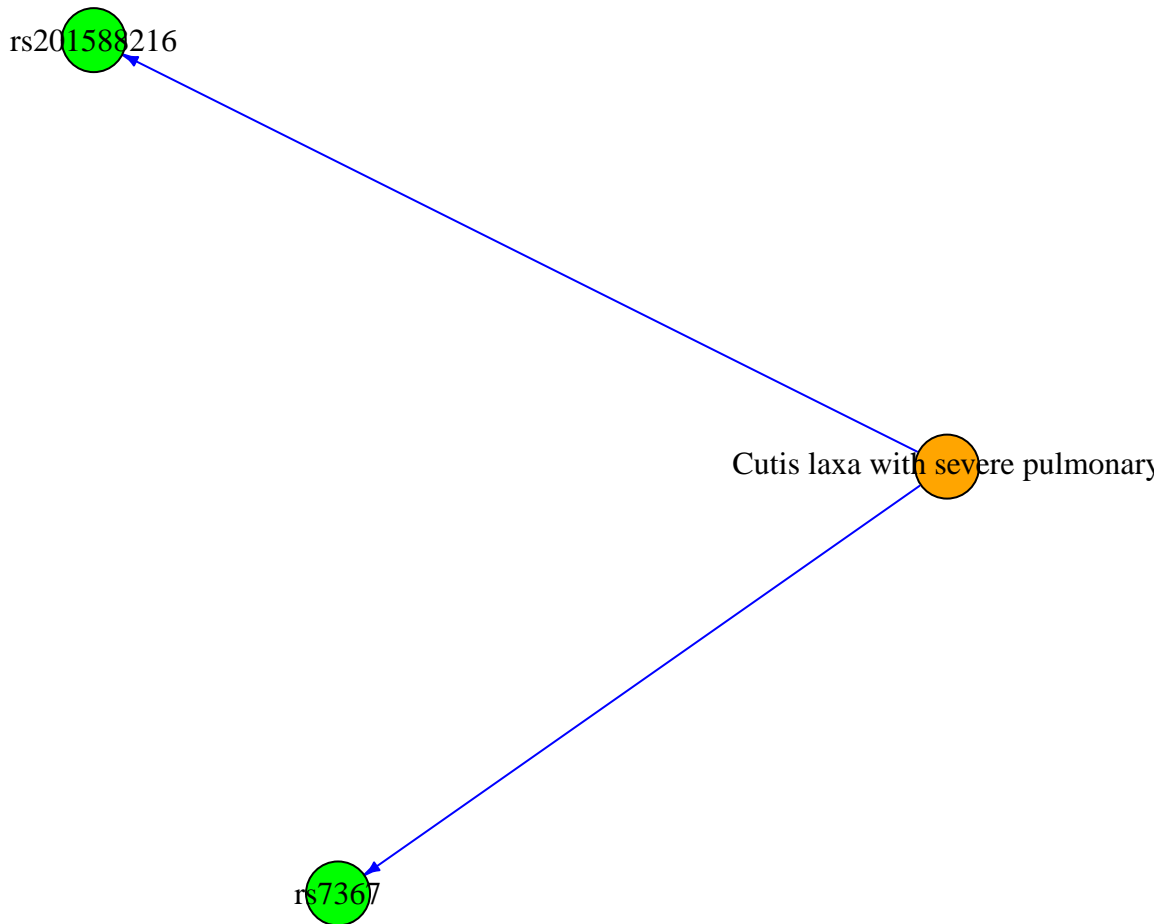

## Variant–Disease Network (Cylindromatosis)

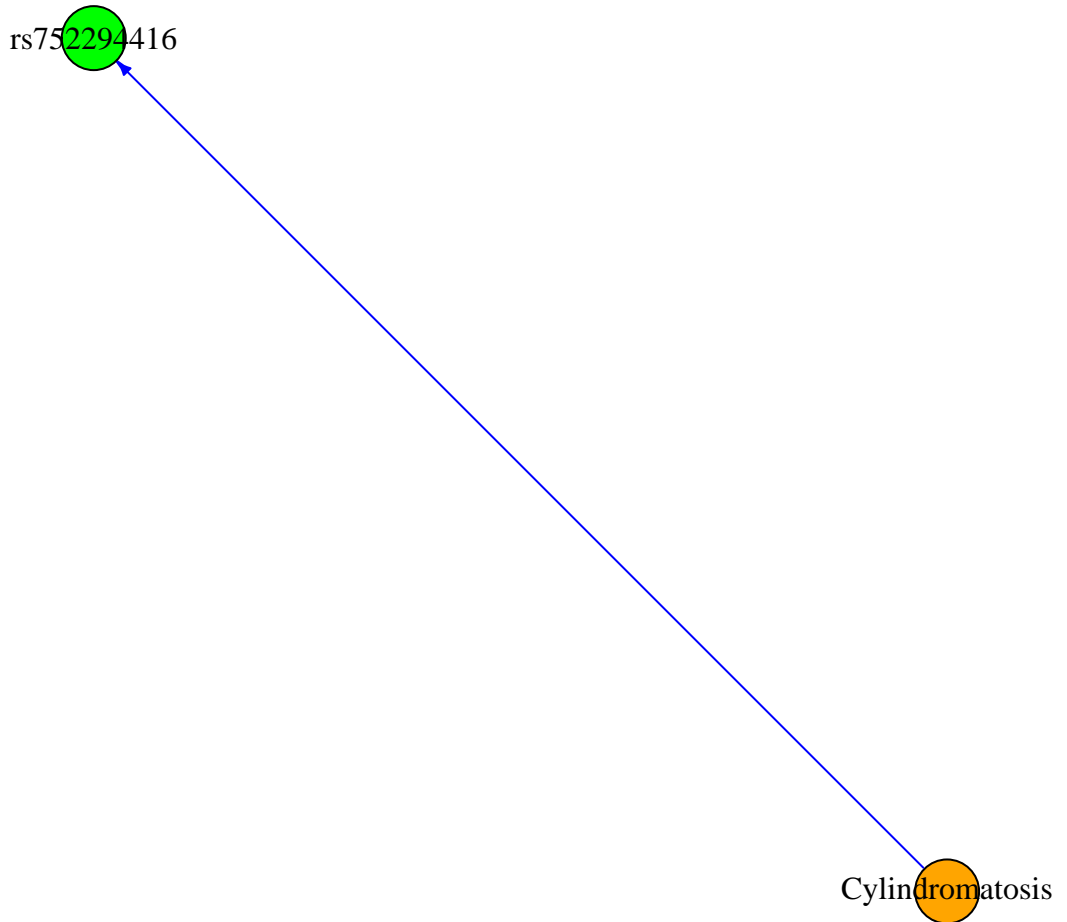

**Variant–Disease Network (Cystic fibrosis)**

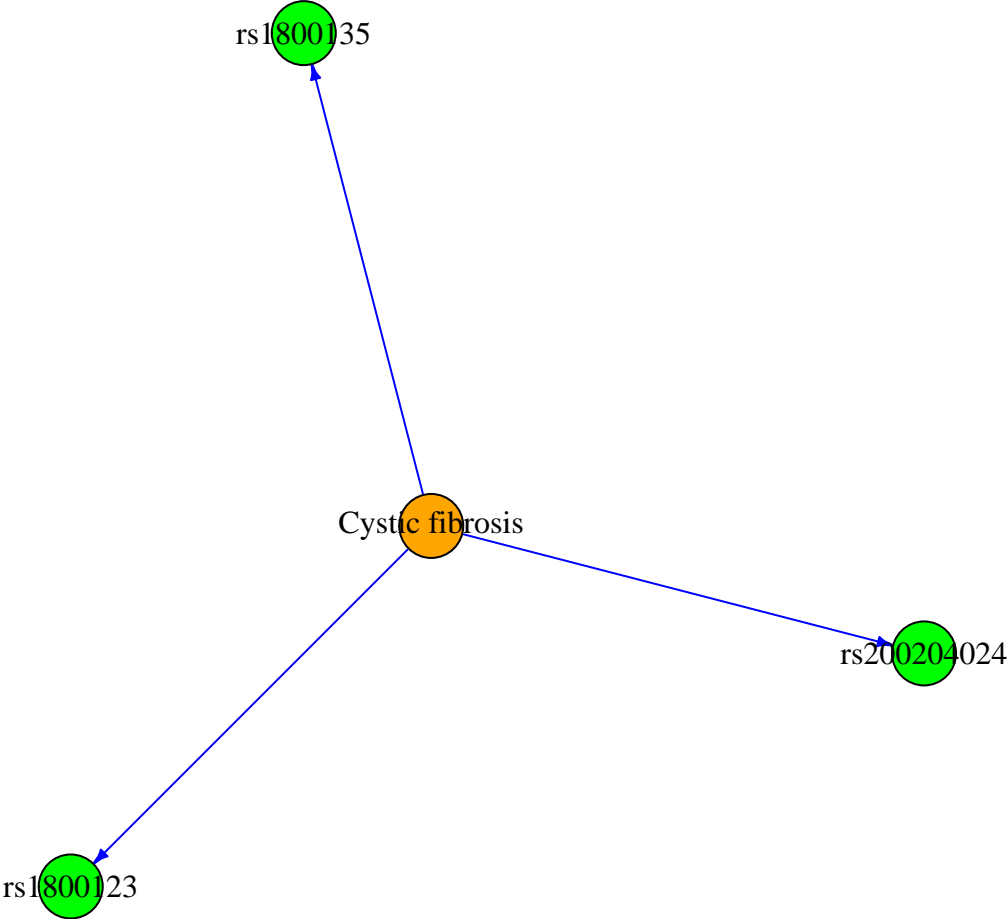

Variant–Disease Network (Cystic Fibrosis–Like Syndrome)

Cystic Fibrosis–Like Syndrome

rs61731141

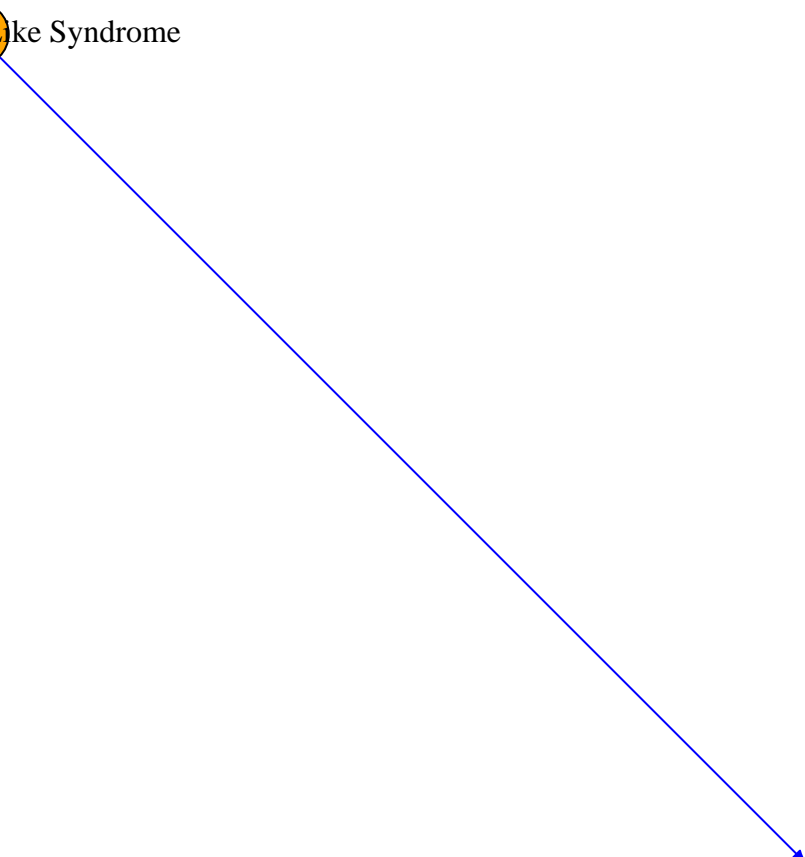

## Variant-Disease Network (Cystinuria)

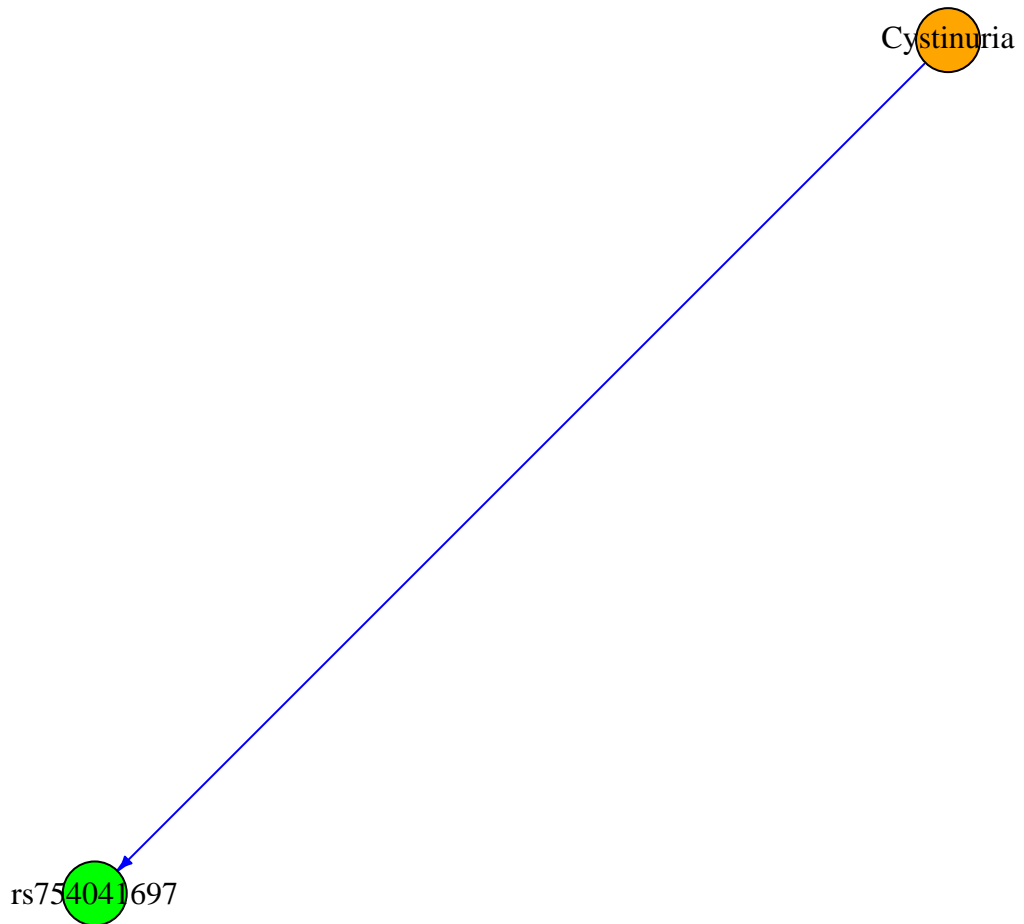



**Variant–Disease Network (D–2–hydroxyglutaric aciduria 2)**

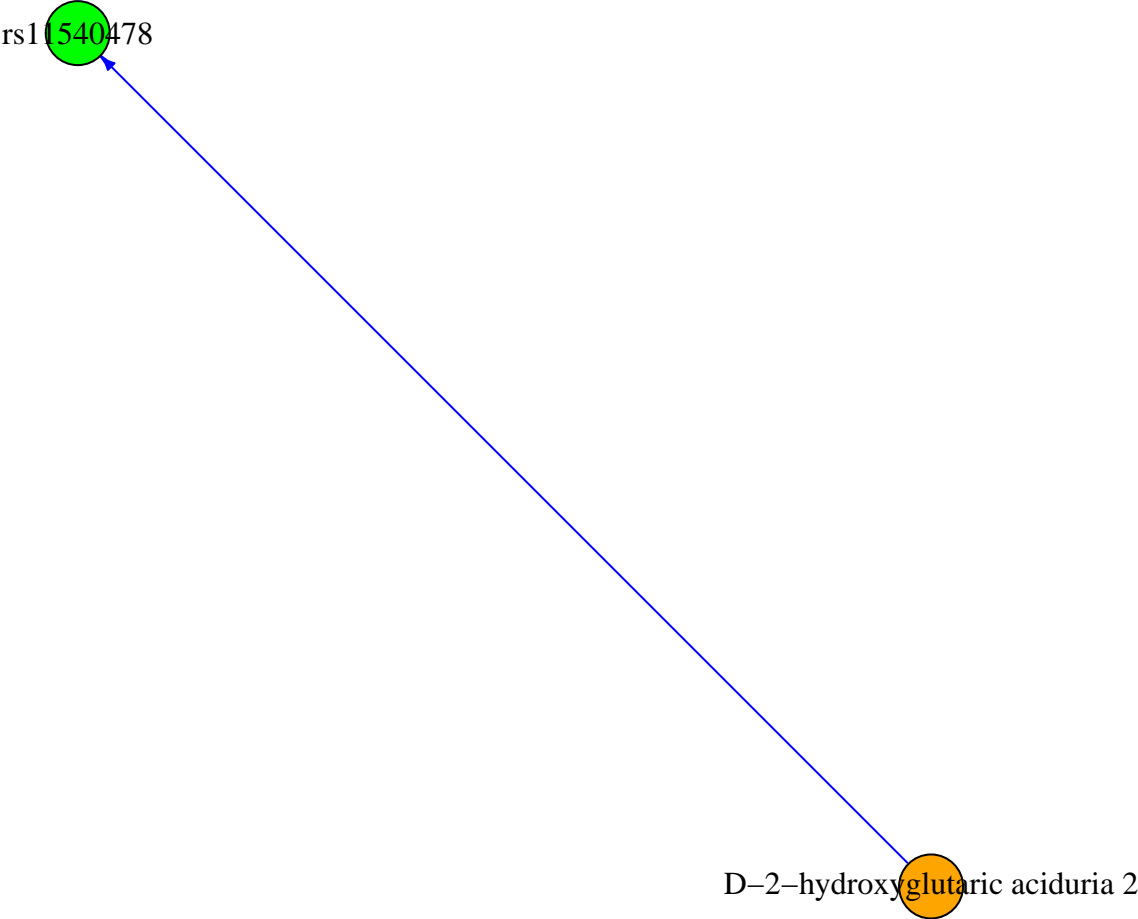

Variant–Disease Network (Danon disease)

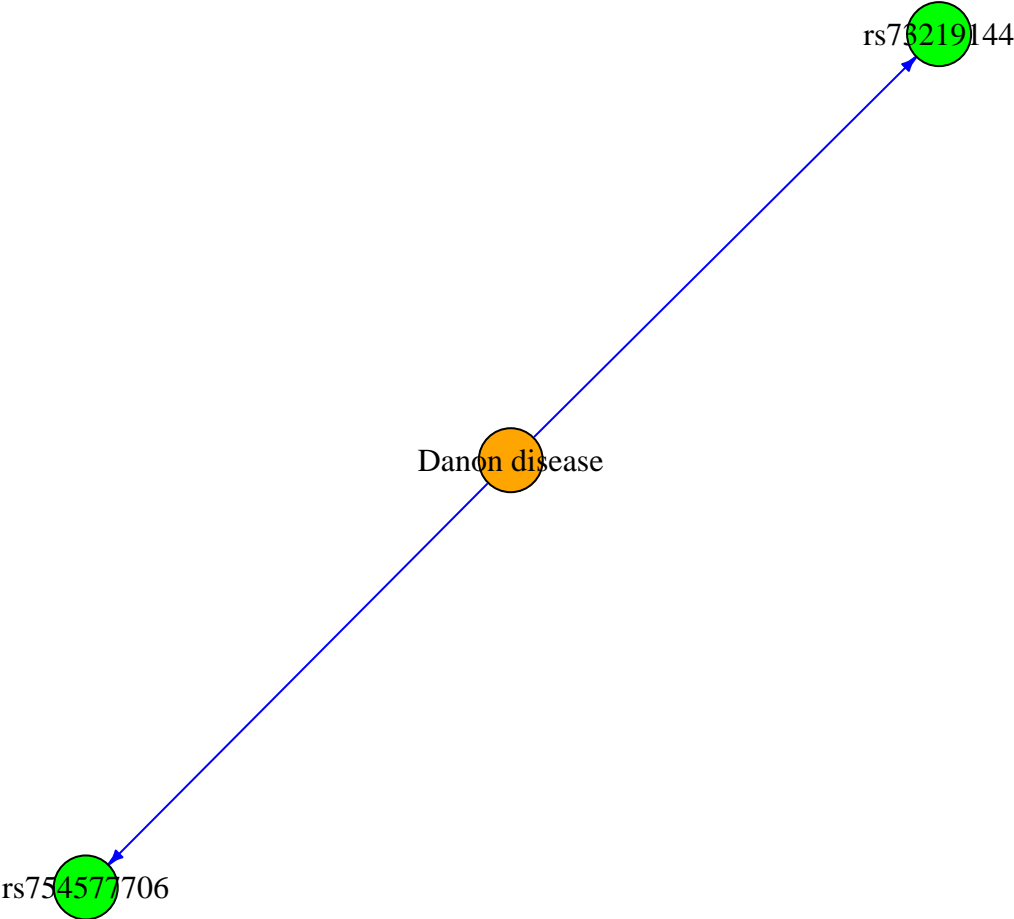

## Variant–Disease Network (Deafness)

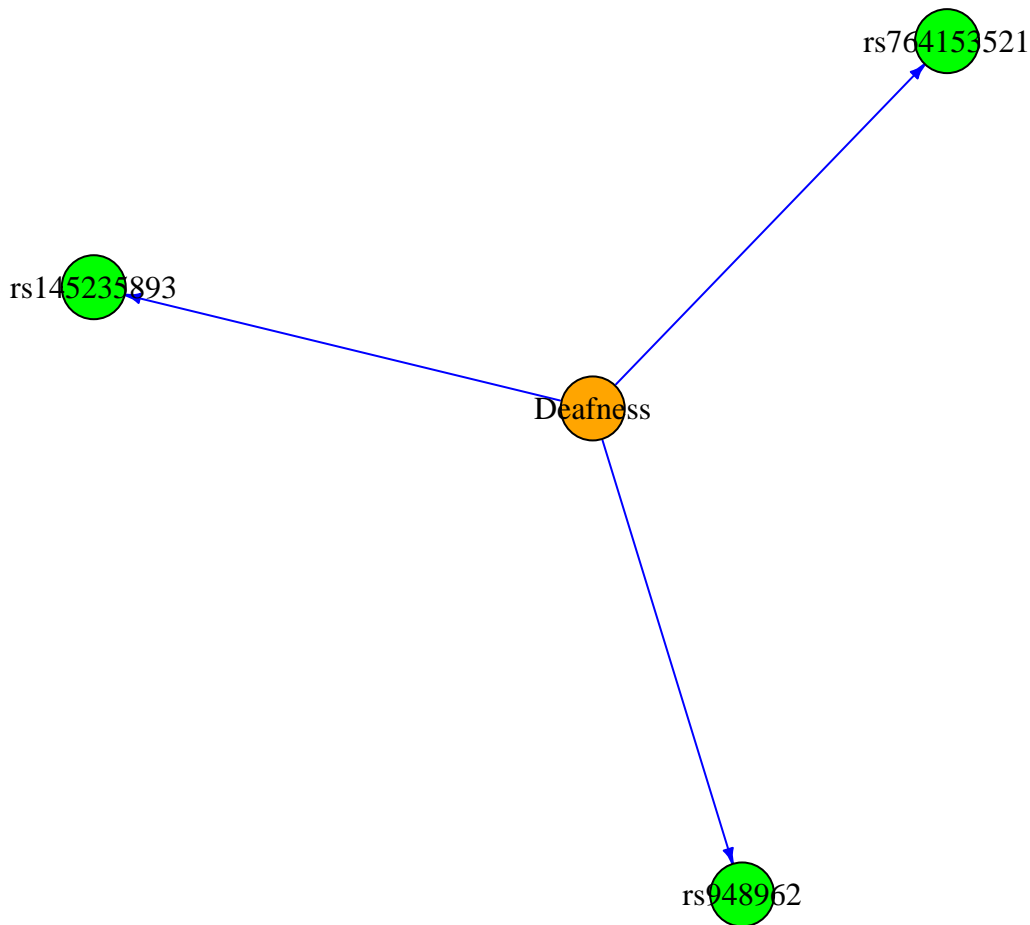

Variant–Disease Network (Deficiency of 2-methylbutyryl–CoA dehydrogenase)

Deficiency of 2-methylbutyryl–CoA dehydrogenase

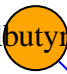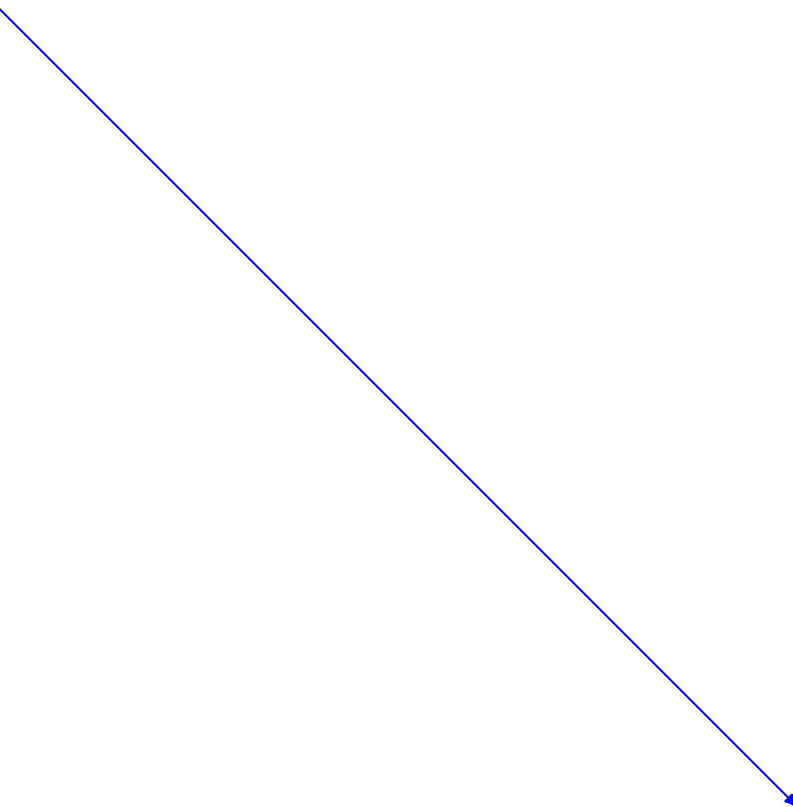

rs1140591

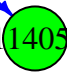

**Variant–Disease Network (Deficiency of acetyl–CoA acetyltransferase)**

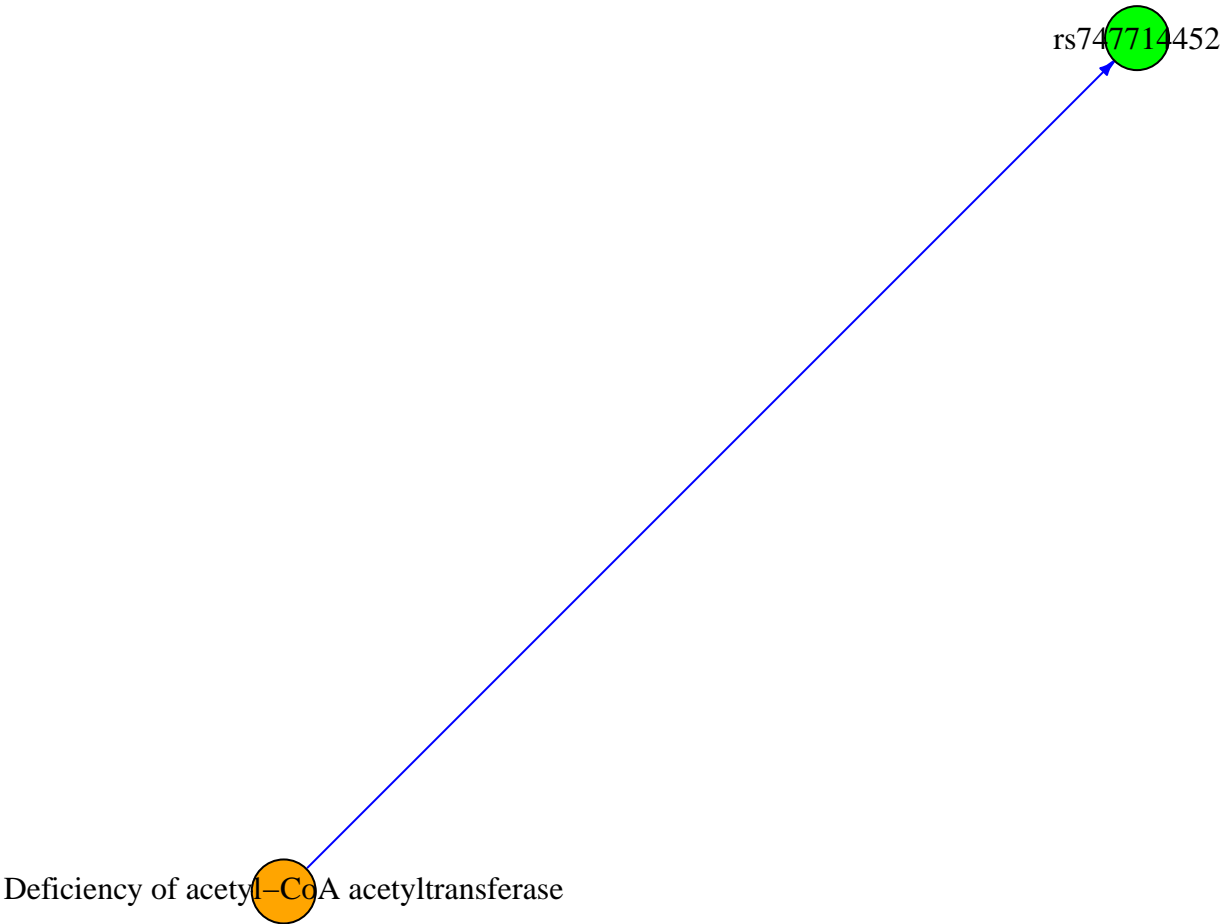

# Variant-Disease Network (Deficiency of alpha-mannosidase)

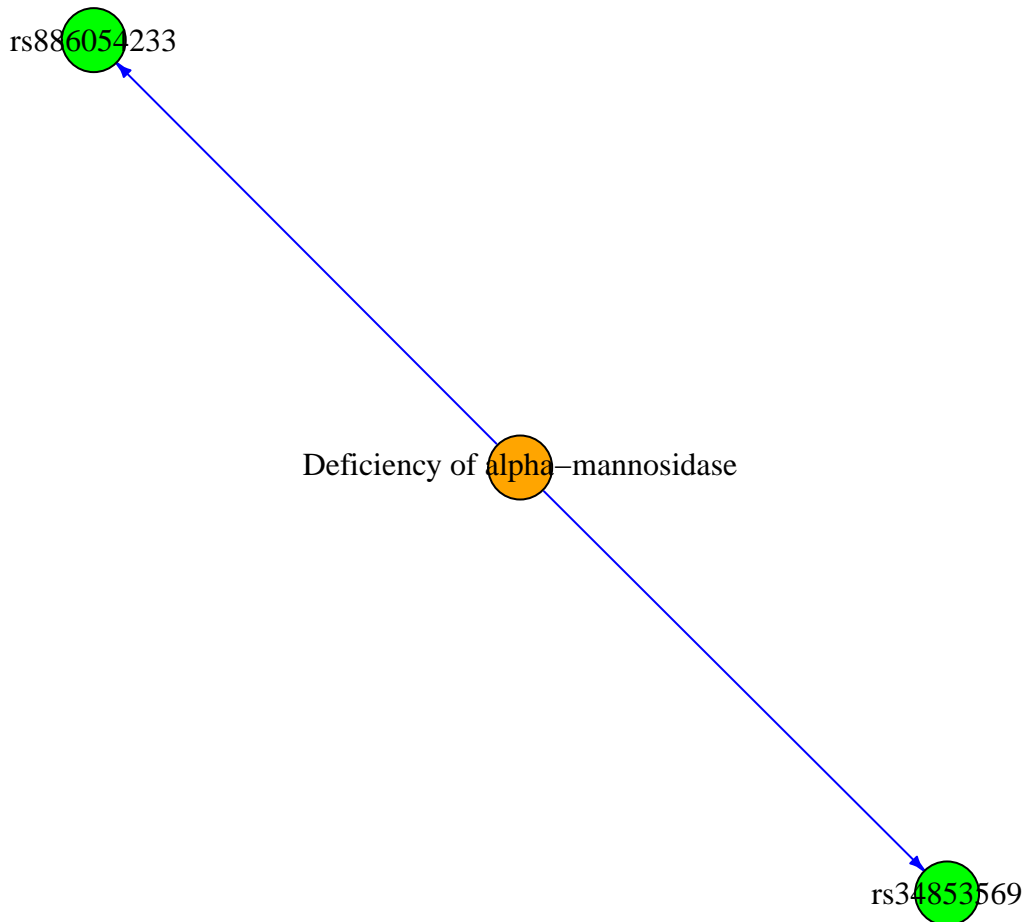

# Variant-Disease Network (Deficiency of aromatic-L-amino-acid decarboxylase)

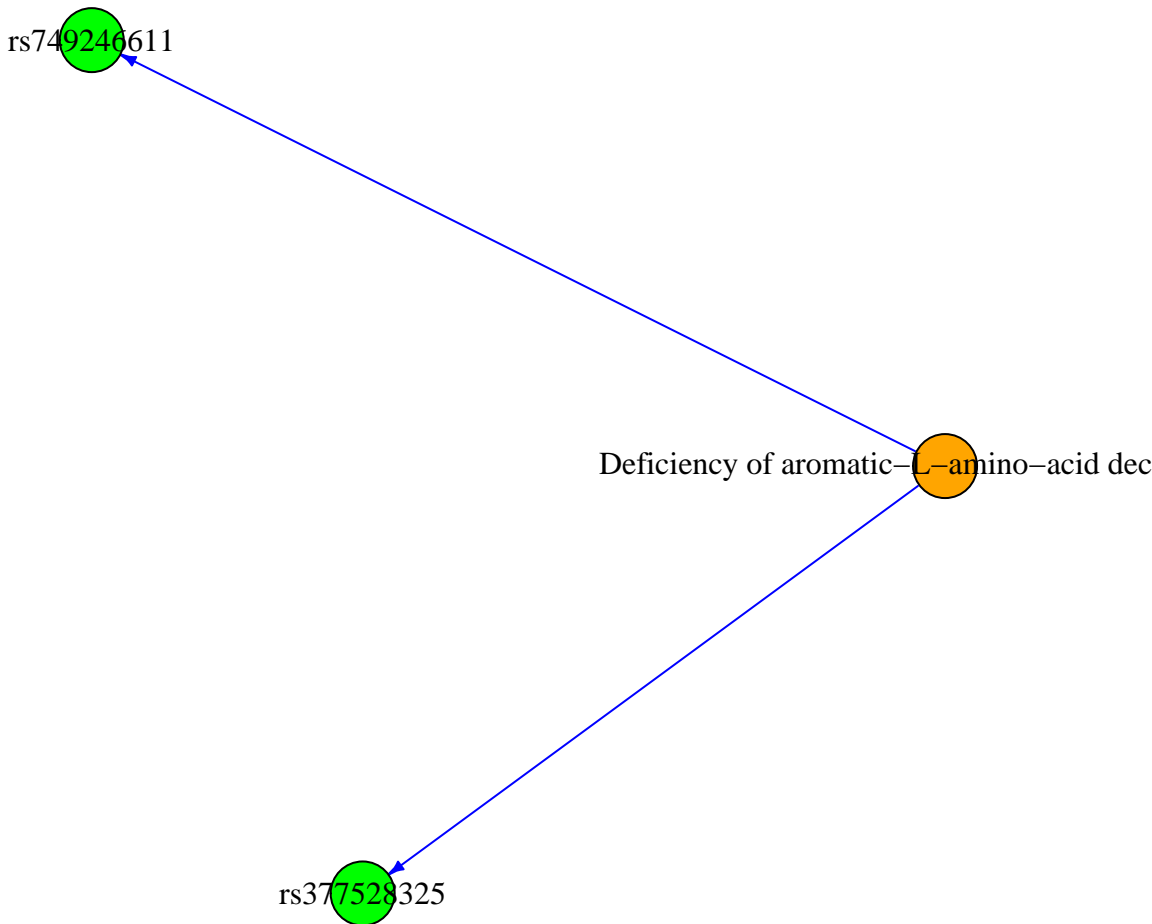

**Variant–Disease Network (Deficiency of butyryl–CoA dehydrogenase)**

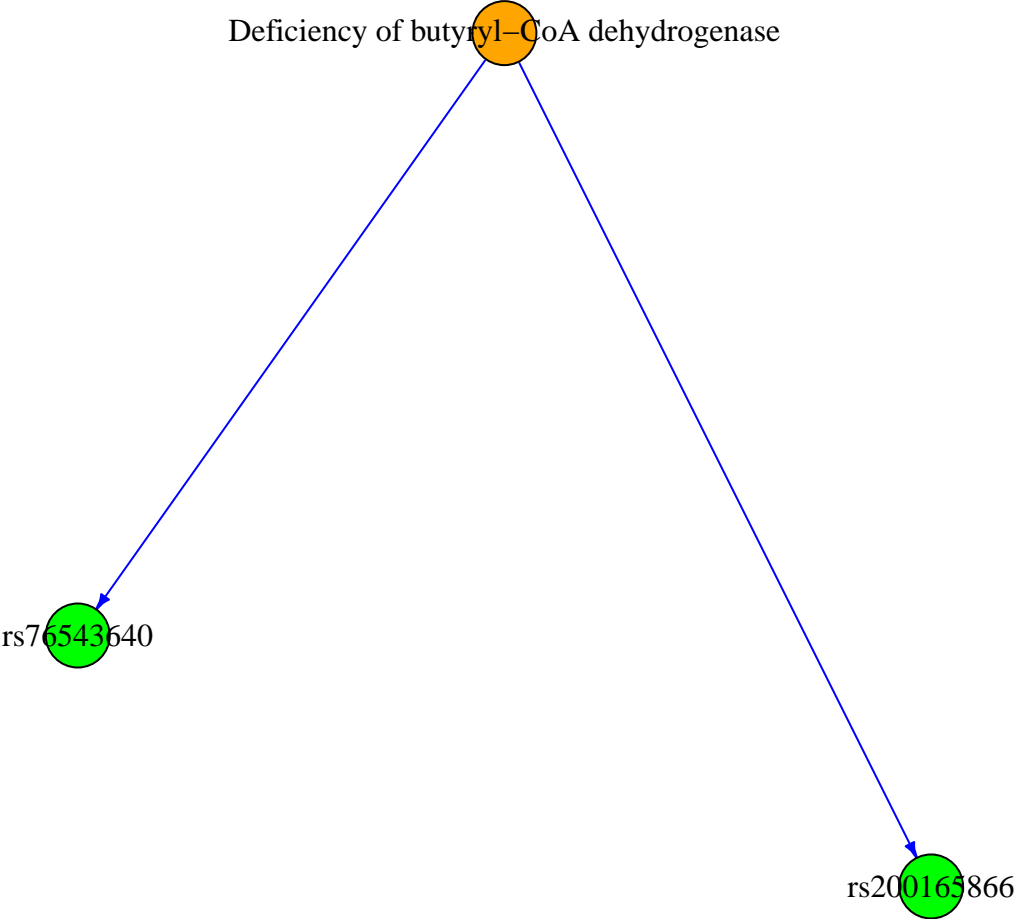



# Variant–Disease Network (Deficiency of ferroxidase)

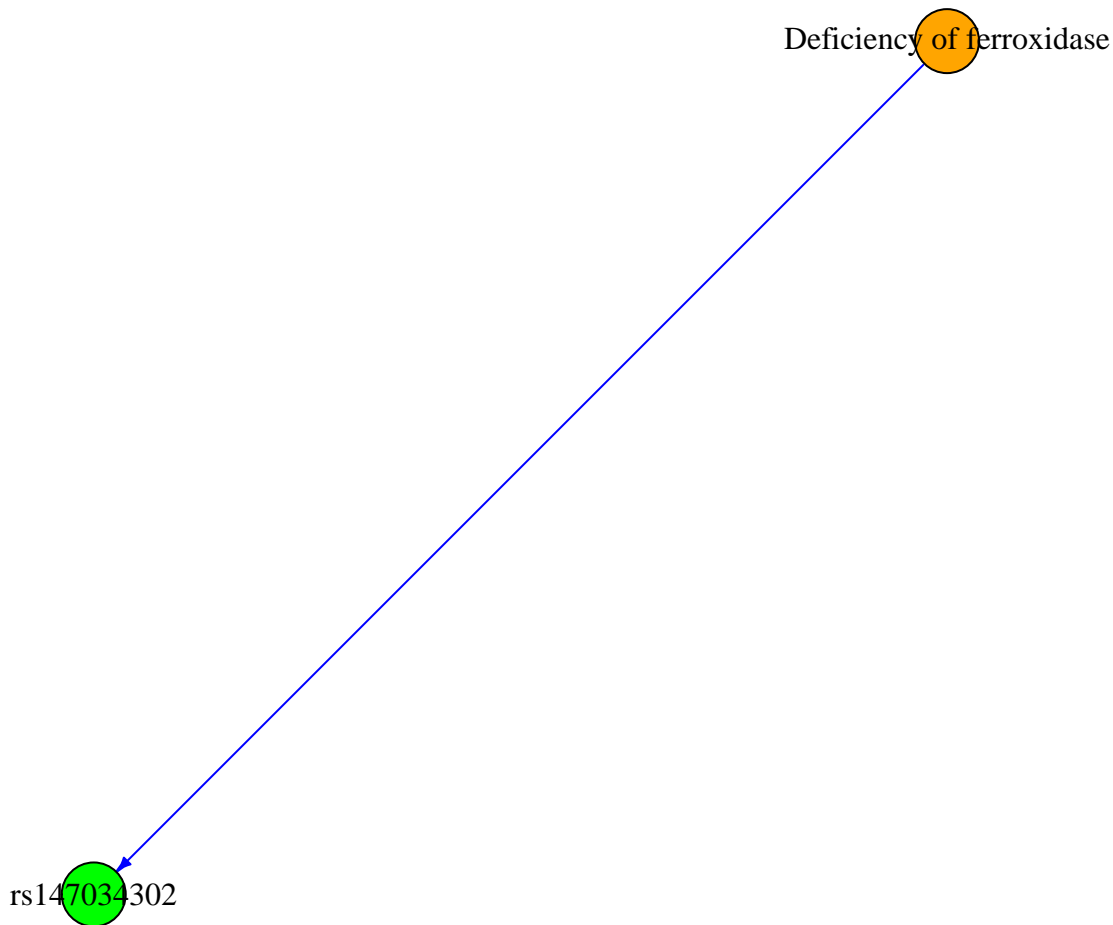

**Variant–Disease Network (Deficiency of iodide peroxidase)**

Deficiency of iodide peroxidase

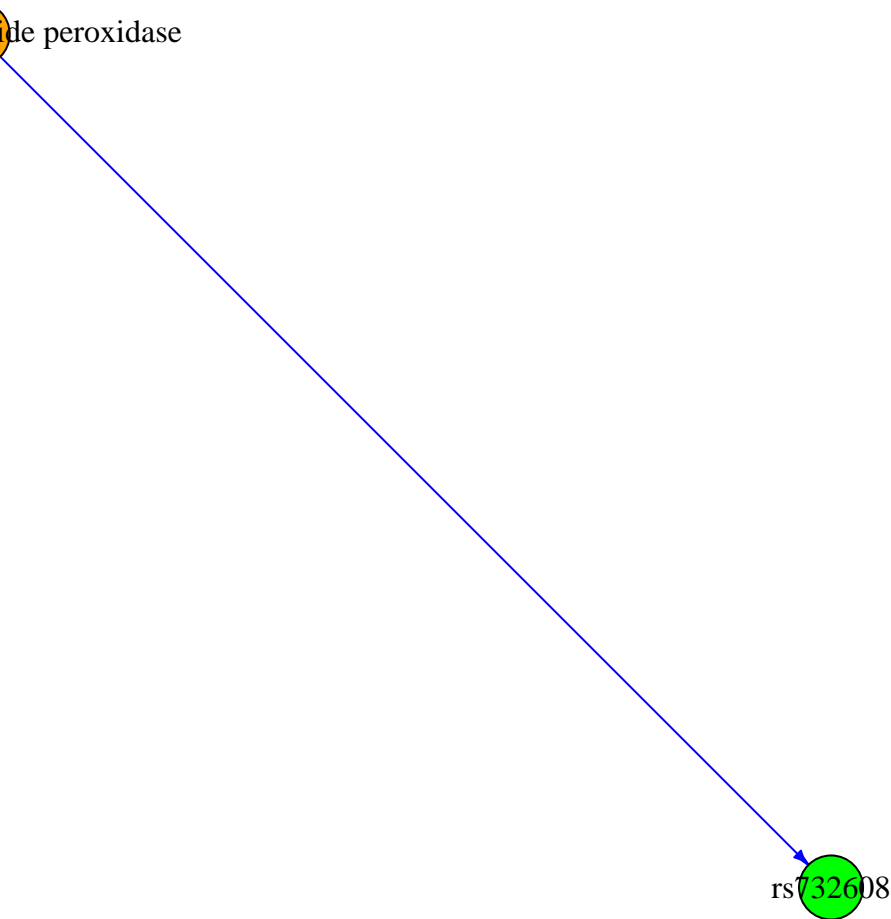

## Variant–Disease Network (Dementia)

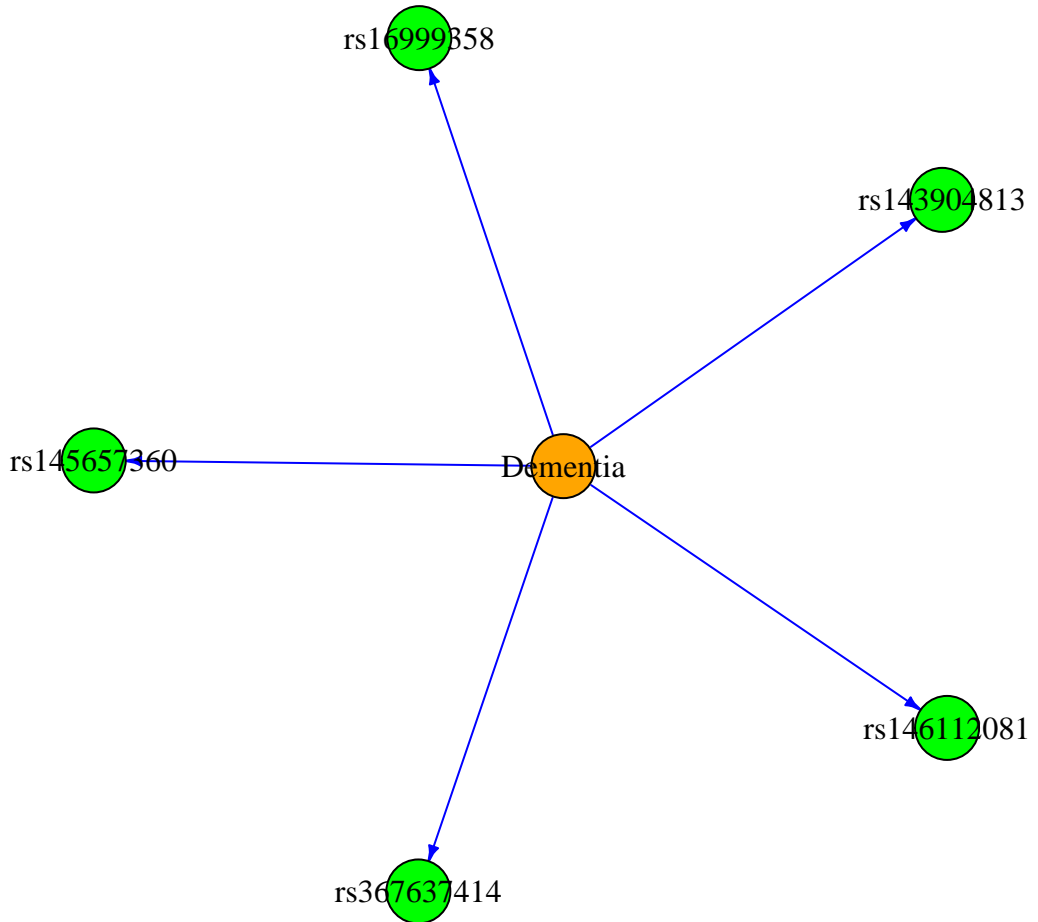

## Variant-Disease Network (Dents disease)

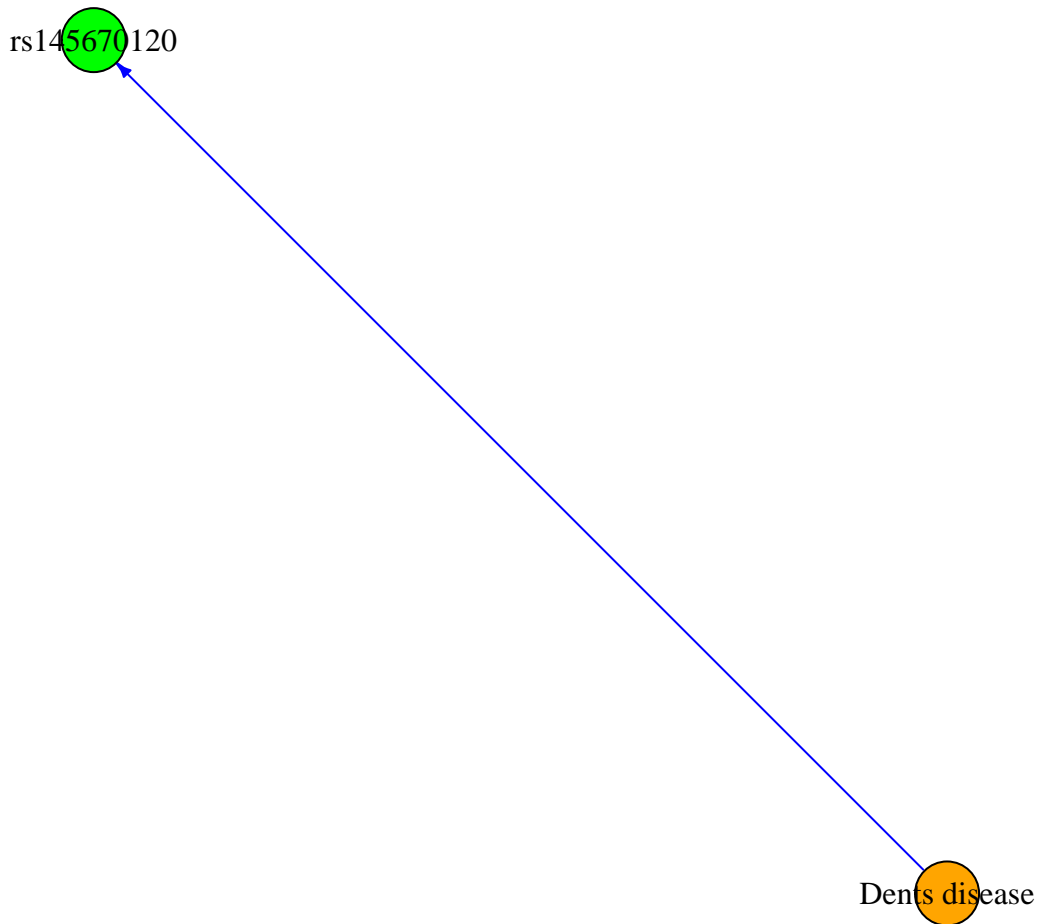

## Variant-Disease Network (Desmoid disease)

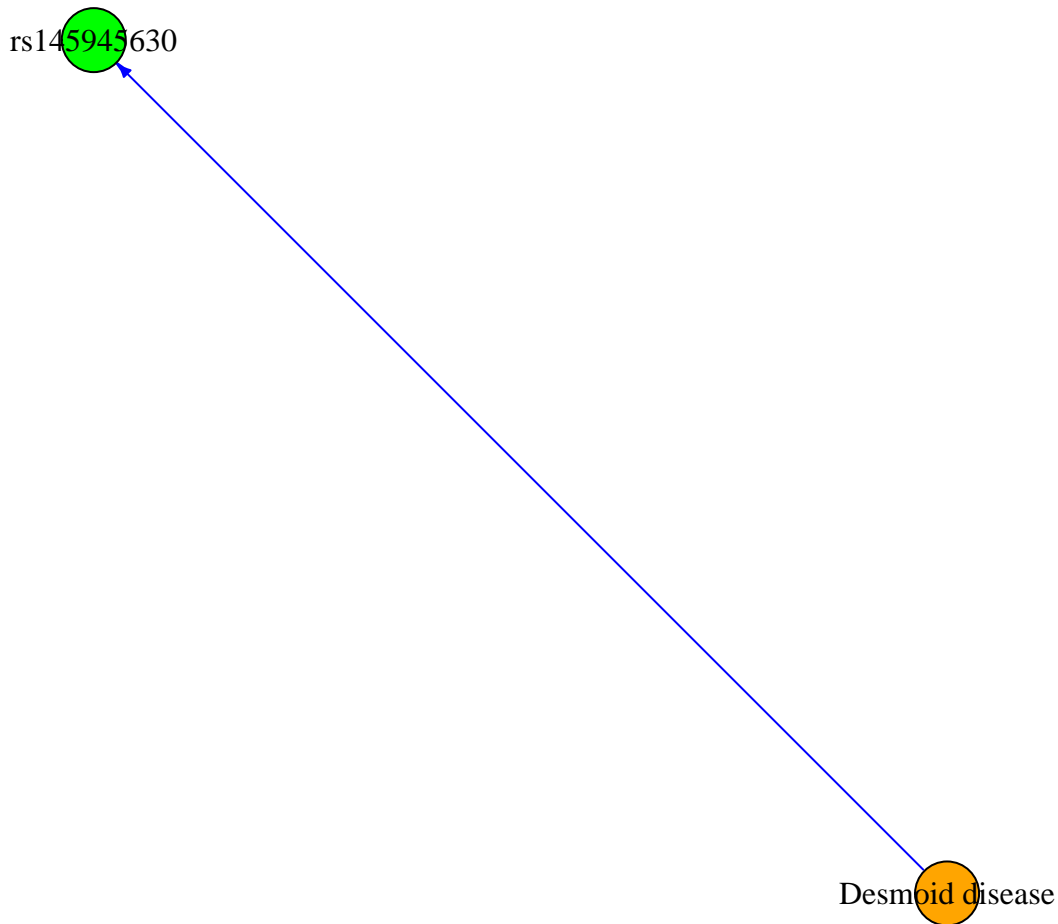

Variant–Disease Network (Diabetes mellitus)

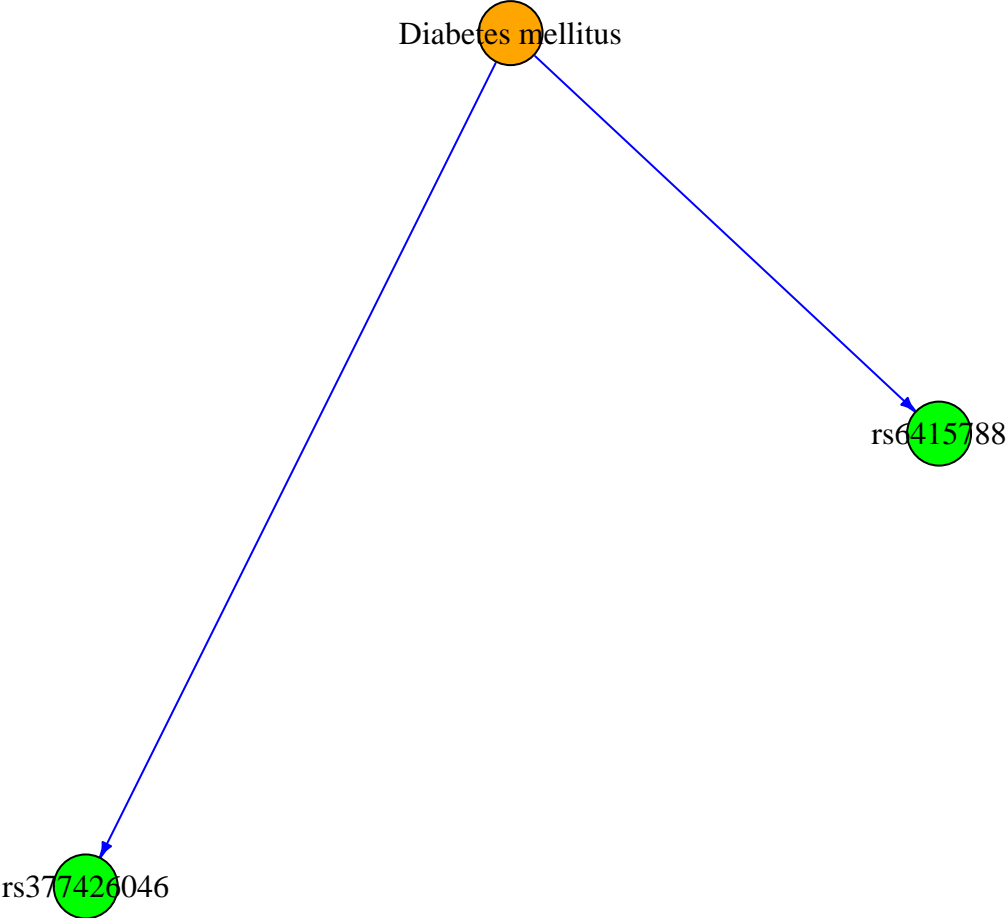

**Variant–Disease Network (Diamond–Blackfan anemia)**

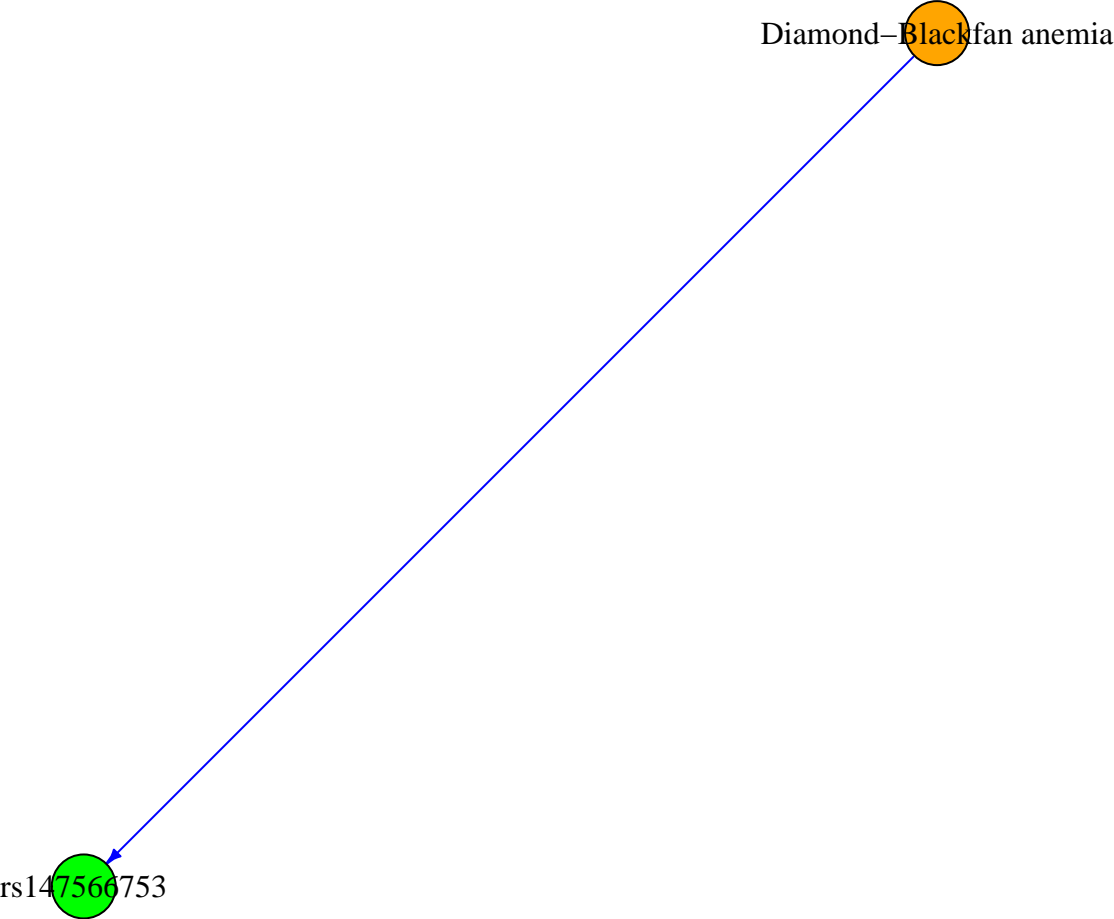

## Variant–Disease Network (Dicarboxylic aminoaciduria)

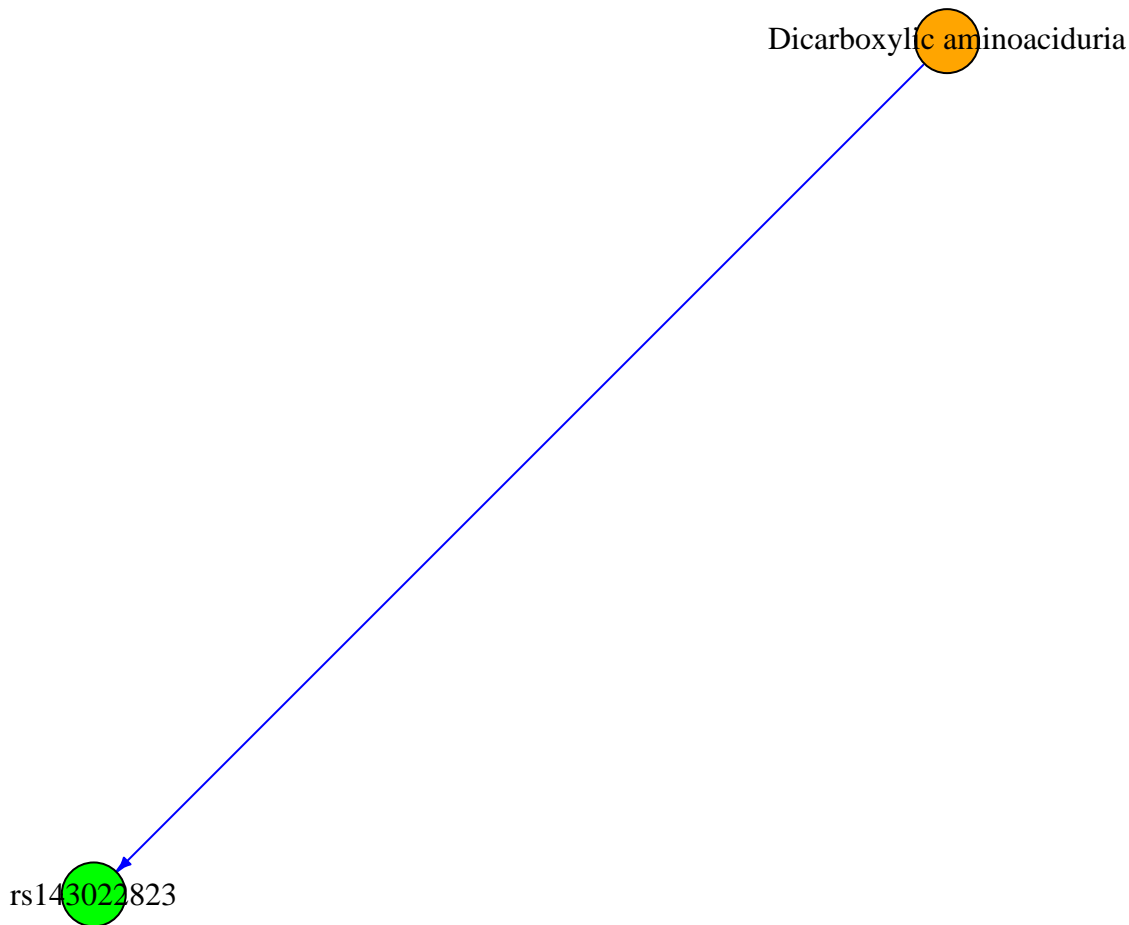



# Disease Network (DICER1-related pleuropulmonary blastoma cancer predispos

rs764827361

DICER1-related pleuropulmonary blastoma cancer pr



## Variant-Disease Network (Dihydropyrimidinase deficiency)

Dihydropyrimidinase deficiency

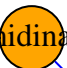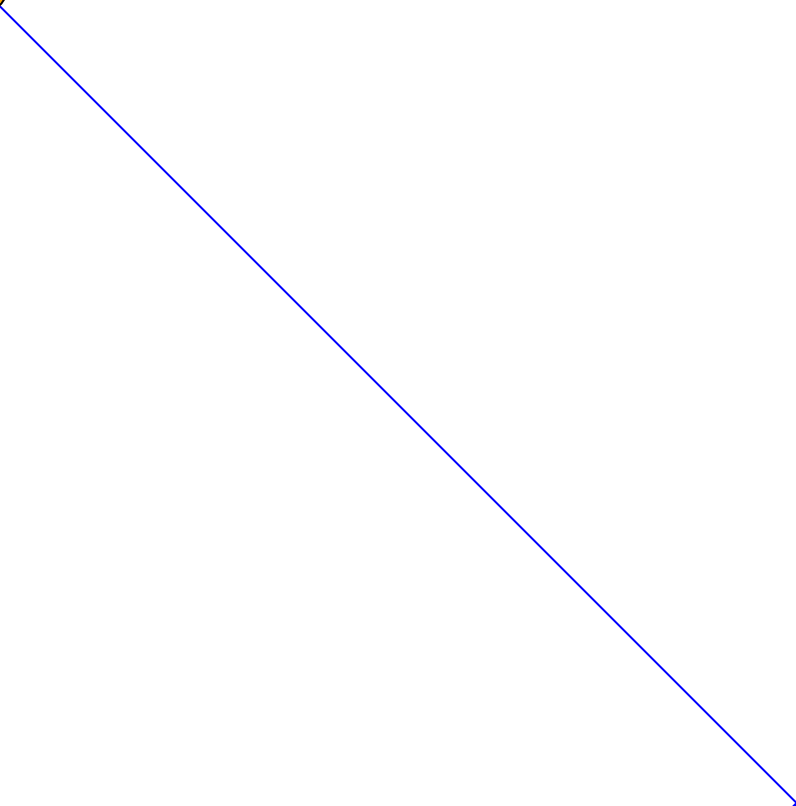

rs75490773

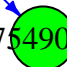

**Variant–Disease Network (Dihydropyrimidine dehydrogenase deficiency)**

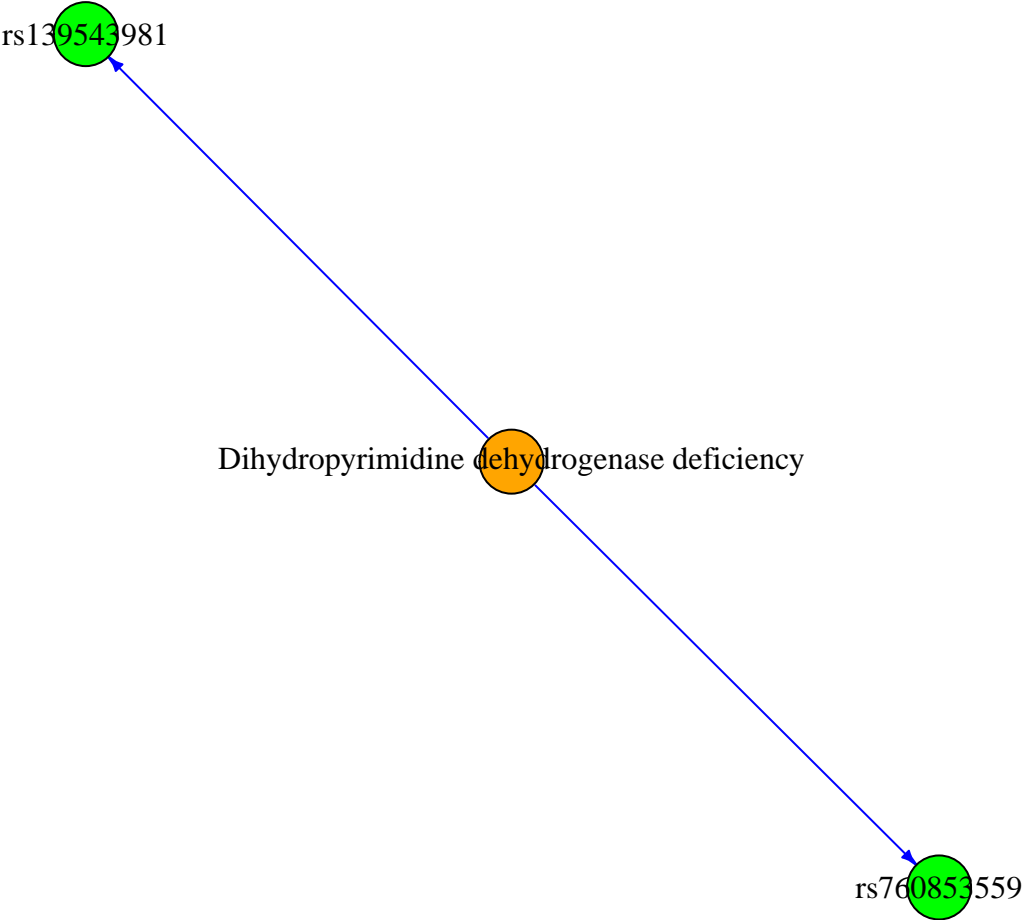

Variant–Disease Network (Dilated Cardiomyopathy)

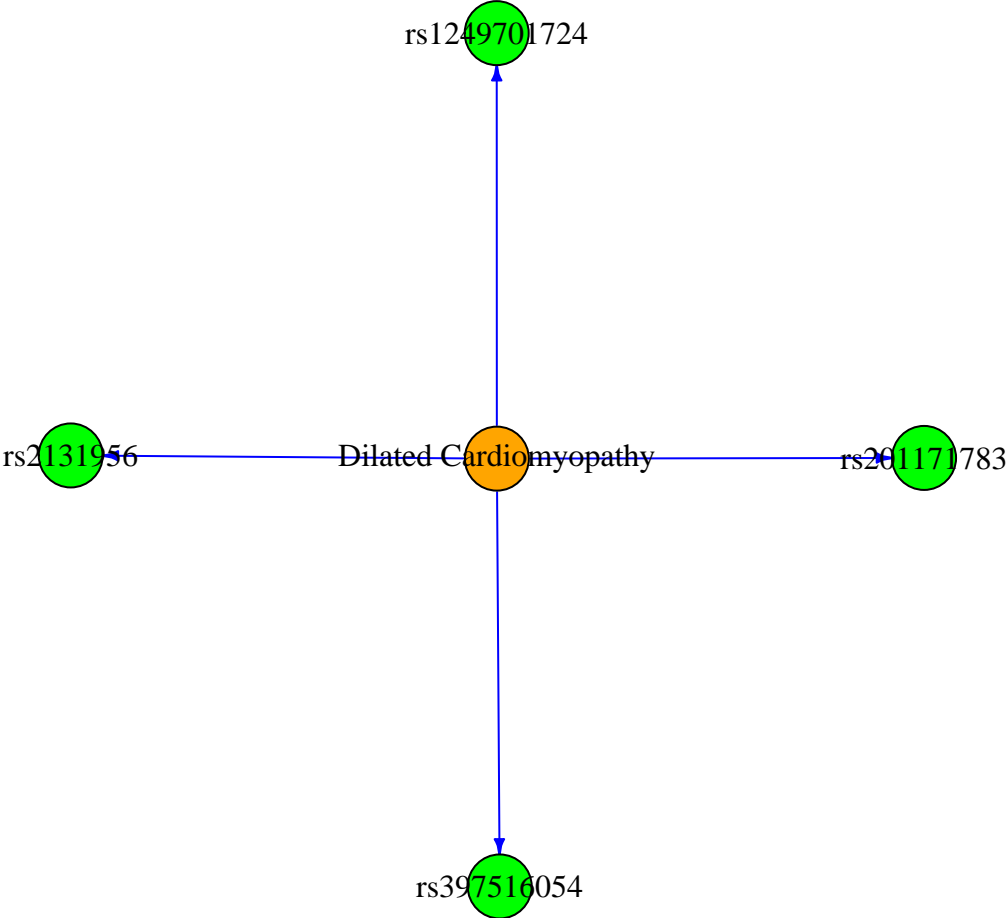

## Variant–Disease Network (Dilated cardiomyopathy 1HH)

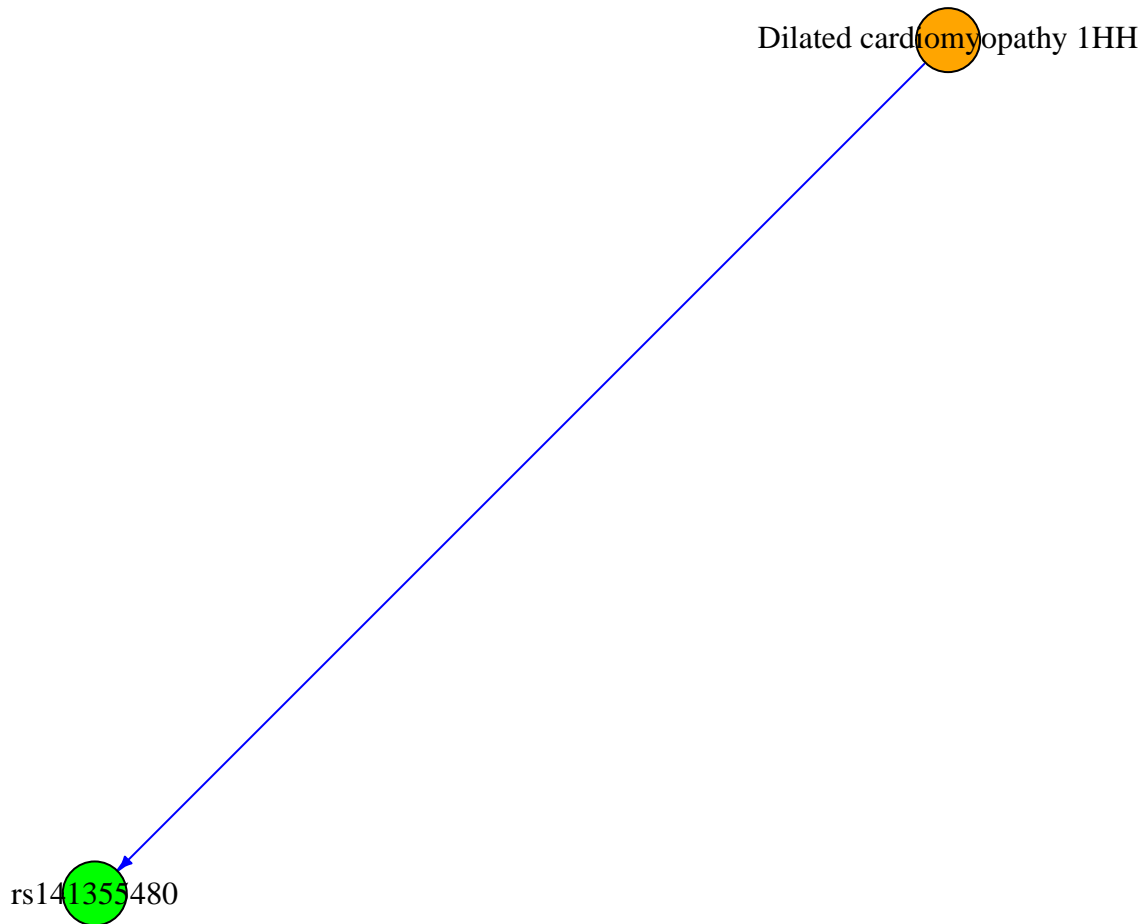

**Variant–Disease Network (Dilated cardiomyopathy 1II)**

rs147970333

Dilated cardiomyopathy 1II

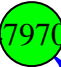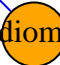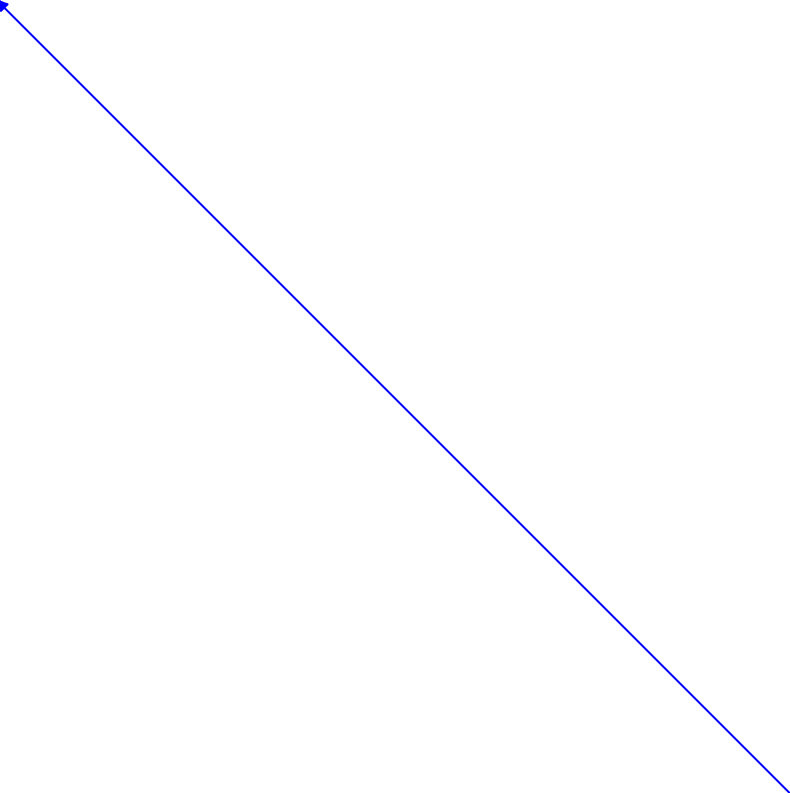

**Variant–Disease Network (Dilated cardiomyopathy 1J)**

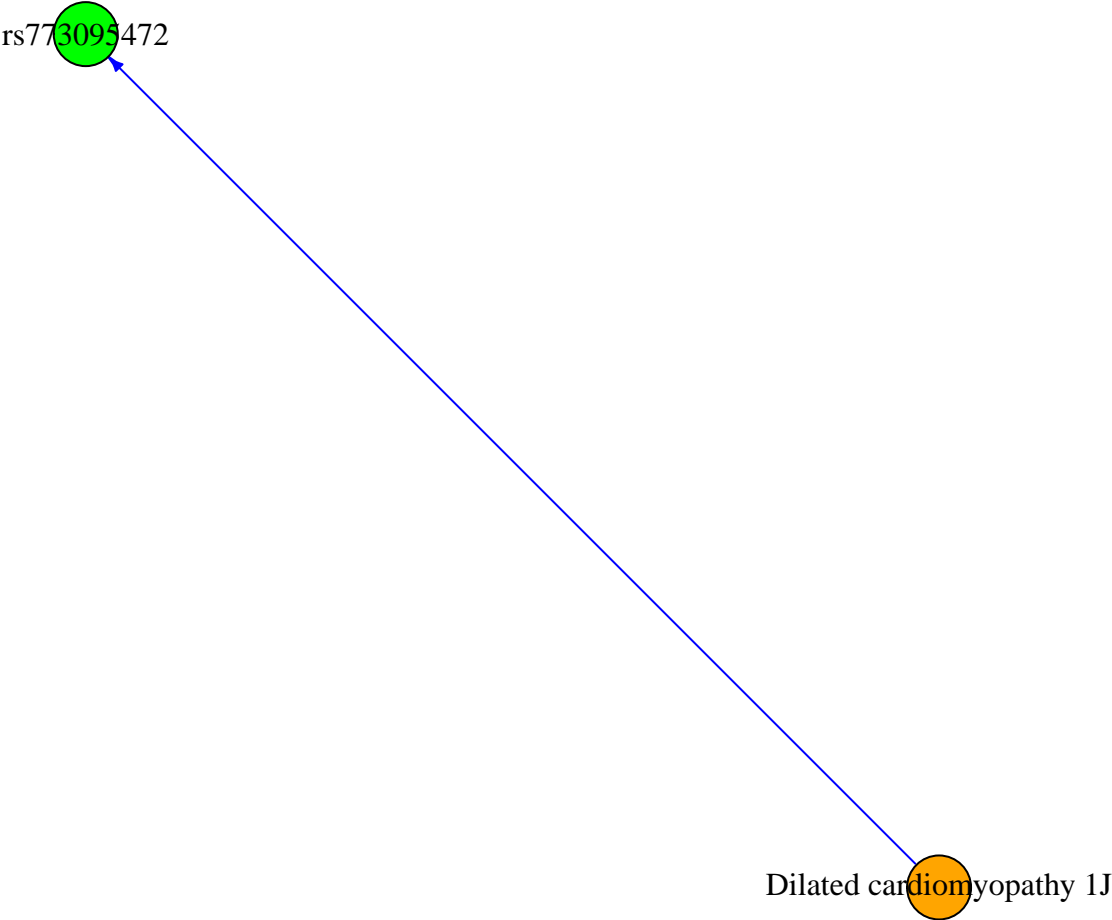

## Variant–Disease Network (Dilated cardiomyopathy 1JJ)

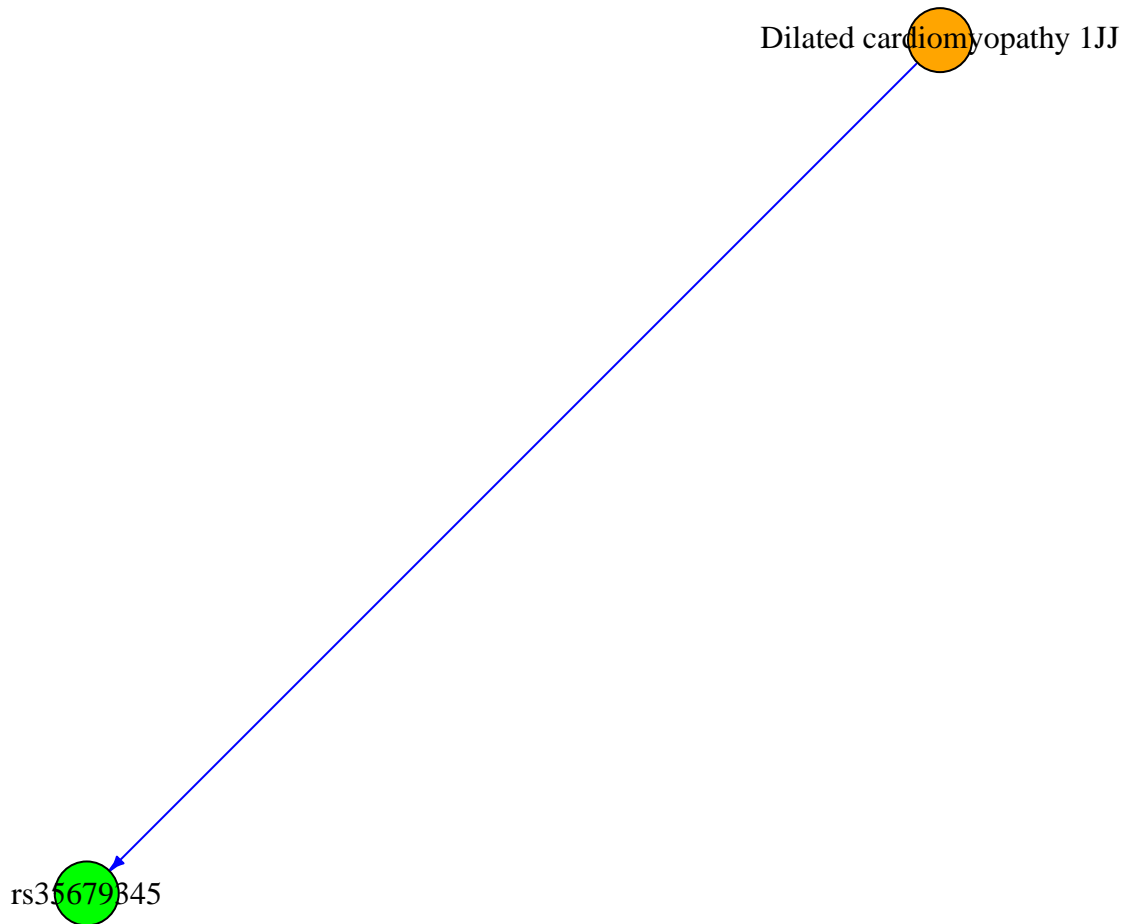



## Variant–Disease Network (Dilated cardiomyopathy 1KK)

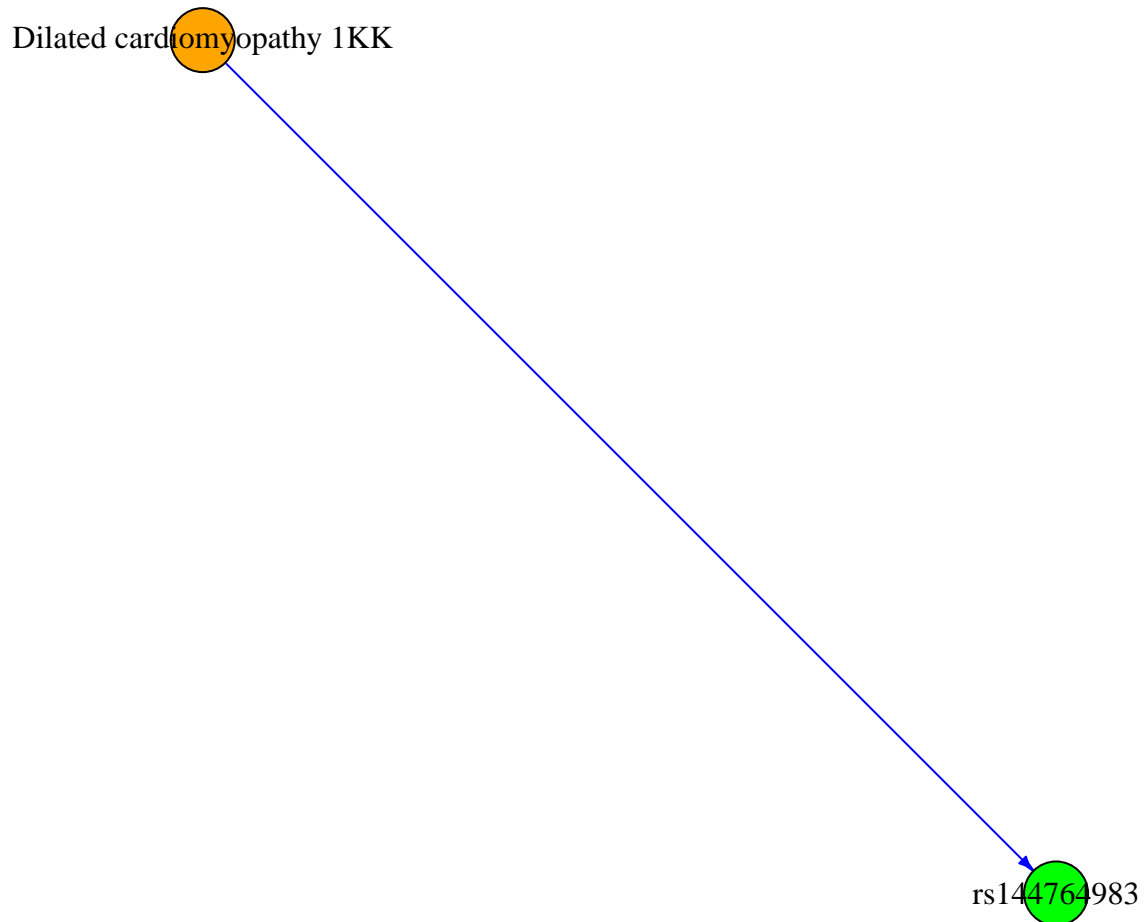

## Variant–Disease Network (Dilated cardiomyopathy 1W)

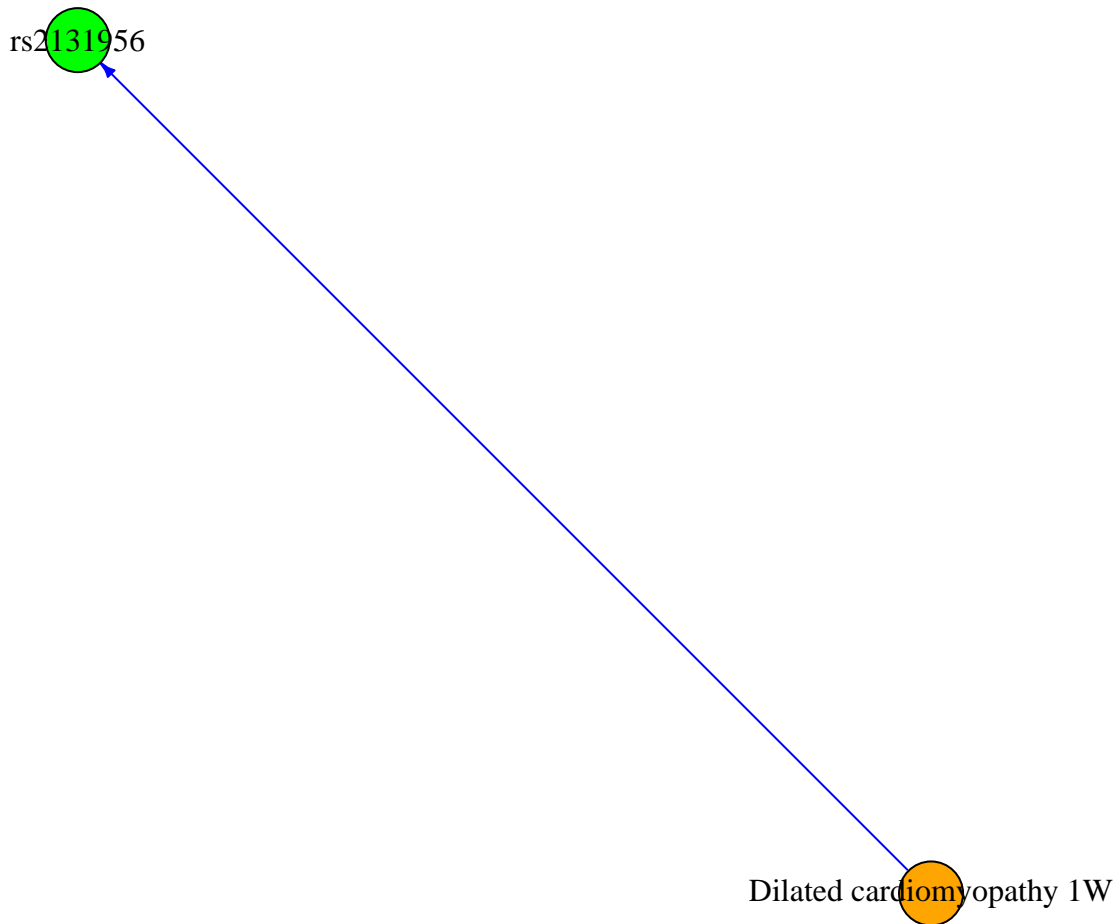

**Variant–Disease Network (Dilated cardiomyopathy 1Z)**

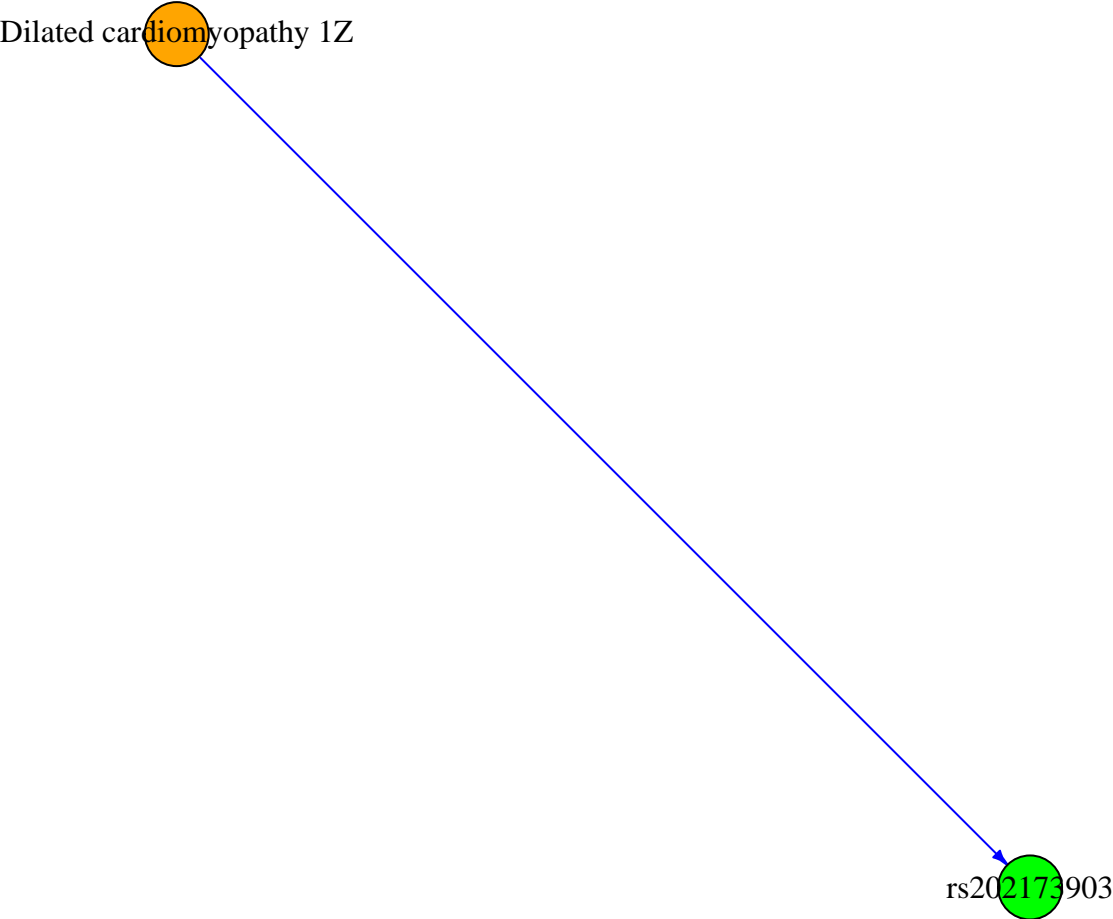

Variant–Disease Network (Disorders of Intracellular Cobalamin Metabolism)

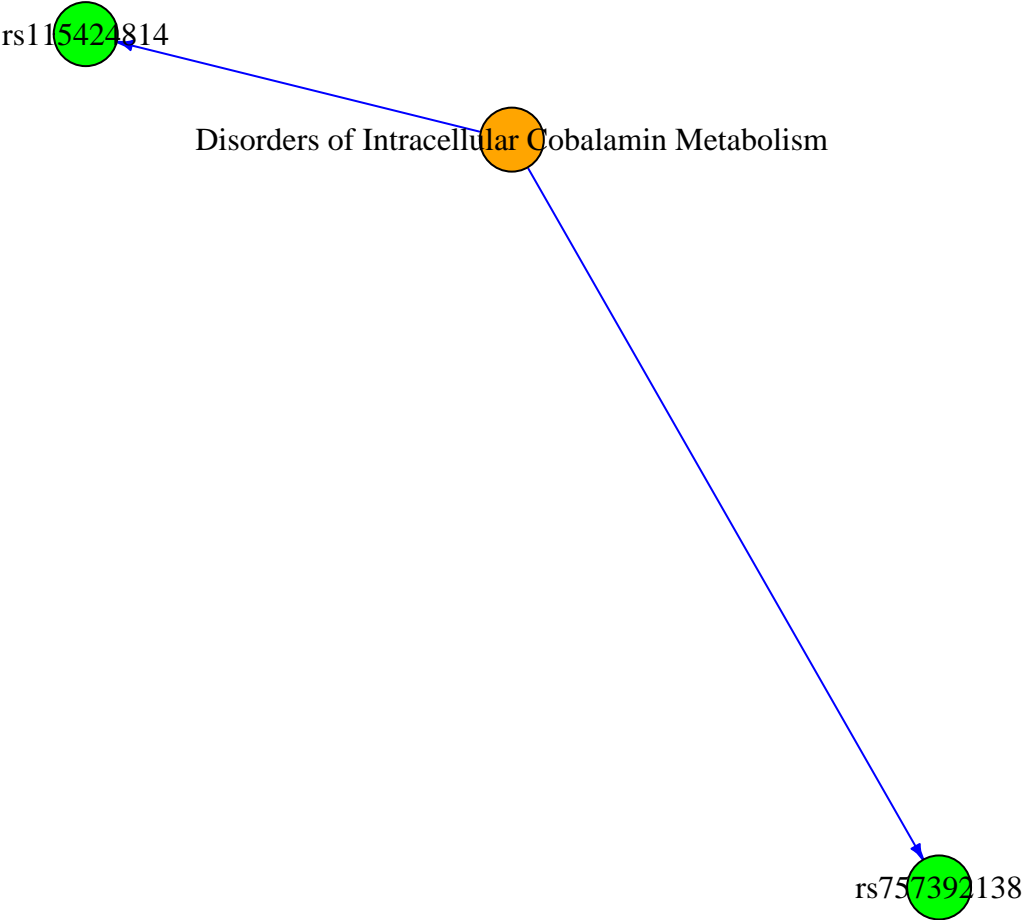

Variant–Disease Network (Distal hereditary motor neuropathy)

Distal hereditary motor neuropathy

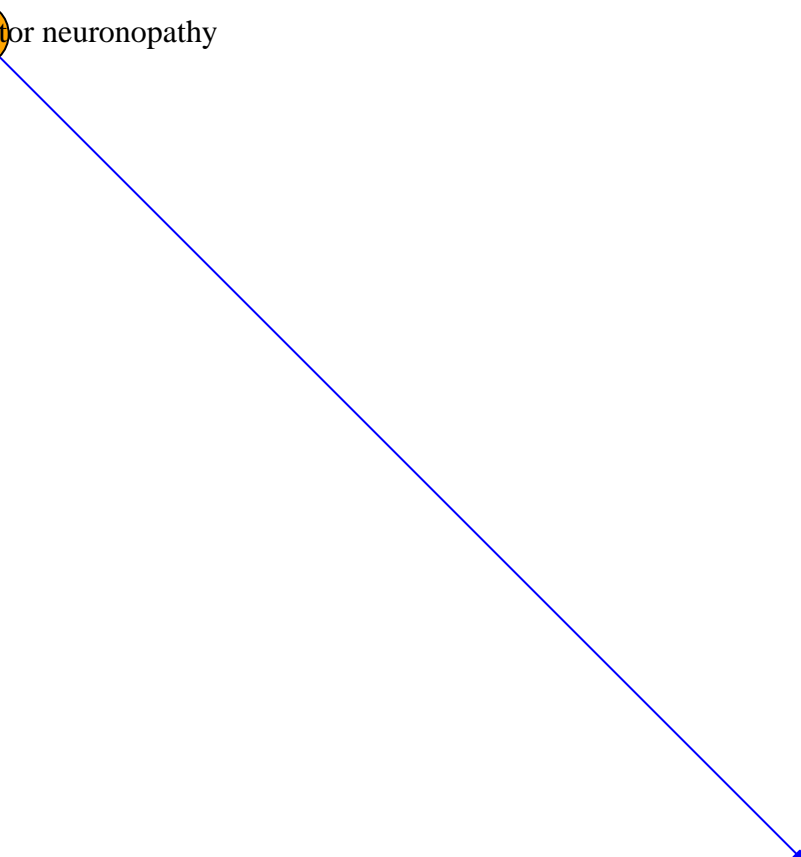

rs367560285

# Variant–Disease Network (Distal hereditary motor neuropathy type 5)

Distal hereditary motor neuropathy type 5

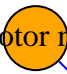

rs1049402

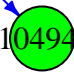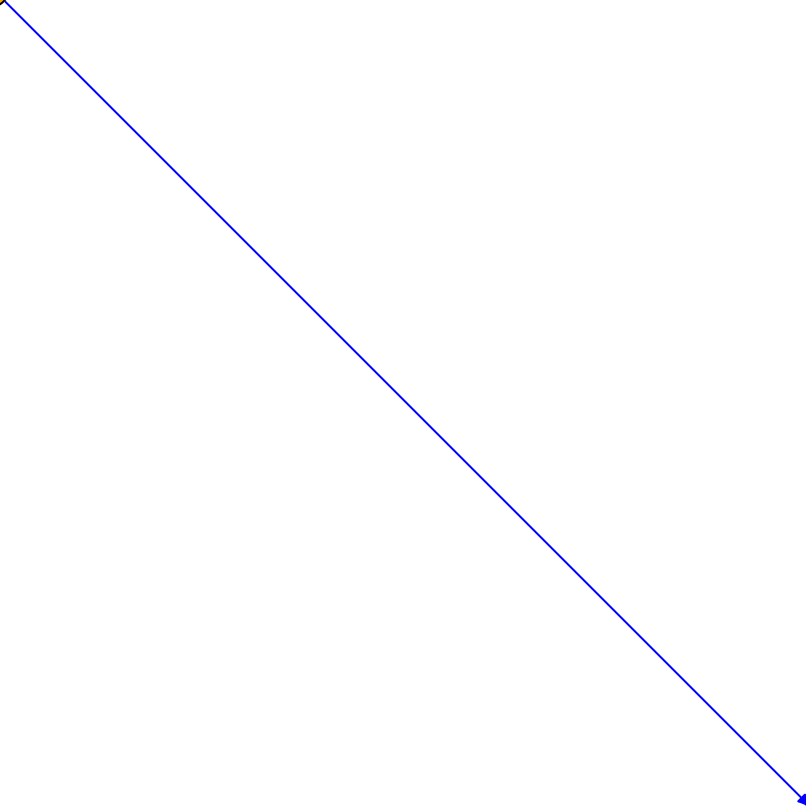

Variant–Disease Network (Distal hereditary motor neuronopathy type 7B

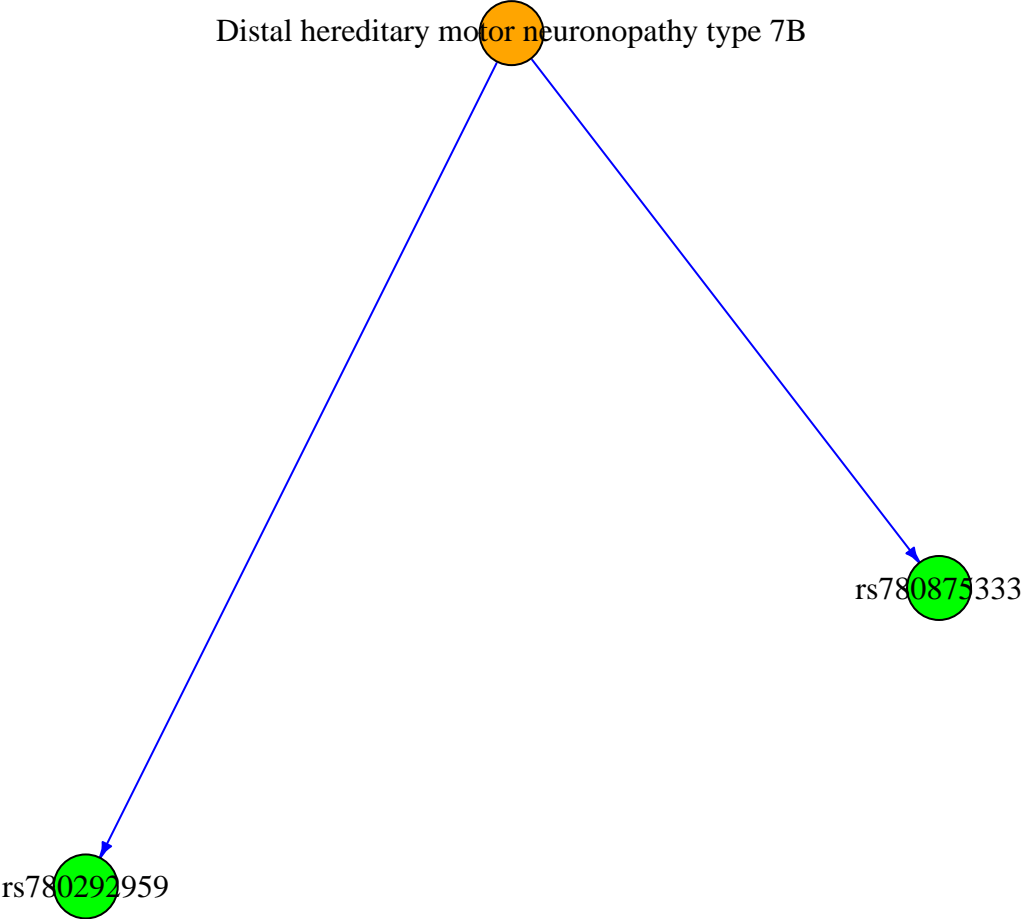

## Variant–Disease Network (Distal myopathy)

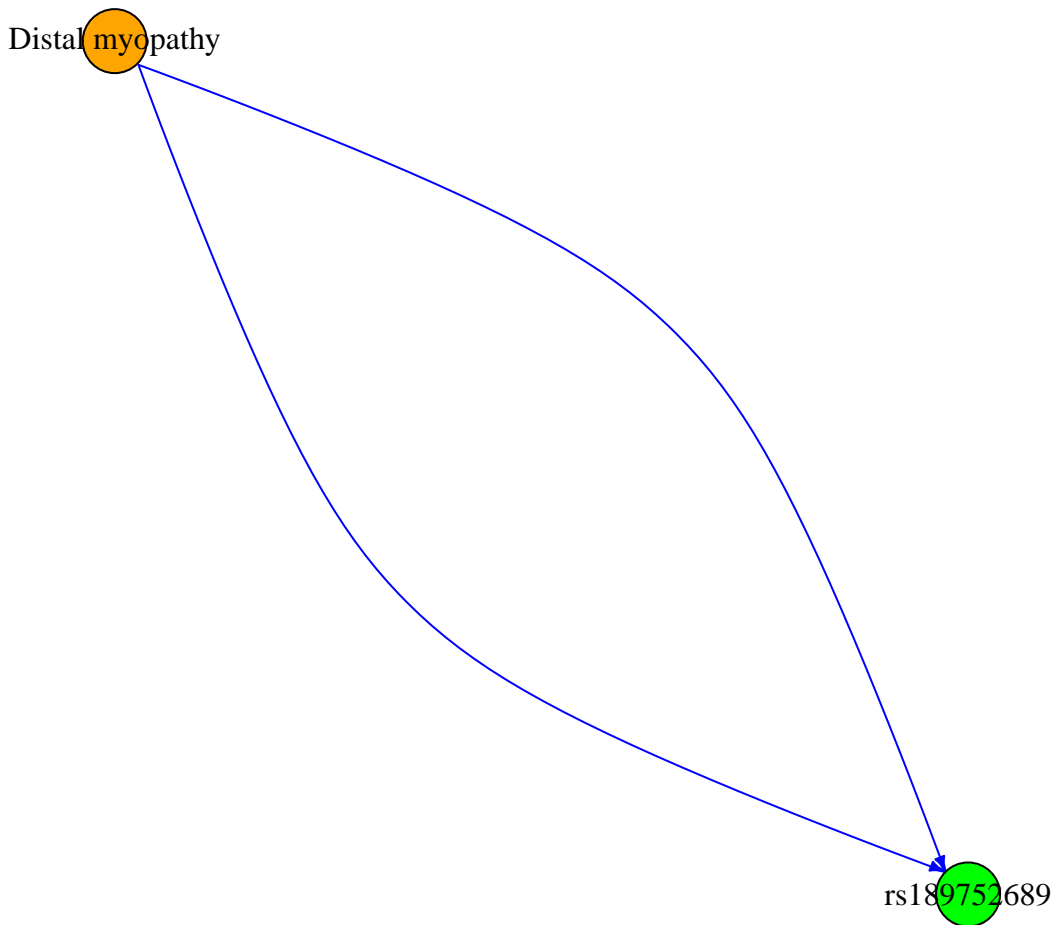



Variant–Disease Network (Distal Renal Tubular Acidosis)

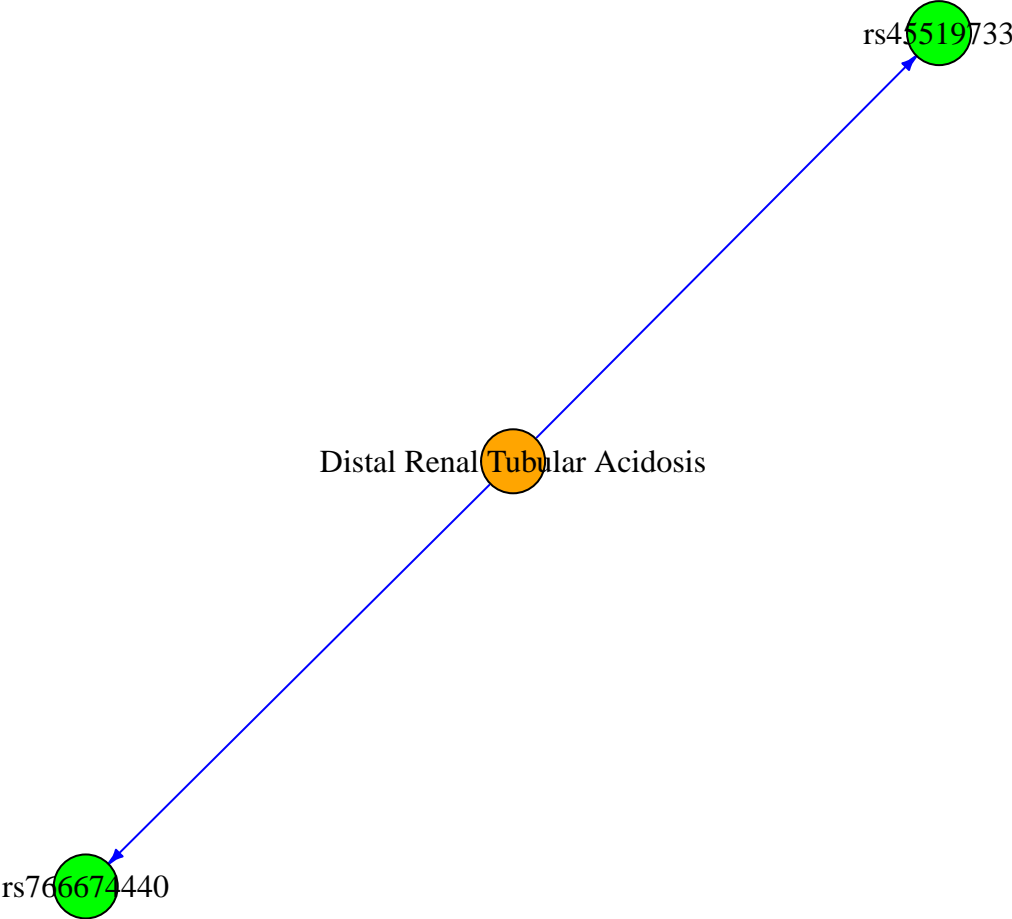

**Variant–Disease Network (Distal spinal muscular atrophy)**

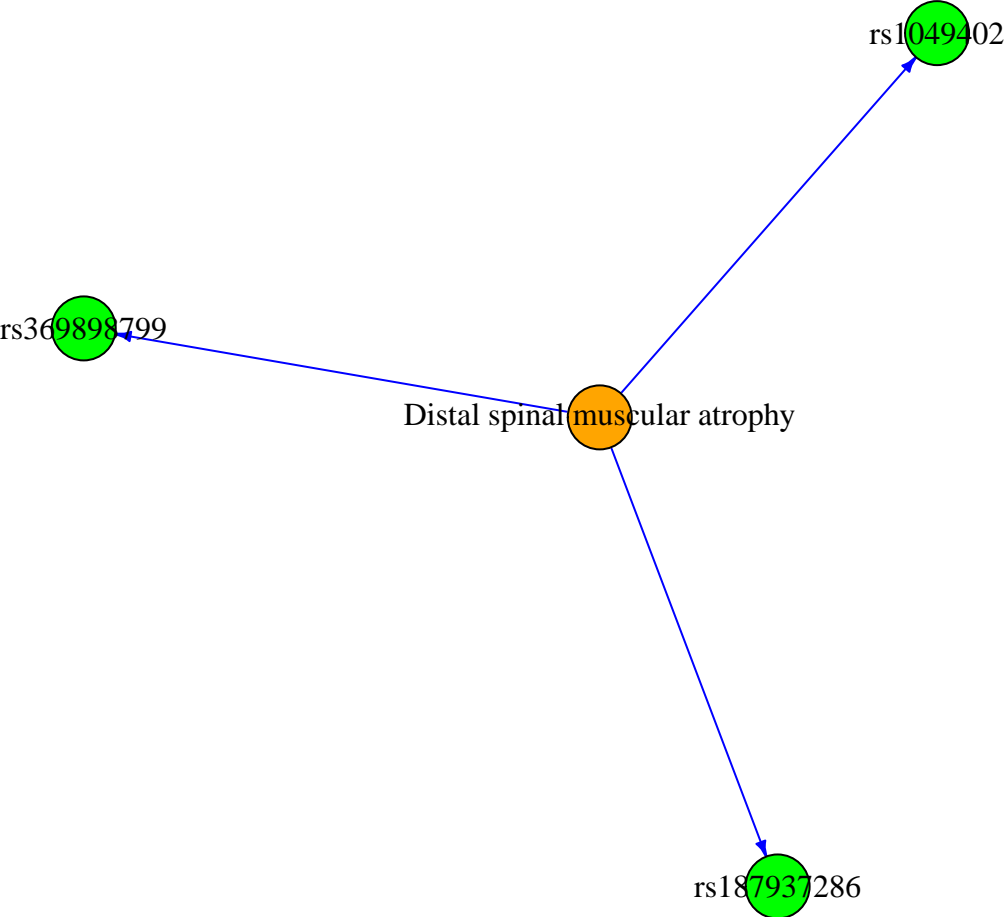

Variant–Disease Network (Donnai Barrow syndrome)

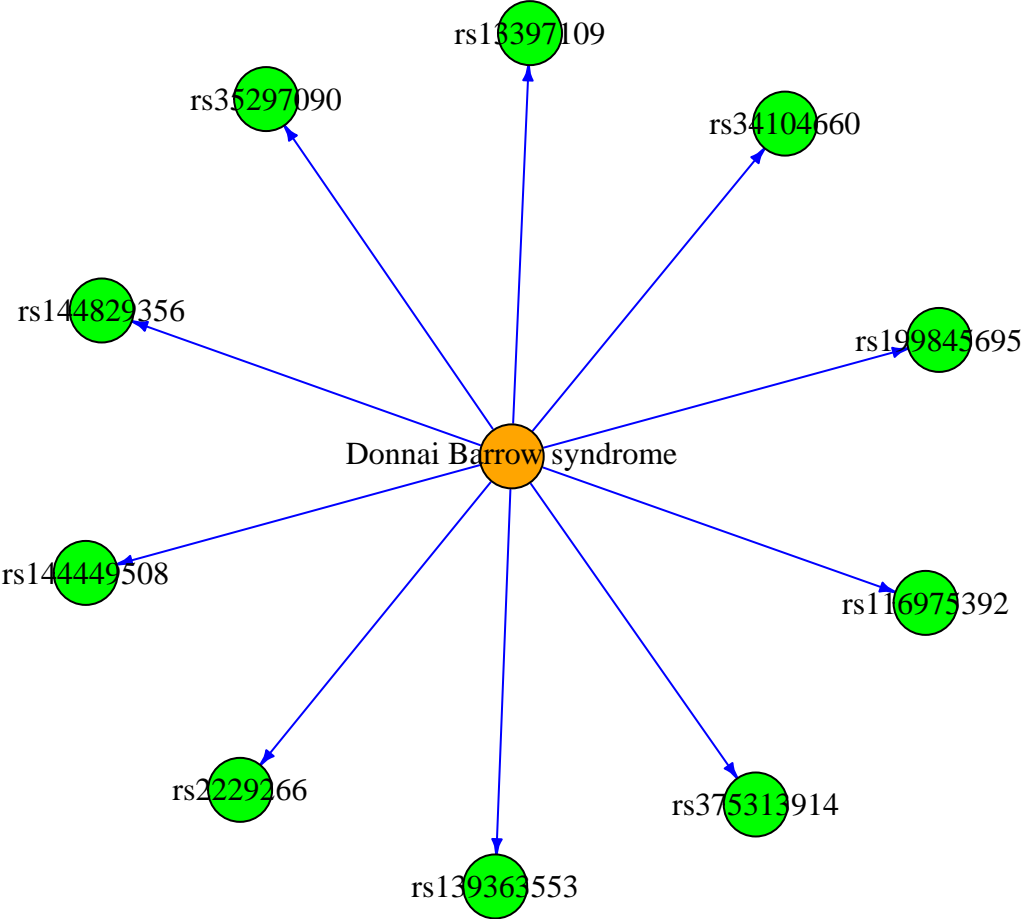

**Variant–Disease Network (Dubin–Johnson syndrome)**

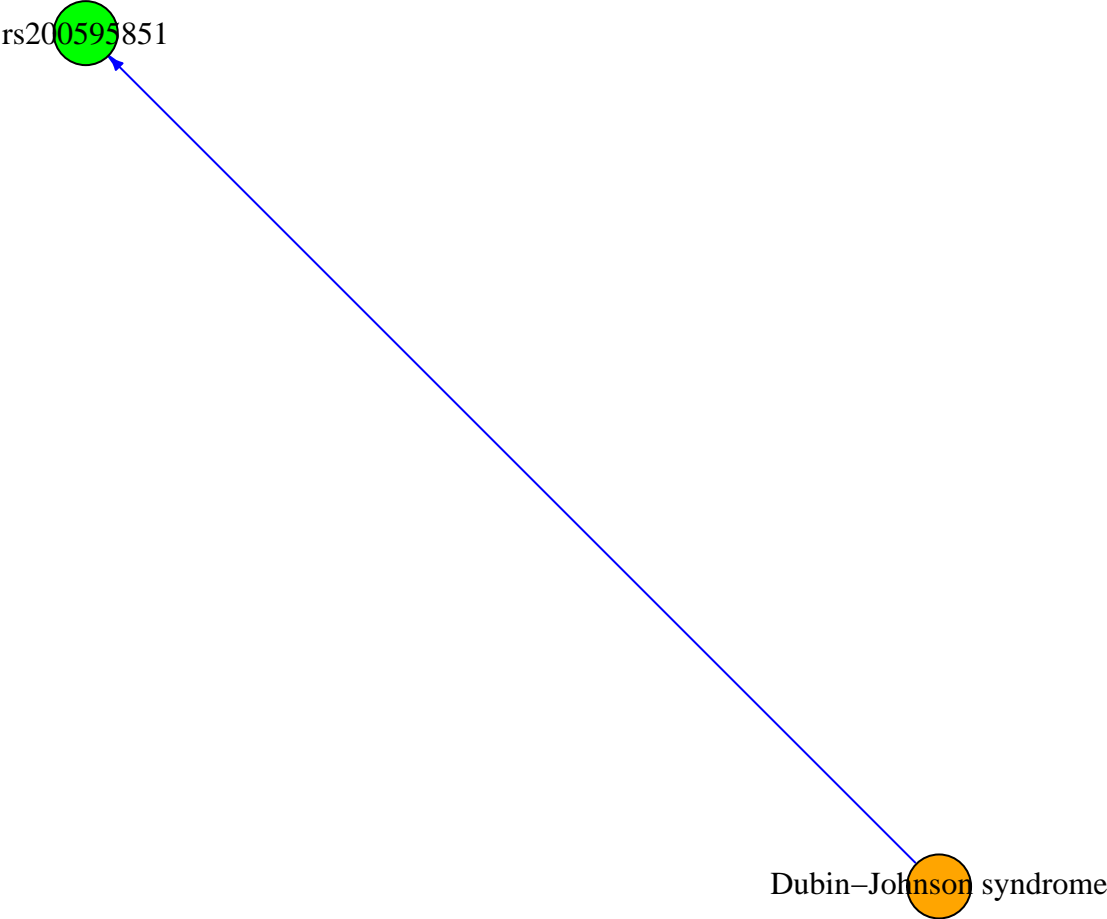

## Variant–Disease Network (Duchenne muscular dystrophy)

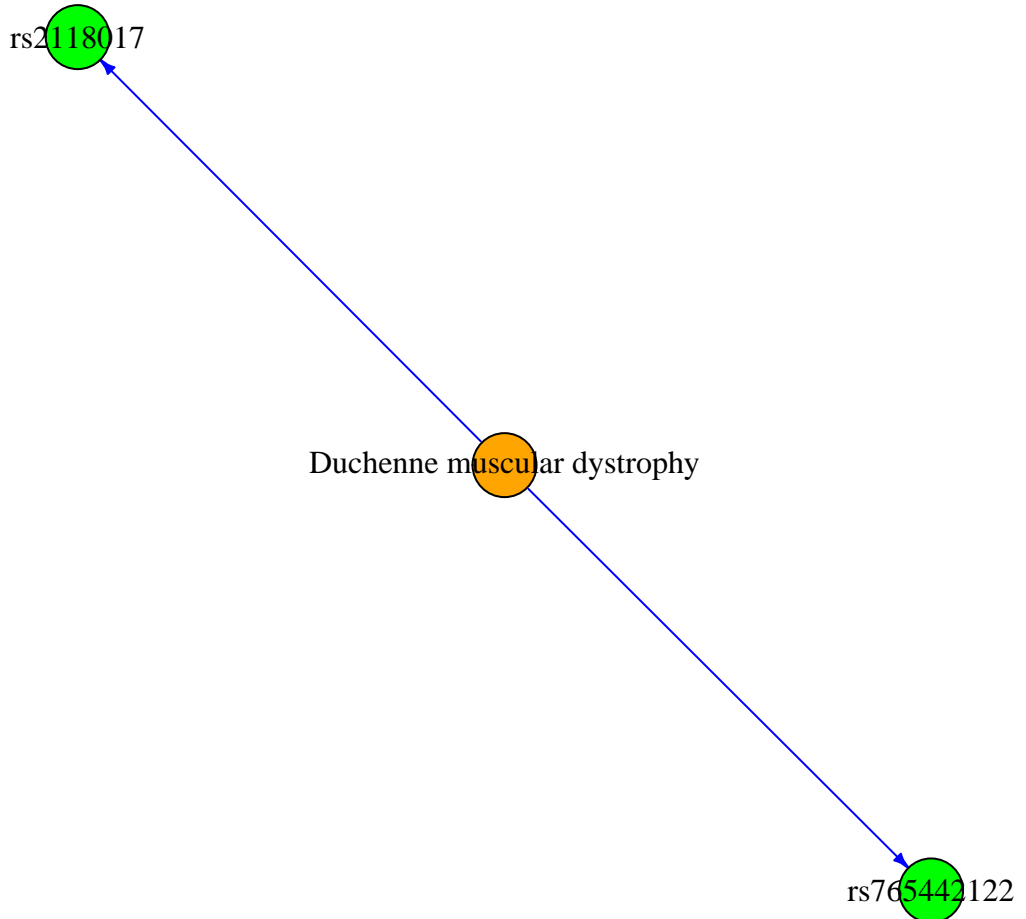

Variant–Disease Network (Dyggve–Melchior–Clausen syndrome)

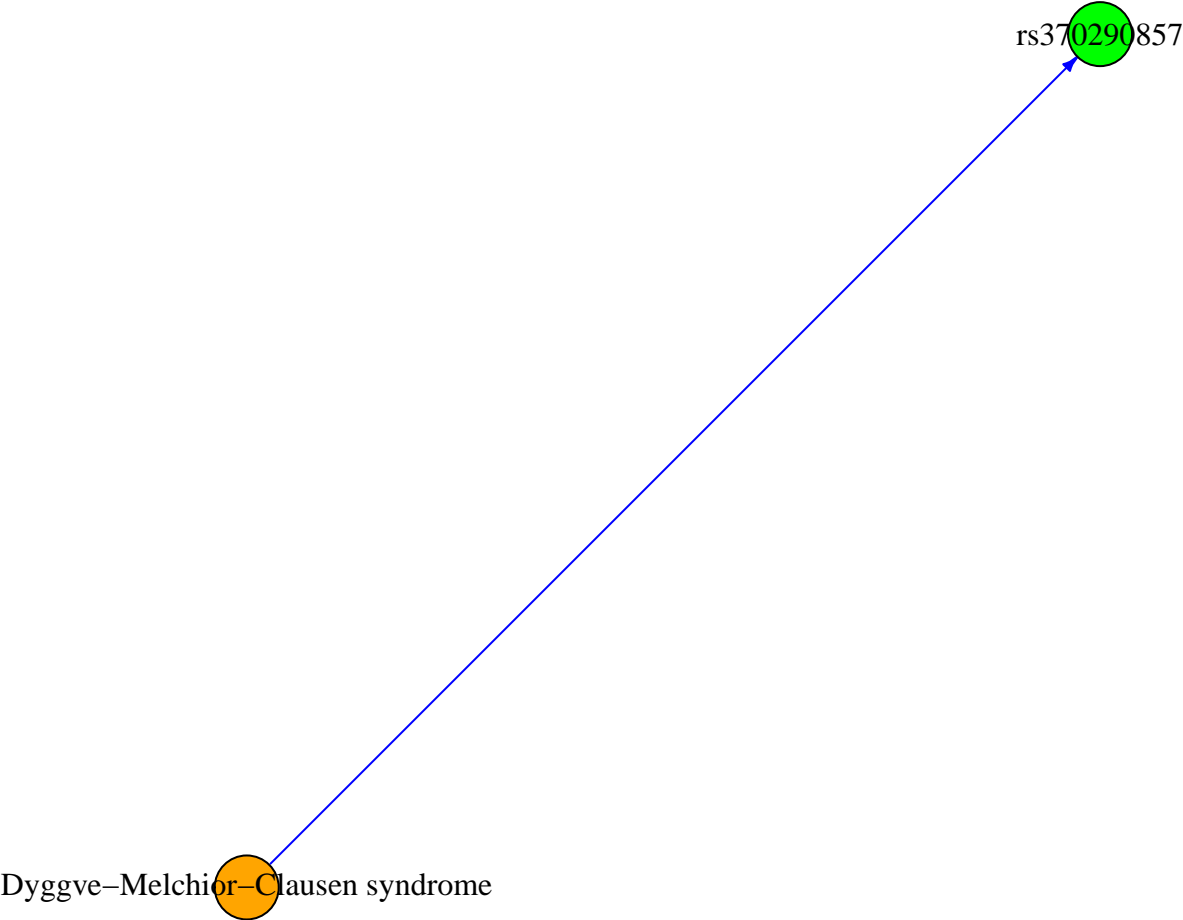

## Variant–Disease Network (Dyskeratosis Congenita)

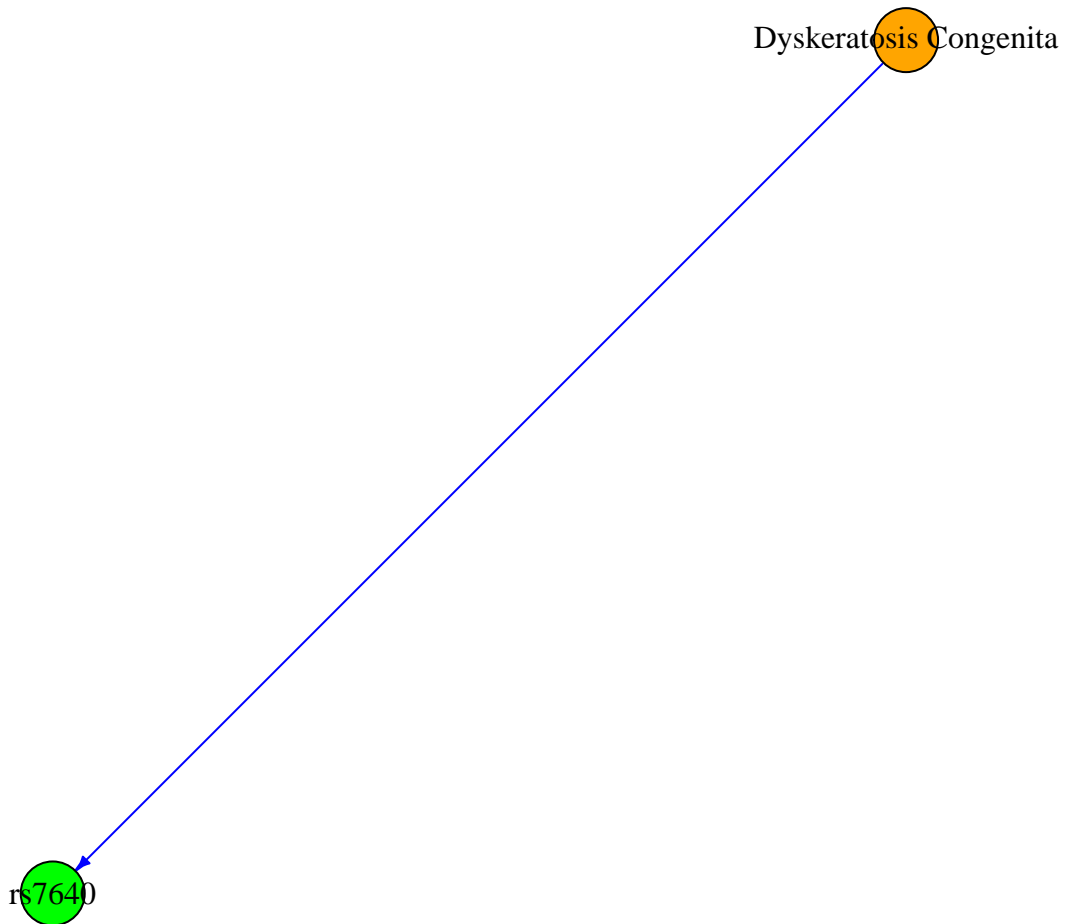

## Variant–Disease Network (Dyssegmental Dysplasia)

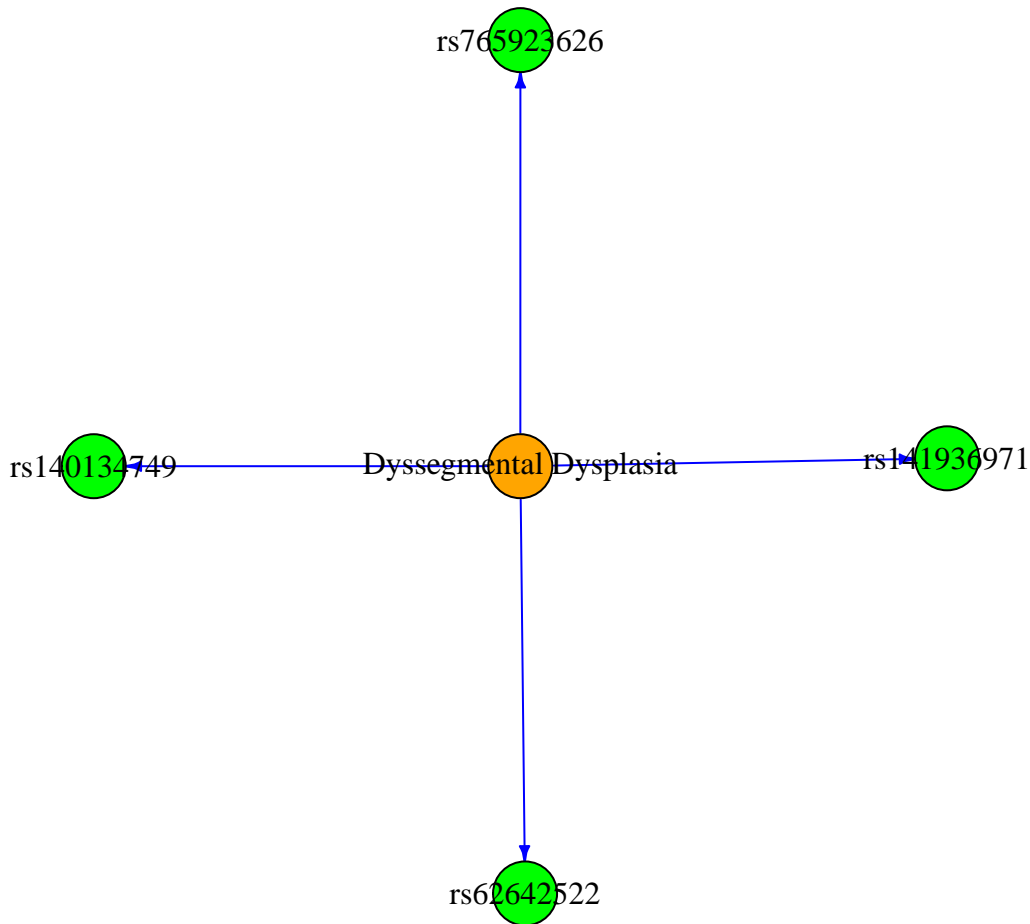



# Variant–Disease Network (Early infantile epileptic encephalopathy)

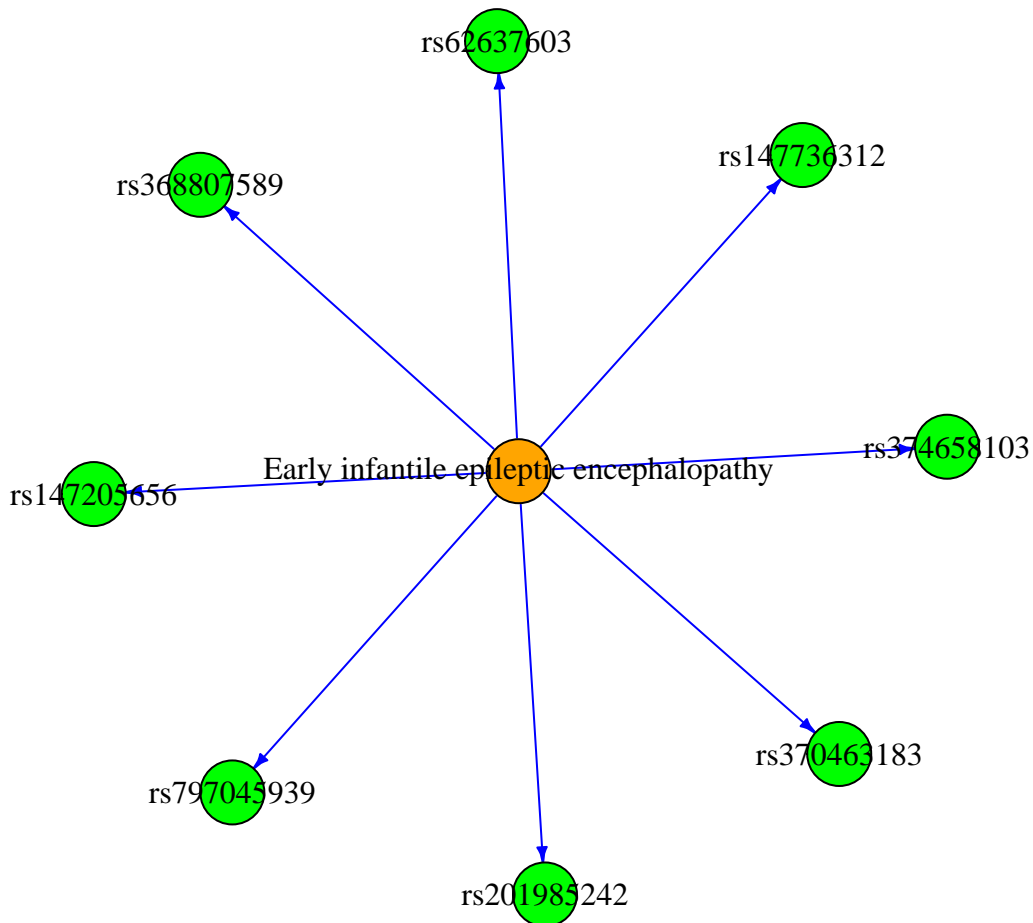

**Variant–Disease Network (Early infantile epileptic encephalopathy 10)**

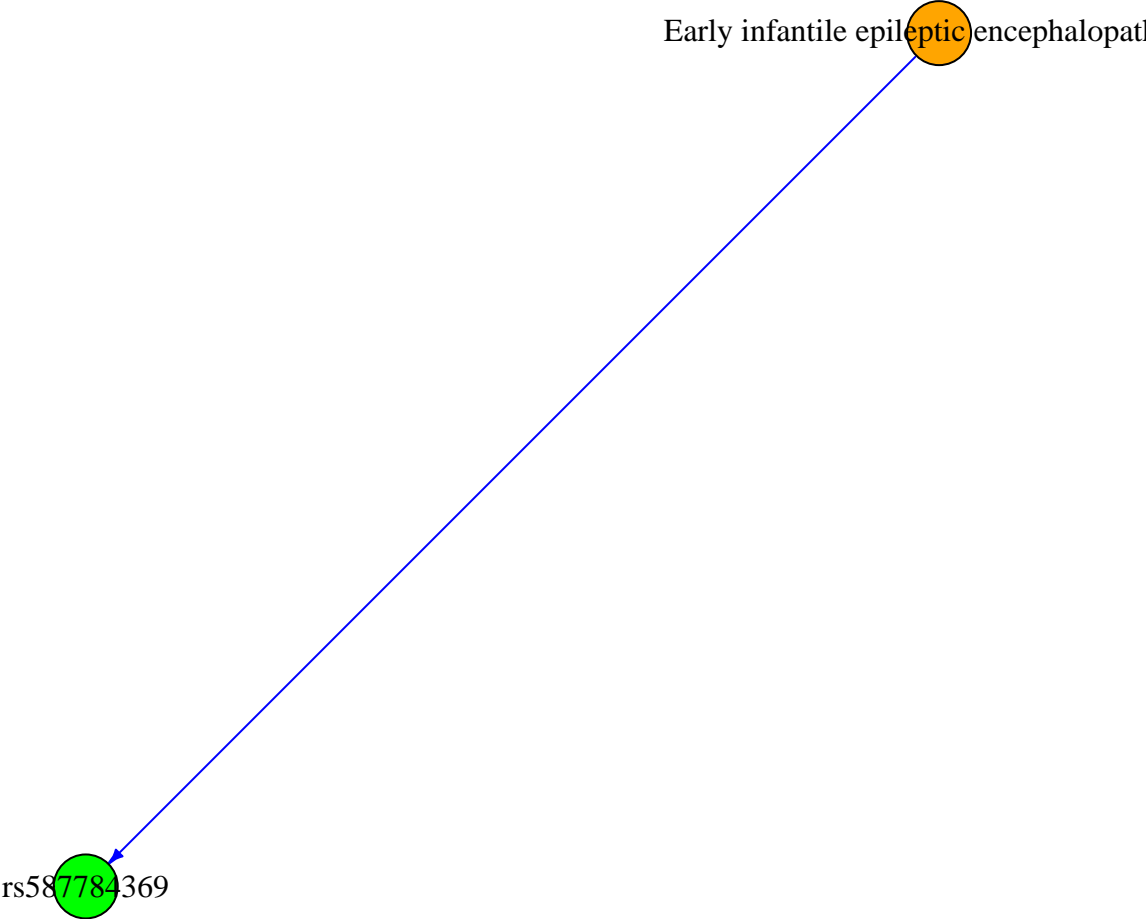

Variant–Disease Network (Early infantile epileptic encephalopathy 12)

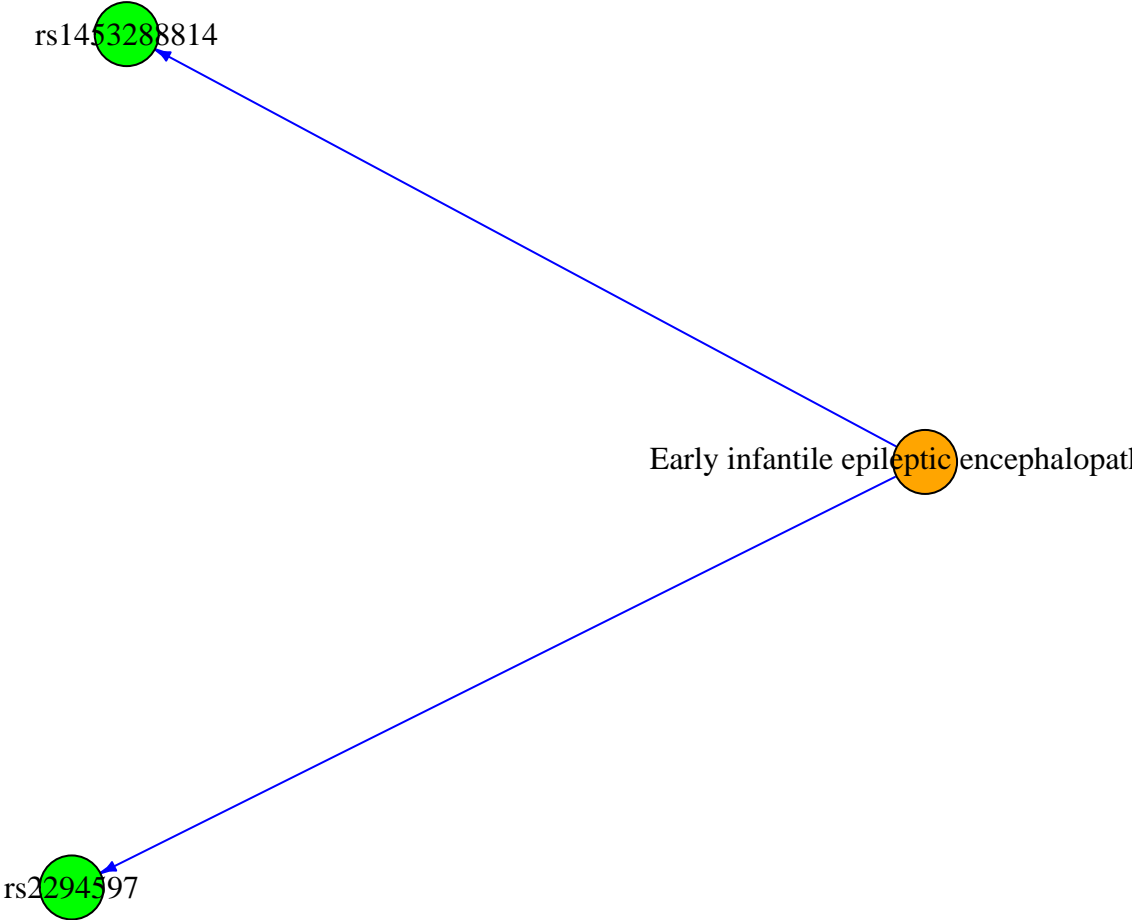

**Variant–Disease Network (Early infantile epileptic encephalopathy 14)**

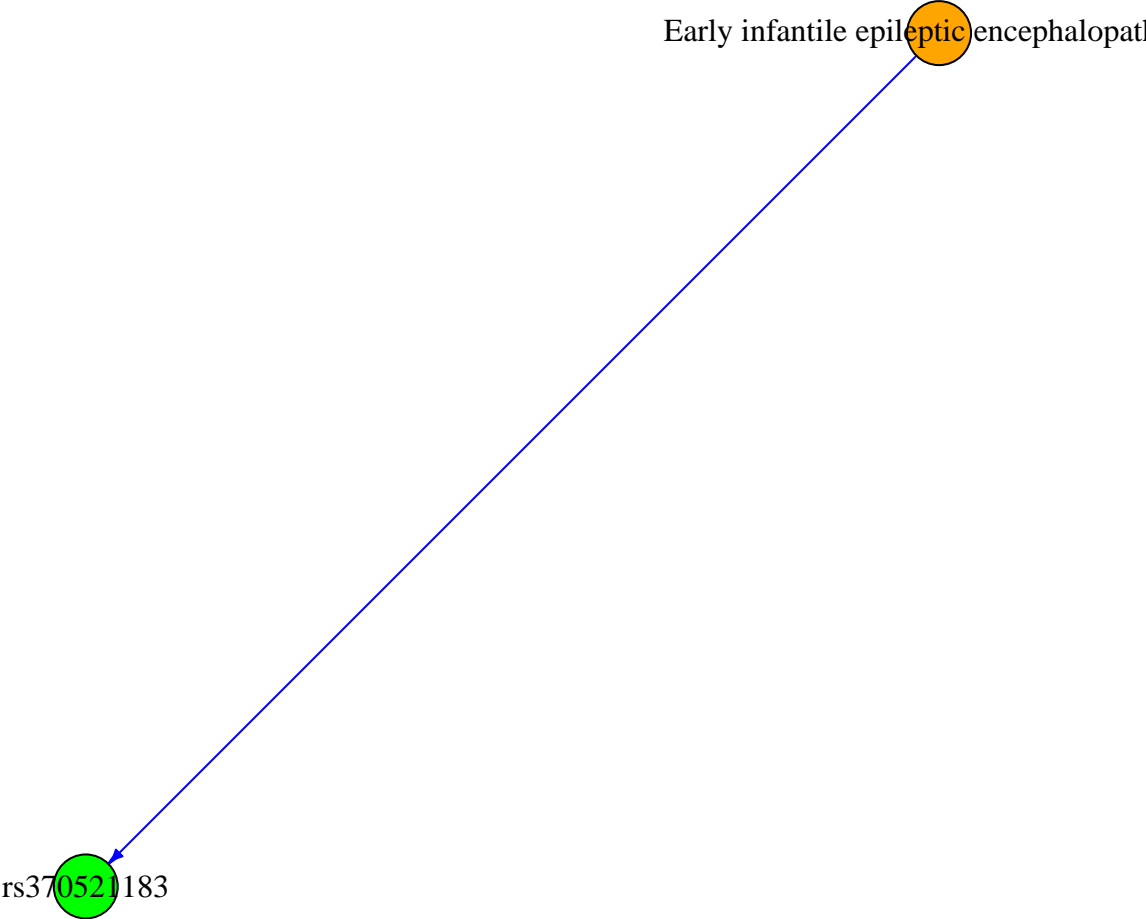

**Variant–Disease Network (Early infantile epileptic encephalopathy 34)**

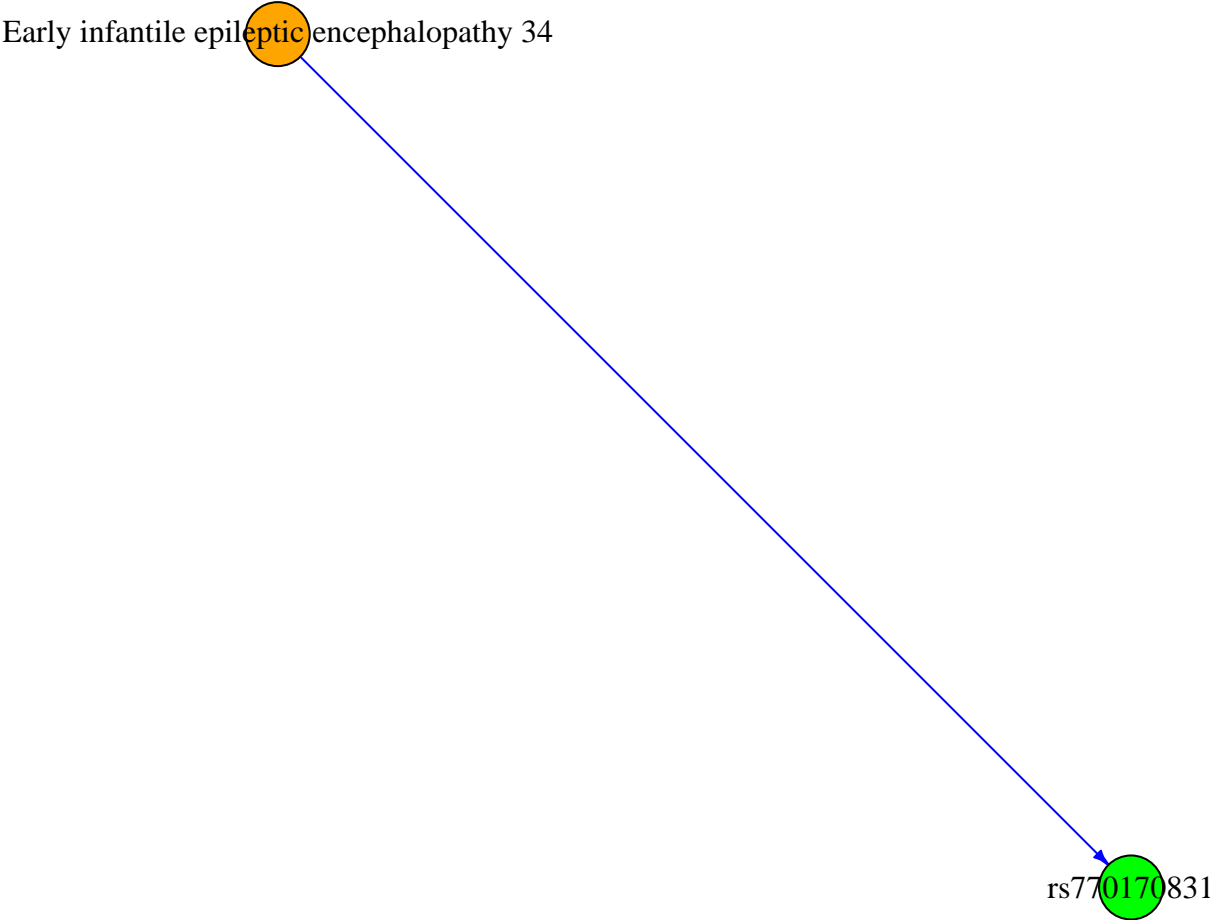

## Variant–Disease Network (Early infantile epileptic encephalopathy 9)

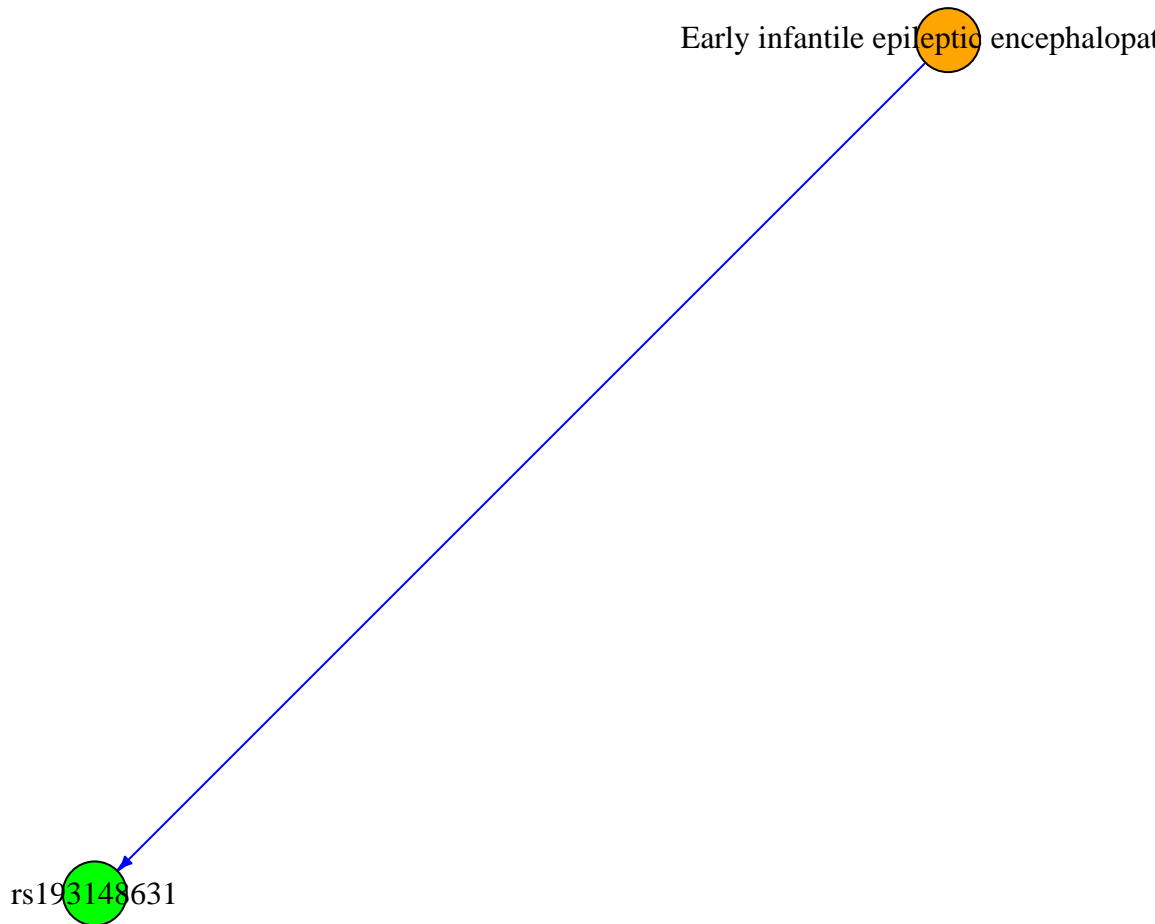

**Variant–Disease Network (Ectodermal dysplasia skin fragility syndrome)**

rs139095230

Ectodermal dysplasia skin fragility syndrome

rs1722779

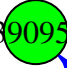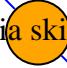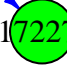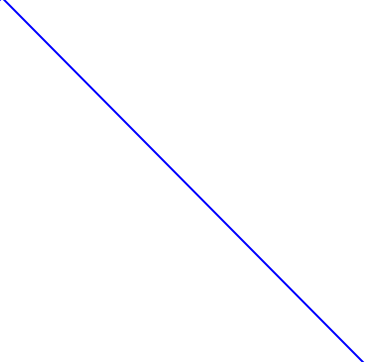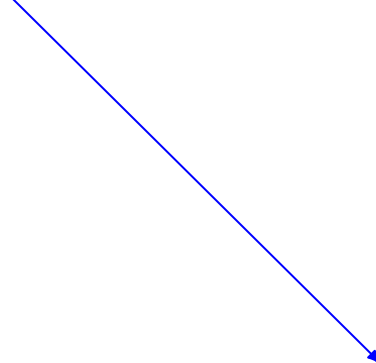

## Variant–Disease Network (Ectopia lentis)

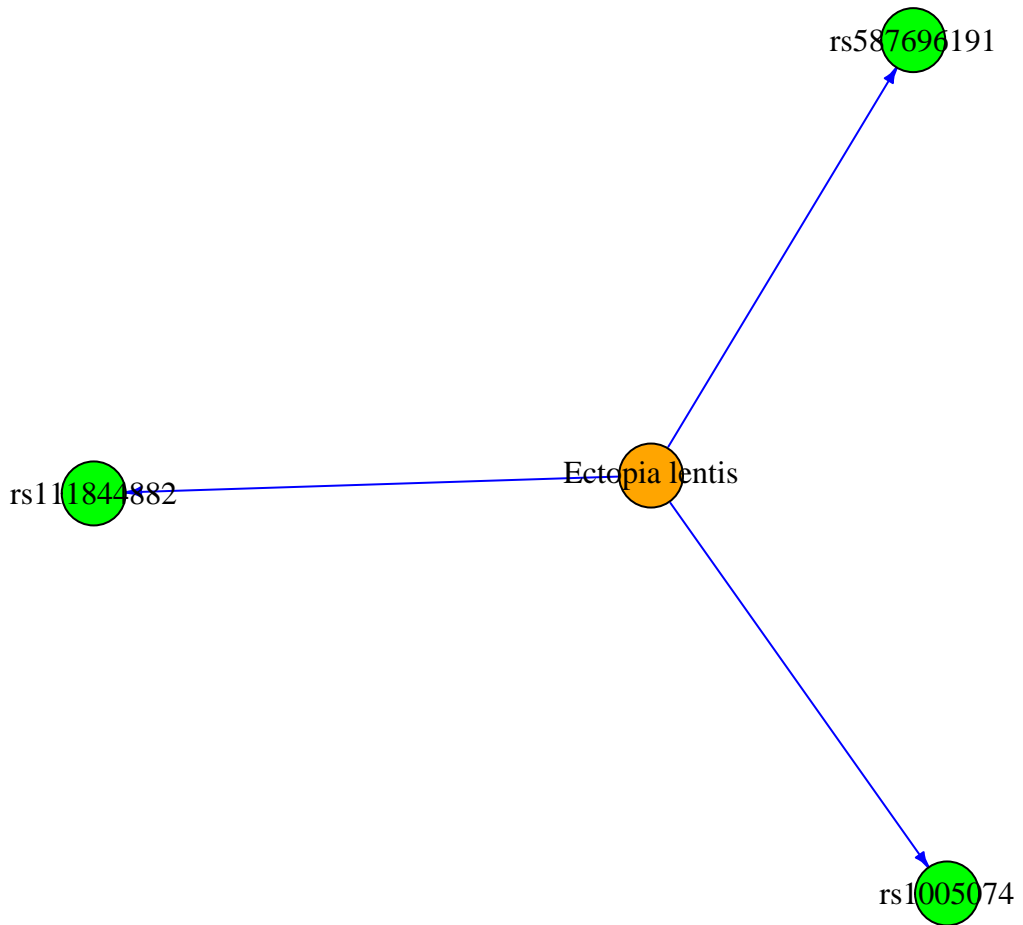



**Variant–Disease Network (Ehlers–Danlos syndrome)**

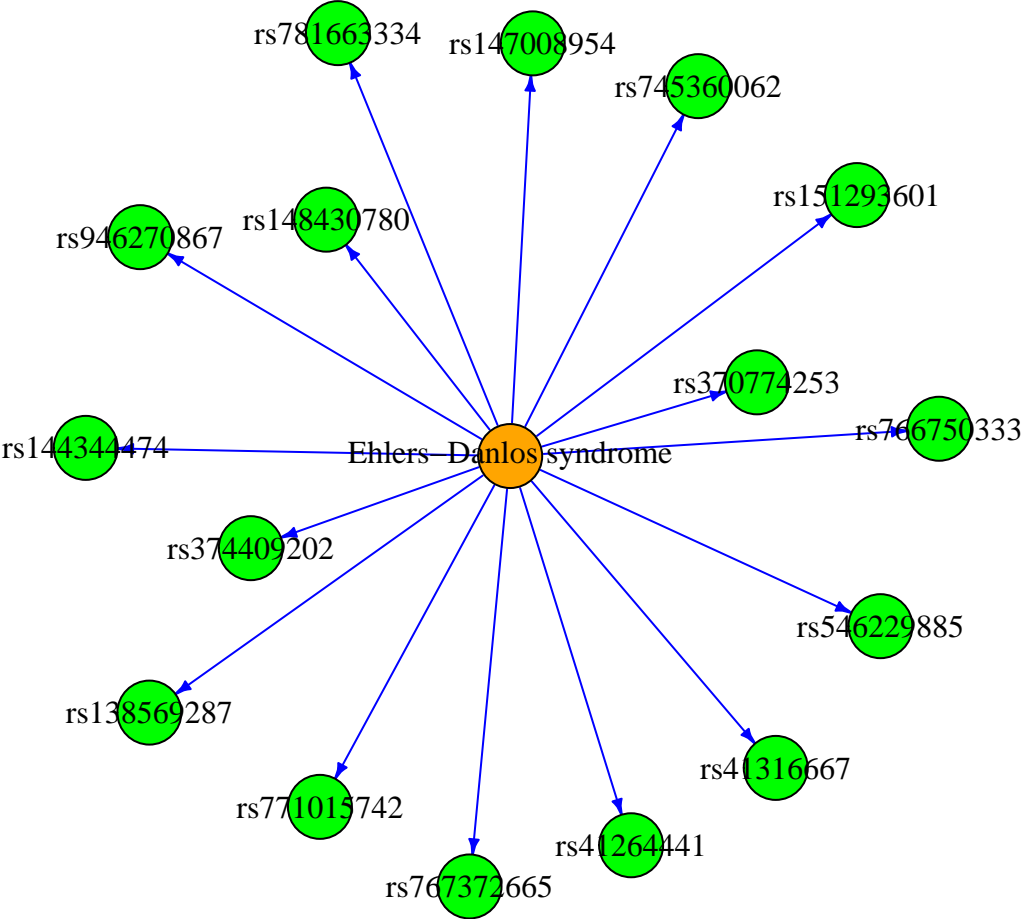

## Variant–Disease Network (Ehlers–Danlos syndrome classic type 2)

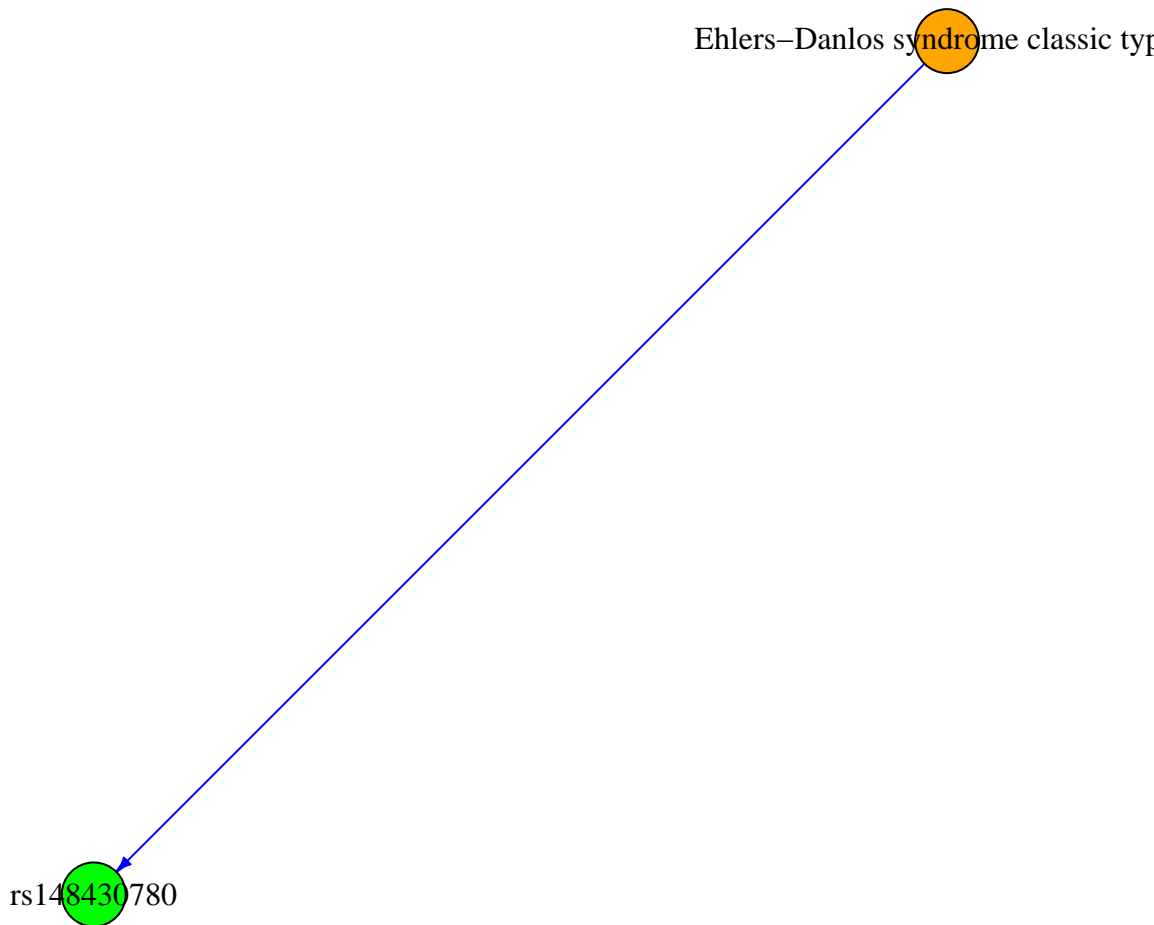

Variant–Disease Network (Ehlers–Danlos syndrome dermatosparaxis type)

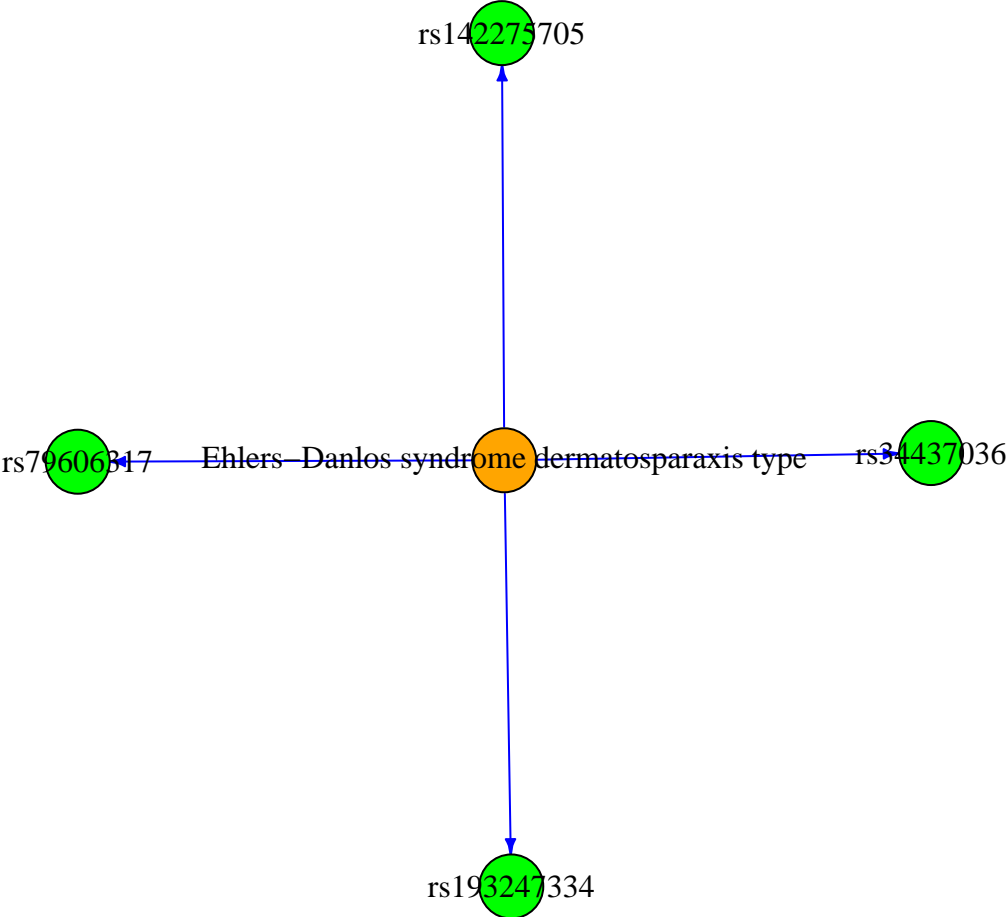

Variant–Disease Network (Ehlers–Danlos syndrome progeroid type)

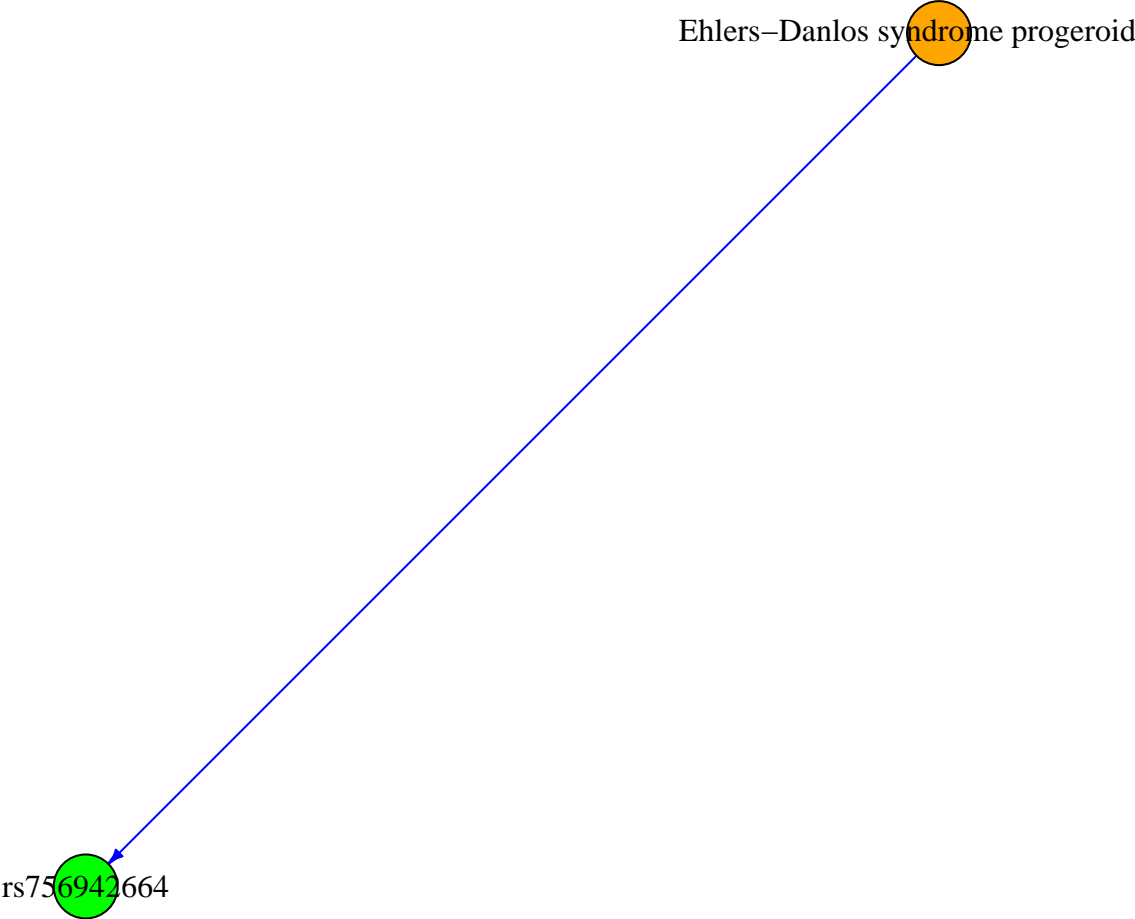

## Variant-Disease Network (Elliptocytosis)

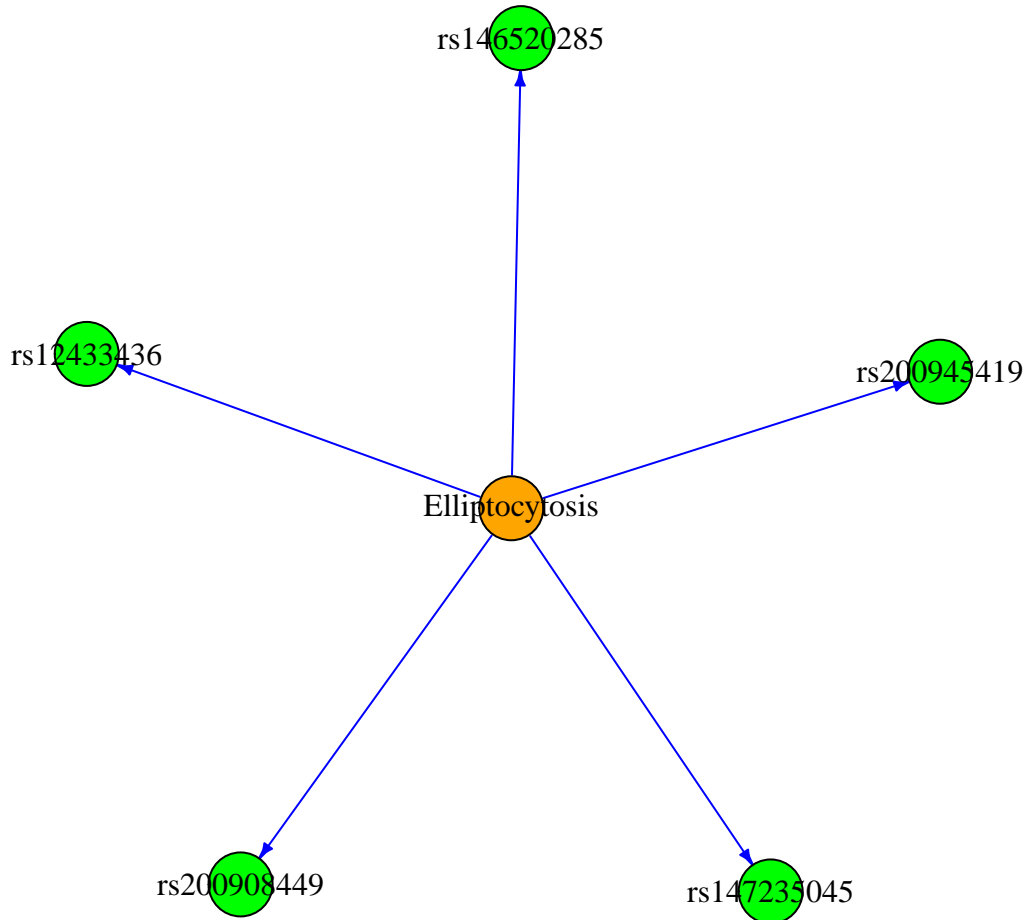

## Variant-Disease Network (Encephalopathy)

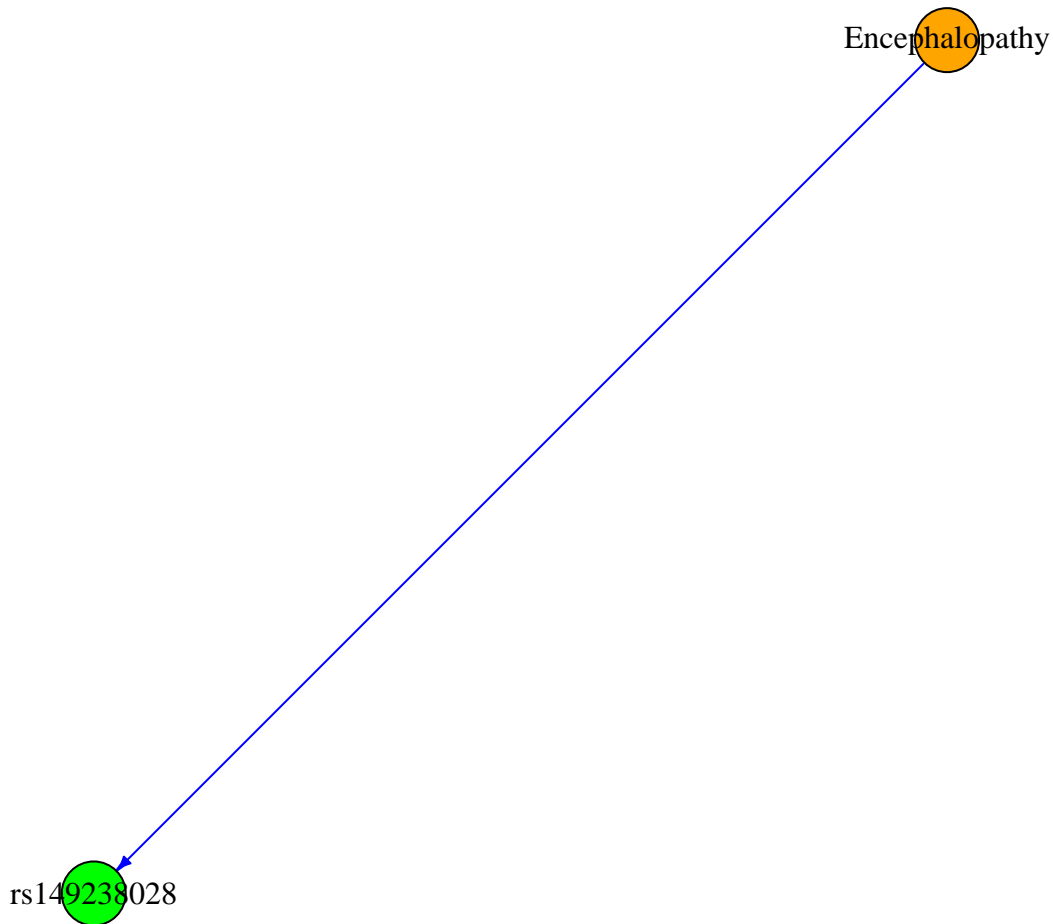

Variant–Disease Network (EPIDERMODYSPLASIA VERRUCIFORMIS)

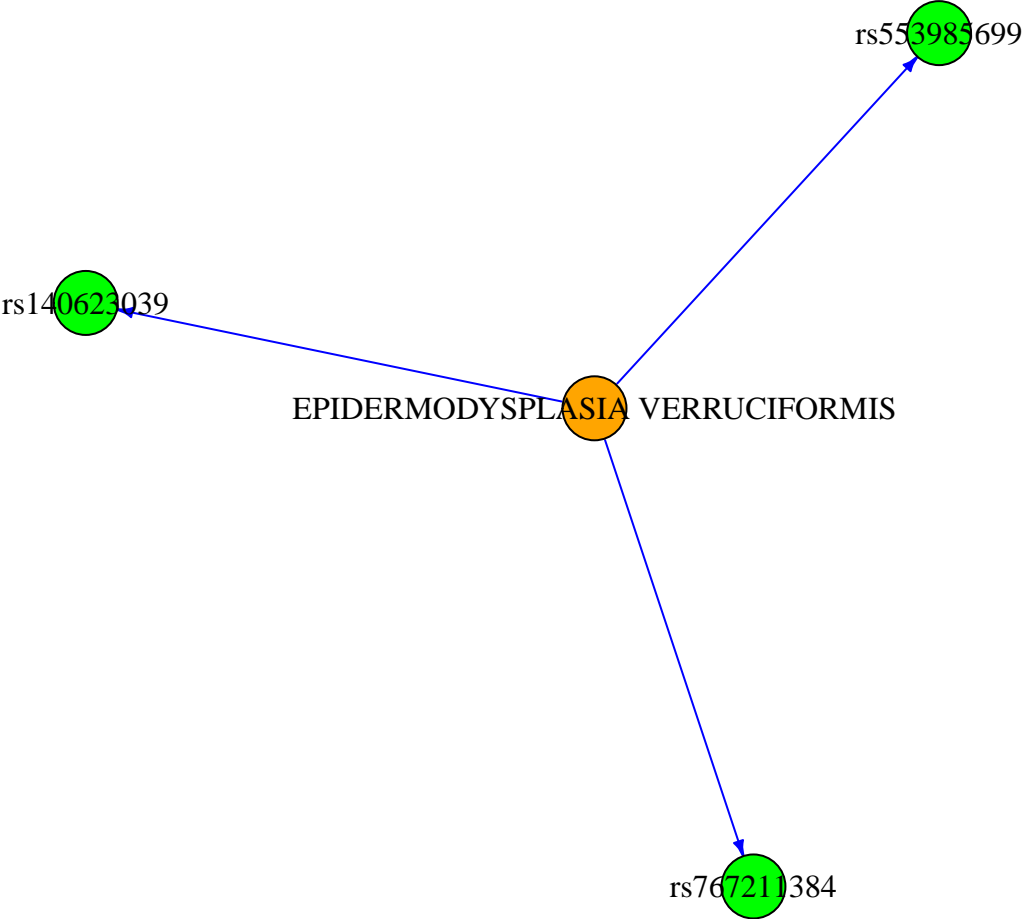

## Variant–Disease Network (Epidermolysis bullosa)

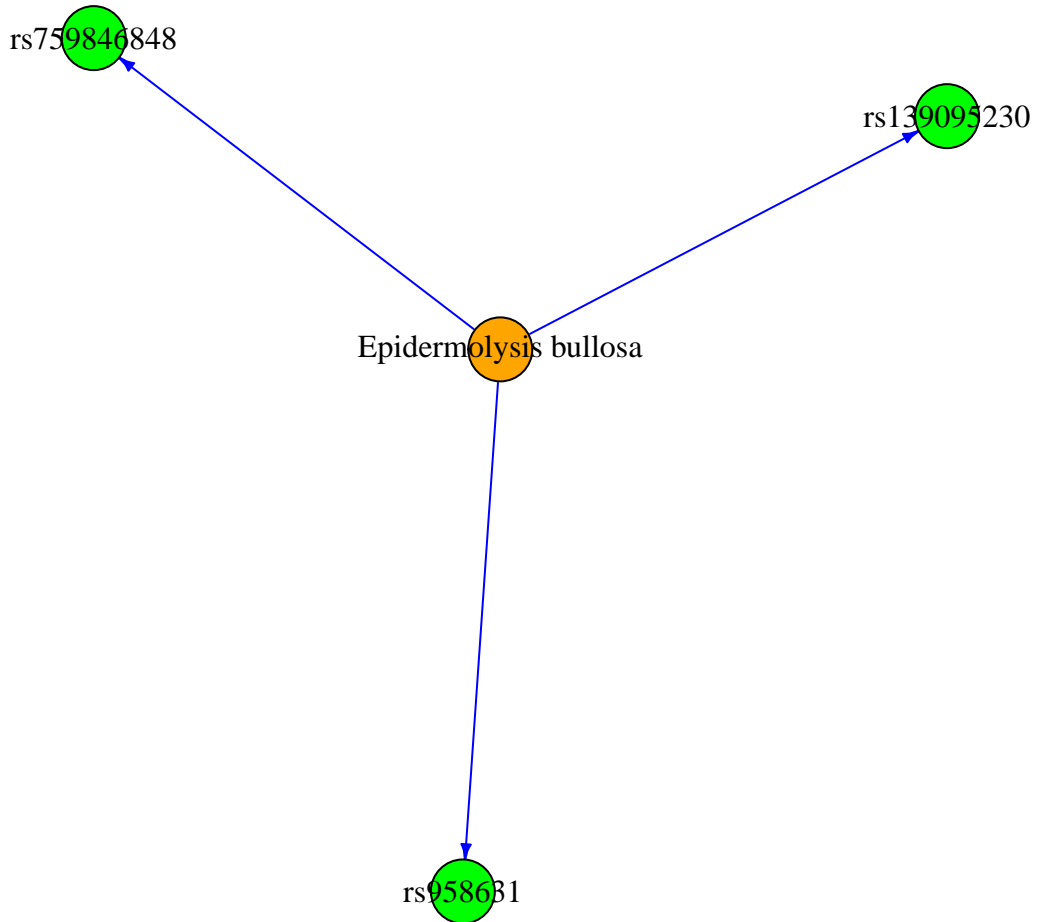



# Variant–Disease Network (Epidermolysis bullosa junctionalis with pyloric at

rs57812564

Epidermolysis bullosa junctionalis with pyl

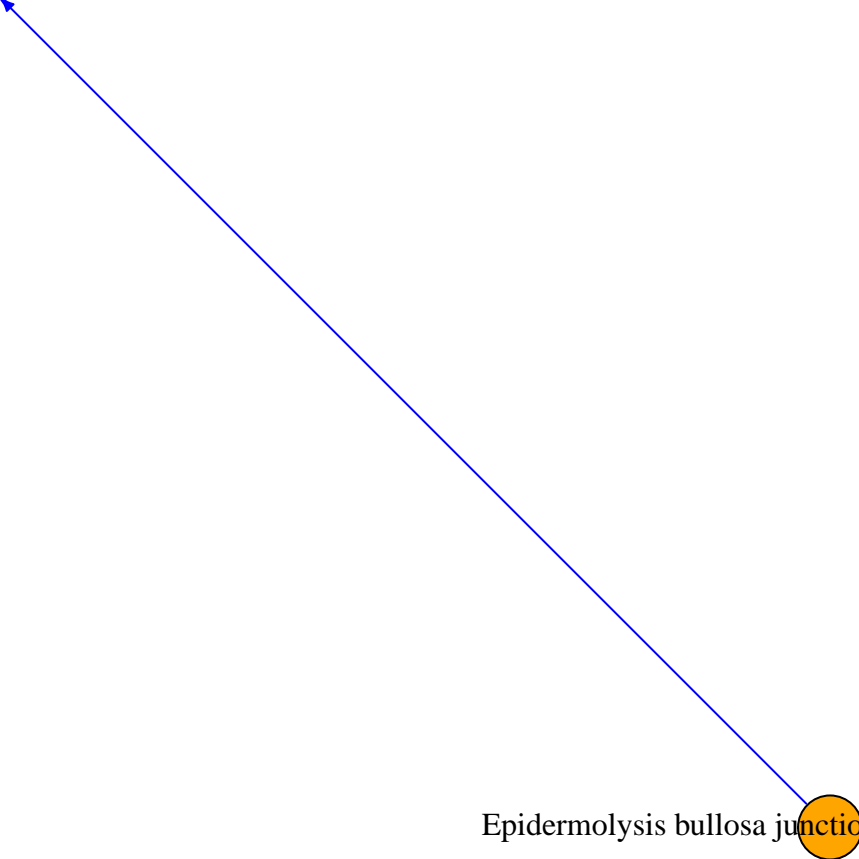

**Variant–Disease Network (Epidermolysis bullosa simplex)**

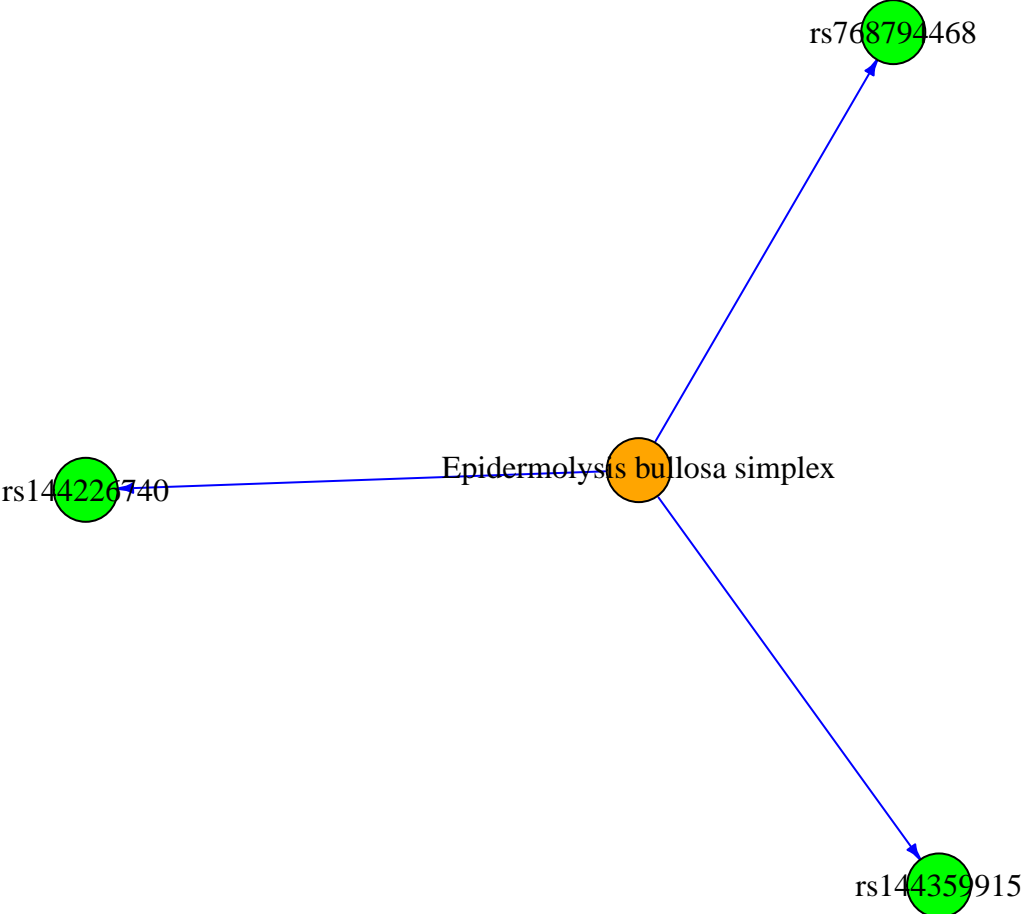

## Variant–Disease Network (Epilepsy)

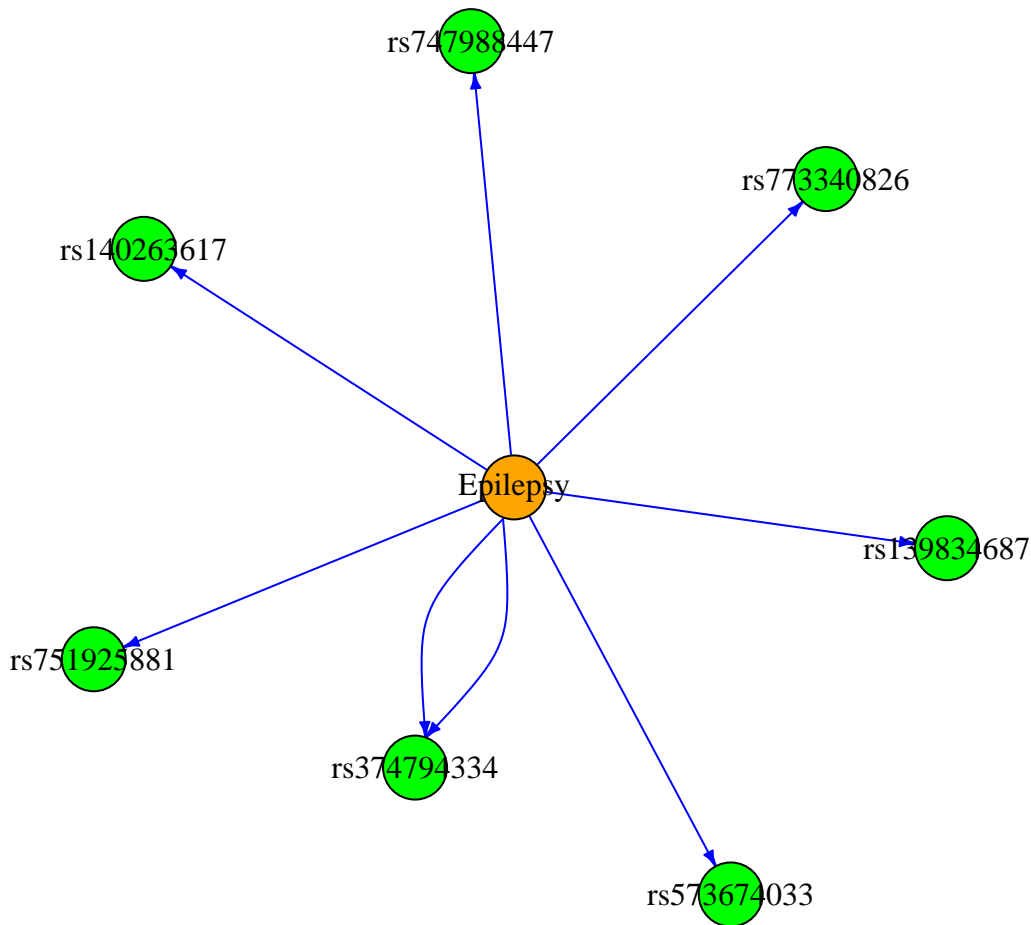

**Variant–Disease Network (Epileptic encephalopathy)**

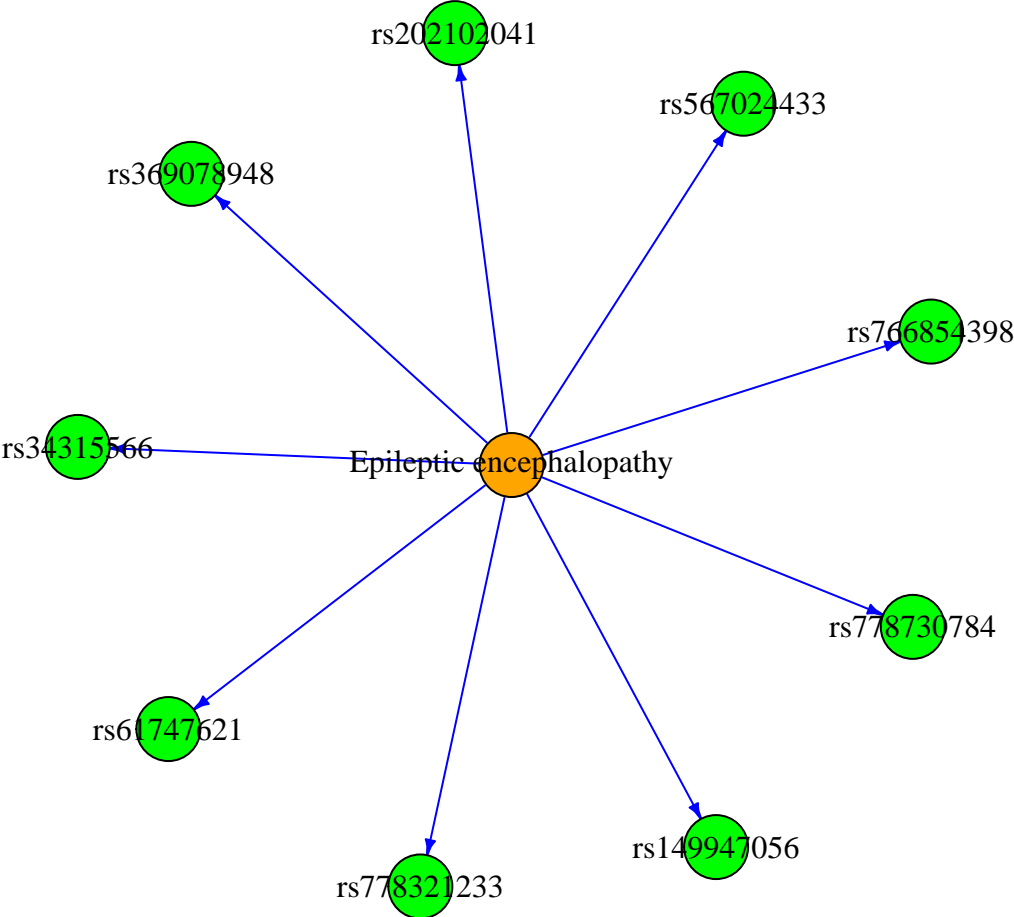

## Variant–Disease Network (Evans syndrome)

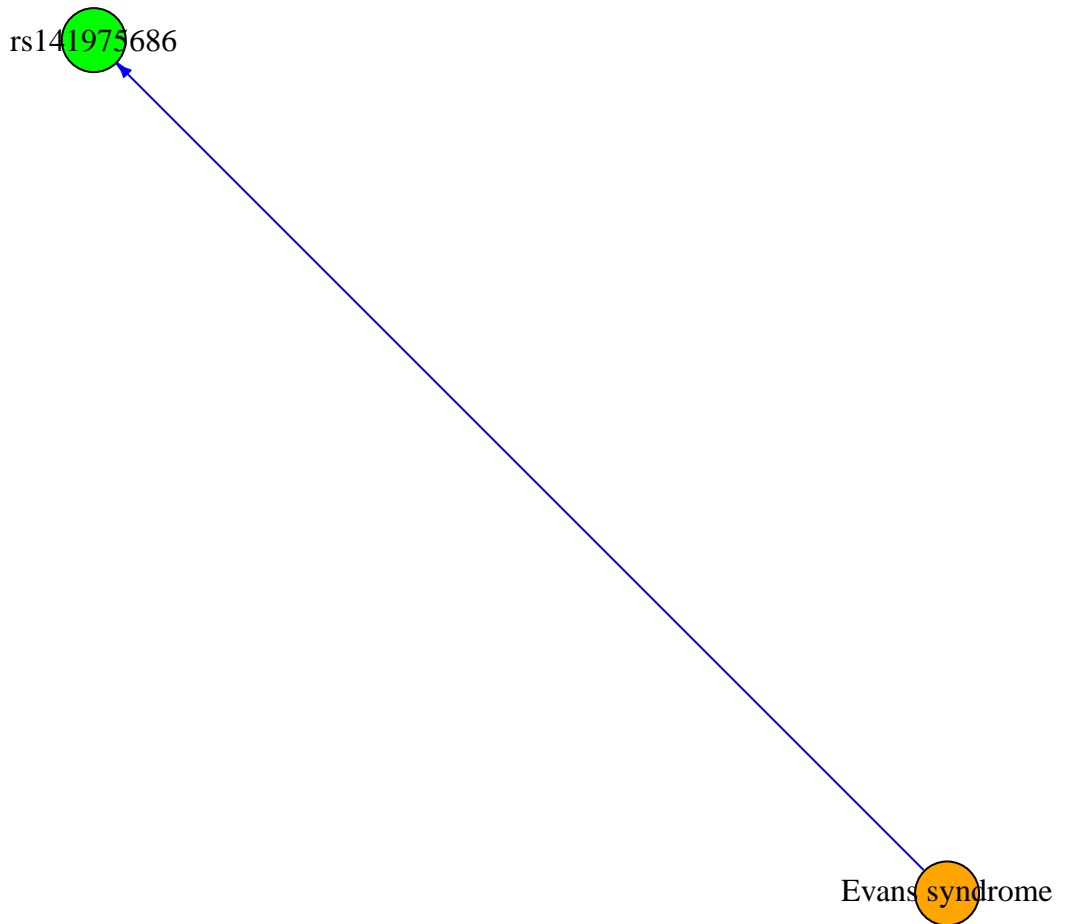

## Variant-Disease Network (Fabry disease)

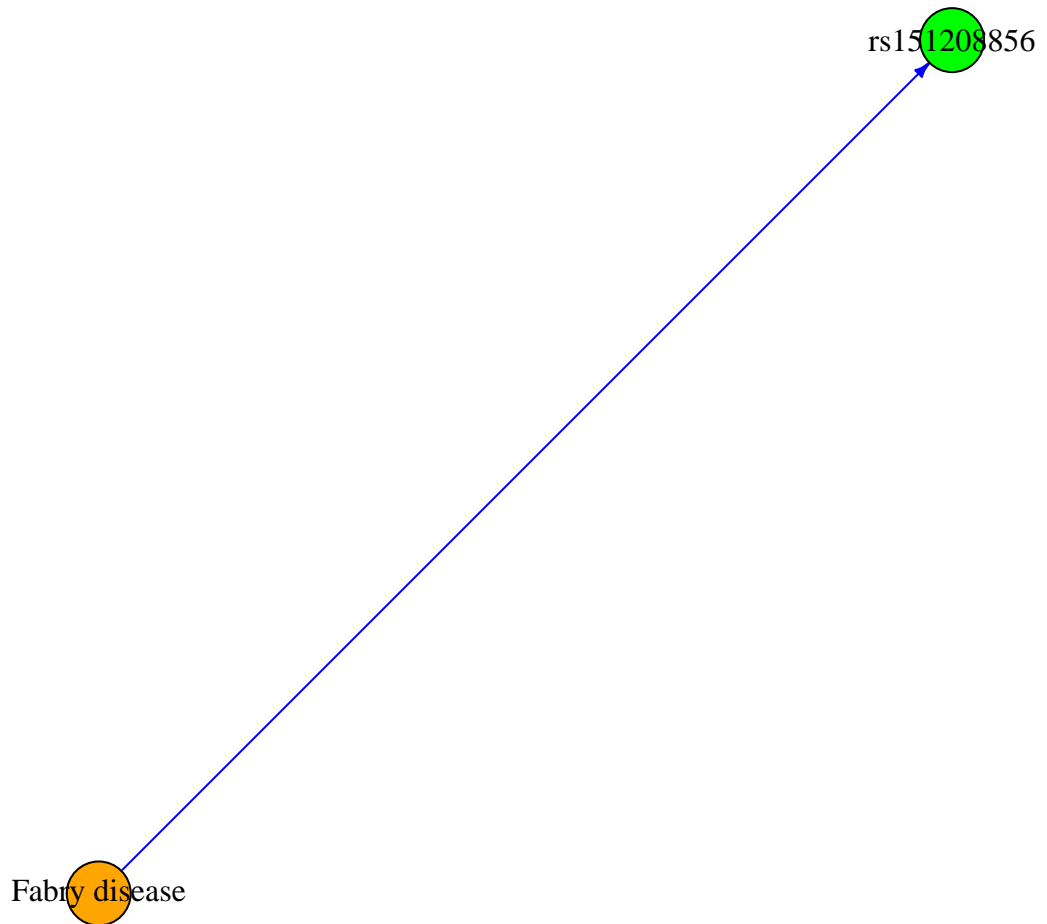

Variant–Disease Network (Factor XIII subunit B deficiency)

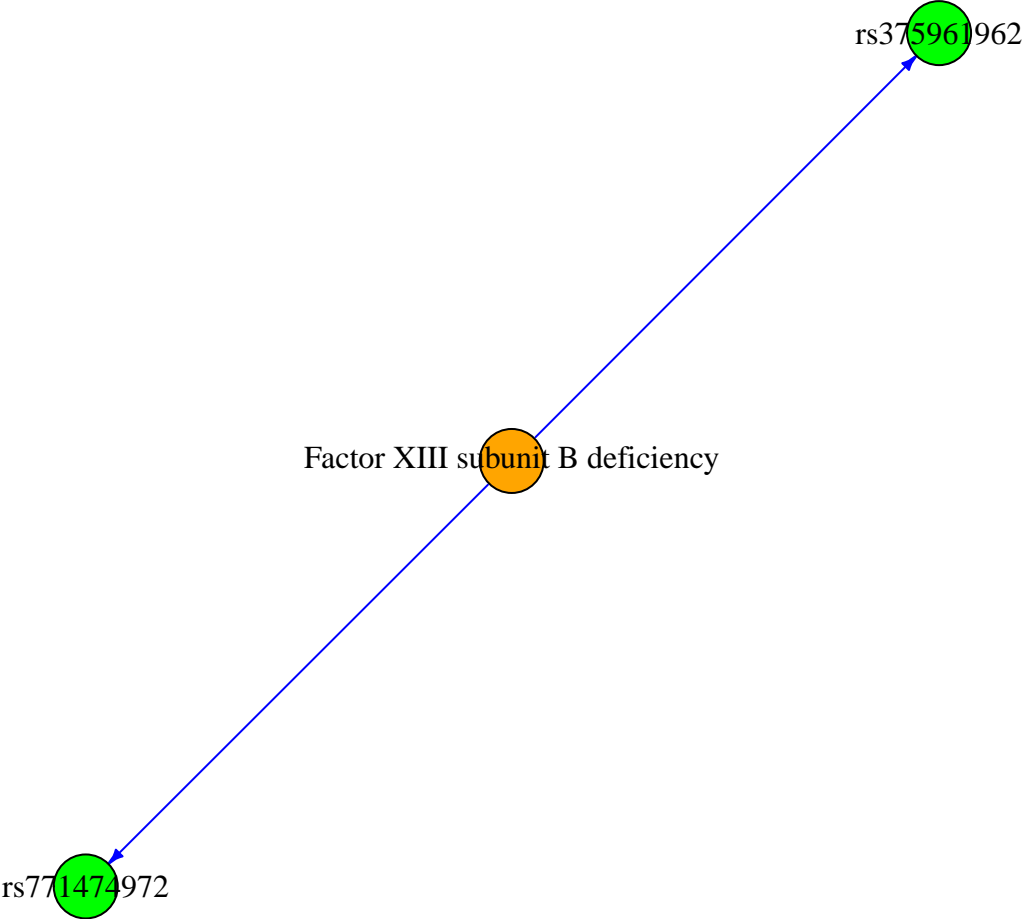

# Variant–Disease Network (Familial adenomatous polyposis)

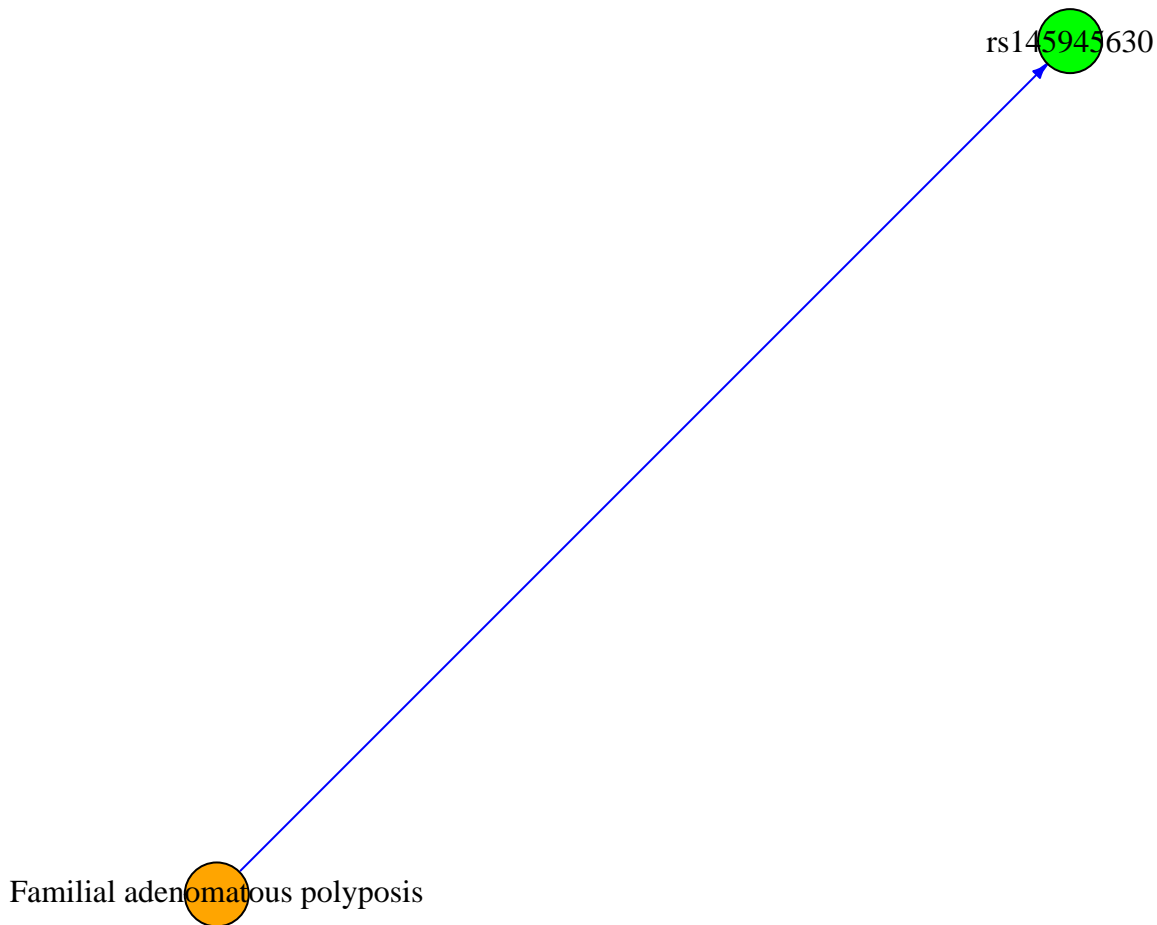



**Variant–Disease Network (Familial adenomatous polyposis 1)**

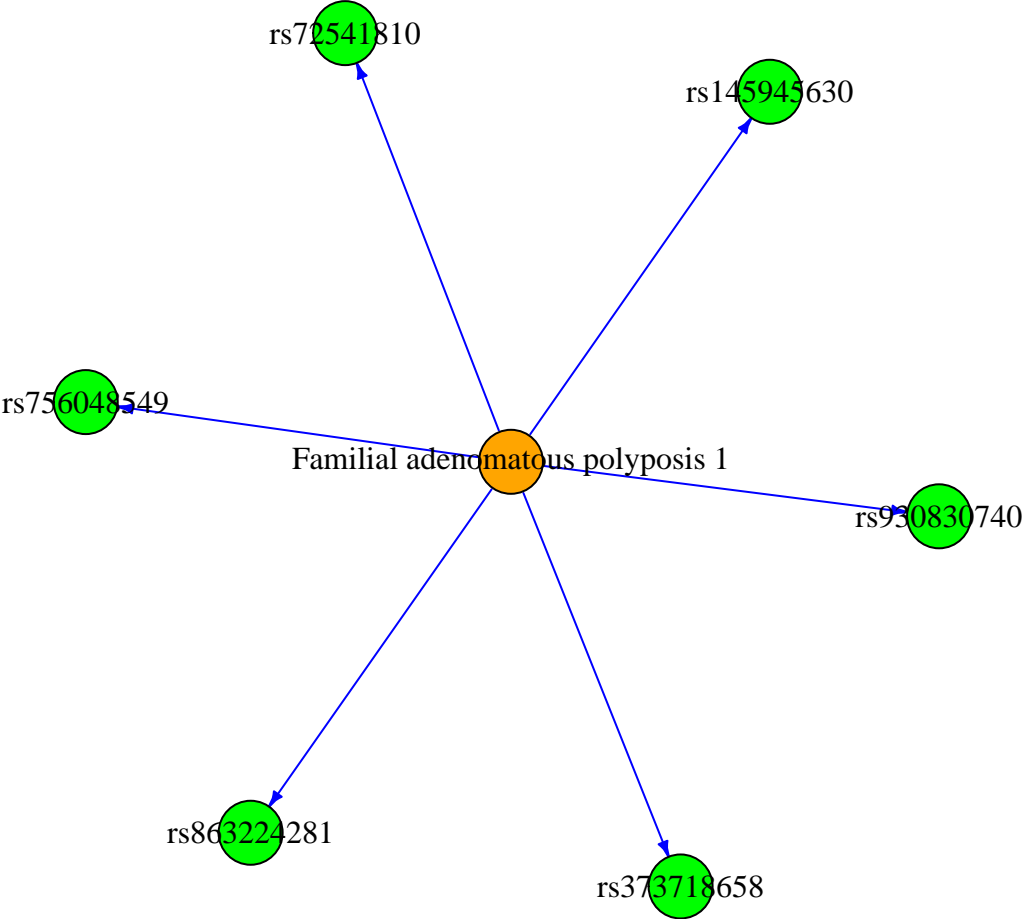

# Variant-Disease Network (Familial amyloid nephropathy with urticaria AND deafness)

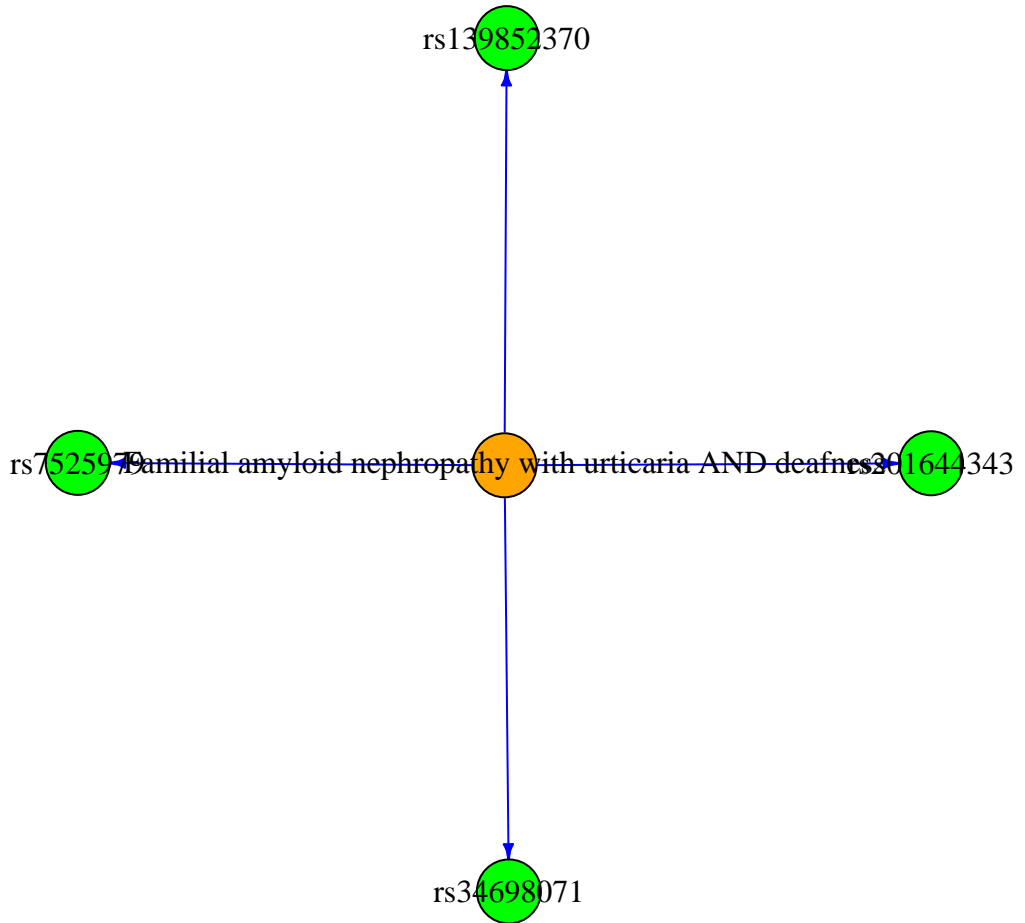

## Variant–Disease Network (Familial atrial fibrillation)

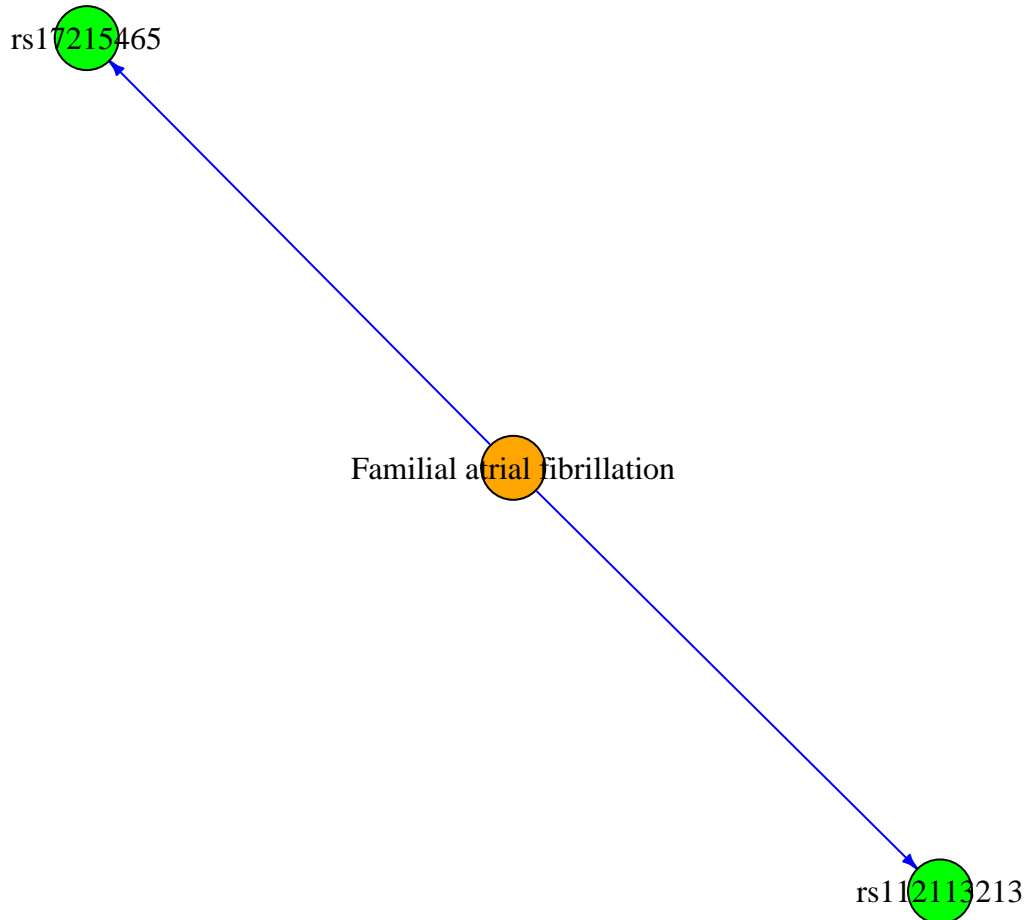

## Variant–Disease Network (Familial cancer of breast)

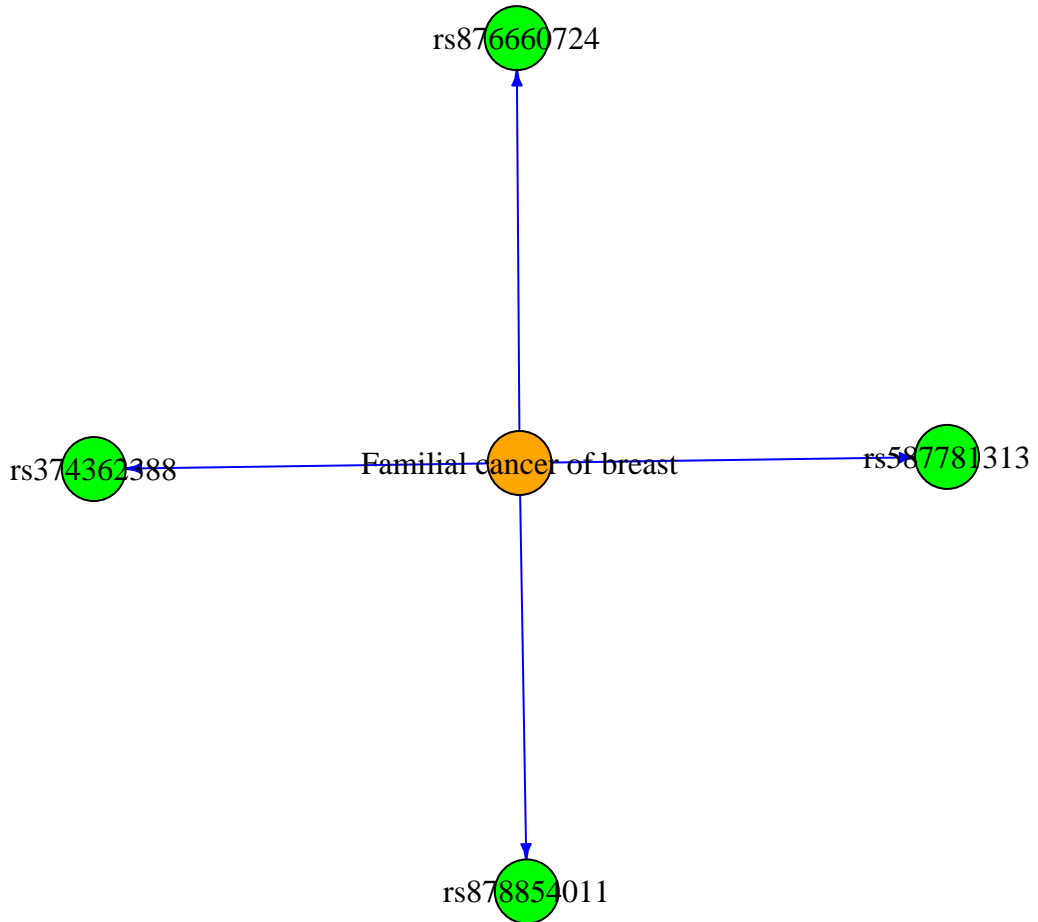

## Variant–Disease Network (Familial Candidiasis)

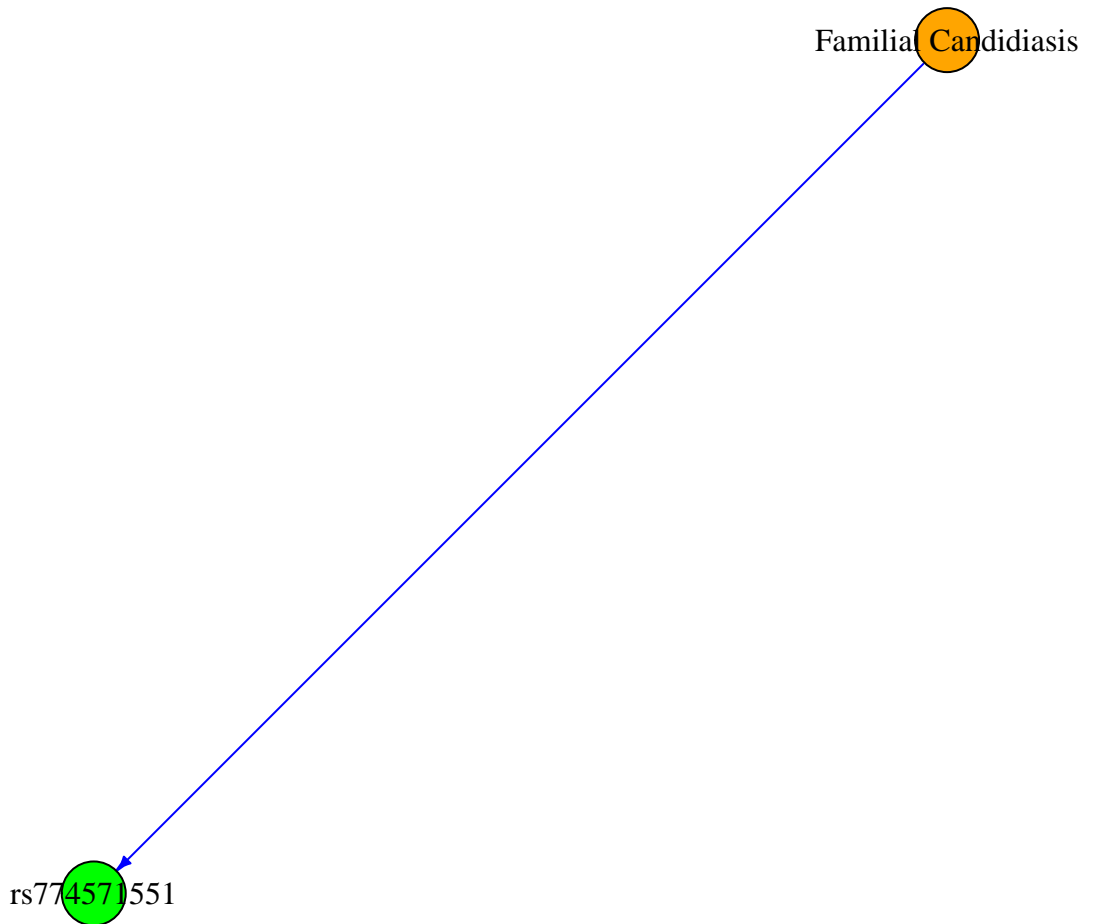

# Variant–Disease Network (Familial cold autoinflammatory syndrome)

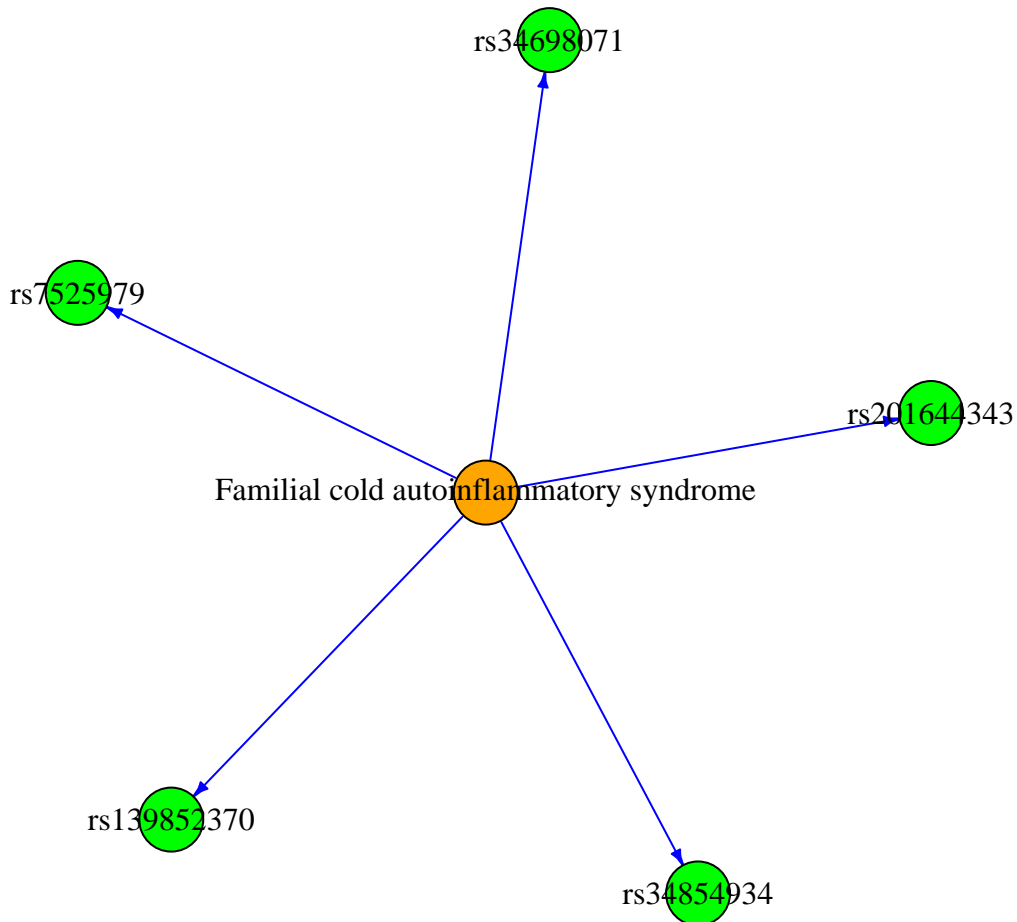

**Variant–Disease Network (Familial cold autoinflammatory syndrome 2)**

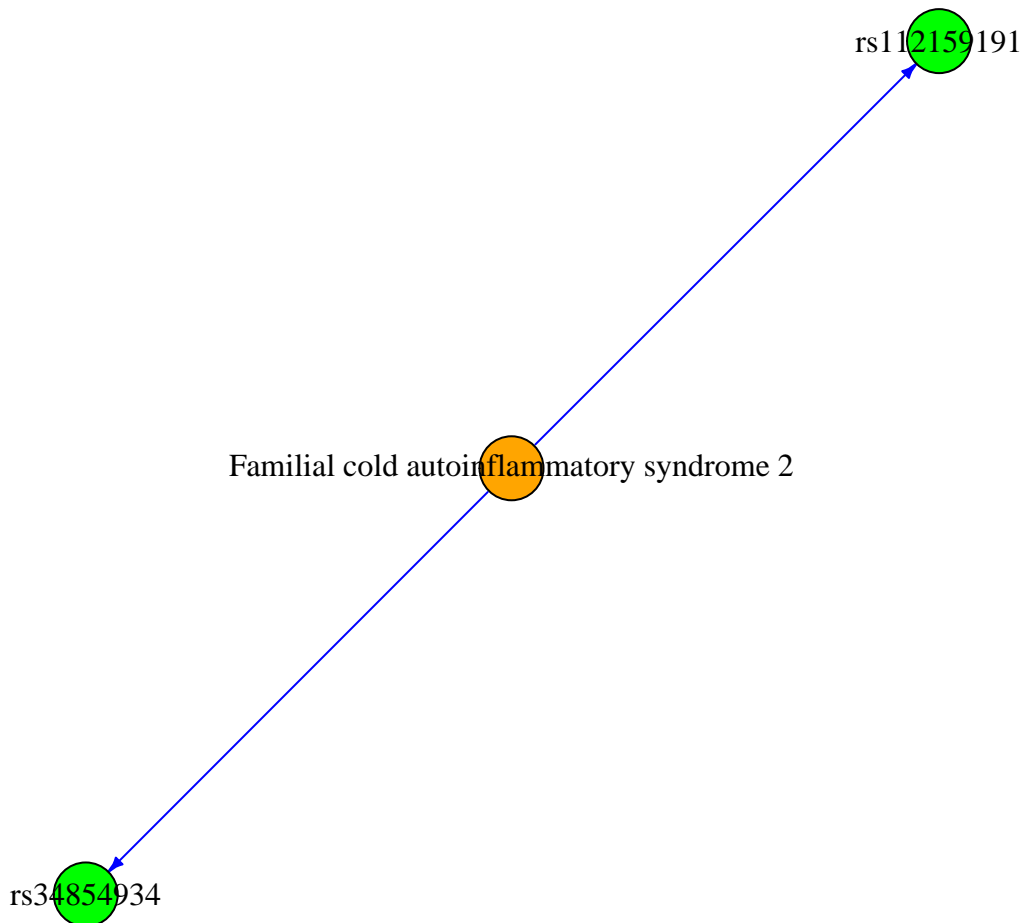

**Variant–Disease Network (Familial cold autoinflammatory syndrome 3)**

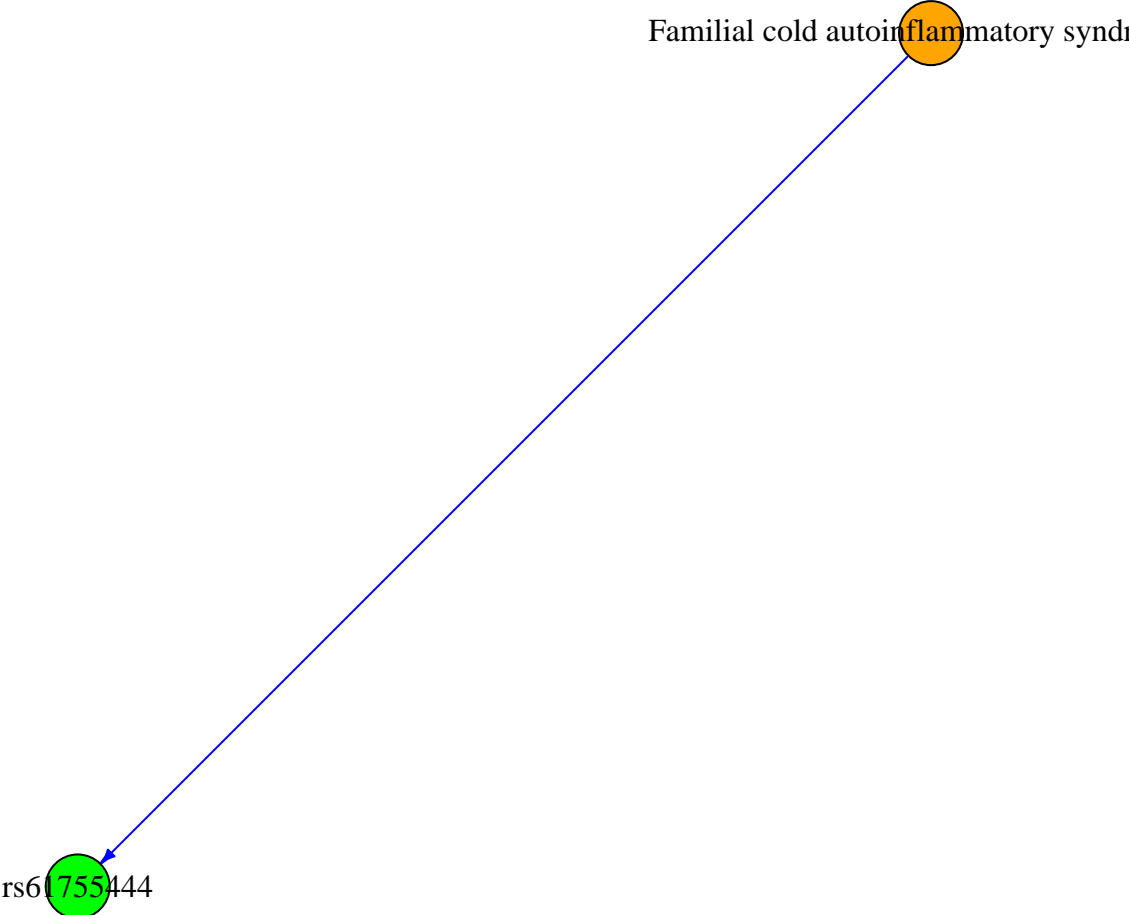



## Variant–Disease Network (Familial cold urticaria)

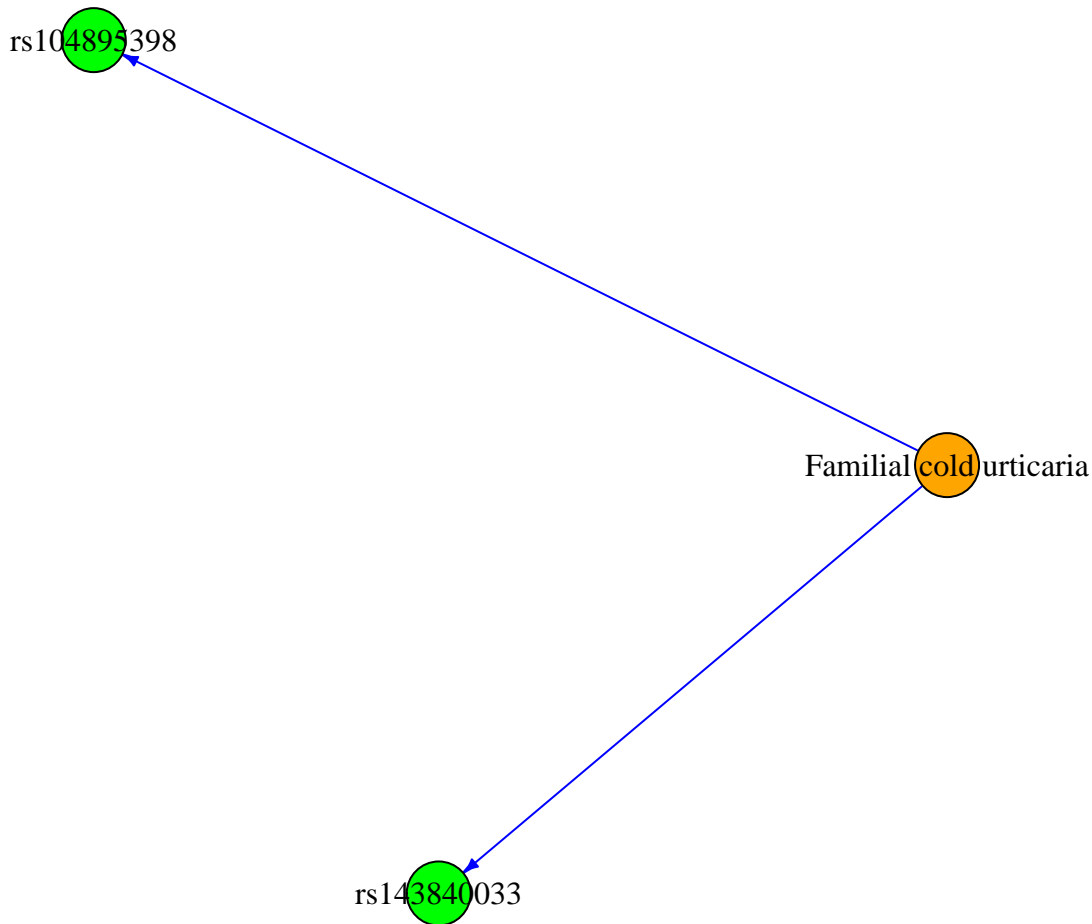

## Variant–Disease Network (Familial colorectal cancer)

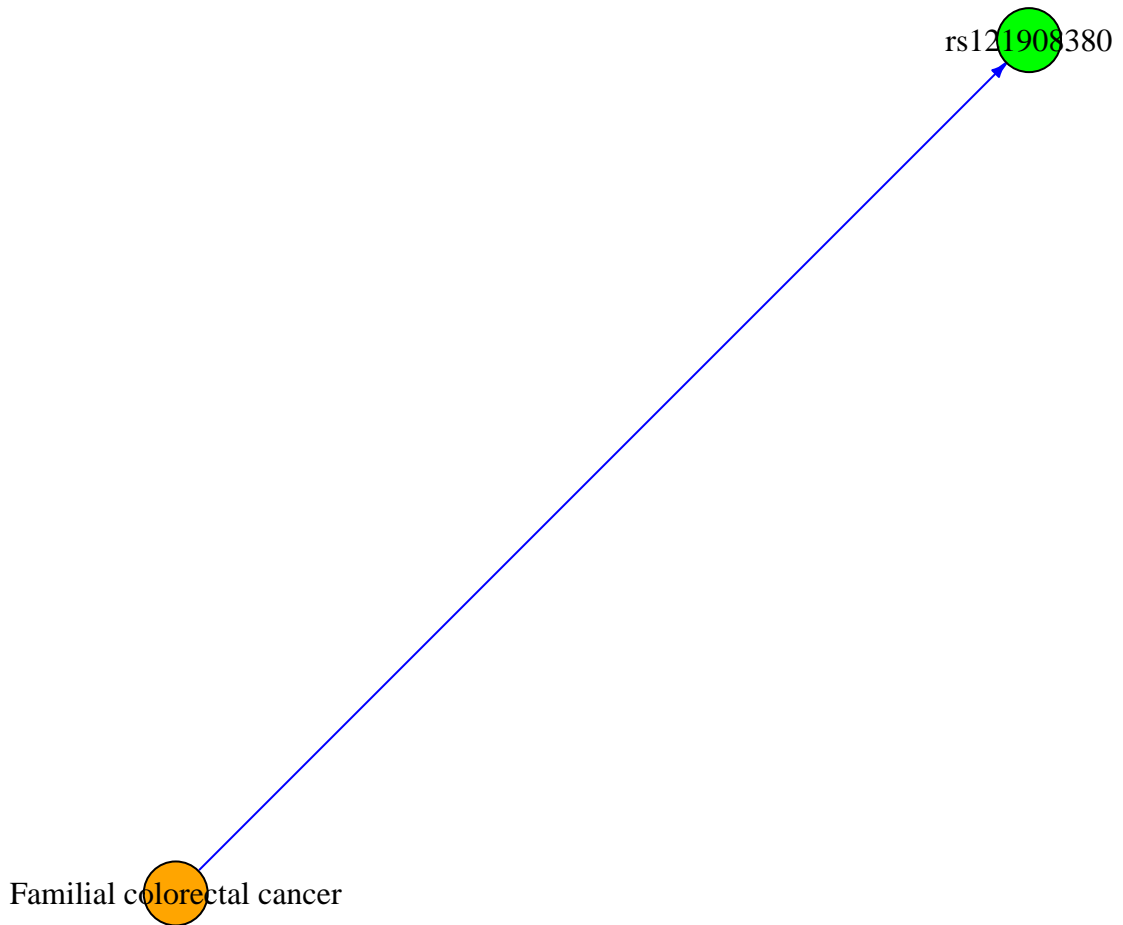

## Variant-Disease Network (Familial erythrocytosis)

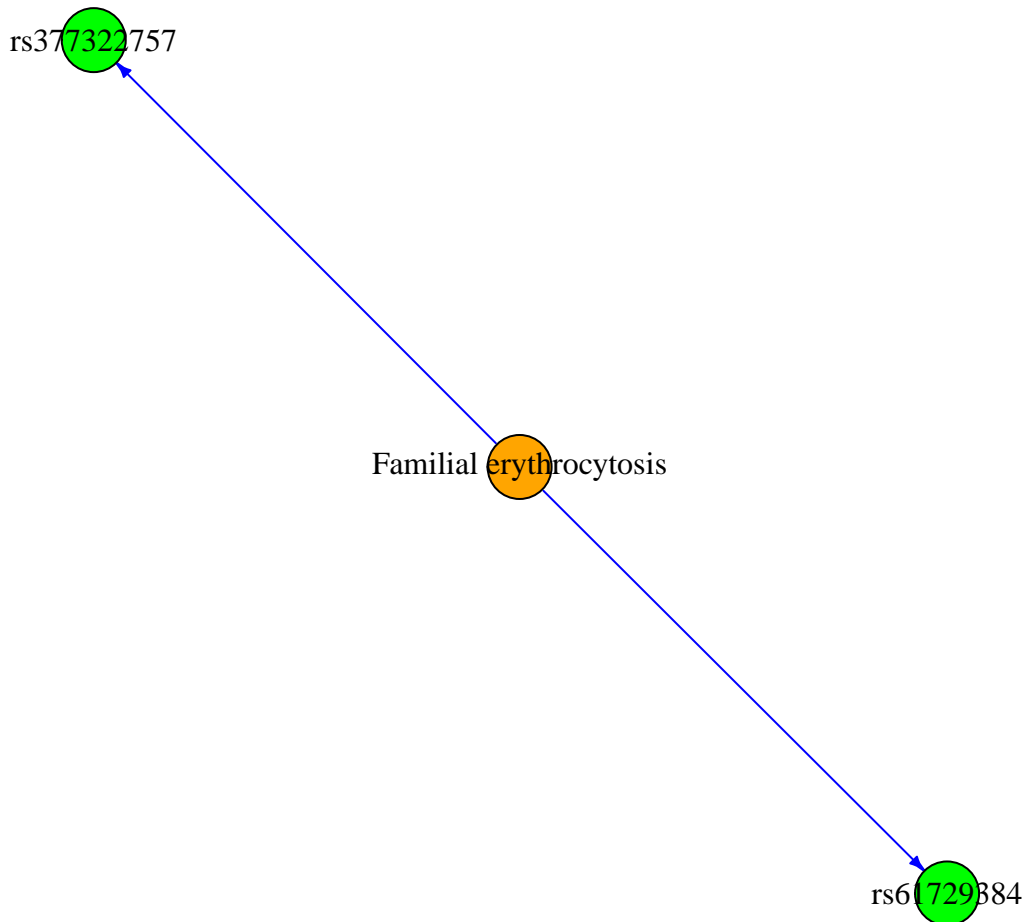

Variant–Disease Network (Familial febrile seizures 8)

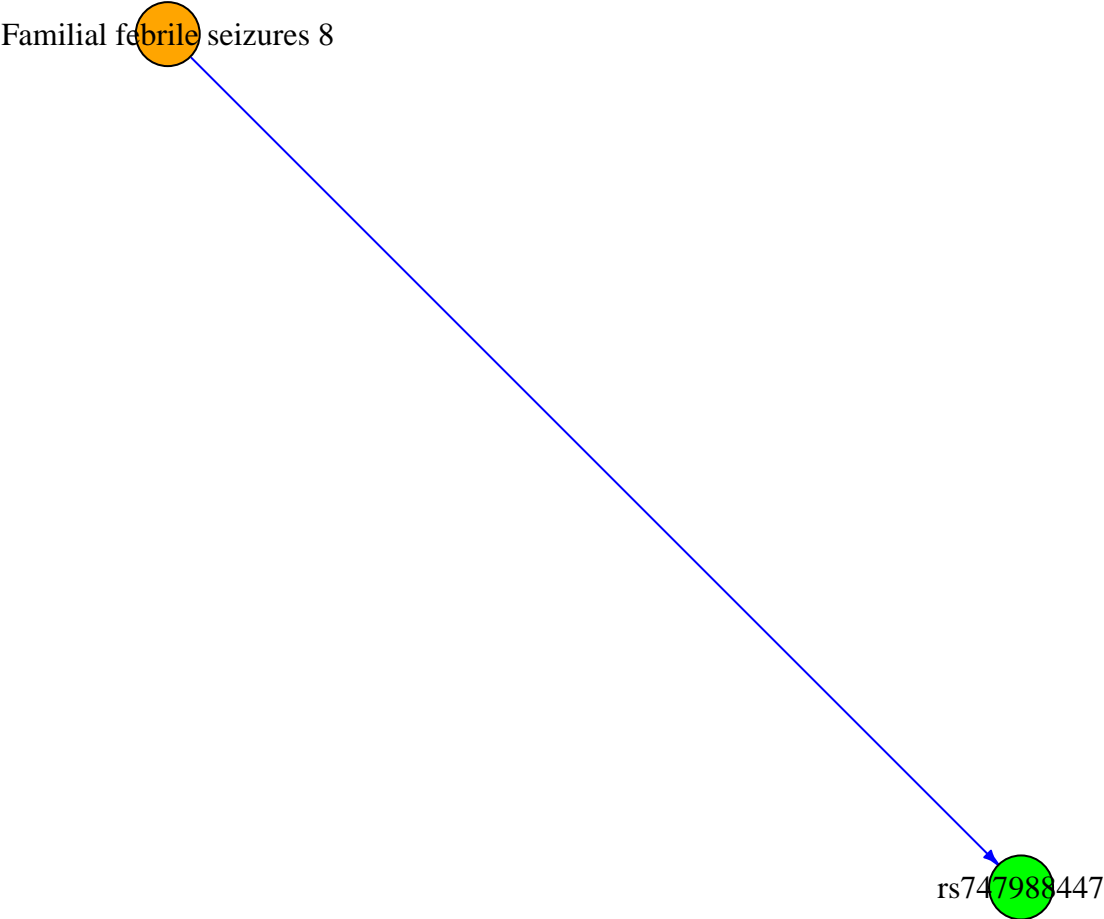

Variant–Disease Network (Familial hemophagocytic lymphohistiocytosis)

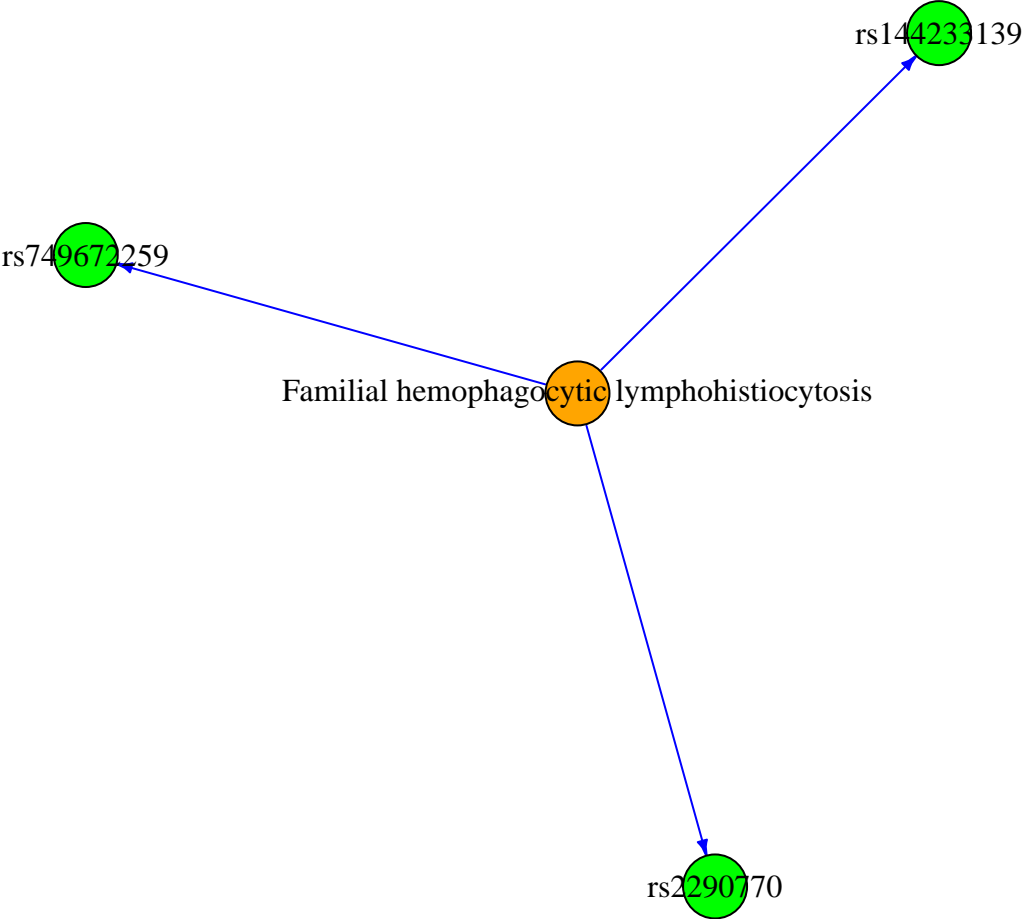

# Variant-Disease Network (Familial High Density Lipoprotein Deficiency)

Familial High Density Lipoprotein Deficiency

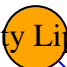

rs34879708

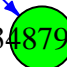

Variant–Disease Network (Familial hyperaldosteronism)

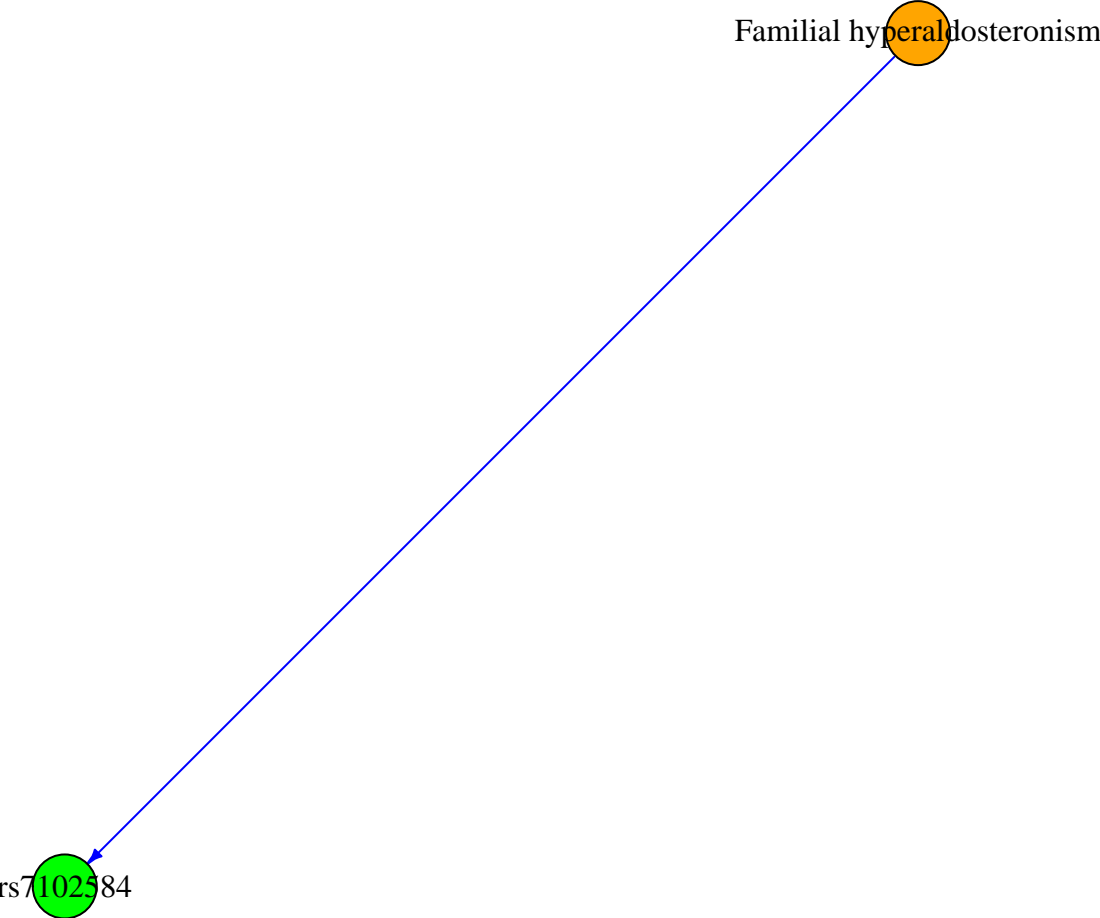

**Variant–Disease Network (Familial hypercholesterolemia)**

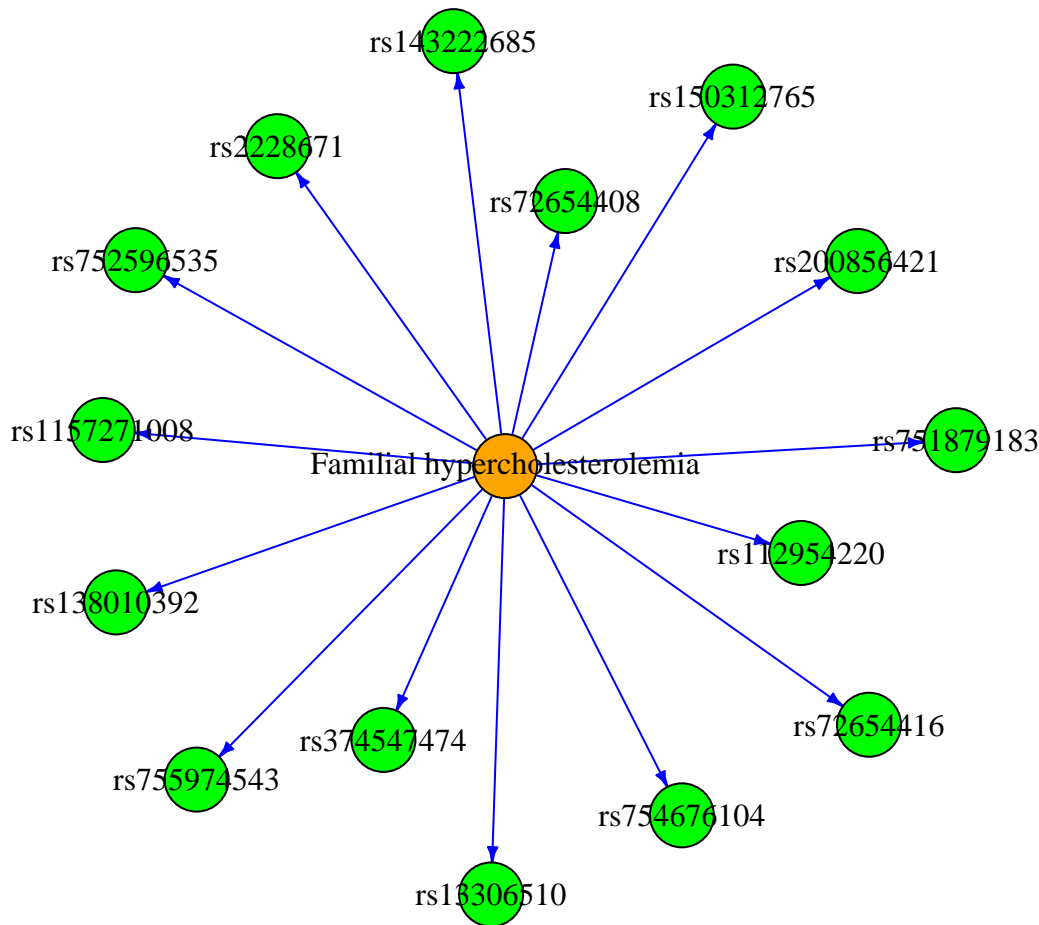



**Variant–Disease Network (Familial hypercholesterolemia – homozygous)**

rs752596535

Familial hypercholesterolemia – homozygous

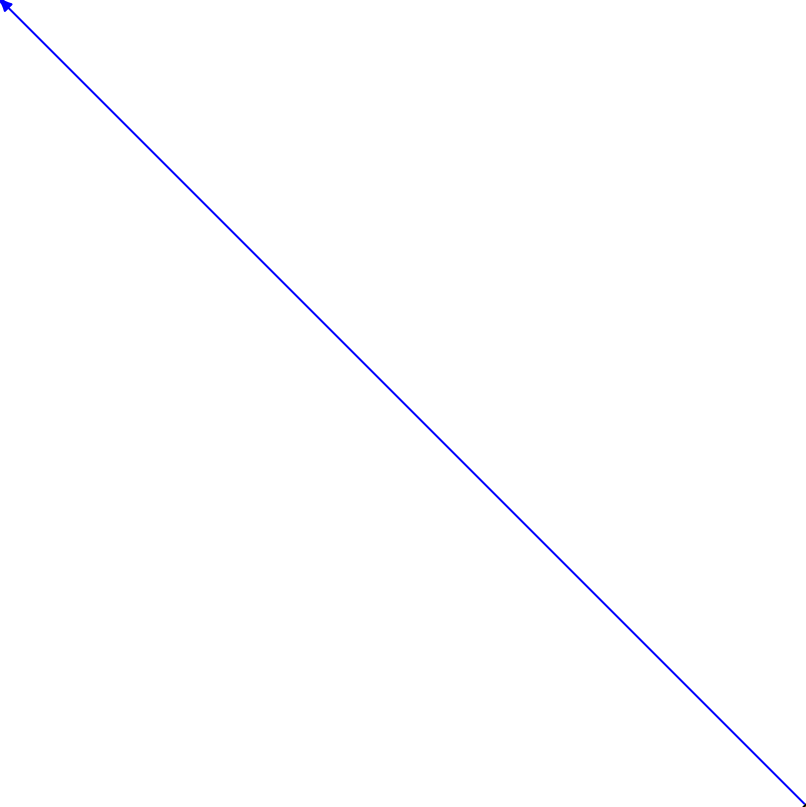

# Variant–Disease Network (Familial hypercholesterolemia 1)

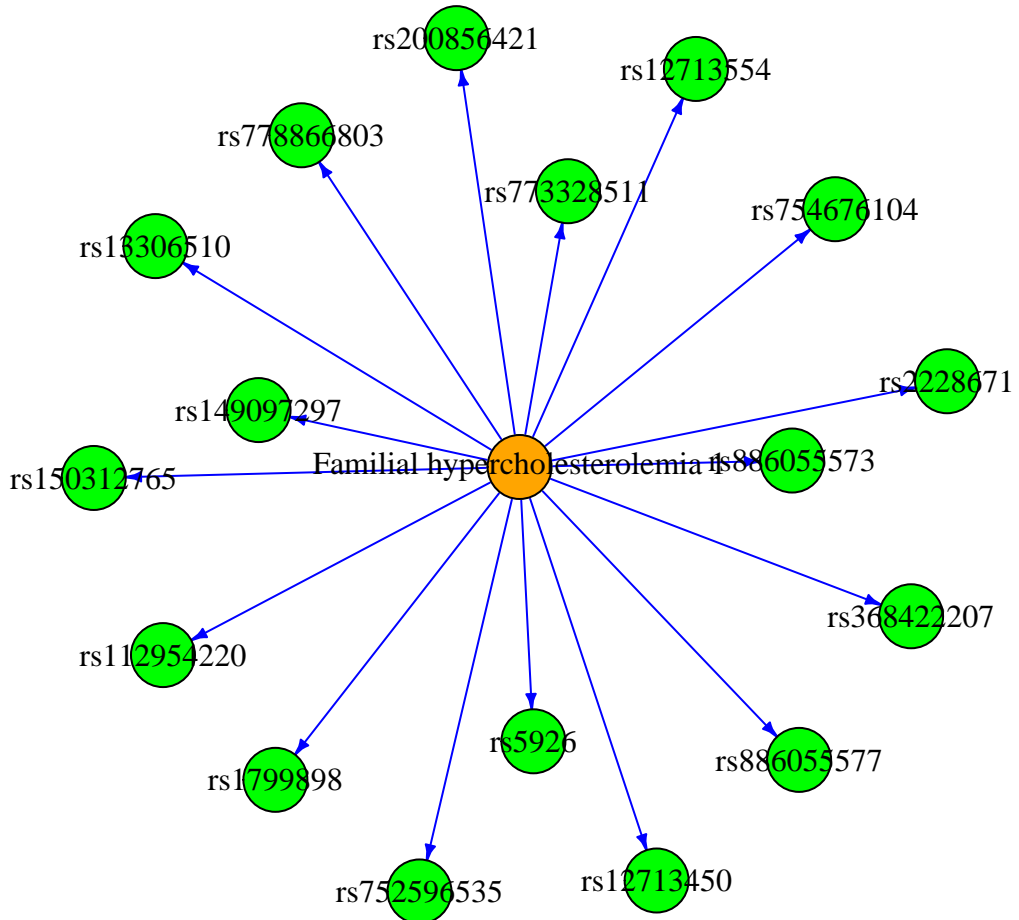

## Variant–Disease Network (Familial hypercholesterolemia 2)

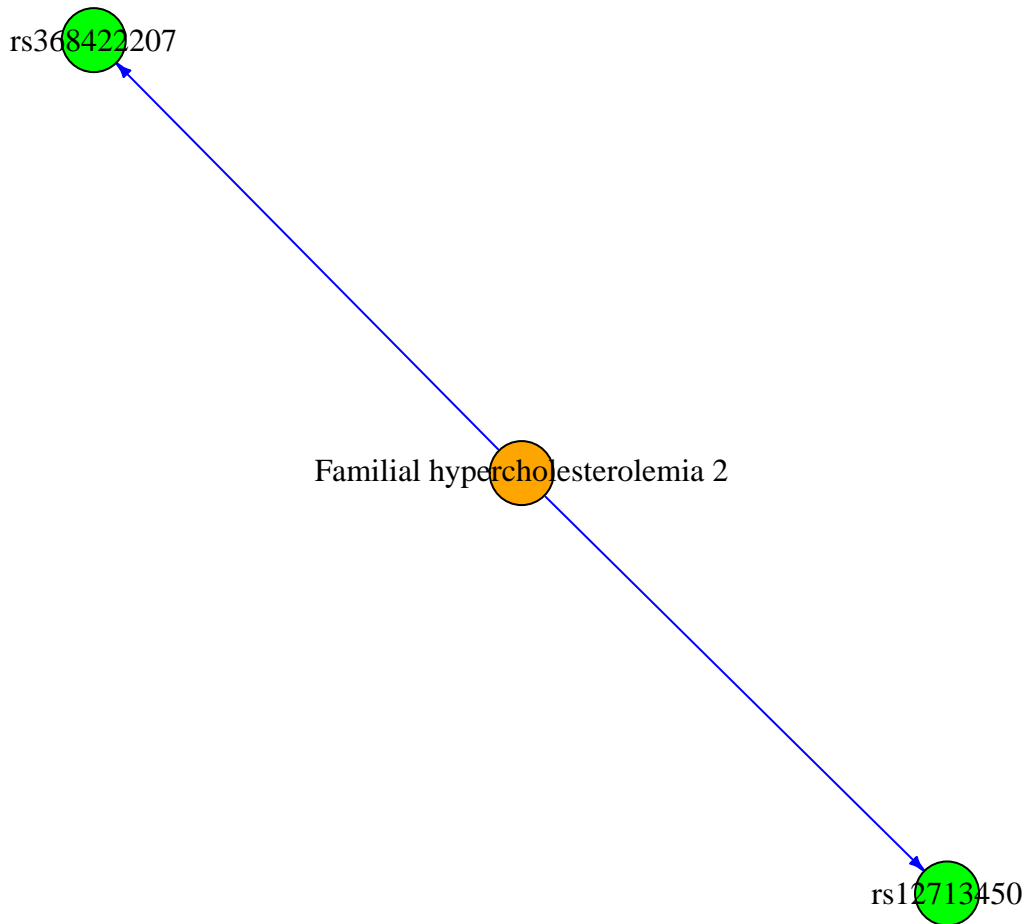

# Variant–Disease Network (Familial hypertrophic cardiomyopathy 1)

Familial hypertrophic cardiomyopathy 1

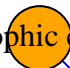

rs374538348

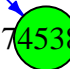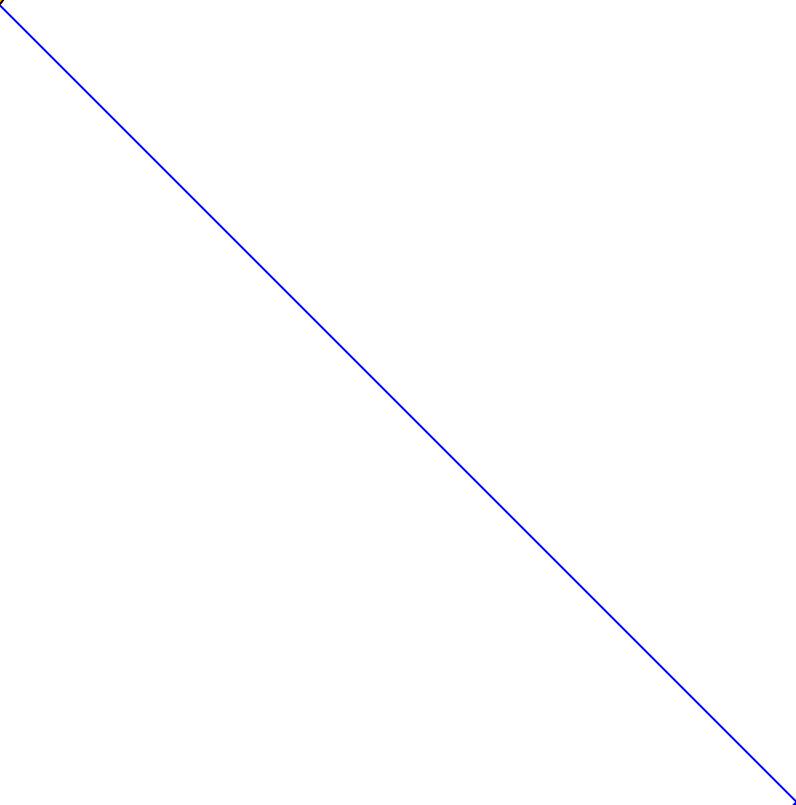

**Variant–Disease Network (Familial hypertrophic cardiomyopathy 13)**

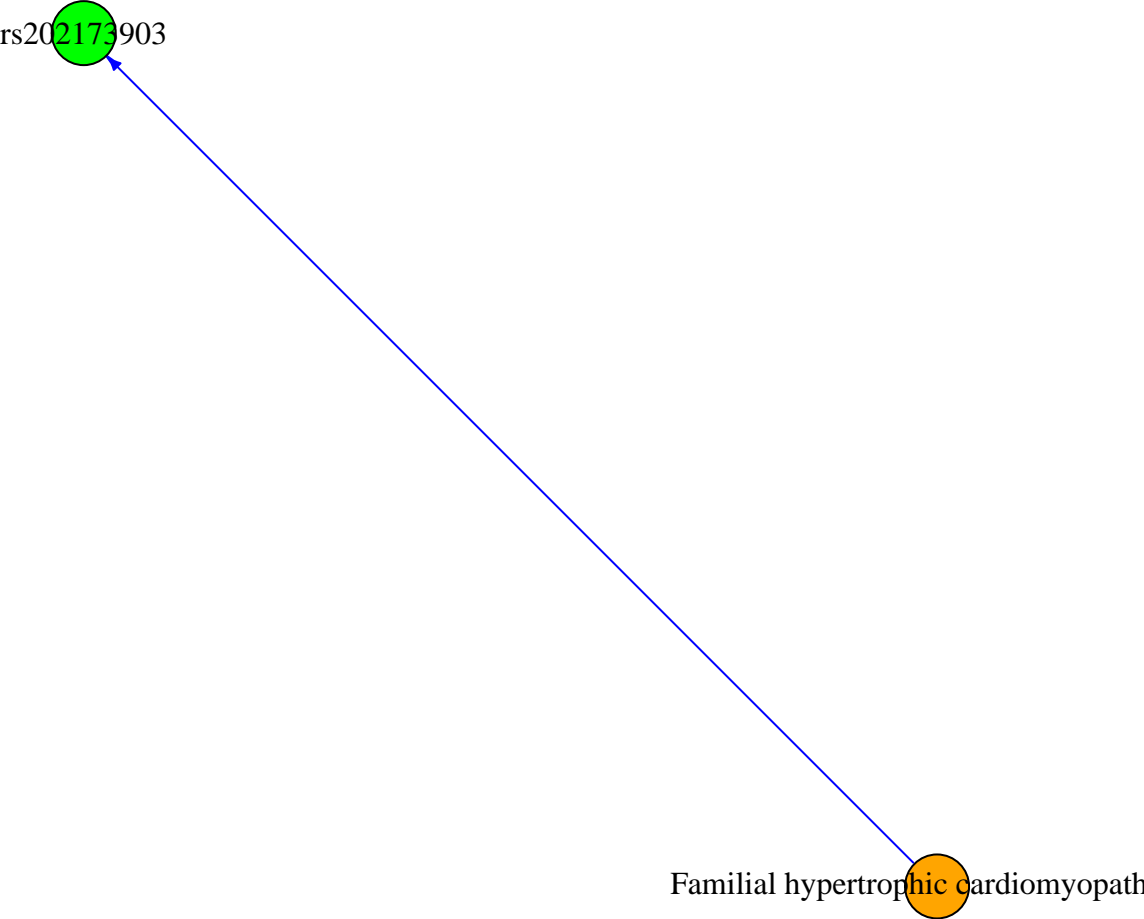

**Variant–Disease Network (Familial hypertrophic cardiomyopathy 16)**

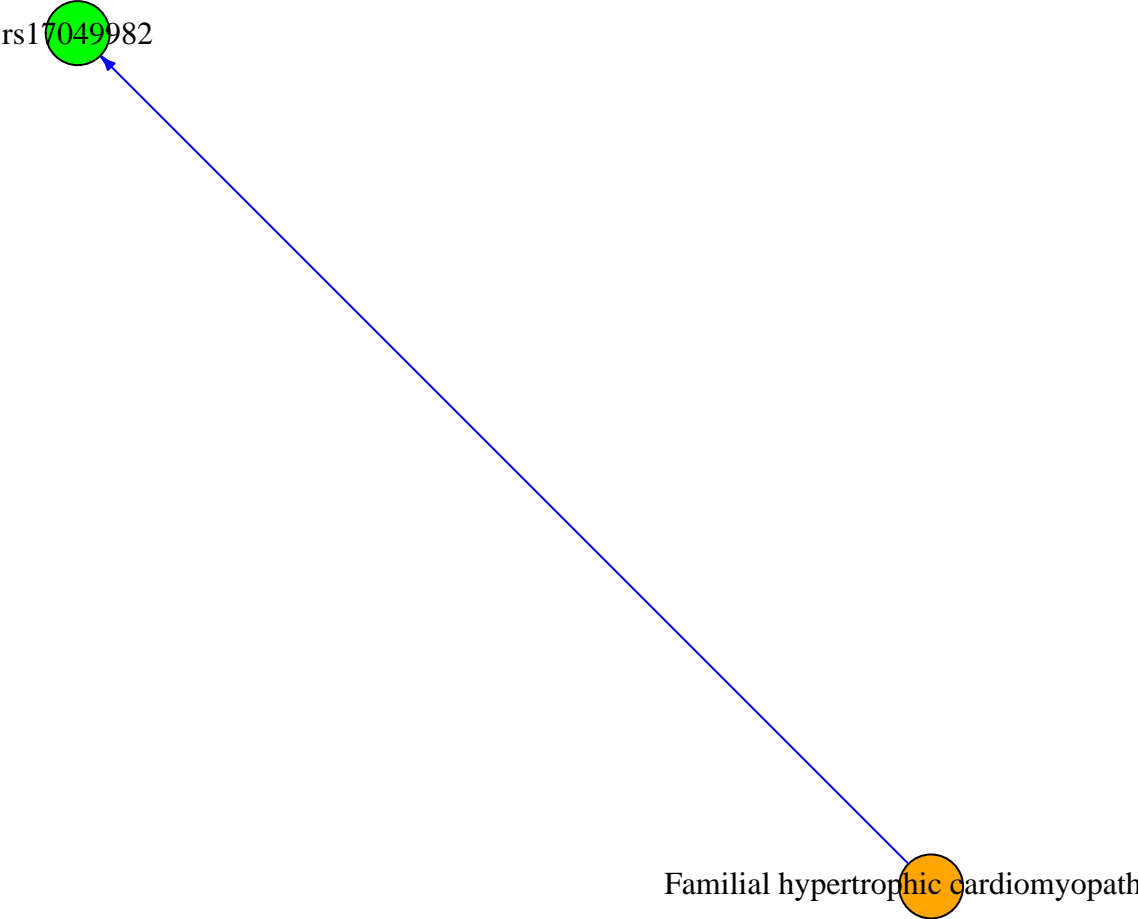

**Variant–Disease Network (Familial hypertrophic cardiomyopathy 19)**

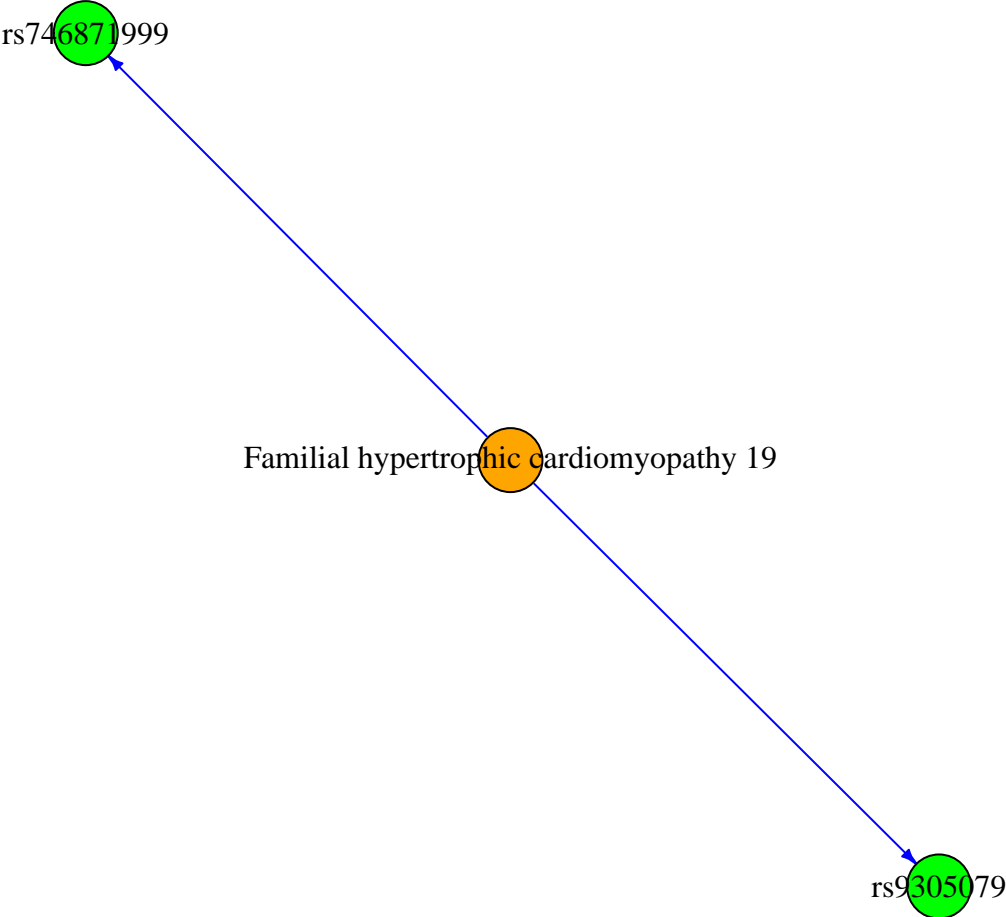

**Variant–Disease Network (Familial hypertrophic cardiomyopathy 2)**

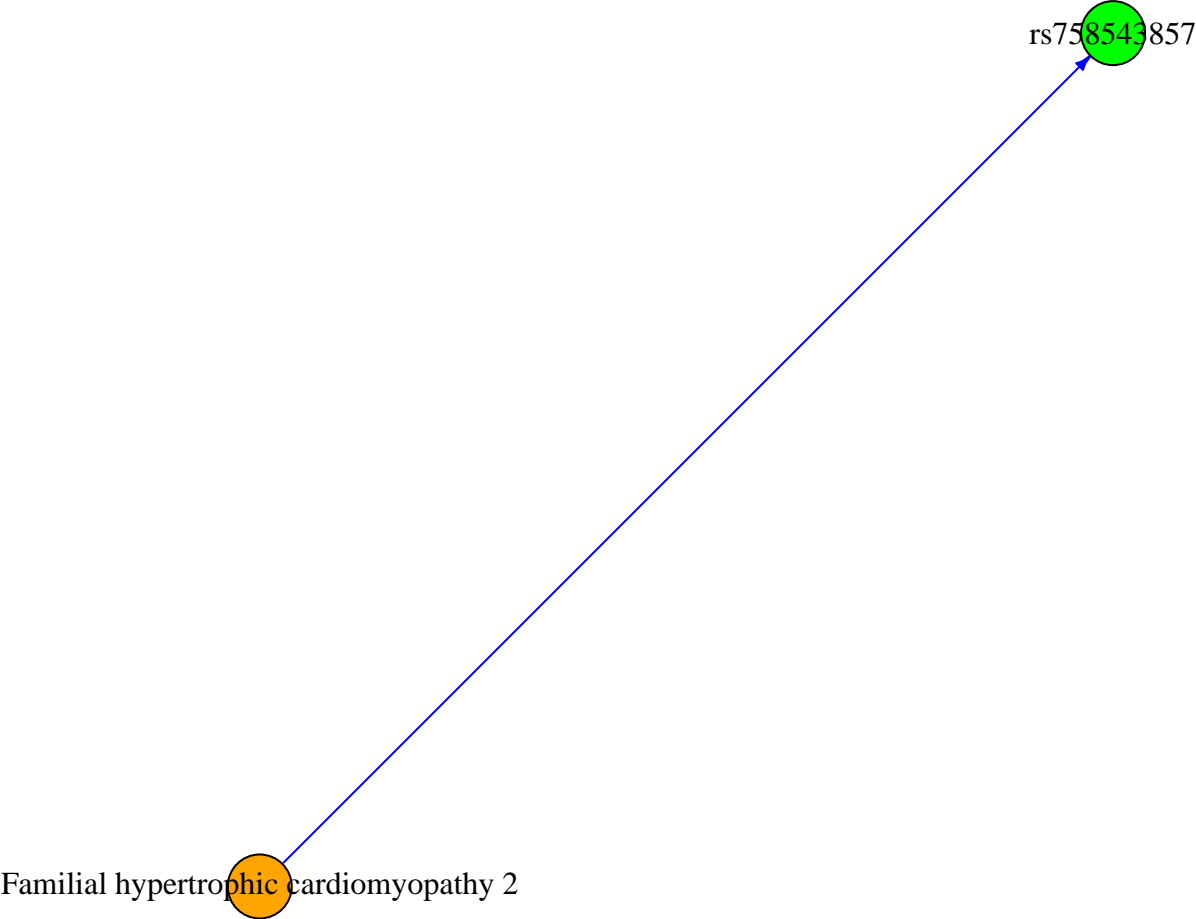



## Variant–Disease Network (Familial hypobetalipoproteinemia)

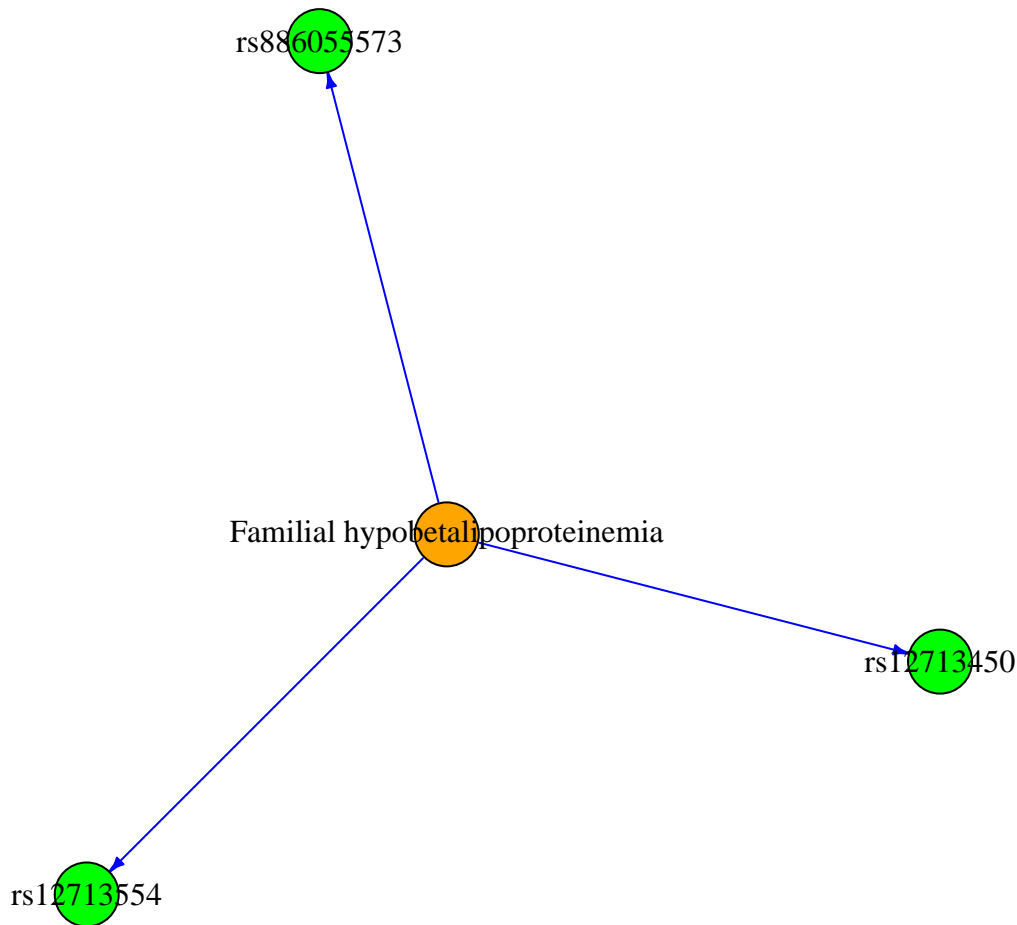

# Variant–Disease Network (Familial hypokalemia–hypomagnesemia)

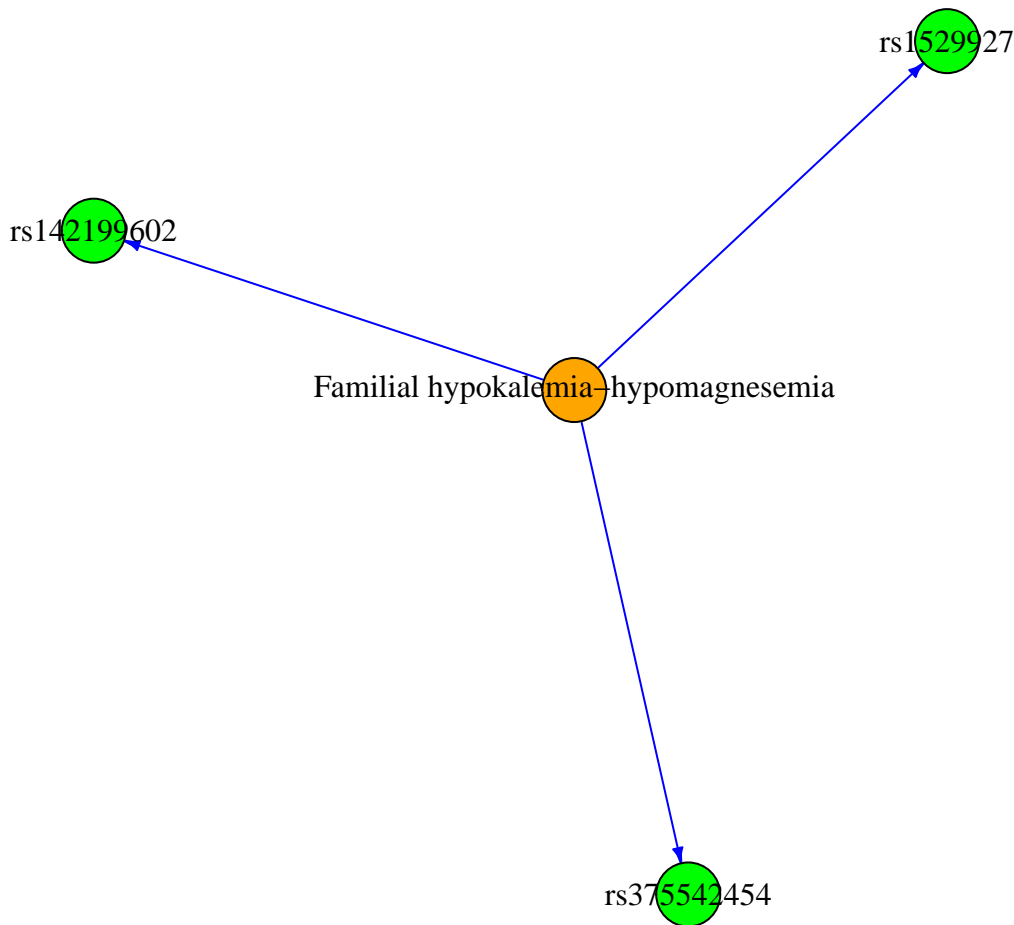

**Variant–Disease Network (Familial infantile myasthenia)**

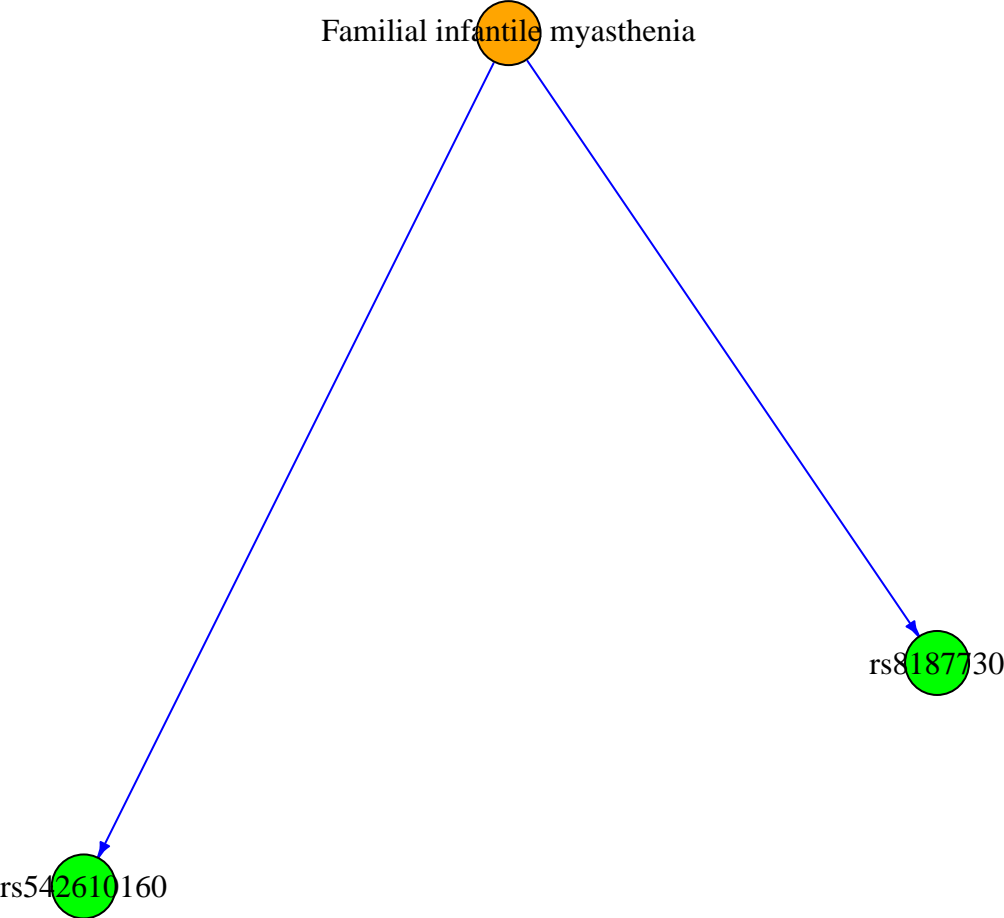

# Variant–Disease Network (Familial medullary thyroid carcinoma)

rs137979116

Familial medullary thyroid carcinoma



Variant–Disease Network (Familial multiple polyposis syndrome)

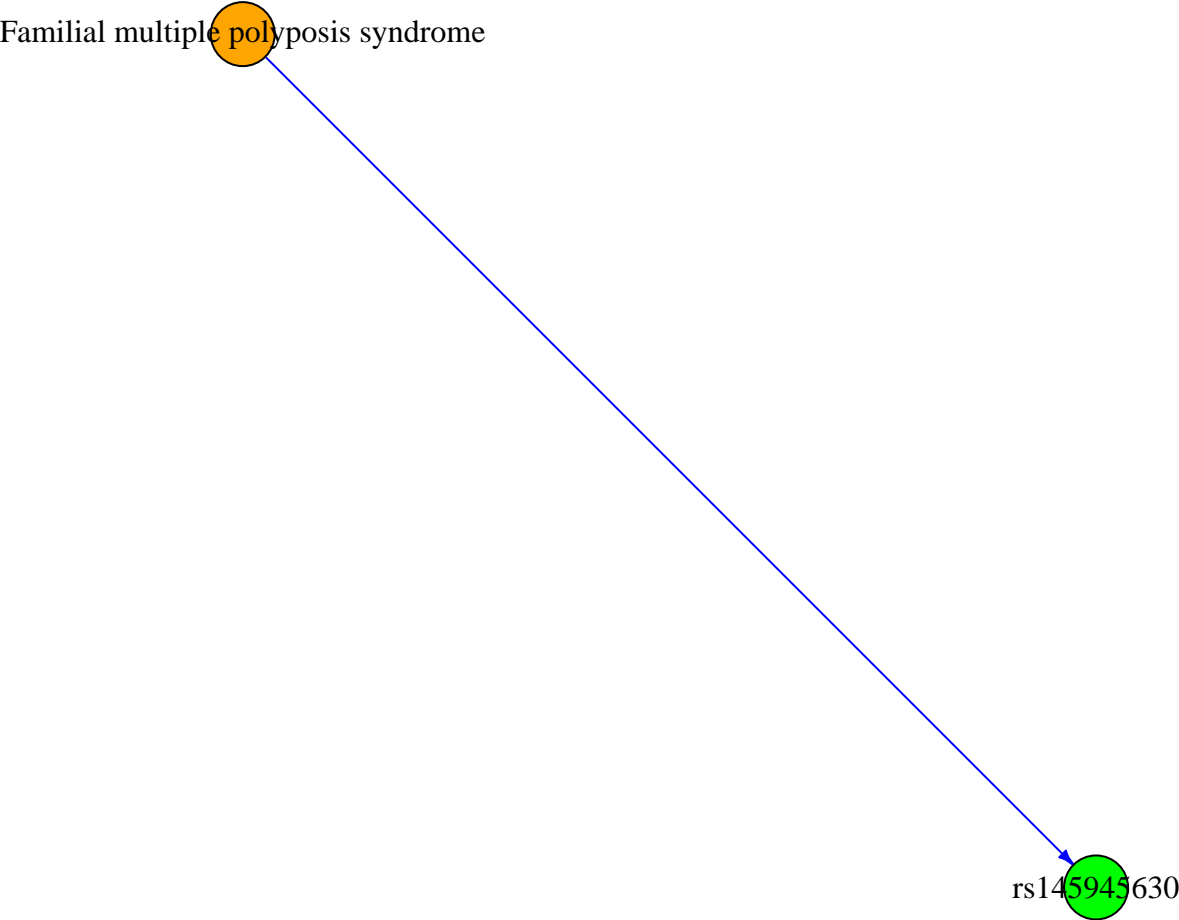

Variant–Disease Network (Familial restrictive cardiomyopathy 3)

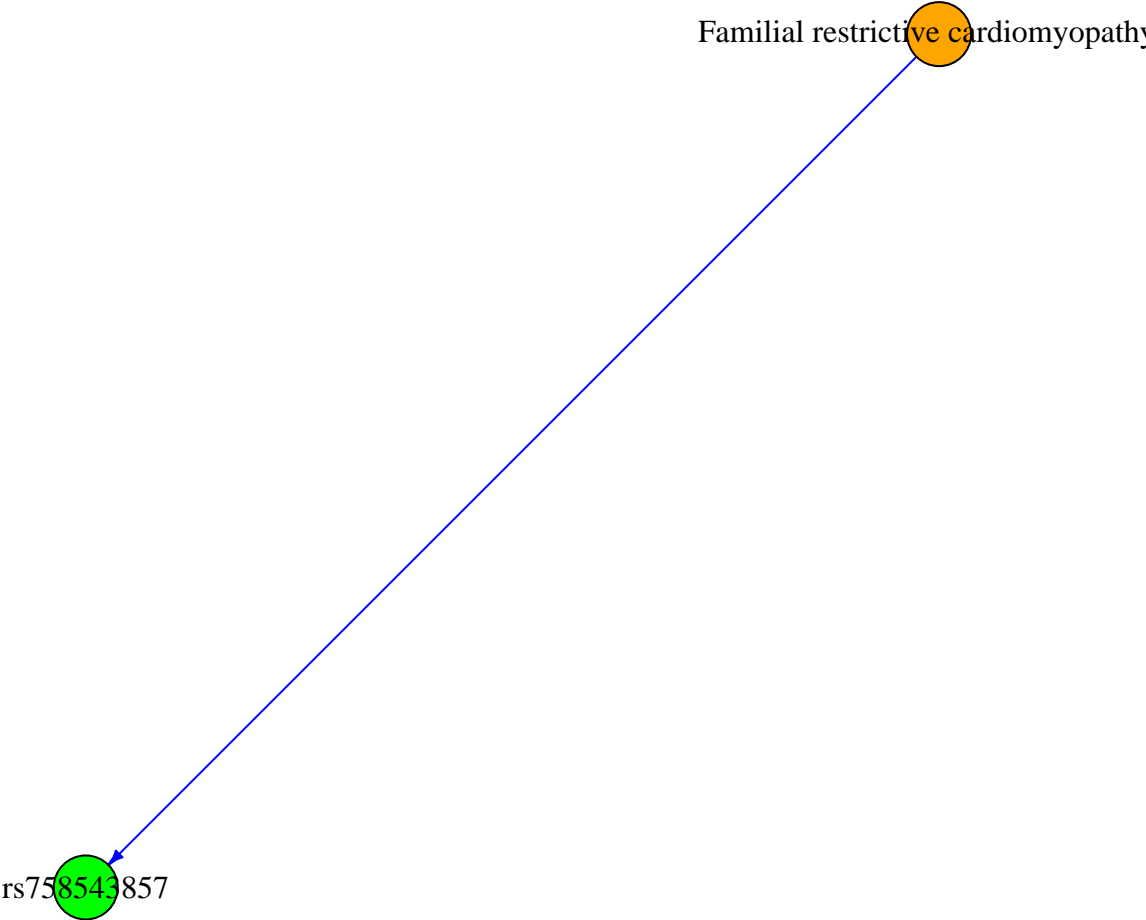

Variant–Disease Network (Fanconi anemia)

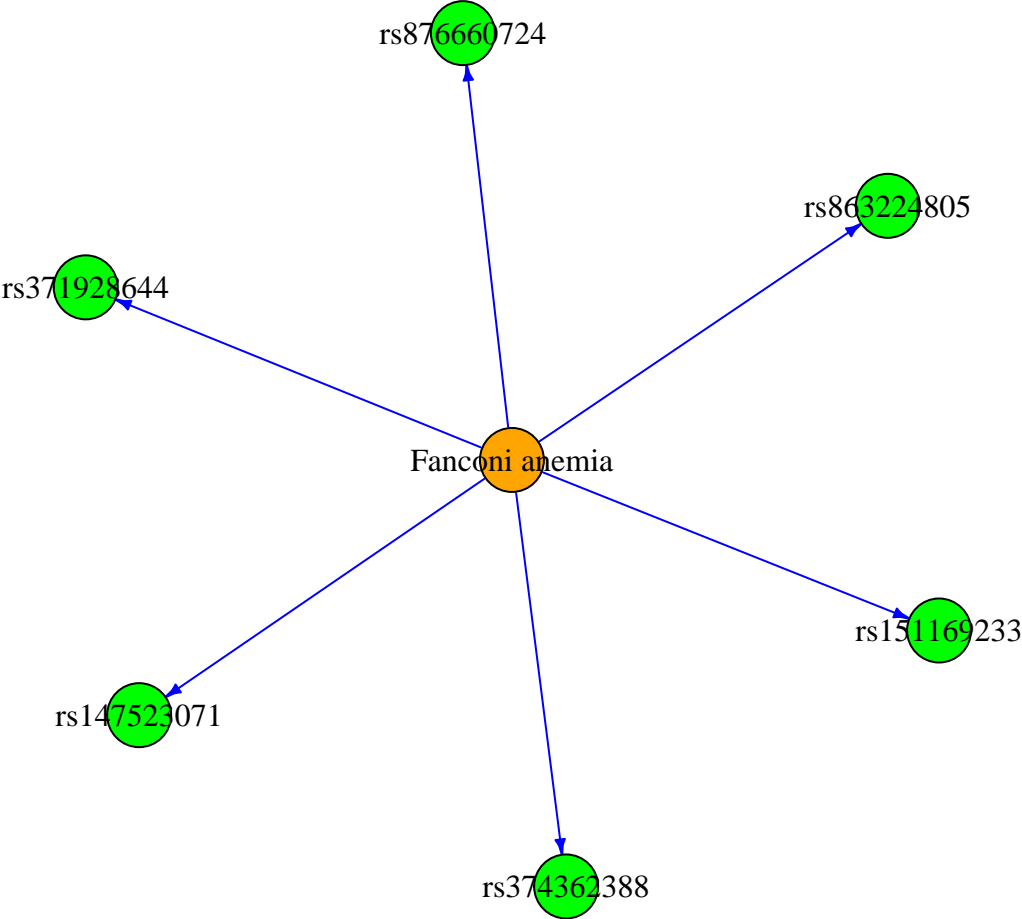

## Variant–Disease Network (Fanconi–Bickel syndrome)

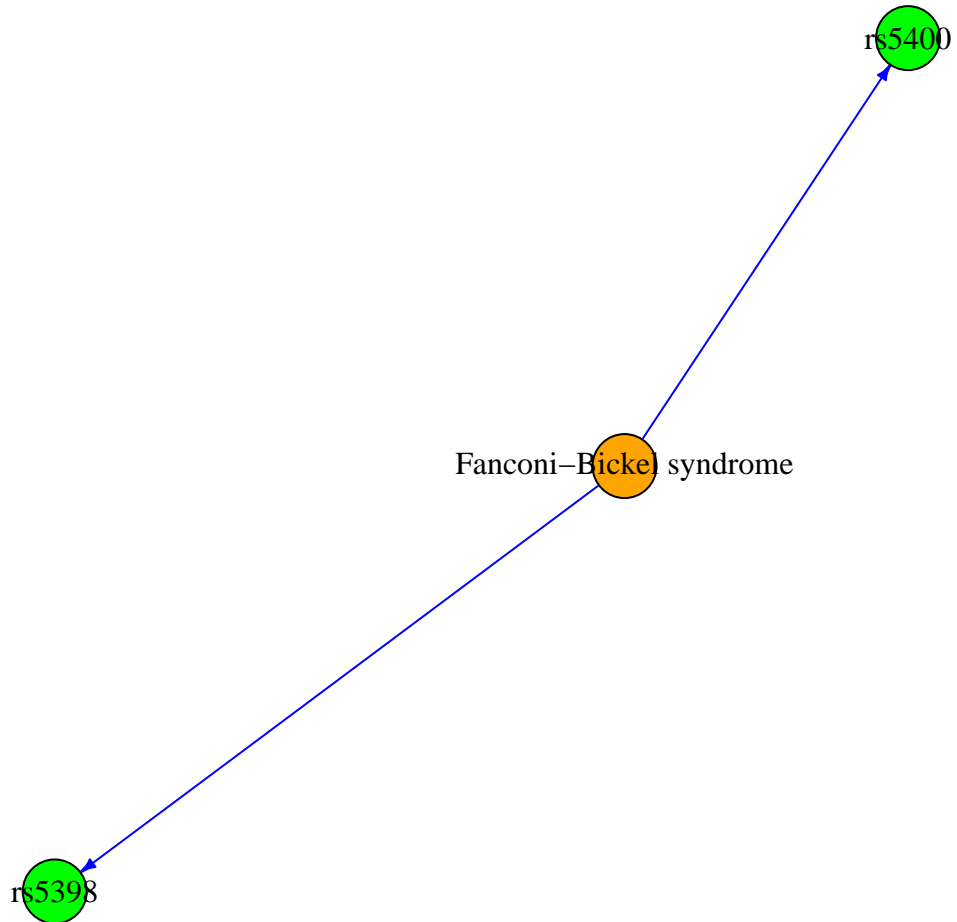



## Variant–Disease Network (Fetal akinesia sequence)

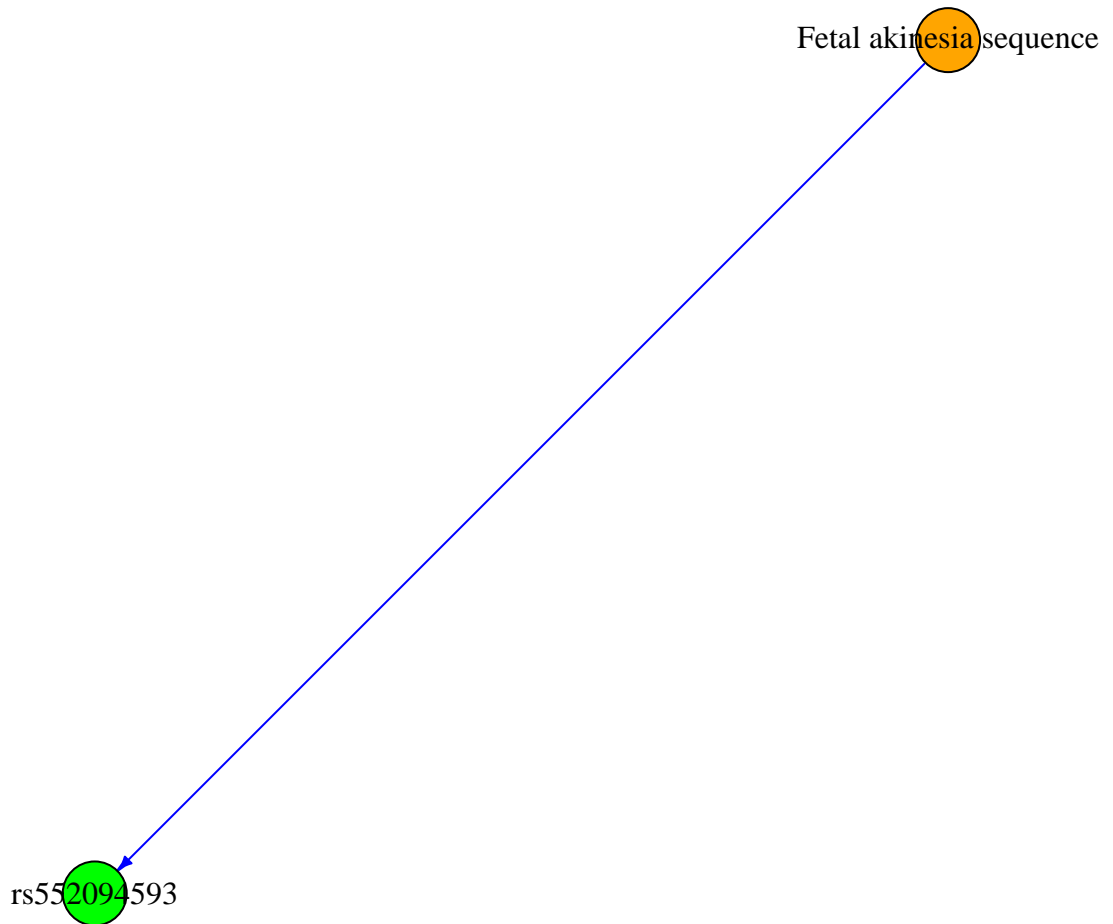

**Variant–Disease Network (Finnish congenital nephrotic syndrome)**

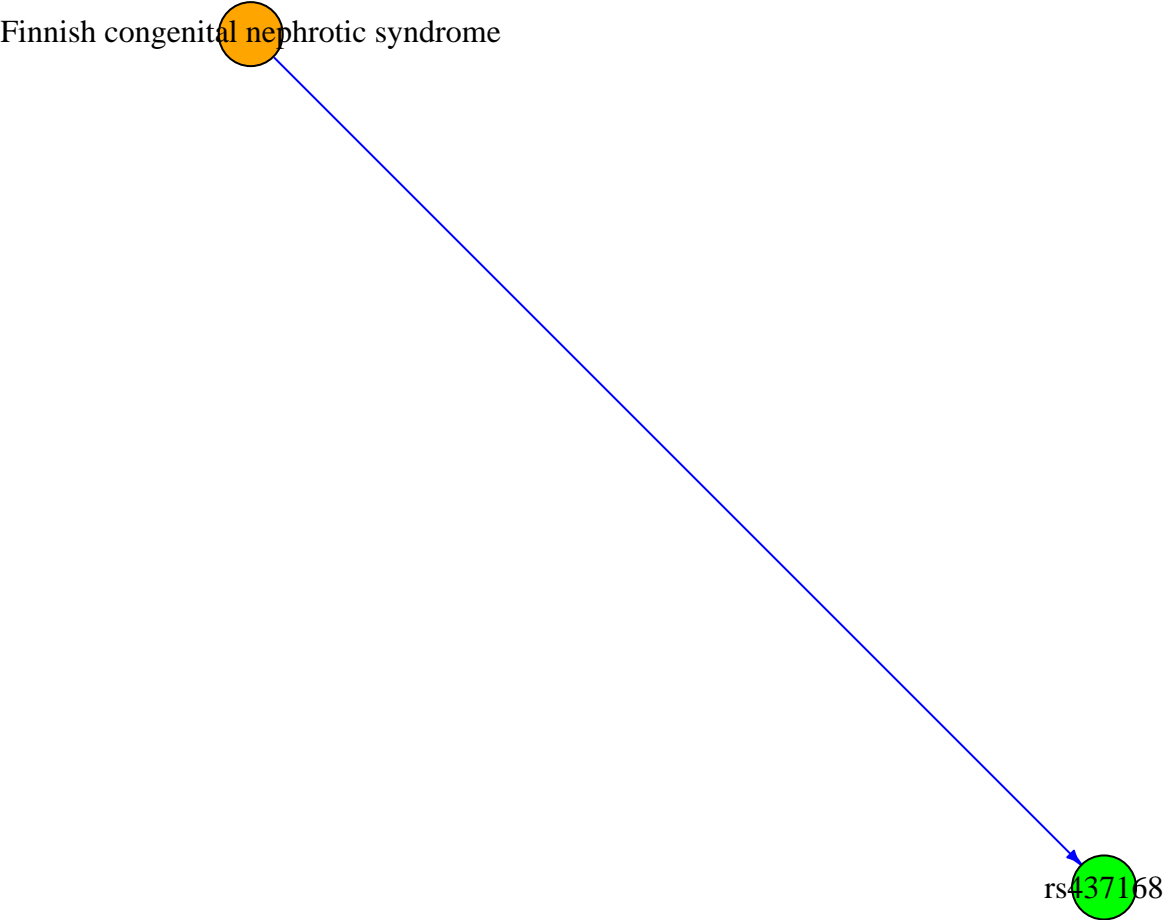

## Variant–Disease Network (Fleck corneal dystrophy)

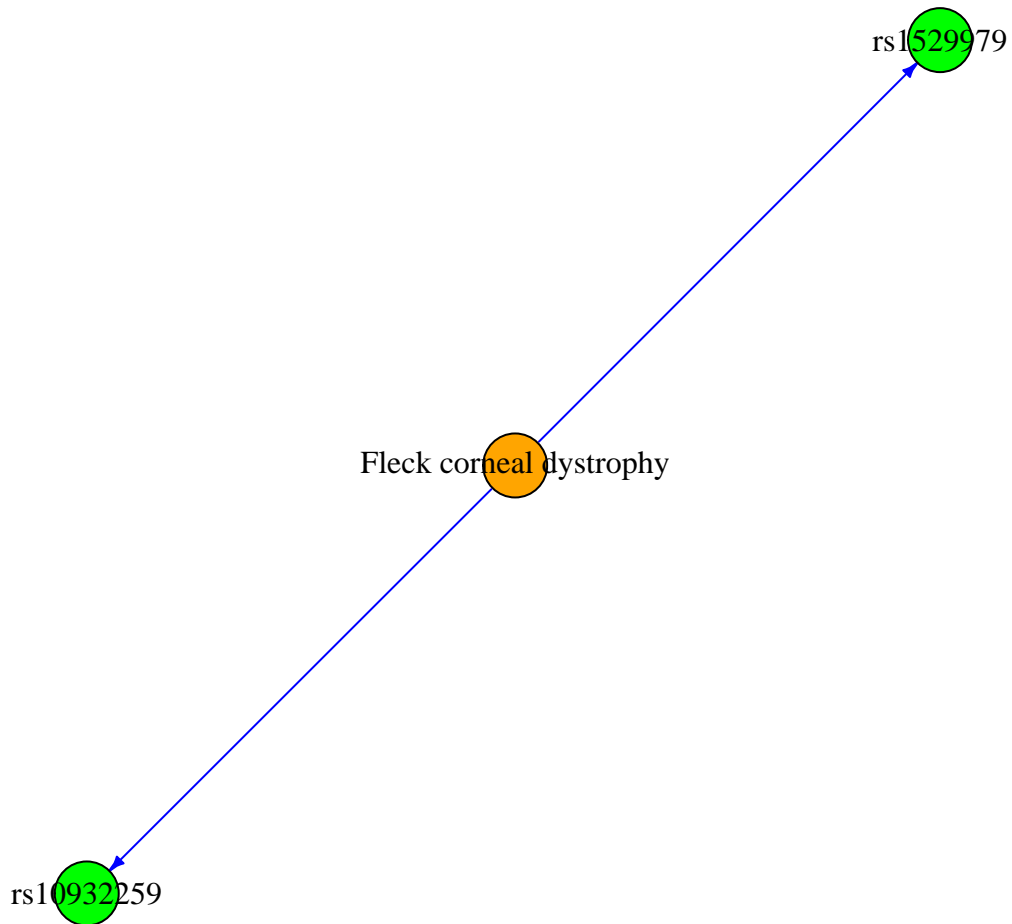

# Variant–Disease Network (FLNB–Related Spectrum Disorders)

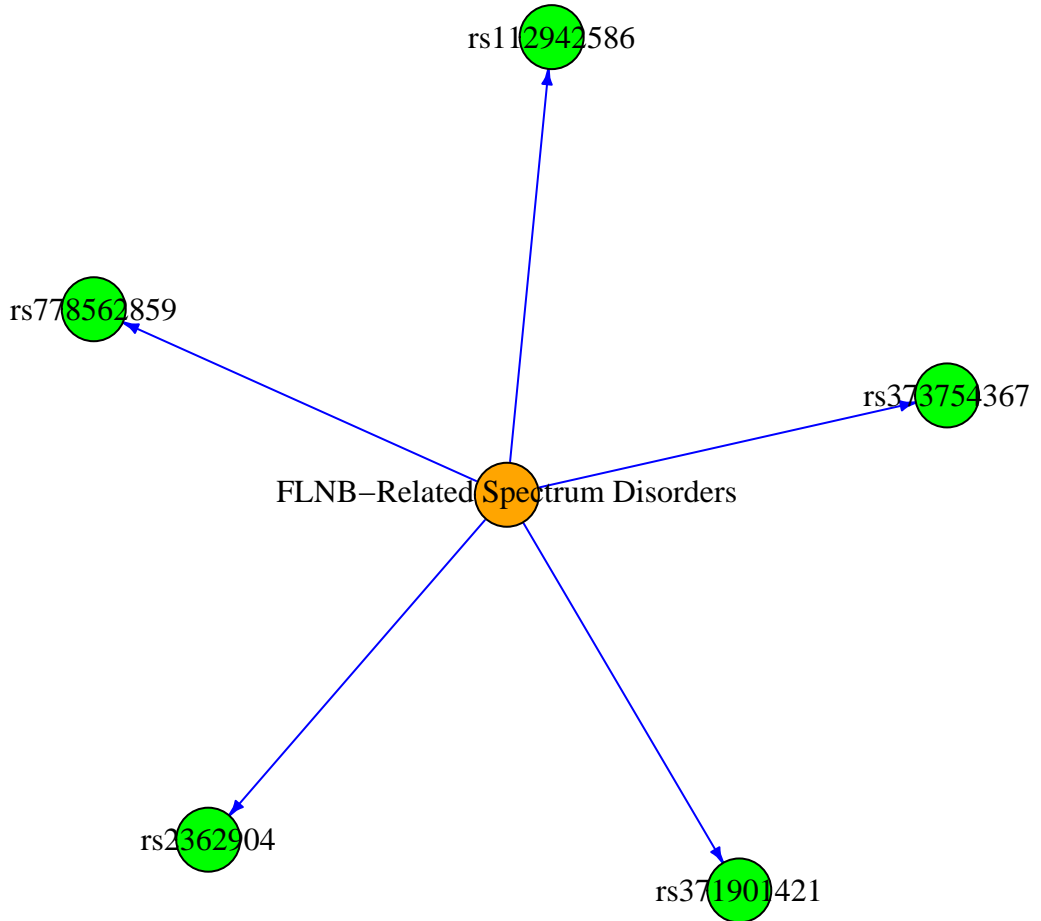

## Variant–Disease Network (Focal cortical dysplasia type II)

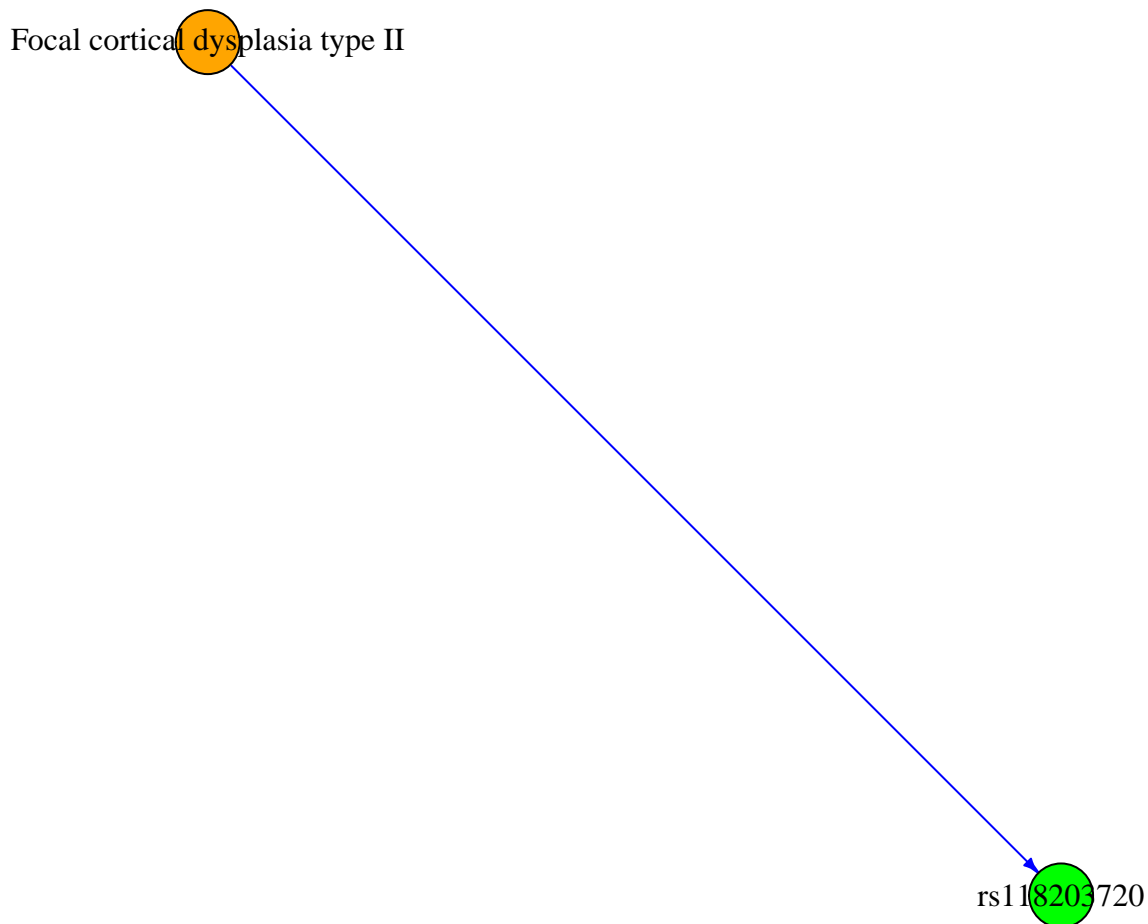

Variant–Disease Network (Focal segmental glomerulosclerosis)

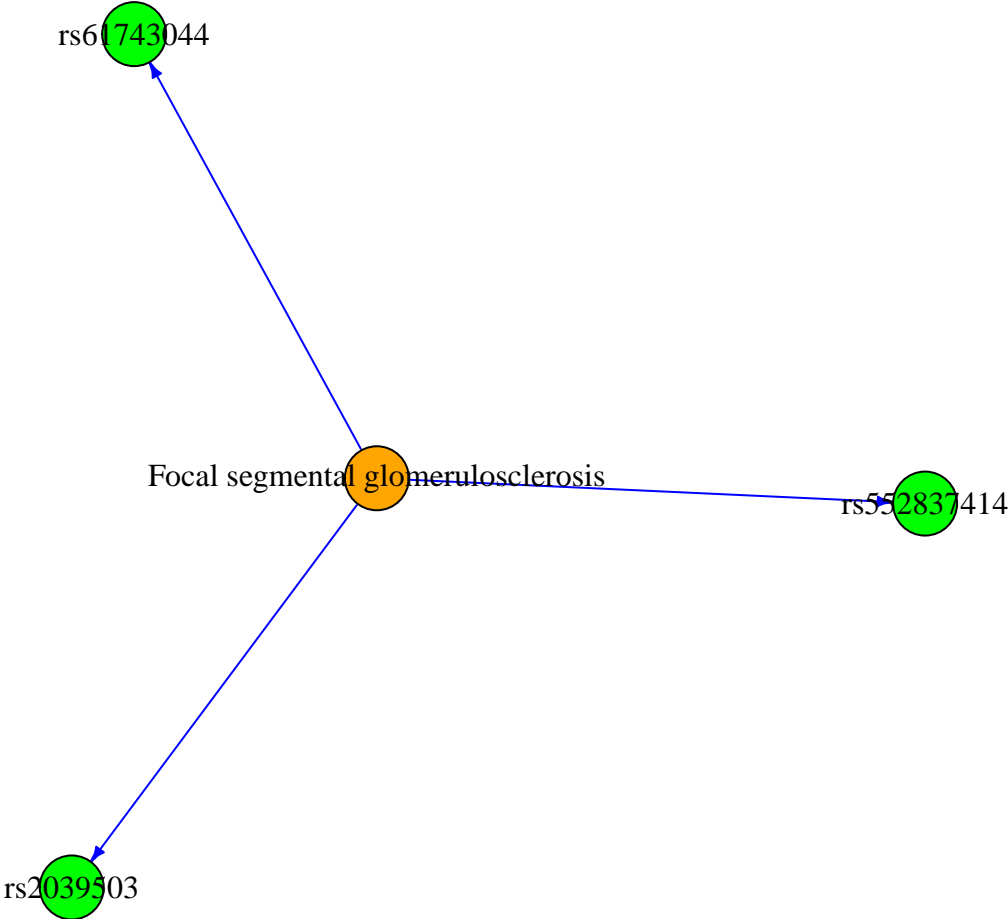

## Variant–Disease Network (Focal segmental glomerulosclerosis 2)

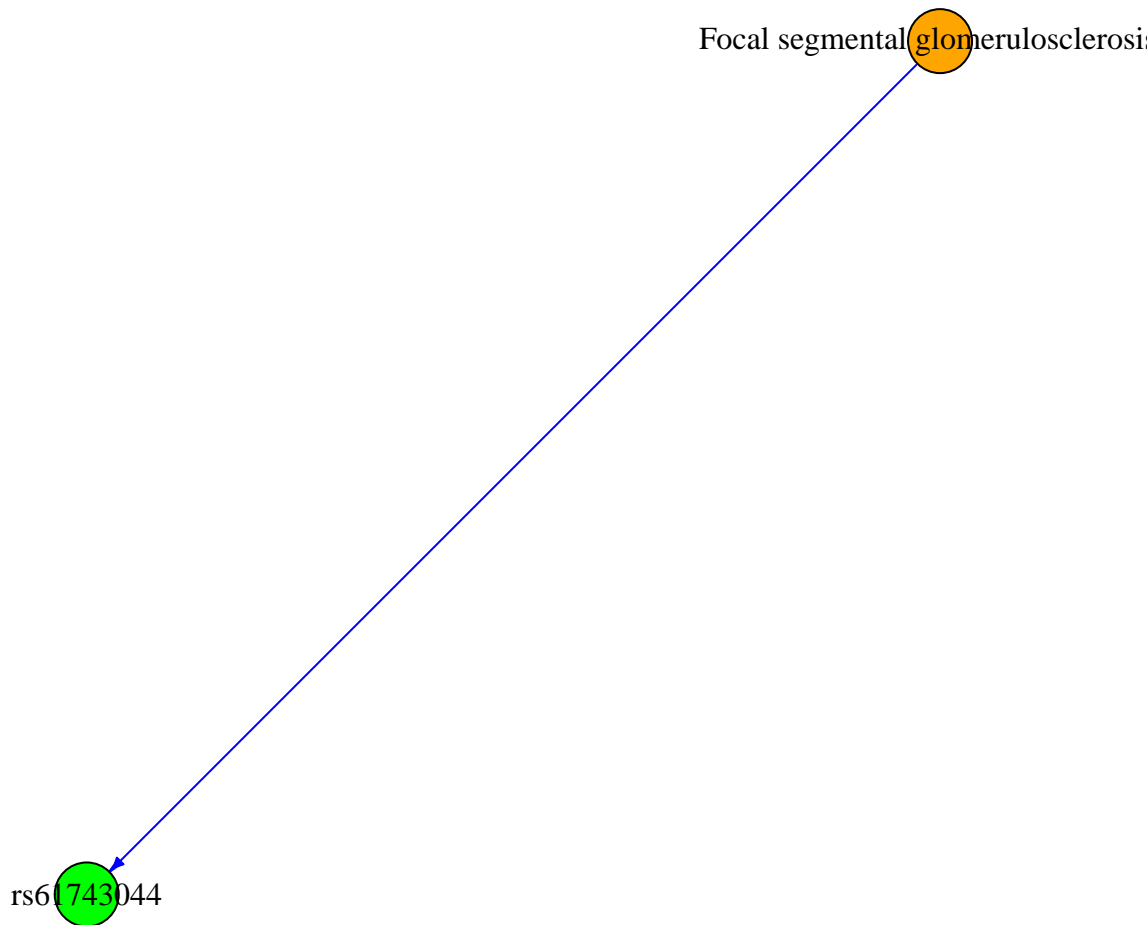

## Variant–Disease Network (Focal segmental glomerulosclerosis 3)

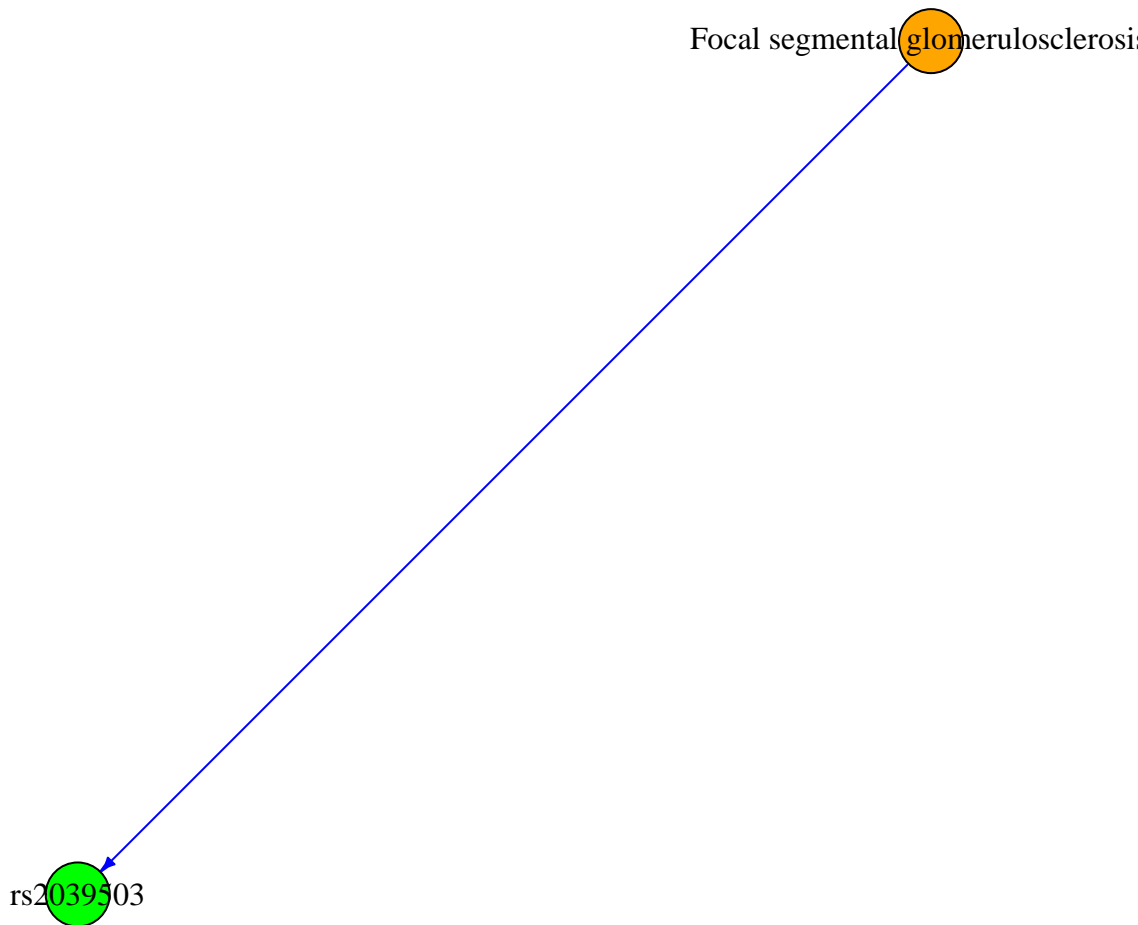



## Variant–Disease Network (Fraser syndrome 1)

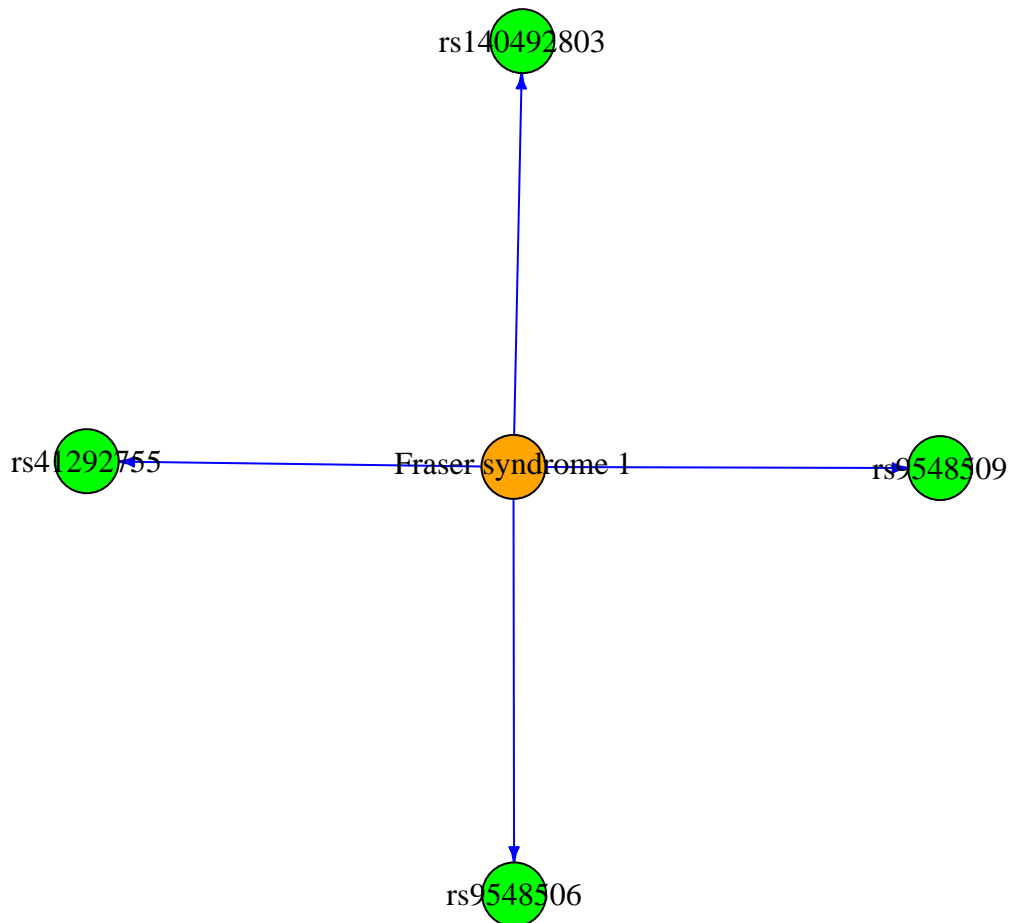

# Variant–Disease Network (Freeman–Sheldon syndrome)

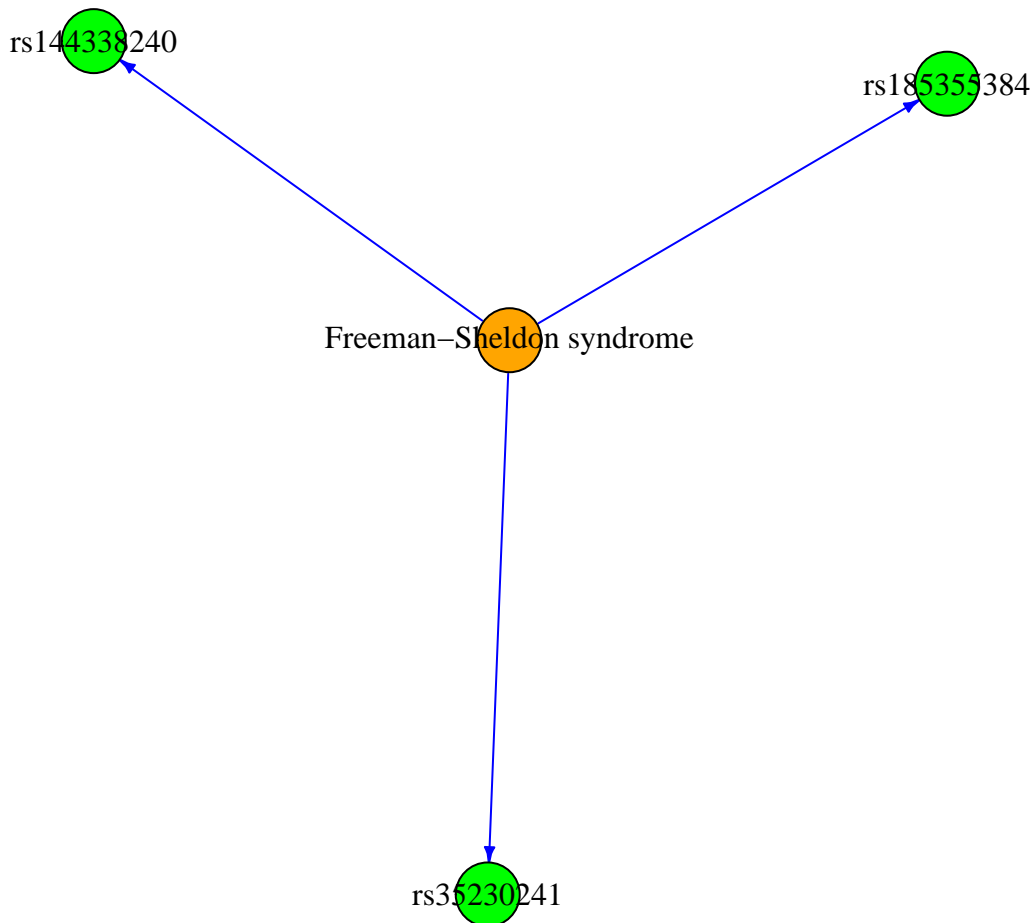

Variant–Disease Network (Frontometaphyseal dysplasia 1)

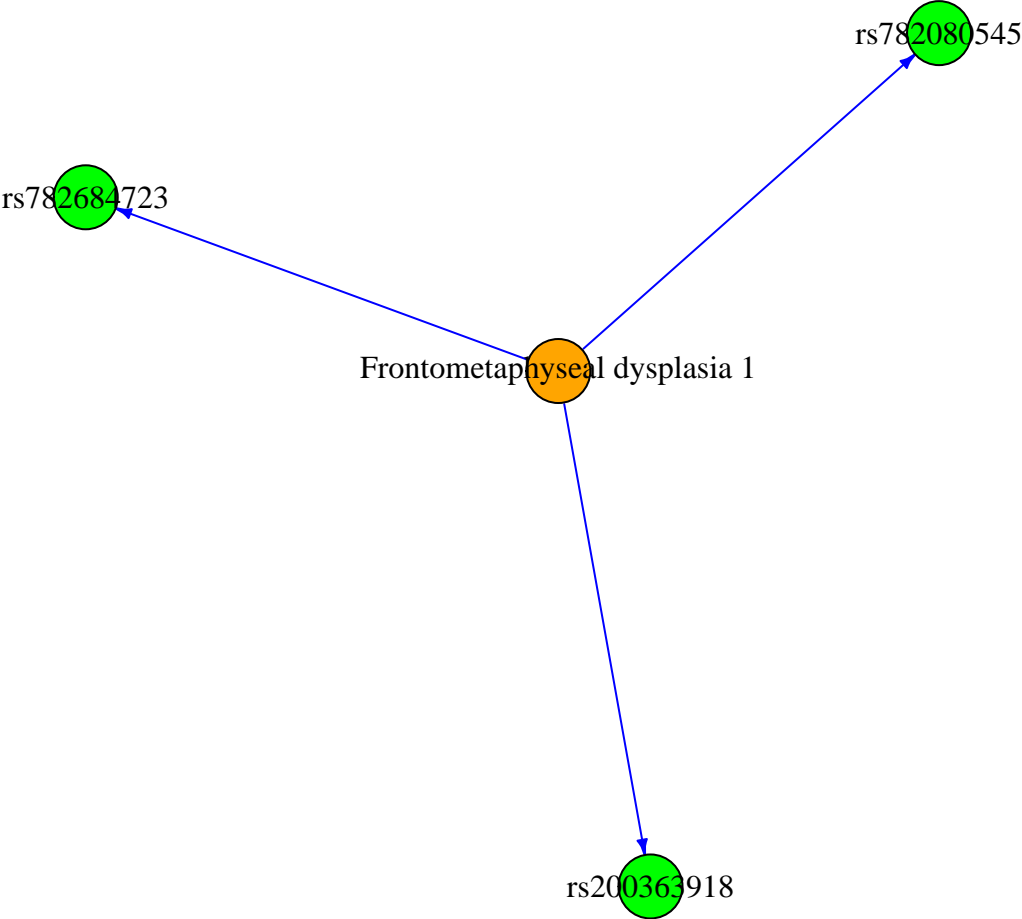

## Variant-Disease Network (Fucosidosis)

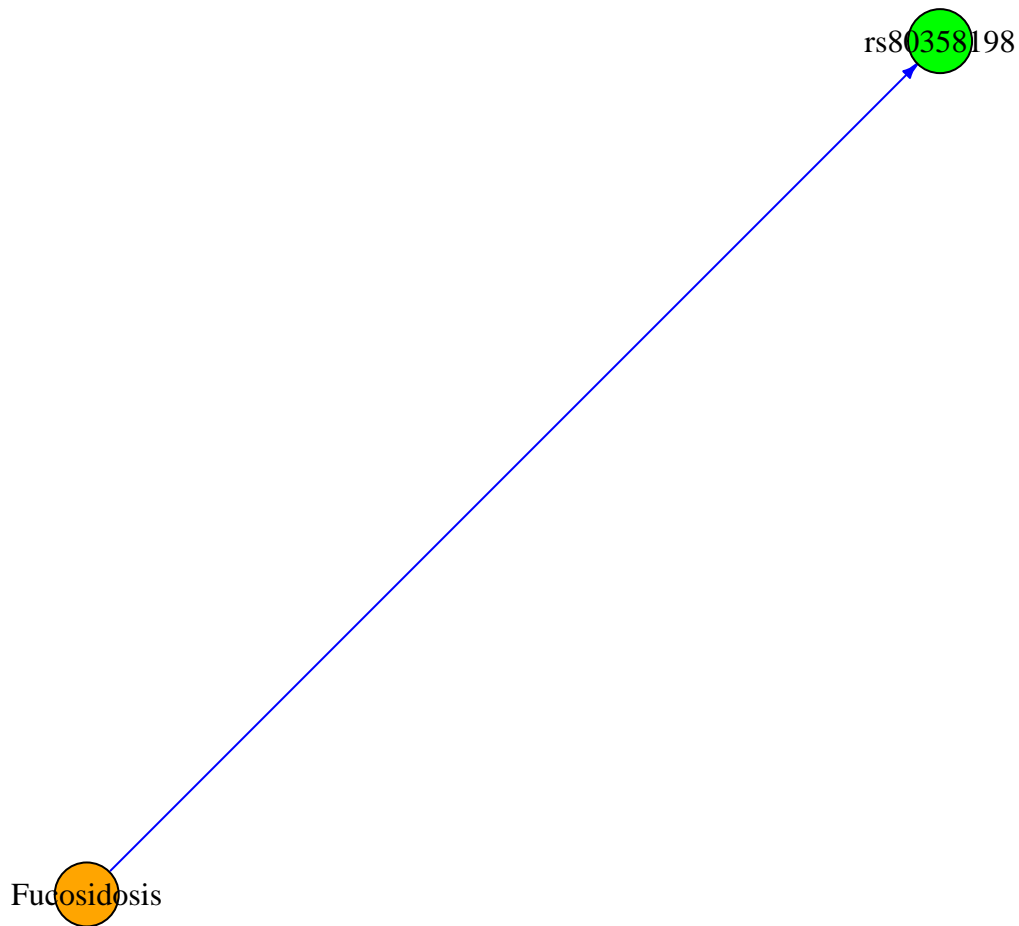

## Variant-Disease Network (Fumarase deficiency)

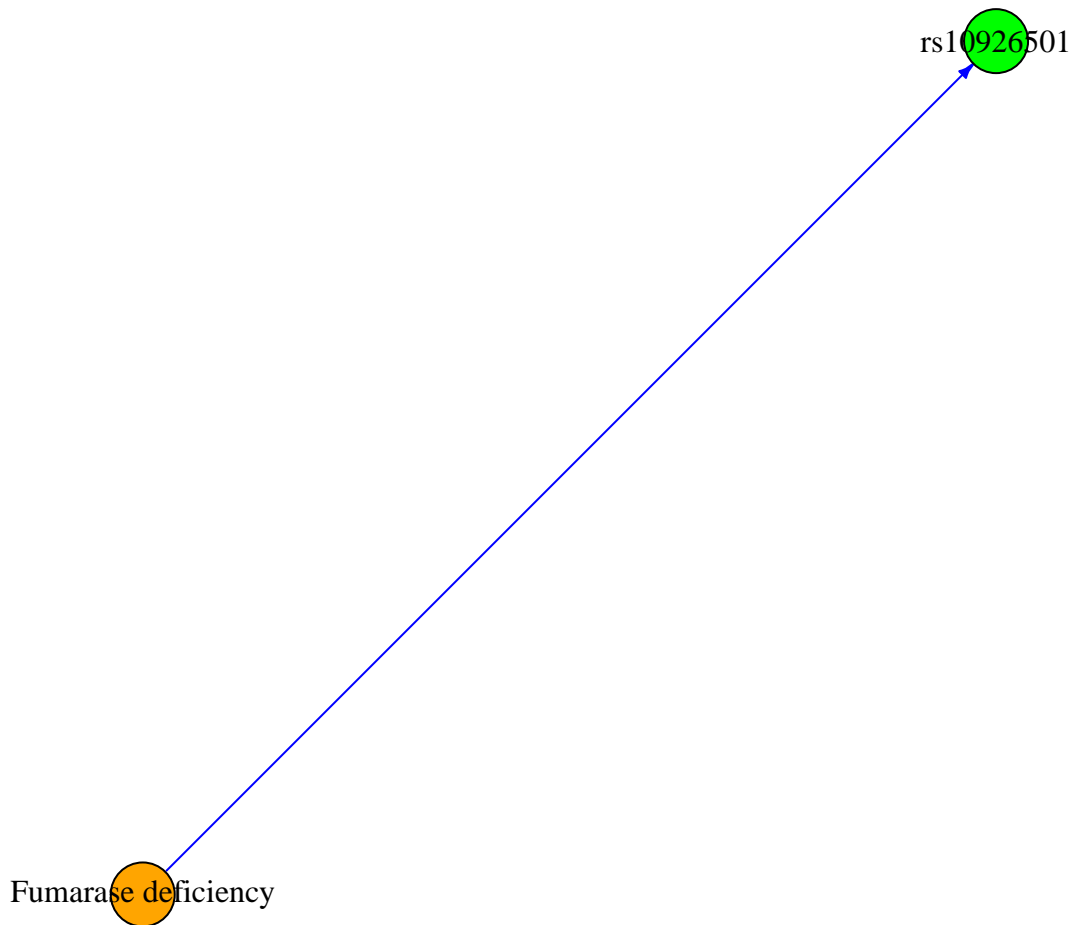

Variant–Disease Network (Galactosylceramide beta–galactosidase deficiency)

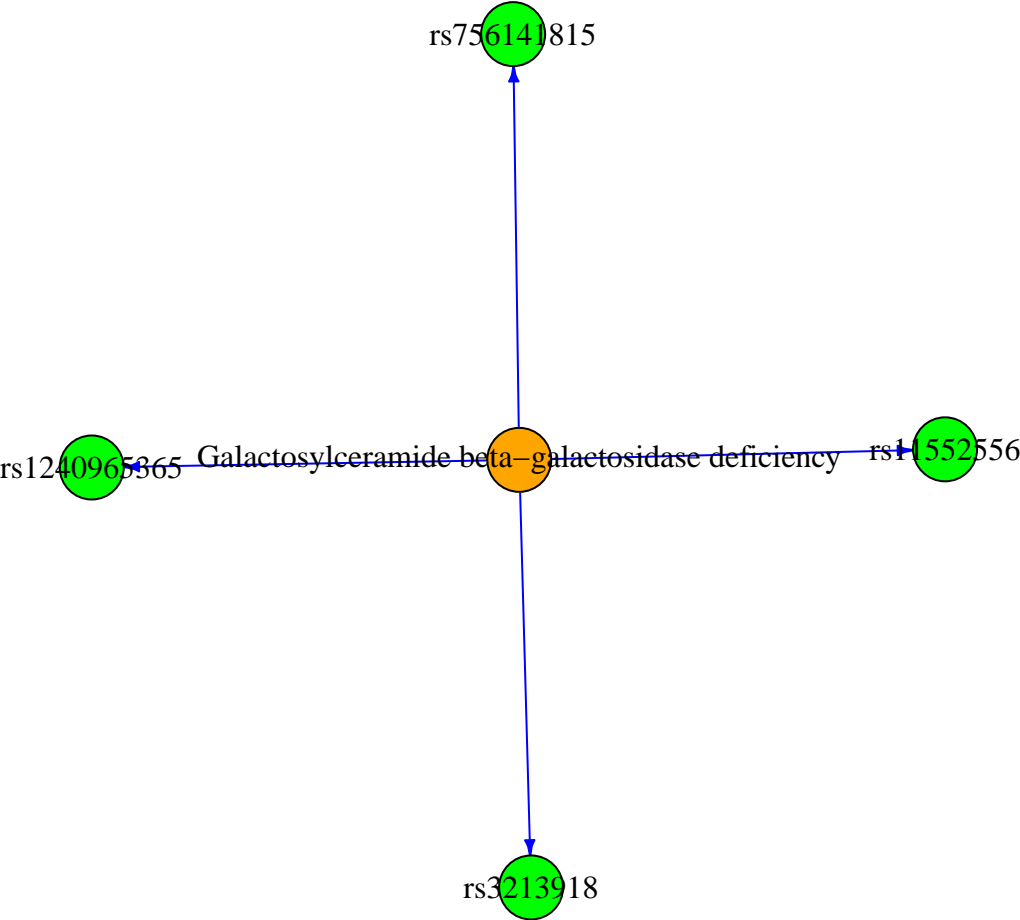

## Variant–Disease Network (Gallbladder disease 1)

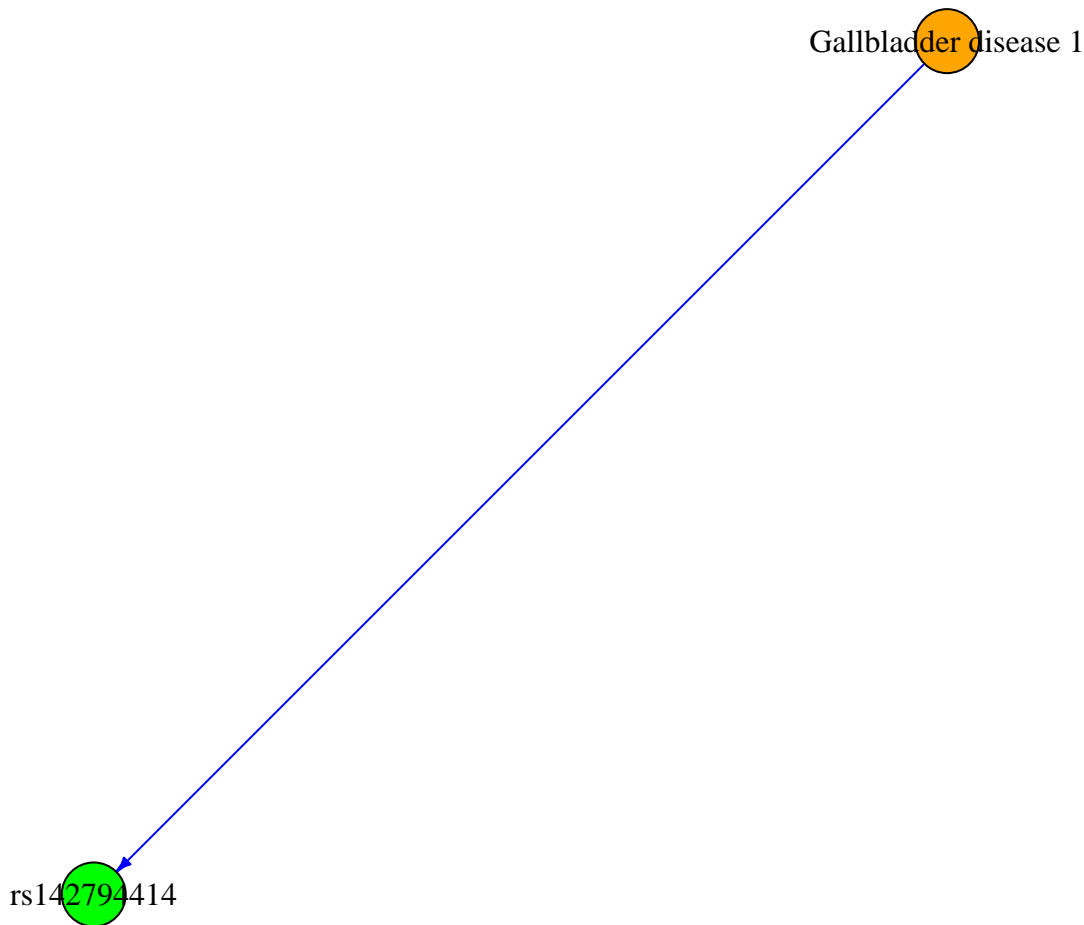

Variant–Disease Network (Gamma–aminobutyric acid transaminase deficiency)

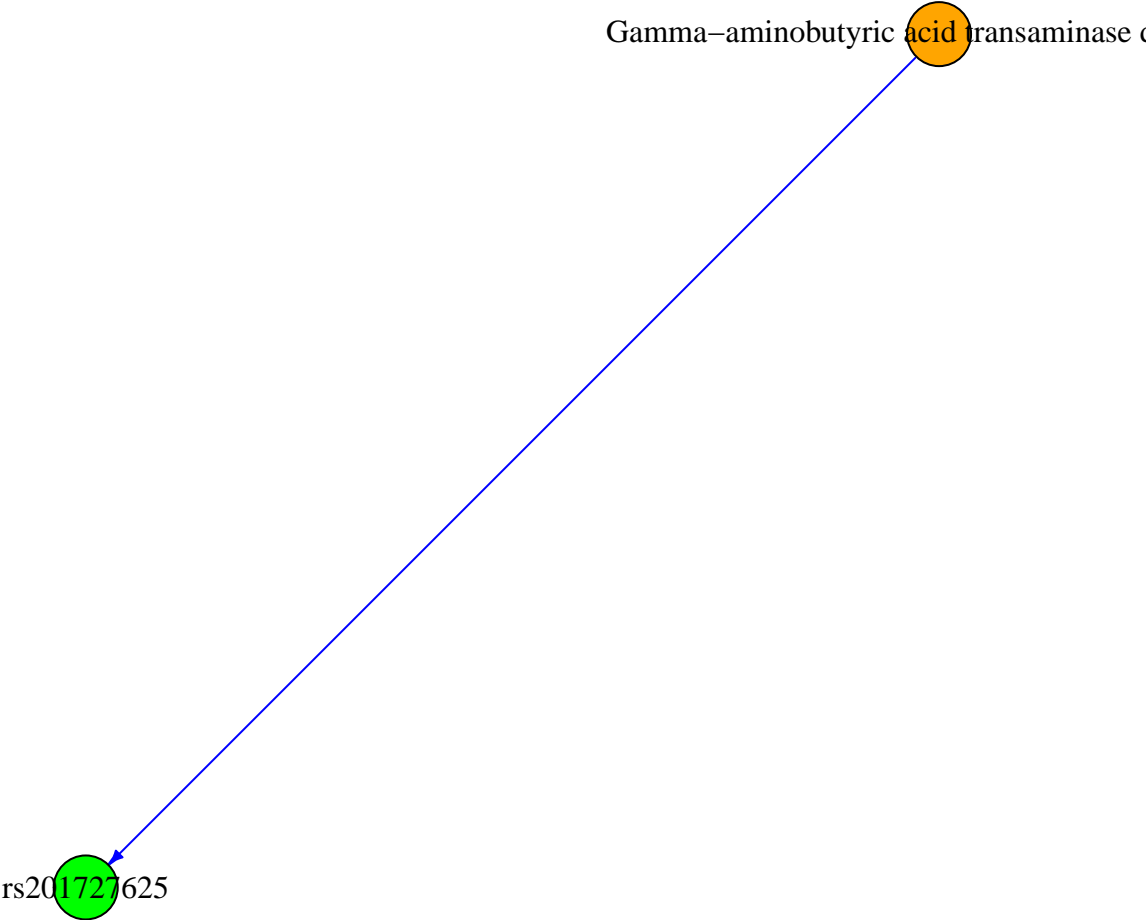



Variant–Disease Network (Gastrointestinal stroma tumor)

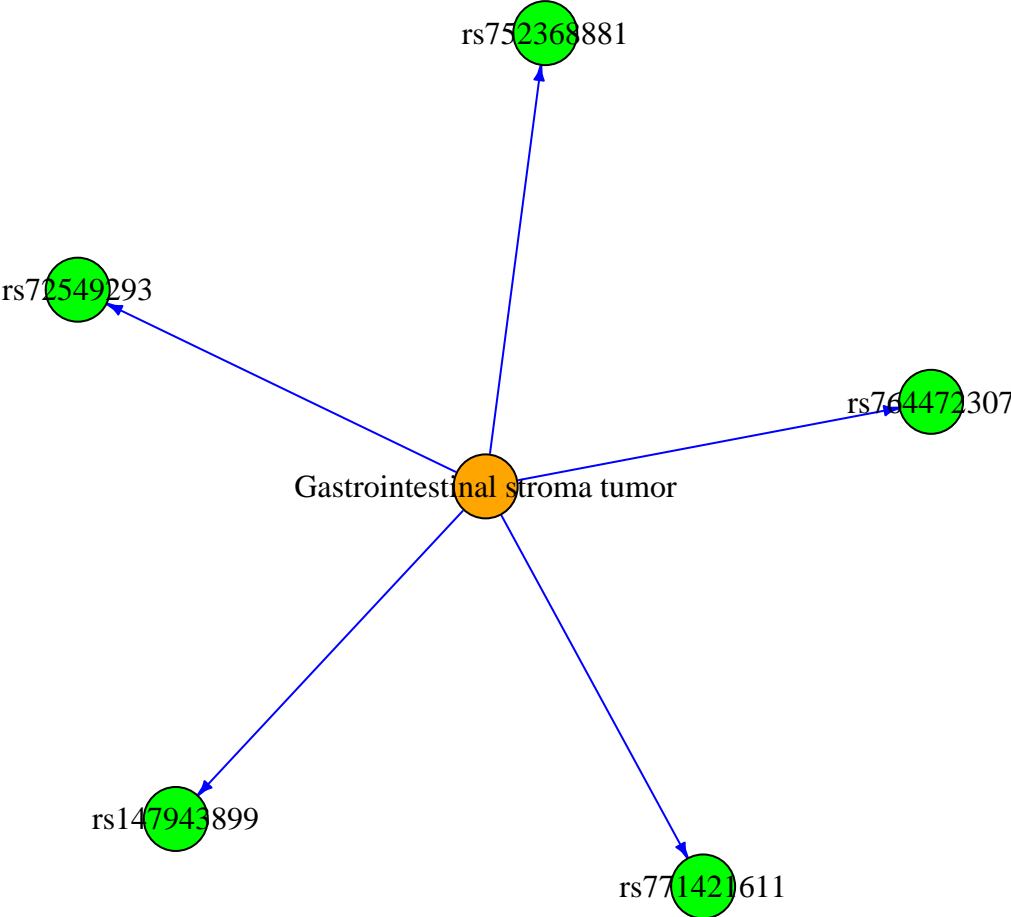

## Variant–Disease Network (Gaze palsy)

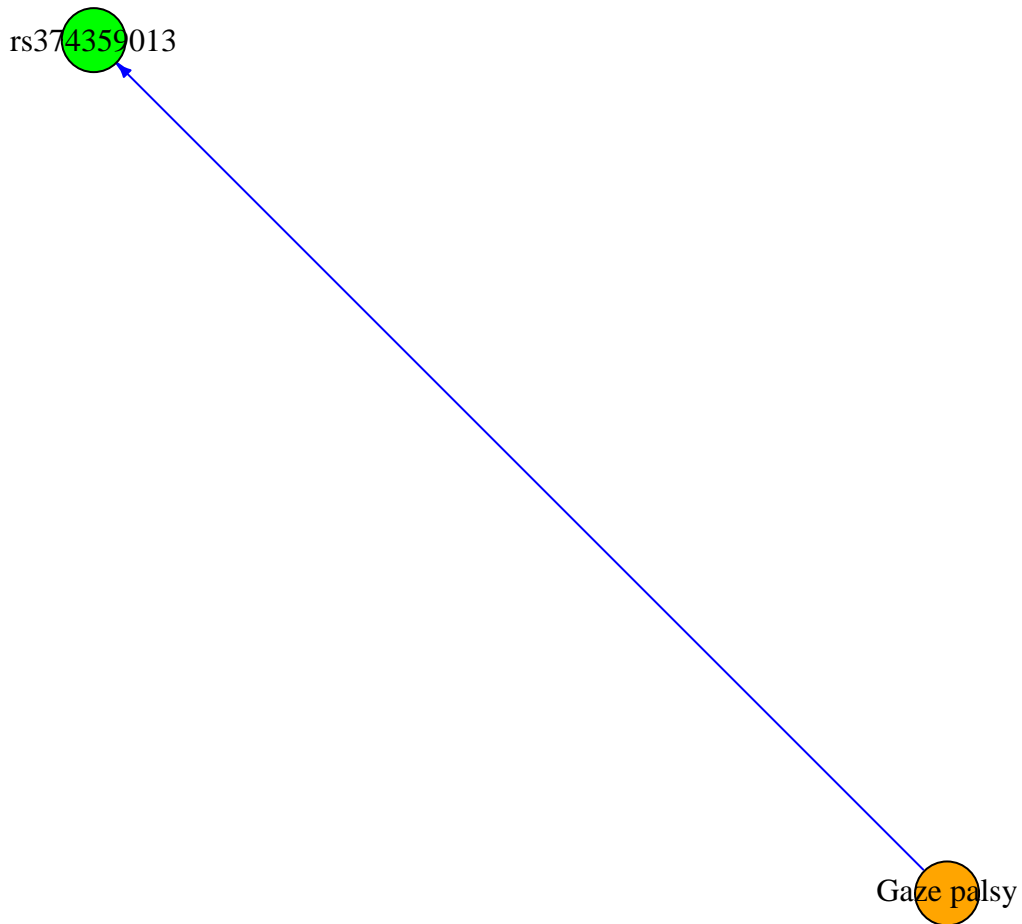

## Variant-Disease Network (Geleophysic dysplasia)

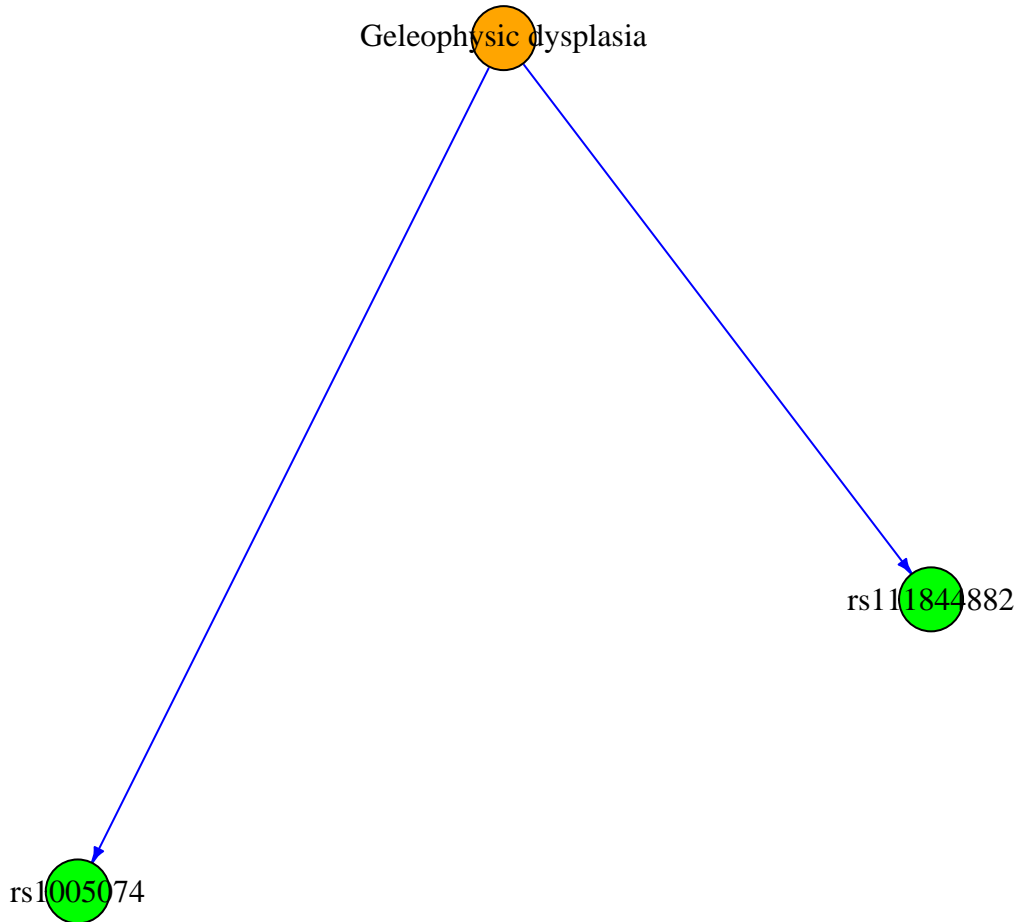

Variant–Disease Network (Generalized epilepsy and paroxysmal dyskinesia)

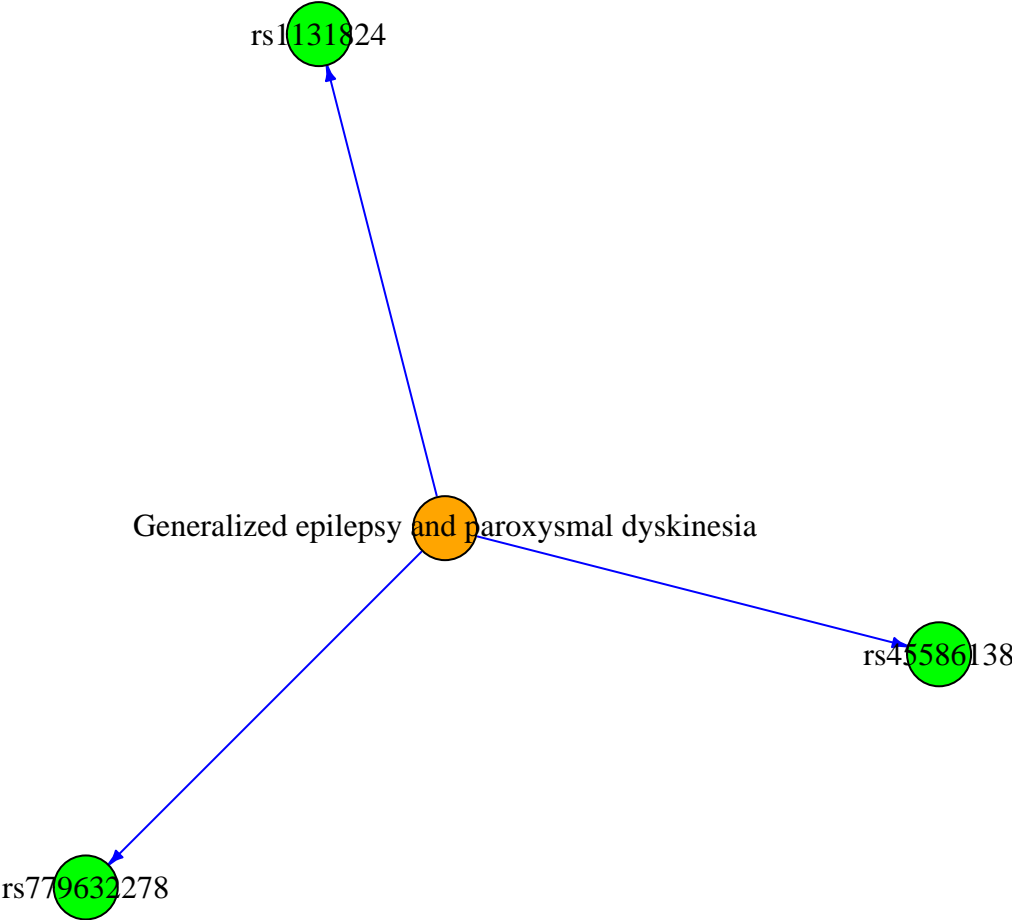

Variant–Disease Network (Generalized epilepsy with febrile seizures plus

Generalized epilepsy with febrile seizures plus

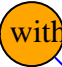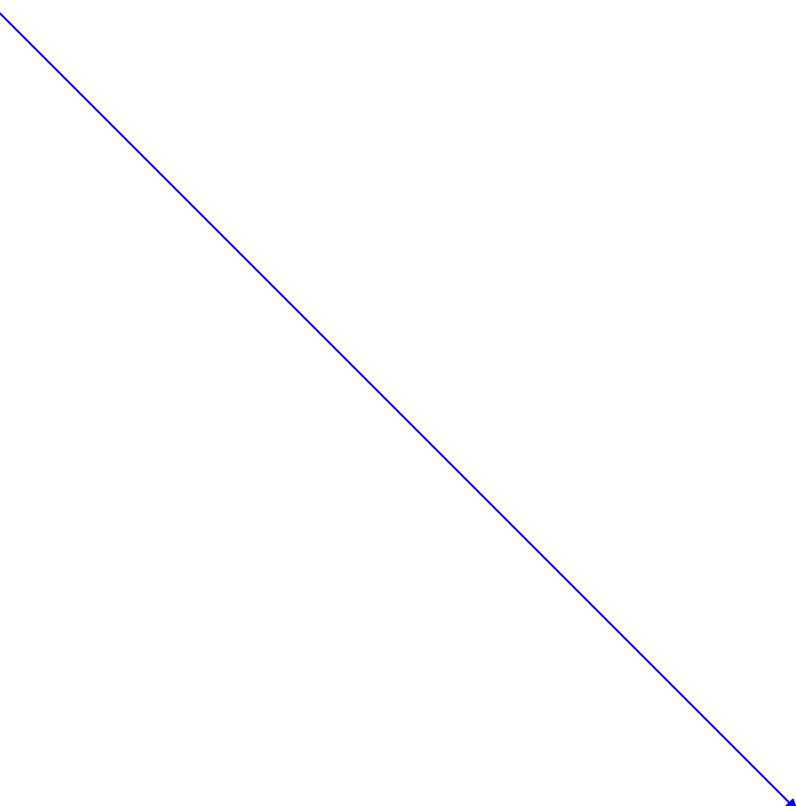

rs201672465

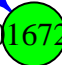

# Variant–Disease Network (Geroderma osteodysplastica)

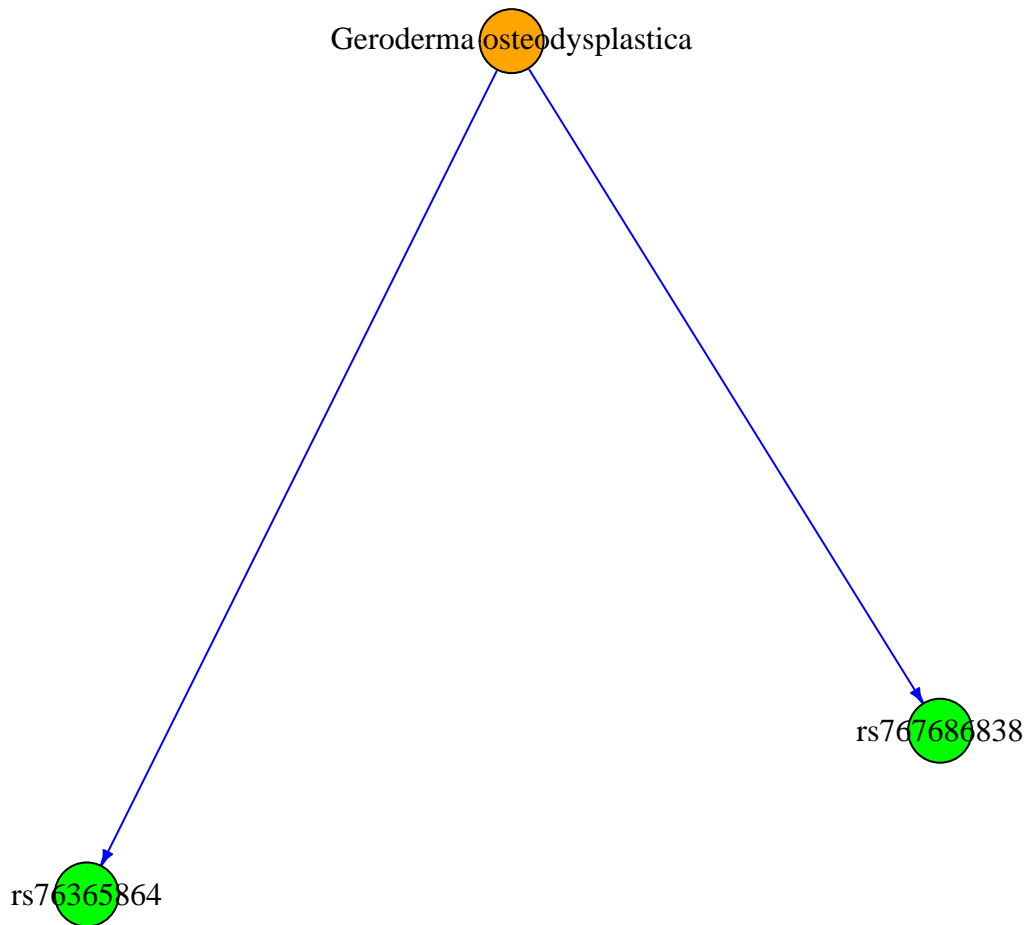

# Variant–Disease Network (Giant axonal neuropathy 1)

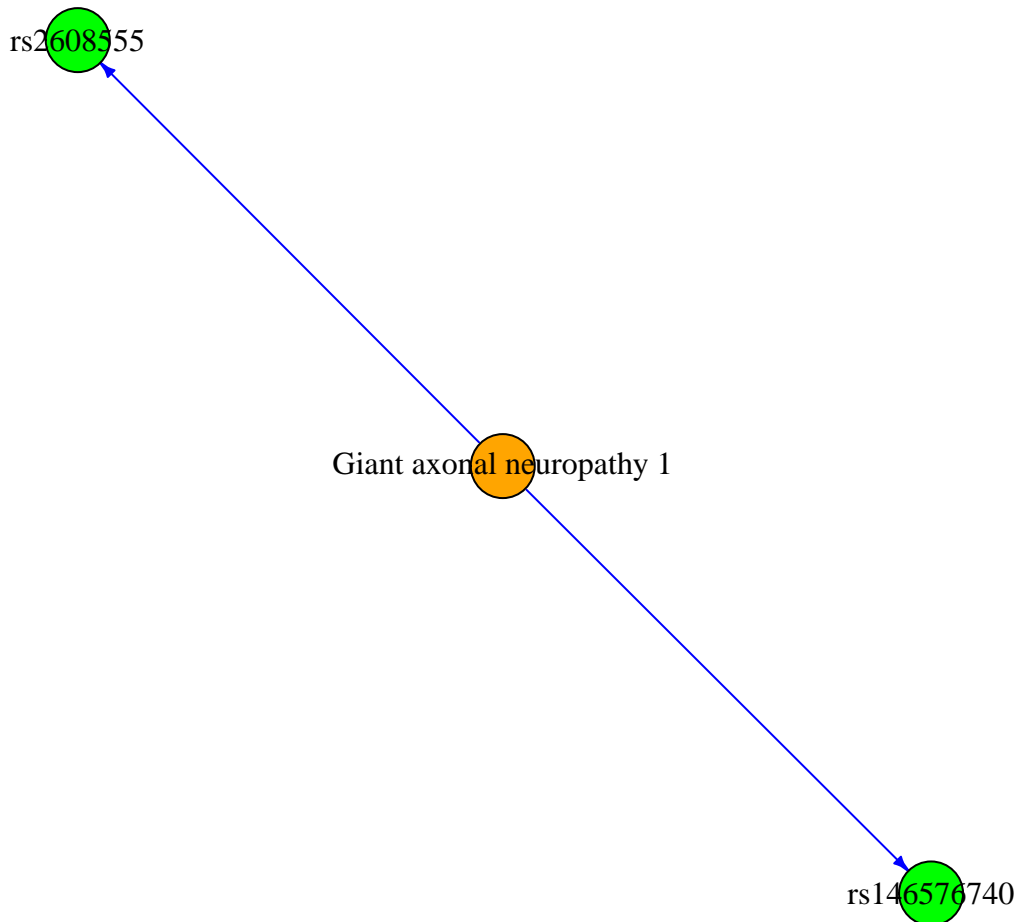

## Variant–Disease Network (Gingival fibromatosis)

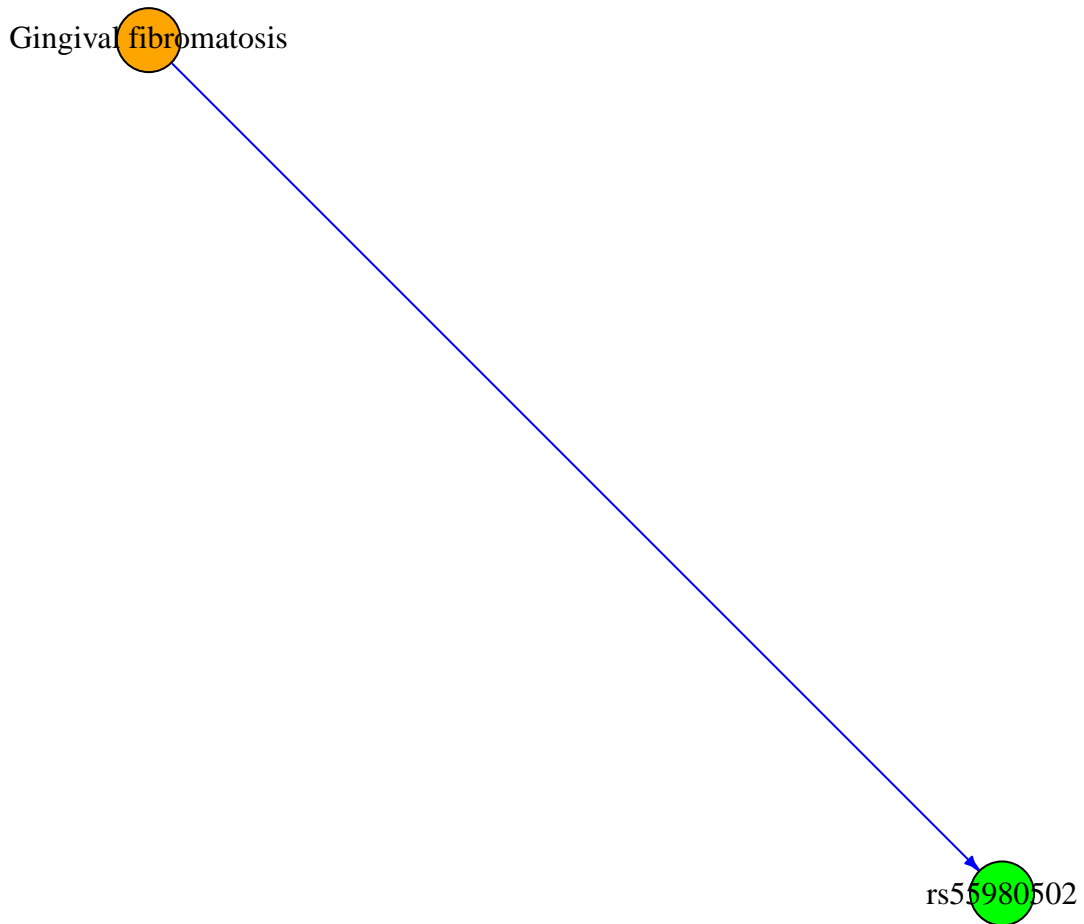



Variant–Disease Network (Glanzmann thrombasthenia)

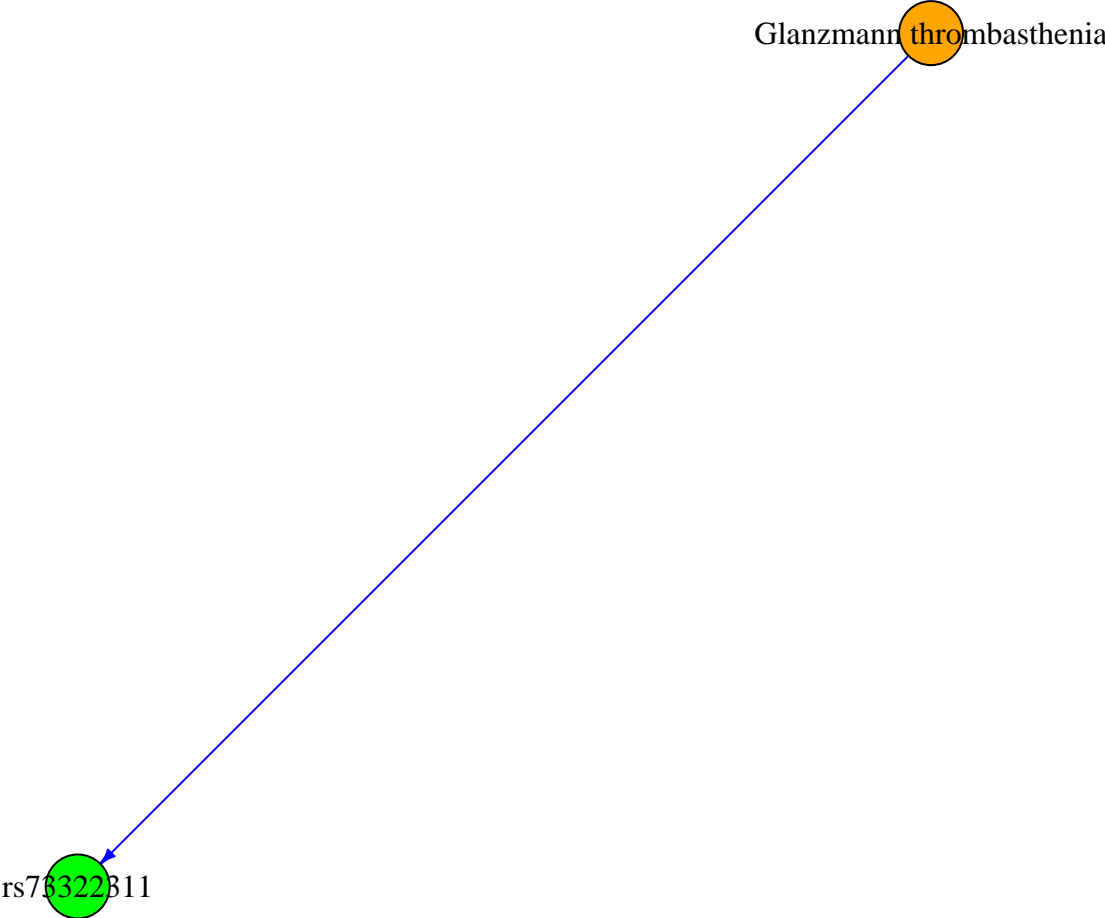

## Variant-Disease Network (Glaucoma 1)

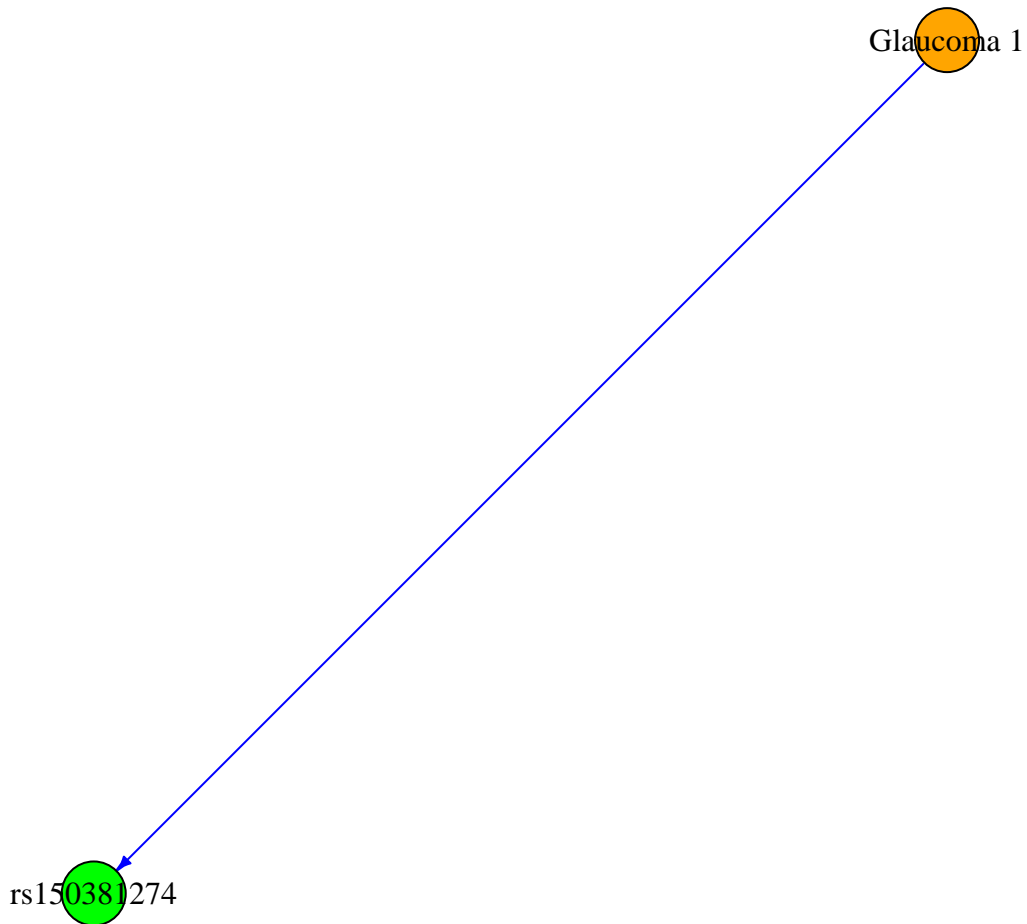

## Variant-Disease Network (Glaucoma 3)

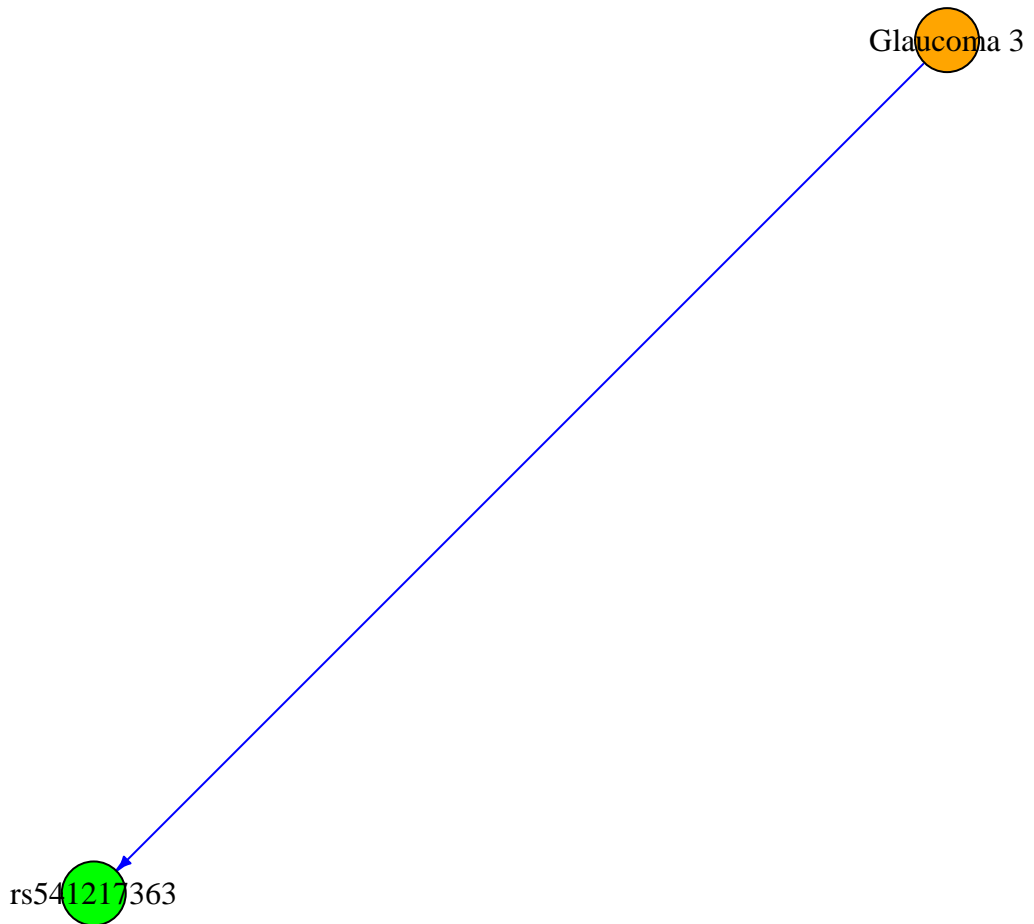

**Variant–Disease Network (Glucocorticoid deficiency with achalasia)**

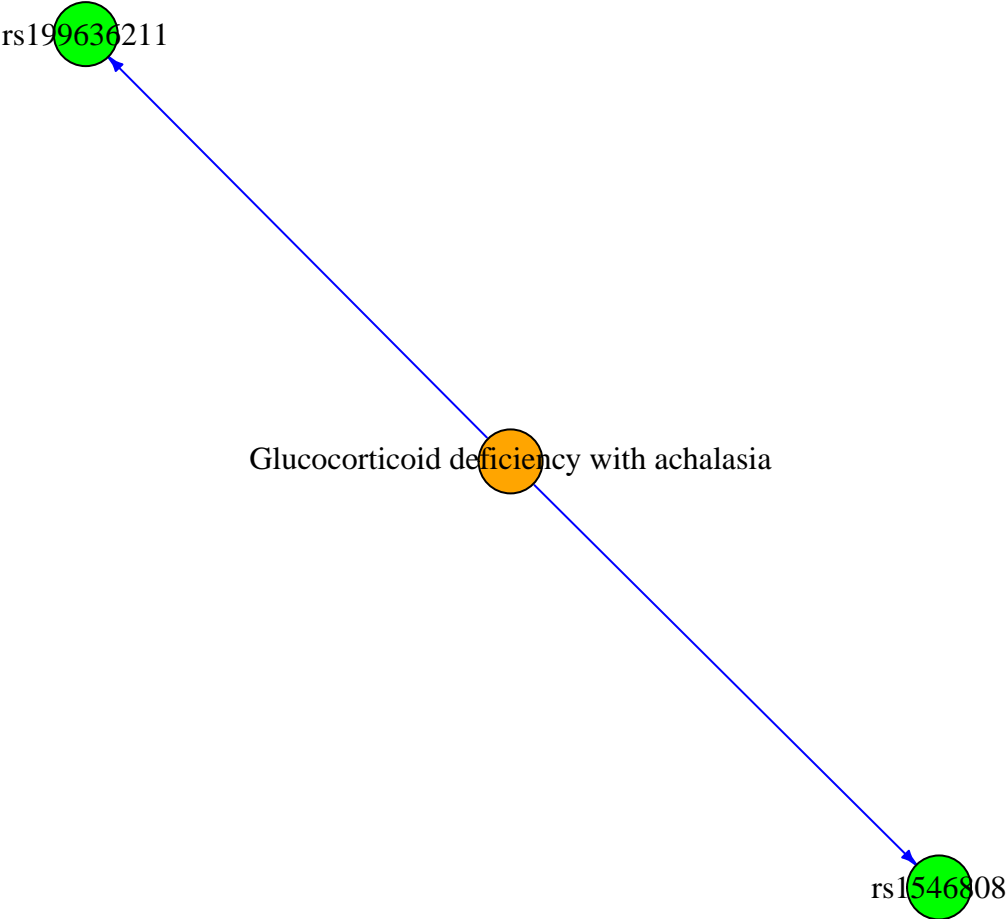

# Variant-Disease Network (GLUTAMIC PYRUVATE TRANSAMINASE POLYMORPHISM)

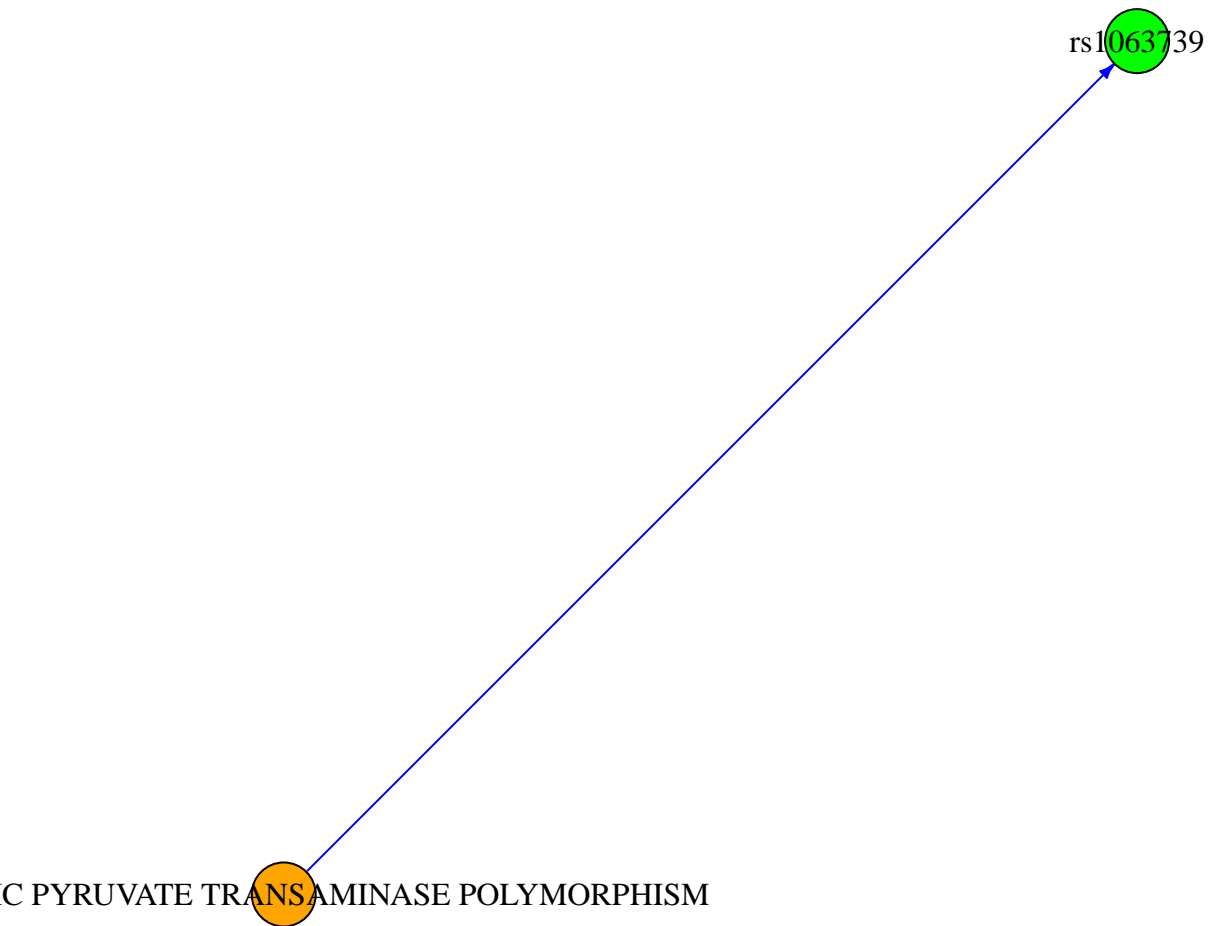

**Variant–Disease Network (Glycogen phosphorylase kinase deficiency)**

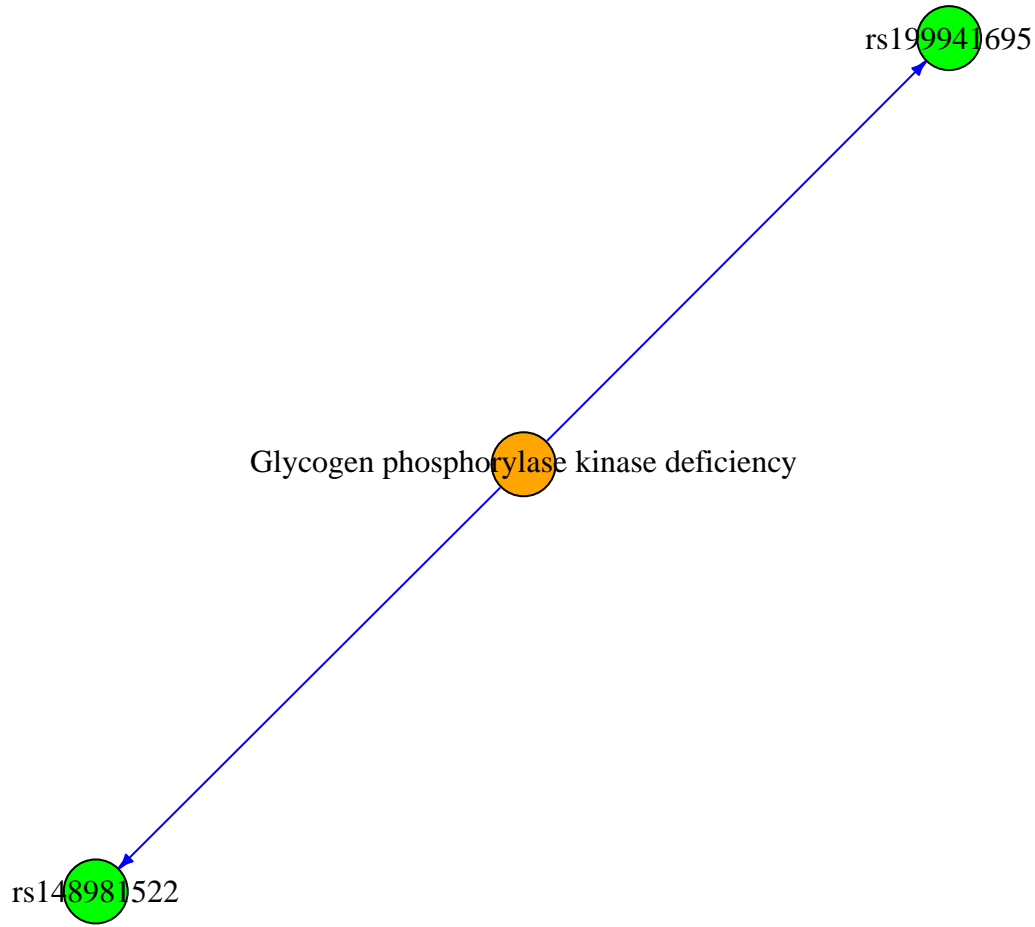

## Variant–Disease Network (Glycogen storage disease)

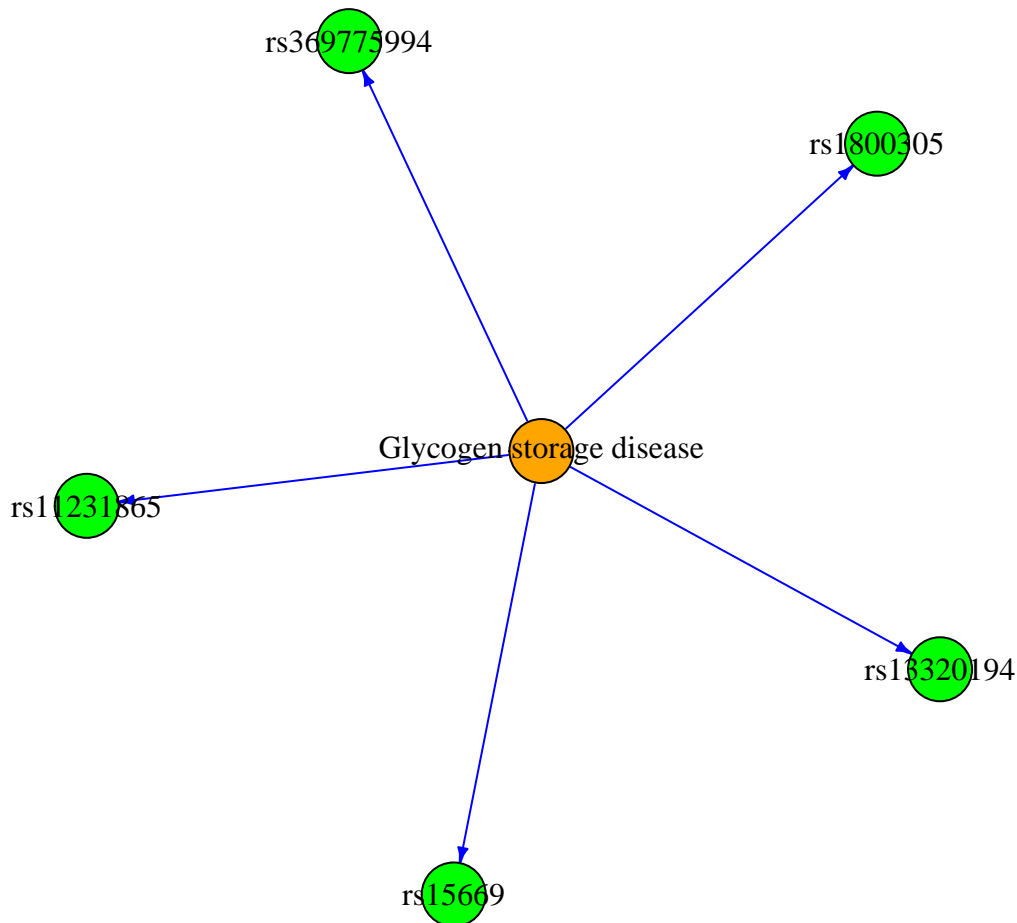

# Variant–Disease Network (Glycogen storage disease type 13)

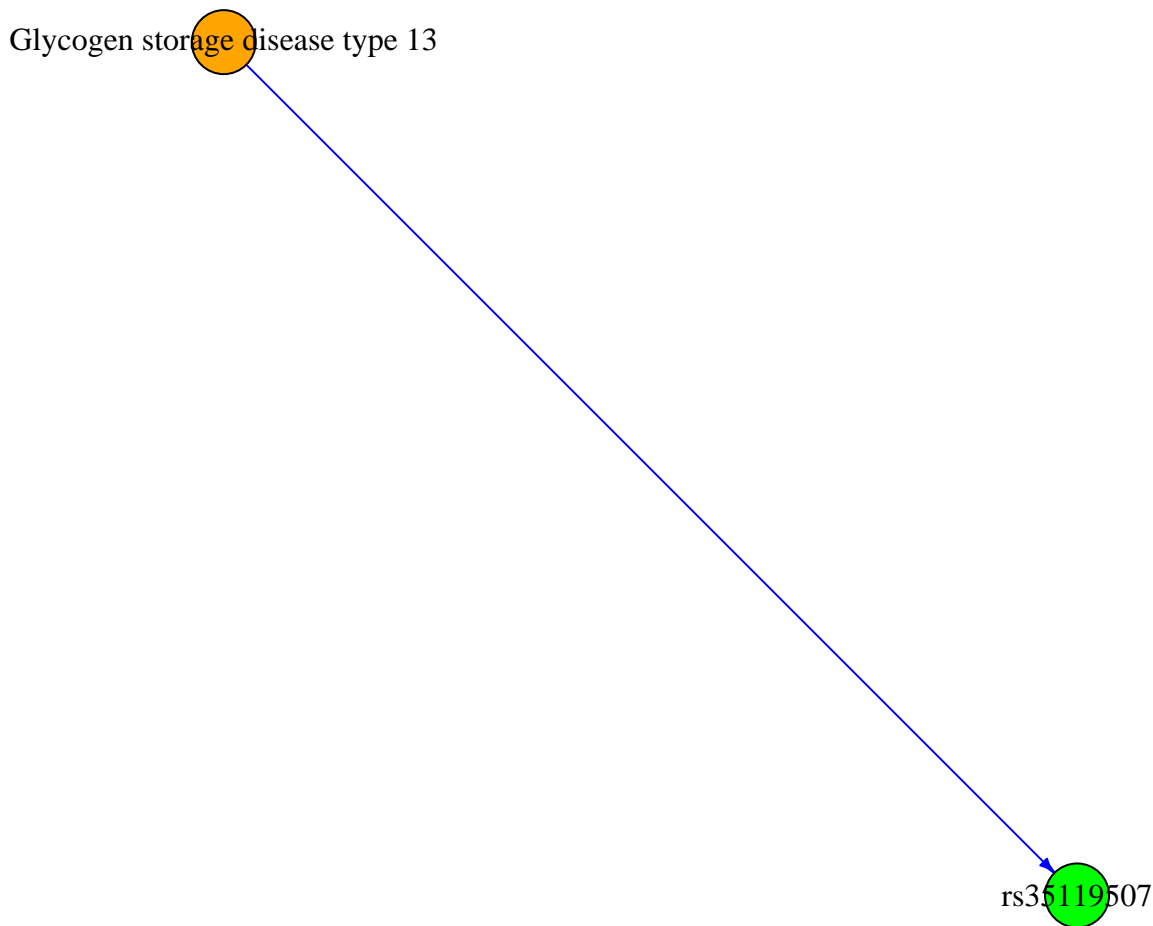



Variant–Disease Network (Glycogen storage disease type III)

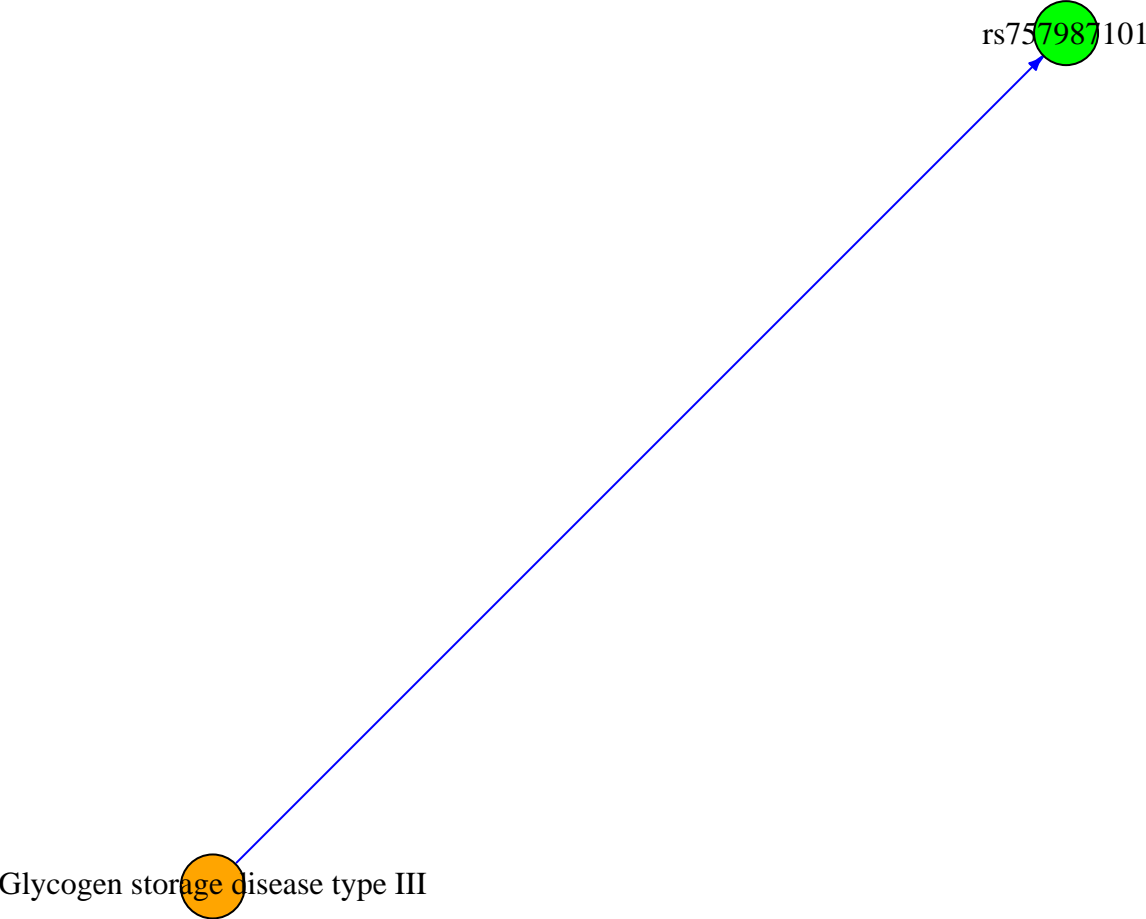

## Variant–Disease Network (Glycogen storage disease XI)

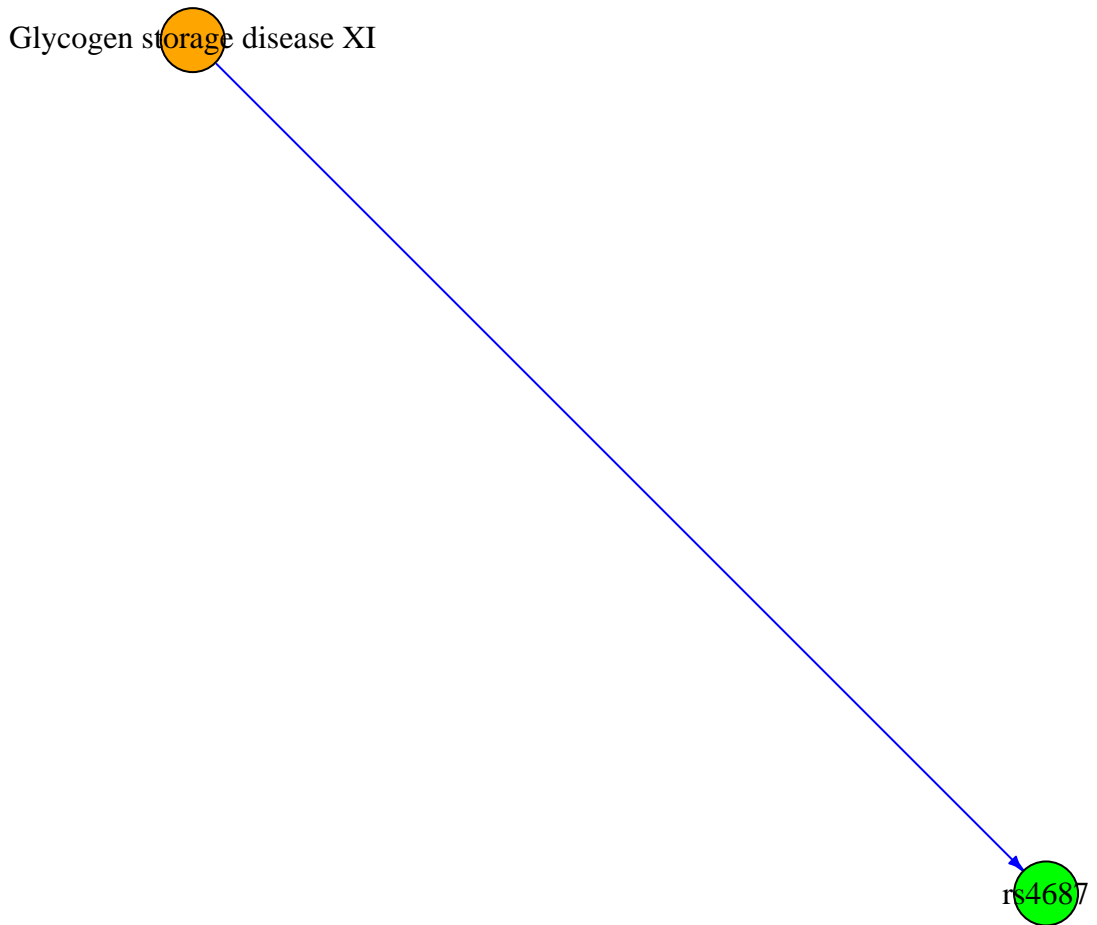

## Variant–Disease Network (GNE myopathy)

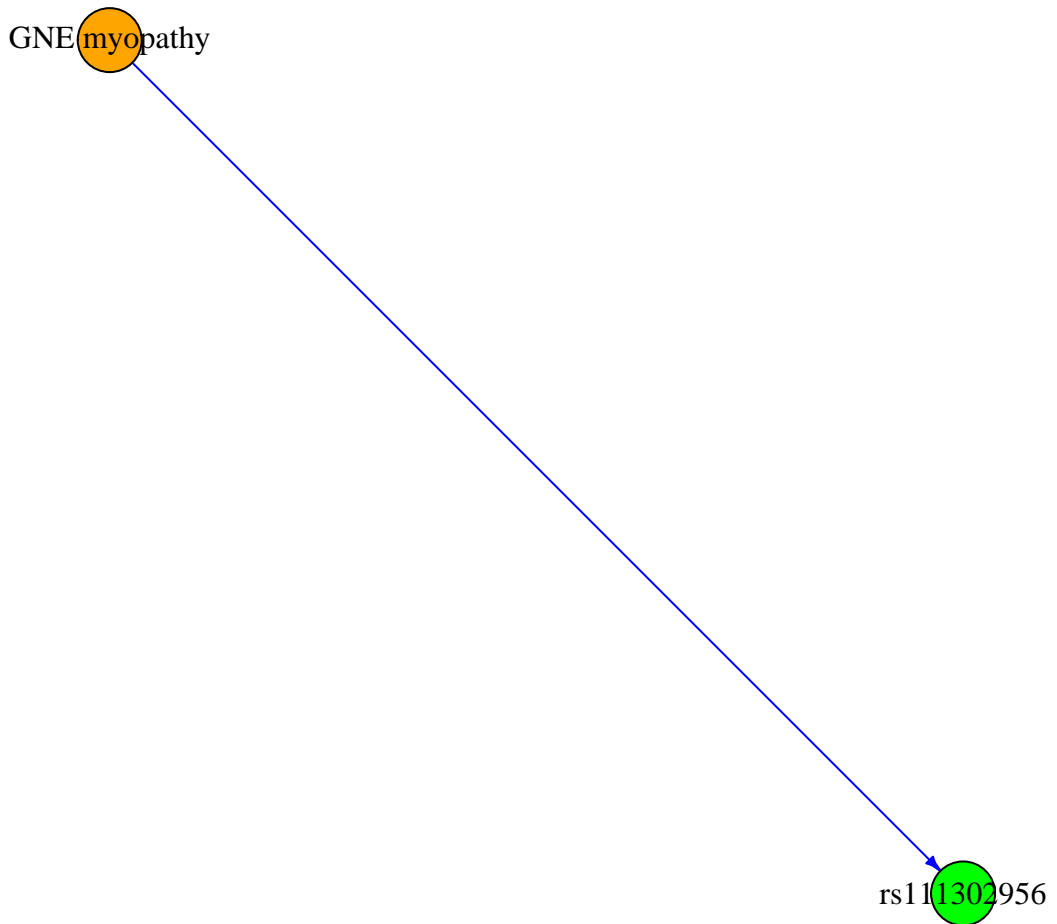

## Variant-Disease Network (Gorlin syndrome)

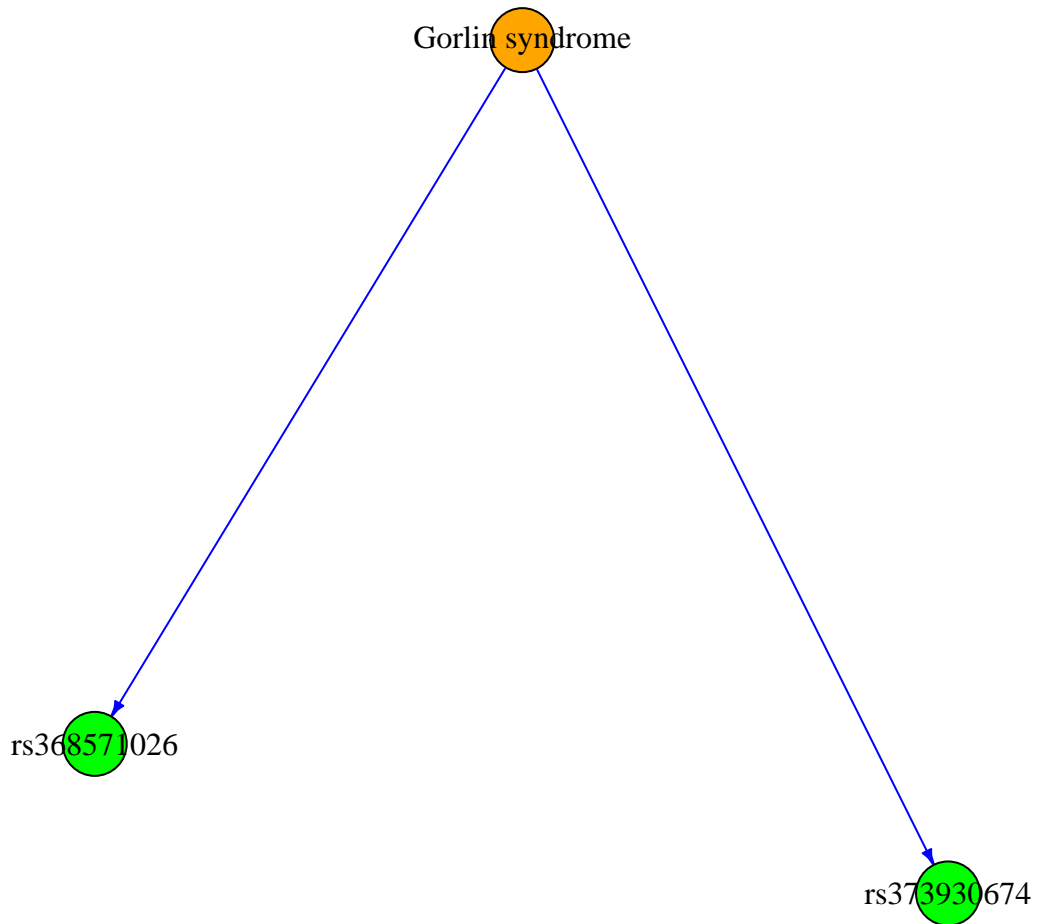

## Variant–Disease Network (Gray platelet syndrome)

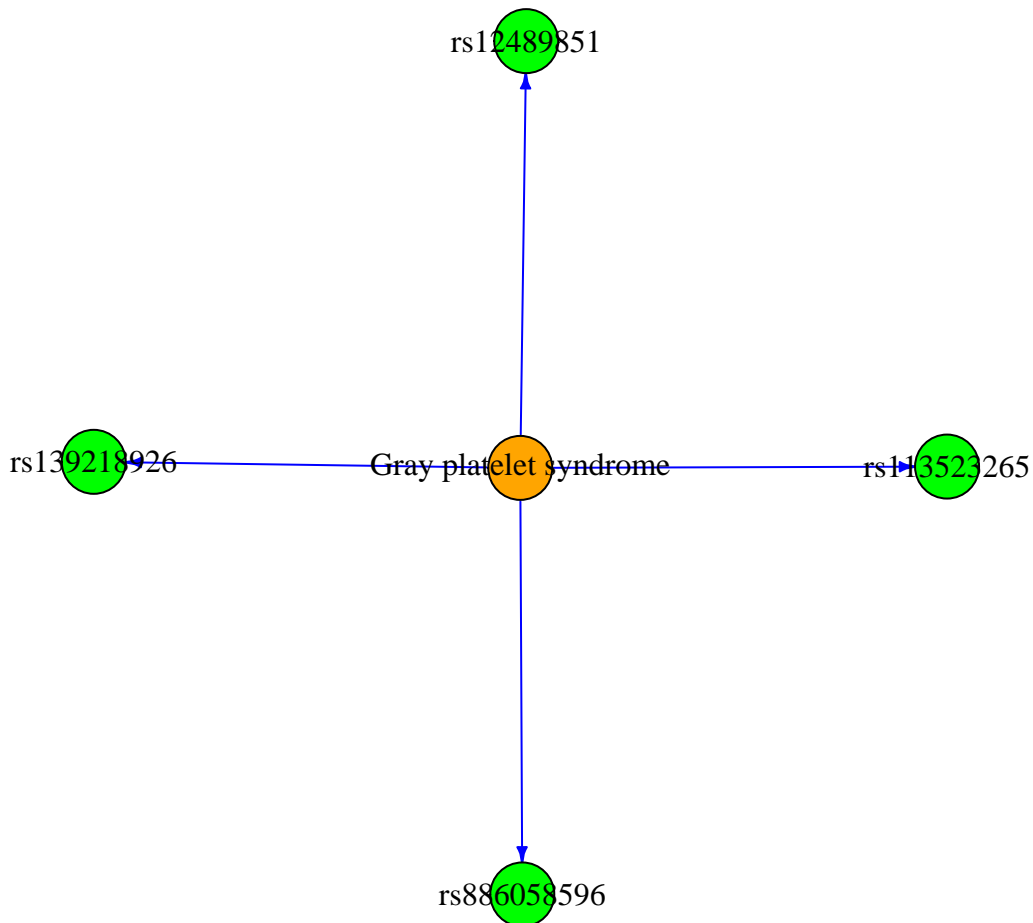

# Variant–Disease Network (Greig cephalopolysyndactyly syndrome)

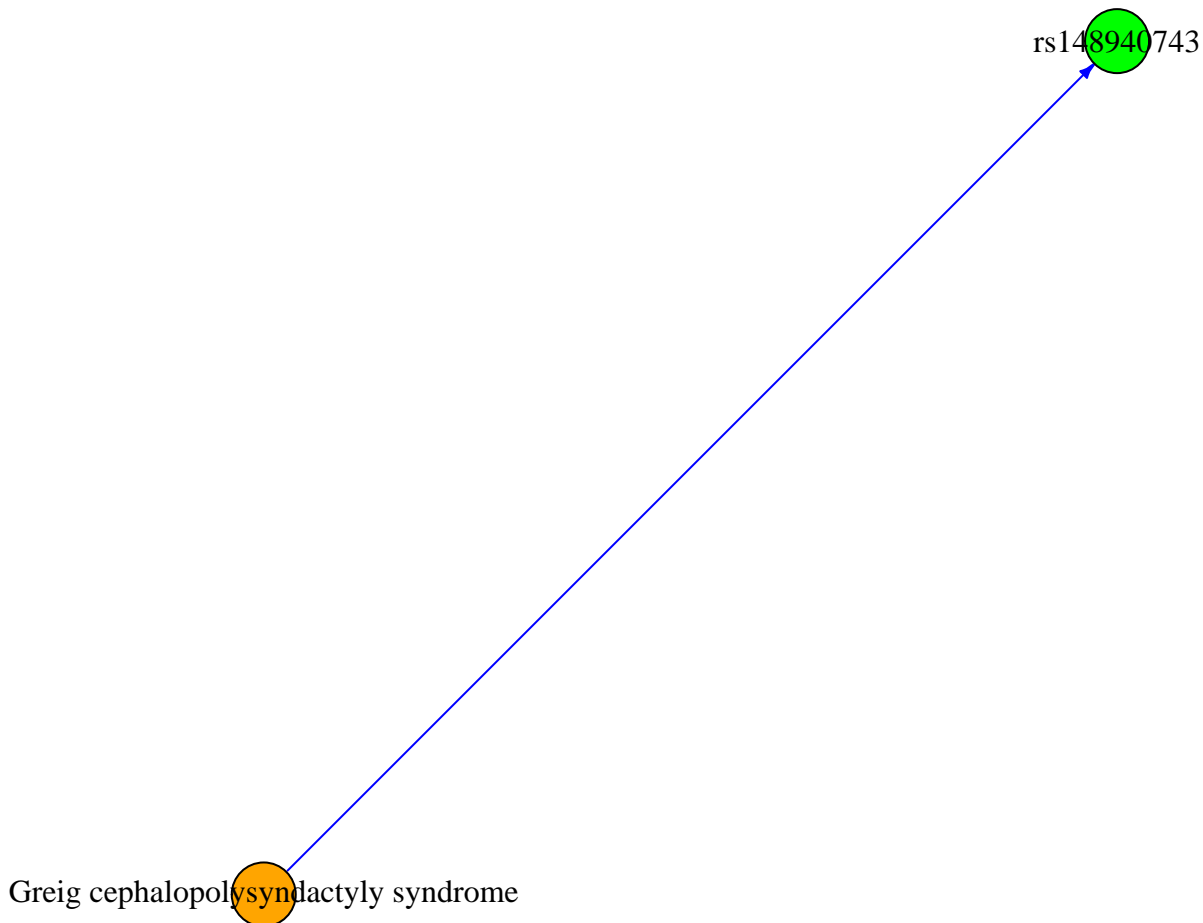

## Variant–Disease Network (Haemorrhagic telangiectasia 1)

rs369997021

Haemorrhagic telangiectasia 1

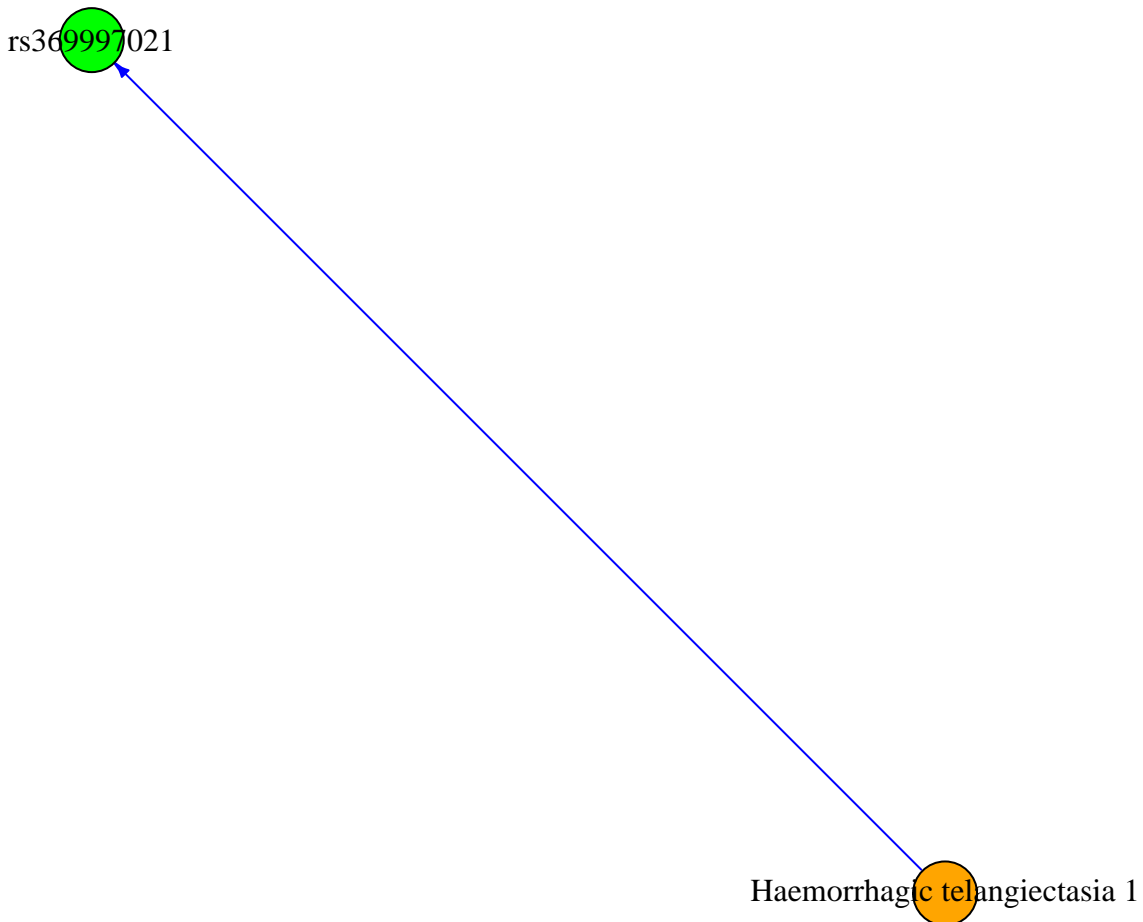

Variant–Disease Network (Hecht syndrome)

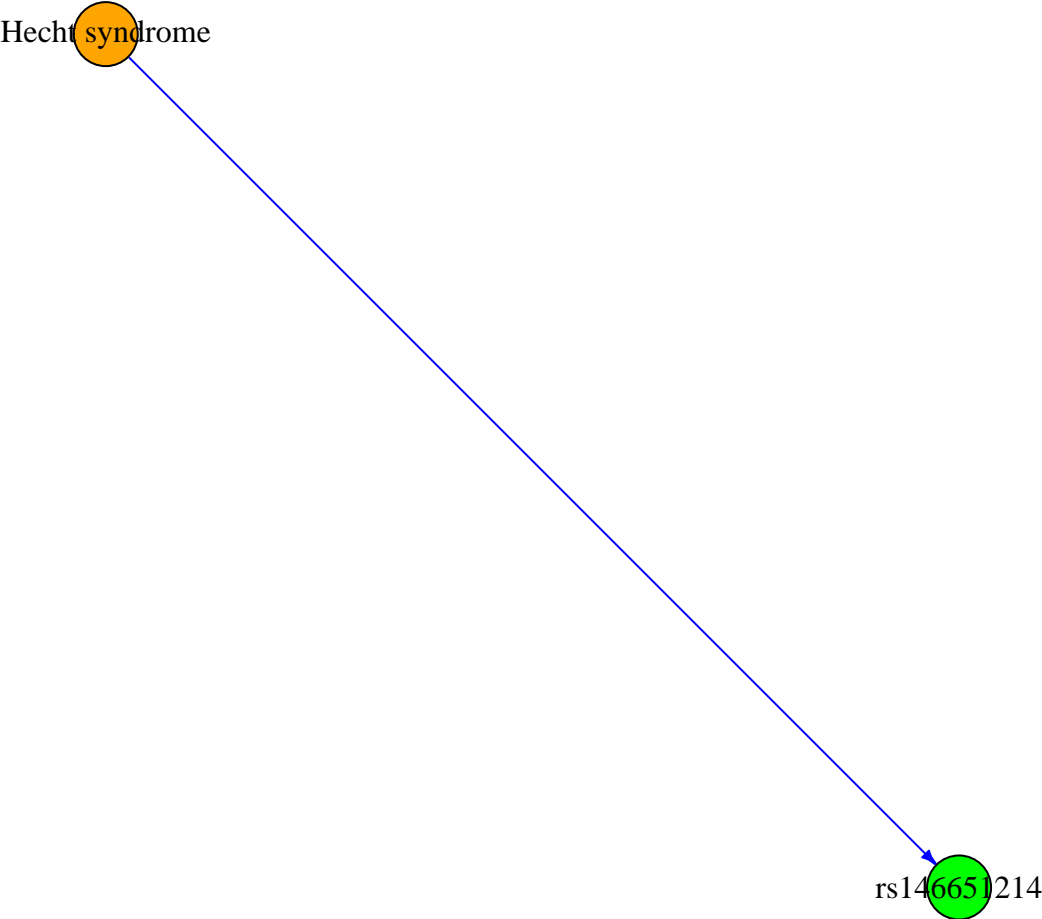



**Variant–Disease Network (Hemochromatosis type 3)**

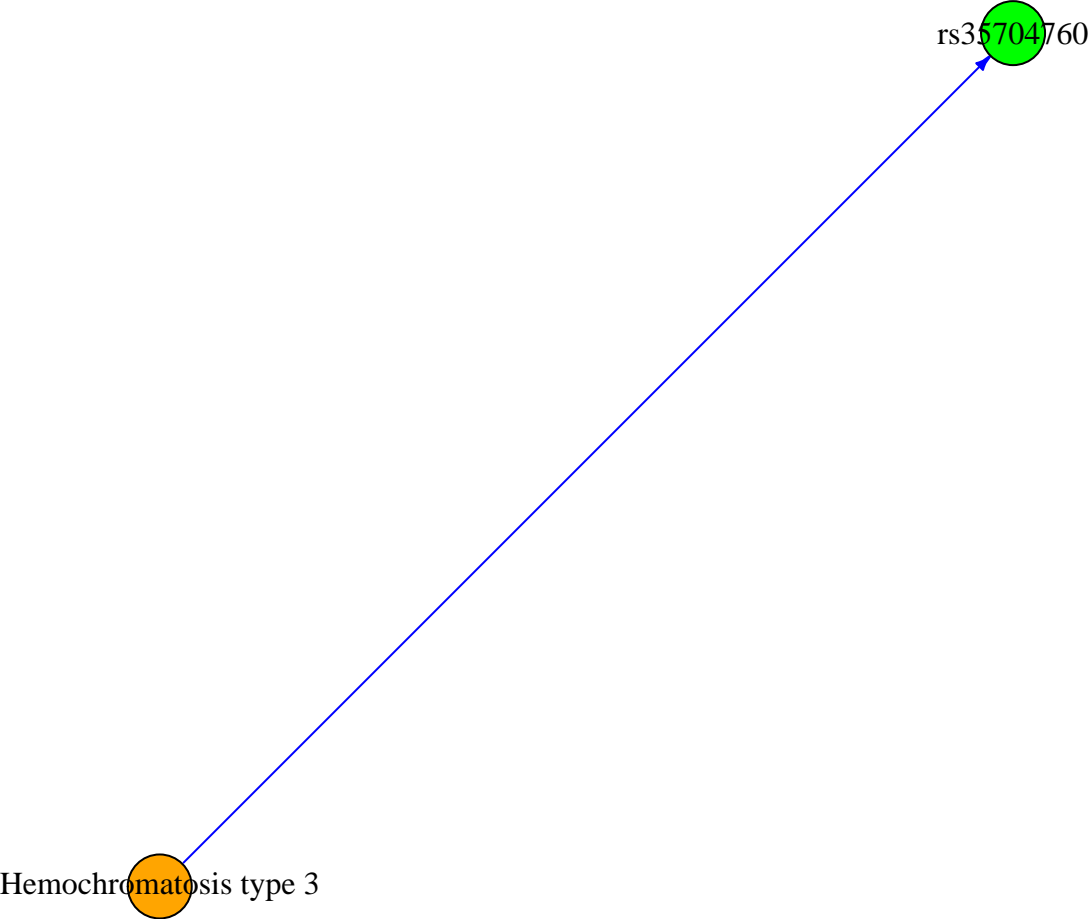

**Variant–Disease Network (HEMOGLOBIN D (IBADAN))**

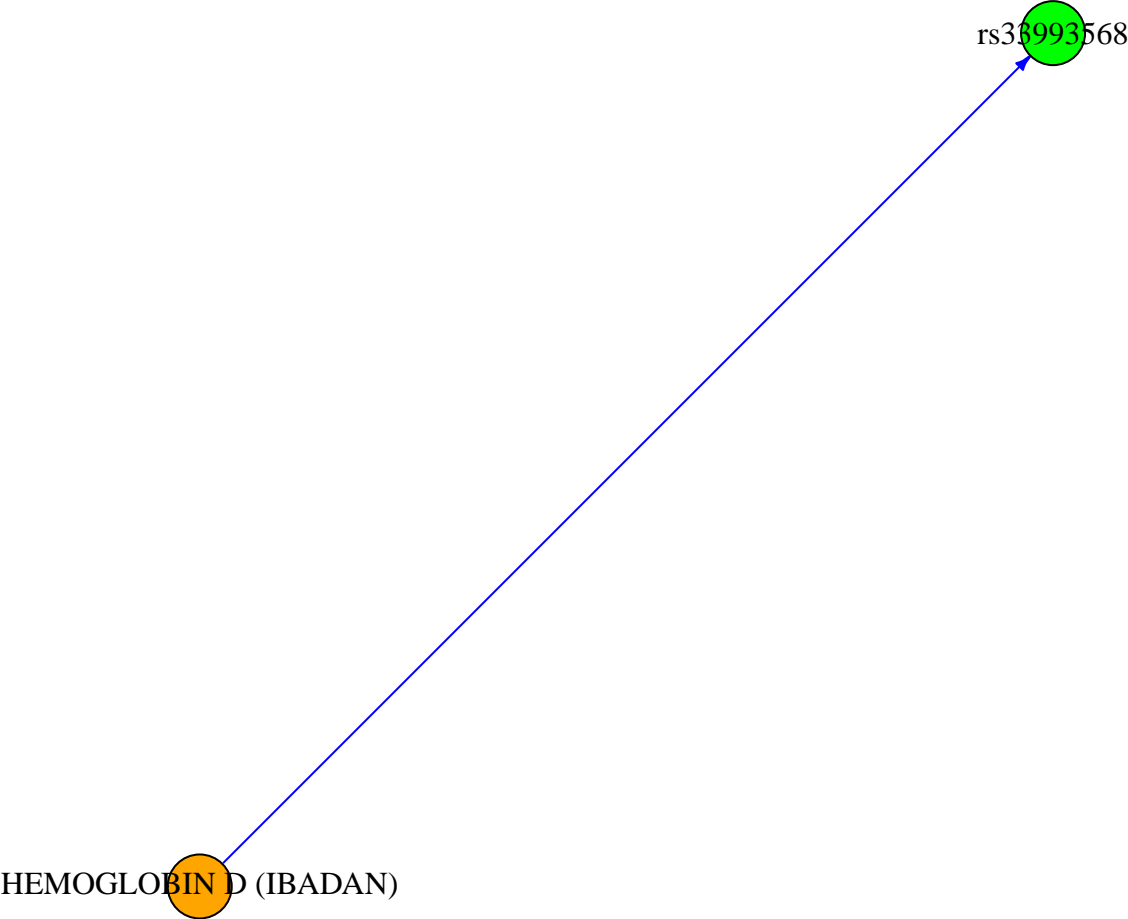

**Variant–Disease Network (HEMOGLOBIN D (OULED RABAH))**

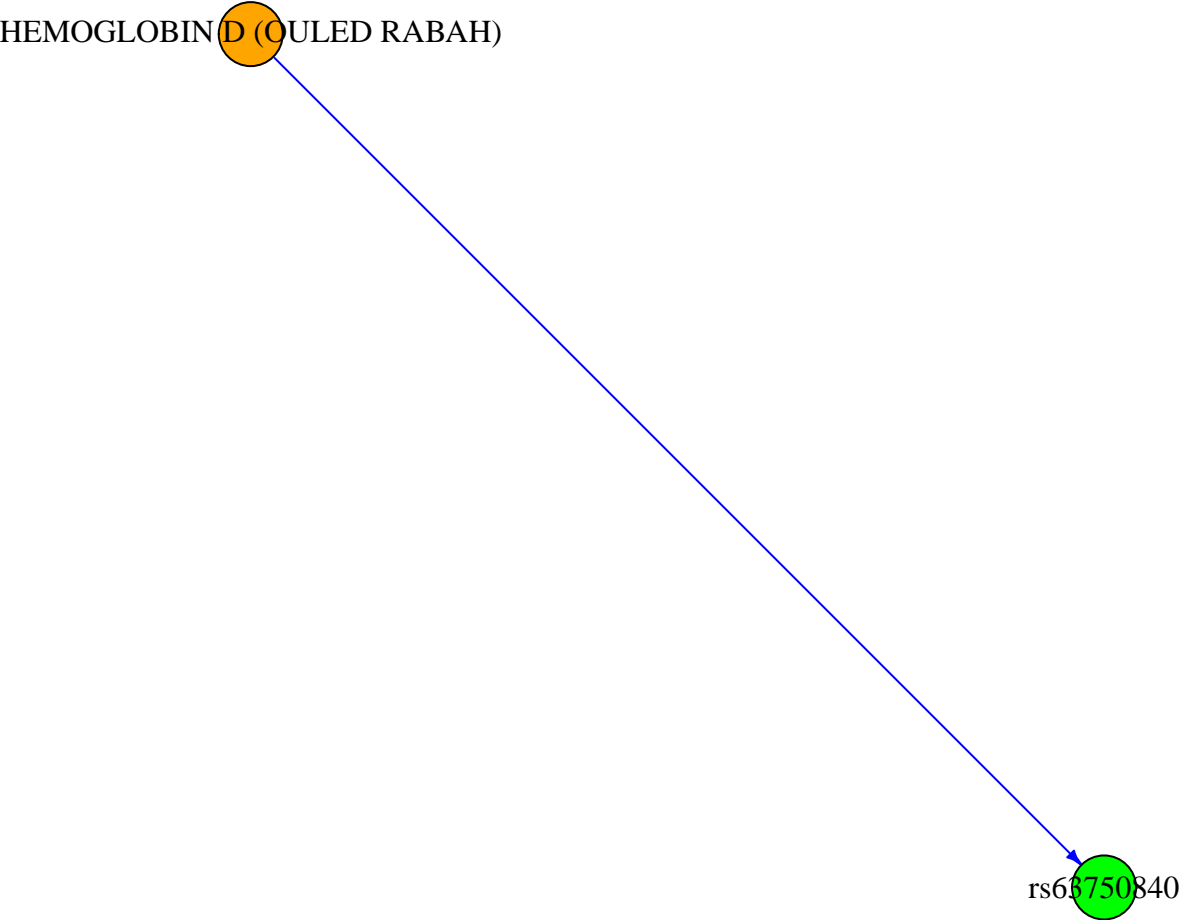

Variant–Disease Network (HEMOGLOBIN TYNE)

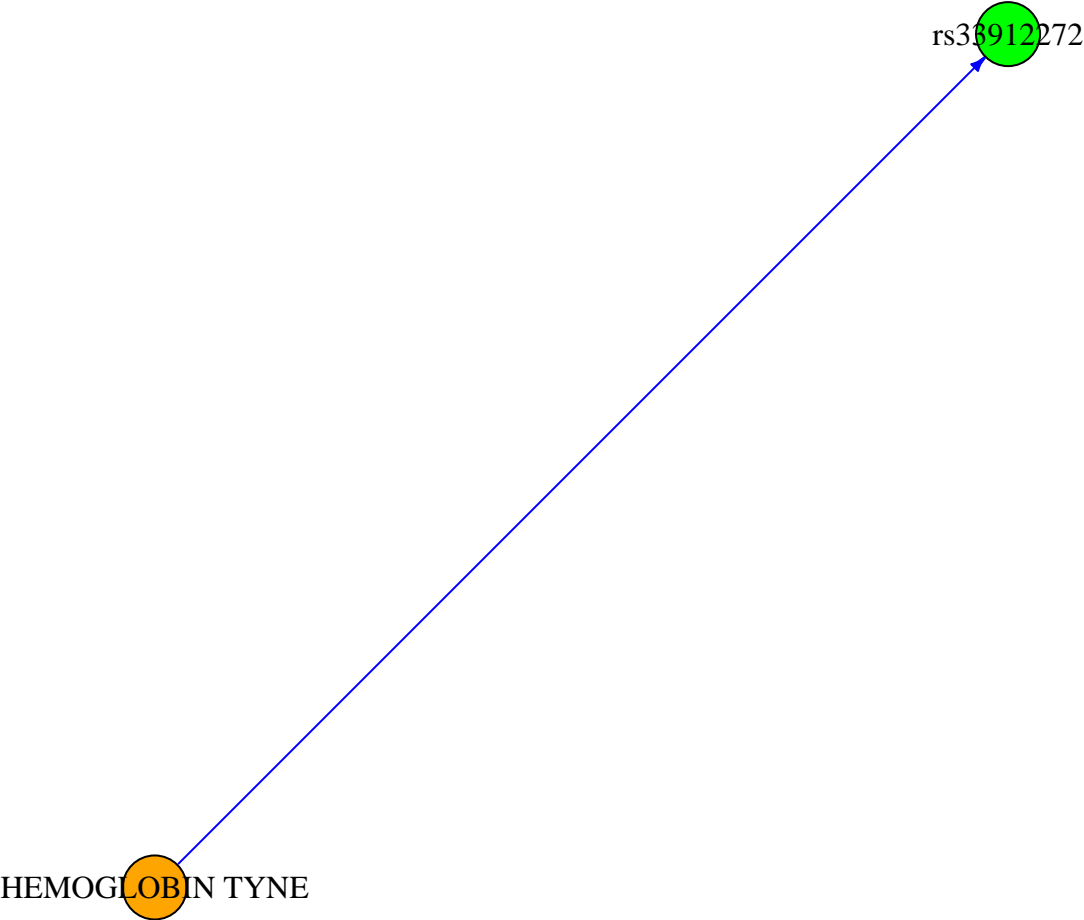

## Variant–Disease Network (Hemolytic anemia)

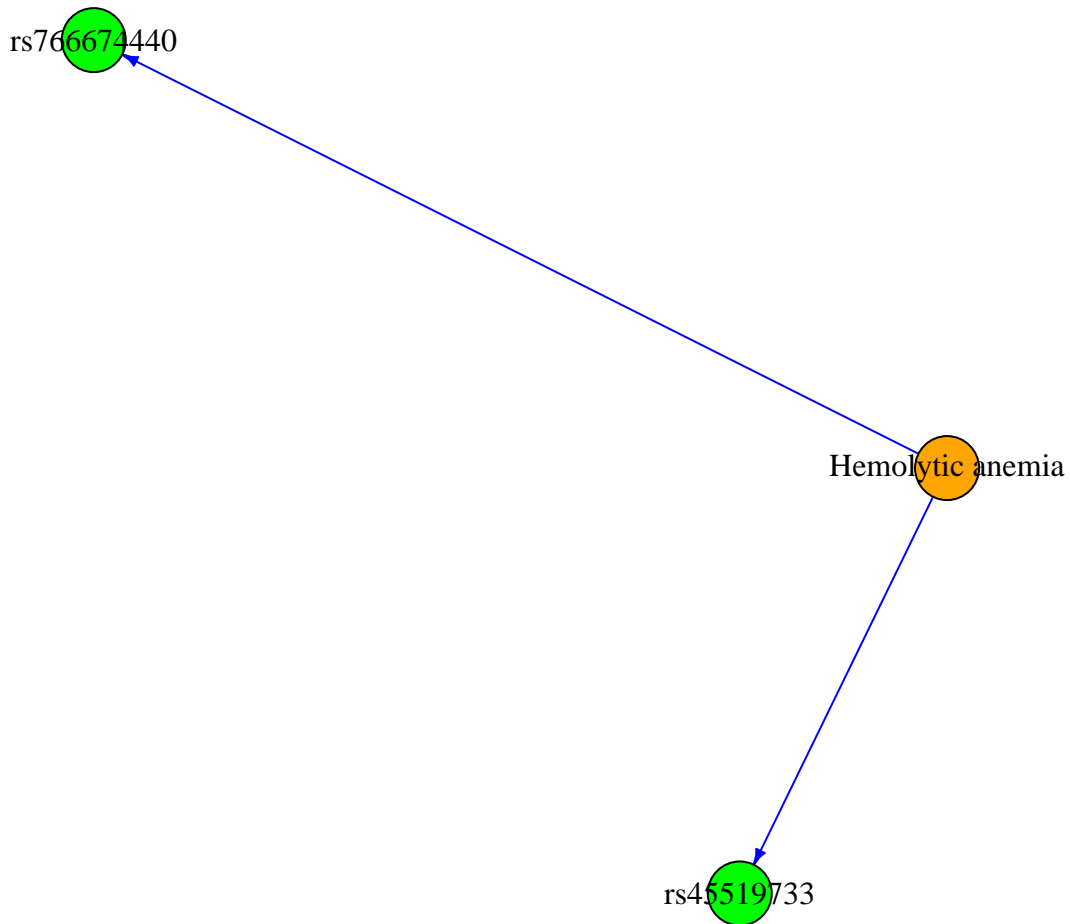

Variant–Disease Network (Hemophagocytic lymphohistiocytosis)

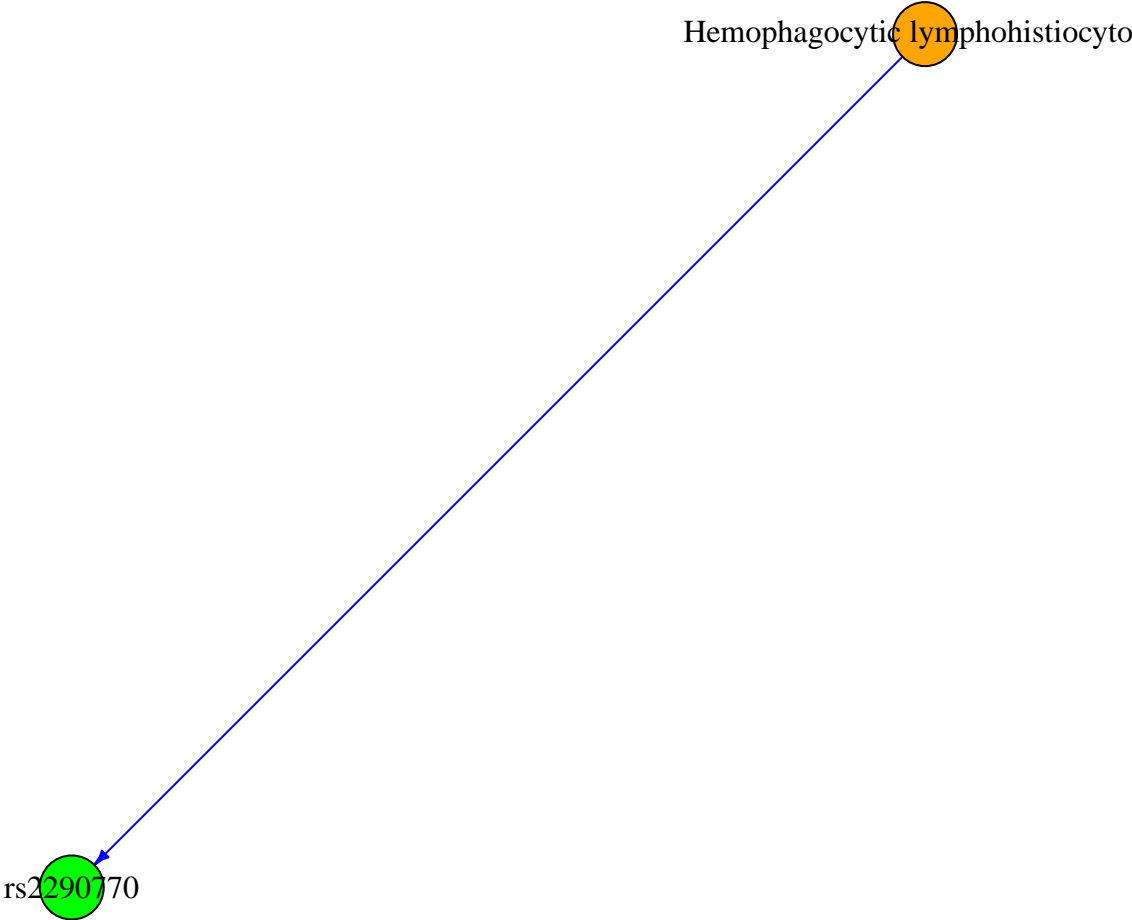

## Variant-Disease Network (Hemophilia B)

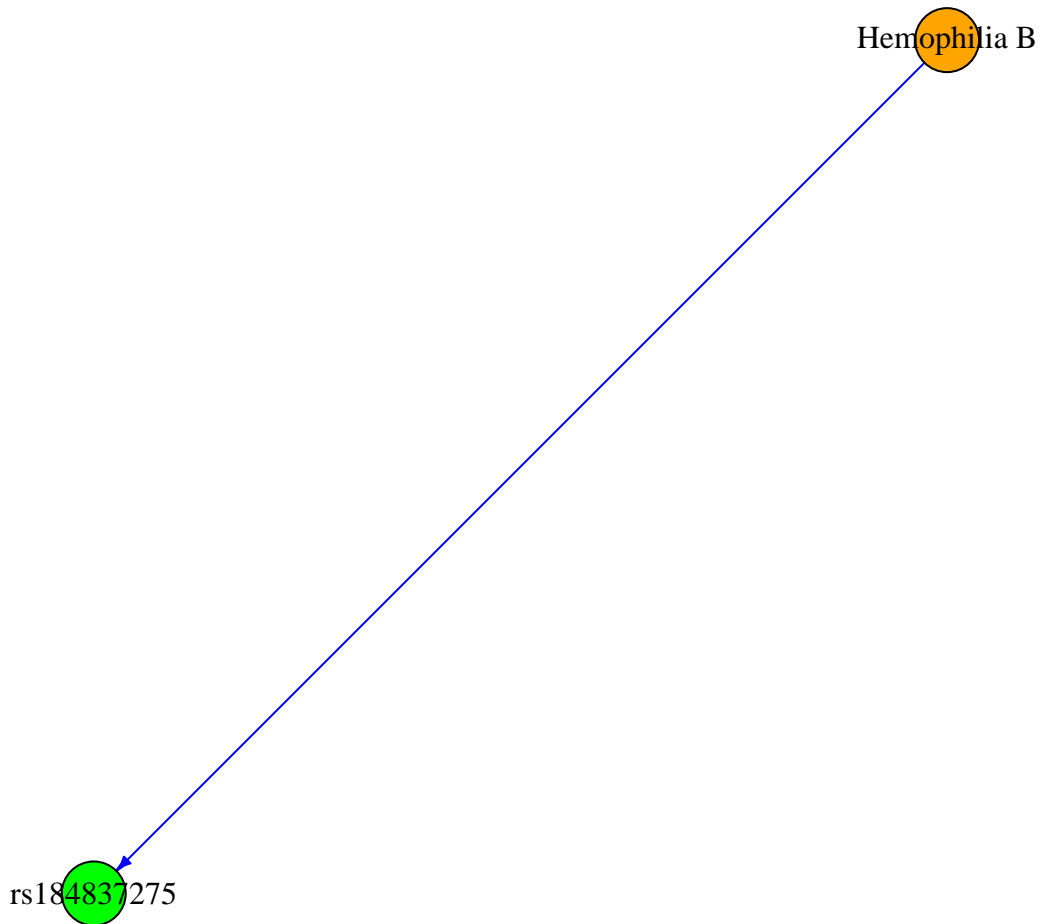

Variant–Disease Network (Hepatic failure)

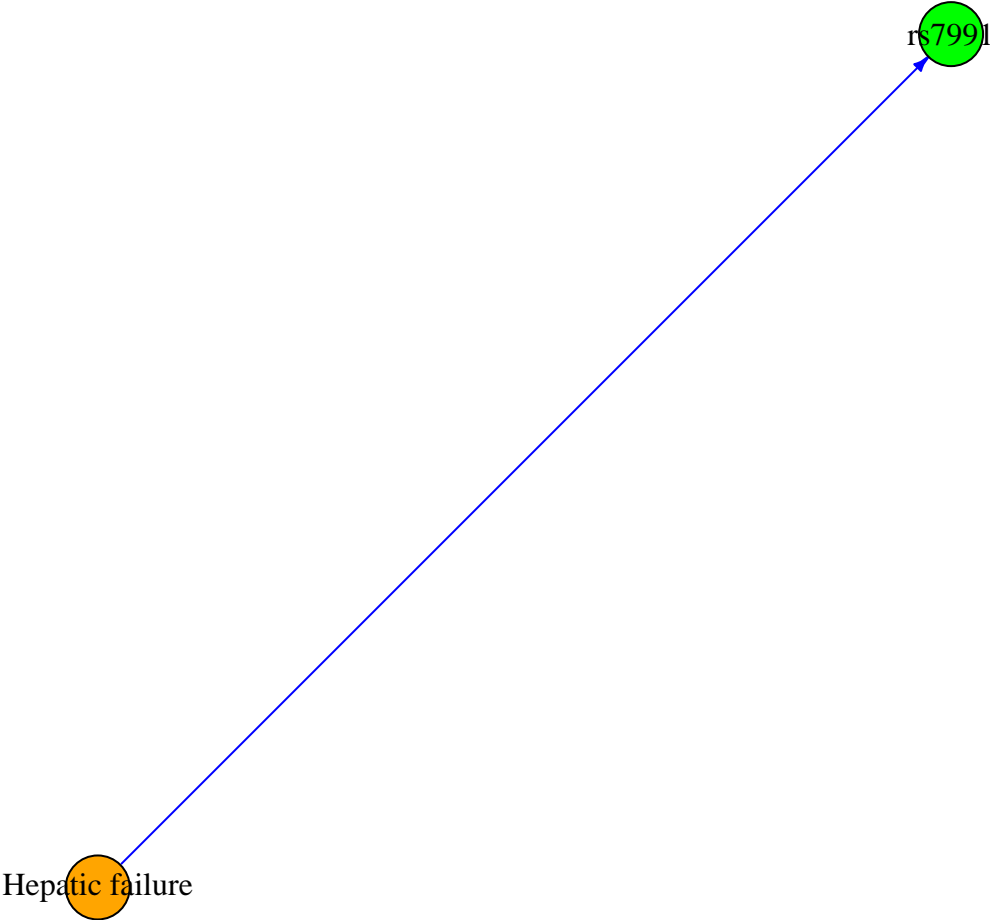



Variant–Disease Network (Hepatic lipase deficiency)

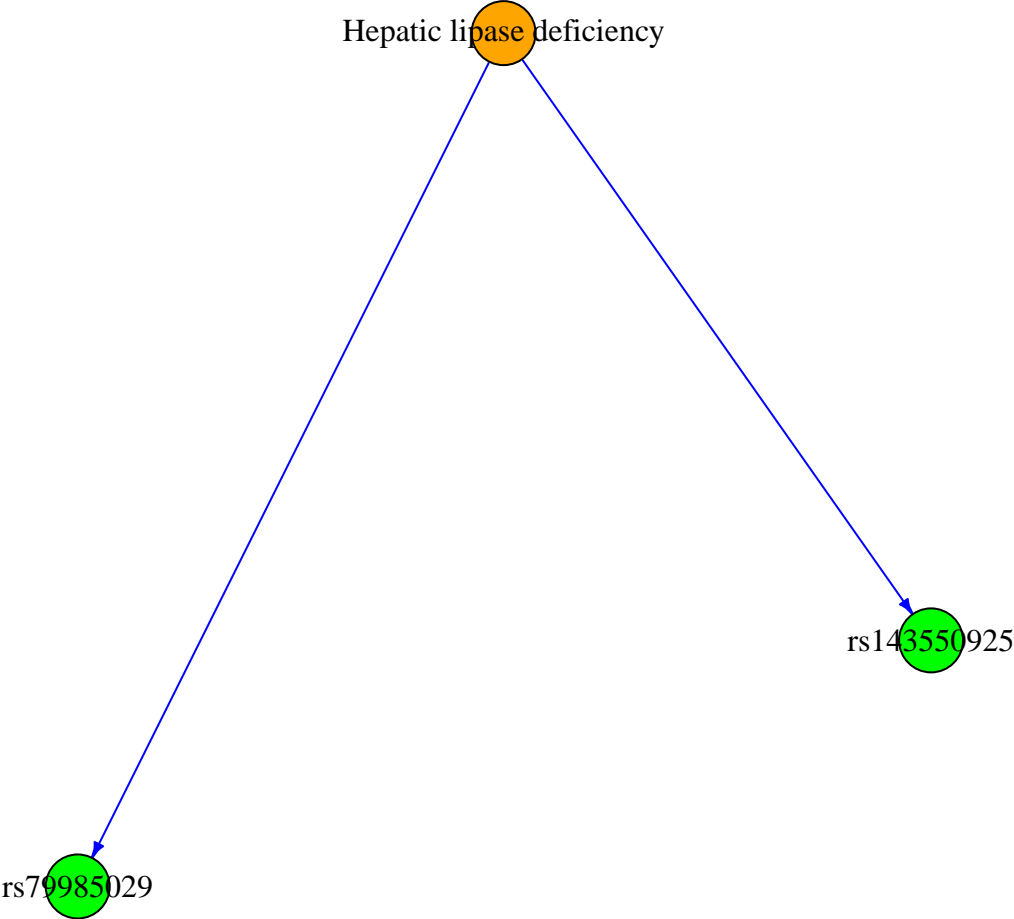

## Variant–Disease Network (Hepatocellular carcinoma)

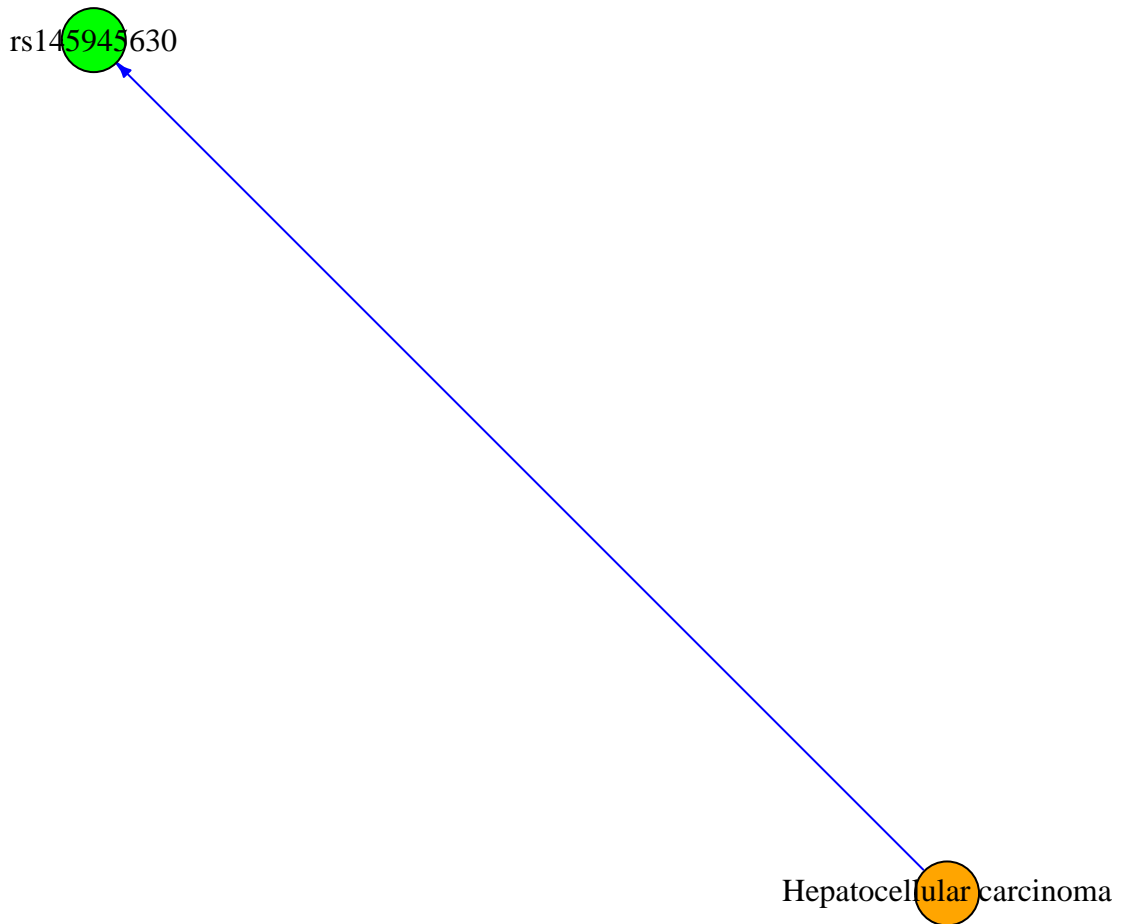

Variant–Disease Network (Hereditary breast and ovarian cancer syndrome)

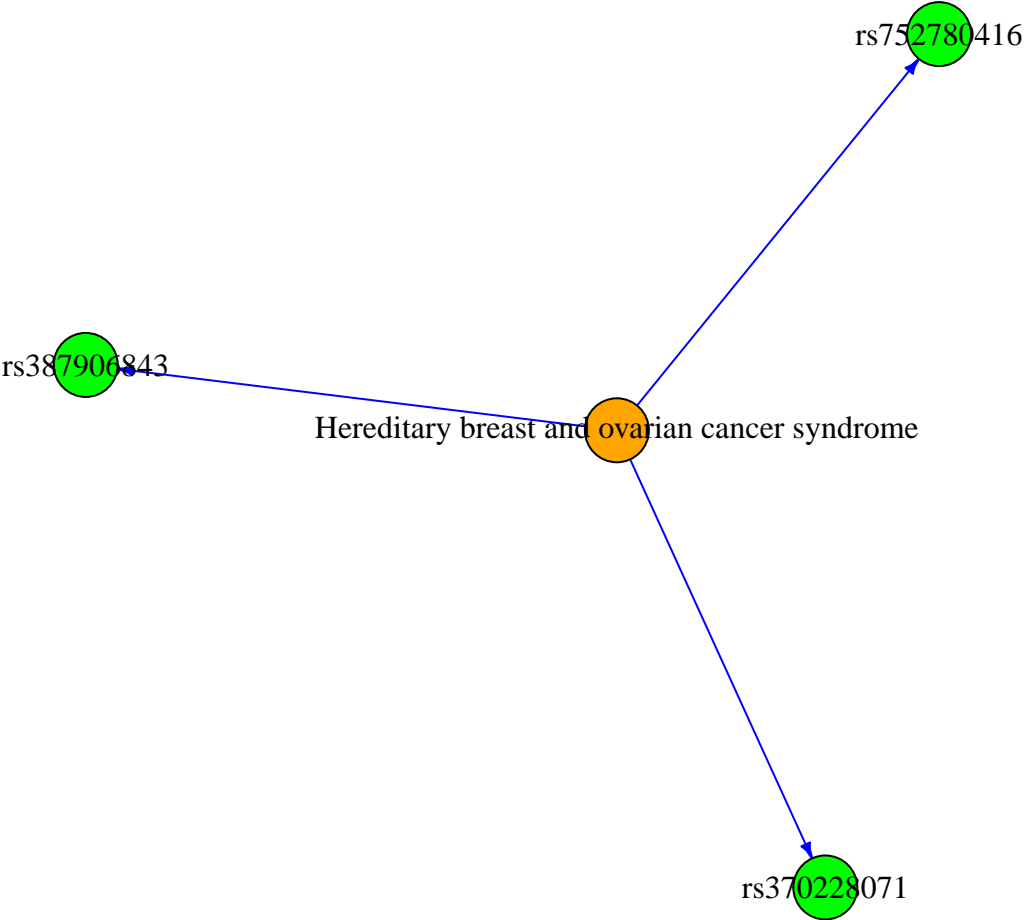

## Variant-Disease Network (Hereditary cancer-predisposing syndrome)

**Variant–Disease Network (Hereditary cutaneous melanoma)**

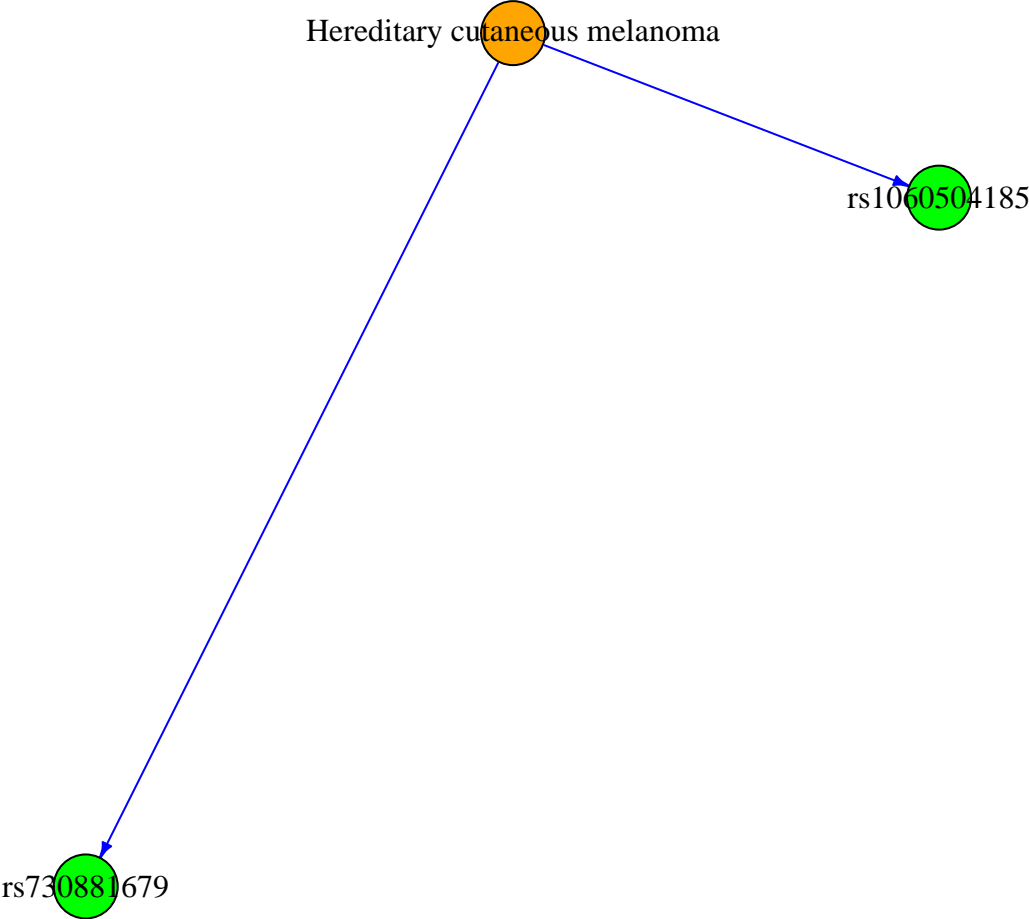

**Variant–Disease Network (Hereditary diffuse gastric cancer)**

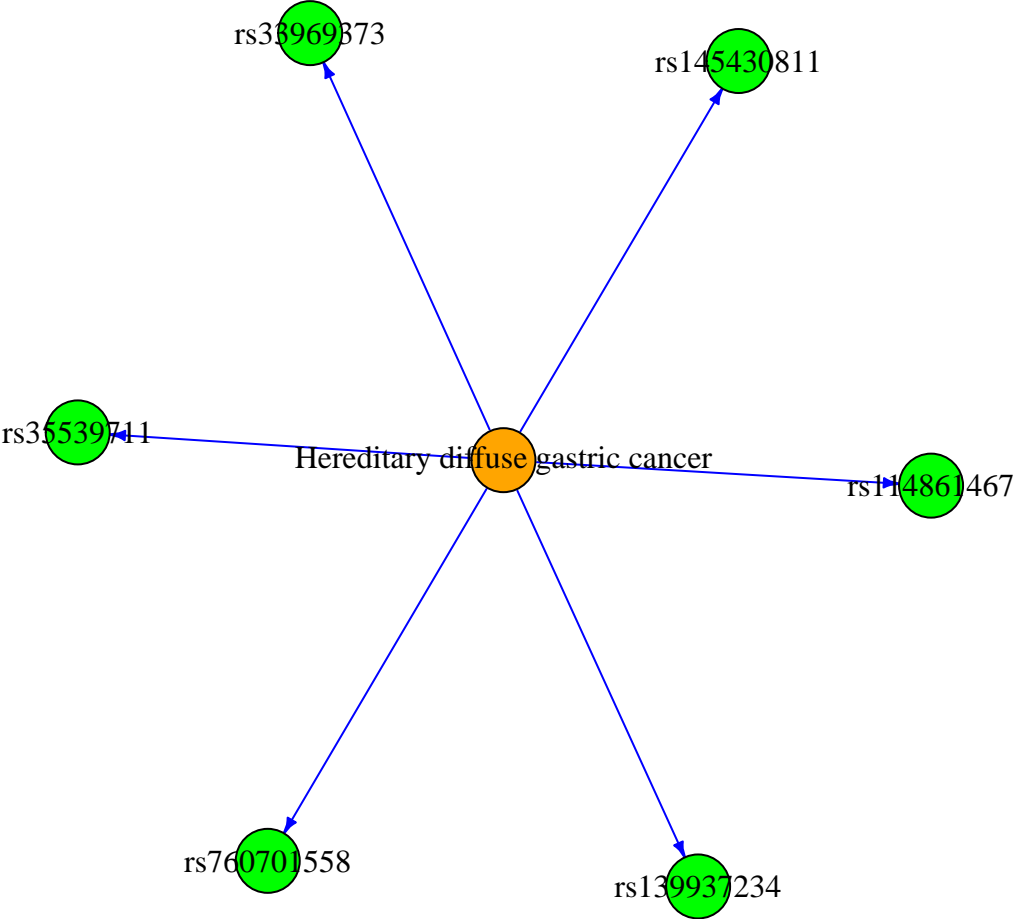

# Variant-Disease Network (Hereditary diffuse leukoencephalopathy with spheroids)

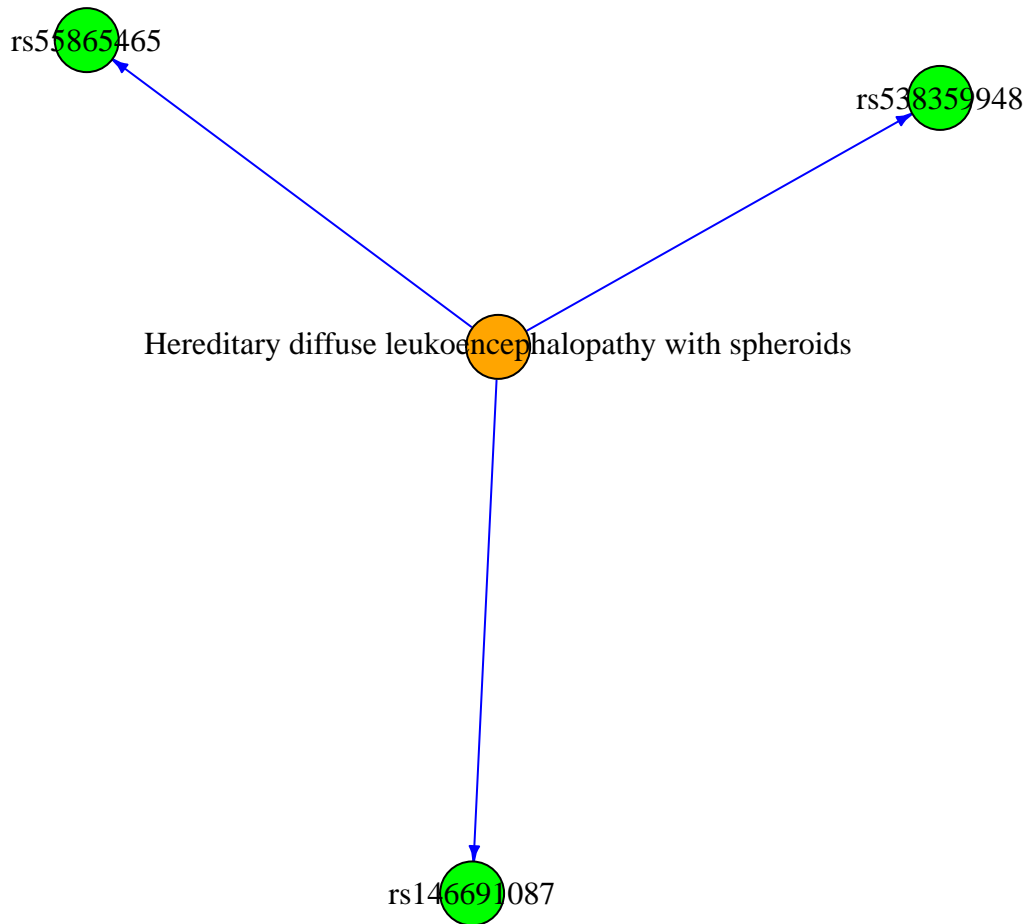

# Variant–Disease Network (Hereditary factor XI deficiency disease)

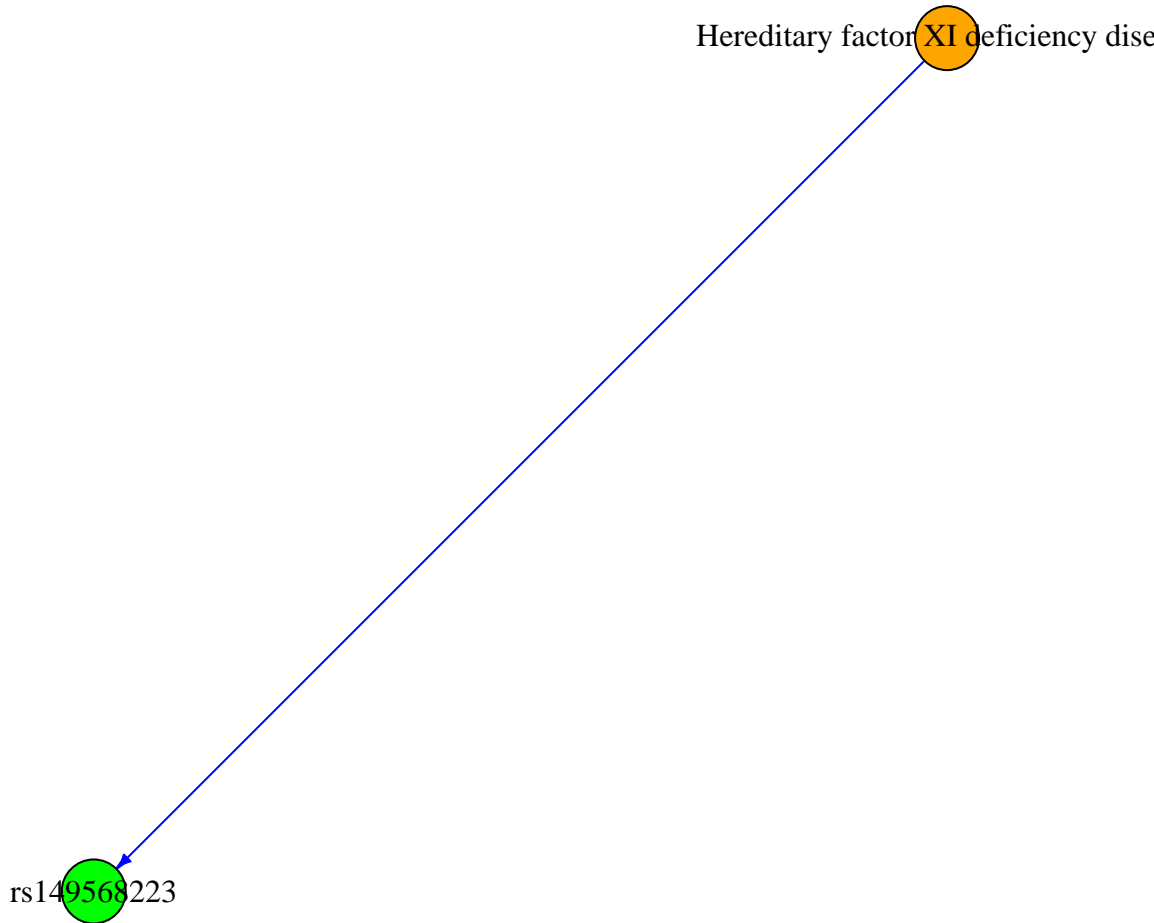



## Variant–Disease Network (Hereditary hemochromatosis)

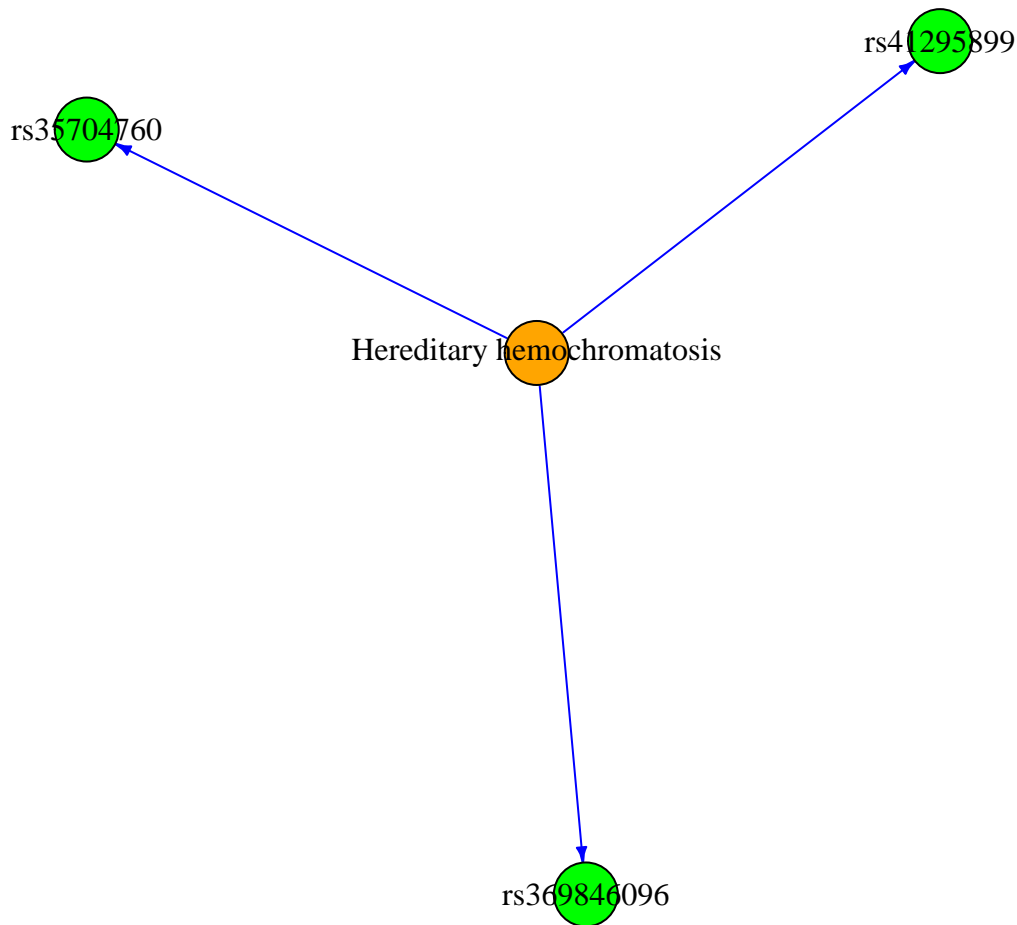

**Variant–Disease Network (Hereditary hemorrhagic telangiectasia type 1)**

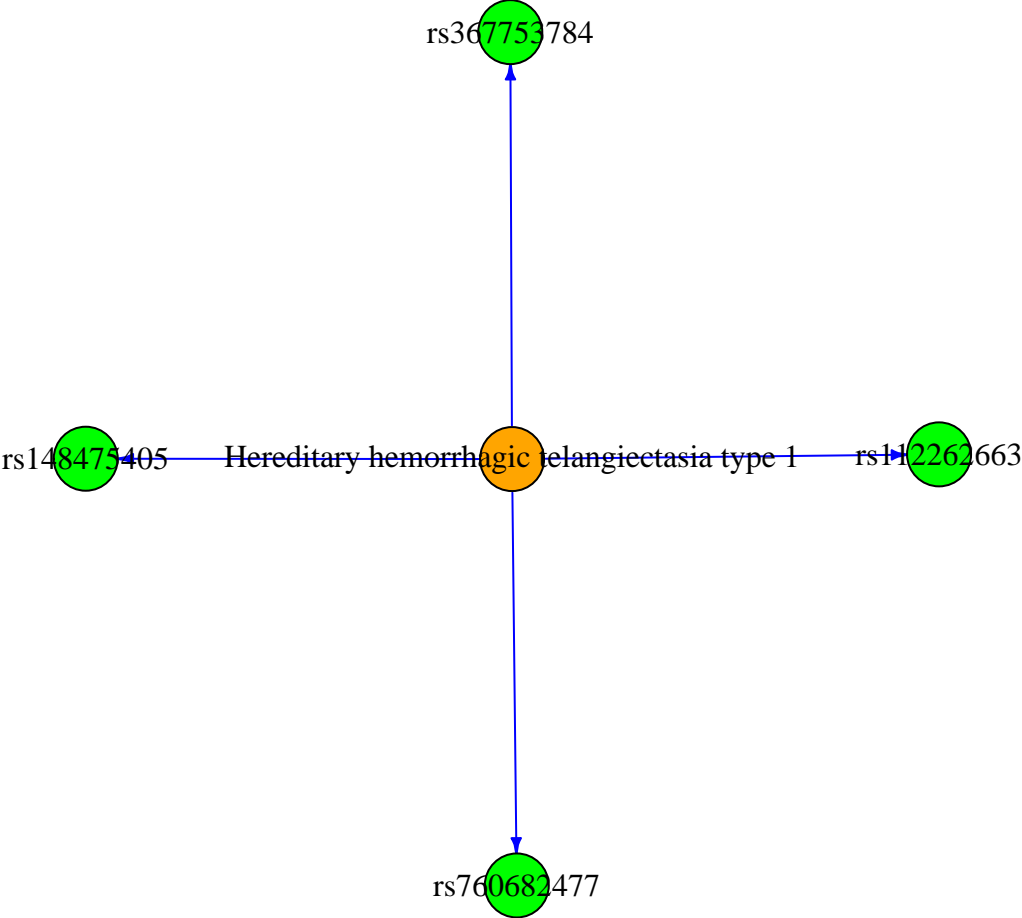

Variant–Disease Network (Hereditary insensitivity to pain with anhidrosis)

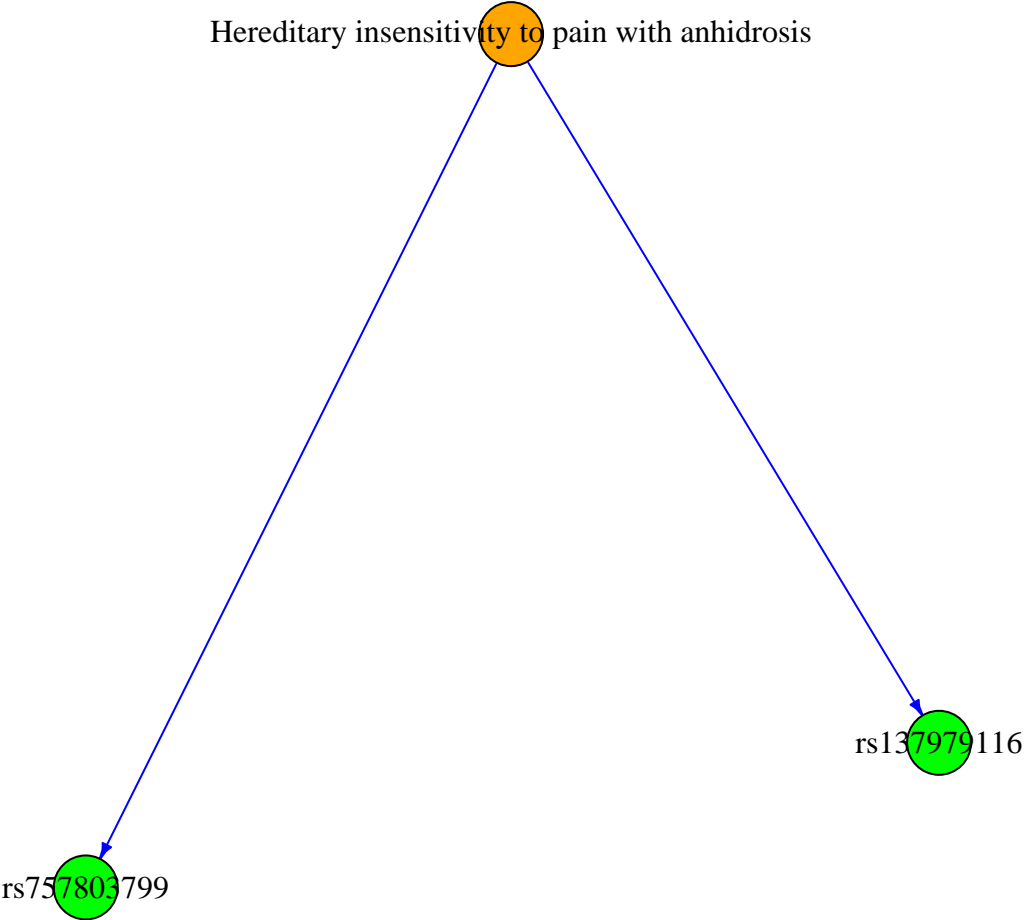

**Variant–Disease Network (Hereditary Multiple Osteochondromatosis)**

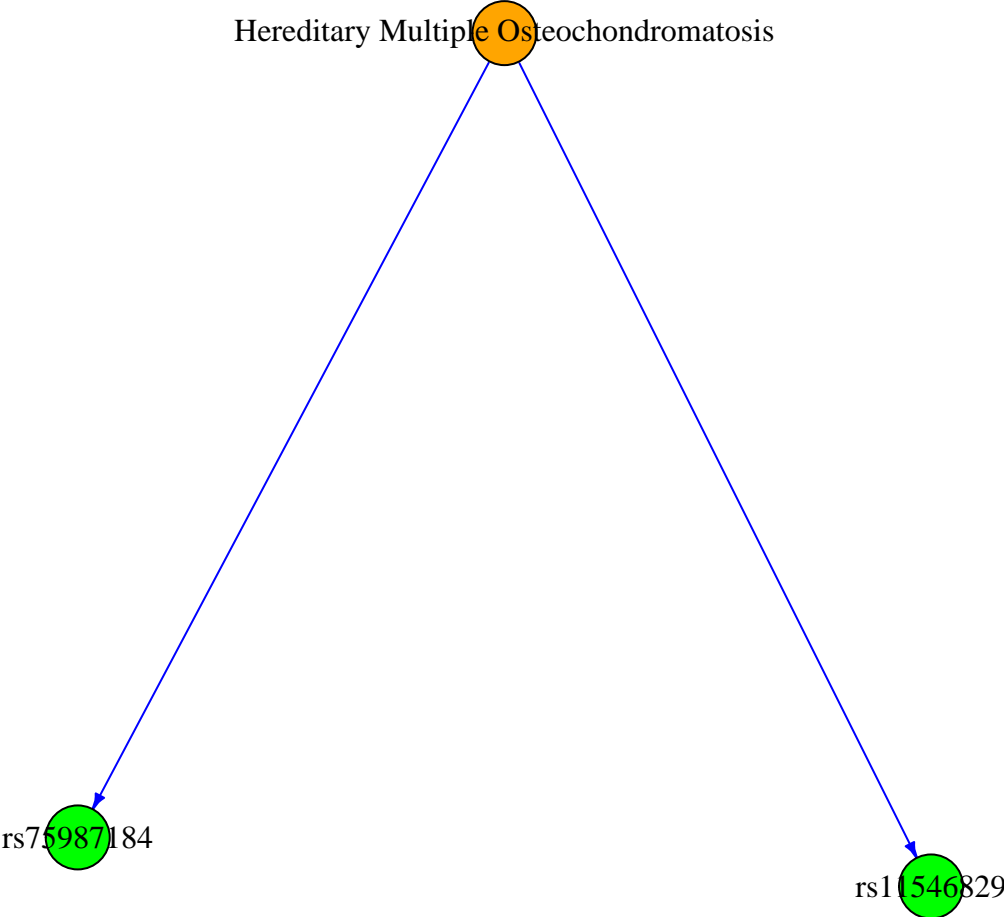

# Variant–Disease Network (Hereditary nonpolyposis colon cancer)

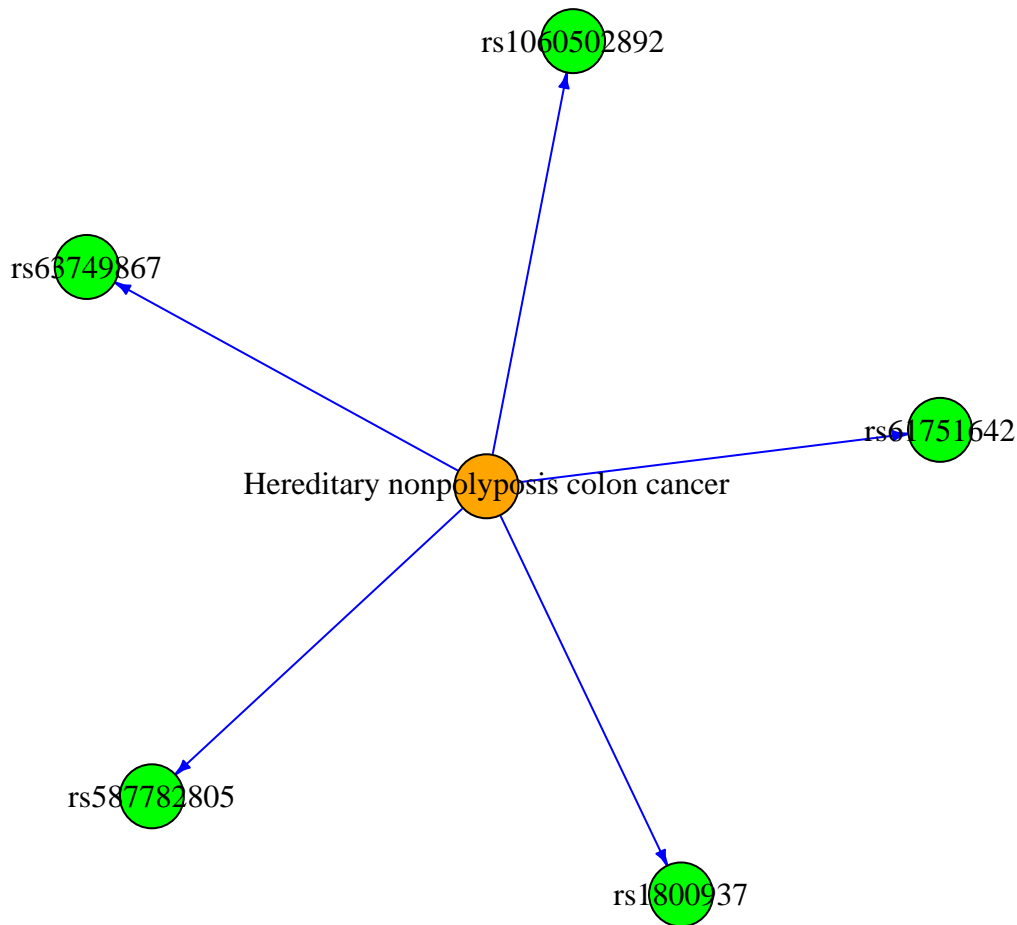

Variant–Disease Network (Hereditary nonpolyposis colorectal cancer type

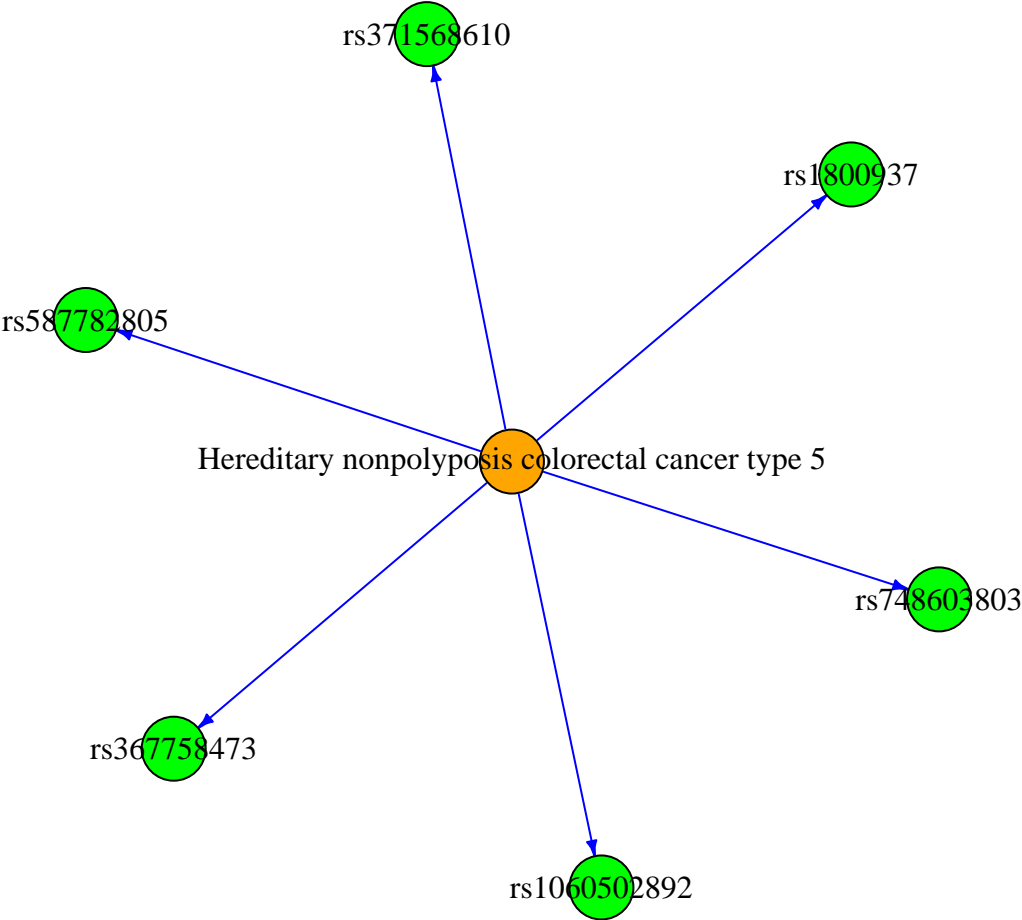

**Variant–Disease Network (Hereditary pyropoikilocytosis)**

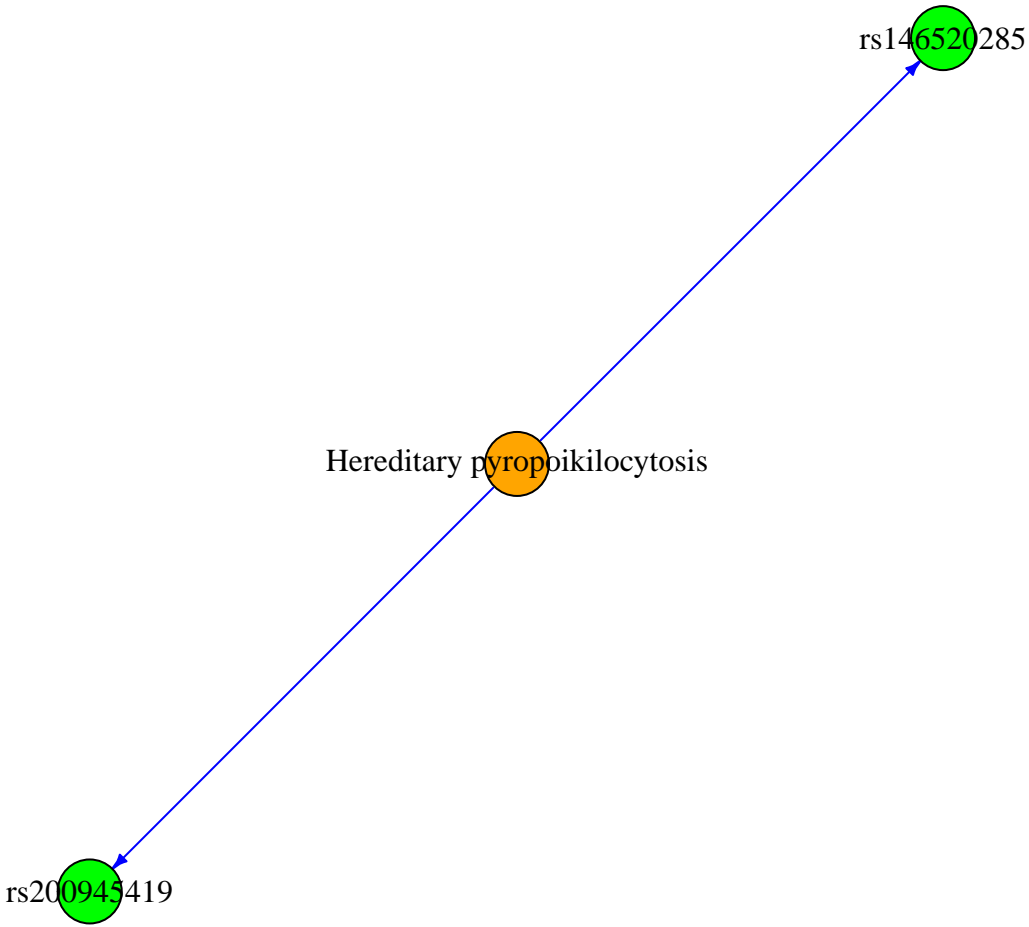

# Variant-Disease Network (Hereditary sensory and autonomic neuropathy type 1)

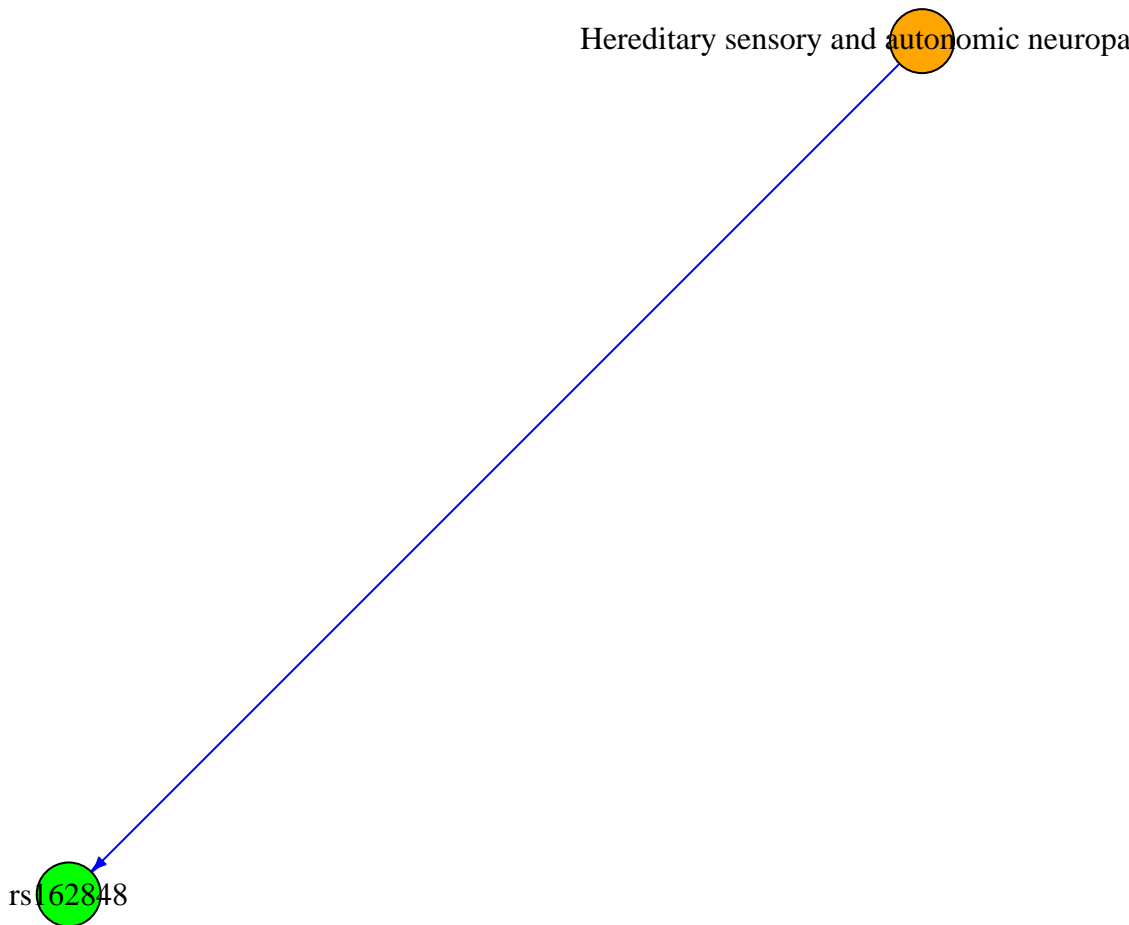



# Variant-Disease Network (Hereditary sensory and autonomic neuropathy type 1)

rs162848

Hereditary sensory and autonomic neuropathy type 1

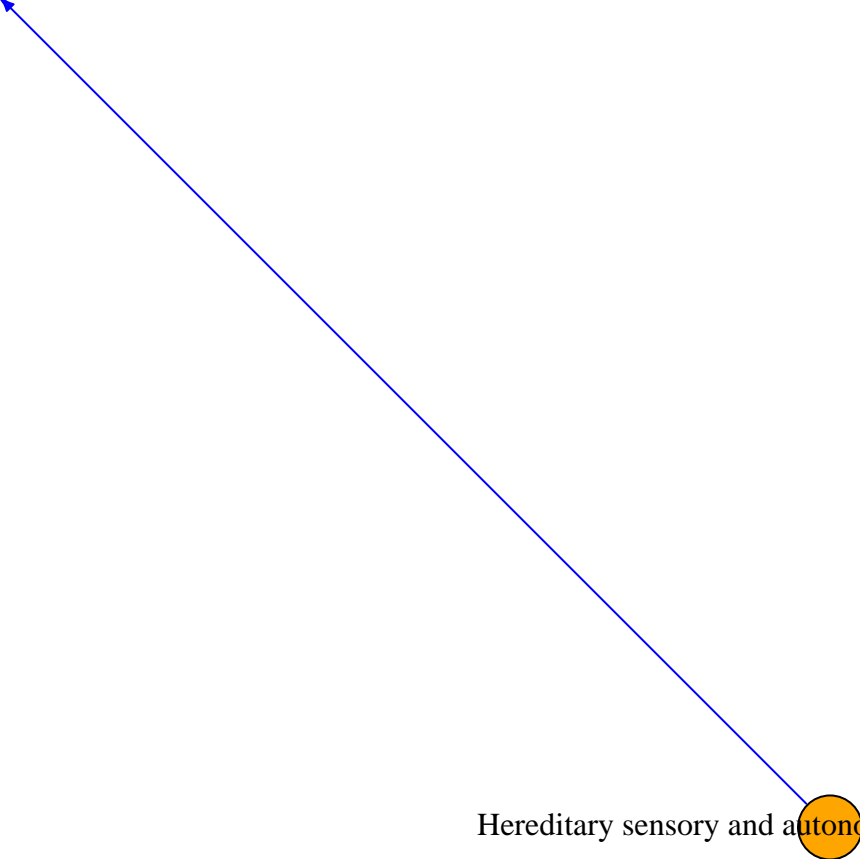

# Variant–Disease Network (Hereditary sensory neuropathy type IE)

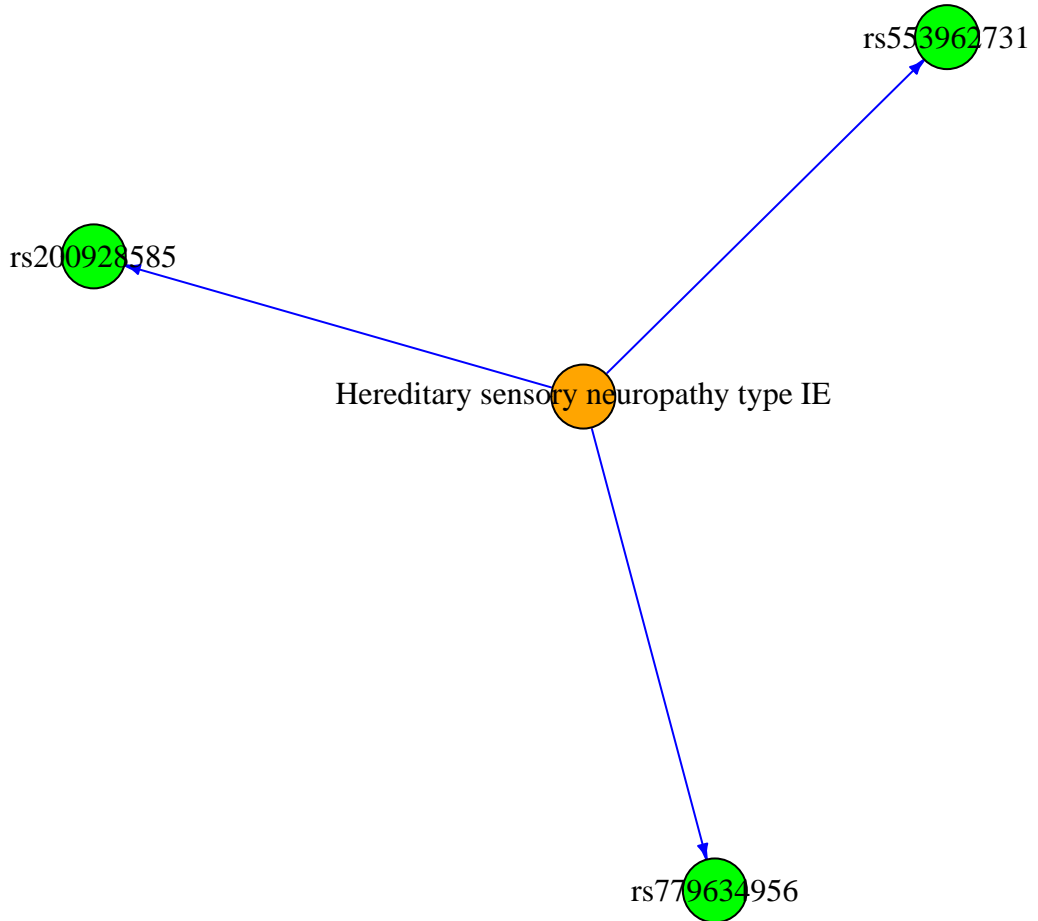

**Variant–Disease Network (Hermansky Pudlak syndrome 2)**

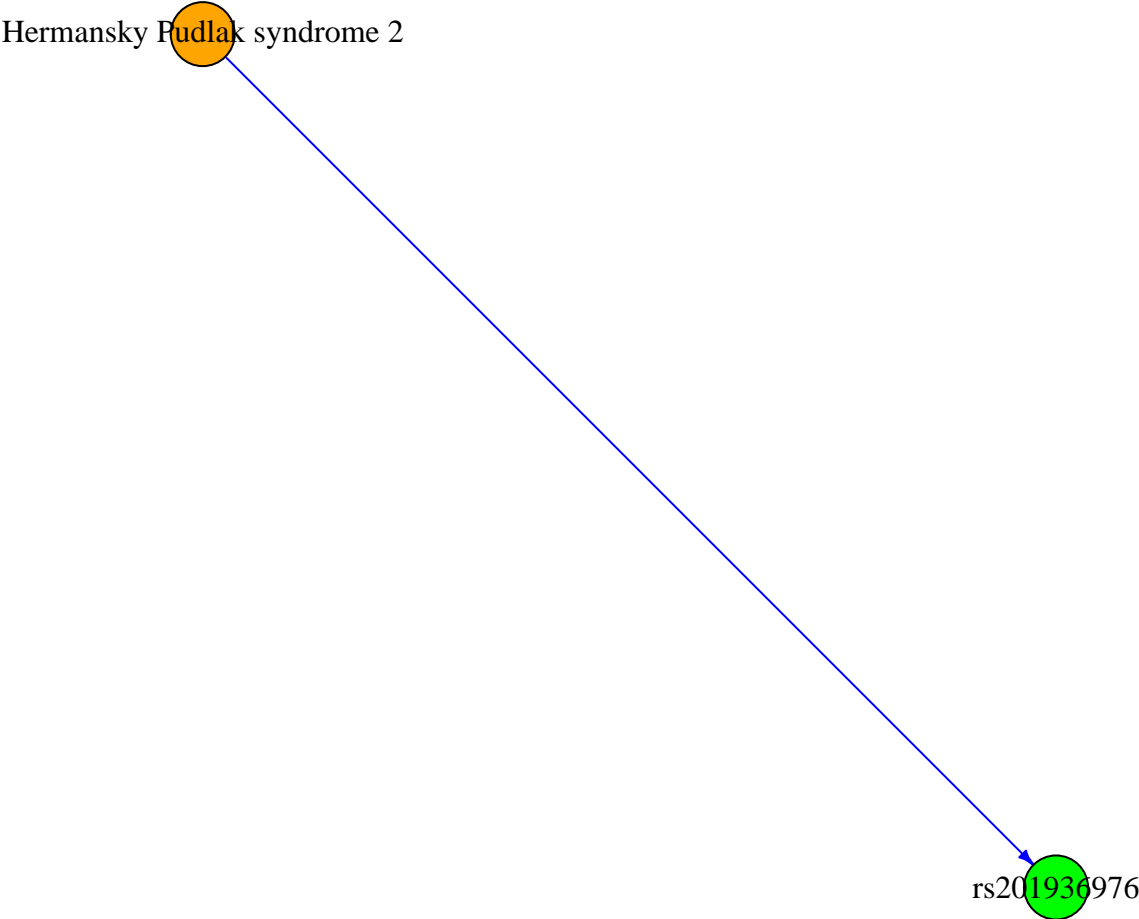

Variant–Disease Network (Hermansky–Pudlak syndrome)

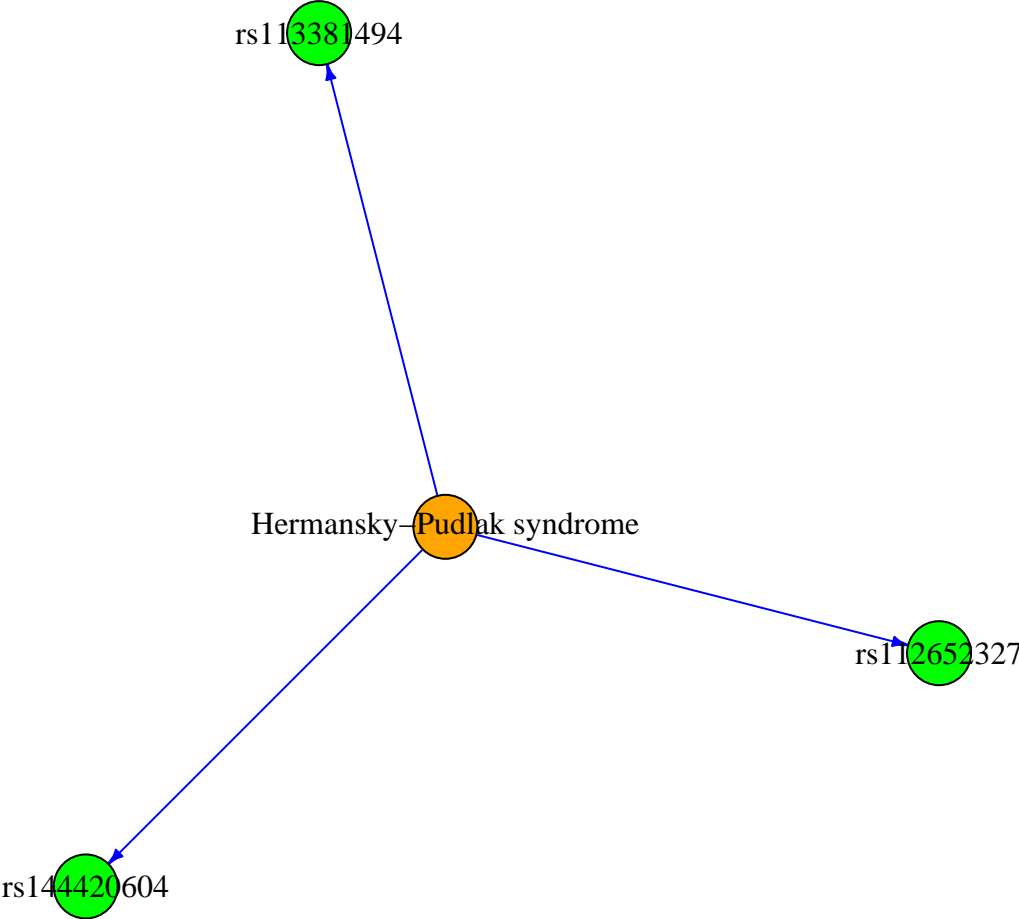

# Variant–Disease Network (Hirschsprung Disease)

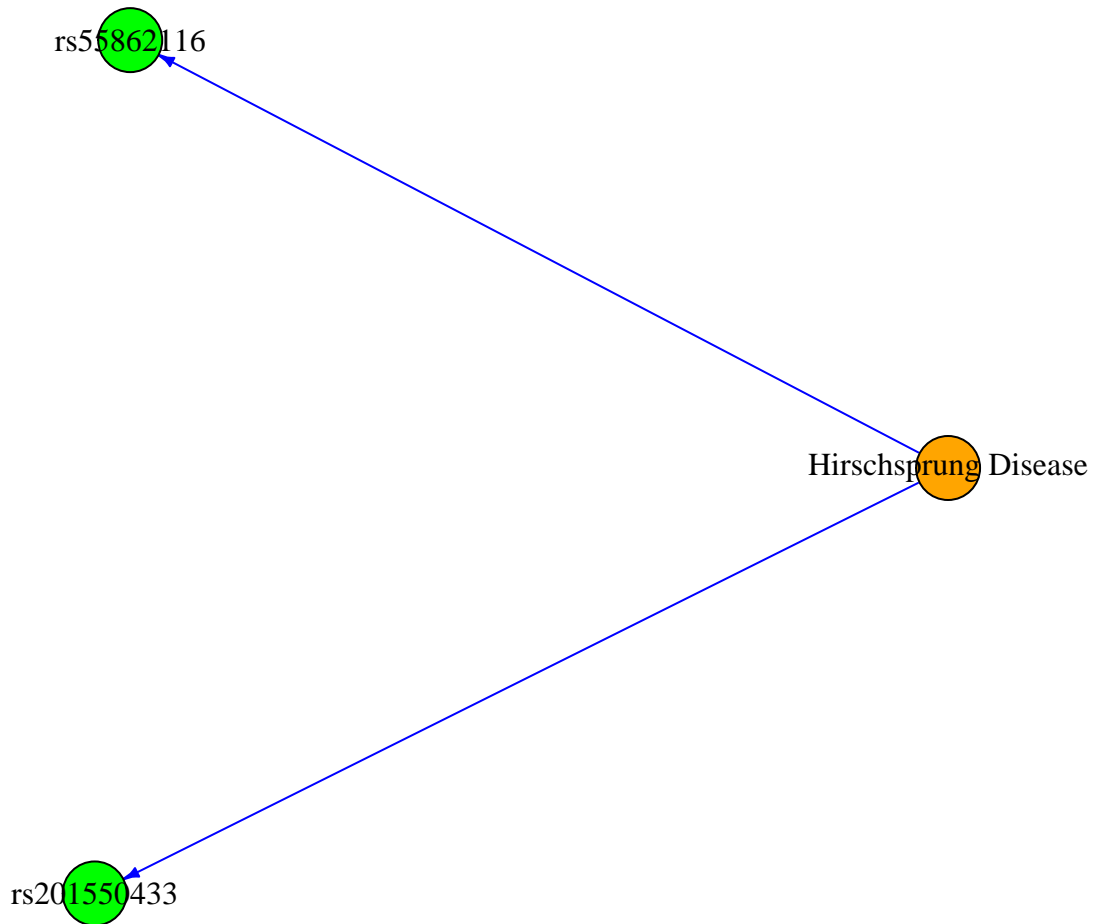

# Variant–Disease Network (History of neurodevelopmental disorder)

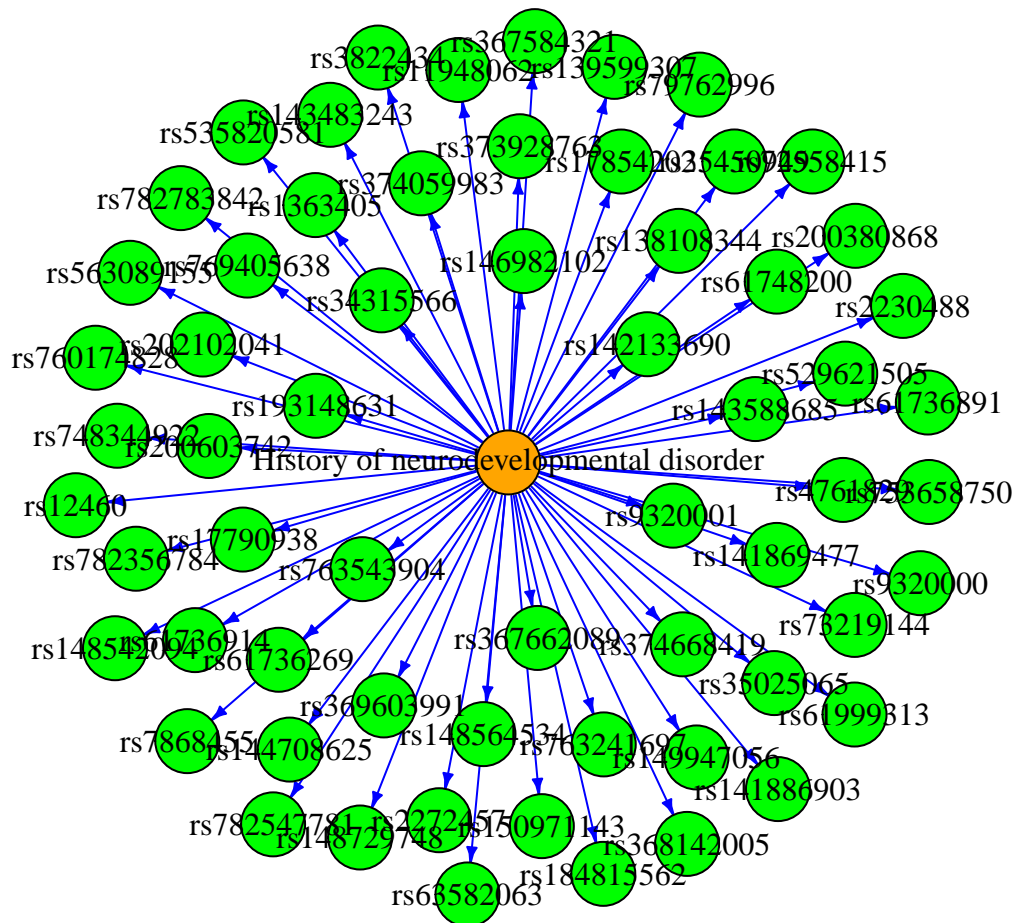

## Variant-Disease Network (Holoprosencephaly 4)

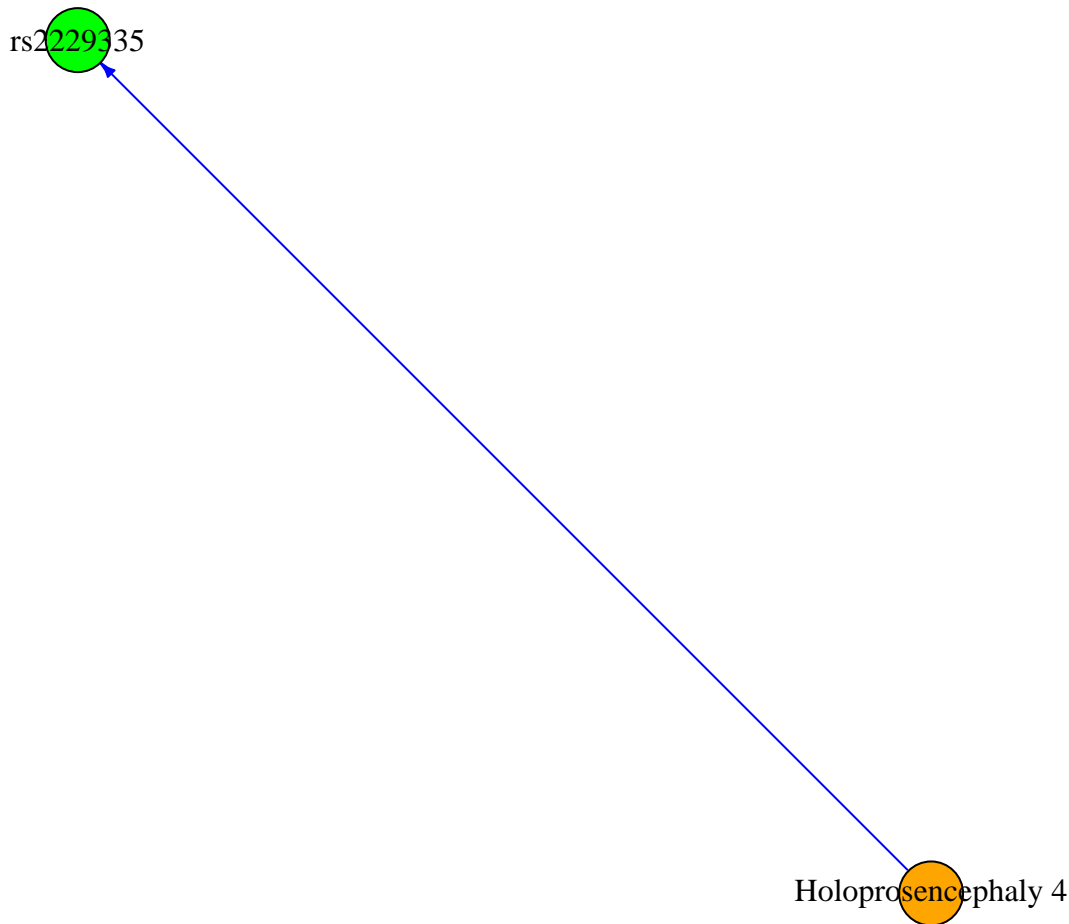

Variant–Disease Network (Holoprosencephaly sequence)

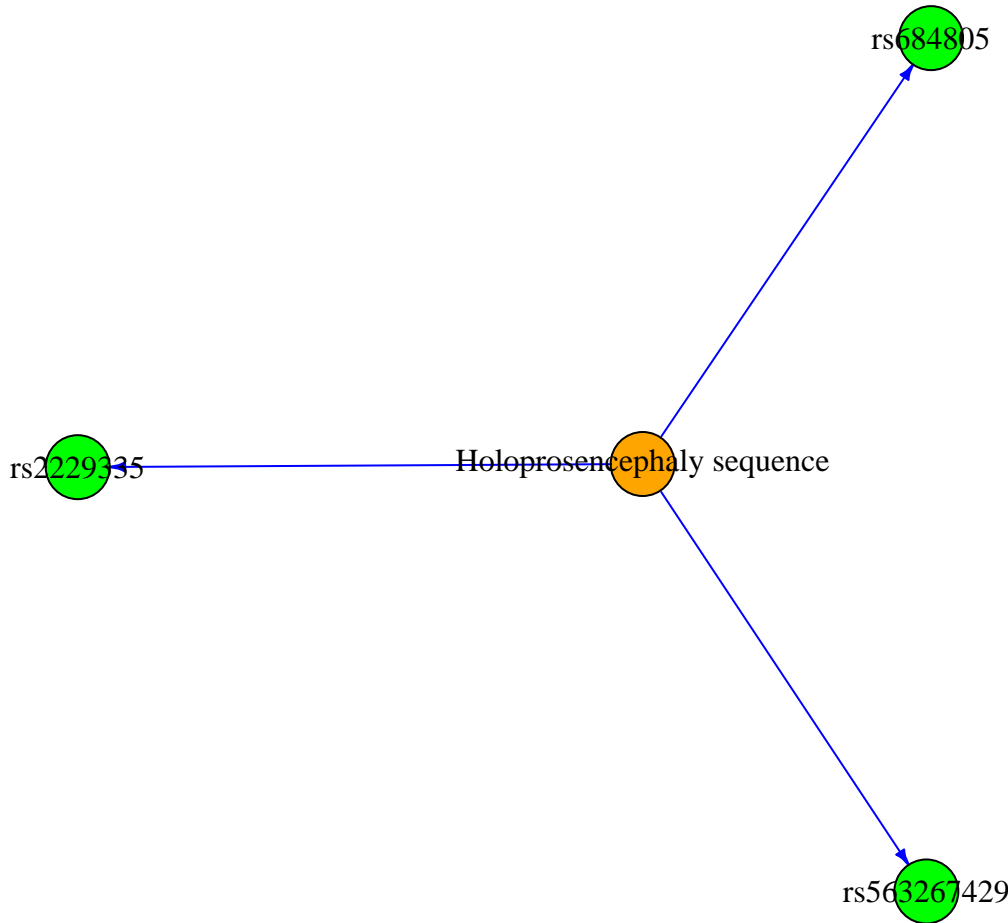



Variant–Disease Network (Homocystinuria)

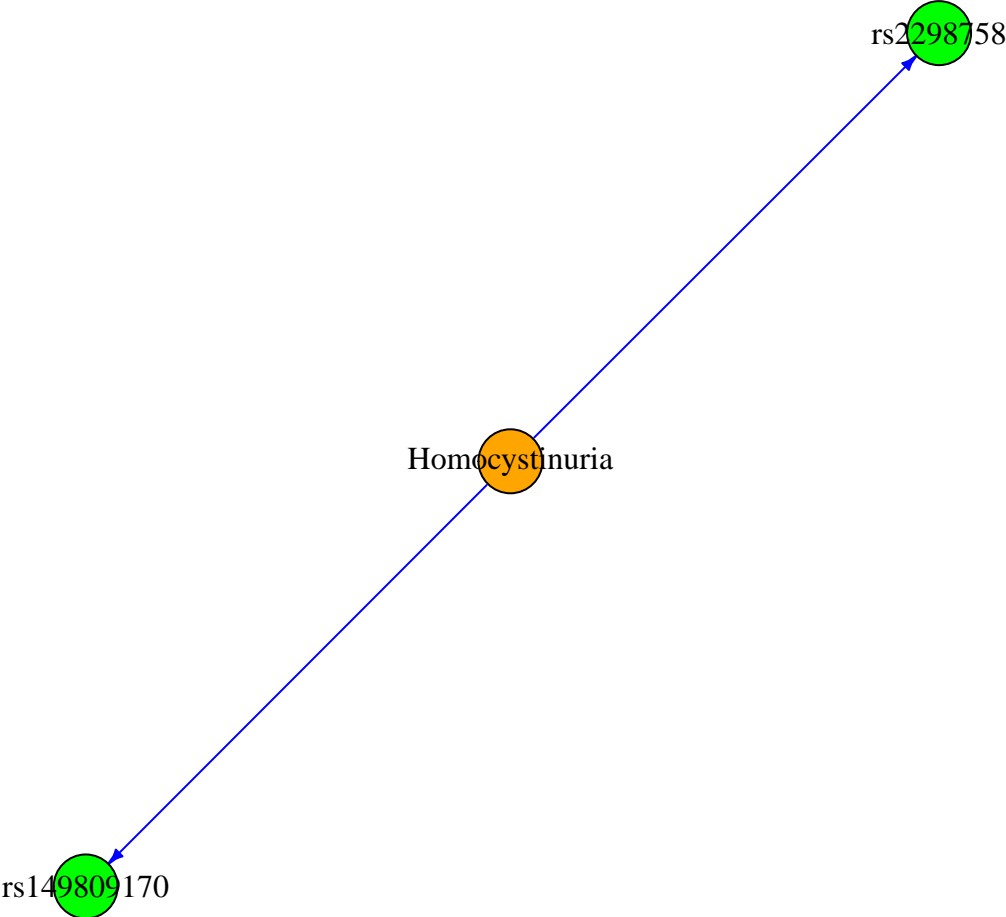

## Variant-Disease Network (Howel-Evans syndrome)

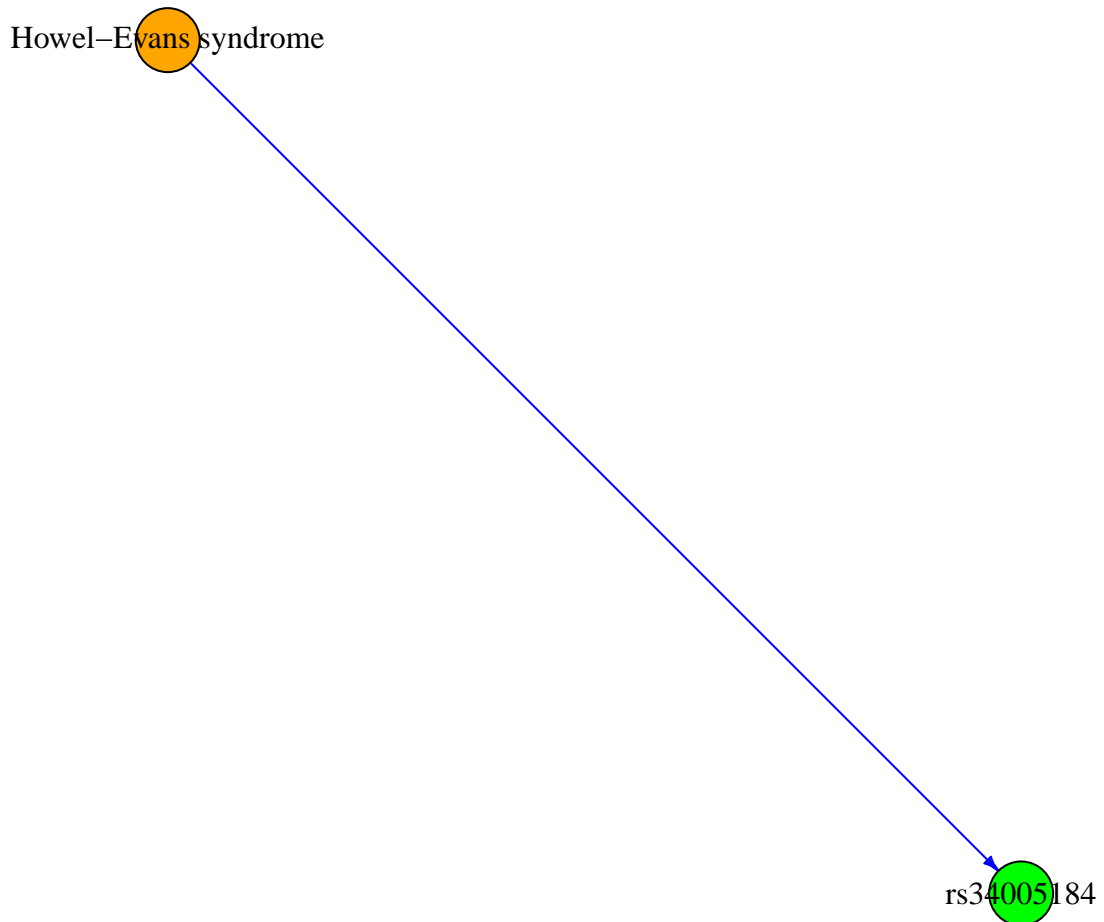

## Variant–Disease Network (Hurler syndrome)

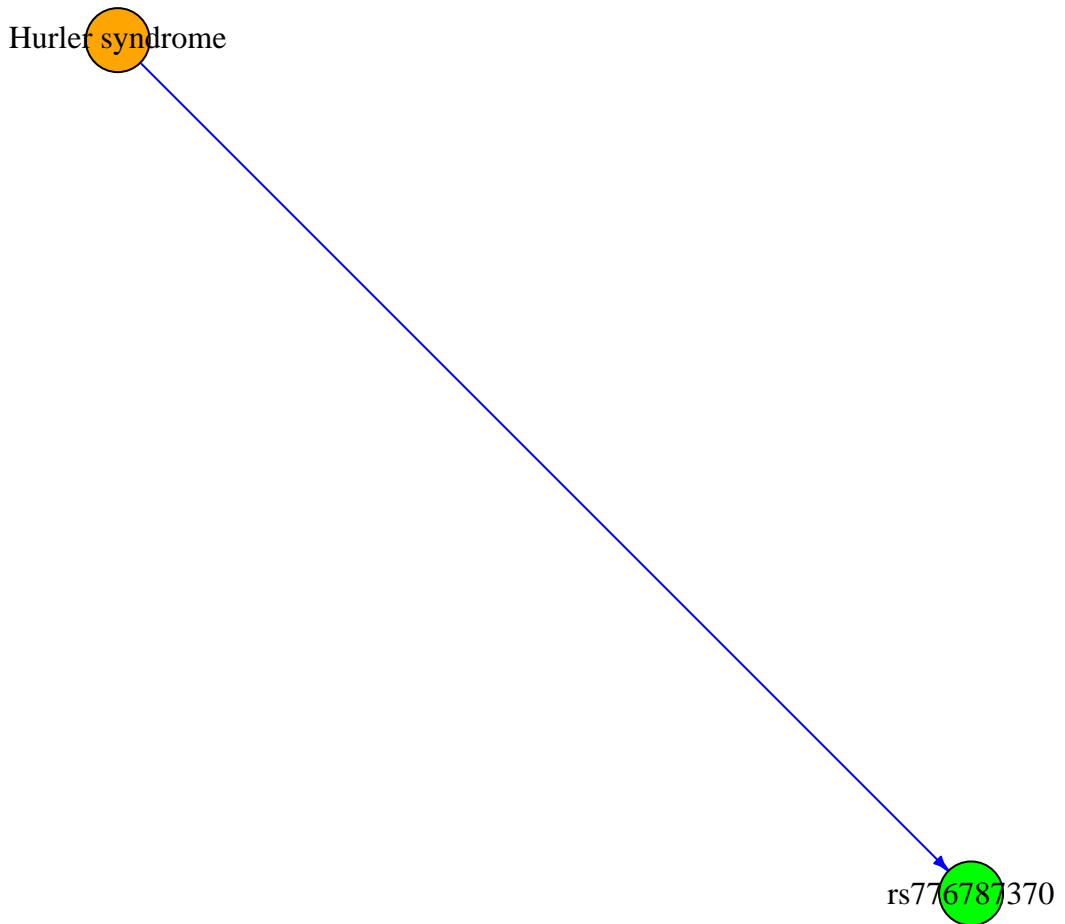

## Variant–Disease Network (Hyperaldosteronism)

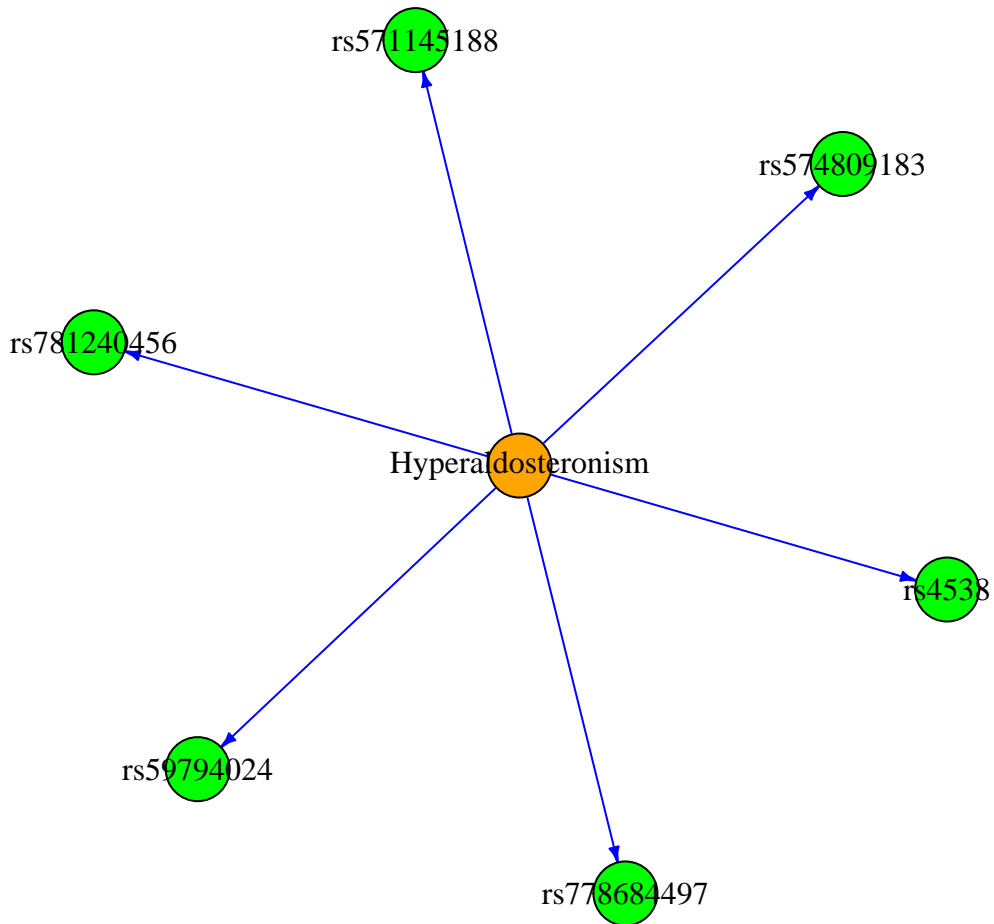

## Variant–Disease Network (Hyperekplexia)

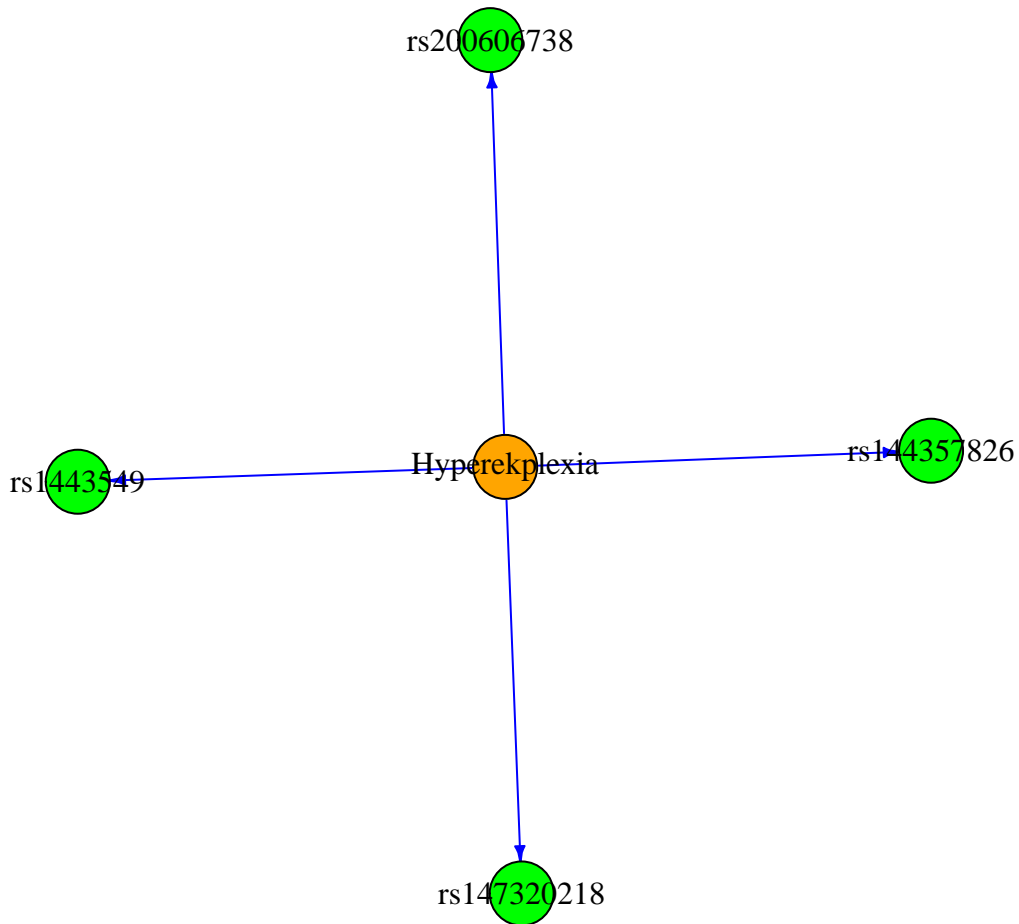

## Variant–Disease Network (Hyperekplexia 1)

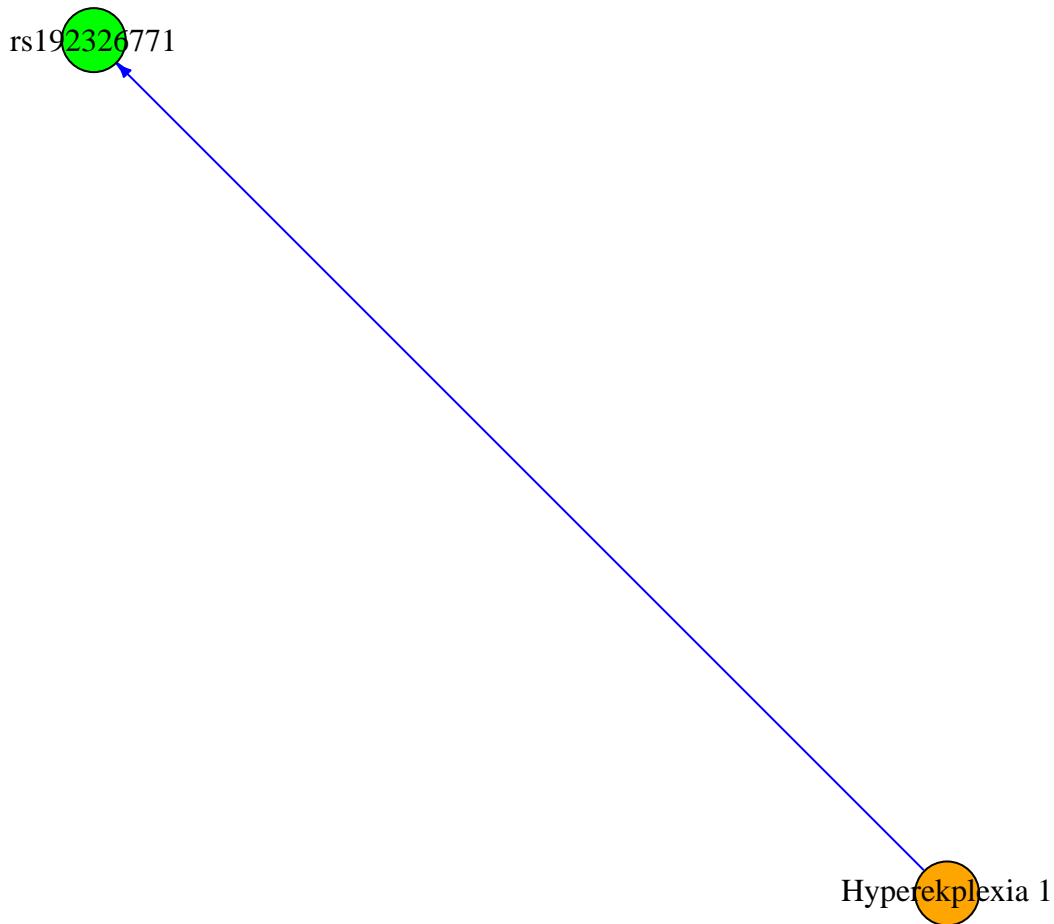

Variant–Disease Network (Hyperekplexia 3)

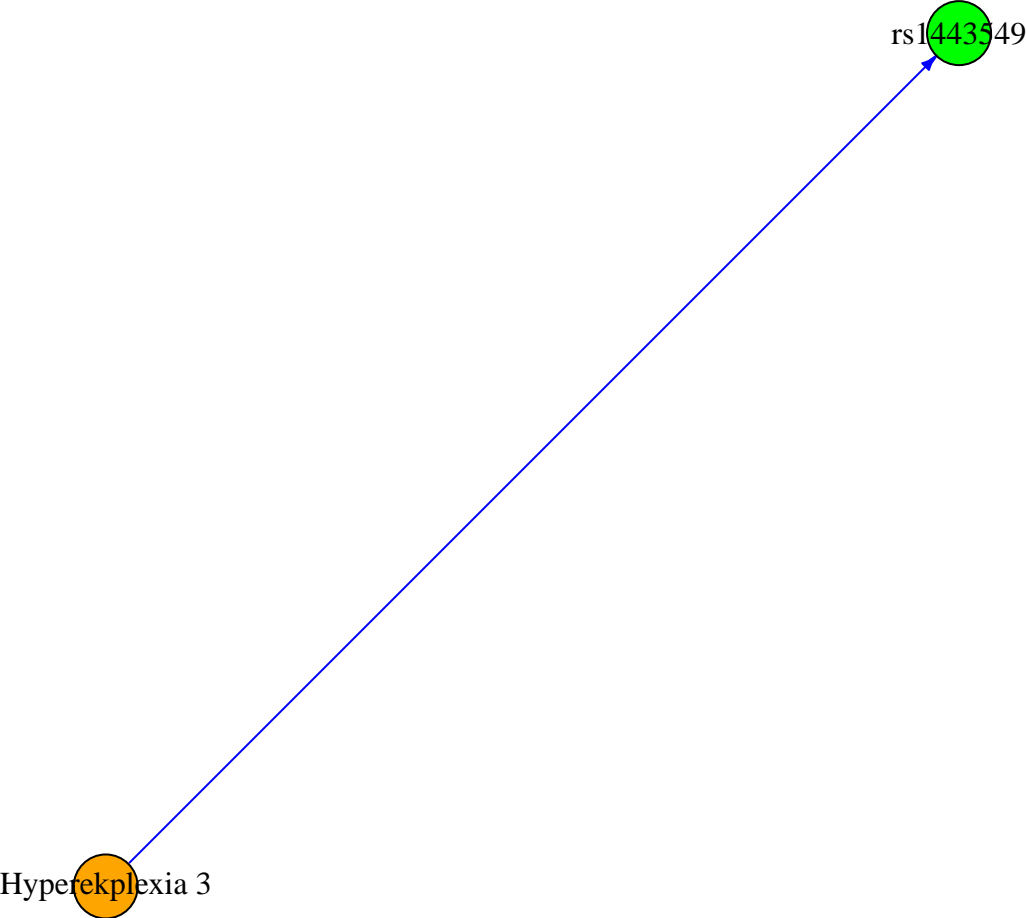

## Variant–Disease Network (Hyperinsulinemic hypoglycemia)

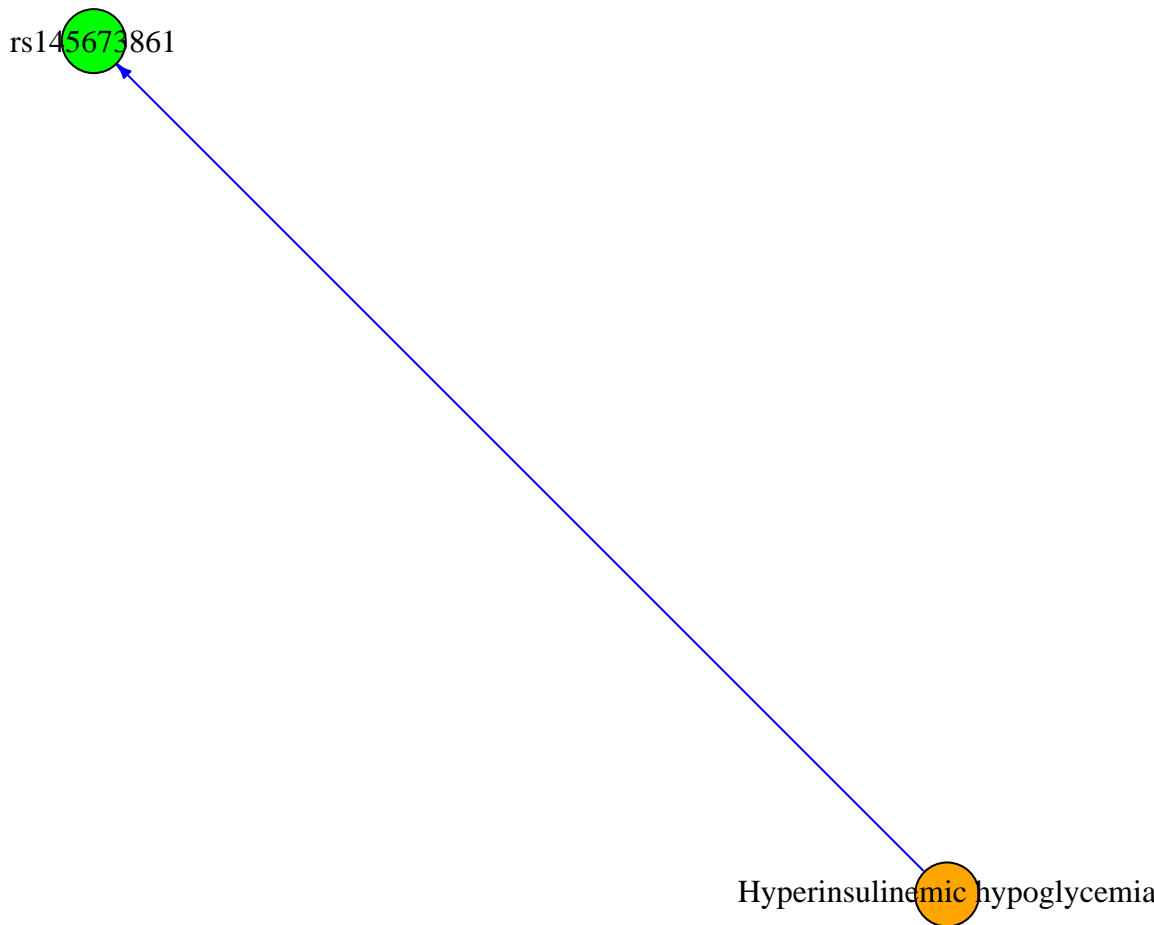



## Variant–Disease Network (Hyperinsulinism)

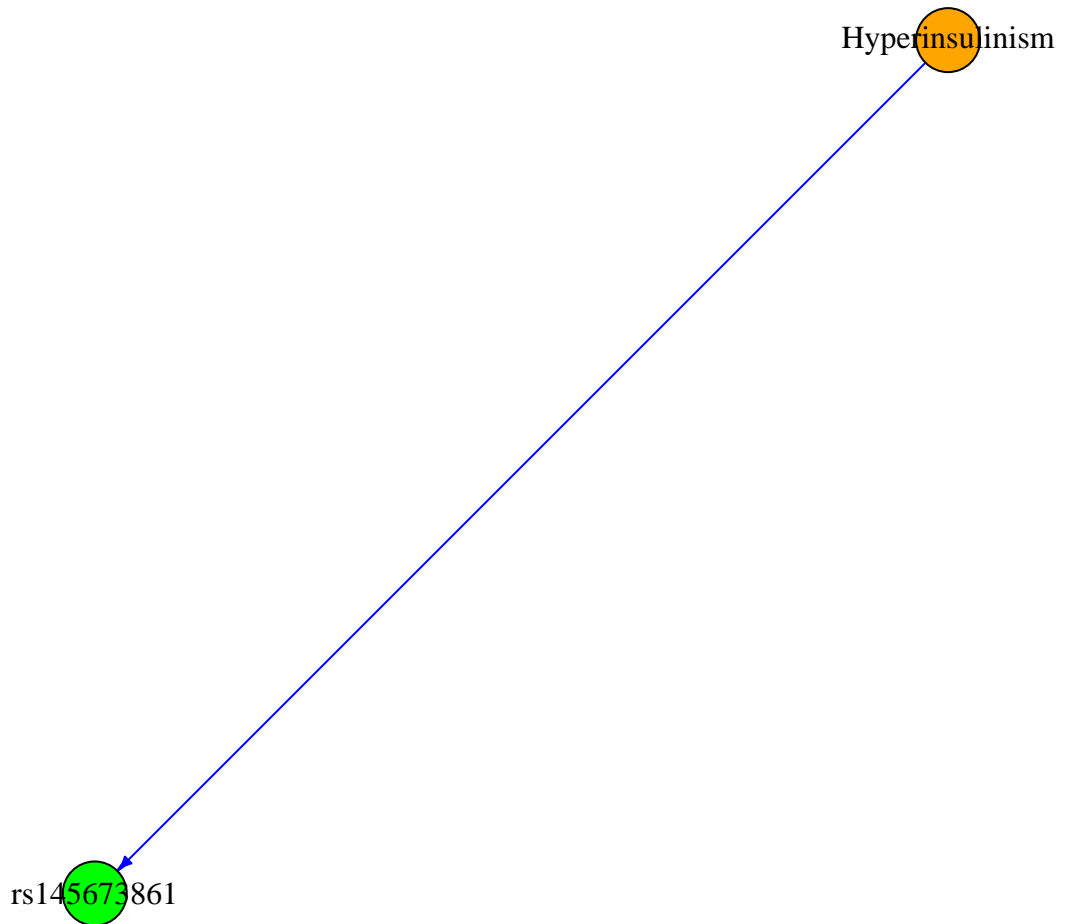

# Variant–Disease Network (Hyperkalemic Periodic Paralysis)

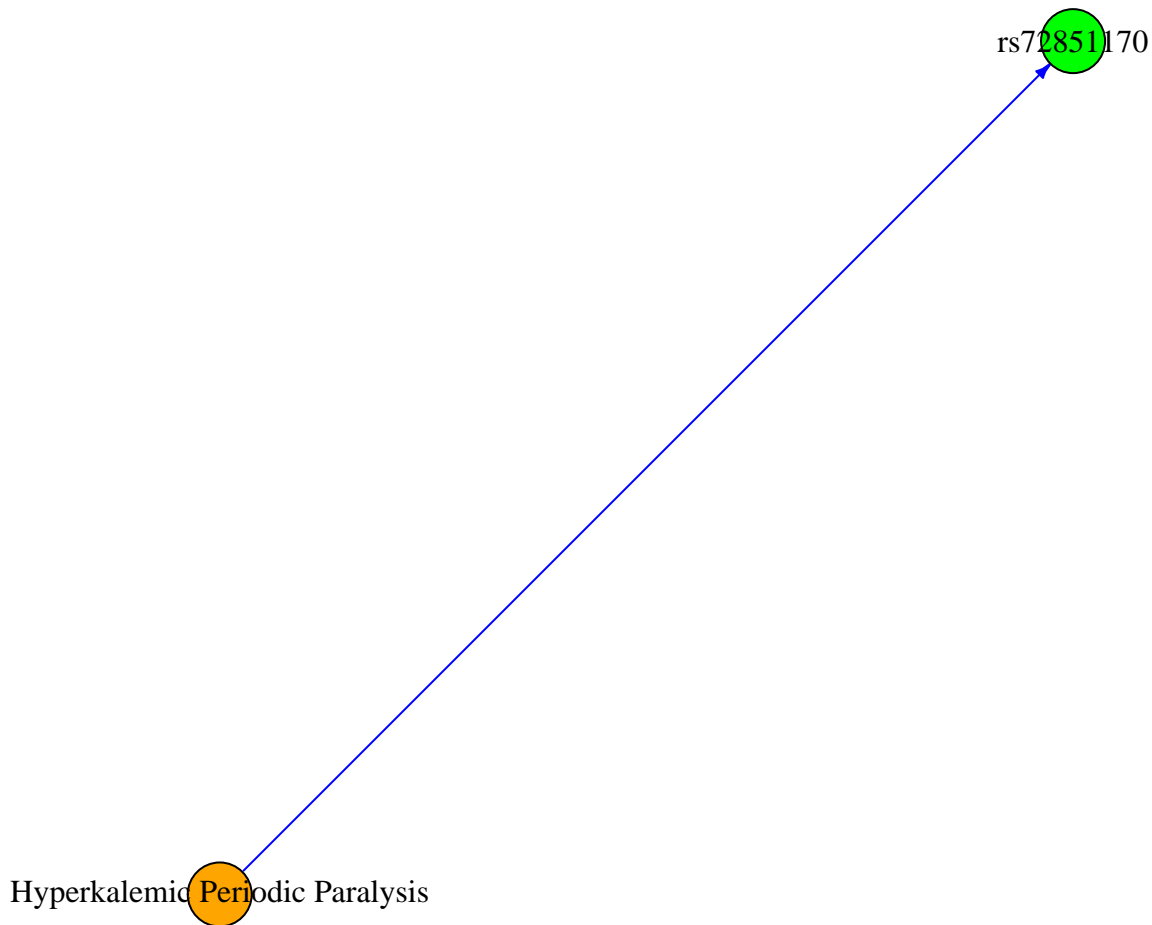

# Variant–Disease Network (Hyperkalemic Periodic Paralysis Type 1)

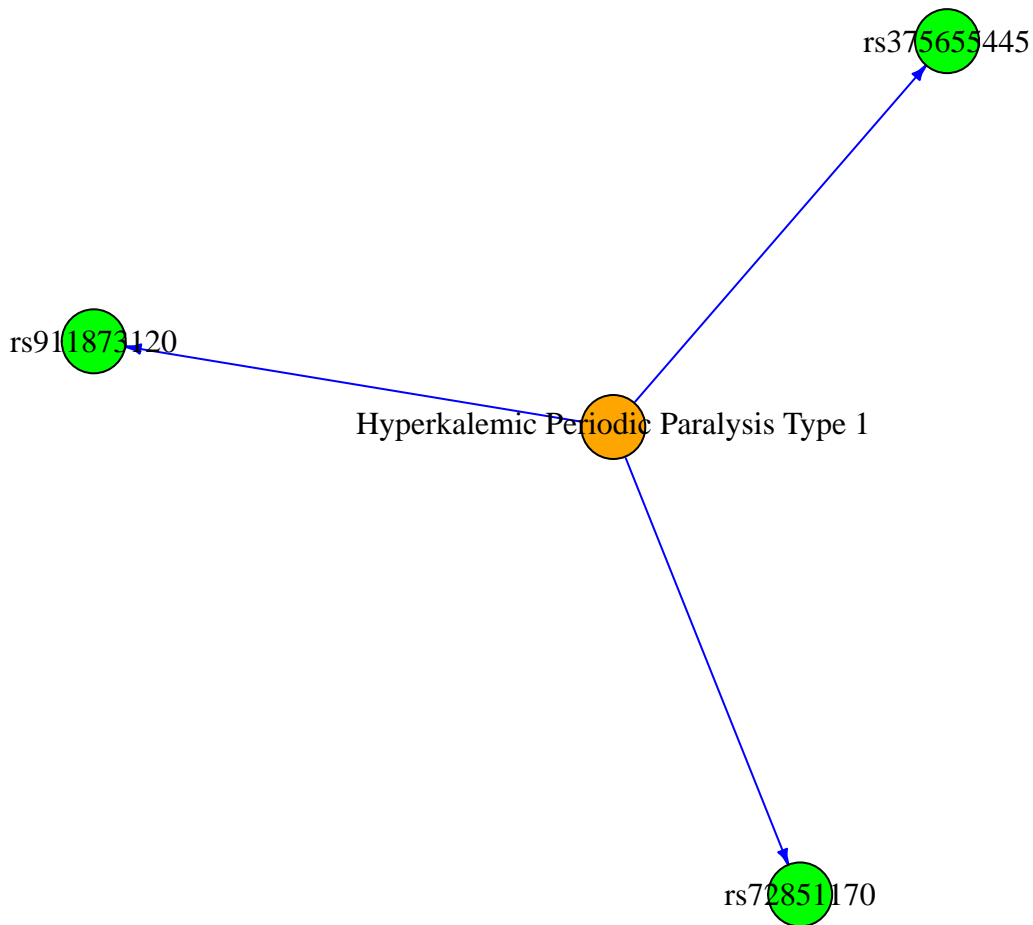

## Variant–Disease Network (Hyperlipoproteinemia)

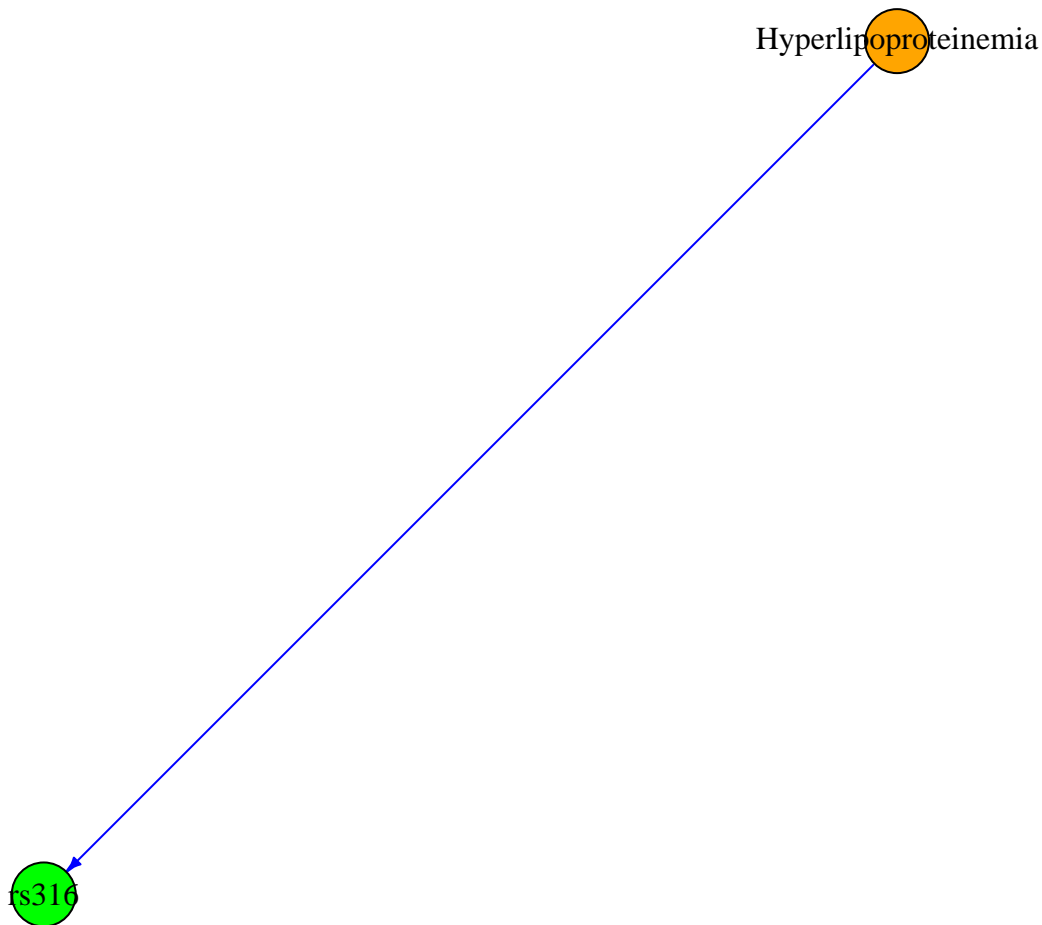

# Disease Network (Hyperornithinemia–hyperammonemia–homocitrullinuria)

rs9577152

Hyperornithinemia–hyperammonemia–homocitrullinuria

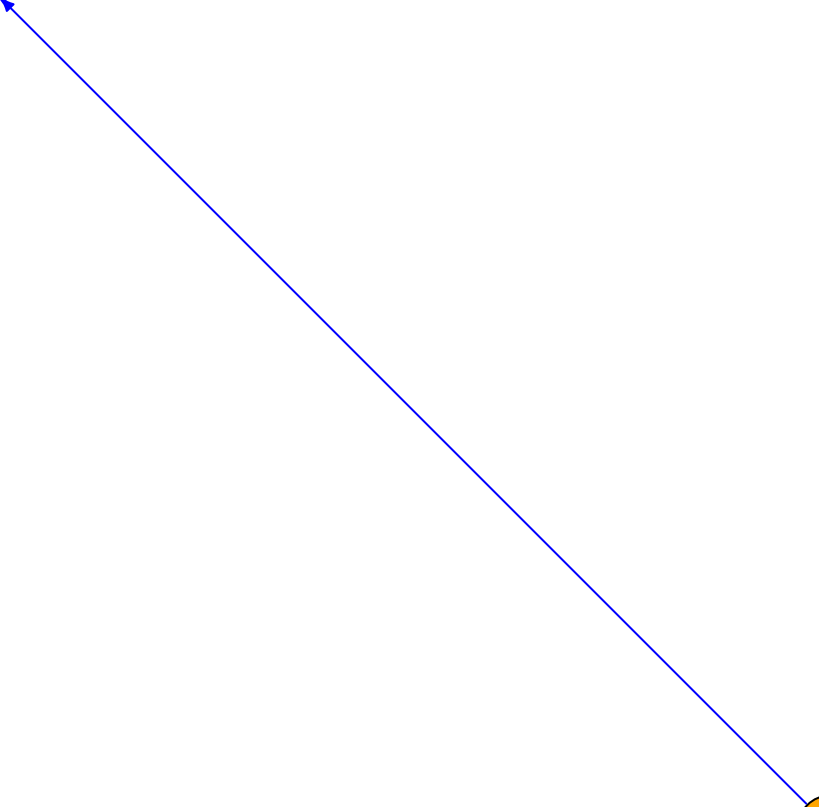

## Variant–Disease Network (Hyperprolinemia)

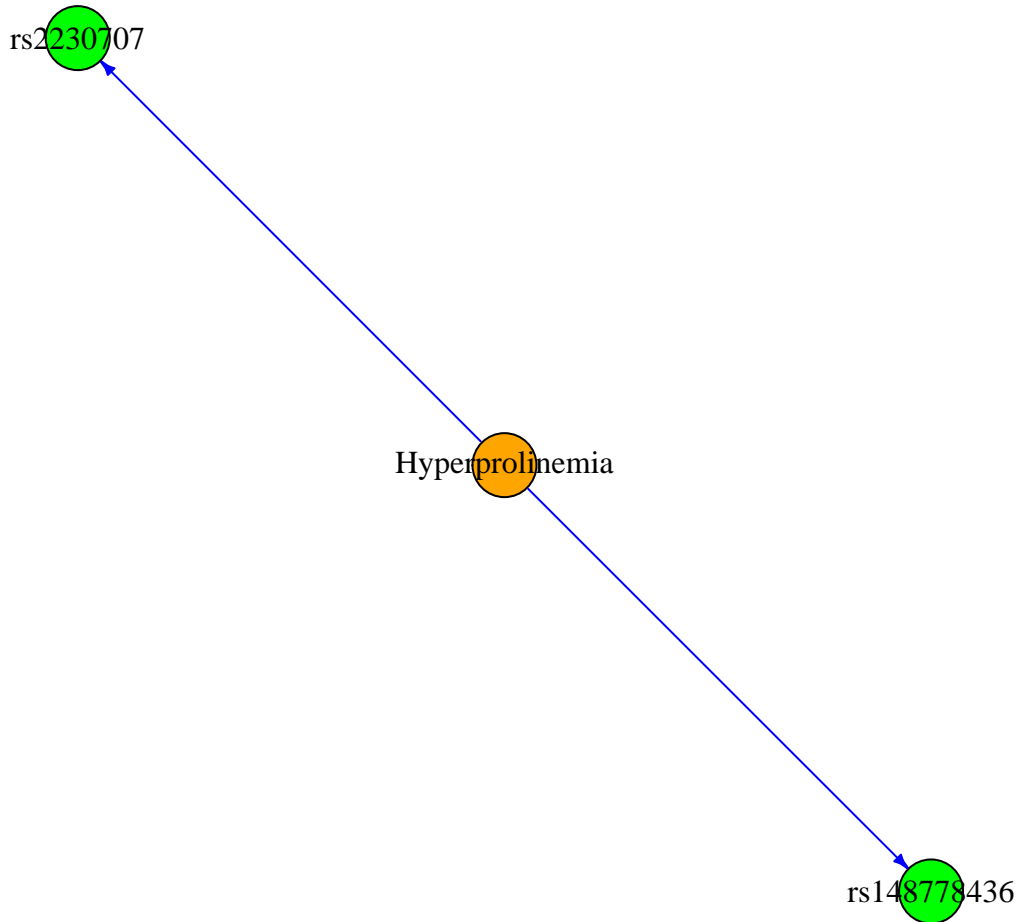

**Variant–Disease Network (Hypertrophic cardiomyopathy)**

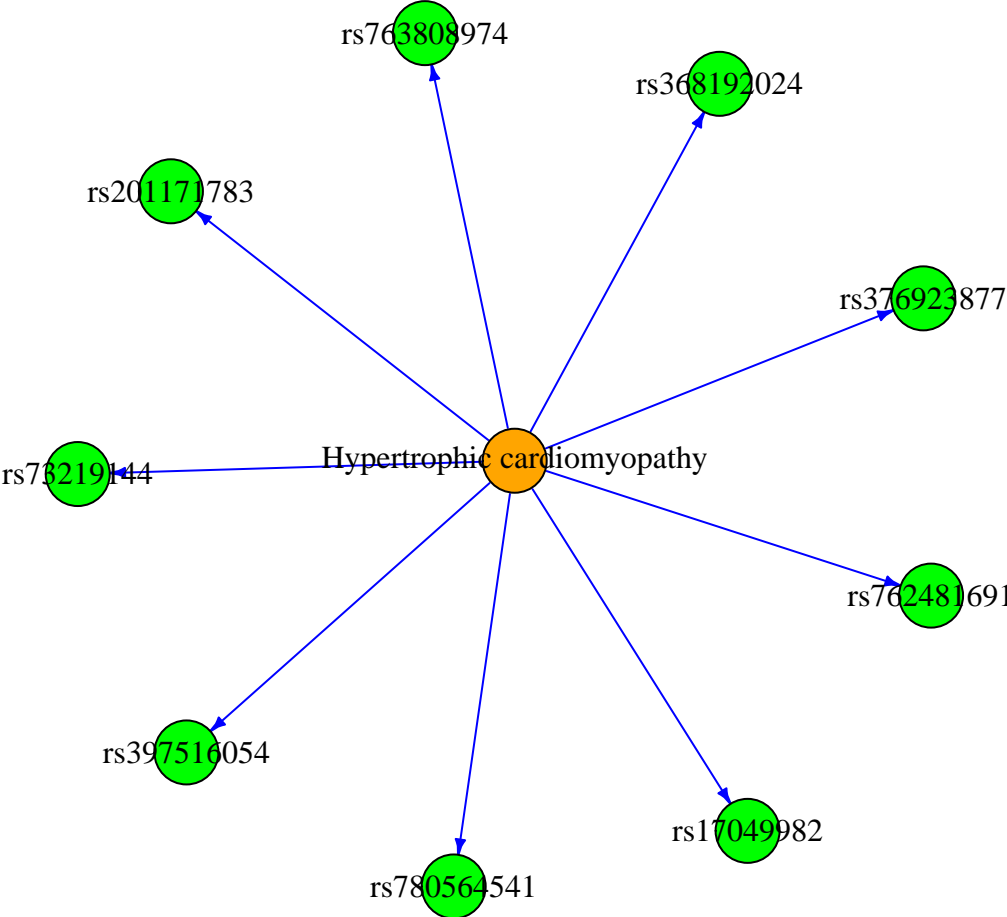

**Variant–Disease Network (Hypobetalipoproteinemia)**

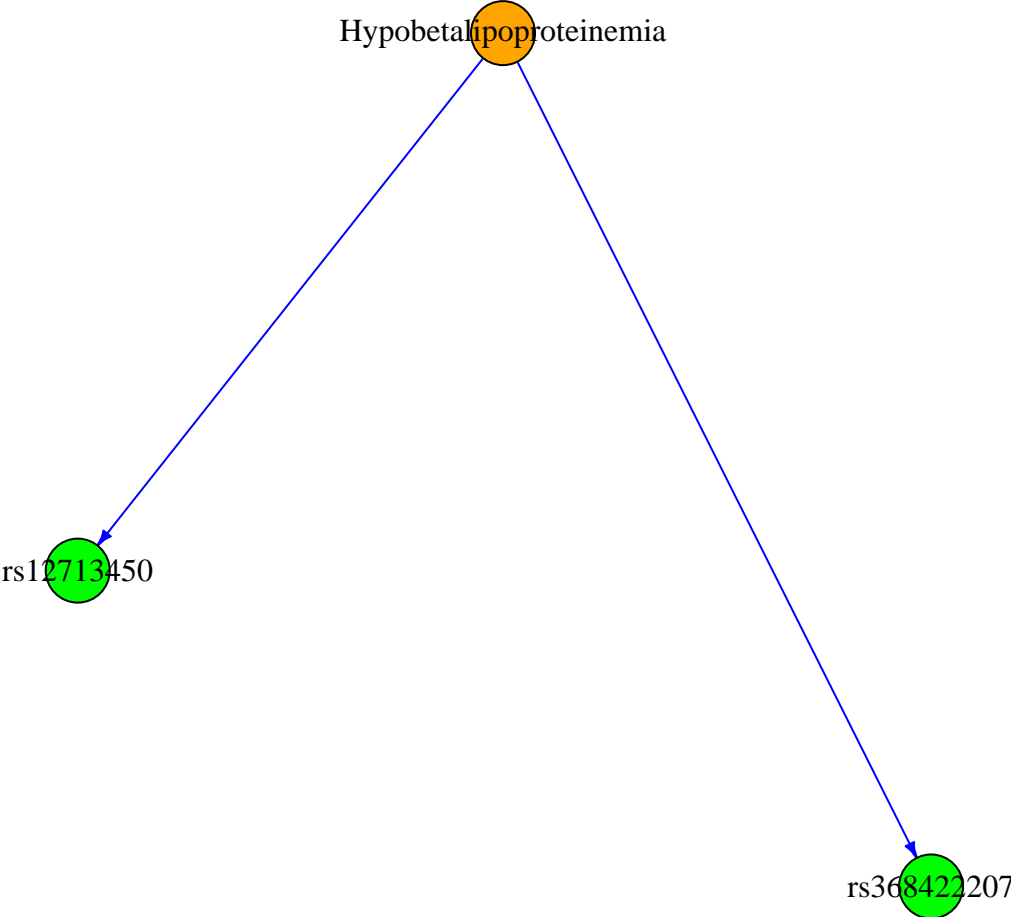



## Variant–Disease Network (Hypogonadism with anosmia)

Hypogonadism with anosmia

rs3746684

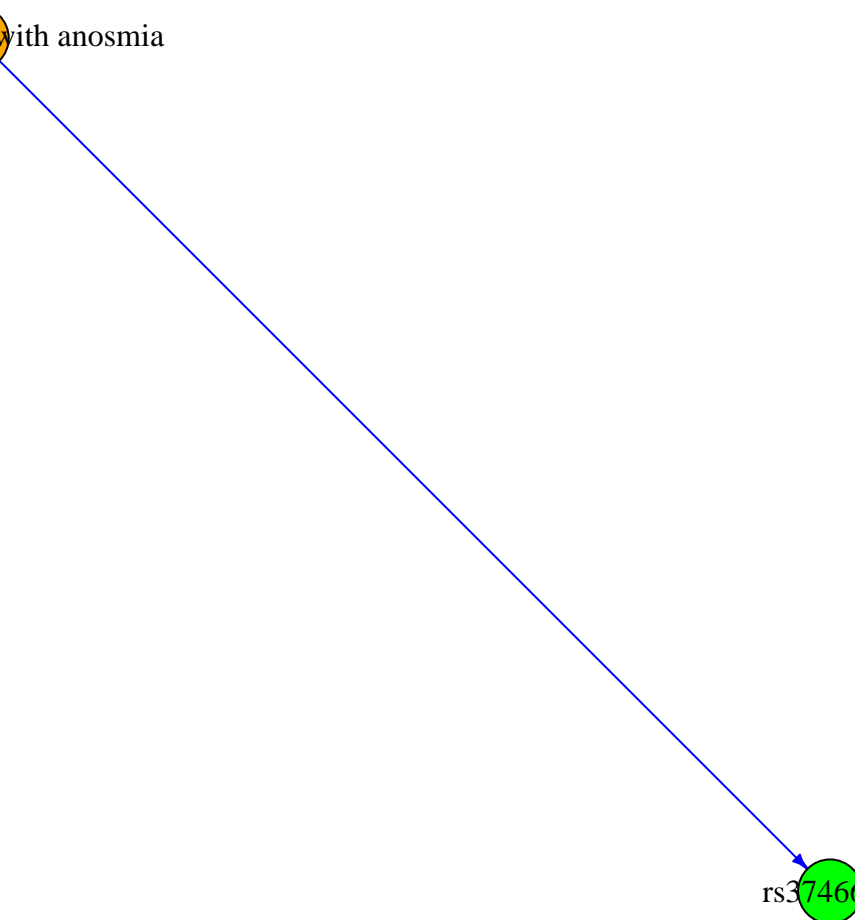

Variant–Disease Network (Hypokalemic periodic paralysis)

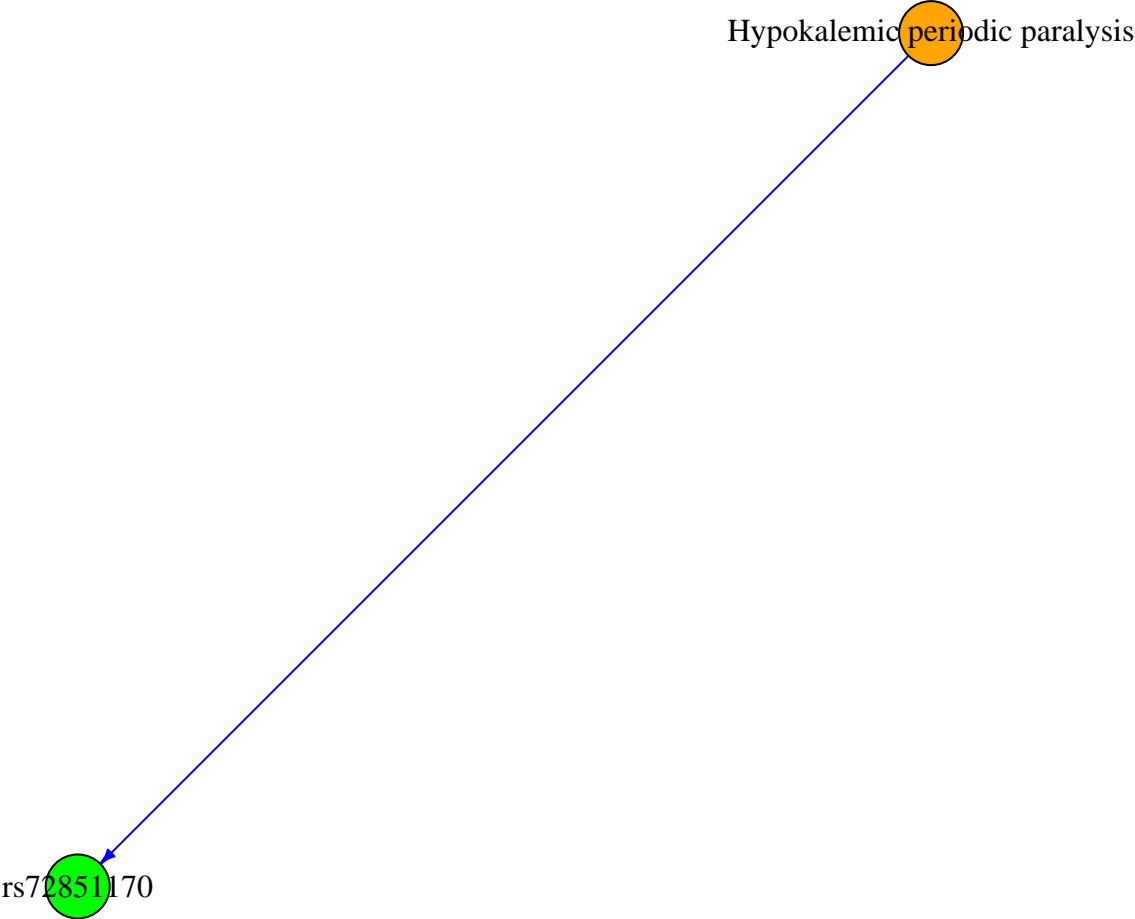

# Variant-Disease Network (Hypoparathyroidism retardation dysmorphism syndrome)

rs762683460

Hypoparathyroidism retardation dysmorphism



# Variant–Disease Network (Hypophosphatemic Rickets)

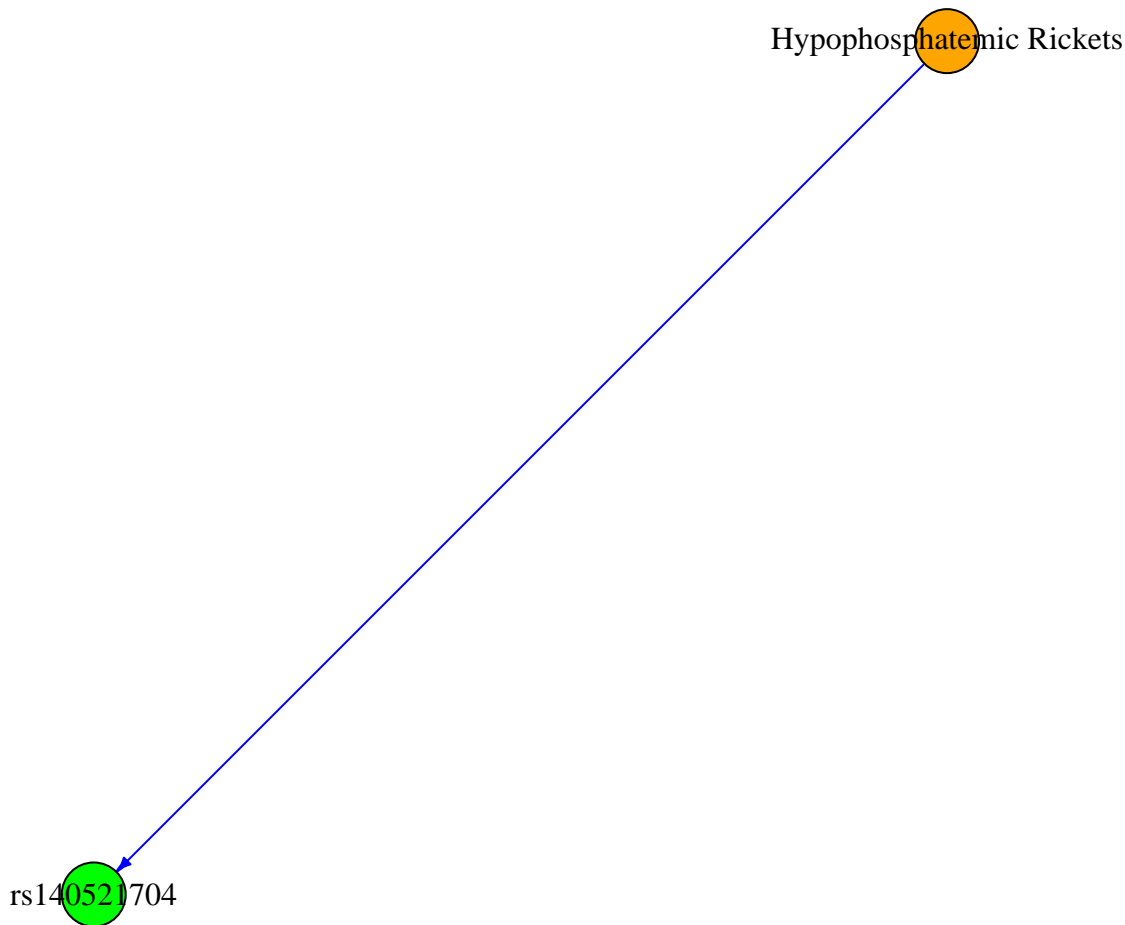

## Variant–Disease Network (Hypotension)

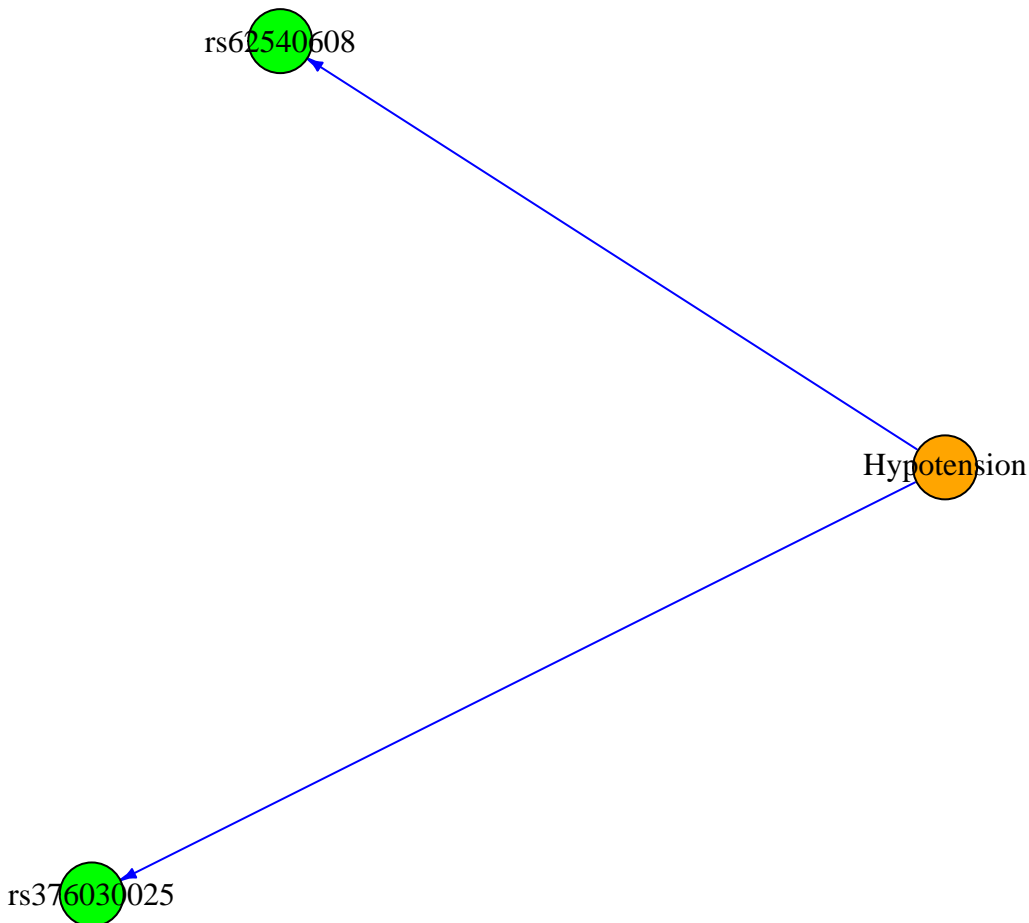

## Variant-Disease Network (Hypotonia)

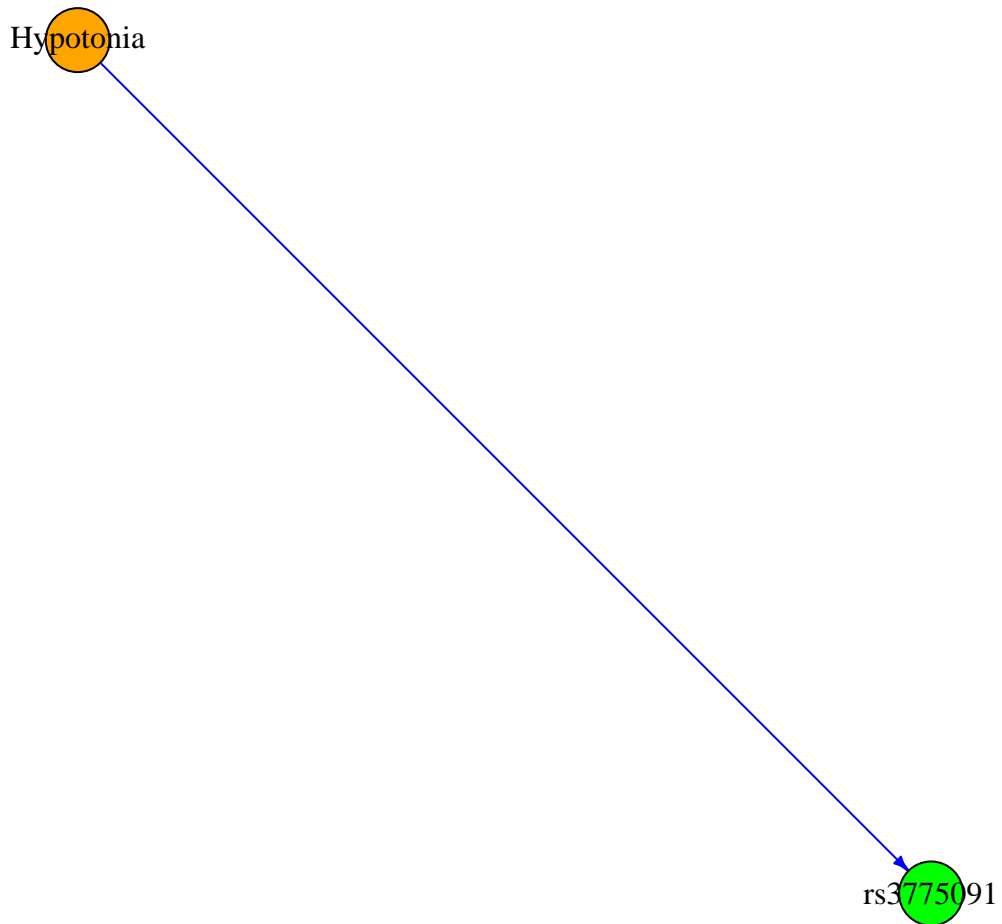

# Variant–Disease Network (Idiopathic basal ganglia calcification 1)

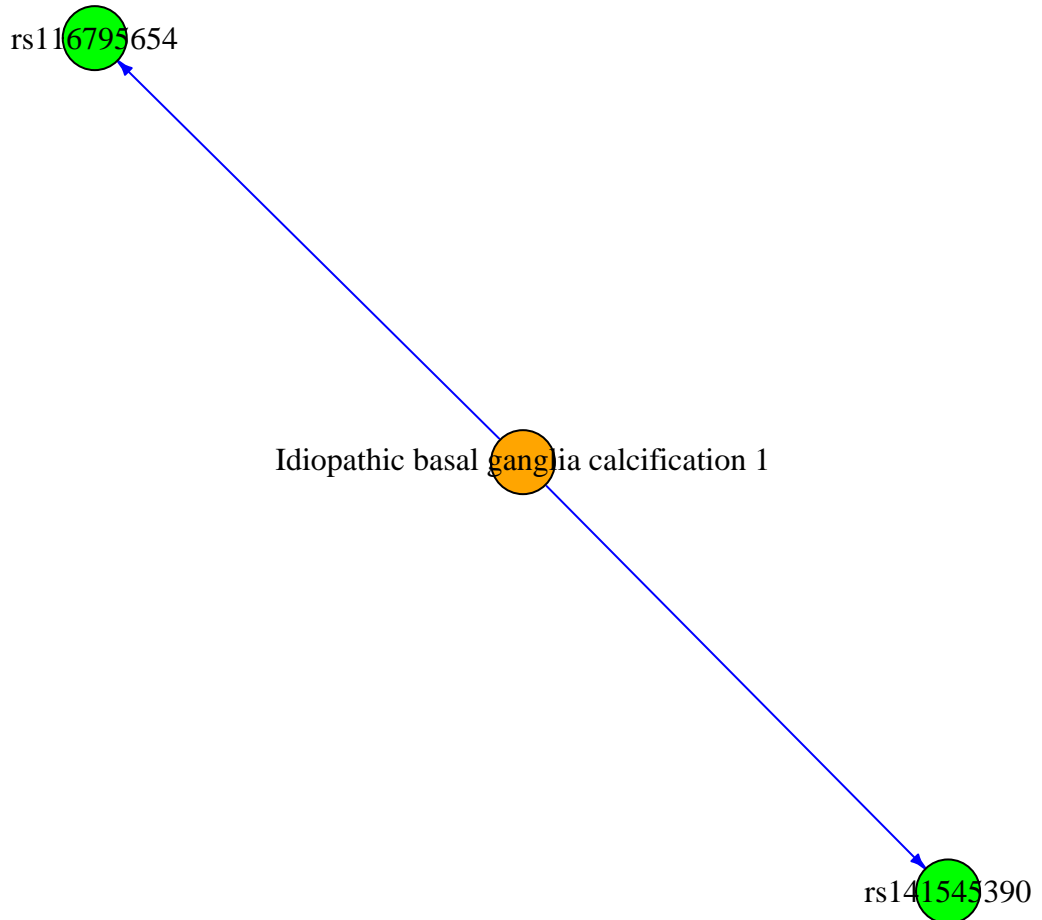

**Variant–Disease Network (Idiopathic generalized epilepsy)**

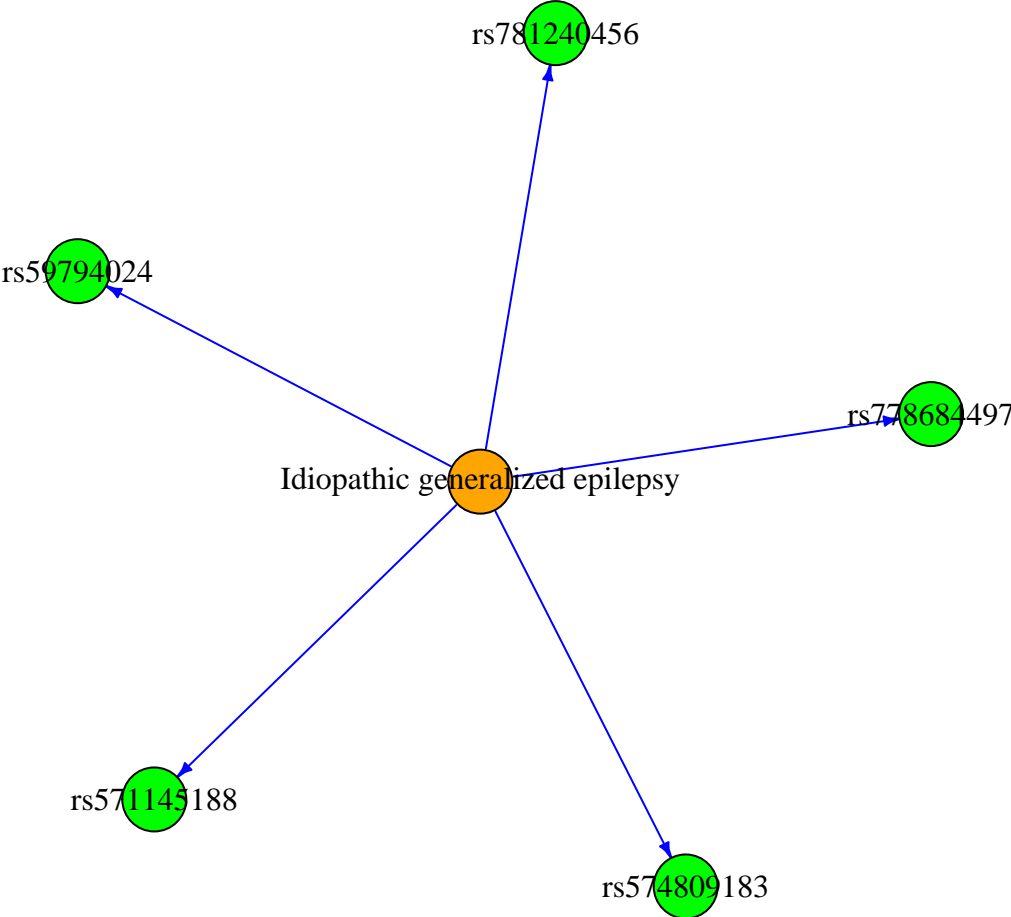



**Variant–Disease Network (Idiopathic hypereosinophilic syndrome)**

Idiopathic hypereosinophilic syndrome

rs771421611

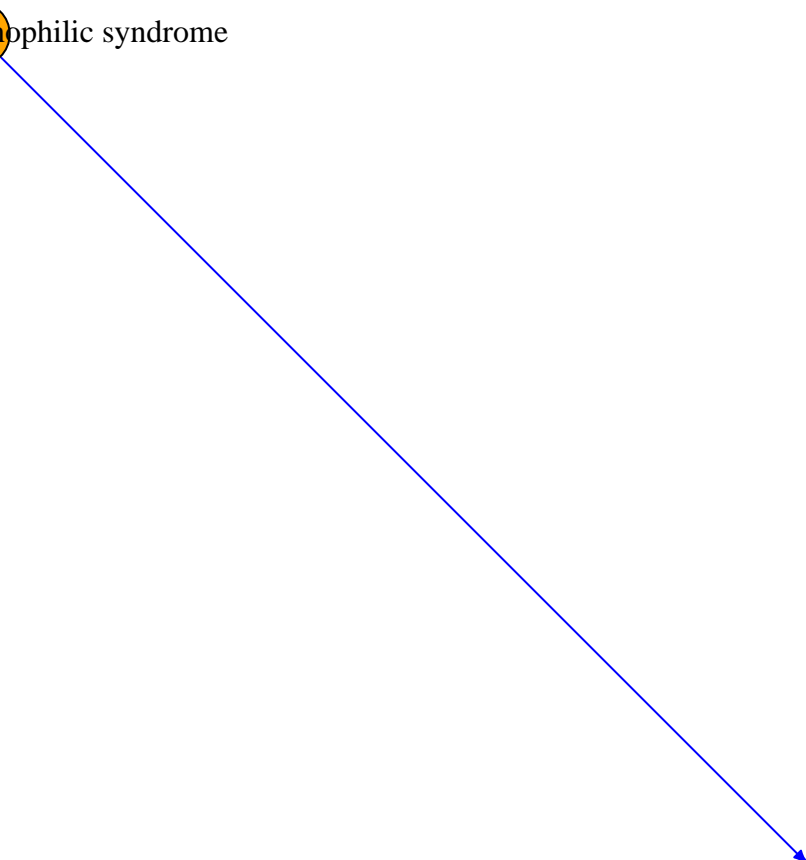

## Variant–Disease Network (Immunodeficiency)

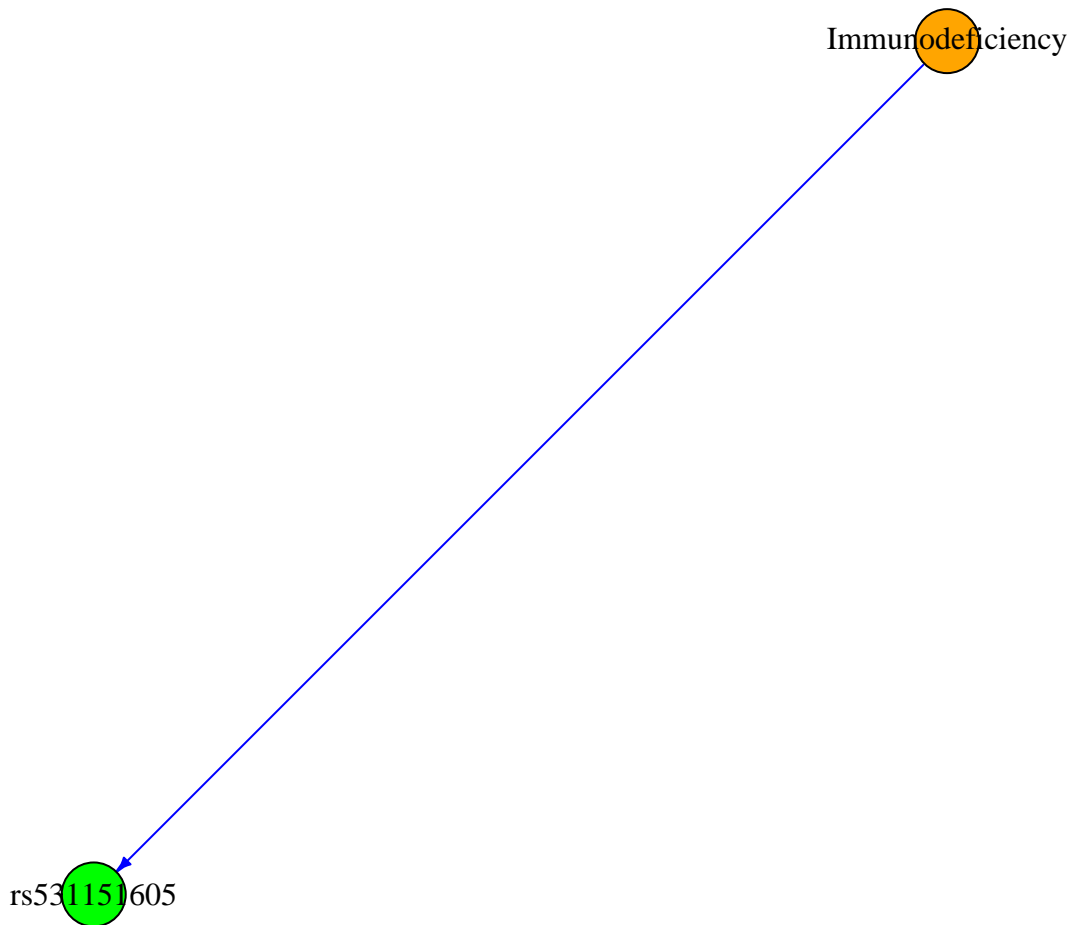

# Ant-Disease Network (Immunodeficiency 26 with or without neurologic abnormalities)

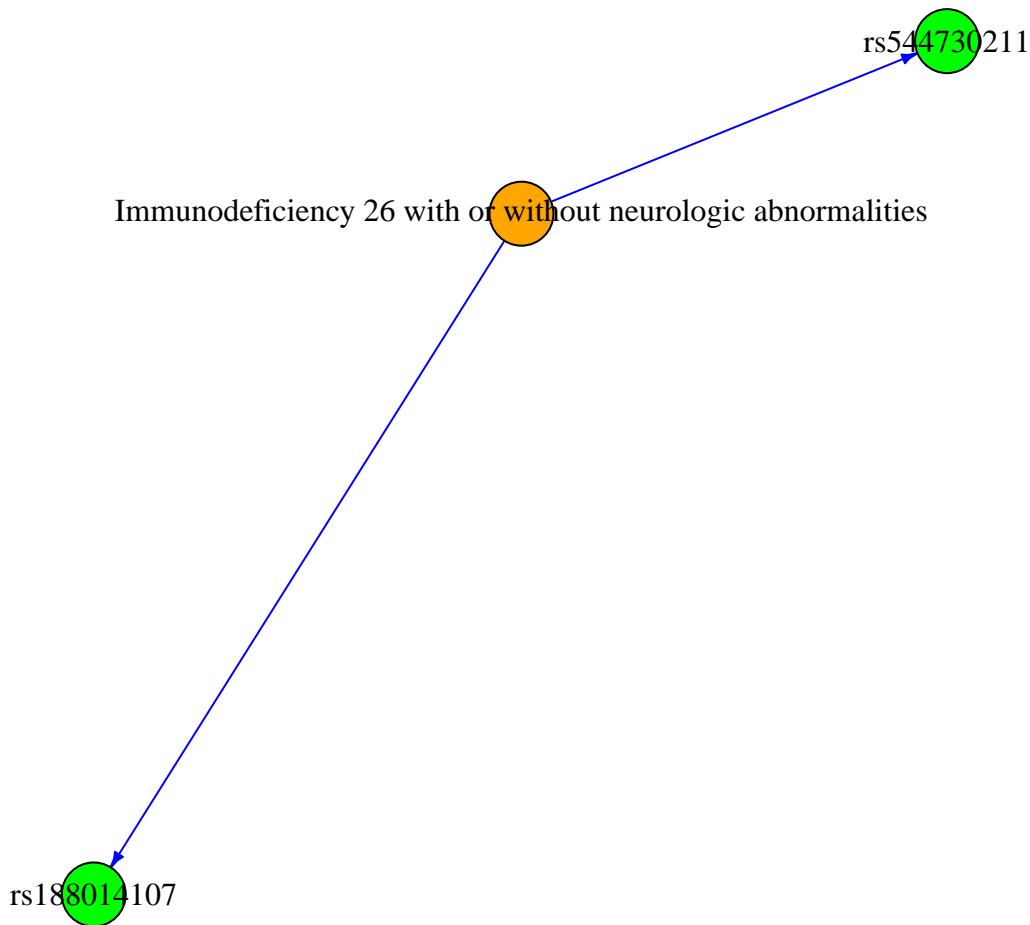

## Variant–Disease Network (Inborn genetic diseases)

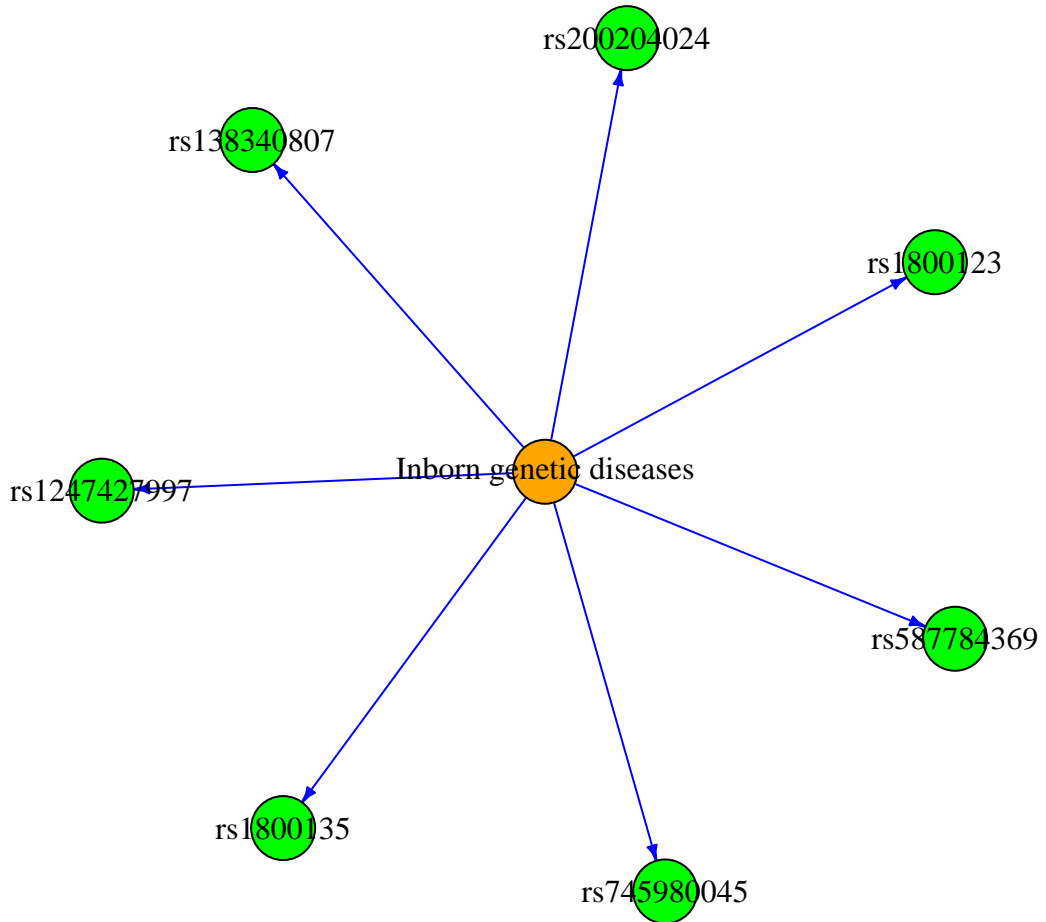

**Variant–Disease Network (Inclusion Body Myopathy)**

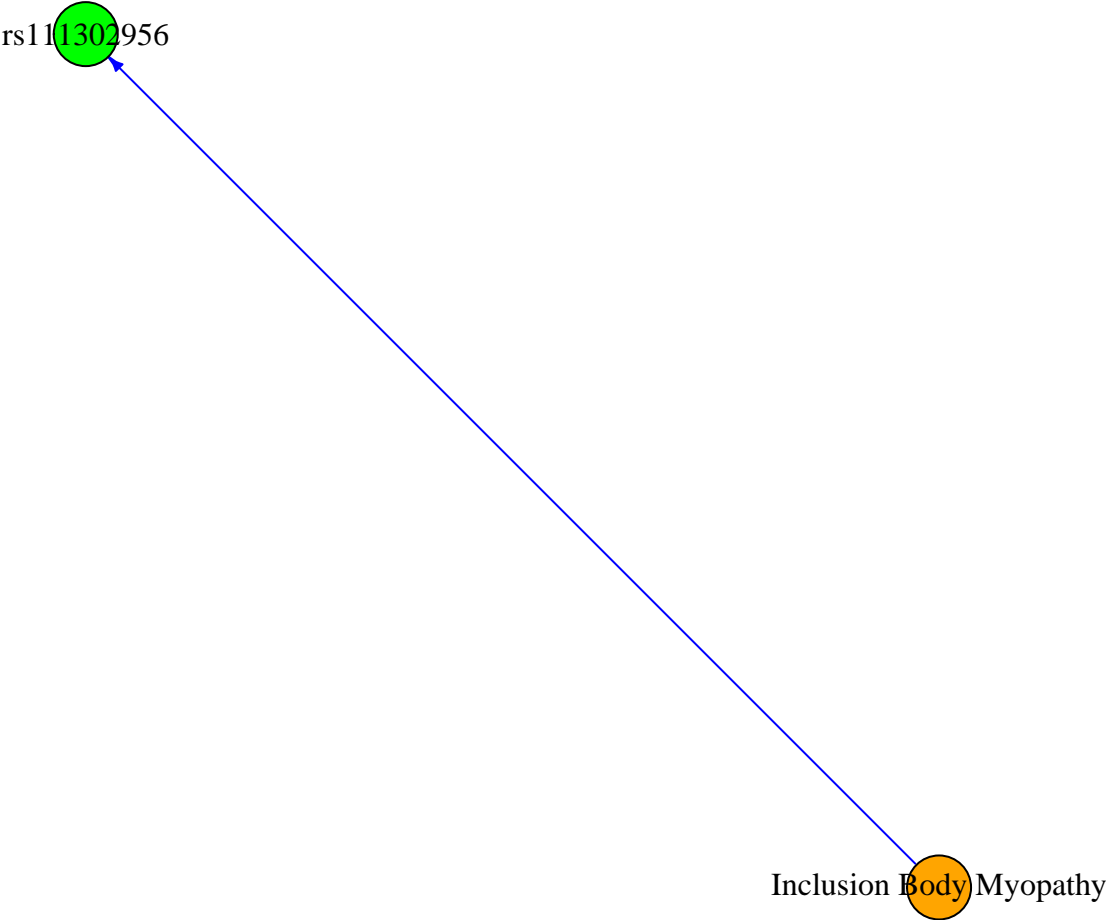

## Variant–Disease Network (Inclusion body myopathy 3)

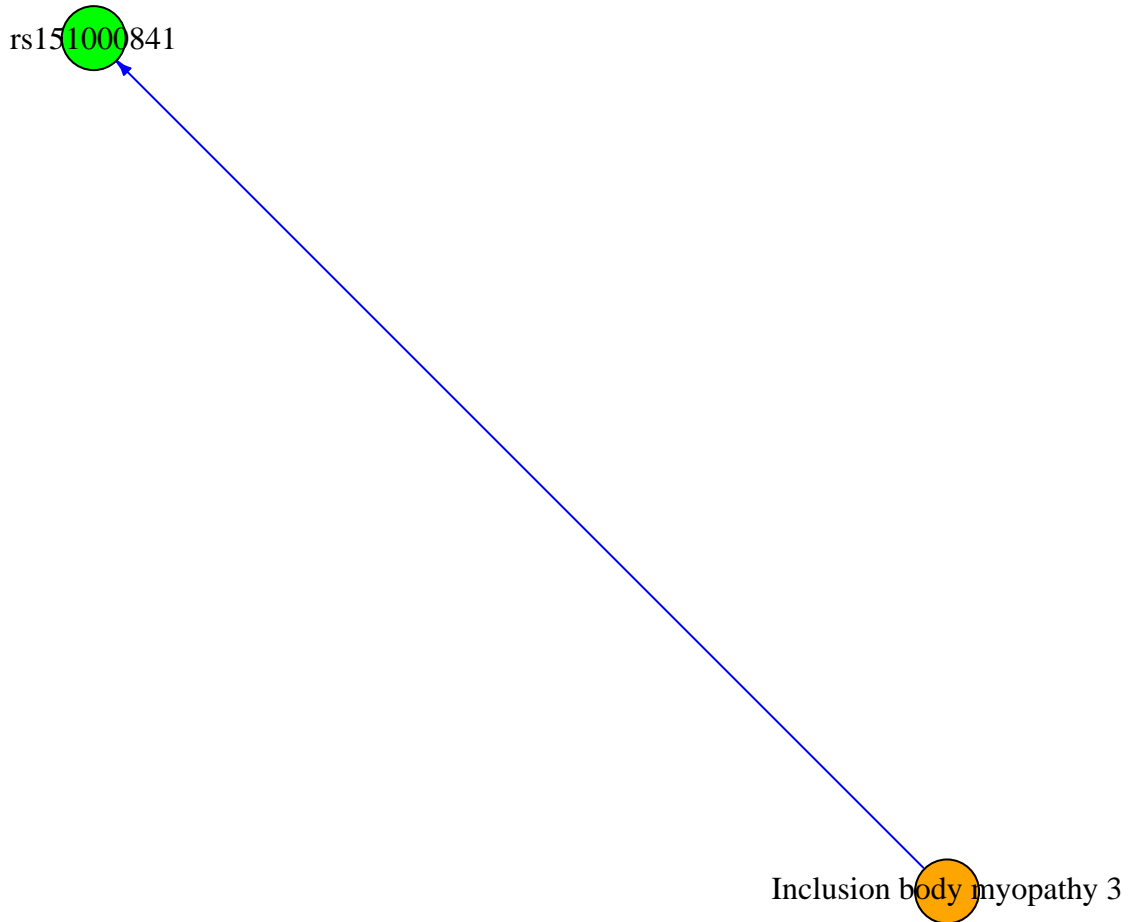

**Variant–Disease Network (Infantile cortical hyperostosis)**

Infantile cortical hyperostosis

rs41316667

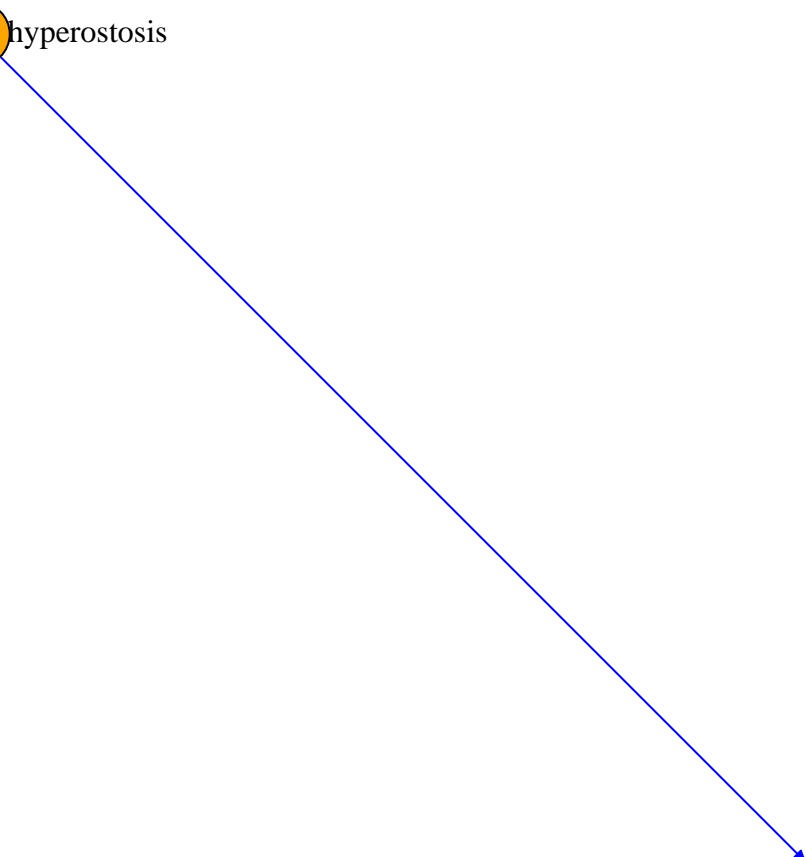

## Variant–Disease Network (Infantile spasms)

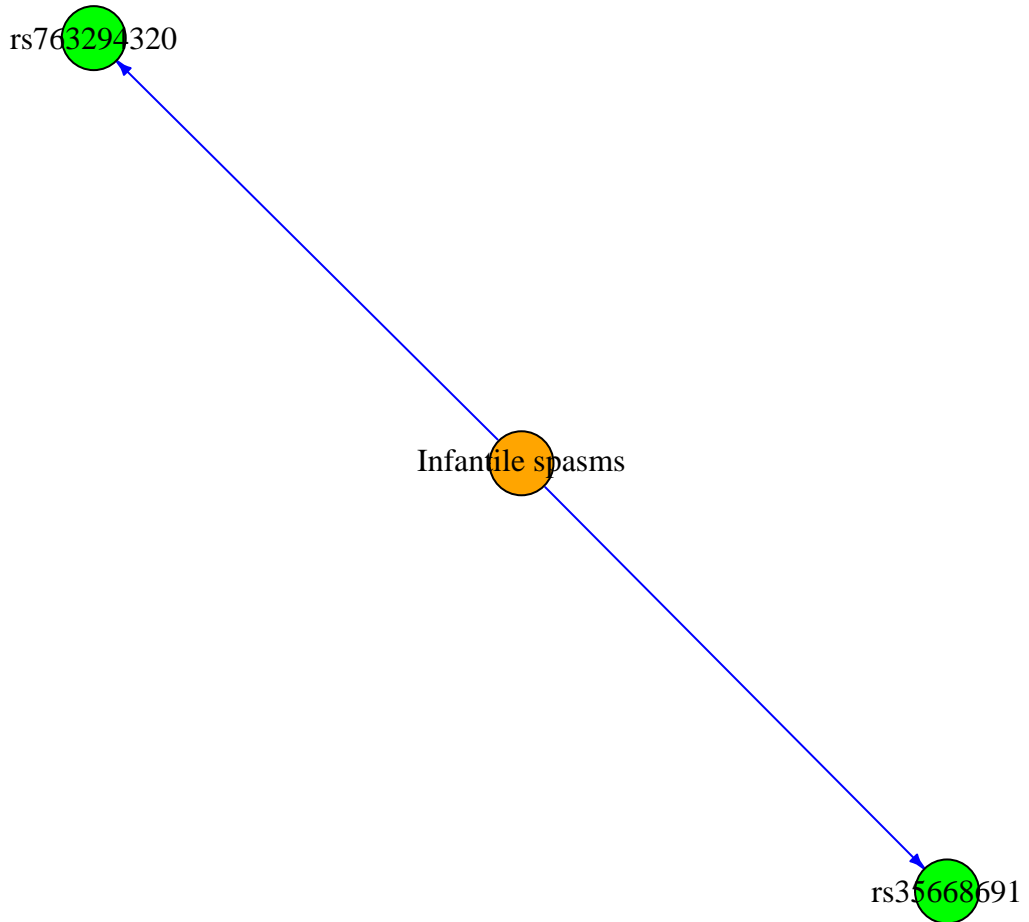



## Variant–Disease Network (Intellectual Disability)

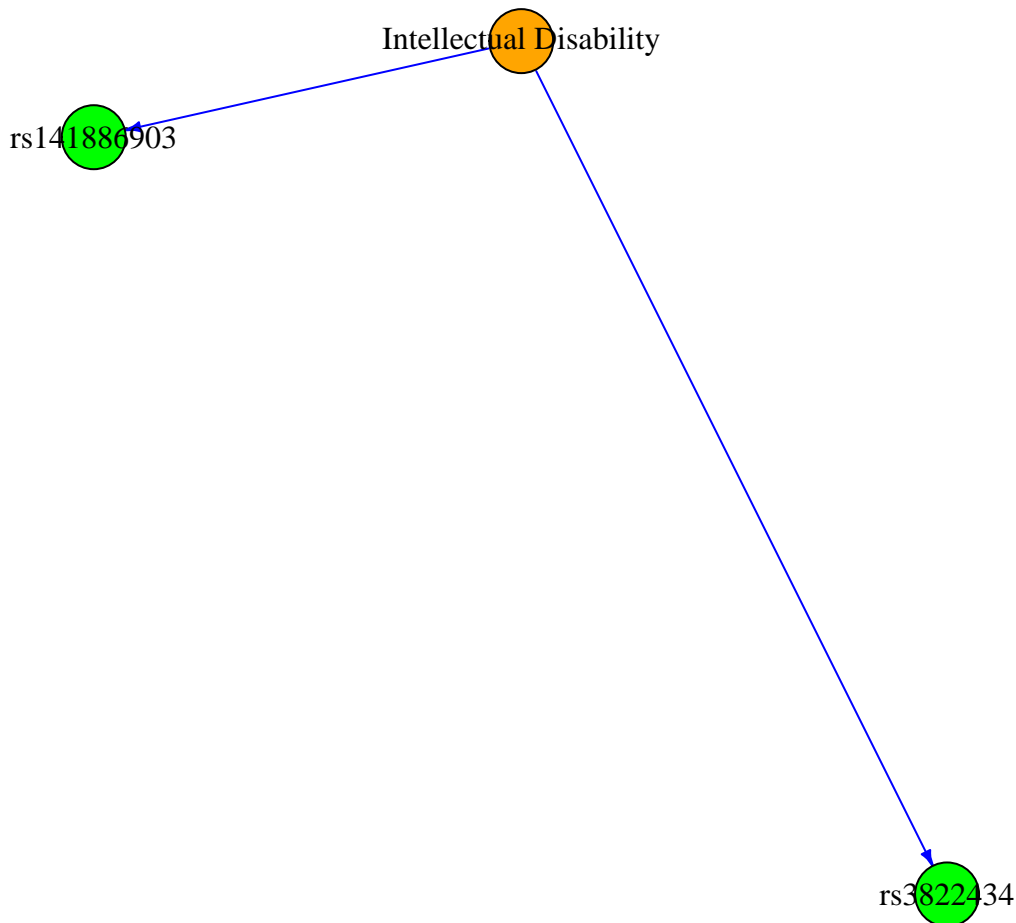

## Variant–Disease Network (Intrinsic factor deficiency)

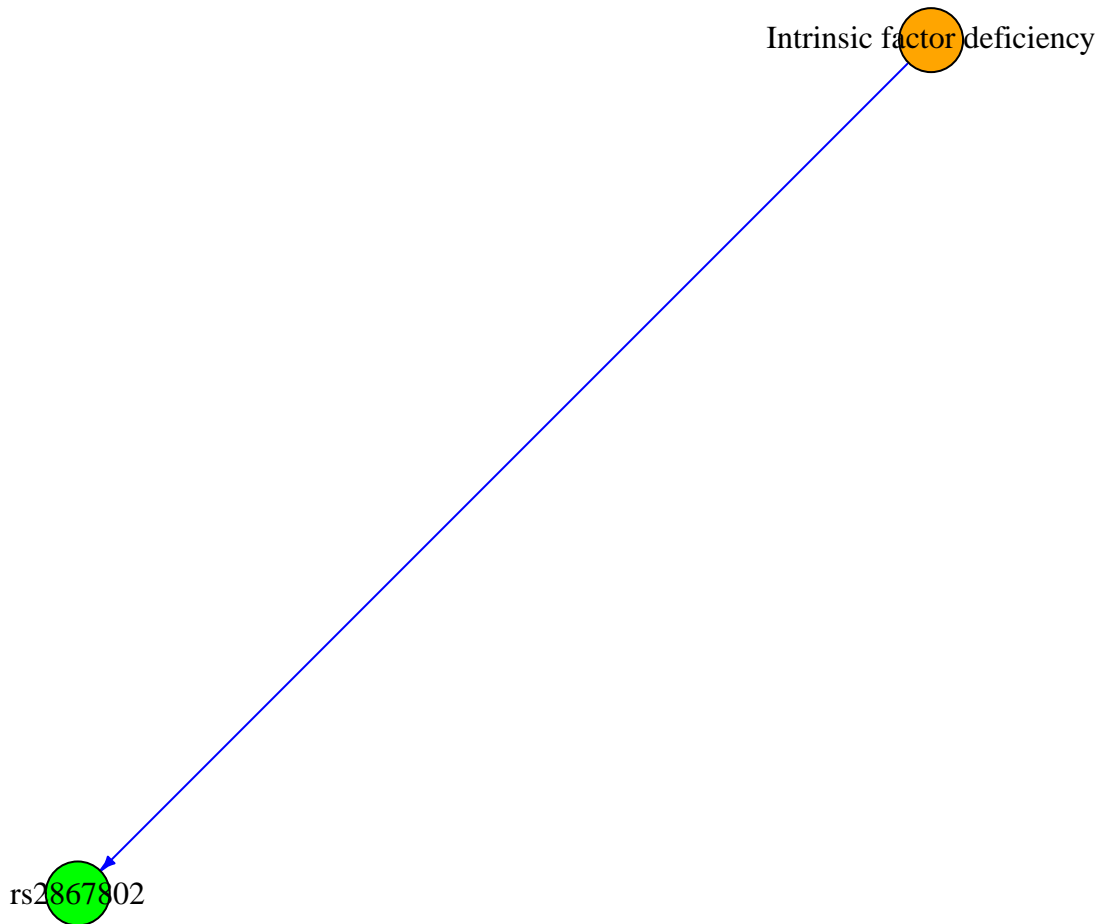

## Variant–Disease Network (Iodotyrosyl coupling defect)

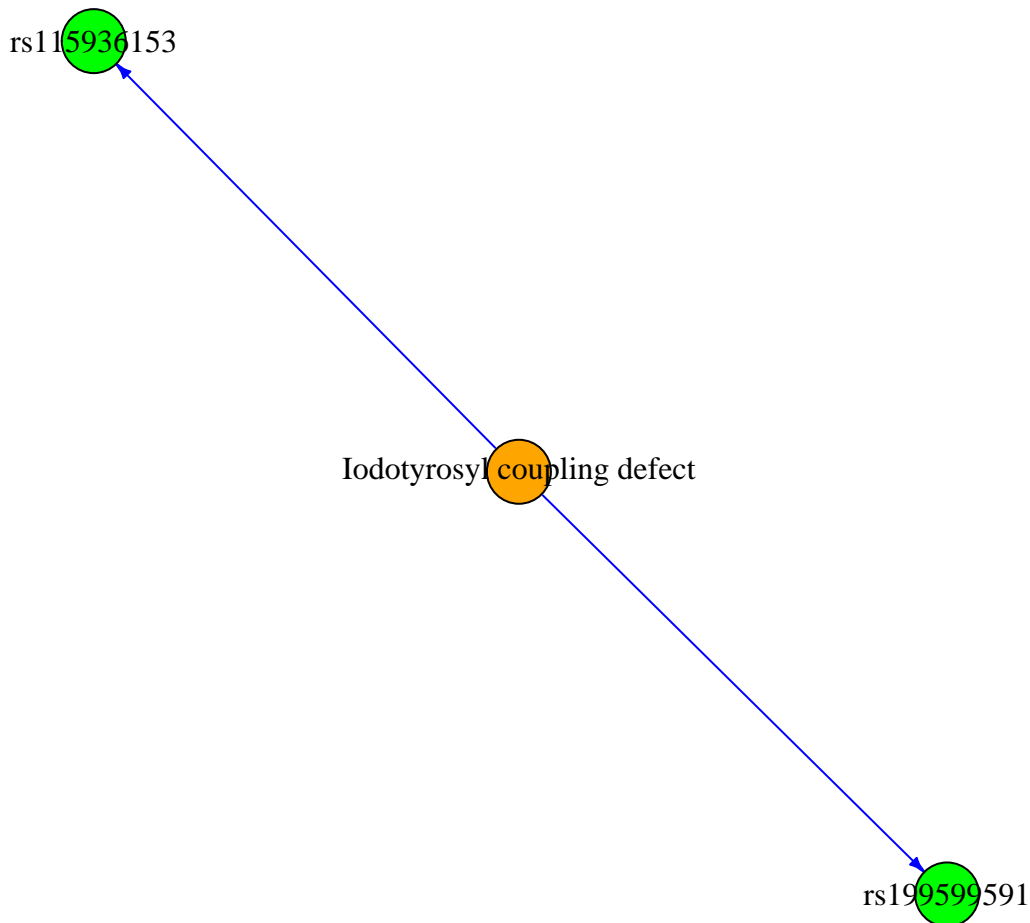

## Variant–Disease Network (Isolated coronal synostosis)

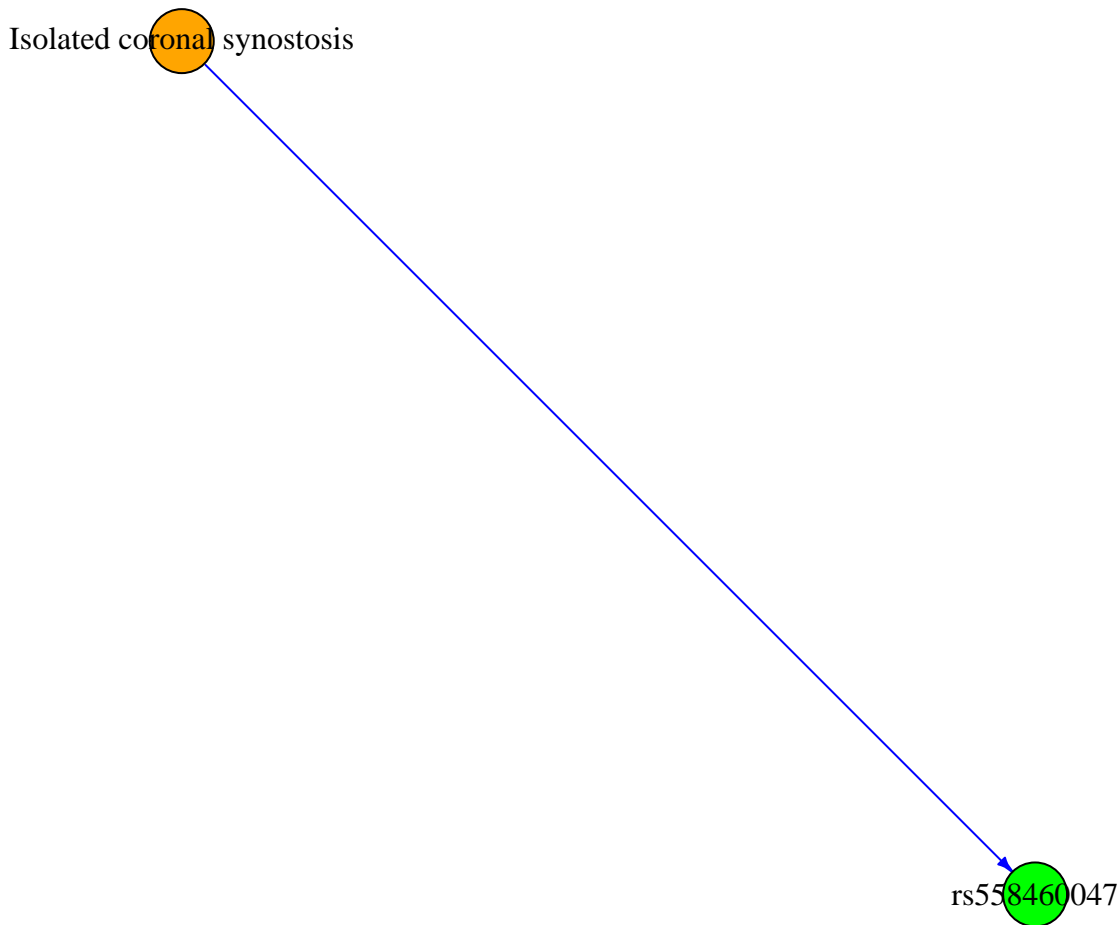

Variant–Disease Network (Isolated Nonsyndromic Congenital Heart Diseases)

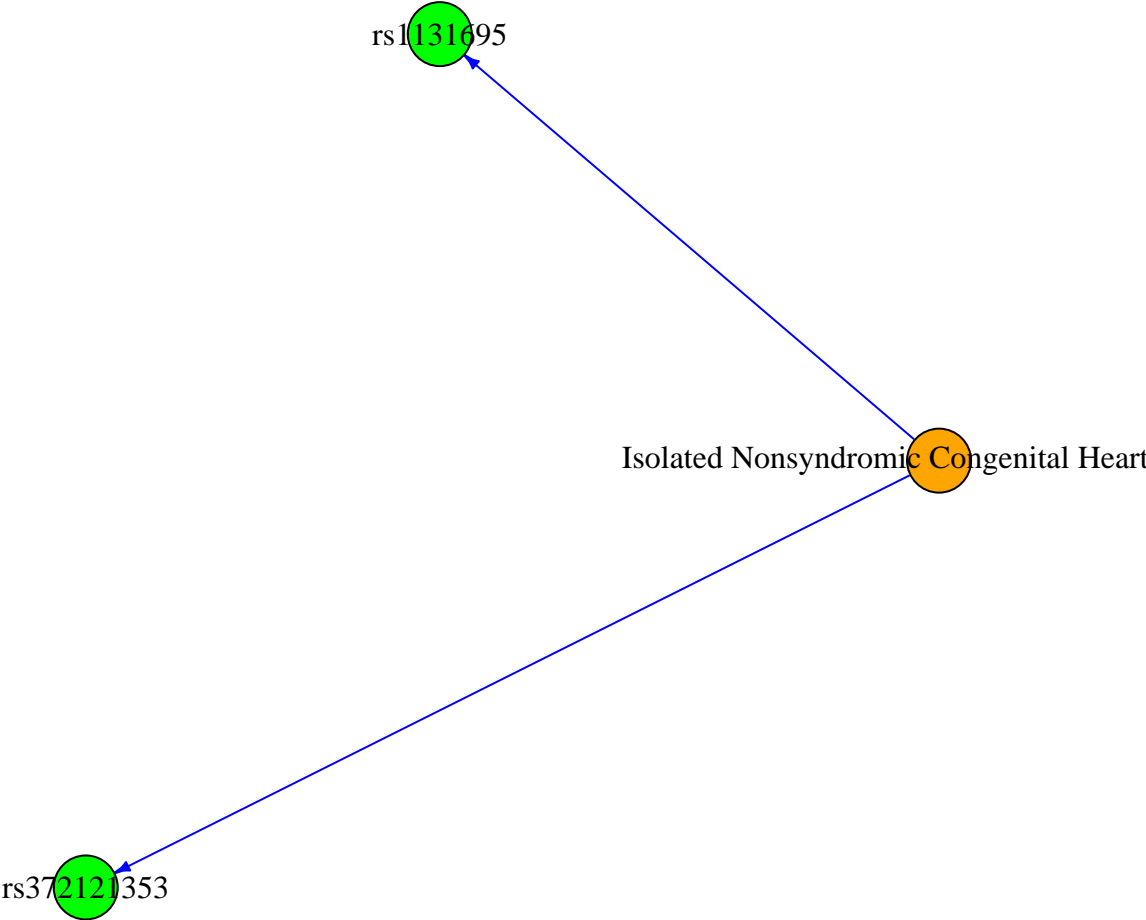

# Variant–Disease Network (Jackson–Weiss syndrome)

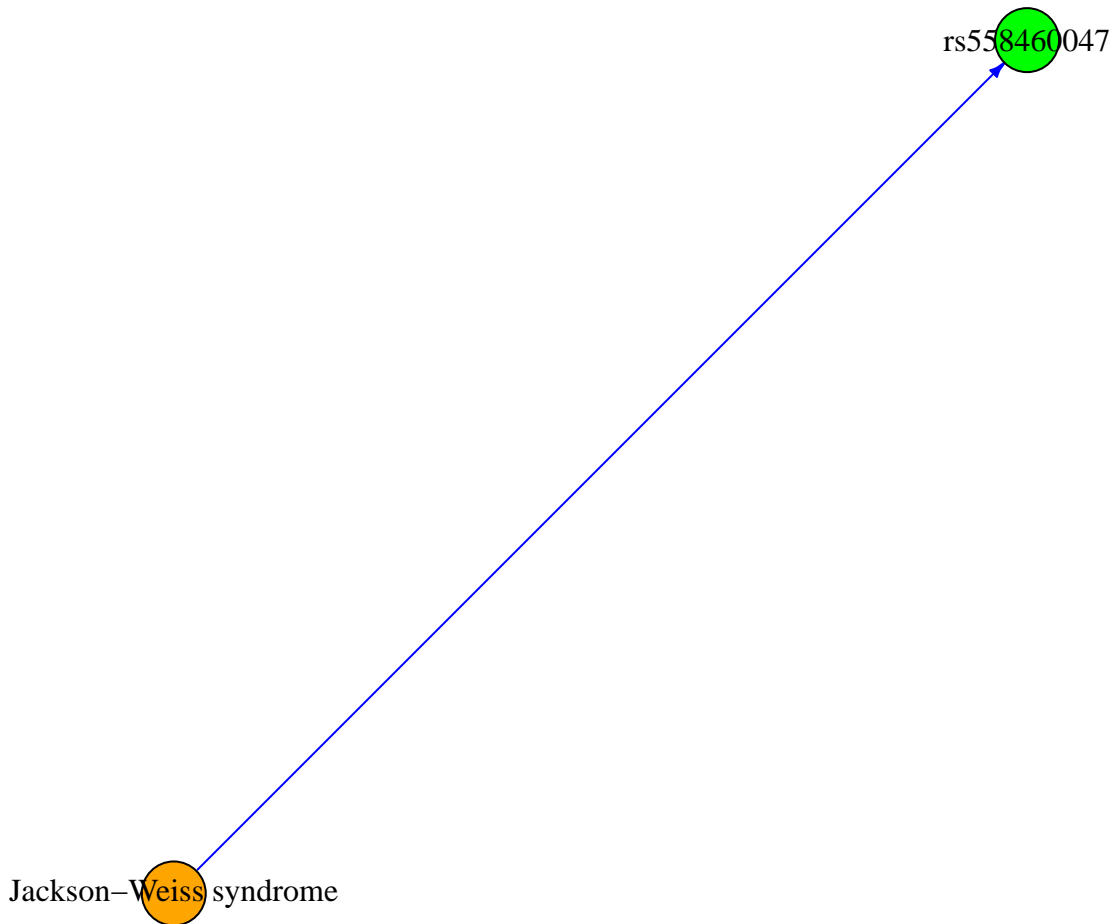

# Variant–Disease Network (Jarcho–Levin syndrome)

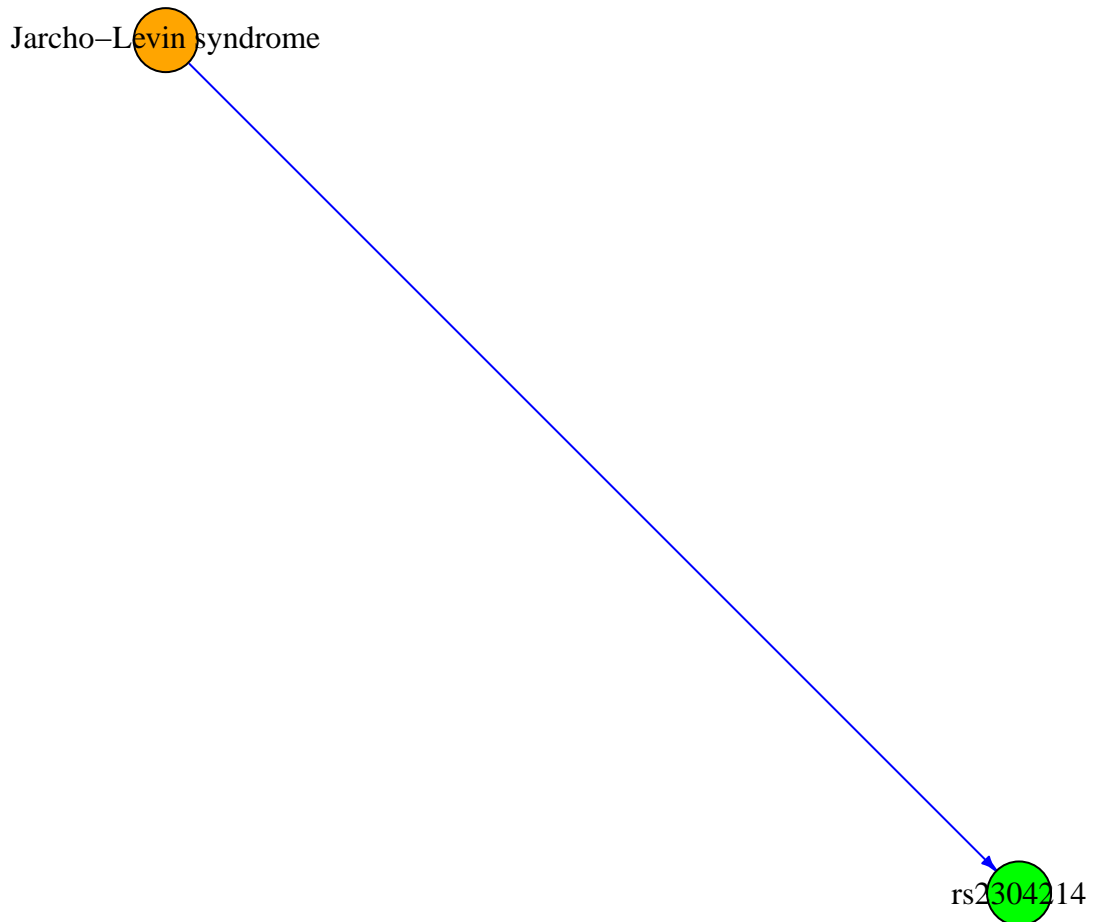

Variant–Disease Network (Jervell and Lange–Nielsen syndrome)

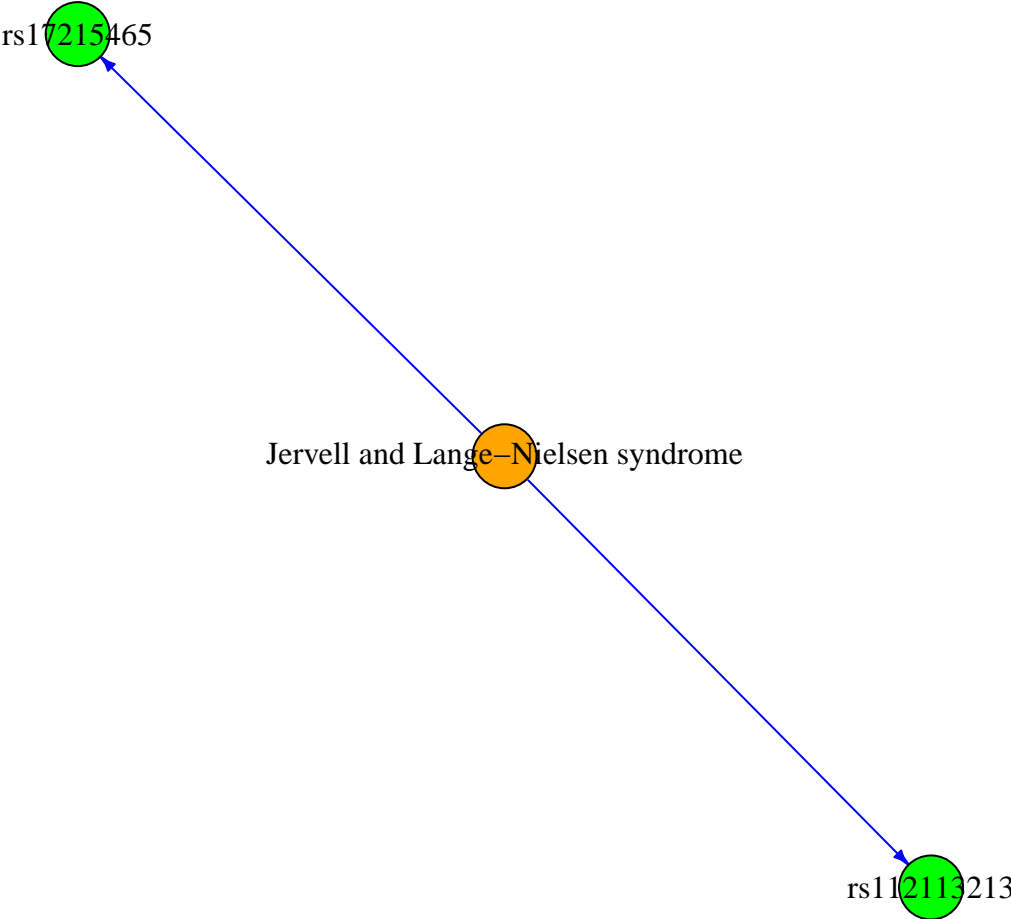



## Variant–Disease Network (Jeune thoracic dystrophy)

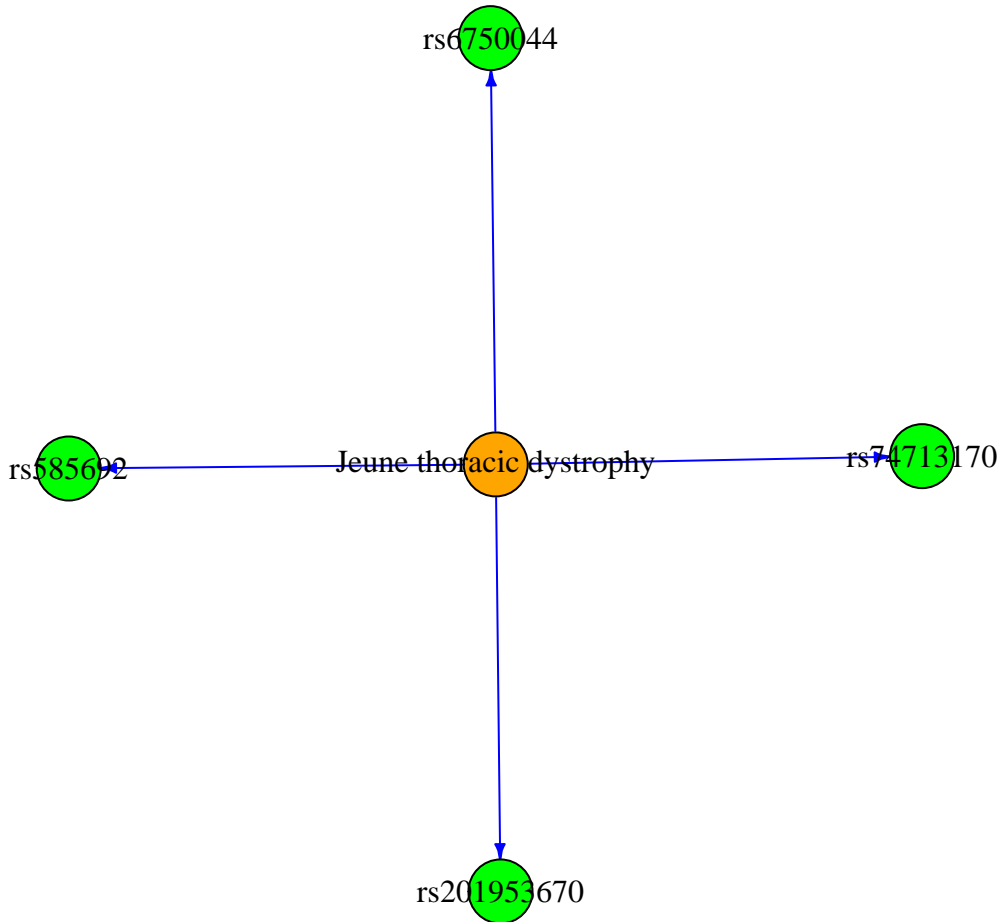

## Variant–Disease Network (Joubert syndrome)

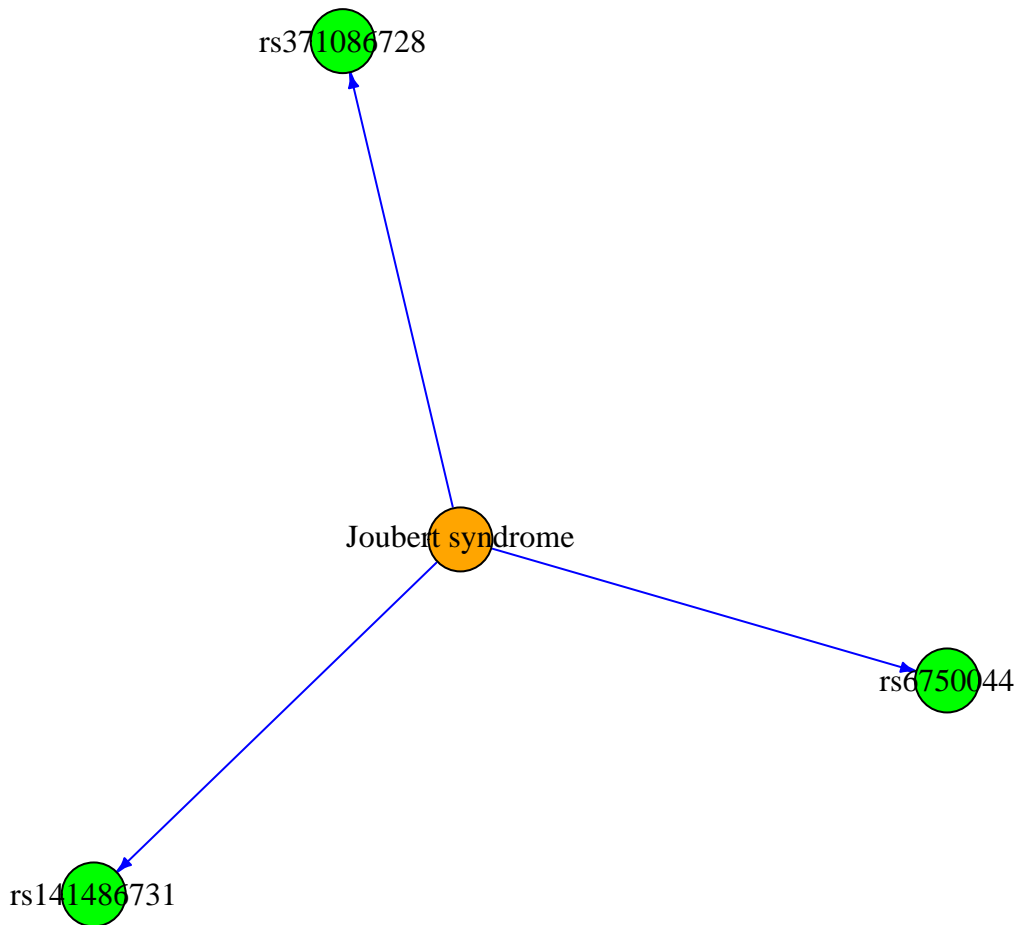

## Variant–Disease Network (Joubert syndrome 1)

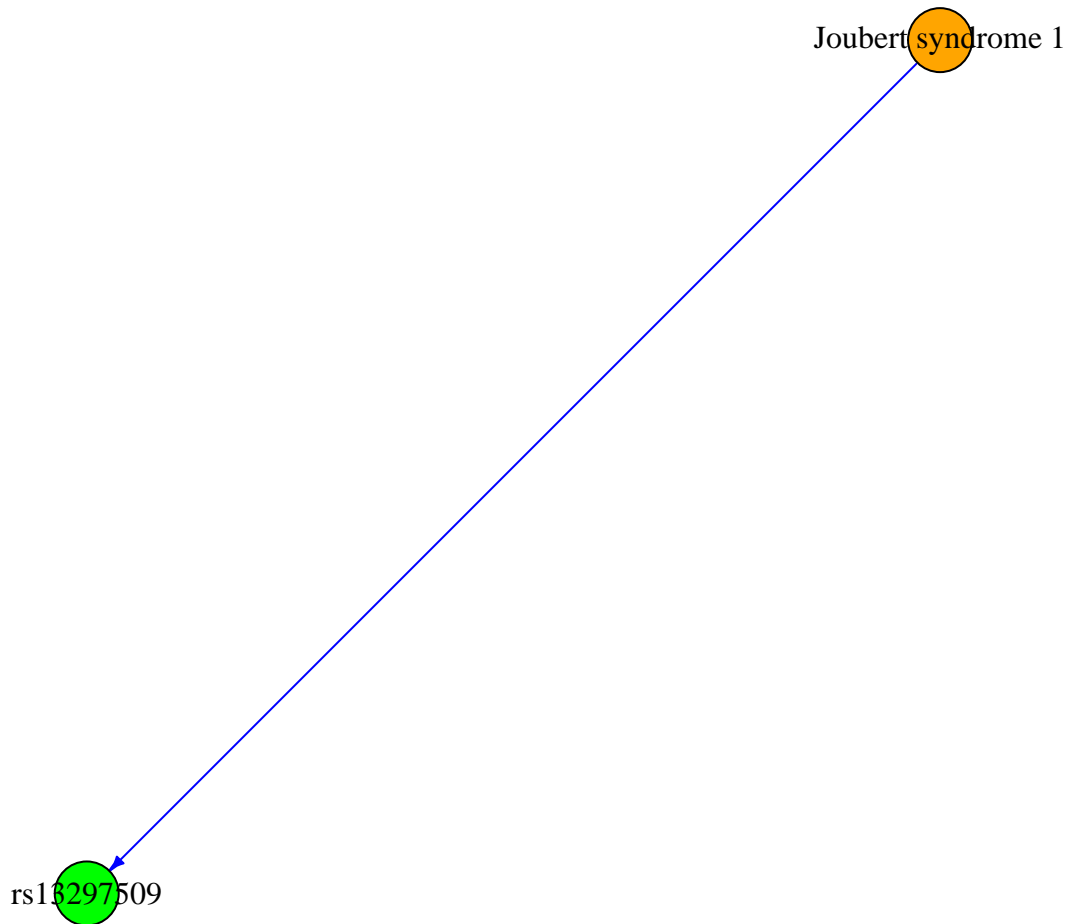

# Variant–Disease Network (Juvenile Polyposis)

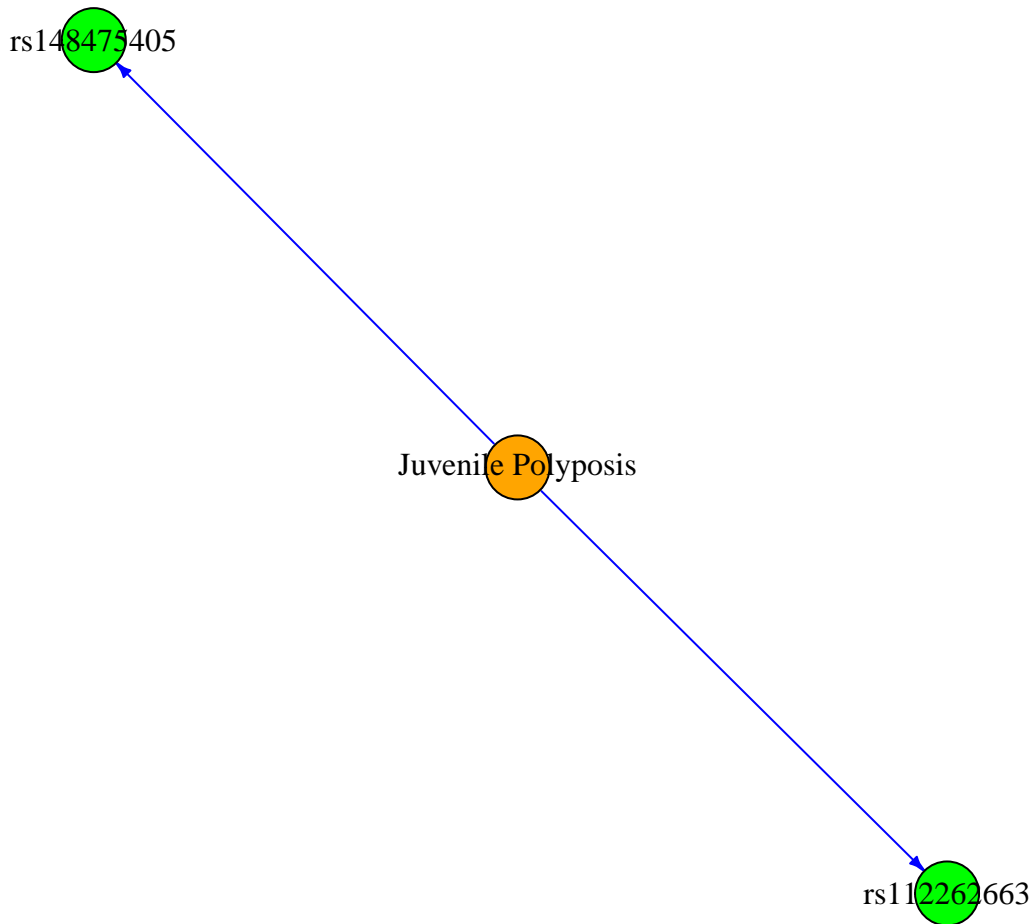

## Variant–Disease Network (Kallmann syndrome 3)

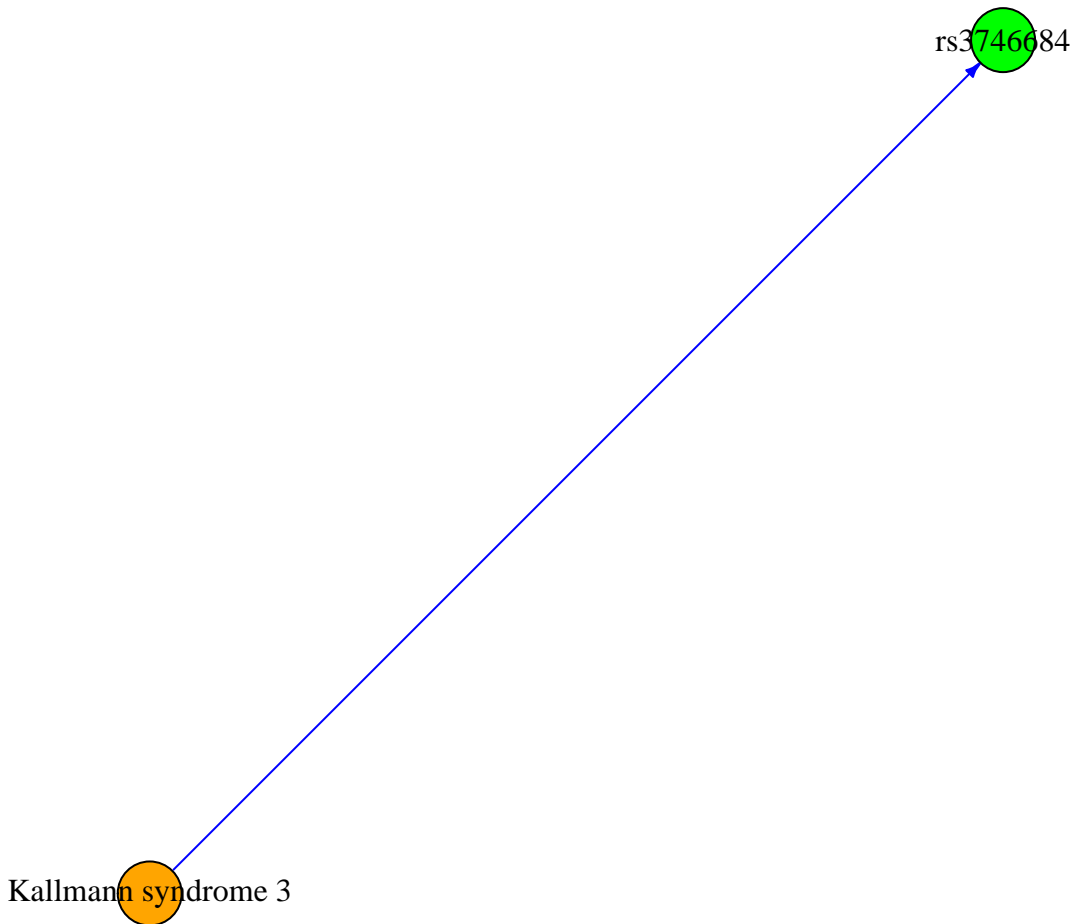

## Variant–Disease Network (Kleefstra syndrome 1)

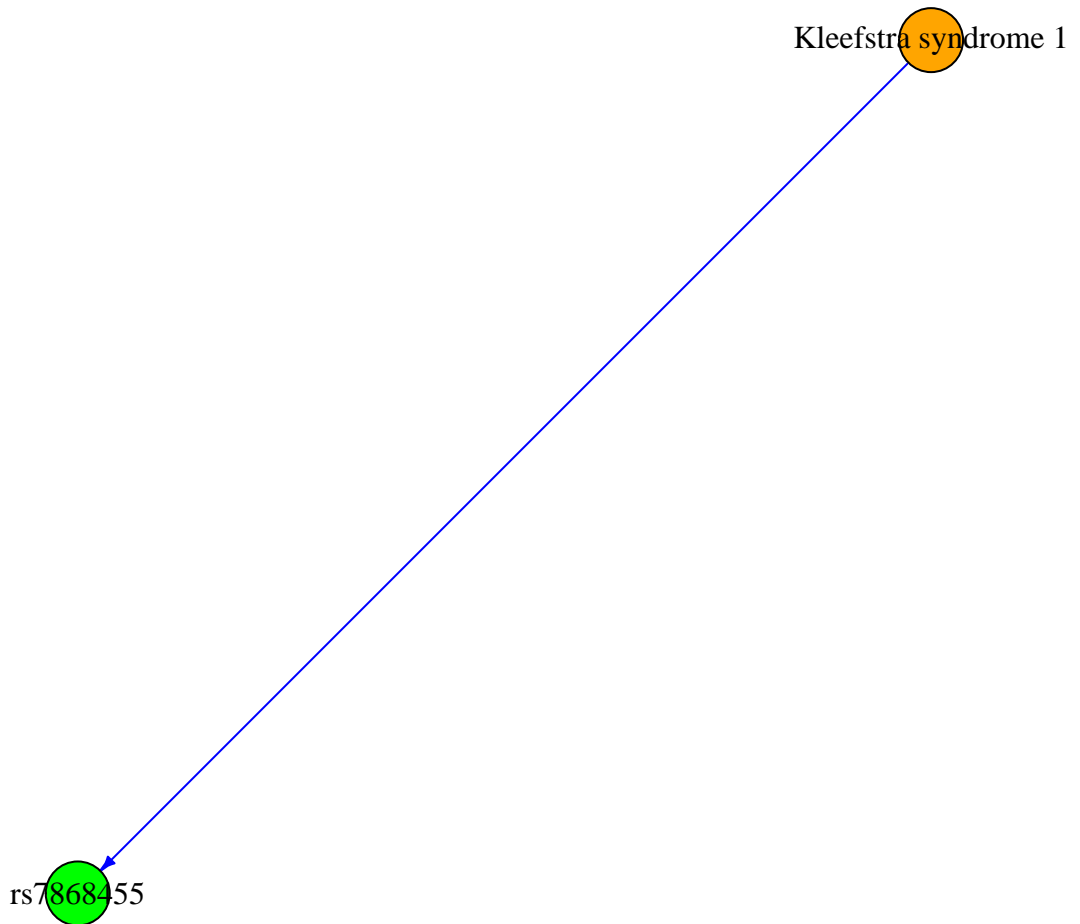

## Variant-Disease Network (Kohlschutters syndrome)

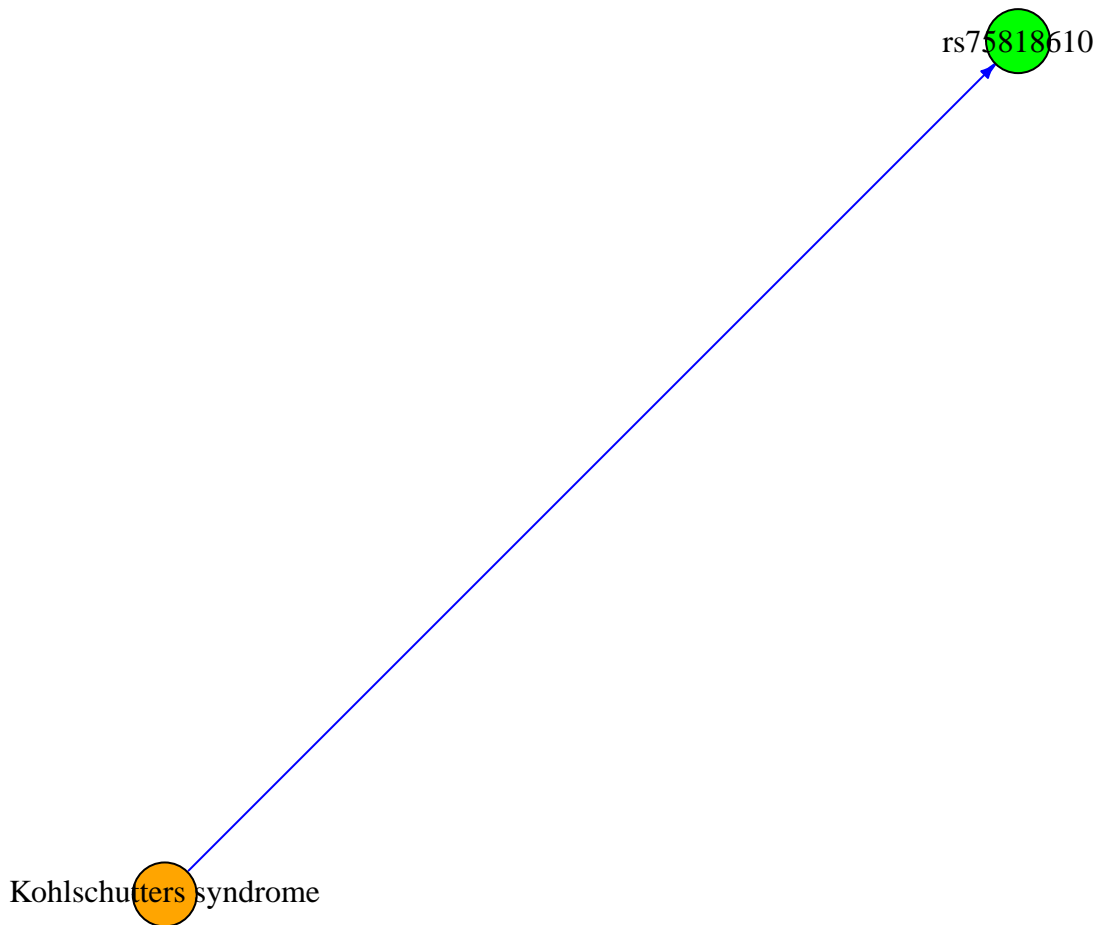

## Variant–Disease Network (Lactose intolerance)

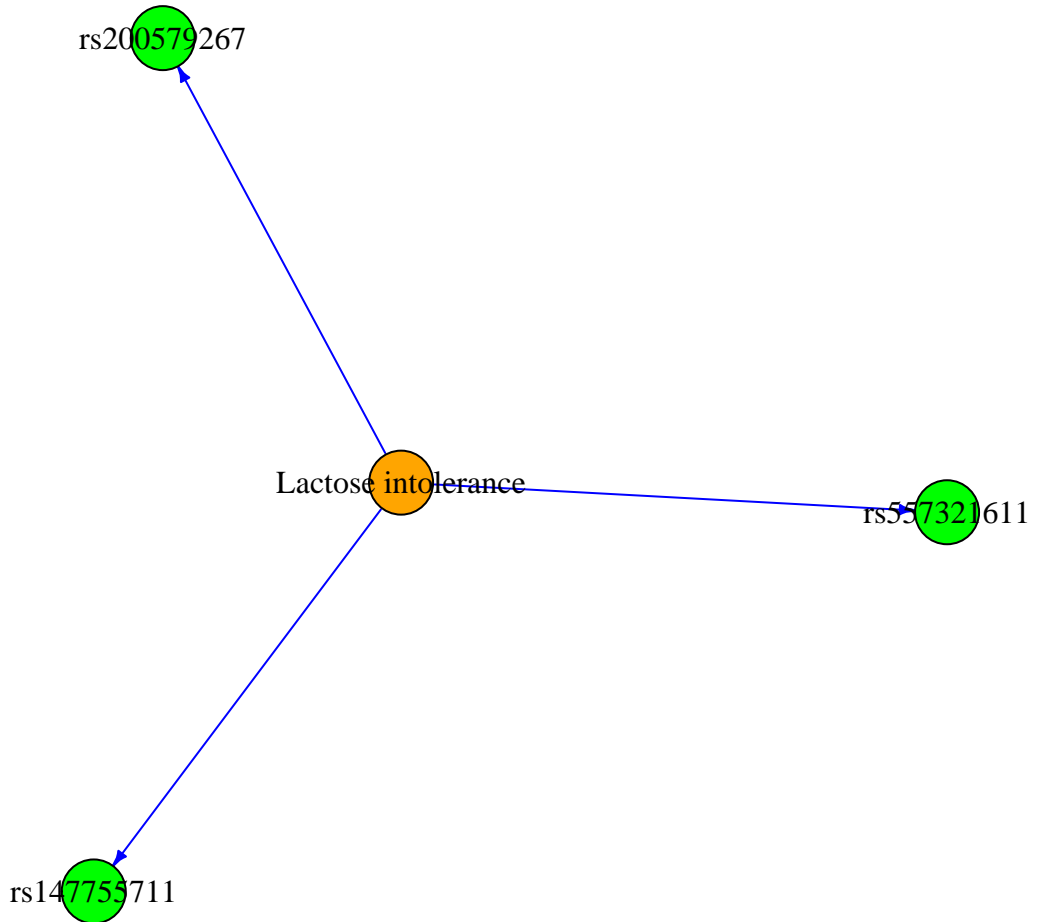



Variant–Disease Network (Laryngoonychocutaneous syndrome)

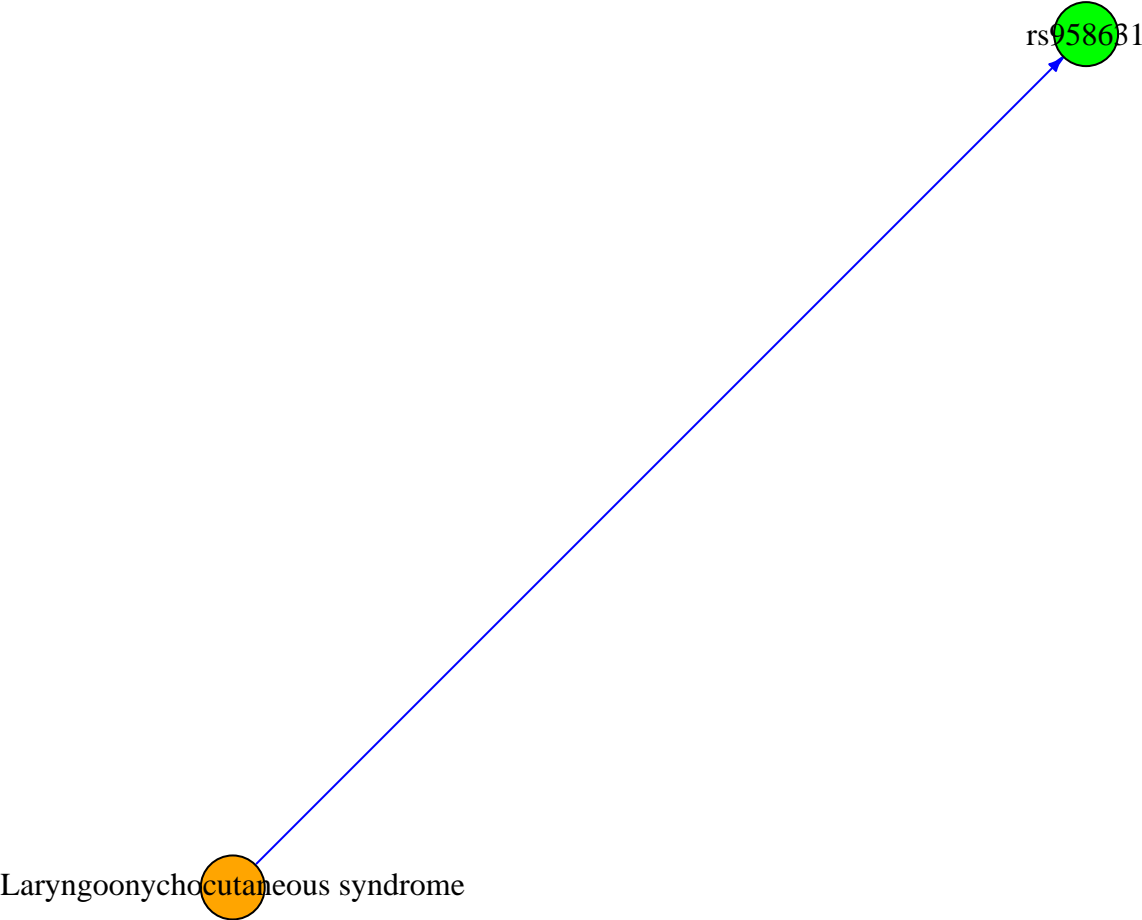

## Variant–Disease Network (LCHAD Deficiency)

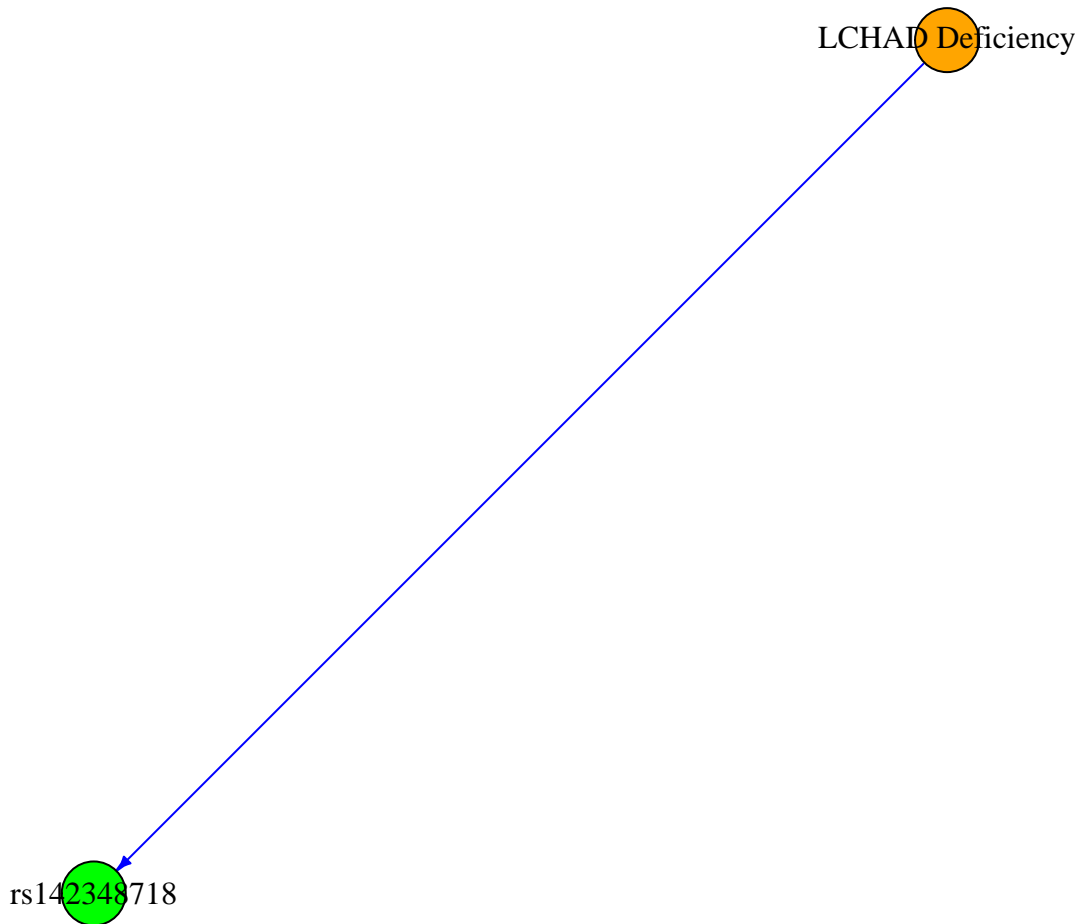

Variant–Disease Network (Leber congenital amaurosis)

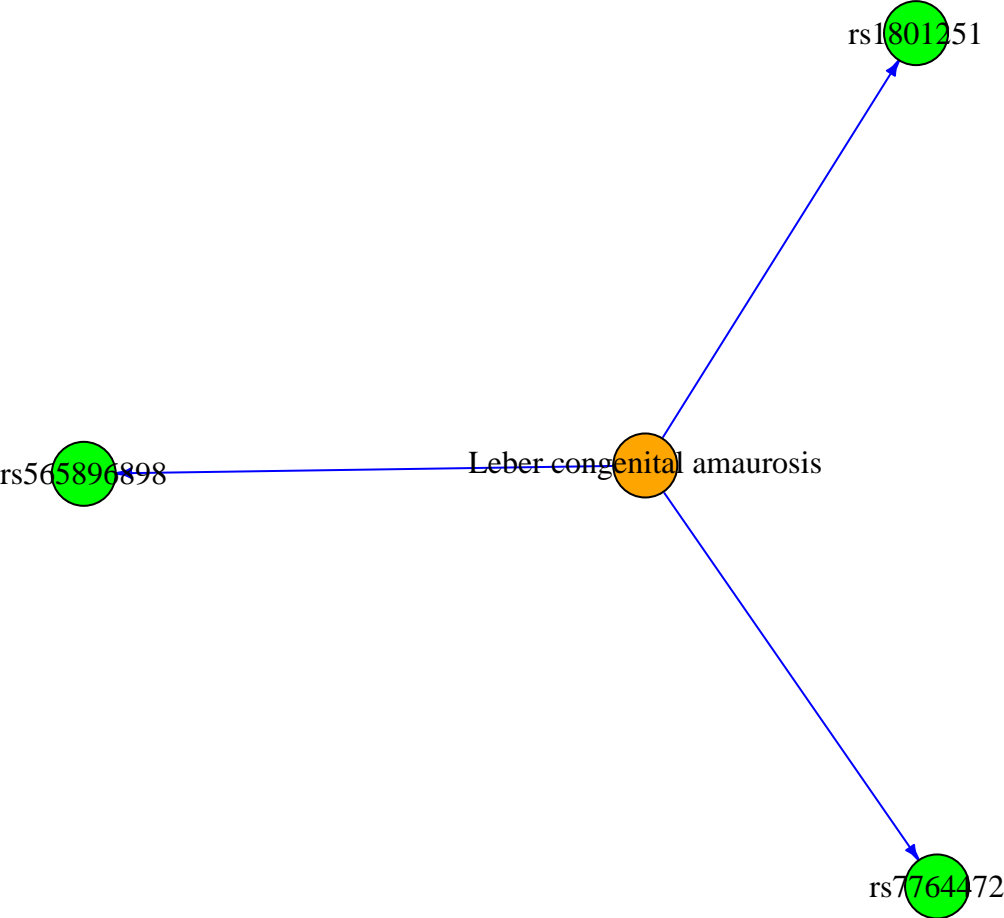

**Variant–Disease Network (Left ventricular noncompaction 6)**

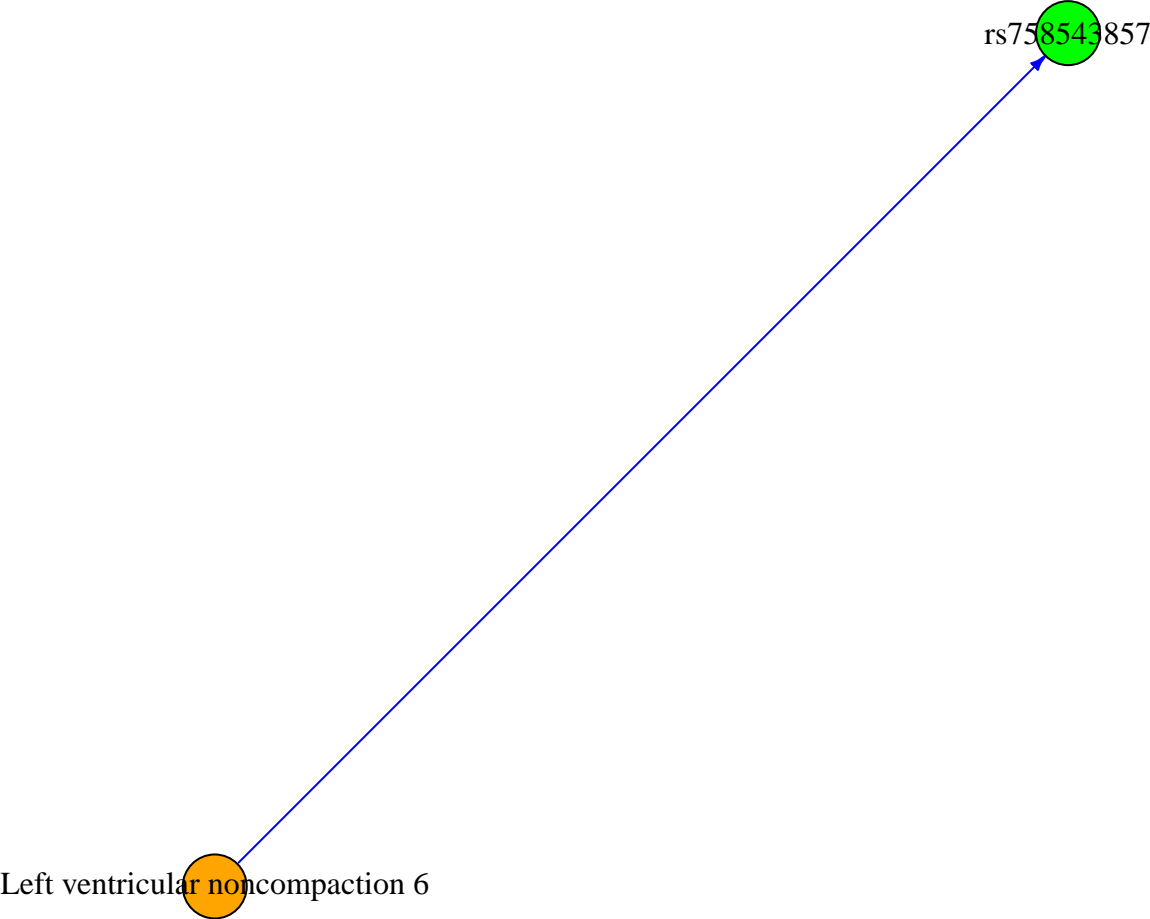

**Variant–Disease Network (Left ventricular noncompaction 8)**

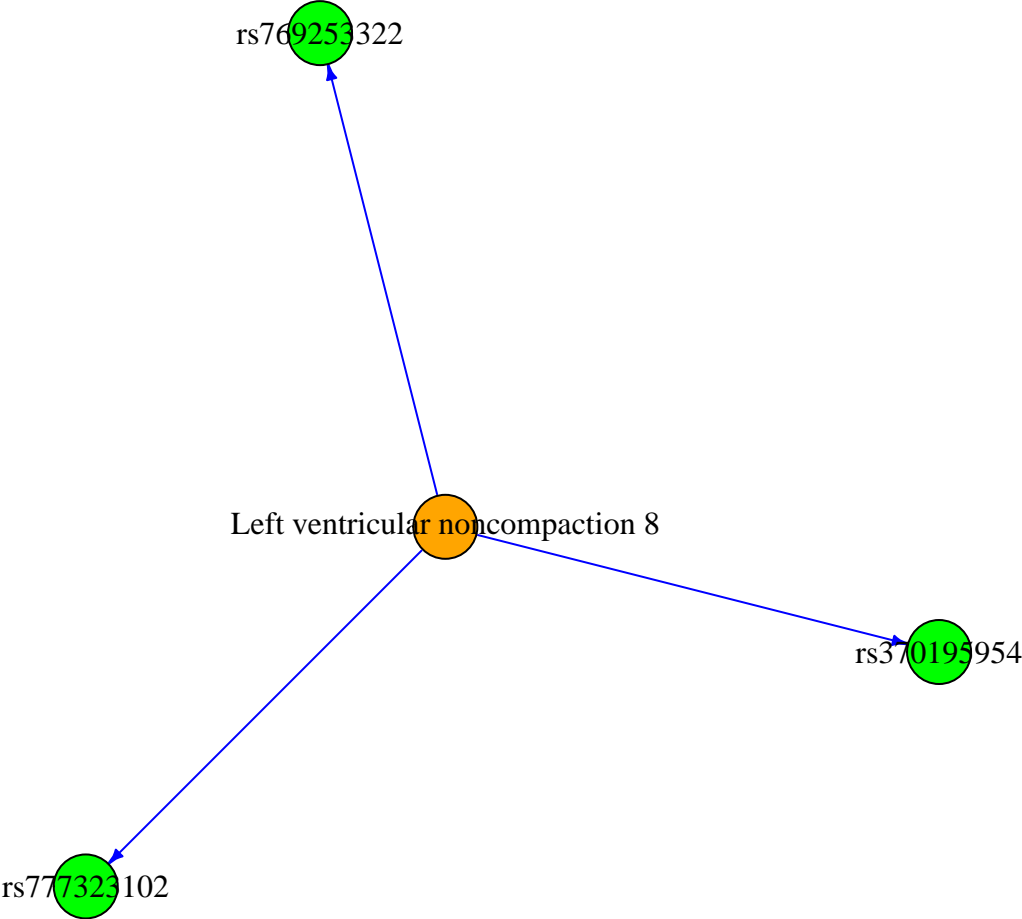

Variant–Disease Network (Left ventricular noncompaction cardiomyopath

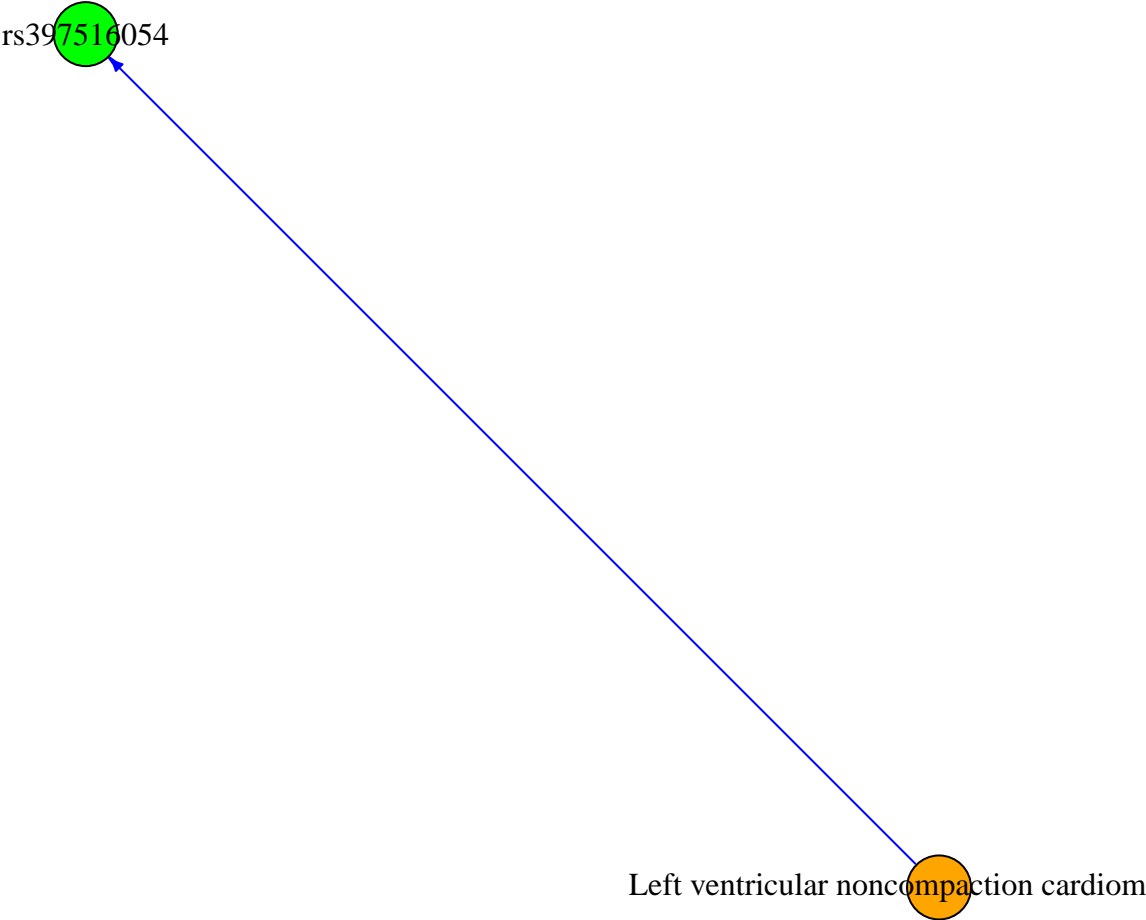

Variant–Disease Network (Leigh syndrome)

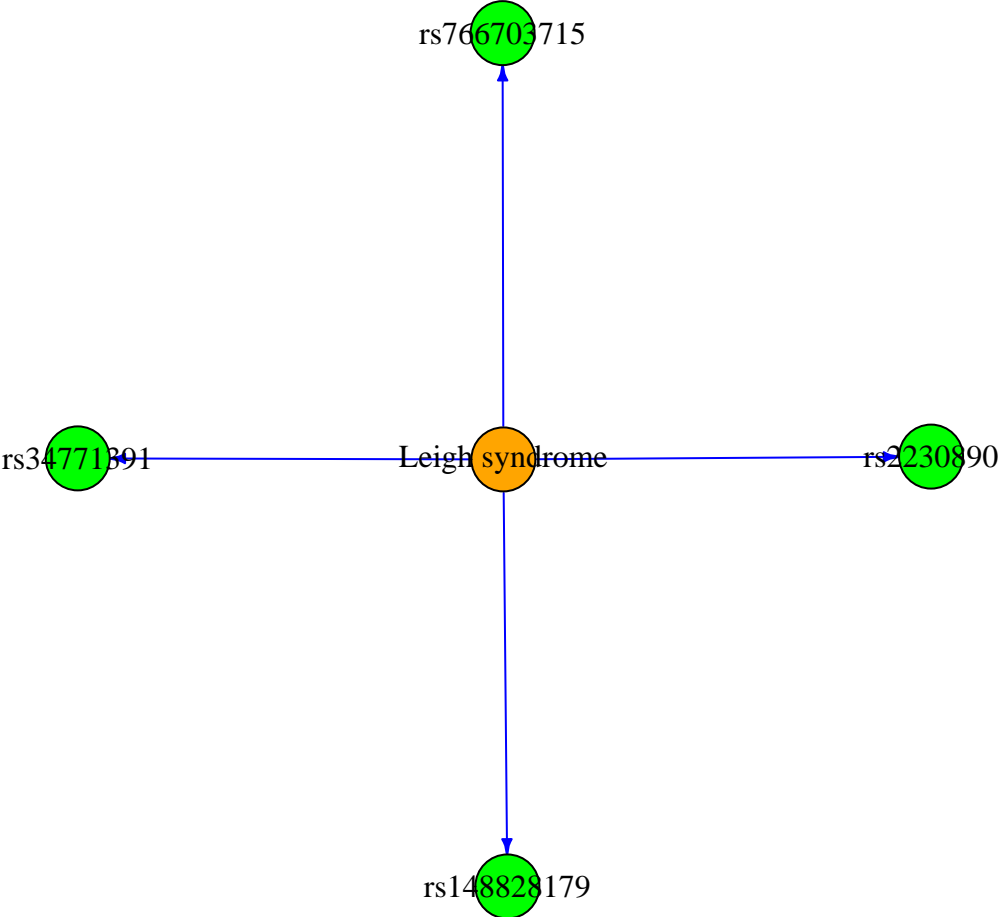

# Variant–Disease Network (Lethal Encephalopathy)

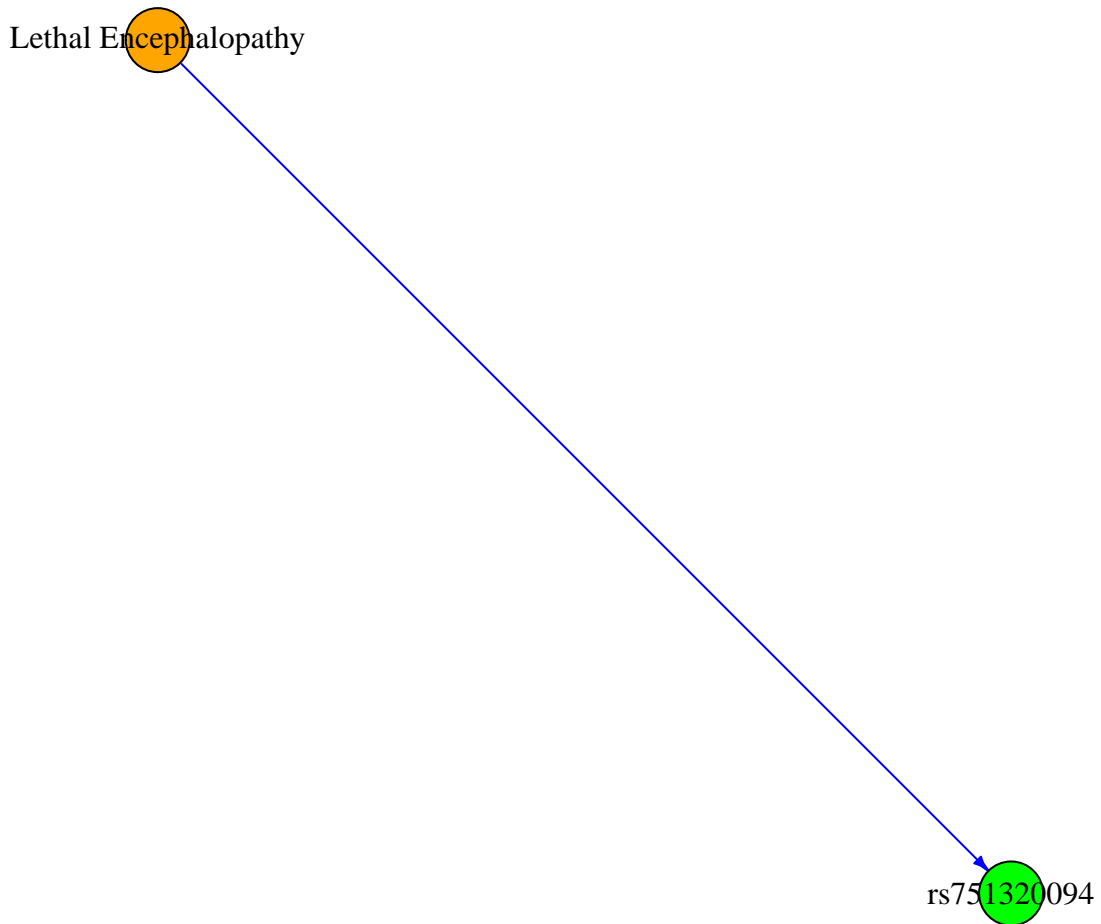



**Variant–Disease Network (Leukoencephalopathy with ataxia)**

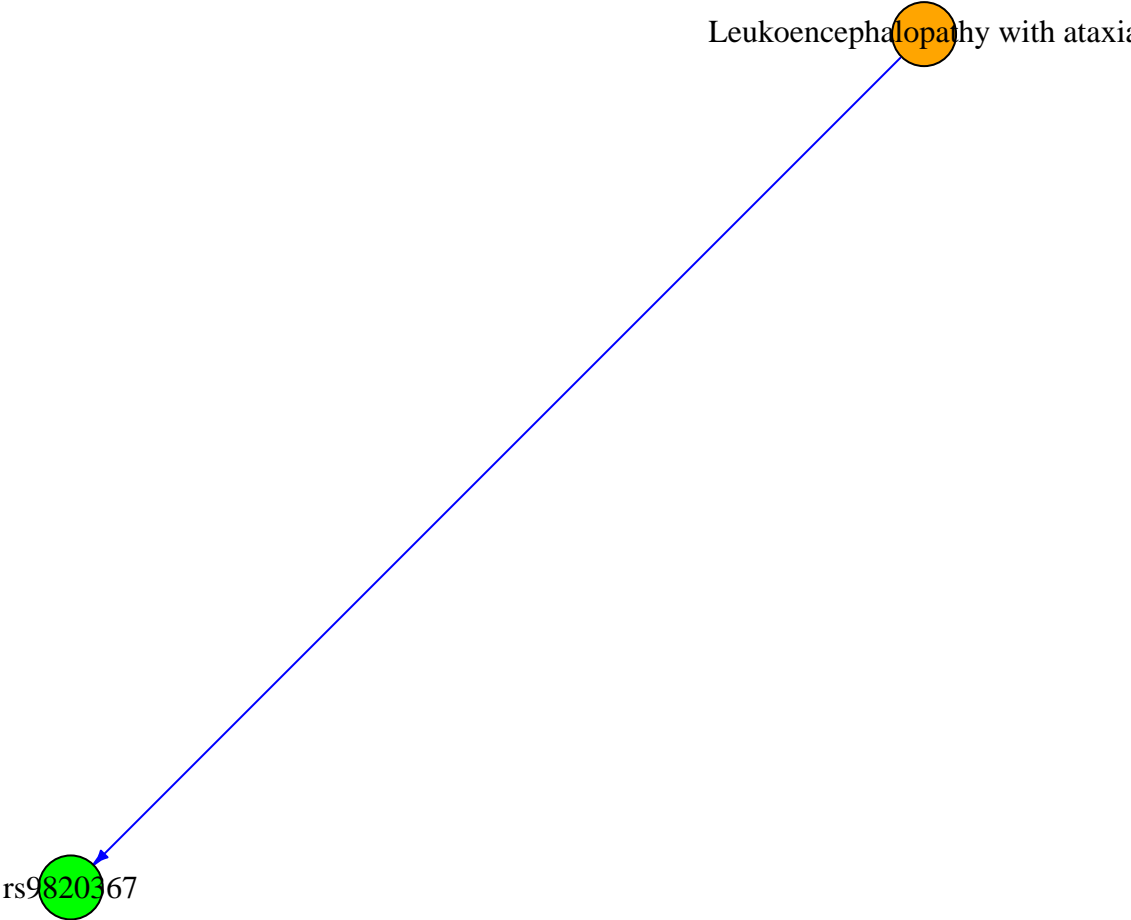

Variant–Disease Network (Levy–Hollister syndrome)

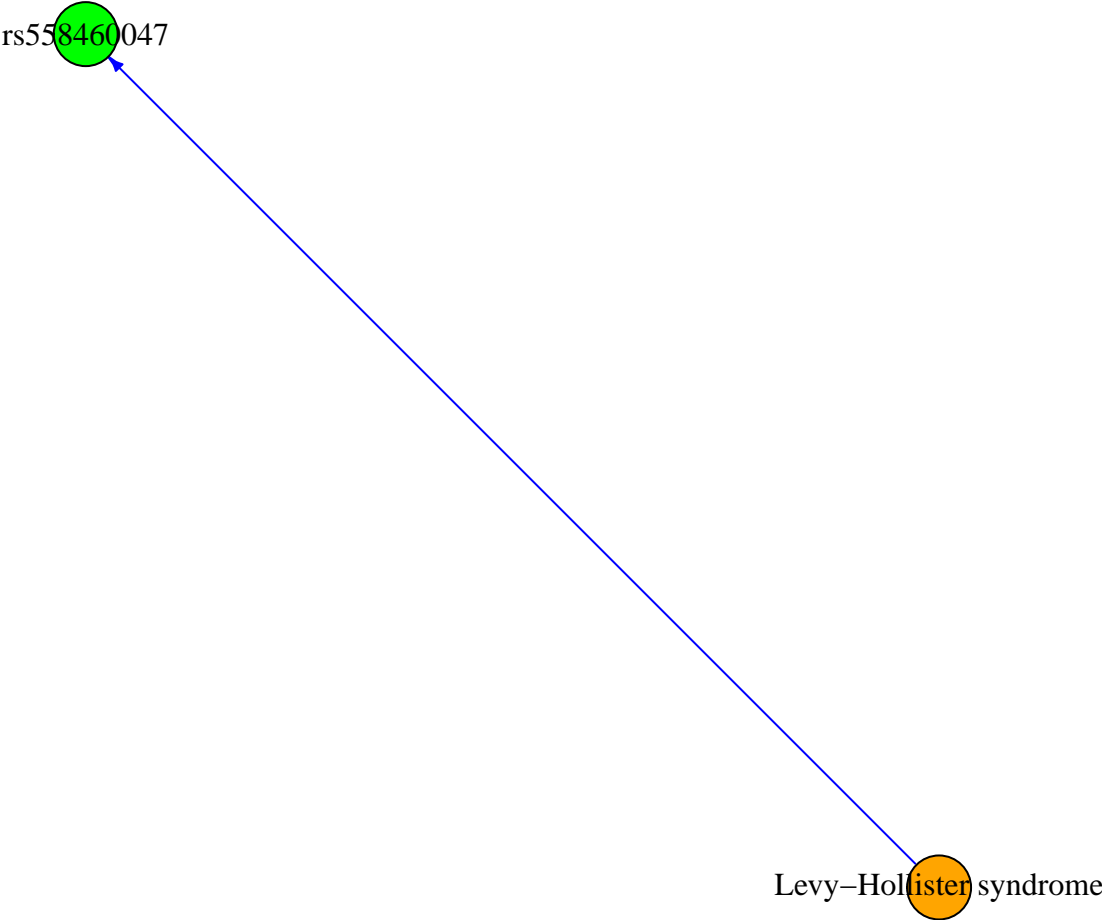

## Variant–Disease Network (Liddle syndrome 1)

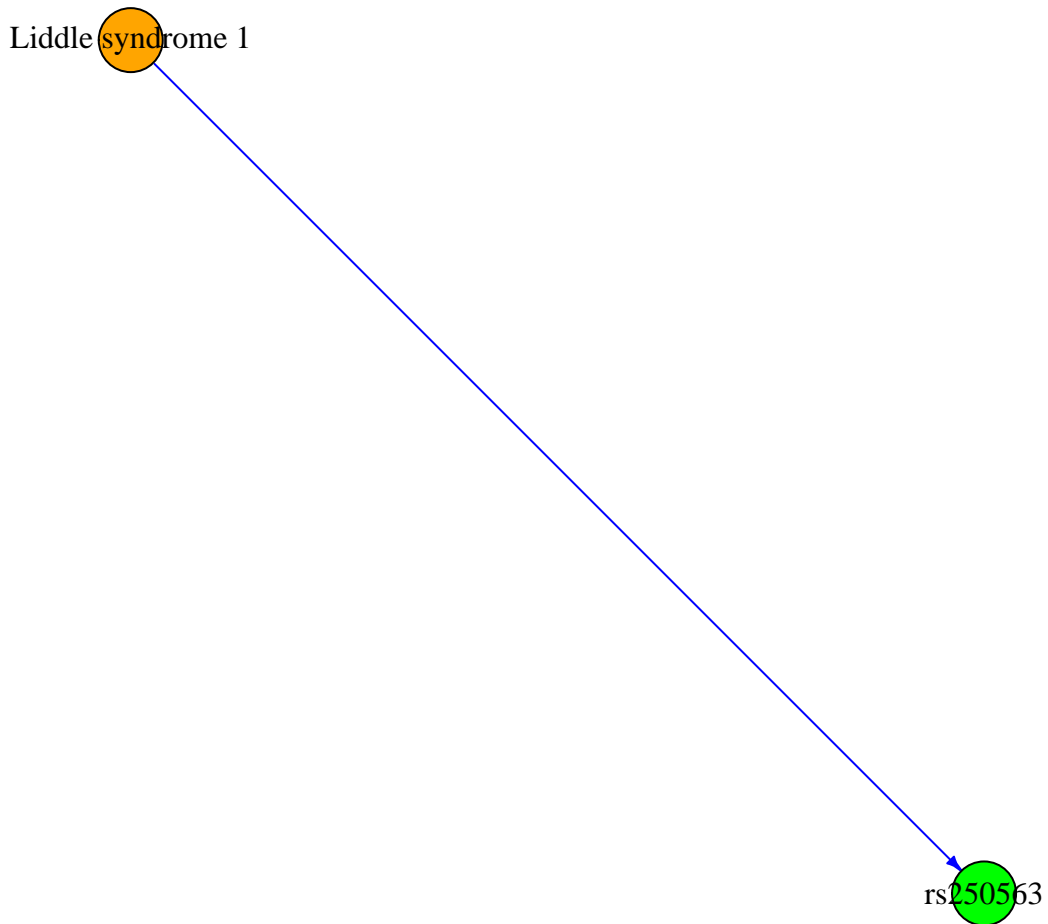

## Variant–Disease Network (Li–Fraumeni syndrome)

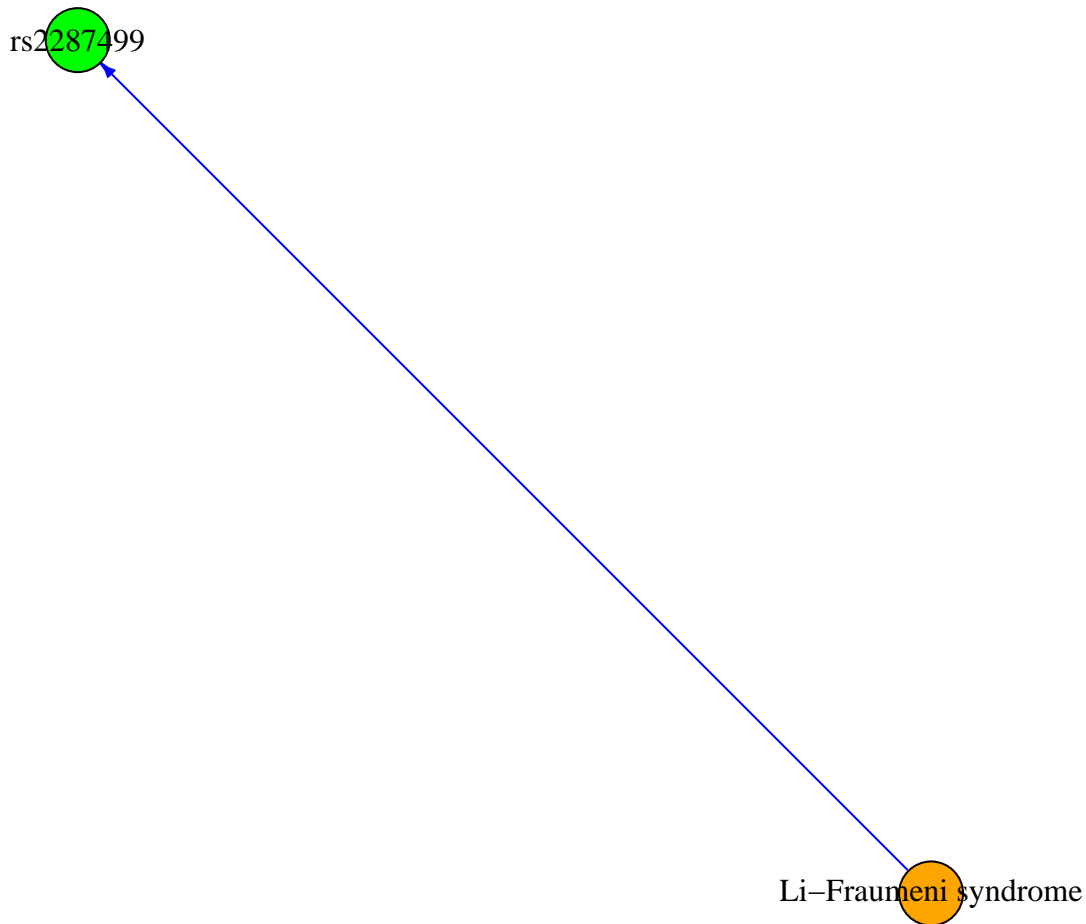

Variant–Disease Network (Lig4 syndrome)

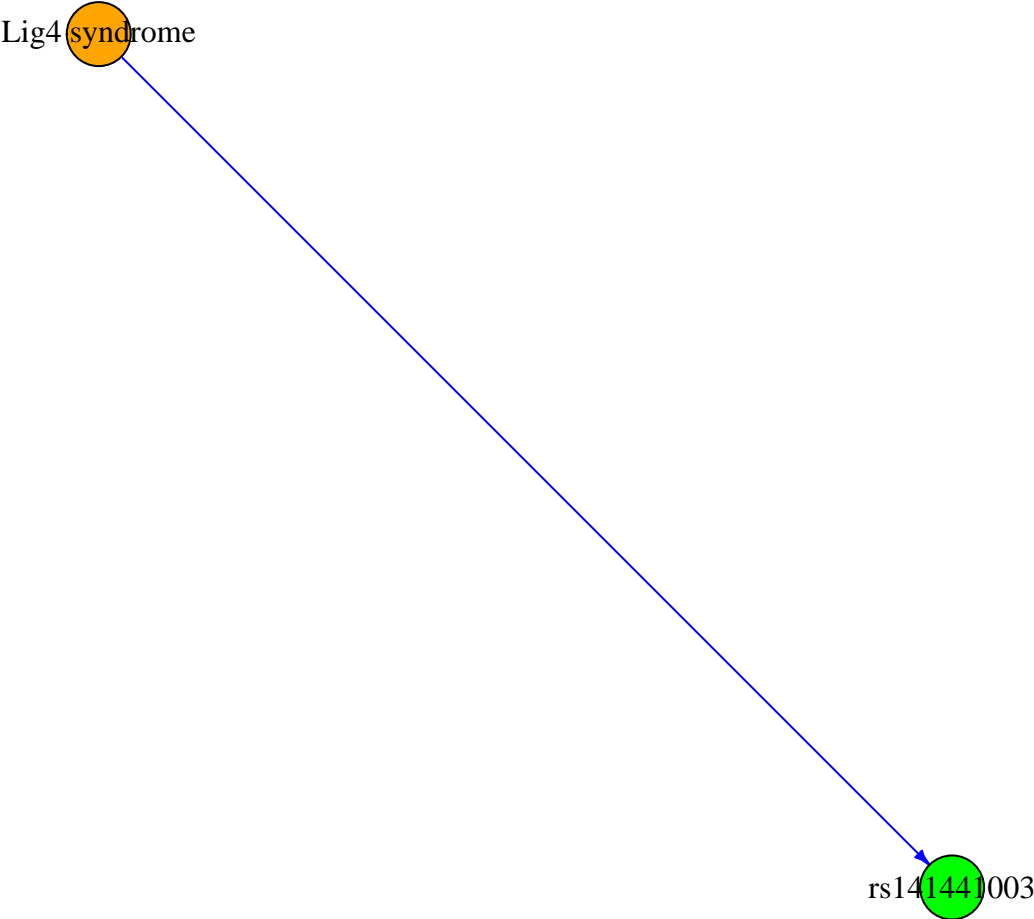

# Variant–Disease Network (Limb–girdle muscular dystrophy)

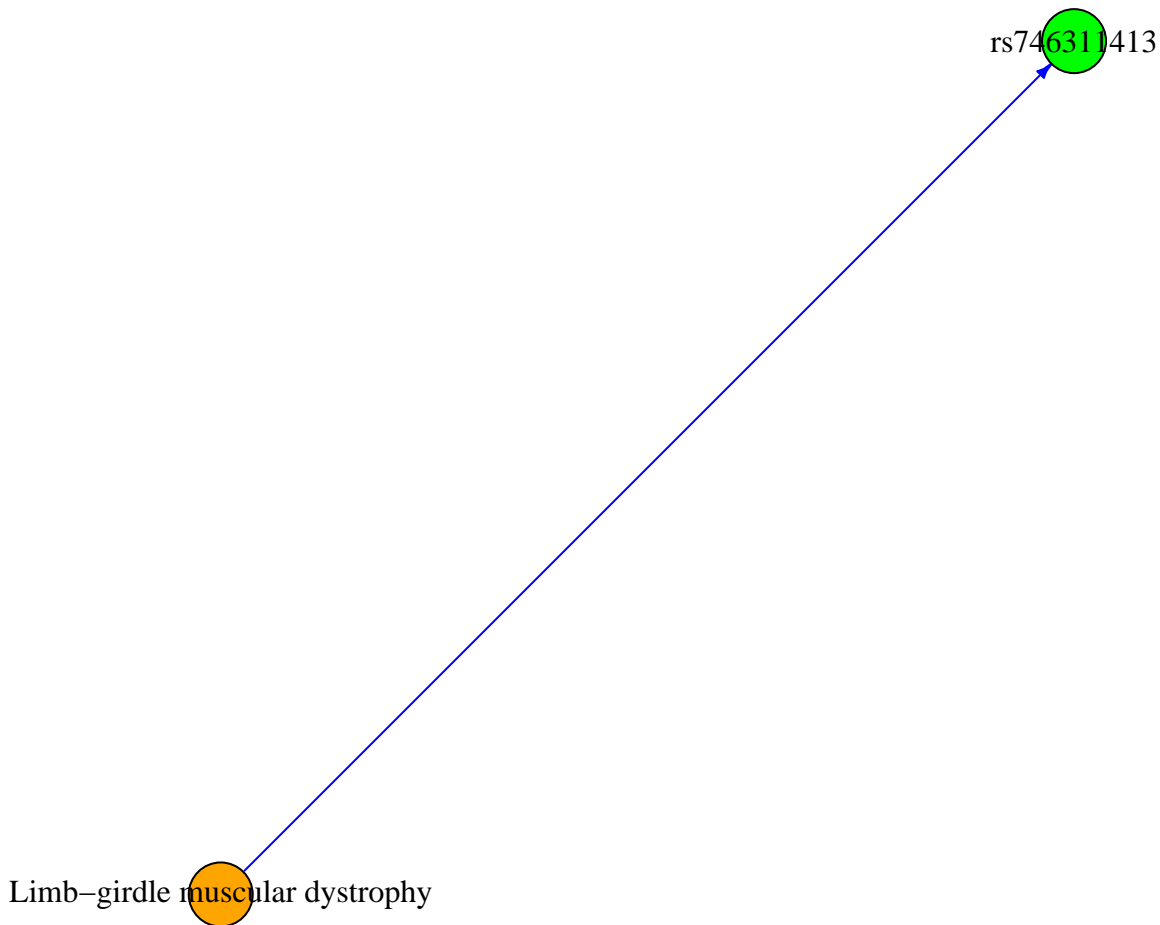

# Variant-Disease Network (Limb-girdle muscular dystrophy-dystroglycanopathies)

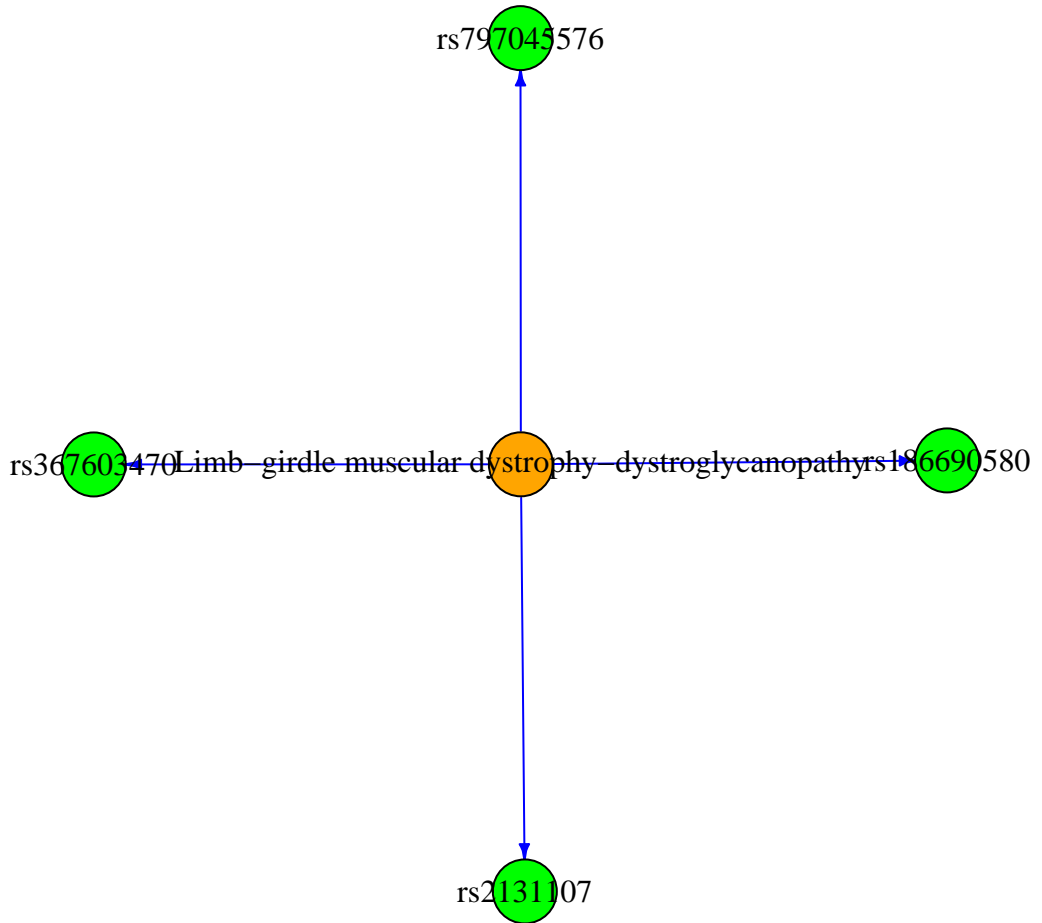

Variant–Disease Network (Lissencephaly)

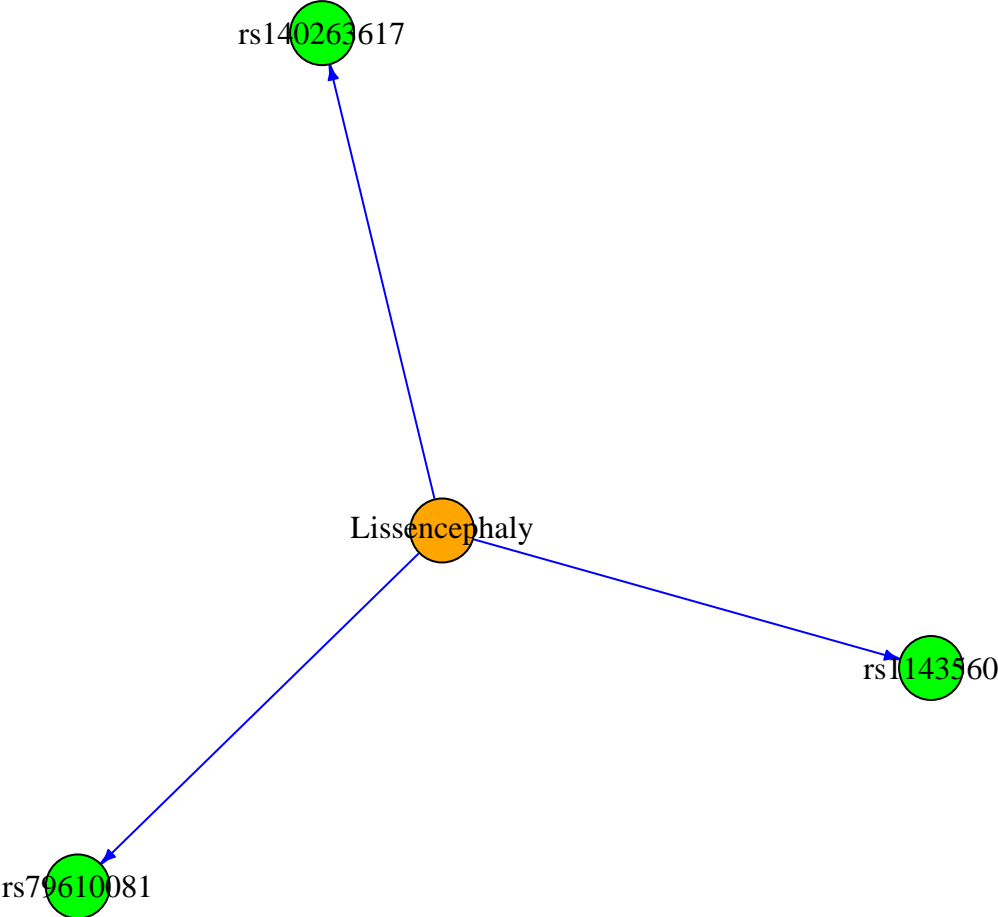



## Variant–Disease Network (Lissencephaly 2)

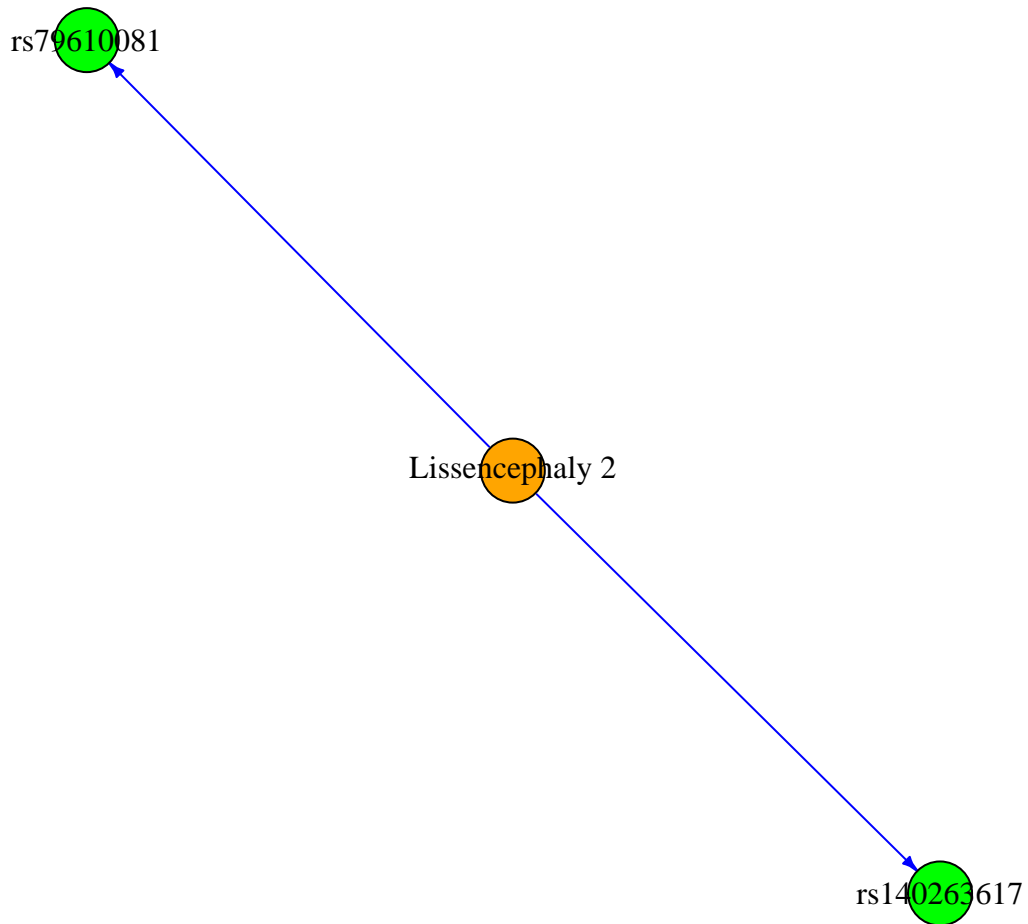

**Variant–Disease Network (Lissencephaly/Subcortical Band Heterotopia)**

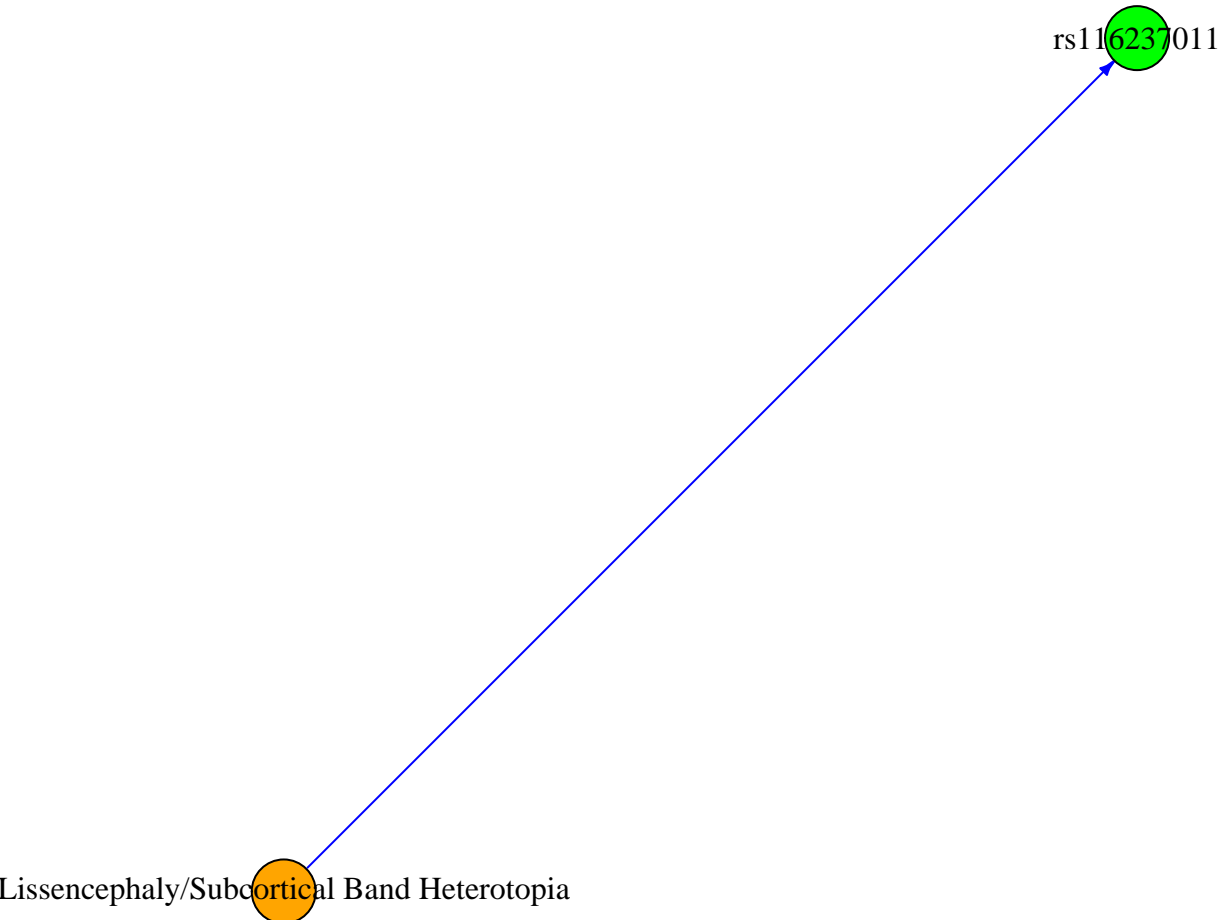

**Variant–Disease Network (Liver failure acute infantile)**

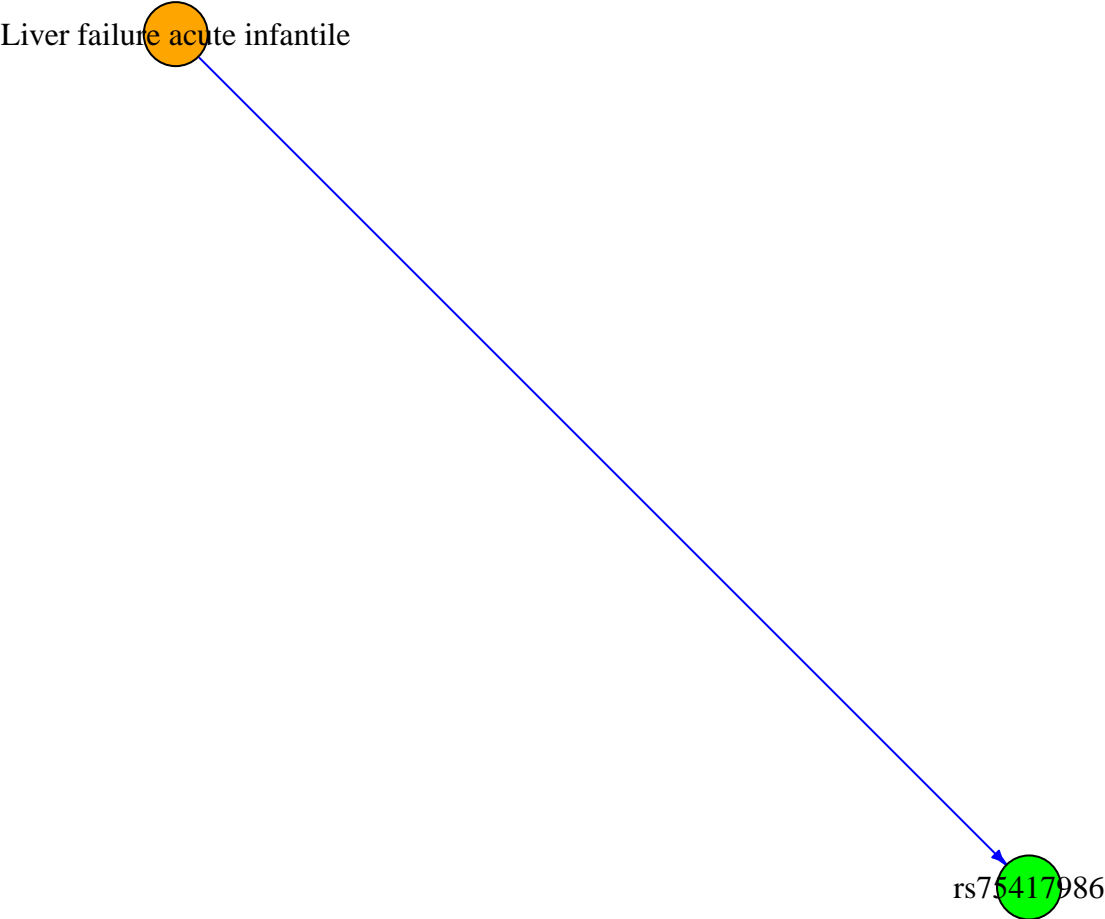

# Variant–Disease Network (Localized AR Hypotrichosis)

Localized AR Hypotrichosis

rs7234288

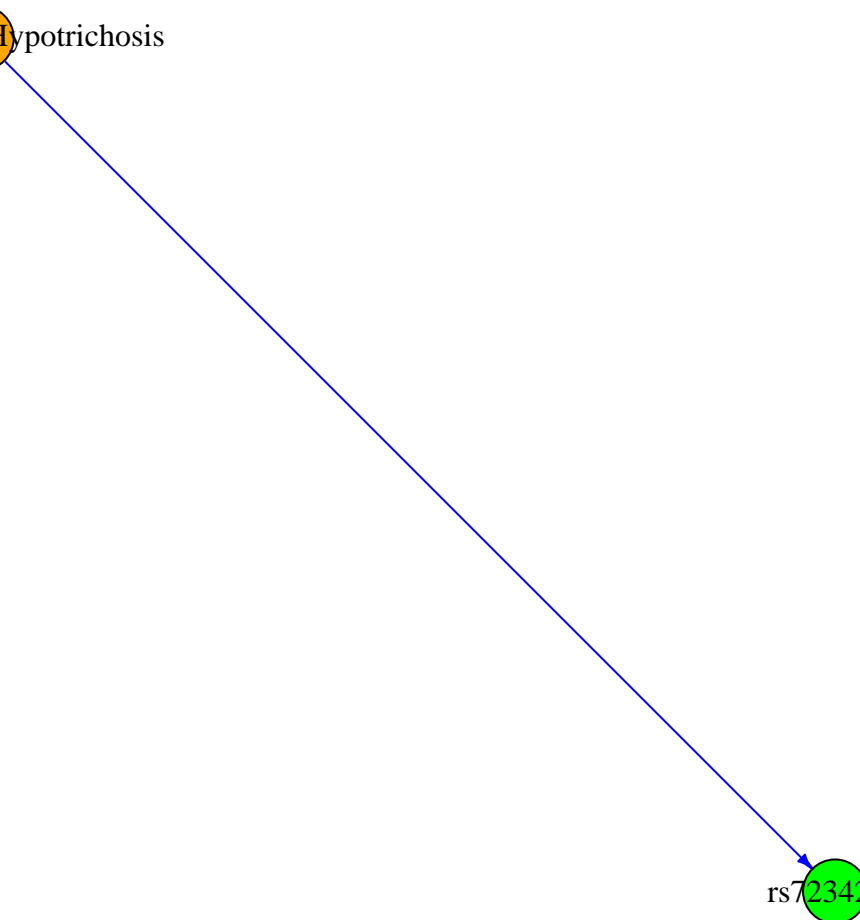

## Variant-Disease Network (Loeys-Dietz syndrome 3)

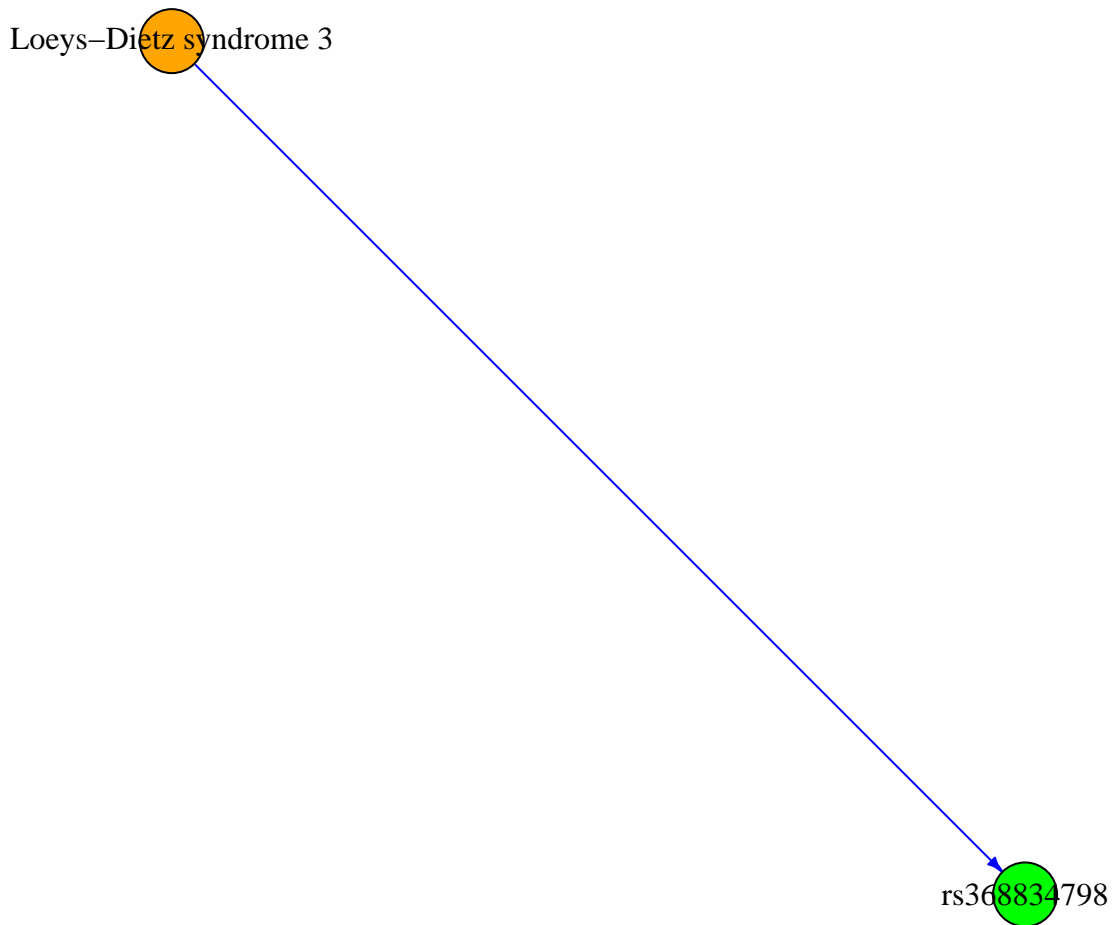

## Variant–Disease Network (Long QT syndrome)

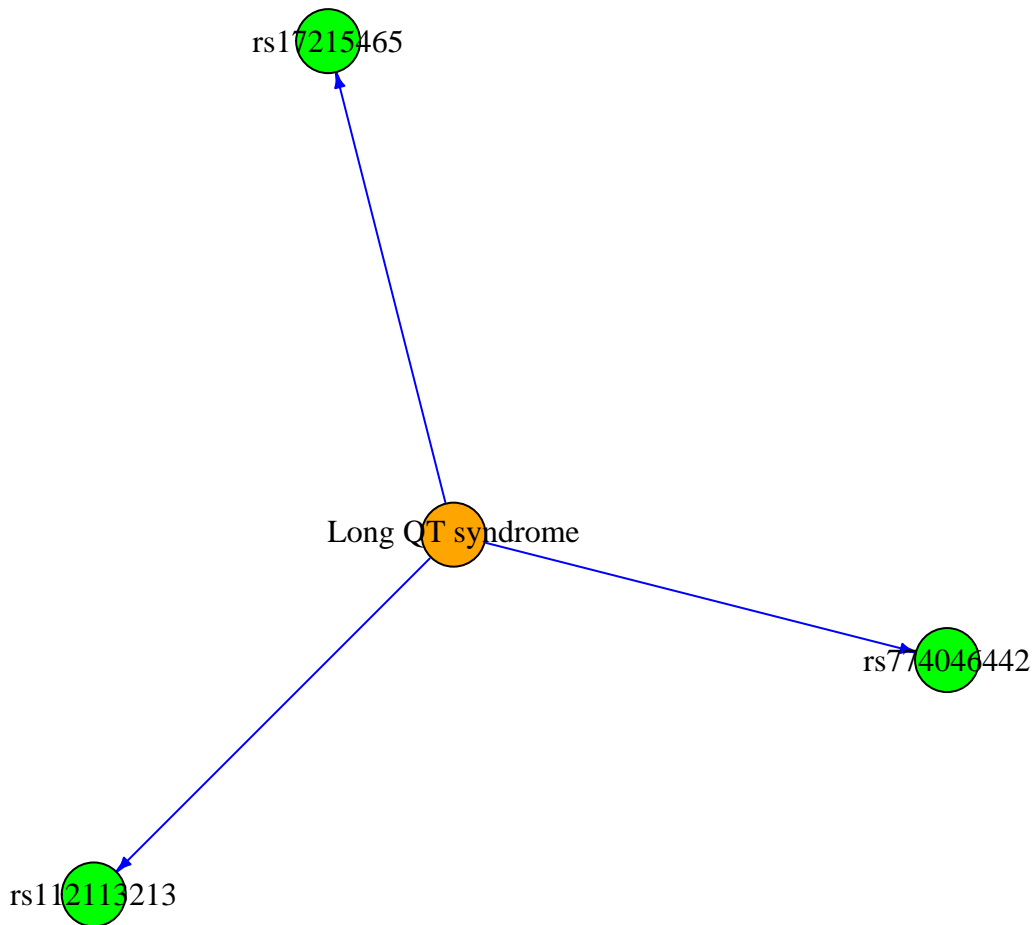

## Variant–Disease Network (Lowe syndrome)

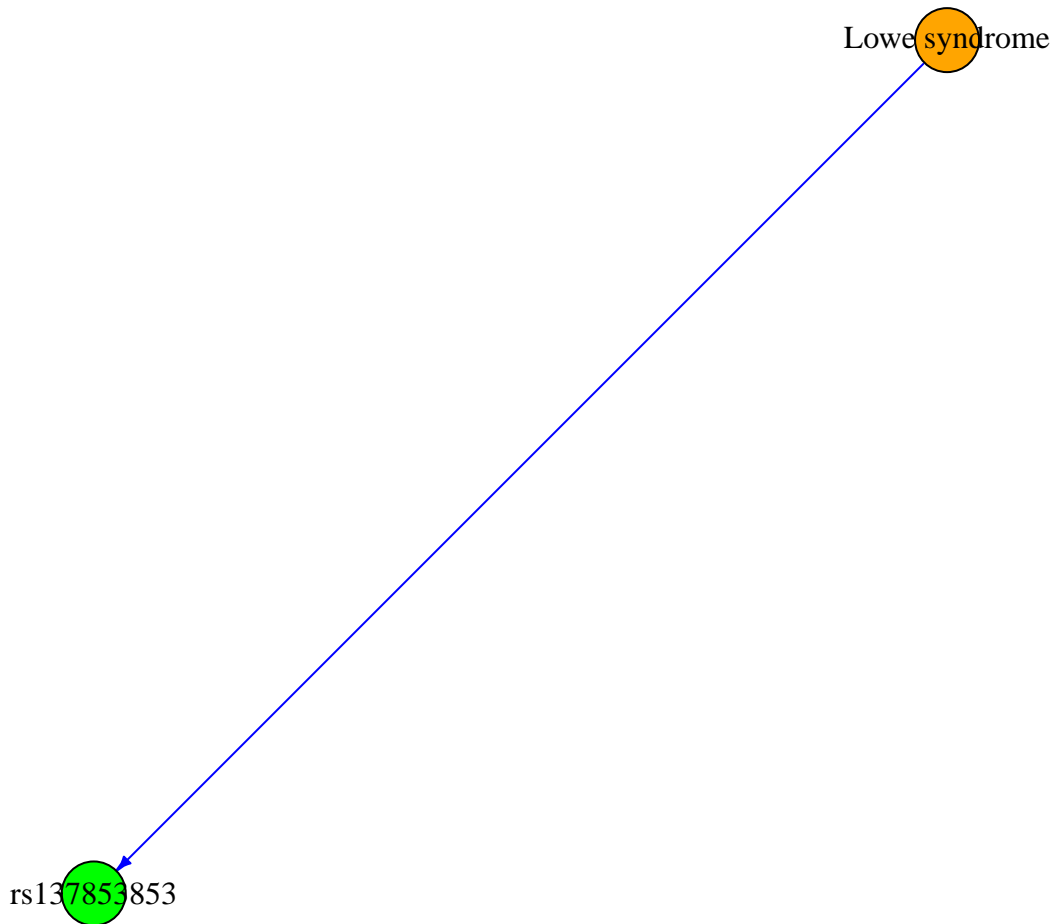

## Variant–Disease Network (Lynch syndrome)

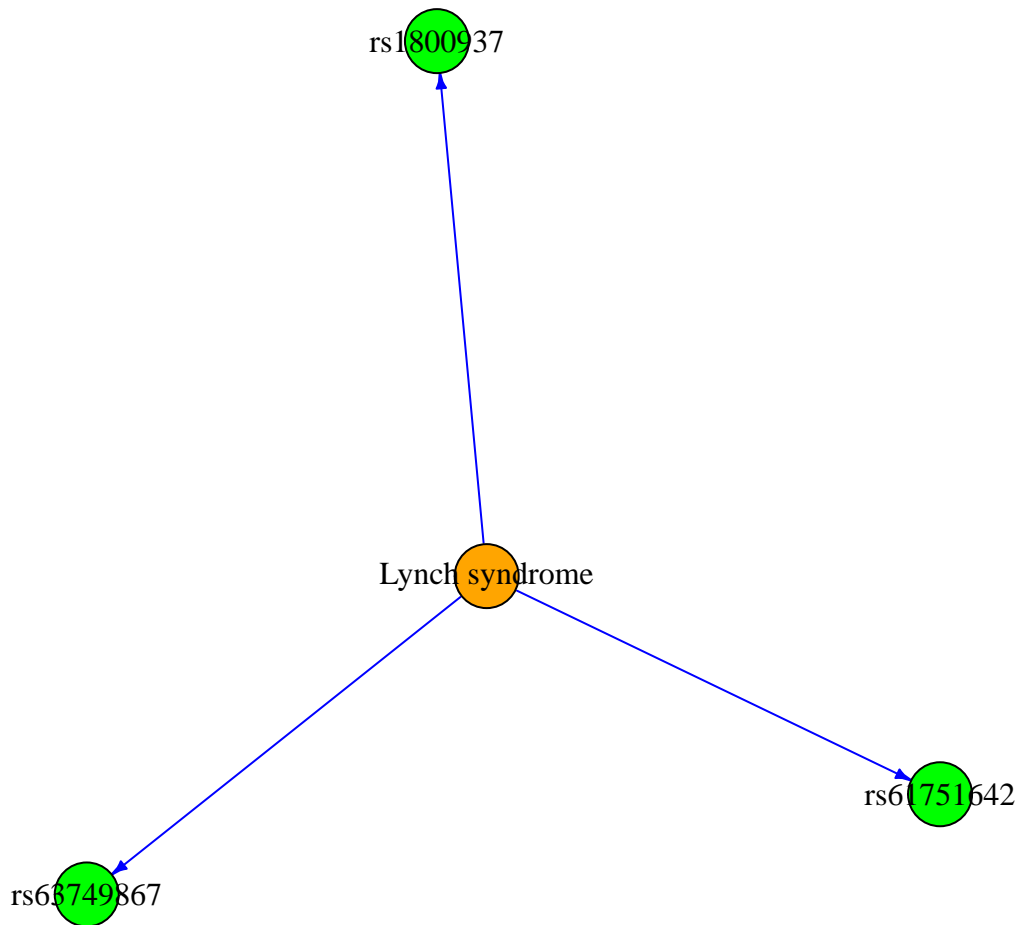



## Variant–Disease Network (Lynch syndrome II)

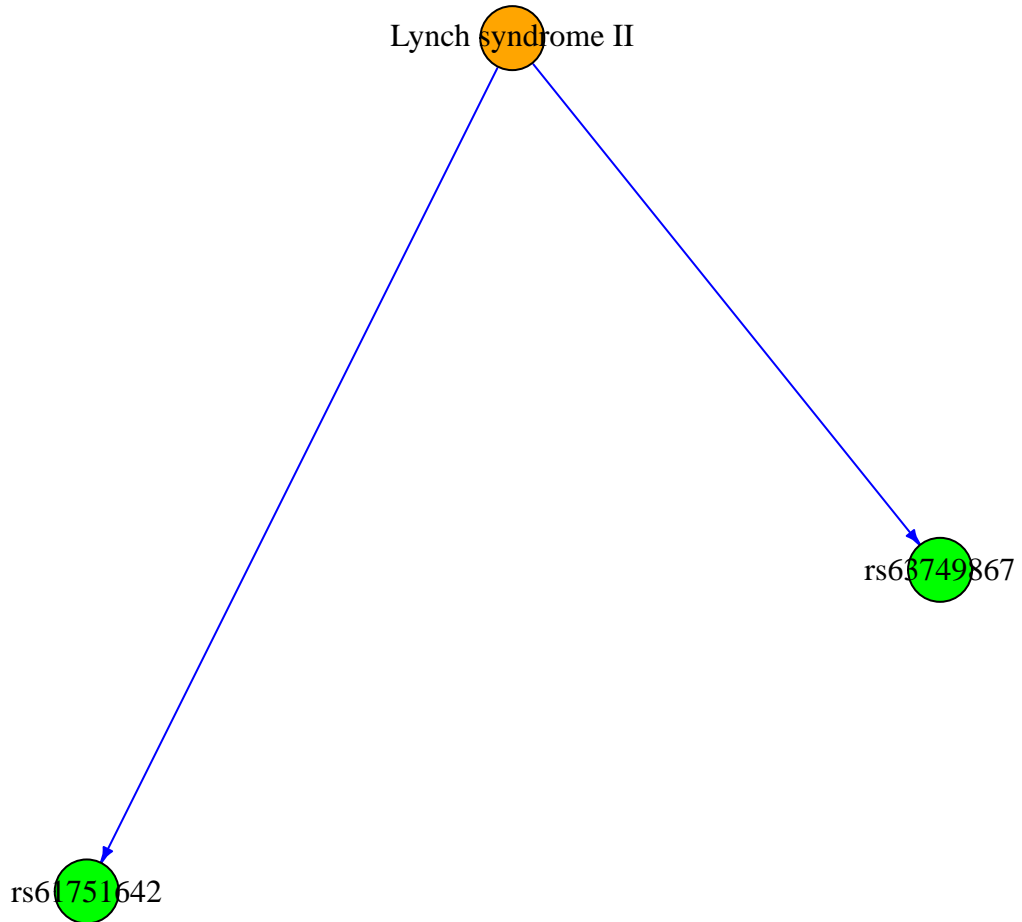

## Variant–Disease Network (Macular degeneration)

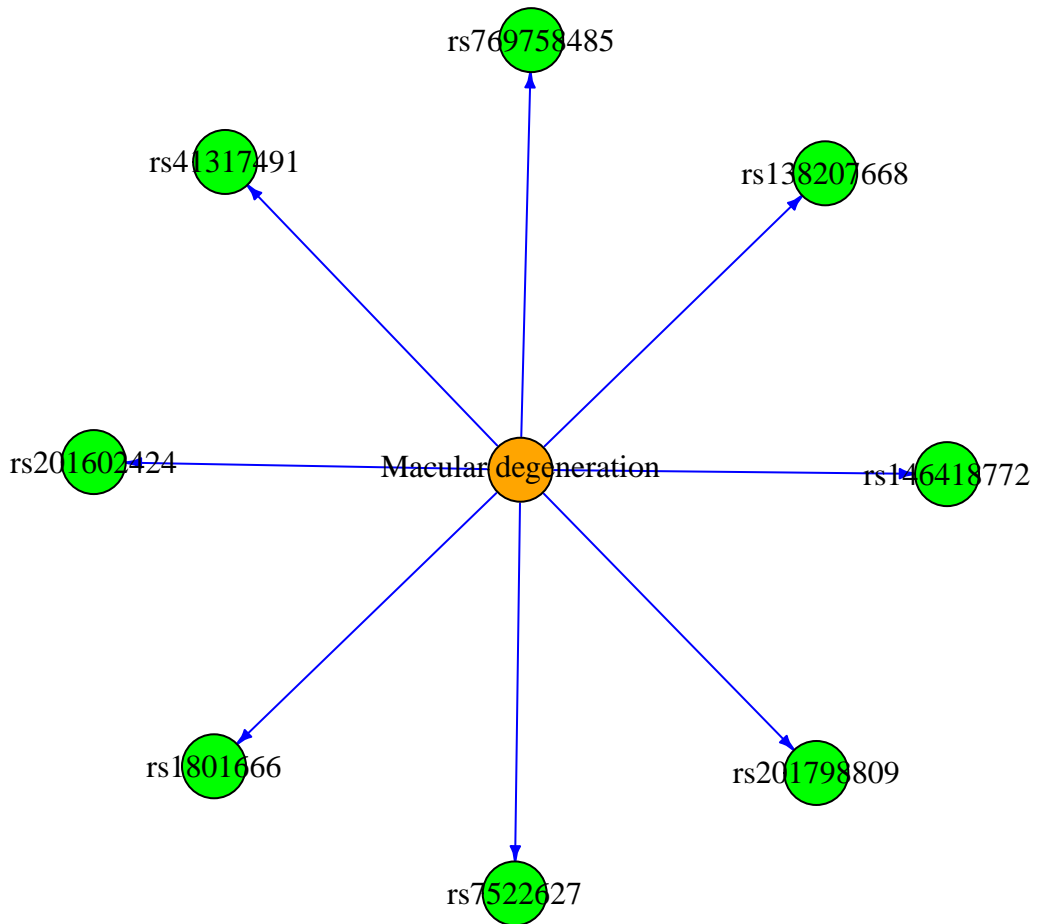

## Variant–Disease Network (Macular dystrophy)

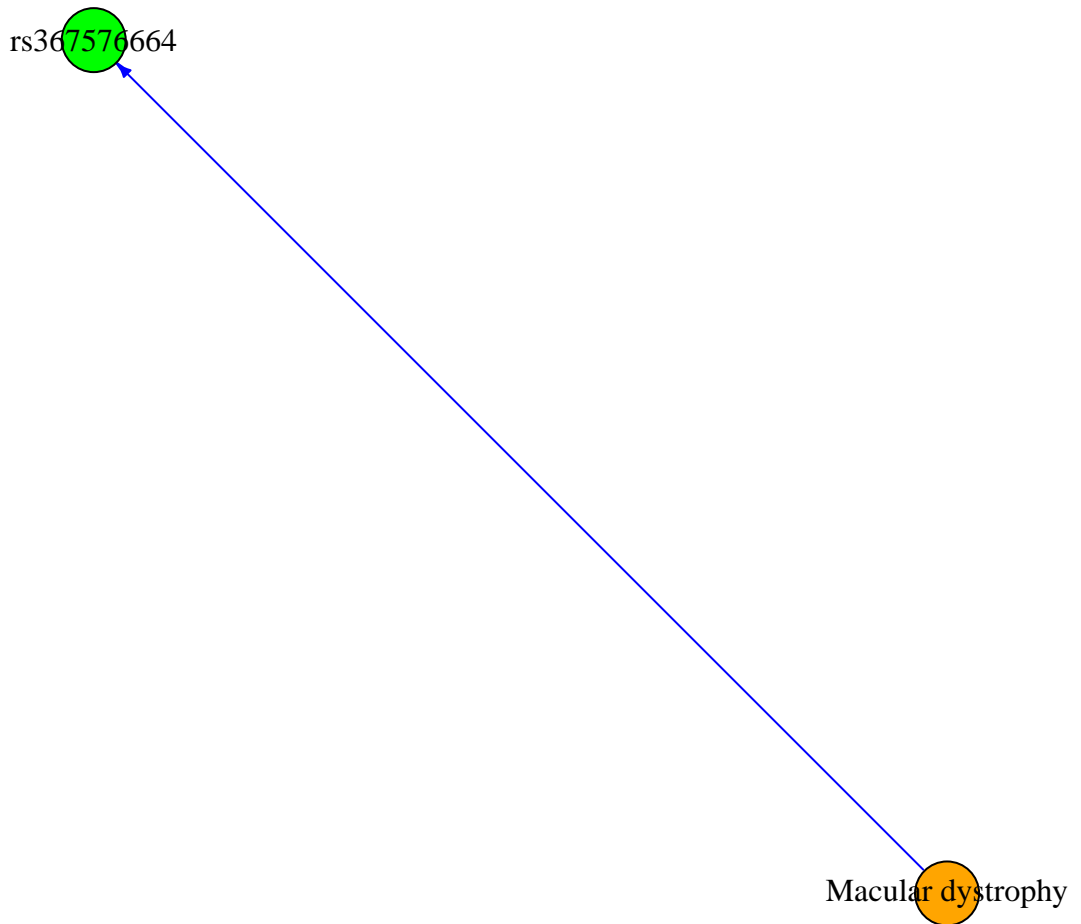

## Variant–Disease Network (Majeed syndrome)

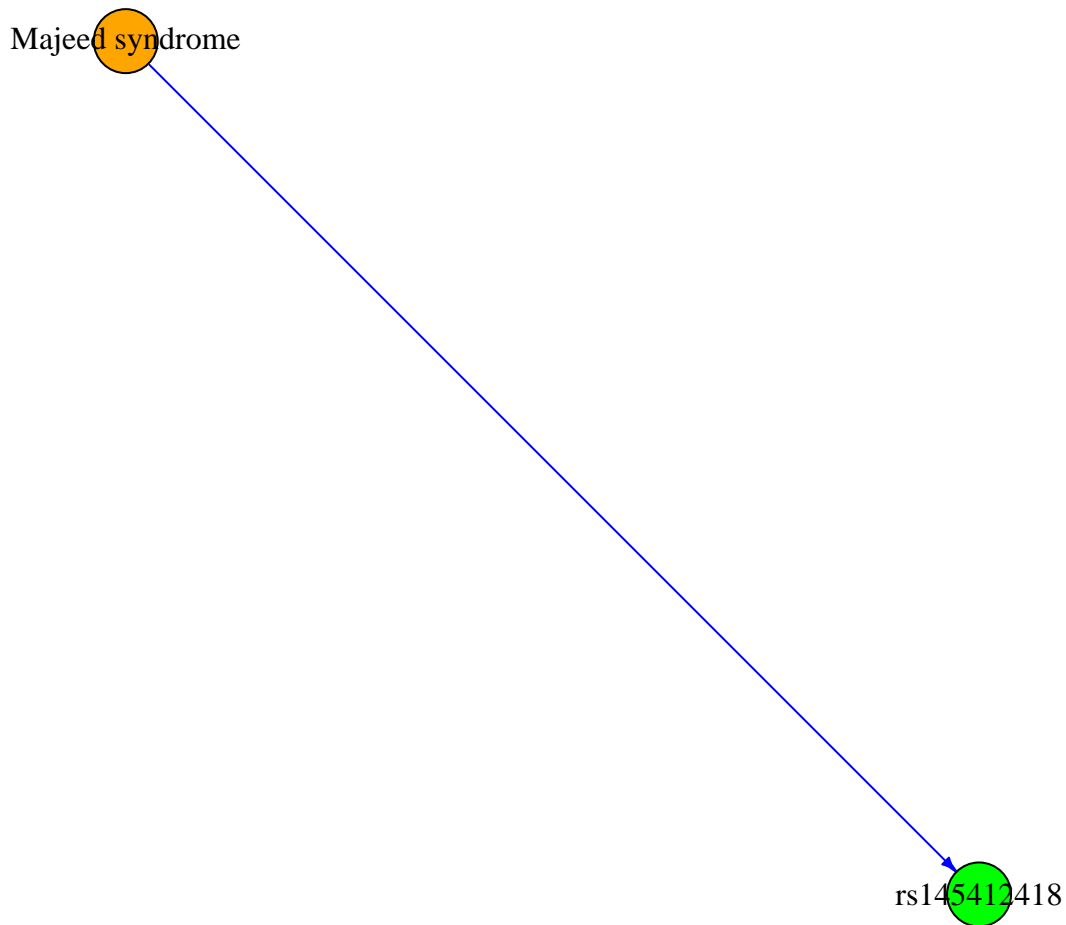

Variant–Disease Network (Malignant tumor of prostate)

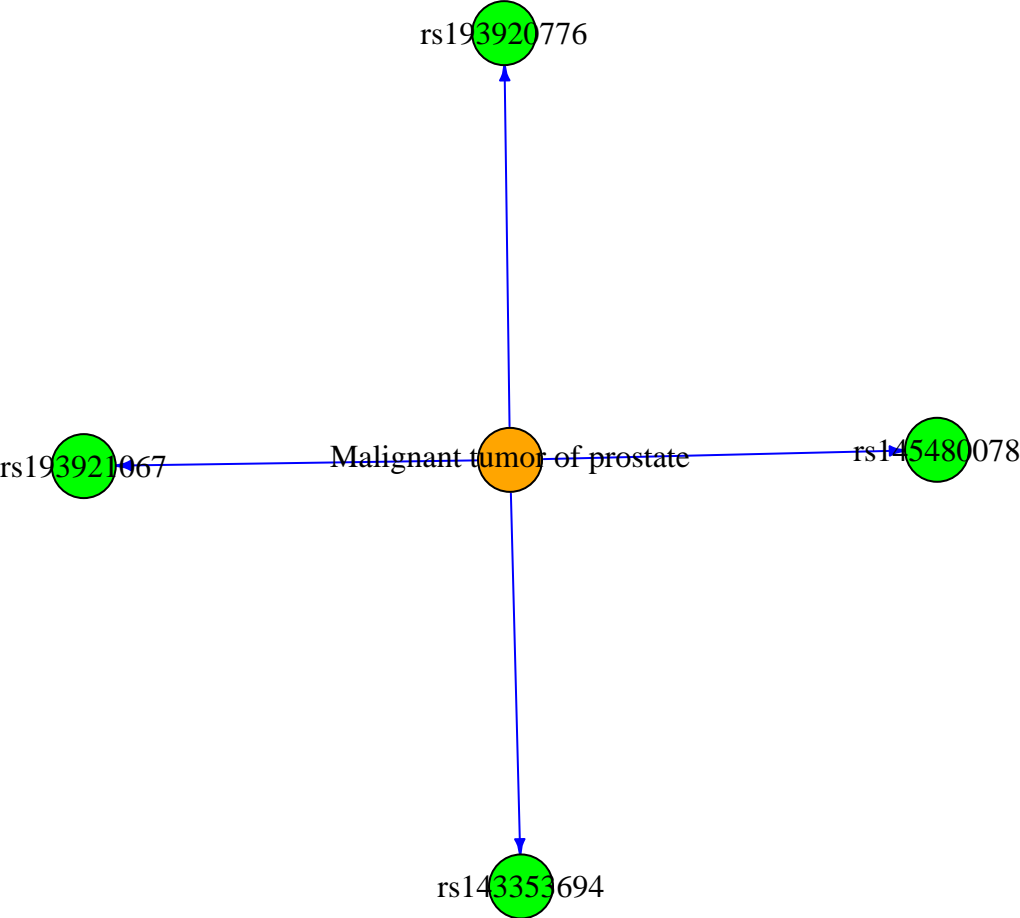

## Variant–Disease Network (Maple syrup urine disease)

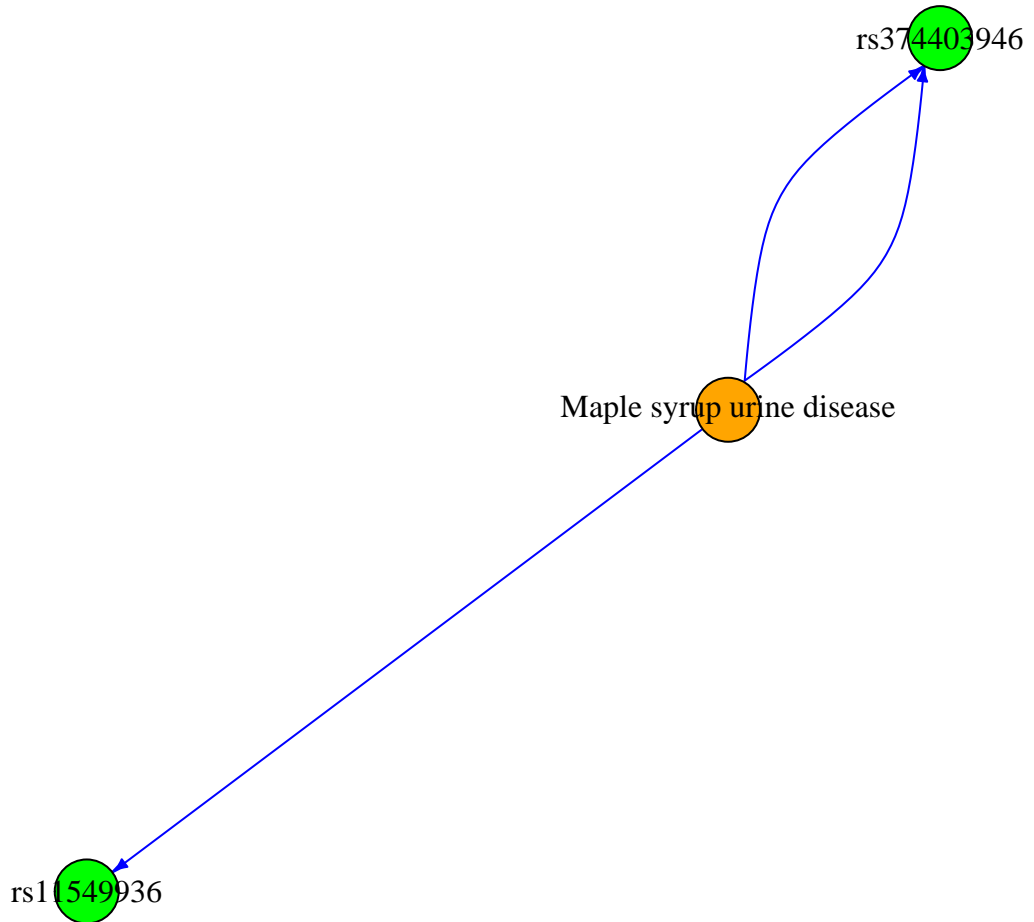

## Variant-Disease Network (Marfan syndrome)

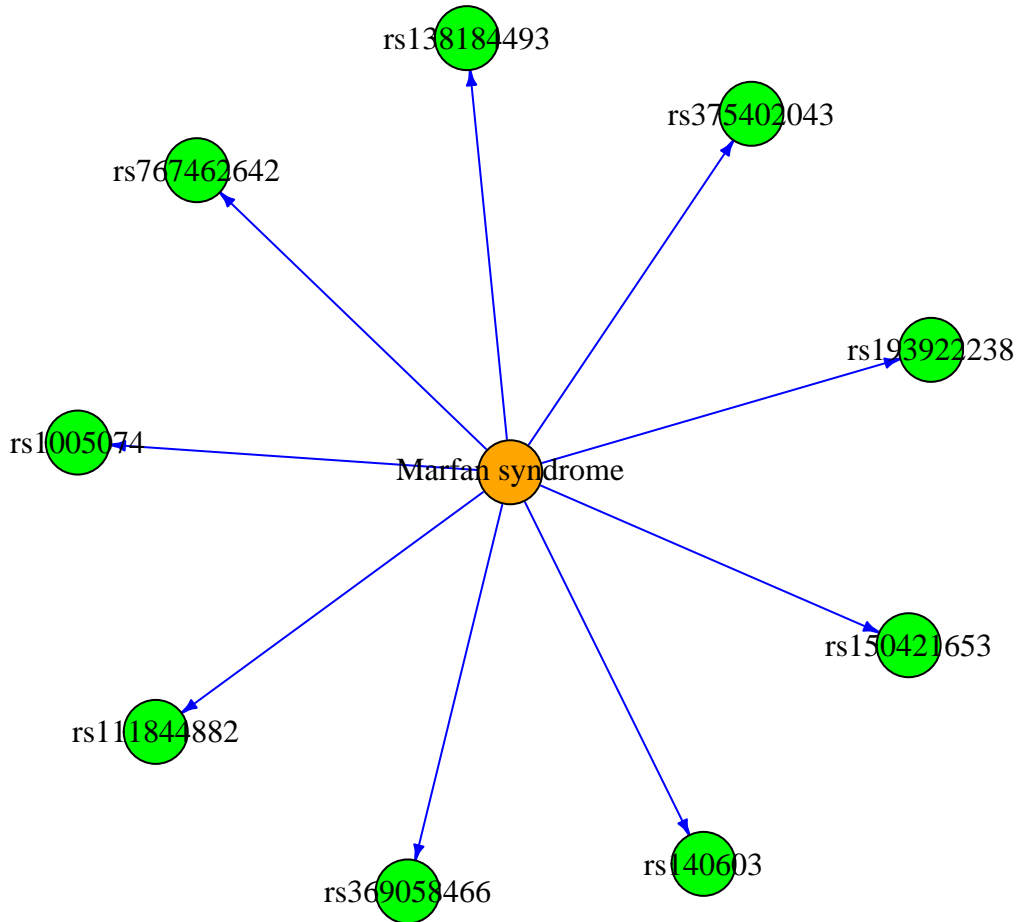

## Variant–Disease Network (Martsolf syndrome)

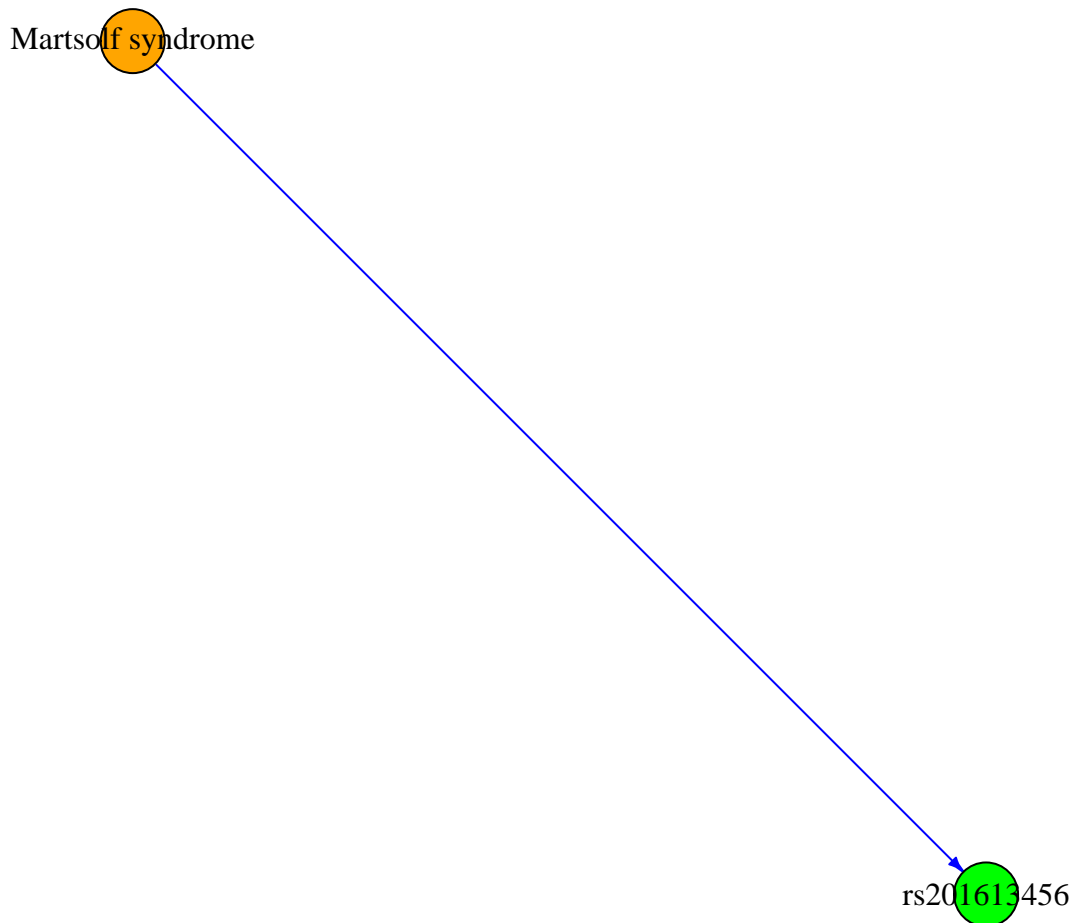



## Variant–Disease Network (MASS syndrome)

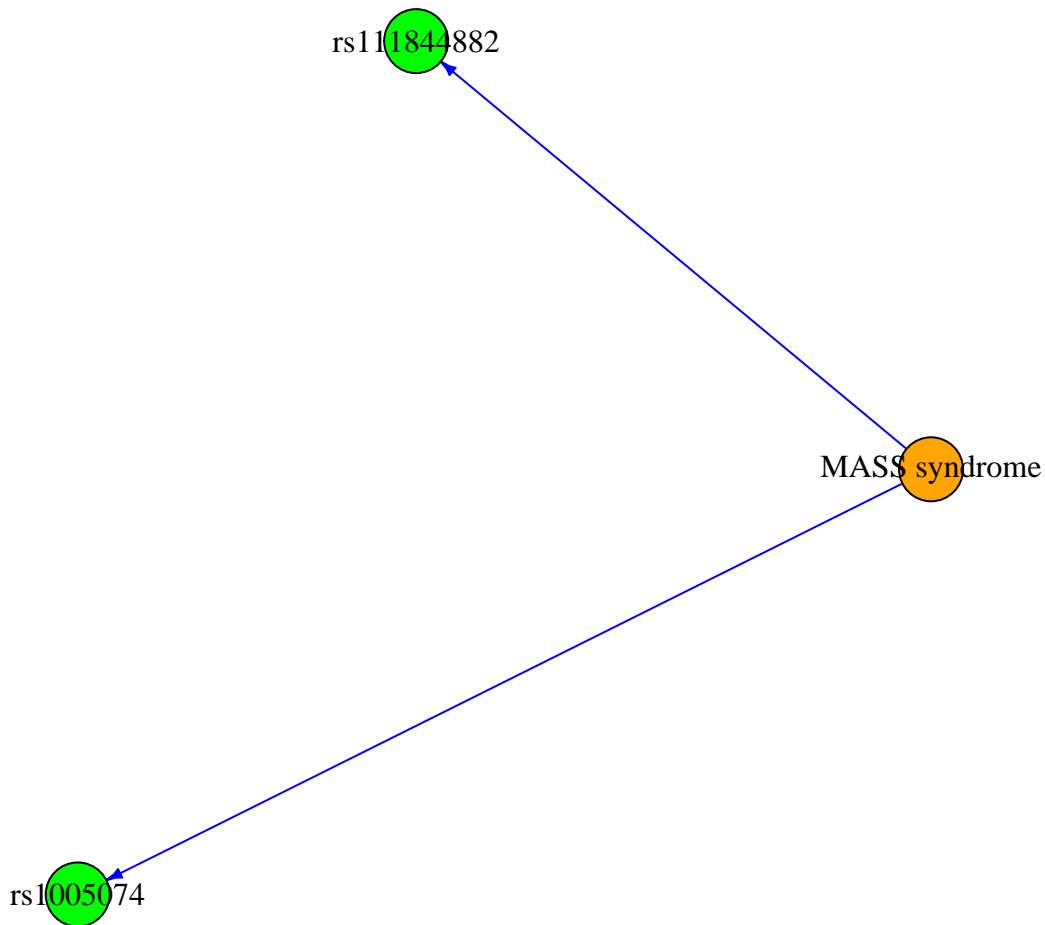

## Variant-Disease Network (Mastocytosis)

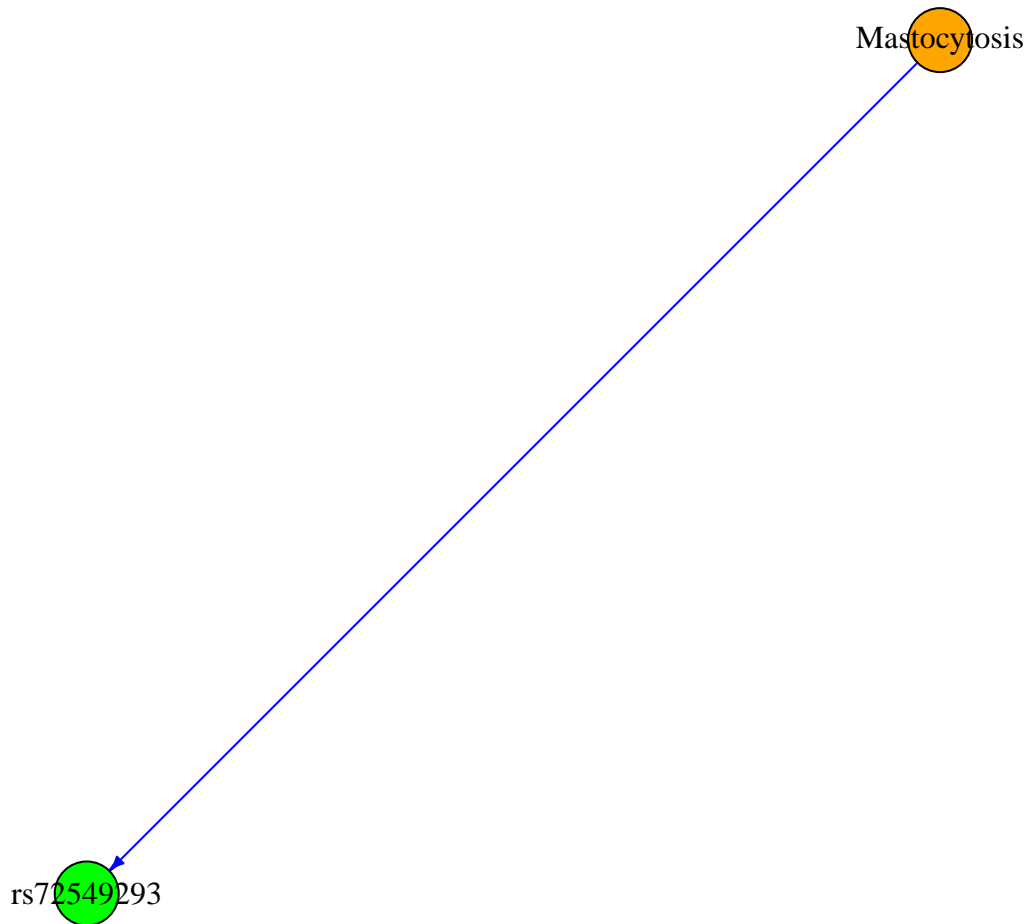

# Variant–Disease Network (Maturity onset diabetes mellitus in young)

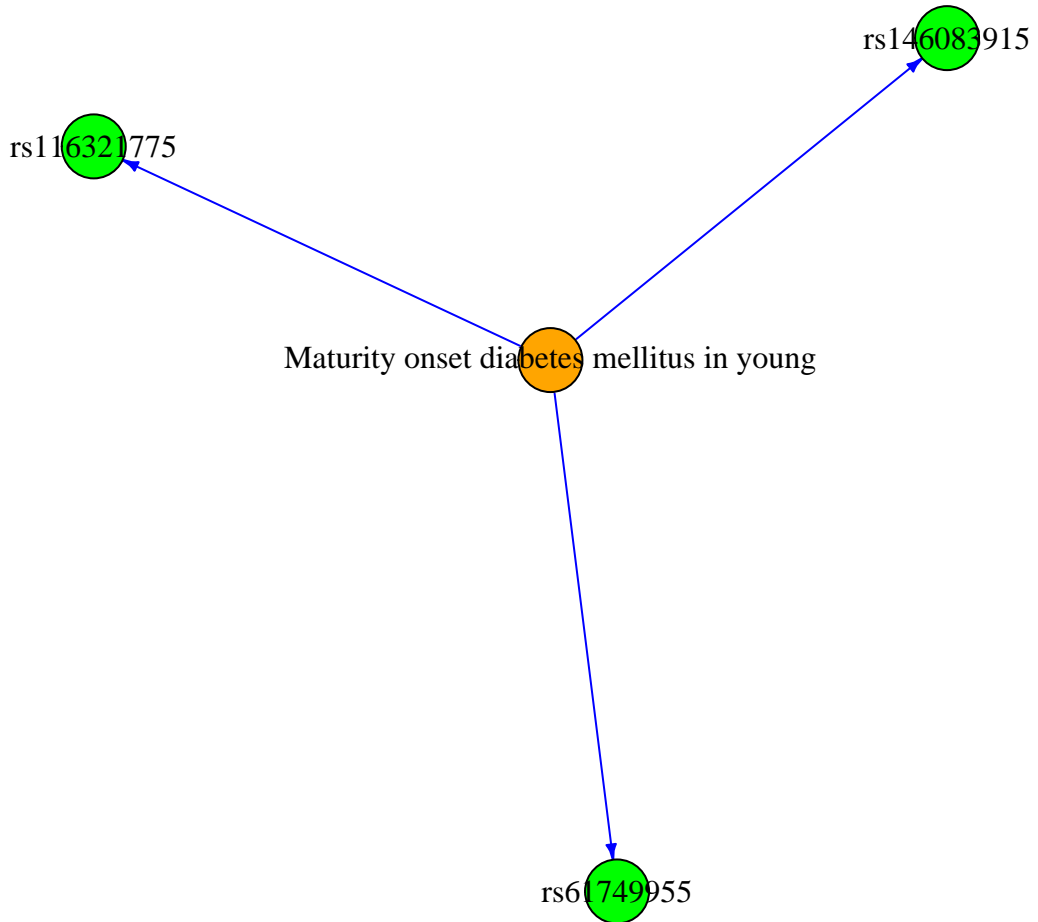

Variant–Disease Network (McKusick Kaufman syndrome)

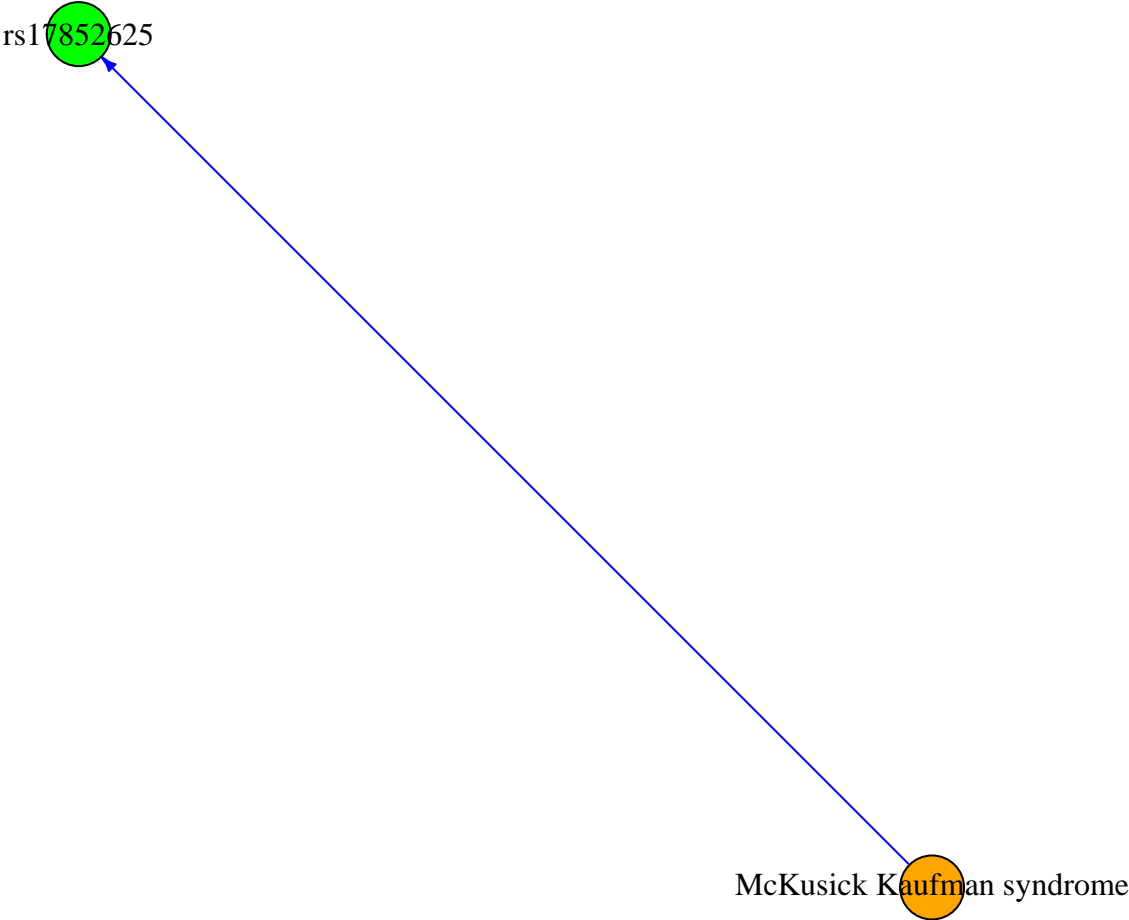

## Variant–Disease Network (Meckel–Gruber syndrome)

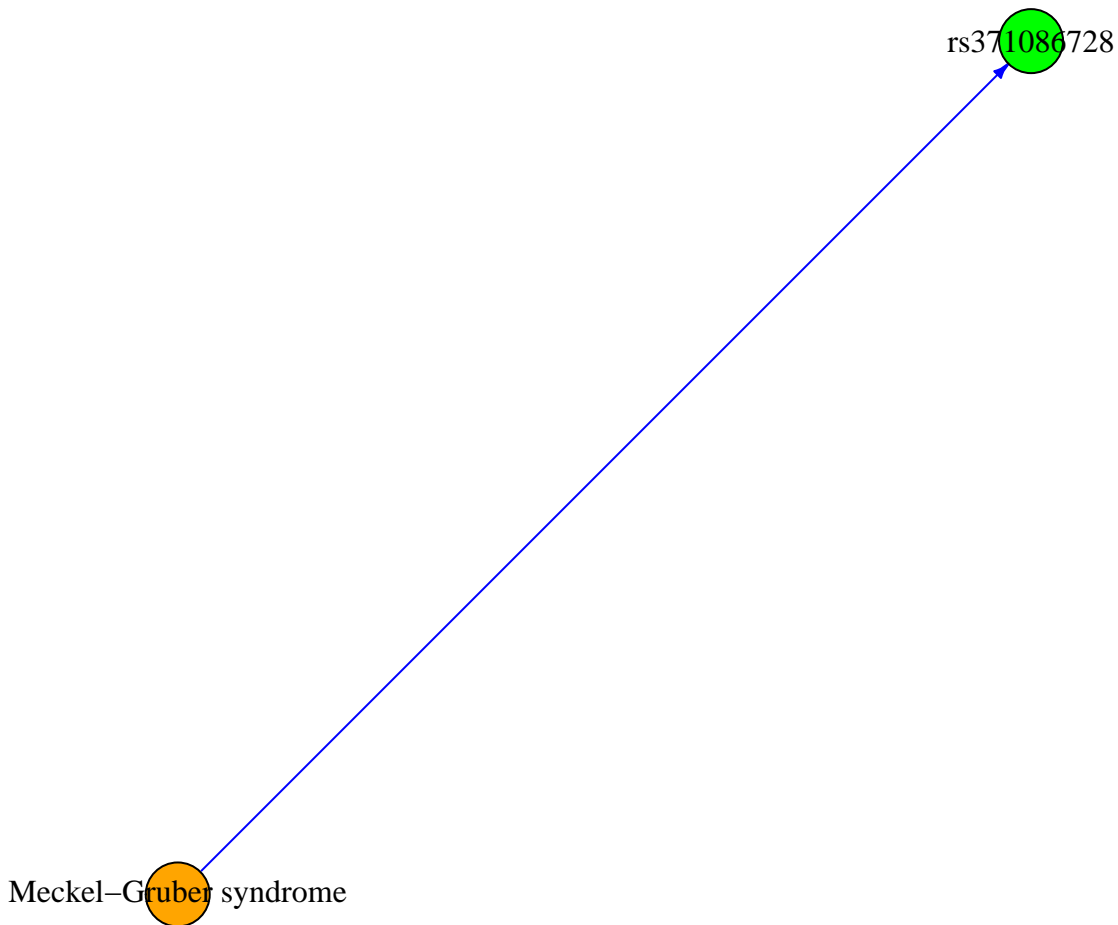

# sease Network (Megalencephaly–polymicrogyria–polydactyly–hydrocephalus)

rs201347487

Megalencephaly–polymicrogyria–polydactyly–hydrocephalus



## Variant–Disease Network (Megaloblastic anemia)

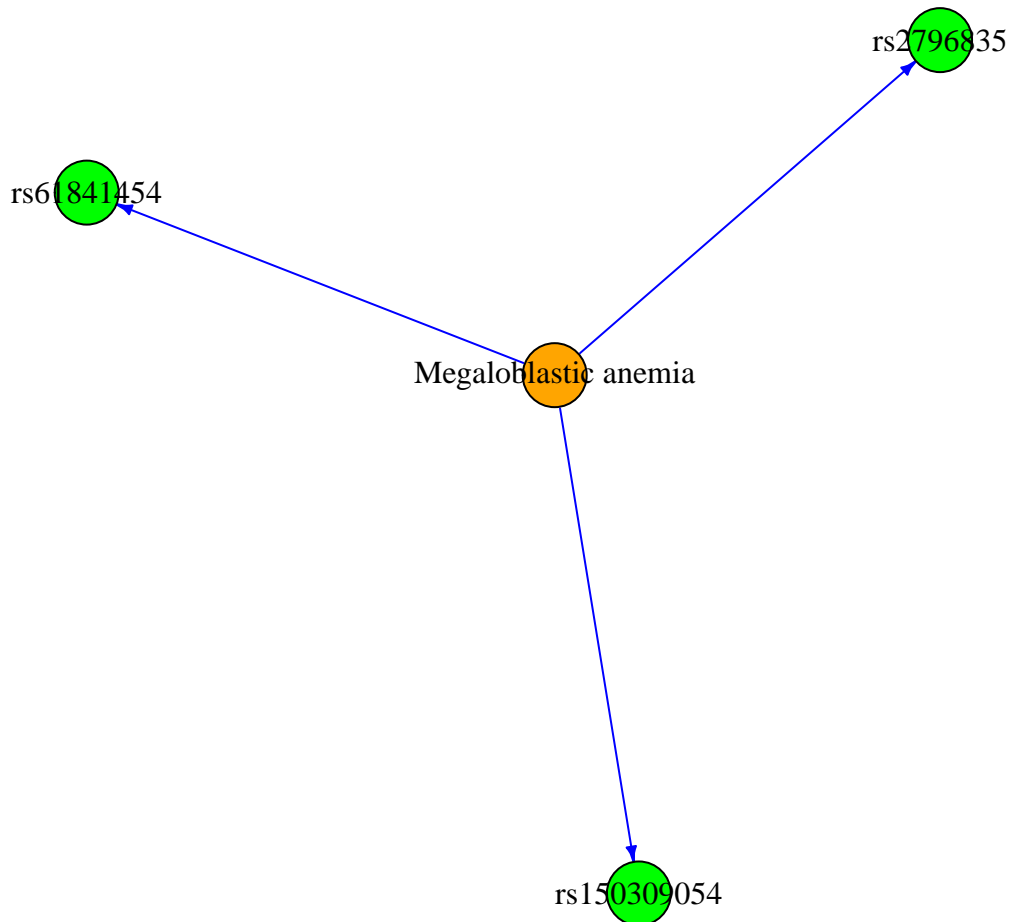

# Variant-Disease Network (Megaloblastic anemia due to inborn errors of metab

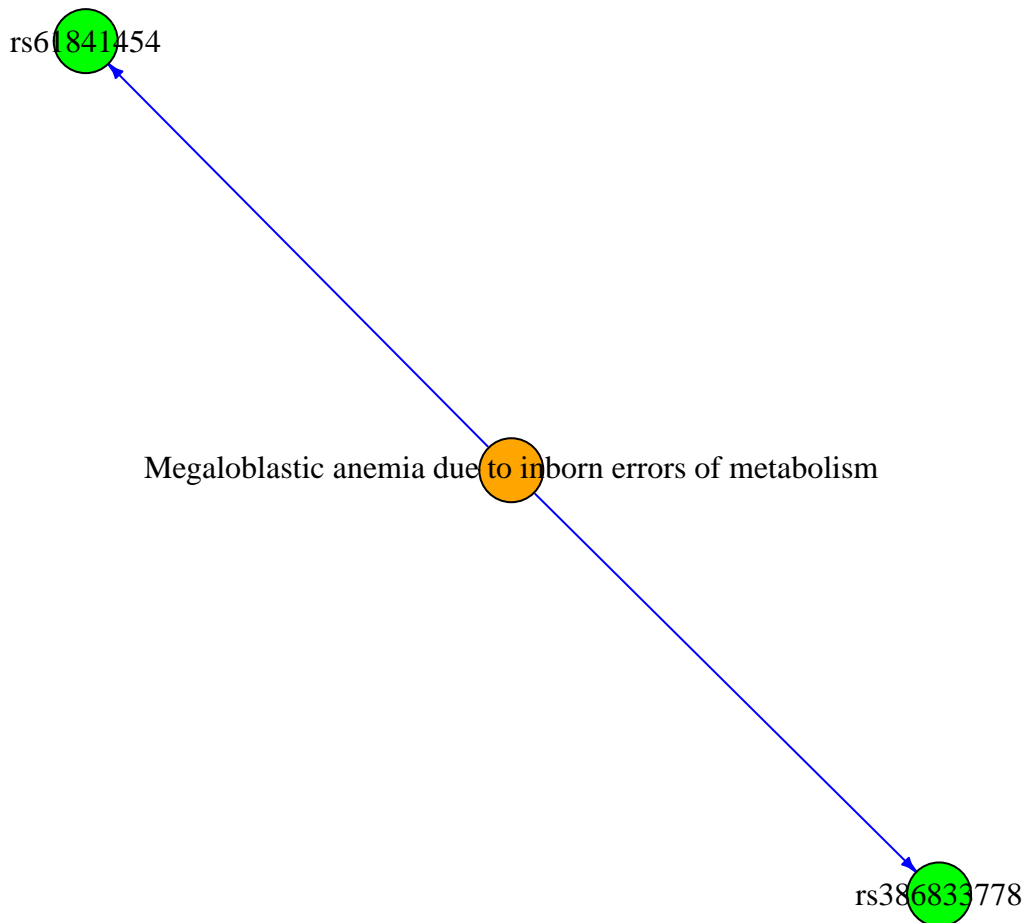



## Variant–Disease Network (Melnick–Needles syndrome)

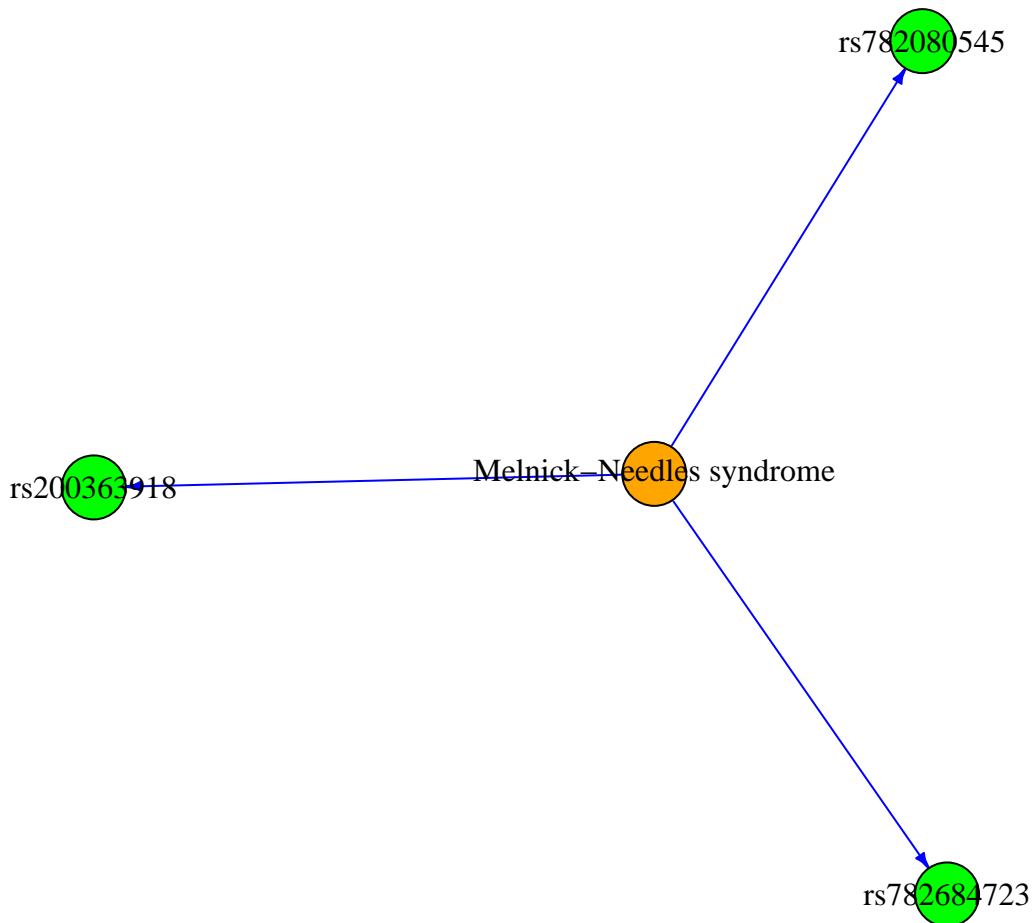

## Variant–Disease Network (Mental retardation)

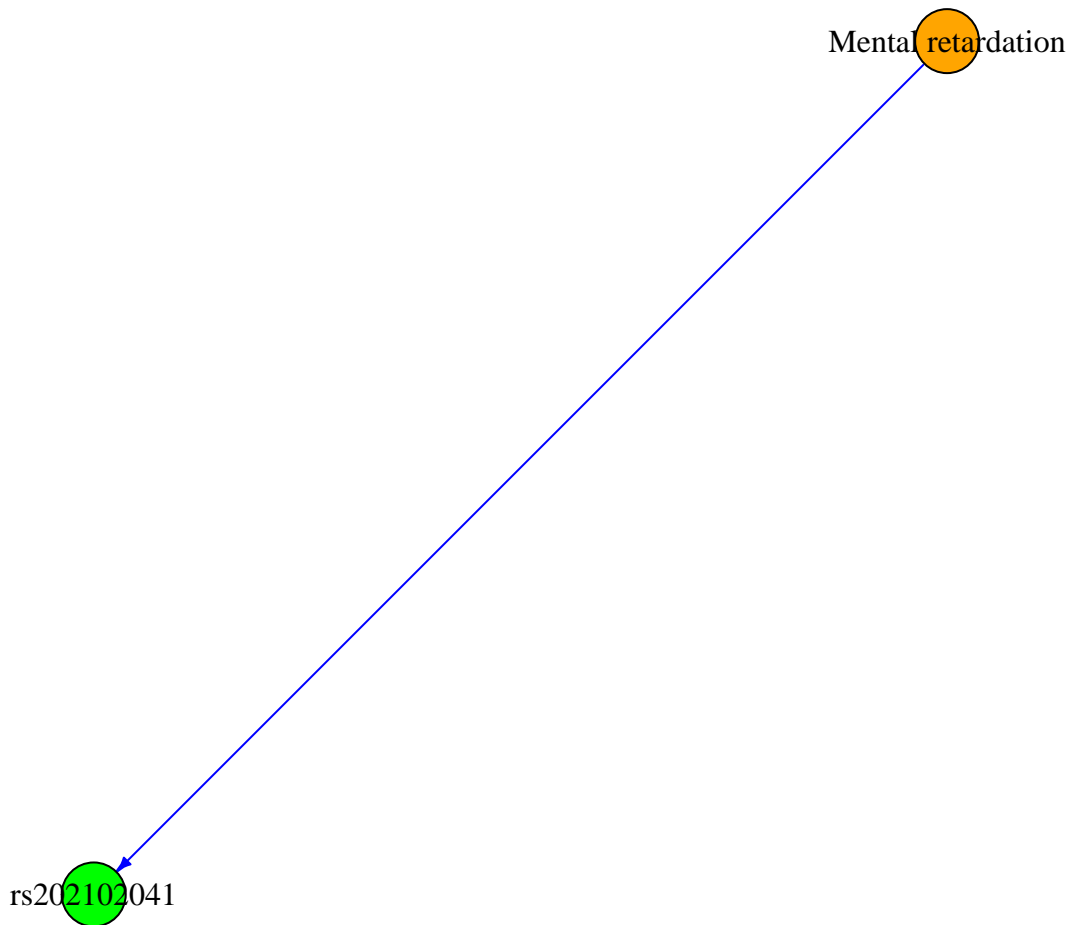

# Network (Mental retardation X-linked with cerebellar hypoplasia and distinct

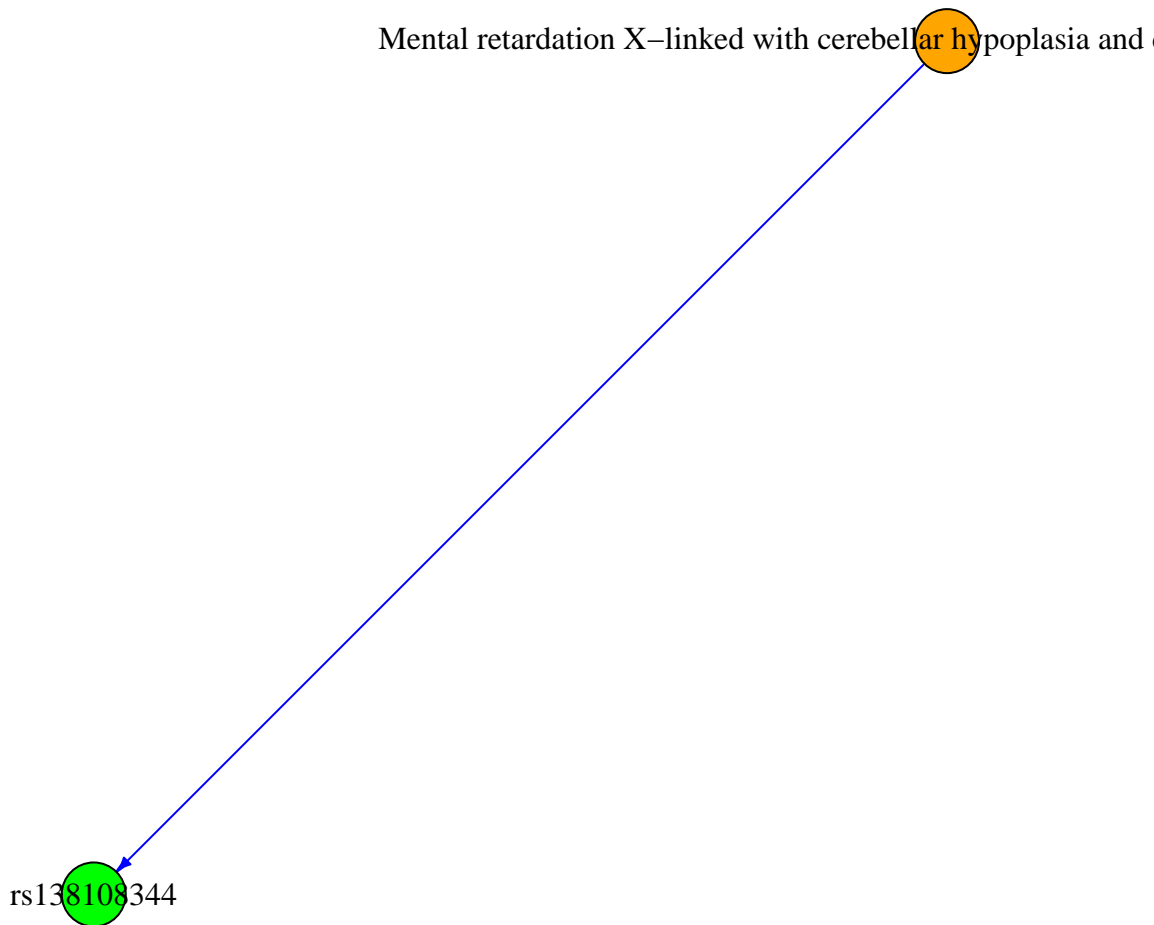

## Variant-Disease Network (Metachondromatosis)

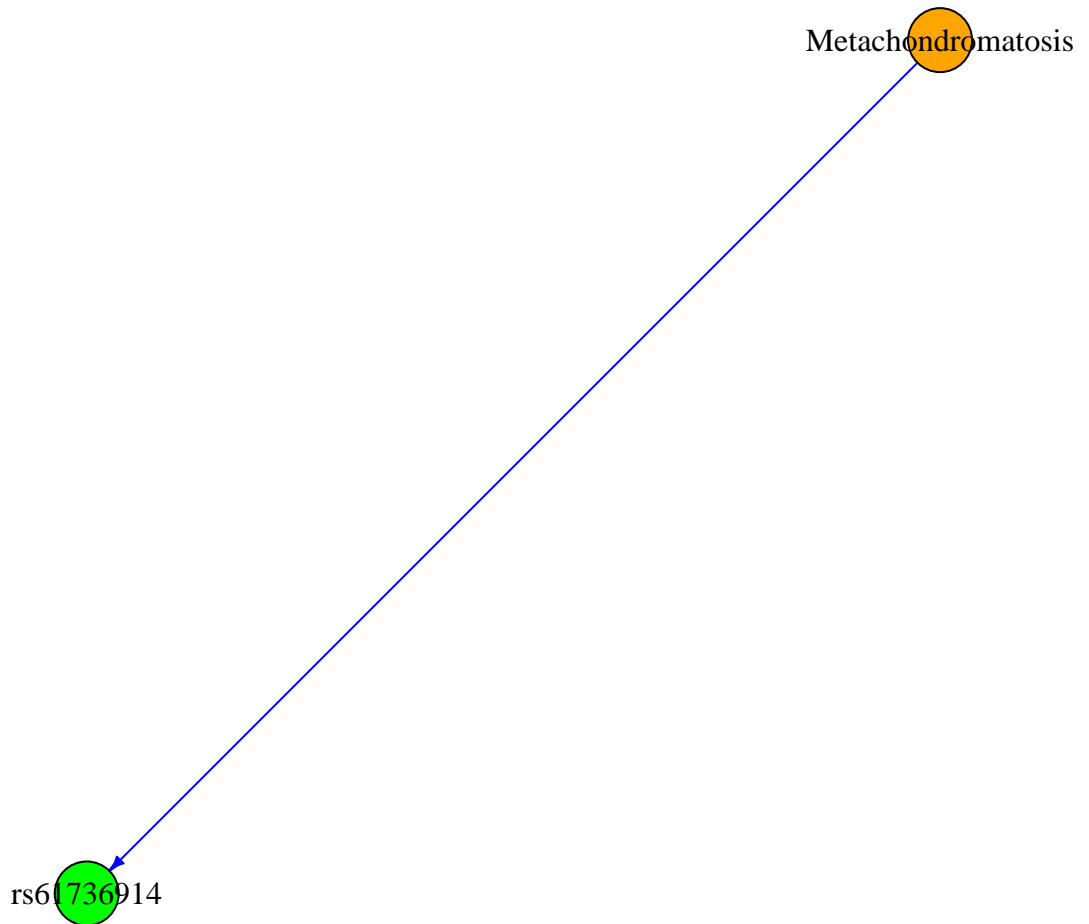

# Variant–Disease Network (Metaphyseal anadysplasia)

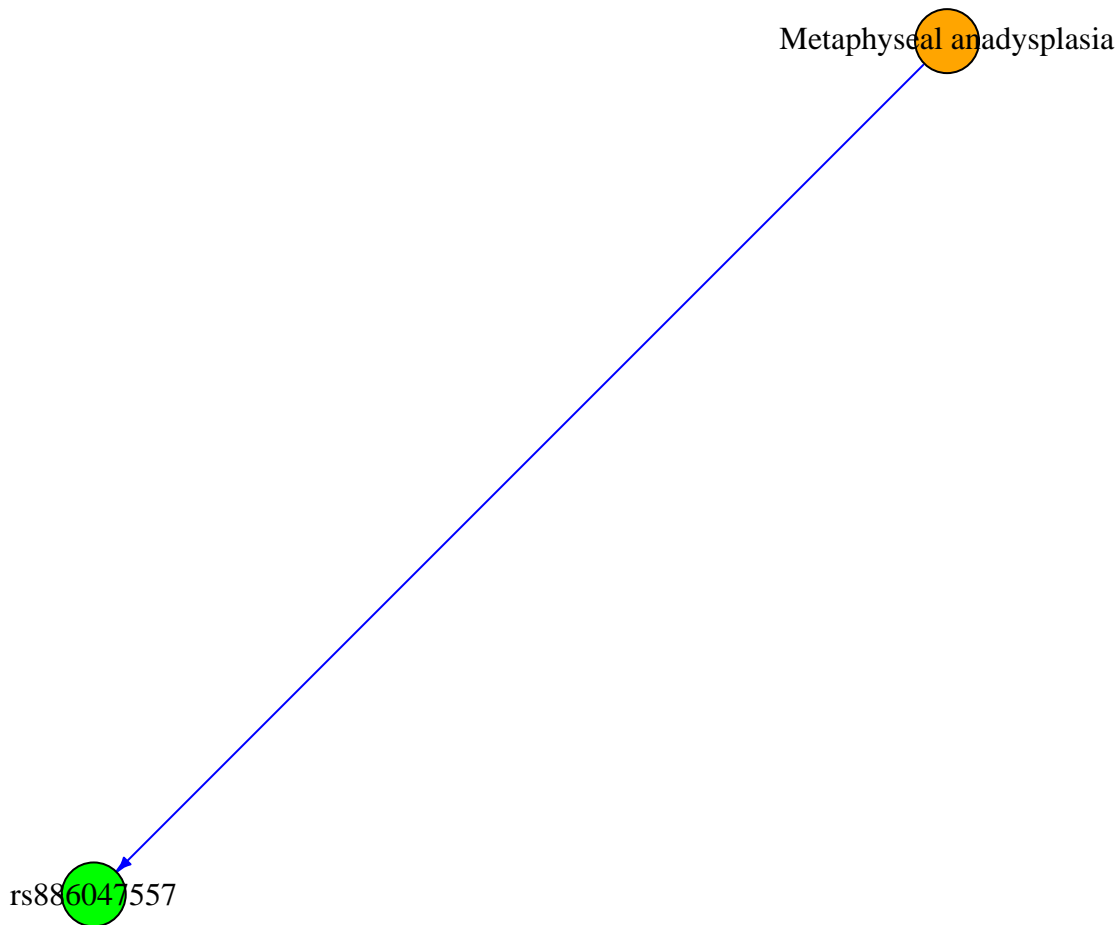

Variant–Disease Network (Metaphyseal chondrodysplasia)

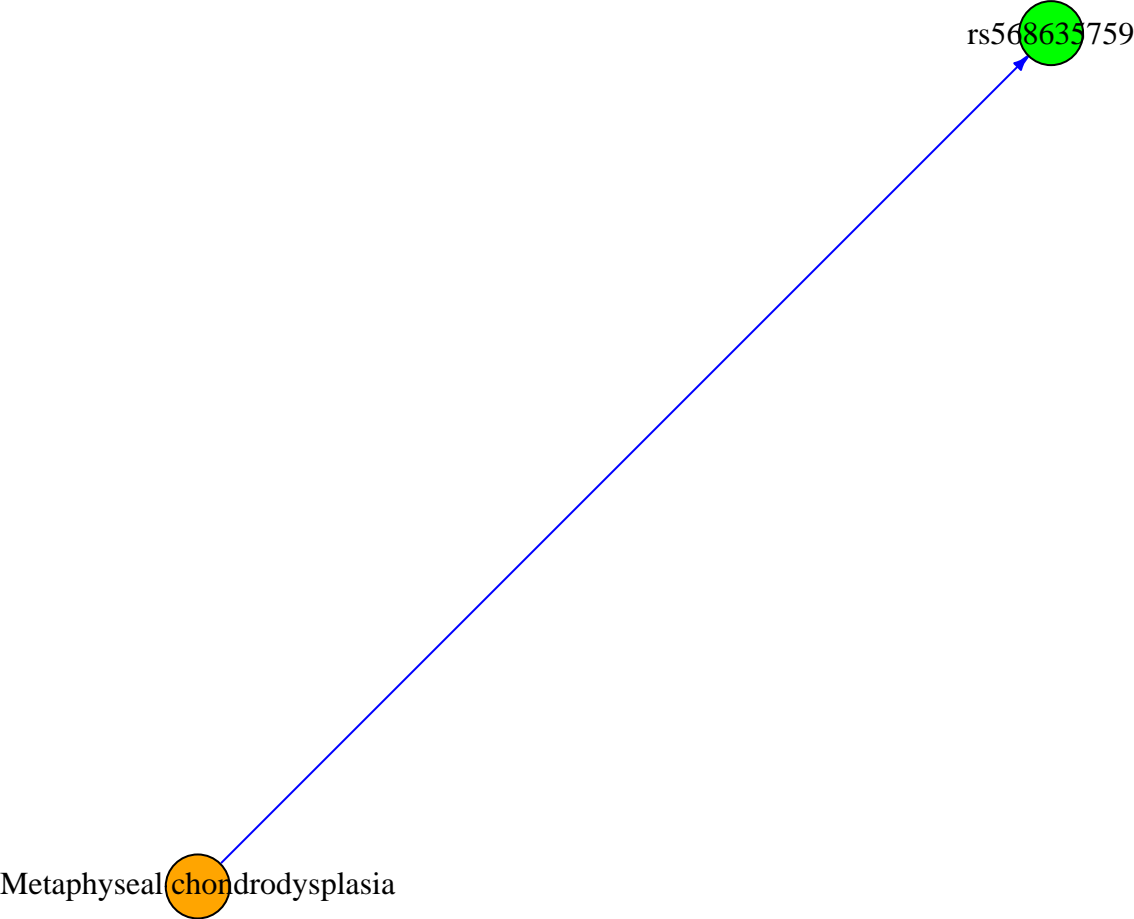

## Variant–Disease Network (Methylmalonic acidemia)

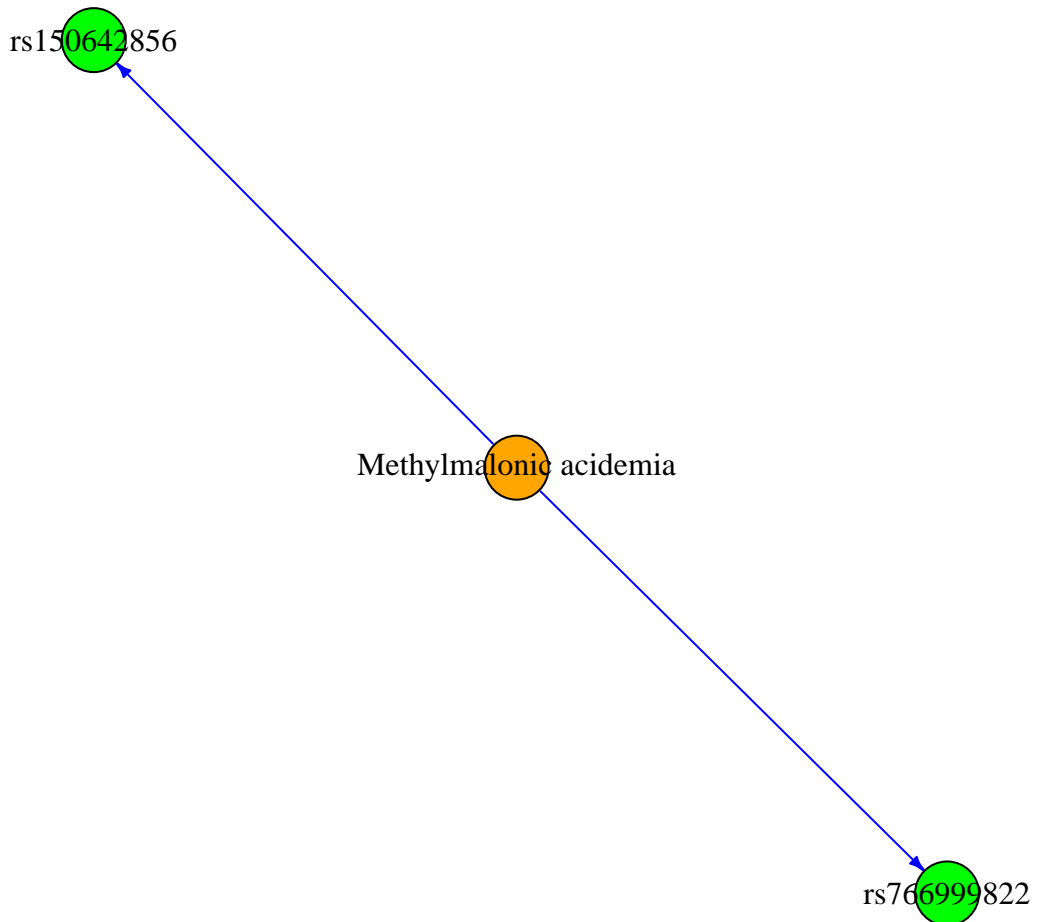

# Disease Network (Methylmalonic aciduria due to methylmalonyl-CoA mutase deficiency)

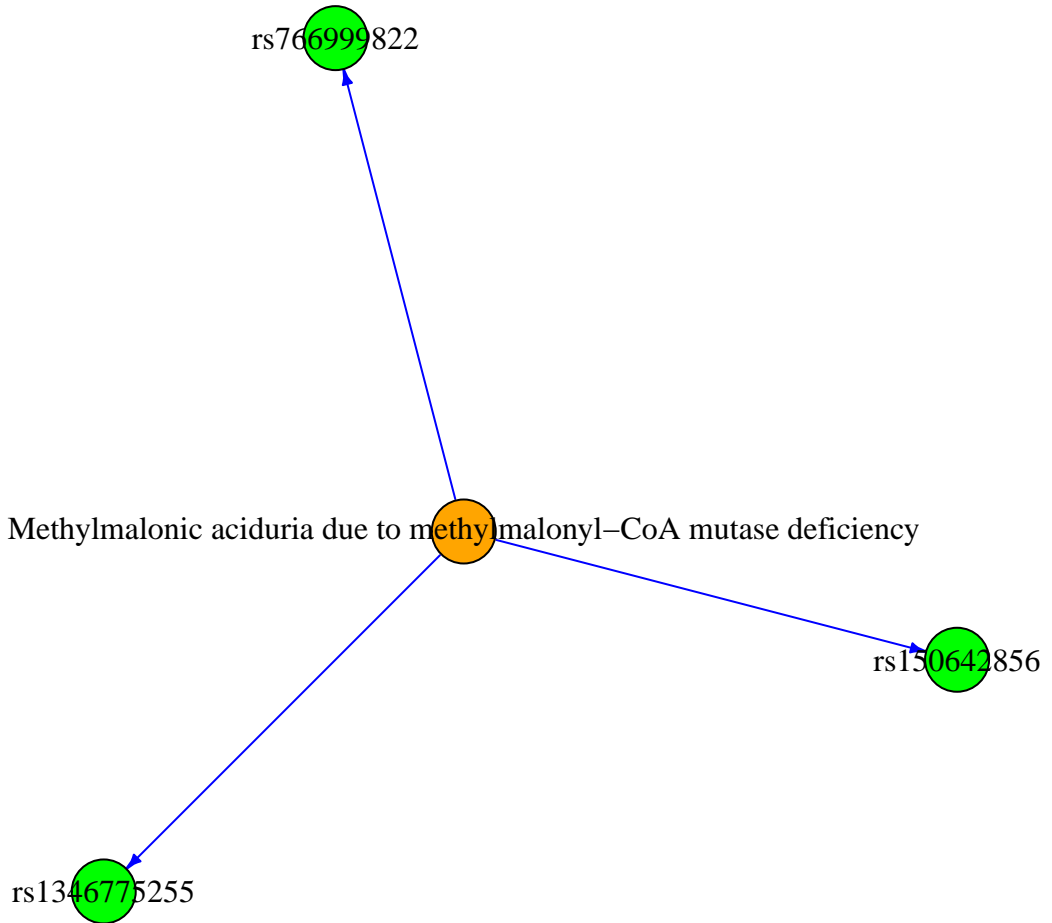



## Variant-Disease Network (Microcephaly)

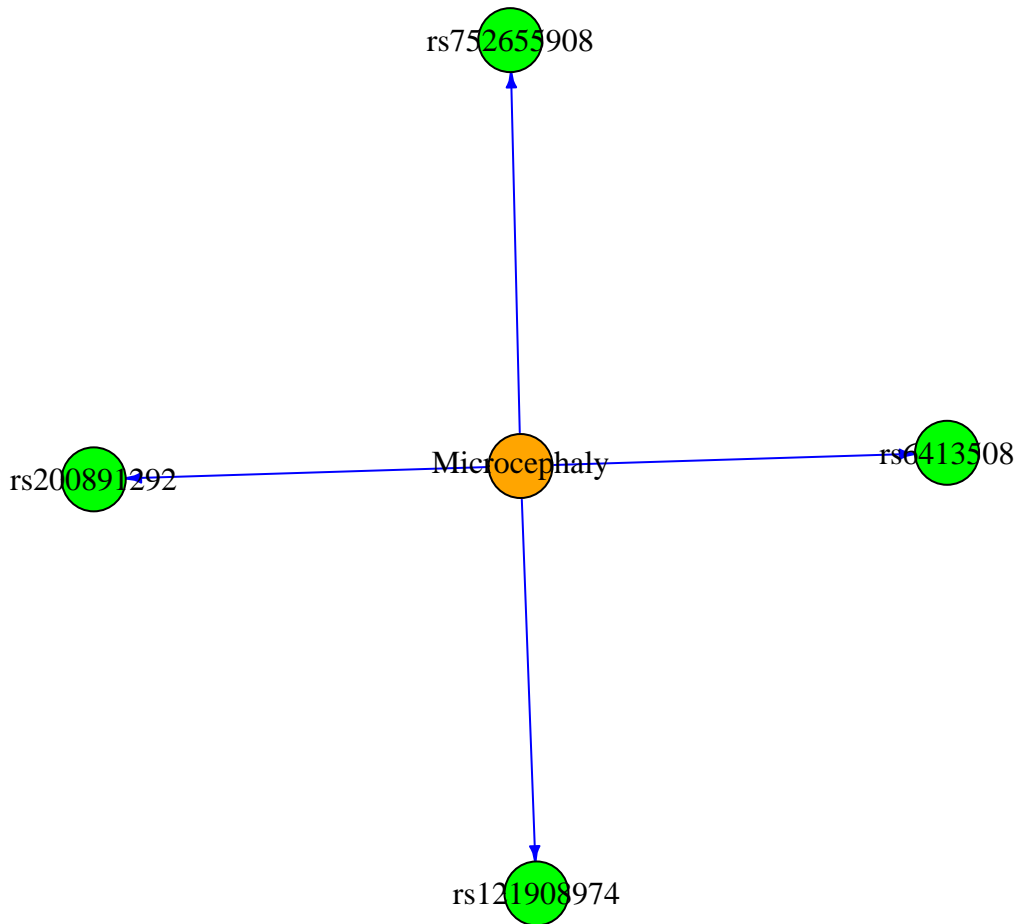

Variant–Disease Network (Microcephaly–capillary malformation syndrome)

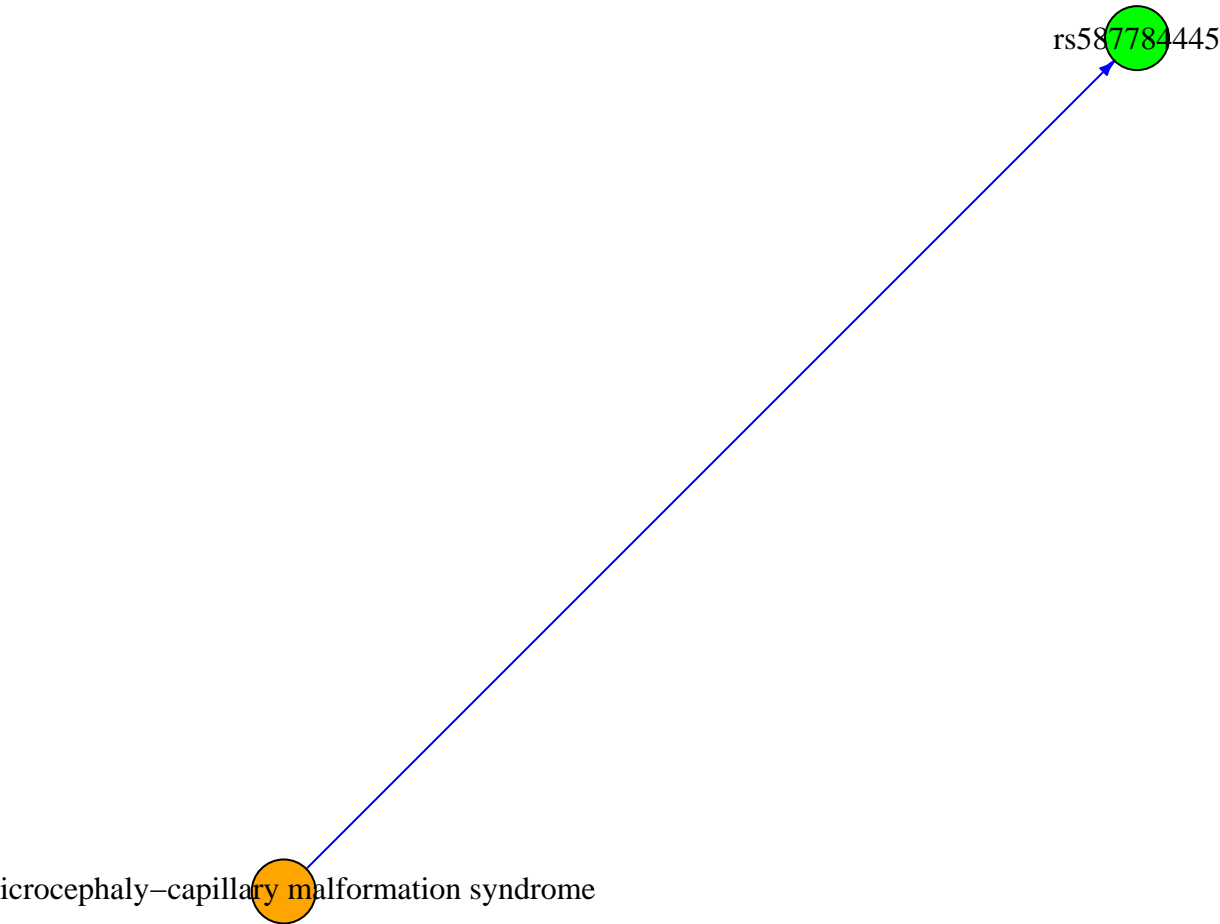

## Variant–Disease Network (Microcytic anemia)

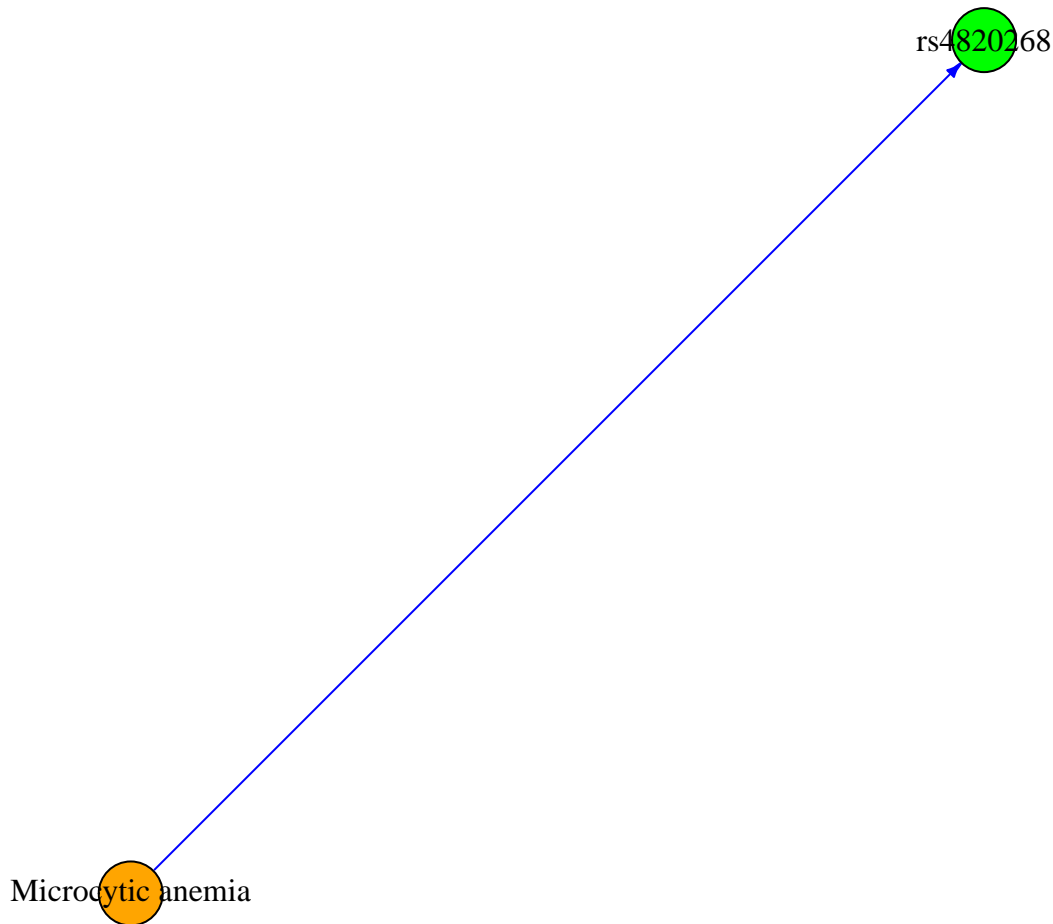

## Variant–Disease Network (Mitochondrial complex I deficiency)

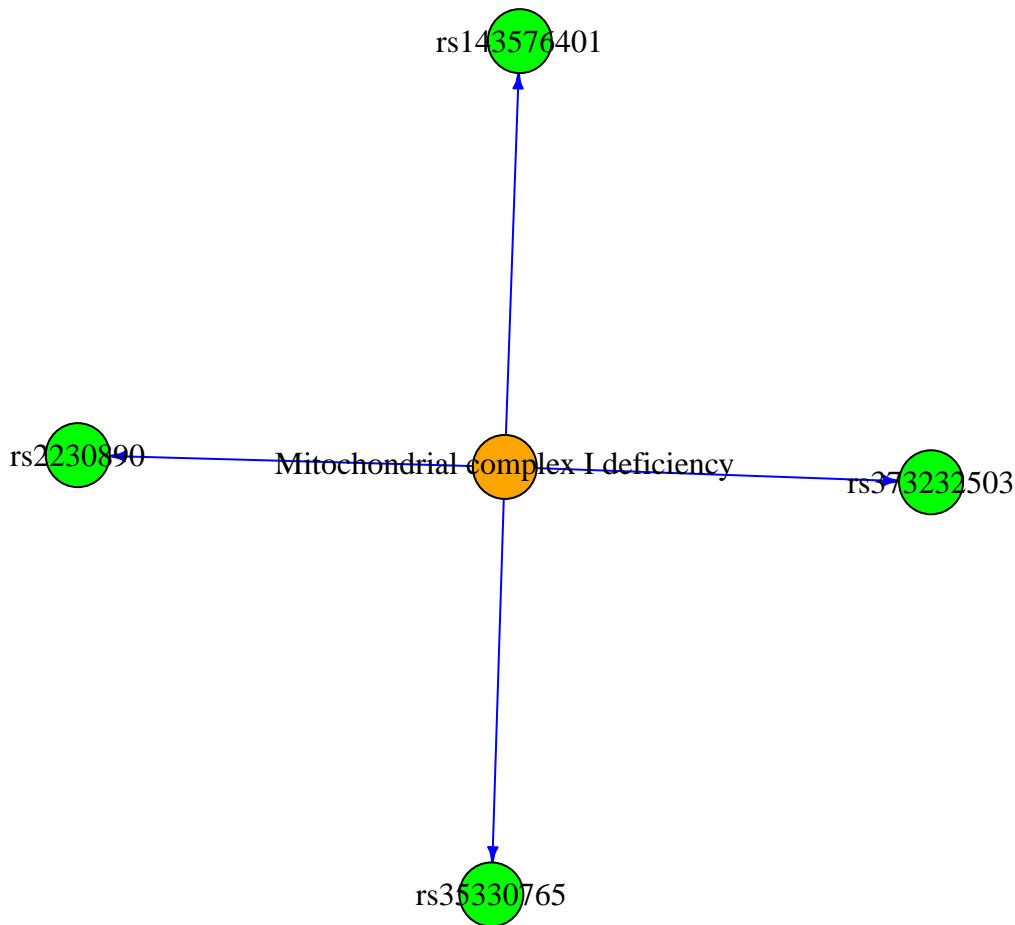

## Variant–Disease Network (Mitochondrial complex II deficiency)

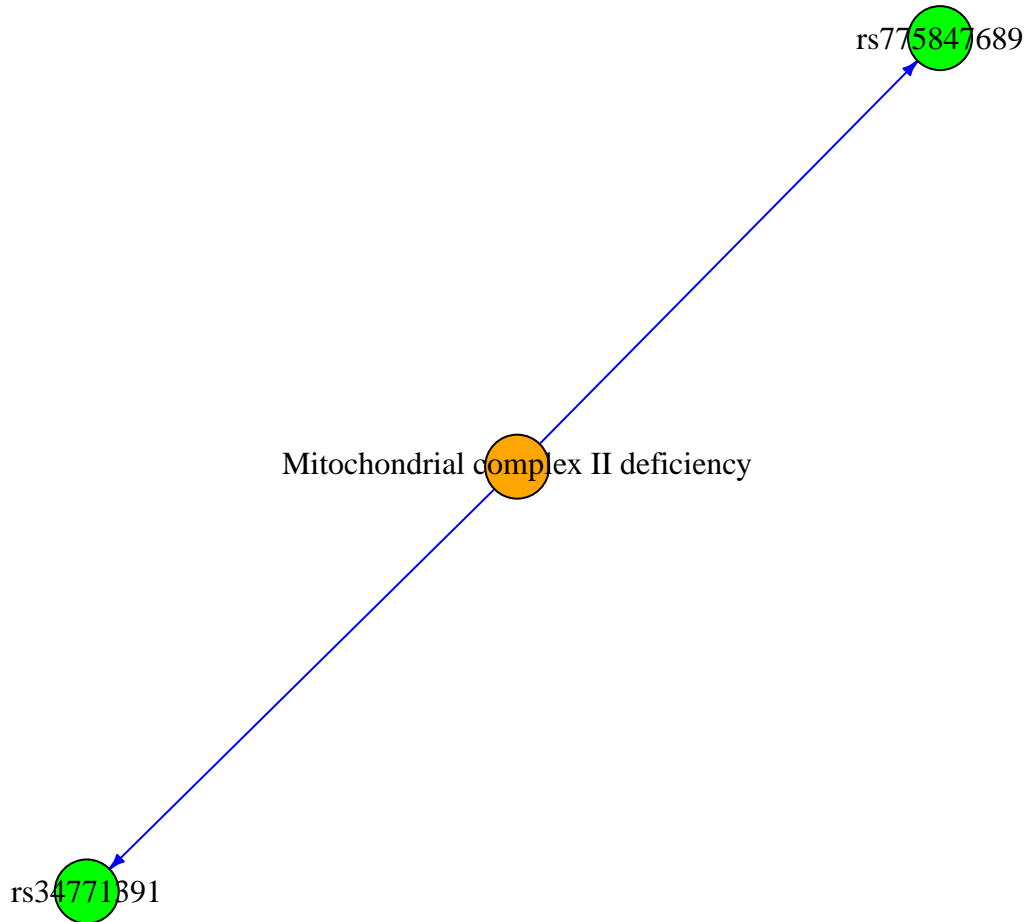

## Variant–Disease Network (Mitochondrial diseases)

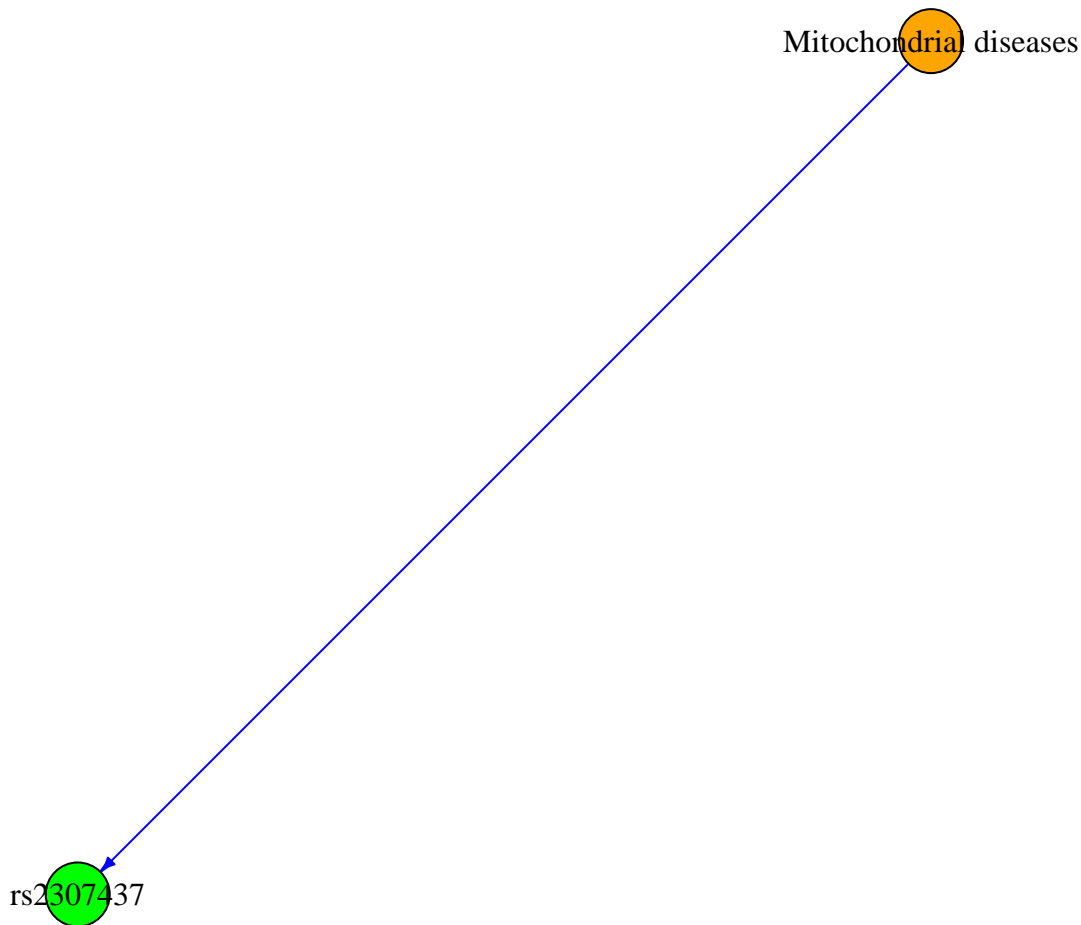

# Variant–Disease Network (Mitochondrial DNA depletion syndrome)

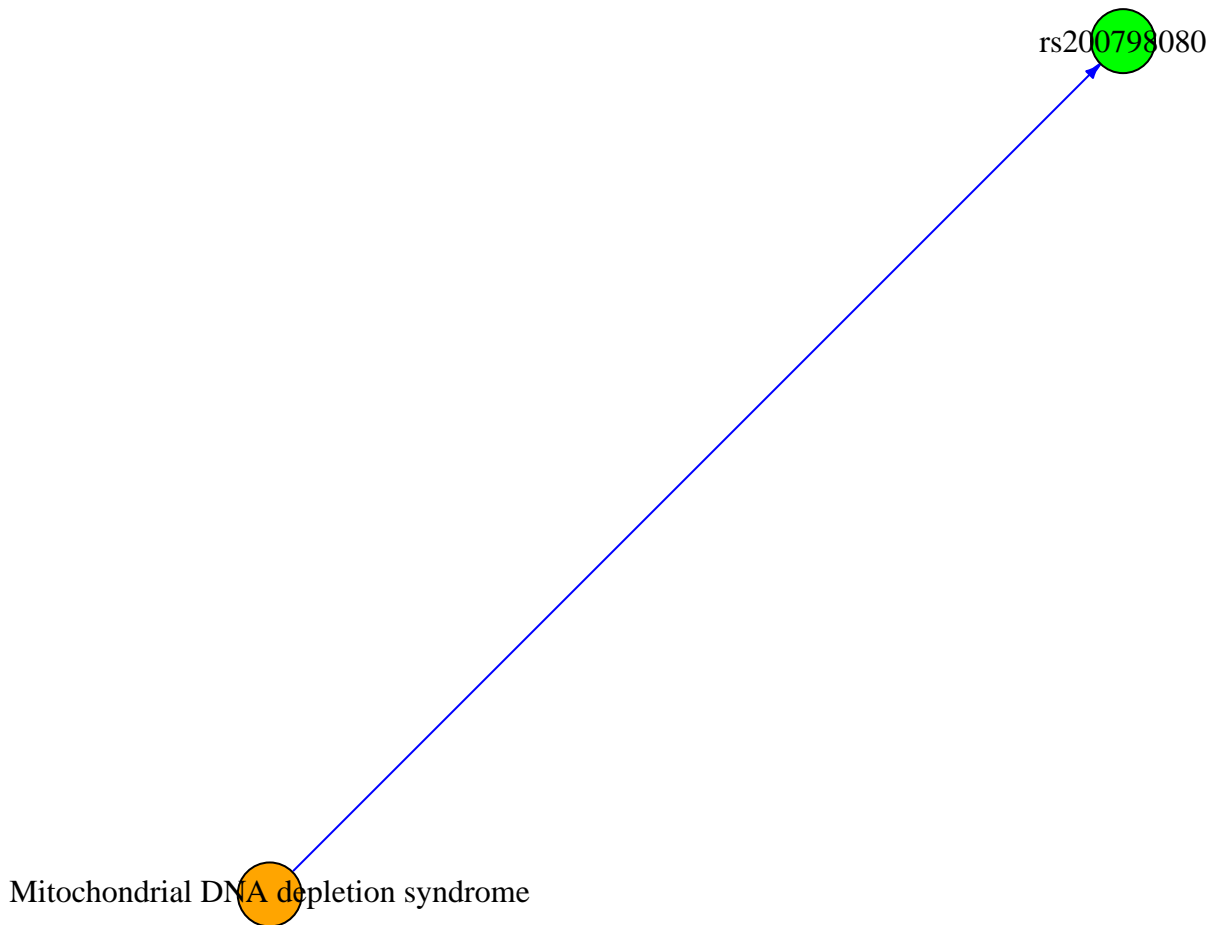

# Disease Network (Mitochondrial DNA depletion syndrome 13 (encephalomyopathy

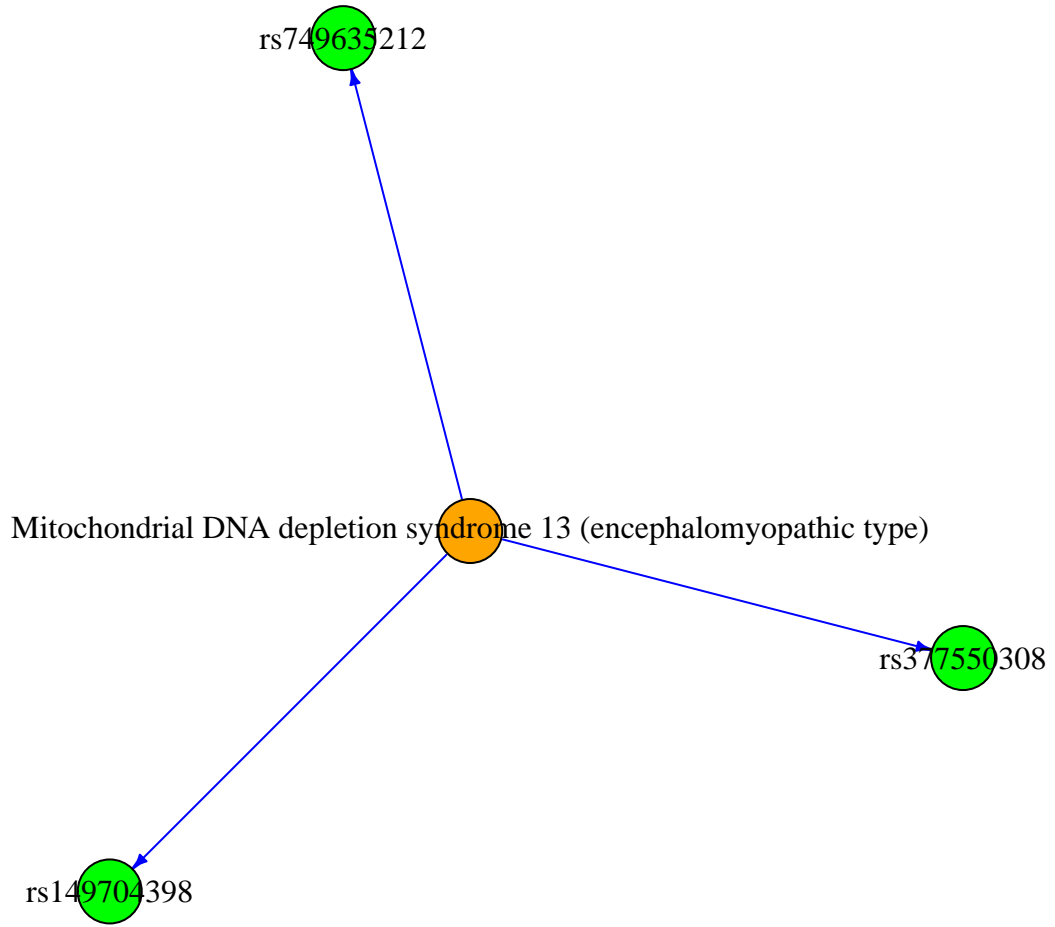



network (Mitochondrial DNA depletion syndrome 9 (encephalomyopathic with r

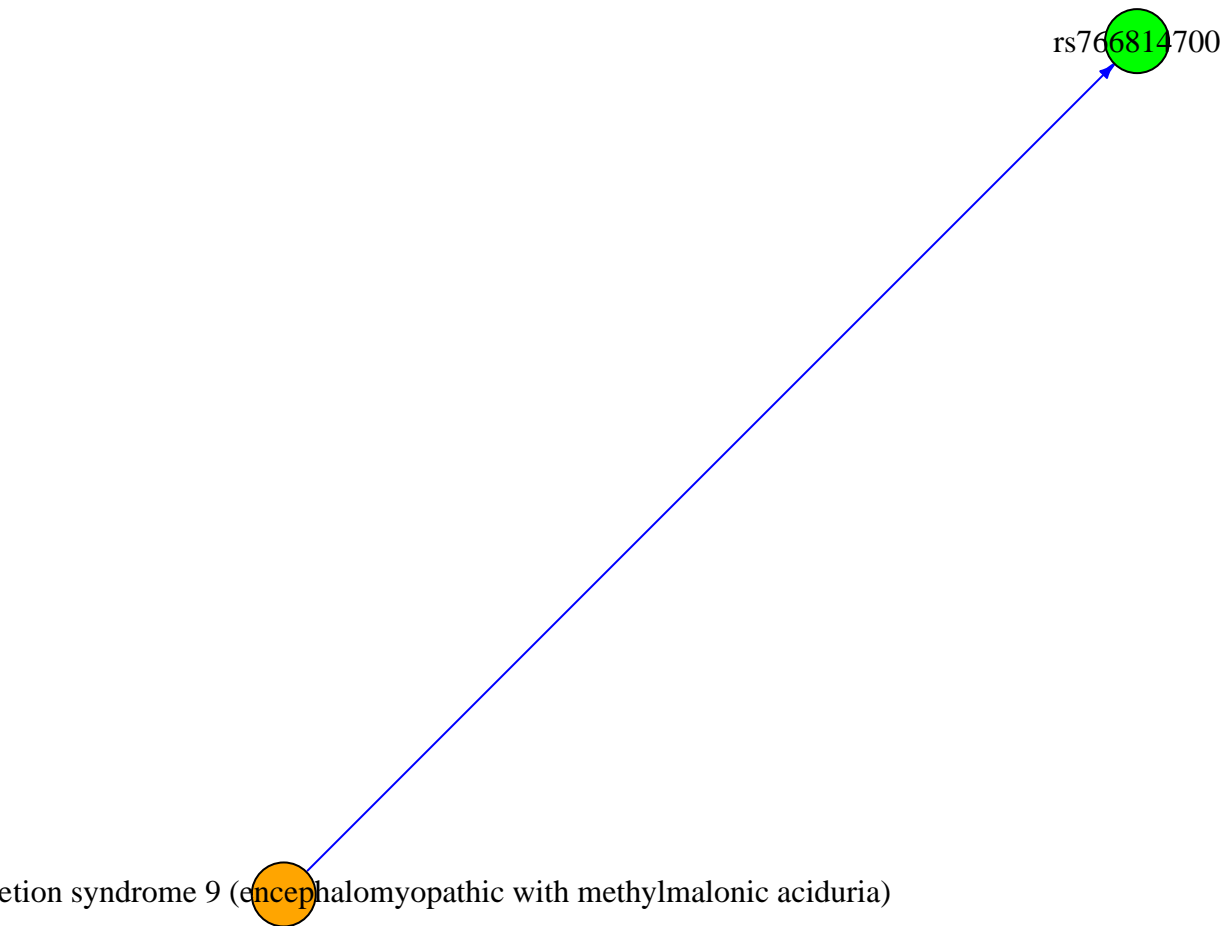

**Variant–Disease Network (Mitochondrial trifunctional protein deficiency)**

rs142348718

Mitochondrial trifunctional protein defi

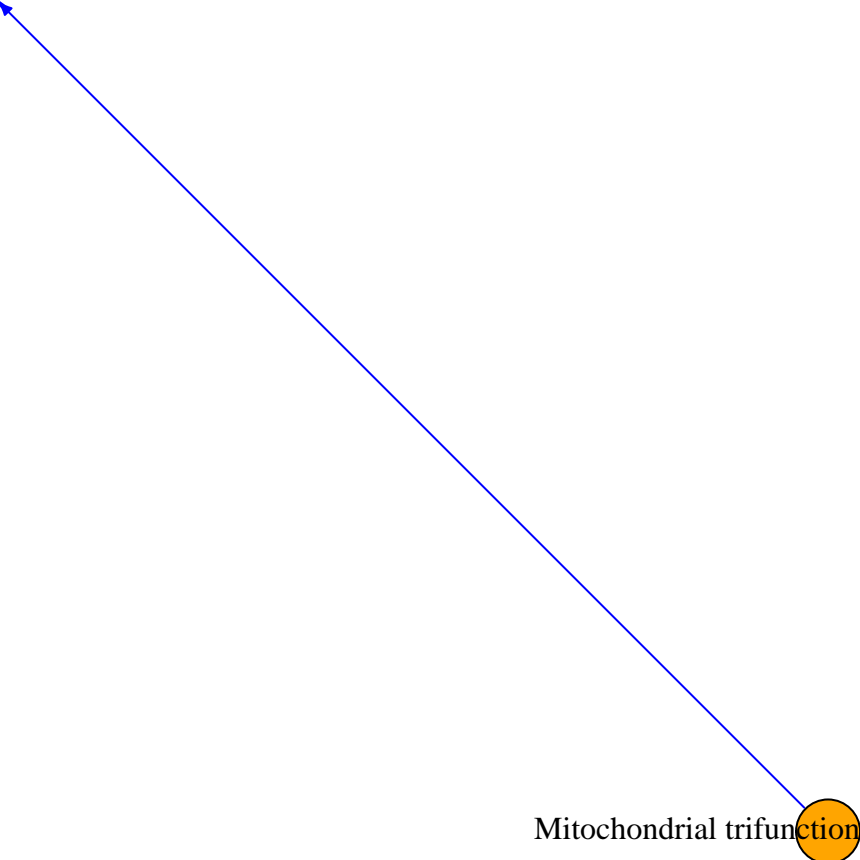

**Variant–Disease Network (Monocarboxylate transporter 1 deficiency)**

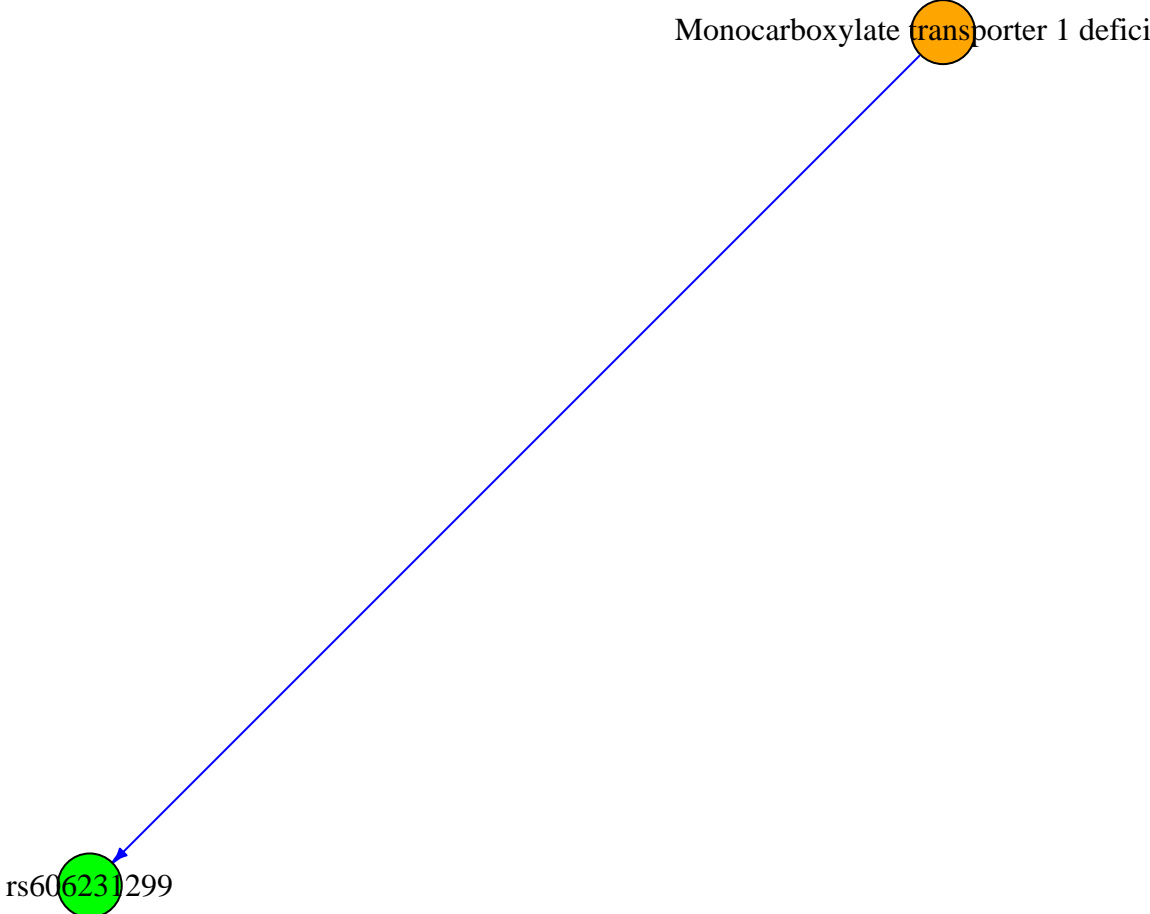

## Variant–Disease Network (Monogenic diabetes)

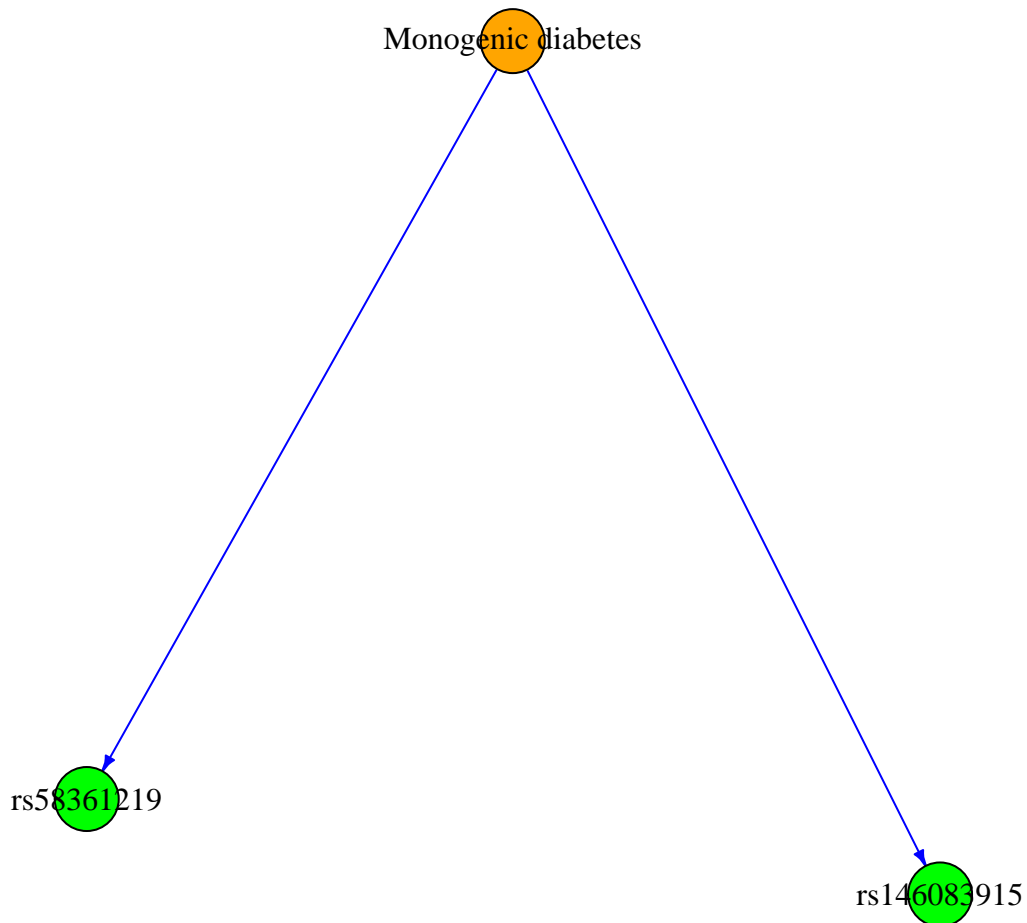

Variant–Disease Network (Monogenic Non–Syndromic Obesity)

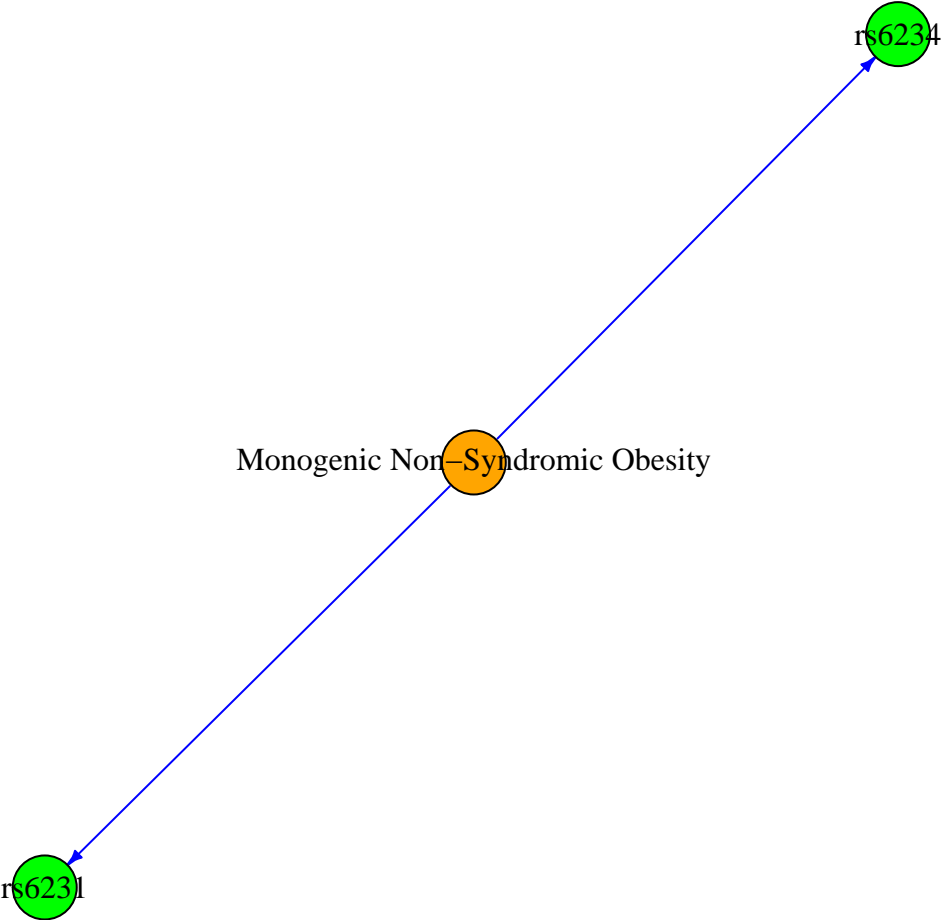

Variant–Disease Network (Mononeuropathy of the Median Nerve)

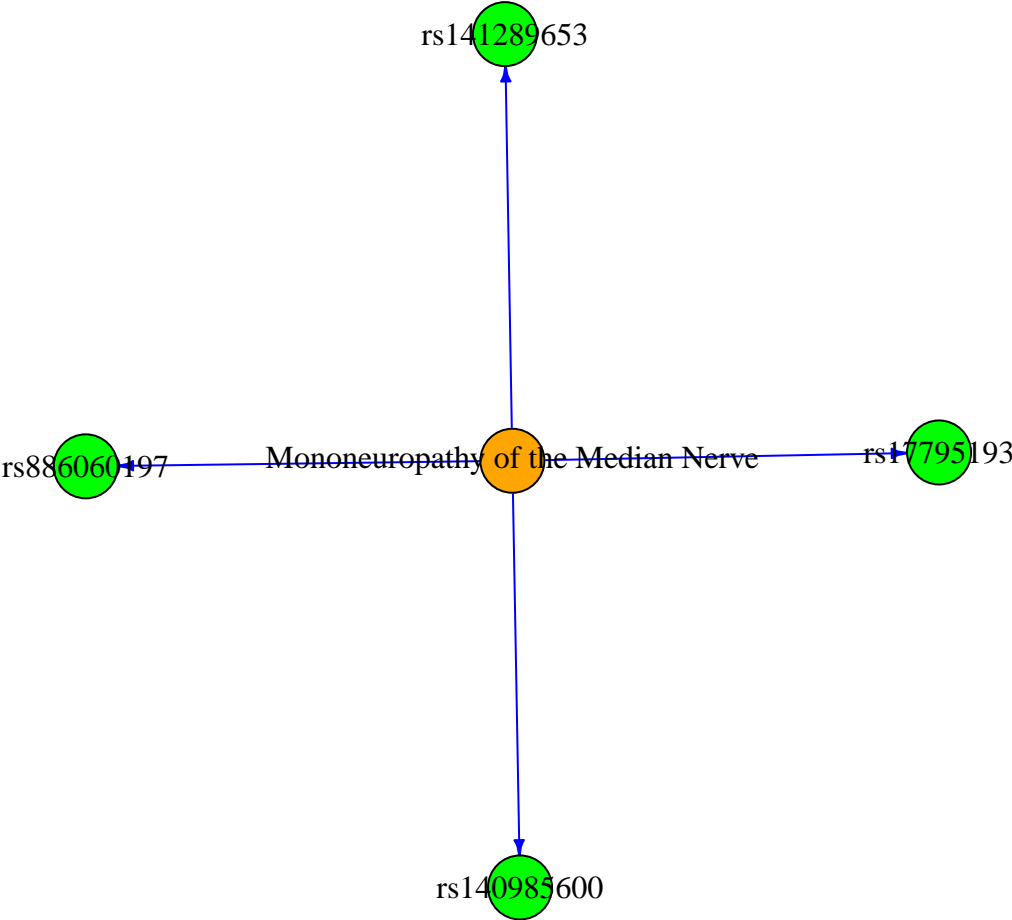

## Variant–Disease Network (Morquio syndrome)

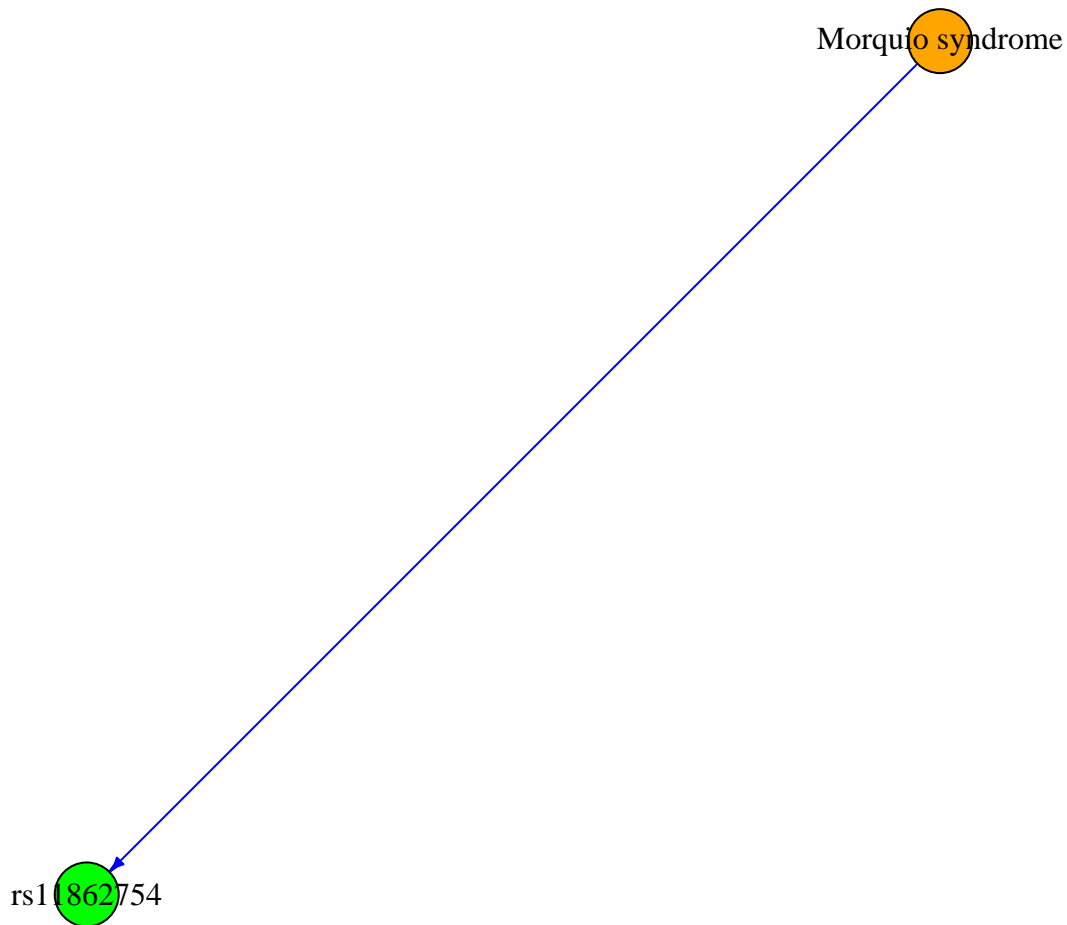

## Variant–Disease Network (Mucopolipidosis type IV)

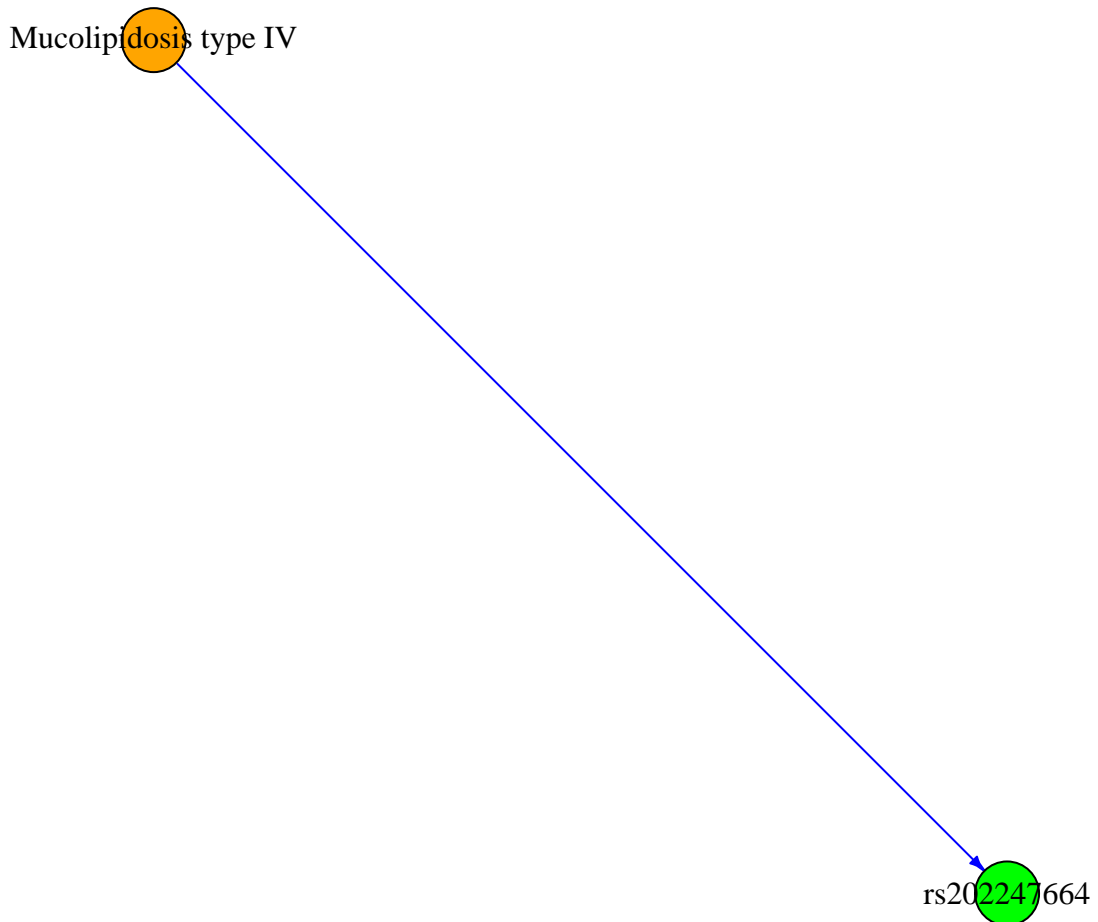



## Variant–Disease Network (Mucopolysaccharidosis)

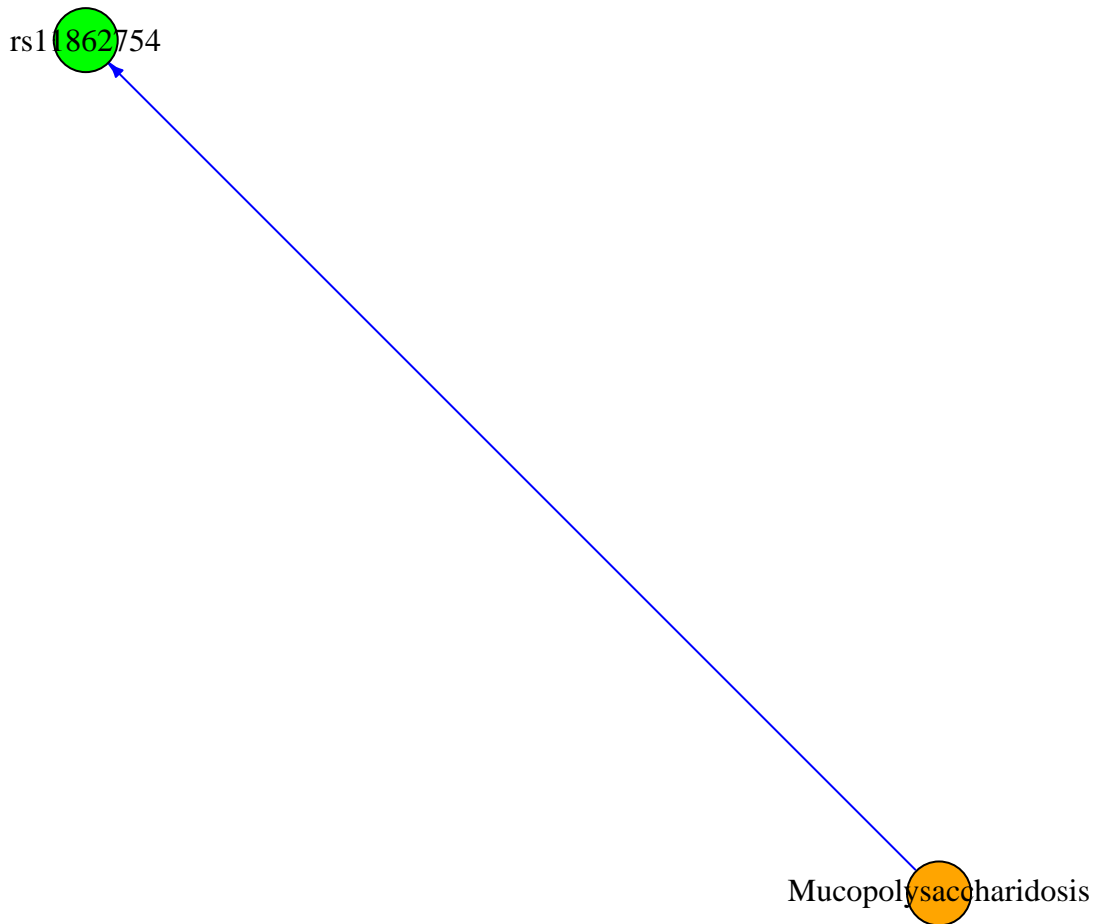

Variant–Disease Network (Mucopolysaccharidosis type I)

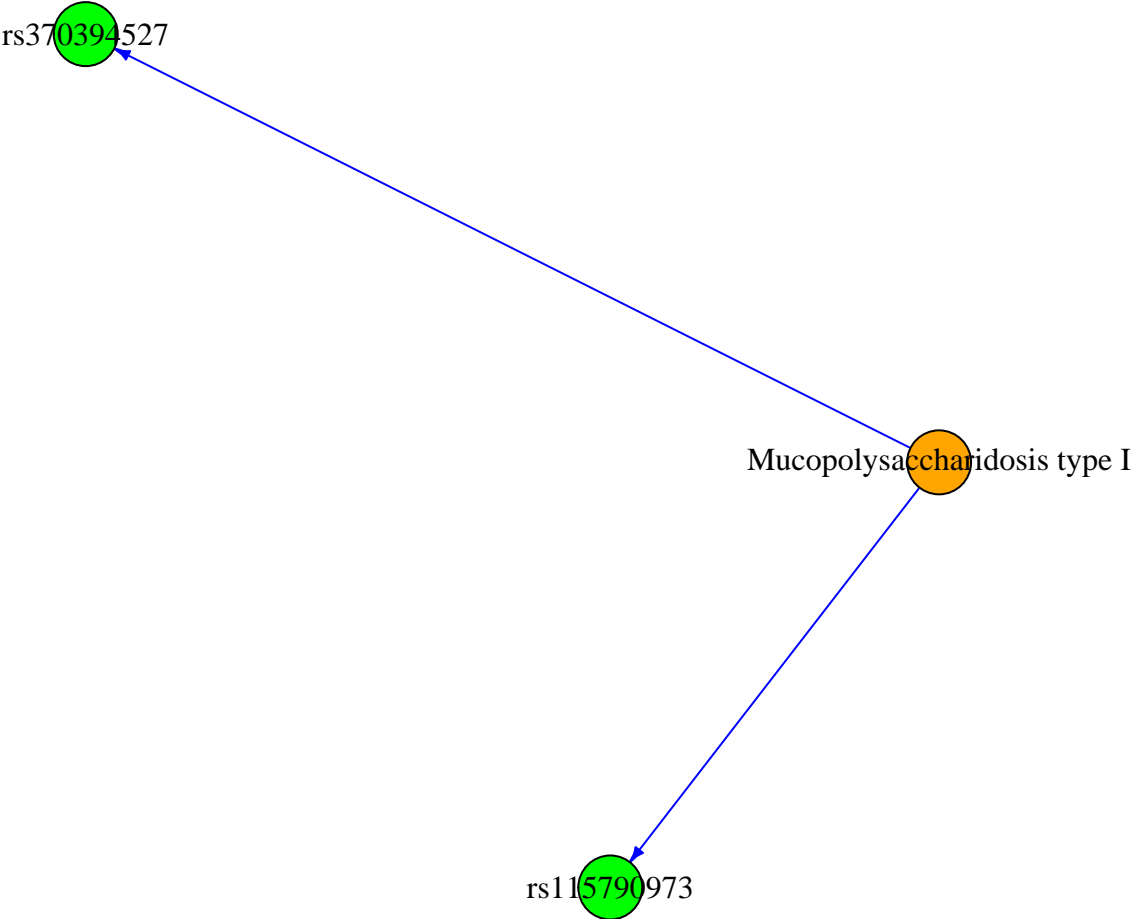

## Variant–Disease Network (Mulibrey nanism syndrome)

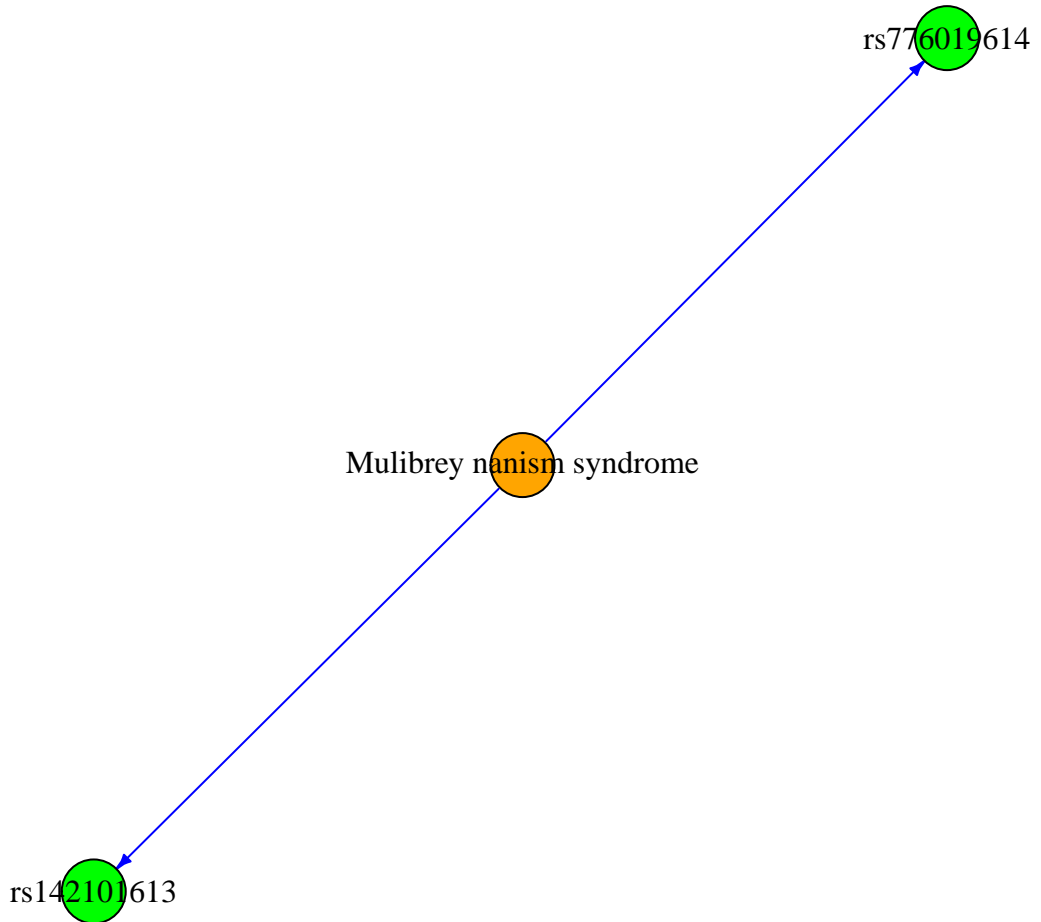

# nt-Disease Network (Multiple congenital anomalies–hypotonia–seizures syn

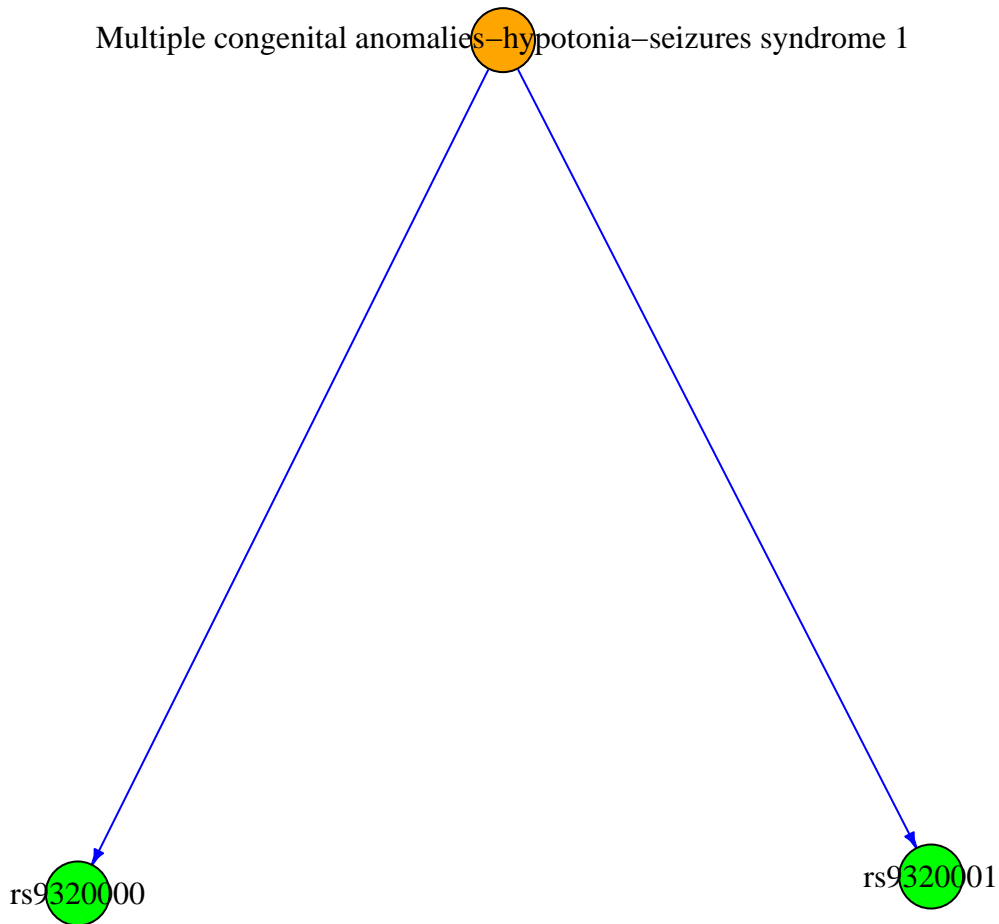

**Variant–Disease Network (Multiple Cutaneous and Uterine Leiomyomas)**

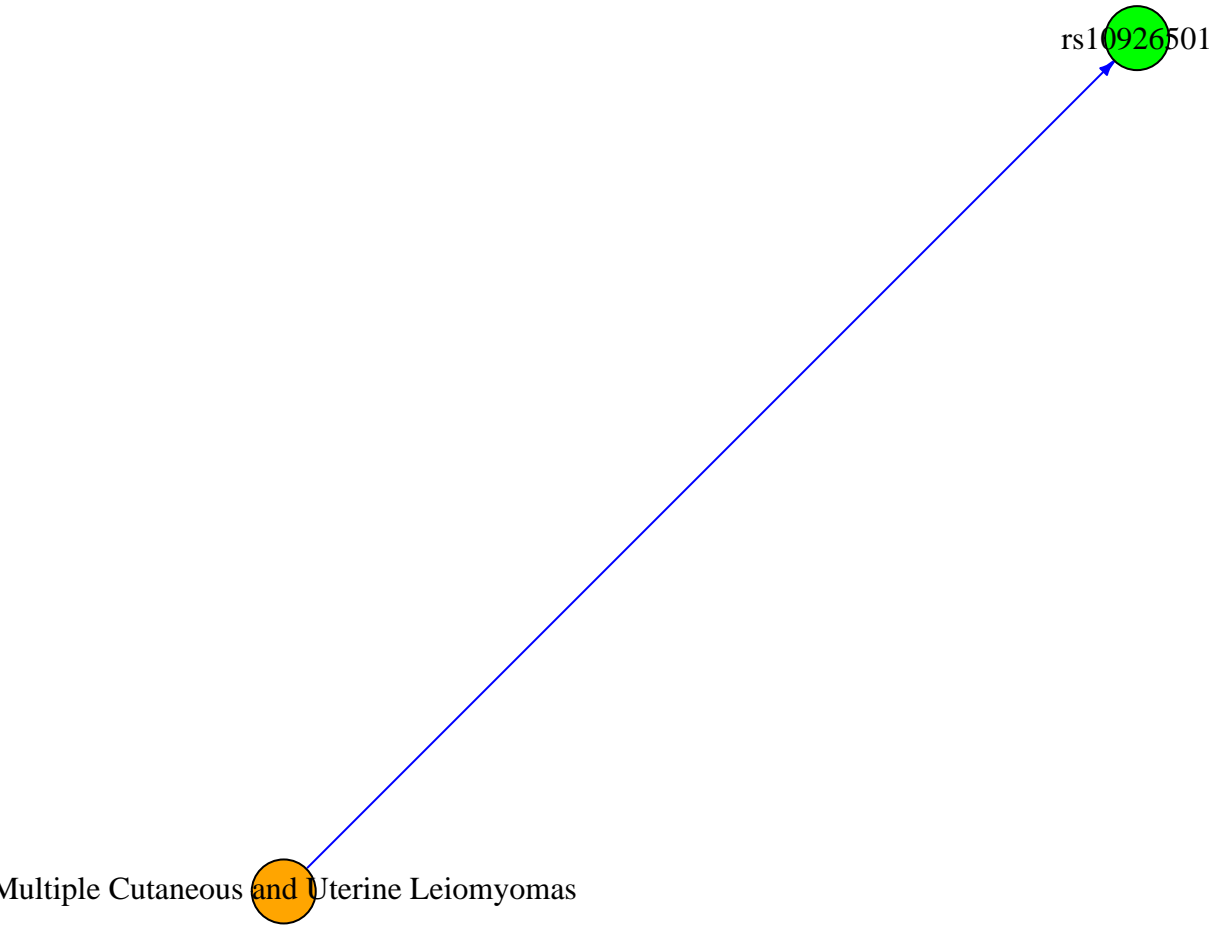

## Variant-Disease Network (Multiple cutaneous leiomyomas)

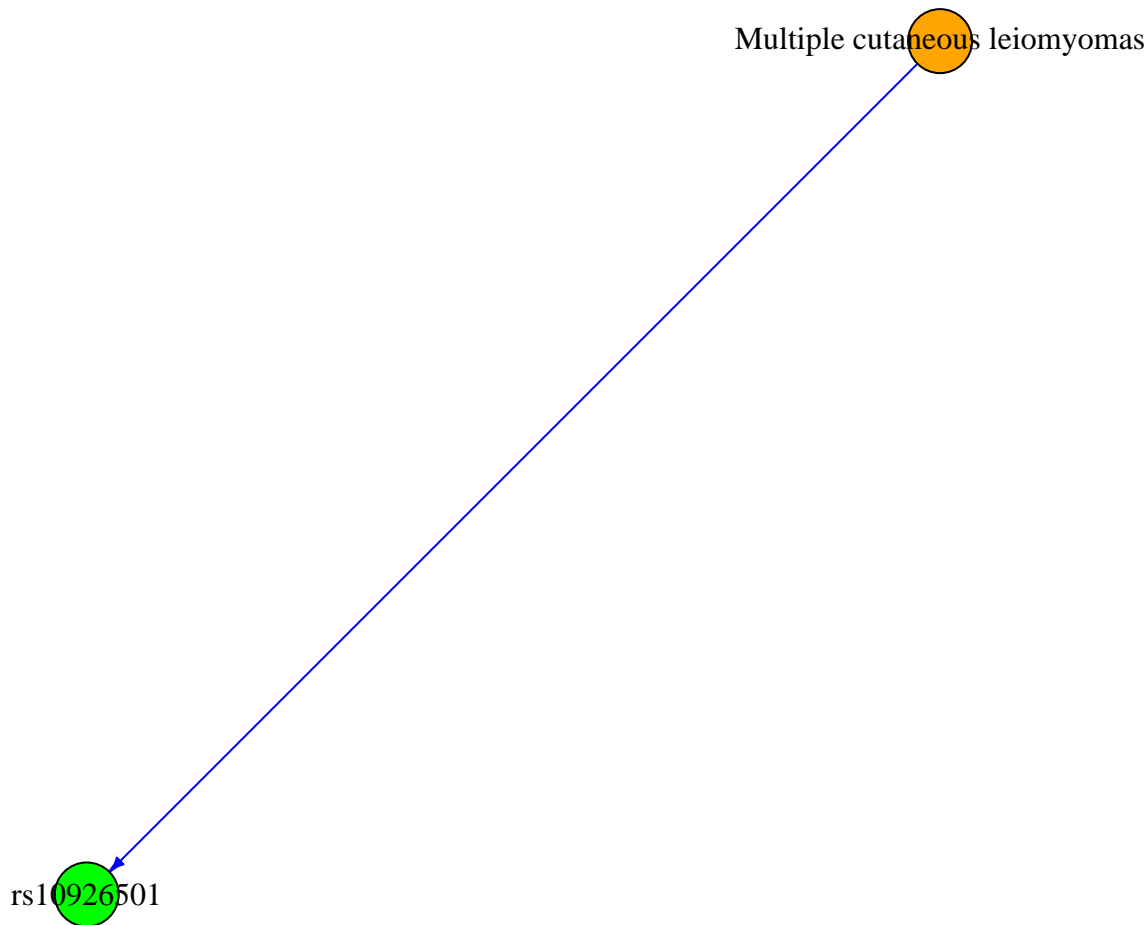

## Variant–Disease Network (Multiple endocrine neoplasia)

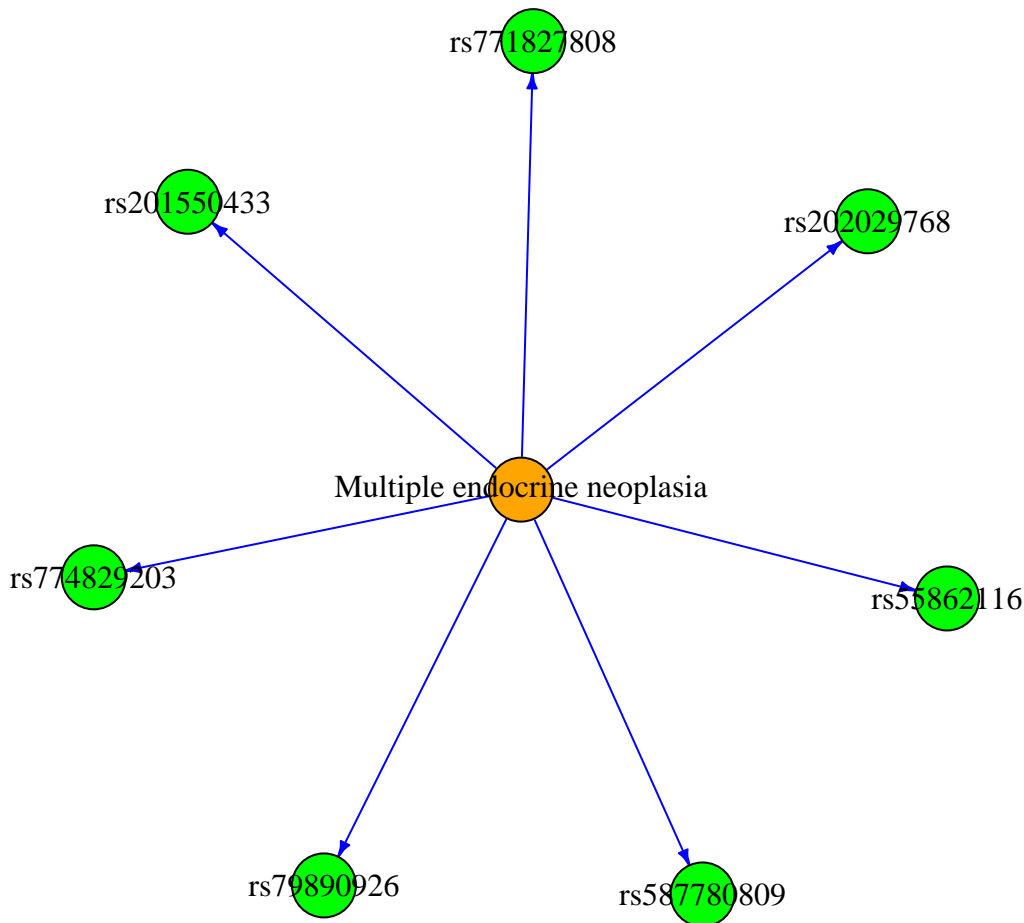

Variant–Disease Network (Multiple Epiphyseal Dysplasia)

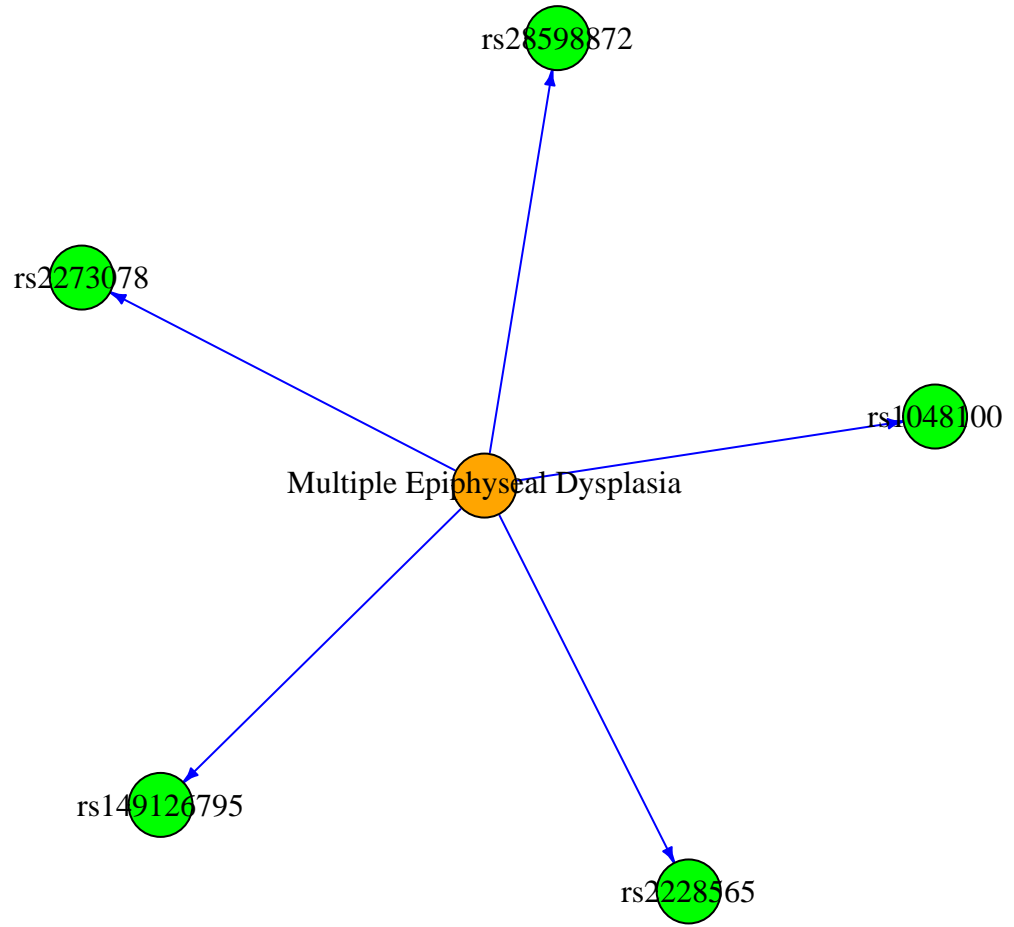



**Variant–Disease Network (Multiple exostoses type 1)**

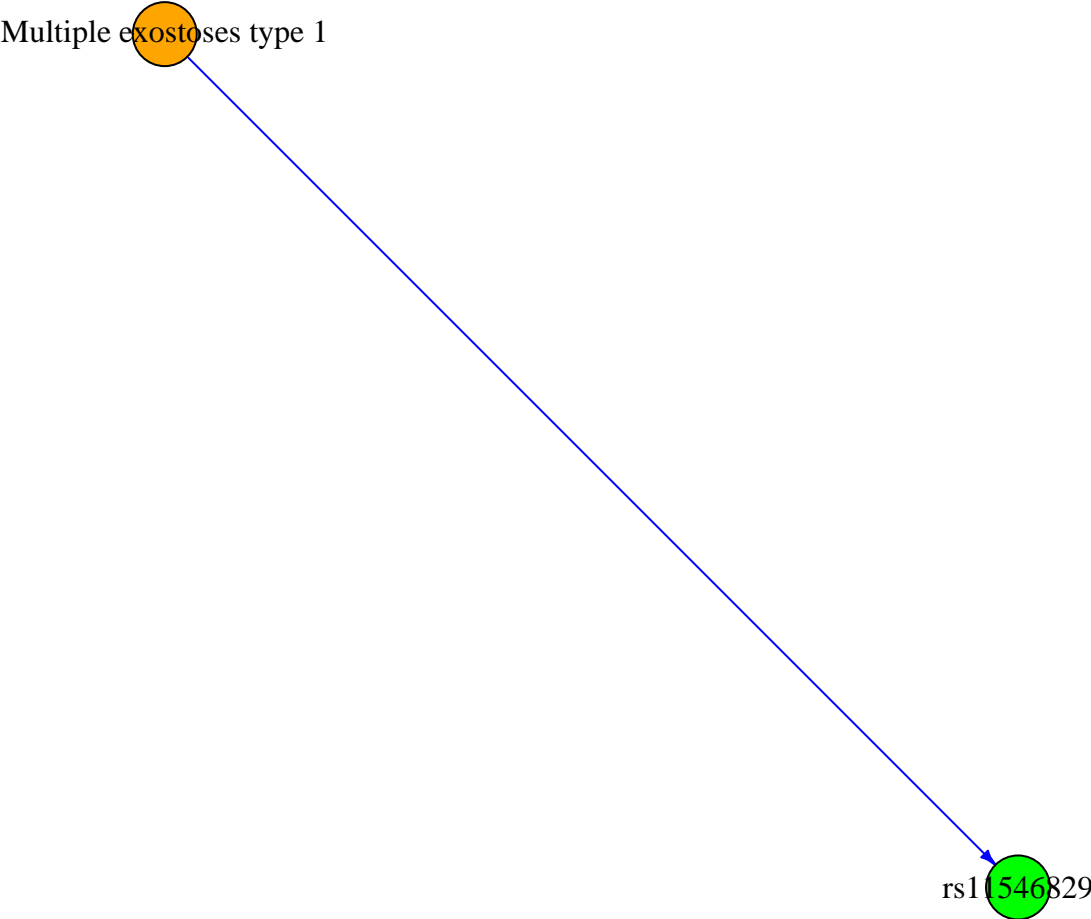

**Variant–Disease Network (Multiple gastrointestinal atresias)**

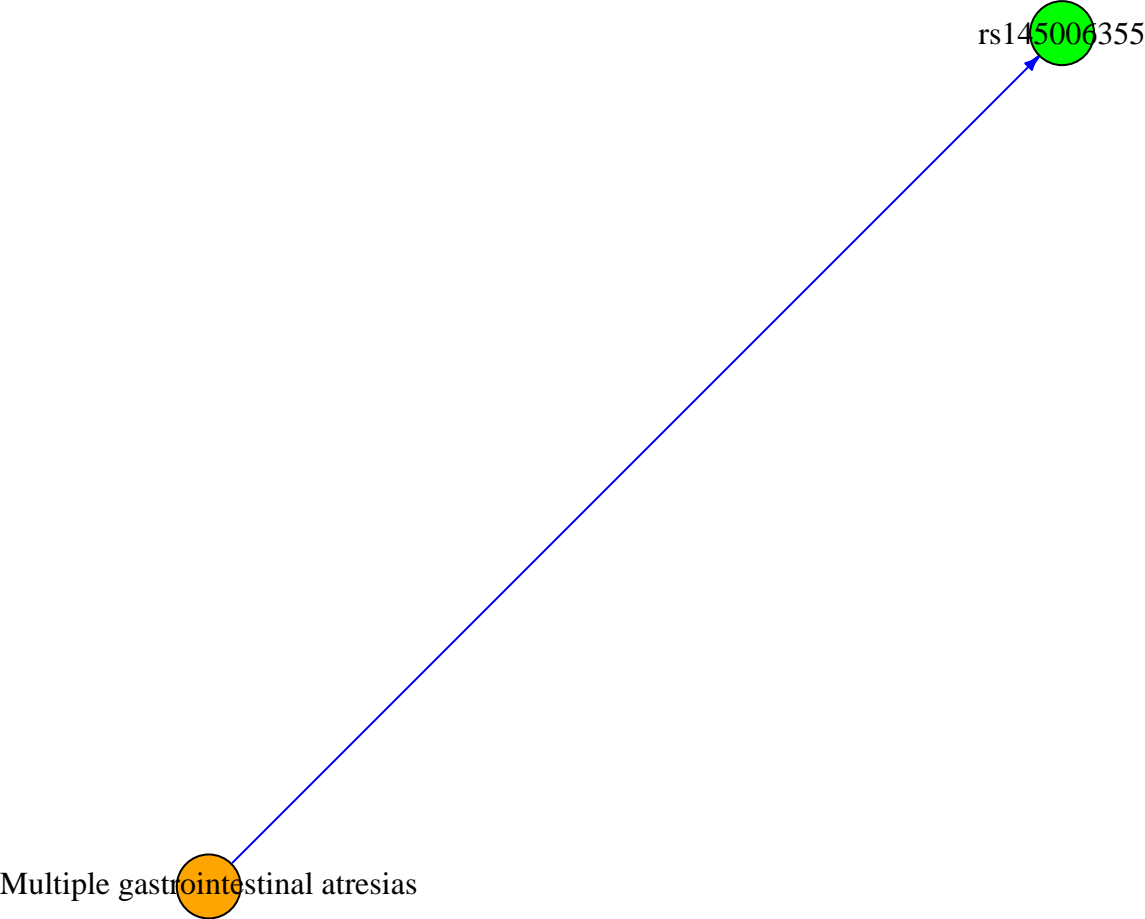

## Variant–Disease Network (Muscular dystrophy)

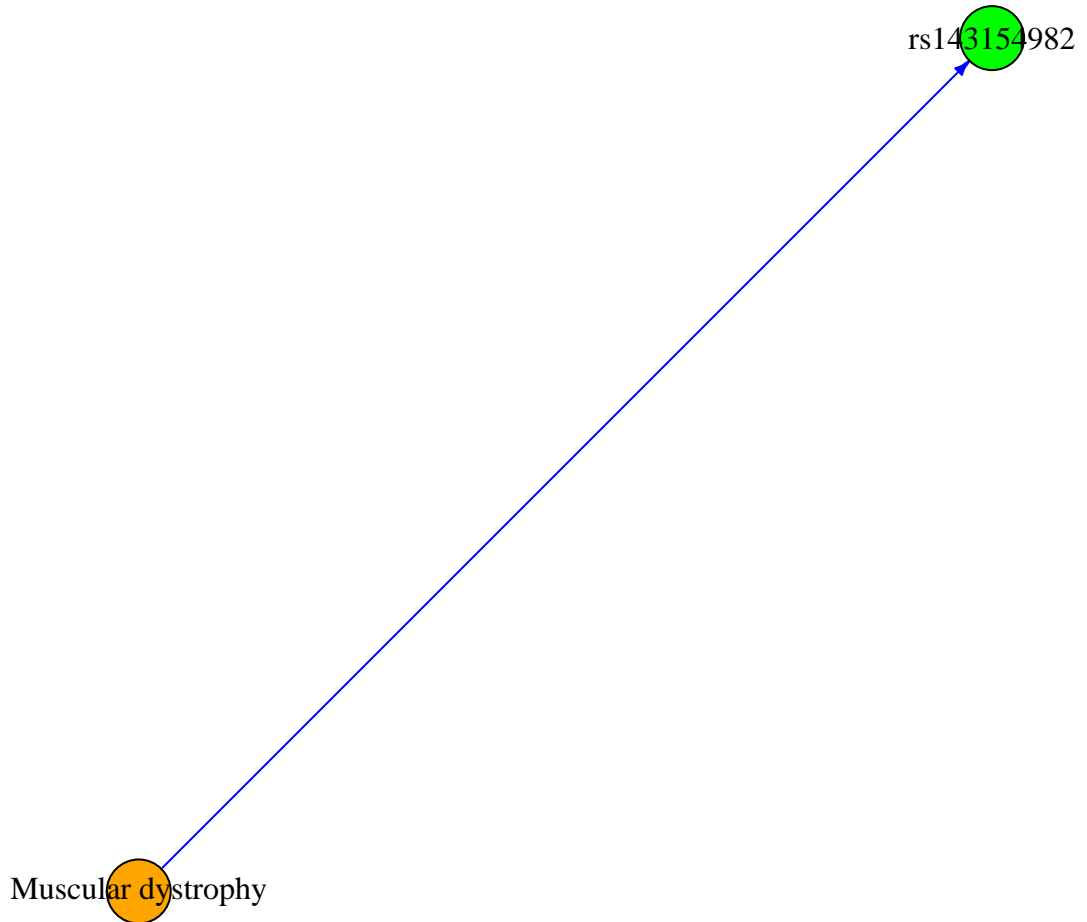

# e Network (Muscular dystrophy–dystroglycanopathy (congenital with brain a

rs367603470

Muscular dystrophy–dystroglycanopathy (congenital with



Variant–Disease Network (MUTYH–associated polyposis)

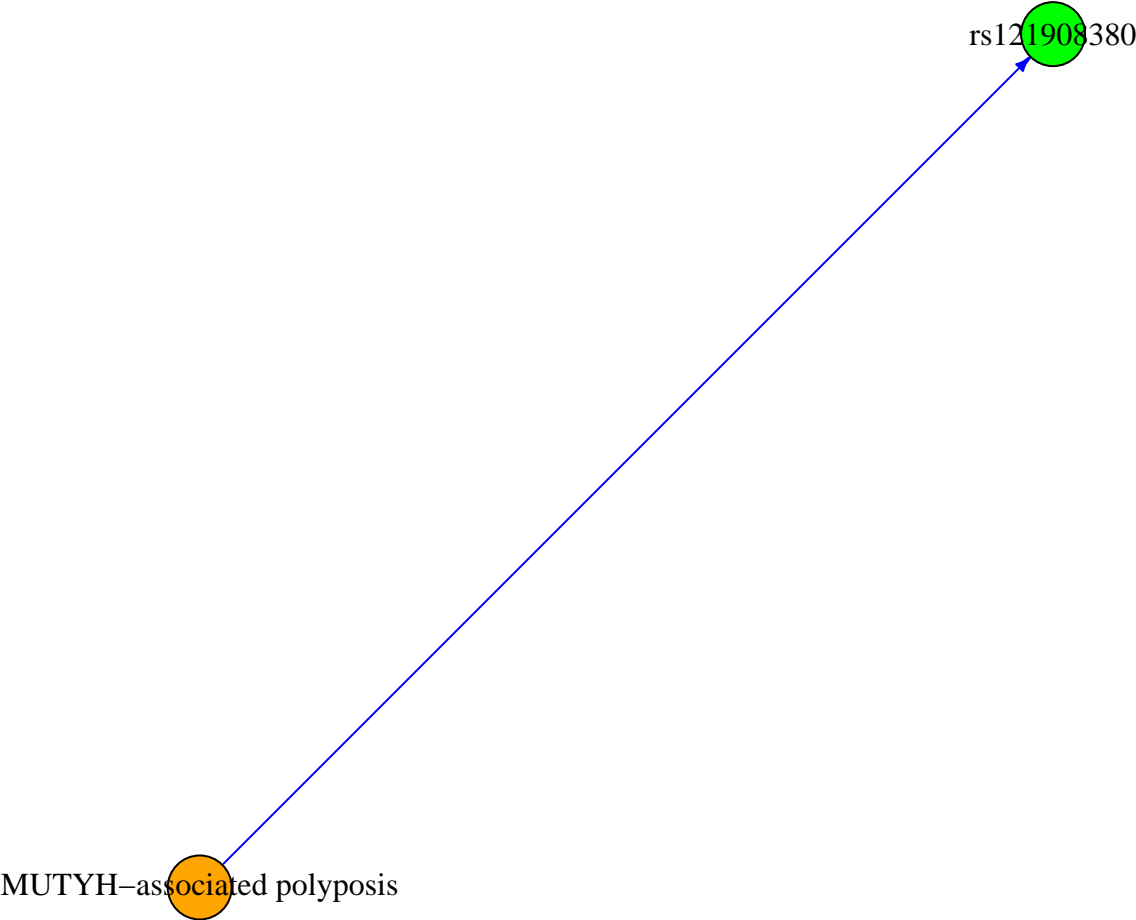

## Variant–Disease Network (MYH-associated polyposis)

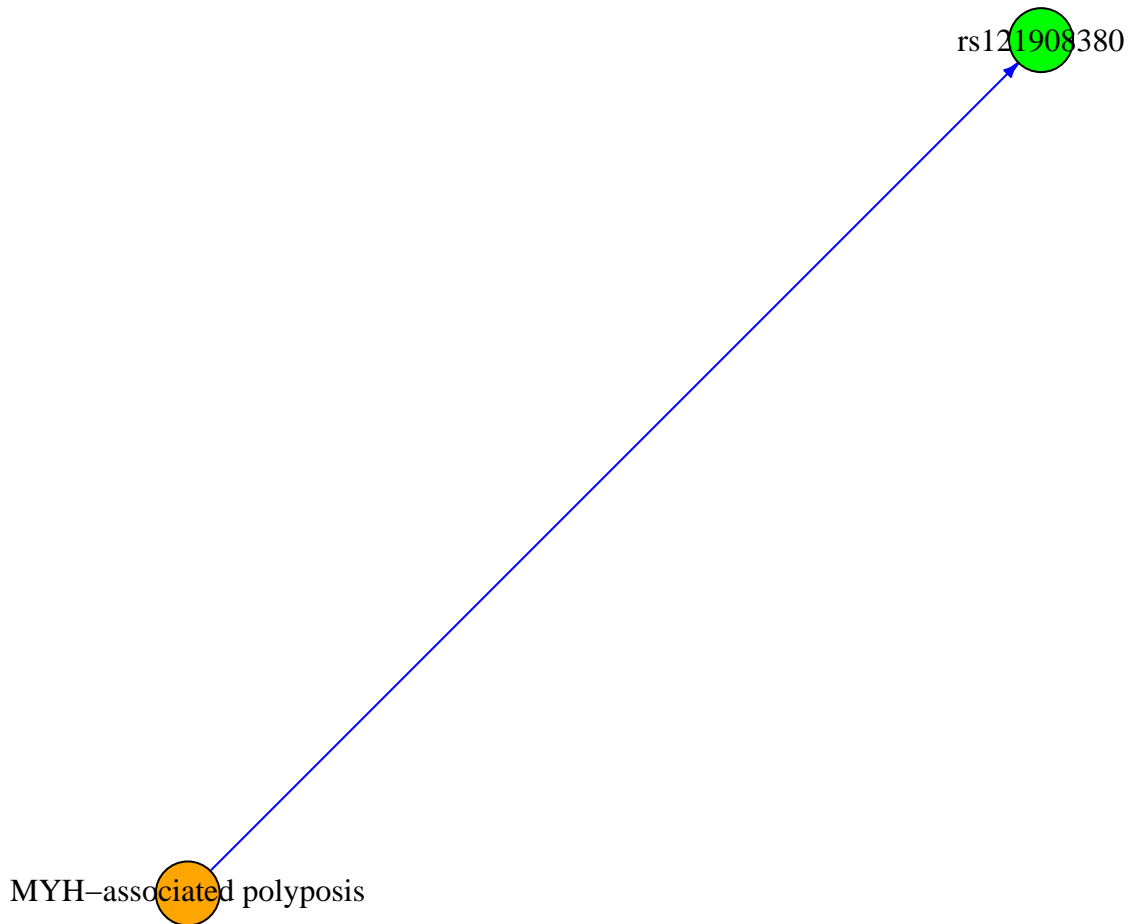

## Variant–Disease Network (Myofibrillar myopathy)

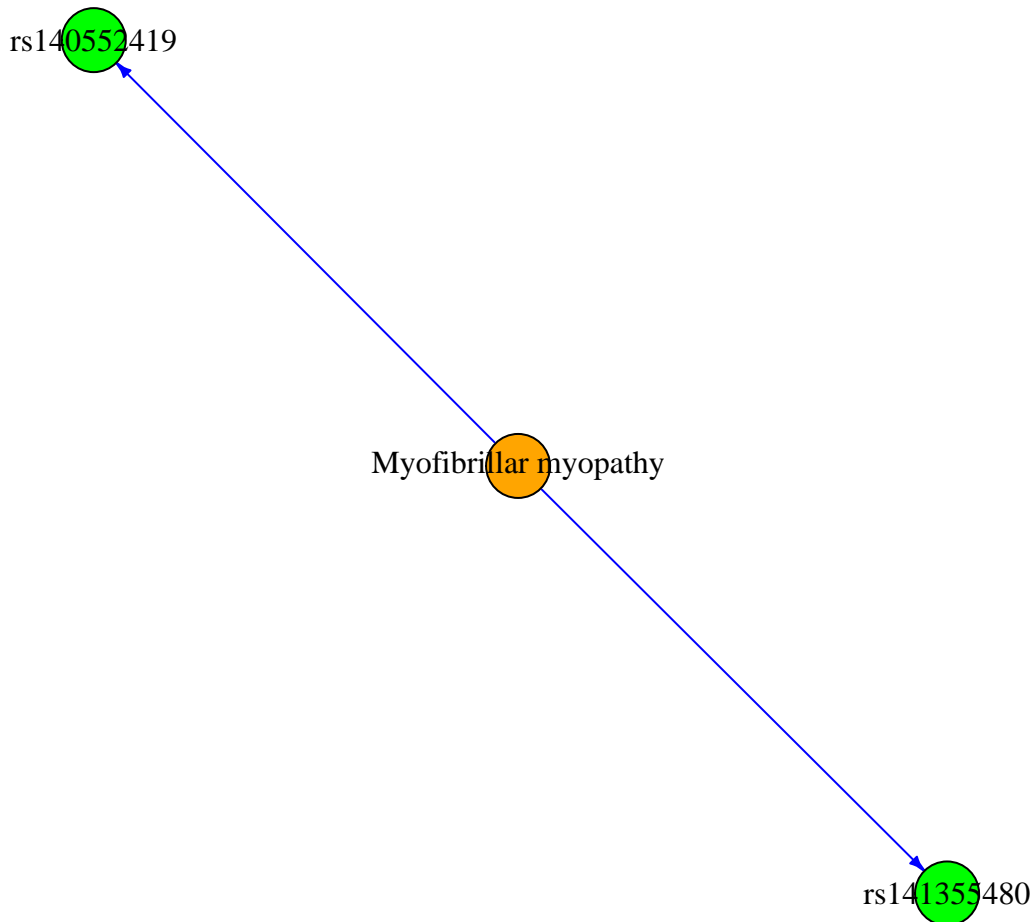

Variant–Disease Network (Myofibrillar myopathy 1)

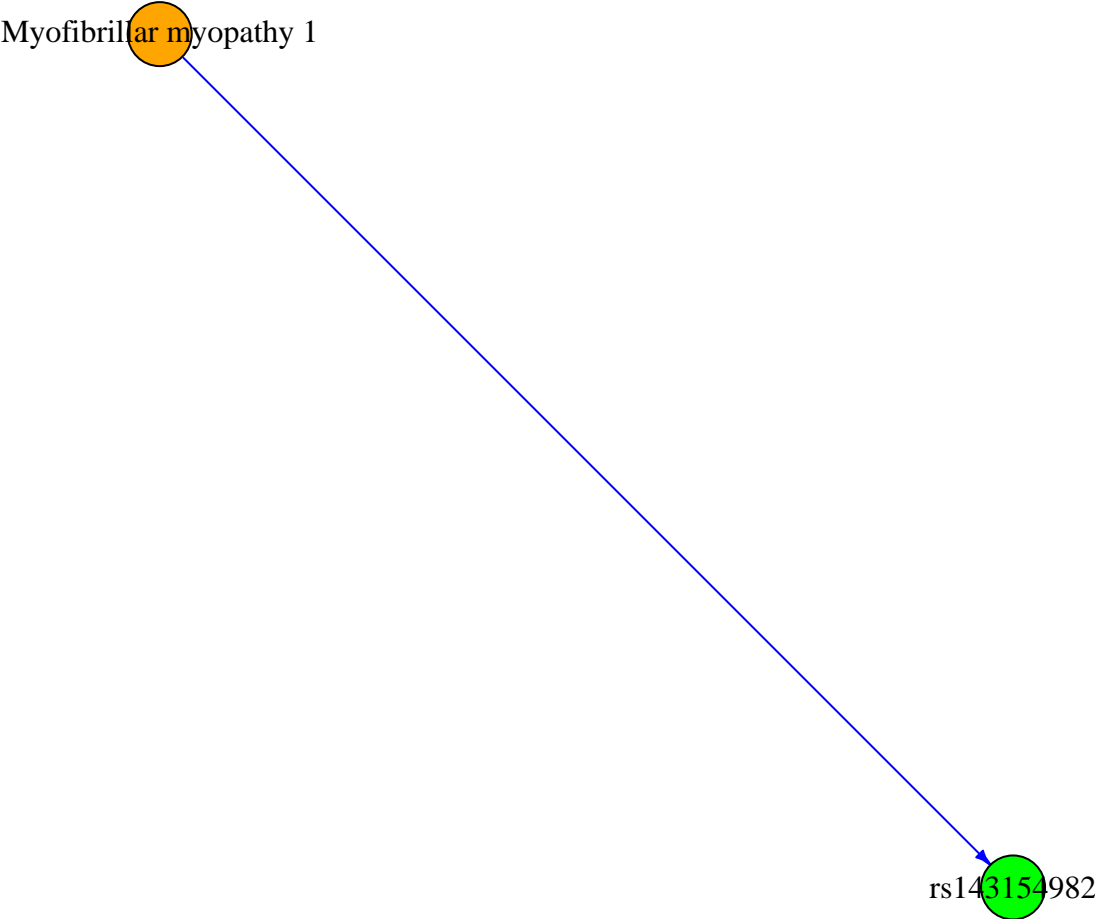



# Variant–Disease Network (Myostatin–related muscle hypertrophy)

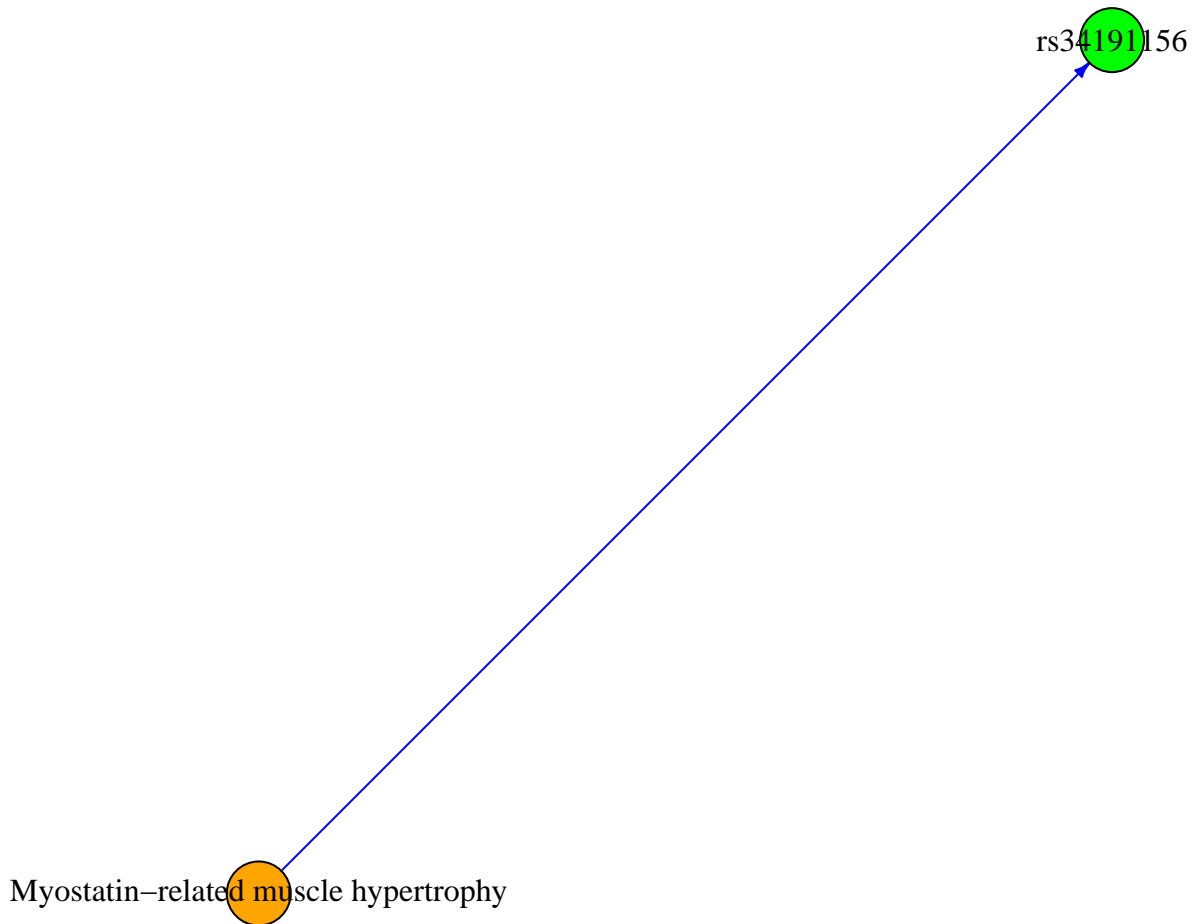

## Variant–Disease Network (Nager syndrome)

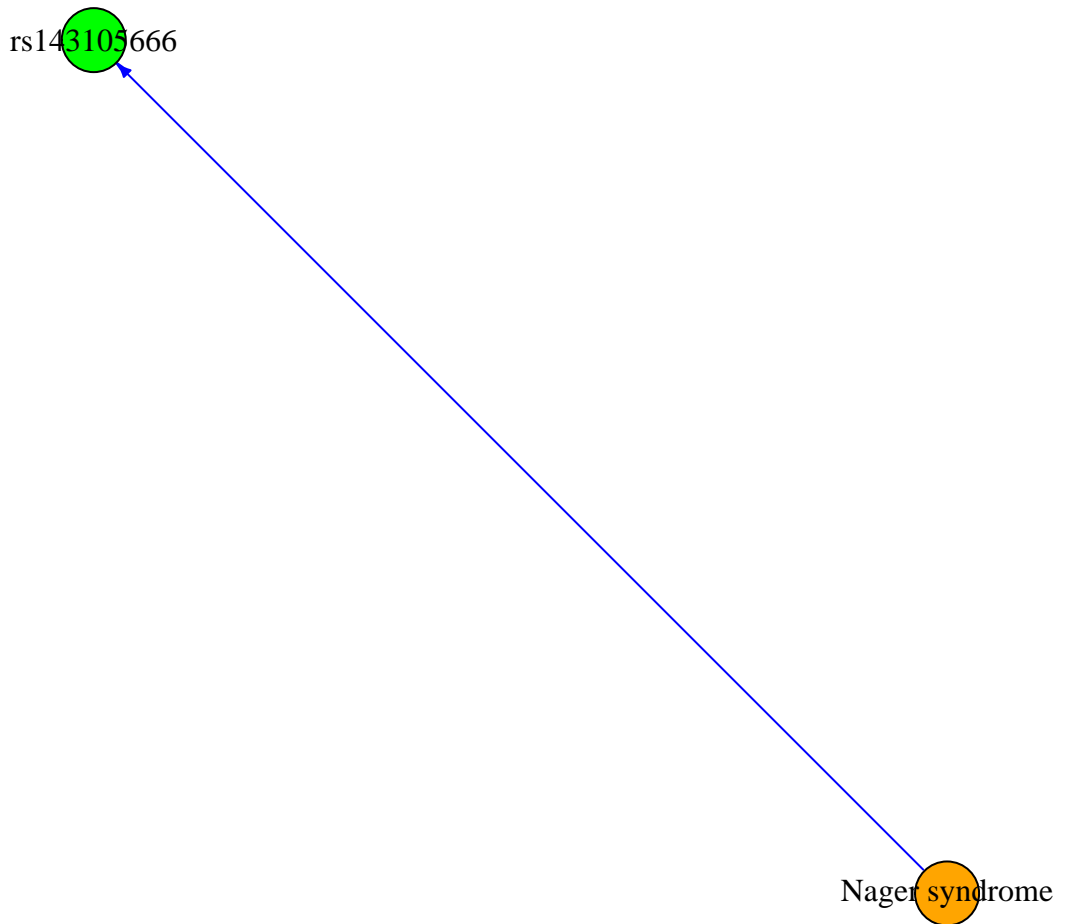

Variant–Disease Network (Naxos disease)

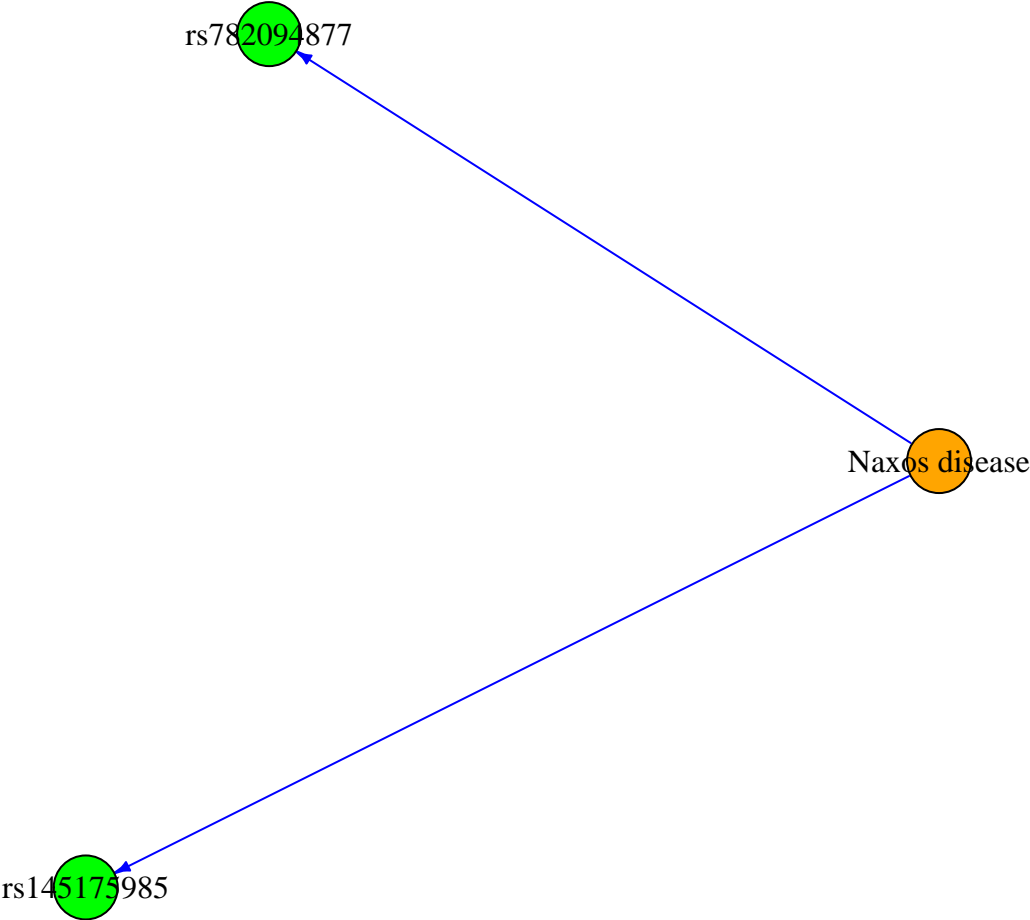

## Variant–Disease Network (Nemaline myopathy 8)

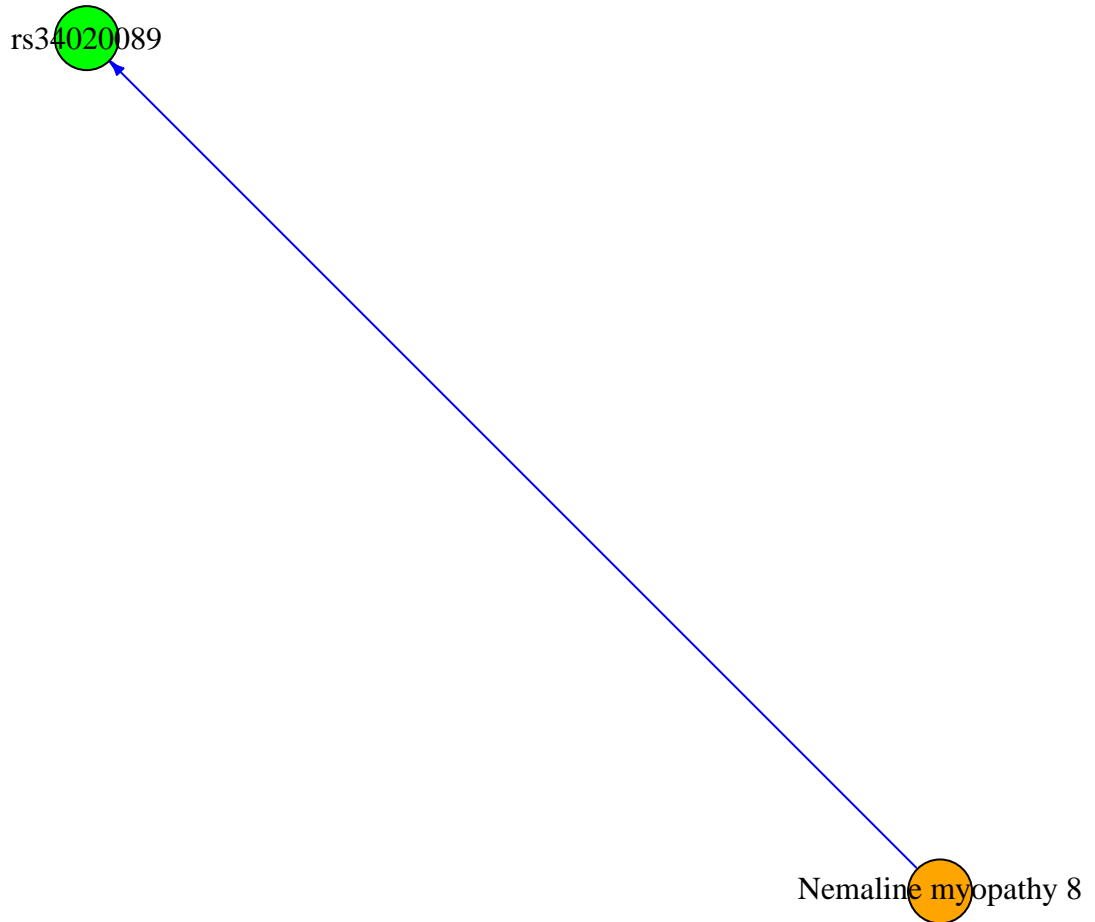

# ant-Disease Network (Neonatal intrahepatic cholestasis caused by citrin deficiency)

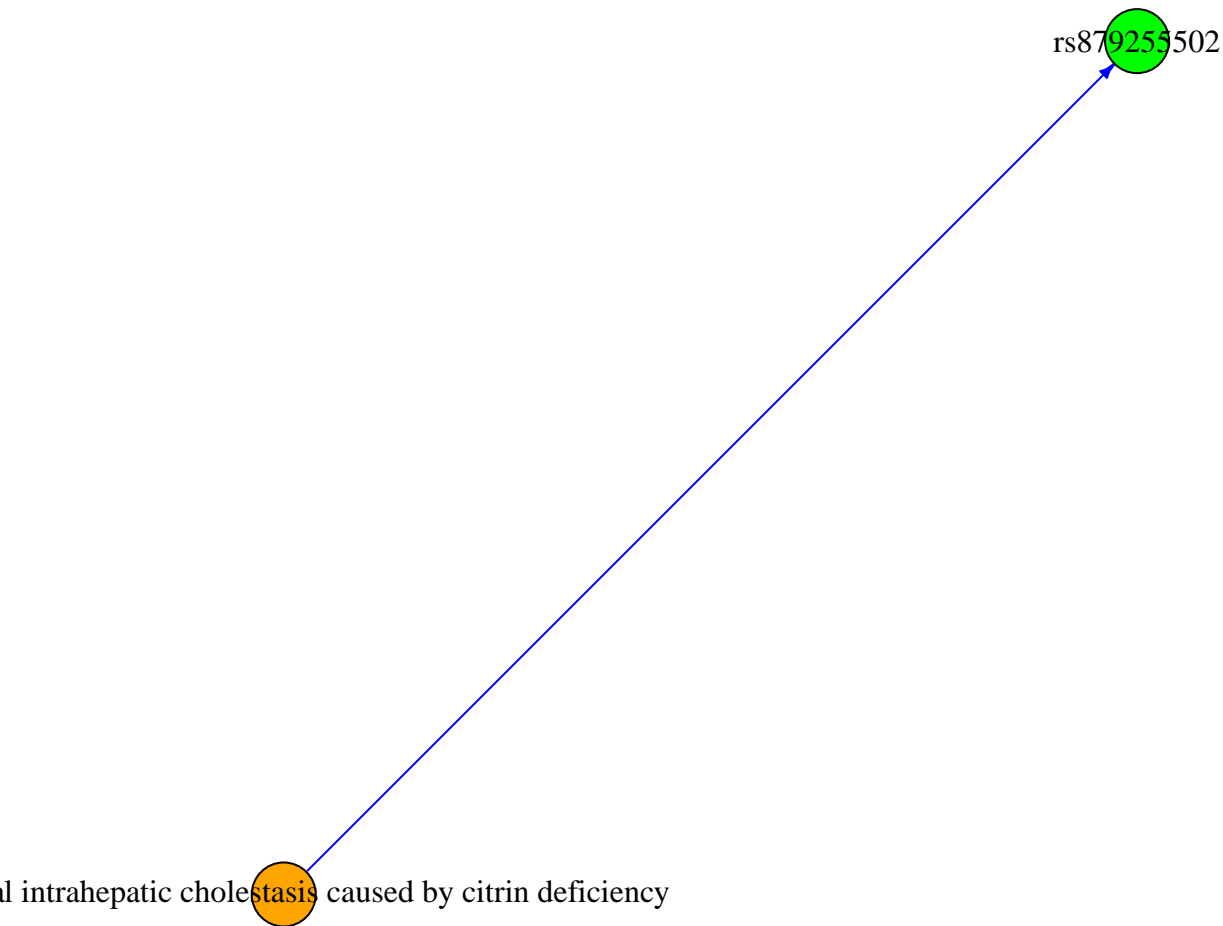

## Variant–Disease Network (Neoplasm of ovary)

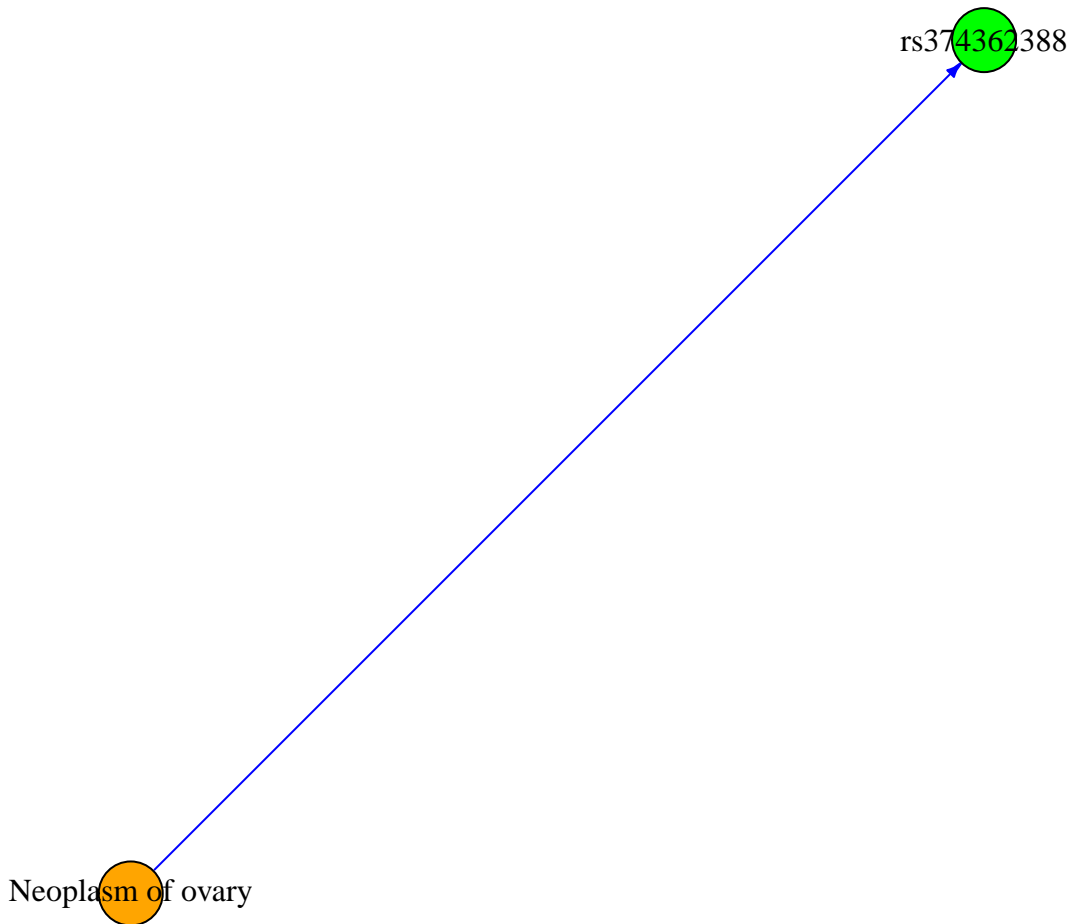

## Variant–Disease Network (Neoplasm of stomach)

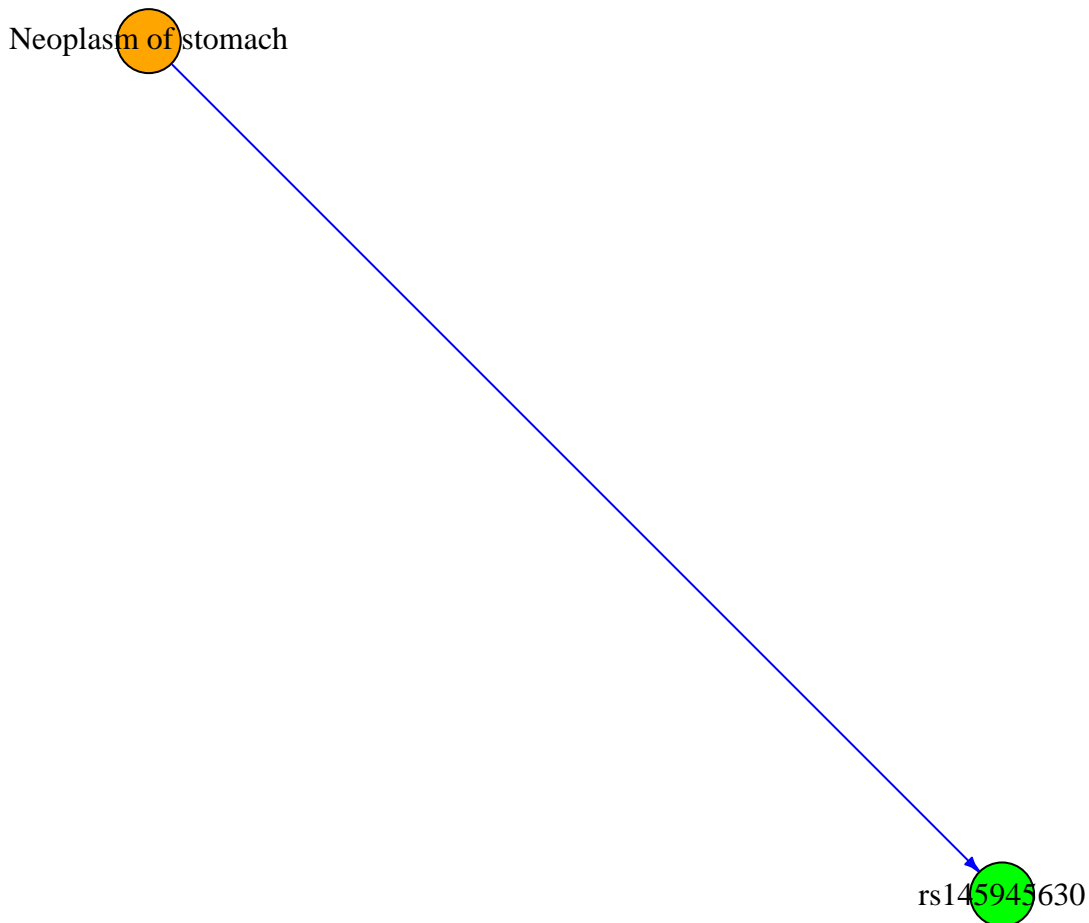

## Variant–Disease Network (Nephronophthisis)

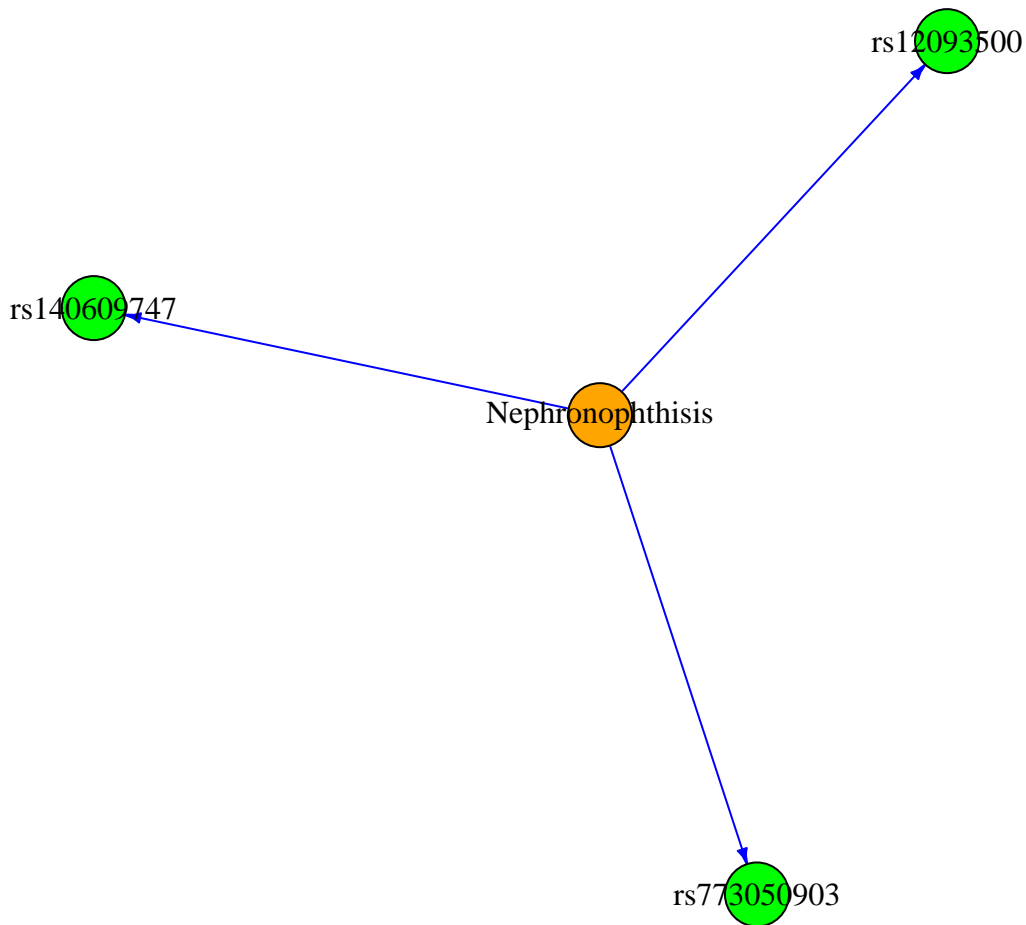



Variant–Disease Network (Nephrotic syndrome)

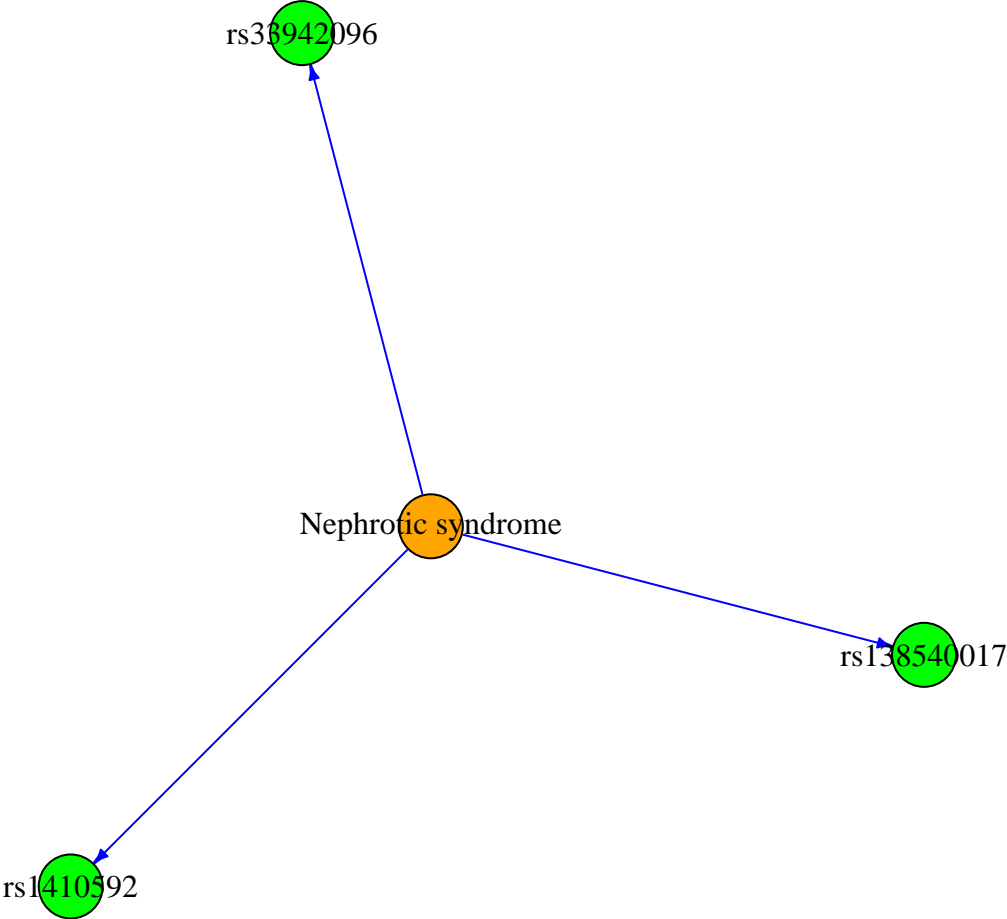

## Variant–Disease Network (Neural tube defect)

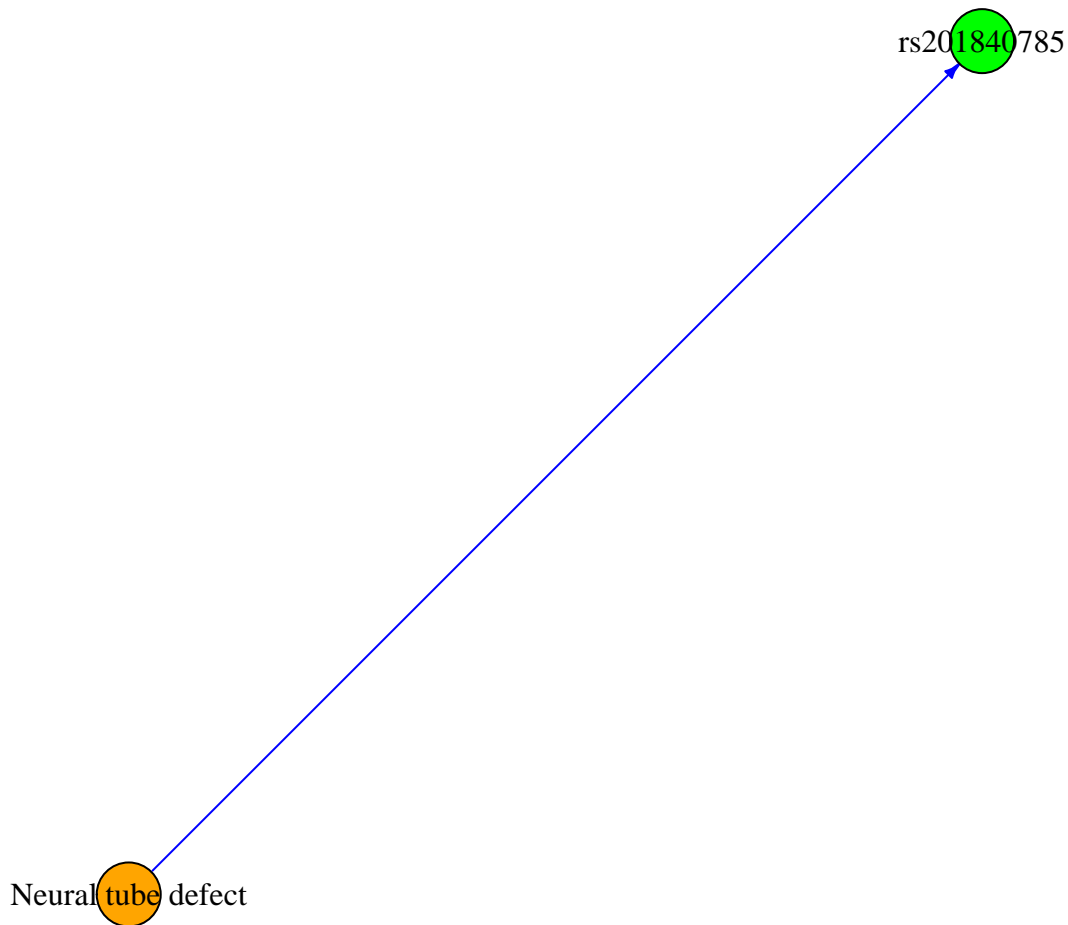

## Variant–Disease Network (Neural tube defects)

Neural tube defects

rs4846051

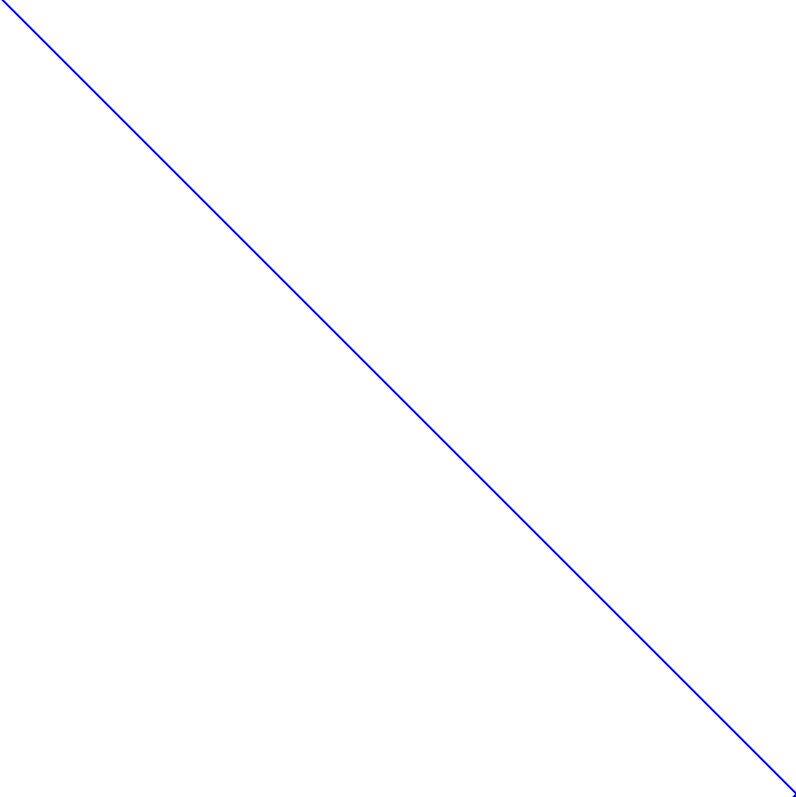

## Variant-Disease Network (Neuroblastoma)

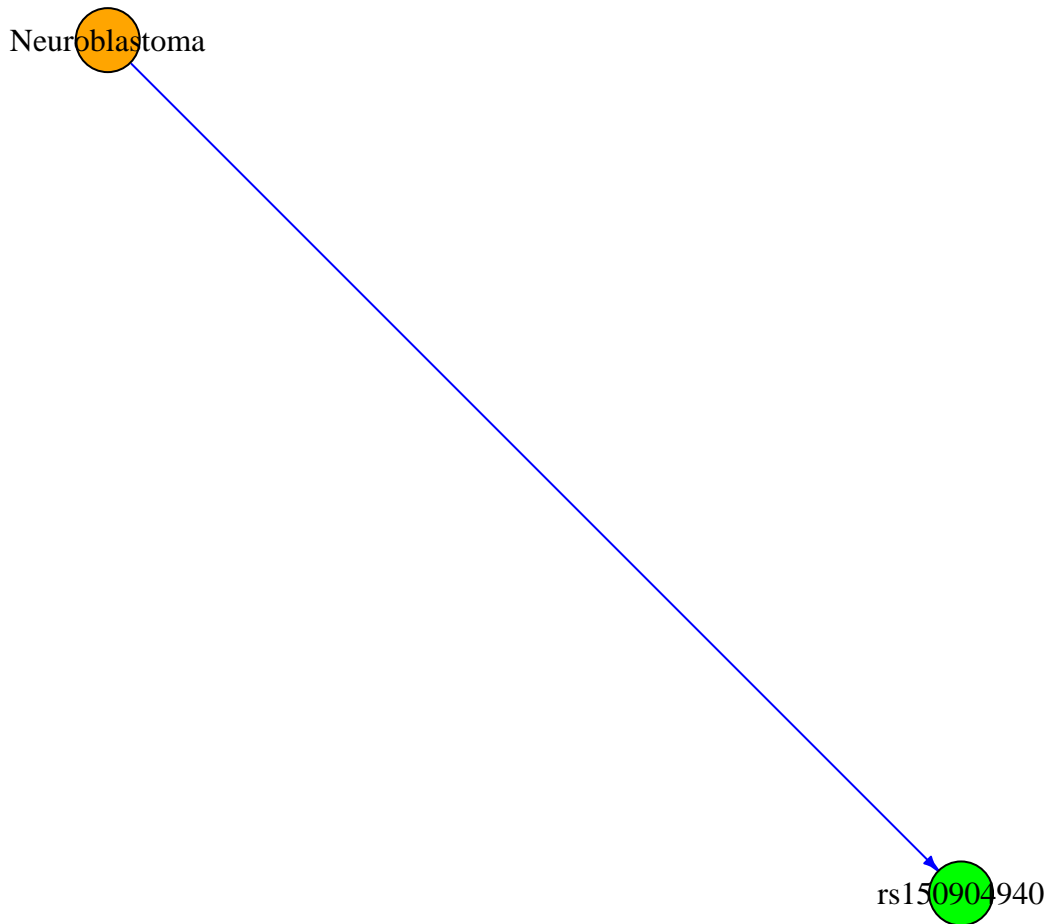

## Variant-Disease Network (Neuroblastoma 3)

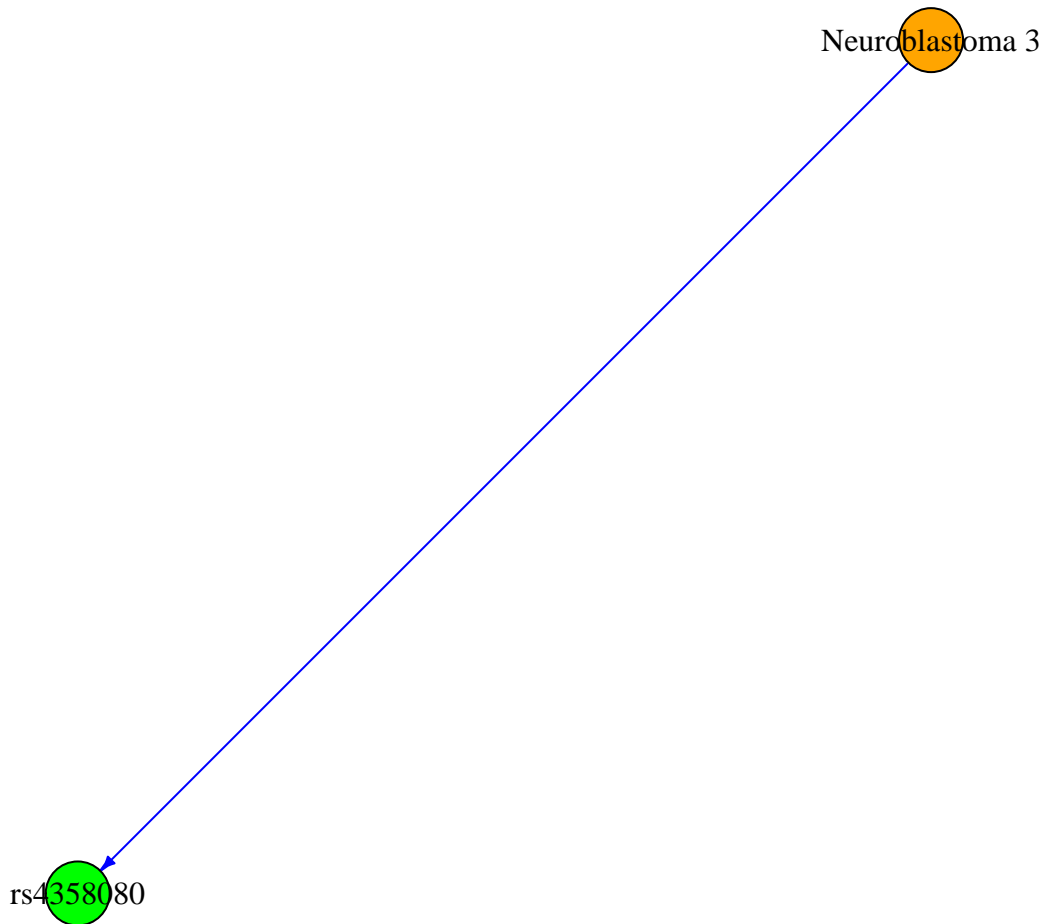

Variant–Disease Network (Neuroblastoma Susceptibility)

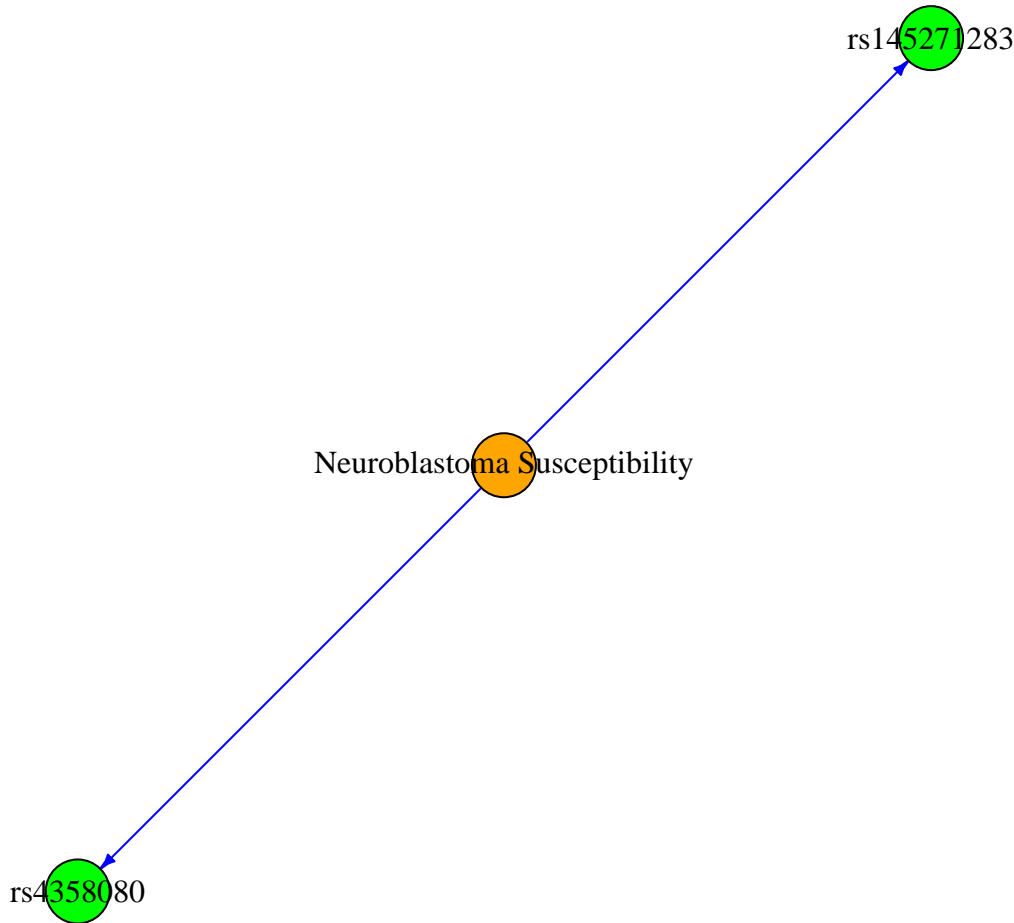

# e Network (Neurodevelopmental disorder with or without hyperkinetic movement disorder)

rs146086141

Neurodevelopmental disorder with or without hyperkinetic movement disorder

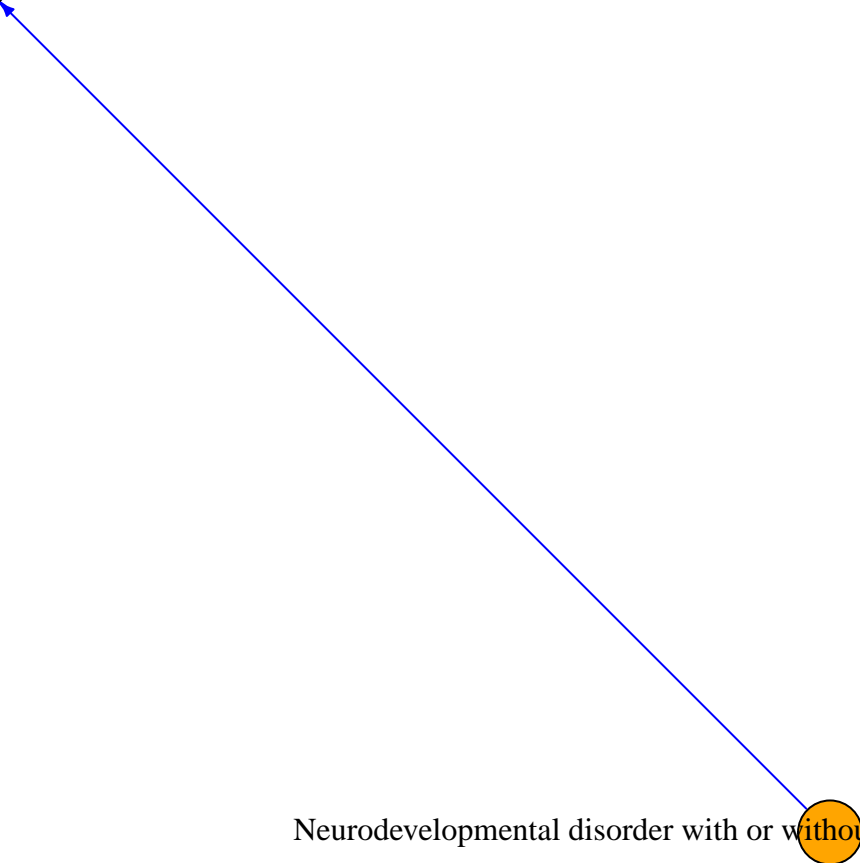

## Variant–Disease Network (Neurofibromatosis)

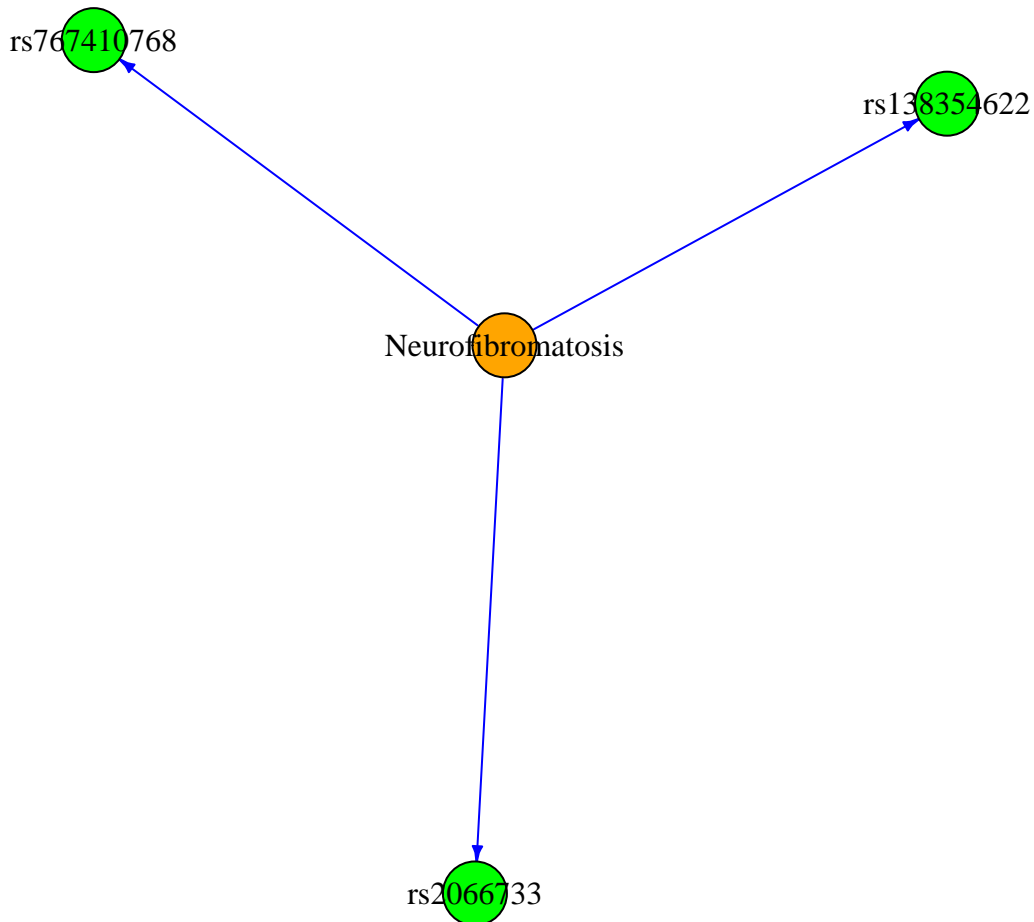



**Variant–Disease Network (Nijmegen breakage syndrome–like disorder)**

rs34147298

Nijmegen breakage syndrome–like disorder

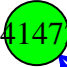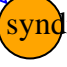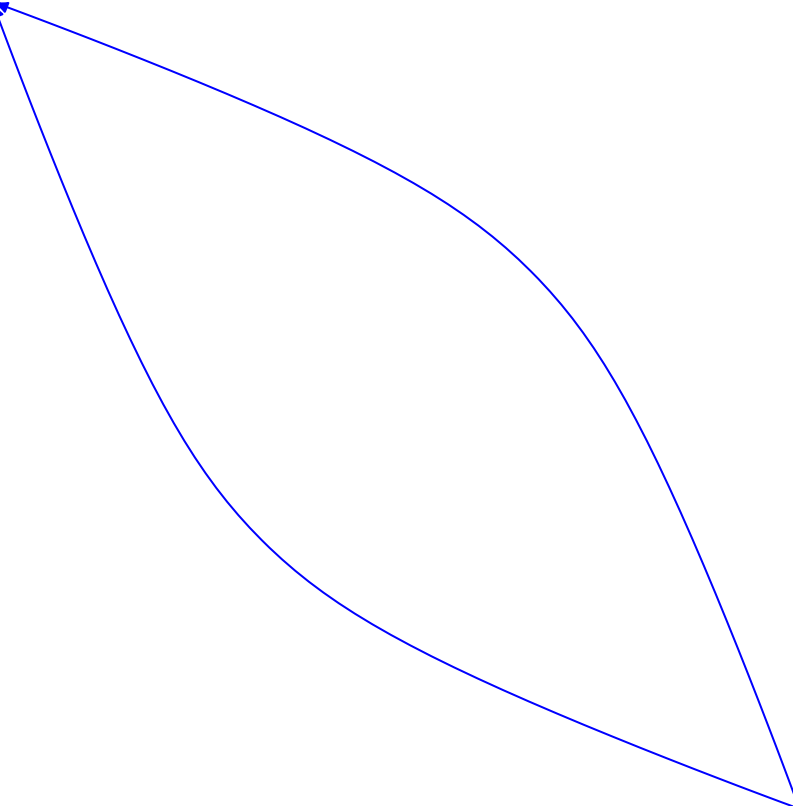

## Variant–Disease Network (Nocturnal frontal lobe epilepsy)

rs2472553

Nocturnal frontal lobe epilepsy

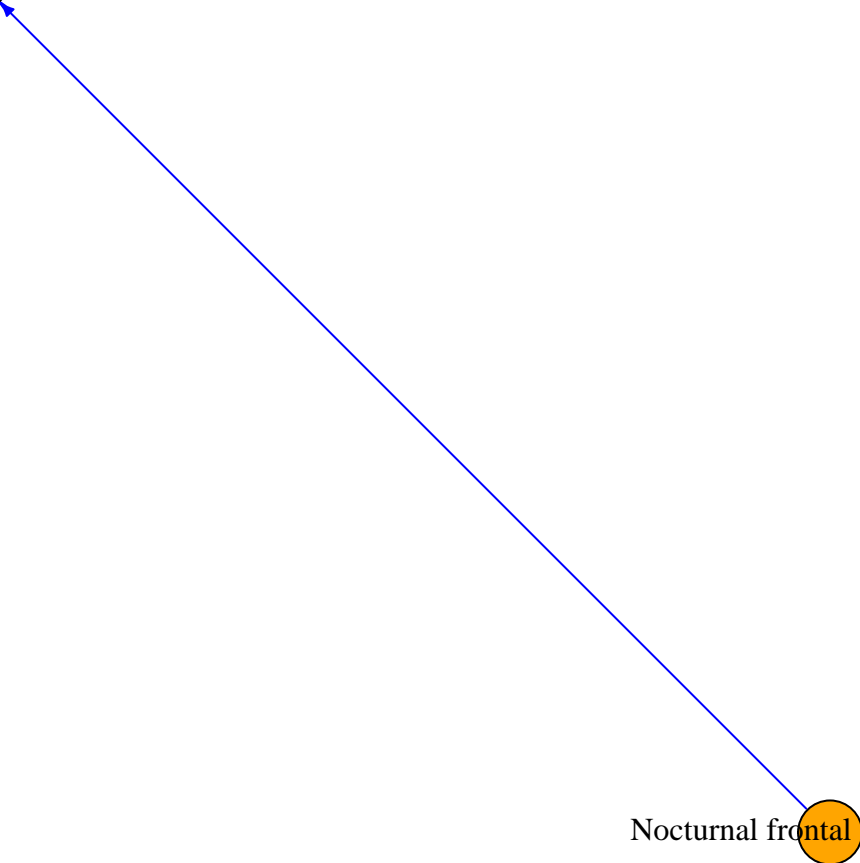

**Variant–Disease Network (Nonepidermolytic palmoplantar keratoderma)**

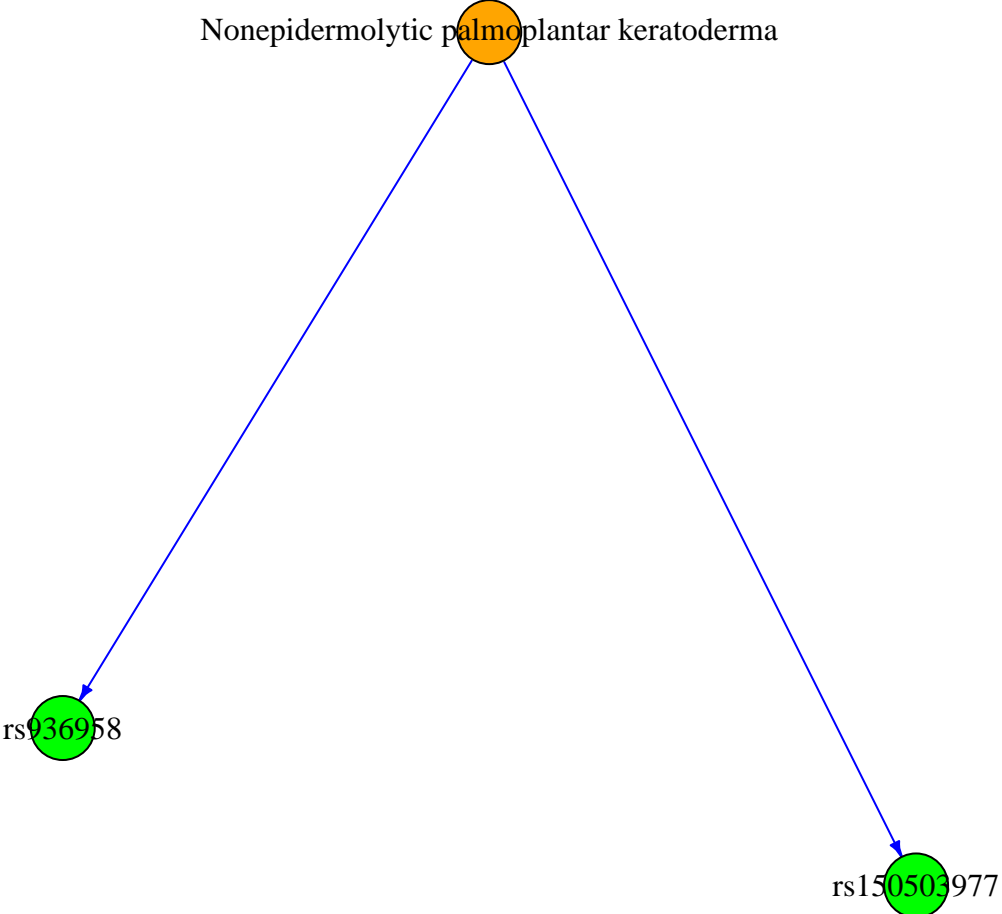

# Variant–Disease Network (Non–ketotic hyperglycinemia)

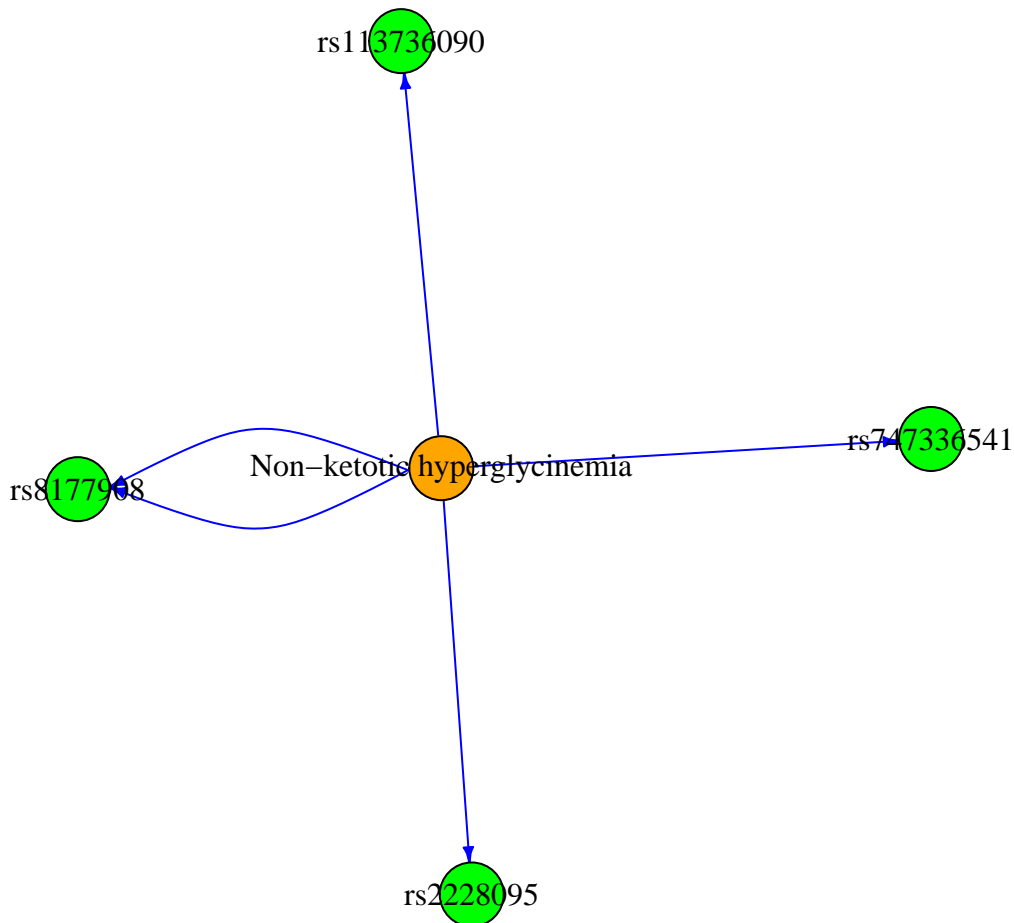

# Variant–Disease Network (Nonsyndromic Hearing Loss)

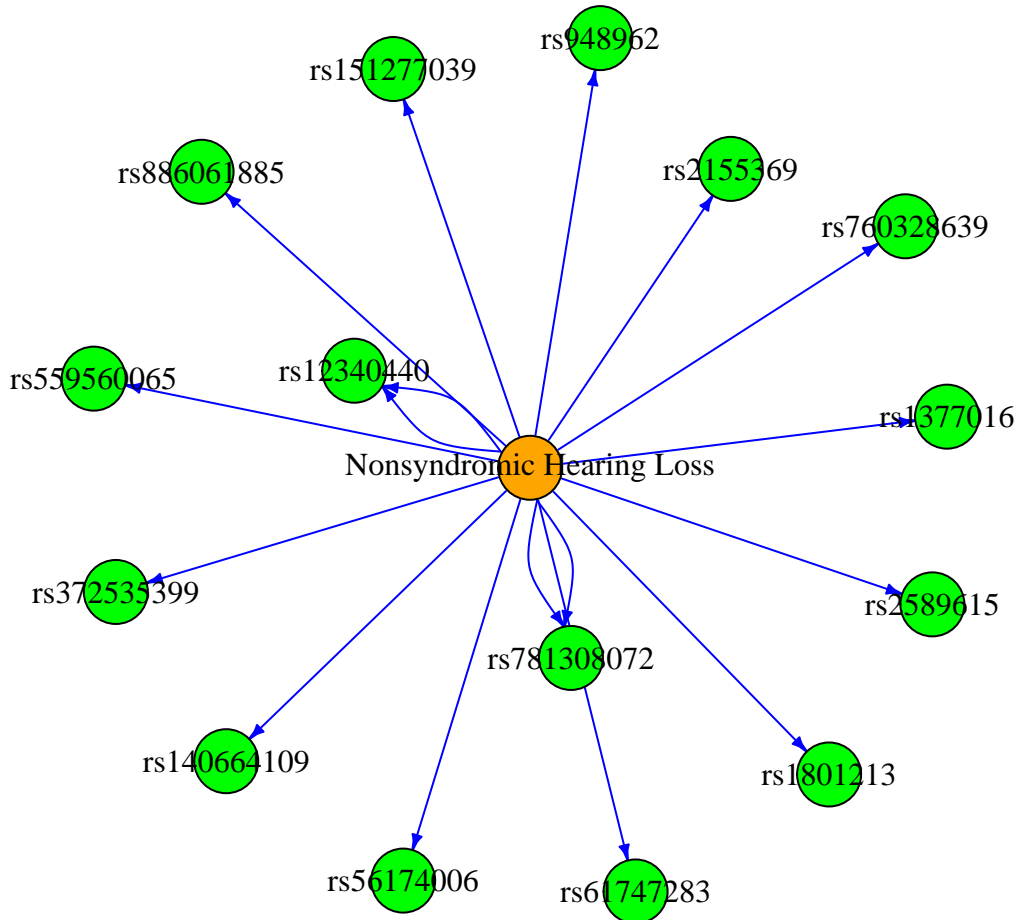

Variant–Disease Network (Non–syndromic X–linked intellectual disability)

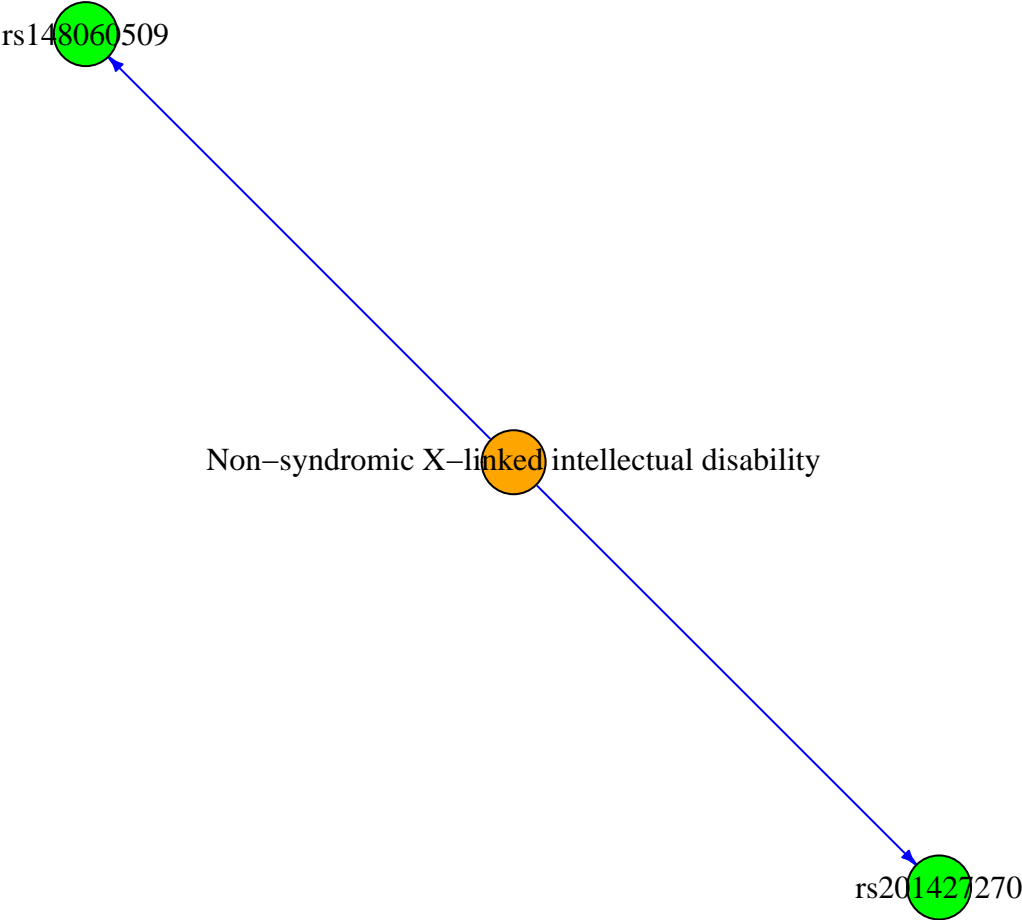

## Variant–Disease Network (Noonan syndrome)

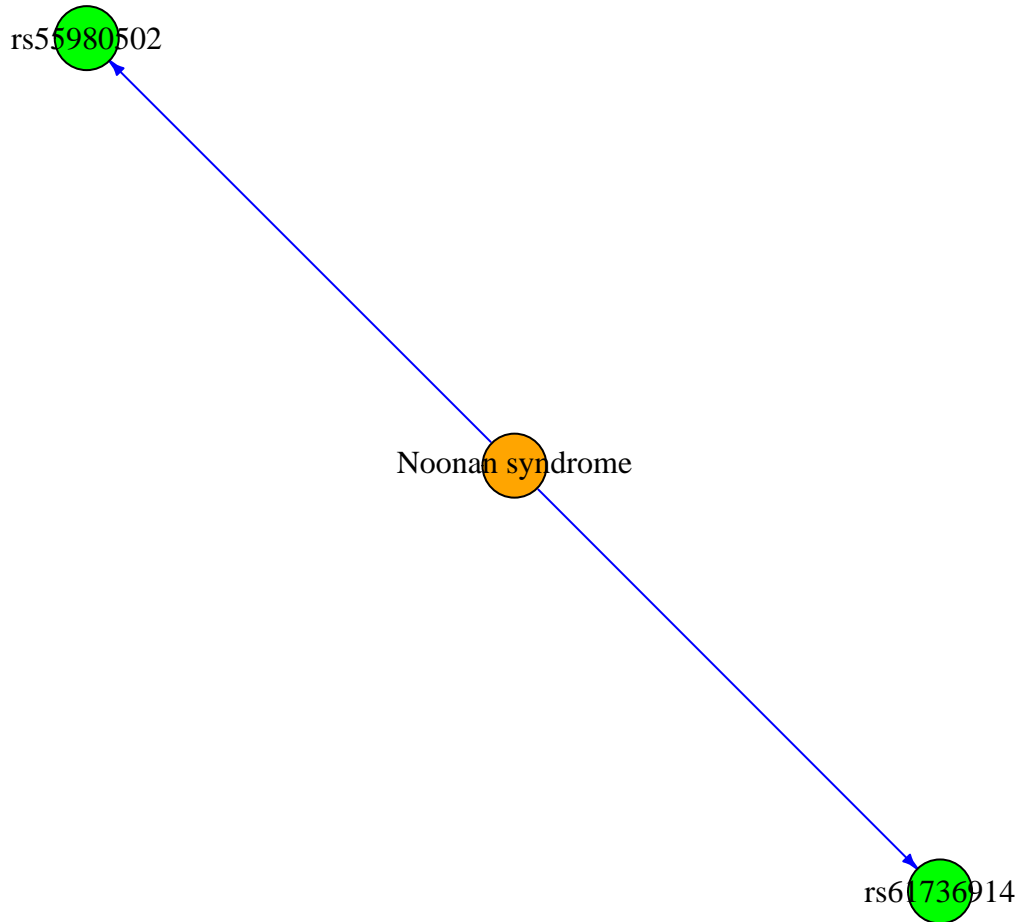

Variant–Disease Network (Noonan syndrome with multiple lentigines)

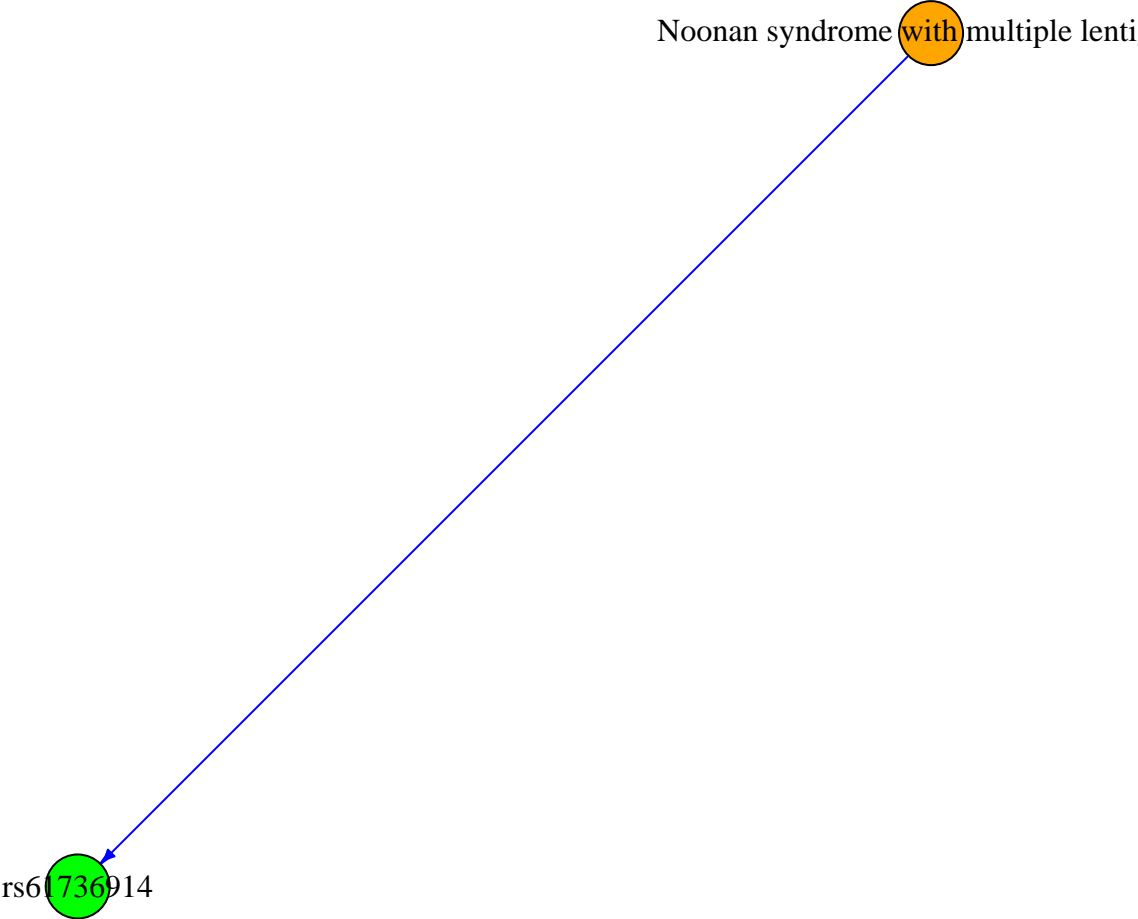



## Variant–Disease Network (Odontoonychodermal dysplasia)

rs143463683

Odontoonychodermal dysplasia



# Variant-Disease Network (Oligodontia-colorectal cancer syndrome)

Oligodontia-colorectal cancer syndrome

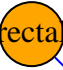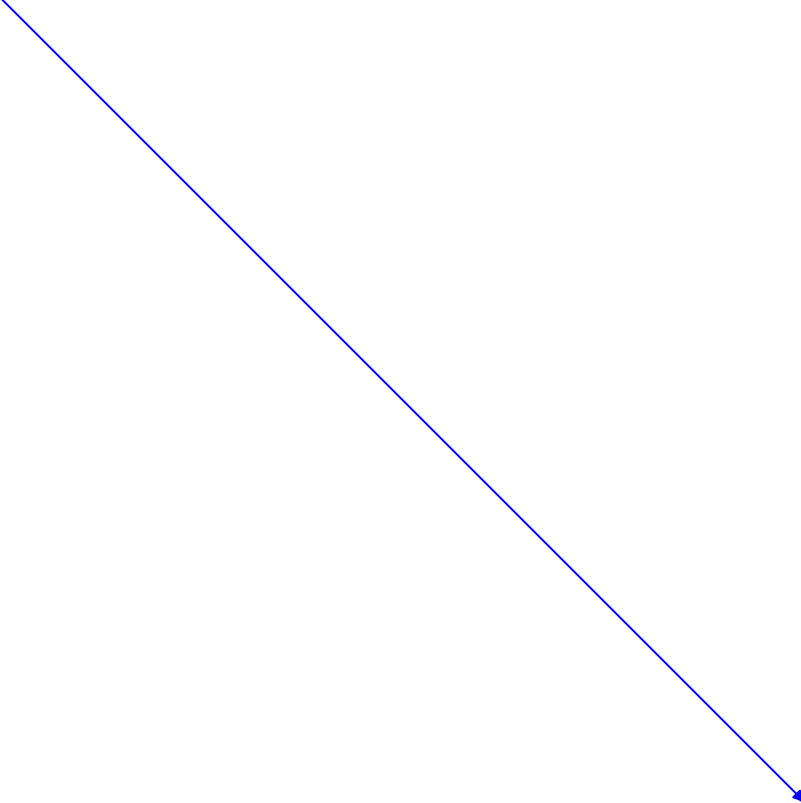

rs377642903

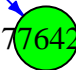

## Variant-Disease Network (Optic Atrophy)

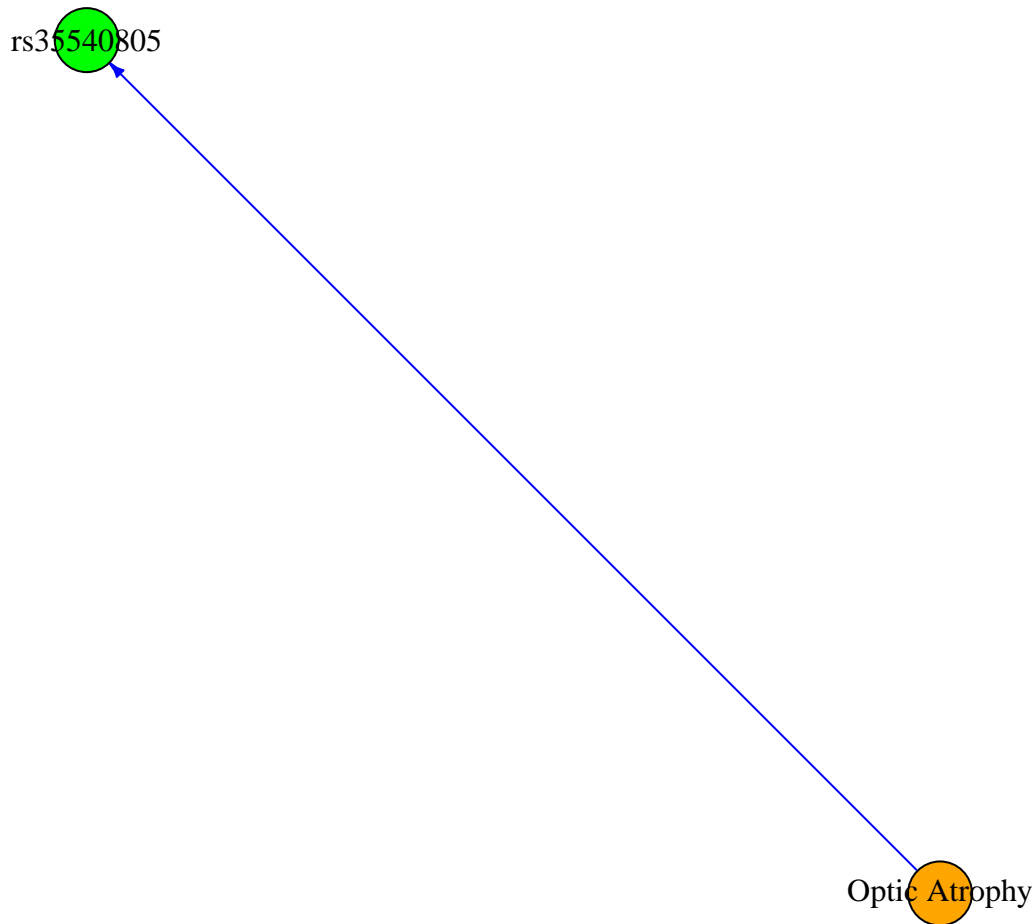

# Variant–Disease Network (Ornithine aminotransferase deficiency)

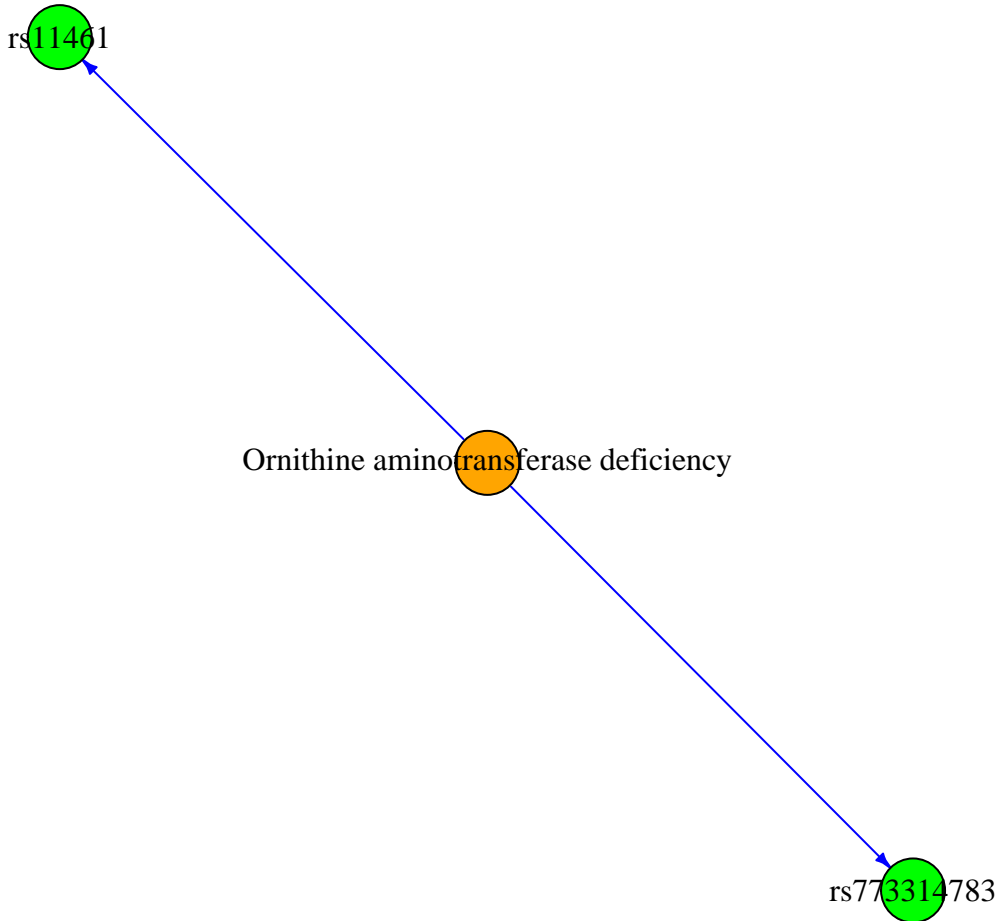

## Variant–Disease Network (Ornithine carbamoyltransferase deficiency)

Ornithine carbamoyltransferase deficiency

rs72558415

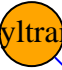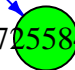

## Variant–Disease Network (Orthostatic hypotension 1)

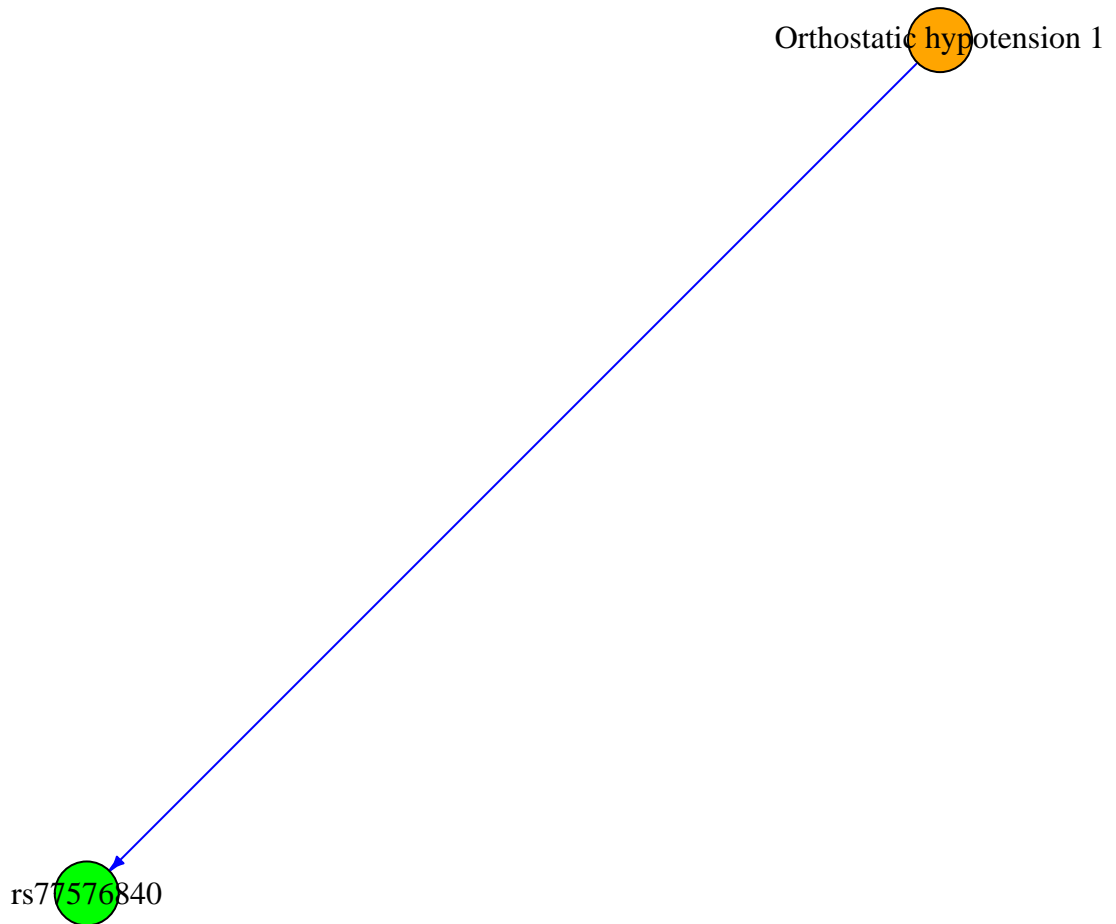

Variant–Disease Network (Osteogenesis Imperfecta)

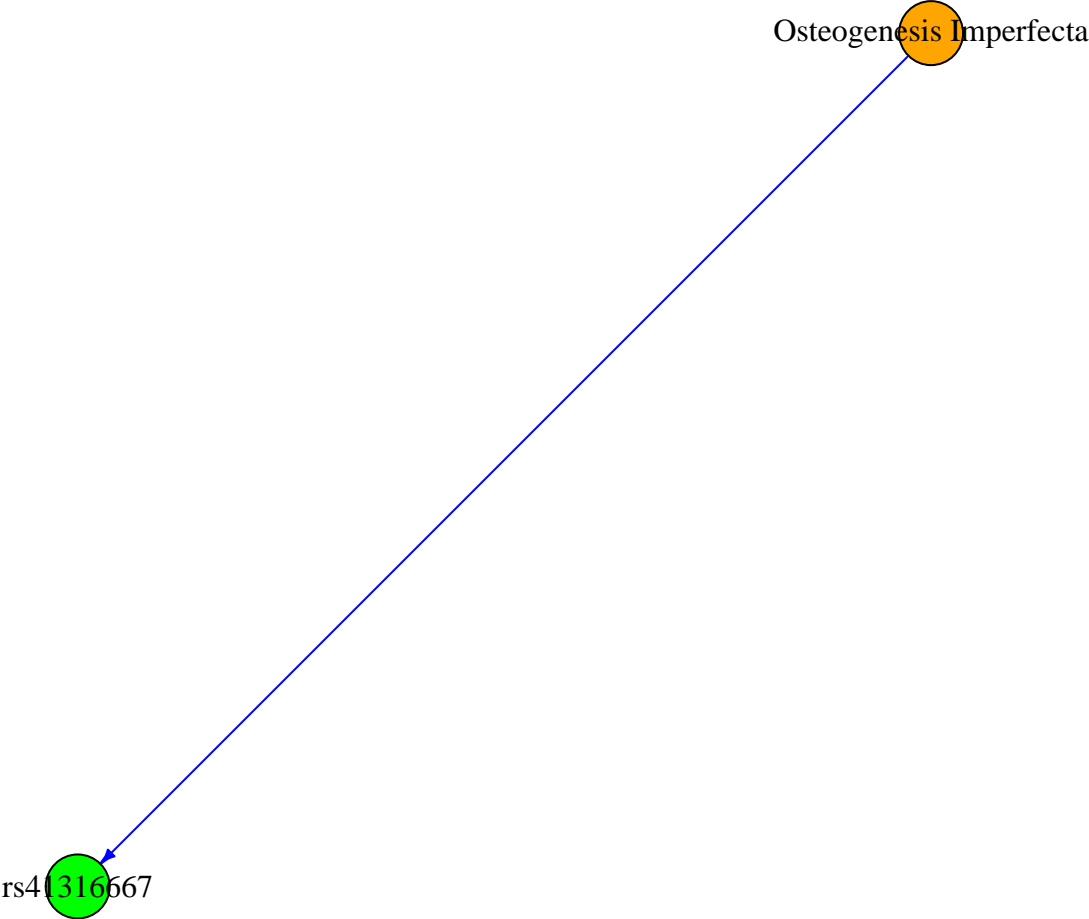

Variant–Disease Network (Osteogenesis imperfecta type I)

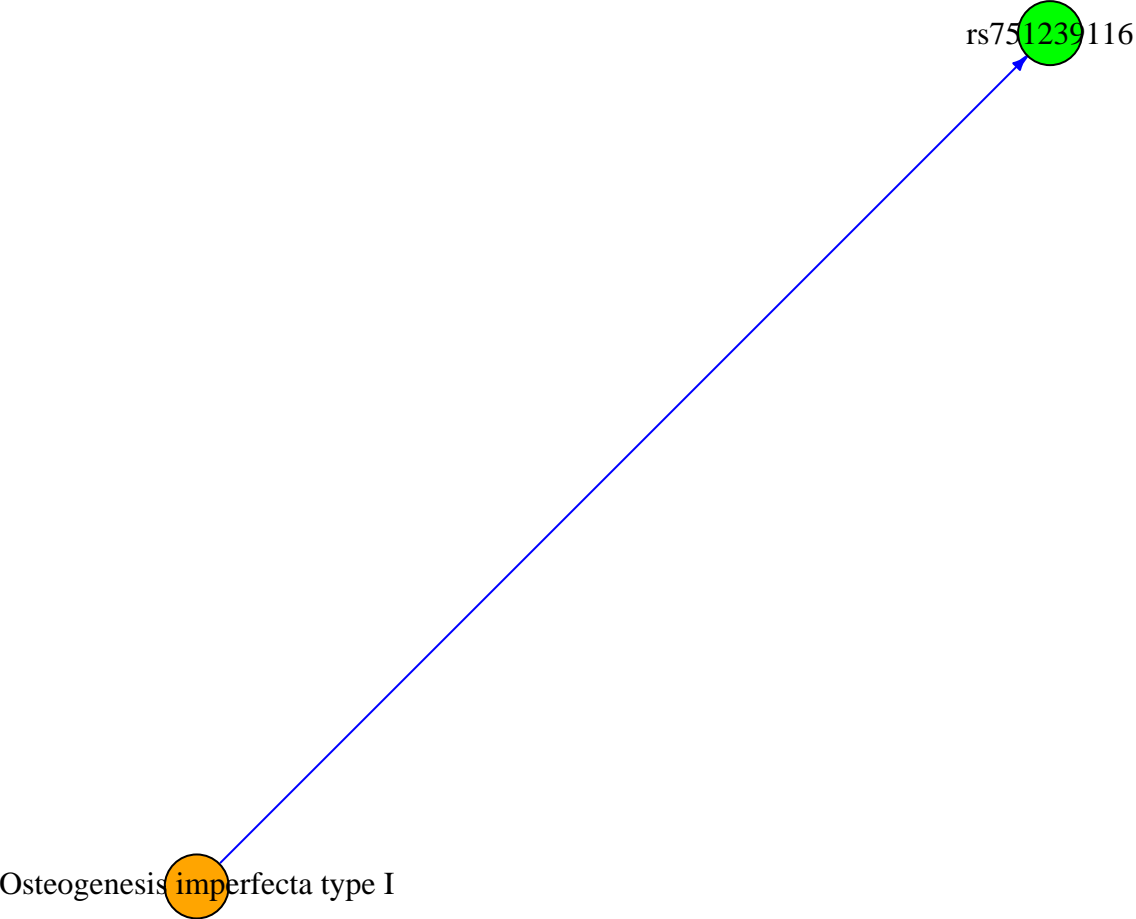



## Variant–Disease Network (Osteopetrosis)

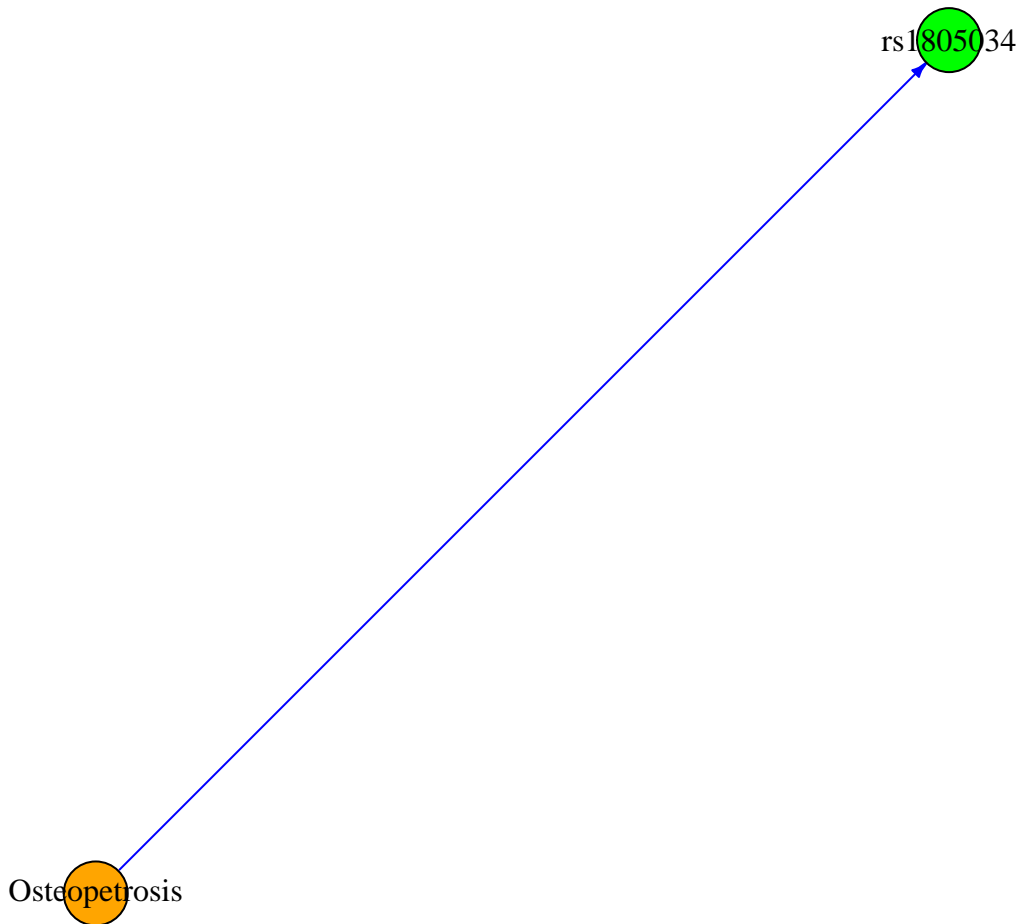

## Variant–Disease Network (Osteopetrosis with renal tubular acidosis)

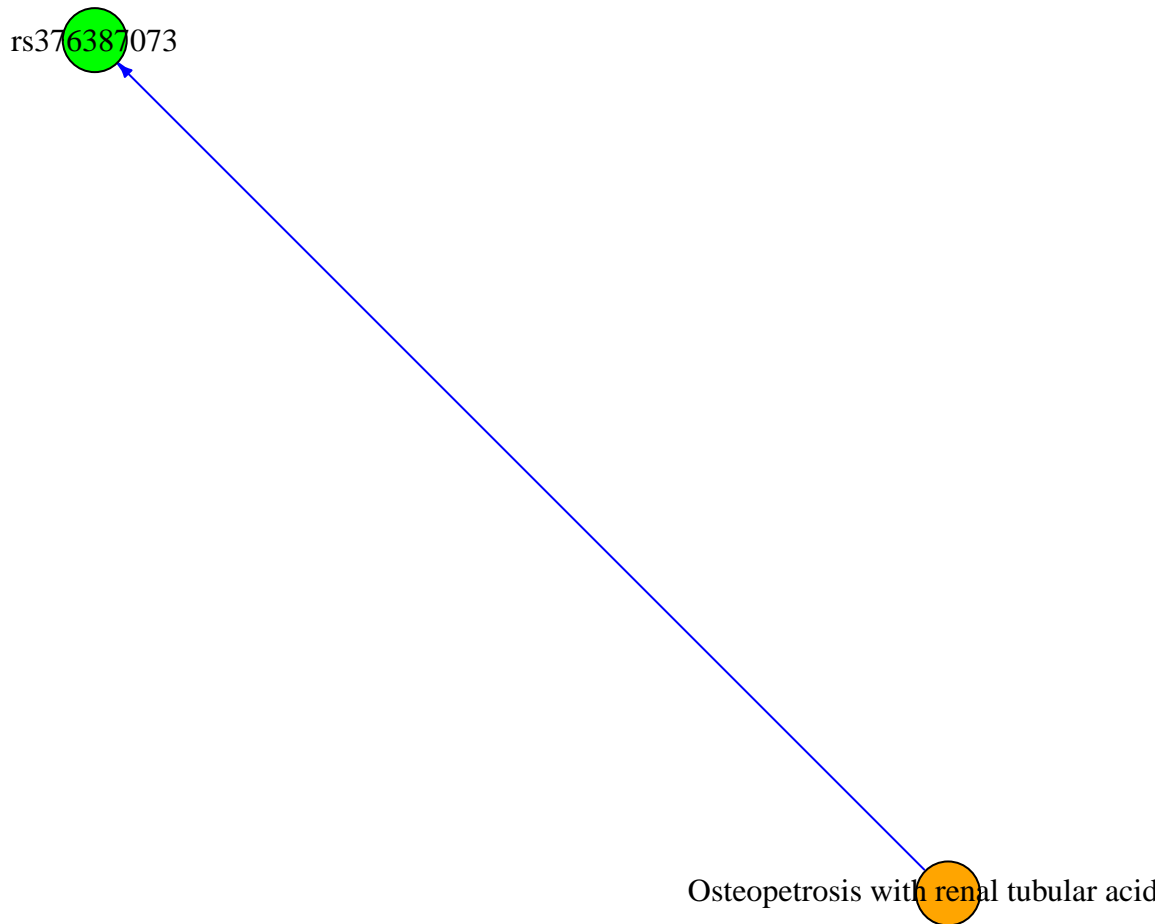

# Variant–Disease Network (Oto–palato–digital syndrome)

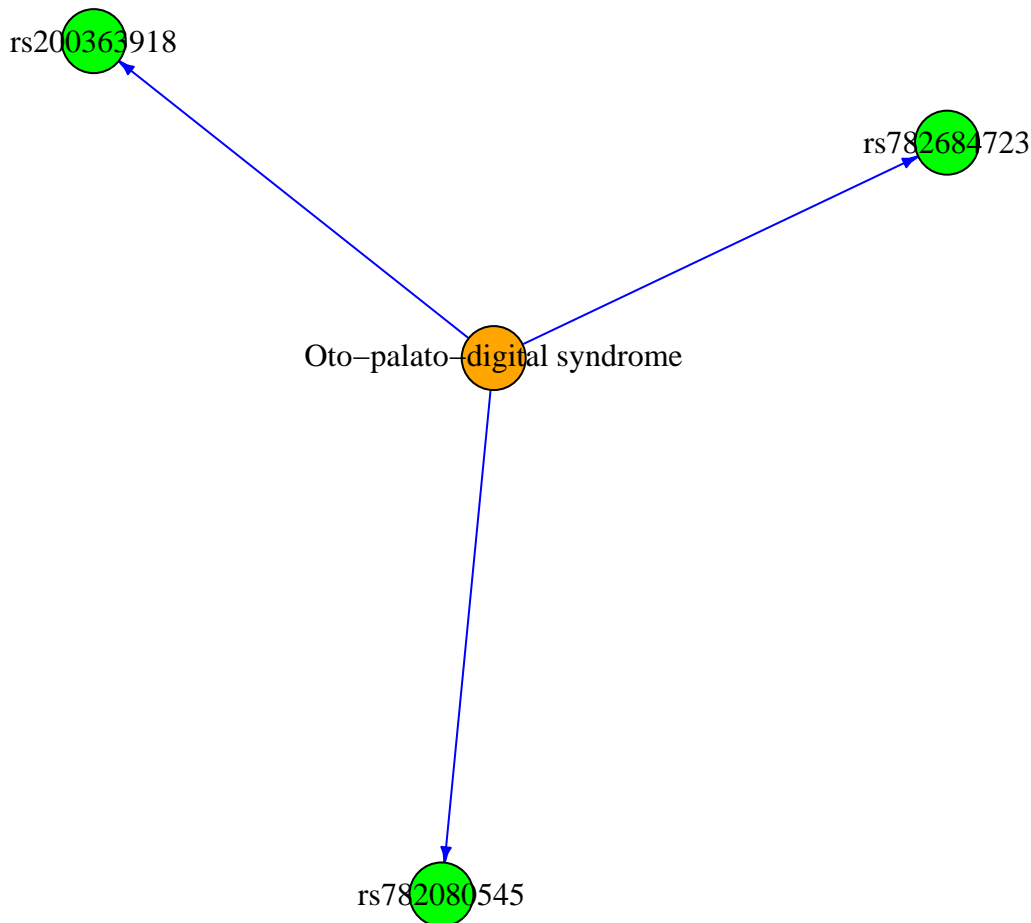

## Variant–Disease Network (Ovarian dysgenesis)

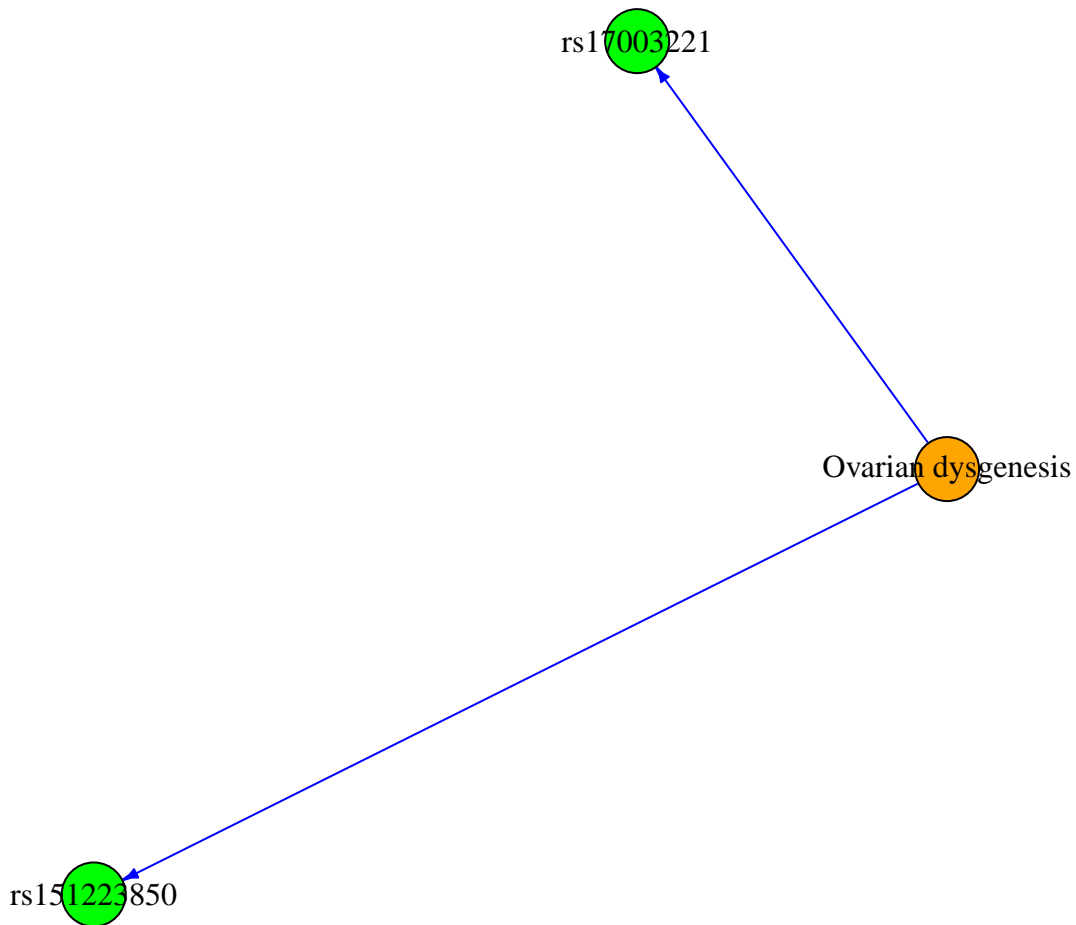

## Variant–Disease Network (Paget disease of bone)

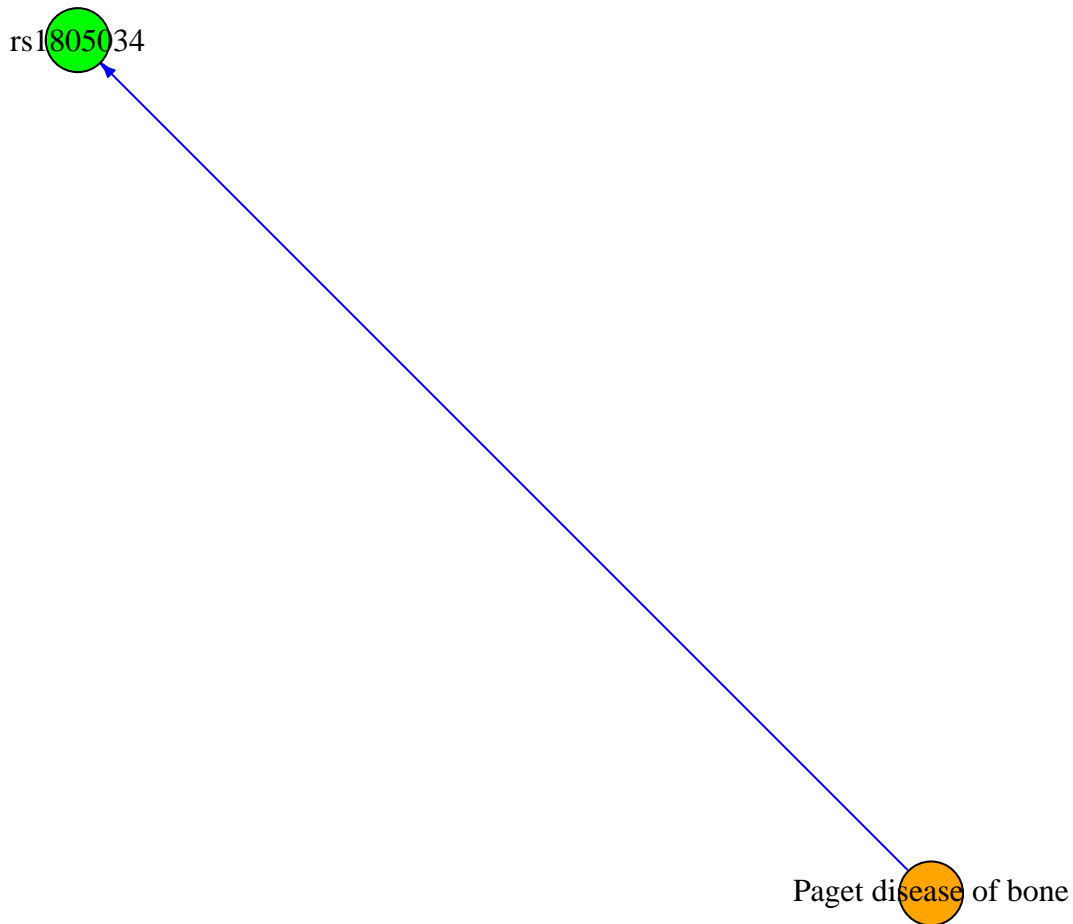

## Variant–Disease Network (Pallister–Hall syndrome)

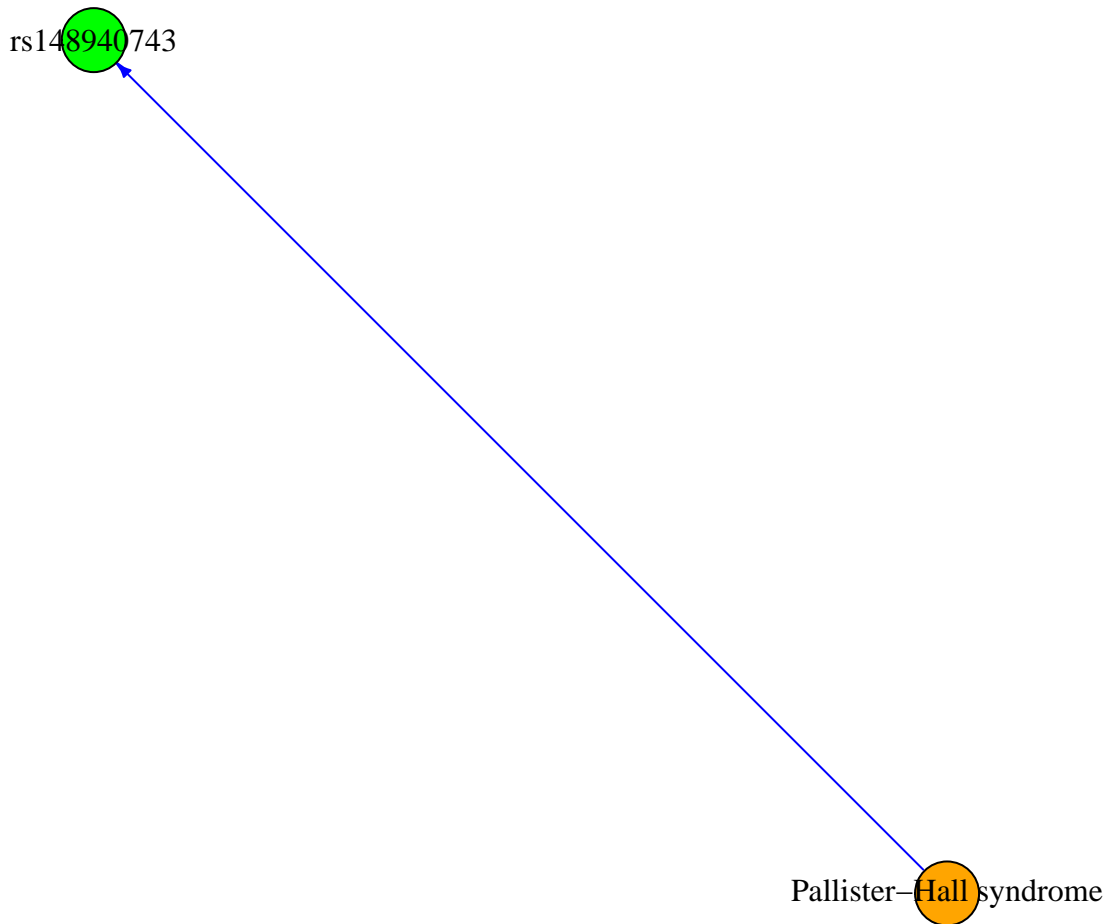

# Variant-Disease Network (Palmoplantar keratoderma)

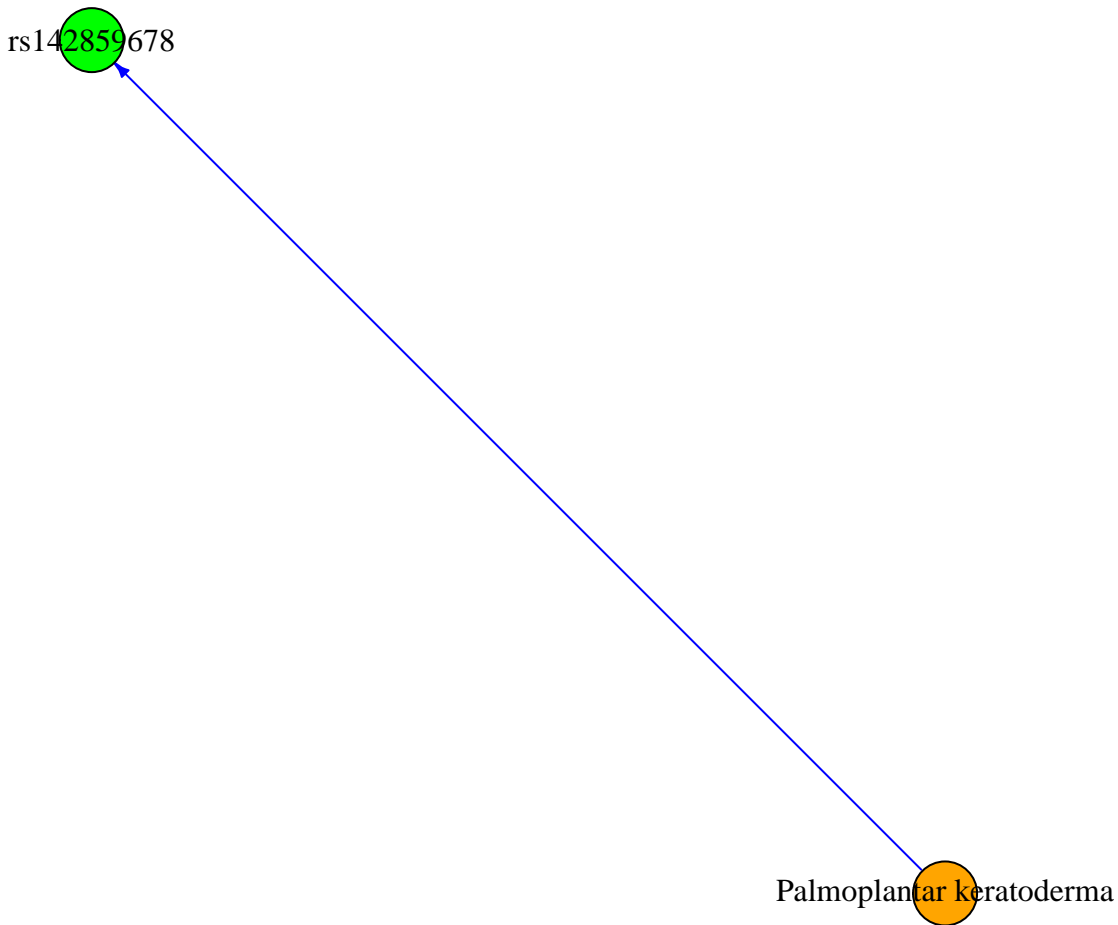

## Variant–Disease Network (Paragangliomas 5)

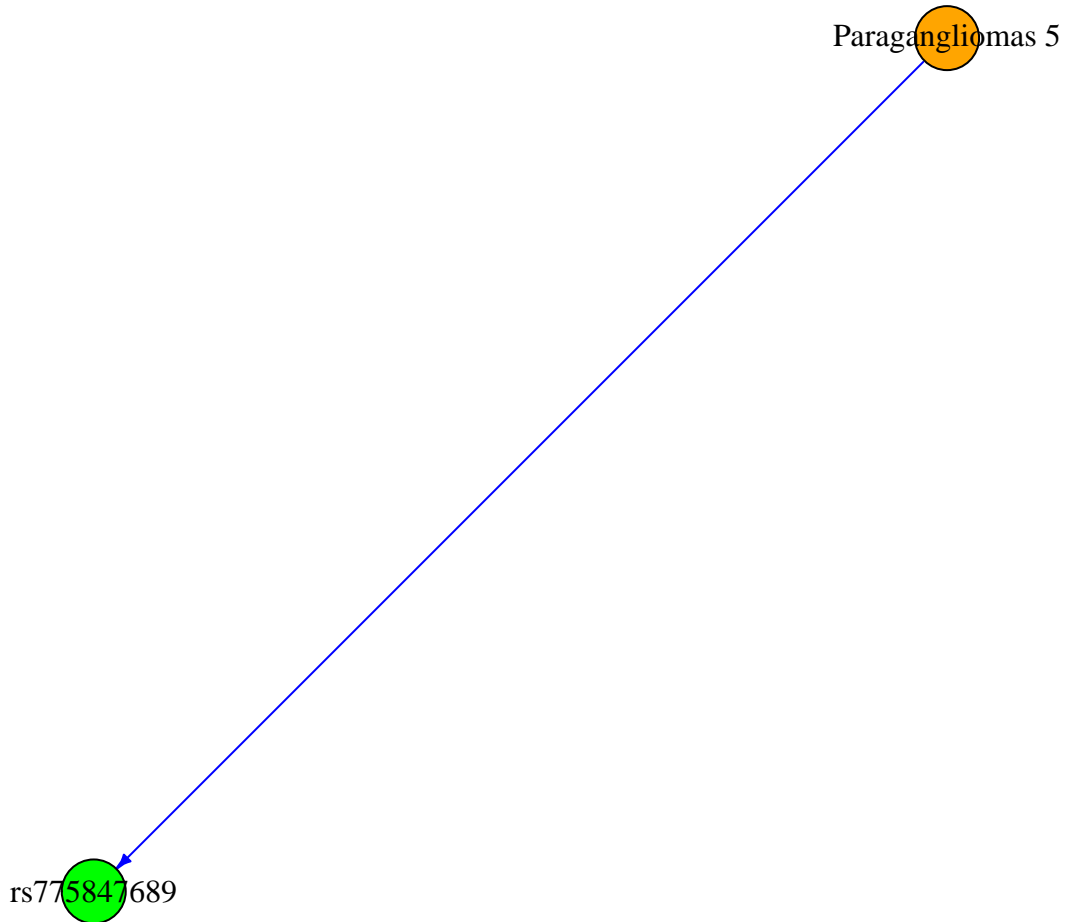



**Variant–Disease Network (Paramyotonia congenita of von Eulenburg)**

Paramyotonia congenita of von Eulenburg

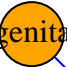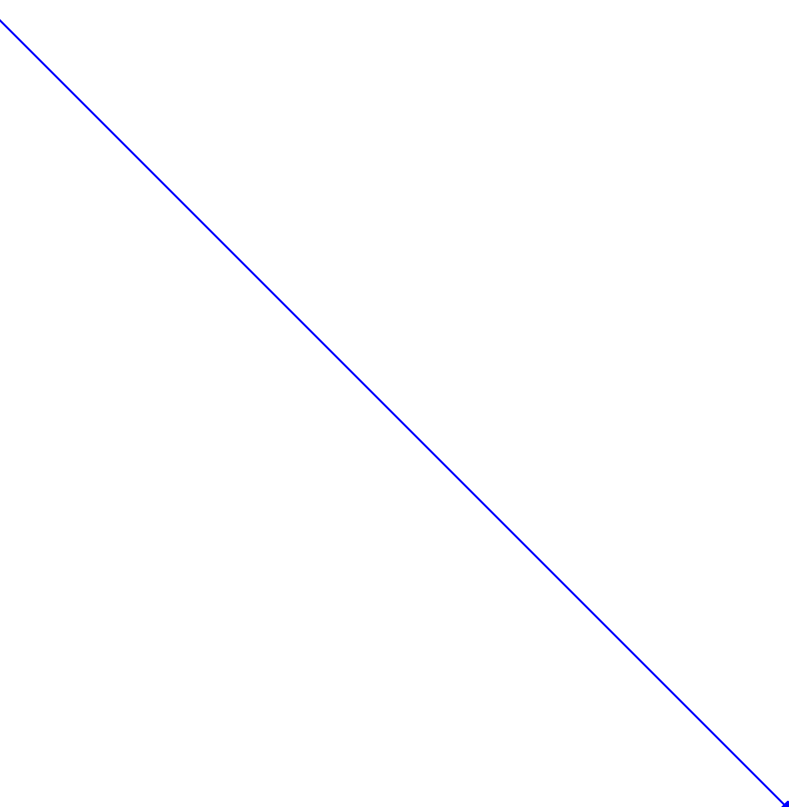

rs72851170

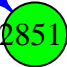

## Variant–Disease Network (Parkinson Disease)

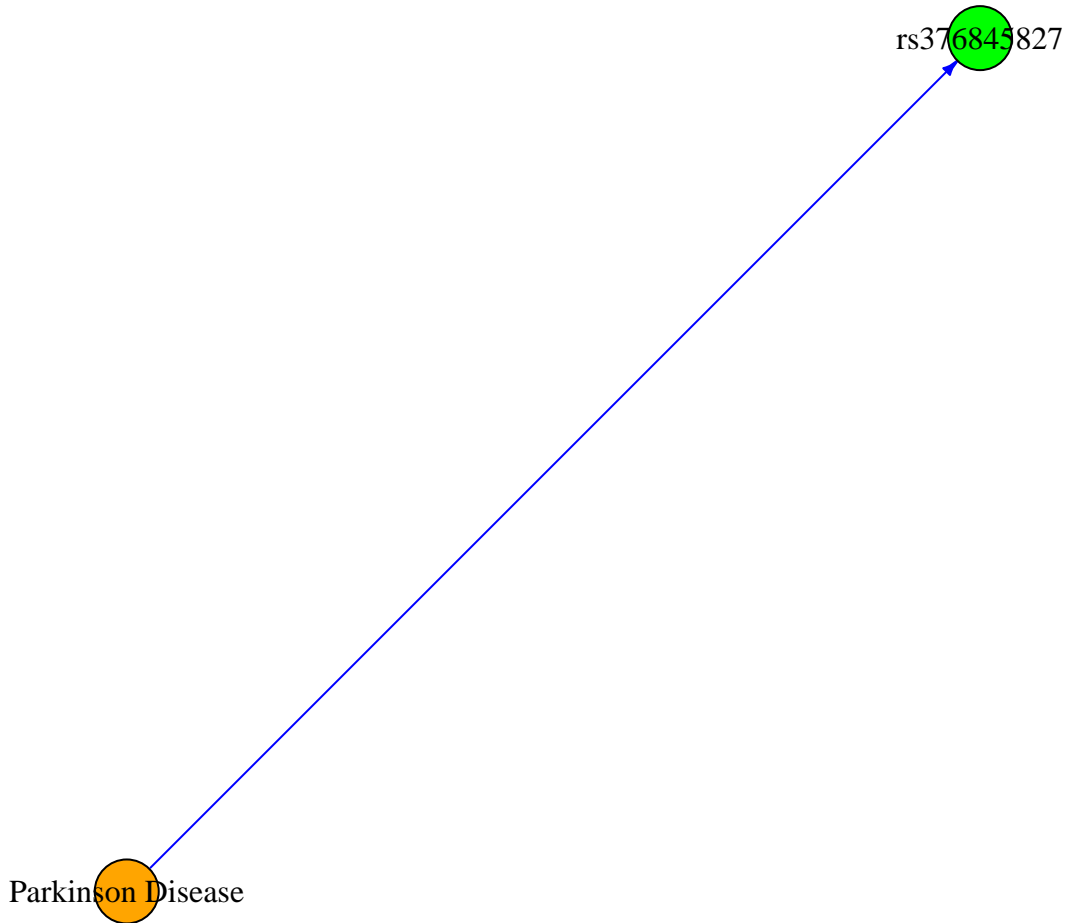

## Variant-Disease Network (Parkinson disease 19a)

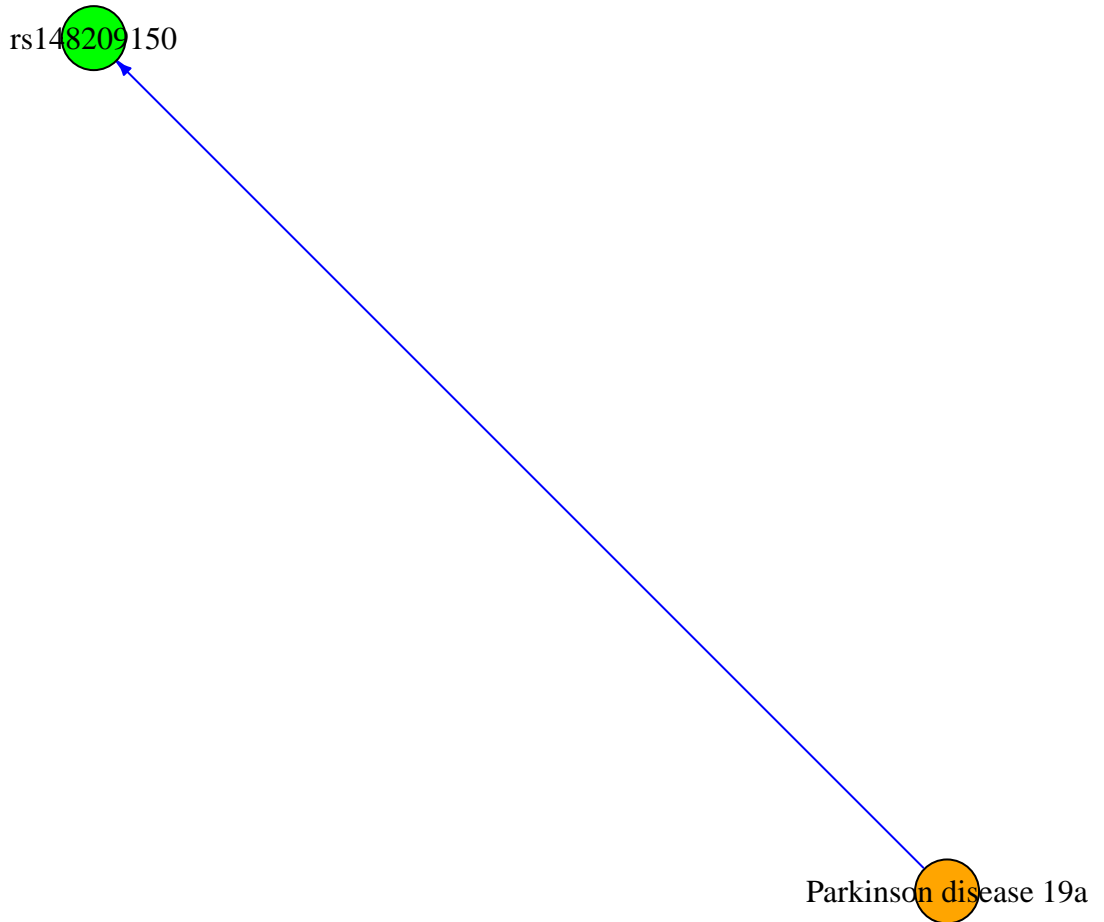

## Variant–Disease Network (Parkinson disease 8)

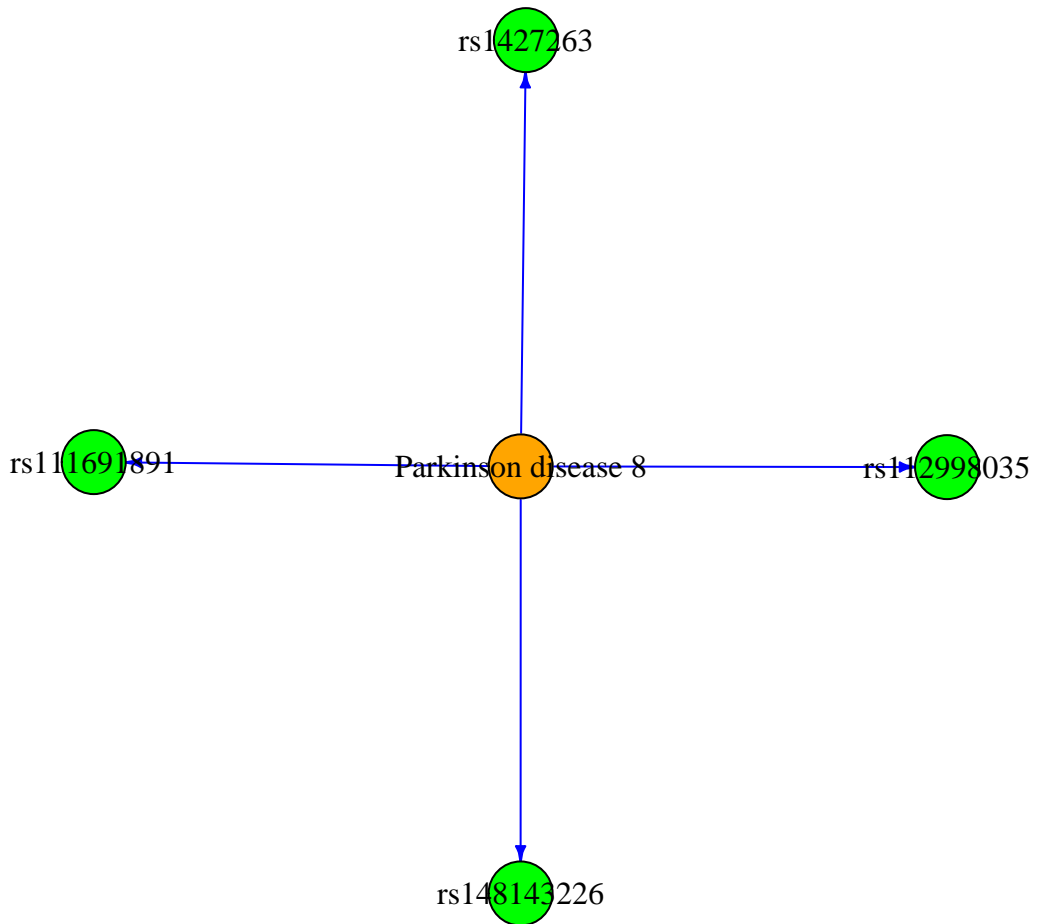

## Variant–Disease Network (Parkinson disease 9)

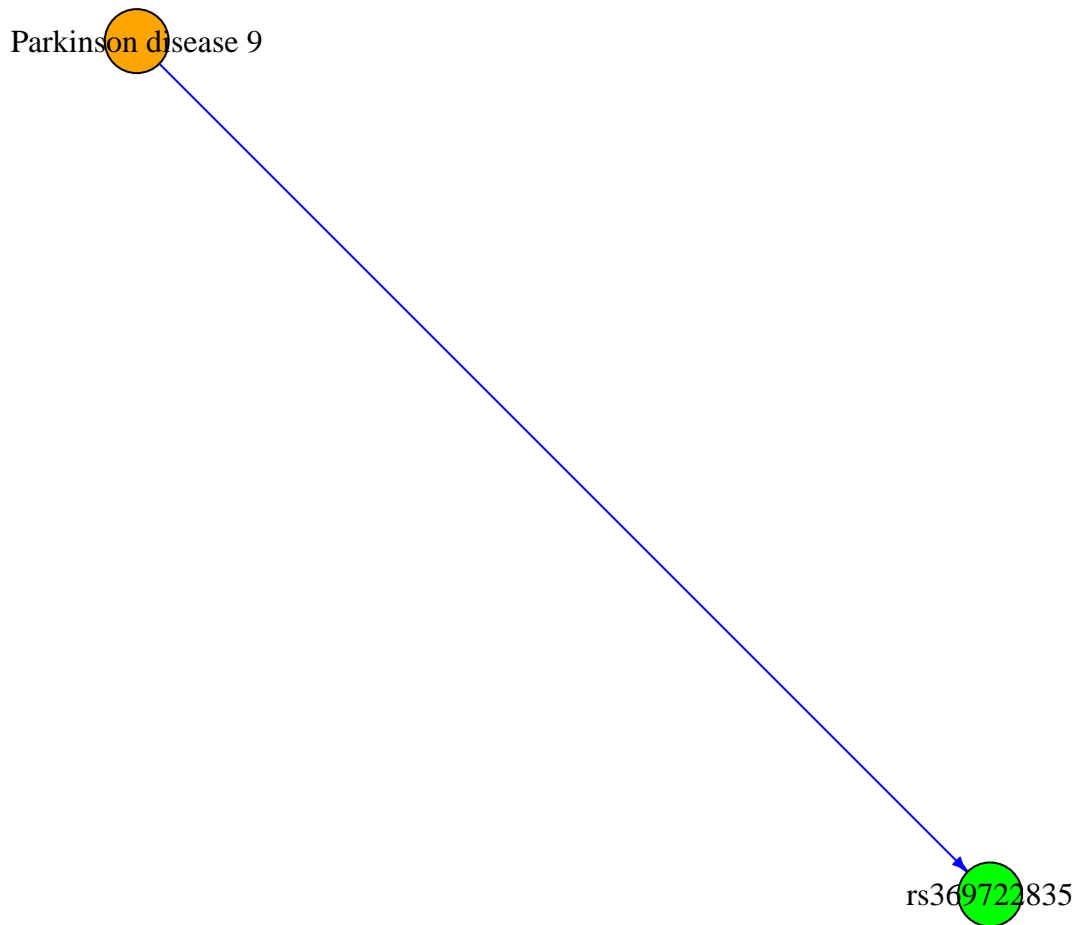

**Variant–Disease Network (Paroxysmal nonkinesigenic dyskinesia 1)**

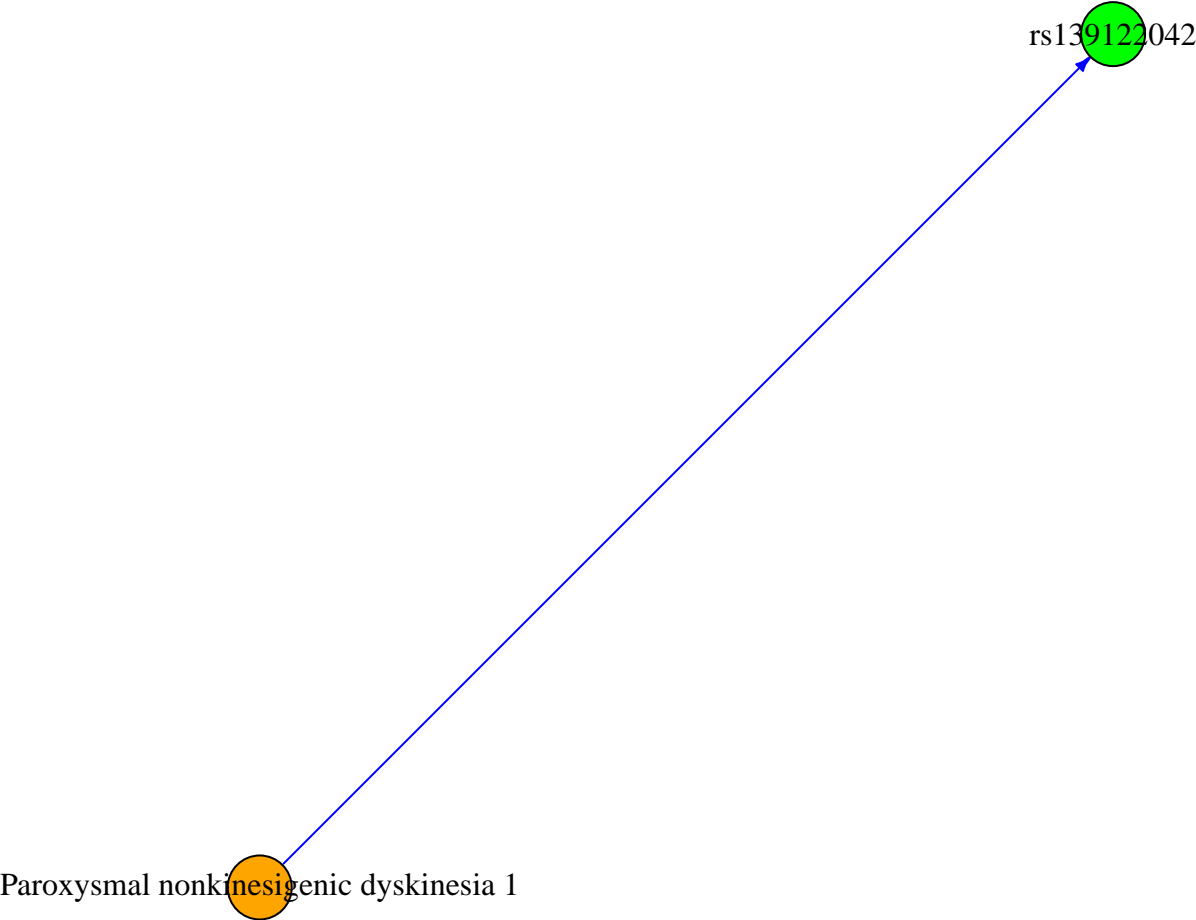

## Variant–Disease Network (Partial albinism)

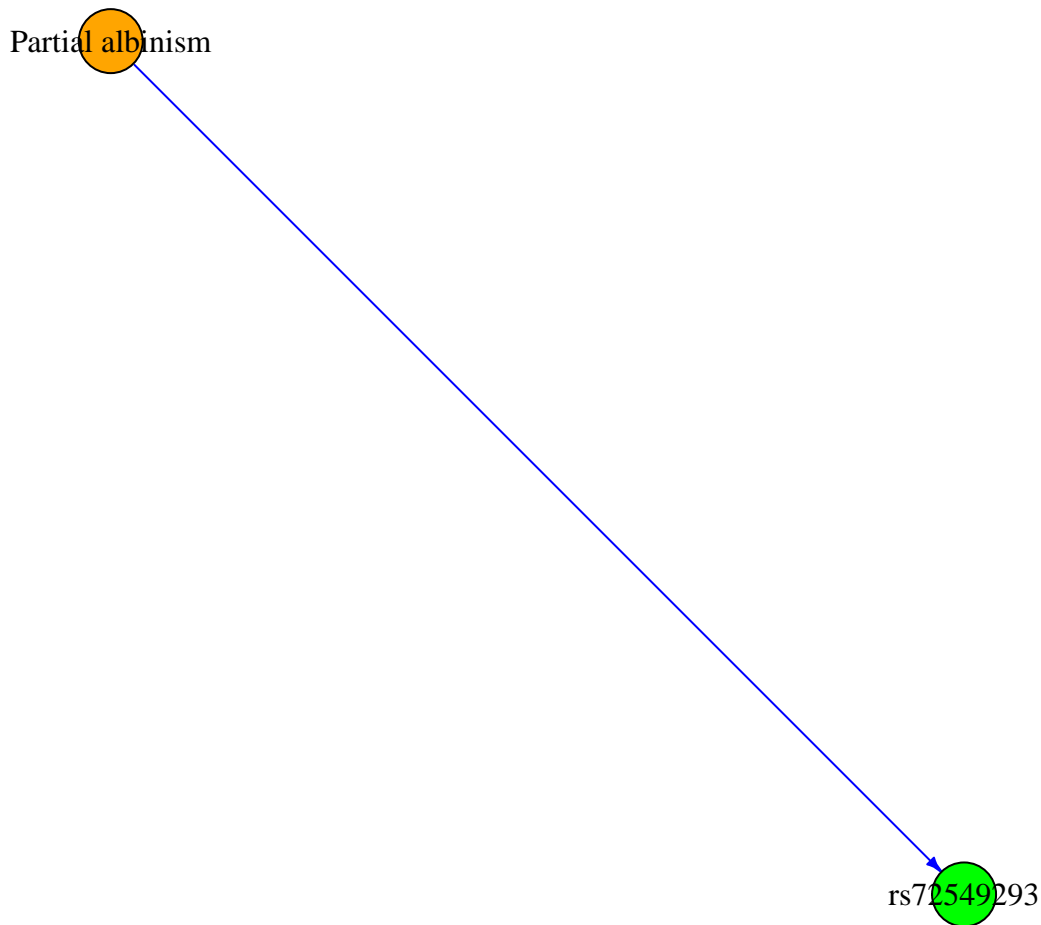

## Variant–Disease Network (Peeling skin syndrome 1)

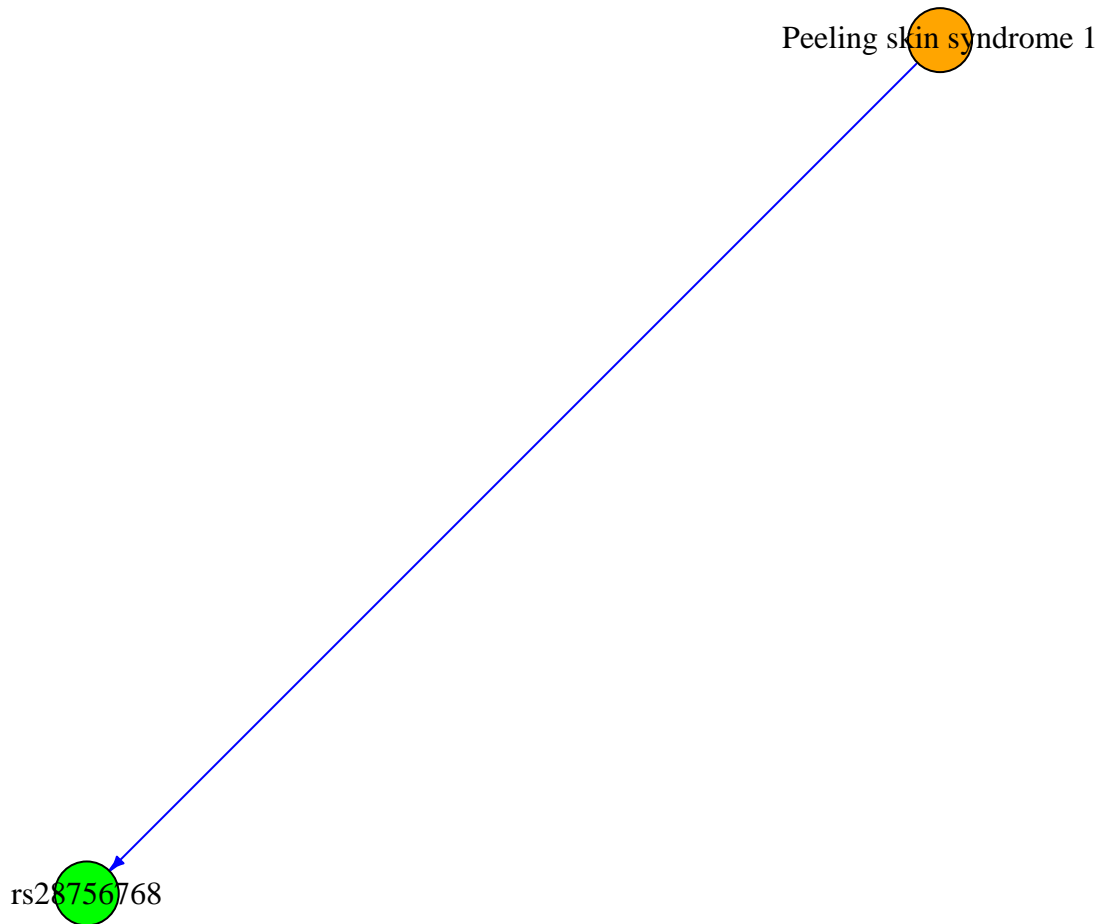



Variant–Disease Network (Pendred syndrome)

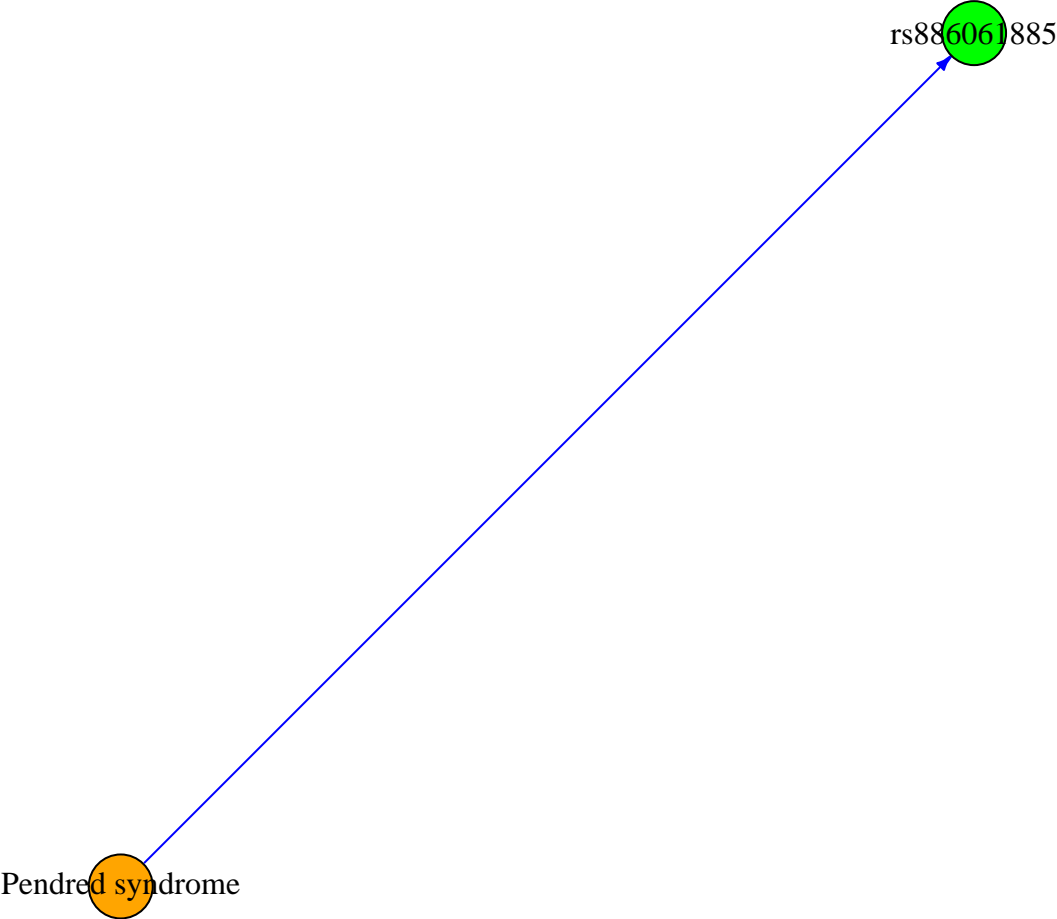

## Variant–Disease Network (PERCHING syndrome)

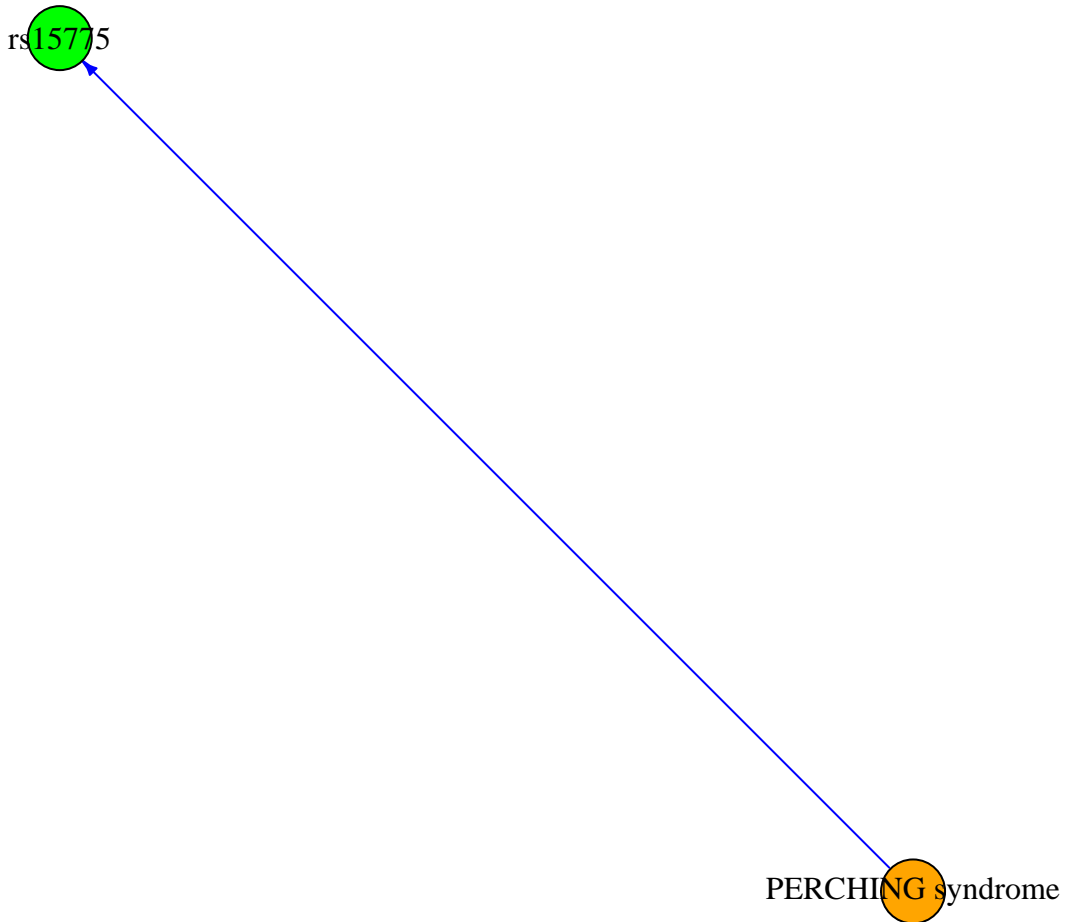

## Variant-Disease Network (Periodic fever syndrome)

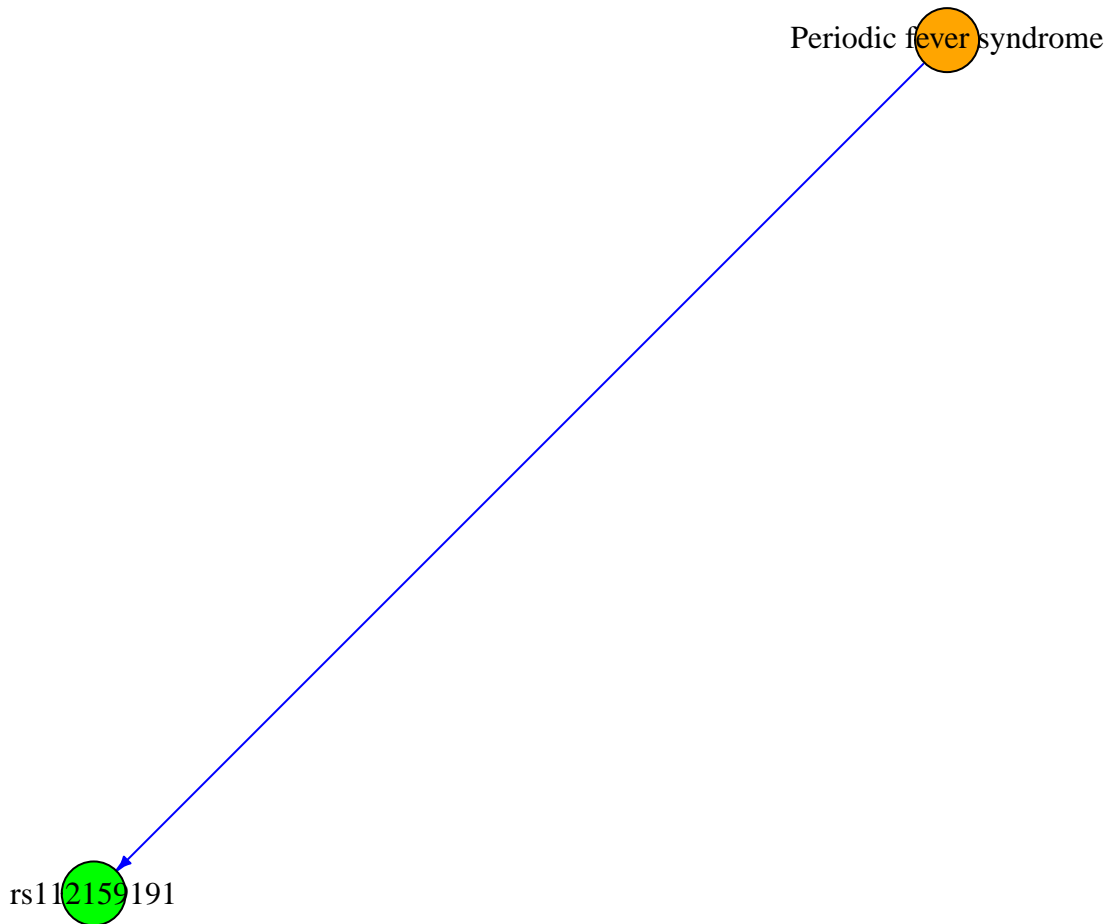

Variant–Disease Network (Peripheral axonal neuropathy)

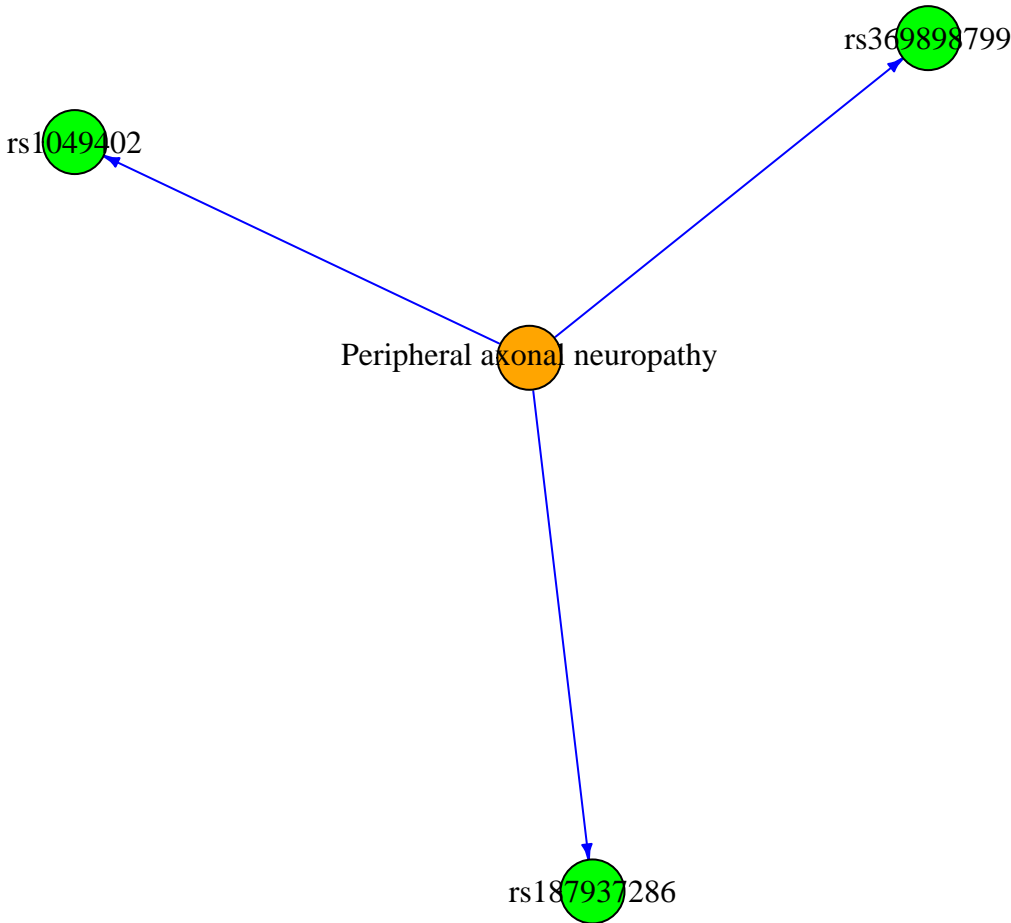

Variant–Disease Network (Periventricular nodular heterotopia 1)

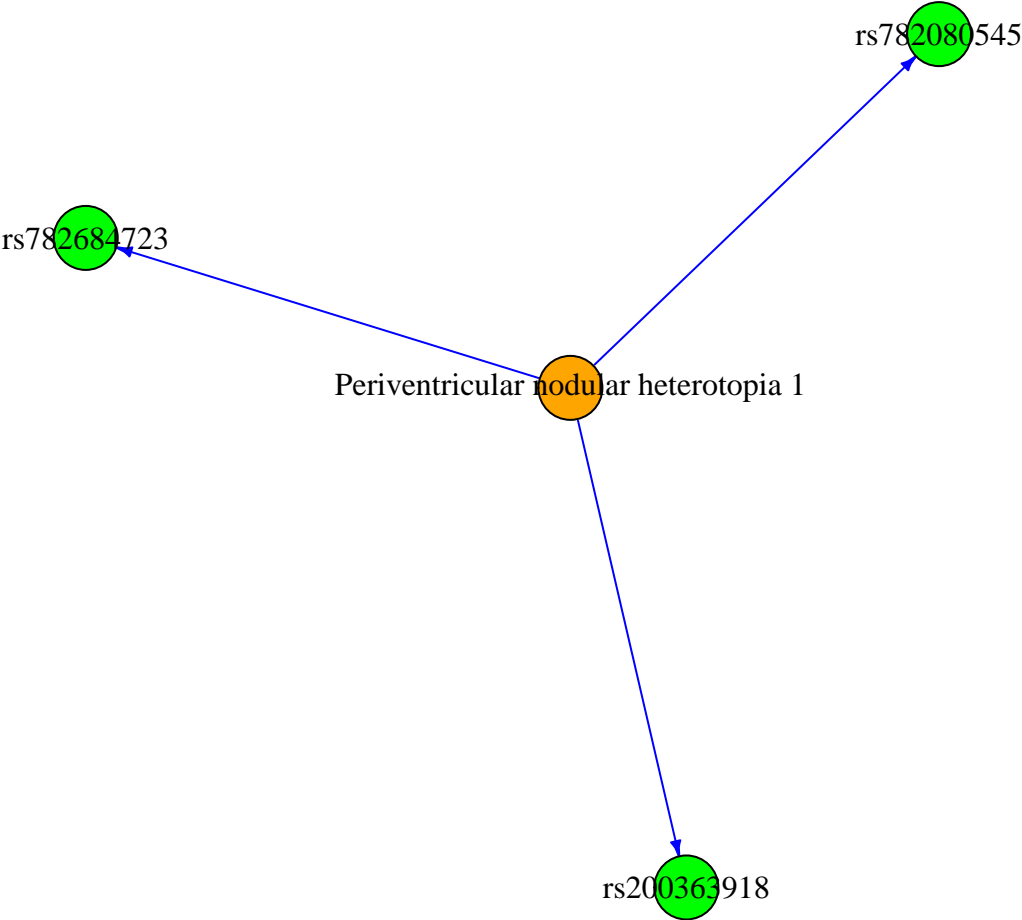

Variant–Disease Network (Permanent neonatal diabetes mellitus)

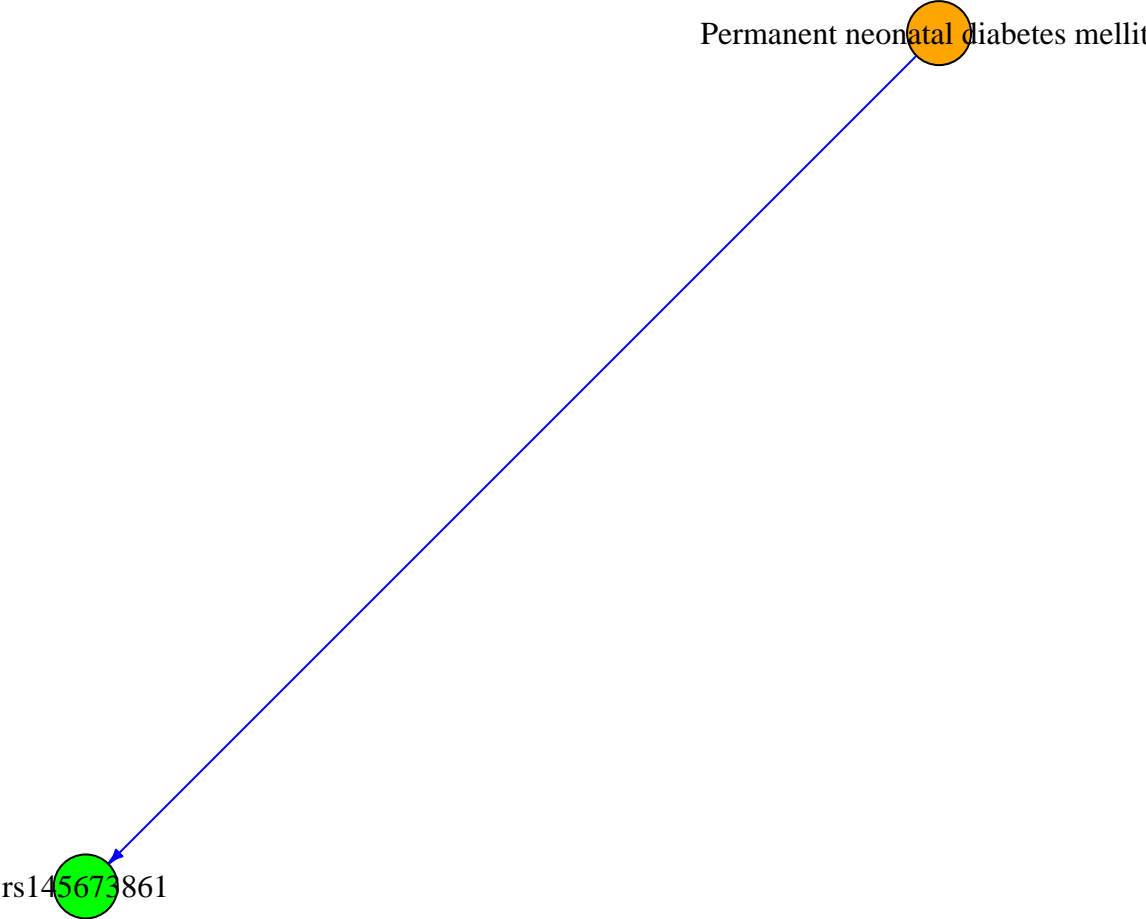

Variant–Disease Network (Peroxisome biogenesis disorder 1A (Zellweger

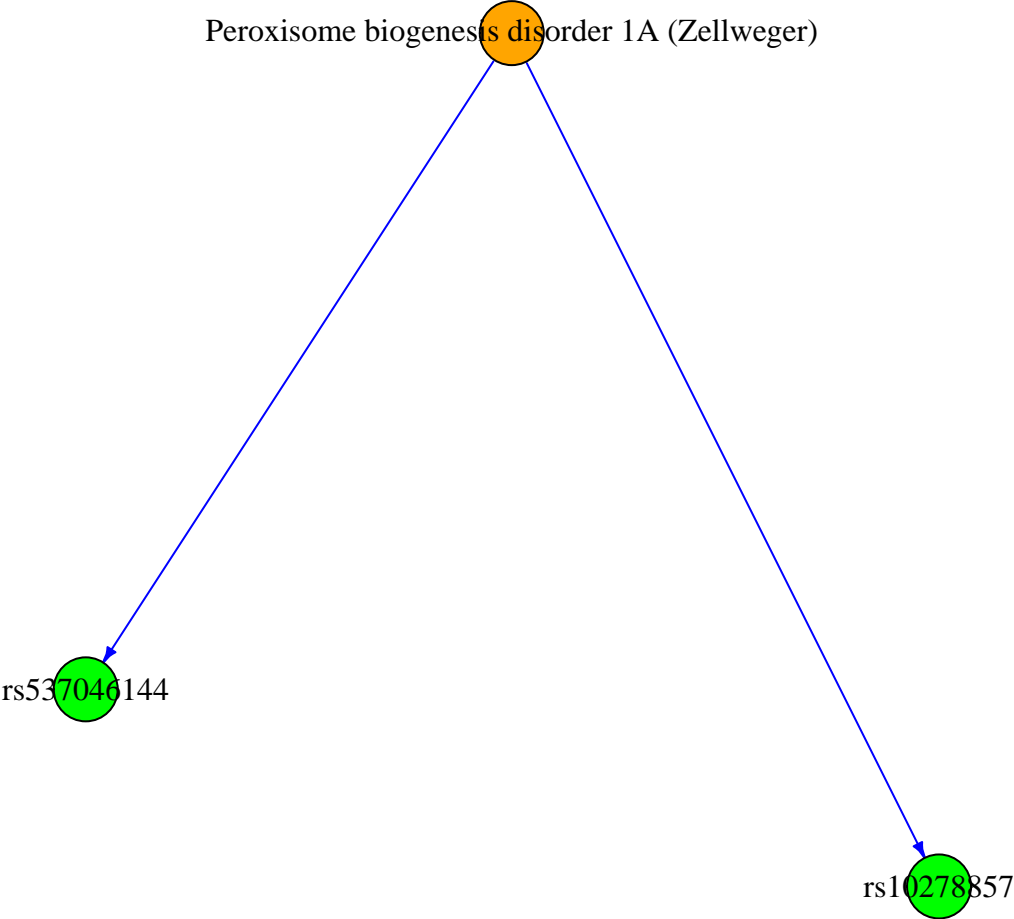

## Variant–Disease Network (Perrault syndrome)

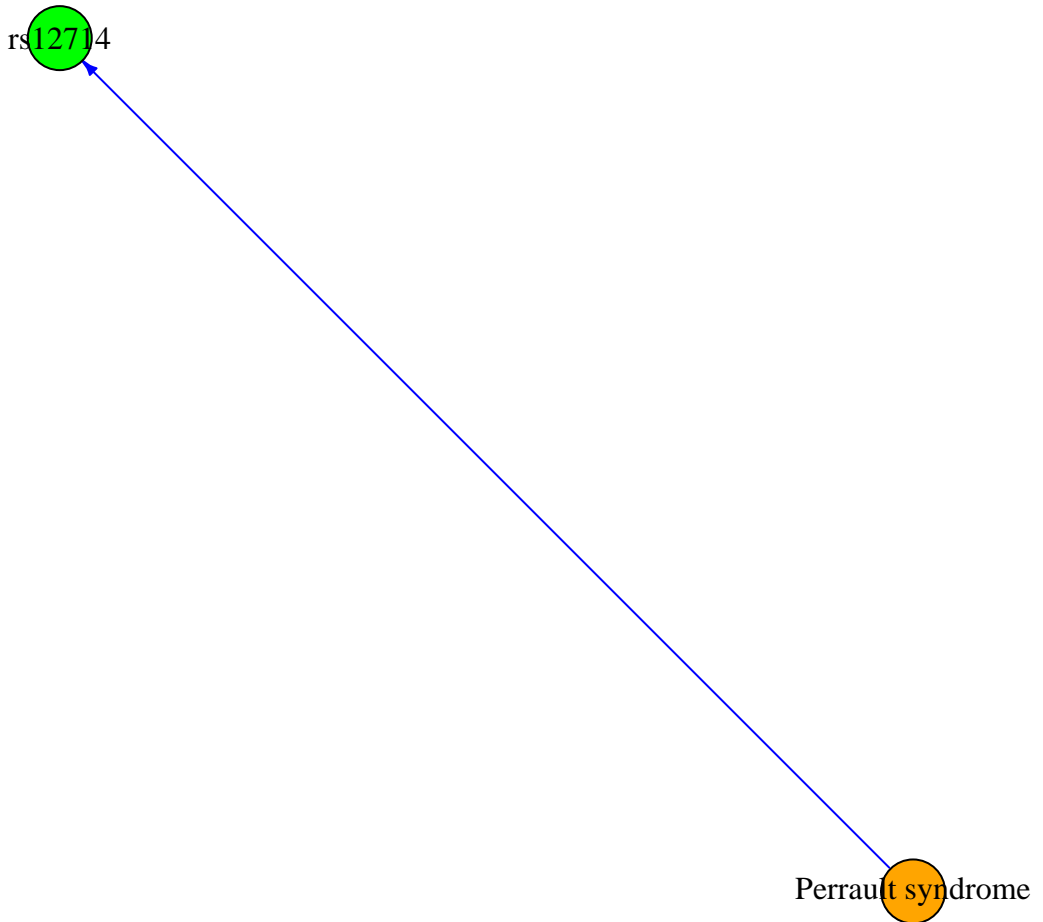



## Variant–Disease Network (Perrault syndrome 1)

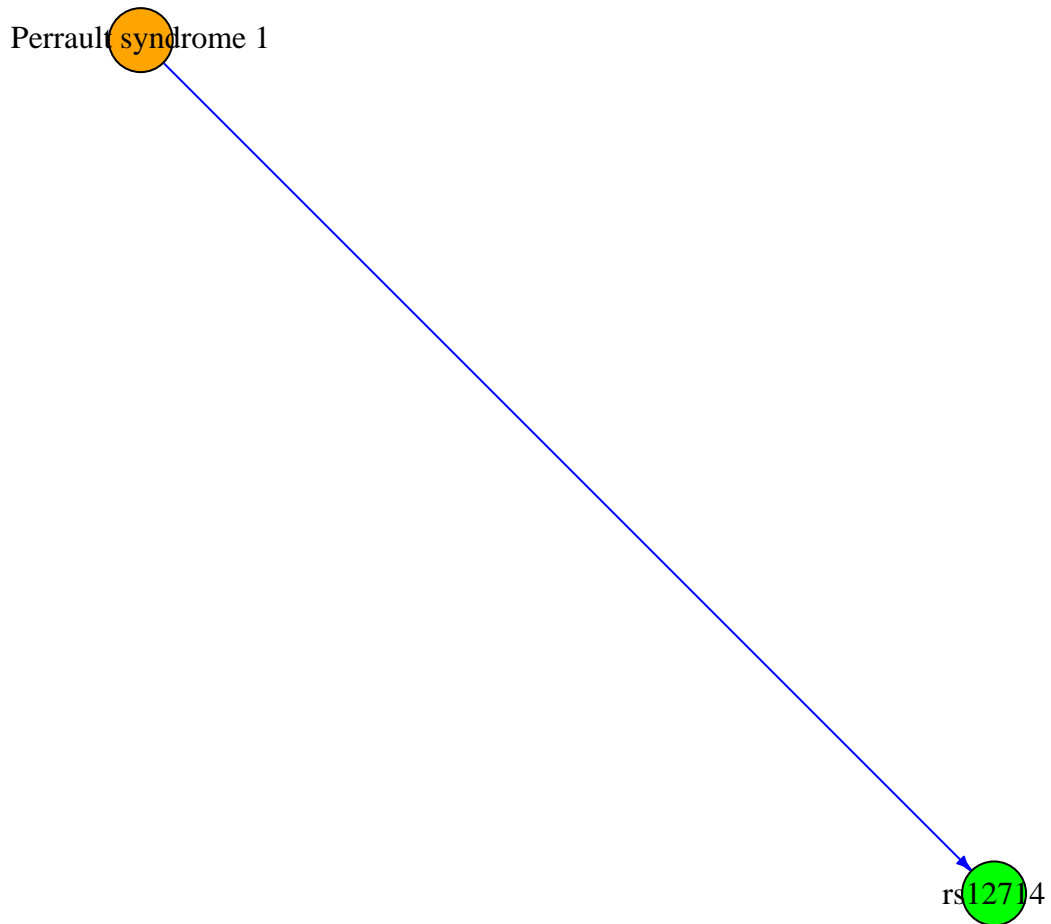

Variant–Disease Network (Perry syndrome)

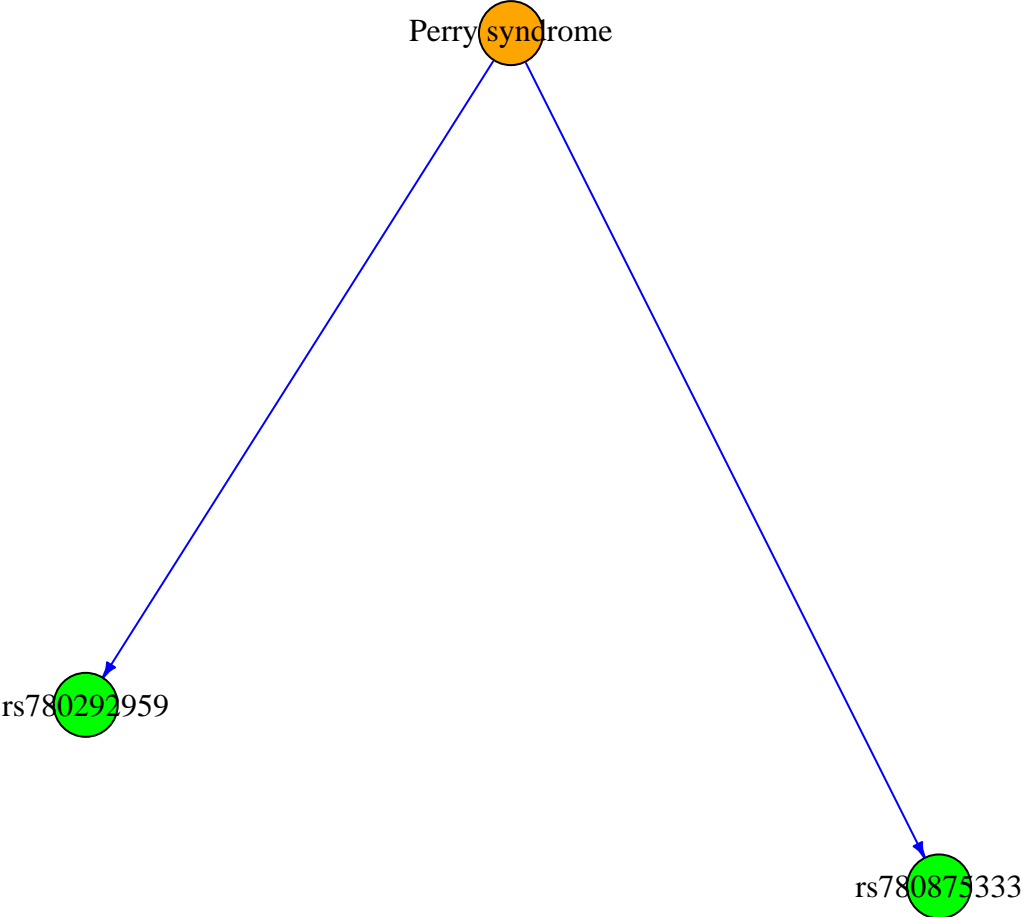

## Variant–Disease Network (Peutz–Jeghers syndrome)

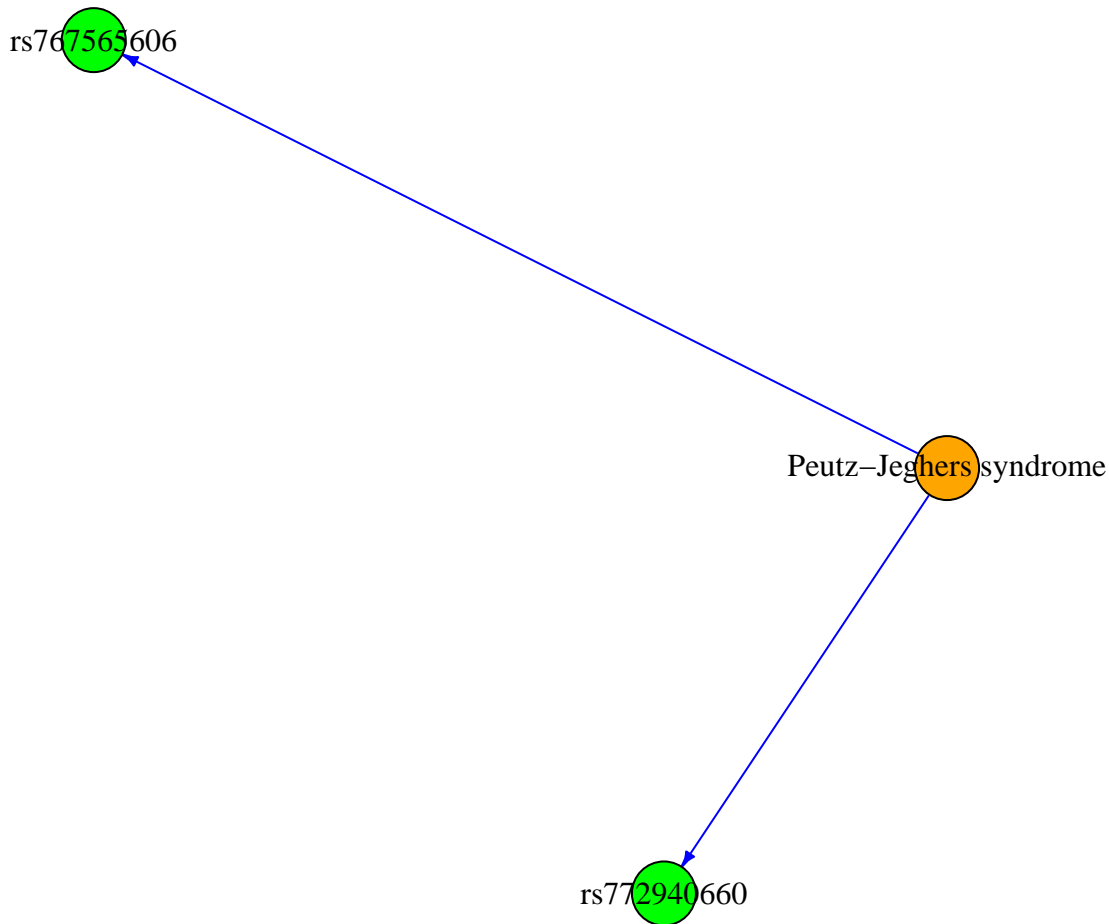

## Variant–Disease Network (Pfeiffer syndrome)

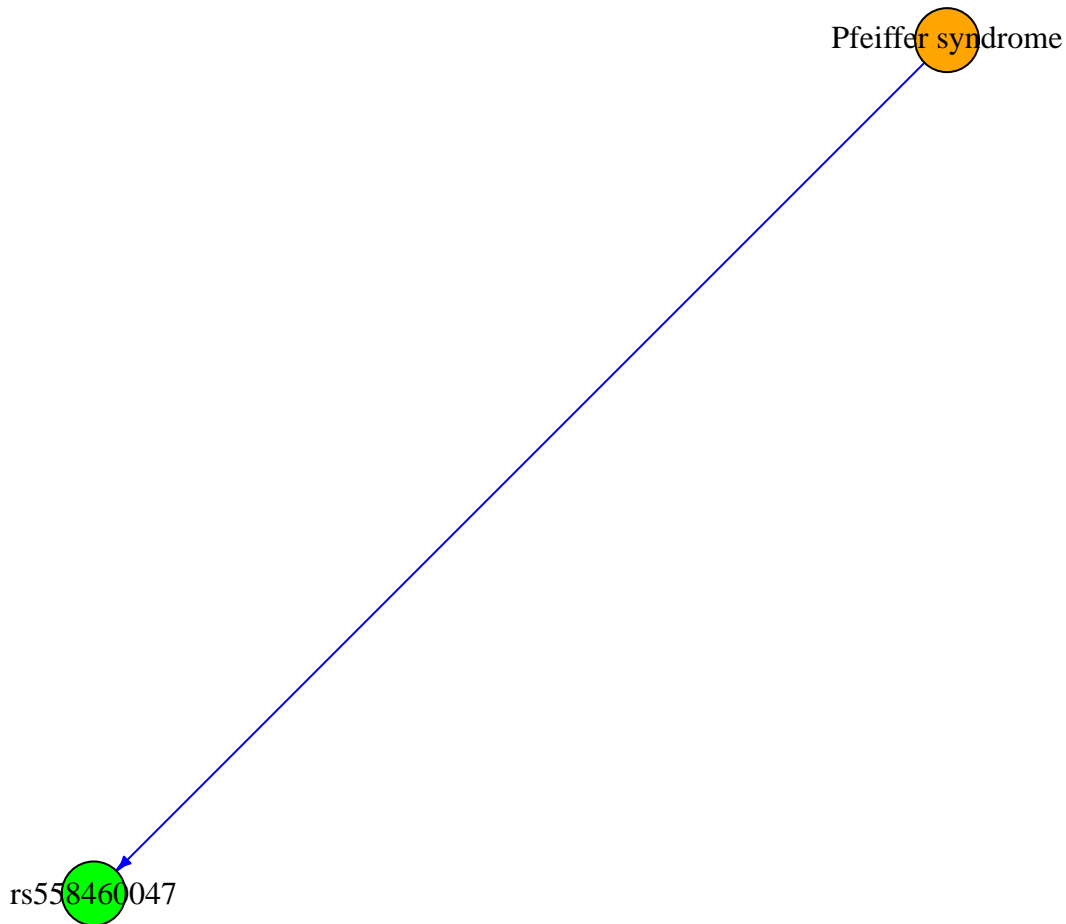

## Variant–Disease Network (Phenylketonuria)

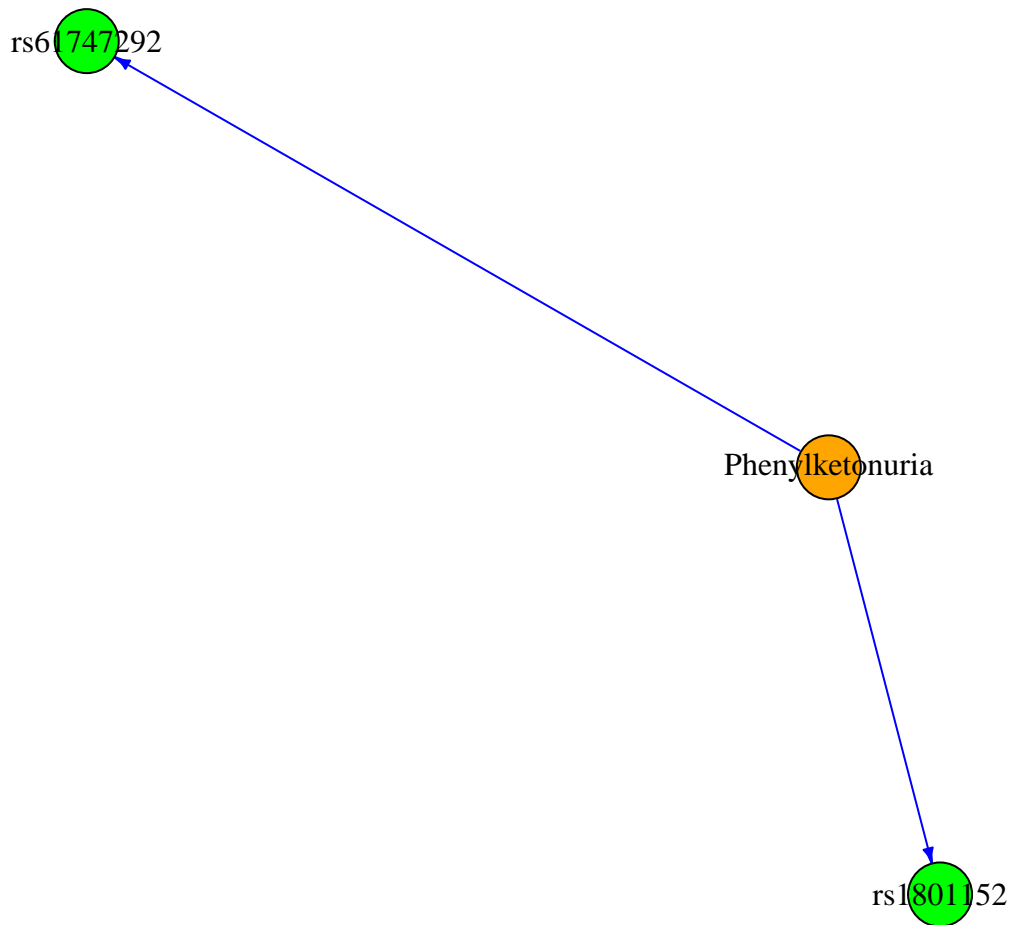

## Variant–Disease Network (Pheochromocytoma)

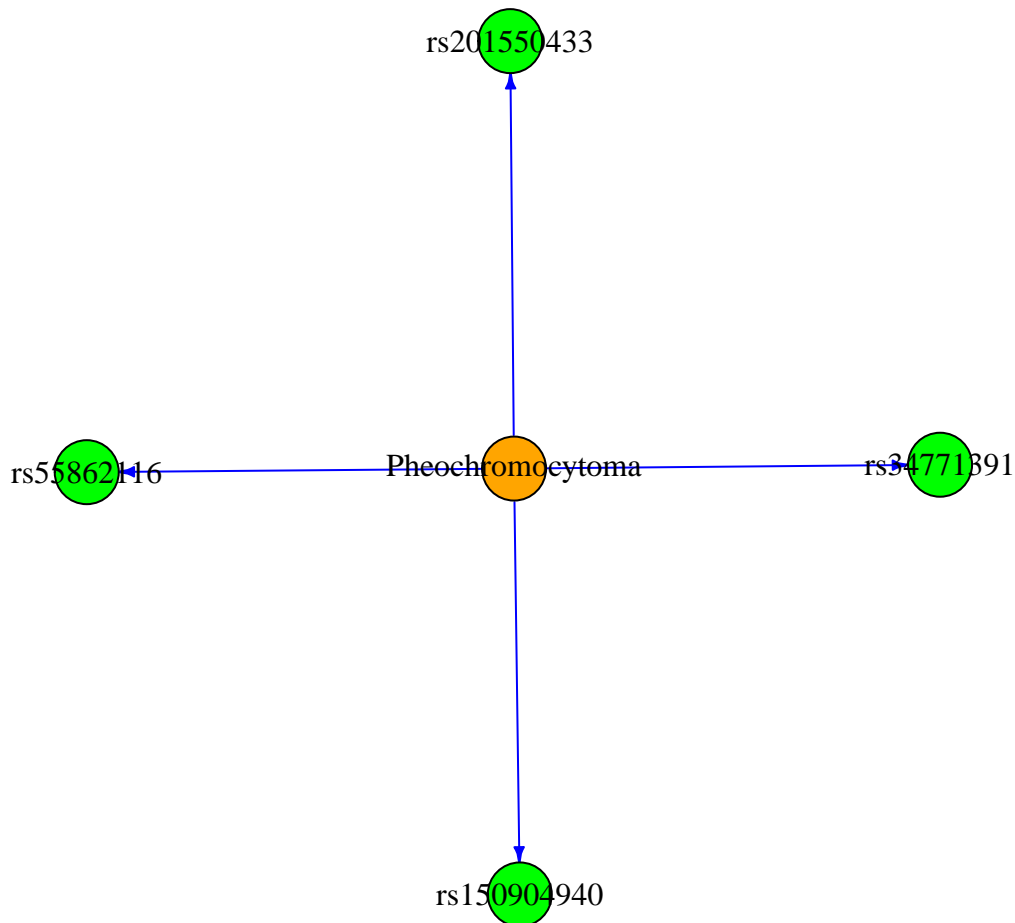

# Variant-Disease Network (Phosphoenolpyruvate carboxykinase (GTP) deficiency)

rs45559638

Phosphoenolpyruvate carboxykinase (GTP)

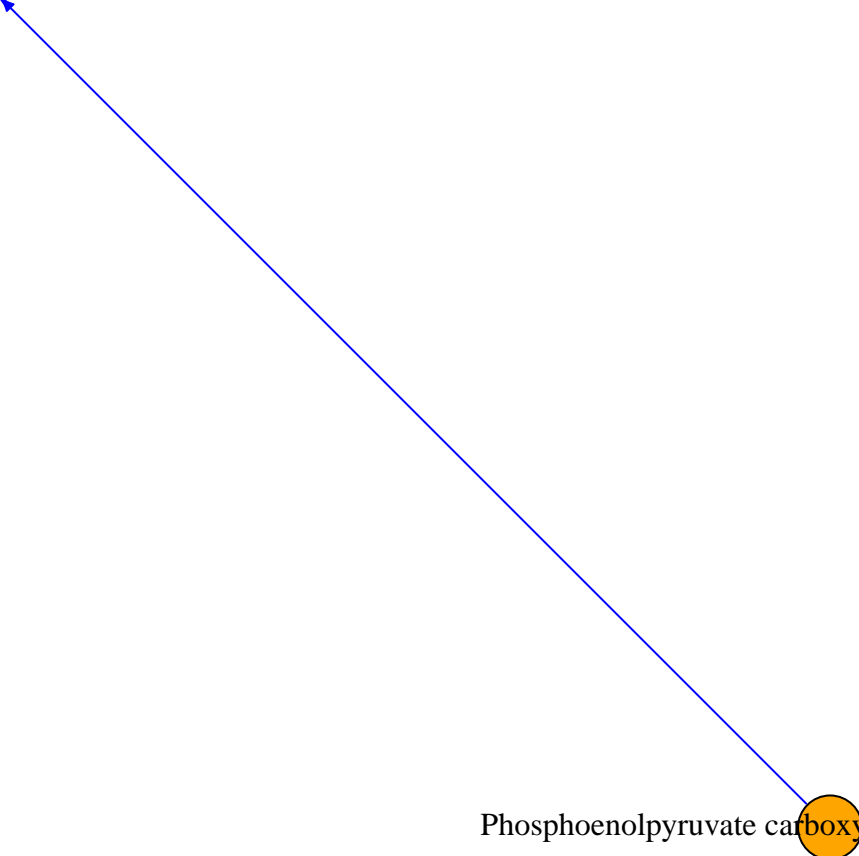

**Variant–Disease Network (Phosphoglycerate dehydrogenase deficiency)**

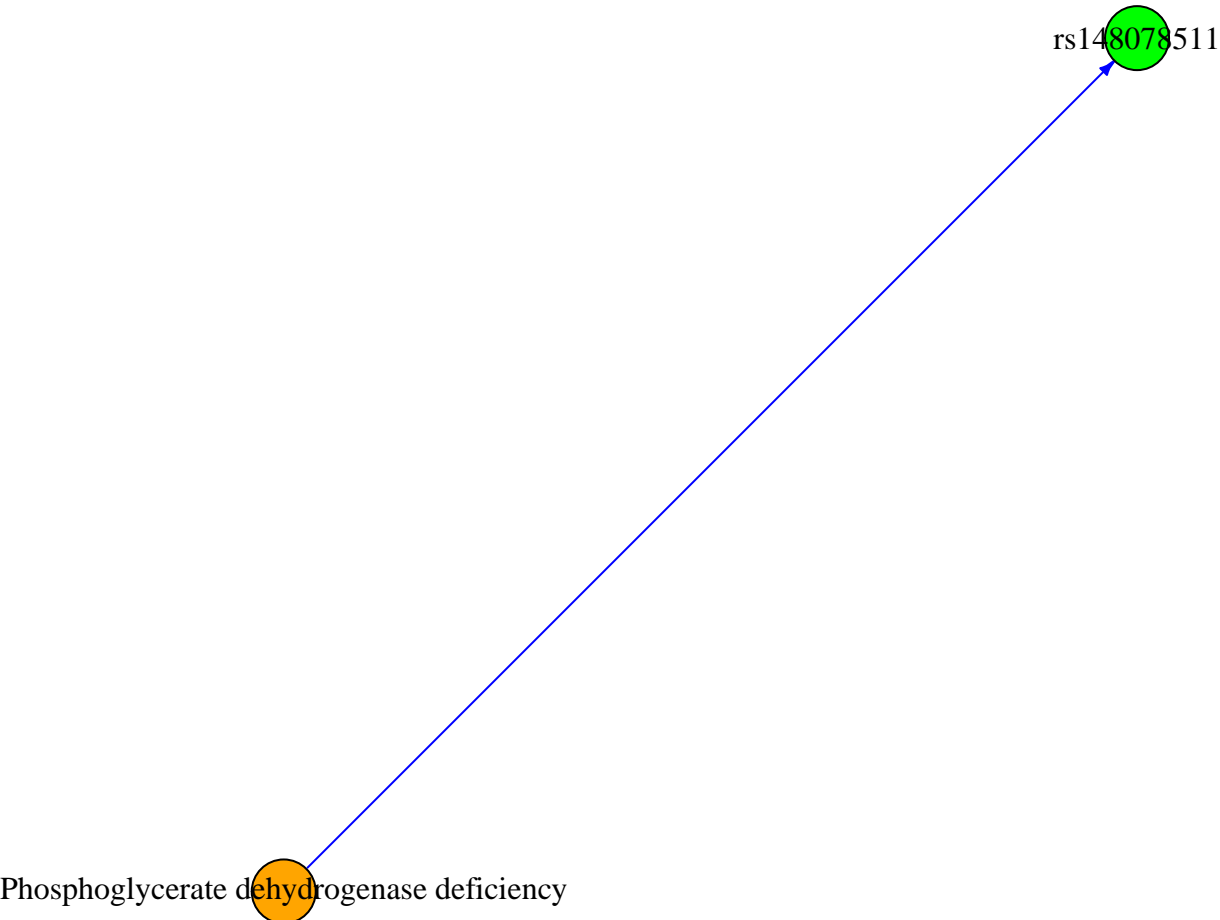



# Variant–Disease Network (Phosphoserine aminotransferase deficiency)

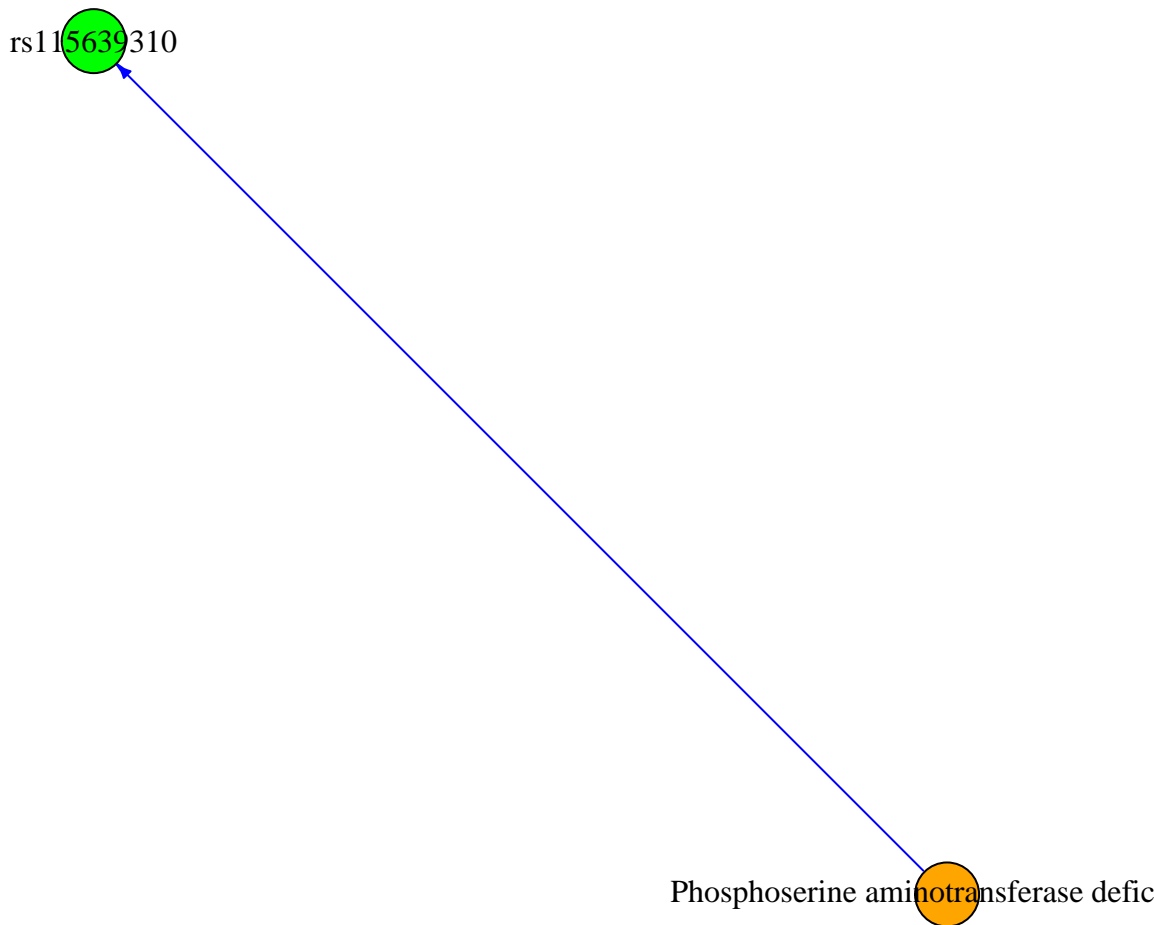

## Variant–Disease Network (Pierson syndrome)

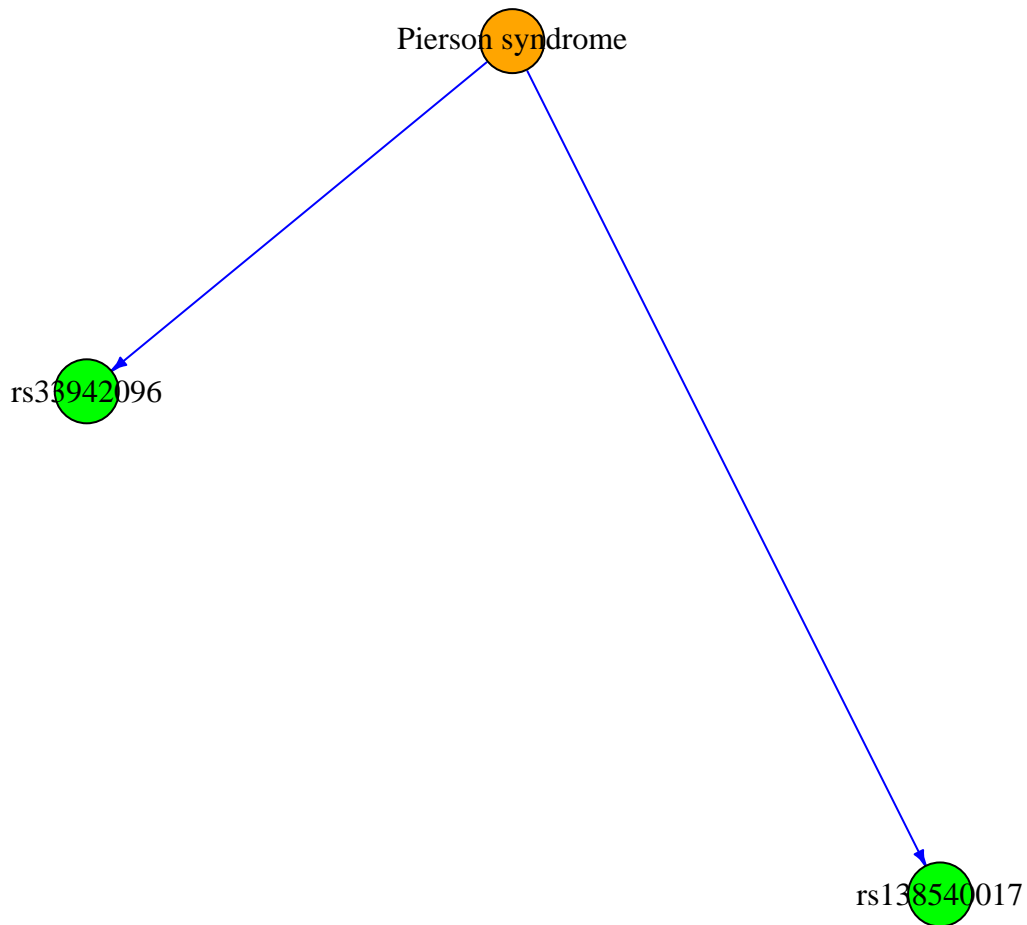

## Variant–Disease Network (Pityriasis rubra pilaris)

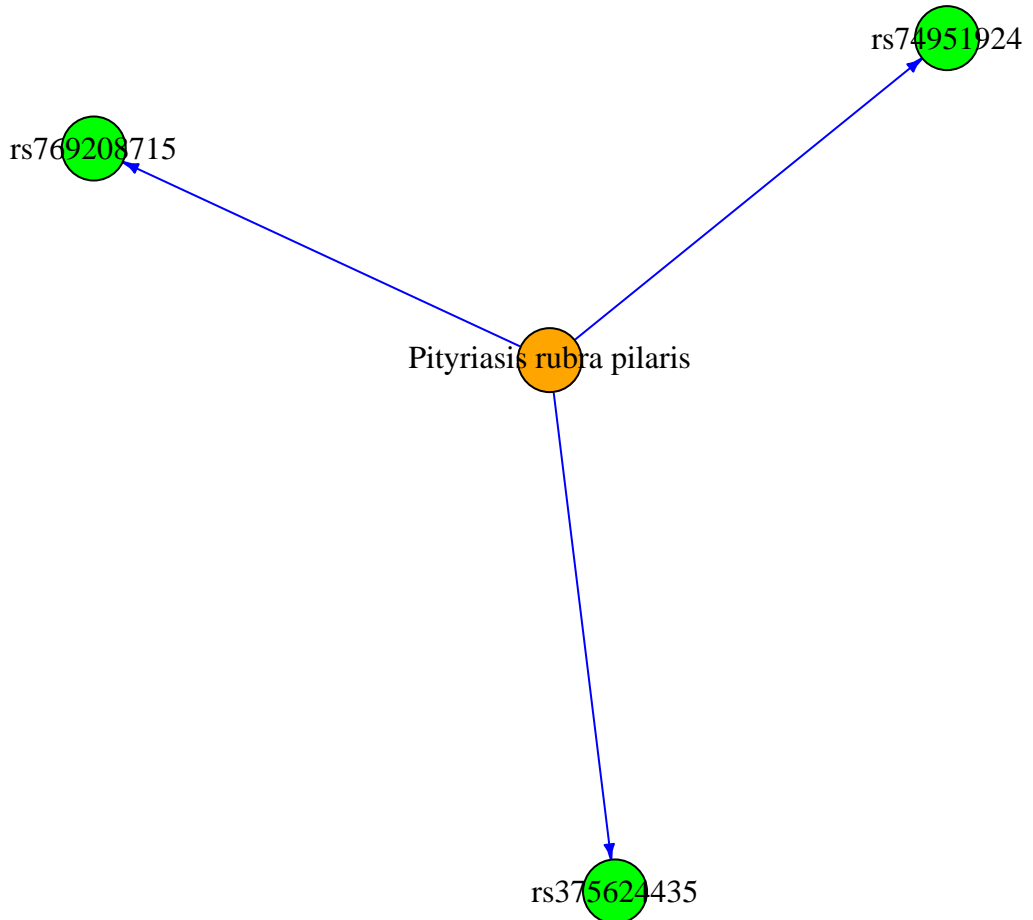

Variant–Disease Network (Plasminogen activator inhibitor type 1 deficiency)

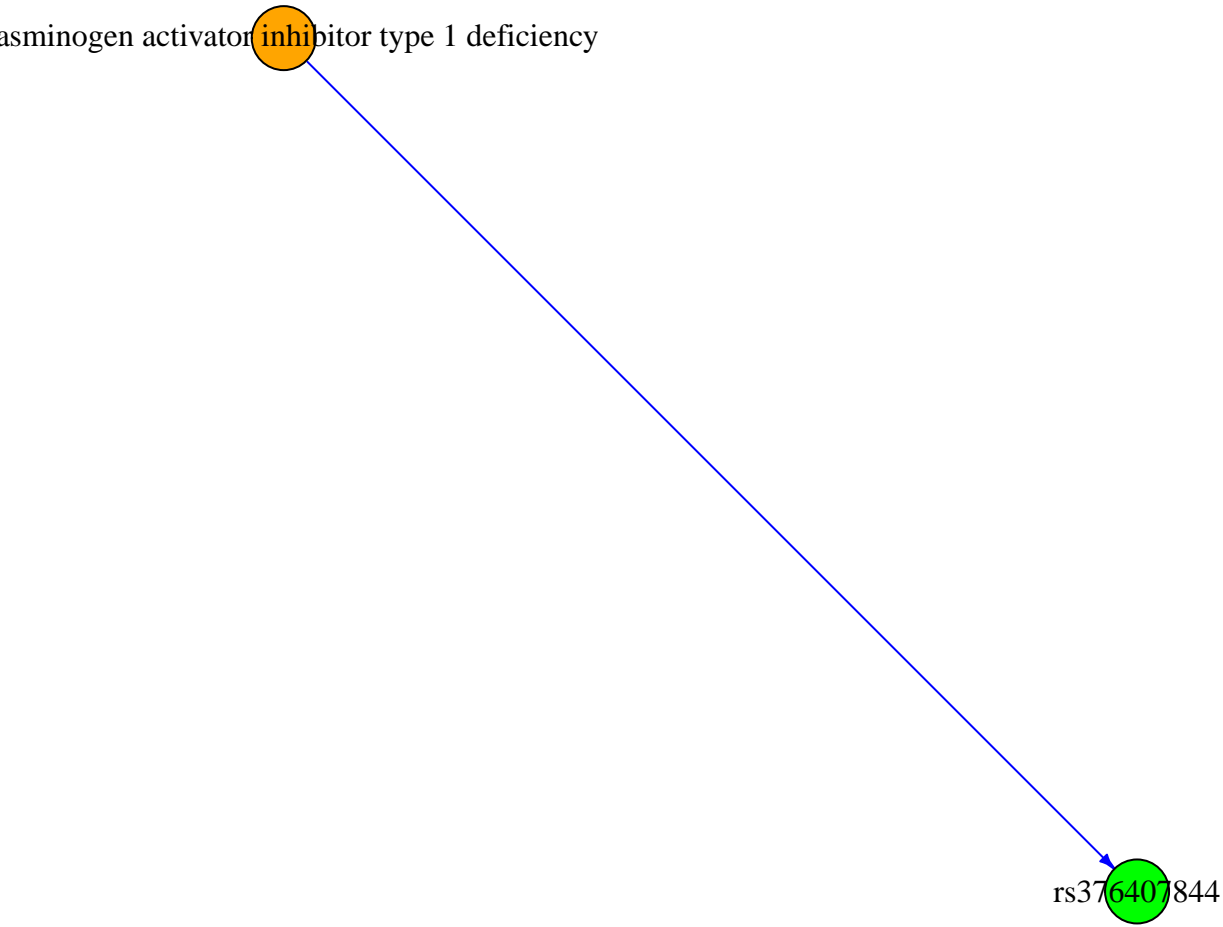

**Variant–Disease Network (Platelet–type bleeding disorder 9)**

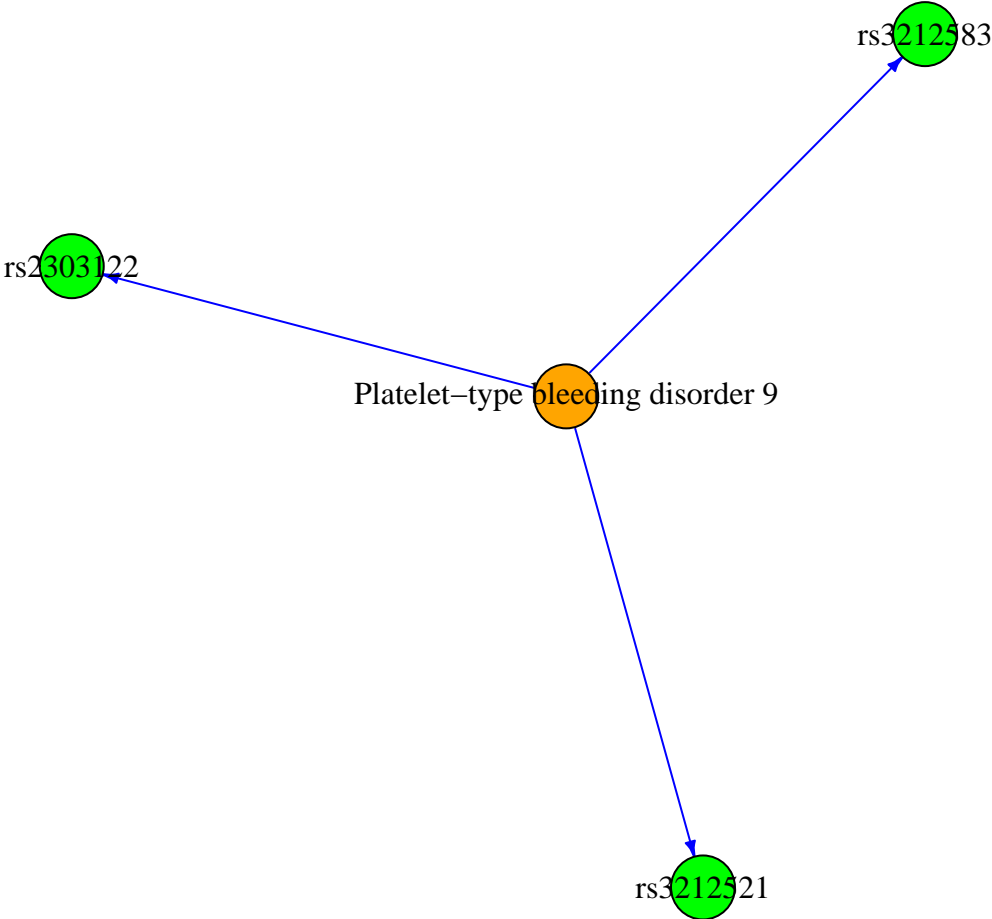

## Variant–Disease Network (Pleuropulmonary blastoma)

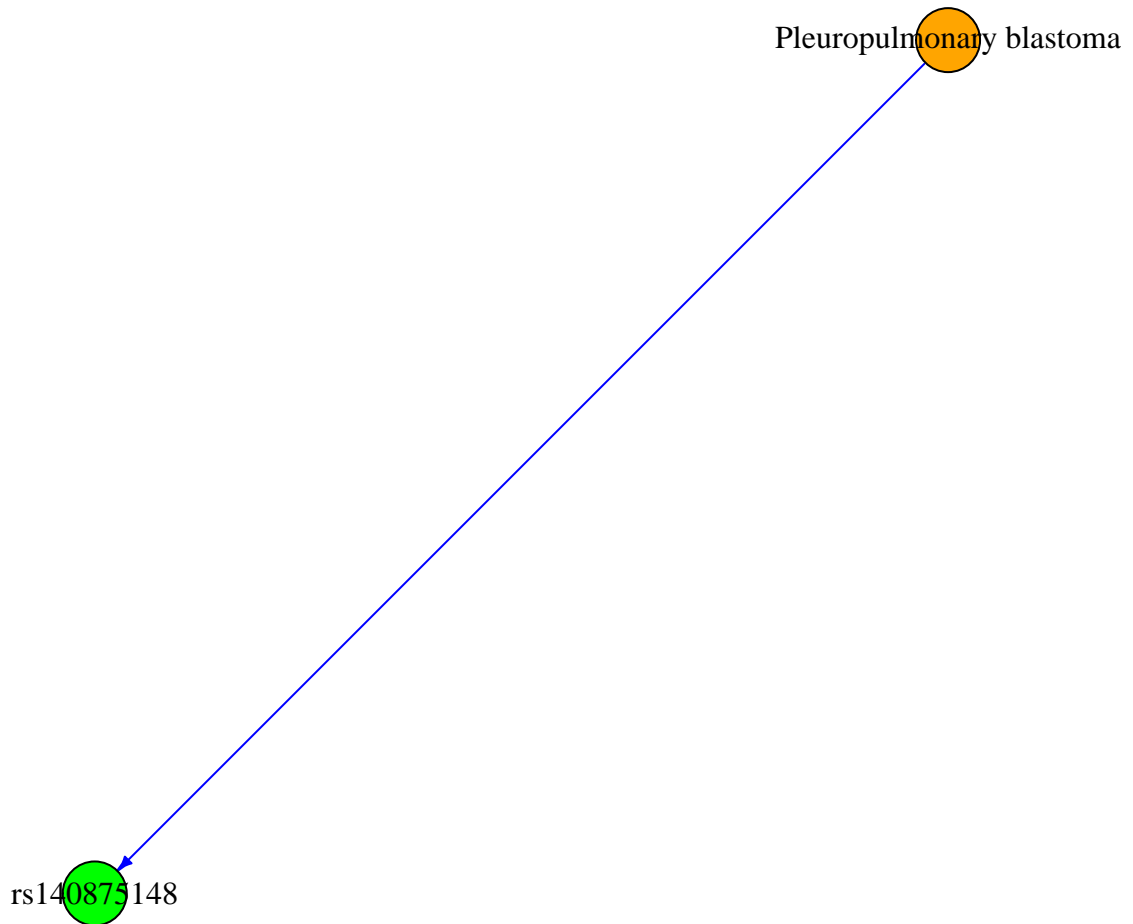

**Variant–Disease Network (Pol III–related leukodystrophy)**

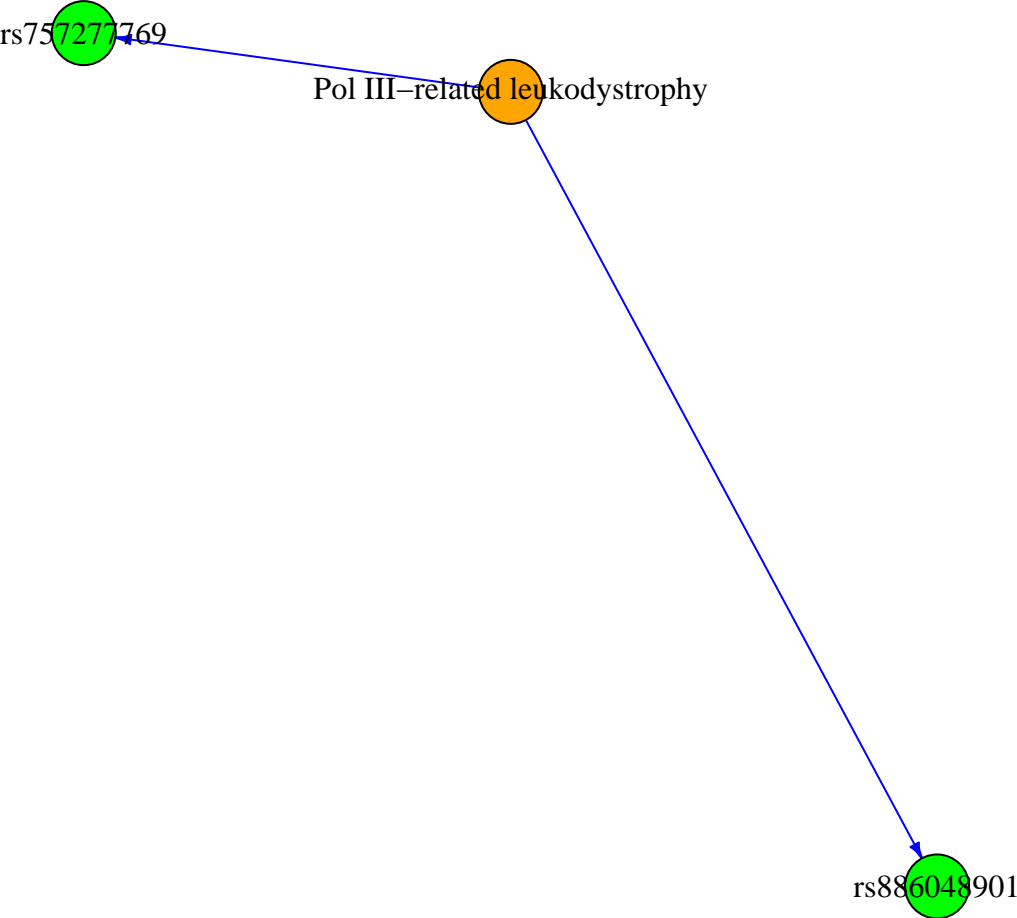

## Variant–Disease Network (Polycystic kidney disease)

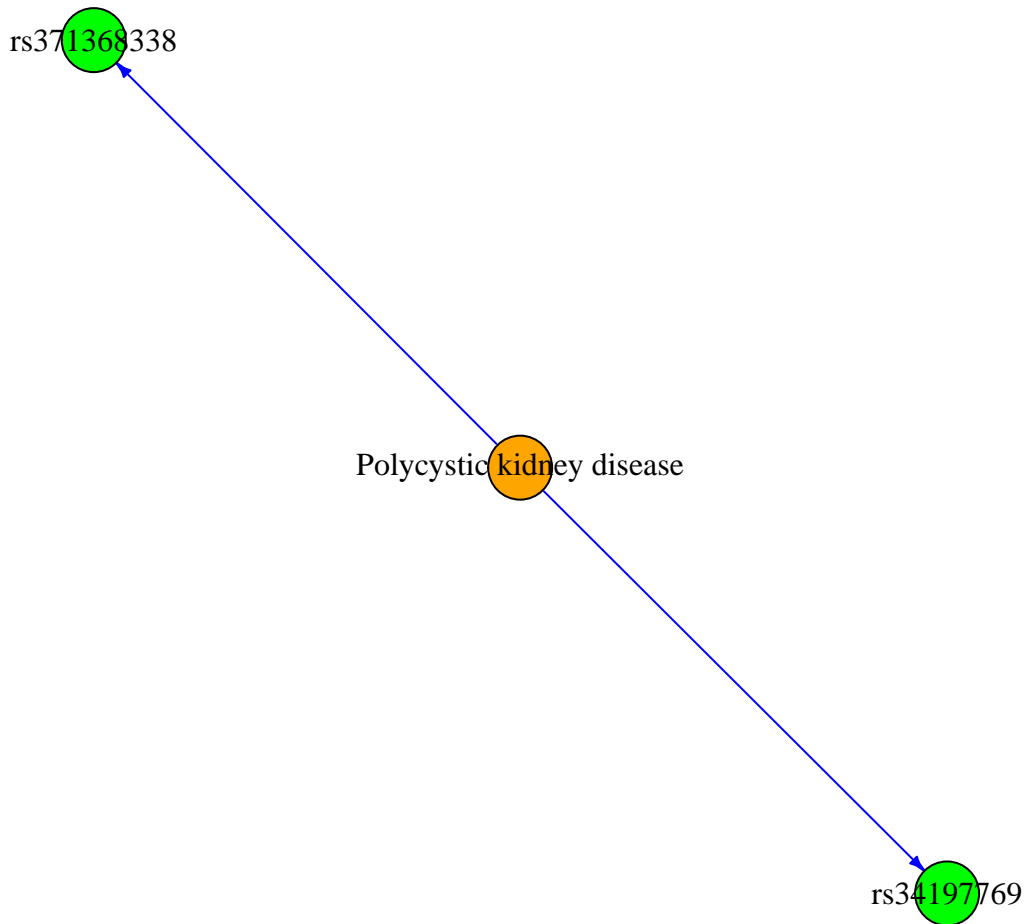



## Variant–Disease Network (Polycystic liver disease 1)

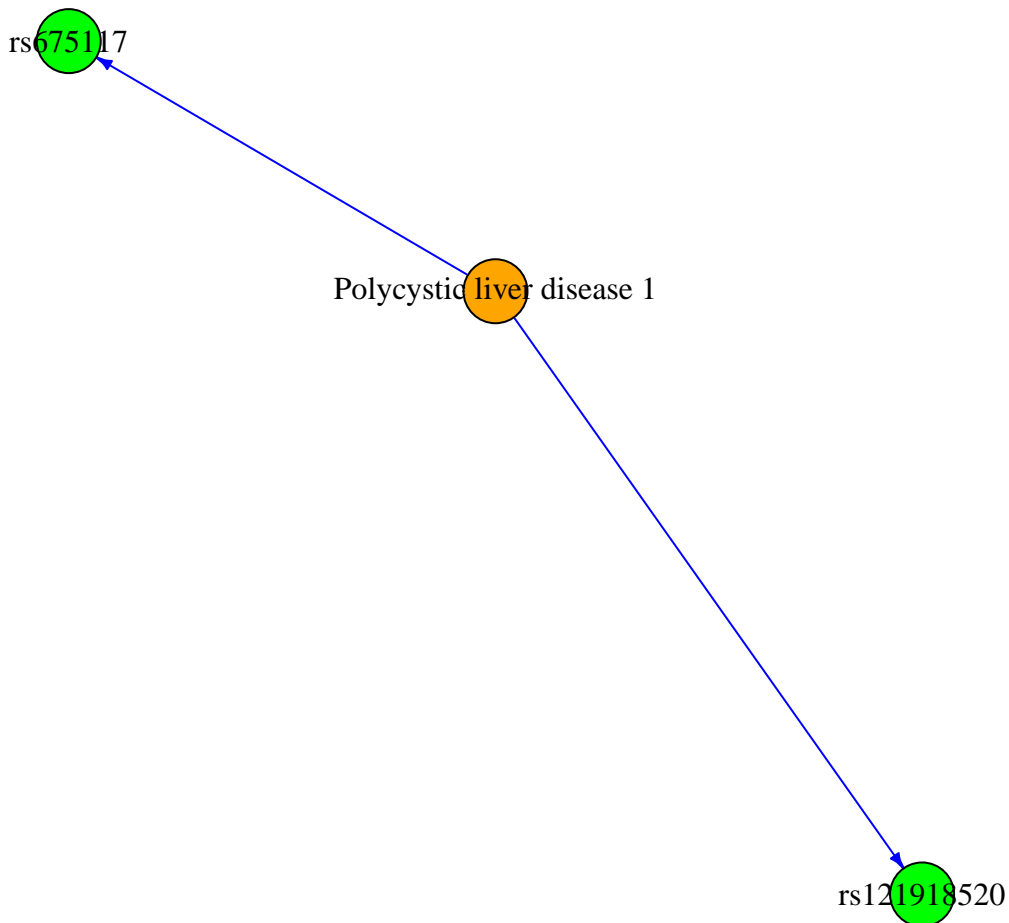

Variant–Disease Network (Polydactyly)

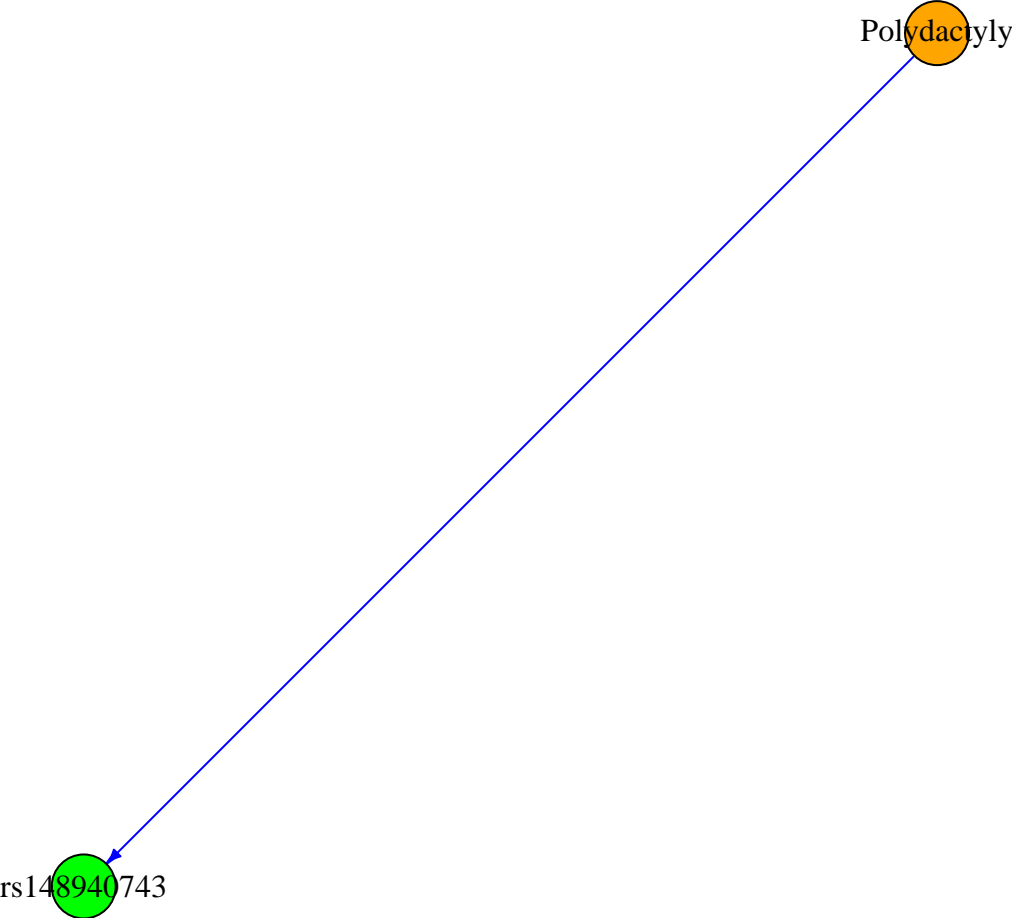

Variant–Disease Network (Polyglandular autoimmune syndrome)

Polyglandular autoimmune syndrome

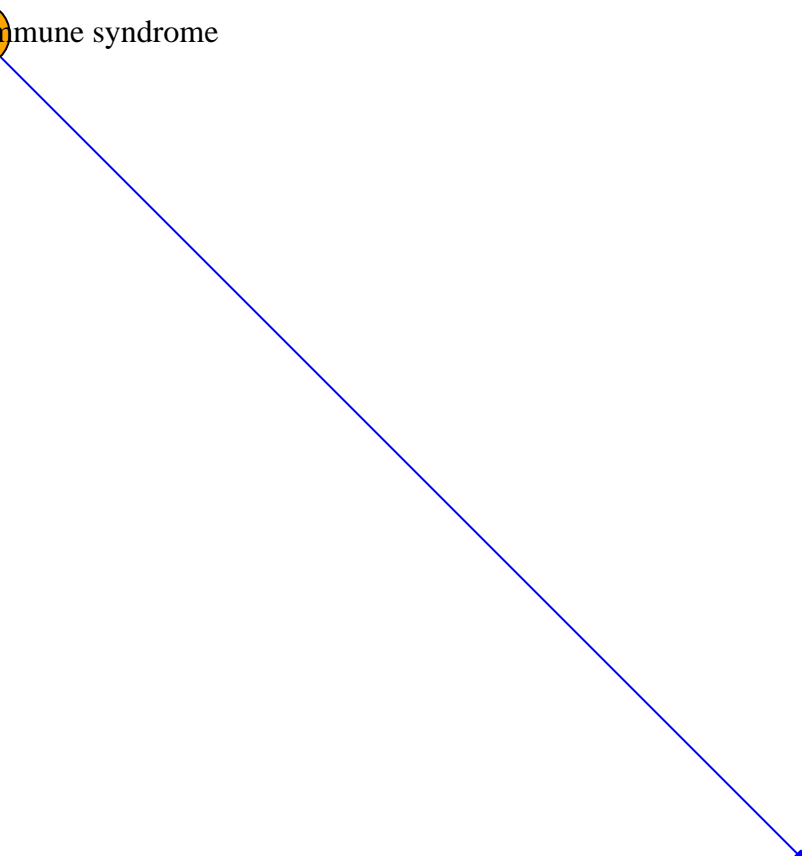

rs34397615

## Variant–Disease Network (Polyglucosan body disease)

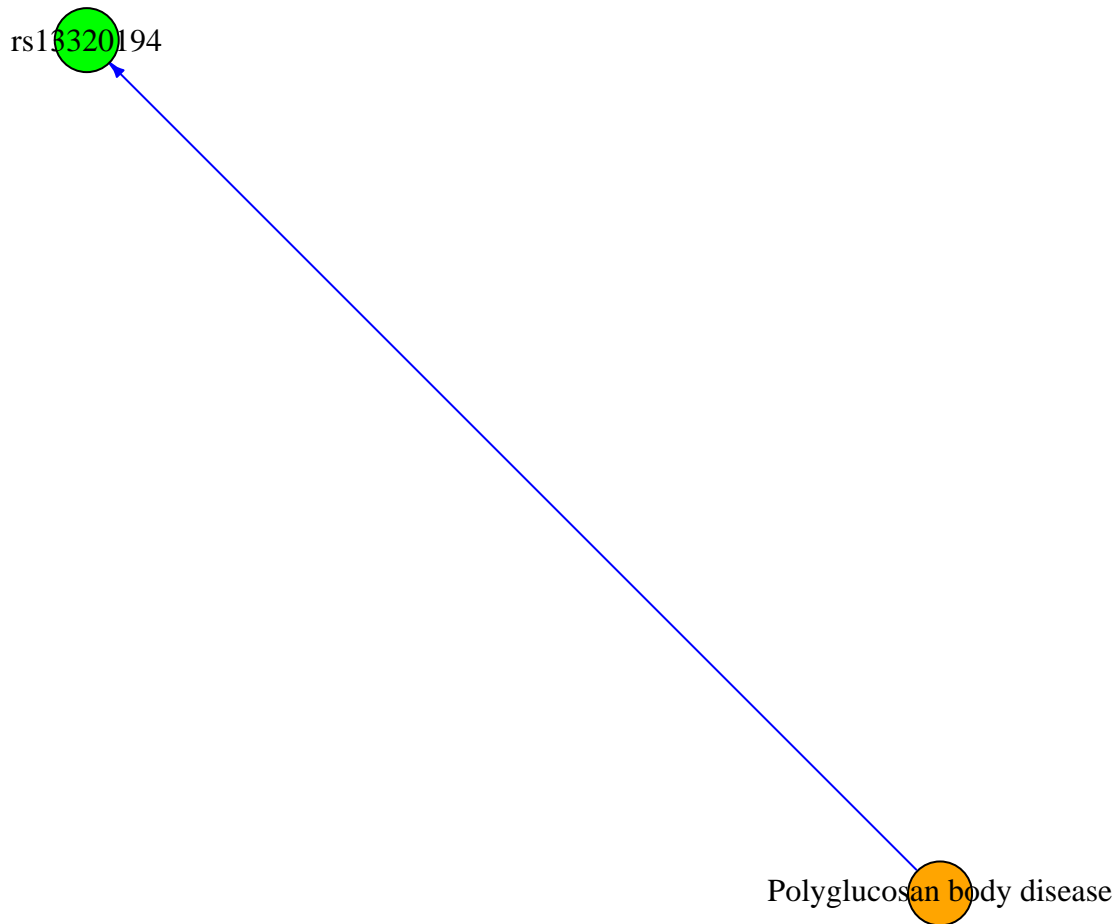

# t-Disease Network (Polyglucosan body myopathy 1 with or without immunon

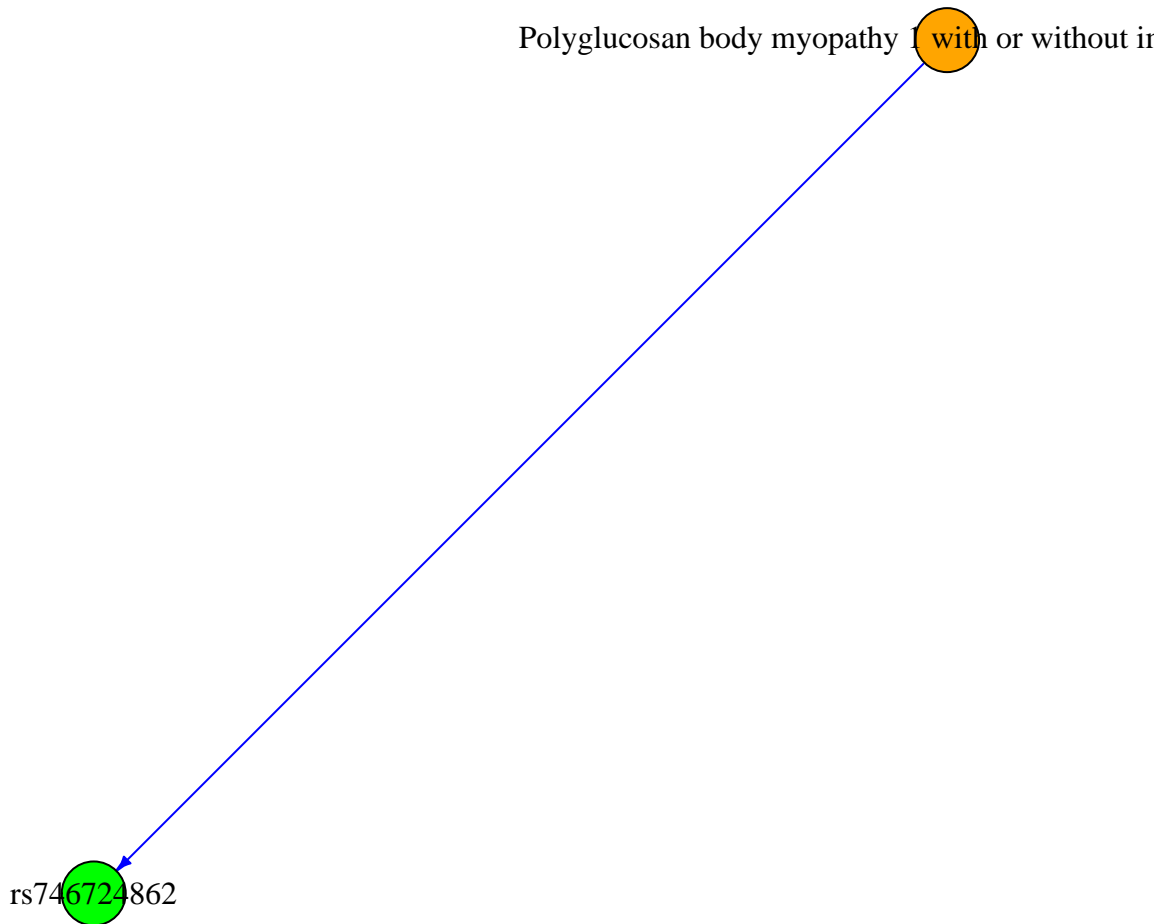

Variant–Disease Network (Polyneuropathy)

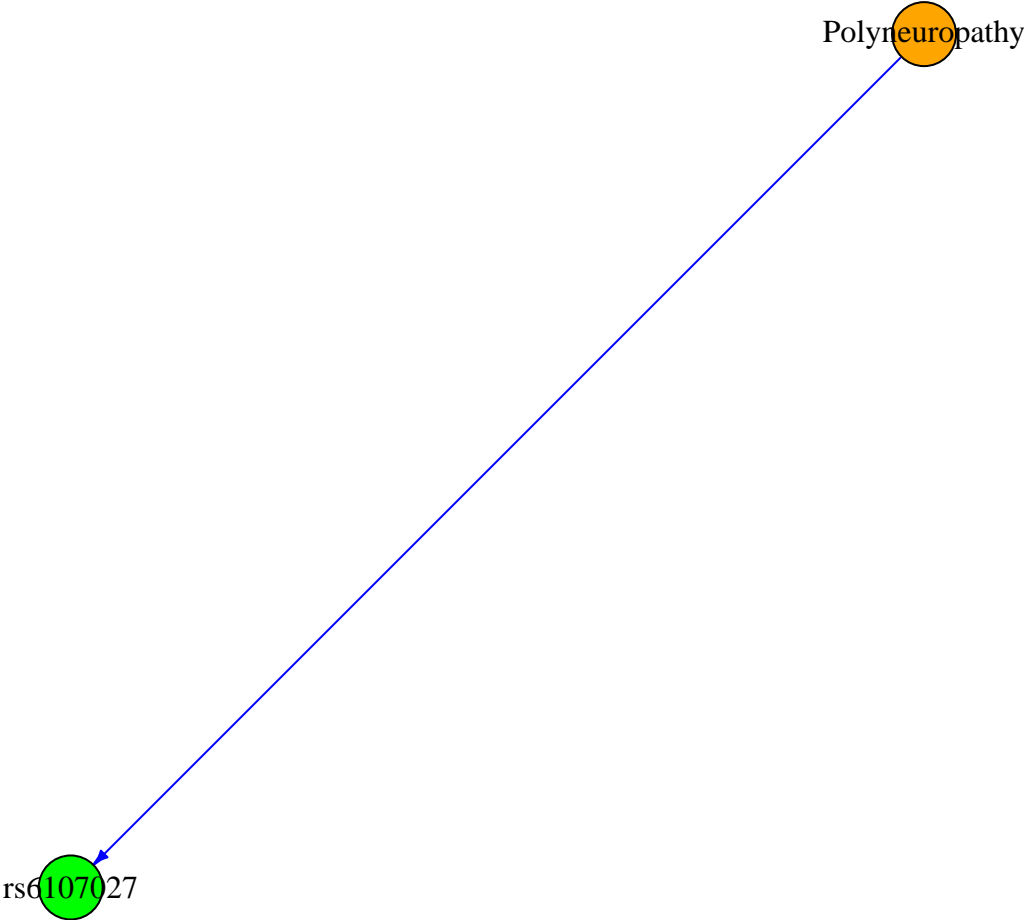

## Variant–Disease Network (Pontocerebellar hypoplasia)

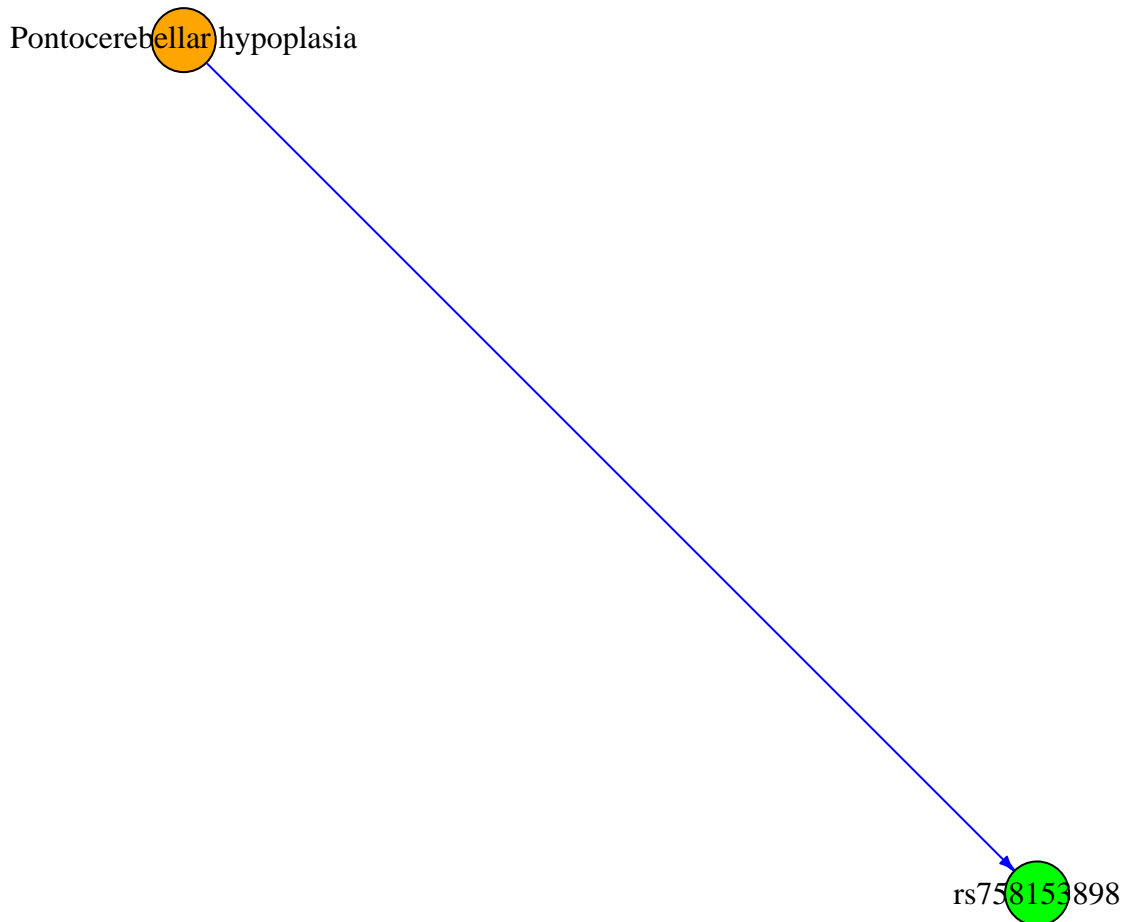

**Variant–Disease Network (Pontocerebellar hypoplasia)**

Pontocerebellar hypoplasia

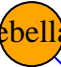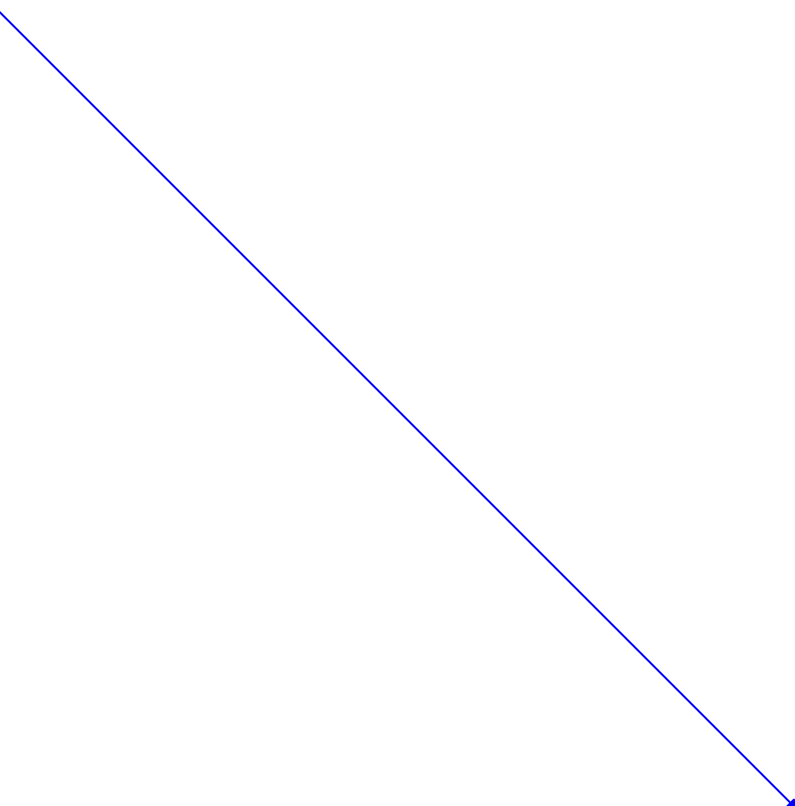

rs6501818

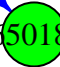



Variant–Disease Network (Popliteal pterygium syndrome)

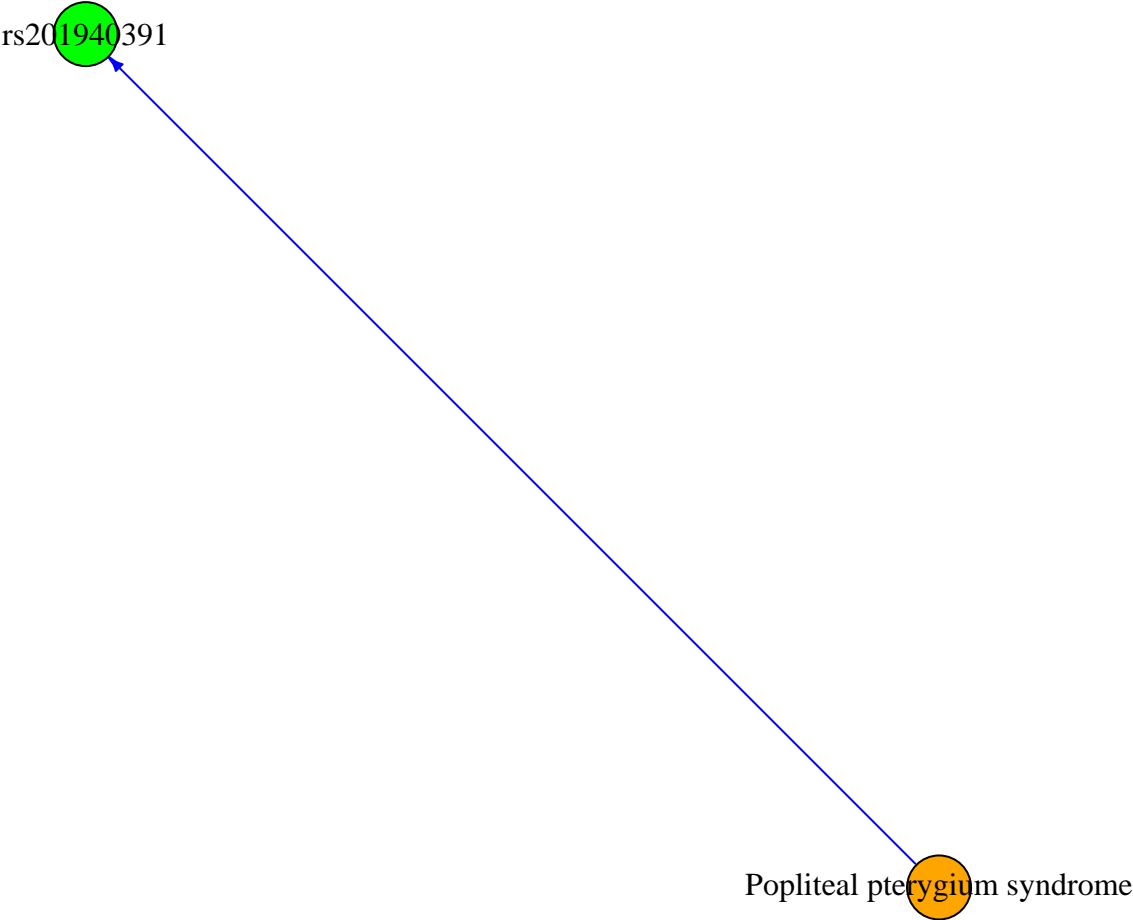

Variant–Disease Network (Porphobilinogen synthase deficiency)

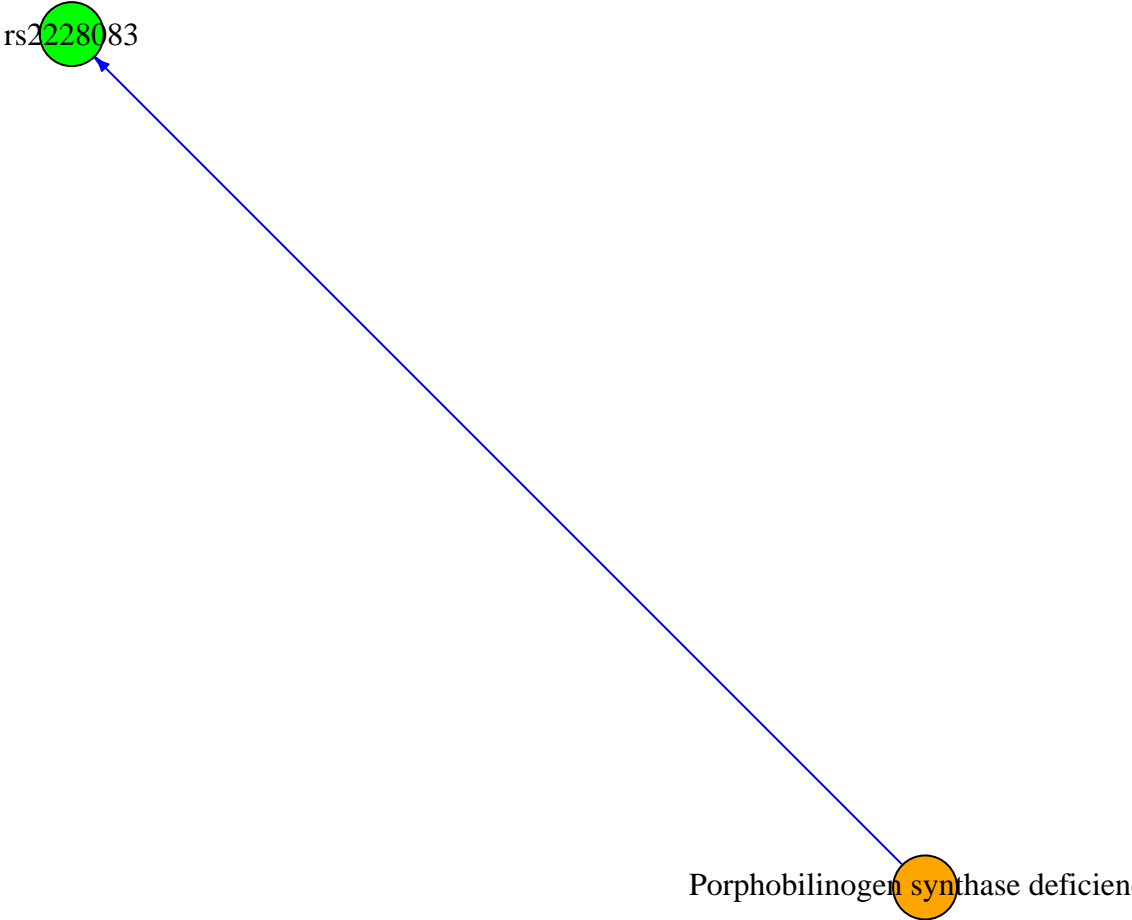

## Variant–Disease Network (Potassium aggravated myotonia)

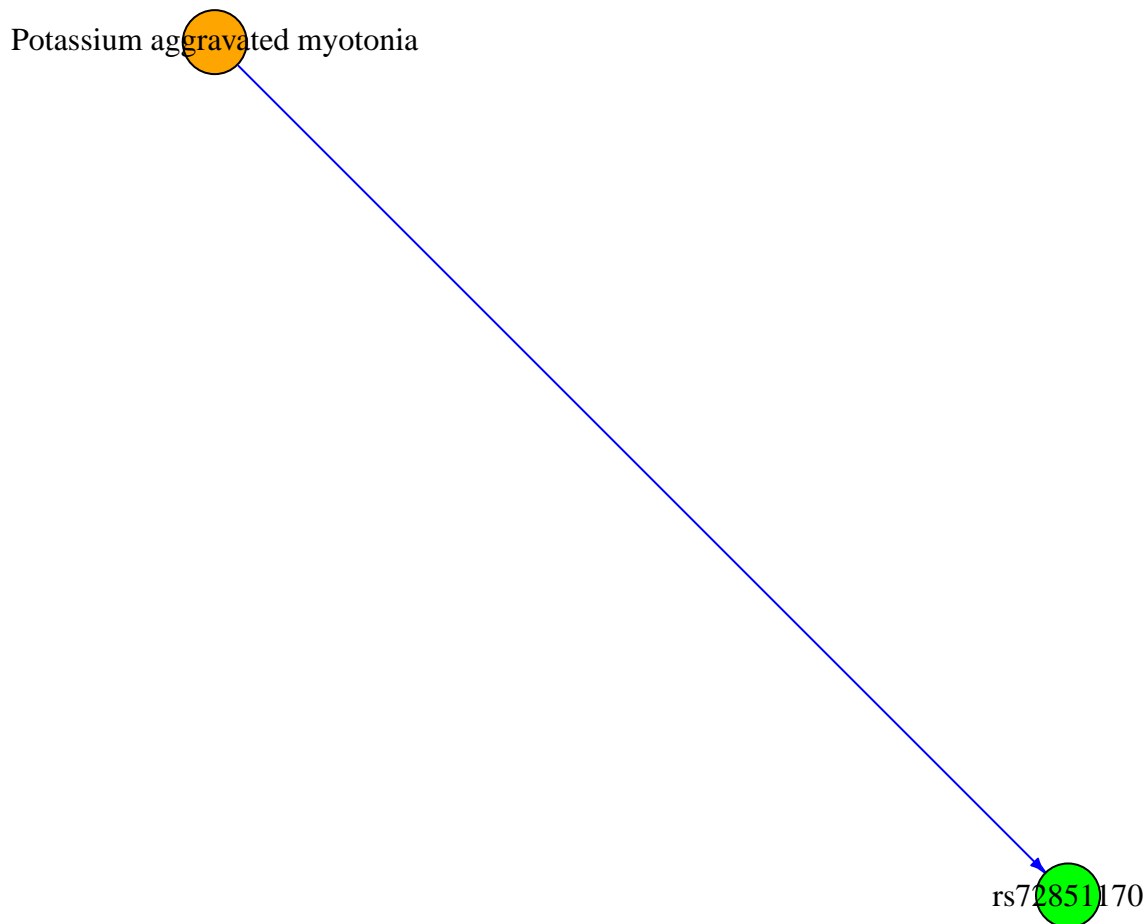

## Variant–Disease Network (Primary ciliary dyskinesia)

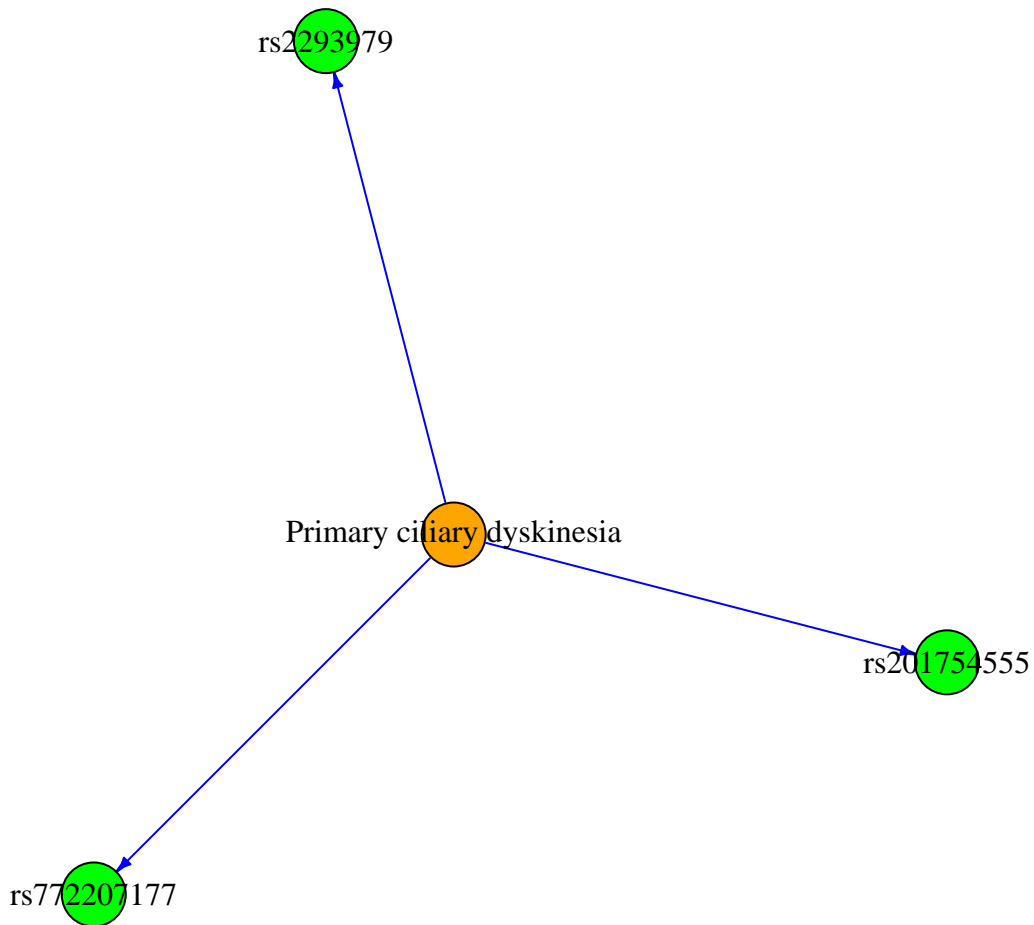

Variant–Disease Network (Primary congenital glaucoma)

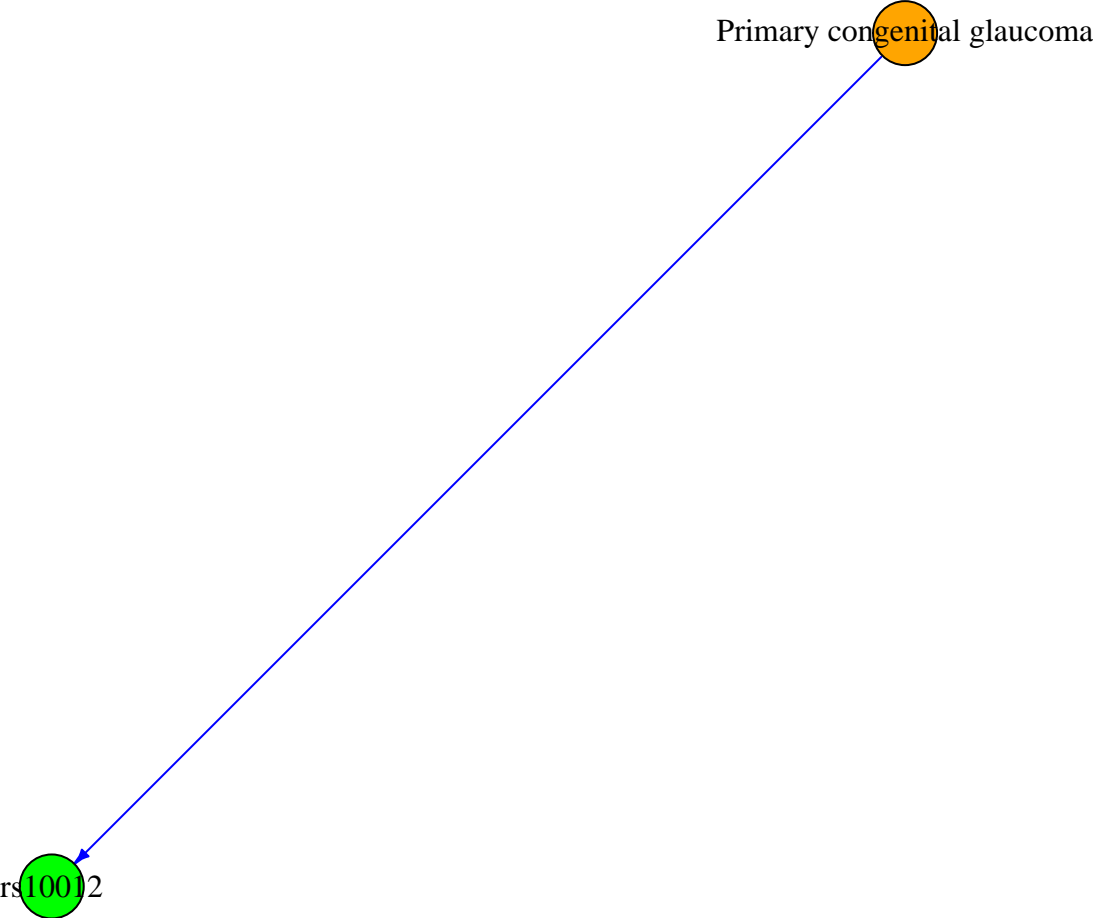

## Variant–Disease Network (Primary dilated cardiomyopathy)

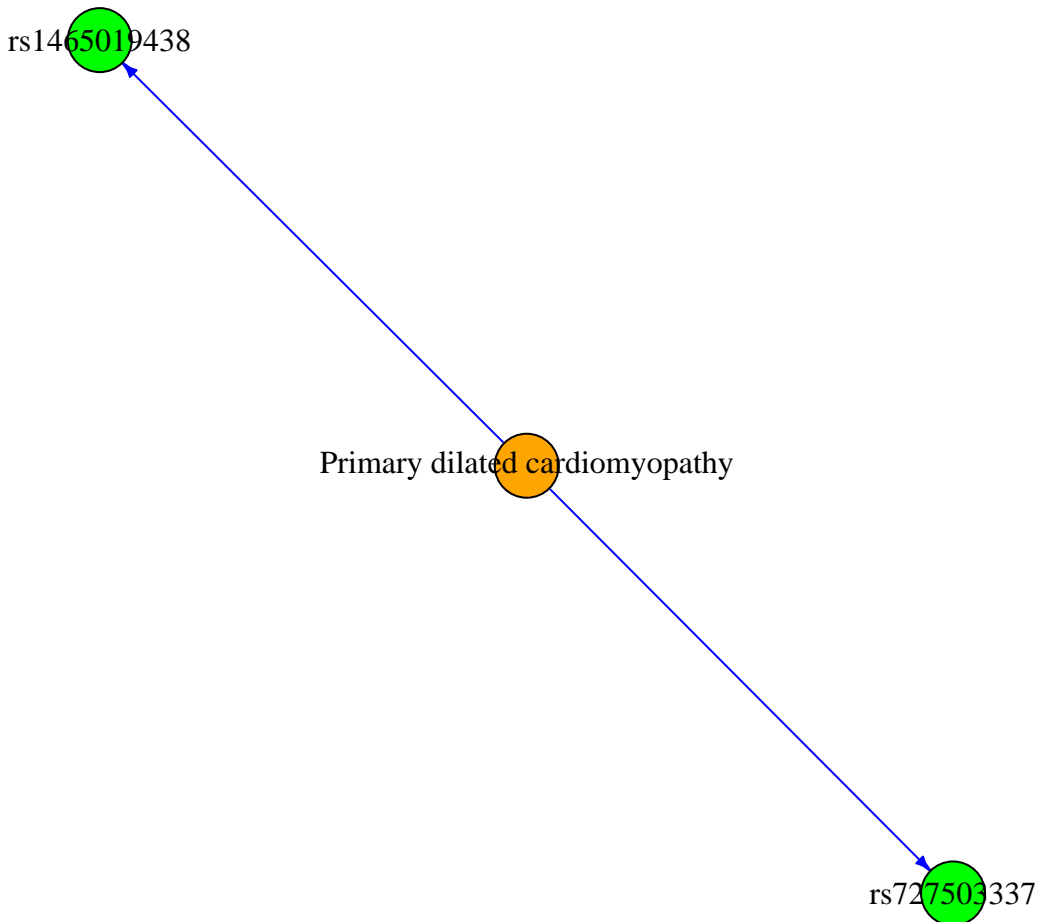

Variant–Disease Network (Primary familial hypertrophic cardiomyopathy)

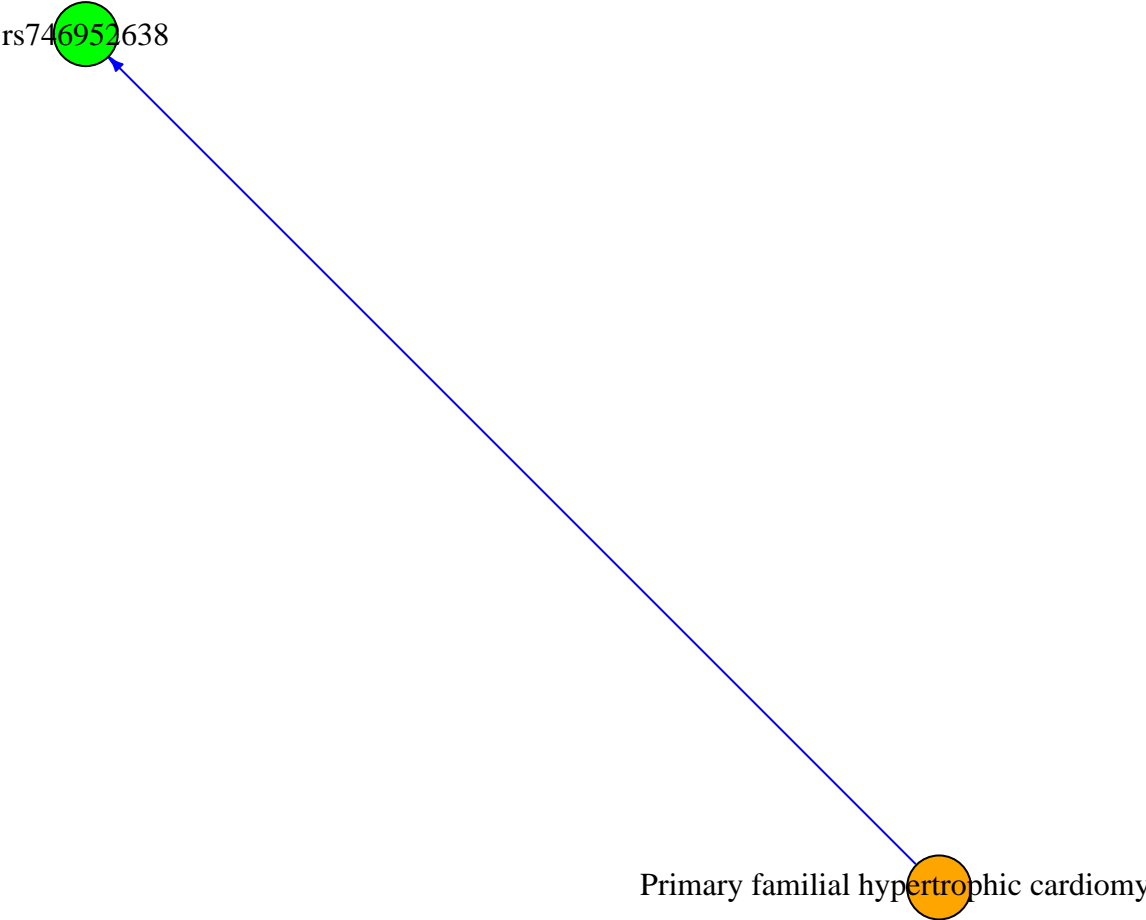

Variant–Disease Network (Primary open angle glaucoma)

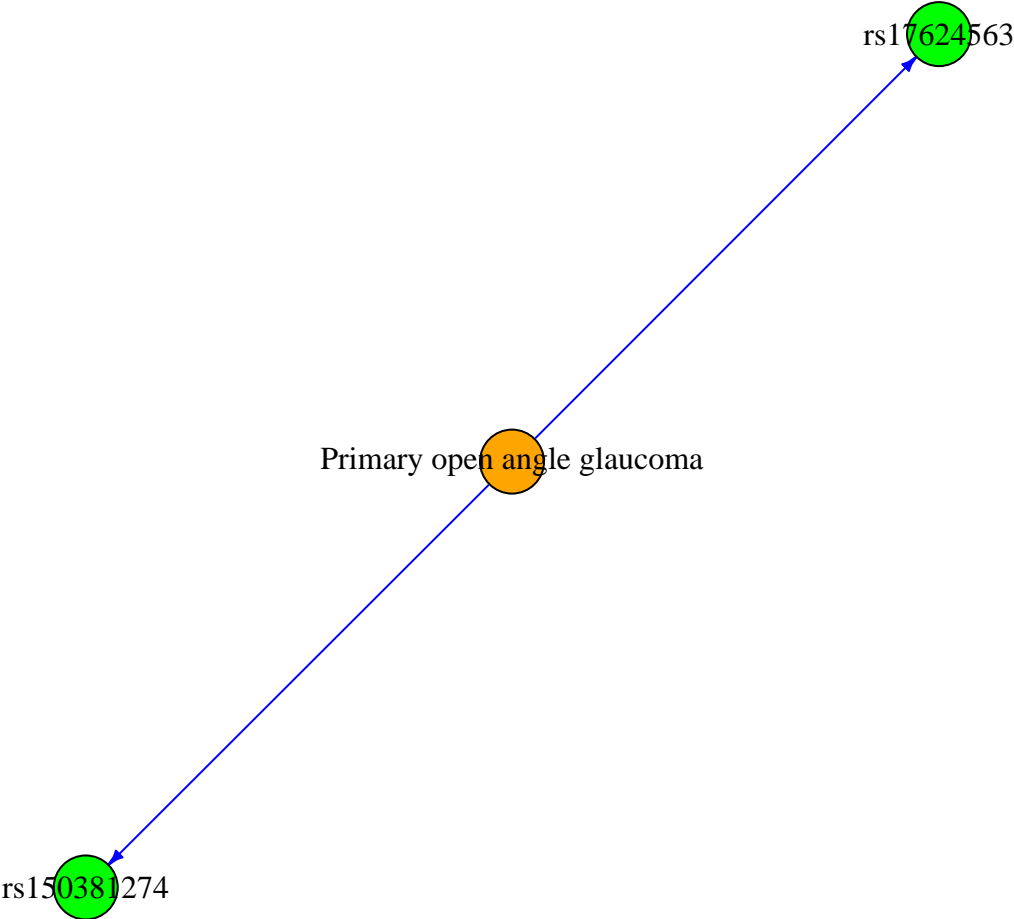



# Disease Network (Progressive External Ophthalmoplegia with Mitochondrial D

Progressive External Ophthalmoplegia with Mitochondrial DNA Deletions

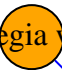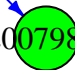

rs200798080

# Variant–Disease Network (Progressive familial intrahepatic cholestasis)

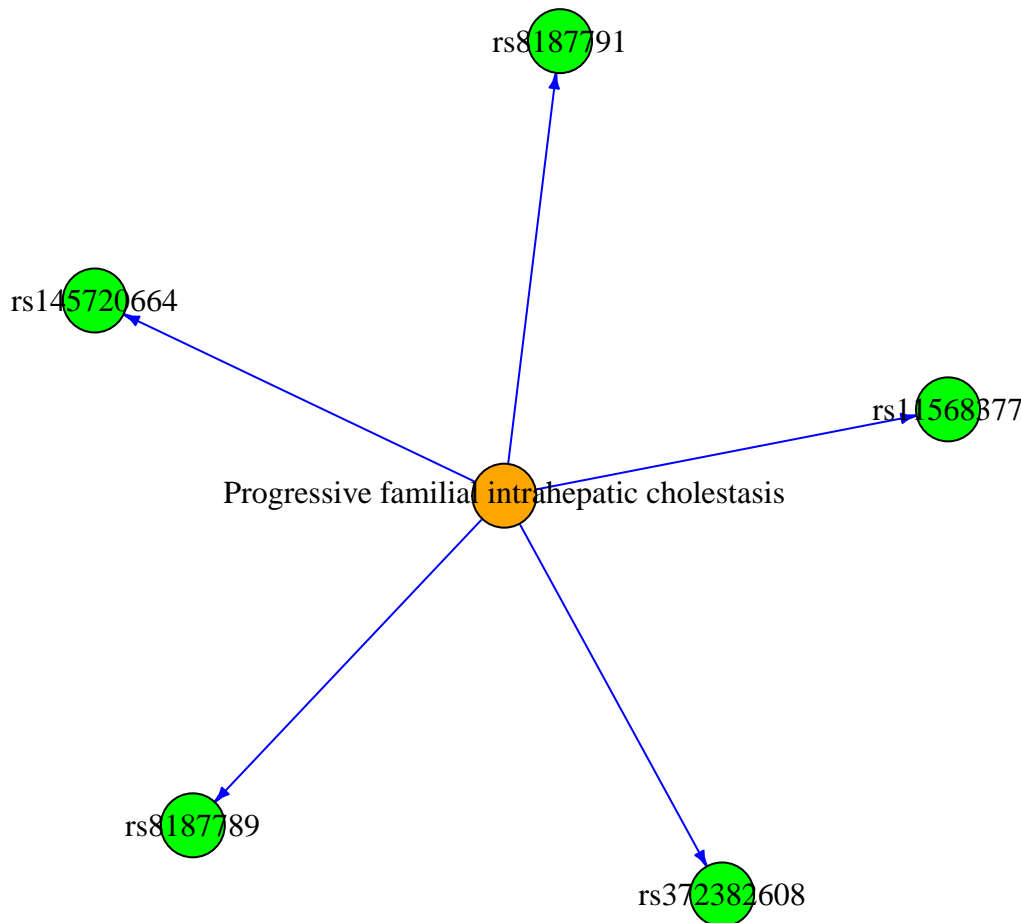

Variant–Disease Network (Progressive familial intrahepatic cholestasis 3)

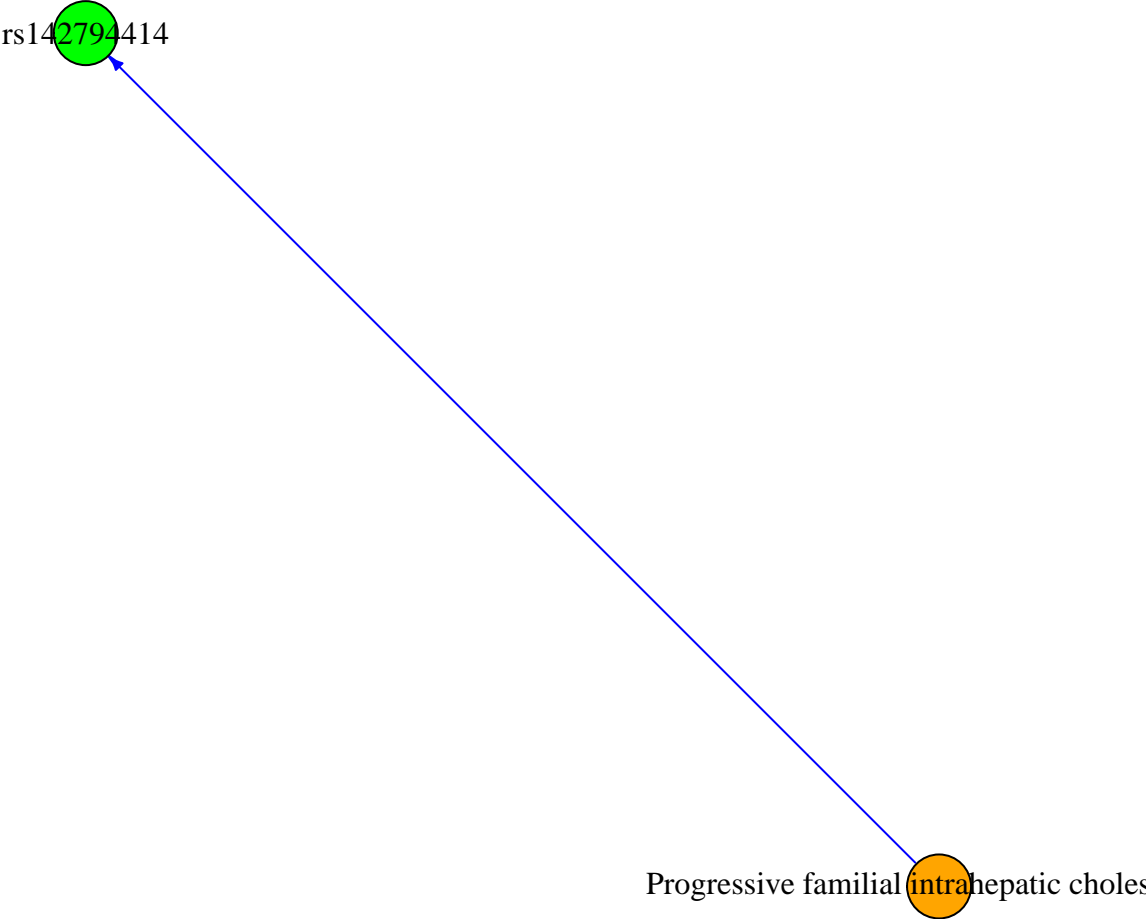

# Variant-Disease Network (Progressive myoclonic epilepsy)

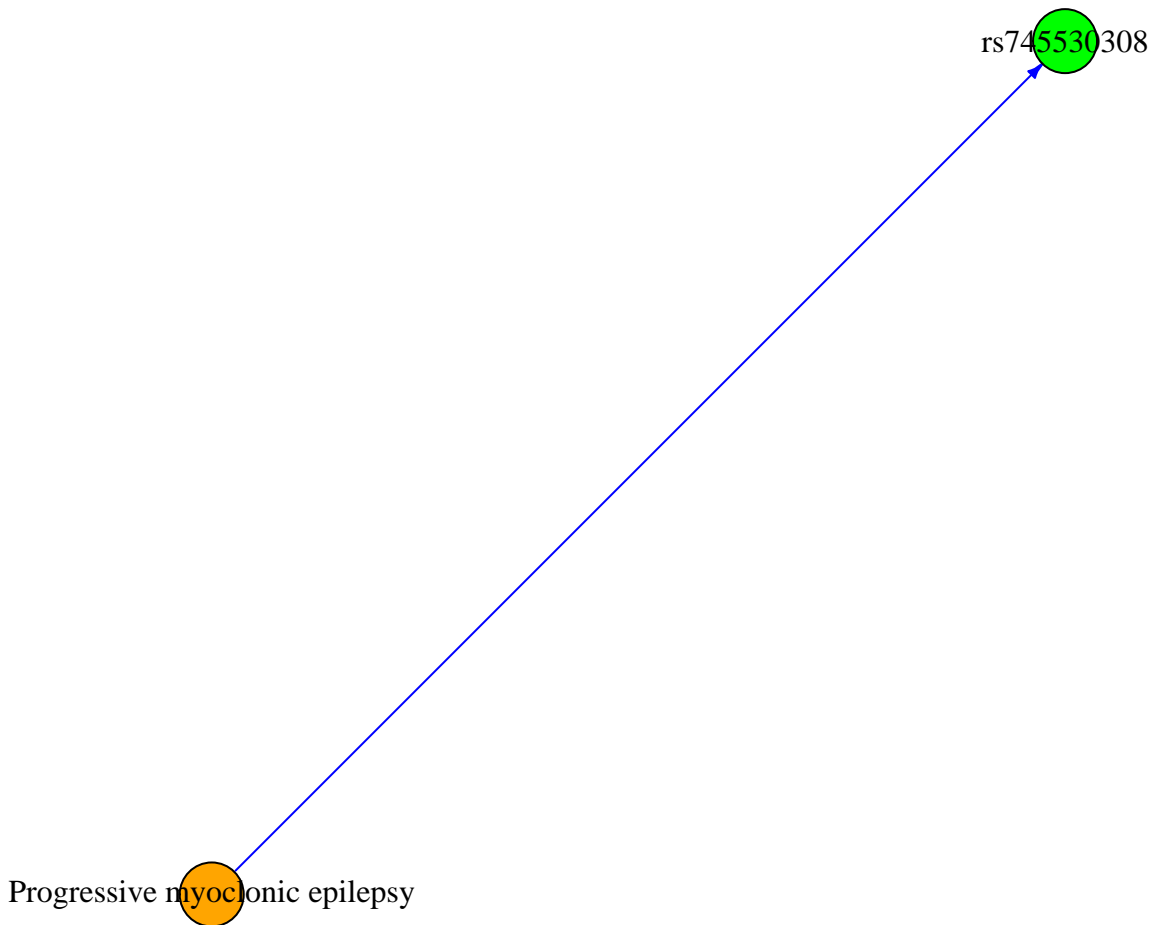

**Variant–Disease Network (Progressive myoclonus epilepsy with ataxia)**

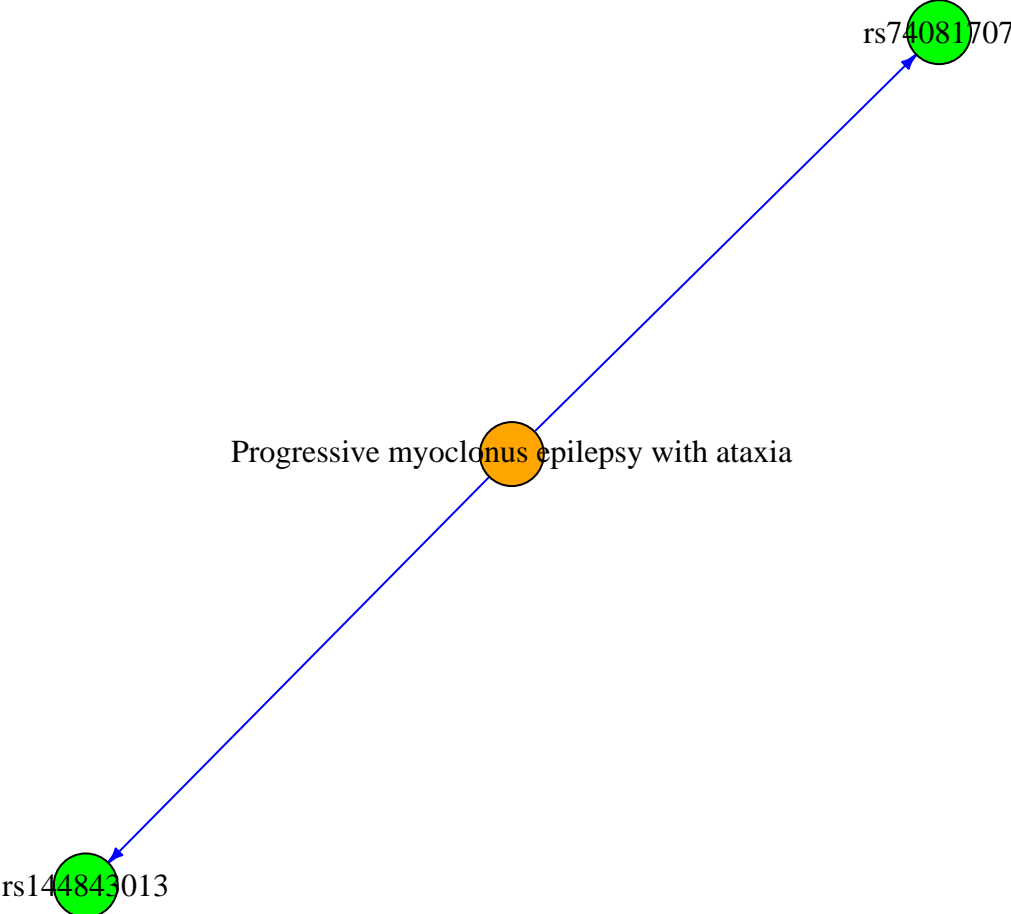

## Variant-Disease Network (Progressive myositis ossificans)

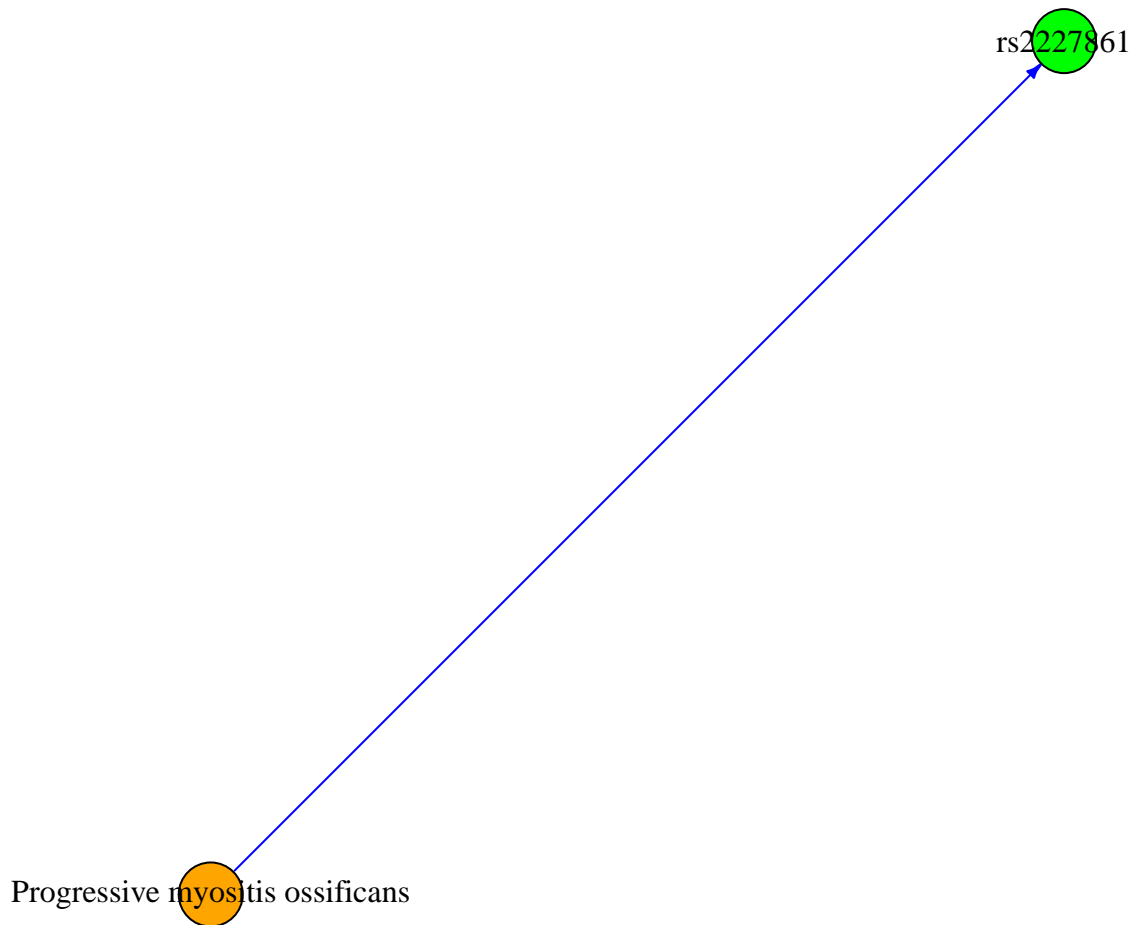

Variant–Disease Network (Progressive sclerosing poliodystrophy)

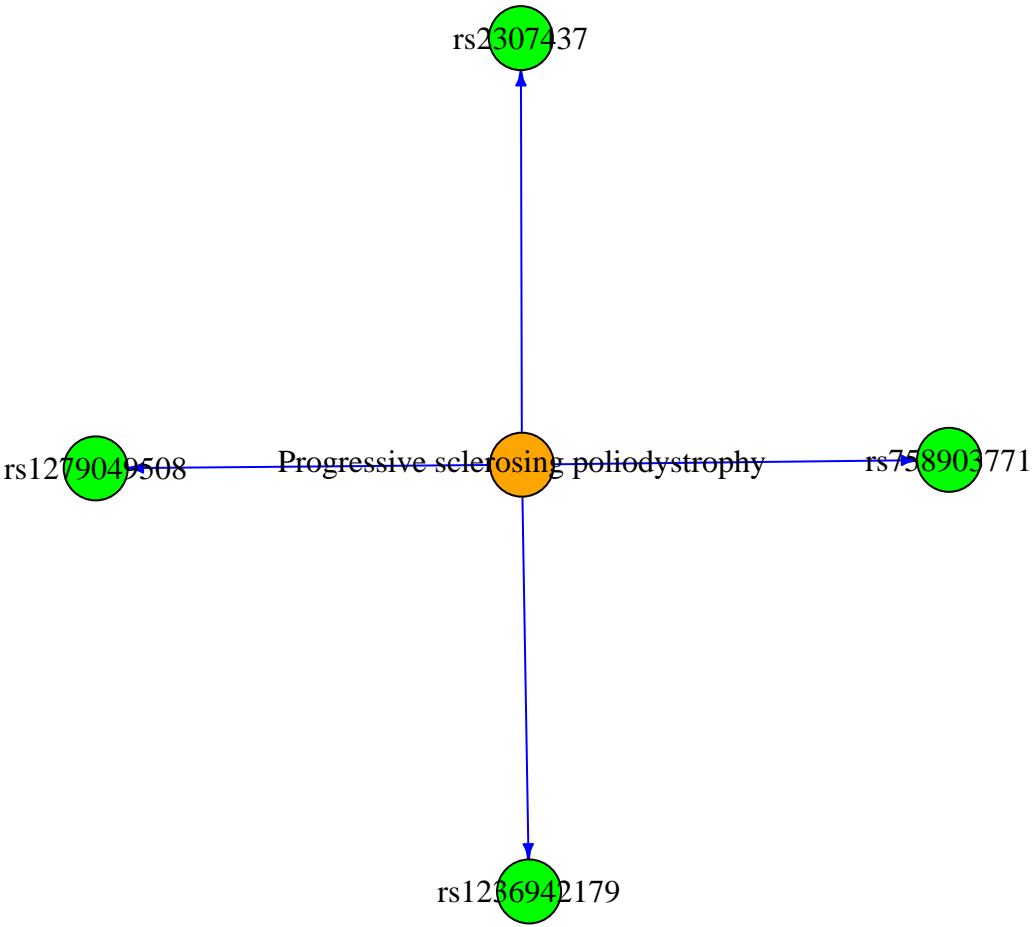

Variant–Disease Network (Propionyl–CoA carboxylase deficiency)

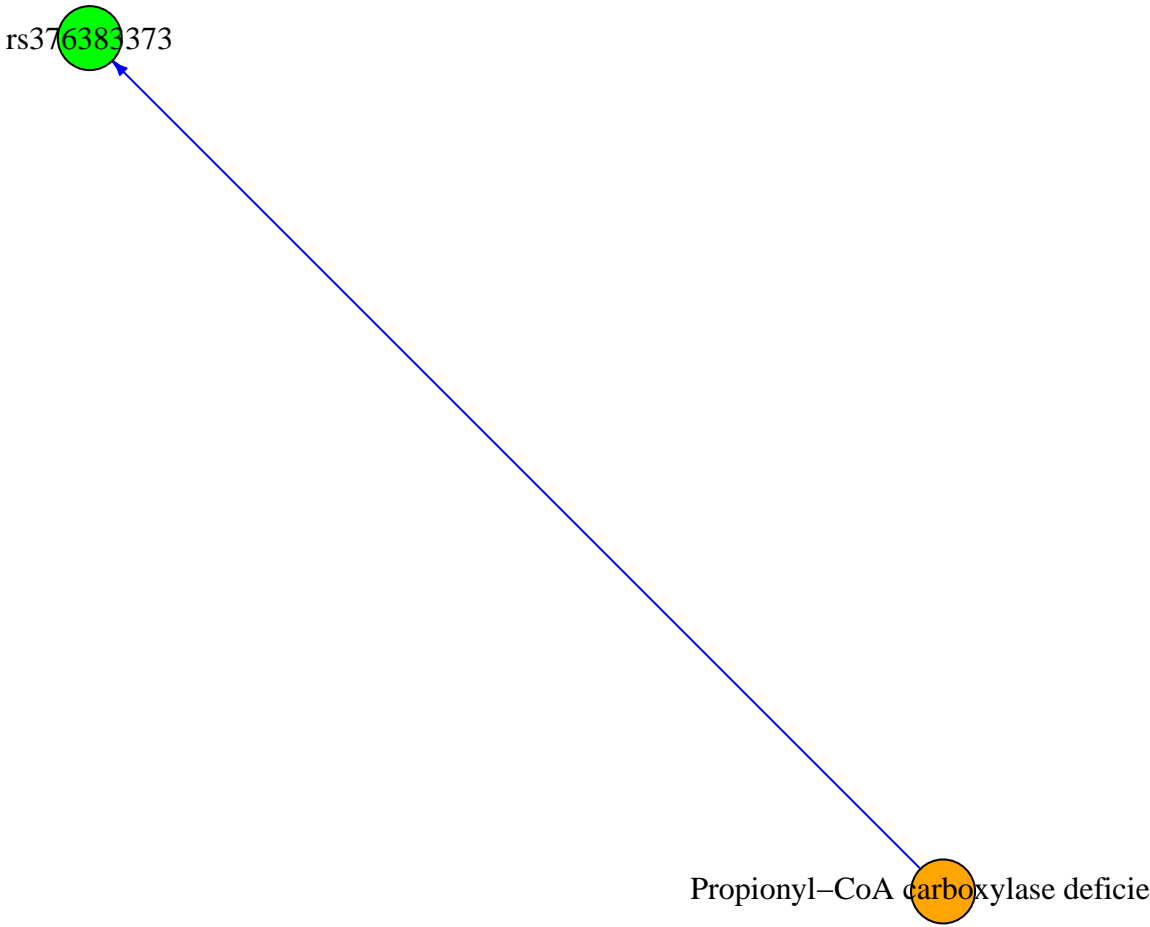



# Variant–Disease Network (Proprotein convertase 1/3 deficiency)

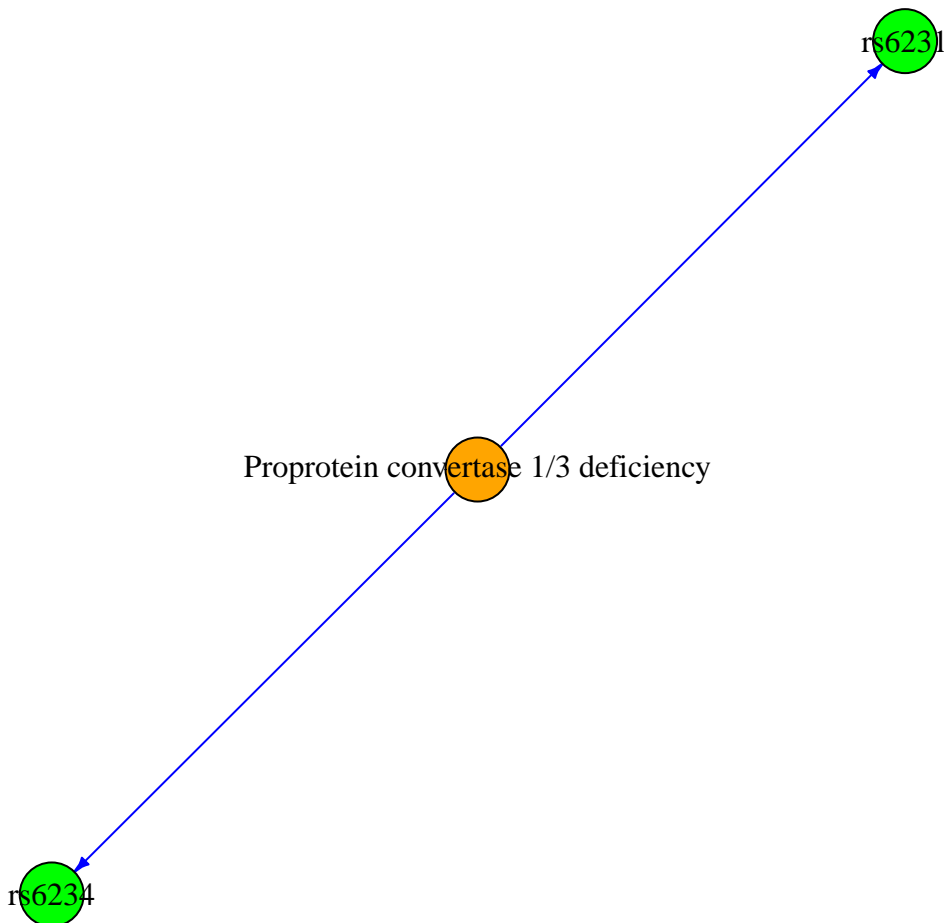

## Variant–Disease Network (Protein S deficiency)

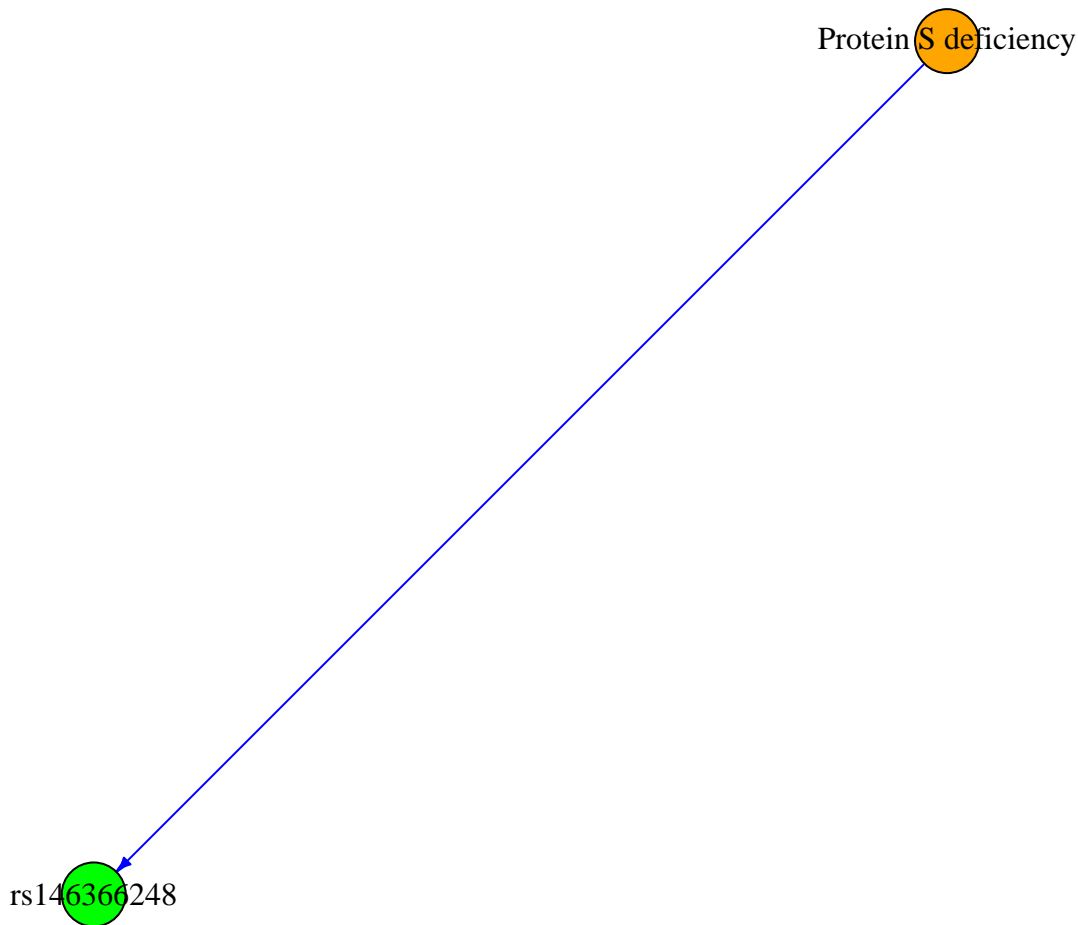

## Variant–Disease Network (Protoporphyrria)

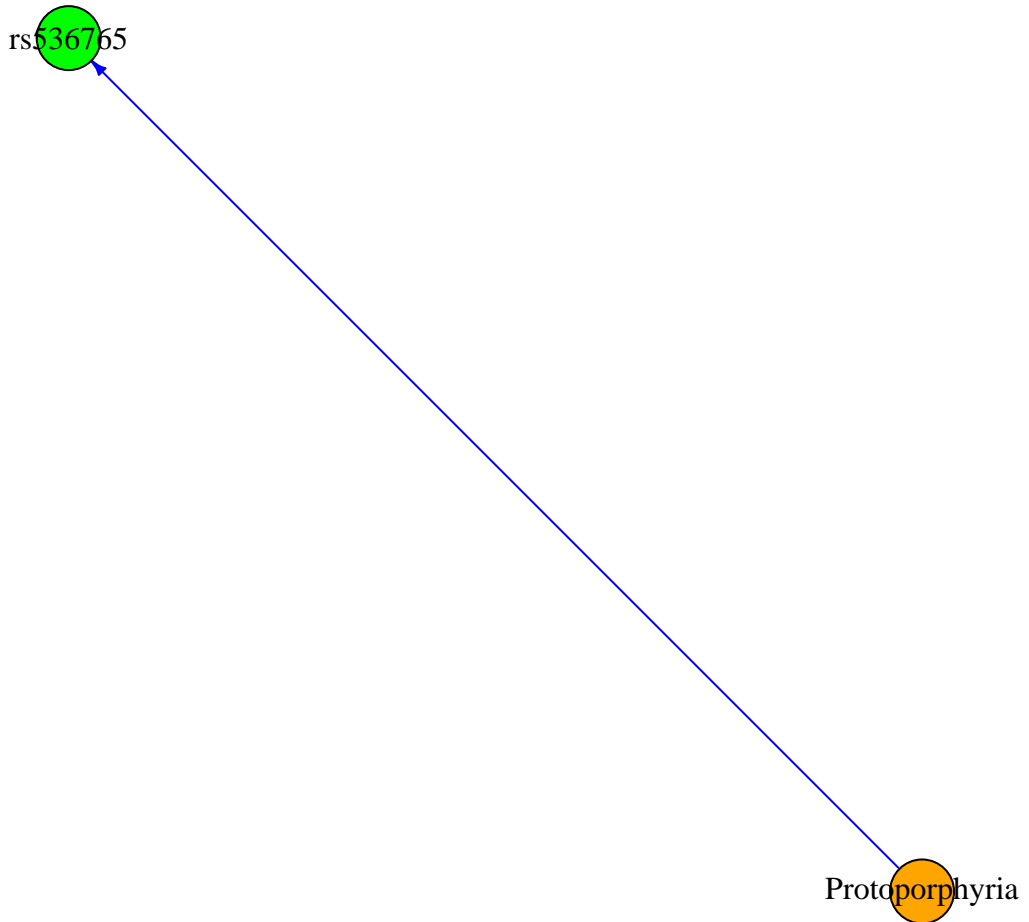

# Variant-Disease Network (Pseudohypoaldosteronism type 1 autosomal recessive)

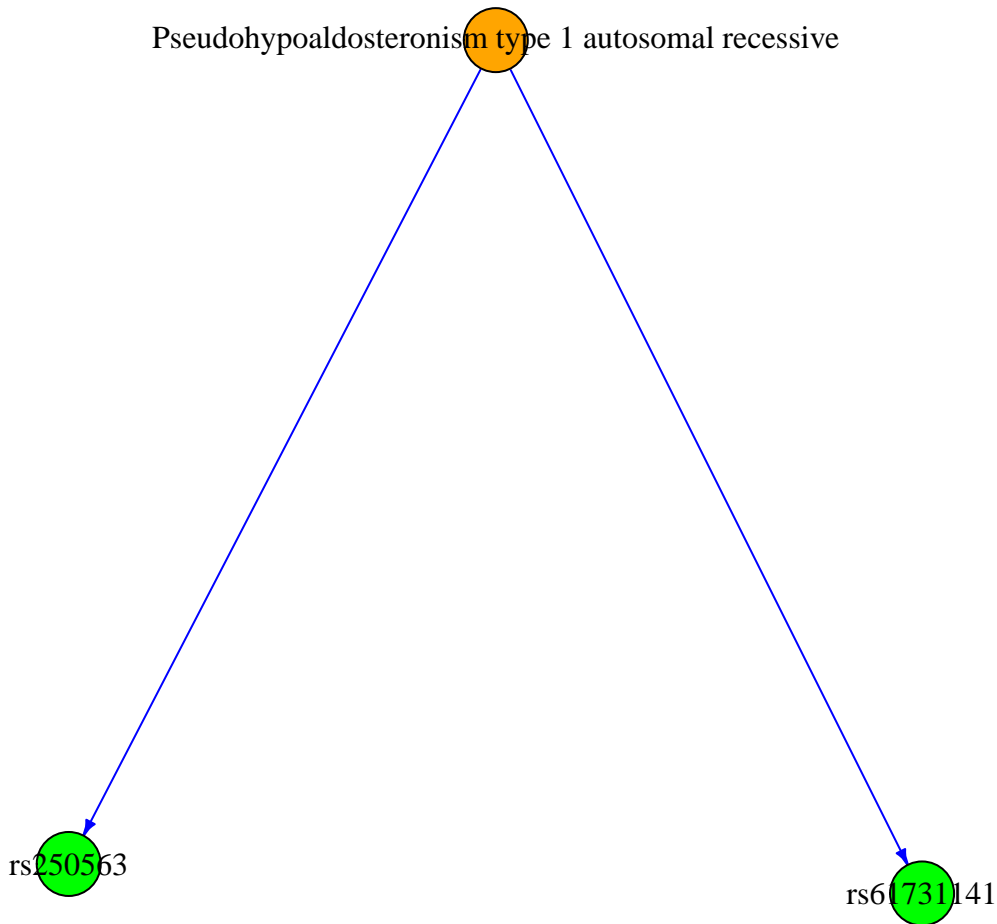

Variant–Disease Network (Pseudoinflammatory fundus dystrophy)

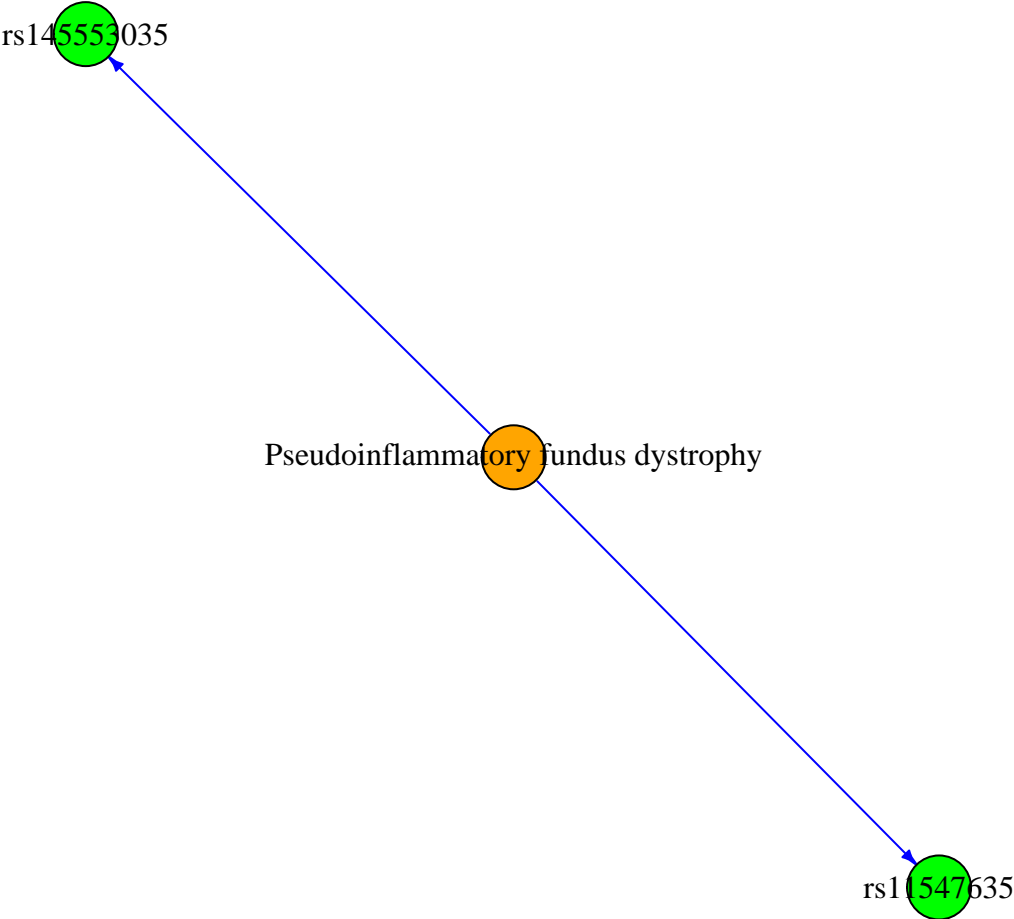

**Variant–Disease Network (Psoriasis susceptibility 2)**

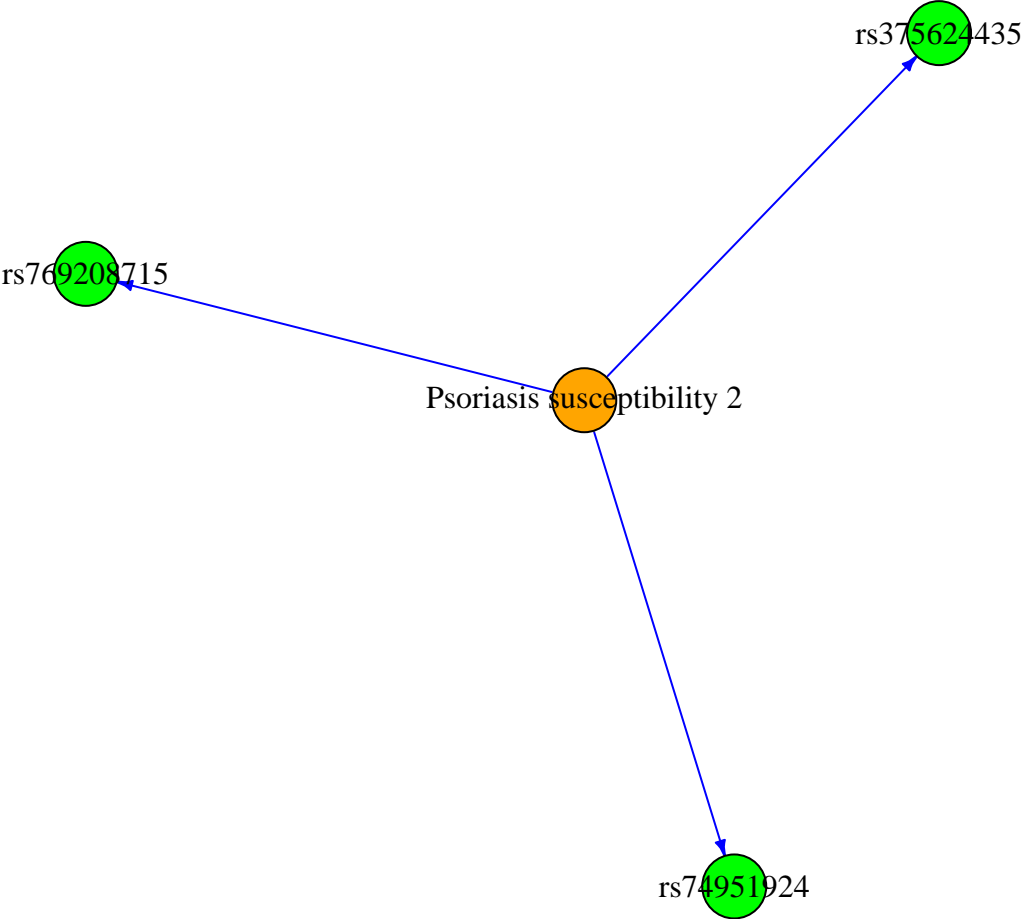

Variant–Disease Network (Pulmonary Surfactant Metabolism Dysfunction

Pulmonary Surfactant Metabolism Dysfunction

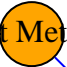

rs623043

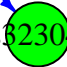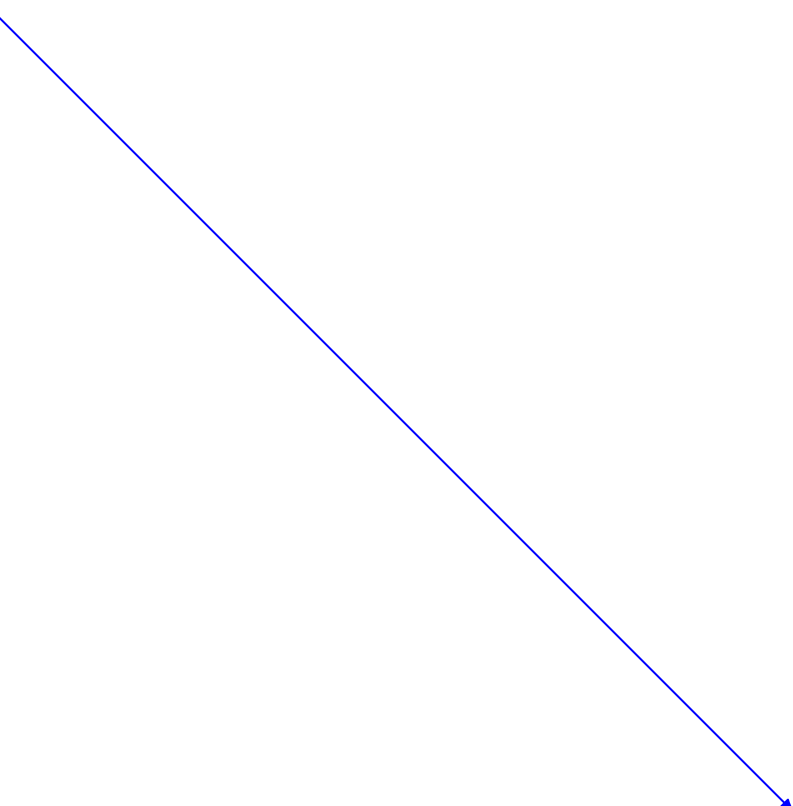

Variant–Disease Network (Pyruvate dehydrogenase phosphatase deficiency)

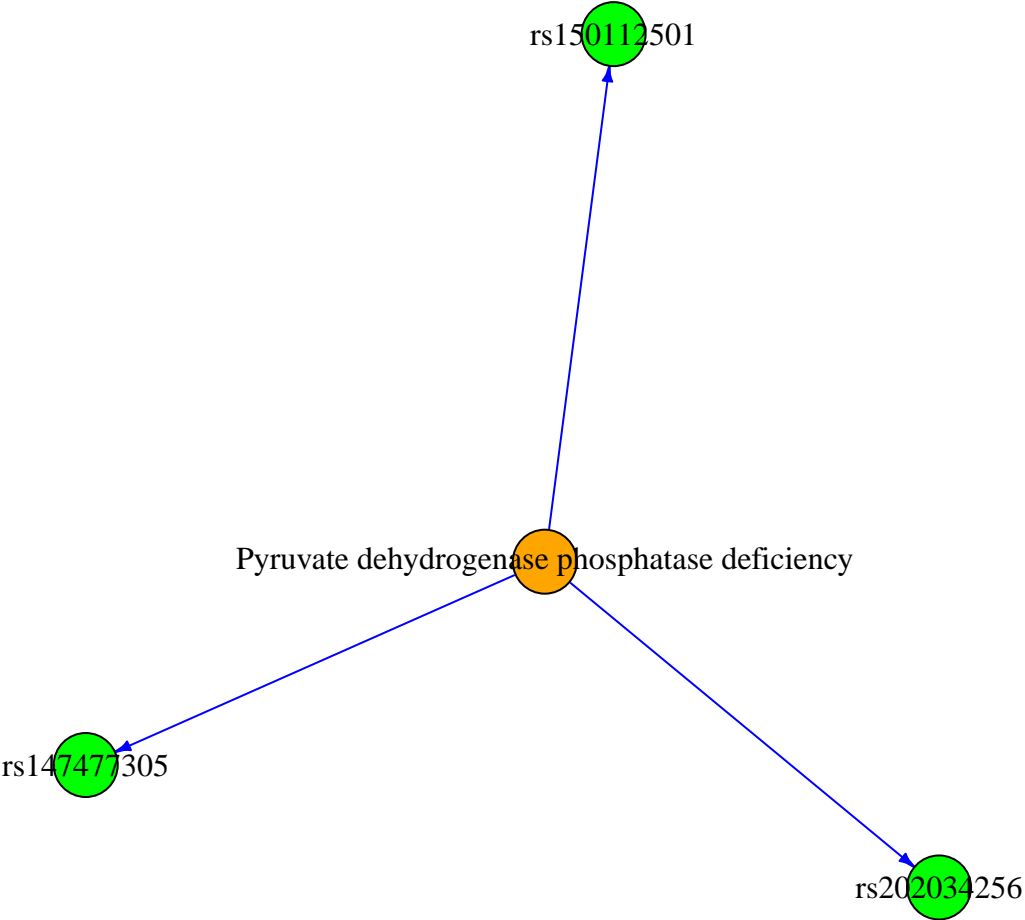



## Variant–Disease Network (Rare genetic deafness)

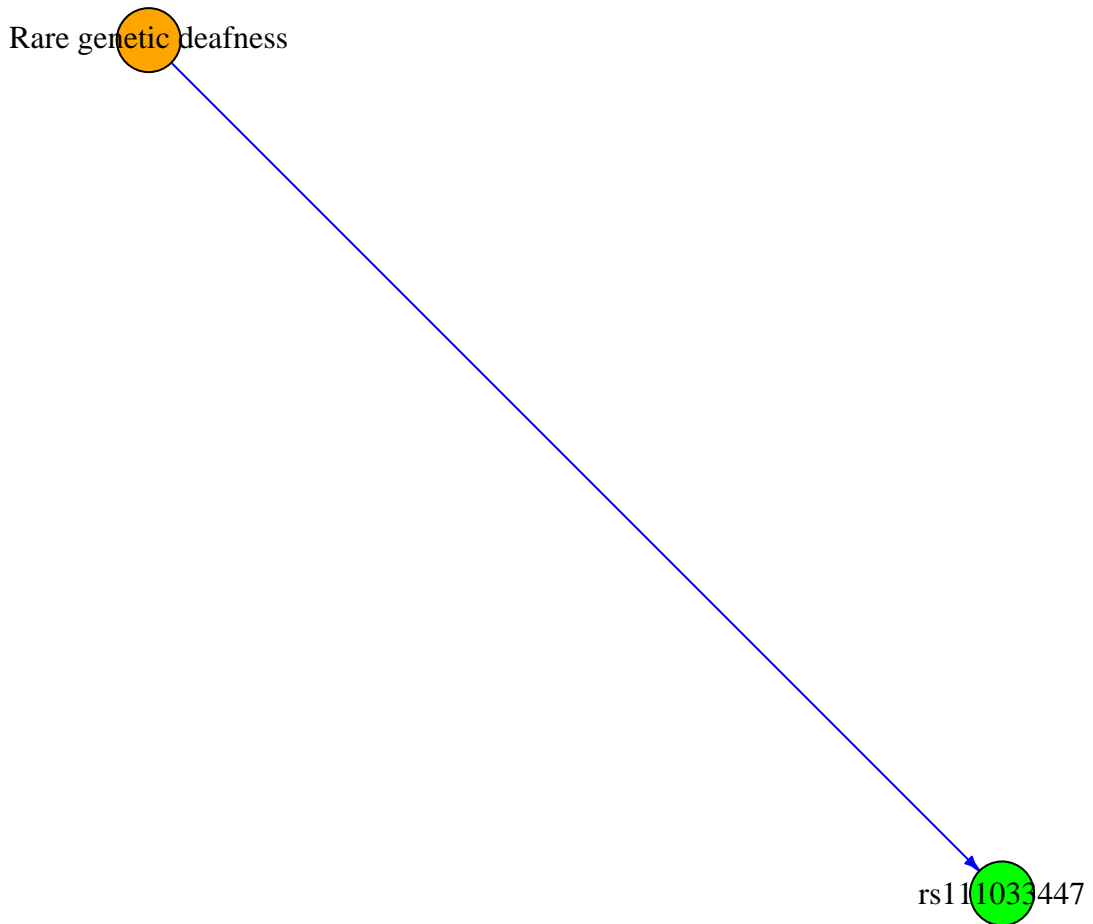

## Variant–Disease Network (Rasopathy)

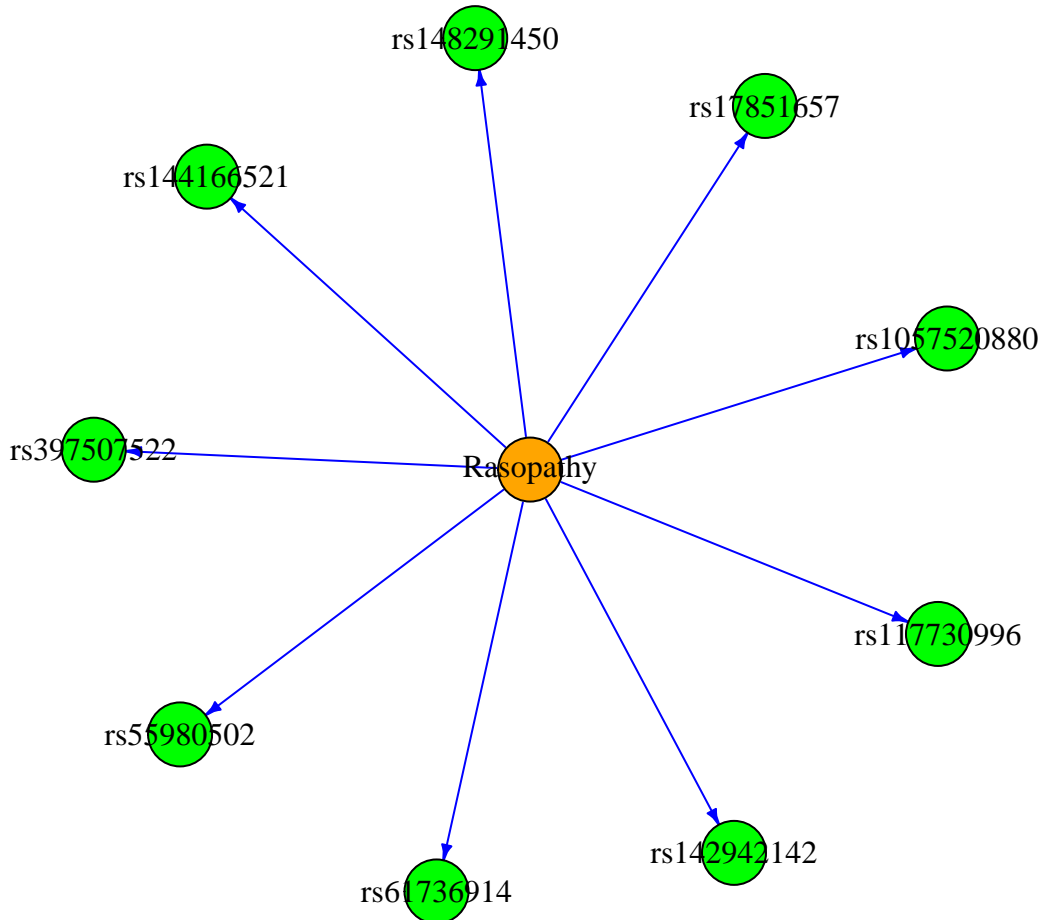

## Variant–Disease Network (Renal carnitine transport defect)

rs145350949

Renal carnitine transport defect

rs199689597

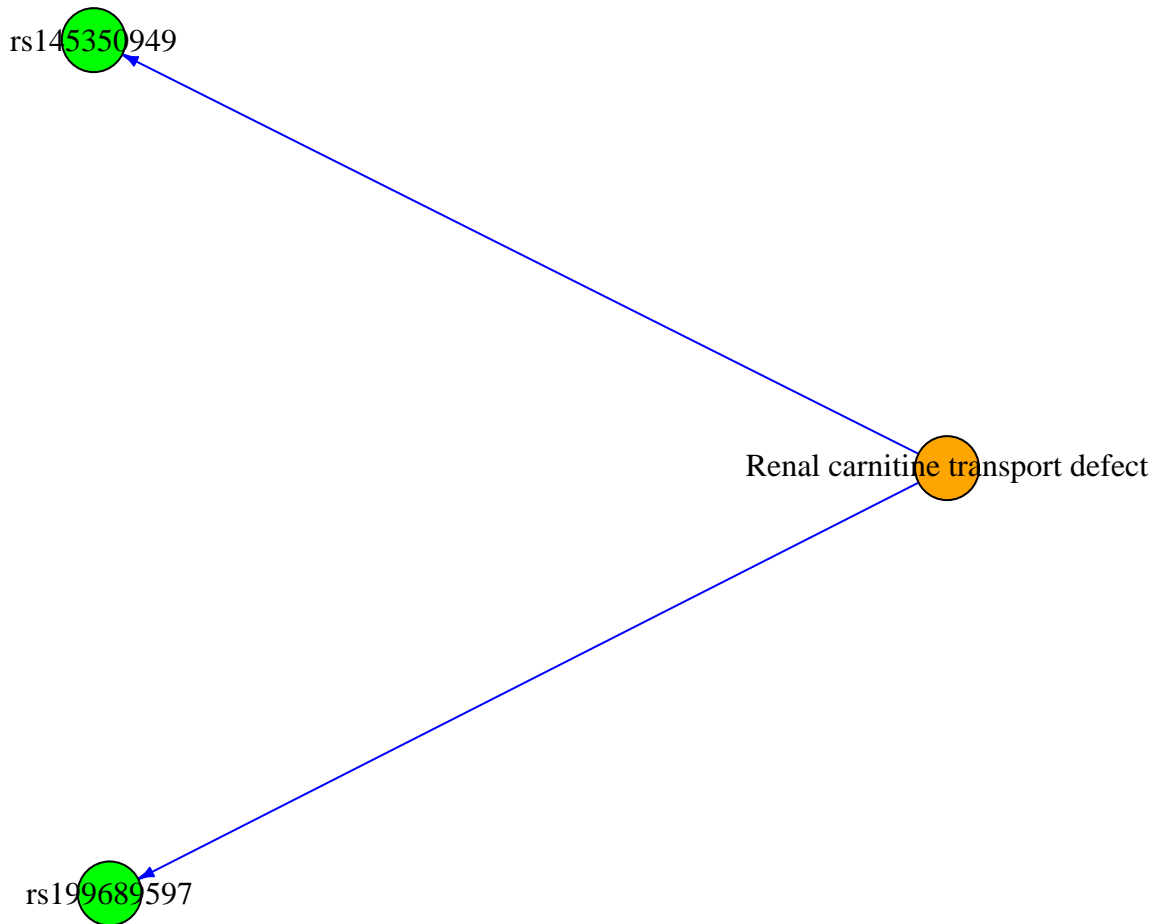

Variant–Disease Network (Renal dysplasia)

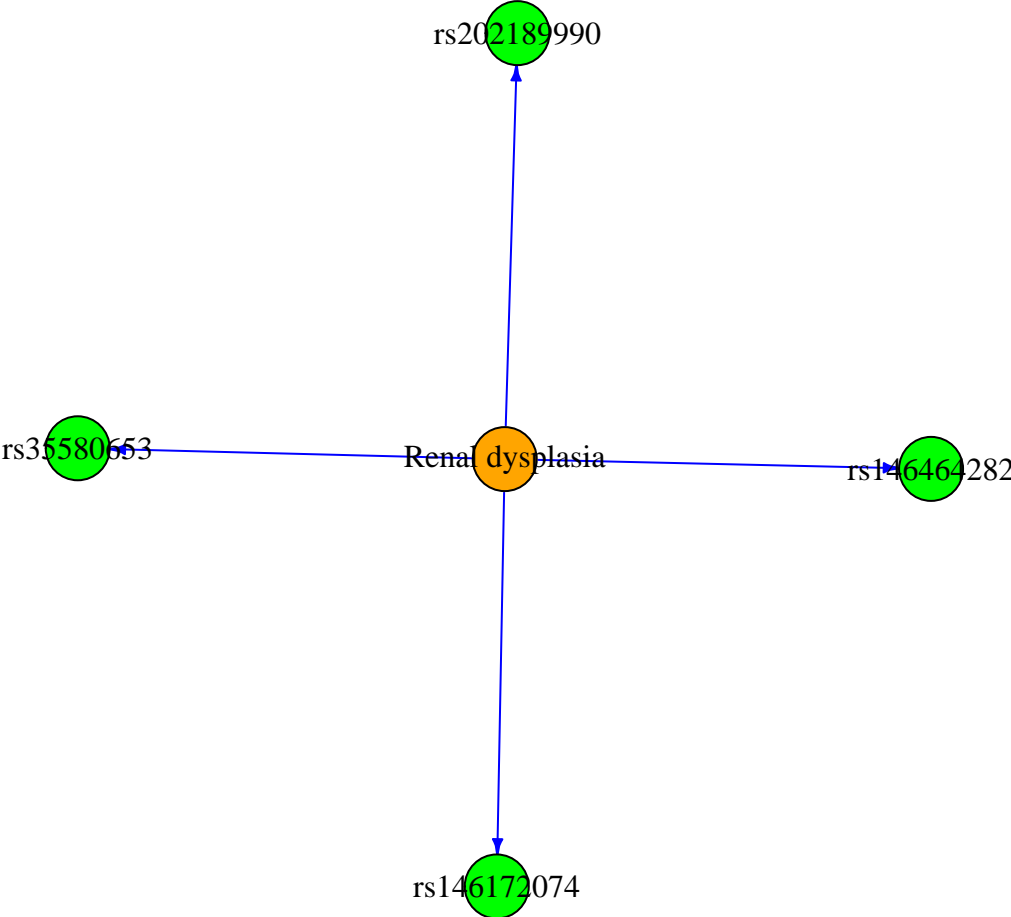

## Variant–Disease Network (Renal dysplasia and retinal aplasia)

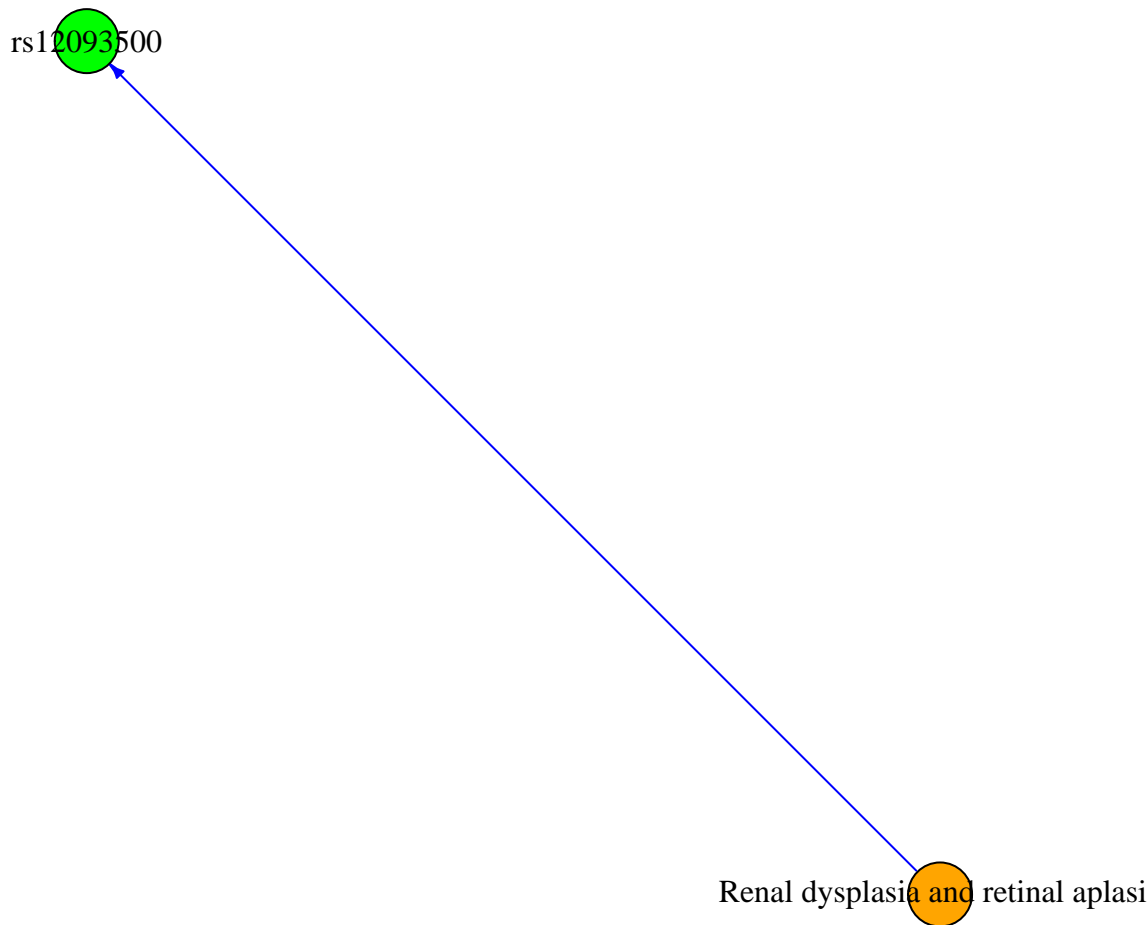

# ant-Disease Network (Renal hamartomas nephroblastomatosis and fetal gigantism)

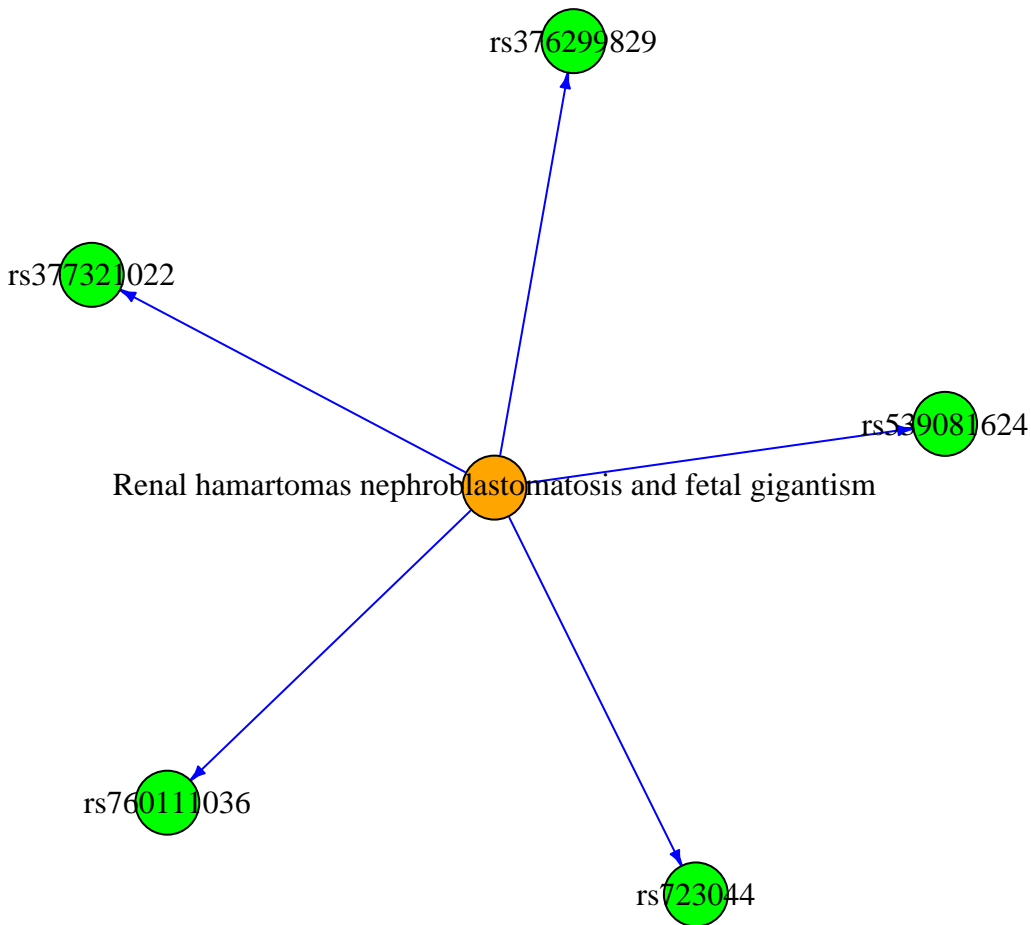

## Variant–Disease Network (Renal hypodysplasia/aplasia 1)

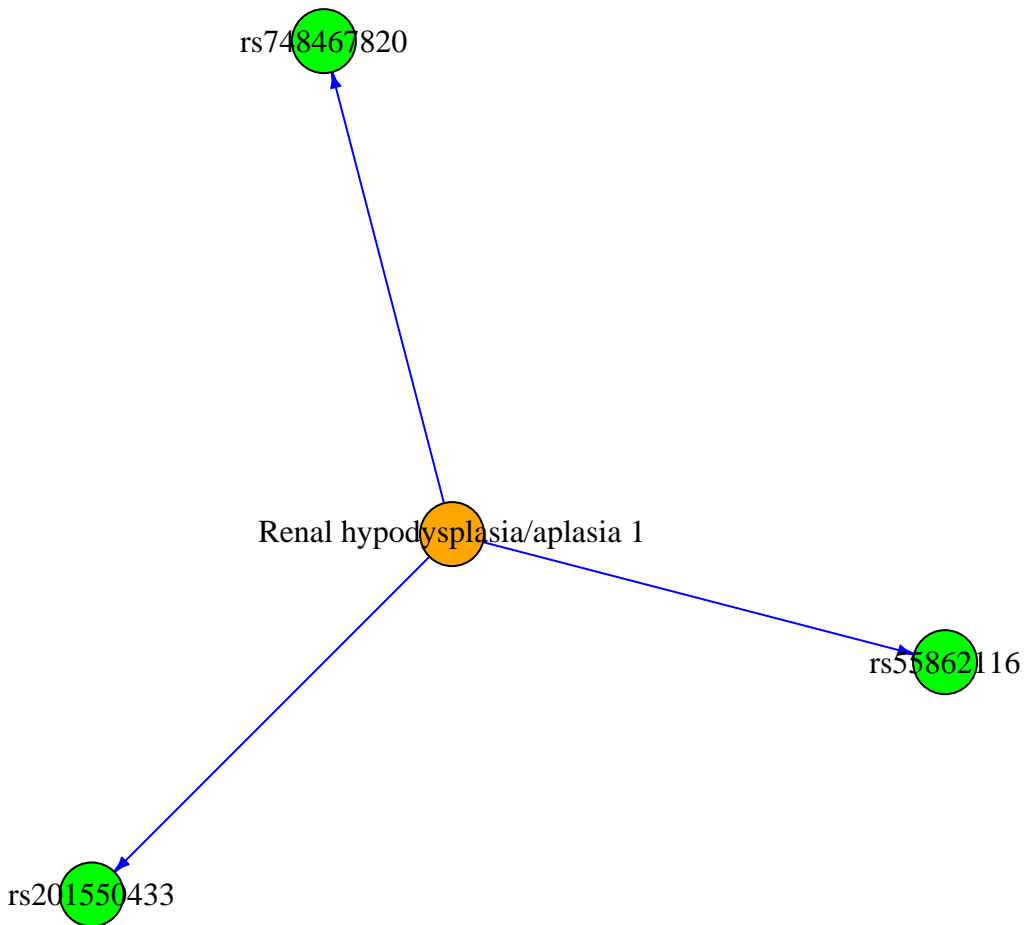

## Variant–Disease Network (Renal tubular acidosis)

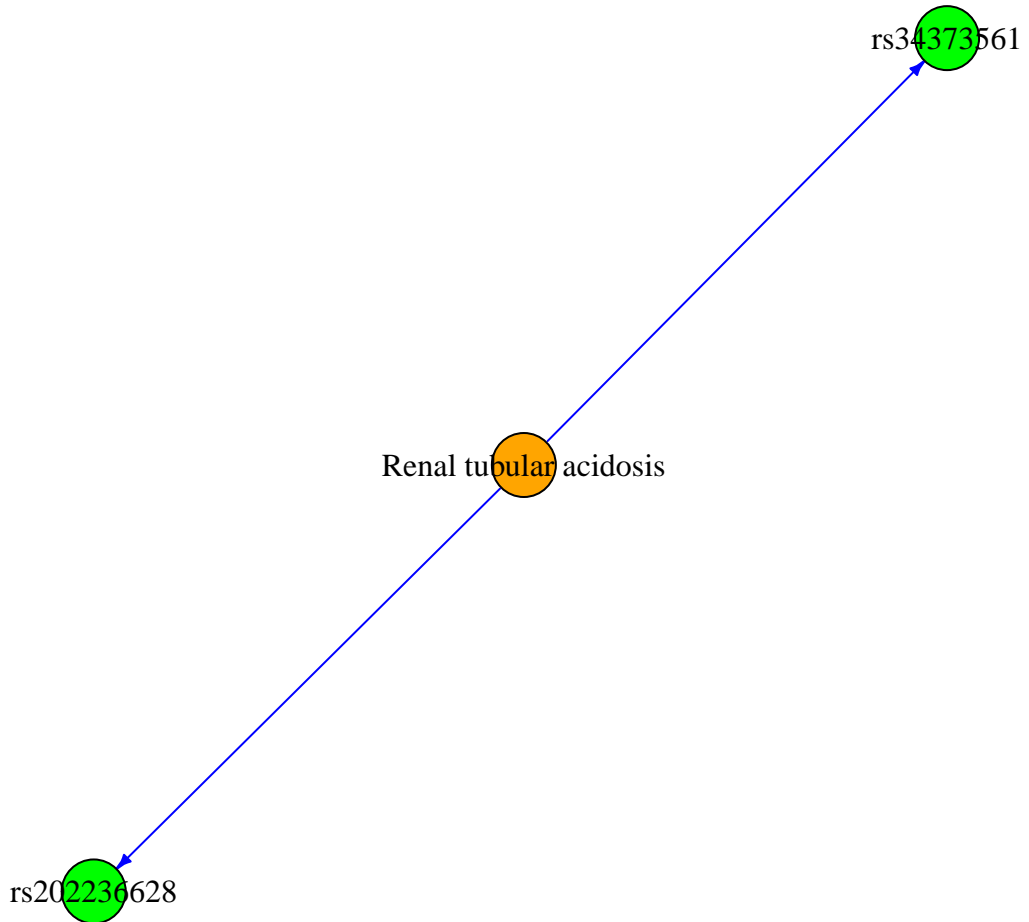



## Variant-Disease Network (Retinal dystrophy)

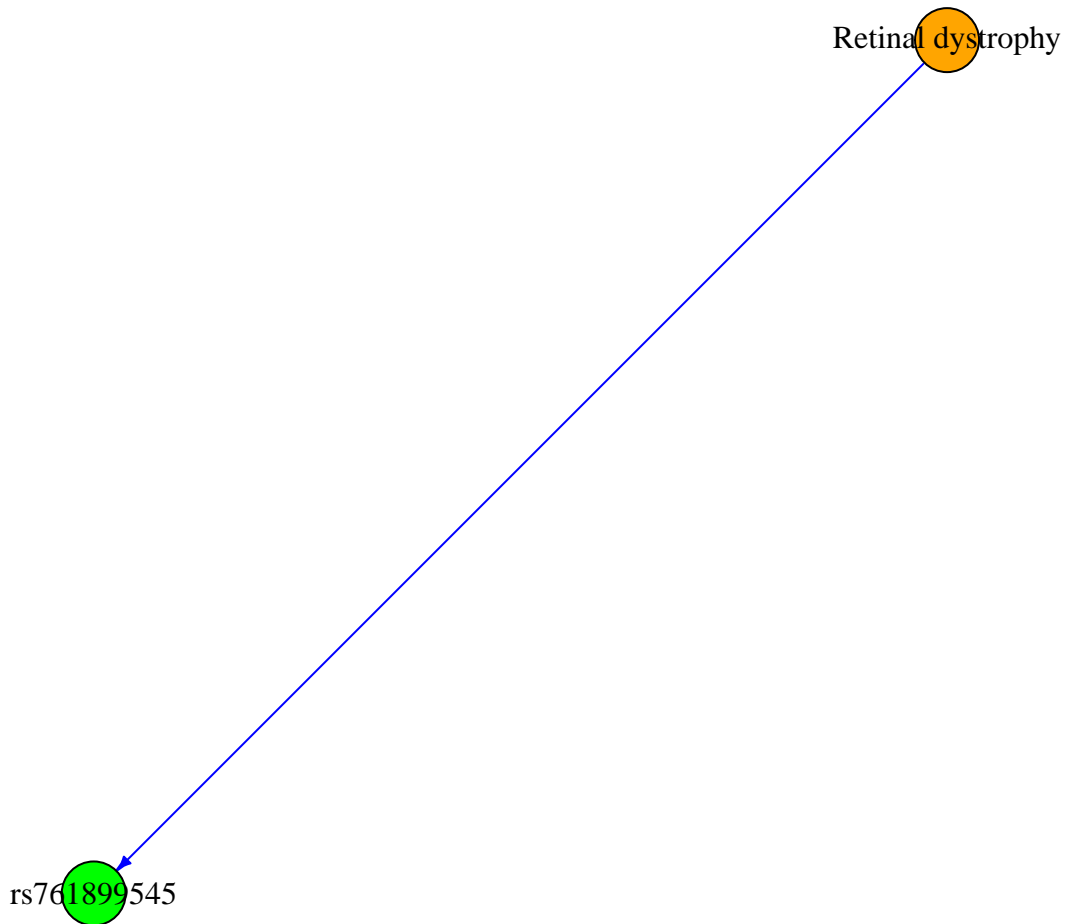

## Variant-Disease Network (Retinitis Pigmentosa)

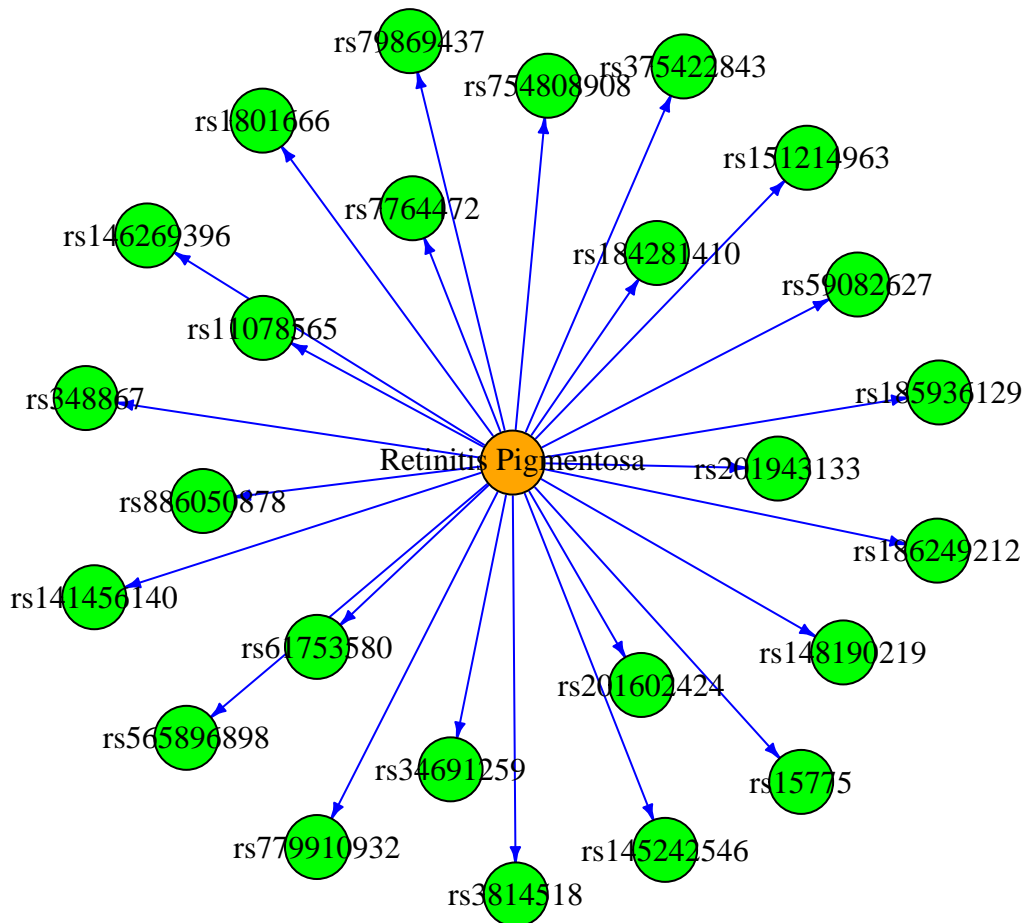

**Variant–Disease Network (Retinitis pigmentosa 66)**

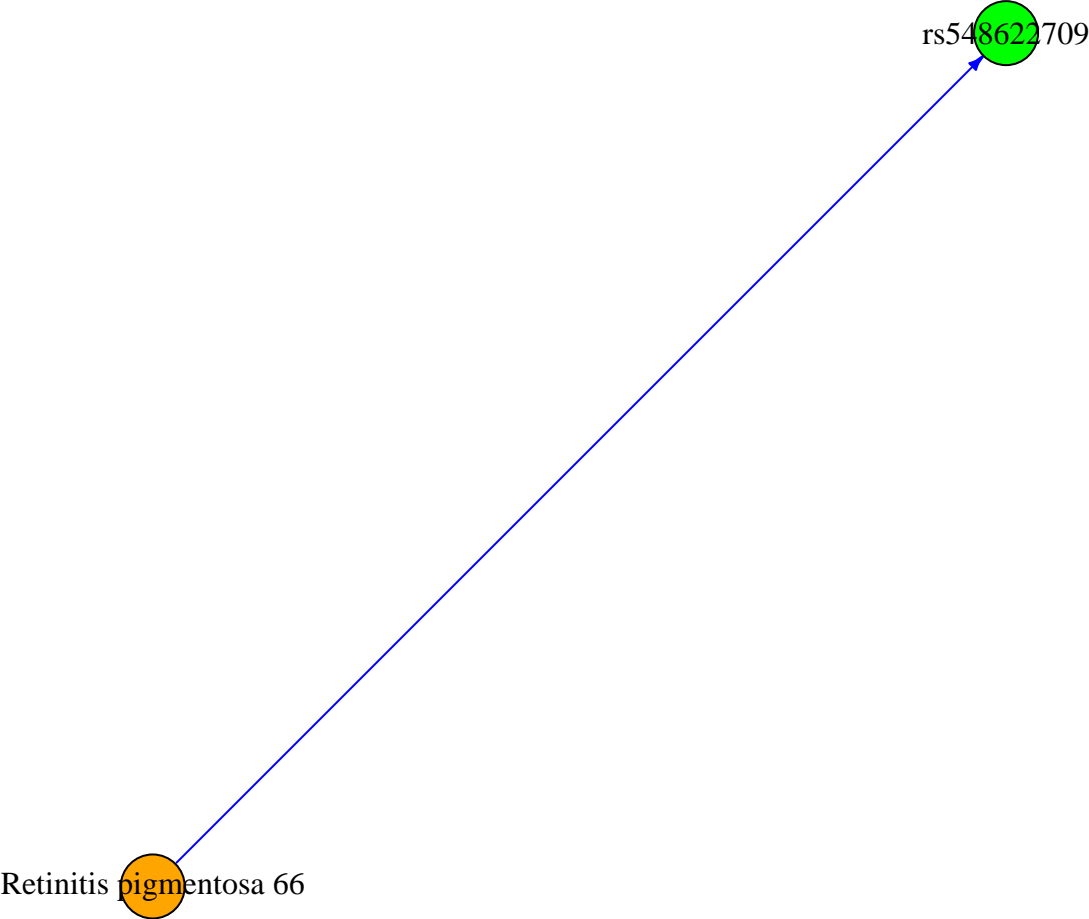

**Variant–Disease Network (Retinitis pigmentosa–deafness syndrome)**

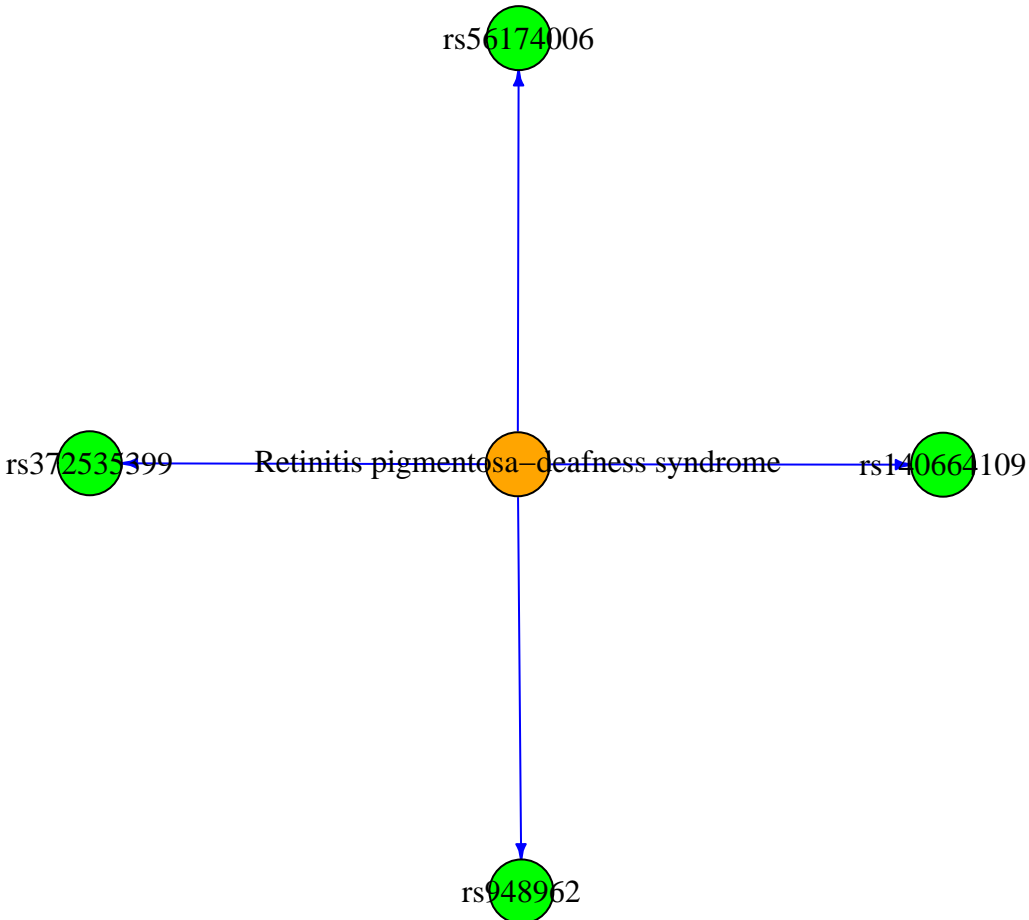

Variant–Disease Network (Retinoblastoma)

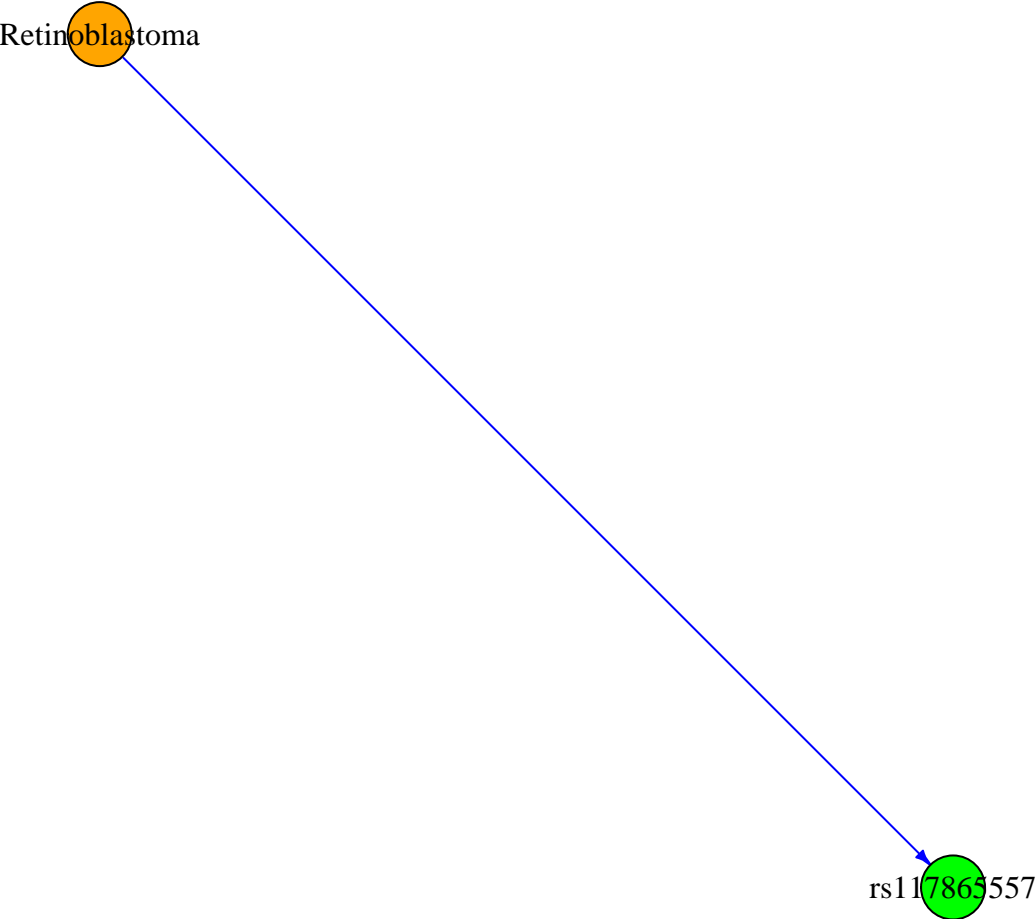

Variant–Disease Network (Rhizomelic chondrodysplasia punctata)

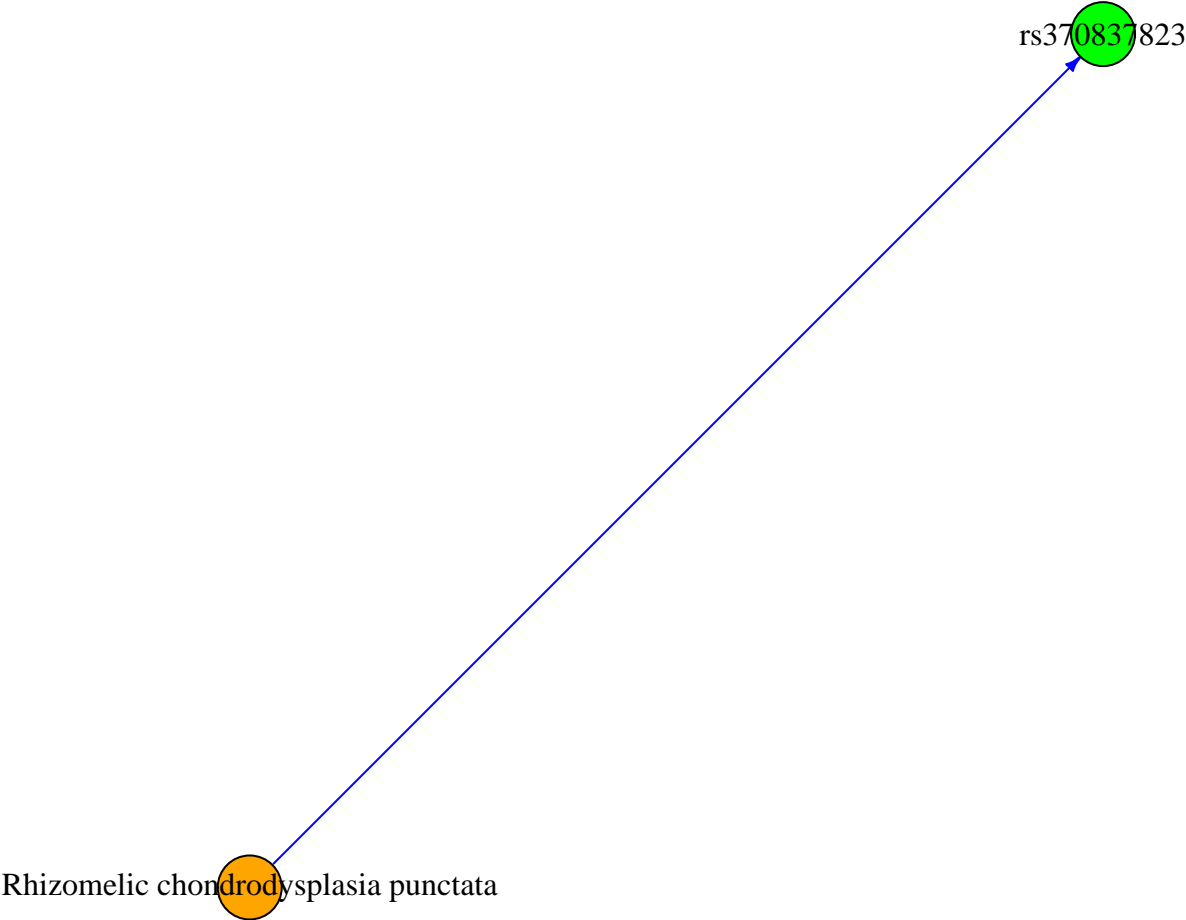

## Variant–Disease Network (Robinow syndrome)

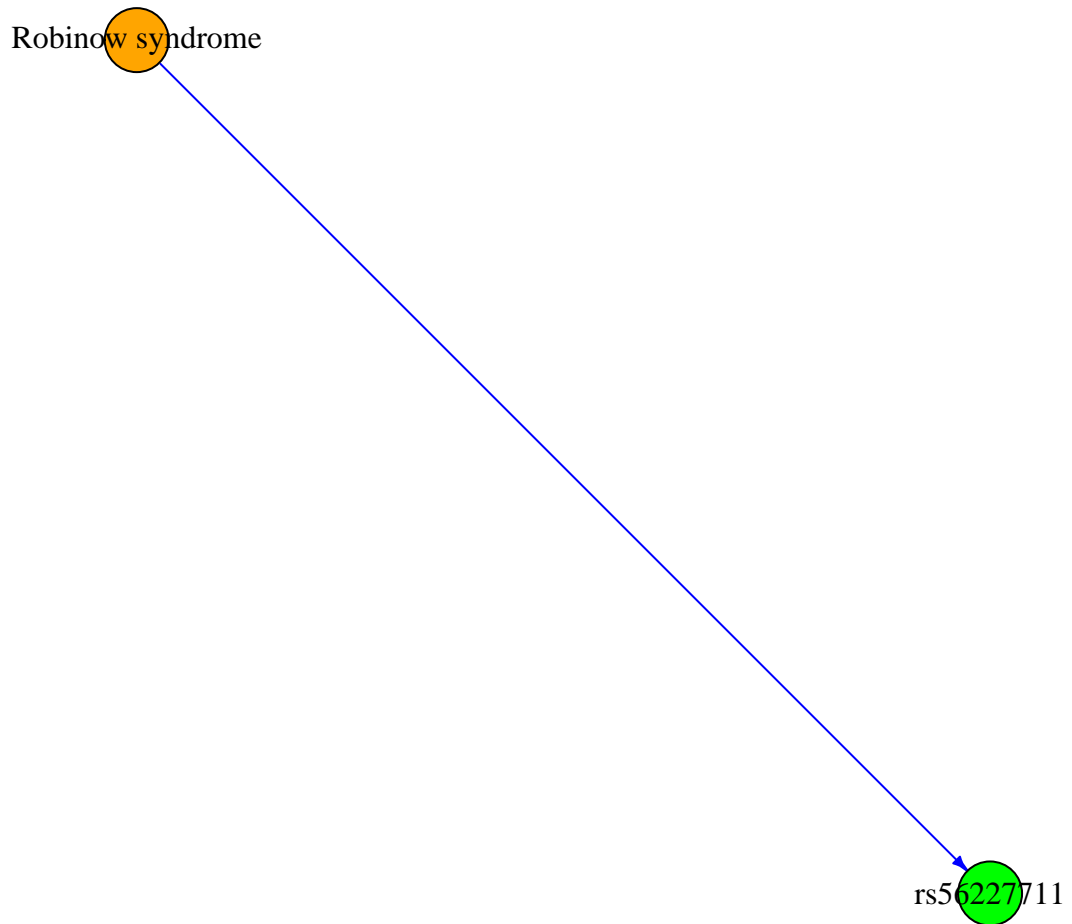

**Variant–Disease Network (Romano–Ward syndrome)**

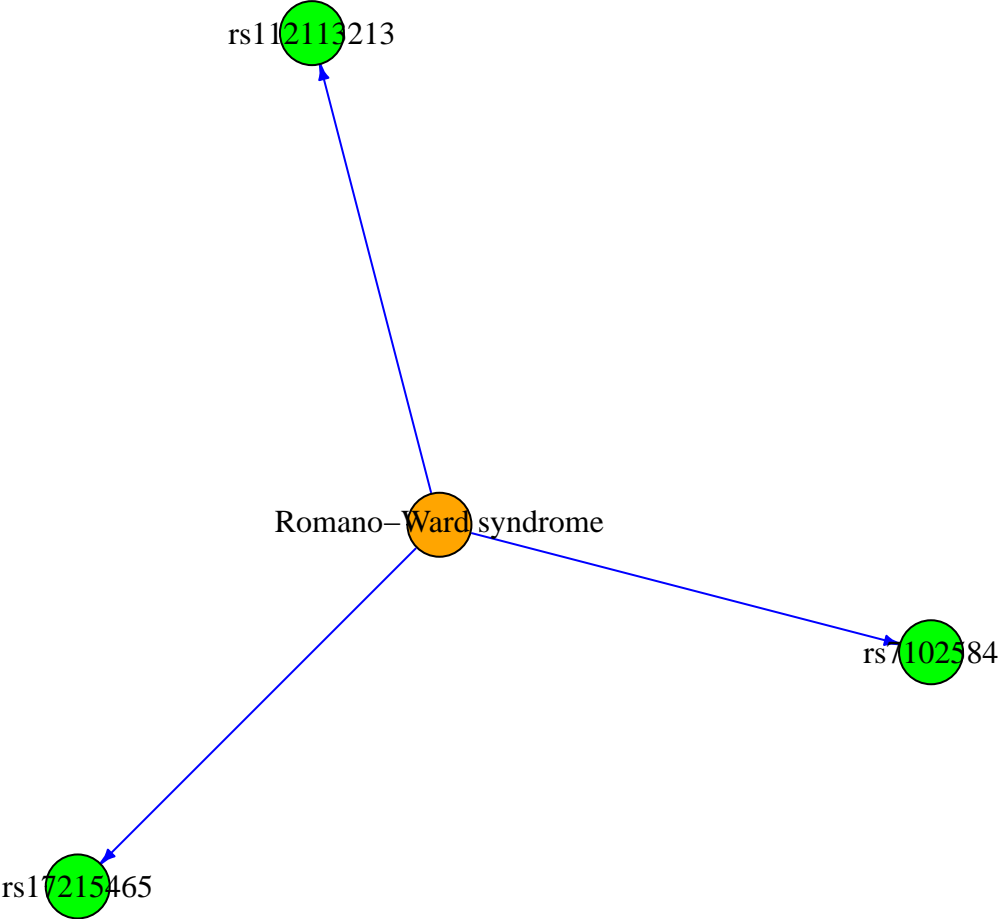



Variant–Disease Network (Rotor syndrome)

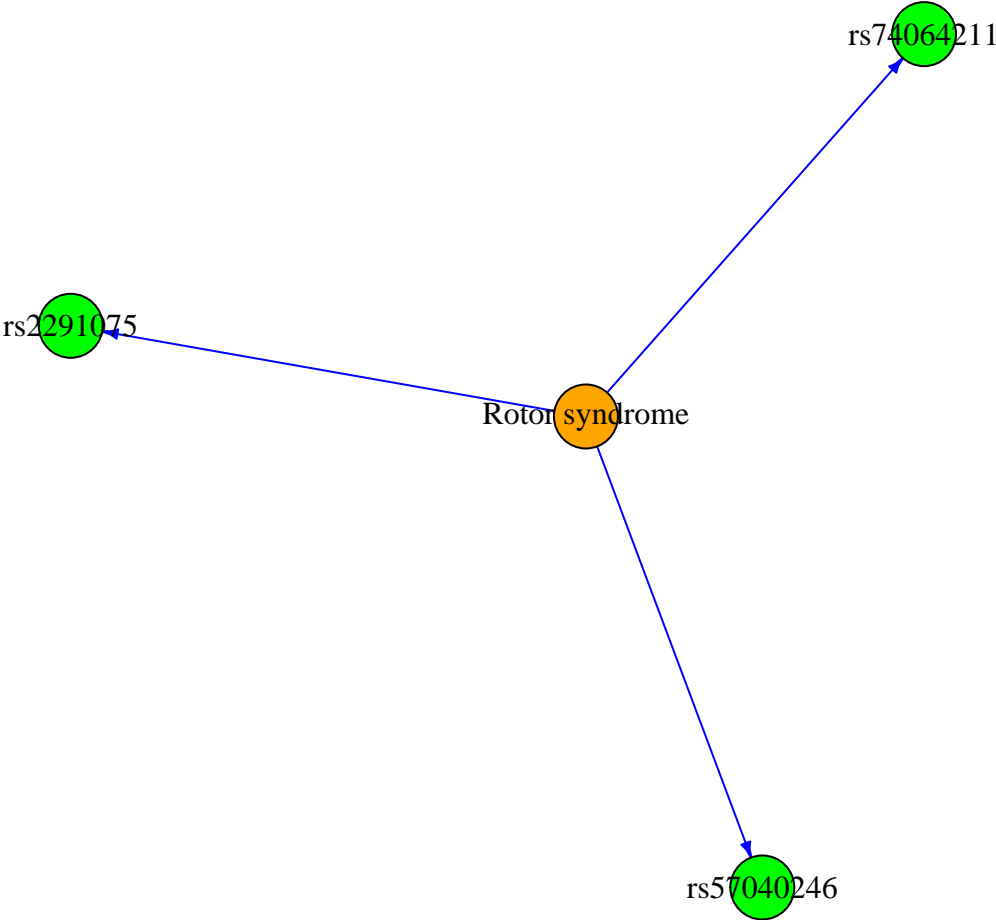

# Variant–Disease Network (Saethre–Chotzen syndrome)

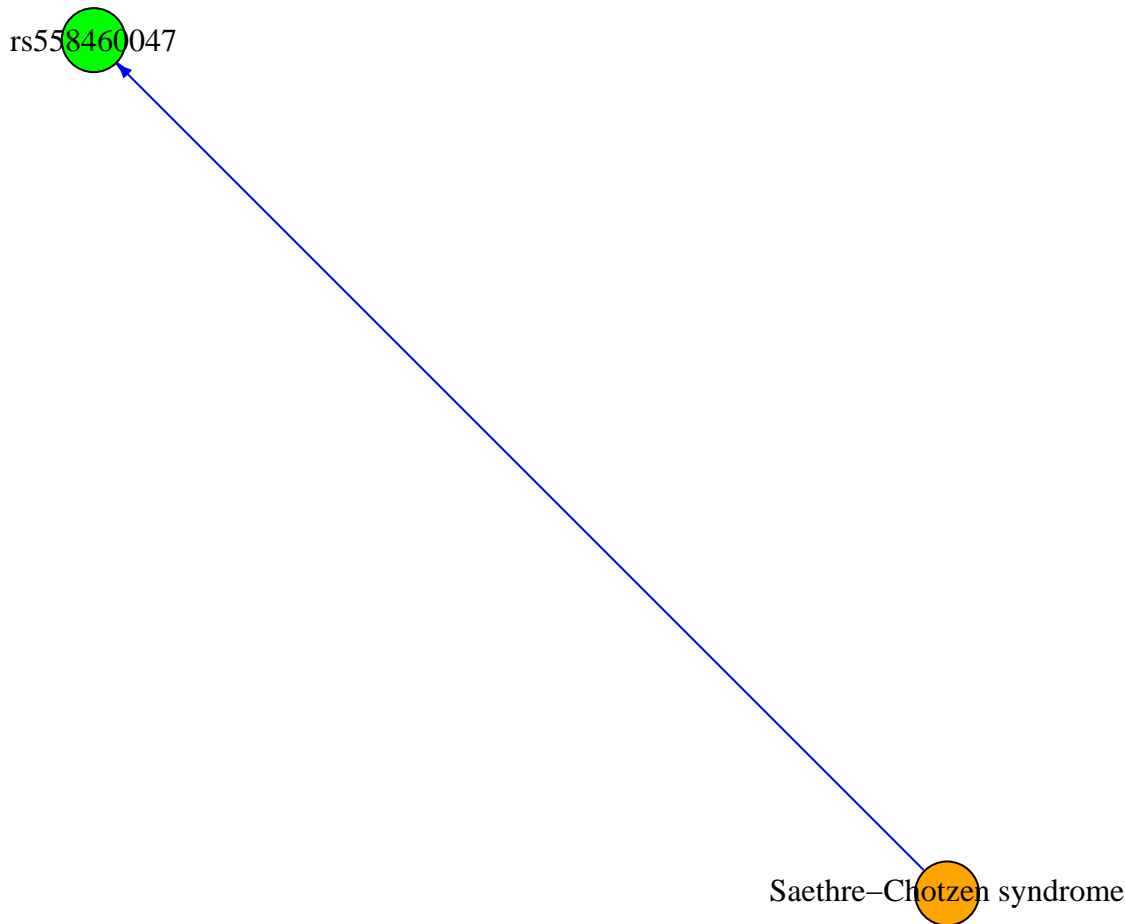

Variant–Disease Network (Schinzel–Giedion syndrome)

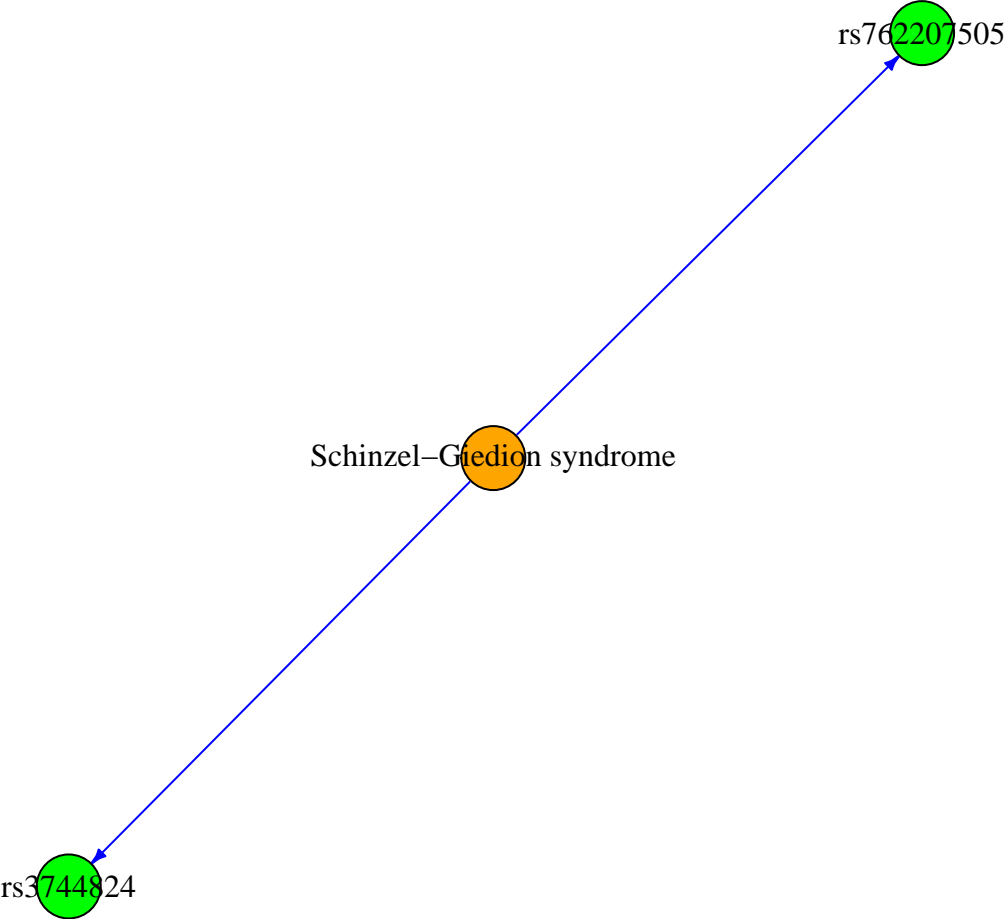

Variant–Disease Network (Schopf–Schulz–Passarge syndrome)

Schopf–Schulz–Passarge syndrome

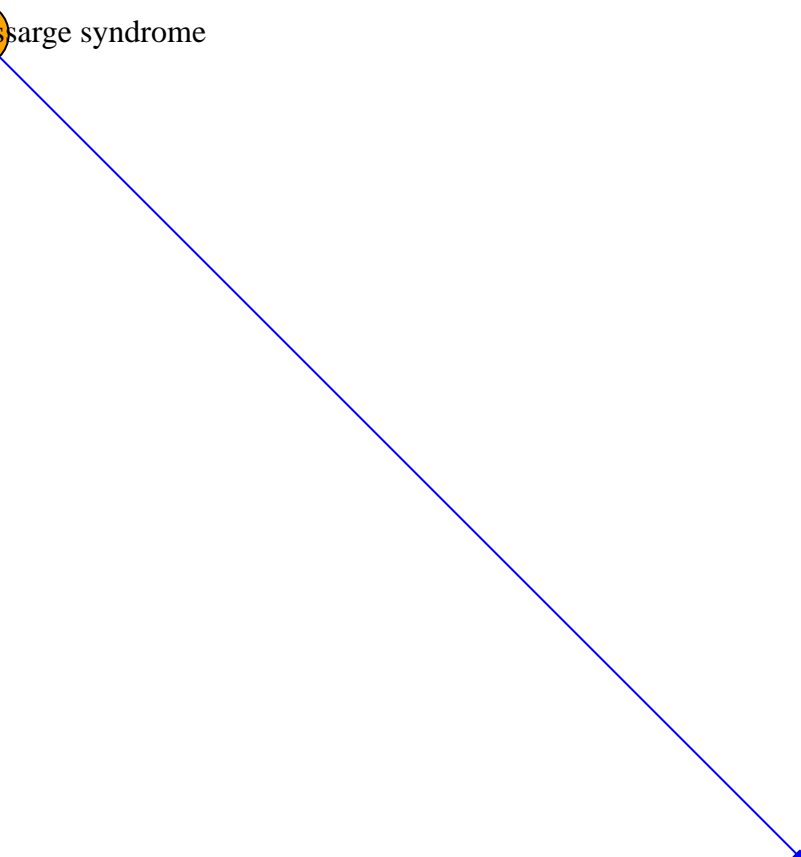

rs143463683

# Variant–Disease Network (Schuurs–hoeijmakers syndrome)

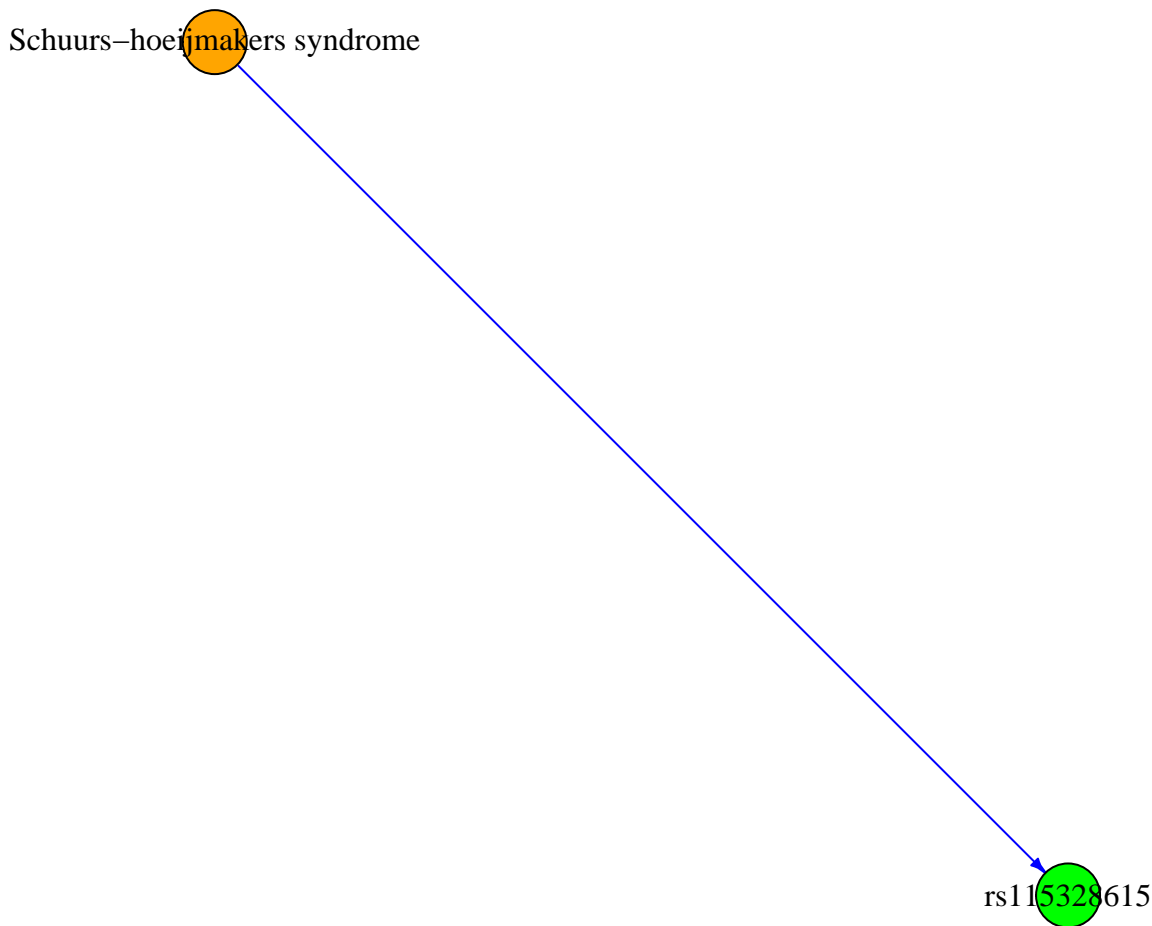

Variant–Disease Network (Schwartz Jampel syndrome type 1)

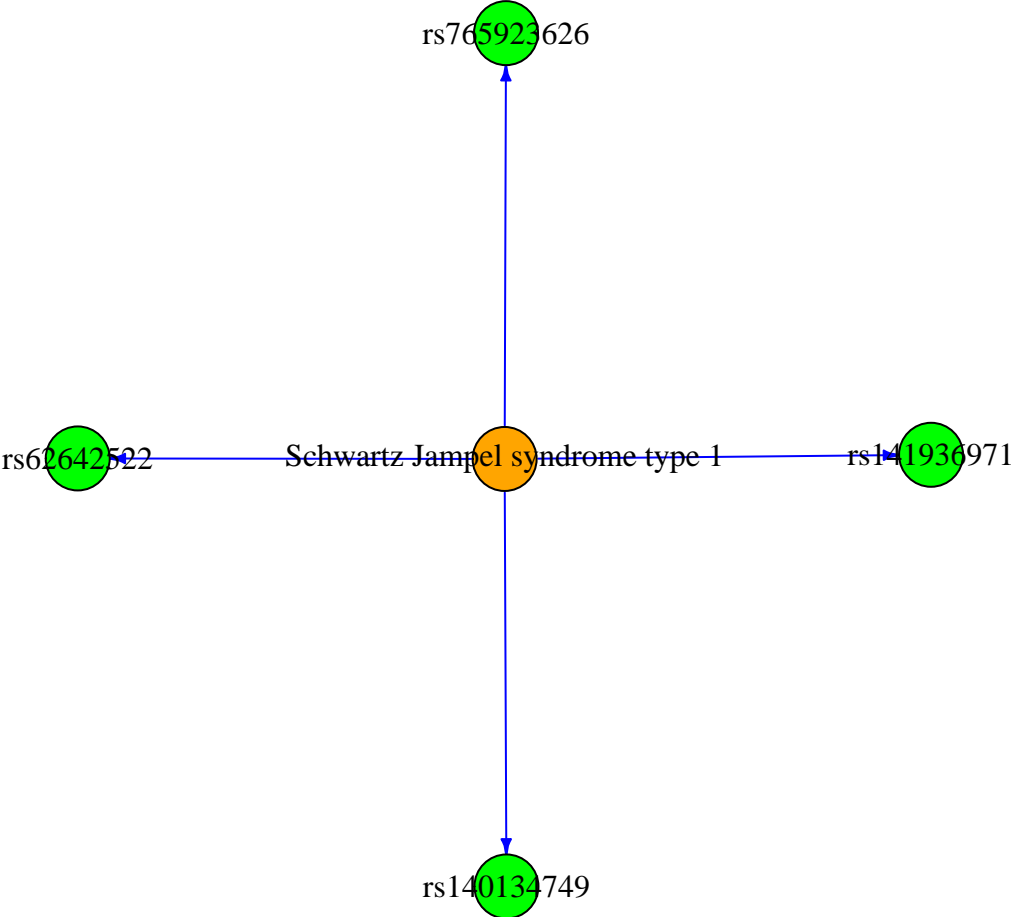

## Variant-Disease Network (SCID)

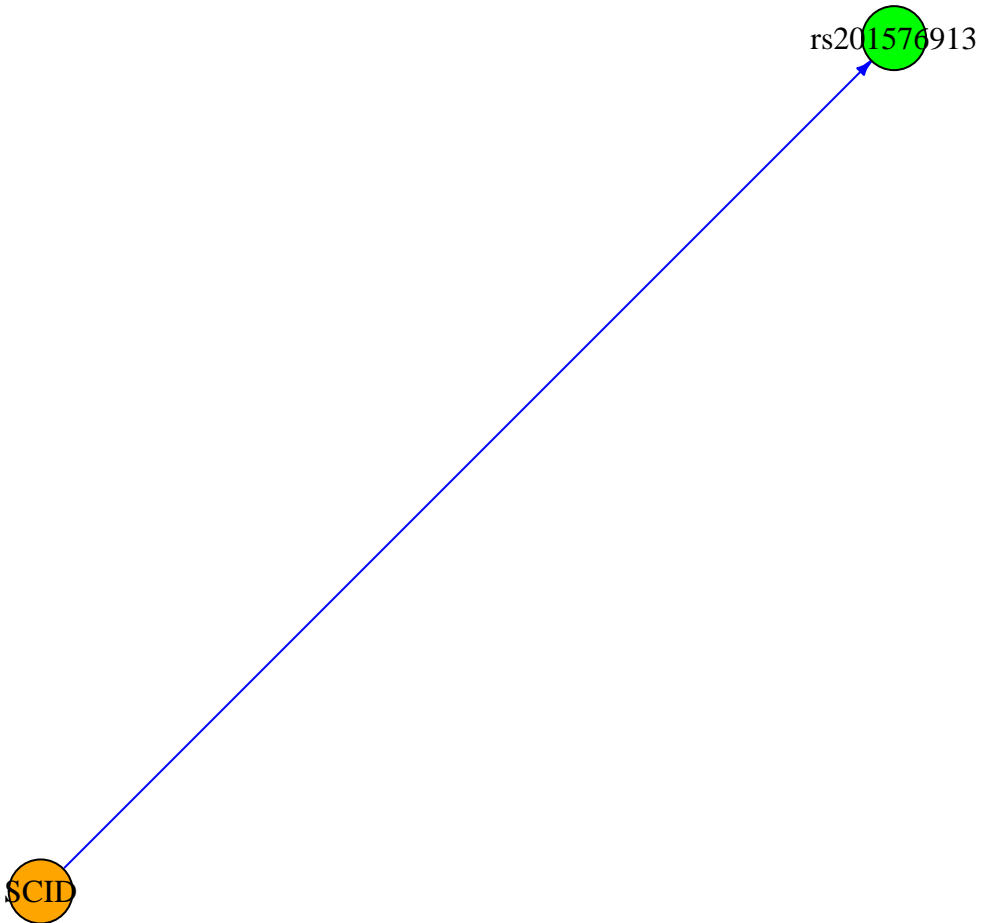

## Variant–Disease Network (Seckel syndrome)

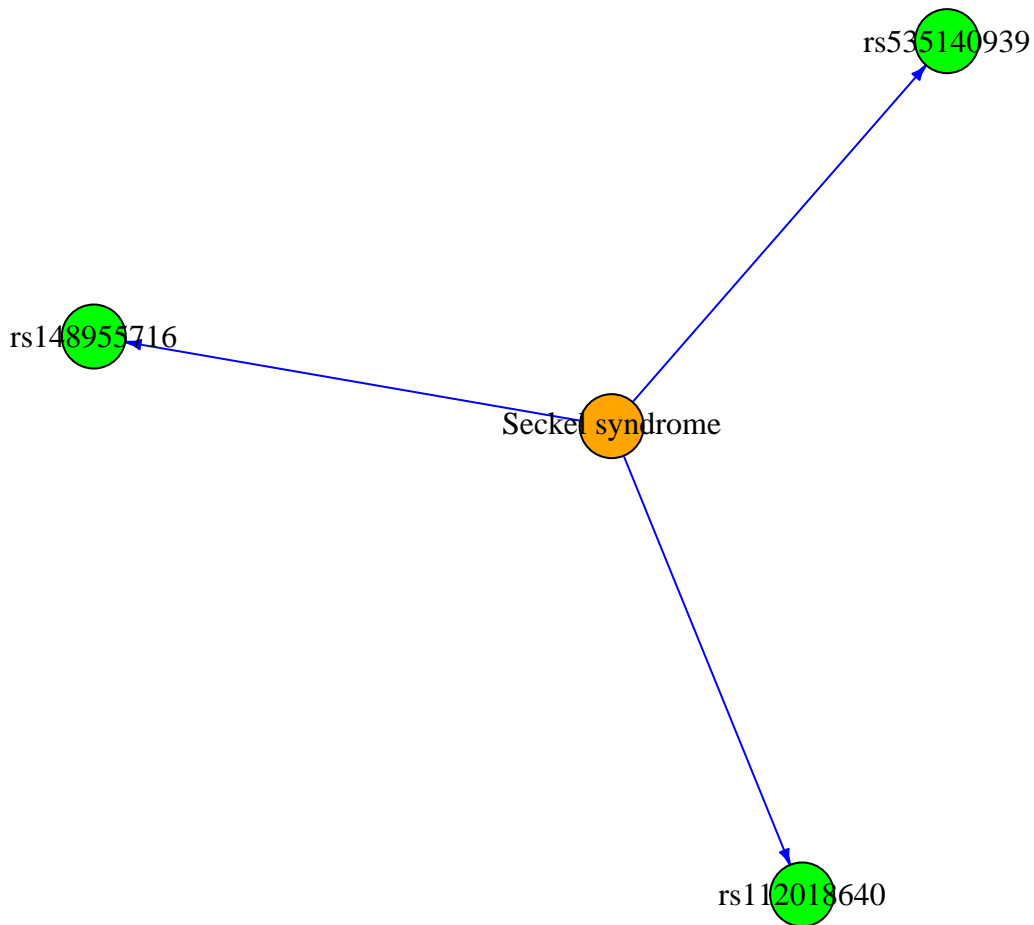



## Variant–Disease Network (Seizures)

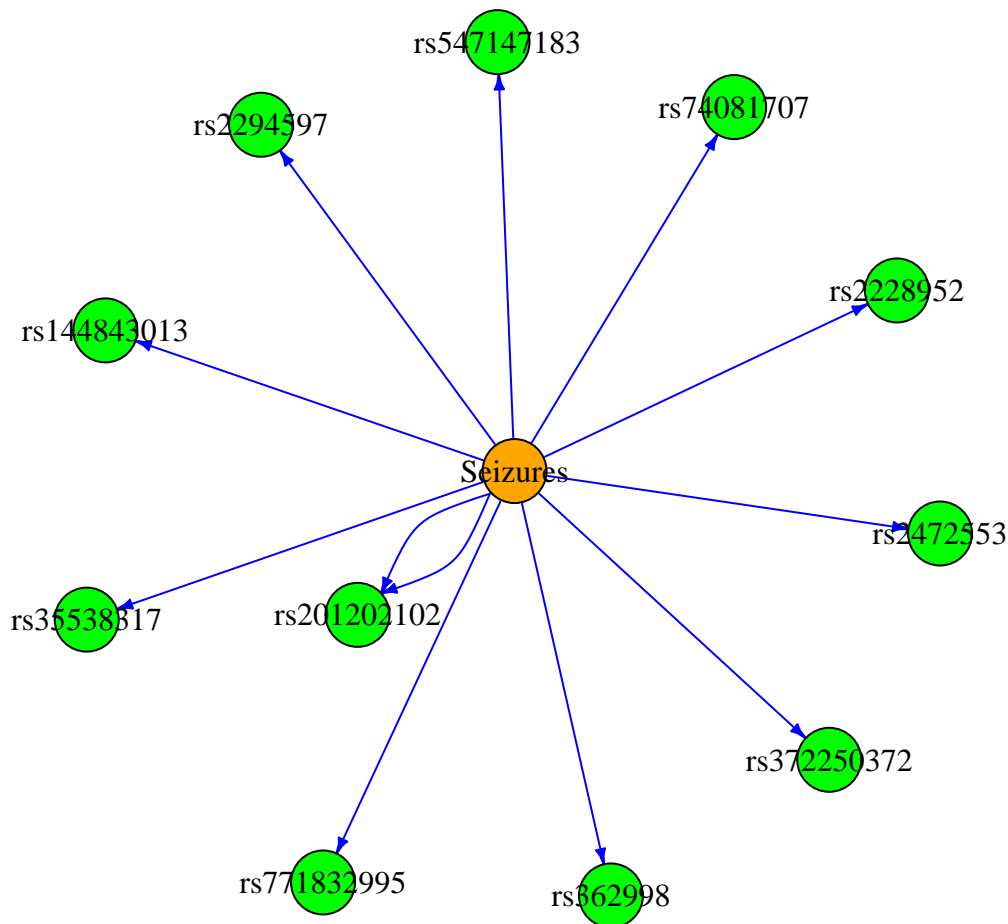

## Variant-Disease Network (Selective tooth agenesis)

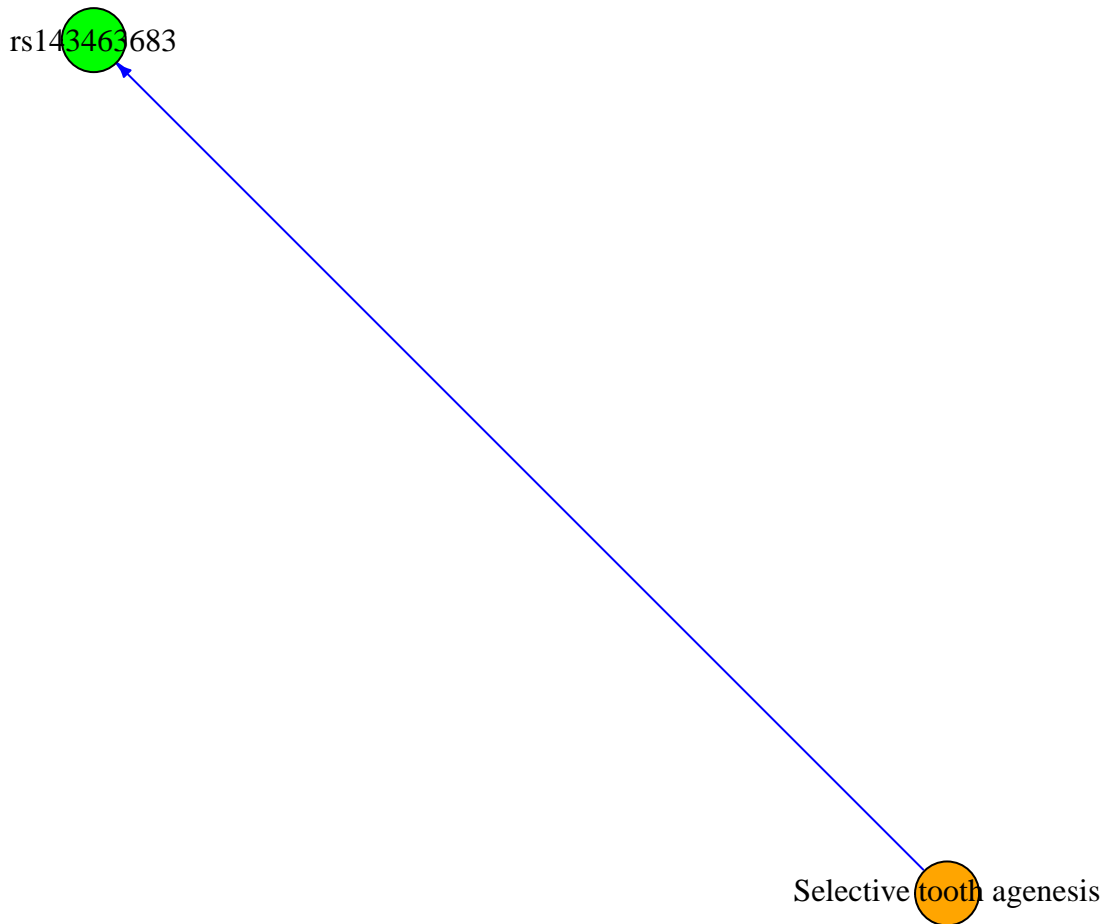

Variant–Disease Network (Severe Combined Immune Deficiency)

Severe Combined Immune Deficiency

rs201576913

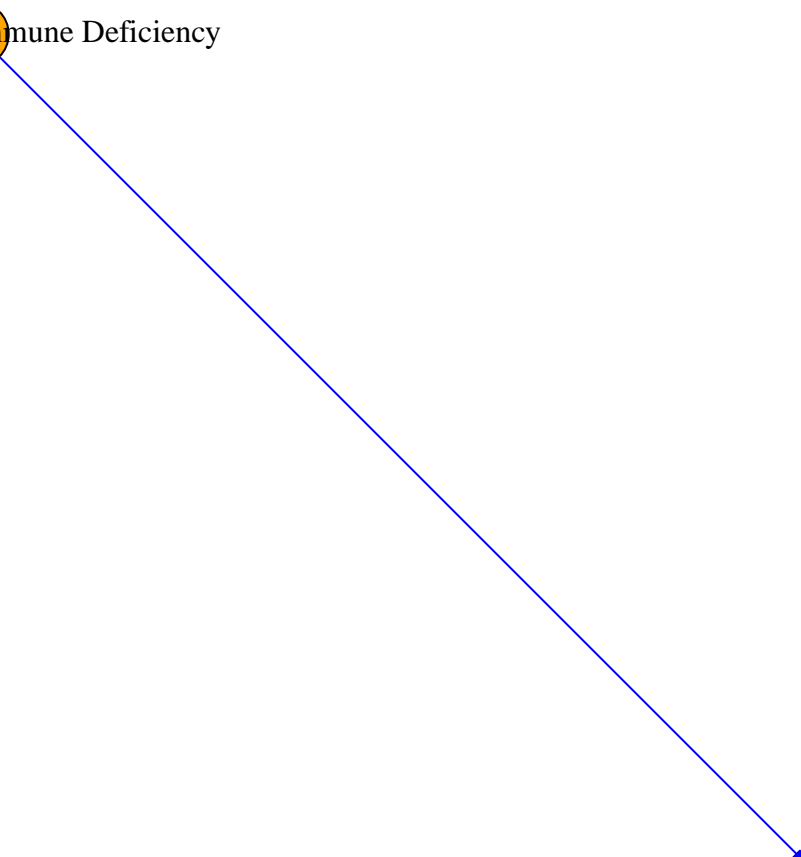

# Variant–Disease Network (Severe combined immunodeficiency)

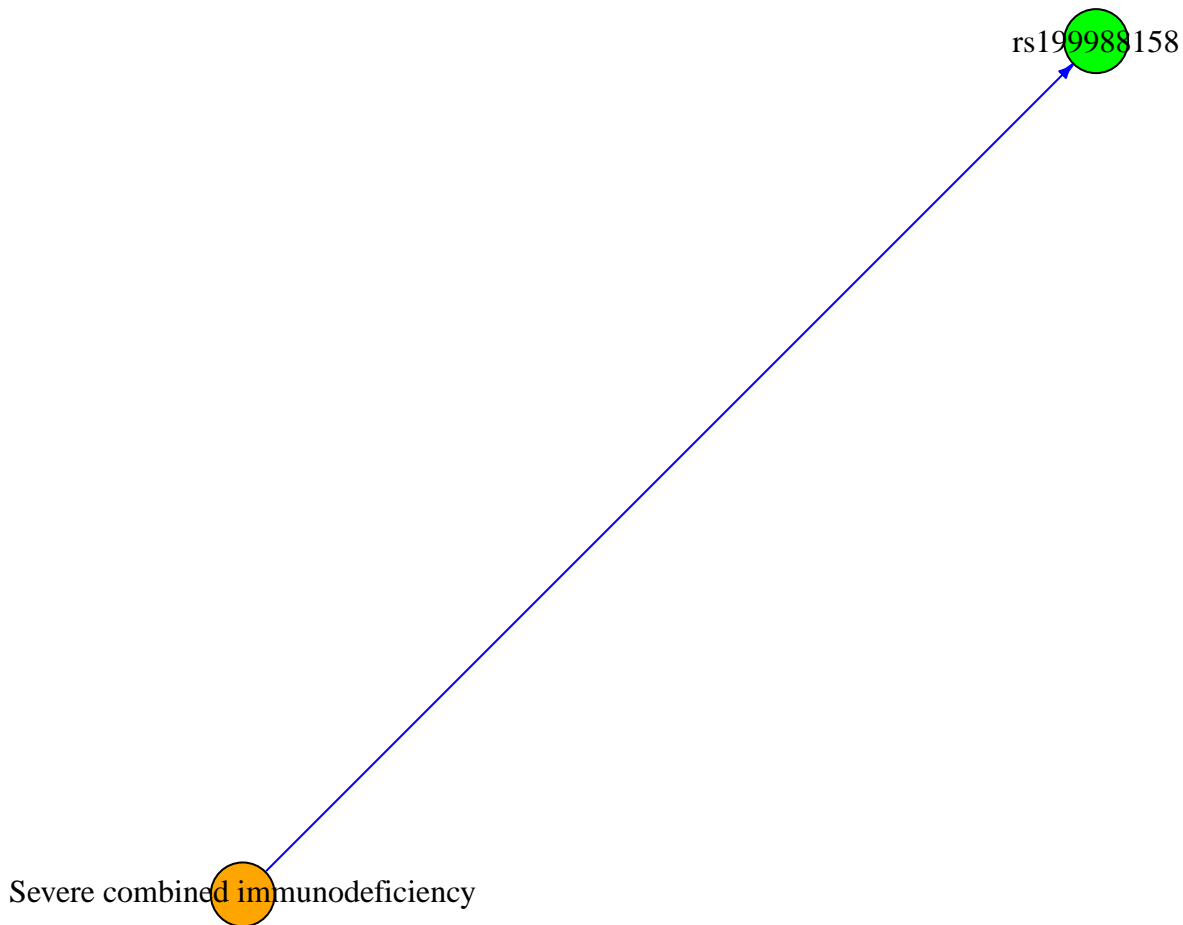

# Variant-Disease Network (Severe combined immunodeficiency due to ADA deficiency)

rs762695968

Severe combined immunodeficiency due to ADA deficiency



# Variant–Disease Network (Severe myoclonic epilepsy in infancy)

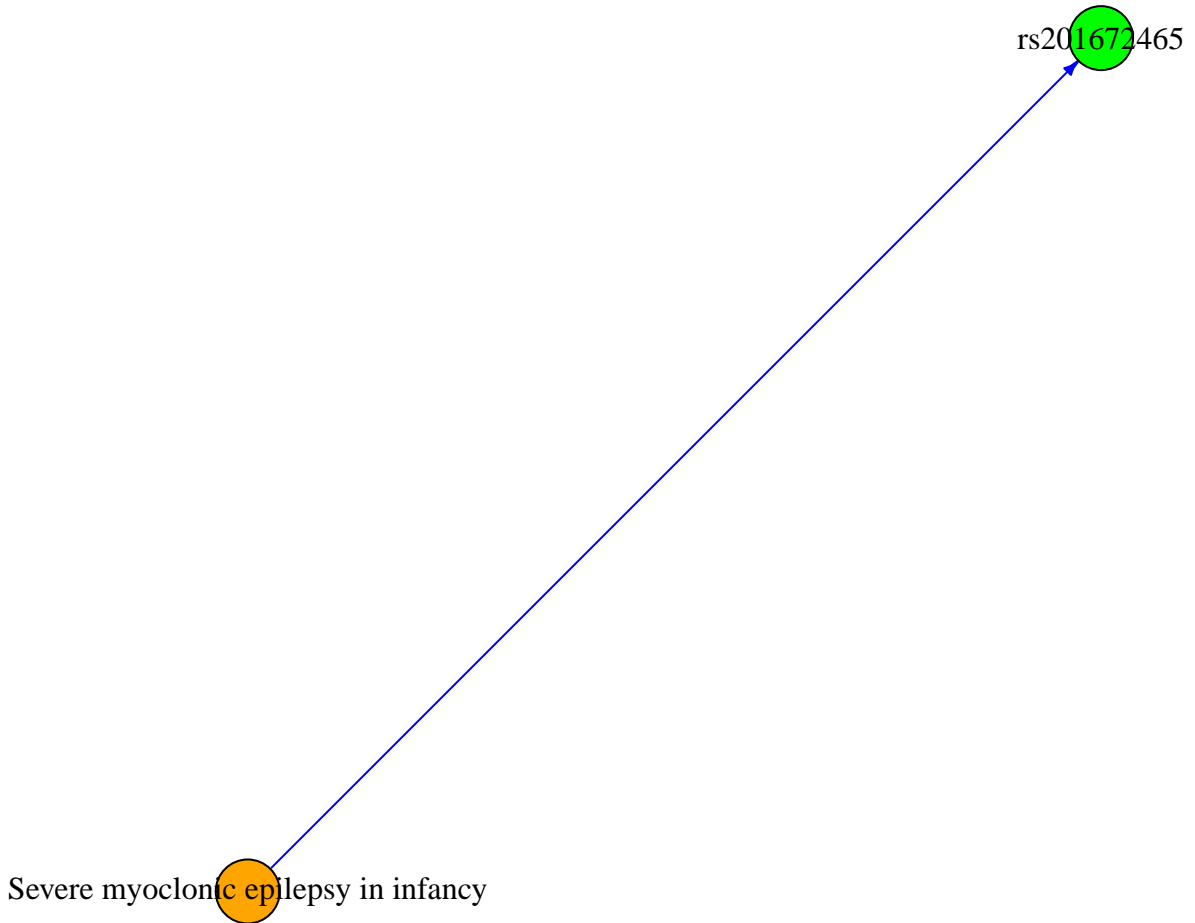

## Variant–Disease Network (short QT syndrome)

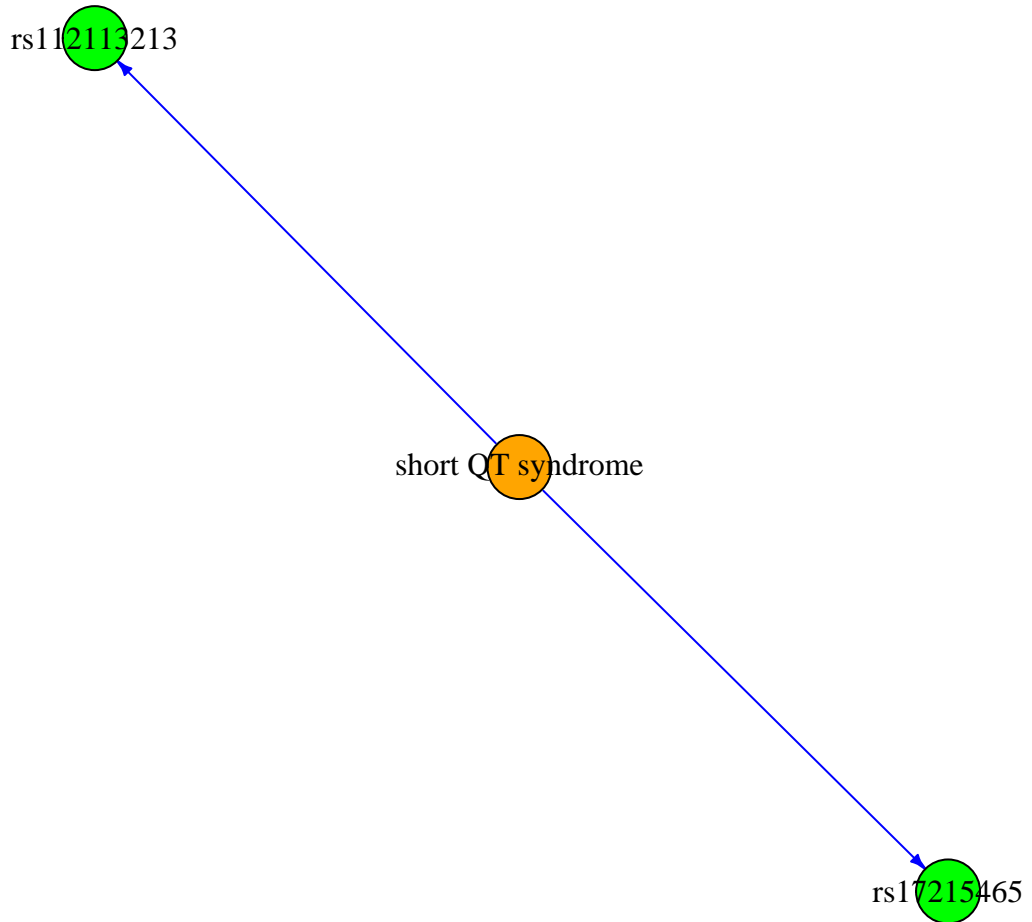

Variant–Disease Network (Short Rib Polydactyly Syndrome)

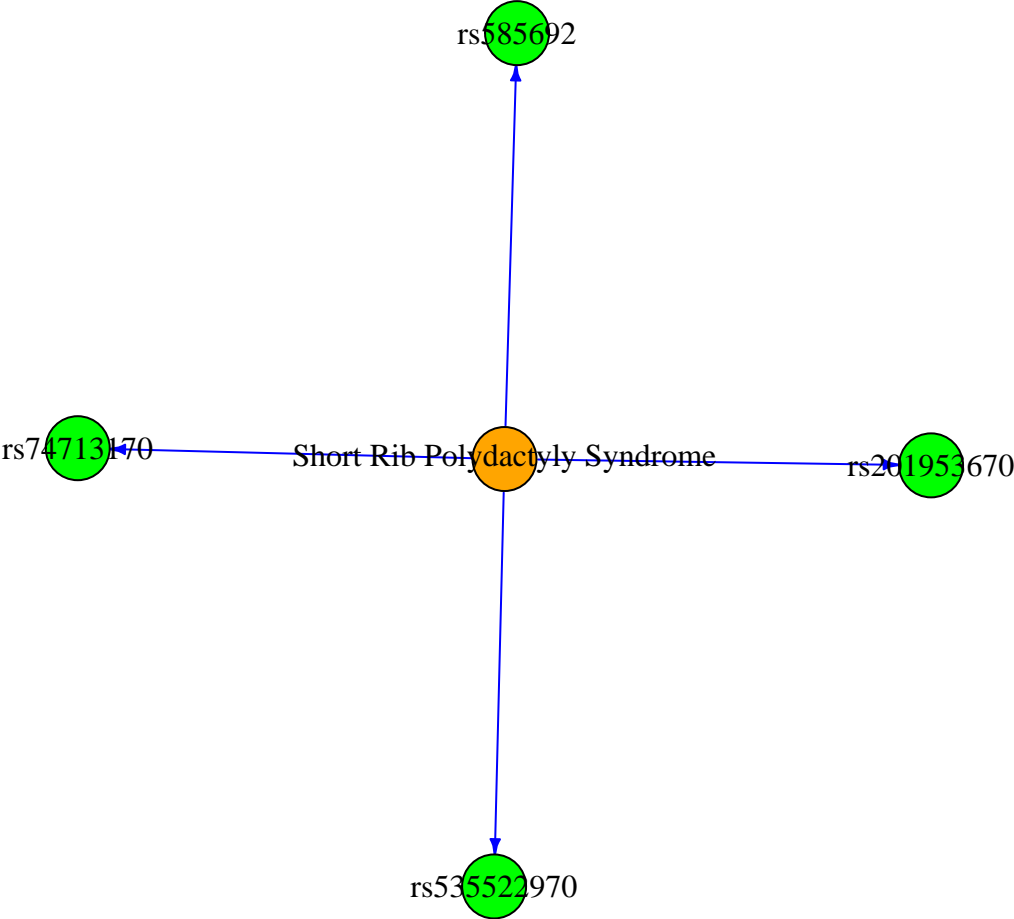



## Variant–Disease Network (Short stature)

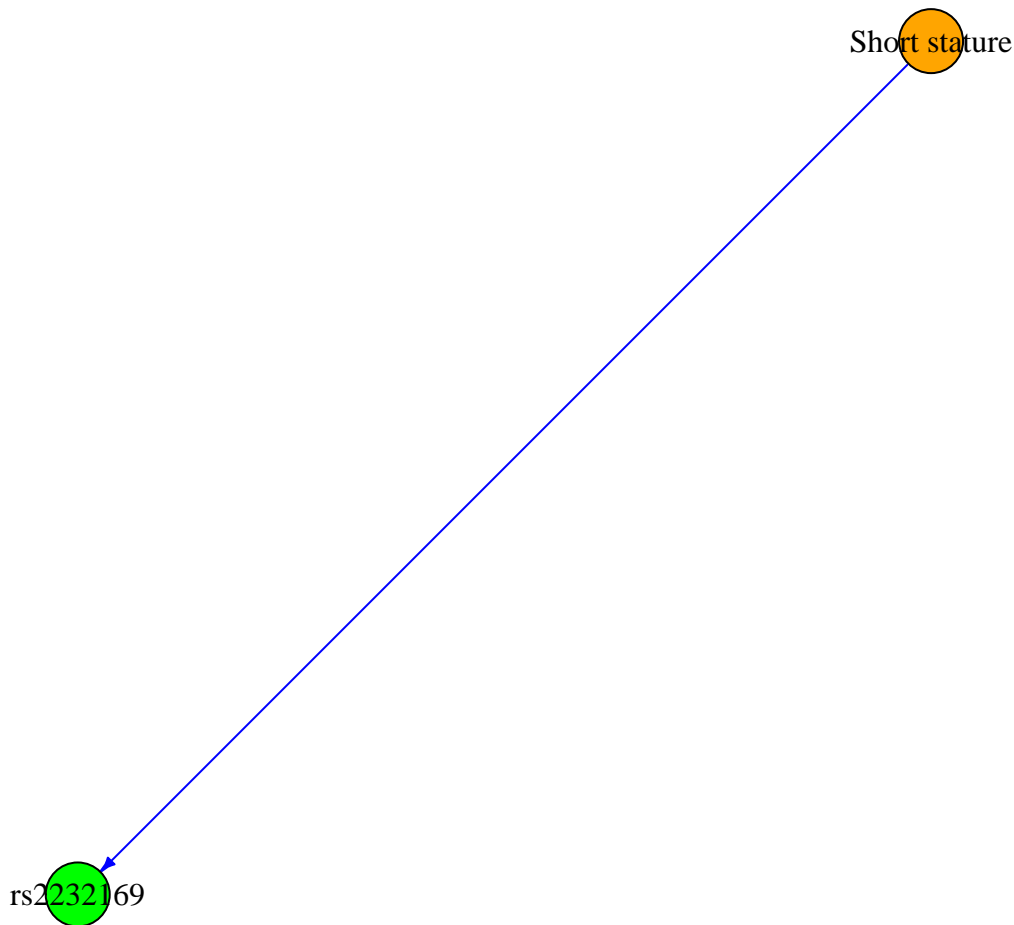

# Variant-Disease Network (Short-rib thoracic dysplasia 13 with or without polydactyly)

rs143893793

Short-rib thoracic dysplasia 13 with or without polydactyly



# Variant-Disease Network (Short-rib thoracic dysplasia 8 with or without polydactyly)

rs2709859

Short-rib thoracic dysplasia 8 with or without polydactyly



## Variant–Disease Network (Shwachman–Diamond syndrome 1)

rs113993989

Shwachman–Diamond syndrome

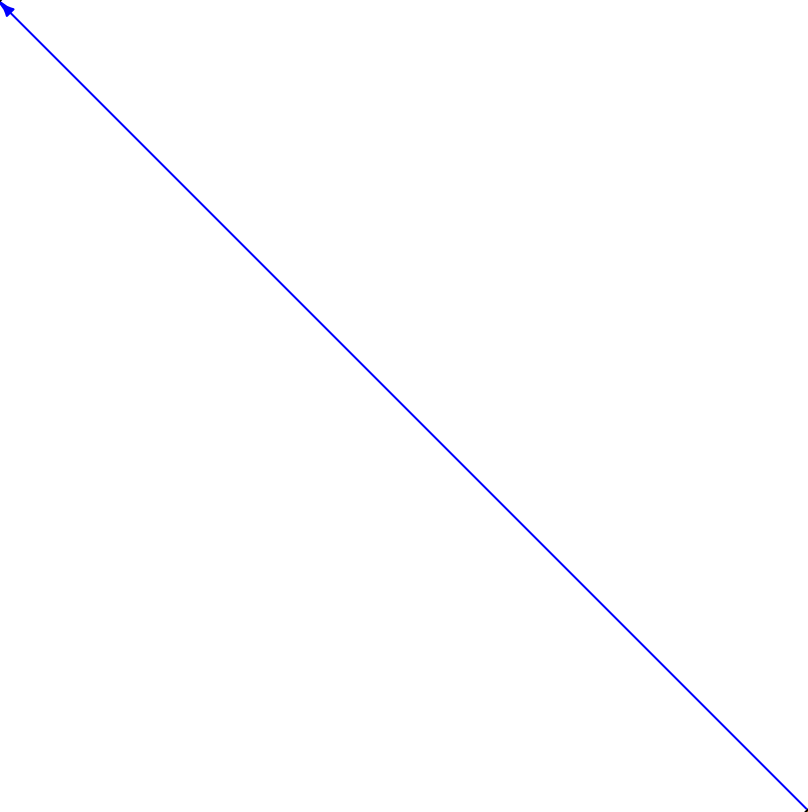

## Variant-Disease Network (Sialidosis)

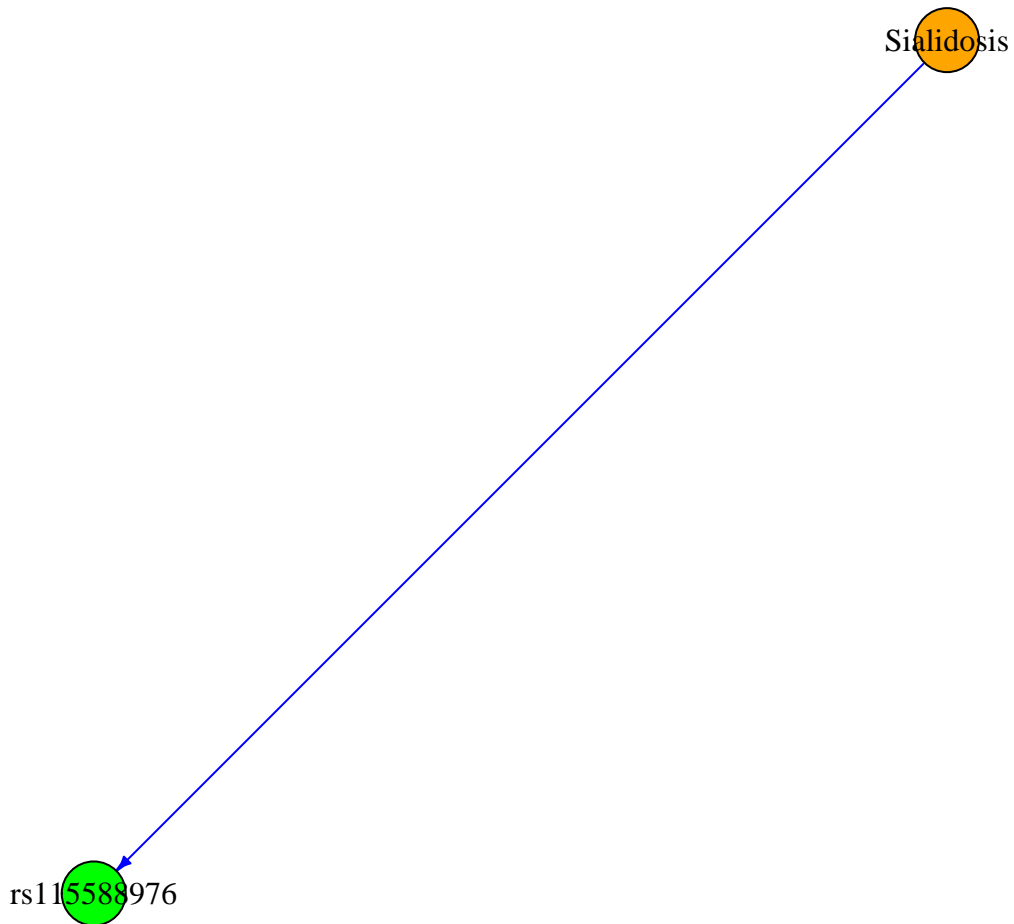

## Variant–Disease Network (Sialuria)

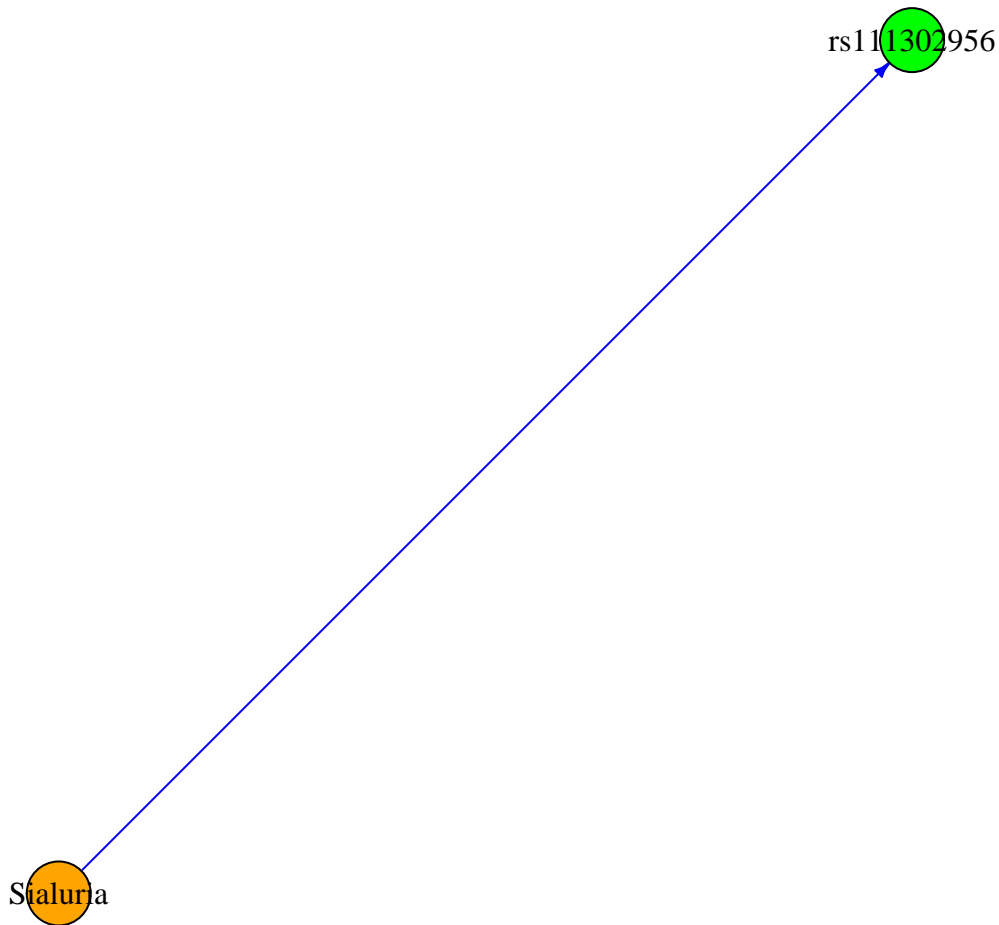

Variant–Disease Network (Sideroblastic anemia with B–cell immunodeficiency)

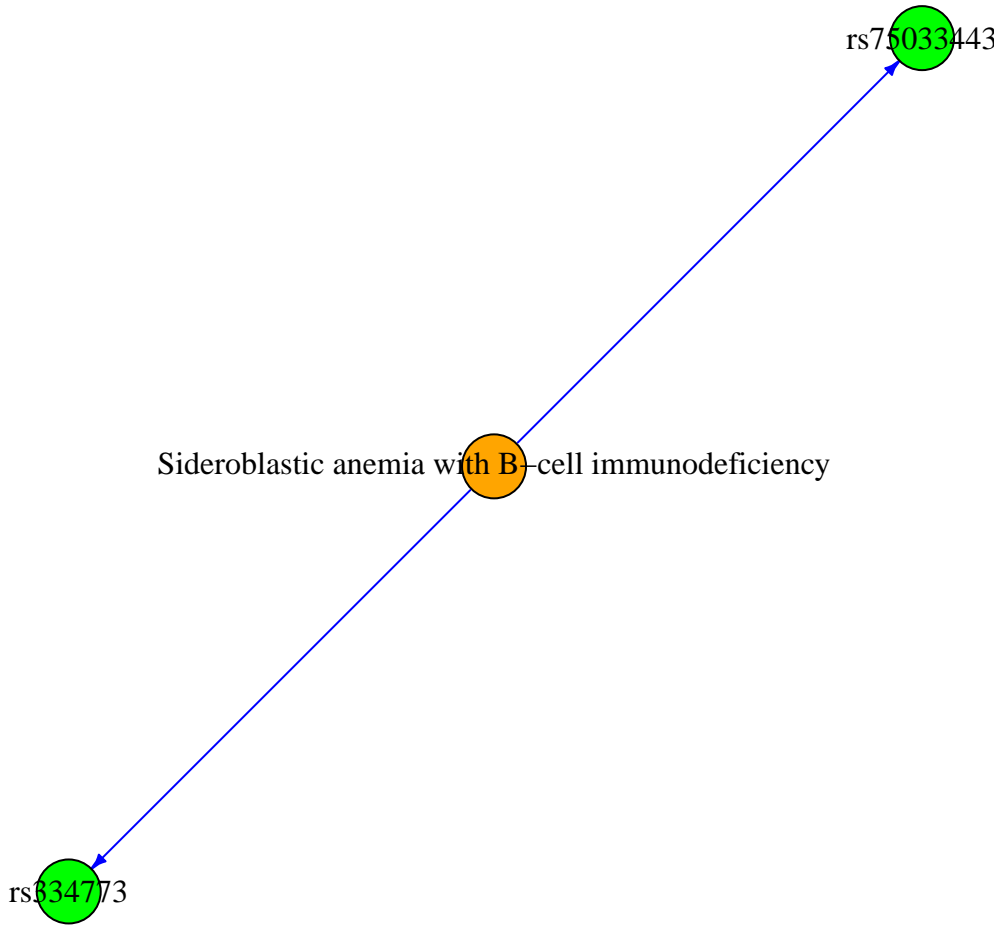

Variant–Disease Network (Sitosterolemia)

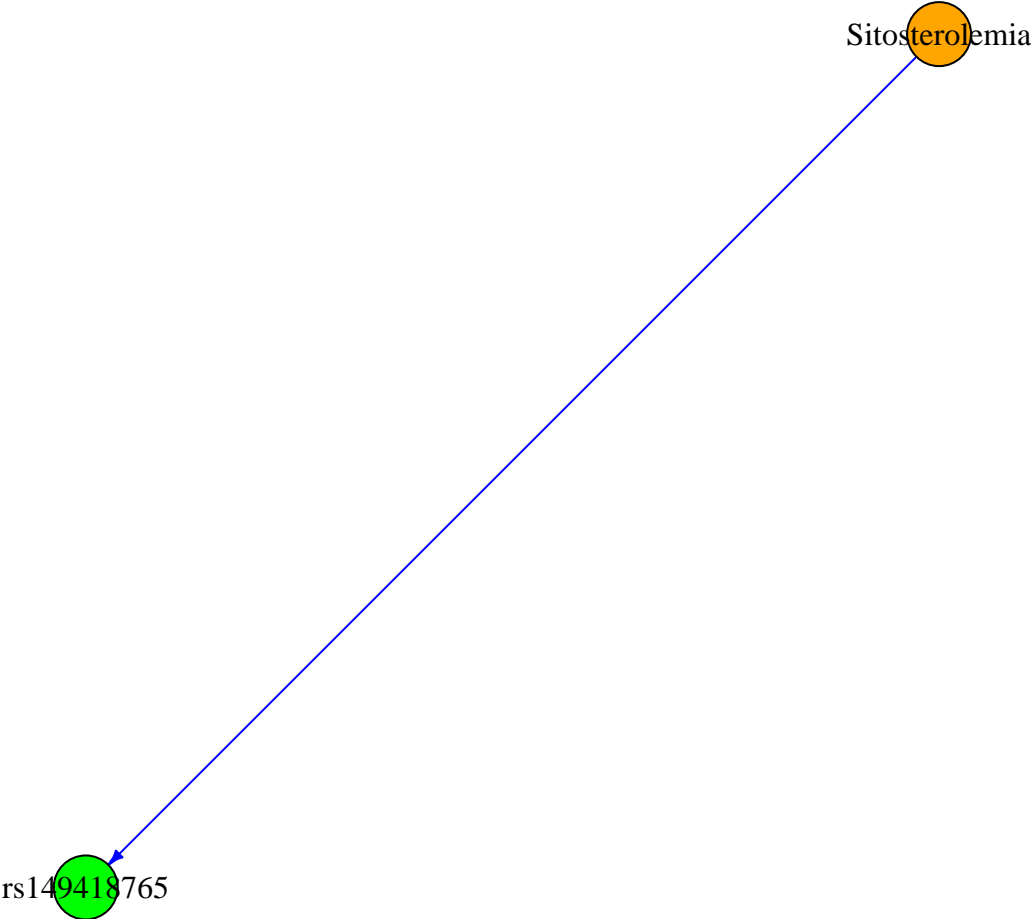



Variant–Disease Network (Skin fragility woolly hair syndrome)

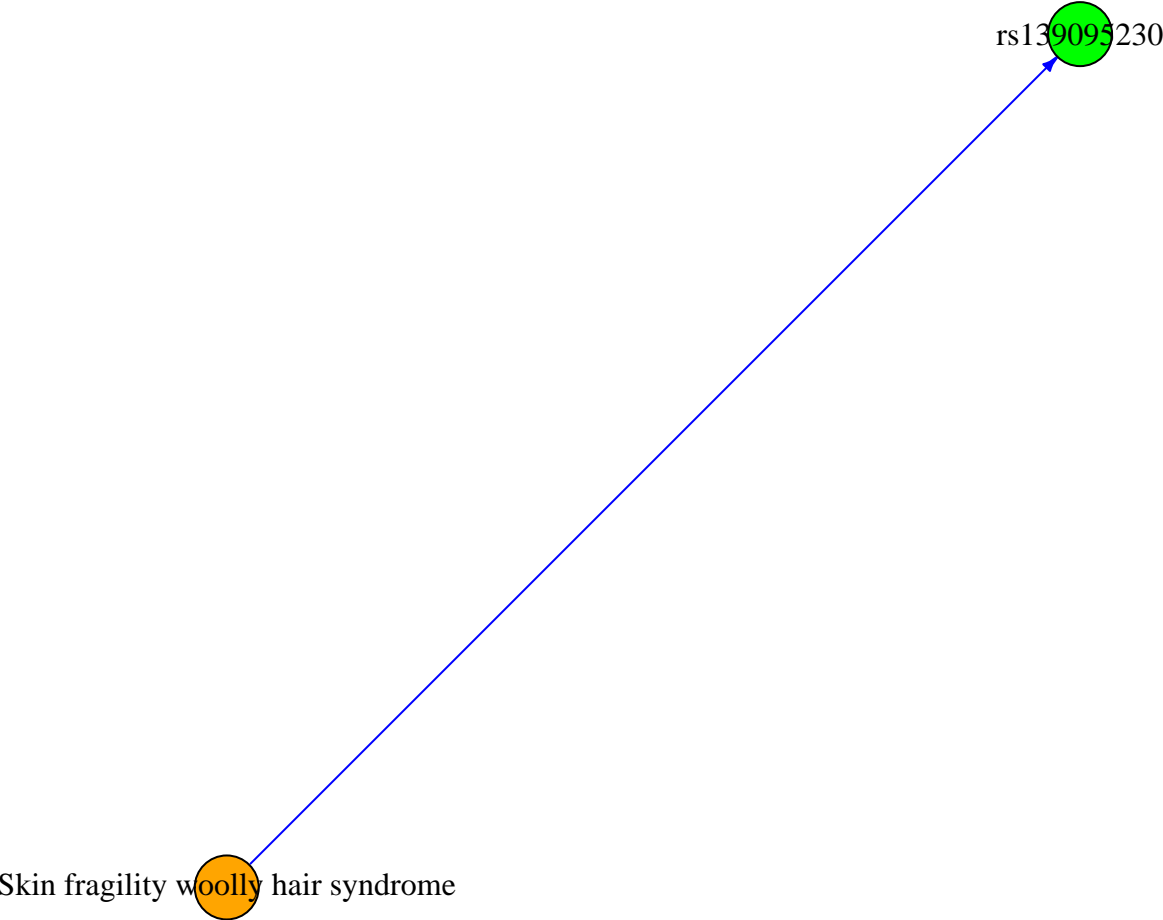

## Variant–Disease Network (Smith–McCort dysplasia)

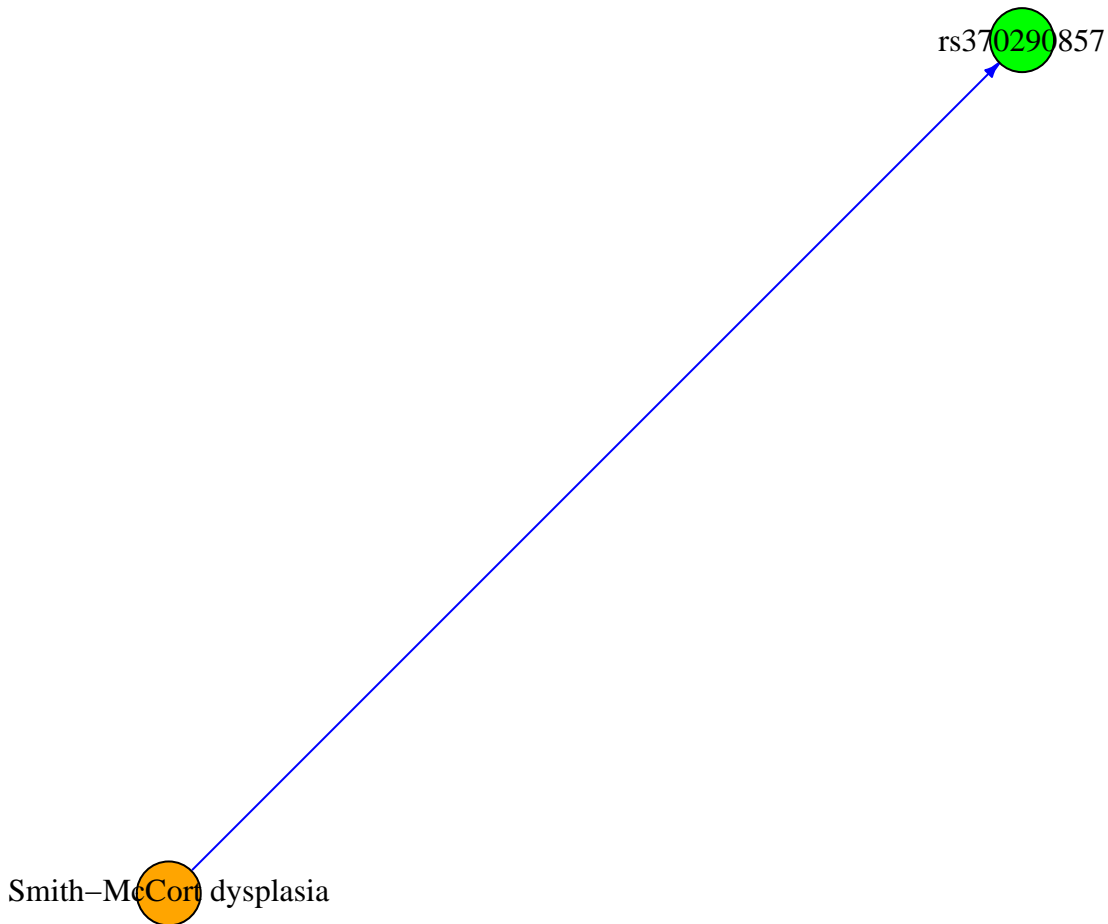

## Variant-Disease Network (Somatotroph adenoma)

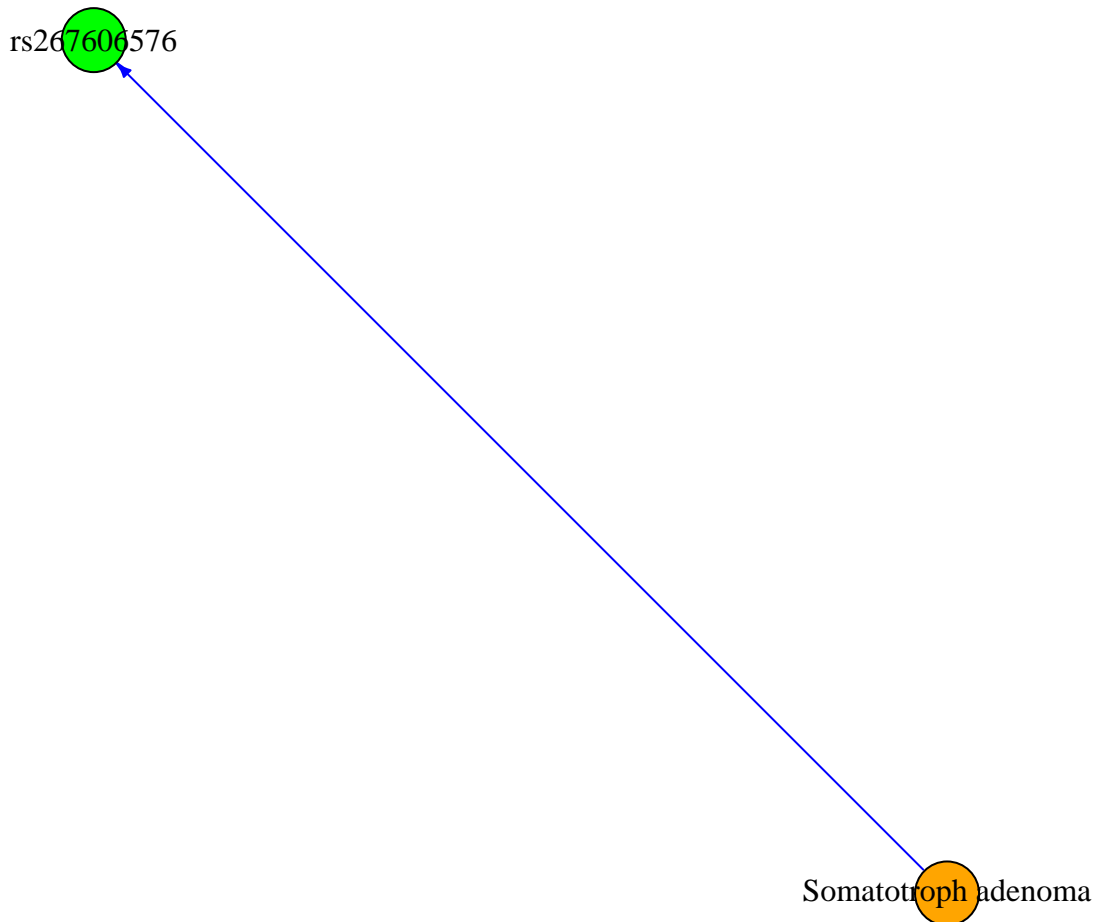

## Variant–Disease Network (Sotos syndrome)

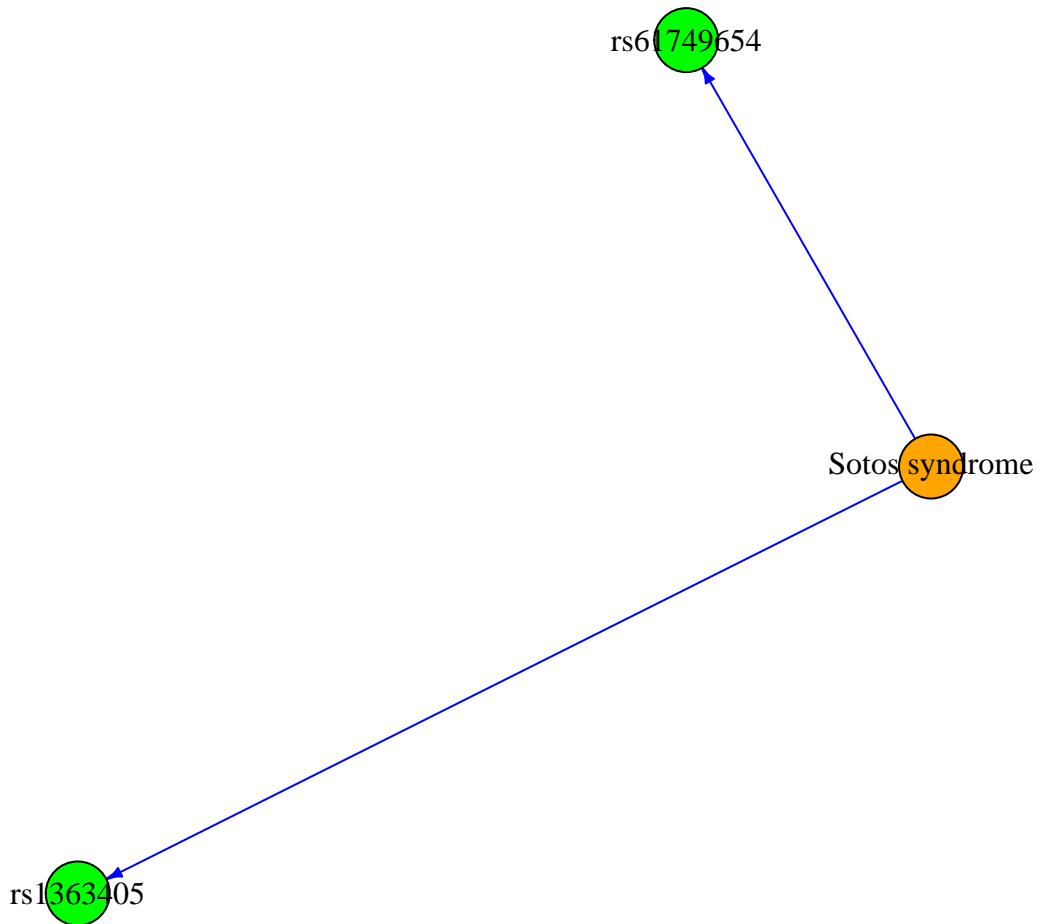

## Variant–Disease Network (Sotos syndrome 1)

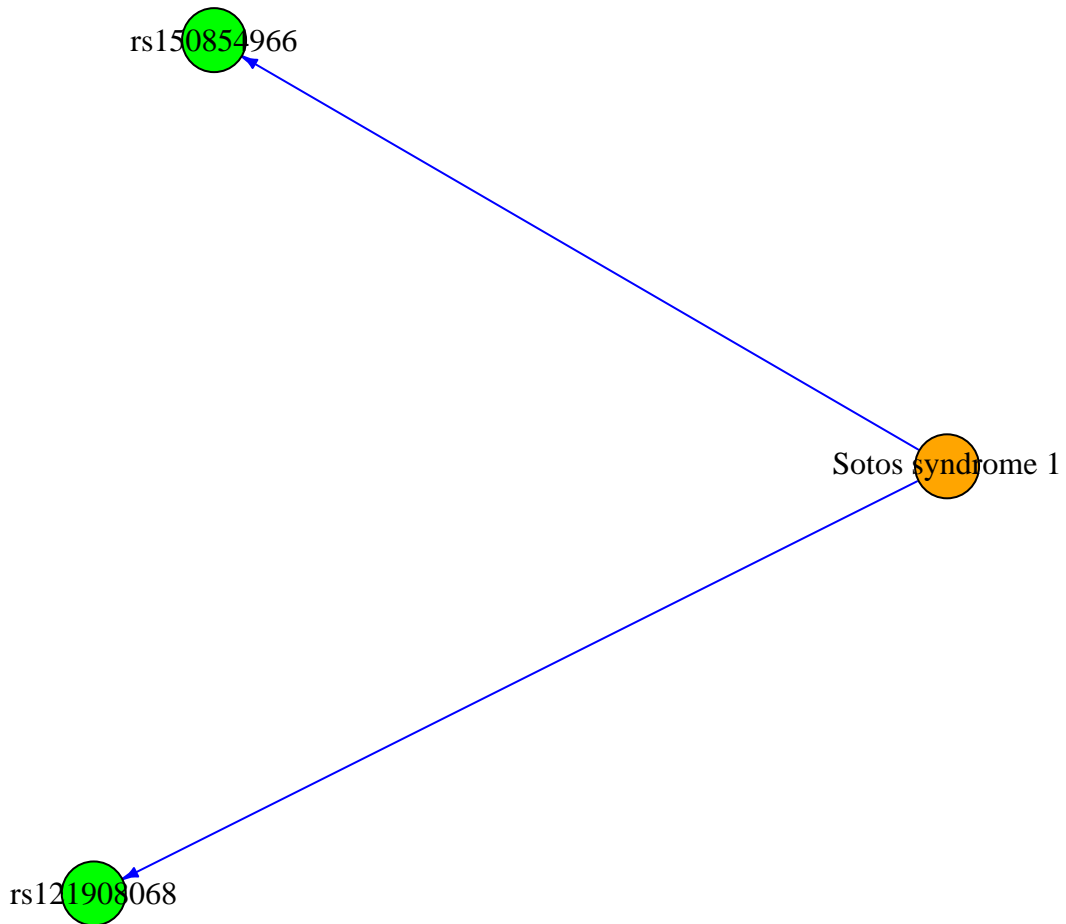

**Variant–Disease Network (Spastic ataxia Charlevoix–Saguenay type)**

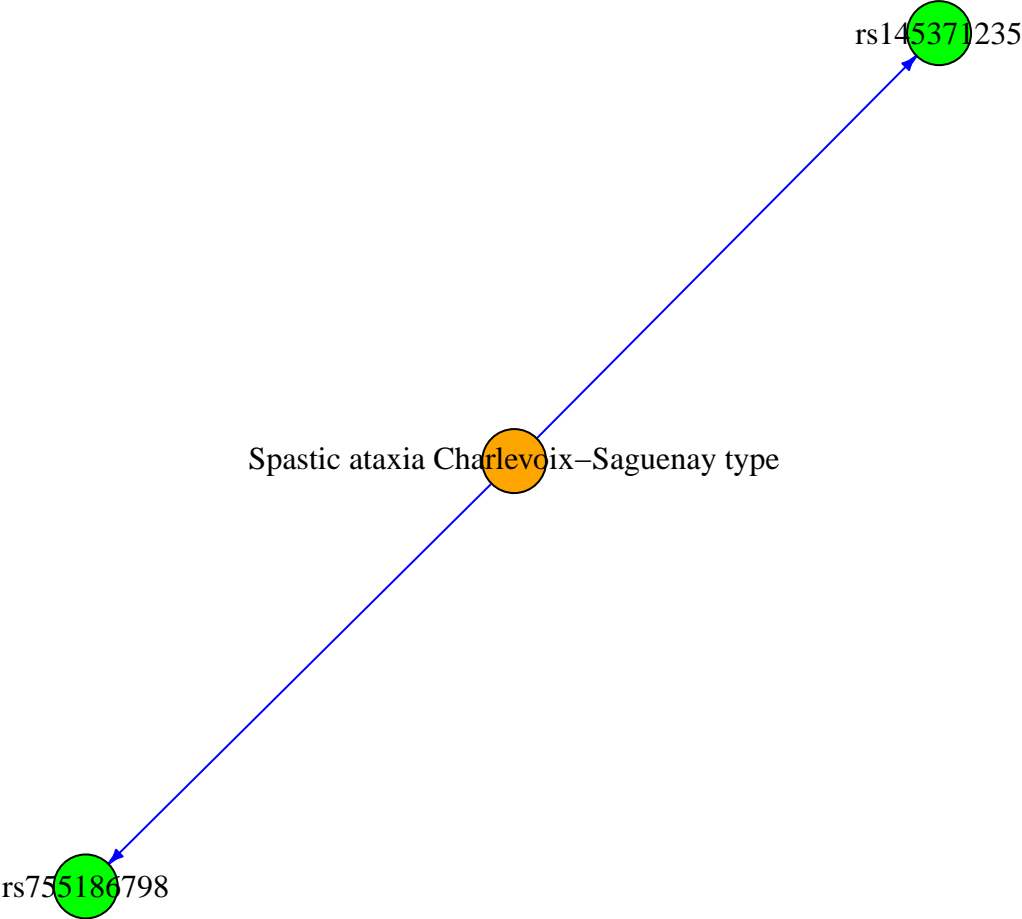

## Variant–Disease Network (Spastic paraplegia)

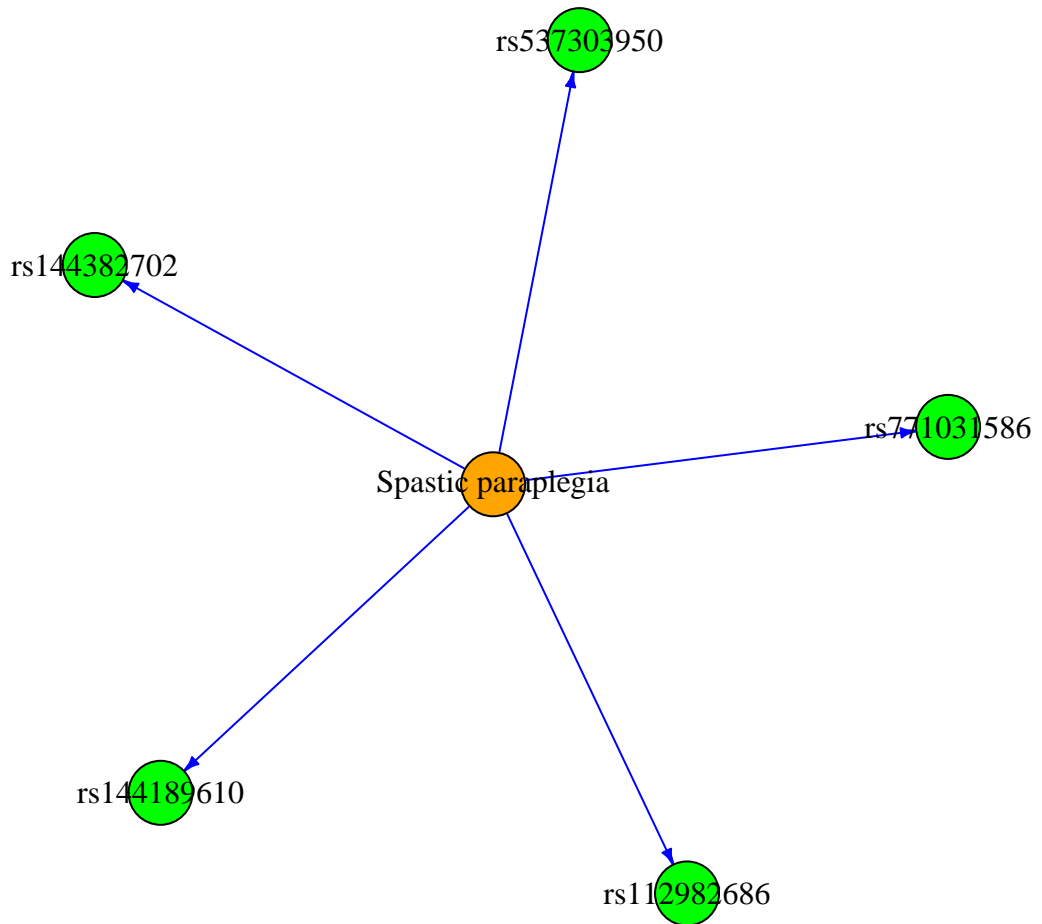

## Variant–Disease Network (Spastic paraplegia 11)

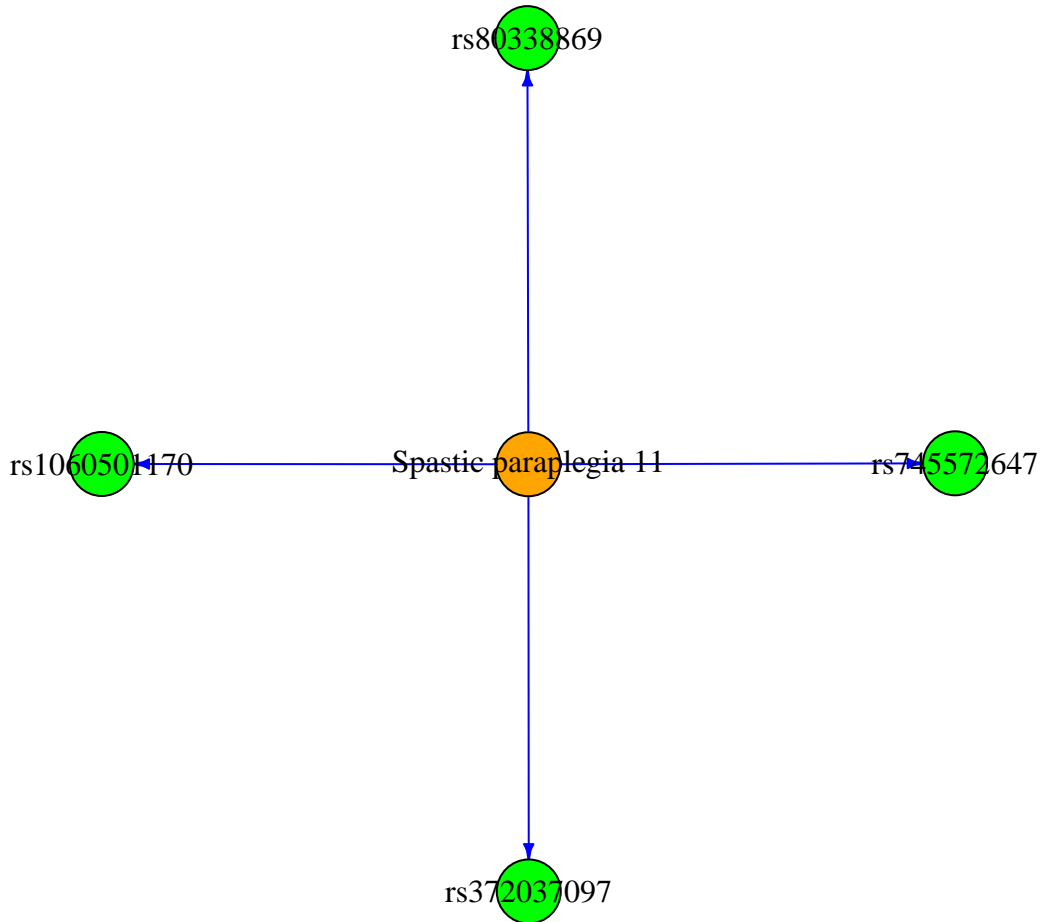



## Variant–Disease Network (Spastic paraplegia 15)

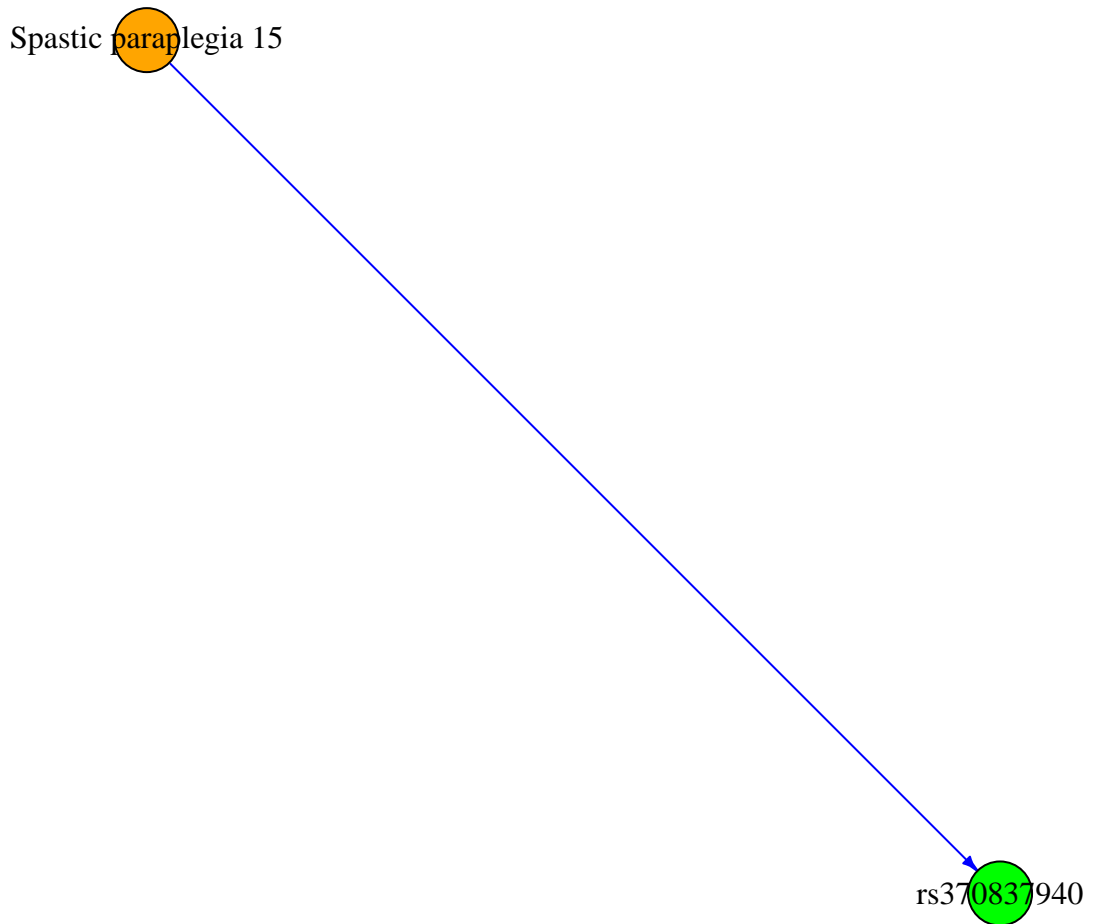

## Variant–Disease Network (Spastic paraplegia 50)

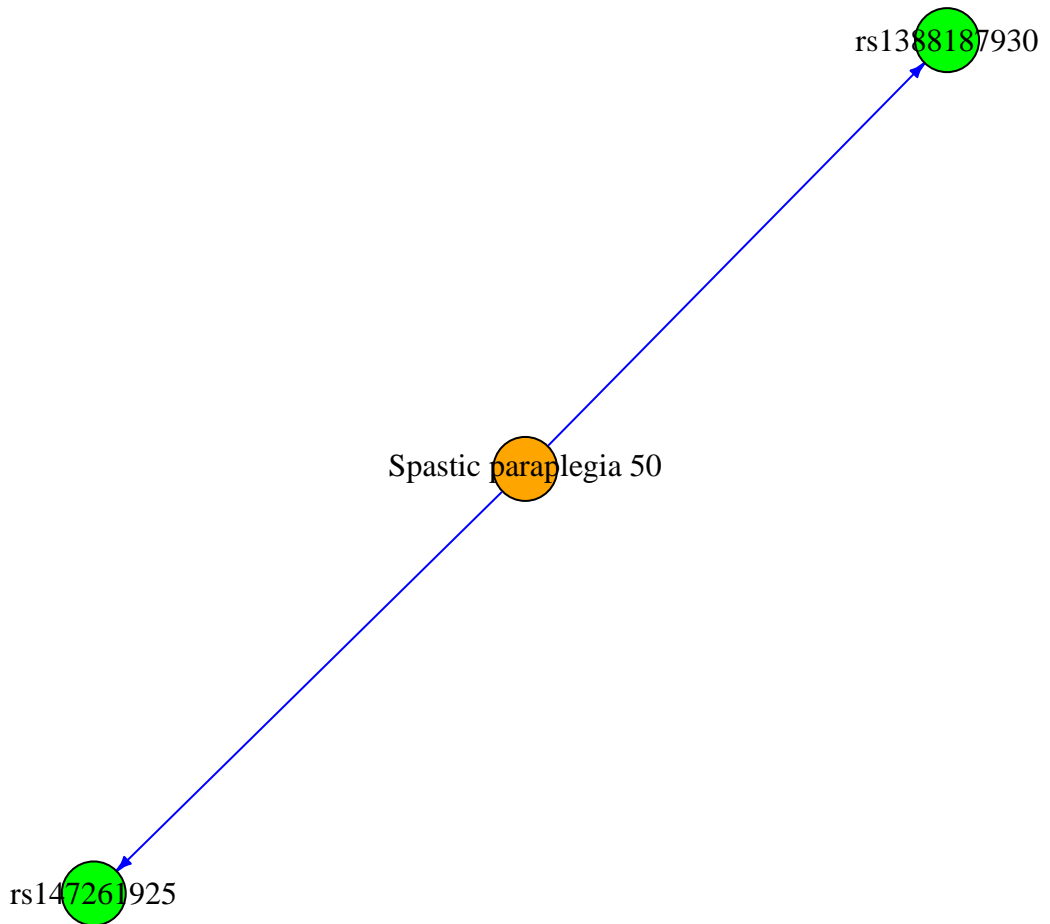

**Variant–Disease Network (Spermatogenic failure 13)**

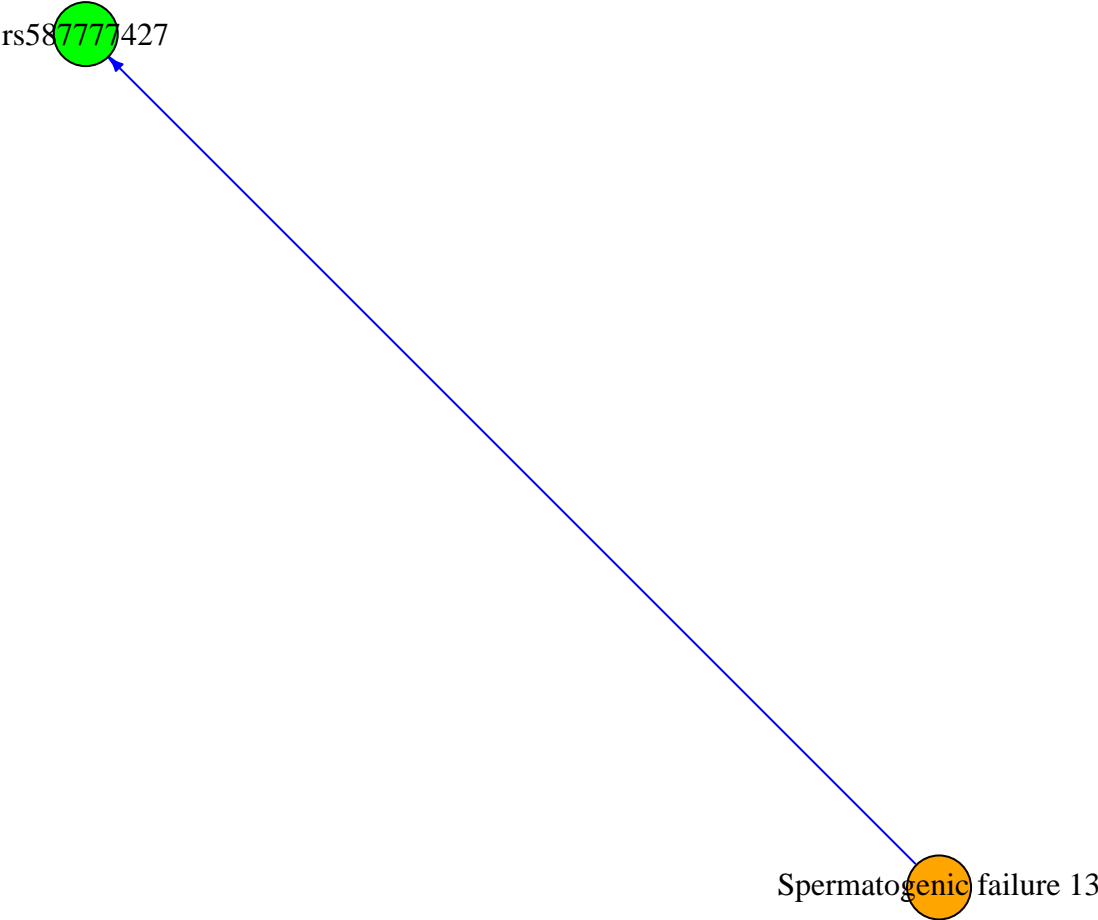

**Variant–Disease Network (Spherocytosis)**

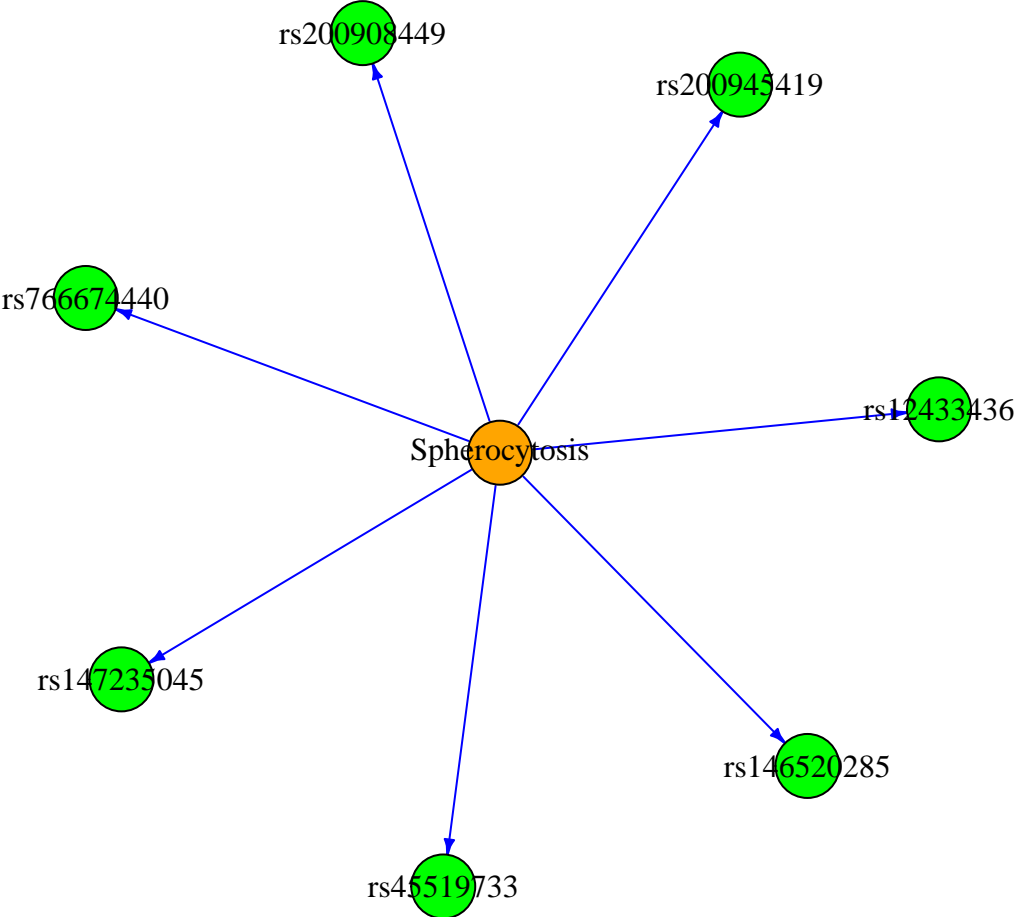

Variant–Disease Network (Sphingomyelin/cholesterol lipidosis)

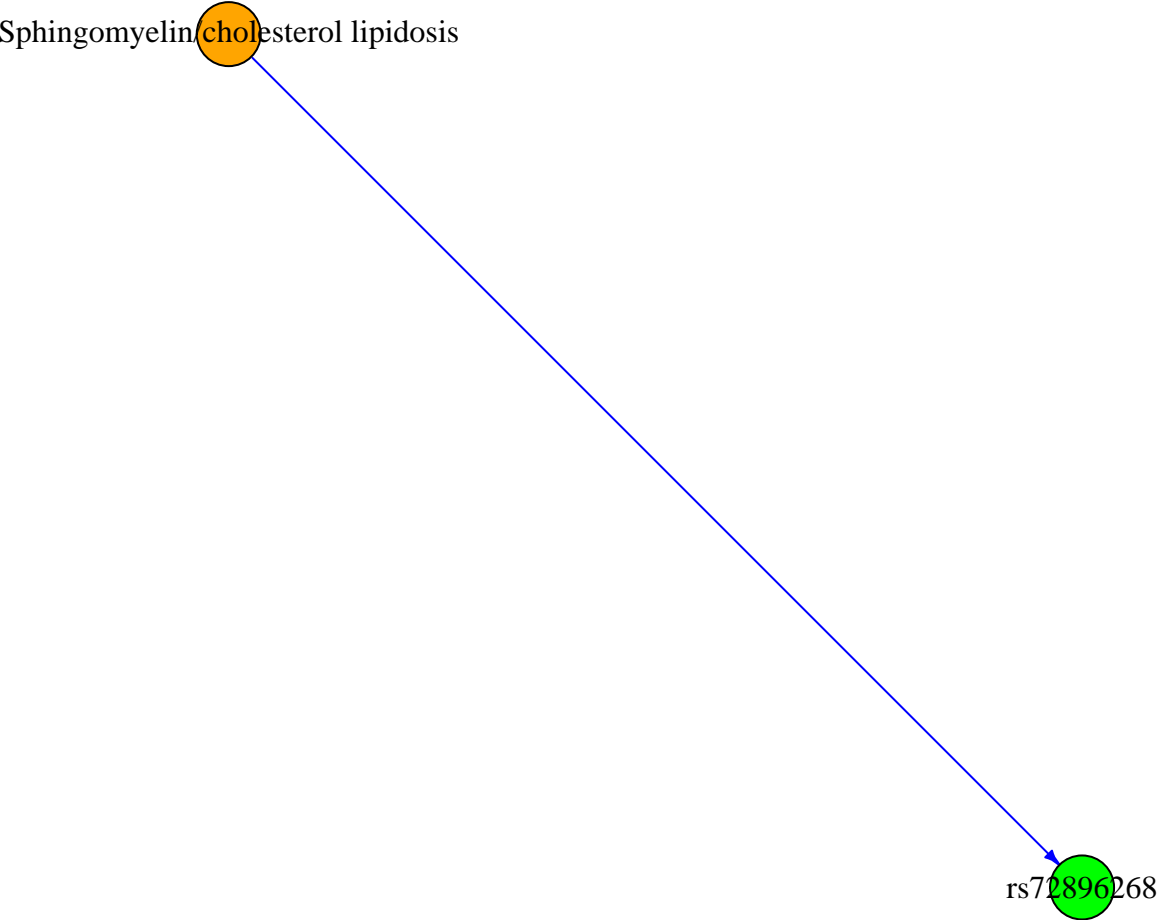

## Variant–Disease Network (Spiegler–Brooke syndrome)

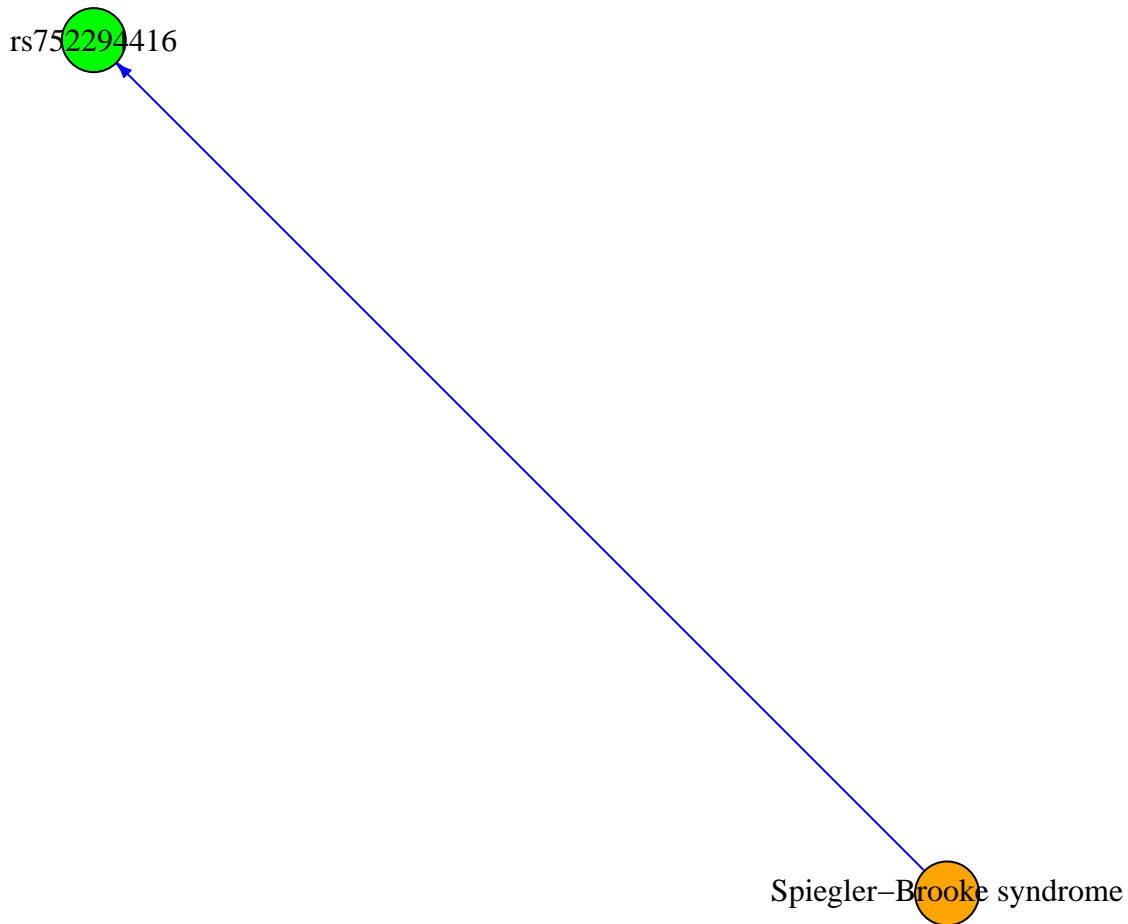

**Variant–Disease Network (Spinal muscular atrophy)**

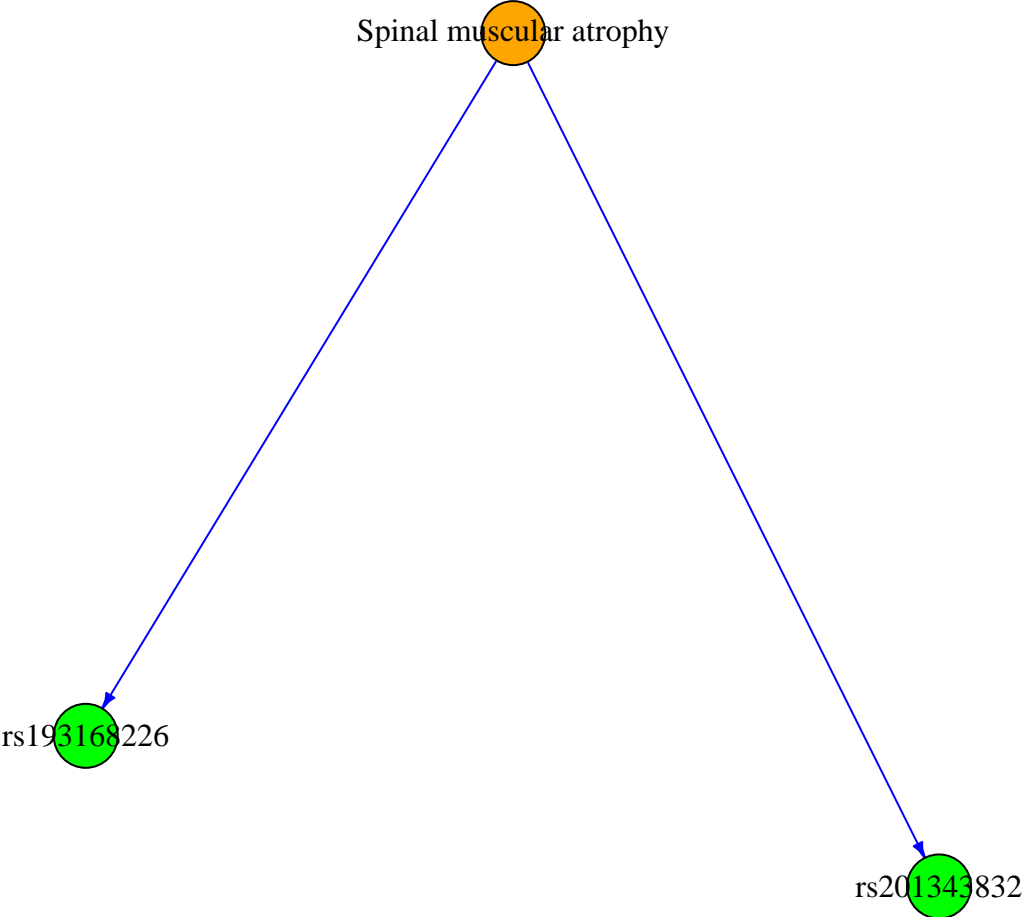

## Variant–Disease Network (Spinocerebellar ataxia)

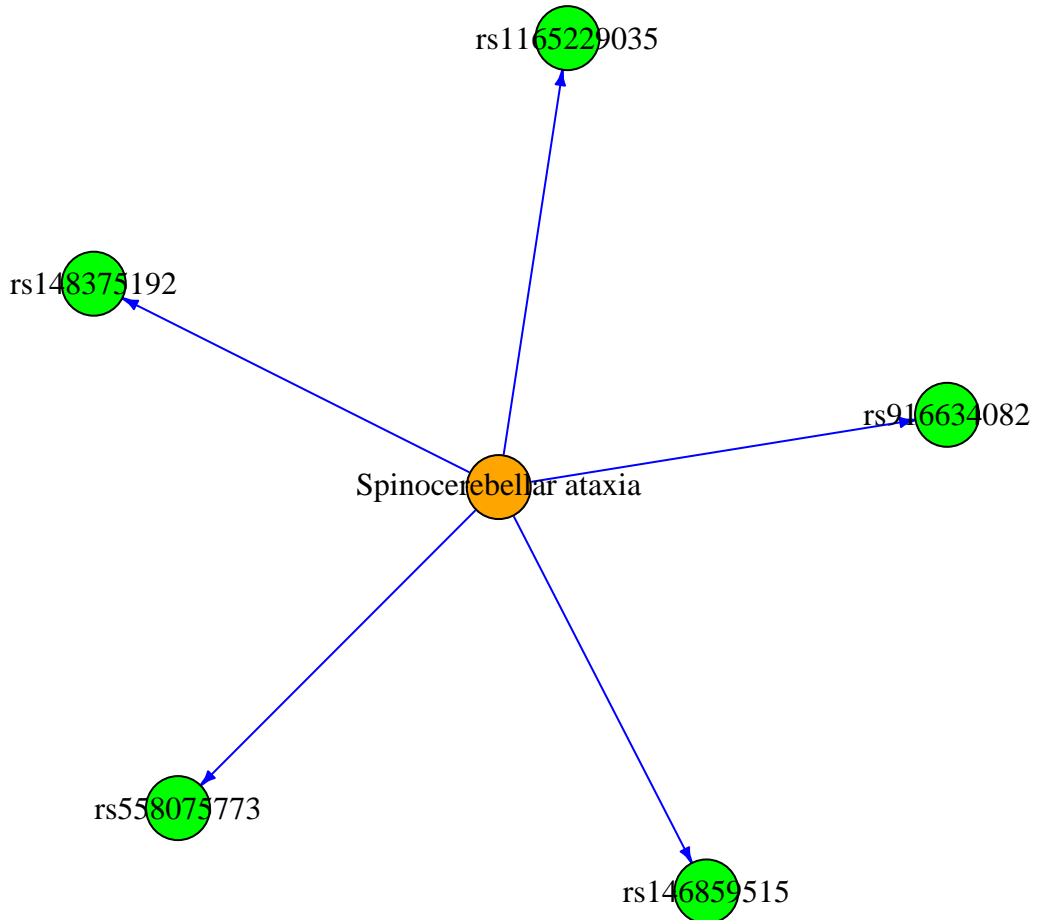



**Variant–Disease Network (Spinocerebellar ataxia 14)**

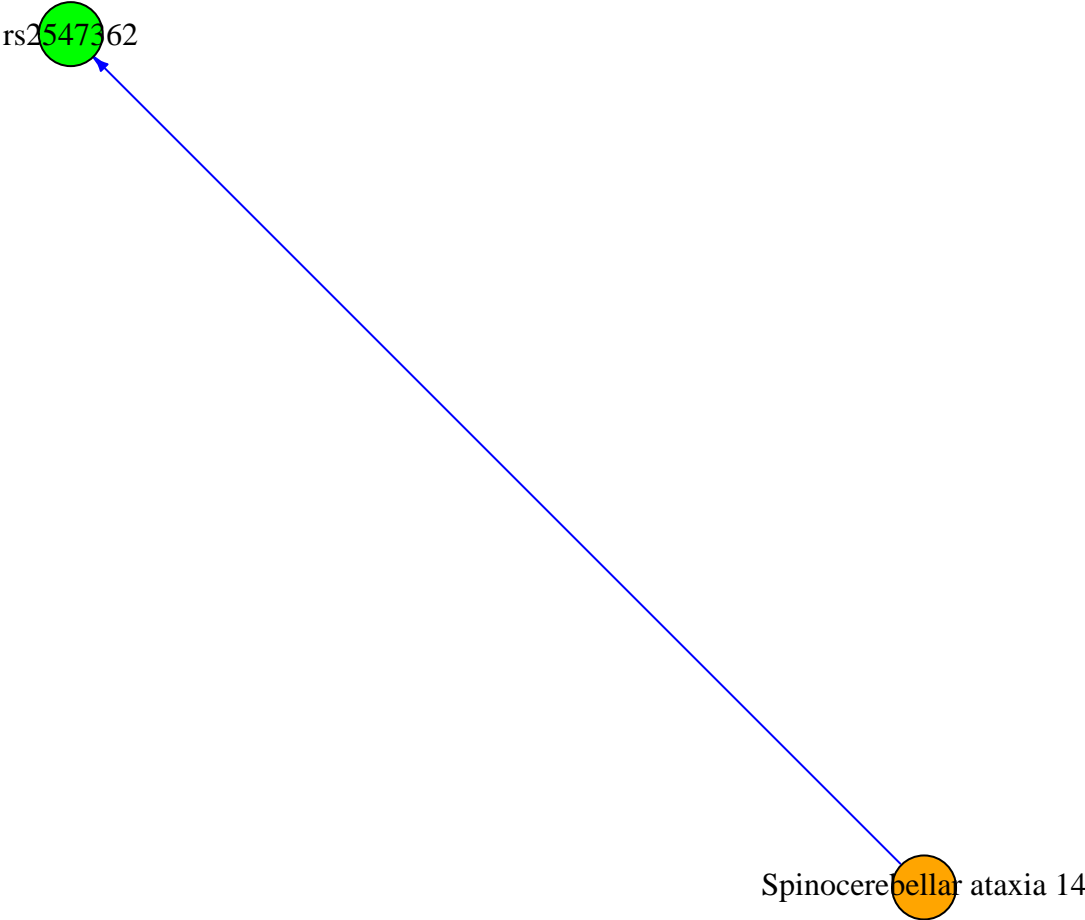

# Variant–Disease Network (Split–hand/foot malformation)

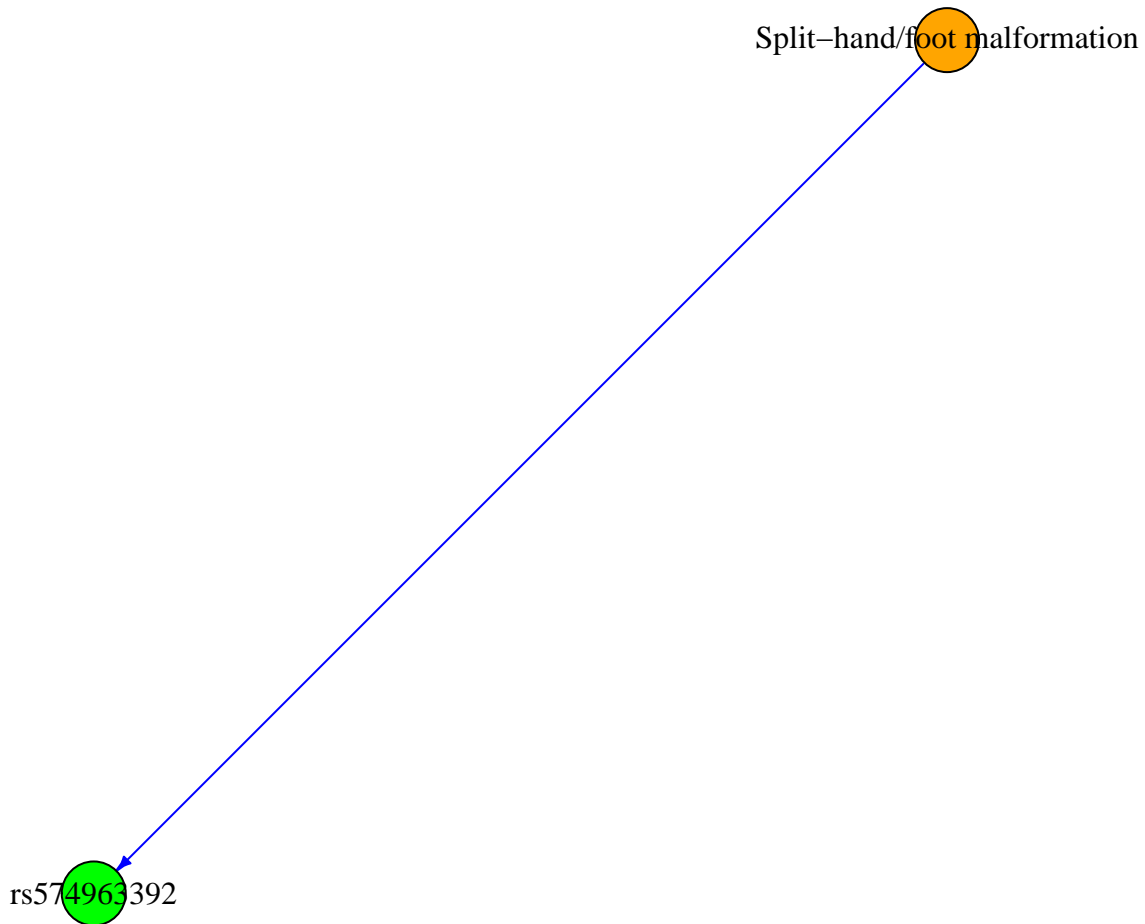

# Variant–Disease Network (Spondylocostal dysostosis 1)

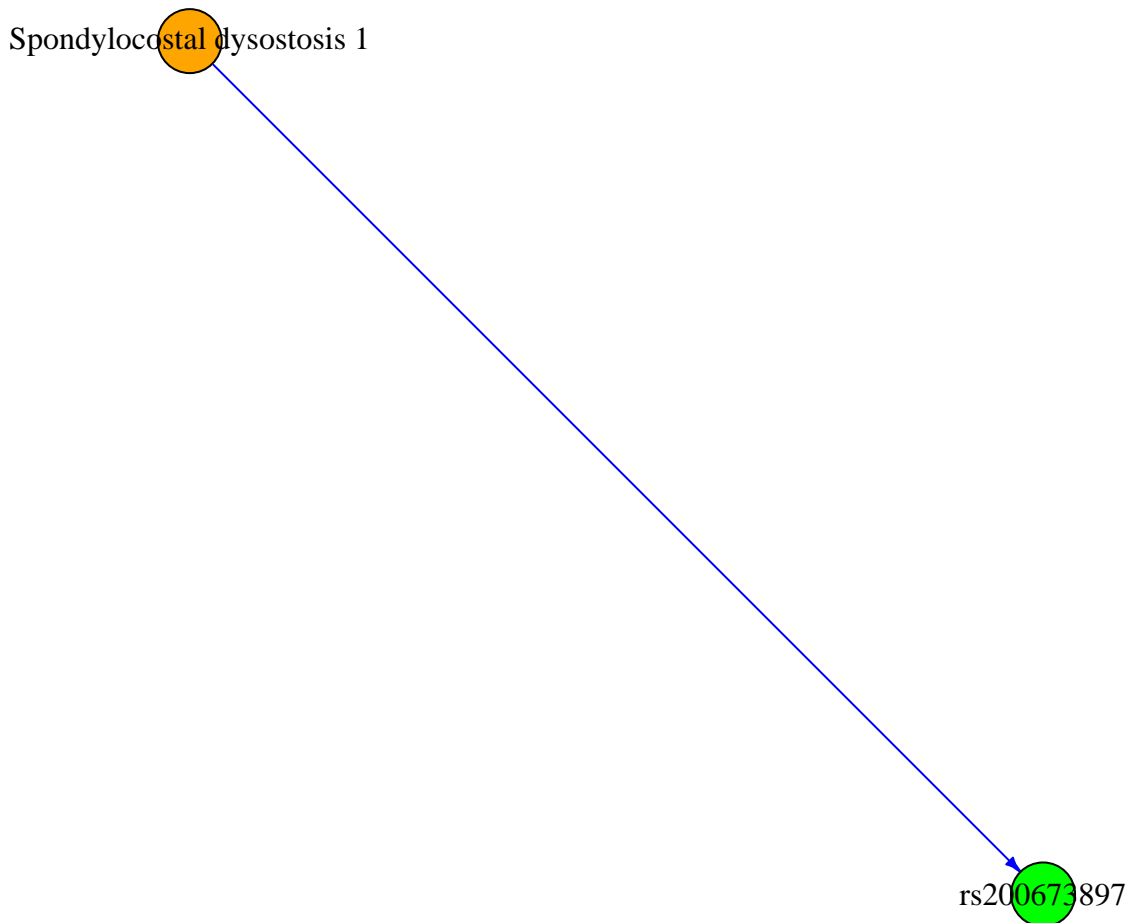

## Variant–Disease Network (Spondyloepimetaphyseal dysplasia)

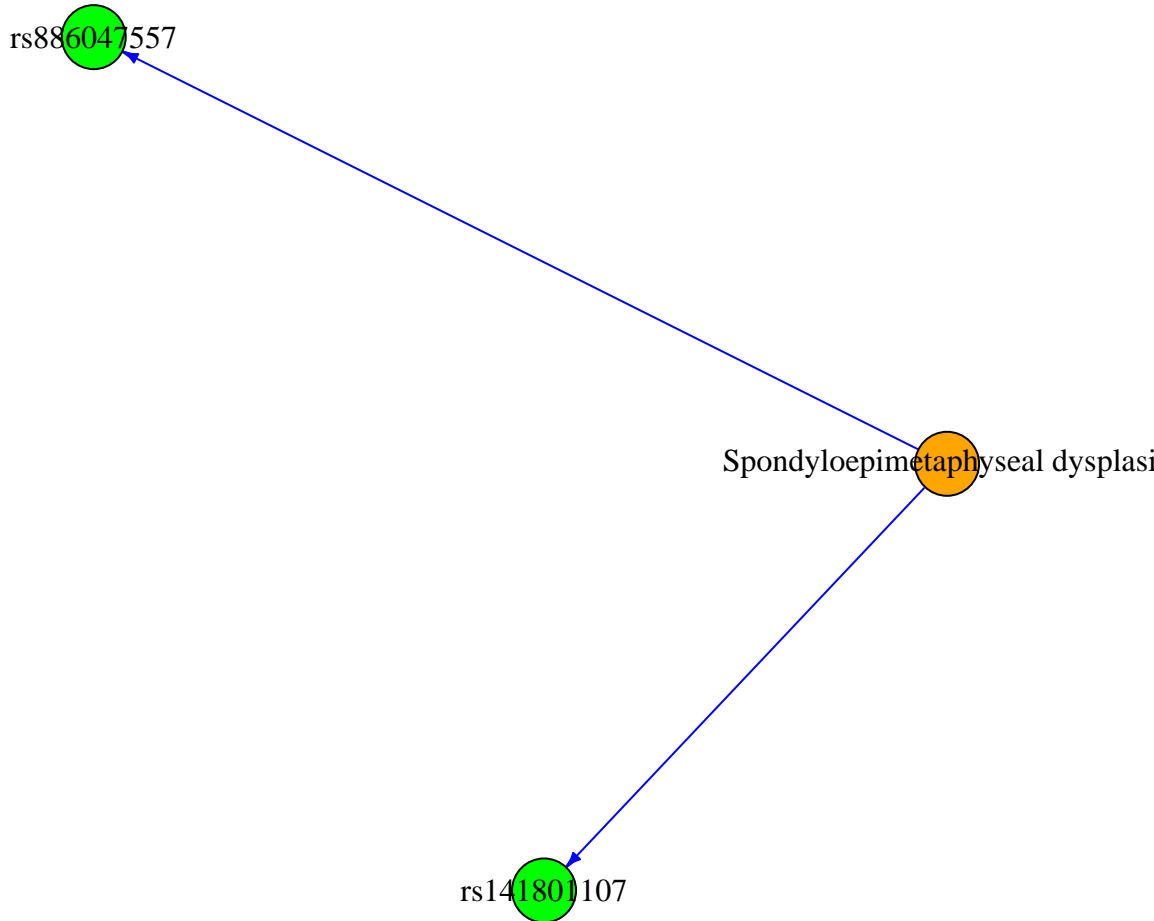

Variant–Disease Network (Spongy degeneration of central nervous system)

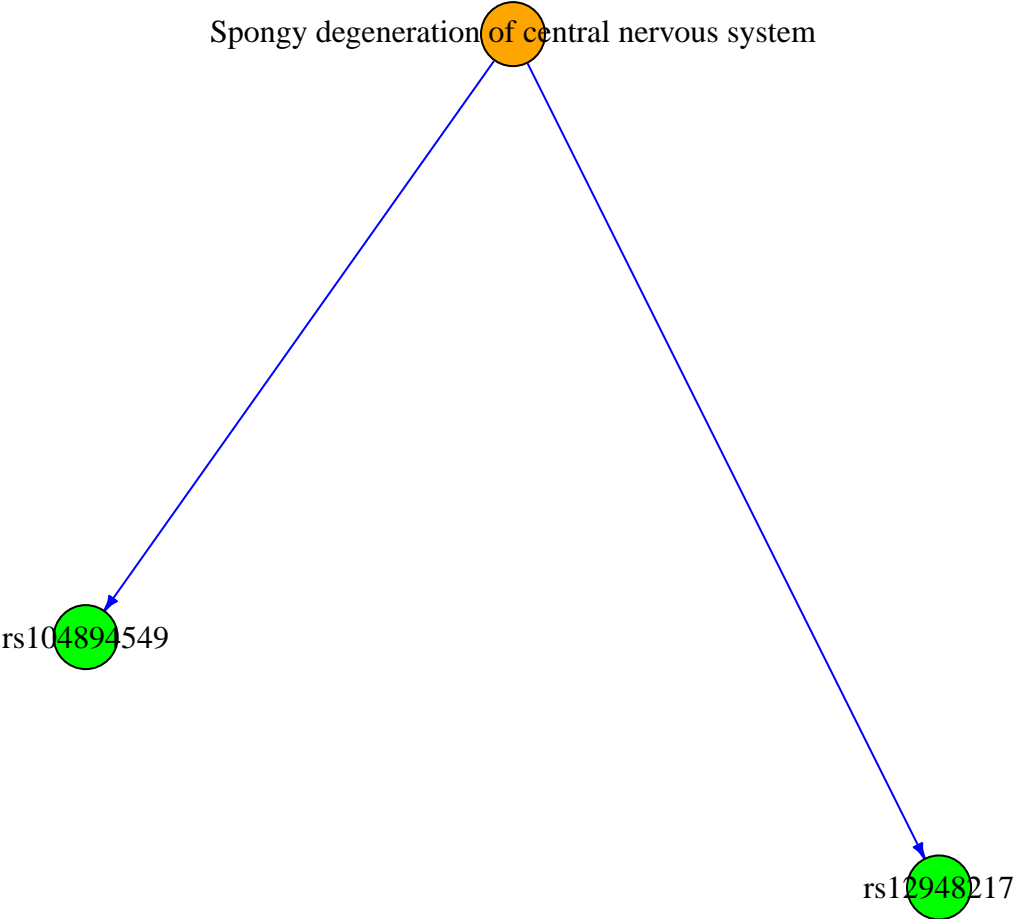

Variant–Disease Network (Stargardt Disease)

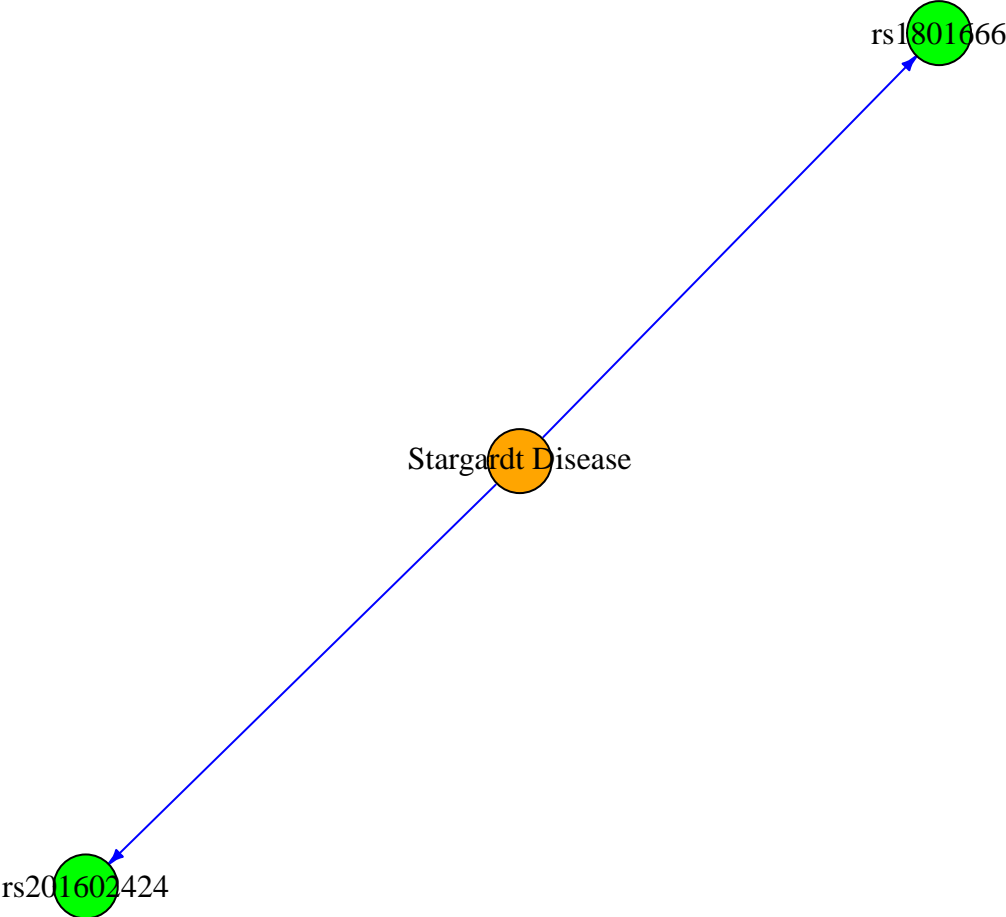

## Variant–Disease Network (Stargardt disease 1)

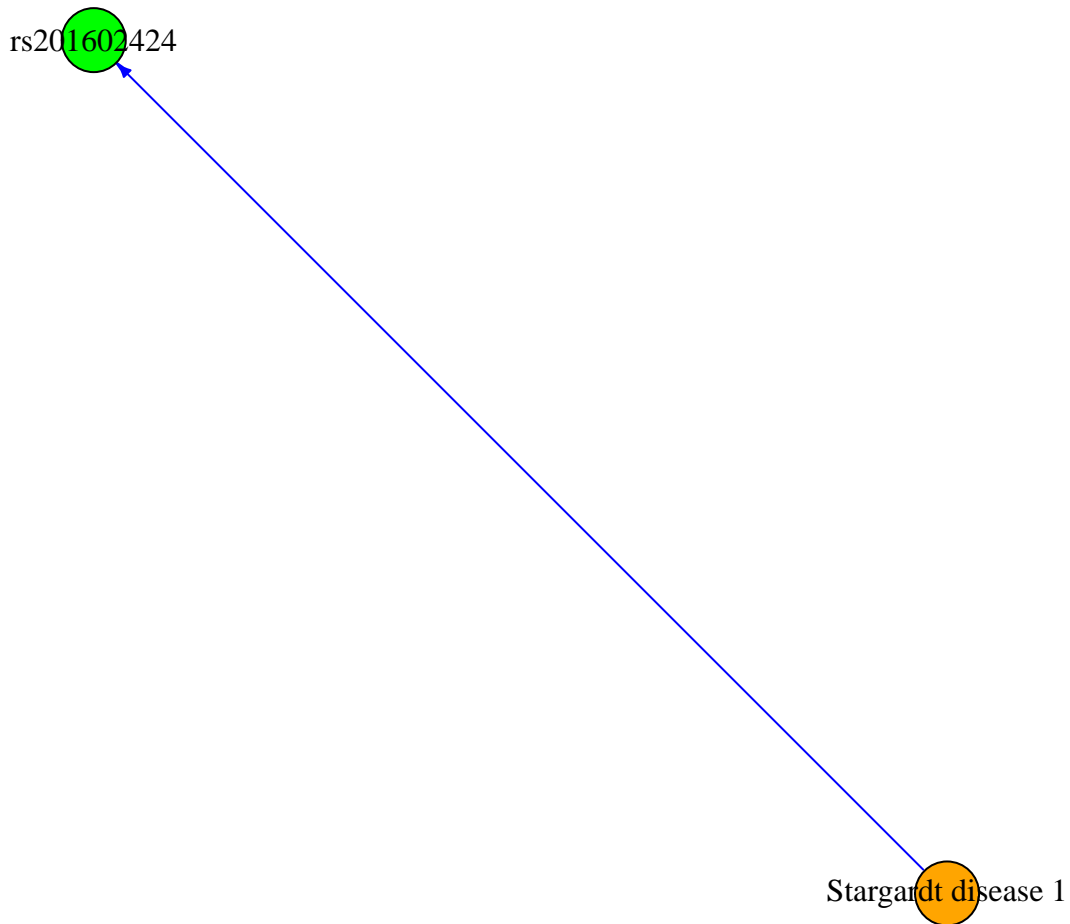

# Variant–Disease Network (Steroid-resistant nephrotic syndrome)

rs1410592

Steroid-resistant nephrotic syndrome

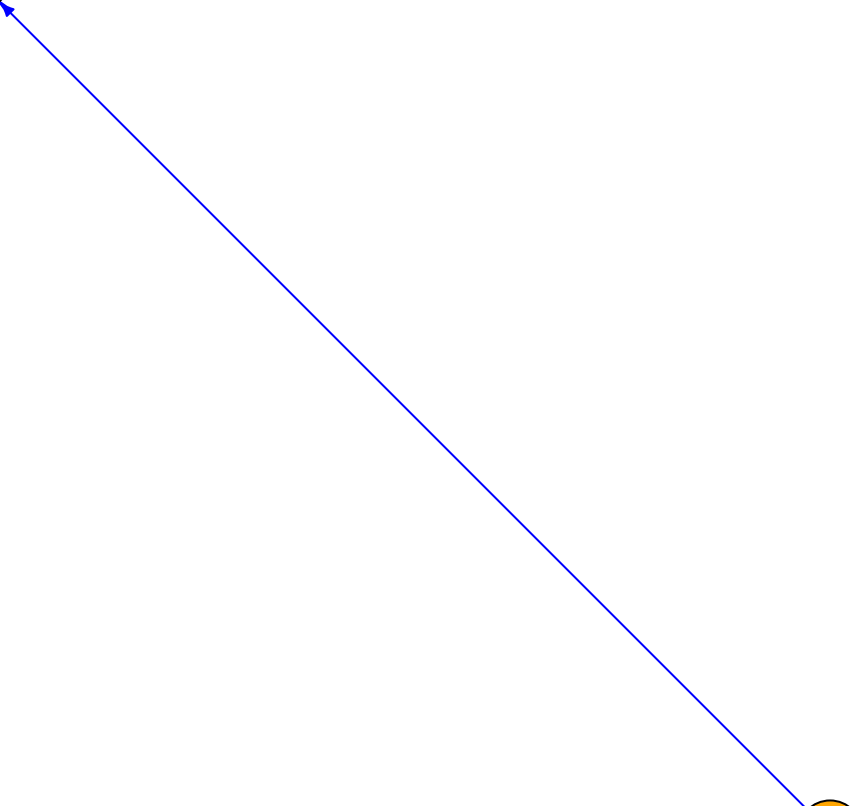



## Variant–Disease Network (Stickler Syndrome)

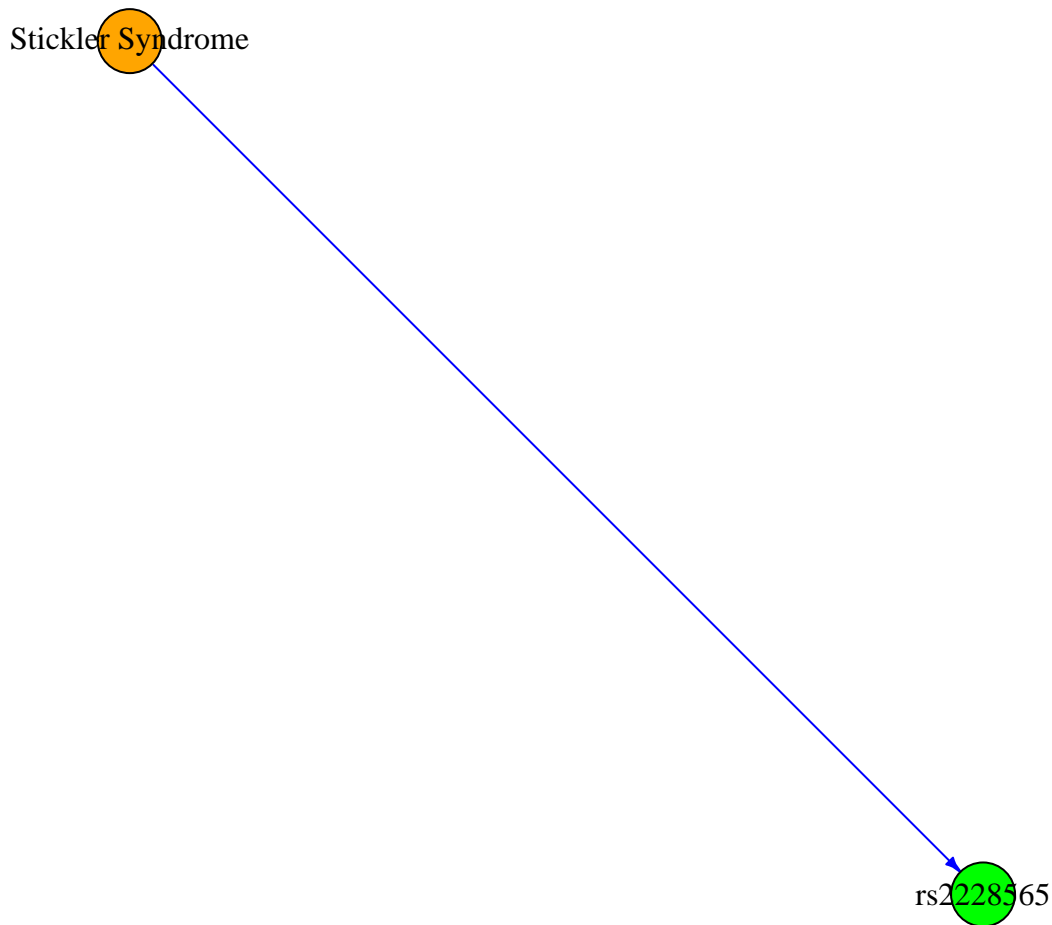

## Variant–Disease Network (Stiff skin syndrome)

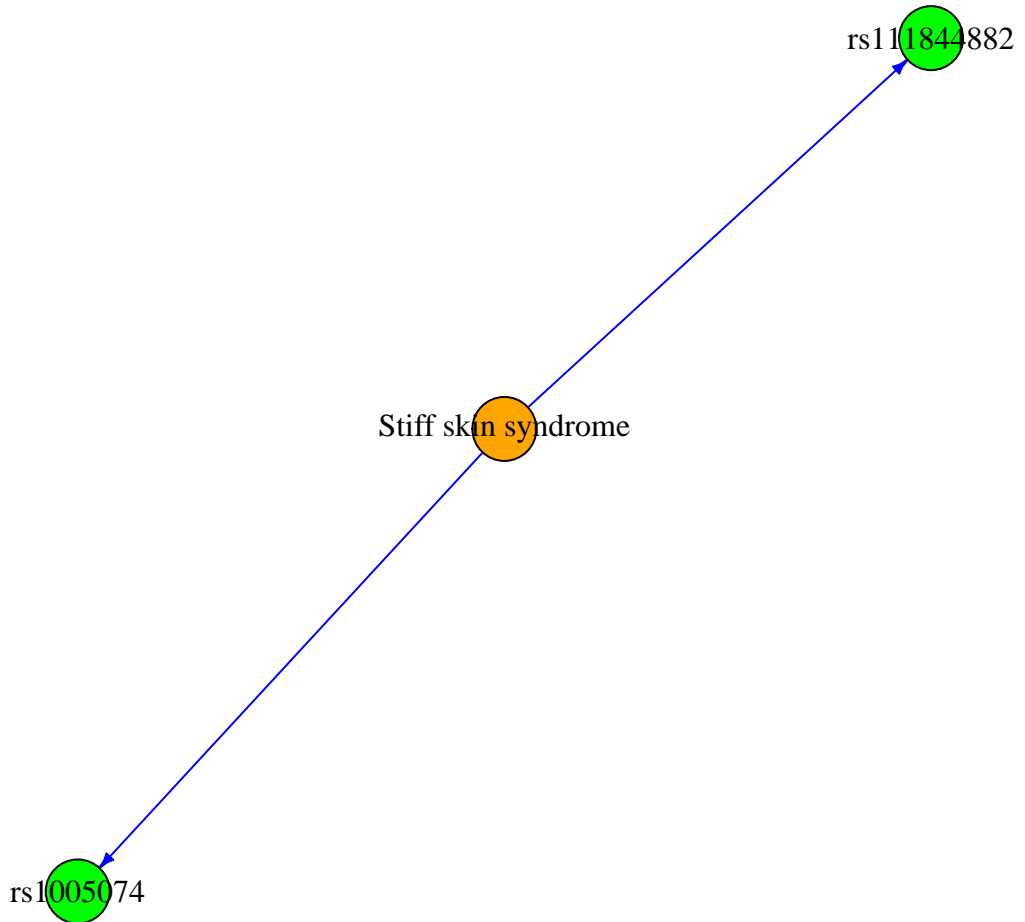

## Variant–Disease Network (Striatal Degeneration)

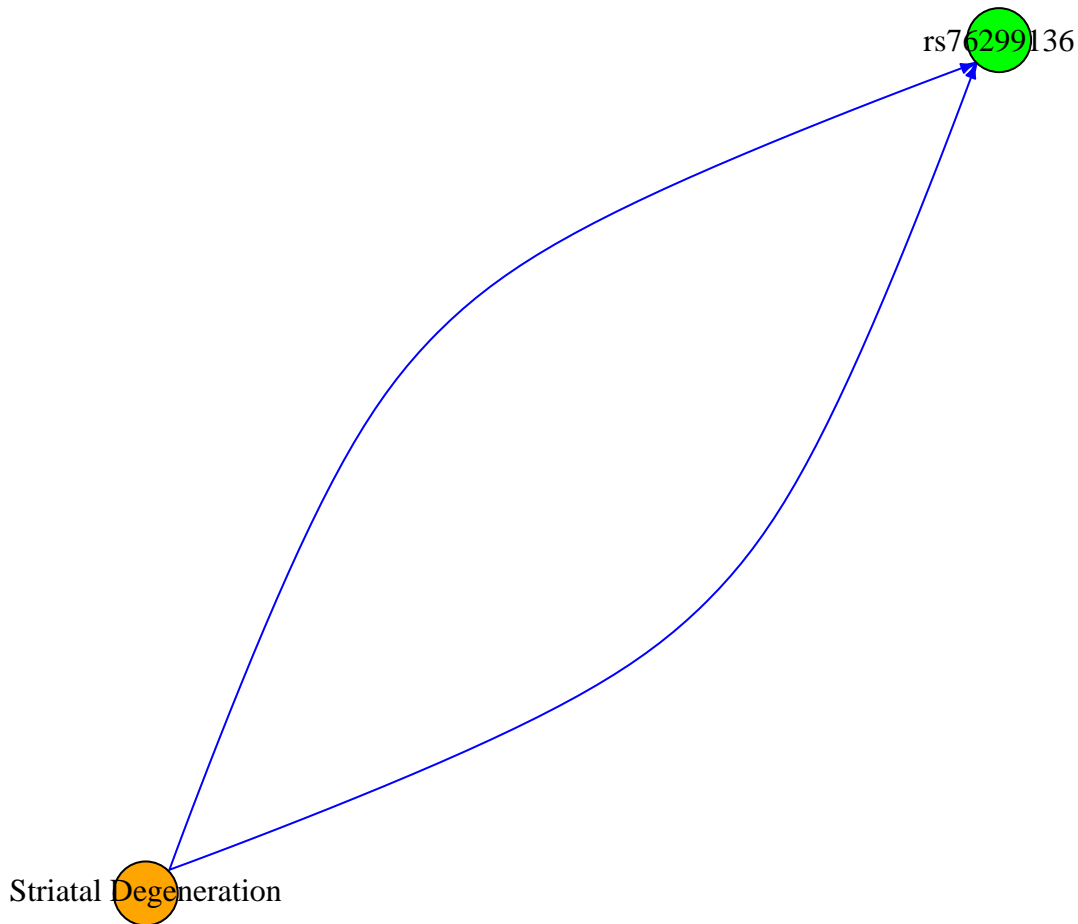

**Variant–Disease Network (Sucrase–isomaltase deficiency)**

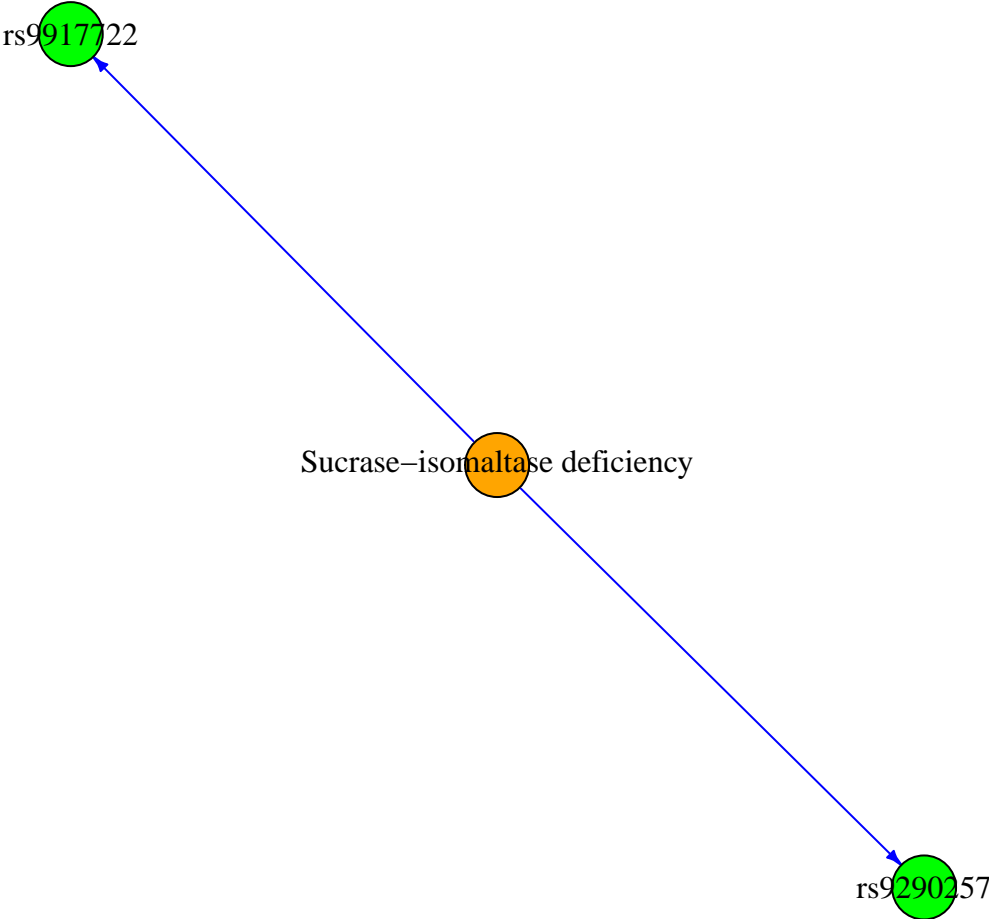

## Variant–Disease Network (Syndactyly)

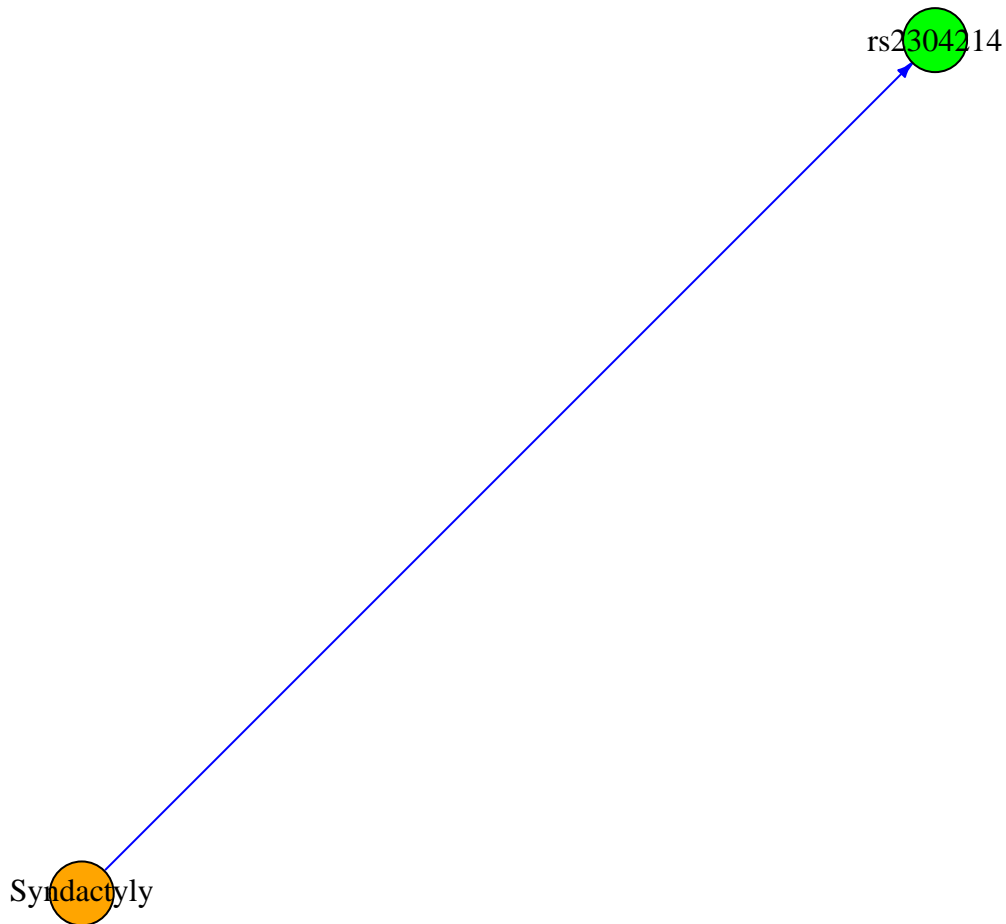

## Variant–Disease Network (Syndromic intellectual disability)

rs1881194

Syndromic intellectual disability

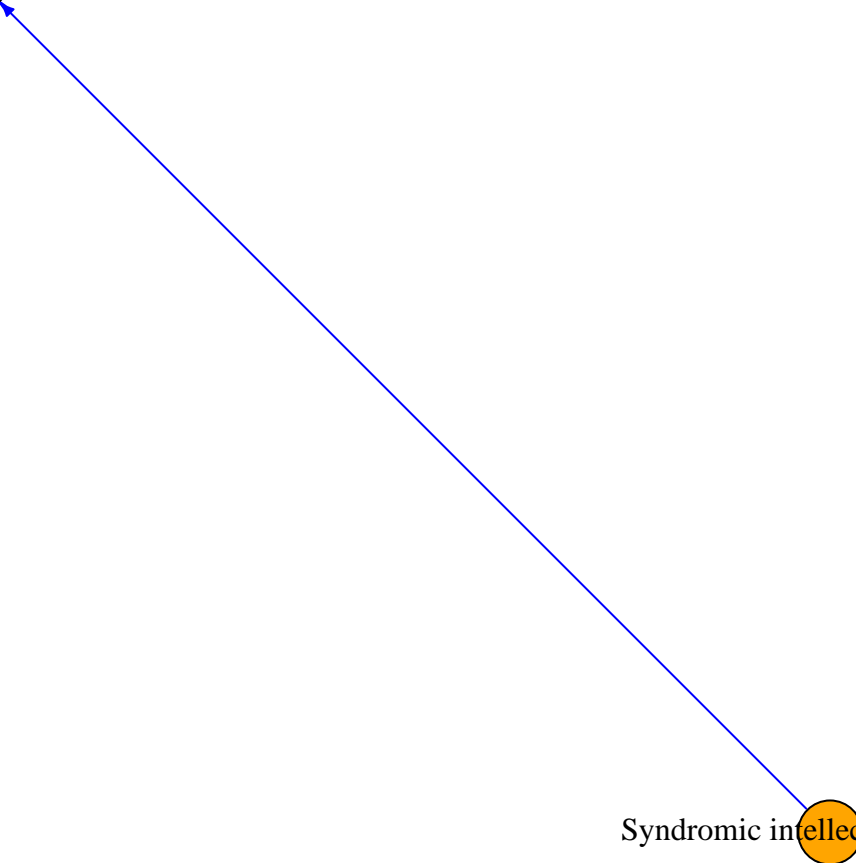

## Variant–Disease Network (Syndromic Microphthalmia)

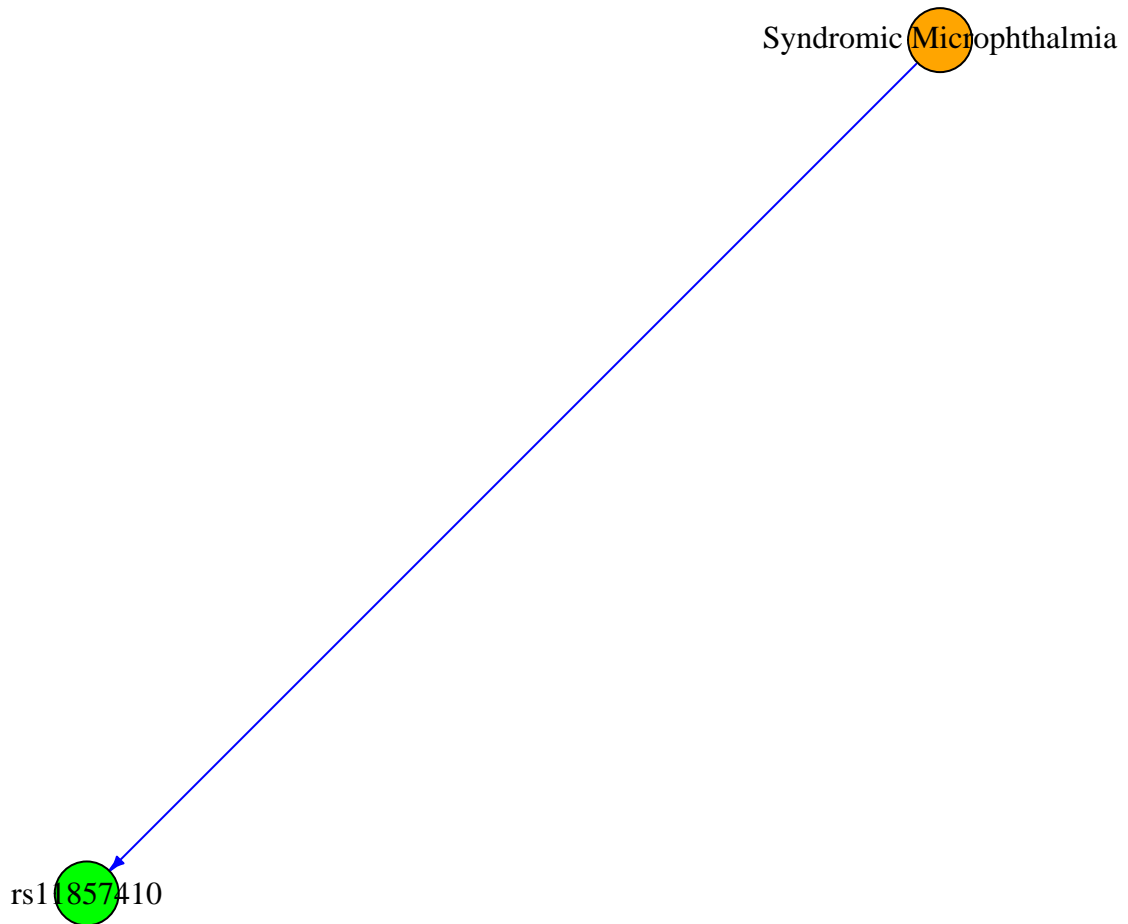

Variant–Disease Network (Tangier disease)

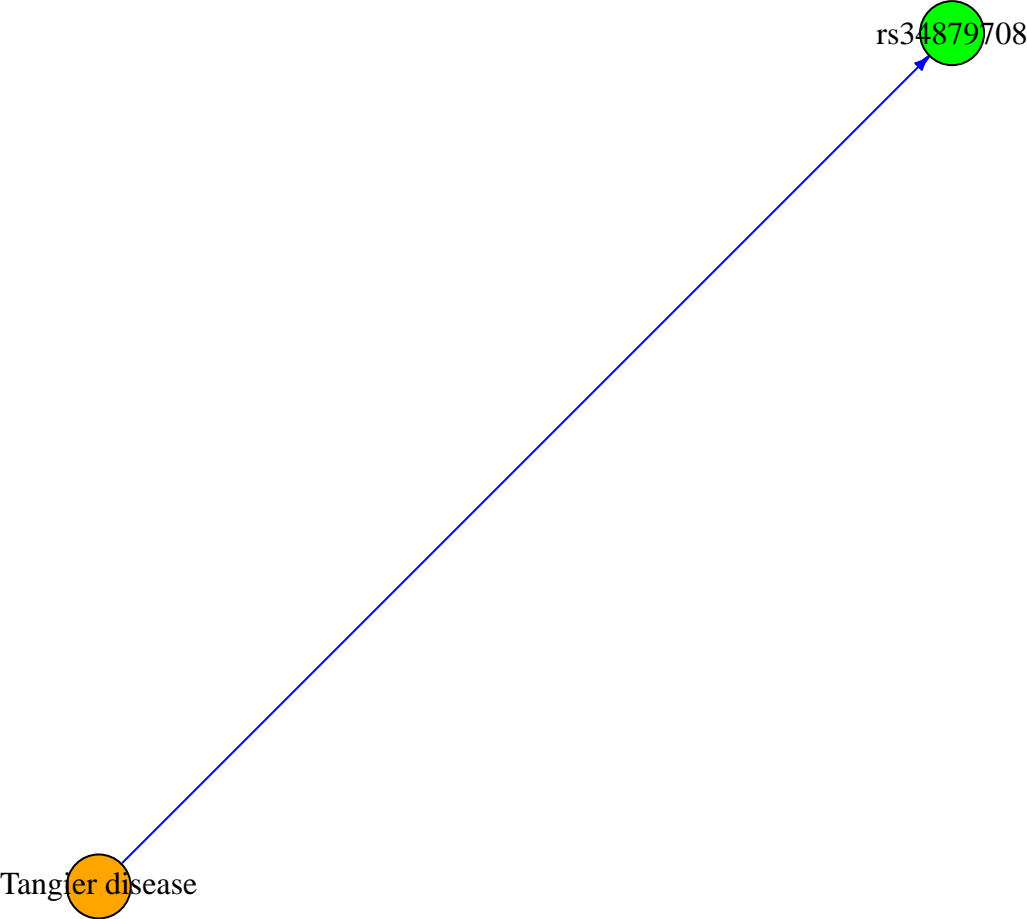



**Variant–Disease Network (Temptamy preaxial brachydactyly syndrome)**

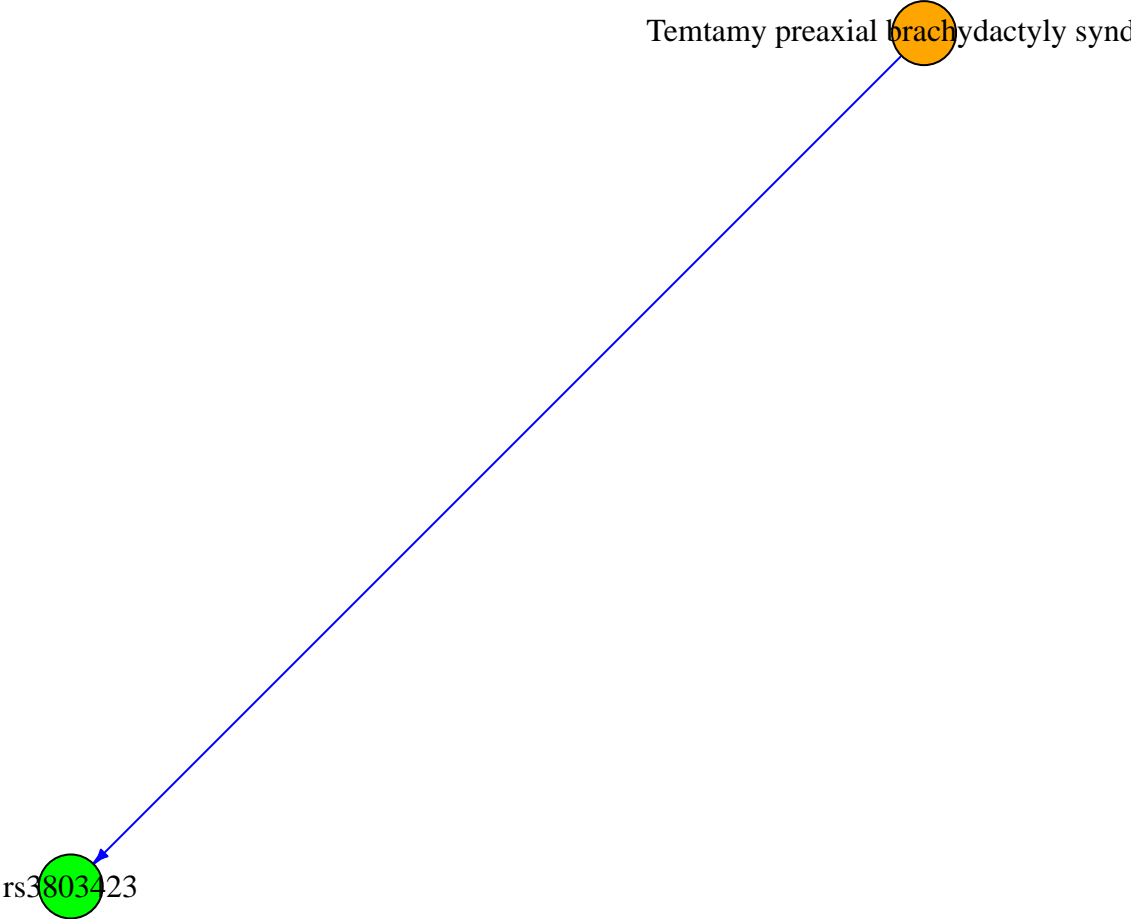

**Variant–Disease Network (Thoracic aortic aneurysm and aortic dissection)**

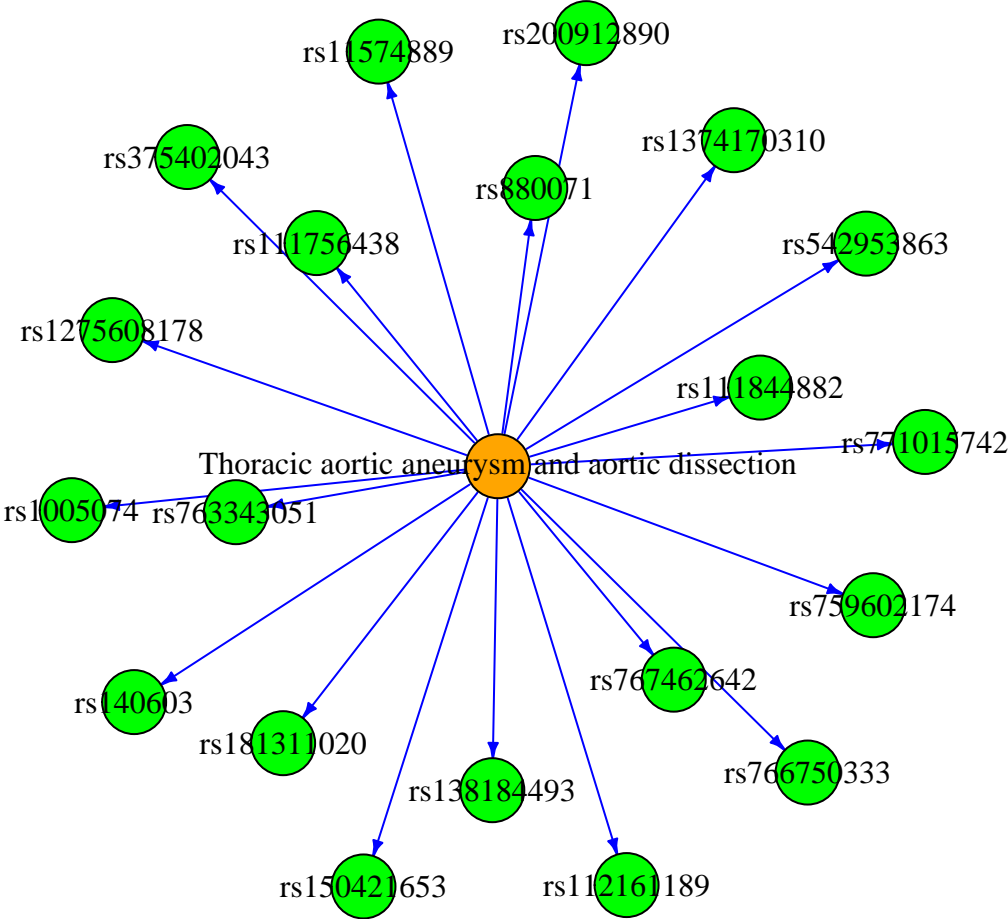

## Variant–Disease Network (Thyroid dysmorphogenesis)

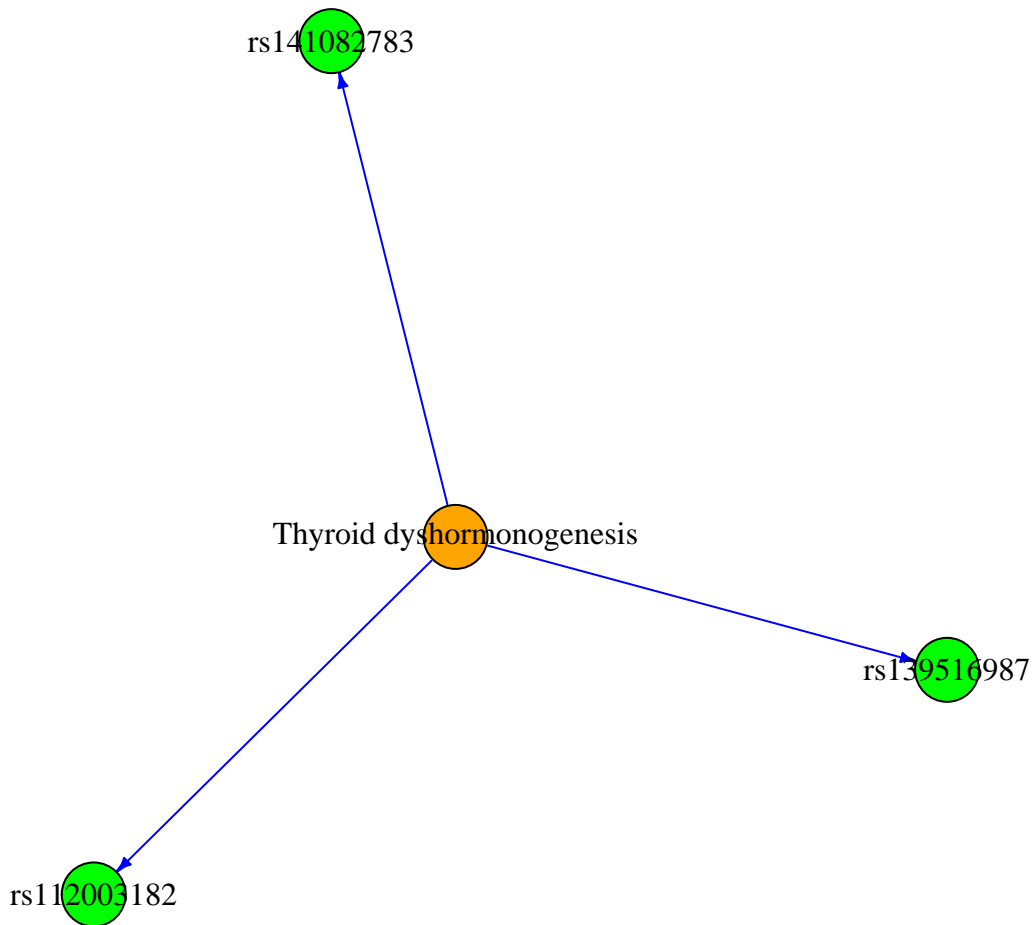

**Variant–Disease Network (Transient Neonatal Diabetes)**

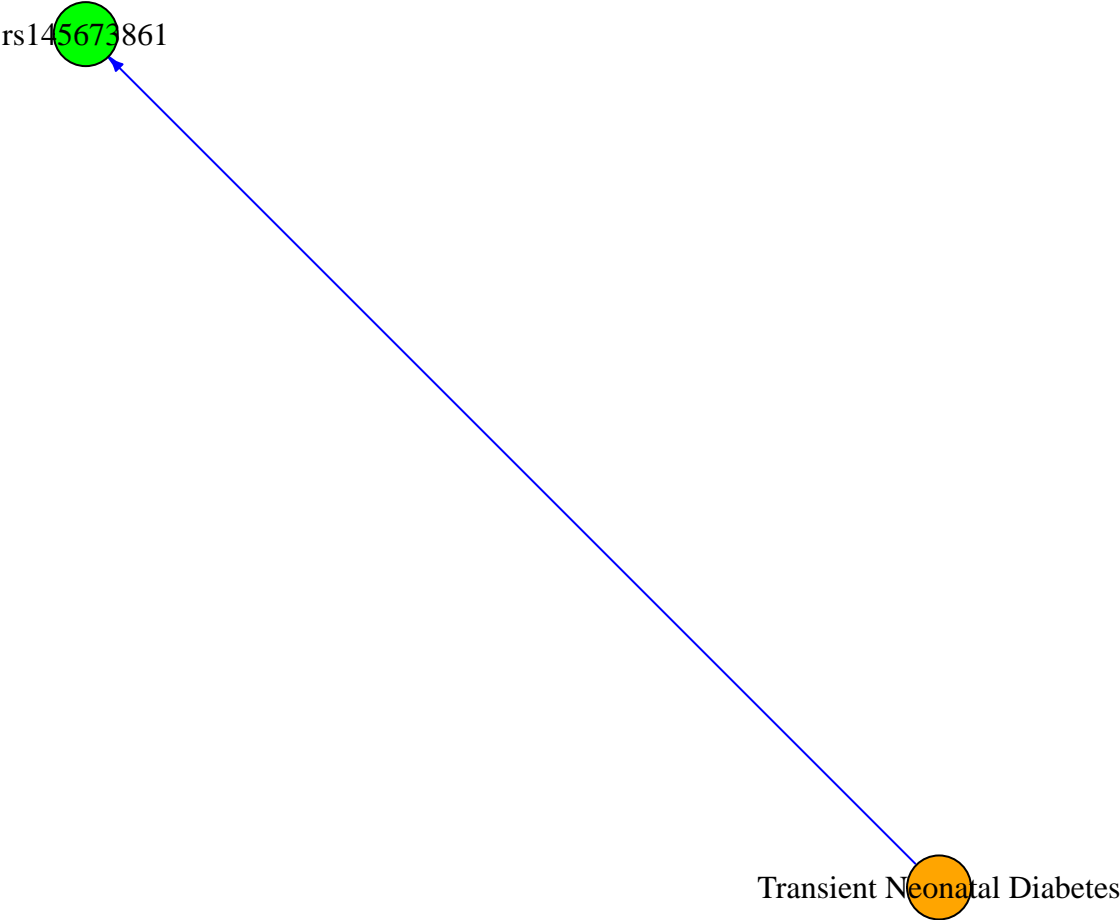

Variant–Disease Network (Trichoepithelioma multiple familial 2)

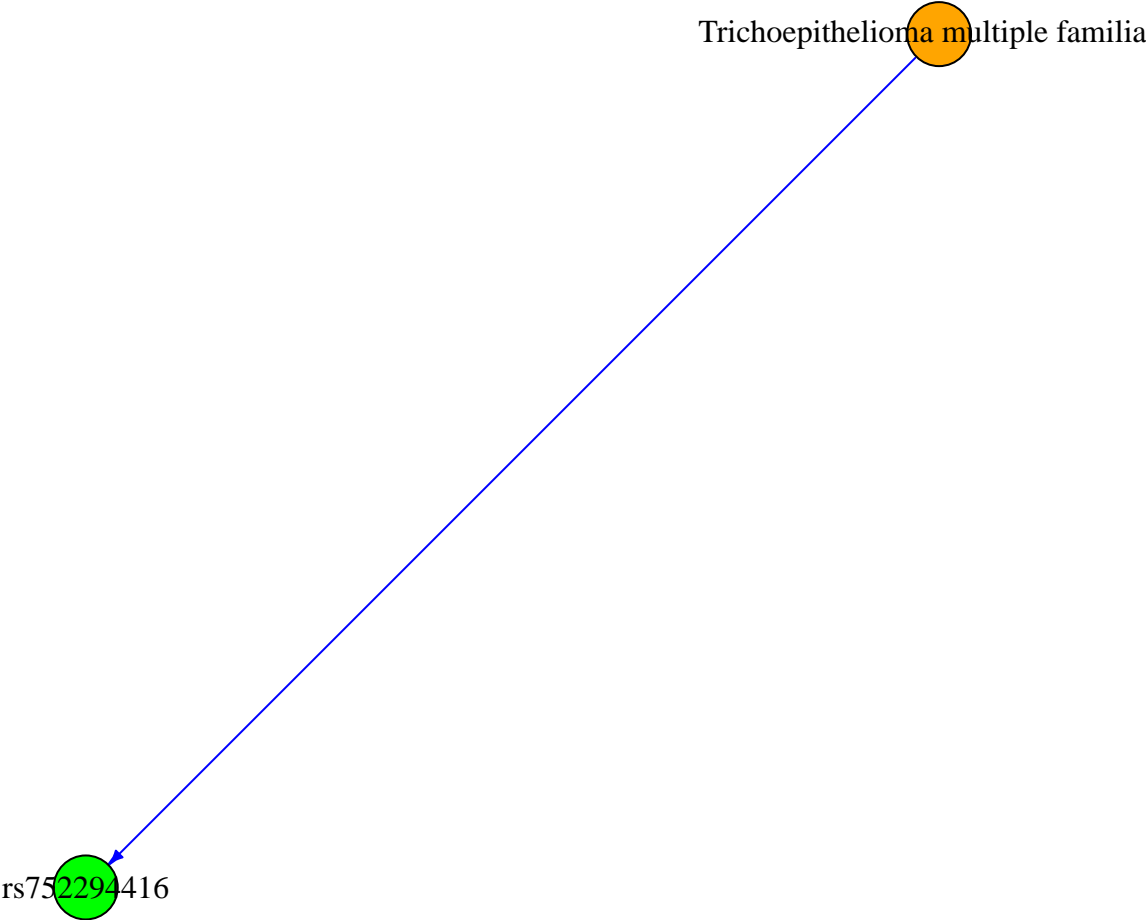

## Variant–Disease Network (Trimethylaminuria)

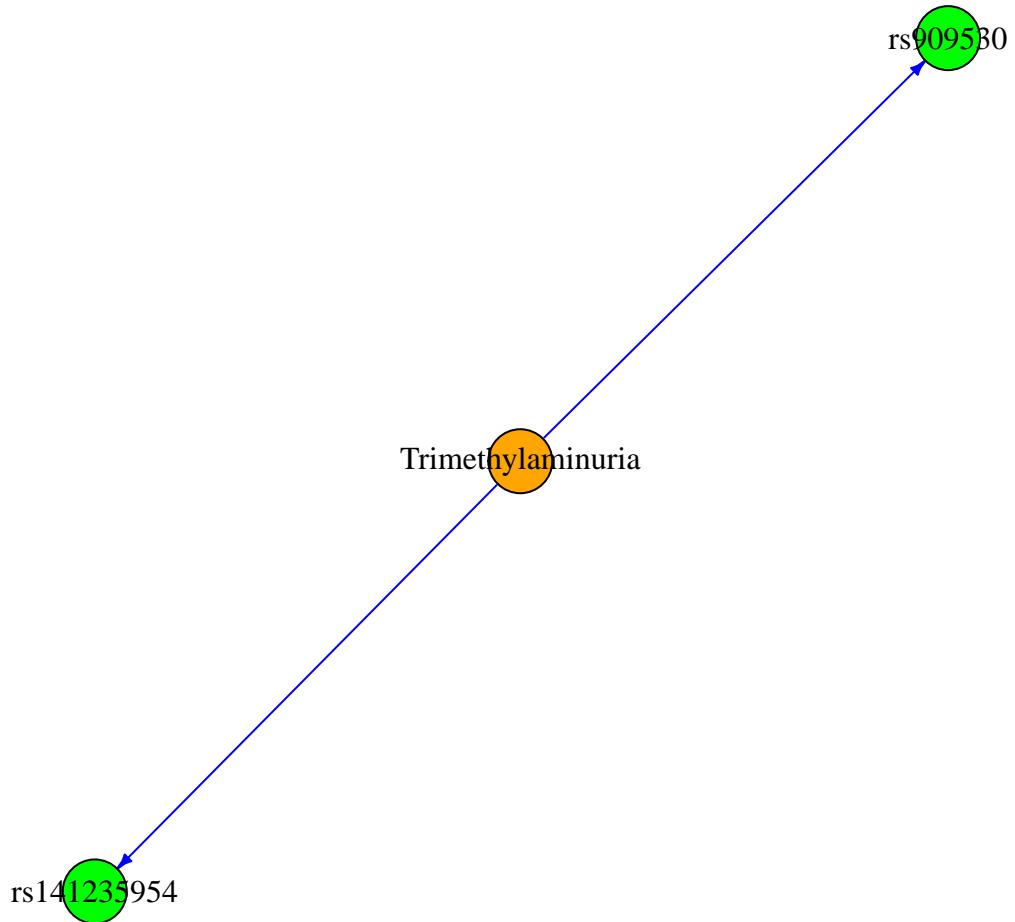

Variant–Disease Network (Tuberous sclerosis 1)

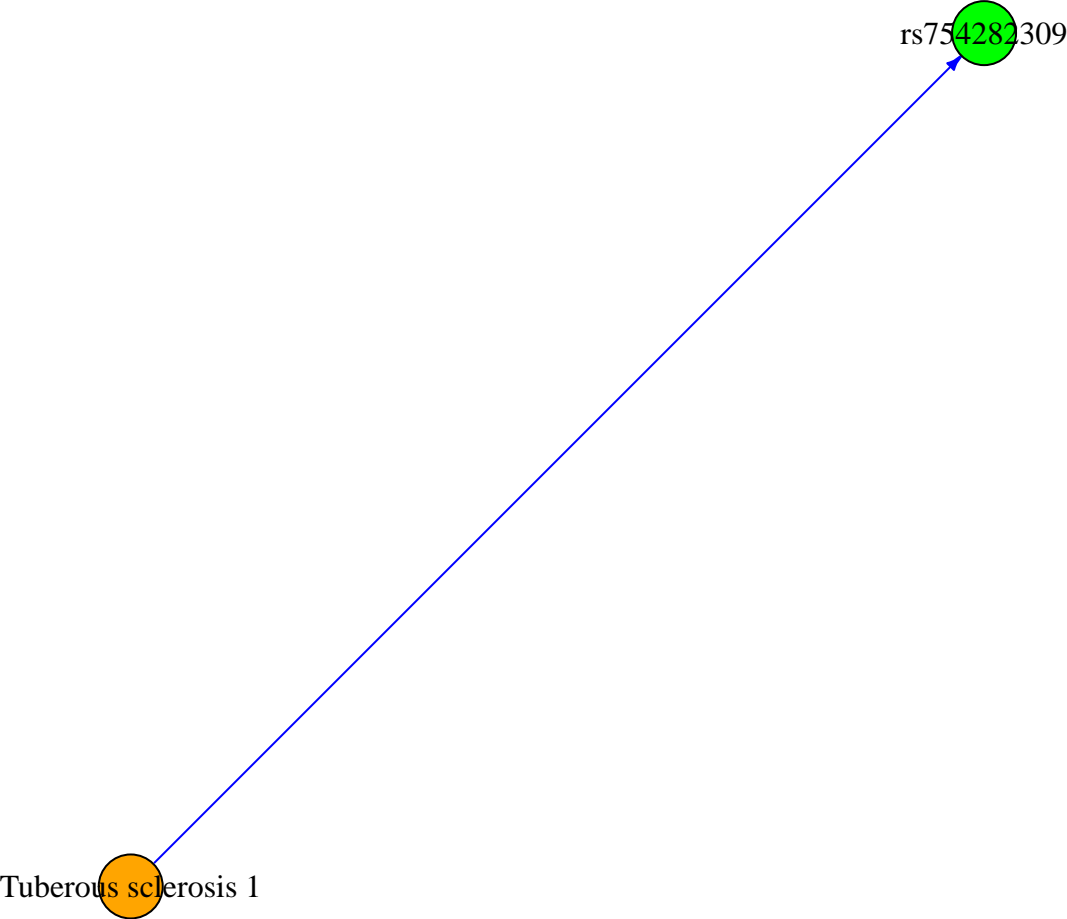

Variant–Disease Network (Tuberous sclerosis 2)

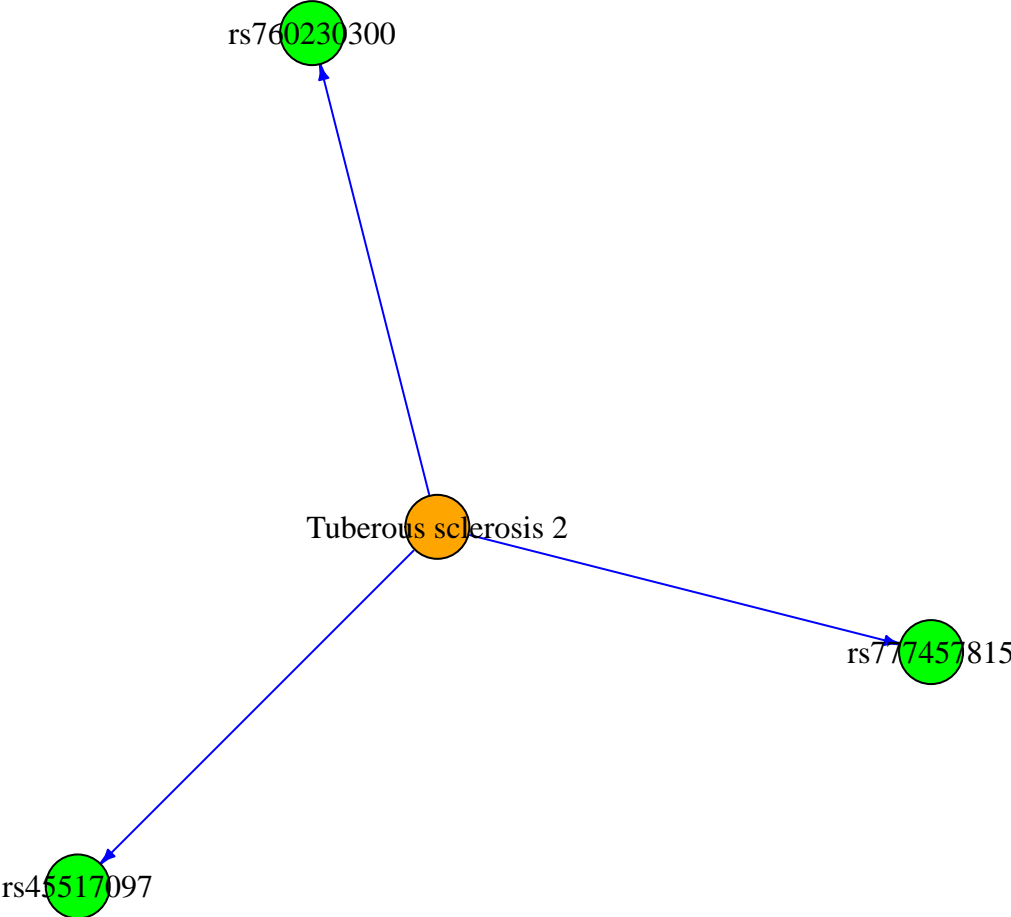



**Variant–Disease Network (Tuberous sclerosis syndrome)**

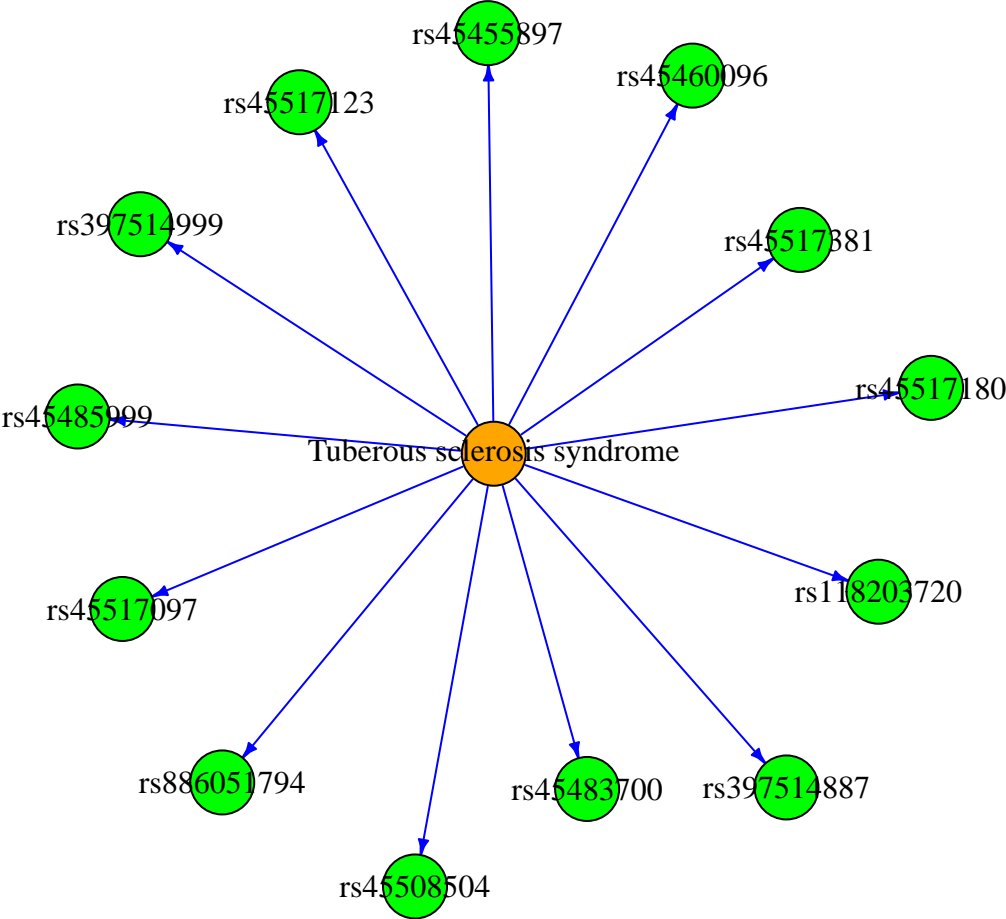

## Variant–Disease Network (Tubulinopathies)

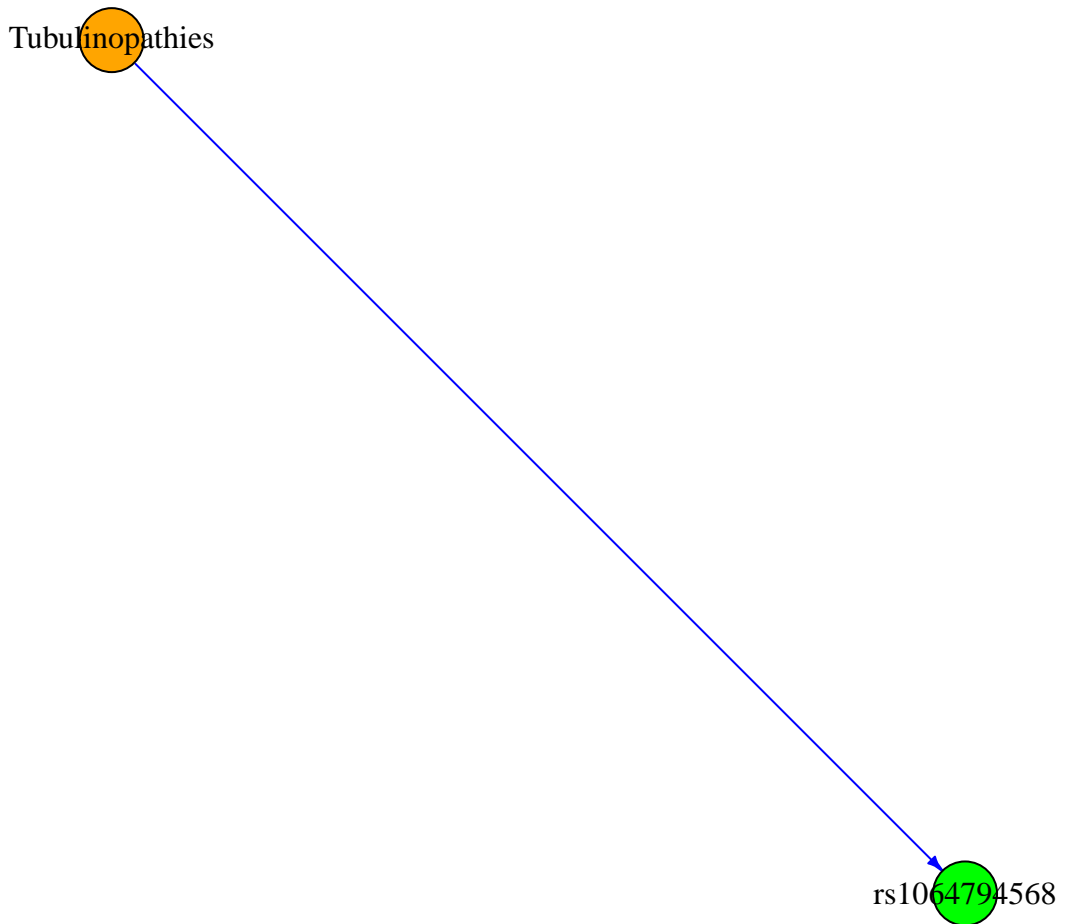

# Variant-Disease Network (Tumor susceptibility linked to germline BAP1 mutation)

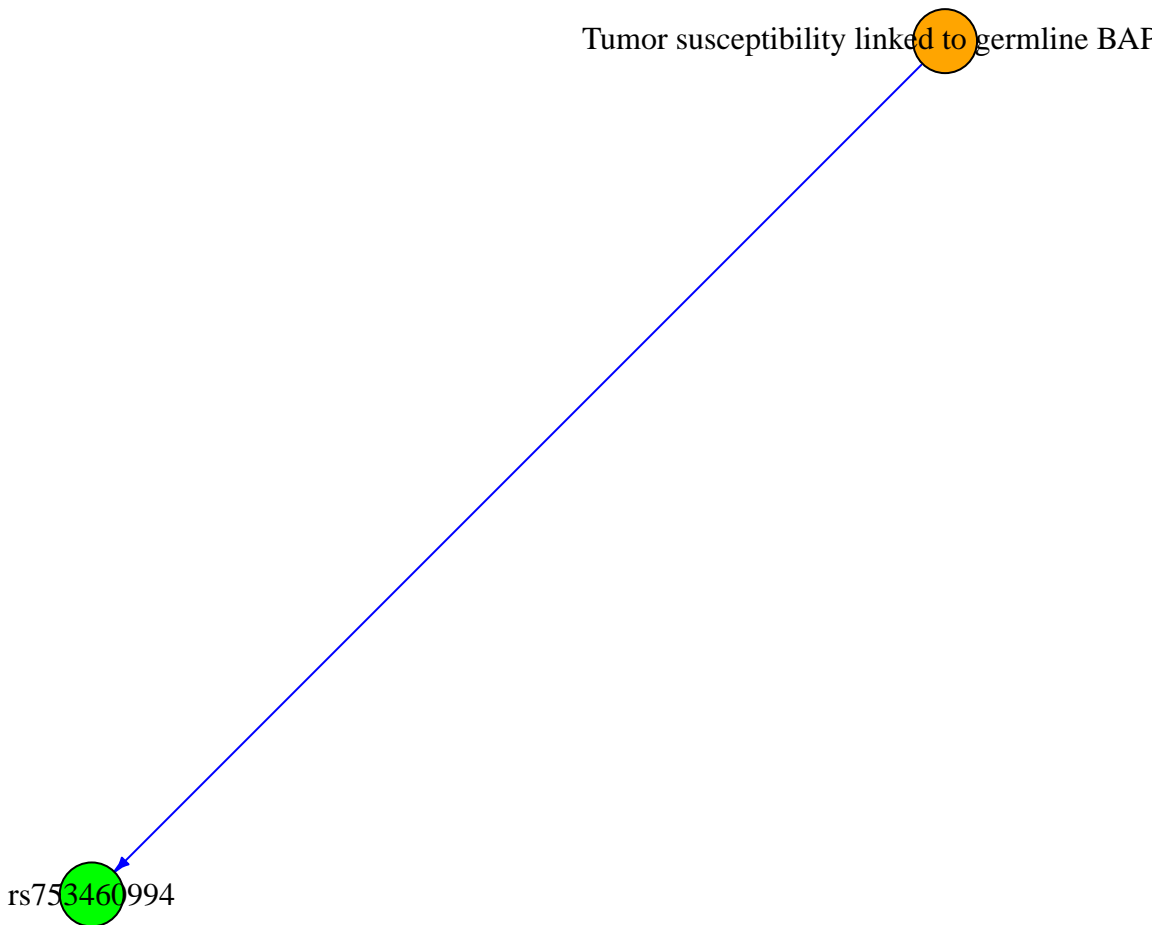

**Variant–Disease Network (Tyrosine kinase 2 deficiency)**

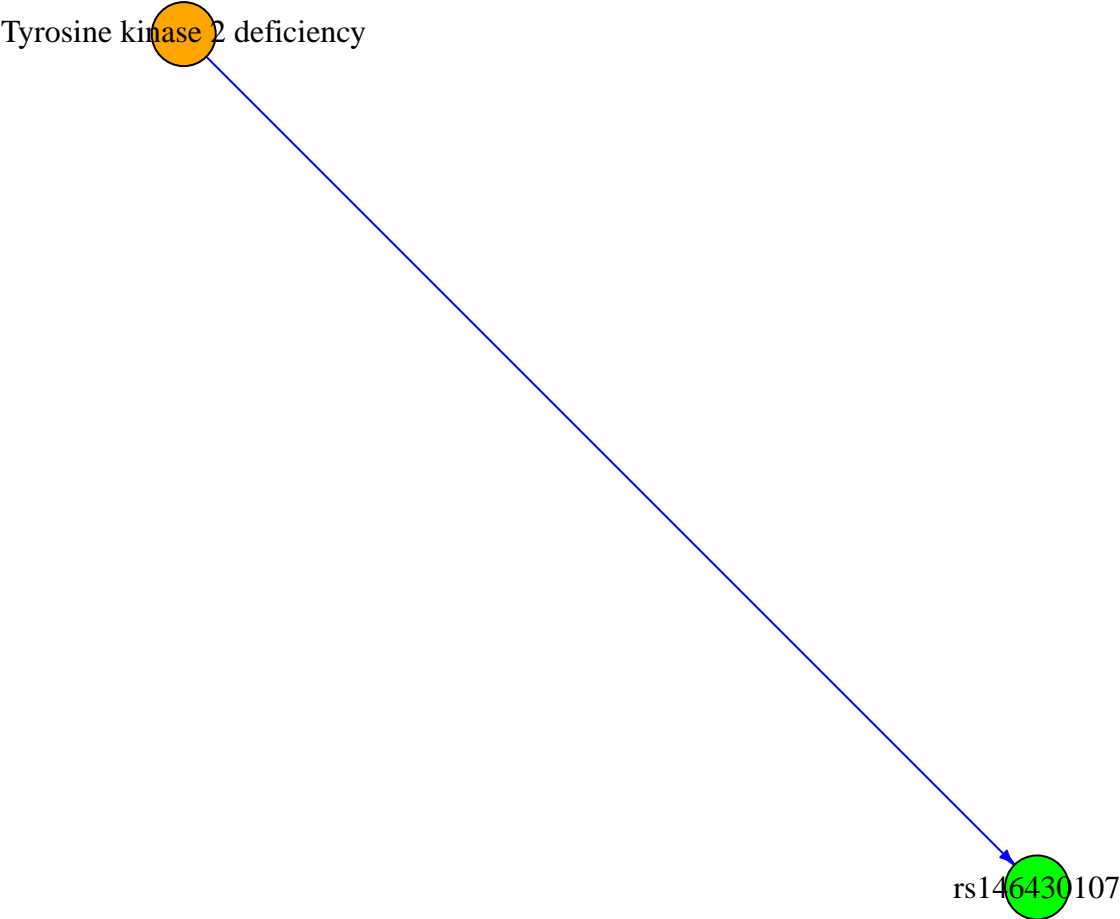

# Variant–Disease Network (Ullrich congenital muscular dystrophy 2)

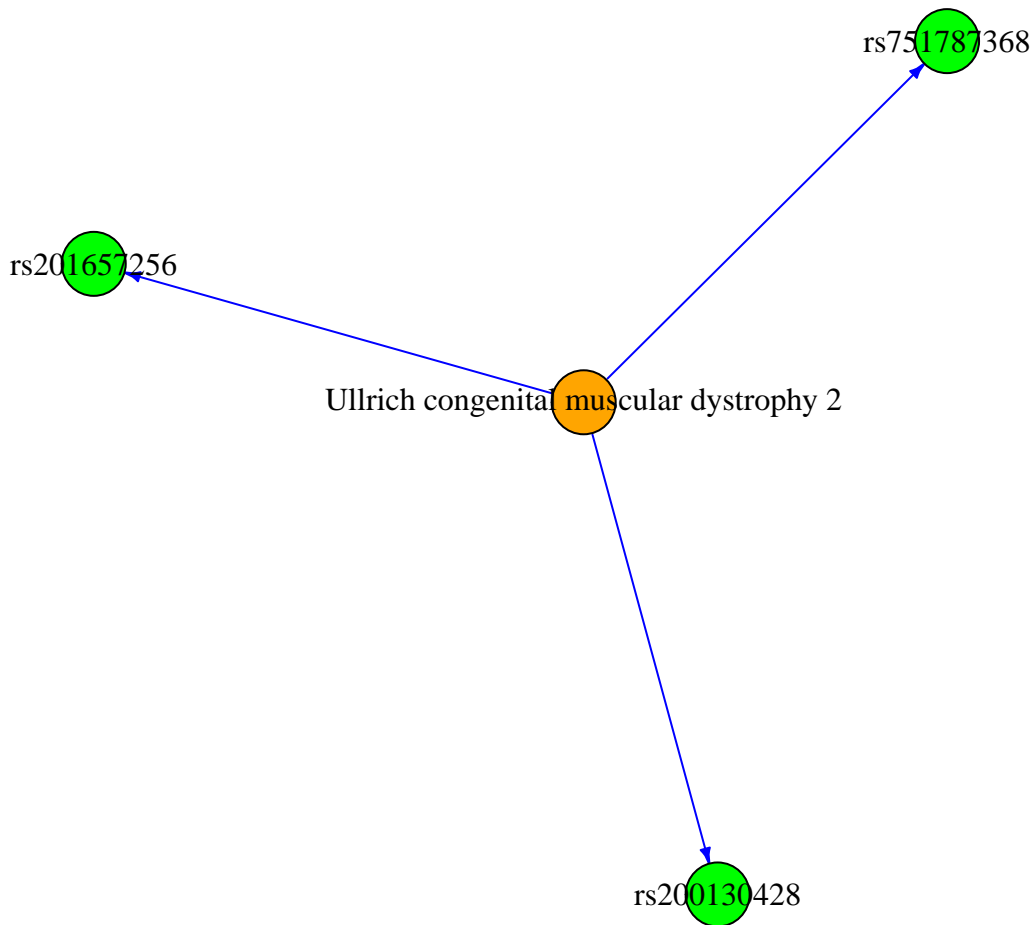

Variant–Disease Network (Upshaw–Schulman syndrome)

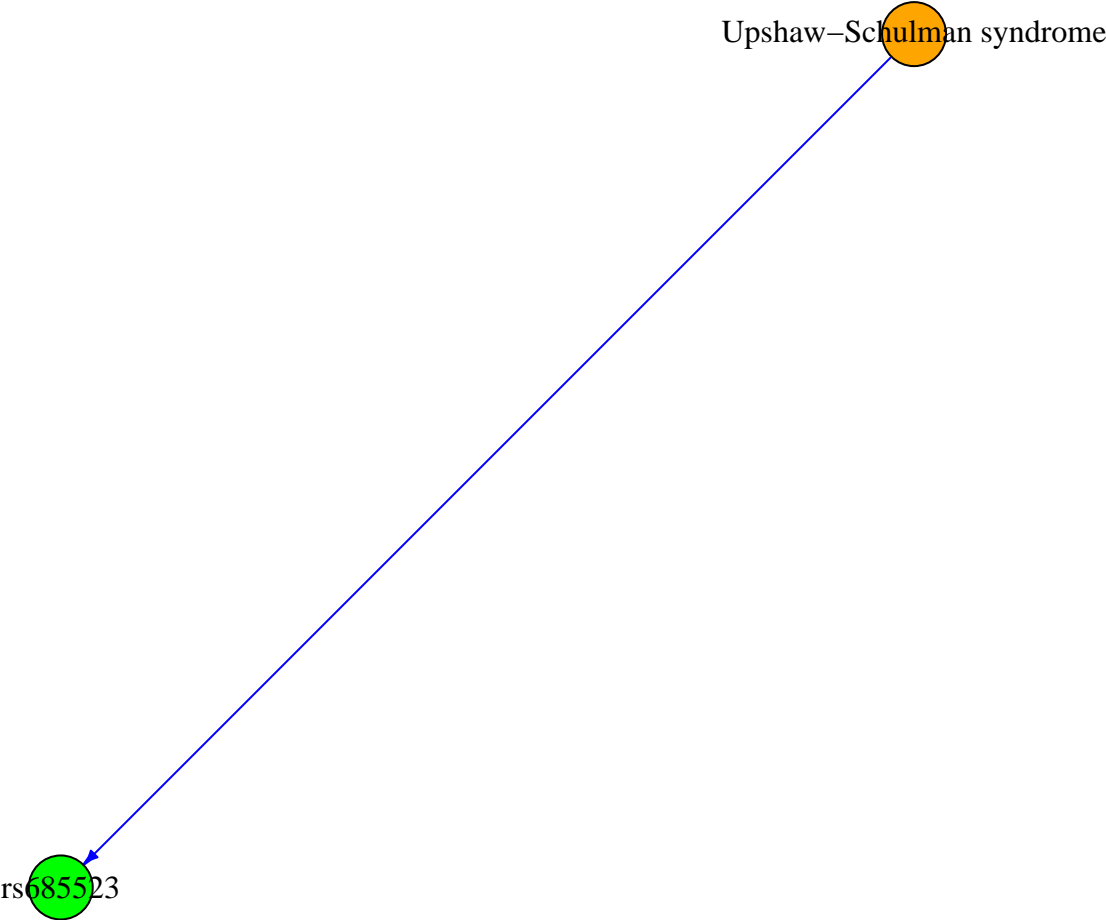

## Variant–Disease Network (Usher syndrome)

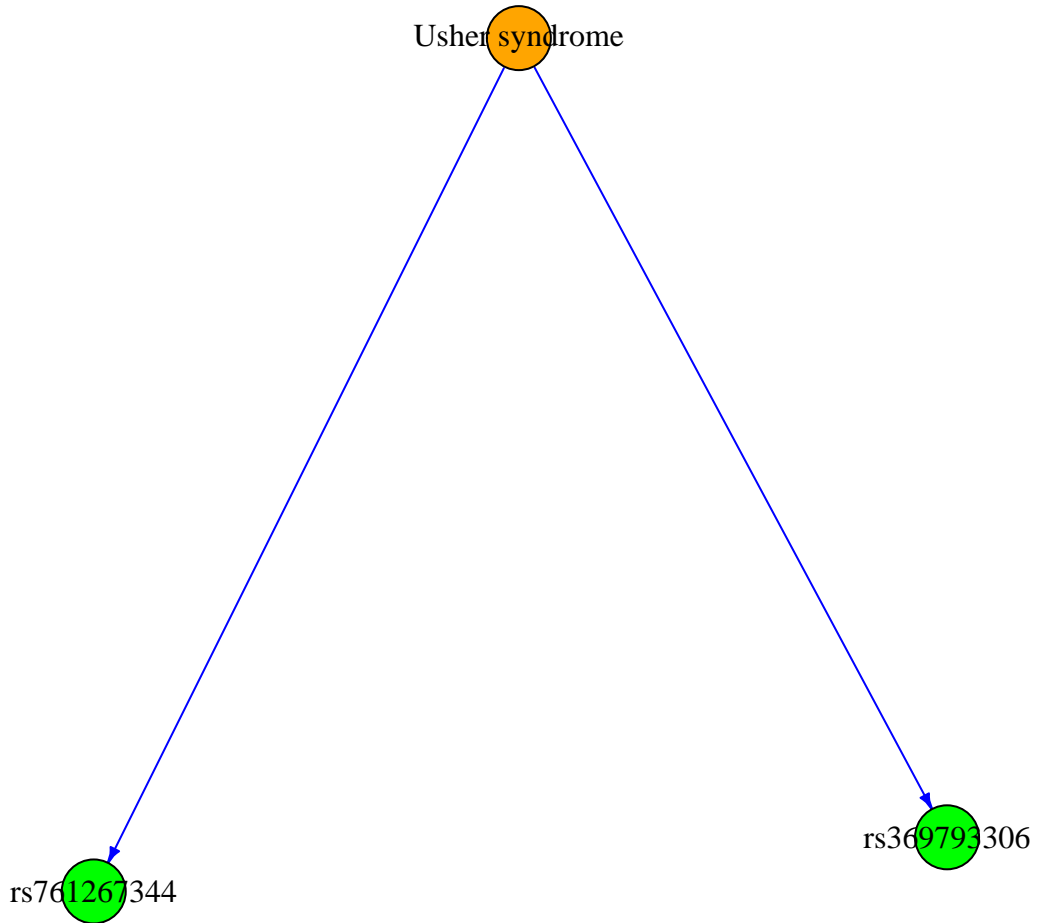

## Variant–Disease Network (Van der Woude syndrome)

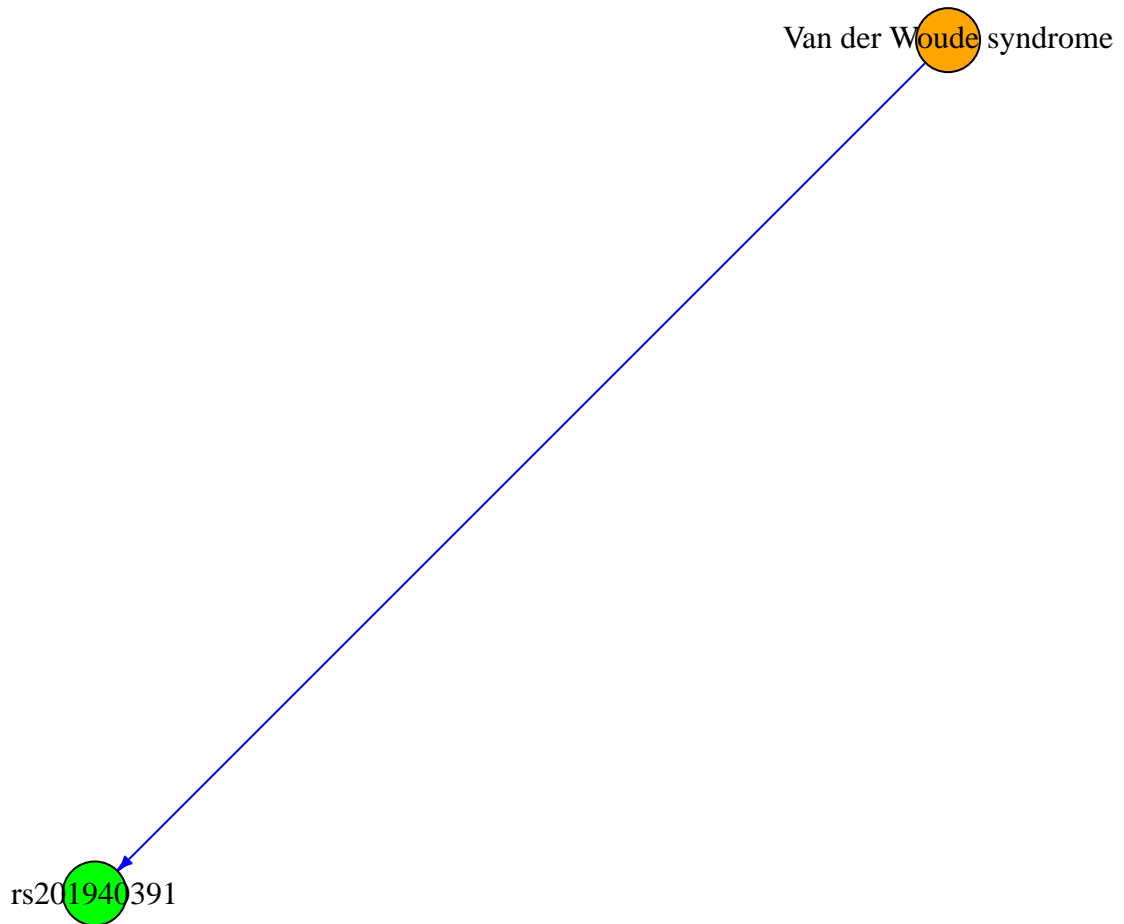



## Variant–Disease Network (Vesicoureteral reflux)

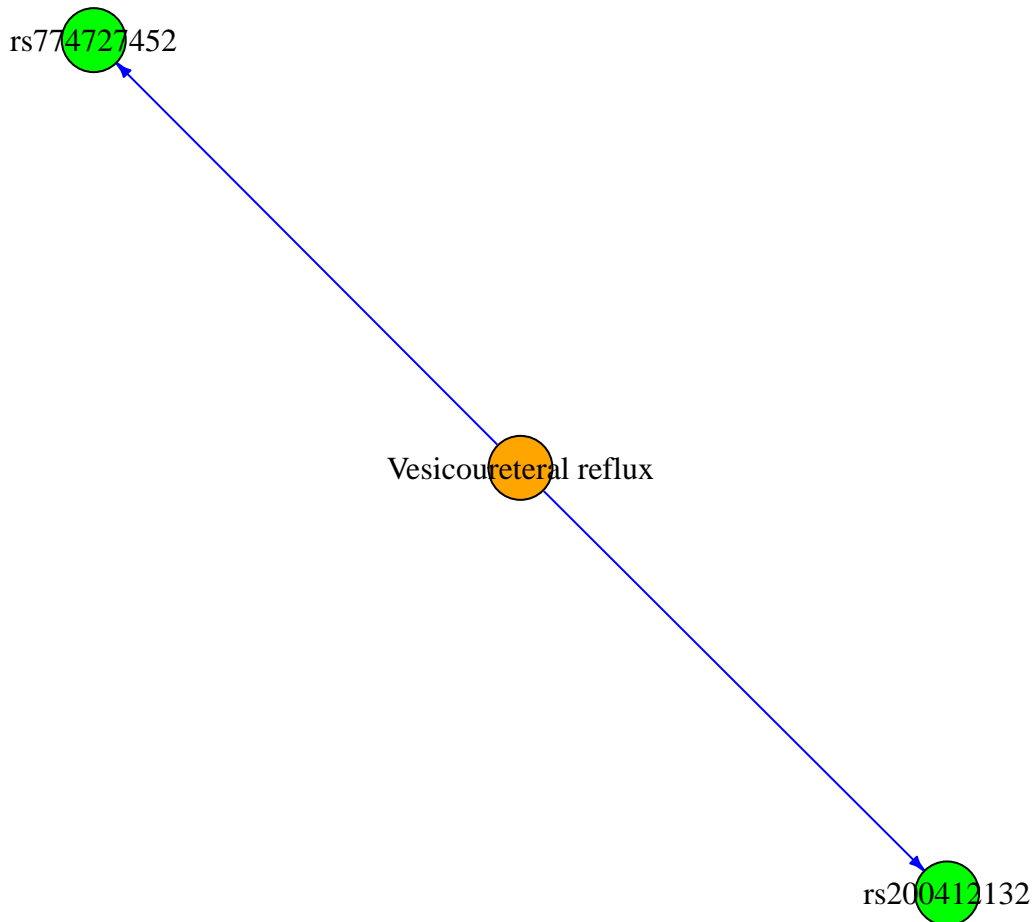

**Variant–Disease Network (Vici syndrome)**

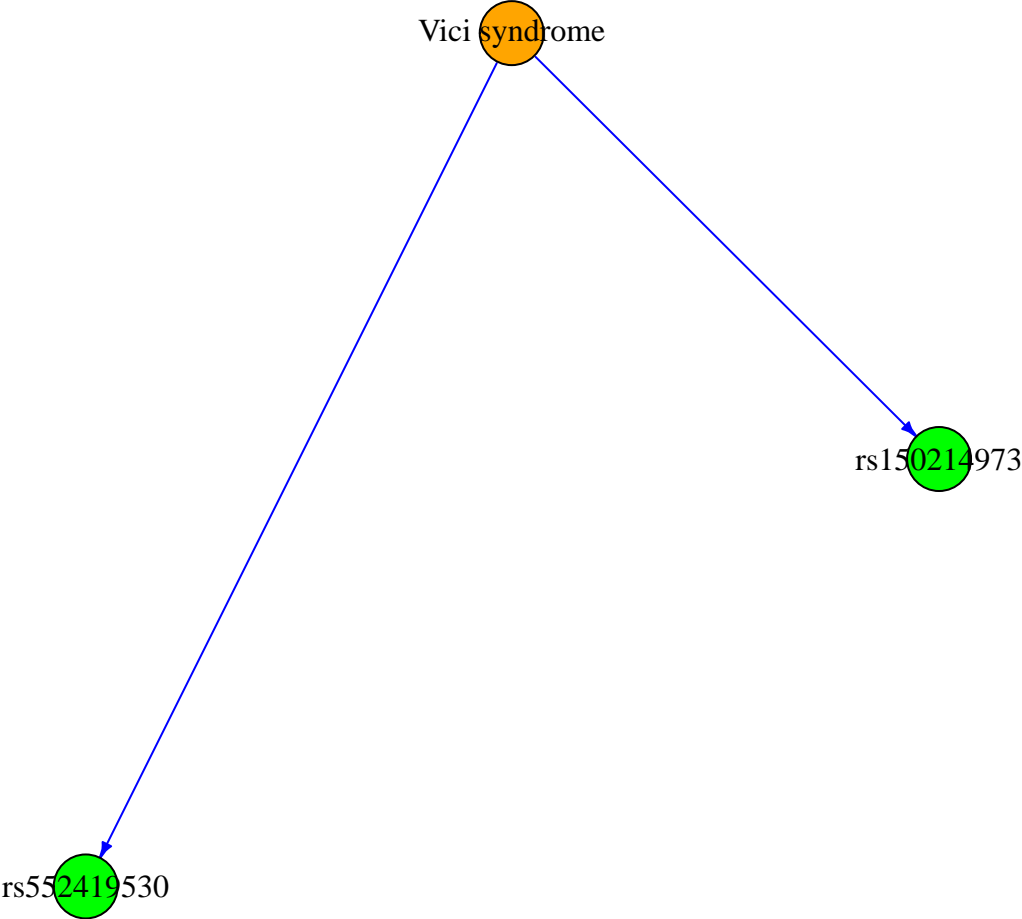

Variant–Disease Network (Vitreoretinopathy)

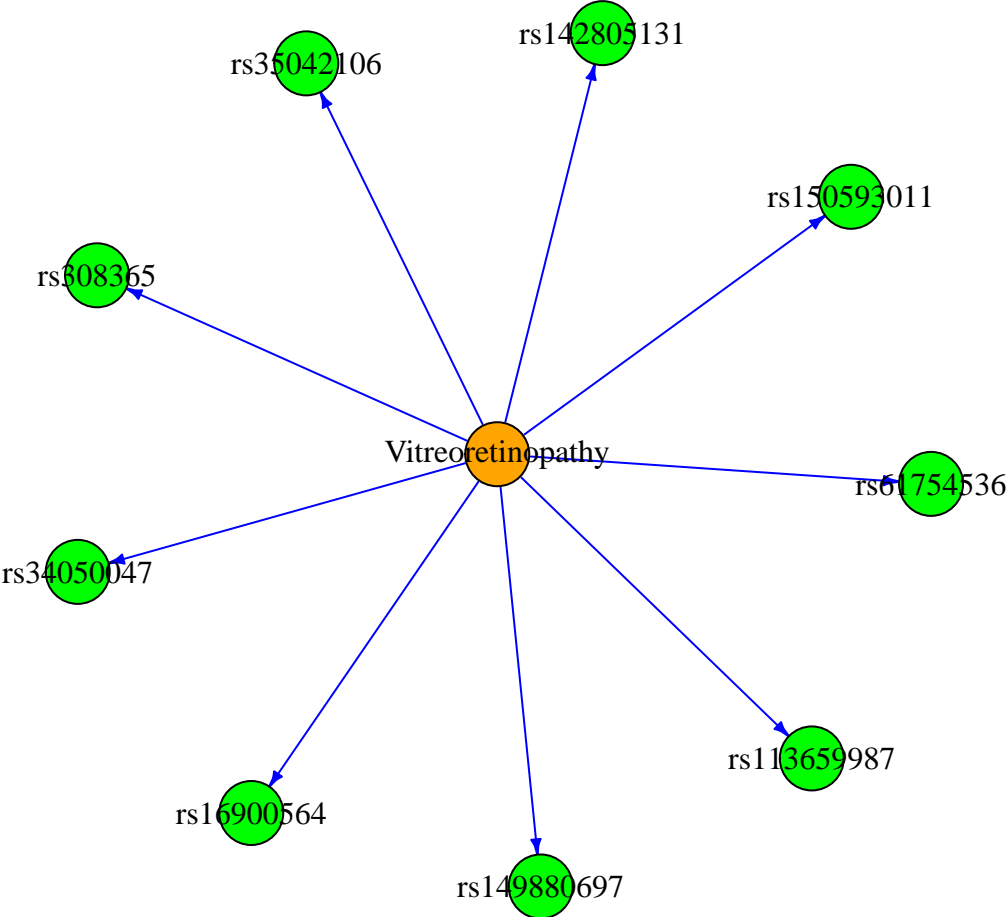

Variant–Disease Network (Von Hippel–Lindau syndrome)

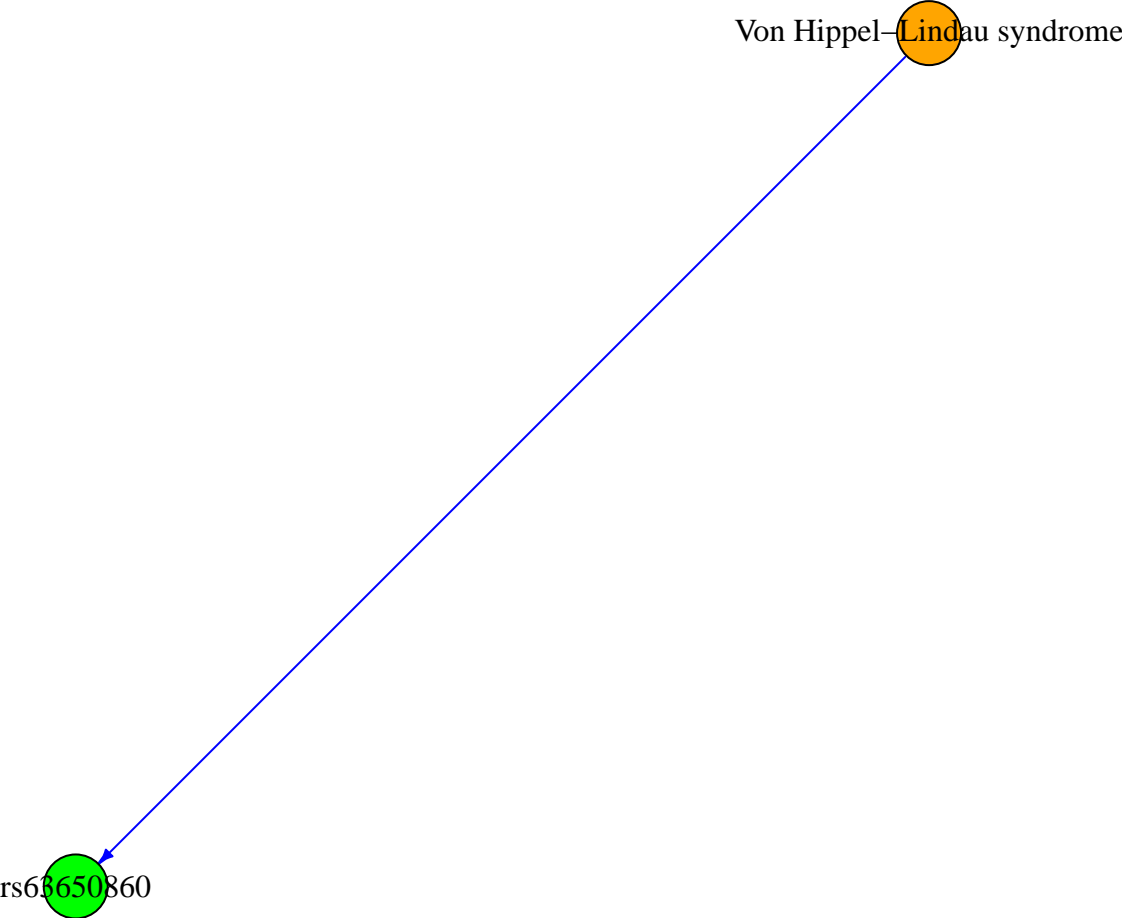

## Variant–Disease Network (von Willebrand disorder)

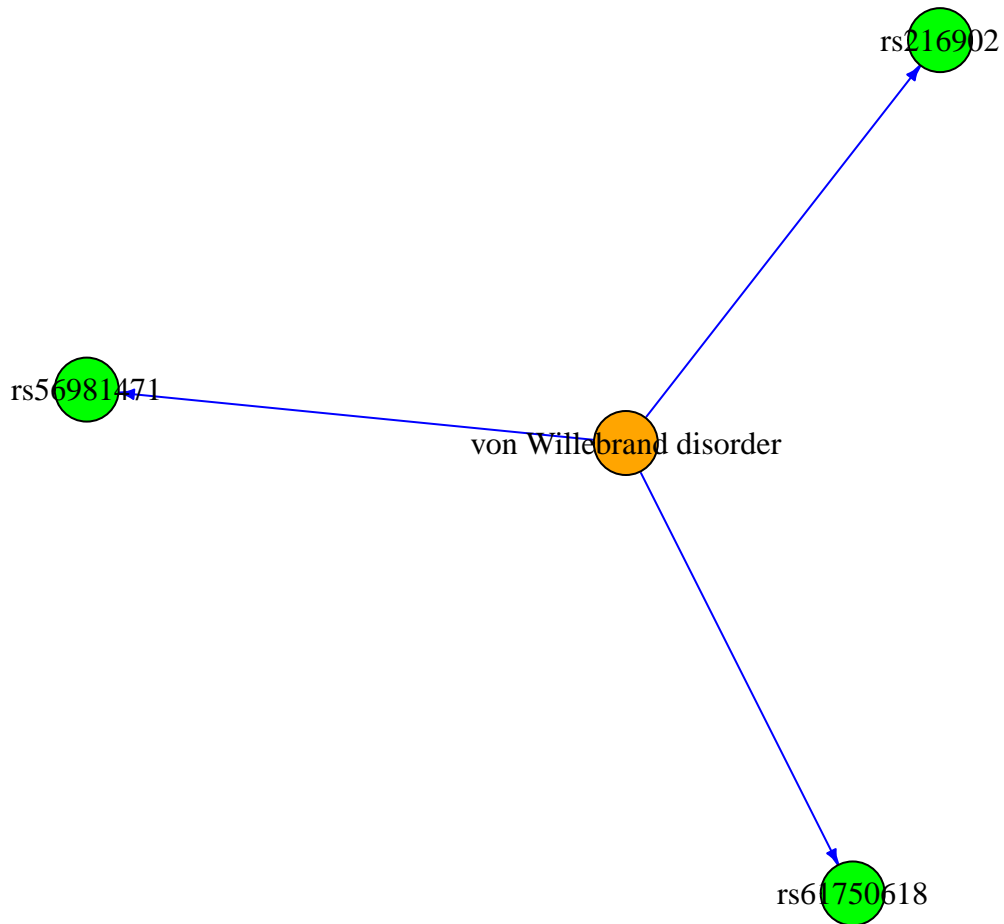

## Variant–Disease Network (Wagner syndrome)

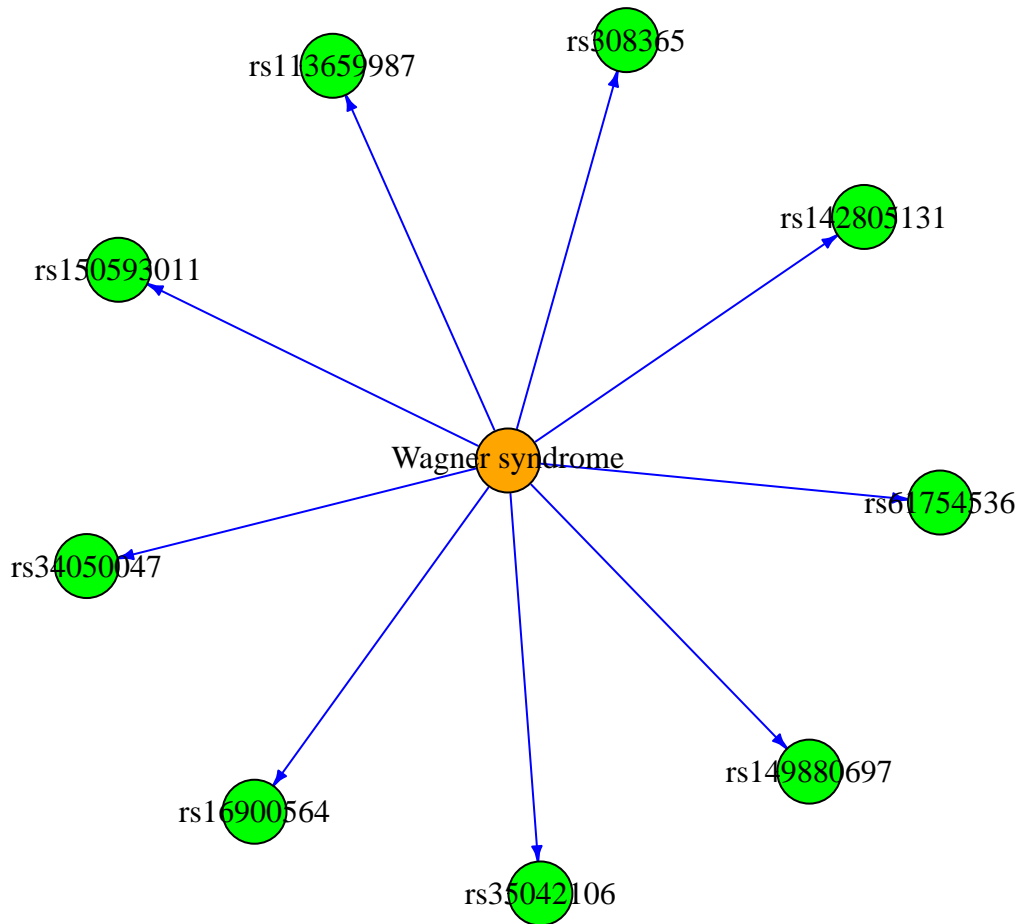

Variant–Disease Network (Warburg micro syndrome)

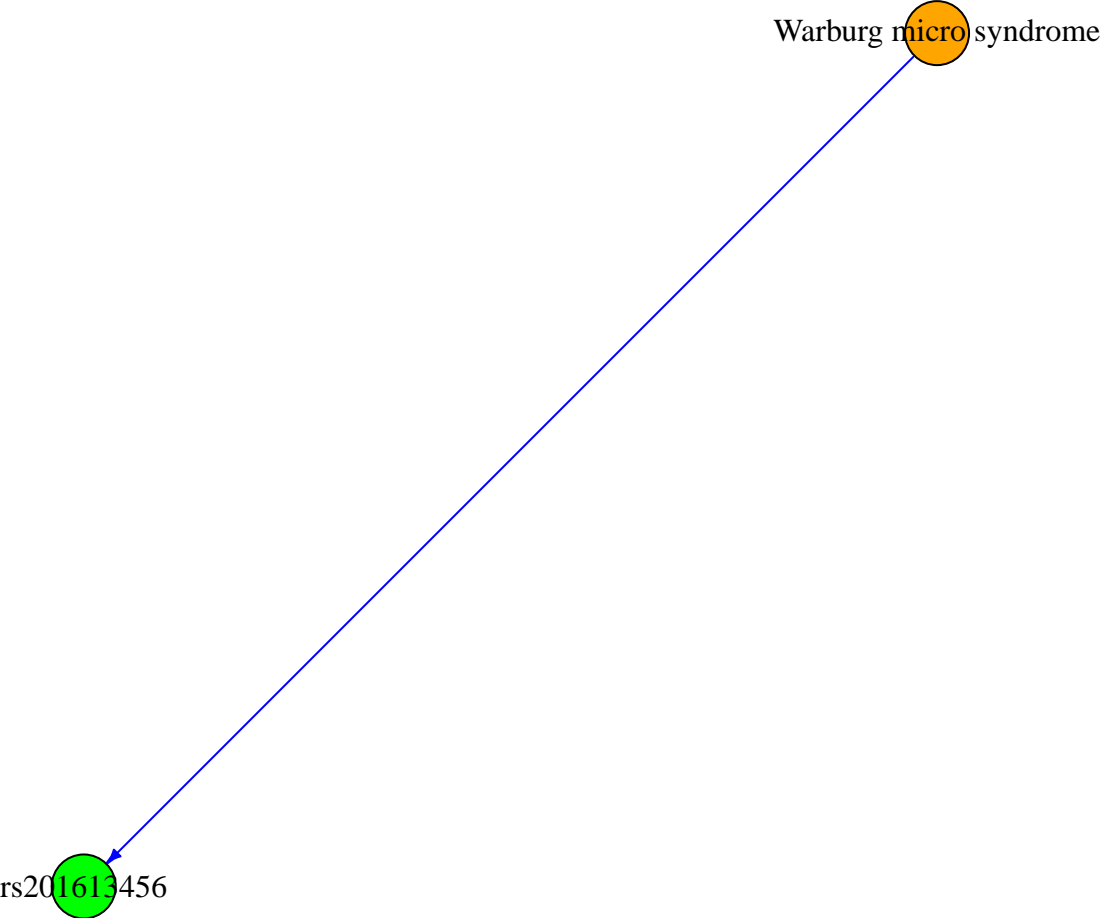

**Variant–Disease Network (Warsaw breakage syndrome)**

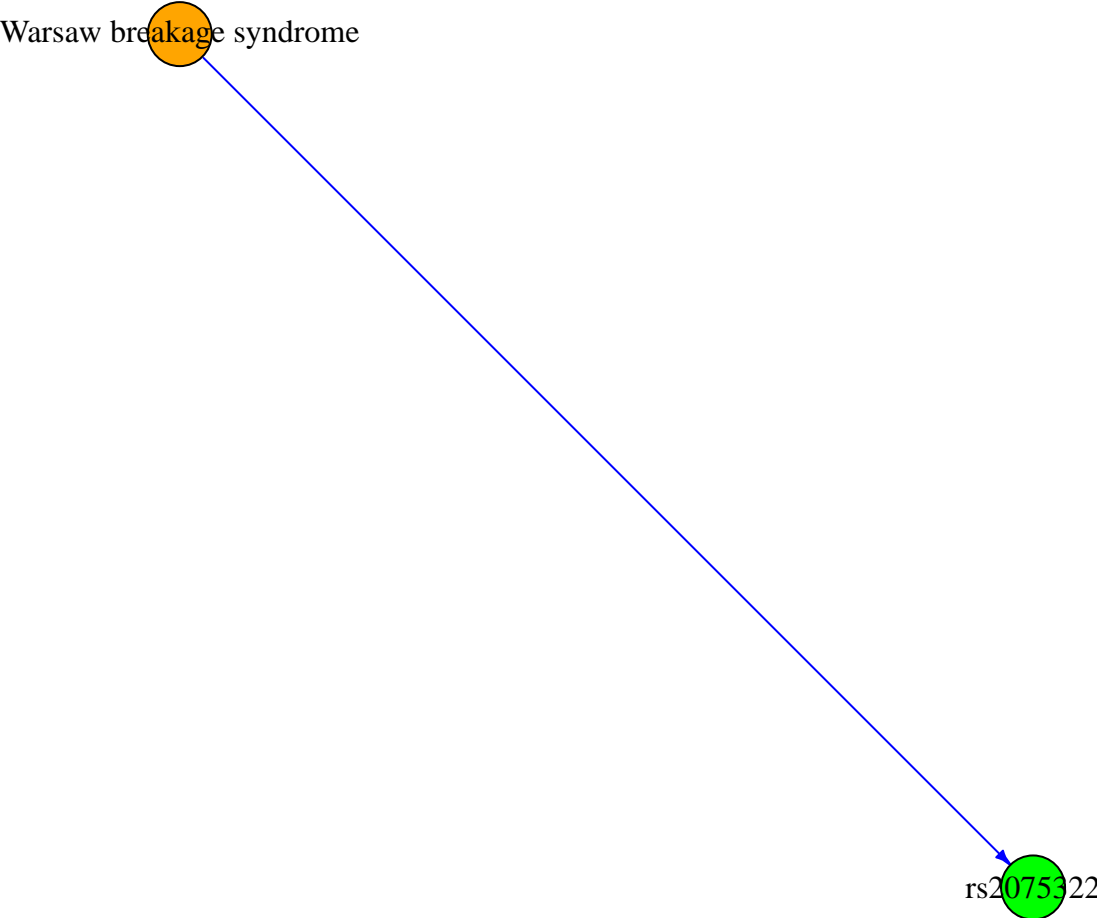



## Variant–Disease Network (Weaver syndrome)

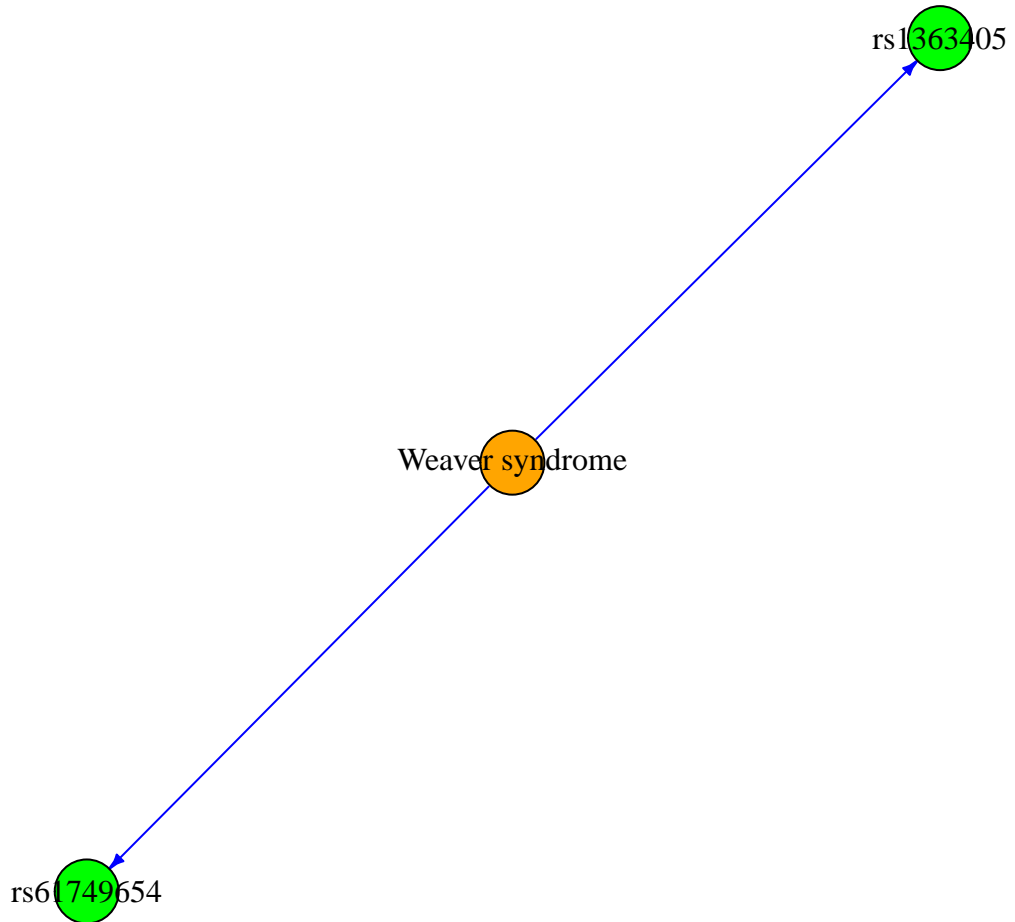

Variant–Disease Network (Weill–Marchesani syndrome)

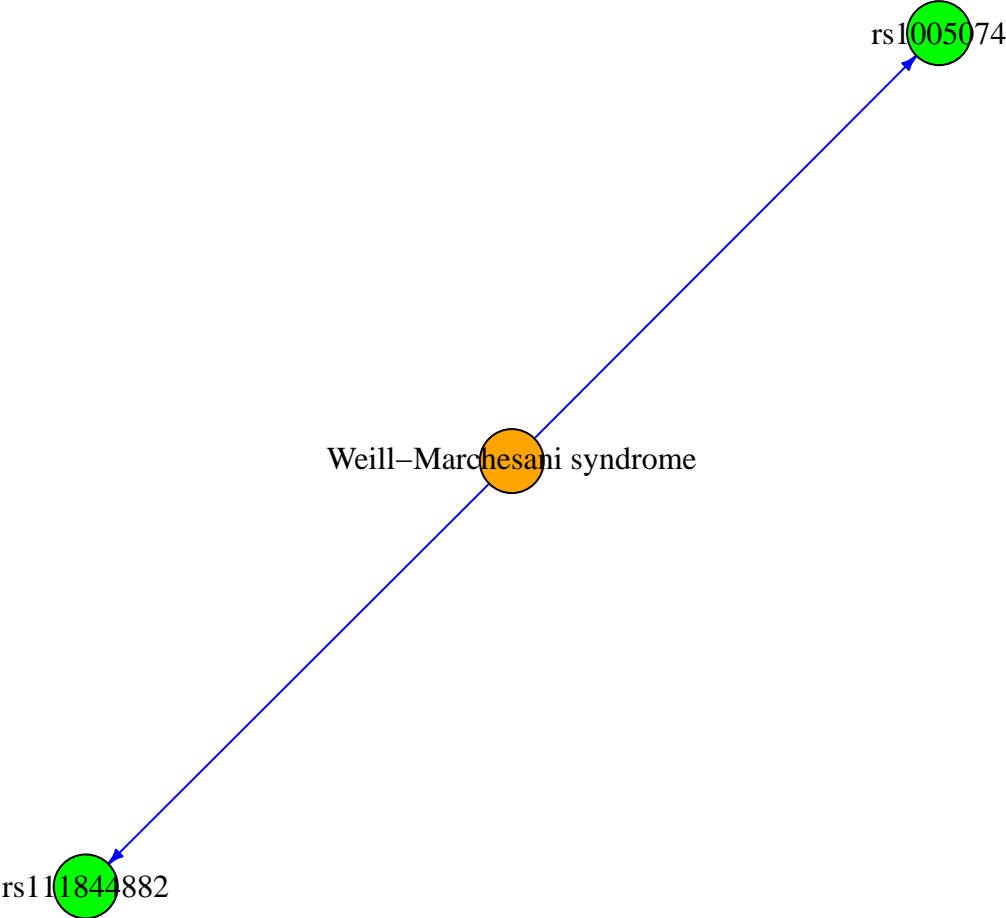

Variant–Disease Network (Weill–Marchesani syndrome 4)

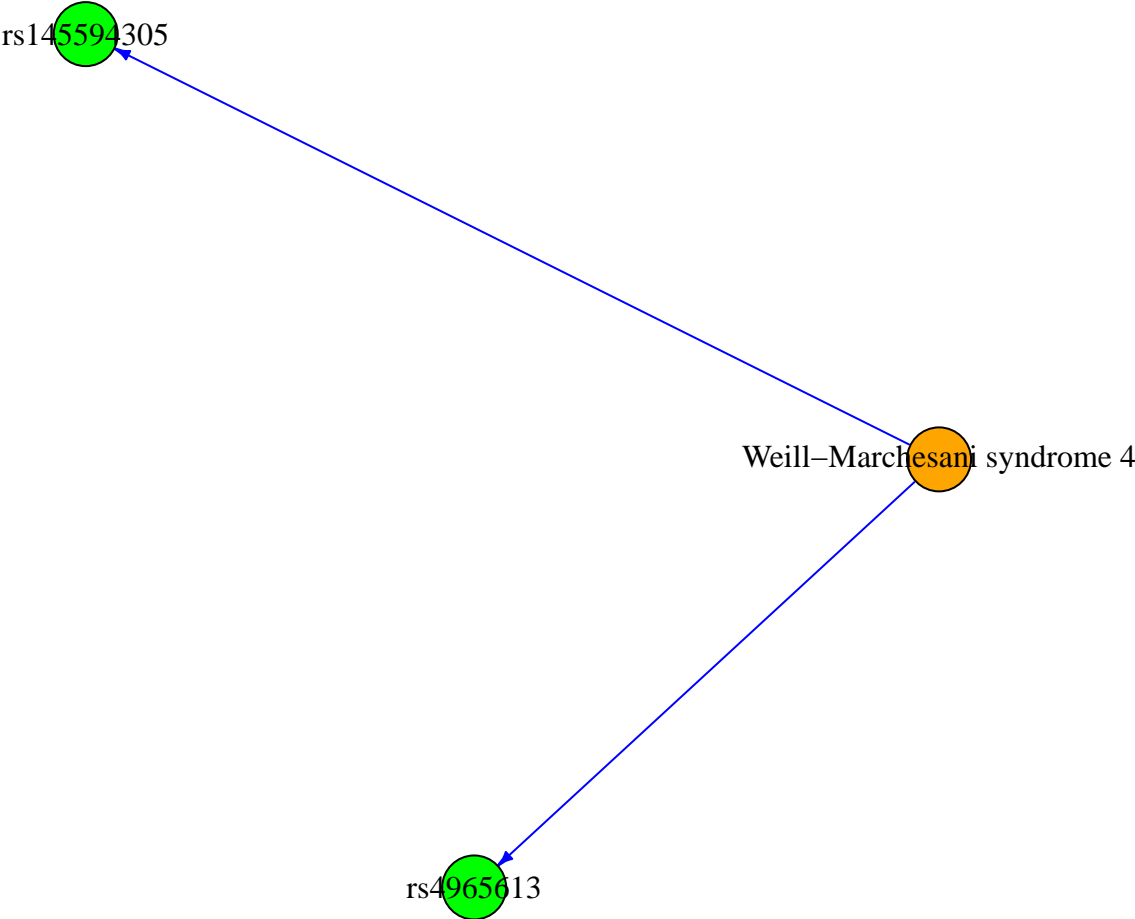

## Variant–Disease Network (Werner syndrome)

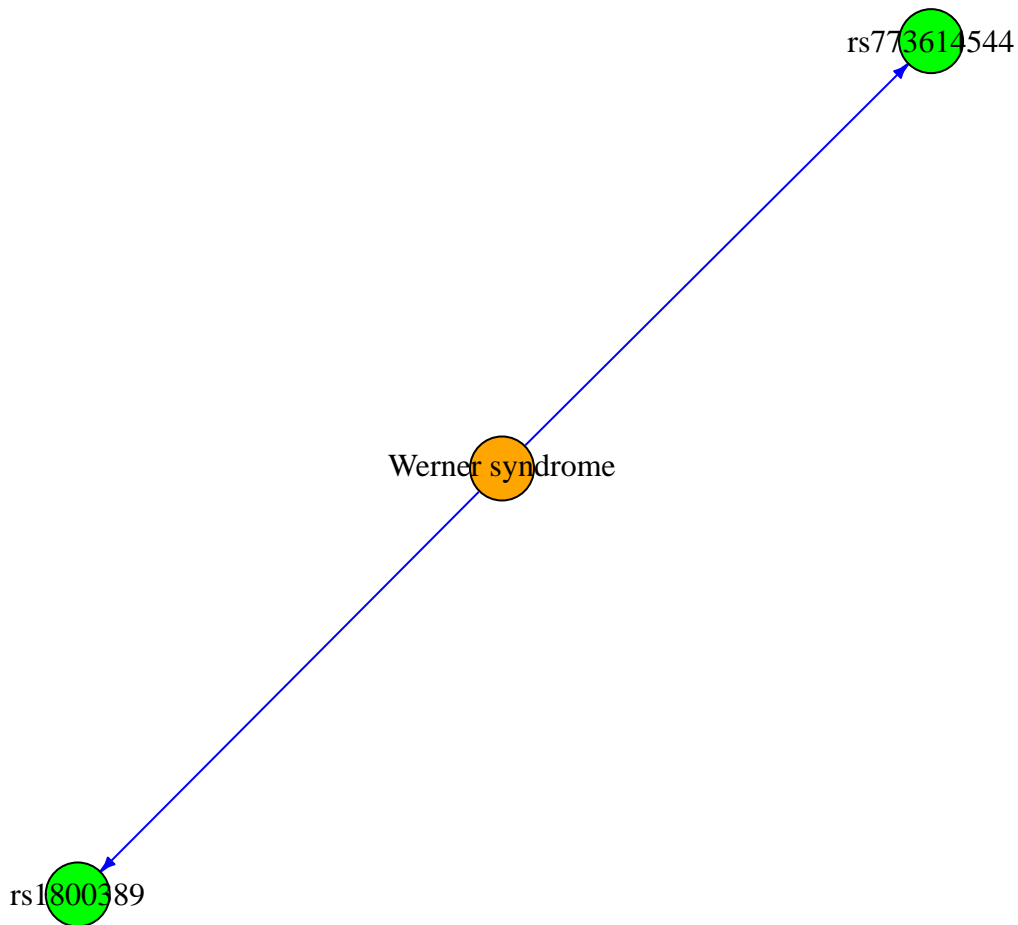

# Variant–Disease Network (WFS1–Related Spectrum Disorders)

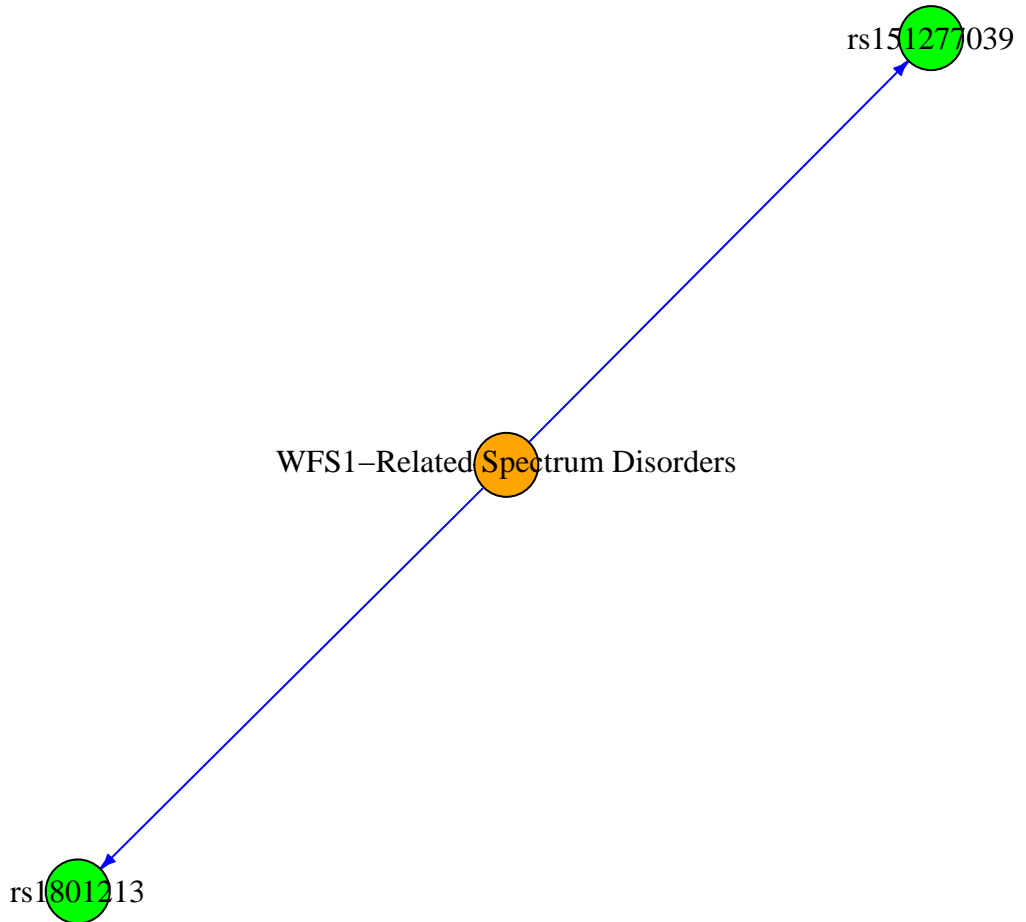

Variant–Disease Network (Xeroderma pigmentosum)

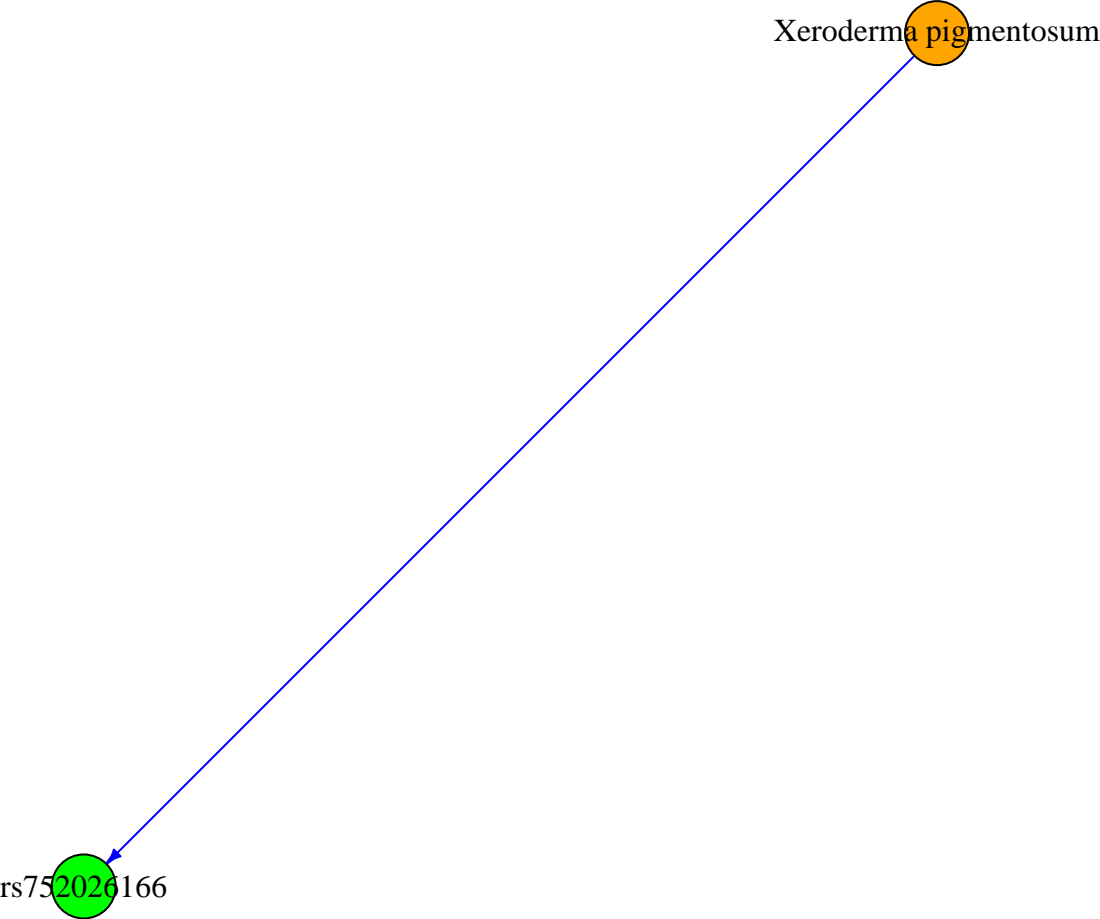

## Variant–Disease Network (X-linked agammaglobulinemia)

rs128621199

X-linked agammaglobulinemia

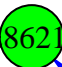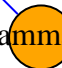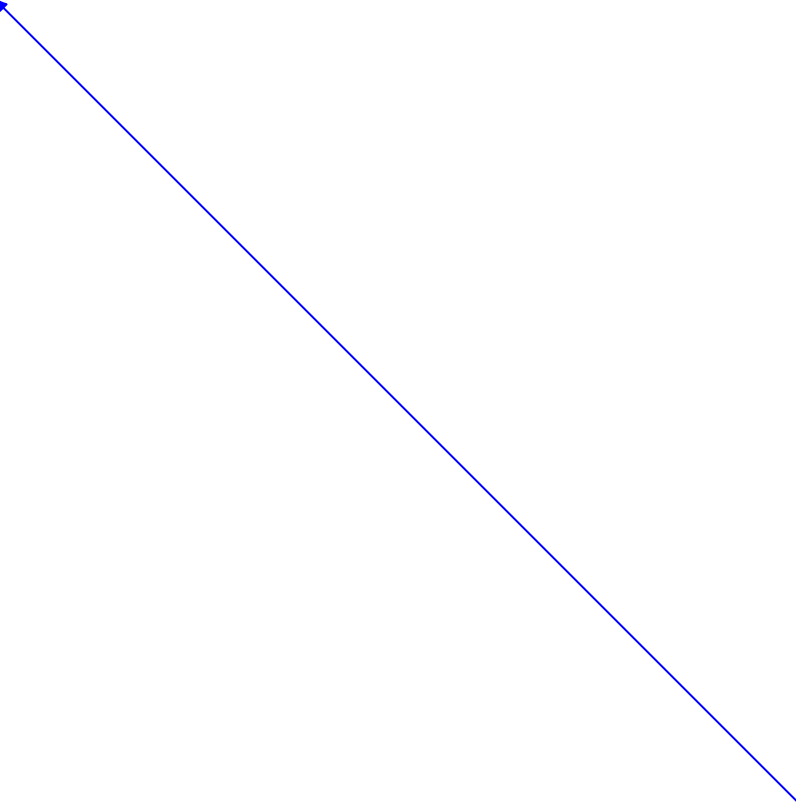

# nt-Disease Network (X-linked agammaglobulinemia with growth hormone d

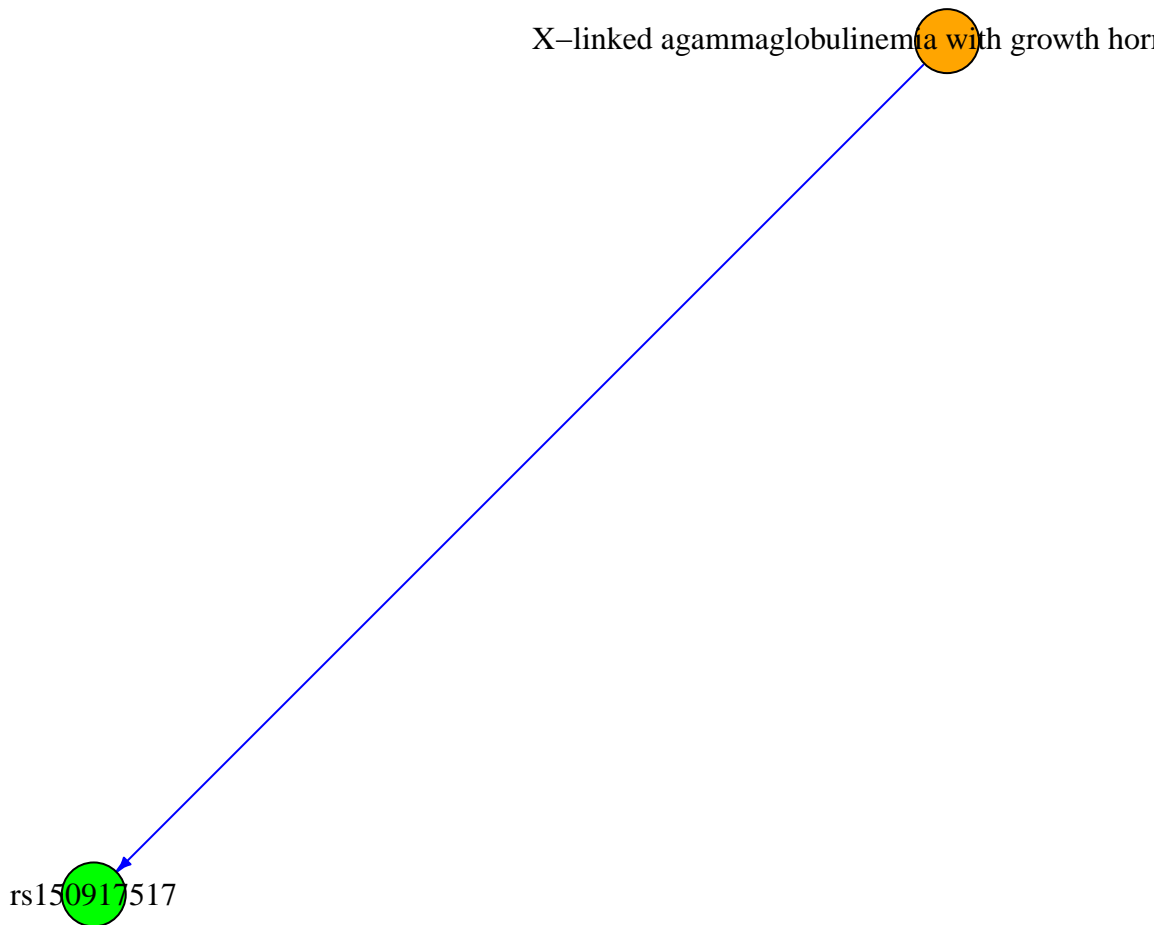



# Variant-Disease Network (XY sex reversal)

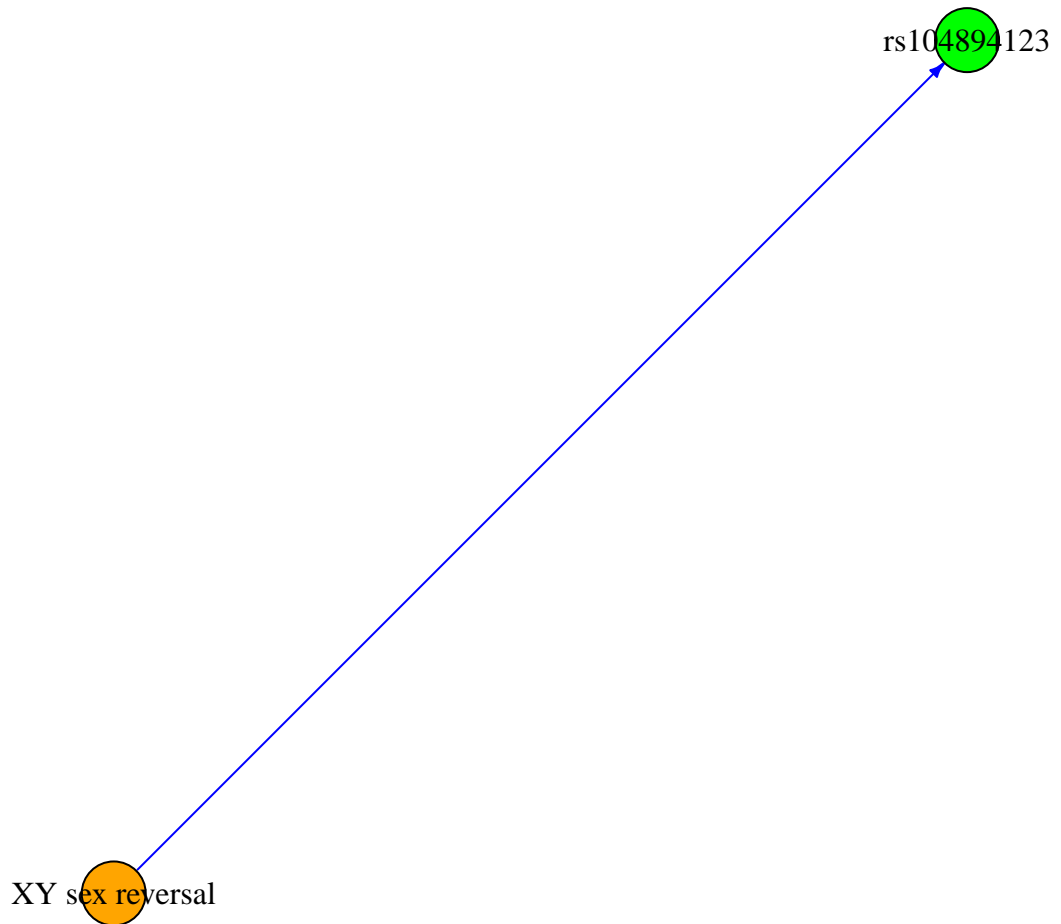

## Variant–Disease Network (Alcohol consumption)

rs7640



```
graph LR; A((Alcohol consumption)) --> B((rs7640))
```

A green circular node with a black outline, containing the text 'rs7640'.

Alcohol consumption



An orange circular node with a black outline, containing the text 'Alcohol consumption'.

**Variant–Disease Network (Alcoholic chronic pancreatitis)**

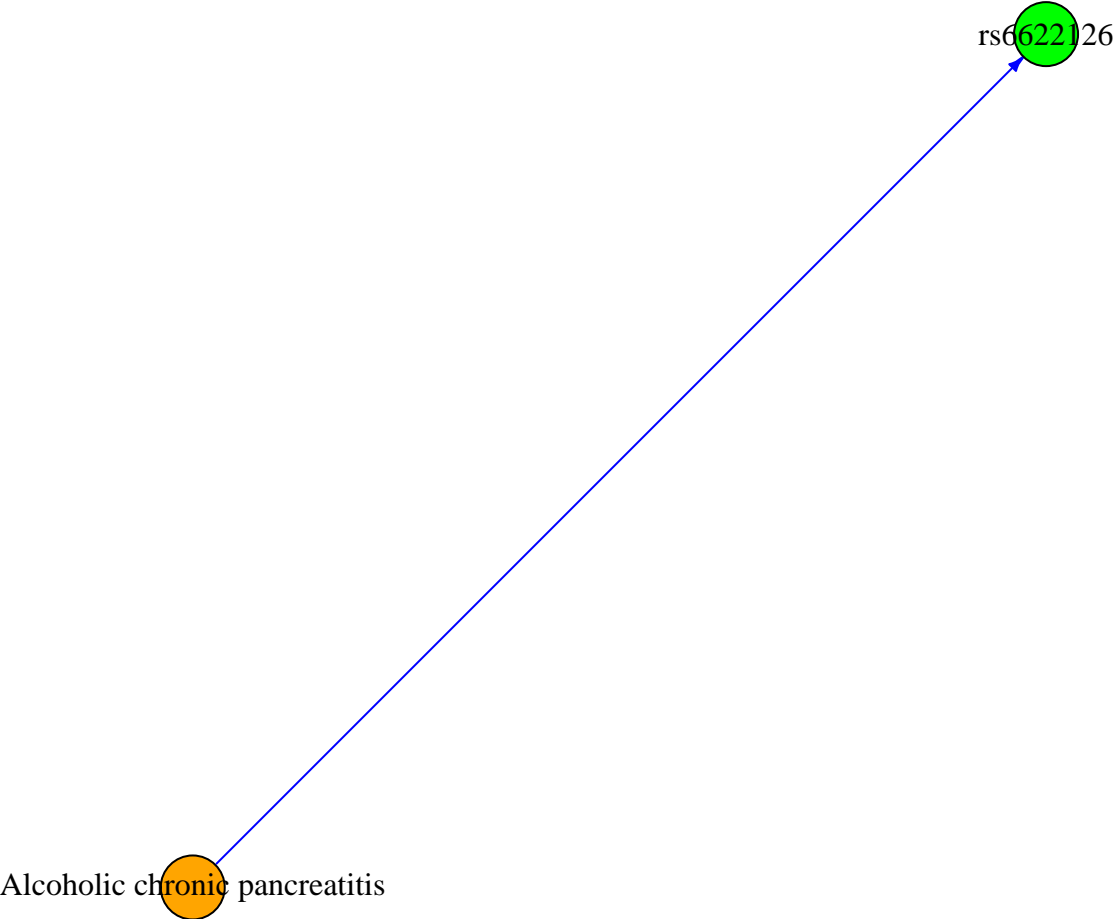

## Variant-Disease Network (Apolipoprotein A1 levels)

rs3814883

Apolipoprotein A1 levels



# Variant–Disease Network (Autism spectrum disorder or schizophrenia)

Autism spectrum disorder or schizophrenia

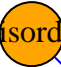

rs3617

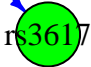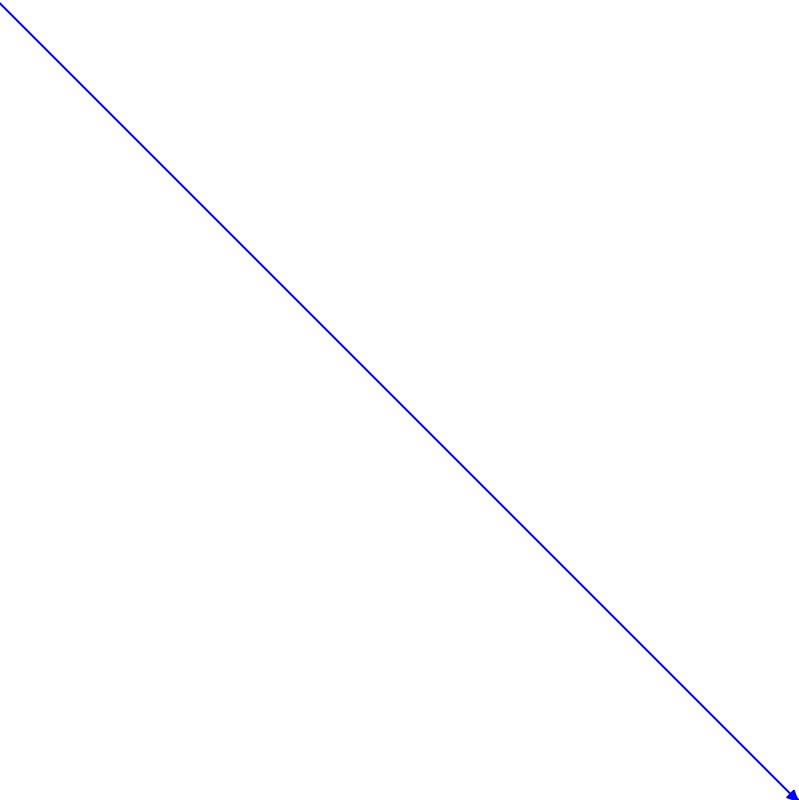

## Variant–Disease Network (Balding type 1)

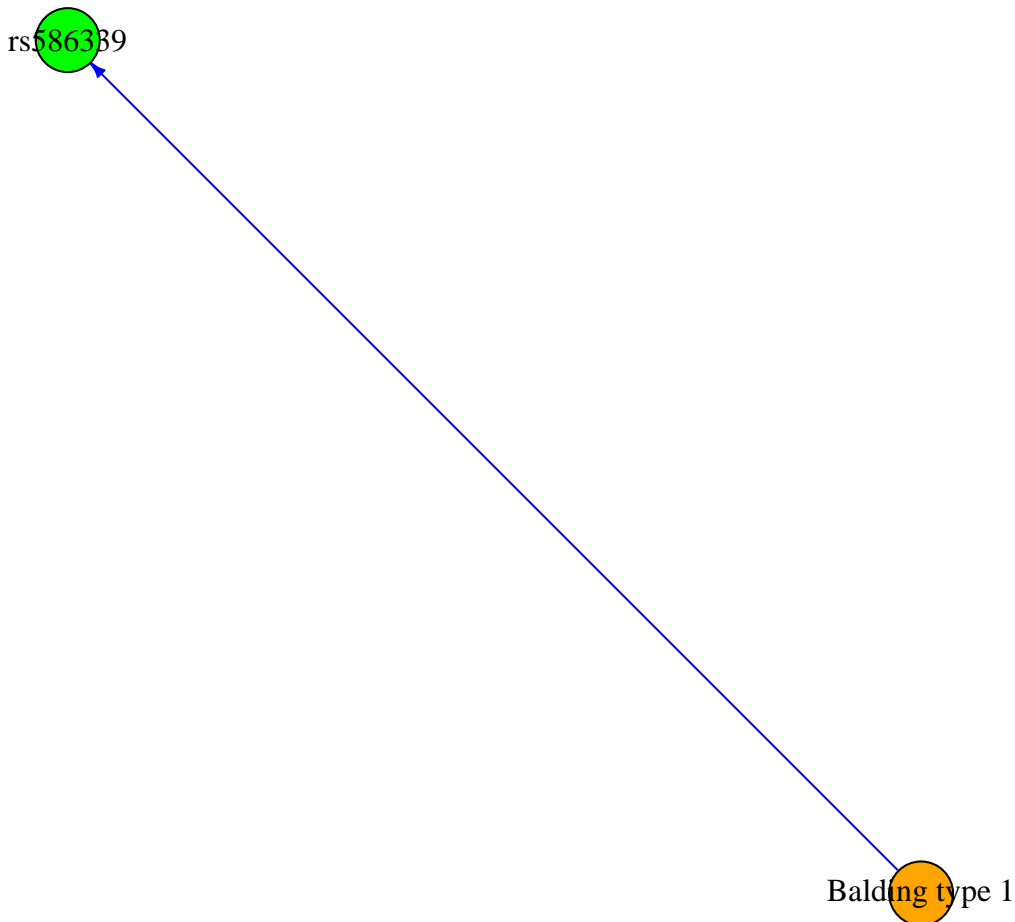

## Variant–Disease Network (Birth weight)

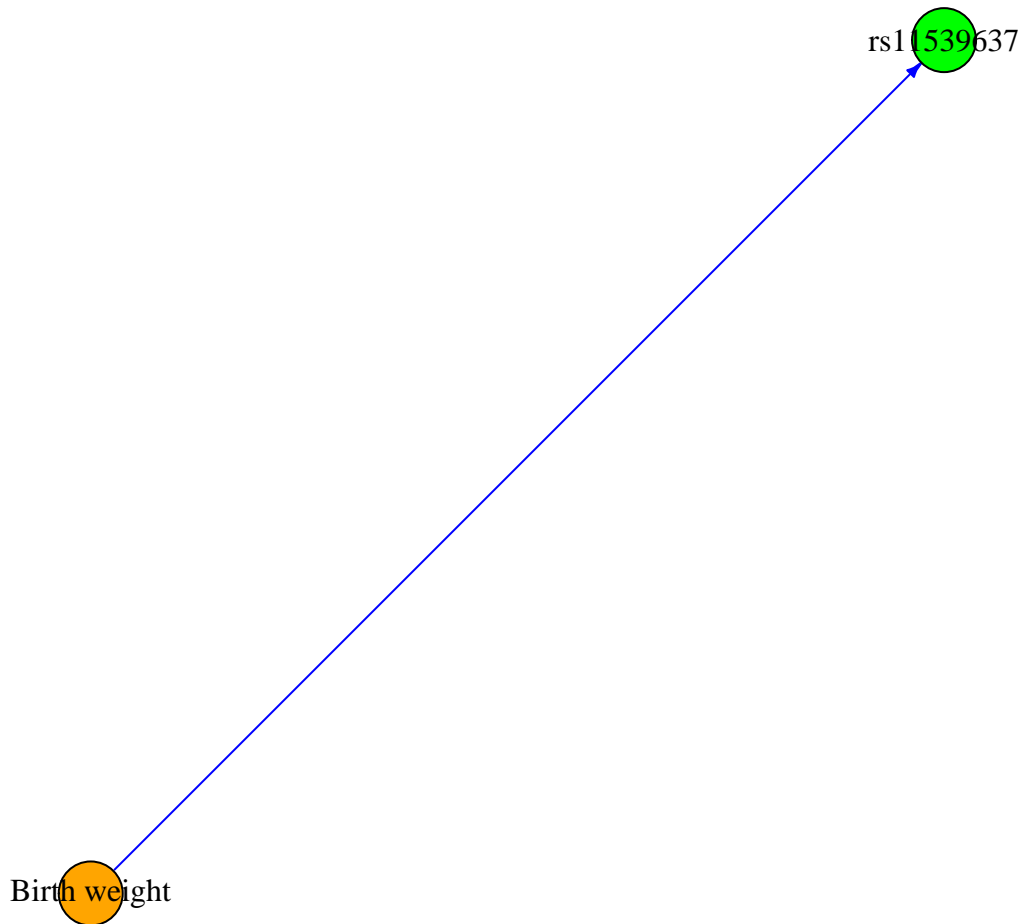

# Variant–Disease Network (Blond vs. brown/black hair color)

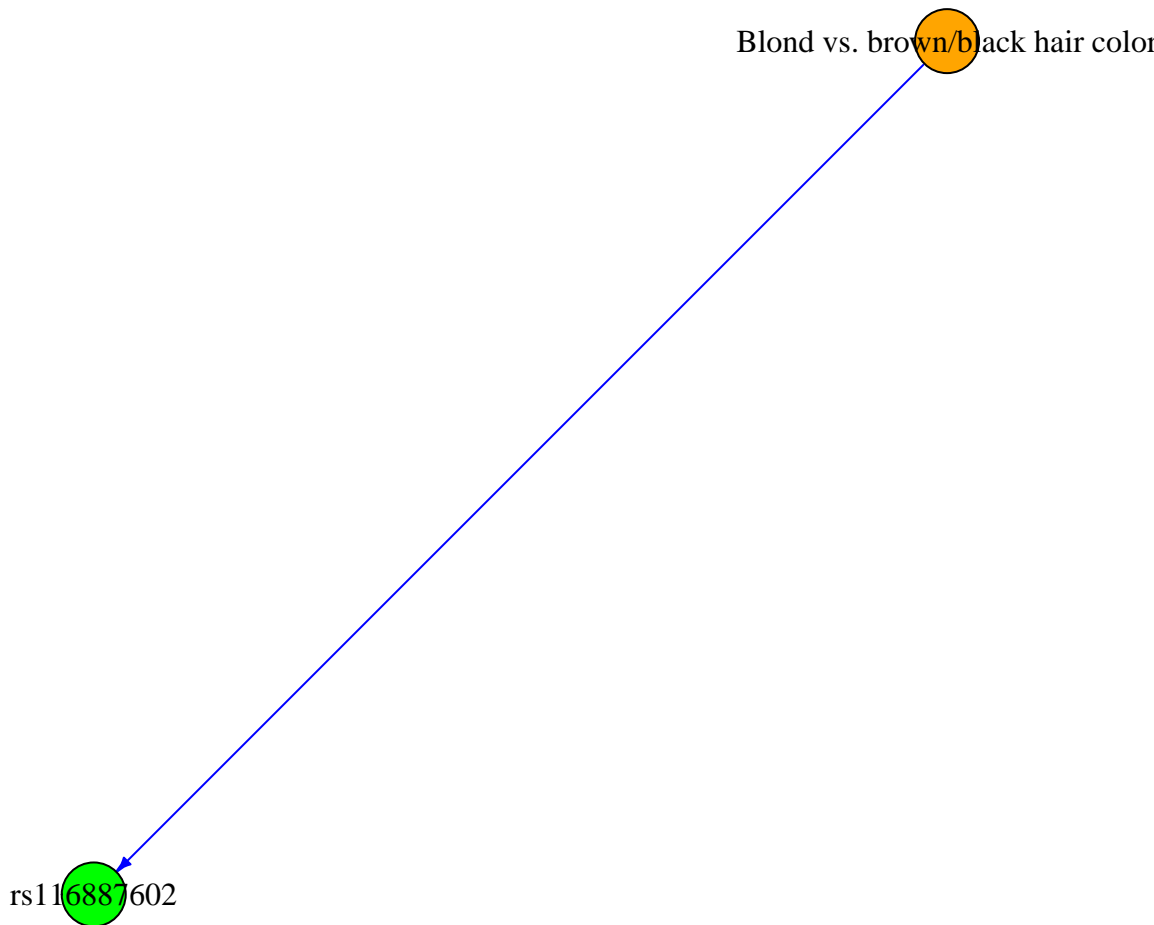



Variant–Disease Network (Blood metabolite ratios)

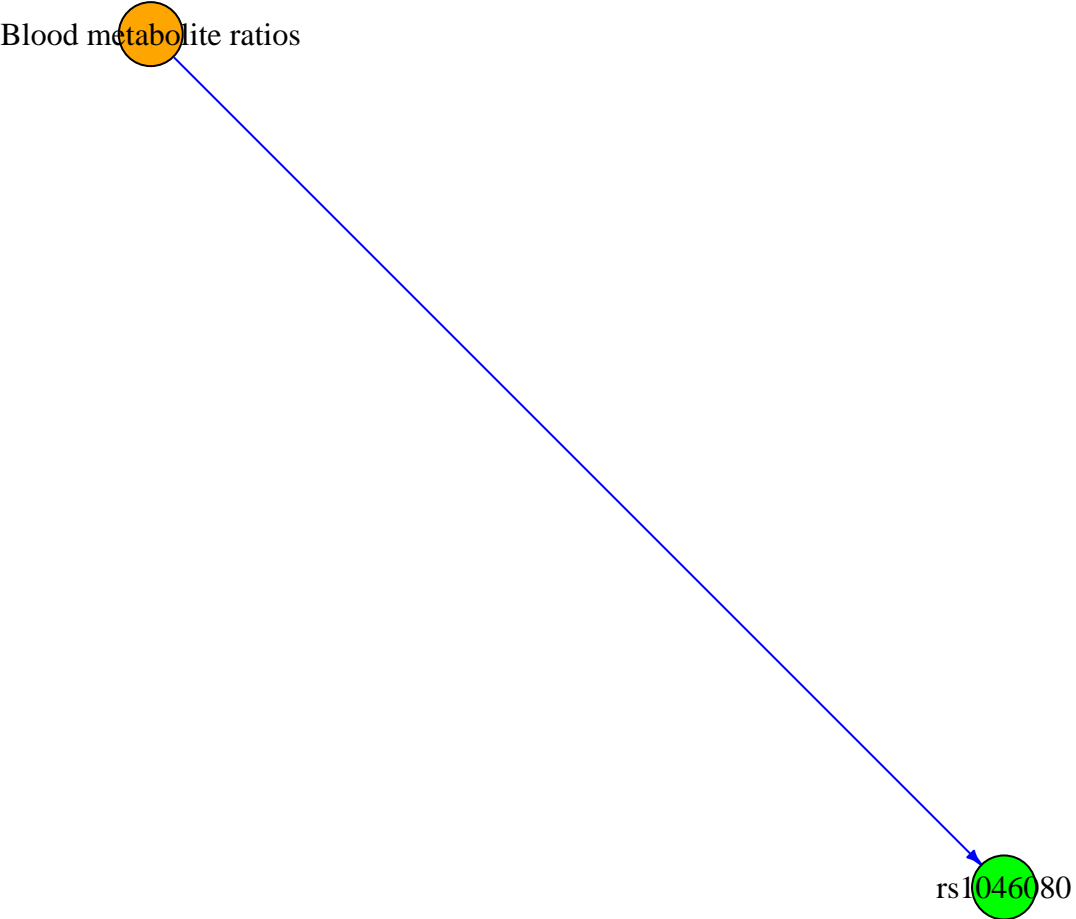

## Variant–Disease Network (Blood protein levels)

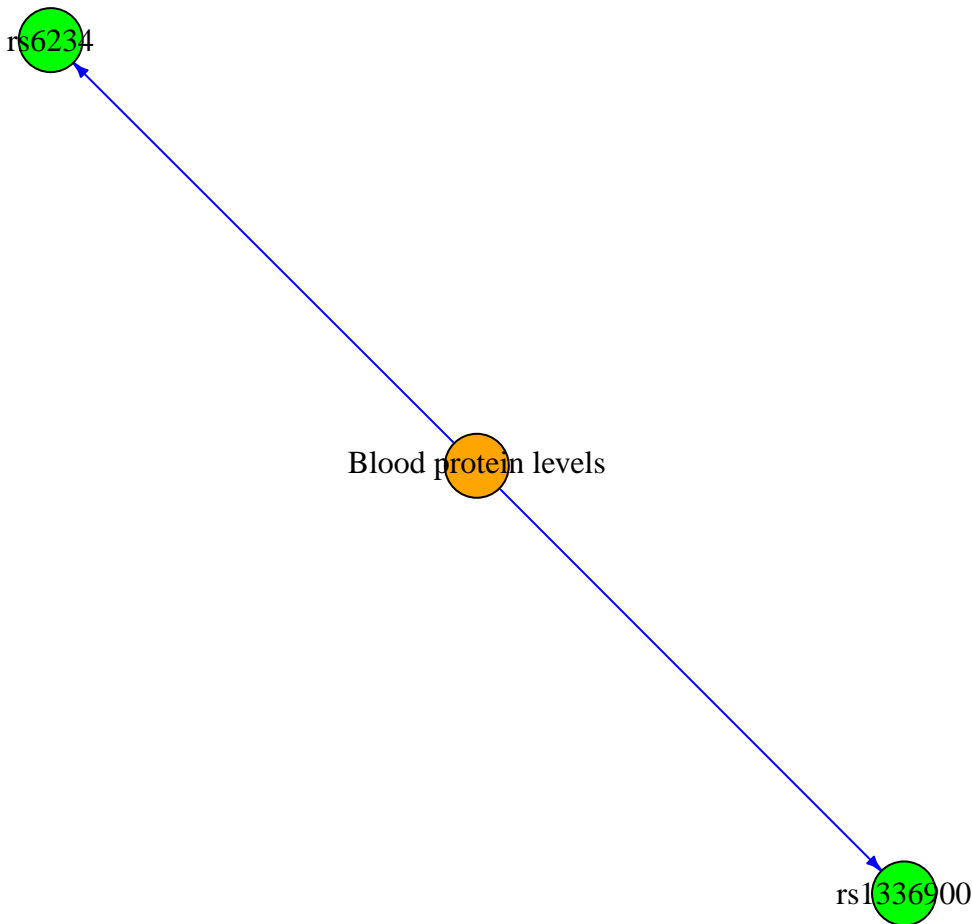

## Variant–Disease Network (Body fat percentage)

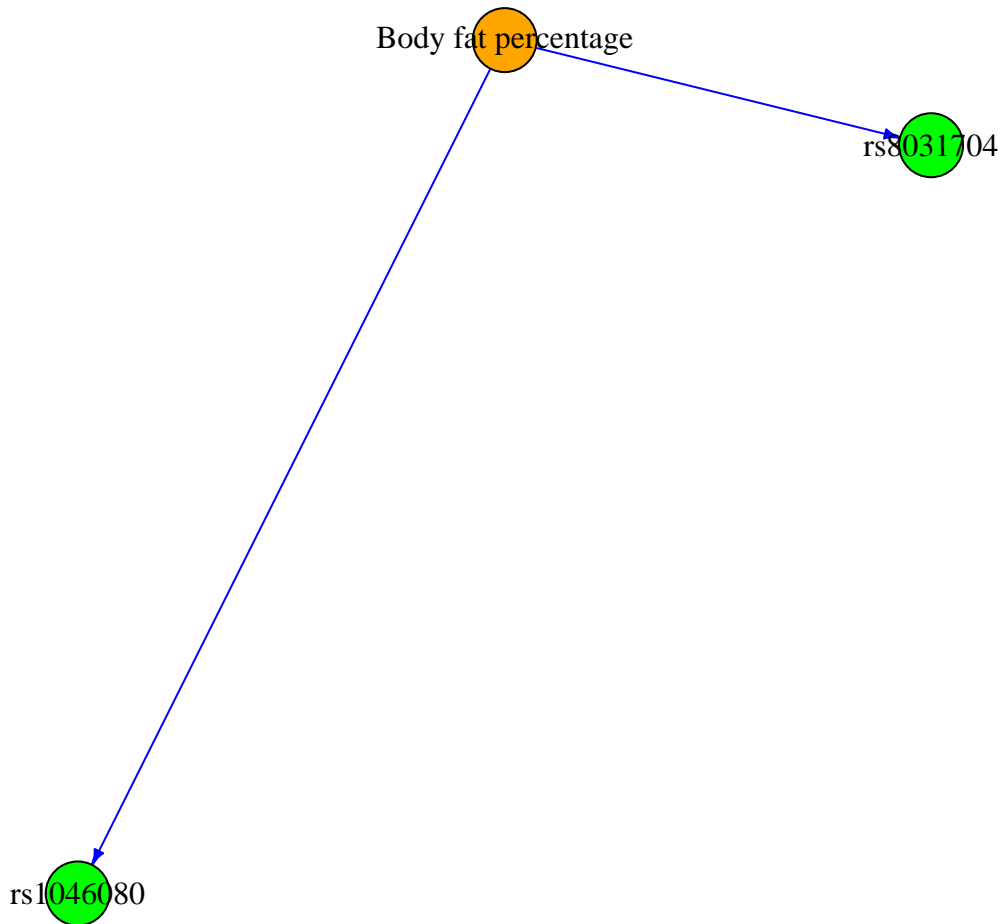

## Variant–Disease Network (Body mass index)

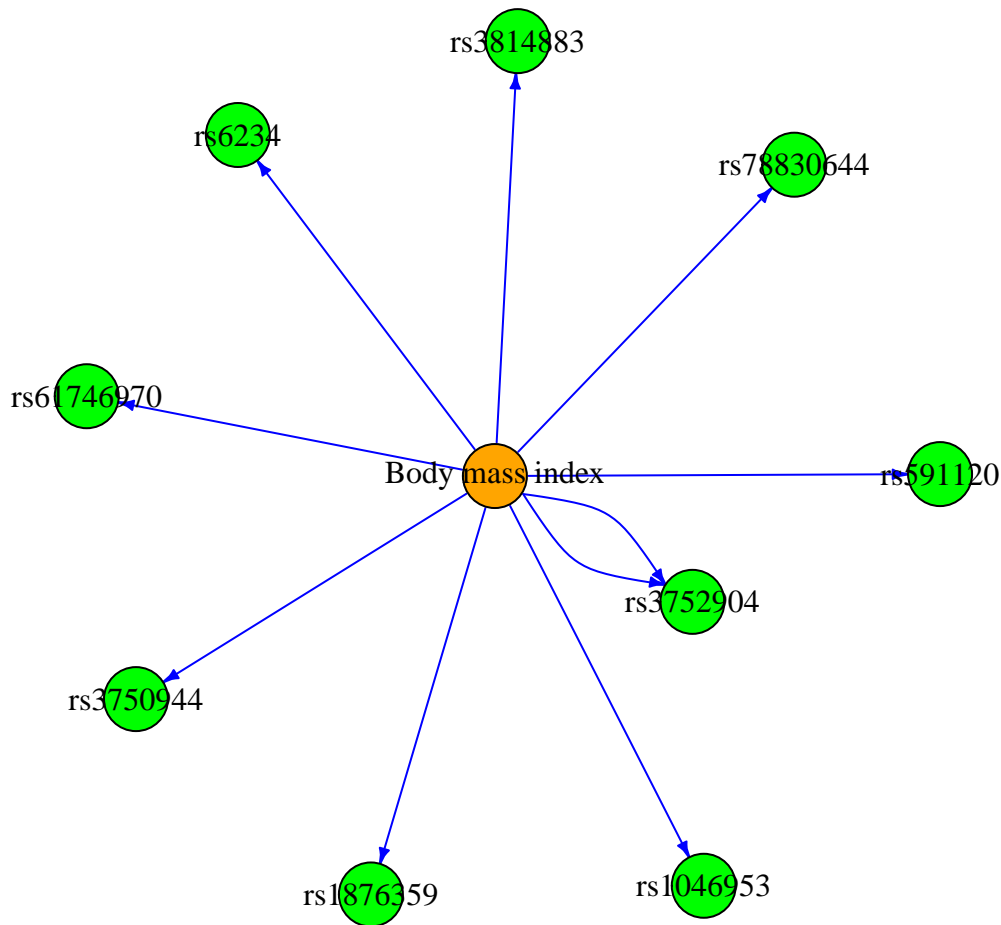

## Variant–Disease Network (Body mass index )

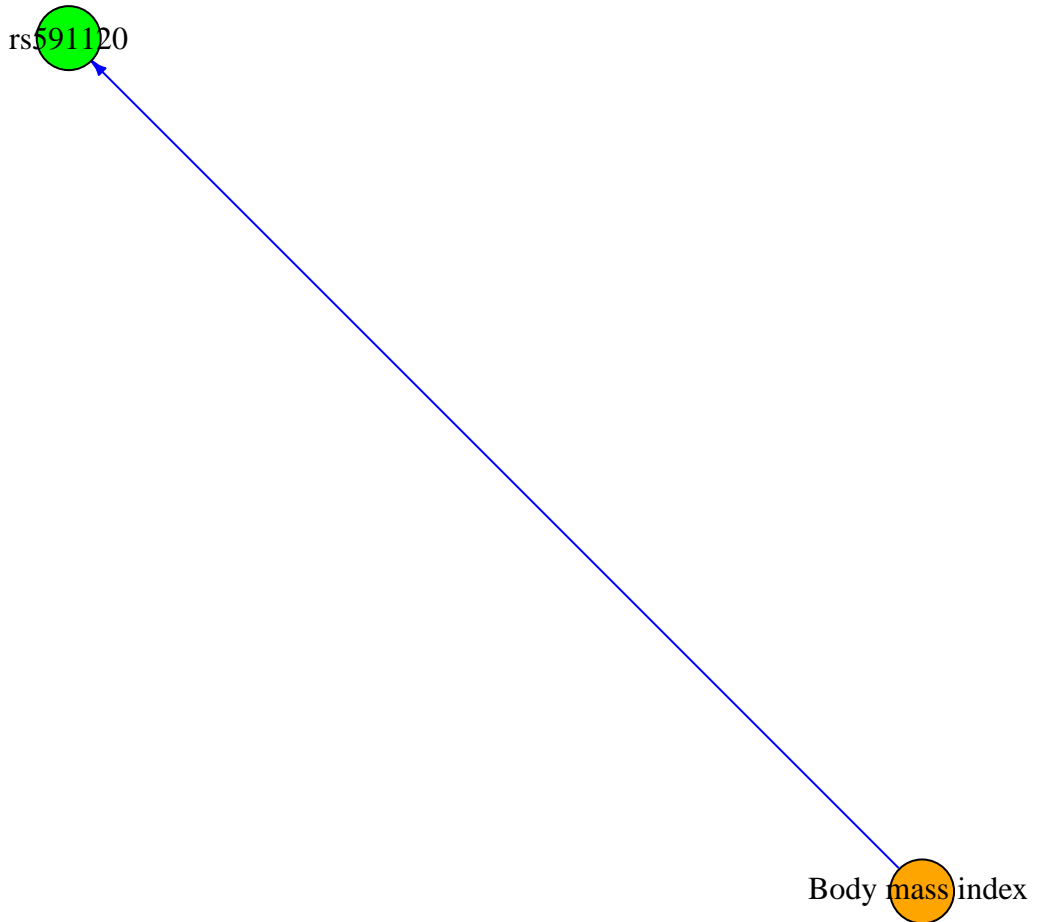

# Variant–Disease Network (Body mass index x sex x age interaction )

Body mass index x sex x age interaction

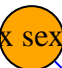

rs591120

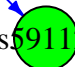

## Variant–Disease Network (Brain region volumes)

rs3741280

Brain region volumes



**Variant–Disease Network (Cardiovascular disease)**

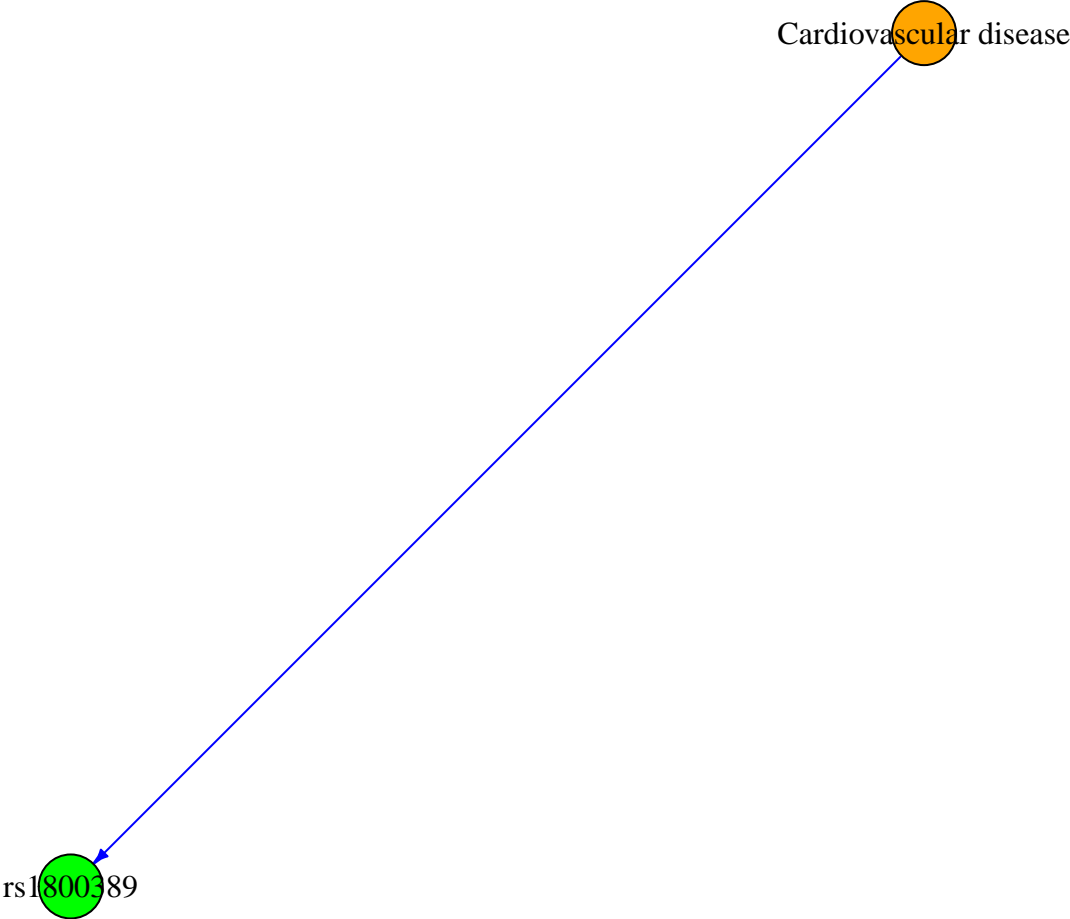



Variant–Disease Network (Cerebrospinal AB1–42 levels in normal cognition

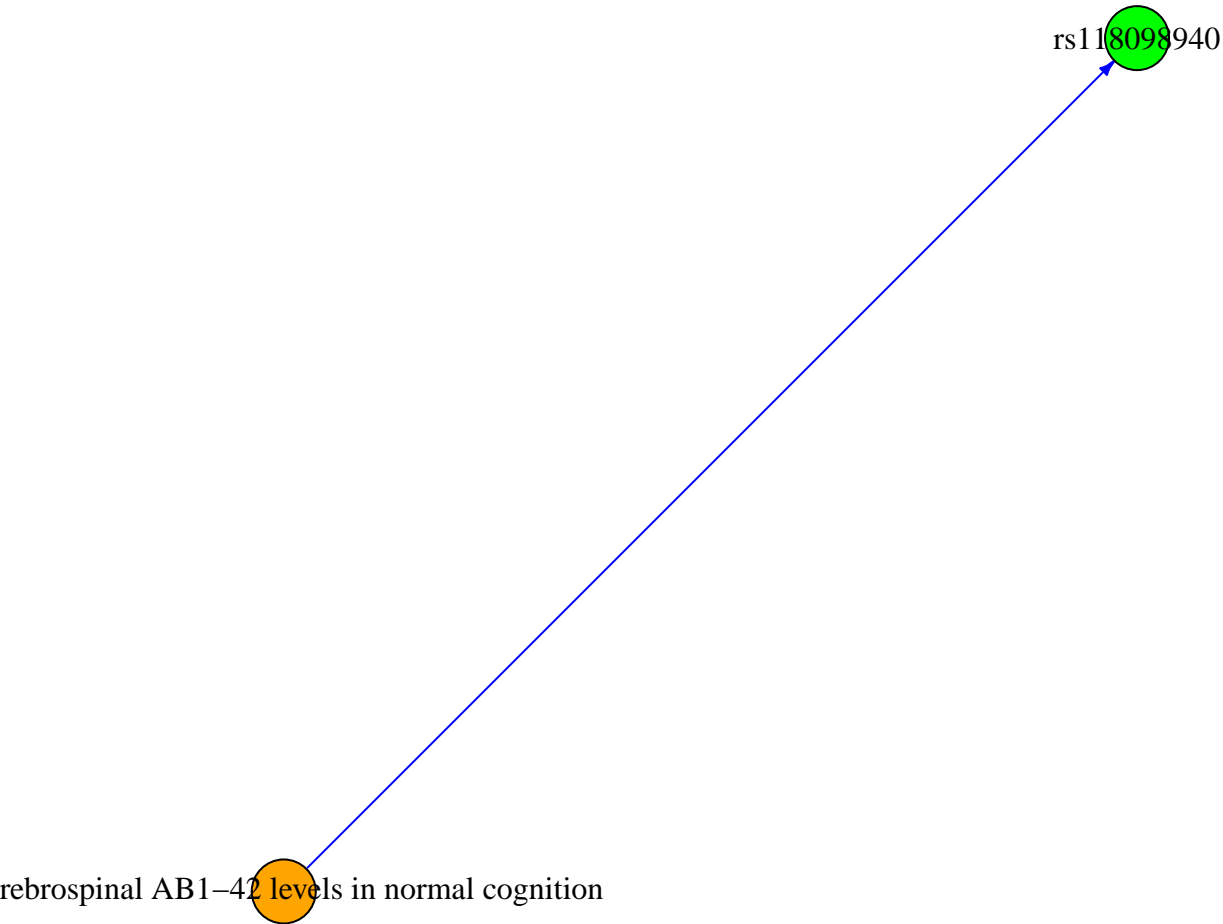

# Variant–Disease Network (Cerebrospinal fluid t-tau:AB1–42 ratio)

Cerebrospinal fluid t-tau:AB1–42 ratio

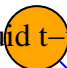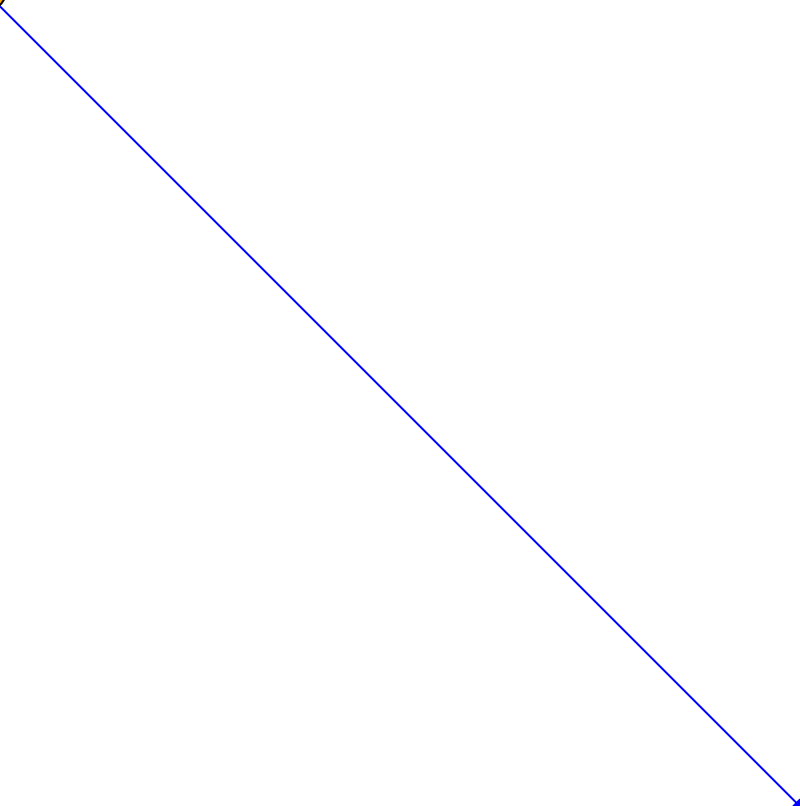

rs2280301

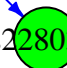

## Variant-Disease Network (Cholesterol)

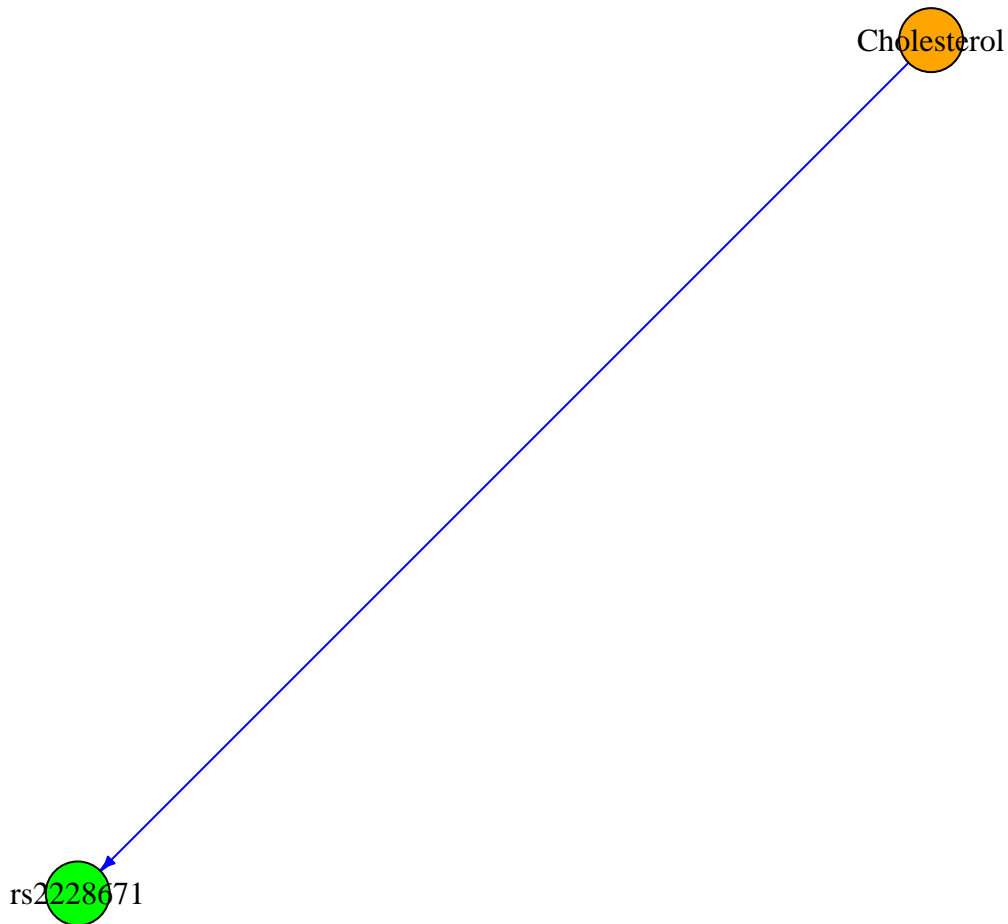

# Variant–Disease Network (Chronic obstructive pulmonary disease)

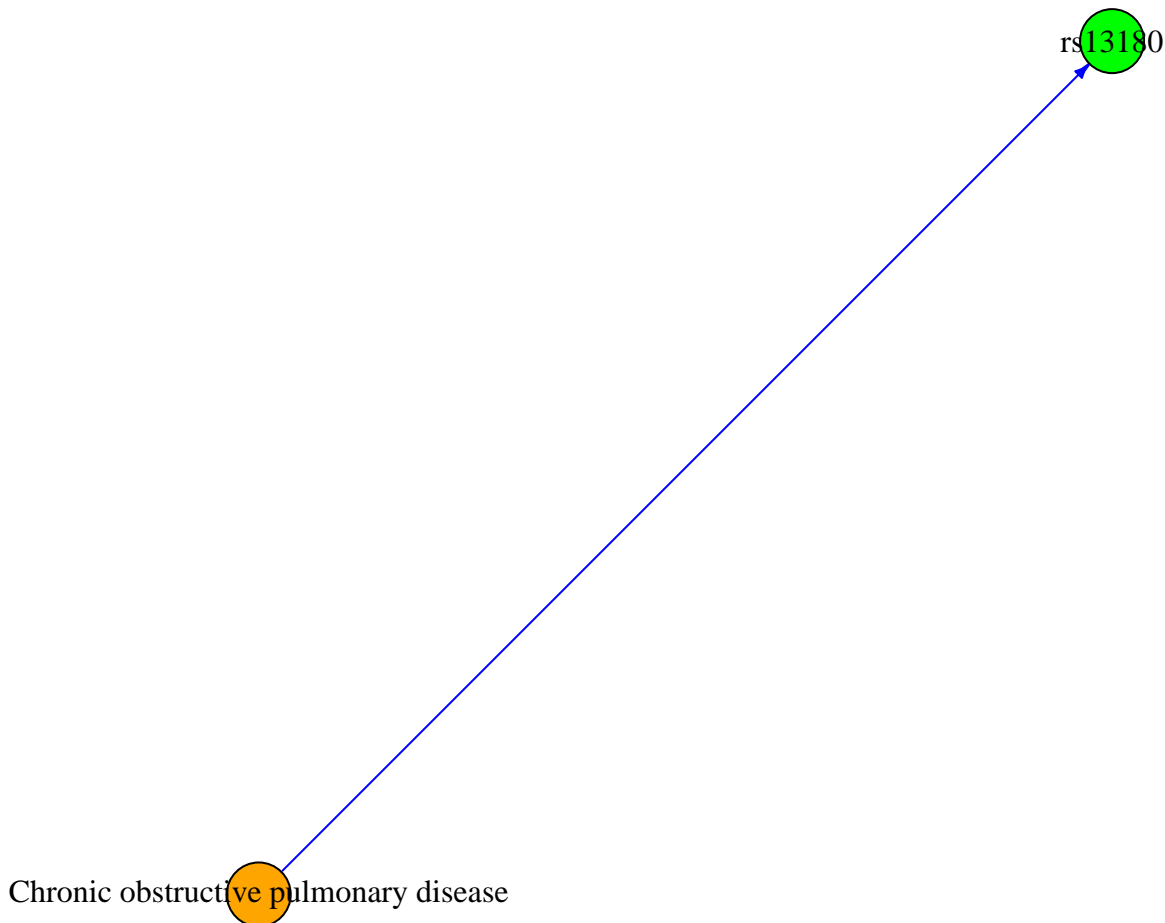

Variant–Disease Network (schizophrenia )

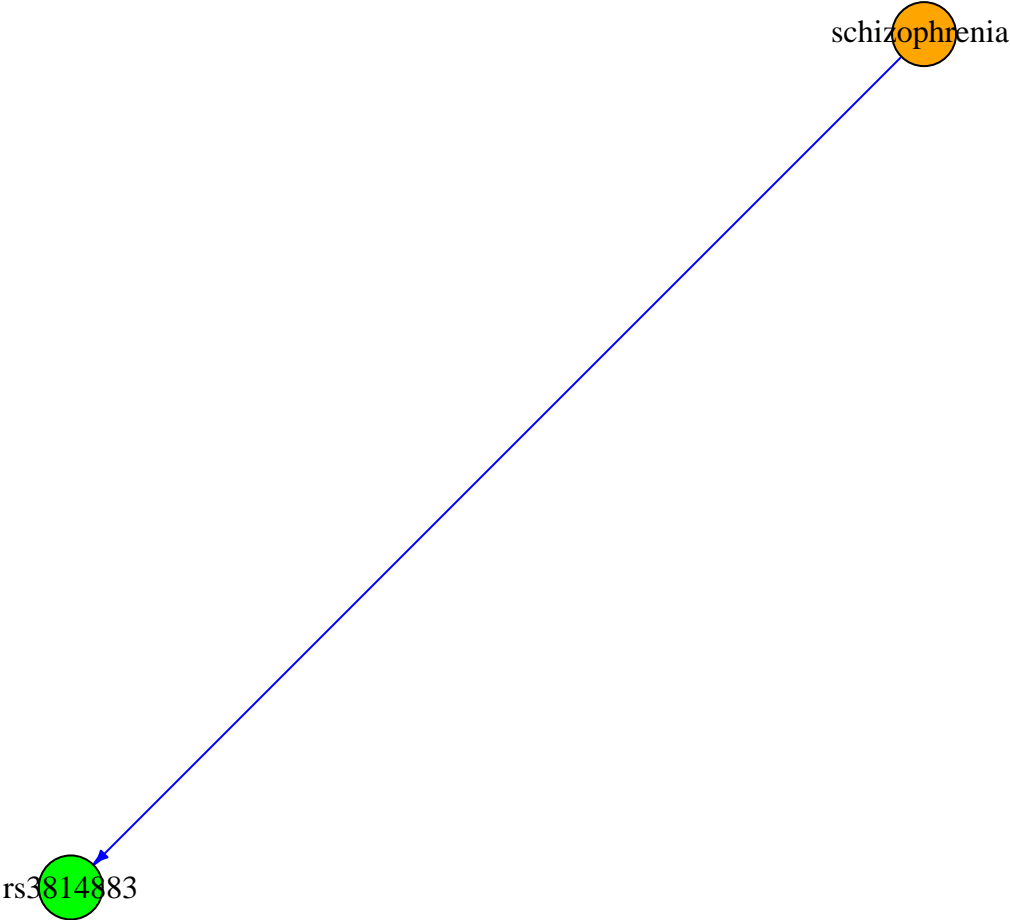

## Variant–Disease Network (Cognitive function)

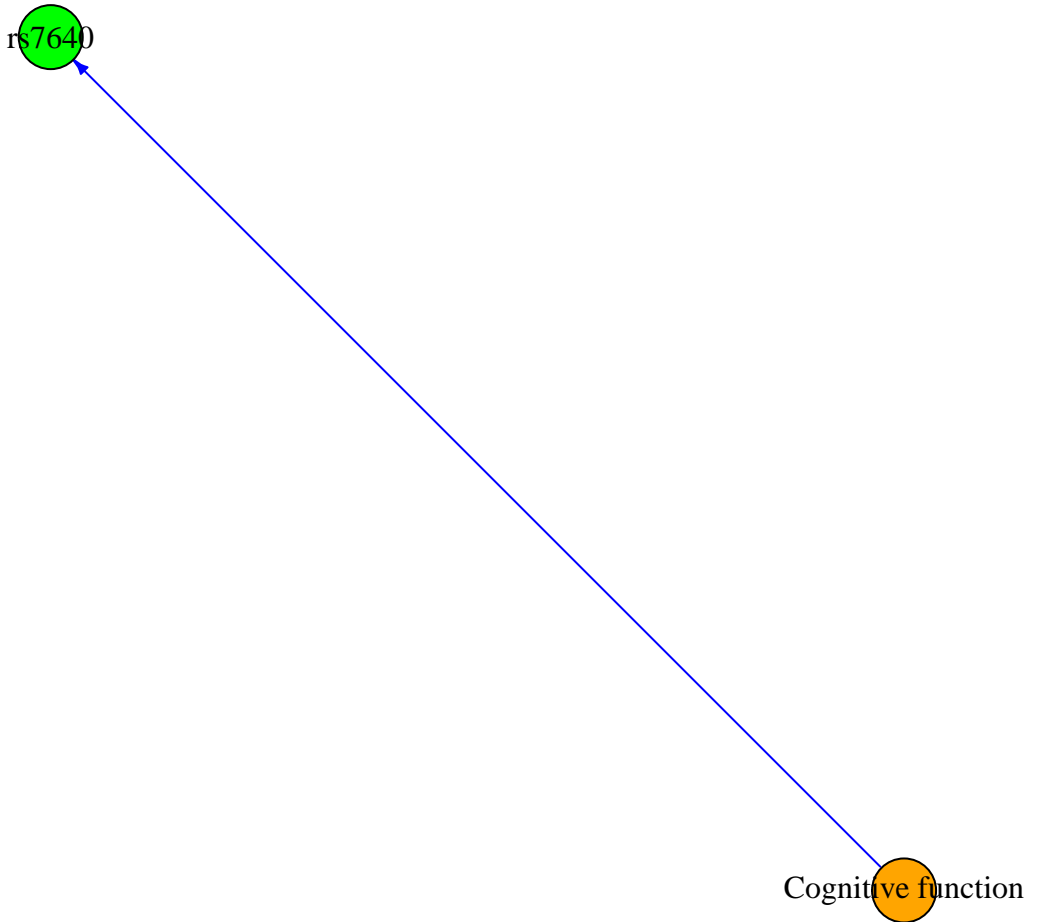

## Variant-Disease Network (Coronary artery disease)

Coronary artery disease

rs1801251

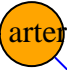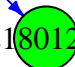

## Variant–Disease Network (Cortical thickness)

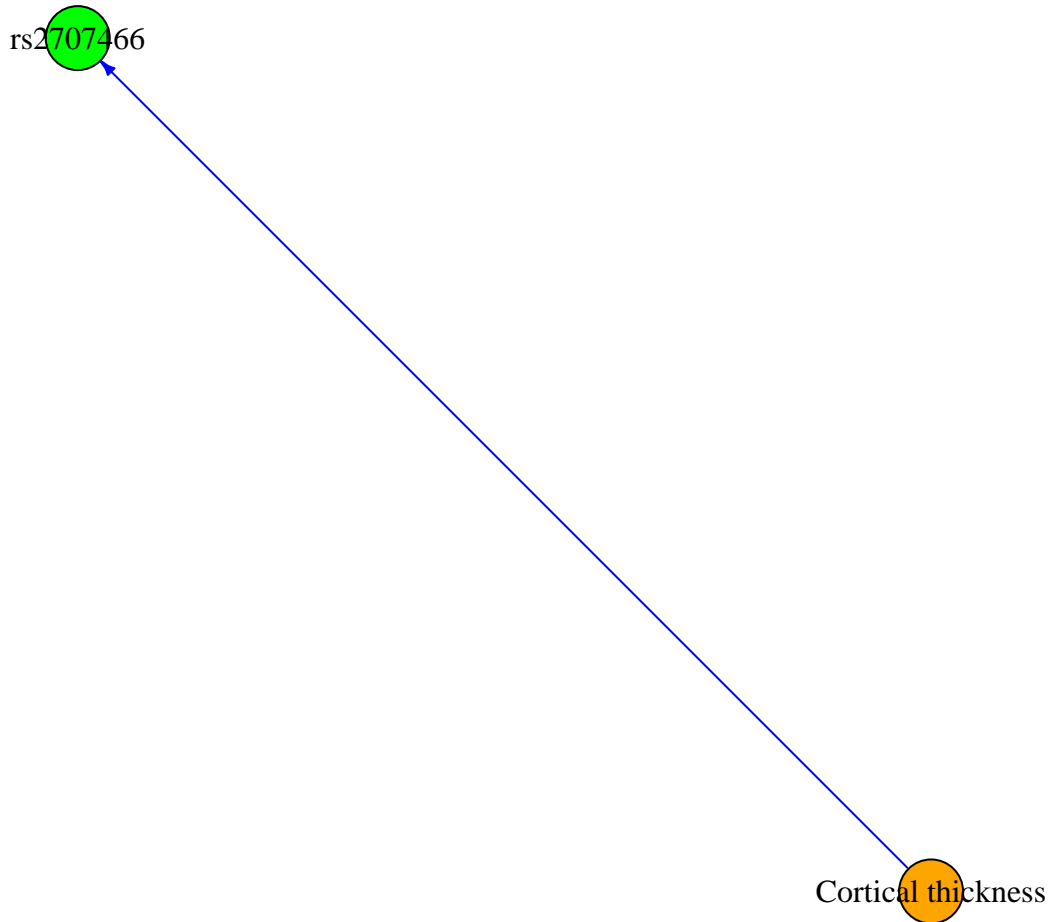



# Variant–Disease Network (Educational attainment )

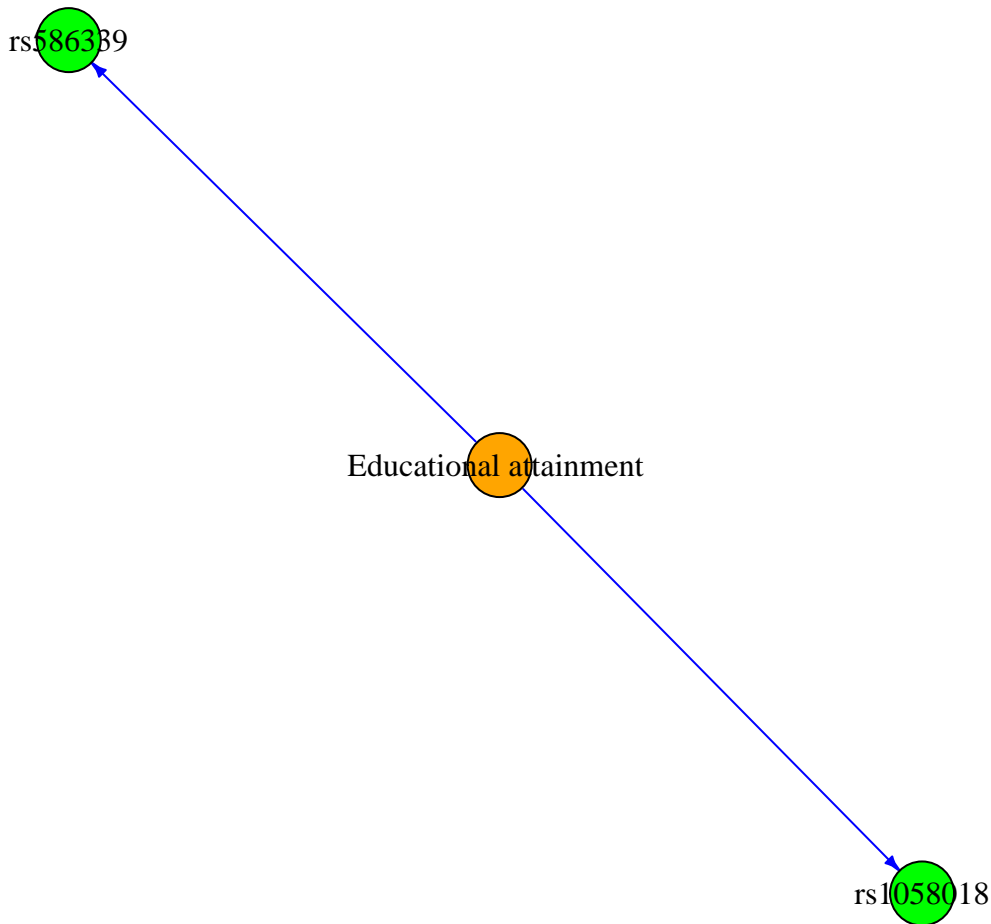

## Variant-Disease Network (Erosive tooth wear )

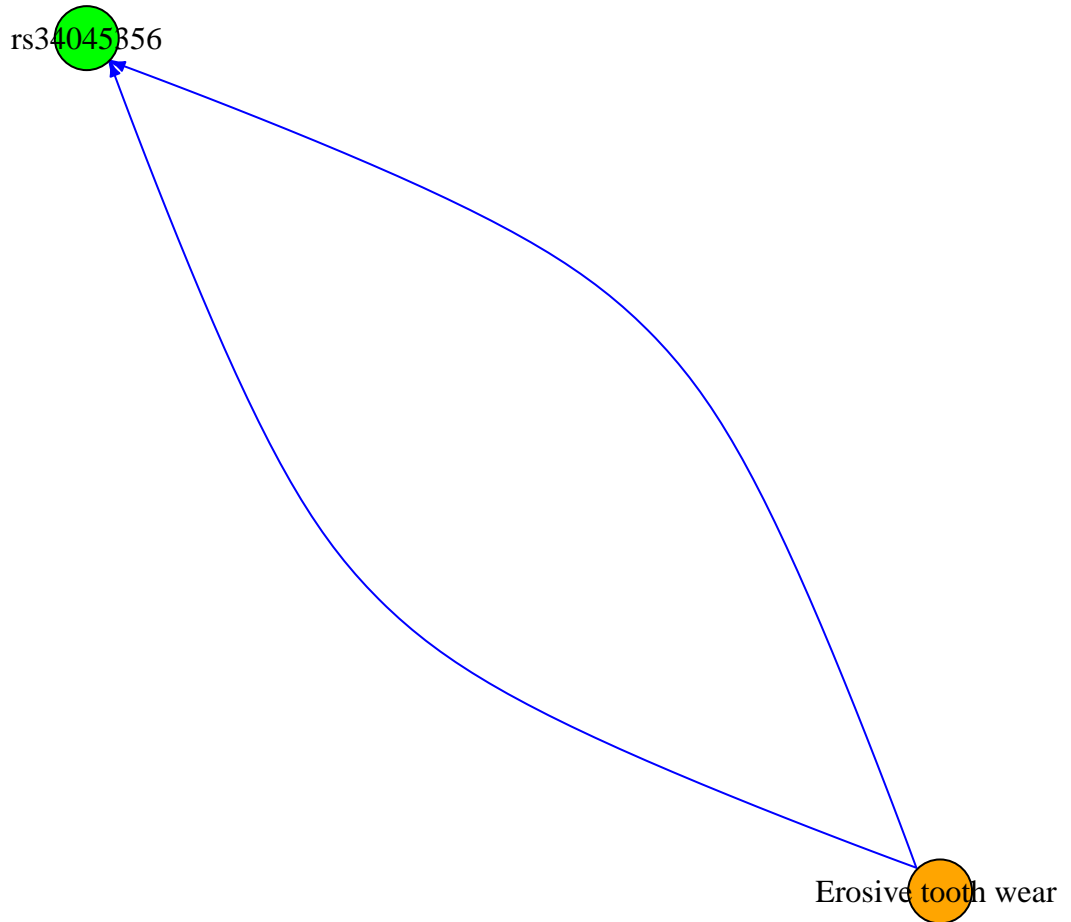

# Variant–Disease Network (Estimated glomerular filtration rate)

Estimated glomerular filtration rate

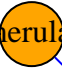

rs883541

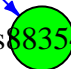

# Variant–Disease Network (Fasting blood glucose adjusted for BMI)

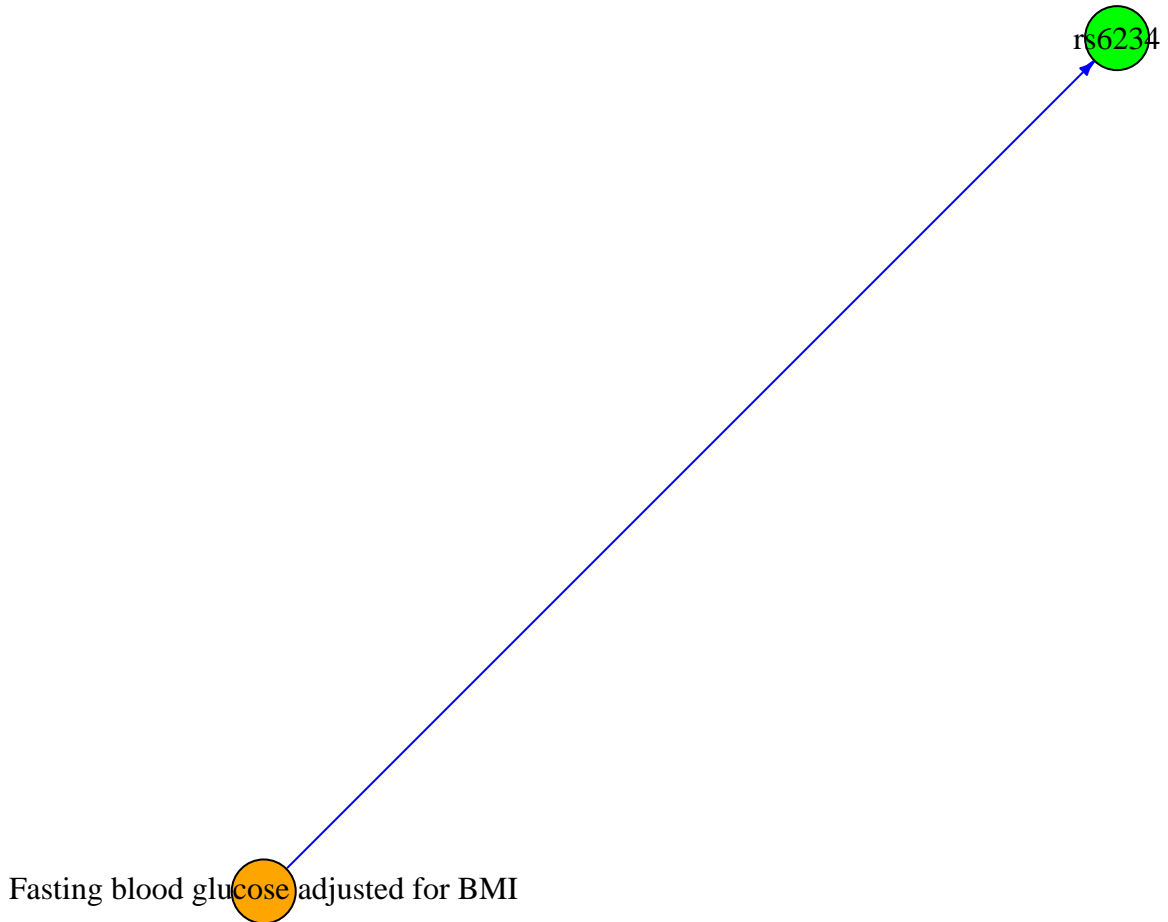

**Variant–Disease Network (Fish– and plant–related diet)**

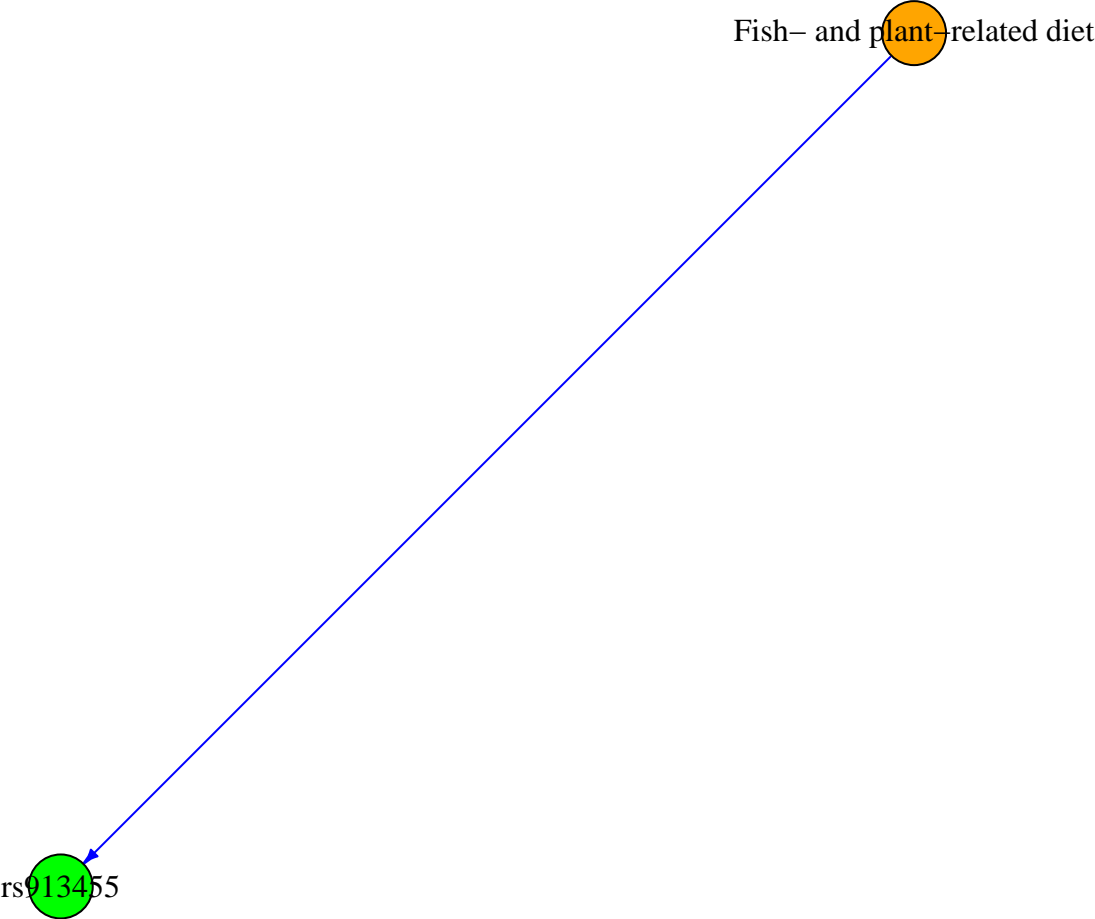

## Variant–Disease Network (General cognitive ability)

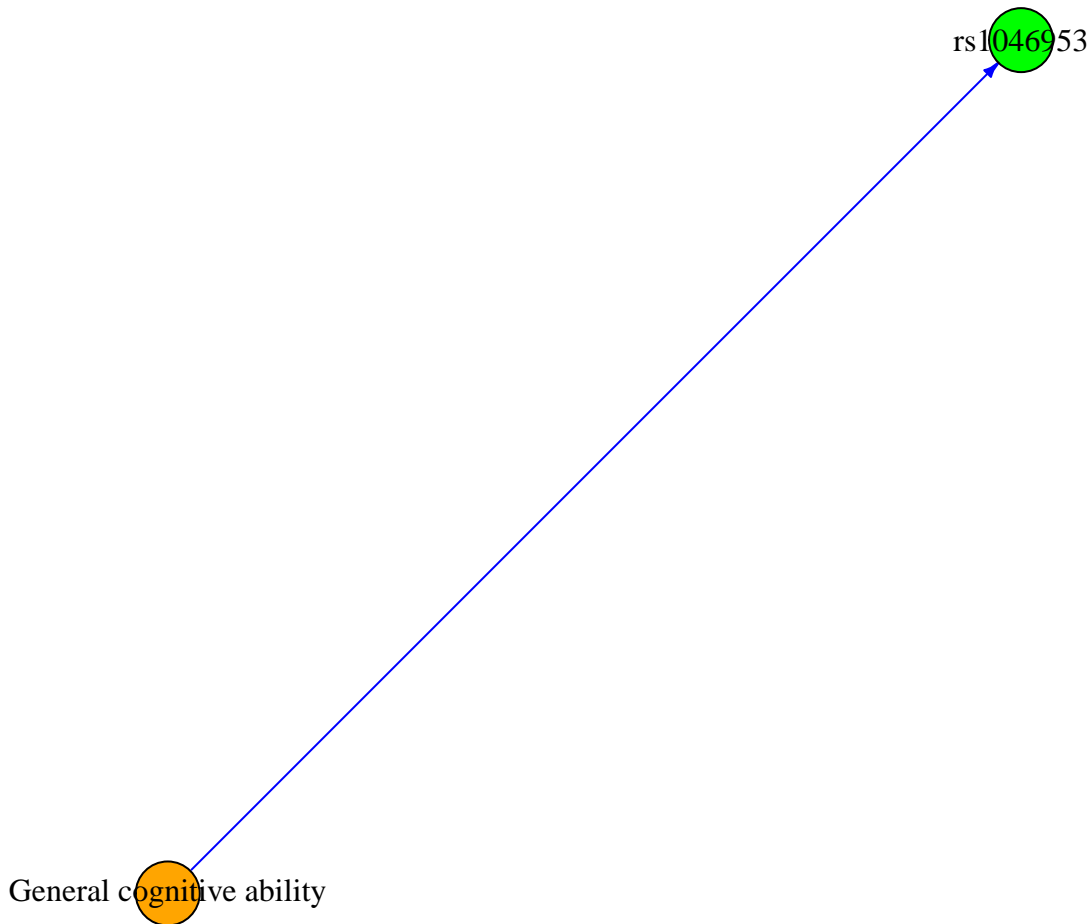

# Variant–Disease Network (Glycated hemoglobin levels)

Glycated hemoglobin levels

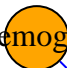

rs4820268

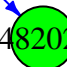

## Variant–Disease Network (HDL cholesterol levels)

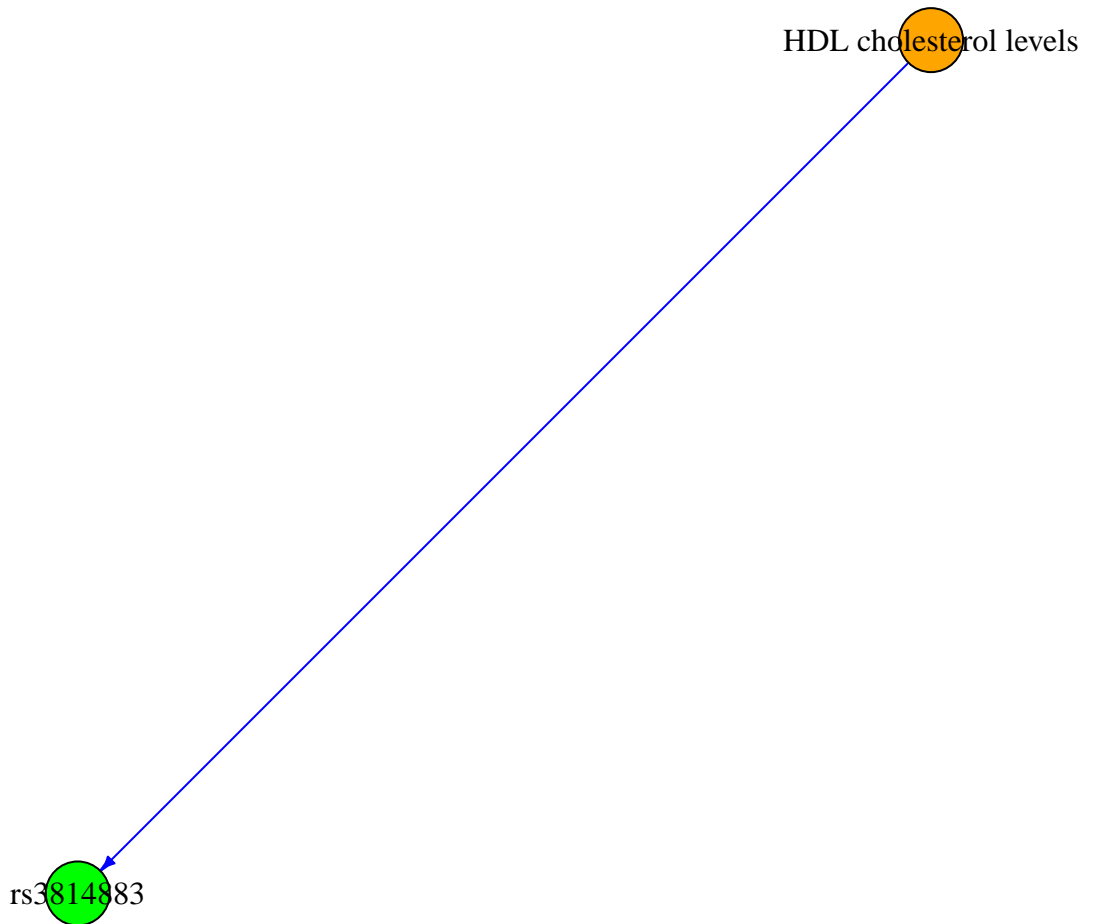



## Variant-Disease Network (Height)

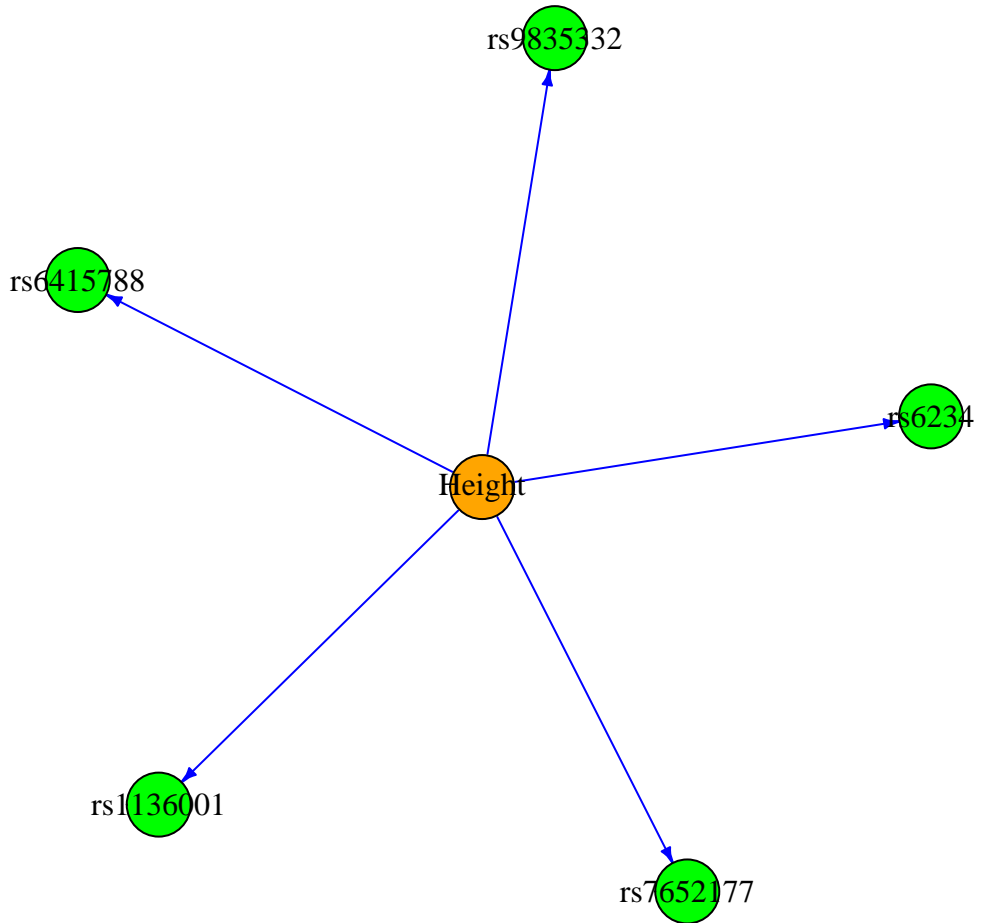

## Variant–Disease Network (Hematocrit)

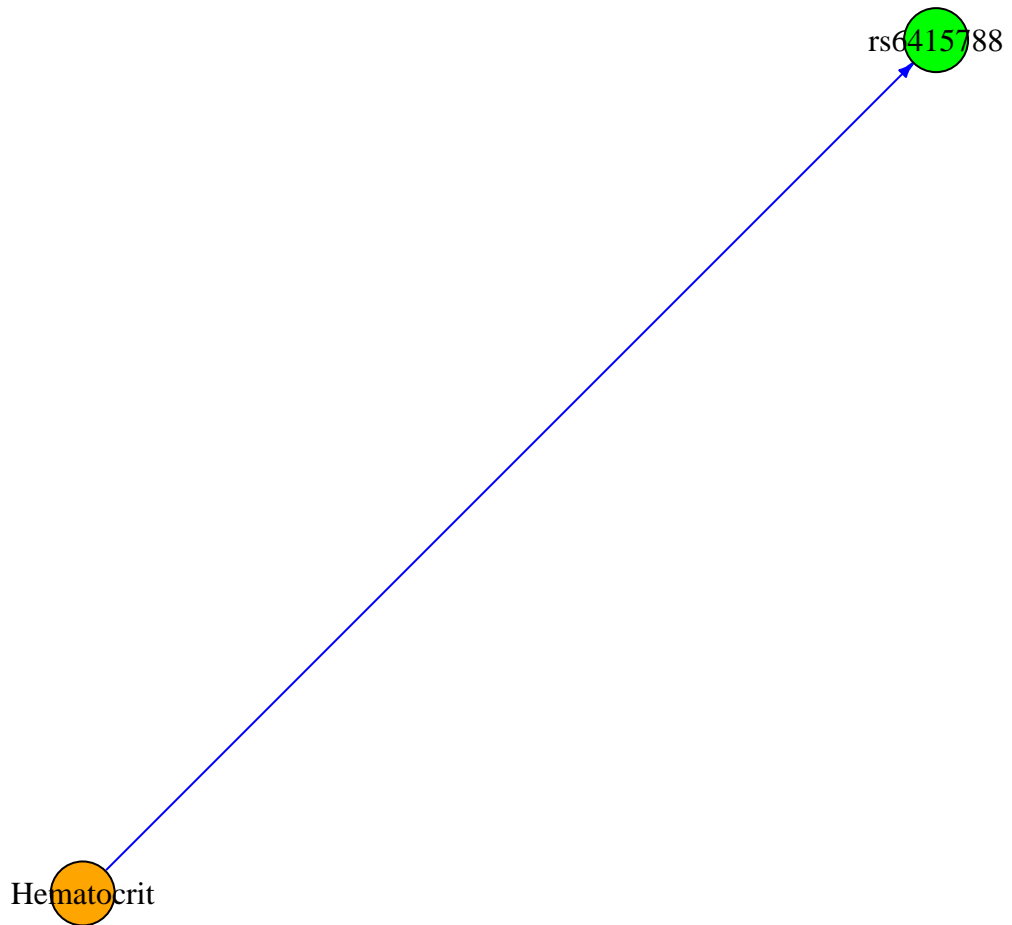

**Variant–Disease Network (Hemoglobin concentration)**

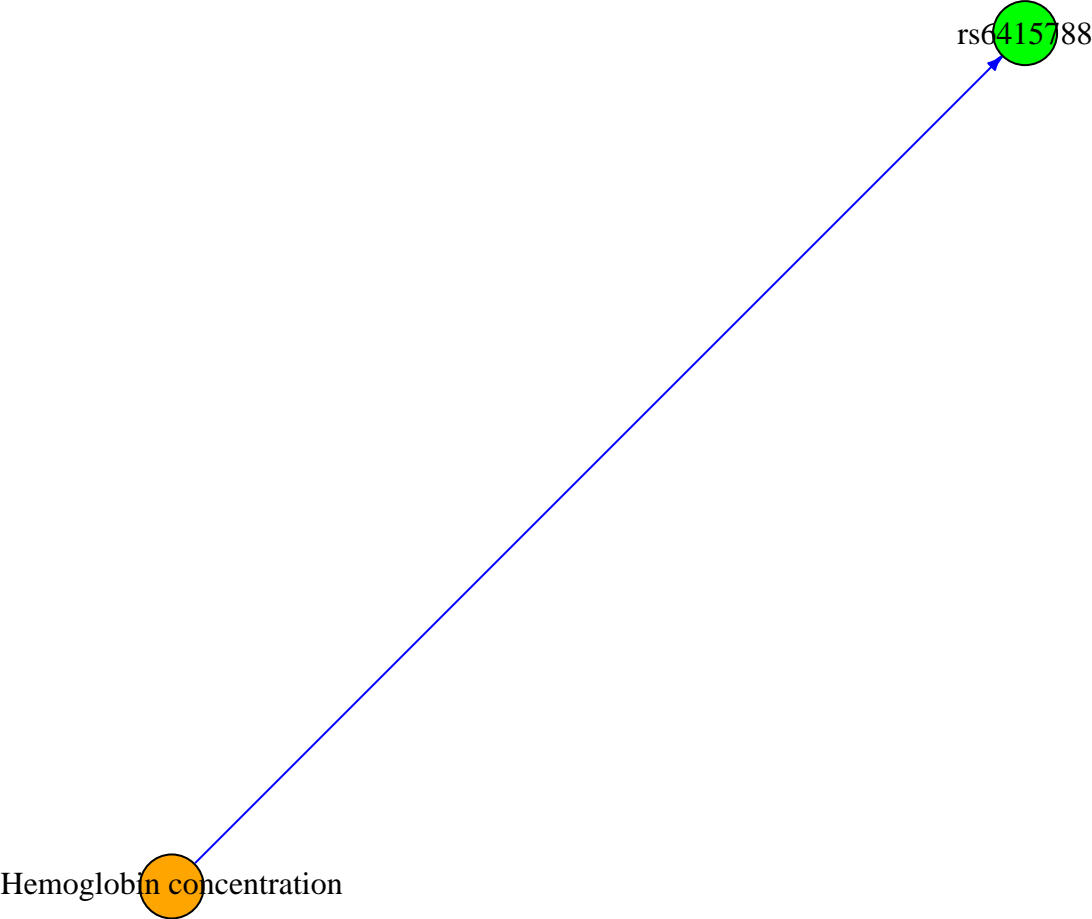

## Variant–Disease Network (Hemoglobin levels)

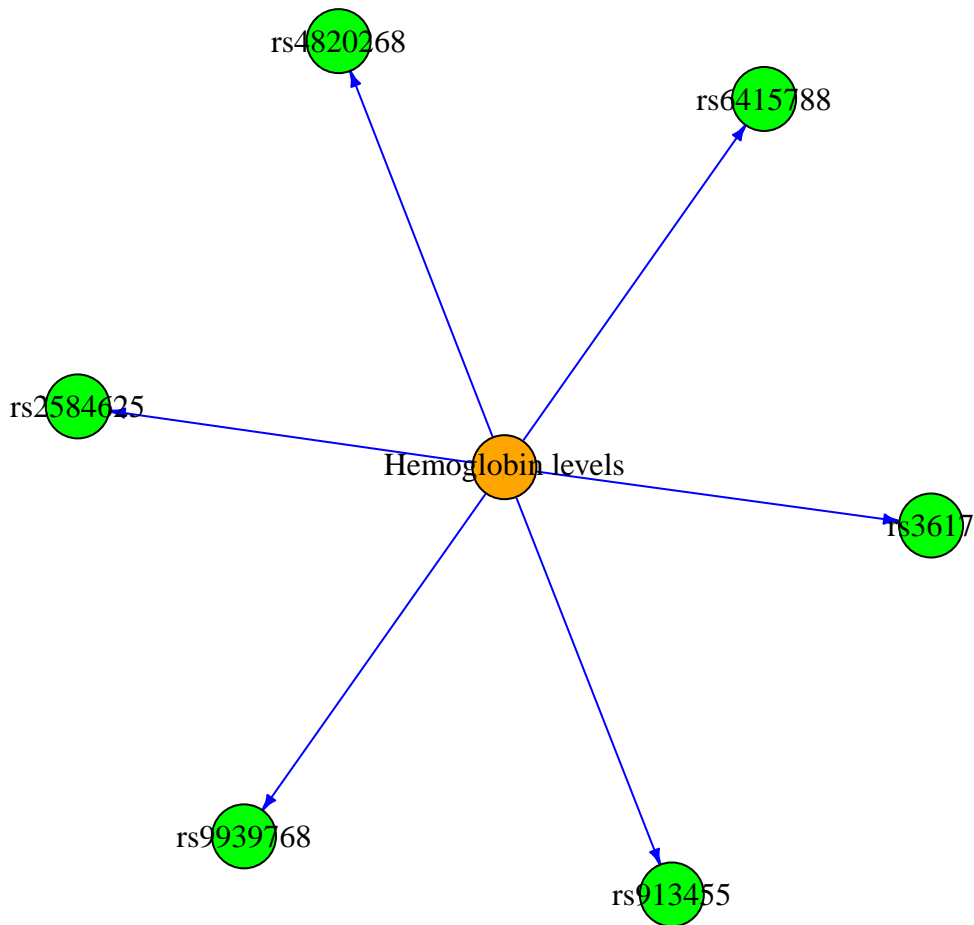

Variant–Disease Network (High light scatter reticulocyte count)

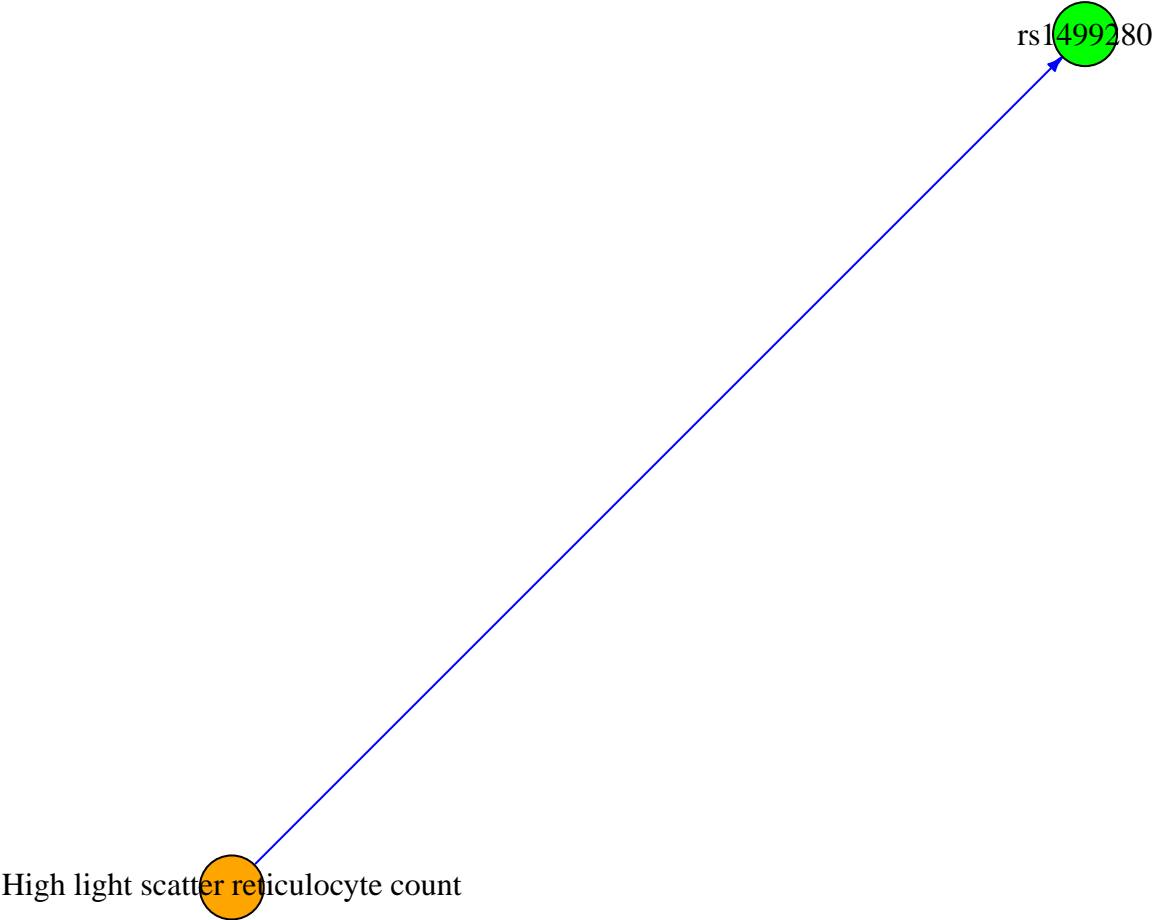

# Variant–Disease Network (High light scatter reticulocyte percentage of red c

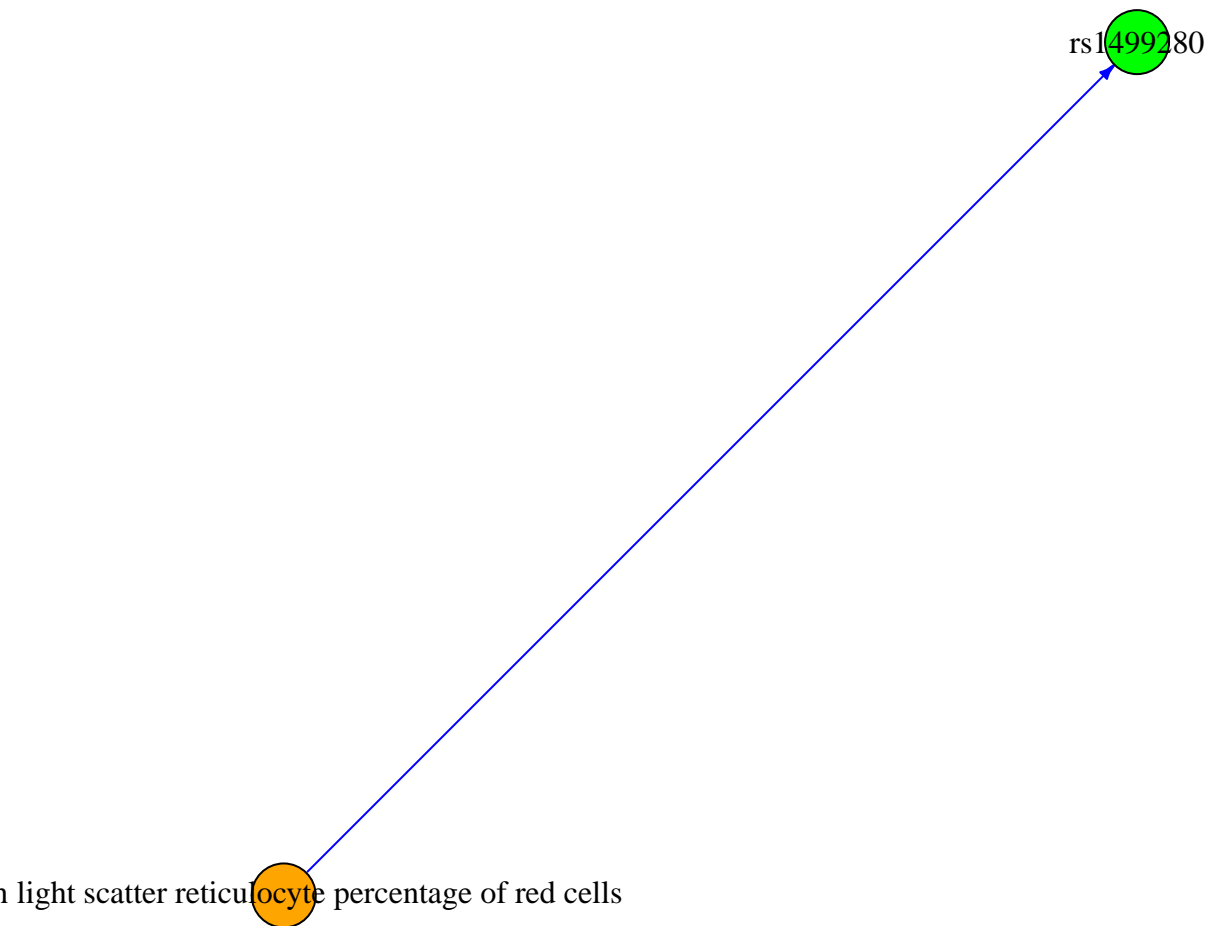

# Variant–Disease Network (Hip circumference adjusted for BMI)

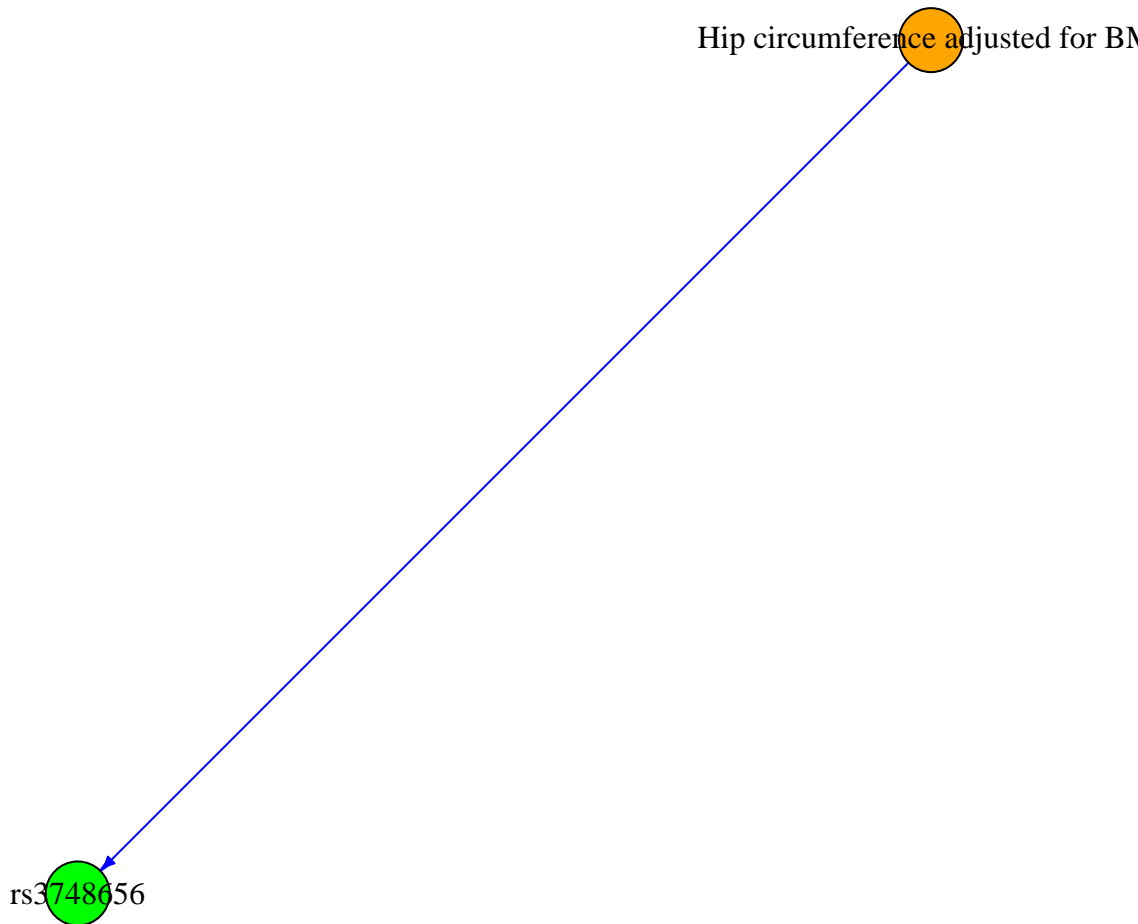

## Variant-Disease Network (IgG glycosylation)

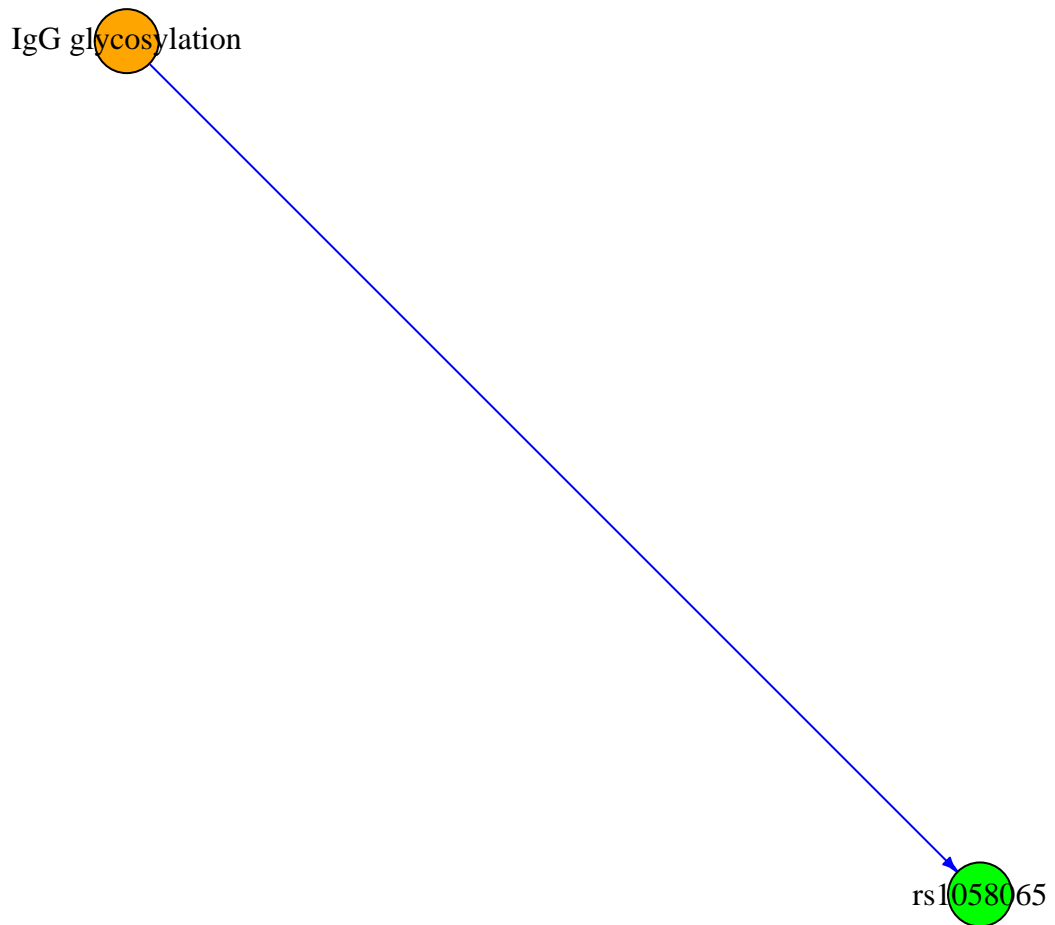



# Variant–Disease Network (Immature fraction of reticulocytes)

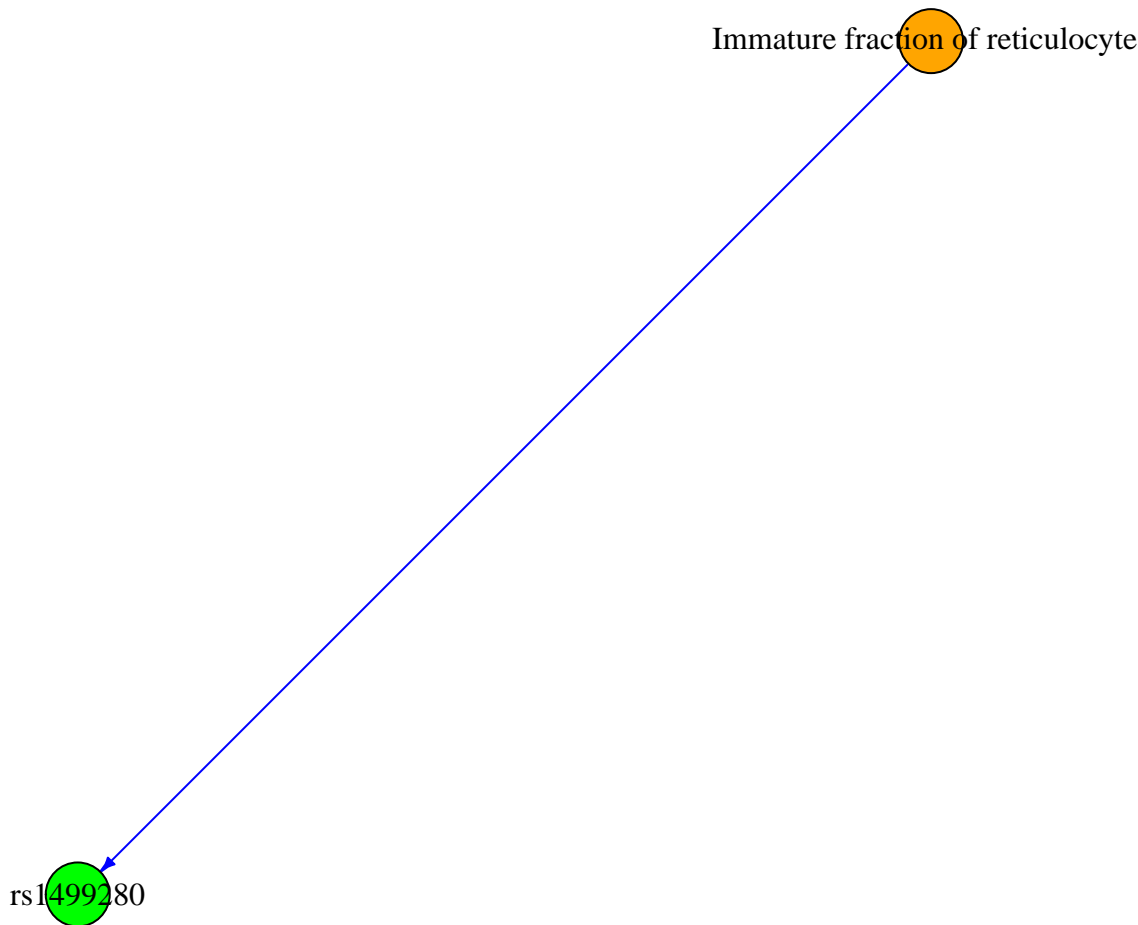

**Variant–Disease Network (Inflammatory bowel disease)**

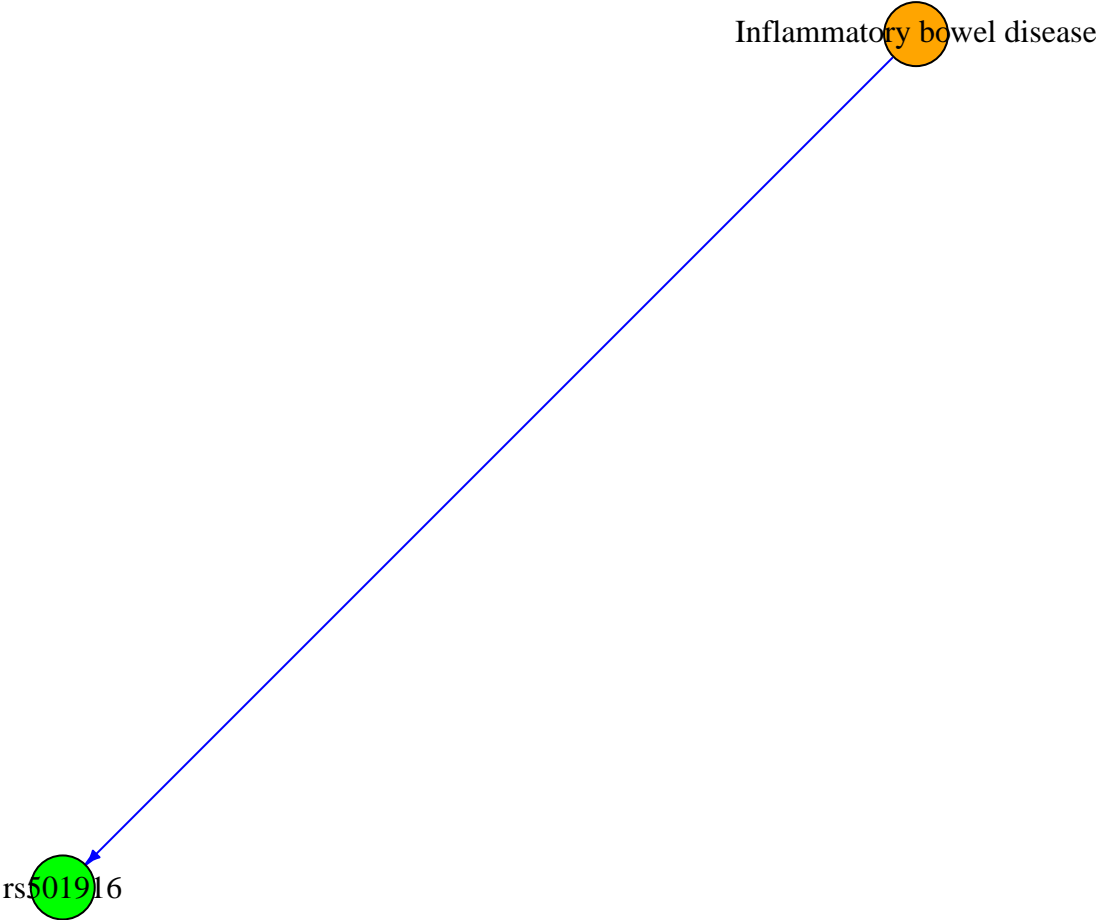

## Variant-Disease Network (Iron levels)

rs4820268

Iron levels



## Variant-Disease Network (Iron status biomarkers)

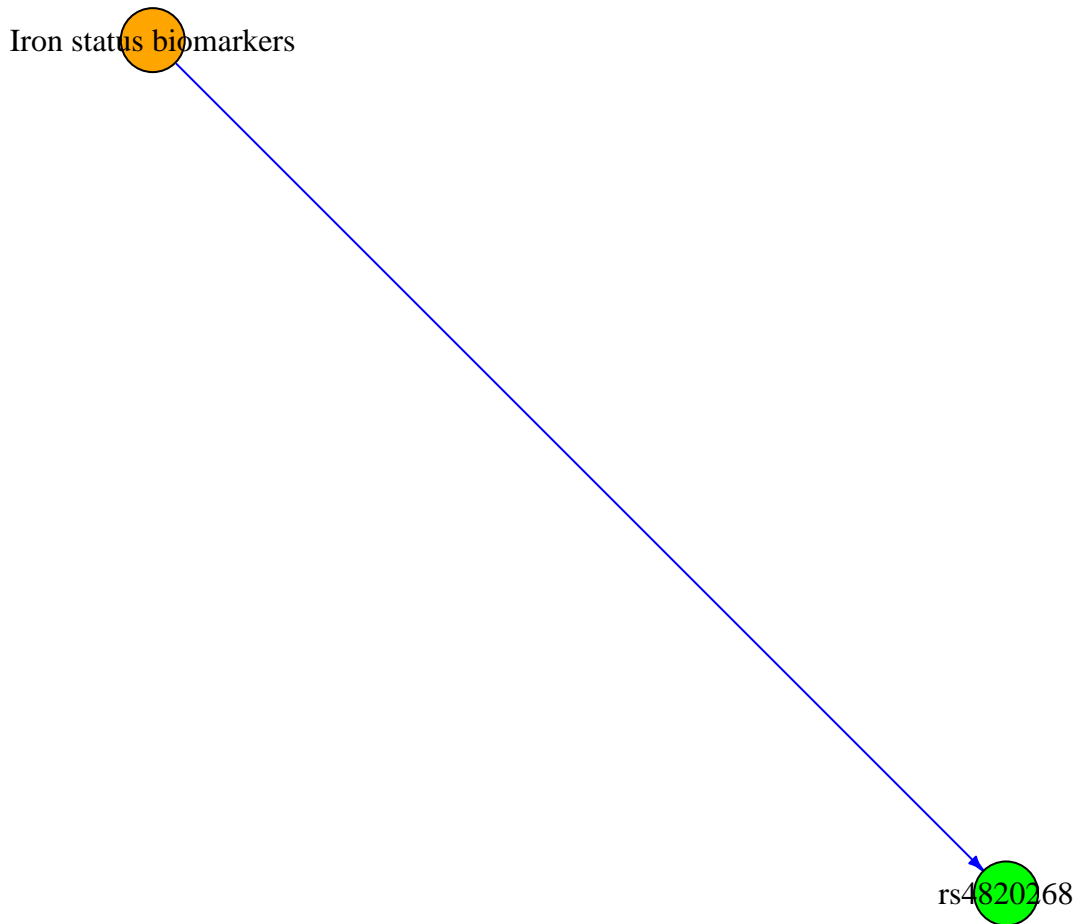

Variant–Disease Network (LDL cholesterol)

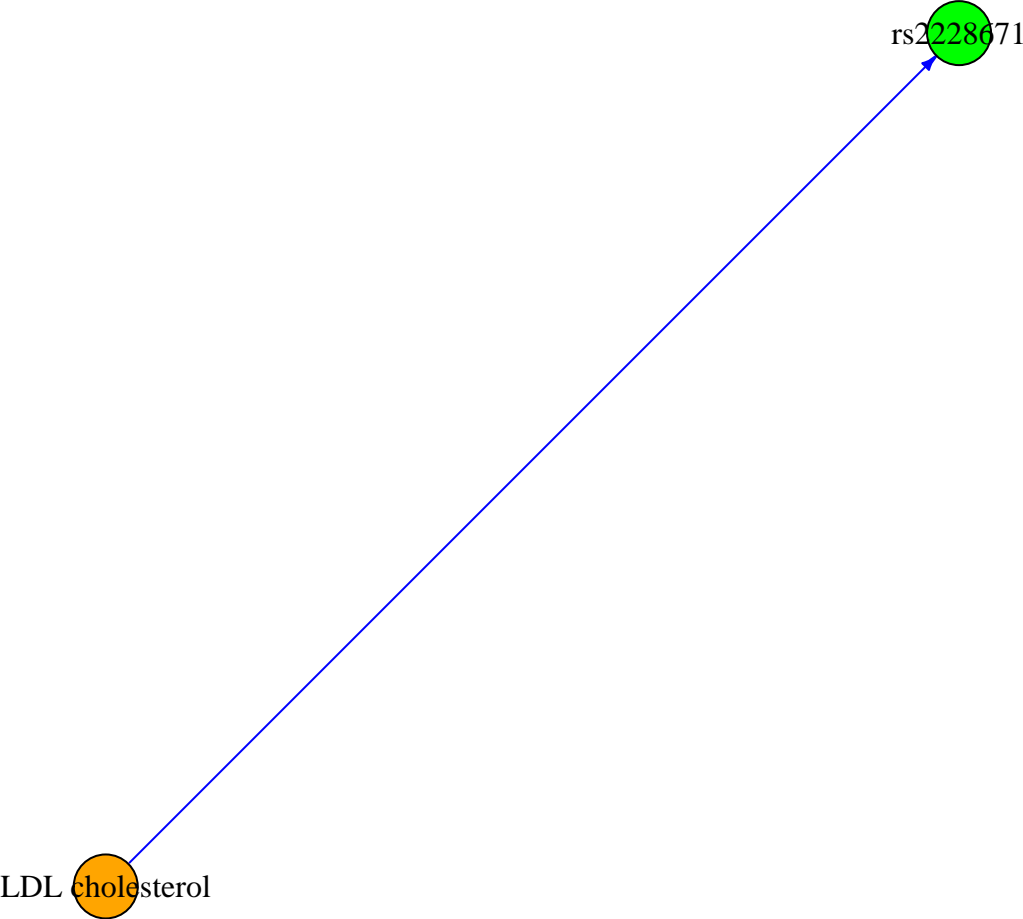

## Variant–Disease Network (Lipoprotein levels)

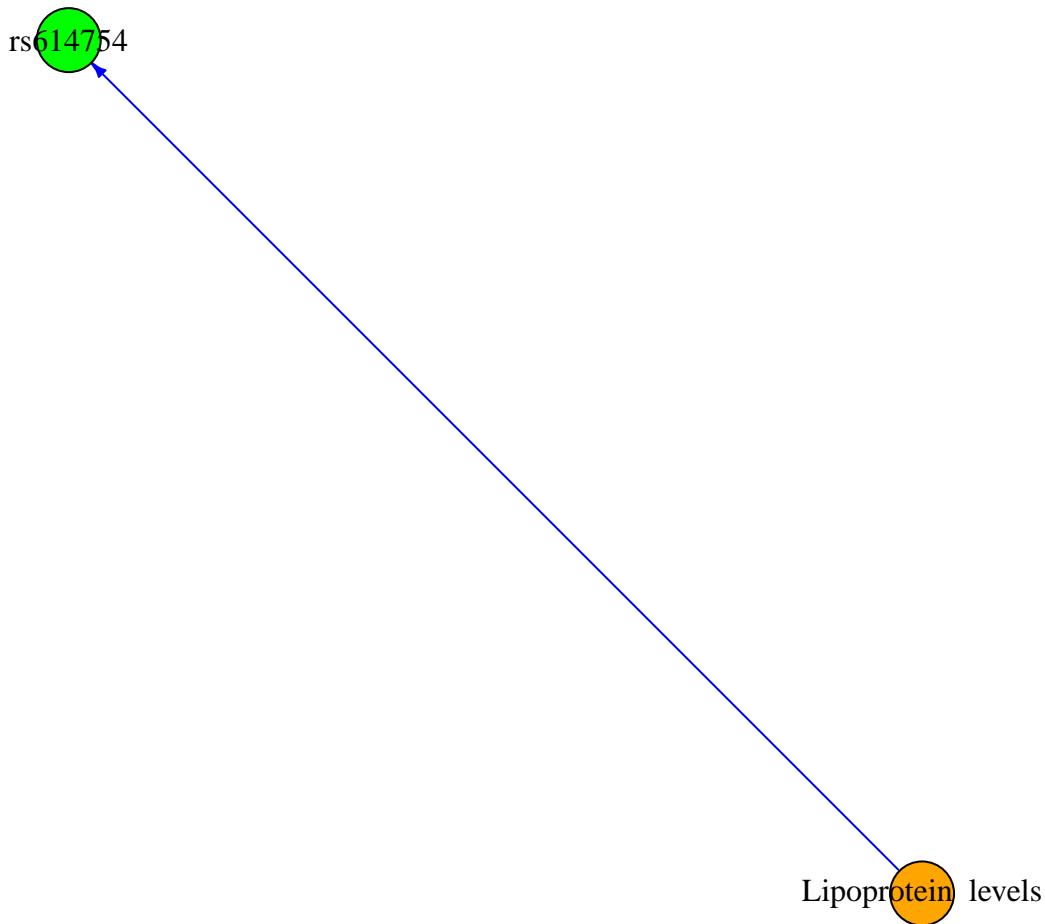

**Variant–Disease Network (Liver fibrosis and steatohepatitis severity )**

Liver fibrosis and steatohepatitis severity

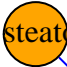

rs4820268

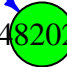

**Variant–Disease Network (Low density lipoprotein cholesterol levels)**

Low density lipoprotein cholesterol levels

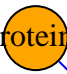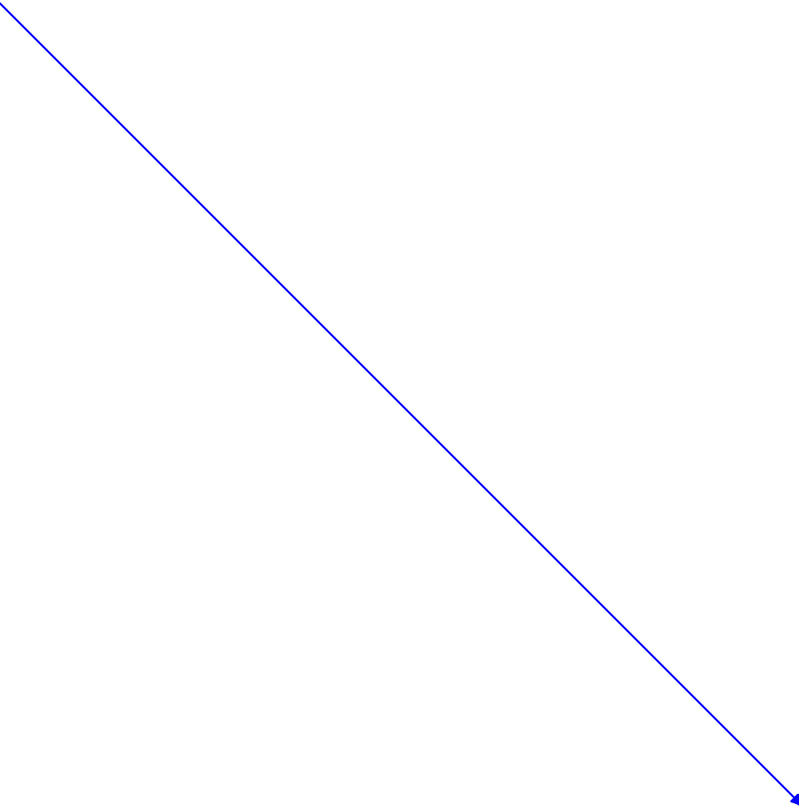

rs2228671

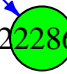



## Variant–Disease Network (Macular thickness)

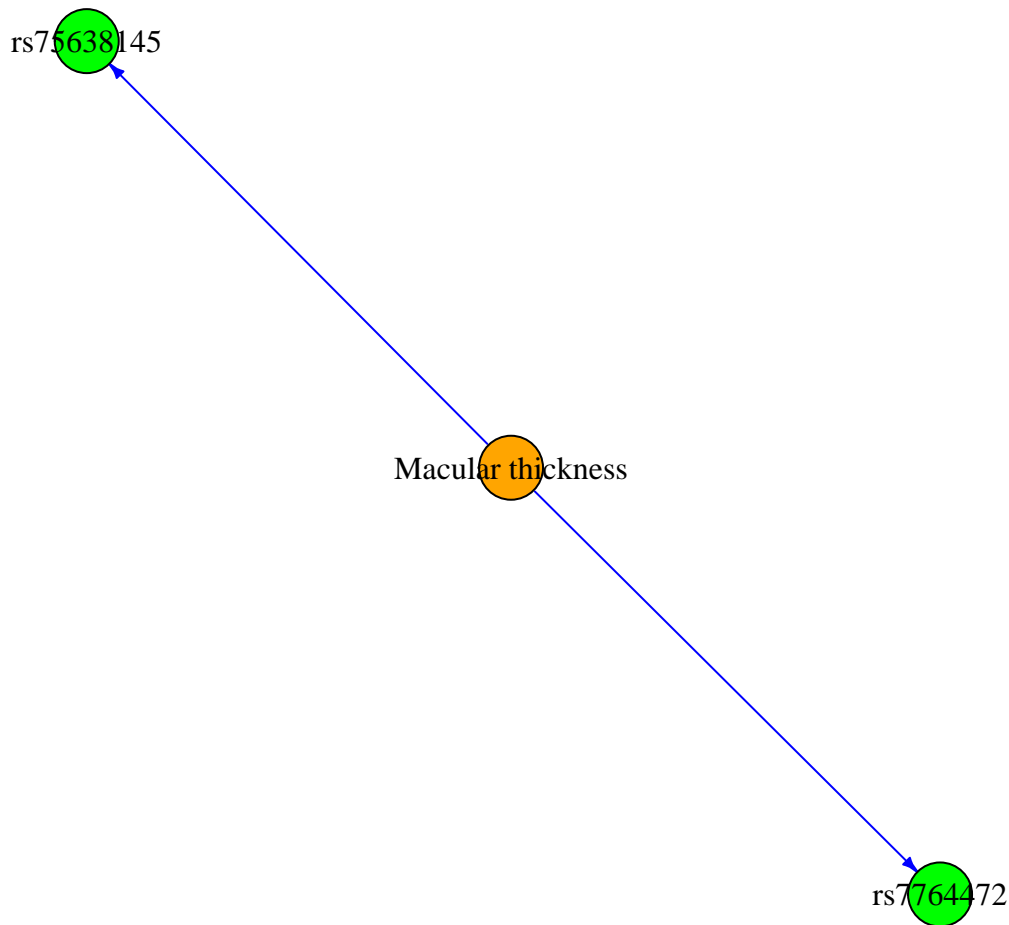

# Variant–Disease Network (Mean corpuscular hemoglobin)

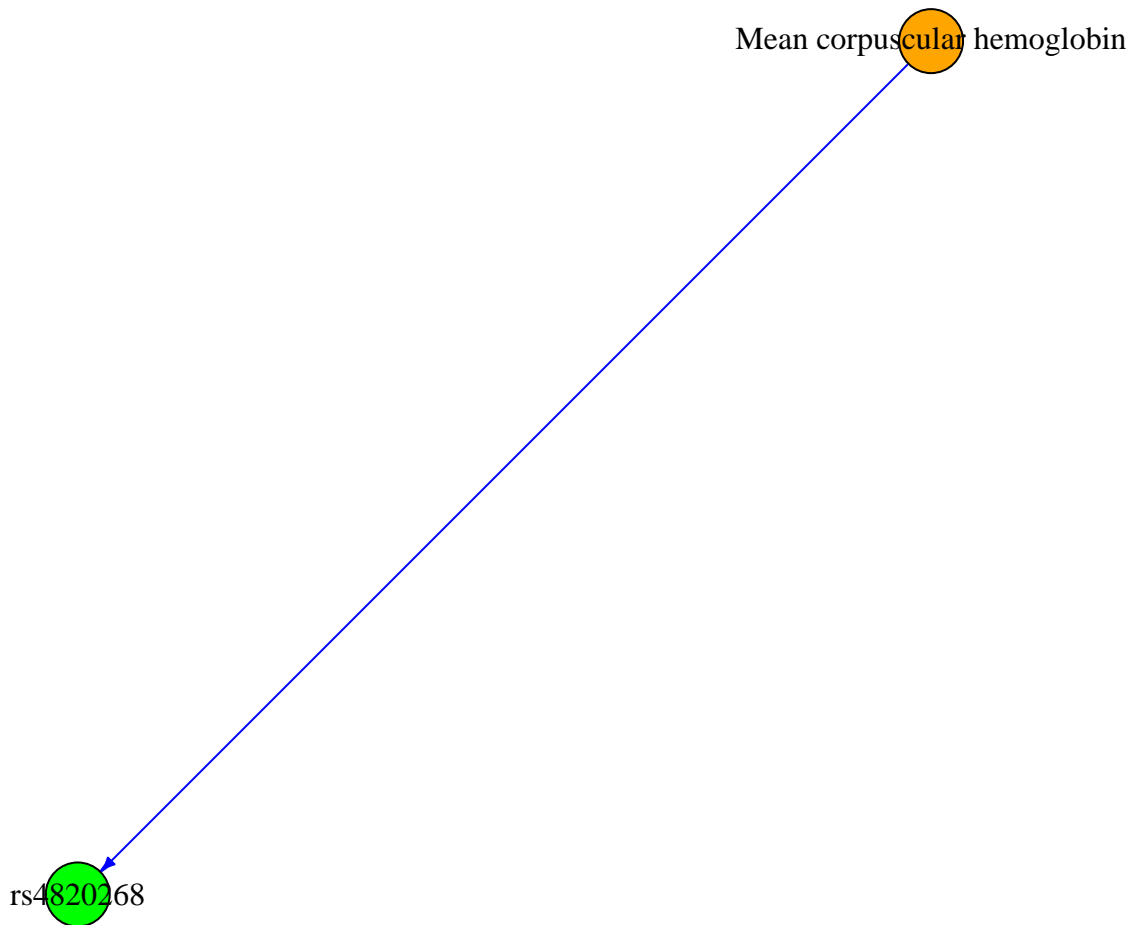

**Variant–Disease Network (Mean corpuscular hemoglobin concentration)**

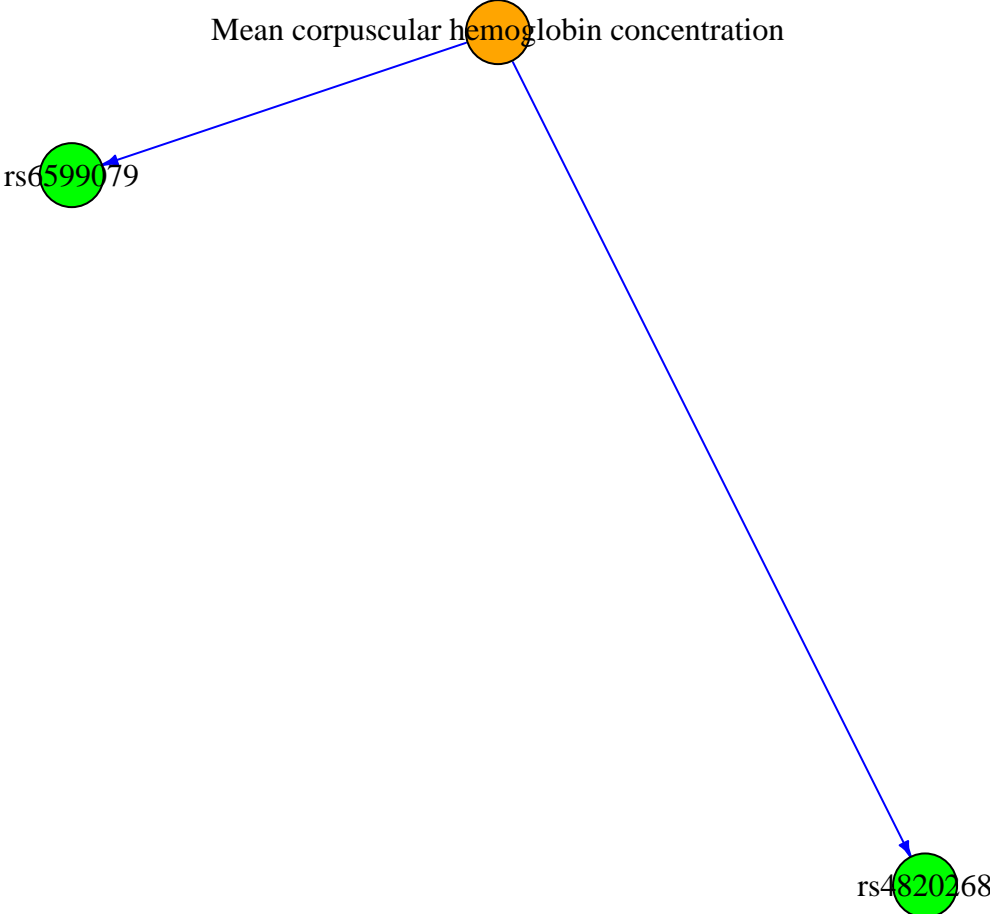

# Variant–Disease Network (Mean corpuscular volume)

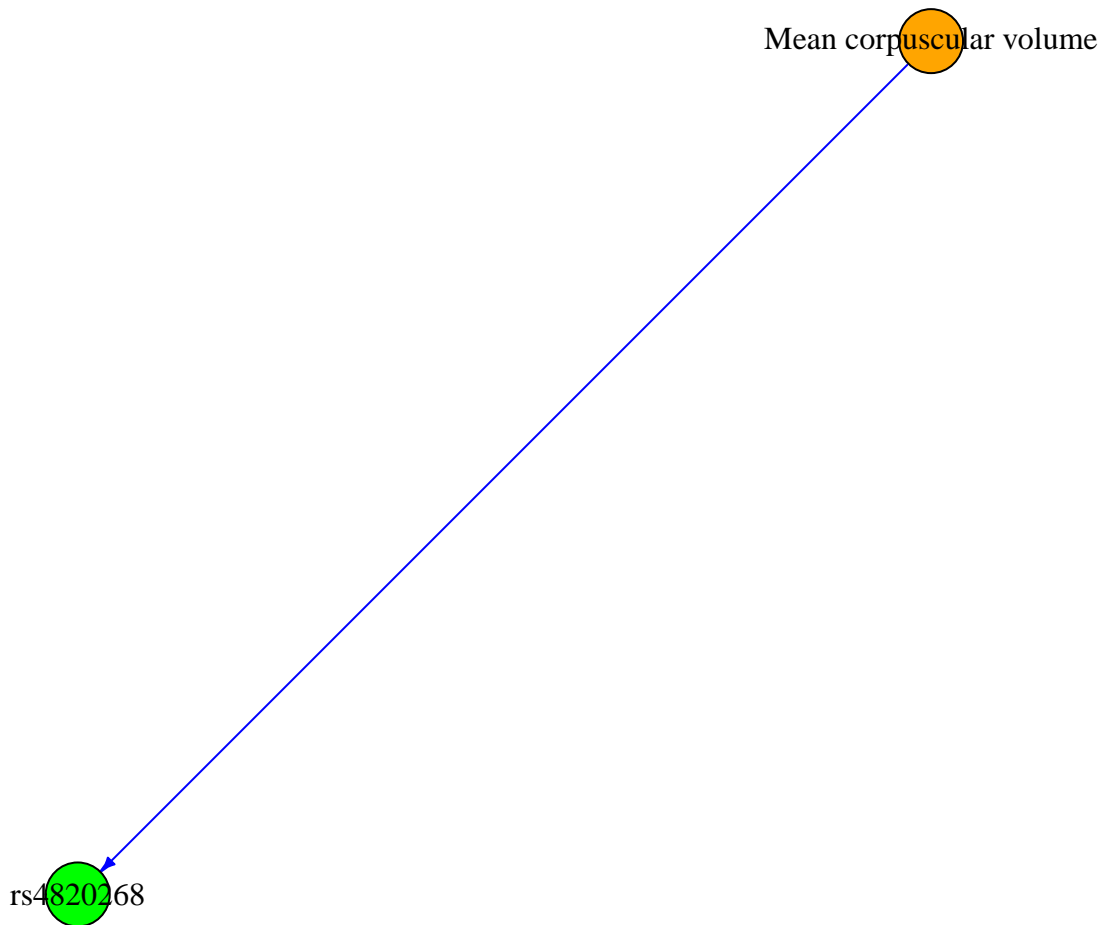

## Variant–Disease Network (Mean platelet volume)

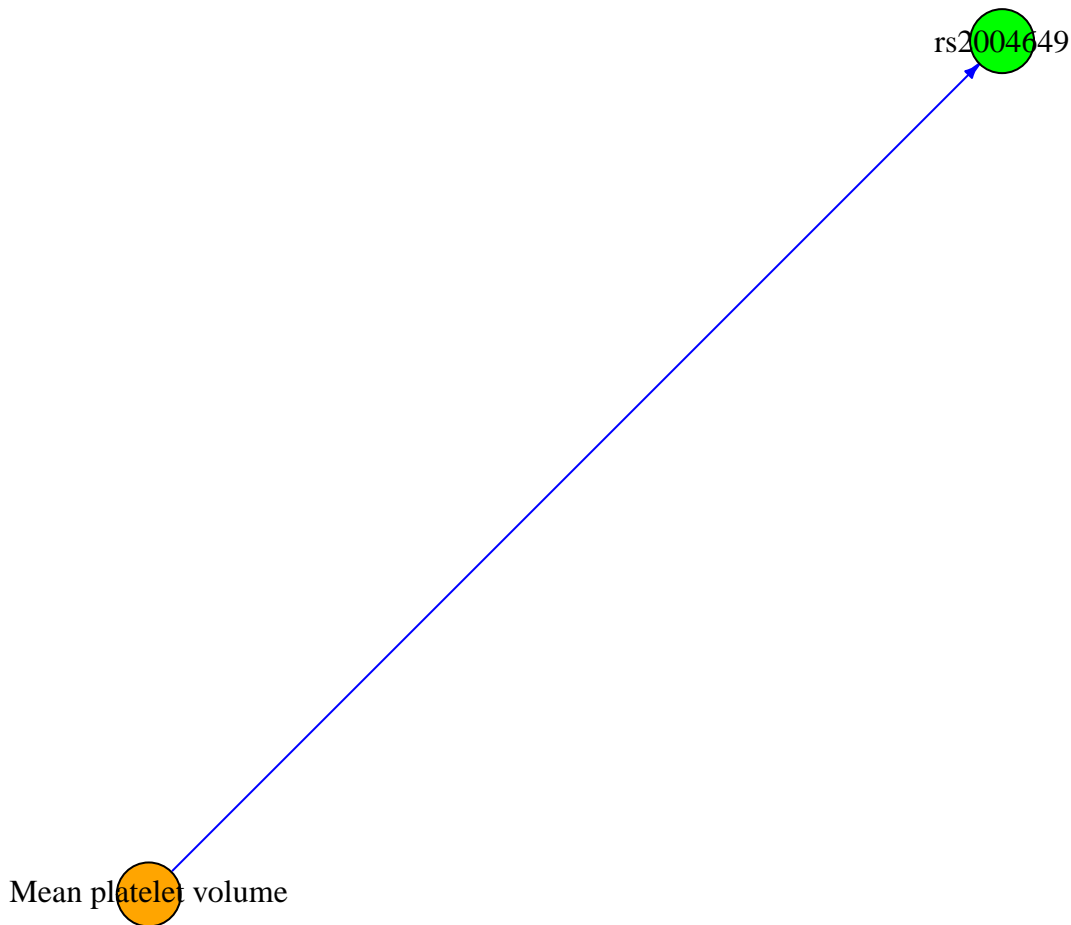

## Variant-Disease Network (Menarche )

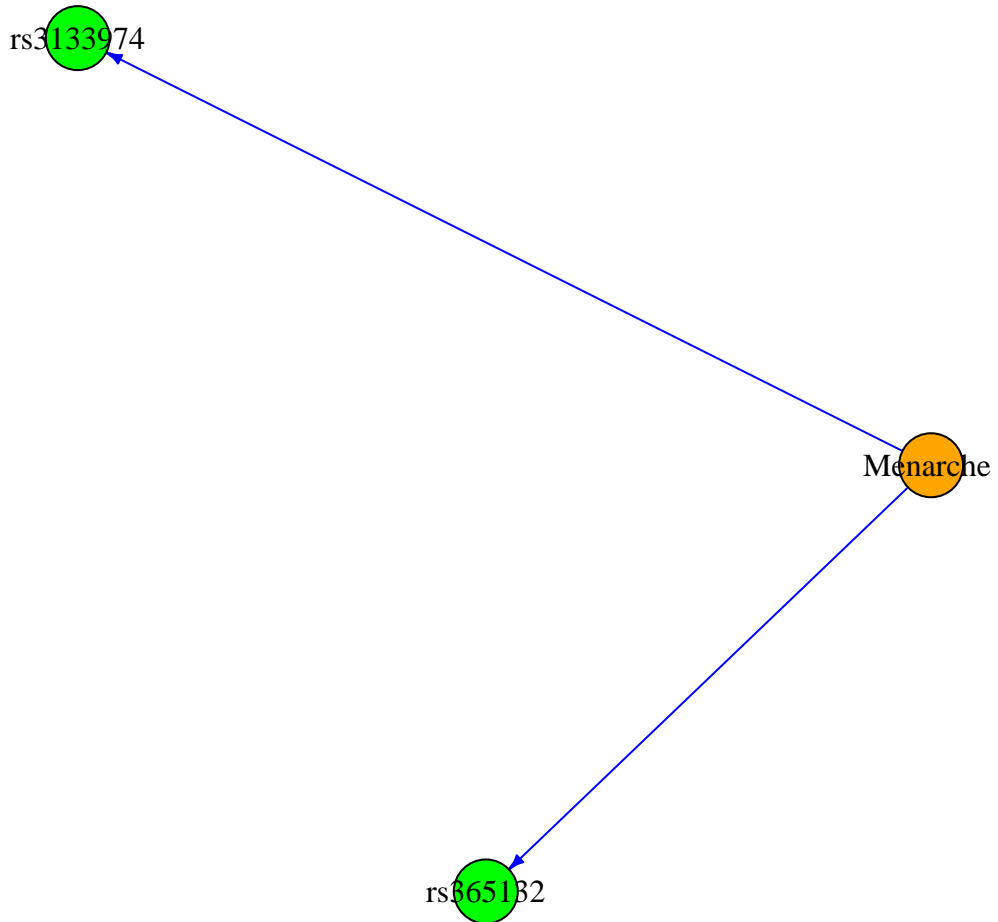

**Variant–Disease Network (Menarche and menopause )**

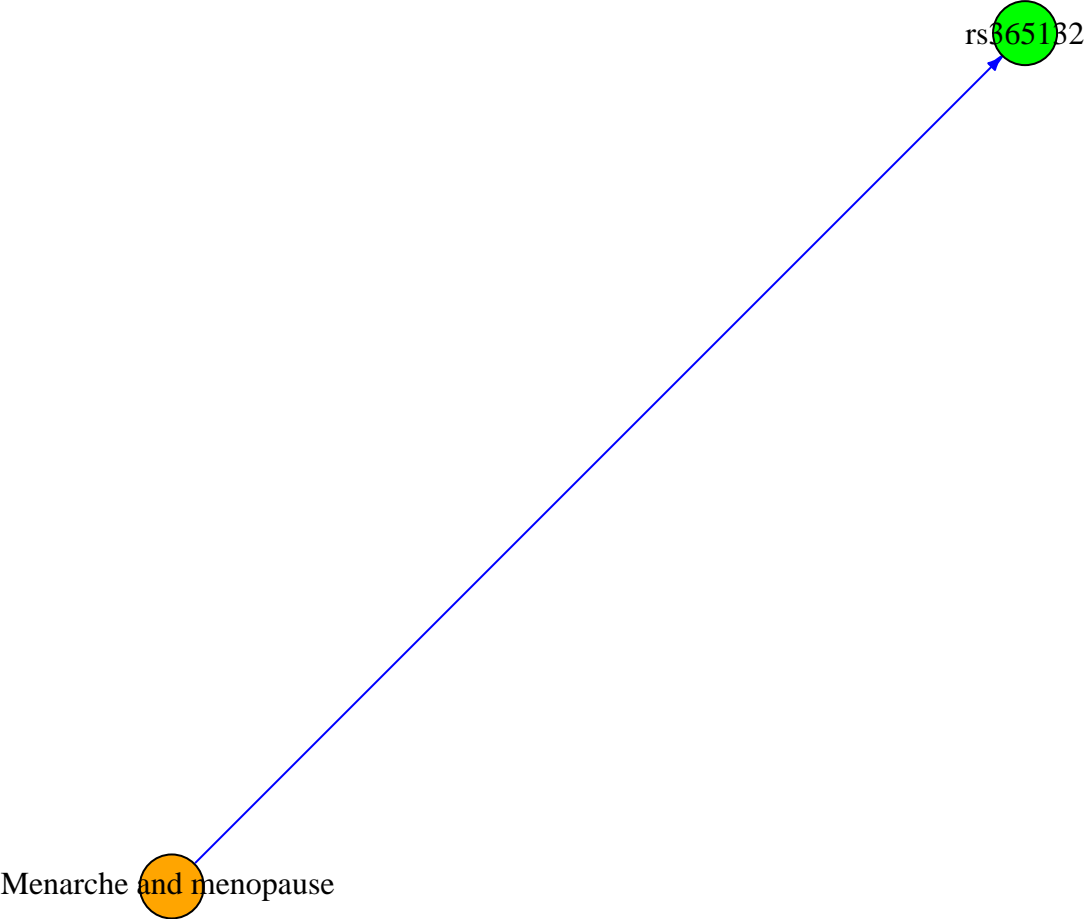

## Variant-Disease Network (Menopause )

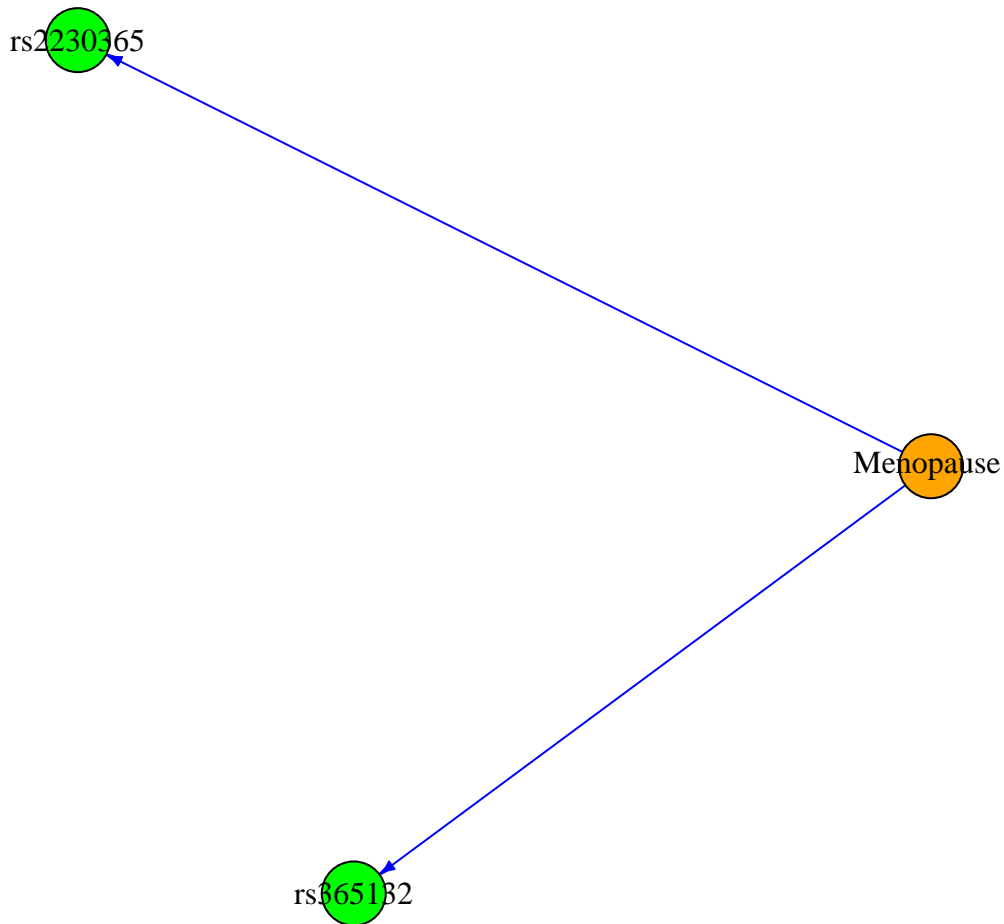



## Variant–Disease Network (Metabolic syndrome)

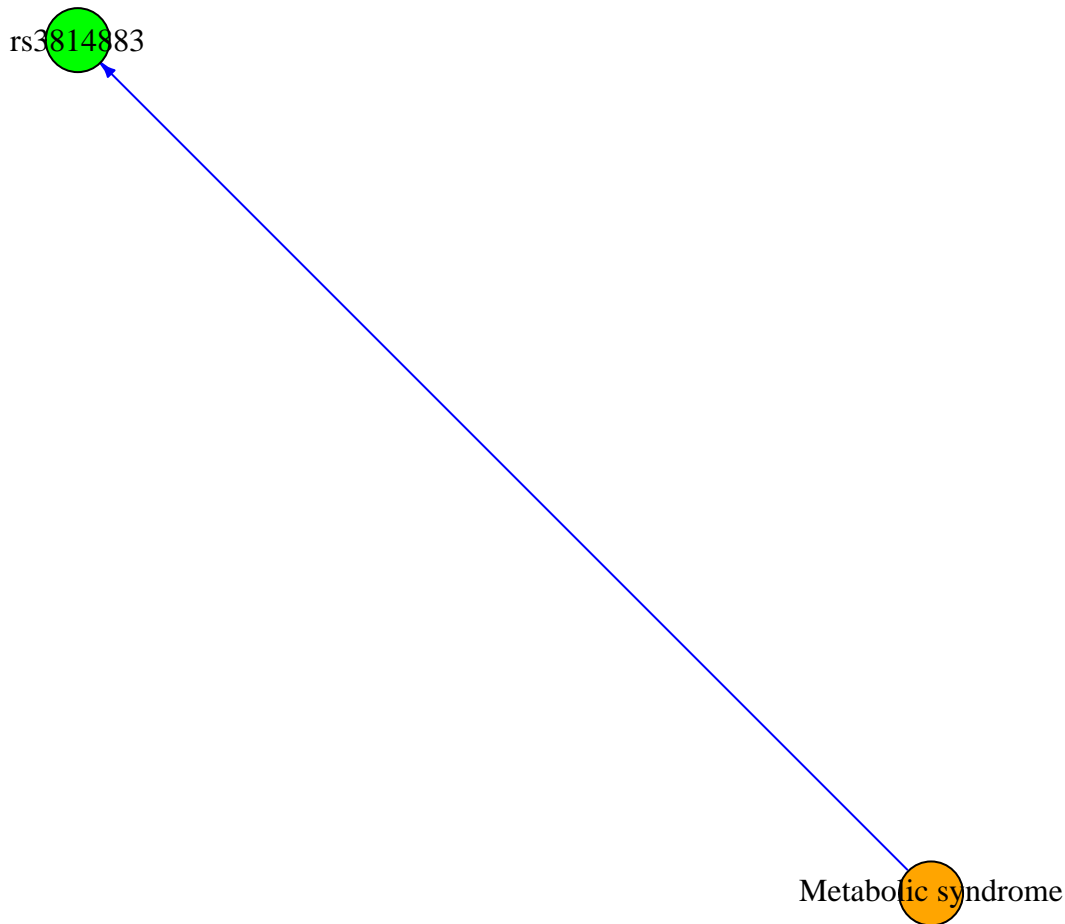

## Variant–Disease Network (Monocyte count)

Monocyte count

rs34197769

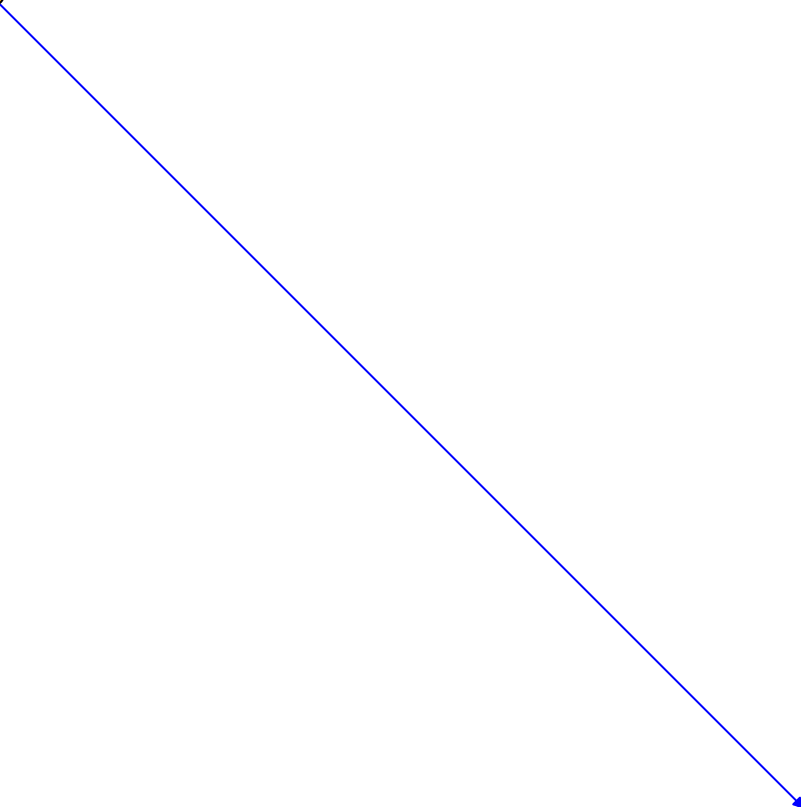

## Variant–Disease Network (Neuroticism)

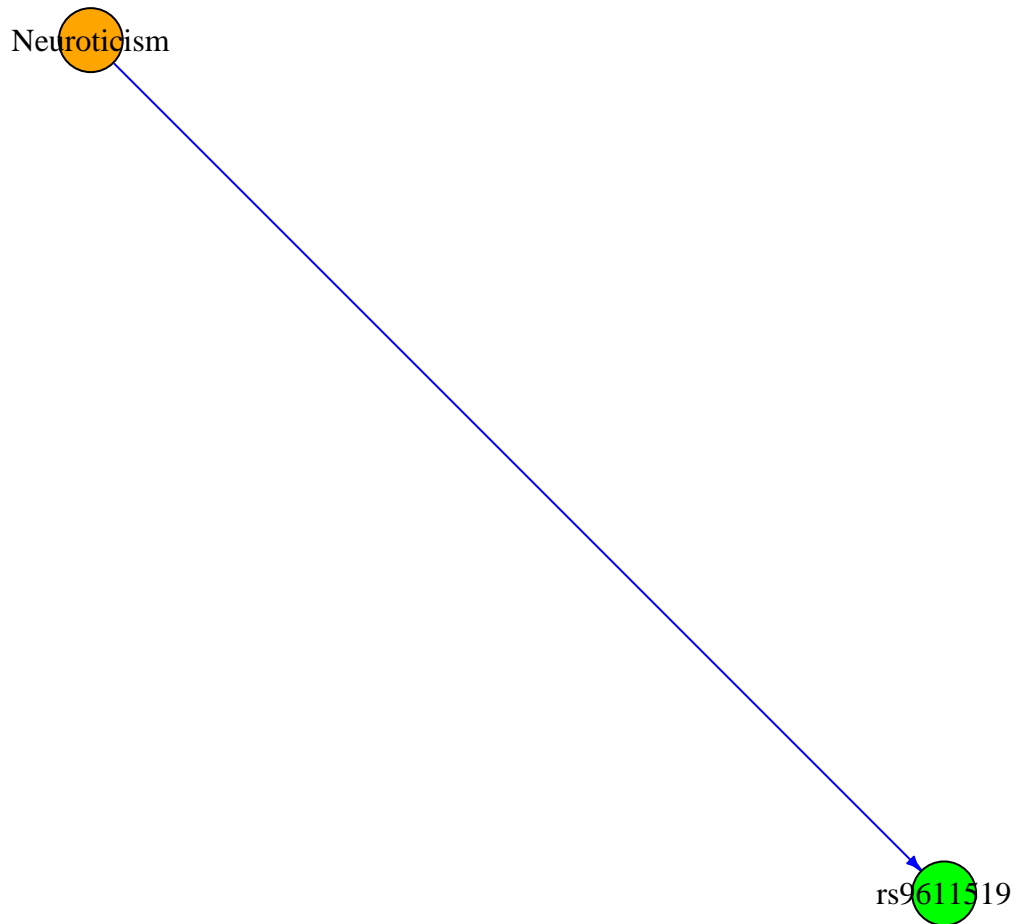

# Variant–Disease Network (Nonobstructive coronary artery disease)

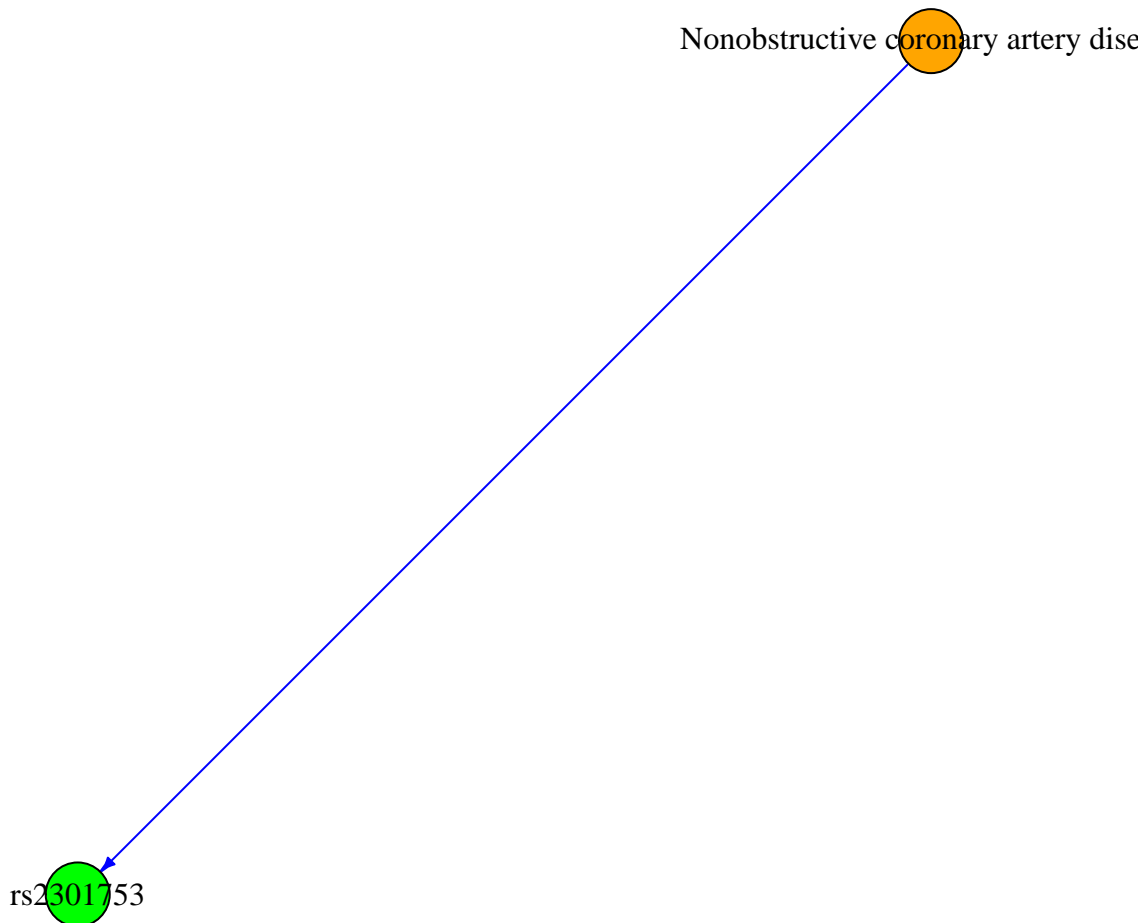

## Variant–Disease Network (Obesity–related traits)

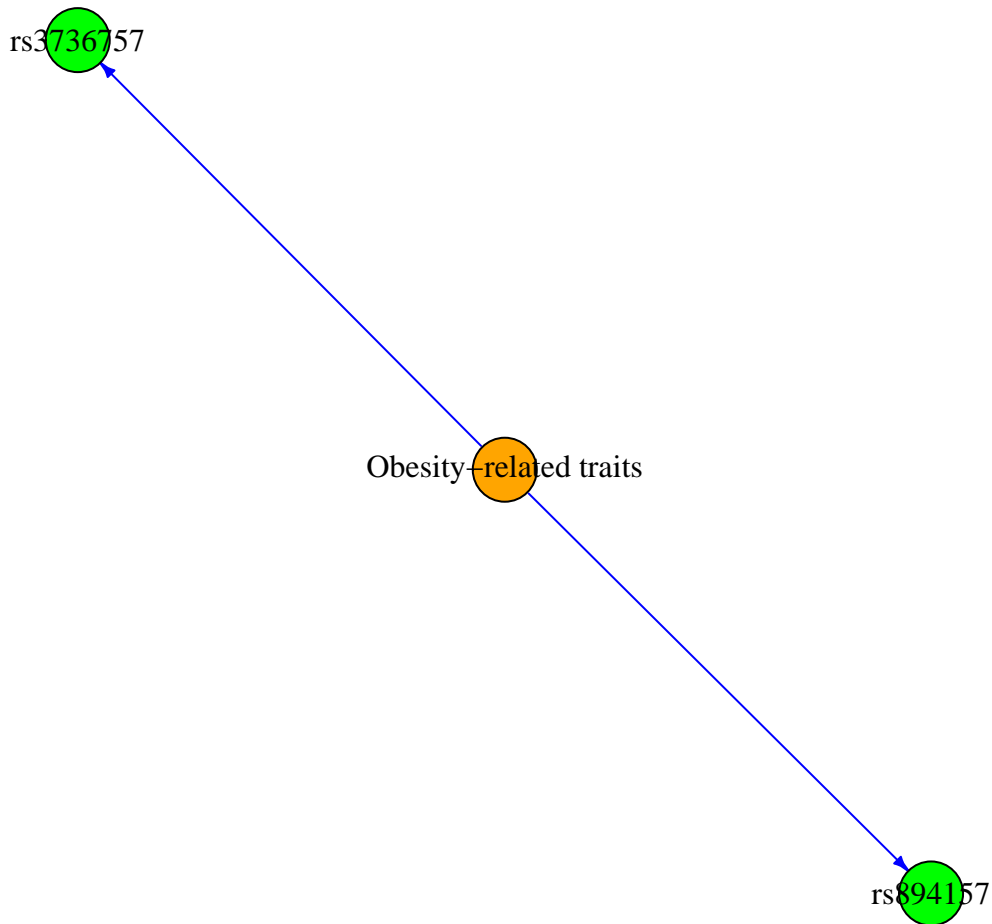

Variant–Disease Network (Plasma omega–6 polyunsaturated fatty acid levels)

Plasma omega–6 polyunsaturated fatty acid levels

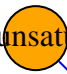

rs1136001

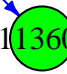

## Variant–Disease Network (Platelet aggregation)

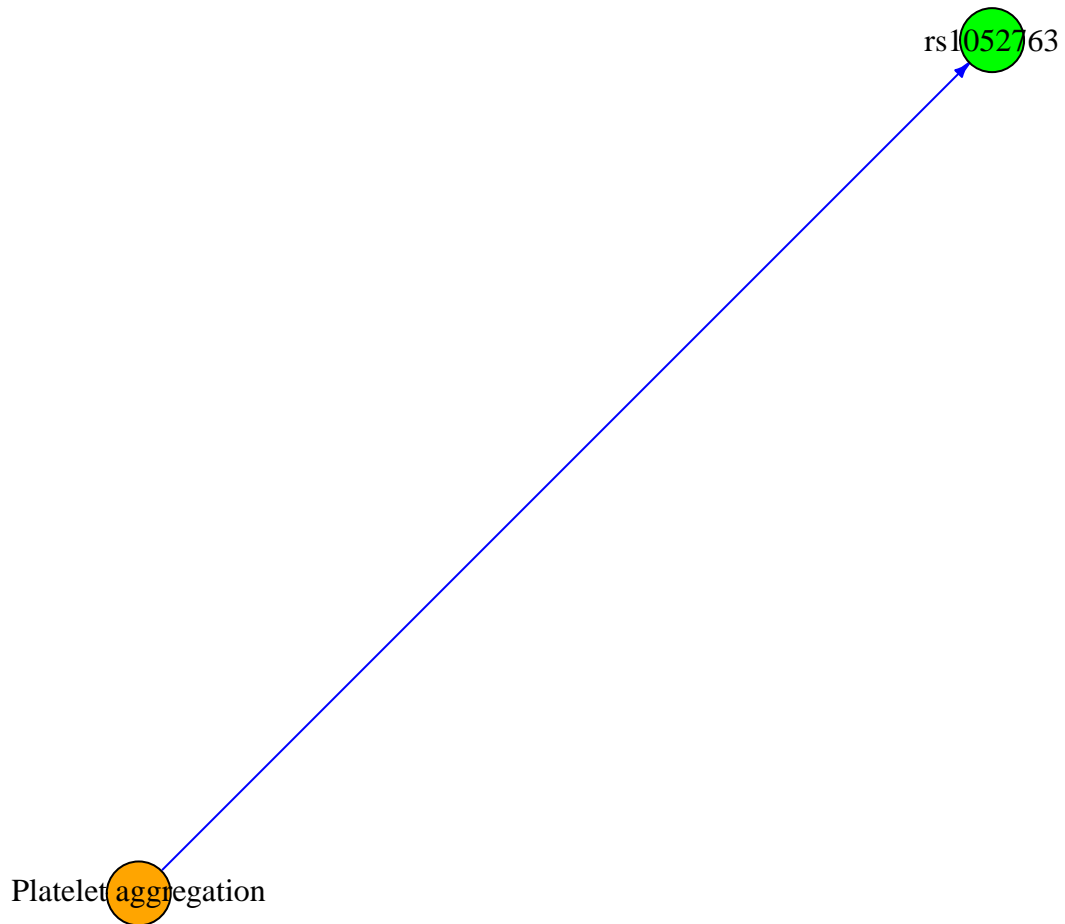

## Variant-Disease Network (Platelet count)

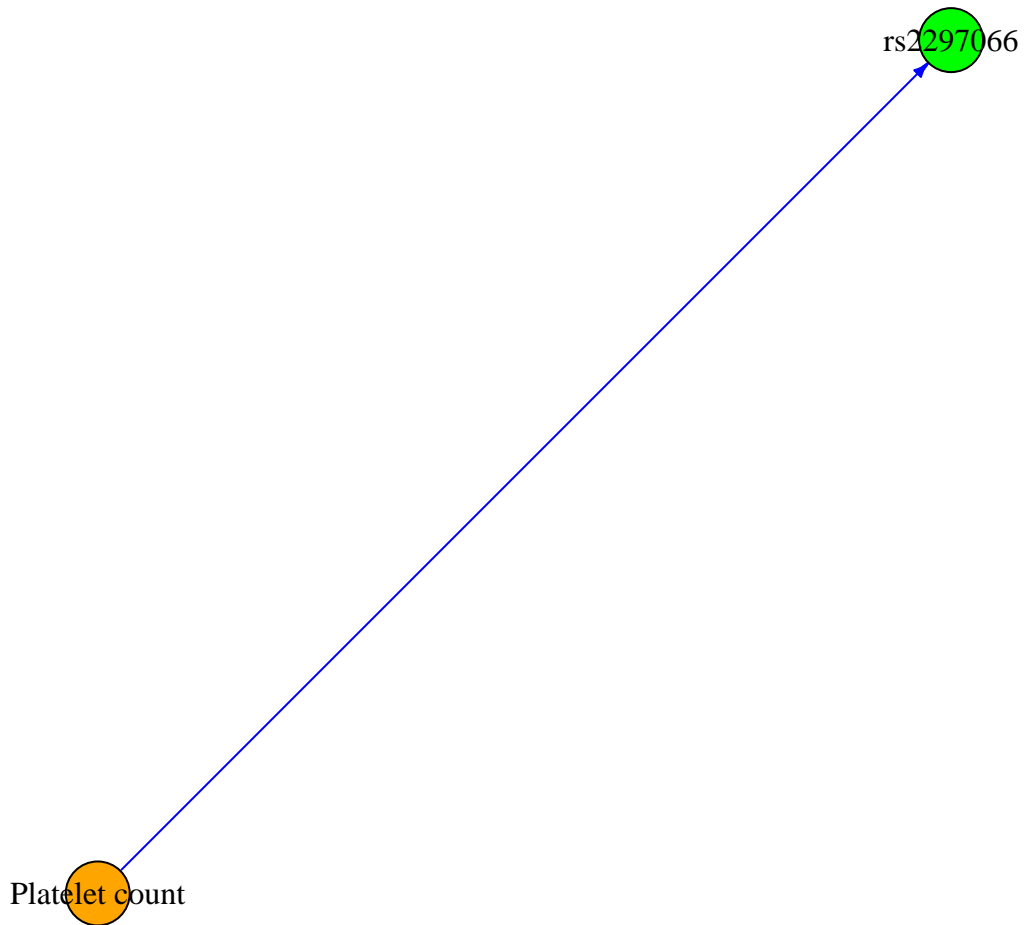



## Variant–Disease Network (Post bronchodilator FEV1)

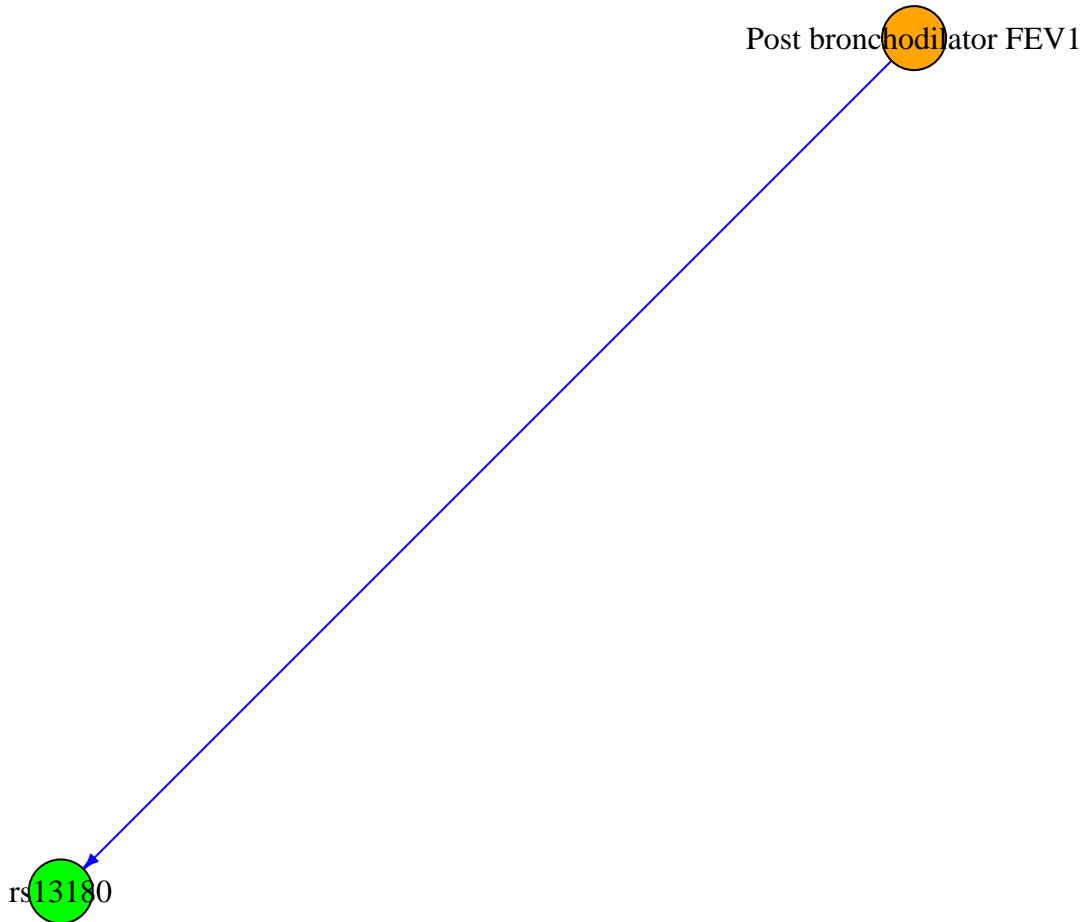

**Variant–Disease Network (Post bronchodilator FEV1/FVC ratio)**

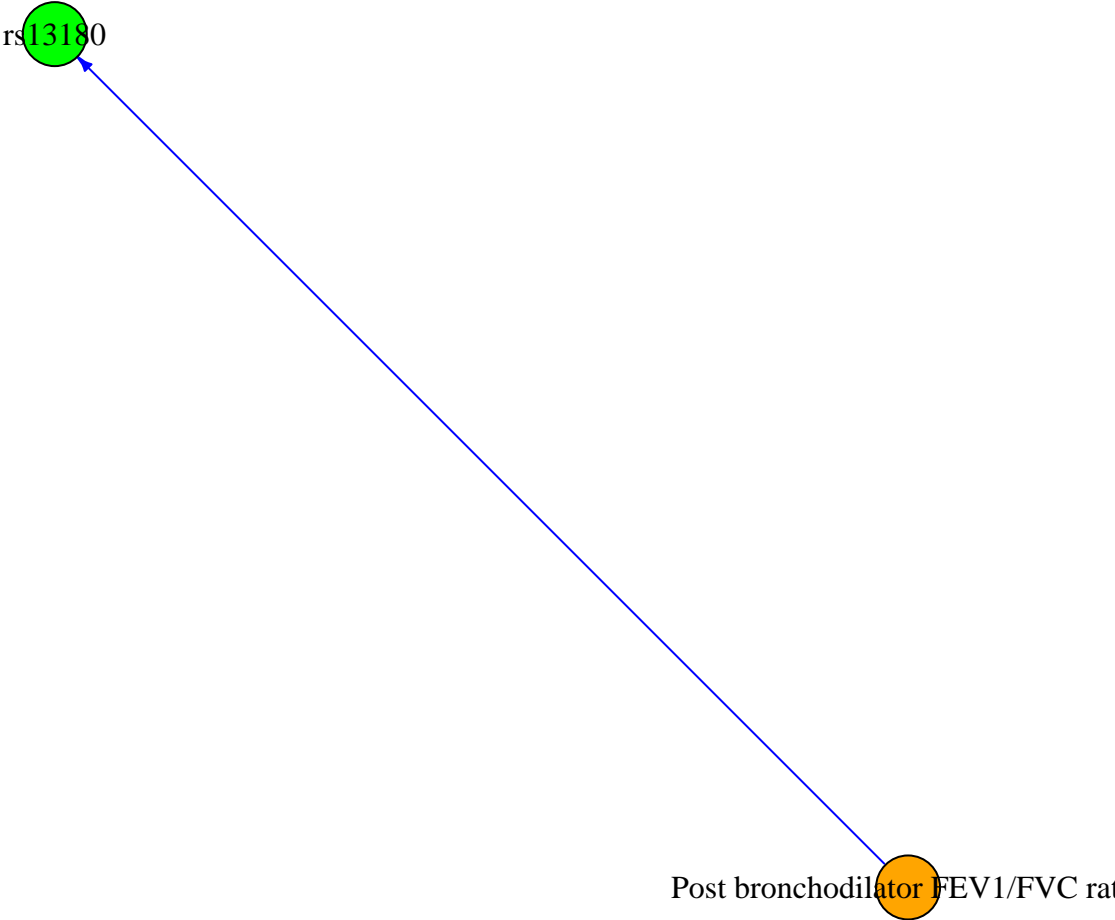

# Variant-Disease Network (Postoperative survival time in hepatocellular carcinoma)

rs3096380

Postoperative survival time in hepatocellular carcinoma

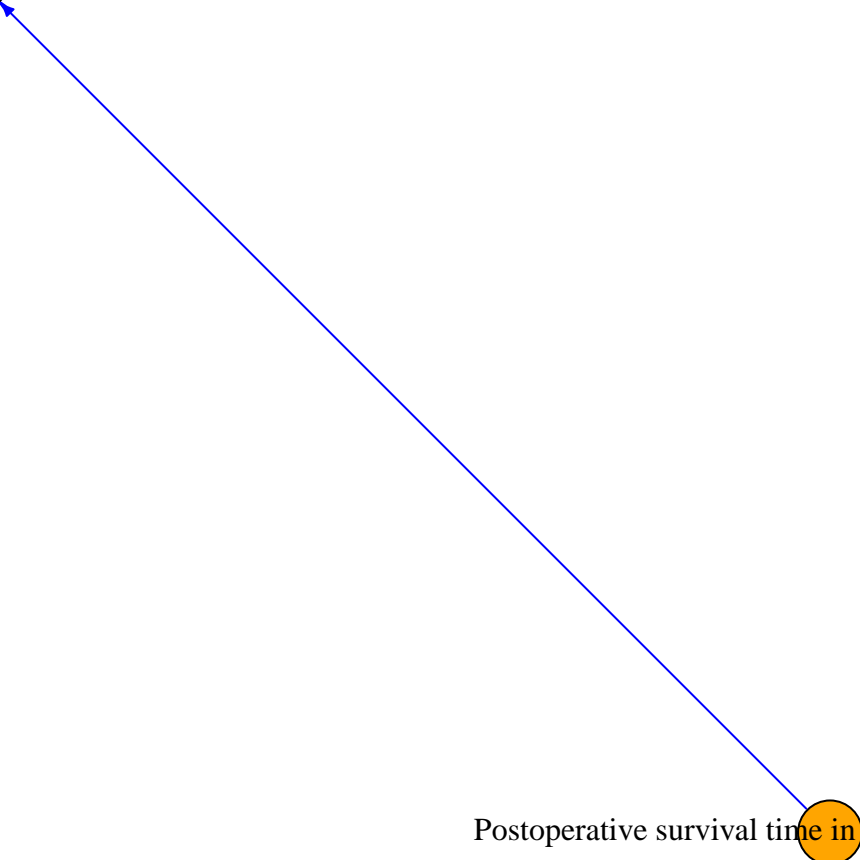

Variant–Disease Network (Psoriatic arthritis)

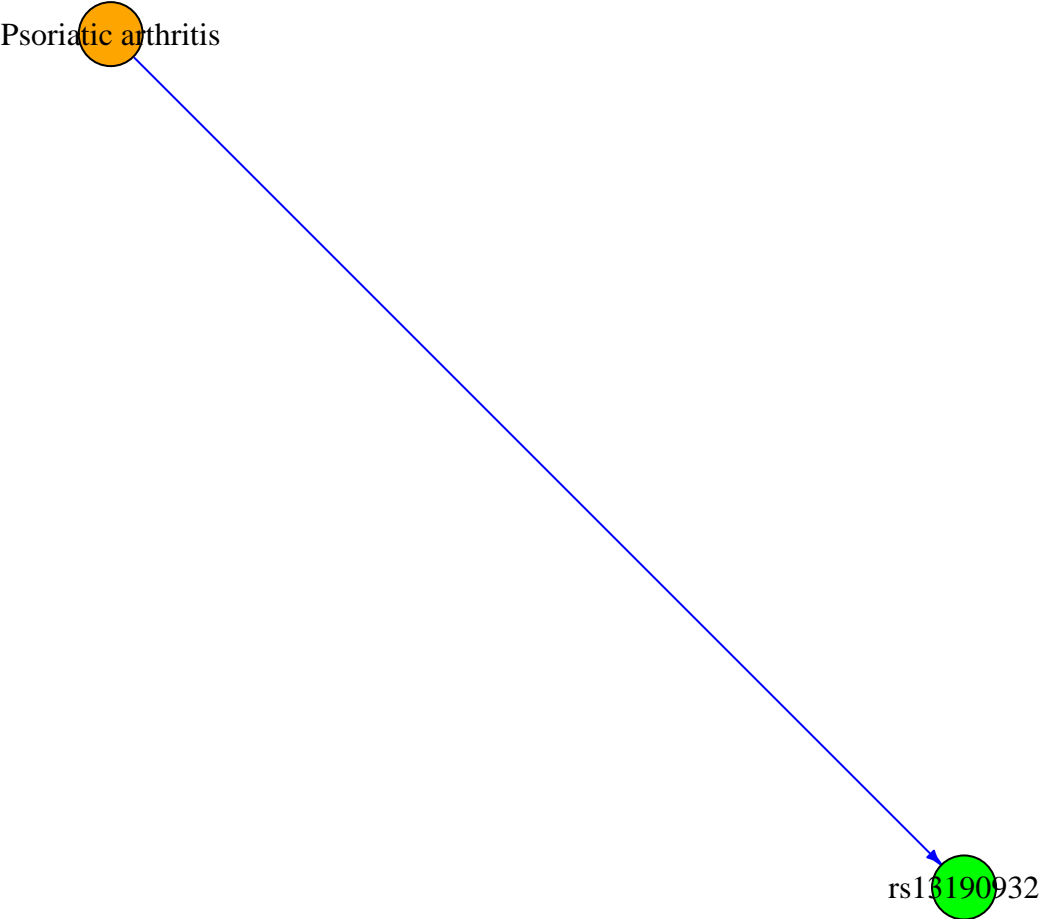

## Variant–Disease Network (Pulse pressure)

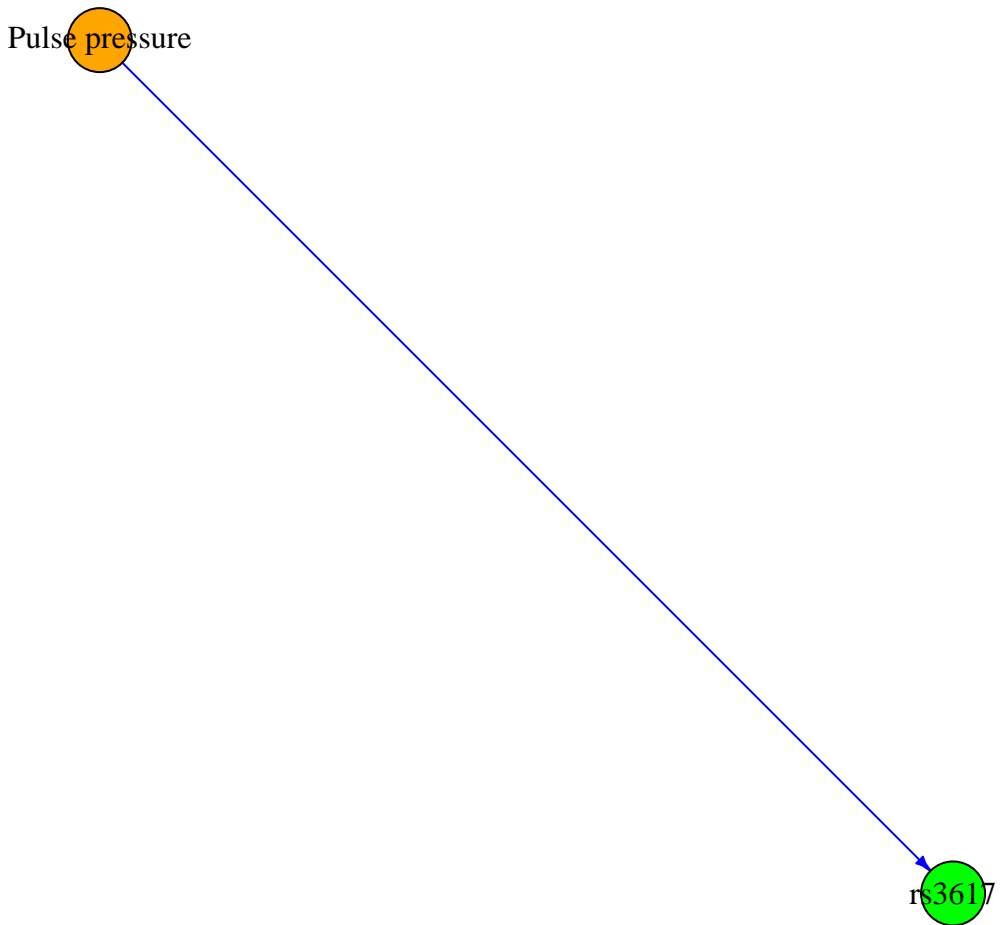

## Variant-Disease Network (QRS duration)

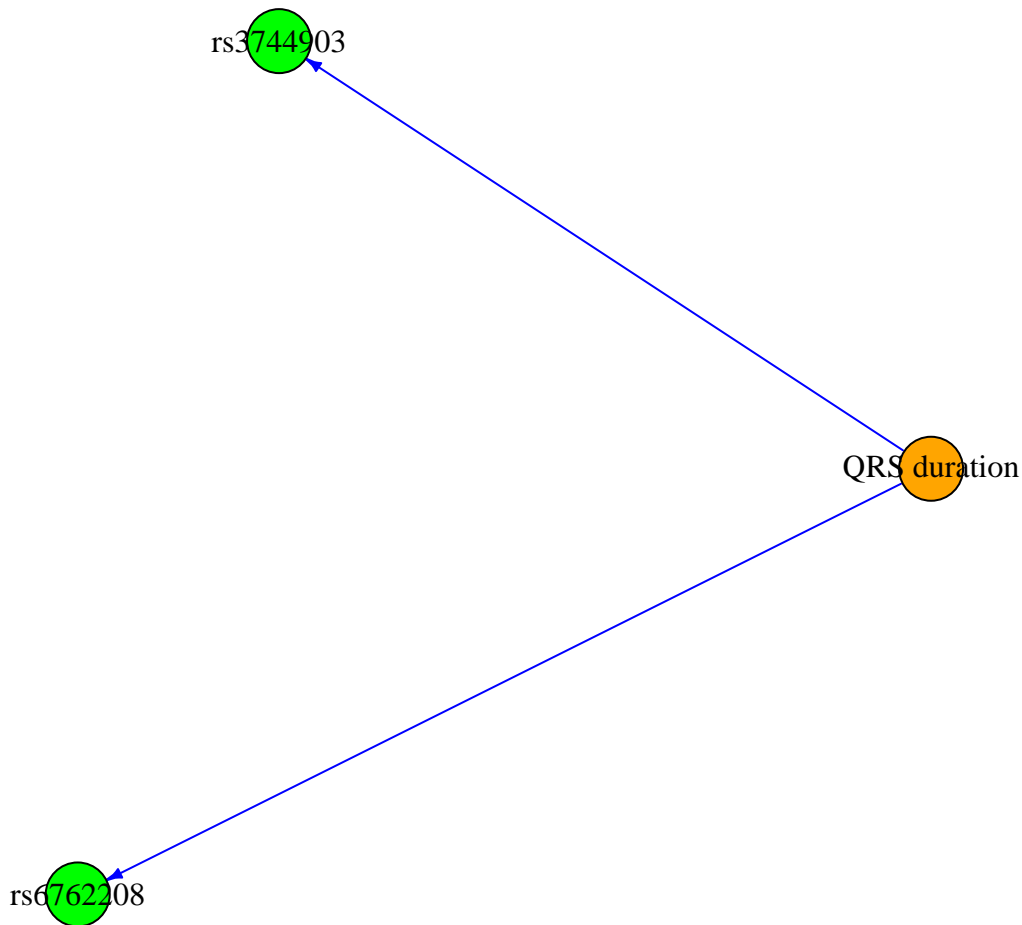

## Variant–Disease Network (Red blood cell count)

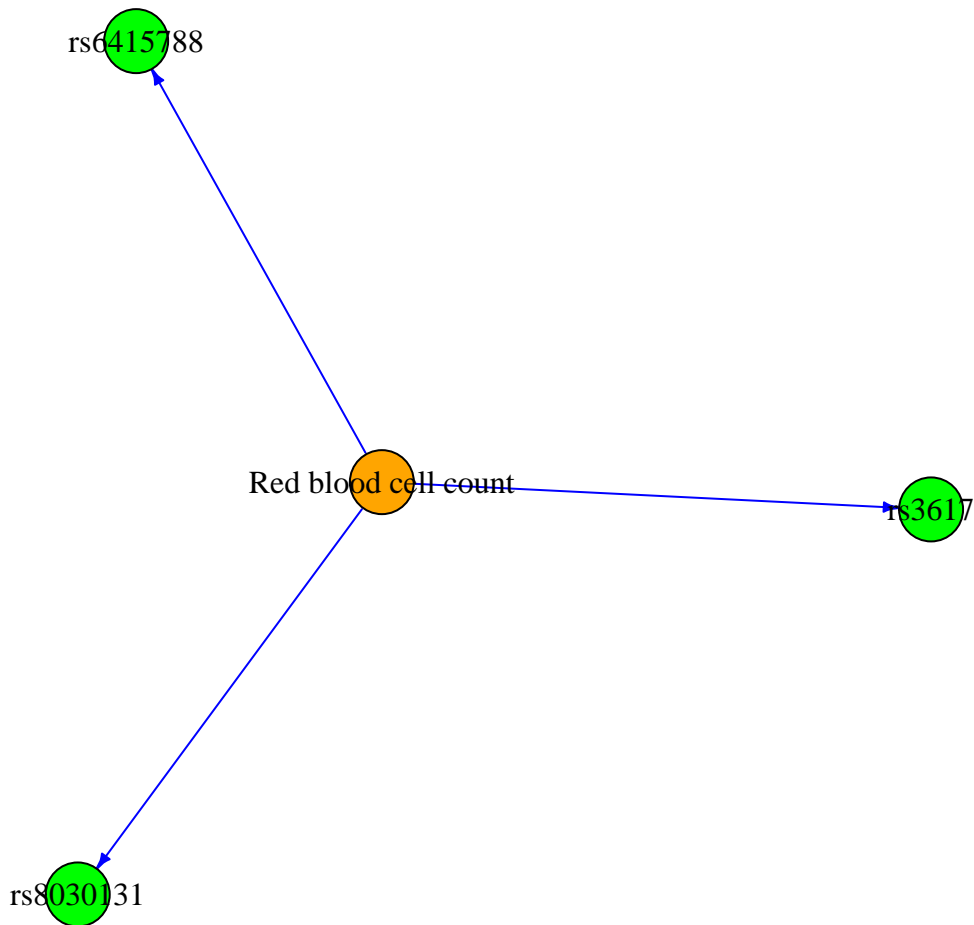

## Variant–Disease Network (Red blood cell traits)

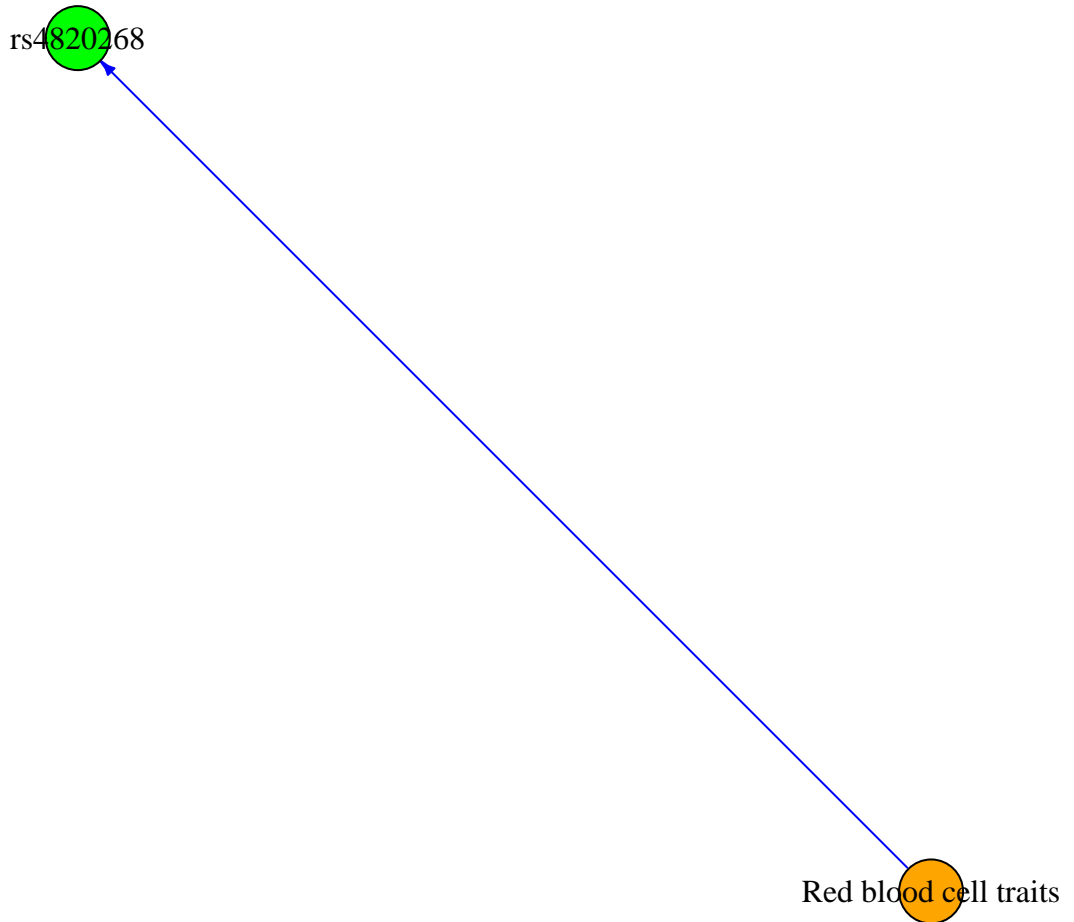



# Variant–Disease Network (Red cell distribution width)

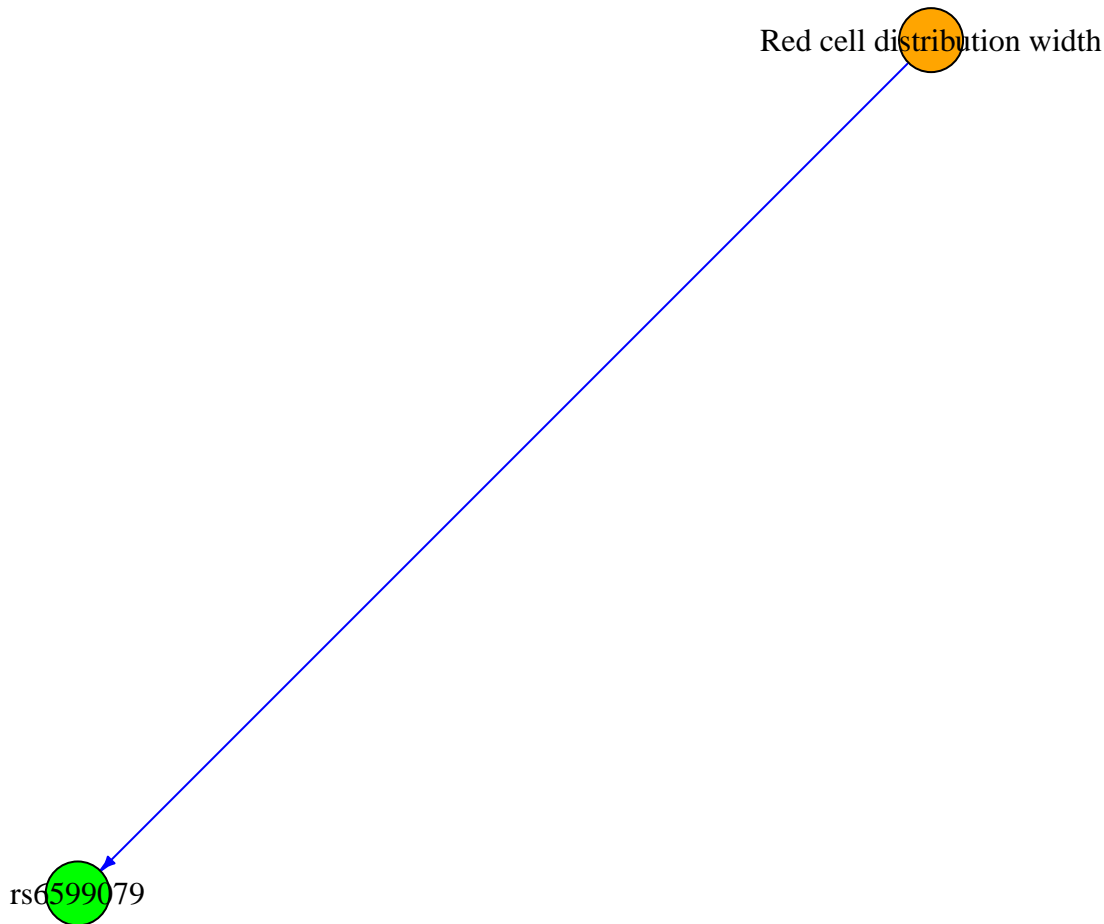

## Variant-Disease Network (Refractive error)

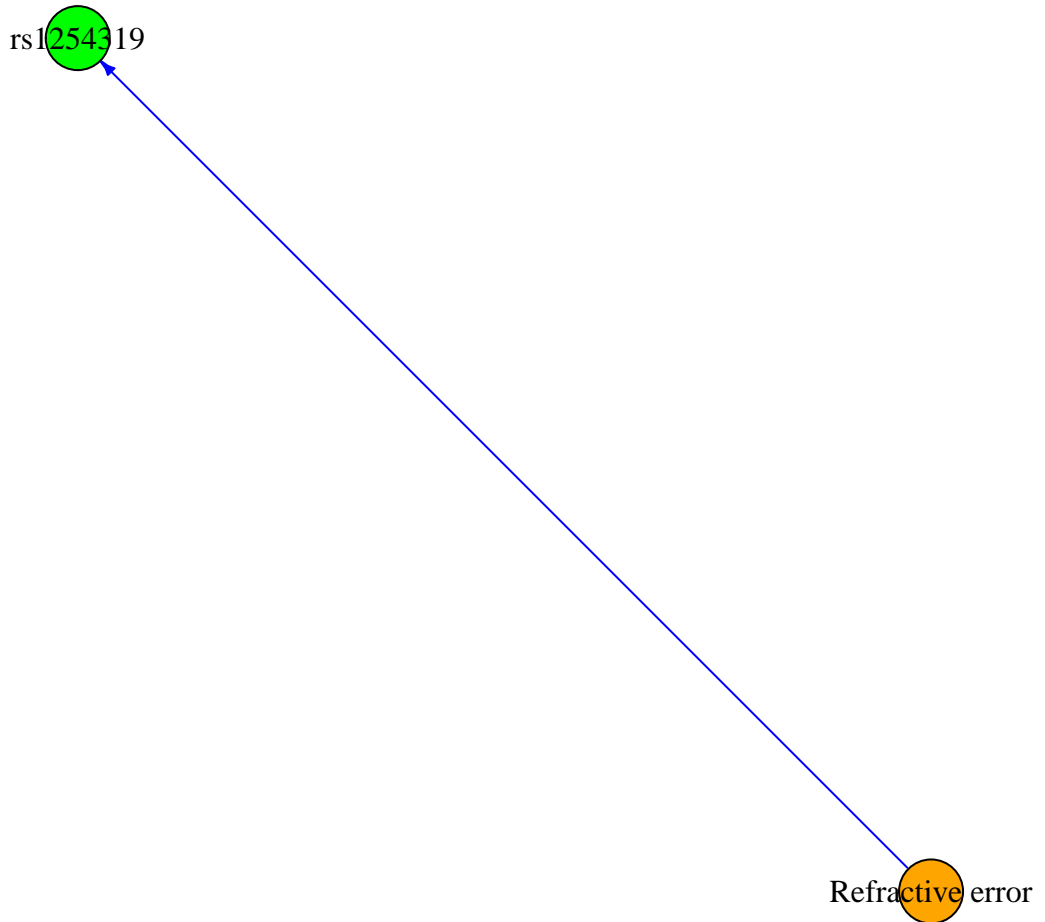

## Variant–Disease Network (Reticulocyte count)

Reticulocyte count

rs1499280

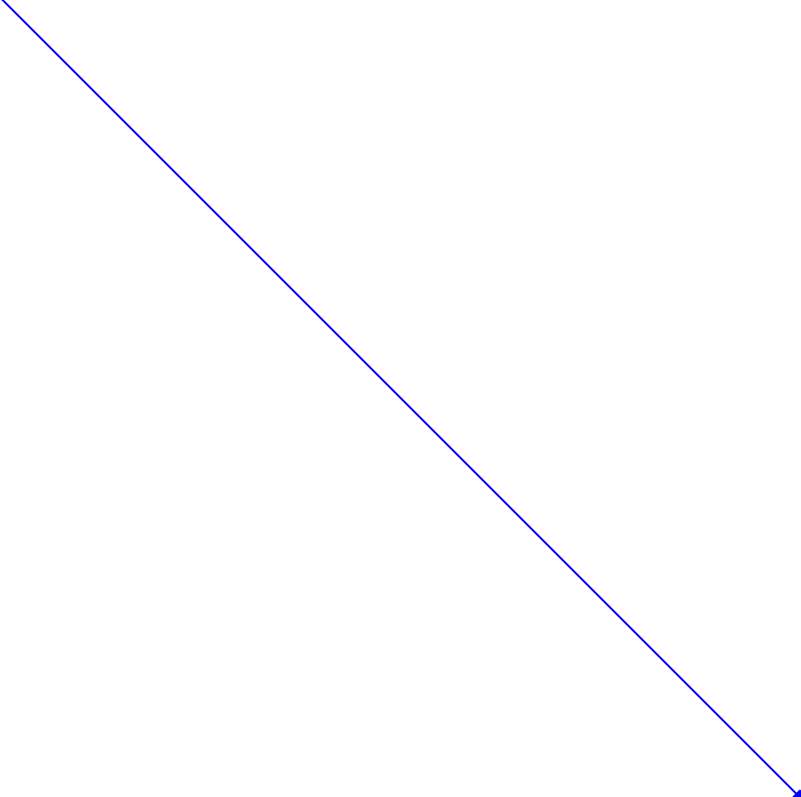

# Variant–Disease Network (Reticulocyte fraction of red cells)

Reticulocyte fraction of red cells

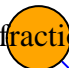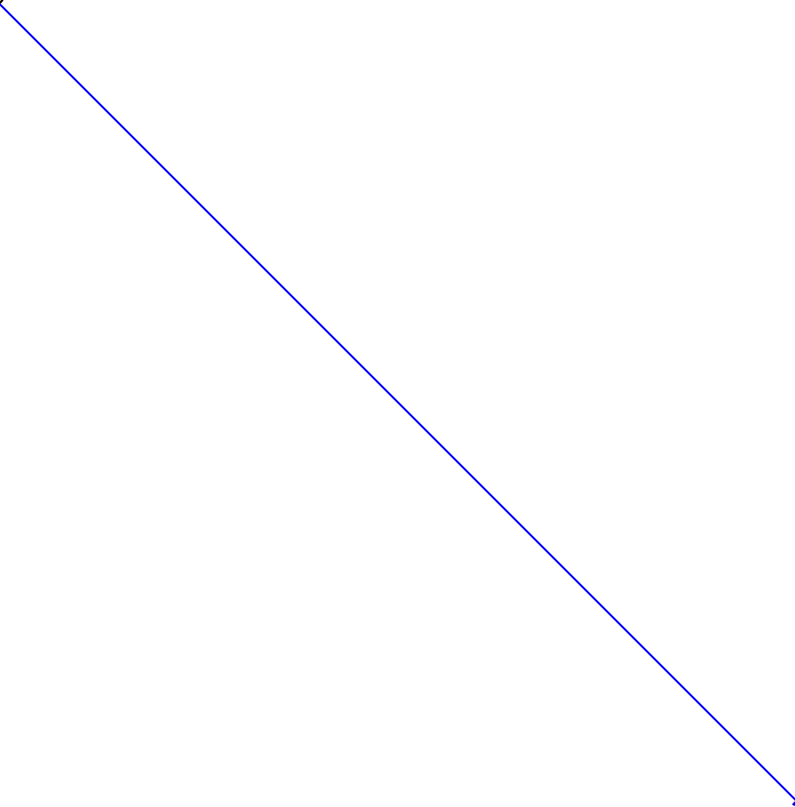

rs1499280

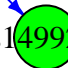

## Variant–Disease Network (Risk-taking tendency )

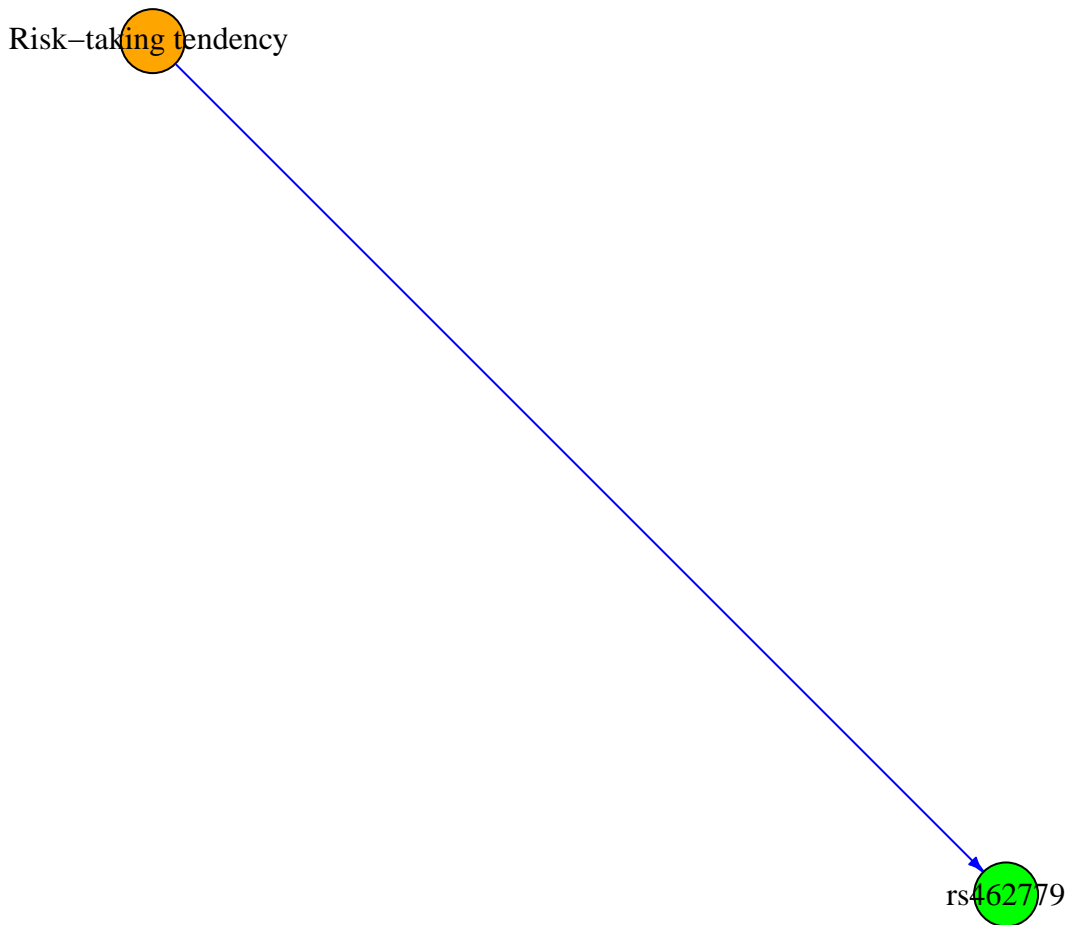

**Variant–Disease Network (Schizophrenia)**

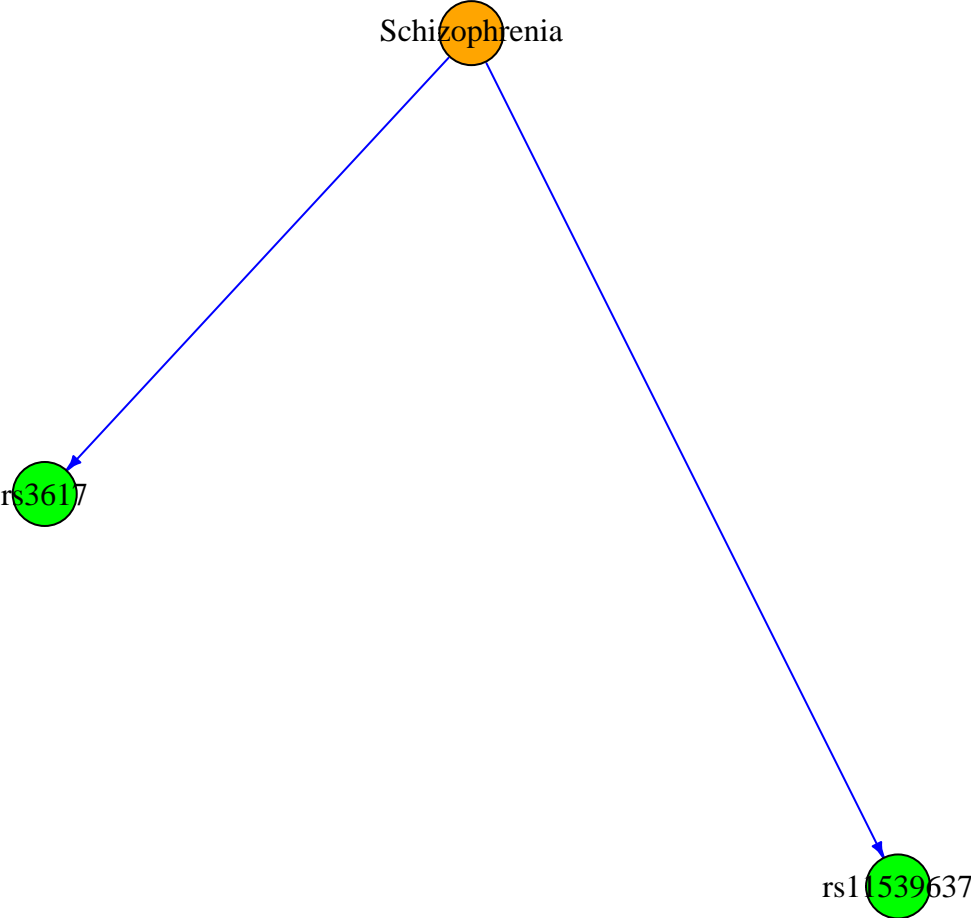

# Variant–Disease Network (Serum 25–Hydroxyvitamin D levels)

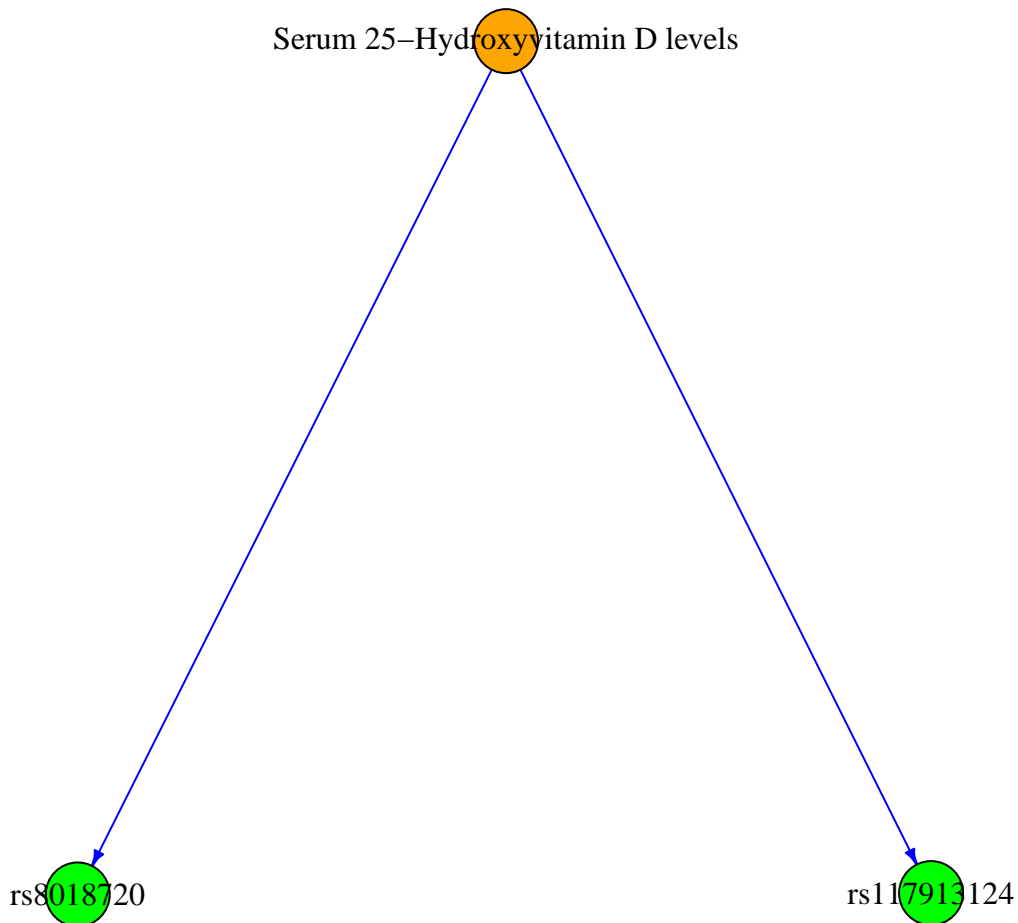

## Variant–Disease Network (Serum alkaline phosphatase levels)

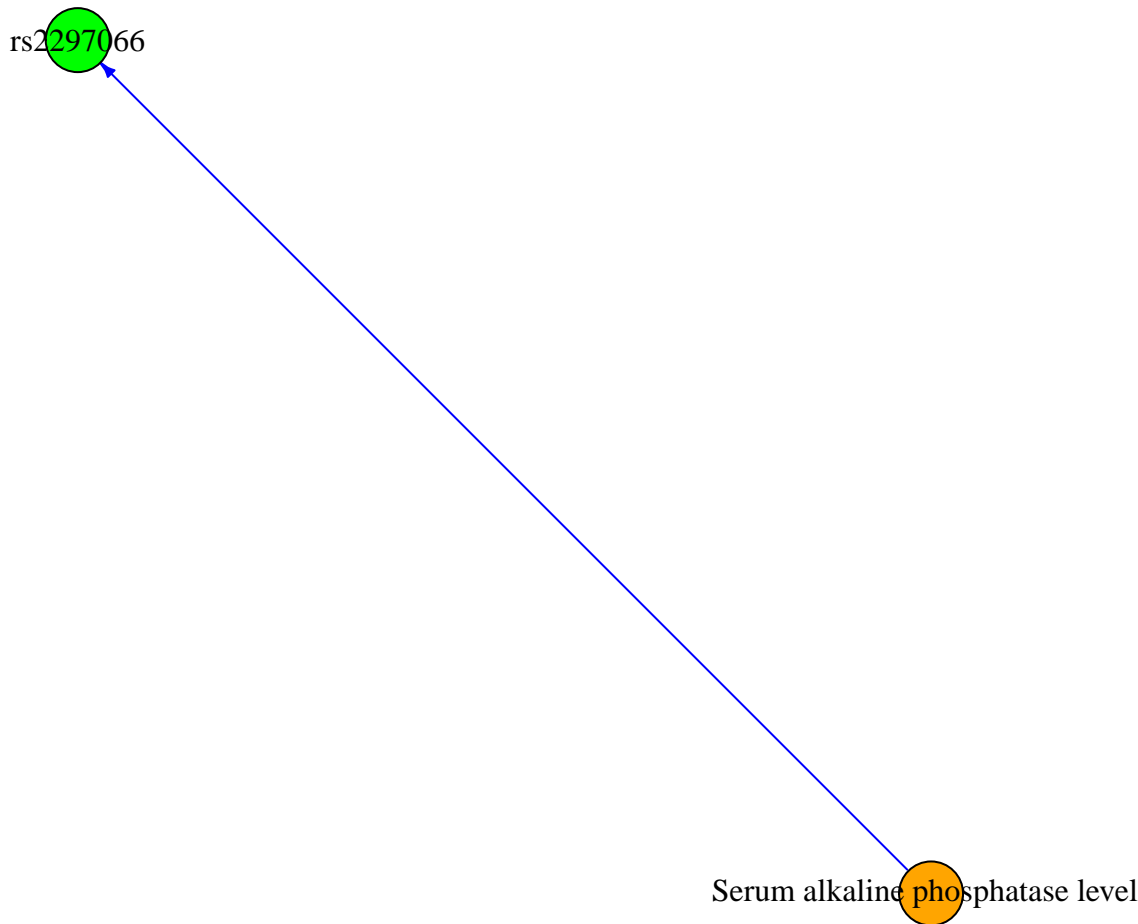



## Variant–Disease Network (Serum metabolite levels)

Serum metabolite levels

rs2228671

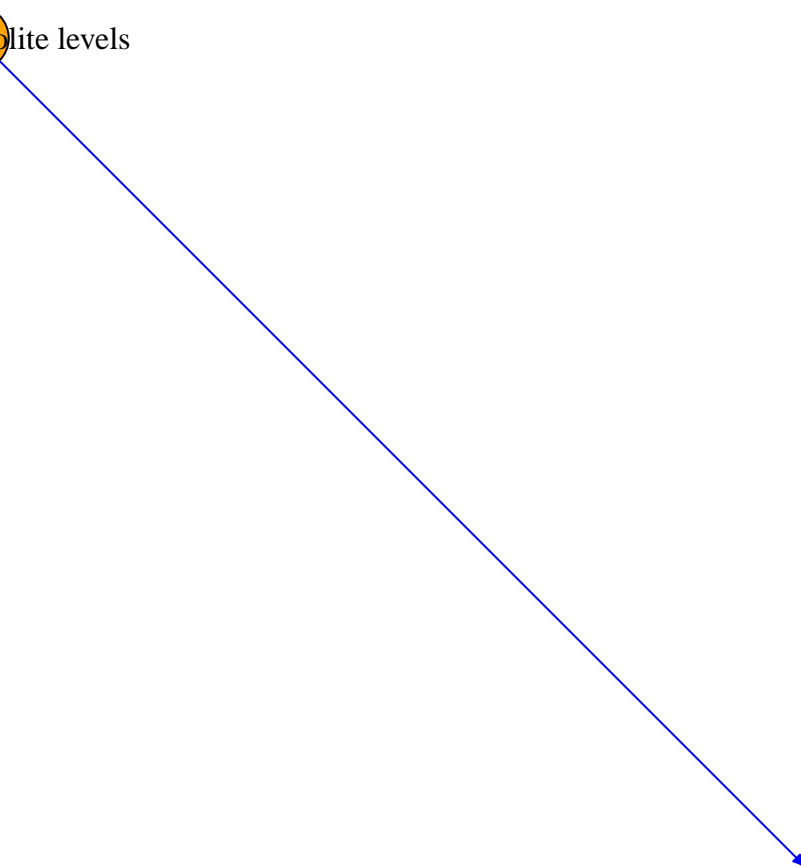

# Variant-Disease Network (Serum metabolite levels )

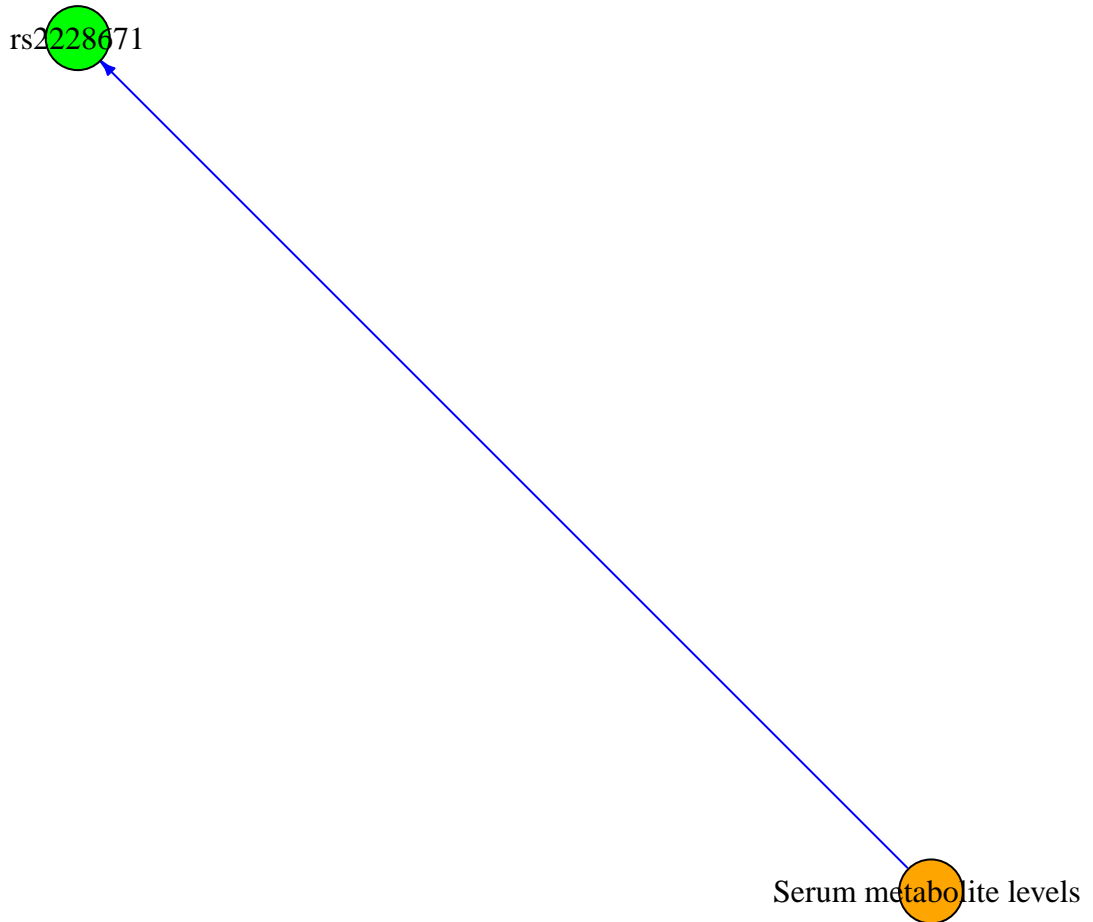

## Variant–Disease Network (Smoking initiation )

Smoking initiation

rs2304693

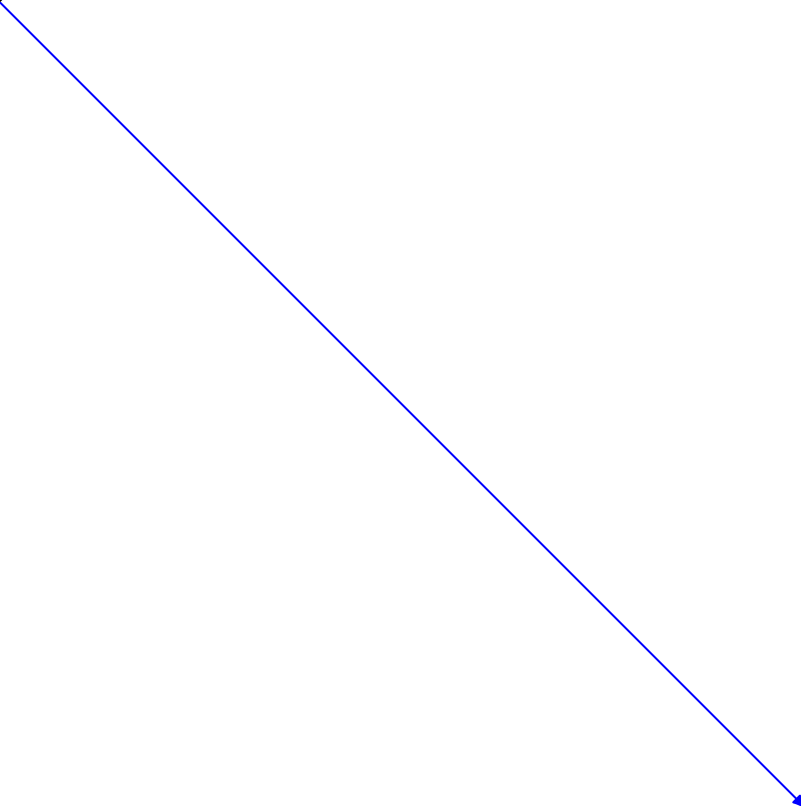

## Variant-Disease Network (Suicide behavior)

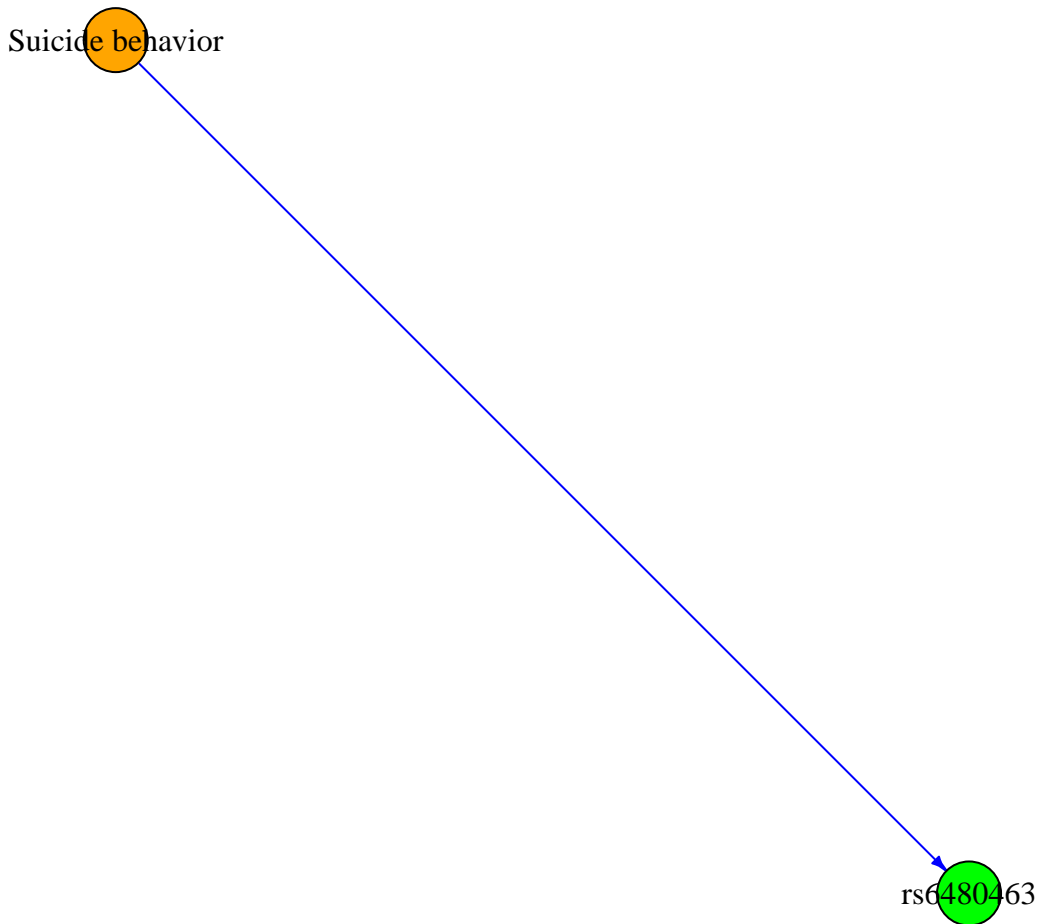

Variant–Disease Network (Systemic lupus erythematosus)

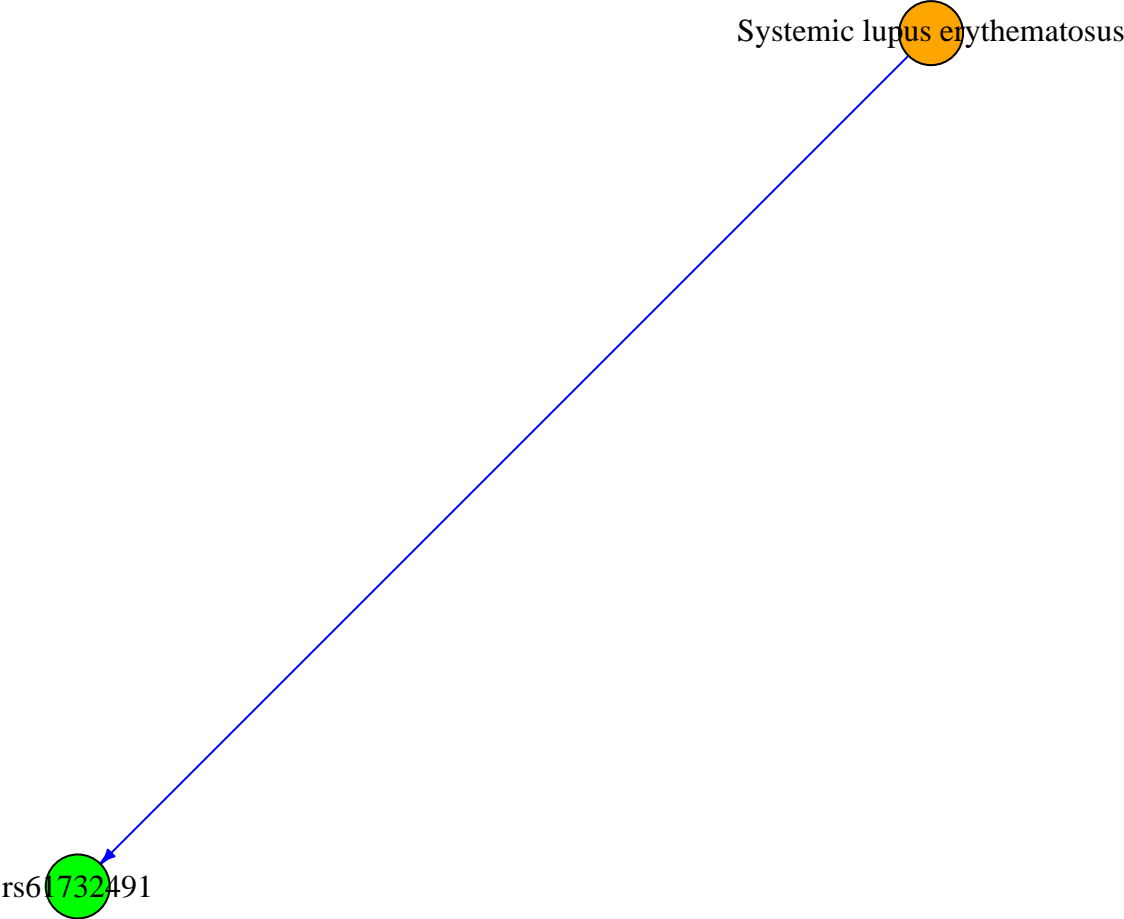

**Variant–Disease Network (Systolic blood pressure in sickle cell anemia)**

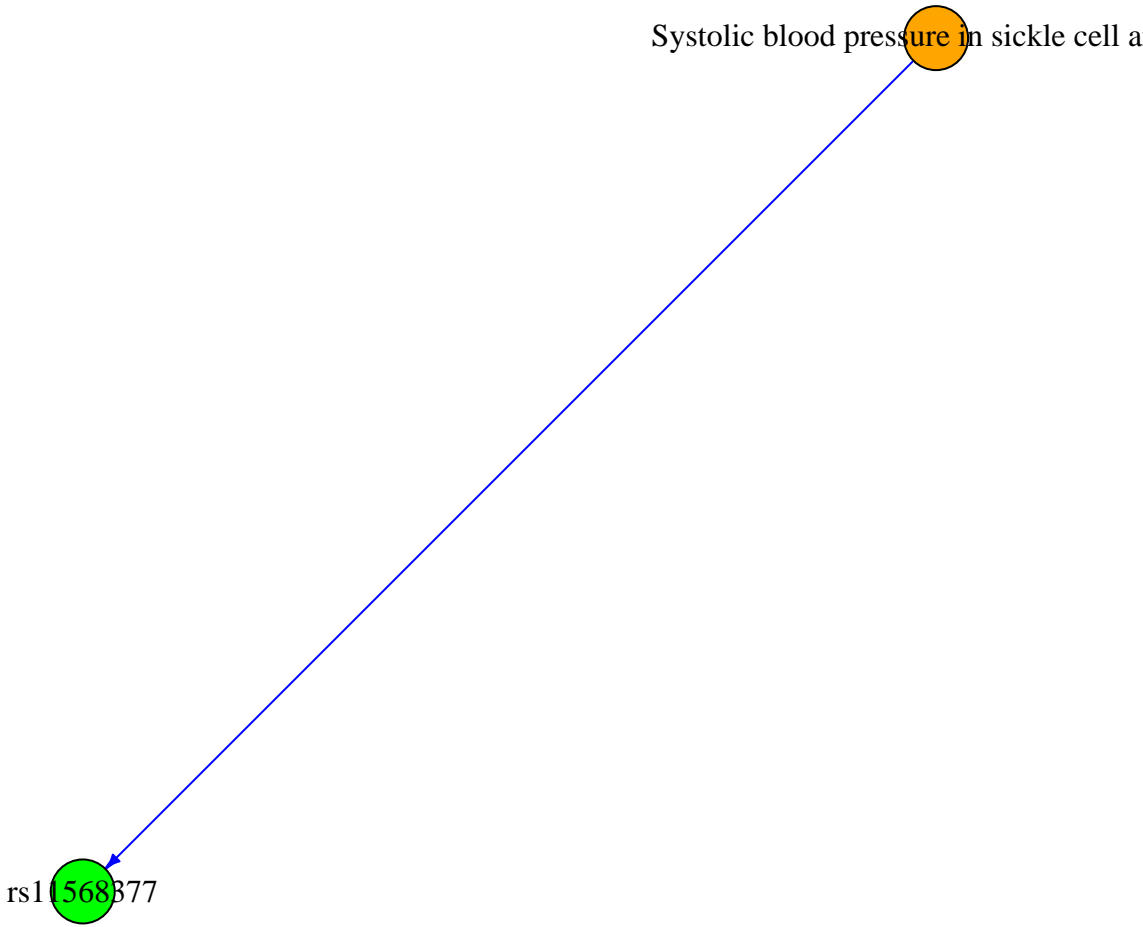

## Variant–Disease Network (Total cholesterol levels)

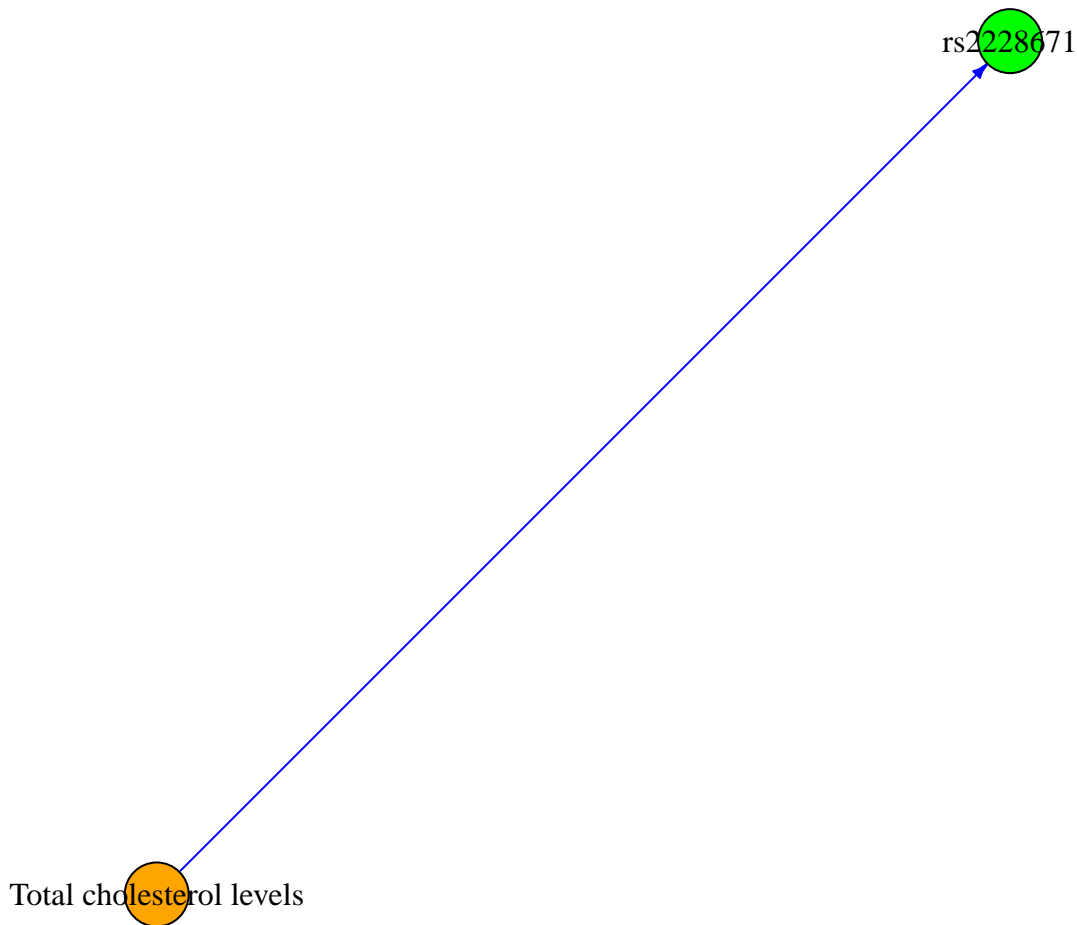

## Variant–Disease Network (Triglyceride levels)

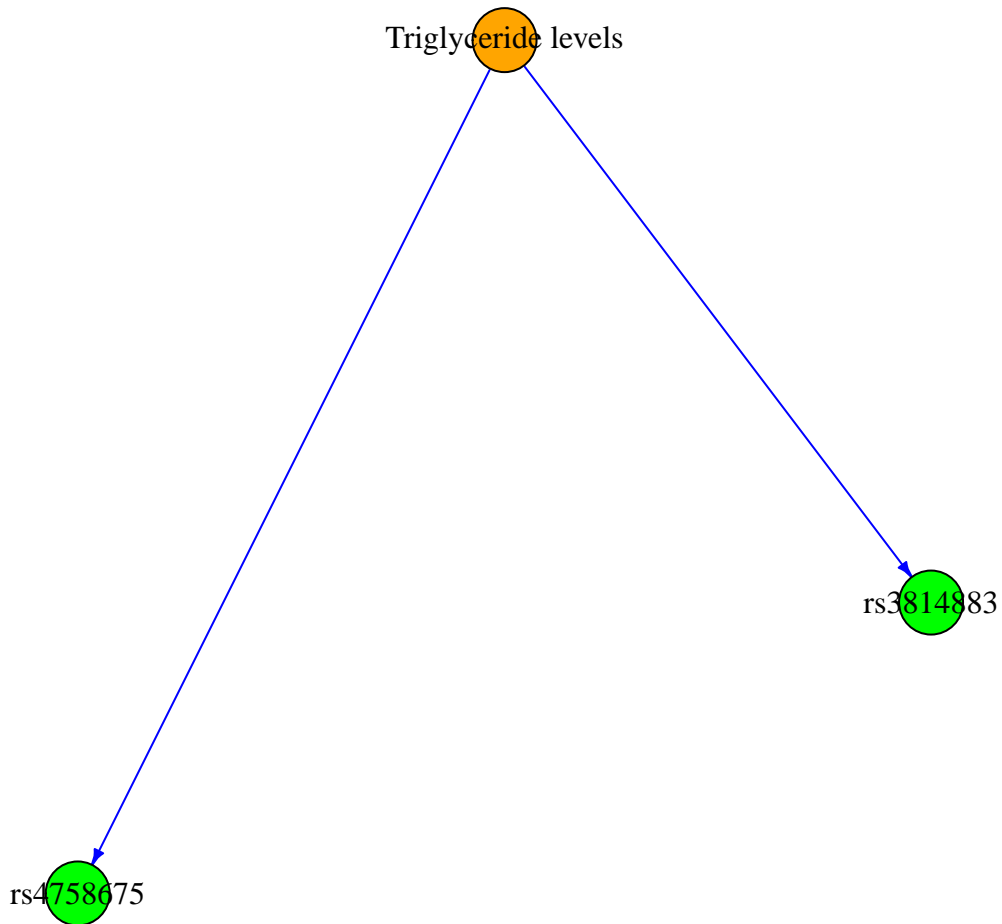



**Variant–Disease Network (Triglyceride levels in non smokers)**

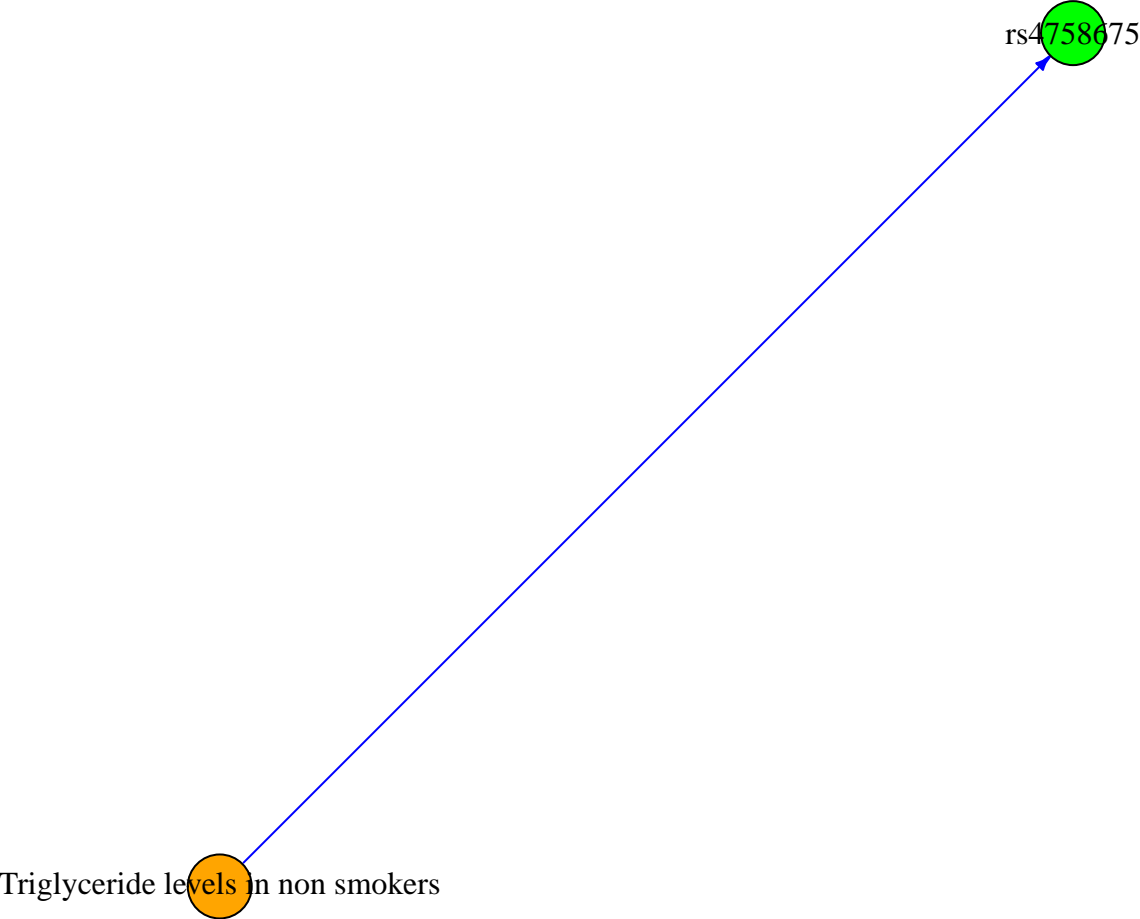

# Variant–Disease Network (Triglyceride levels x smoking interaction )

Triglyceride levels x smoking interaction

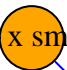

rs4758675

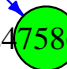

## Variant–Disease Network (Type 2 diabetes)

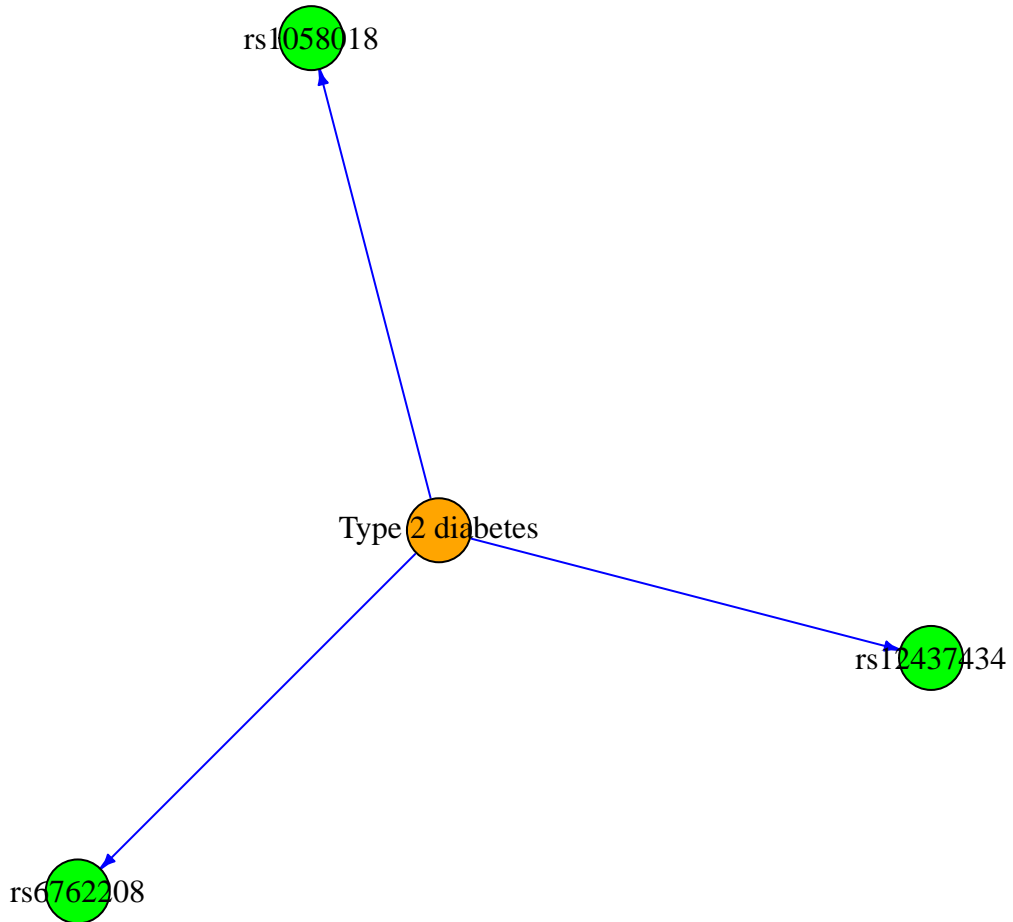

Variant–Disease Network (Type 2 diabetes )

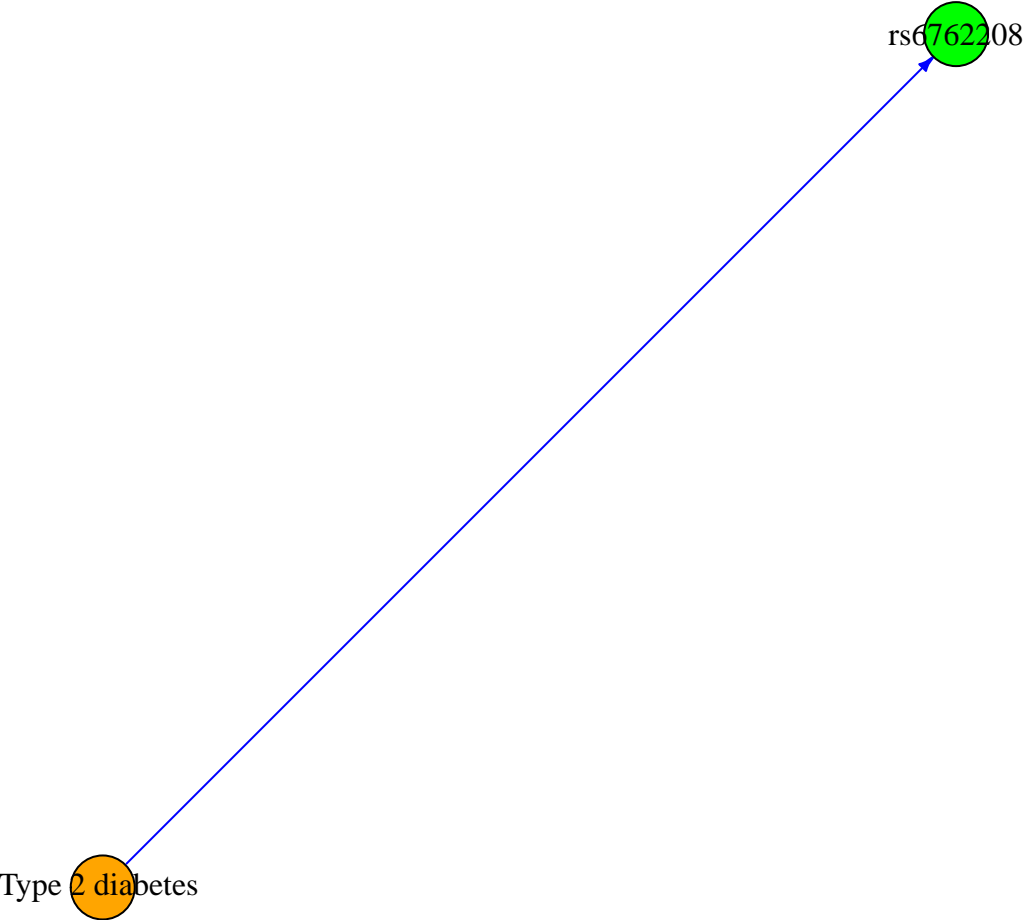

## Variant–Disease Network (Ulcerative colitis)

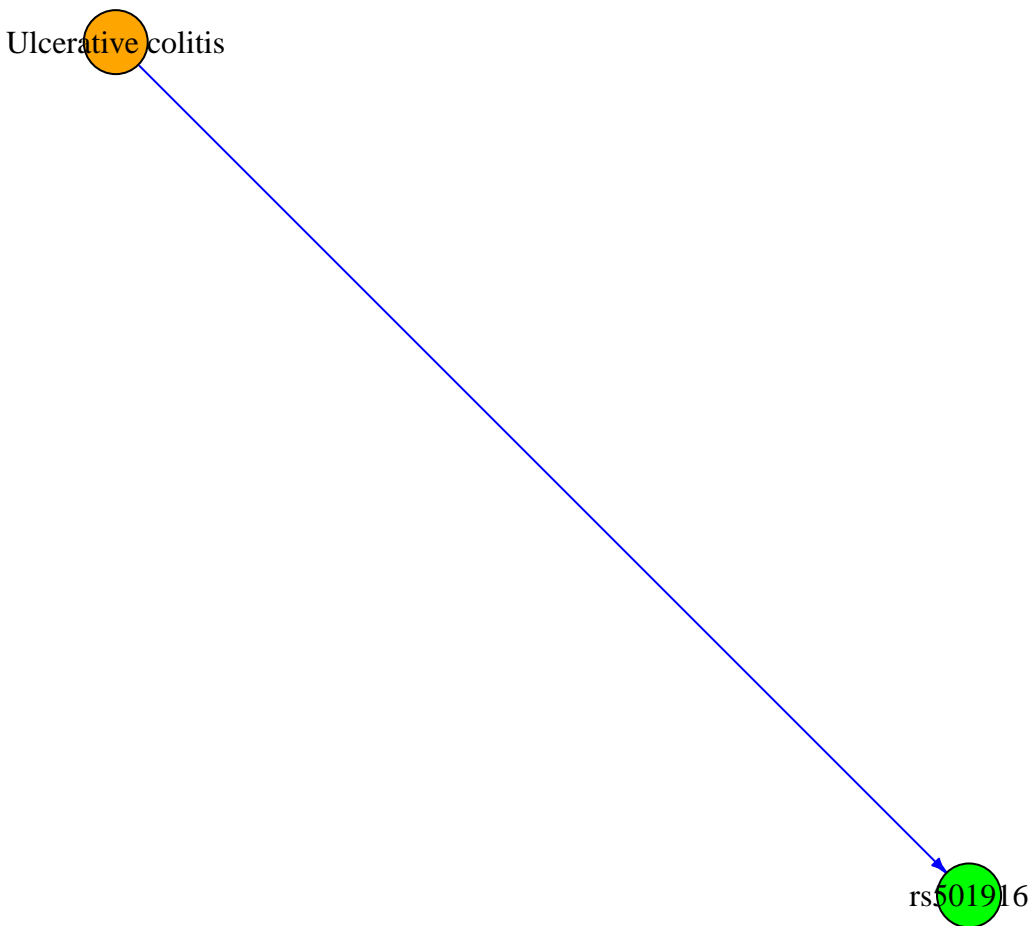

## Variant–Disease Network (Vitamin D levels)

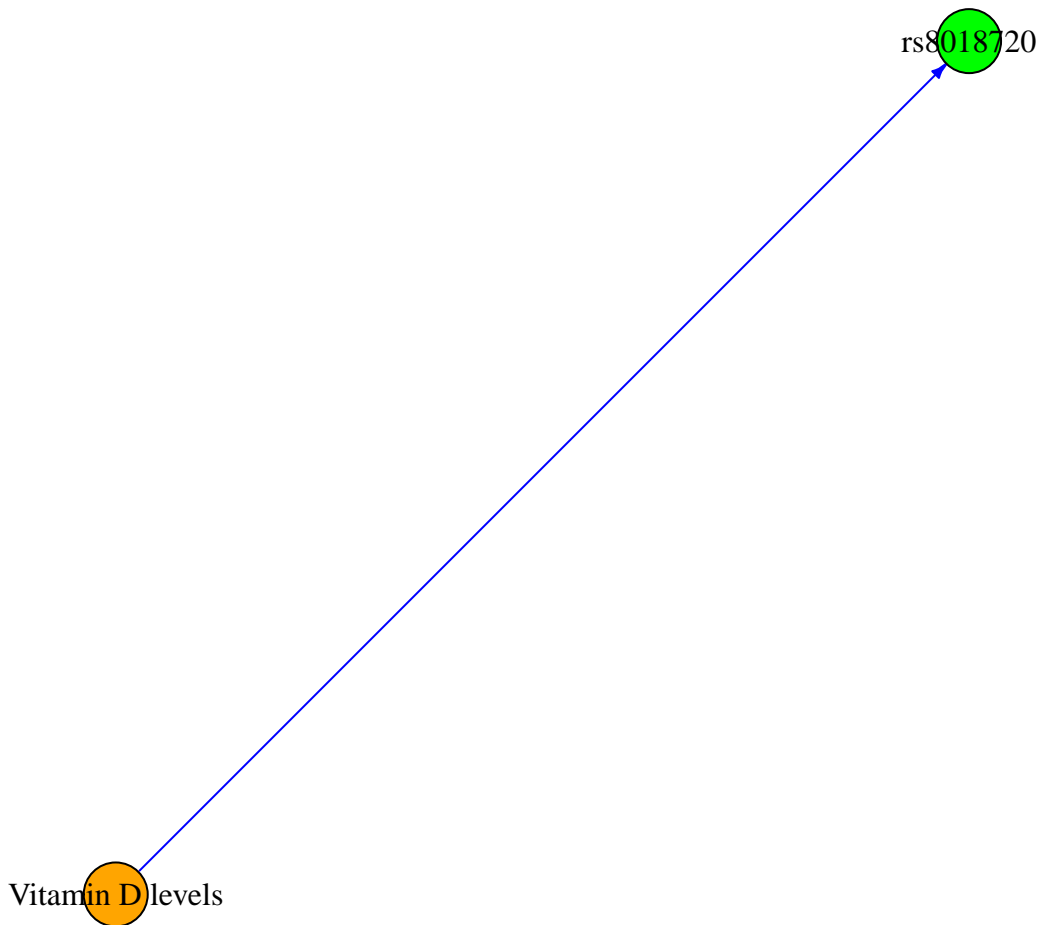

## Variant–Disease Network (Waist–hip ratio)

Waist–hip ratio

rs1254319



# Variant-Disease Network (Waist-to-hip ratio adjusted for BMI)

Waist-to-hip ratio adjusted for BMI

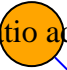

rs1061093

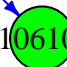



Variant–Disease Network (Waist–to–hip ratio adjusted for BMI )

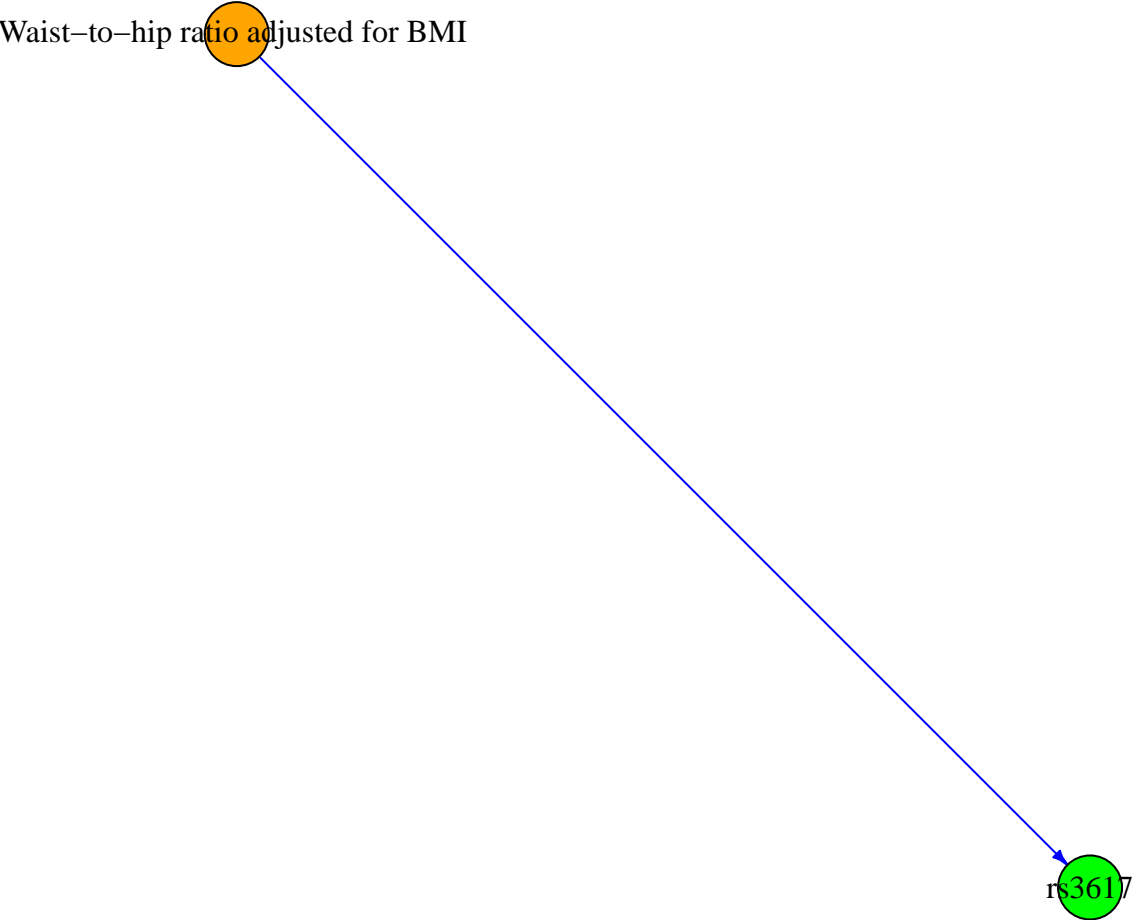

# Variant-Disease Network (Waist-to-hip ratio adjusted for BMI x sex x age interaction)

rs1061093

Waist-to-hip ratio adjusted for BMI x sex x age

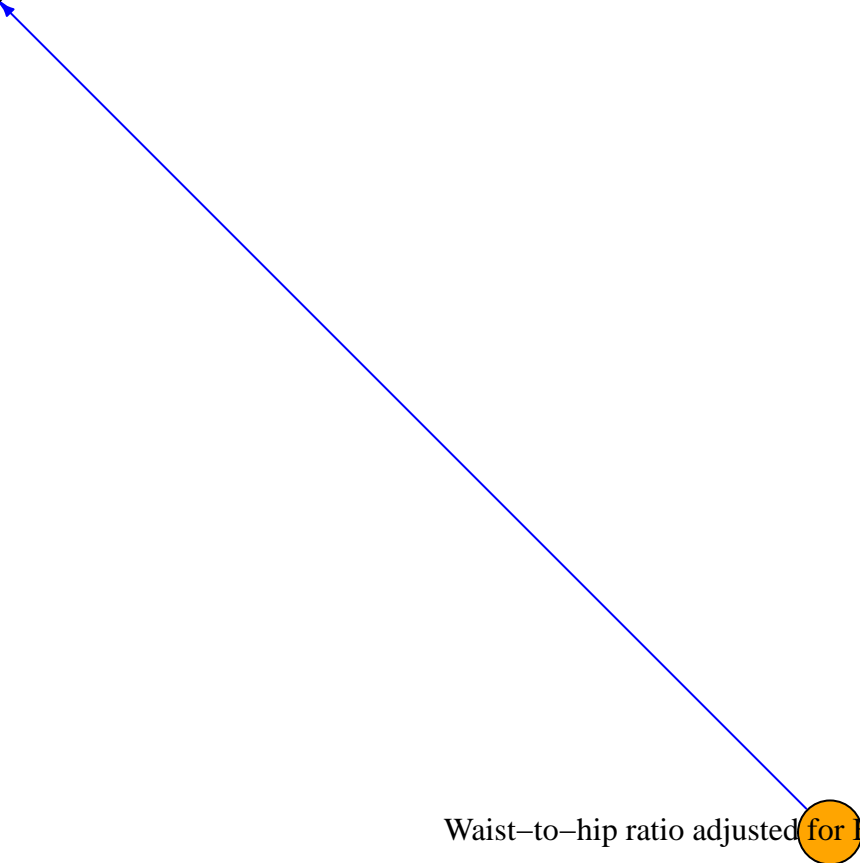

## Variant–Disease Network (White blood cell count)

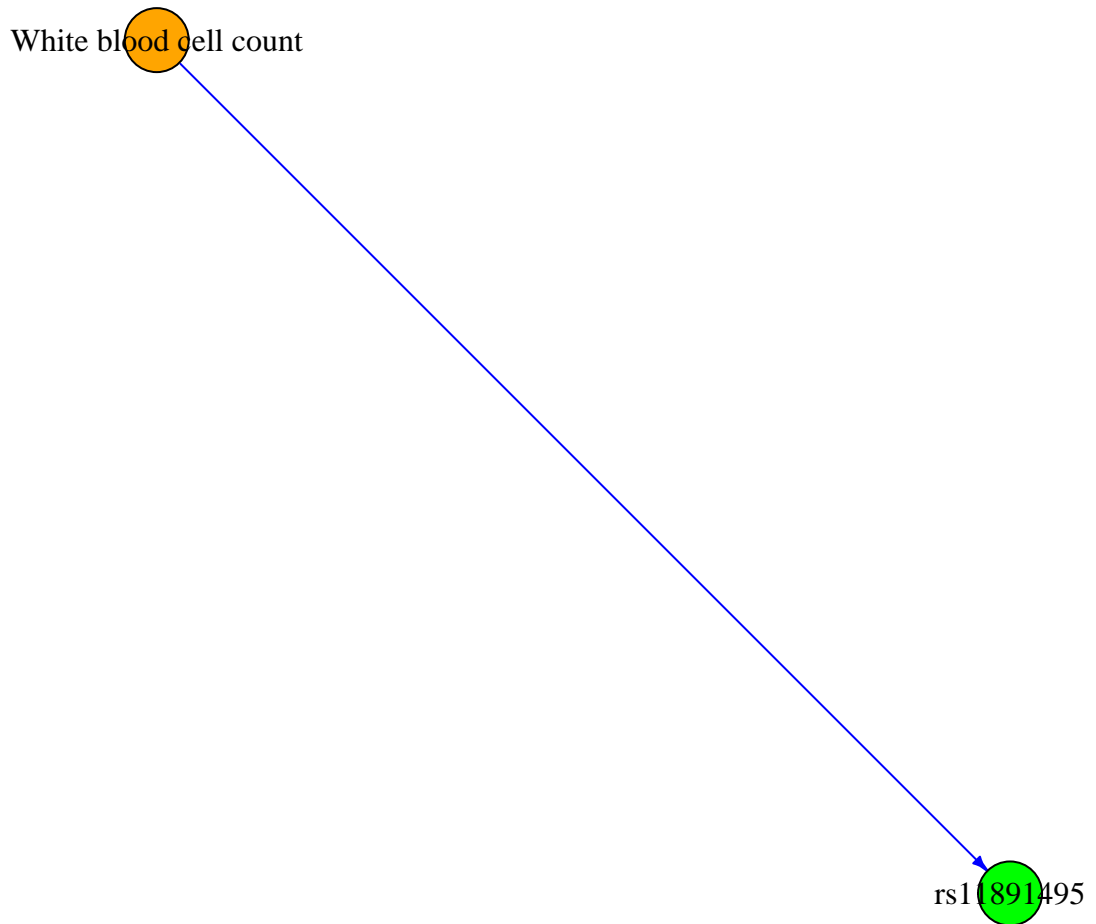

## Variant–Disease Network (bone density)

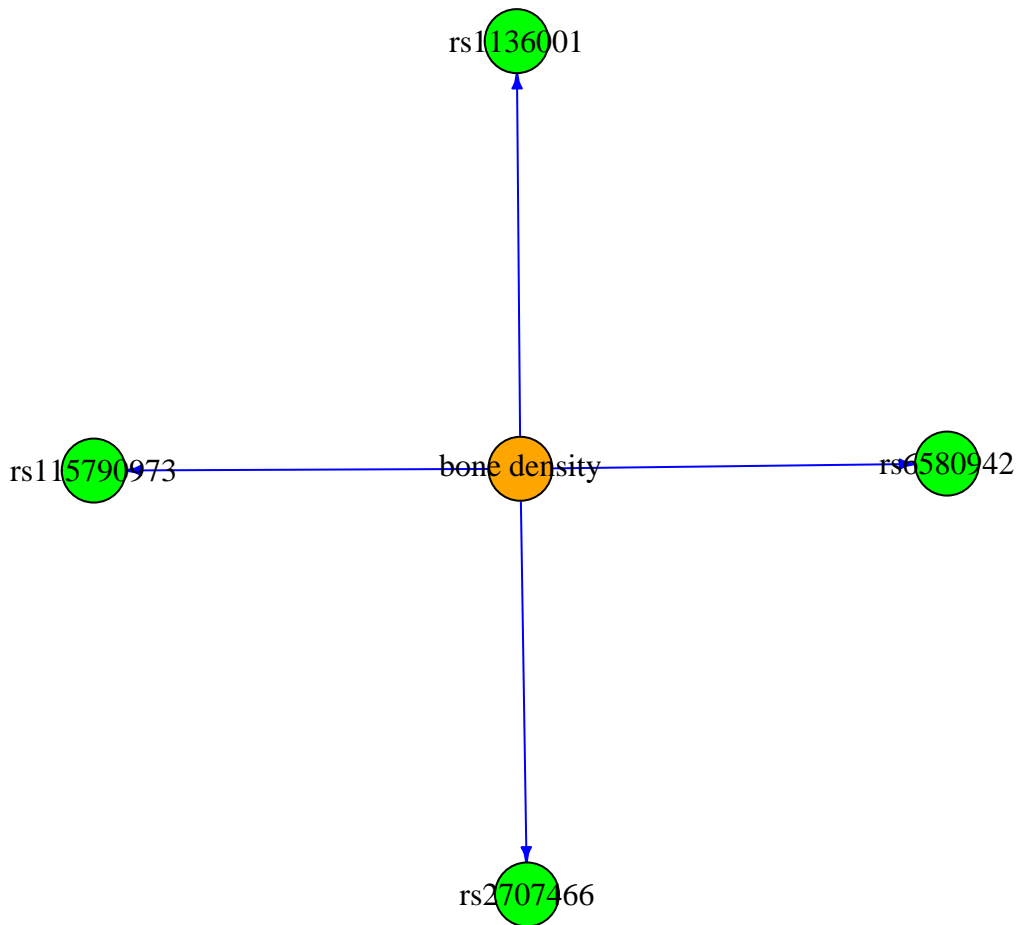

## Variant–Disease Network (response to statin)

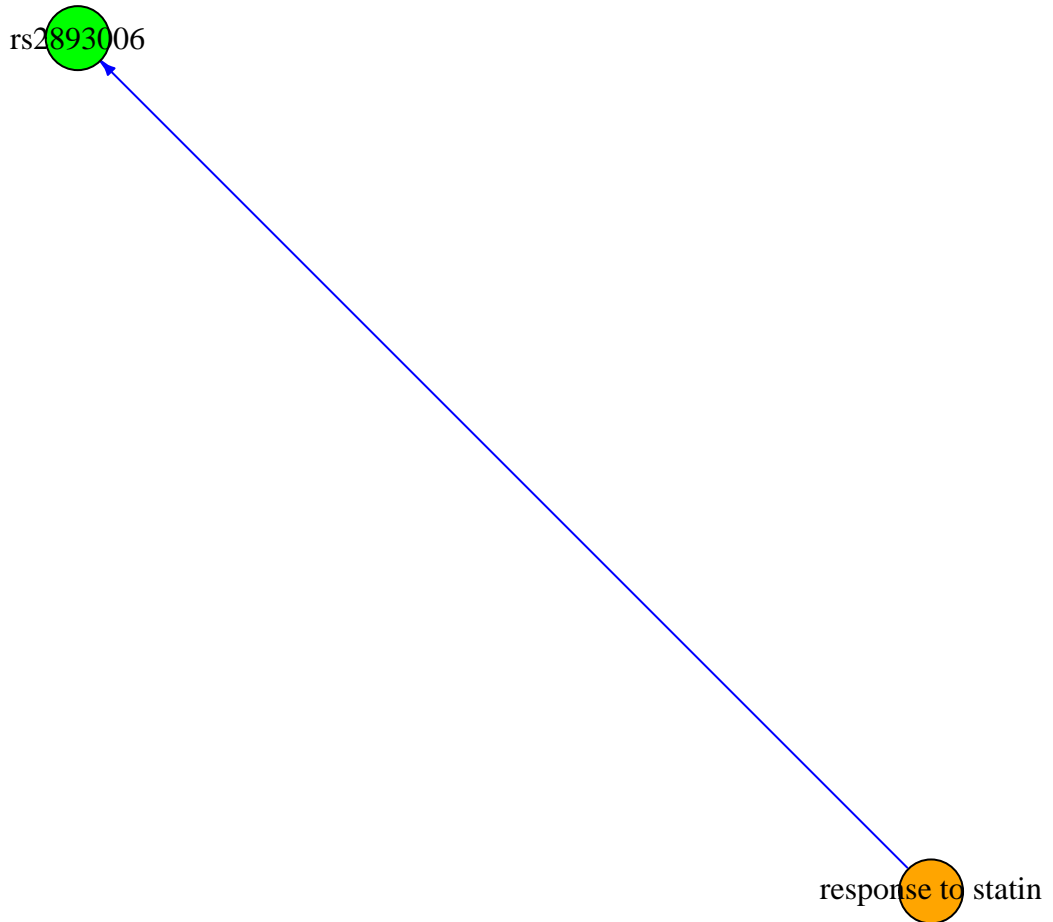

**Variant–Disease Network (blood metabolite measurement)**

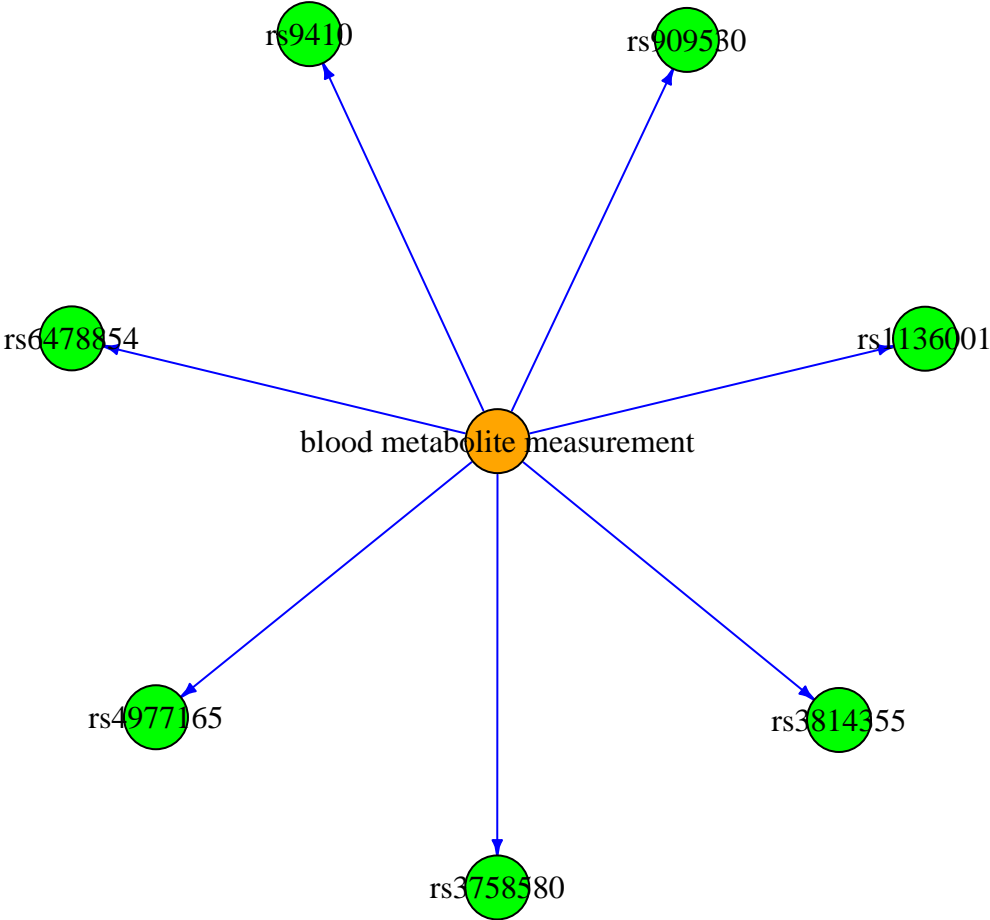

## Variant–Disease Network (cleft lip)

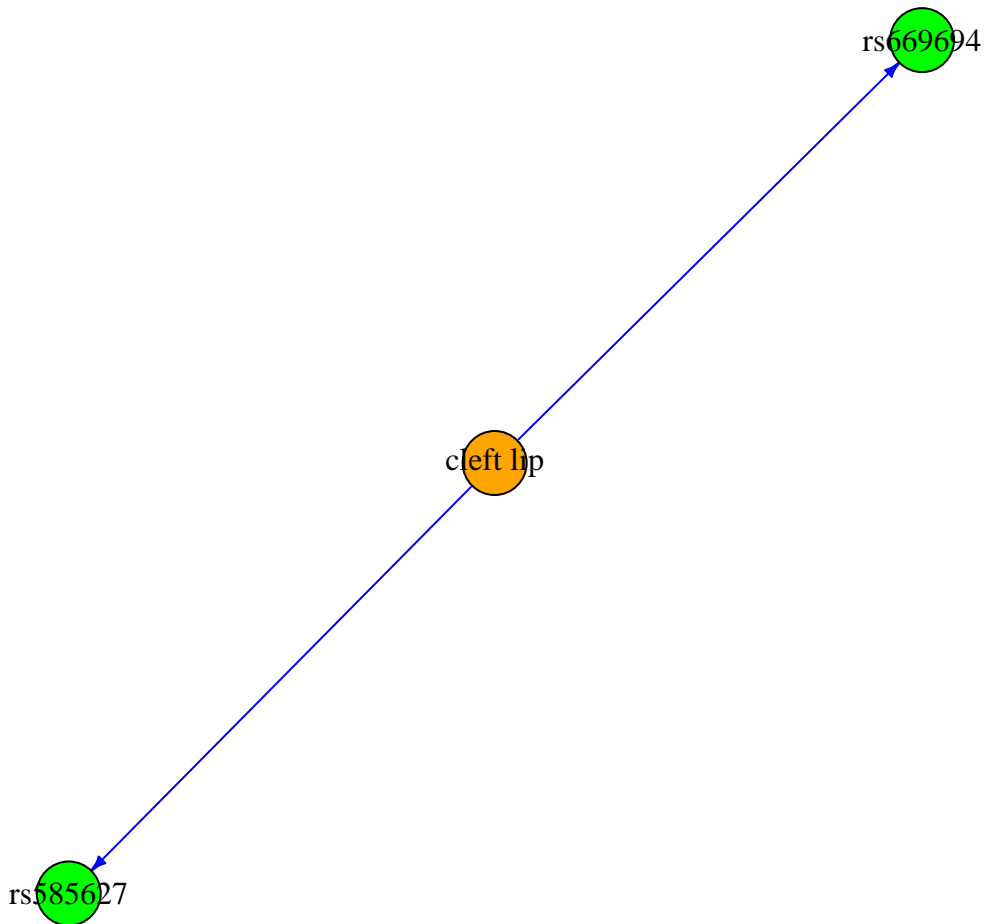

## Variant–Disease Network (progranulin measurement)

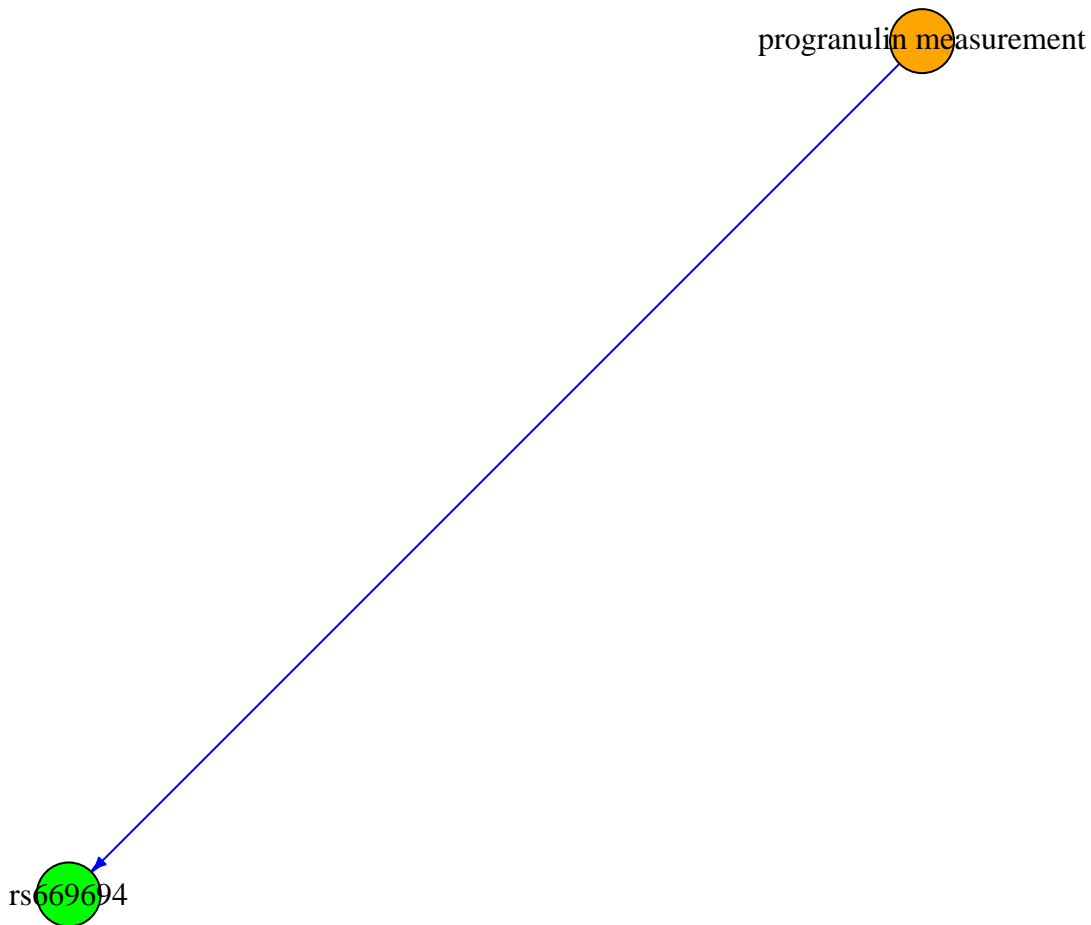



## Variant–Disease Network (systolic blood pressure)

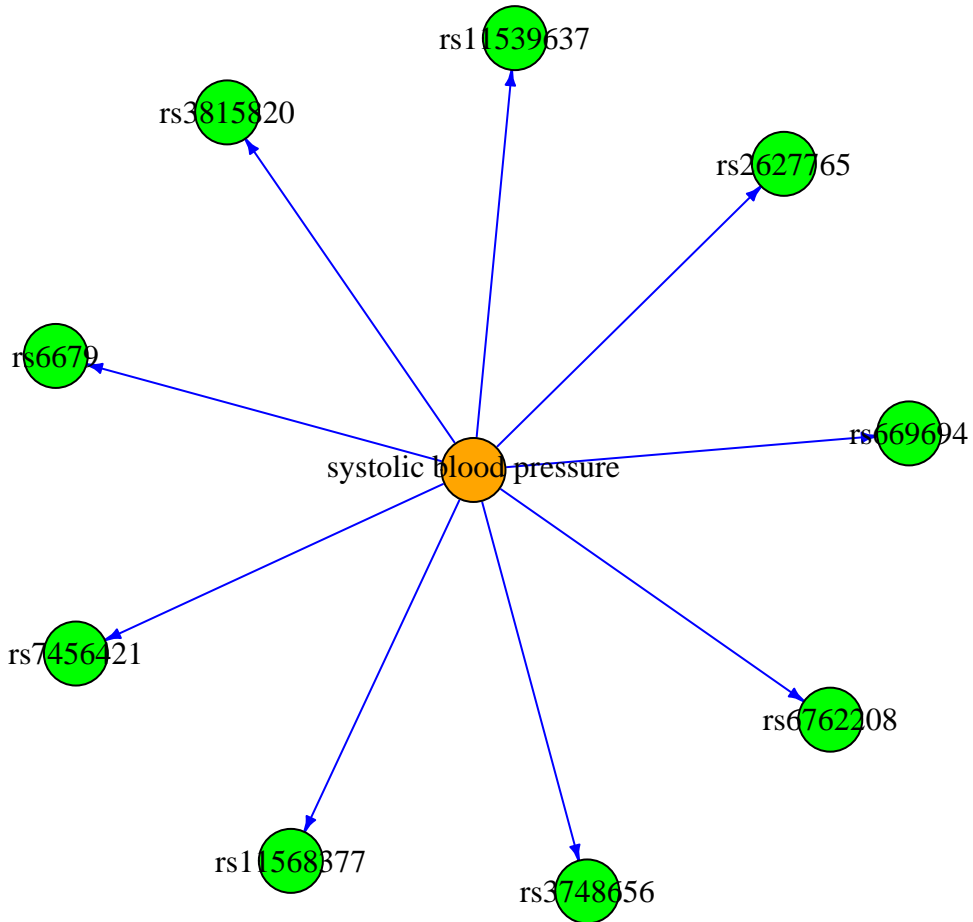

## Variant–Disease Network (alkaline phosphatase measurement)

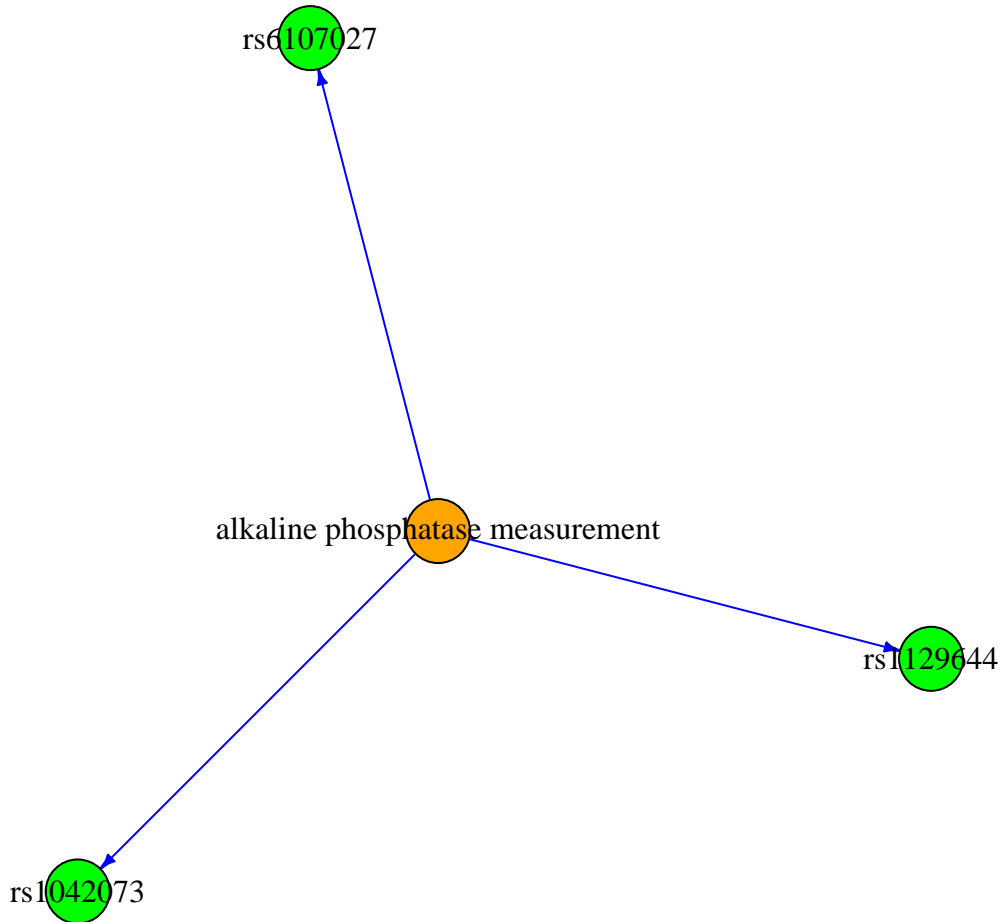

## Variant–Disease Network (unipolar depression)

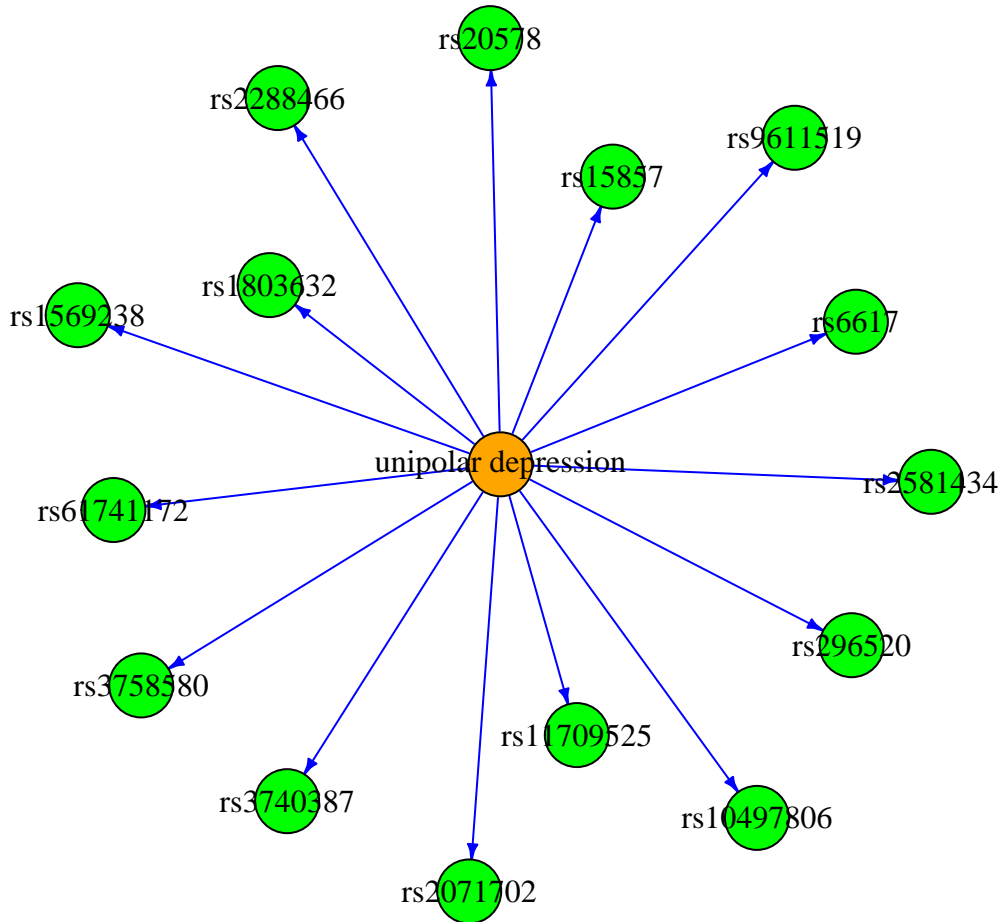

Variant–Disease Network (helping behavior measurement)

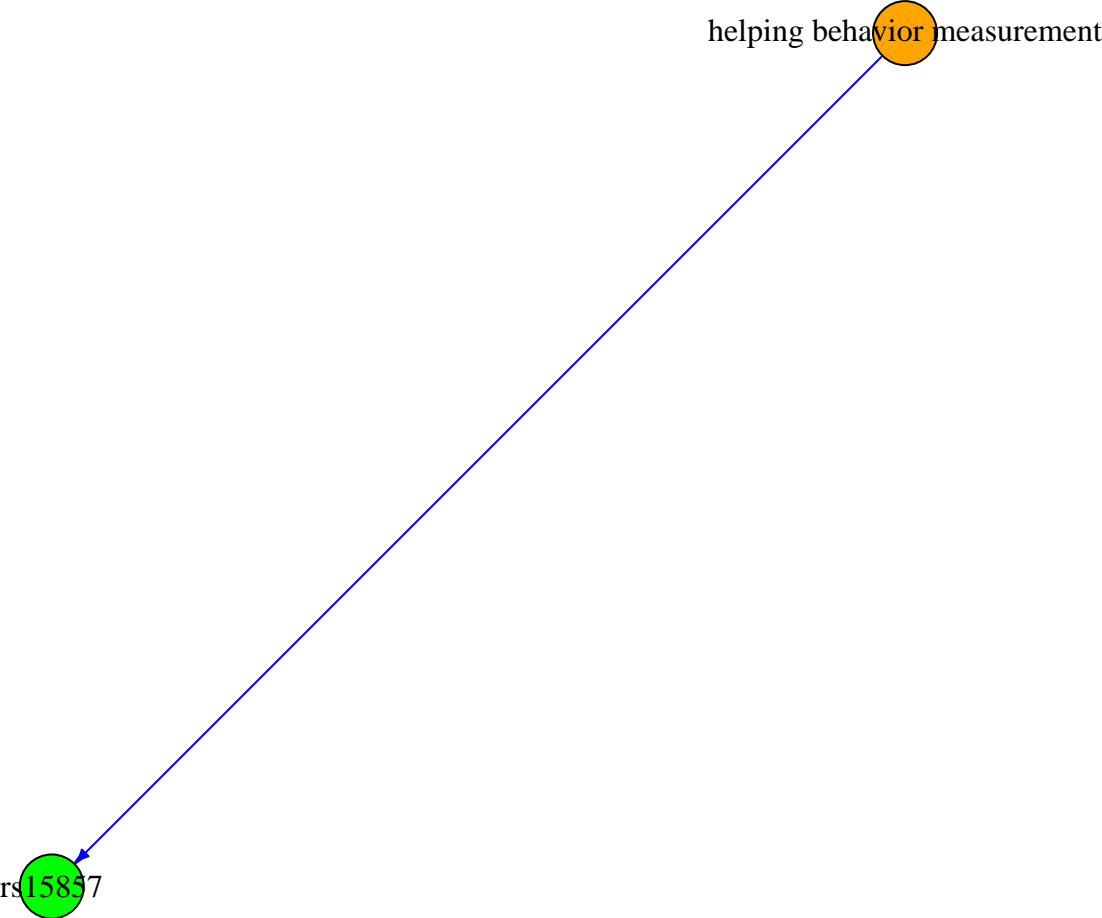

## Variant–Disease Network (age at menarche)

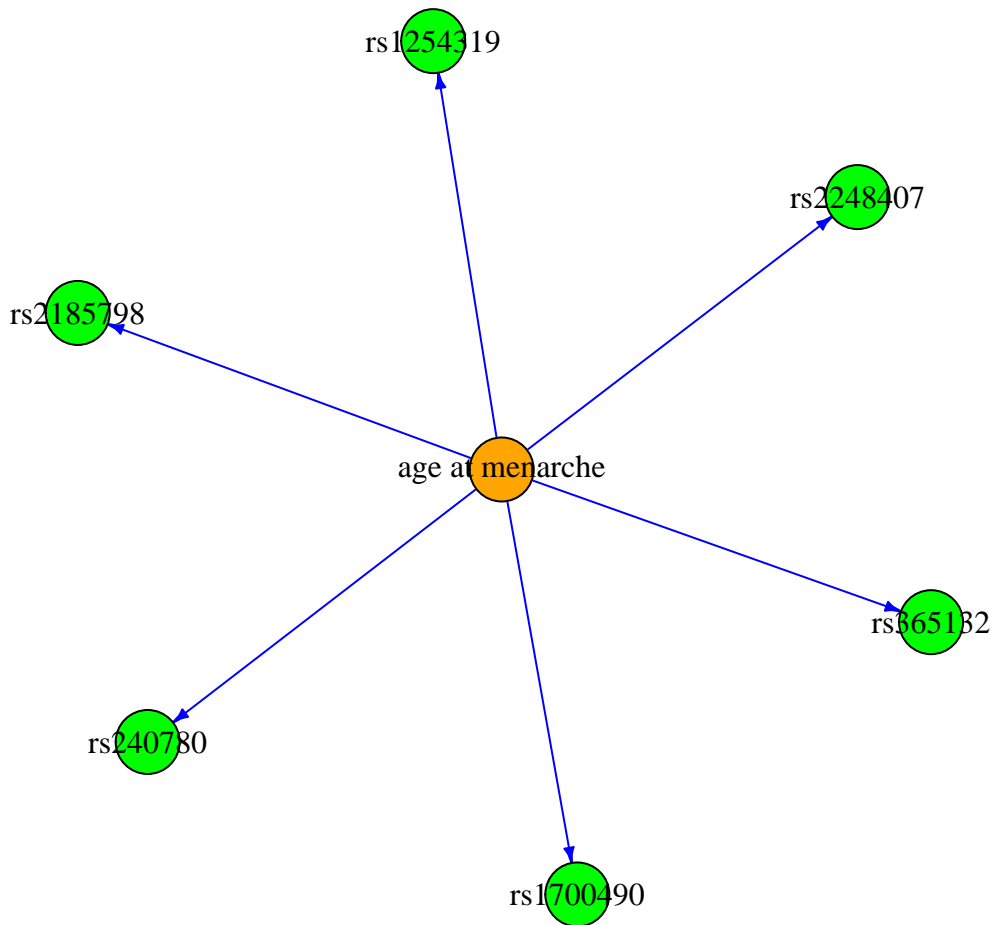

## Variant–Disease Network (Alzheimers disease)

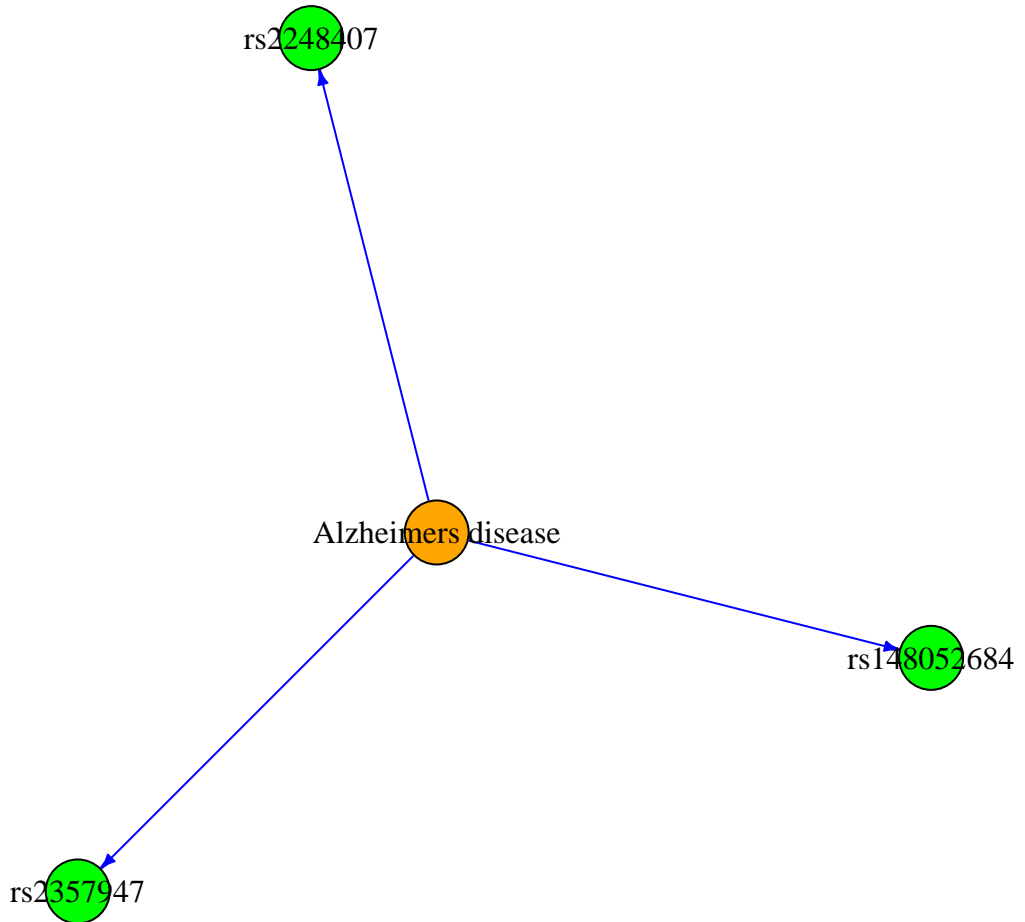

**Variant–Disease Network (creatine kinase measurement)**

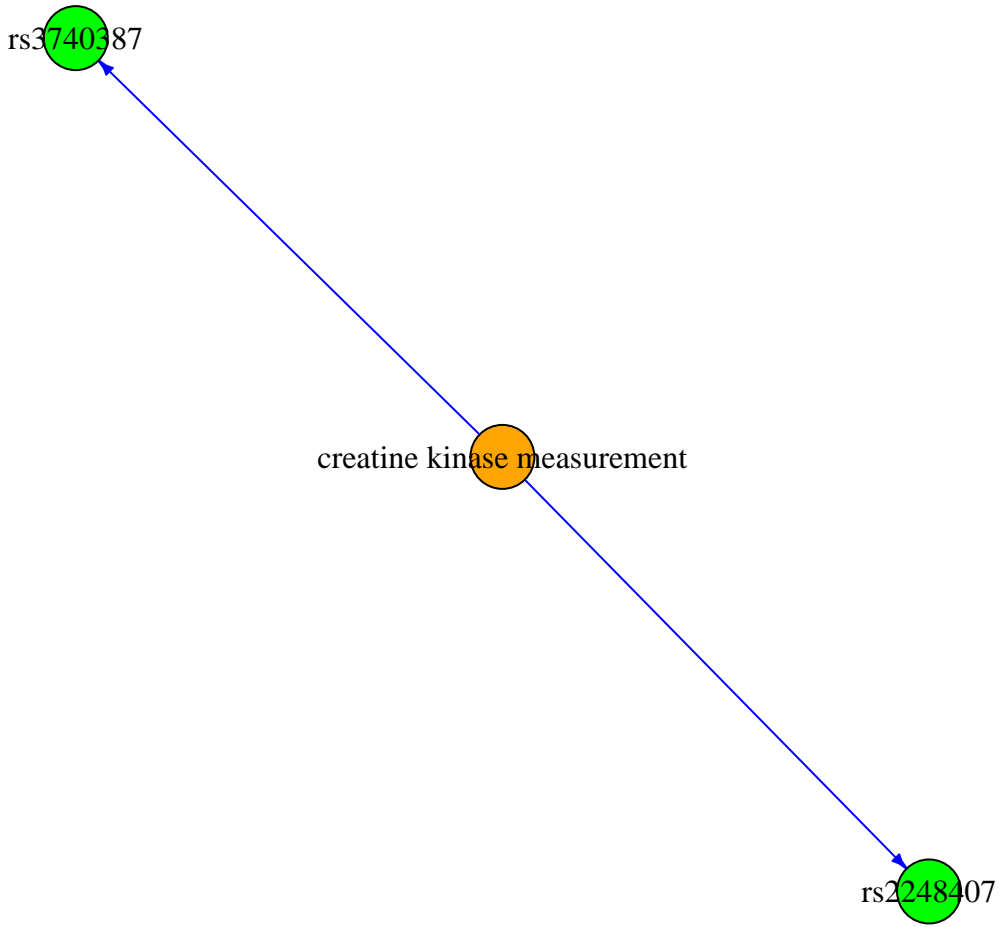

## Variant–Disease Network (diastolic blood pressure)

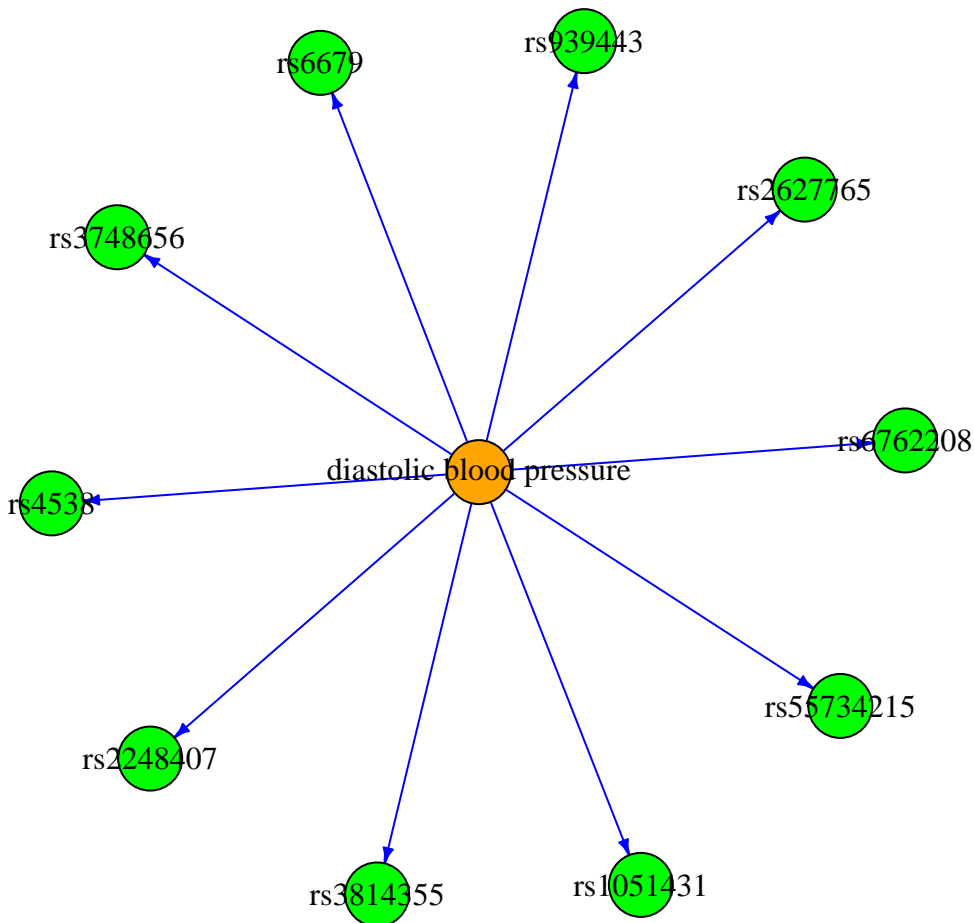



## Variant–Disease Network (glomerular filtration rate)

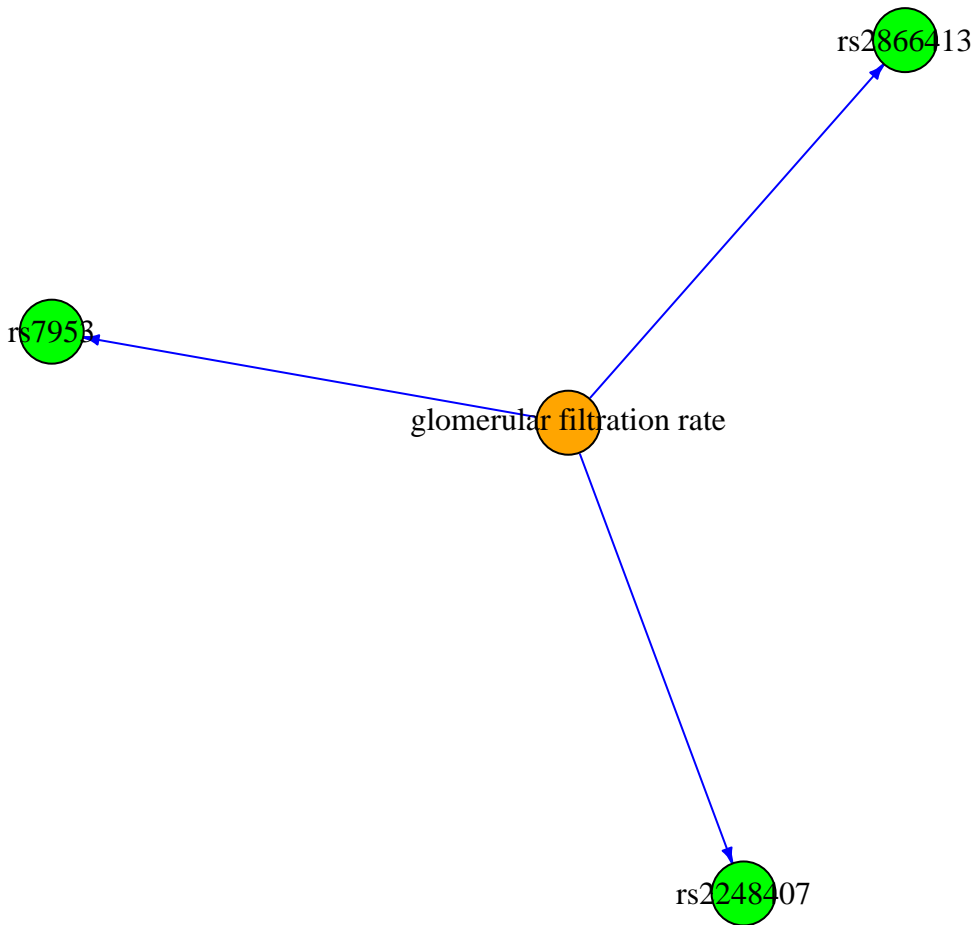

Variant–Disease Network (hair colour measurement)

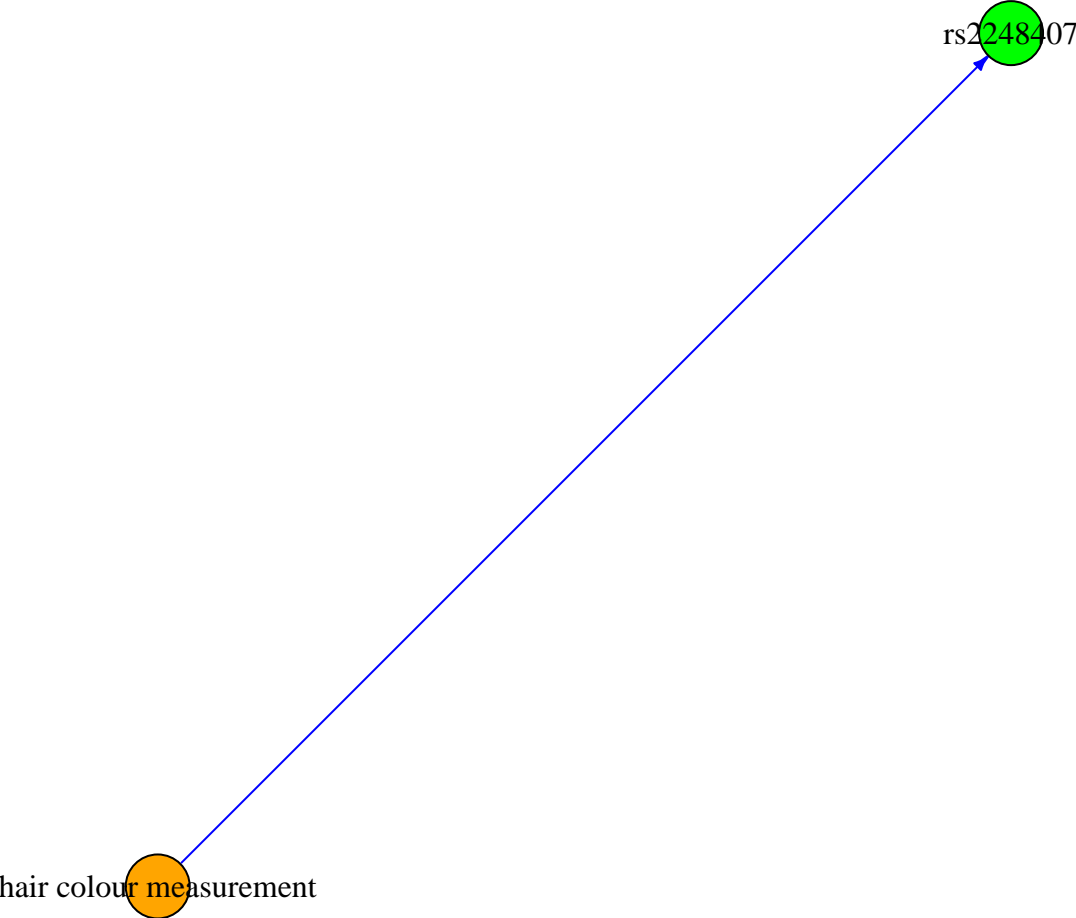

Variant–Disease Network (high density lipoprotein cholesterol measurement

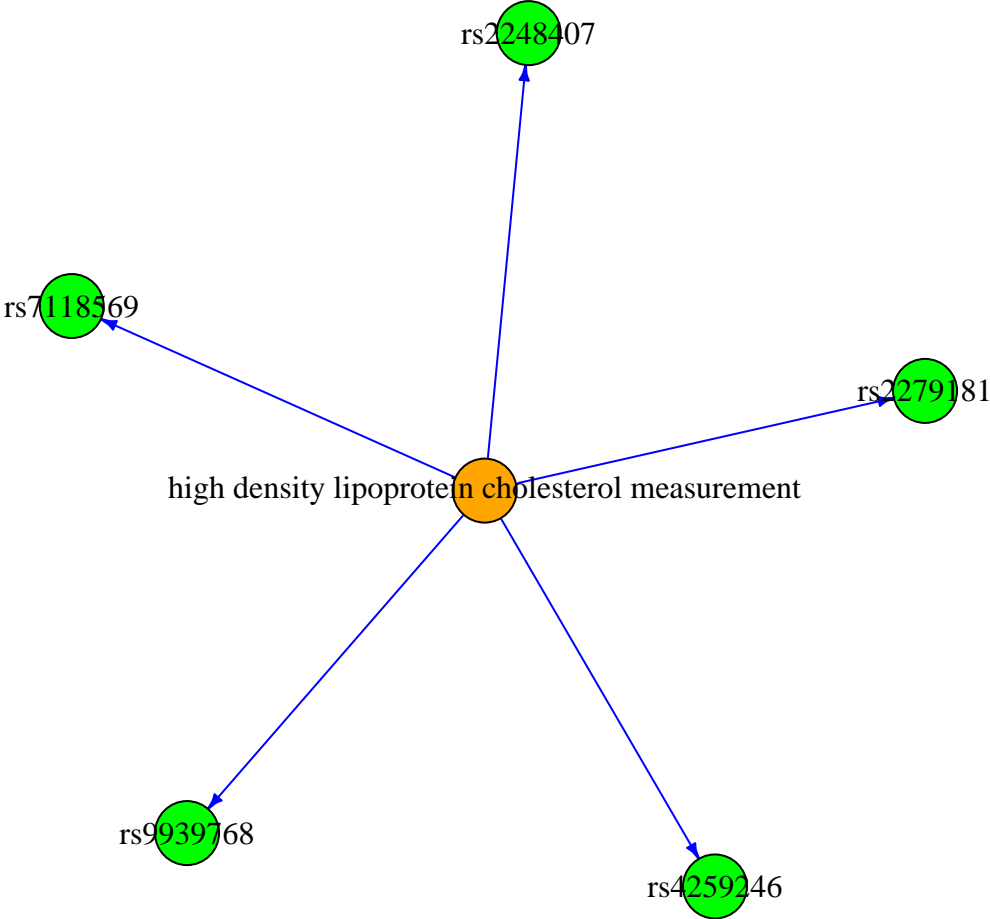

**Variant–Disease Network (intraocular pressure measurement)**

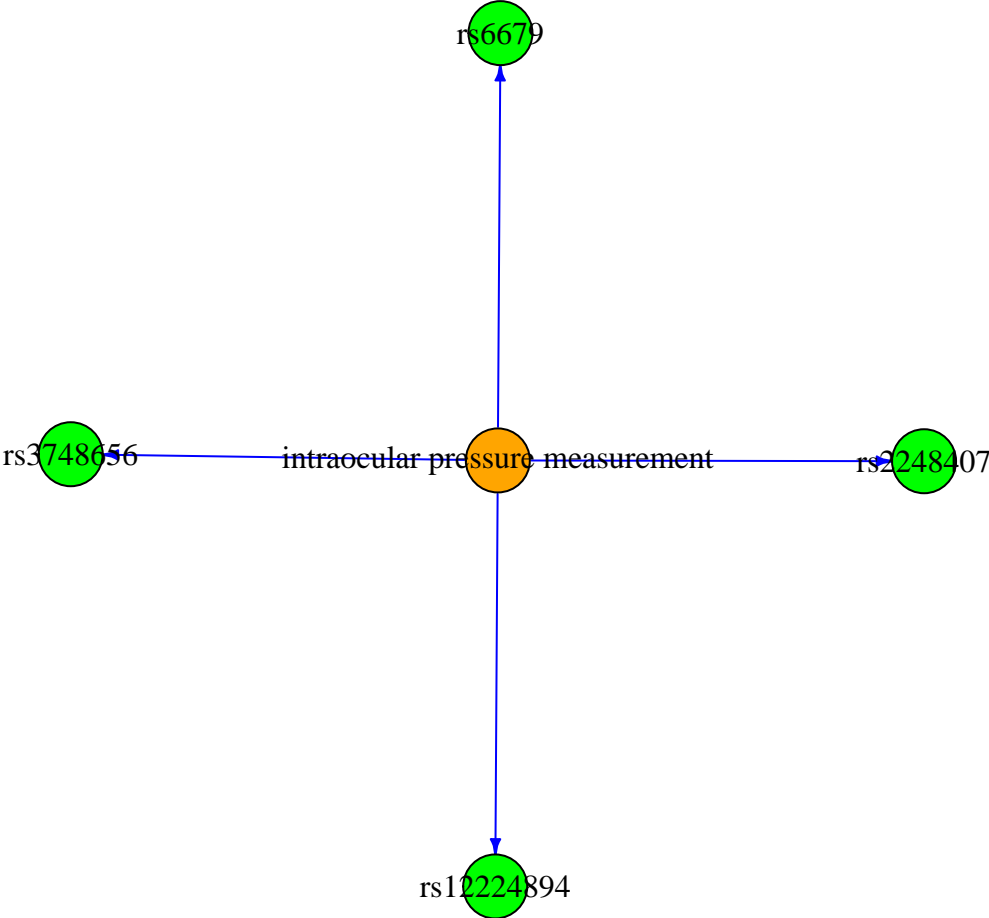

# Variant–Disease Network (l lactate dehydrogenase measurement)

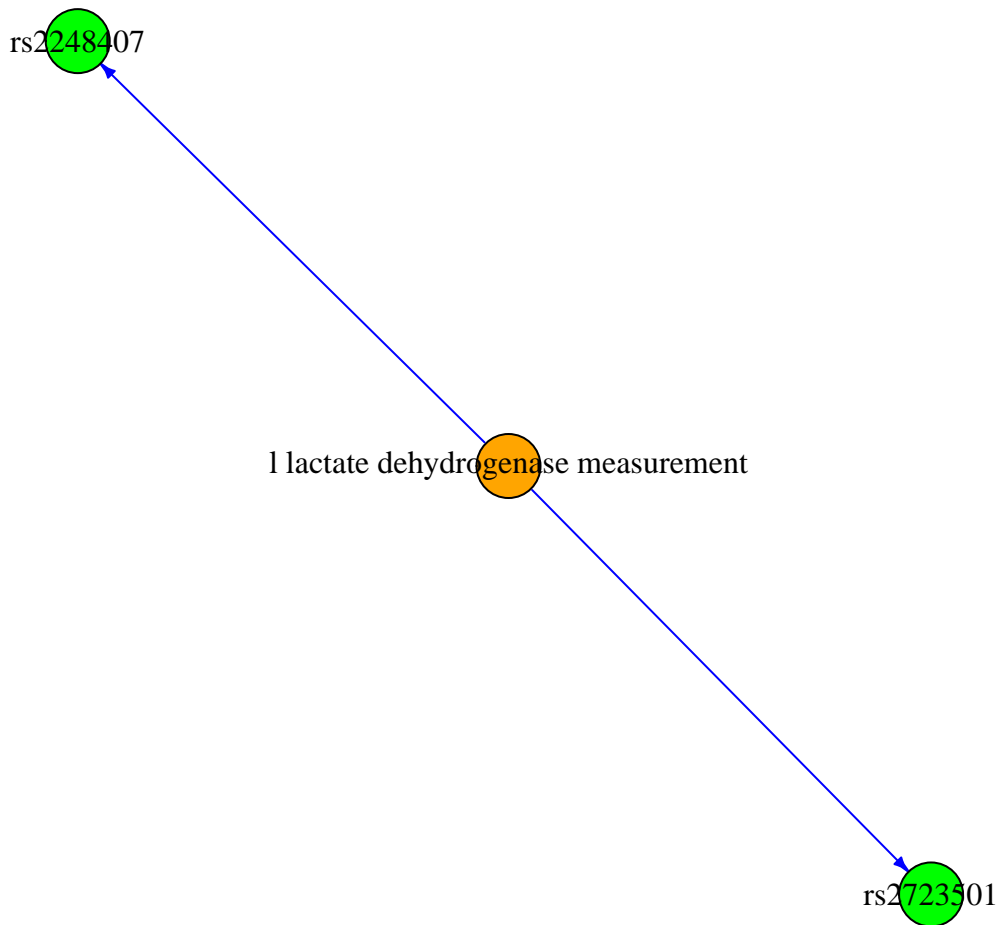

Variant–Disease Network (low density lipoprotein cholesterol measurement

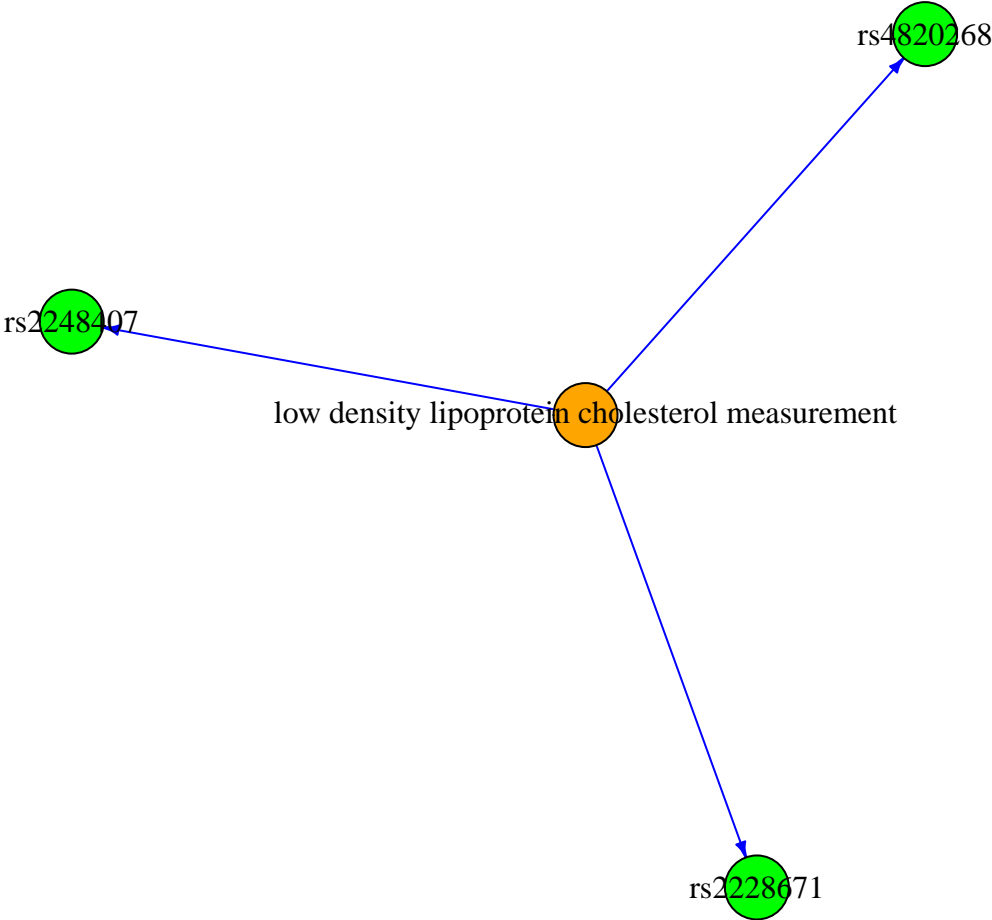

Variant–Disease Network (serum creatinine measurement)

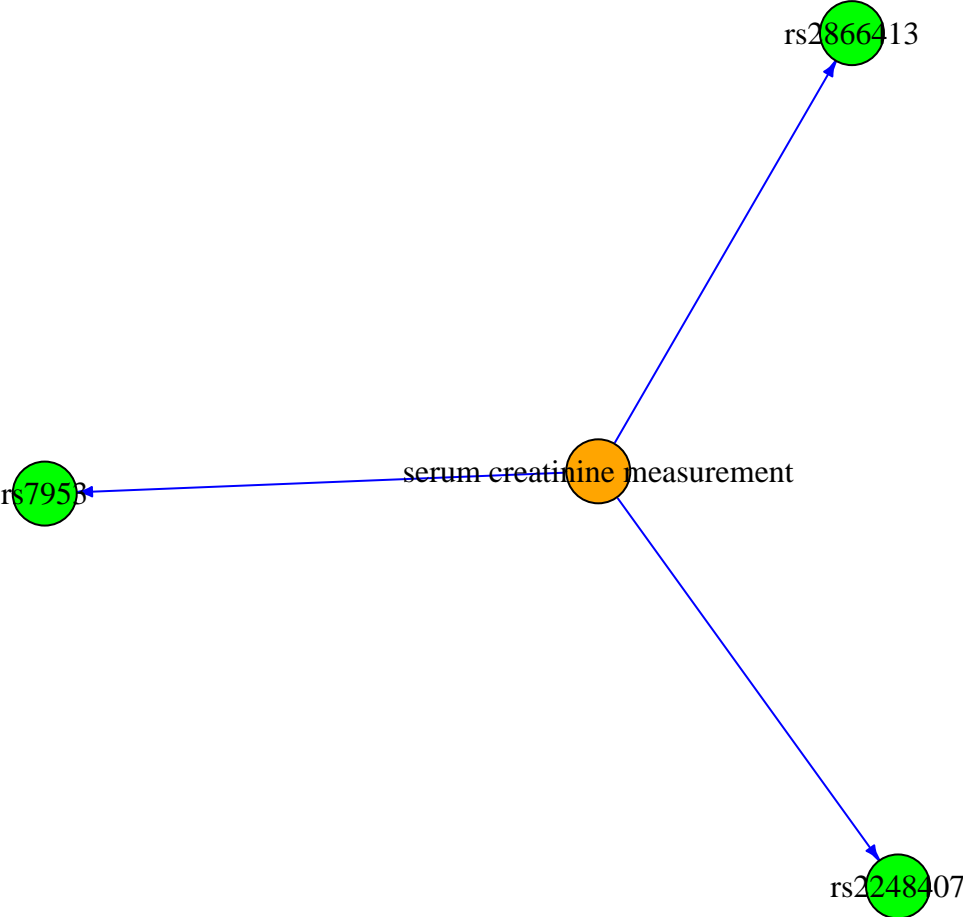

## Variant–Disease Network (Testicular Germ Cell Tumor)

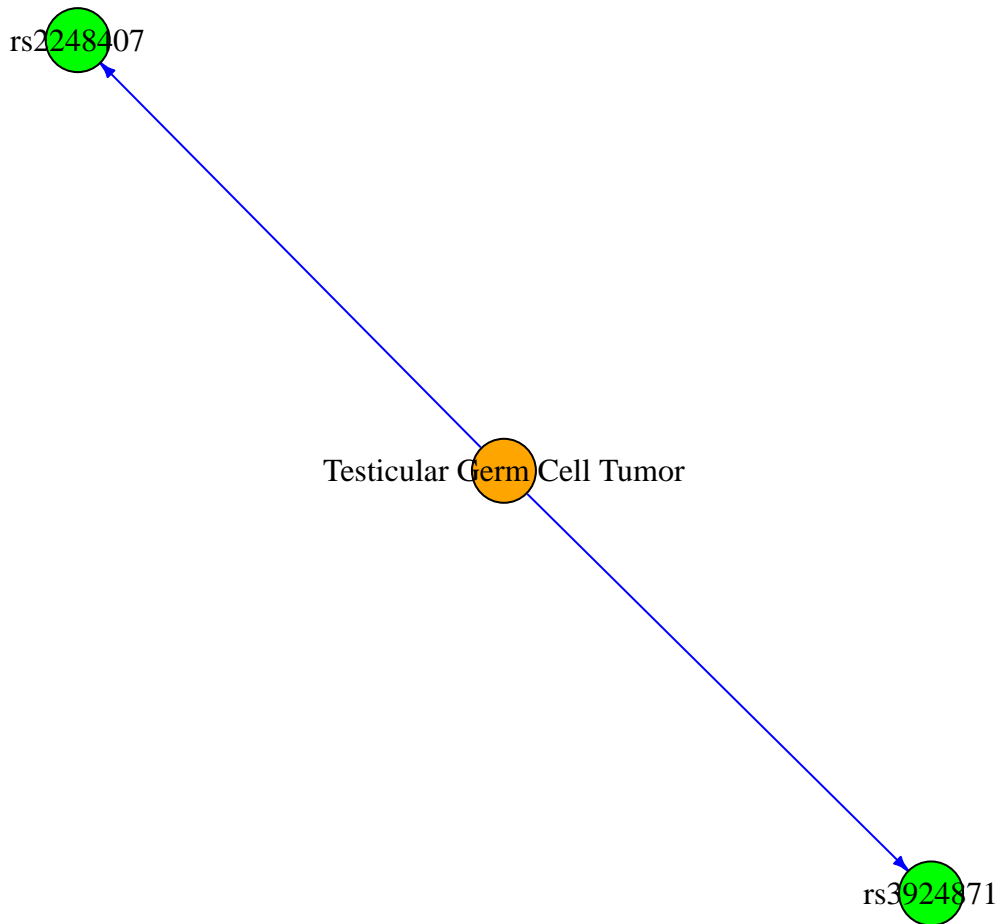



## Variant–Disease Network (total cholesterol measurement)

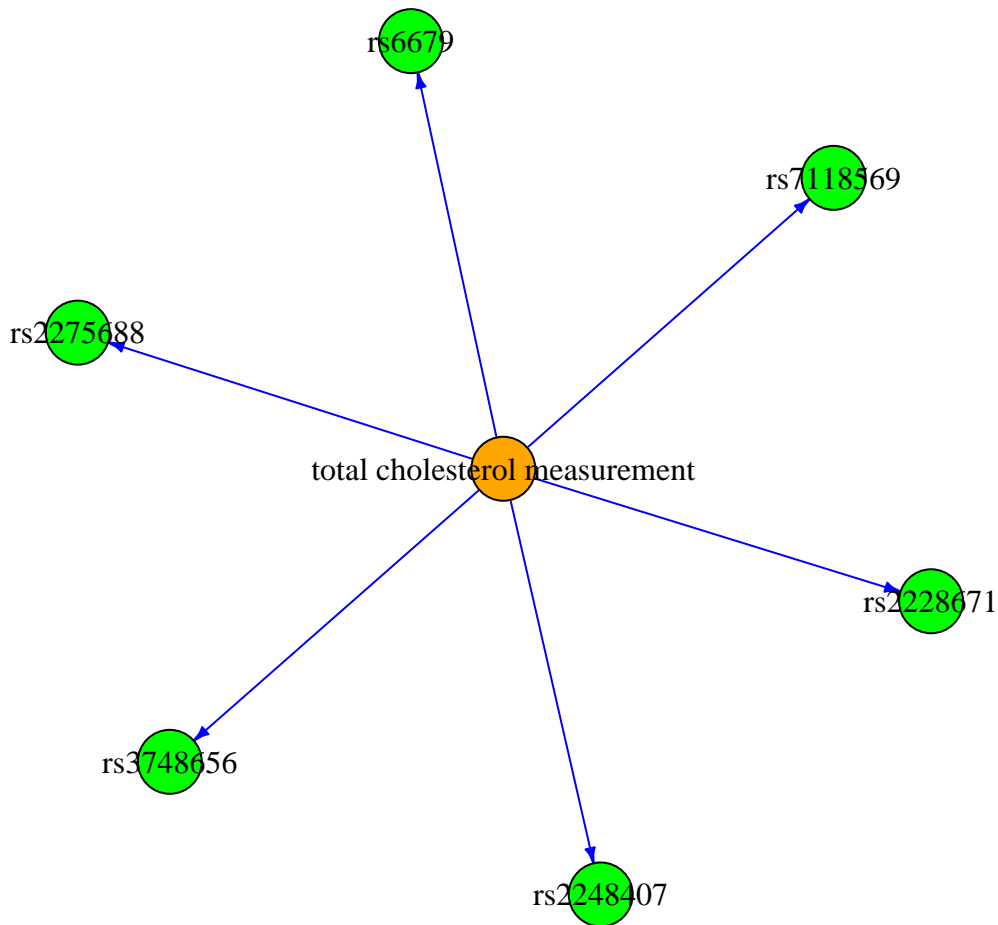

## Variant–Disease Network (triglyceride measurement)

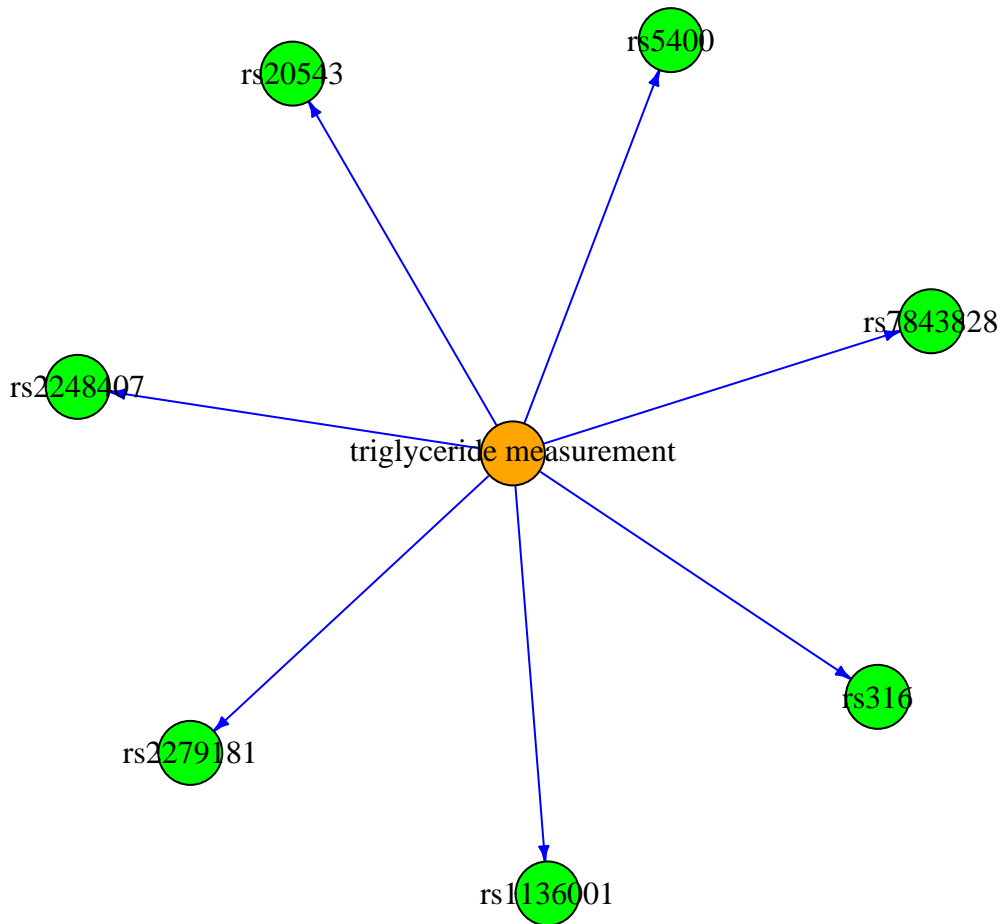

## Variant–Disease Network (diverticulitis)

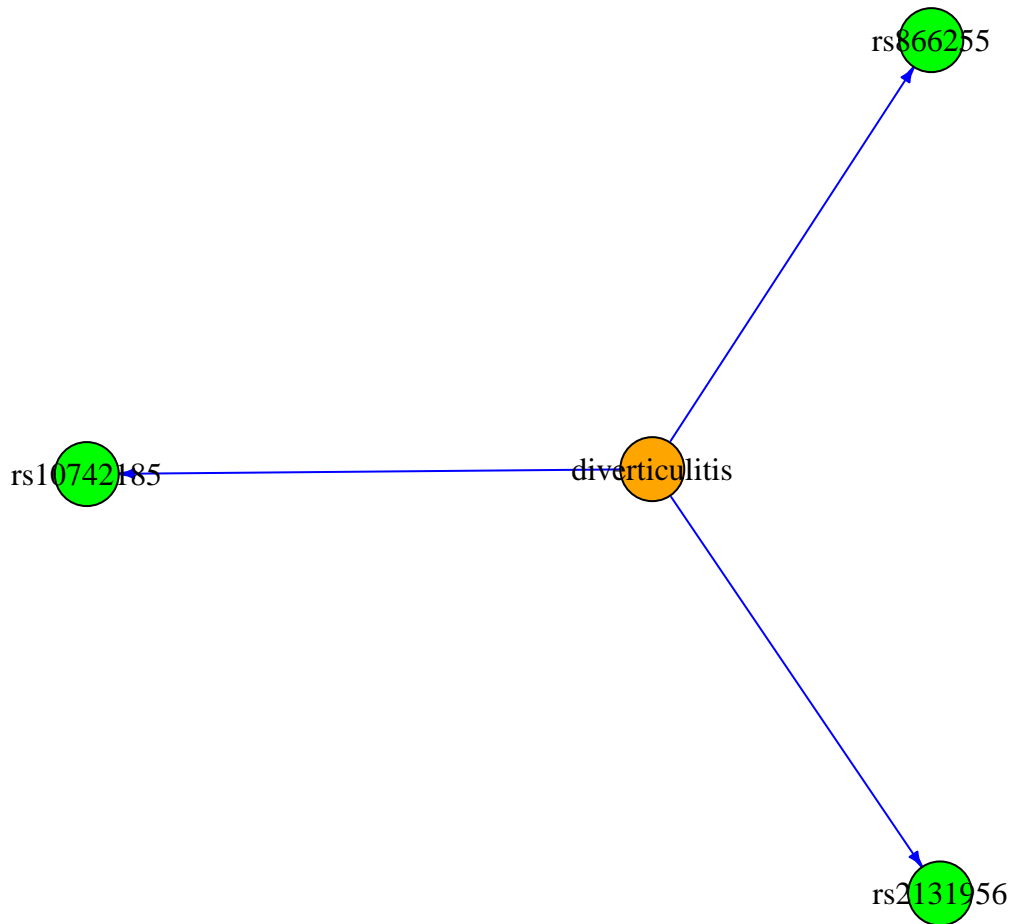

**Variant–Disease Network (albumin:globulin ratio measurement)**

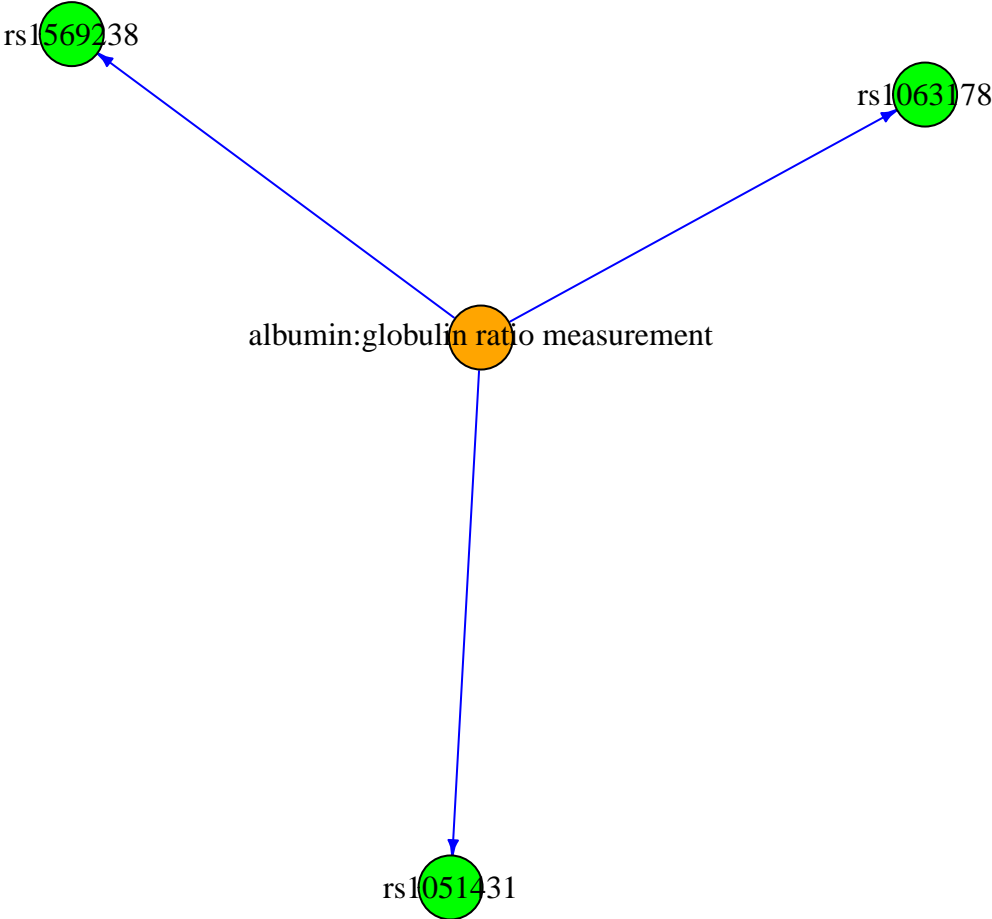

**Variant–Disease Network (allergic rhinitis)**

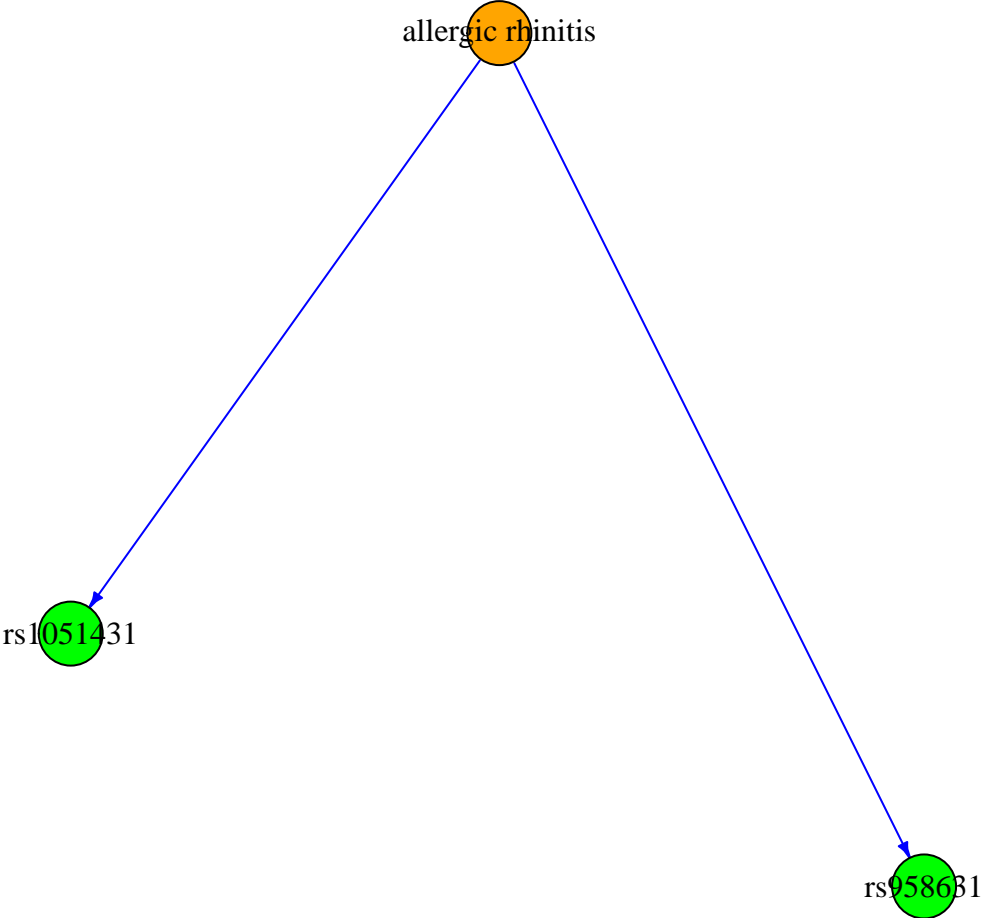

**Variant–Disease Network (allergy)**

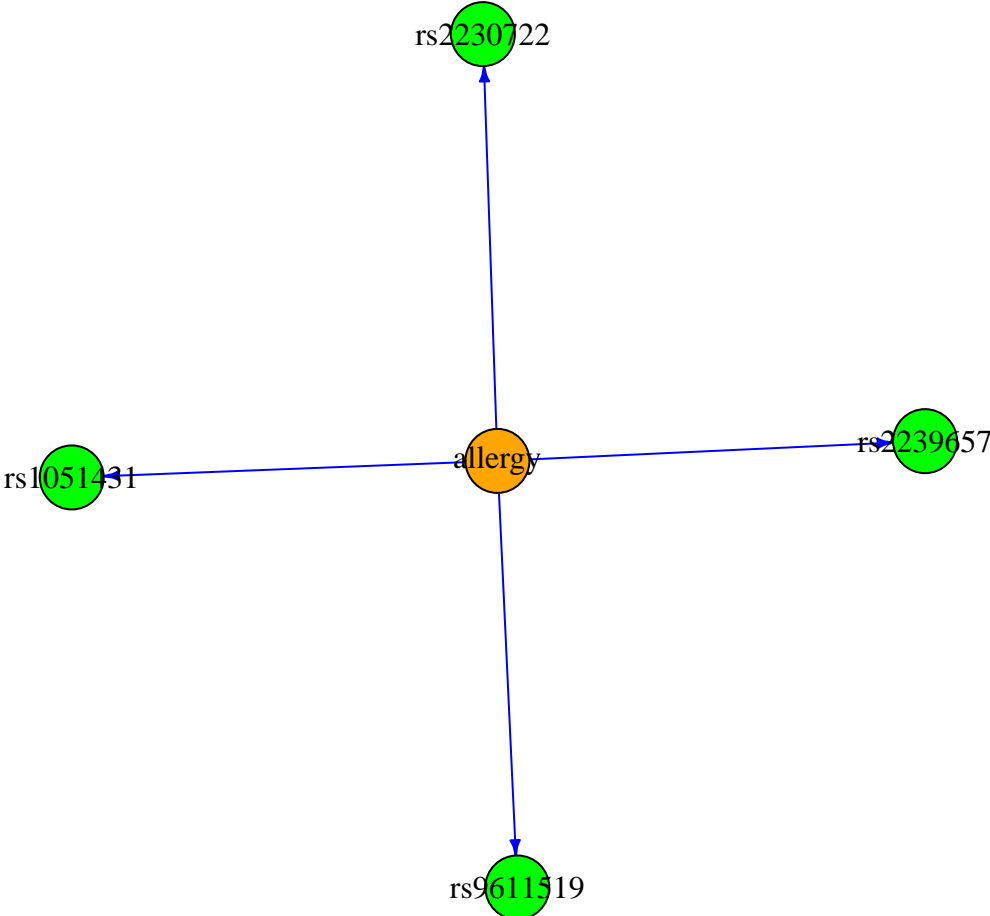

## Variant–Disease Network (autism spectrum disorder)

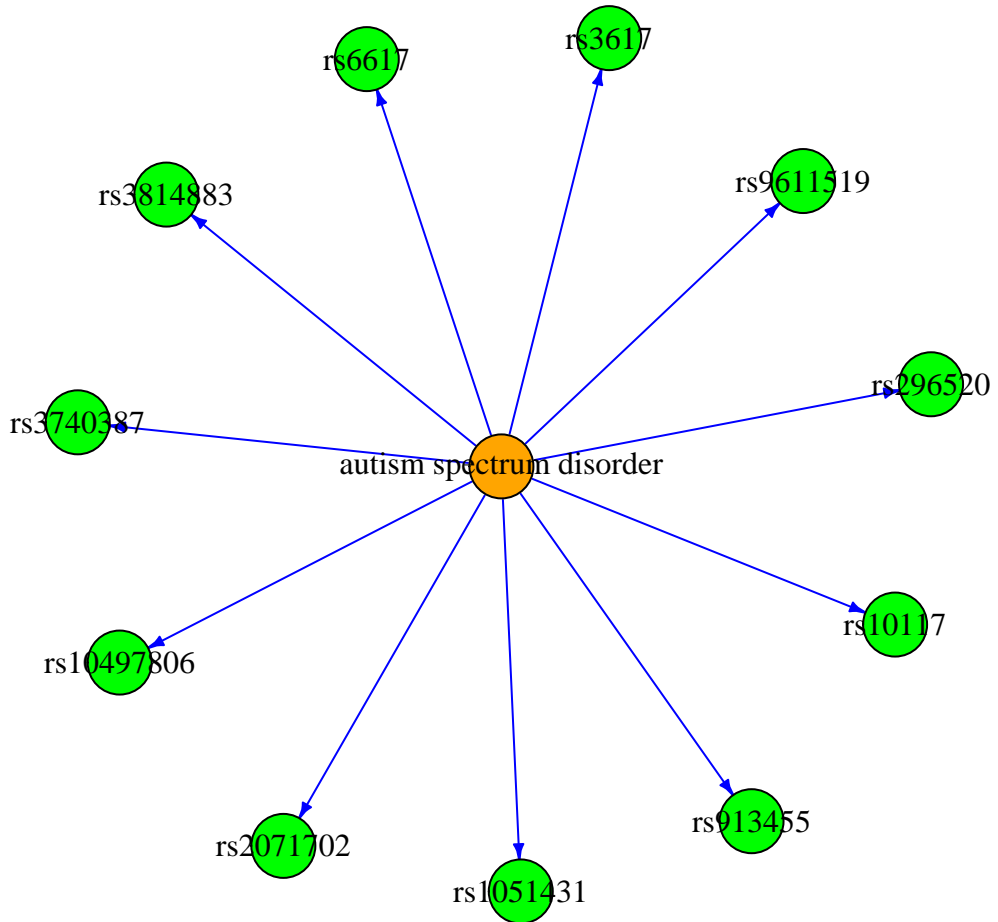

## Variant-Disease Network (body height)

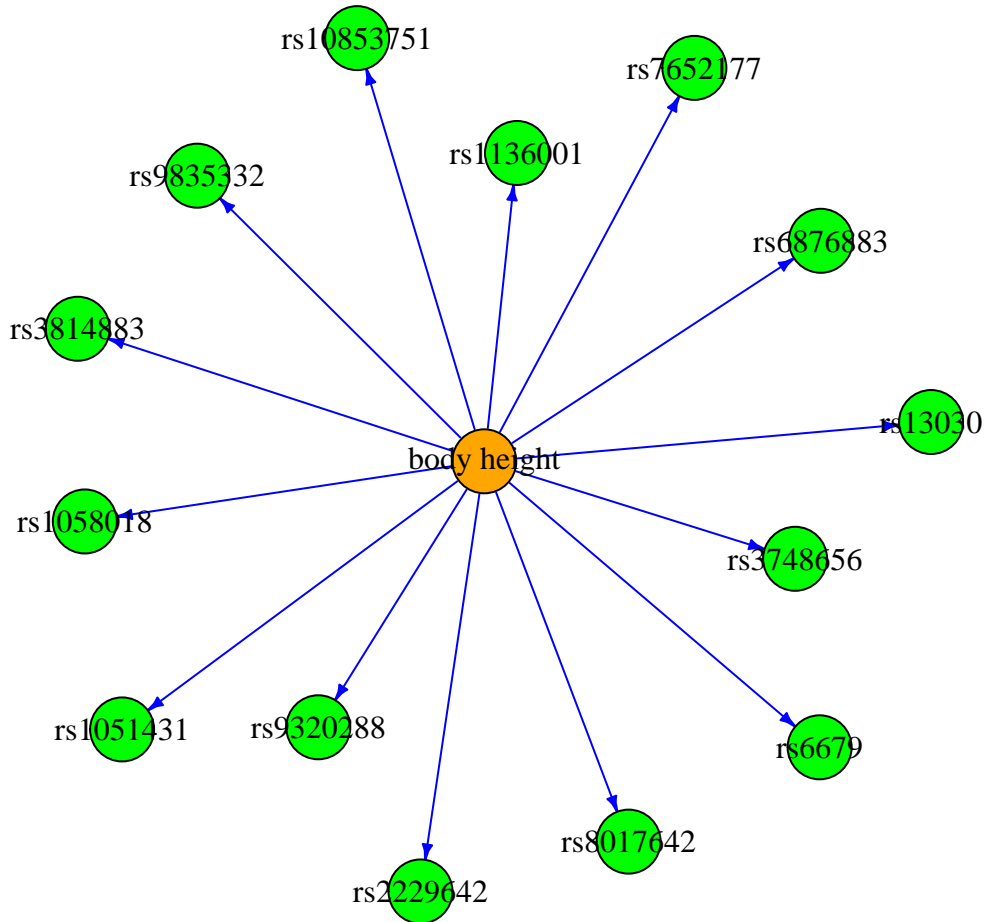



## Variant–Disease Network (hip circumference)

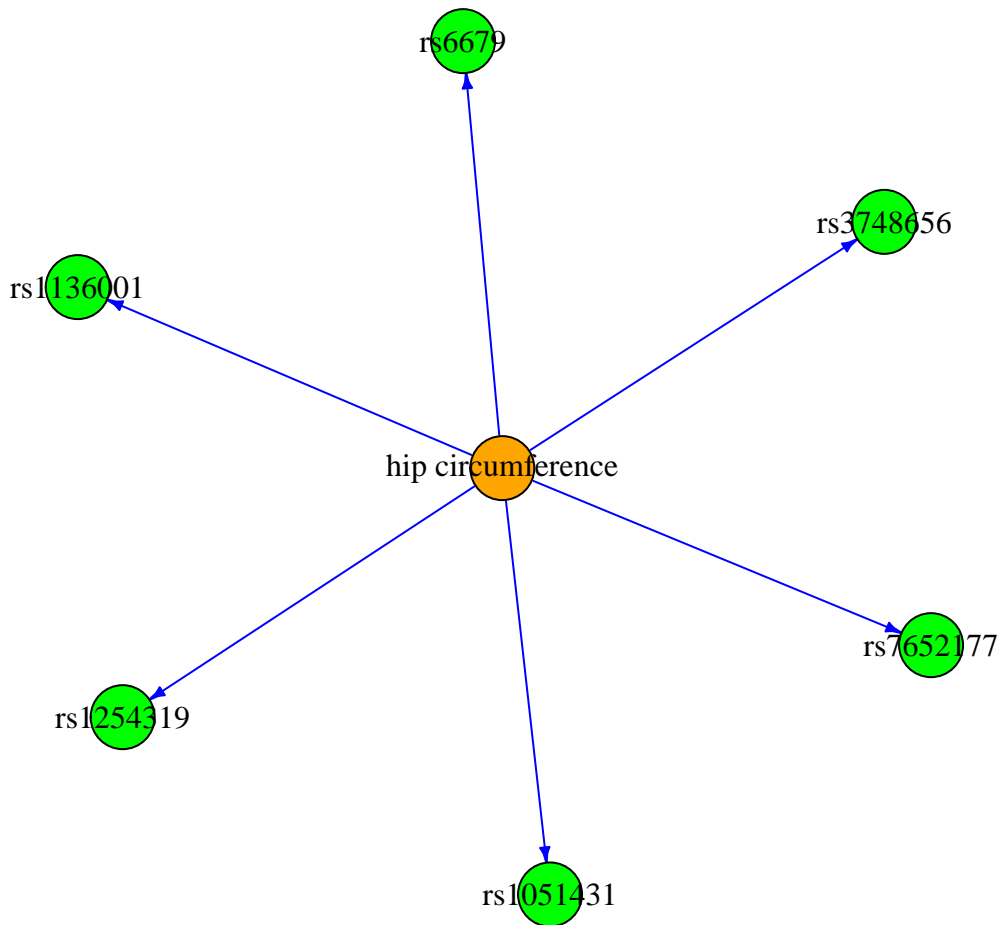

## Variant-Disease Network (infant head circumference)

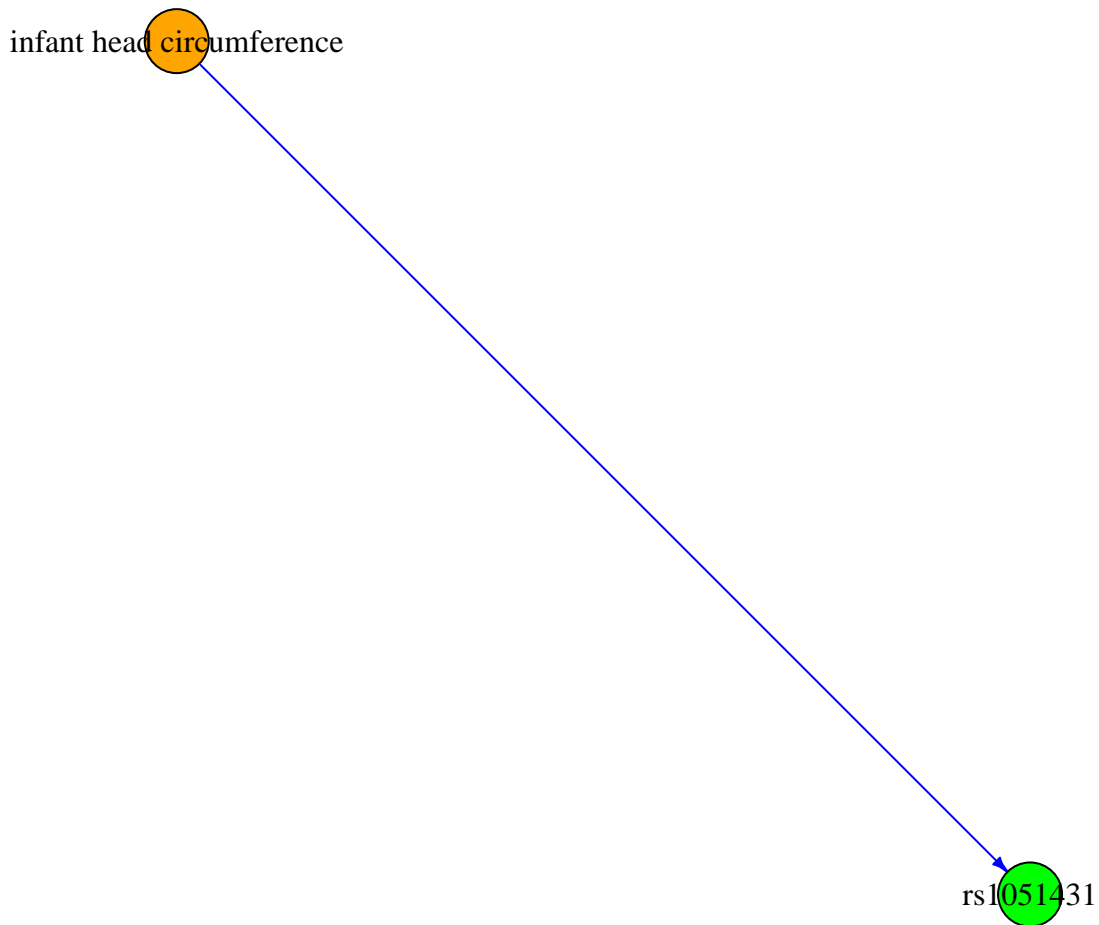

Variant–Disease Network (lymphocyte percentage of white cells)

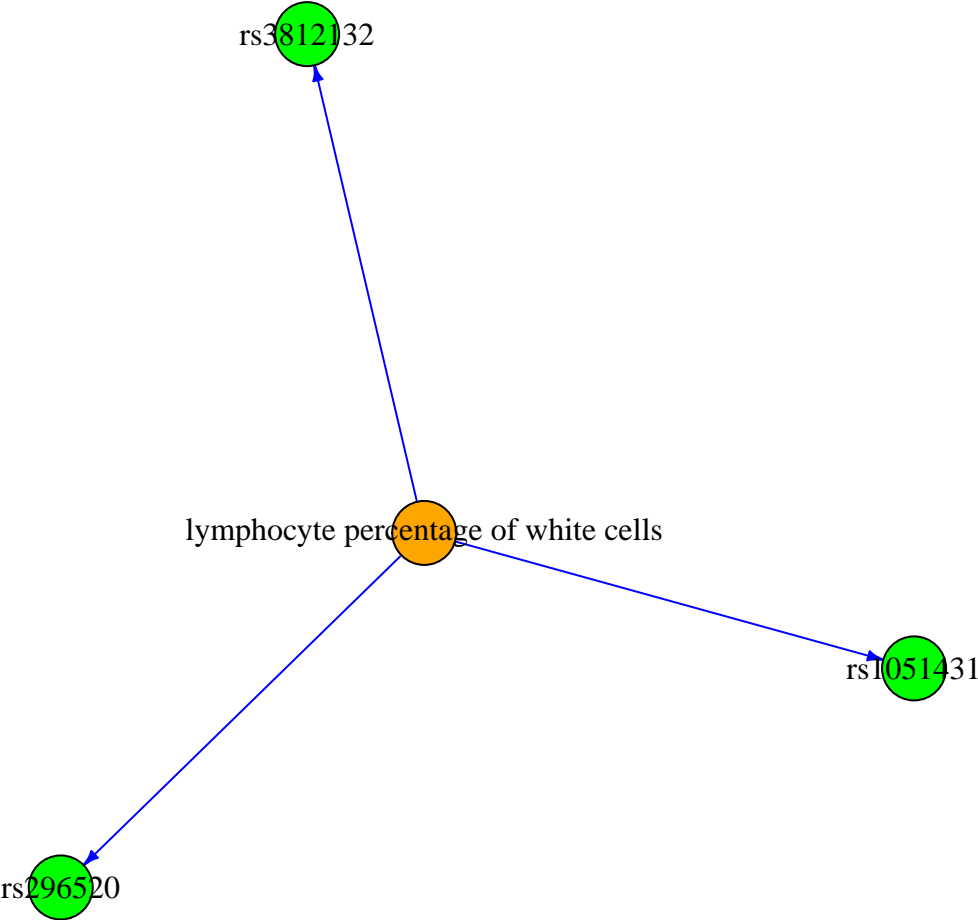

## Variant-Disease Network (multiple sclerosis)

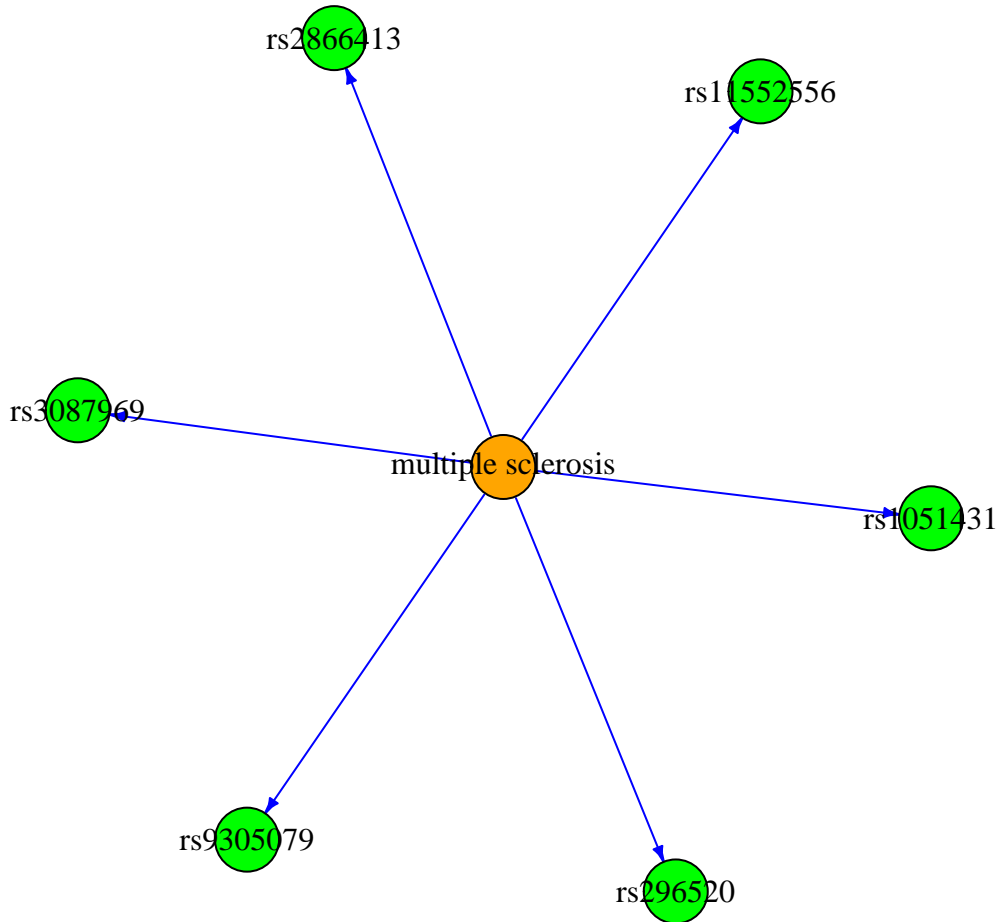

## Variant–Disease Network (plateletcrit)

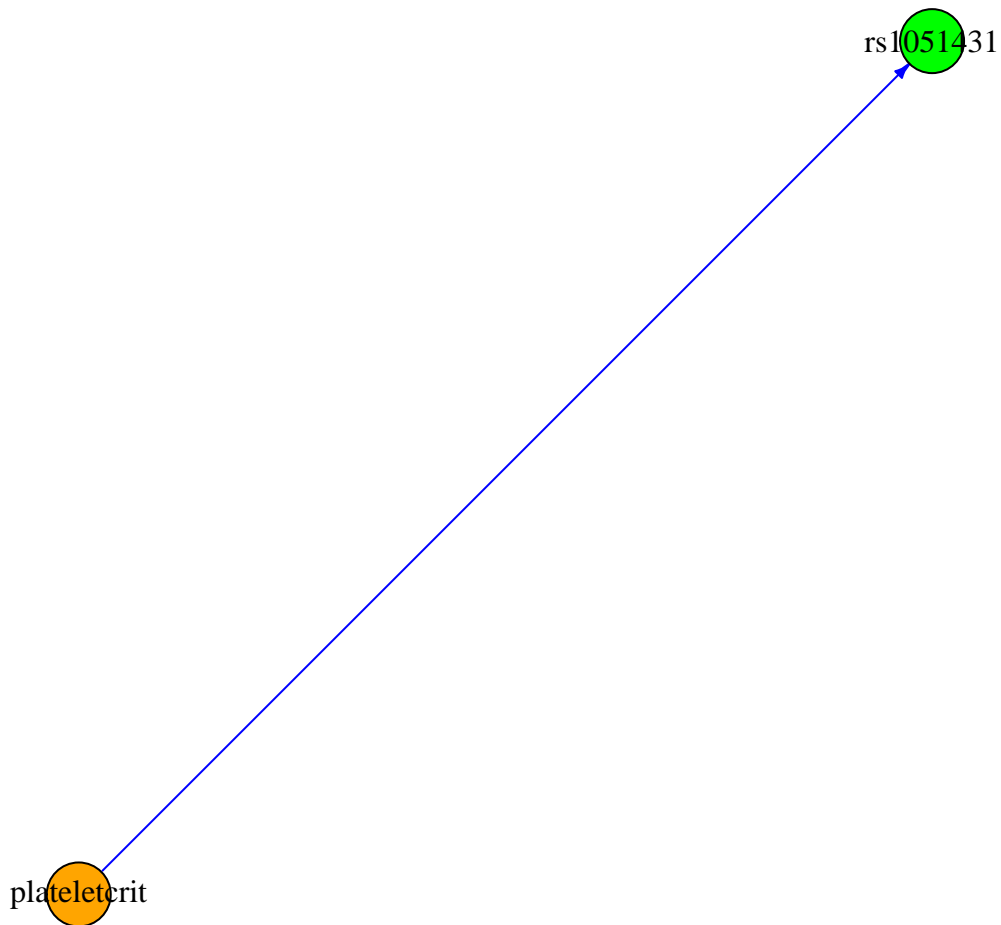

## Variant–Disease Network (type ii diabetes mellitus)

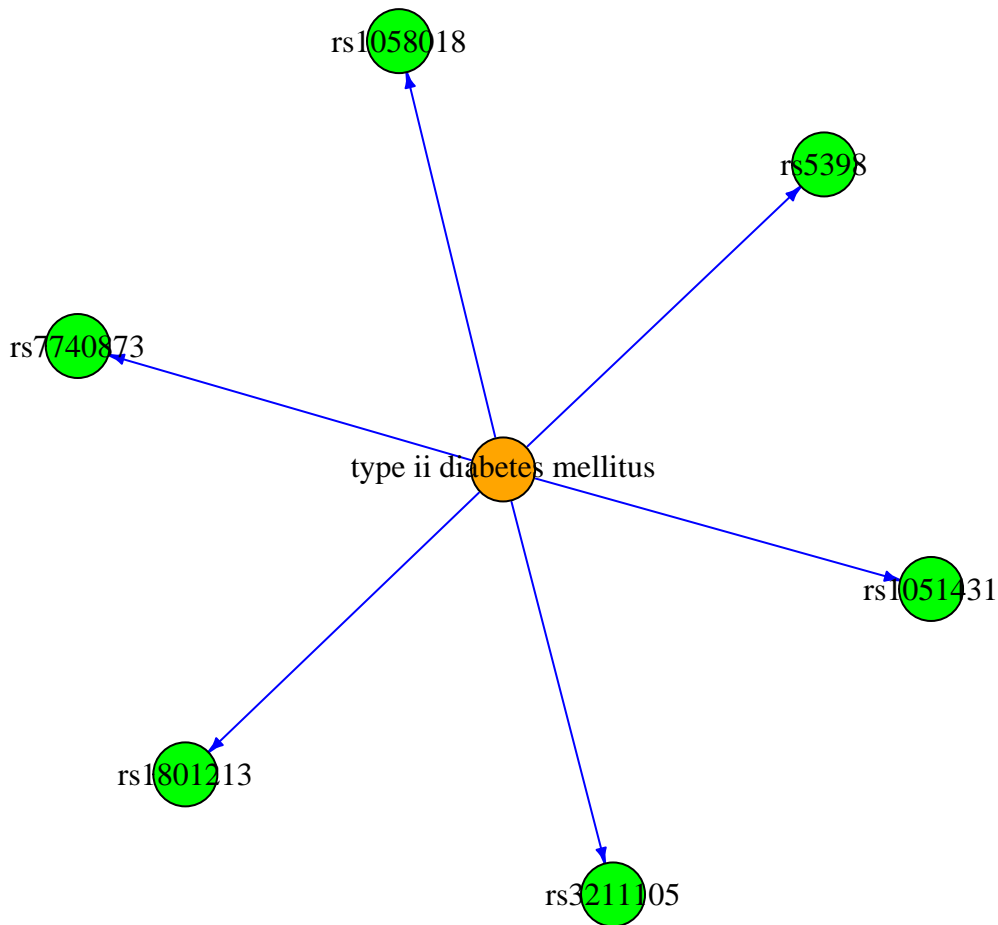

Variant–Disease Network (granulocyte percentage of myeloid white cells)

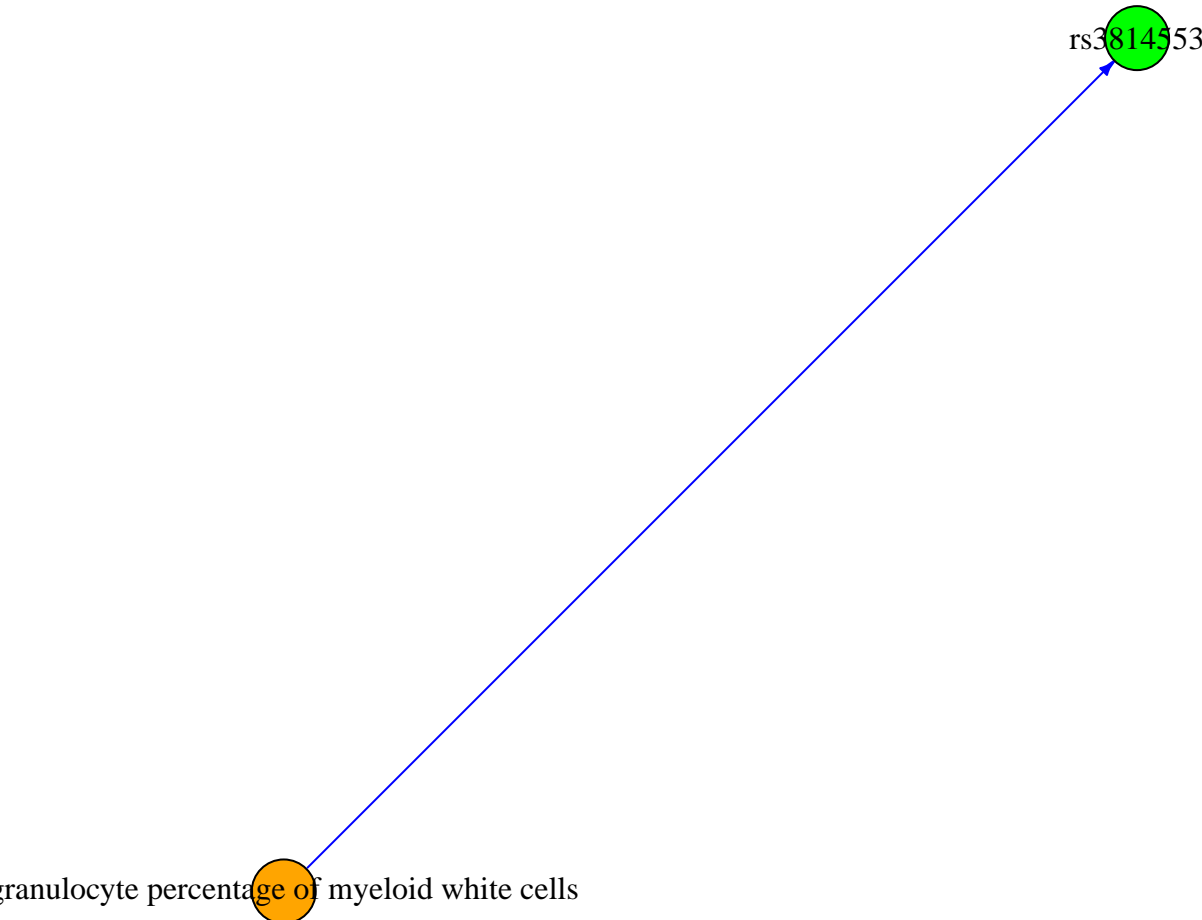

**Variant–Disease Network (cranial vault morphology measurement)**

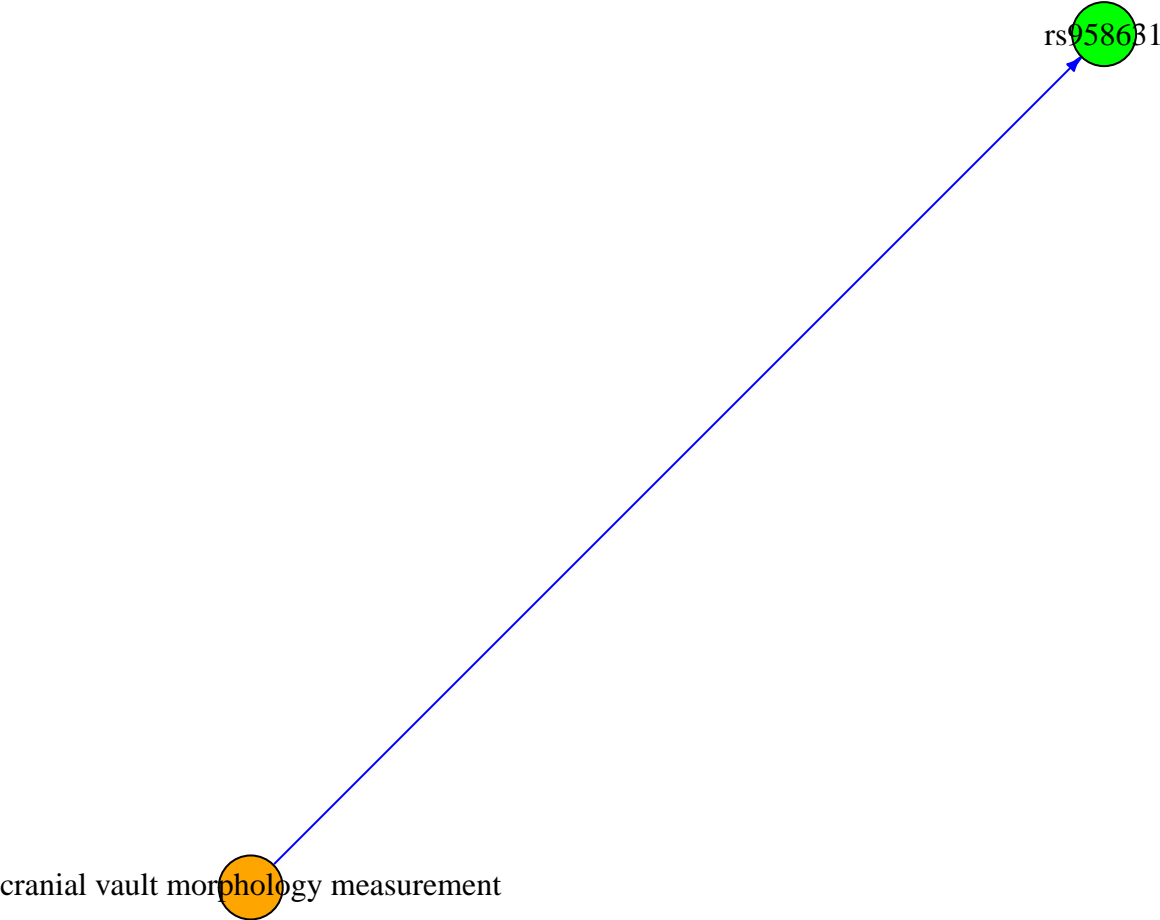



## Variant-Disease Network (crohns disease)

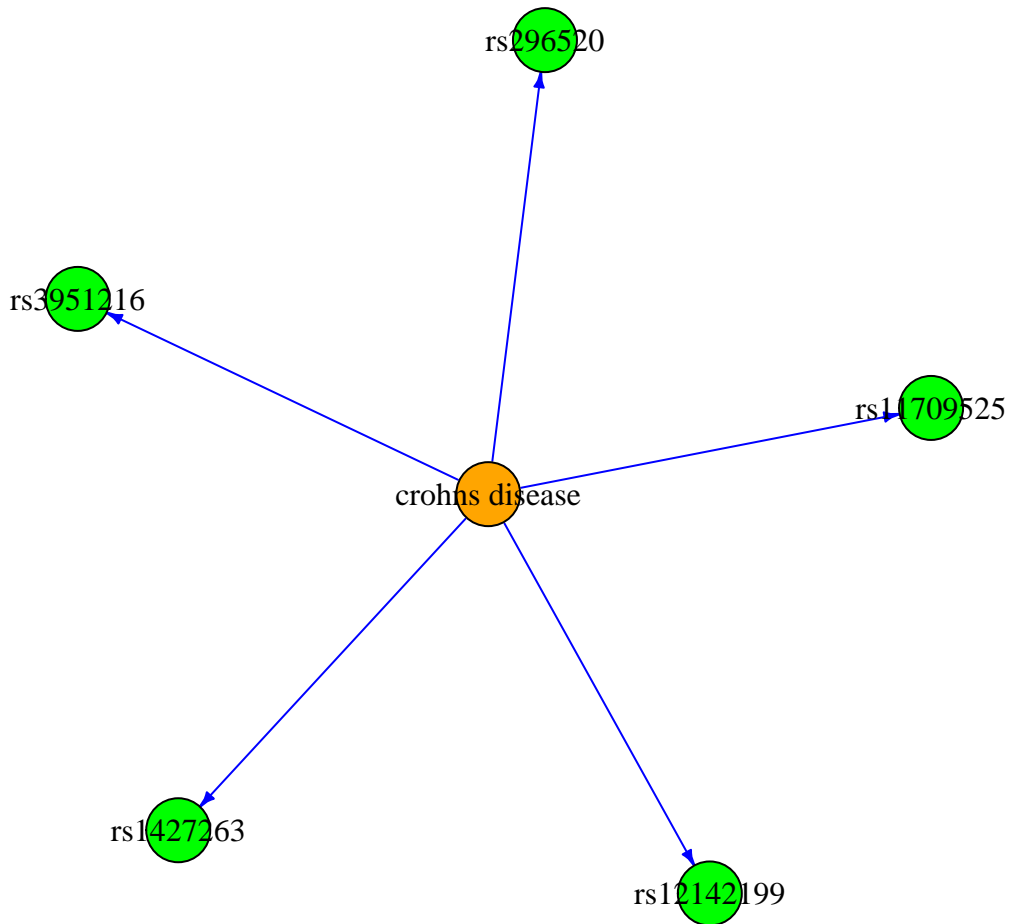

## Variant–Disease Network (erythema nodosum)

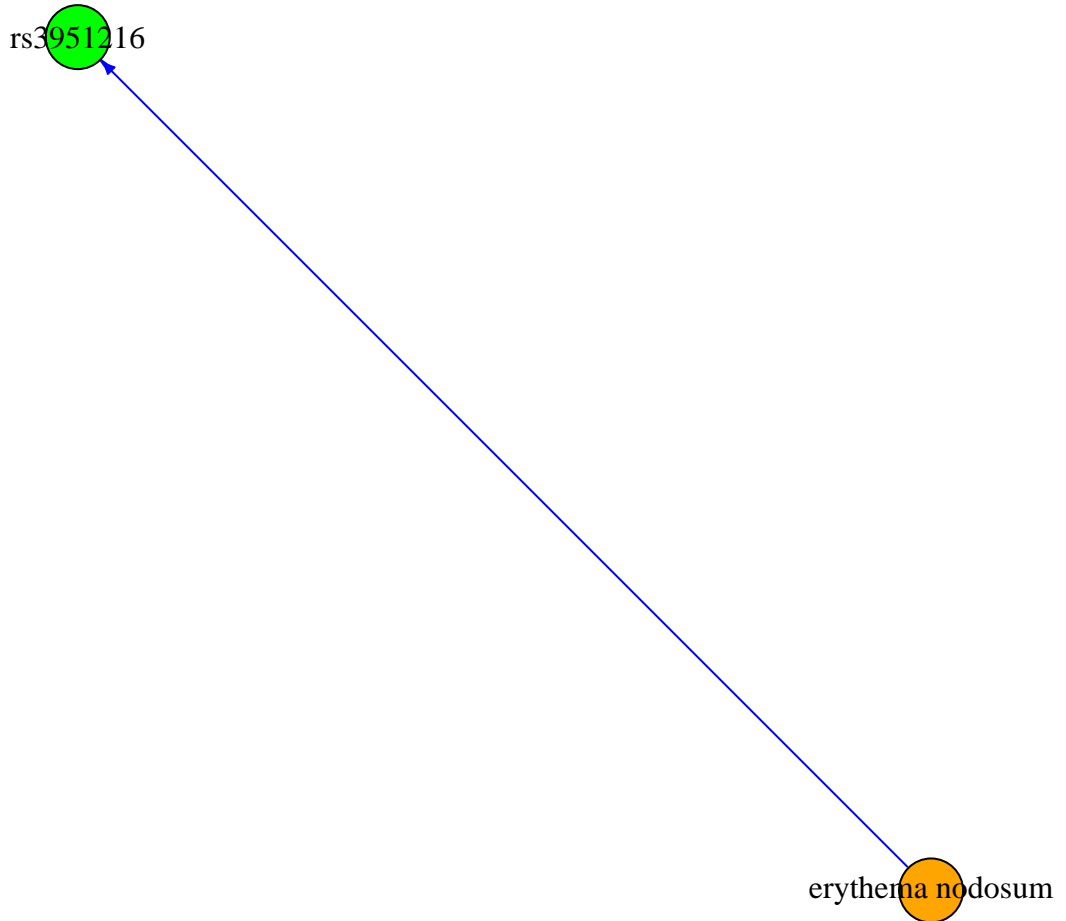

## Variant–Disease Network (leukocyte count)

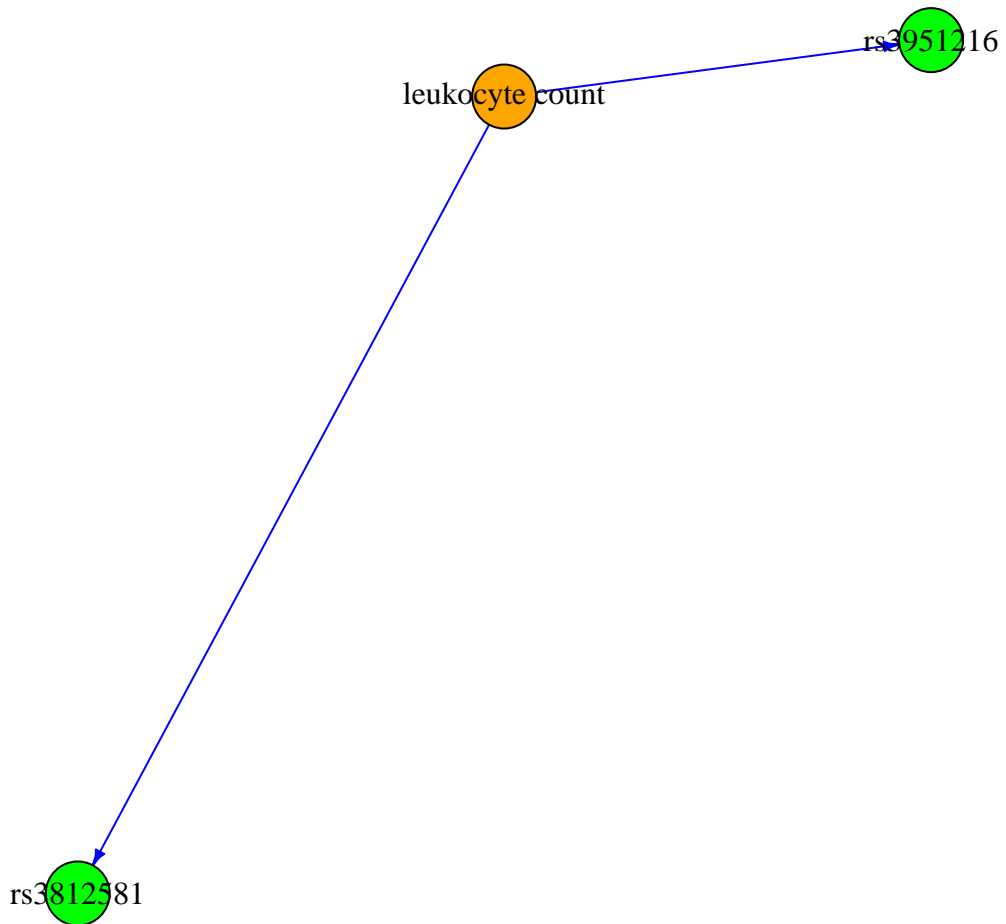

## Variant–Disease Network (head and neck squamous cell carcinoma)

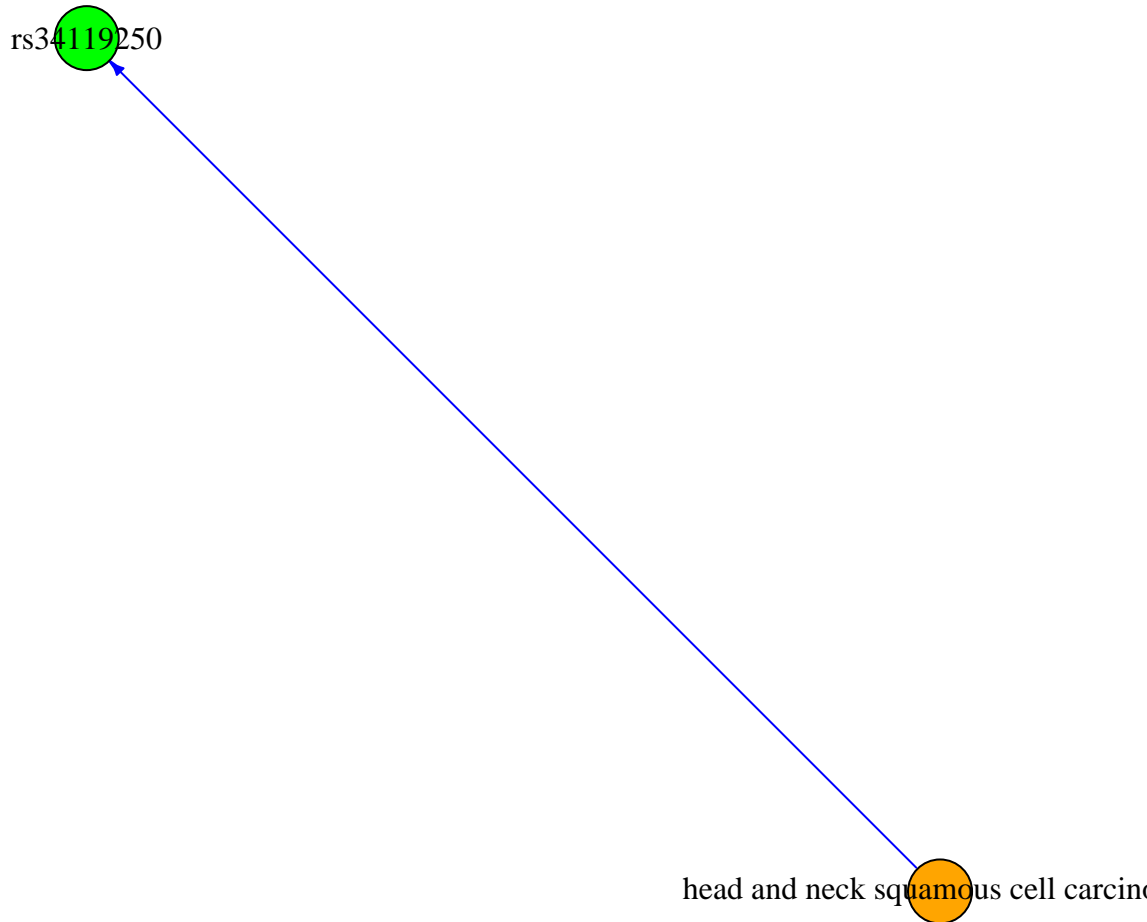

## Variant-Disease Network (pain)

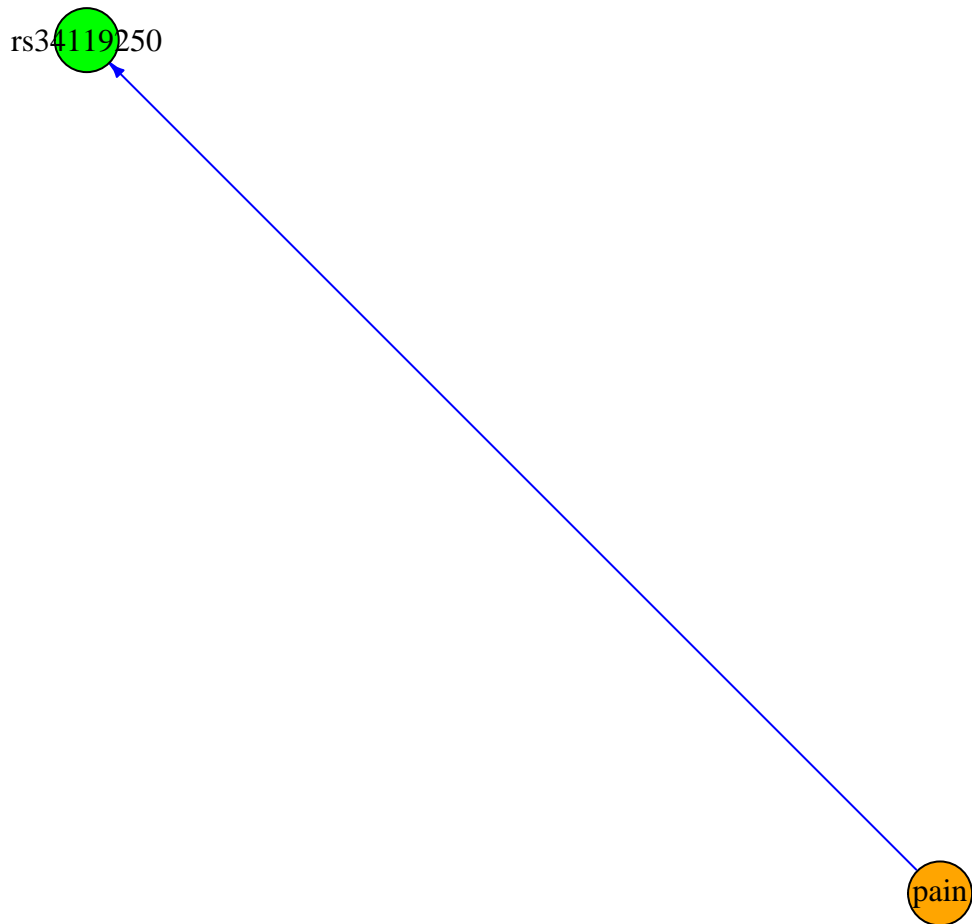

## Variant-Disease Network (immune system disease)

immune system disease

rs2239657

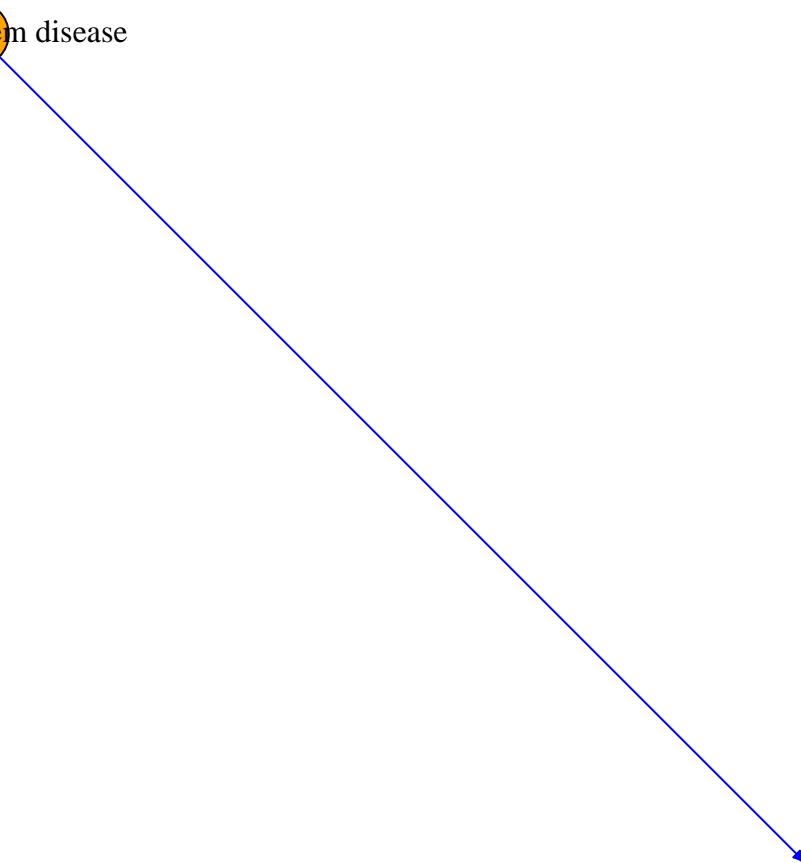

## Variant–Disease Network (lymphocyte count)

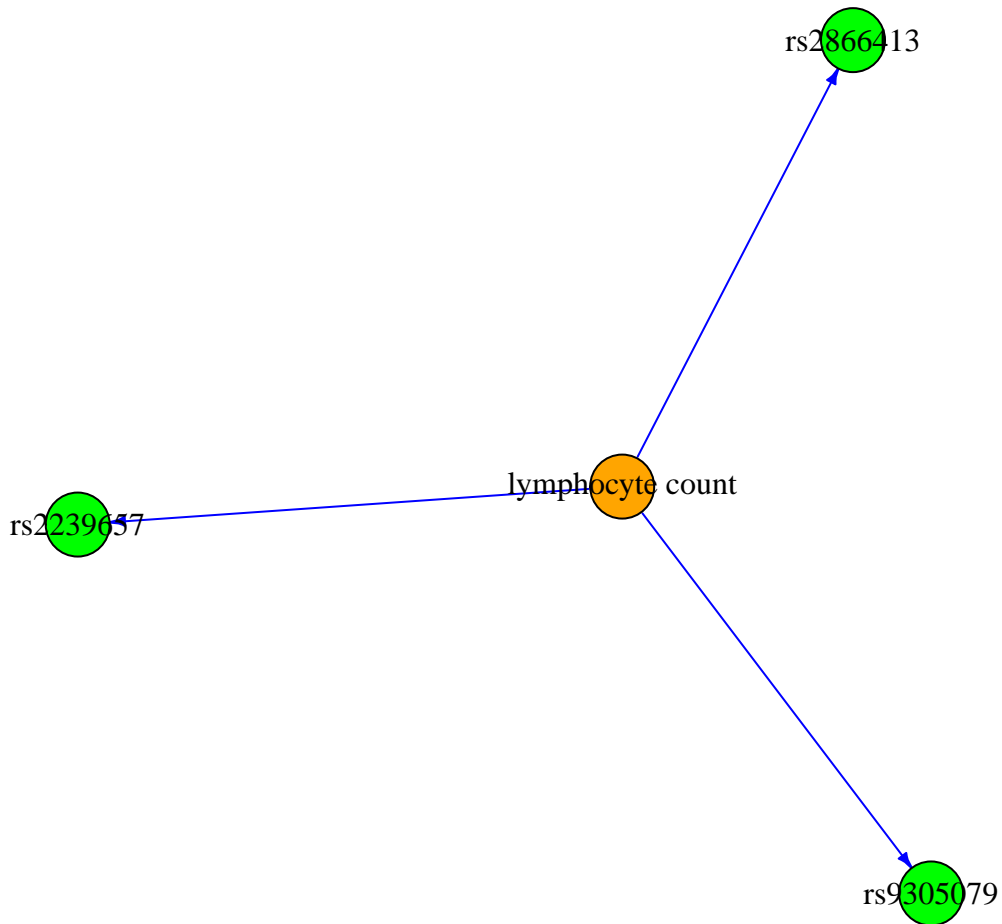

**Variant–Disease Network (prostate specific antigen measurement)**

prostate specific antigen measurement

rs2239657

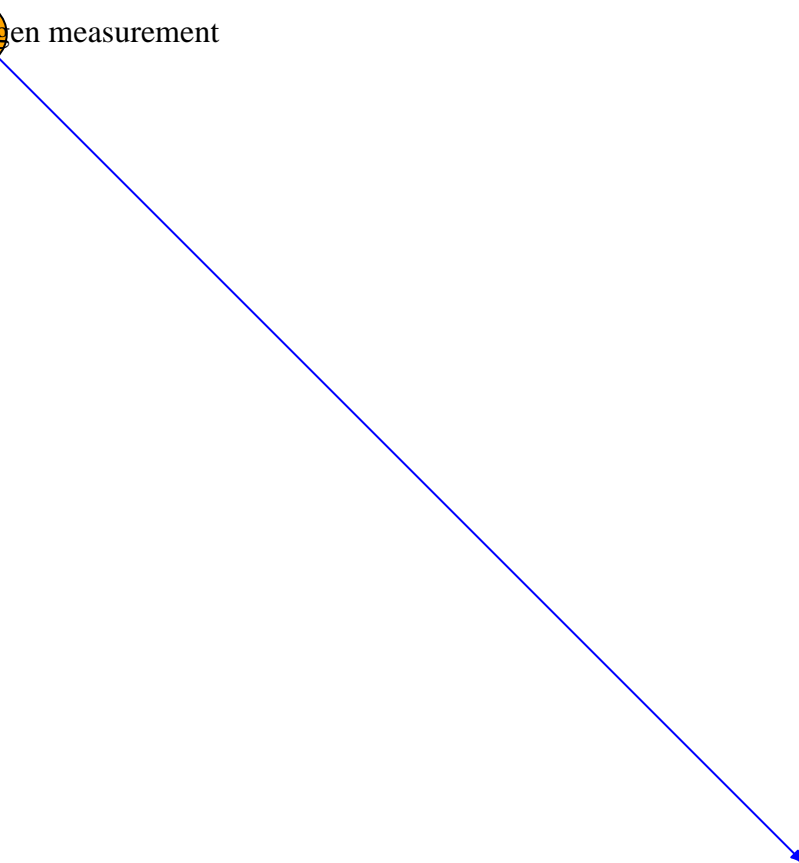



# Variant–Disease Network (pulse pressure measurement)

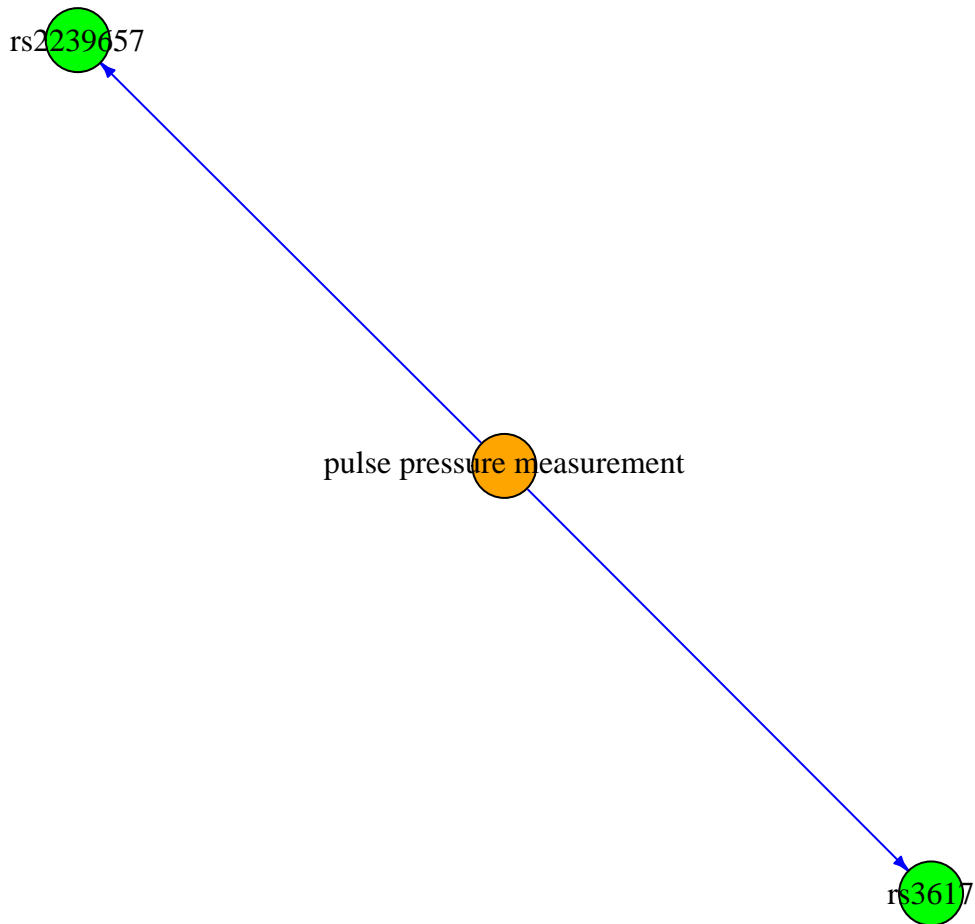

## Variant–Disease Network (rheumatoid arthritis)

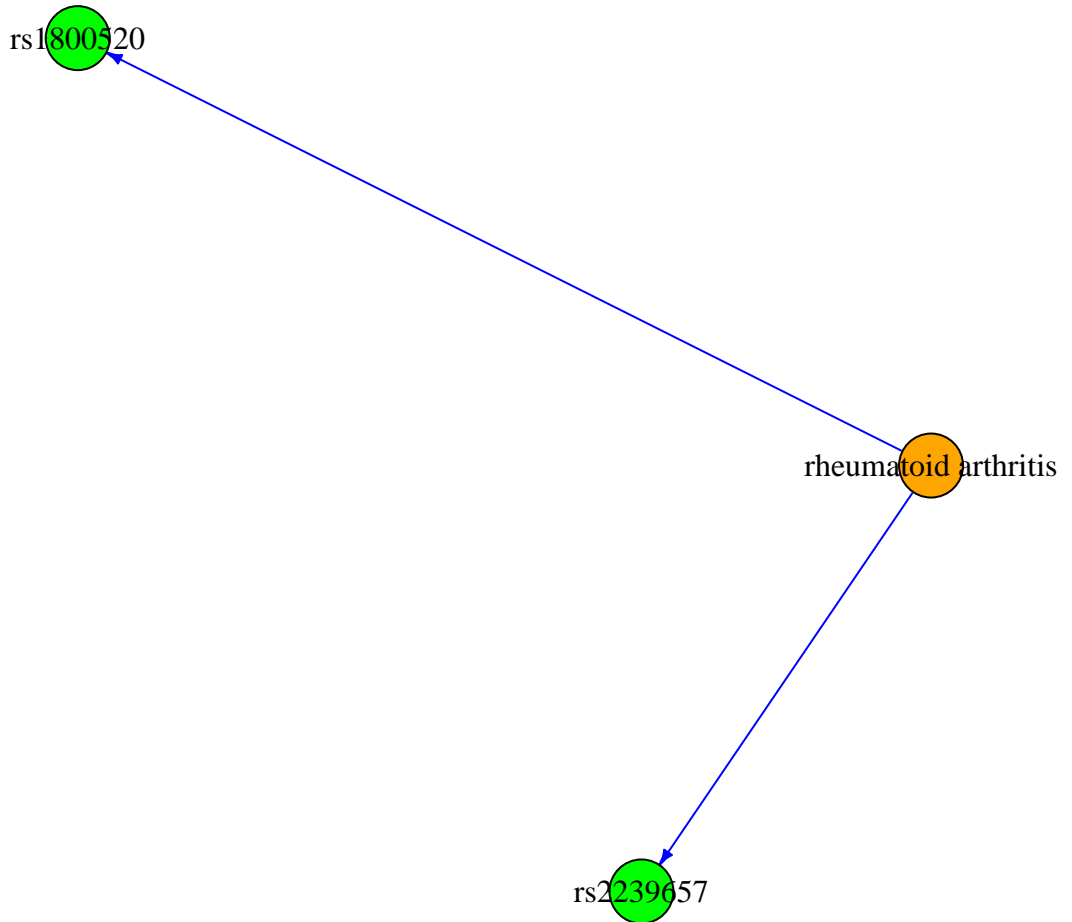

## Variant–Disease Network (psoriasis)

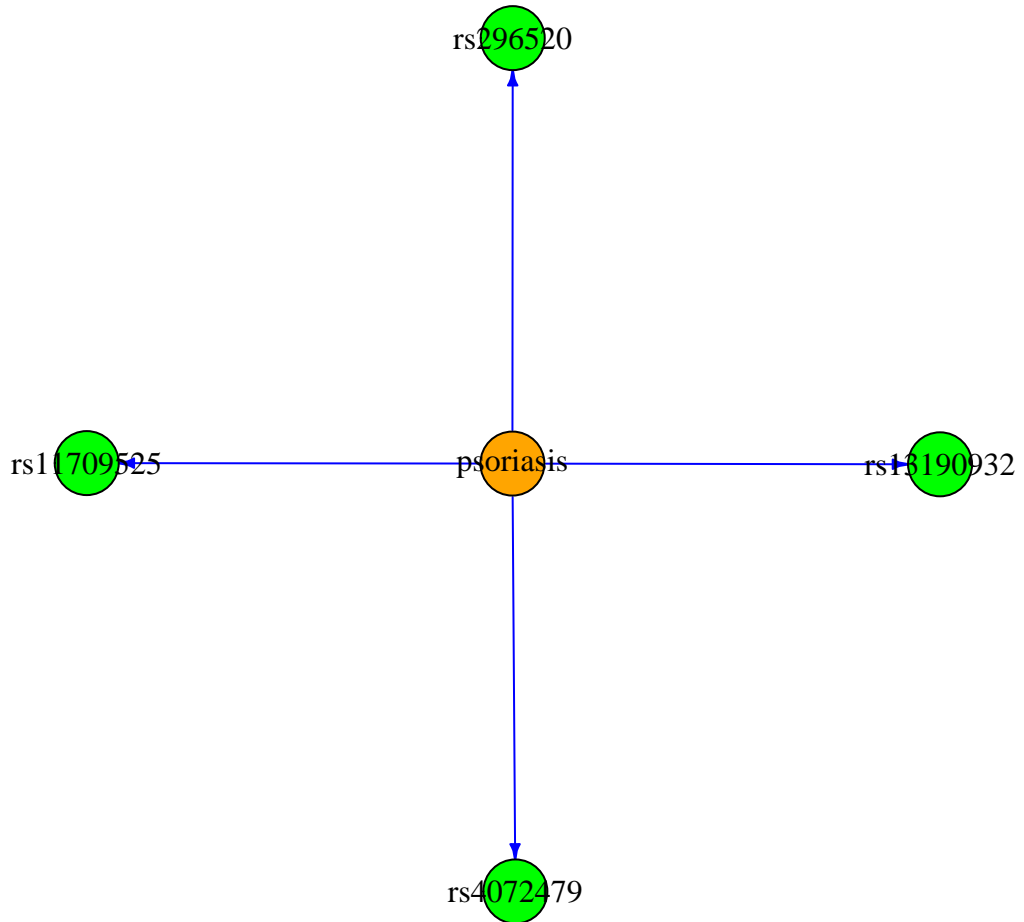

## Variant–Disease Network (psoriasis vulgaris)

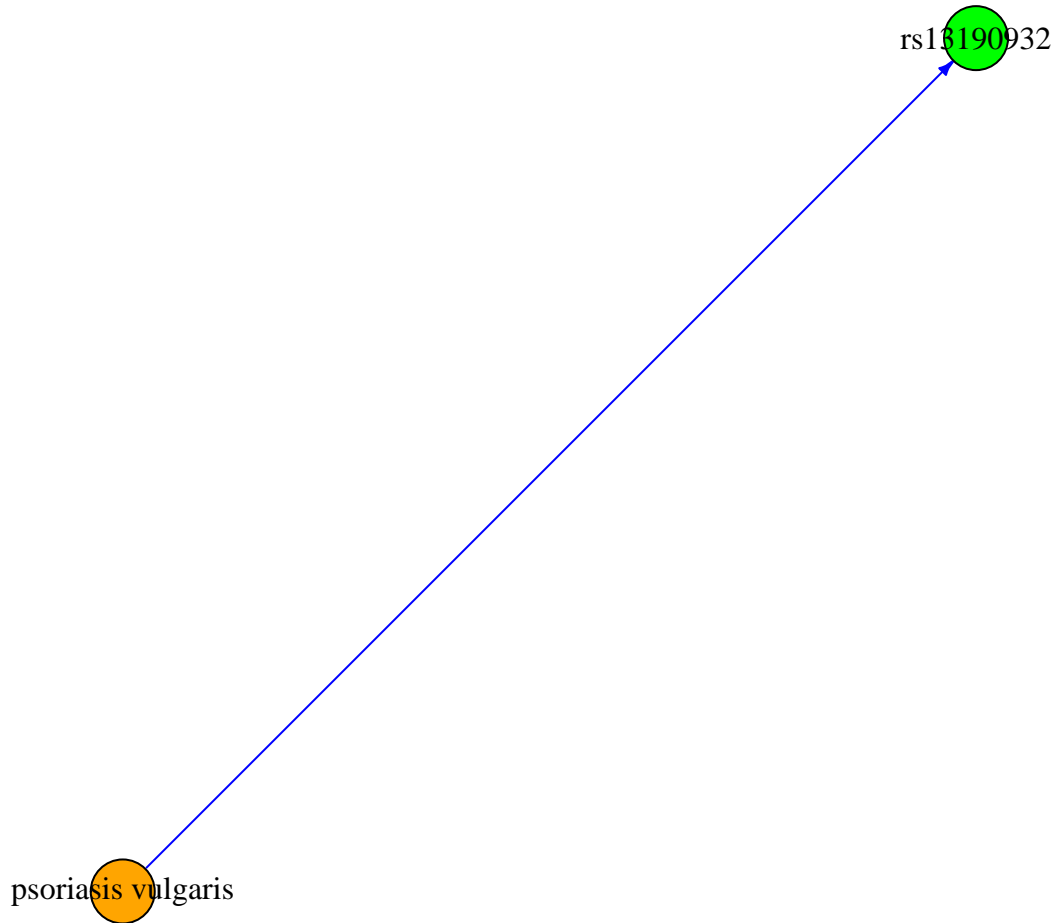

## Variant–Disease Network (grip strength measurement)

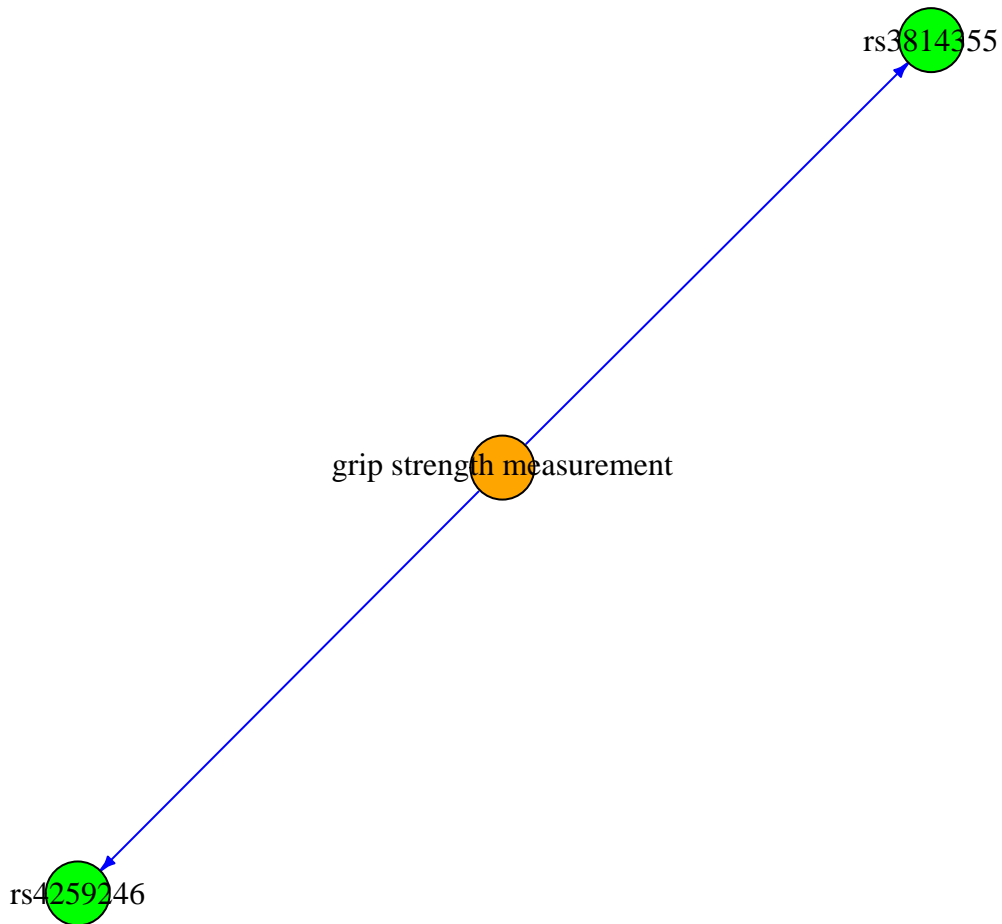

## Variant–Disease Network (smoking behavior)

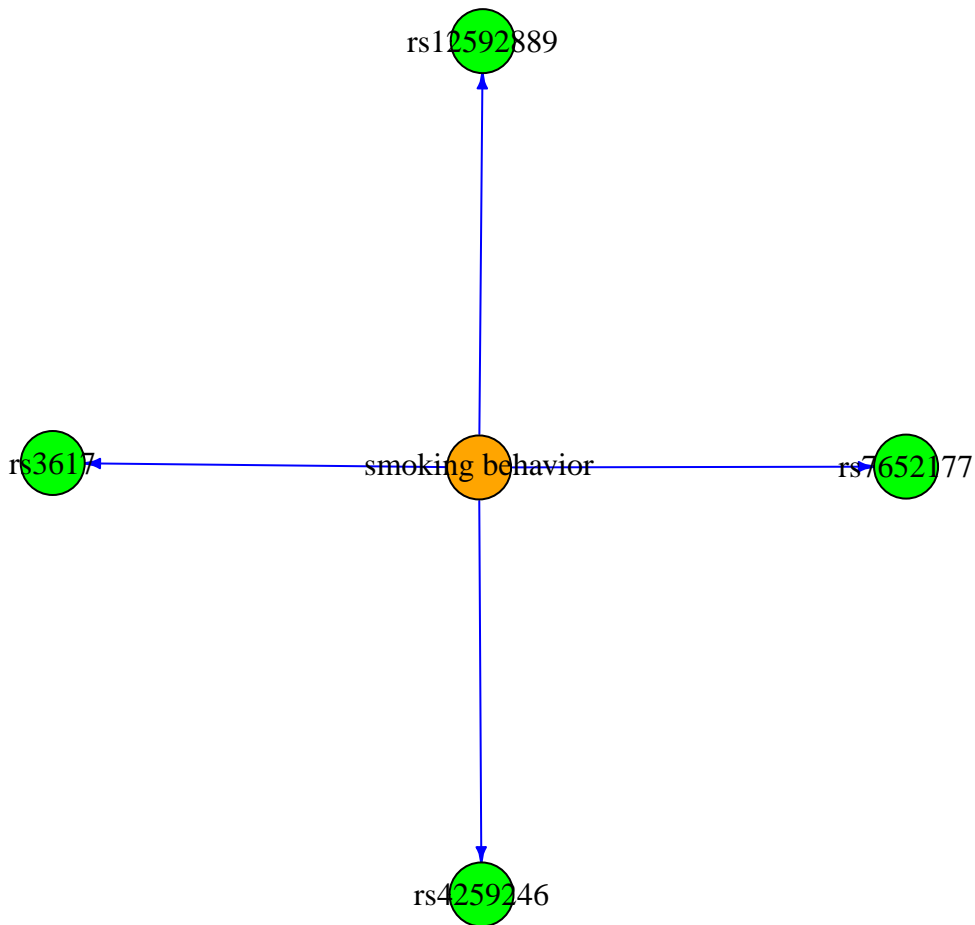

## Variant–Disease Network (lobe attachment)

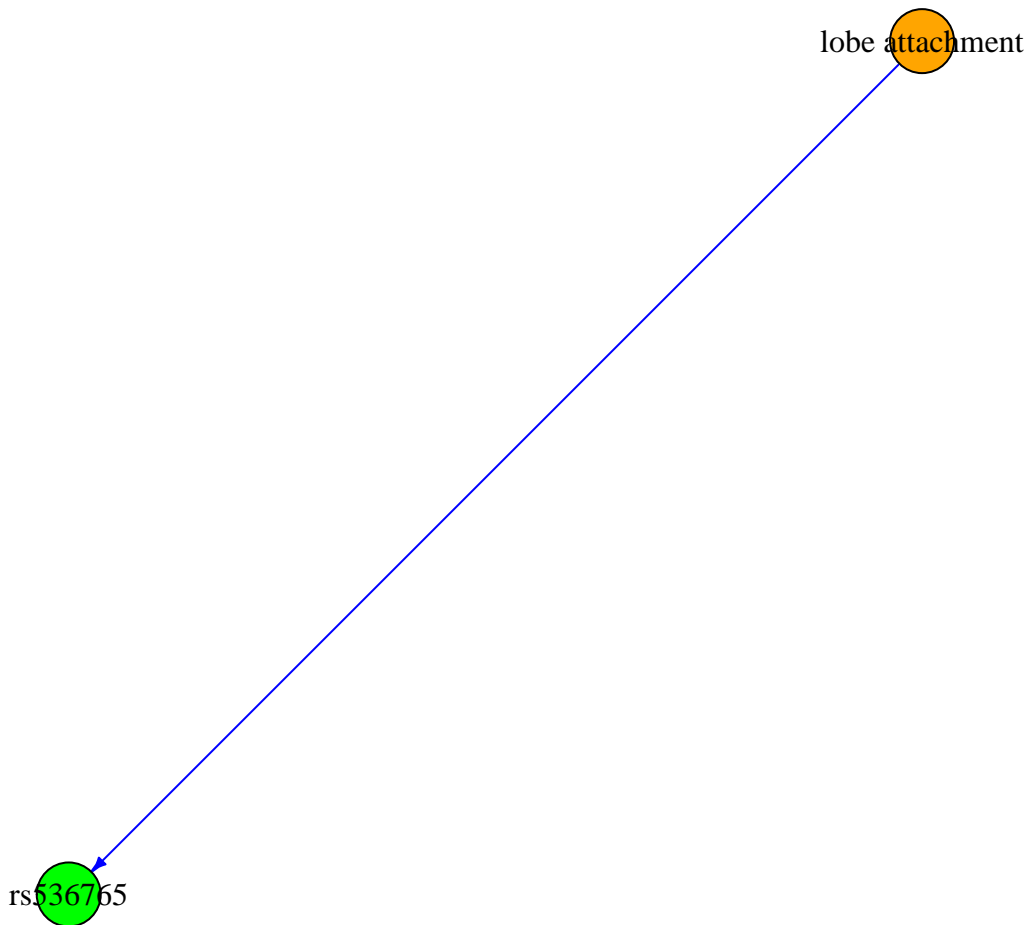

## Variant–Disease Network (late-onset Alzheimers disease)

late-onset Alzheimers disease

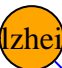

rs6010201

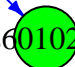



## **Variant–Disease Network (family history of Alzheimer’s disease)**

## Variant–Disease Network (sickle cell anemia)

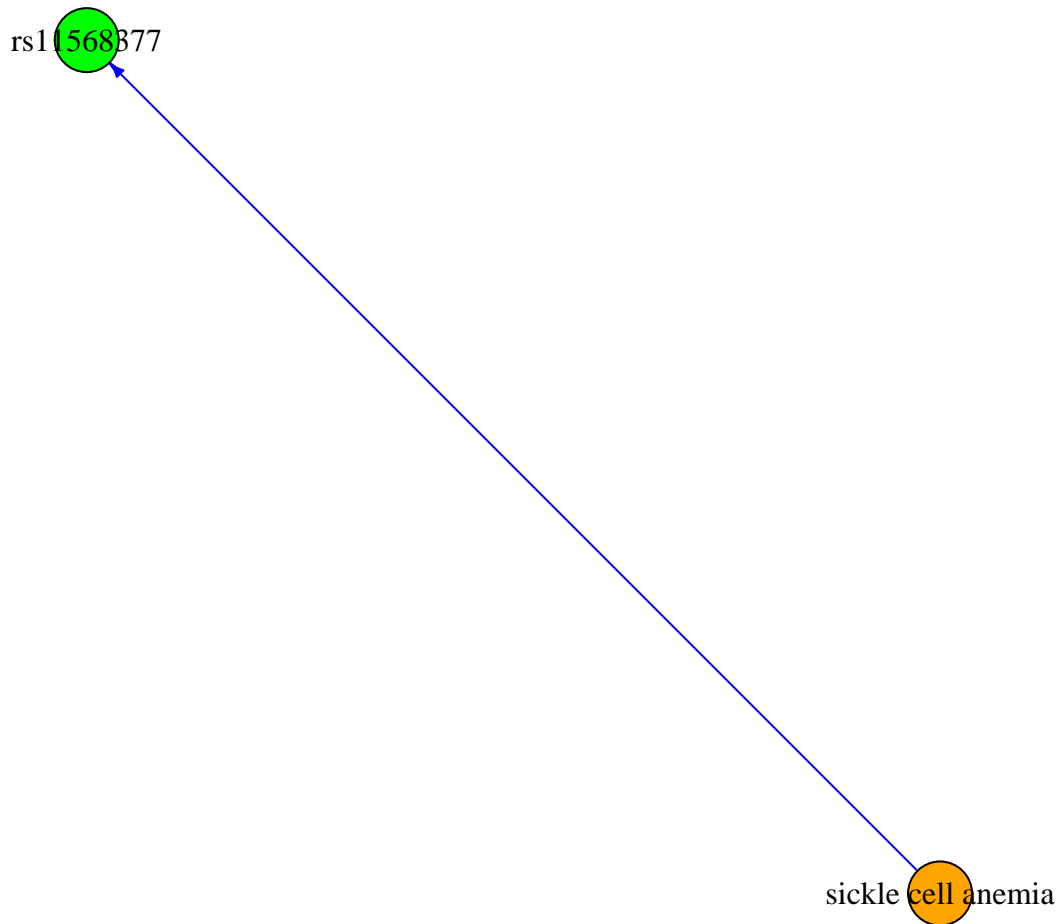

## Variant–Disease Network (age at onset)

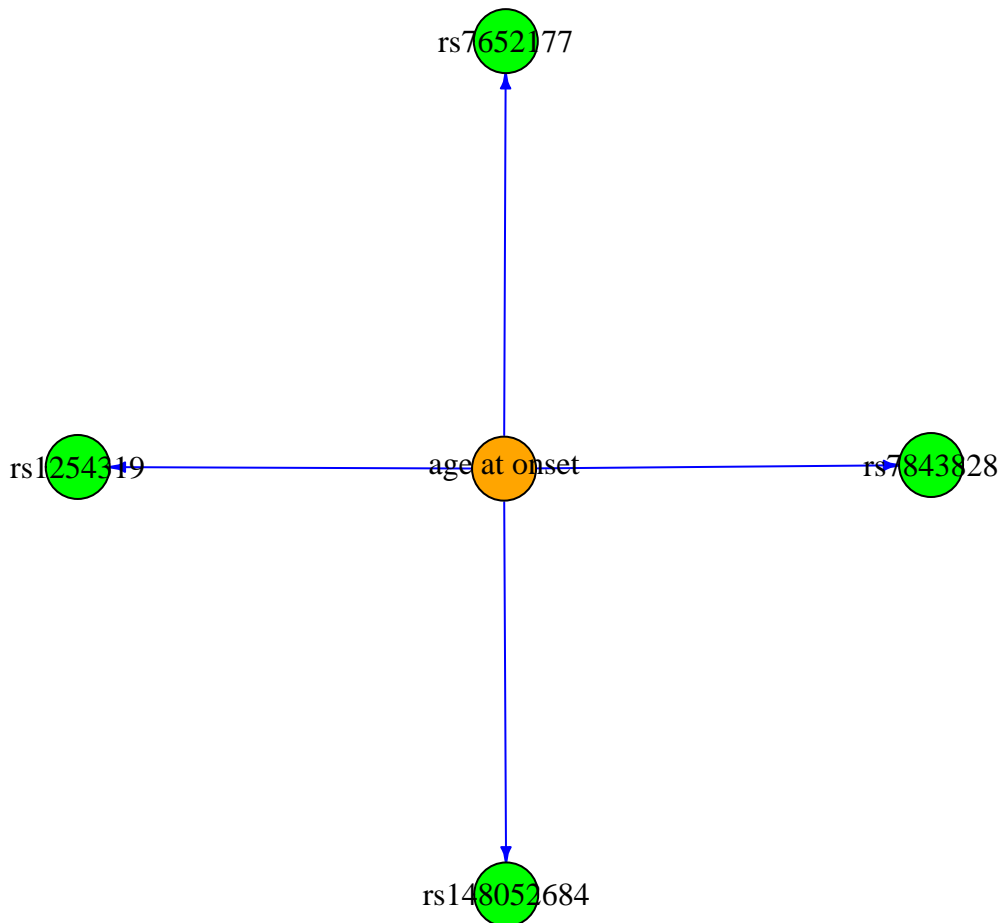

Variant–Disease Network (BMI-adjusted waist circumference)

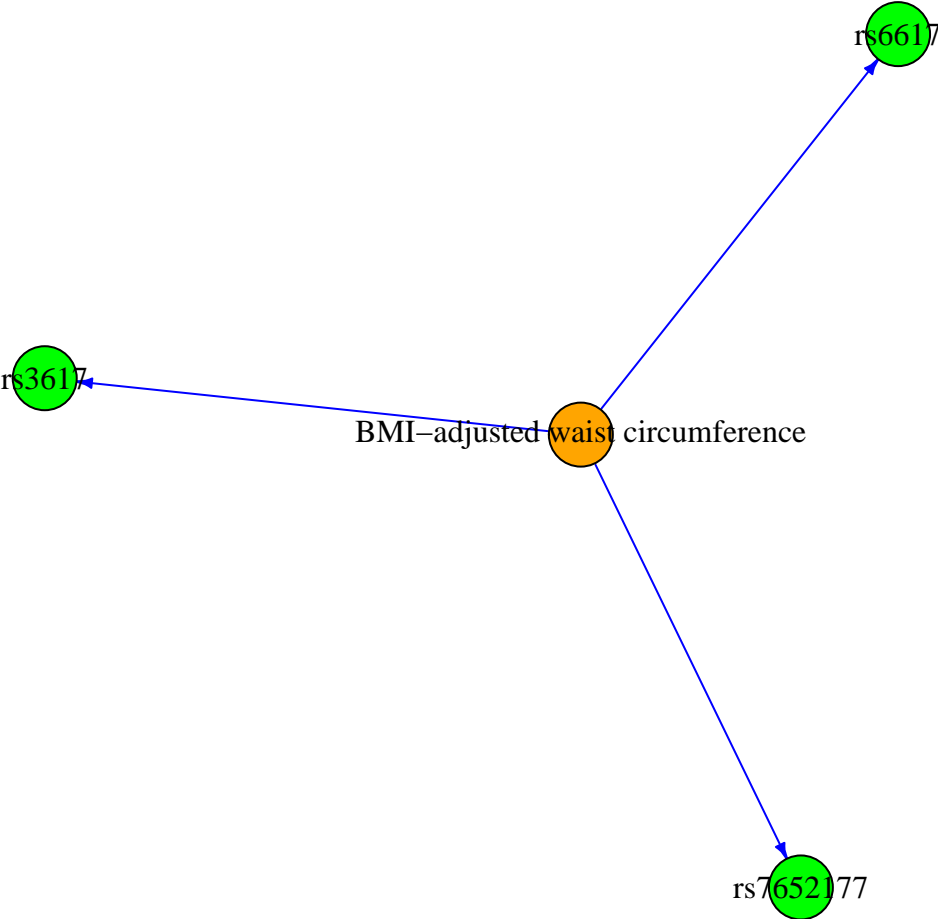

## Variant–Disease Network (Myopia)

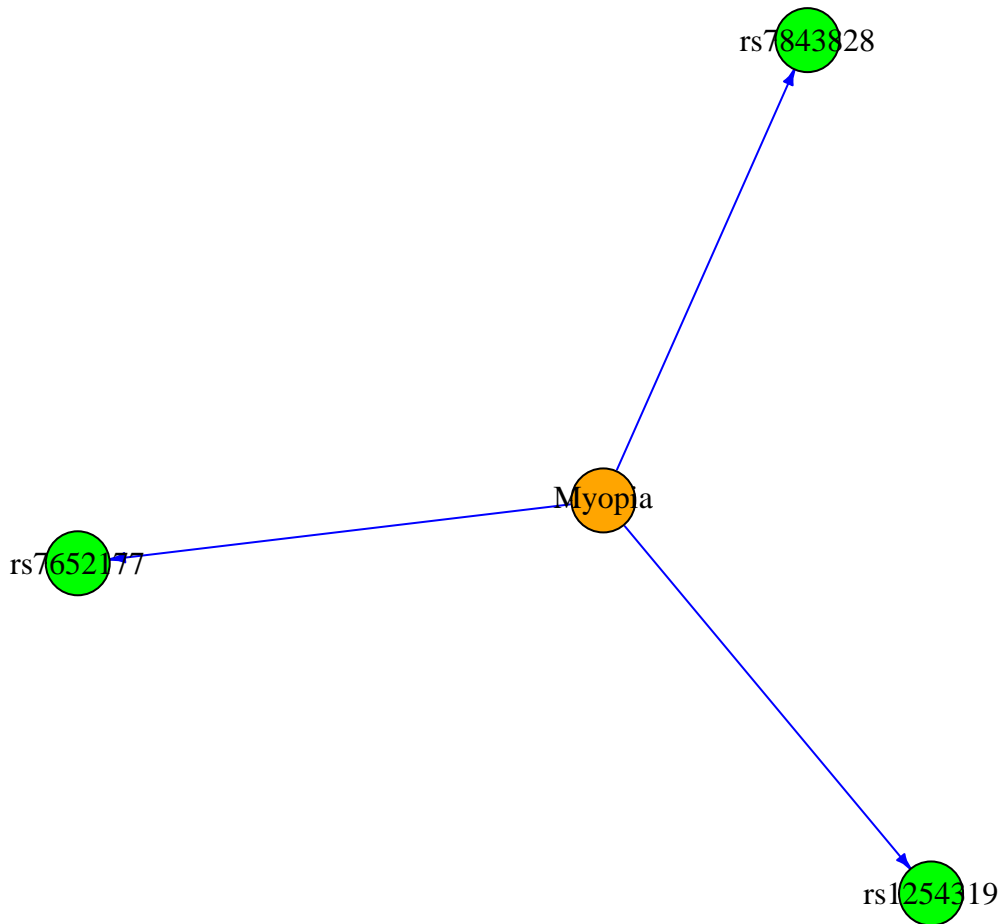

## Variant–Disease Network (physical activity measurement)

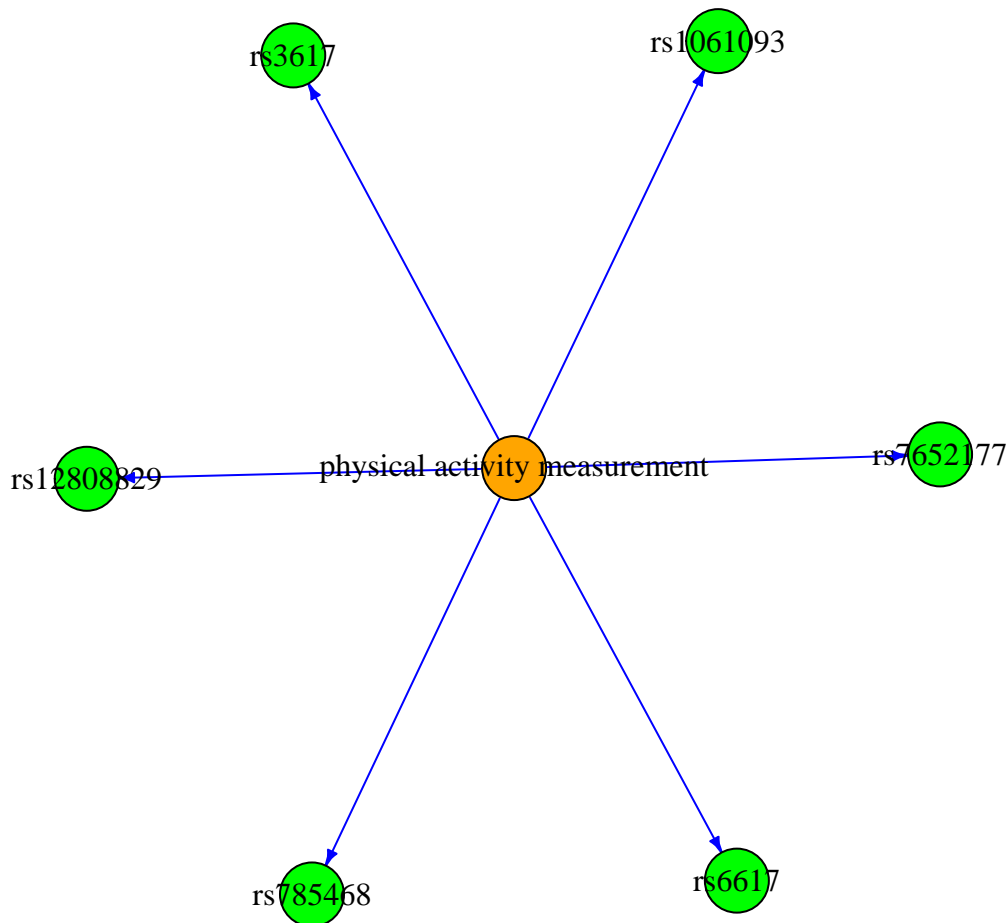

# Variant–Disease Network (refractive error measurement)

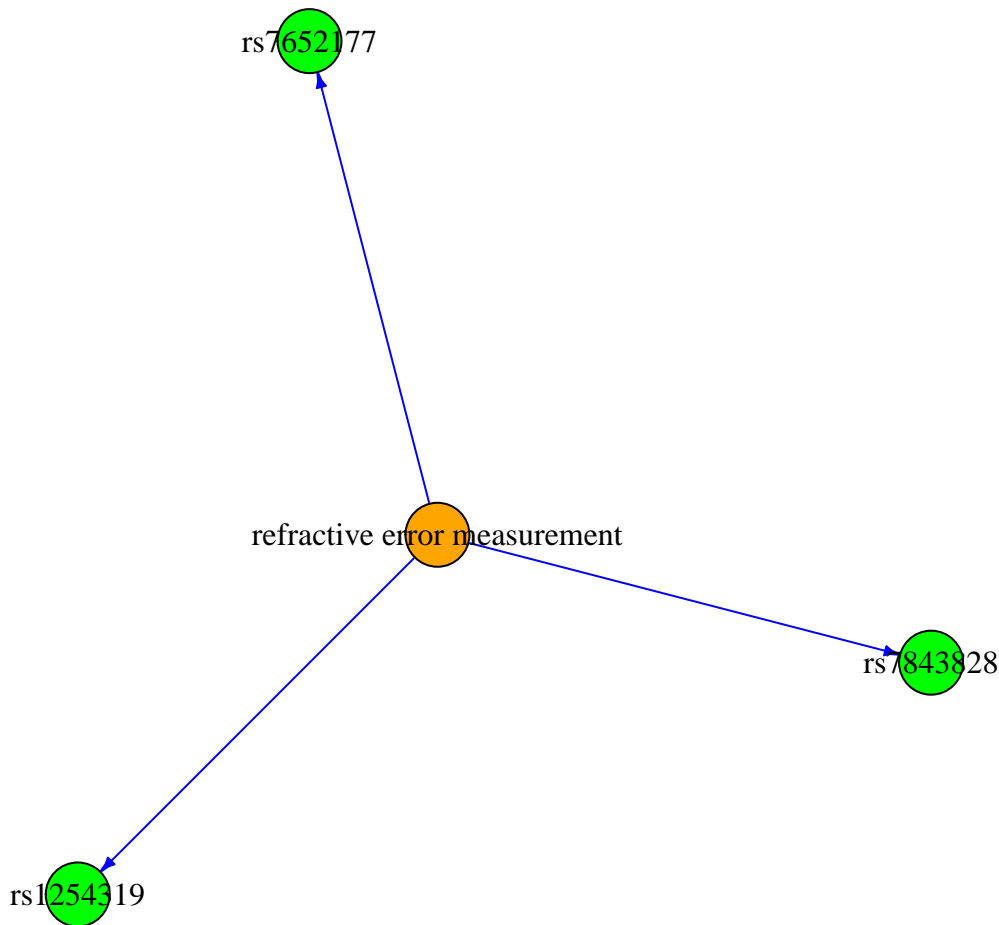

## Variant–Disease Network (waist circumference)

waist circumference

rs7652177

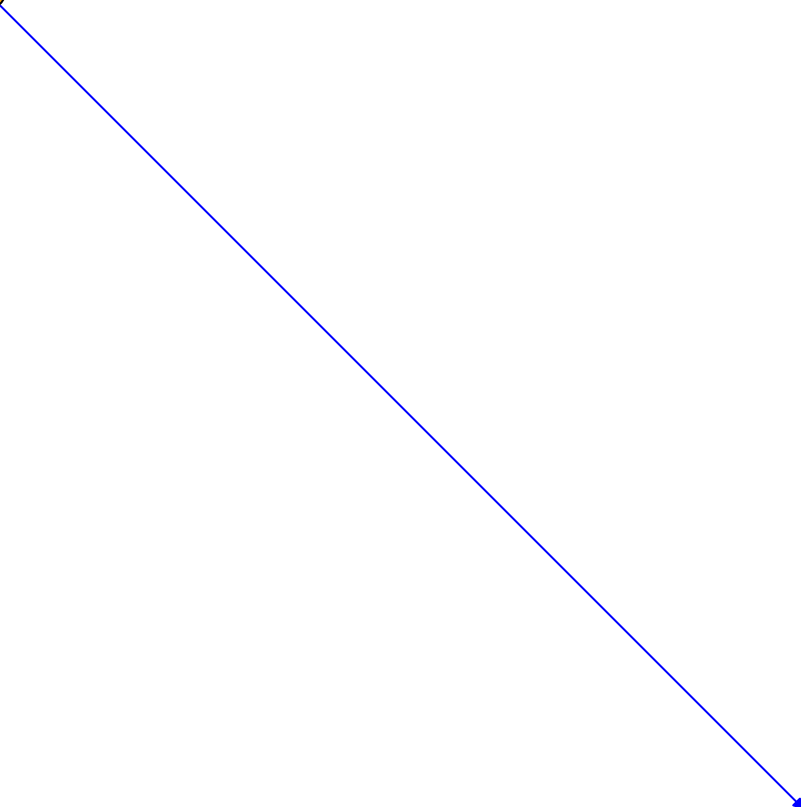



## Variant–Disease Network (dental caries)

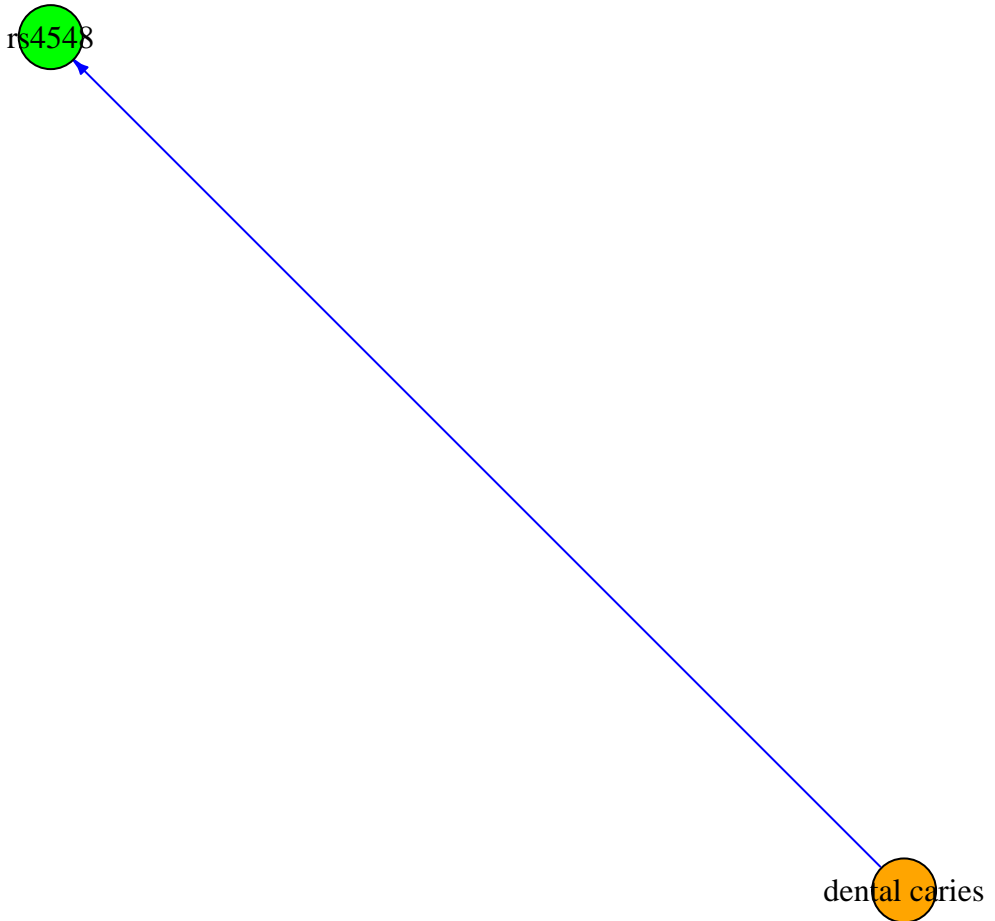

**Variant–Disease Network (fatty acid measurement)**

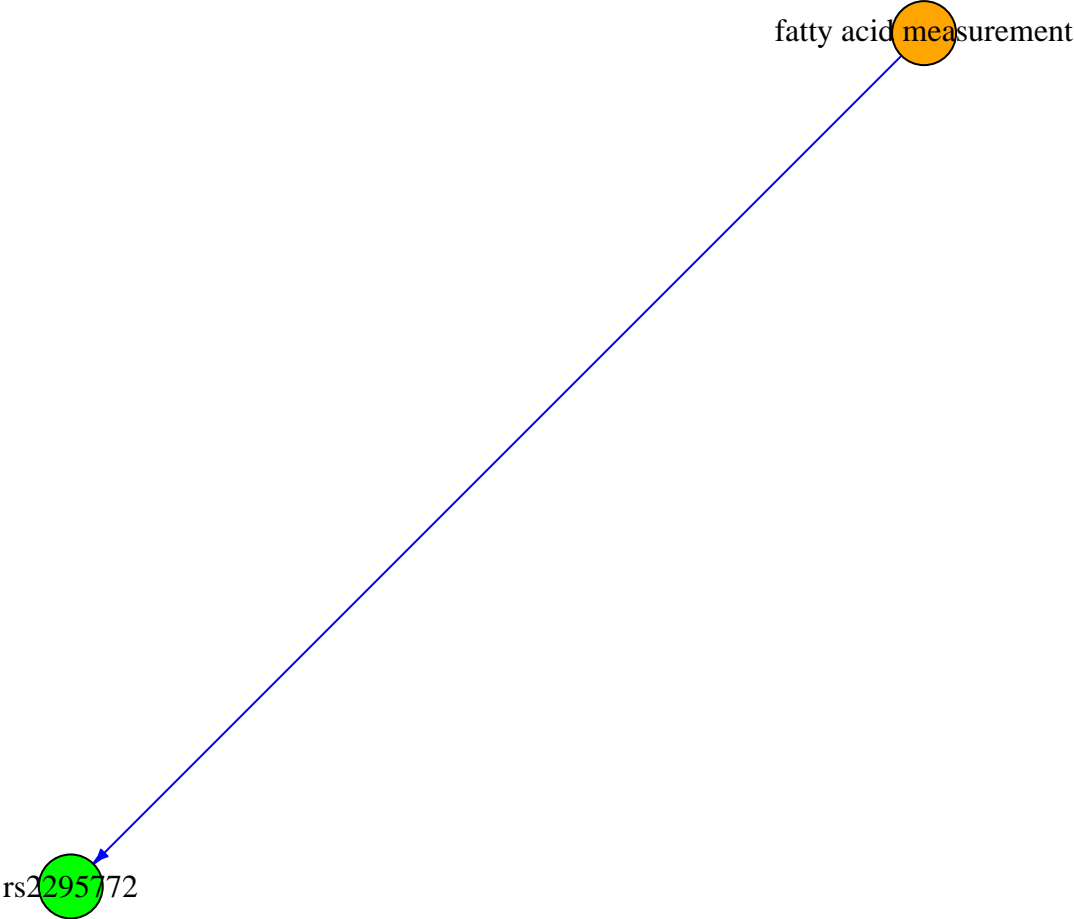

**Variant–Disease Network (palmitoleic acid measurement)**

palmitoleic acid measurement

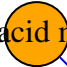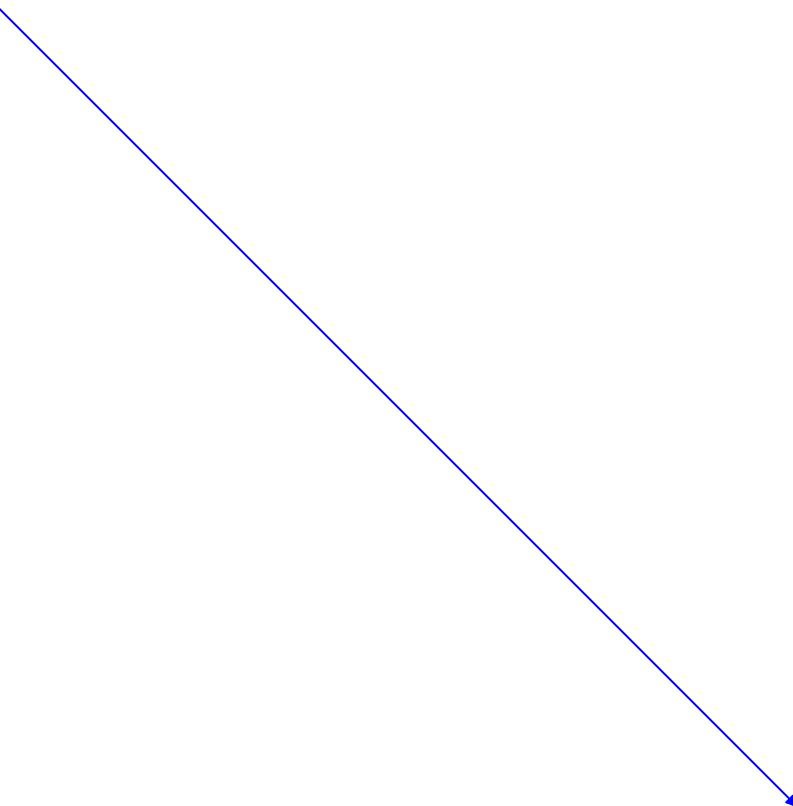

rs2295772

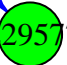

## Variant-Disease Network (anxiety)

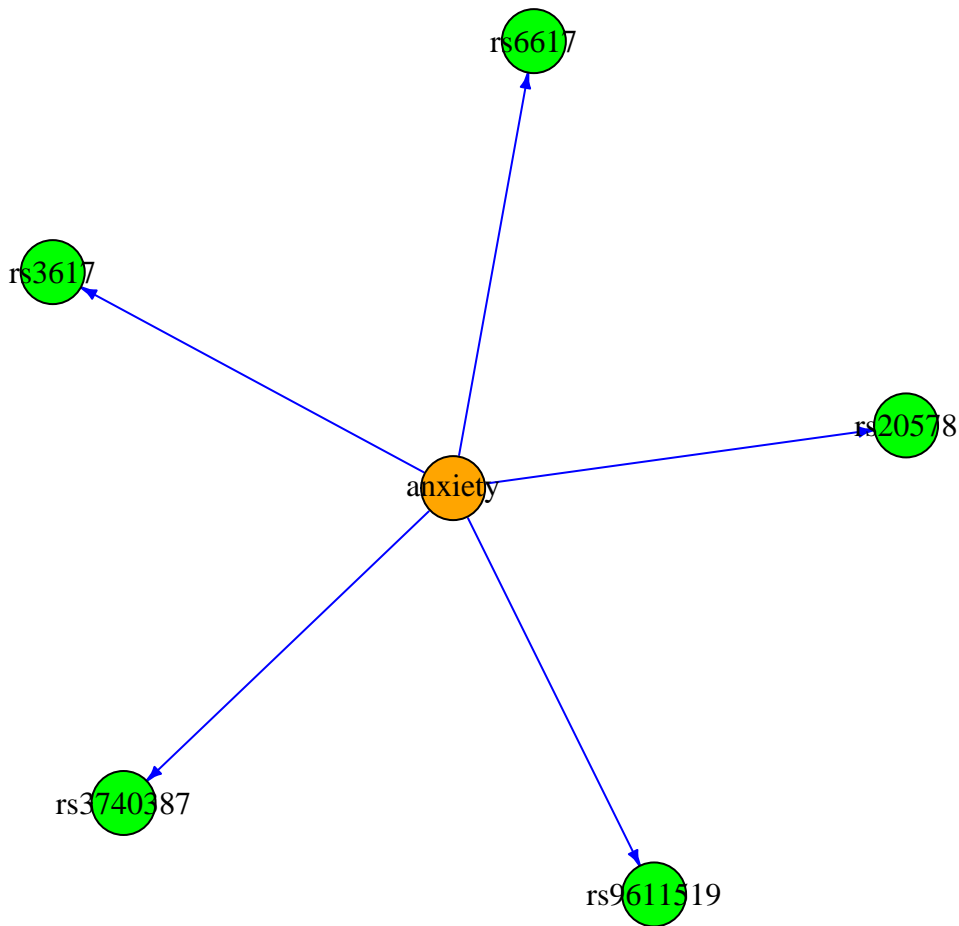

# Variant–Disease Network (attention deficit hyperactivity disorder)

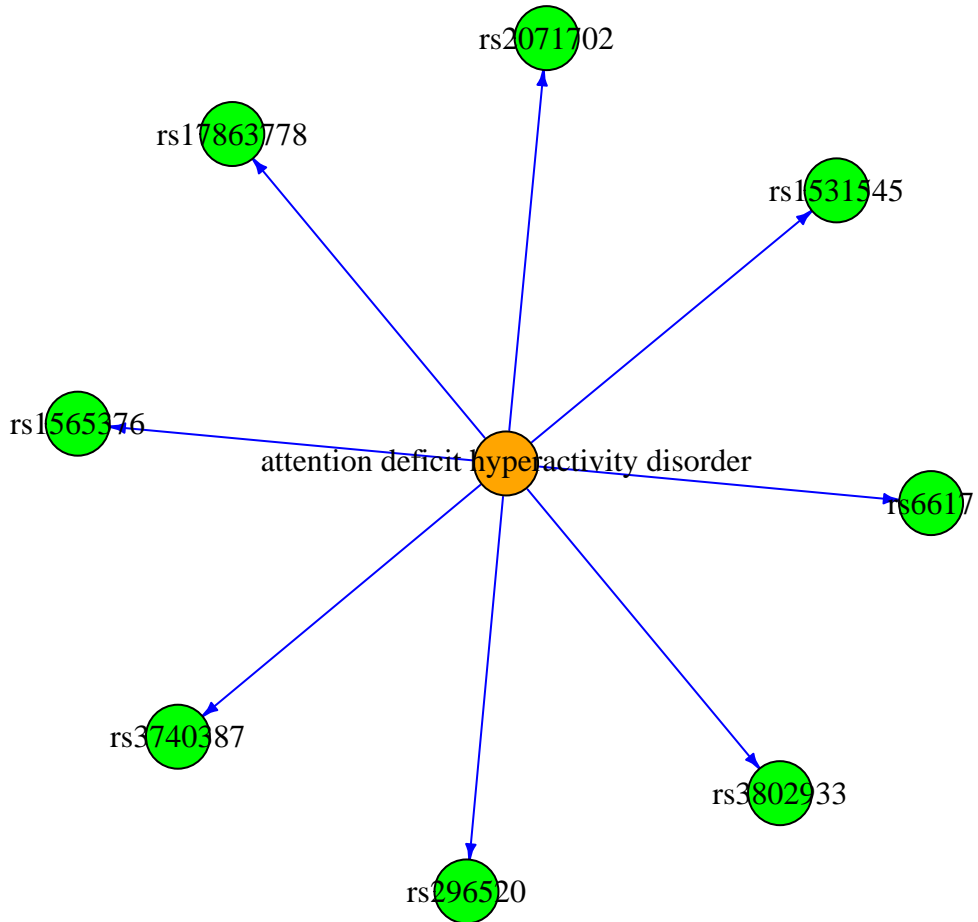

## Variant–Disease Network (bipolar disorder)

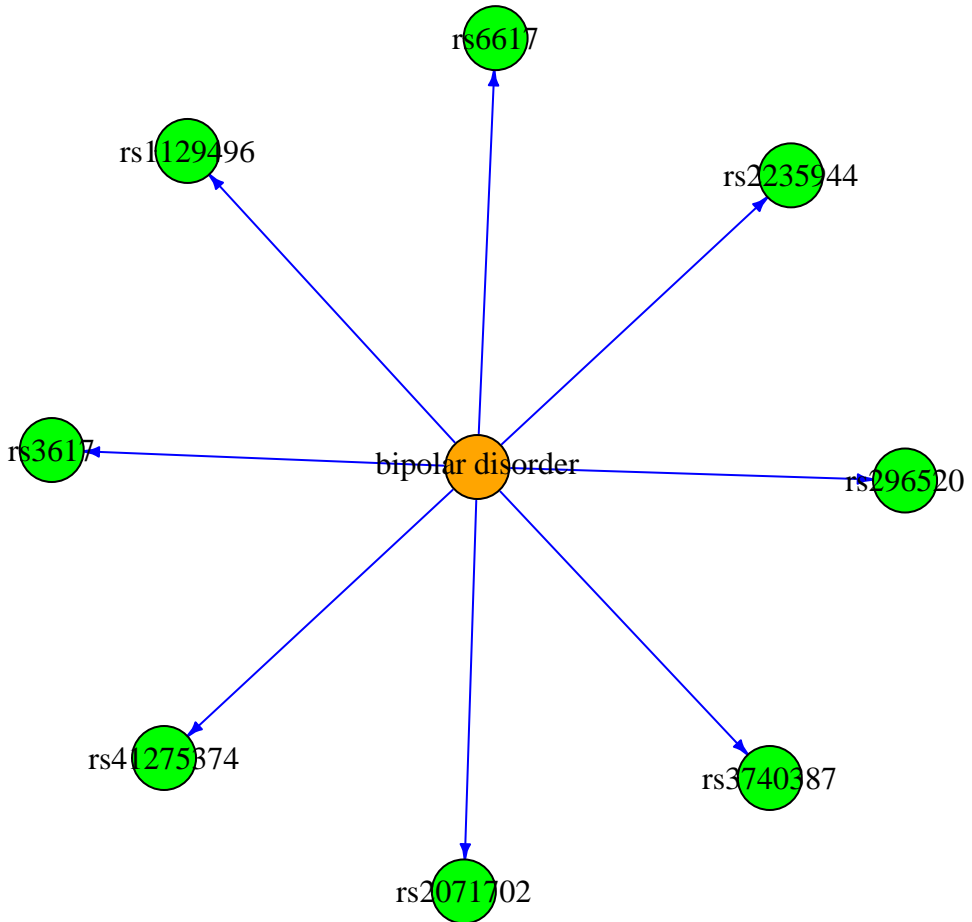

## Variant–Disease Network (migraine disorder)

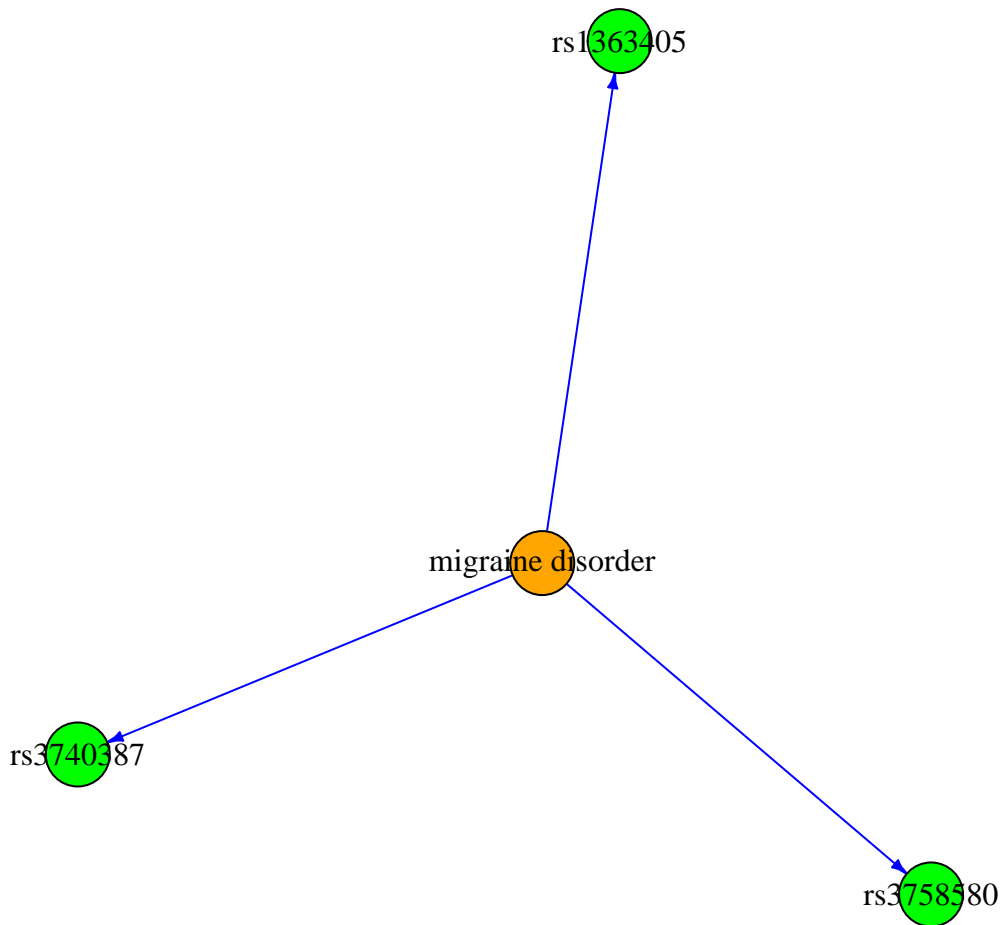

**Variant–Disease Network (white matter lesion progression measurement)**

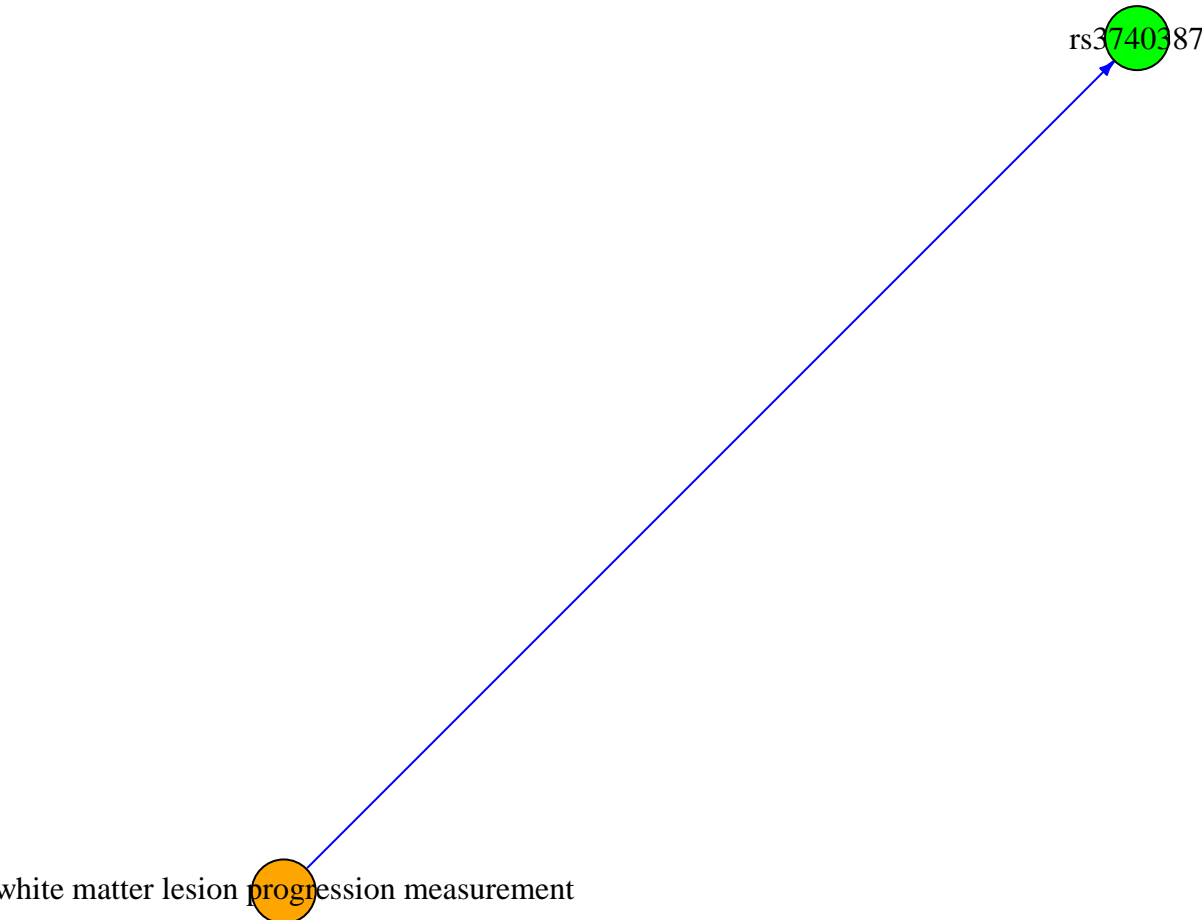



**Variant–Disease Network (adolescent idiopathic scoliosis)**

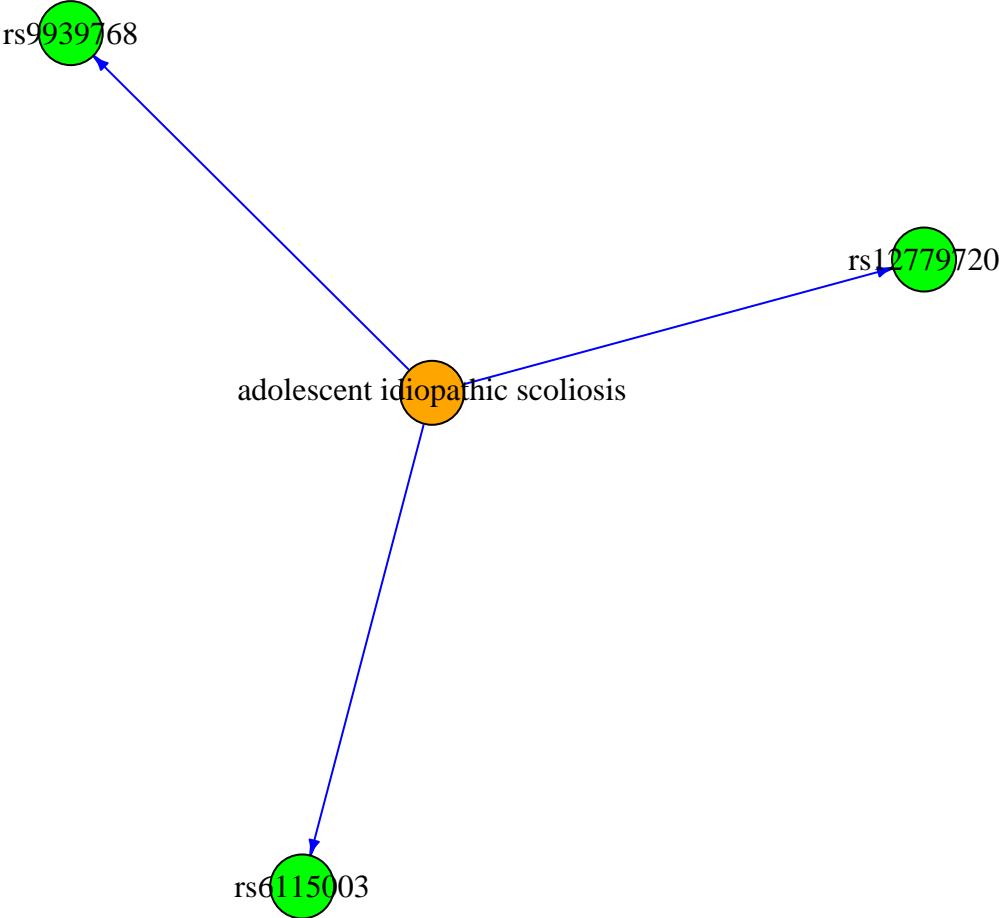

# Variant–Disease Network (parental genotype effect measurement)

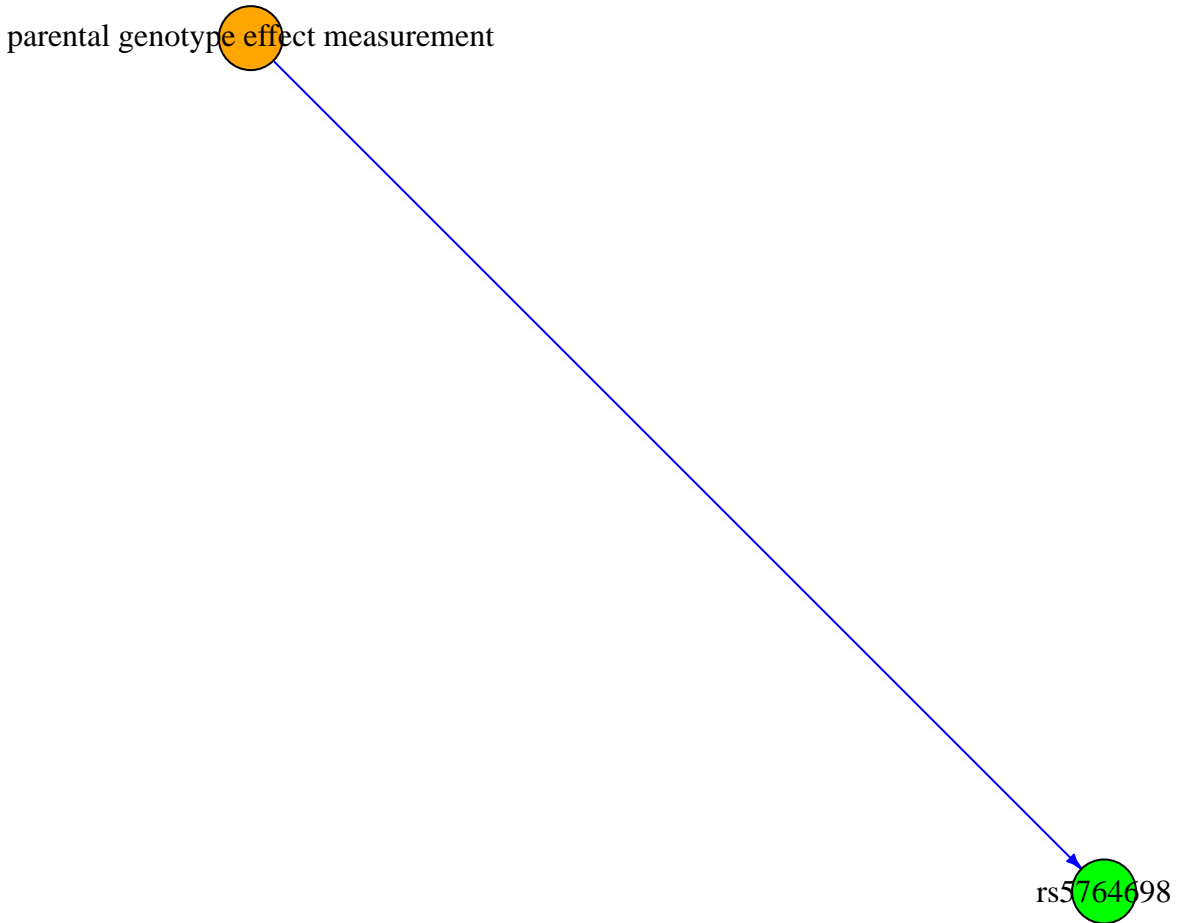

# Variant–Disease Network (peanut allergy measurement)

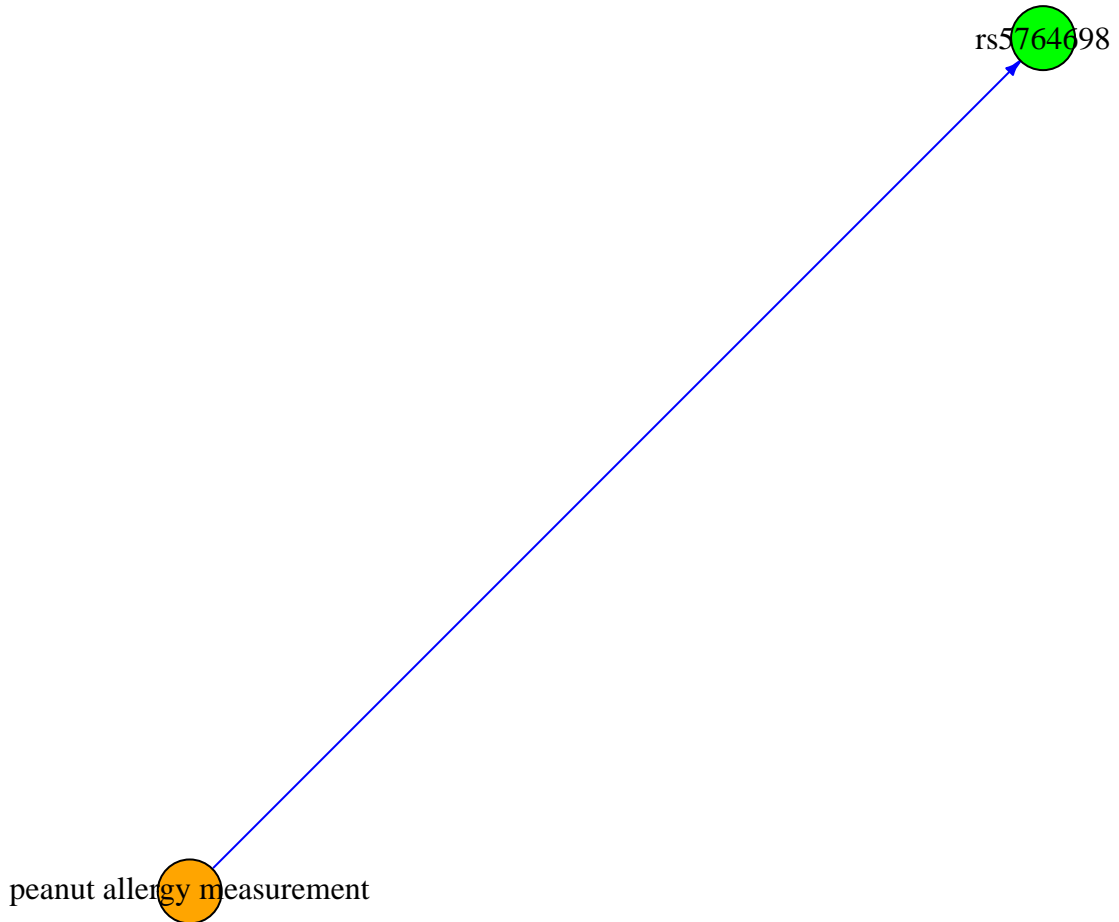

## Variant–Disease Network (D dimer measurement)

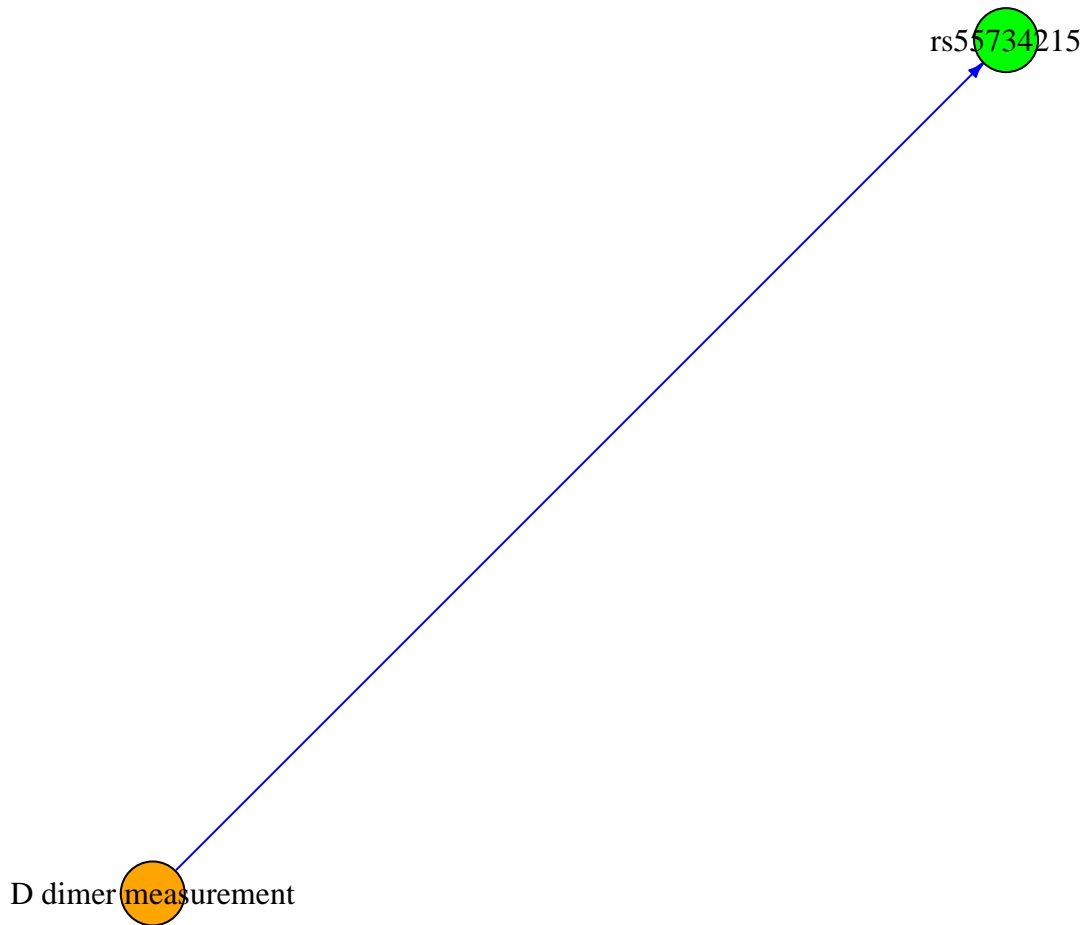

# Variant–Disease Network (factor VII measurement)

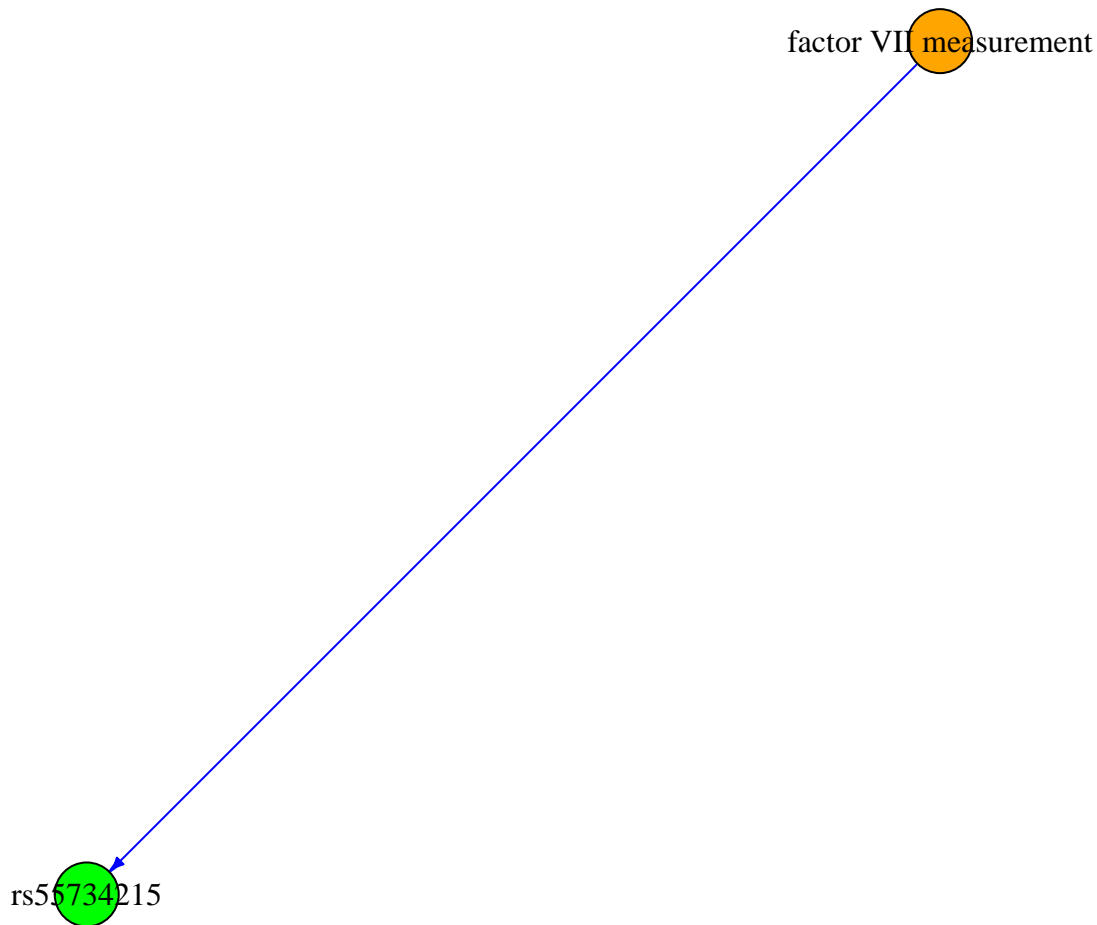

## Variant-Disease Network (hematological measurement)

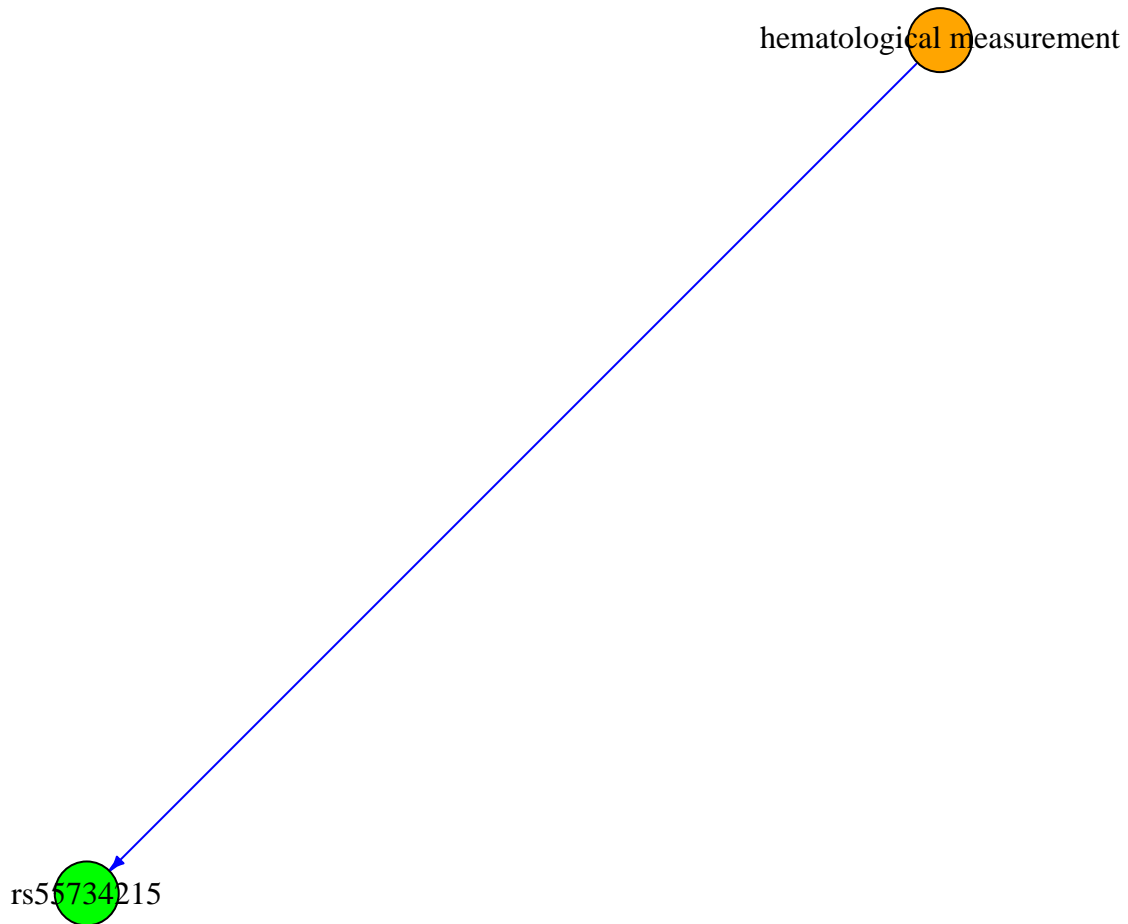

## Variant–Disease Network (protein c measurement)

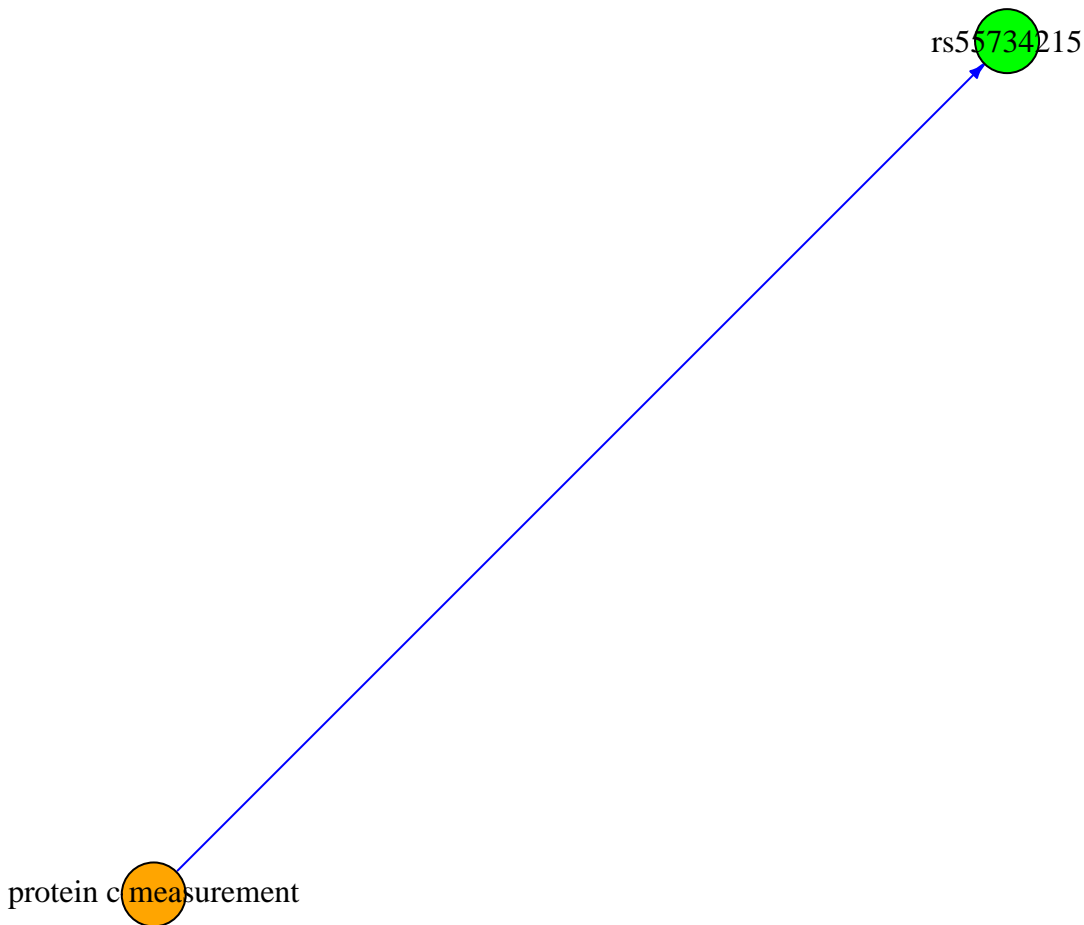

## Variant–Disease Network (prothrombin time measurement)

prothrombin time measurement

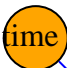

rs55734215

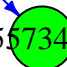



## Variant–Disease Network (sporadic amyotrophic lateral sclerosis)

sporadic amyotrophic lateral sclerosis

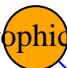

rs55734215

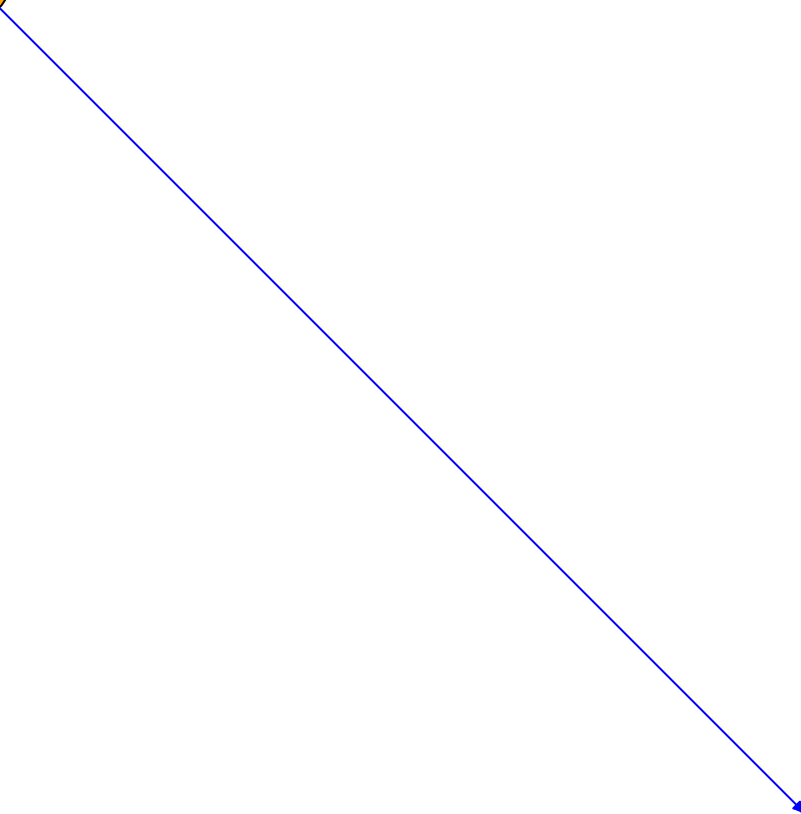

# Variant–Disease Network (vitamin K–dependent protein C measurement)

vitamin K–dependent protein C measurement

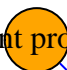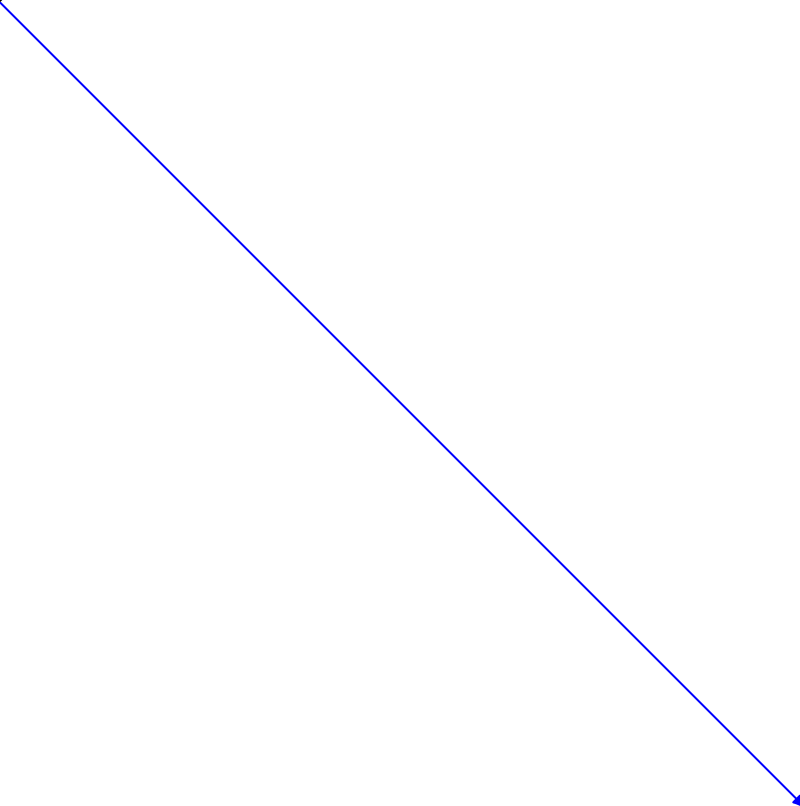

rs55734215

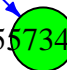

**Variant–Disease Network (smoking status measurement)**

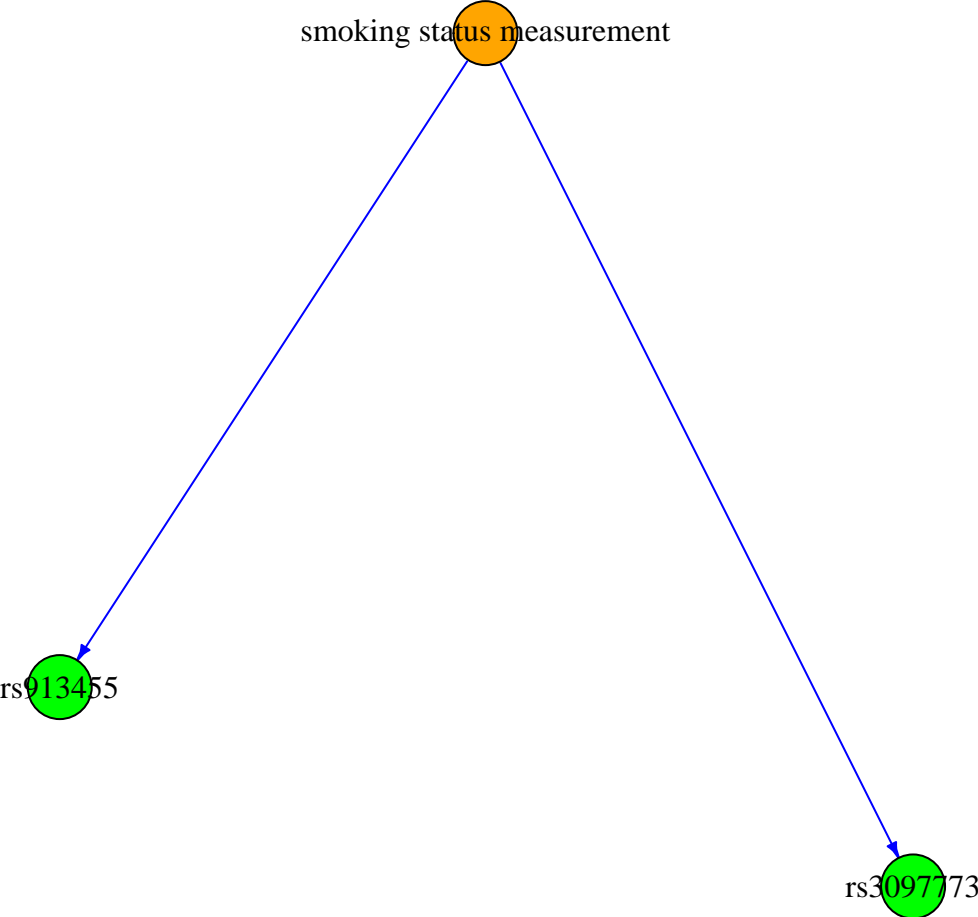

## Variant–Disease Network (squamous cell lung carcinoma)

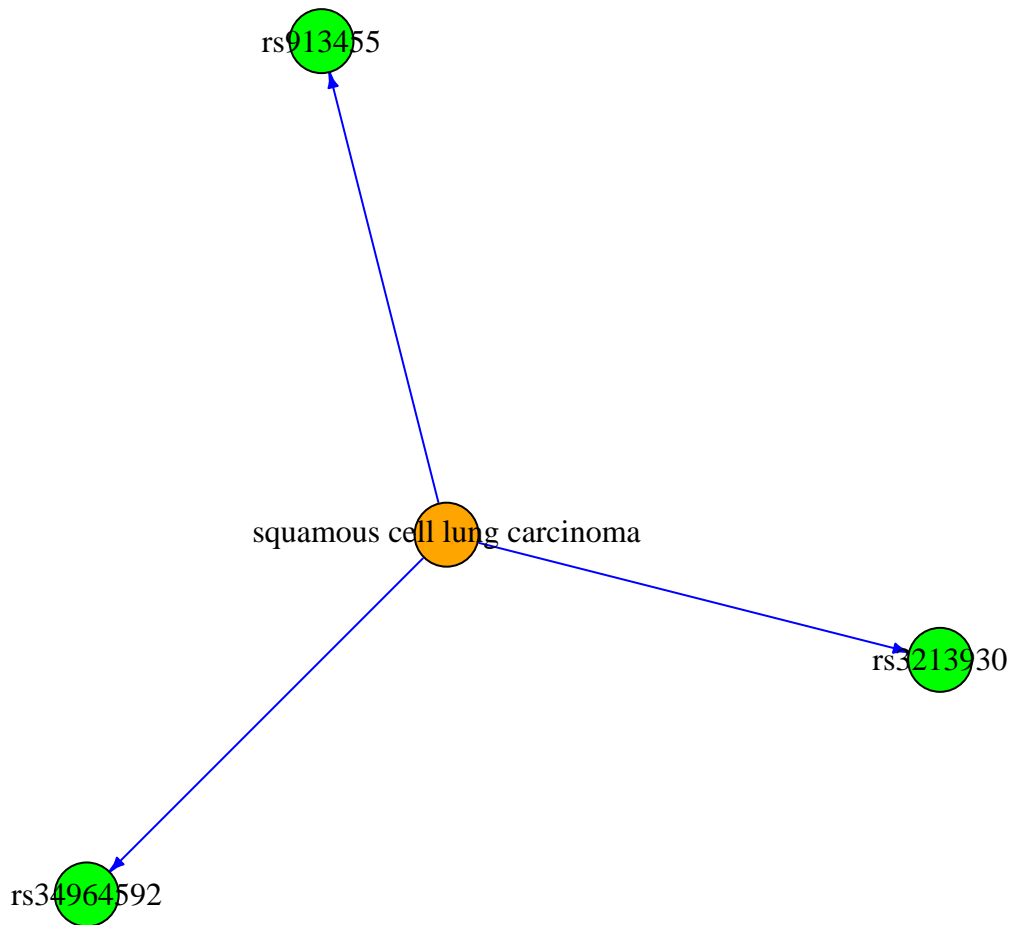

**Variant–Disease Network (serum non–albumin protein measurement)**

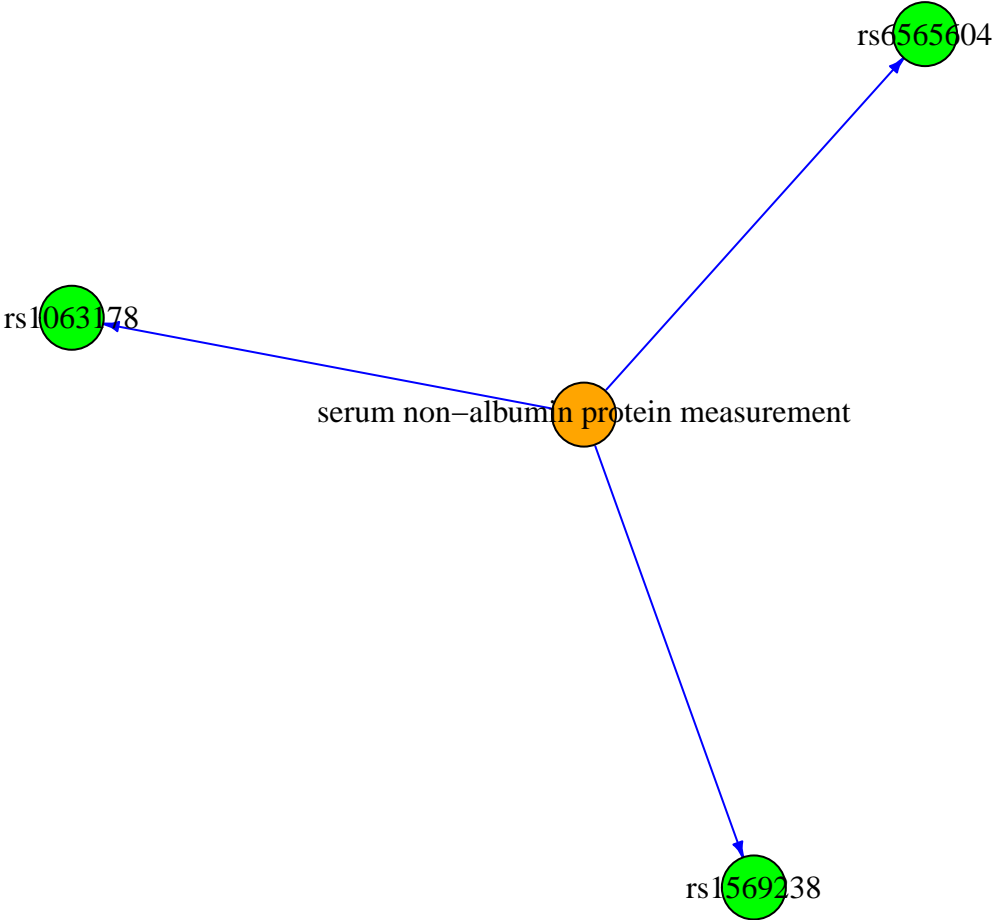

## Variant–Disease Network (asthma)

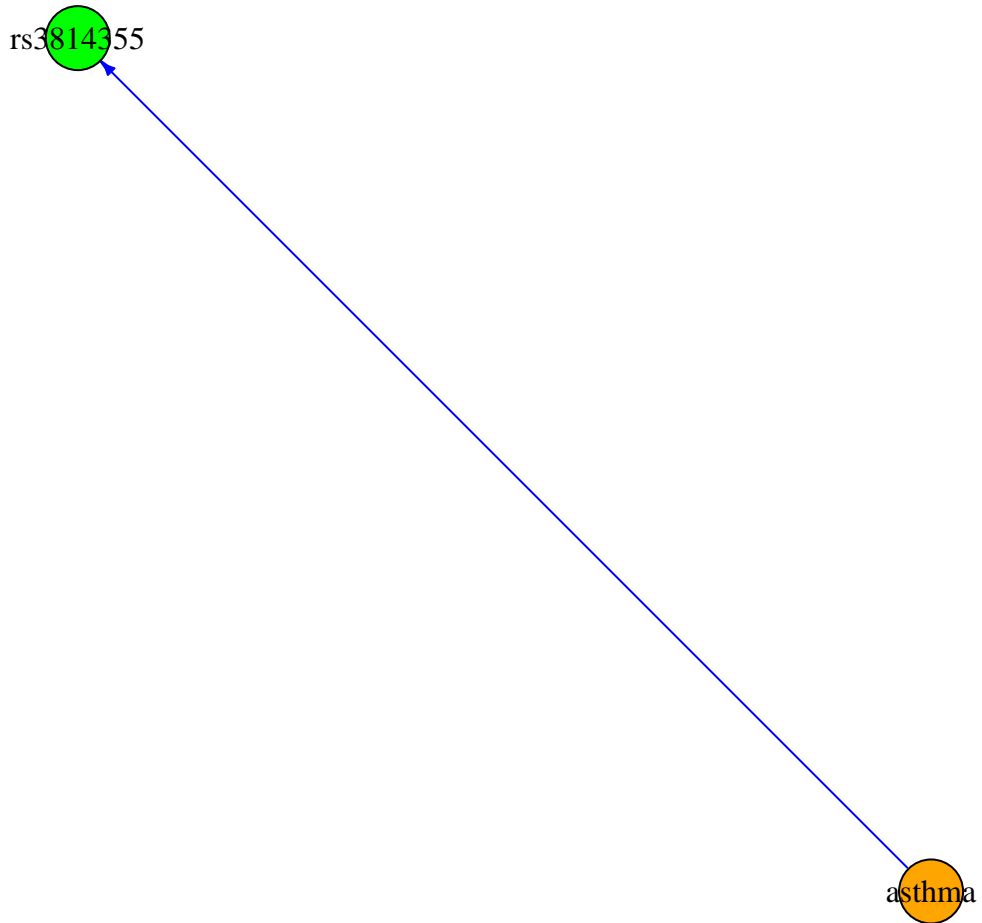

## Variant–Disease Network (response to diisocyanate)

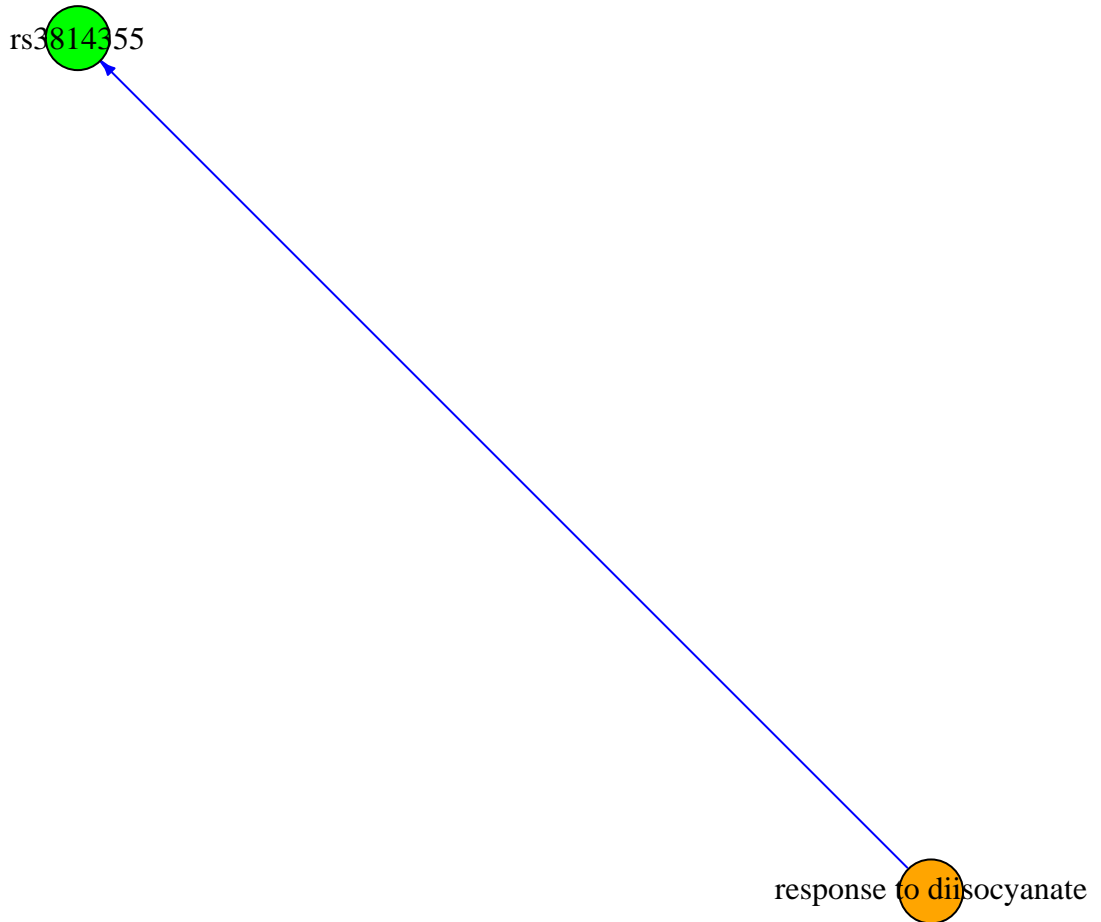

## Variant–Disease Network (small cell lung carcinoma)

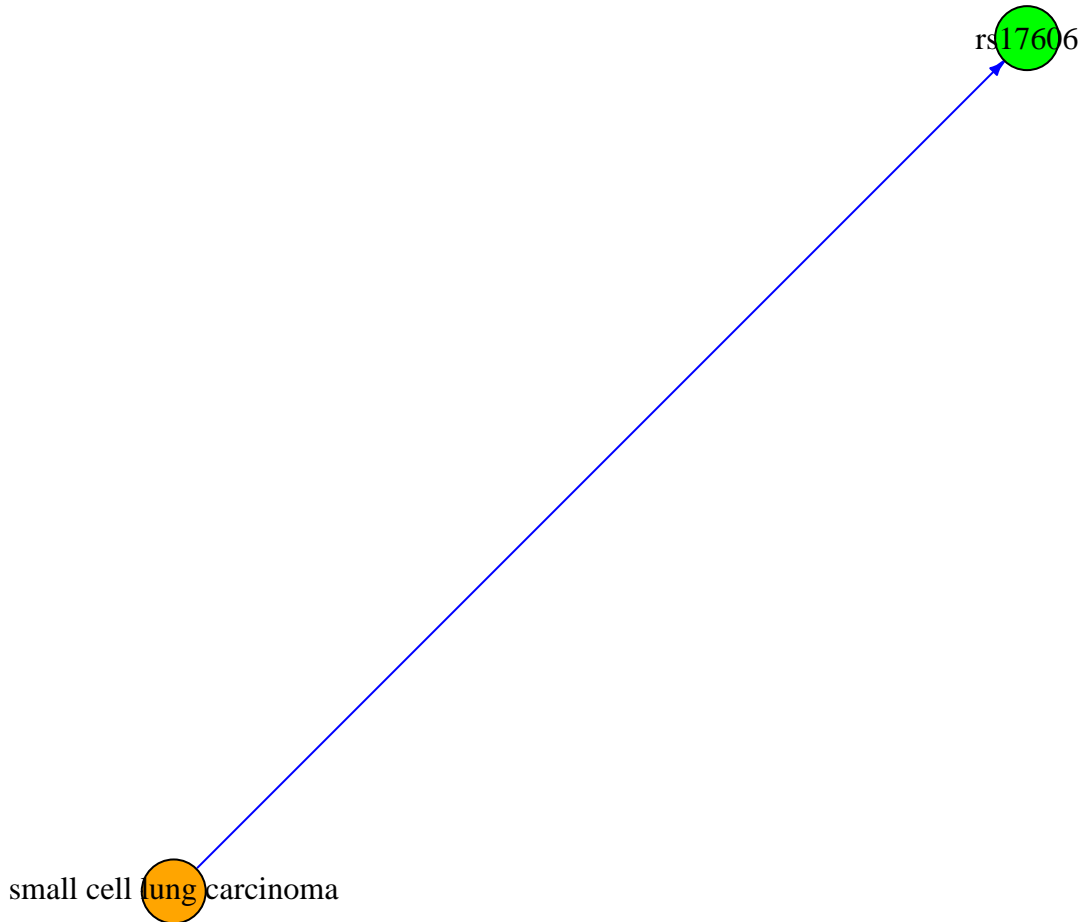



## Variant–Disease Network (cognitive function measurement)

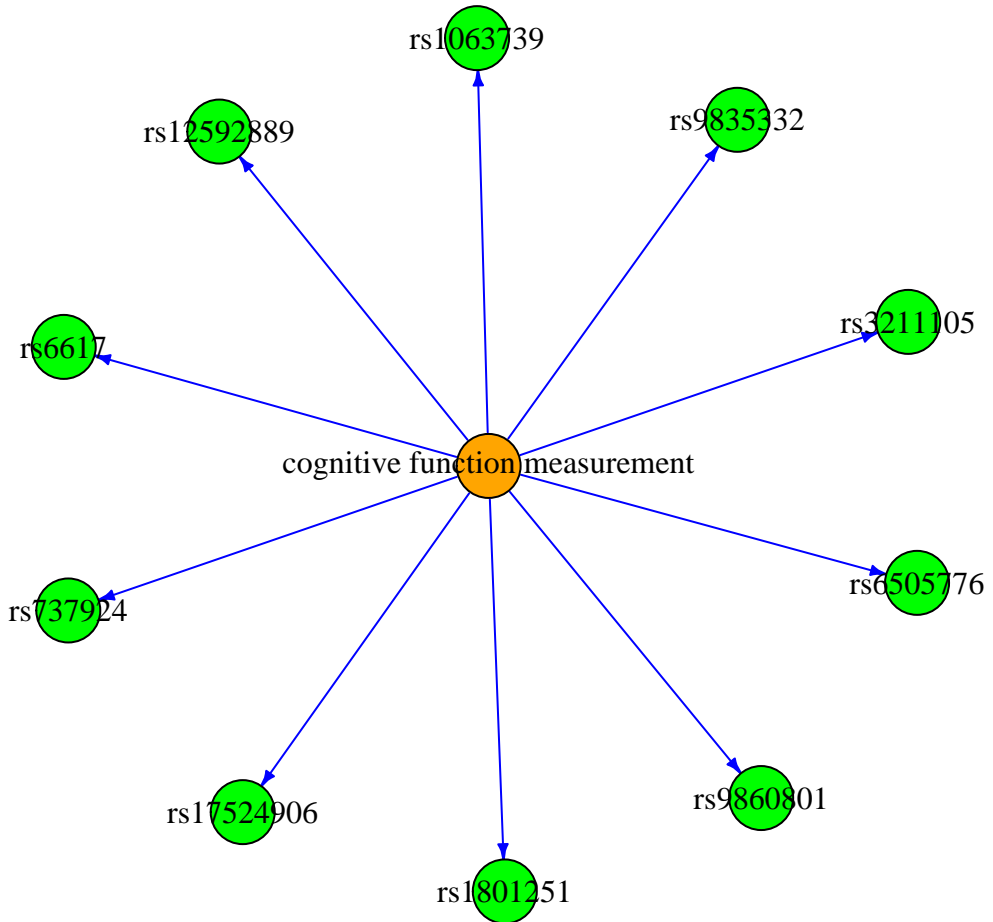

## Variant-Disease Network (homocysteine measurement)

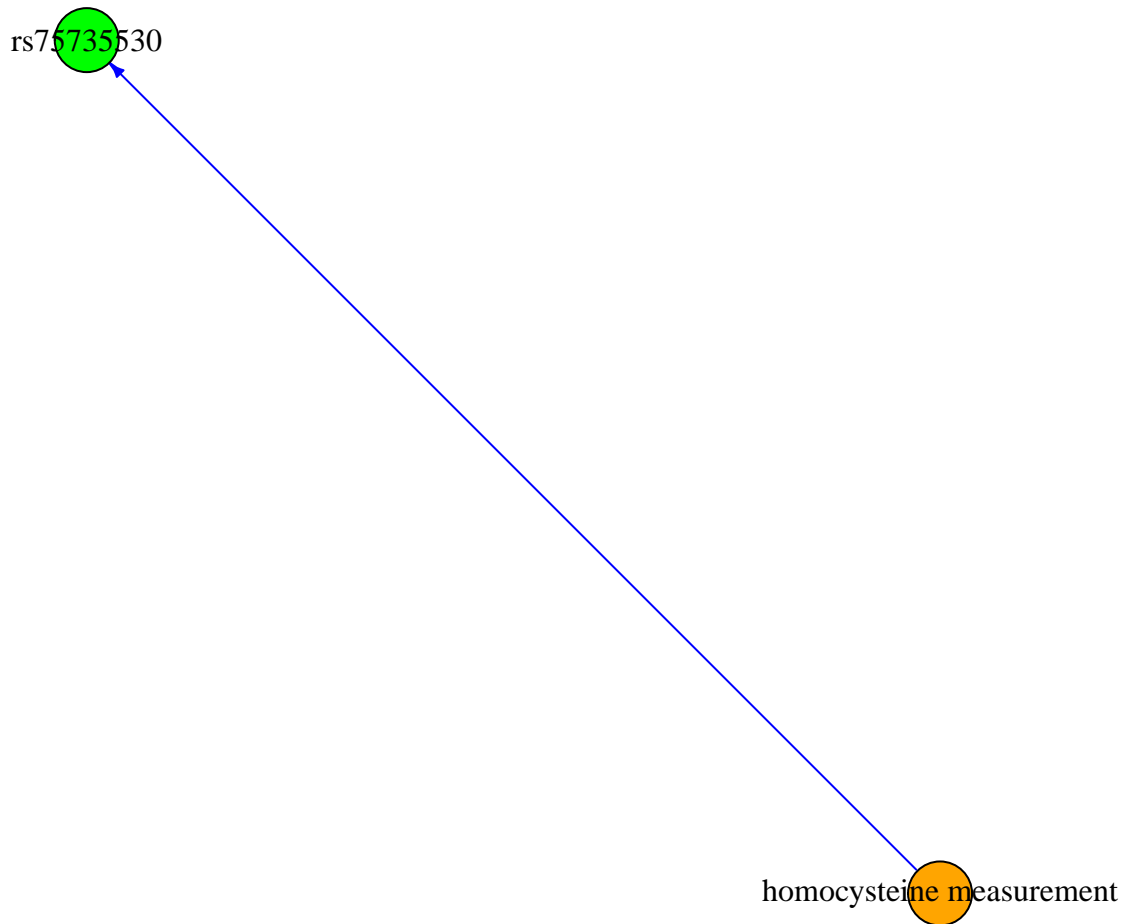

## Variant–Disease Network (age at menopause)

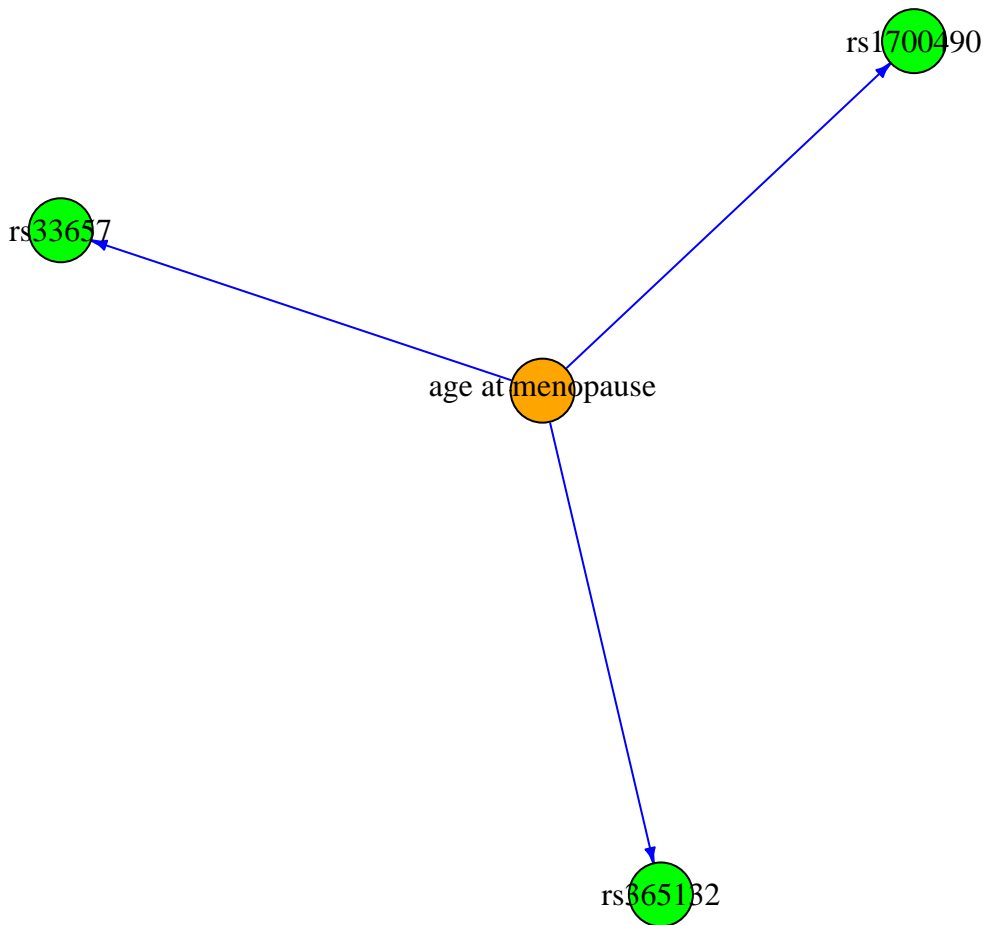

## Variant–Disease Network (uterine fibroid)

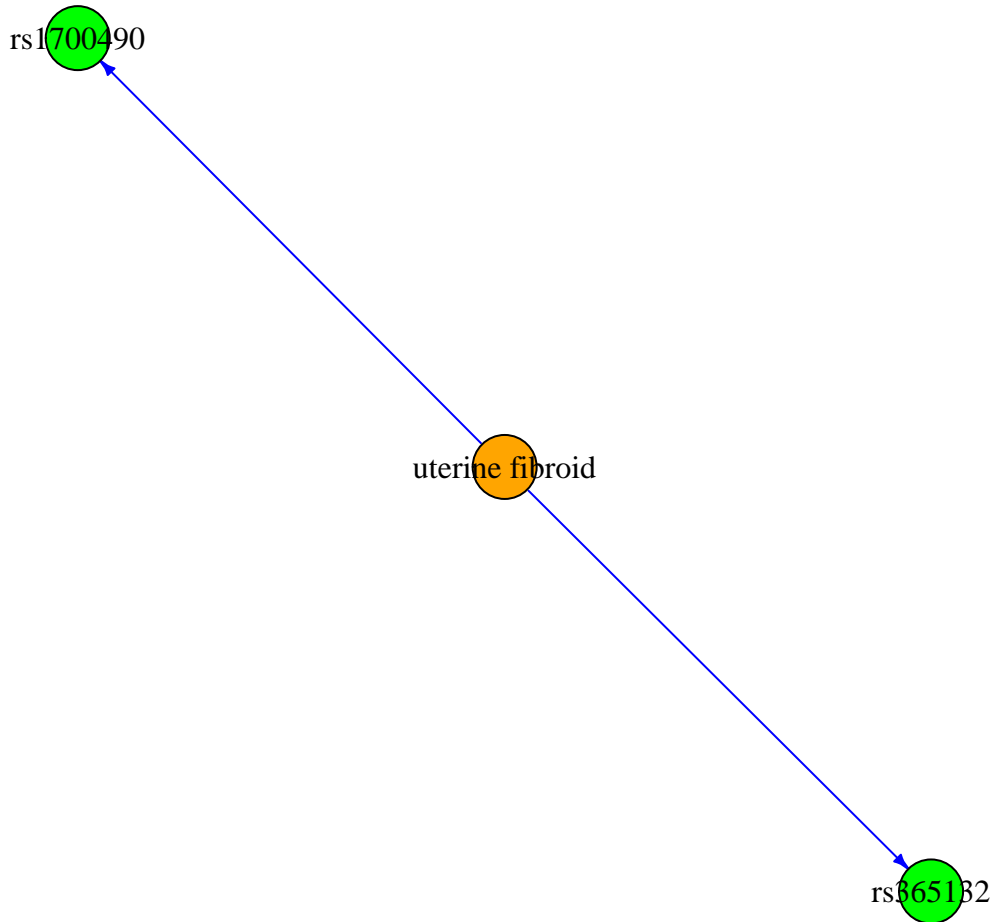

## Variant–Disease Network (1,5 anhydroglucitol measurement)

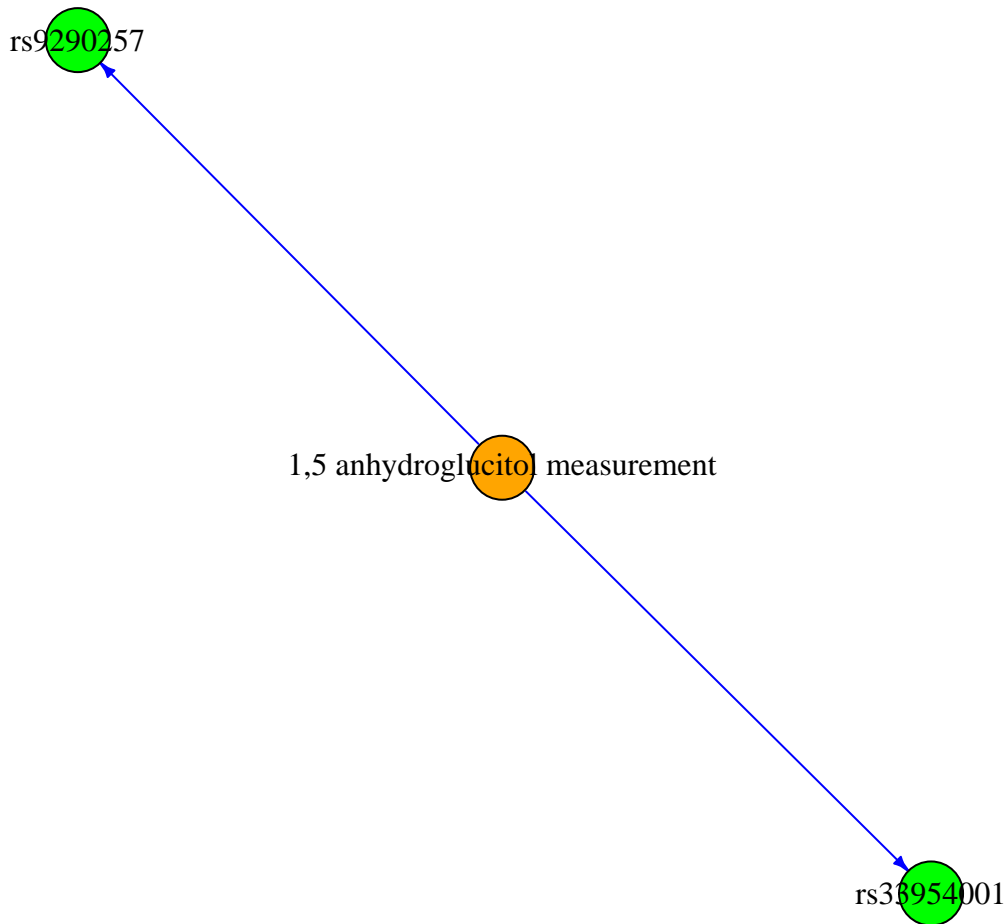

## Variant–Disease Network (cortisol secretion measurement)

rs1048100

cortisol secretion measurement

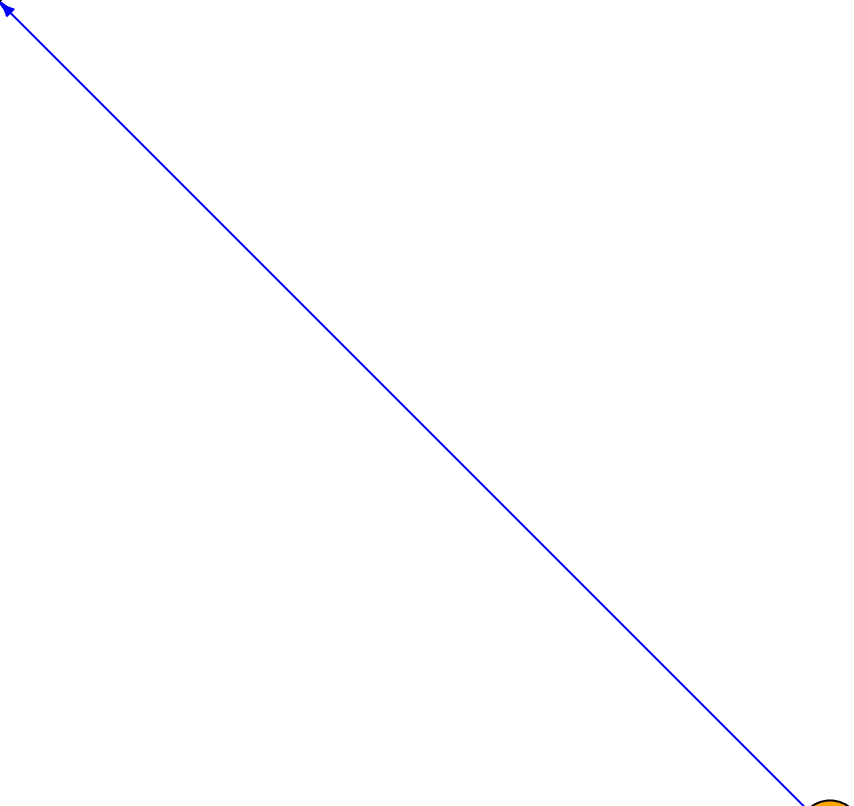

## Variant–Disease Network (basophil count)

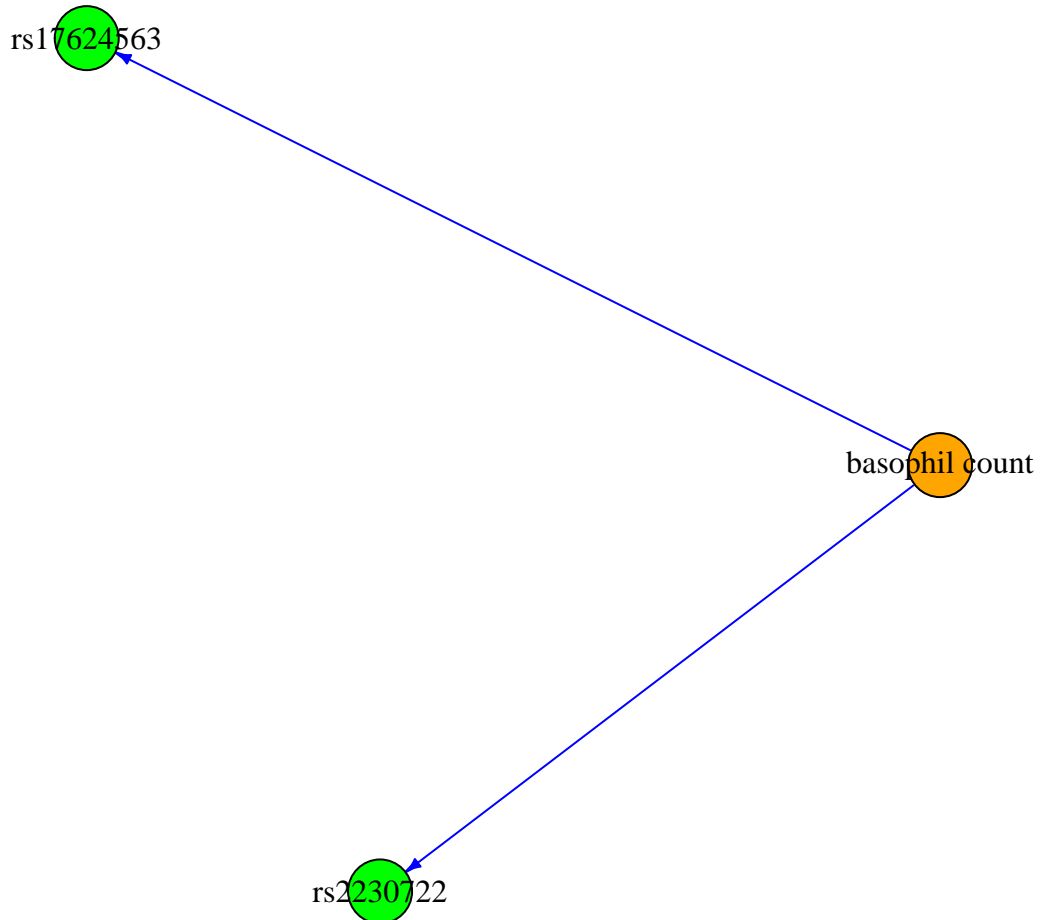

## Variant–Disease Network (eosinophil count)

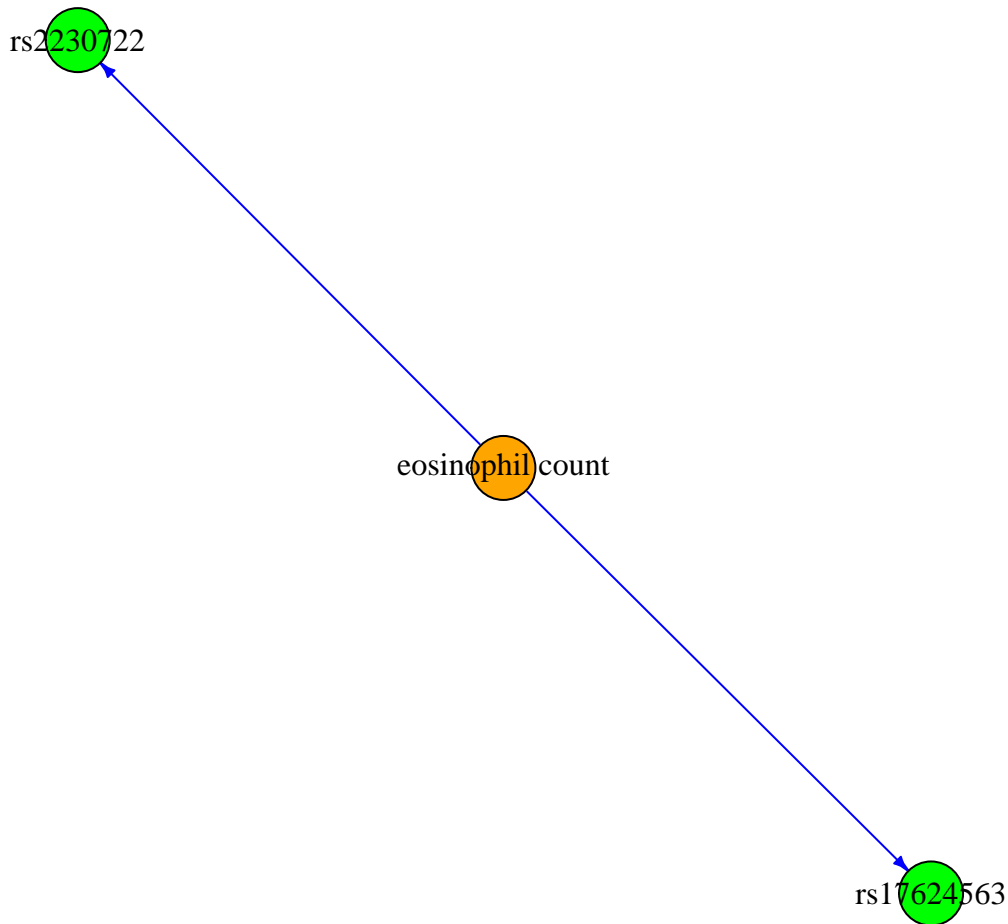



## Variant–Disease Network (myeloproliferative disorder)

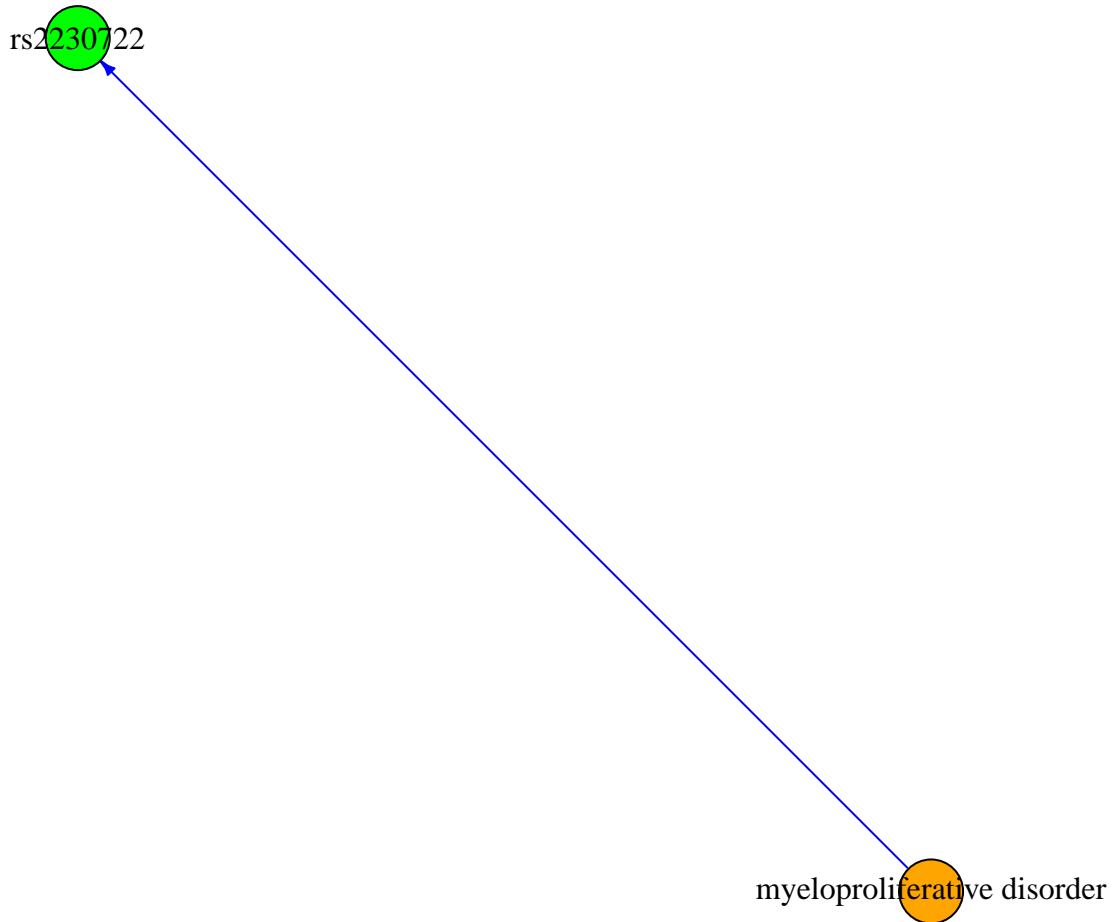

# Variant–Disease Network (brain serotonin transporter measurement)

brain serotonin transporter measurement

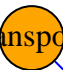

rs2040533

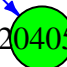

## Variant–Disease Network (diabetic nephropathy)

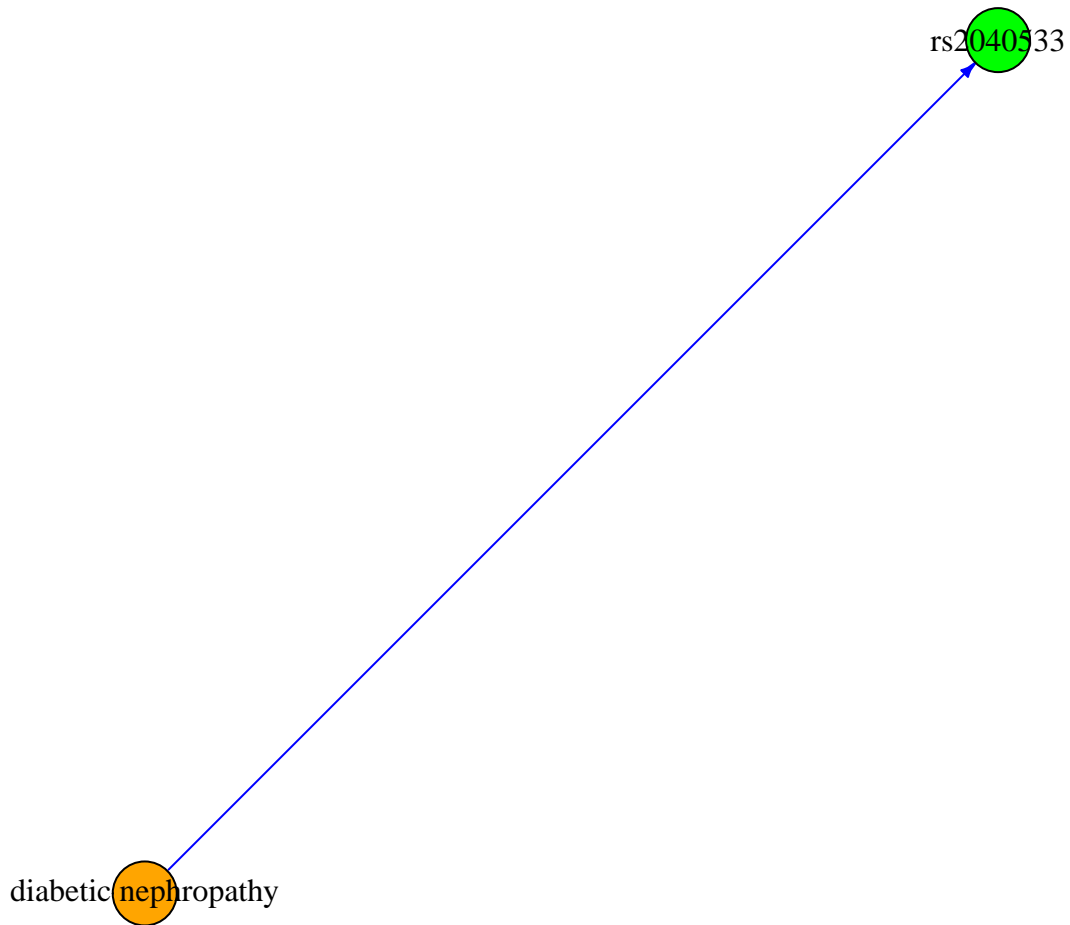

## Variant–Disease Network (reaction time measurement)

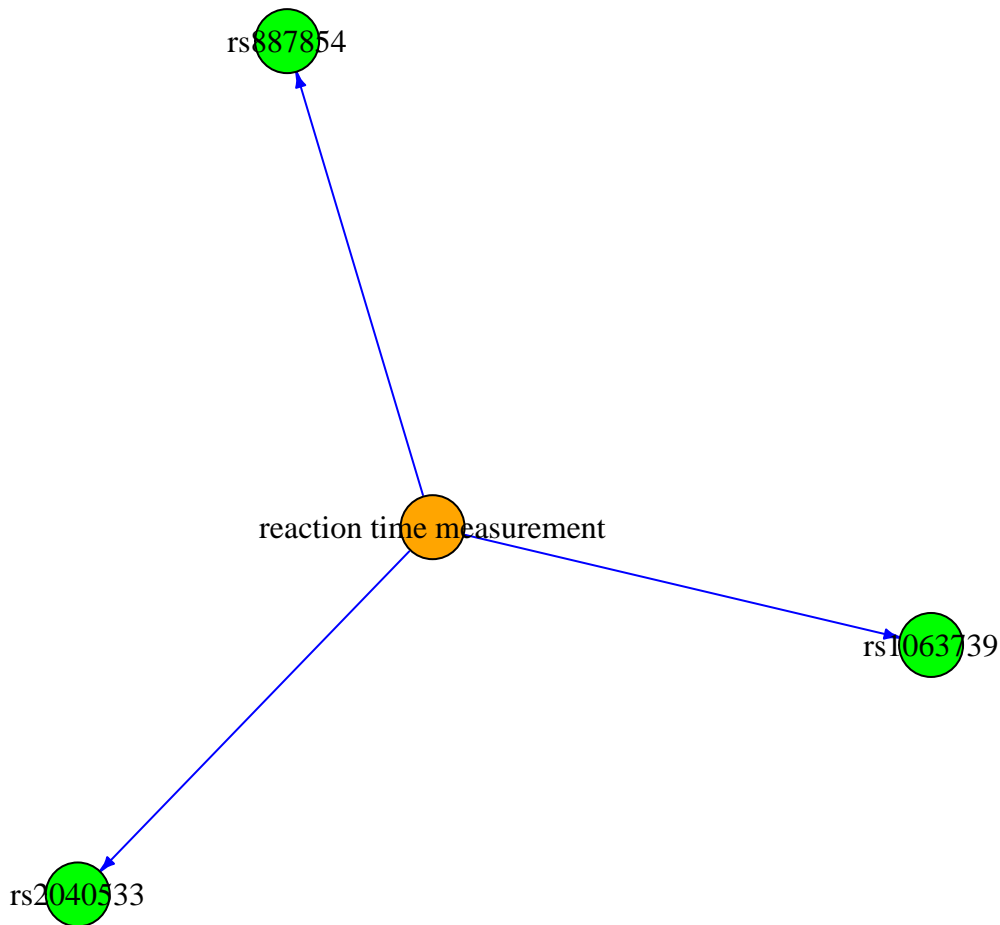

## Variant–Disease Network (response to paclitaxel)

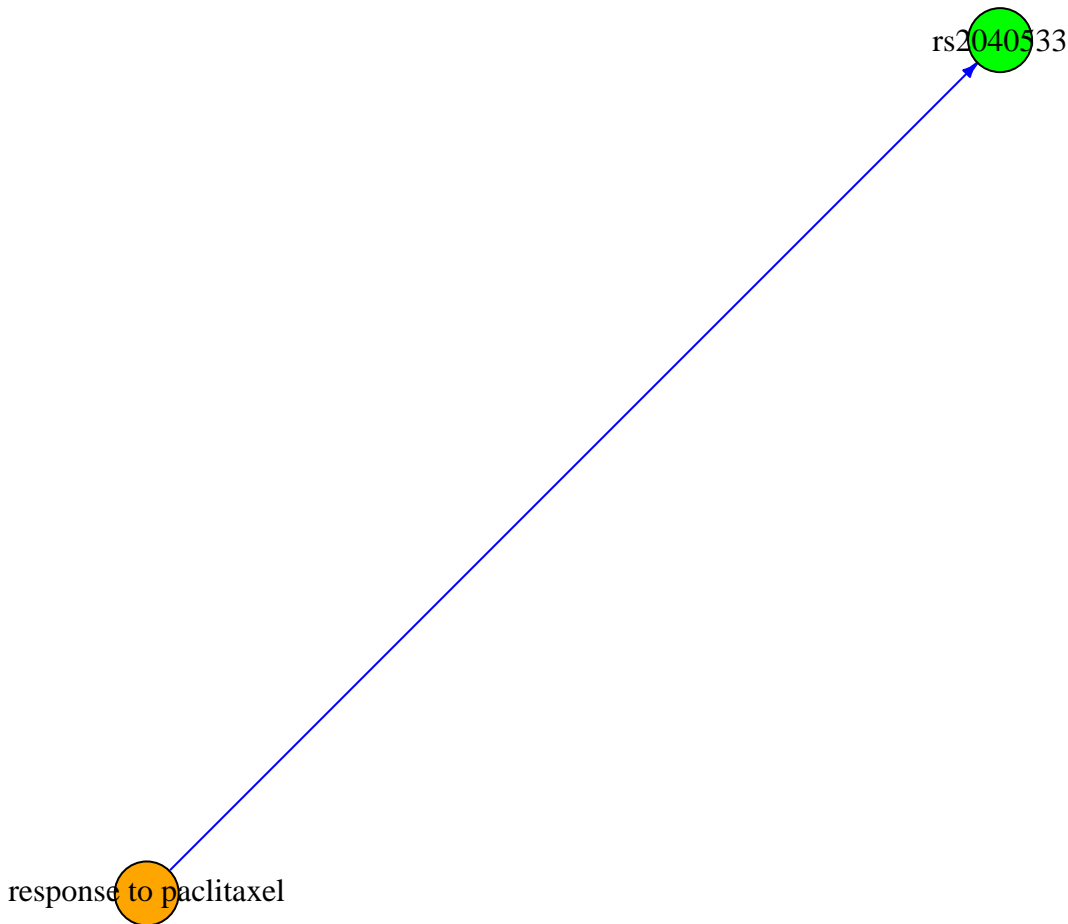

**Variant–Disease Network (glucagon–like peptide–1 measurement)**

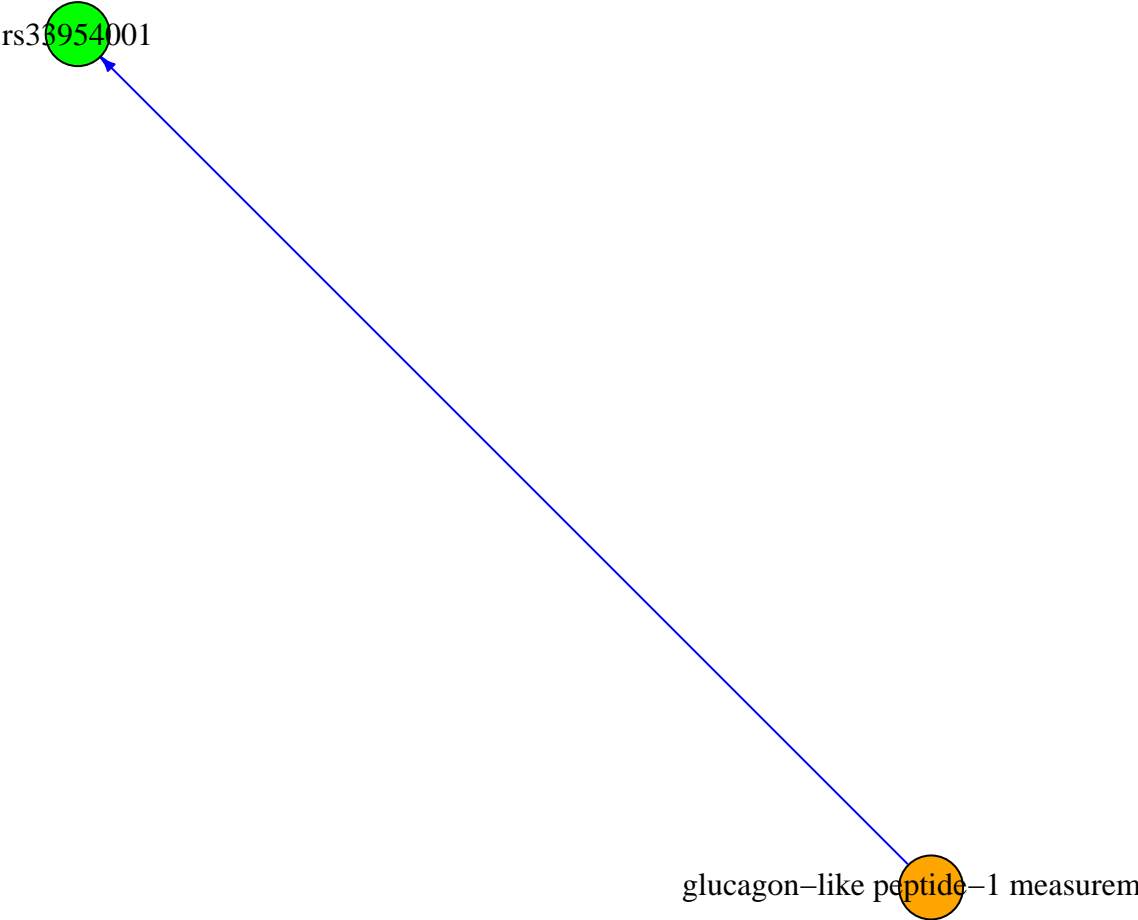

# ant-Disease Network (glucose-dependent insulintropic peptide (GIP) meas

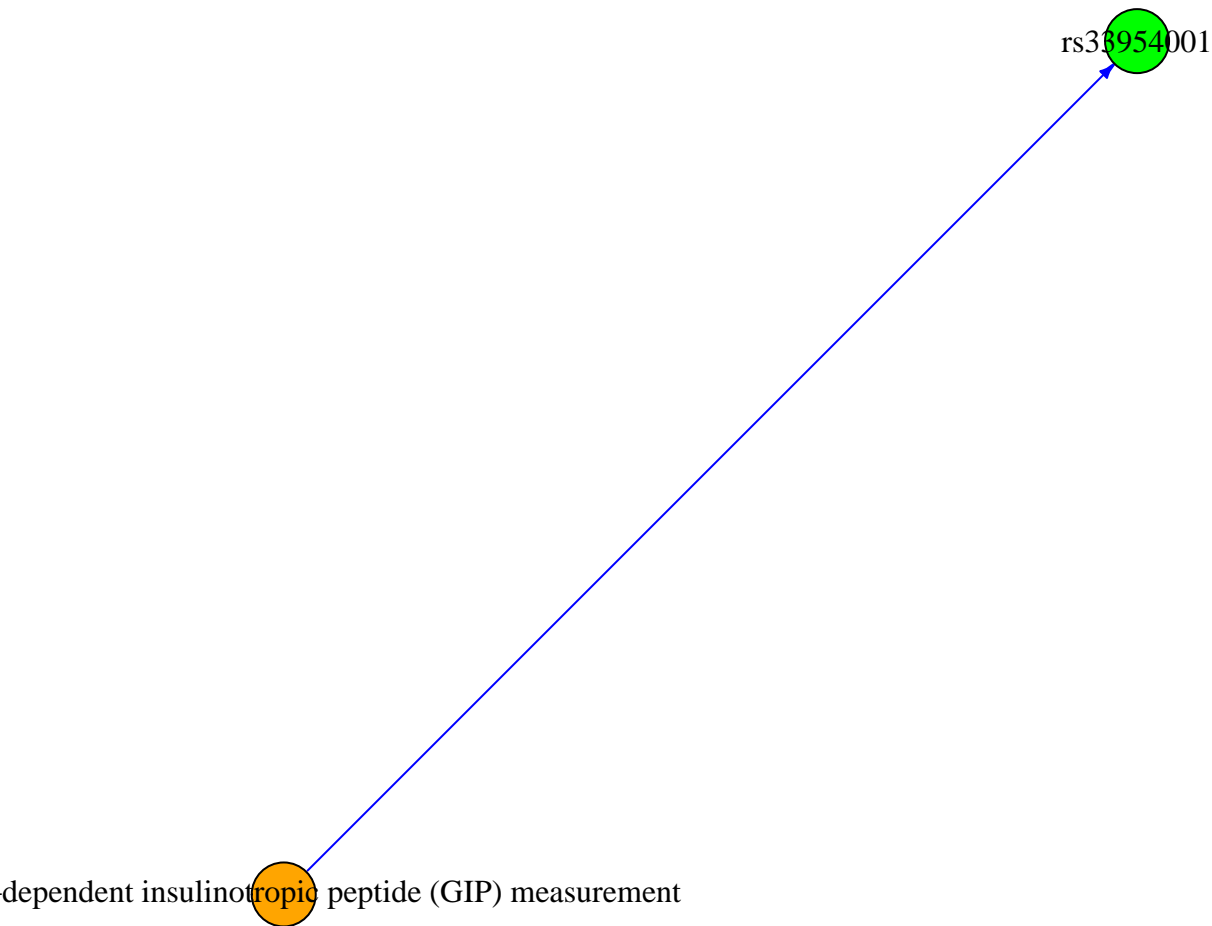

## Variant–Disease Network (glucose tolerance test)

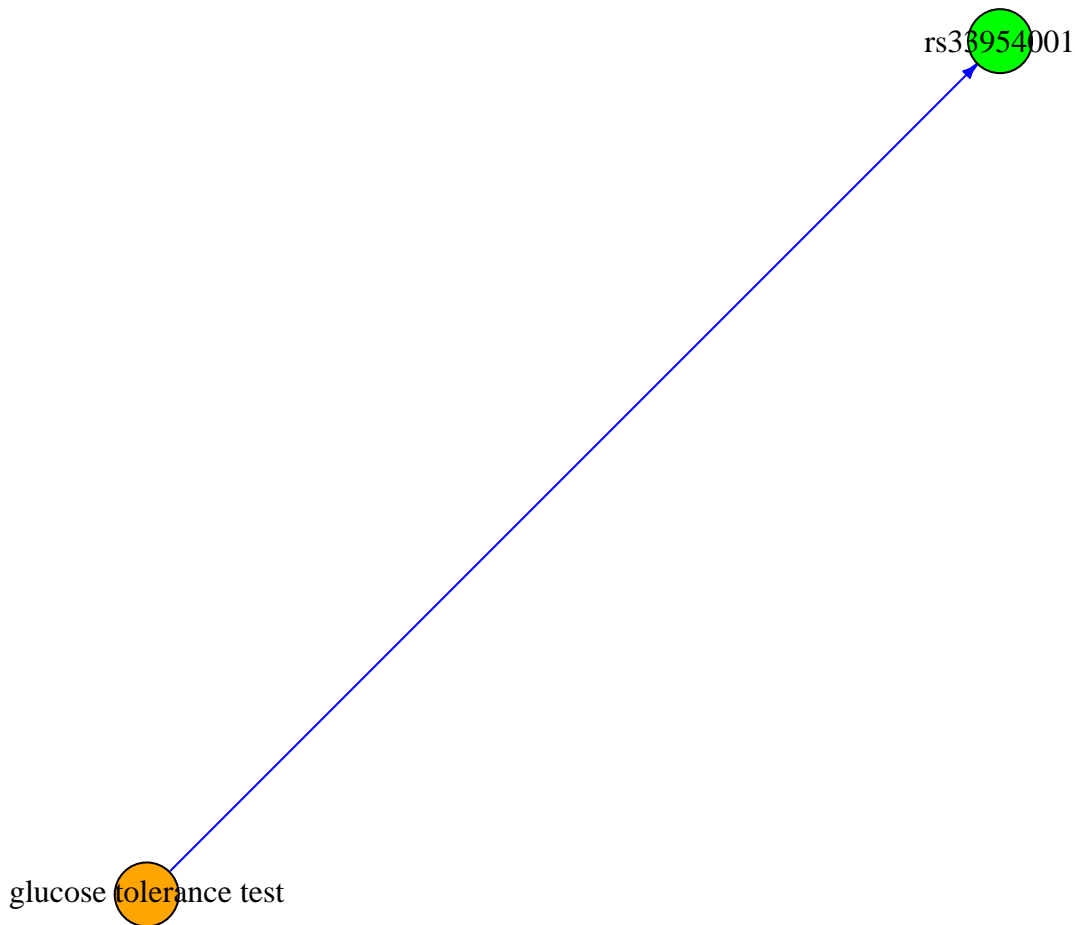



# Variant–Disease Network (depressive symptom measurement)

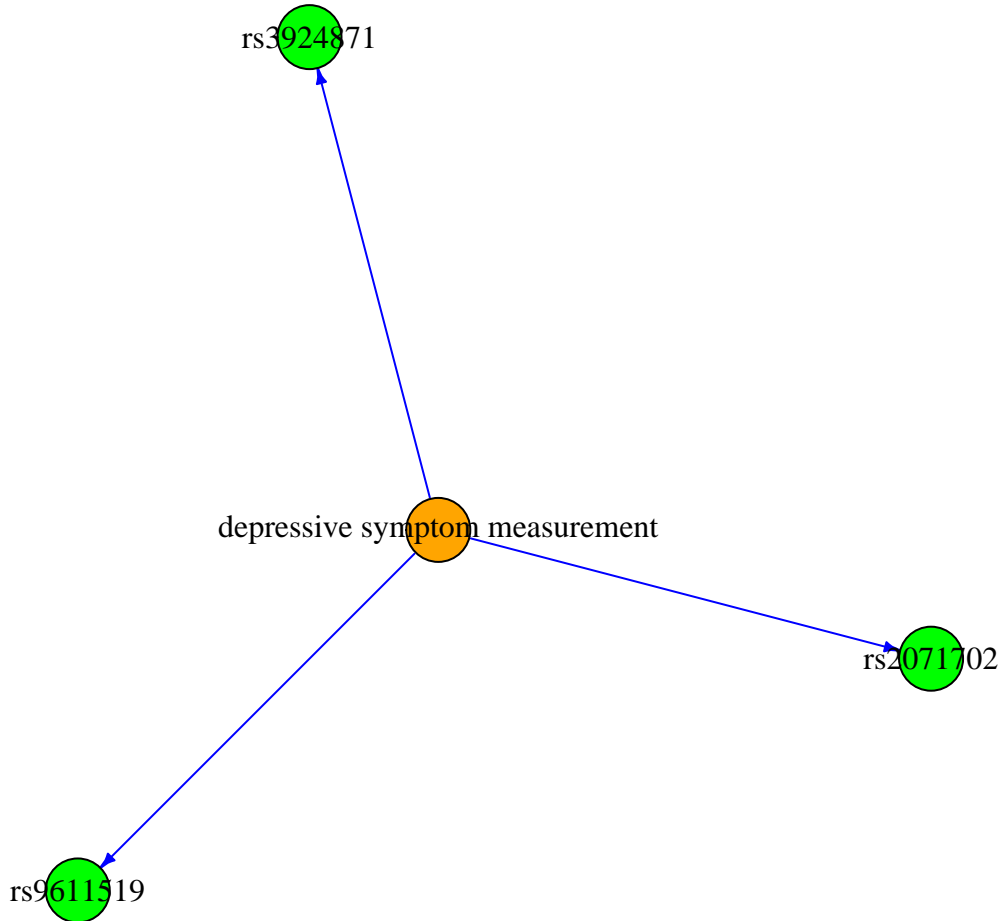

## Variant–Disease Network (neuroticism measurement)

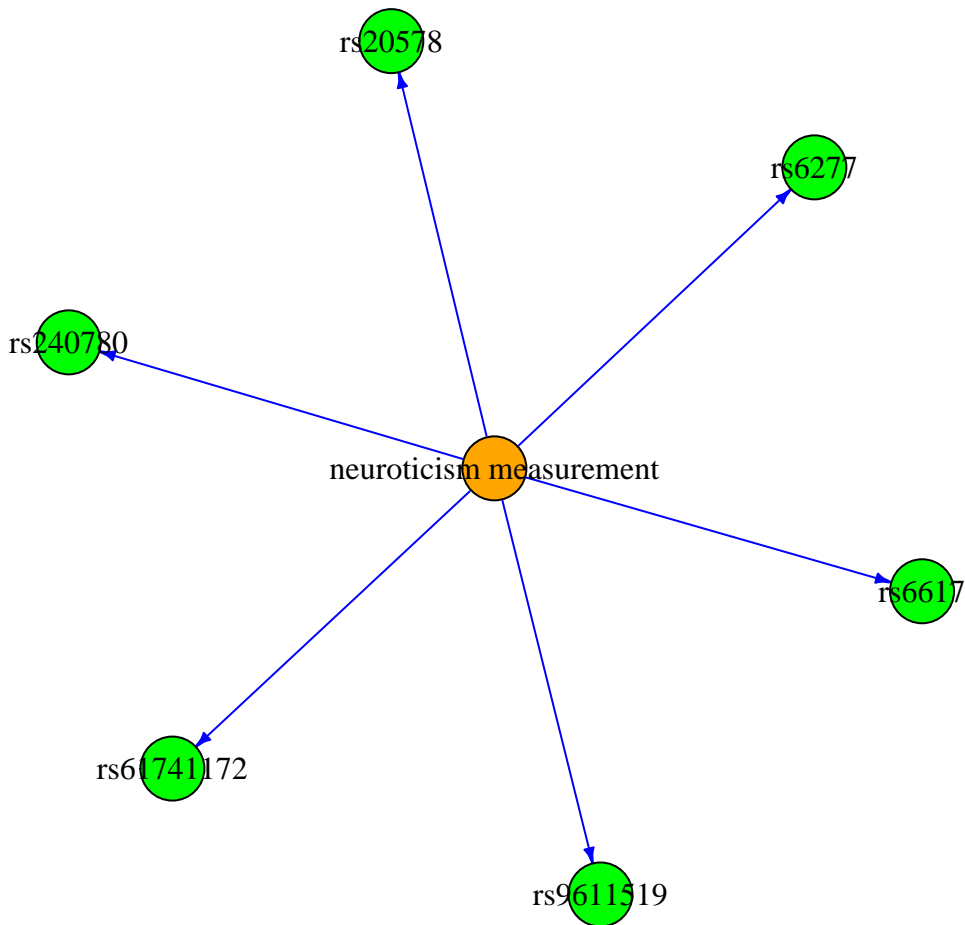

## Variant–Disease Network (vitamin D measurement)

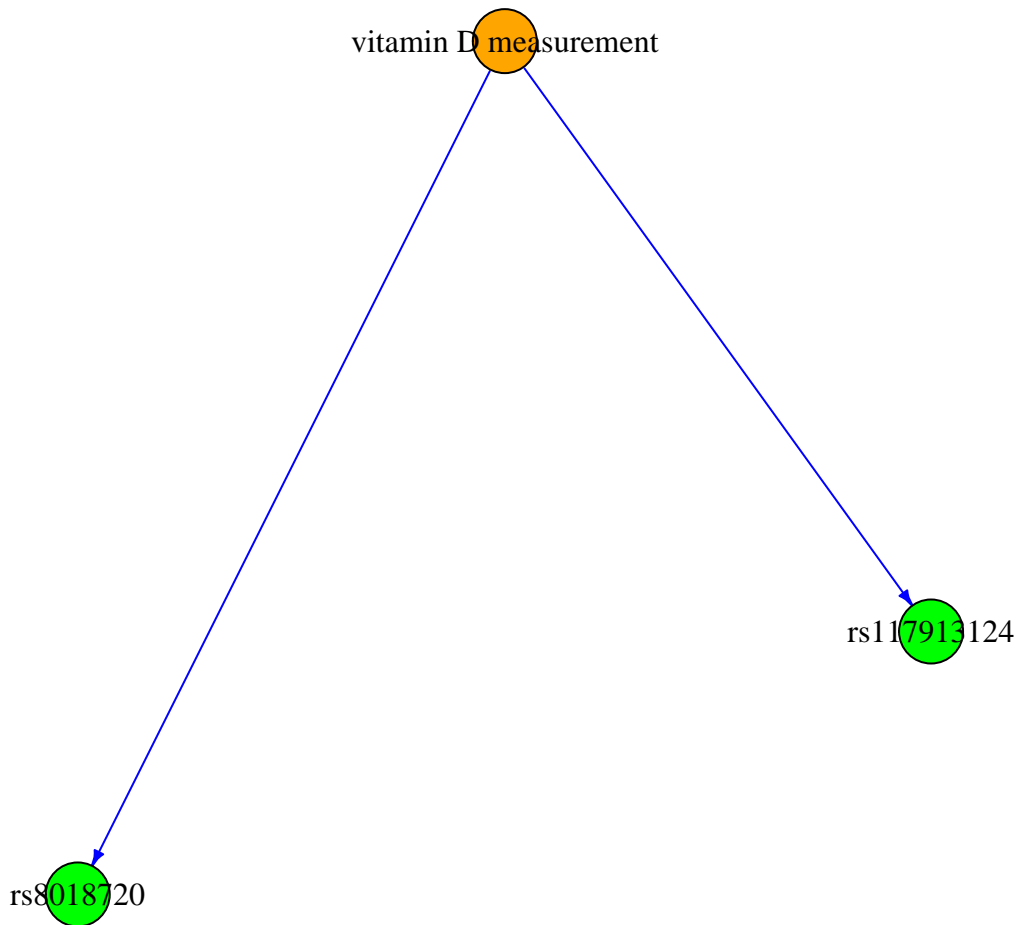

## Variant–Disease Network (disease progression measurement)

rs2118017

disease progression measurement



## Variant–Disease Network (eosinophilic esophagitis)

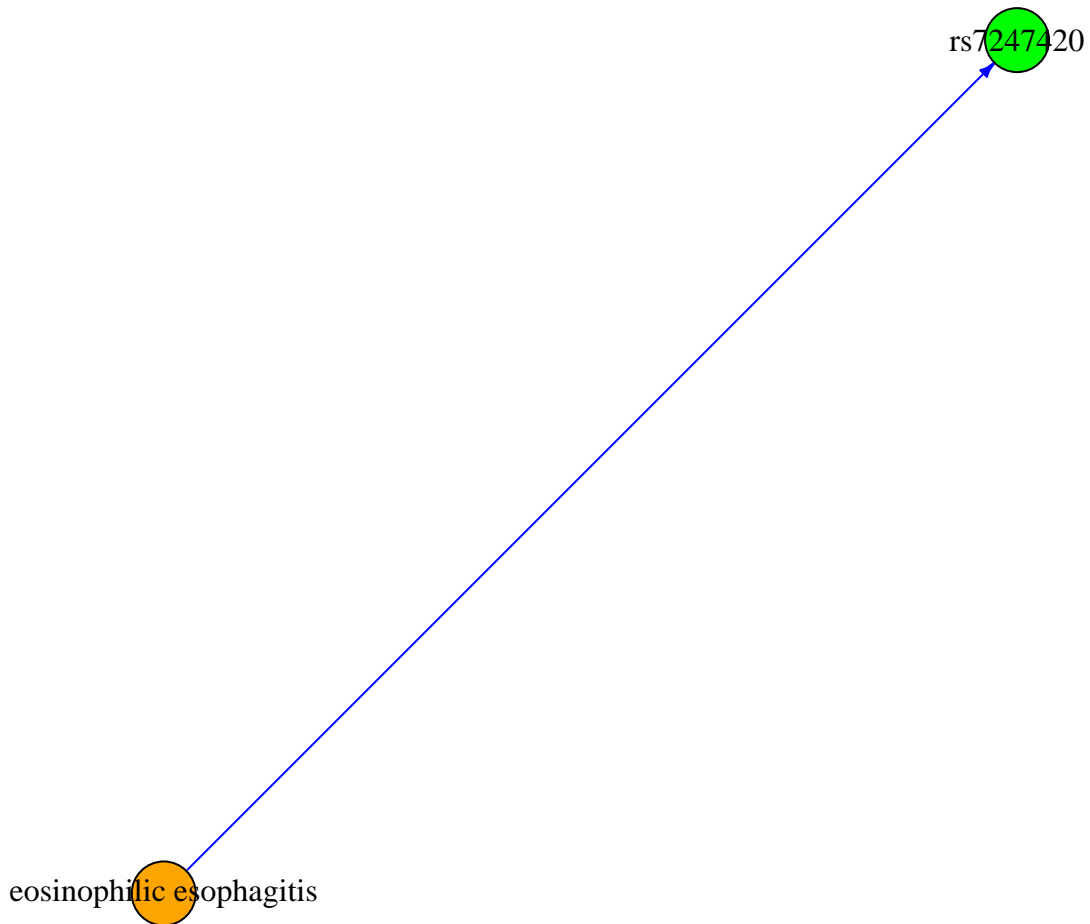

**Variant–Disease Network (erosive tooth wear measurement)**

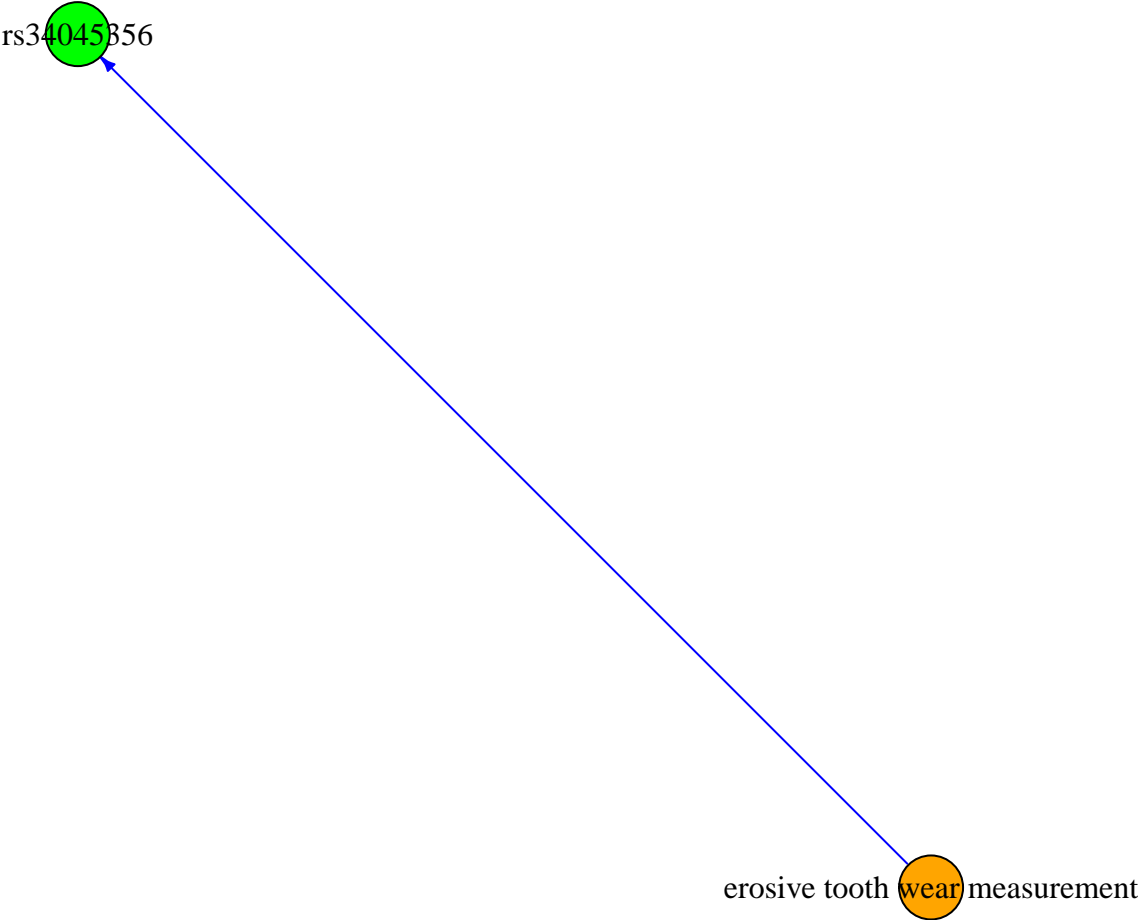

## Variant–Disease Network (clostridium difficile infection)

rs3807550

clostridium difficile infection

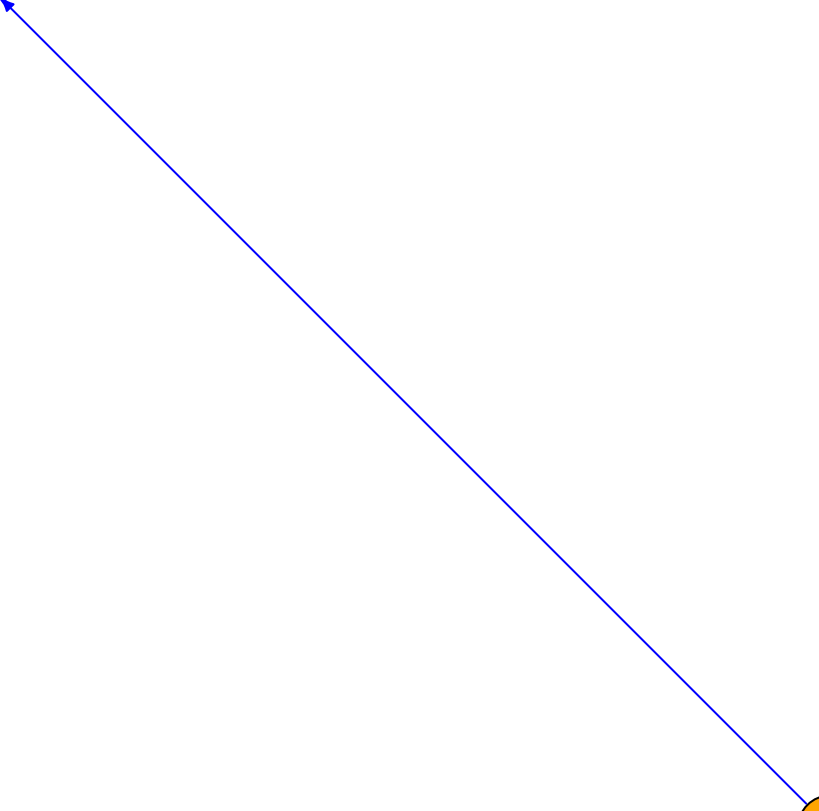

## Variant–Disease Network (multiple myeloma)

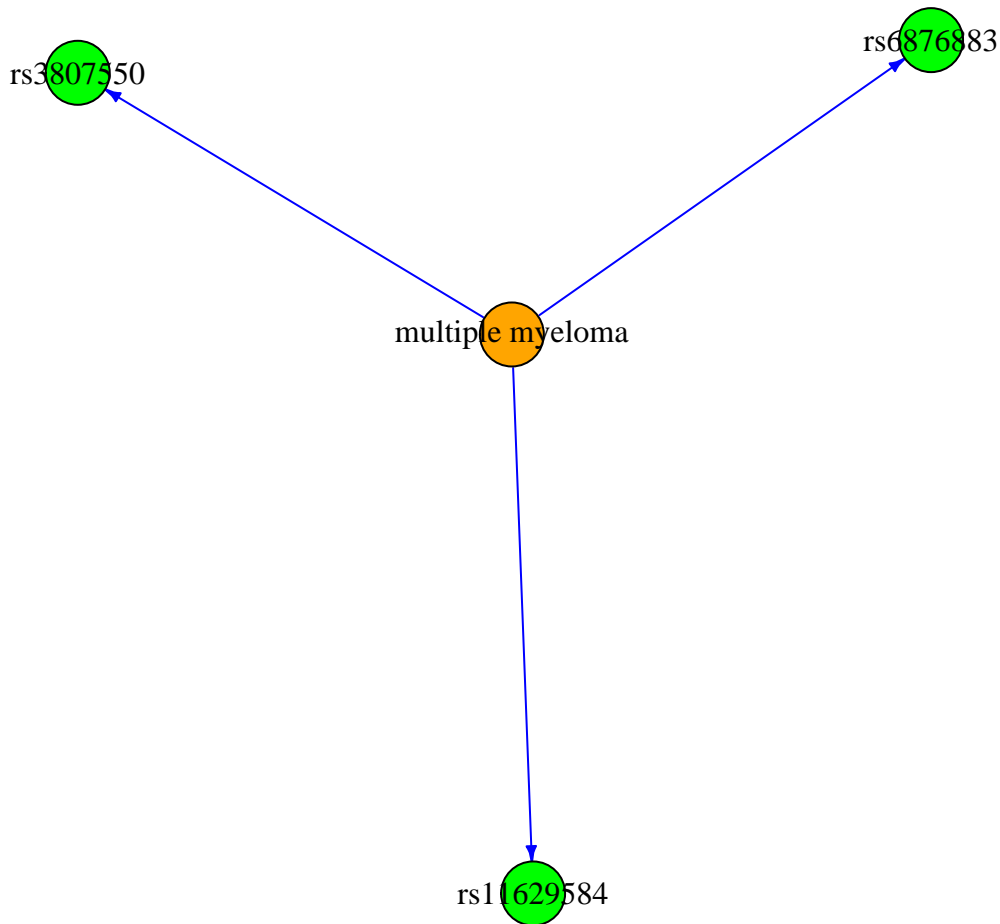



## Variant–Disease Network (serum metabolite measurement)

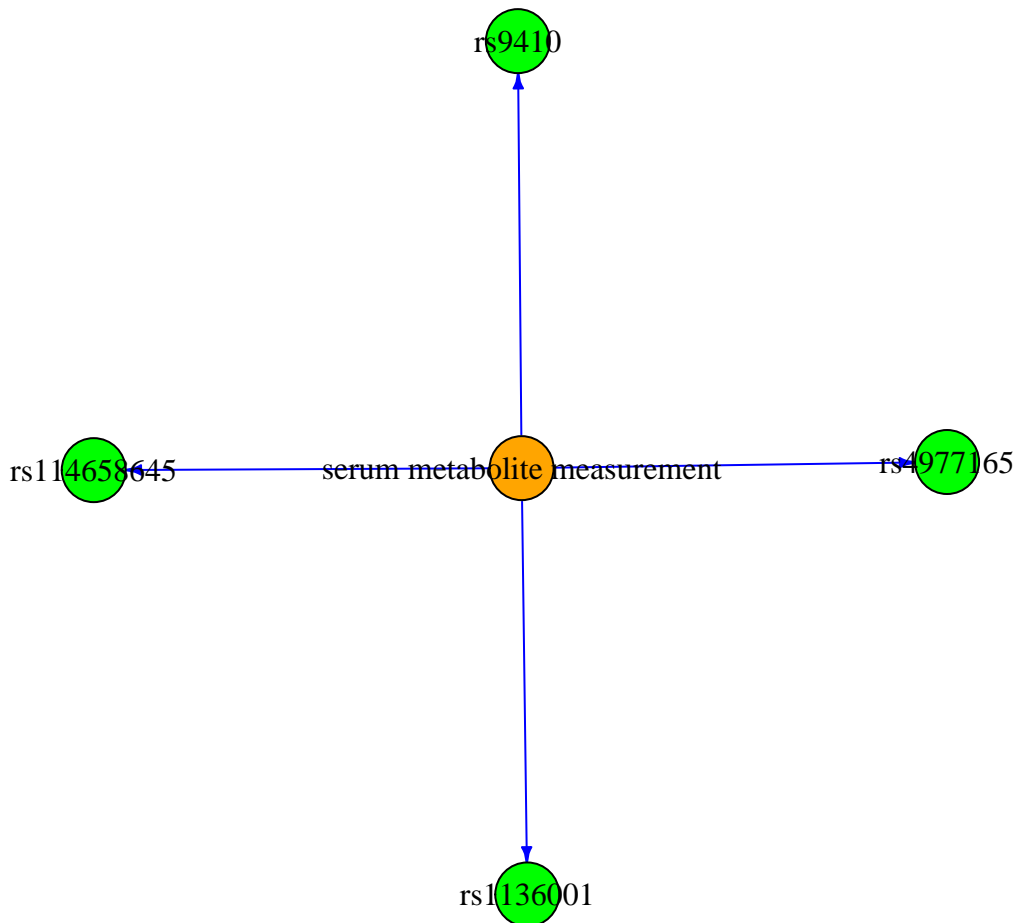

## Variant–Disease Network (erythrocyte count)

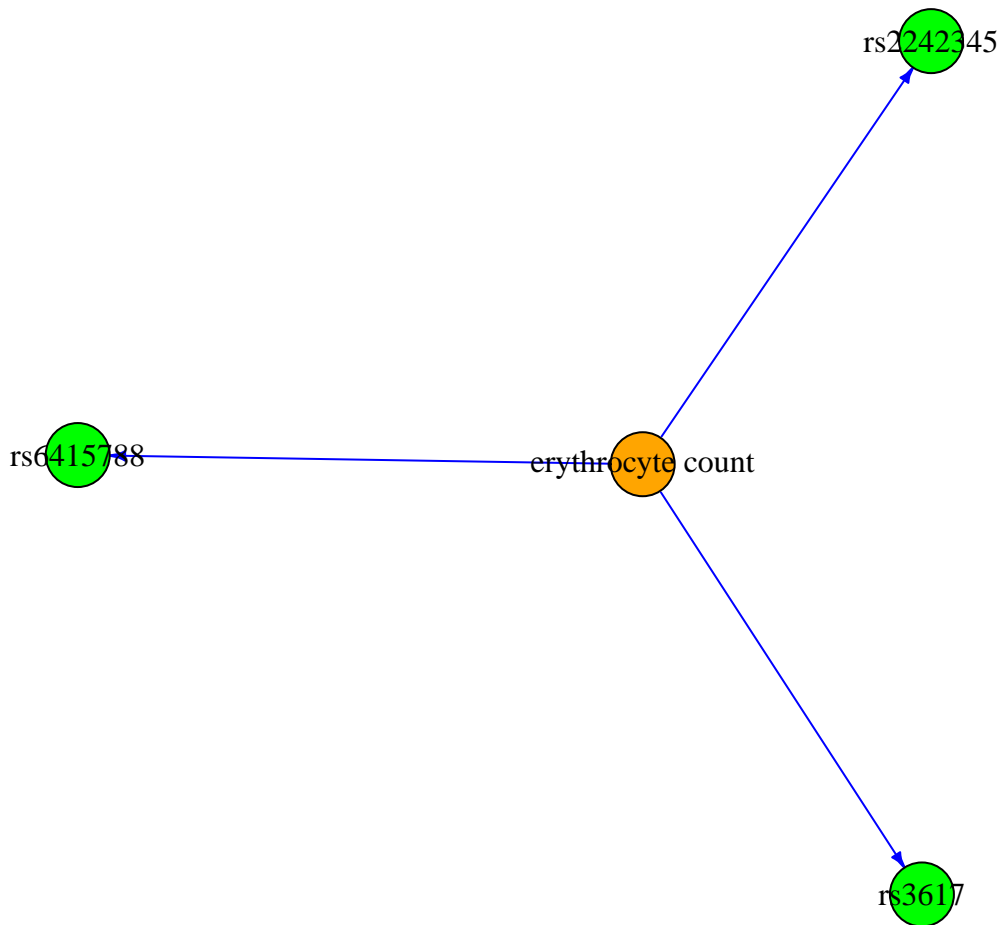

## Variant–Disease Network (hemoglobin measurement)

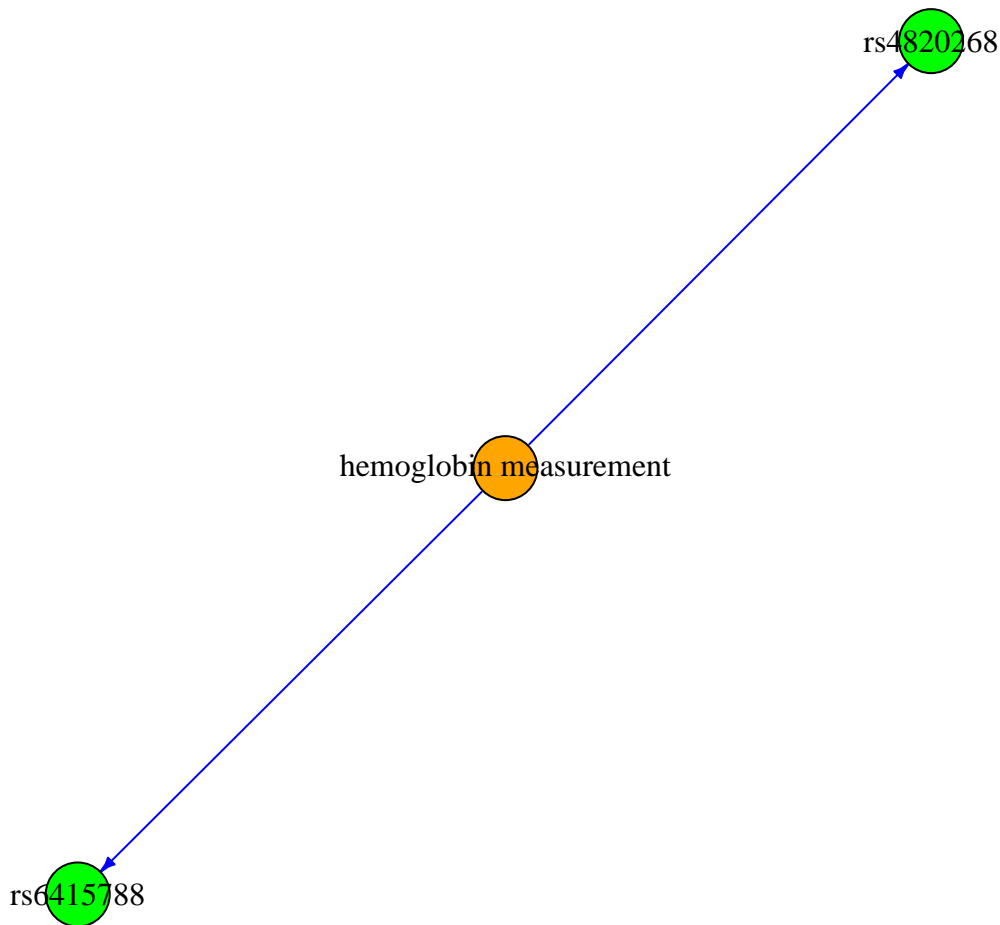

## Variant–Disease Network (telomere length)

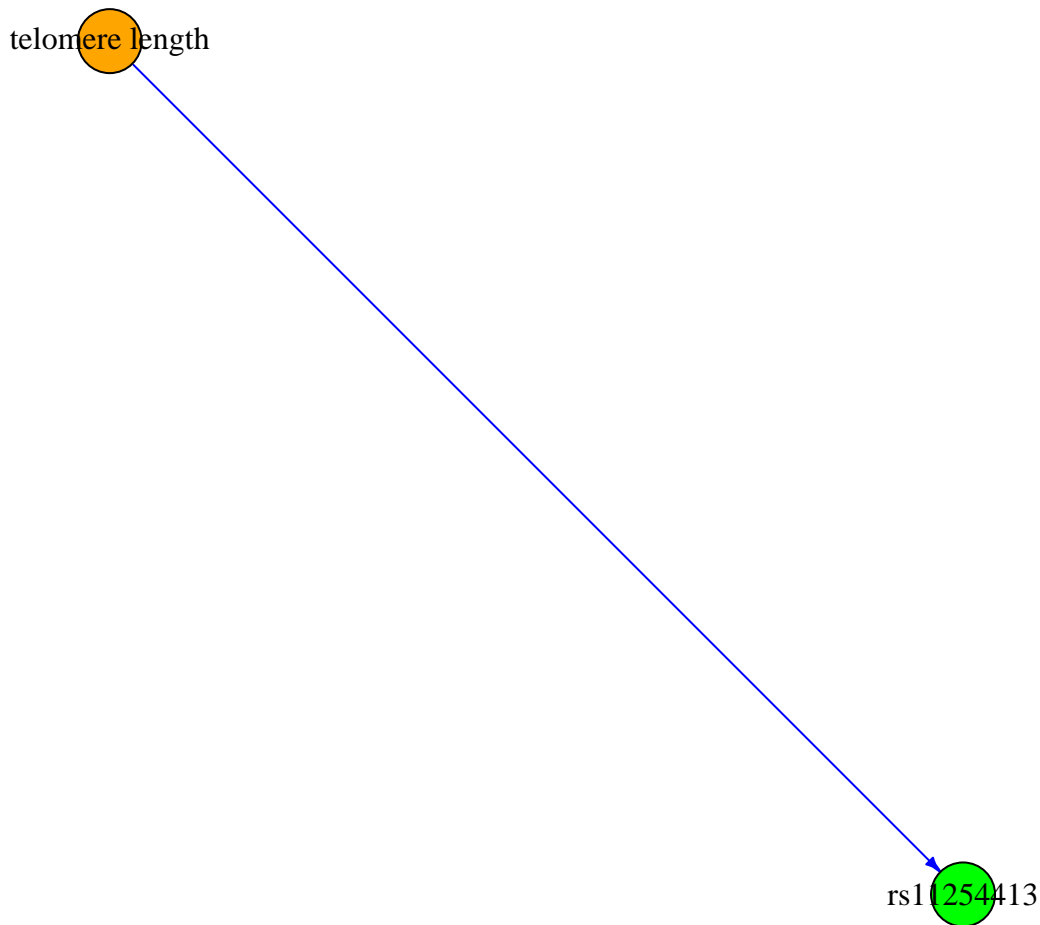

## Variant–Disease Network (cutaneous melanoma)

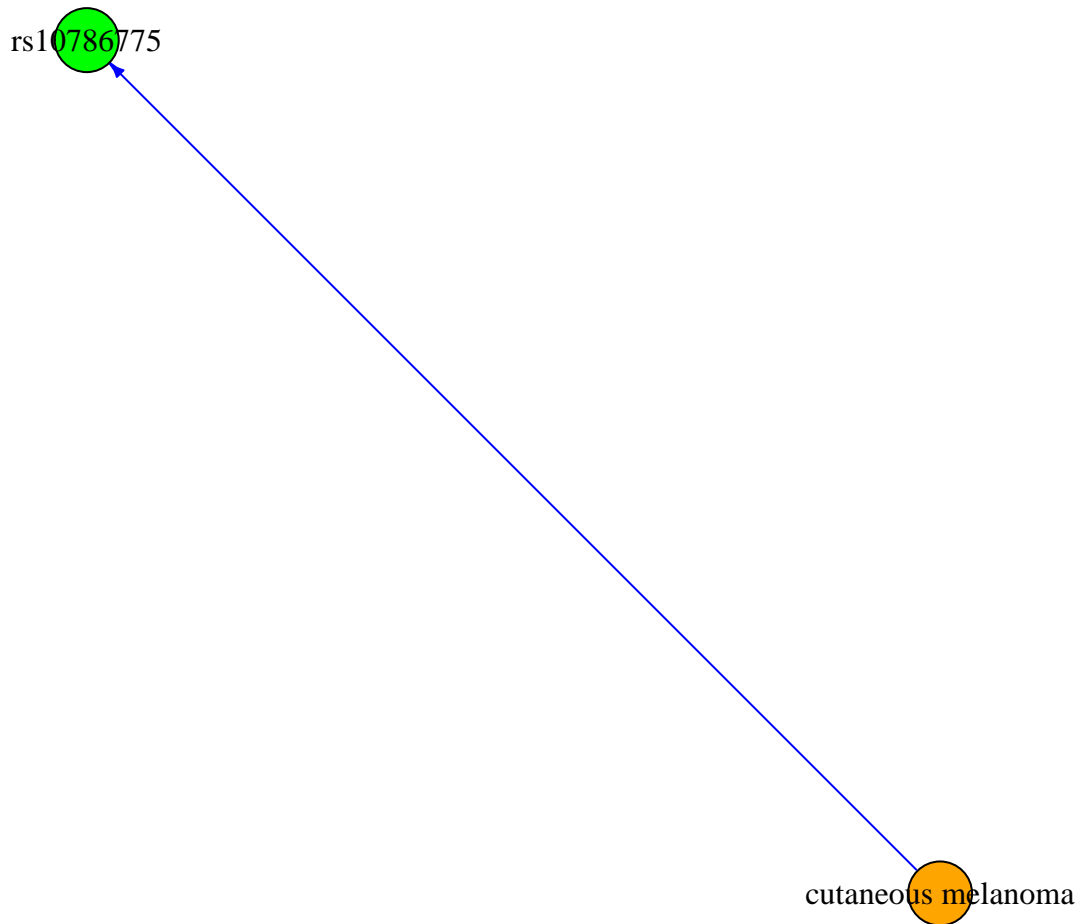

## Variant-Disease Network (melanoma)

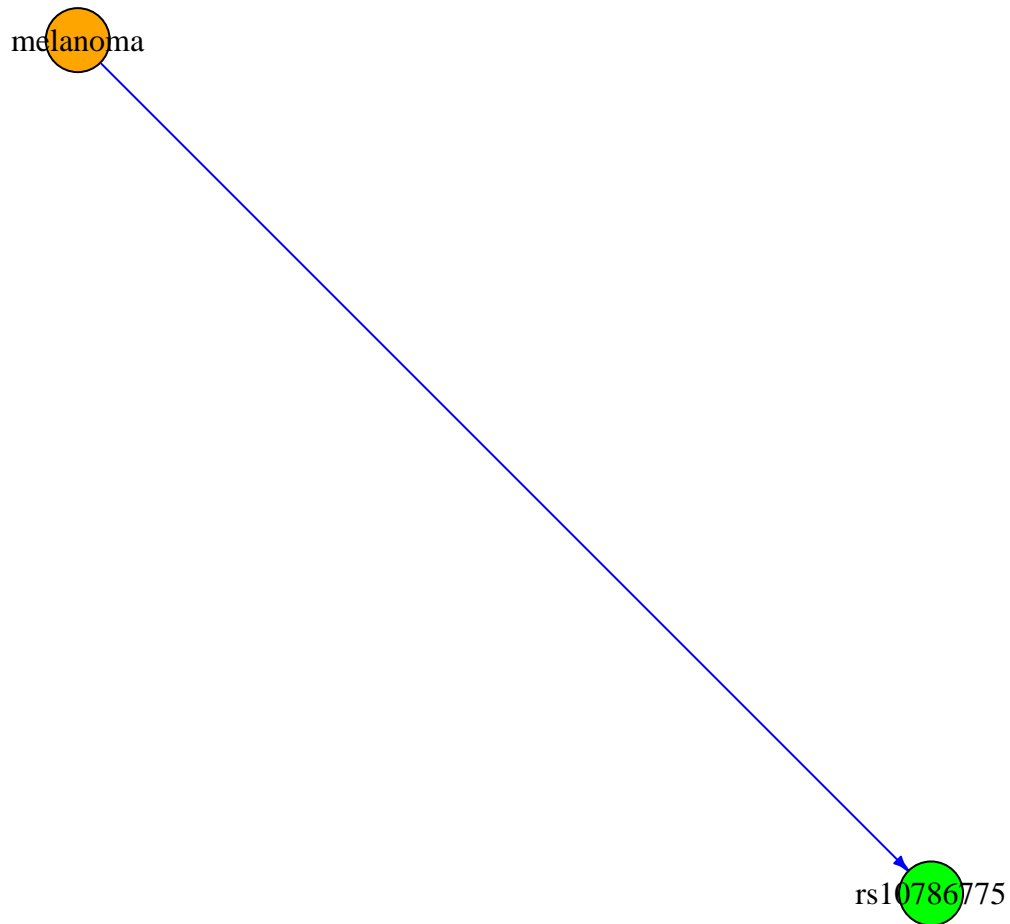

## Variant–Disease Network (ovarian serous carcinoma)

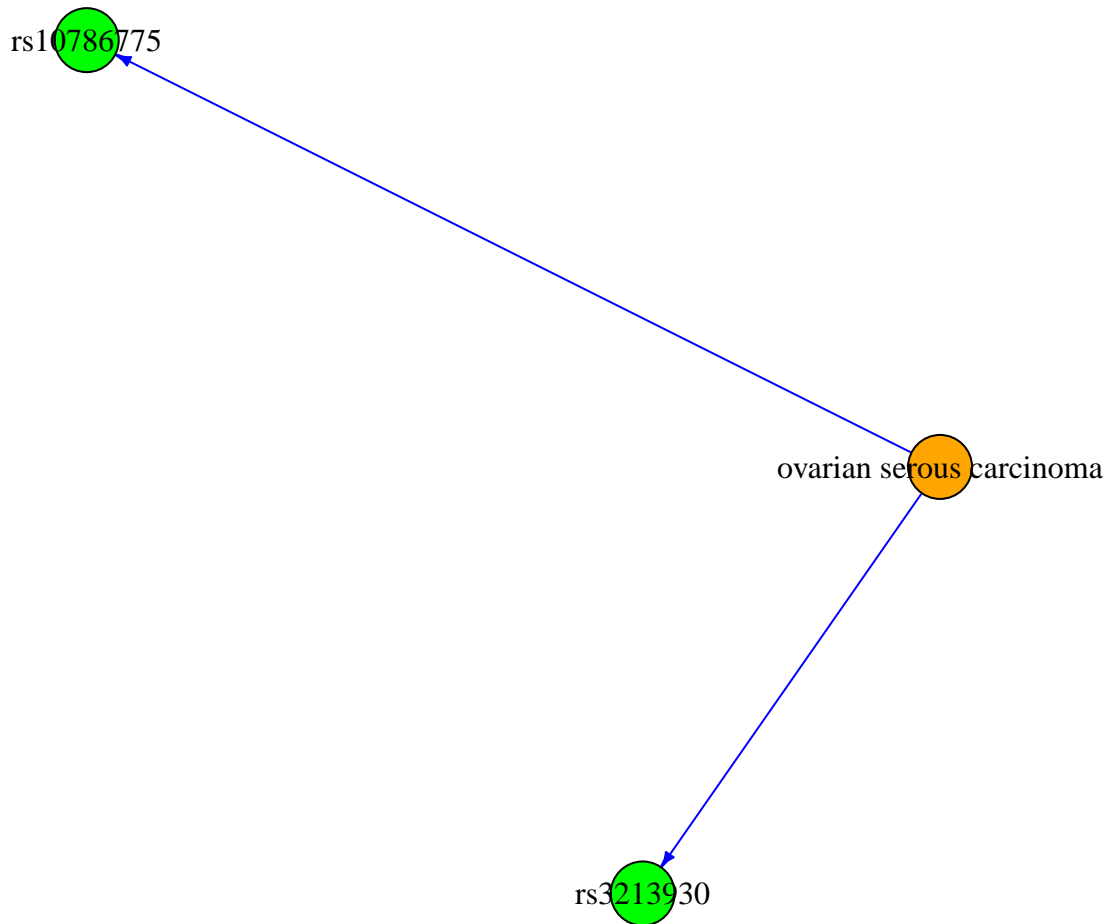

## Variant–Disease Network (diet measurement)

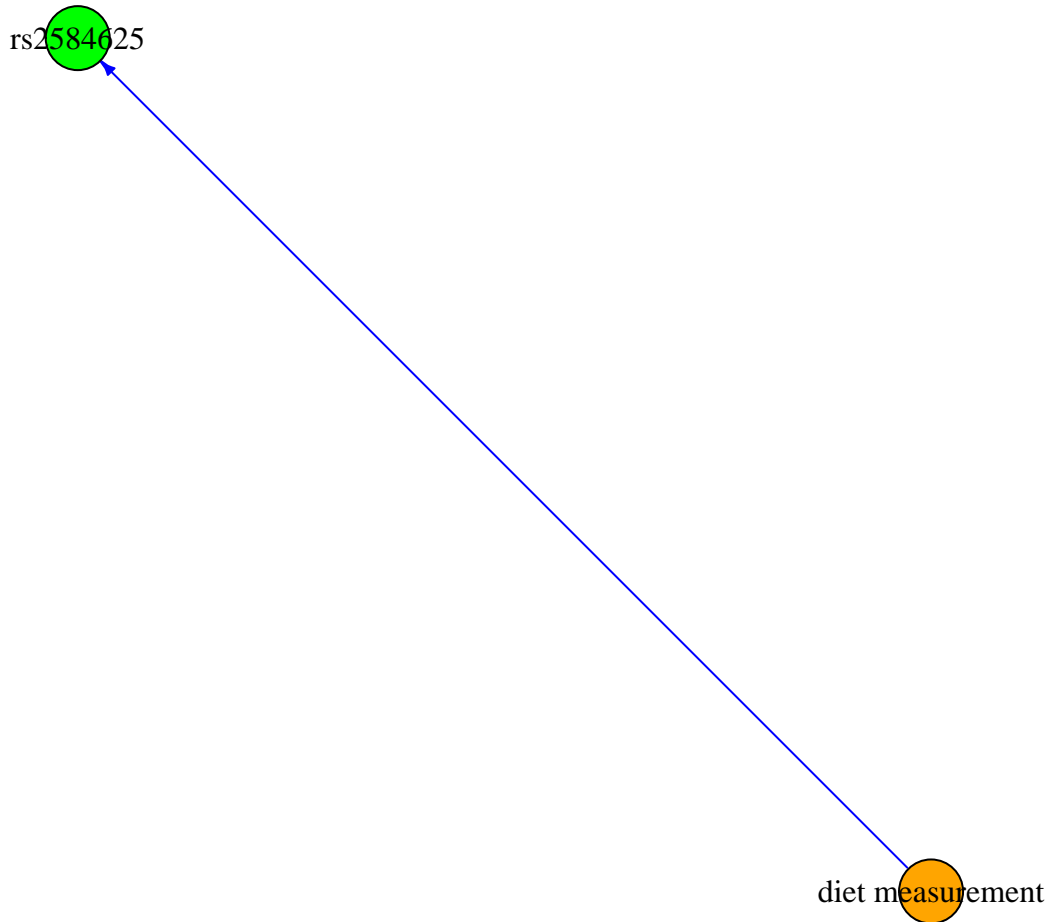



## Variant–Disease Network (biliary liver cirrhosis)

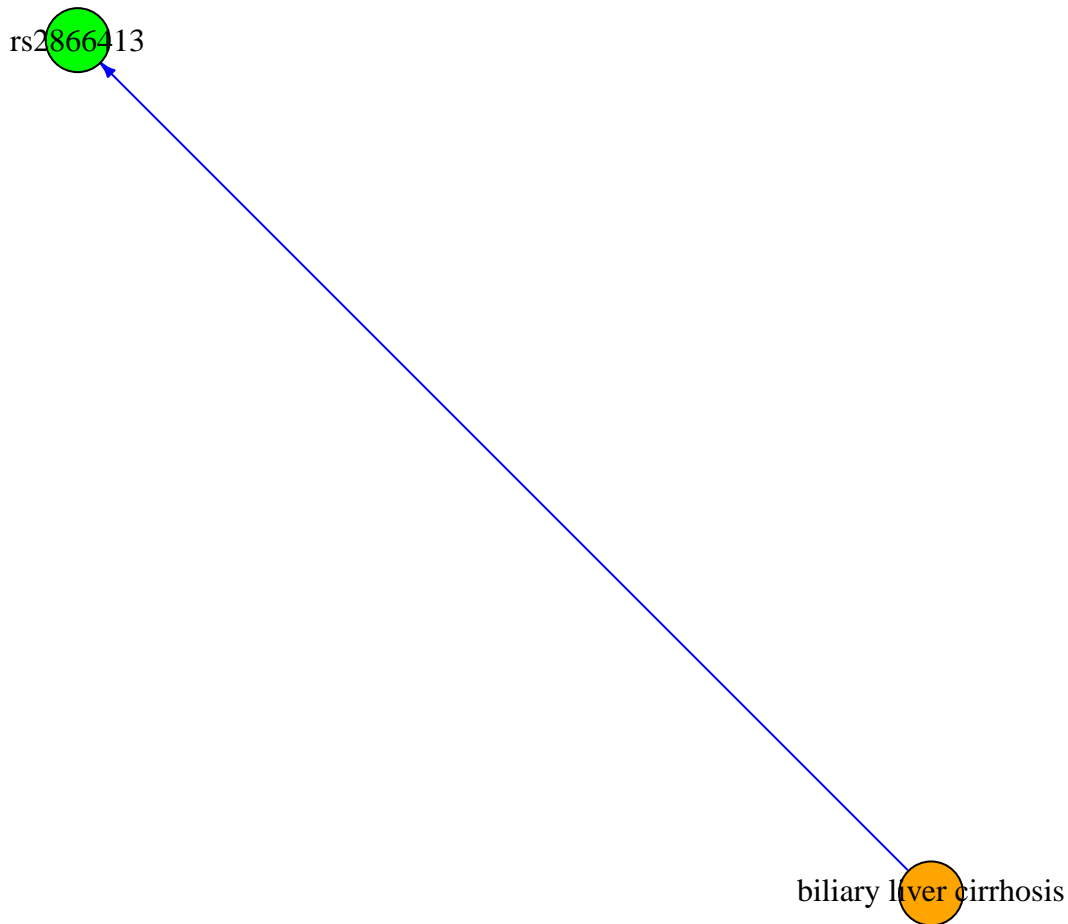

## Variant–Disease Network (primary biliary cirrhosis)

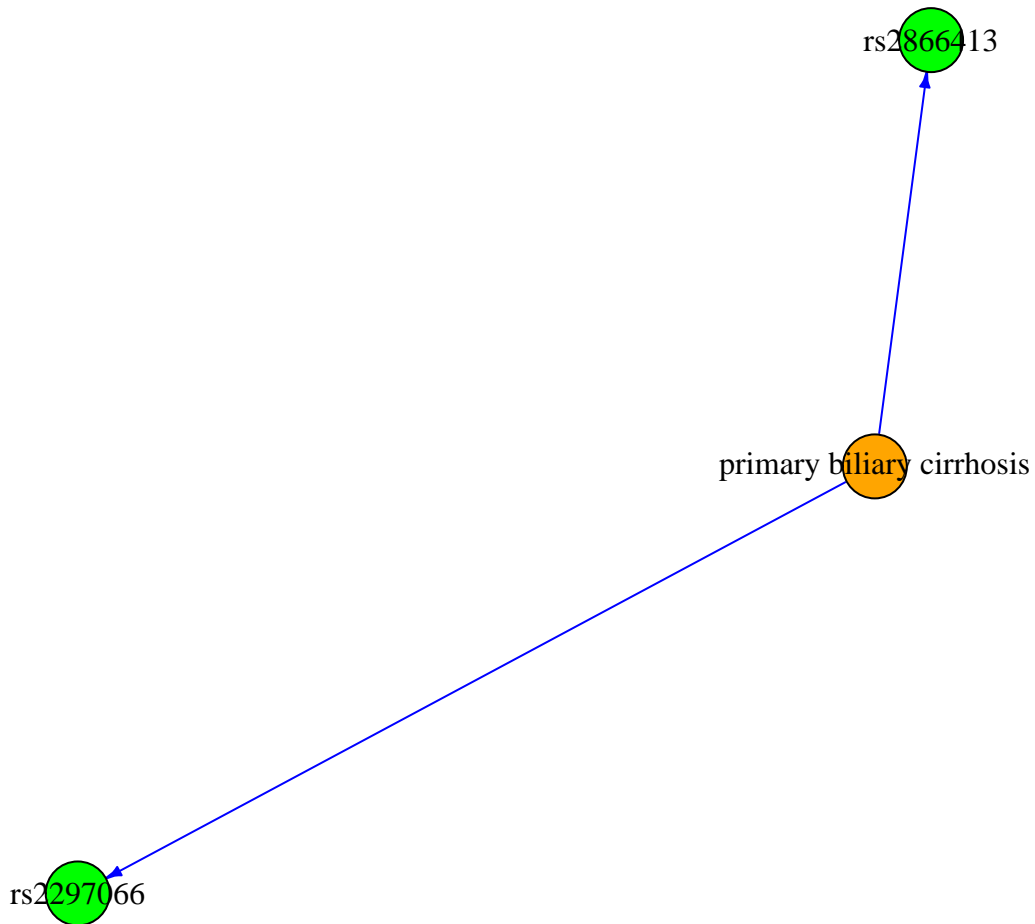

## Variant–Disease Network (sclerosing cholangitis)

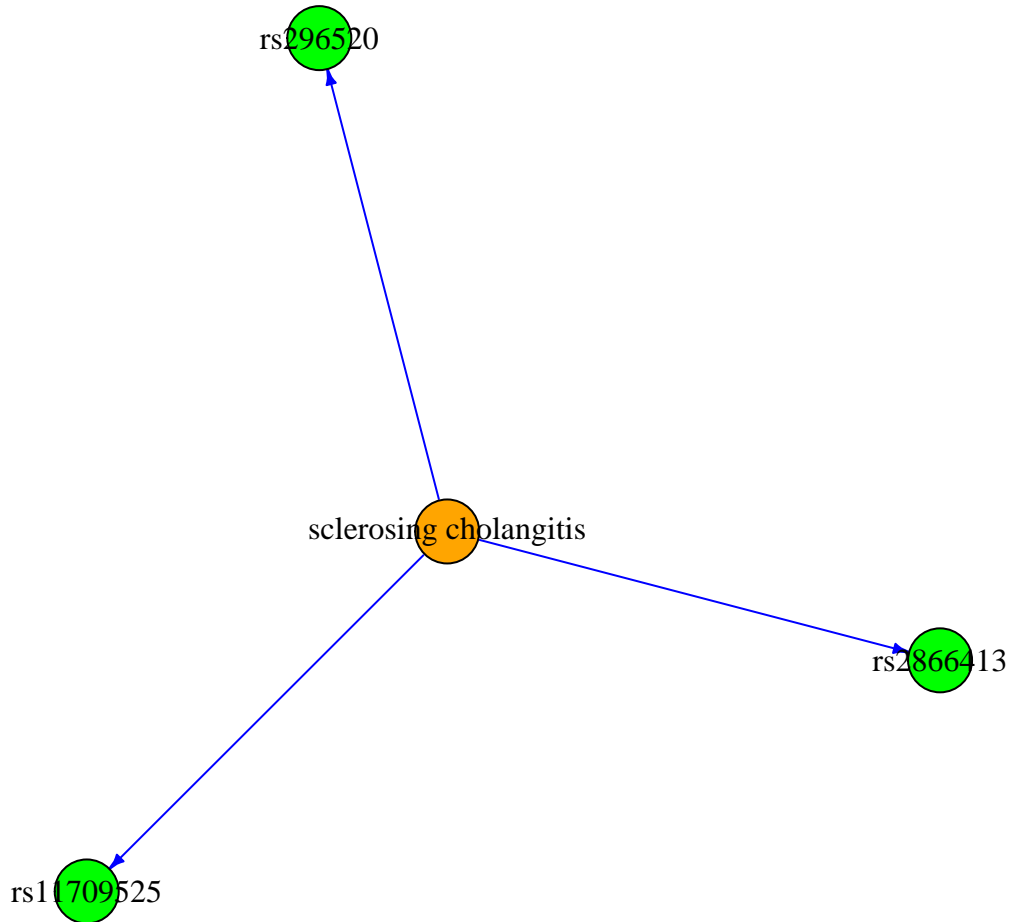

## Variant–Disease Network (attempted suicide)

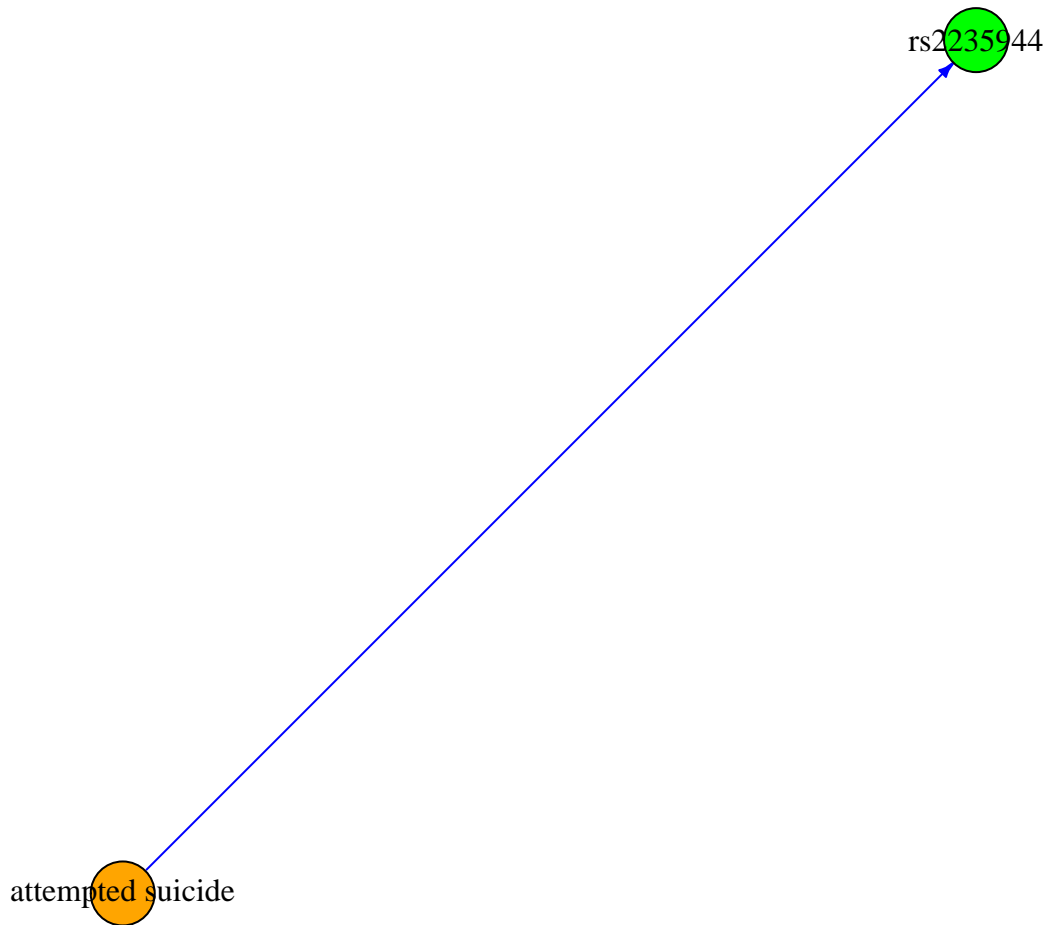

Variant–Disease Network (cirrhosis of liver)

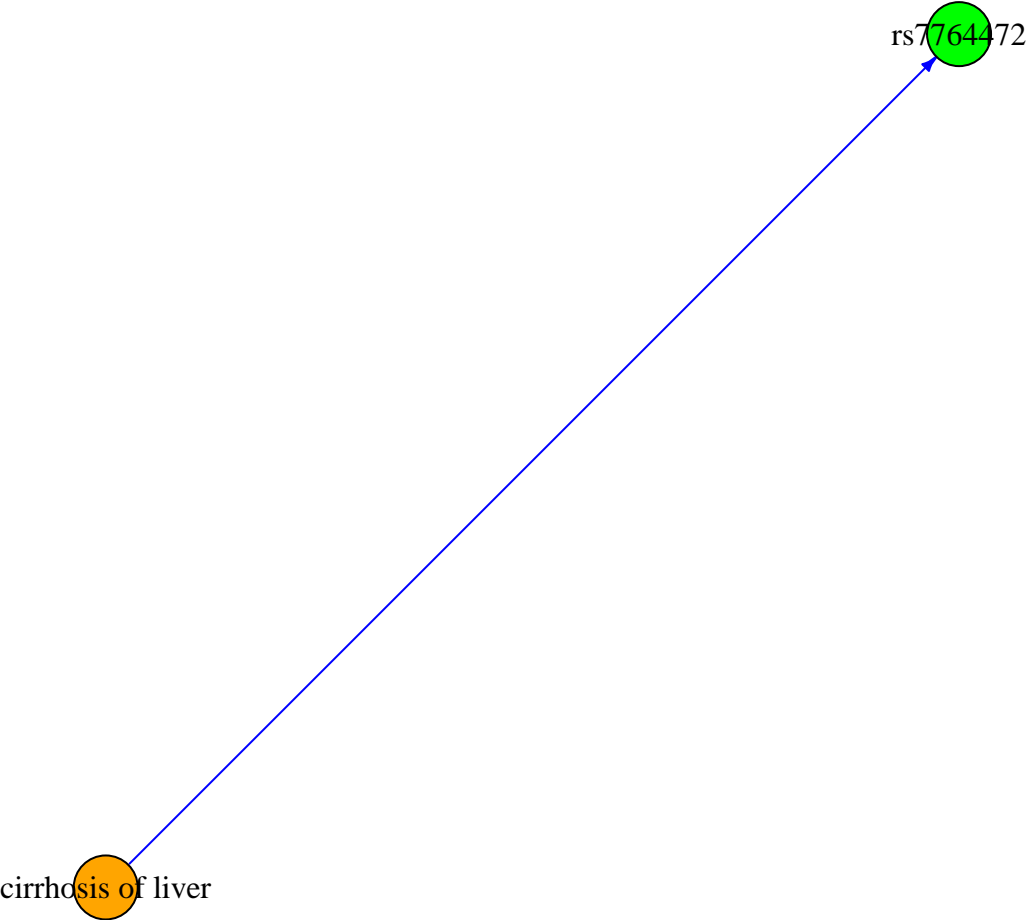

## Variant–Disease Network (hepatitis C infection)

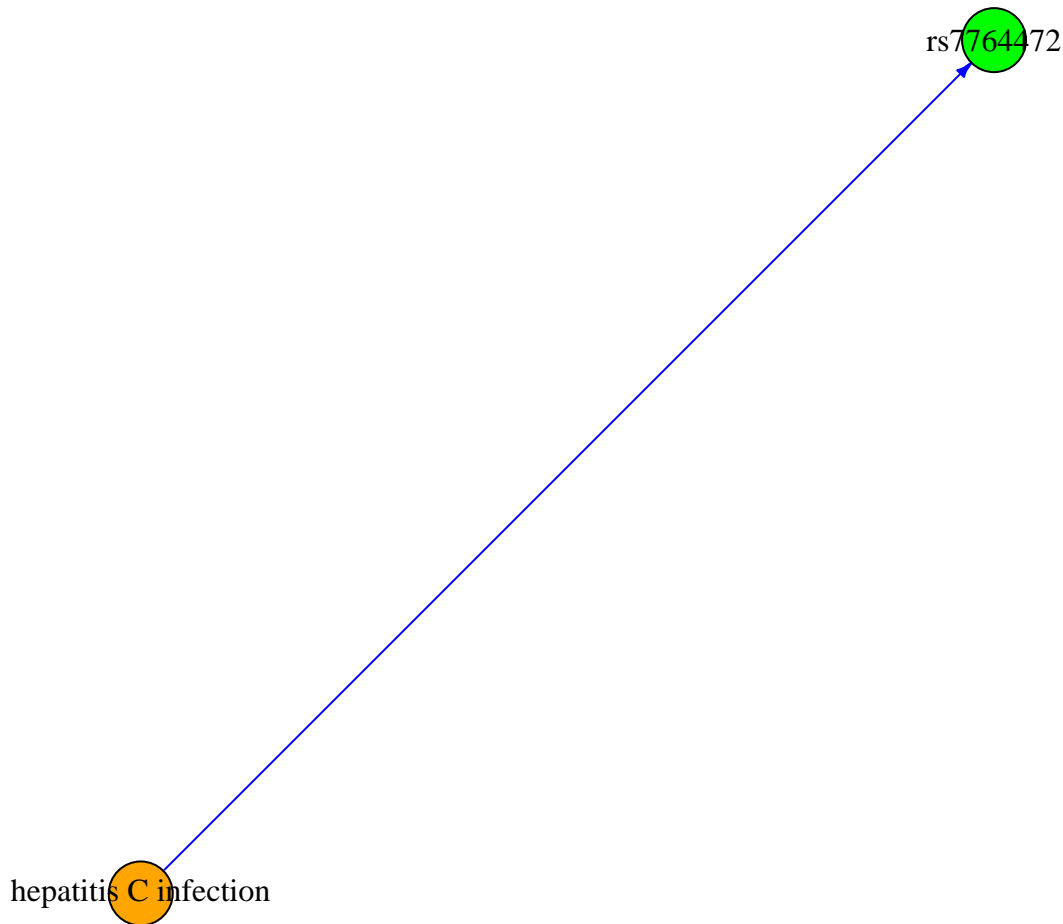

## Variant–Disease Network (a1c measurement)

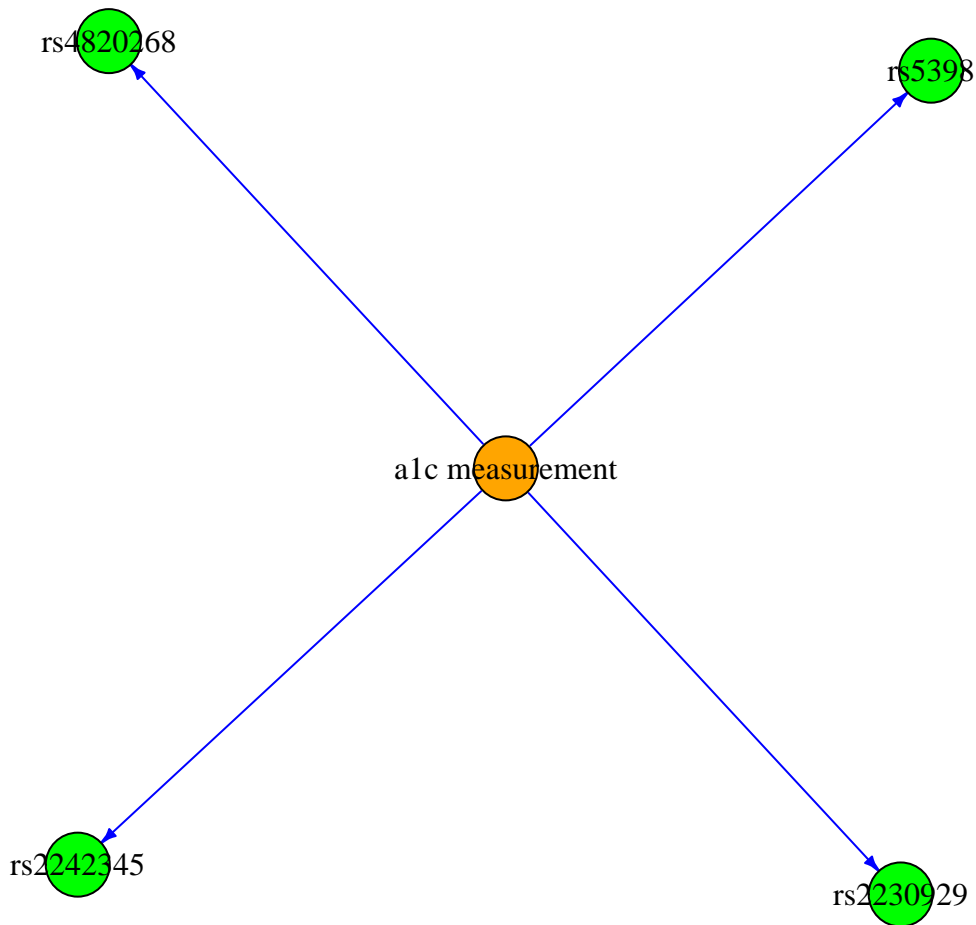

## Variant–Disease Network (functional laterality)

functional laterality

rs2293312

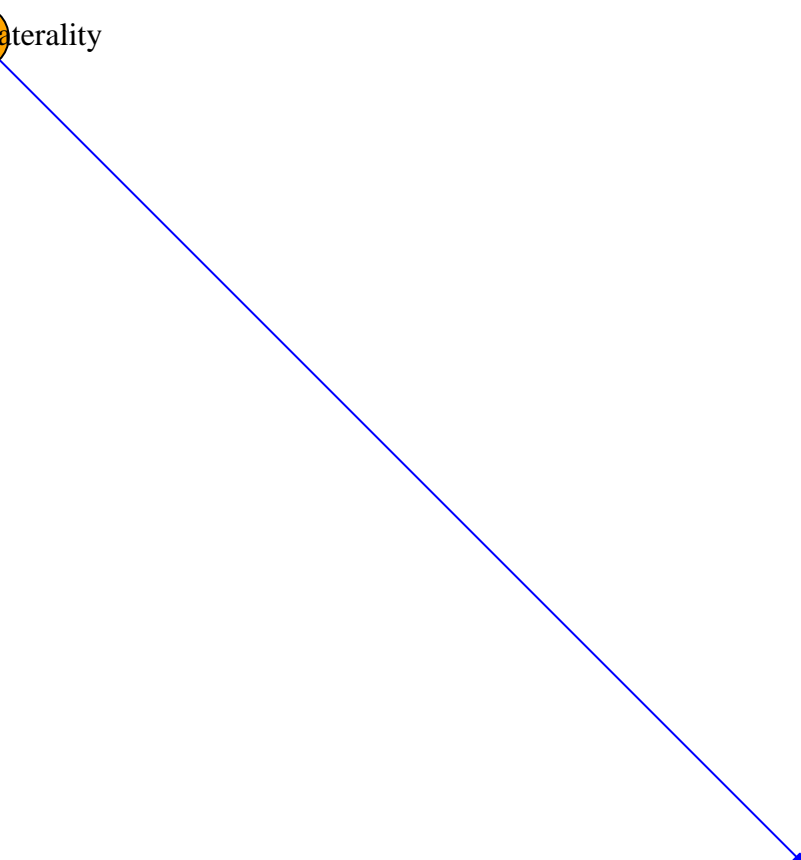



Variant–Disease Network (mood disorder)

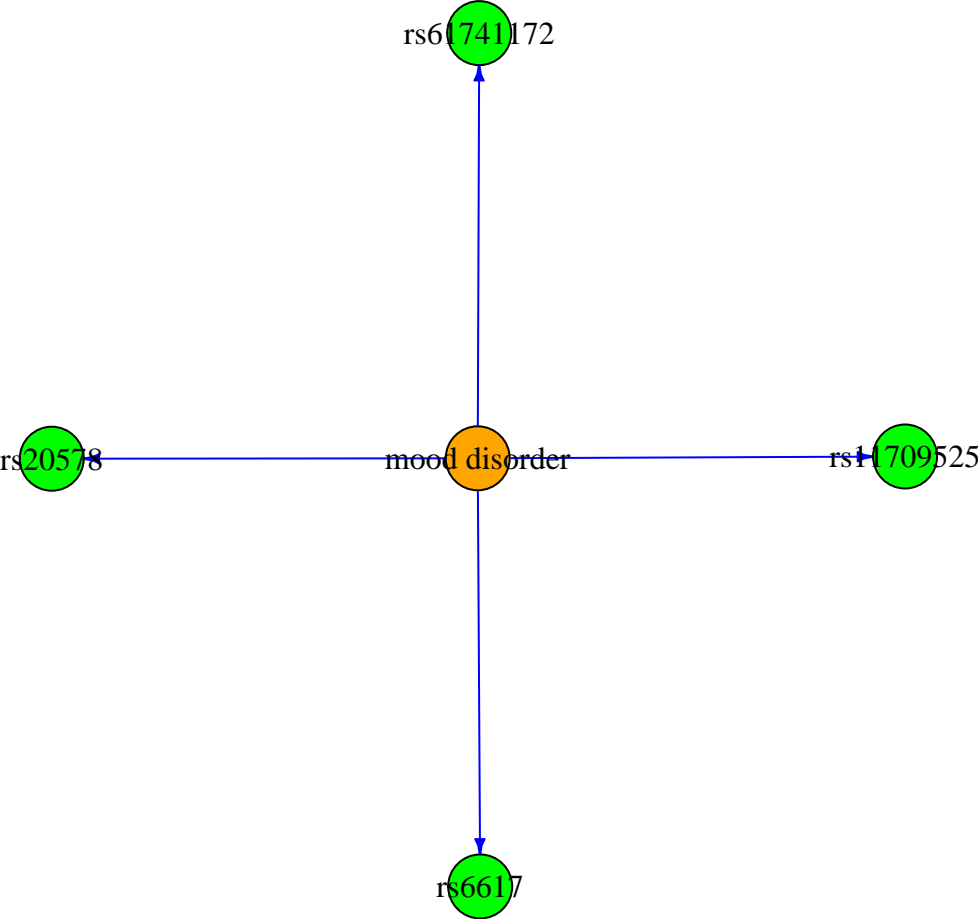

## Variant-Disease Network (osteoarthritis)

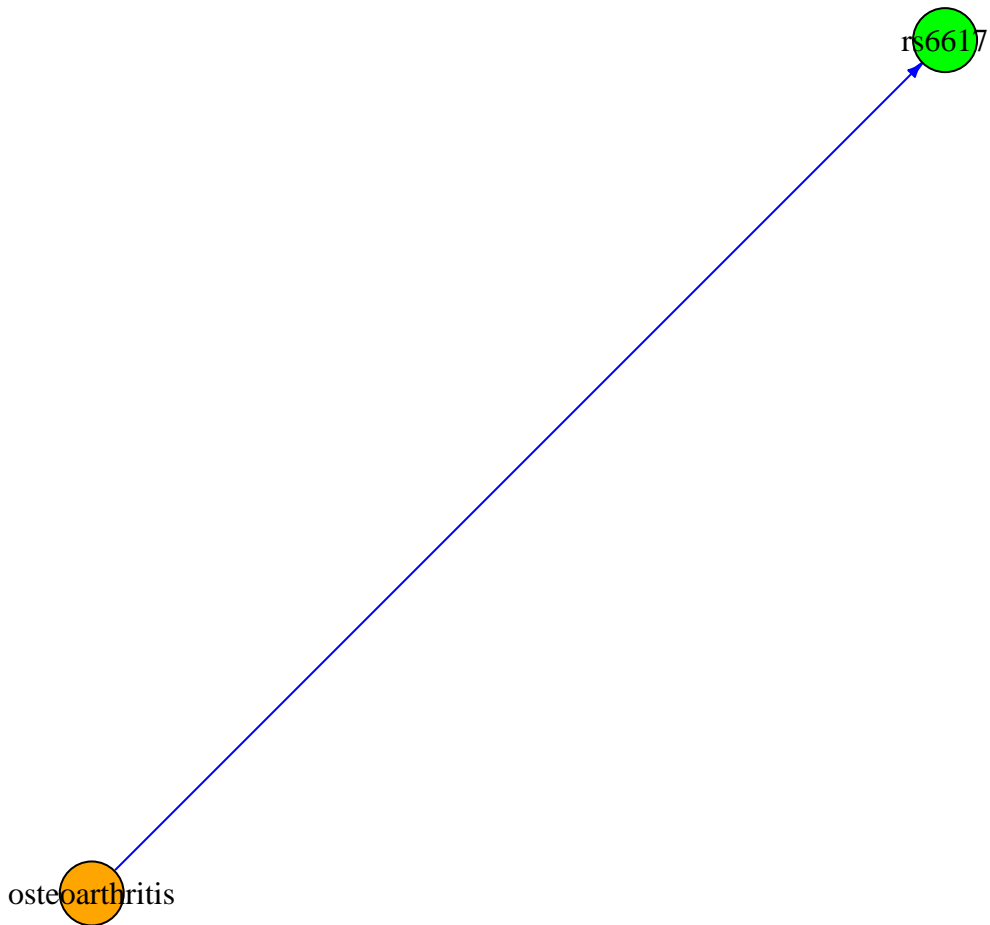

**Variant–Disease Network (serum IgG glycosylation measurement)**

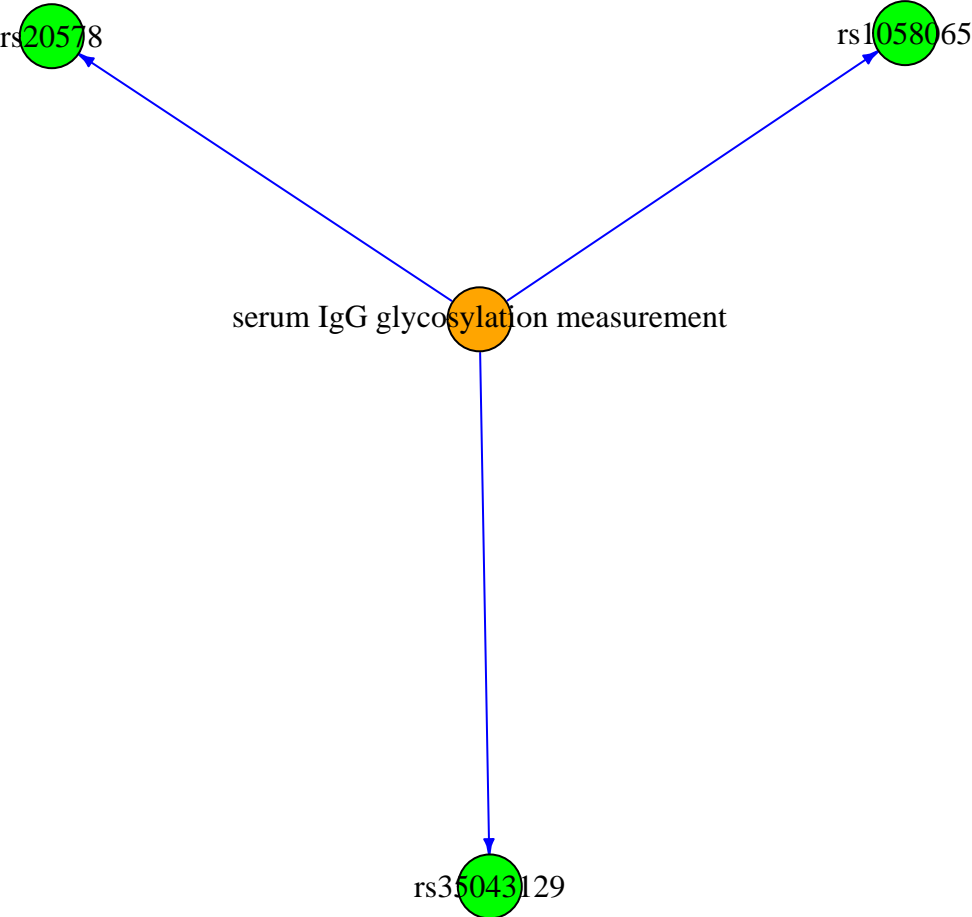

## Variant–Disease Network (QT interval)

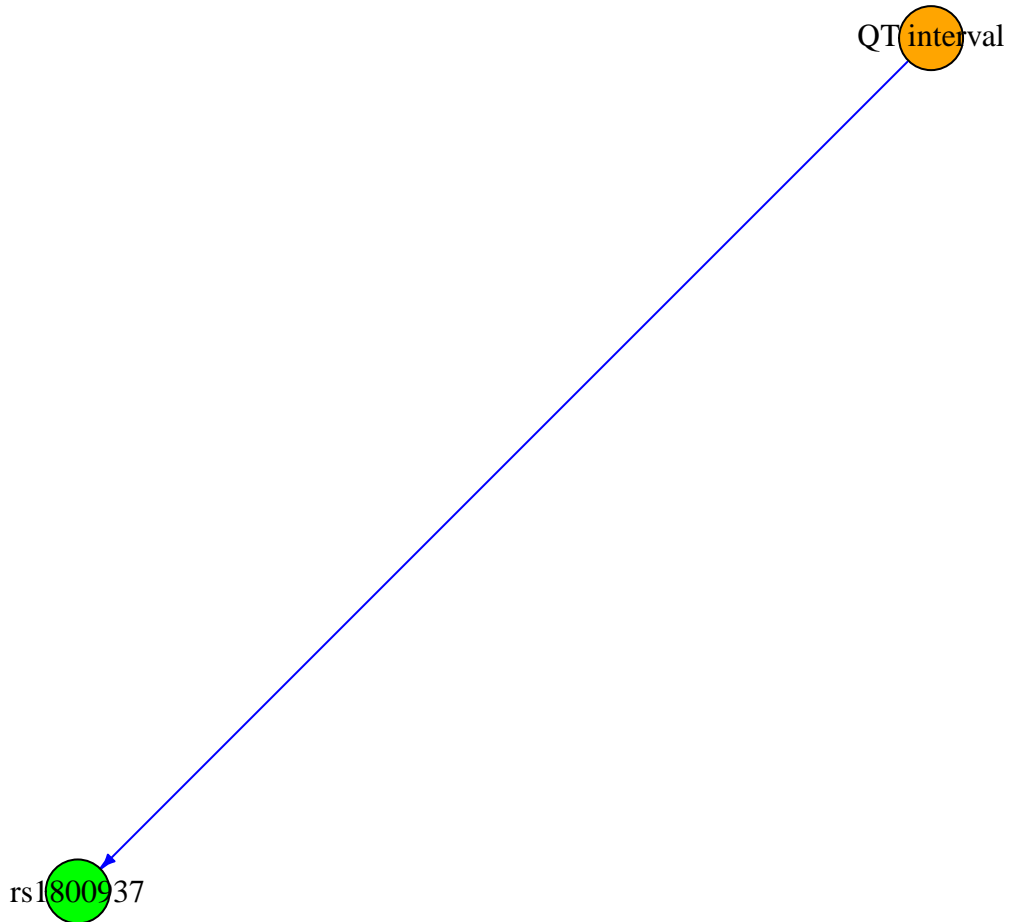

## Variant–Disease Network (Trypanosoma cruzi seropositivity)

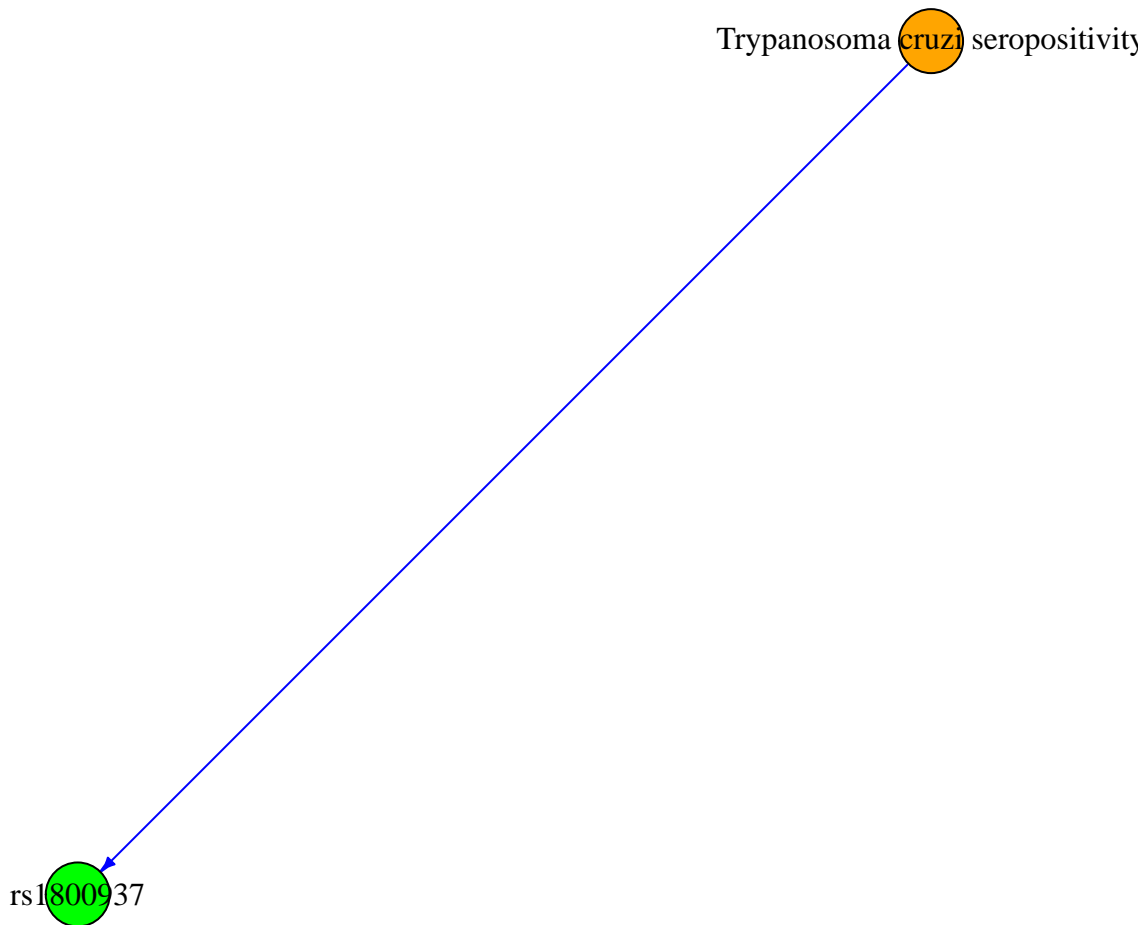

# Variant–Disease Network (body composition measurement)

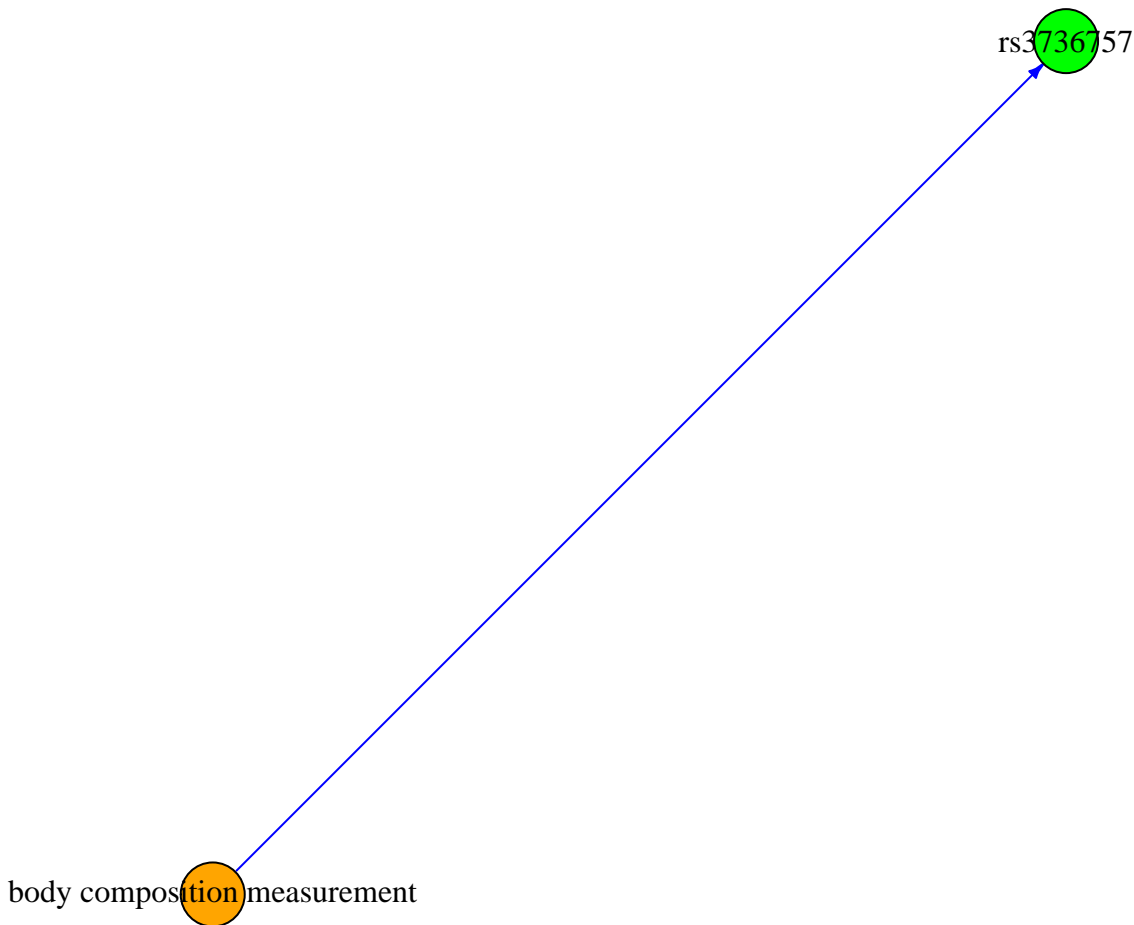

## Variant–Disease Network (sodium measurement)

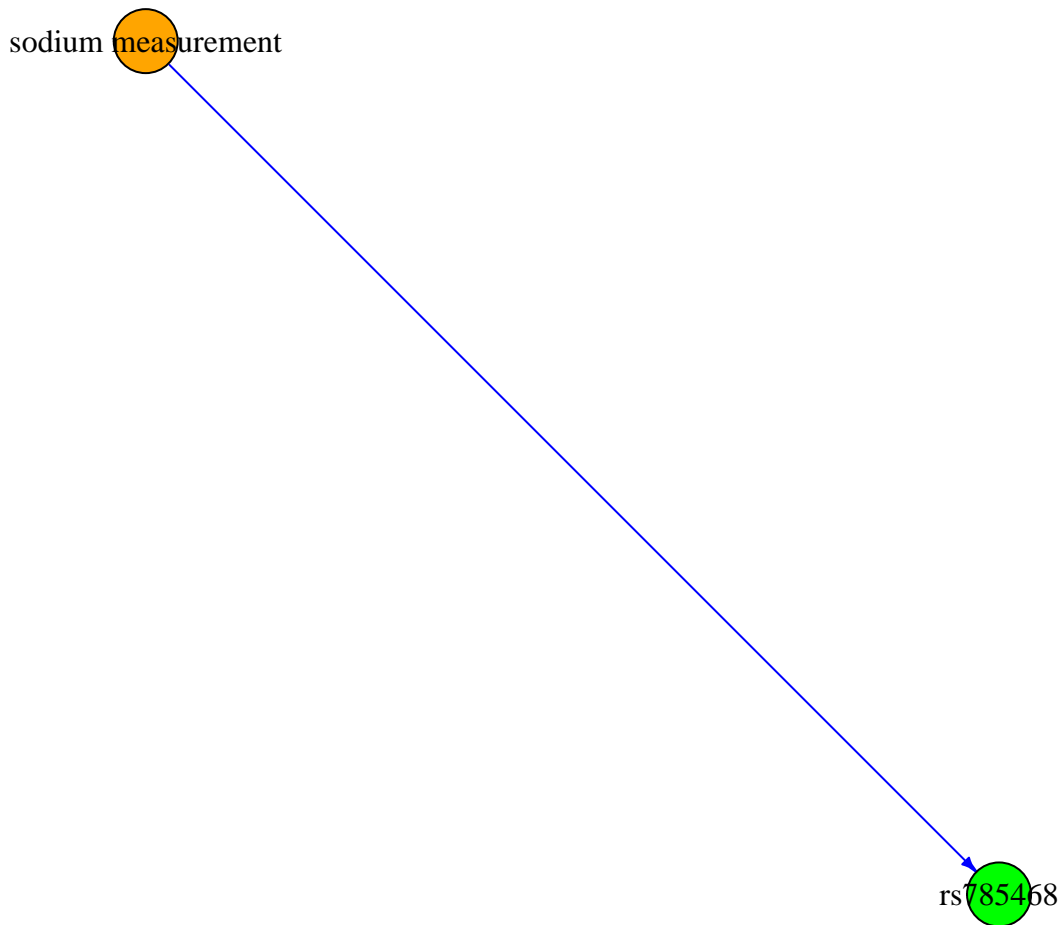

## Variant-Disease Network (generalised epilepsy)

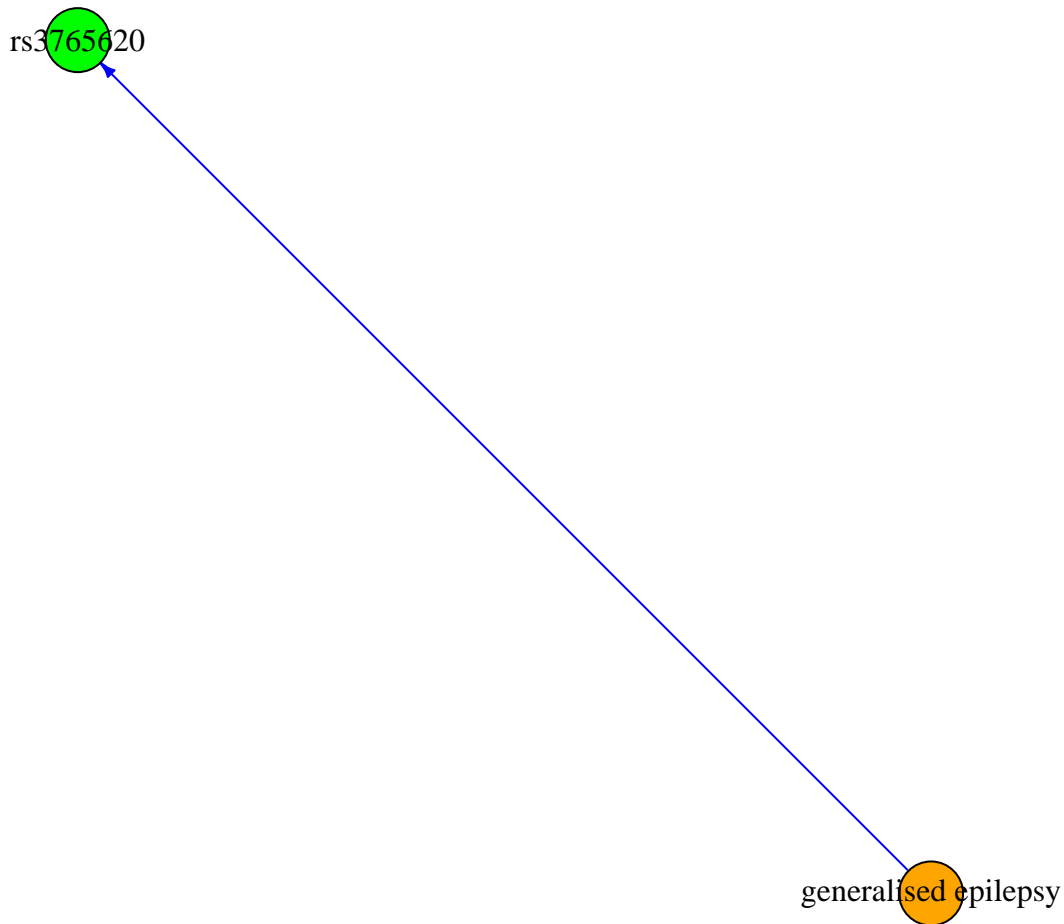



## Variant–Disease Network (parental longevity)

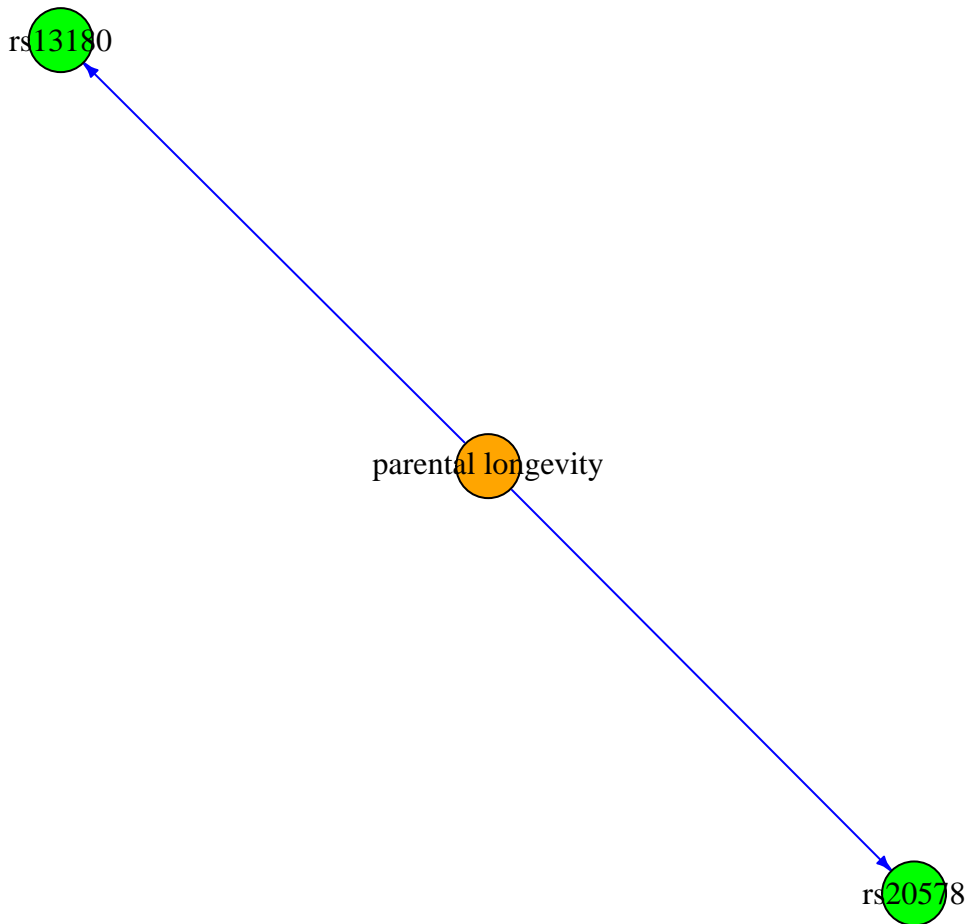

## Variant–Disease Network (age at assessment)

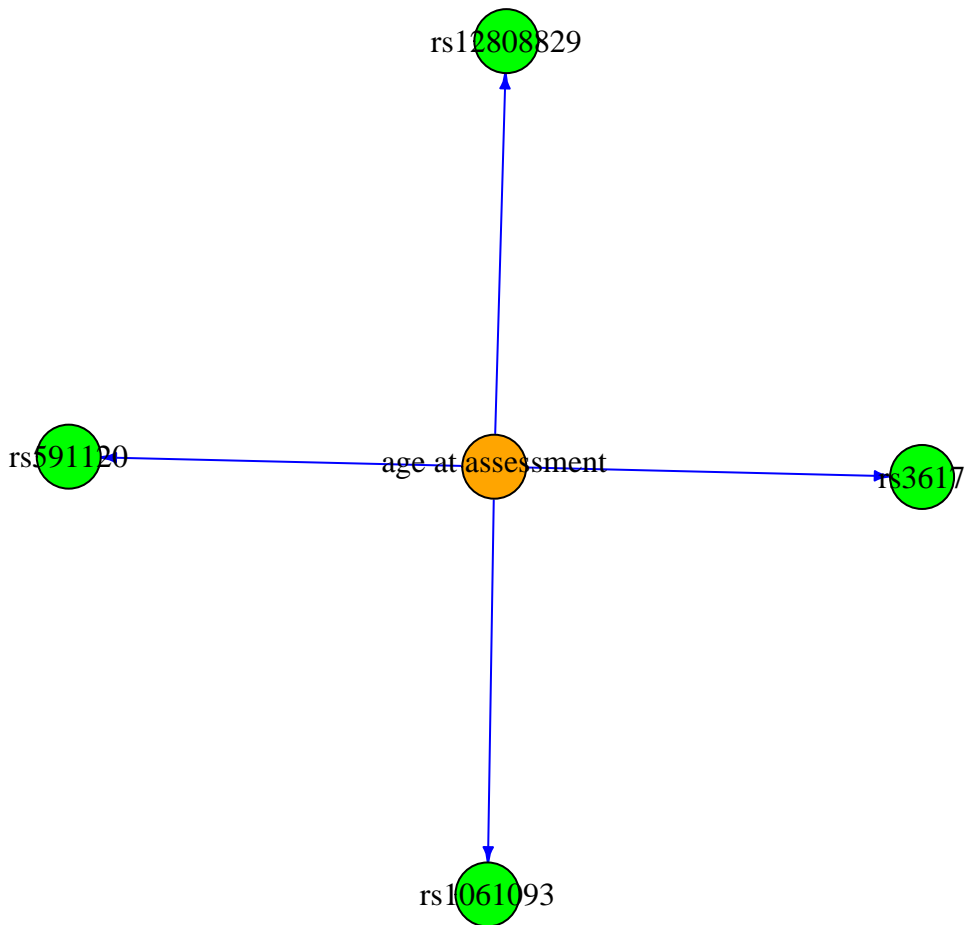

# Variant–Disease Network (sex interaction measurement)

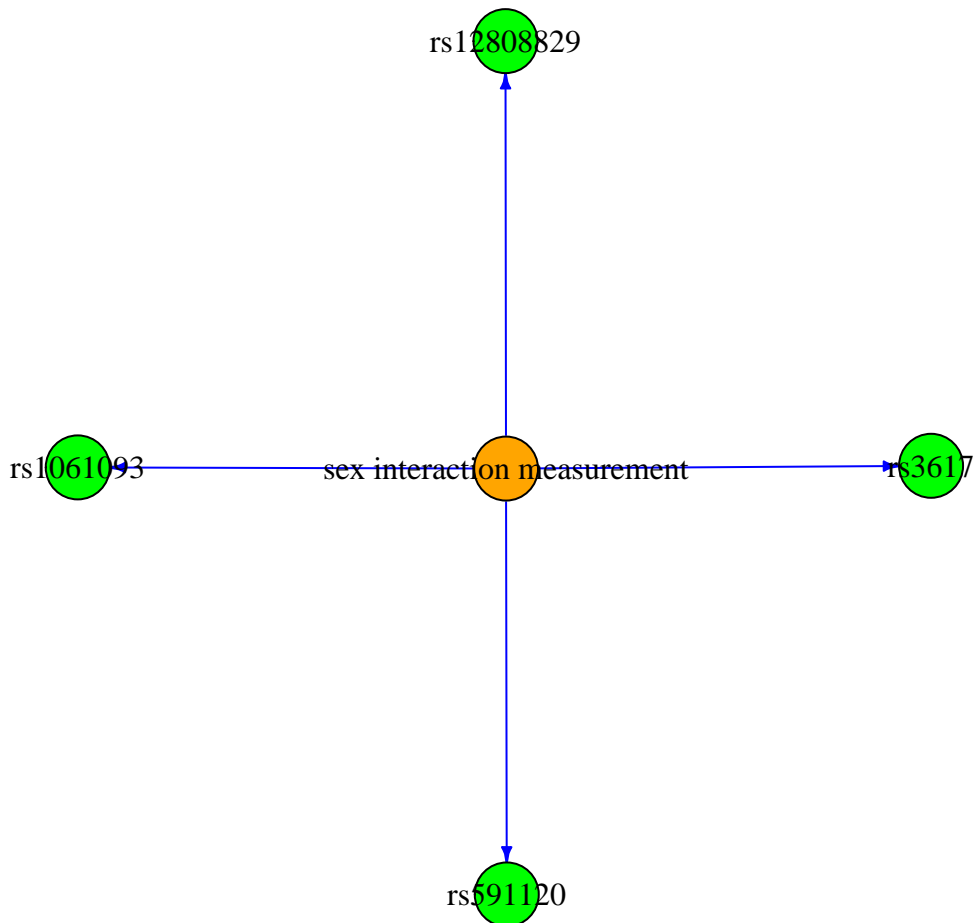

## Variant–Disease Network (brain measurement)

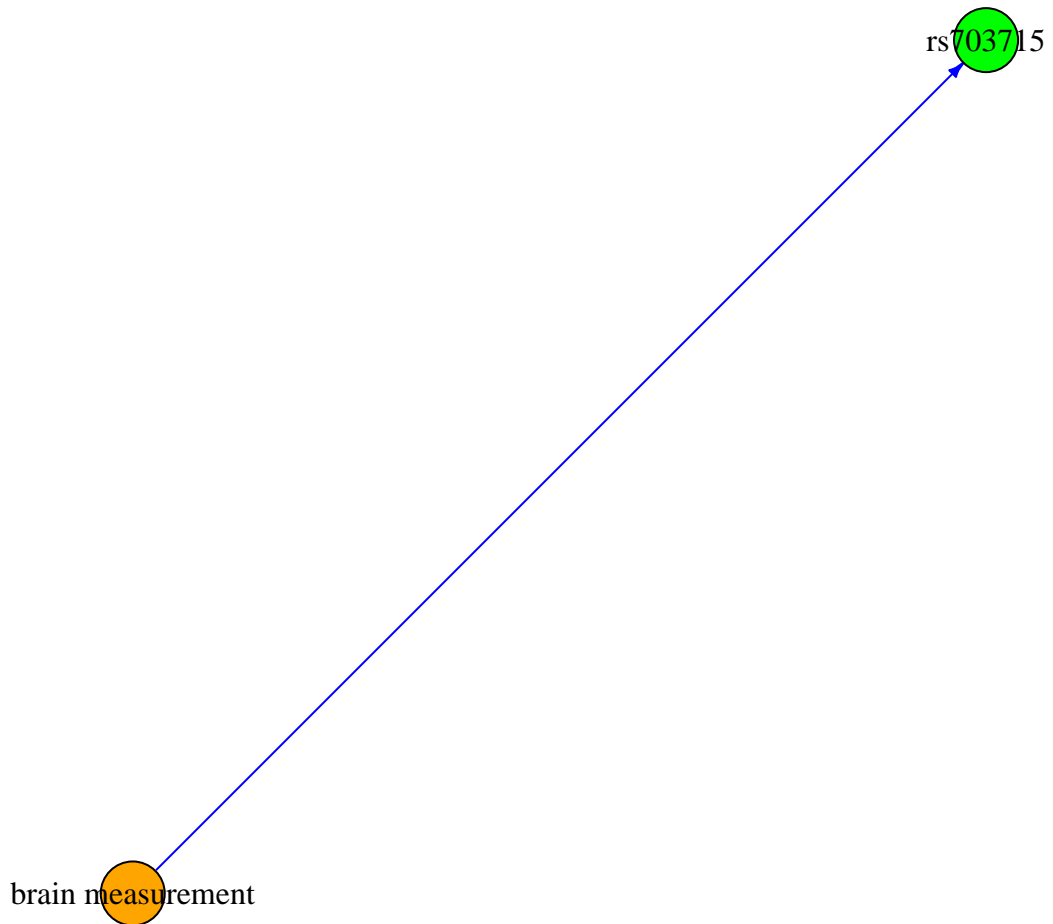

## Variant–Disease Network (hippocampal volume)

hippocampal volume

rs703715

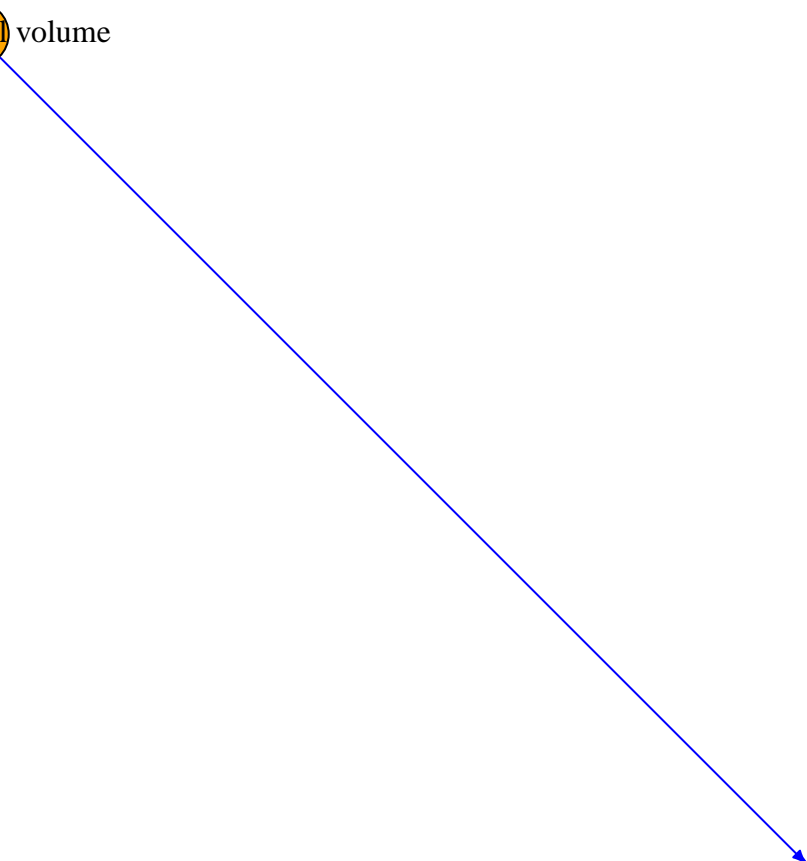

## Variant–Disease Network (parkinsons disease)

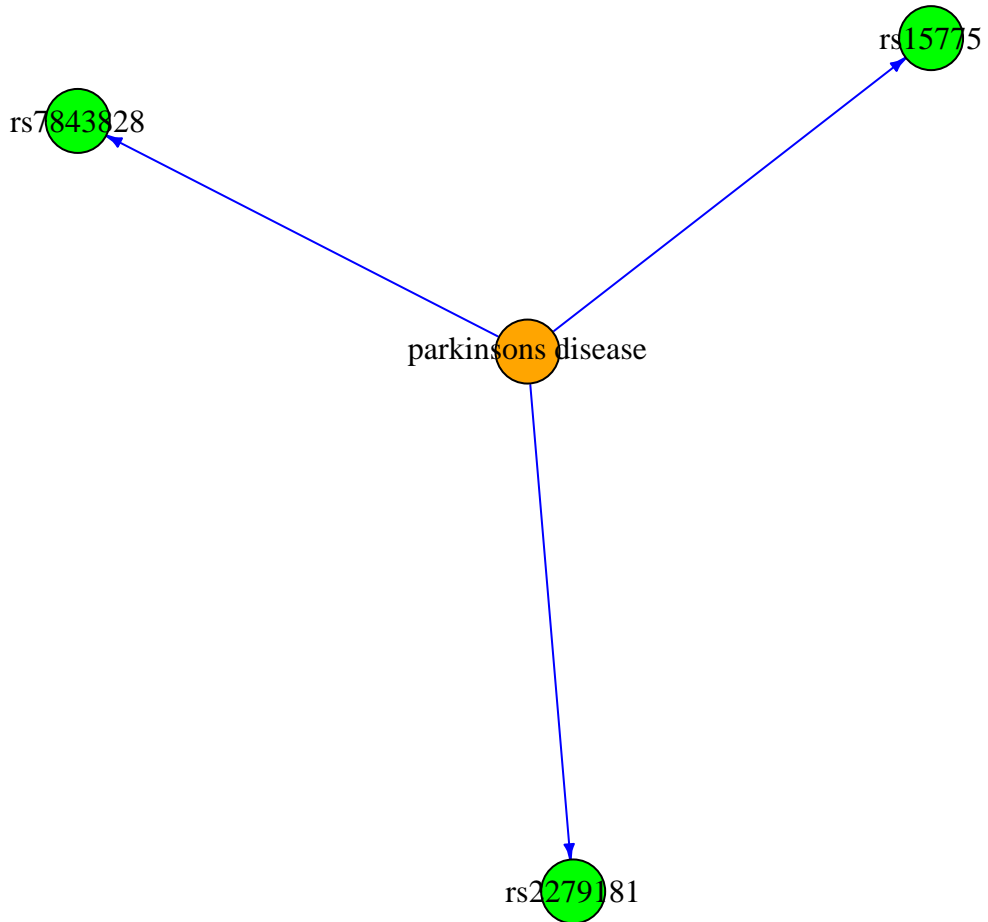

Variant–Disease Network (transmembrane glycoprotein NMB measurement)

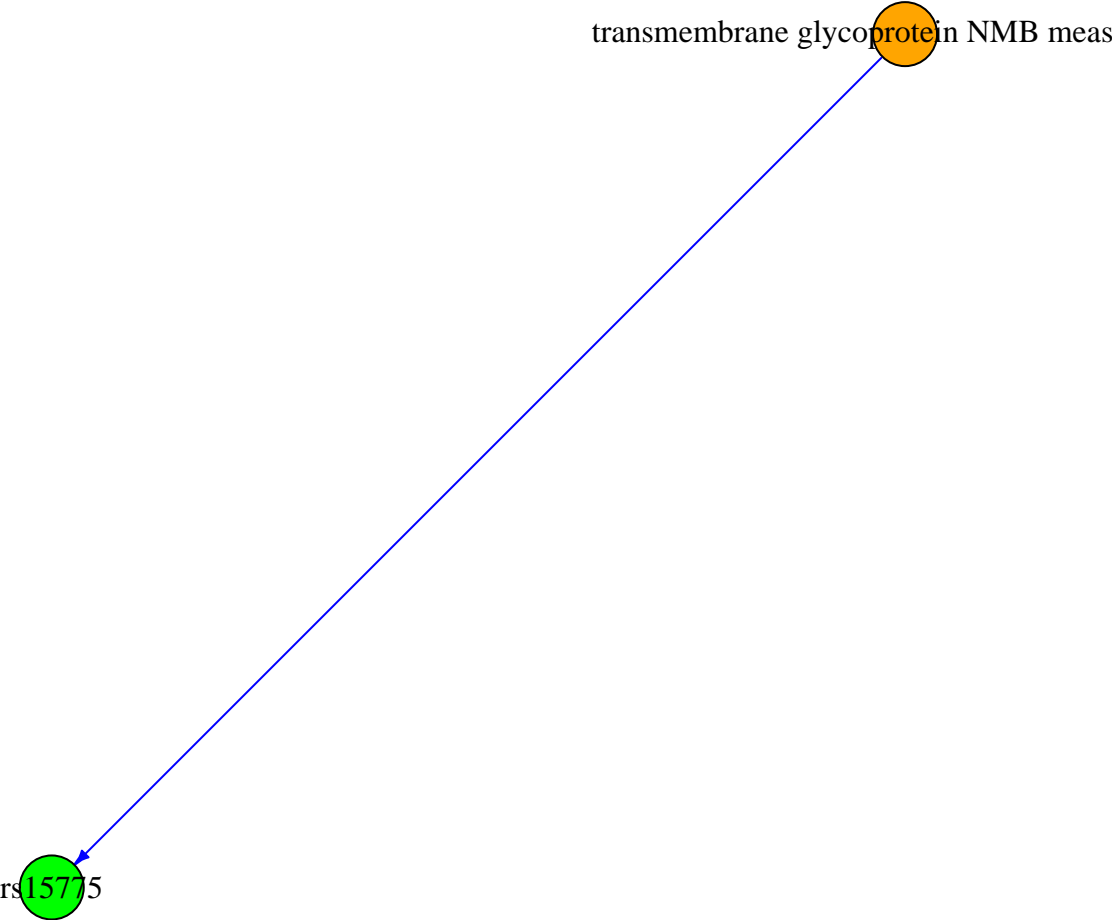

**Variant–Disease Network (creatinine clearance measurement)**

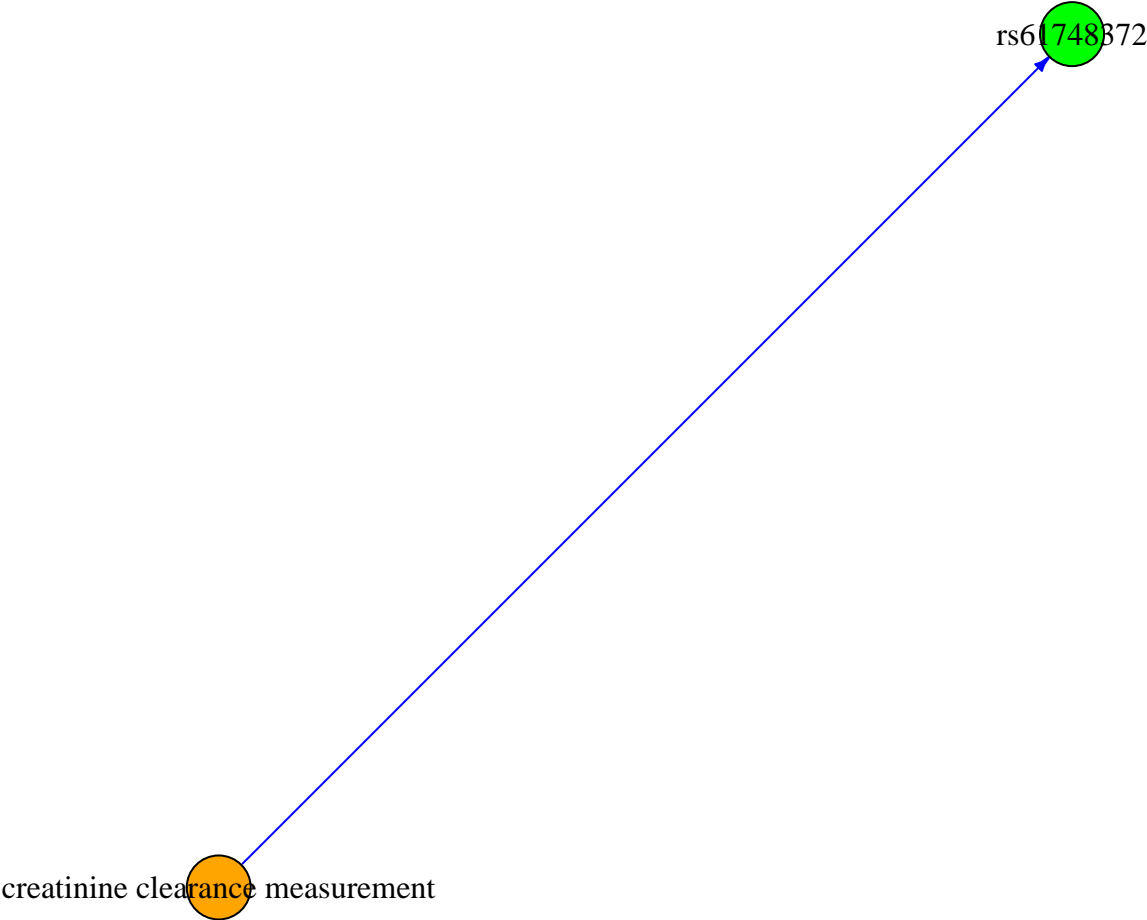



## Variant–Disease Network (HIV infection)

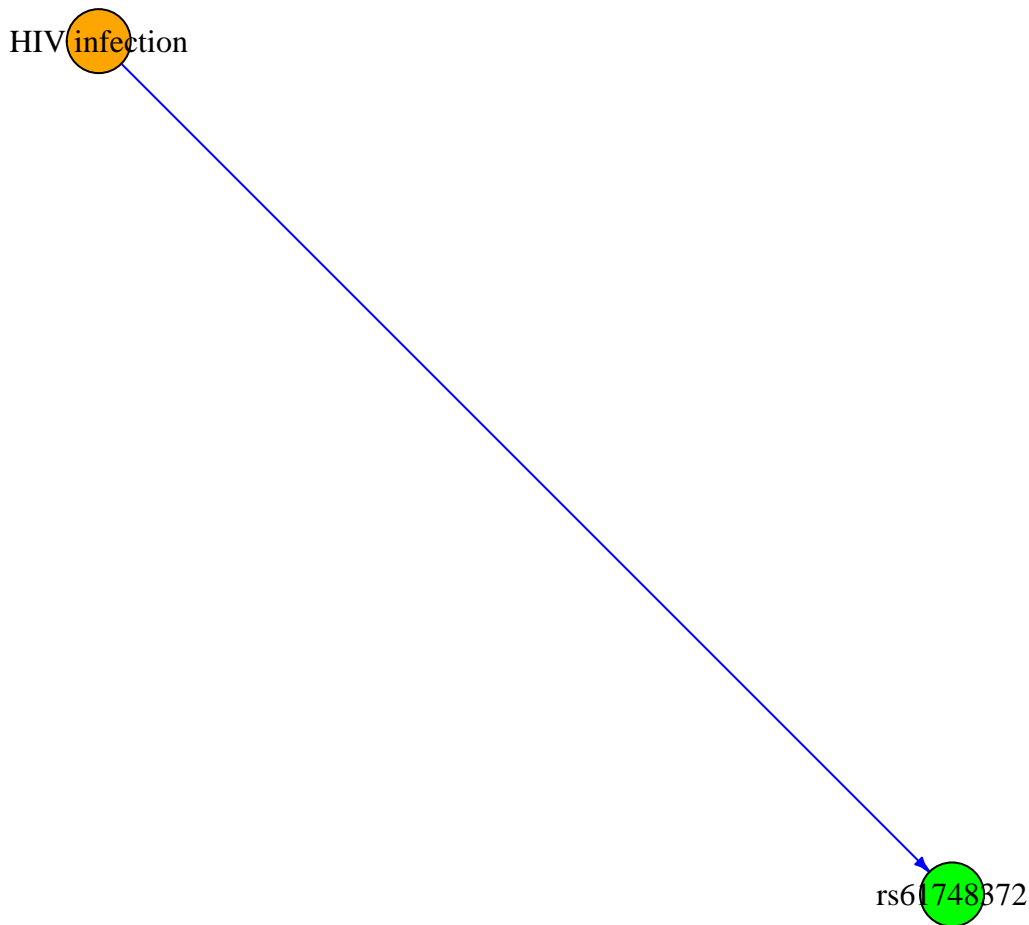

## Variant–Disease Network (response to tenofovir)

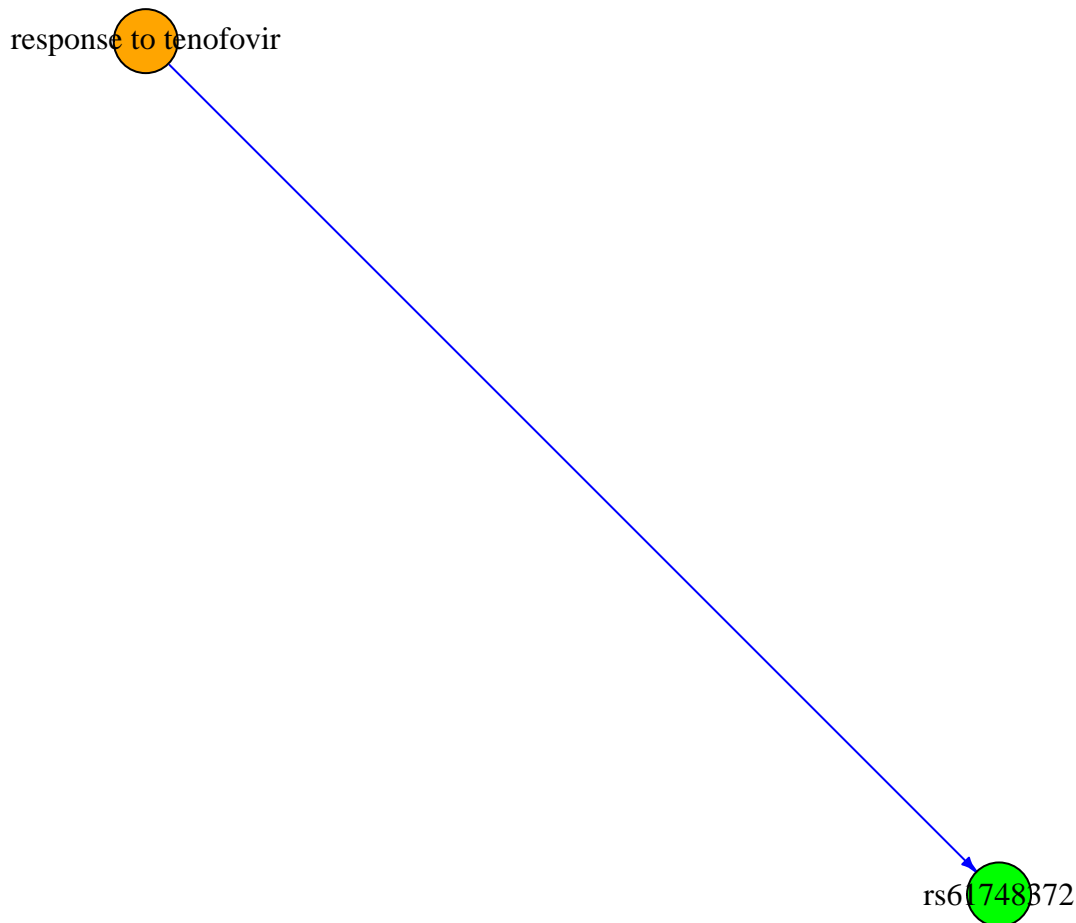

# Variant–Disease Network (mosquito bite reaction size measurement)

mosquito bite reaction size measurement

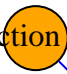

rs11541311

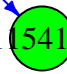

# Variant–Disease Network (mental or behavioural disorder)

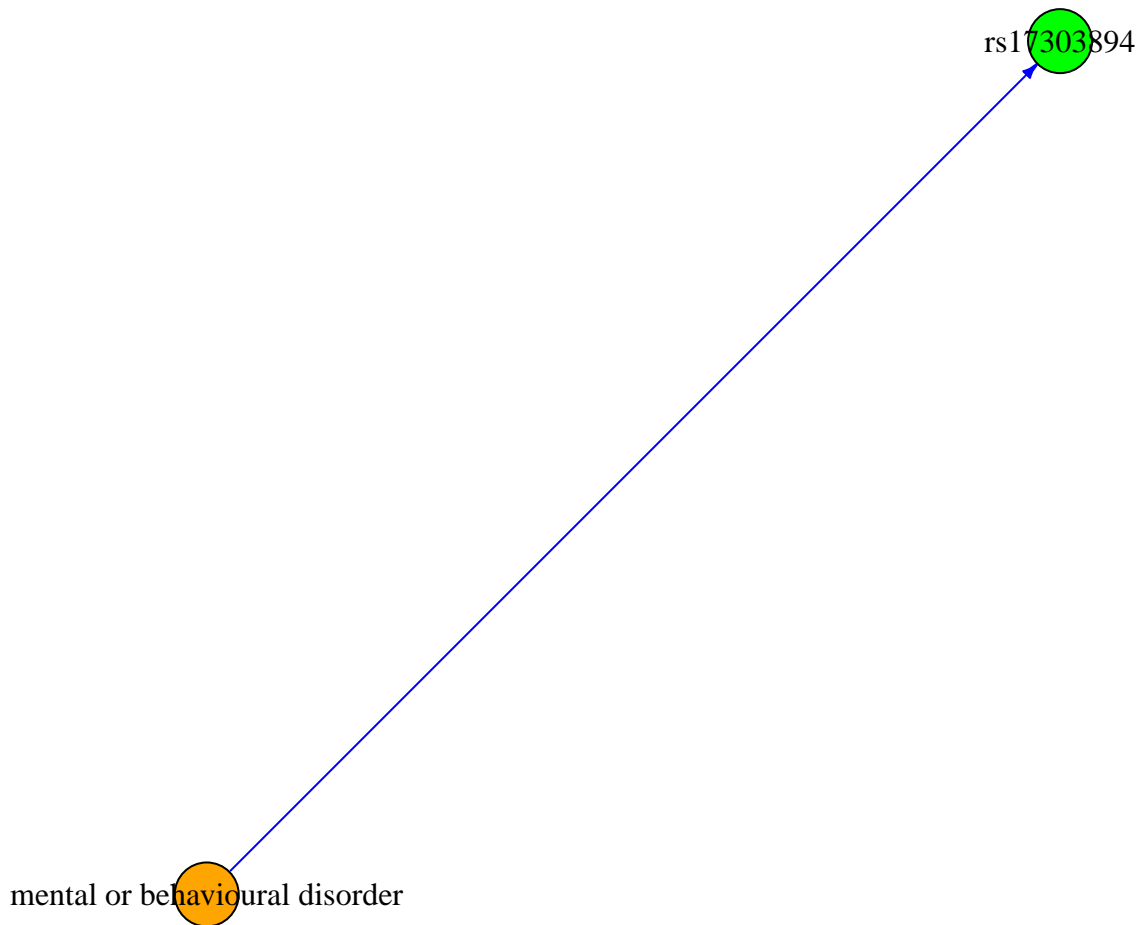

## Variant–Disease Network (abnormal thrombosis)

abnormal thrombosis

rs3087969

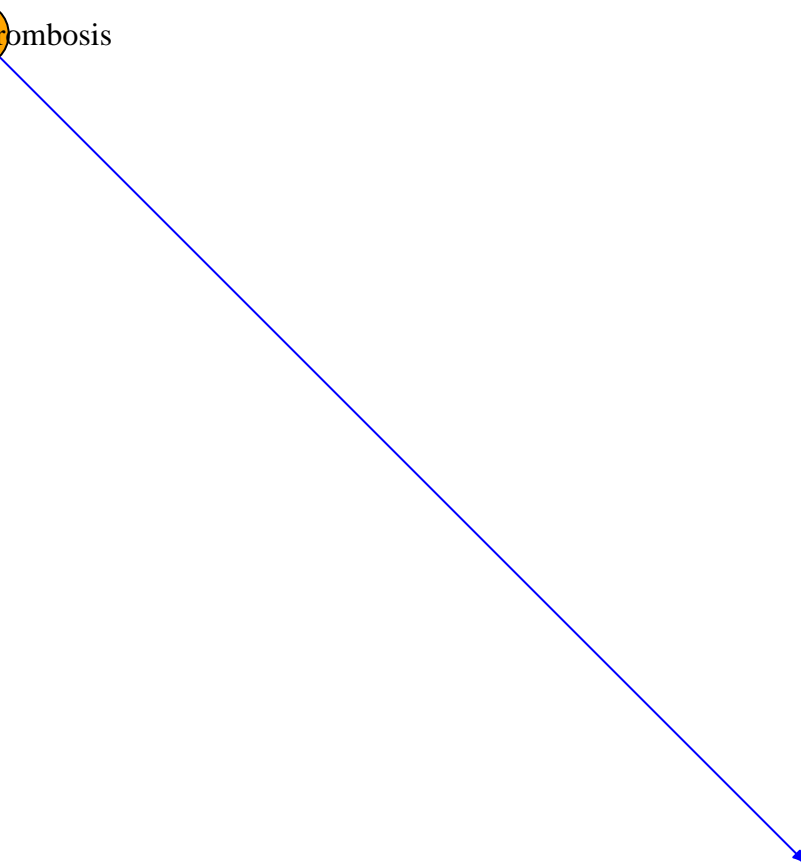

## Variant–Disease Network (deep vein thrombosis)

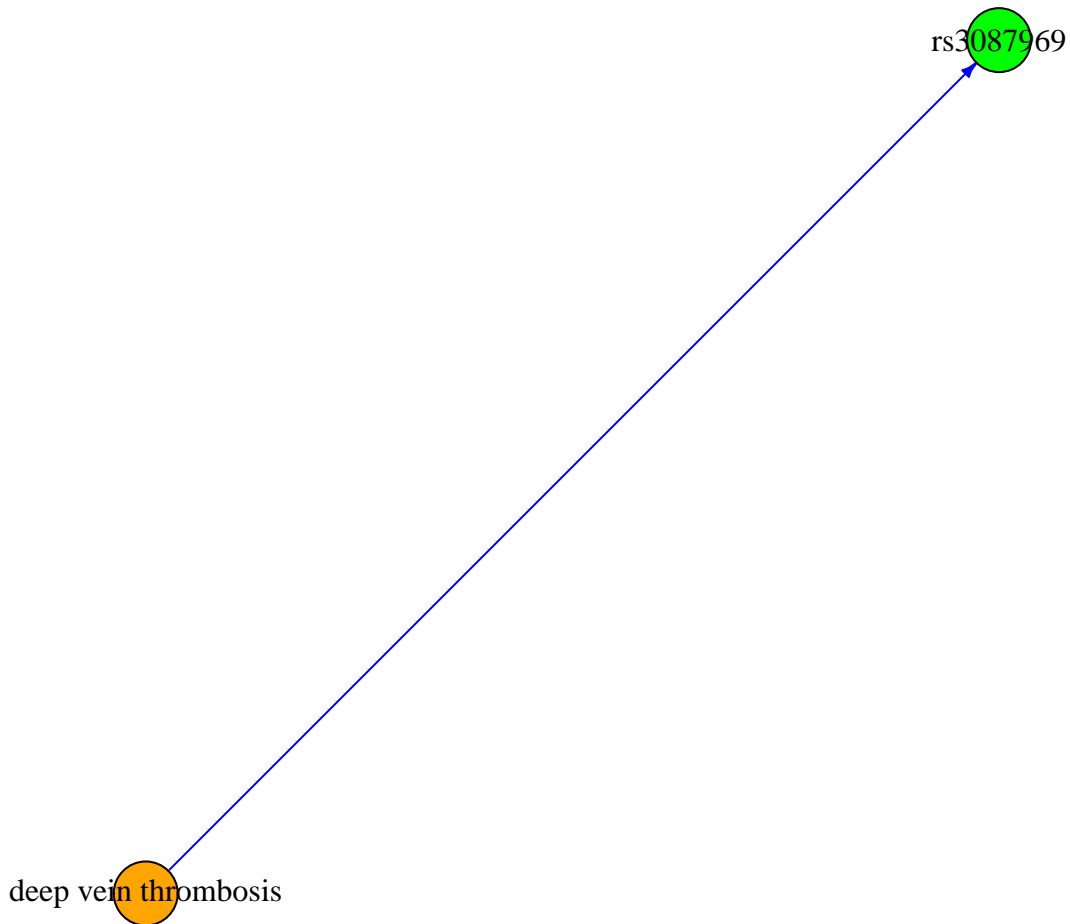

Variant–Disease Network (Ischemic stroke)

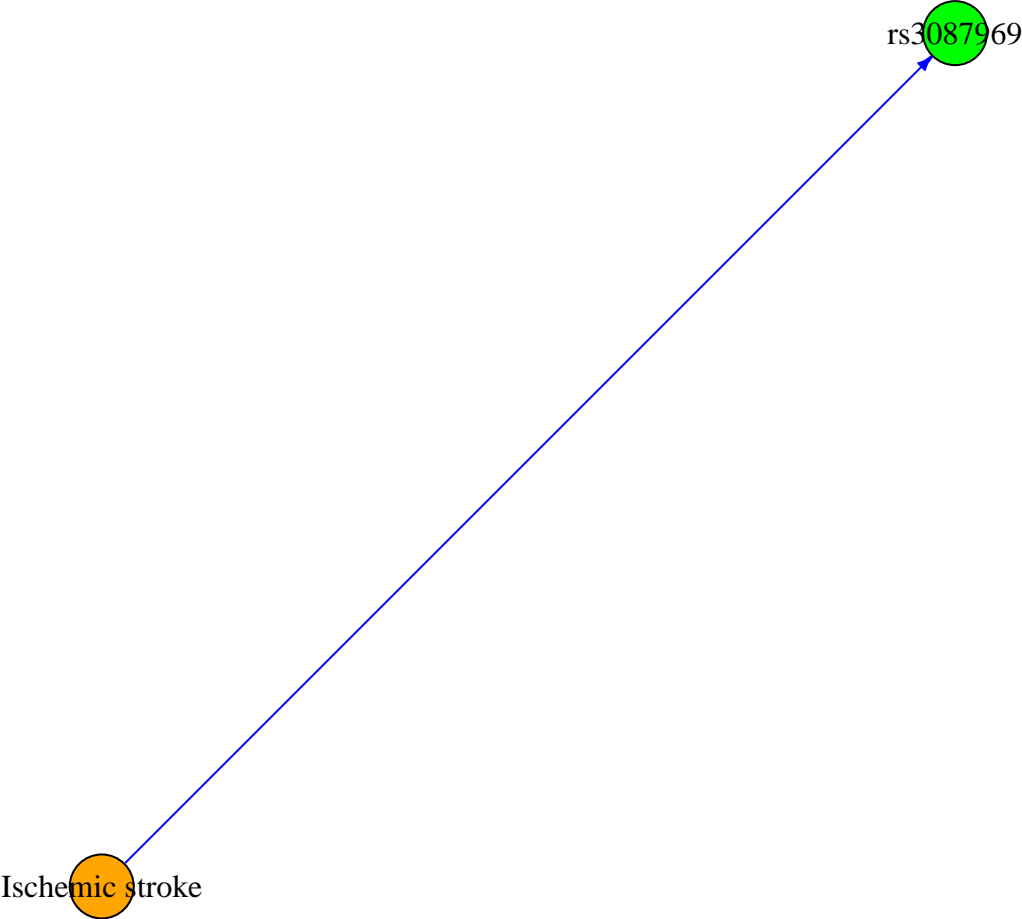

## Variant–Disease Network (platelet distribution width)

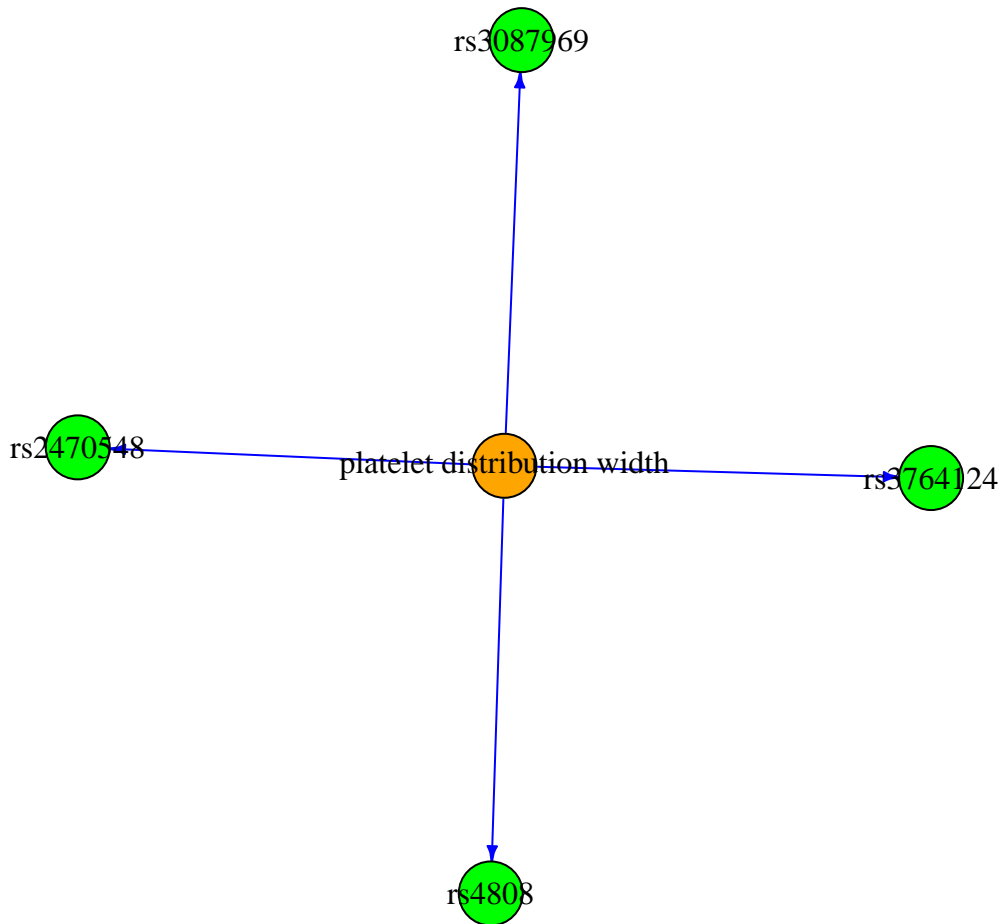



## Variant-Disease Network (pulmonary embolism)

pulmonary embolism

rs3087969

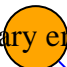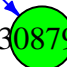

## Variant-Disease Network (stroke)

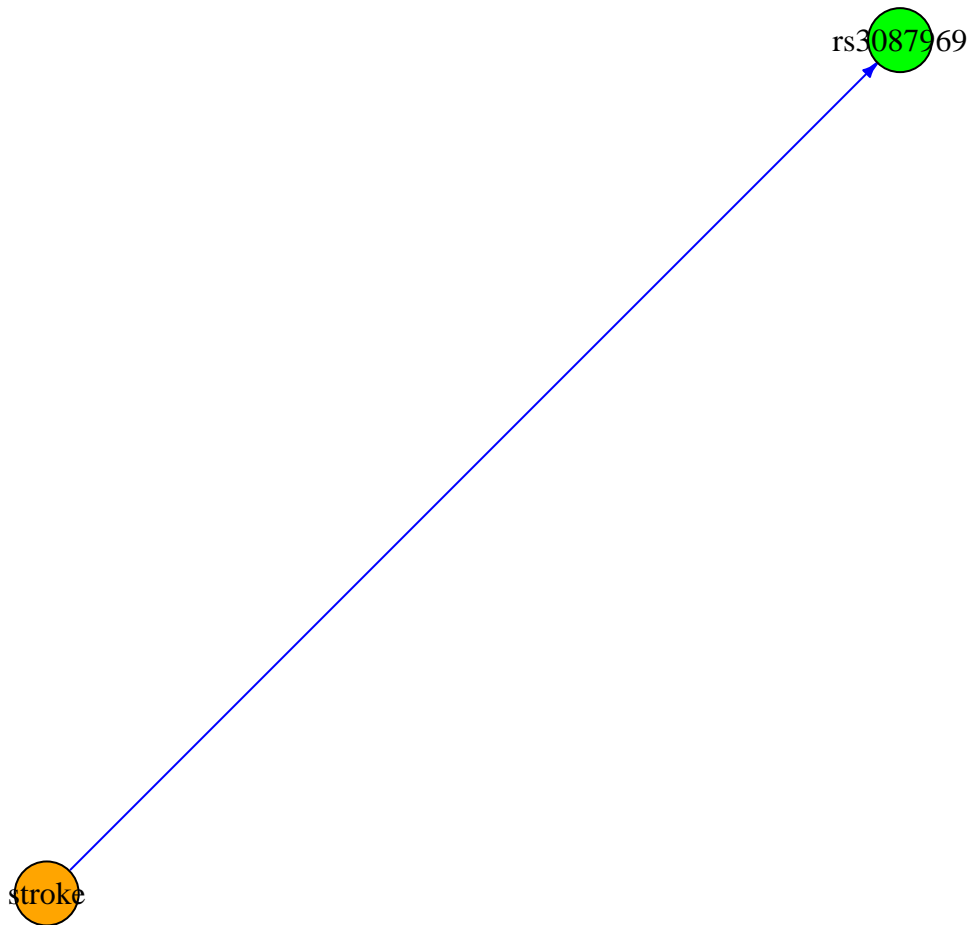

# Variant-Disease Network (venous thromboembolism)

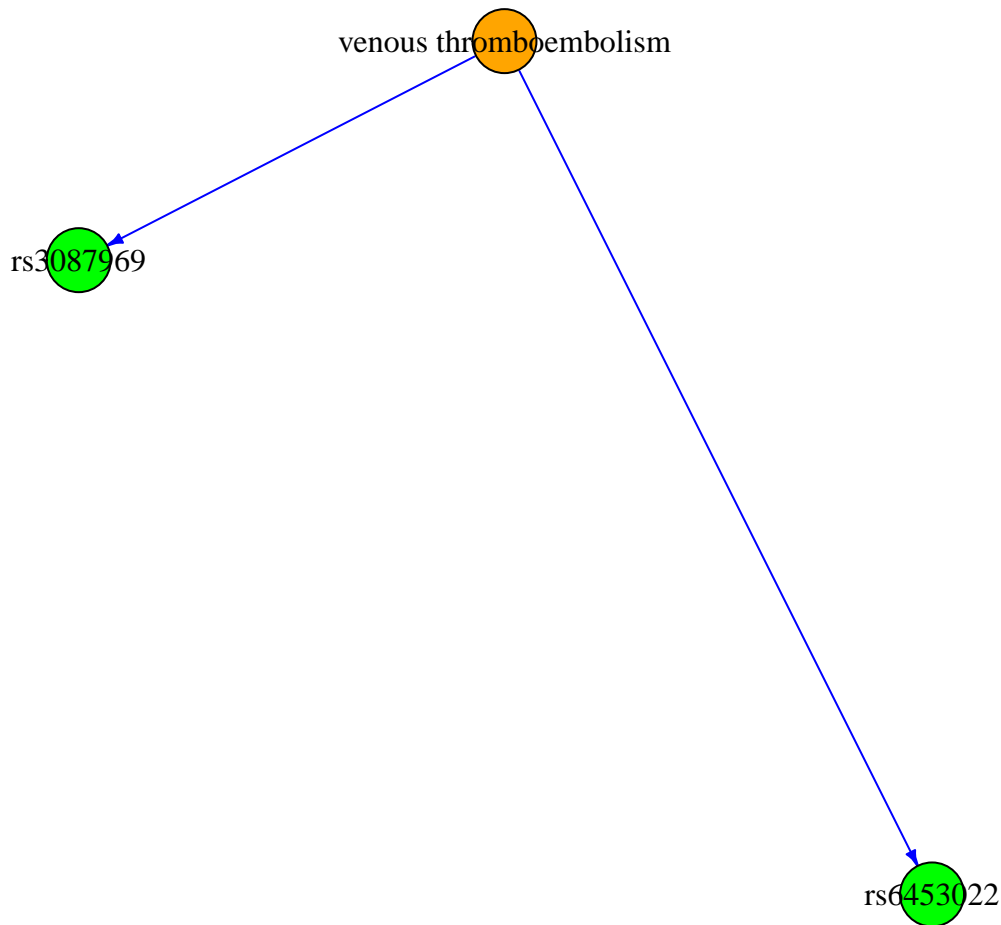

## Variant–Disease Network (t–tau:Ab1:42 ratio)

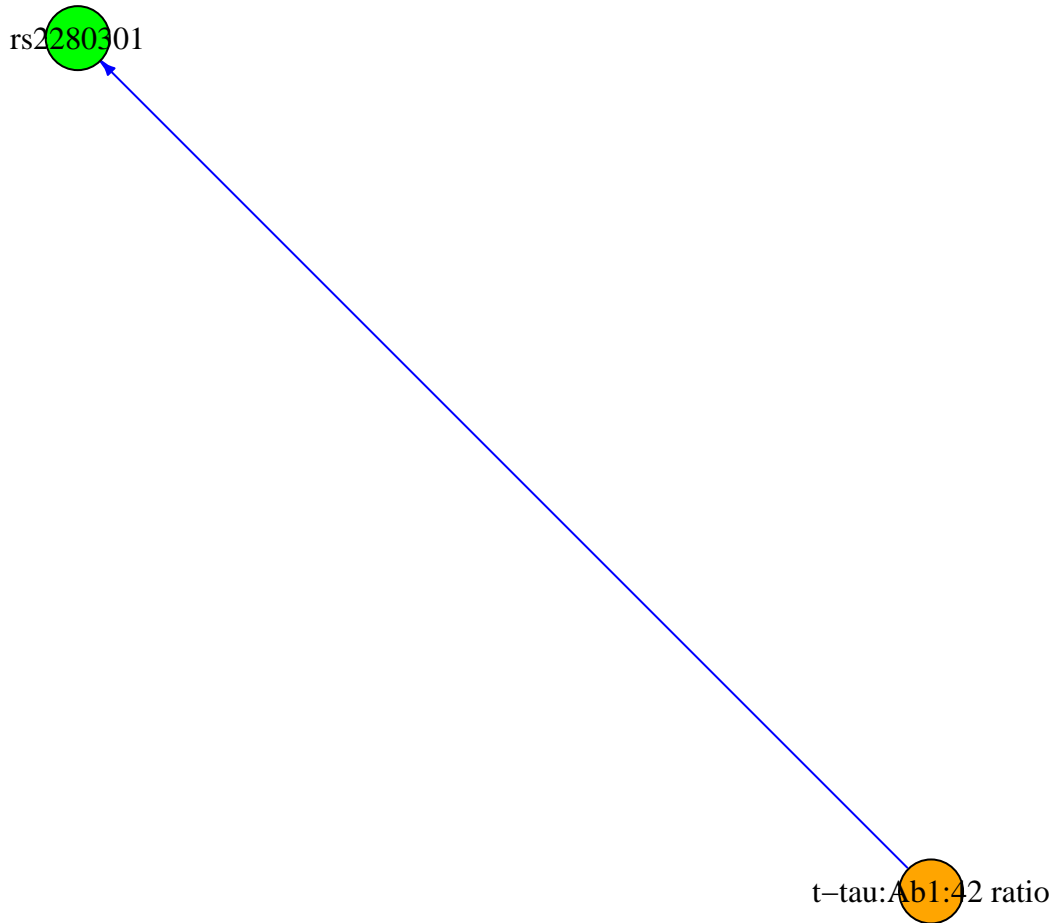

# Variant–Disease Network (response to paliperidone)

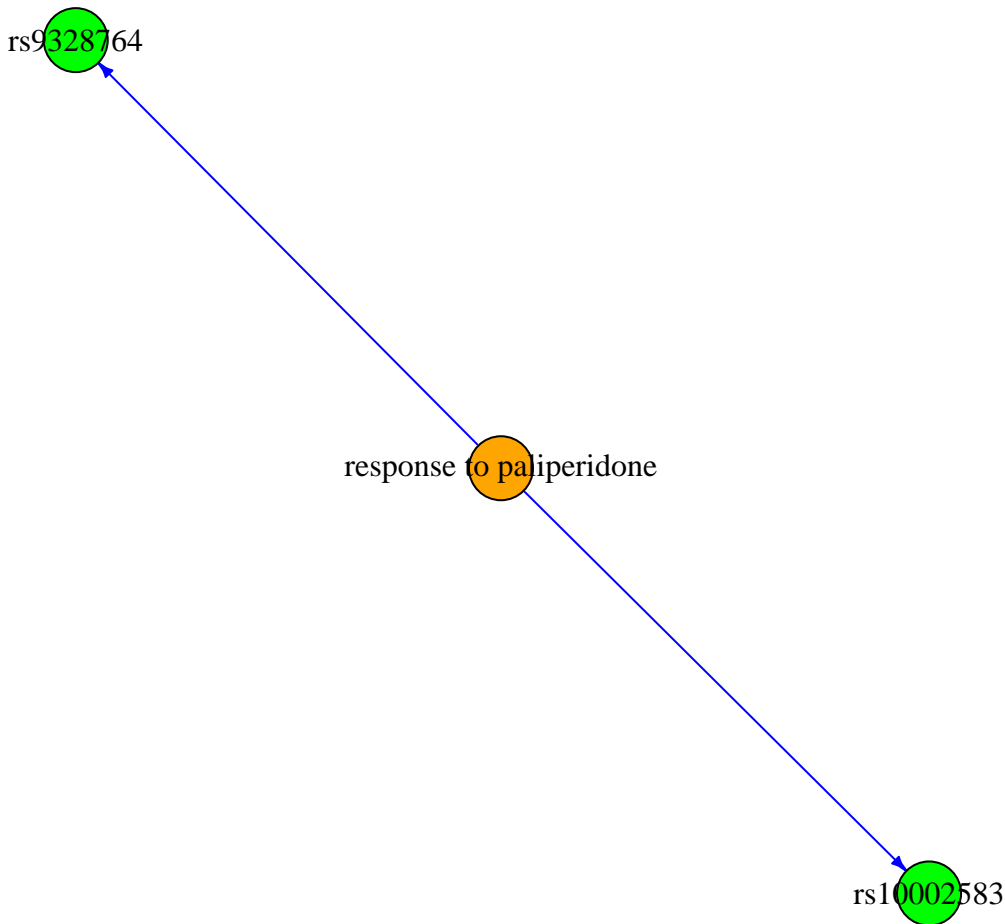

Variant–Disease Network (schizophrenia symptom severity measurement)

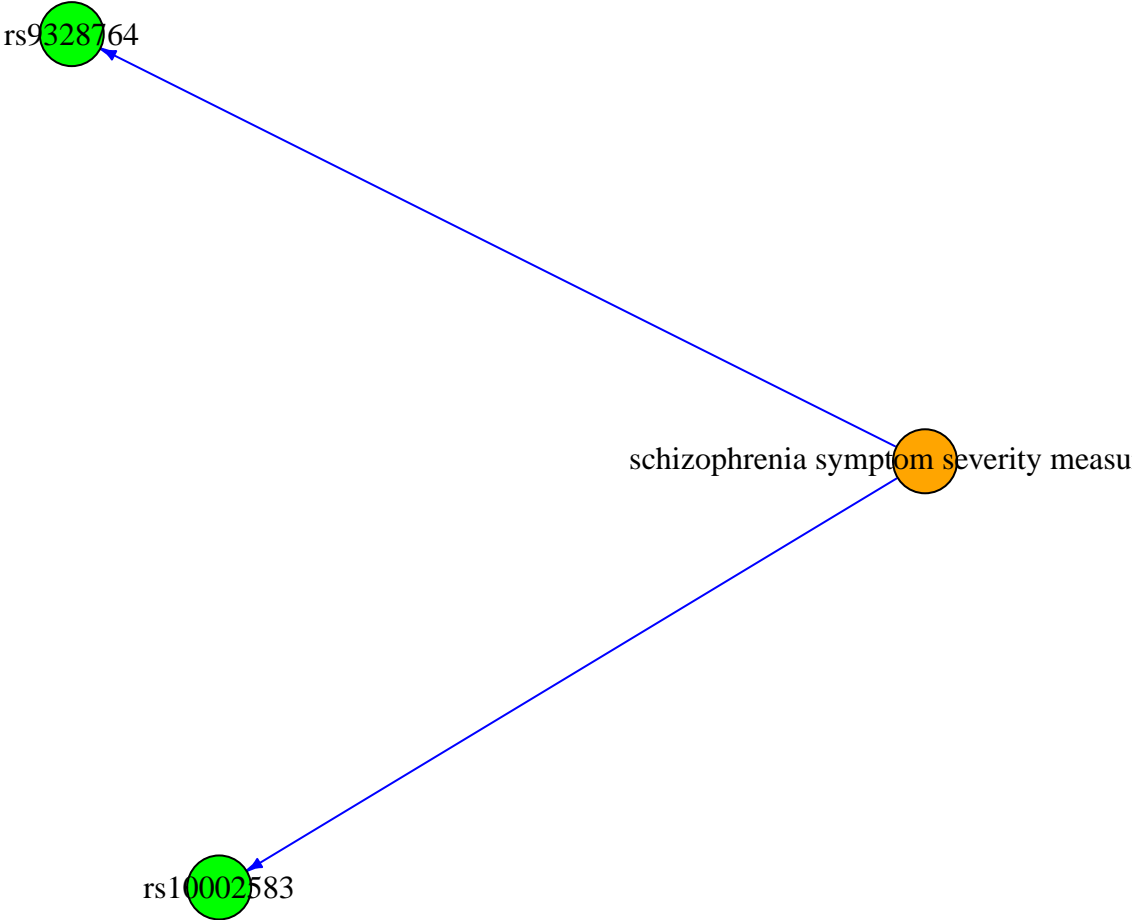

Variant–Disease Network (nicotine dependence symptom count)

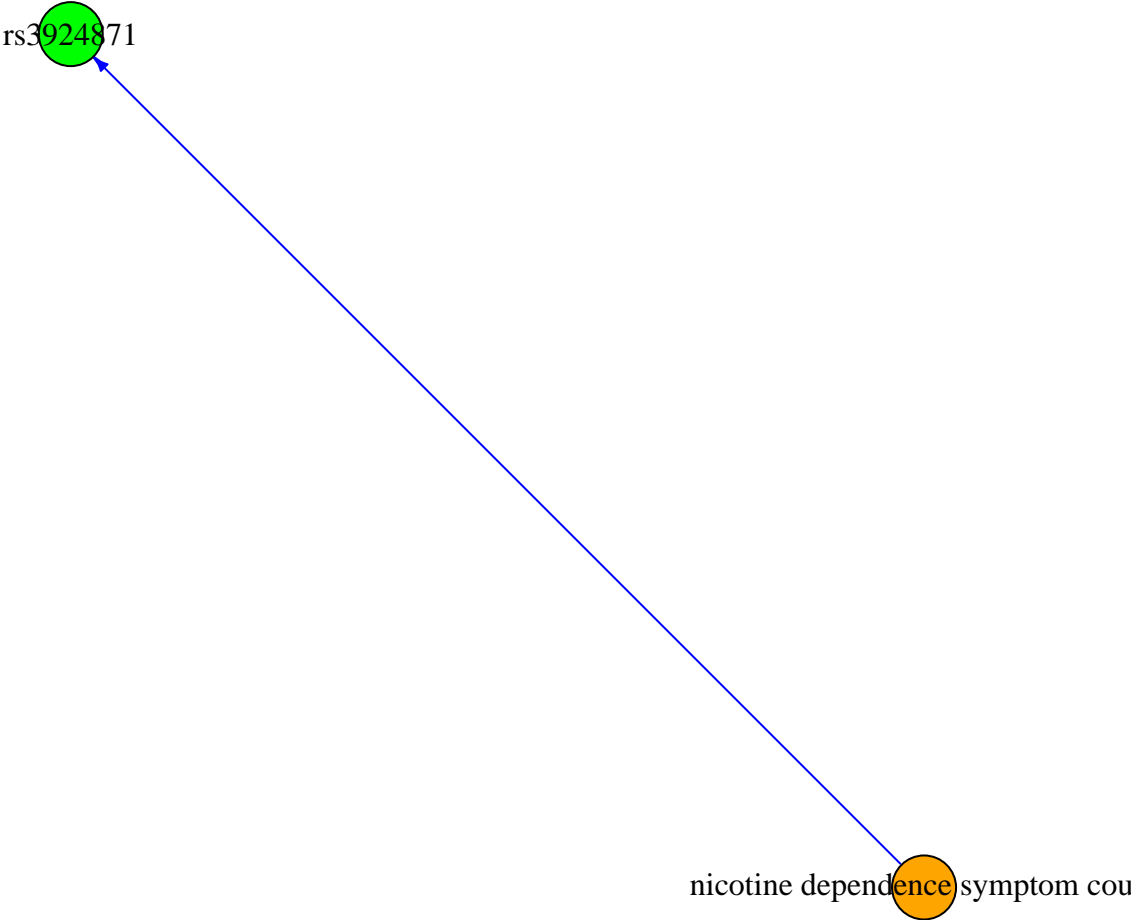

## Variant–Disease Network (endometrial neoplasm)

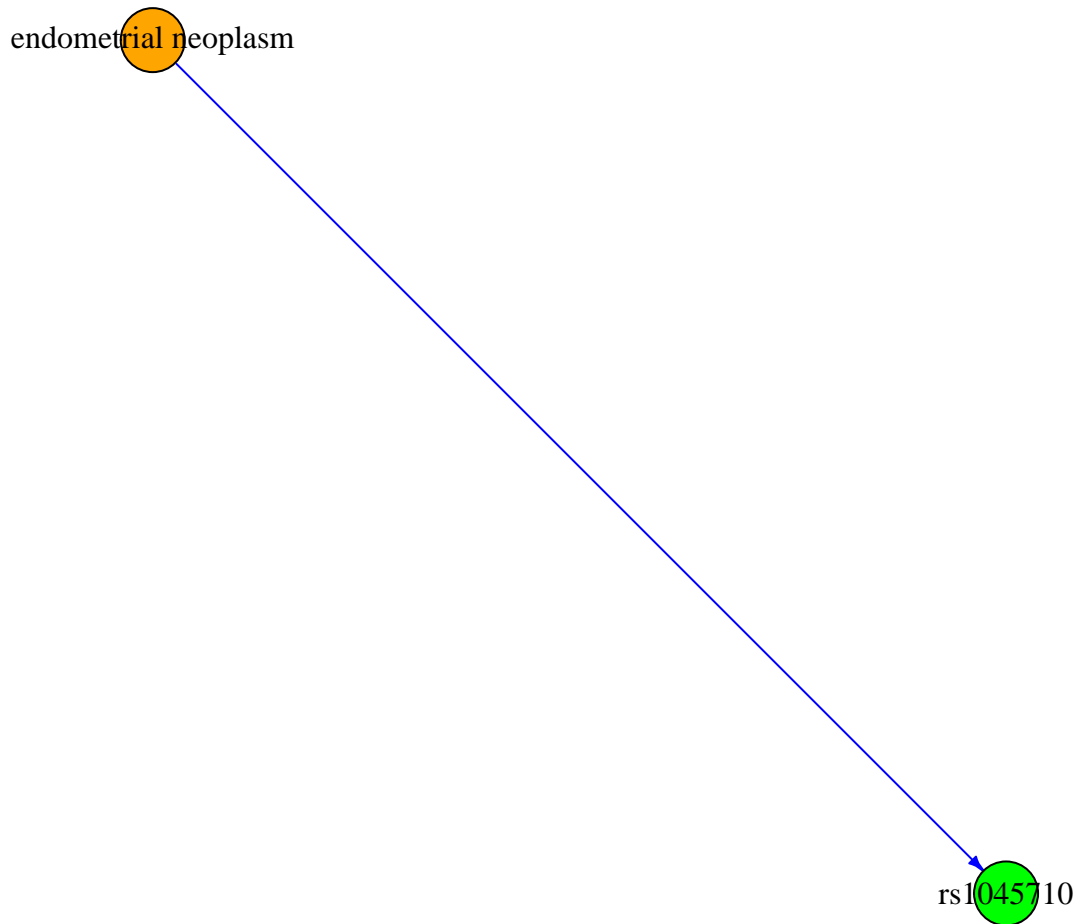



## Variant-Disease Network (Astigmatism)

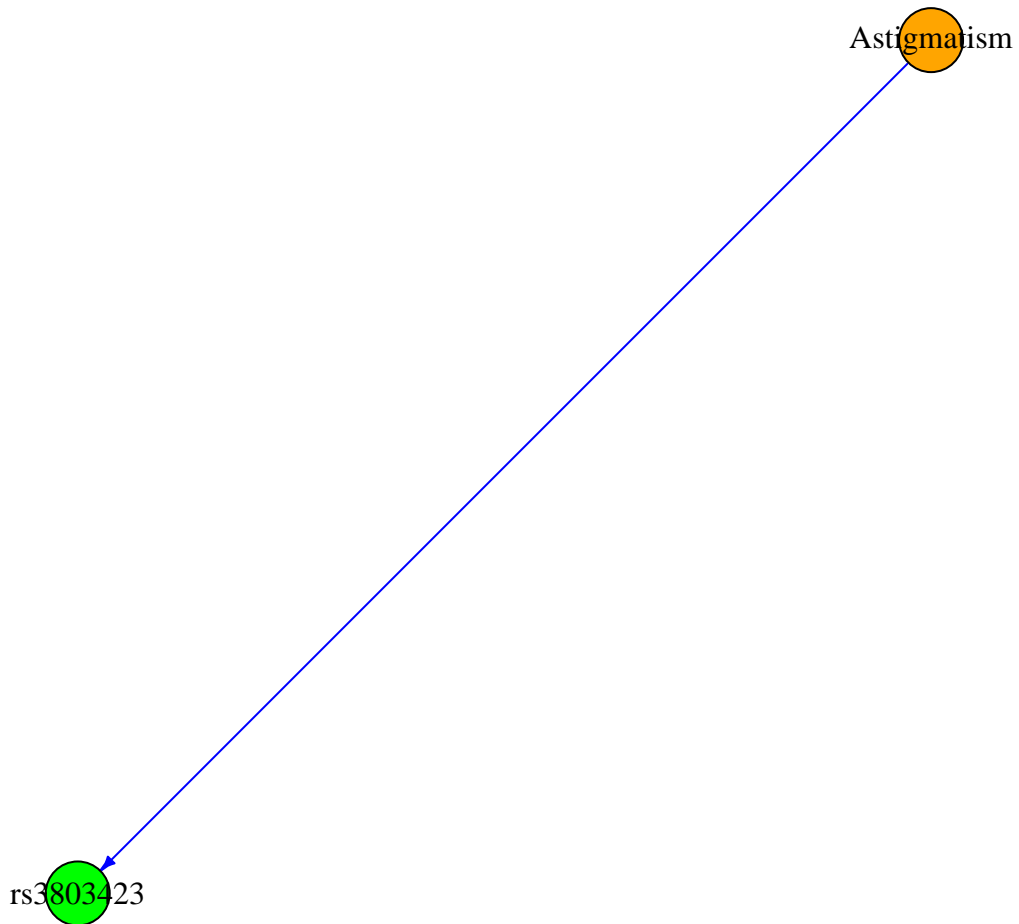

# Variant–Disease Network (white matter hyperintensity measurement)

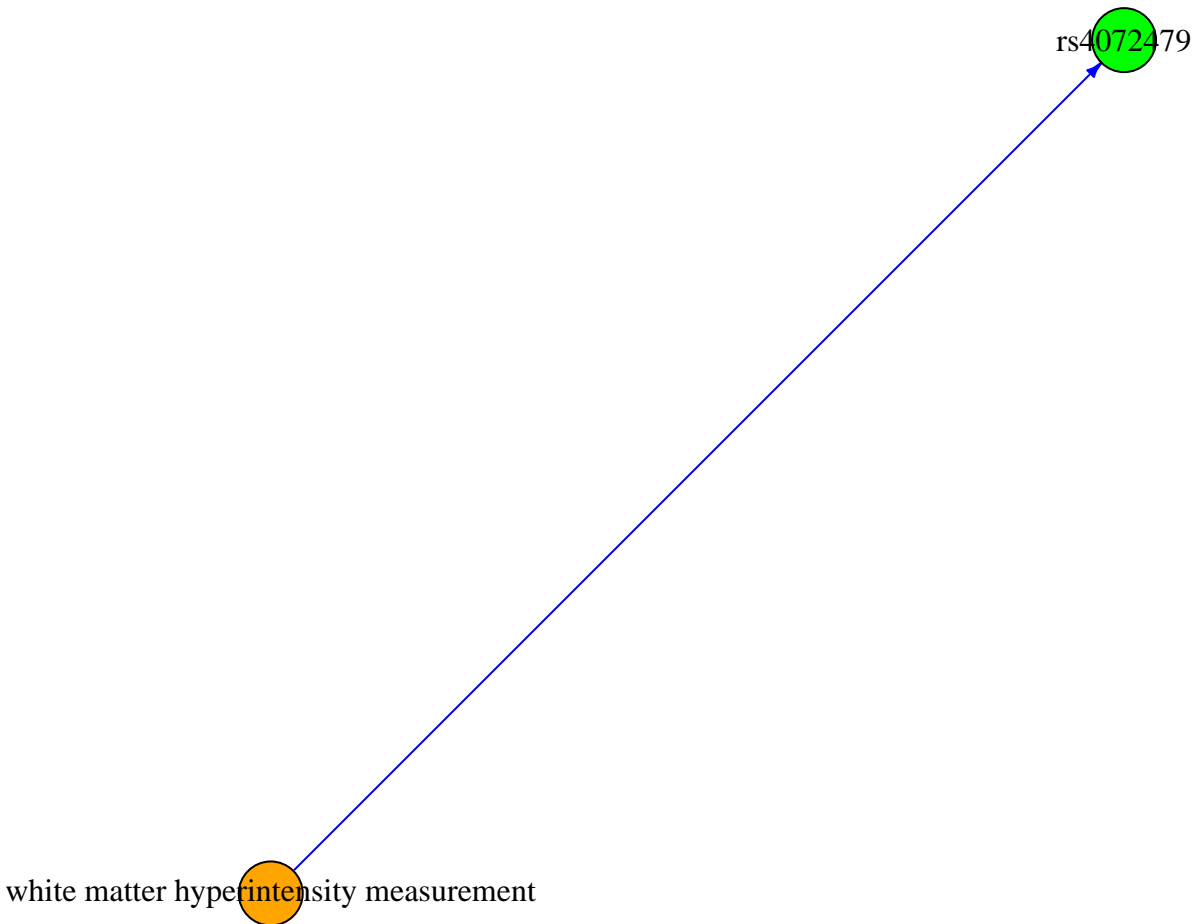

# Variant–Disease Network (red blood cell distribution width)

red blood cell distribution width

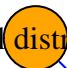

rs2242345

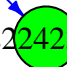

**Variant–Disease Network (selenium measurement)**

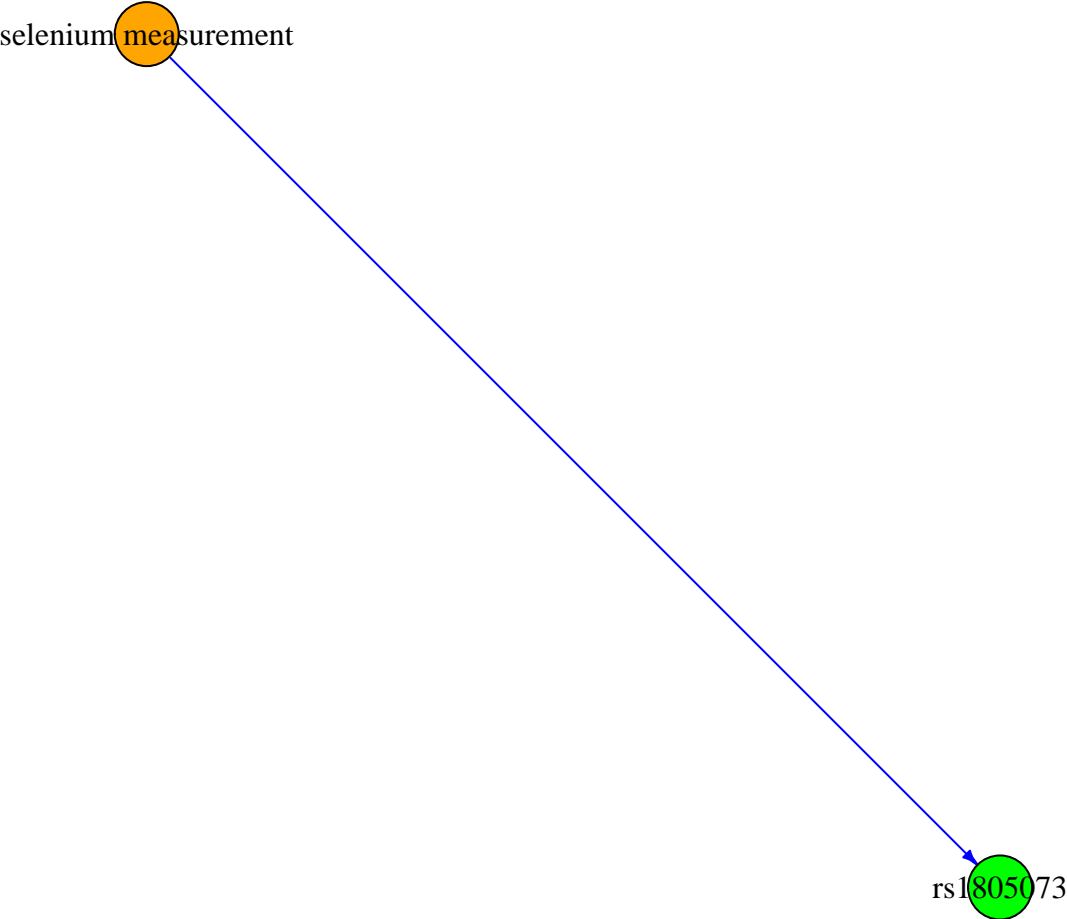

## Variant–Disease Network (serum selenium measurement)

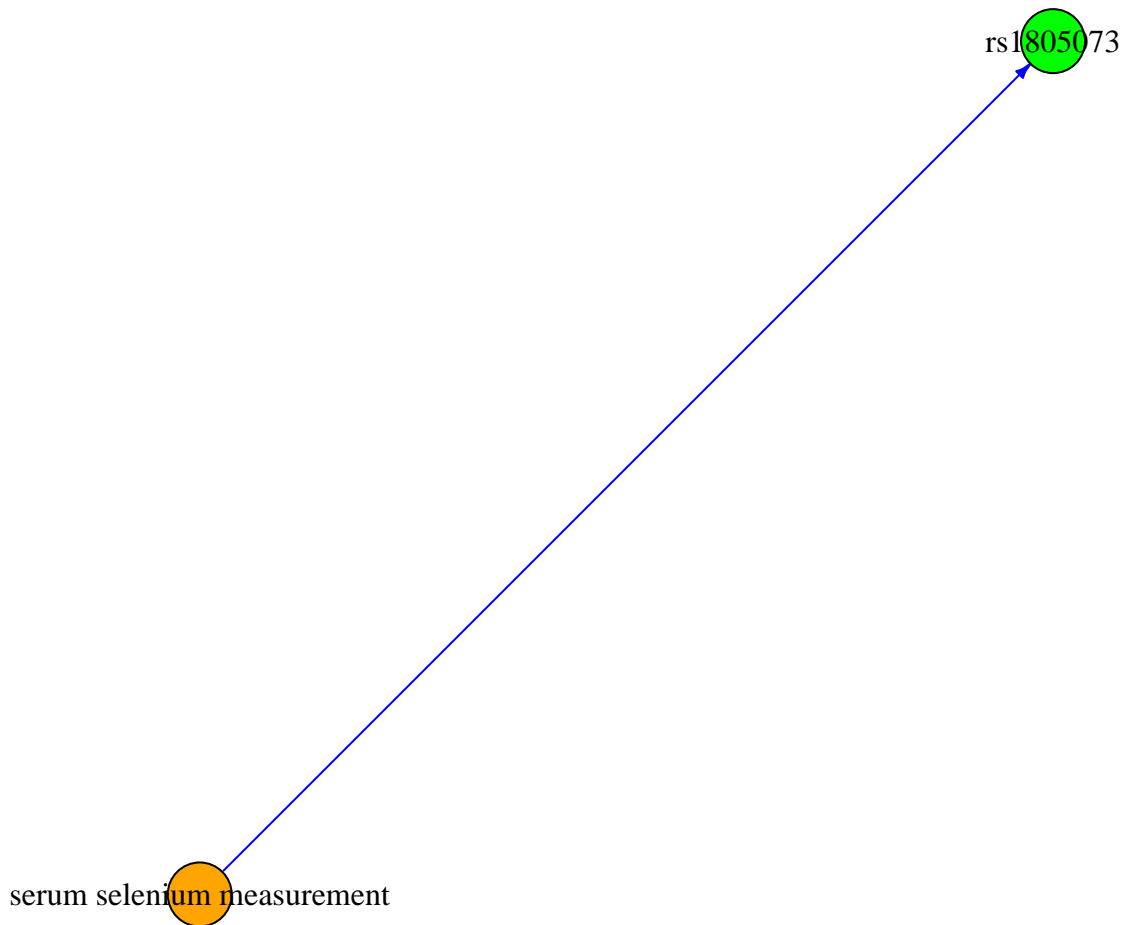

## Variant–Disease Network (alcoholic pancreatitis)

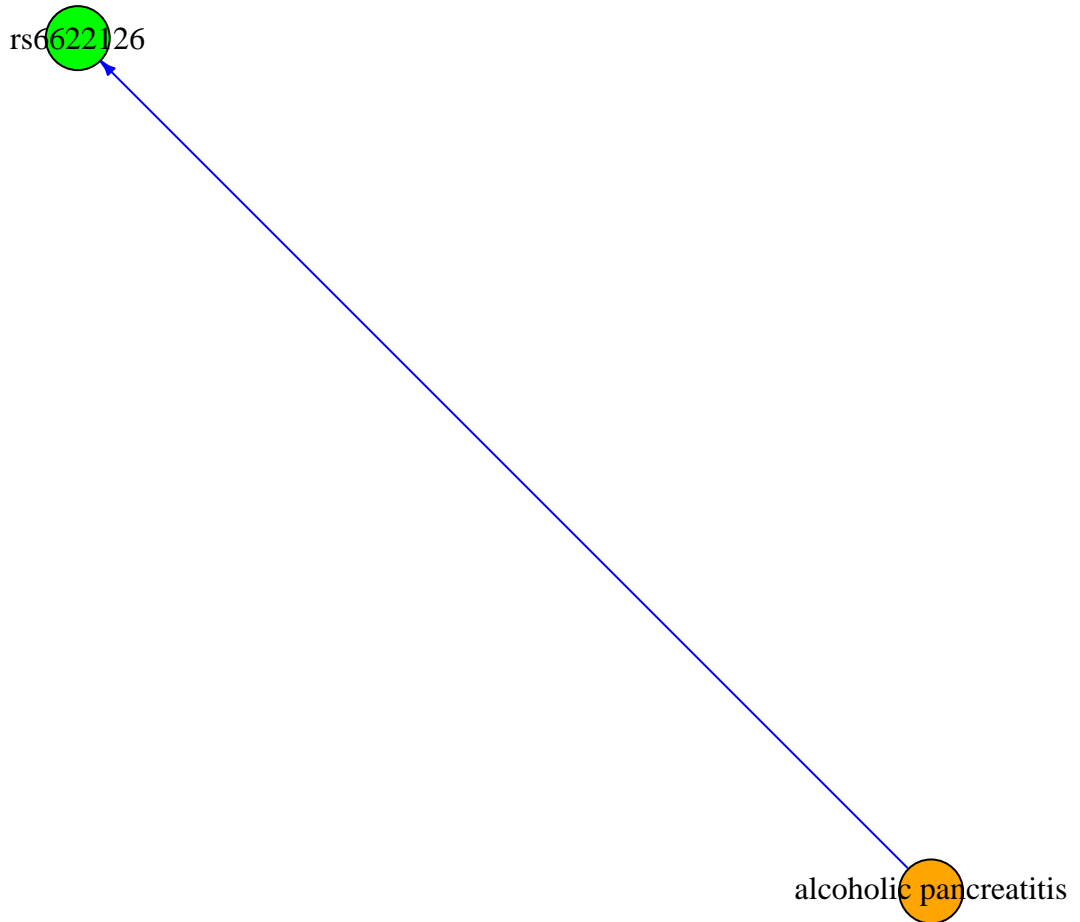

## Variant-Disease Network (QRS complex)

QRS complex

rs3744903



# Variant–Disease Network (eosinophil percentage of granulocytes)

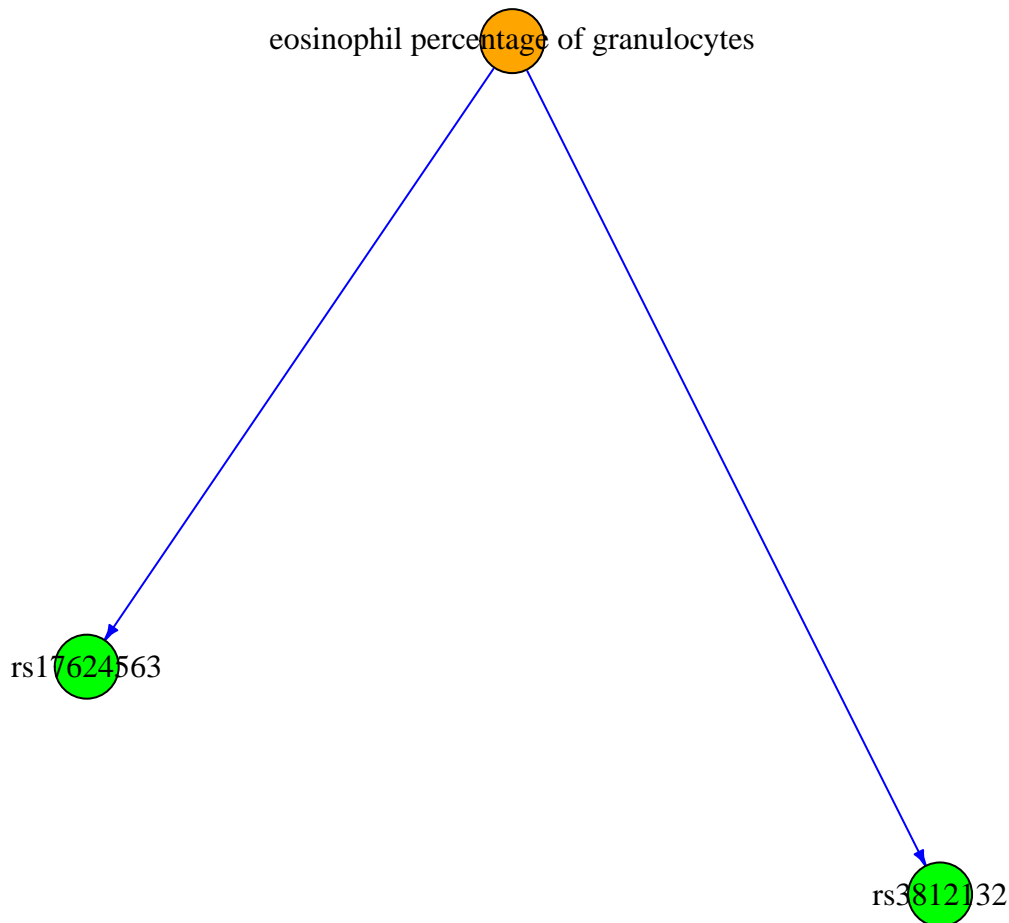



Variant–Disease Network (eosinophil percentage of white cells)

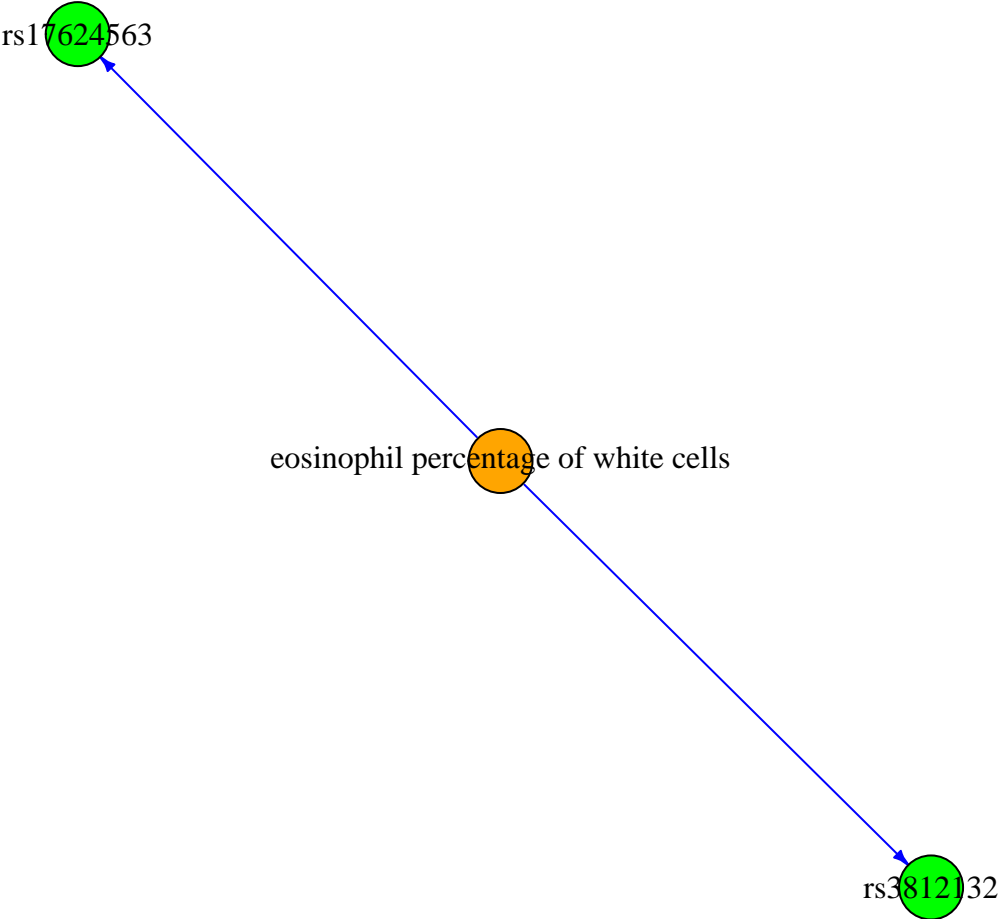

# Variant–Disease Network (neutrophil percentage of granulocytes)

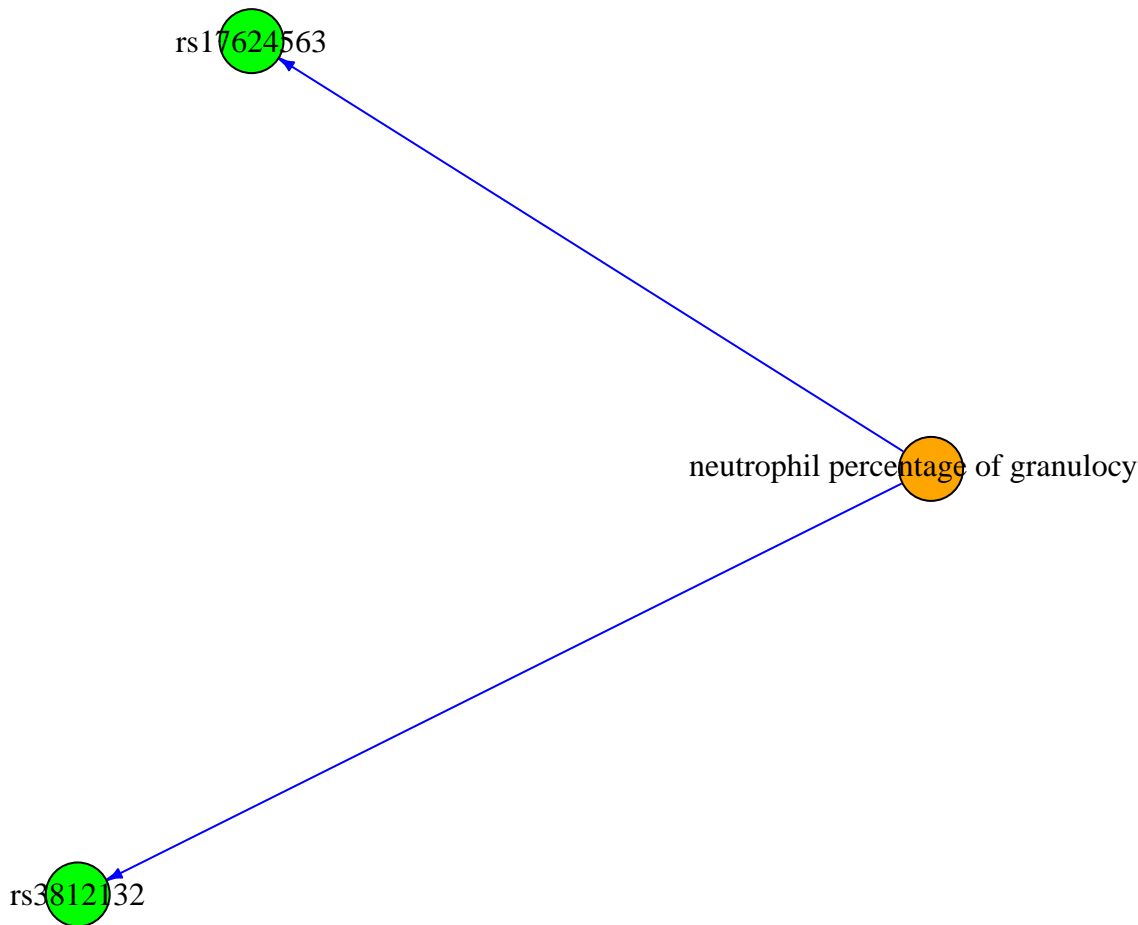

## Variant–Disease Network (chronic kidney disease)

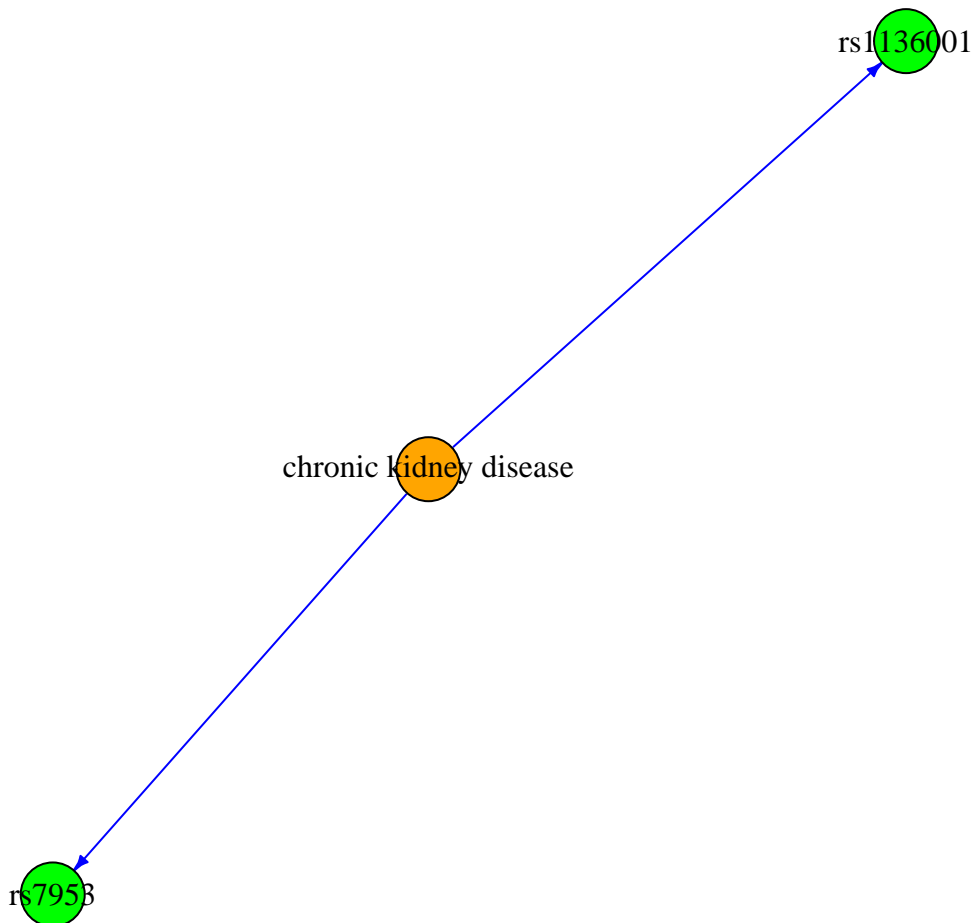

## Variant–Disease Network (colorectal health)

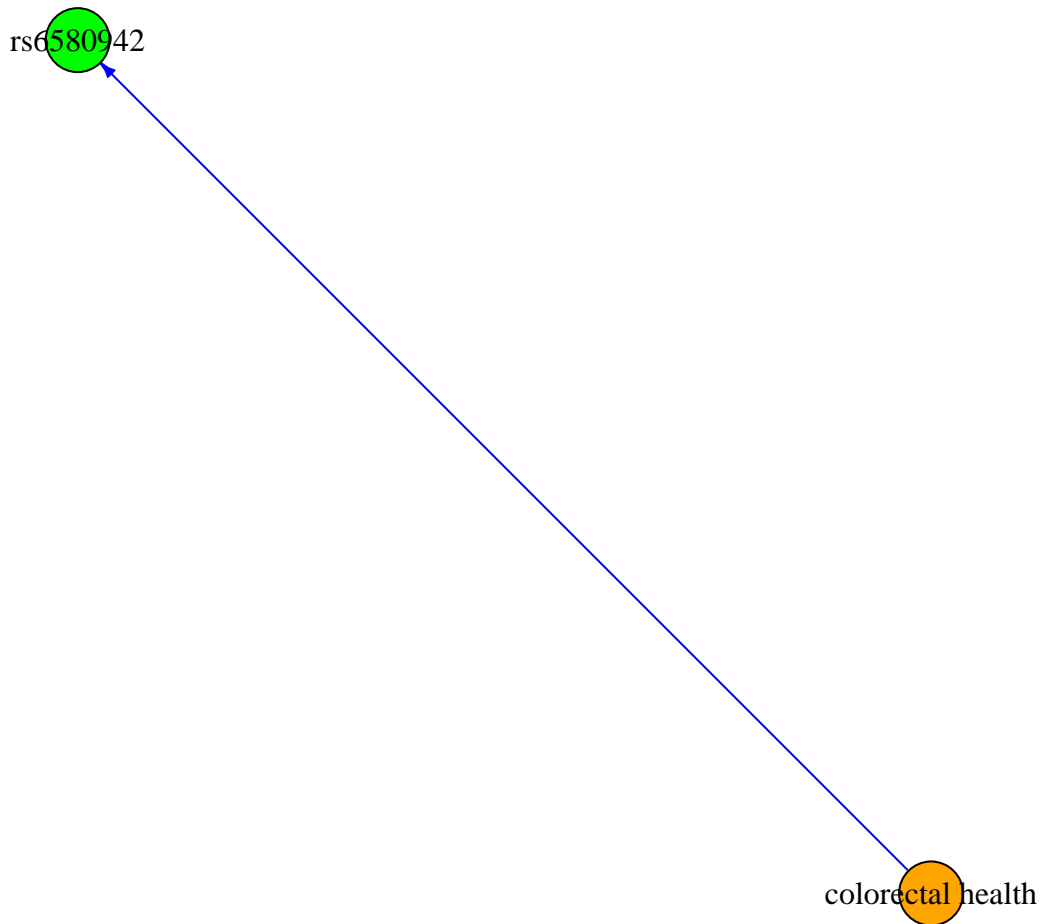

**Variant–Disease Network (femoral neck bone mineral density)**

femoral neck bone mineral density

rs6580942

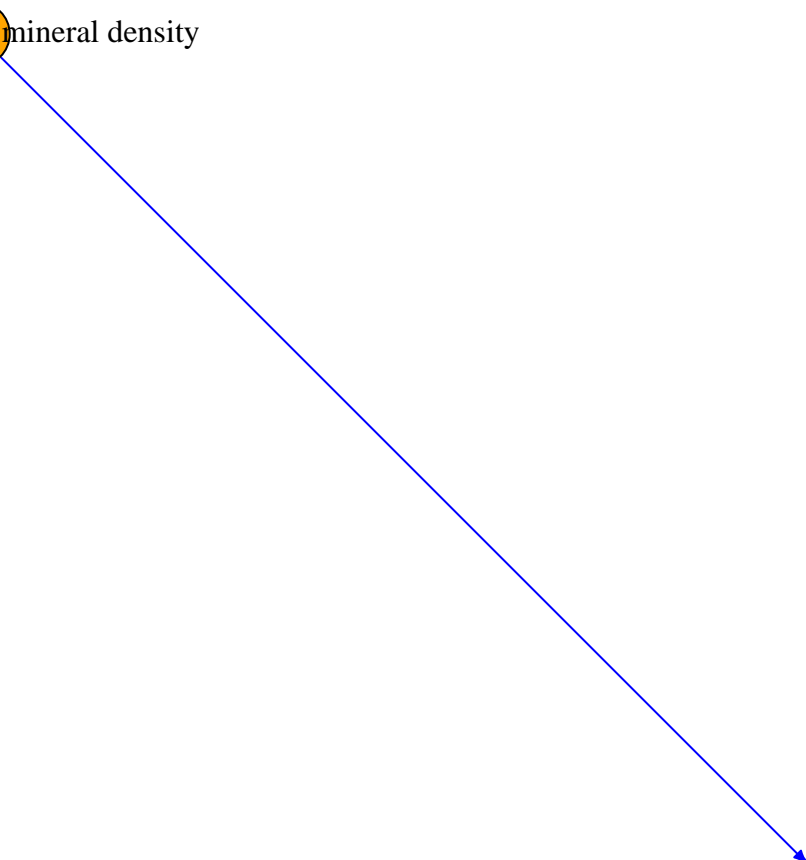

## Variant–Disease Network (spine bone mineral density)

spine bone mineral density

rs6580942



Variant–Disease Network (response to selective serotonin reuptake inhibitor)

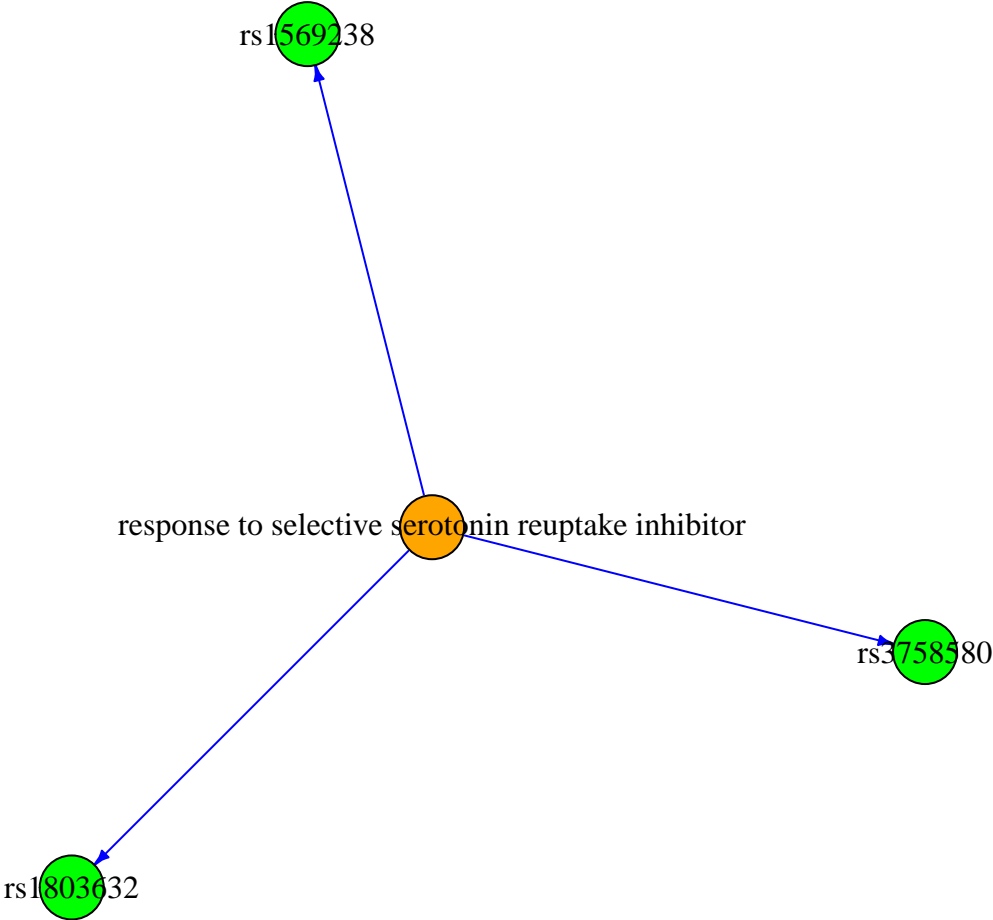

**Variant–Disease Network (forced expiratory volume)**

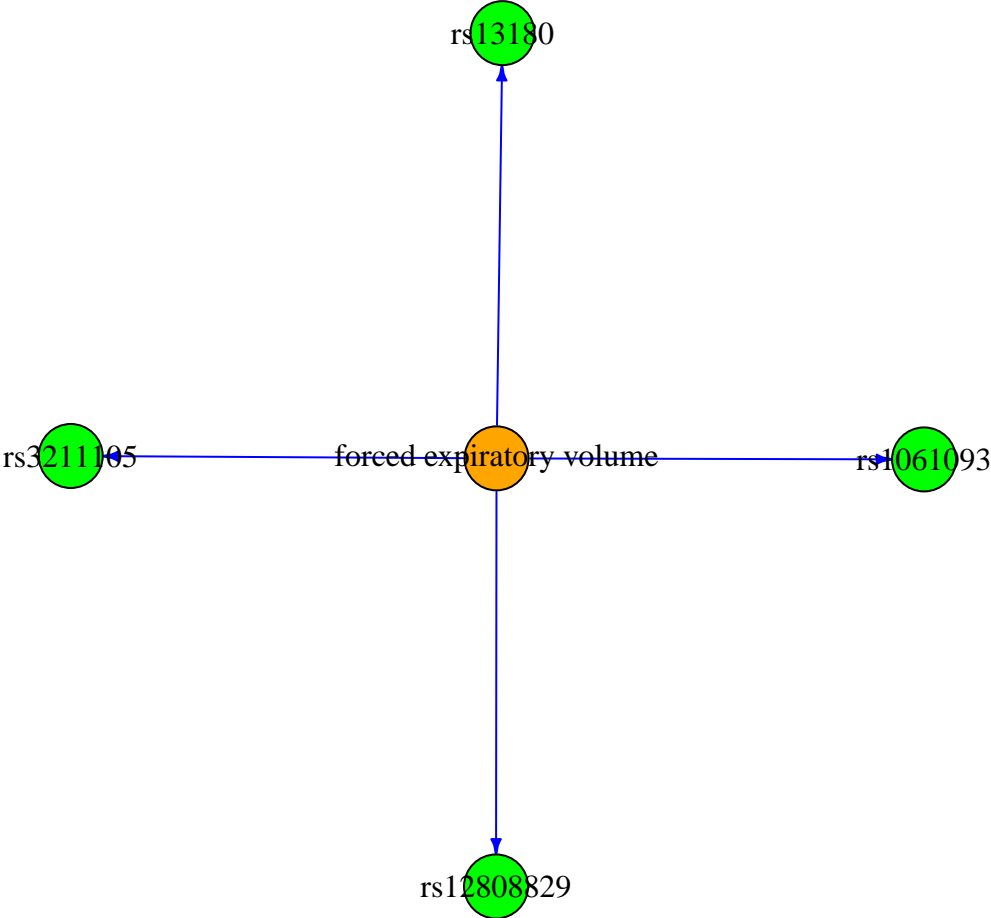



## Variant-Disease Network (suntan)

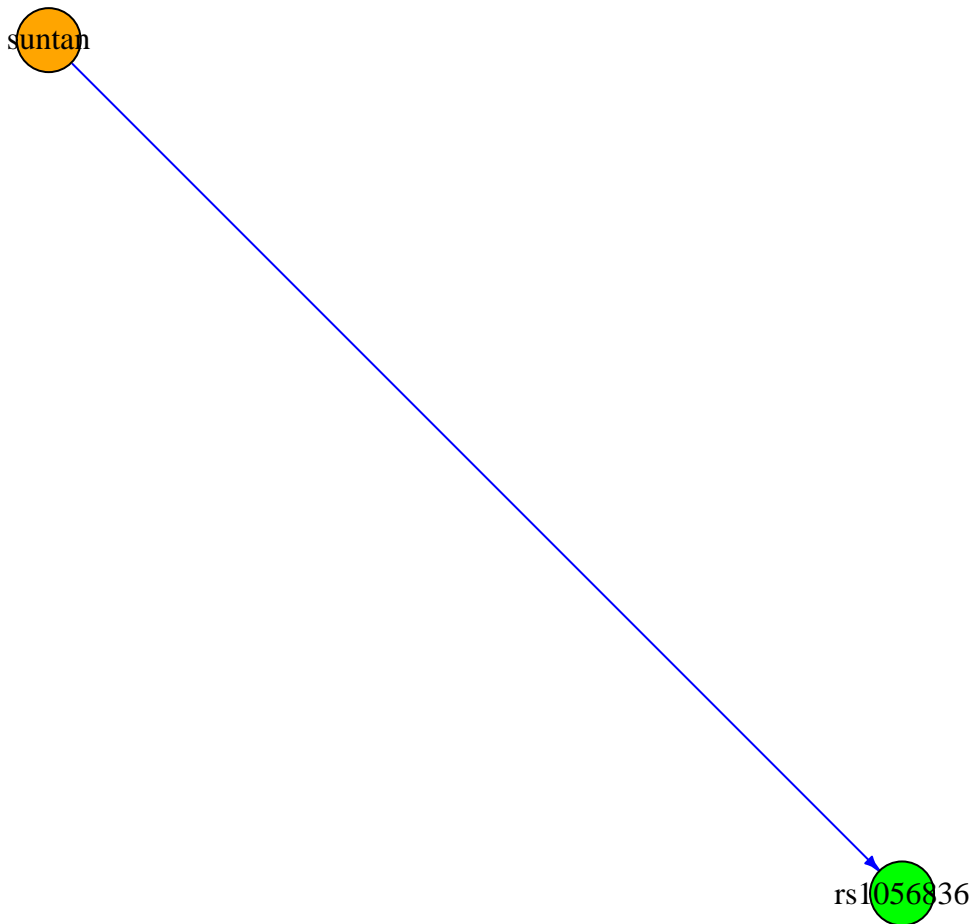

## Variant–Disease Network (suicide behaviour)

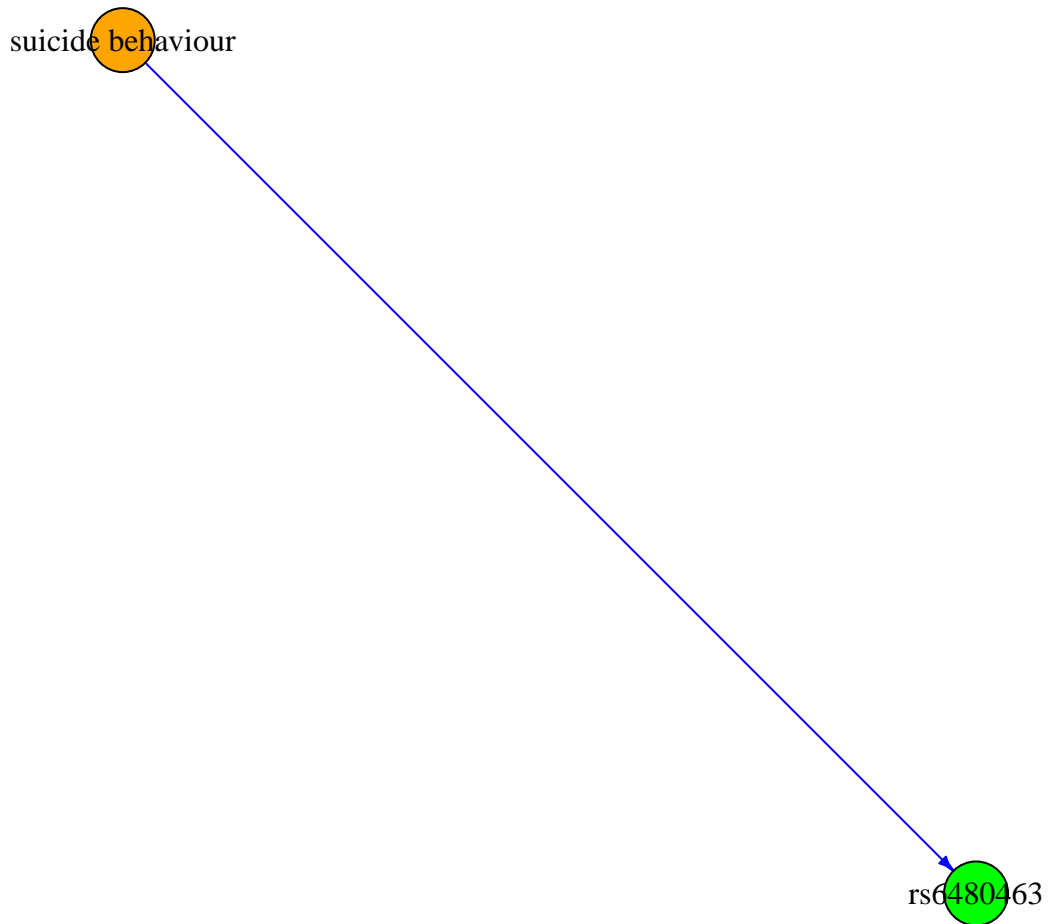

**Variant–Disease Network (progressive supranuclear palsy)**

progressive supranuclear palsy

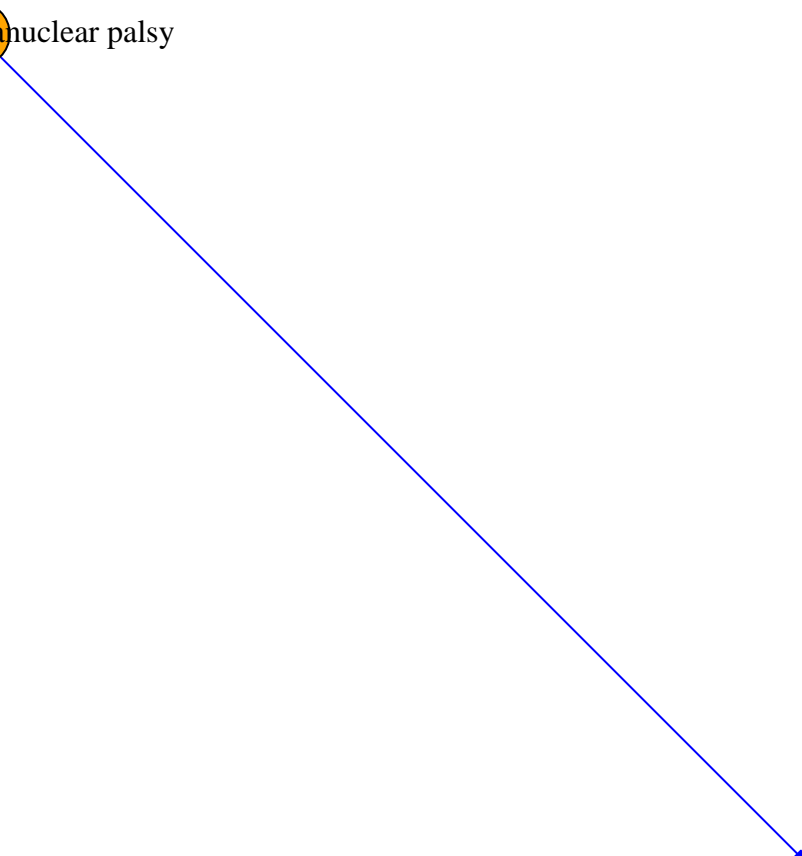

rs7688384

## Variant–Disease Network (type i diabetes mellitus)

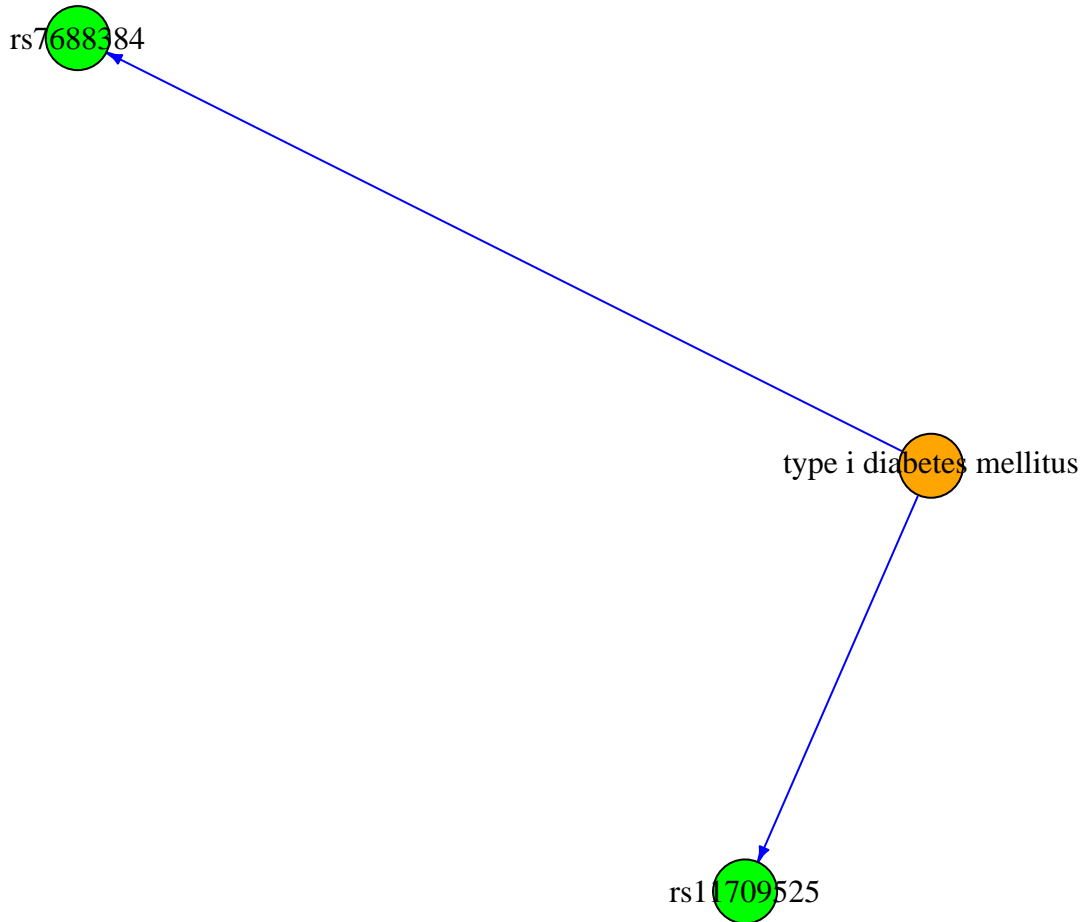

Variant–Disease Network (atrial fibrillation)

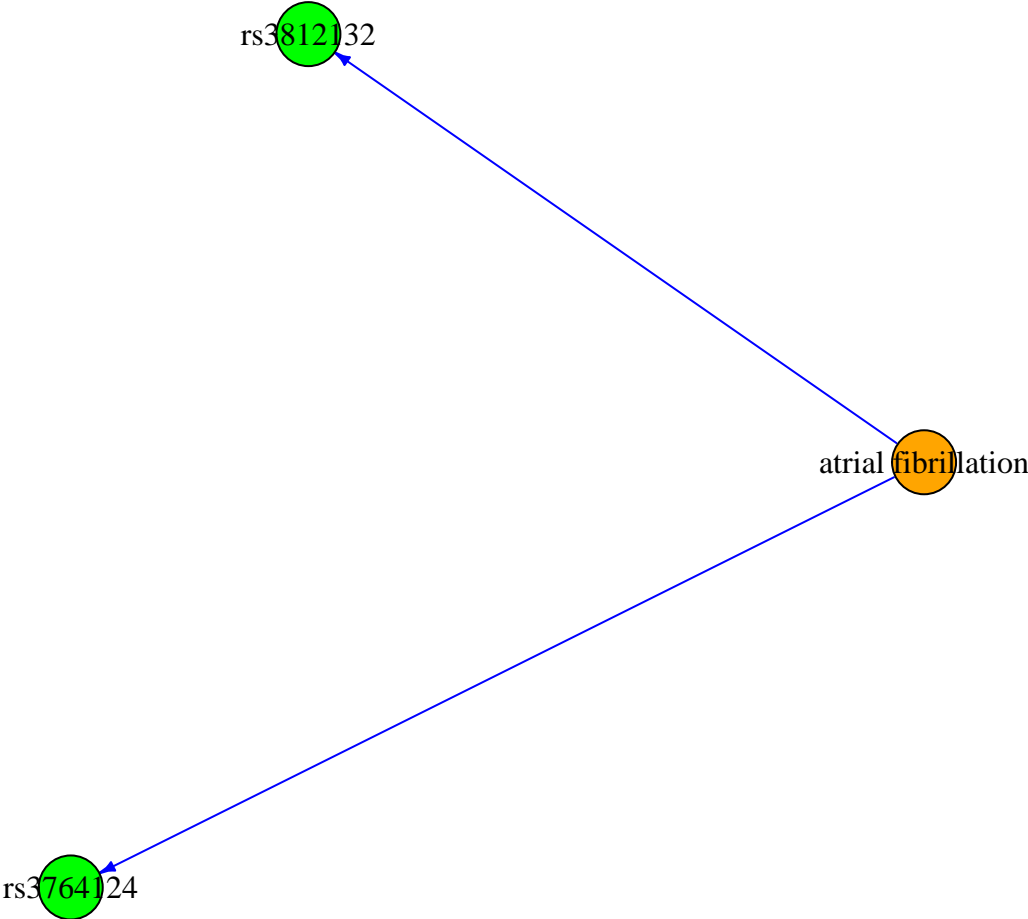

# Disease Network (dual specificity mitogen-activated protein kinase kinase 2 network)

by mitogen-activated protein kinase kinase 2 measurement

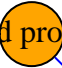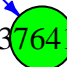

rs3764124

## Variant–Disease Network (lupus nephritis)

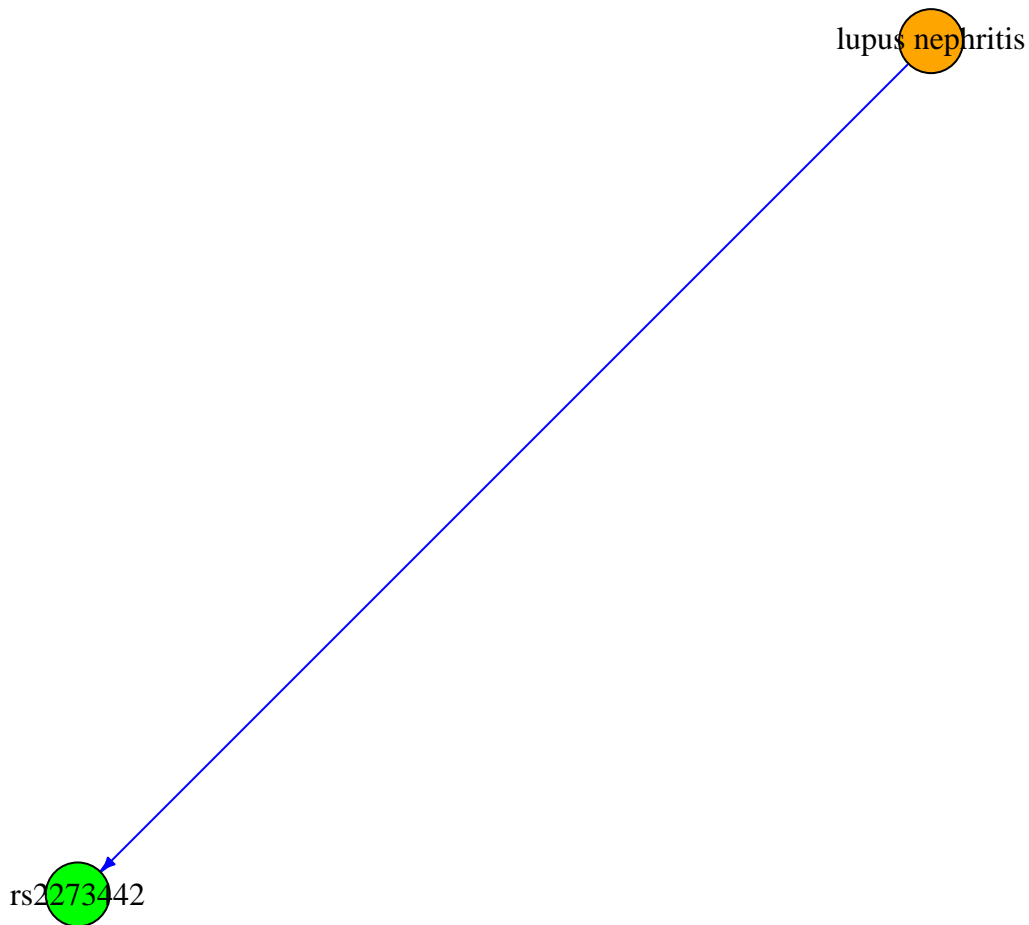

## Variant–Disease Network (IgF–1 measurement)

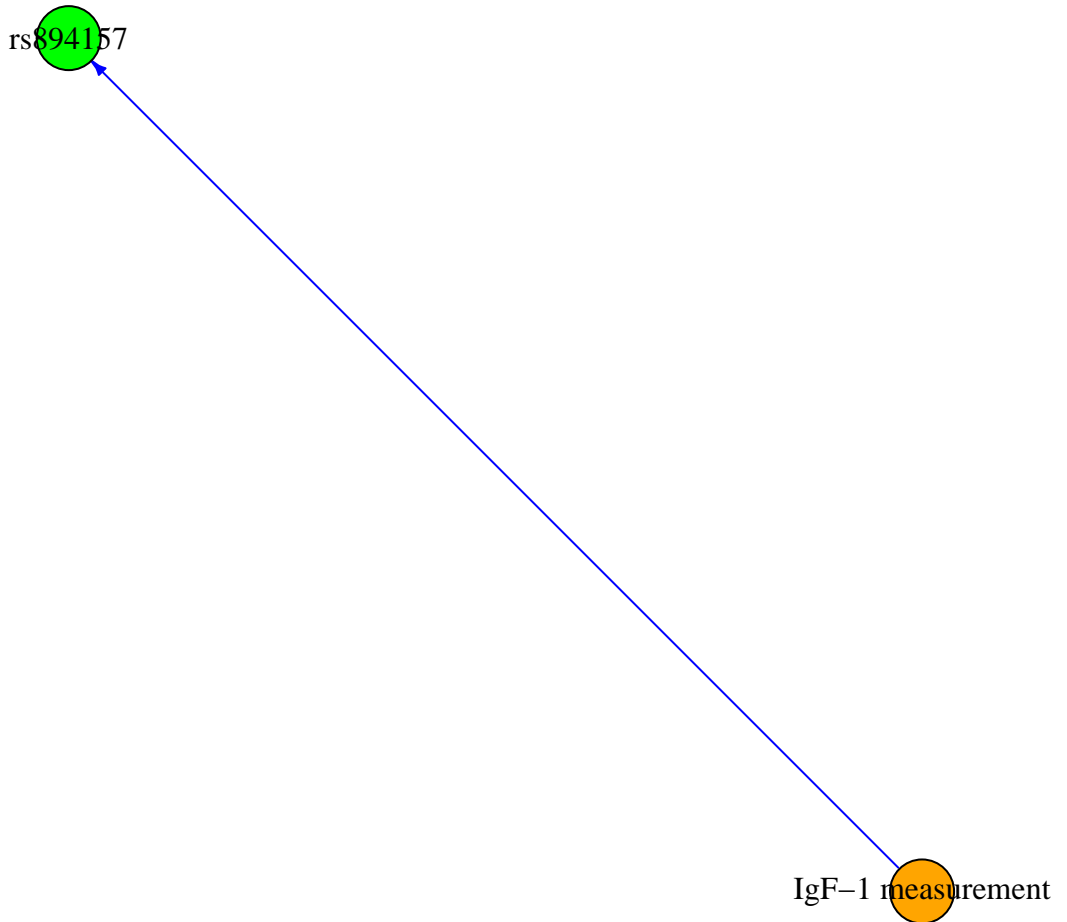



## Variant–Disease Network (cathepsin S measurement)

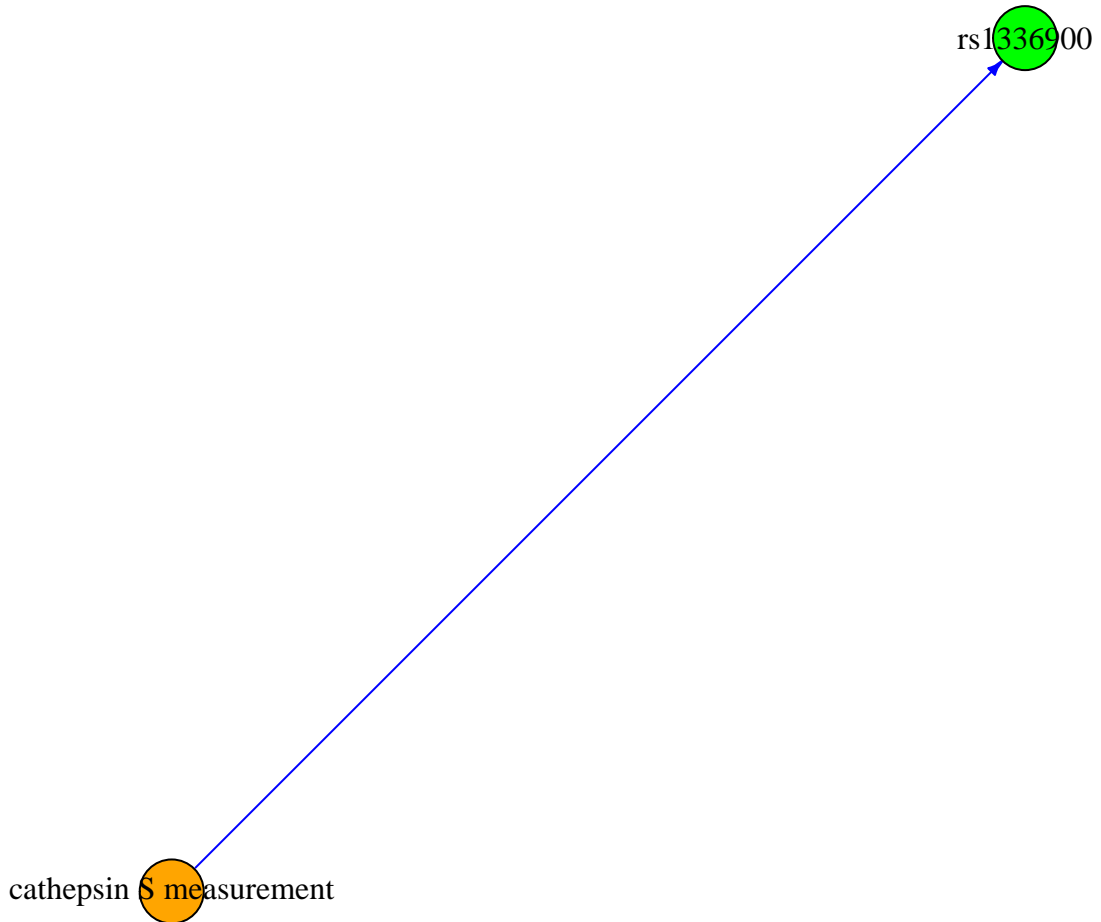

## Variant–Disease Network (CCL2 measurement)

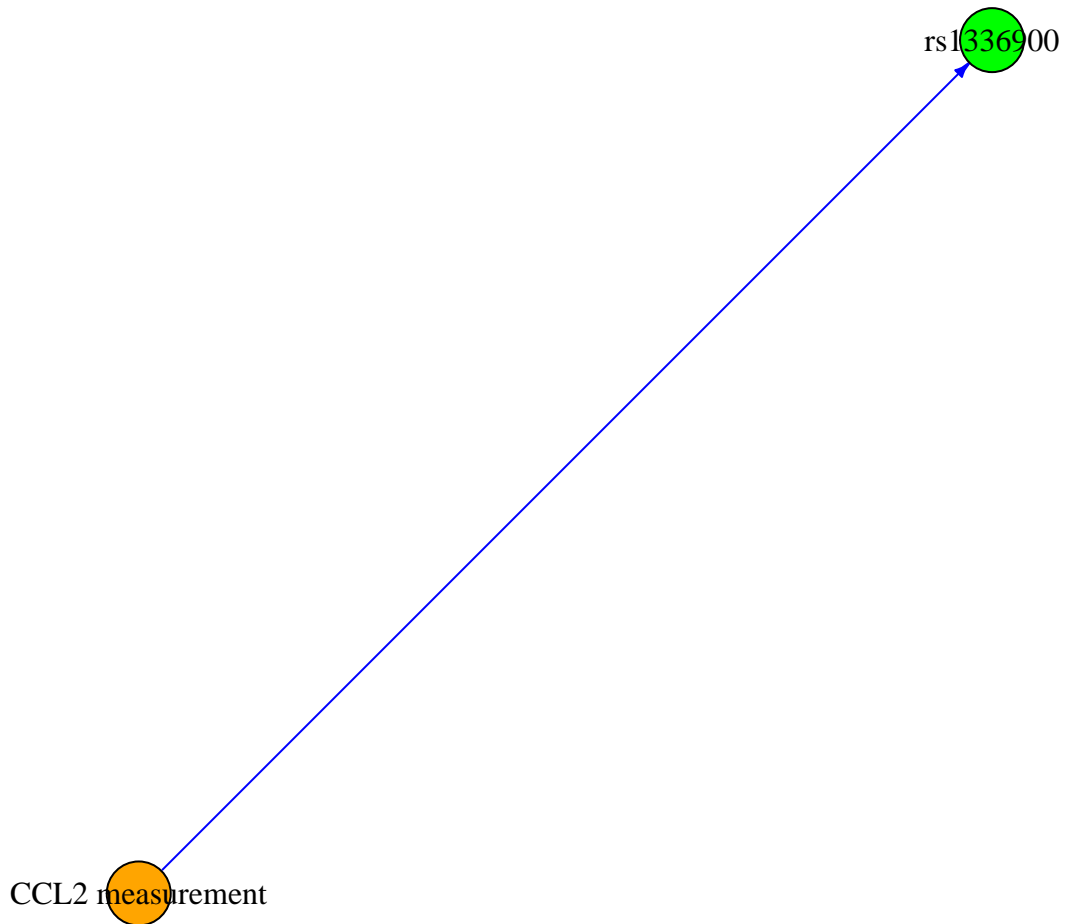

## Variant–Disease Network (fat body mass)

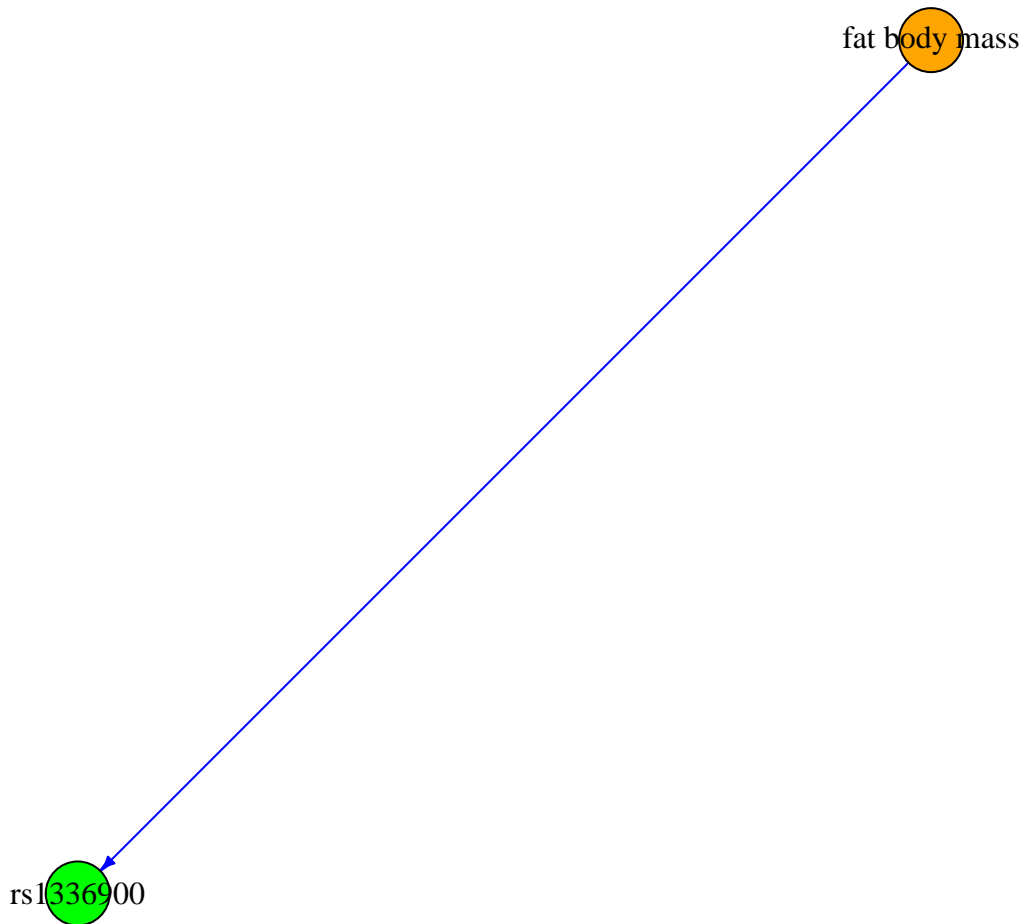

Variant–Disease Network (behavior or behavioral disorder measurement

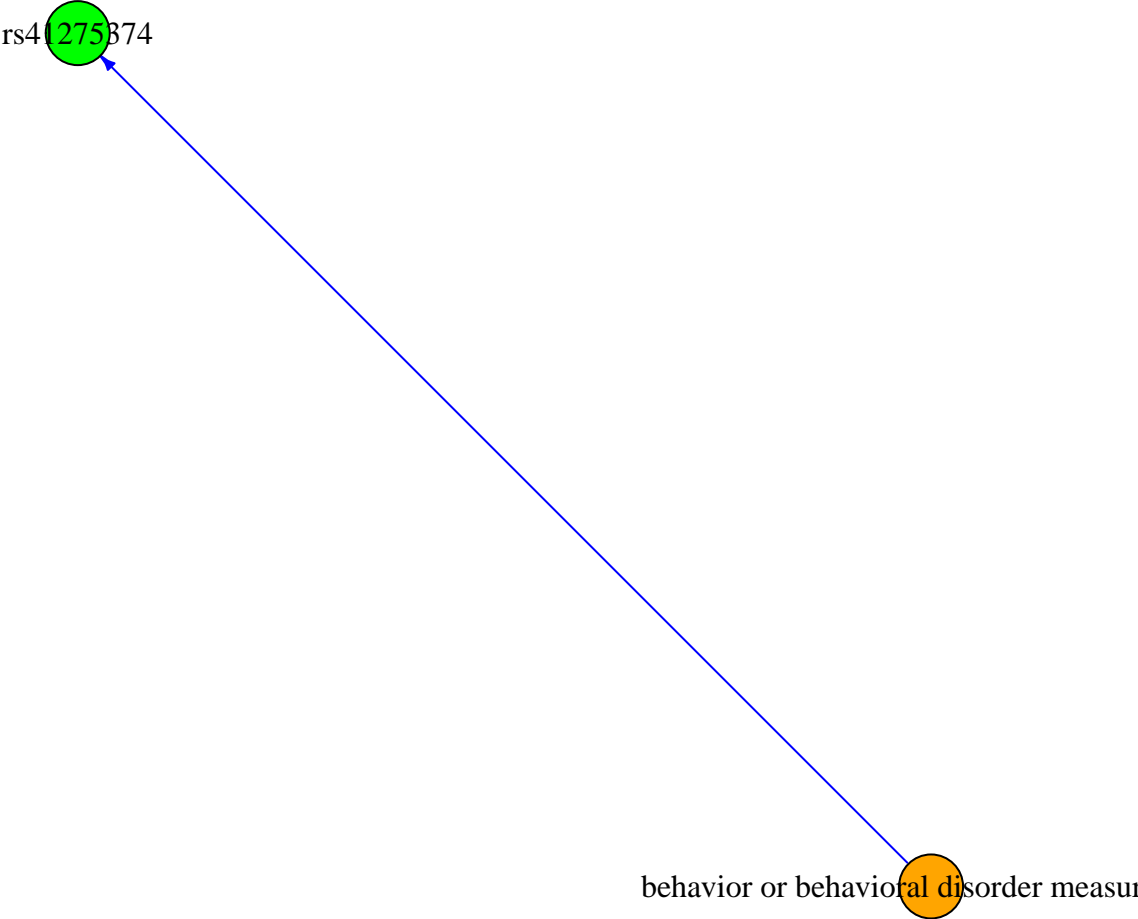

Variant–Disease Network (personality trait)

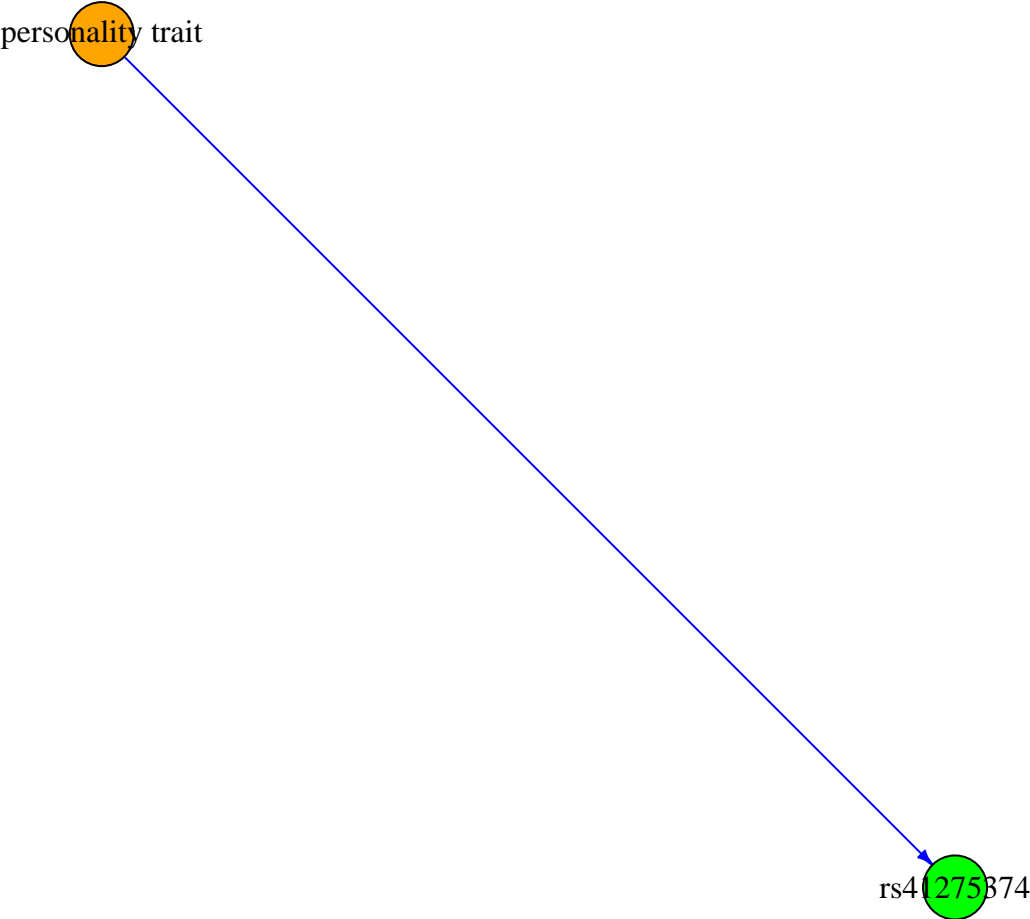

**Variant–Disease Network (alpha-carotene measurement)**

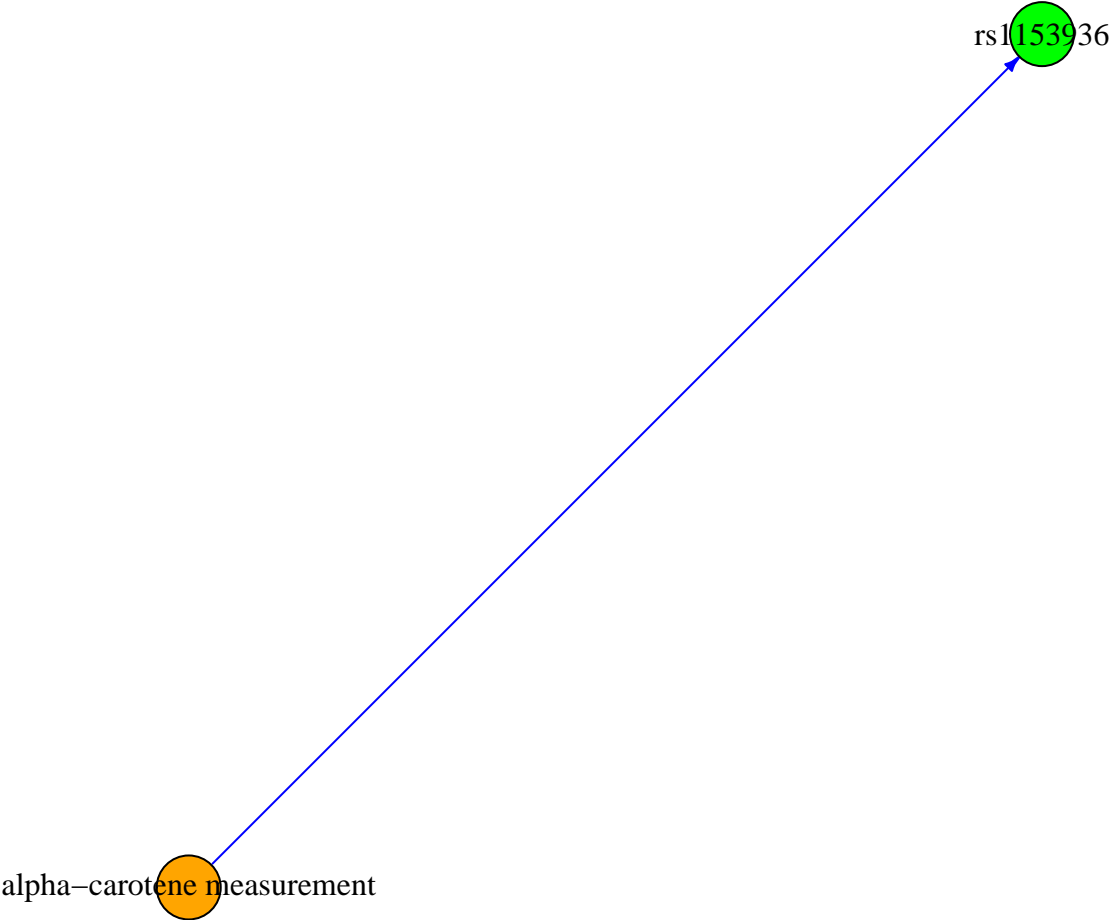

**Variant–Disease Network (amyloid plaque accumulation rate)**

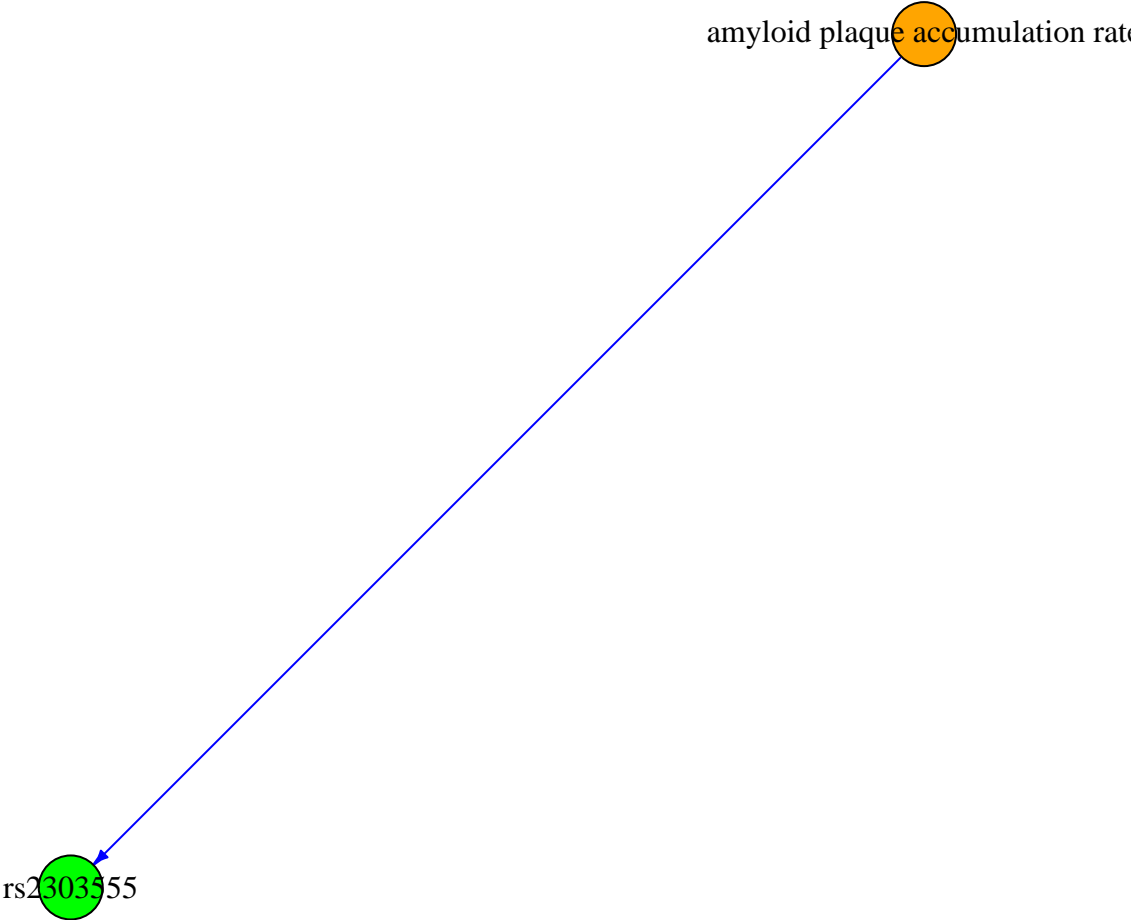

## Variant–Disease Network (maximal midexpiratory flow rate)

maximal midexpiratory flow rate

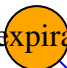

rs2903250

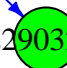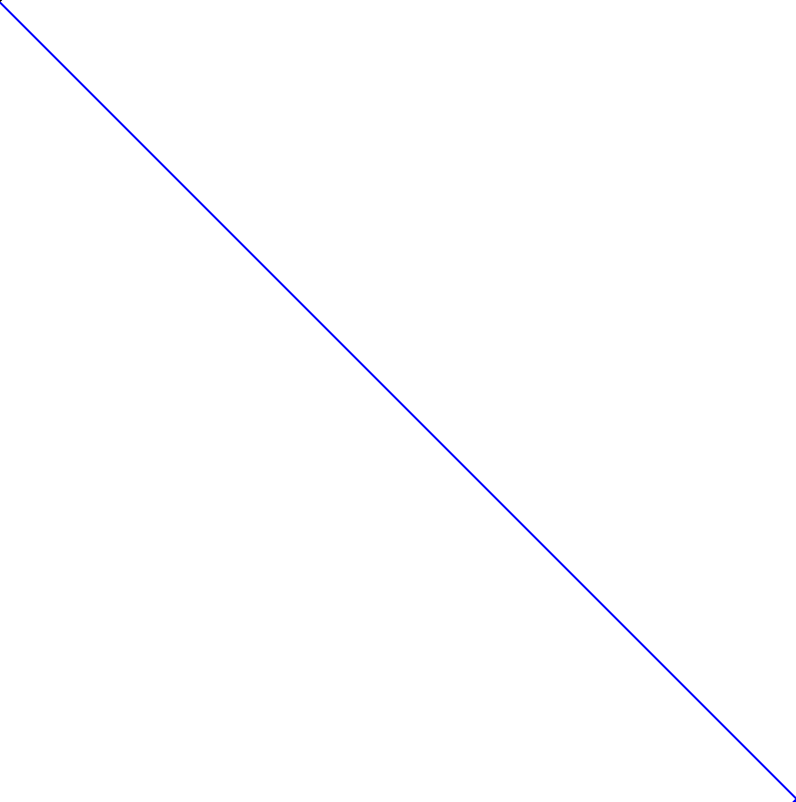



Variant–Disease Network (congenital left–sided heart lesions)

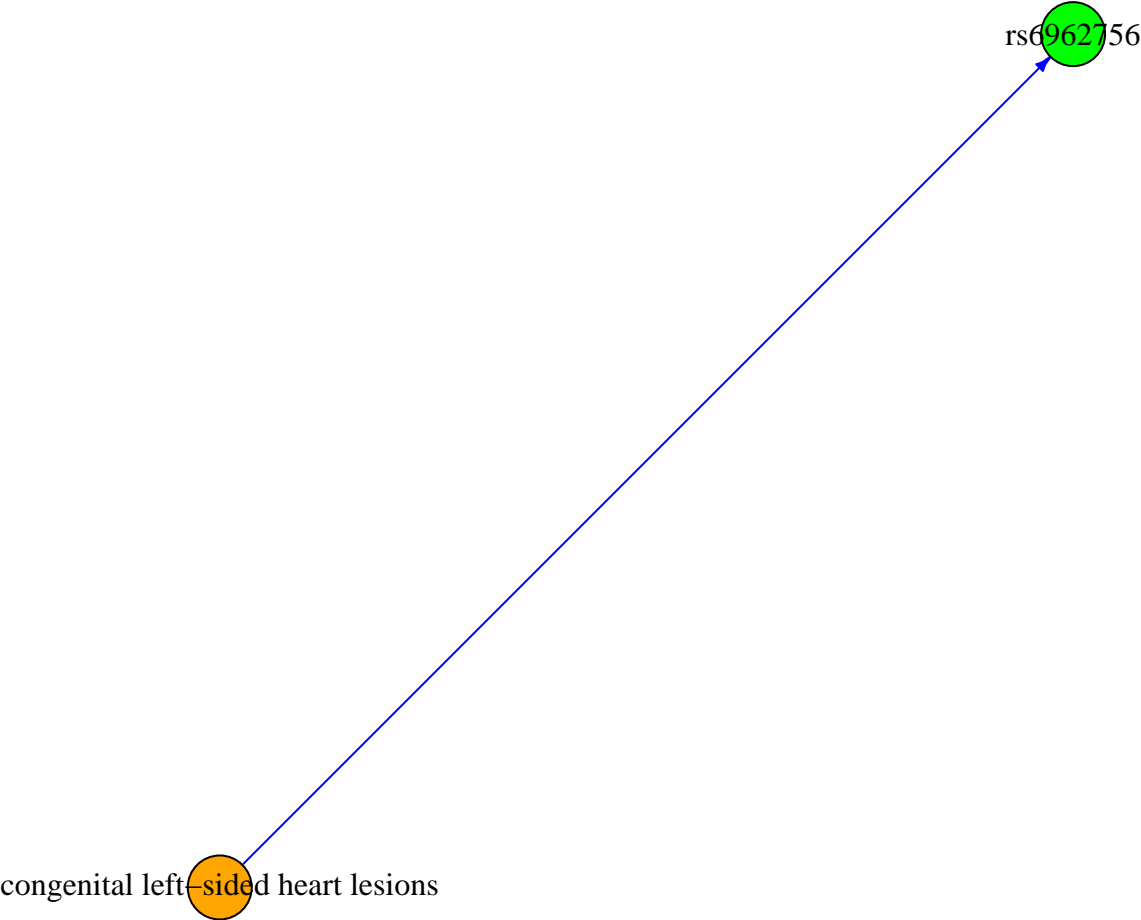

Variant–Disease Network (information processing speed)

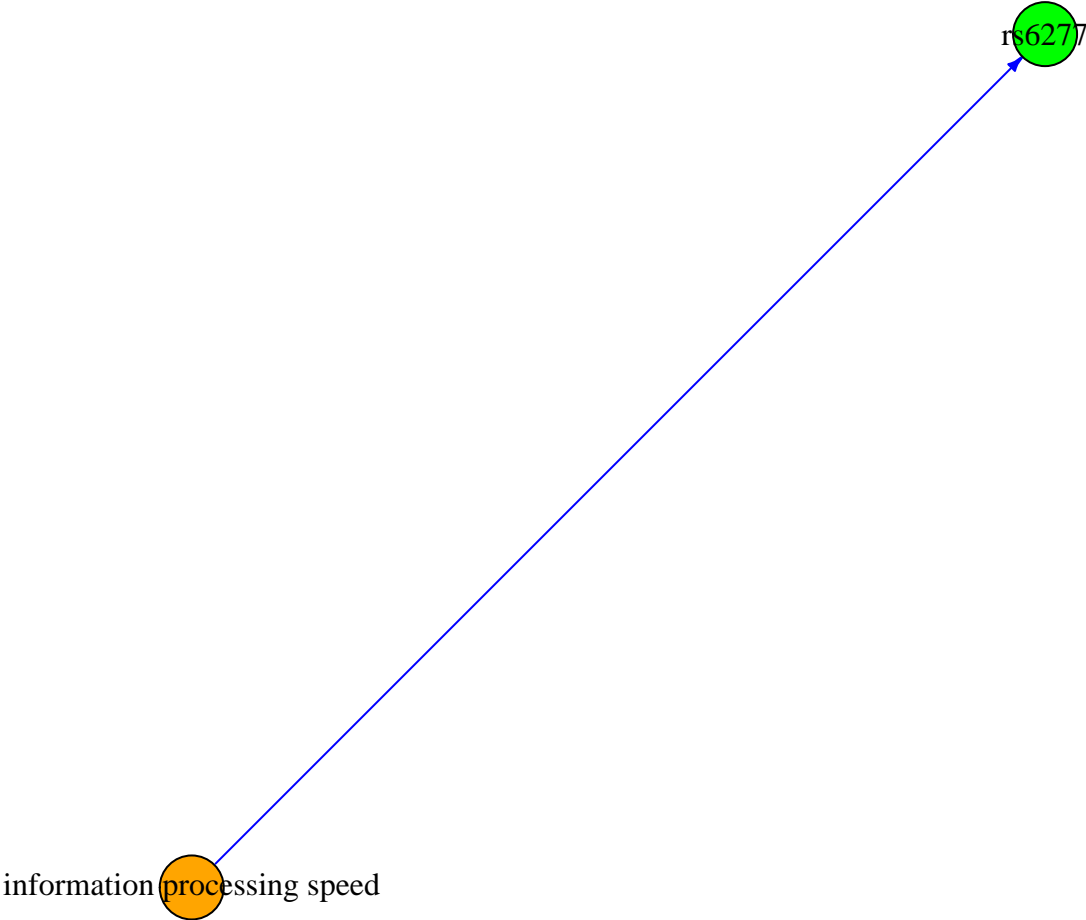

# Variant–Disease Network (BMI–adjusted waist–hip ratio)

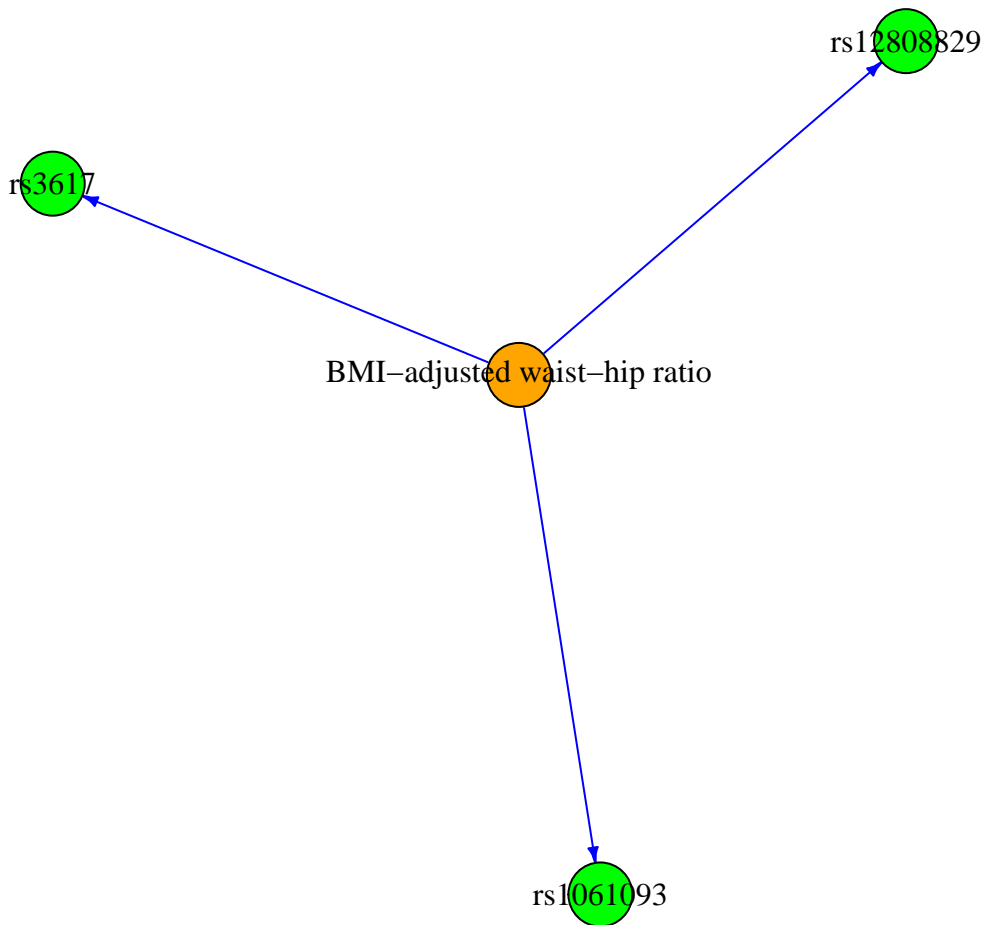

## Variant–Disease Network (DNA methylation)

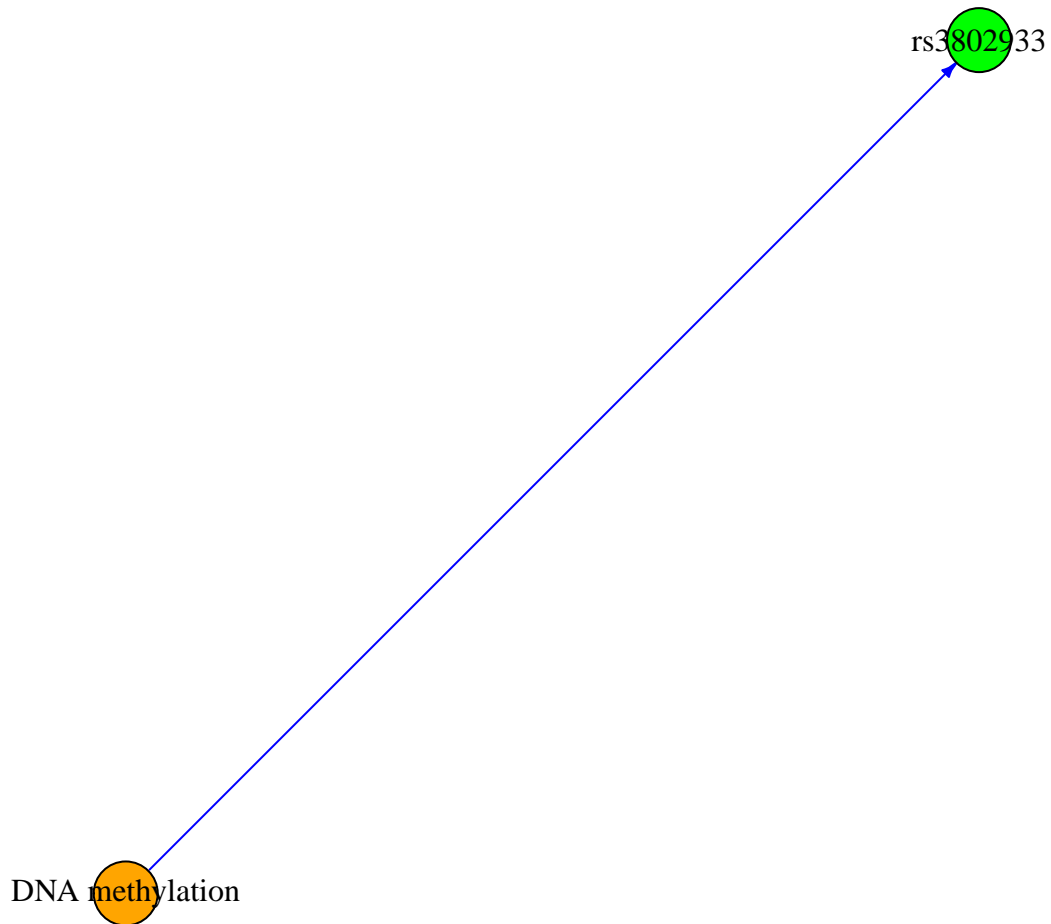

## Variant–Disease Network (calcium measurement)

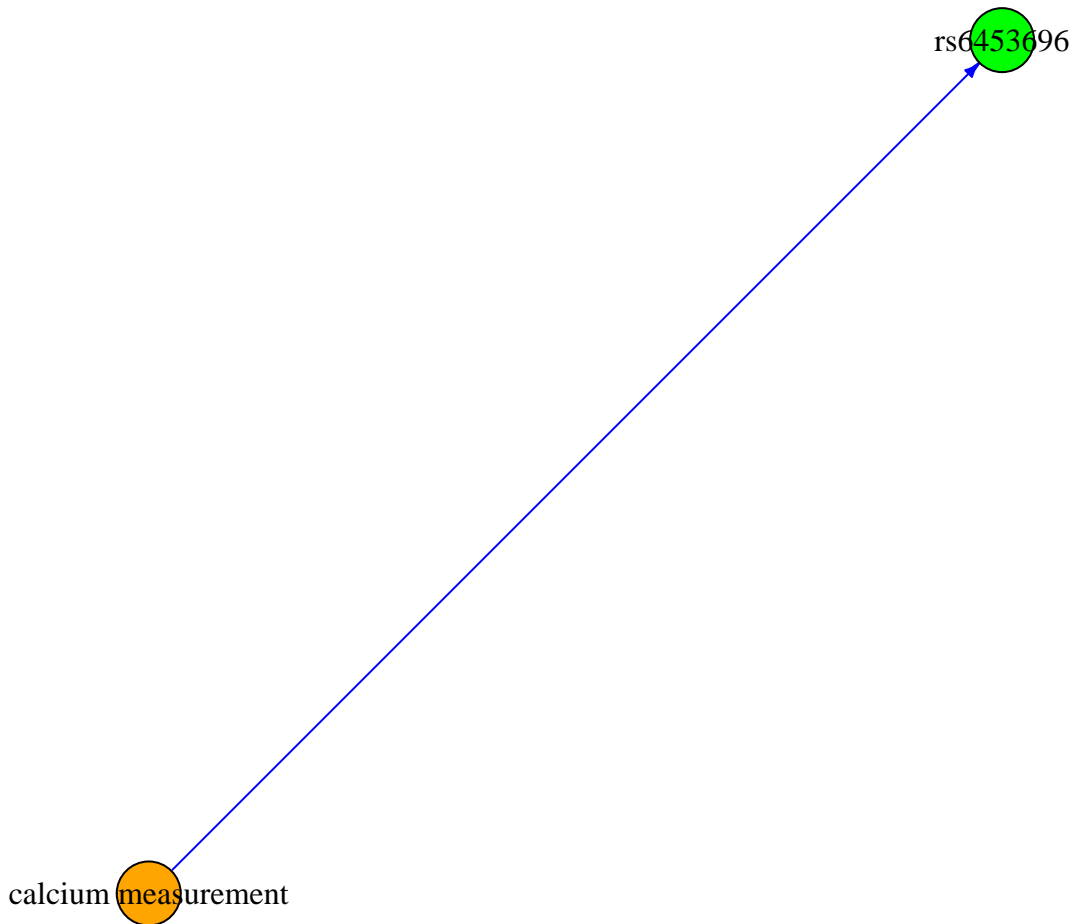

## Variant–Disease Network (CD109 antigen measurement)

CD109 antigen measurement

rs6453696

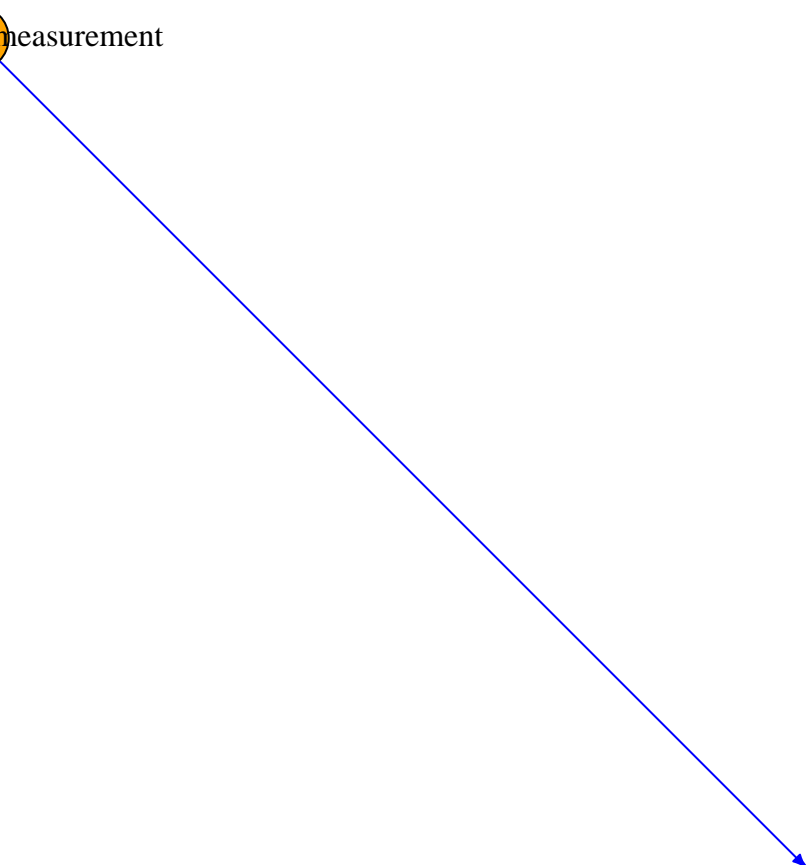

## Variant–Disease Network (glycerophospholipid measurement)

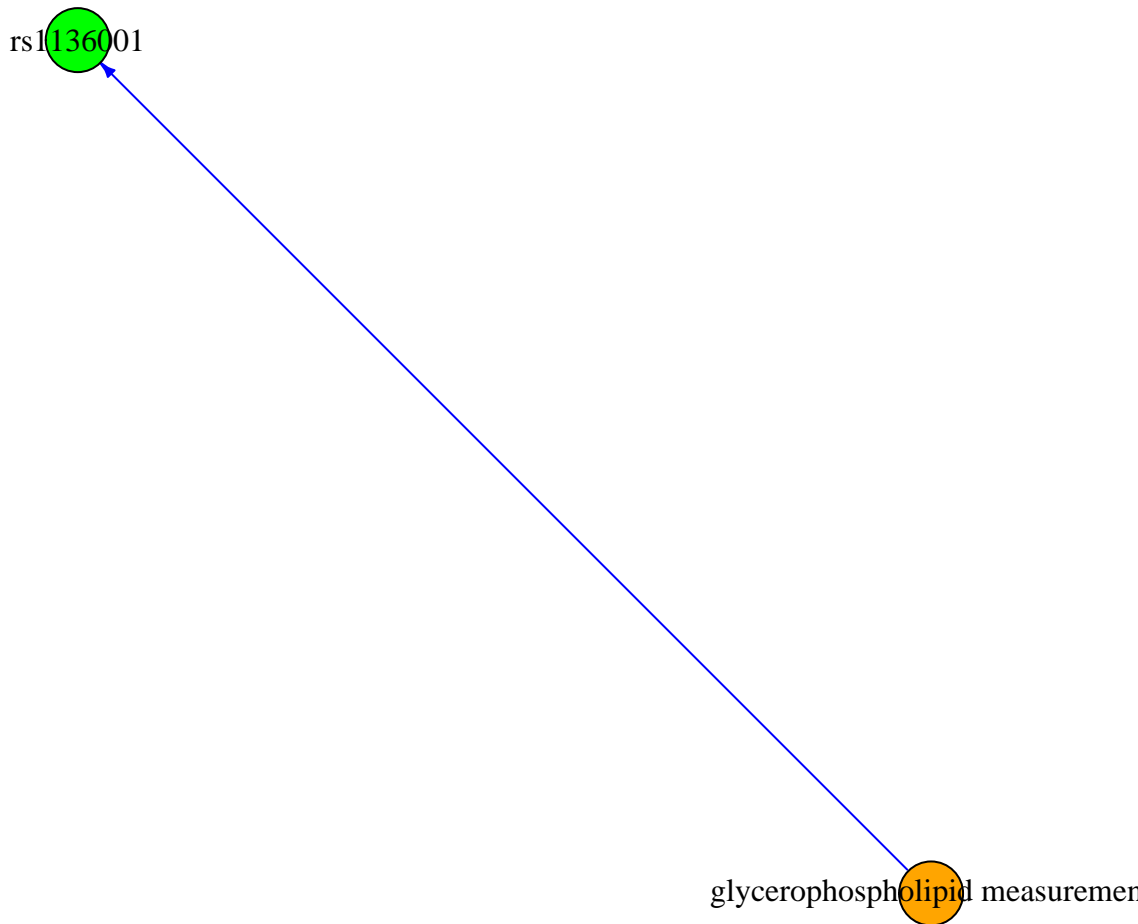

# Variant–Disease Network (metabolite measurement)

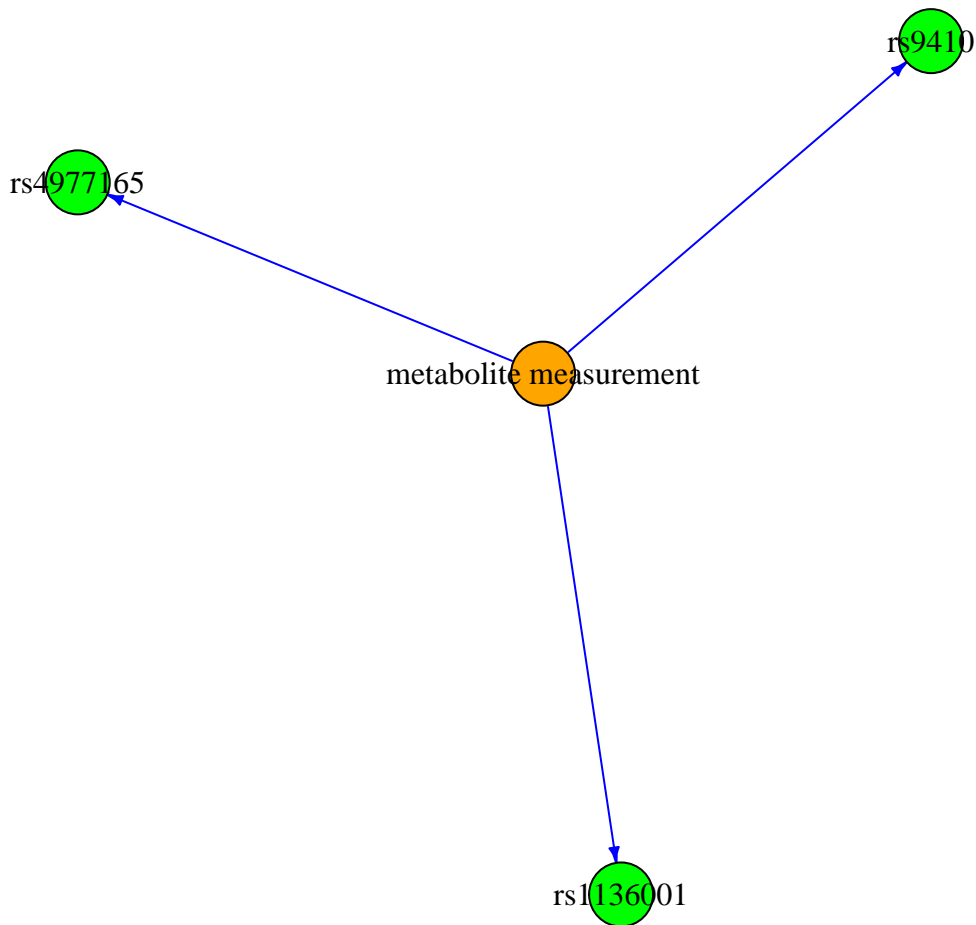



Variant–Disease Network (omega–6 polyunsaturated fatty acid measurement)

omega–6 polyunsaturated fatty acid measurement

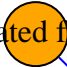

rs1136001

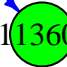

## Variant–Disease Network (phospholipid measurement)

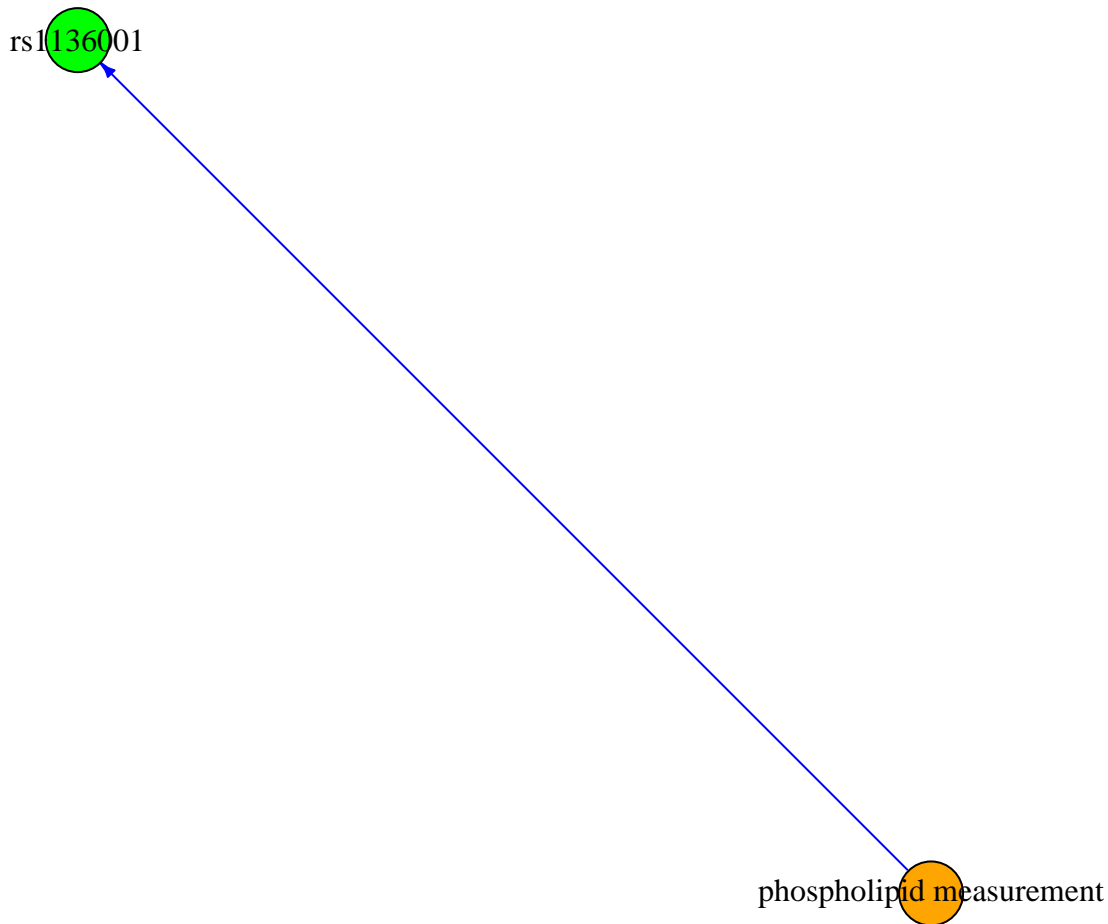

# Variant–Disease Network (exploratory eye movement measurement)

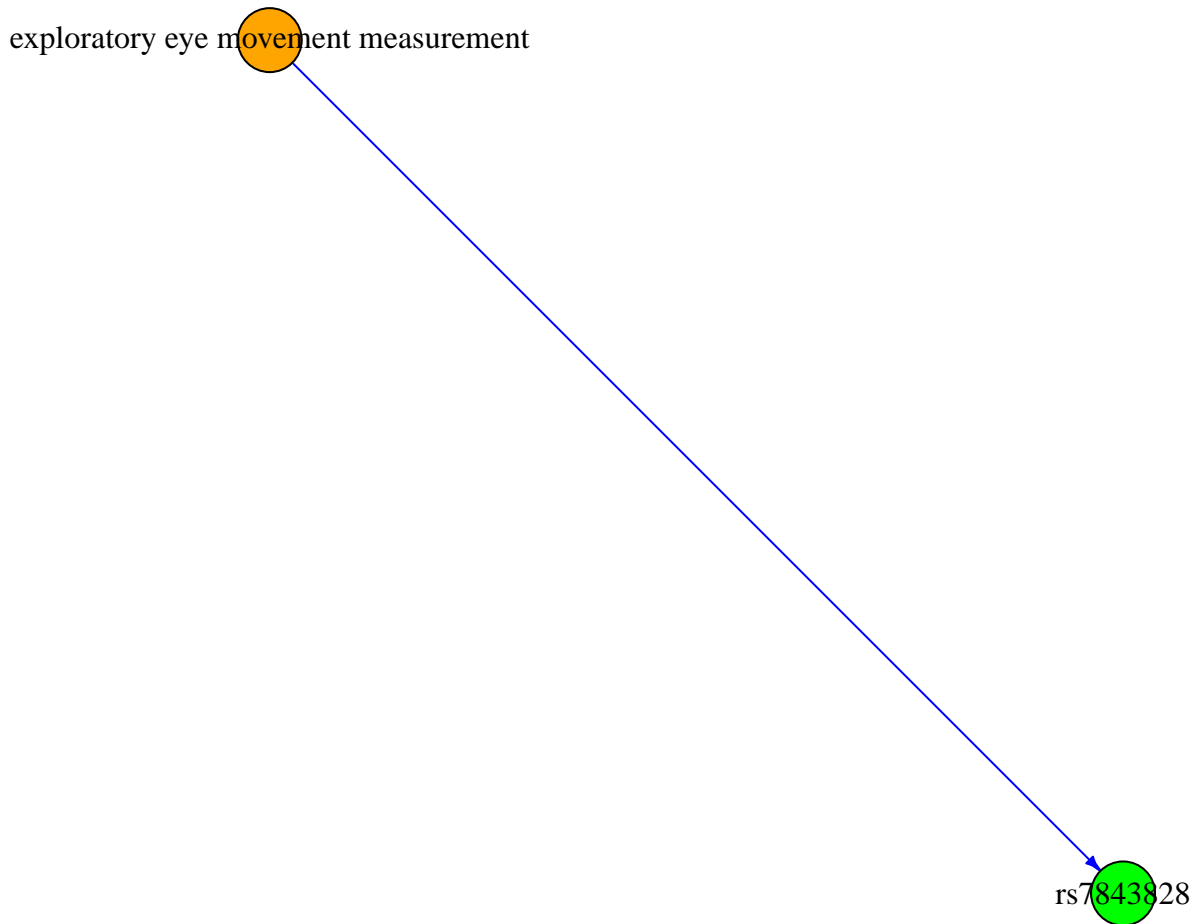

## Variant–Disease Network (coronary heart disease)

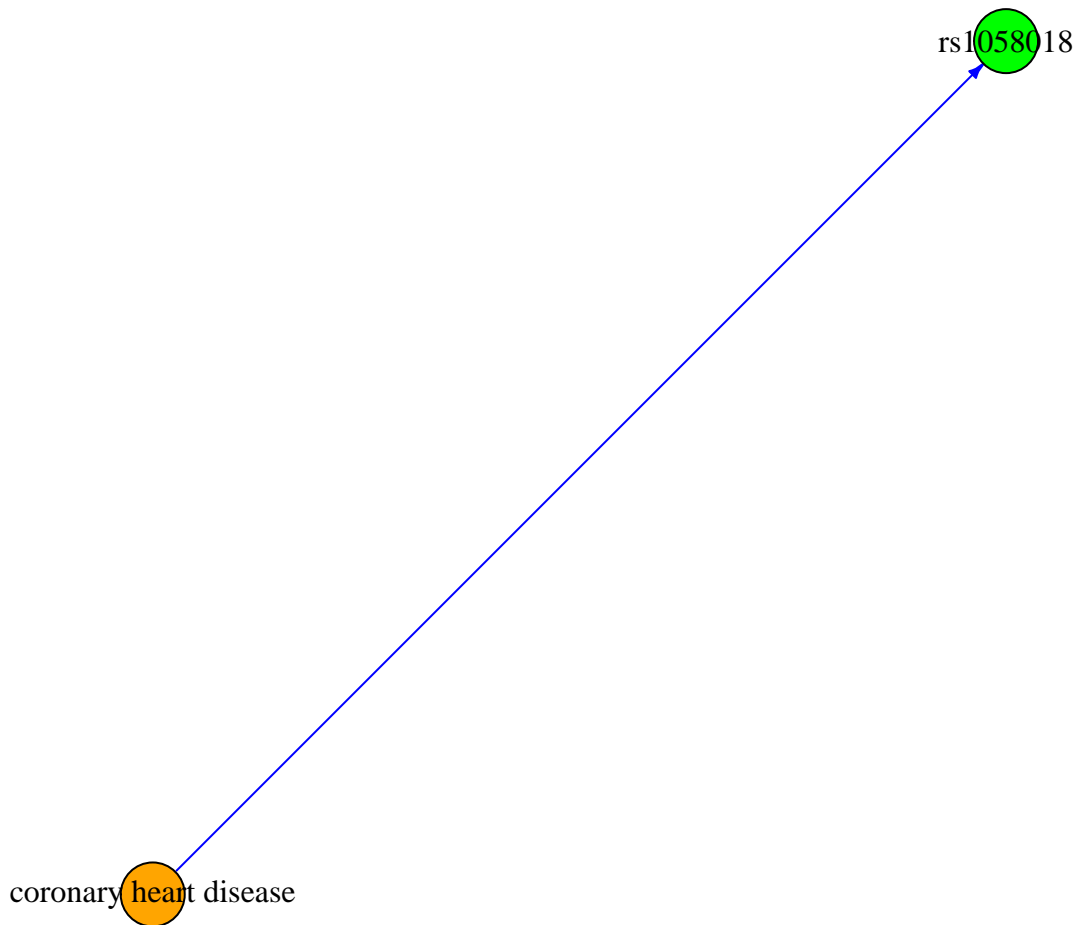

## Variant–Disease Network (adiponectin measurement)

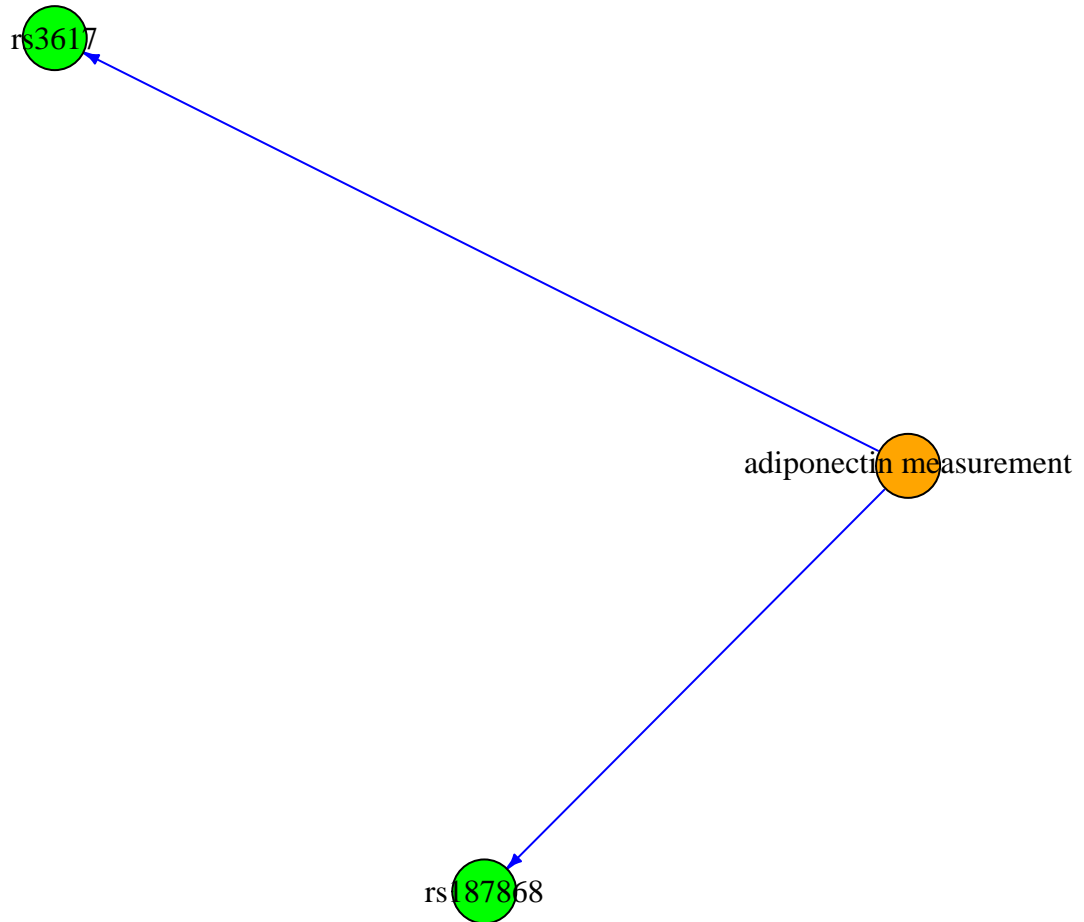

## Variant–Disease Network (open–angle glaucoma)

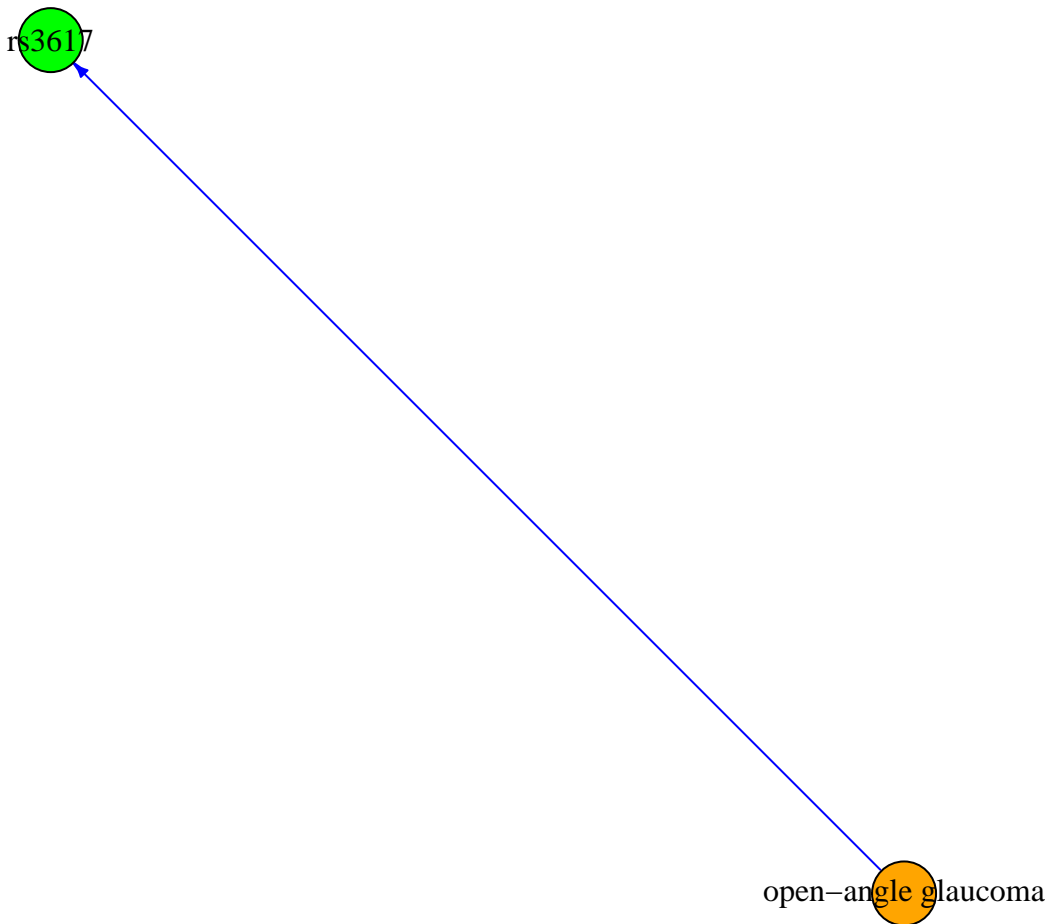

## Variant–Disease Network (schizoaffective disorder)

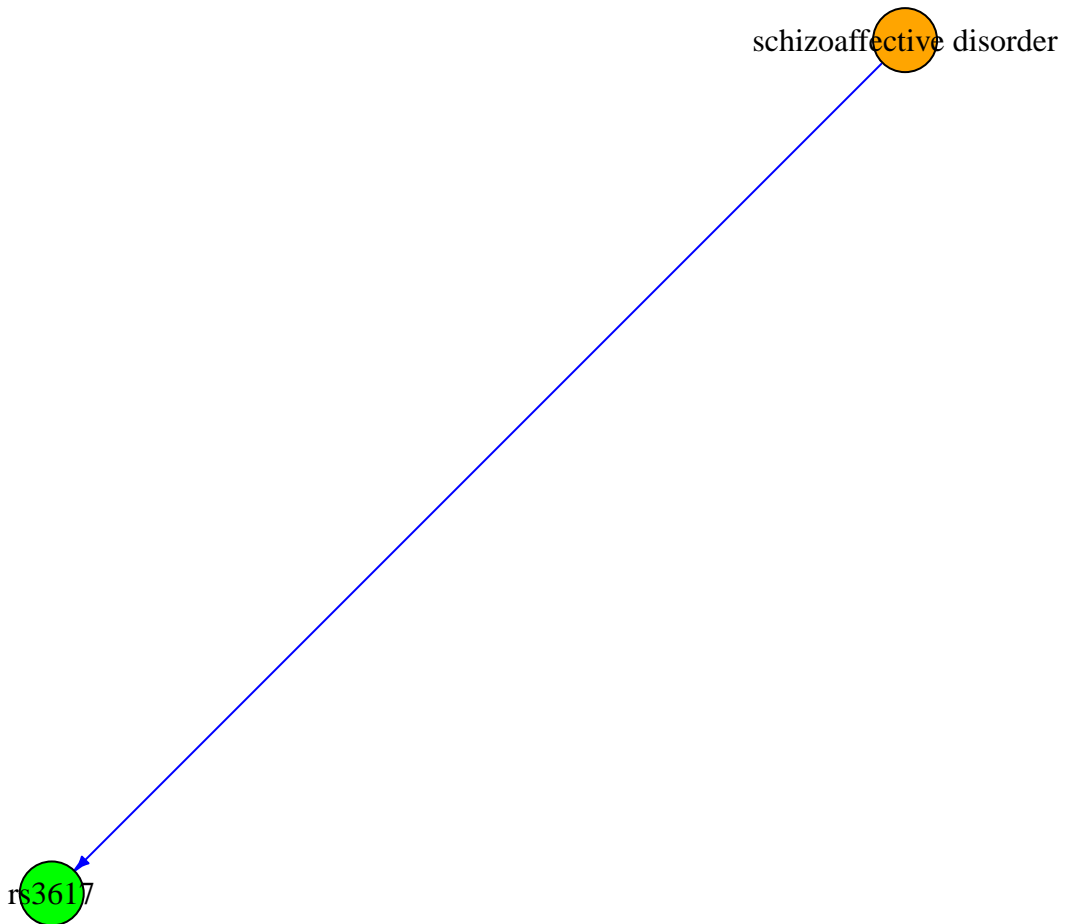

## Variant–Disease Network (openness measurement)

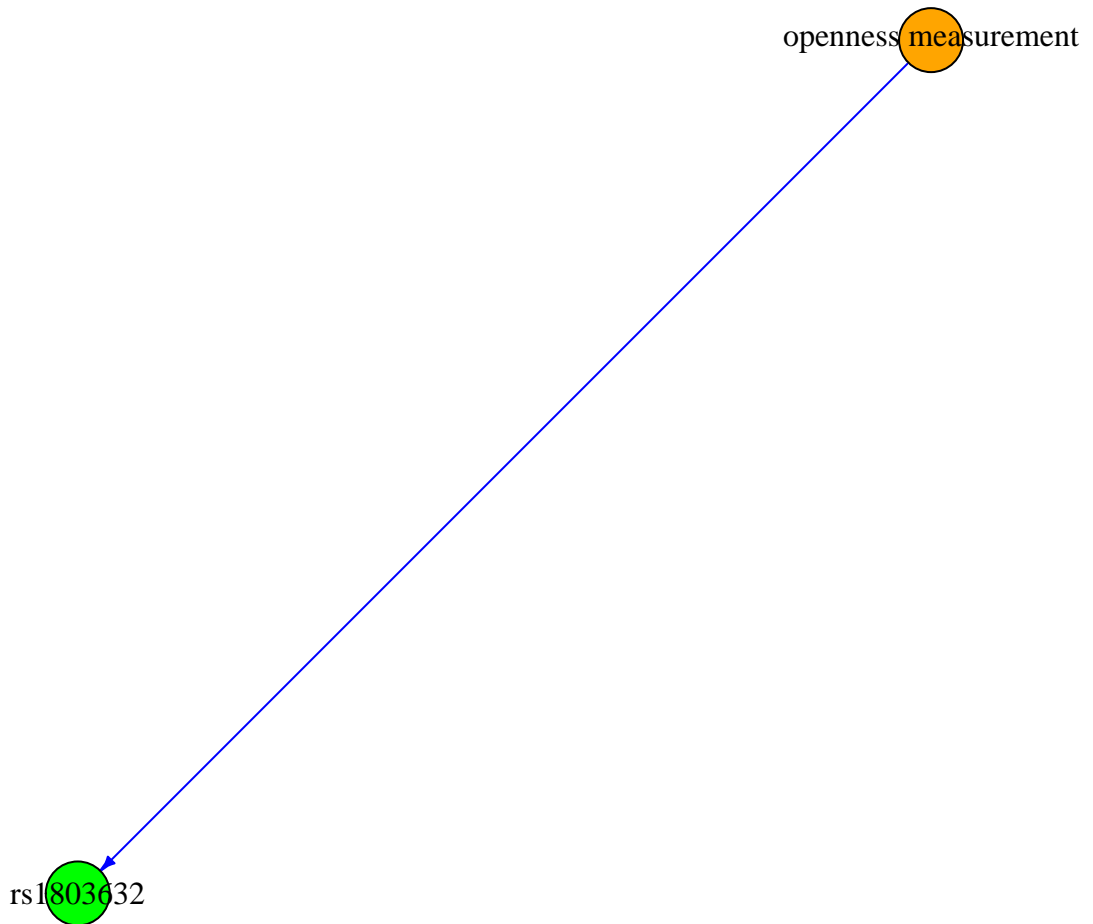



## Variant–Disease Network (alcohol dependence)

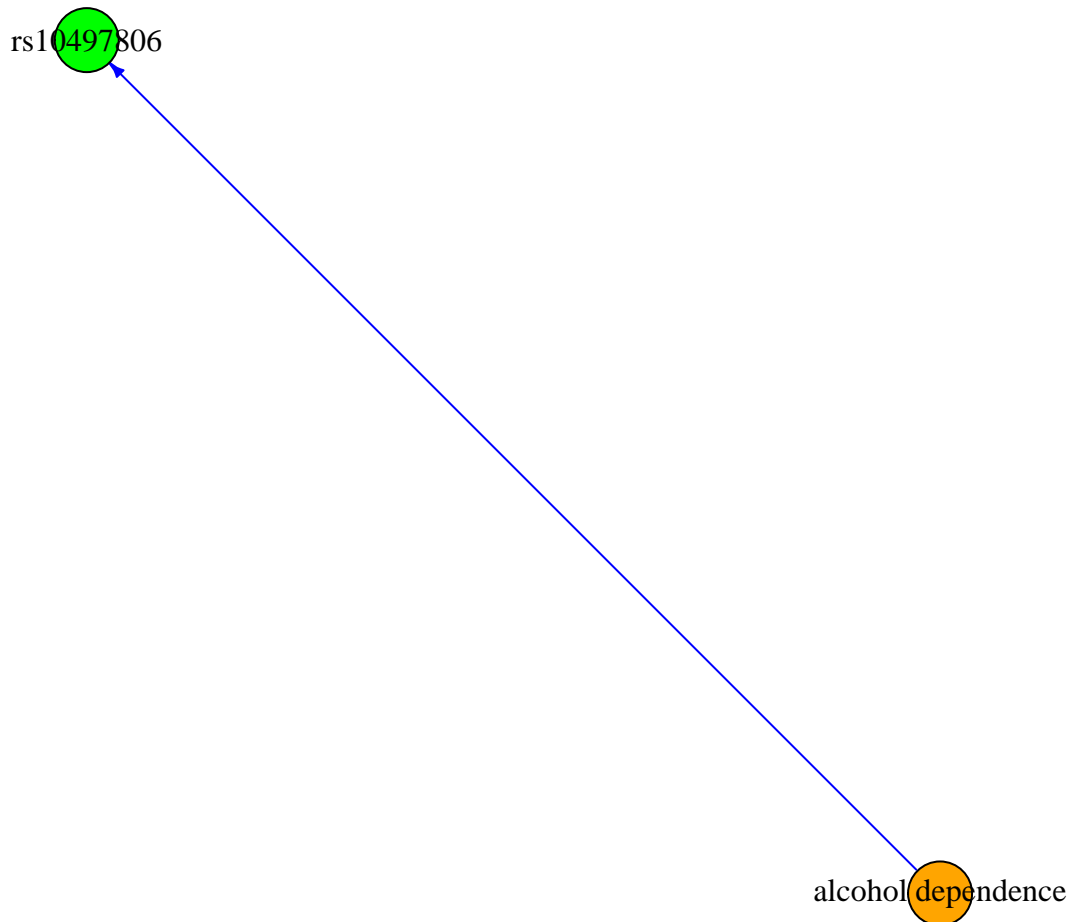

## Variant-Disease Network (brain aneurysm)

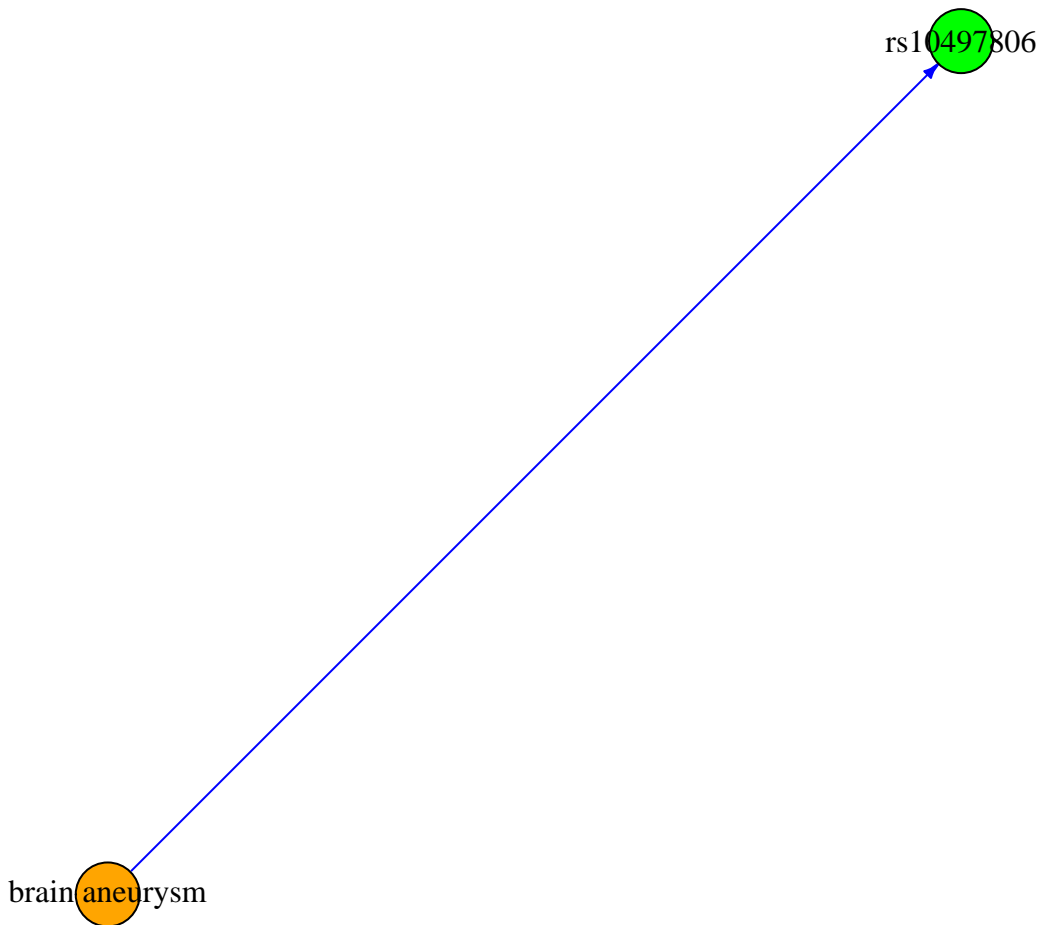

## Variant–Disease Network (ankylosing spondylitis)

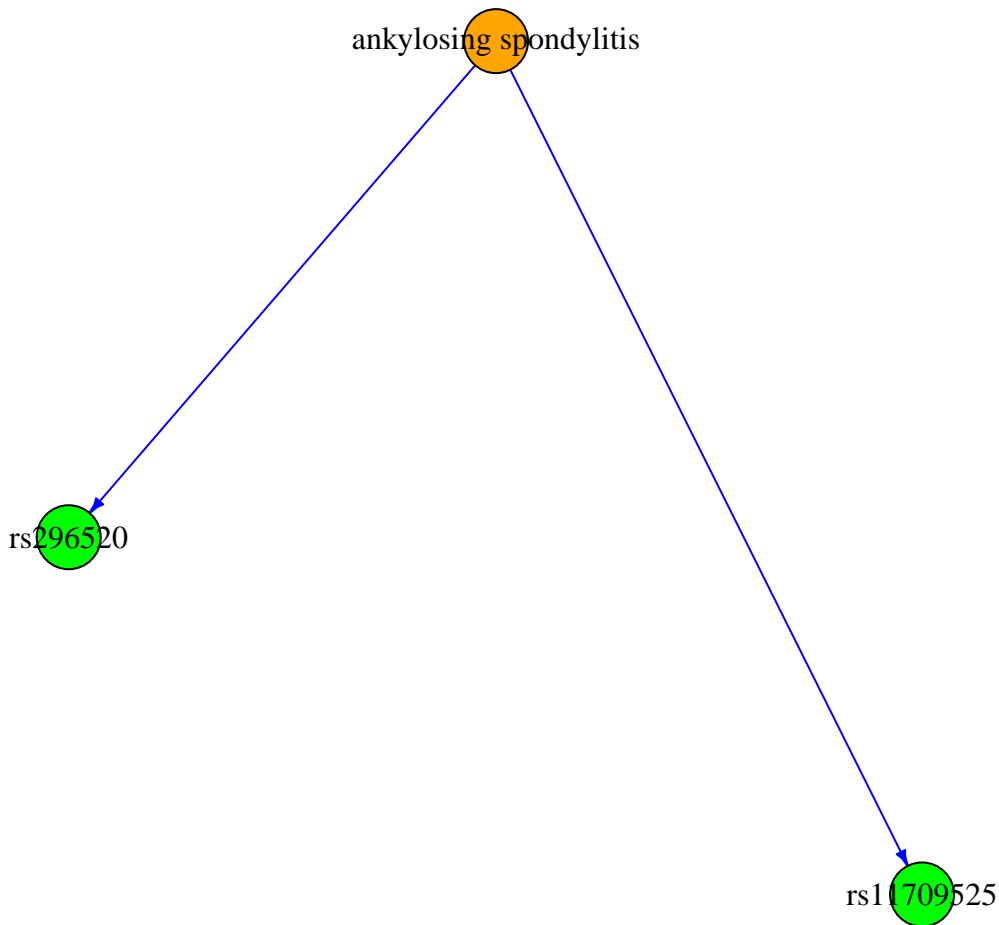

## Variant–Disease Network (celiac disease)

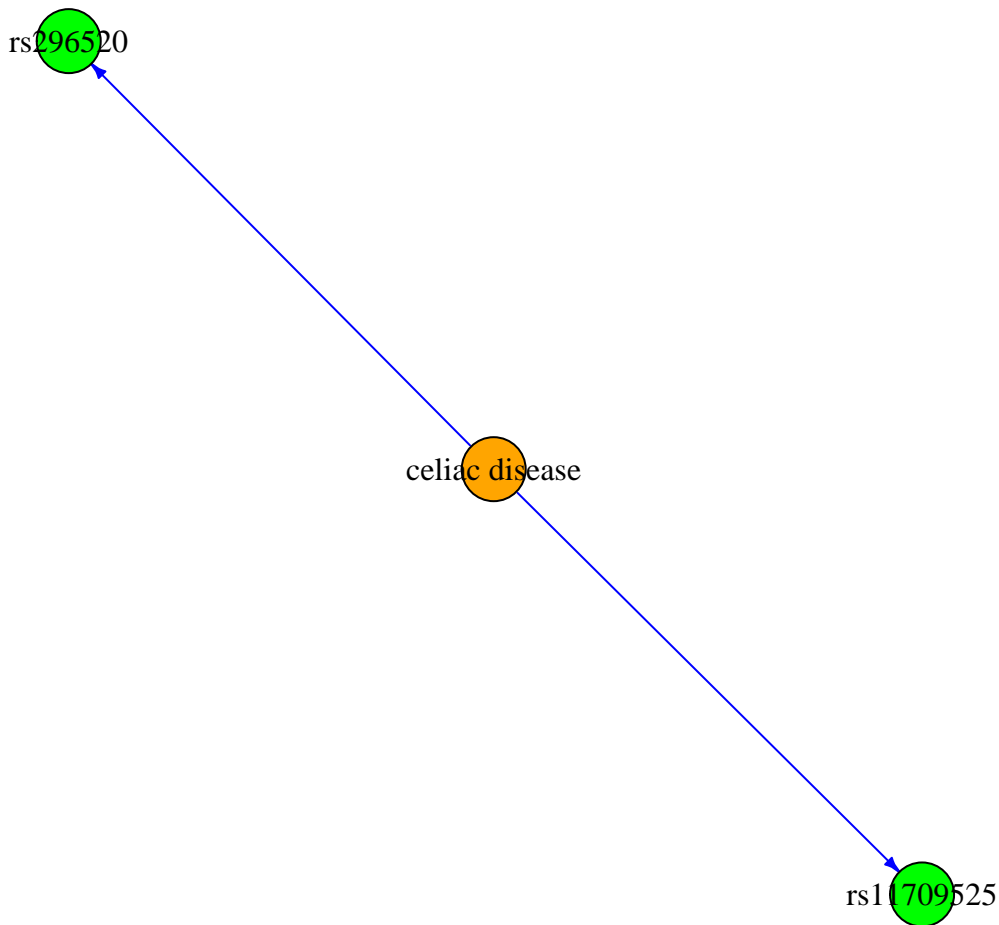

## Variant–Disease Network (estrogen receptor negative breast cancer)

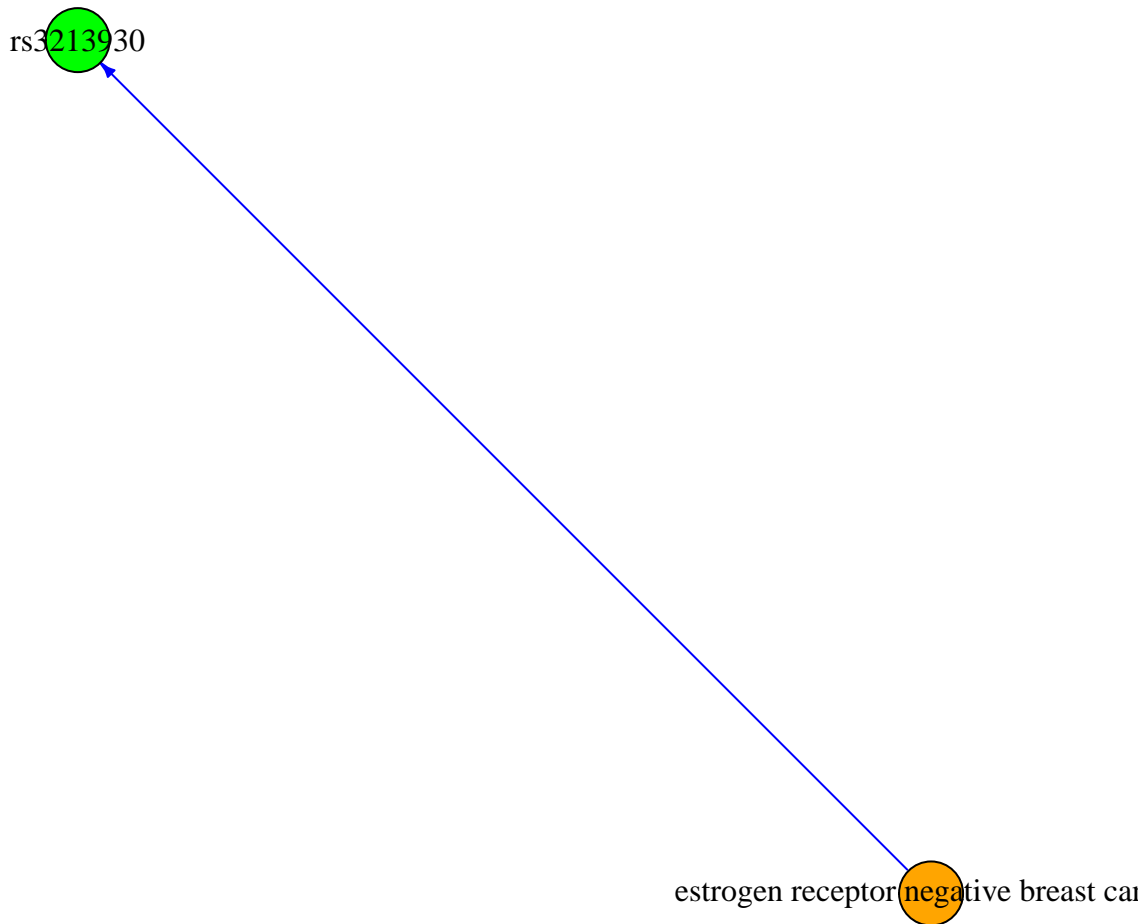

## Variant–Disease Network (lung adenocarcinoma)

lung adenocarcinoma

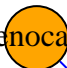

rs3213930

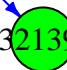

## Variant–Disease Network (ovarian carcinoma)

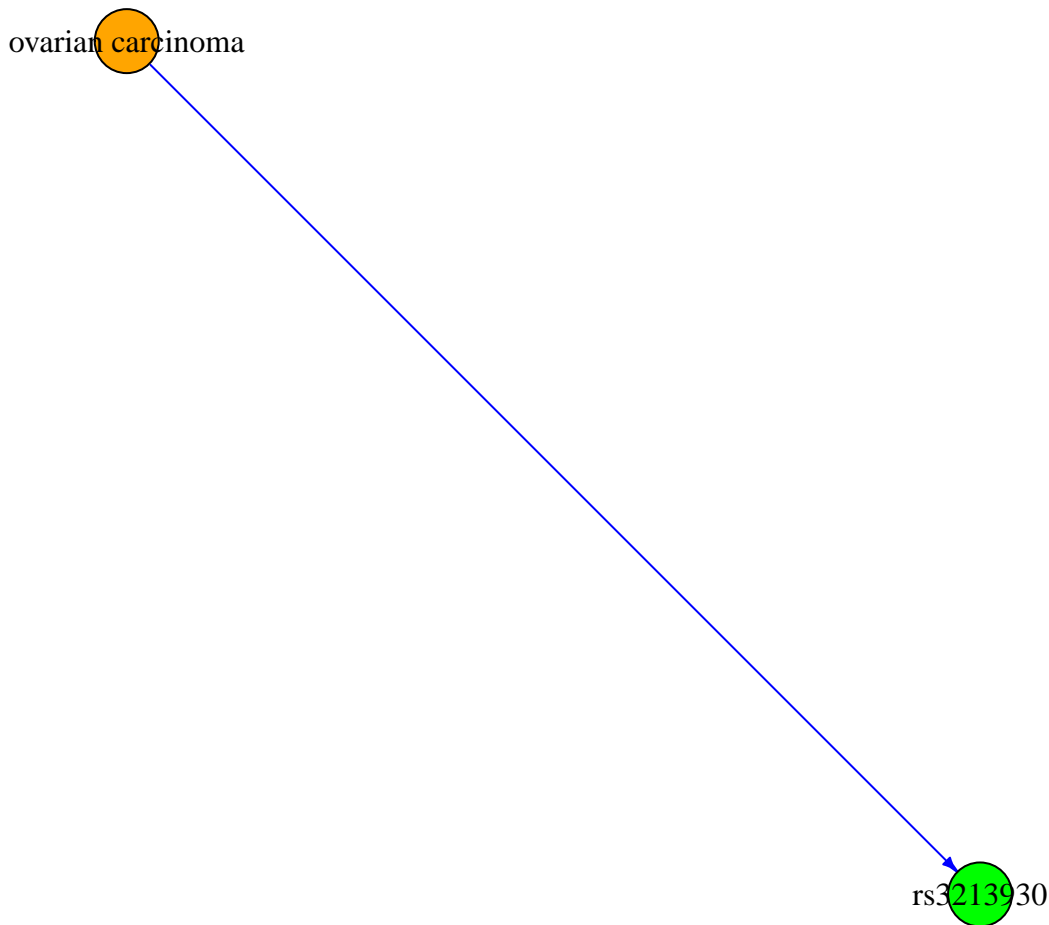

# Variant–Disease Network (ovarian endometrioid carcinoma)

ovarian endometrioid carcinoma

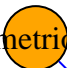

rs3213930

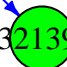



Variant–Disease Network (fasting blood glucose measurement)

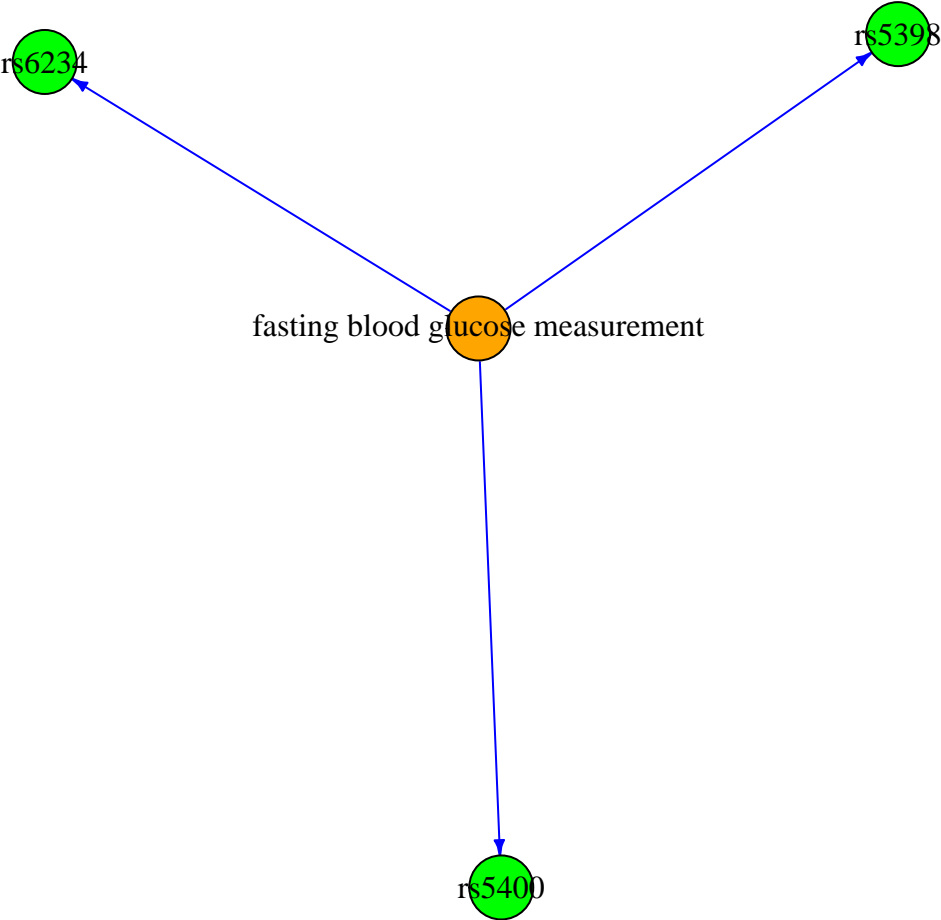

## Variant-Disease Network (HOMA-B)

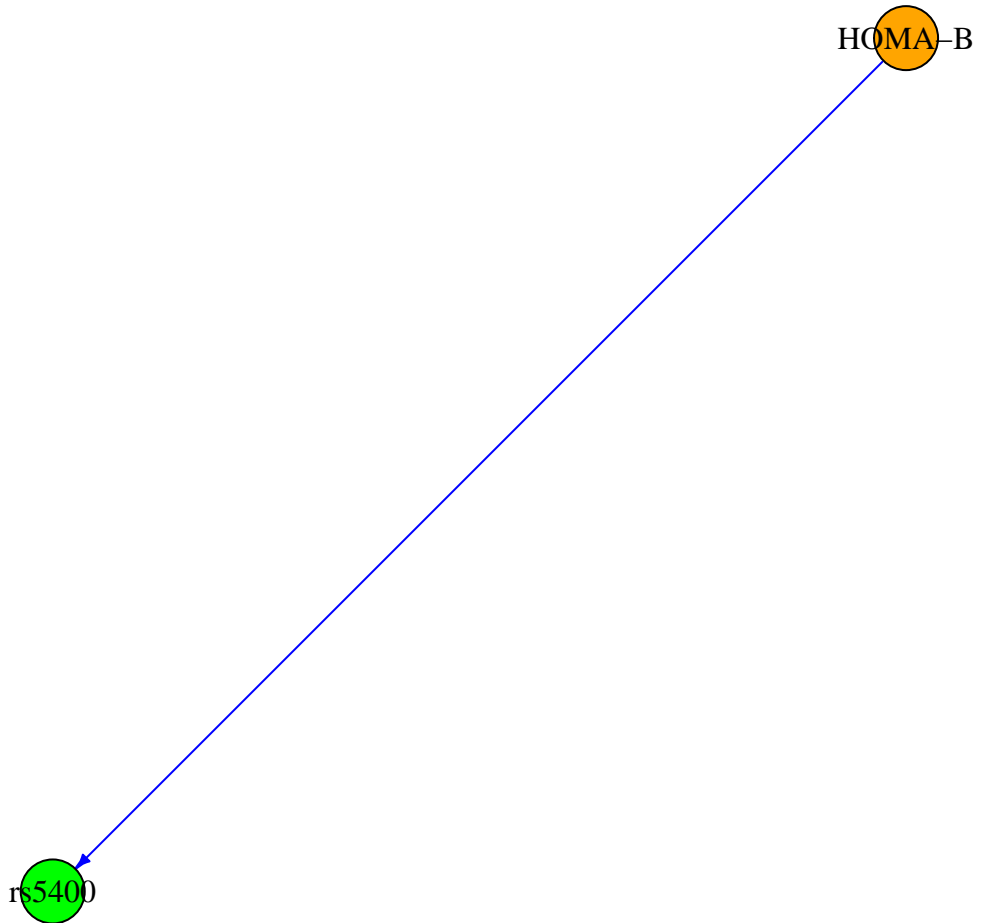

Variant–Disease Network (serum gamma–glutamyl transferase measurement)

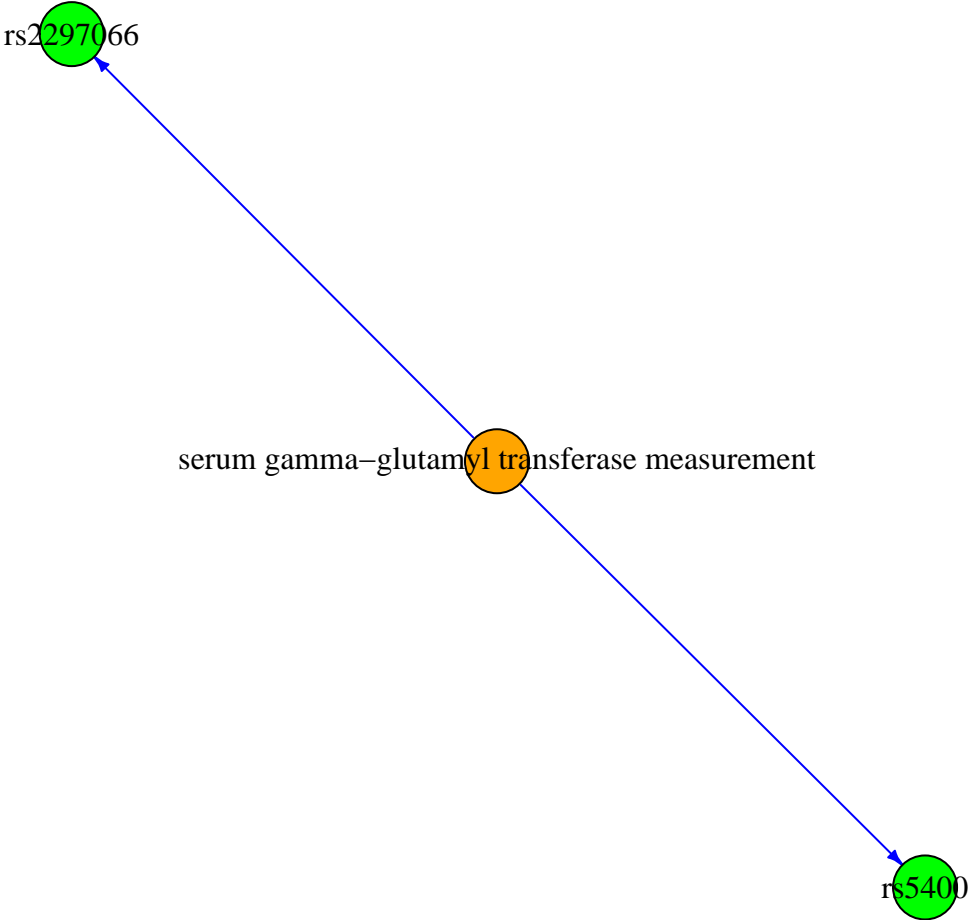

## Variant–Disease Network (glucose measurement)

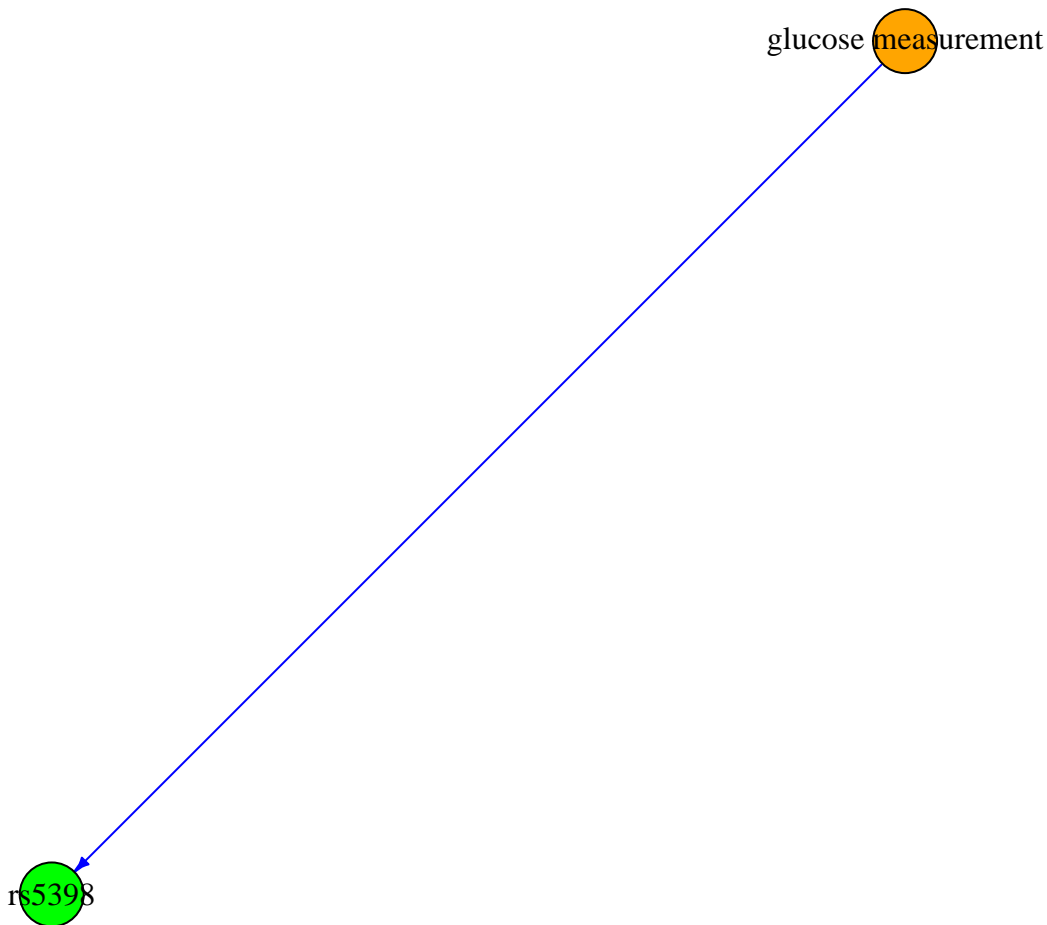

## Variant–Disease Network (response to metformin)

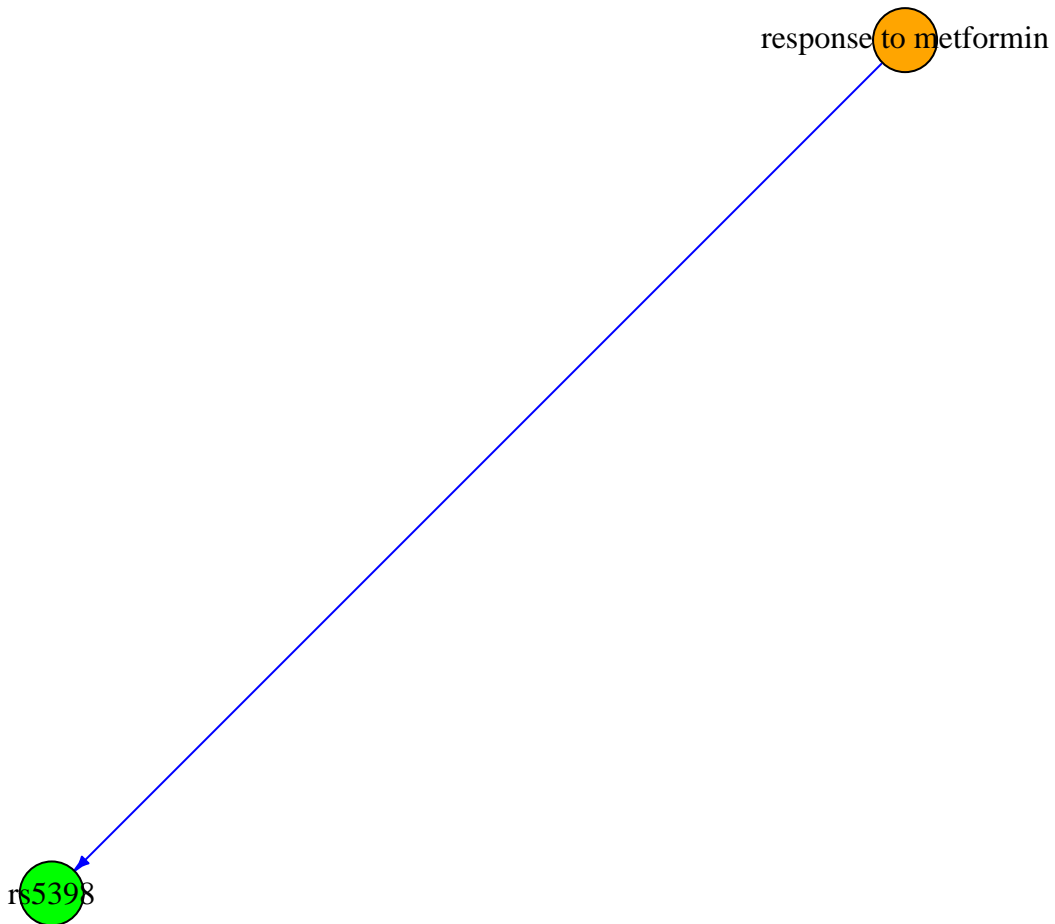

## Variant–Disease Network (seborrheic dermatitis)

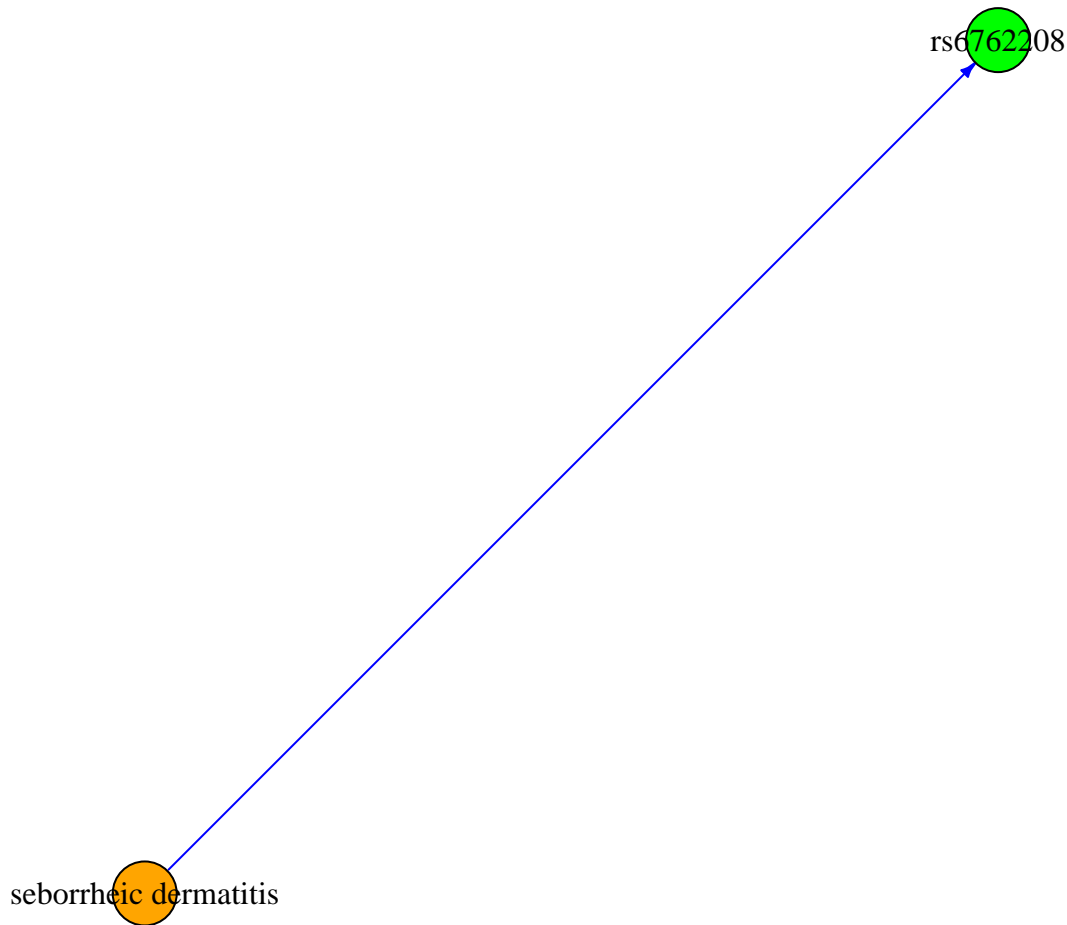

# Variant-Disease Network (attention function measurement)

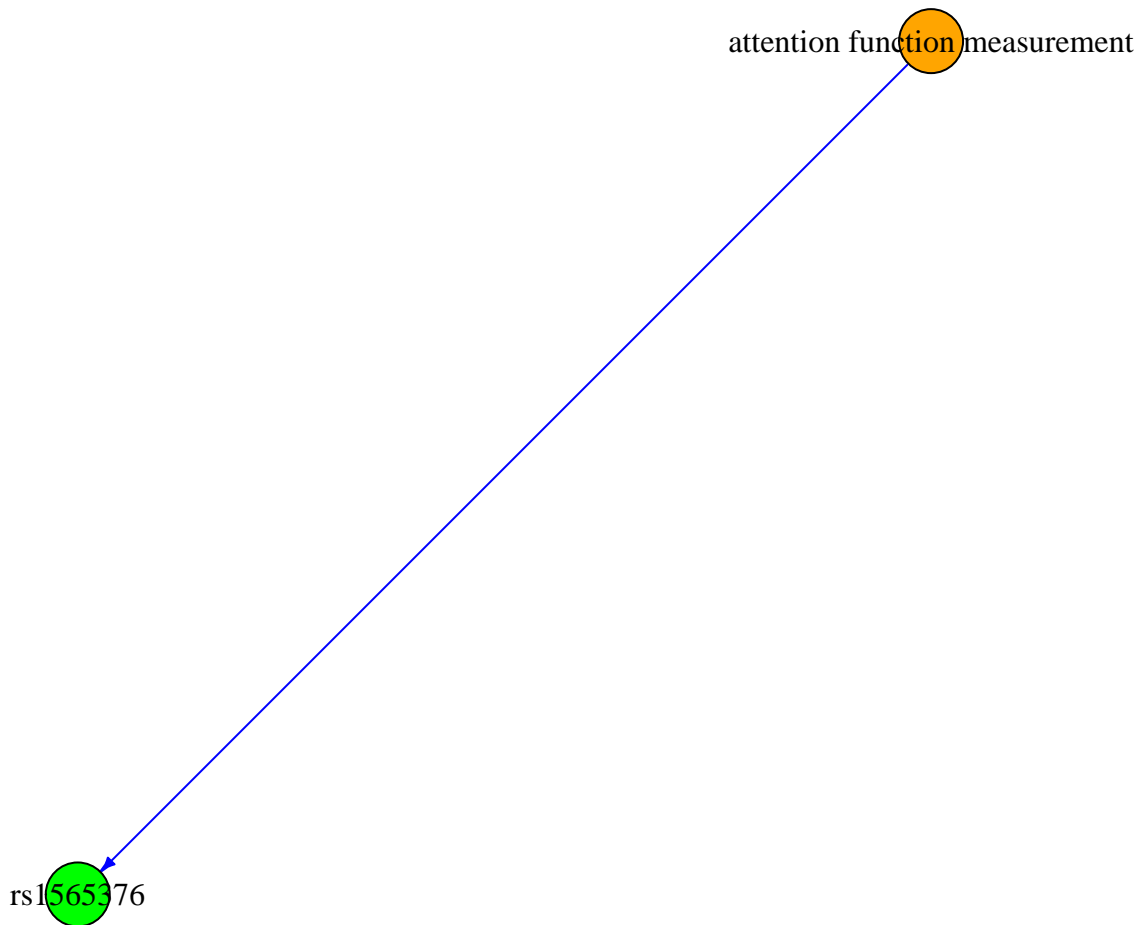

## Variant–Disease Network (longevity)

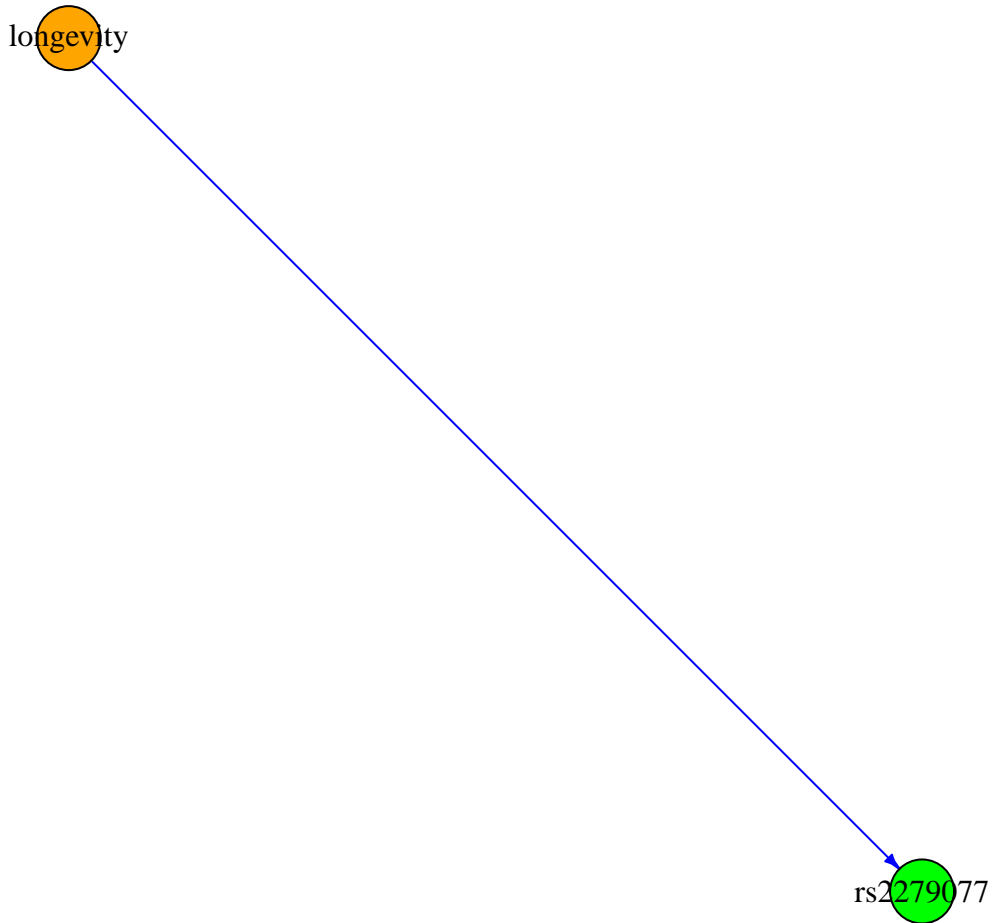



## Variant-Disease Network (autoimmune disease)

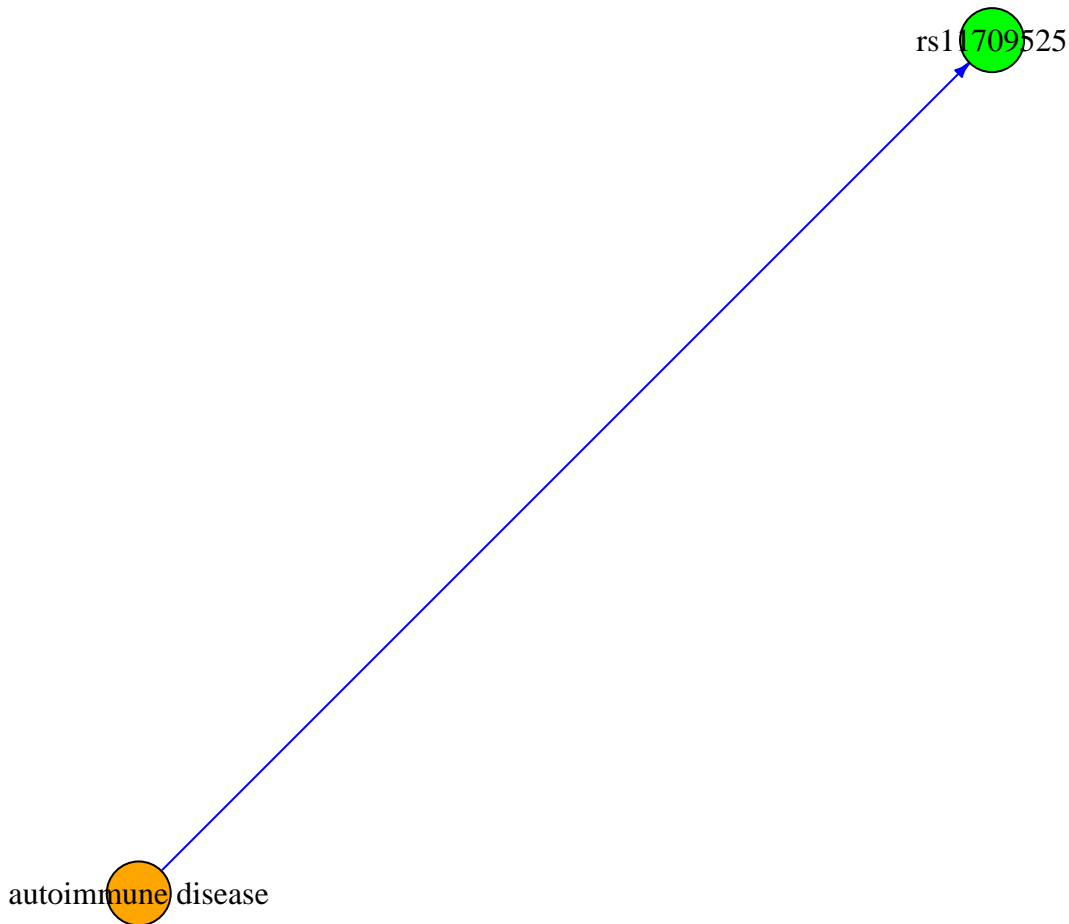

## Variant–Disease Network (autoimmune thyroid disease)

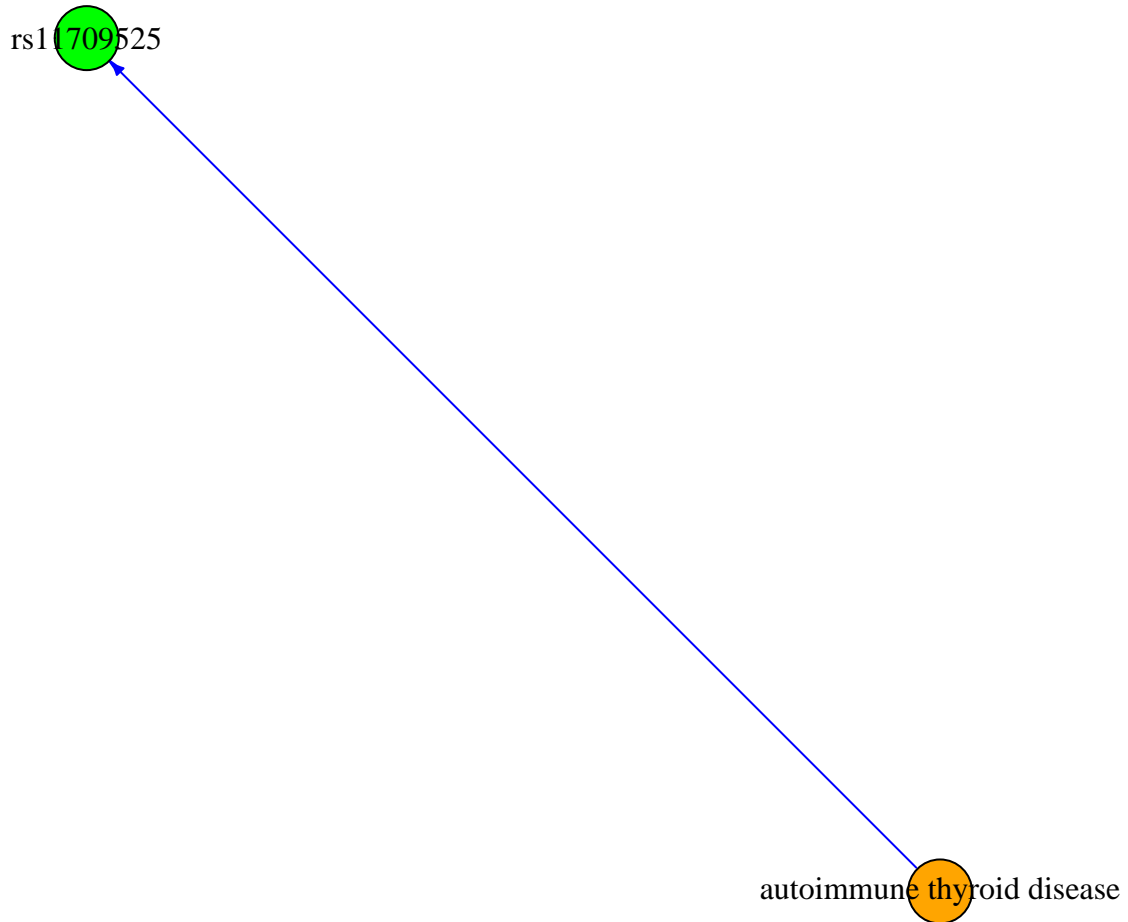

**Variant–Disease Network (chronic childhood arthritis)**

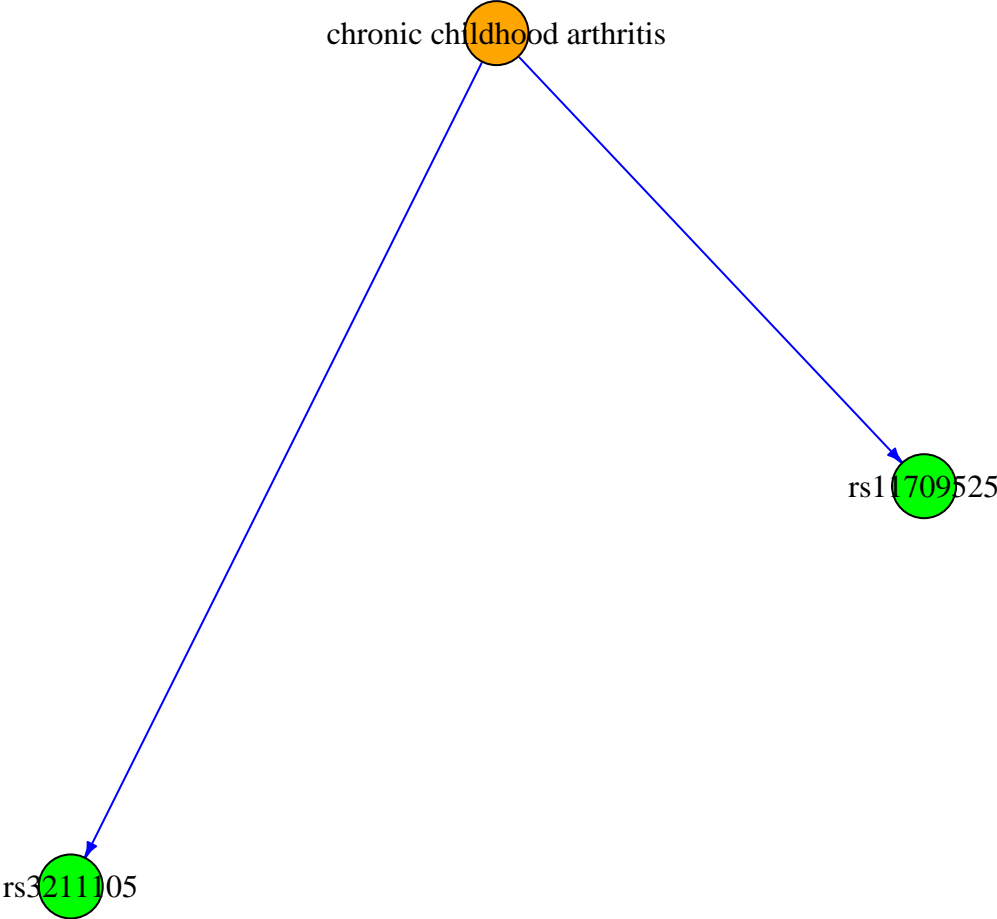

# Variant–Disease Network (common variable immunodeficiency)

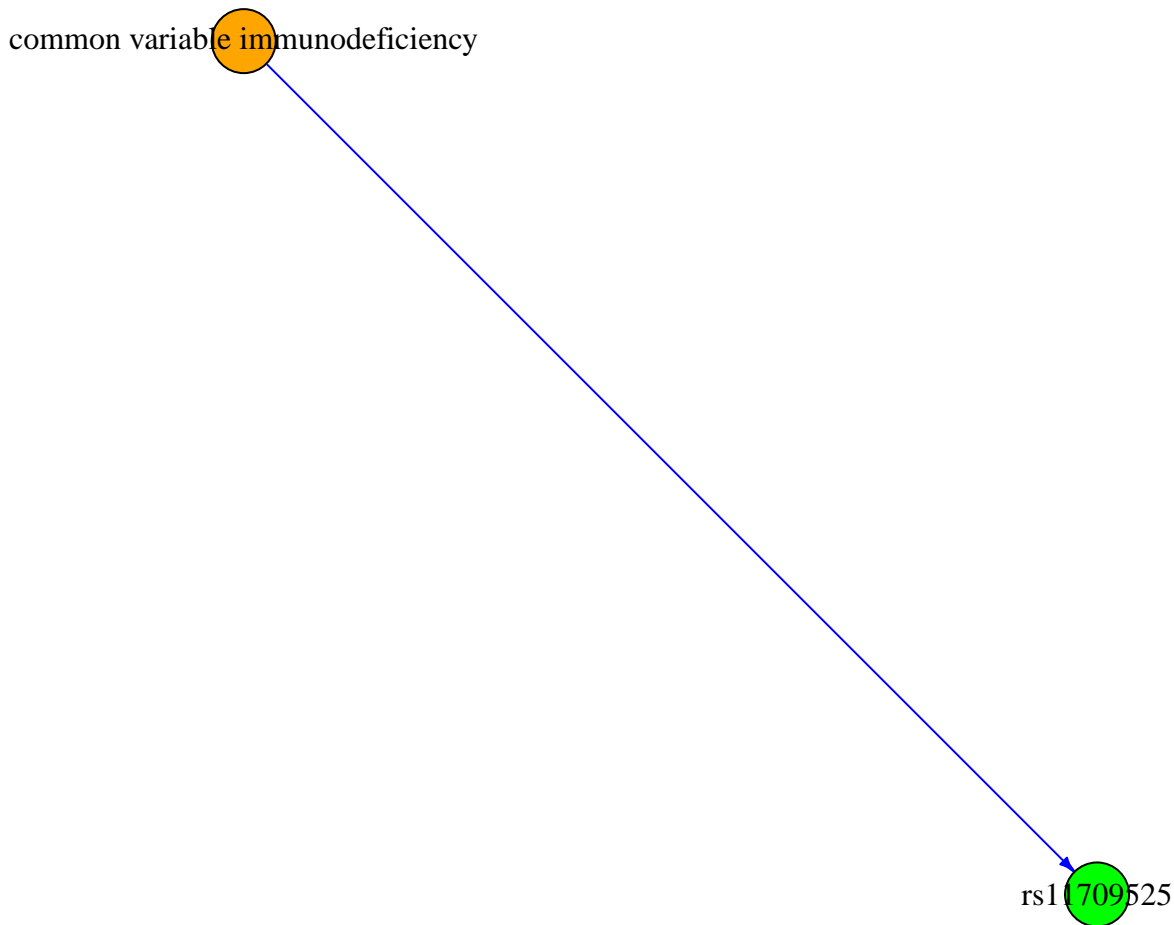

Variant–Disease Network (gut microbiome measurement)

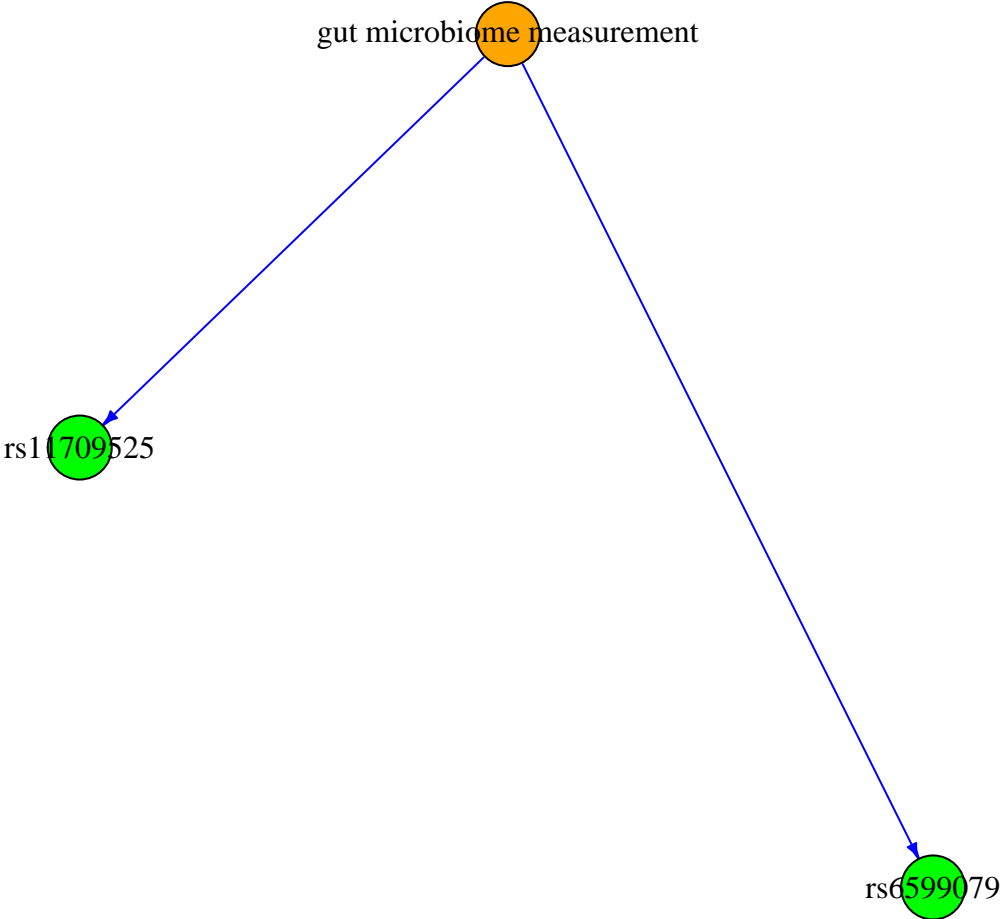

Variant–Disease Network (hepatocyte growth factor–like protein measurement)

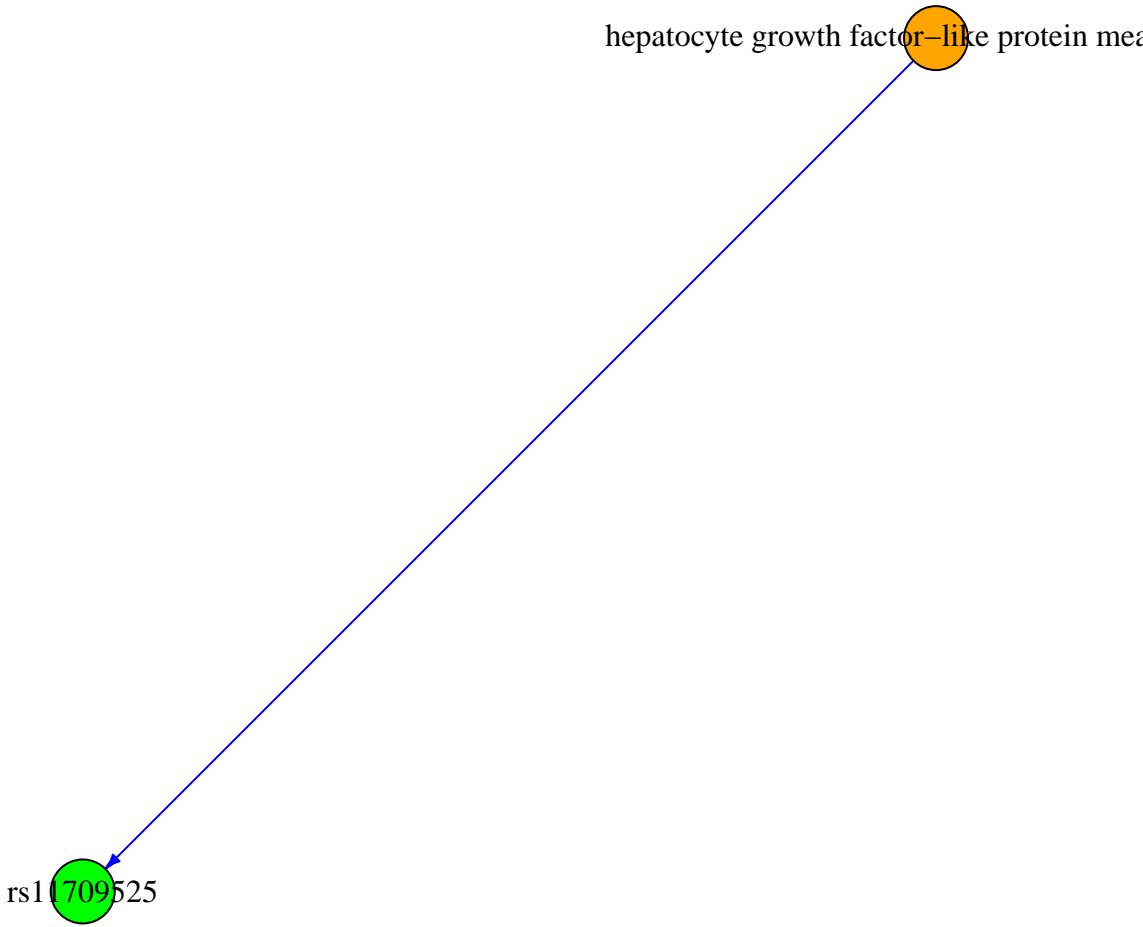

## Variant–Disease Network (self rated health)

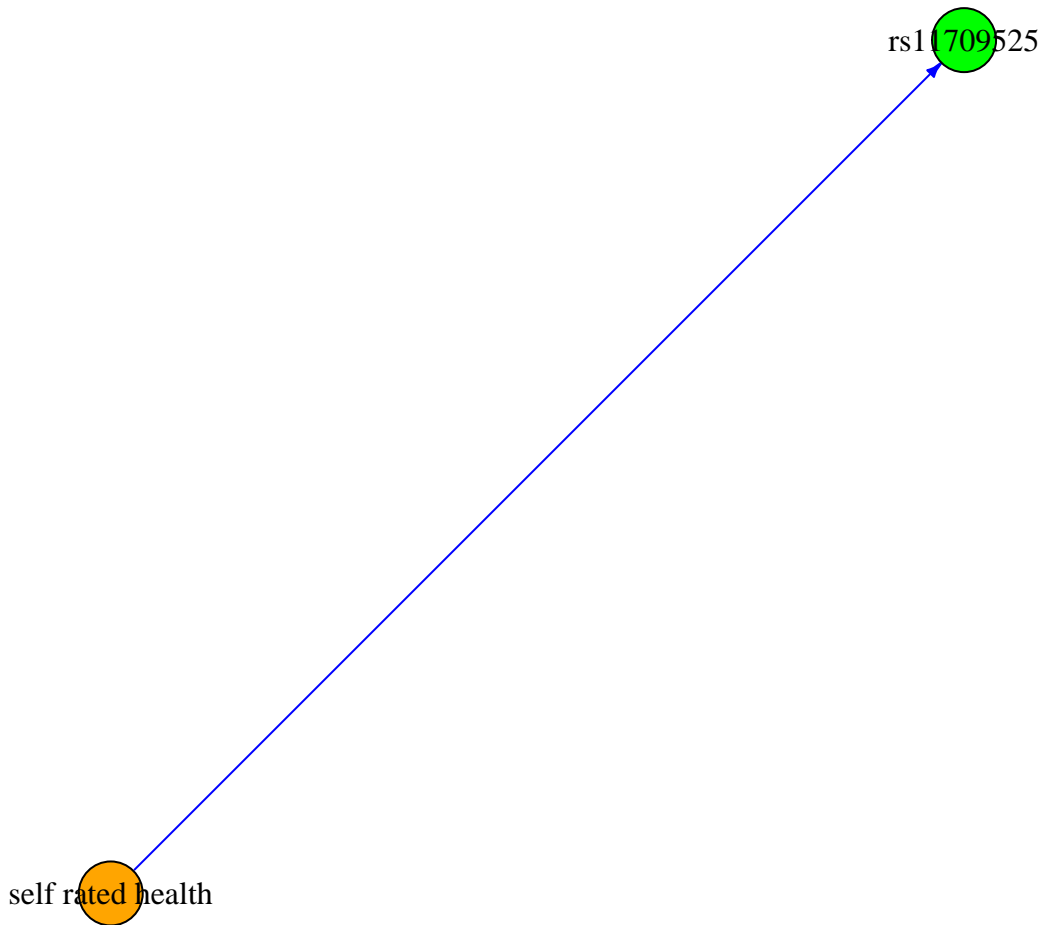

## Variant–Disease Network (physical activity)

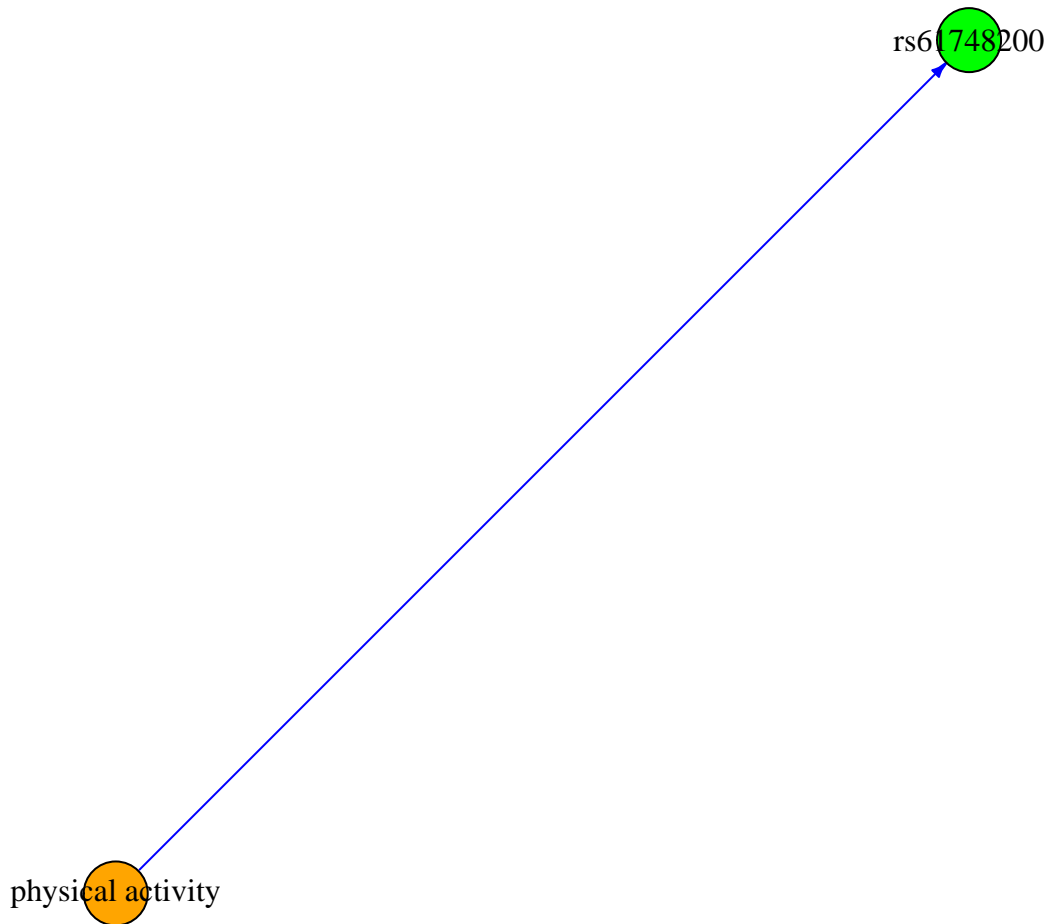



## Variant–Disease Network (exercise test)

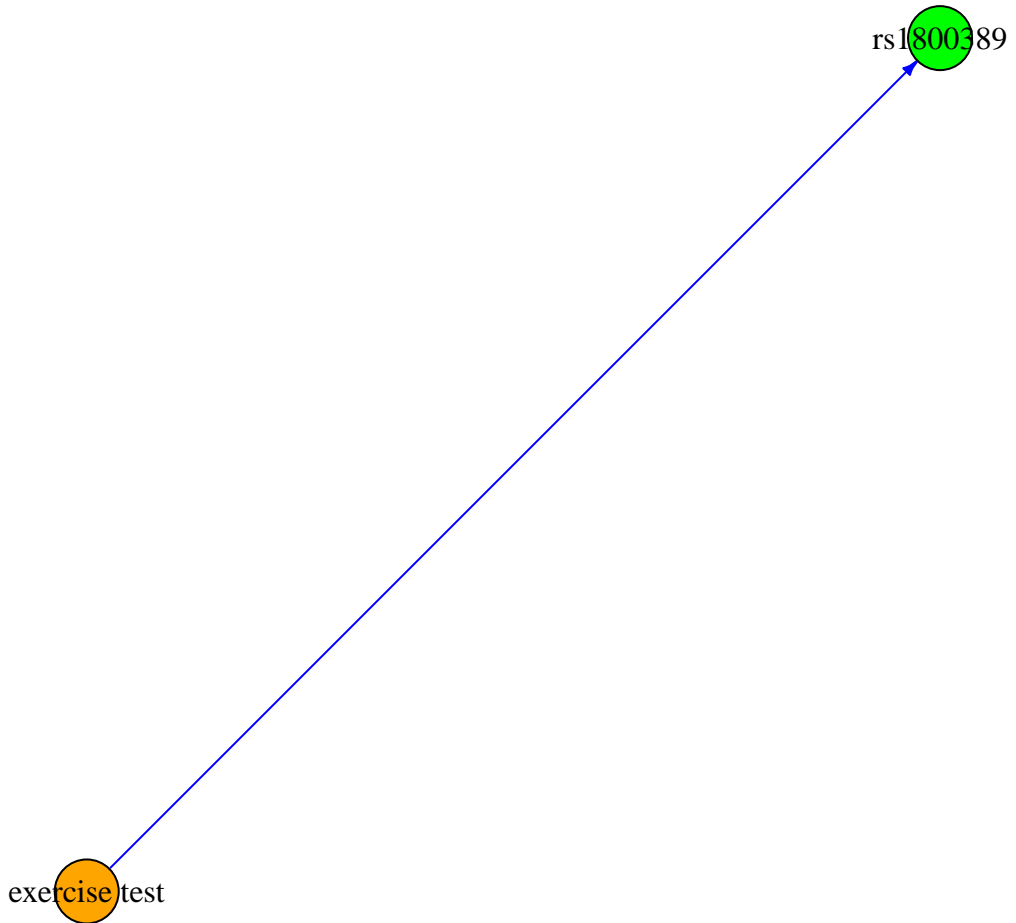

## Variant–Disease Network (response to anticoagulant)

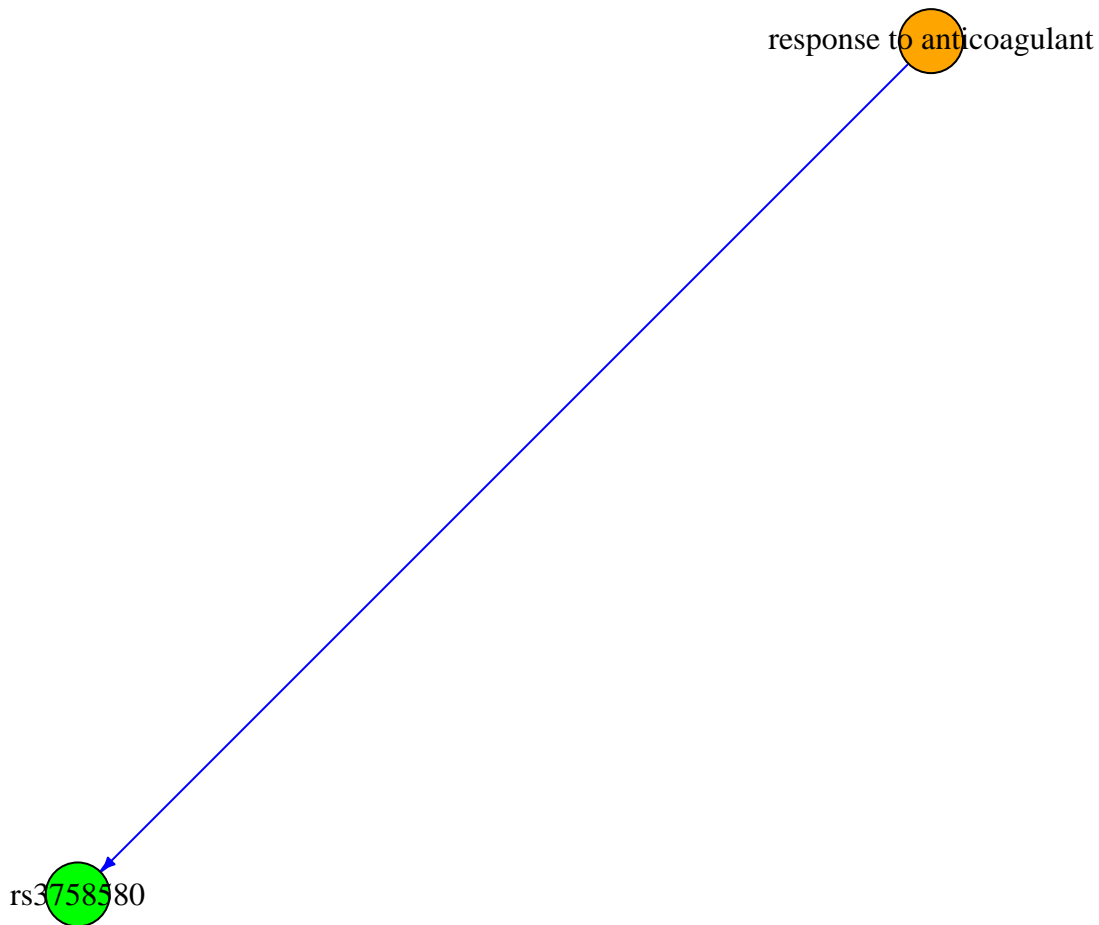

# Variant–Disease Network (response to platelet aggregation inhibitor)

response to platelet aggregation inhibitor

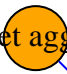

rs3758580

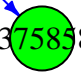

## Variant–Disease Network (insulin measurement)

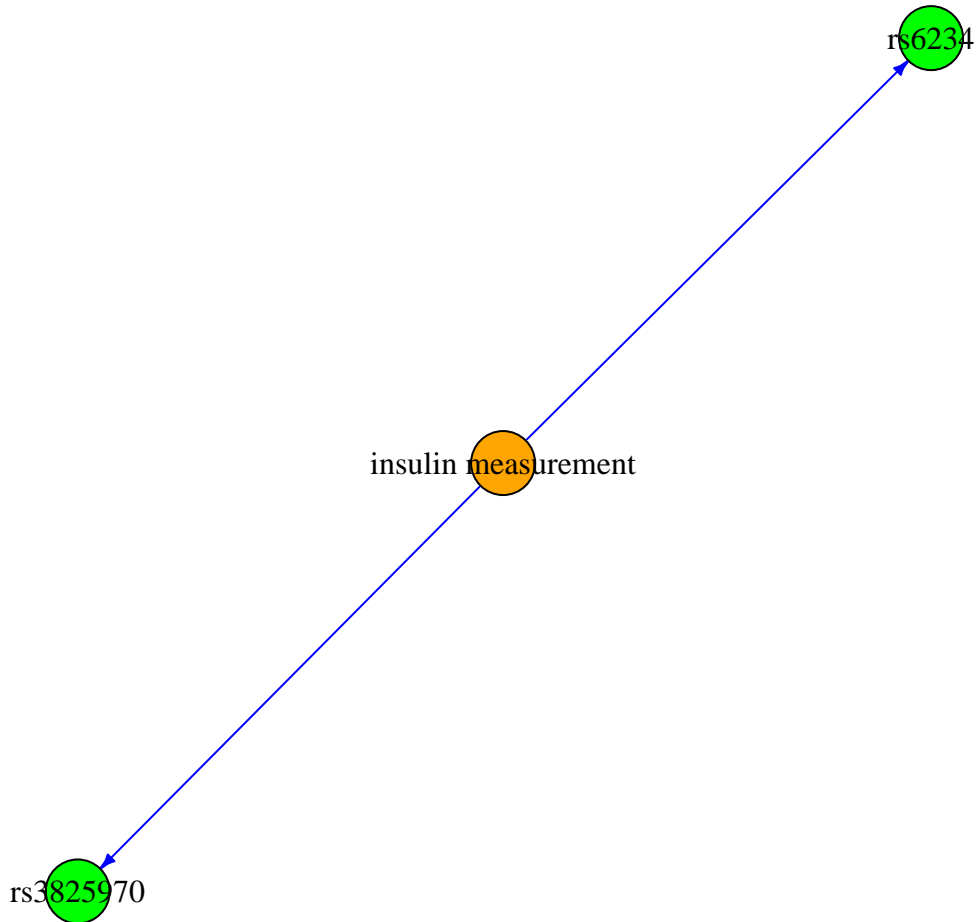

## Variant–Disease Network (age at first birth measurement)

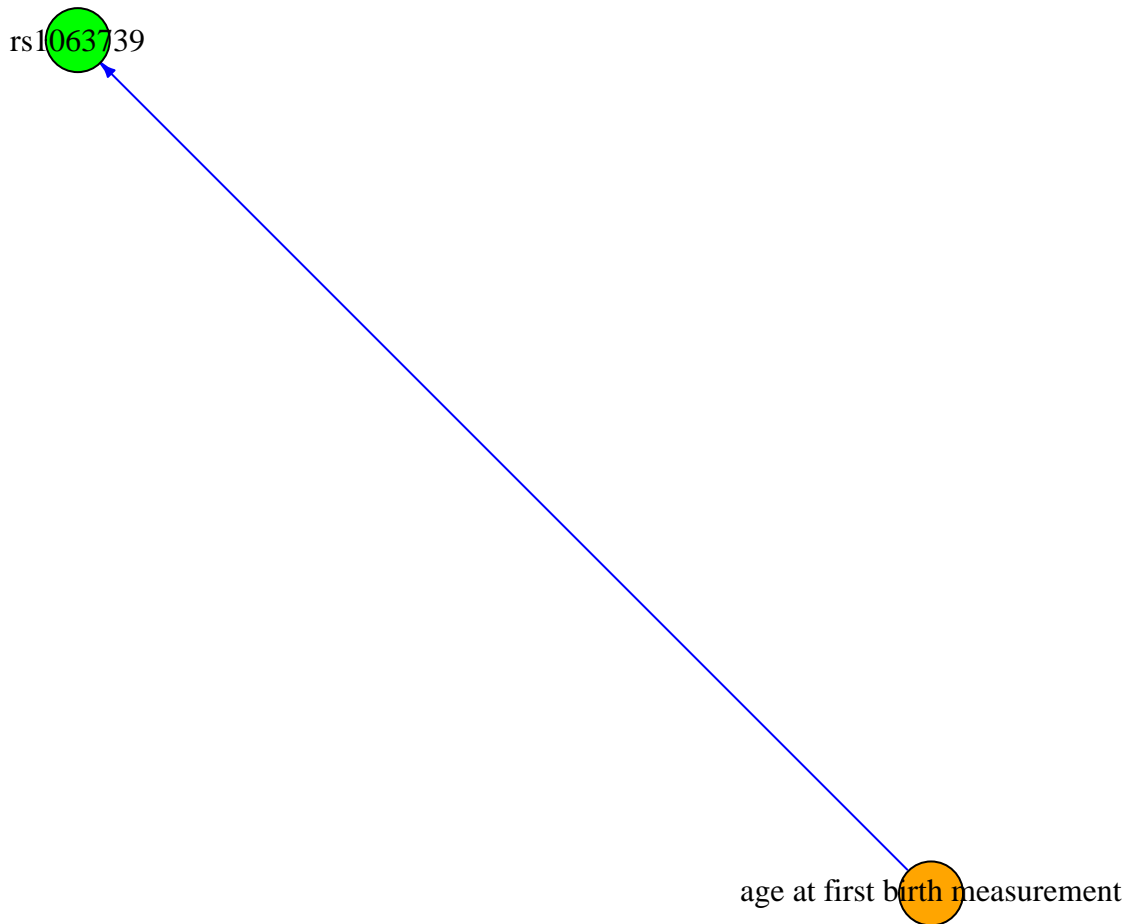

## Variant-Disease Network (albuminuria)

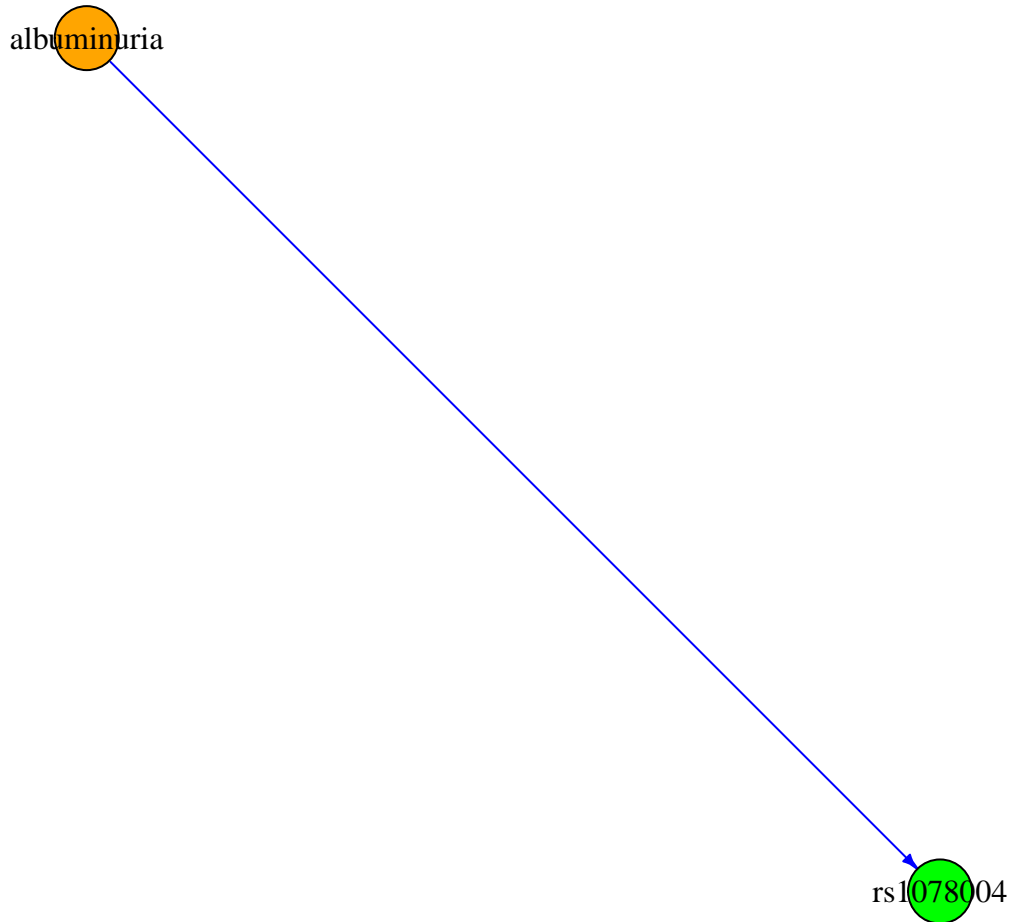

# Variant–Disease Network (blood osmolality measurement)

rs1078004

blood osmolality measurement

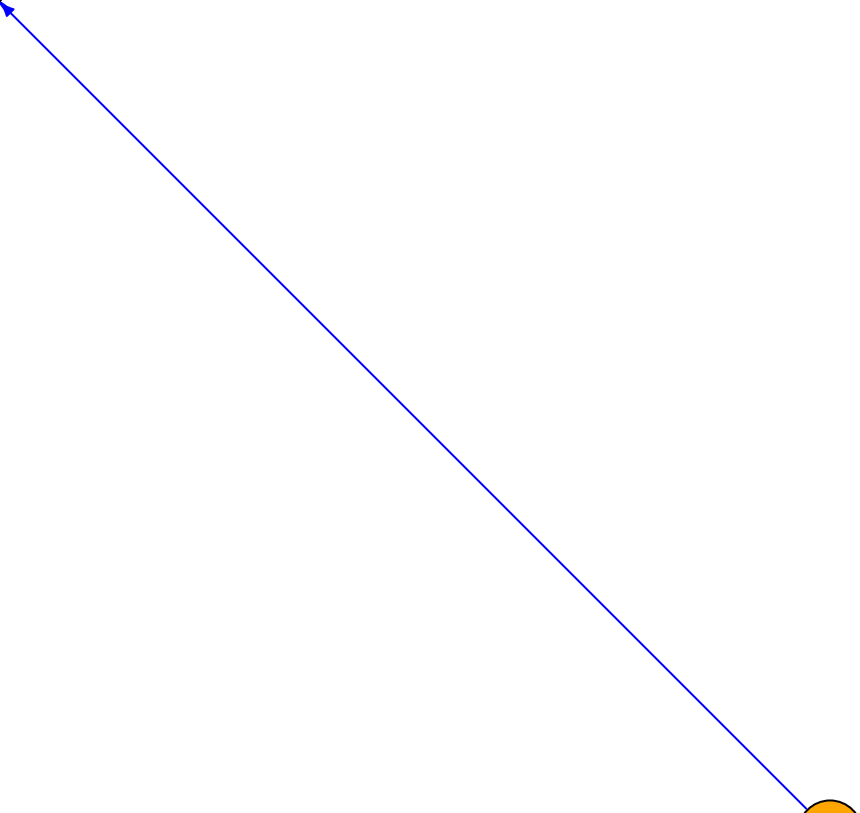

## Variant–Disease Network (myocardial infarction)

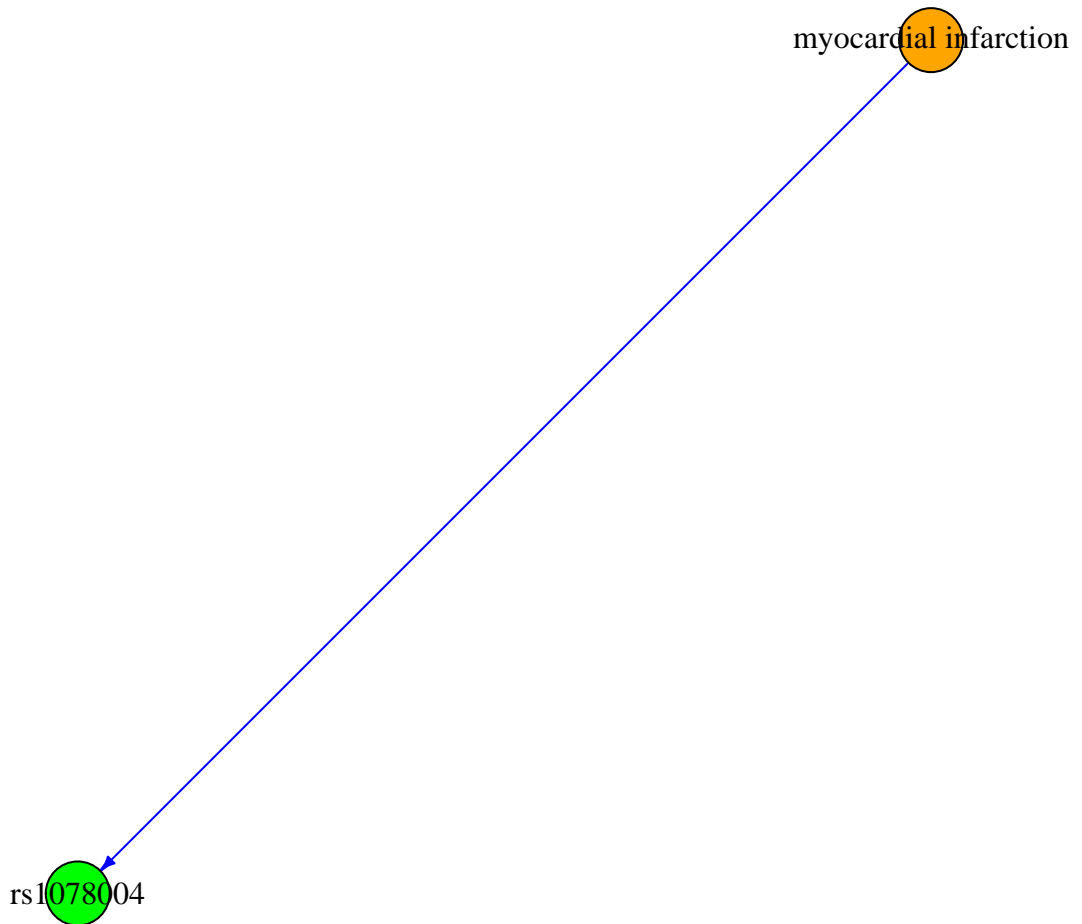



## Variant–Disease Network (body weight)

body weight



```
graph TD; A((body weight)) --> B((rs6876883))
```

The diagram illustrates a directed relationship within a Variant–Disease Network. It features two nodes: an orange circular node at the top left labeled 'body weight' and a green circular node at the bottom right labeled 'rs6876883'. A blue arrow points from the 'body weight' node to the 'rs6876883' node, indicating a directed association or causal link between the trait and the genetic variant.

rs6876883

## Variant–Disease Network (acylcarnitine measurement)

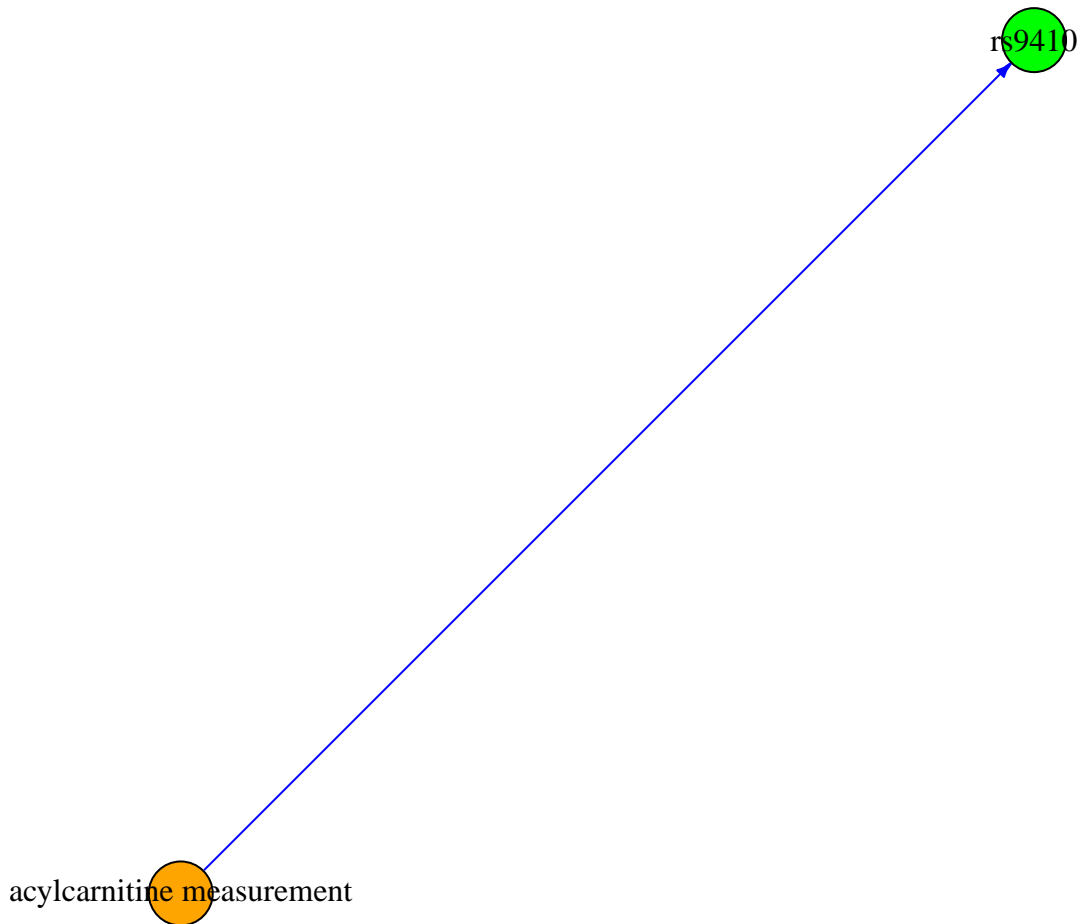

# Variant–Disease Network (peptidyl–prolyl cis–trans isomerase D measurement)

rs94110

peptidyl–prolyl cis–trans isomerase D measurement



**Variant–Disease Network (chronic hepatitis C infection)**

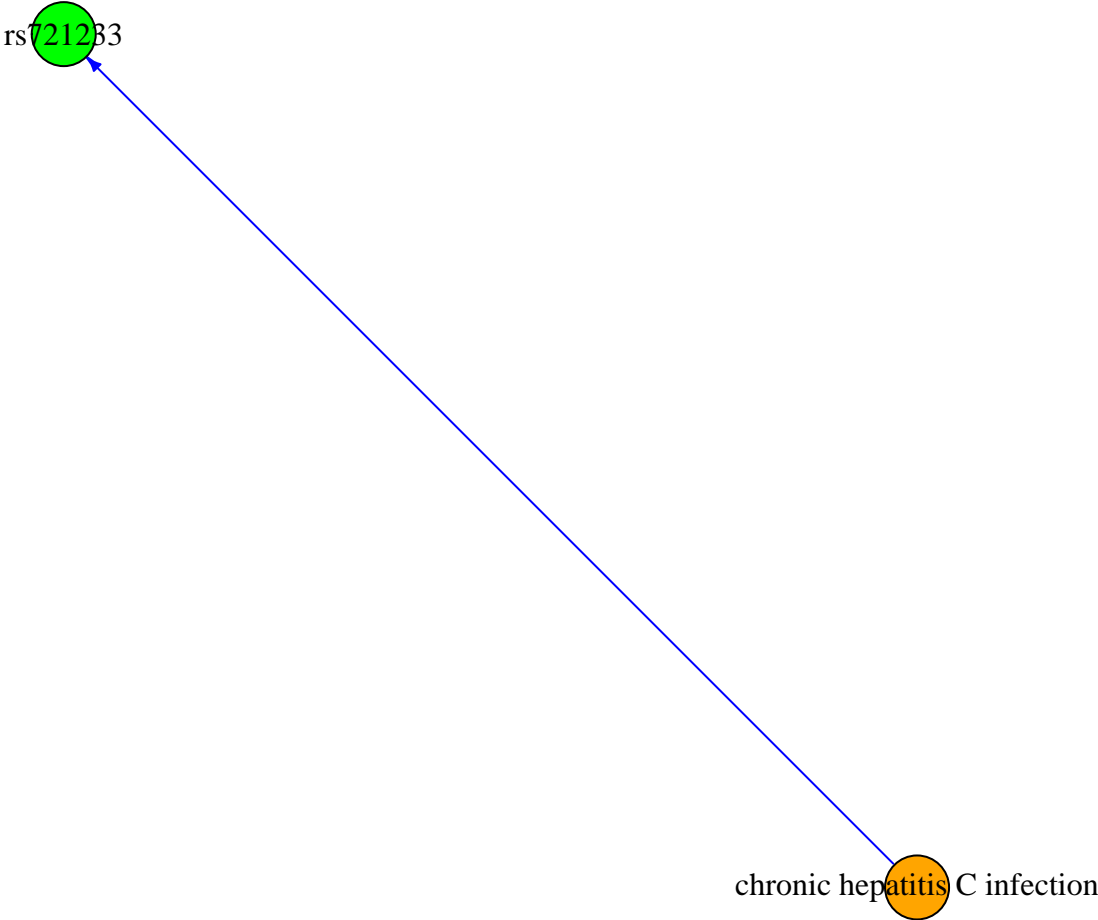

## Variant-Disease Network (vital capacity)

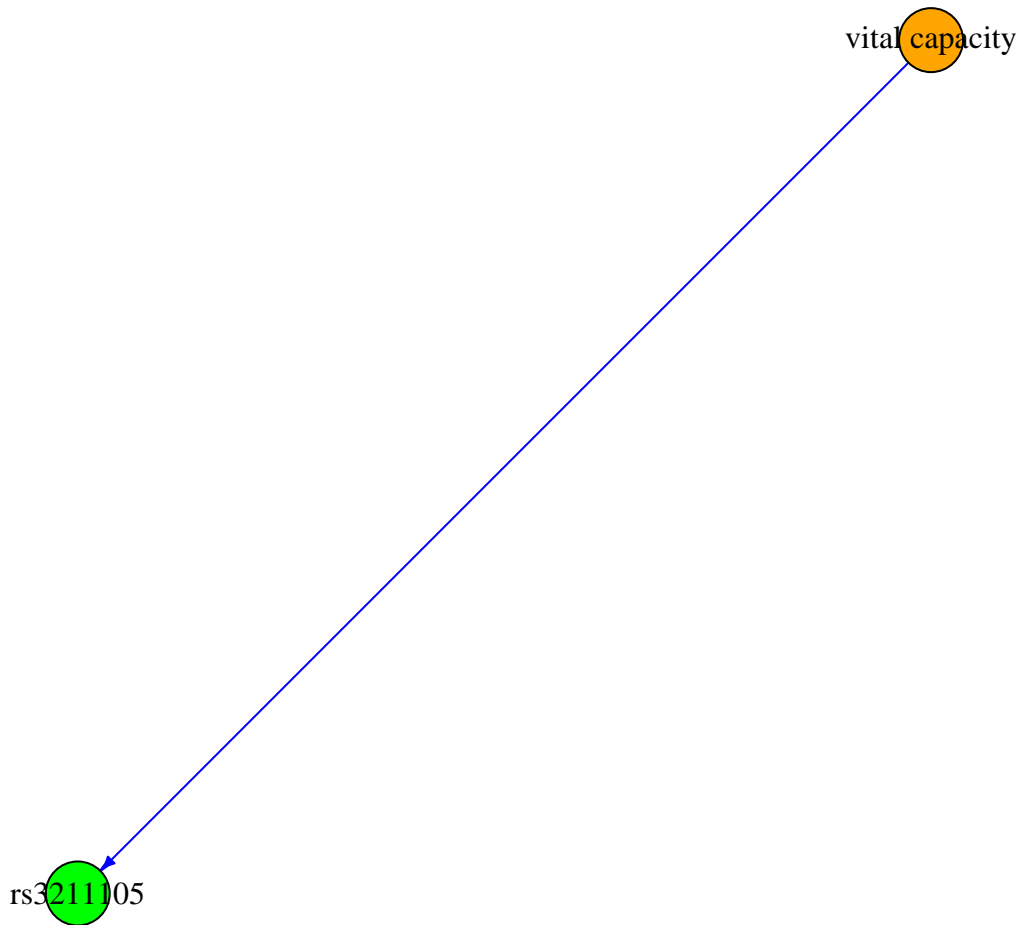

Variant–Disease Network (taxonomic microbiome measurement)

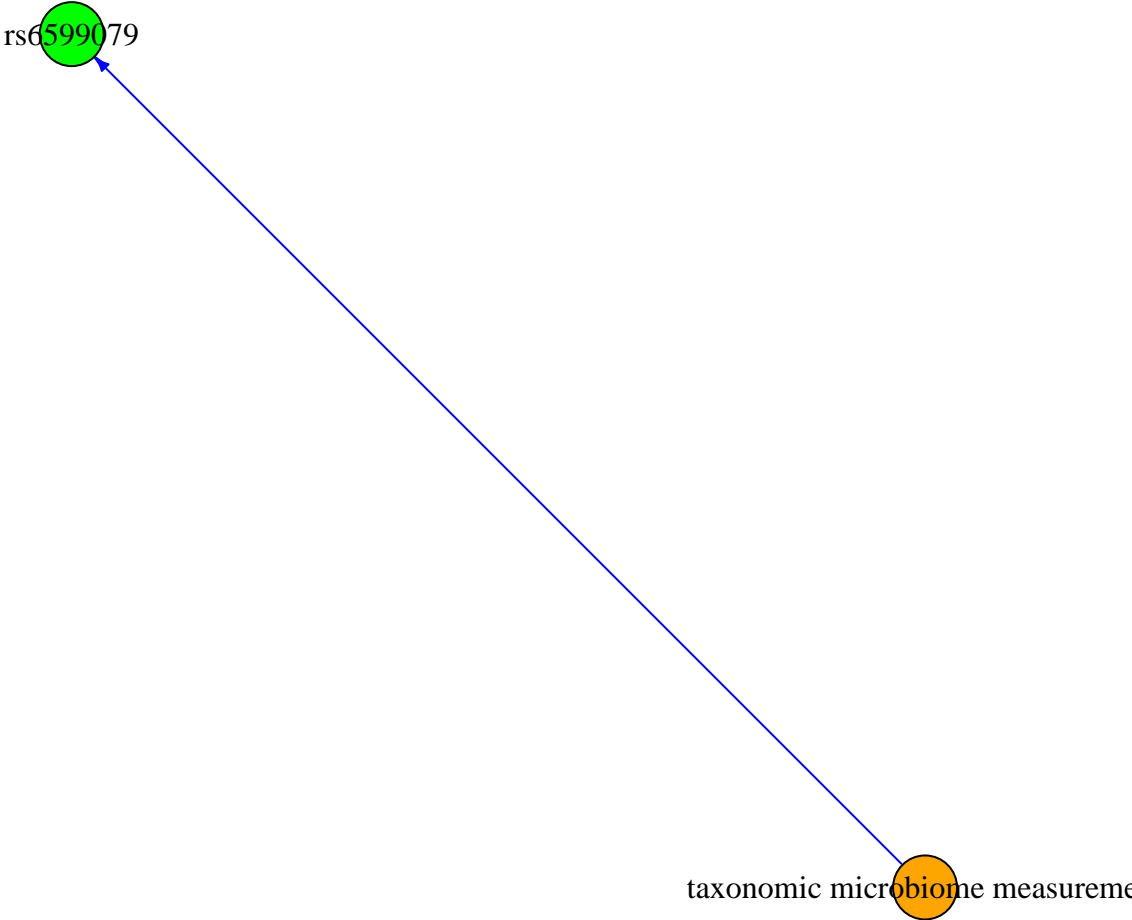

# Variant–Disease Network (fibroblast growth factor basic measurement)

fibroblast growth factor basic measurement

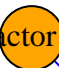

rs2004649

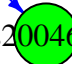

# Variant–Disease Network (beta–nerve growth factor measurement)

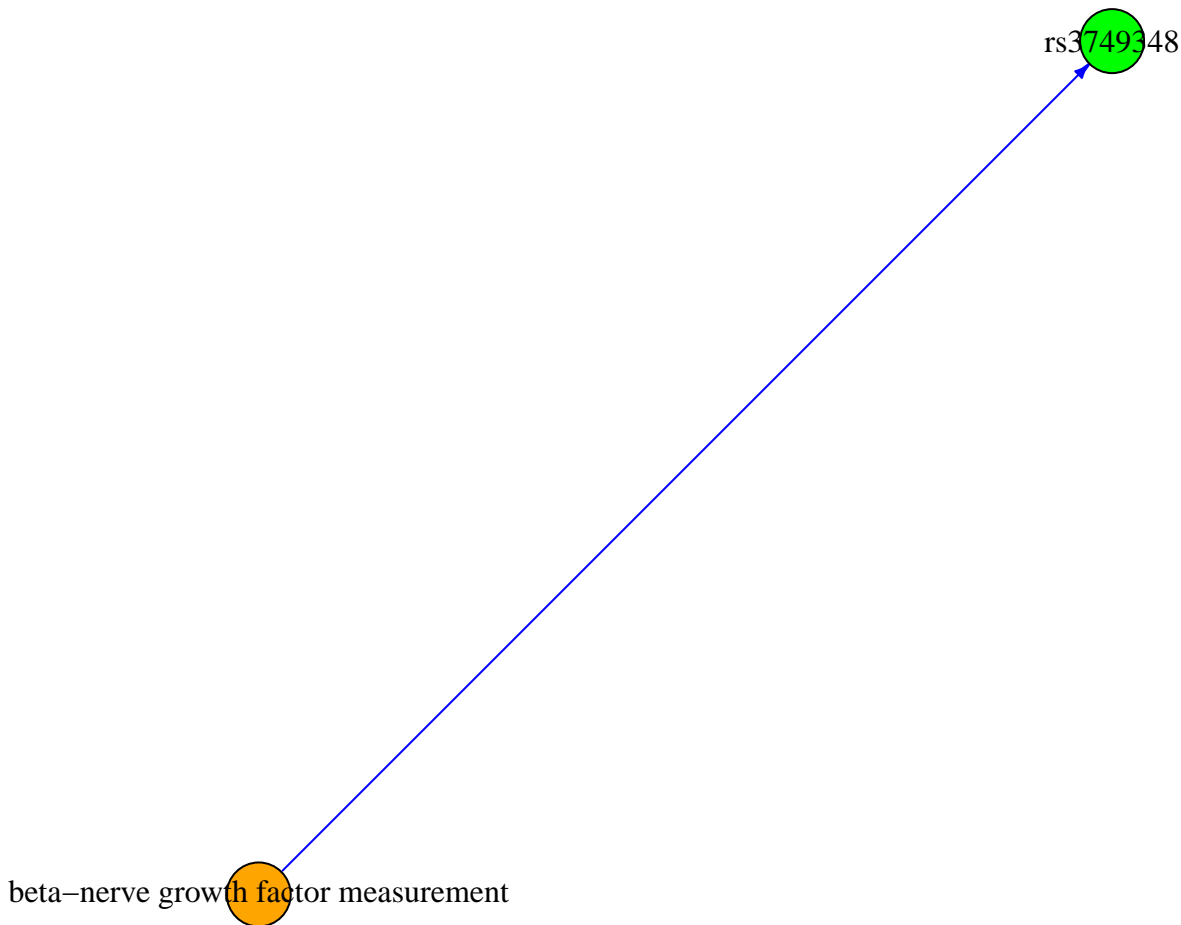



## Variant–Disease Network (response to drug)

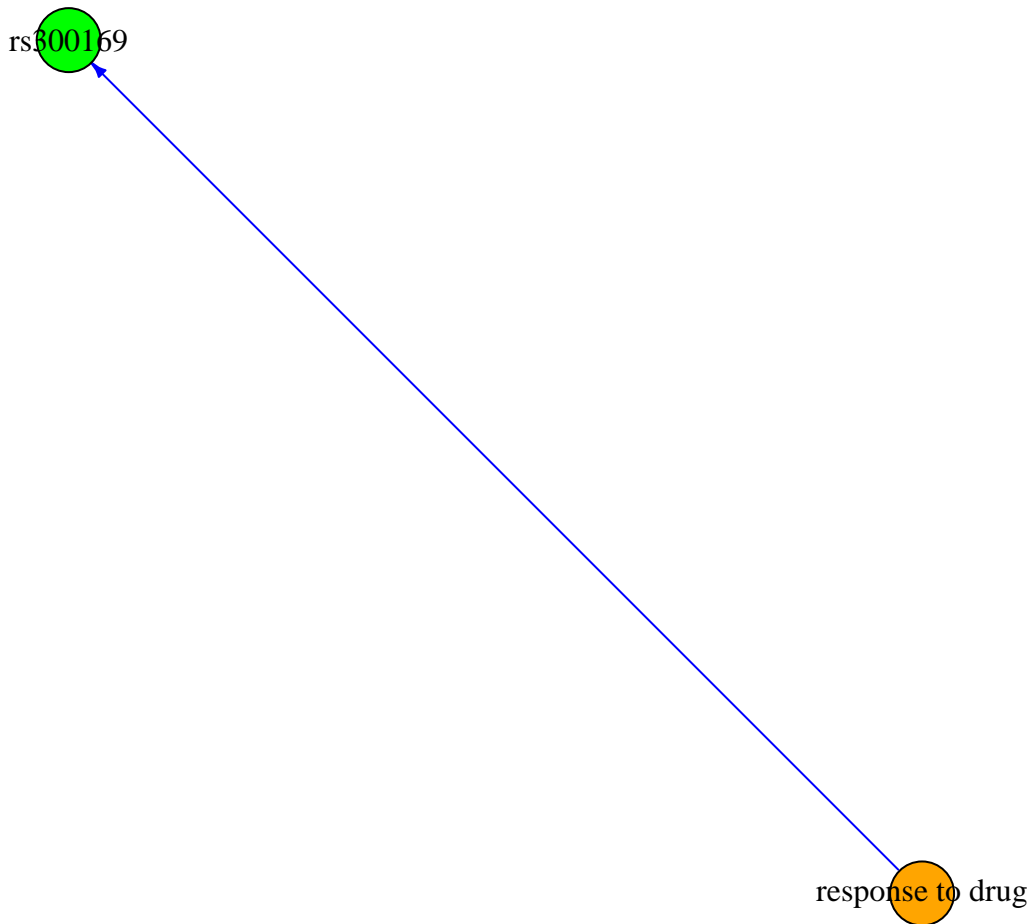

## Variant–Disease Network (Abnormality of refraction)

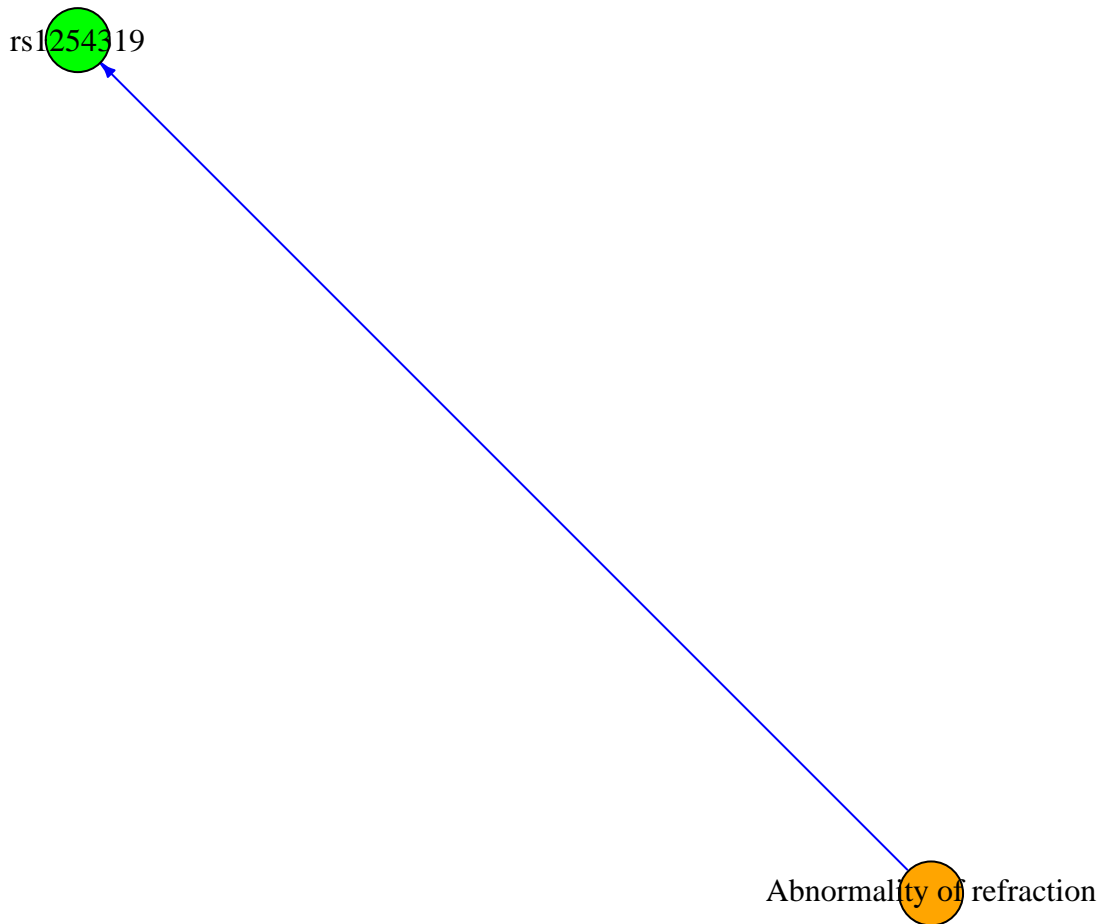

# Variant–Disease Network (estrone measurement)

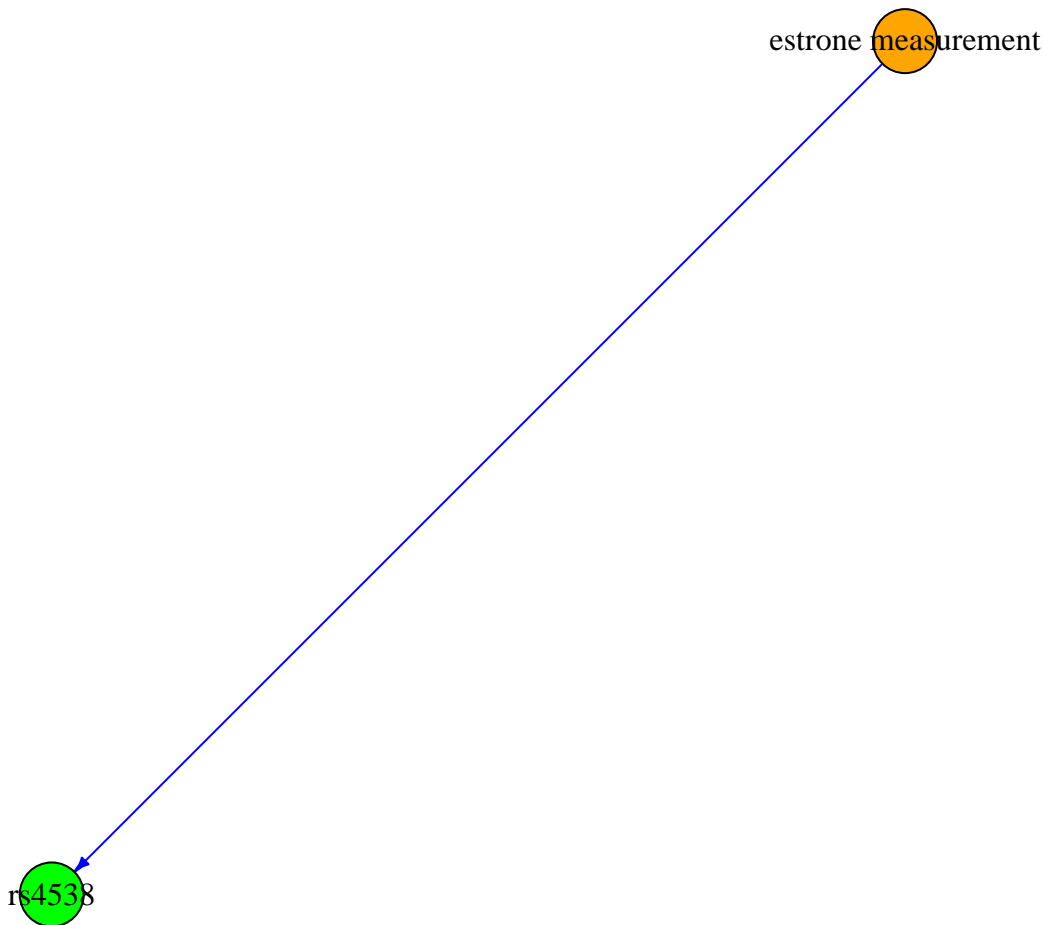

## Variant-Disease Network (eye color)

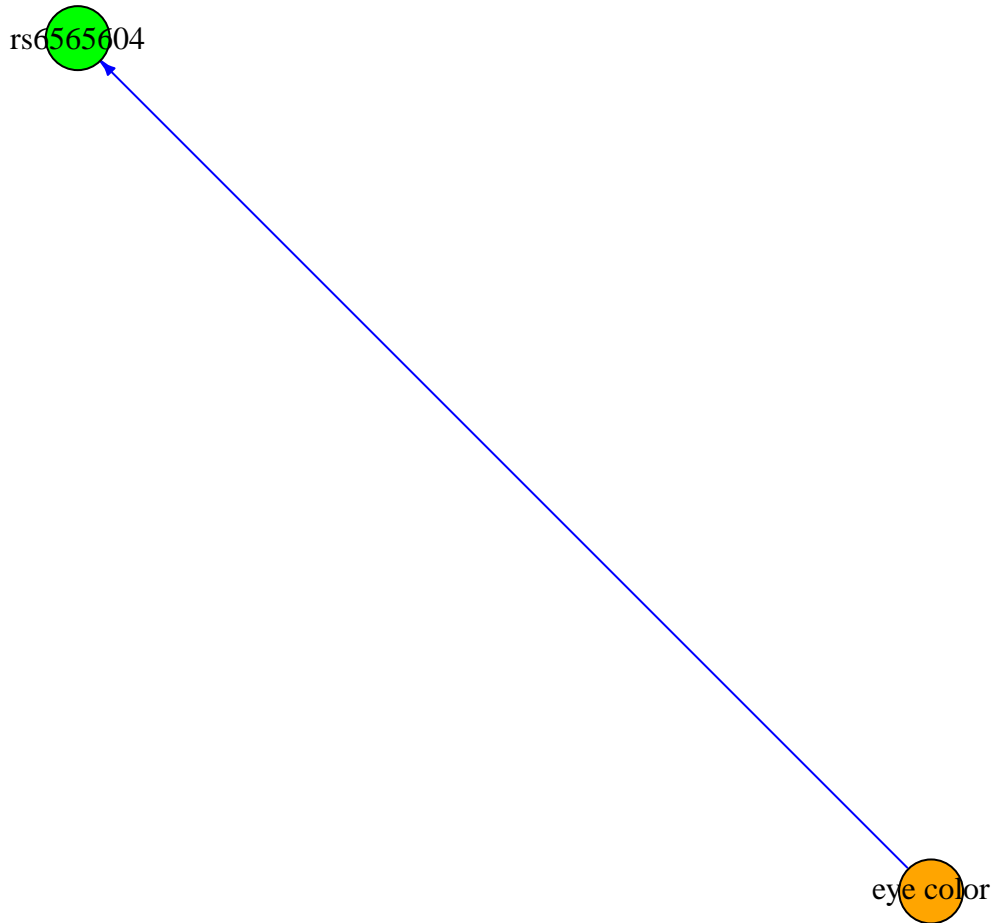

## Variant-Disease Network (mean arterial pressure)

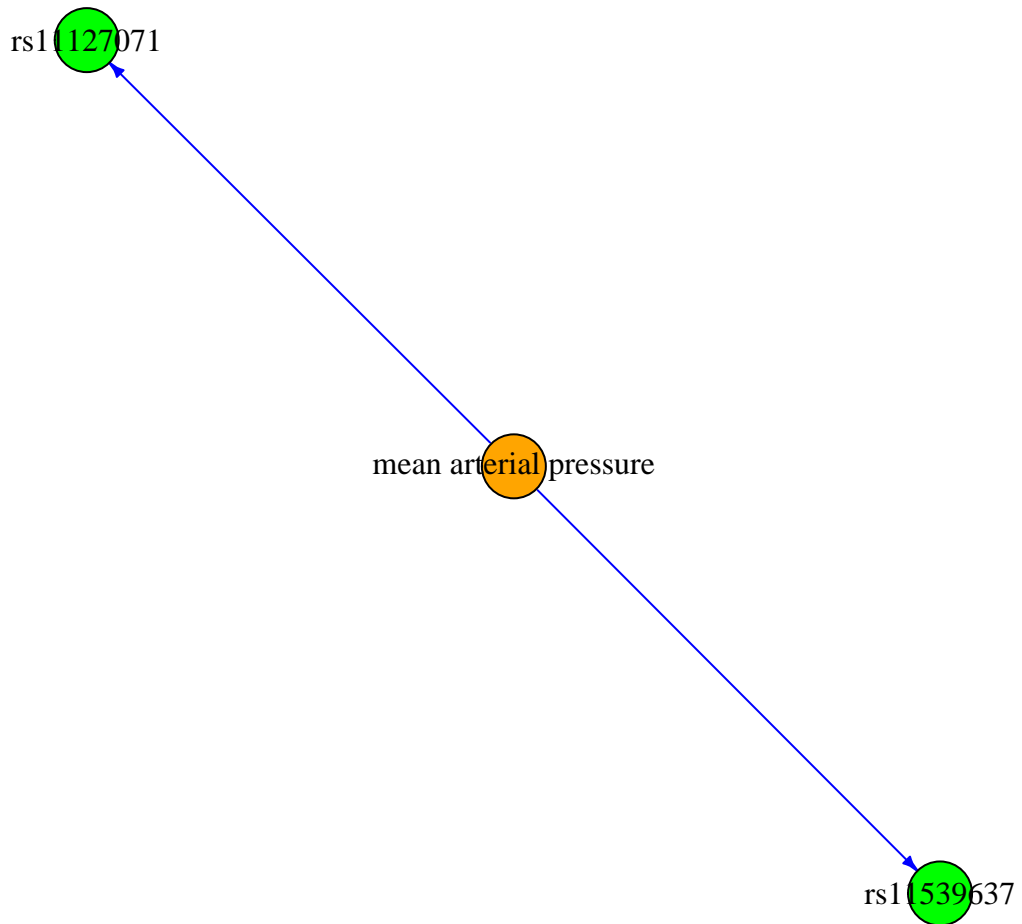

## Variant-Disease Network (bilirubin measurement)

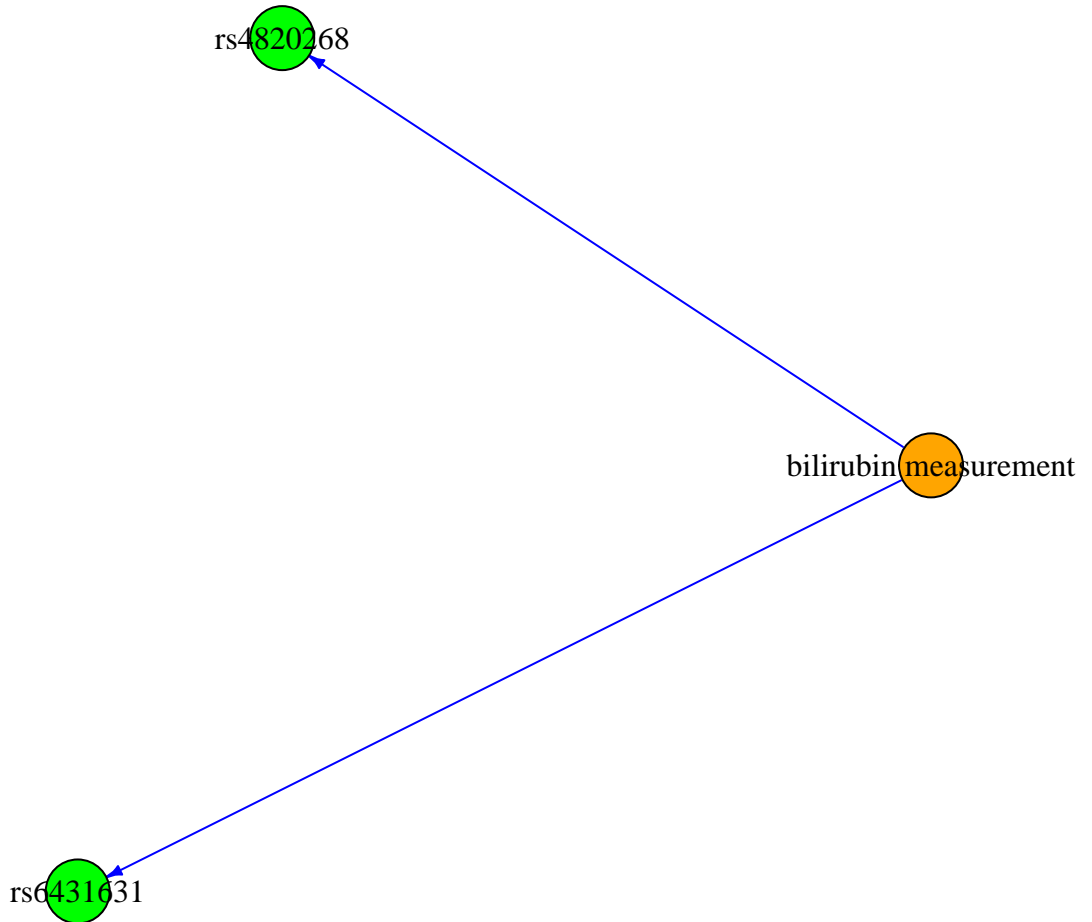

# Variant–Disease Network (clinical laboratory measurement)

rs4820268

clinical laboratory measurement



## Variant–Disease Network (ferritin measurement)

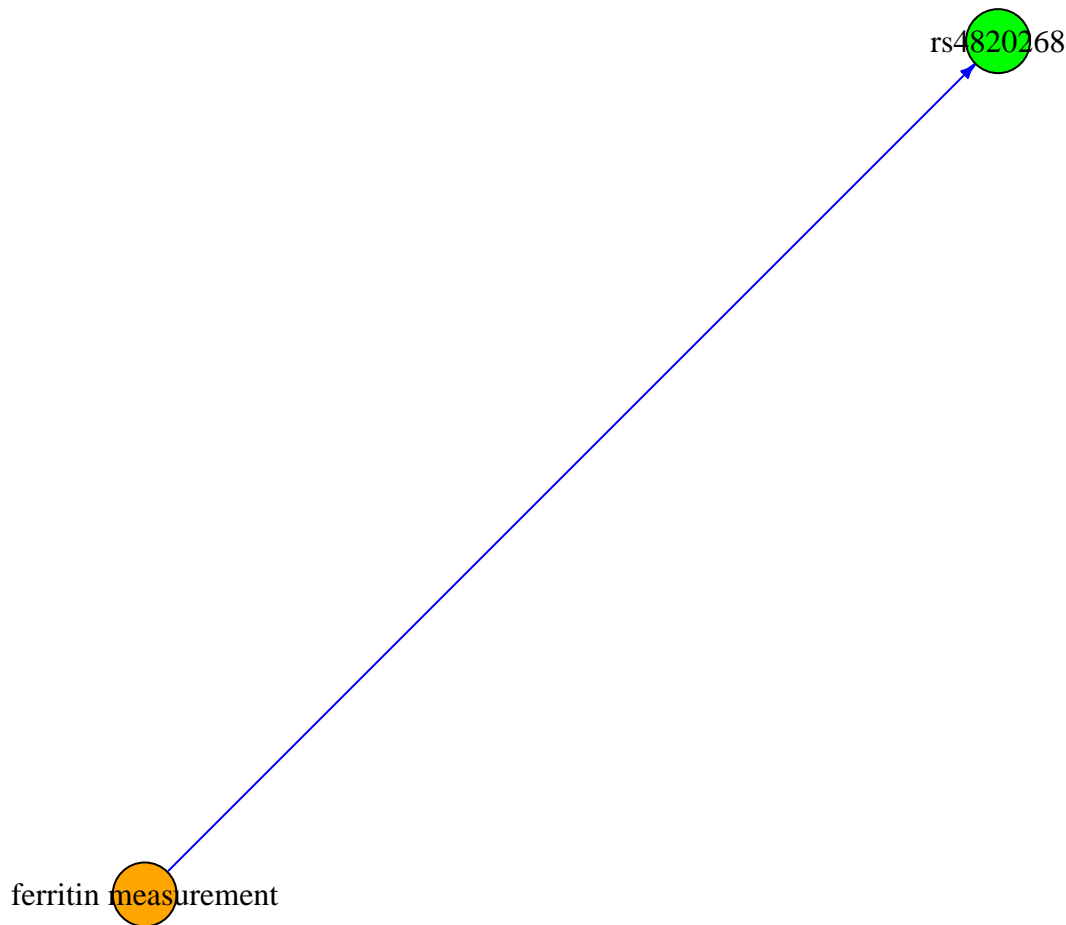



## Variant–Disease Network (hepcidin:ferritin ratio)

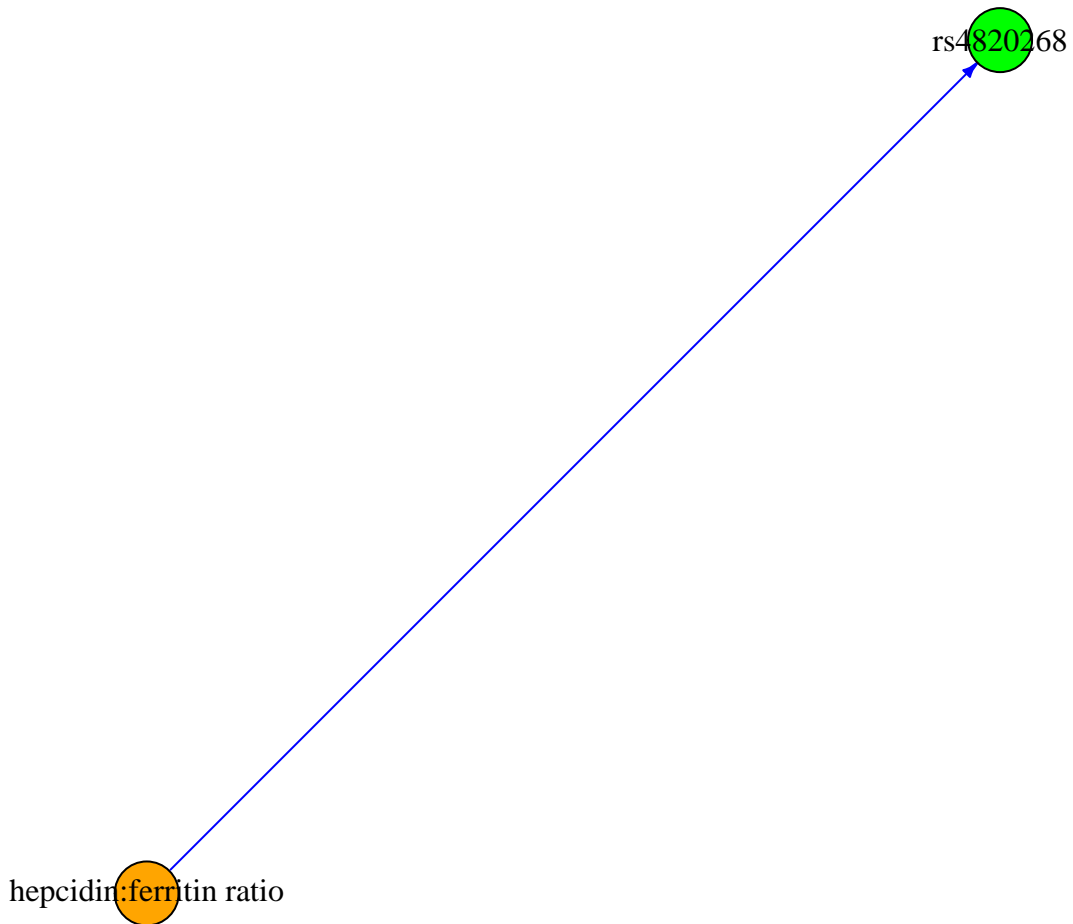

Variant–Disease Network (hepcidin:transferrin saturation ratio)

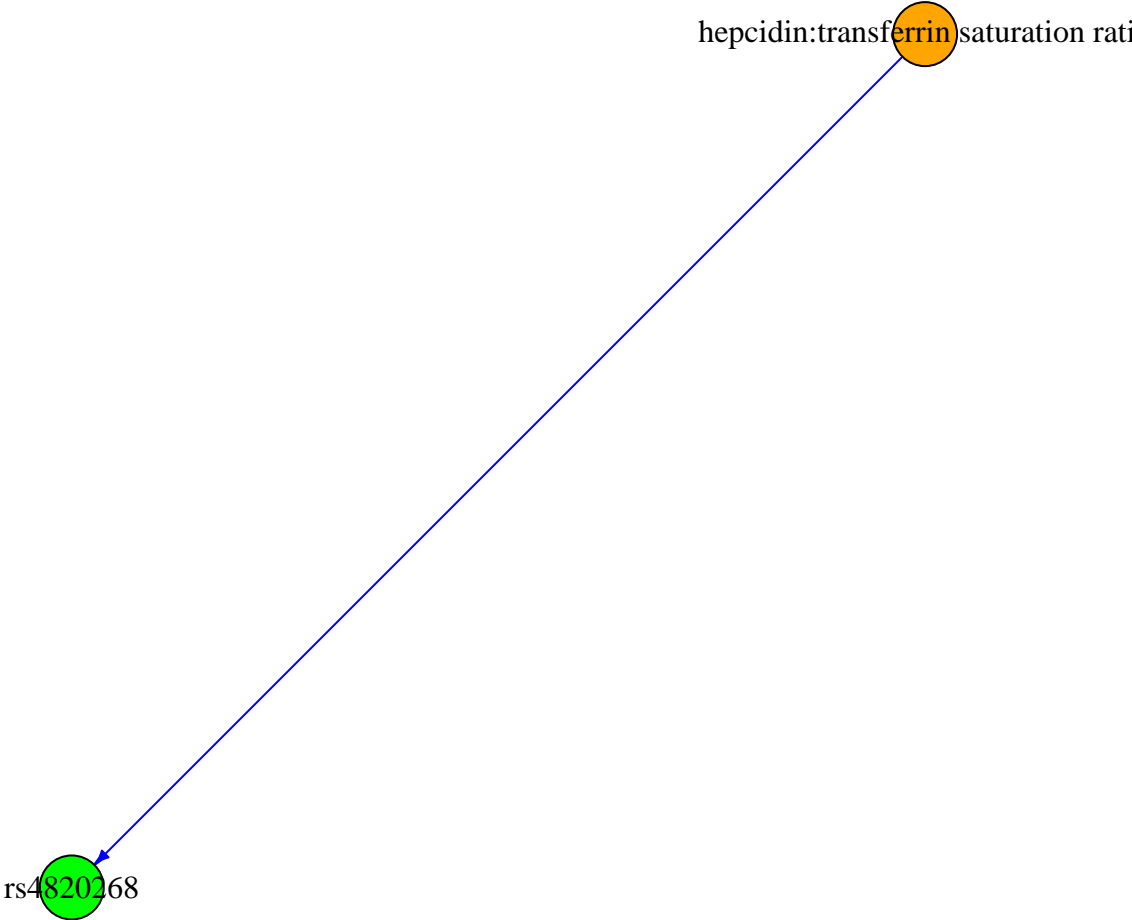

# Variant–Disease Network (iron biomarker measurement)

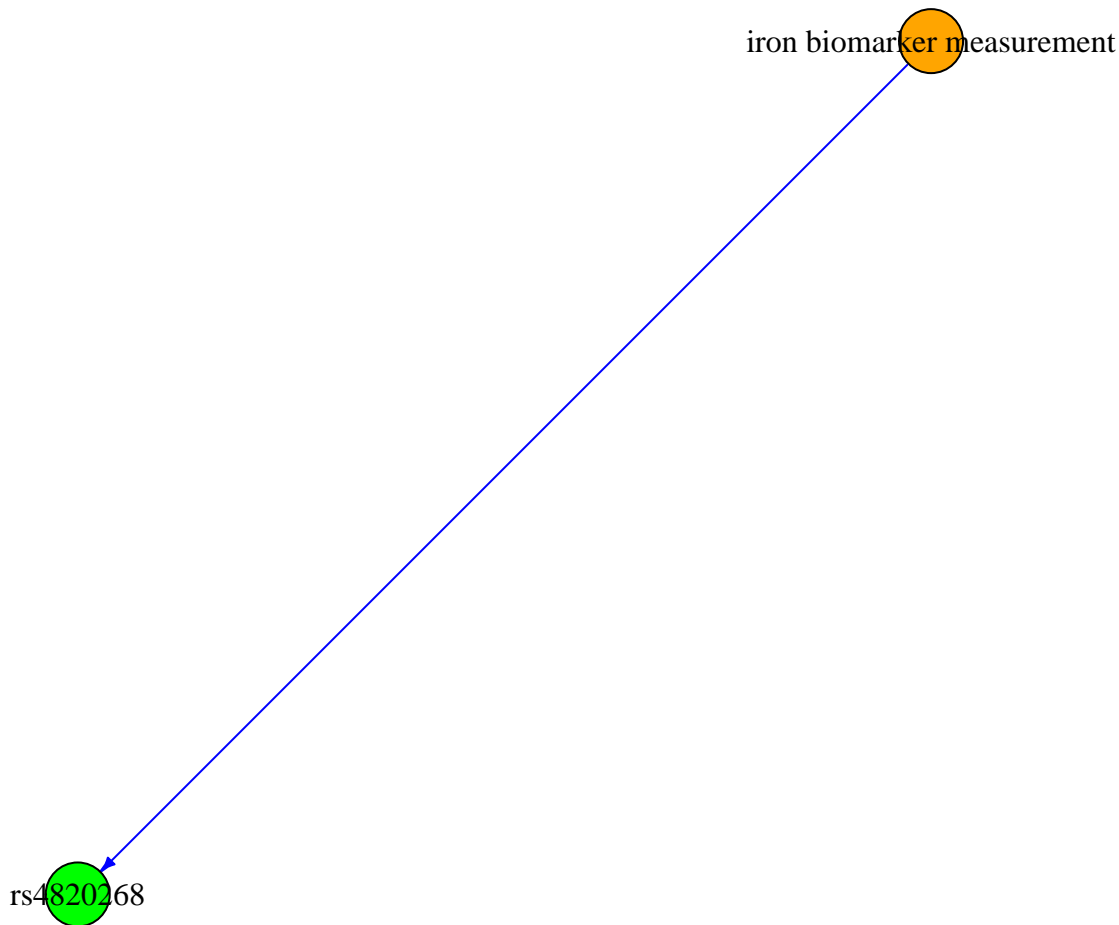

**Variant–Disease Network (serum hepcidin measurement)**

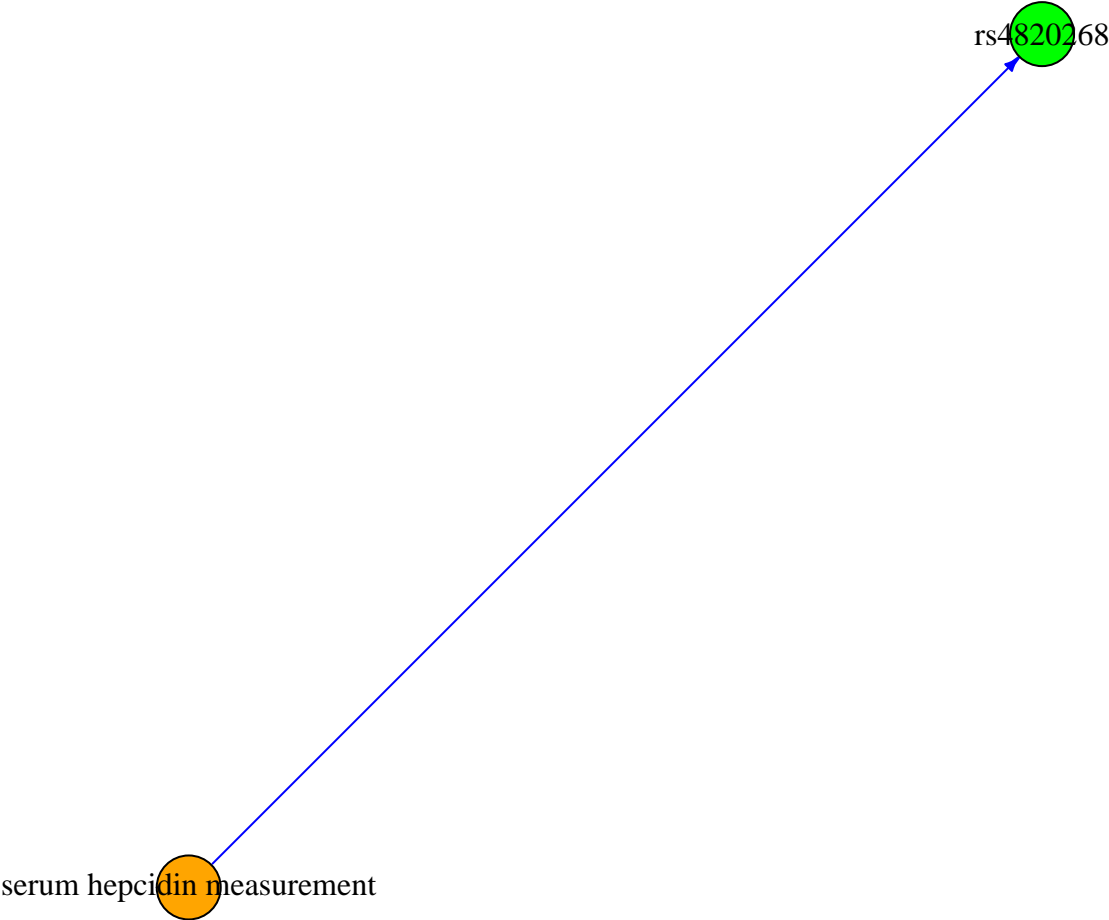

## Variant–Disease Network (serum iron measurement)

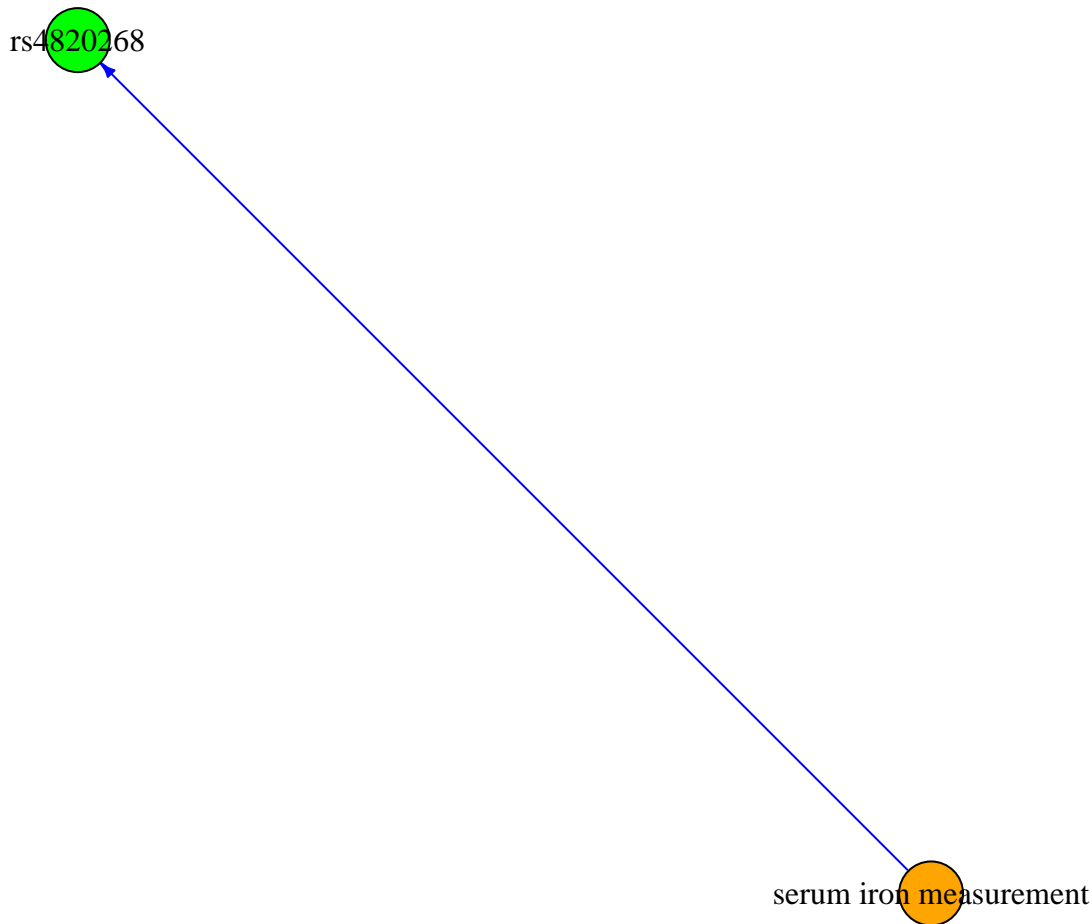

# Variant–Disease Network (soluble transferrin receptor measurement)

soluble transferrin receptor measurement

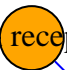

rs4820268

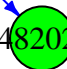

# Variant–Disease Network (transferrin measurement)

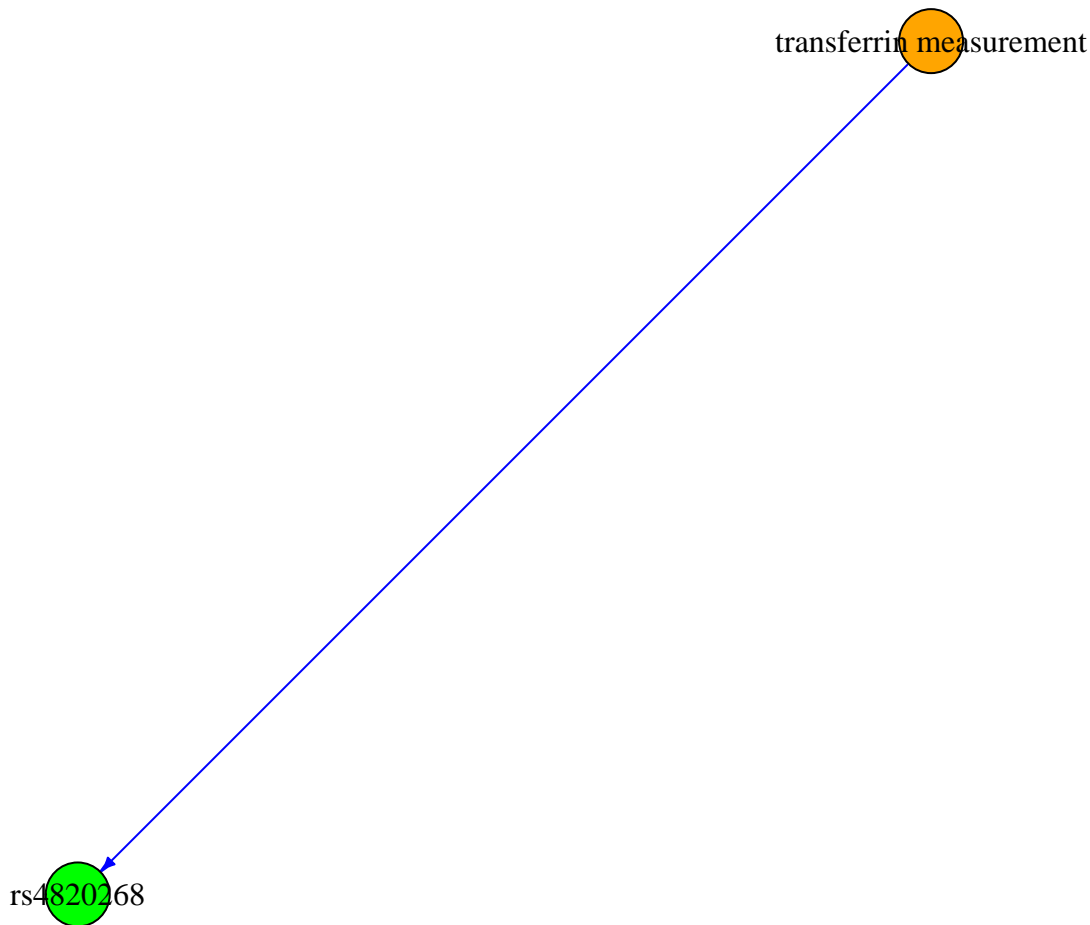

## Variant–Disease Network (transferrin saturation measurement)

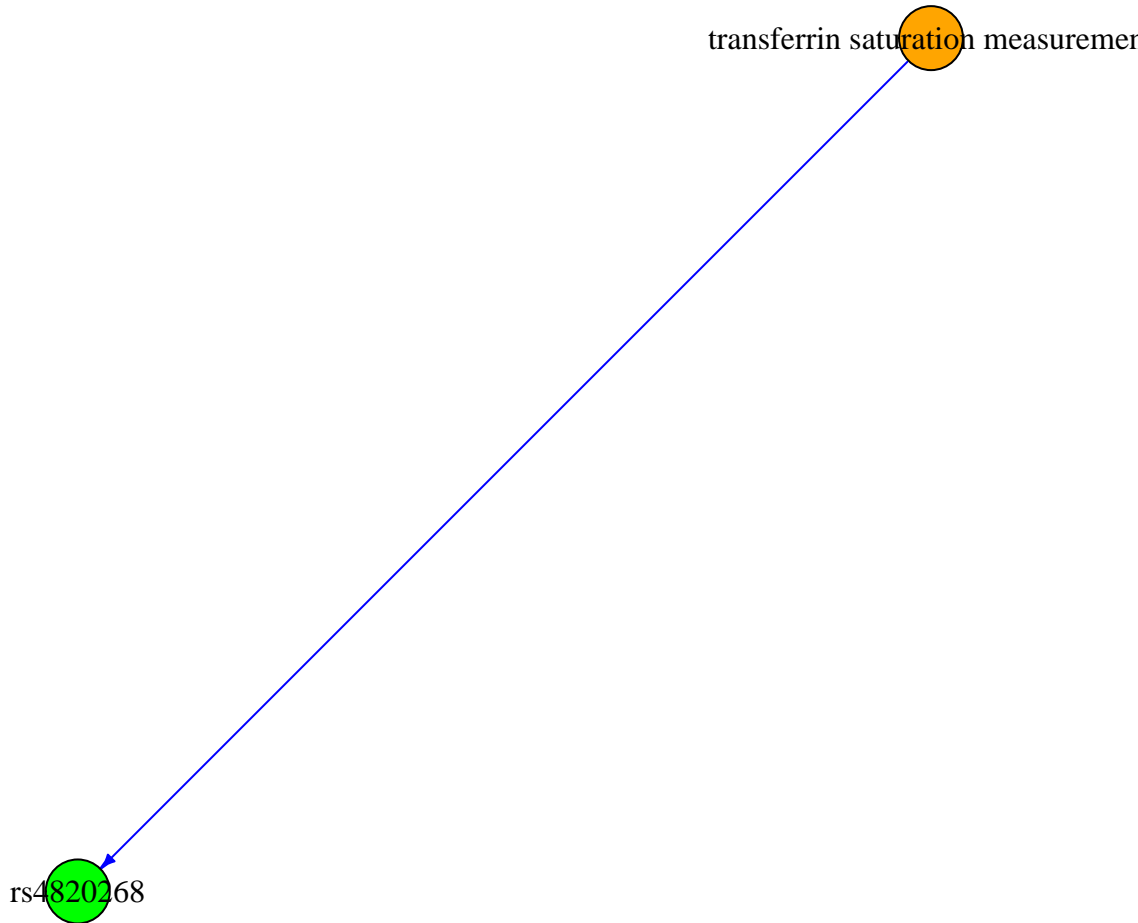



**Variant–Disease Network (neutrophil percentage of white cells)**

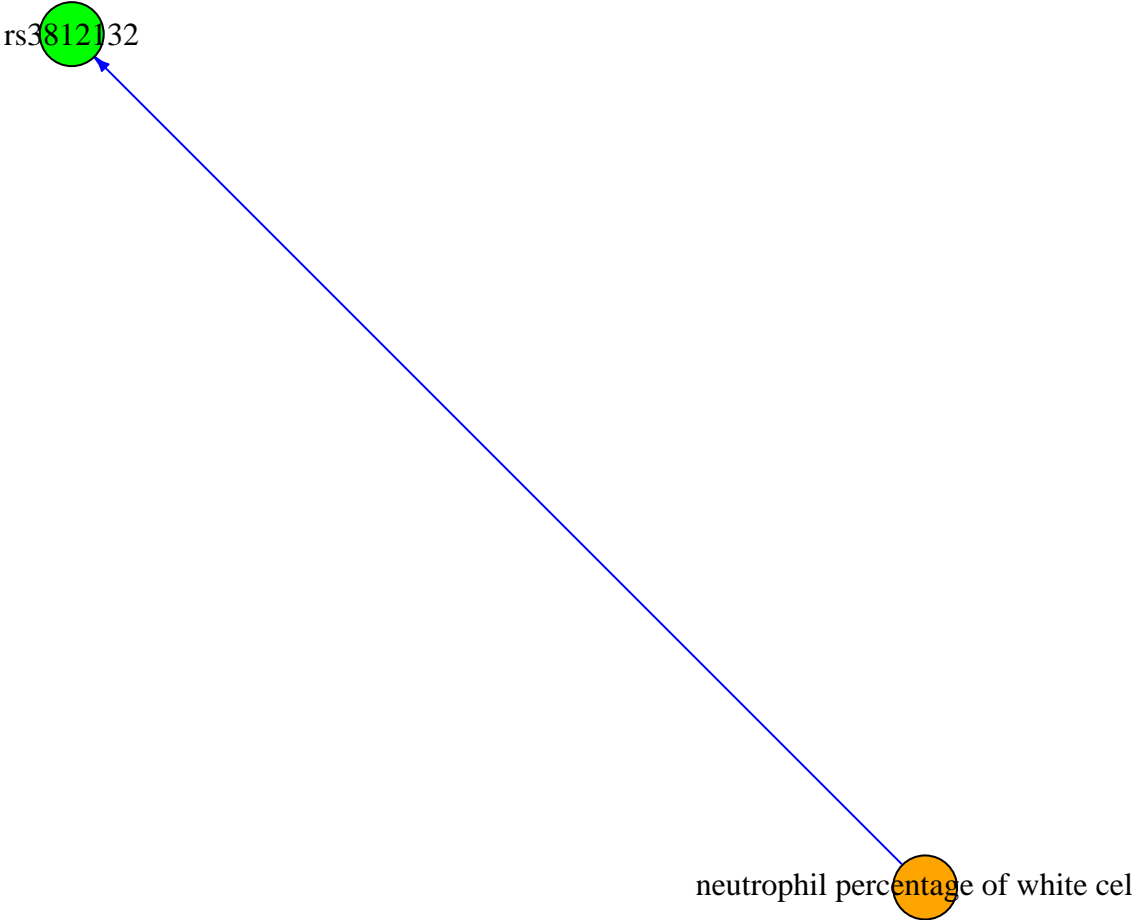

## Variant–Disease Network (lipoprotein A measurement)

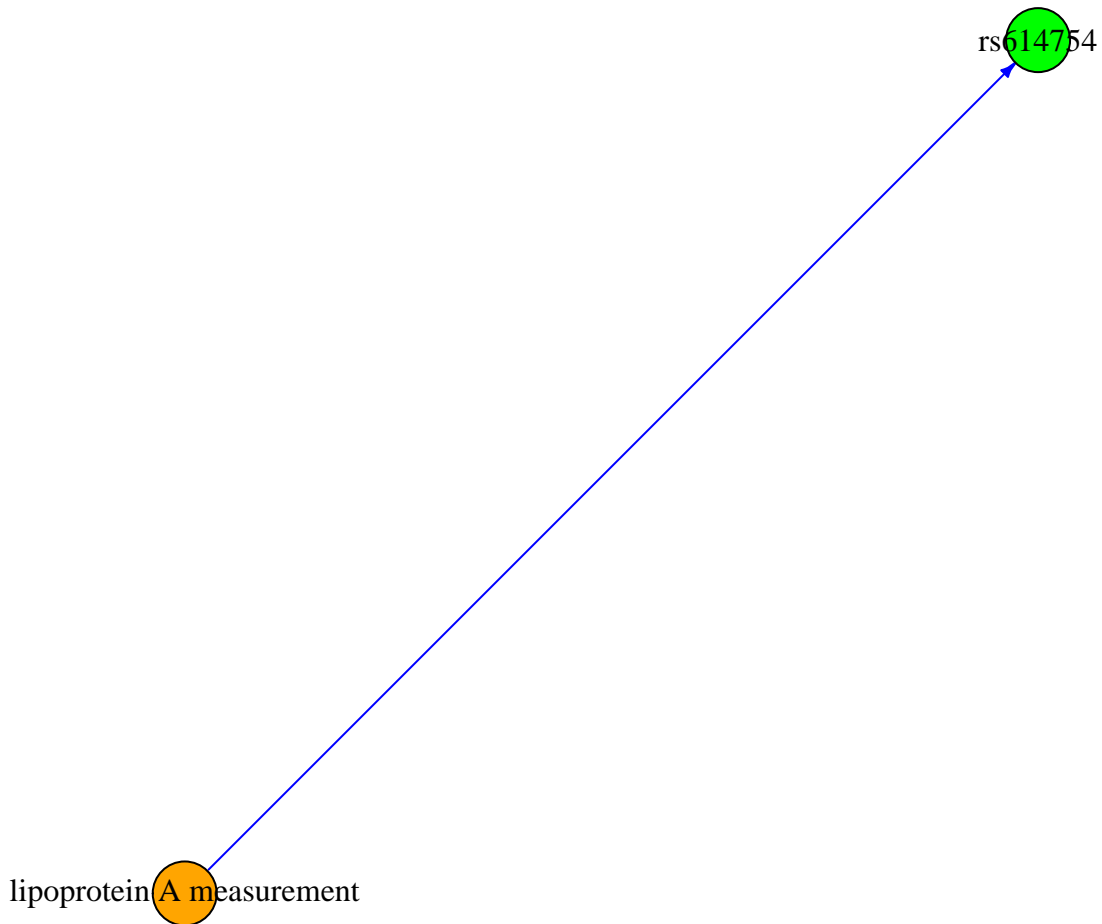

# Variant-Disease Network (synophrys measurement)

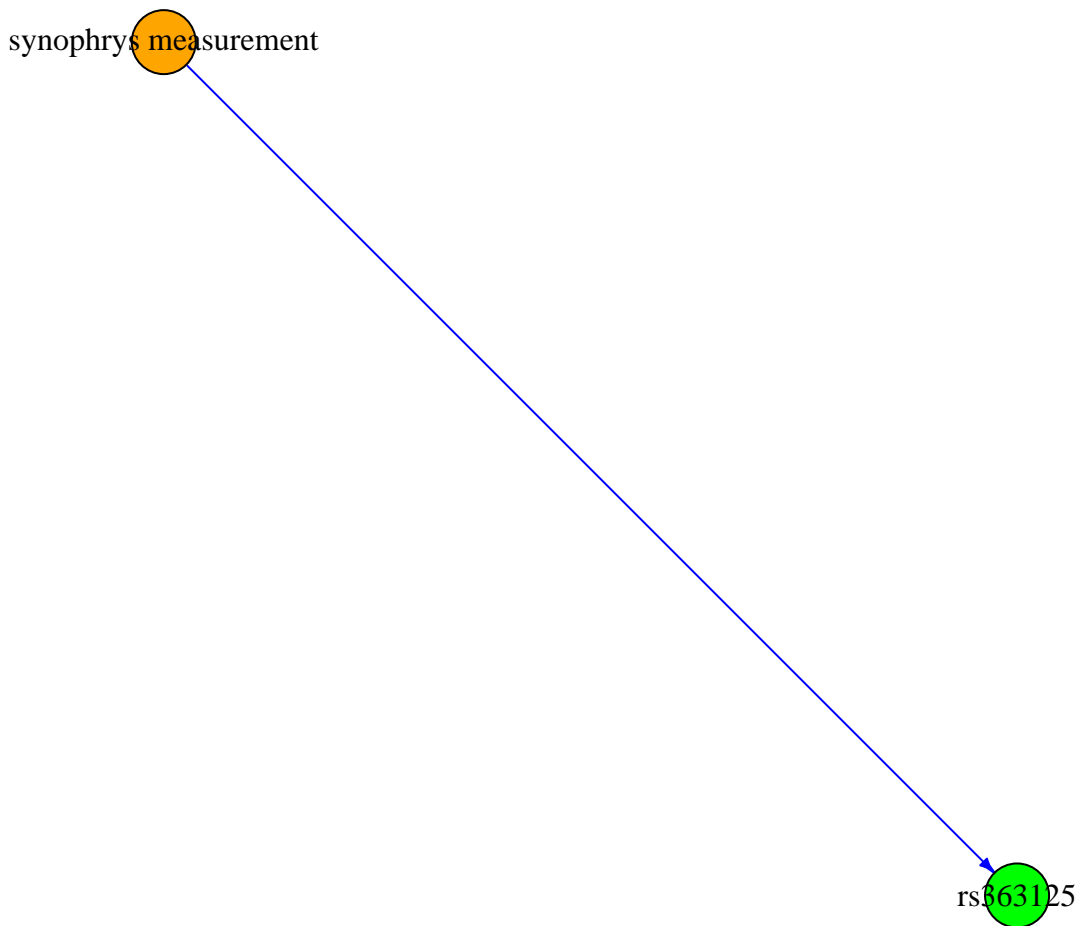

Variant–Disease Network (response to antineoplastic agent)

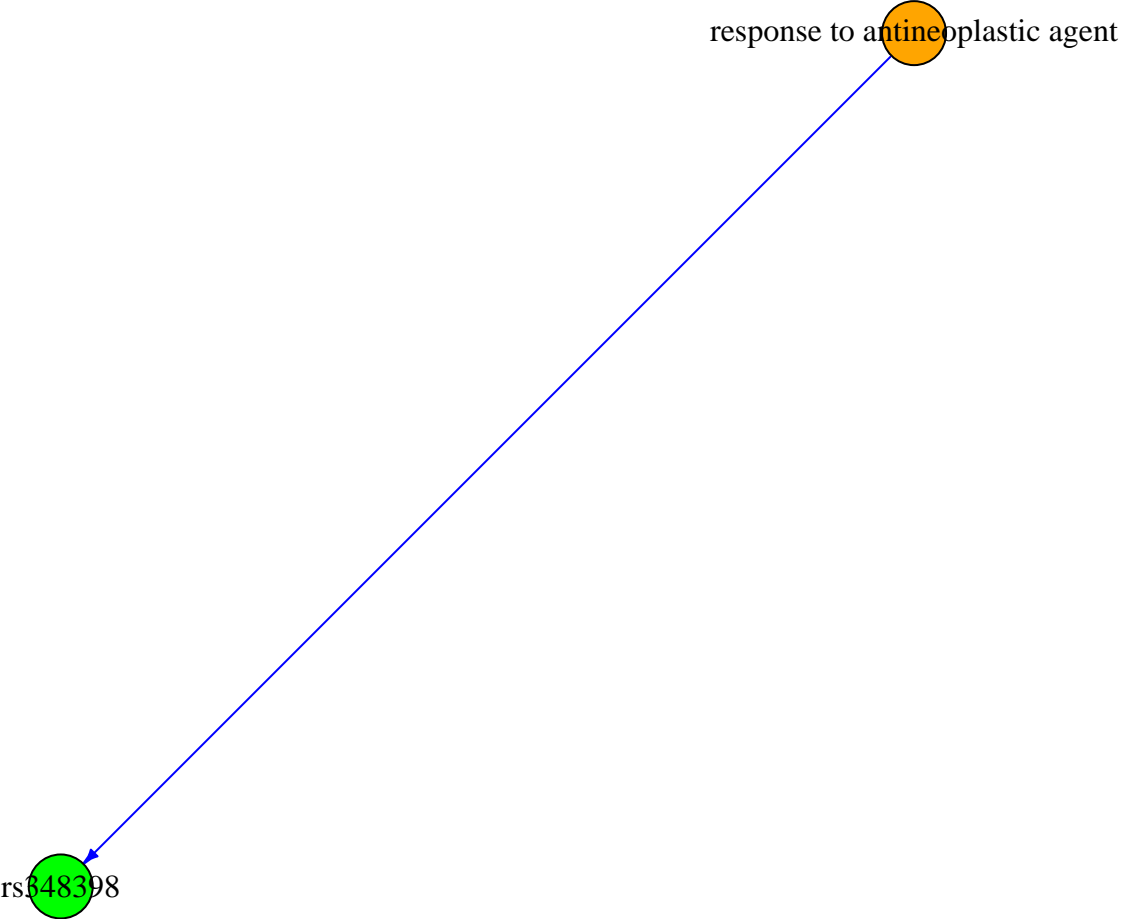

## Variant–Disease Network (response to cyclophosphamide)

rs148398



```
graph LR; A((response to cyclophosphamide)) --> B((rs148398))
```

The diagram illustrates a directed relationship between a clinical response and a genetic variant. It features two circular nodes: a green node at the top-left labeled 'rs148398' and an orange node at the bottom-right labeled 'response to cyclophosphamide'. A blue arrow points from the orange node to the green node, indicating that the clinical response is associated with or predicts the presence of the rs148398 variant.

response to cyclophosphamide

# Variant-Disease Network (cancer biomarker measurement)

rs3097773

cancer biomarker measurement

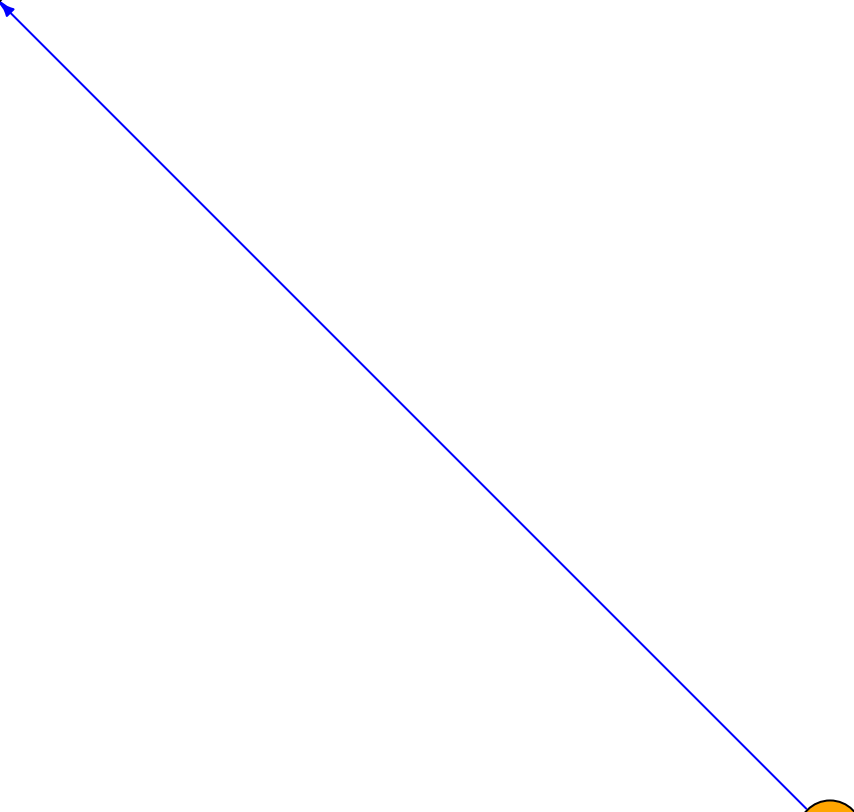

## Variant–Disease Network (oral cavity cancer)

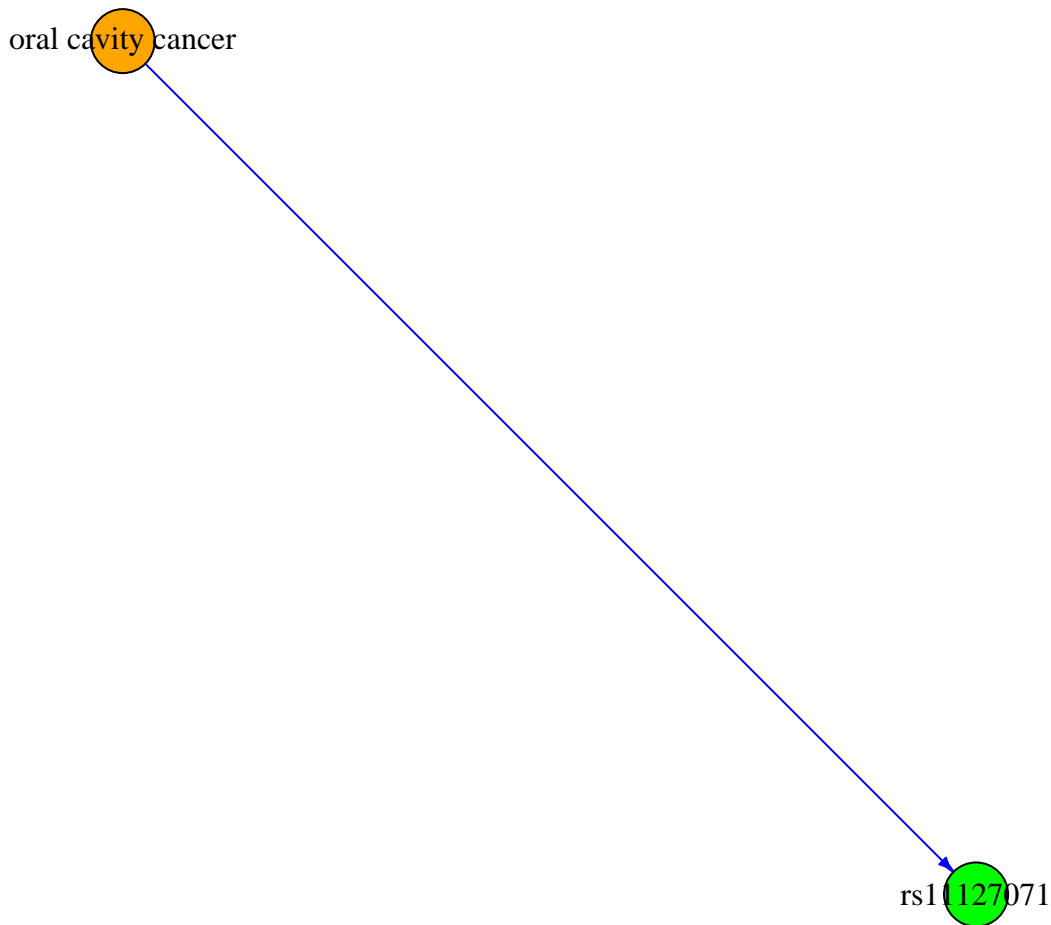

Supplement: Supplementary file 5 [file Supplementary_Fig_S3.pdf › Supplementary files/Supplementary_Fig_S3.pdf]
