# Supplementary material for: Evaluation of Five Mammalian Models for Human Disease Research Using Genomic and Bioinformatic Approaches
Source: Preprints.org preprint supplement (doi:10.20944/preprints202305.1816.v1), 2023-05-26

## Variant-Disease Network (adnexal tumour)

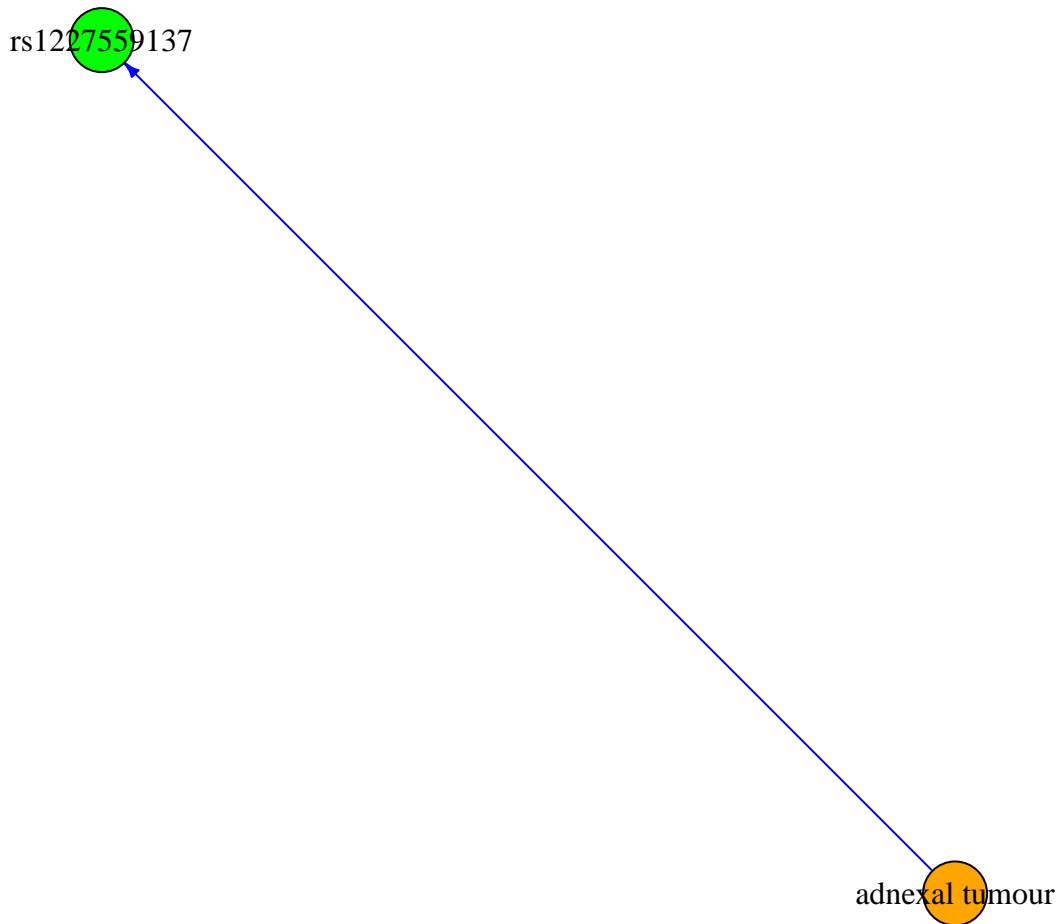

**Variant–Disease Network (carcinoid–endocrine tumour)**

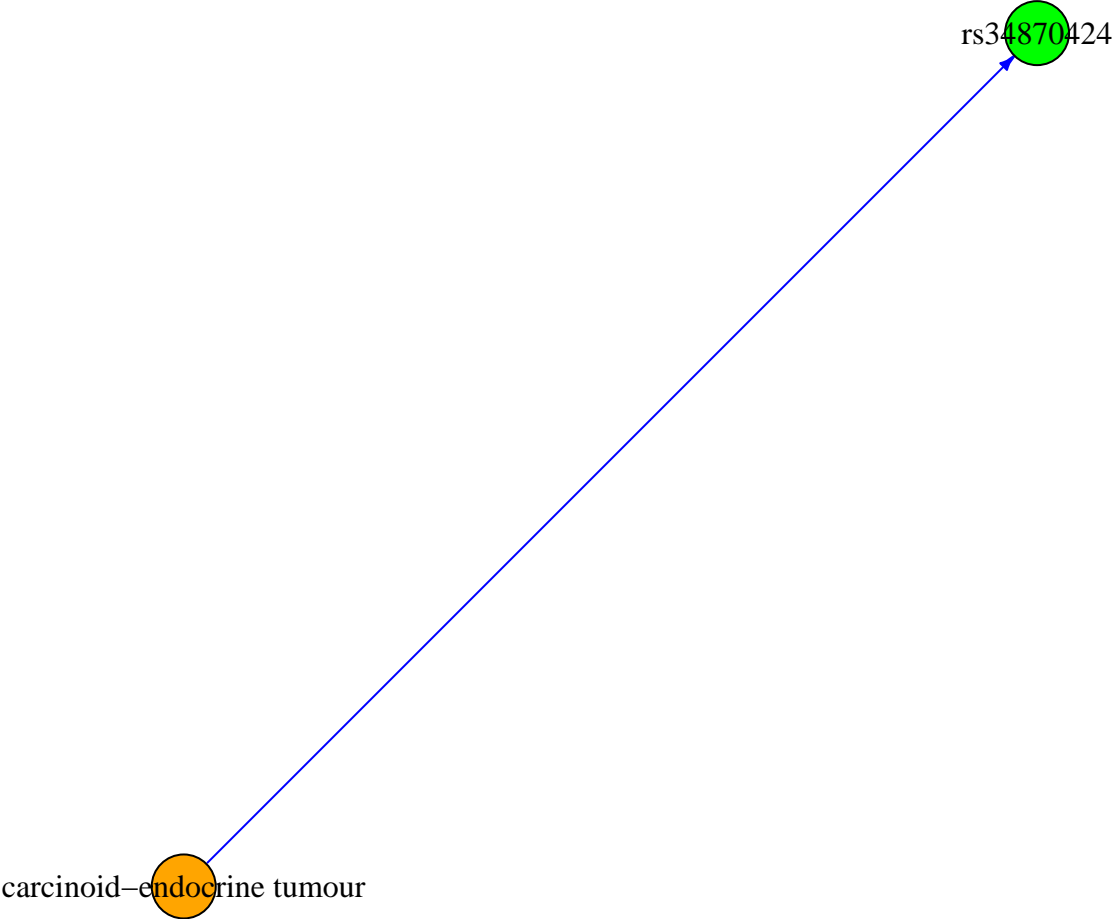

Variant–Disease Network (breast carcinoma)

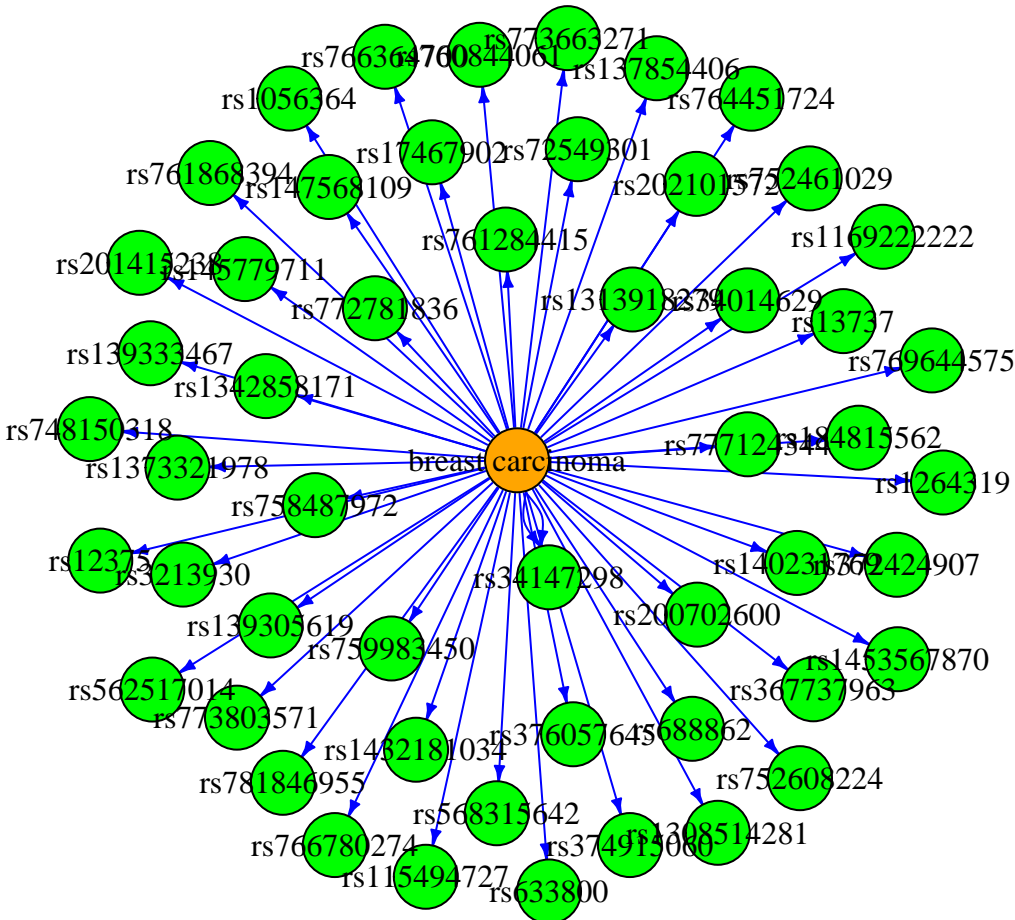

## Variant–Disease Network (skin carcinoma)

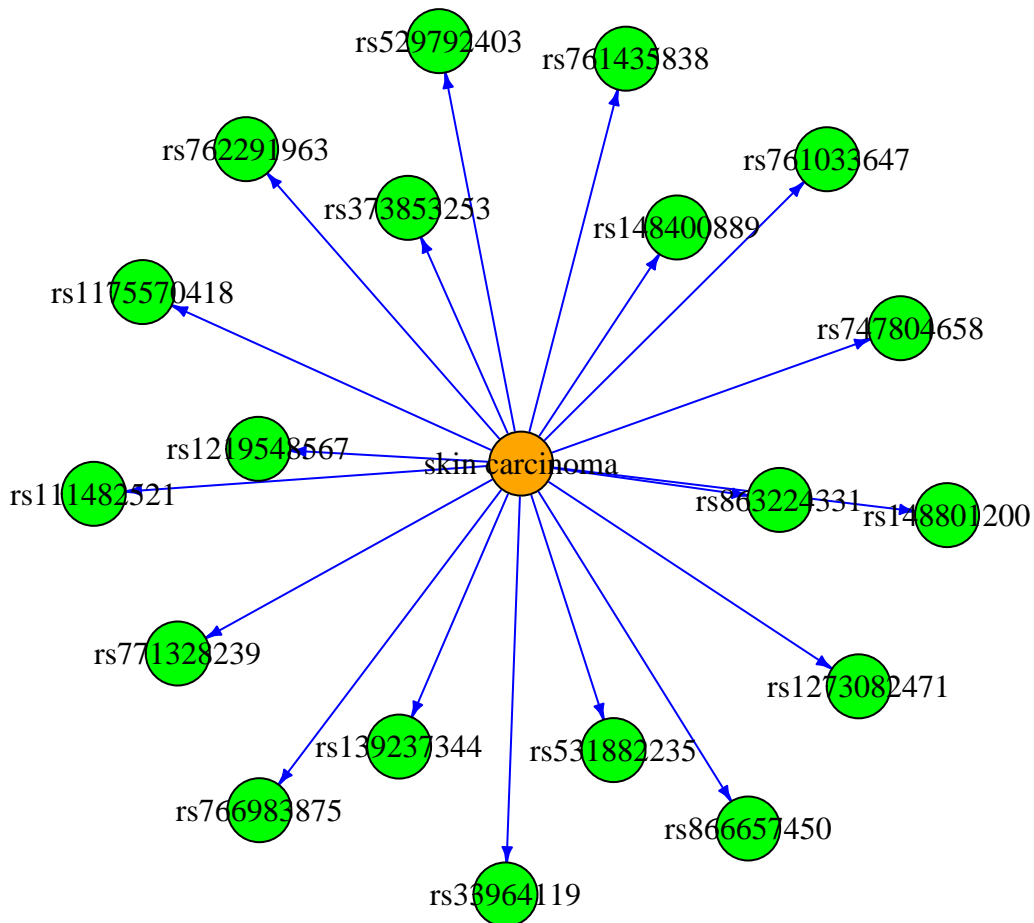

## Variant–Disease Network (lung carcinoma)

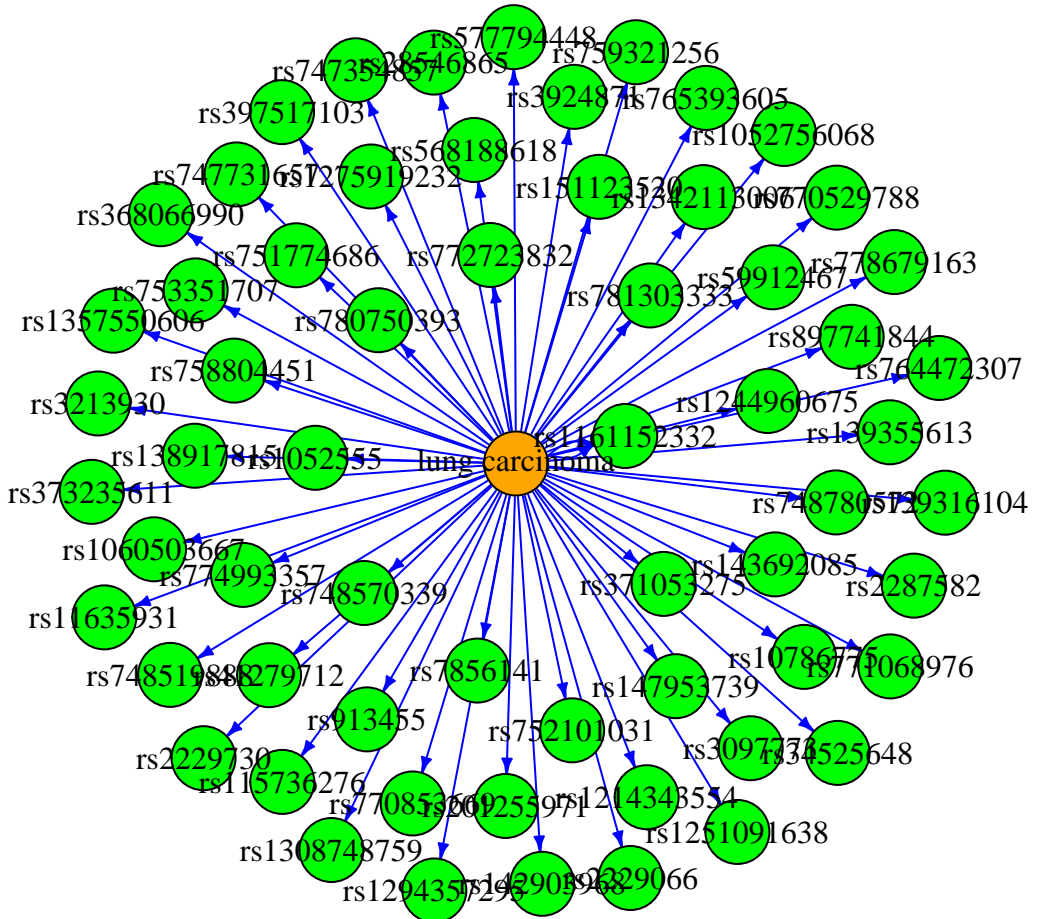

### Variant–Disease Network (large intestine carcinoma)

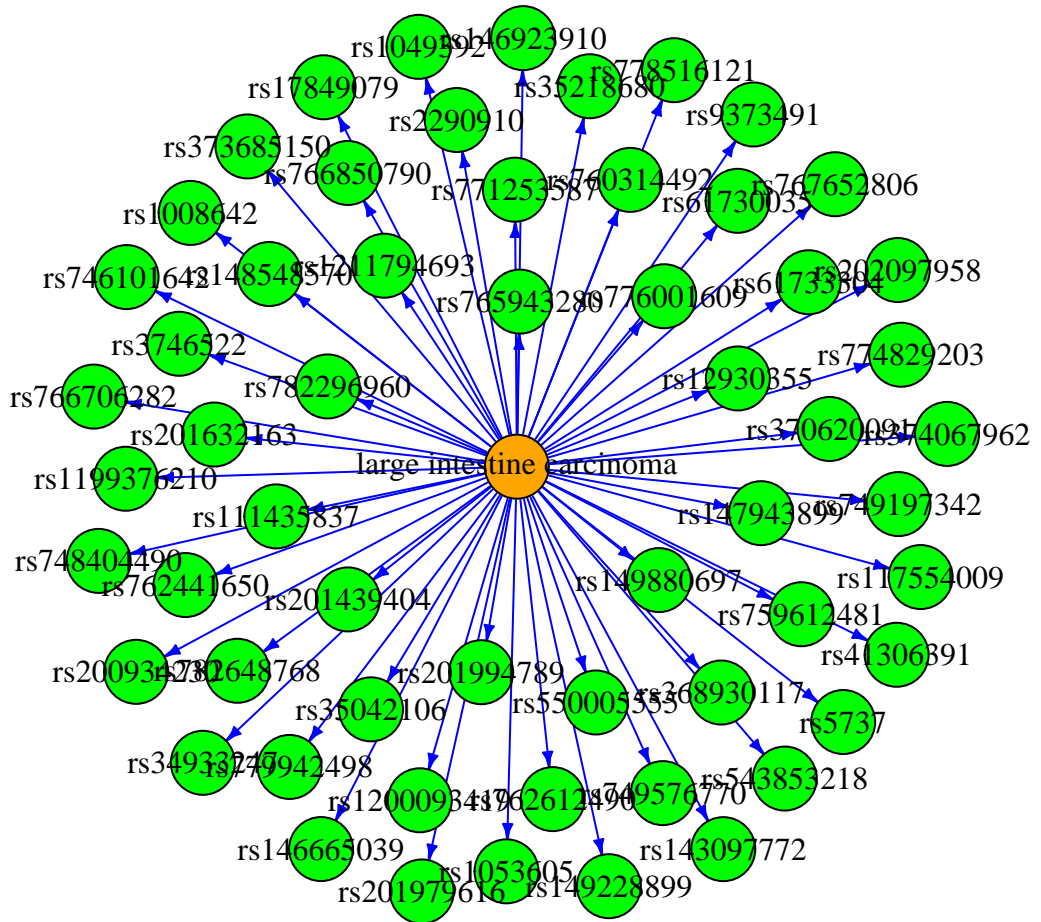

## Variant-Disease Network (liver carcinoma)

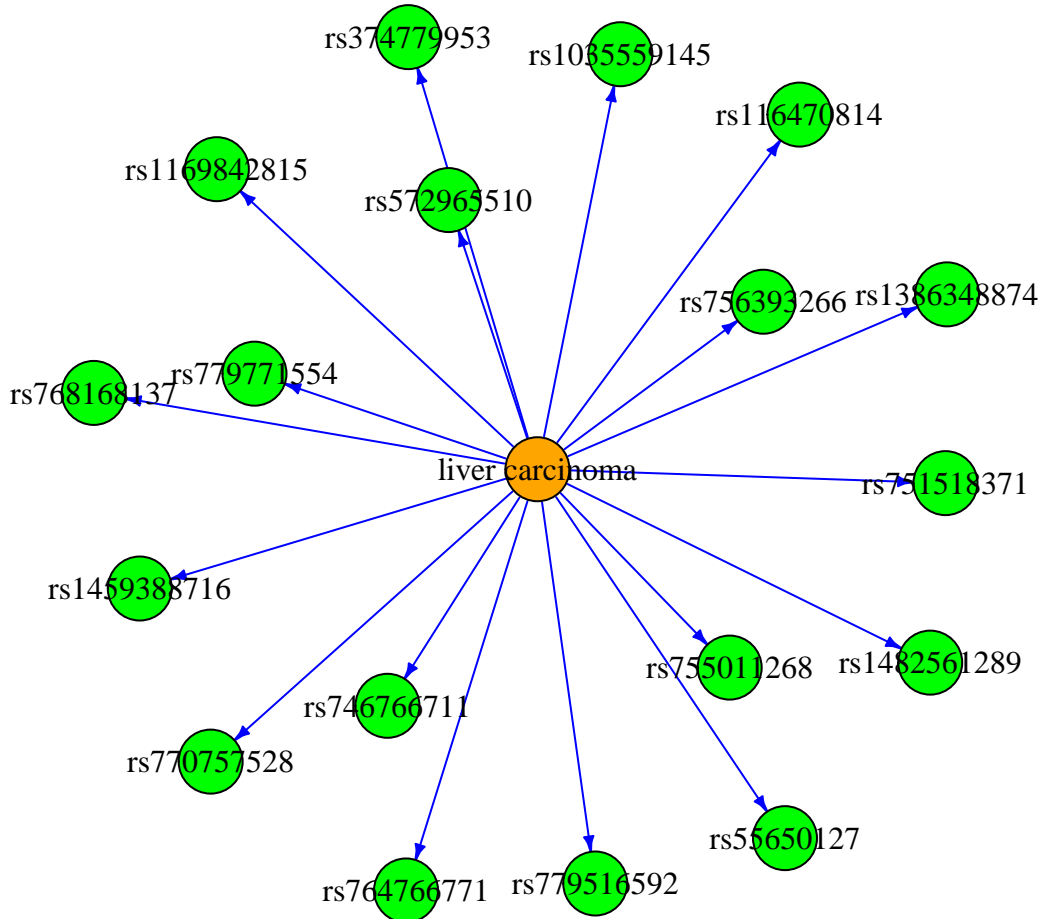

## Variant–Disease Network (urinary tract carcinoma)

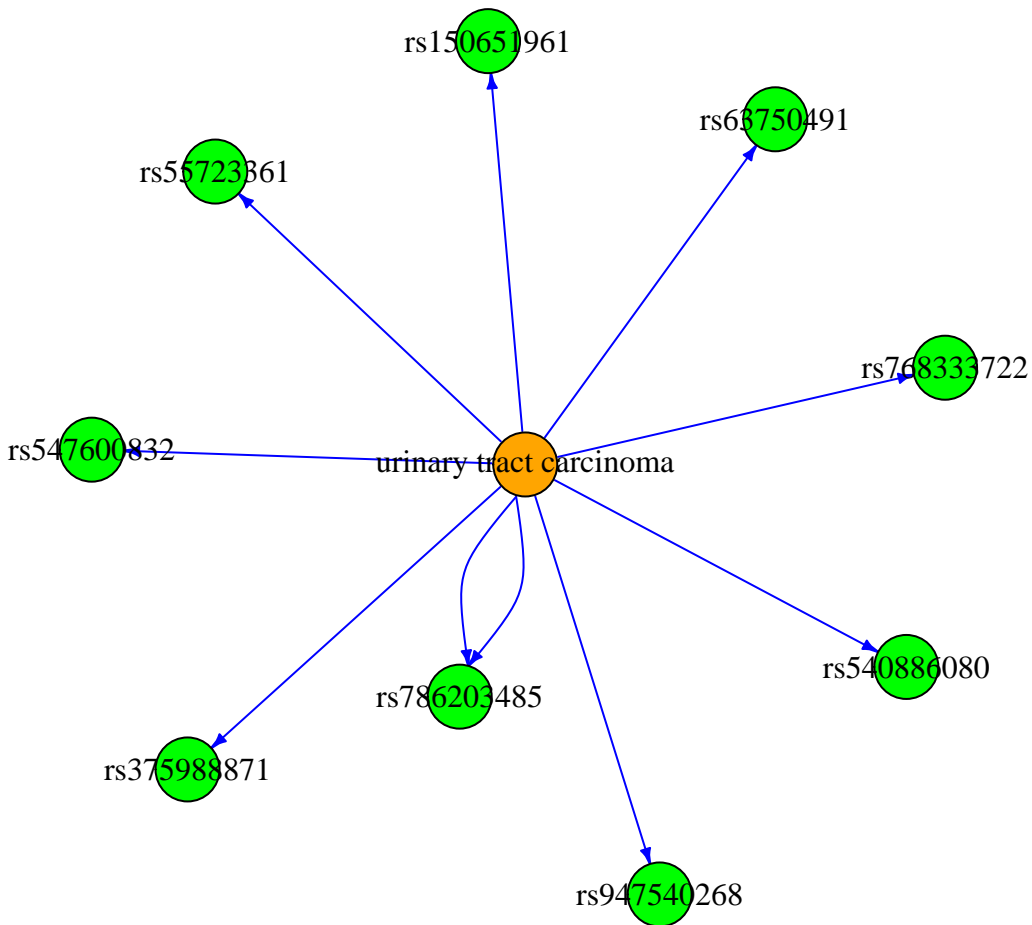



## Variant-Disease Network (prostate carcinoma)

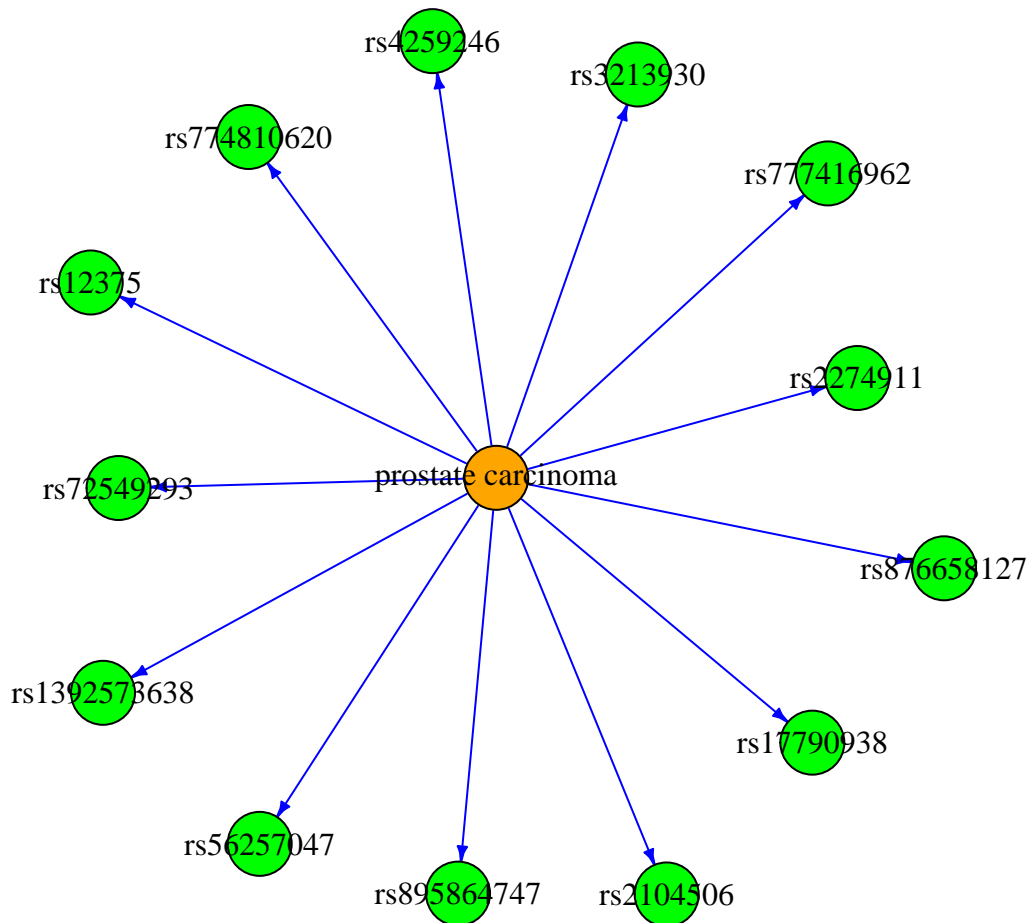

## Variant-Disease Network (endometrium carcinoma)

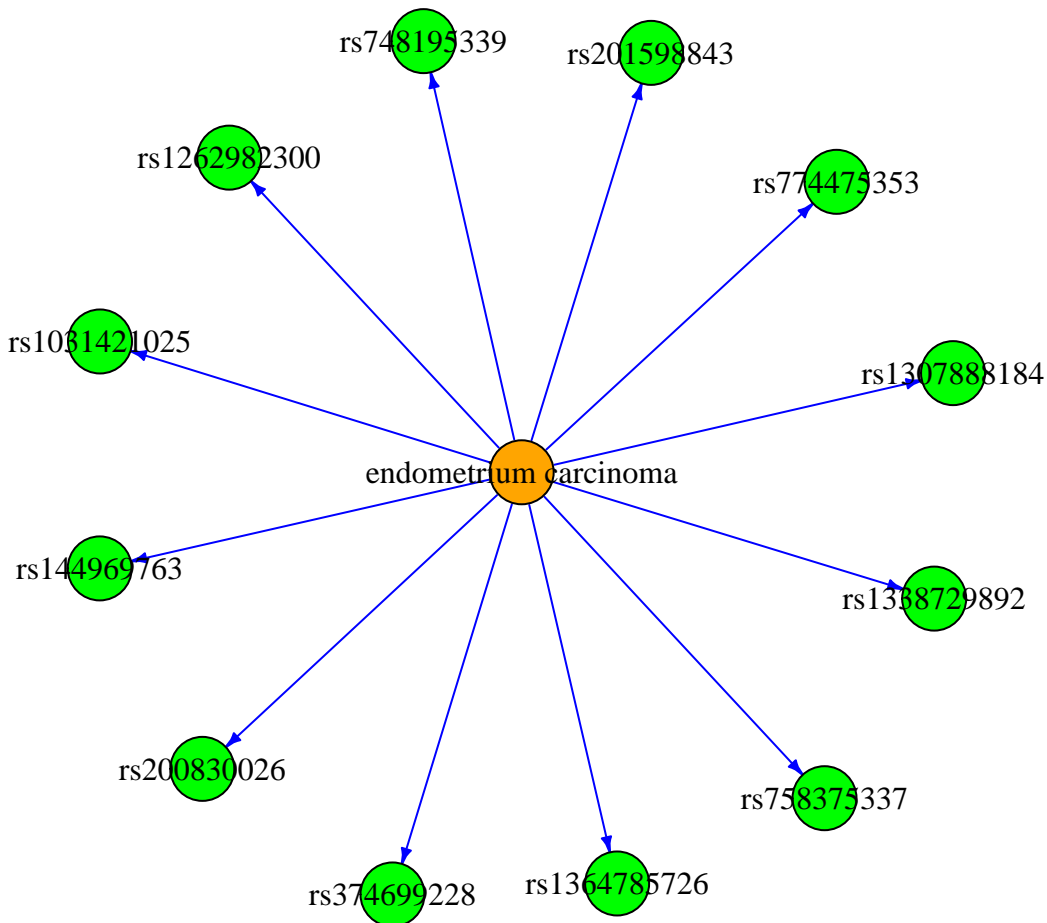

## Variant-Disease Network (cervix carcinoma)

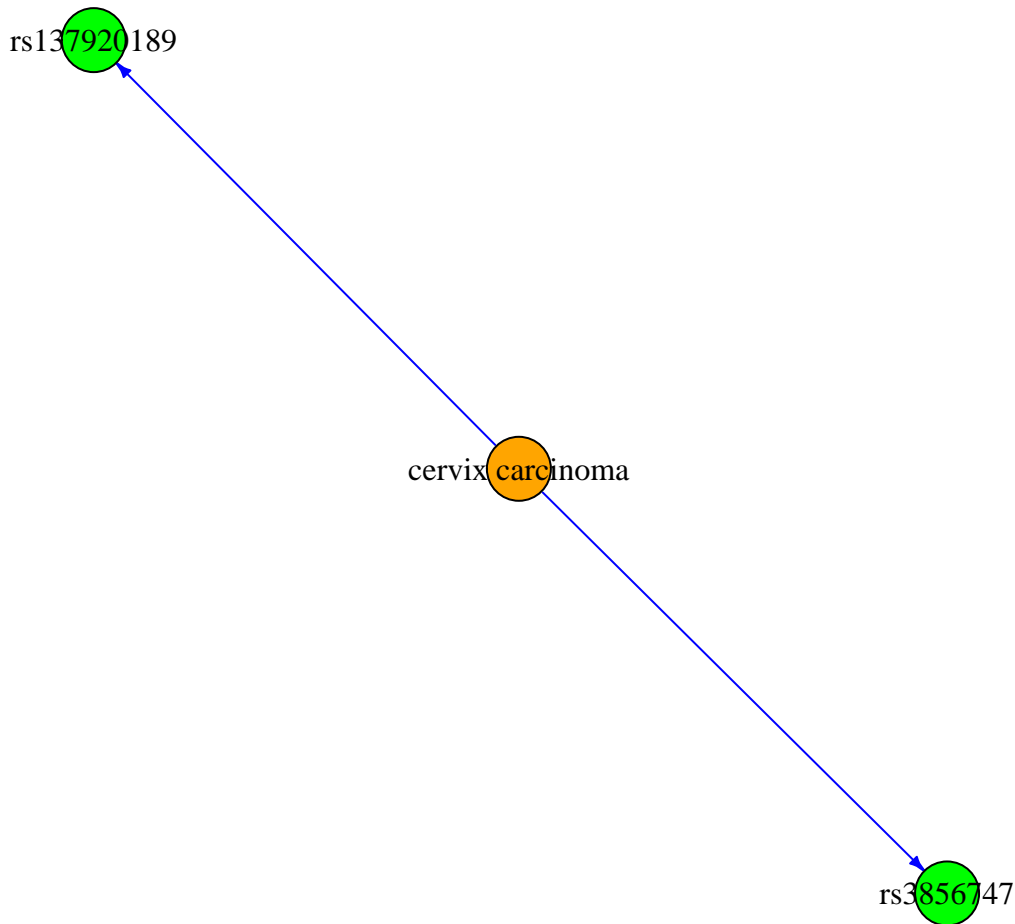

Variant–Disease Network (upper aerodigestive tract carcinoma)

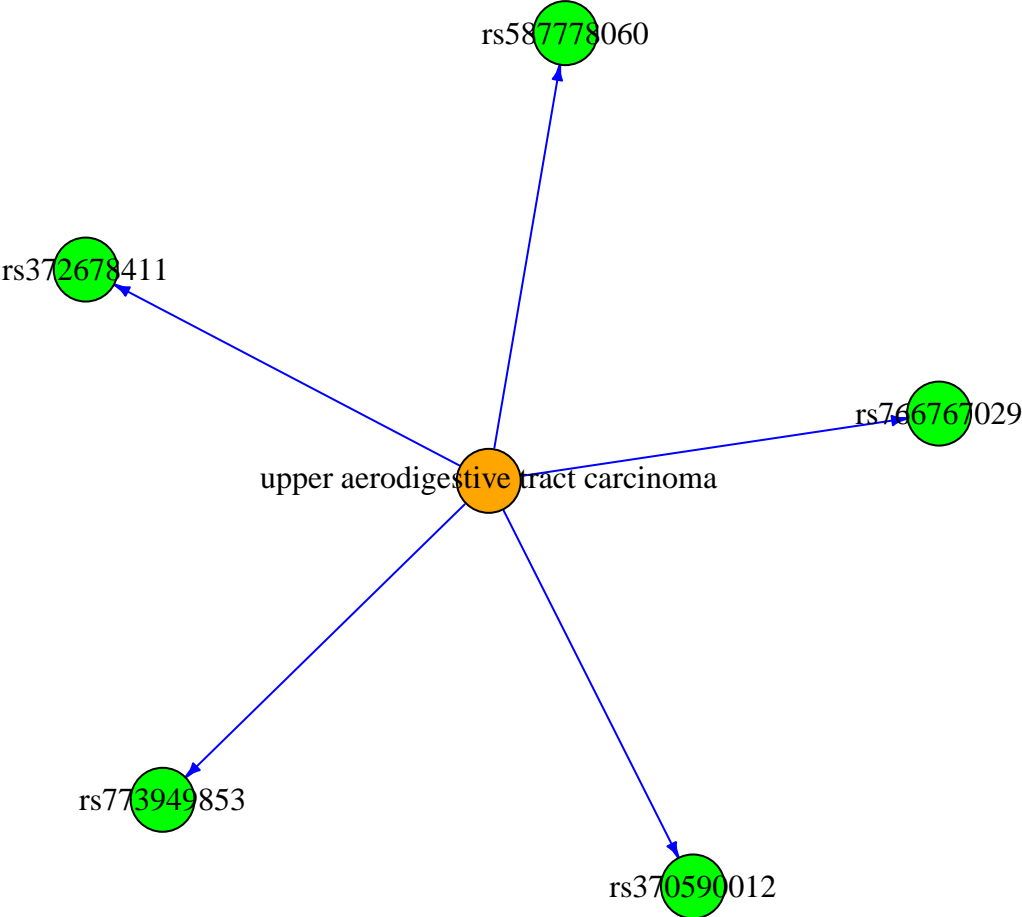

## Variant–Disease Network (stomach carcinoma)

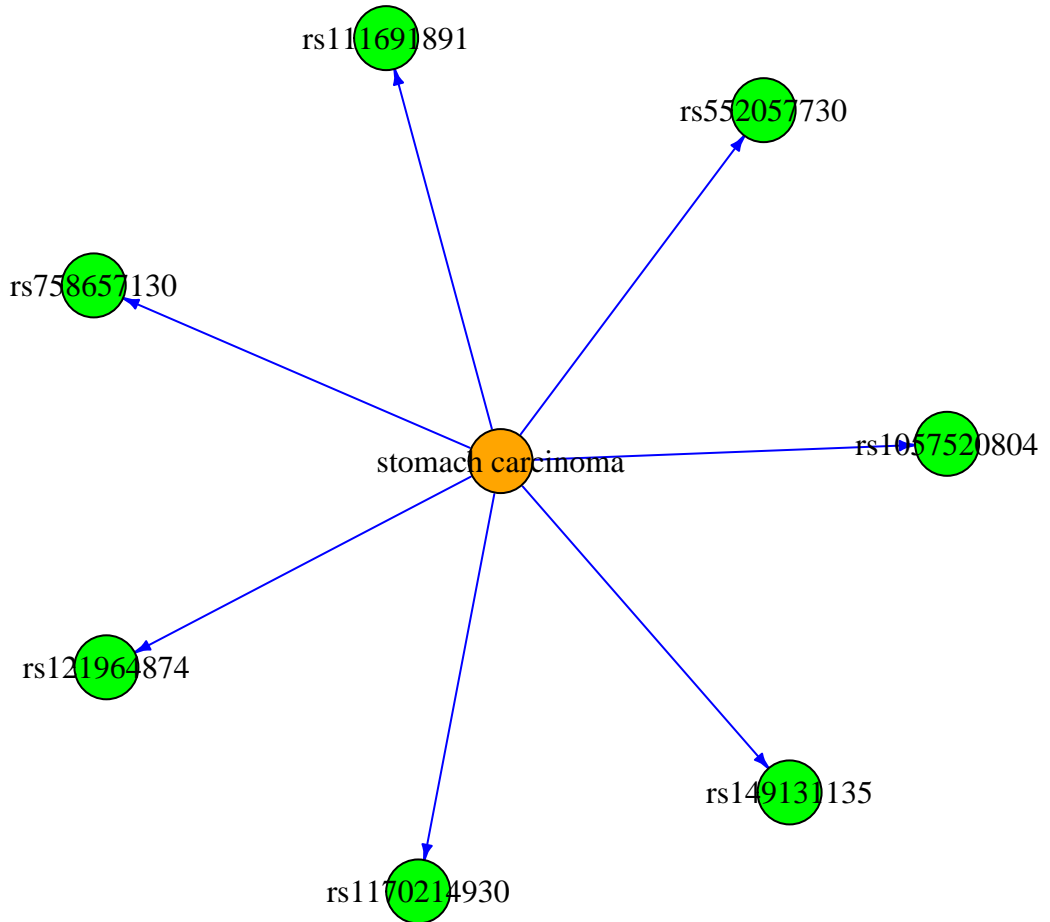

## Variant–Disease Network (biliary tract carcinoma)

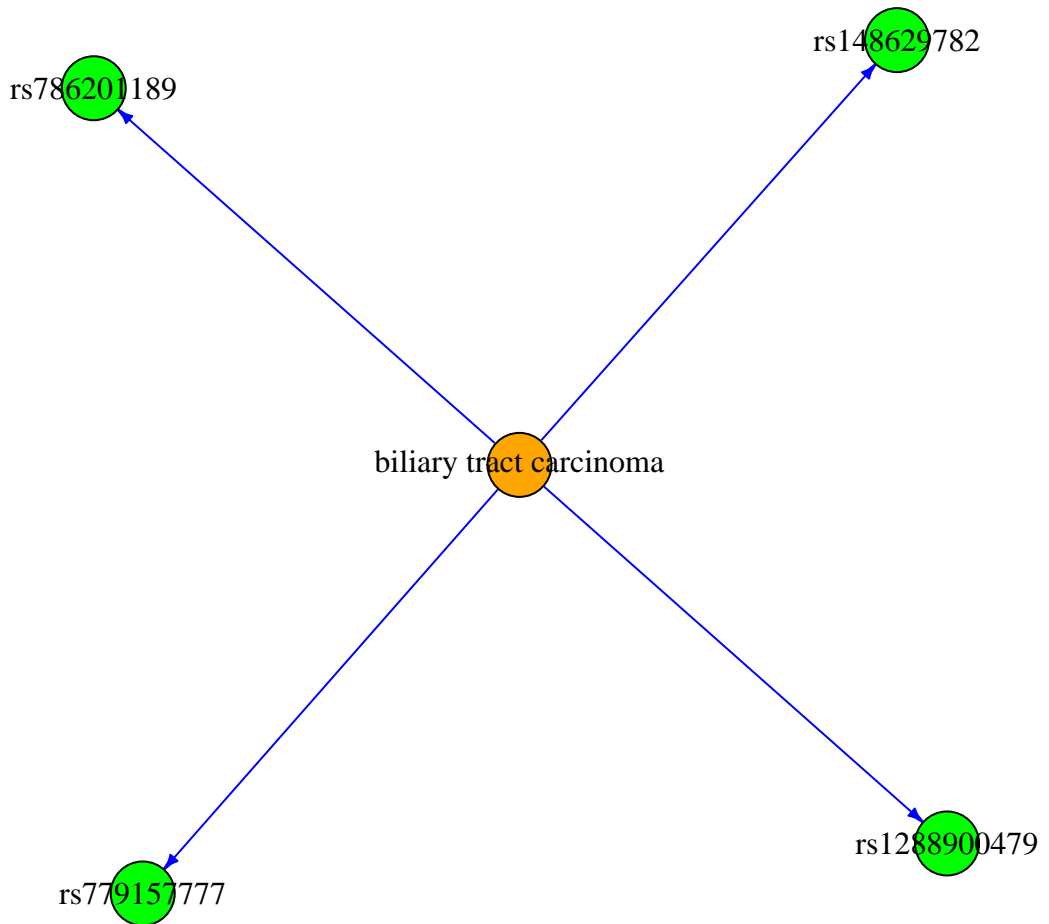

## Variant–Disease Network (kidney carcinoma)

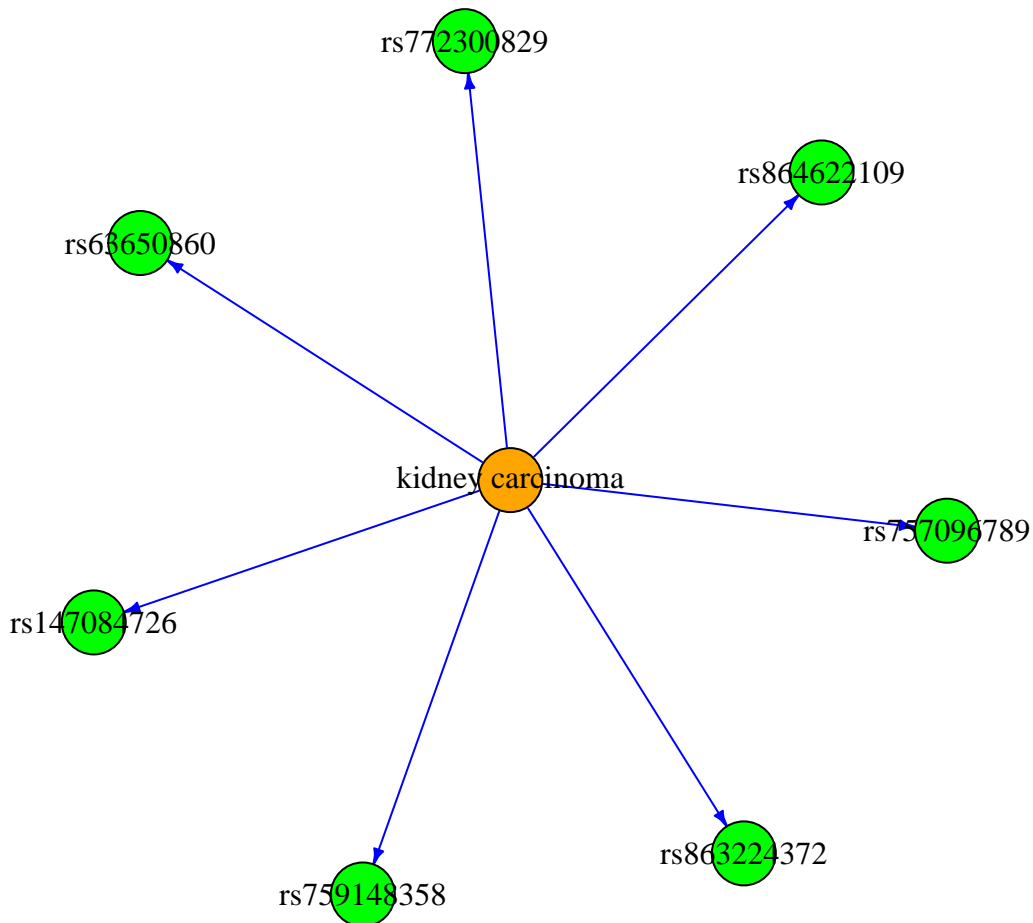

## Variant–Disease Network (thyroid carcinoma)

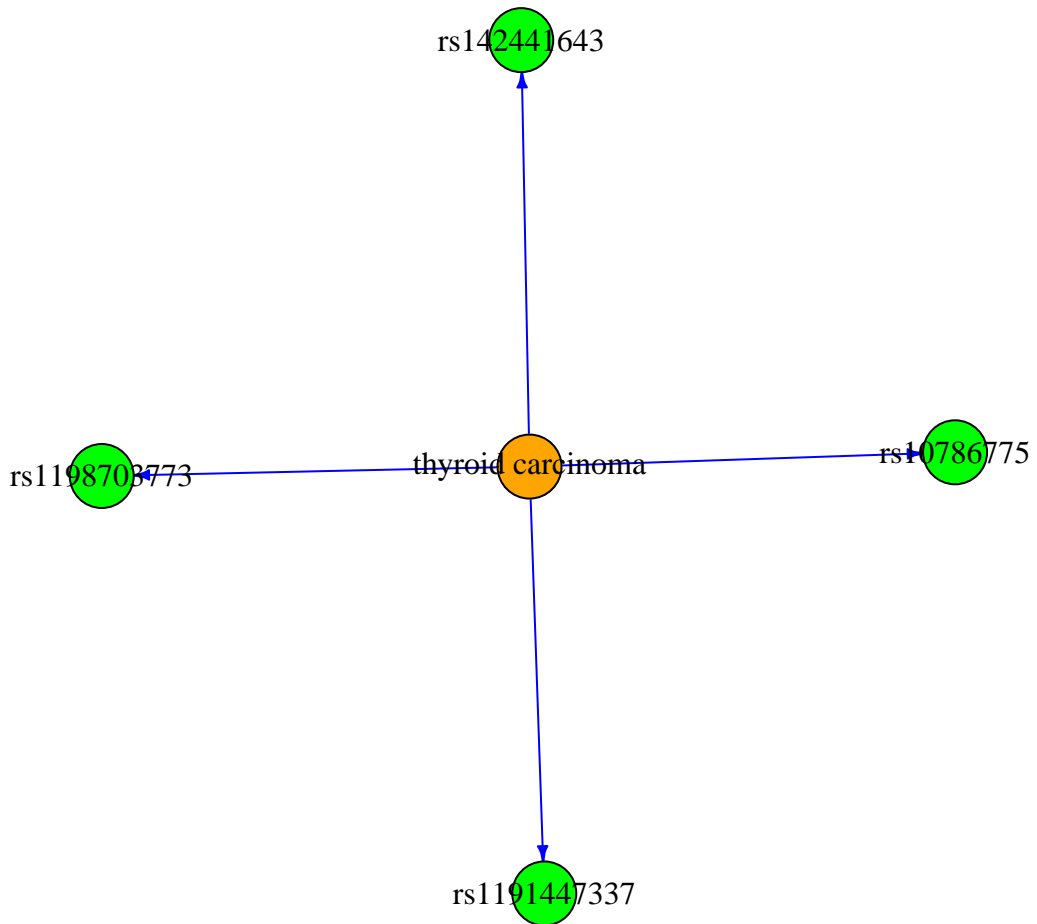



Variant–Disease Network (oesophagus carcinoma)

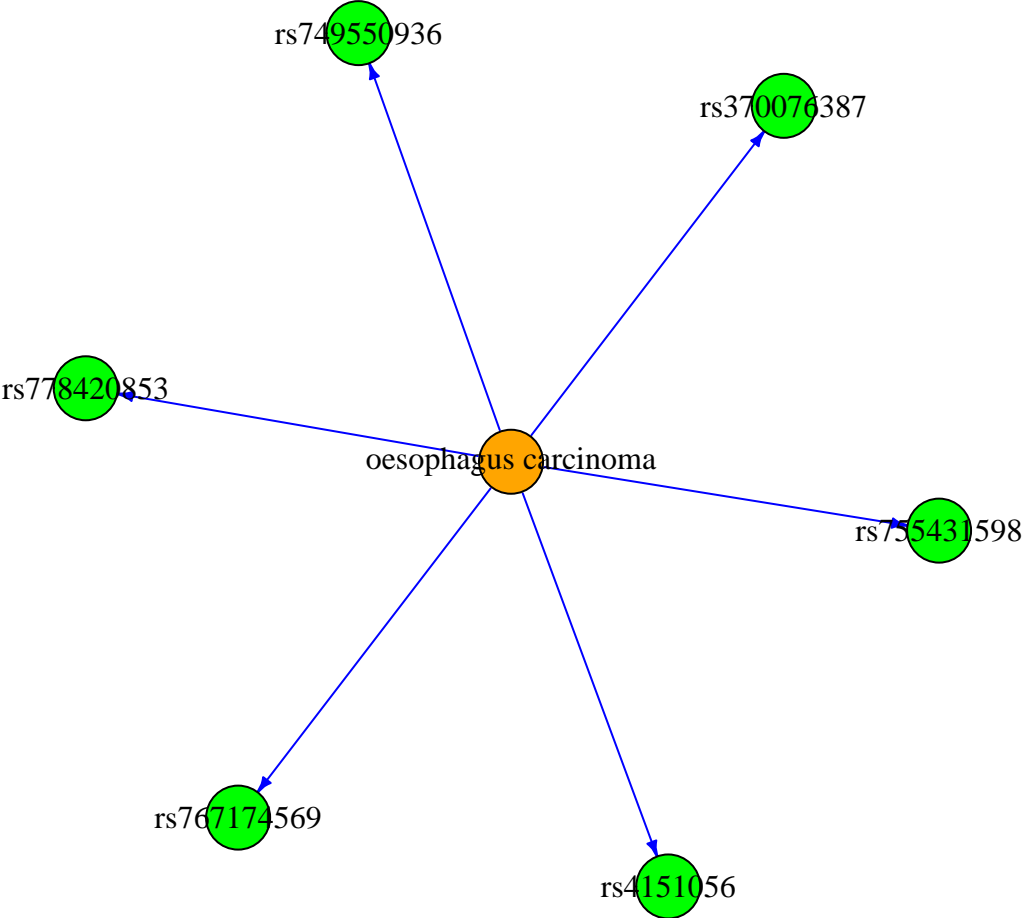

## Variant–Disease Network (pancreas carcinoma)

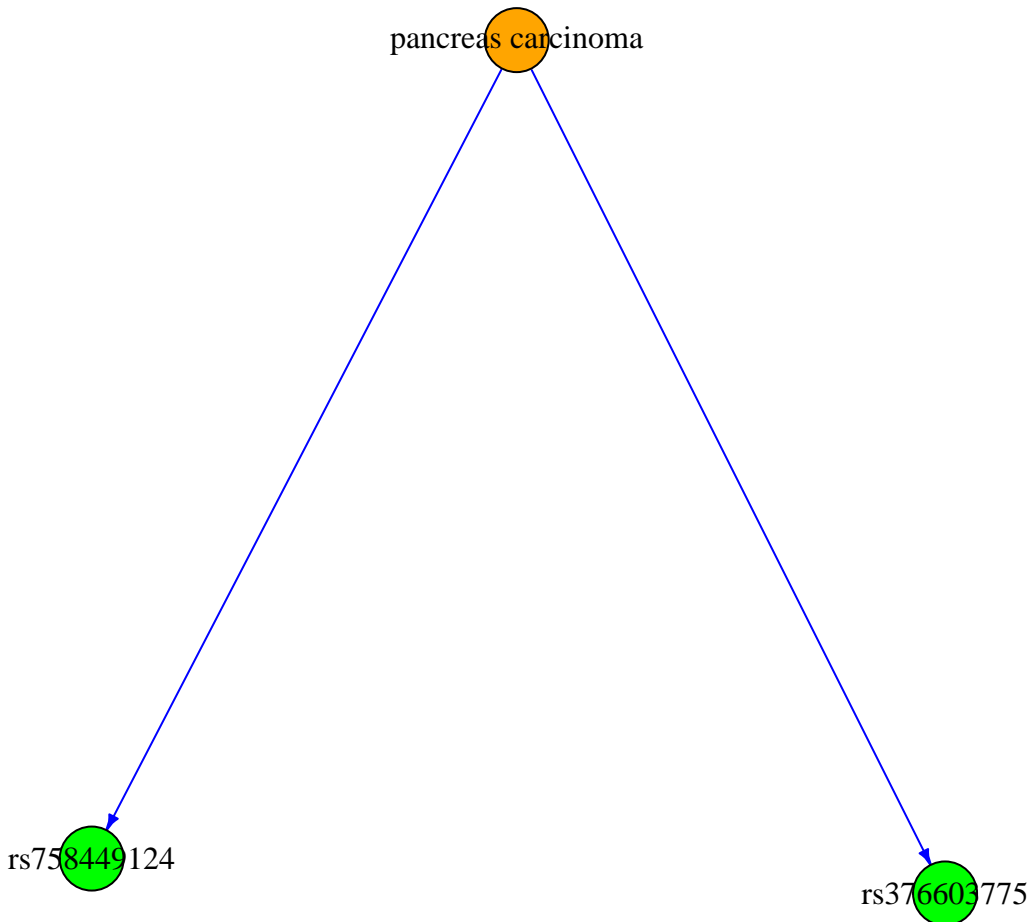

## Variant–Disease Network (ovary carcinoma)

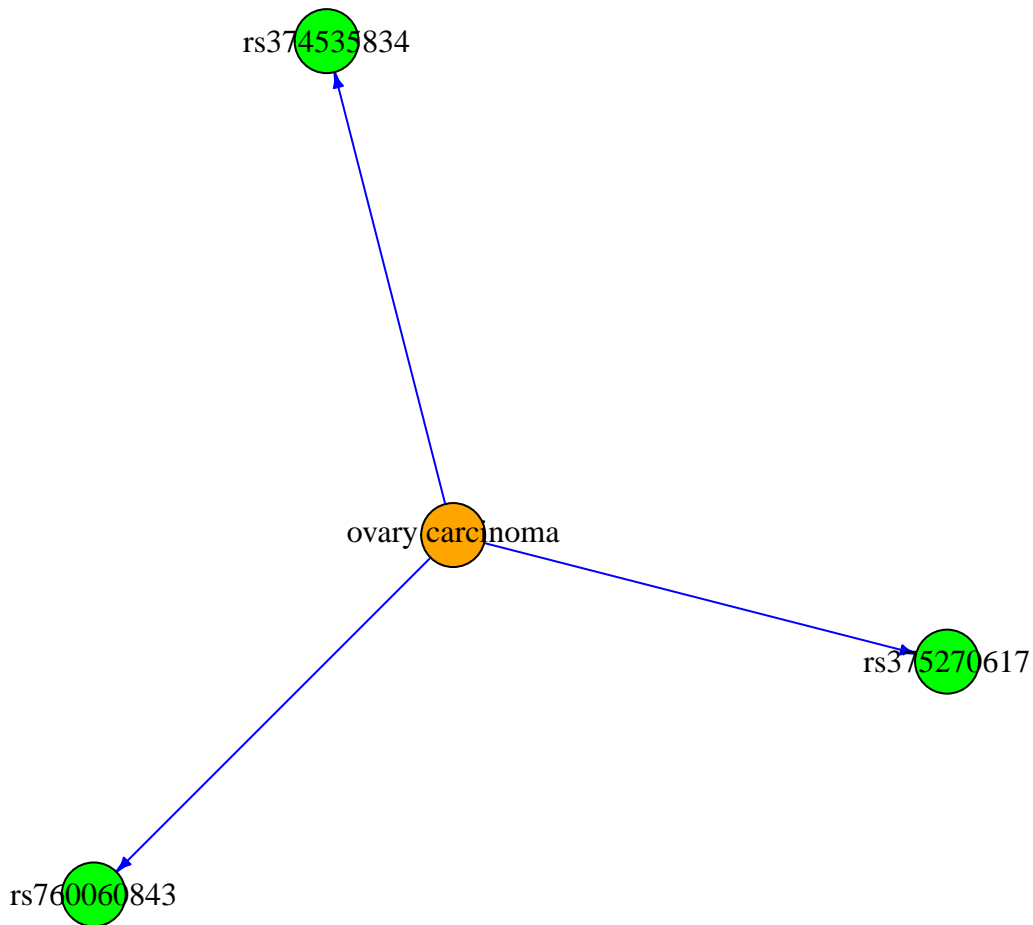

## Variant–Disease Network (small intestine carcinoma)

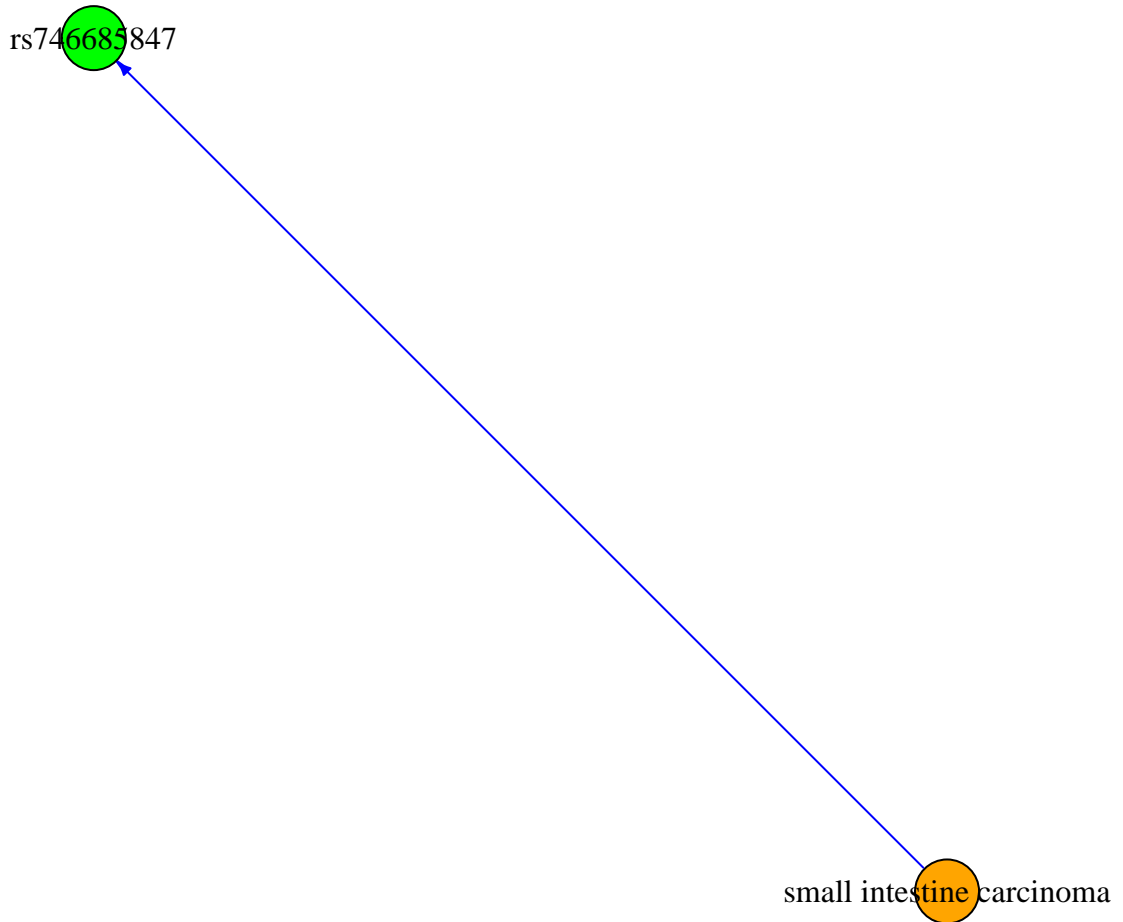

## Variant-Disease Network (fibroepithelial neoplasm)

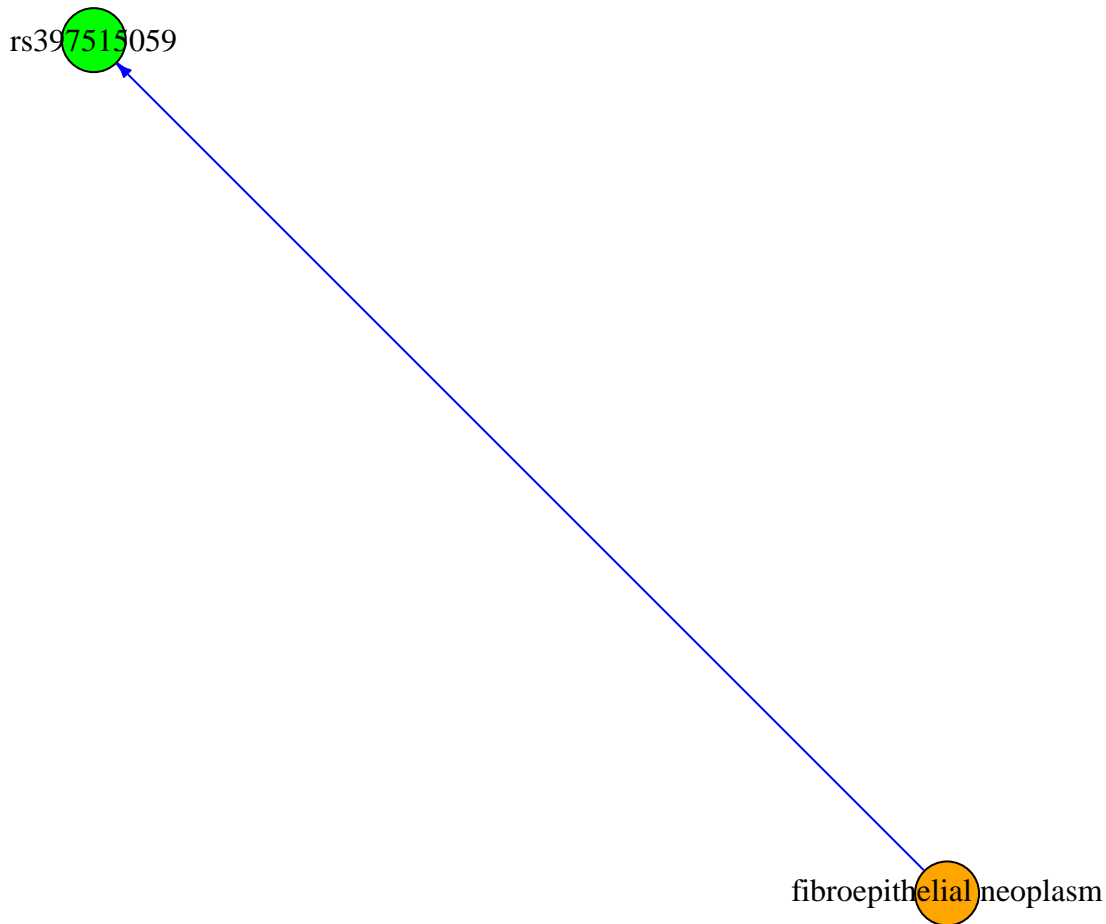

## Variant-Disease Network (fibrosarcoma)

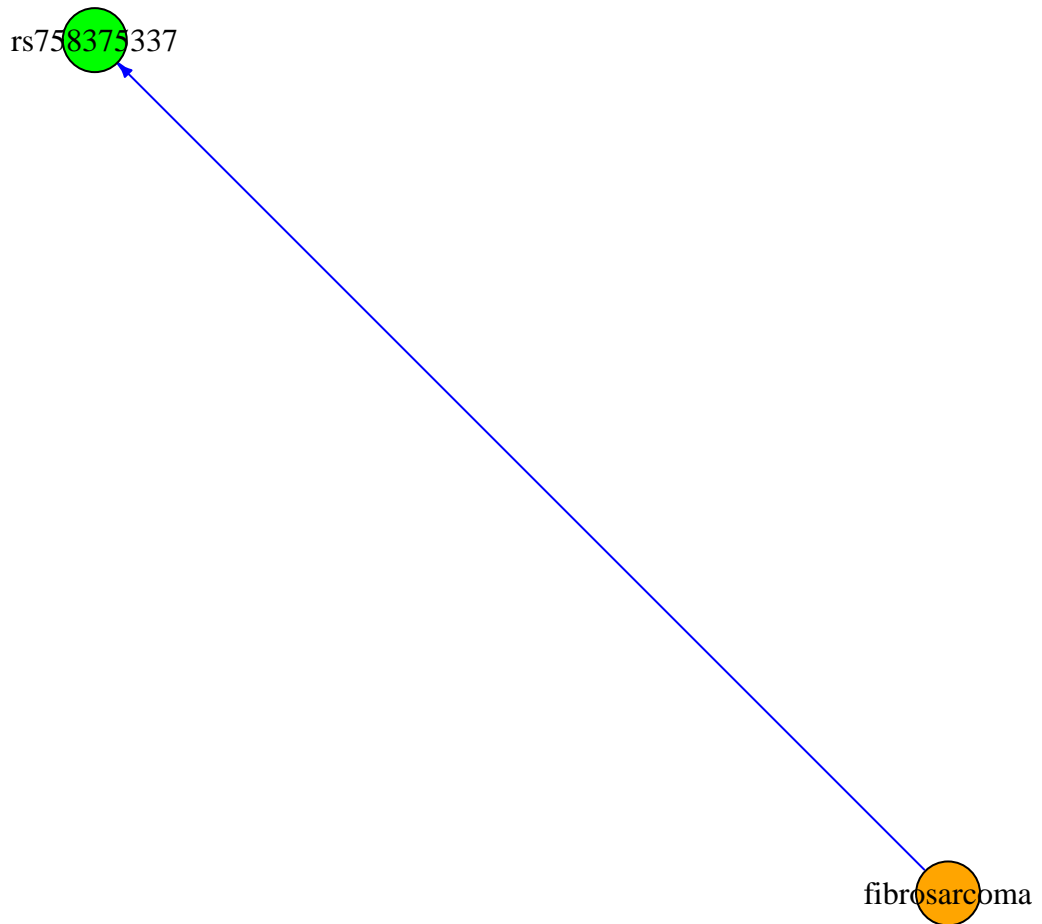

## Variant-Disease Network (gastrointestinal stromal tumour)

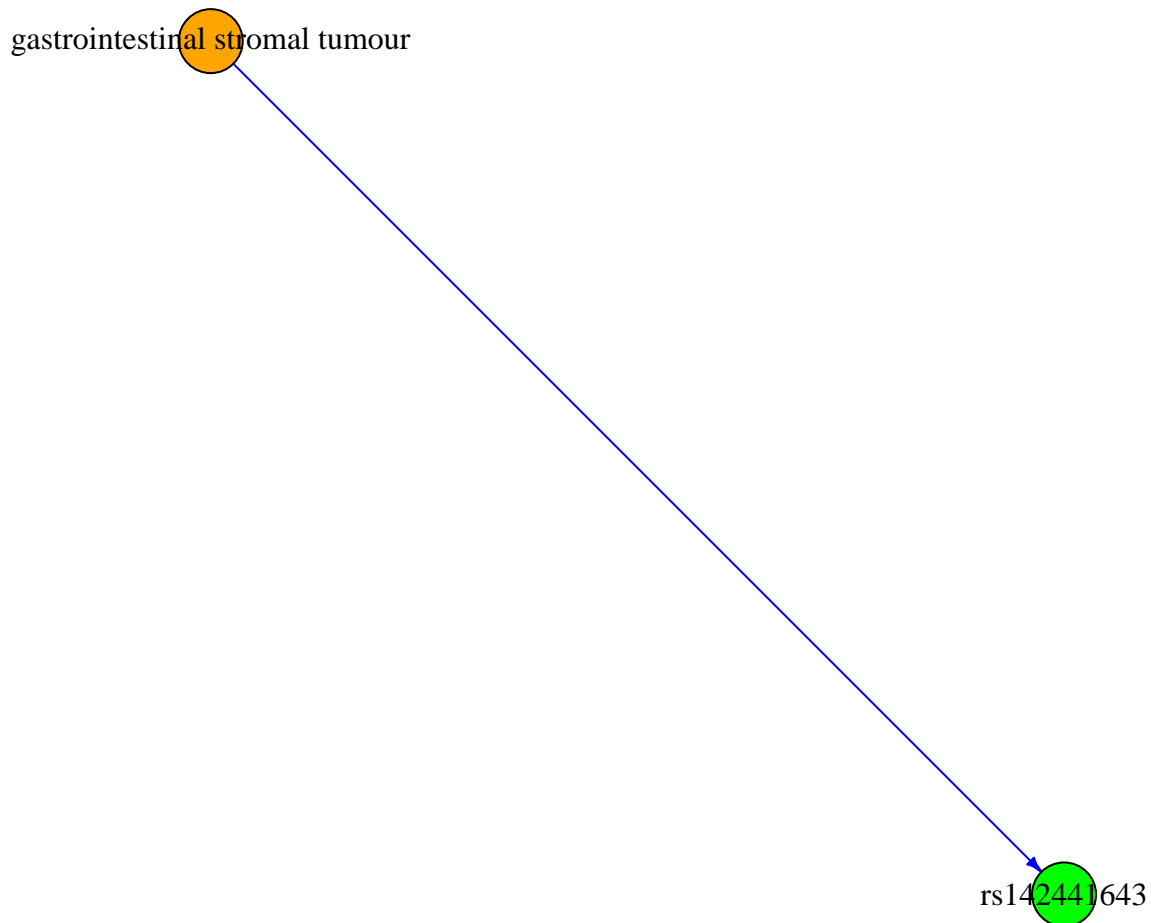

## Variant-Disease Network (germ cell tumour)

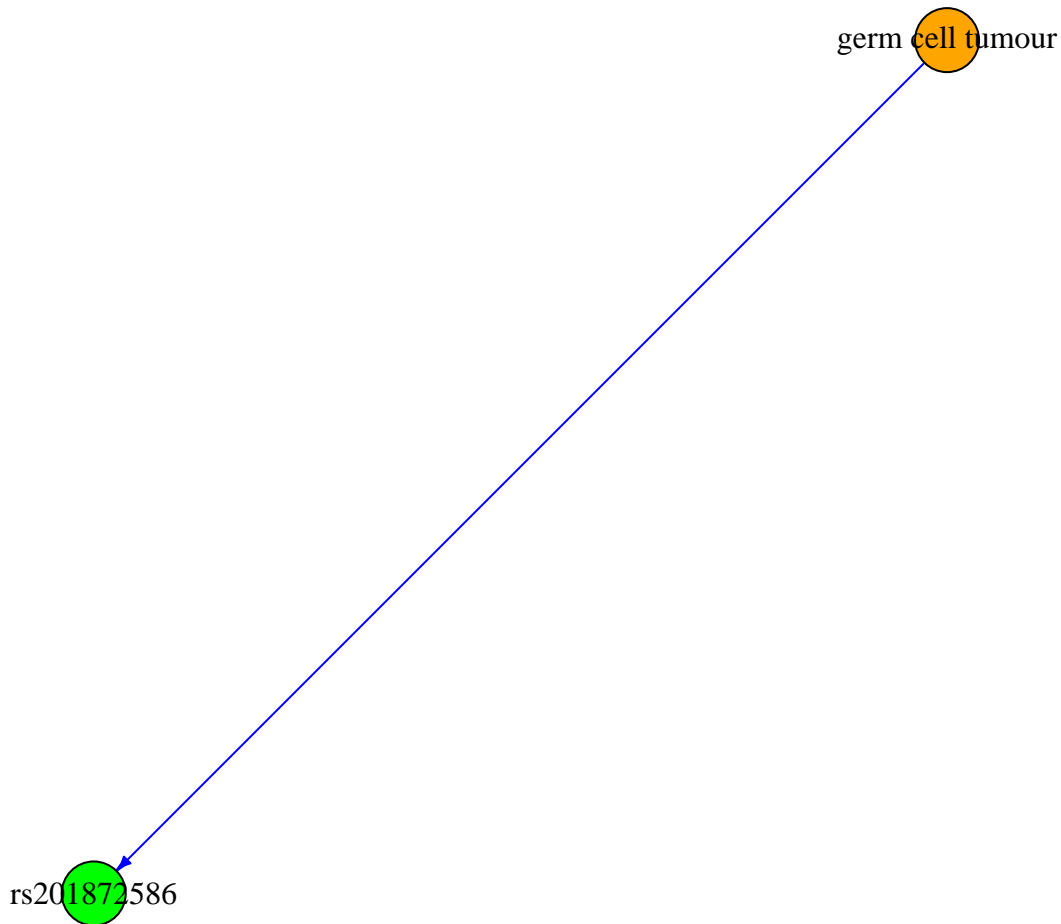



## Variant-Disease Network (glioma)

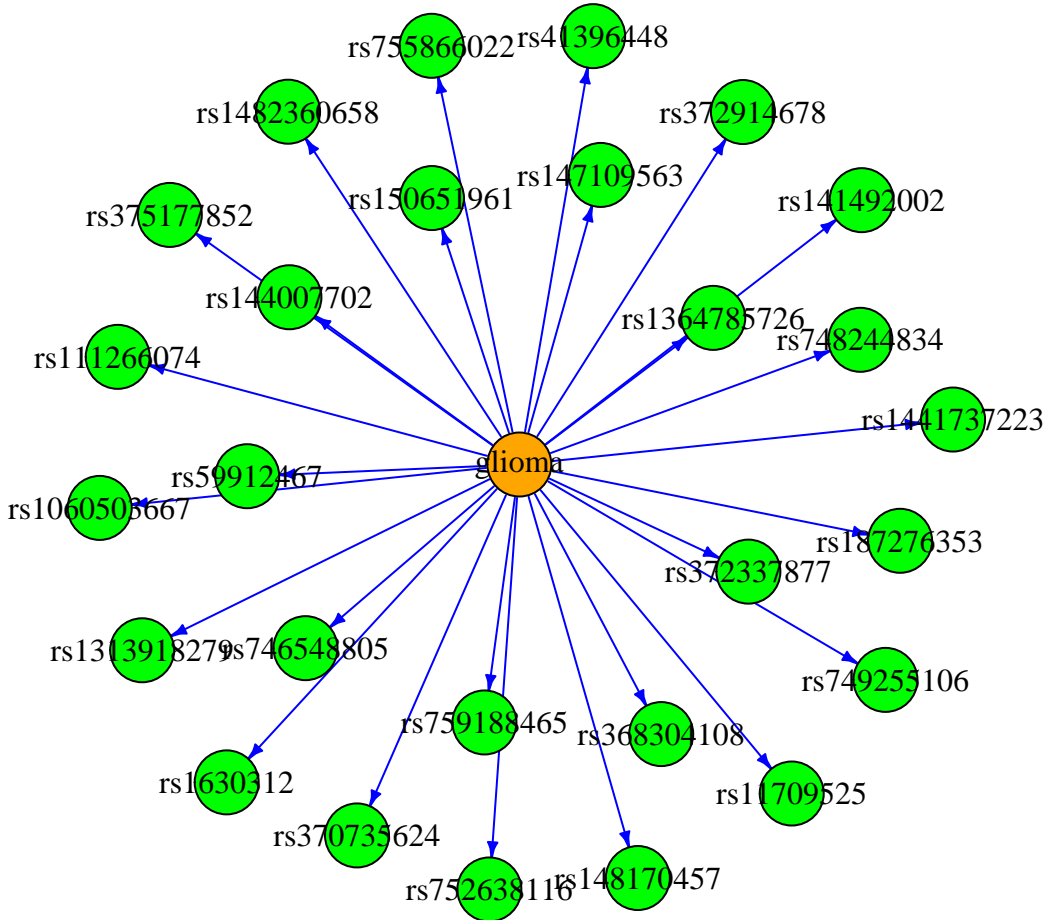

## Variant–Disease Network (haemangioblastoma)

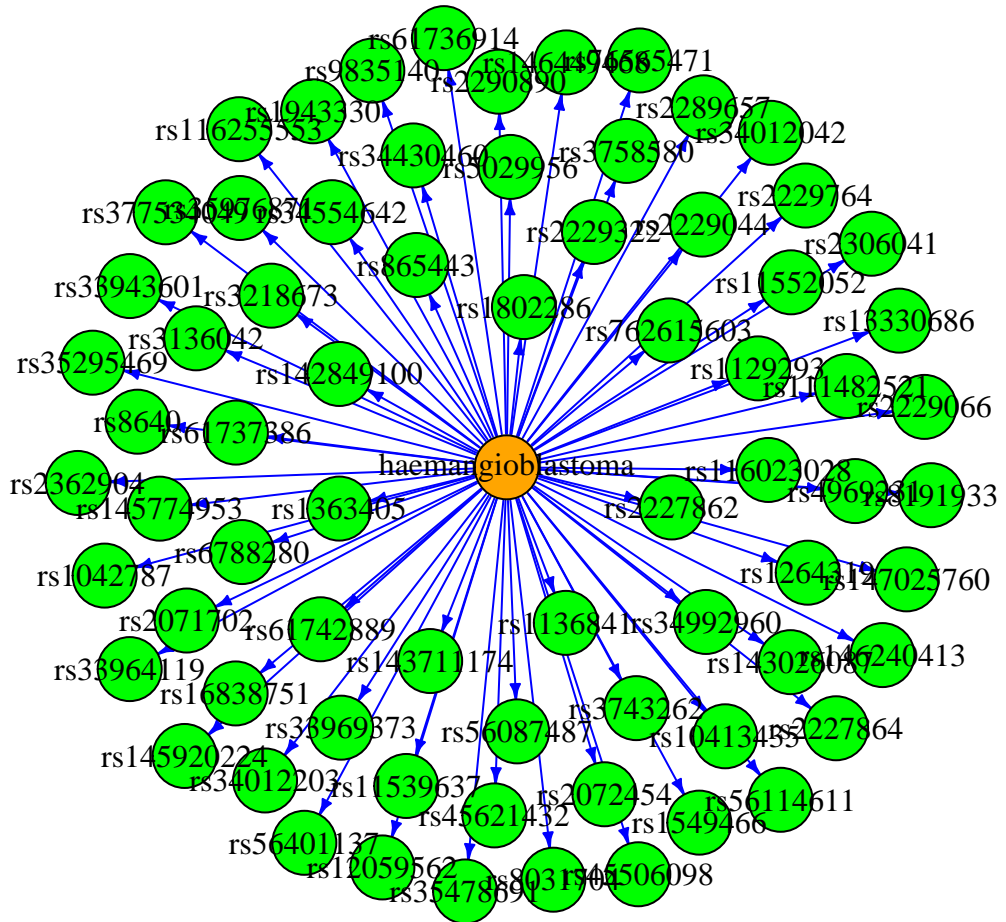

## Variant–Disease Network (haematopoietic neoplasm)

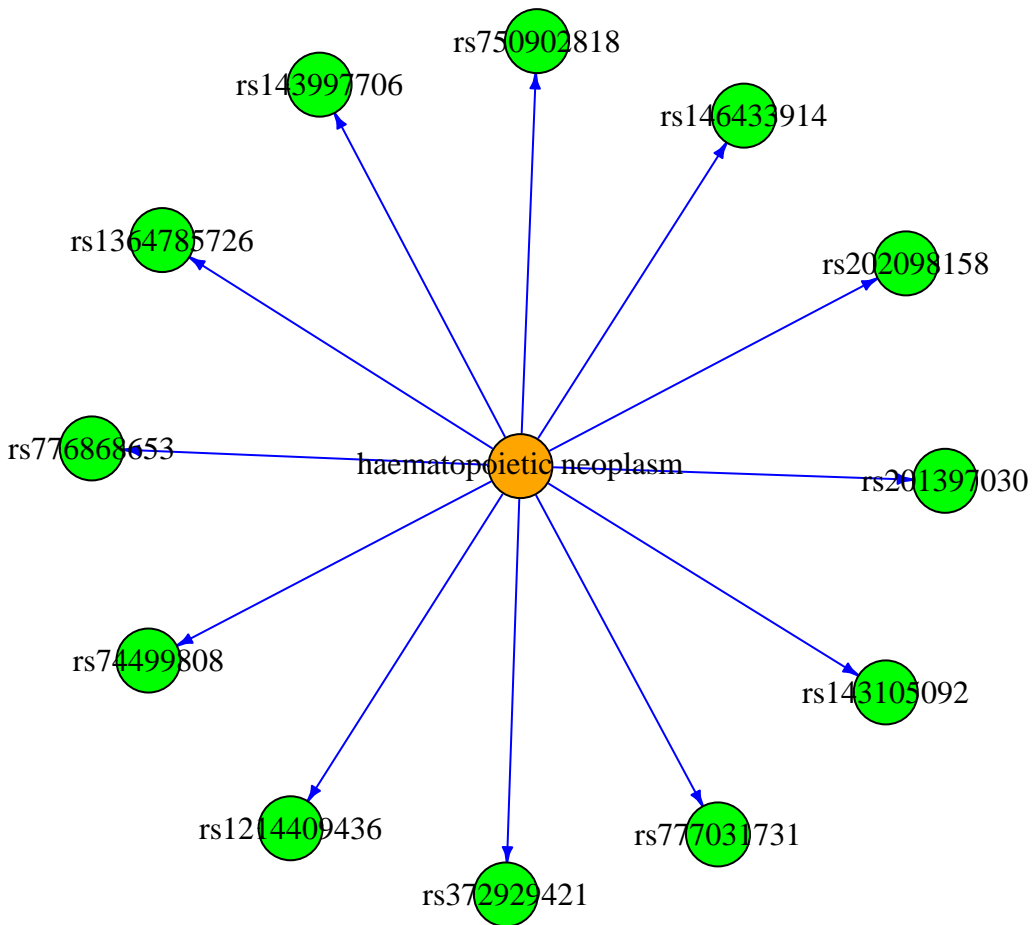

## Variant-Disease Network (liposarcoma)

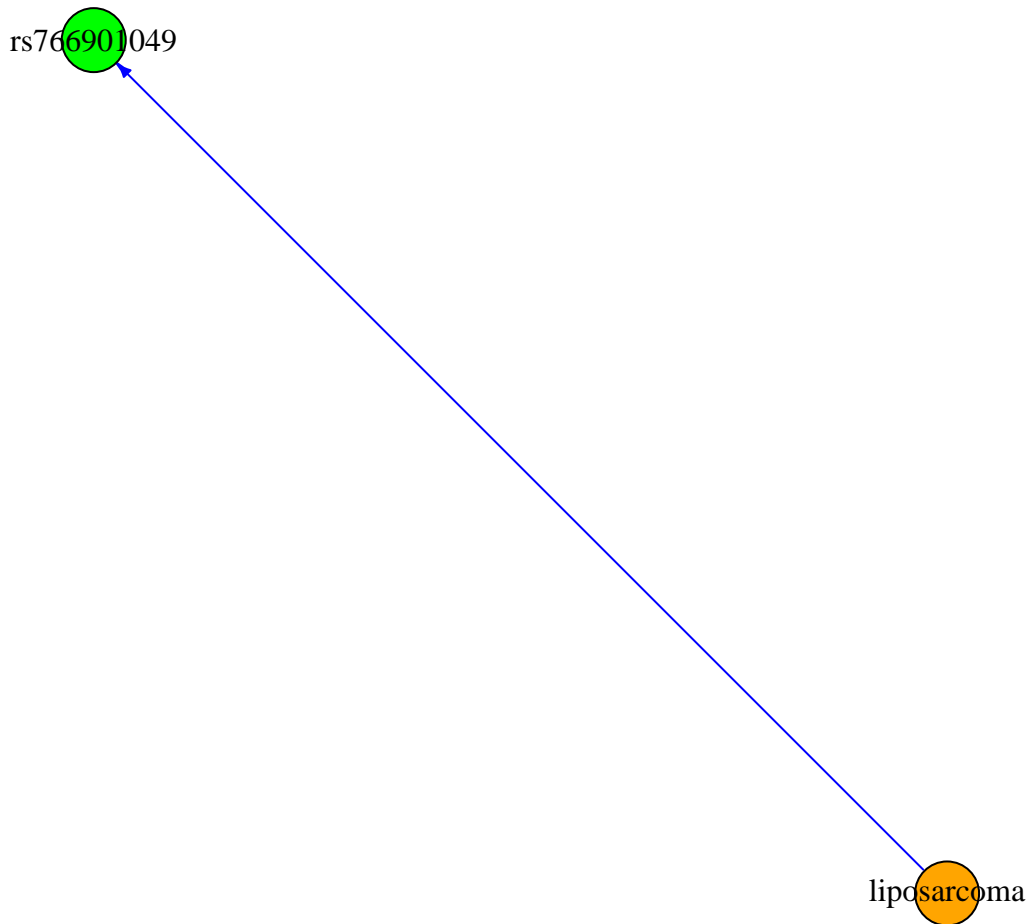

## Variant–Disease Network (lymphoid neoplasm)

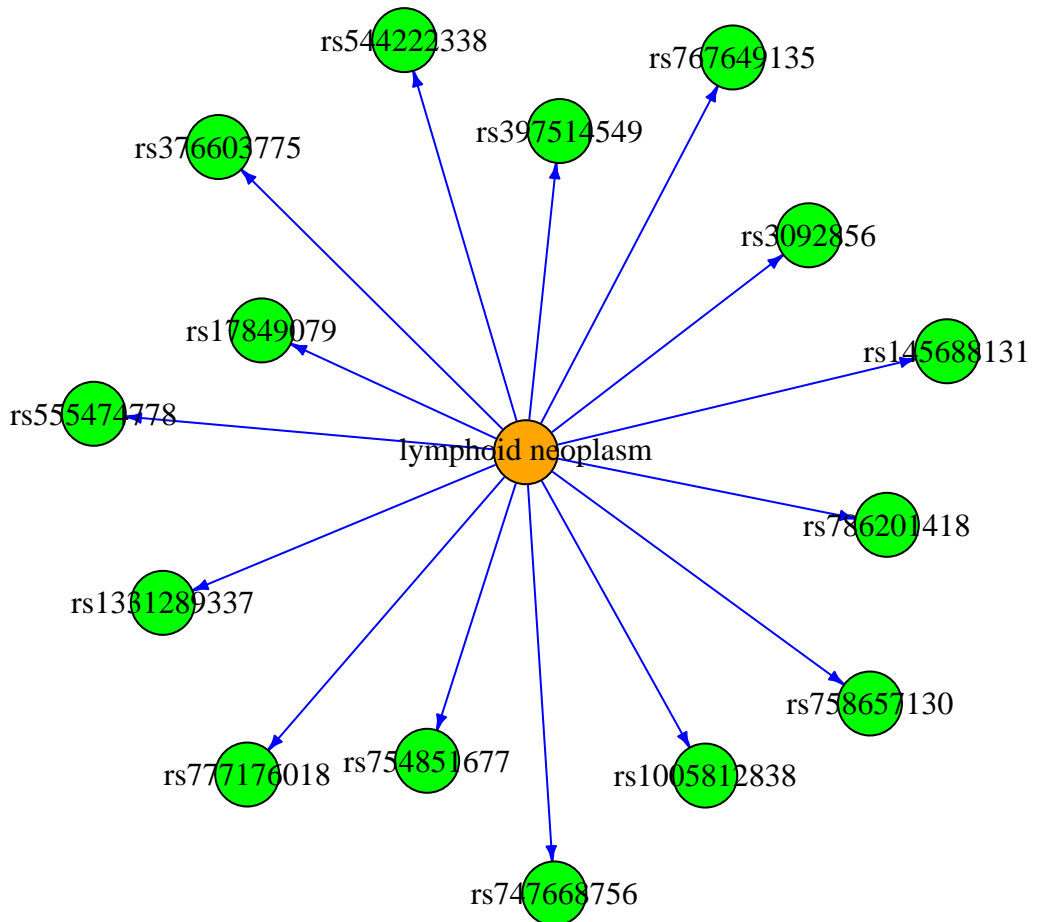

## Variant-Disease Network (malignant melanoma)

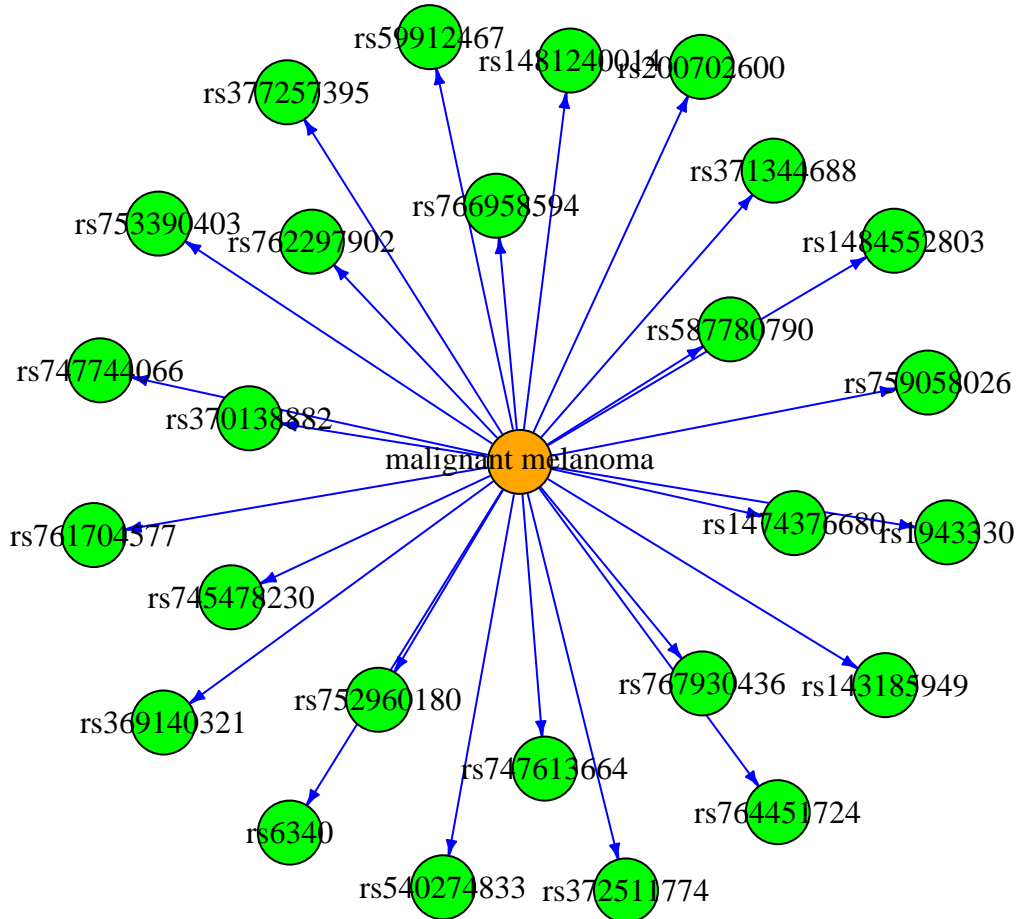

## Variant-Disease Network (meningioma)

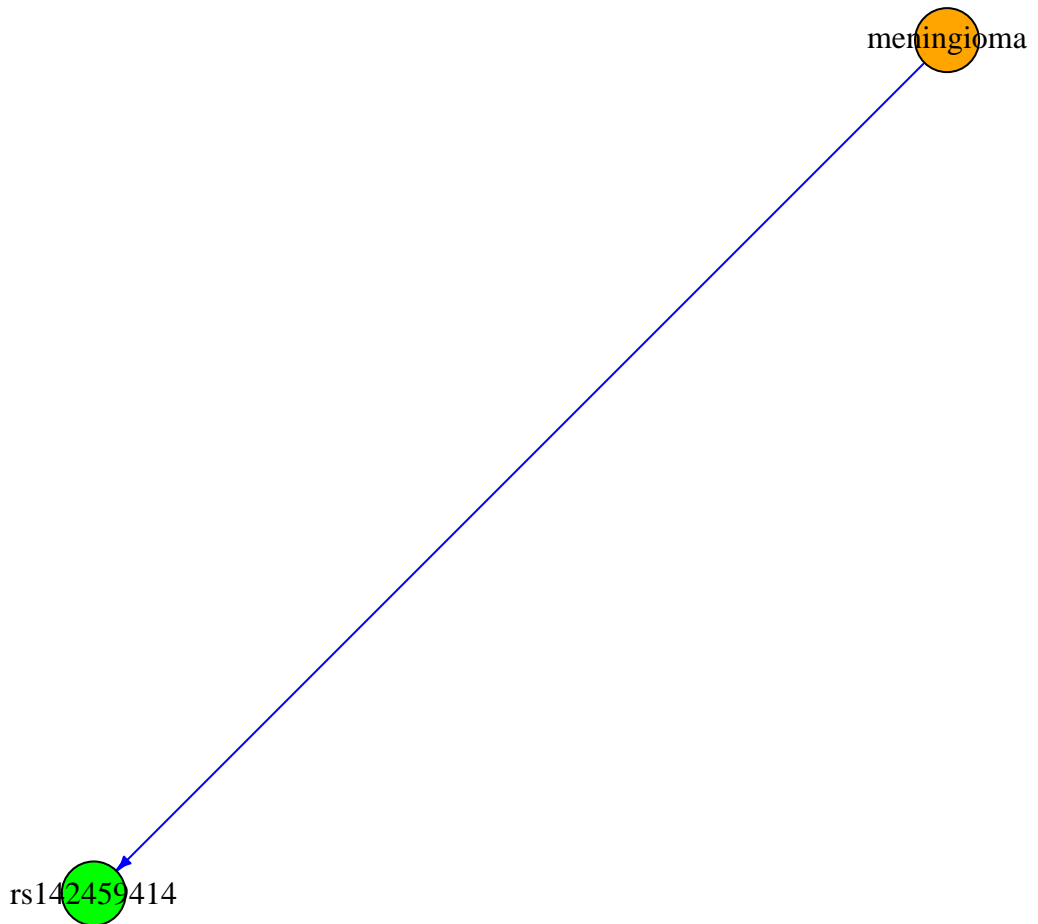

## Variant–Disease Network (mesothelioma)

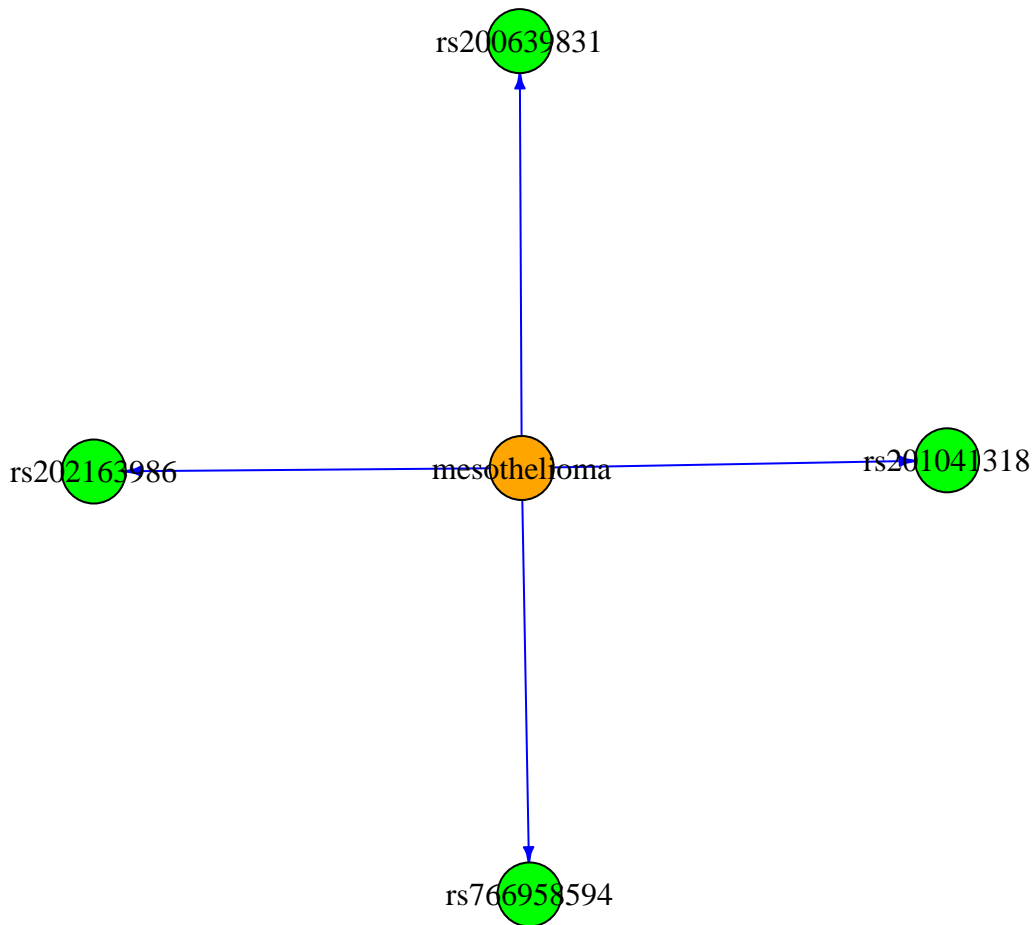



# Variant–Disease Network (primitive neuroectodermal tumour–medulloblastoma)

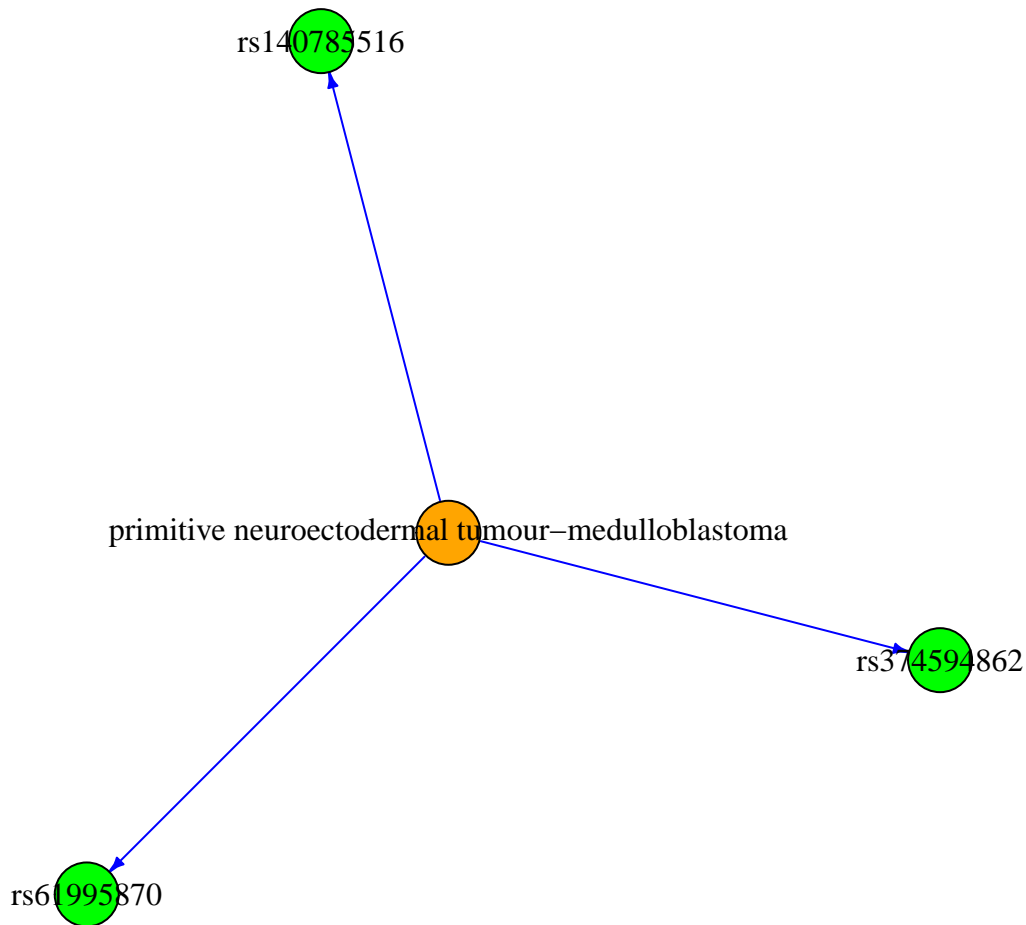

## Variant–Disease Network ( Autosomal Dominant)

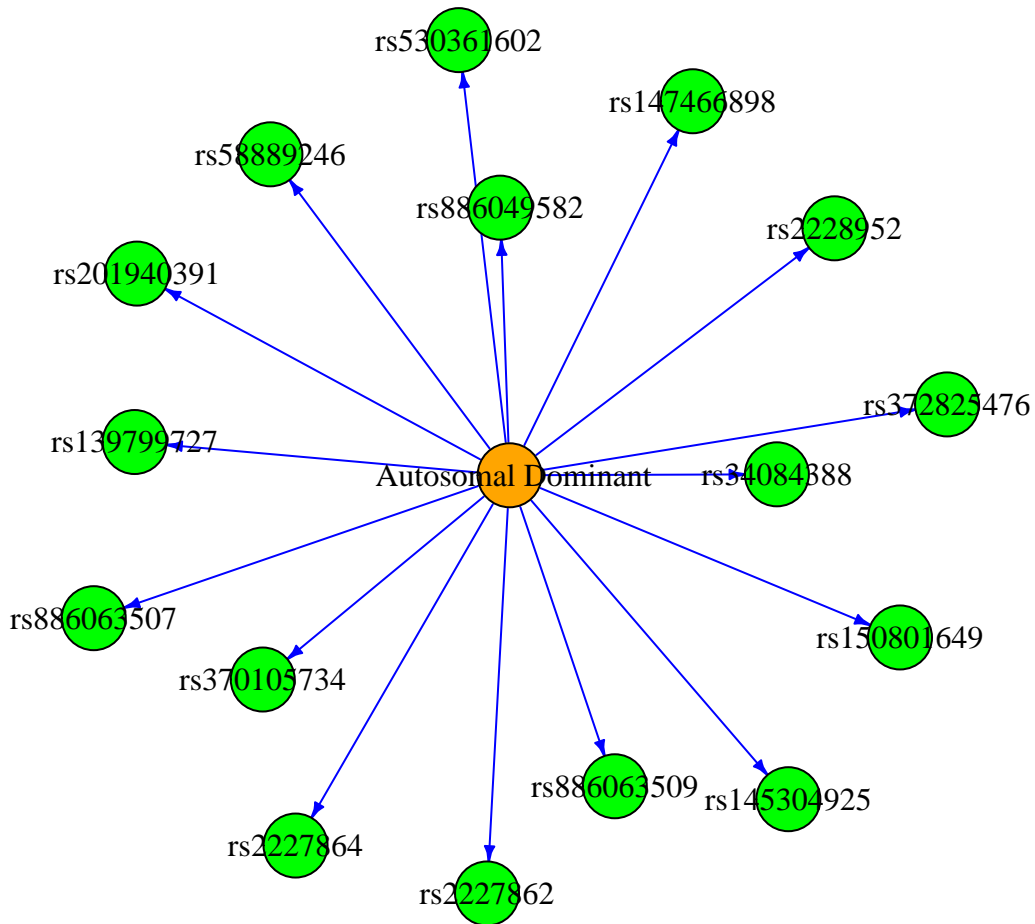

## Variant–Disease Network ( Autosomal Recessive)

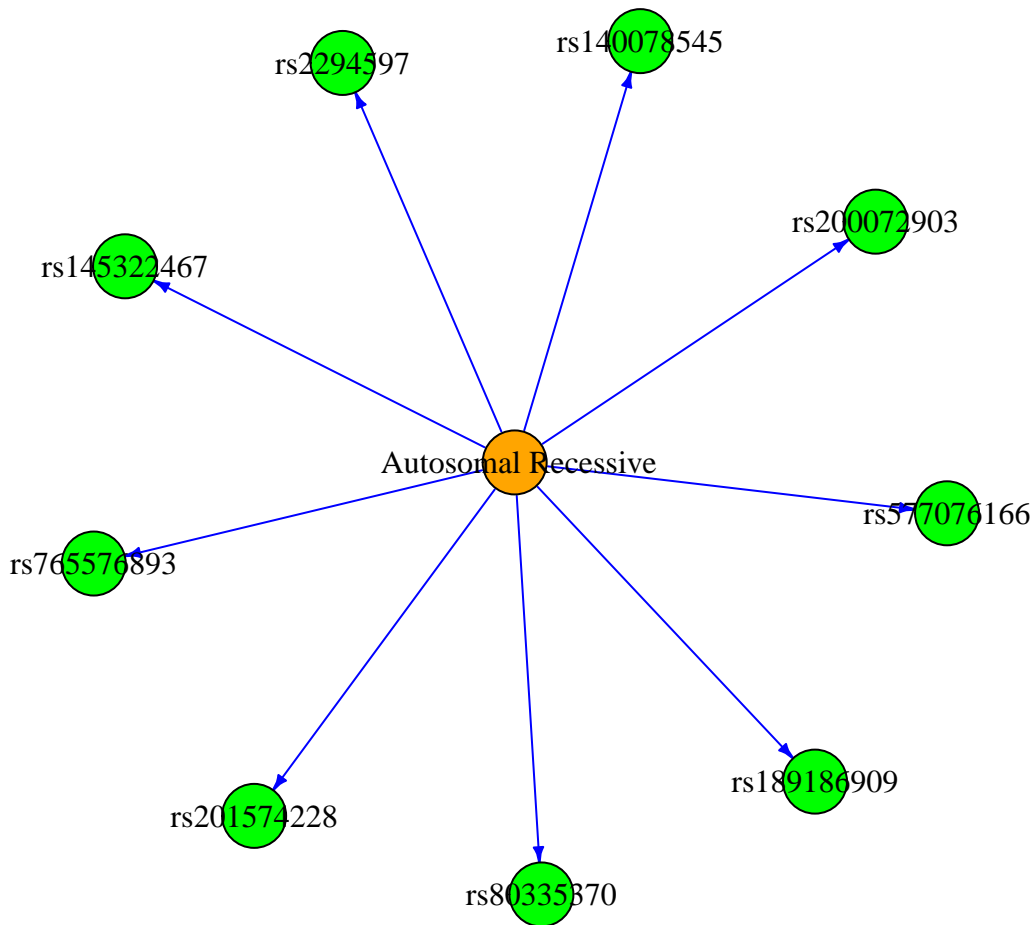

## Variant-Disease Network ( Deafness)

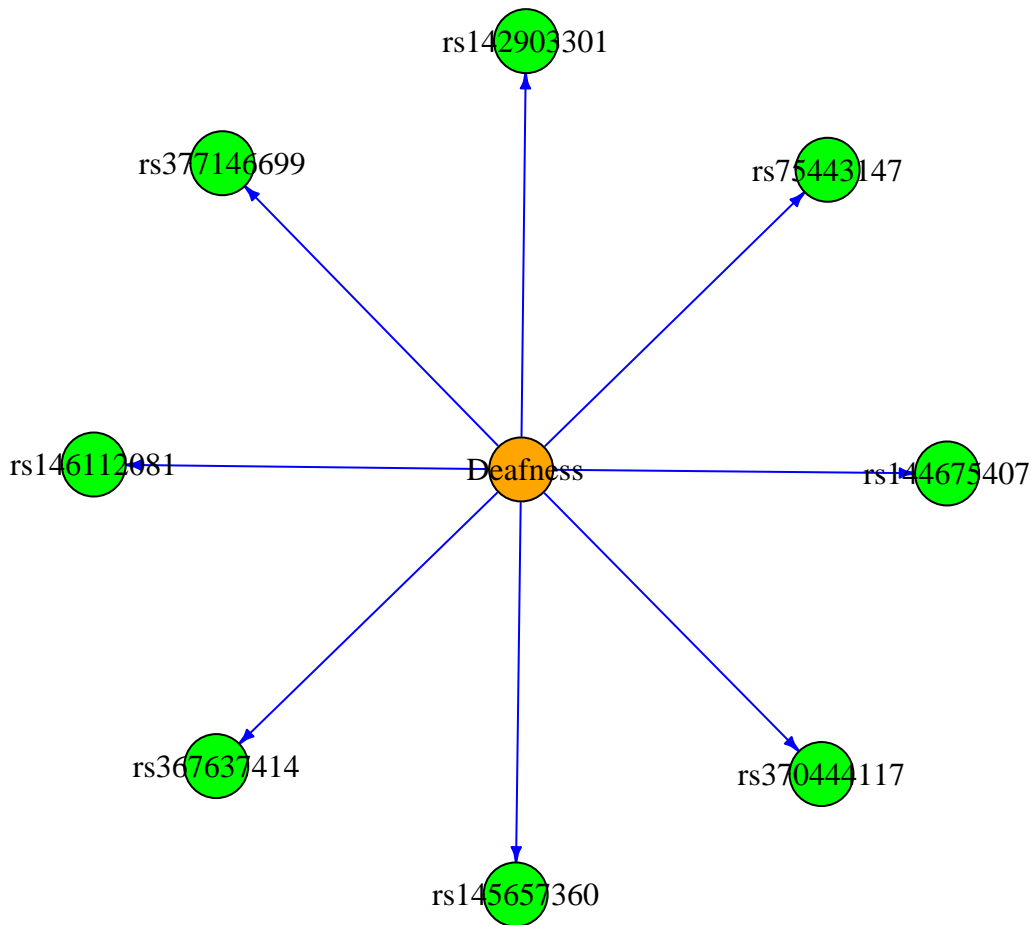

## Variant–Disease Network ( Epilepsy)

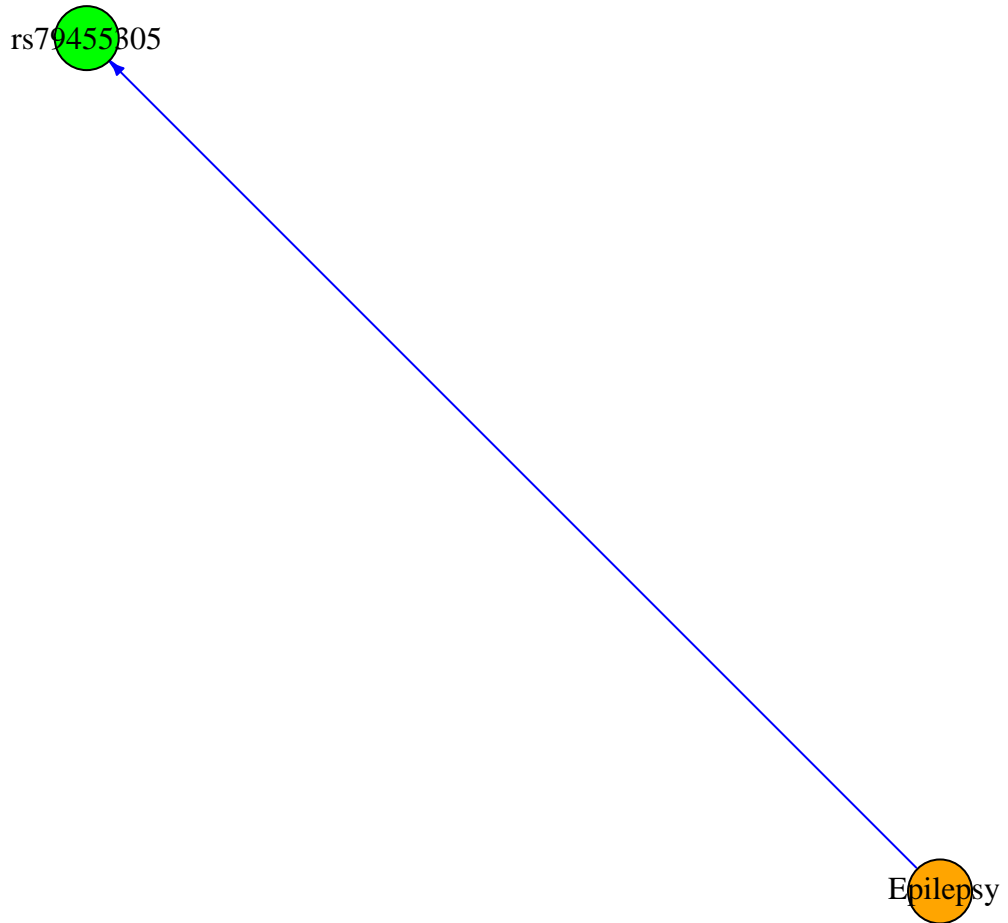

## Variant-Disease Network (Abetalipoproteinaemia)

rs141736123

Abetalipoproteinaemia

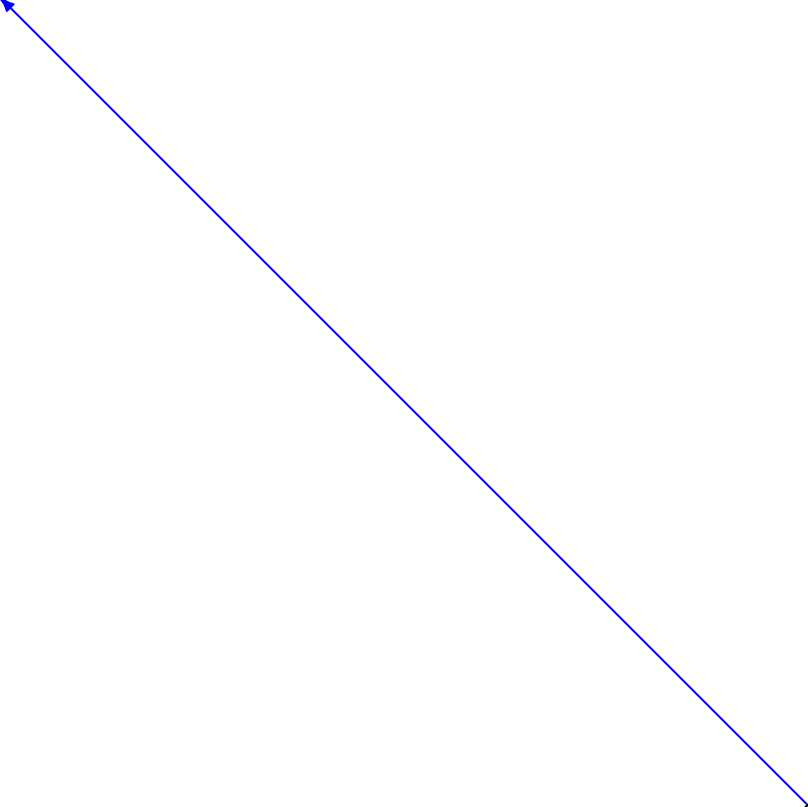

## Variant-Disease Network (Abnormal bleeding)

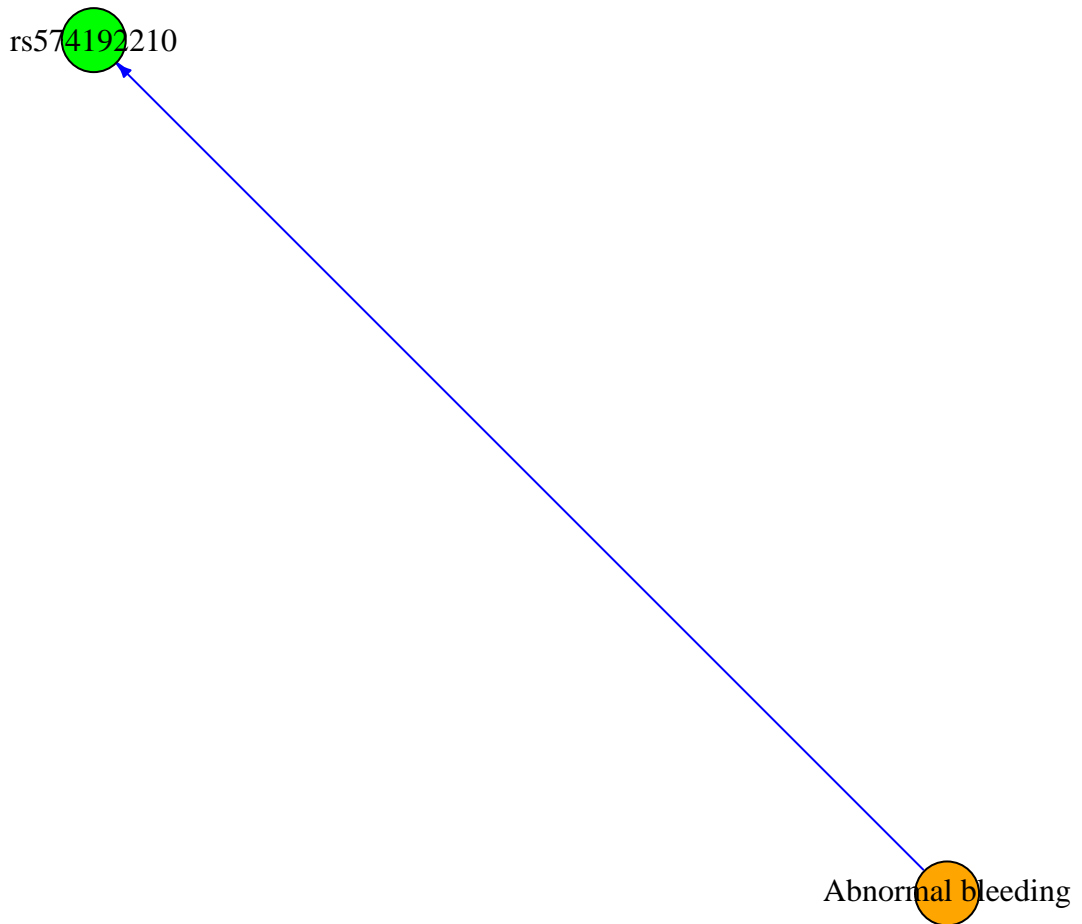

Variant–Disease Network (Abnormality of neuronal migration)

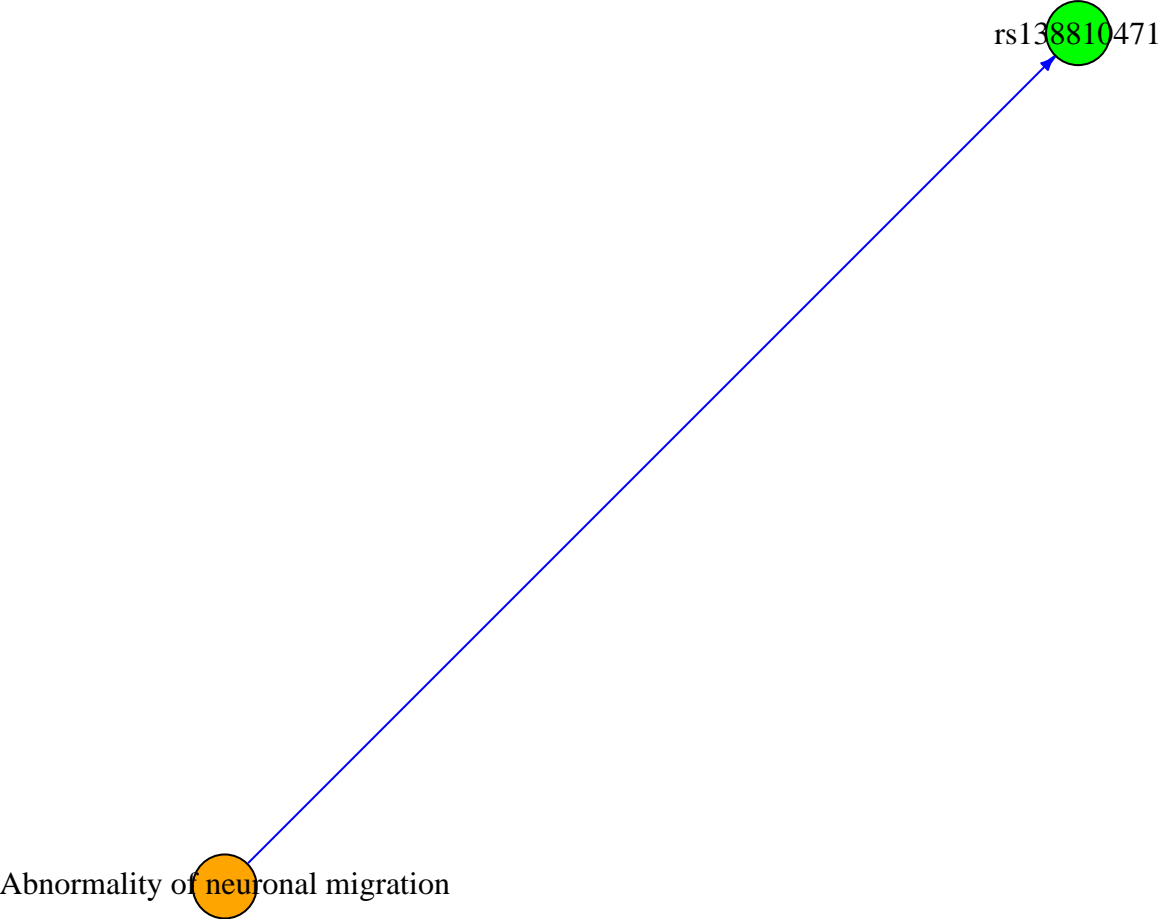



**Variant–Disease Network (Abnormality of the dentition)**

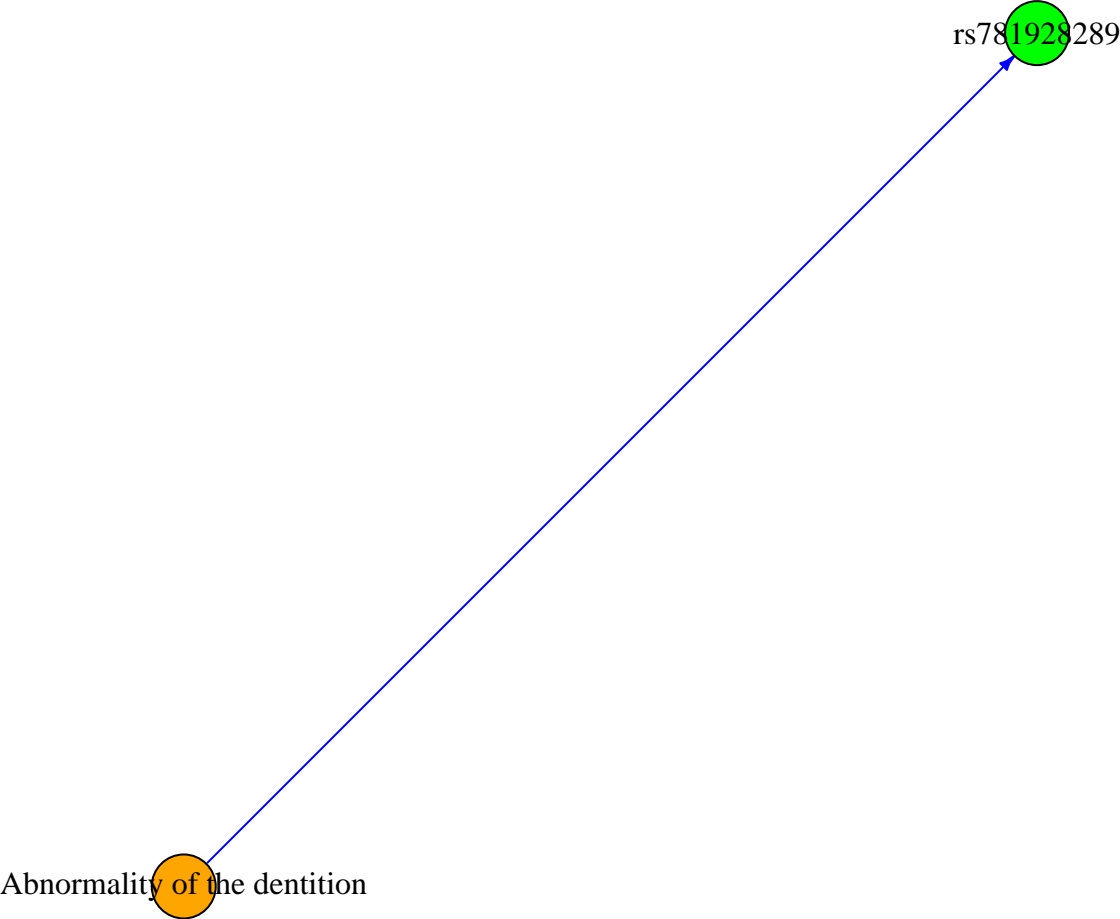

## Variant–Disease Network (Absent speech)

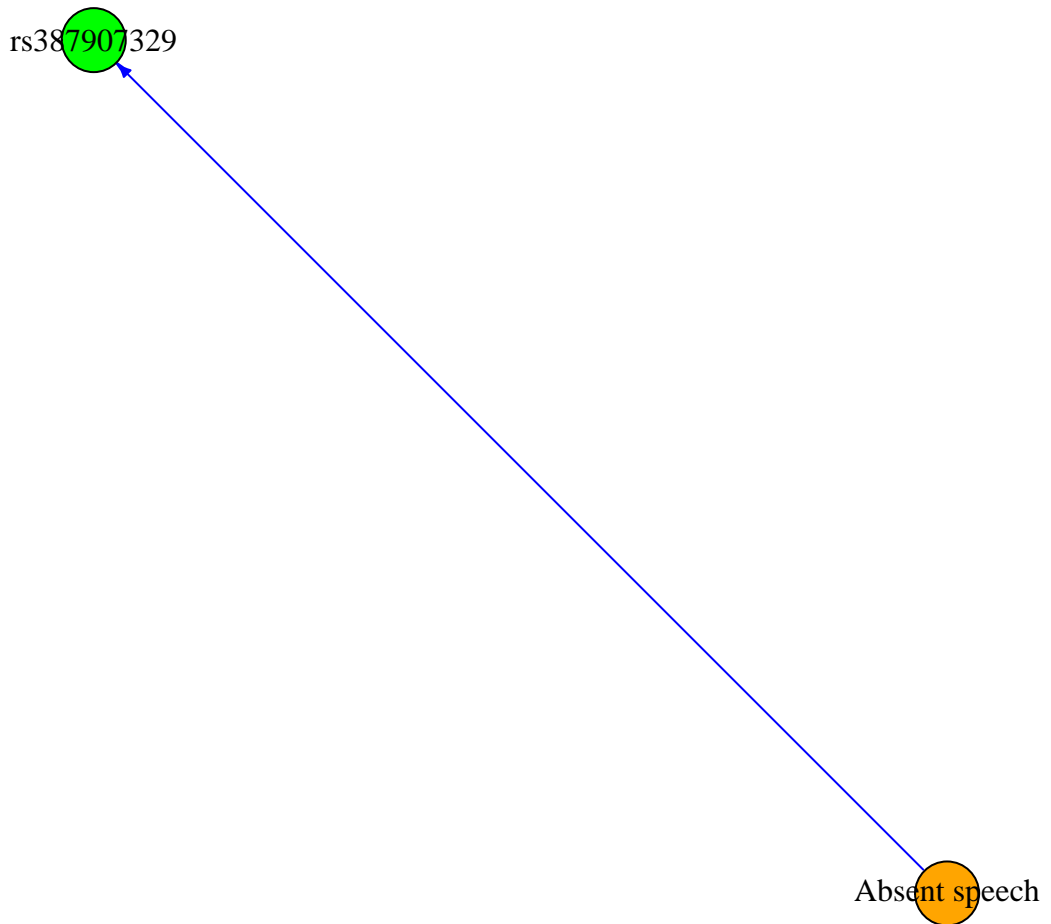

## Variant-Disease Network (Achondrogenesis)

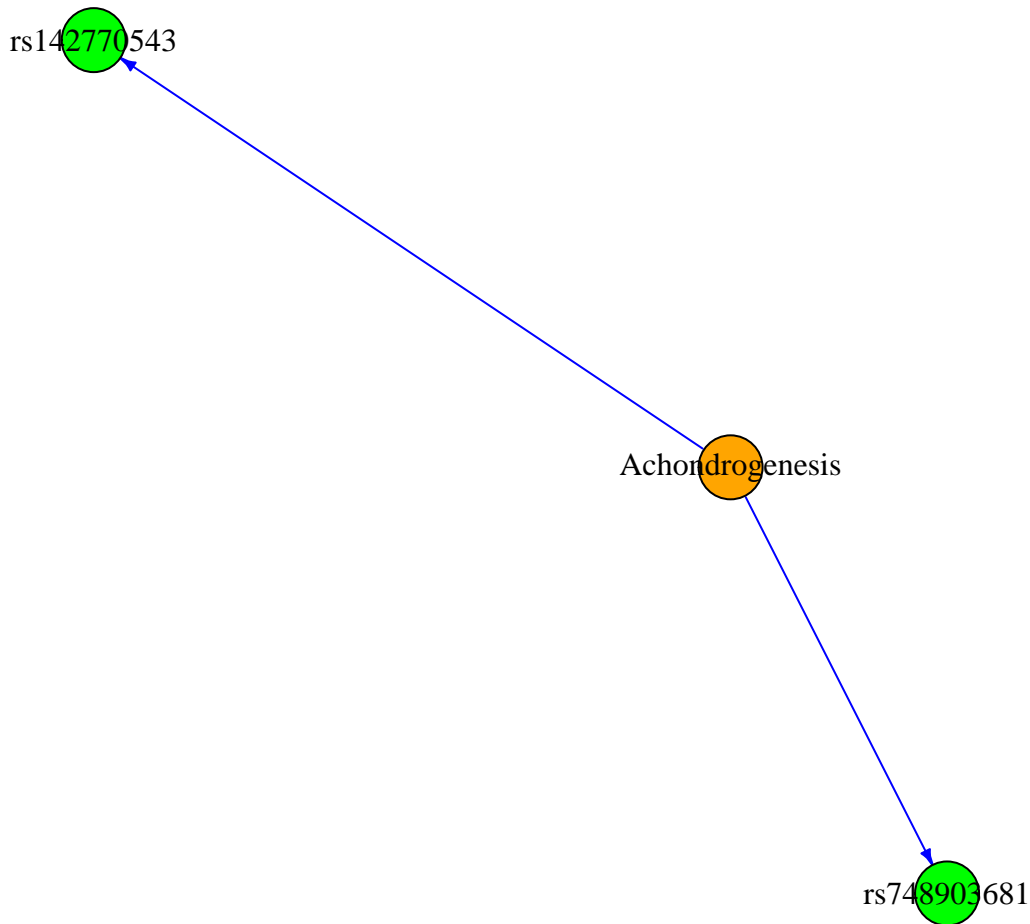

## Variant–Disease Network (Achromatopsia)

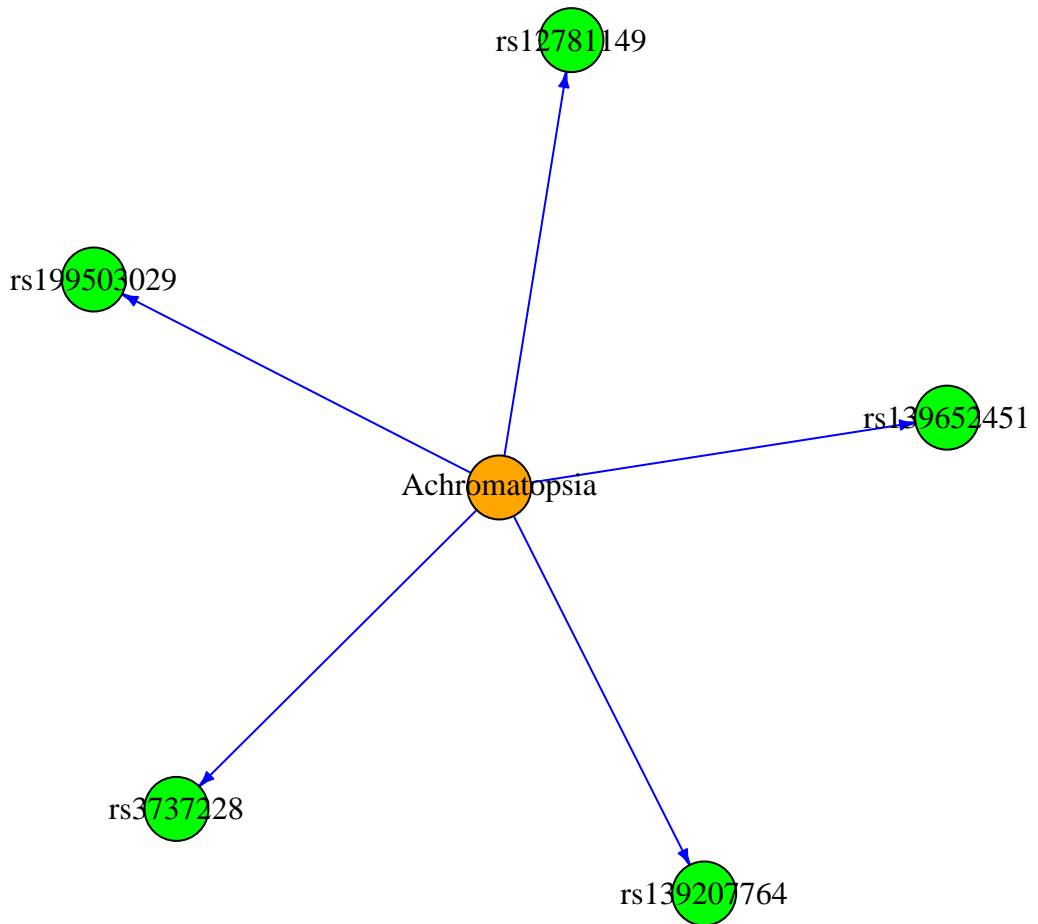

## Variant-Disease Network (Achromatopsia 3)

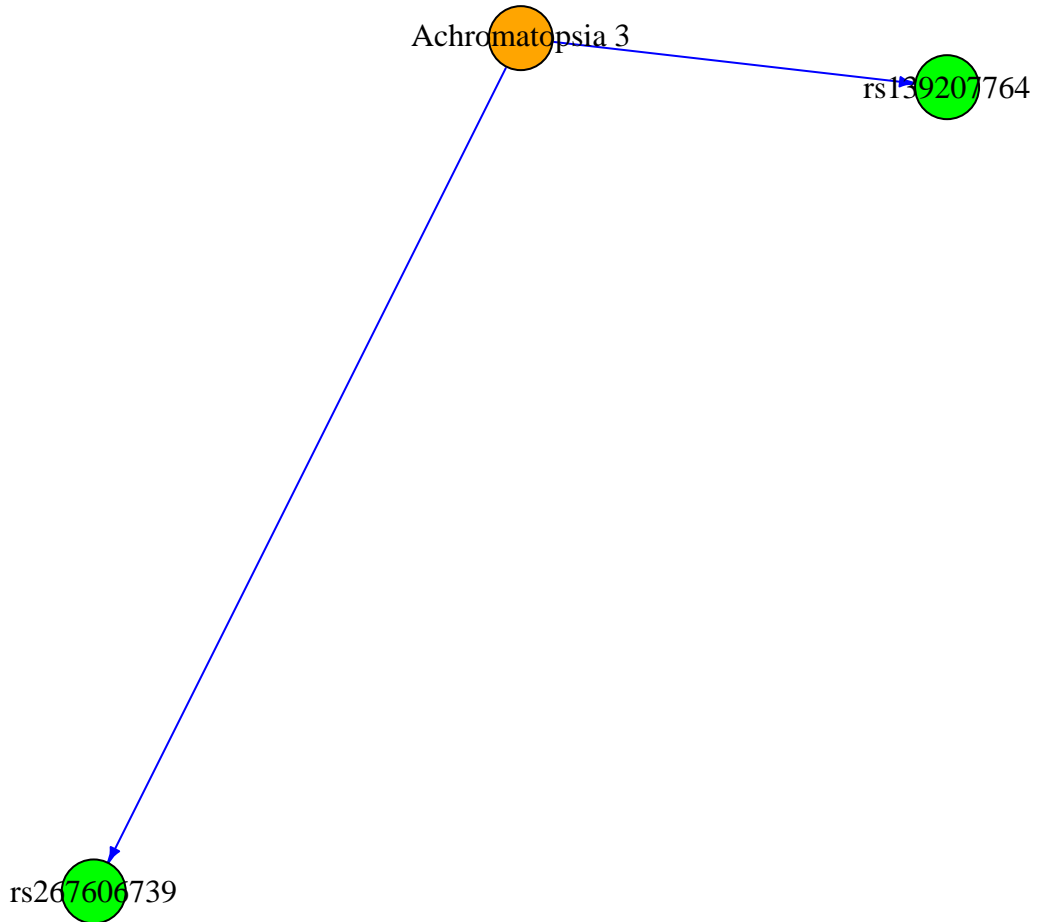

**Variant–Disease Network (Acrocephalosyndactyly type I)**

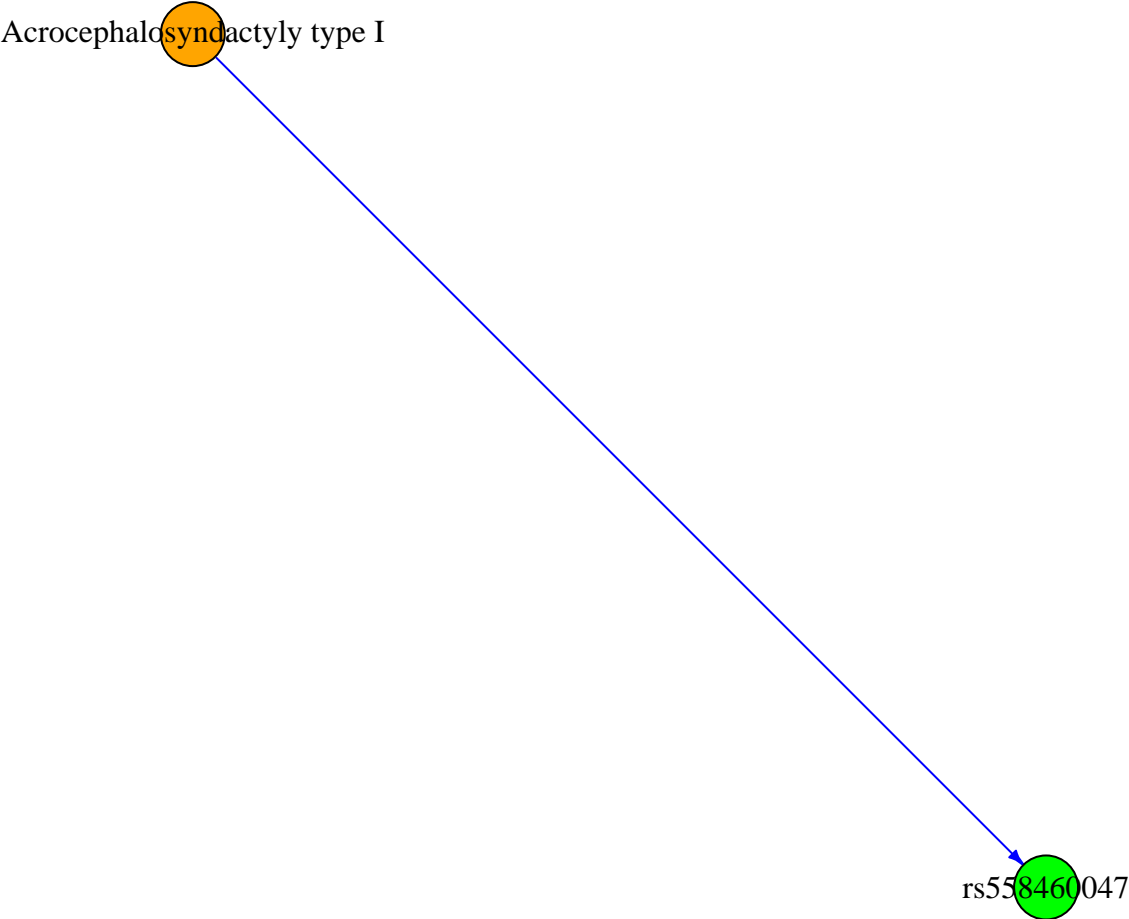

## Variant-Disease Network (Acrodysostosis)

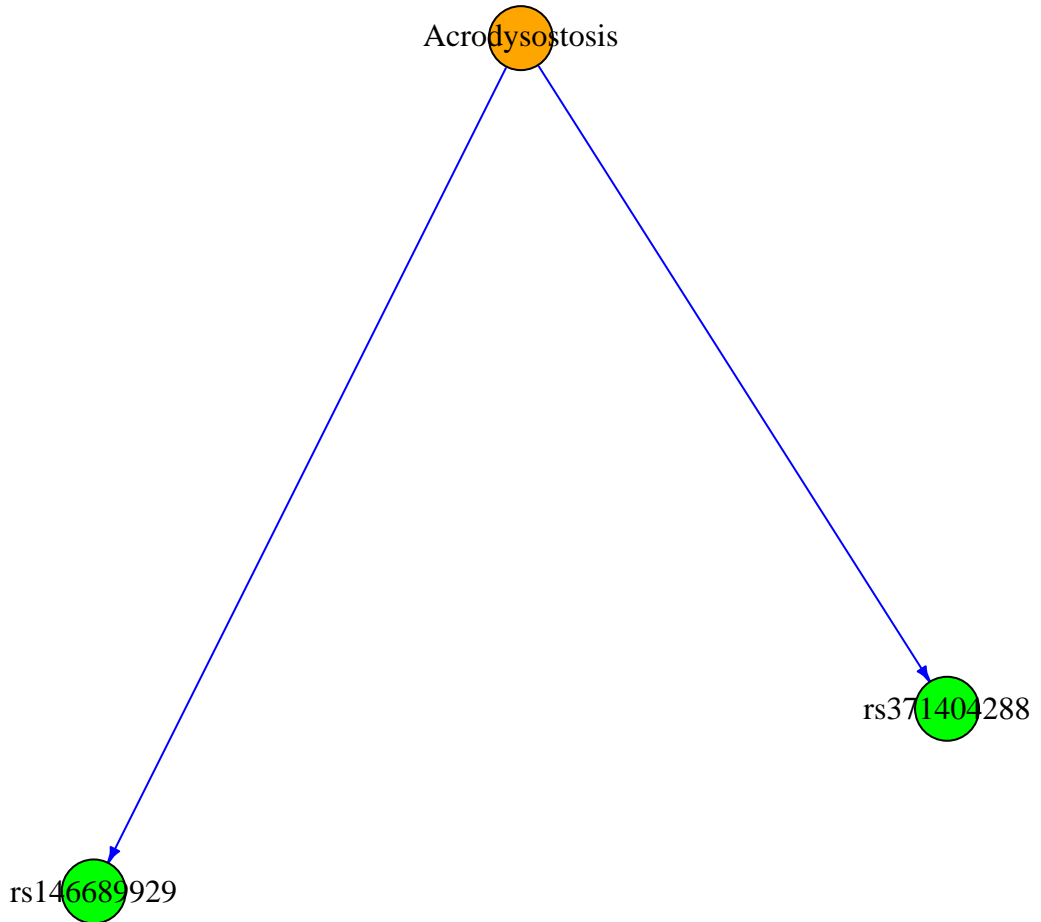

## Variant–Disease Network (Acromesomelic Dysplasia)

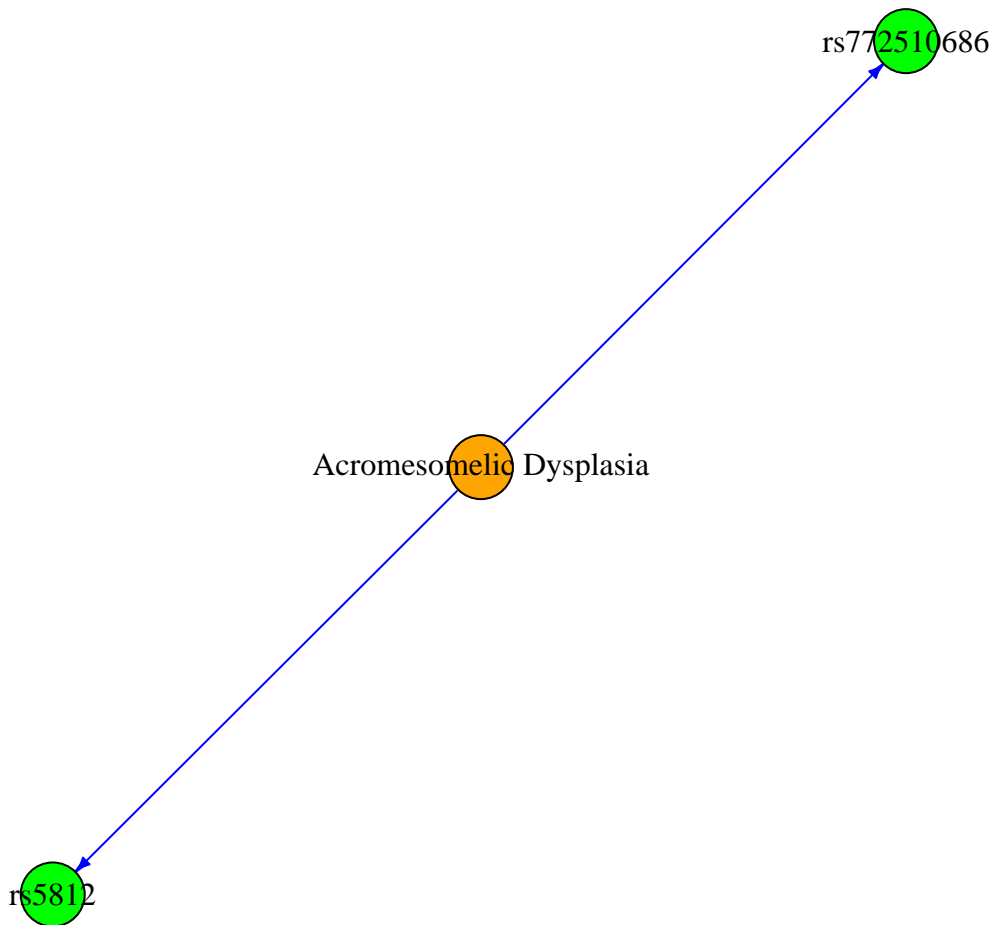



**Variant–Disease Network (Acromesomelic dysplasia Maroteaux type)**

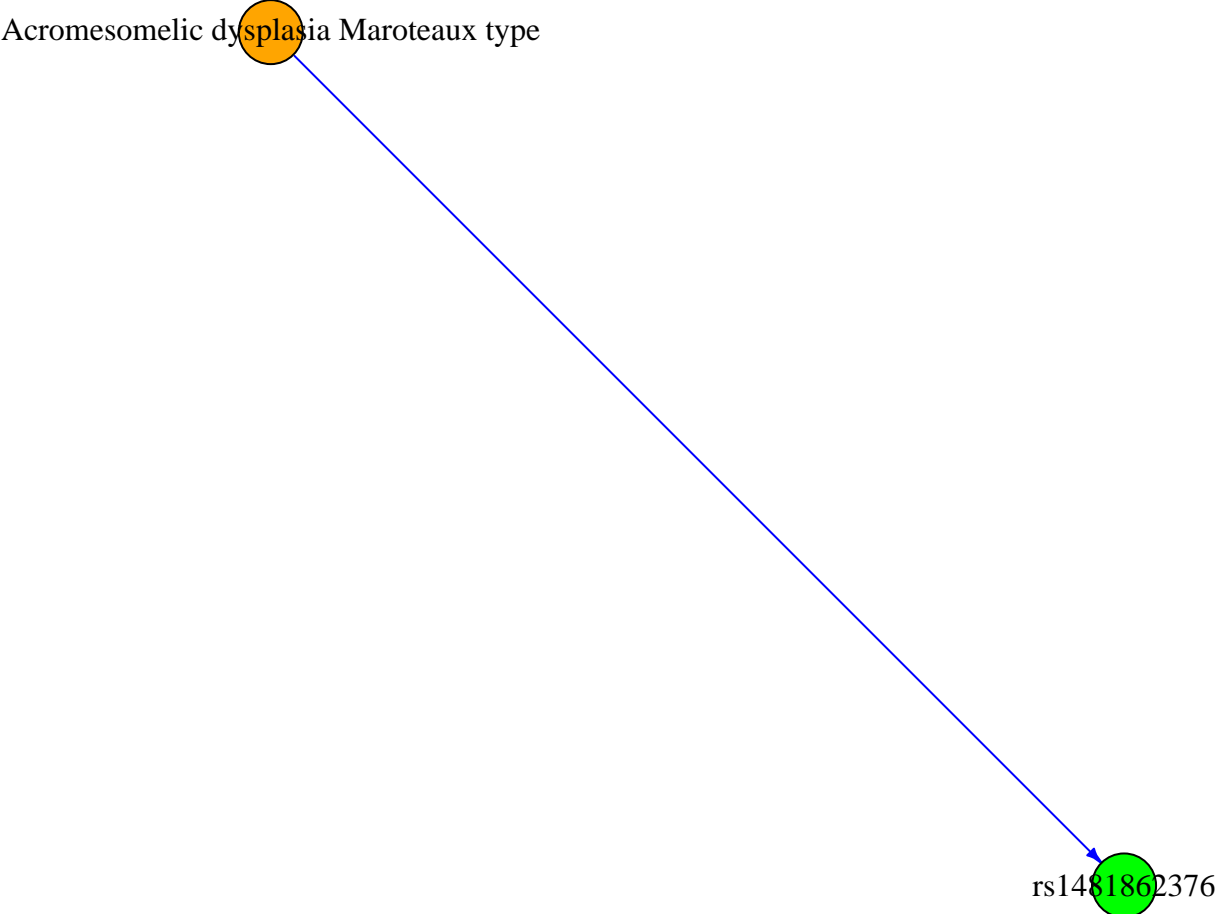

## Variant-Disease Network (Acromicric dysplasia)

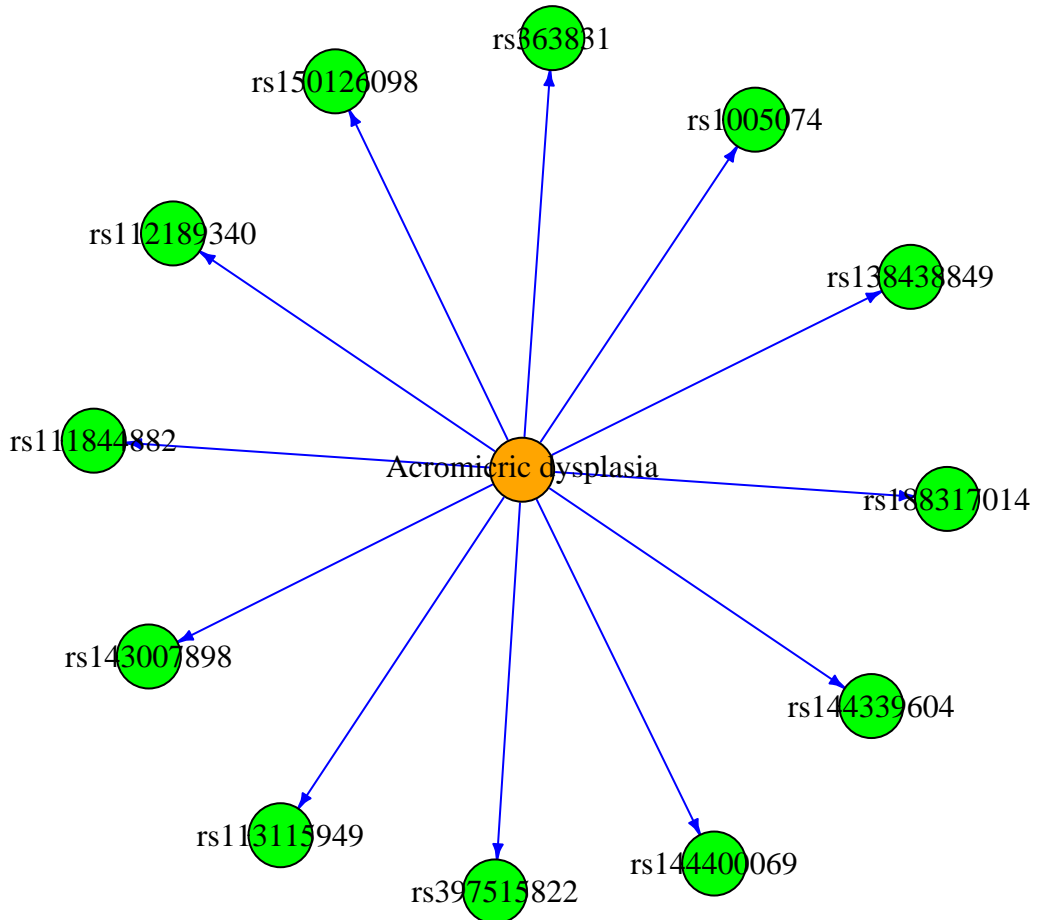

Variant–Disease Network (Acute intermittent porphyria)

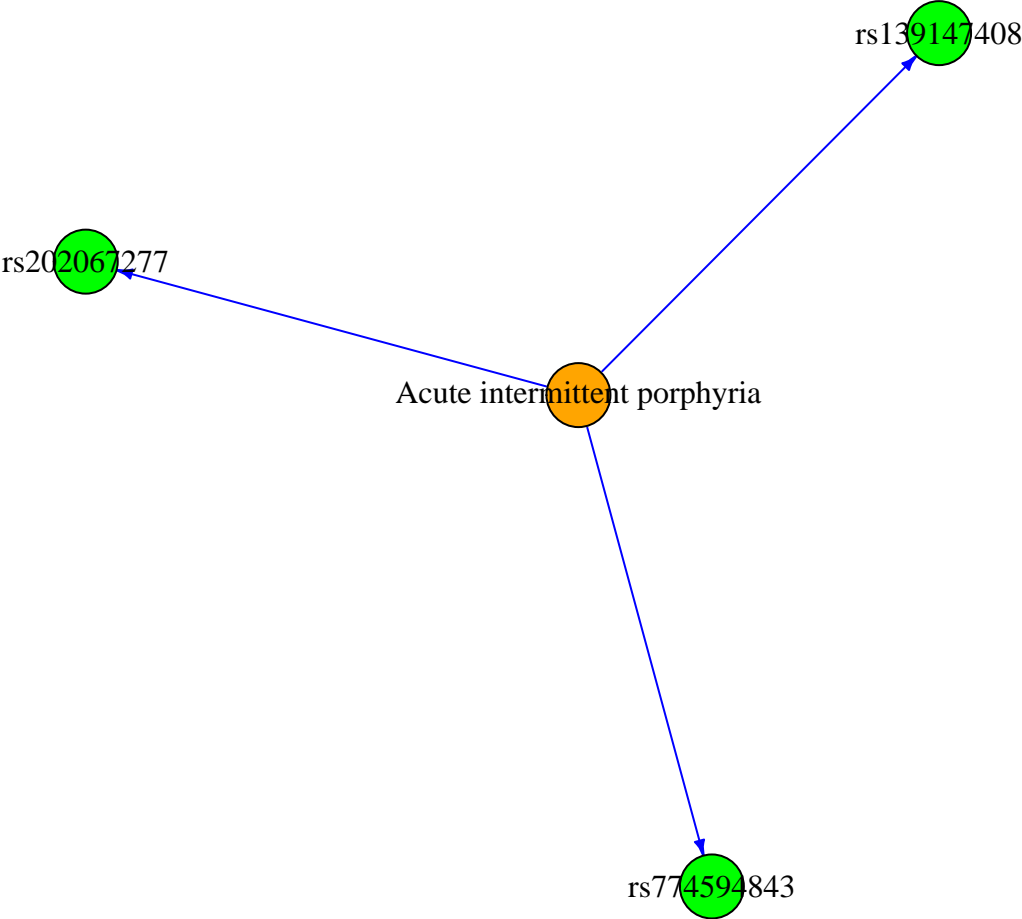

Variant–Disease Network (Acute Recurrent Myoglobinuria)

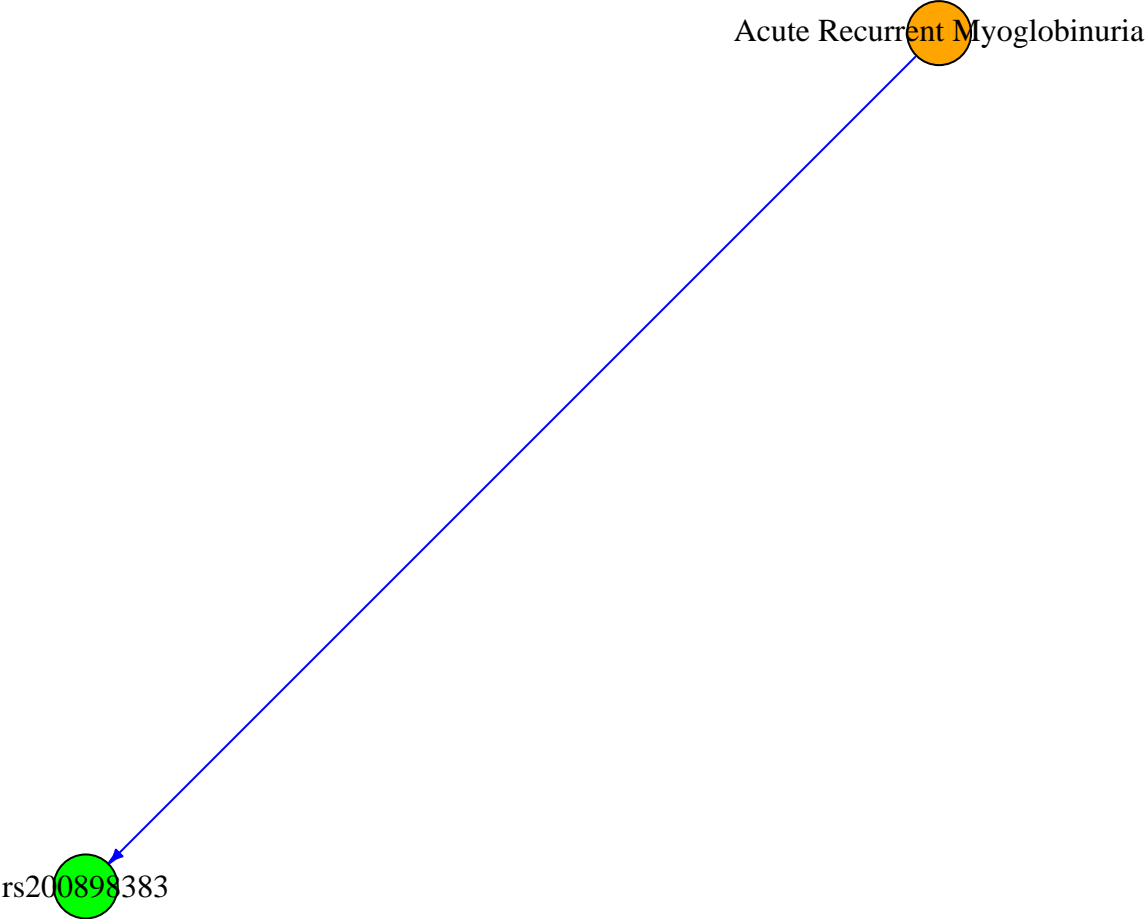

## Variant–Disease Network (Adams–Oliver syndrome 5)

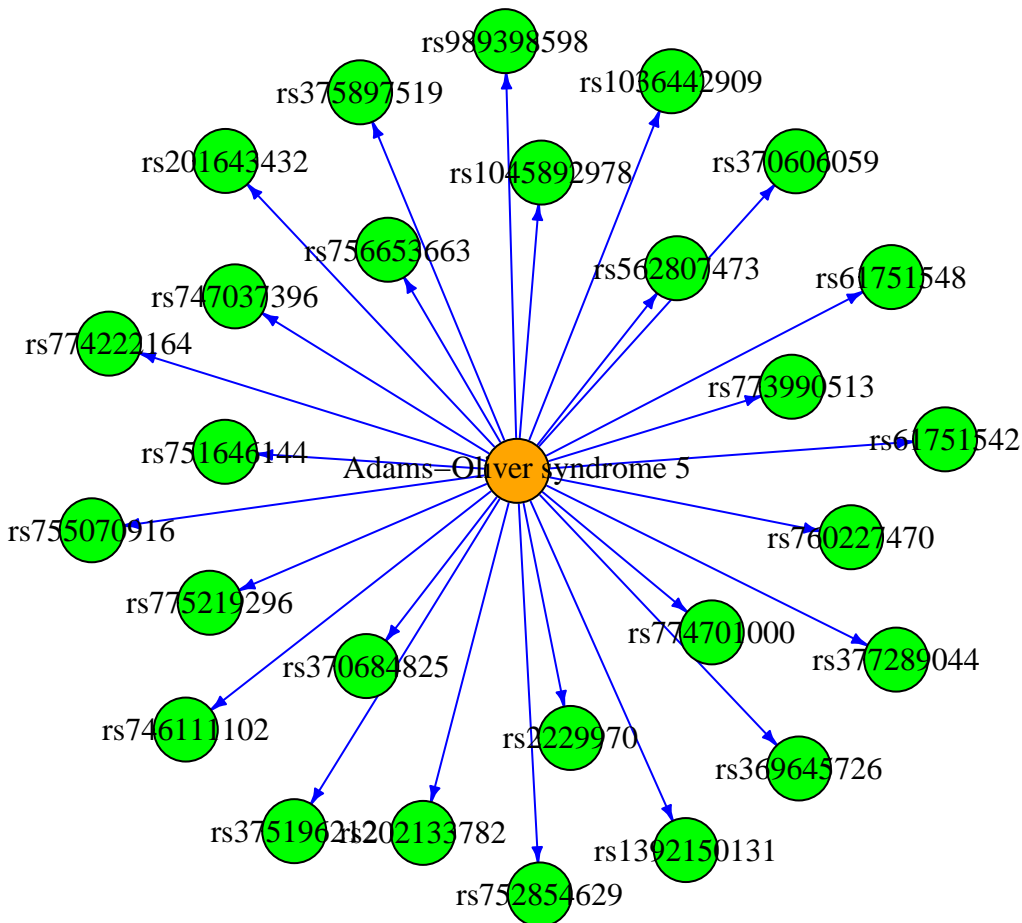

Variant–Disease Network (Adenylosuccinate lyase deficiency)

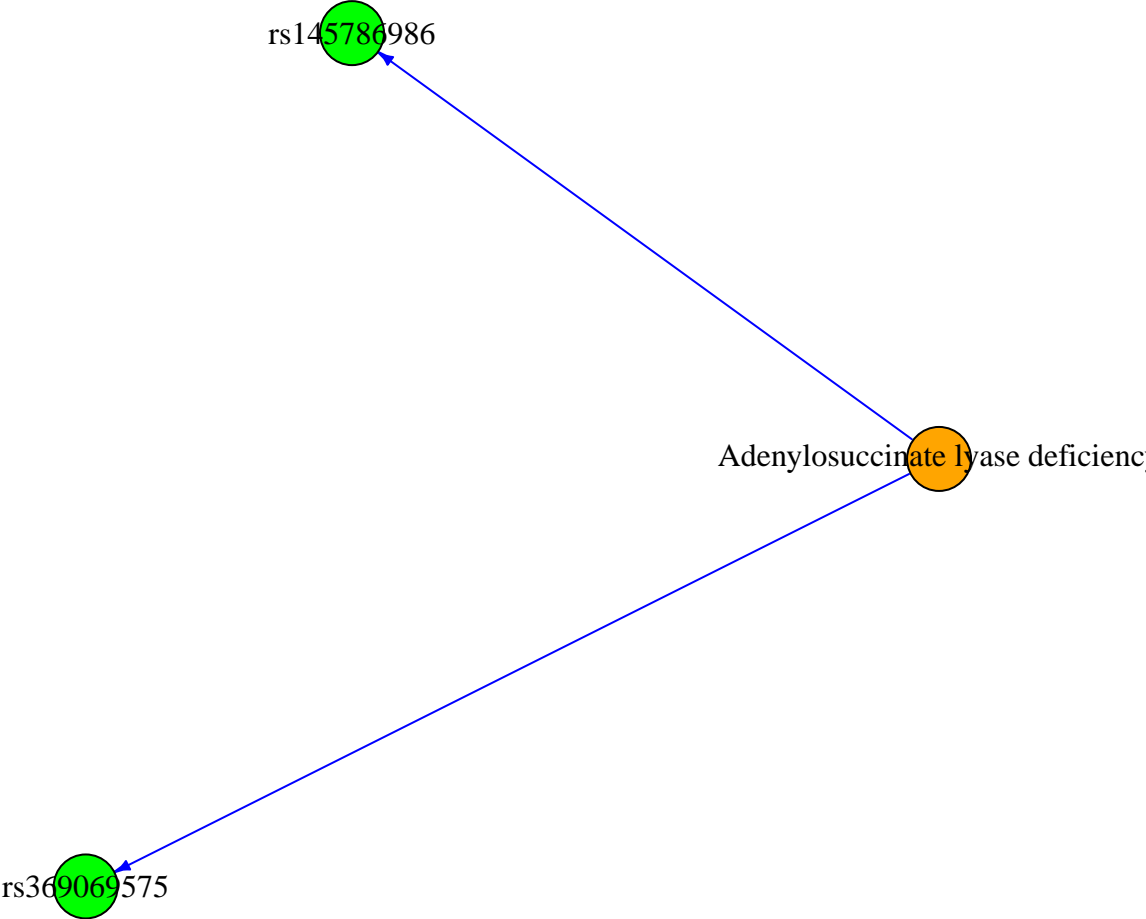

## Variant–Disease Network (Adrenoleukodystrophy)

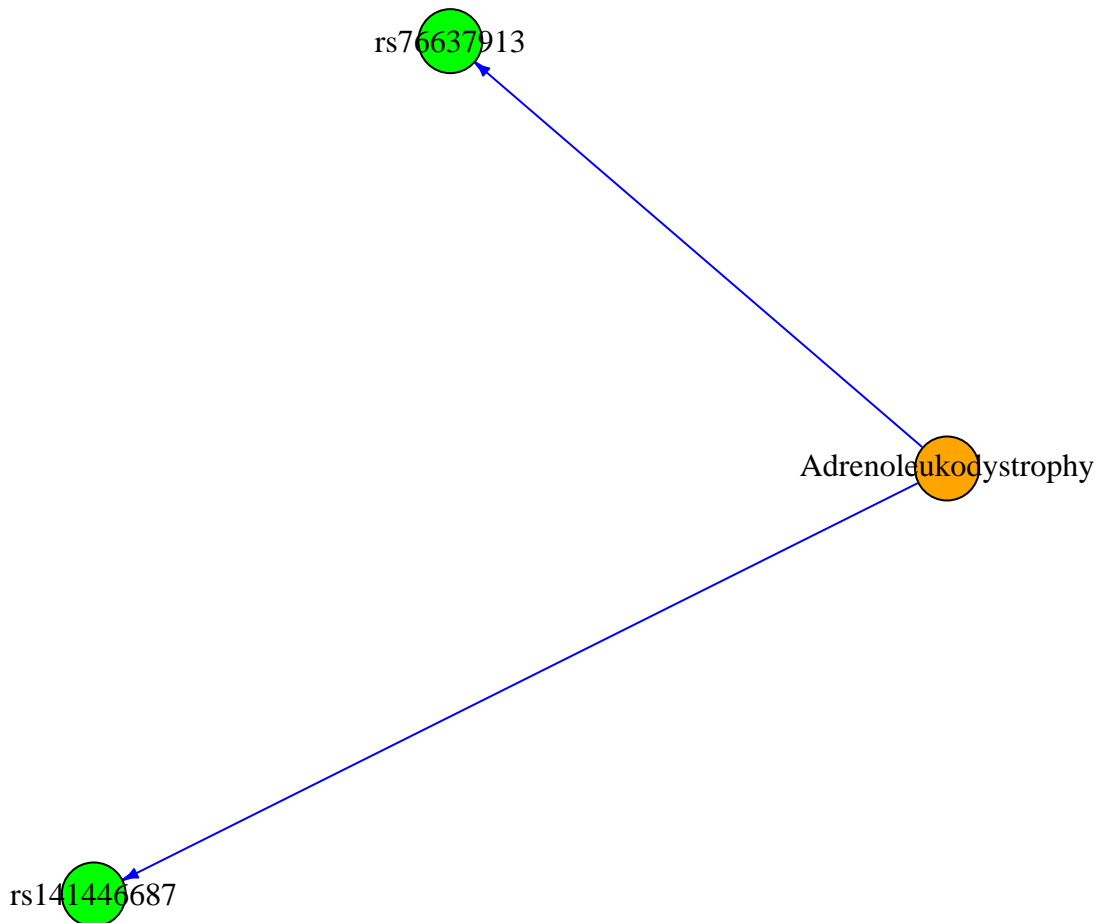

Variant–Disease Network (Agammaglobulinemia 5)

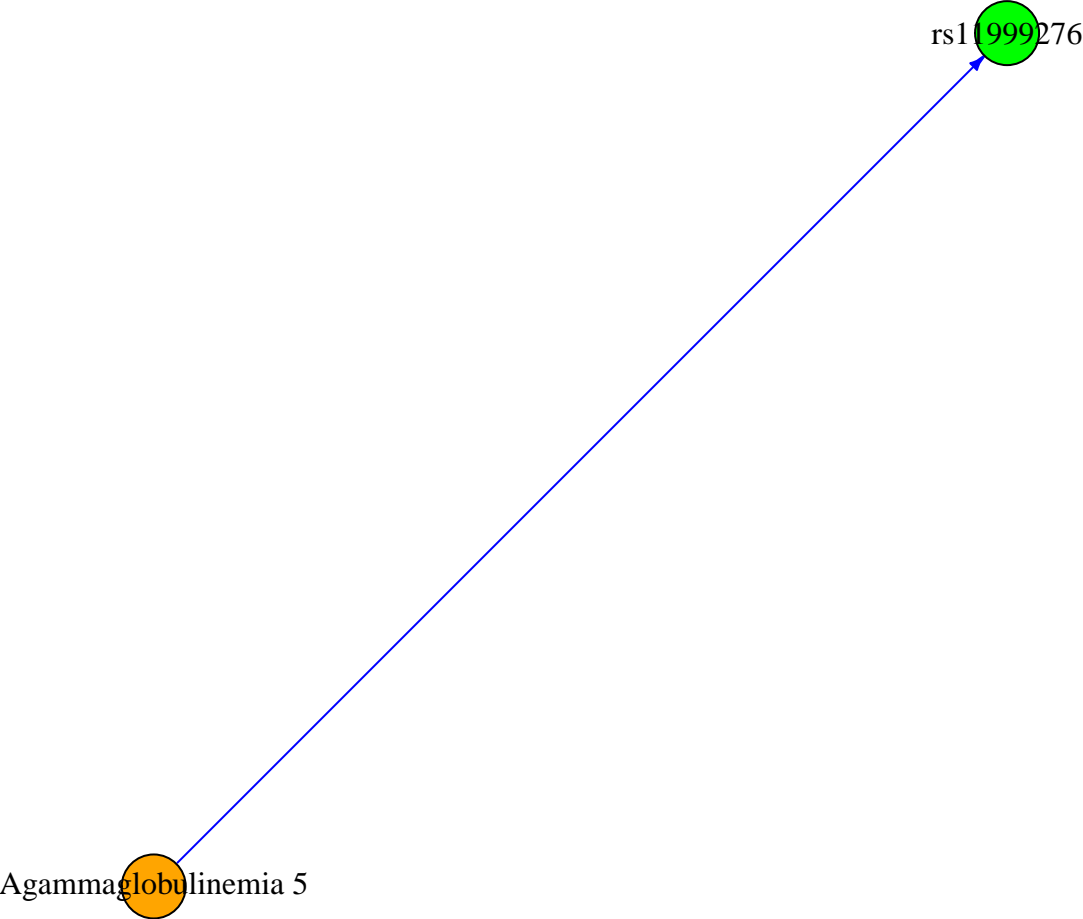



## Variant–Disease Network (Age-related cortical cataract)

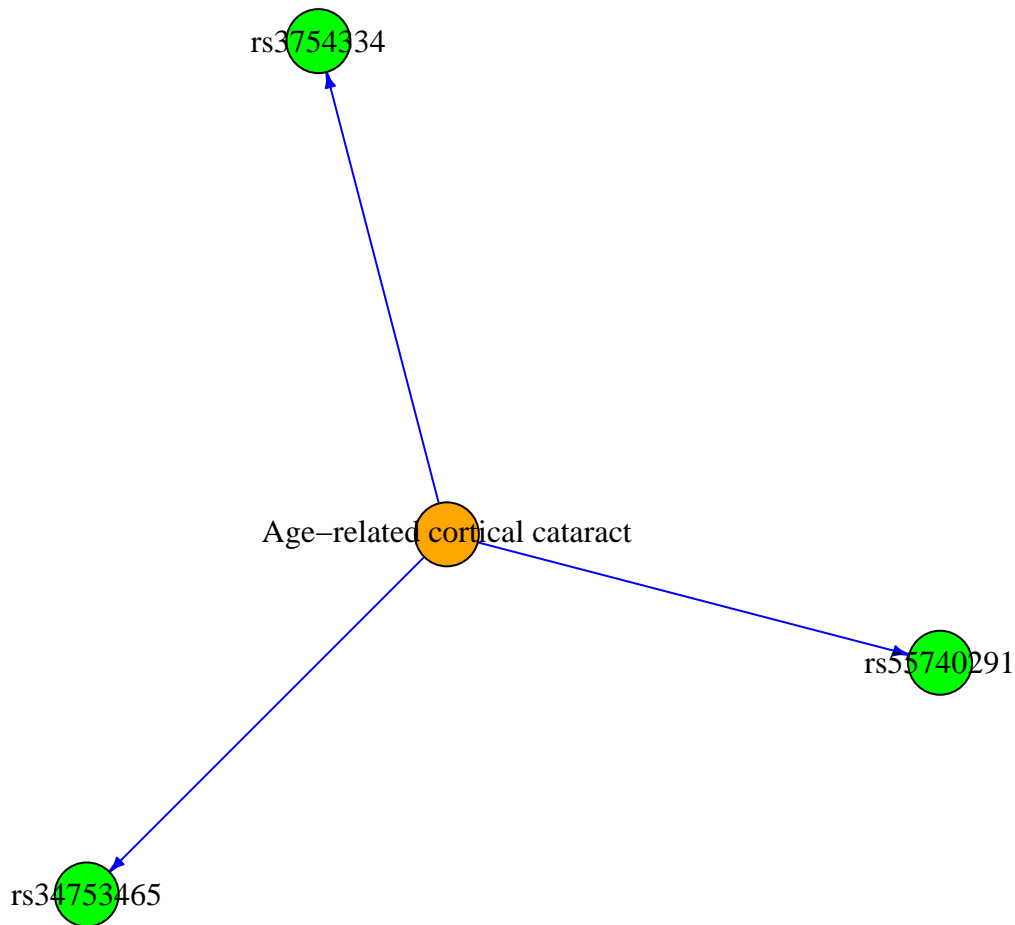

# Variant–Disease Network (Age–related macular degeneration 3)

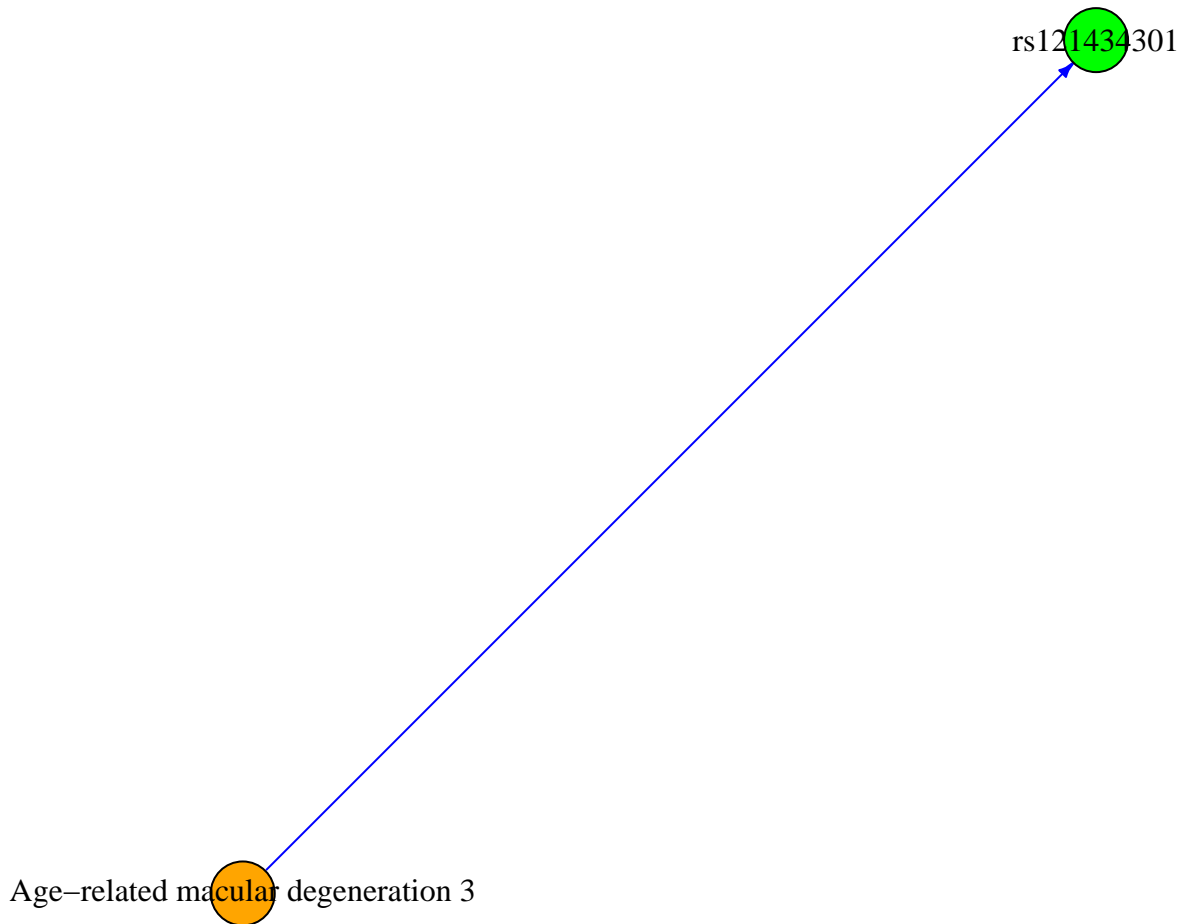

## Variant–Disease Network (Aicardi–Goutieres syndrome 6)

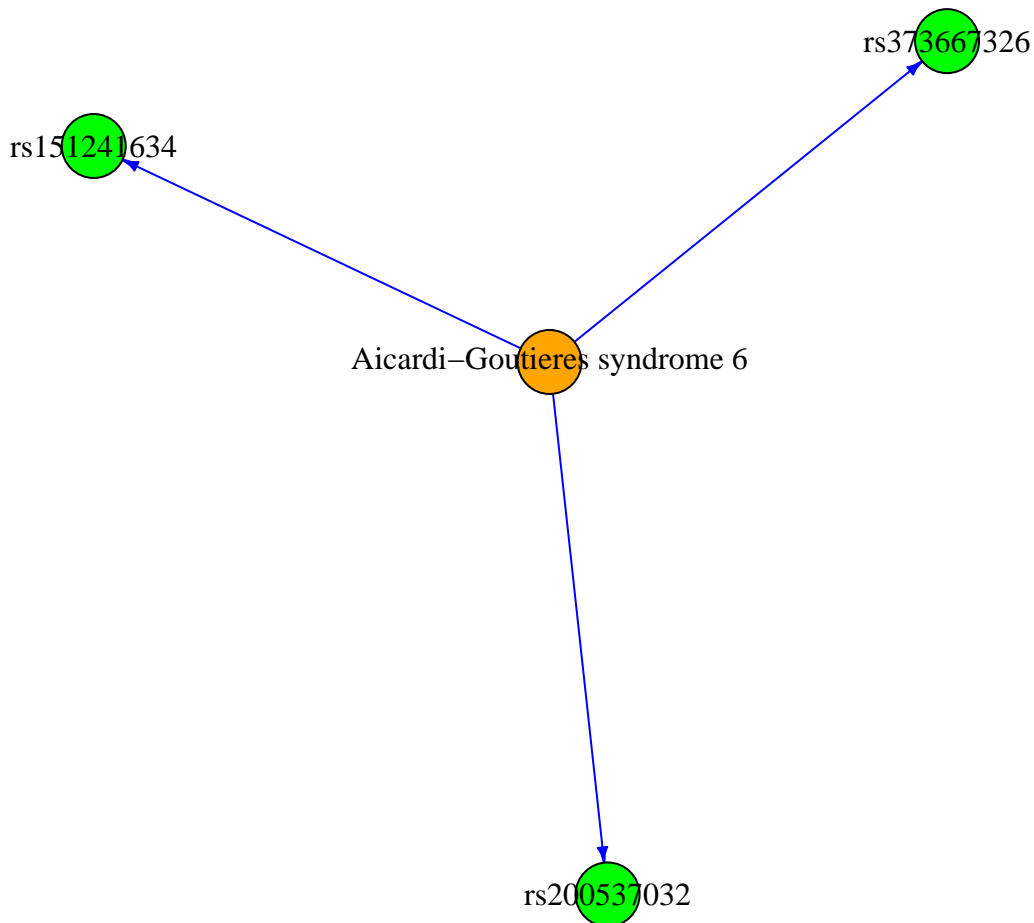

## Variant–Disease Network (Aicardi–Goutieres syndrome 7)

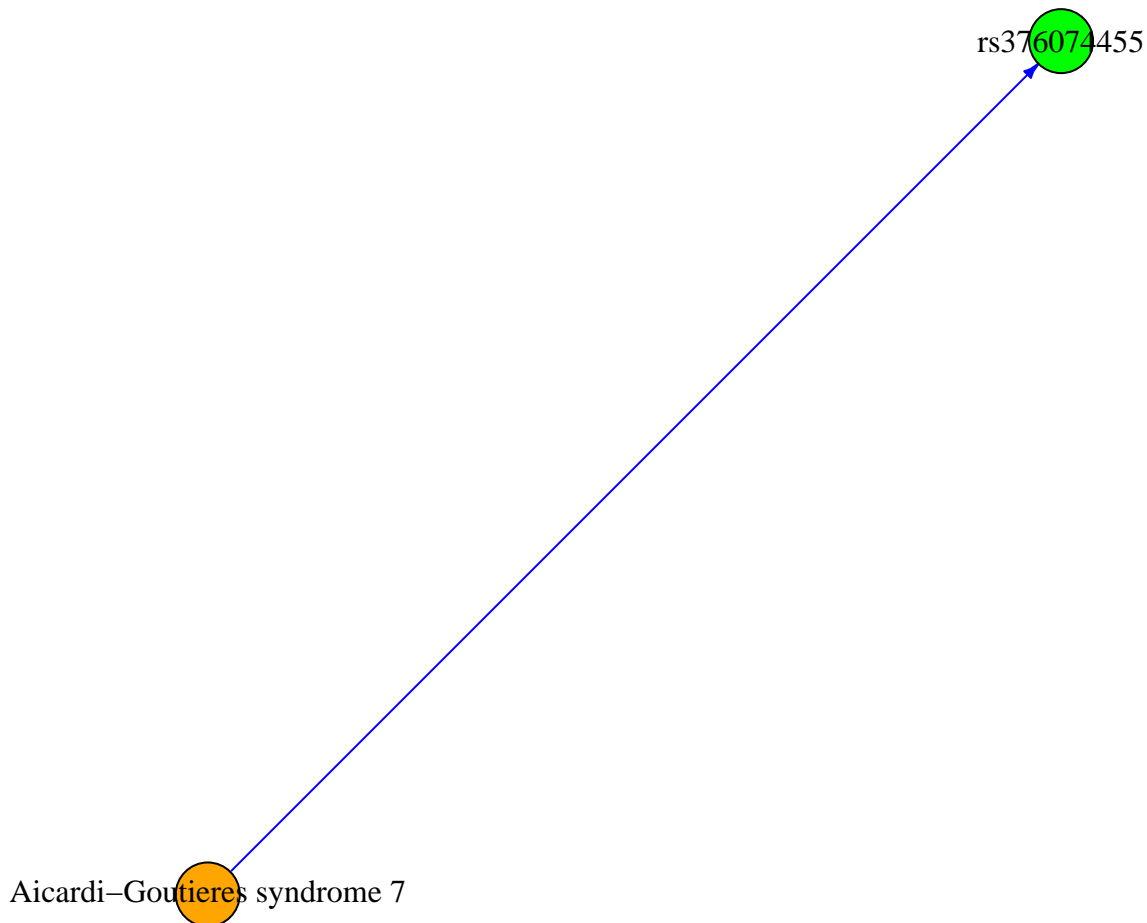

Variant–Disease Network (AIPL1–Related Disorders)

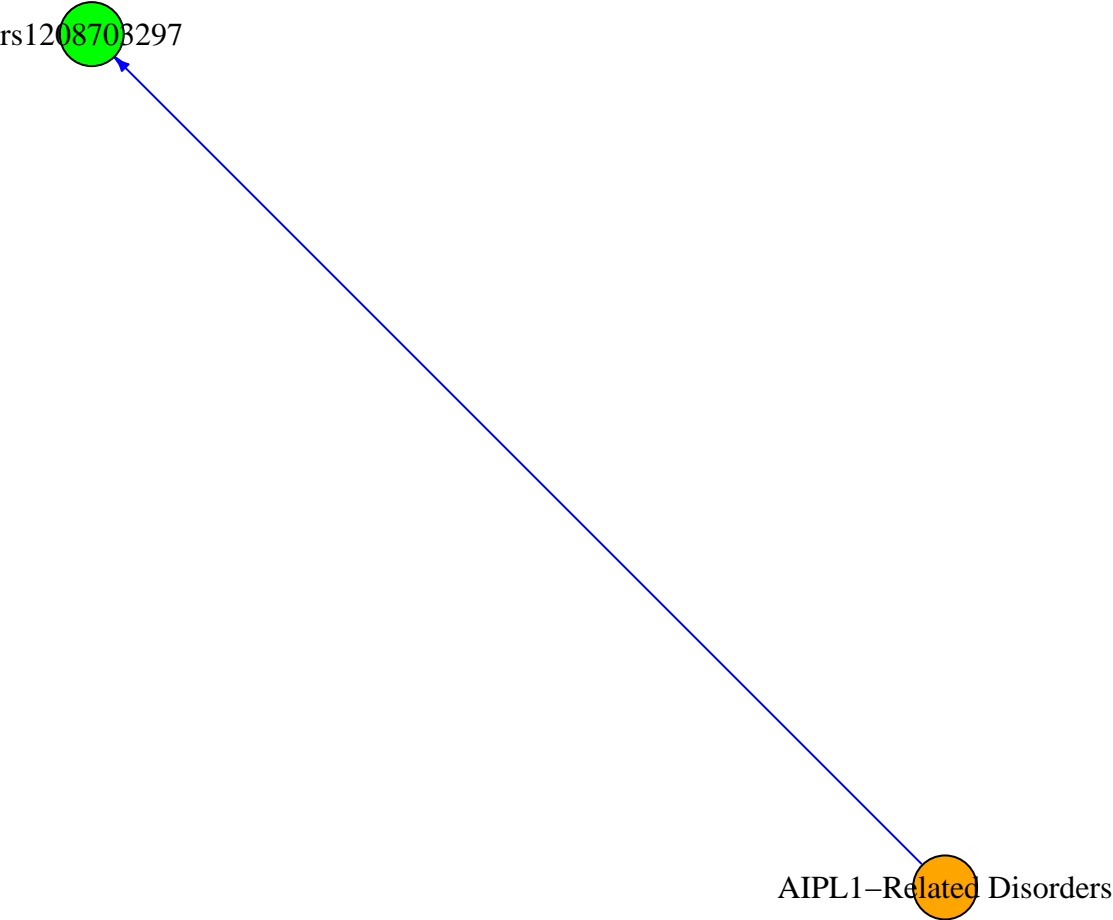

## Variant–Disease Network (Alagille syndrome 1)

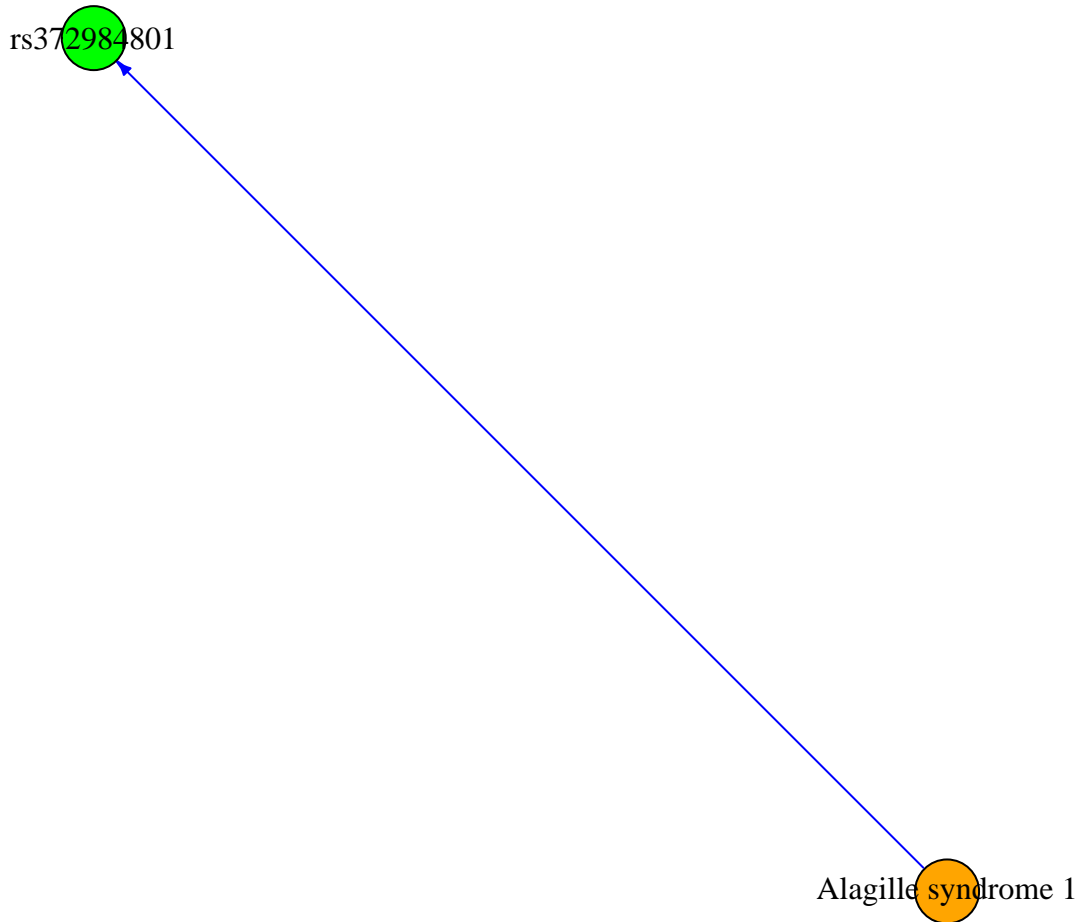

## Variant–Disease Network (Alagille syndrome 2)

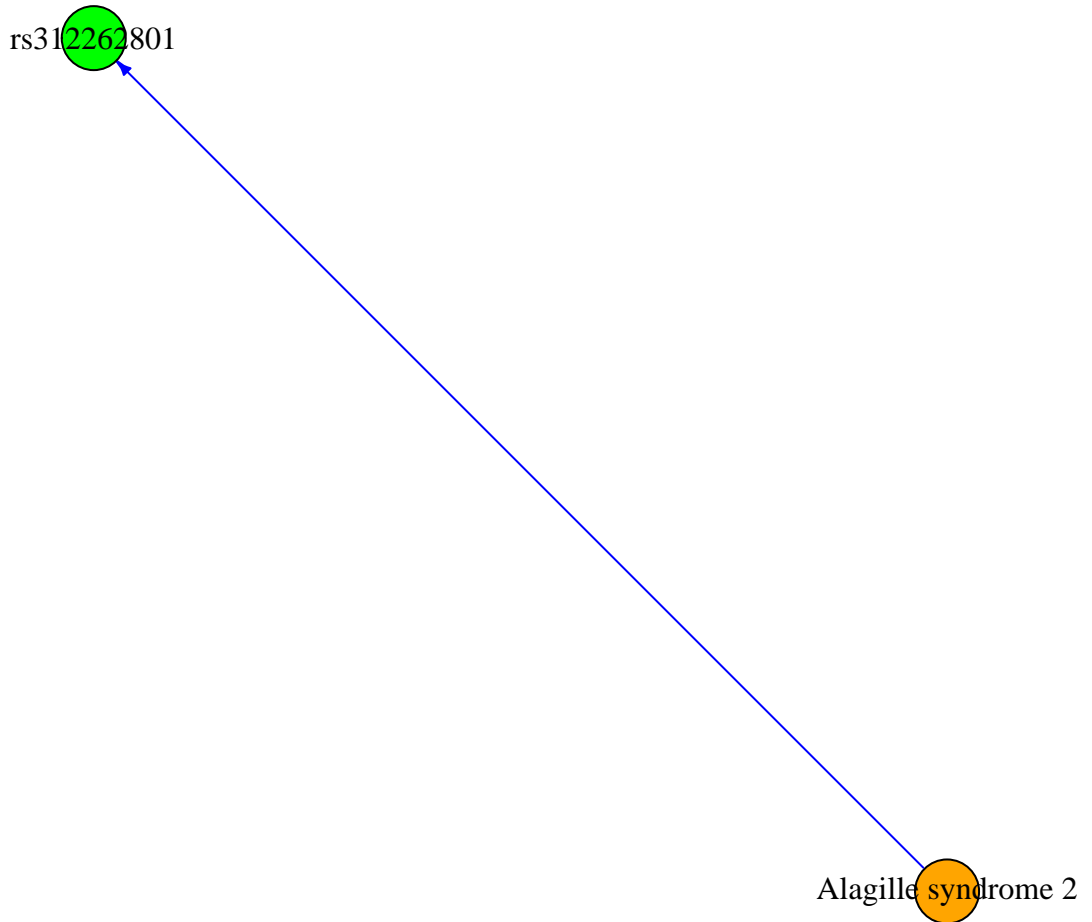

## Variant–Disease Network (Albinism)

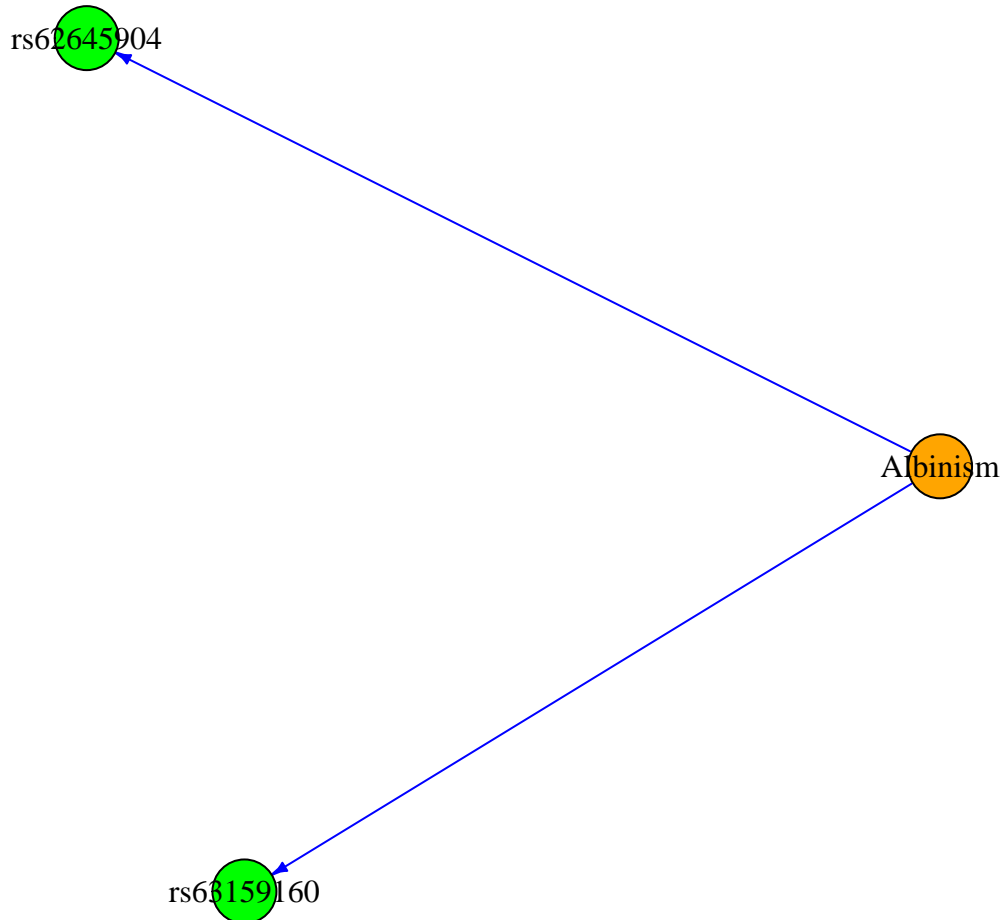



**Variant–Disease Network (ALG12–congenital disorder of glycosylation)**

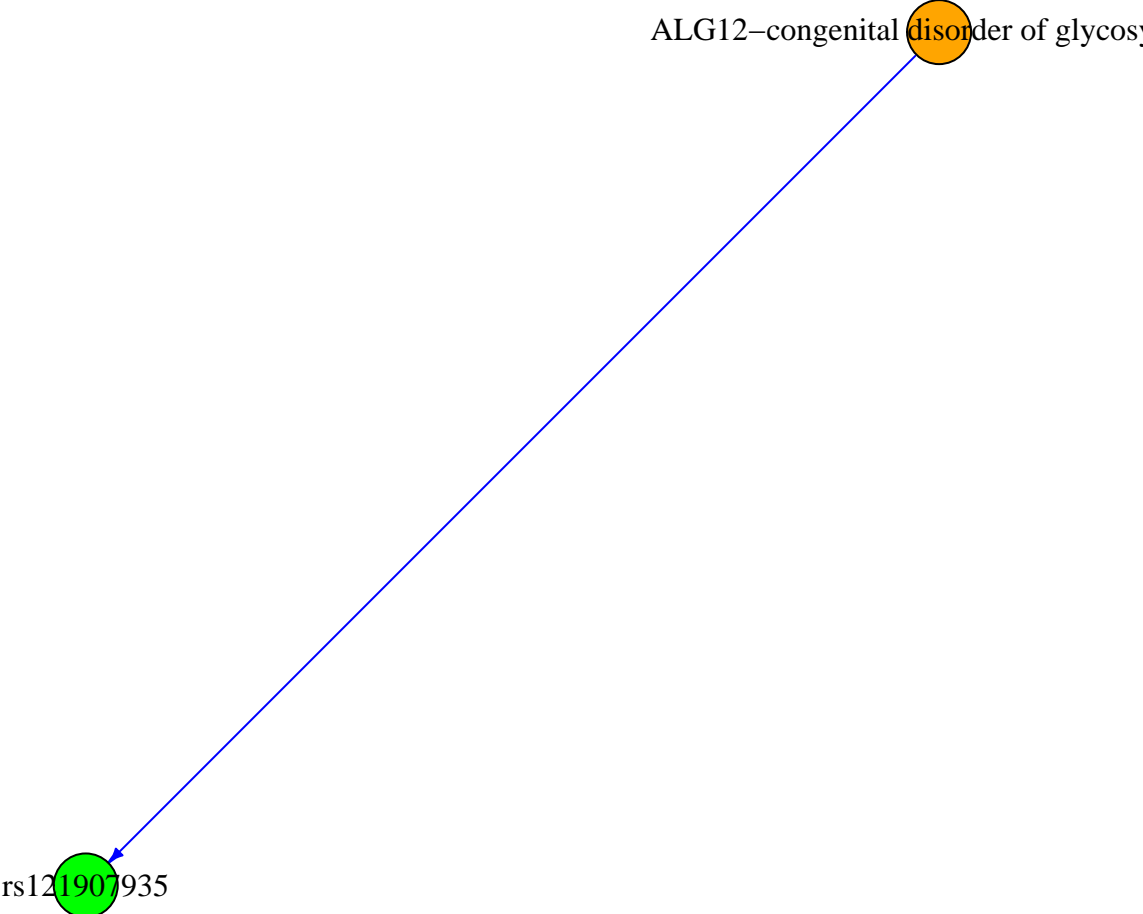

## Variant–Disease Network (Alkaptonuria)

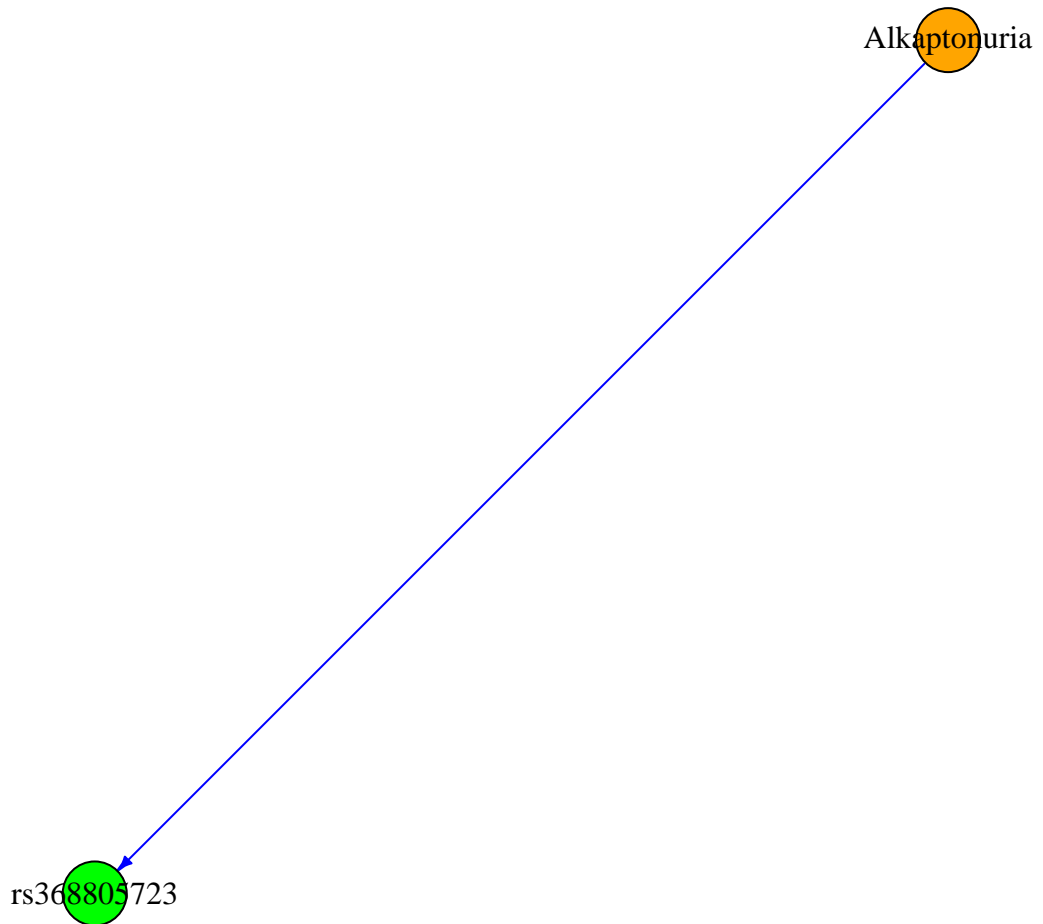

## Variant–Disease Network (Alopecia universalis)

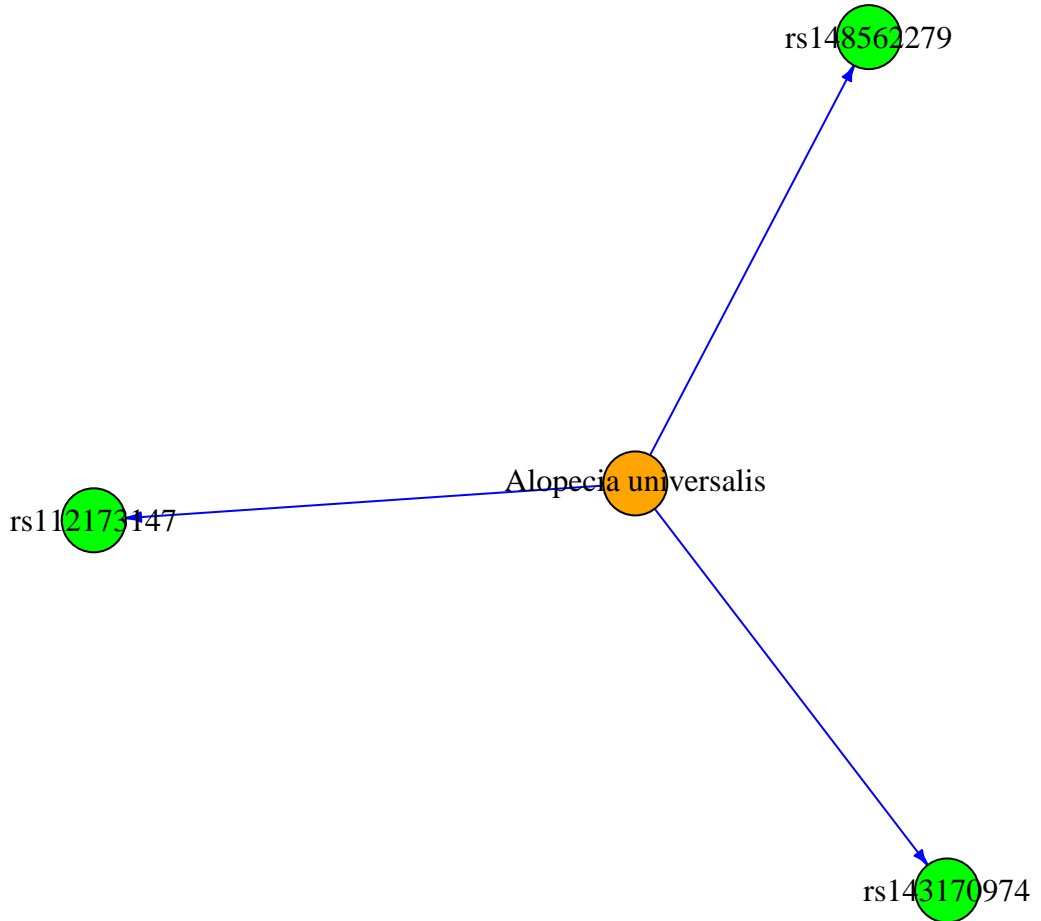

## Variant–Disease Network (Alpha–B crystallinopathy)

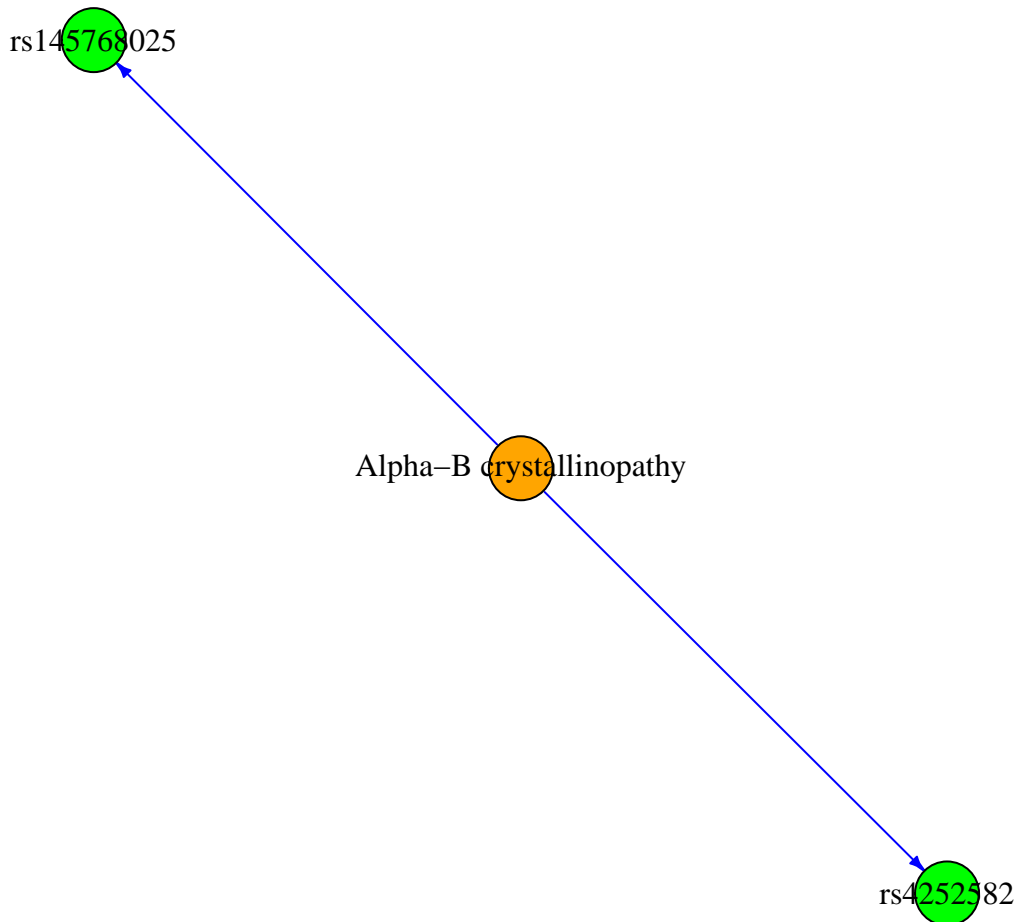

Variant–Disease Network (Alpha–ketoglutarate dehydrogenase deficiency)

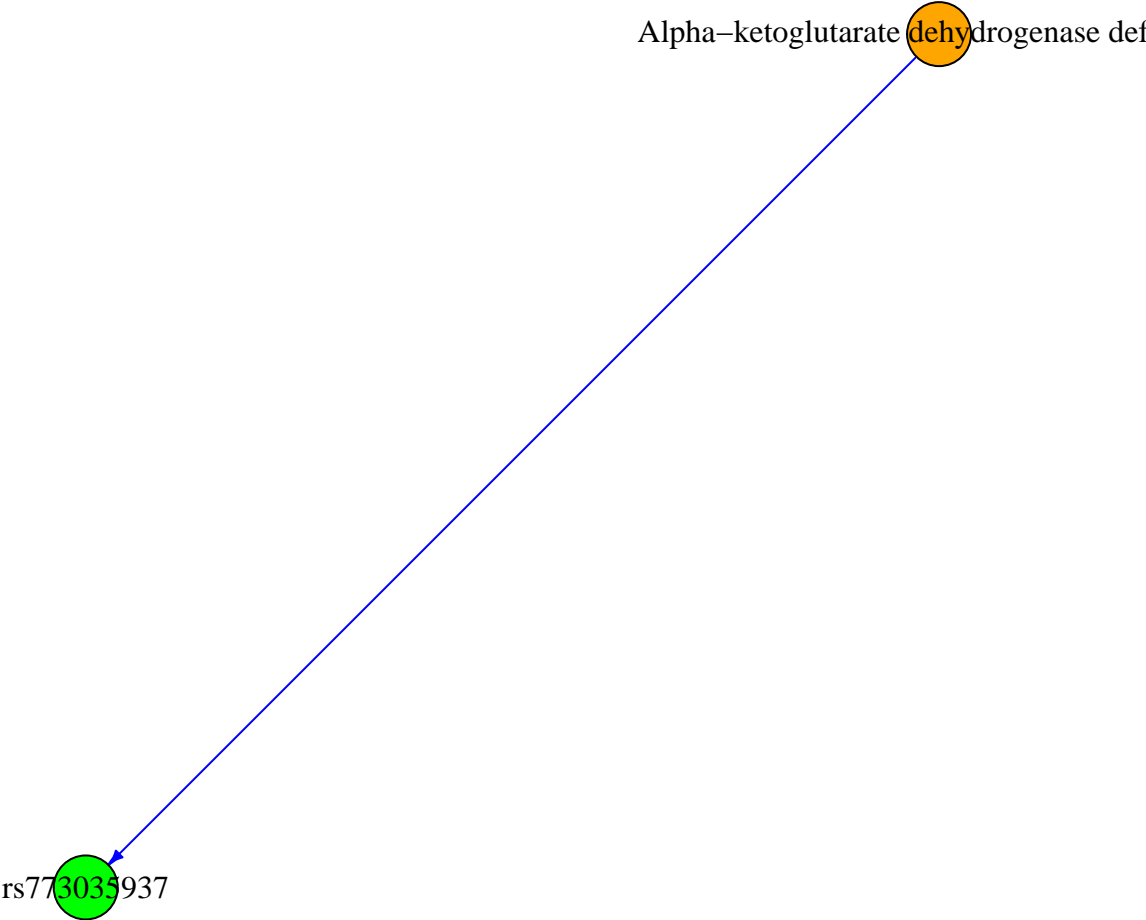

## Variant–Disease Network (Alport syndrome 1)

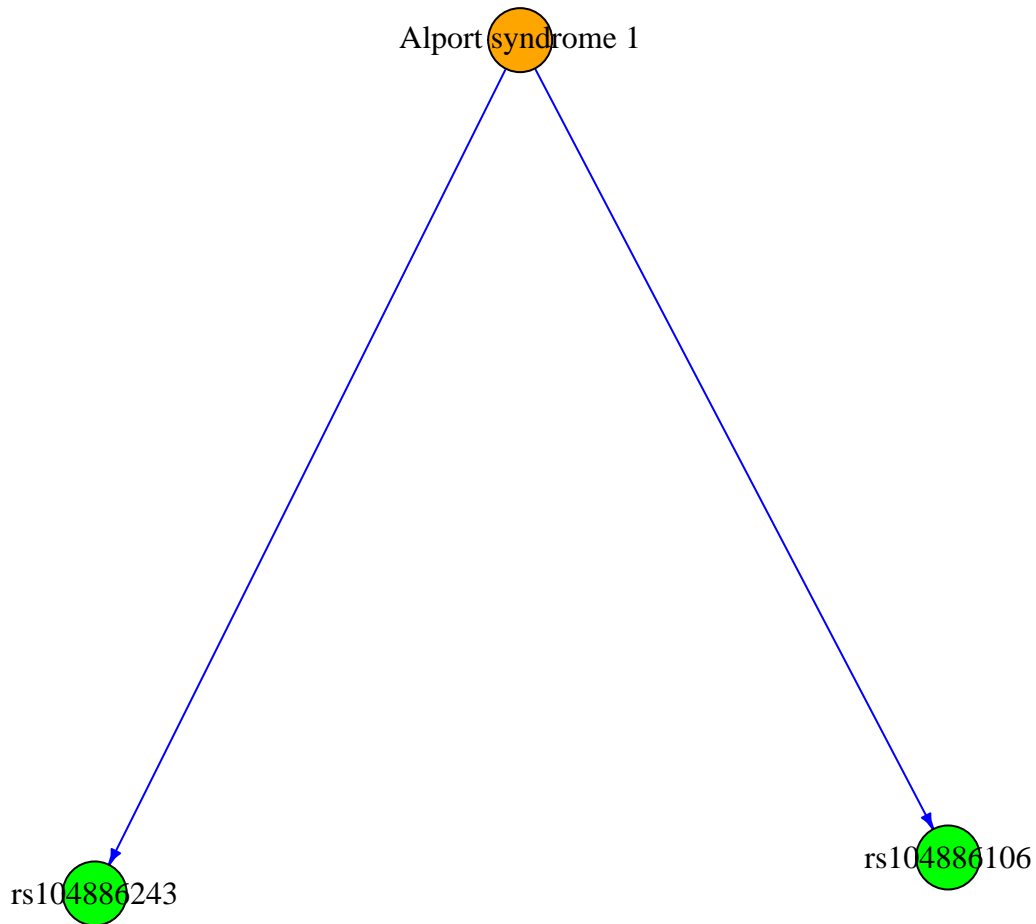

# Variant-Disease Network (ALS2-Related Disorders)

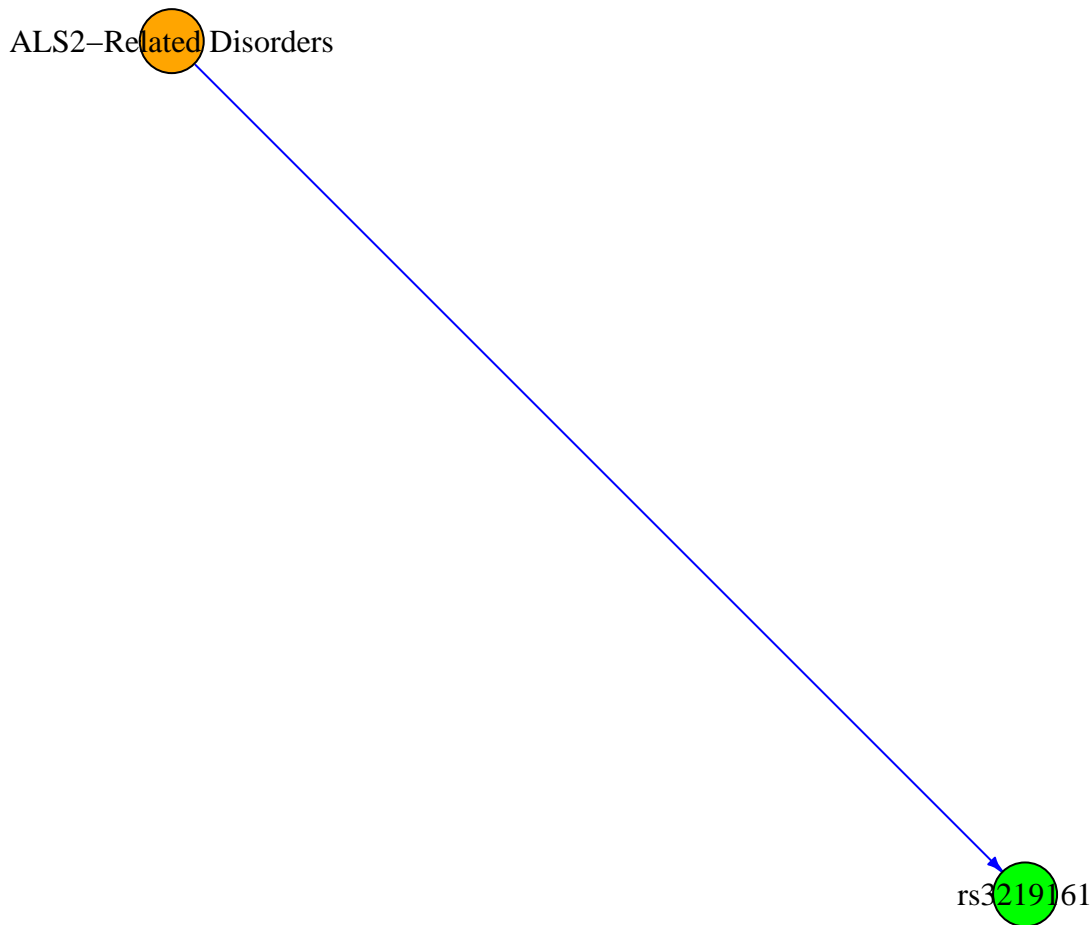

## Variant–Disease Network (Alzheimer disease)

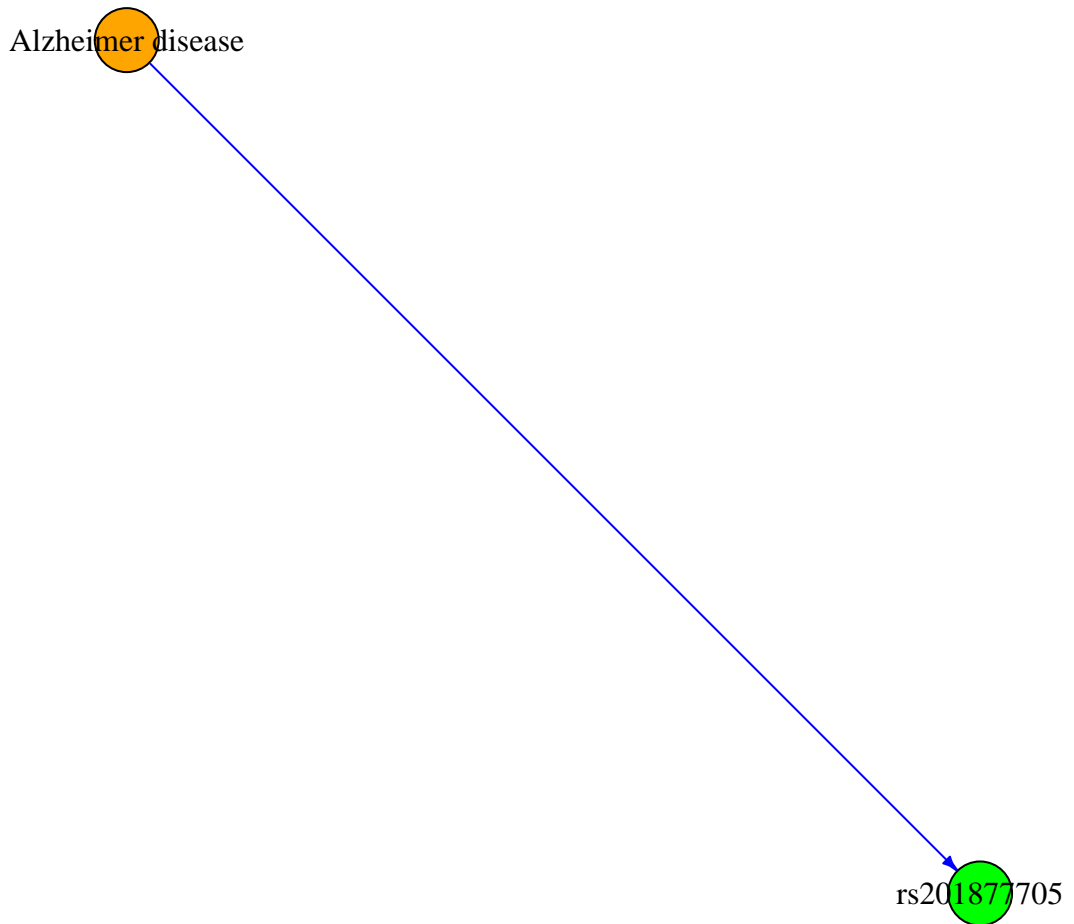



## Variant–Disease Network (Amelogenesis Imperfecta)

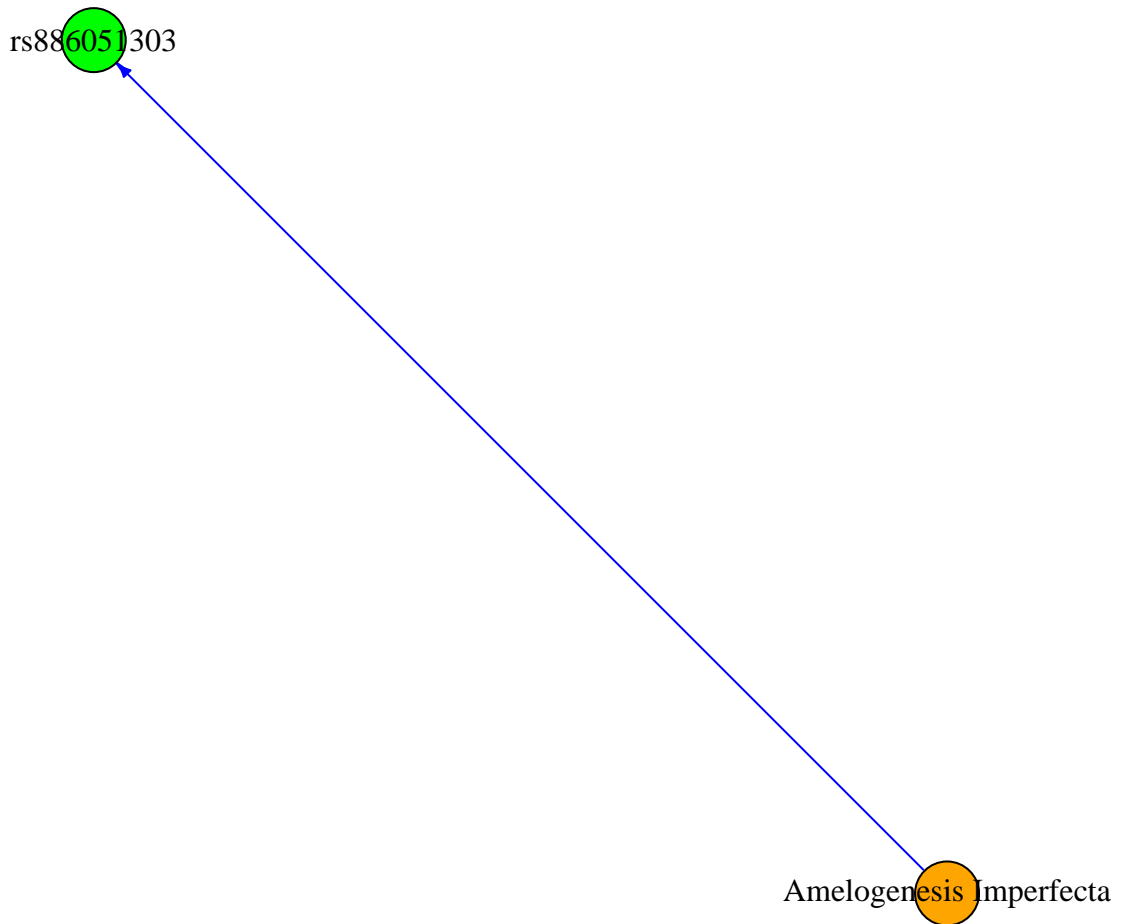

## Variant–Disease Network (Amyloidosis)

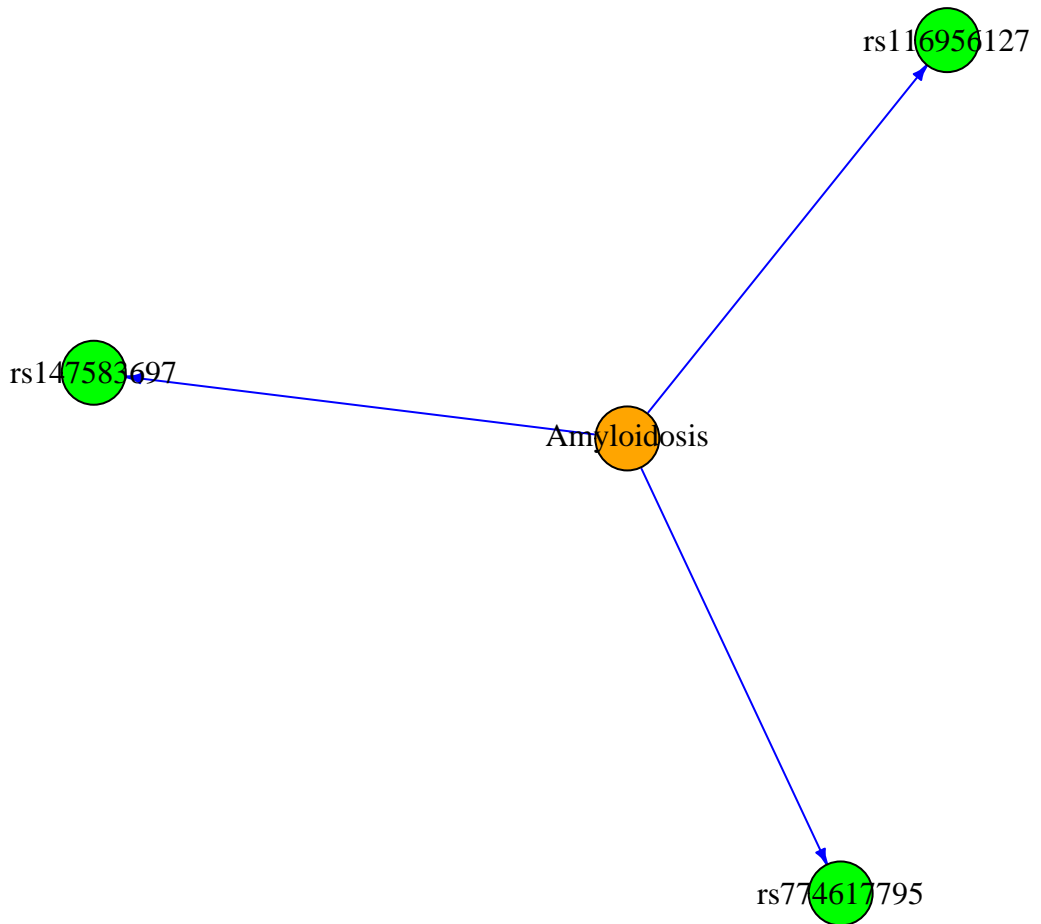

Variant–Disease Network (Amyotrophic Lateral Sclerosis)

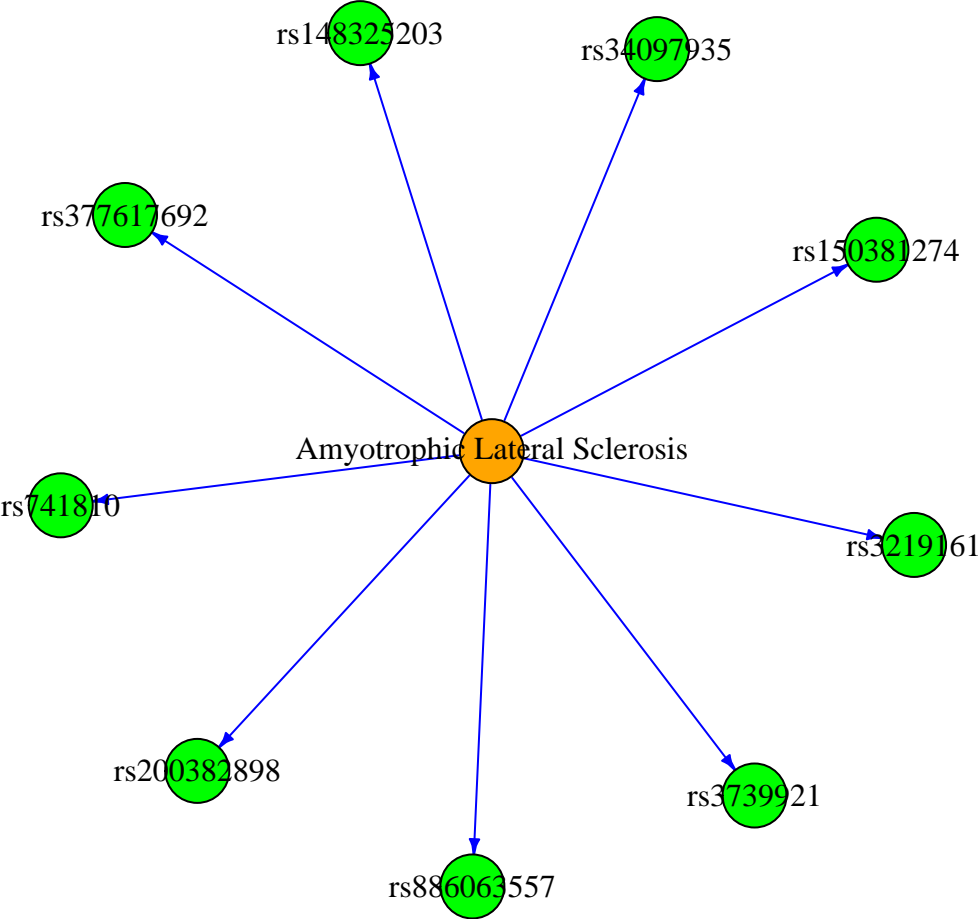

## Variant–Disease Network (Amyotrophic lateral sclerosis 14)

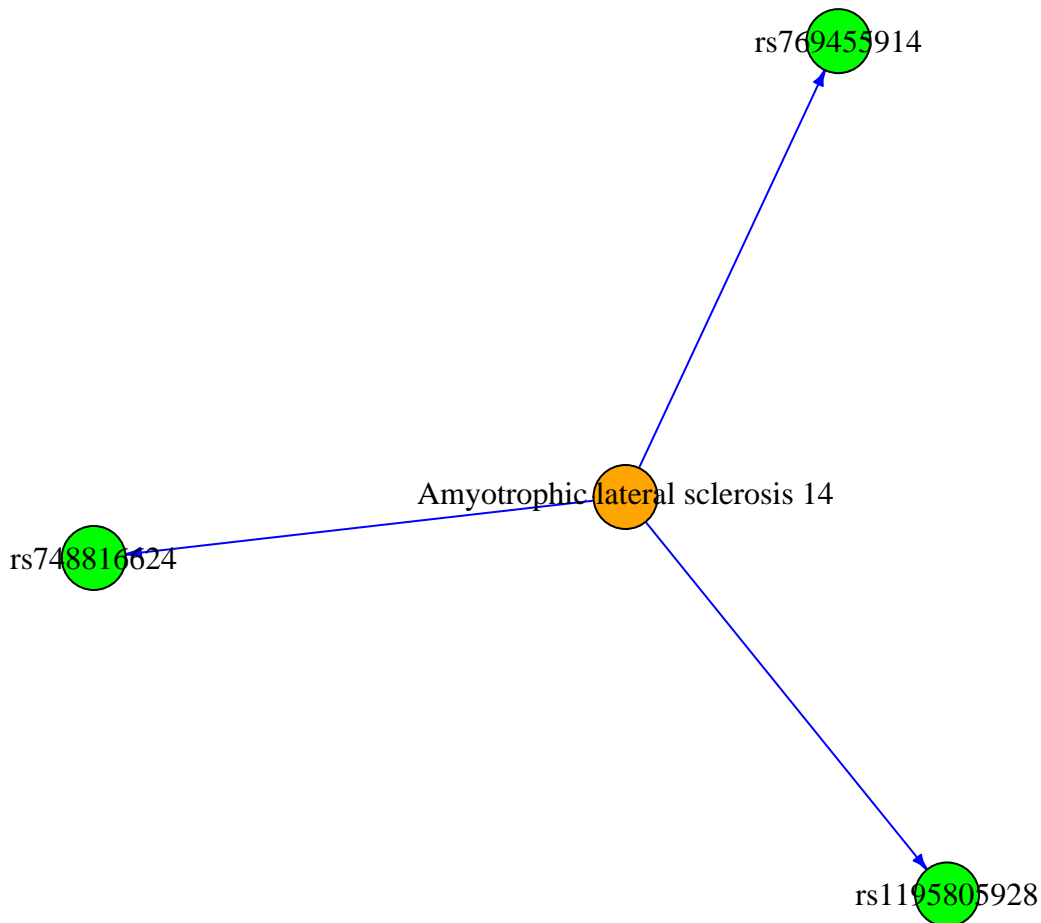

# nt-Disease Network (Amyotrophic lateral sclerosis and/or frontotemporal de

rs10122902

Amyotrophic lateral sclerosis and/or frontotemp



Variant–Disease Network (Amyotrophic lateral sclerosis type 1)

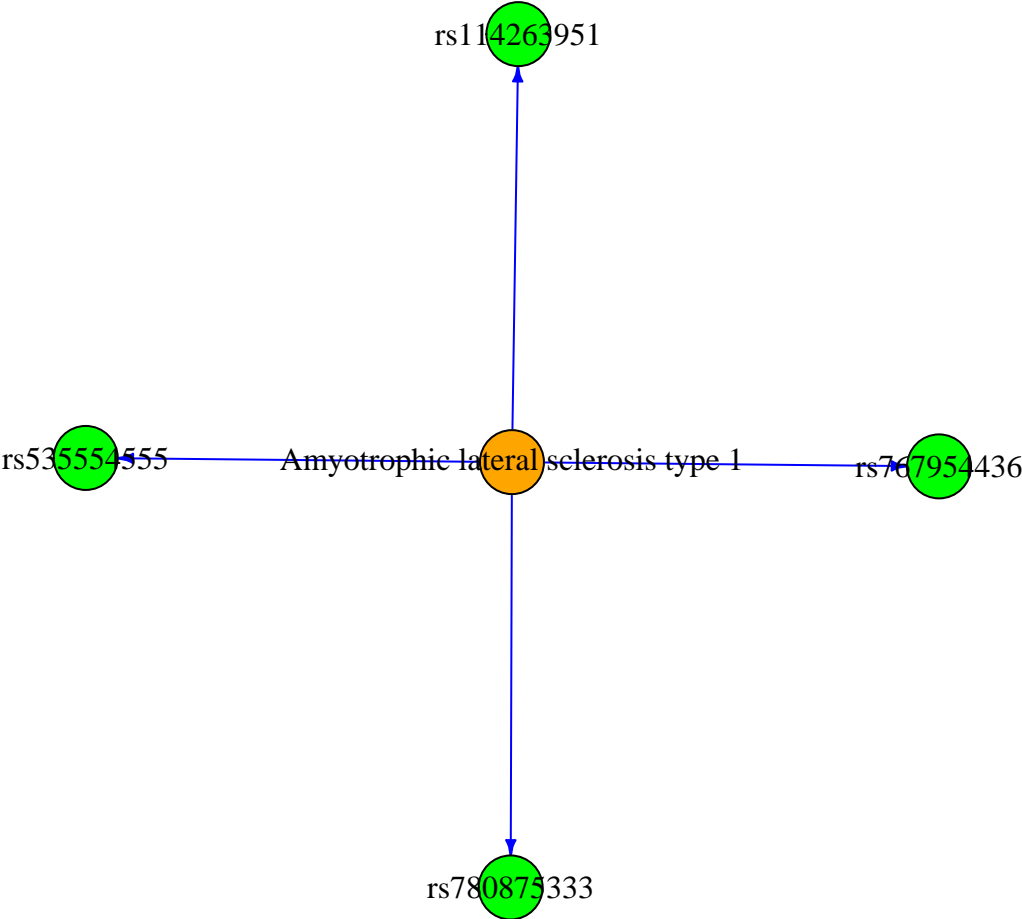

# Variant–Disease Network (Amyotrophic lateral sclerosis type 12)

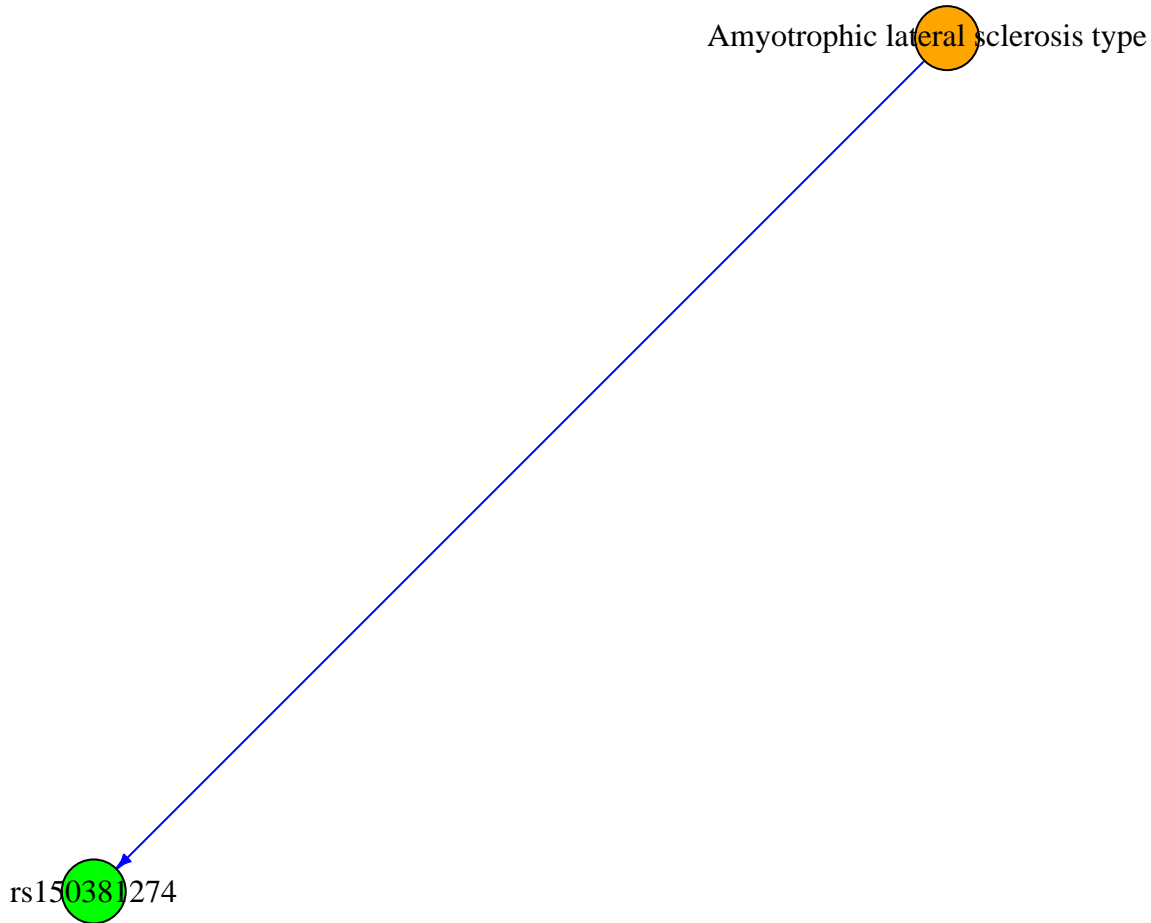

Variant–Disease Network (Amyotrophic lateral sclerosis type 4)

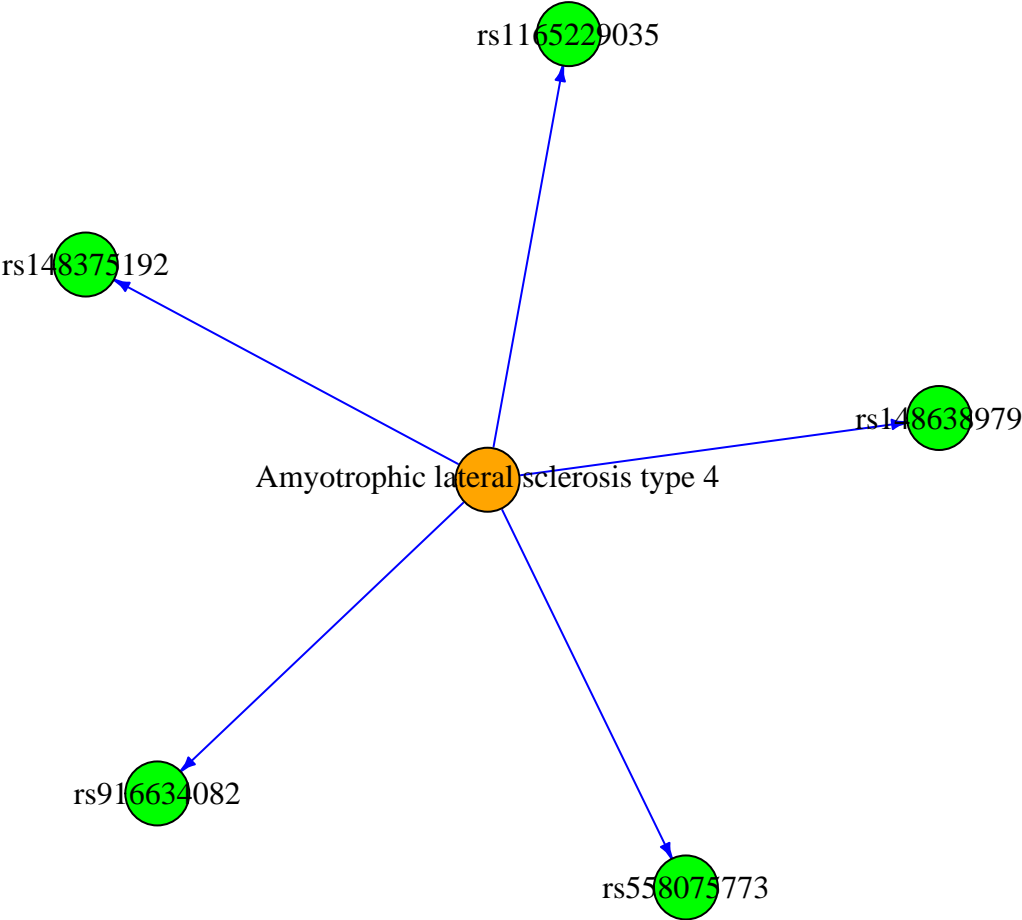



Variant–Disease Network (Amyotrophic lateral sclerosis type 6)

Amyotrophic lateral sclerosis type 6

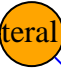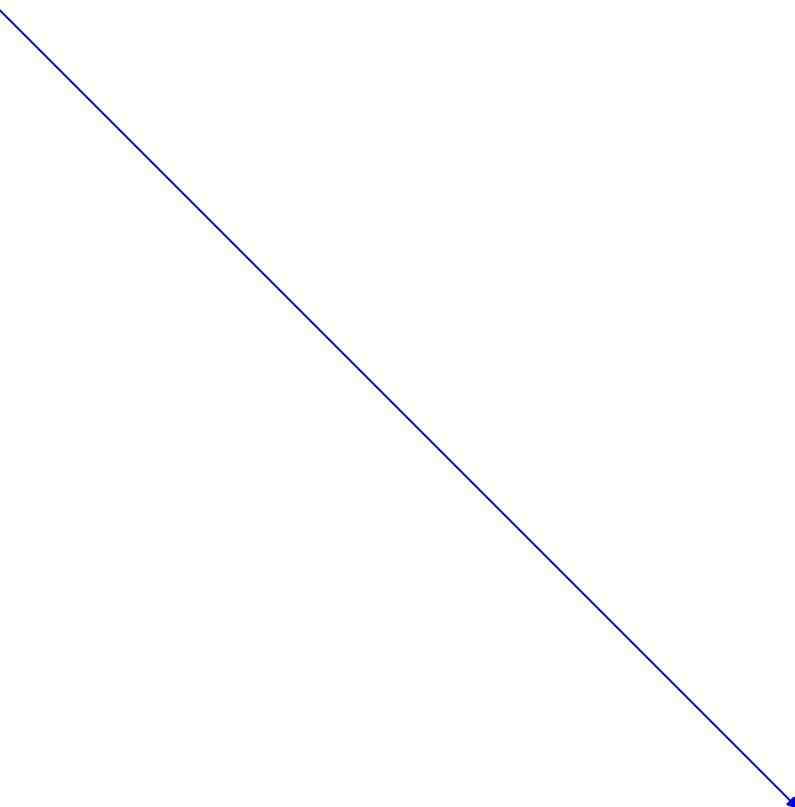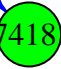

rs741810

# Variant-Disease Network (Amyotrophic Lateral Sclerosis/Frontotemporal Dem

amyotrophic Lateral Sclerosis/ Frontotemporal Dementia

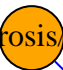

rs10122902

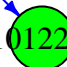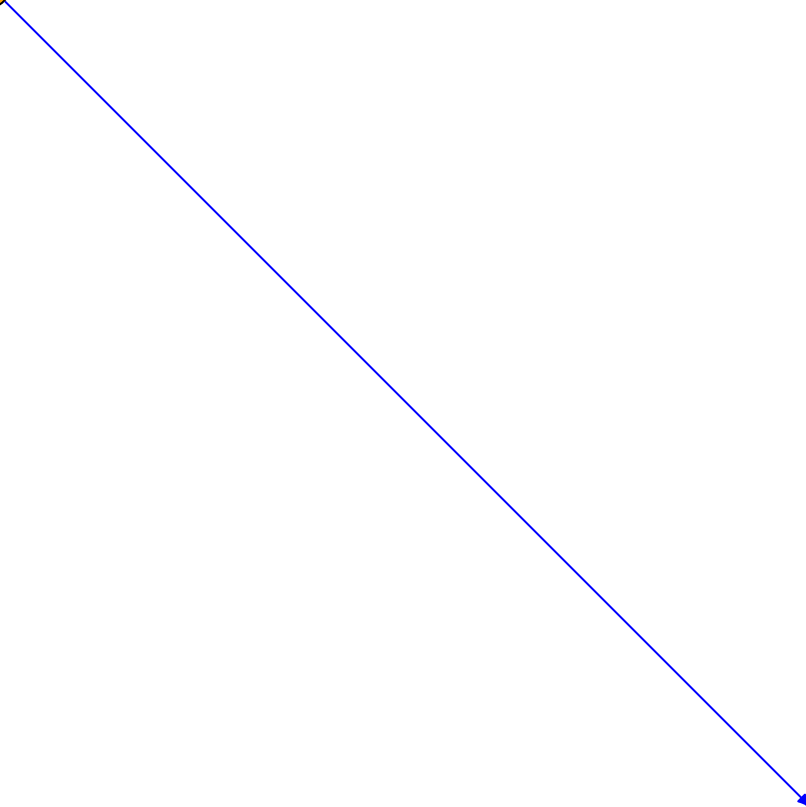

## Variant–Disease Network (Andermann syndrome)

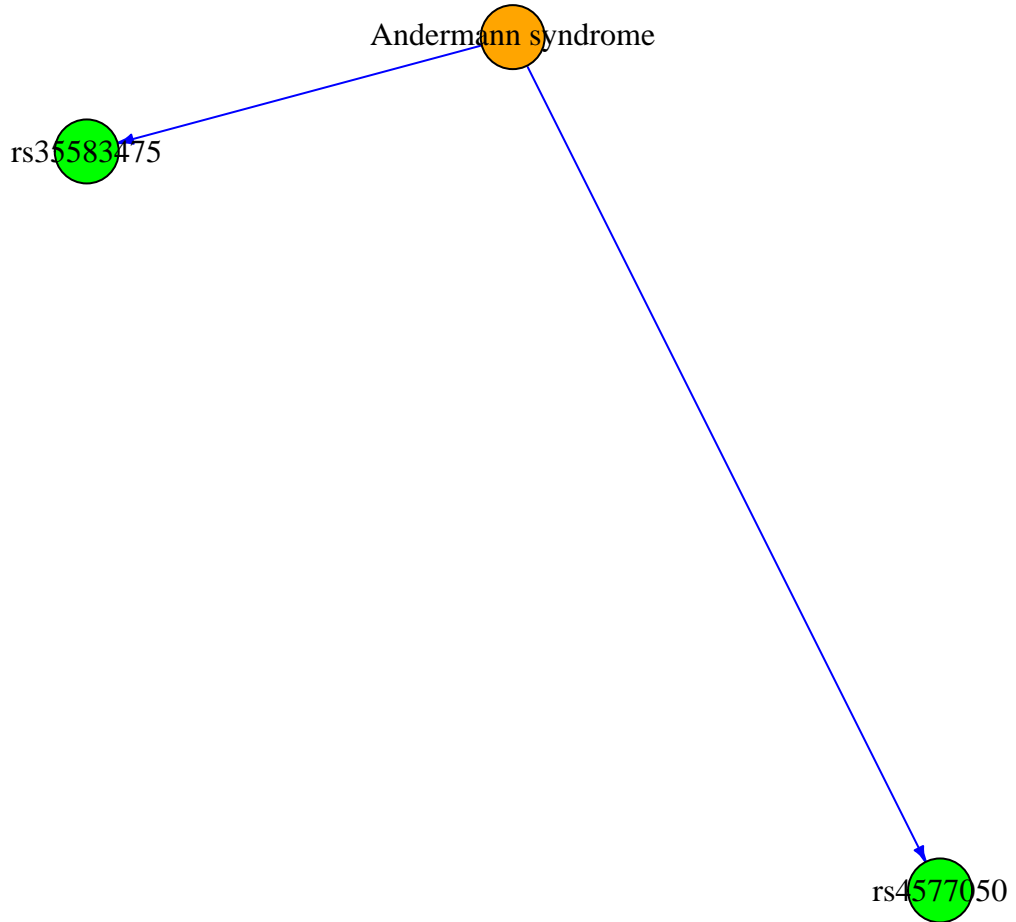

## Variant–Disease Network (Andersen Tawil syndrome)

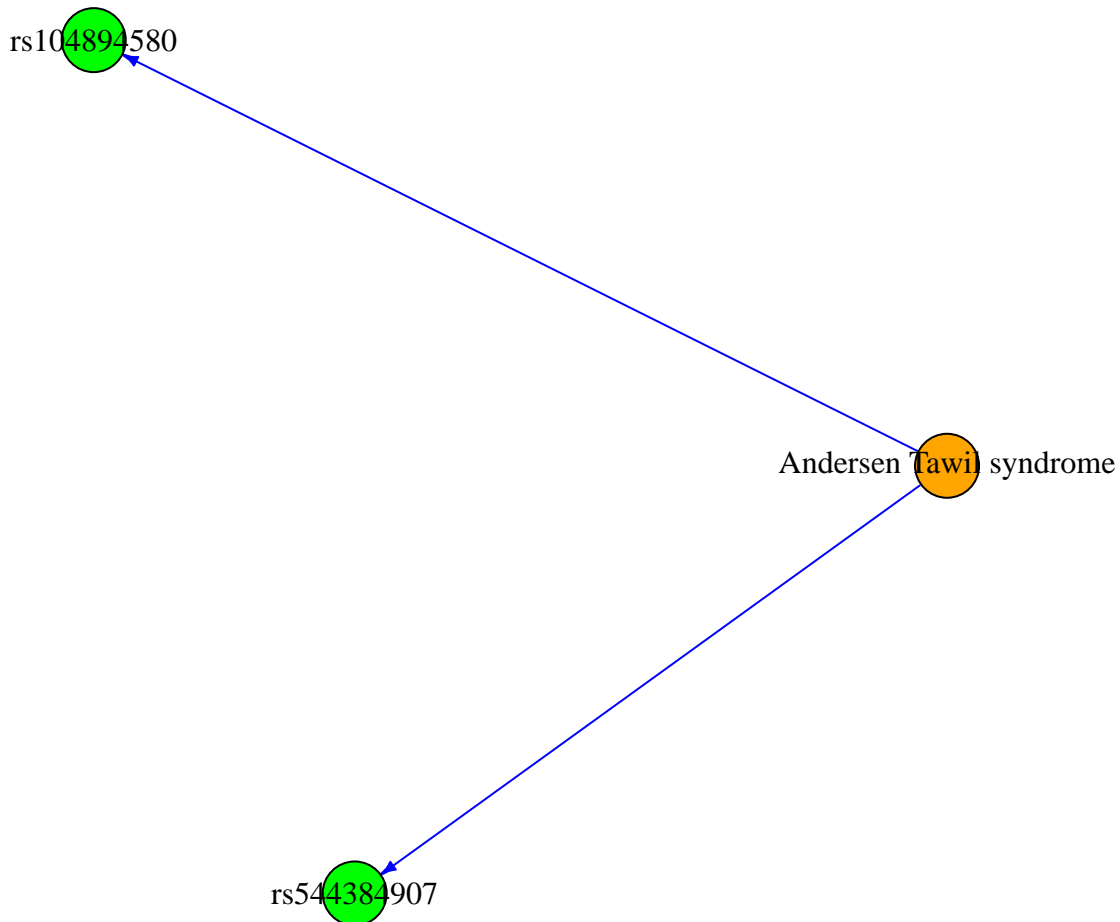

## Variant–Disease Network (Angelman syndrome)

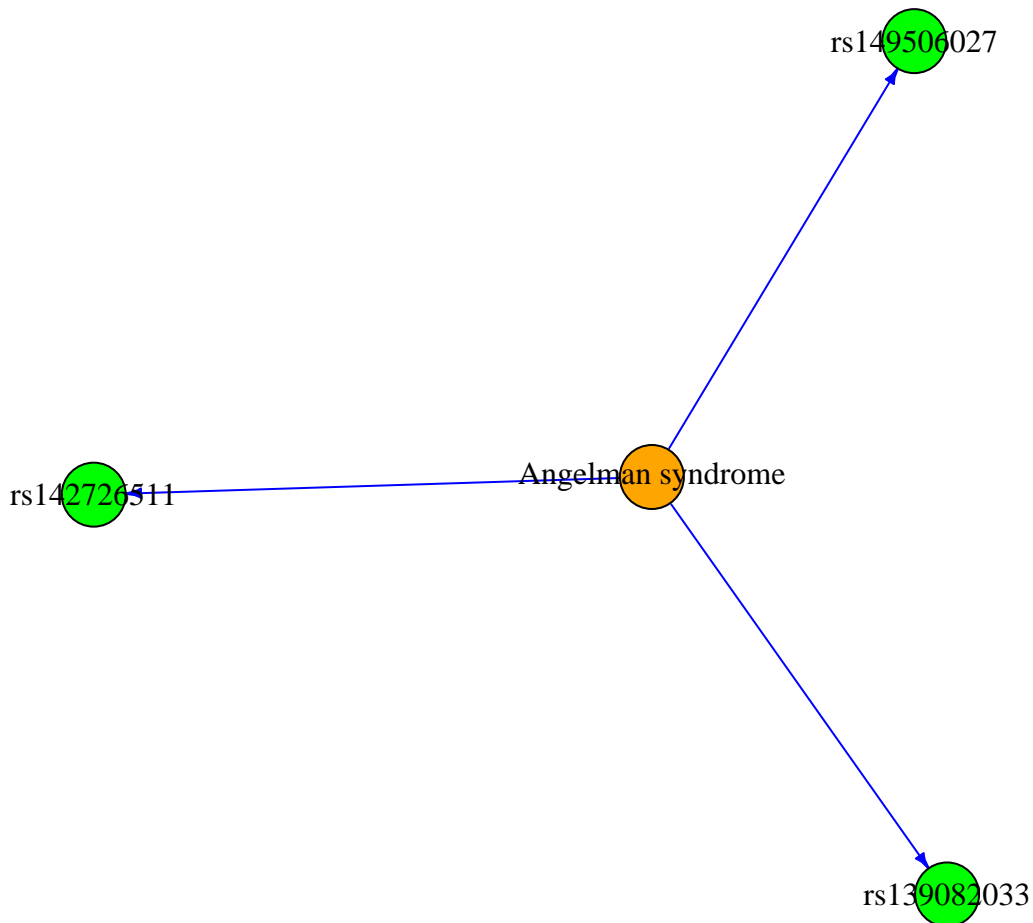

## Variant–Disease Network (Angelman syndrome–like)

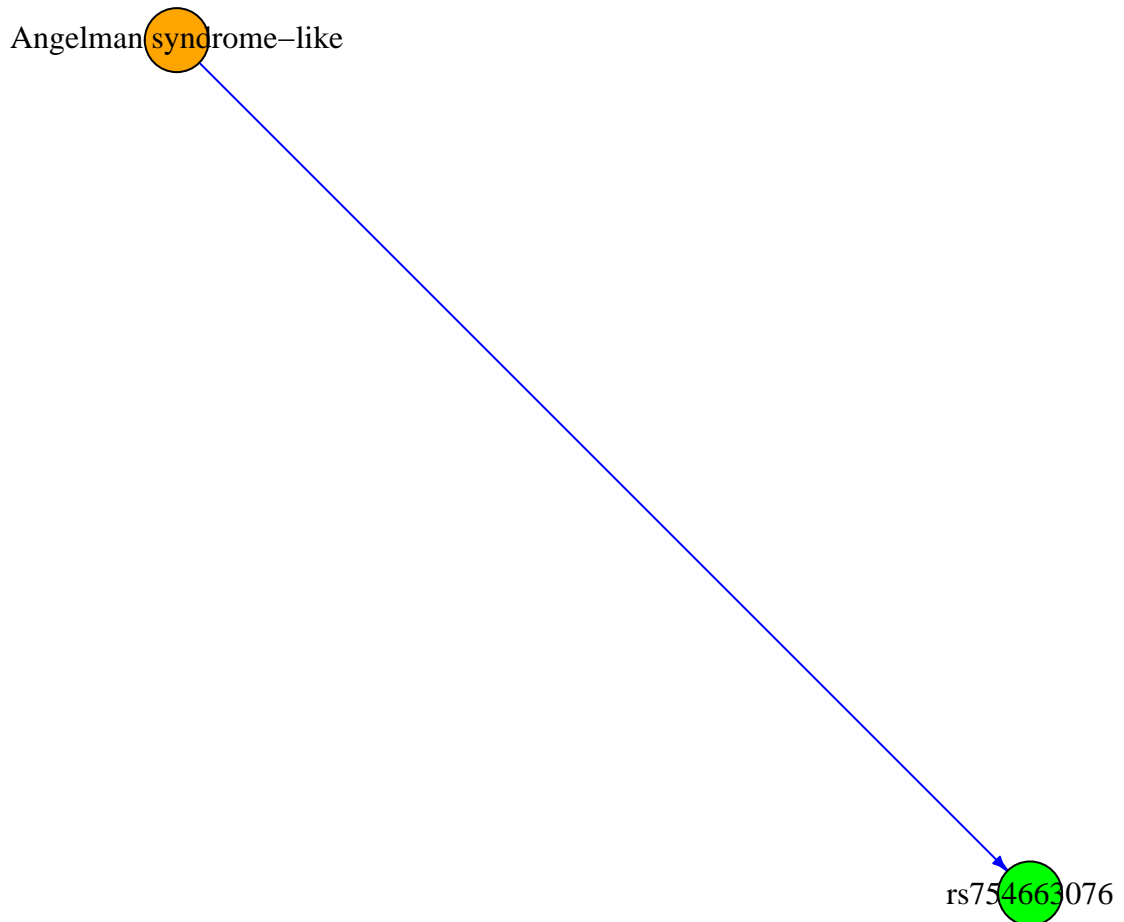

# Ant-Disease Network (Angiokeratoma corporis diffusum with arteriovenous

eratomy corporis diffusum with arteriovenous fistulas

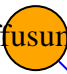

rs533696377

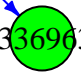

## Variant-Disease Network (Aniridia 1)

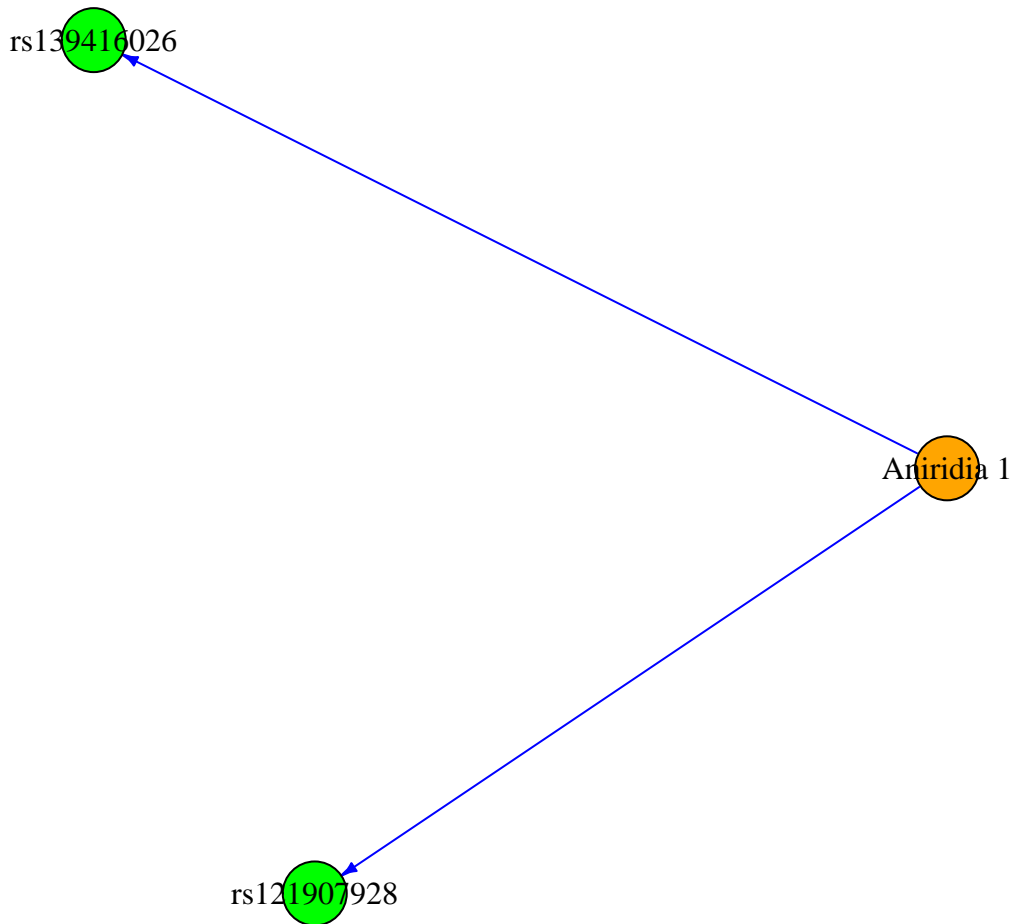



## Variant–Disease Network (Anophthalmia – microphthalmia)

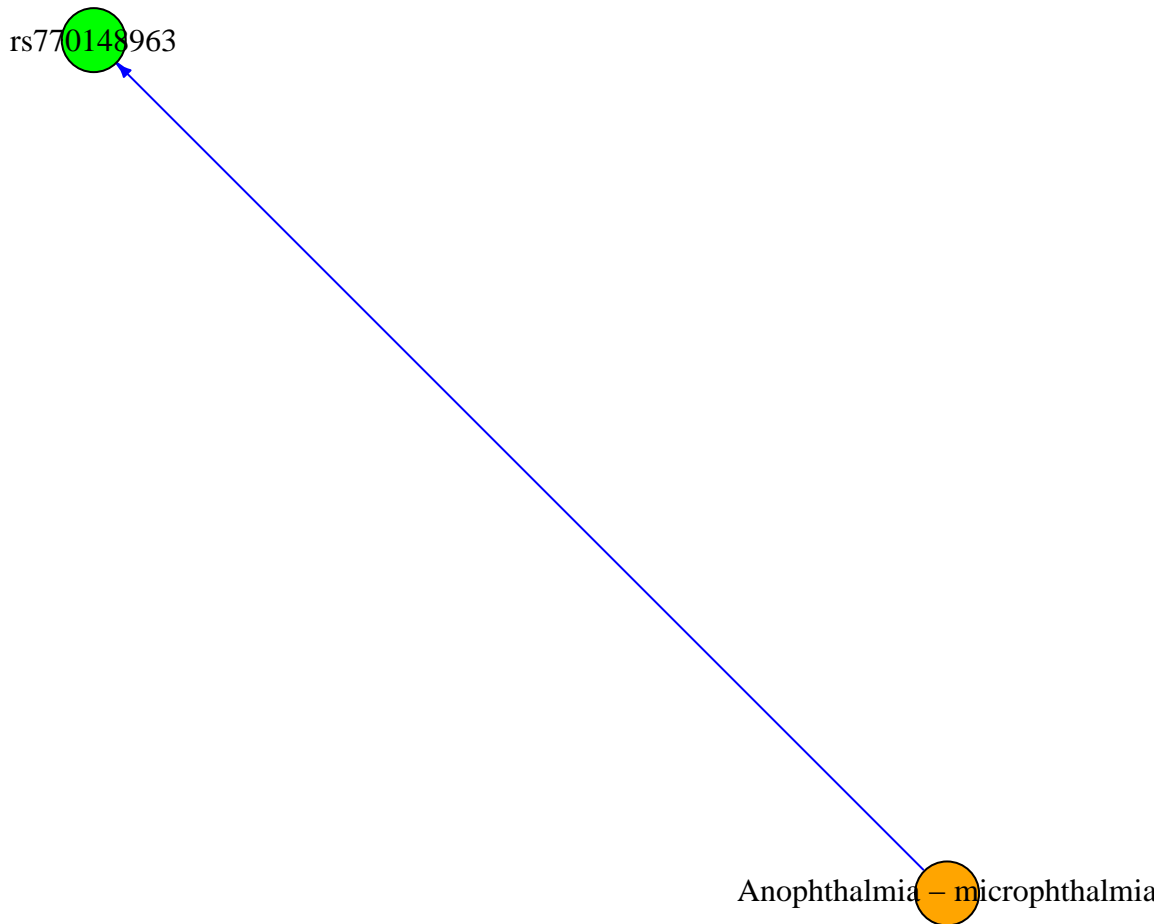

Variant–Disease Network (Antenatal Bartter Syndrome)

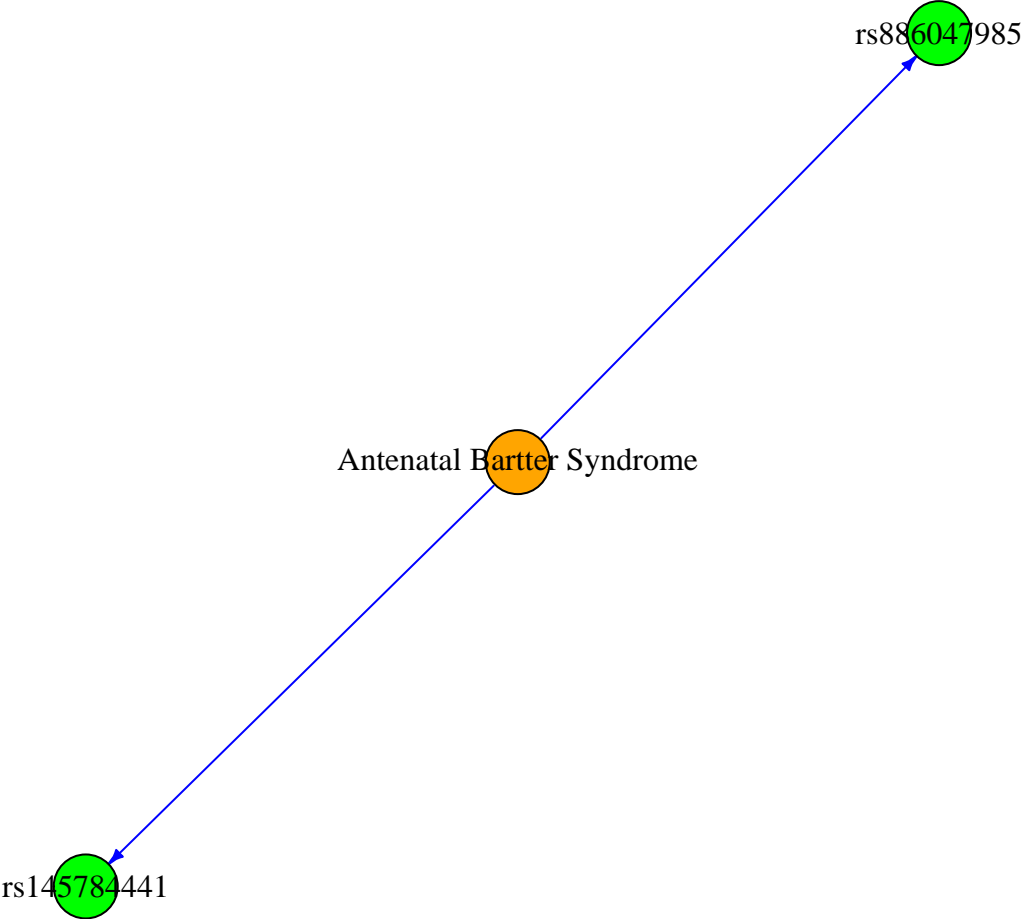

Variant–Disease Network (Anterior segment dysgenesis 3)

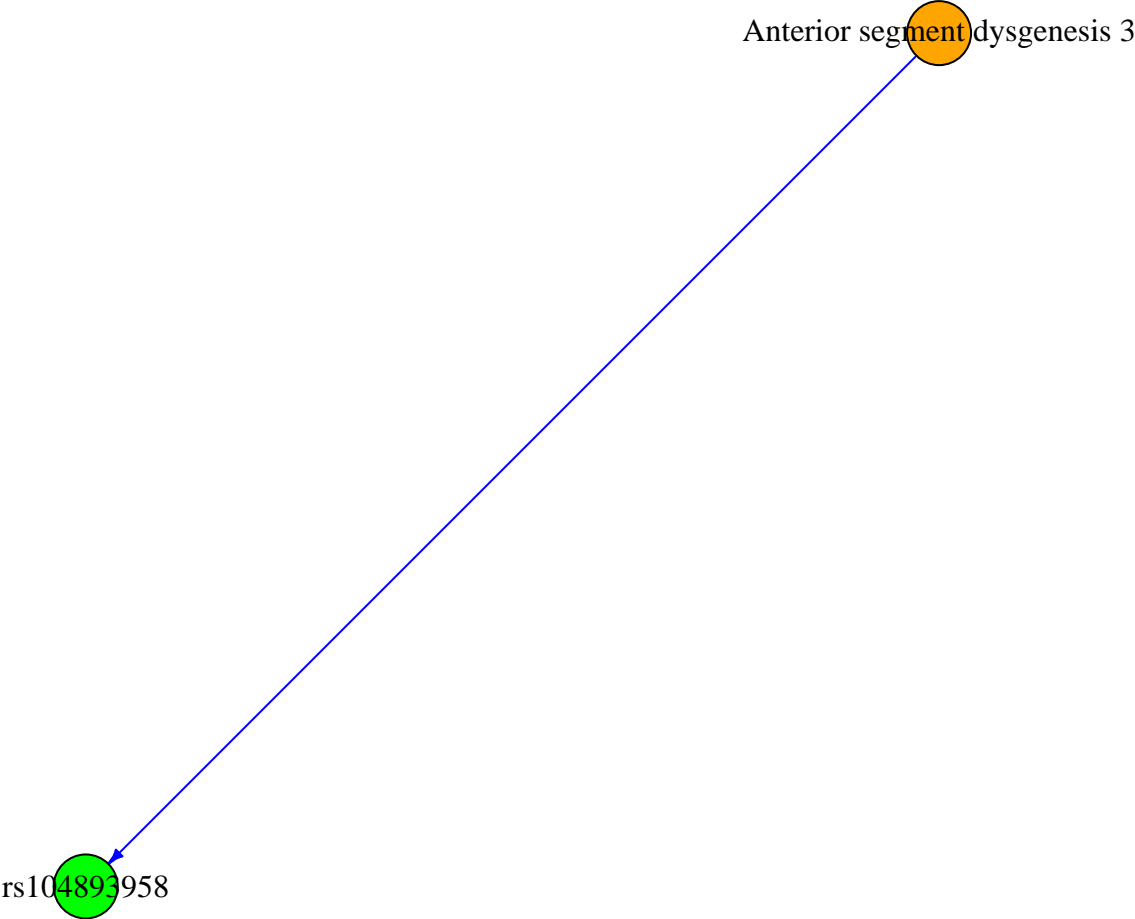

## Variant-Disease Network (Aortic aneurysm)

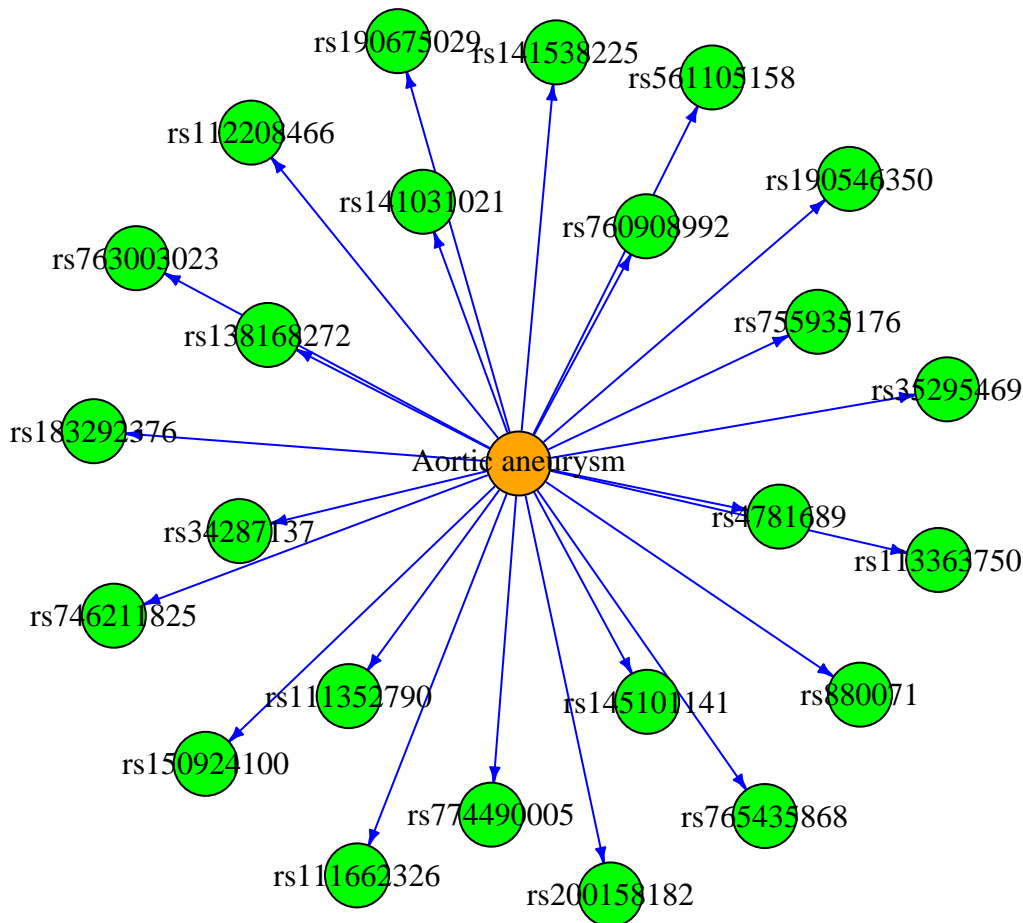

## Variant–Disease Network (Aortic valve disorder)

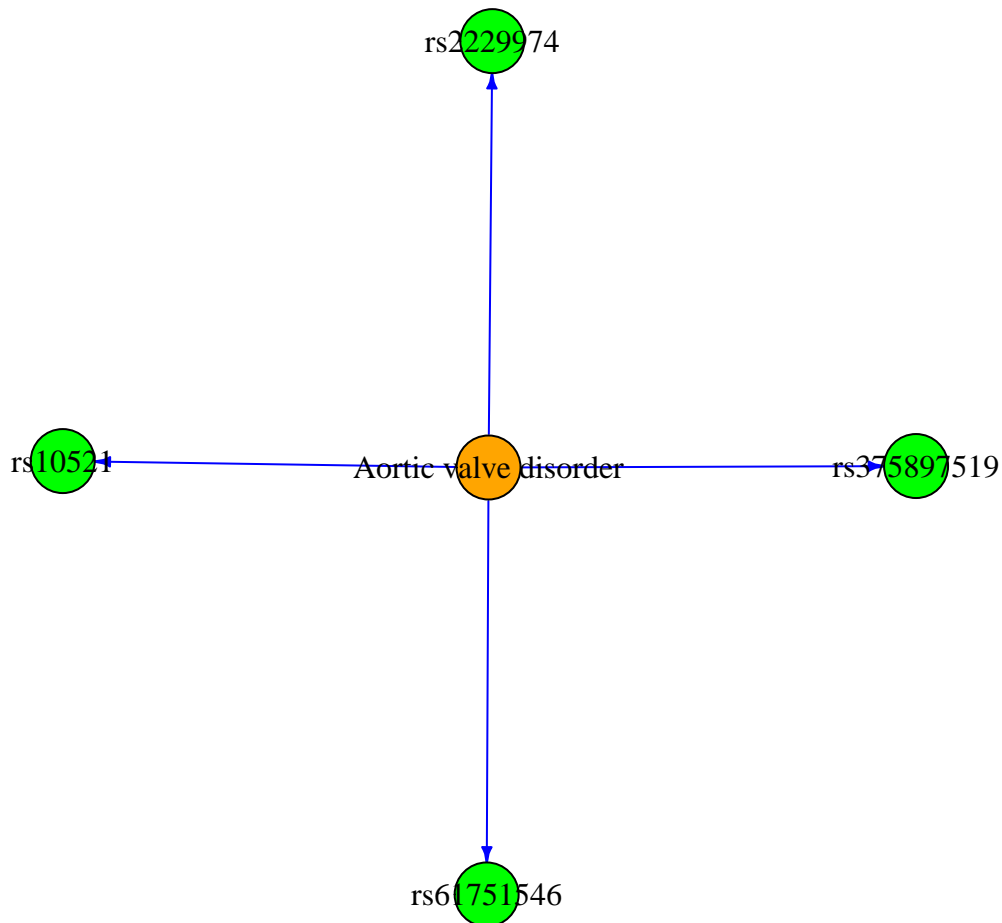

Variant–Disease Network (APOLIPOPROTEIN A-I (MILANO))

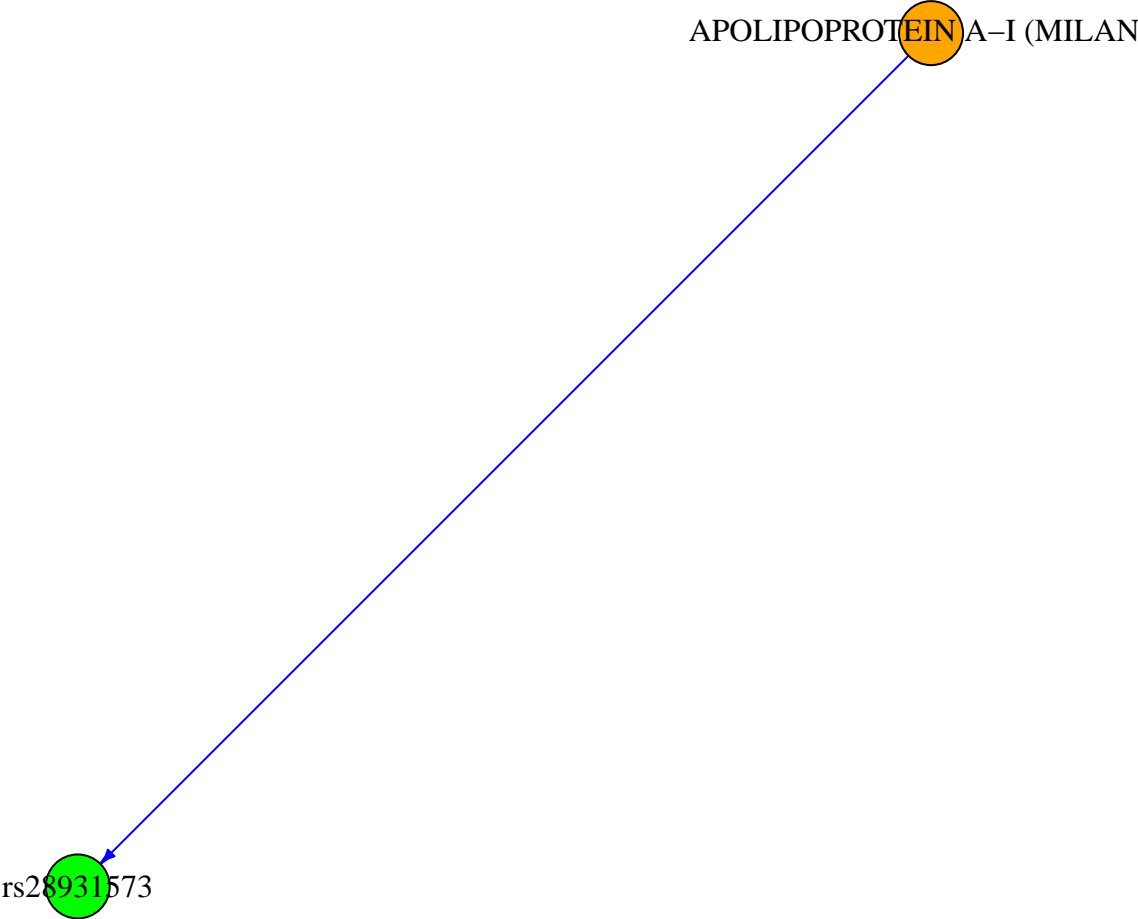

## Variant-Disease Network (Arginase deficiency)

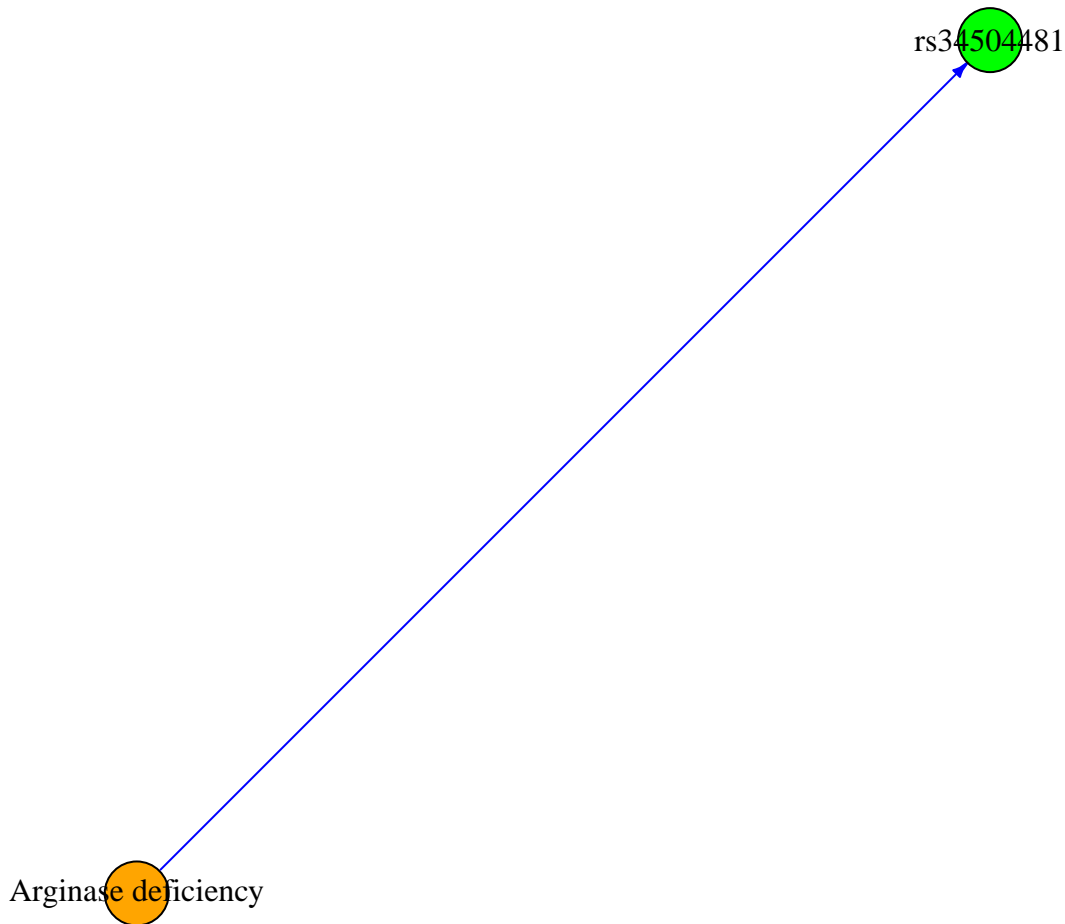

Variant–Disease Network (Arginine:glycine amidinotransferase deficiency)

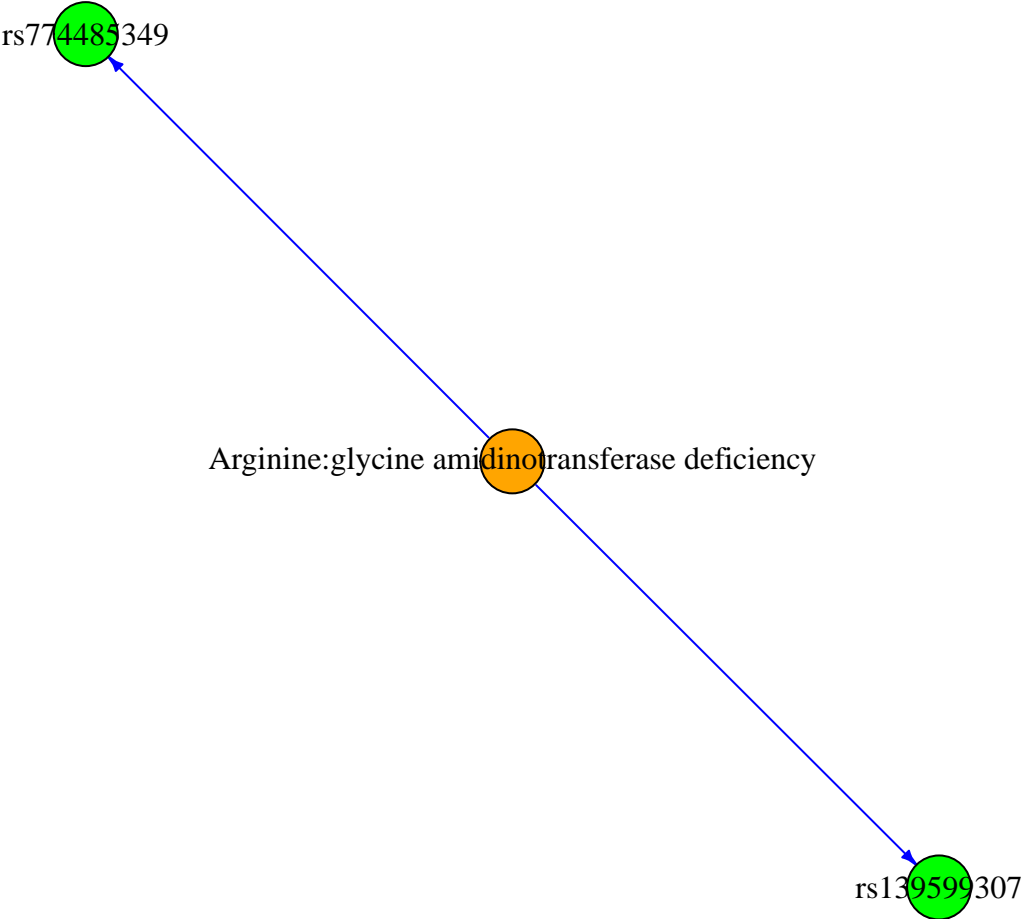



## Variant–Disease Network (Argininosuccinate lyase deficiency)

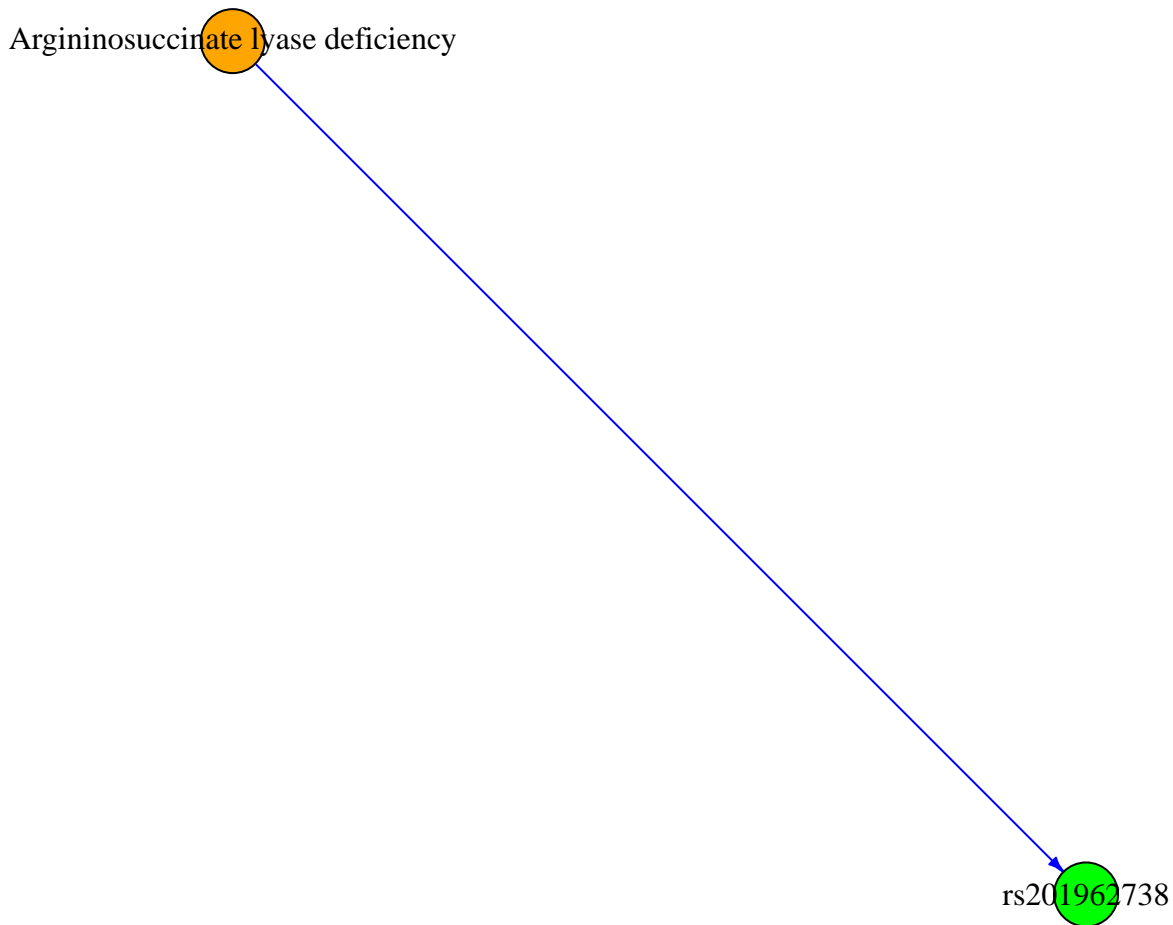

Variant–Disease Network (ARMC9–related Joubert syndrome)

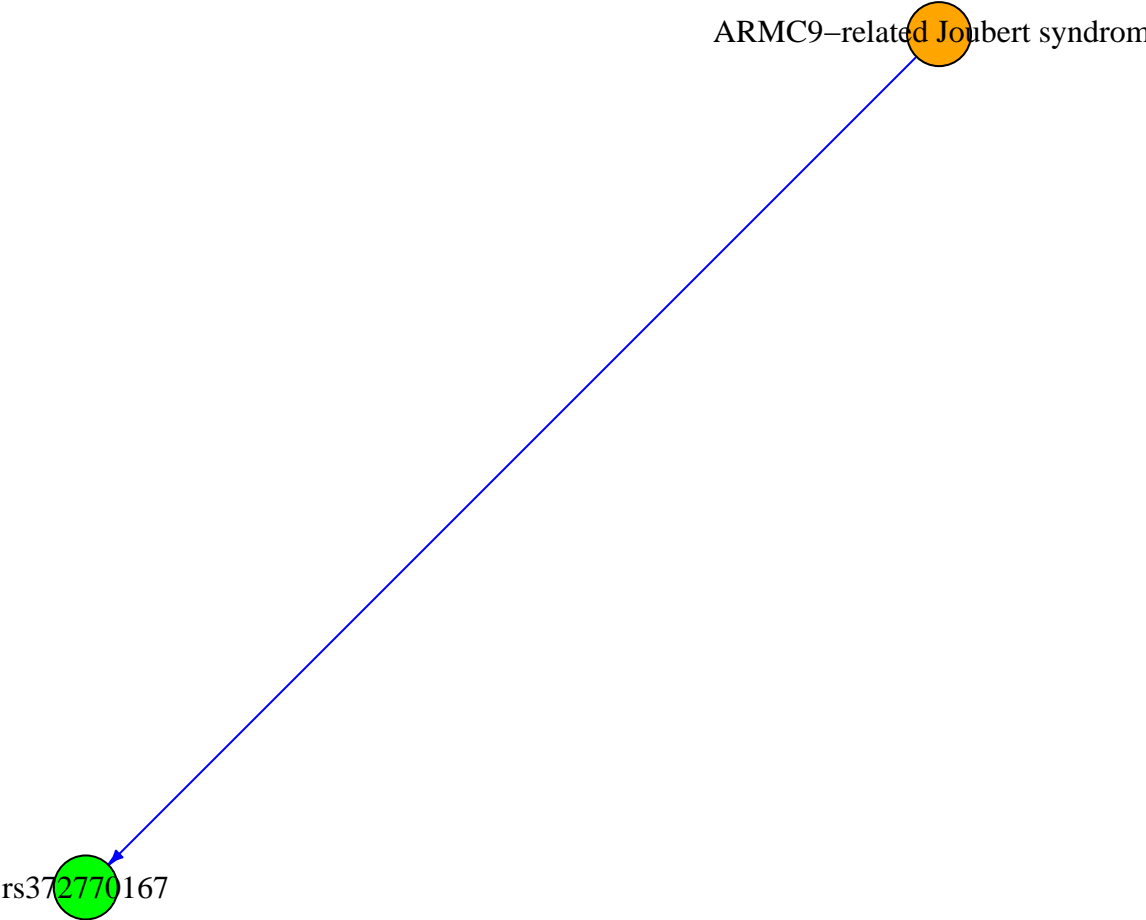

## Variant–Disease Network (Aromatase deficiency)

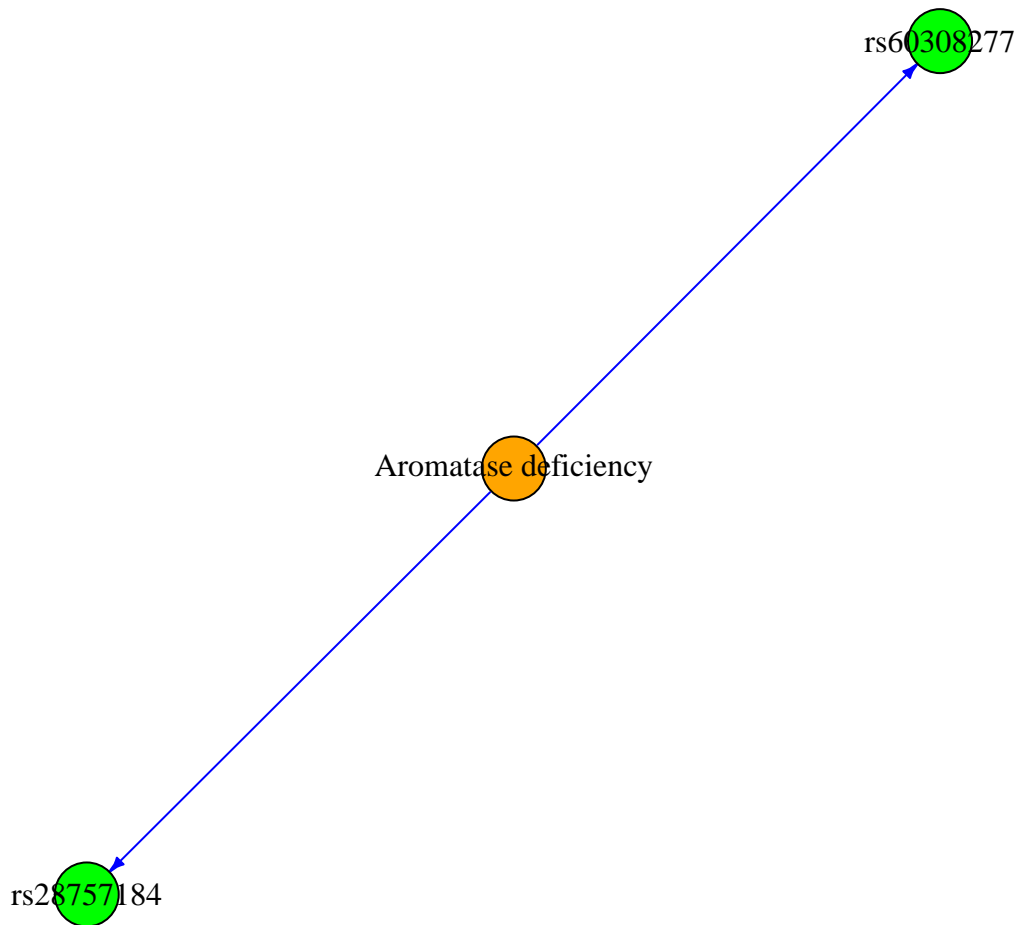

## Variant–Disease Network (Arrhythmia)

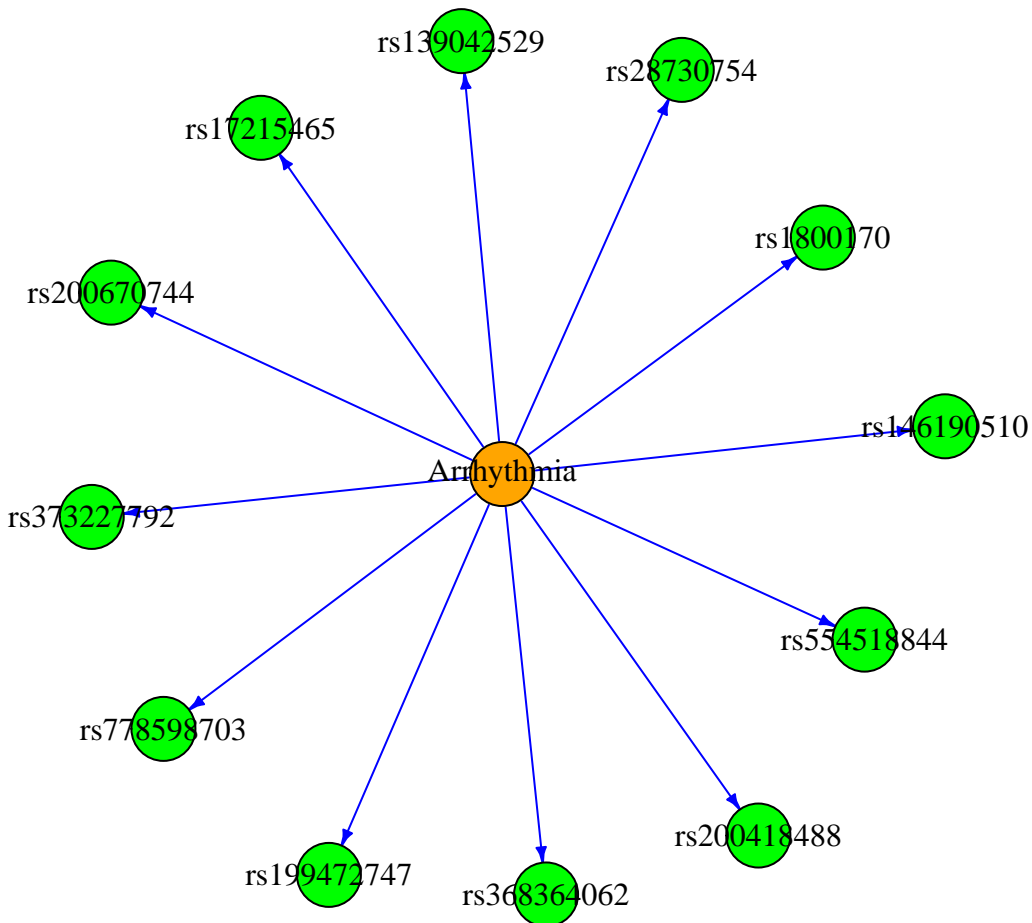

Variant–Disease Network (Arrhythmogenic right ventricular cardiomyopath

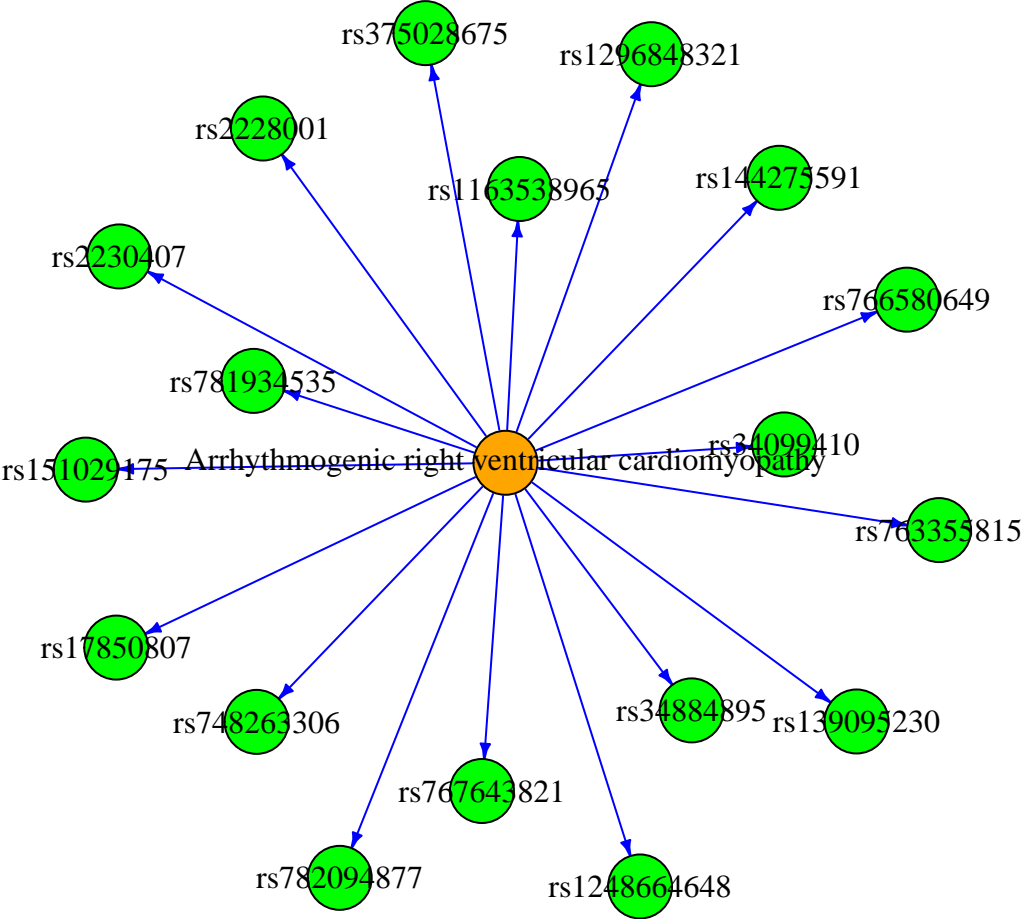

## Variant–Disease Network (Arrhythmogenic right ventricular dysplasia)

rs146754105

Arrhythmogenic right ventricular dysplasia

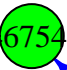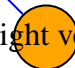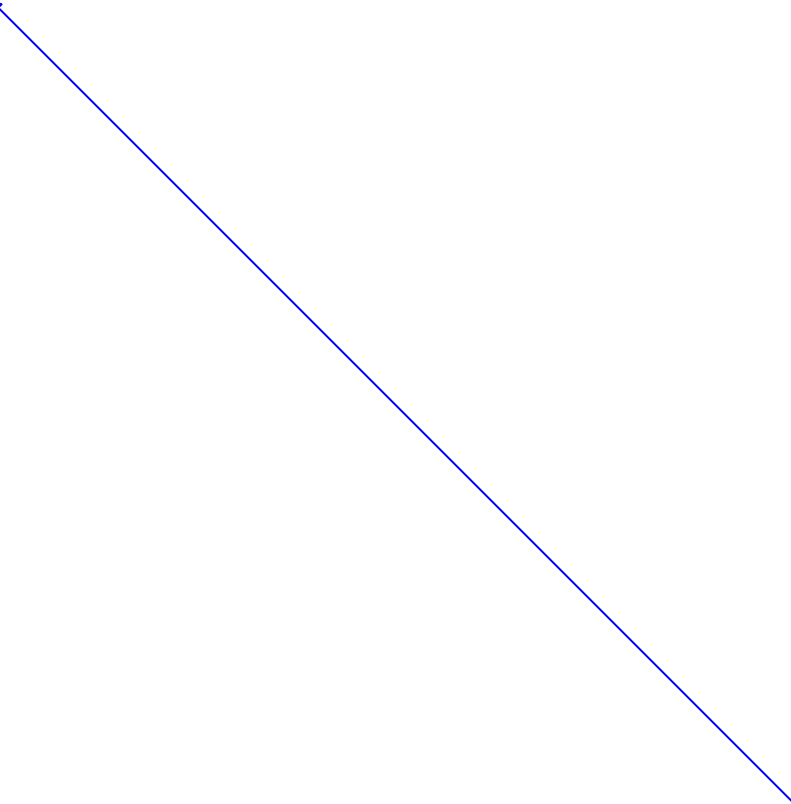

## Variant–Disease Network (Arterial calcification)

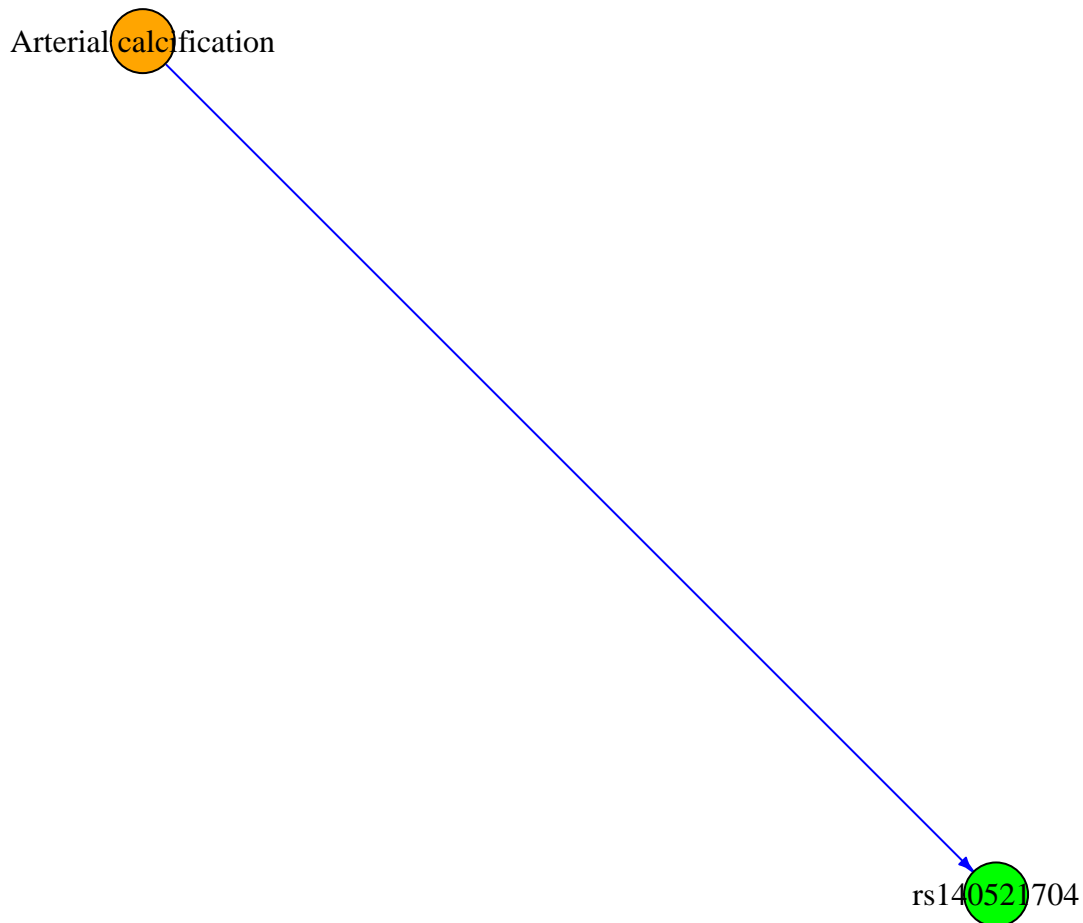

## Variant–Disease Network (Arterial dissection)

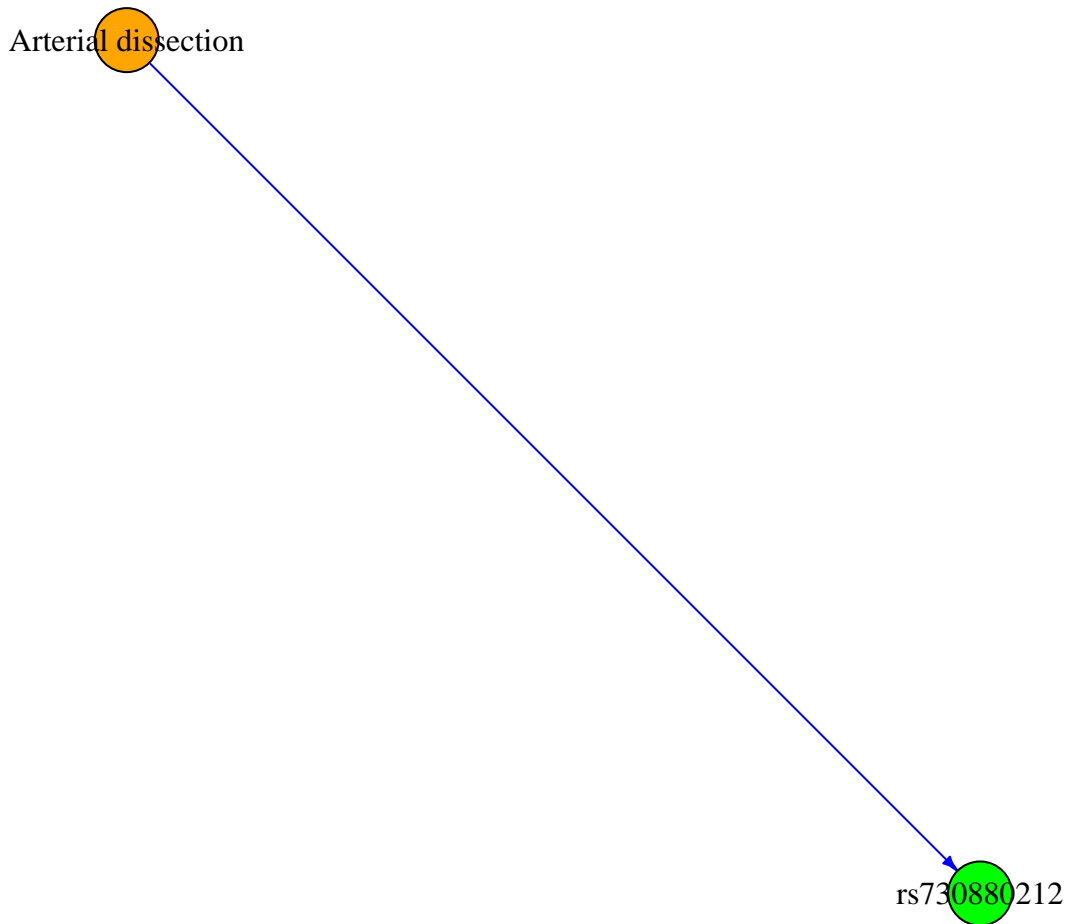



## Variant–Disease Network (Arterial tortuosity syndrome)

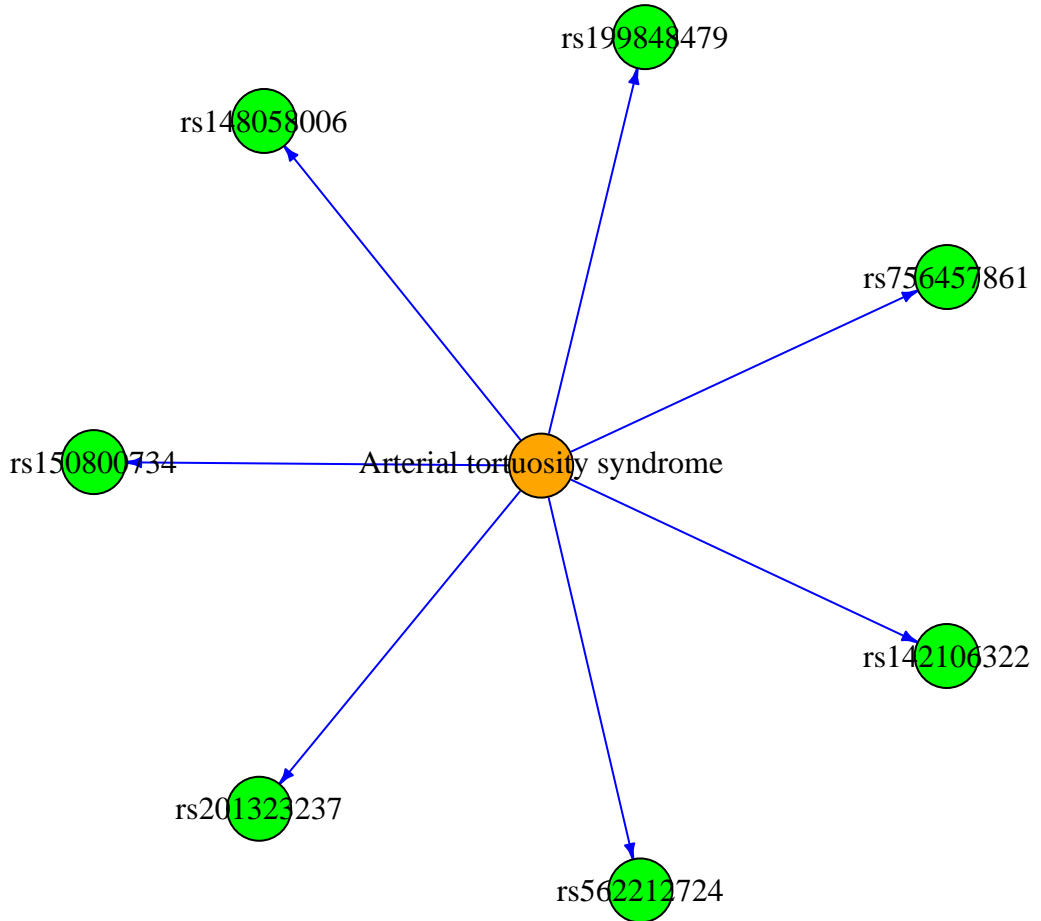

## Variant–Disease Network (Arteriohepatic dysplasia)

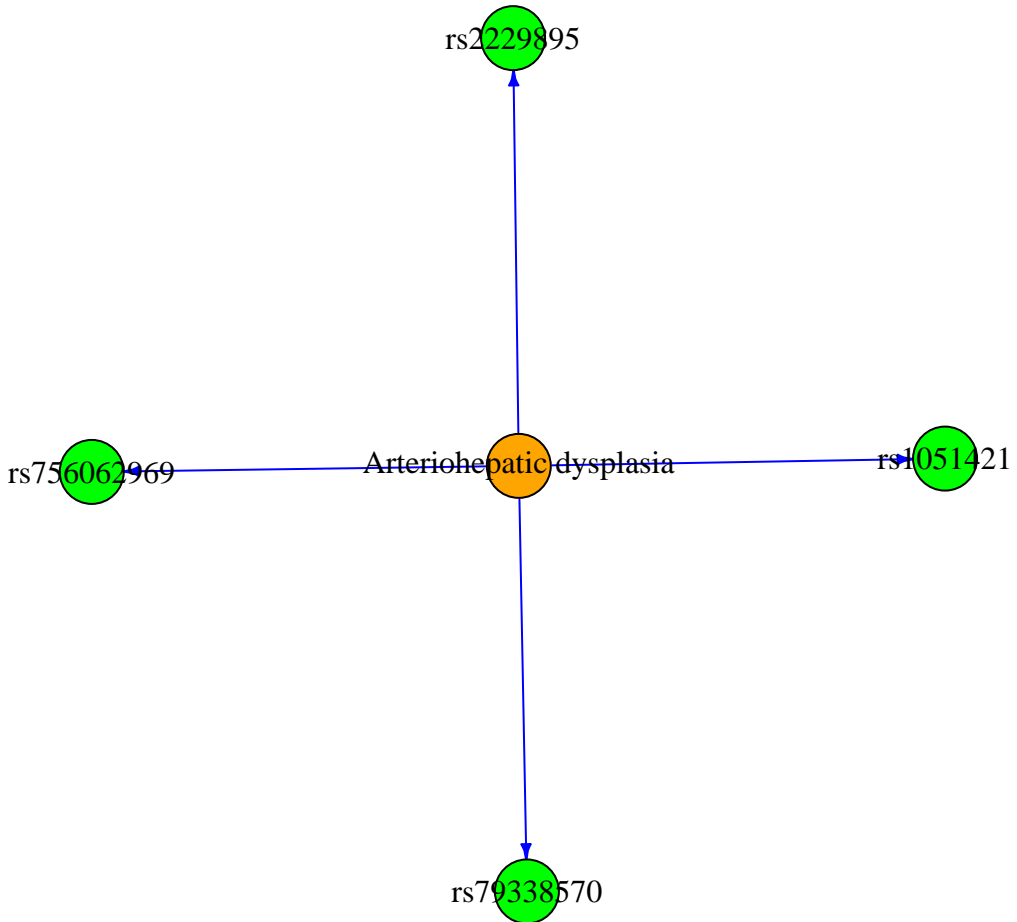

Variant–Disease Network (Arthrogryposis multiplex congenita)

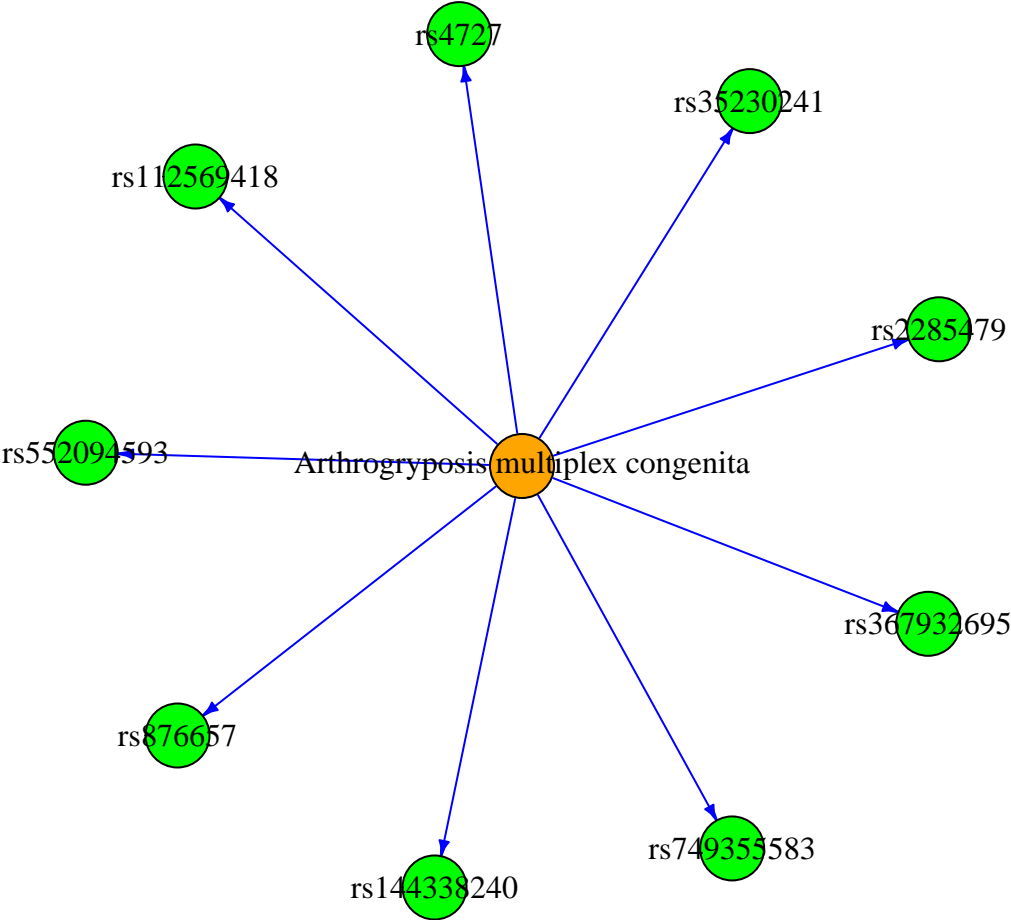

# Variant–Disease Network (Arthrogryposis multiplex congenita distal)

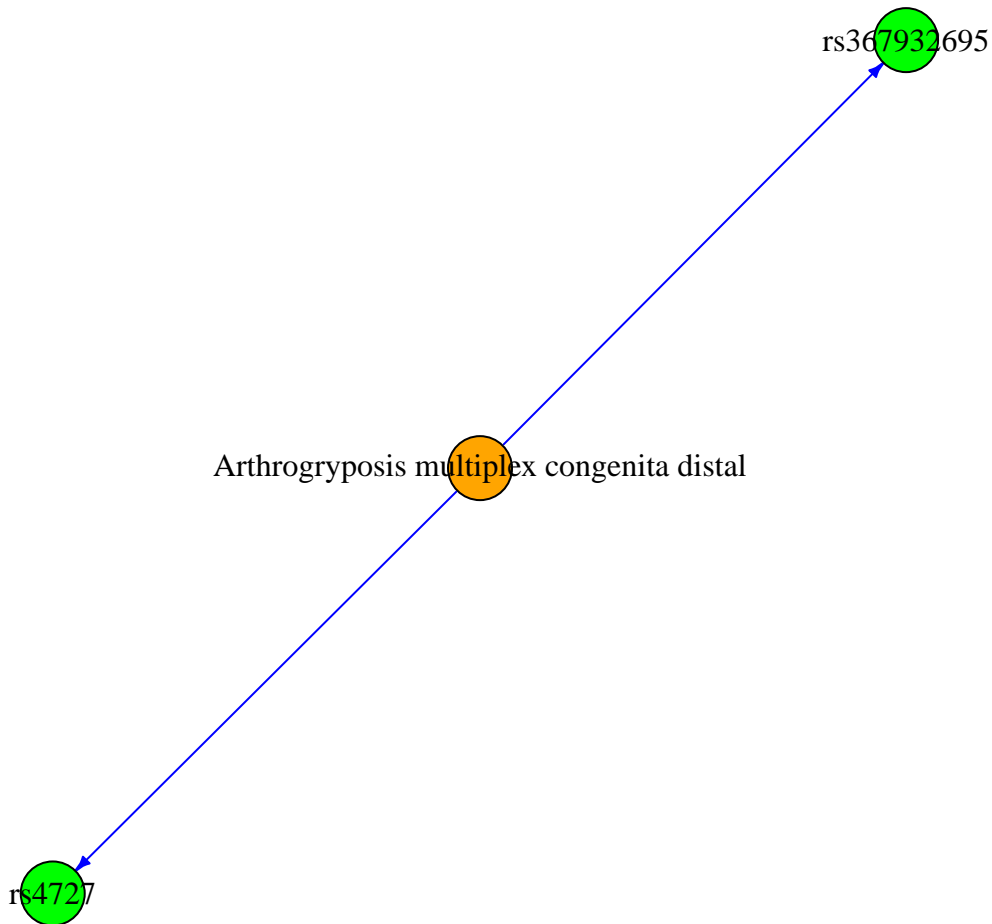

Variant–Disease Network (Aspartylglucosaminuria)

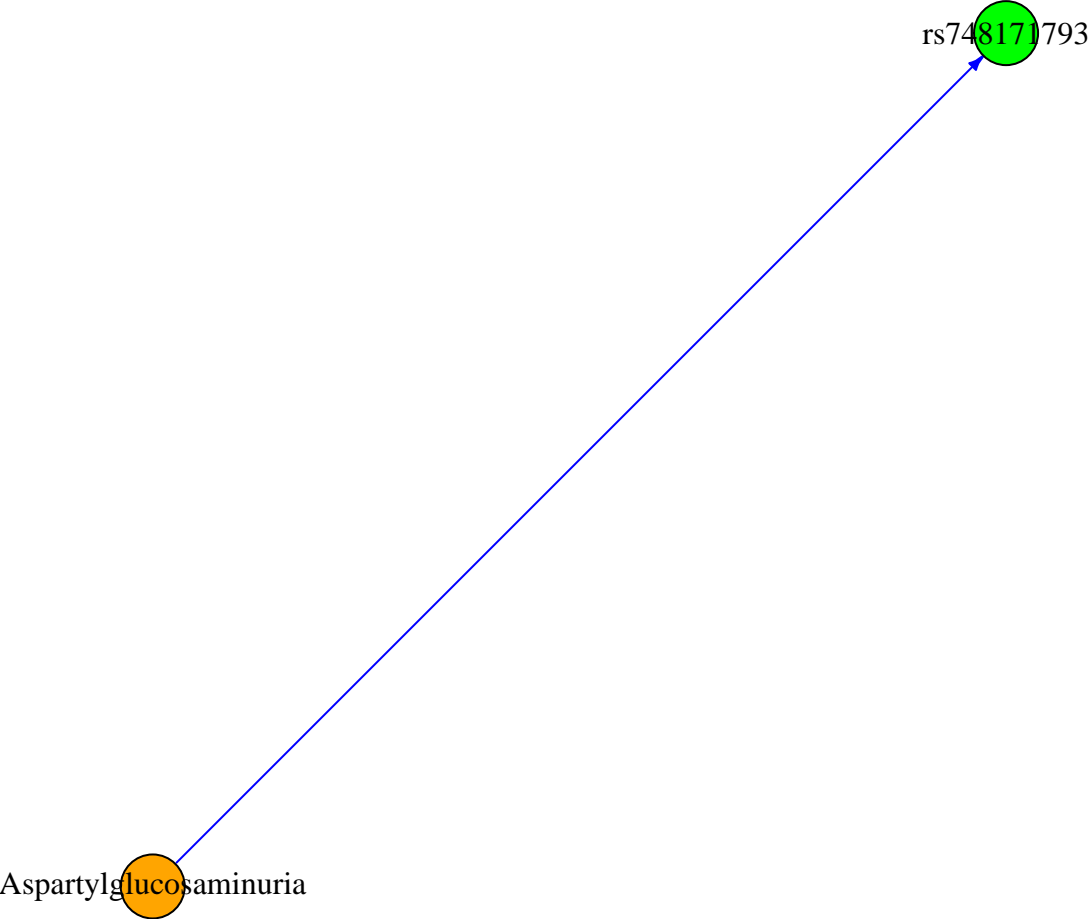

## Variant-Disease Network (Ataxia)

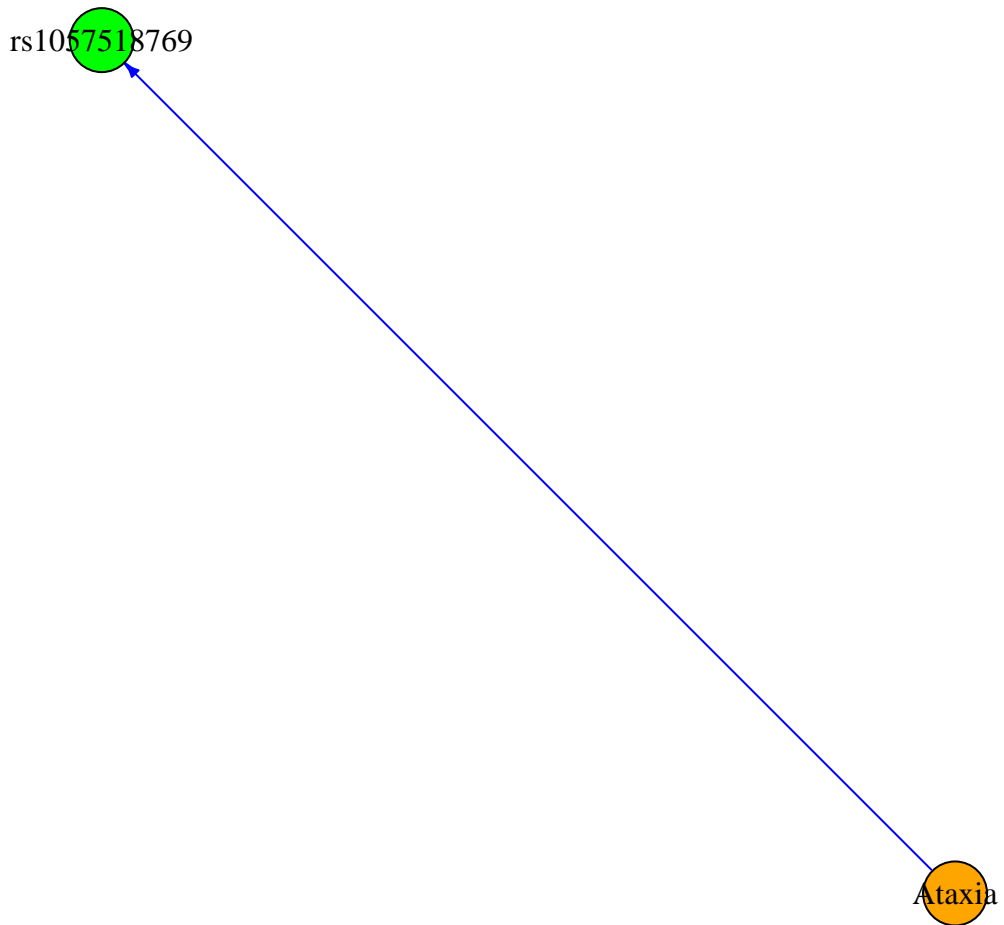

Variant–Disease Network (Ataxia Neuropathy Spectrum Disorders)

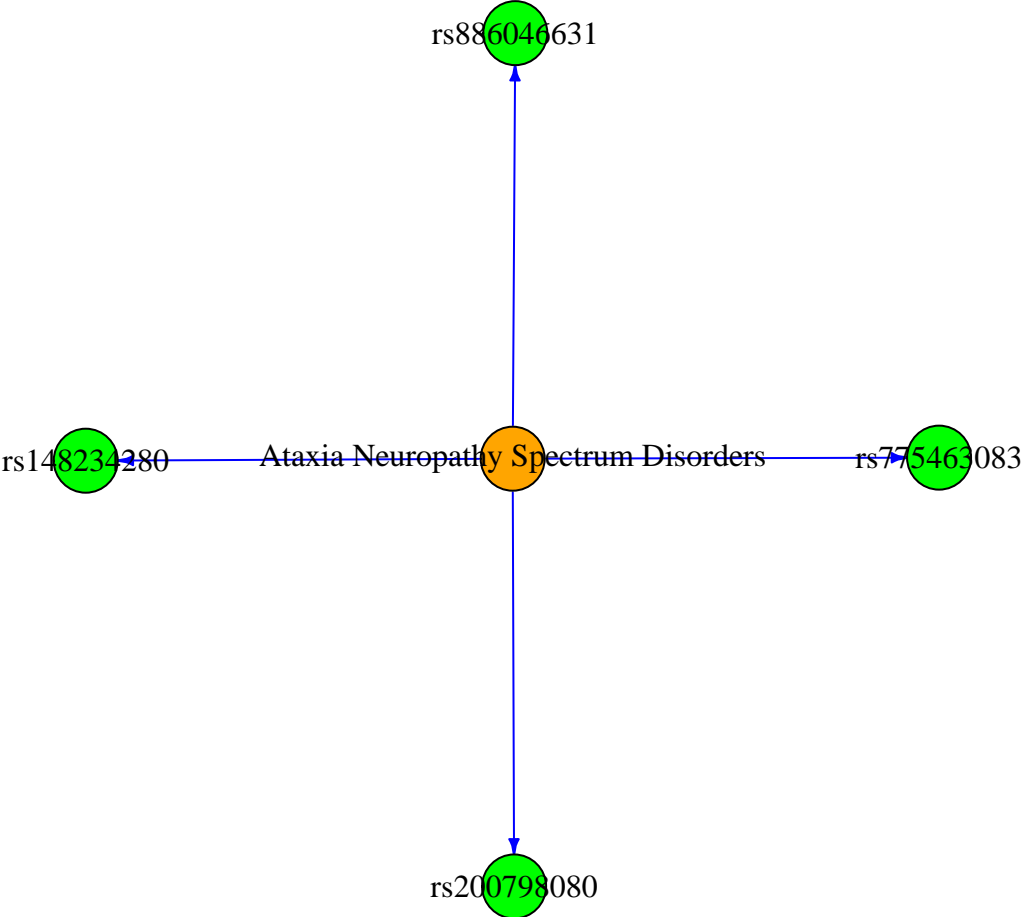

# Variant–Disease Network (Ataxia with Oculomotor Apraxia)

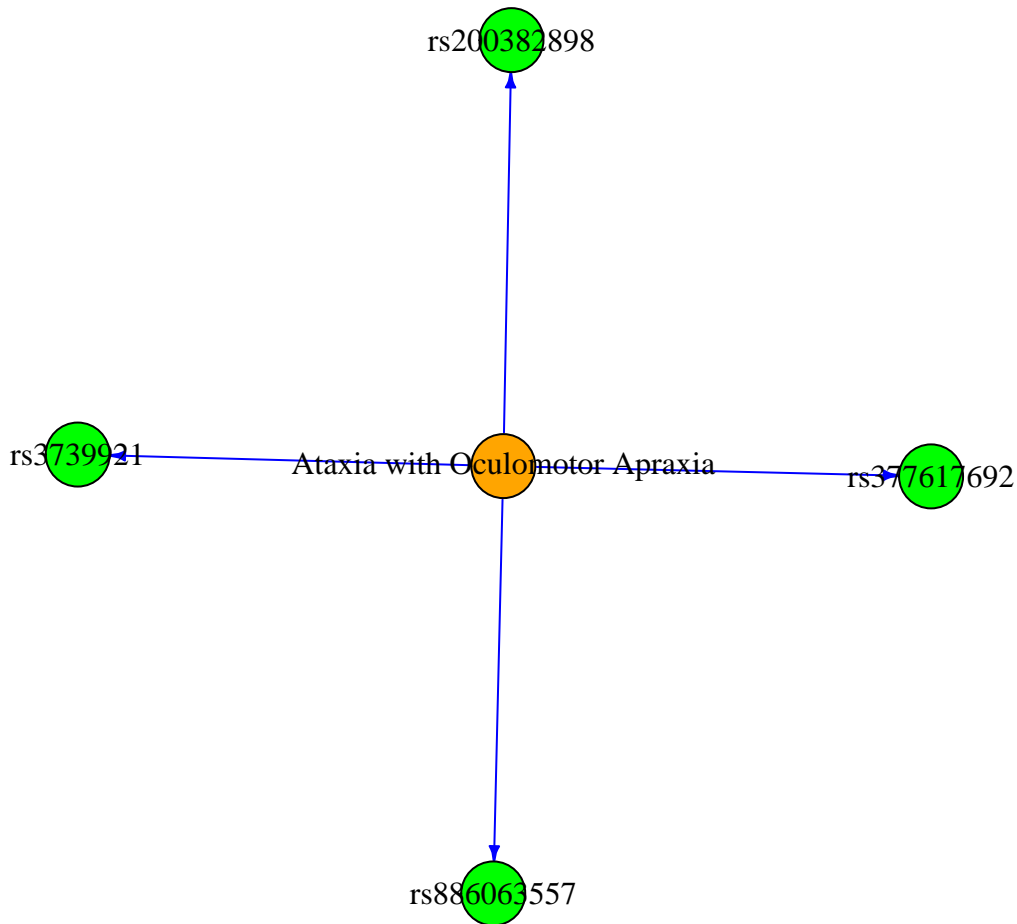



## Variant–Disease Network (Ataxia–telangiectasia syndrome)

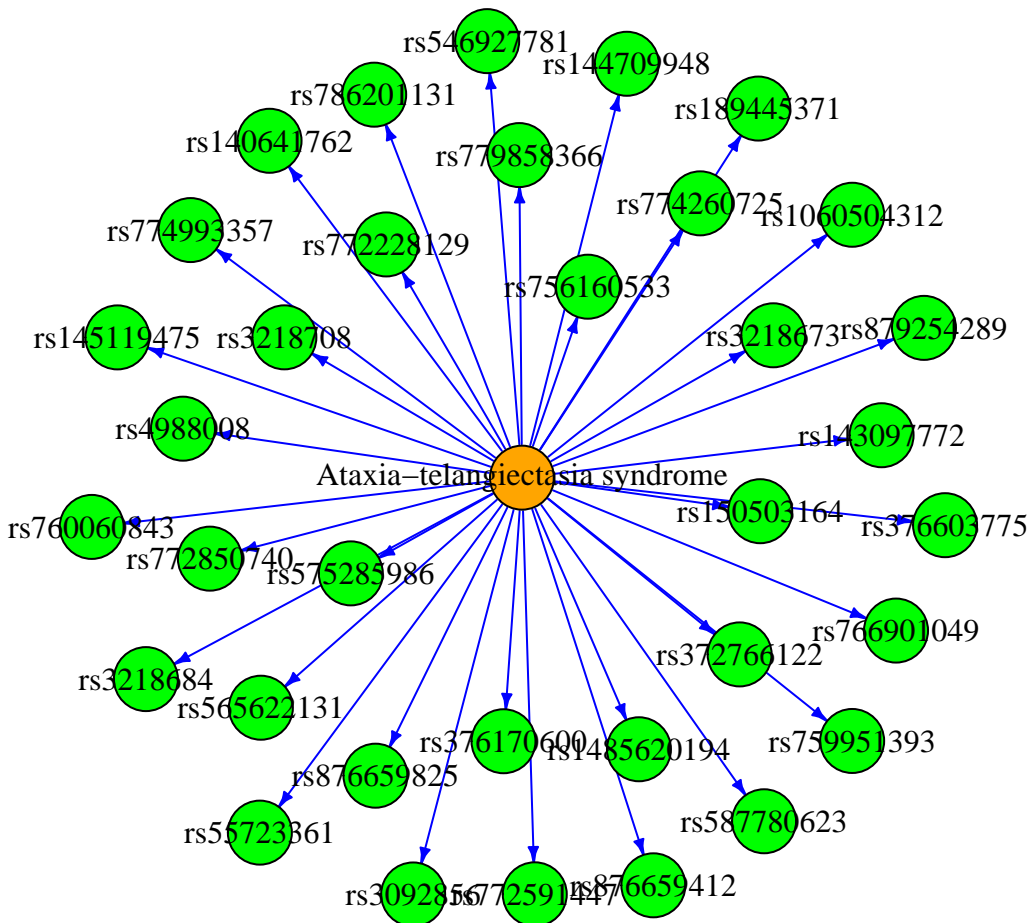

Variant–Disease Network (Ataxia–telangiectasia–like disorder 1)

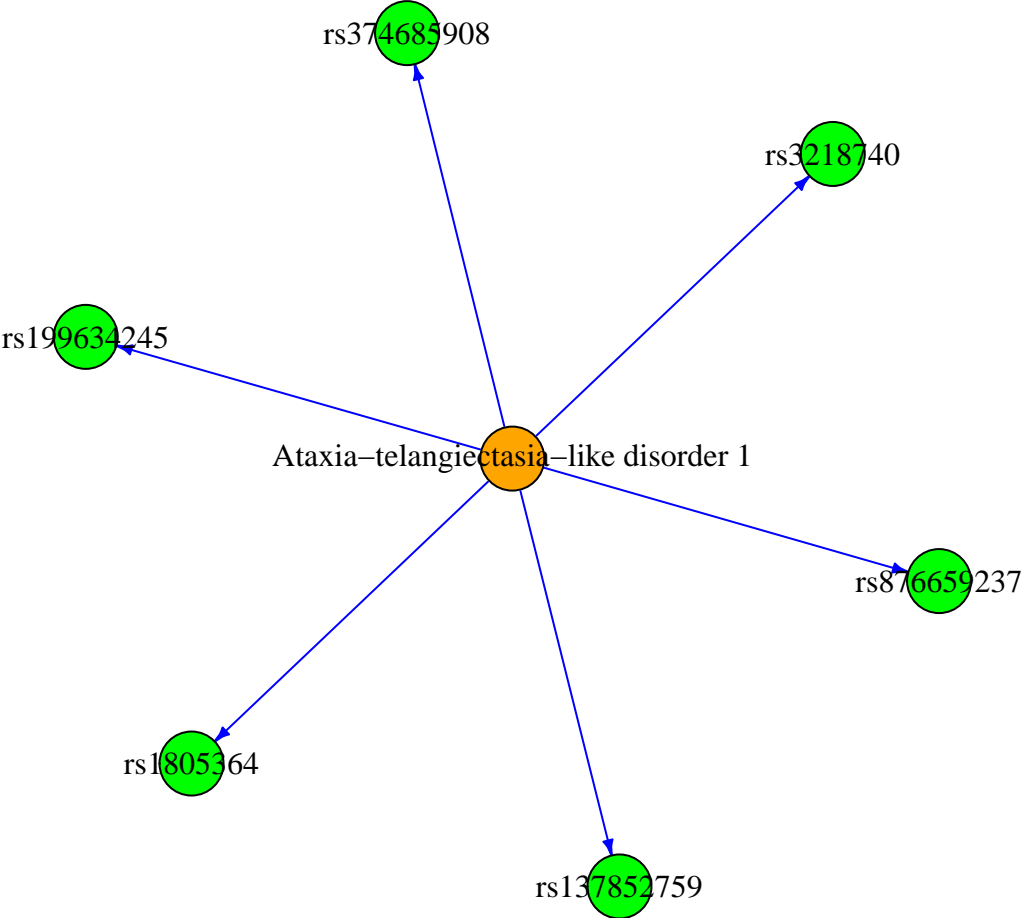

Variant–Disease Network (Atrial fibrillation)

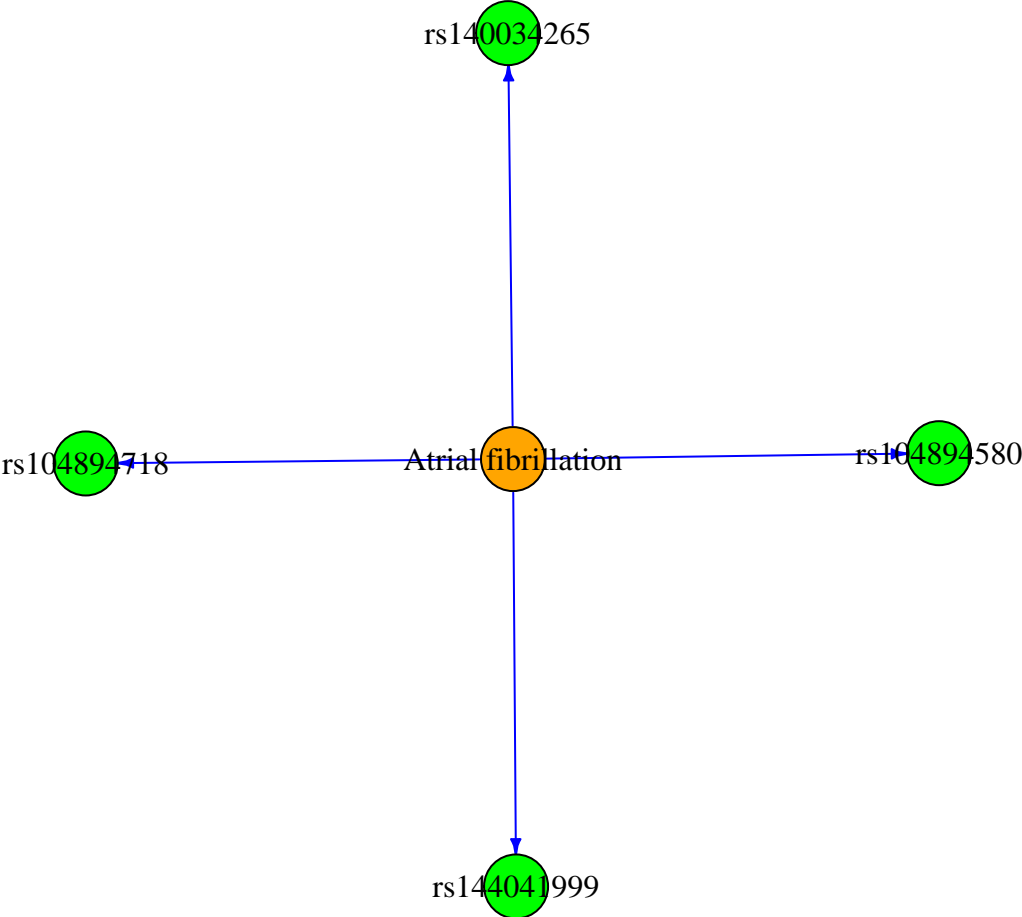

## Variant–Disease Network (Atrial septal defect)

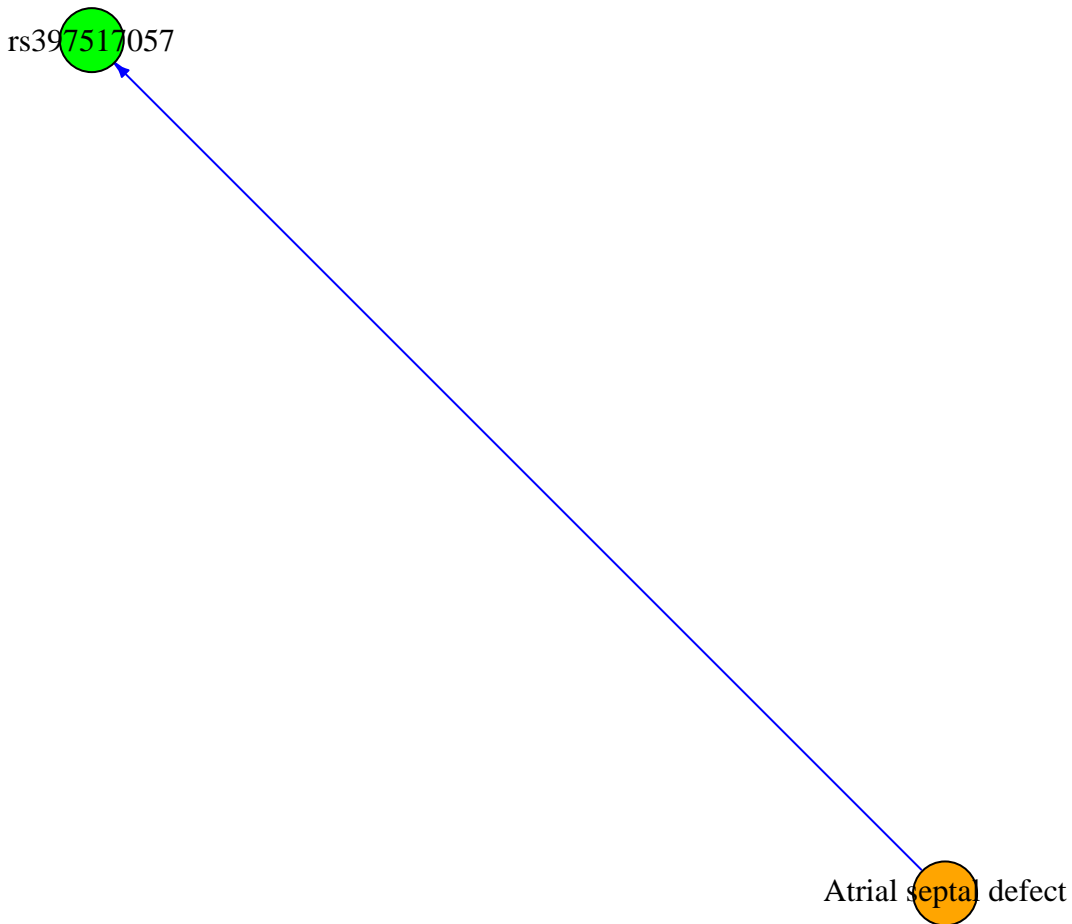

Variant–Disease Network (Atrial septal defect 5)

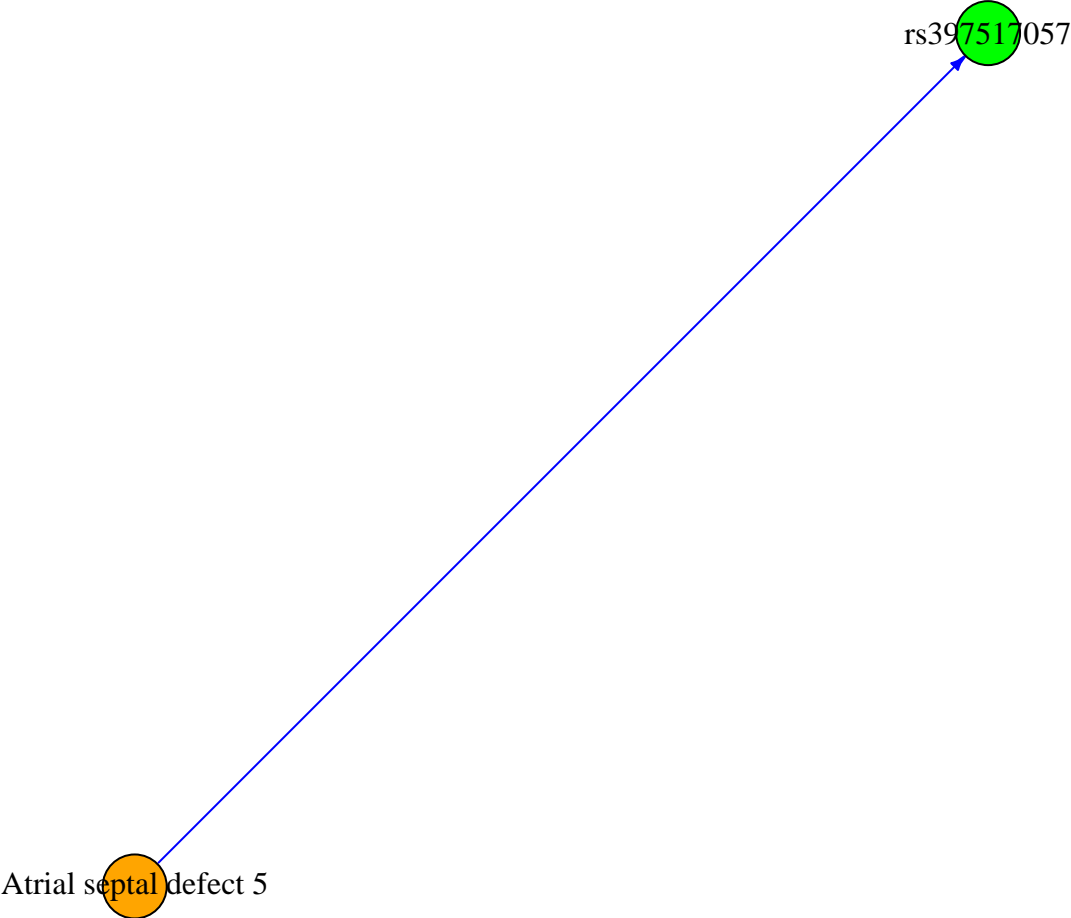

# Variant–Disease Network (Atrichia with papular lesions)

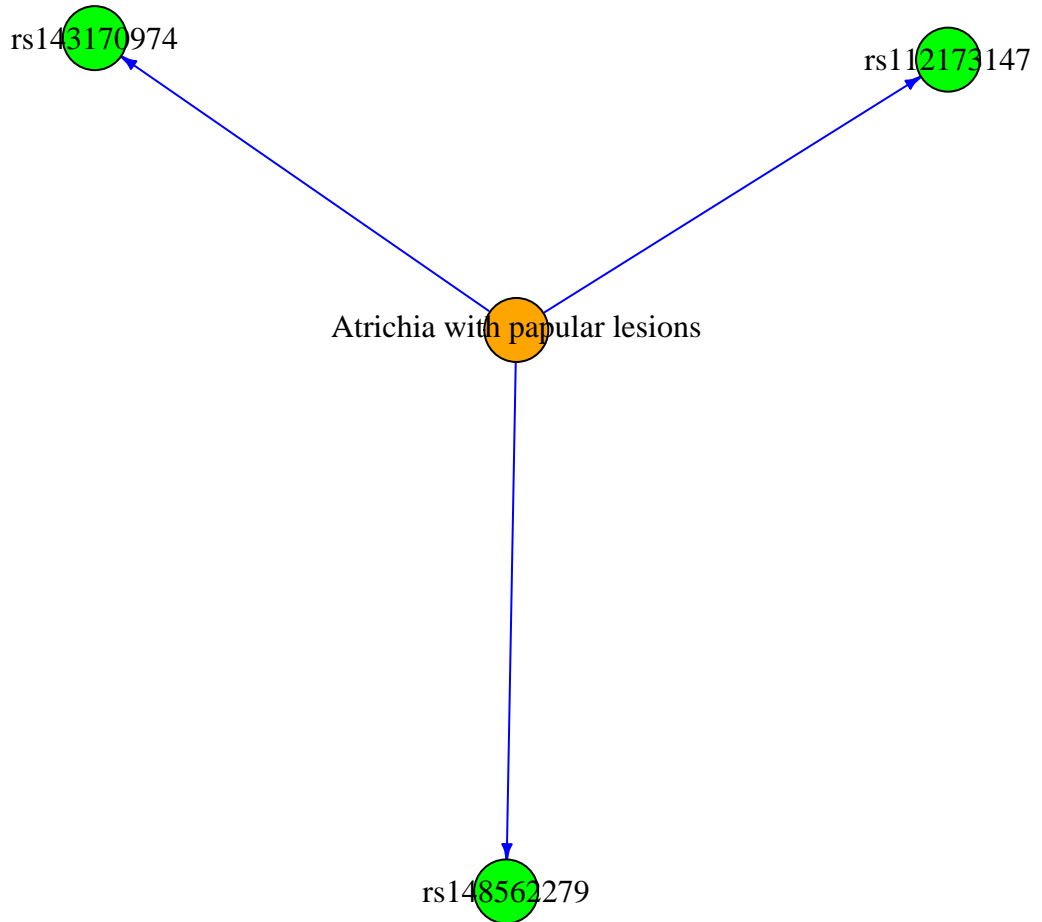

## Variant–Disease Network (Atrioventricular septal defect 4)

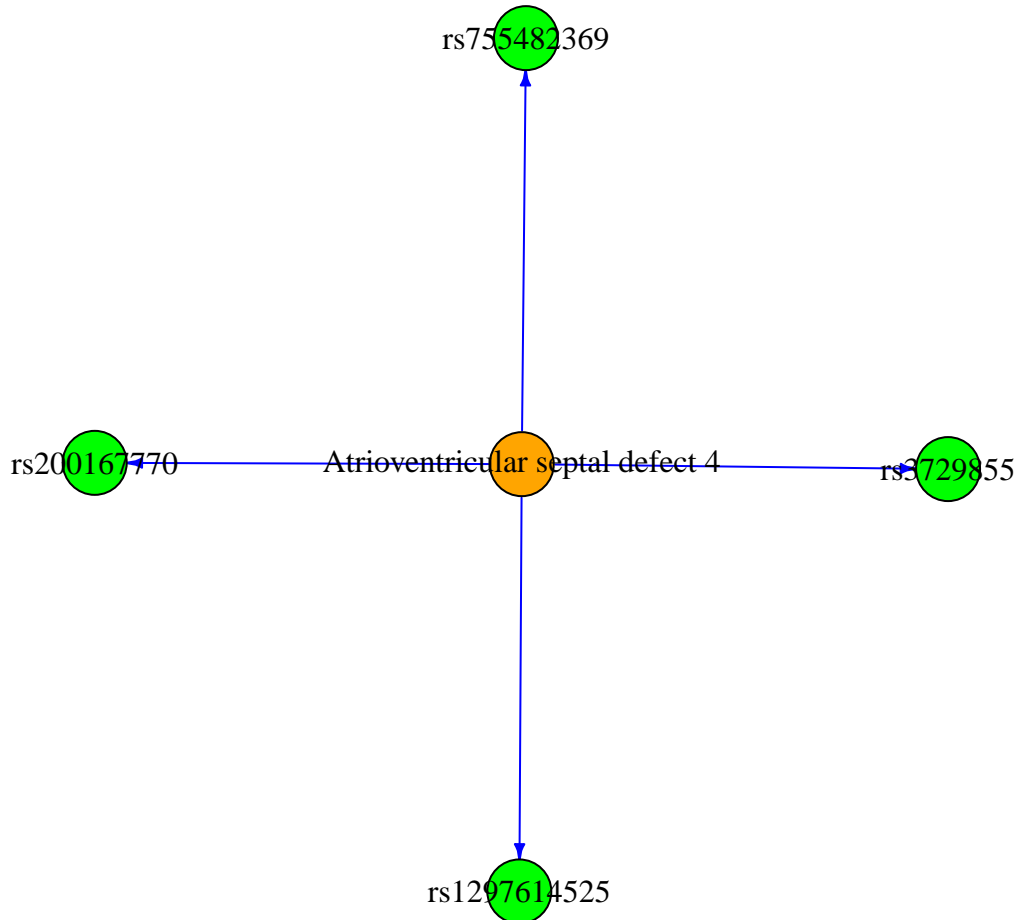

Variant–Disease Network (Atrophia bulborum hereditaria)

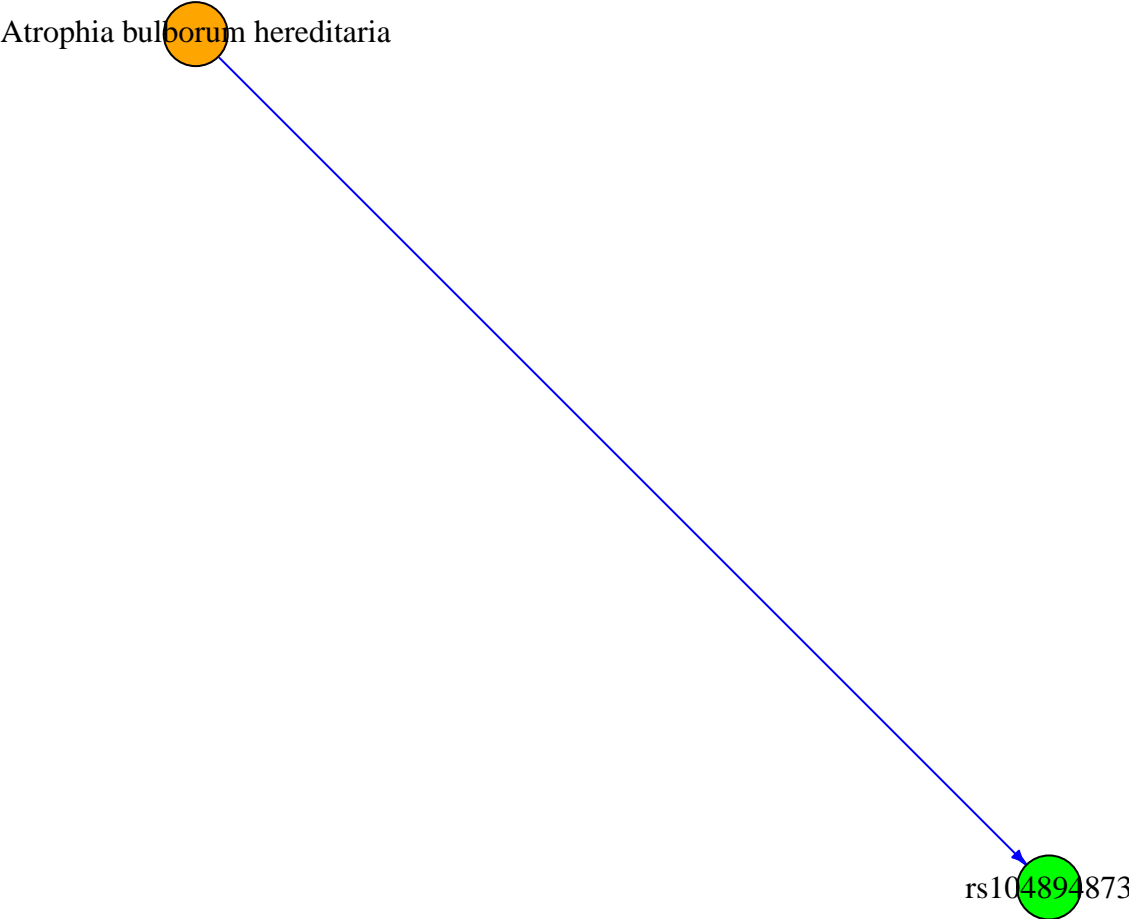



Variant–Disease Network (Atypical hemolytic uremic syndrome)

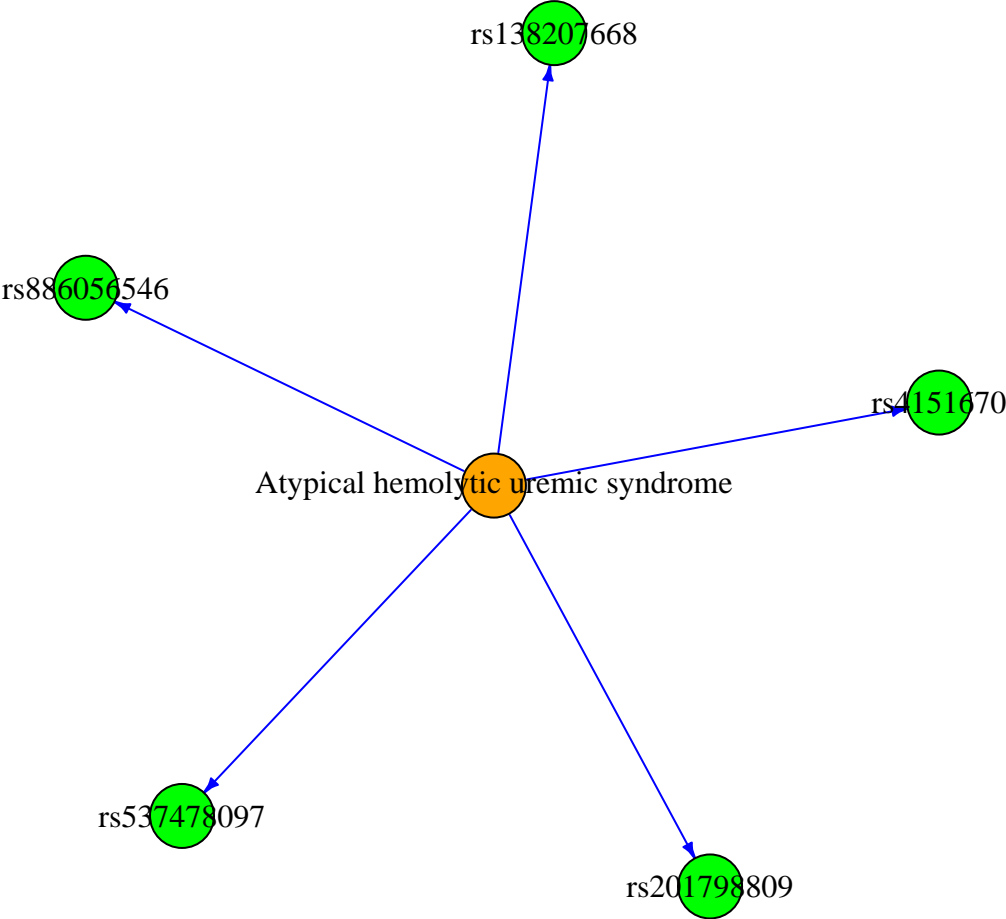

**Variant–Disease Network (Atypical hemolytic–uremic syndrome 4)**

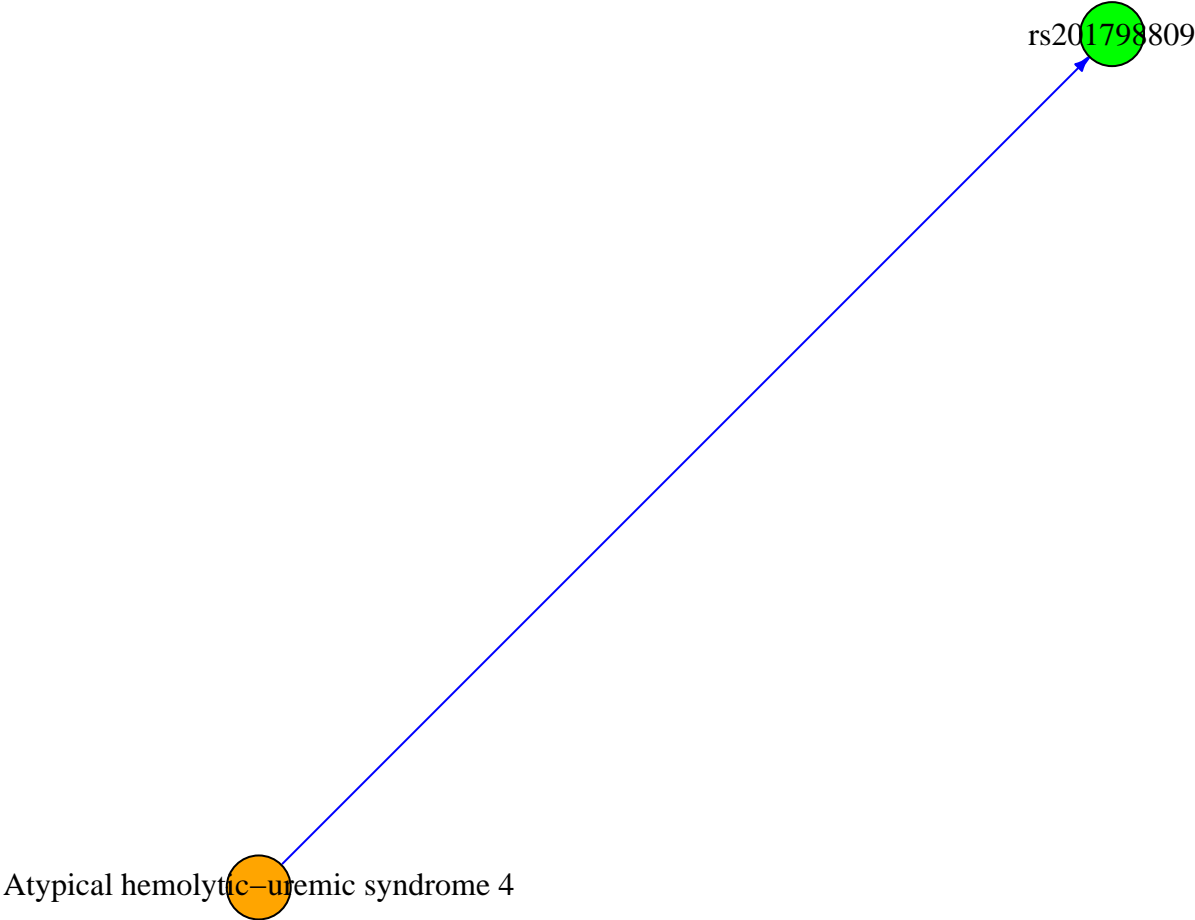

## Variant–Disease Network (Aural atresia)

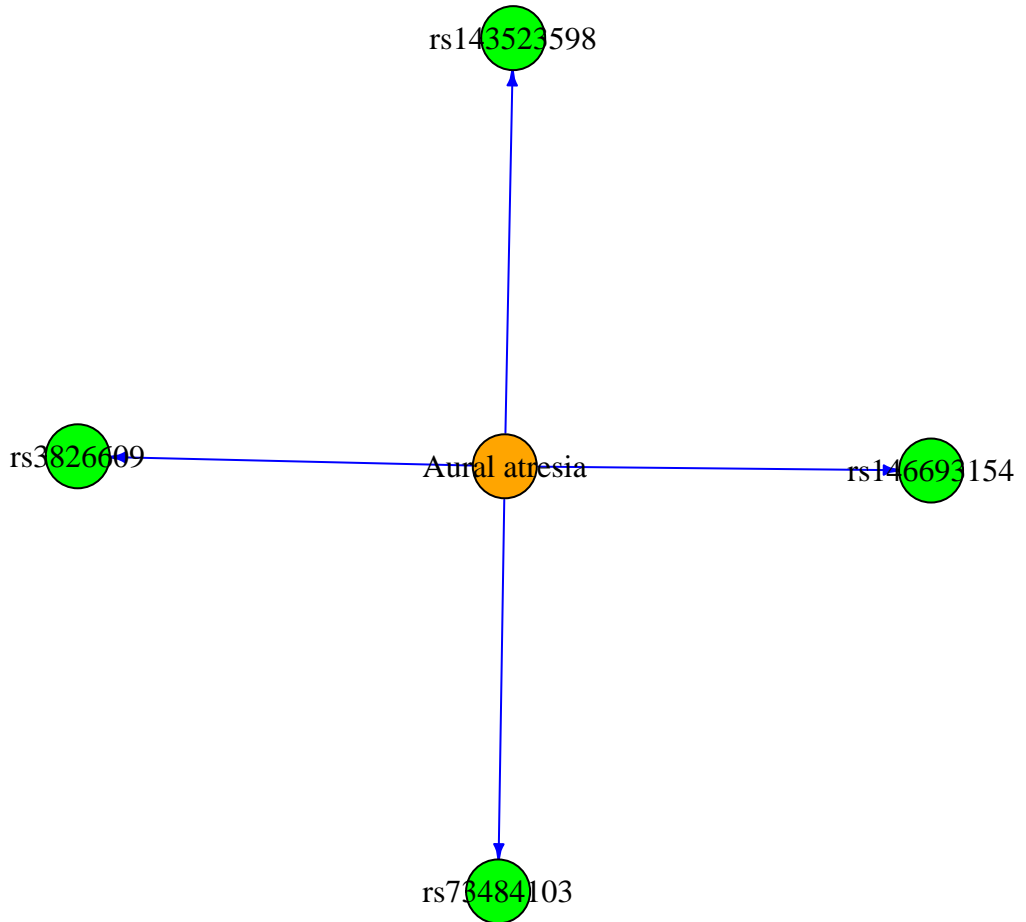

# Variant–Disease Network (Auriculocondylar syndrome)

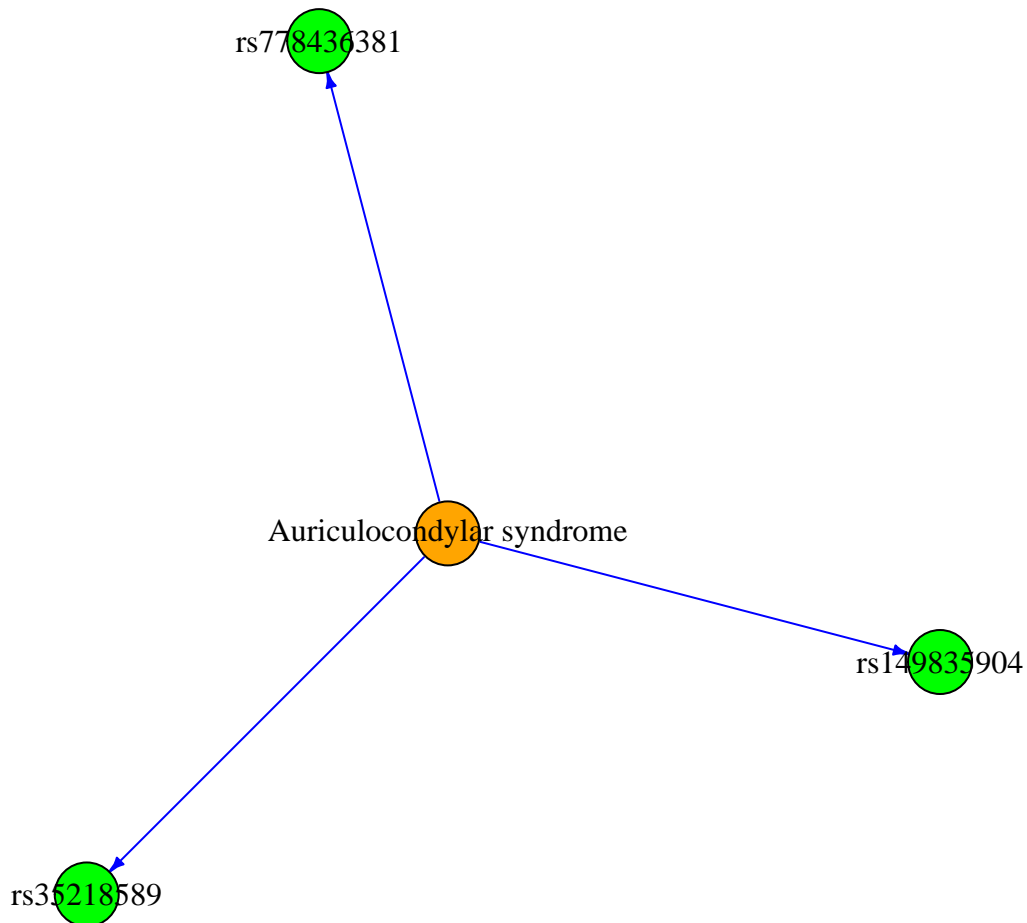

# Variant–Disease Network (Autism spectrum disorder)

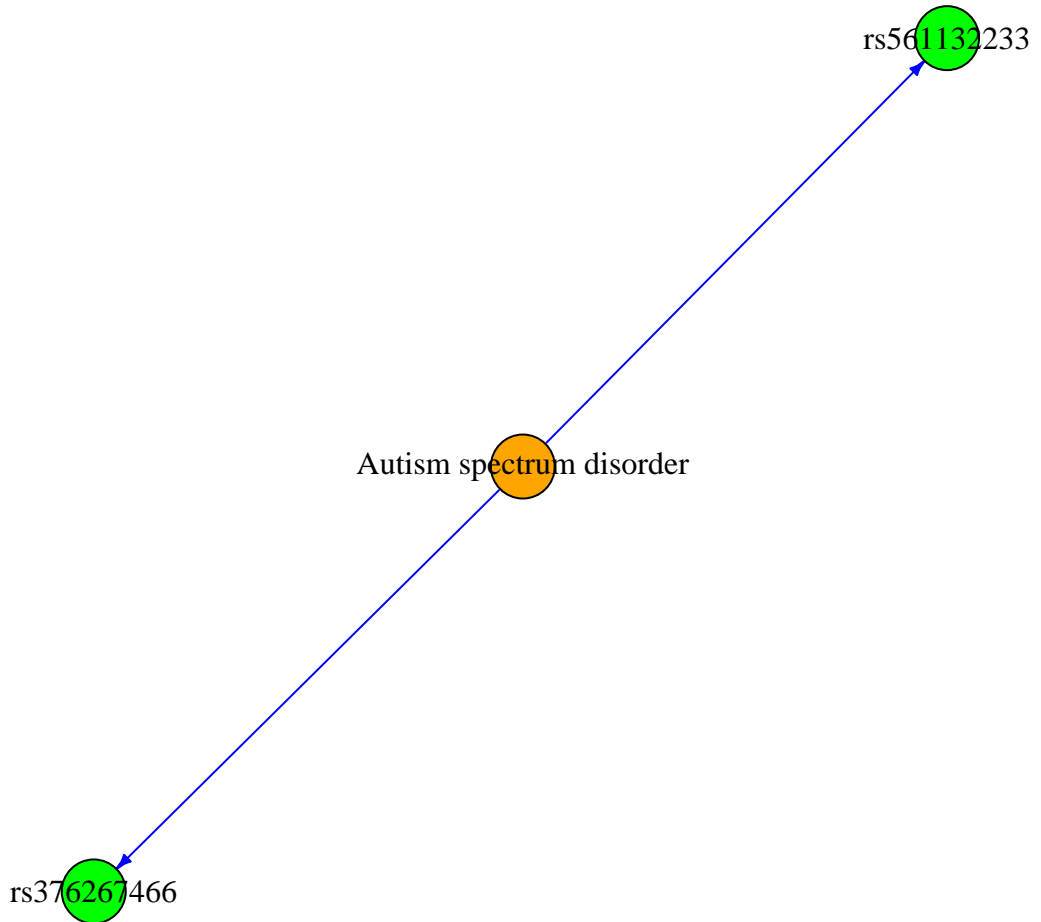

## Variant–Disease Network (Autoimmune interstitial lung)

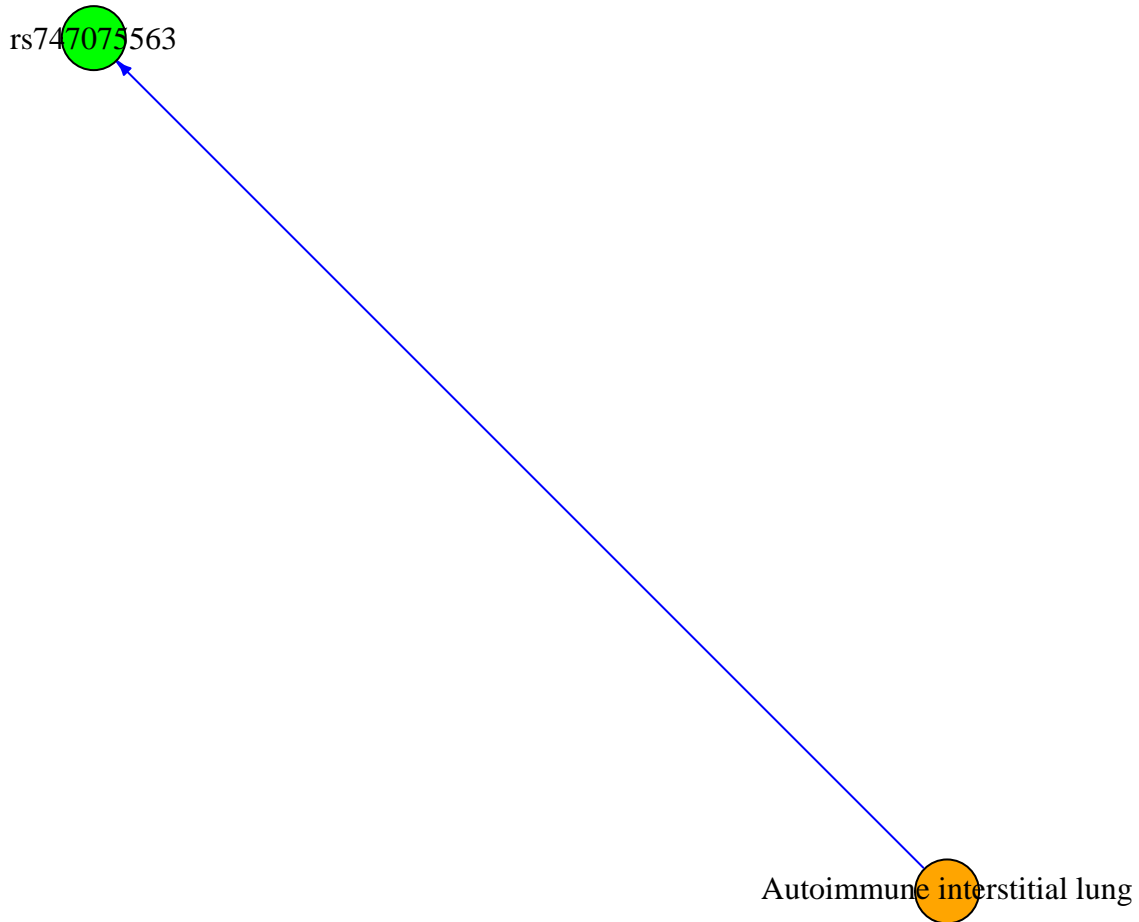

## Variant–Disease Network (Autoinflammatory syndrome)

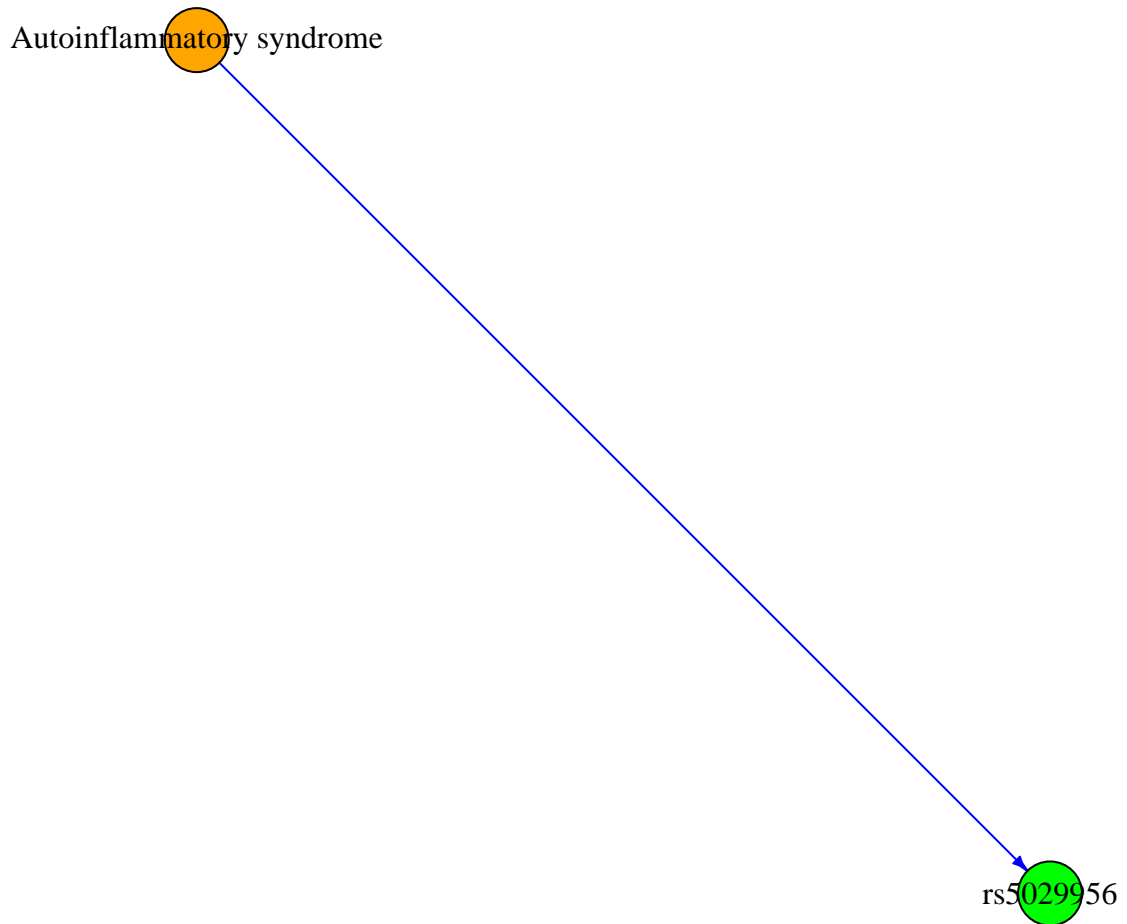

Variant–Disease Network (Autosomal dominant nocturnal frontal lobe epilepsy)

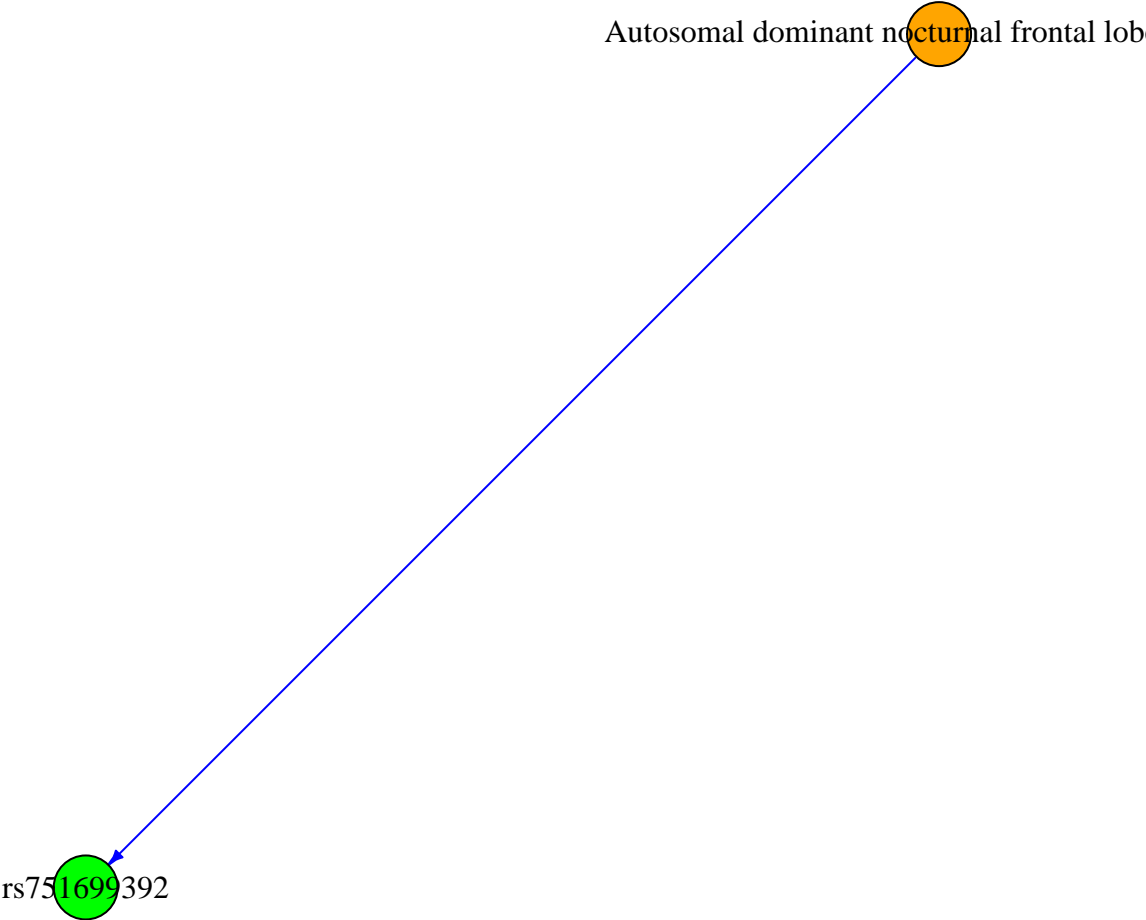



Variant–Disease Network (Autosomal recessive centronuclear myopathy)

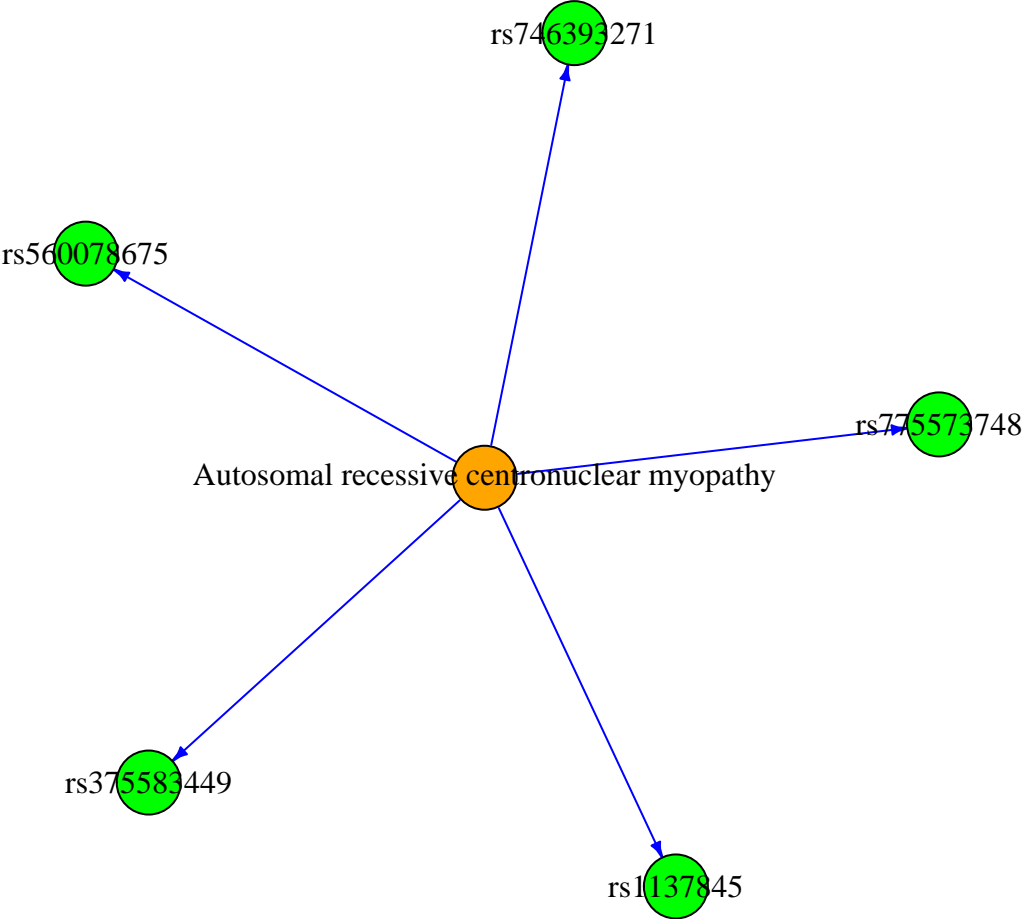

# Variant–Disease Network (Autosomal recessive cerebellar ataxia)

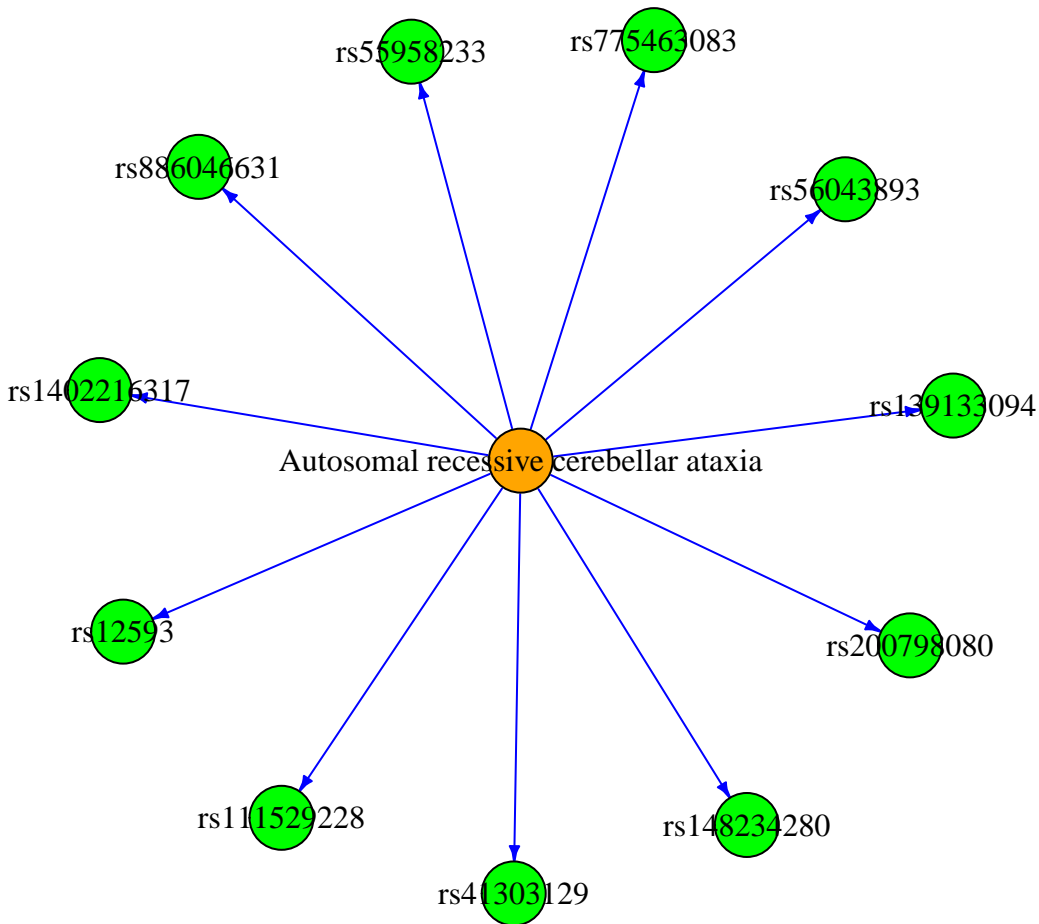

**Variant–Disease Network (Autosomal recessive congenital ichthyosis 1)**

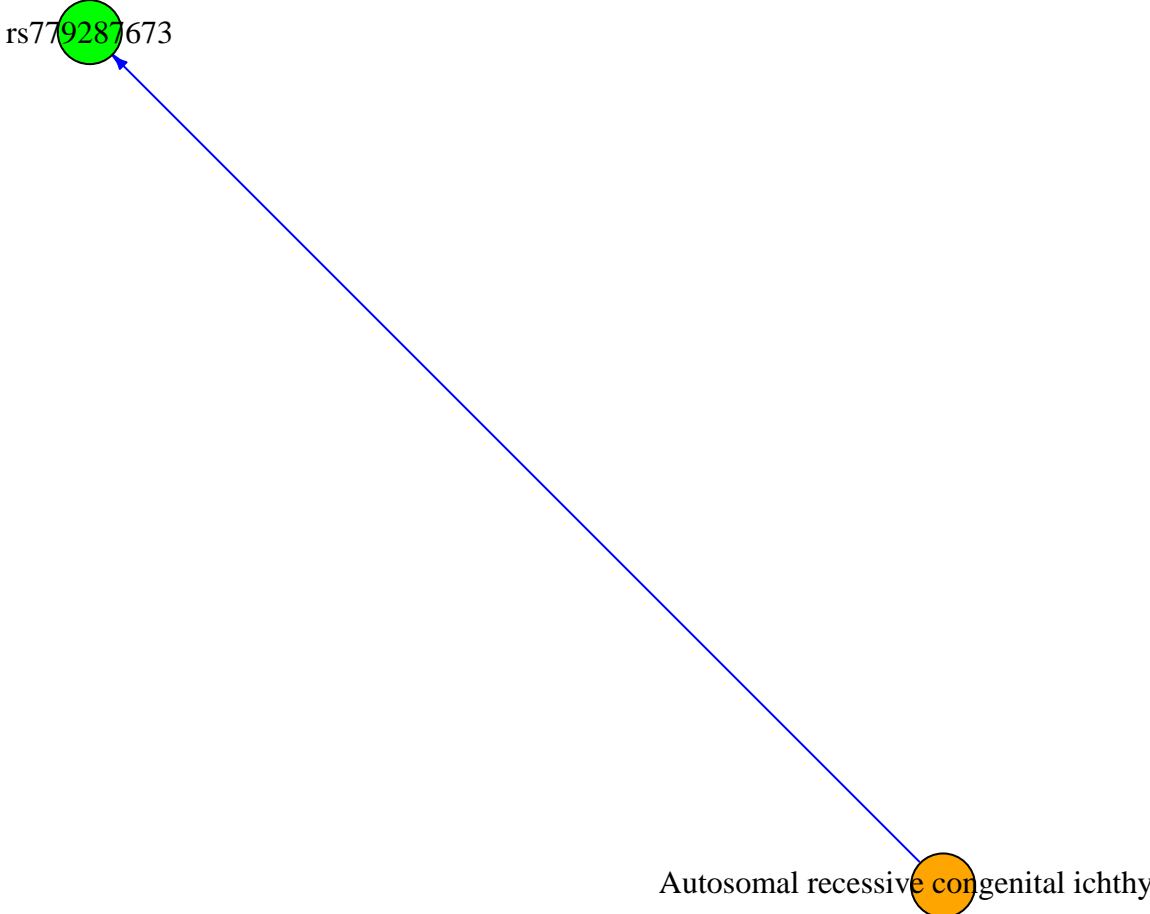

# Variant–Disease Network (Autosomal recessive congenital ichthyosis 6)

Autosomal recessive congenital ichthyosis 6

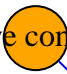

rs777992589

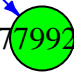

# Variant–Disease Network (Autosomal recessive cutis laxa type 1B)

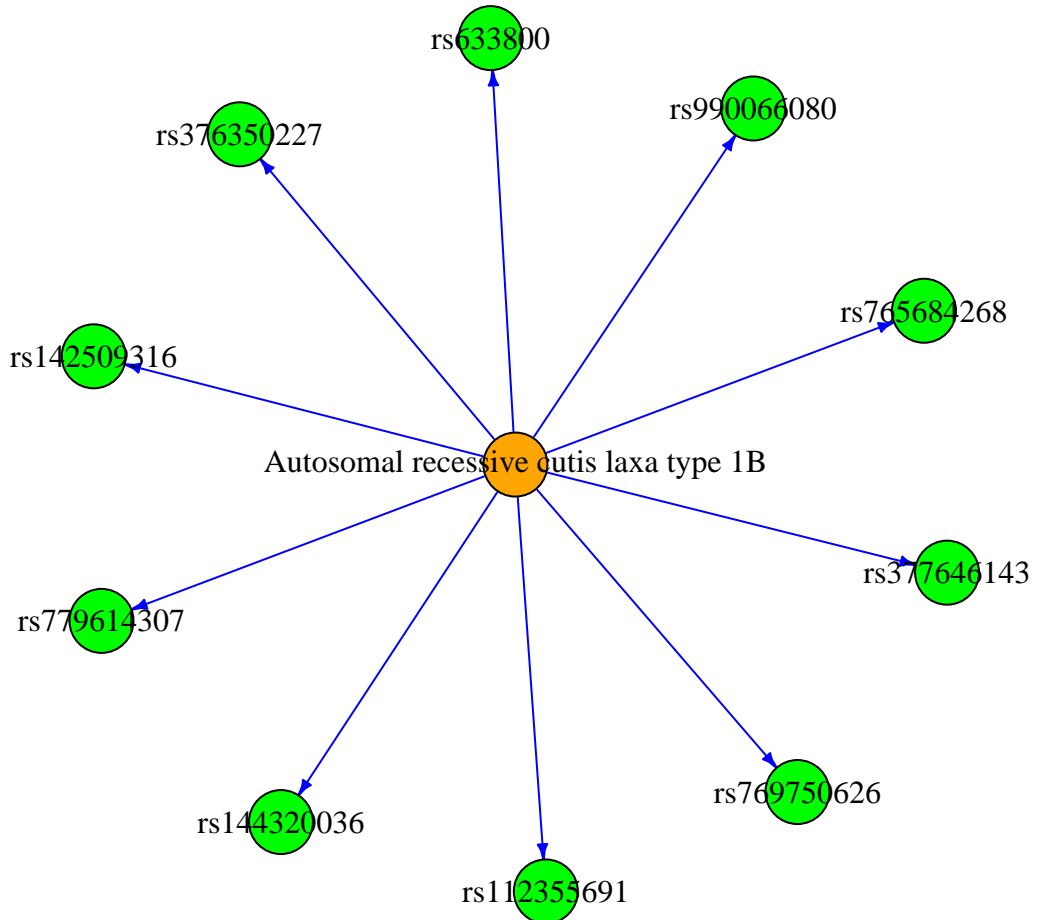

# Variant-Disease Network (Autosomal recessive hypophosphatemic bone dis

Autosomal recessive hypophosphatemic bone disease

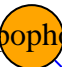

rs121918238

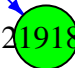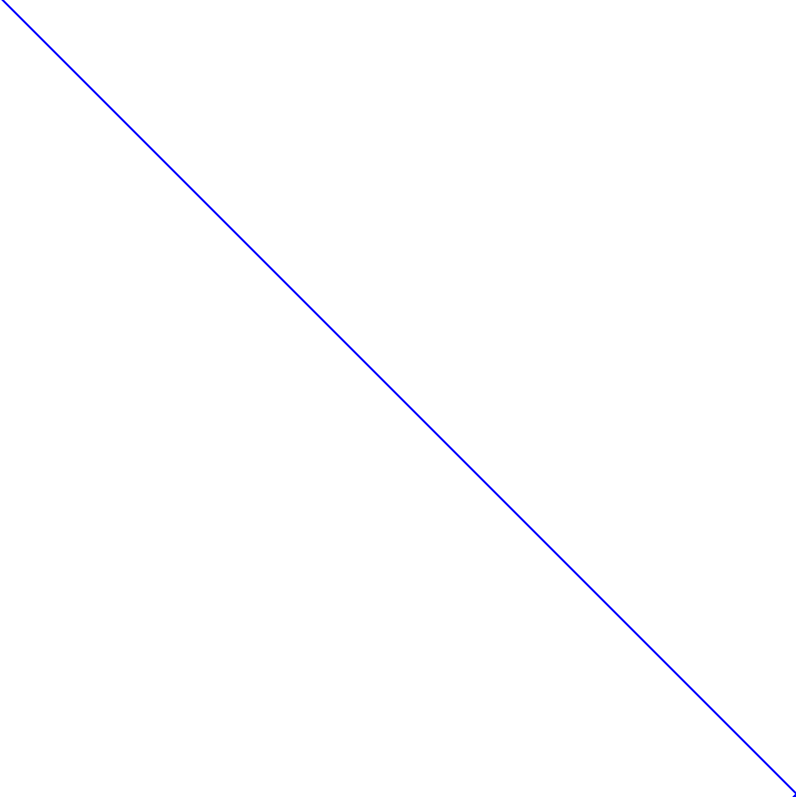

# Variant–Disease Network (Avascular necrosis of the head of femur)

rs142770543

Avascular necrosis of the head of femur



Variant–Disease Network (Bainbridge–Ropers syndrome)

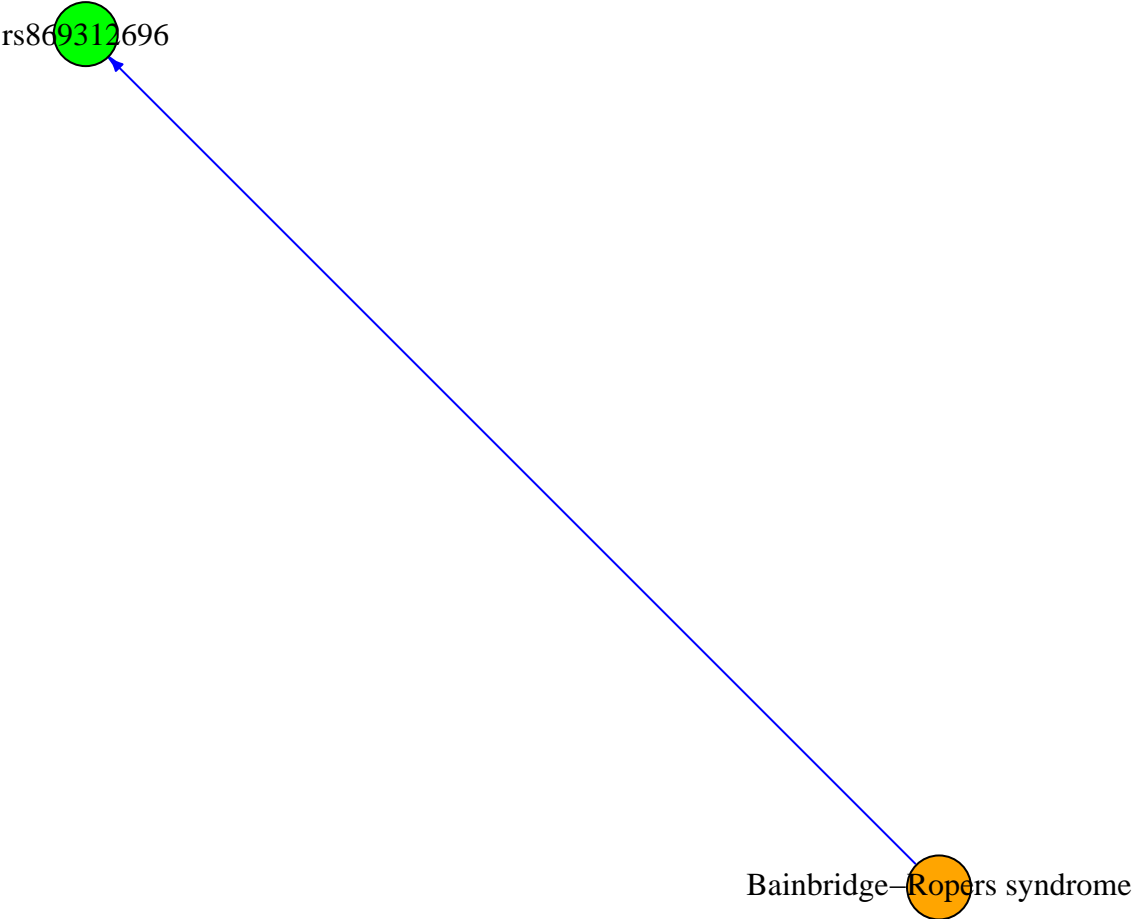



## Variant–Disease Network (Band heterotopia)

Band heterotopia

rs886037935

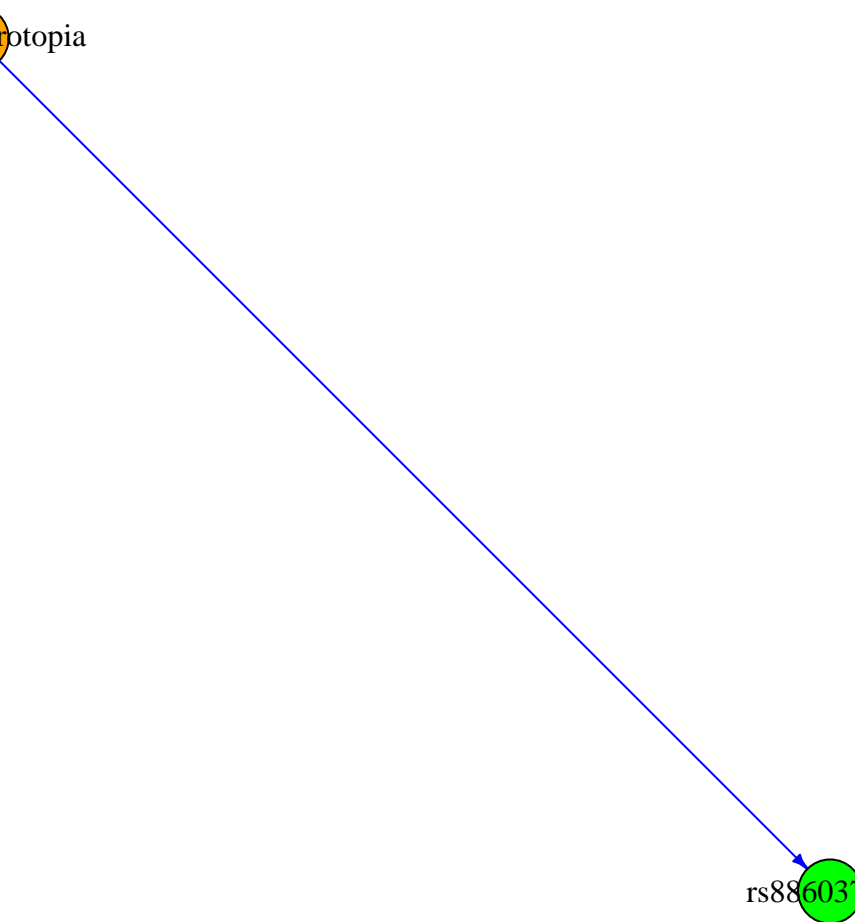

Variant–Disease Network (Baraitser–Winter Syndrome 2)

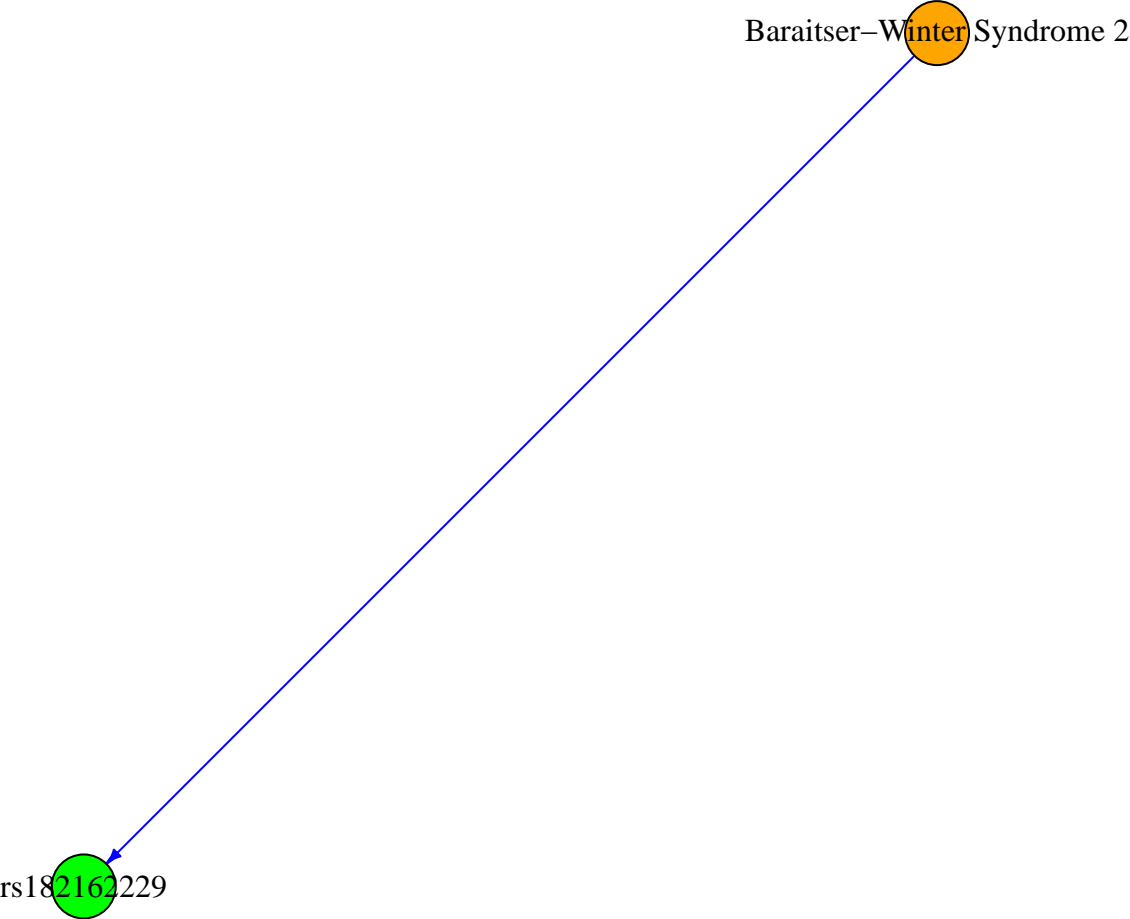

**Variant–Disease Network (Bardet–Biedl syndrome)**

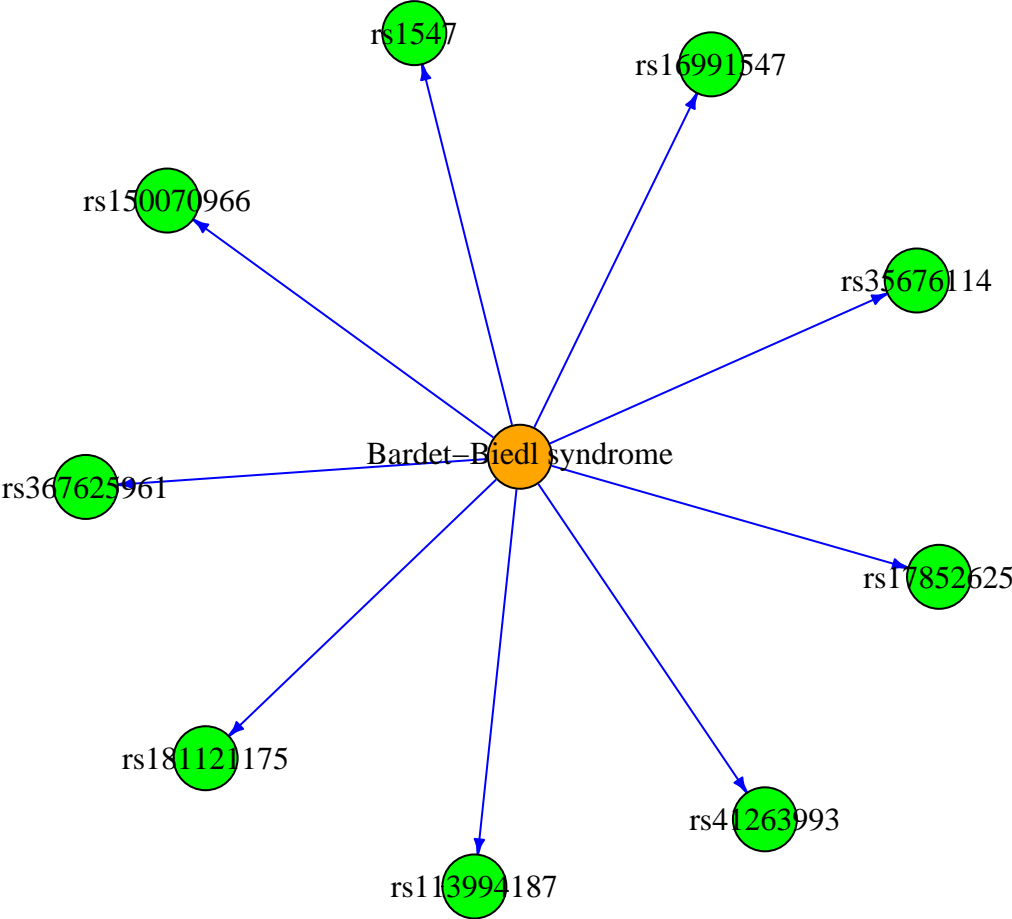

Variant–Disease Network (Bardet–Biedl syndrome 1)

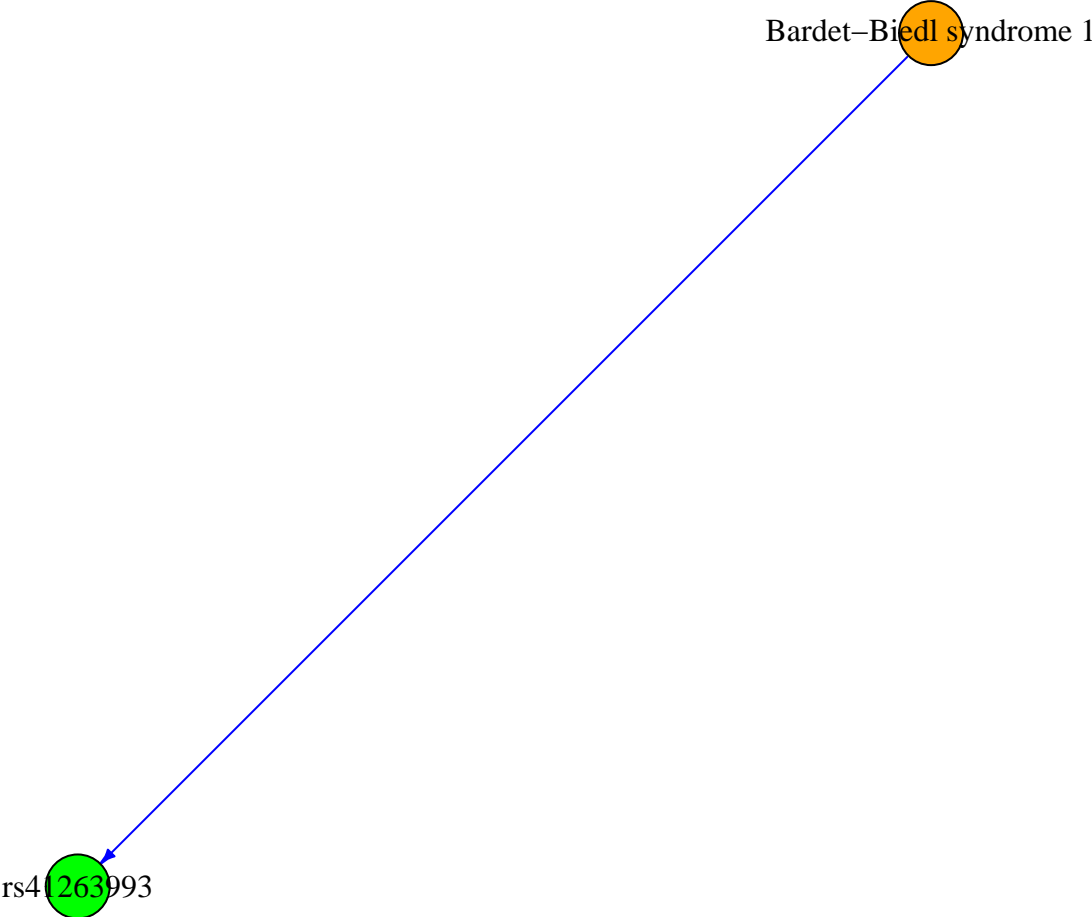

**Variant–Disease Network (Bardet–Biedl syndrome 10)**

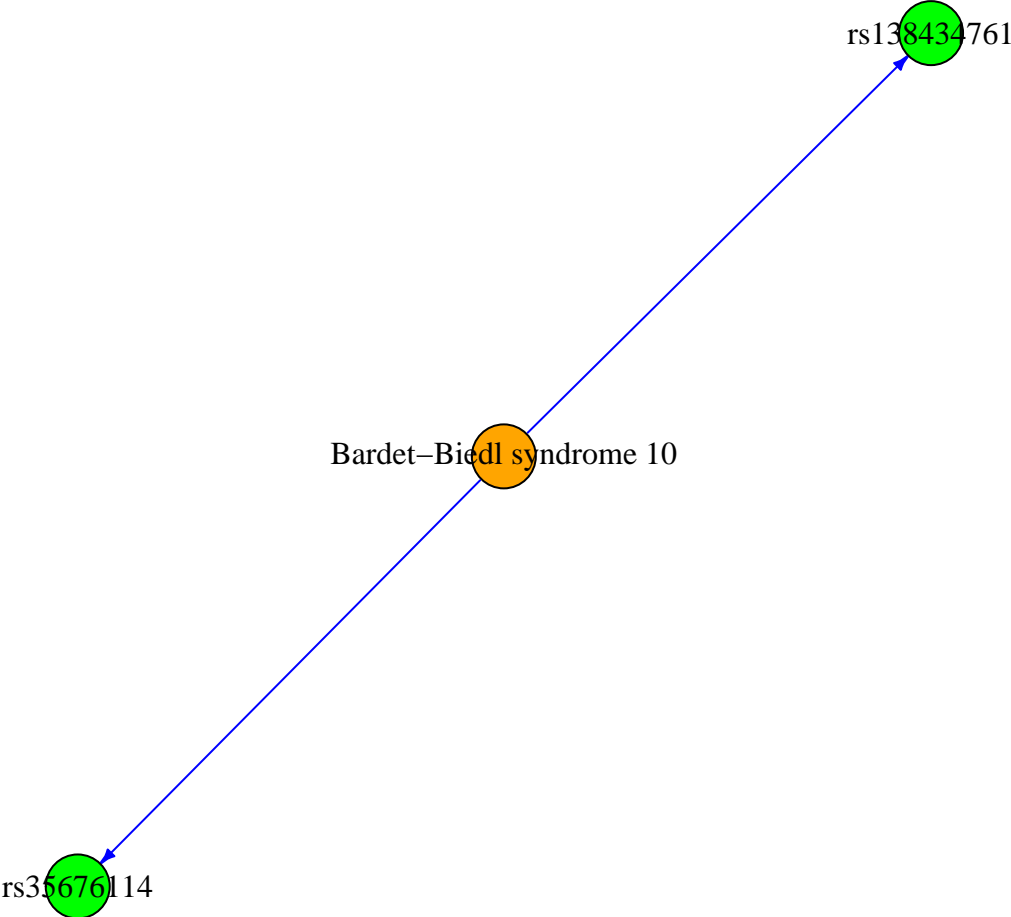

**Variant–Disease Network (Bardet–Biedl syndrome 16)**

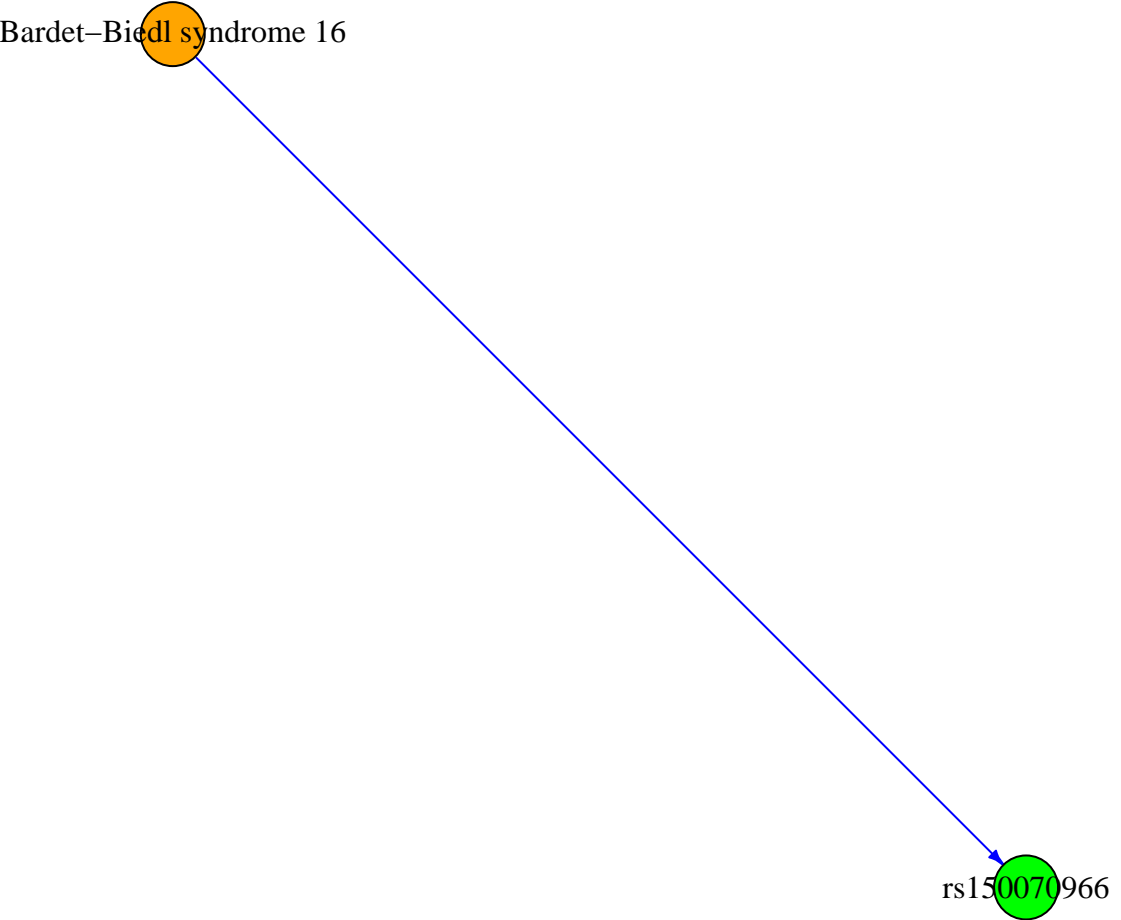

## Variant–Disease Network (Bare lymphocyte syndrome 2)

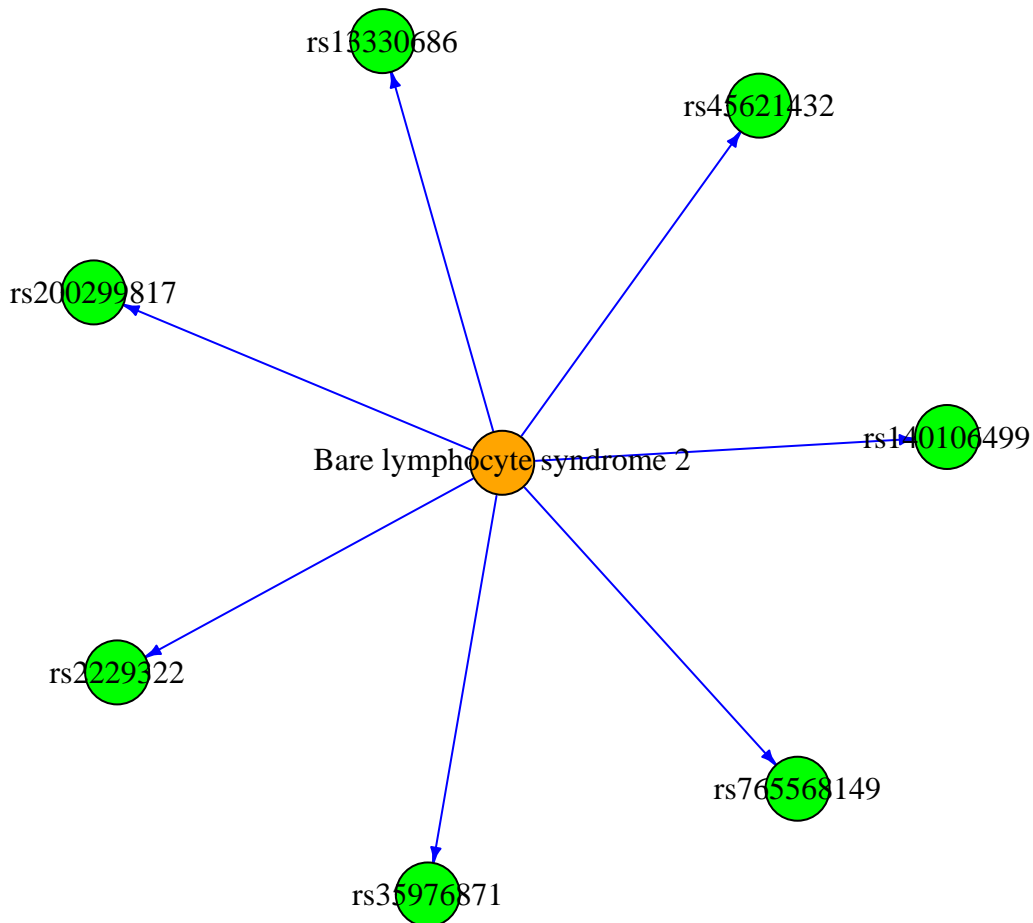

**Variant–Disease Network (Bare lymphocyte syndrome type 1)**

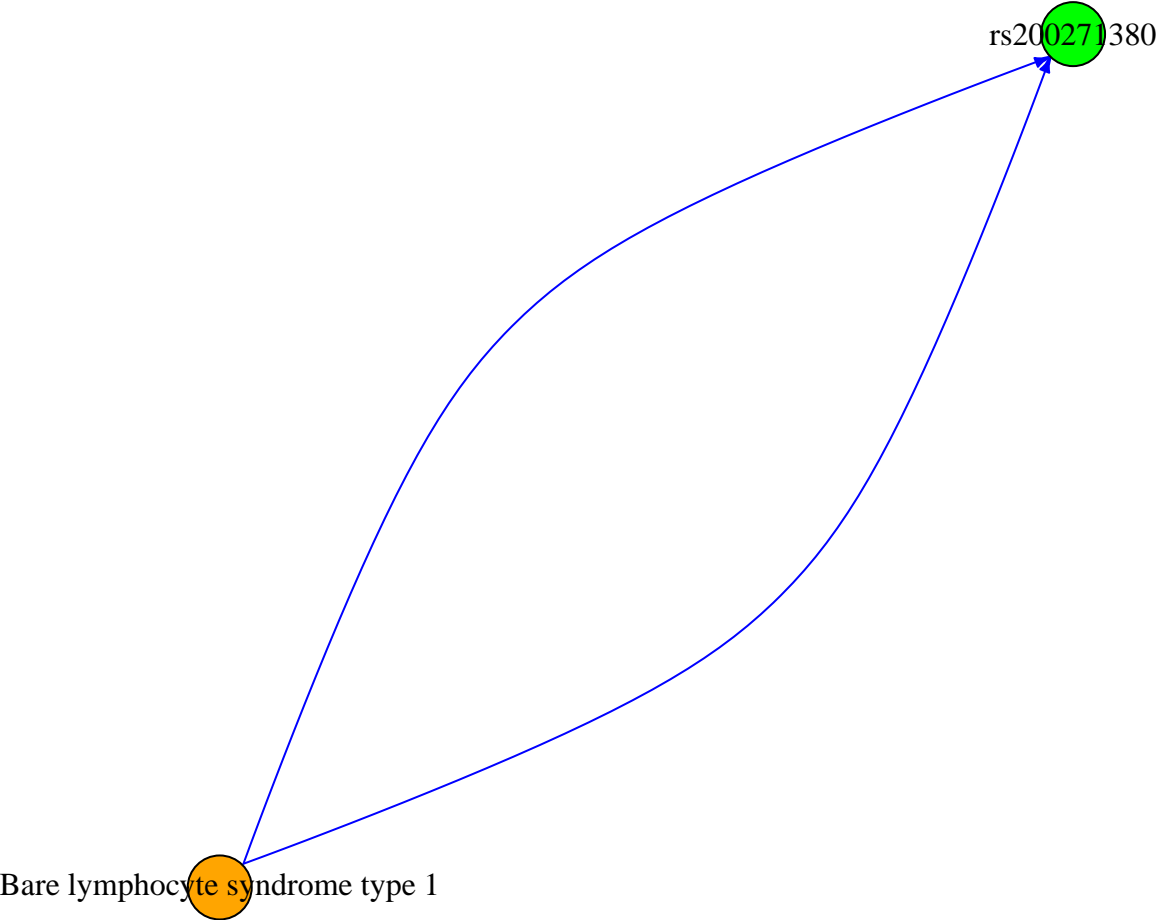



## Variant–Disease Network (Behavior disorder)

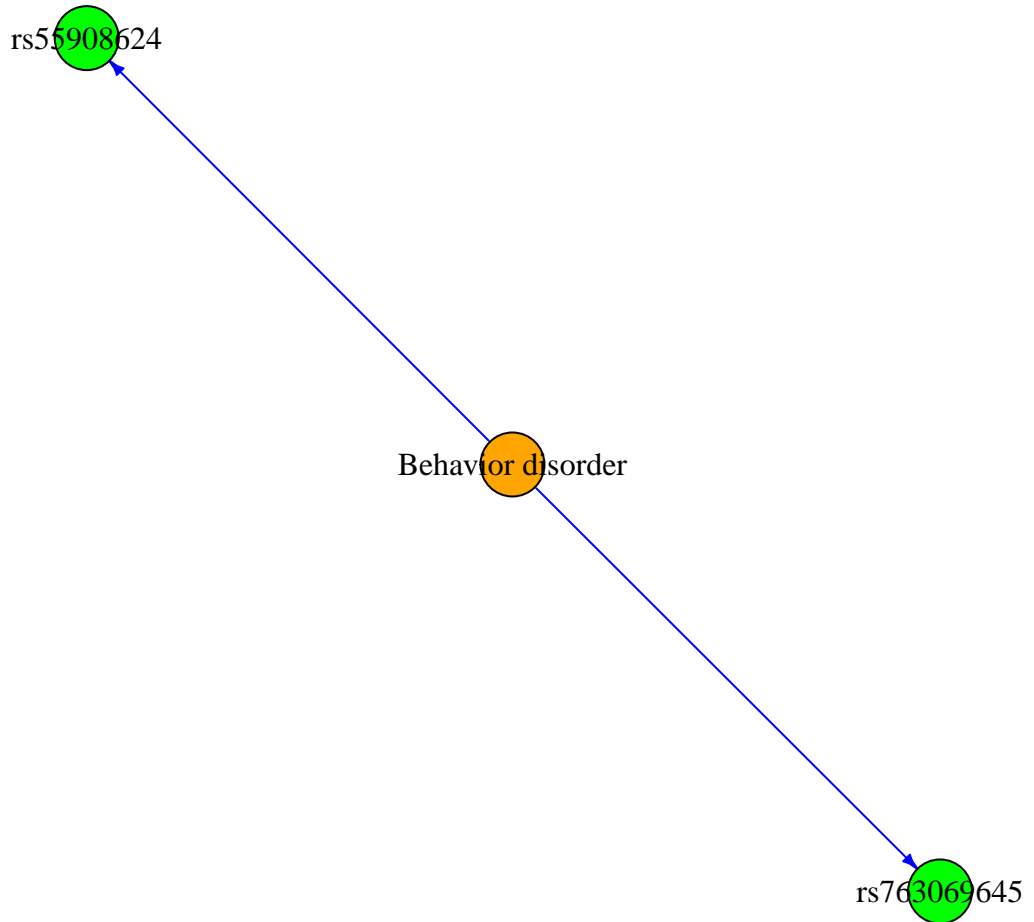

**Variant–Disease Network (Benign familial neonatal seizures)**

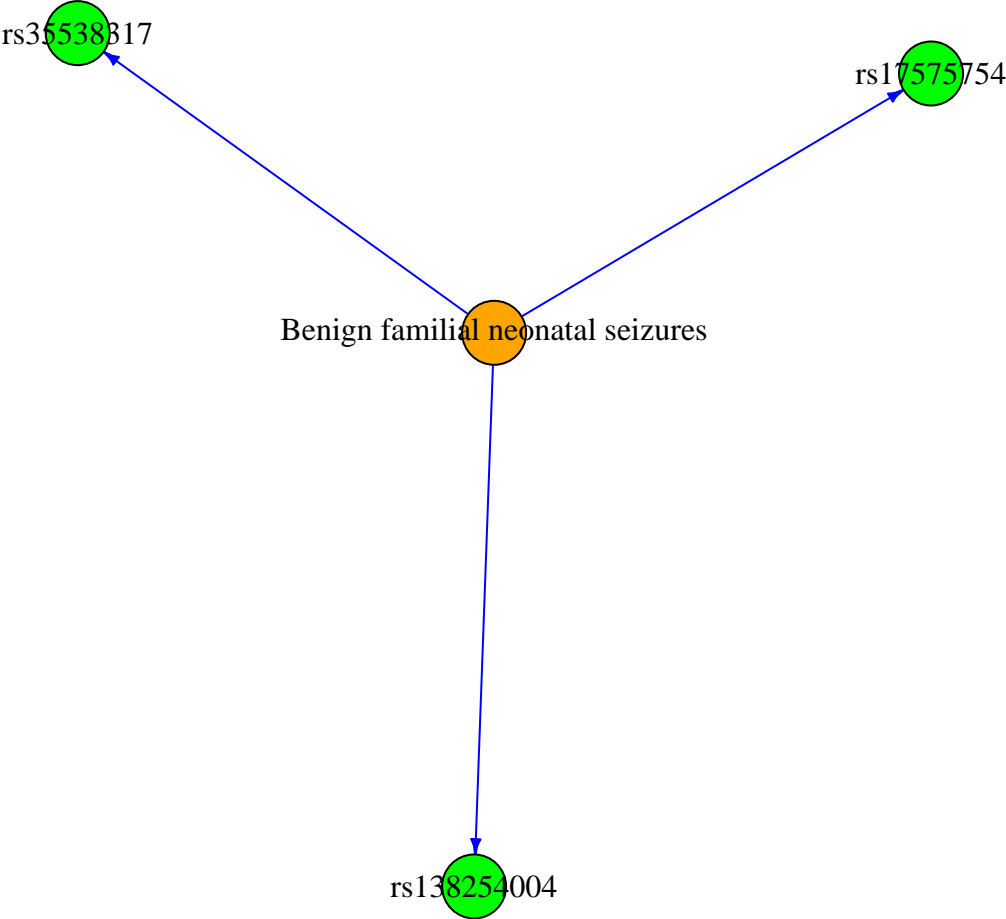

## Variant–Disease Network (Benign familial neonatal seizures 2)

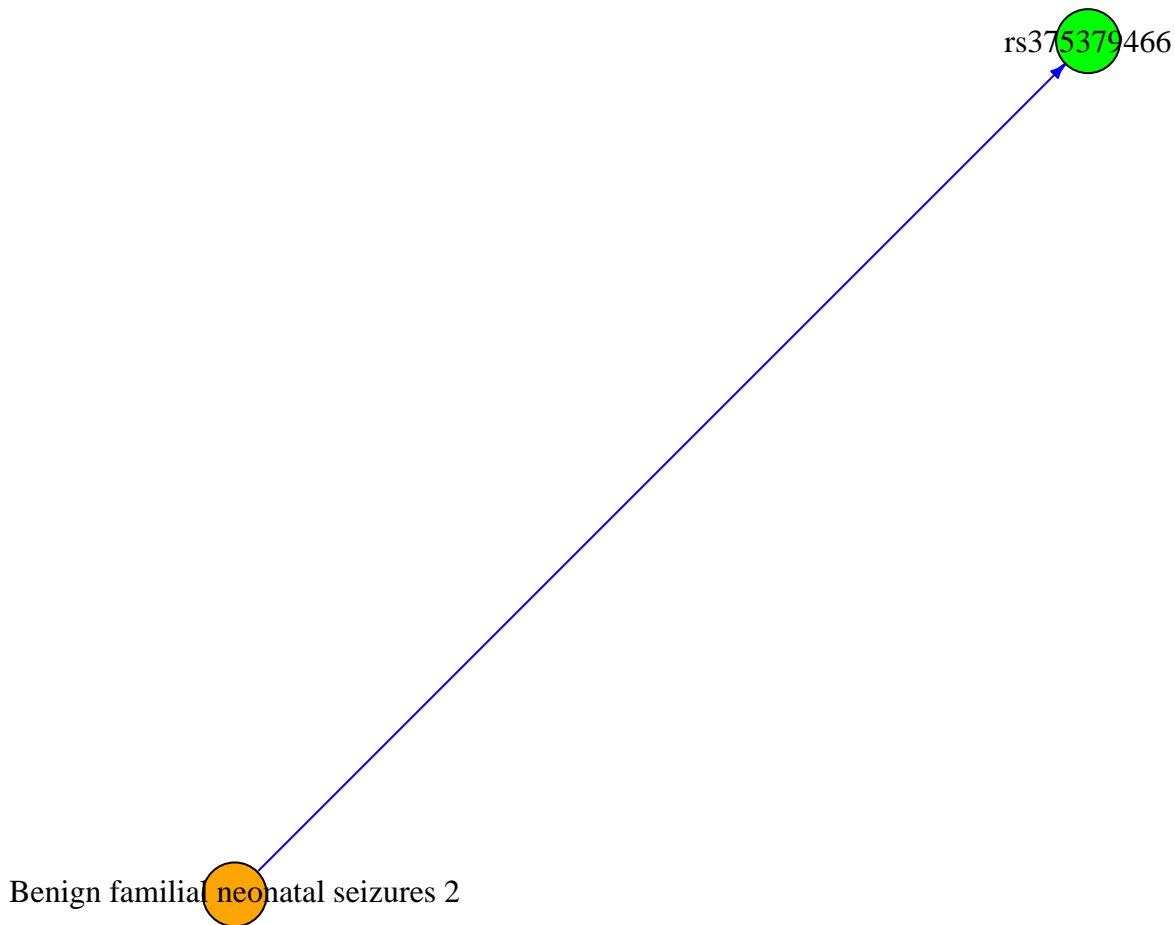

# Variant–Disease Network (Benign Neonatal Epilepsy)

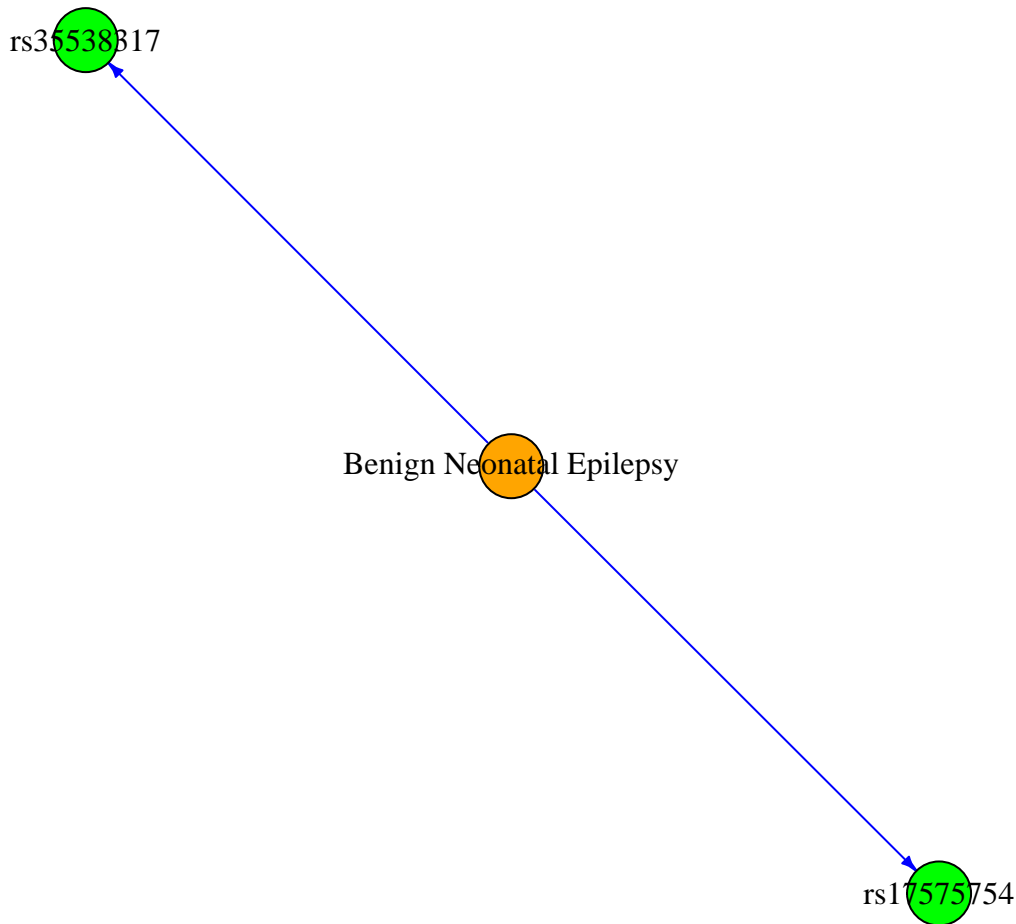

## Variant-Disease Network (beta Thalassemia)

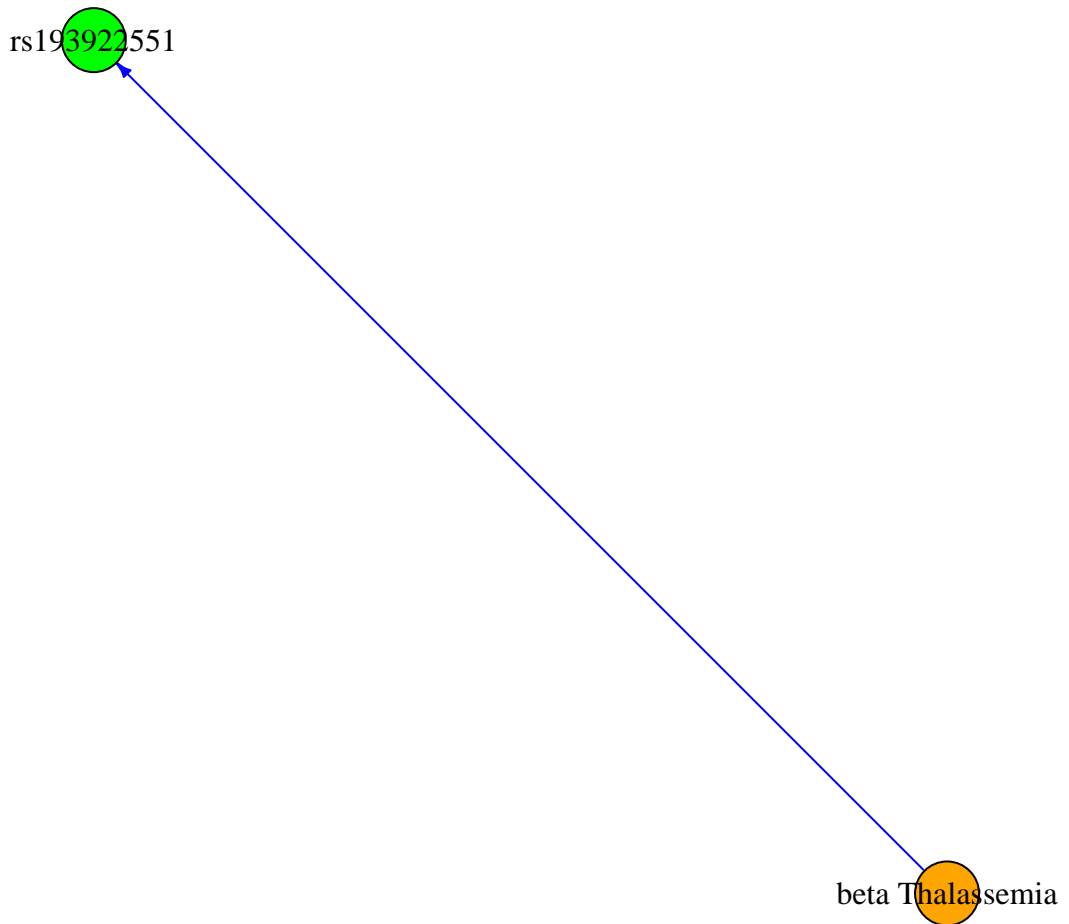

## Variant-Disease Network (Beta-D-mannosidosis)

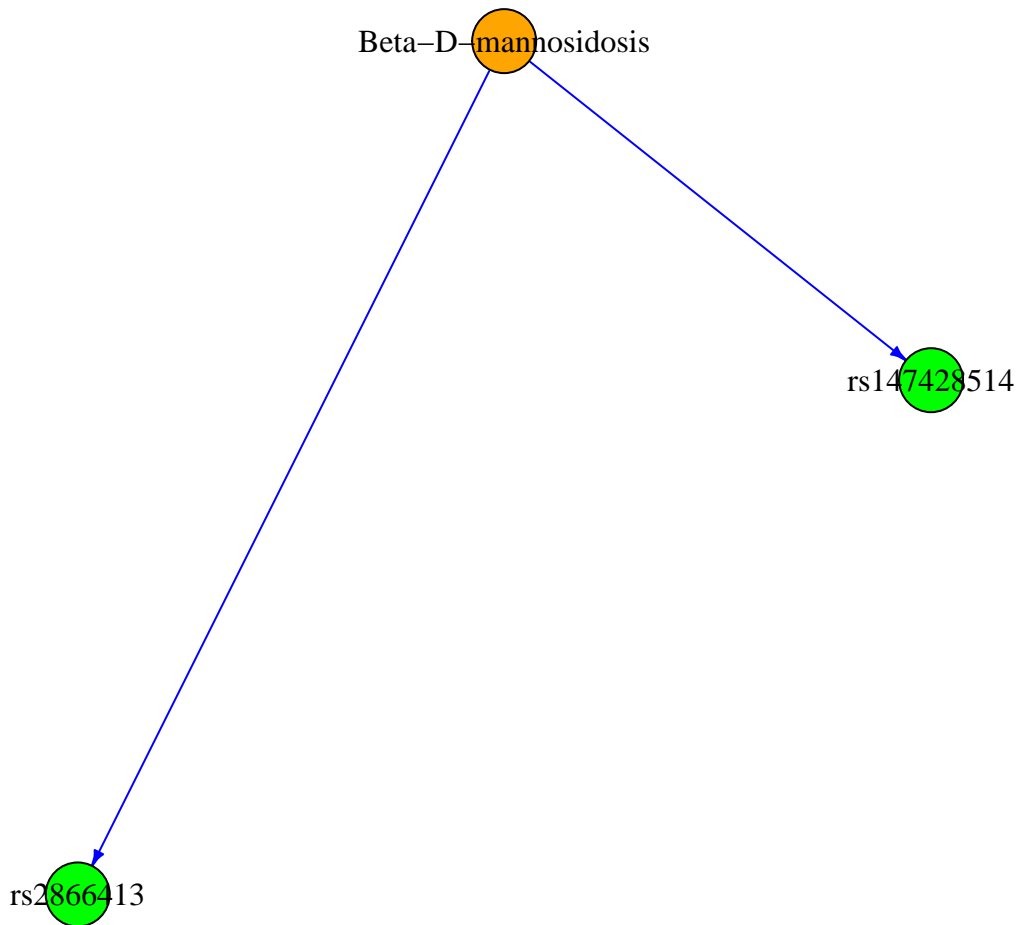

Variant–Disease Network (Beta–hexosaminidase a)

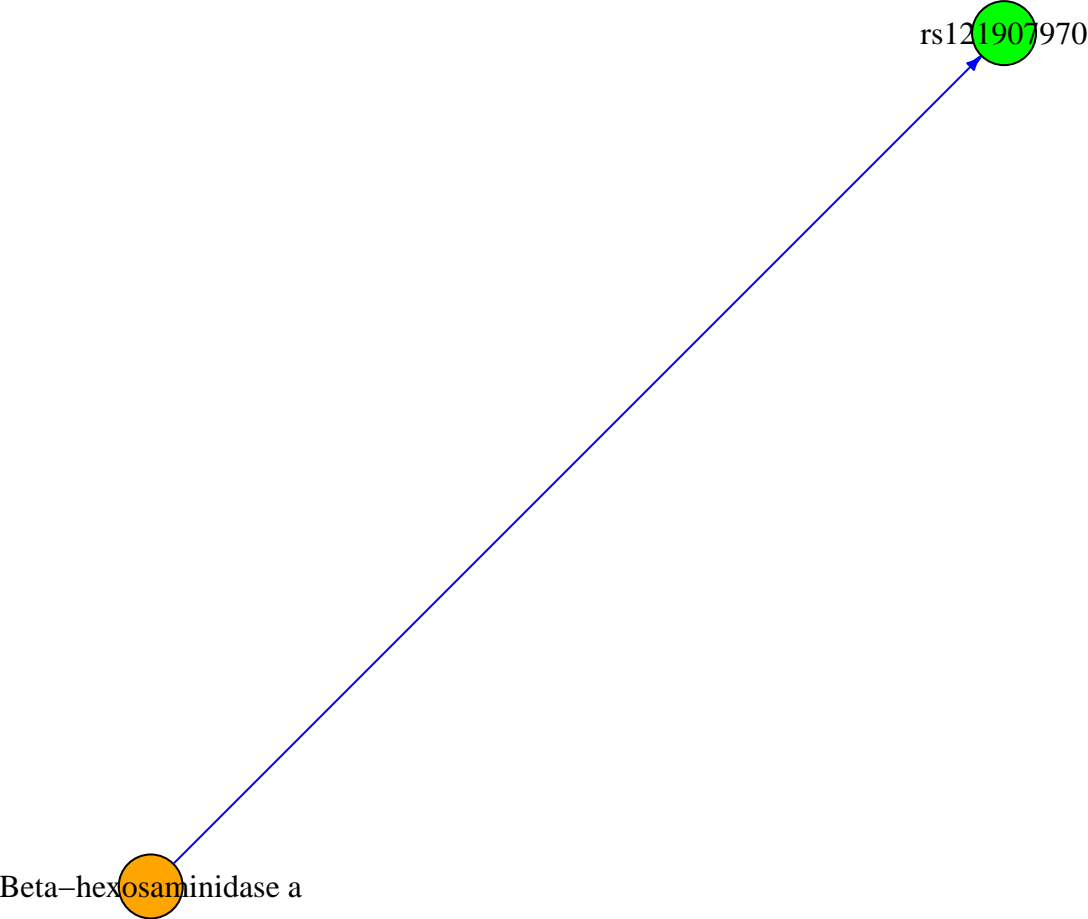

**Variant–Disease Network (Bethlem myopathy 1)**

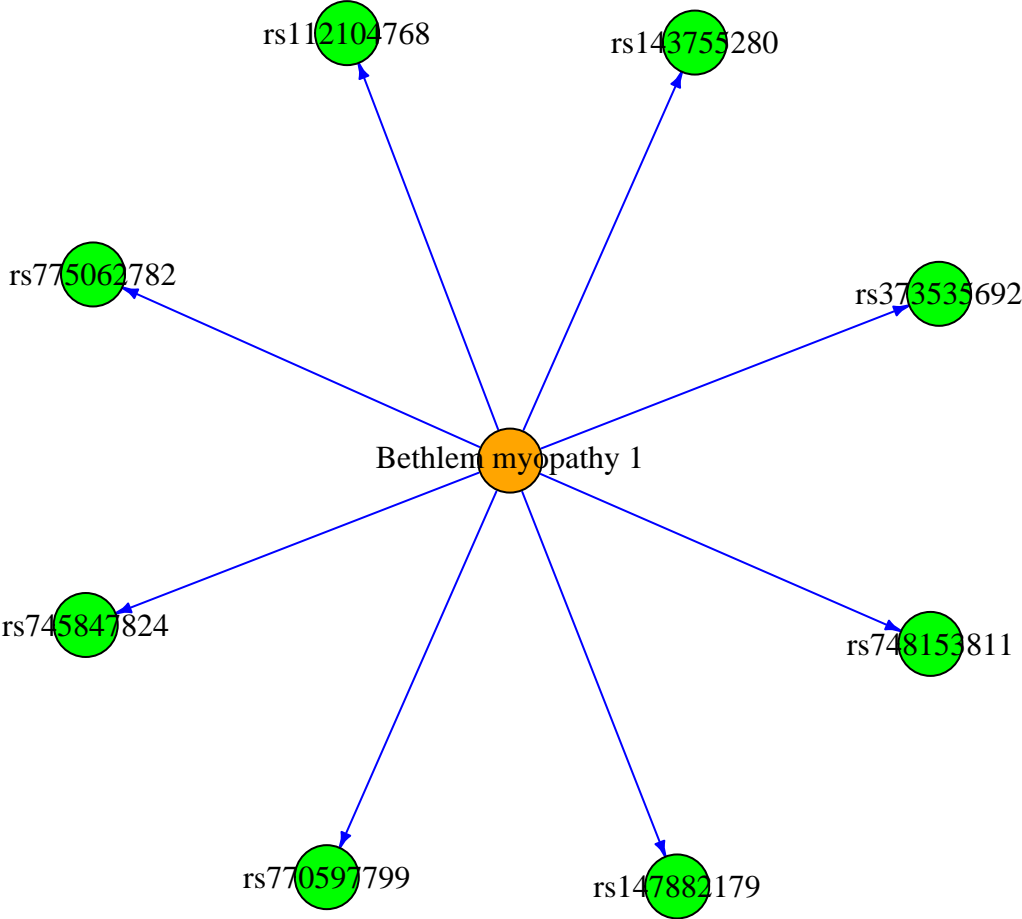



Variant–Disease Network (Bethlem myopathy 2)

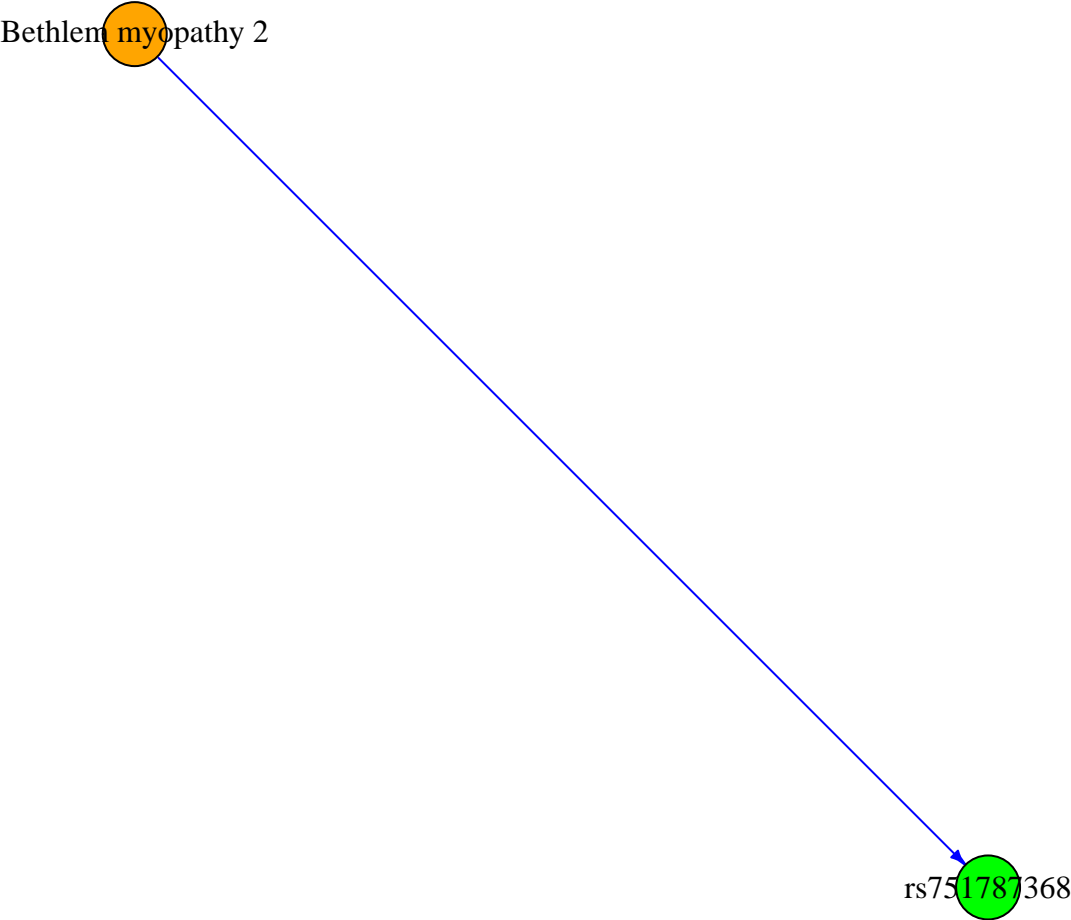

# Variant–Disease Network (BH4–Deficient Hyperphenylalaninemia)

BH4–Deficient Hyperphenylalaninemia

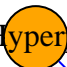

rs12645938

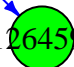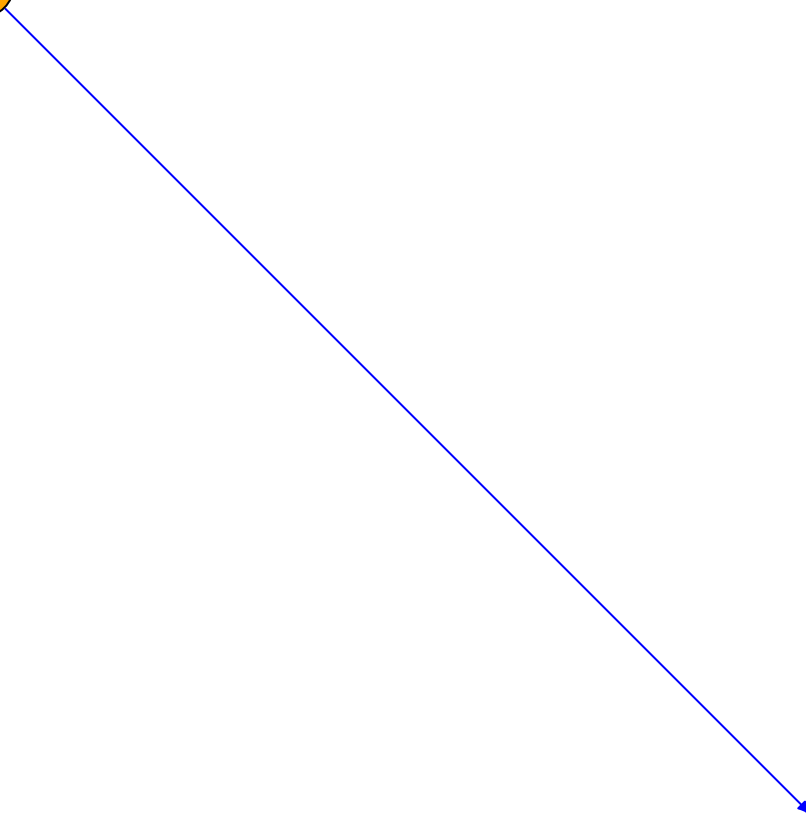

# Variant–Disease Network (Bifunctional peroxisomal enzyme deficiency)

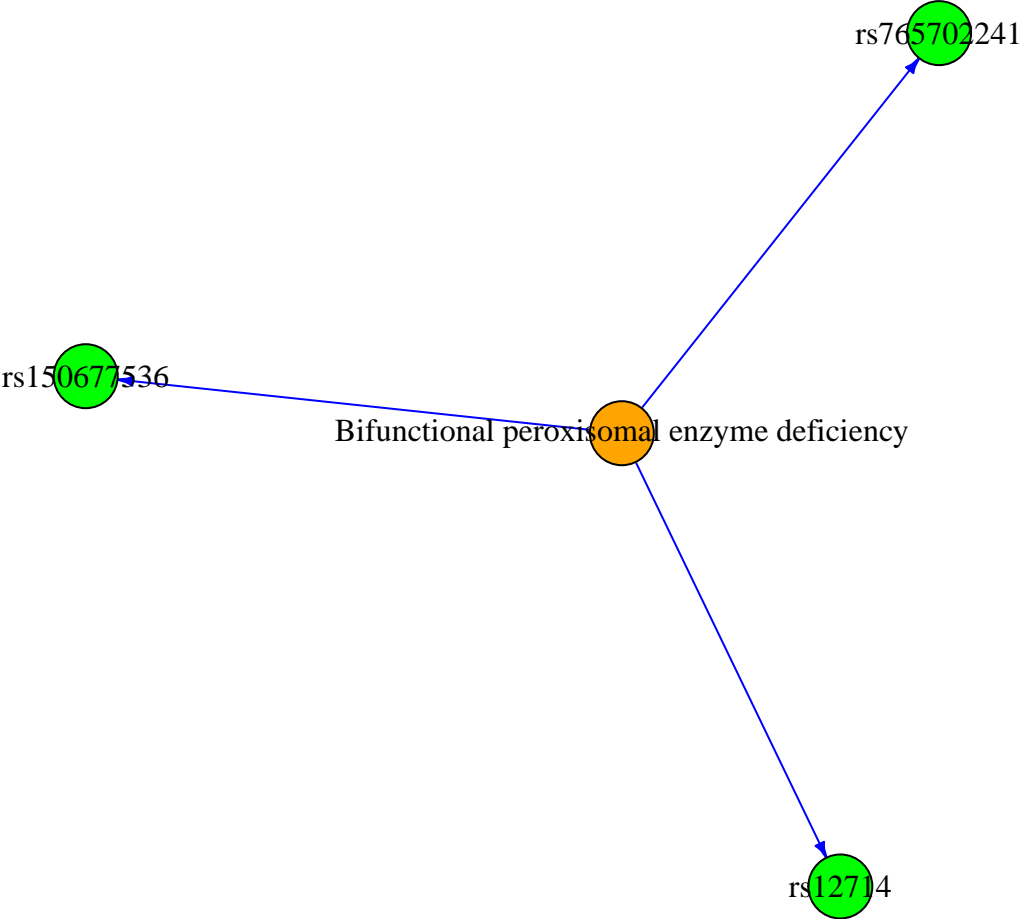

## Variant–Disease Network (Bilateral right–sidedness sequence)

rs121434422

Bilateral right–sidedness sequence



## Variant–Disease Network (Biotinidase deficiency)

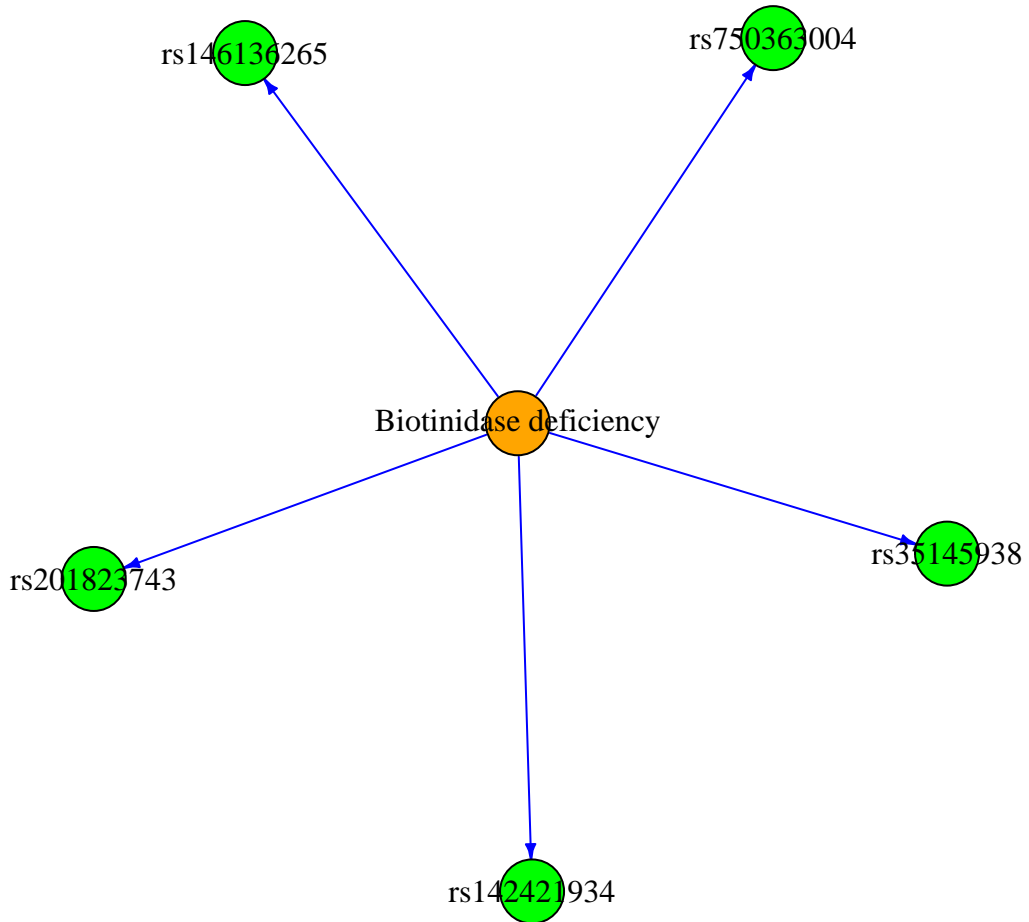

**Variant–Disease Network (Birbeck granule deficiency)**

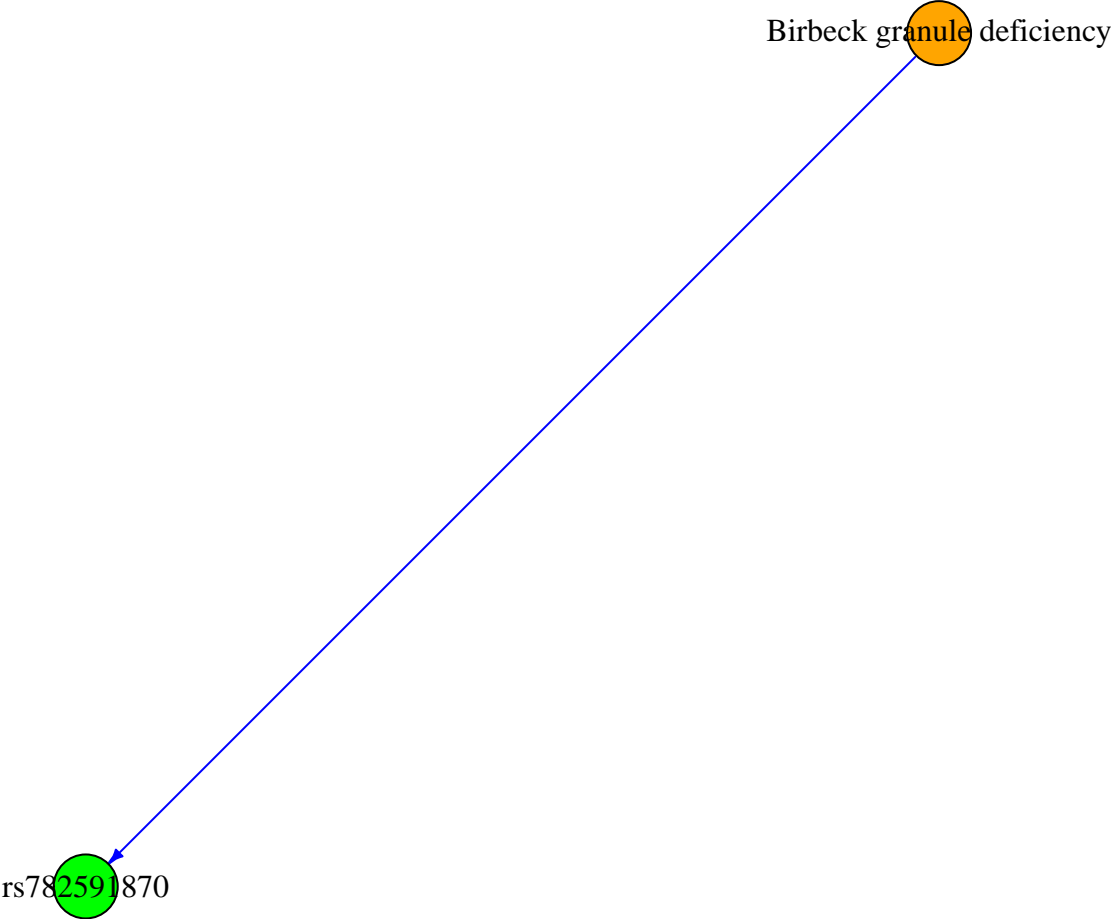

## Variant-Disease Network (Bladder cancer)

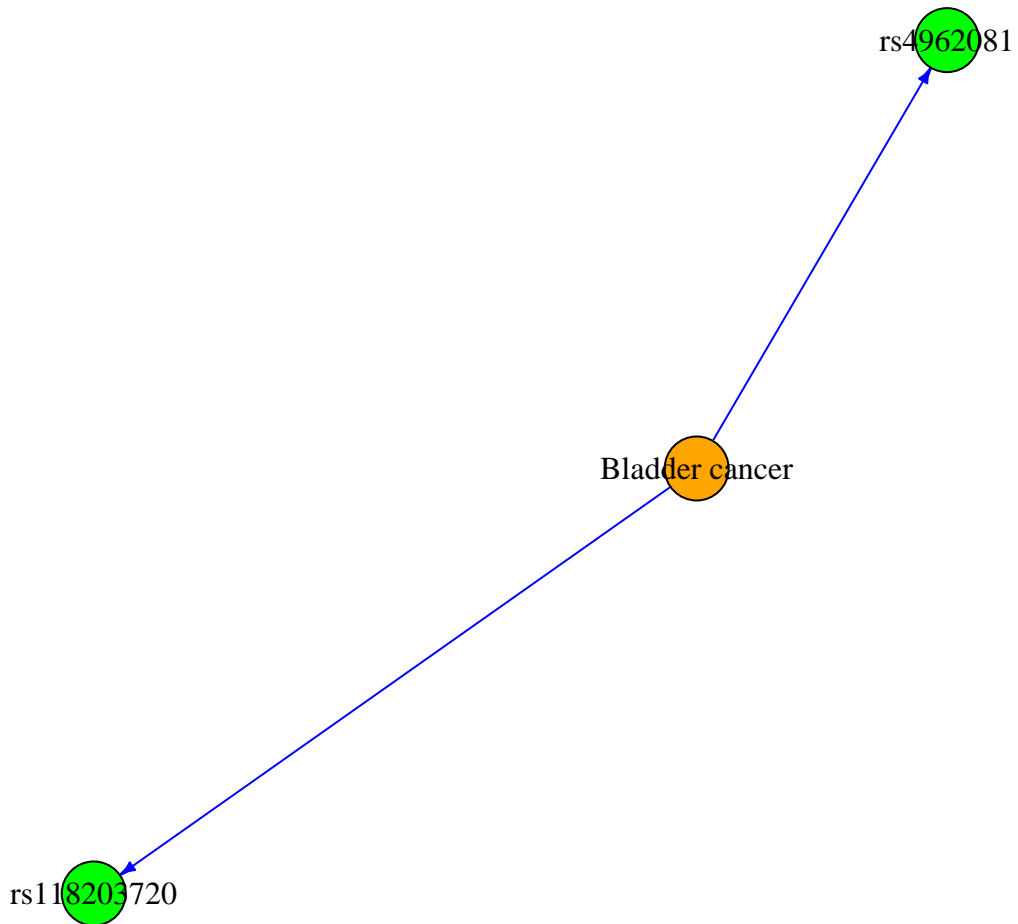

## Variant–Disease Network (Blau syndrome)

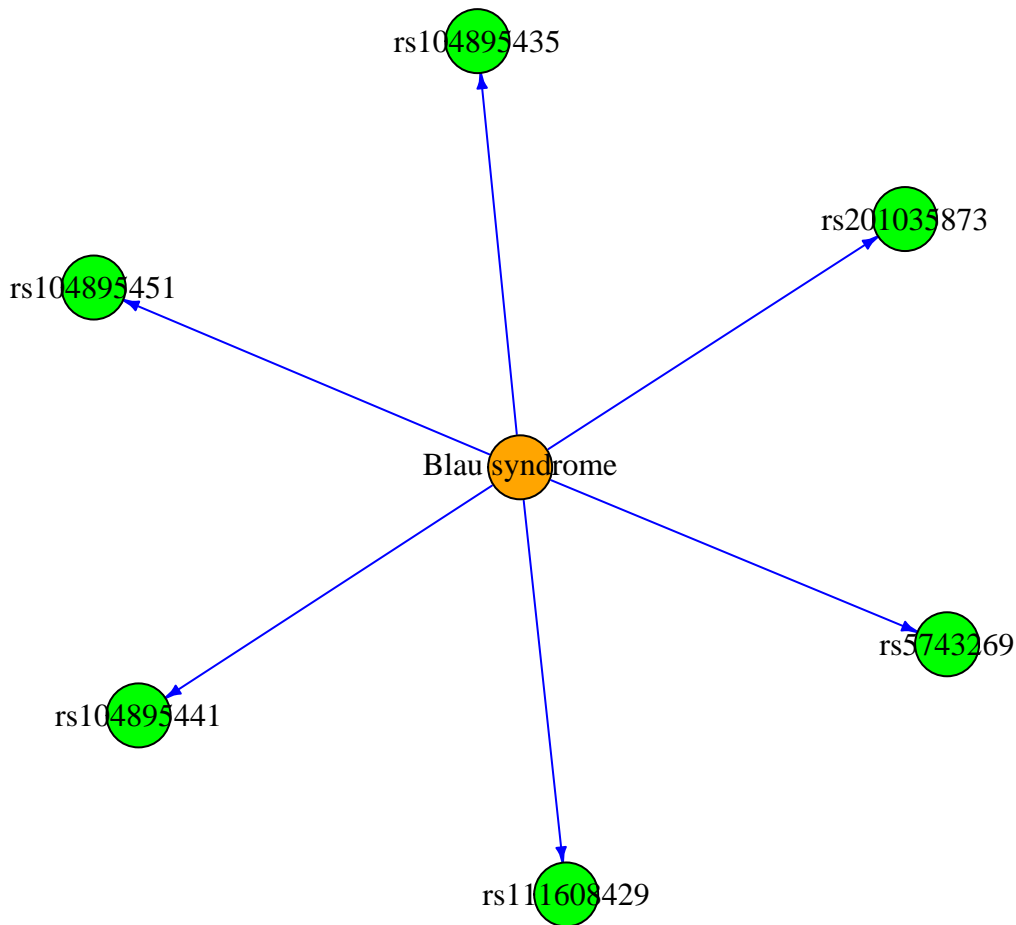



## Variant-Disease Network (Bloom syndrome)

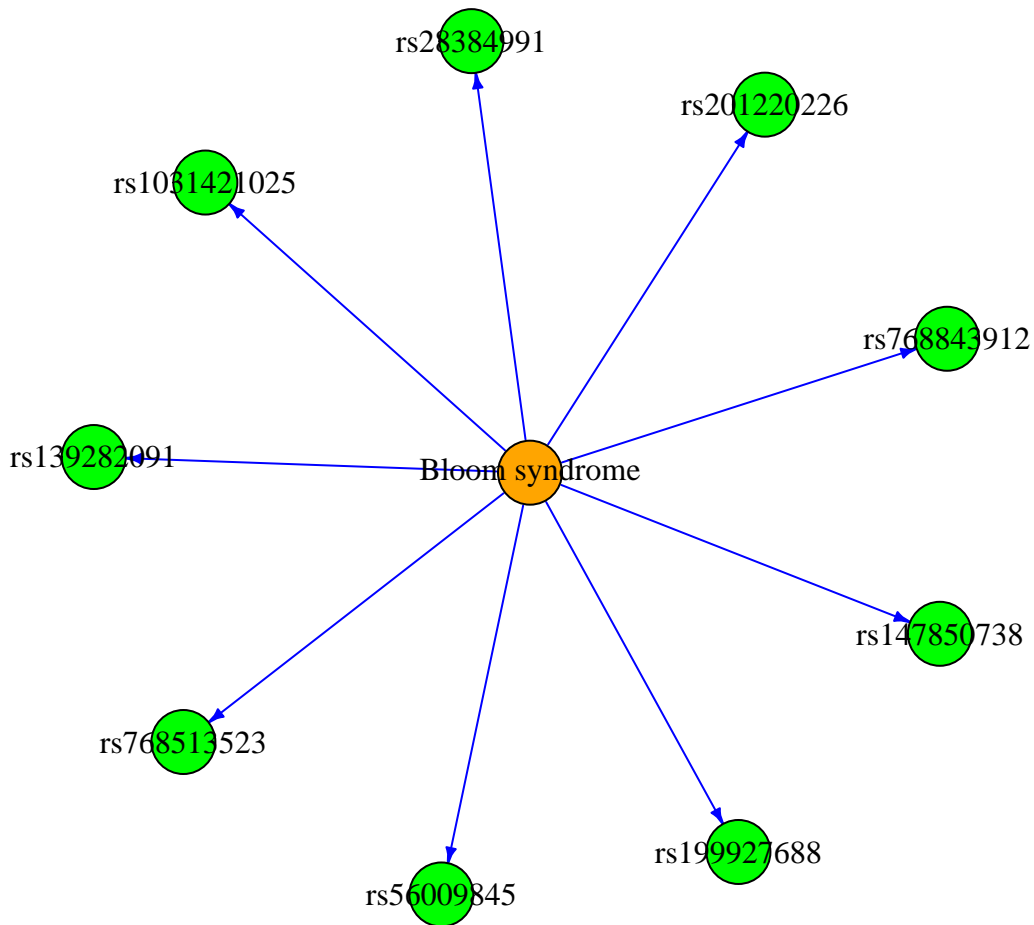

**Variant–Disease Network (Bone fragility with contractures)**

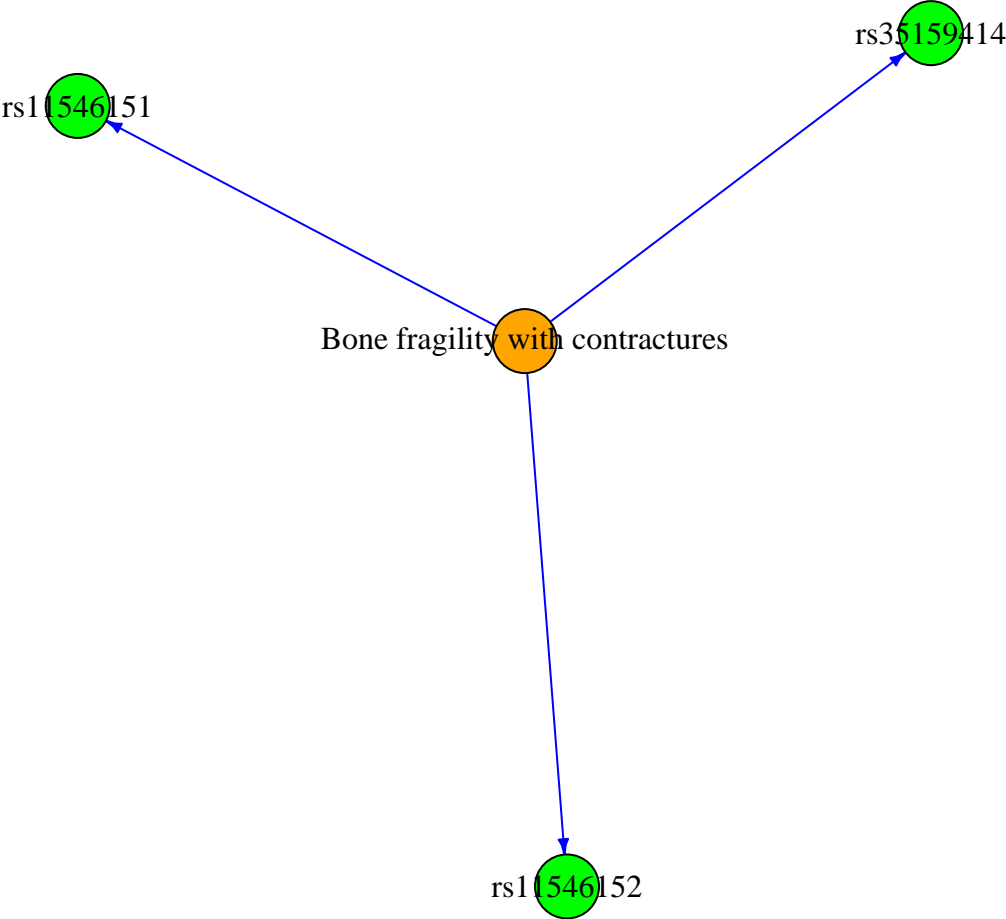

## Variant–Disease Network (Brachydactyly)

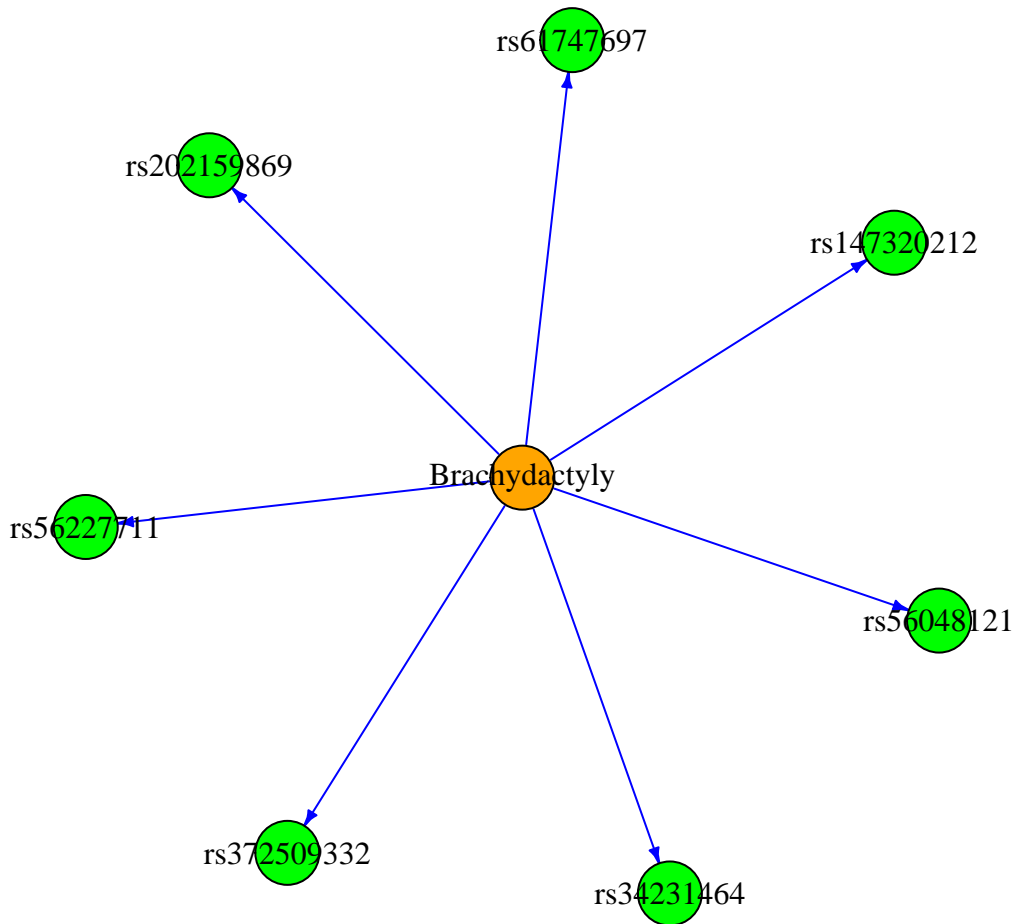

# Variant-Disease Network (BRAIN ABNORMALITIES)

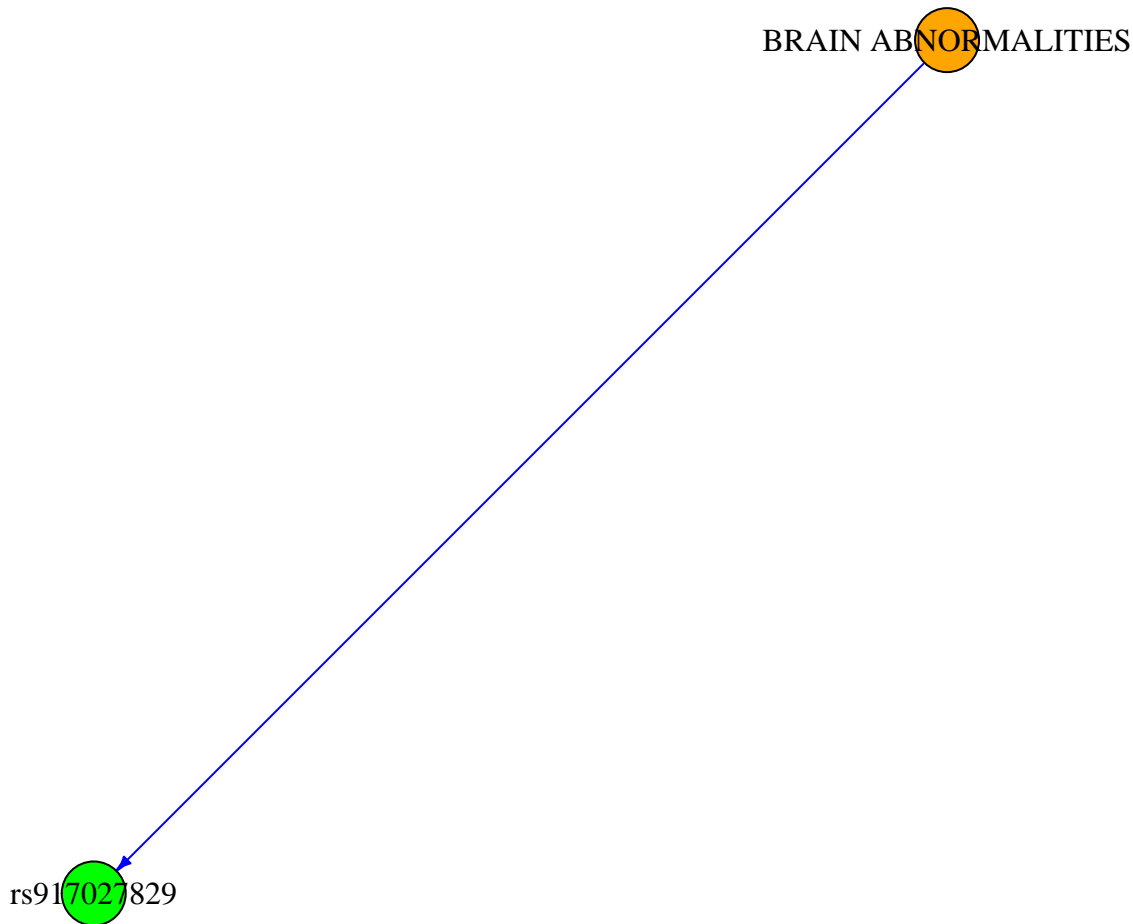

# Variant-Disease Network (Branched-chain keto acid dehydrogenase kinase def

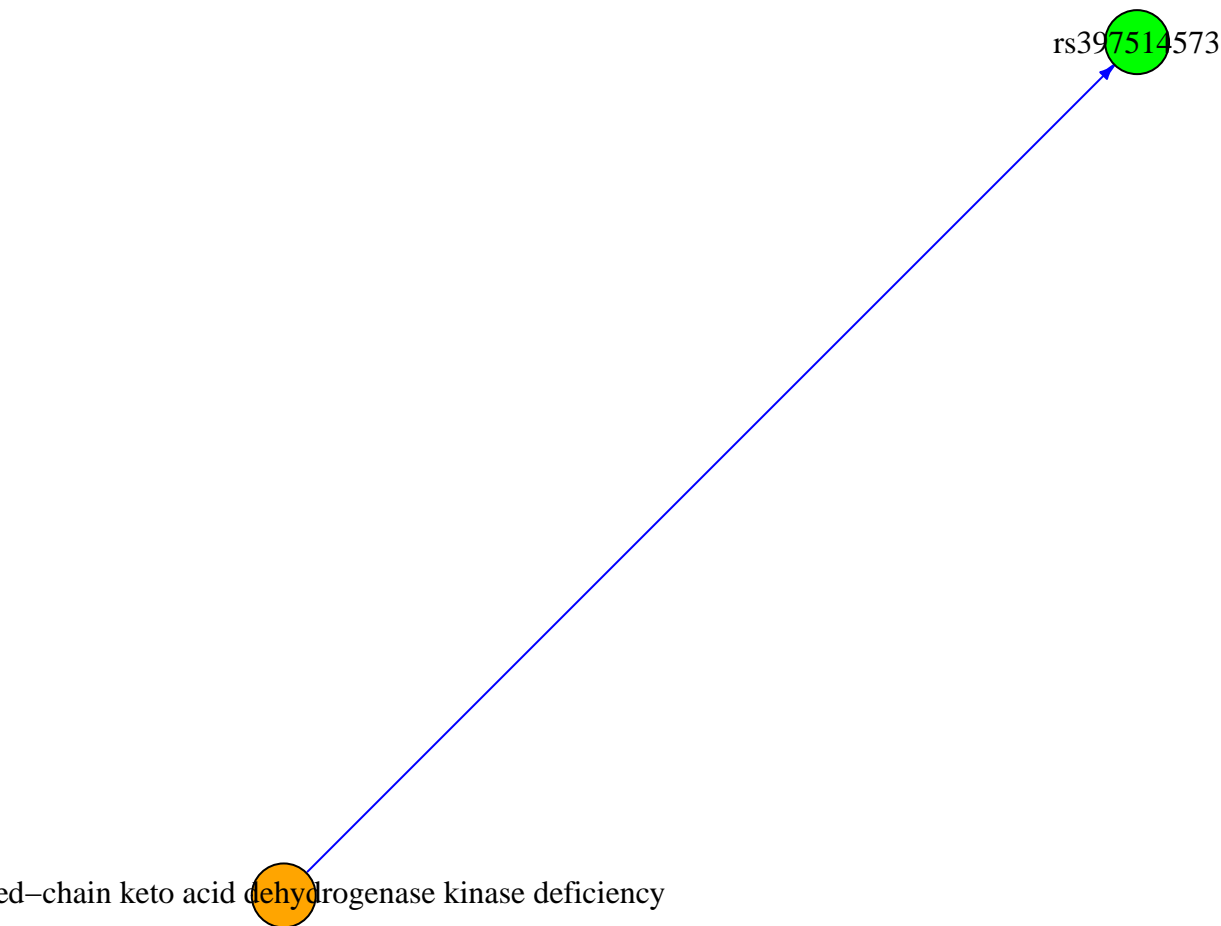

## Variant-Disease Network (breast cancer)

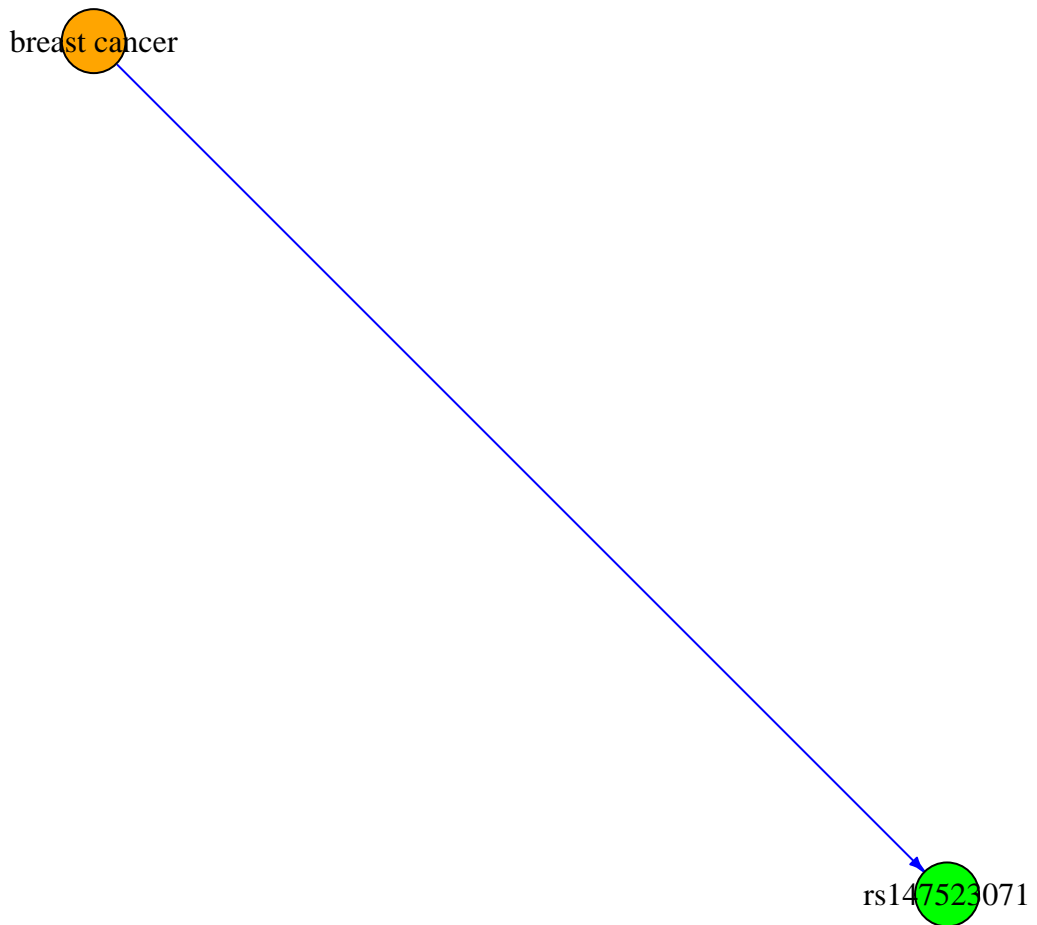

## Variant–Disease Network (Breast–ovarian cancer)

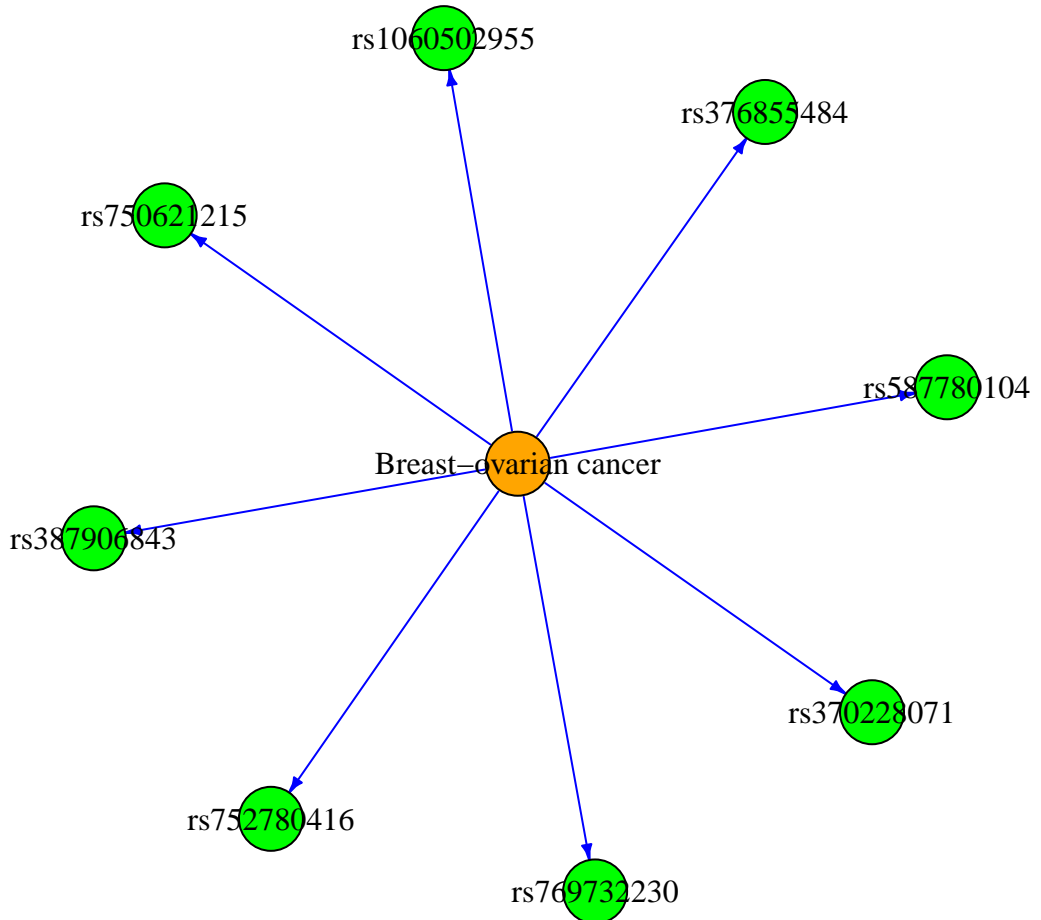

# Variant-Disease Network (Bronchiectasis with or without elevated sweat chloride)

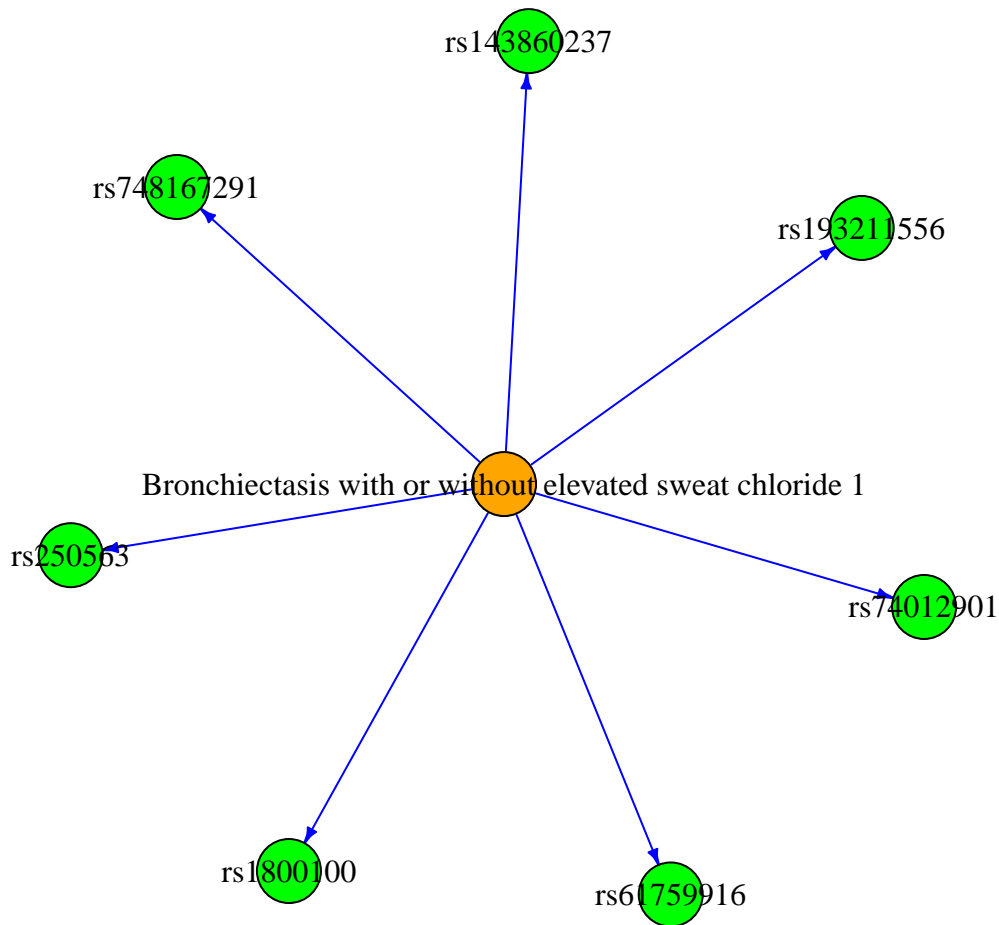



Variant–Disease Network (Brown–Vialletto–Van Laere syndrome 1)

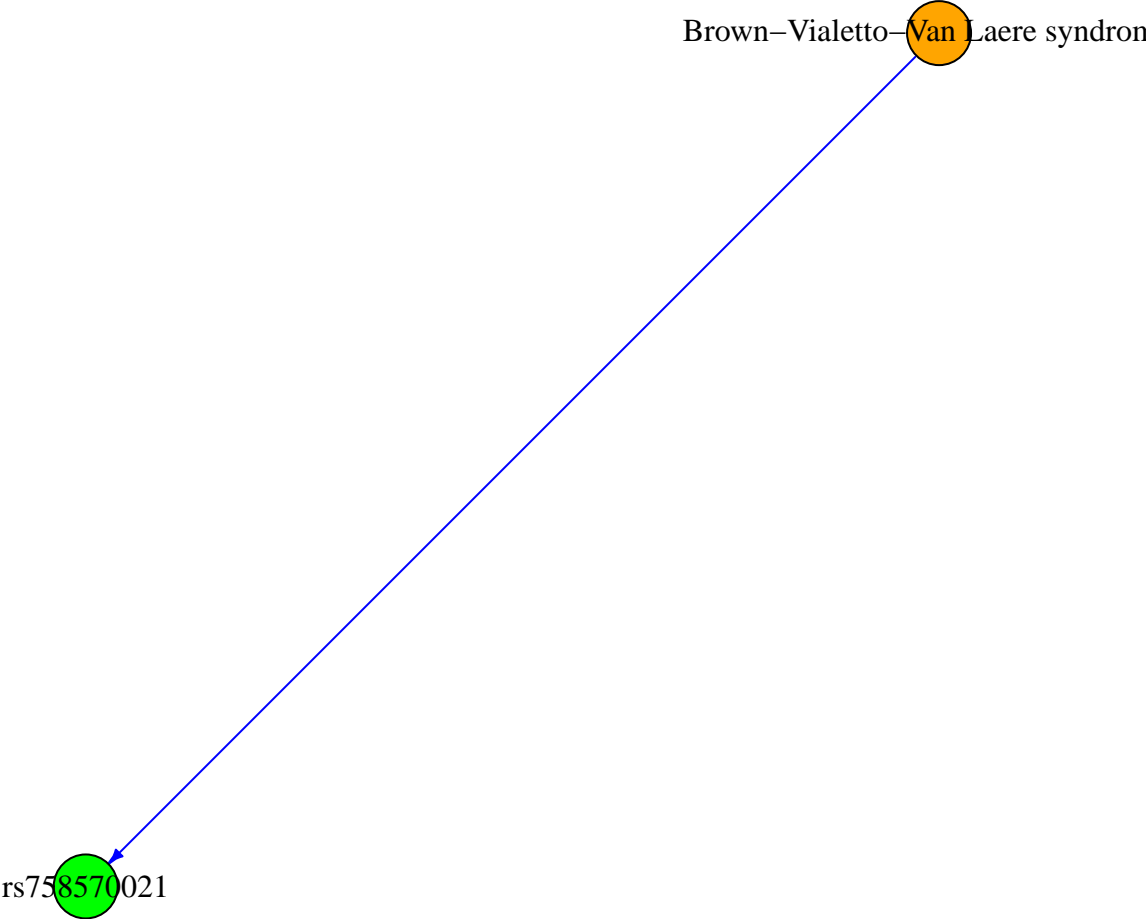

## Variant–Disease Network (Brugada syndrome)

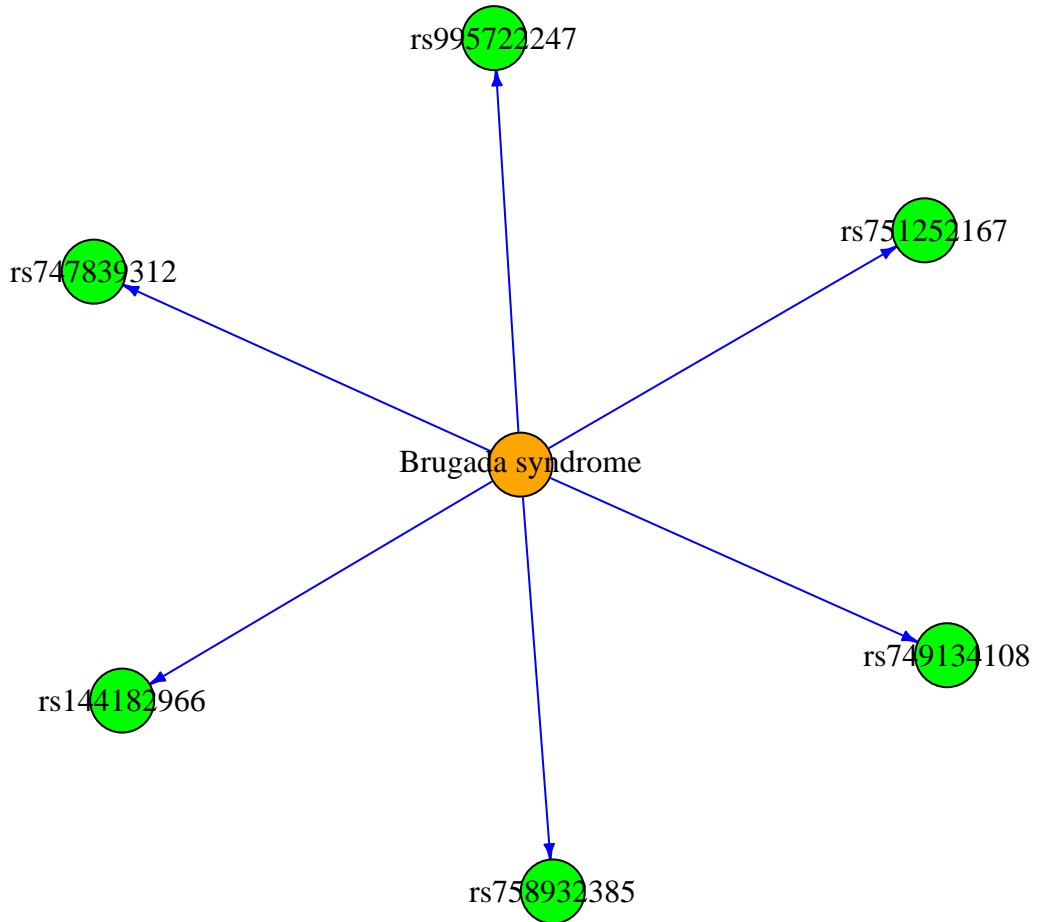

## Variant–Disease Network (Brugada syndrome 4)

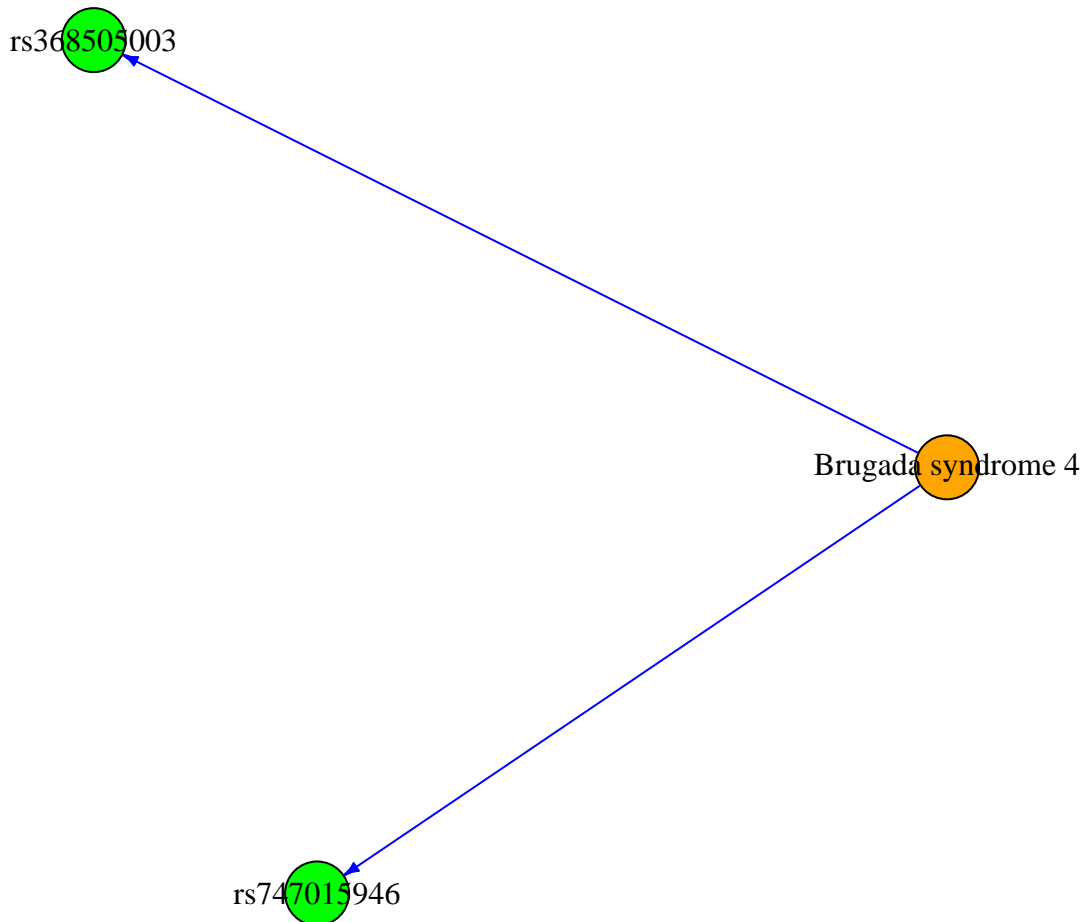

Variant–Disease Network (Brugada syndrome 5)

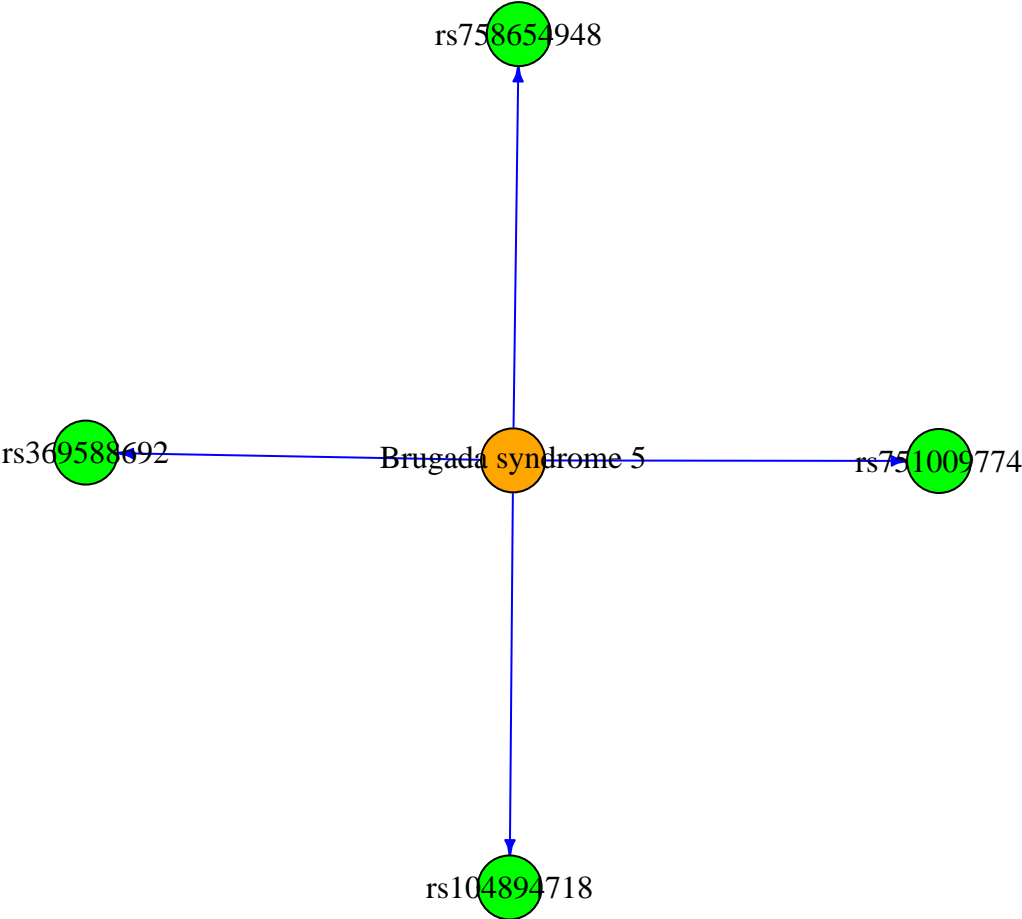

## Variant-Disease Network (Brugada syndrome 8)

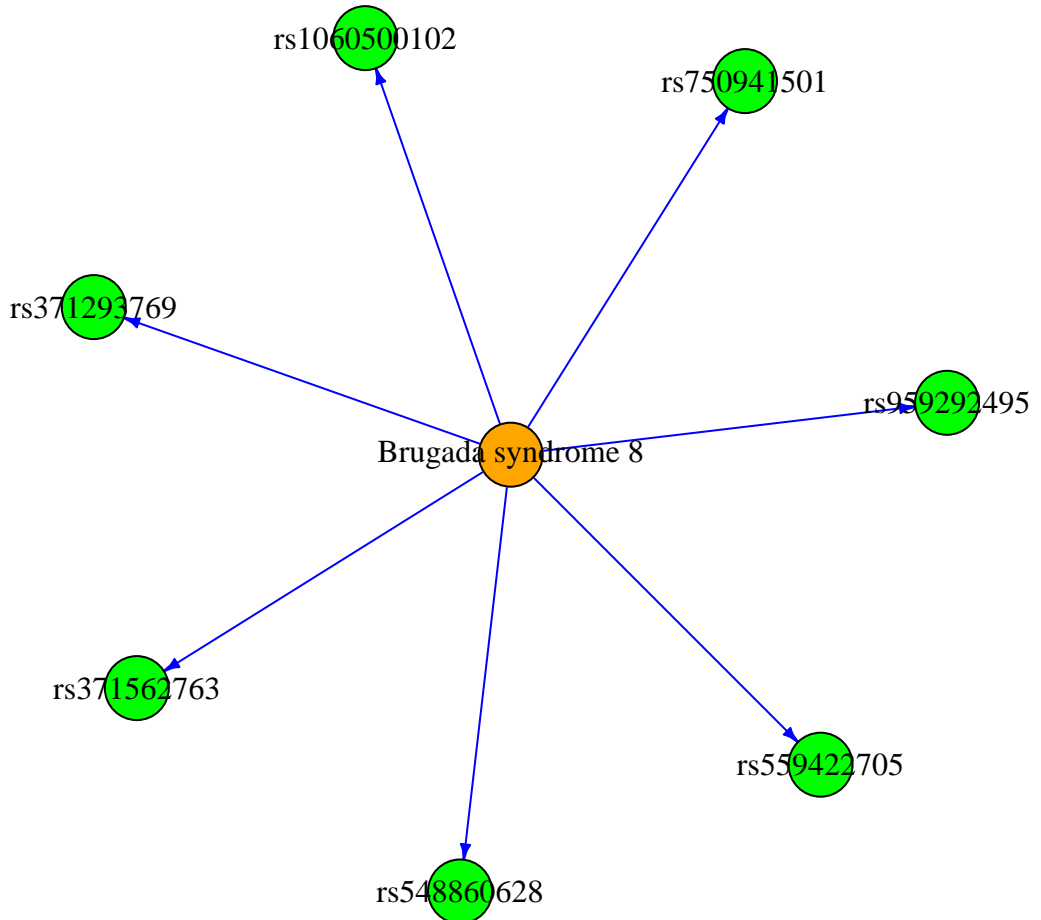

## Variant–Disease Network (Budd–Chiari syndrome)

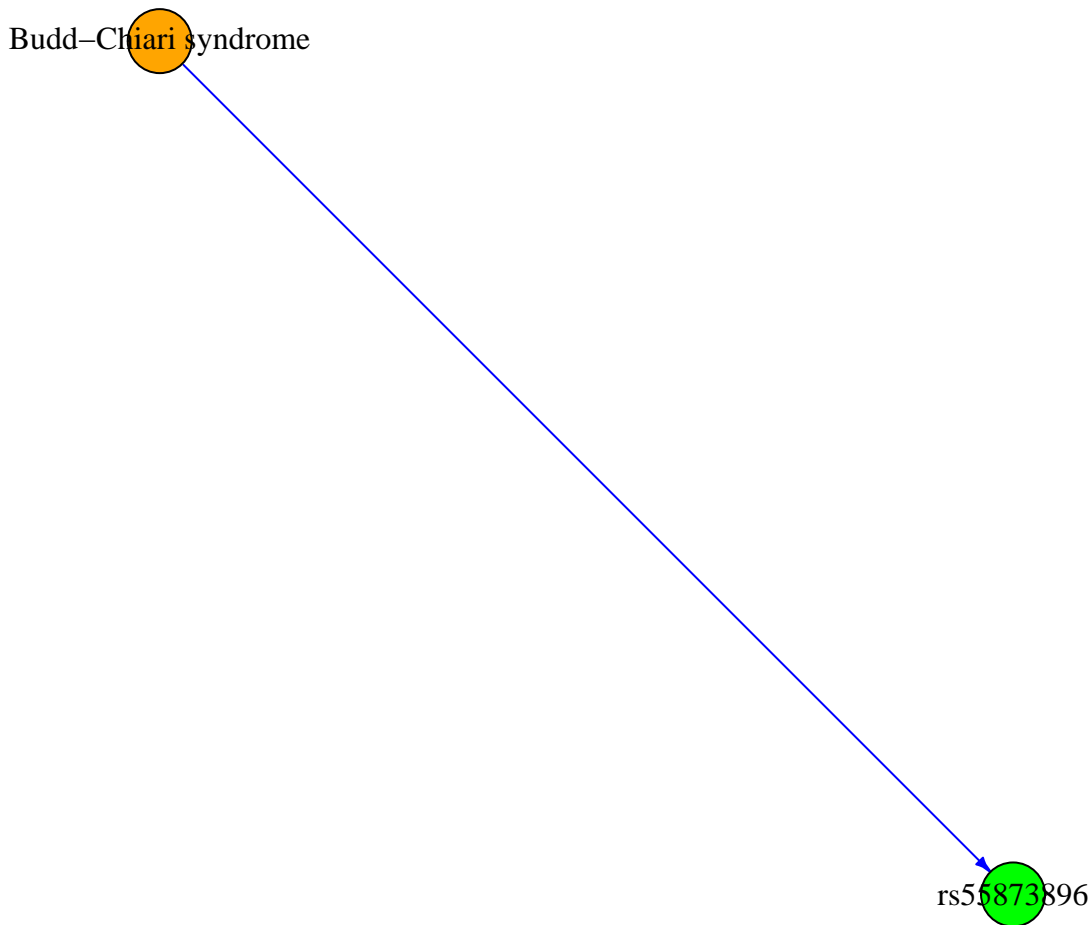

Variant–Disease Network (Bullous ichthyosiform erythroderma)

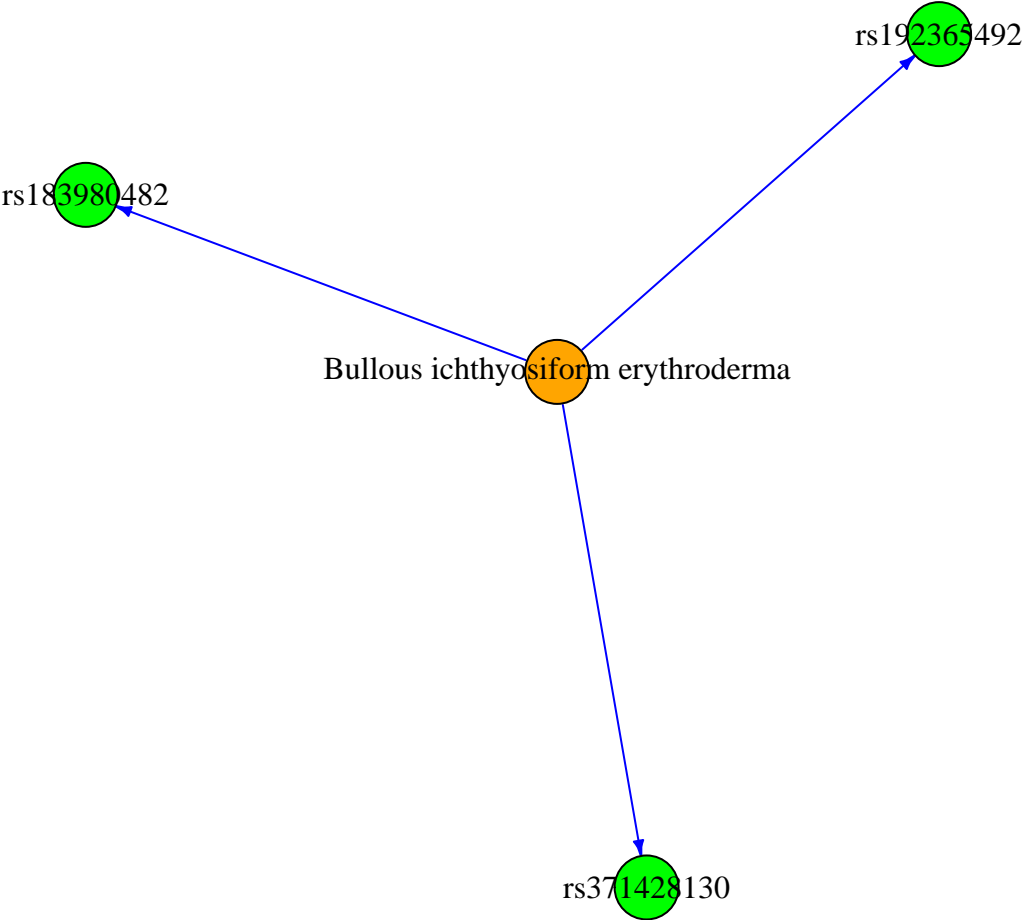

## Variant-Disease Network (Bulls eye maculopathy)

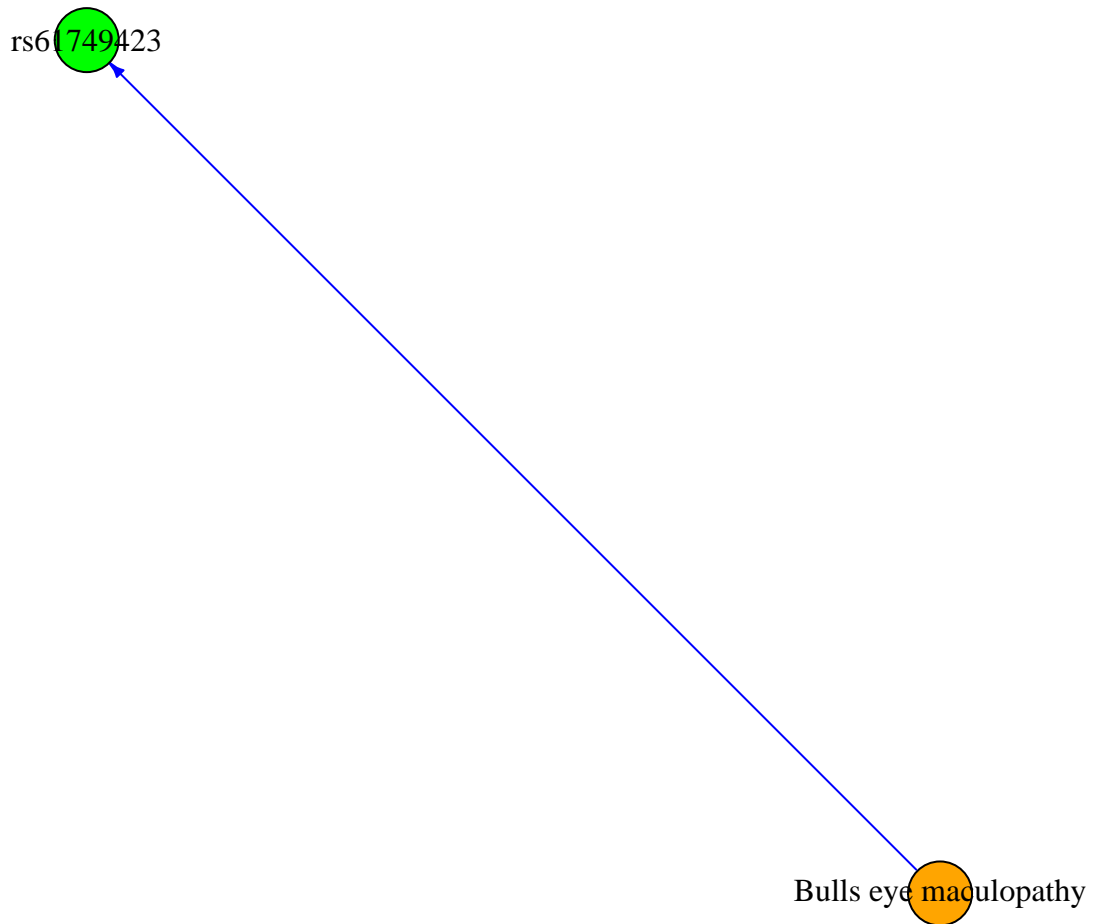



**Variant–Disease Network (Café–au–lait macules with pulmonary stenosis)**

# Variant-Disease Network (Canavan Disease)

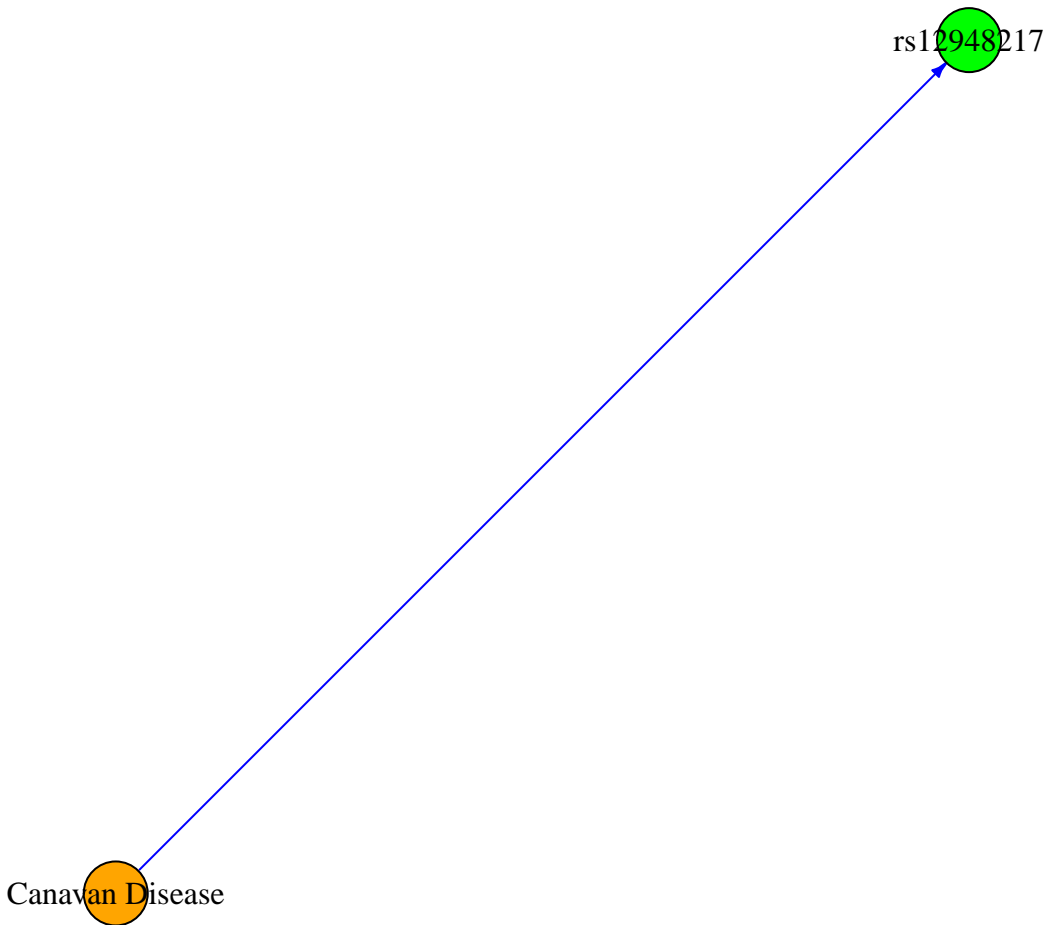

## Variant-Disease Network (Candidiasis)

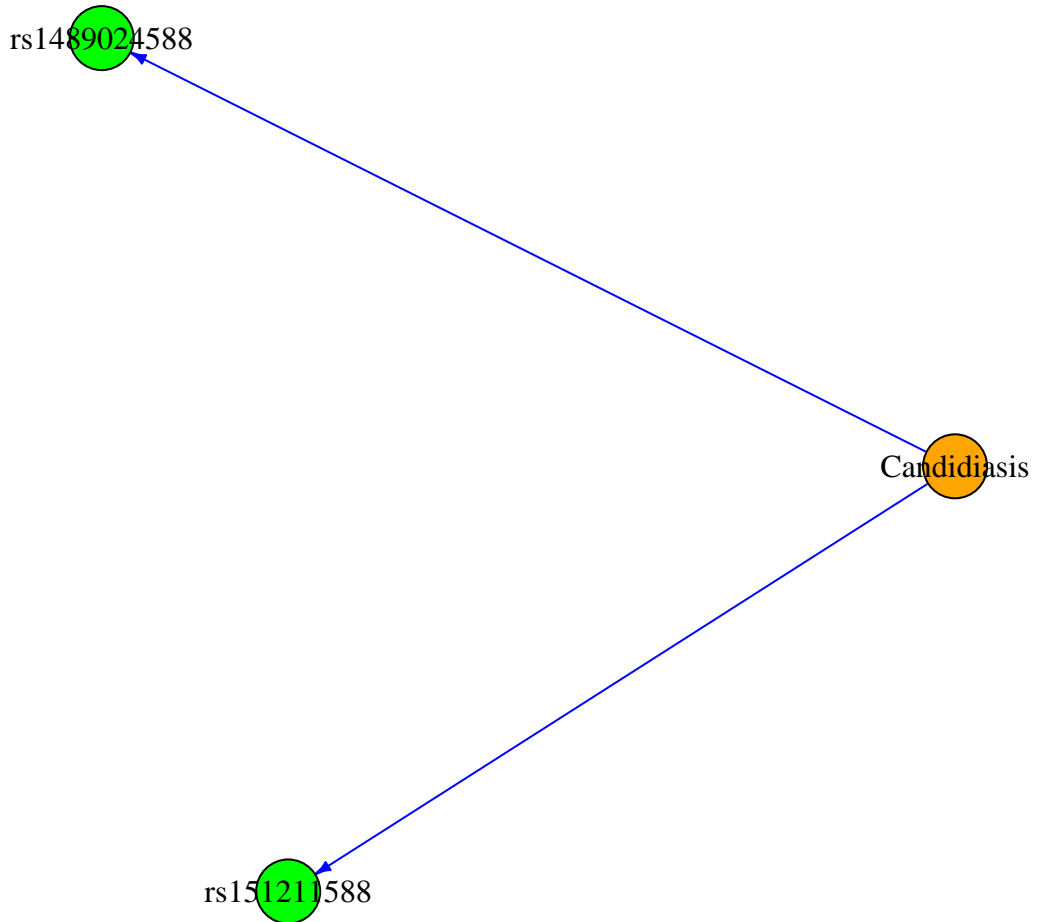

## Variant–Disease Network (Carcinoma of colon)

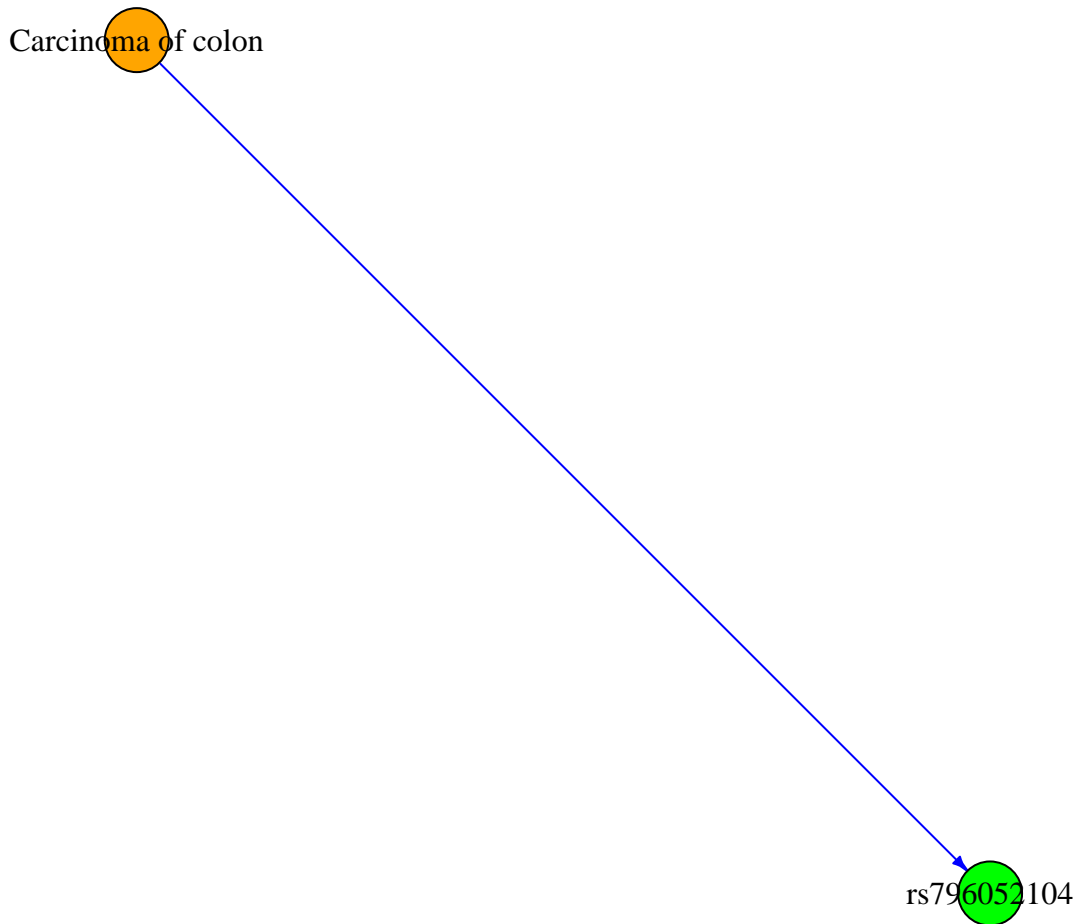

## Variant-Disease Network (Cardiac arrhythmia)

Cardiac arrhythmia

rs2230407

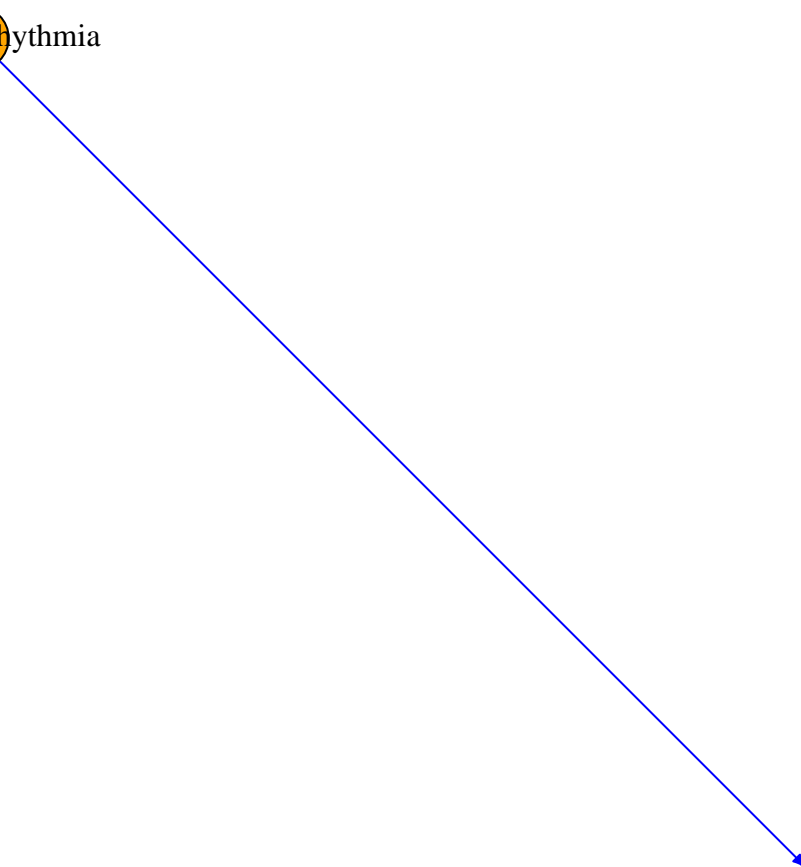

# Variant-Disease Network (Cardio-facio-cutaneous syndrome)

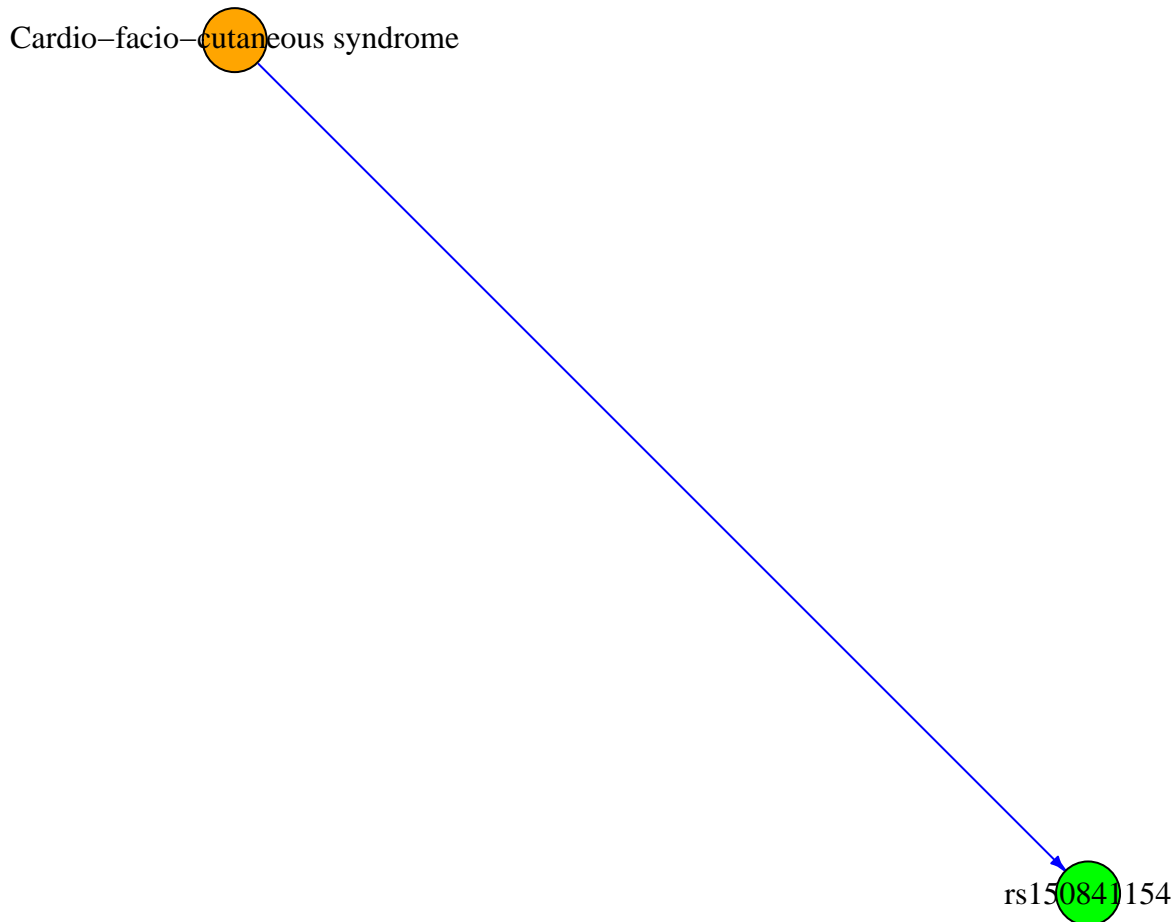

Variant–Disease Network (Cardiofaciocutaneous syndrome 4)

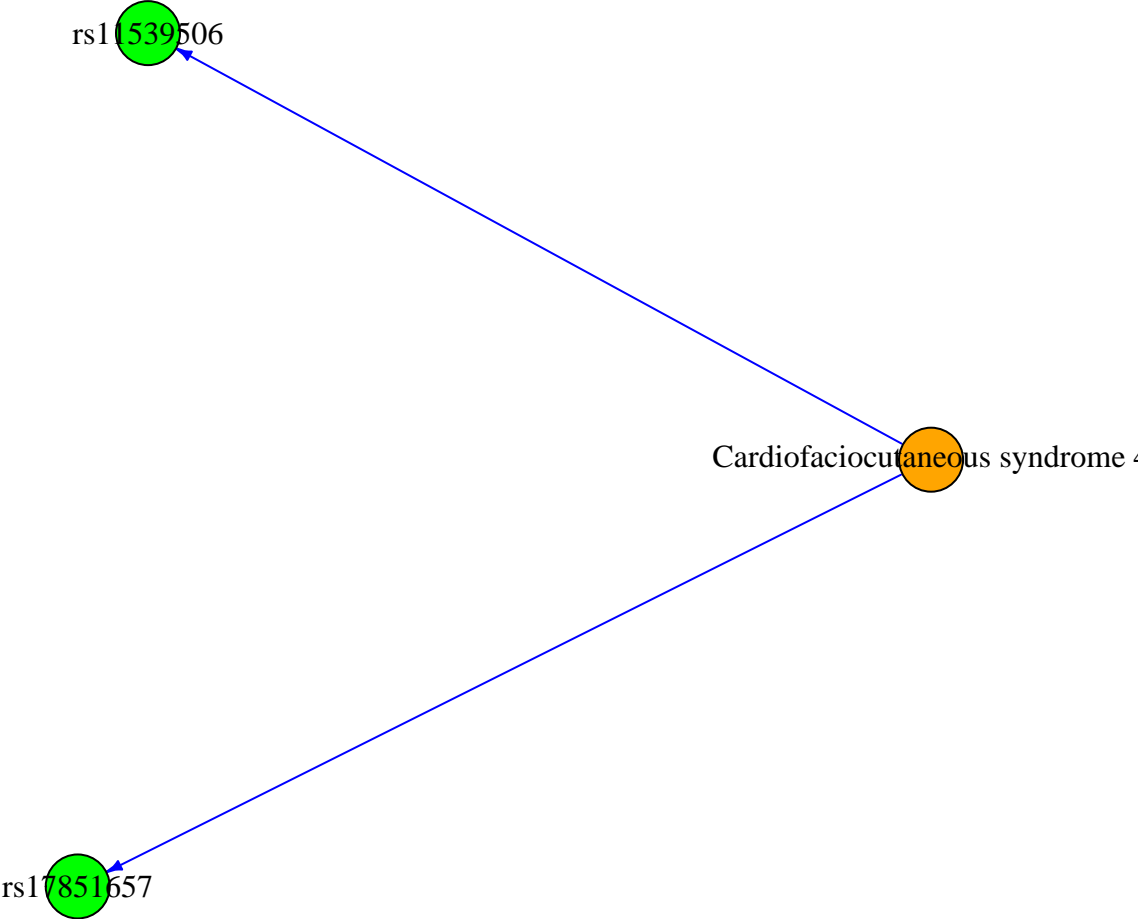

### Variant–Disease Network (Cardiomyopathy)

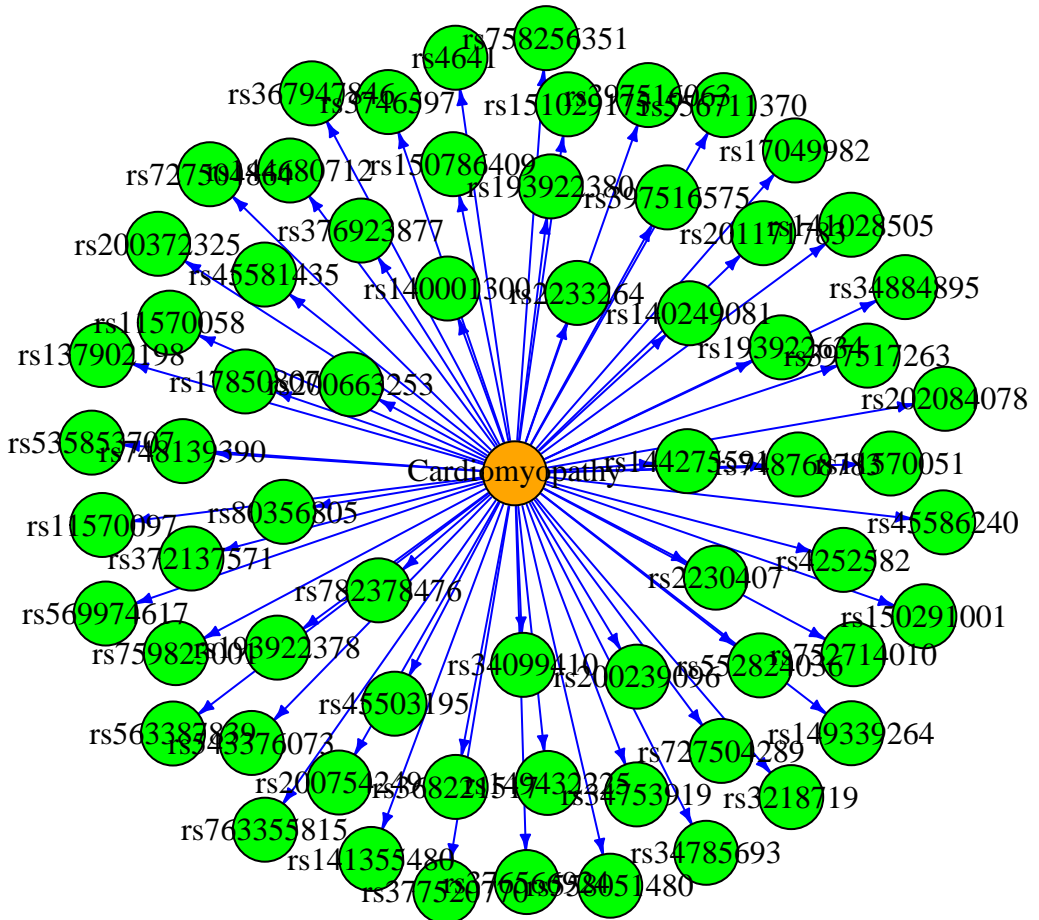



### Variant–Disease Network (Cardiovascular phenotype)

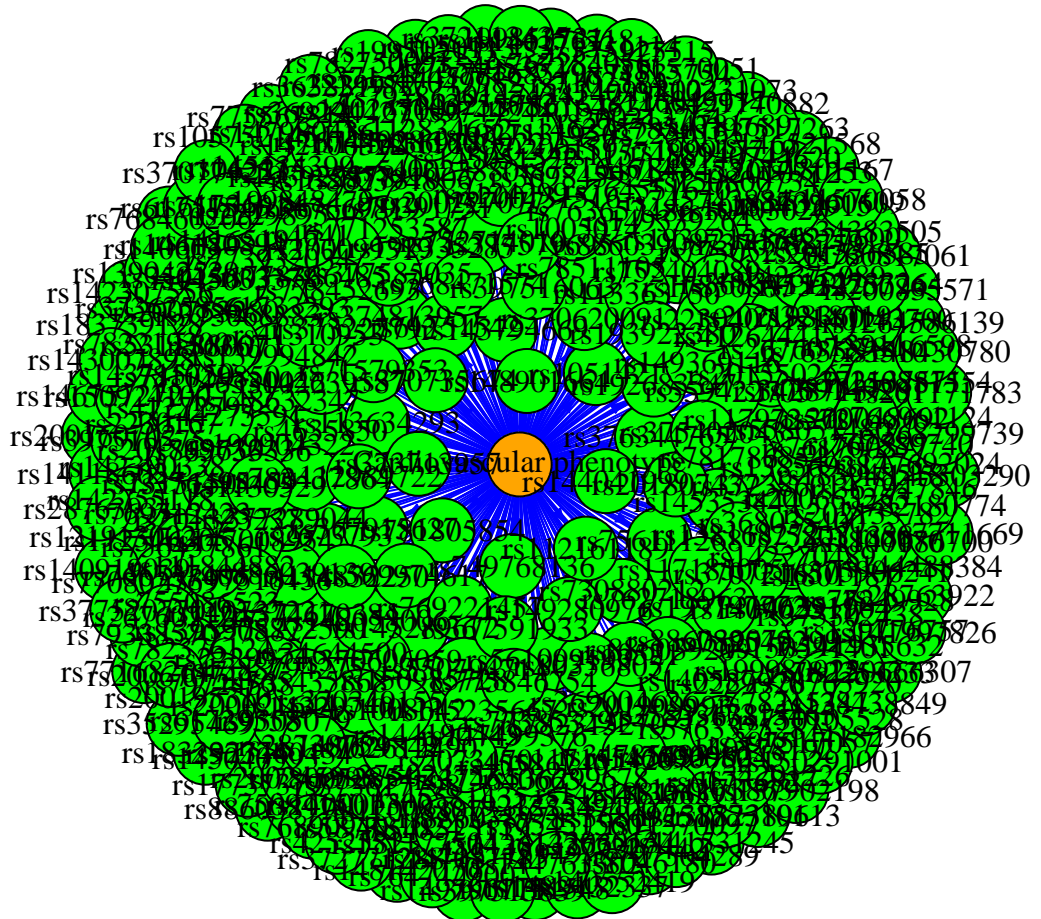

## Variant–Disease Network (Carney complex)

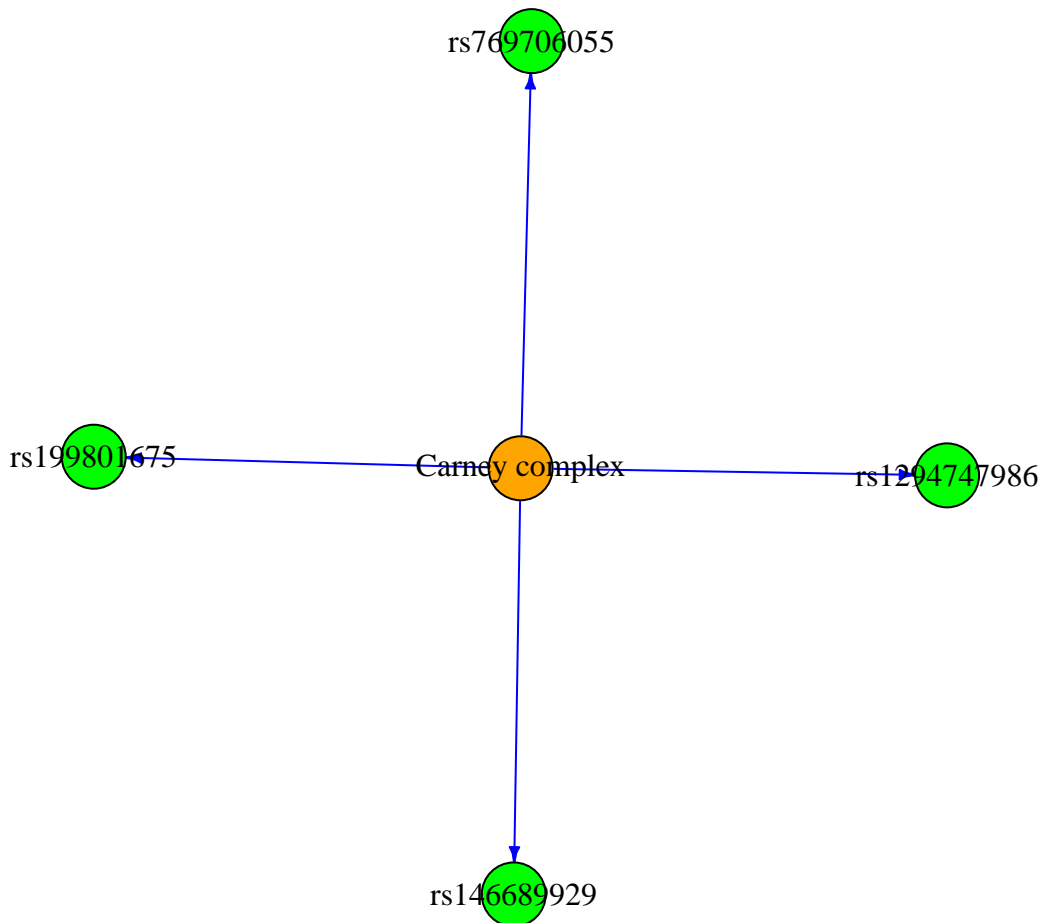

## Variant–Disease Network (Carney triad)

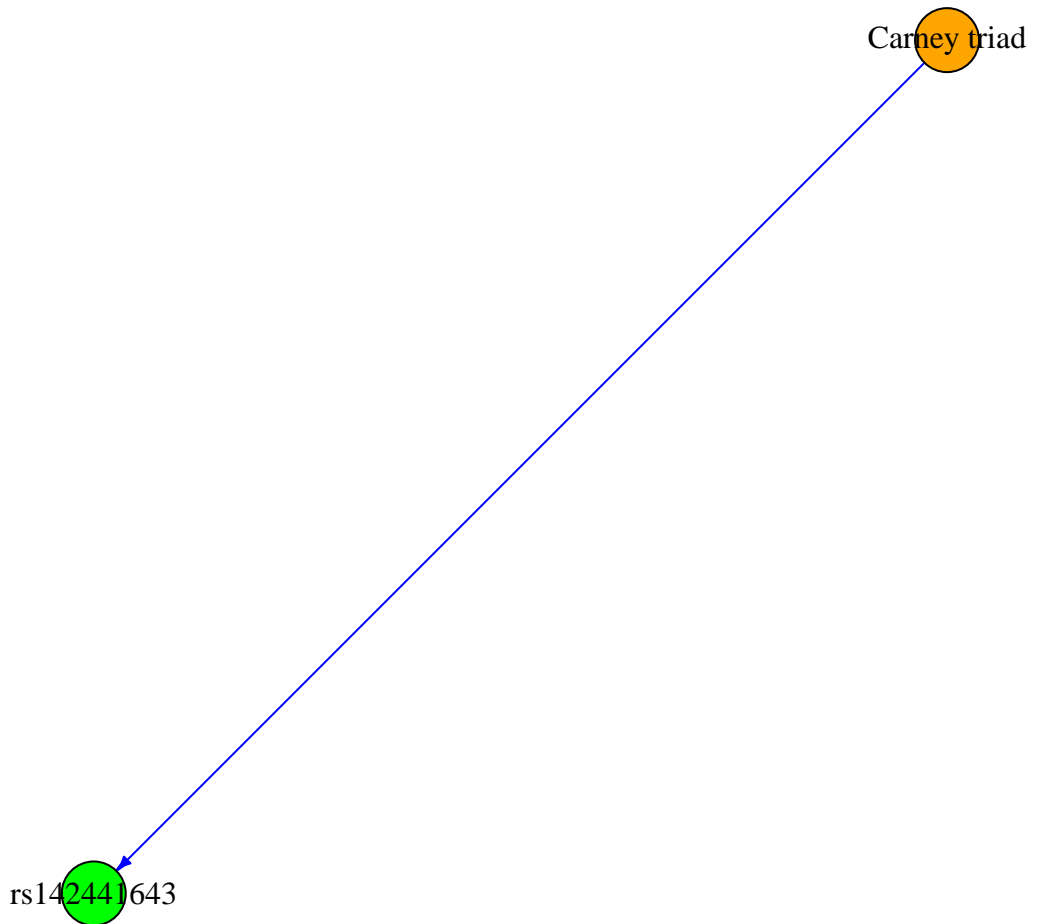

**Variant–Disease Network (Carnitine acylcarnitine translocase deficiency)**

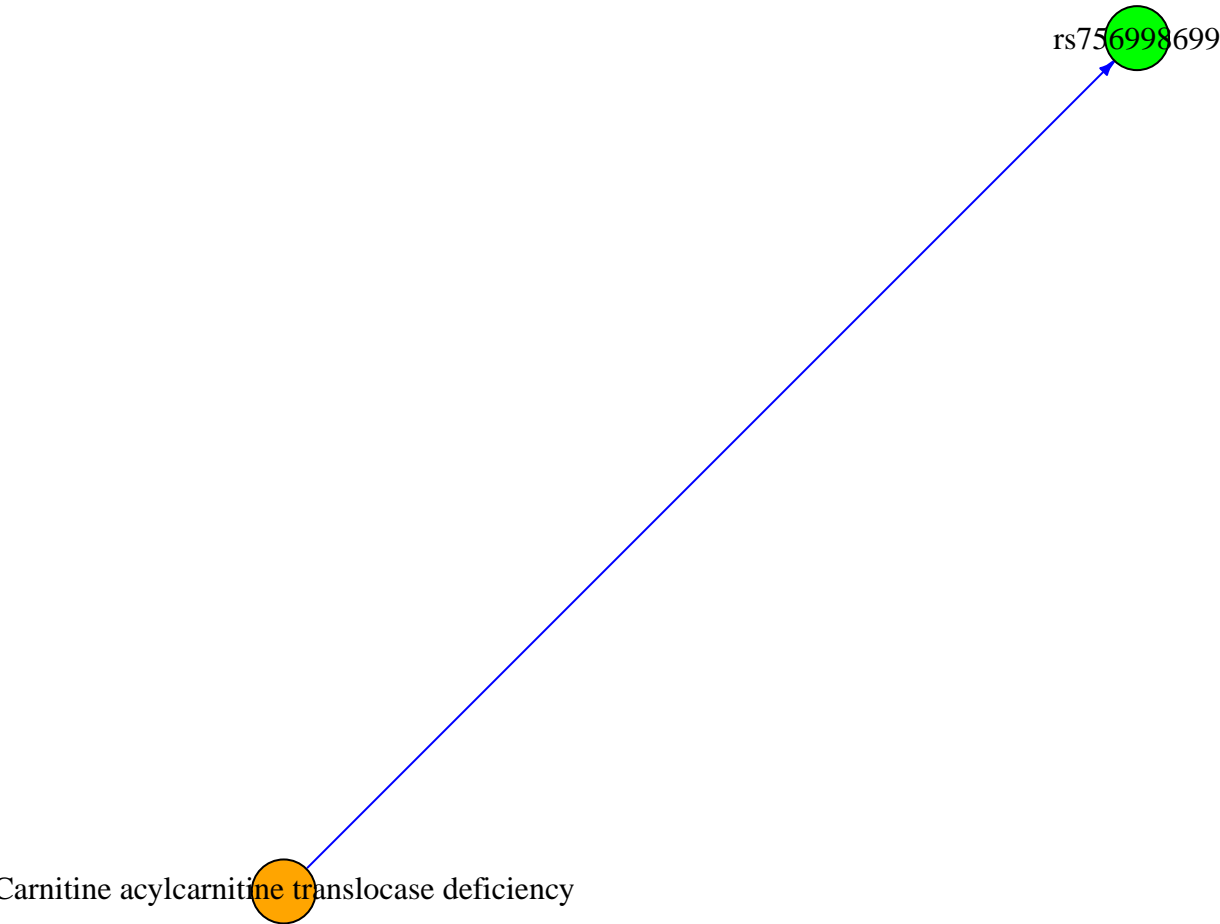

## Variant–Disease Network (Cataract)

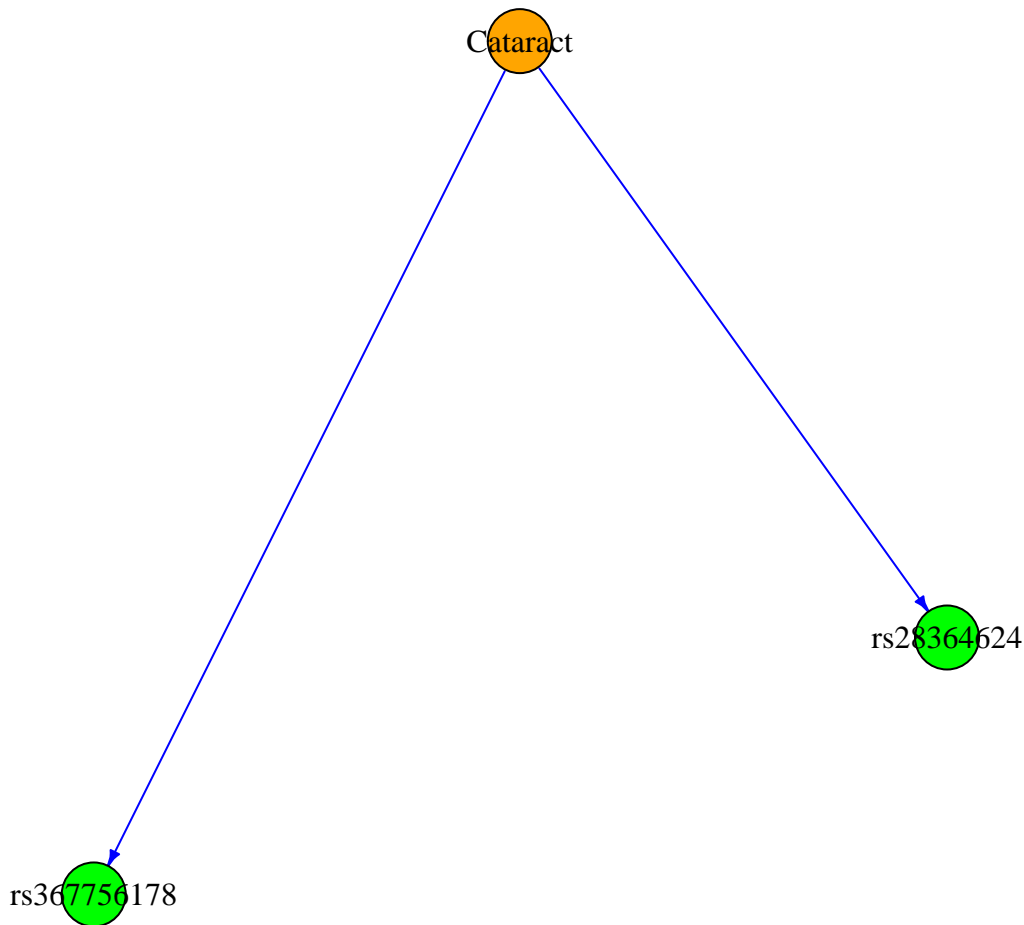

## Variant-Disease Network (Cataract 1)

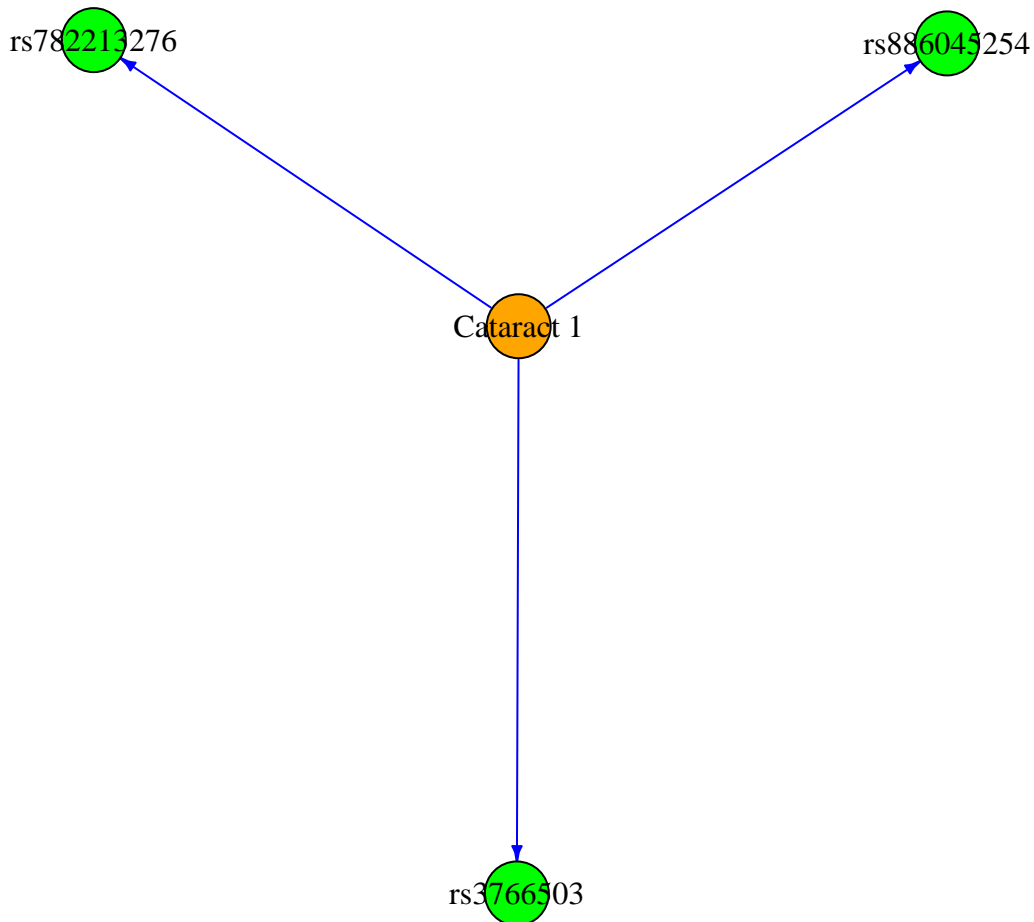

**Variant–Disease Network (Cataract 16)**

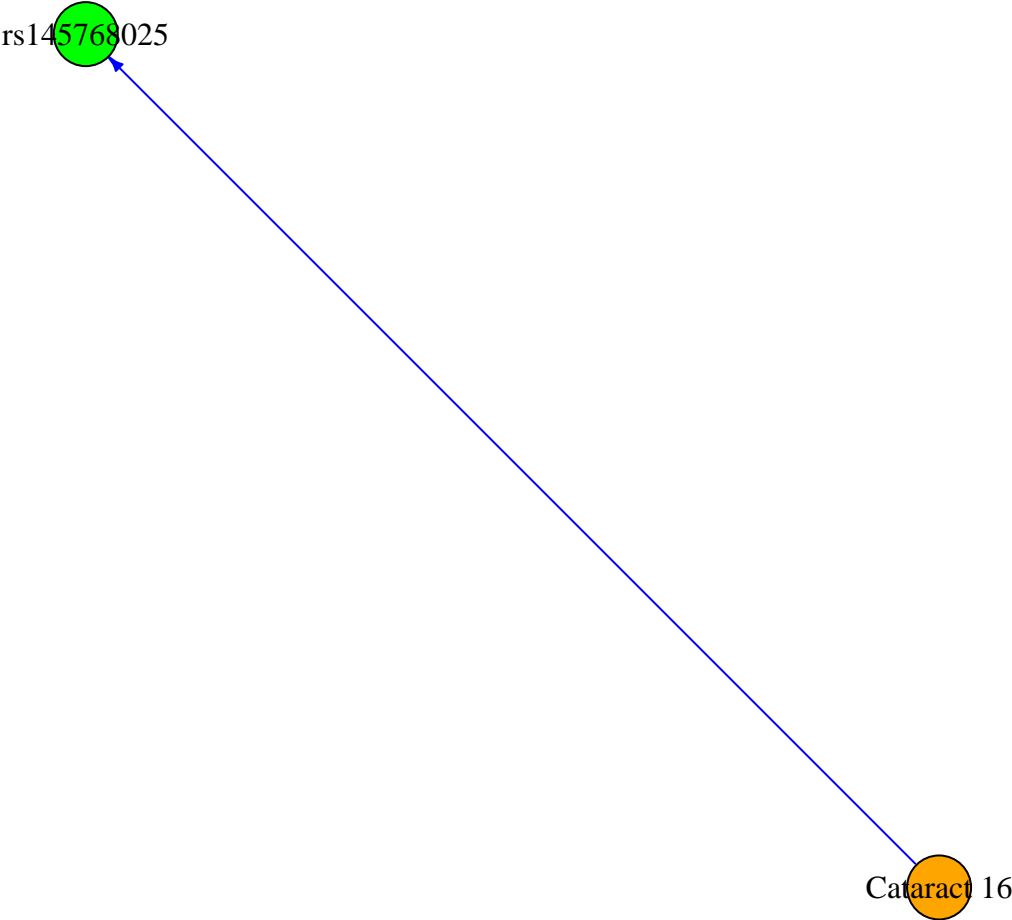

Variant–Disease Network (Cataract 33)

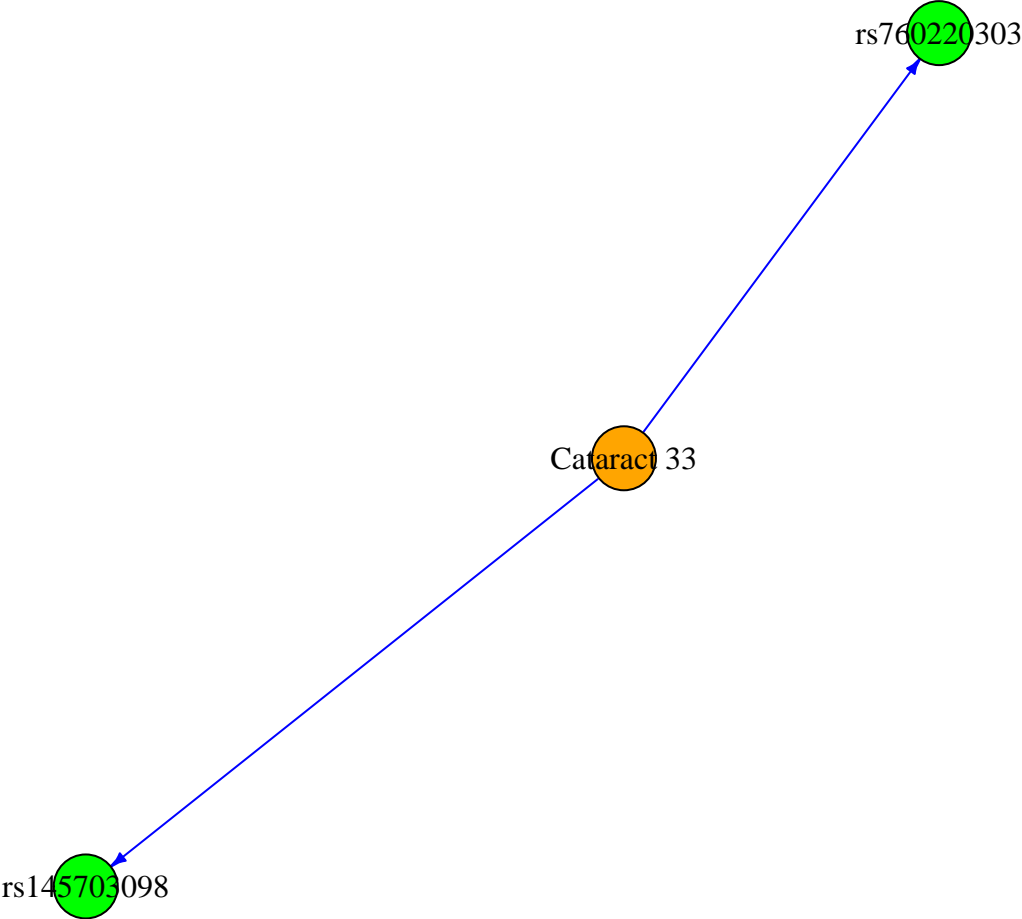



## Variant-Disease Network (Cataract 4)

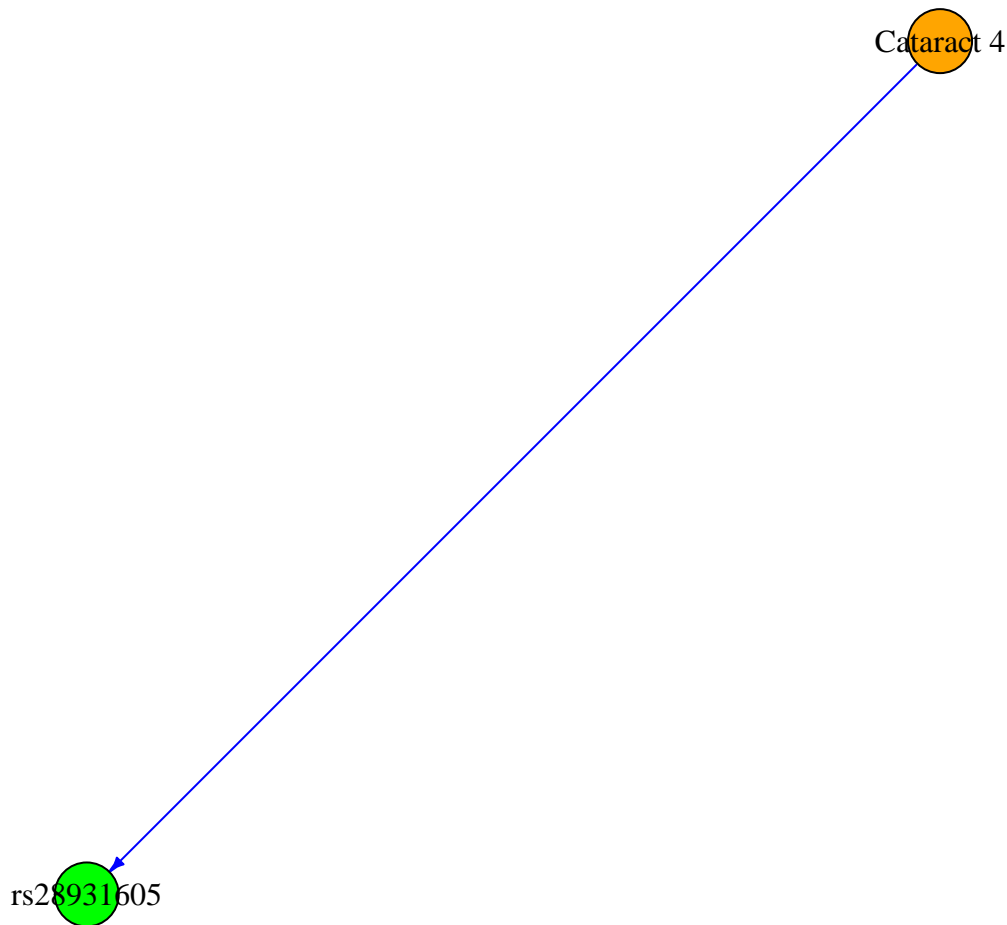

## Variant-Disease Network (Cataract 6)

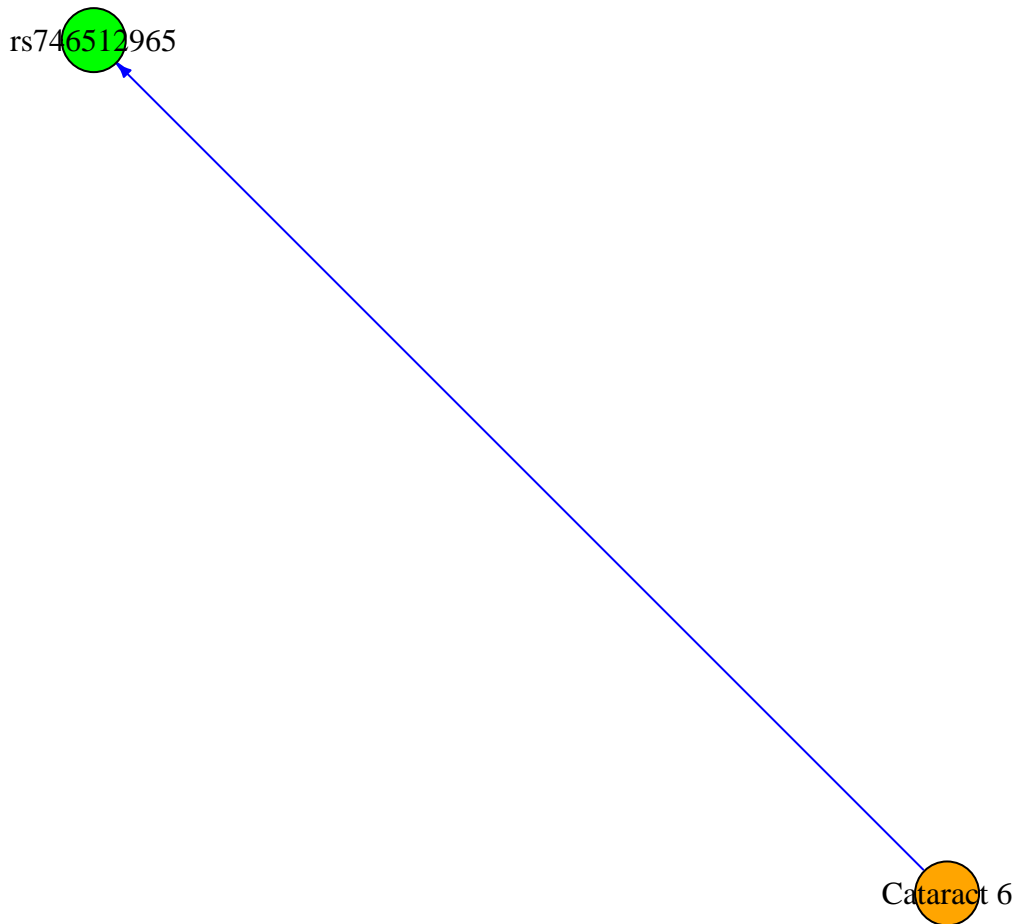

# Variant-Disease Network (Catecholaminergic polymorphic ventricular tachycardia)

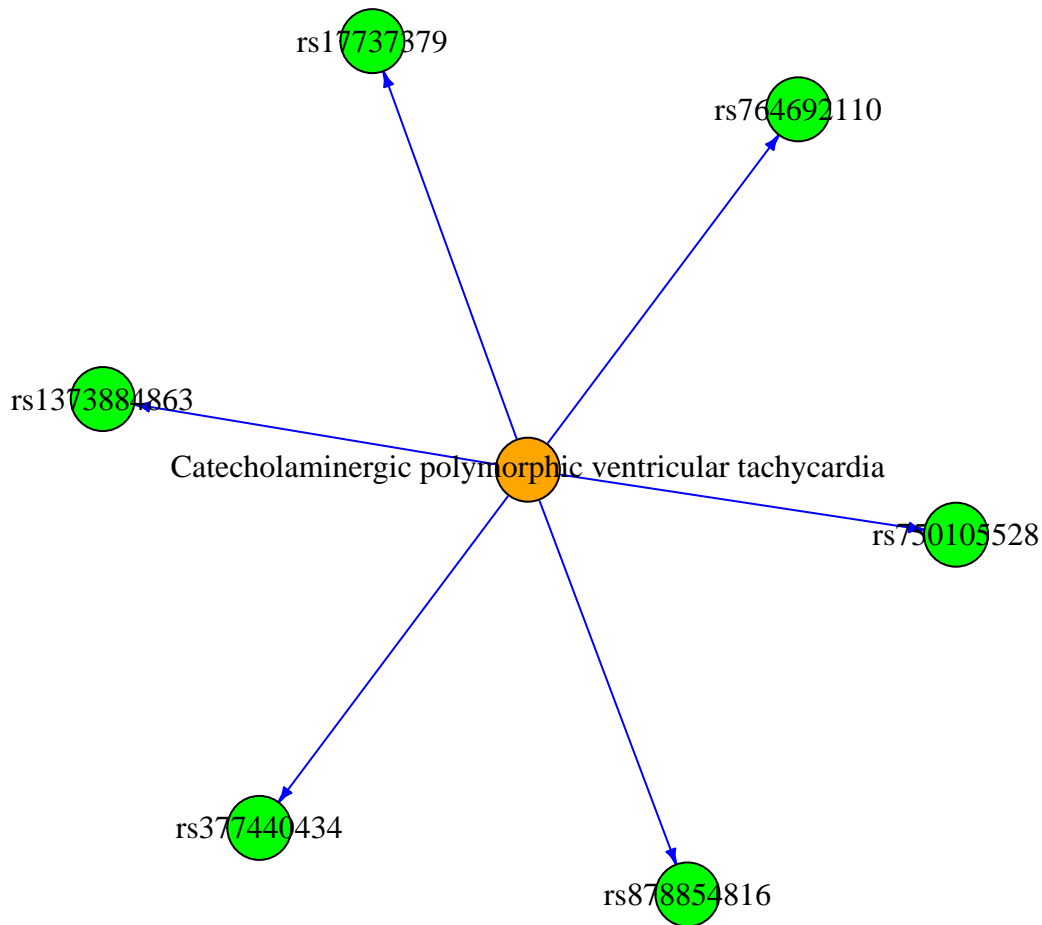

**Variant–Disease Network (Caudal dysgenesis syndrome)**

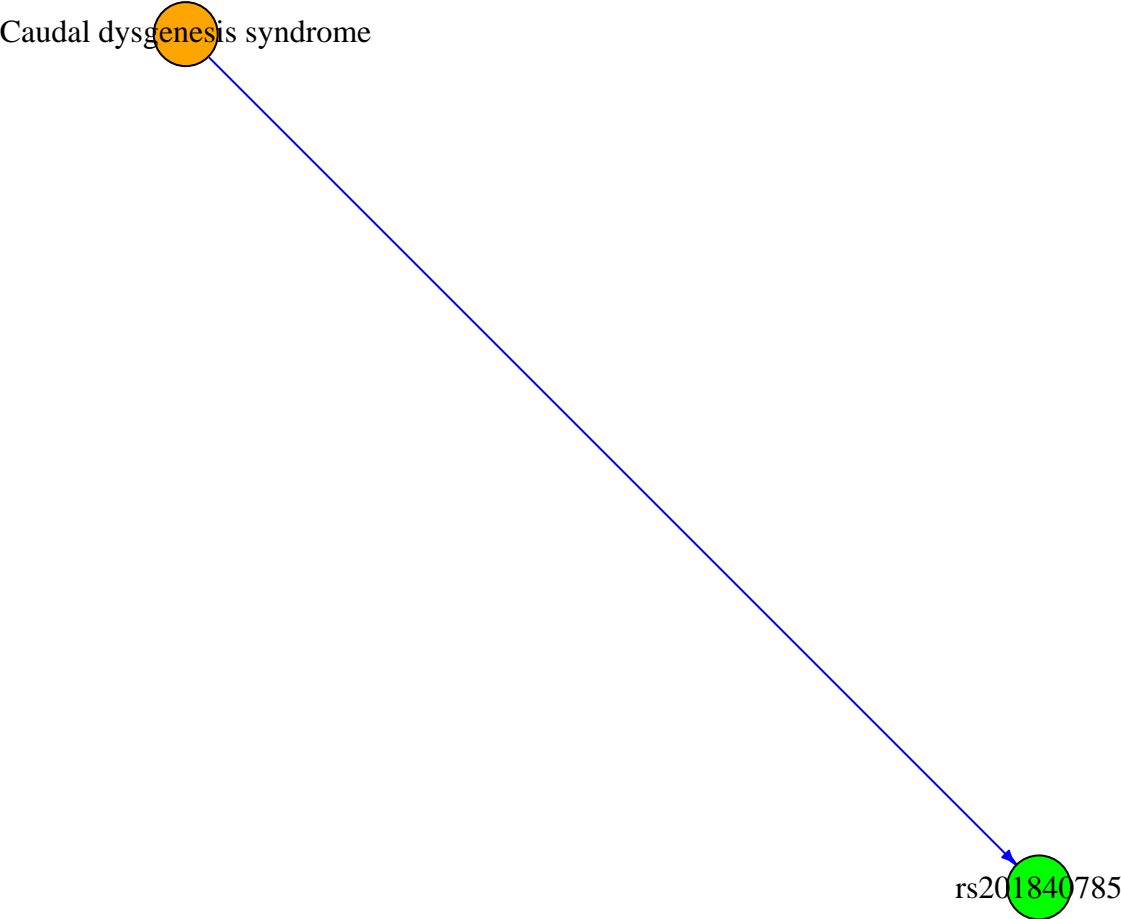

# Variant–Disease Network (Caused by mutation in the TBC1 domain family)

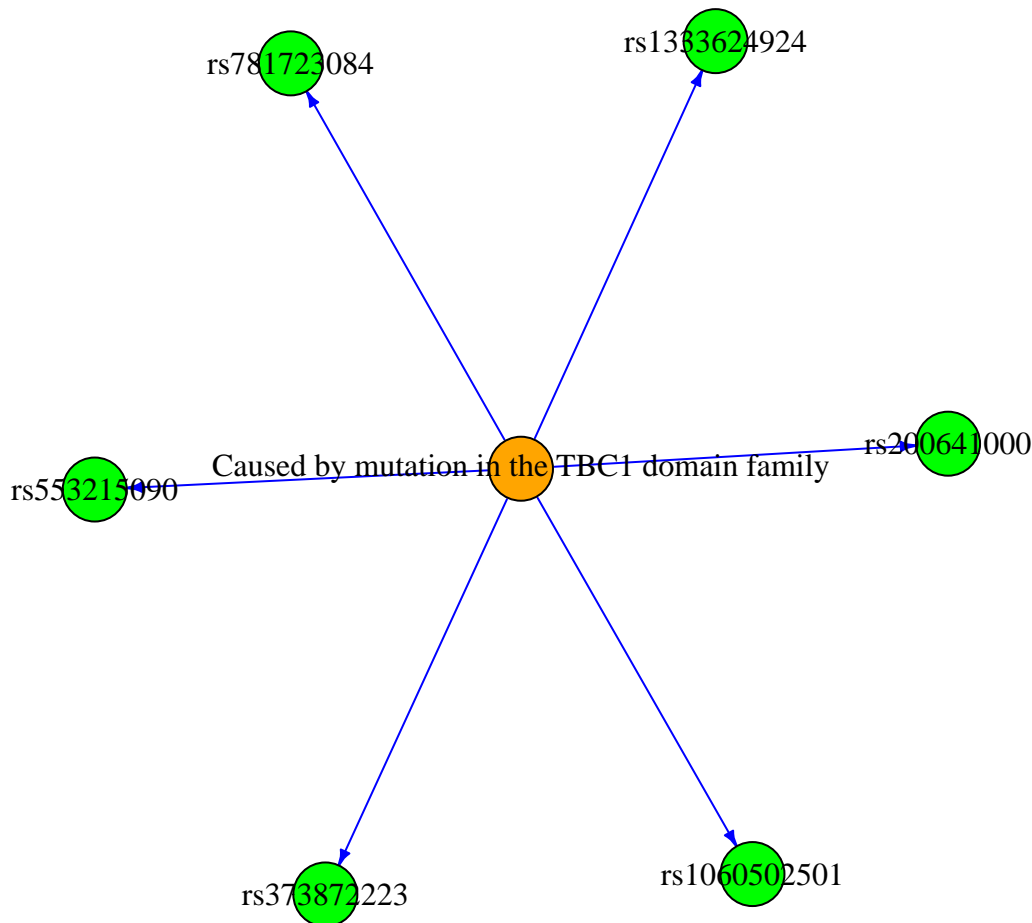

## Variant-Disease Network (Caveolinopathy)

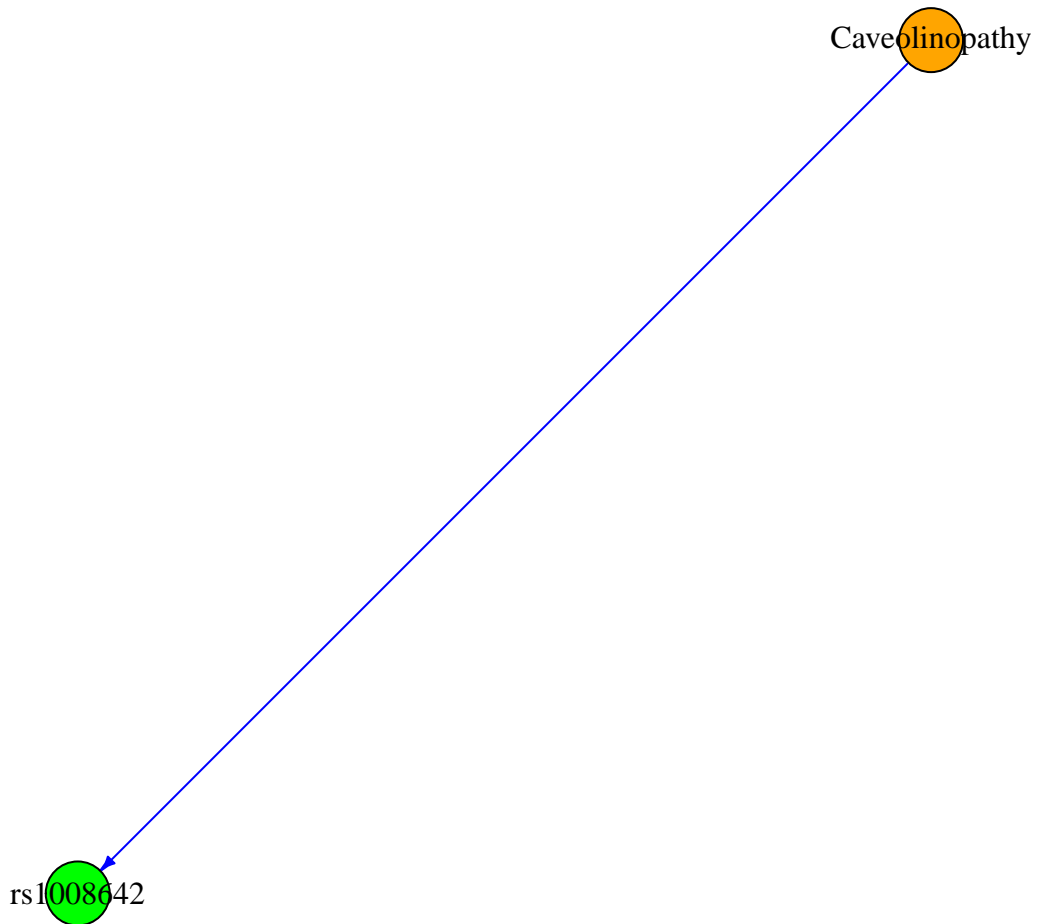

# Variant–Disease Network (CC2D2A–Related Disorders)

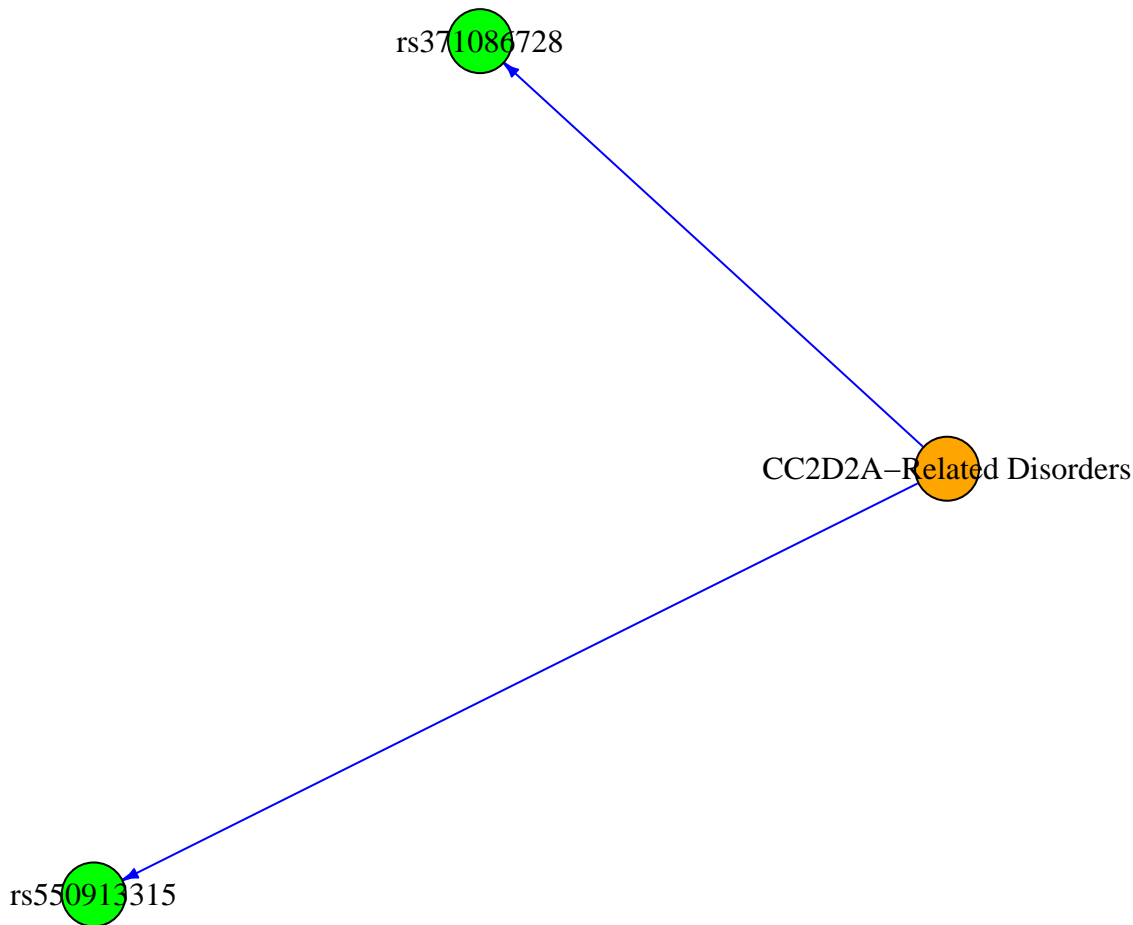

Variant–Disease Network (Centronuclear Myopathy)

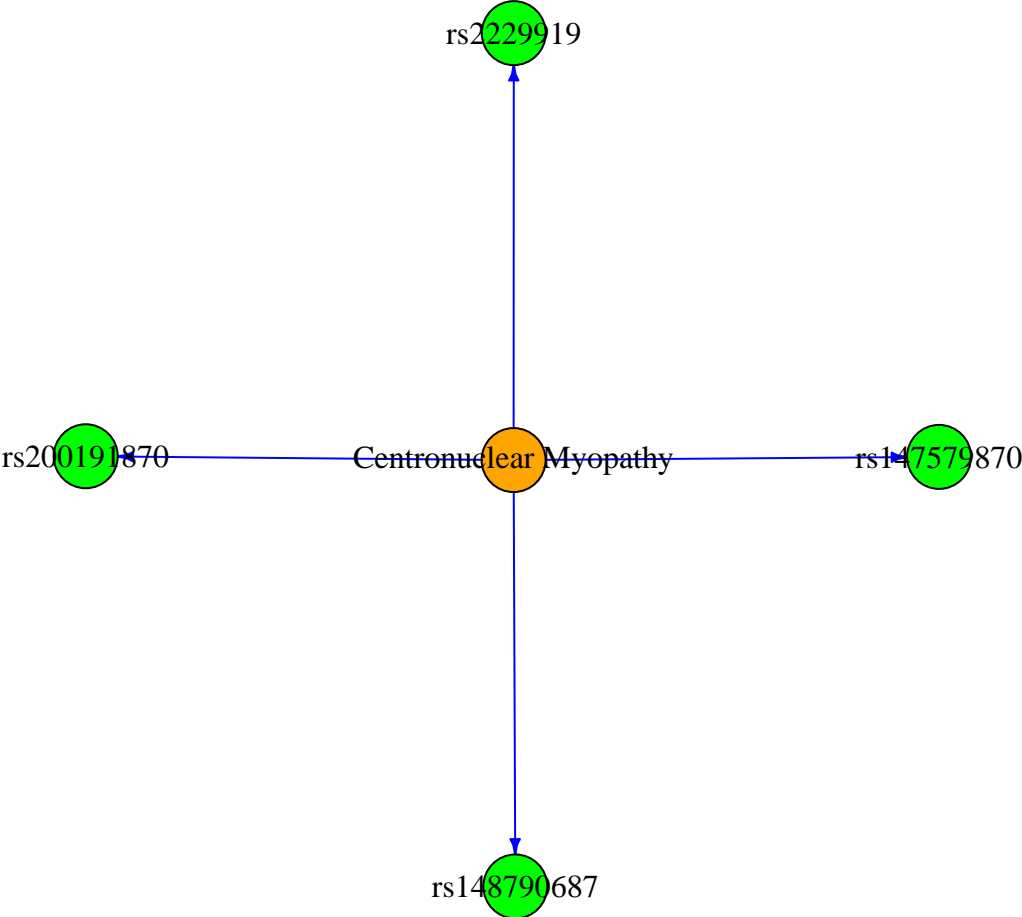



## Variant–Disease Network (Cerebellar ataxia)

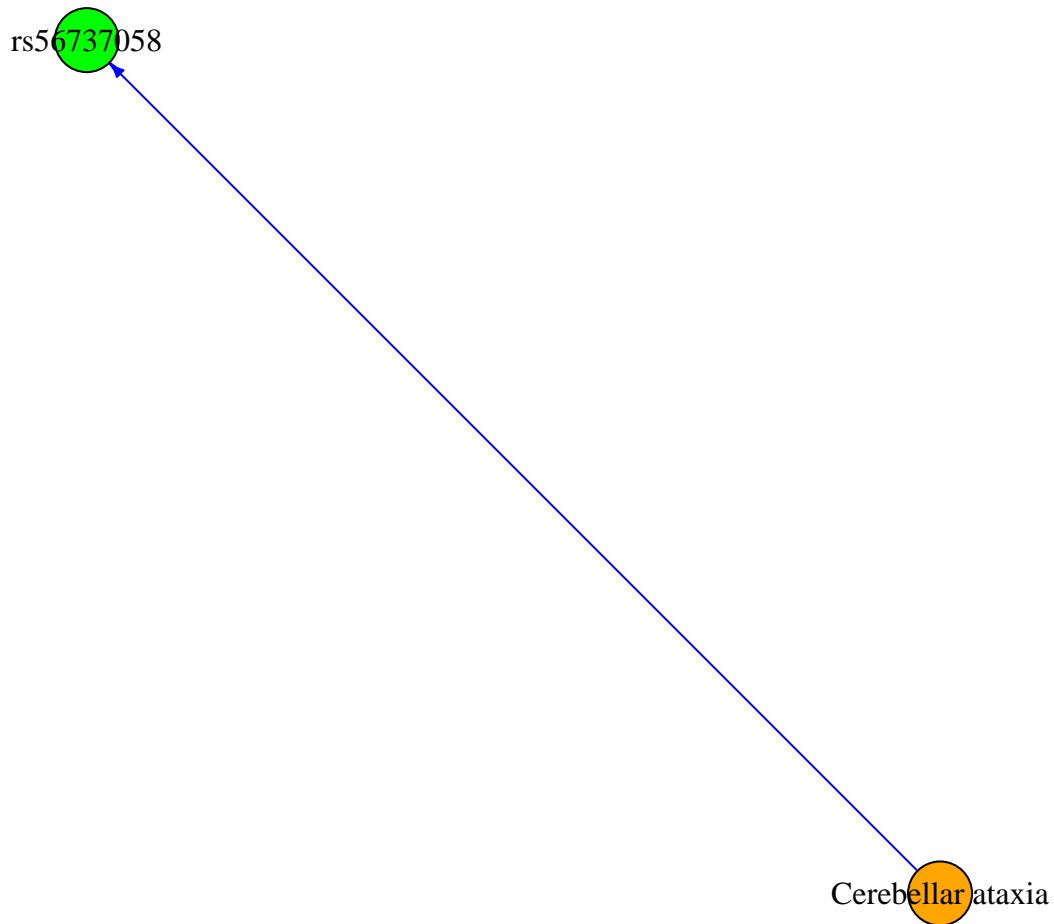

# rs1043096 (Cerebral autosomal dominant arteriopathy with subcortical infarcts and leukoencephalopathy type 1)

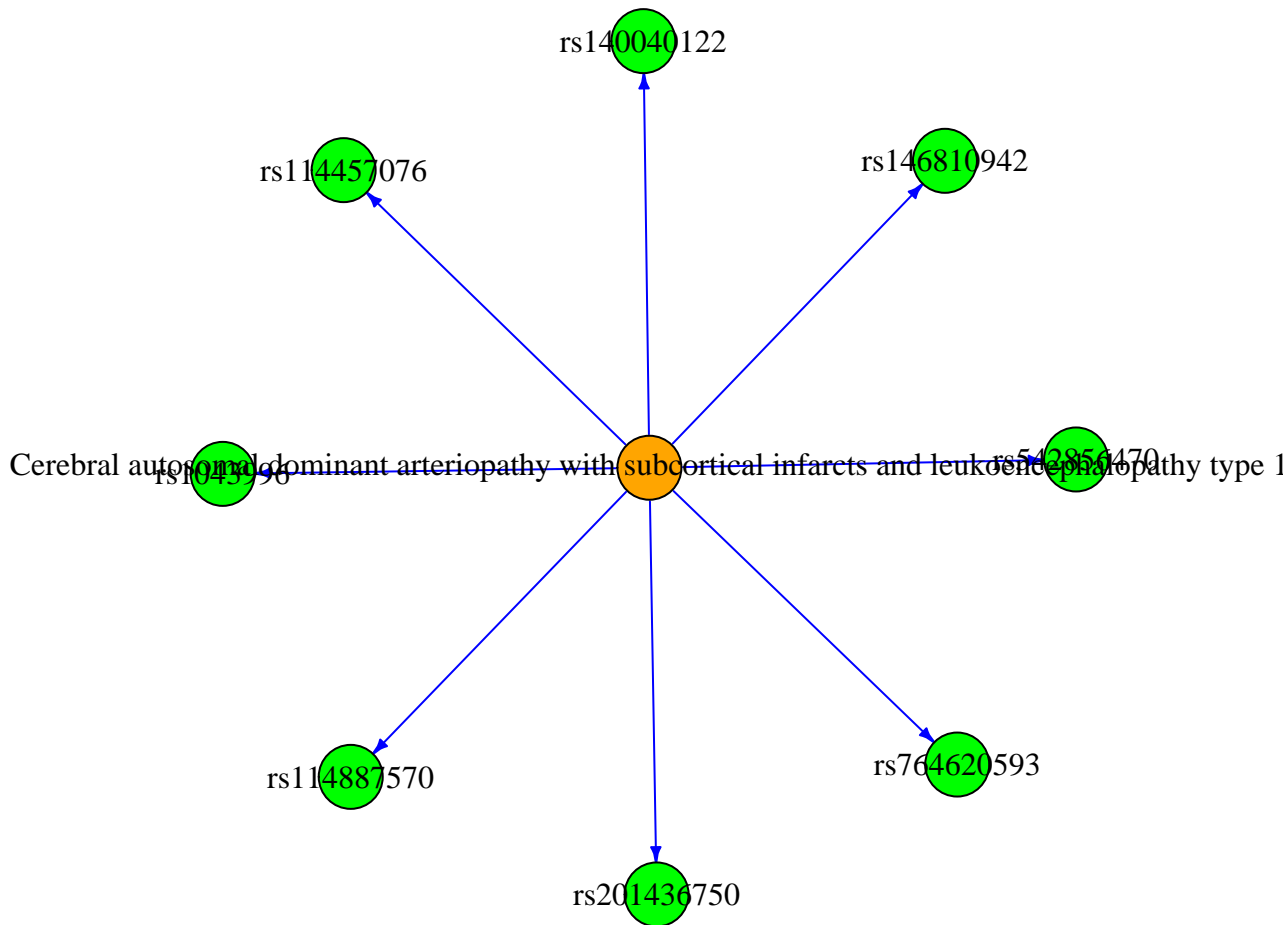

## Variant–Disease Network (Cerebral cavernous malformation)

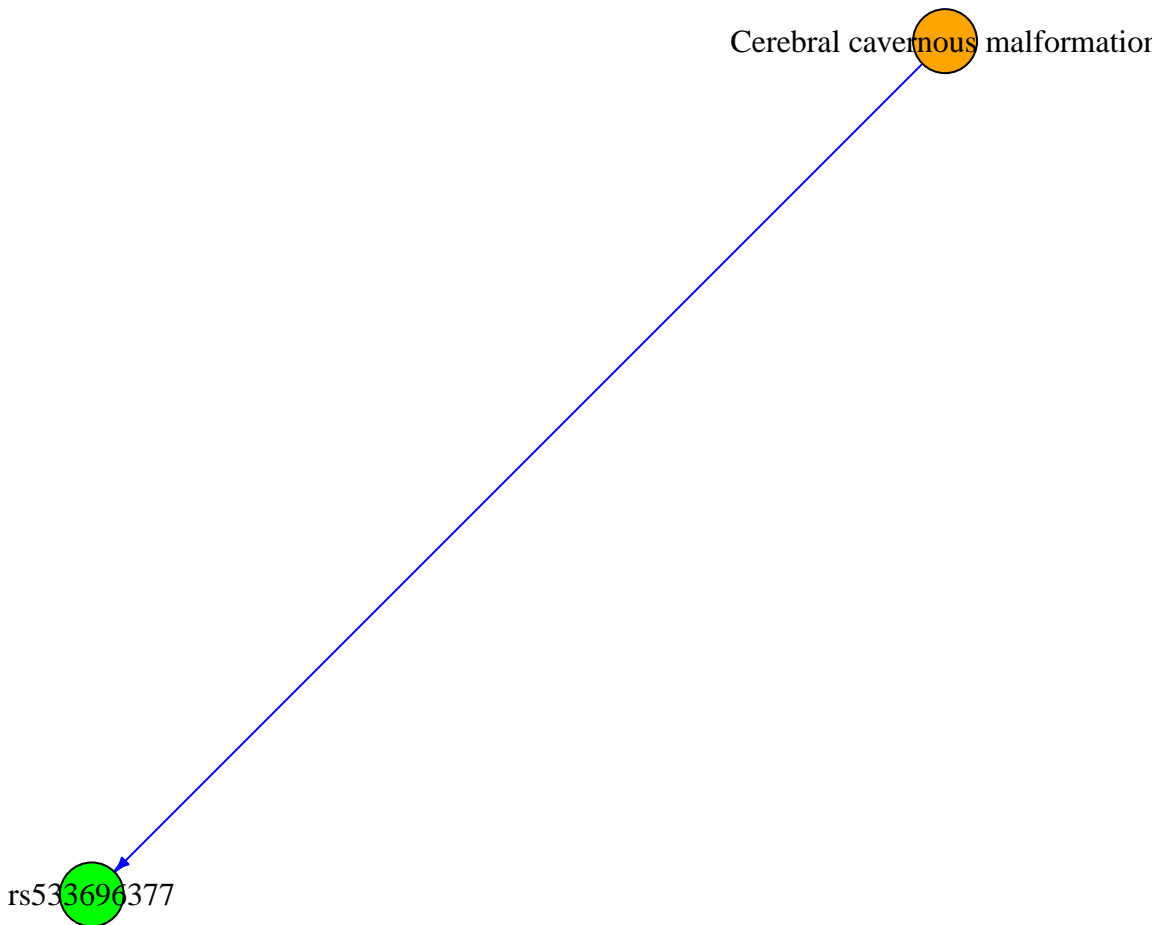

Variant–Disease Network (Ceroid lipofuscinosis neuronal 7)

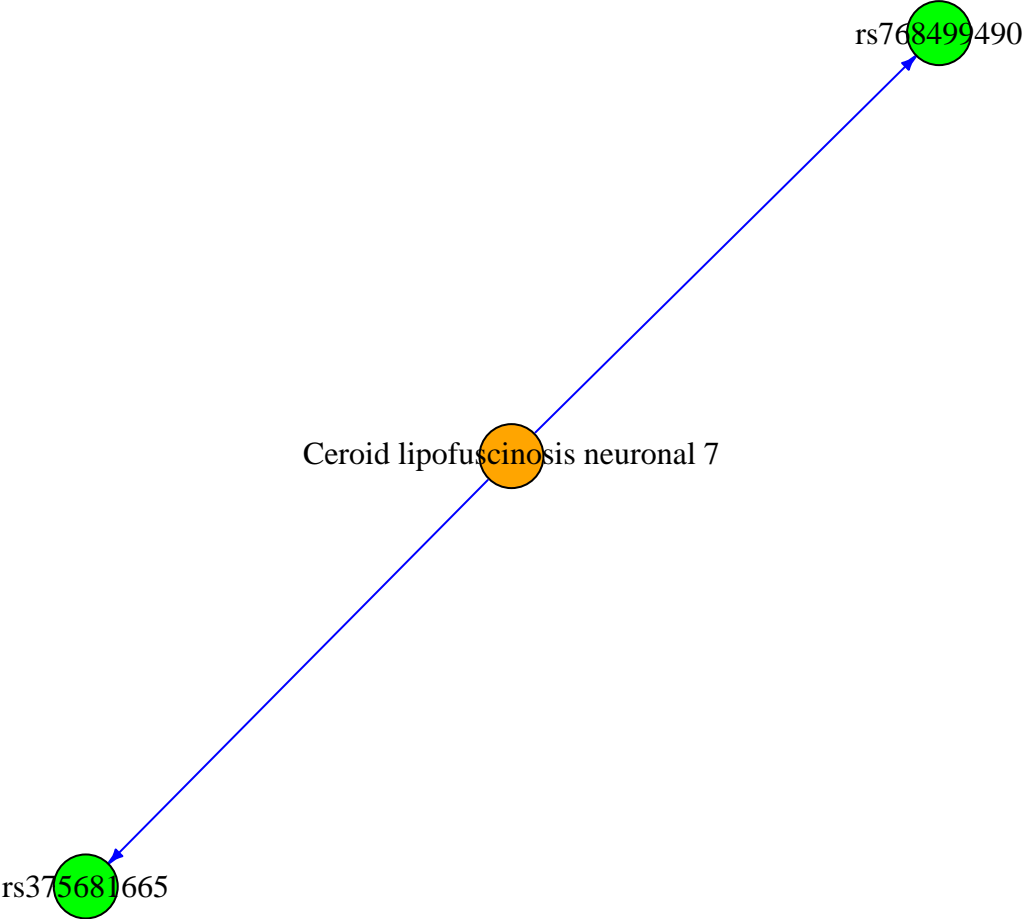

## Variant–Disease Network (CFTR–related disorders)

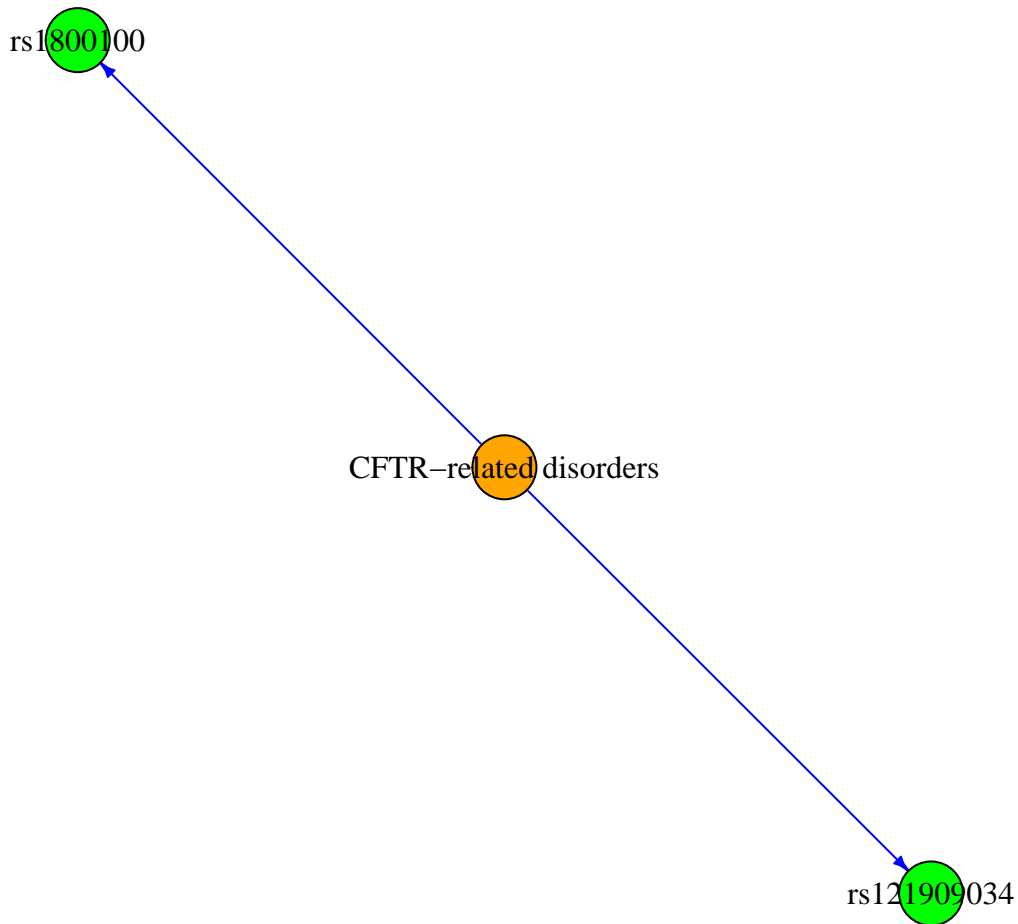

## Variant–Disease Network (Charcot–Marie–Tooth)

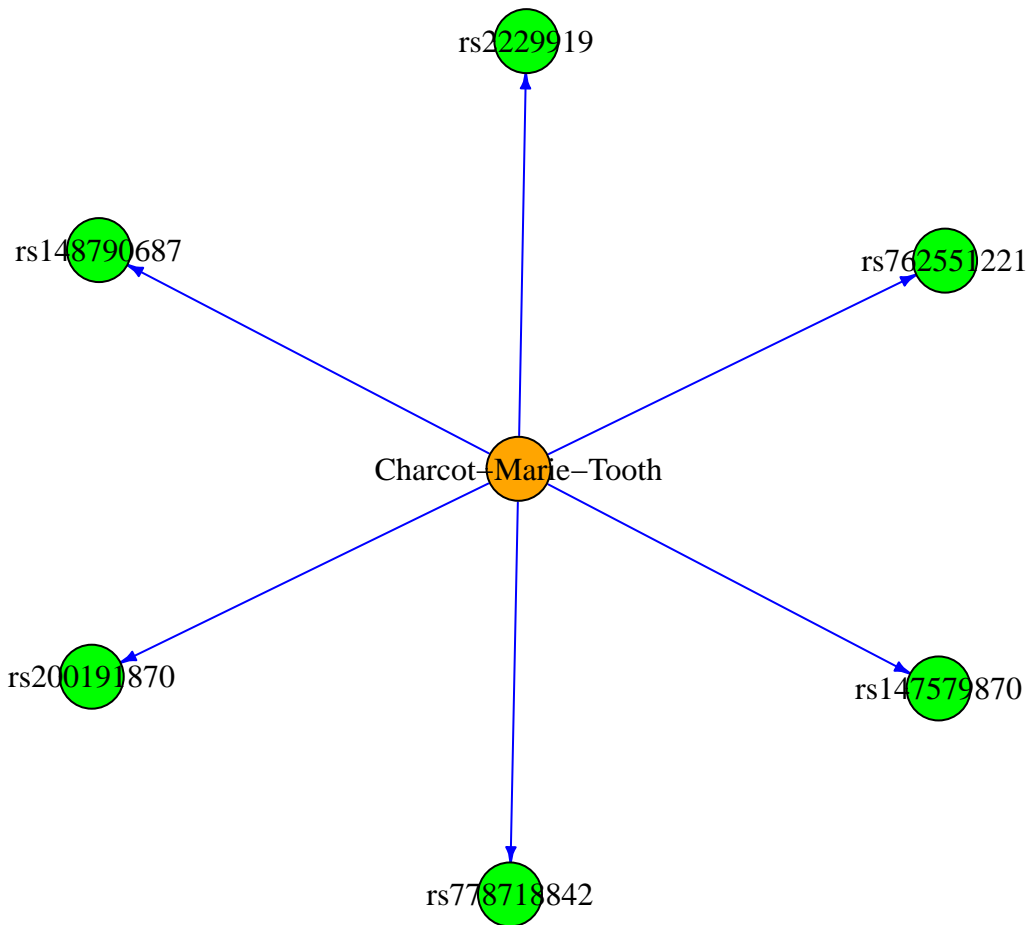

### Variant-Disease Network (Charcot-Marie-Tooth disease)

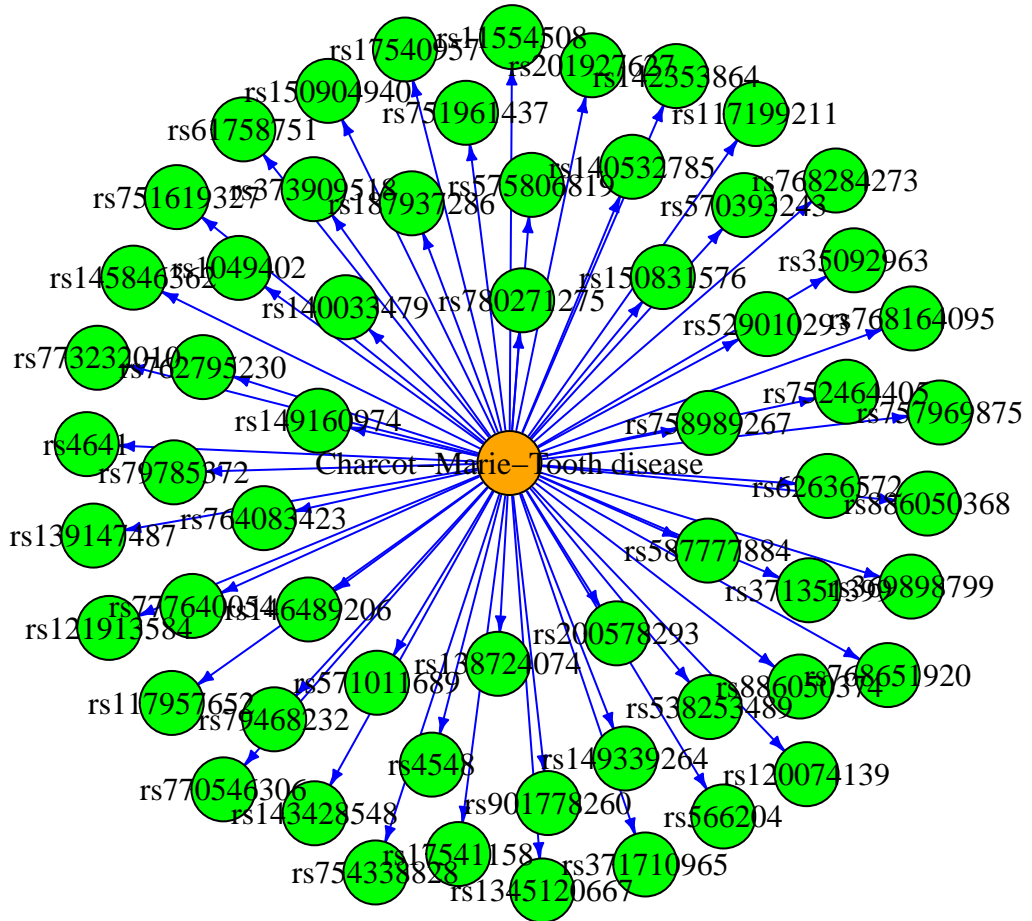

Variant–Disease Network (Charcot–Marie–Tooth disease type 2B1)

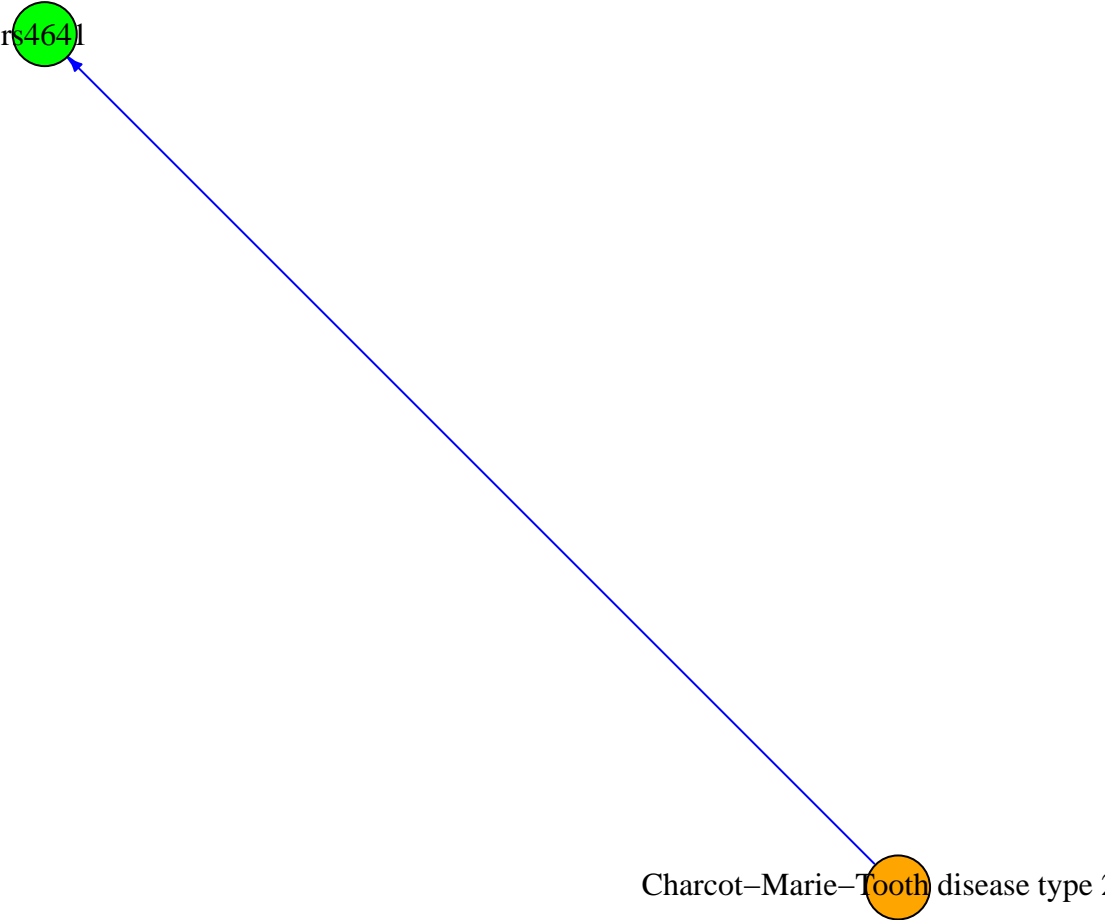



## Variant–Disease Network (Charcot–Marie–Tooth disease type 2D)

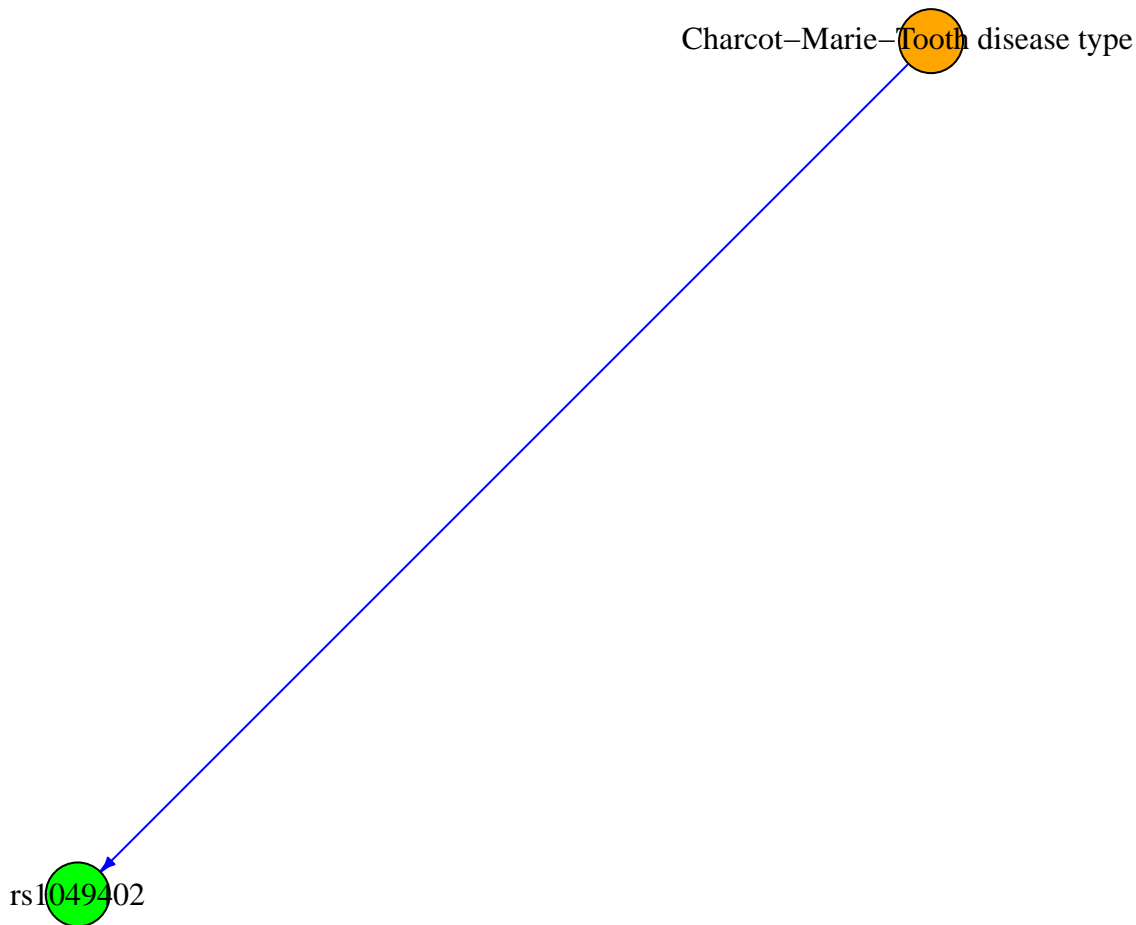

# Variant–Disease Network (Charcot–Marie–Tooth disease type 4)

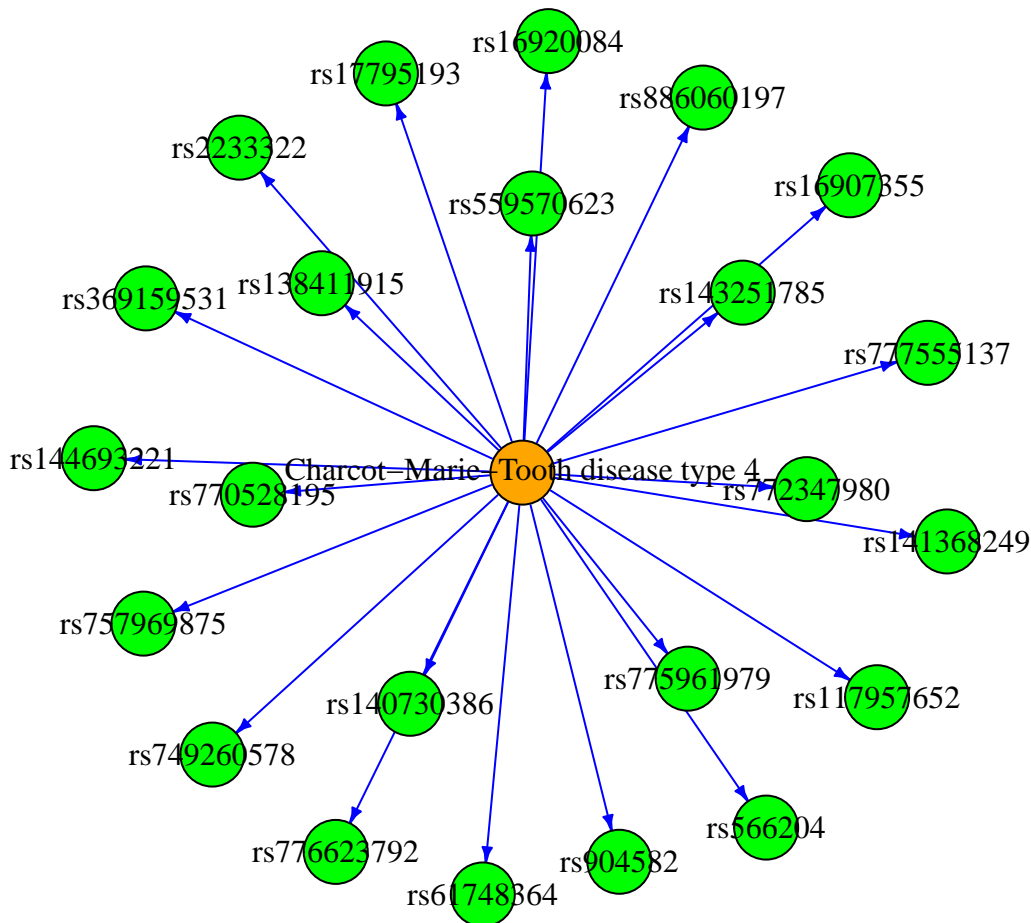

# Disease Network (Charcot–Marie–Tooth disease type 4B2 with early-onset

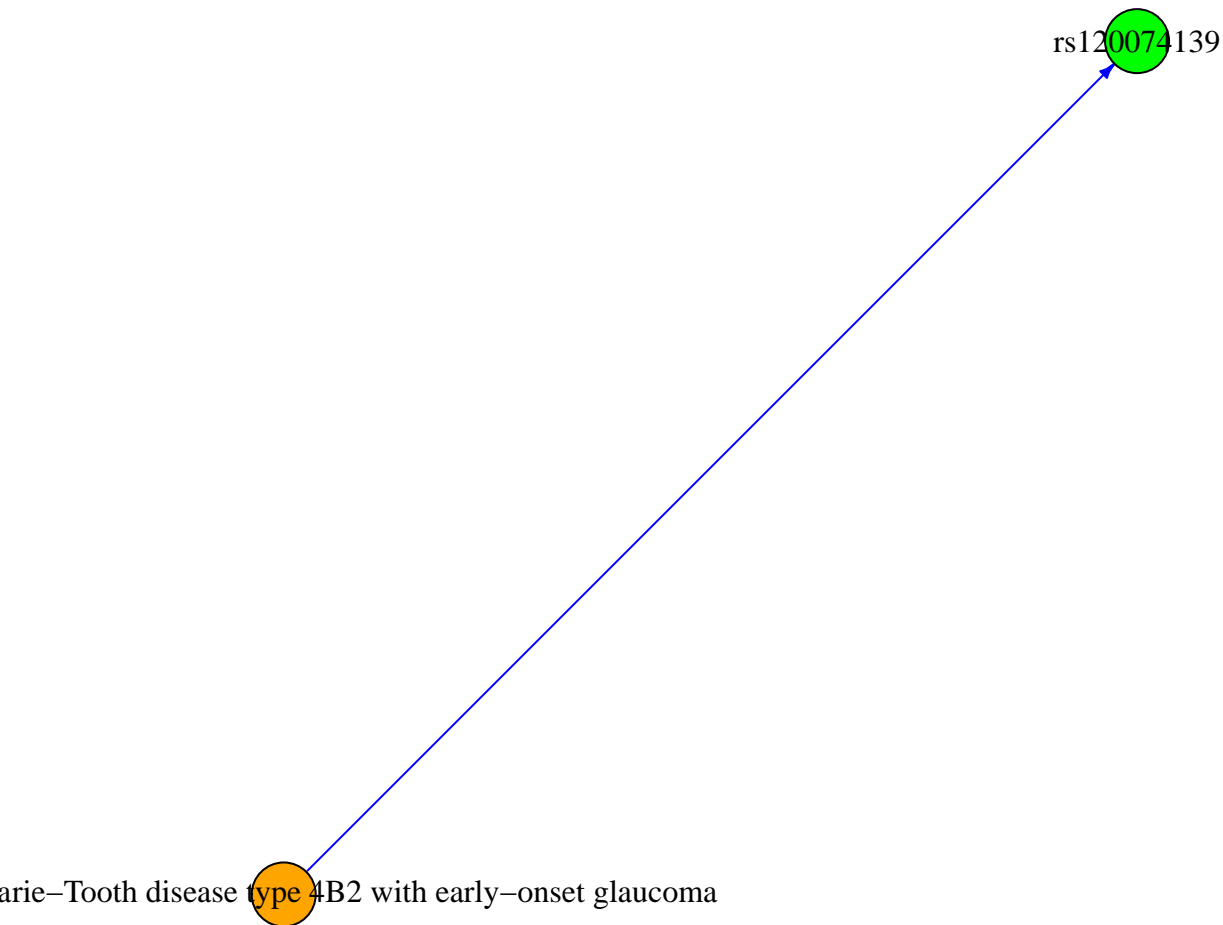

Variant–Disease Network (Charcot–Marie–Tooth Neuropathy X)

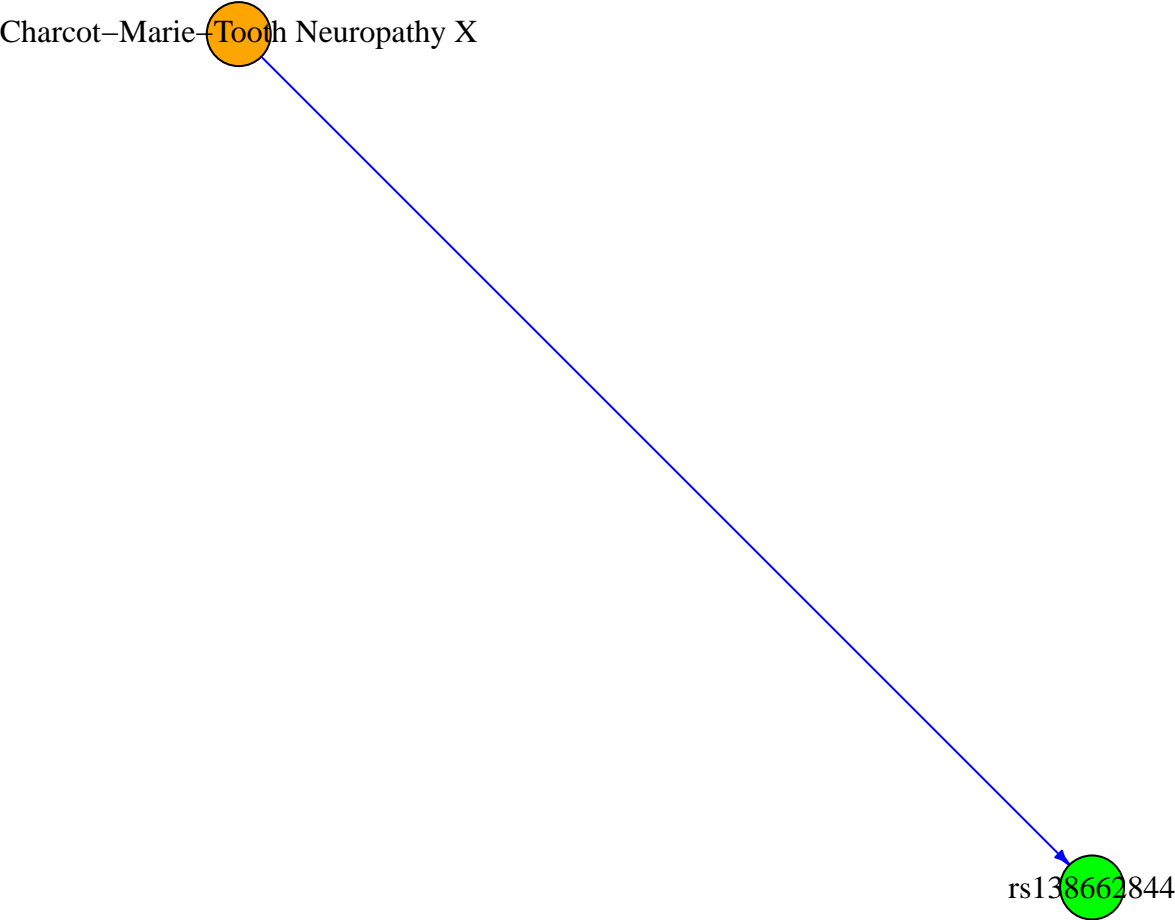

## Variant–Disease Network (CHARGE association)

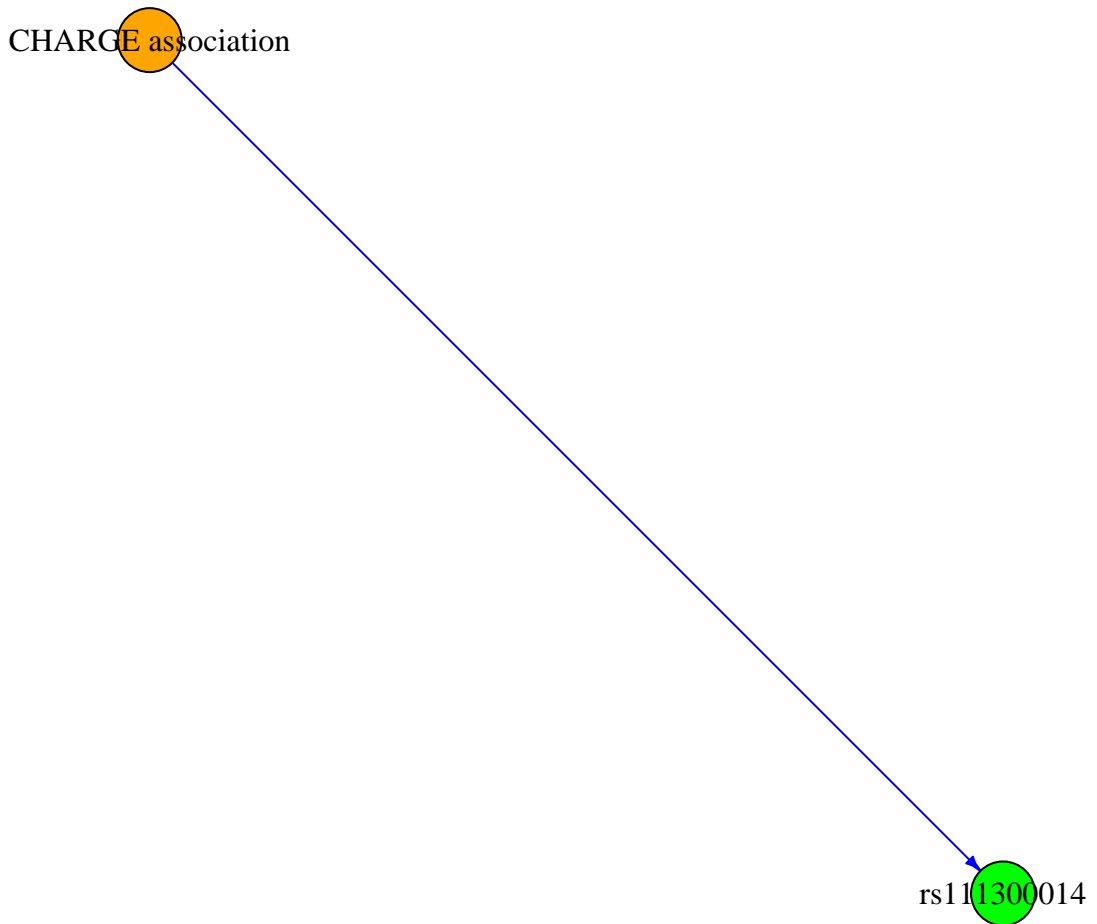

Variant–Disease Network (Childhood–Onset Schizophrenia)

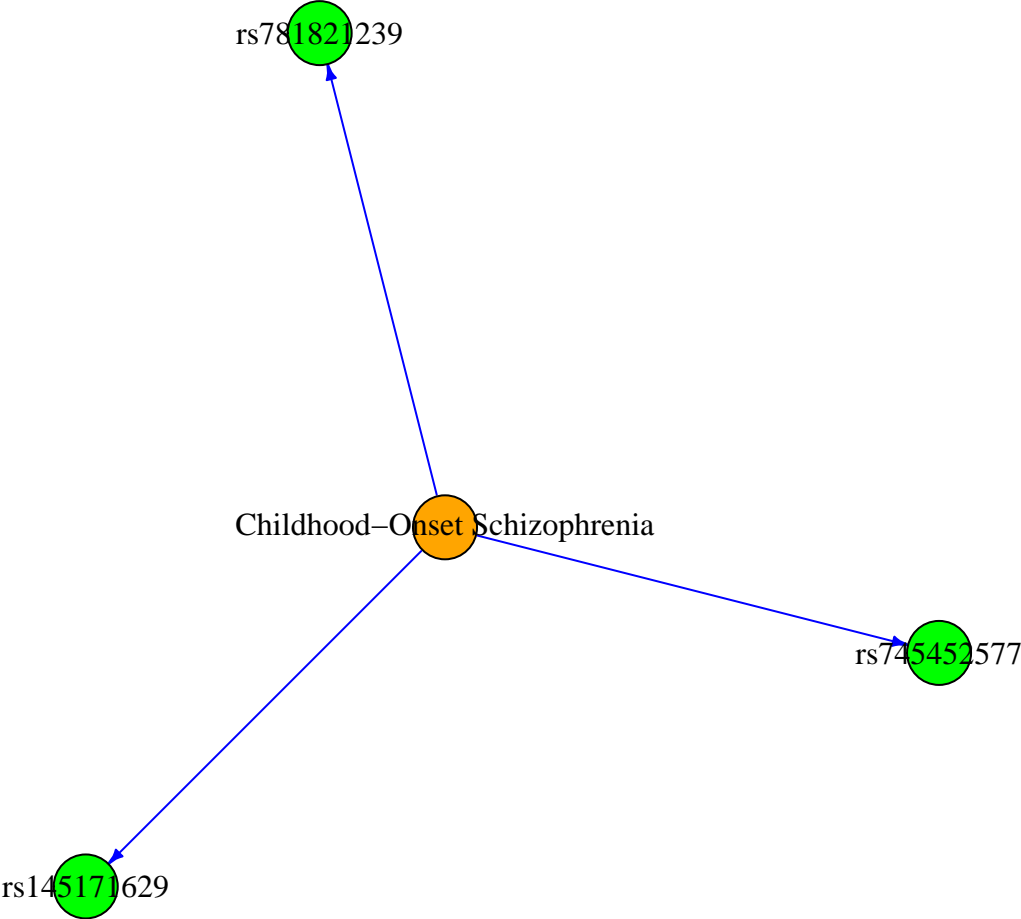

## Variant-Disease Network (Chitotriosidase deficiency)

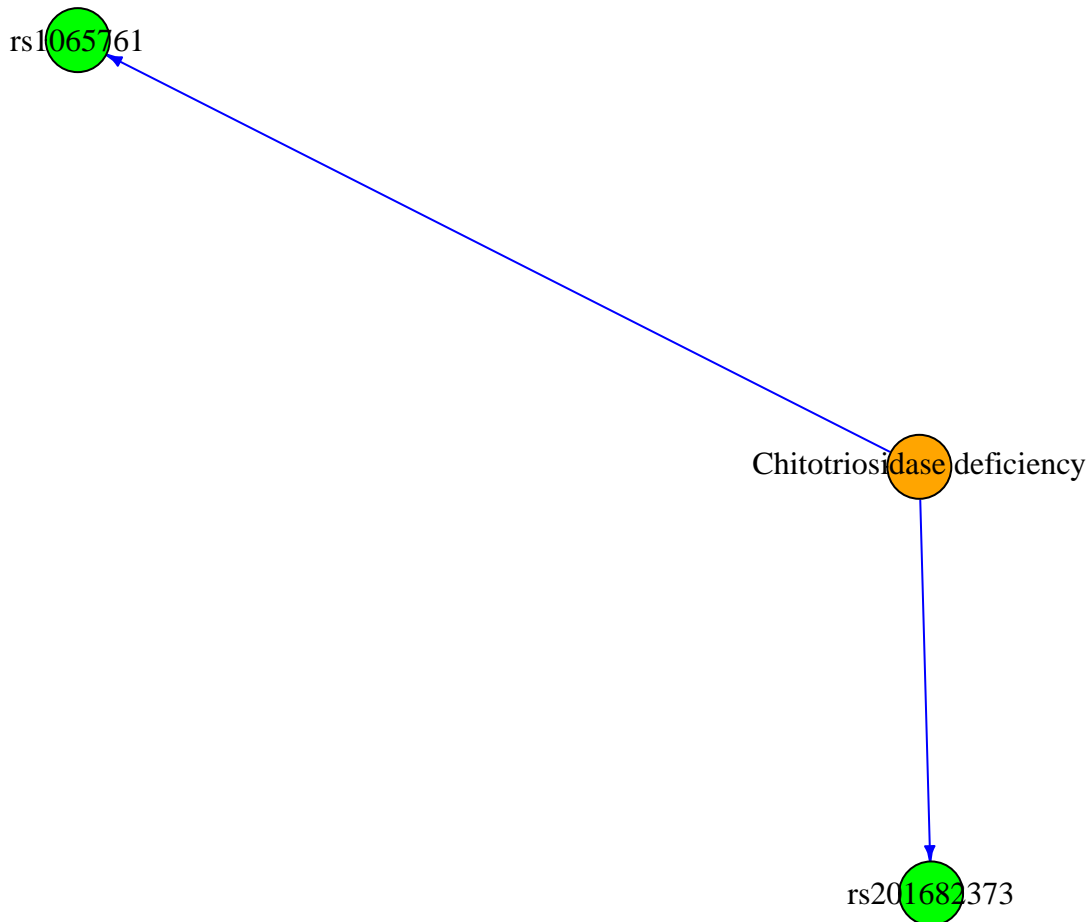

## Variant-Disease Network (Cholestanol storage disease)

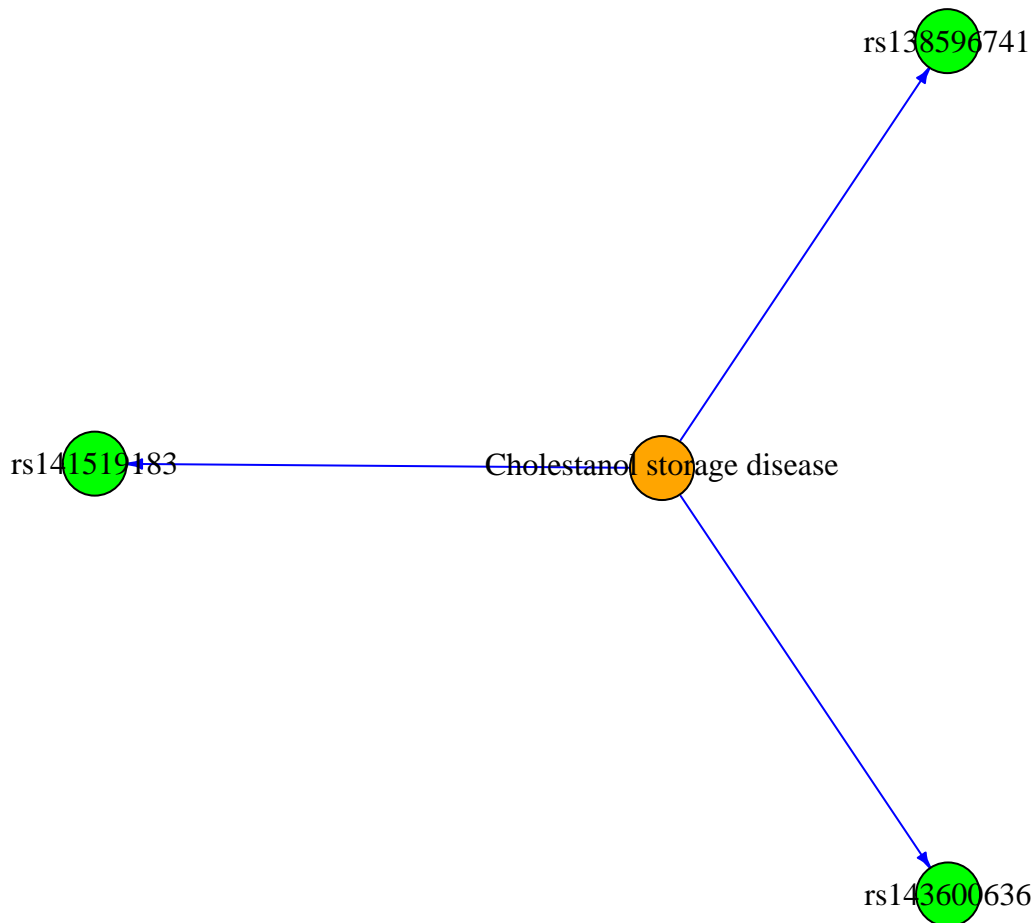



## Variant-Disease Network (Cholestasis)

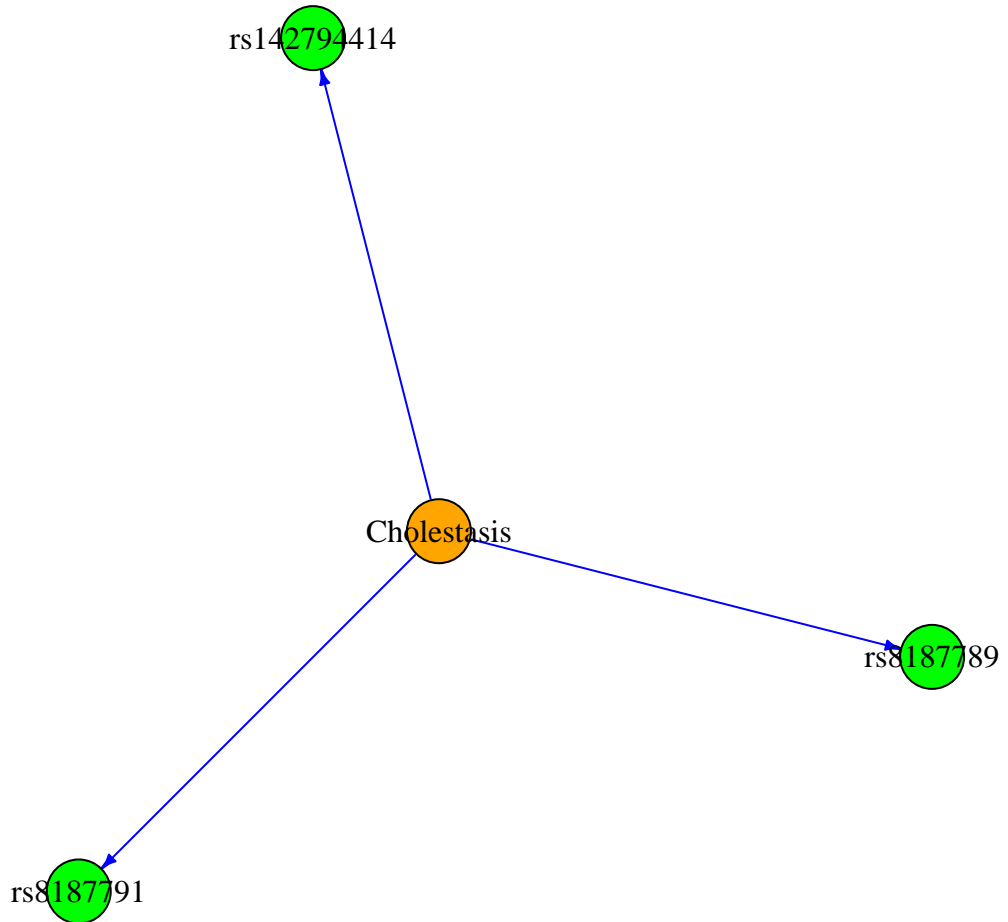

## Variant-Disease Network (Chondrocalcinosis)

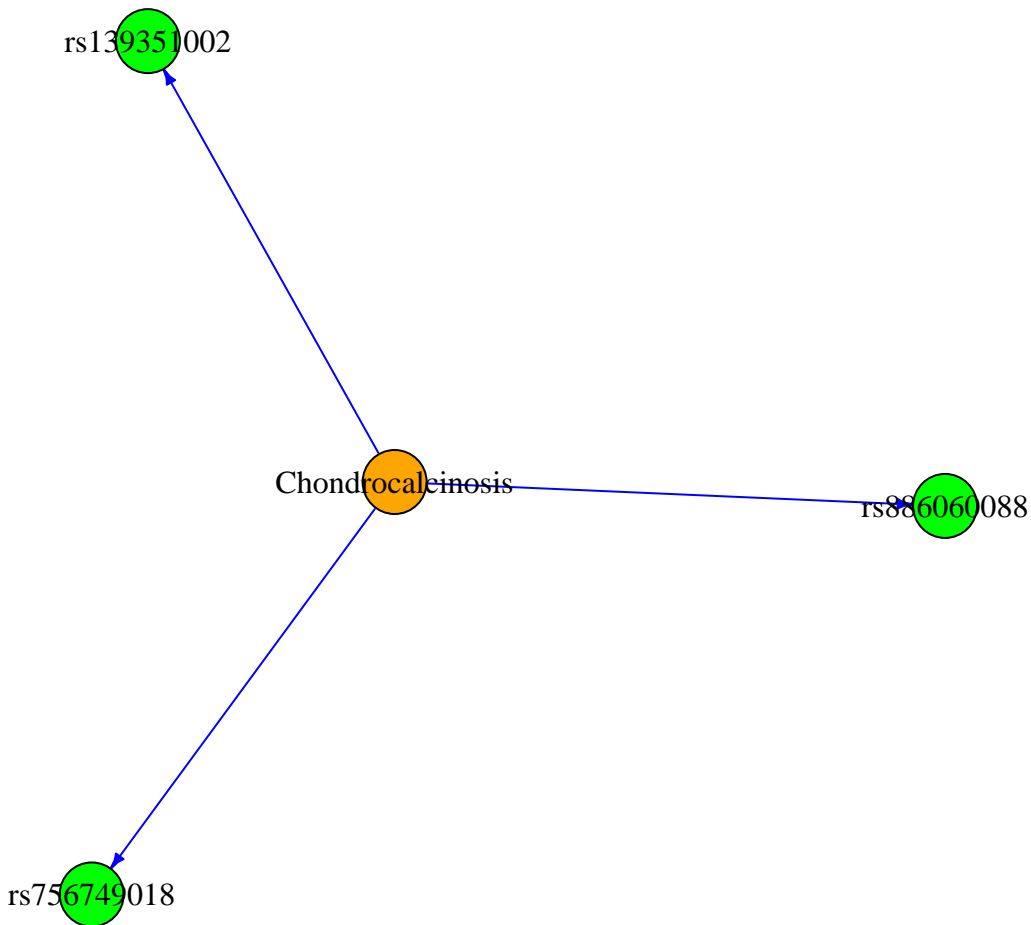

## Variant–Disease Network (Chondrodysplasia)

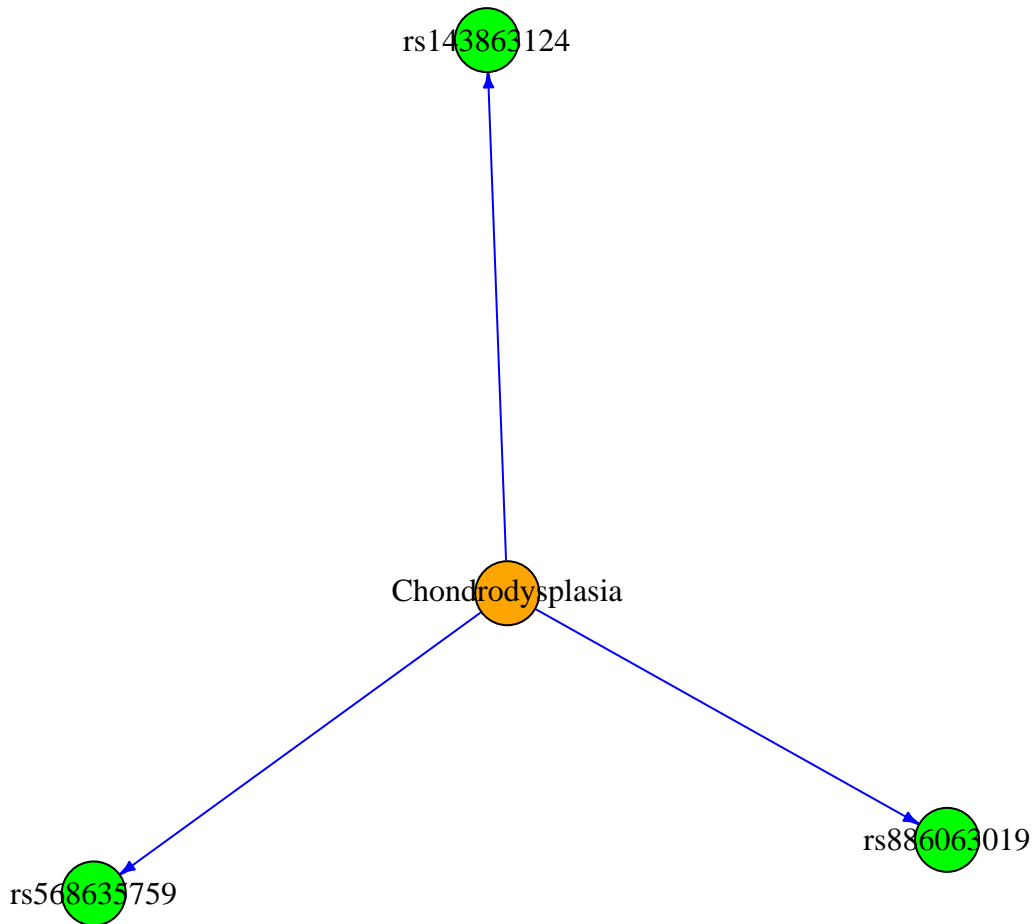

## Variant-Disease Network (Choreoacanthocytosis)

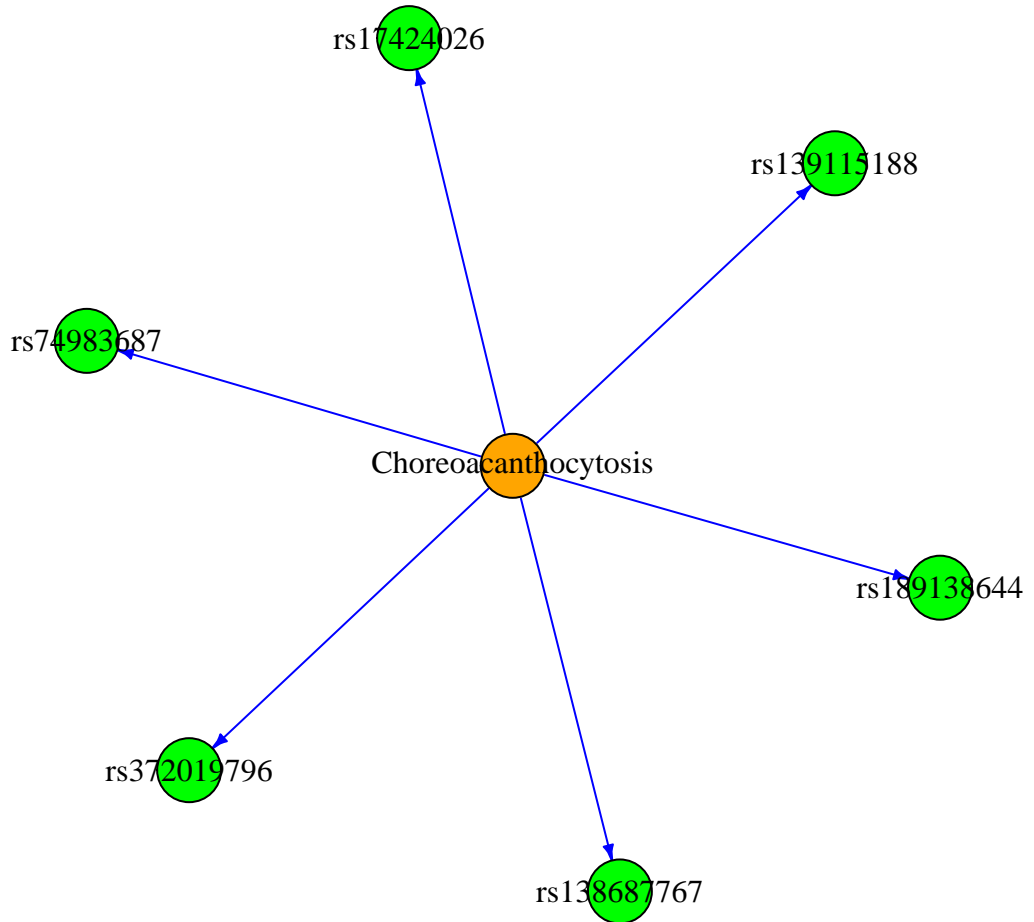

**Variant–Disease Network (Christianson syndrome)**

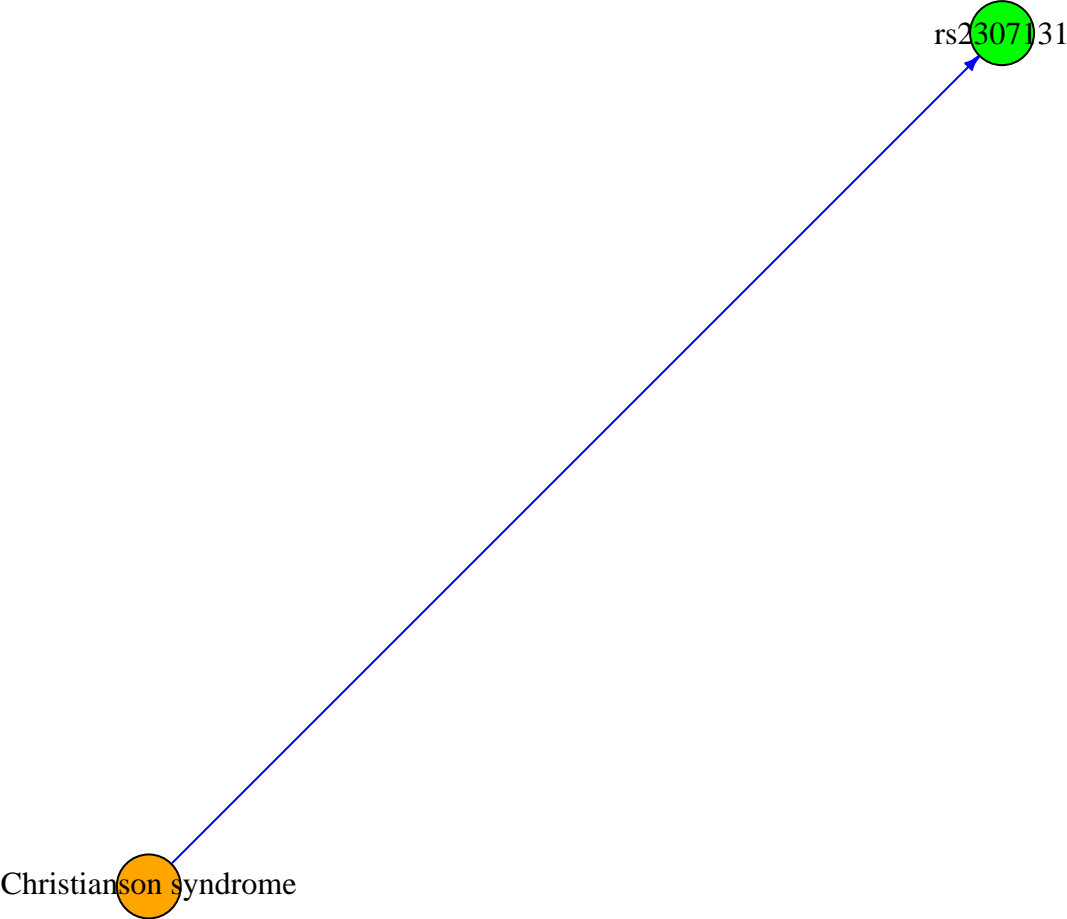

**Variant–Disease Network (Chromosome 2q32–q33 deletion syndrome)**

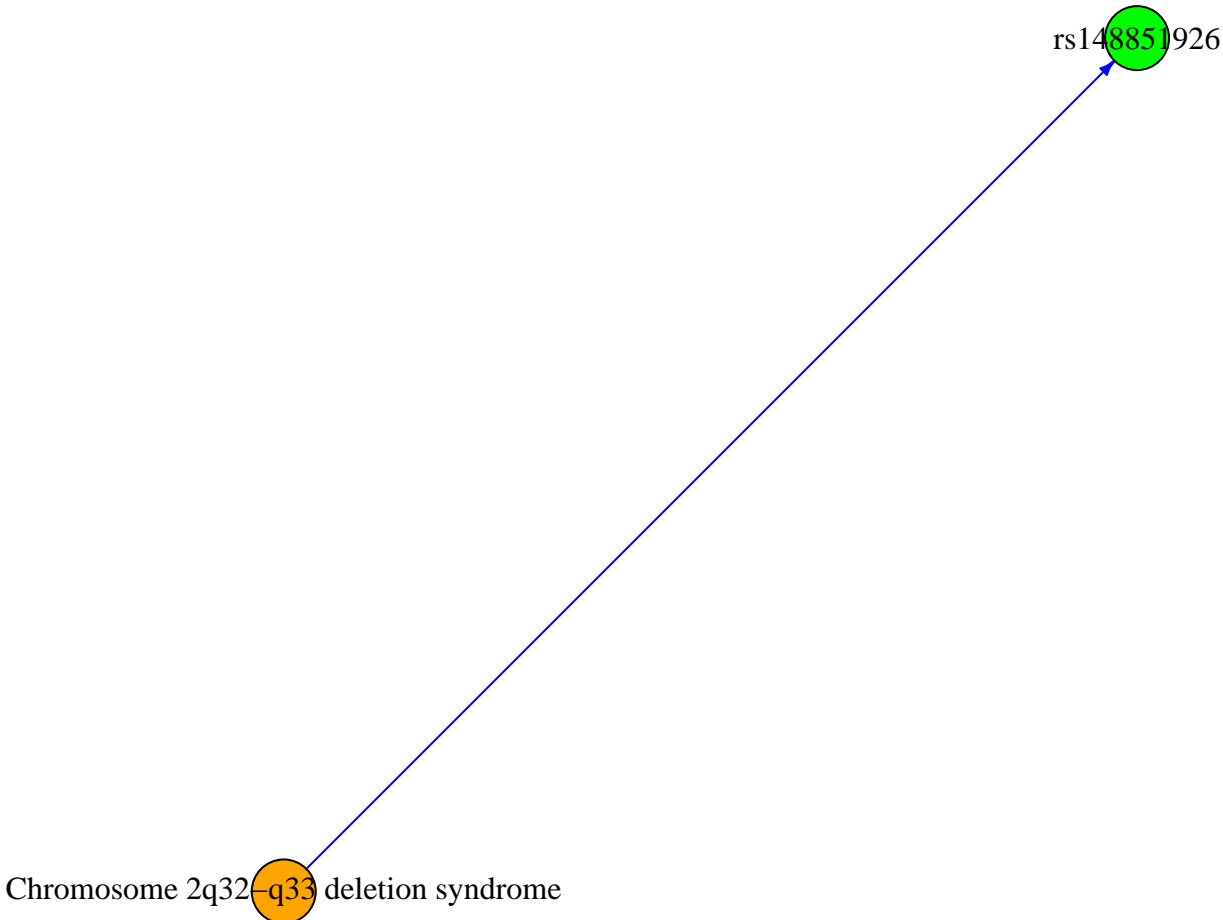

## Variant–Disease Network (Chronic granulomatous disease)

rs193922450

Chronic granulomatous disease

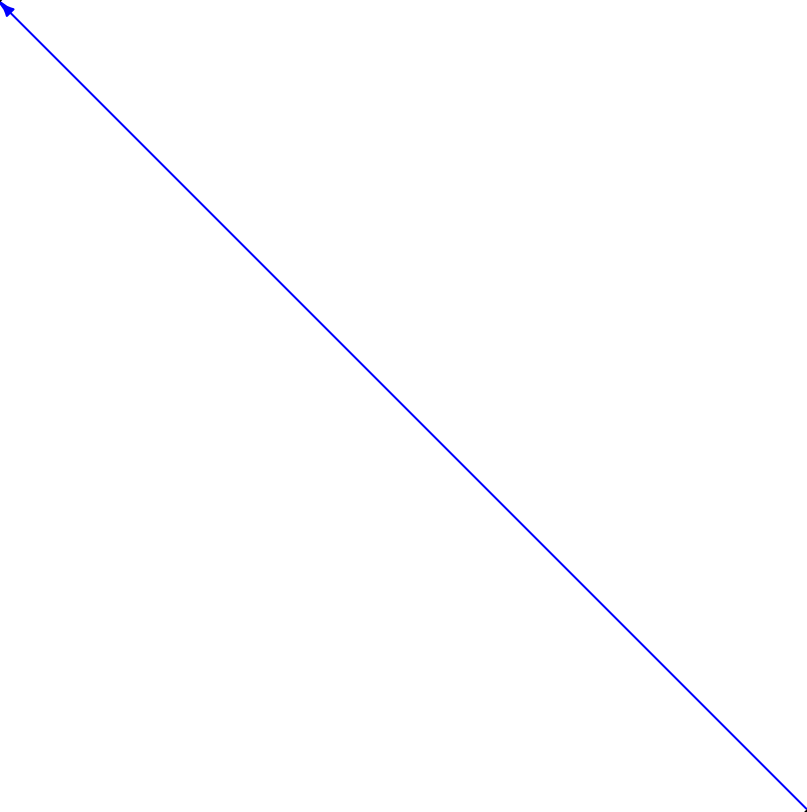

**Variant–Disease Network (Chronic infantile neurological)**

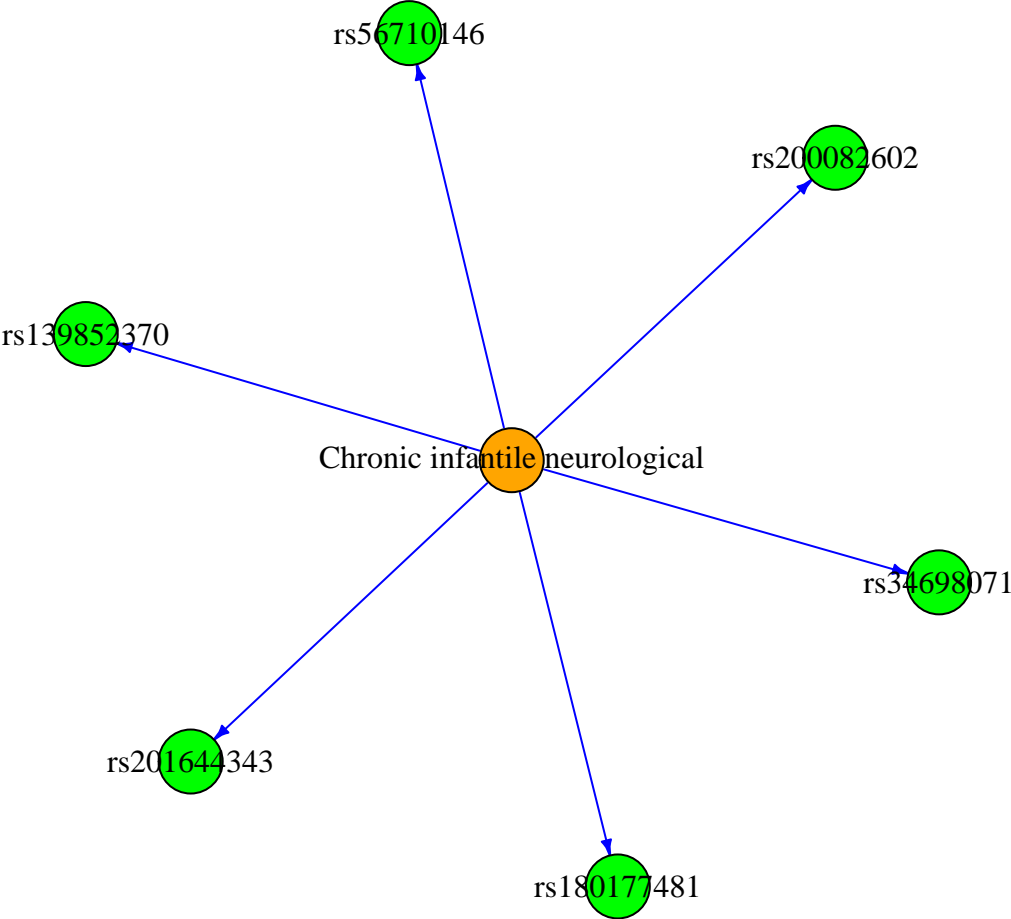



# Variant–Disease Network (Chronic obstructive pulmonary disease)

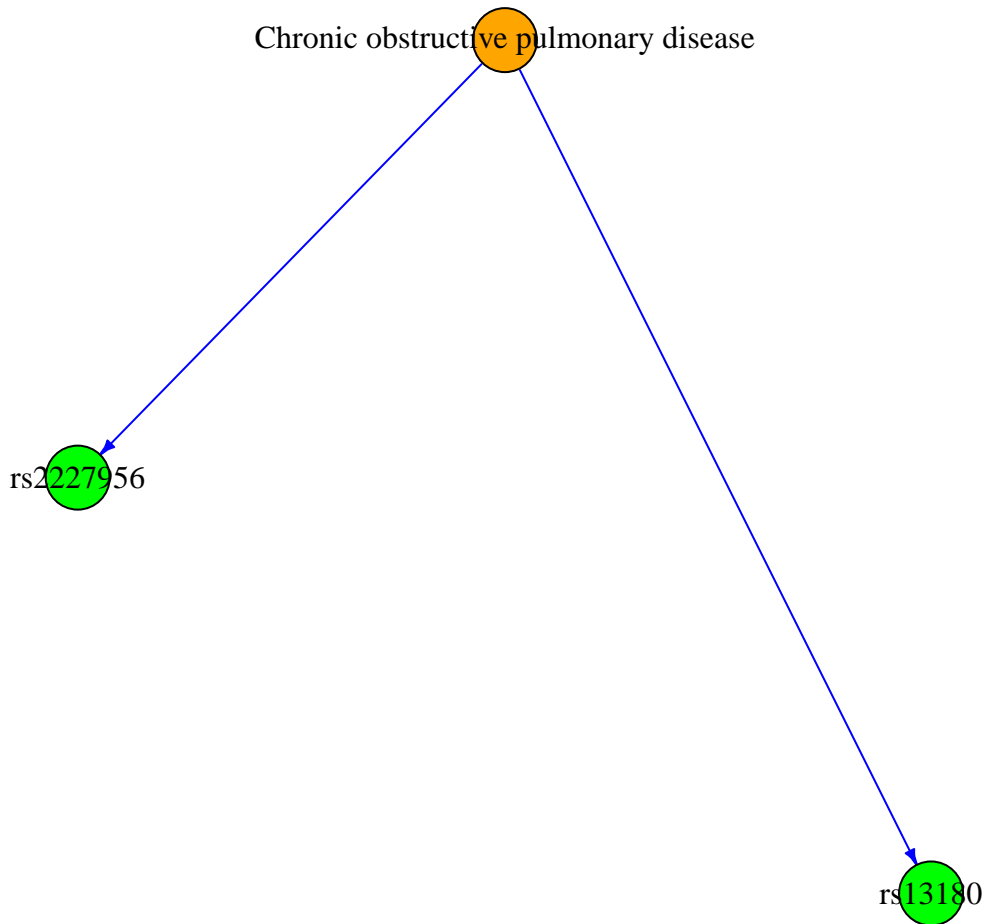

## Variant–Disease Network (Chronic sinusitis)

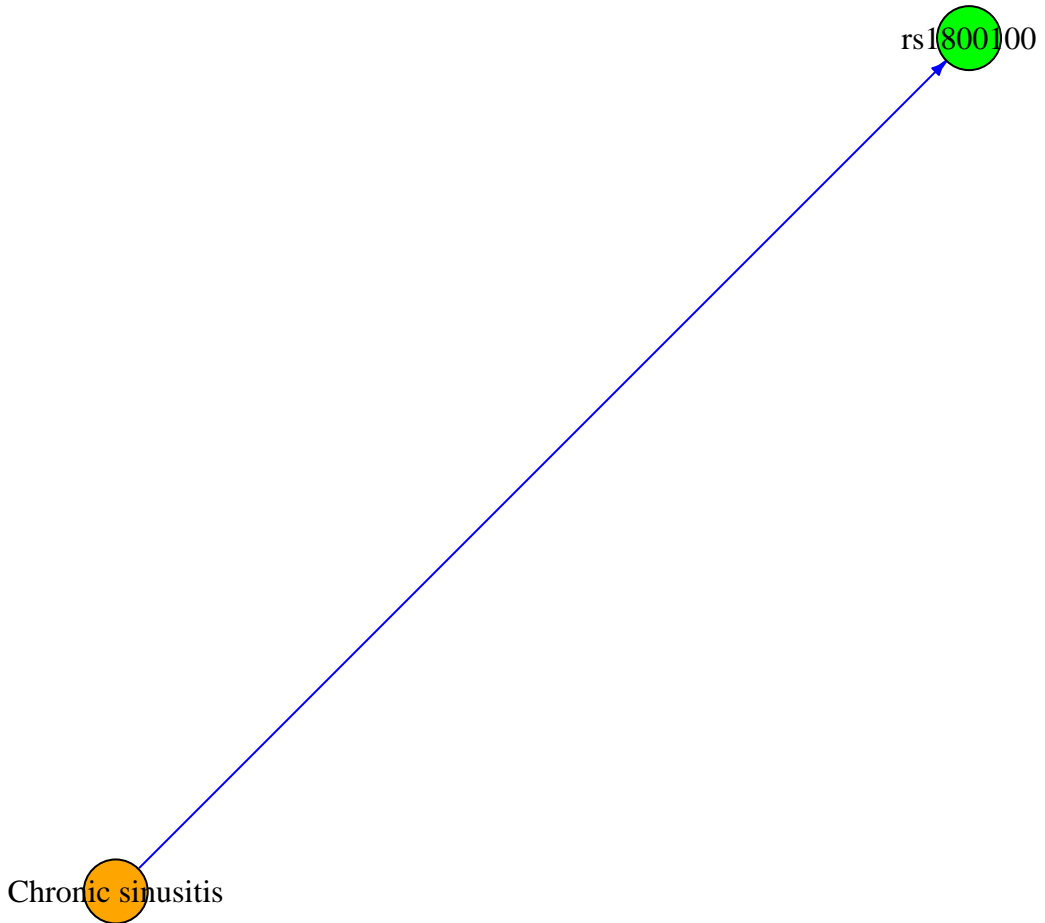

## Variant–Disease Network (Ciliary dyskinesia)

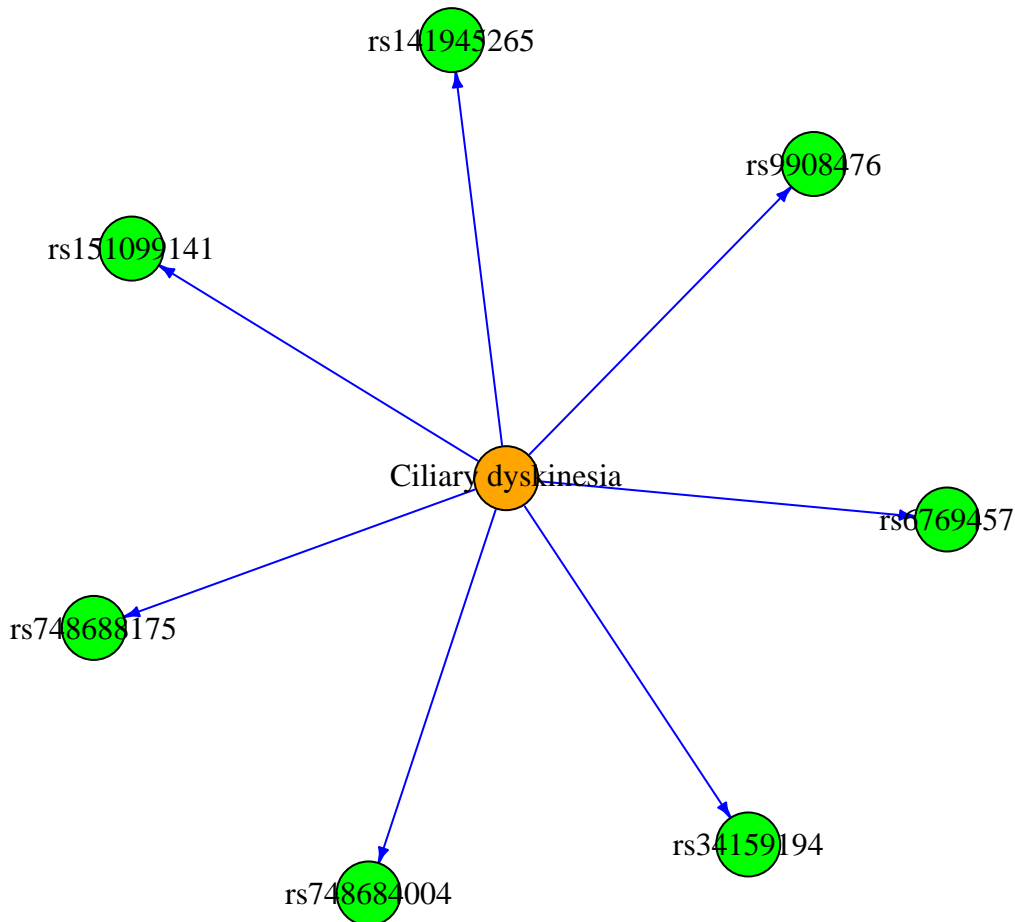

**Variant–Disease Network (cisplatin response – Toxicity/ADR)**

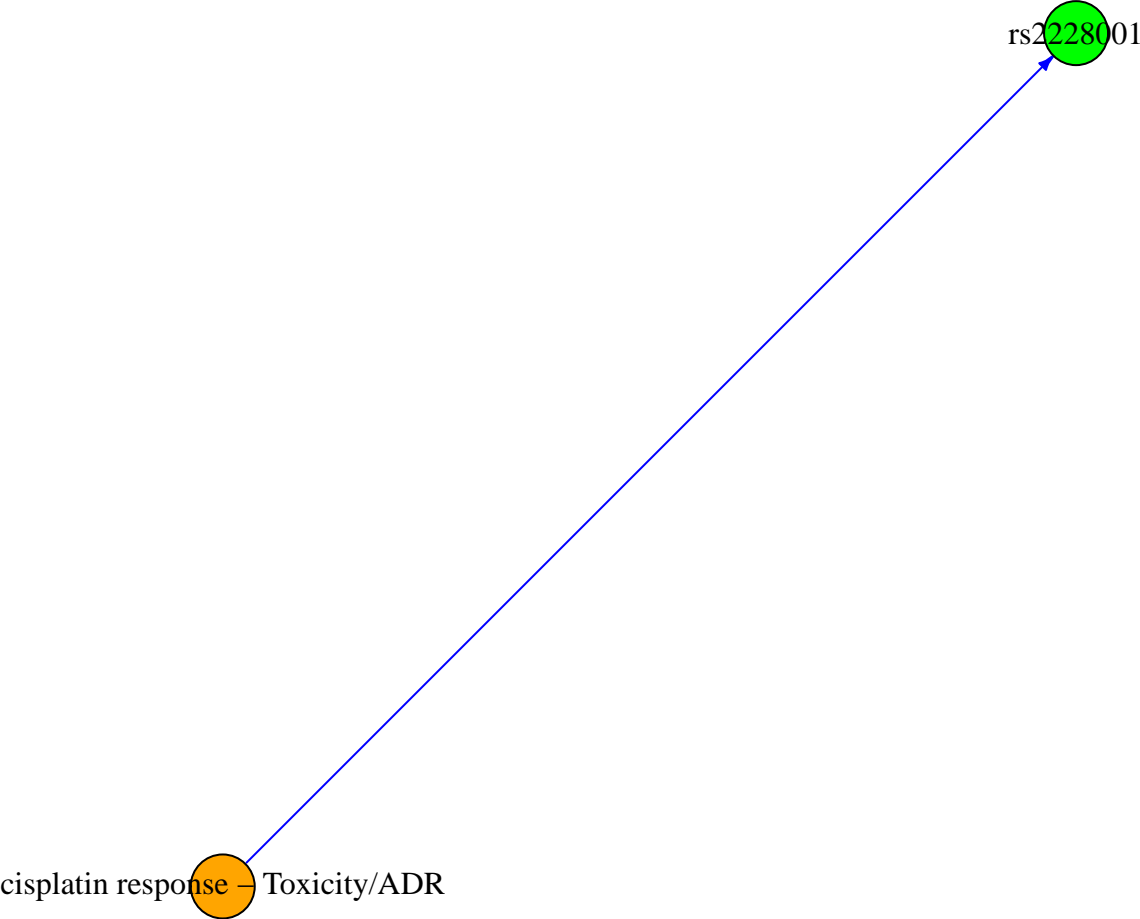

## Variant–Disease Network (Citrullinemia type I)

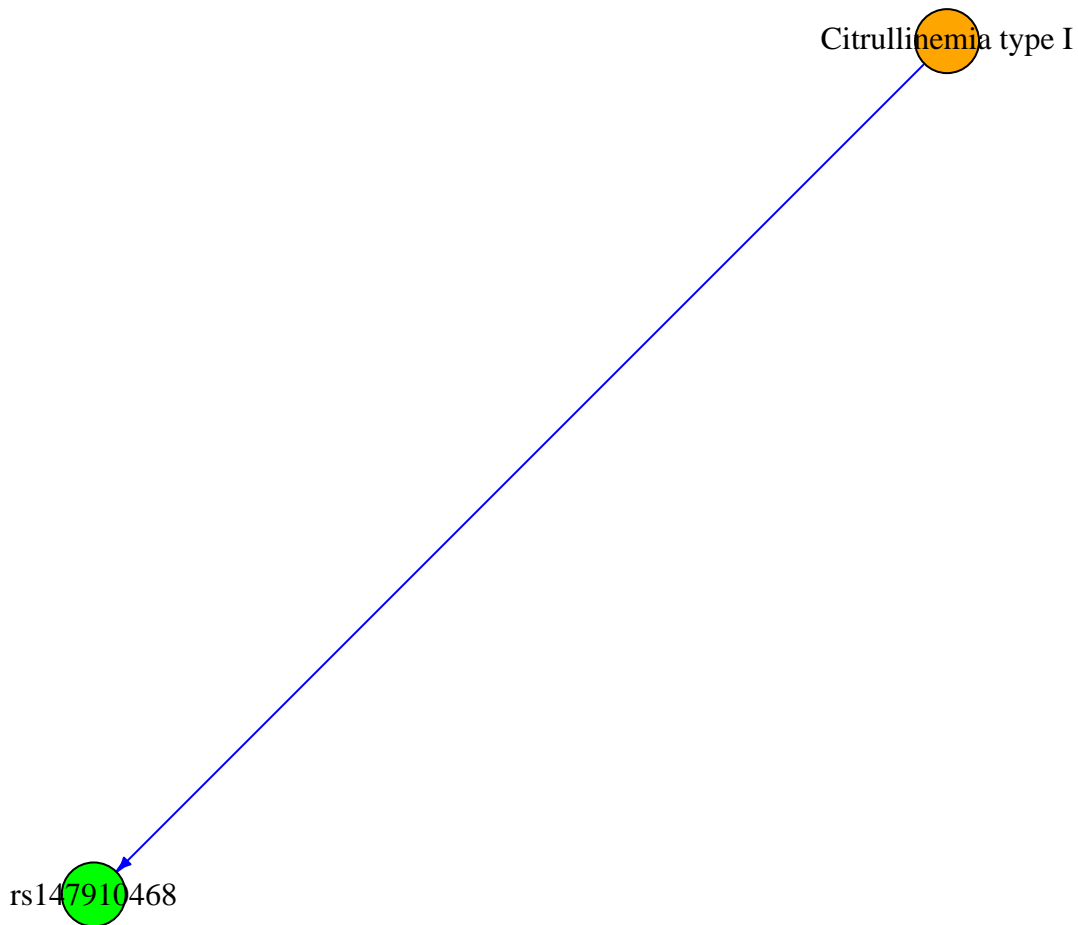

## Variant–Disease Network (Cleft Lip +/- Cleft Palate)

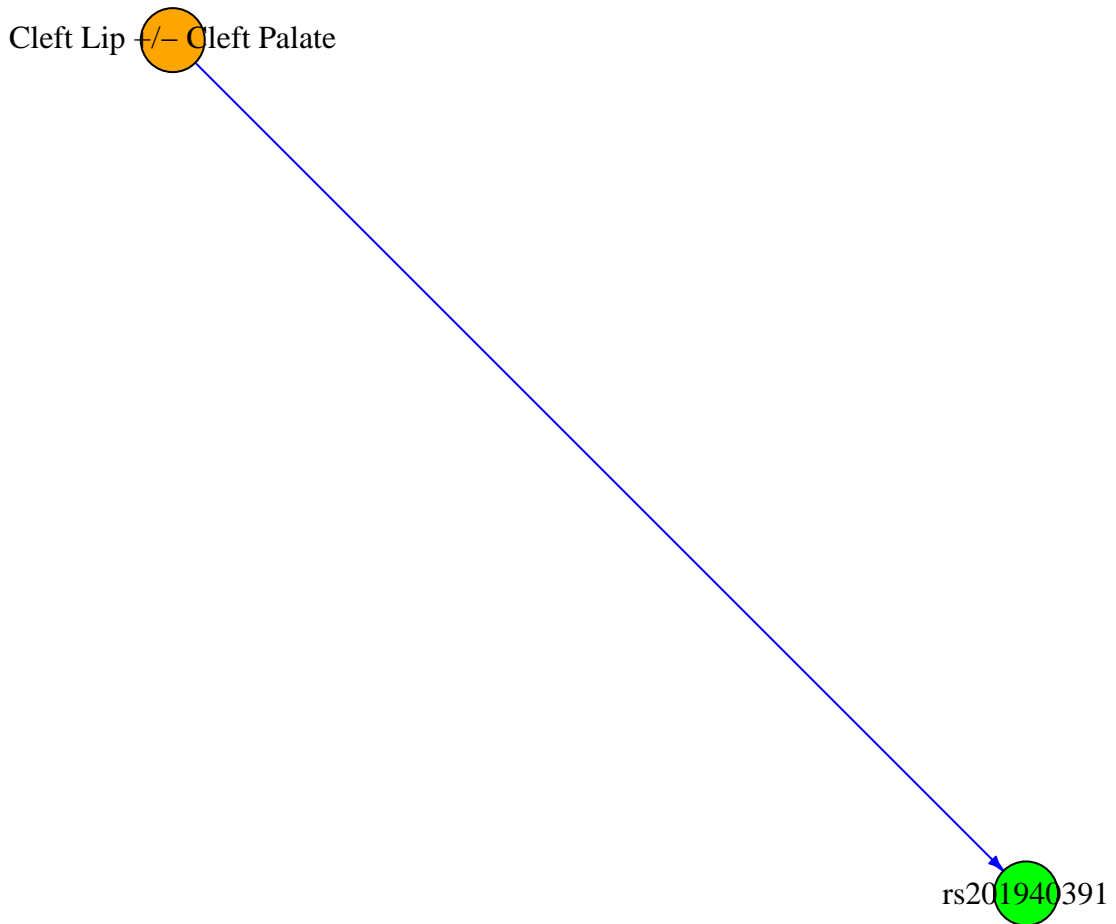

**Variant–Disease Network (Cleft palate)**

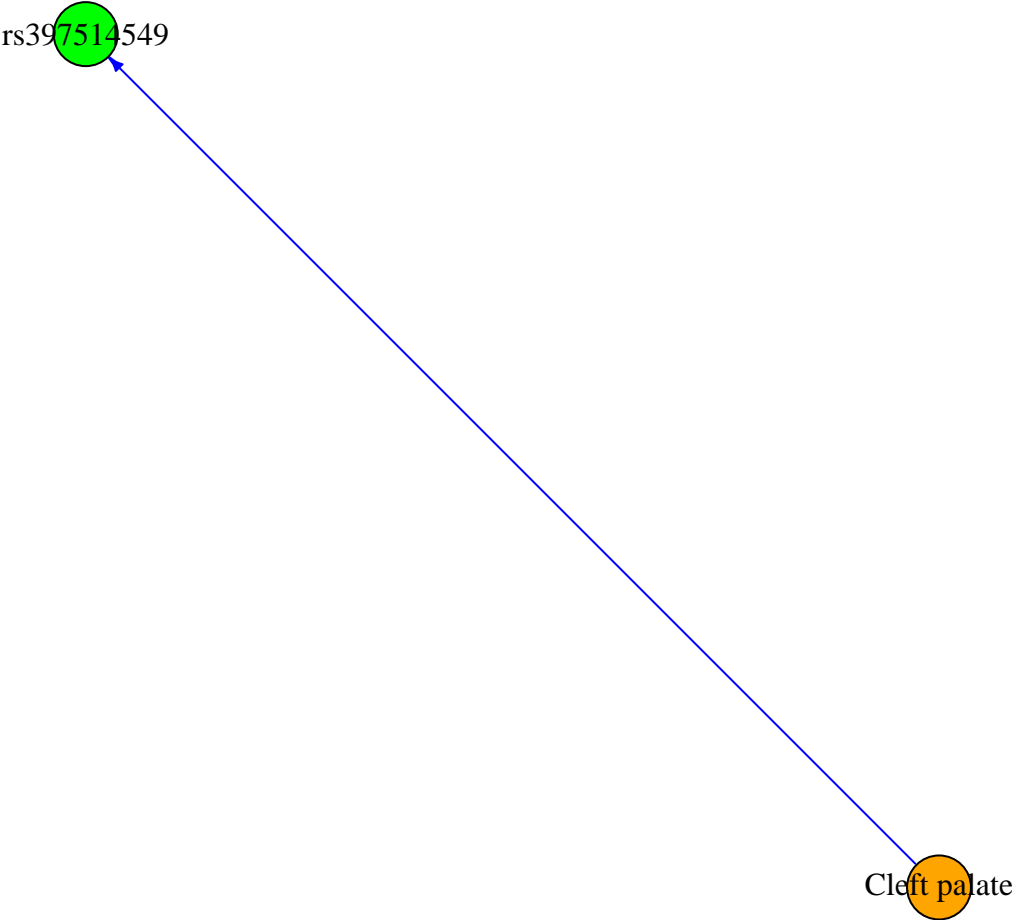

**Variant–Disease Network (Cleft palate X-linked)**

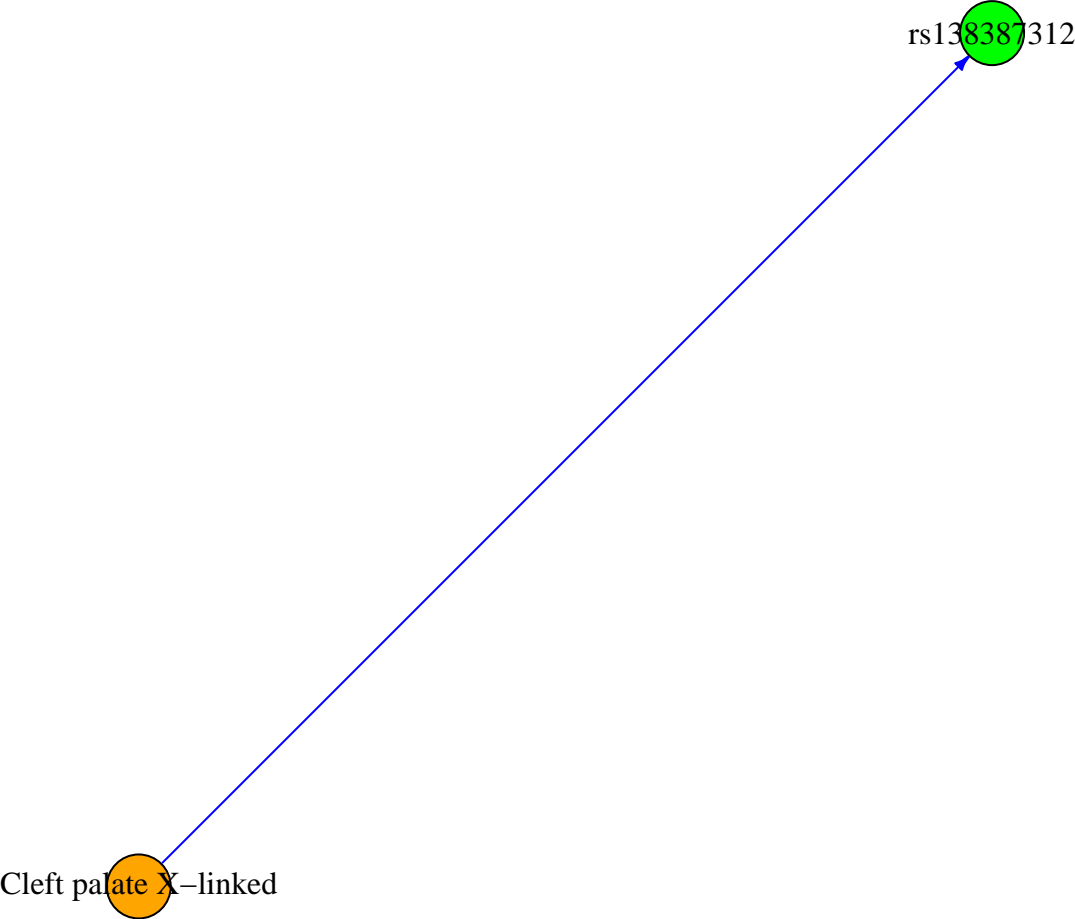



## Variant–Disease Network (C-like syndrome)

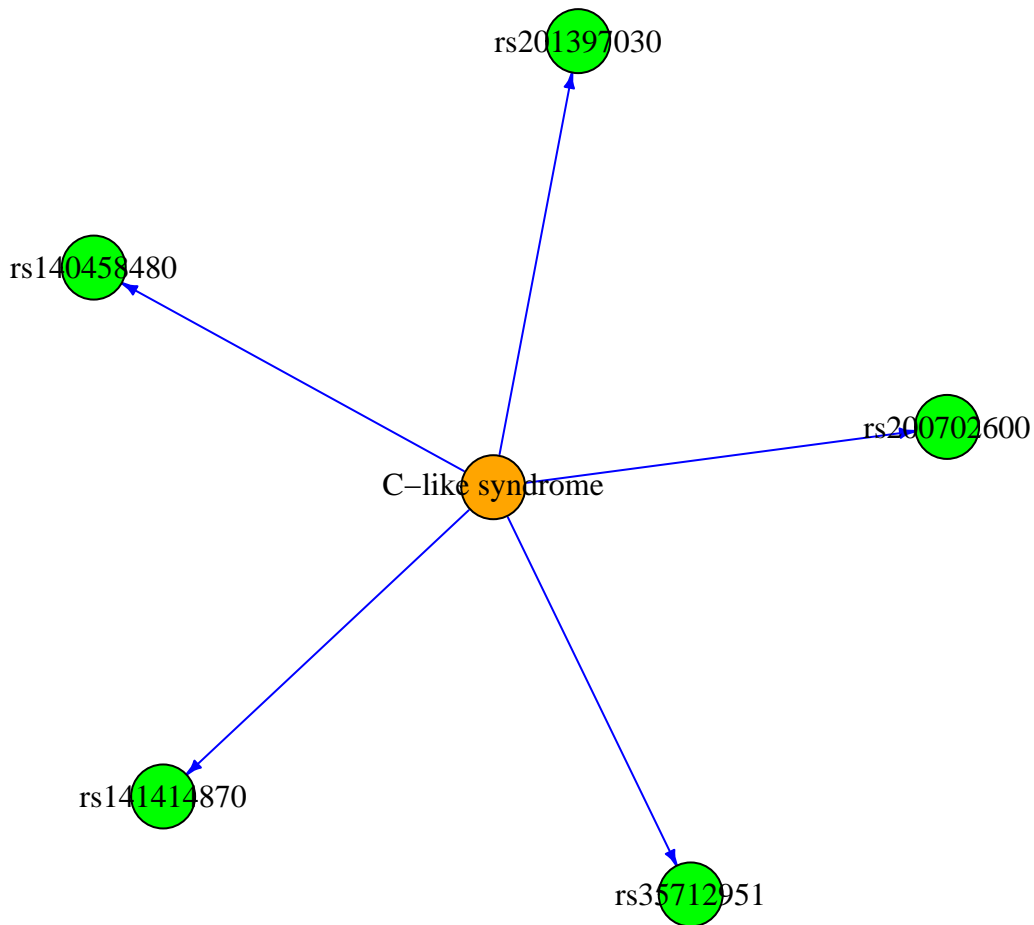

**Variant–Disease Network (Cockayne syndrome)**

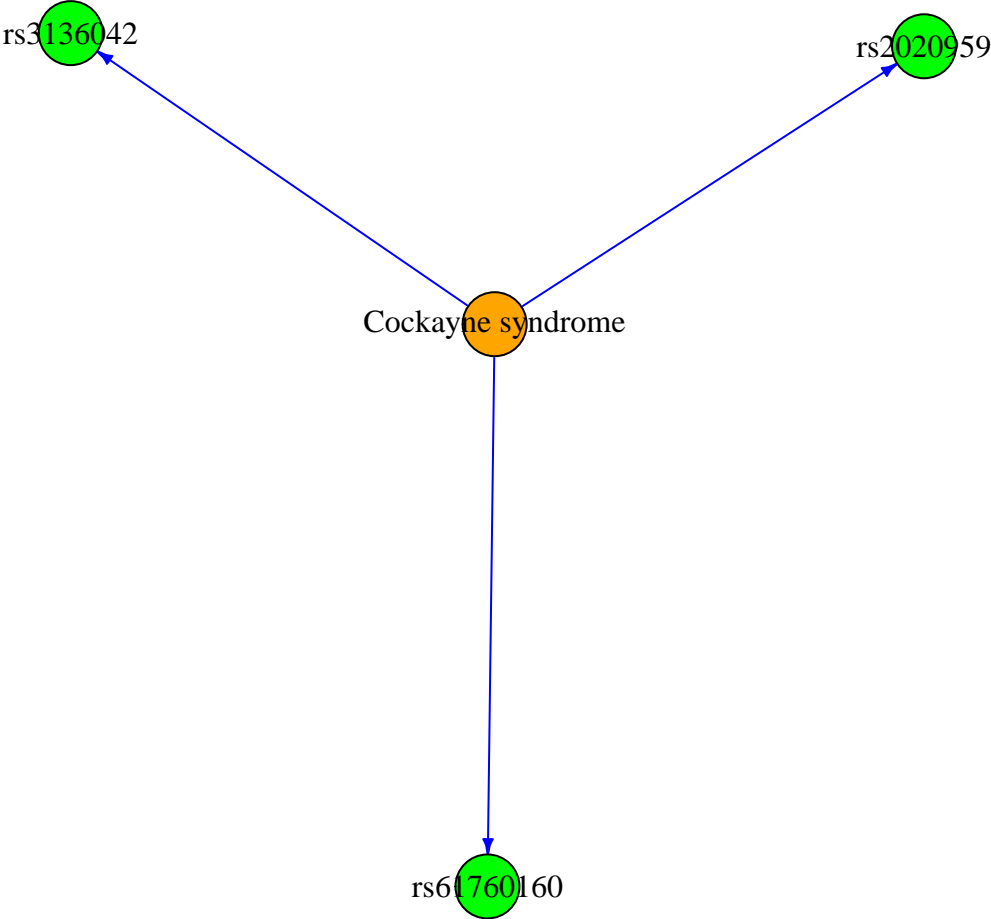

## Variant–Disease Network (Coenzyme Q10 deficiency)

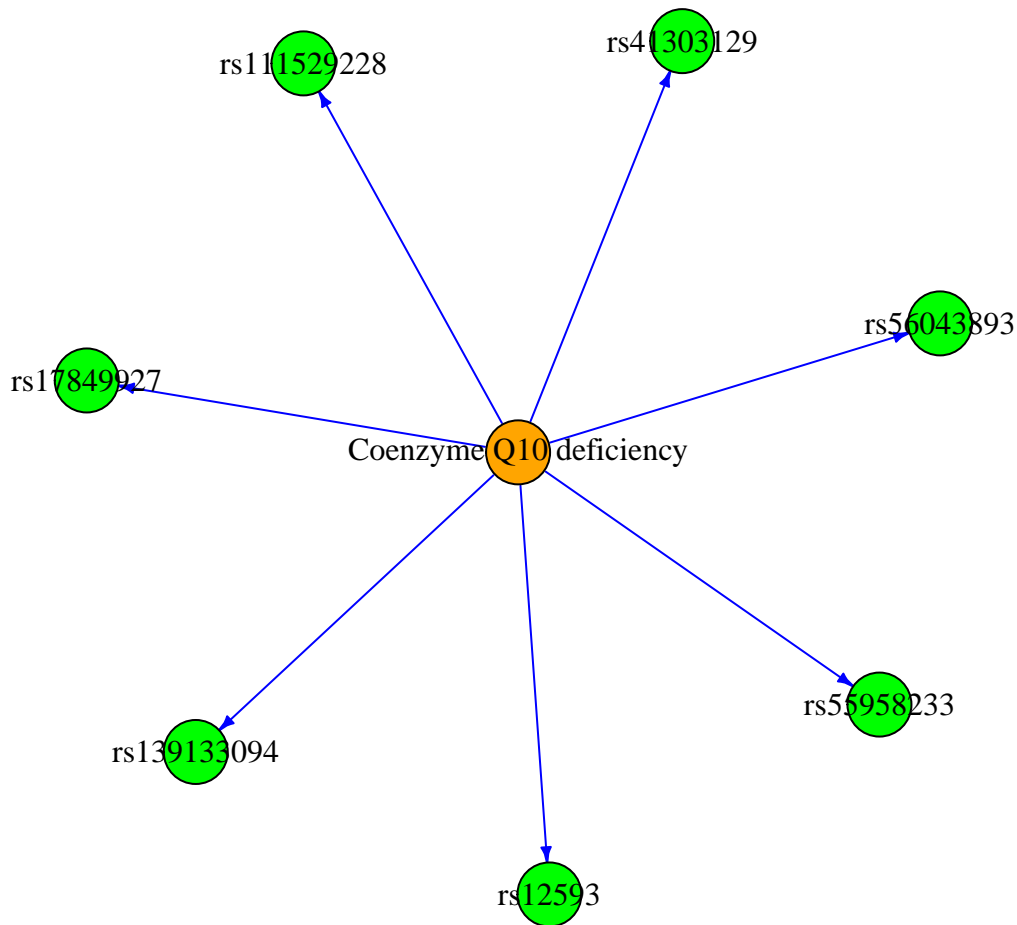

## Variant–Disease Network (Coffin–Siris syndrome)

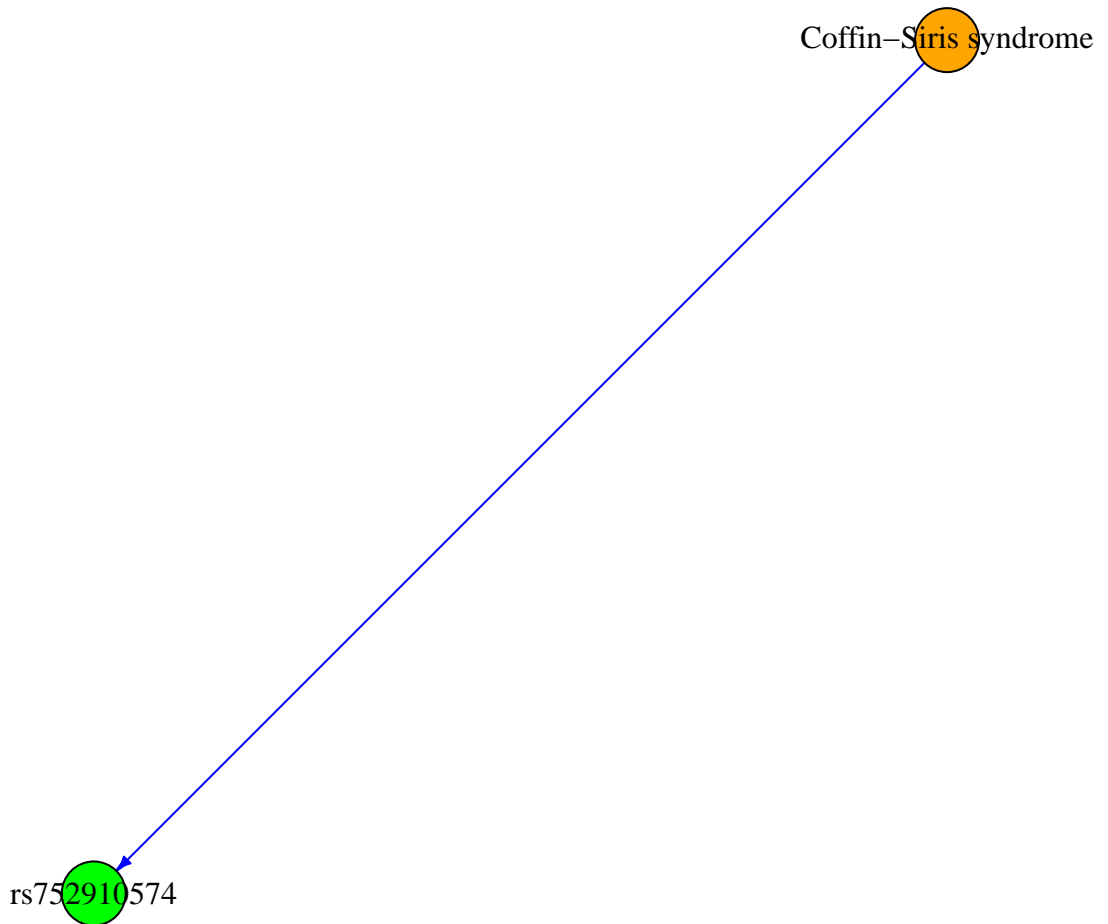

**Variant–Disease Network (Collagen VI–related myopathy)**

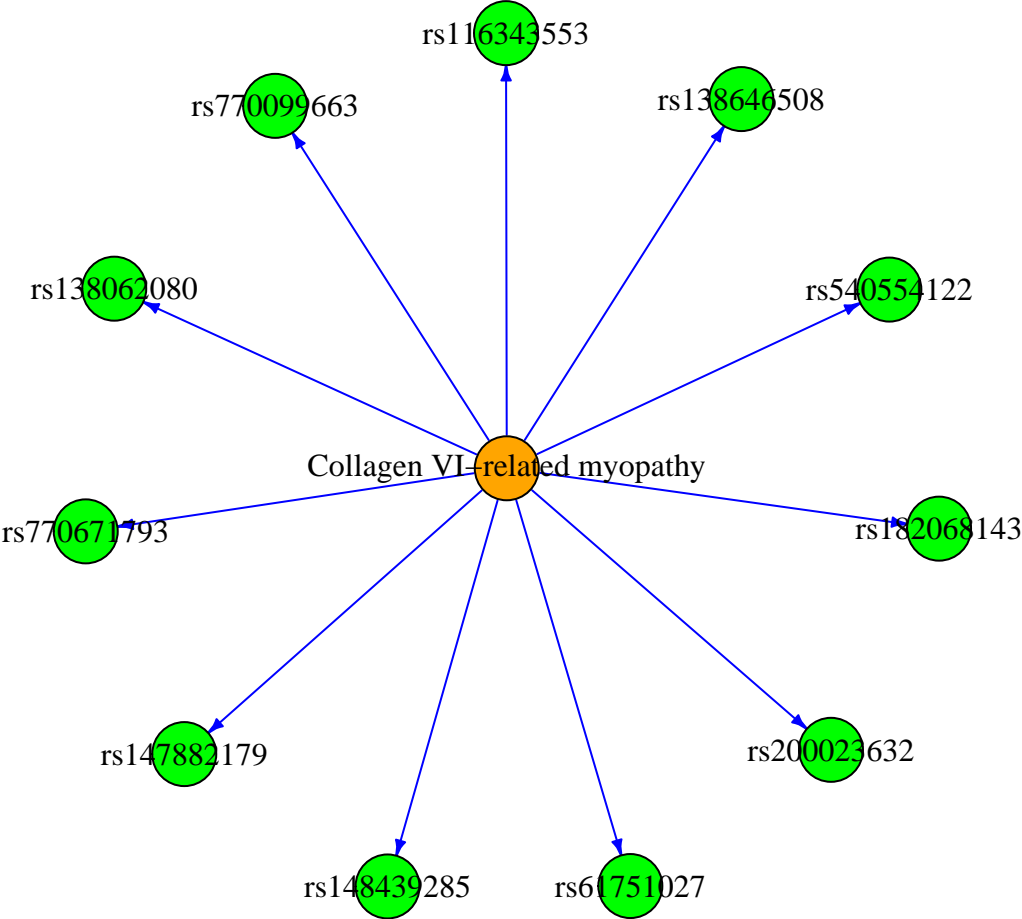

## Variant-Disease Network (Colorectal cancer)

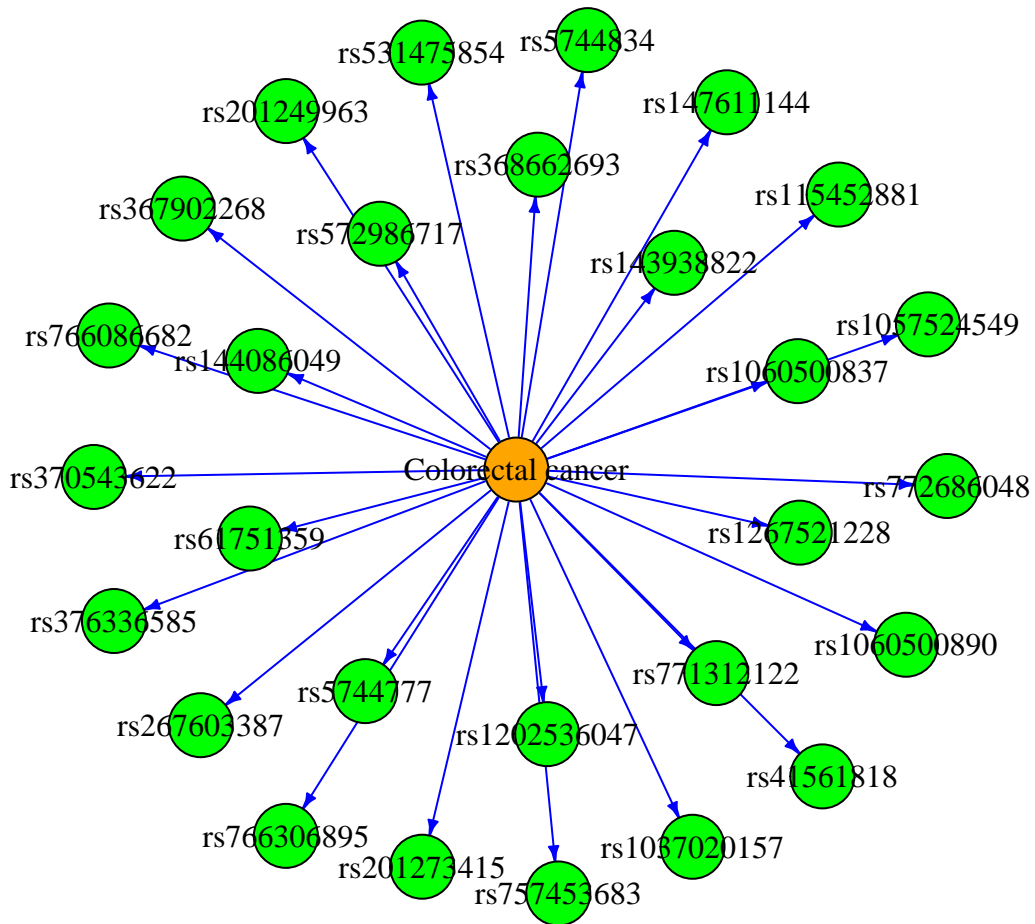

# t-Disease Network (Combined cellular and humoral immune defects with gr

rs138119069

Combined cellular and humoral immune defects



# Variant-Disease Network (Combined deficiency of sialidase AND beta galactosidase)

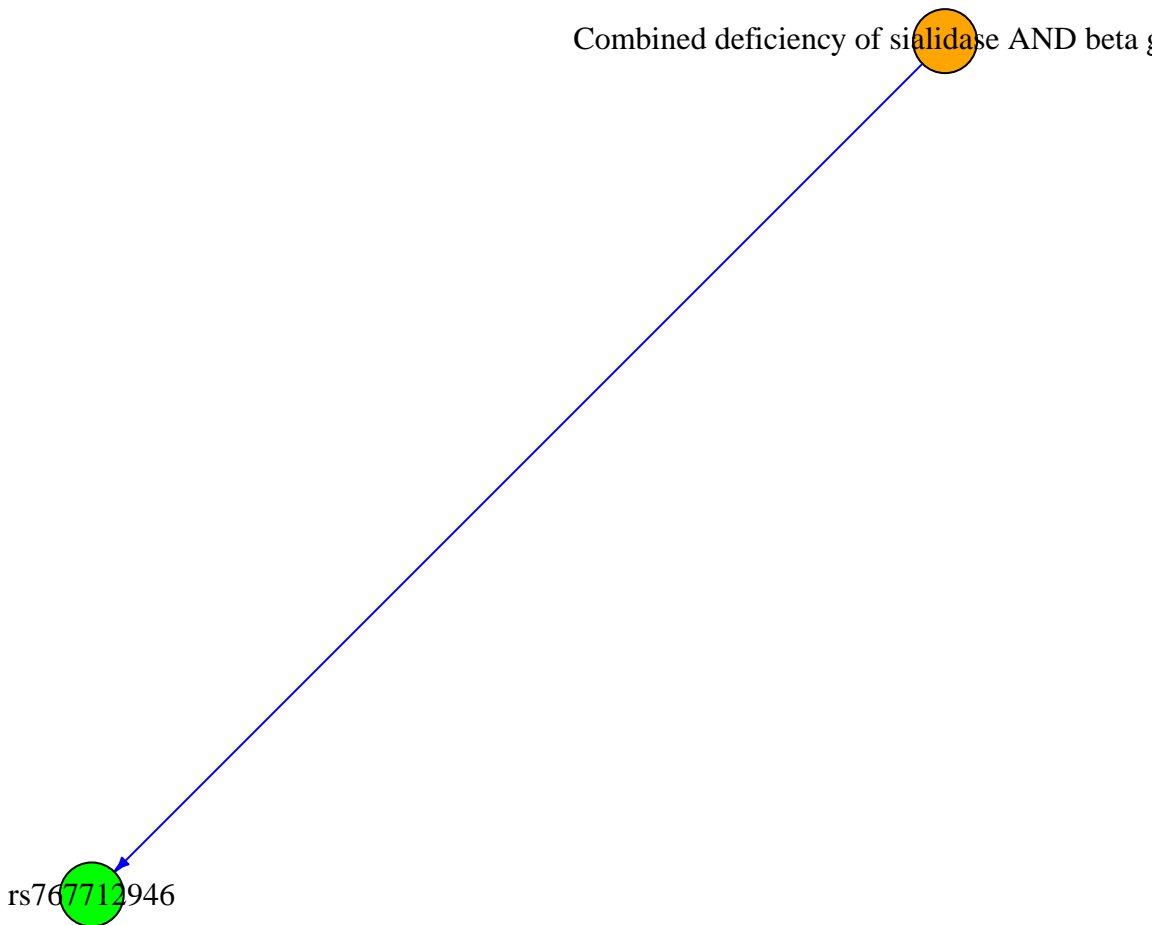



Variant–Disease Network (Combined oxidative phosphory deficiency)

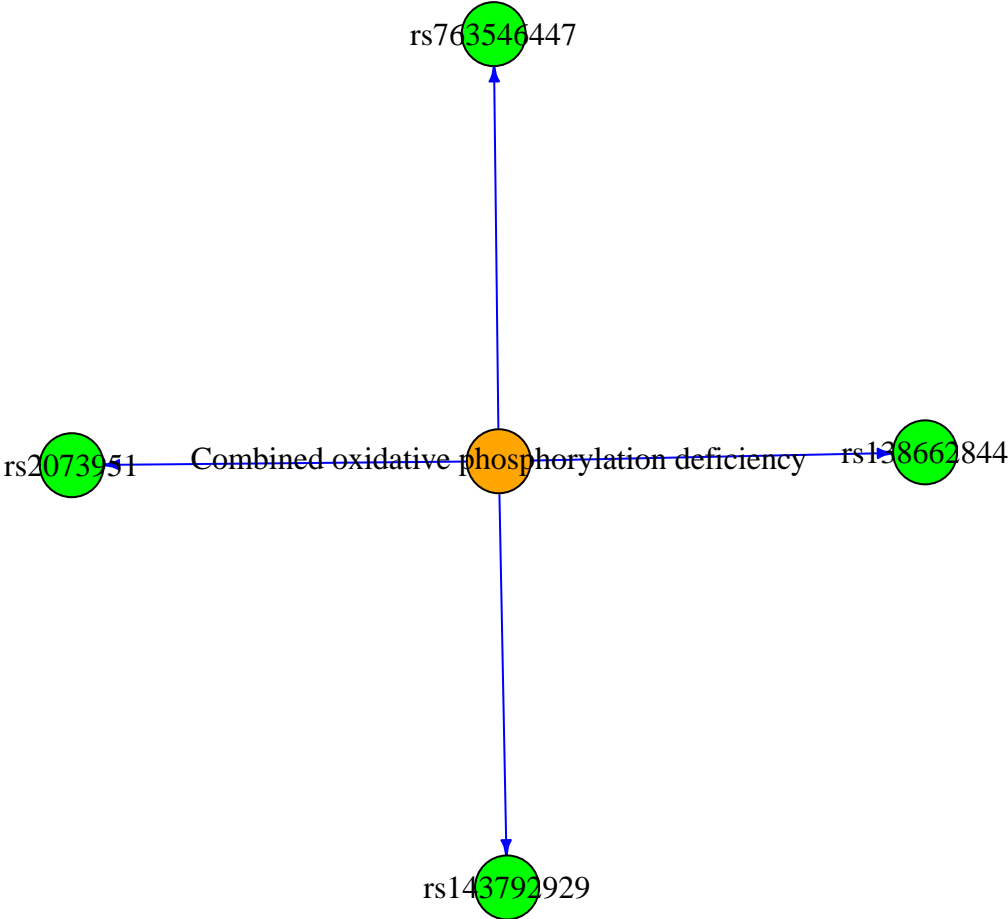

**Variant–Disease Network (Combined oxidative phosphorylation deficiency**

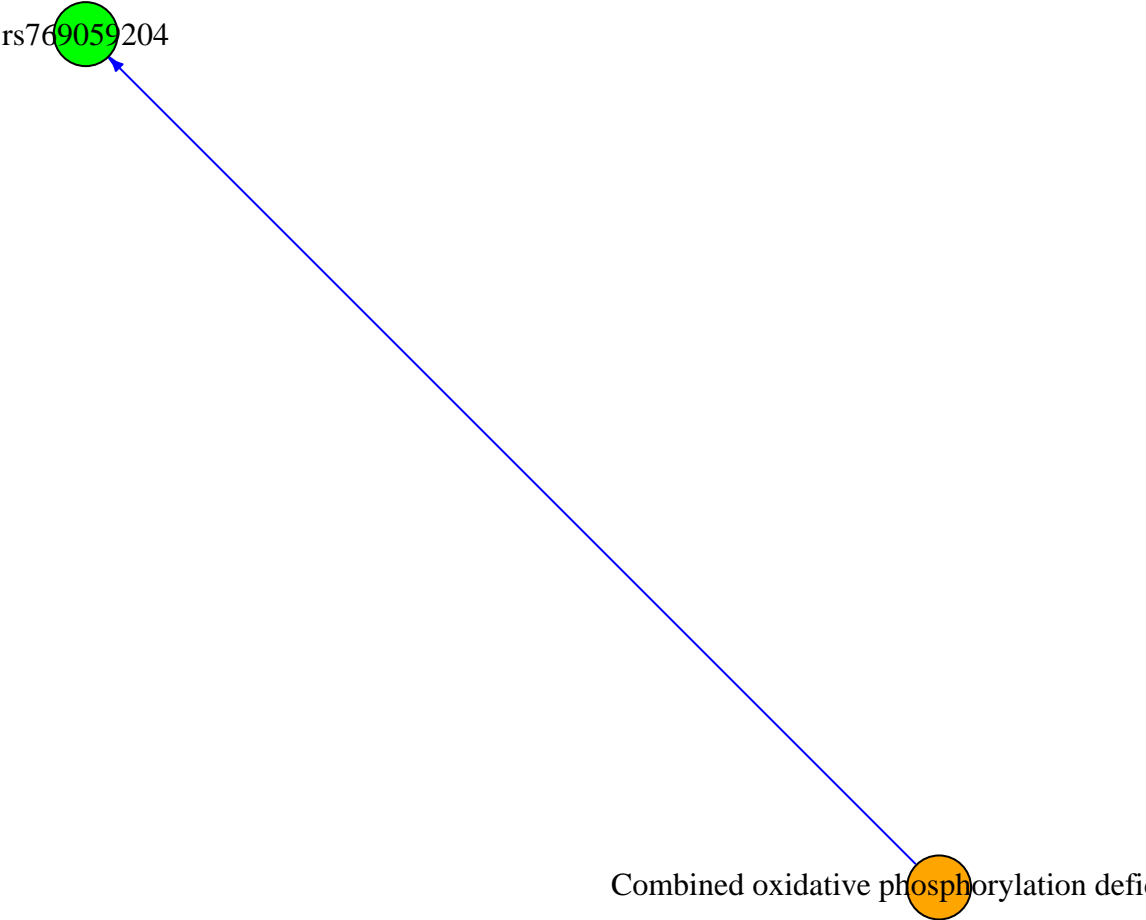

Variant–Disease Network (Combined oxidative phosphorylation deficiency

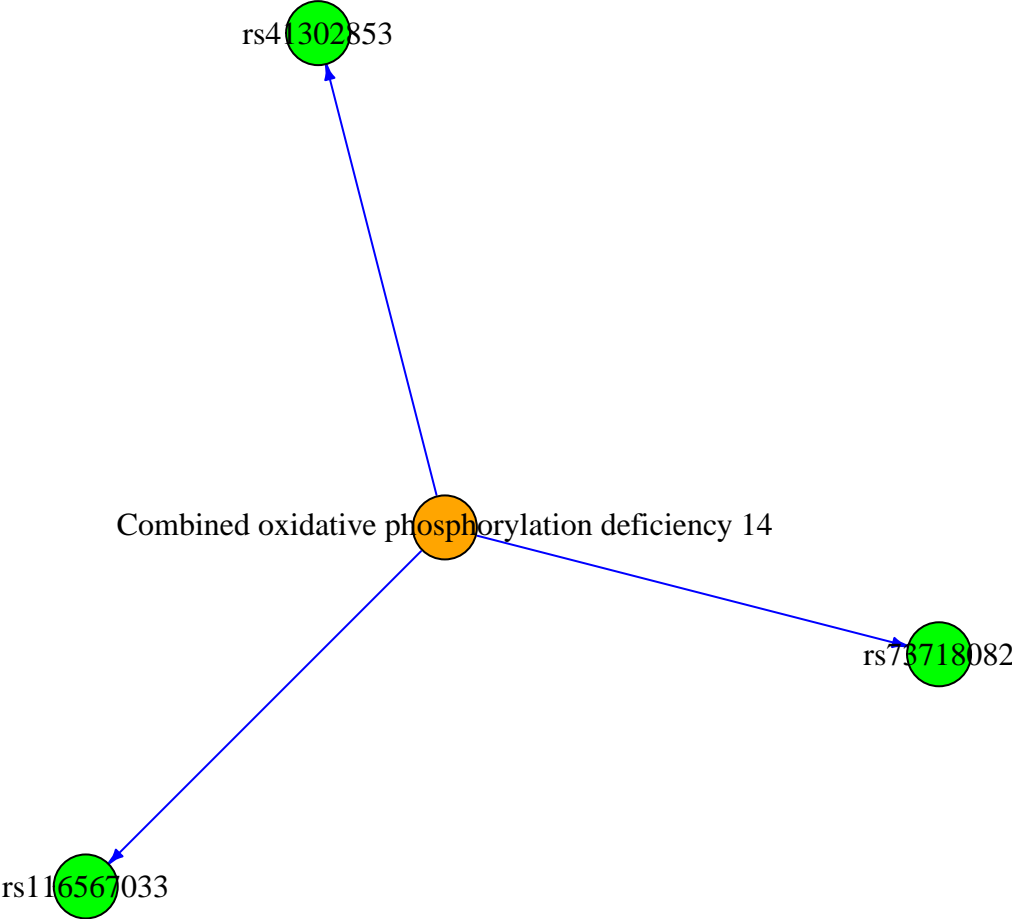

**Variant–Disease Network (Combined oxidative phosphorylation deficiency**

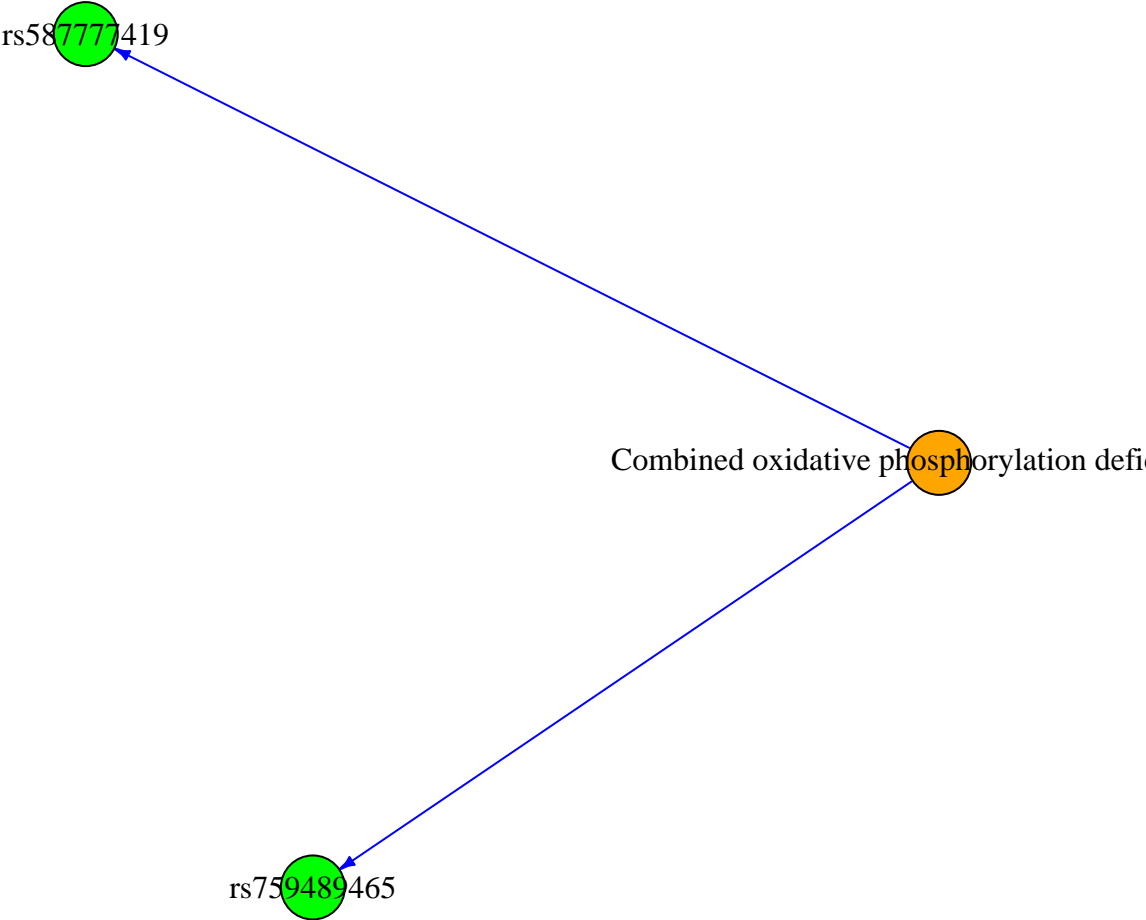

Variant–Disease Network (Combined oxidative phosphorylation deficiency

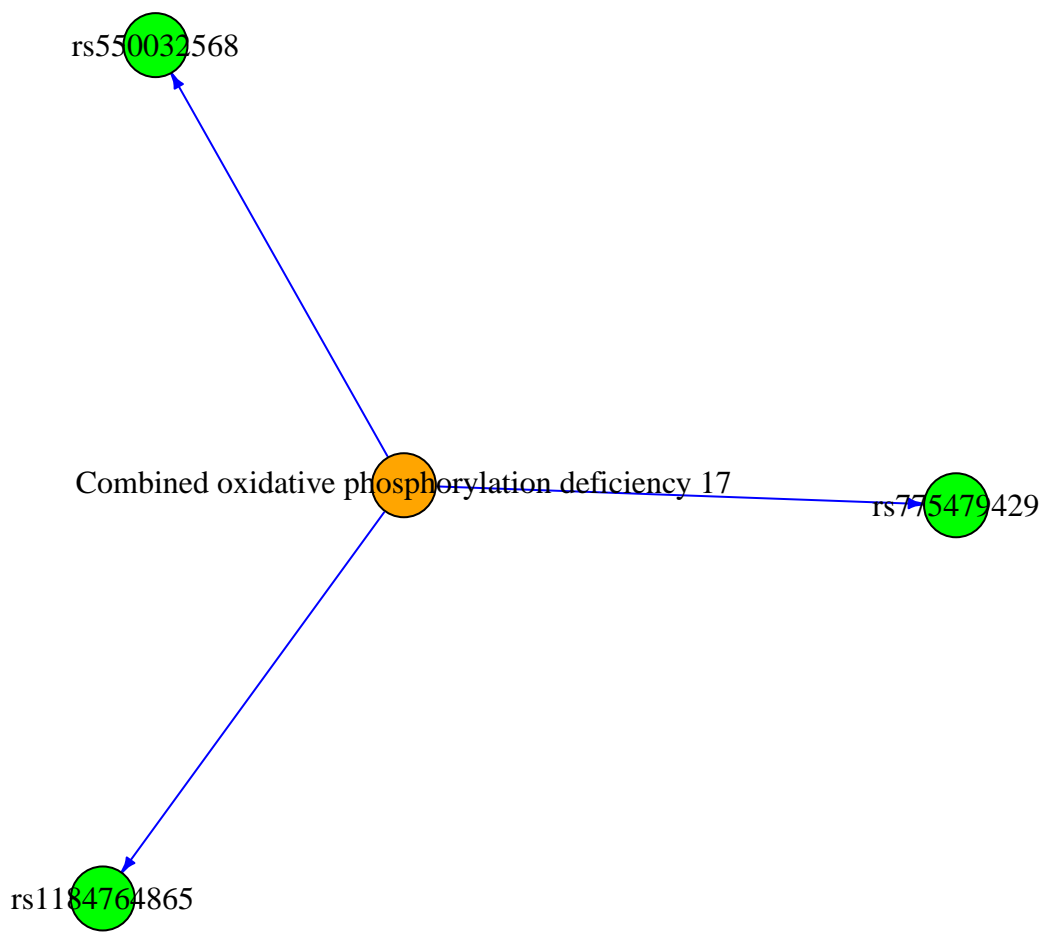

**Variant–Disease Network (Combined Pituitary Hormone Deficiency)**

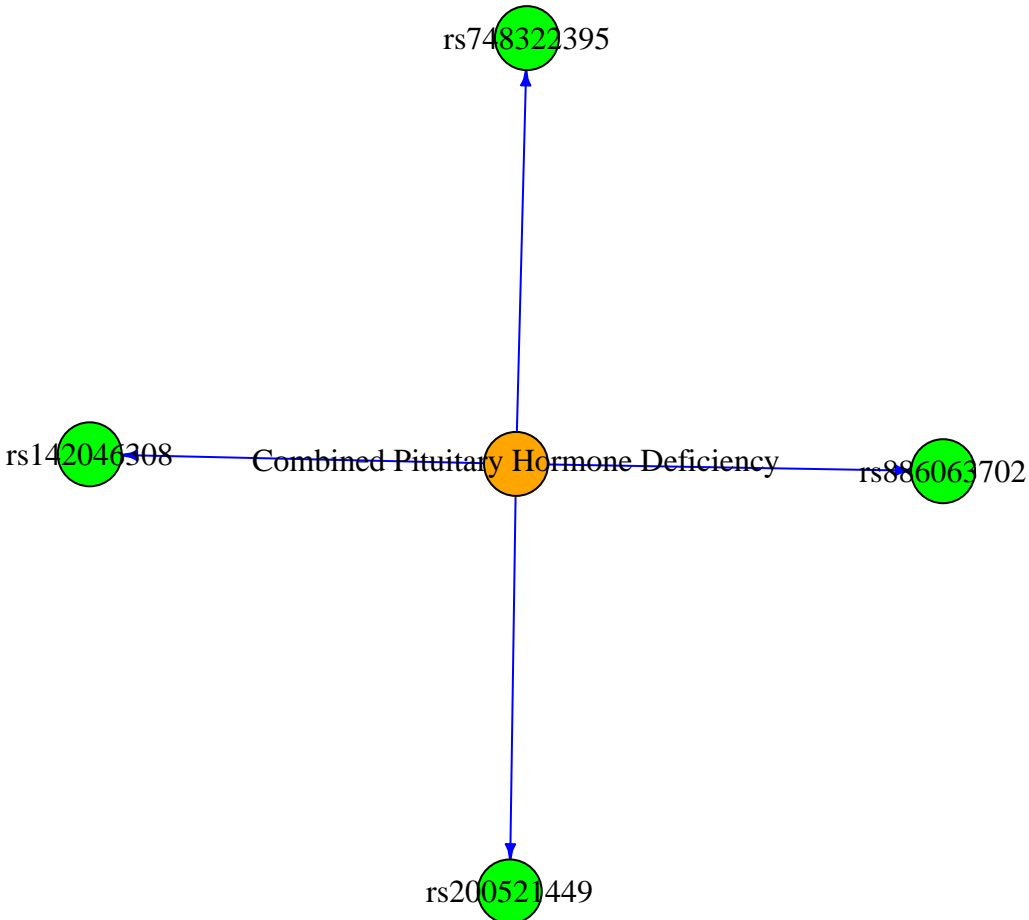

# Variant–Disease Network (Common variable immunodeficiency 10)

Common variable immunodeficiency 10

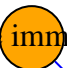

rs11574851

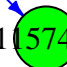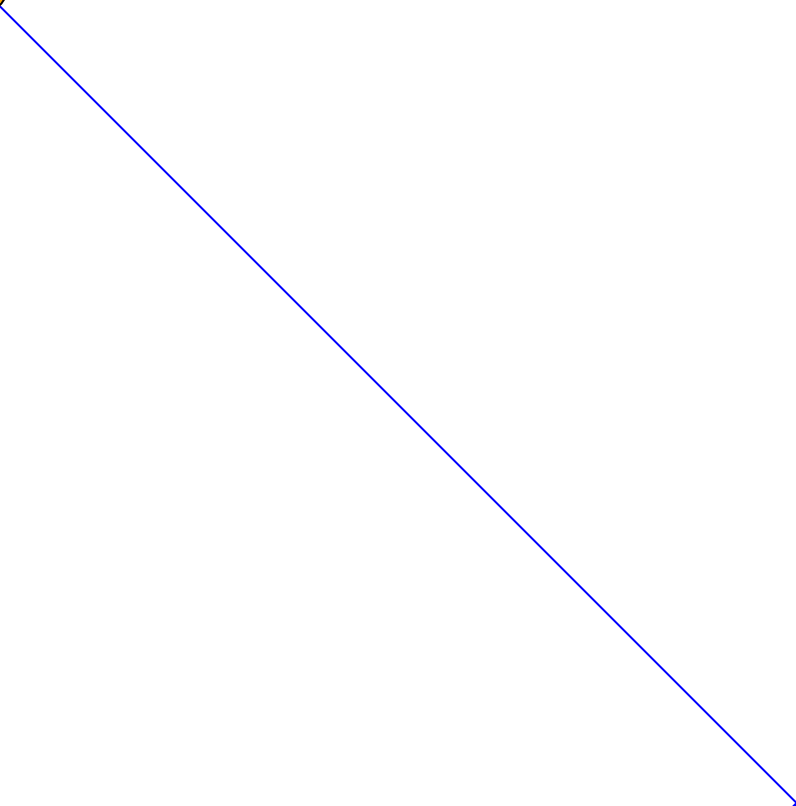

## Variant–Disease Network (Common variable immunodeficiency 6)

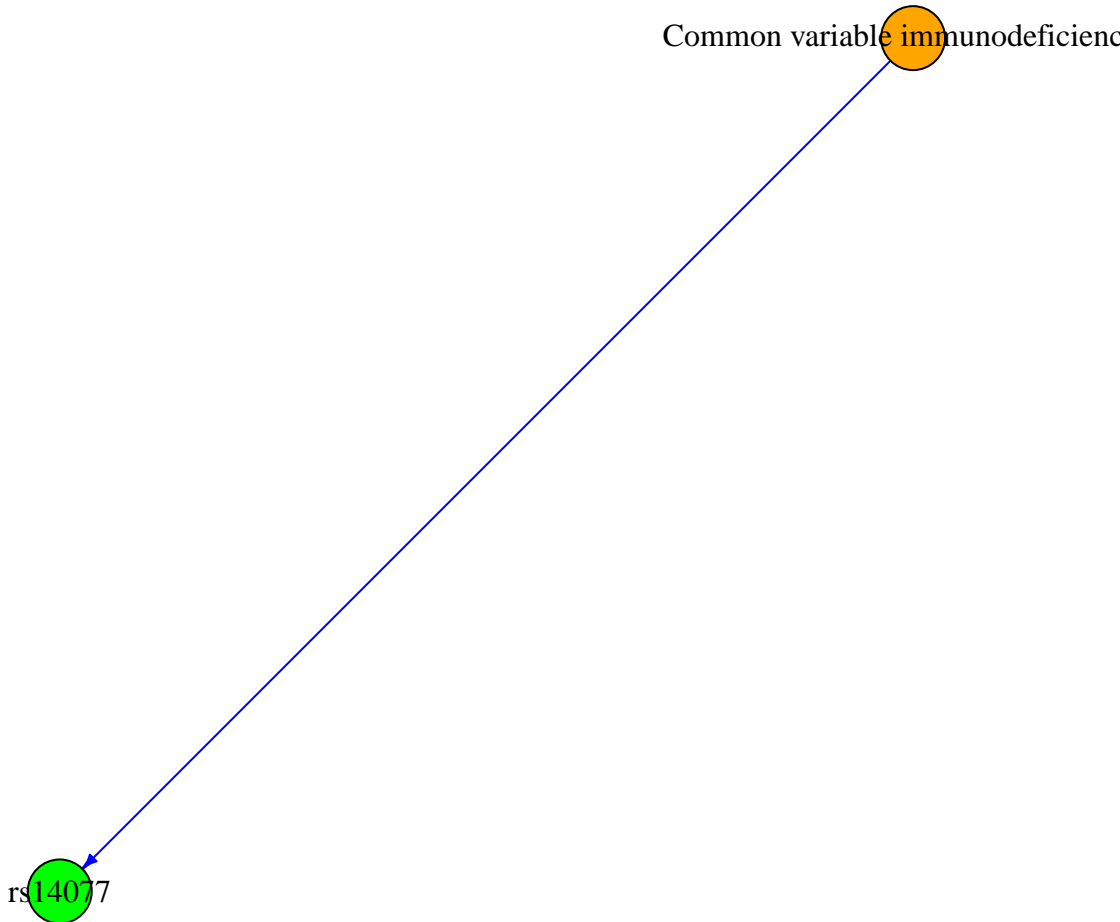



# Variant–Disease Network (Common variable immunodeficiency 7)

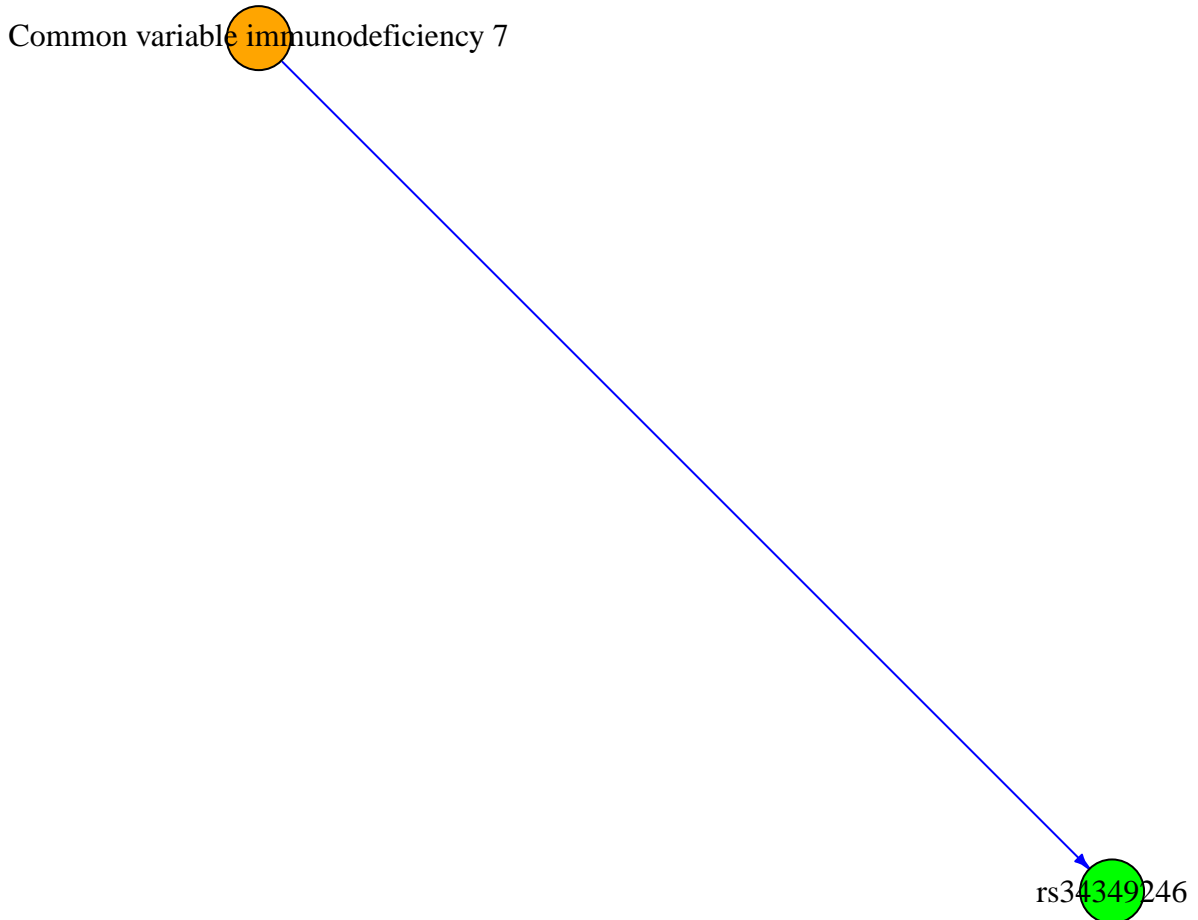

Variant–Disease Network (Complement component 2 deficiency)

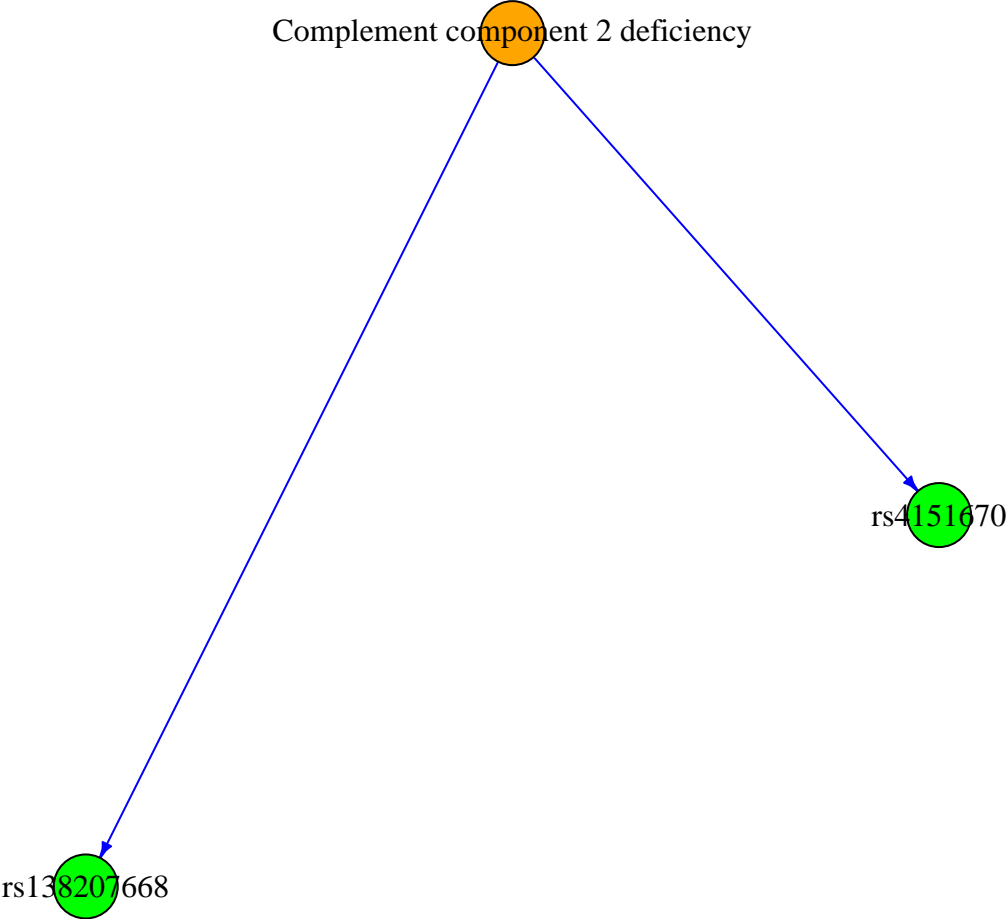

Variant–Disease Network (Complement component 6 deficiency)

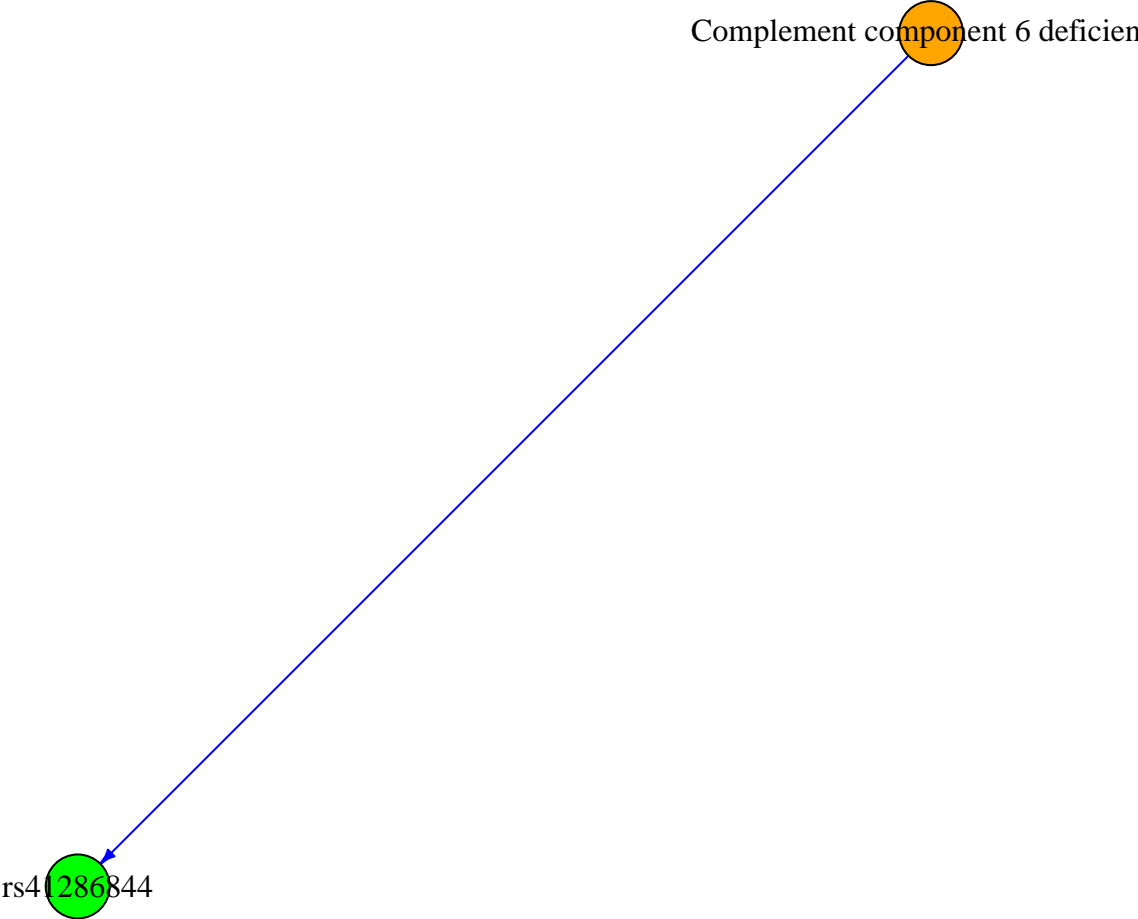

# Variant–Disease Network (Complement component 8 deficiency type 2)

Complement component 8 deficiency type 2

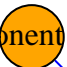

rs41286844

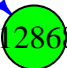

## Variant-Disease Network (Cone dystrophy 3)

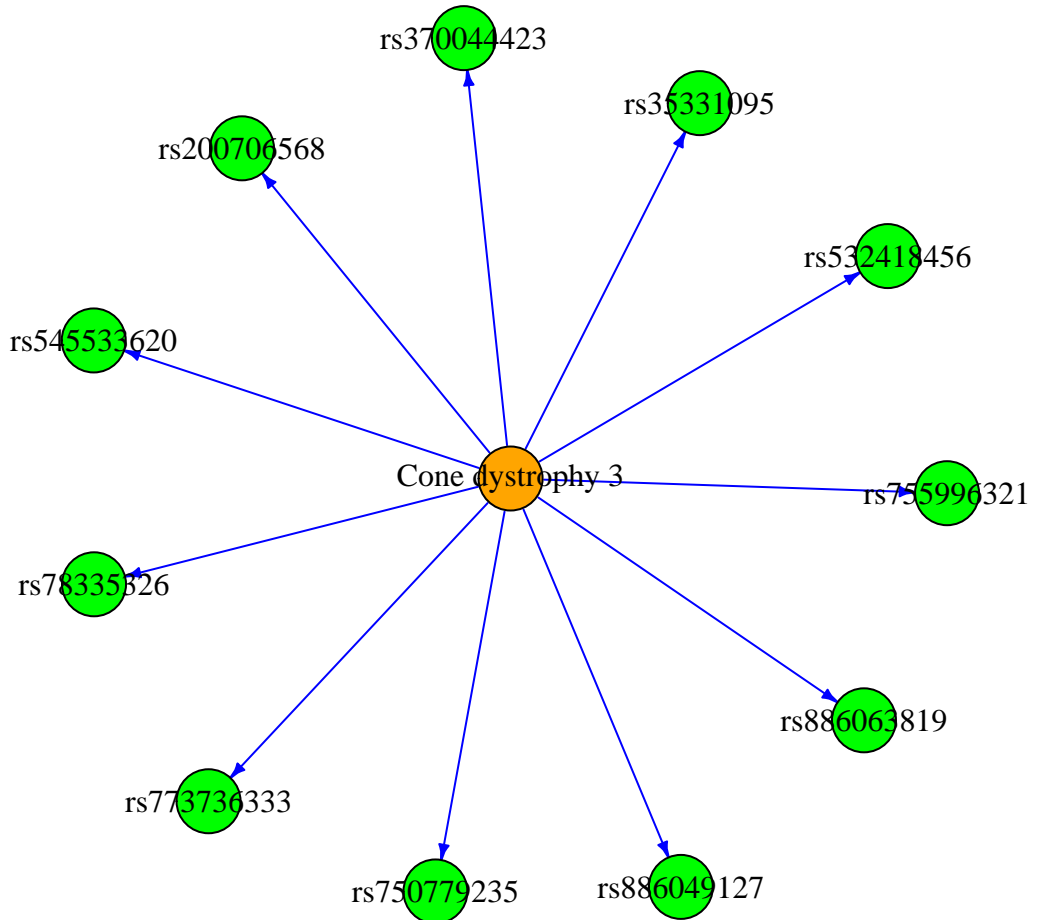

# Variant-Disease Network (Cone-Rod Dystrophy)

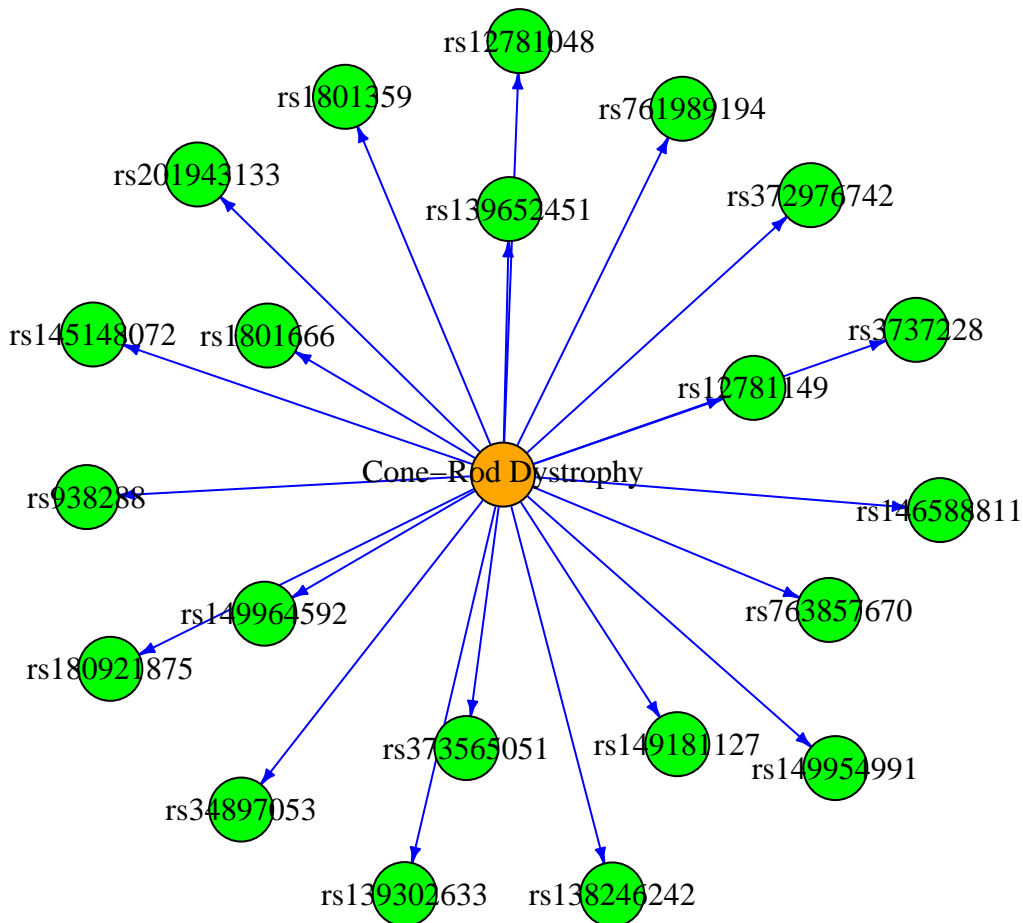

Variant–Disease Network (Cone-rod dystrophy 15)

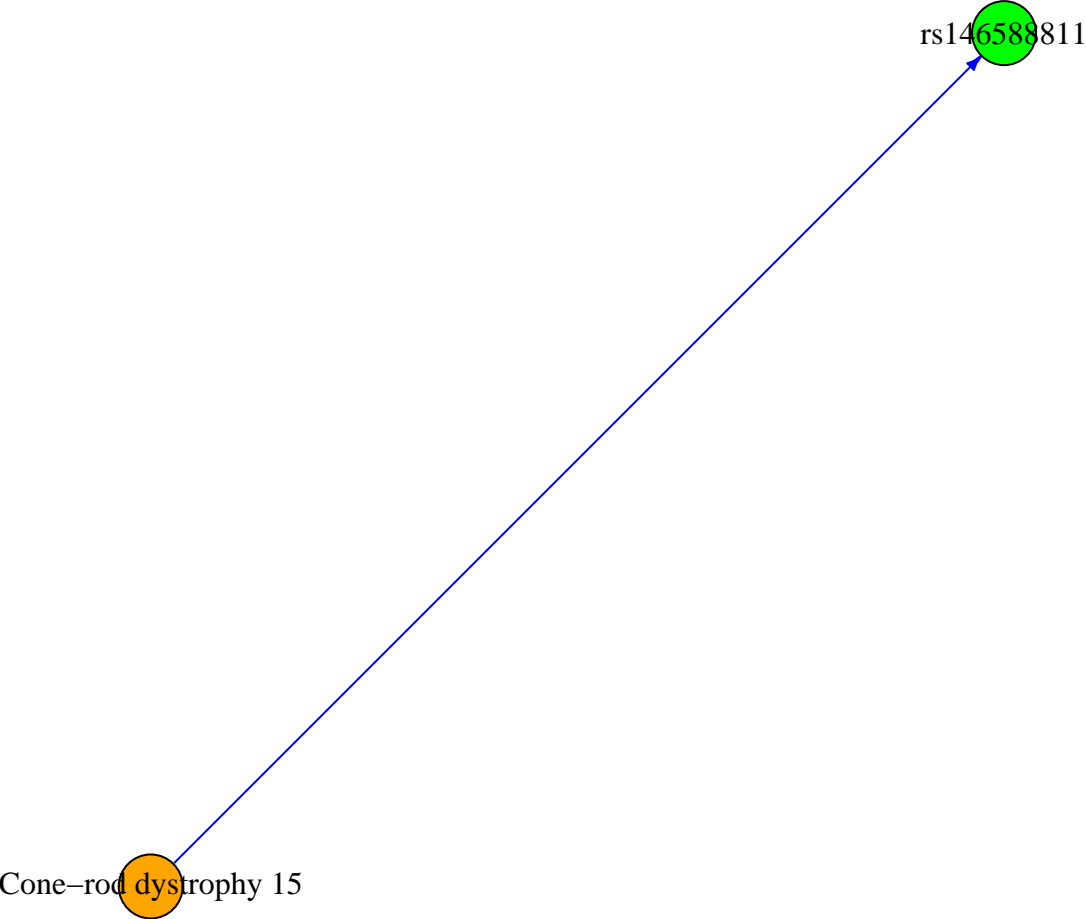

## Variant-Disease Network (Cone-rod dystrophy 3)

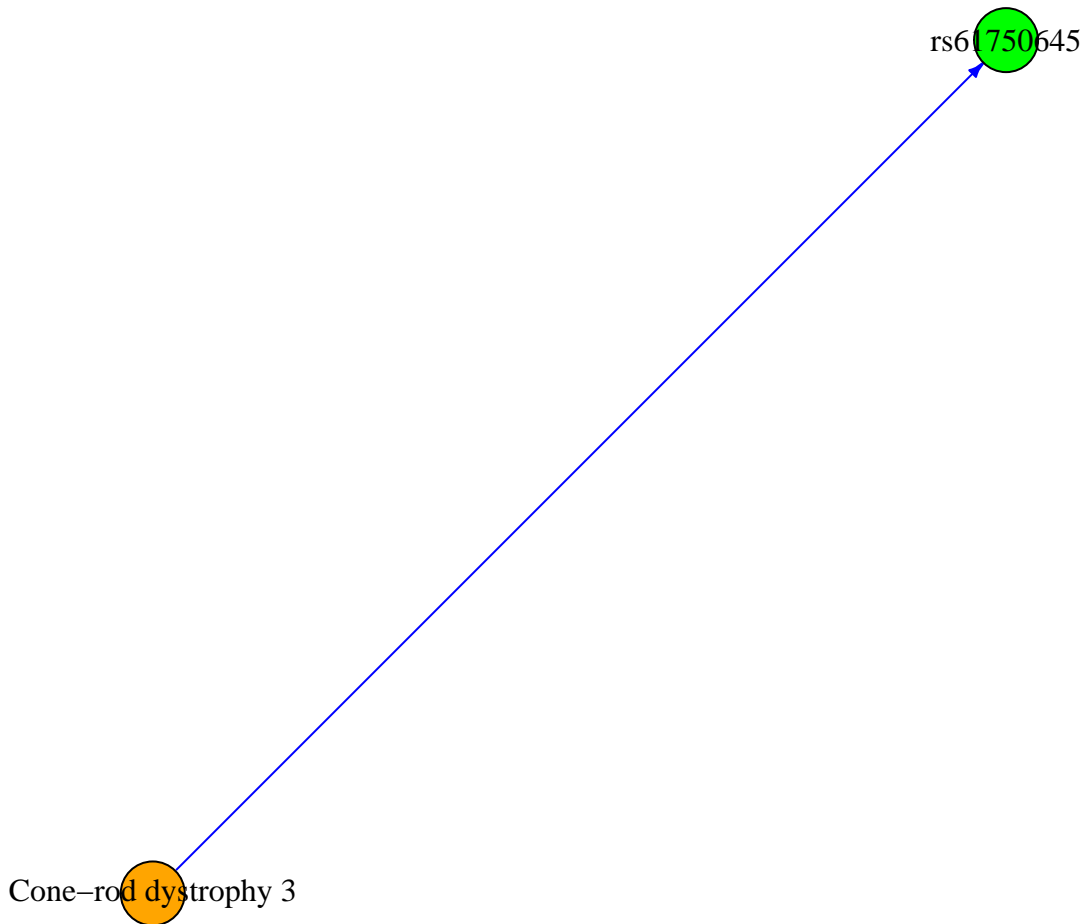



Variant–Disease Network (Cone–rod dystrophy ameloogenesis imperfecta)

Cone–rod dystrophy ameloogenesis imperfecta

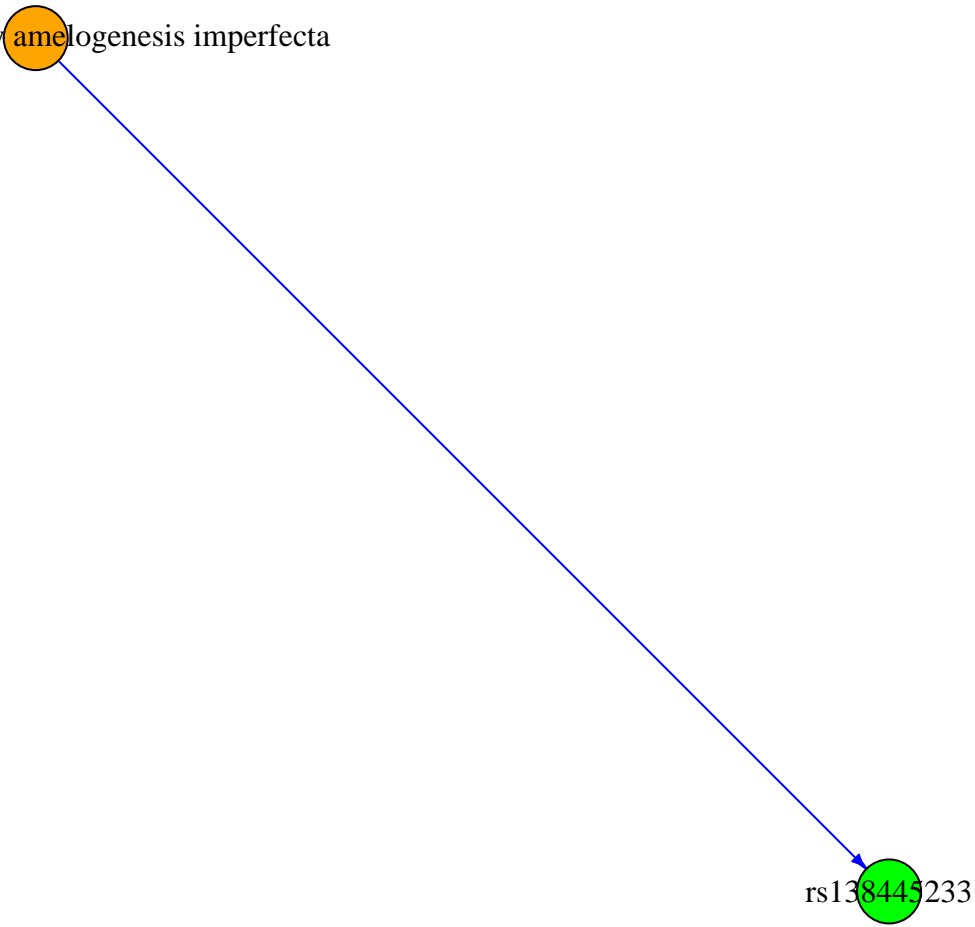

# Variant-Disease Network (Congenital absence of salivary gland)

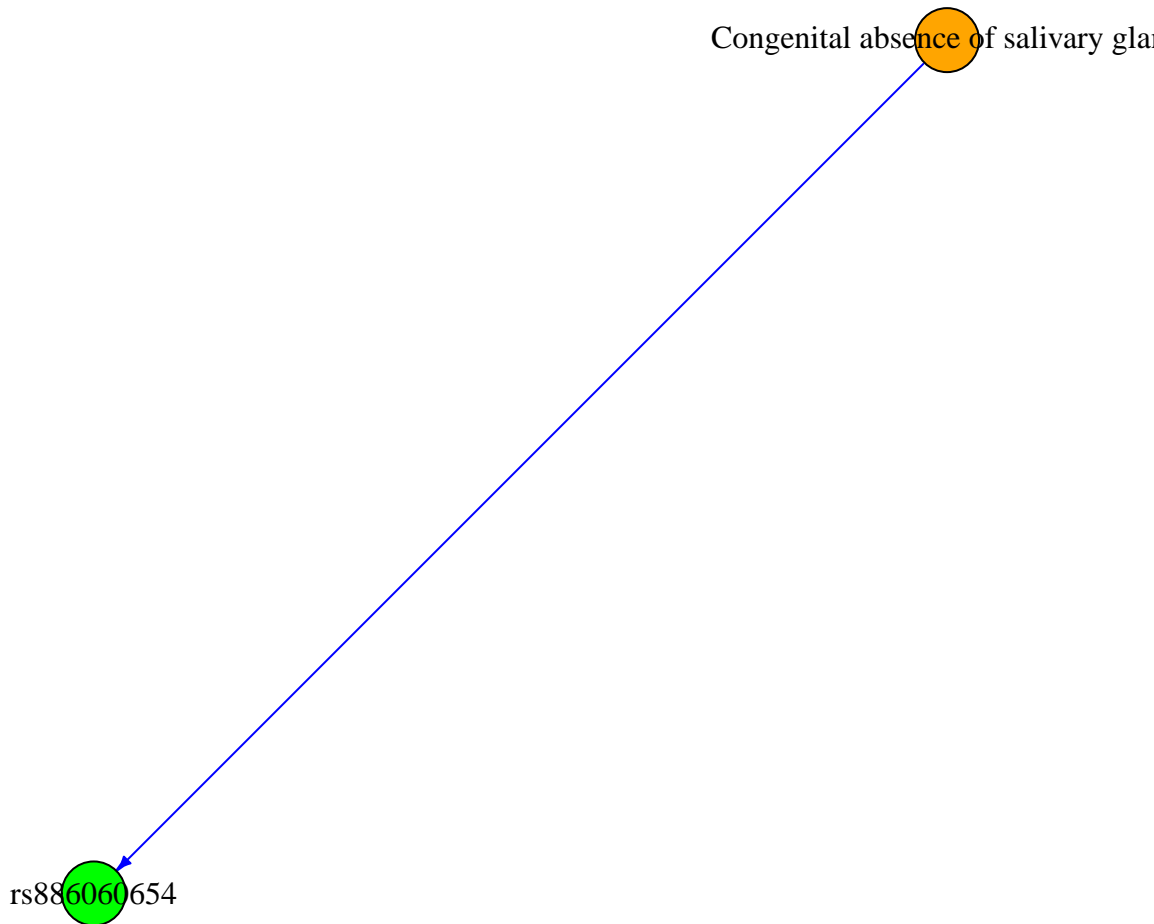

Variant–Disease Network (Congenital adrenal hyperplasia)

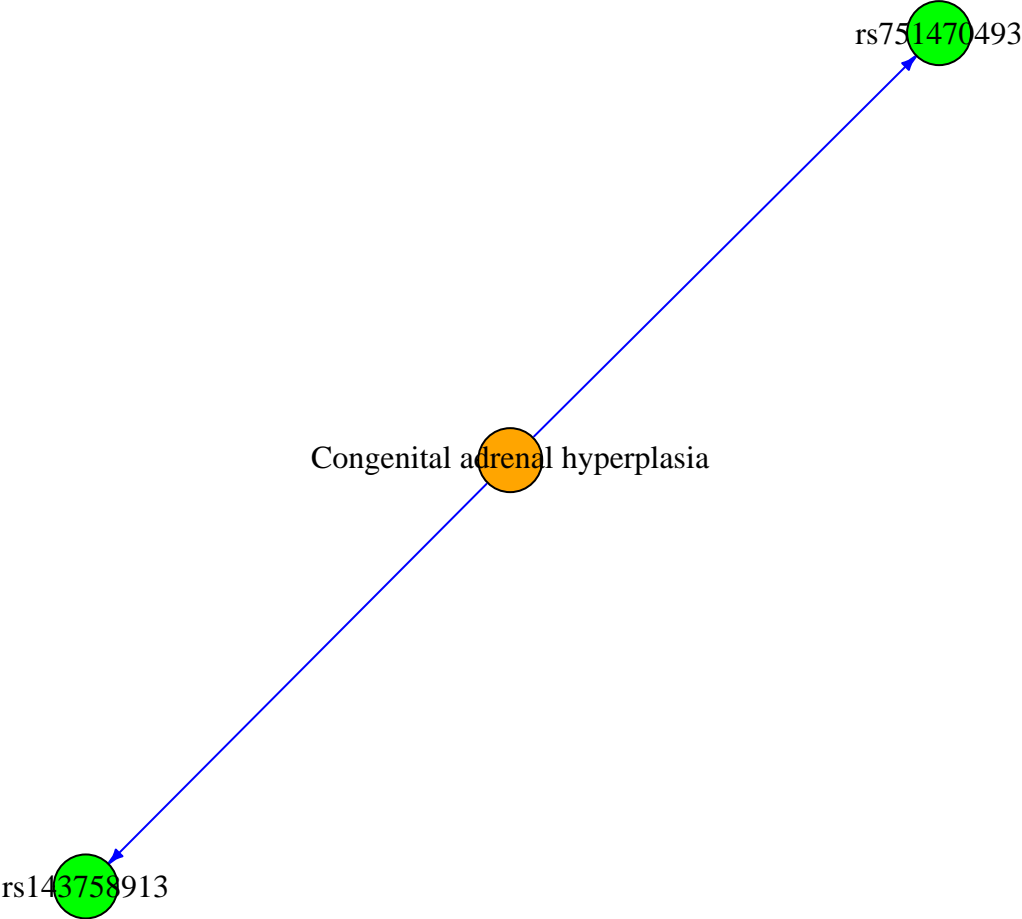

**Variant–Disease Network (Congenital Adrenal Insufficiency)**

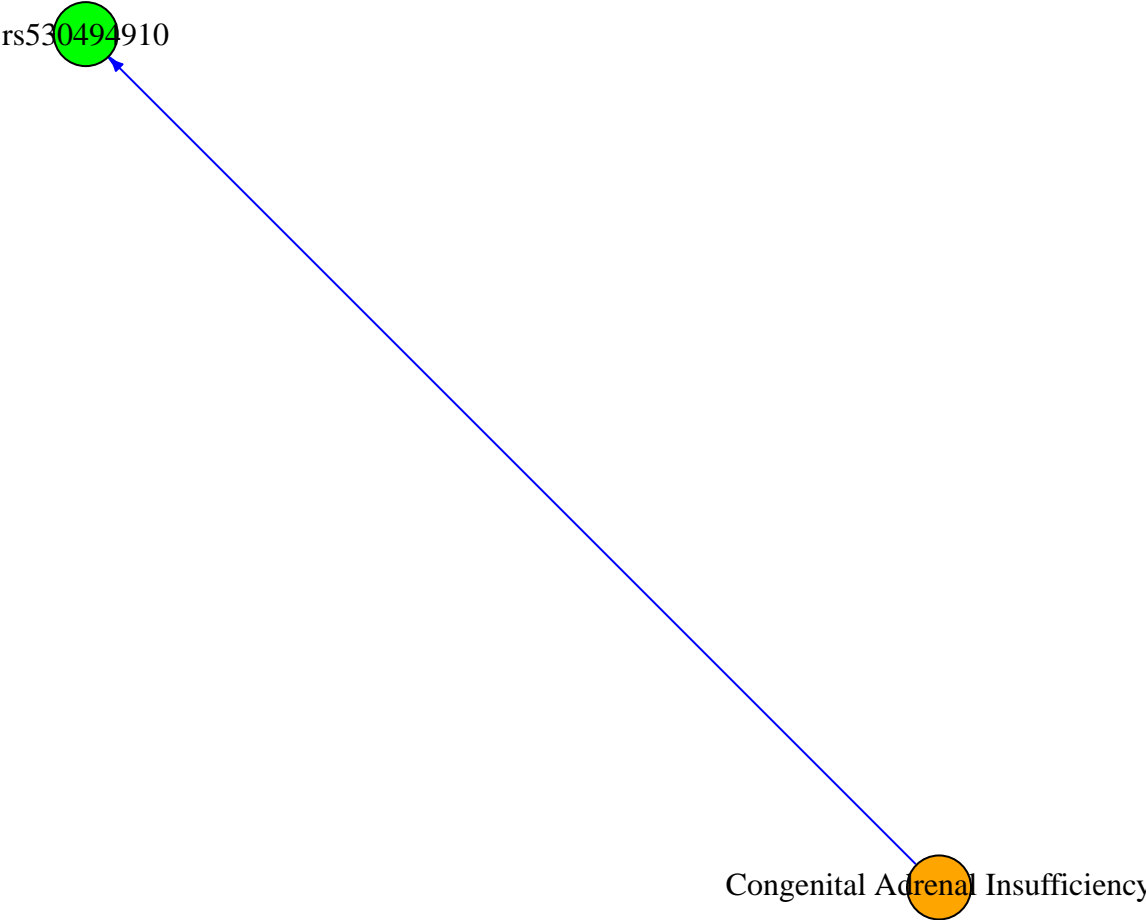

Variant–Disease Network (Congenital amegakaryocytic thrombocytopenia)

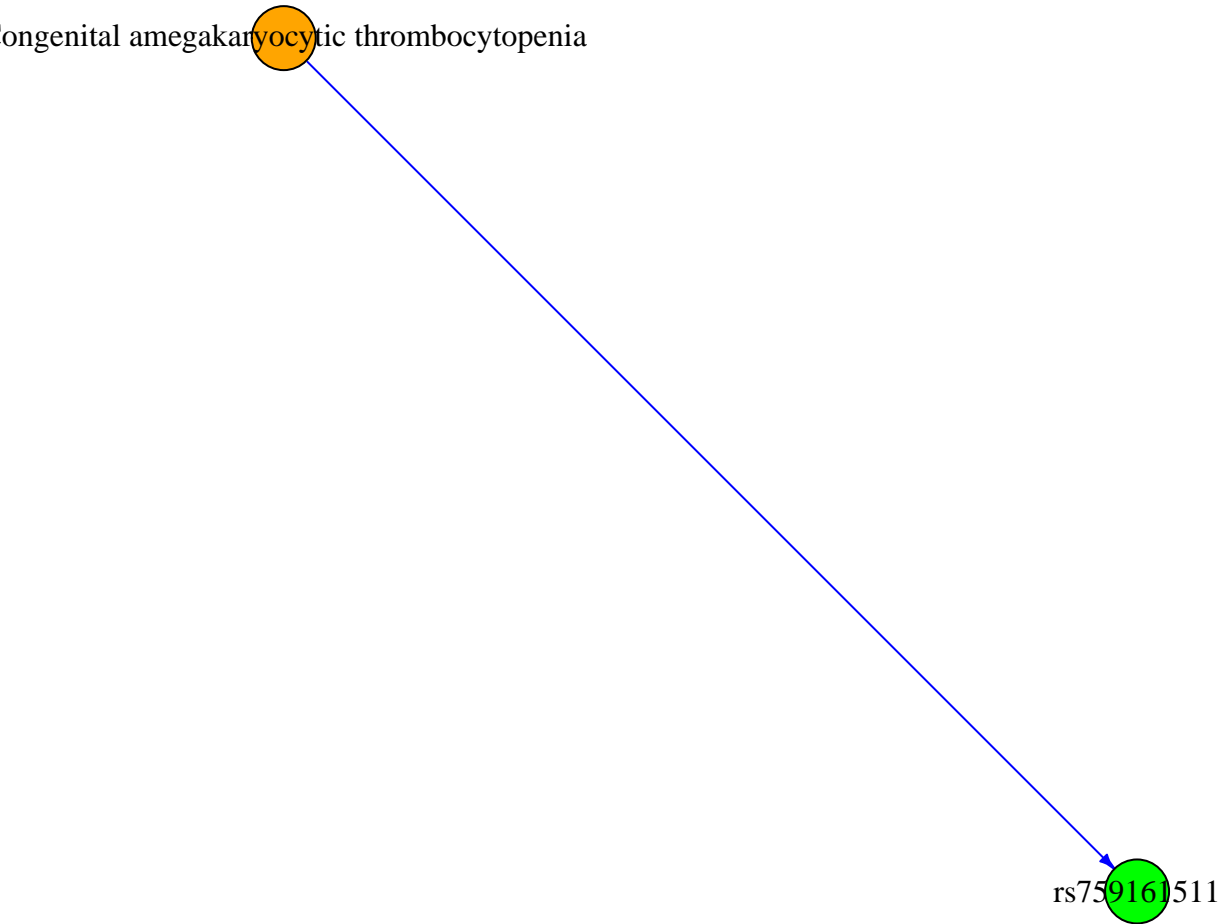

Variant–Disease Network (Congenital anomalies of kidney and urinary tract)

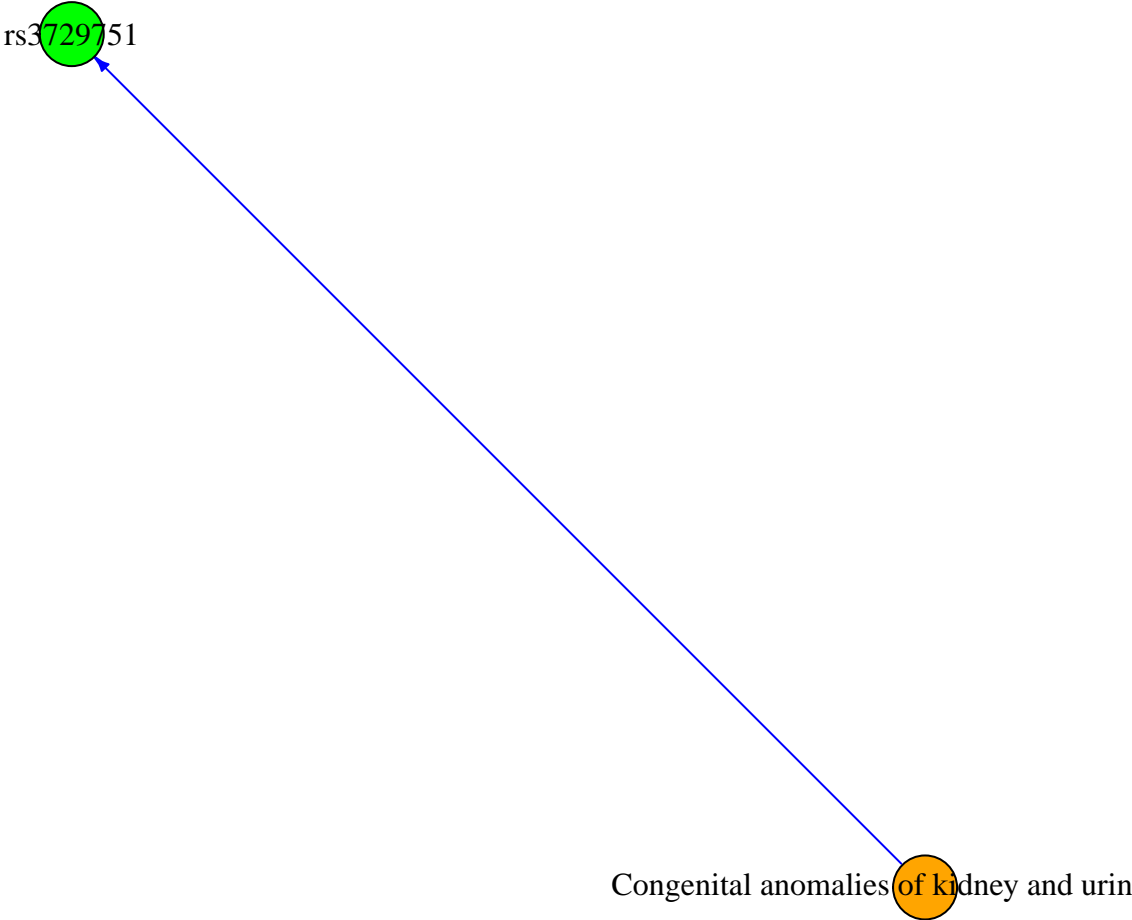

# nt-Disease Network (Congenital bilateral aplasia of vas deferens from CFTR

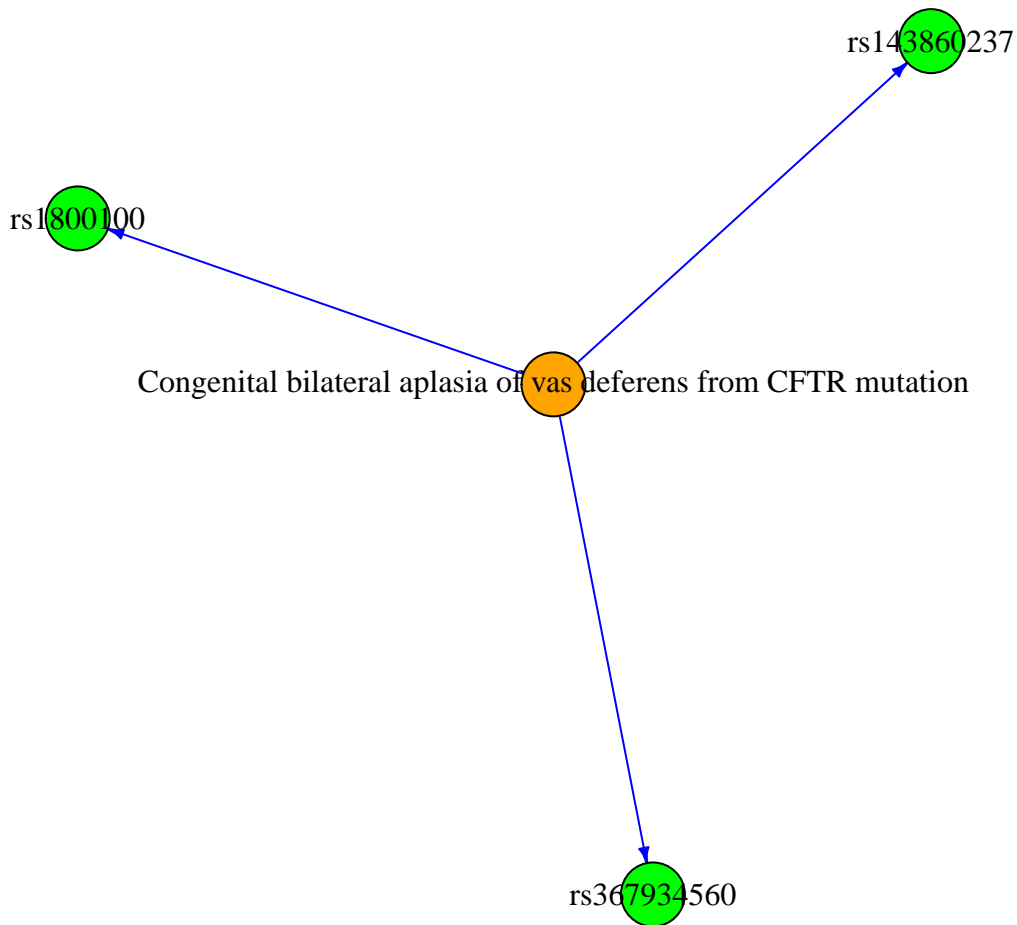

## Variant–Disease Network (Congenital cataract)

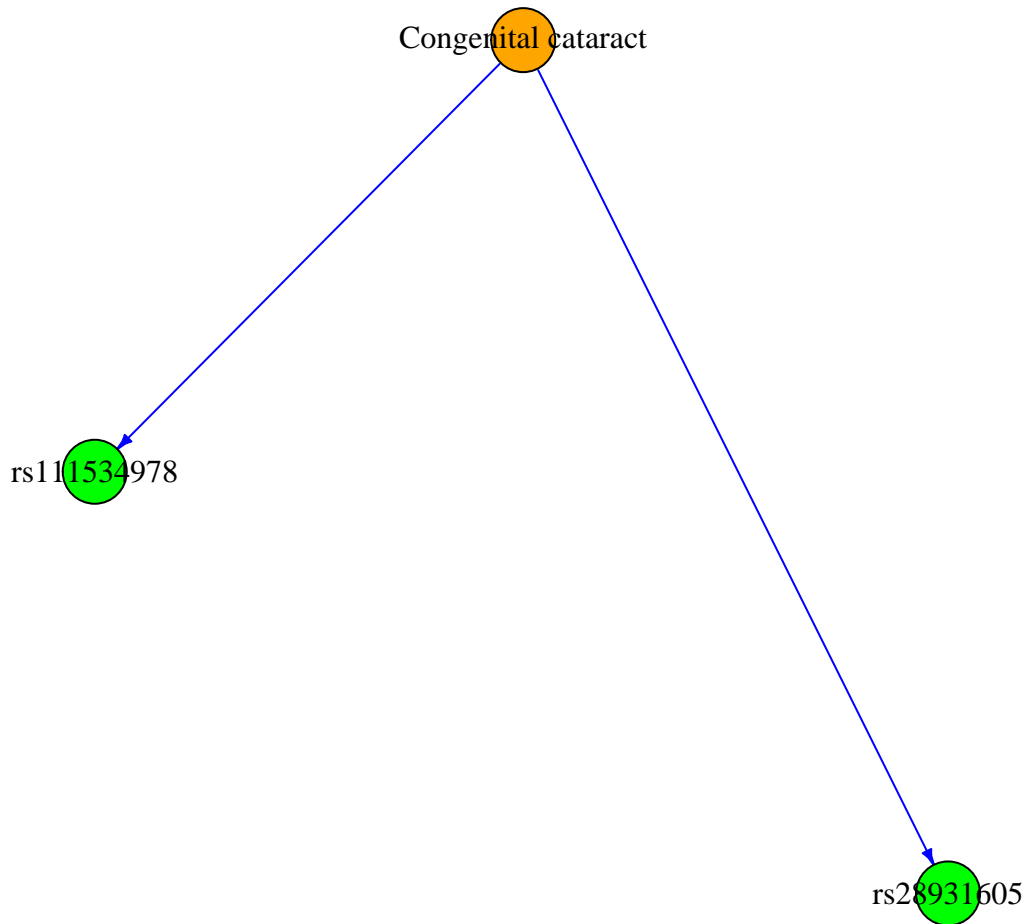



**Variant–Disease Network (Congenital cerebellar hypoplasia)**

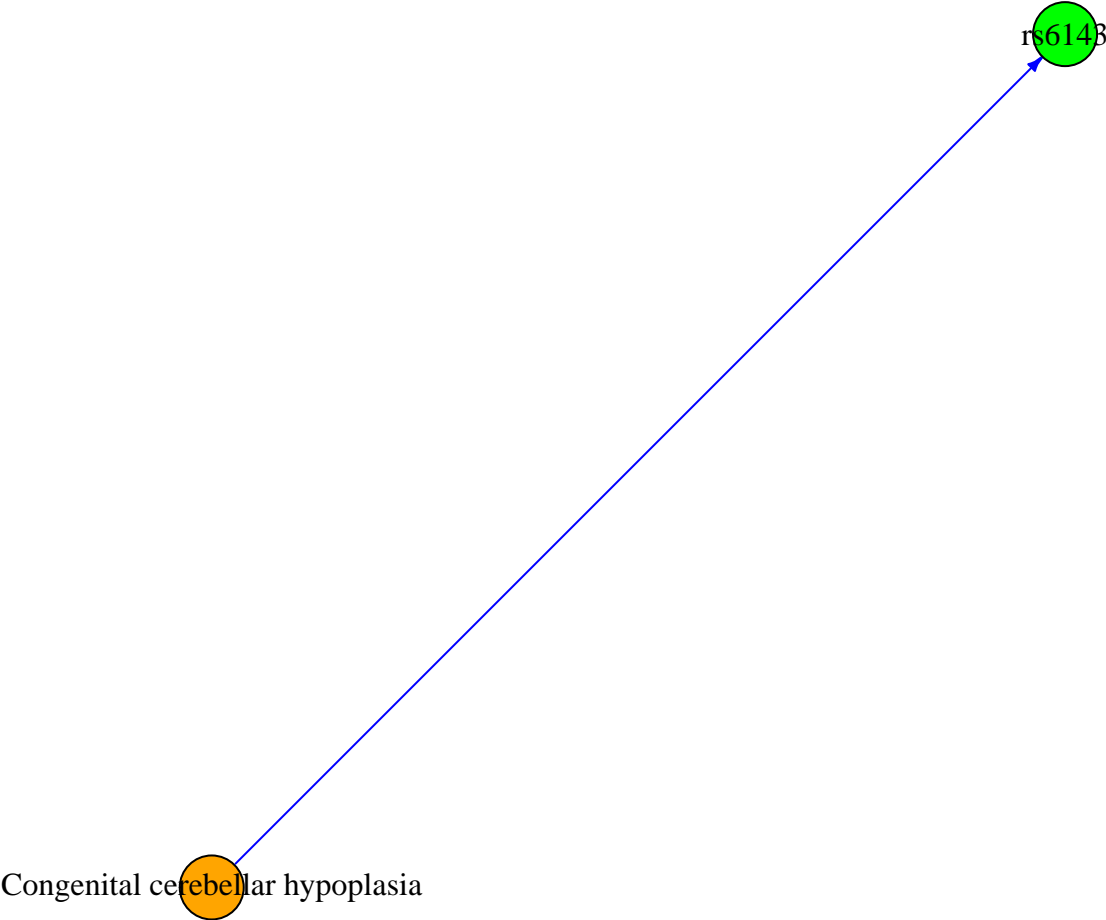

**Variant–Disease Network (Congenital contractural arachnodactyly)**

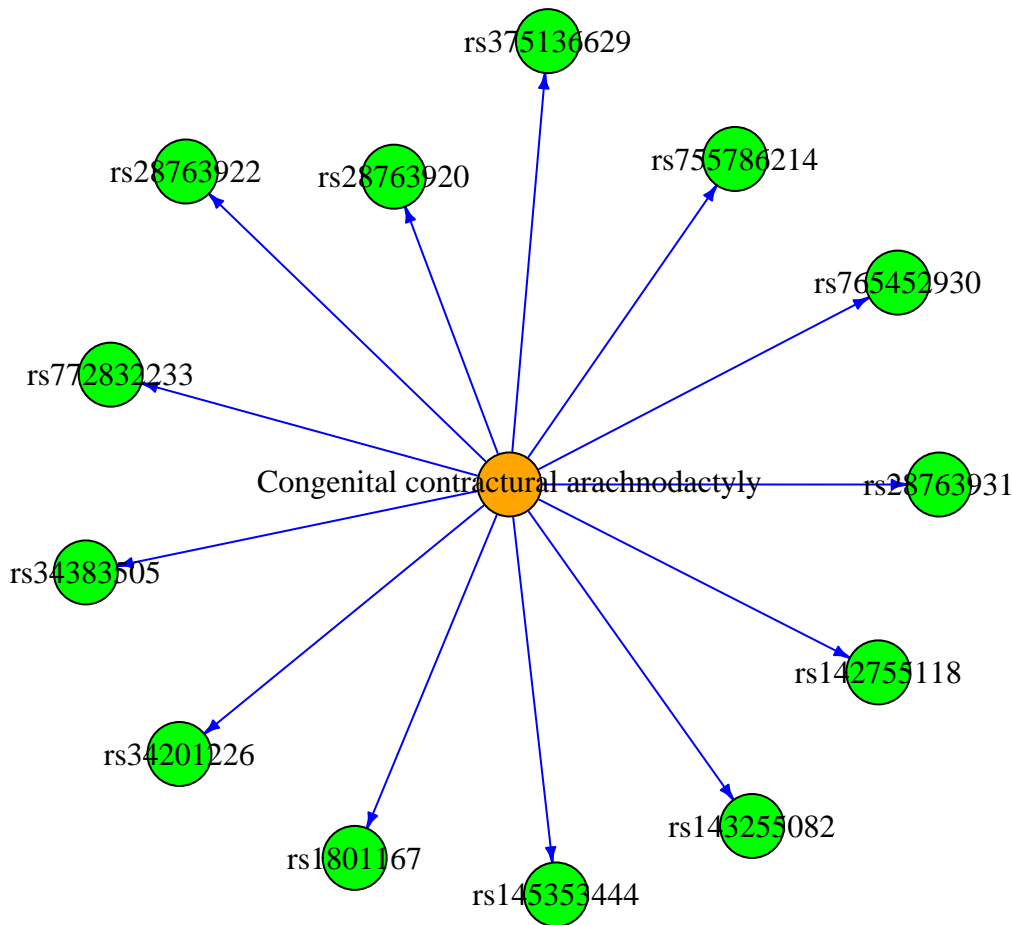

## Variant–Disease Network (Congenital defect of folate absorption)

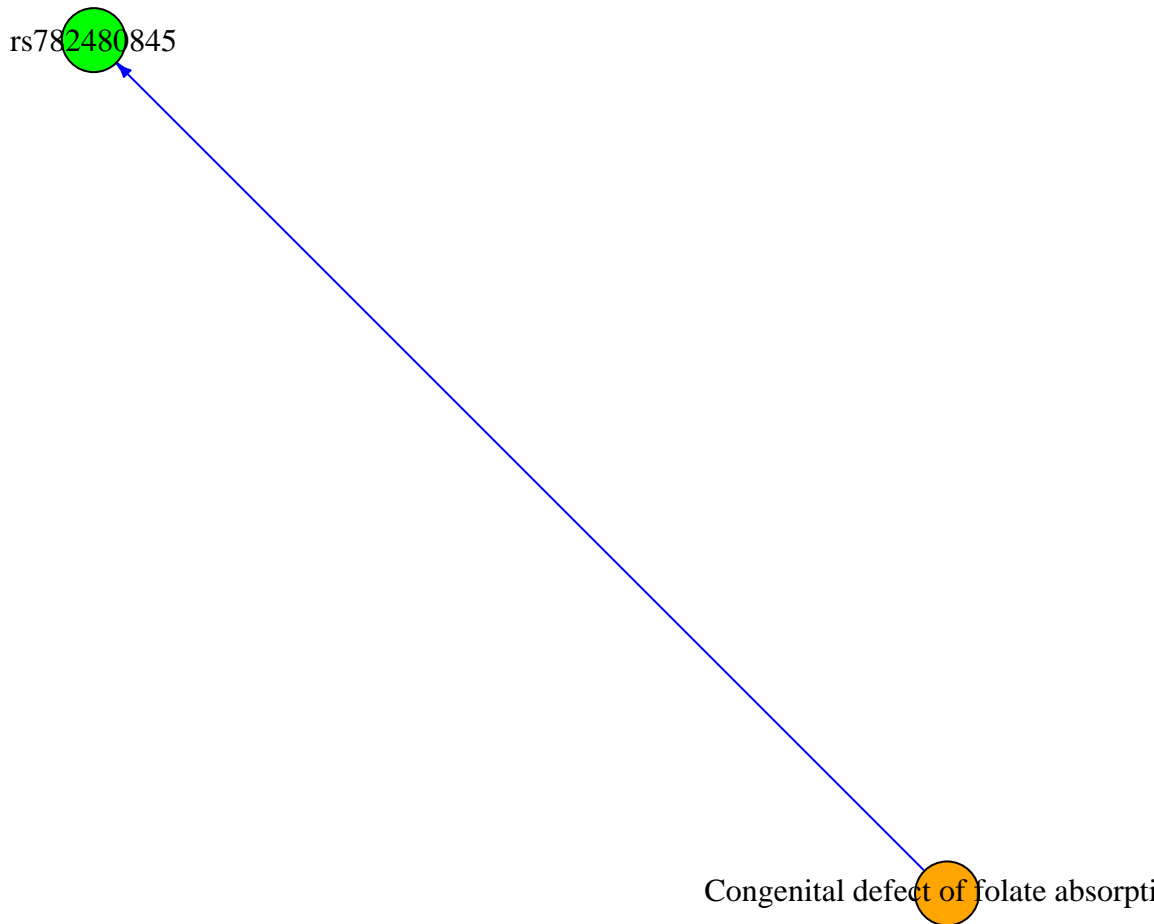

Variant–Disease Network (Congenital disorder of deglycosylation)

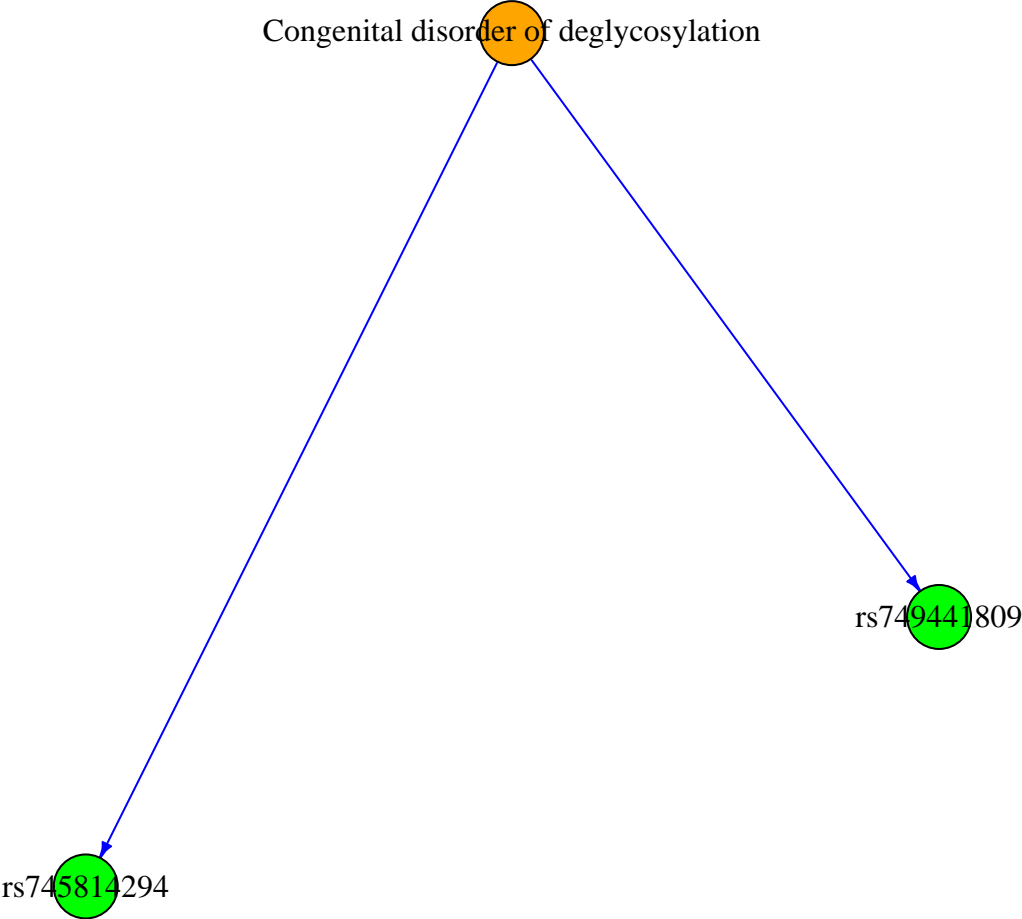

# Variant–Disease Network (Congenital disorder of glycosylation)

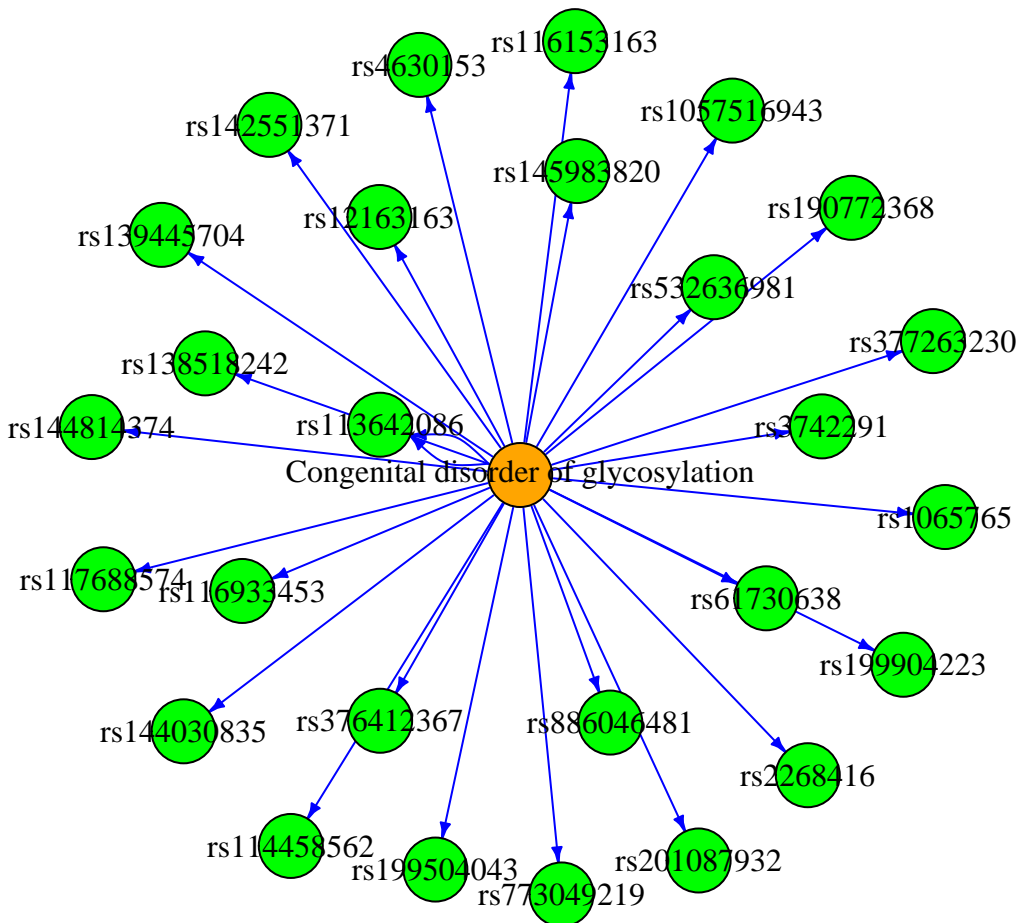

**Variant–Disease Network (Congenital disorder of glycosylation type 1D)**

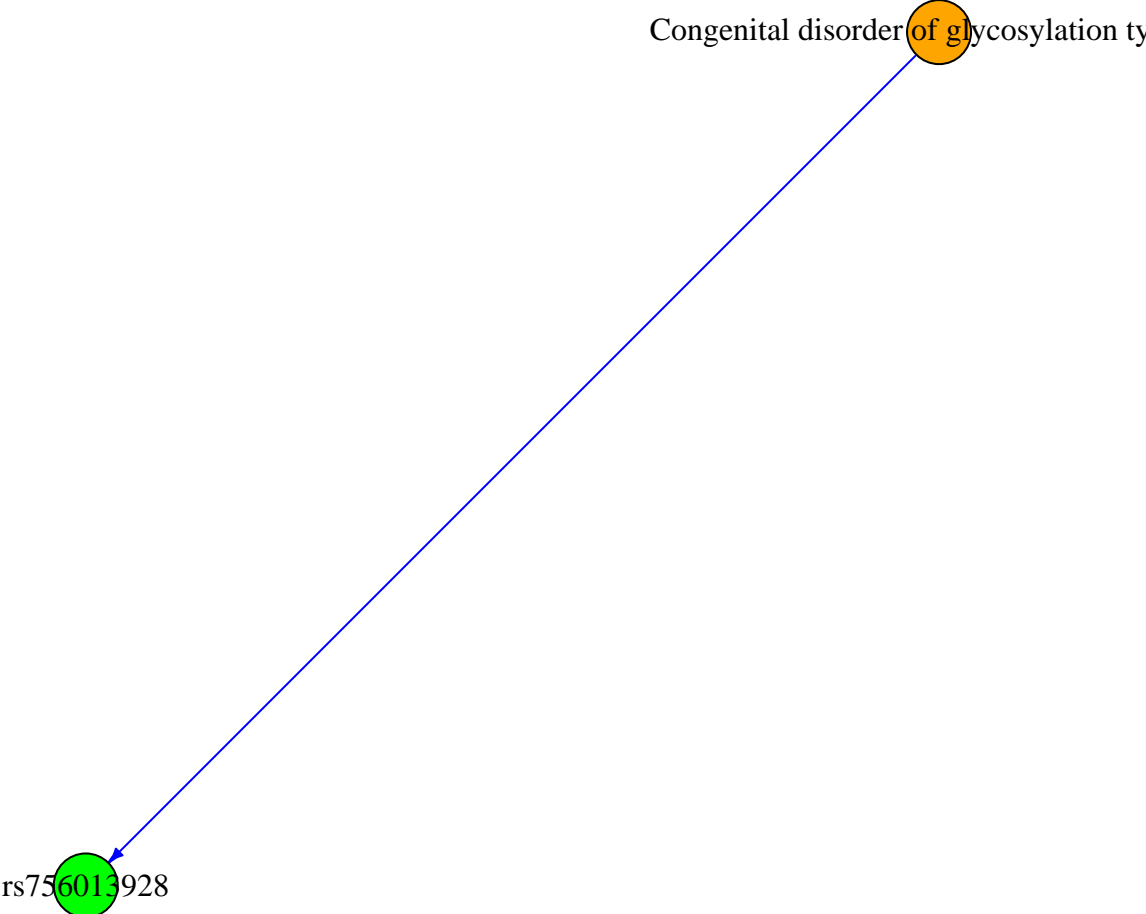

# Variant–Disease Network (Congenital disorder of glycosylation type 1N)

Congenital disorder of glycosylation type 1N

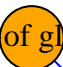

rs138803905

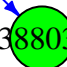

**Variant–Disease Network (Congenital disorder of glycosylation type 1t)**

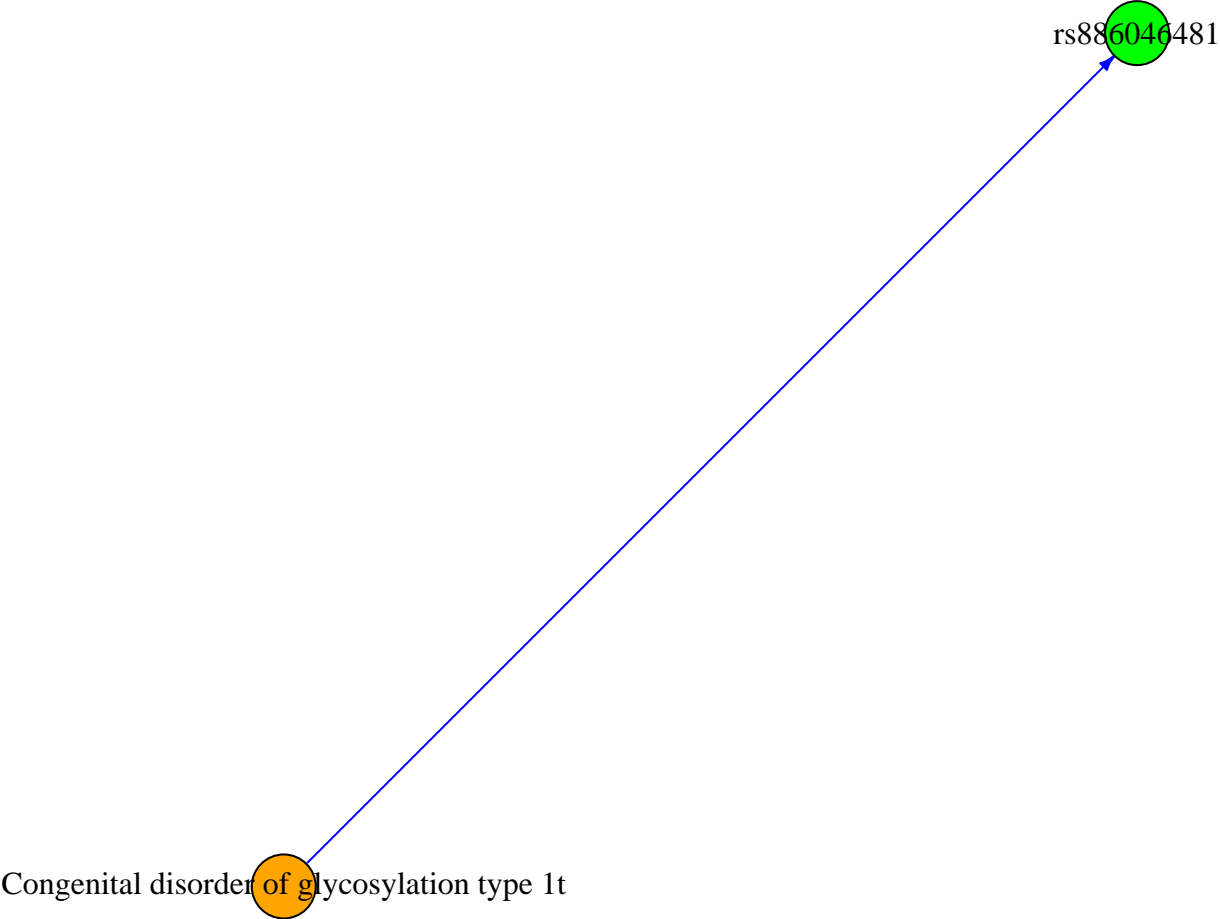



**Variant–Disease Network (Congenital disorder of glycosylation type 2B)**

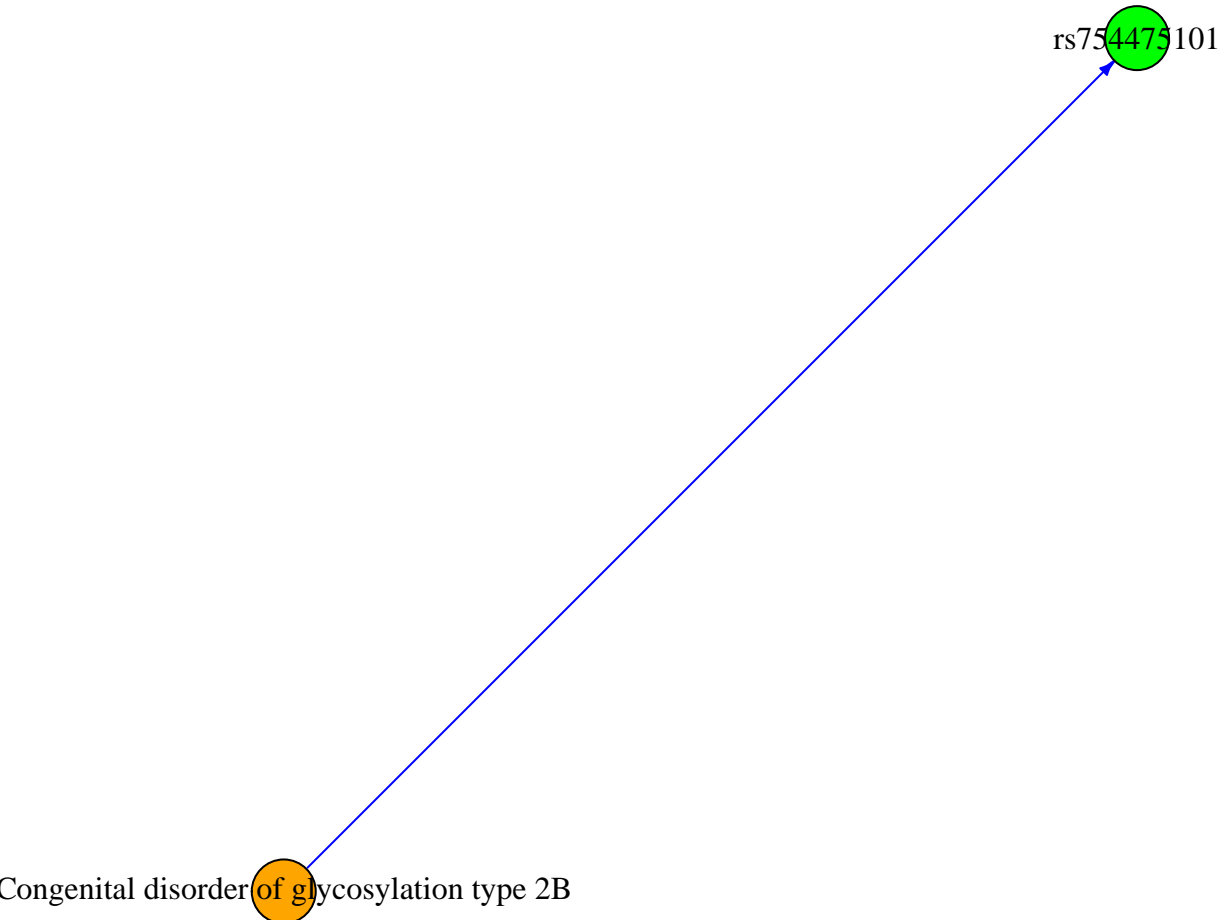

**Variant–Disease Network (Congenital disorder of glycosylation type 2C)**

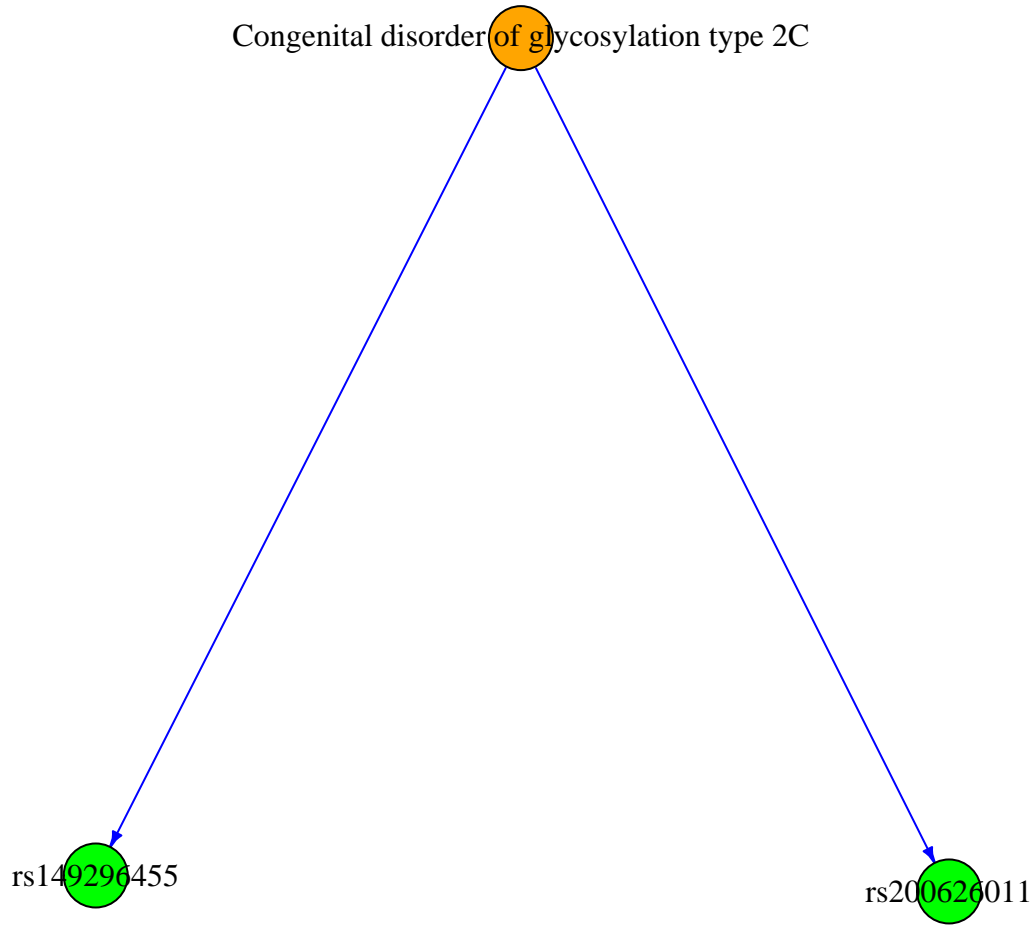

# Variant–Disease Network (Congenital dyserythropoietic anemia)

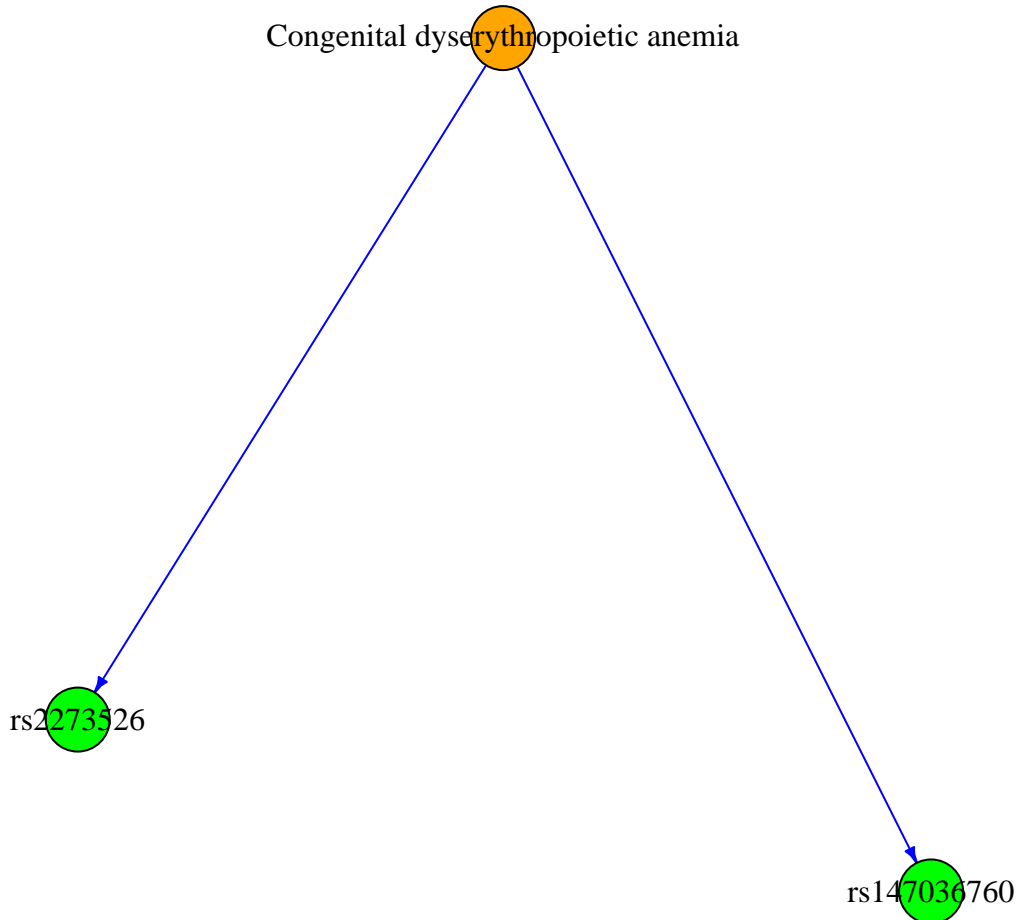

Variant–Disease Network (Congenital fiber–type disproportion)

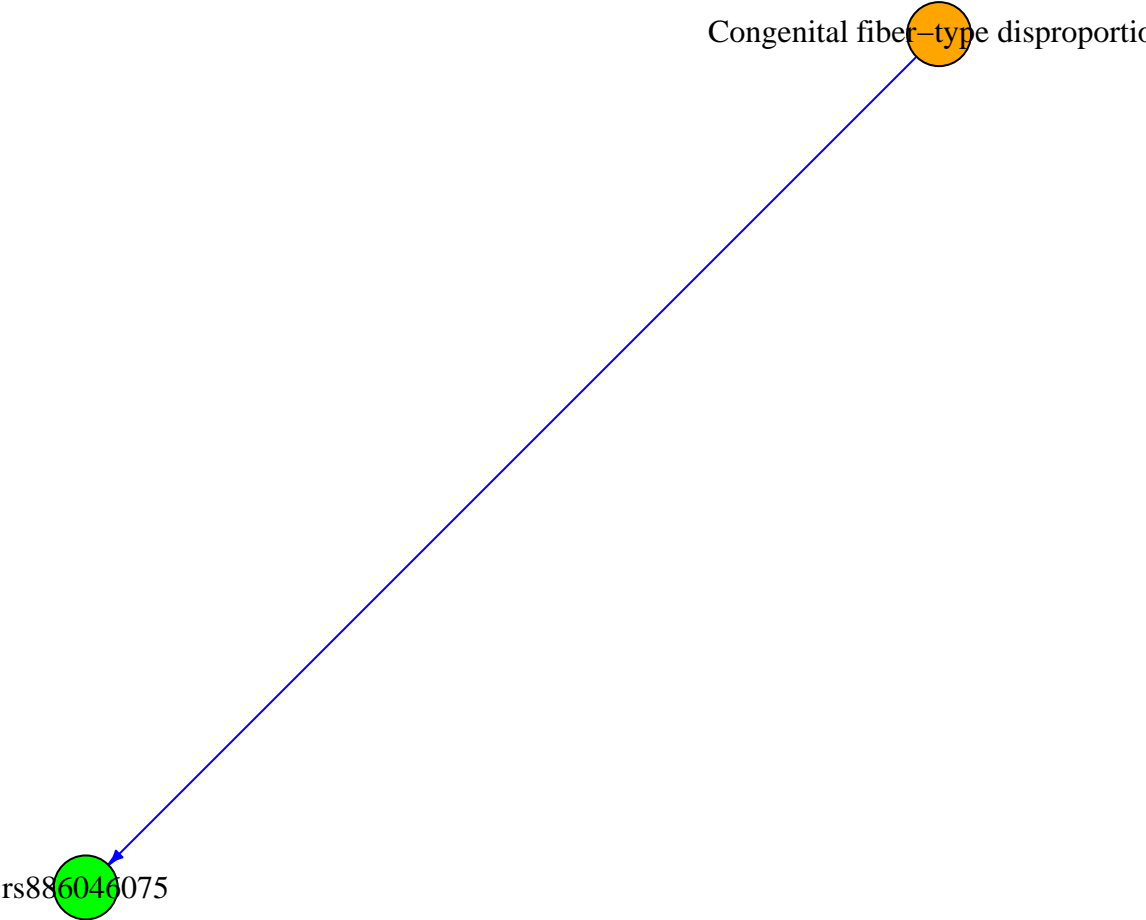

Variant–Disease Network (Congenital fibrosis of the extraocular muscles

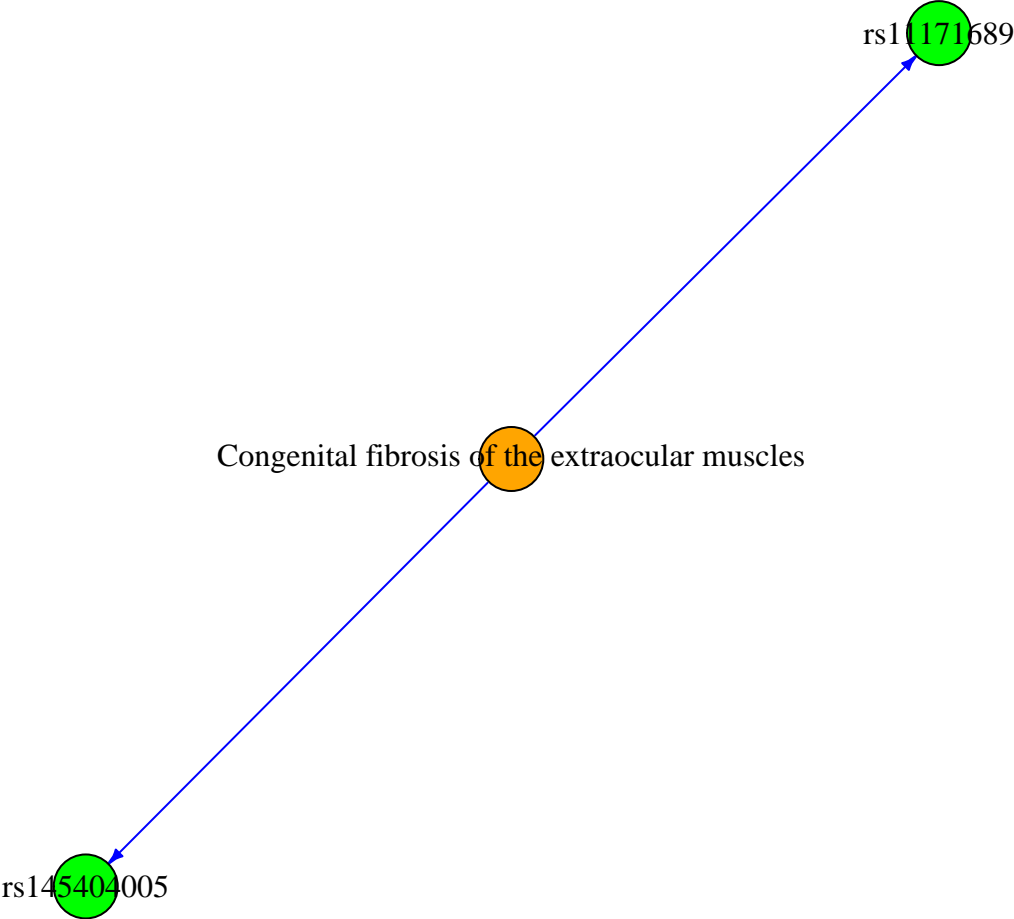

Variant–Disease Network (Congenital generalized lipodystrophy)

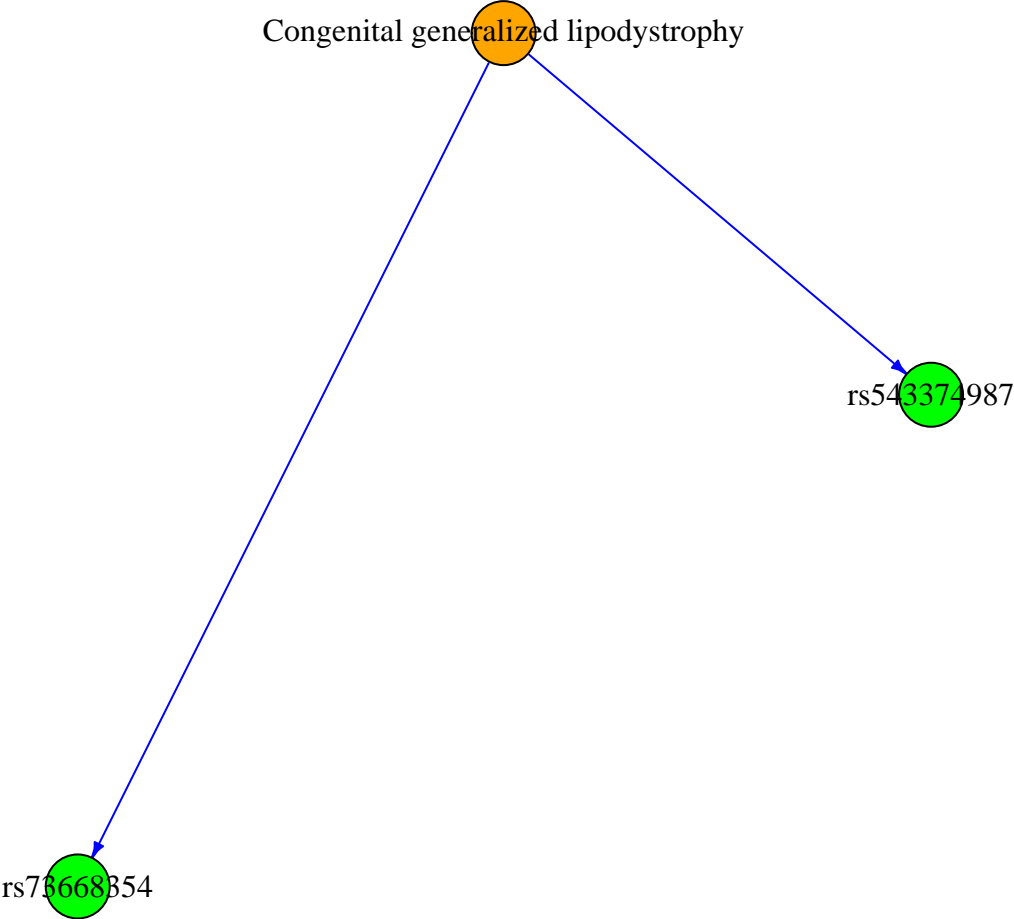

Variant–Disease Network (Congenital glucose–galactose malabsorption)

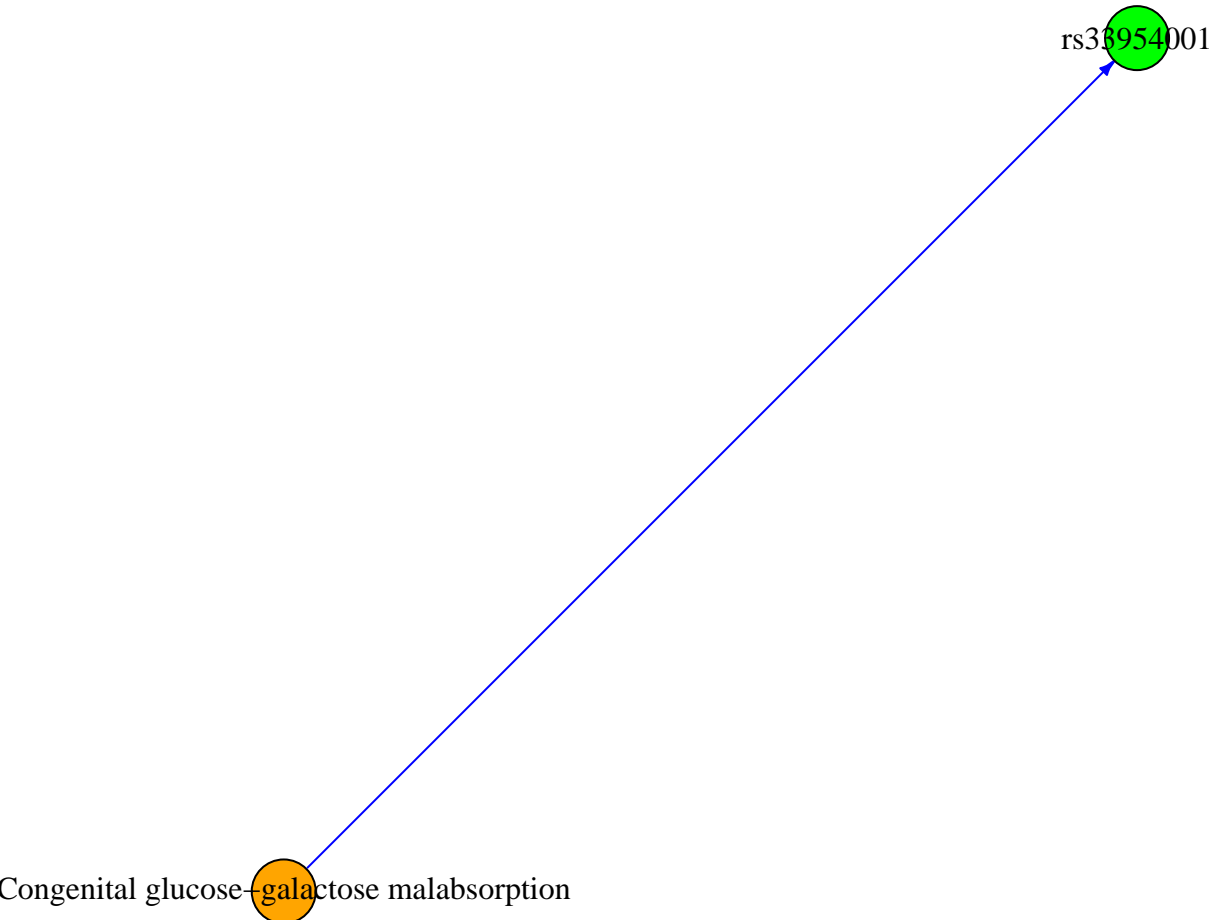

# Variant–Disease Network (Congenital heart defects 1)

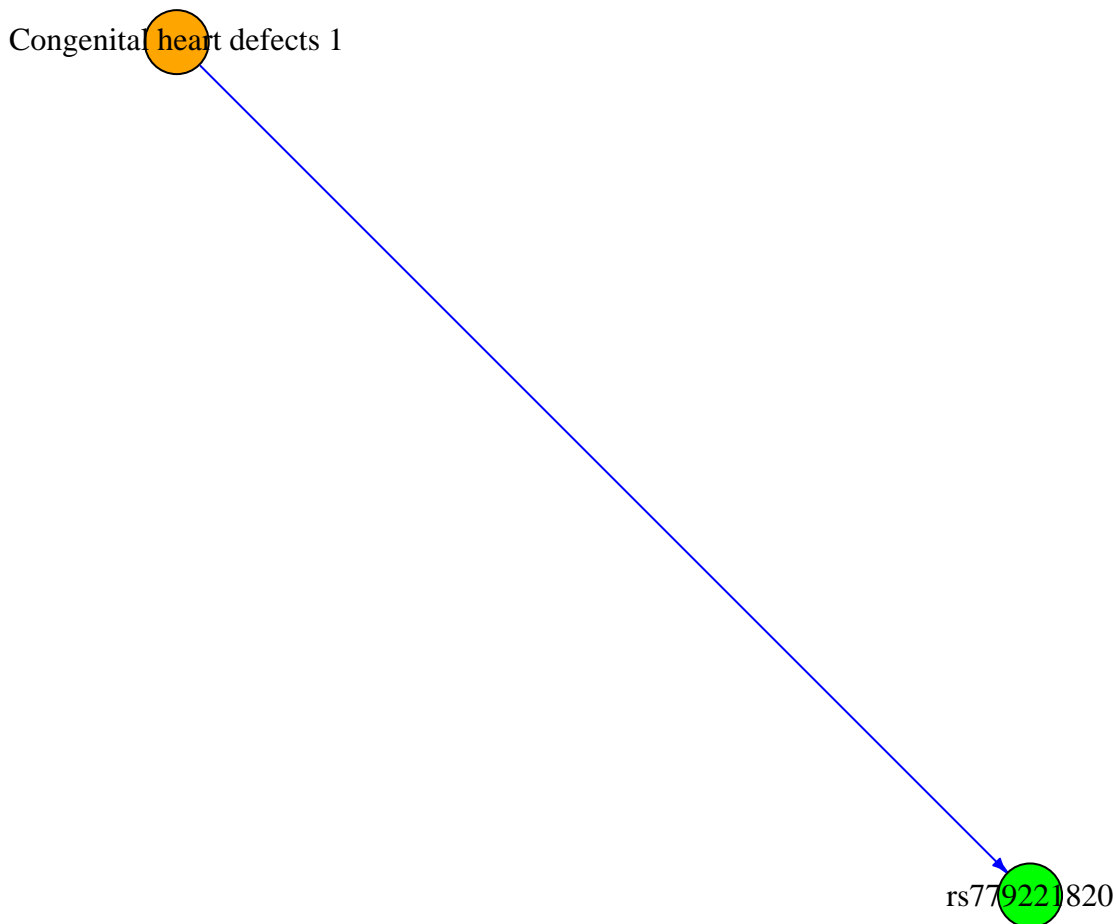



Variant–Disease Network (Congenital hyperammonemia)

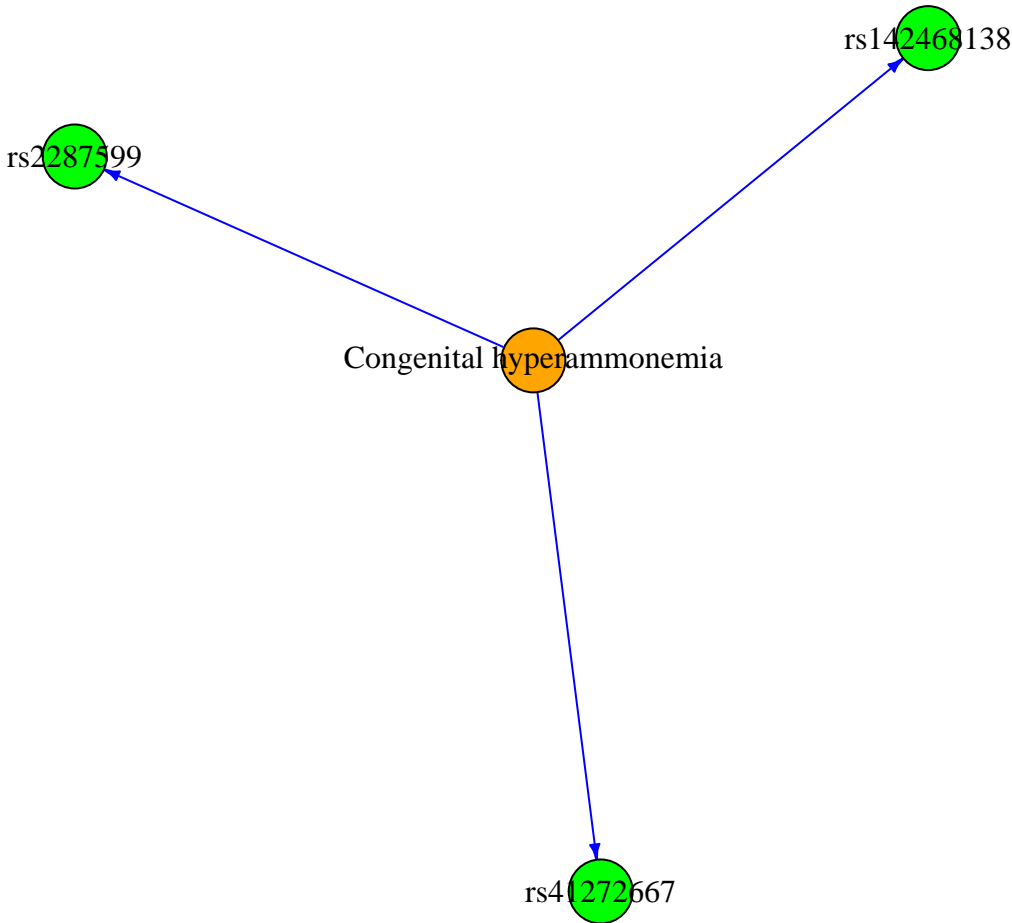

## Variant–Disease Network (Congenital hypothyroidism)

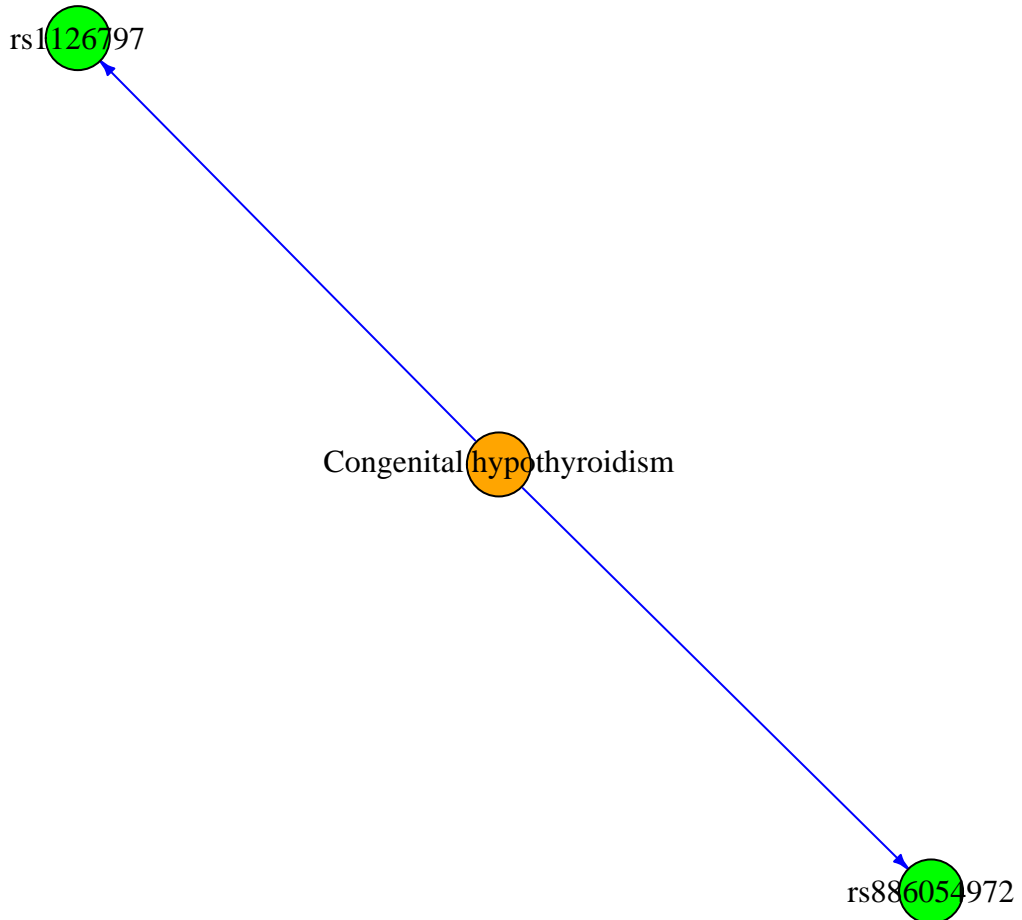

# Variant–Disease Network (Congenital ichthyosiform erythroderma)

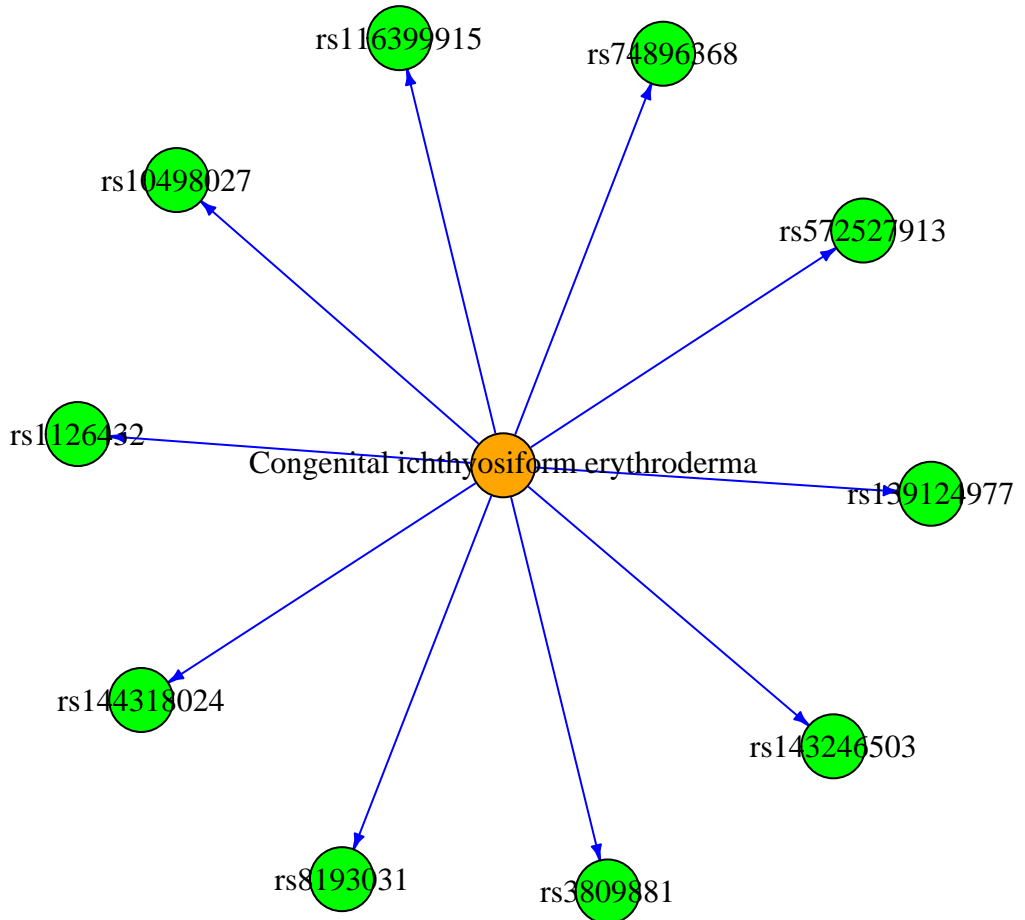

# Variant–Disease Network (Congenital ichthyosis of skin)

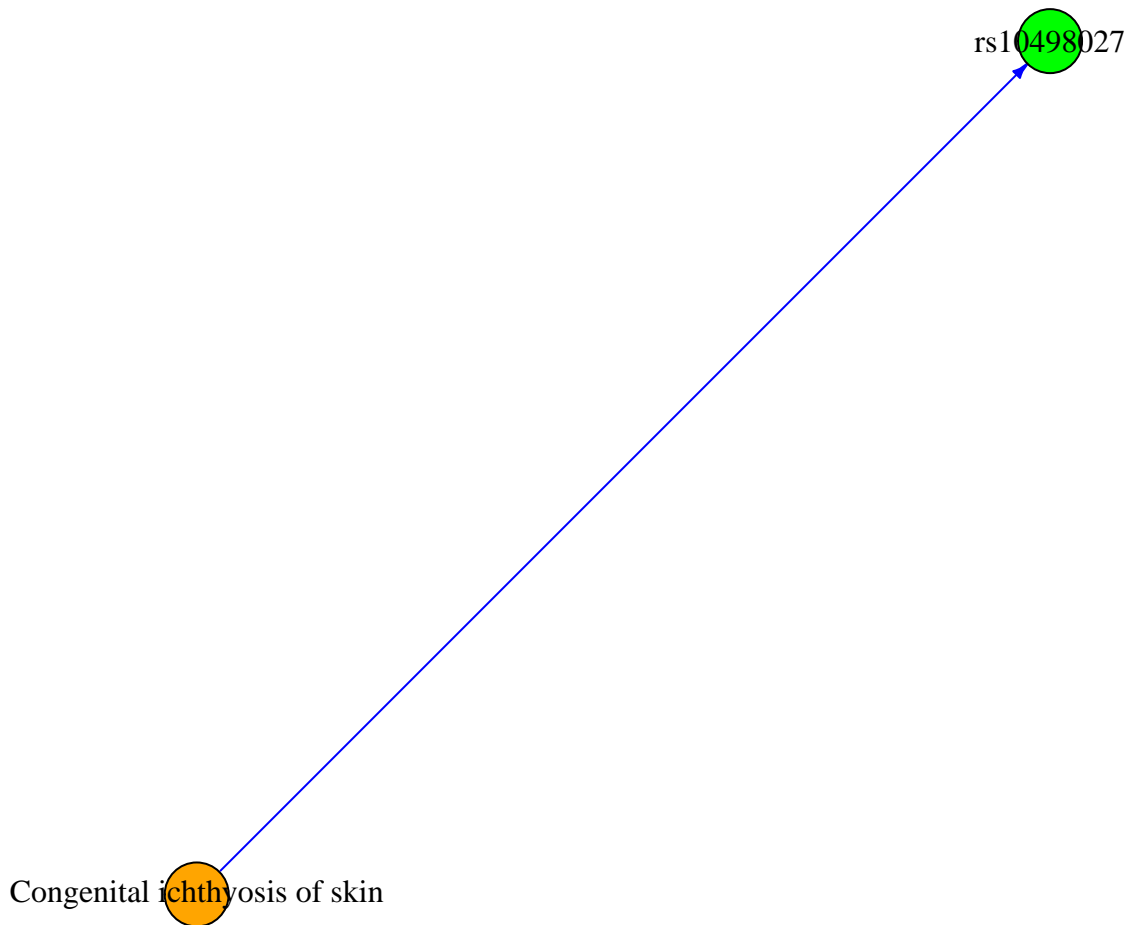

**Variant–Disease Network (Congenital lactase deficiency)**

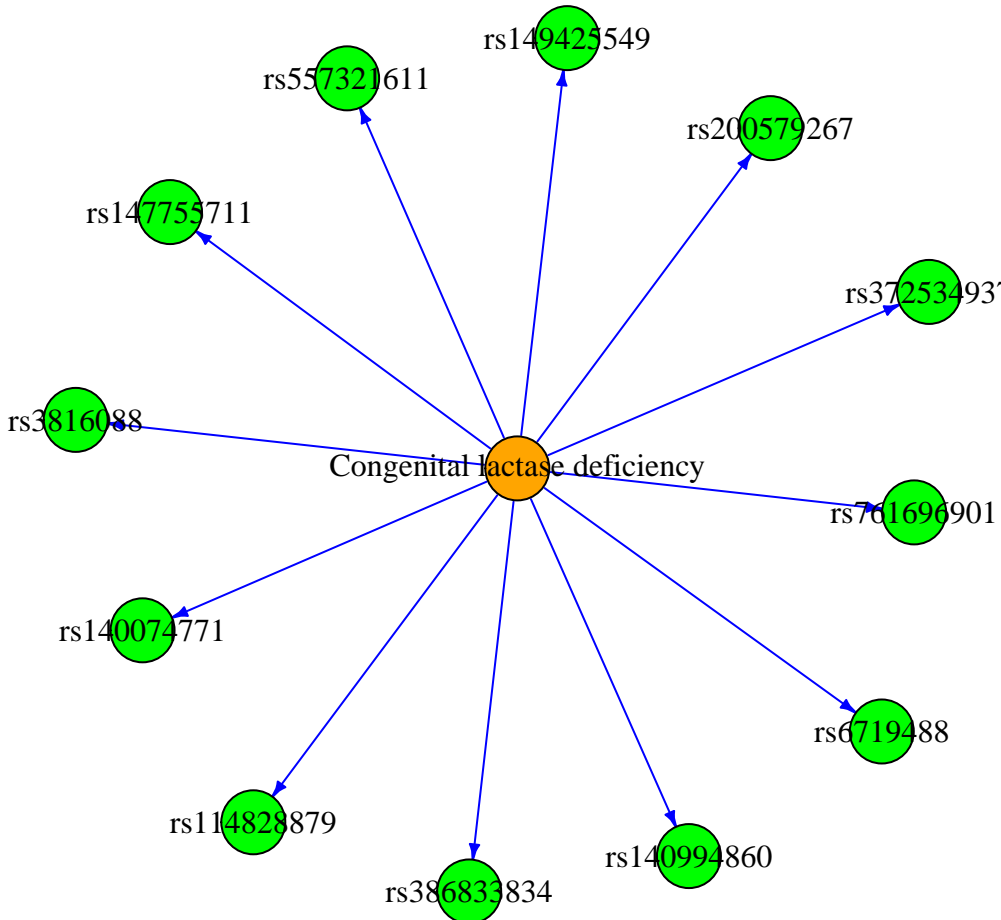

Variant–Disease Network (Congenital long QT syndrome)

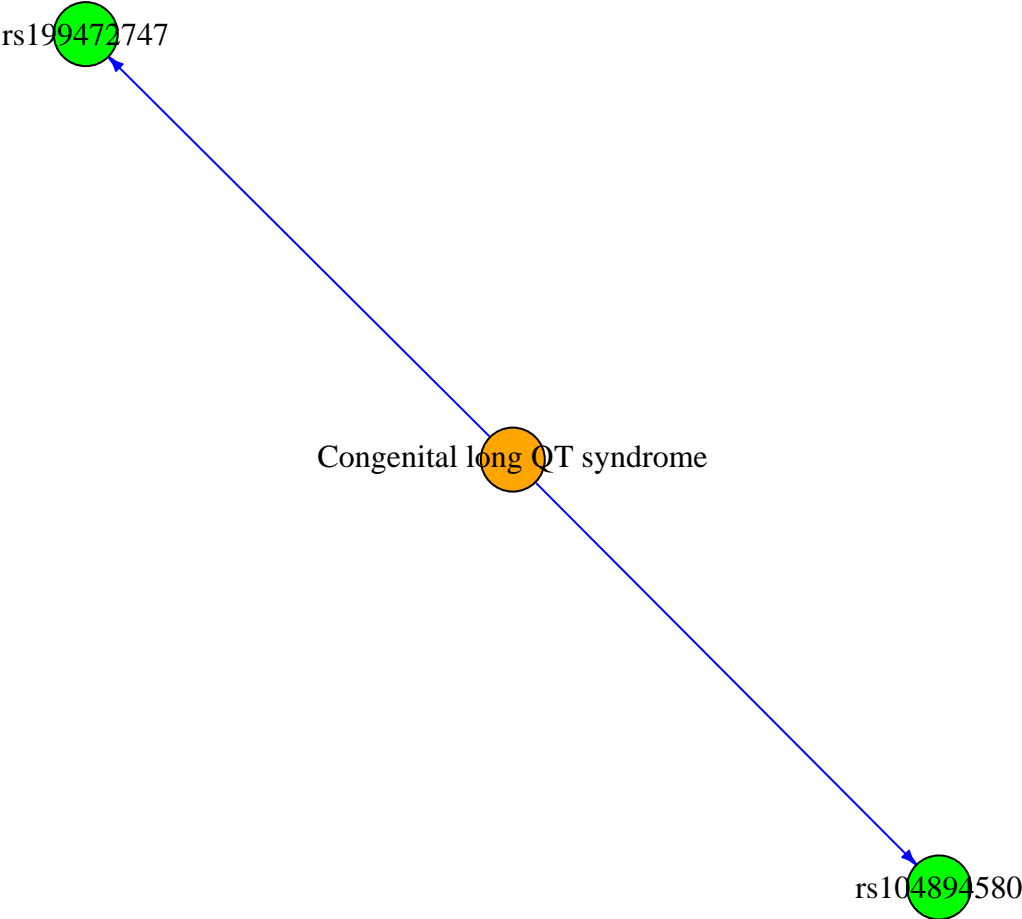

Variant–Disease Network (Congenital Muscular Dystrophy)

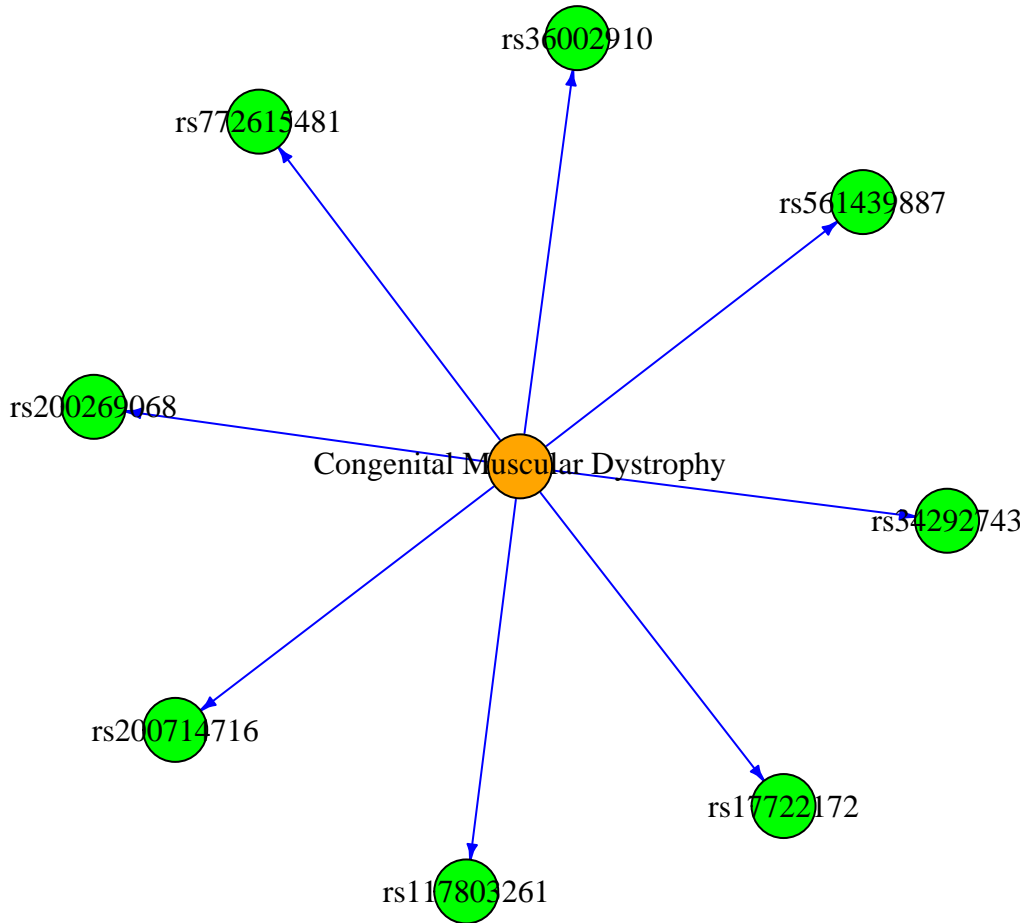

ork (Congenital muscular dystrophy–dystroglycanopathy (with or without m

Congenital muscular dystrophy–dystroglycanopathy (with or wit

rs75079578

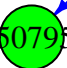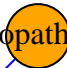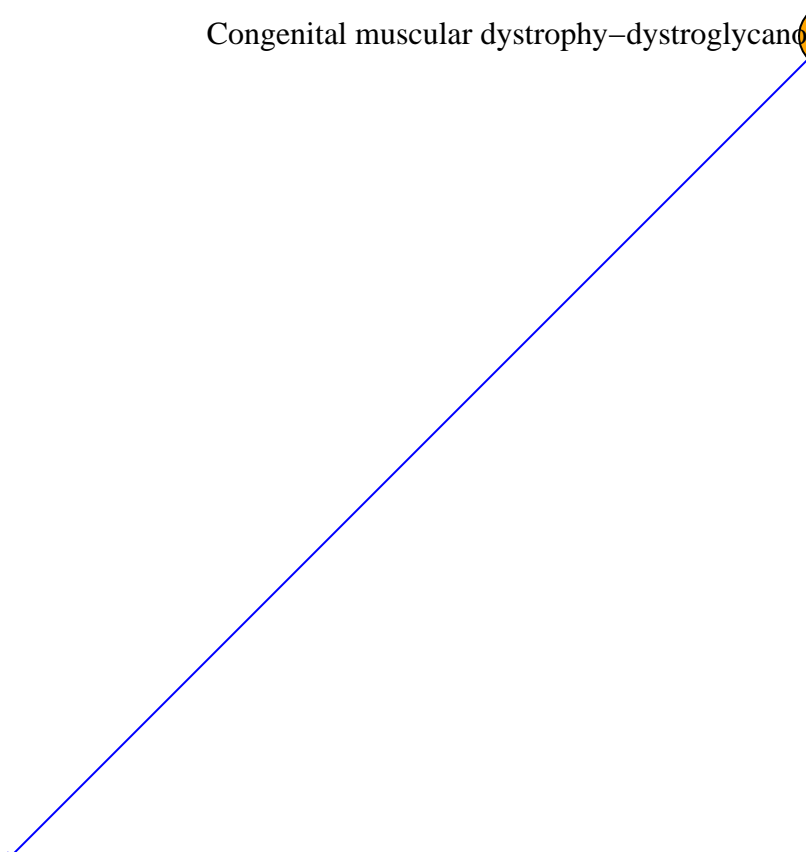



# Case Network (Congenital muscular dystrophy–dystroglycanopathy with brain a

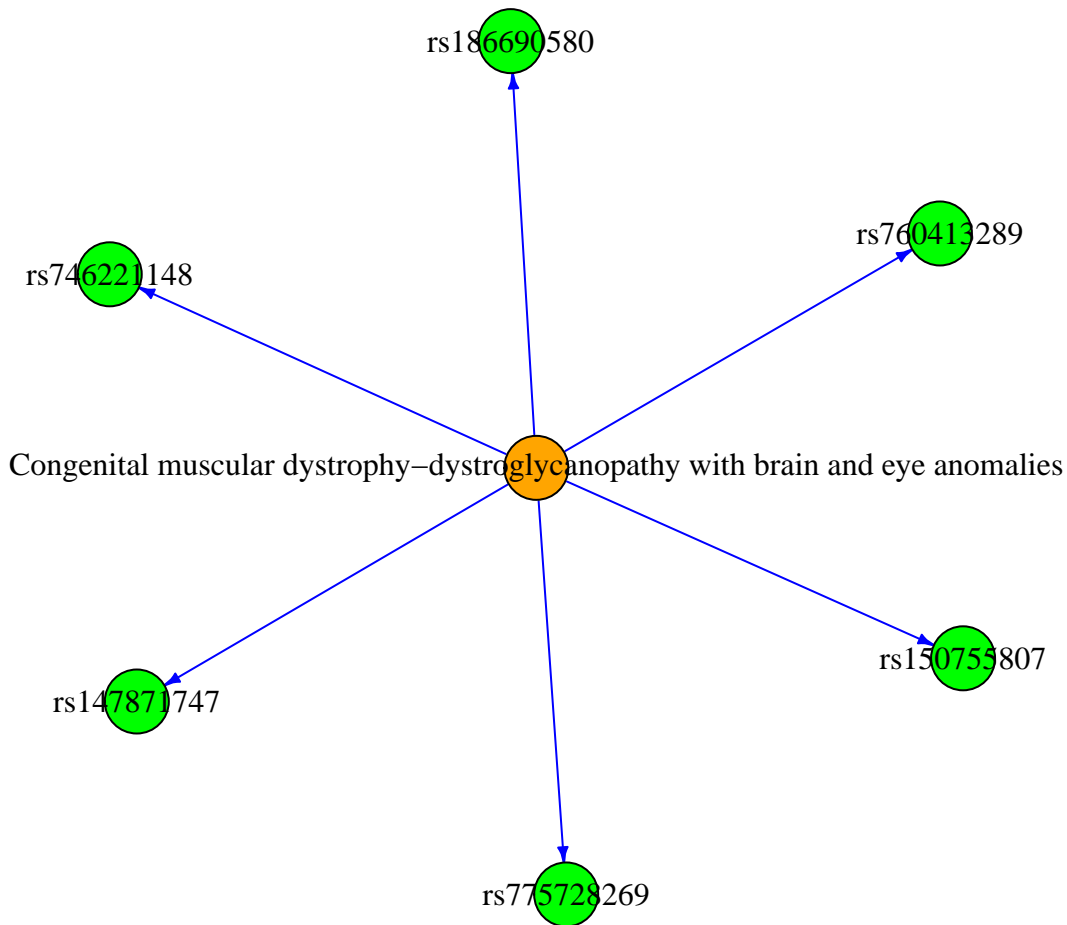

Network (Congenital muscular dystrophy–dystroglycanopathy with brain and

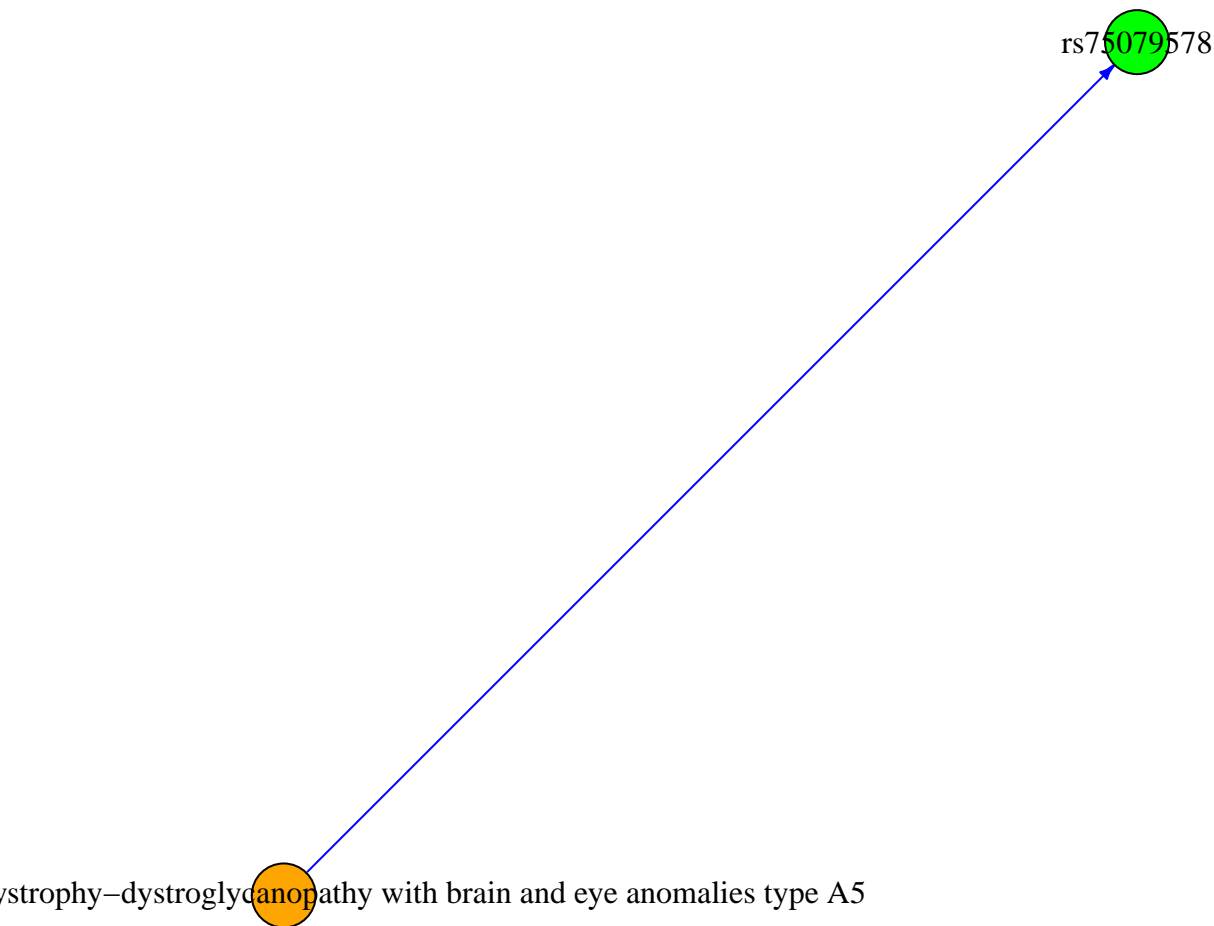

# Disease Network (Congenital muscular dystrophy–dystroglycanopathy with me

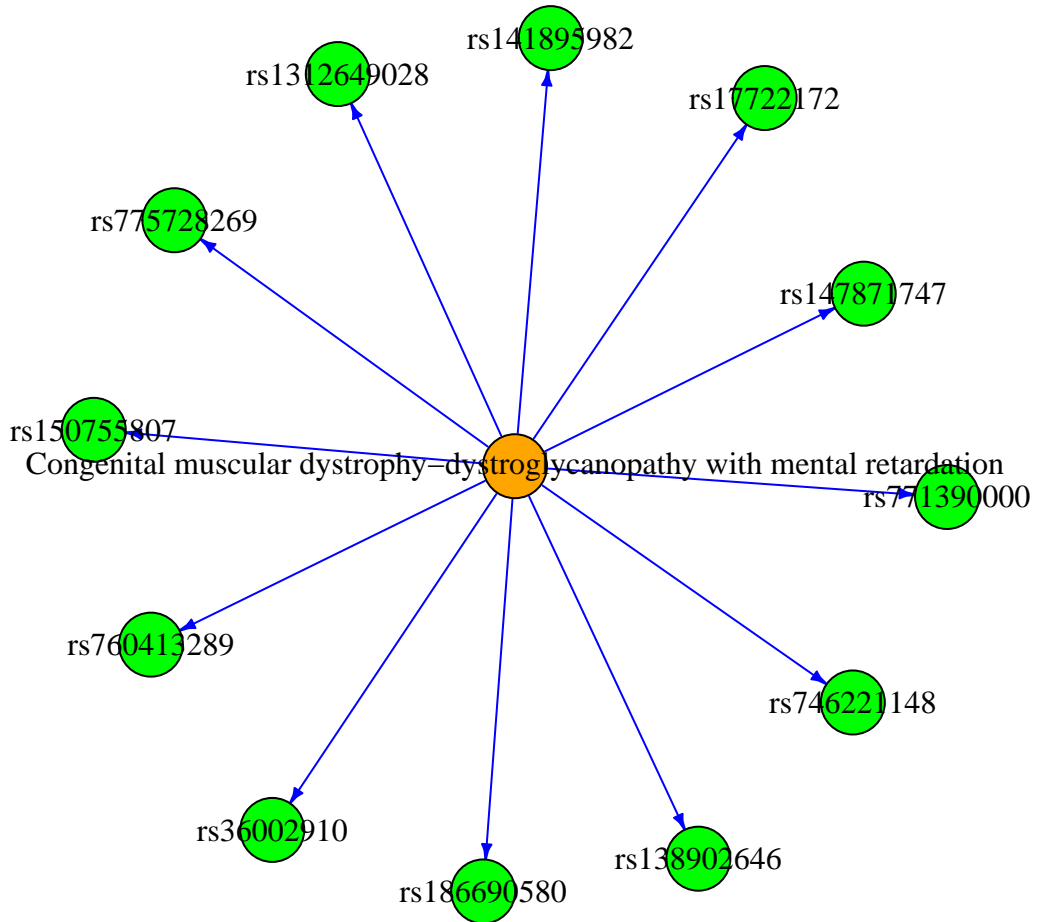

# Variant–Disease Network (Congenital muscular hypertrophy–cerebral syndrome)

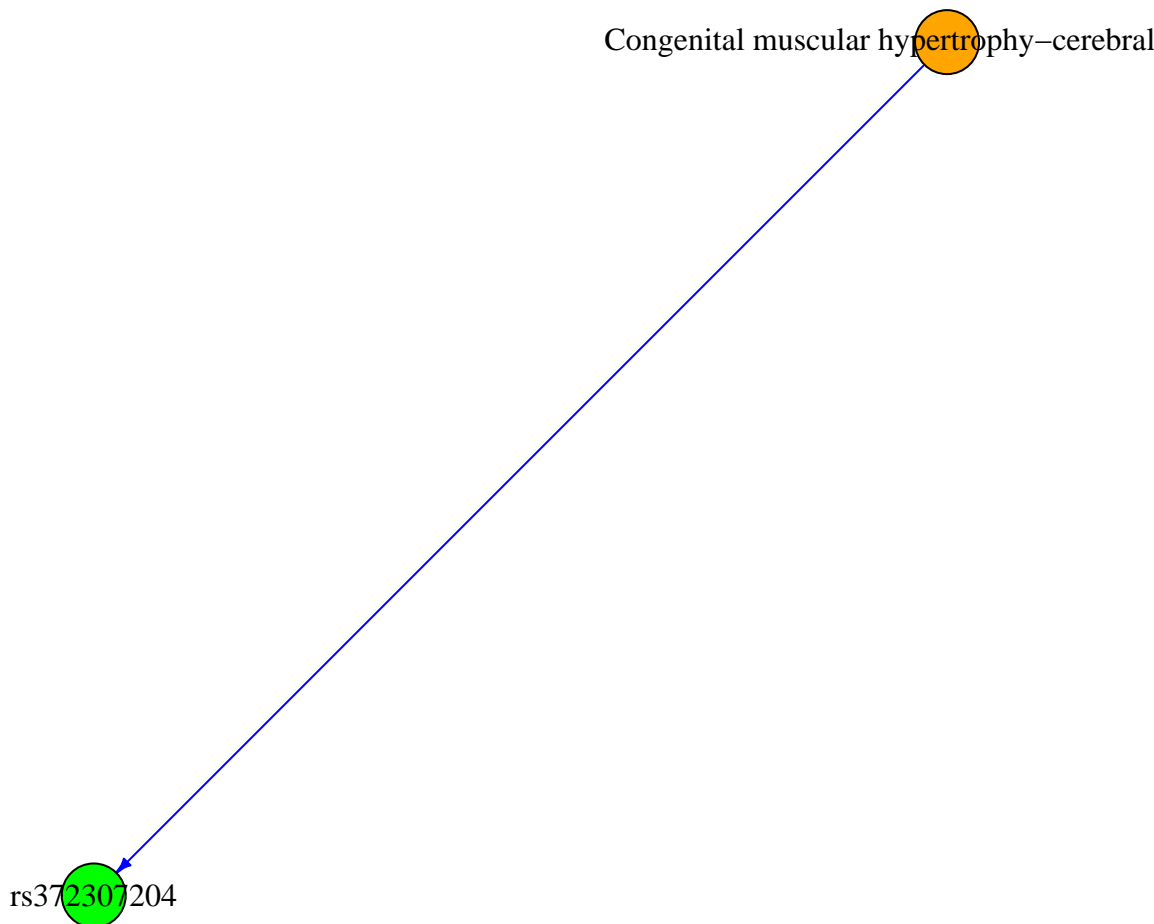

Variant–Disease Network (Congenital Myasthenic Syndrome)

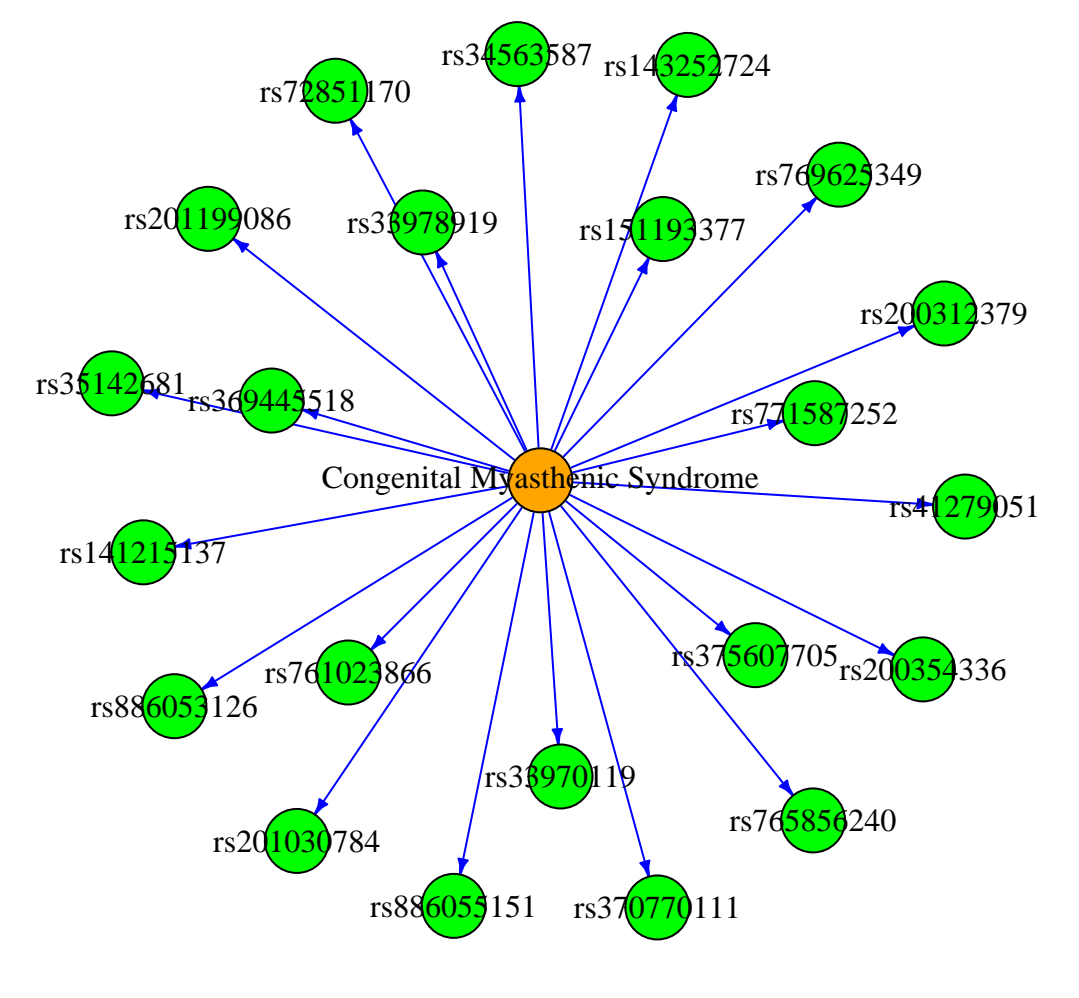

# Variant–Disease Network (Congenital myasthenic syndrome 12)

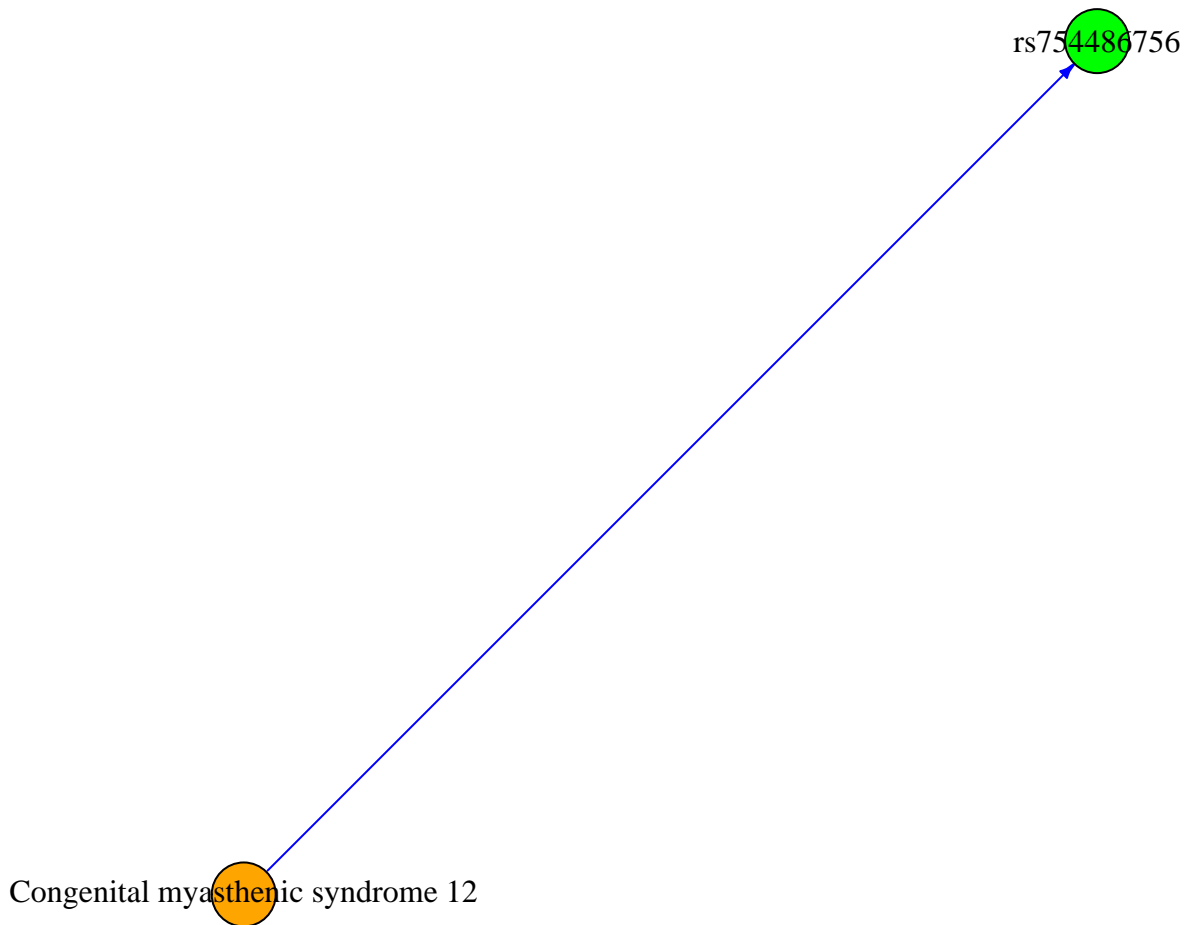

Variant–Disease Network (Congenital myotonia)

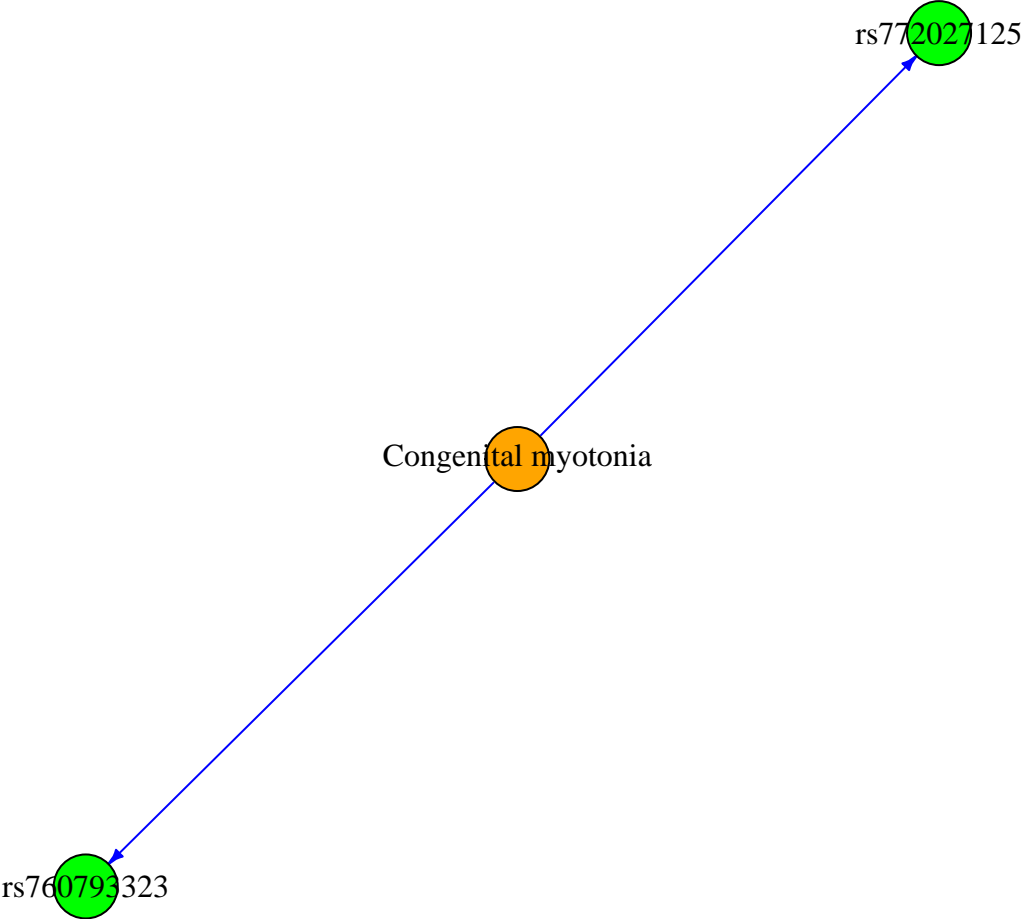

**Variant–Disease Network (Congenital secretory diarrhea)**

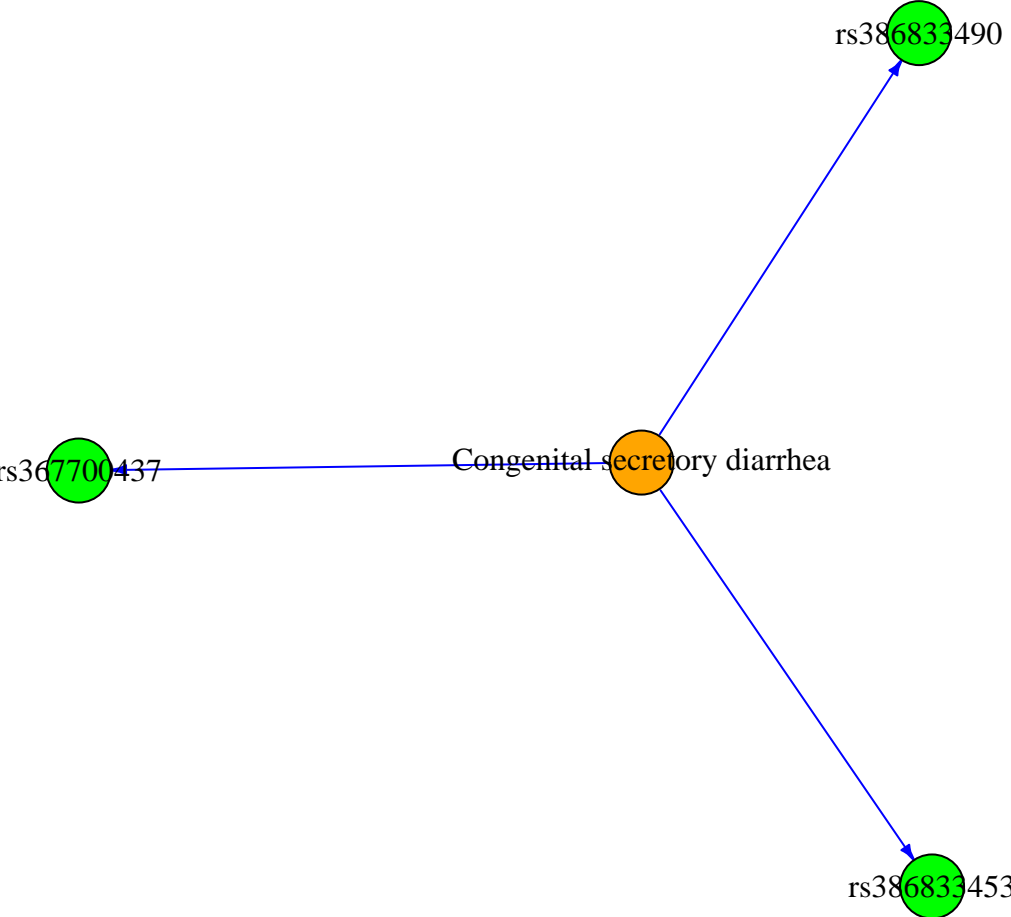



# Variant–Disease Network (Congenital Stationary Night Blindness)

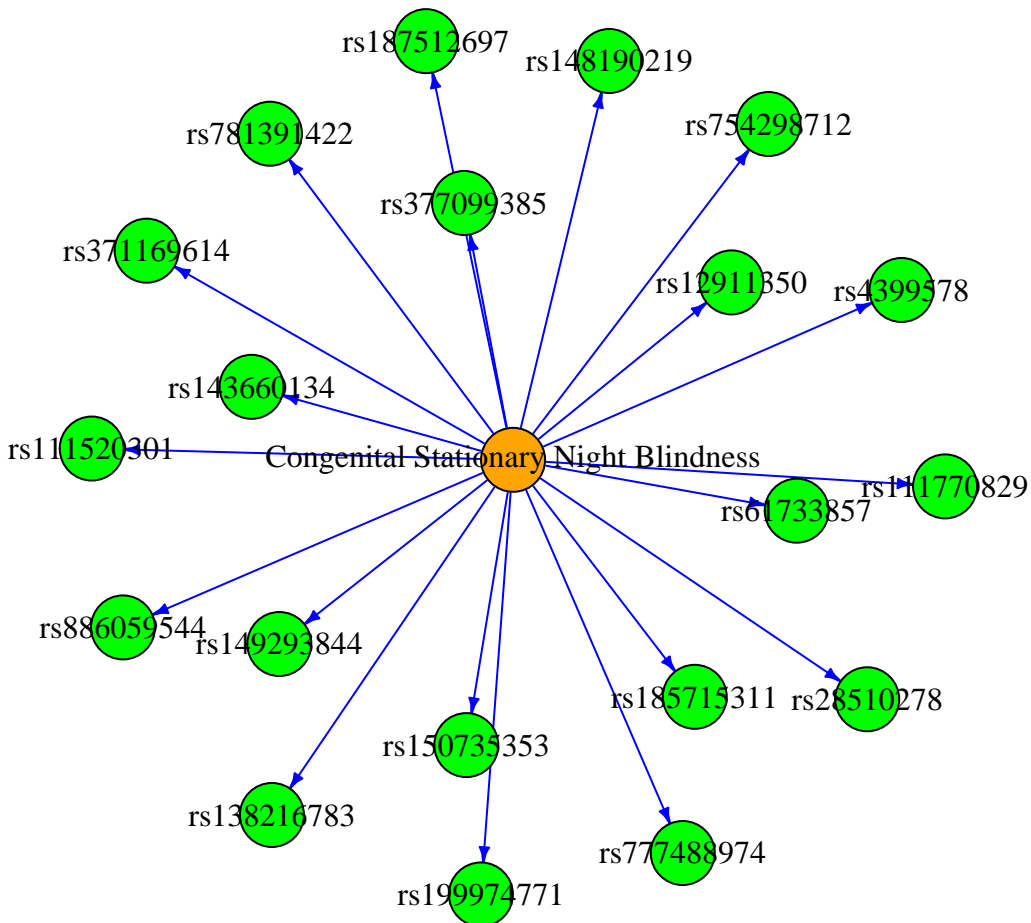

**Variant–Disease Network (Connective tissue disorder)**

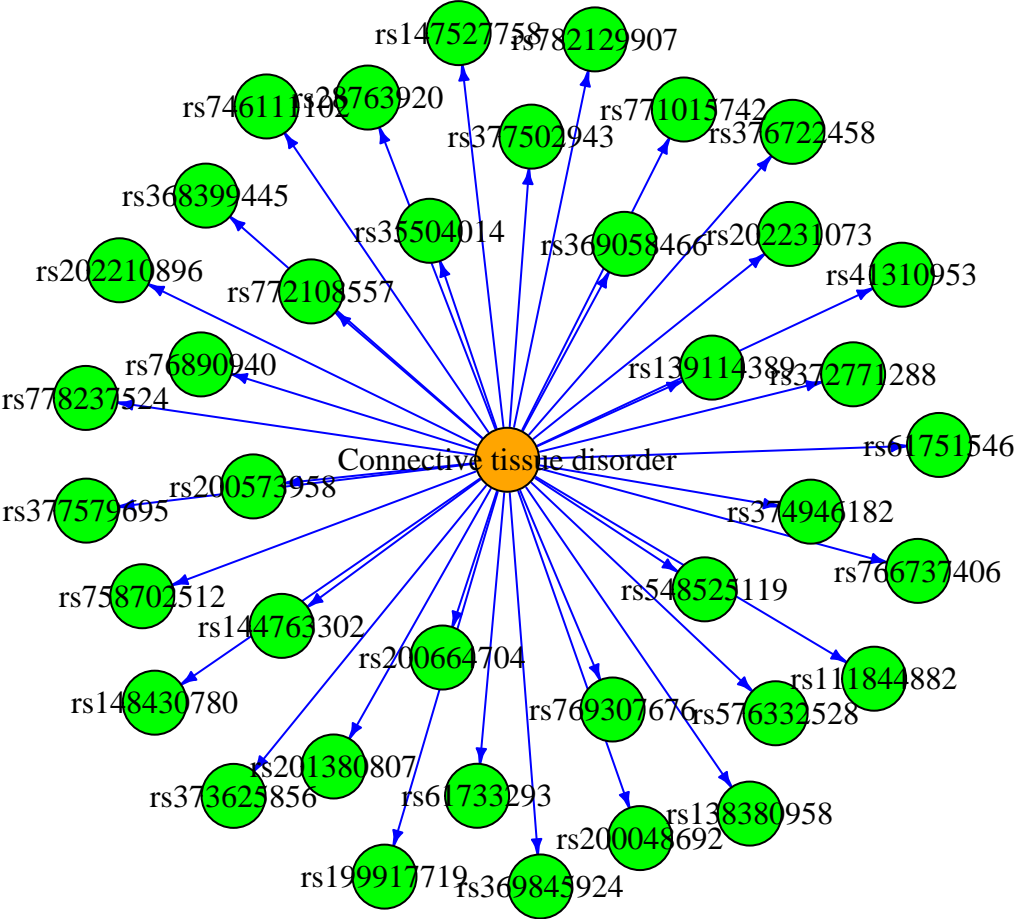

## Variant–Disease Network (Corneal Dystrophy)

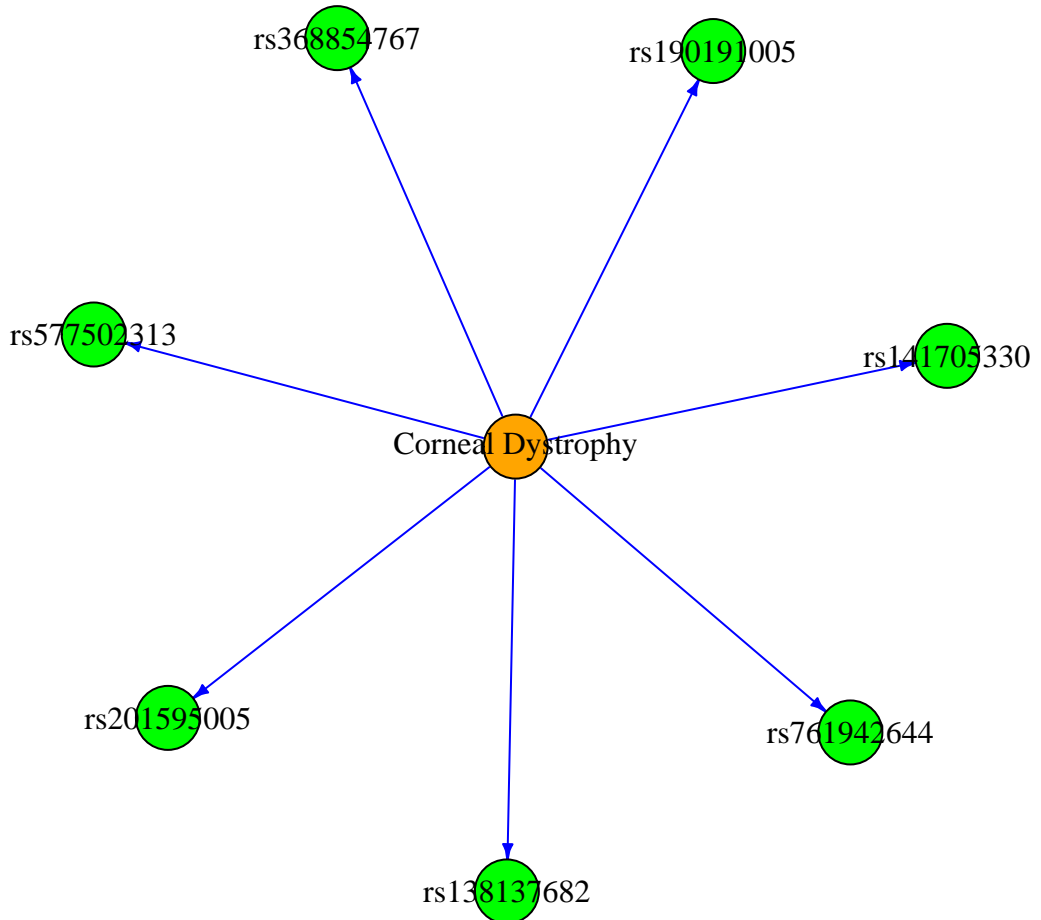

# Variant–Disease Network (Cornelia de Lange Syndrome)

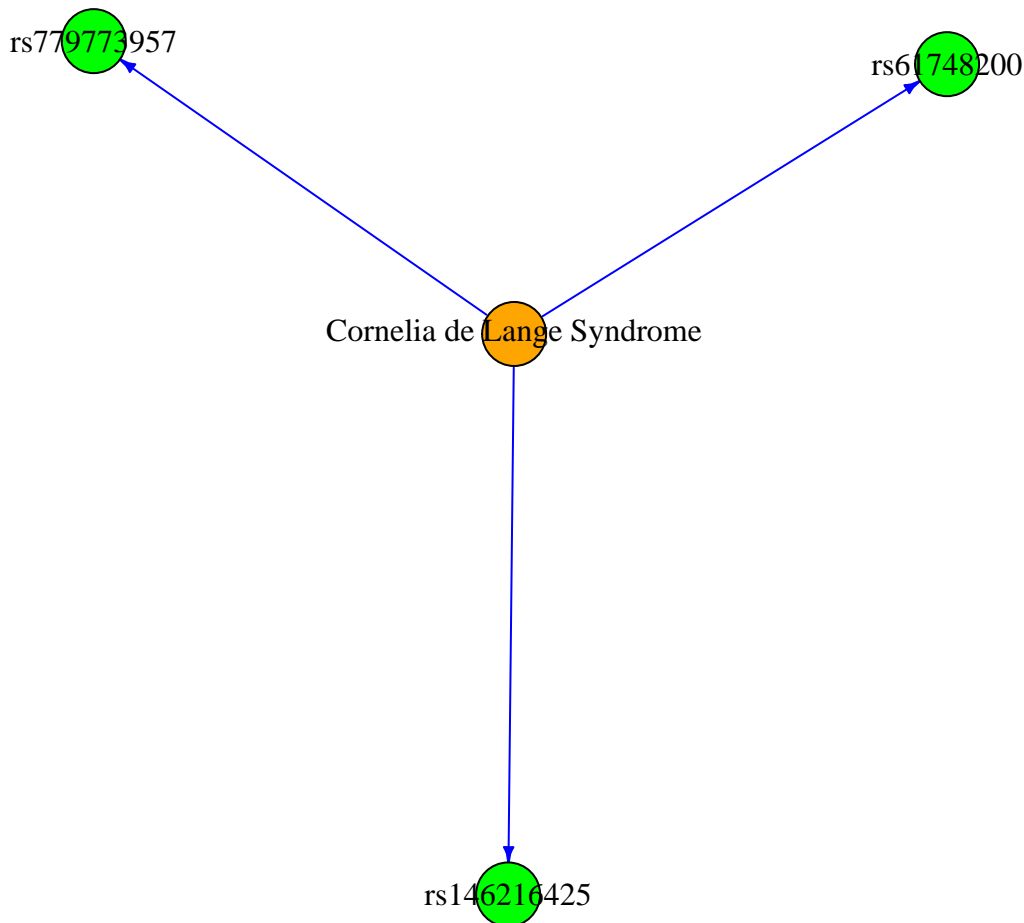

# Variant–Disease Network (Cornelia de Lange syndrome 1)

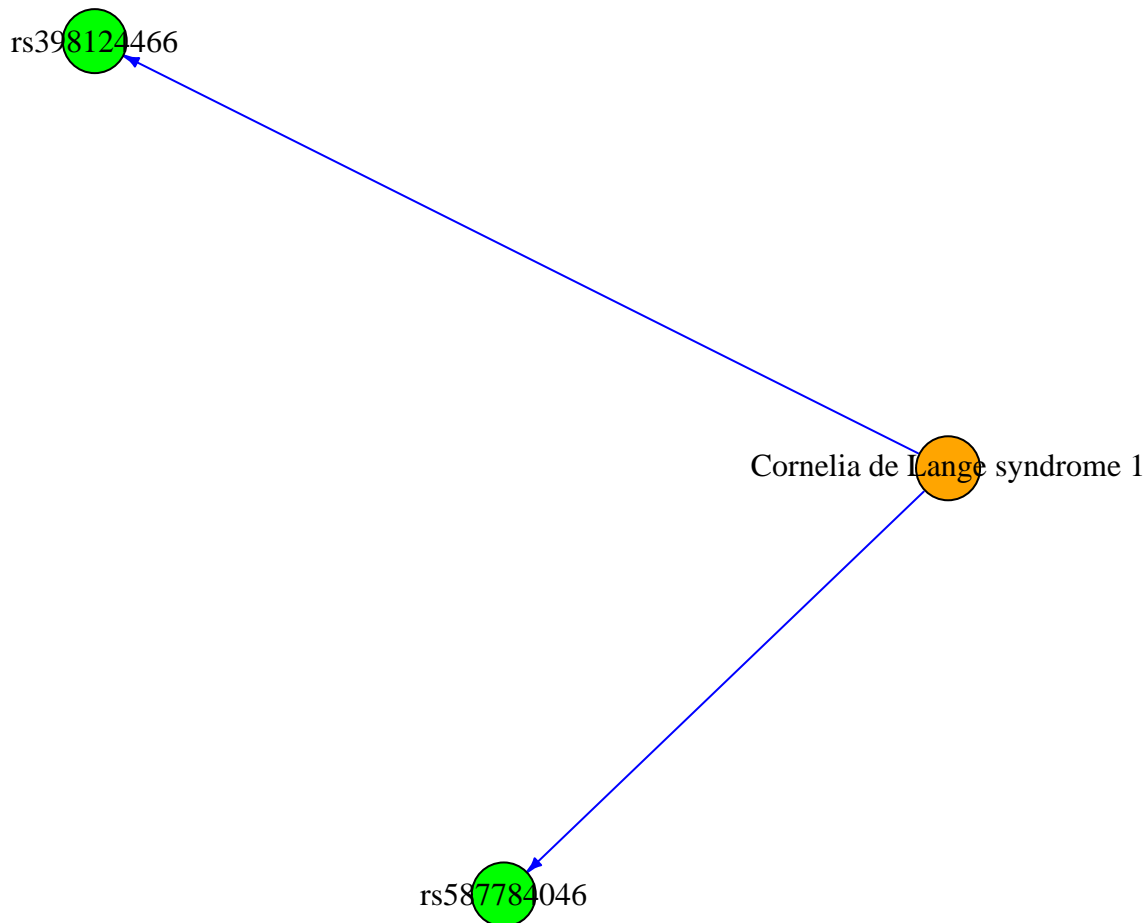

# Variant–Disease Network (Cornelia de Lange syndrome 3)

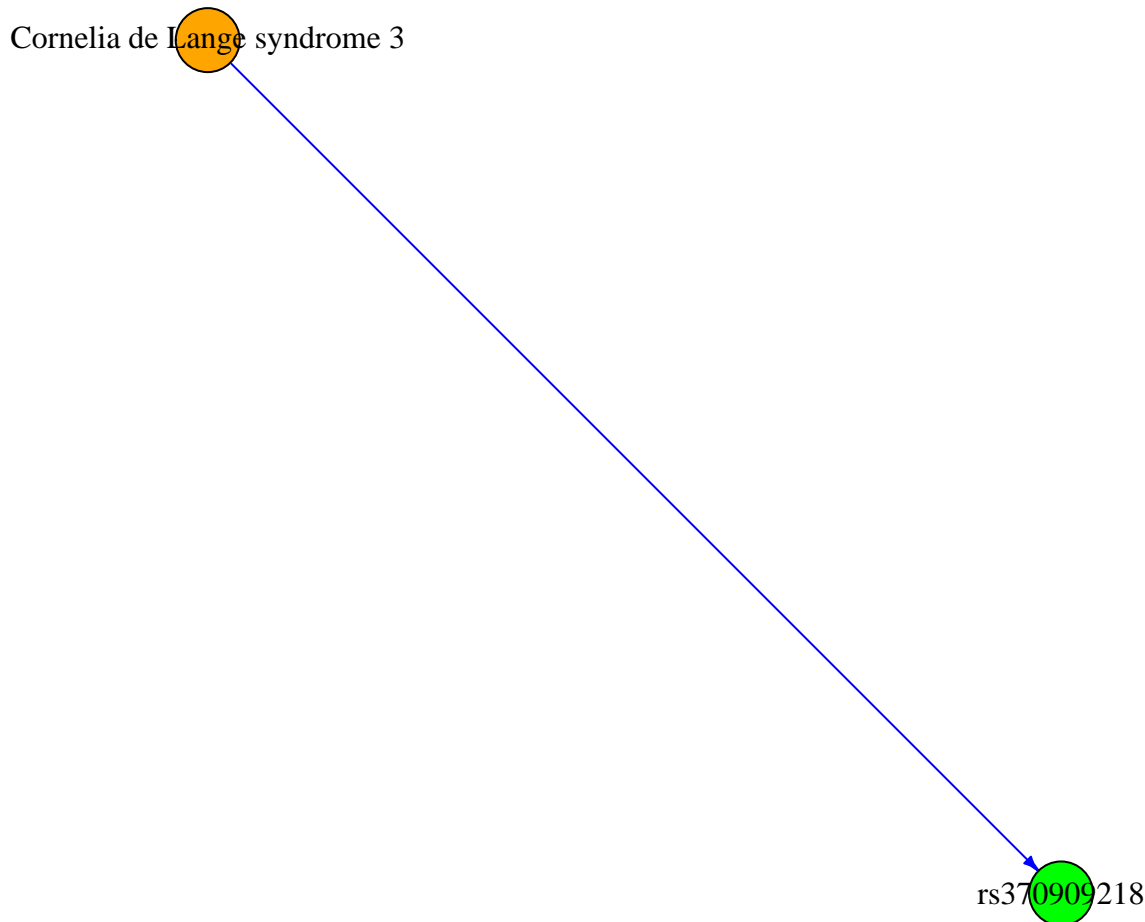

## Variant-Disease Network (Cortical malformations)

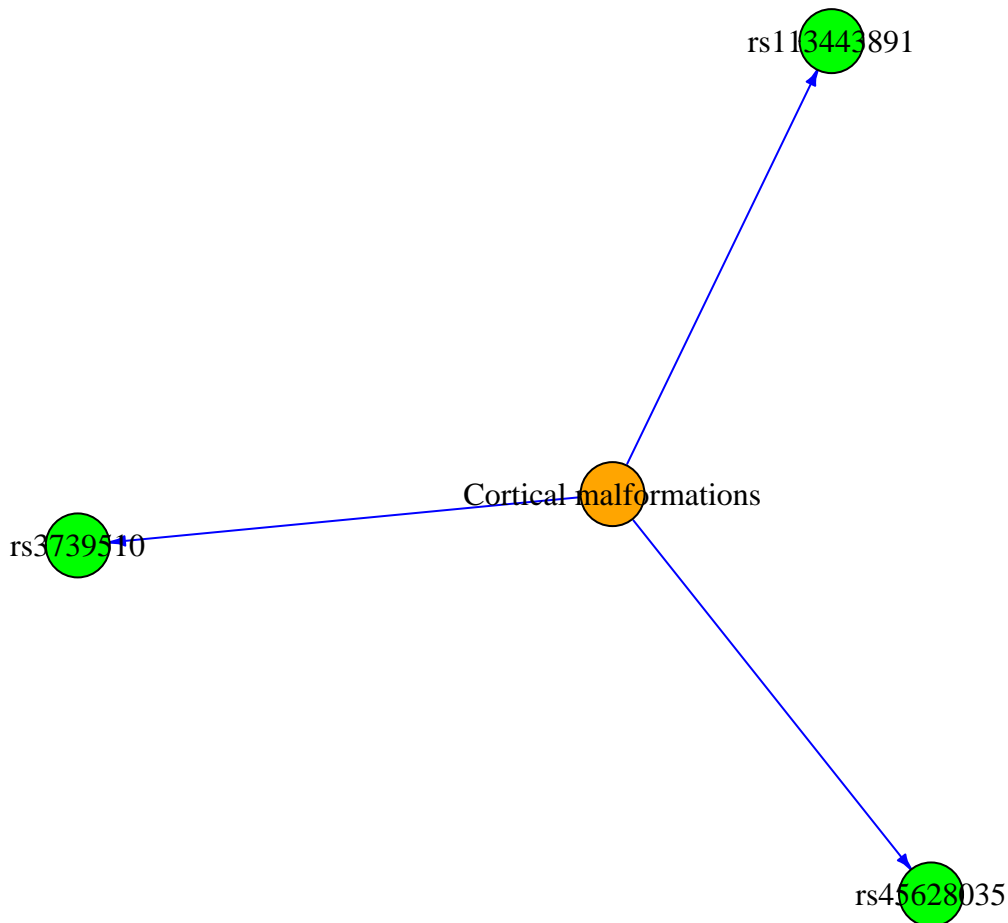

# Variant–Disease Network (Cortical visual impairment)

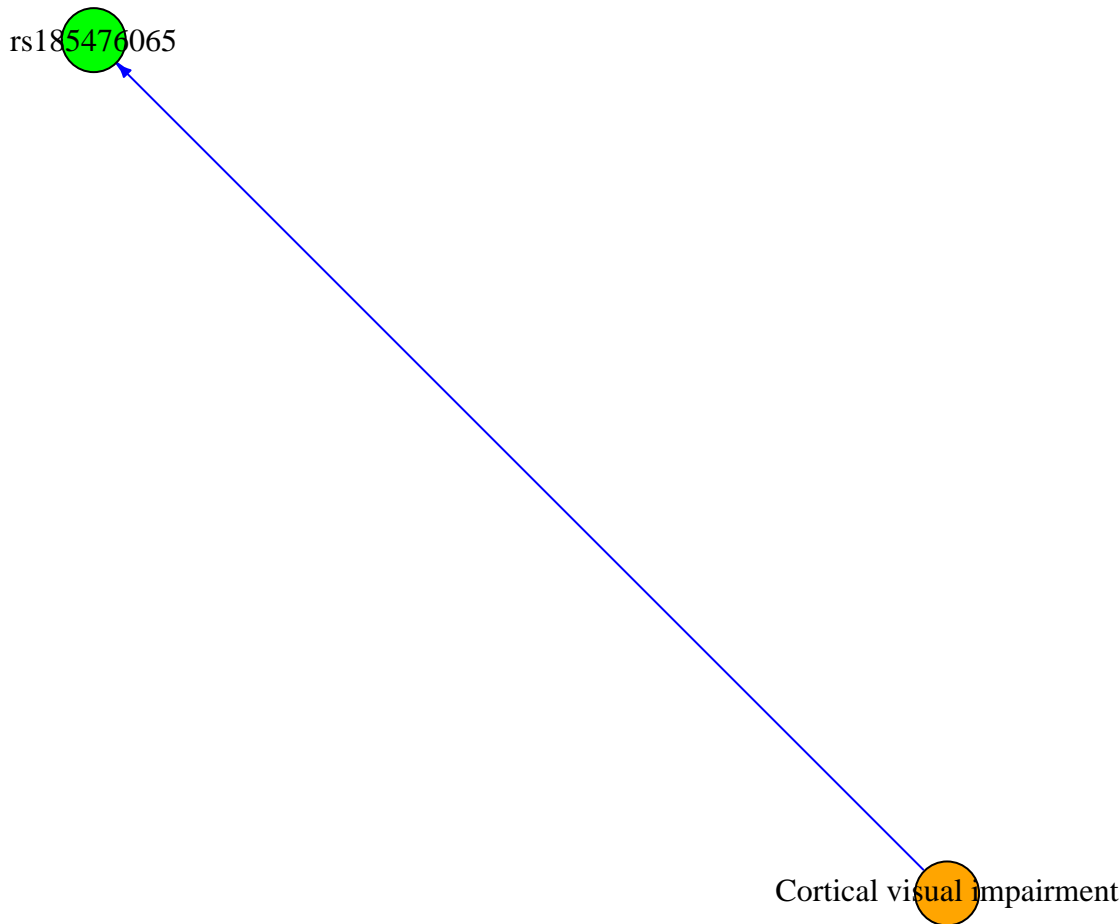



## Variant–Disease Network (Corticosterone methyloxidase type 1 deficiency)

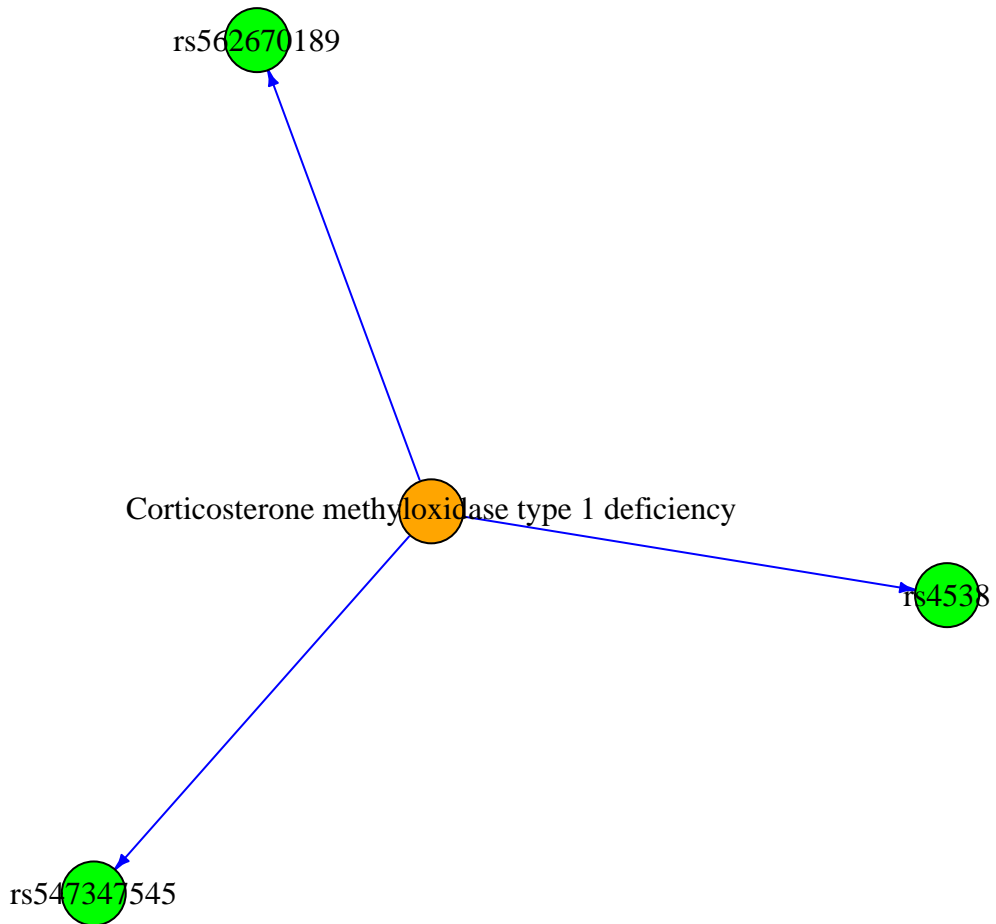

Variant–Disease Network (Corticosterone methyloxidase type 2 deficiency)

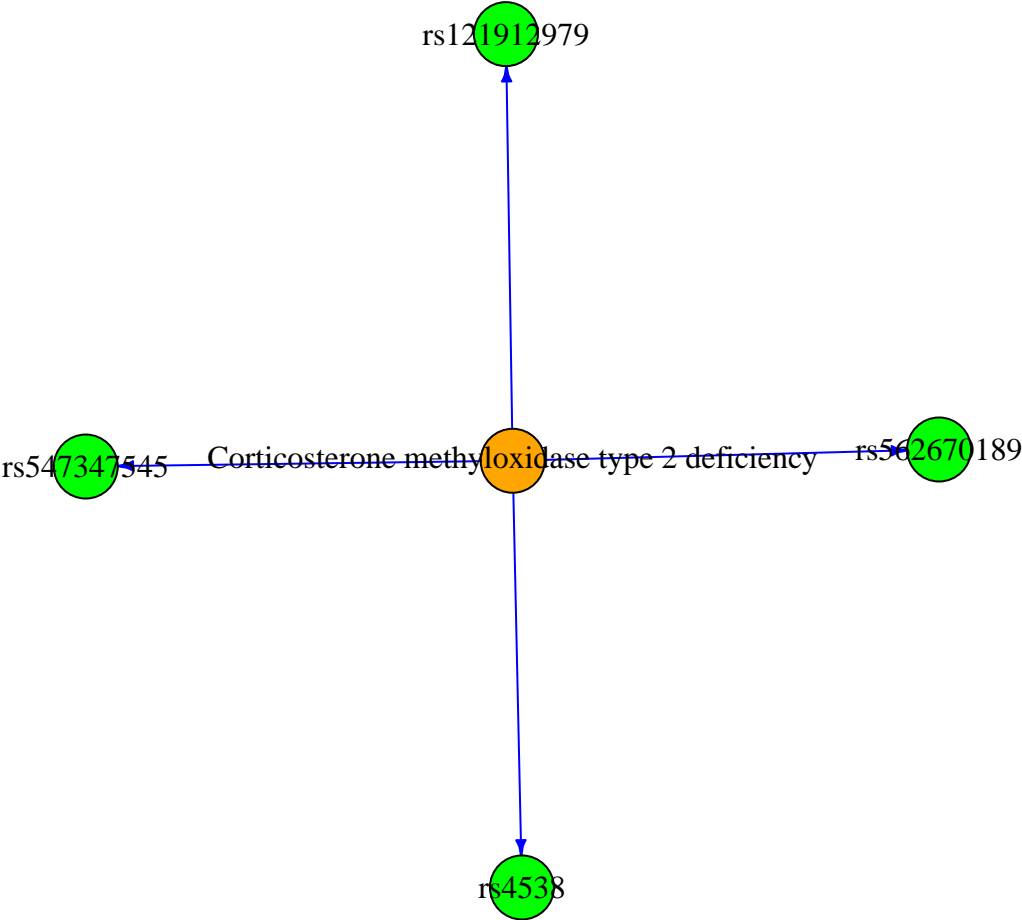

## Variant–Disease Network (Cowden syndrome)

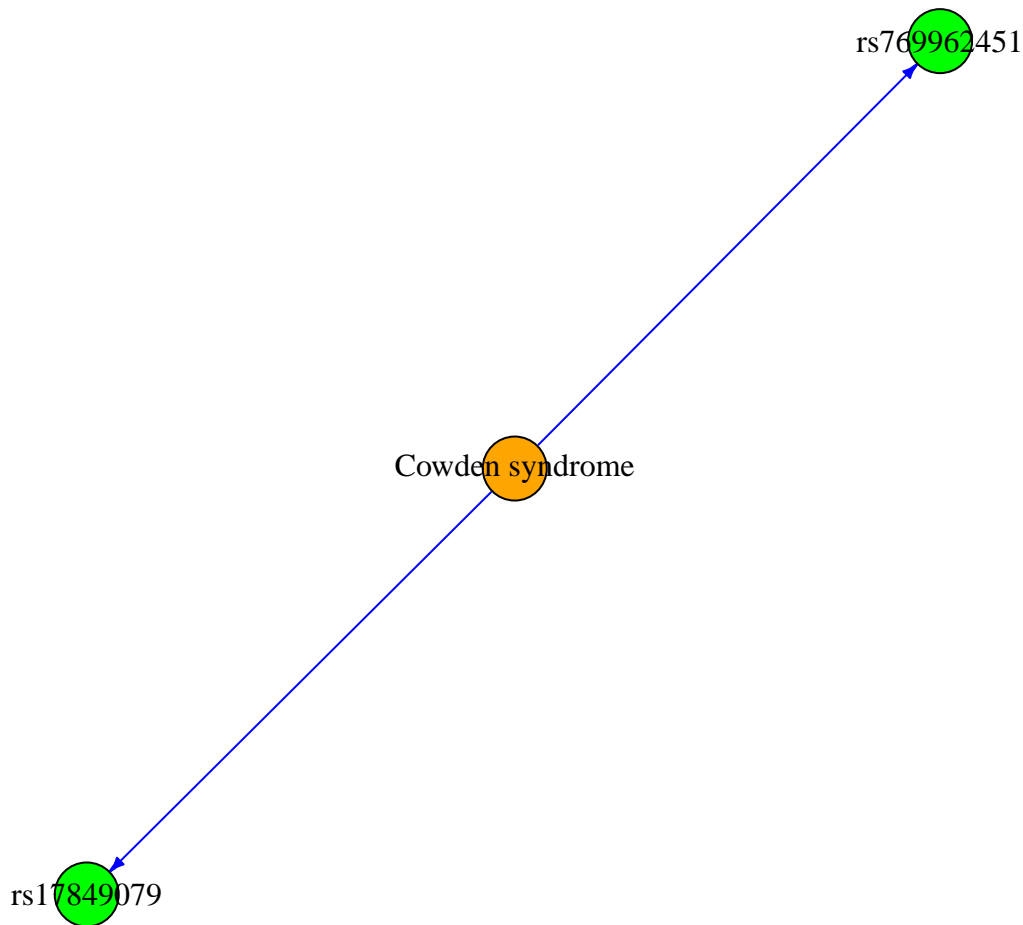

Variant–Disease Network (Cowden syndrome 6)

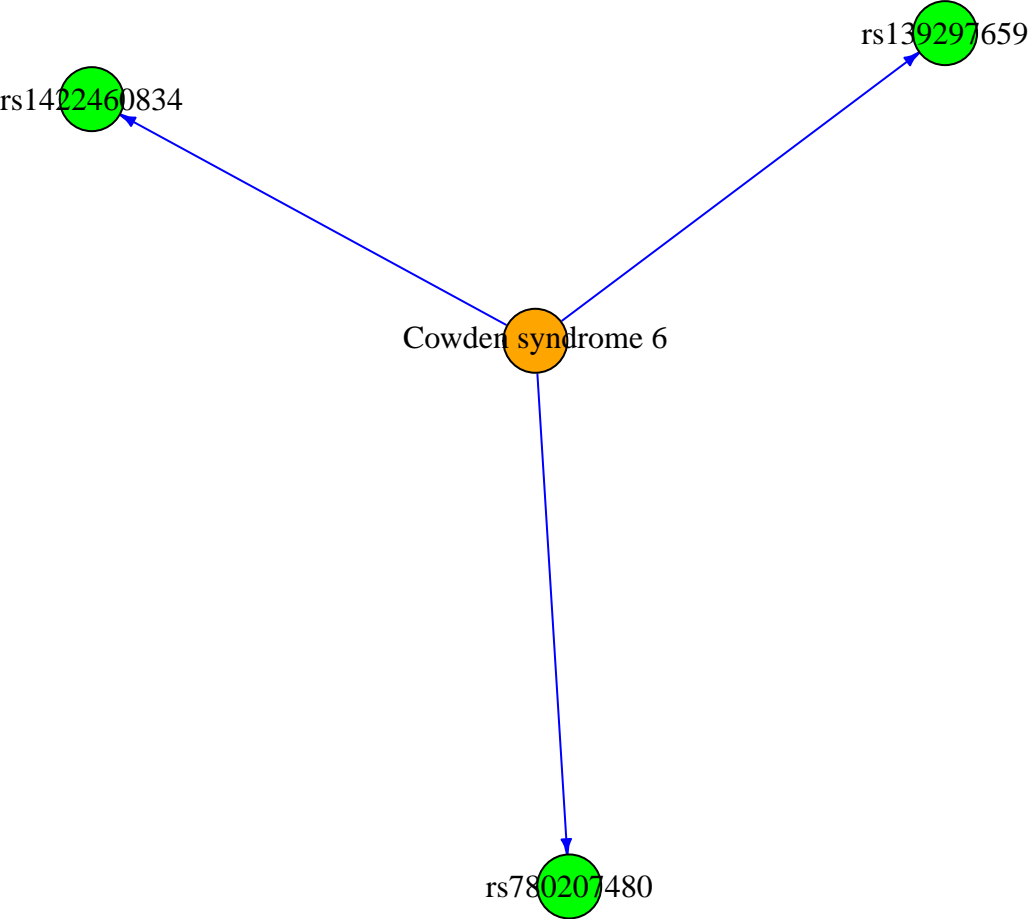

## Variant–Disease Network (Coxa plana)

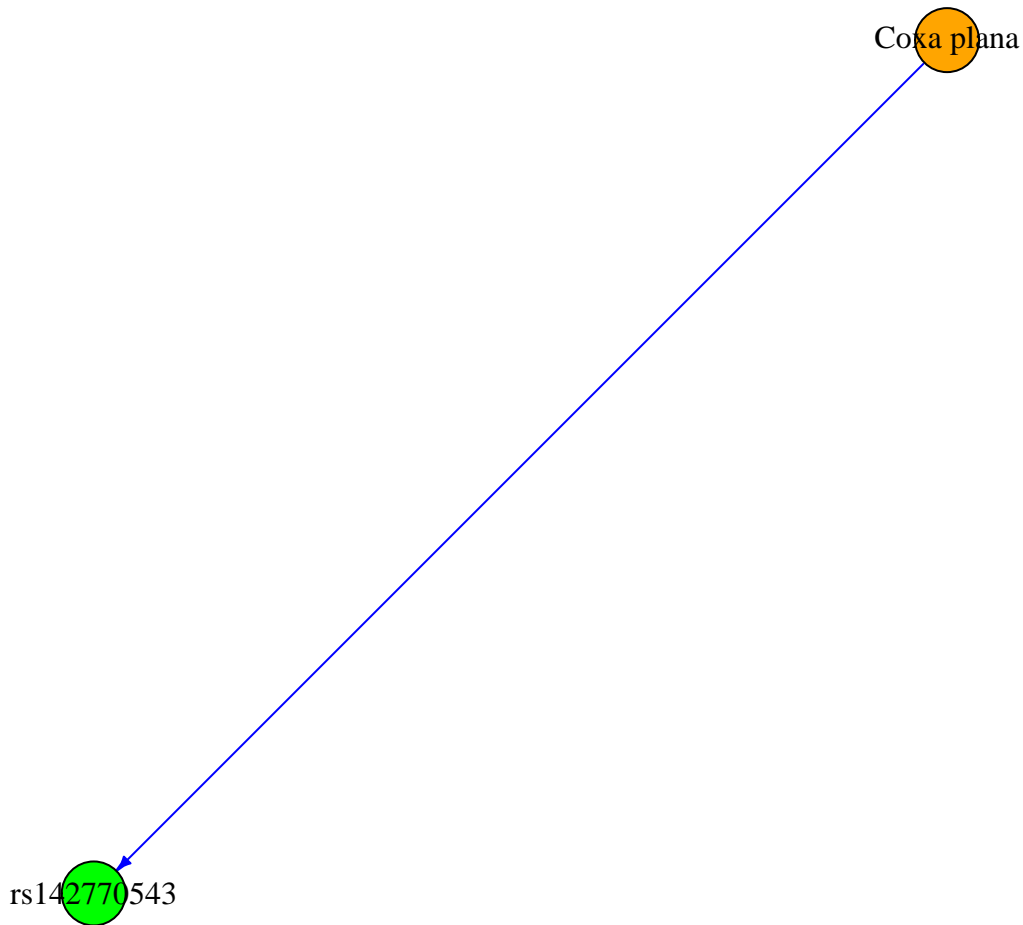

Variant–Disease Network (Cranioectodermal dysplasia)

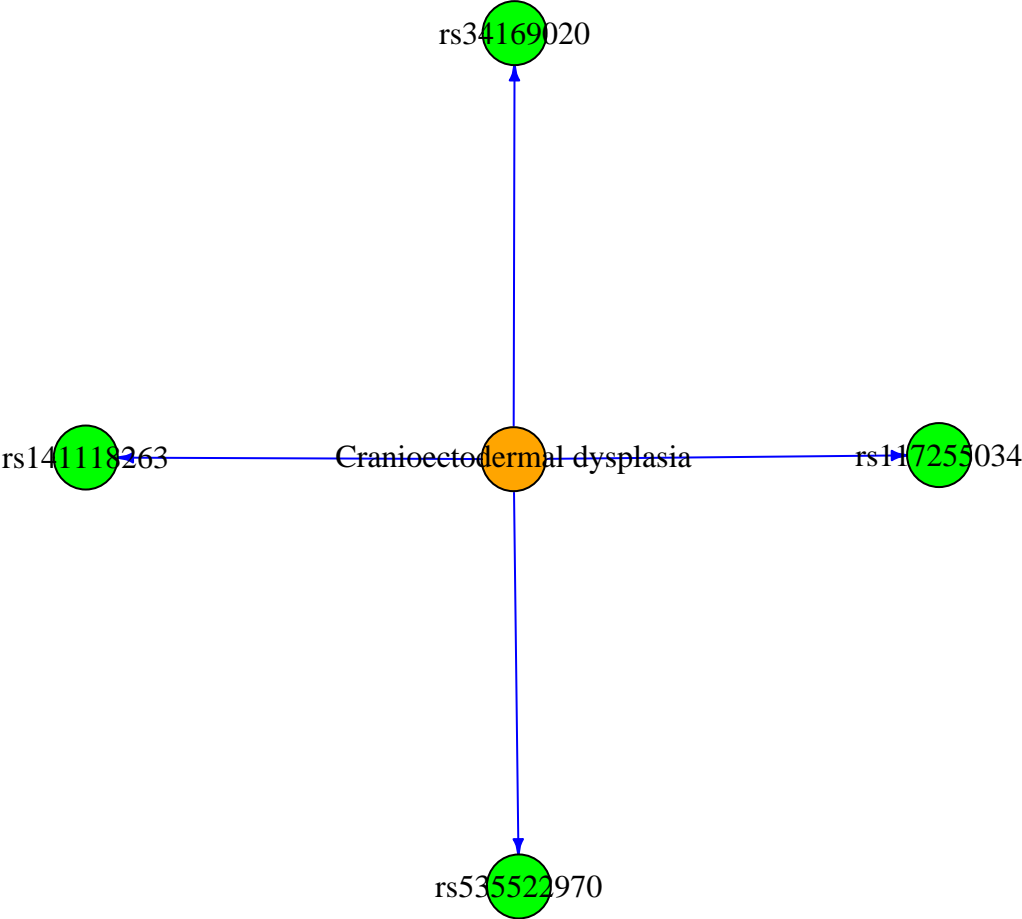

Variant–Disease Network (Cranioectodermal dysplasia 2)

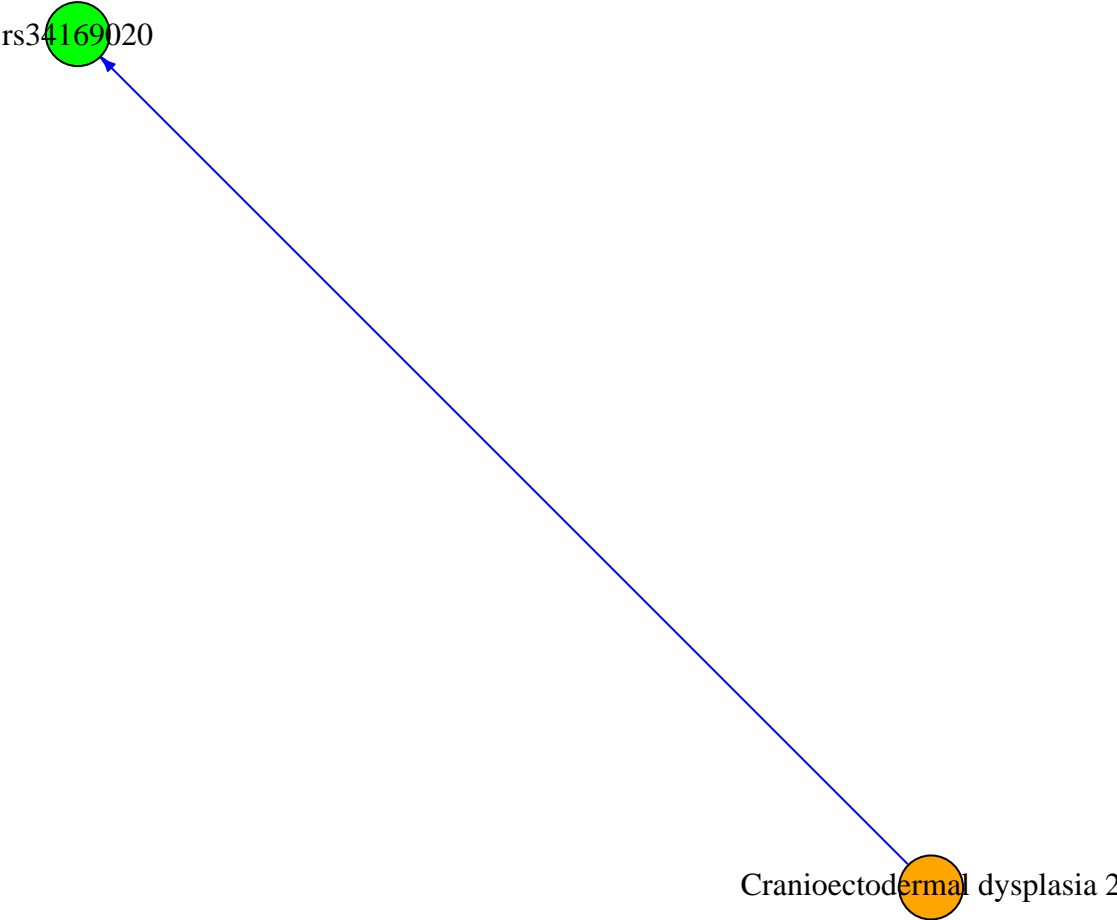

# Variant–Disease Network (Craniofacial deafness hand syndrome)

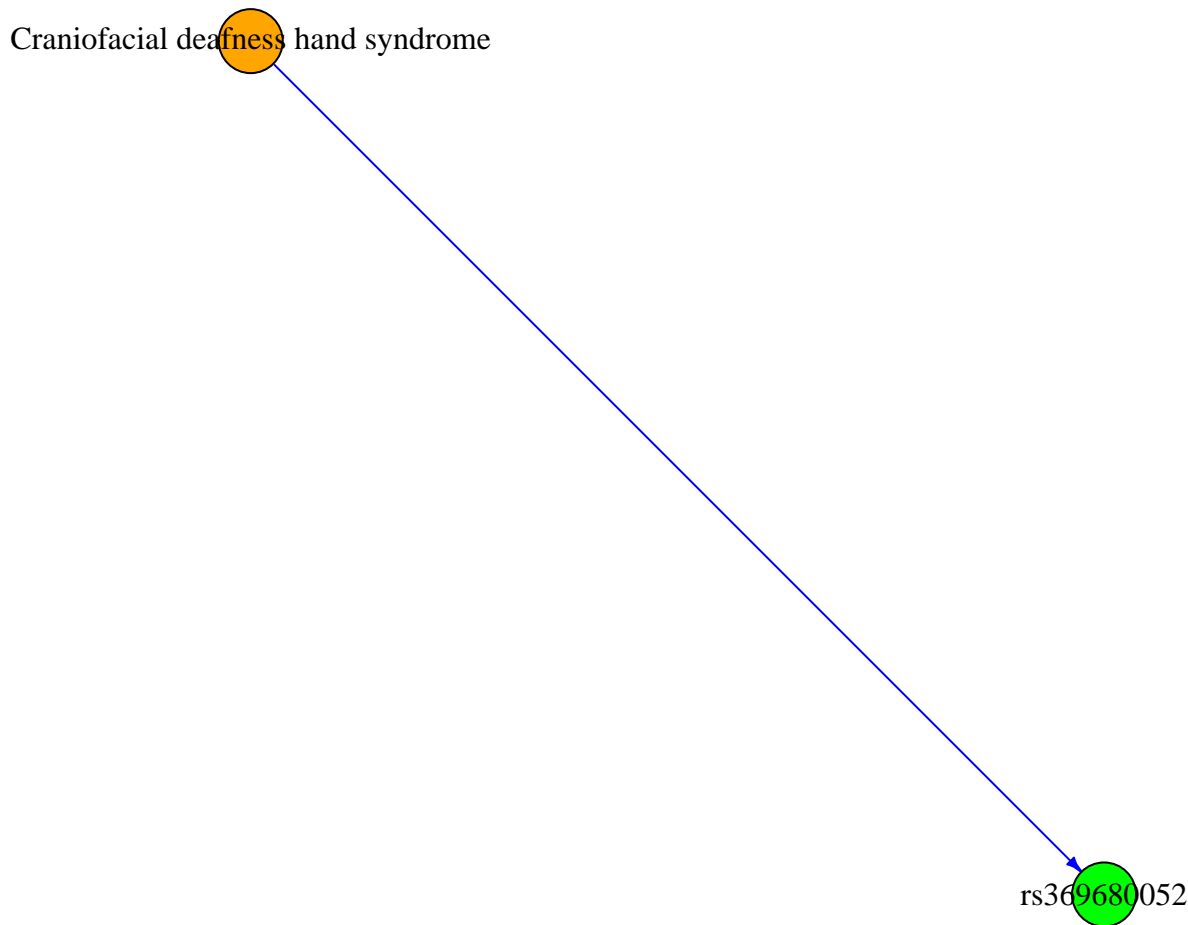



**Variant–Disease Network (Cranio metaphyseal dysplasia)**

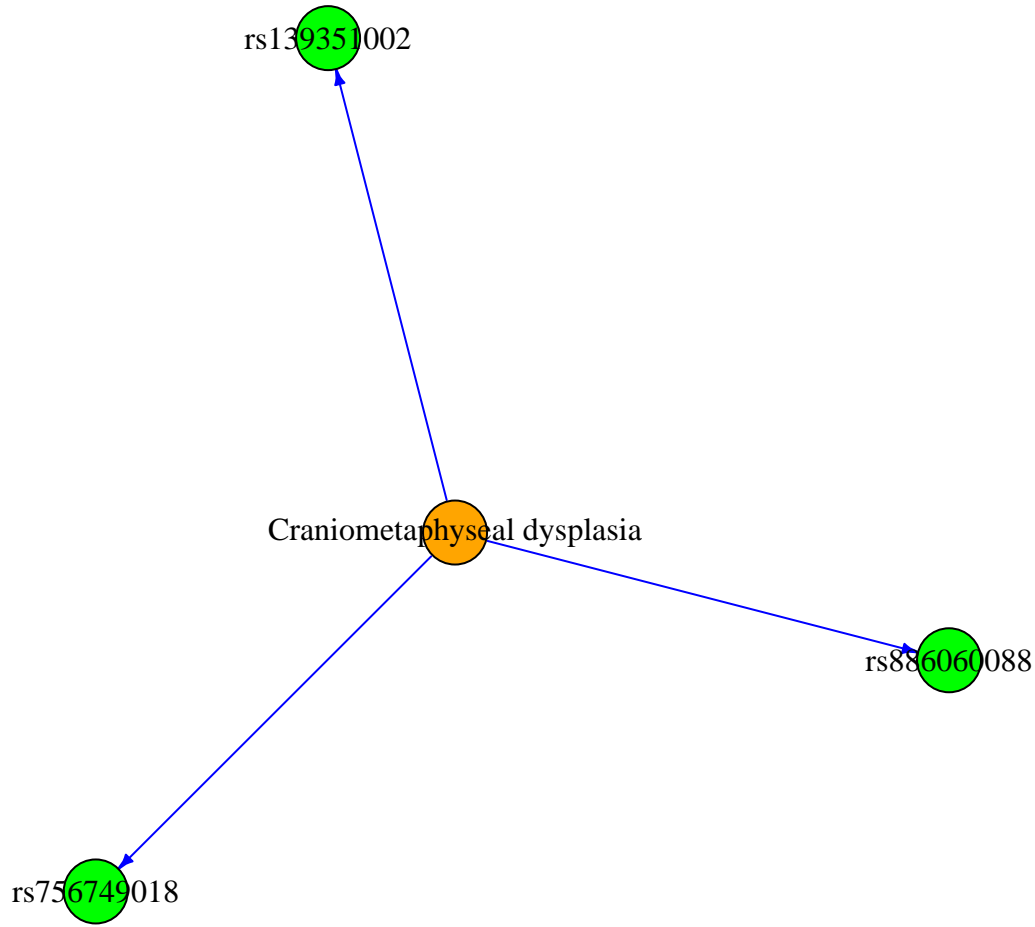

## Variant-Disease Network (Craniosynostosis)

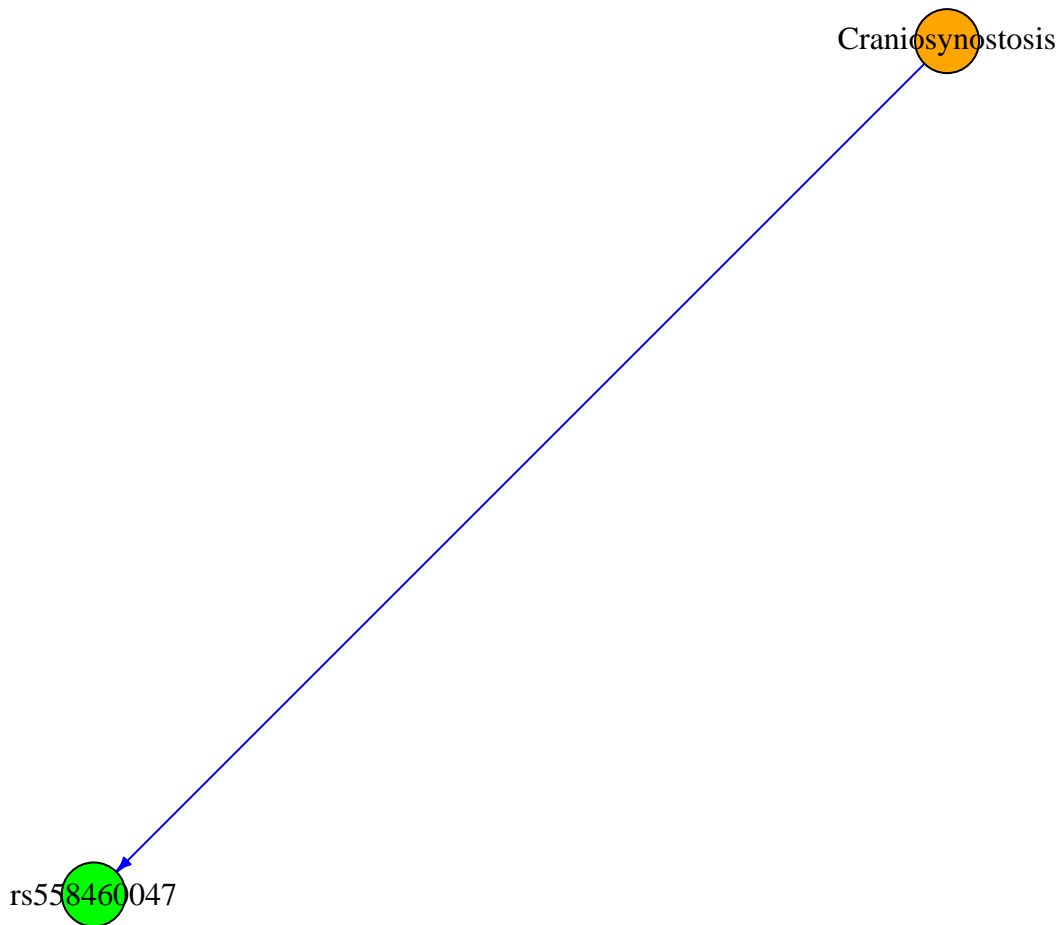

Variant–Disease Network (Crohn disease)

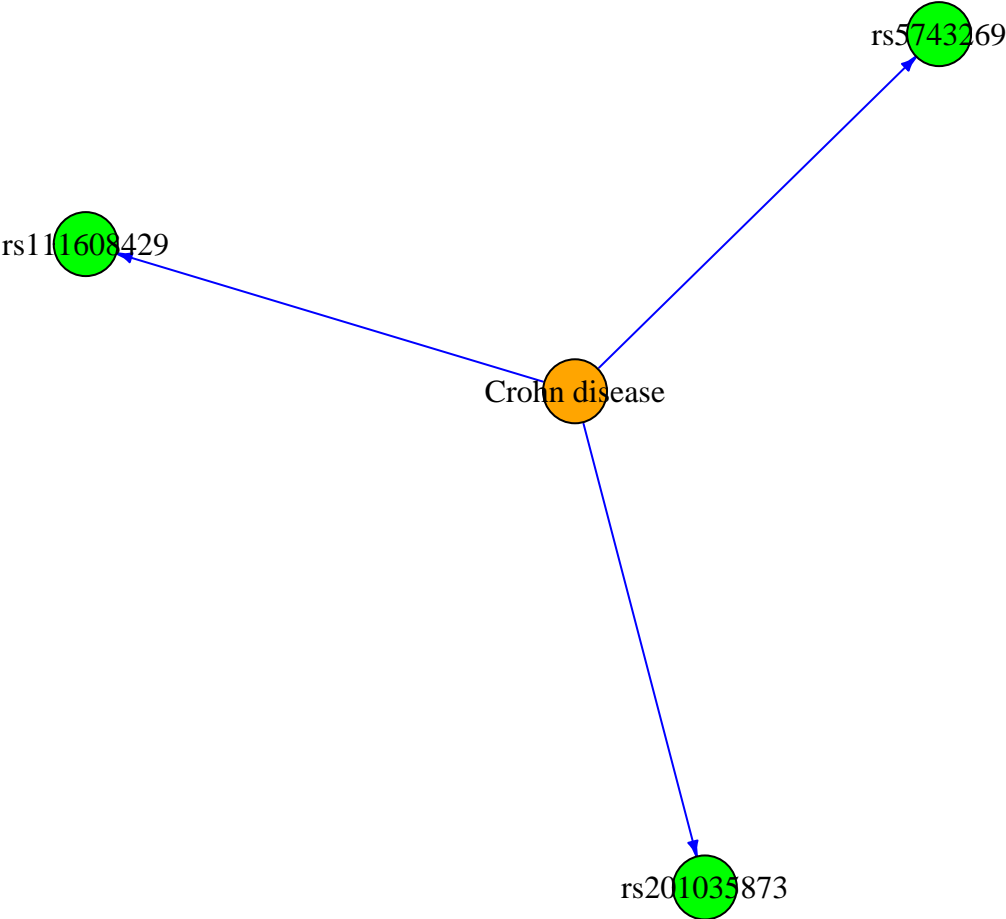

## Variant-Disease Network (Crouzon syndrome)

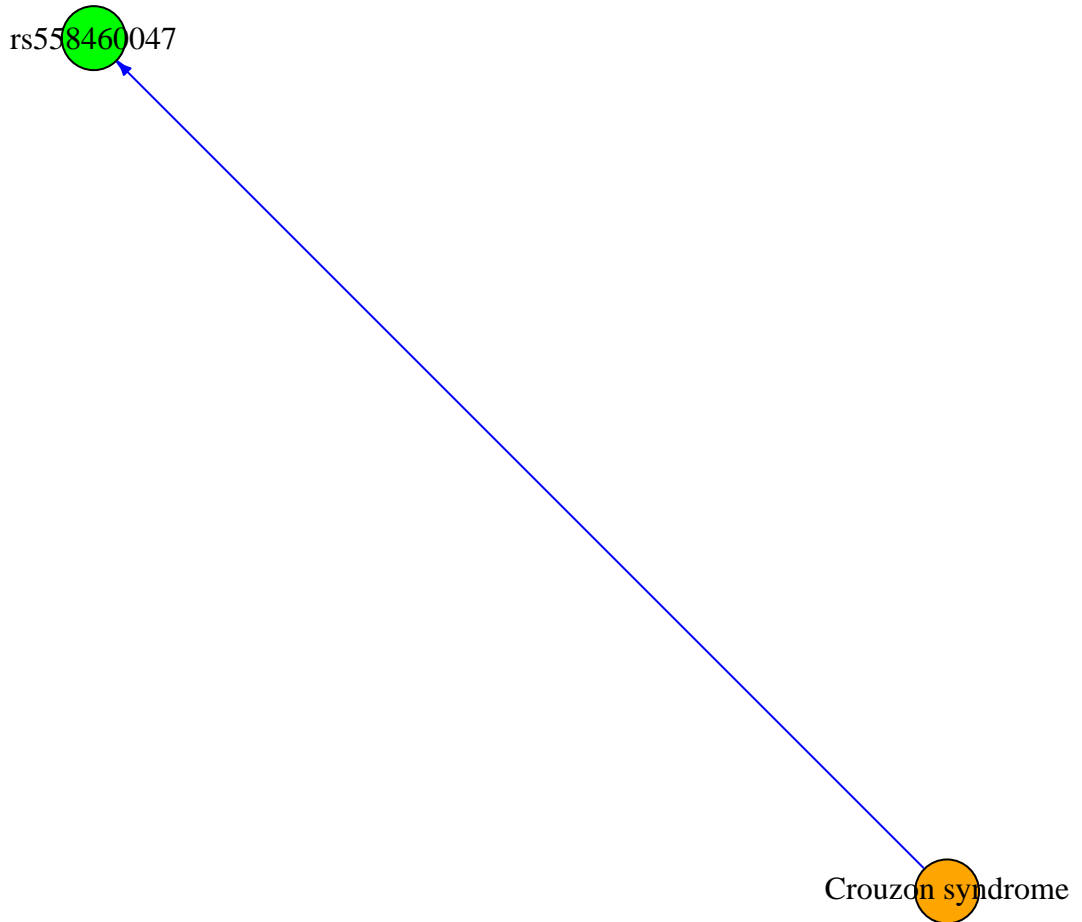

Variant–Disease Network (Cryopyrin associated periodic syndrome)

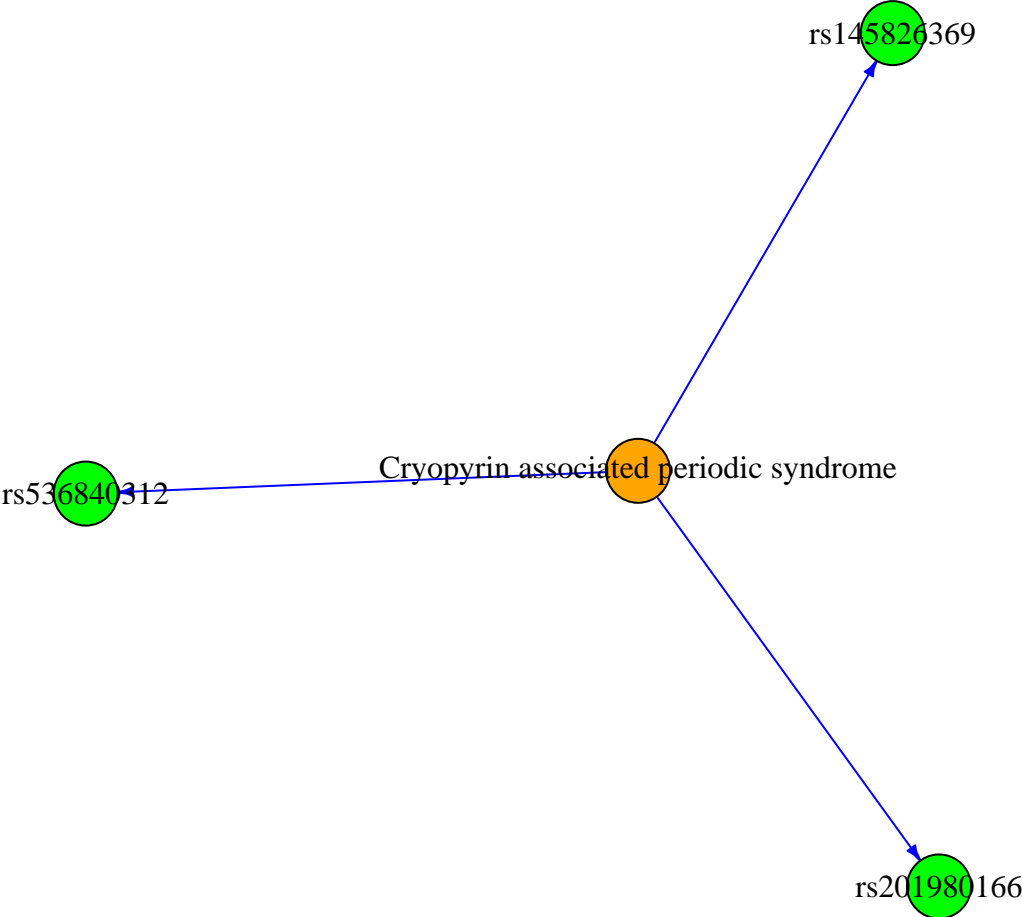

Variant–Disease Network (Cryptophthalmos)

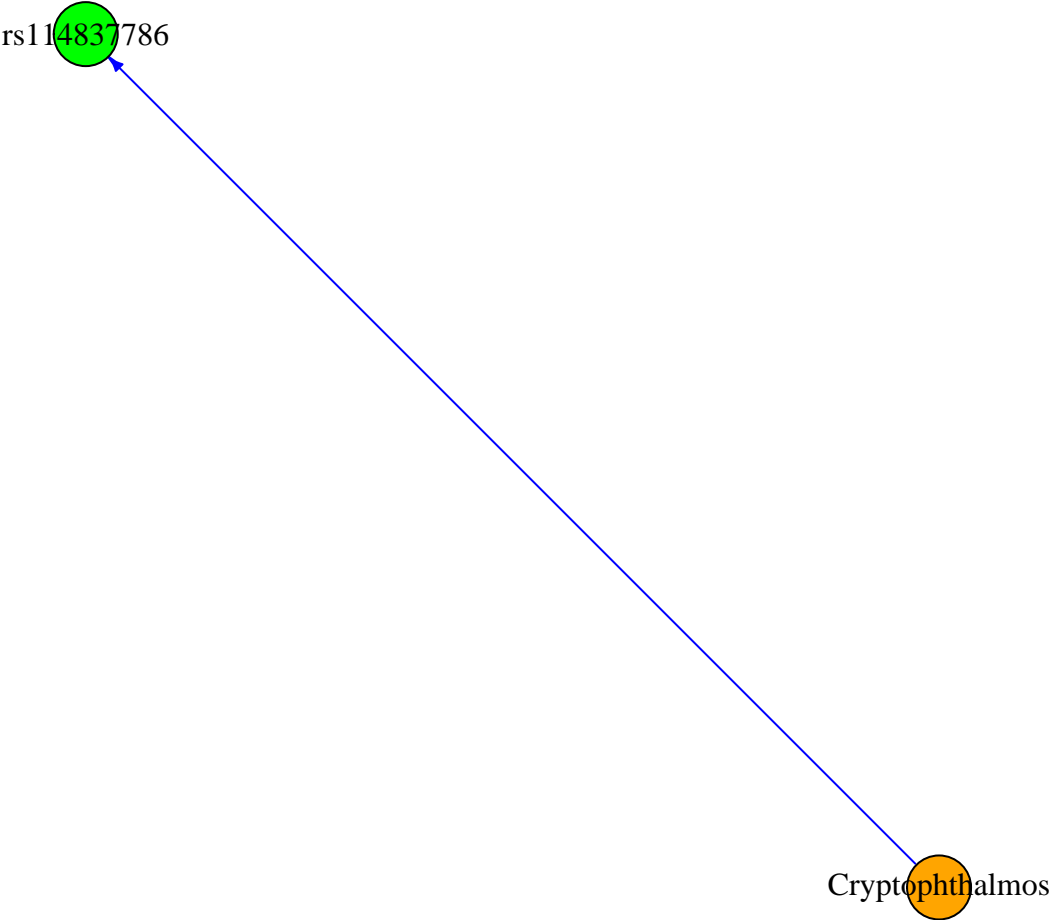

**Variant–Disease Network (Cutaneous malignant melanoma 2)**

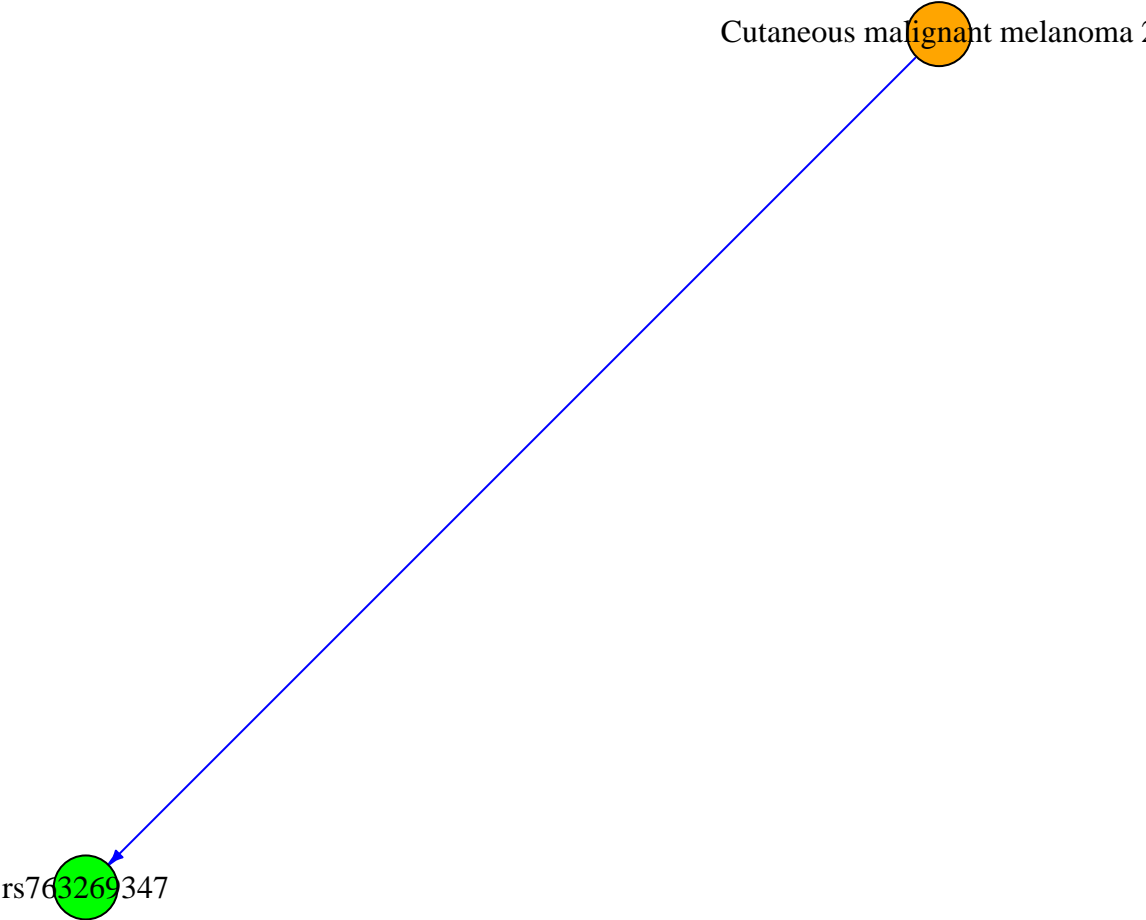

**Variant–Disease Network (Cutaneous malignant melanoma 3)**

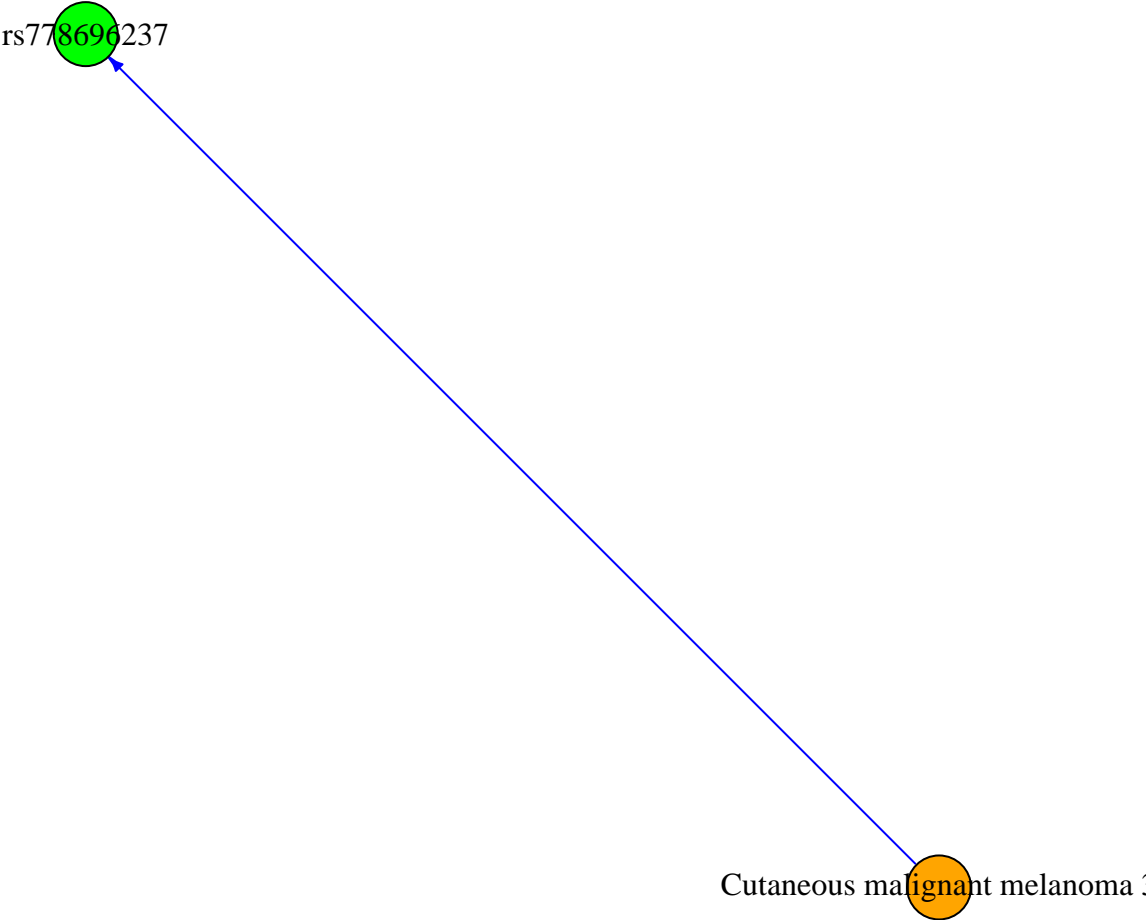



Variant–Disease Network (Cutis Gyrata syndrome of Beare and Stevenson)

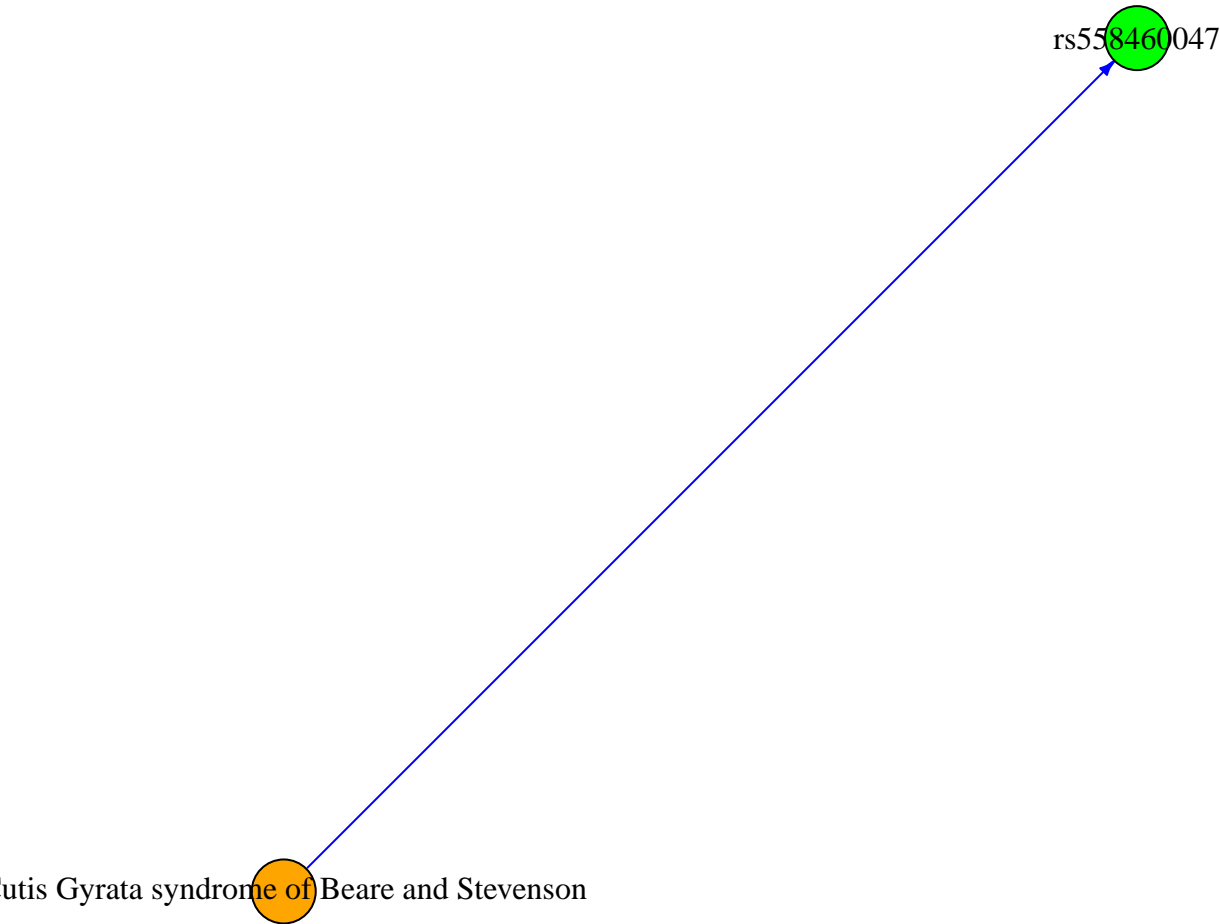

## Variant-Disease Network (Cutis laxa)

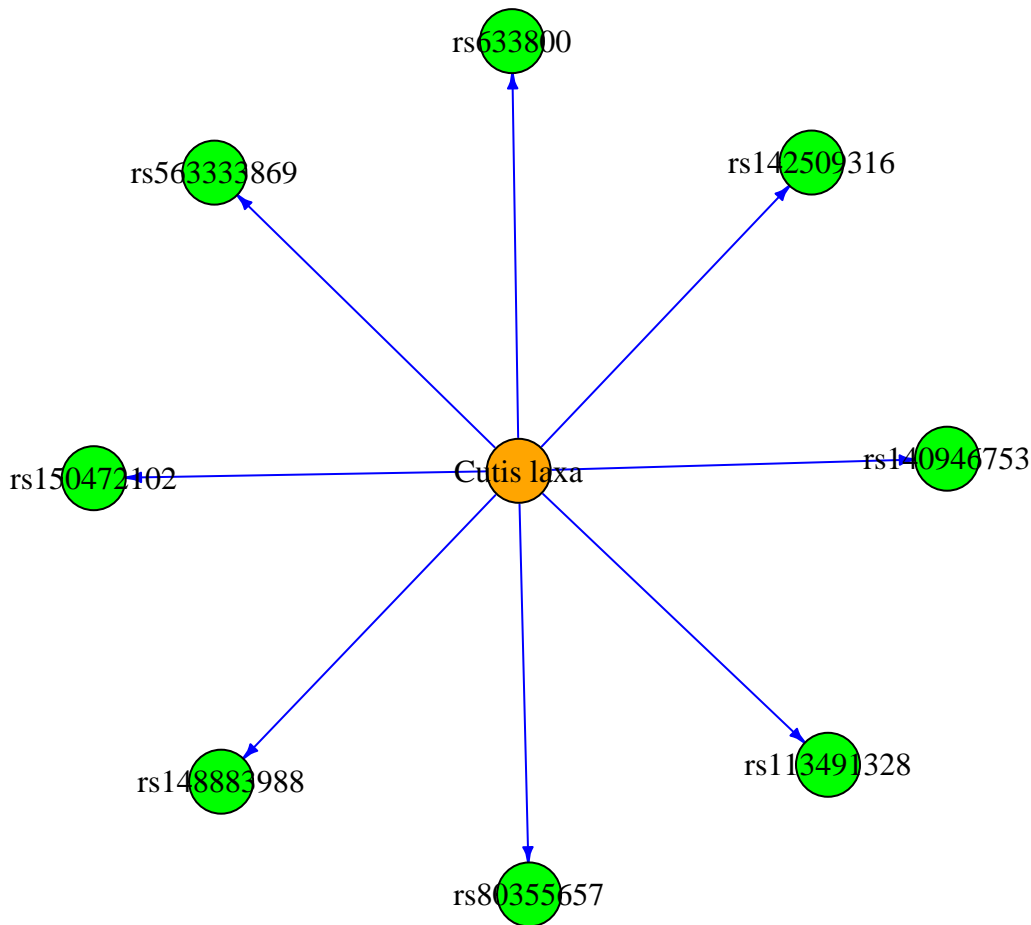

## Variant–Disease Network (Cutis laxa with severe pulmonary)

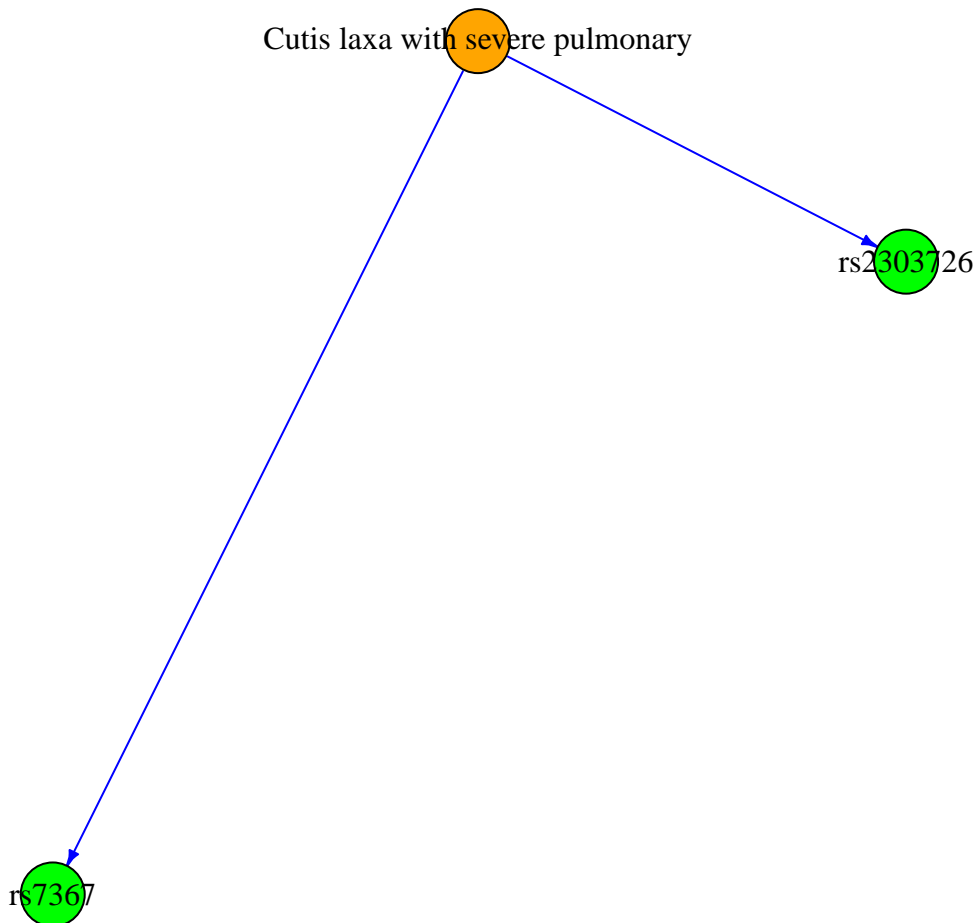

Variant–Disease Network (Cylindromatosis)

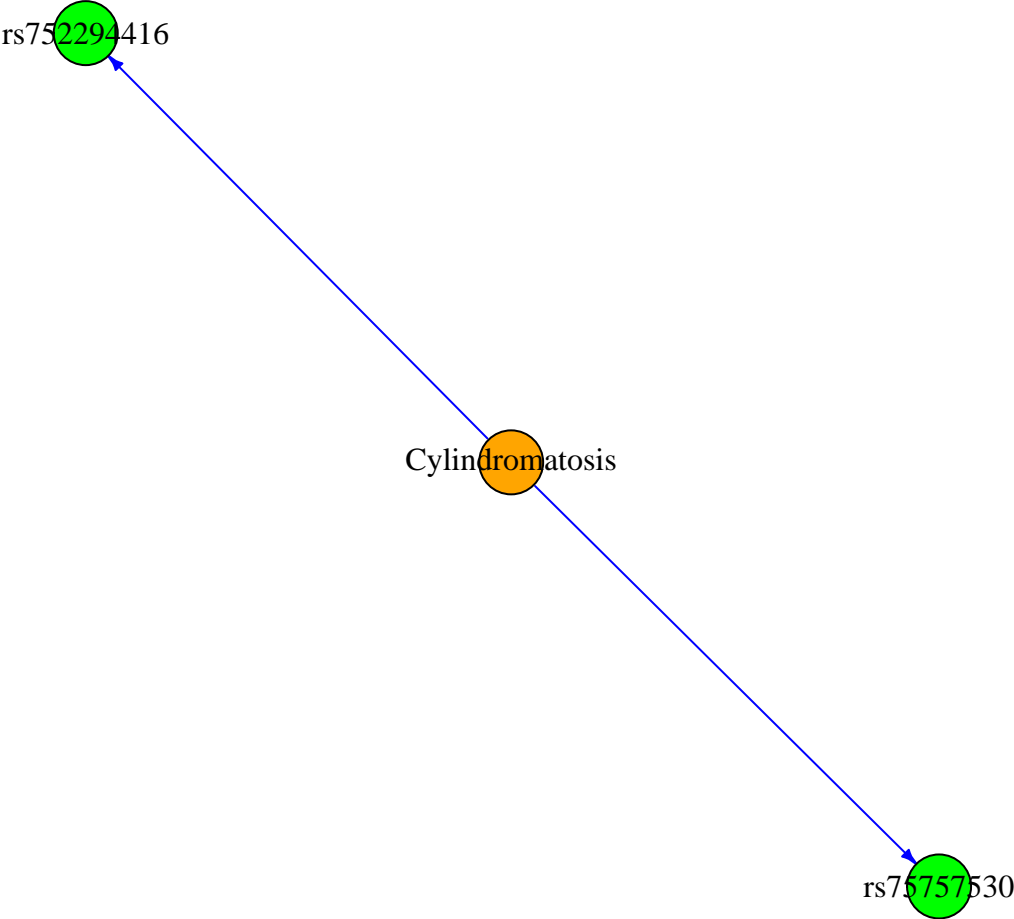

# Variant–Disease Network (CYP2C8 POLYMORPHISM)

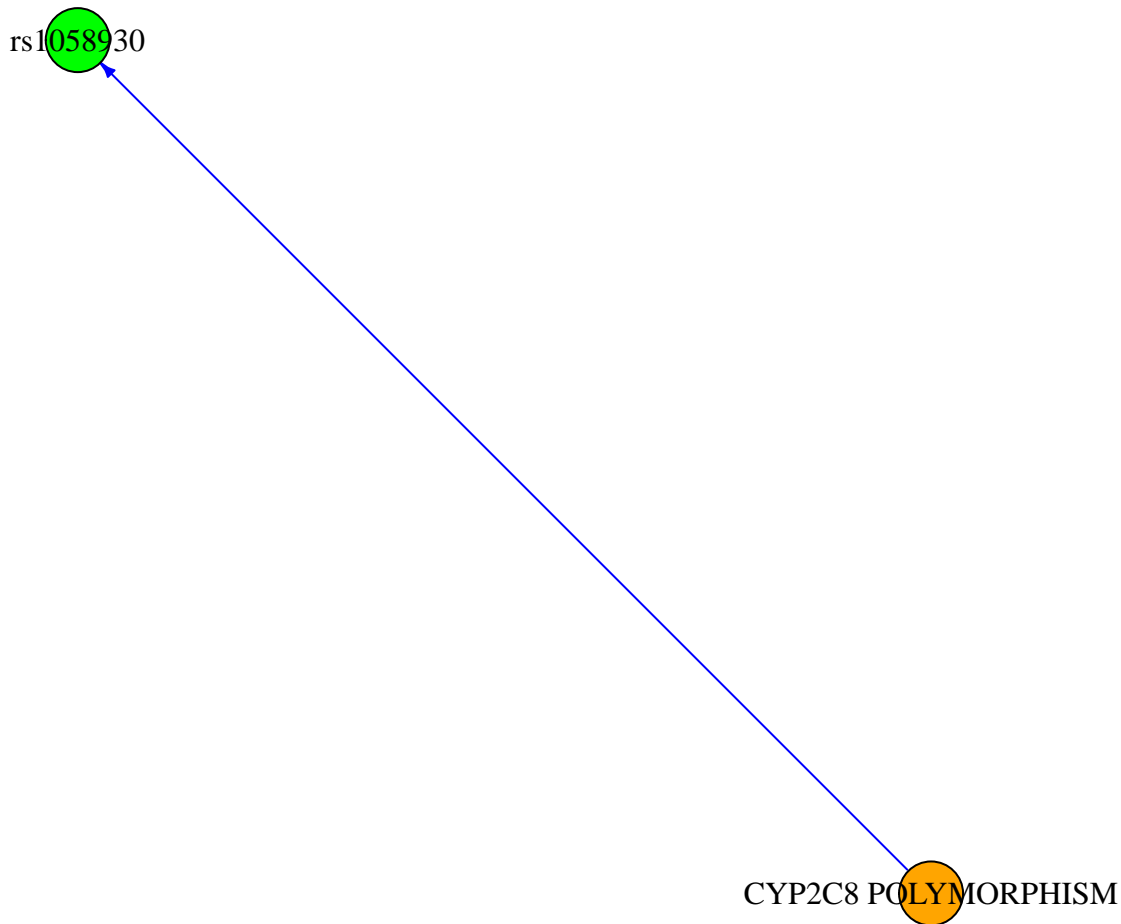

Variant–Disease Network (Cystic fibrosis)

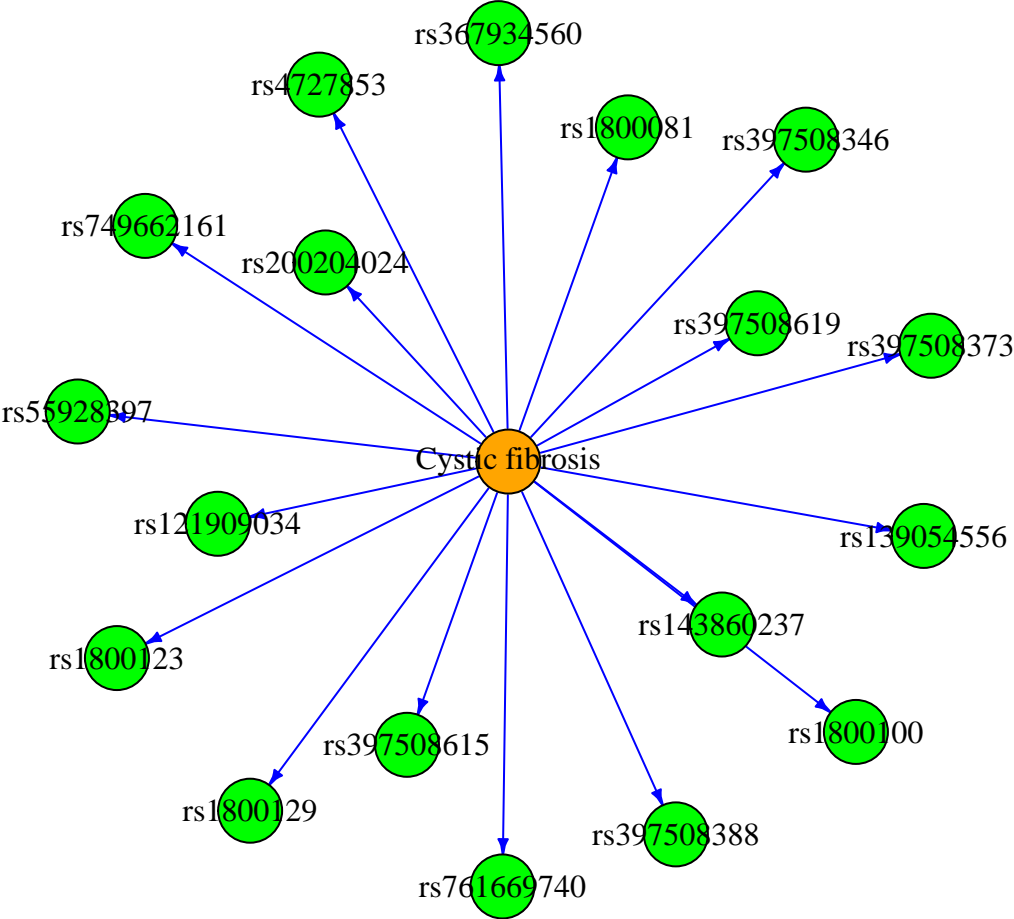

Variant–Disease Network (Cystic Fibrosis–Like Syndrome)

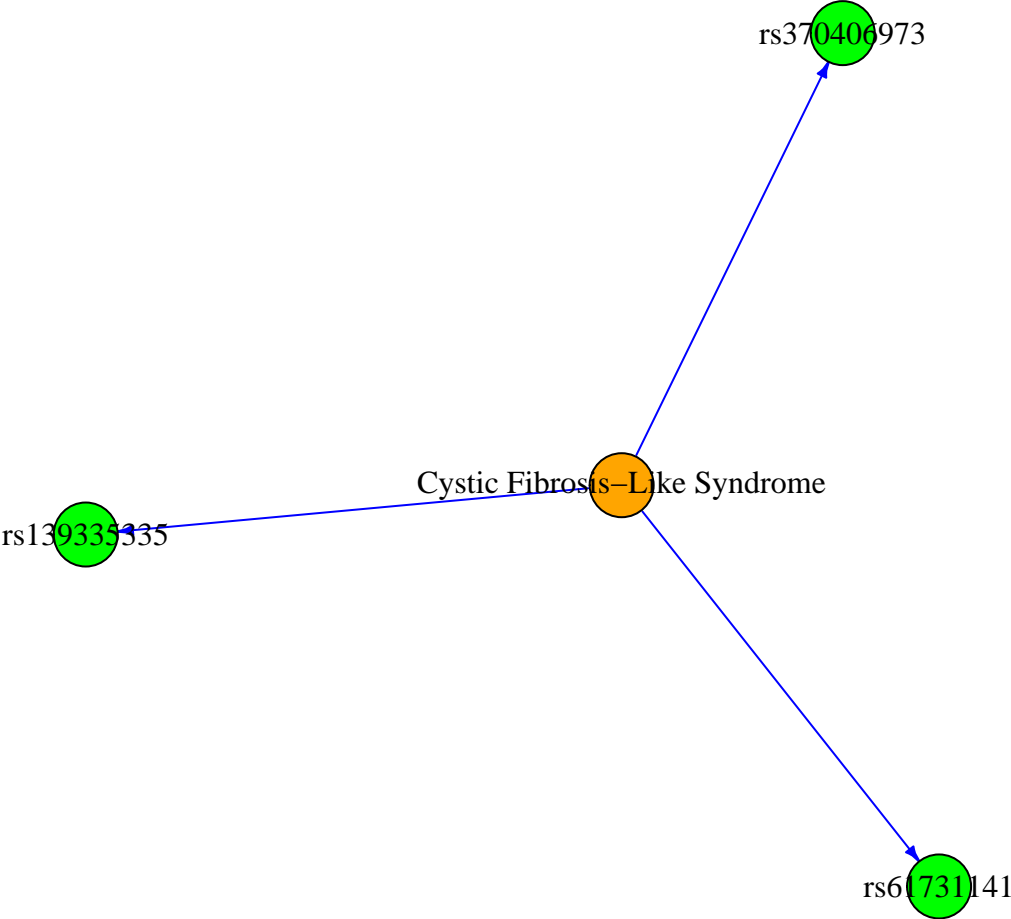

## Variant–Disease Network (Cystinosis)

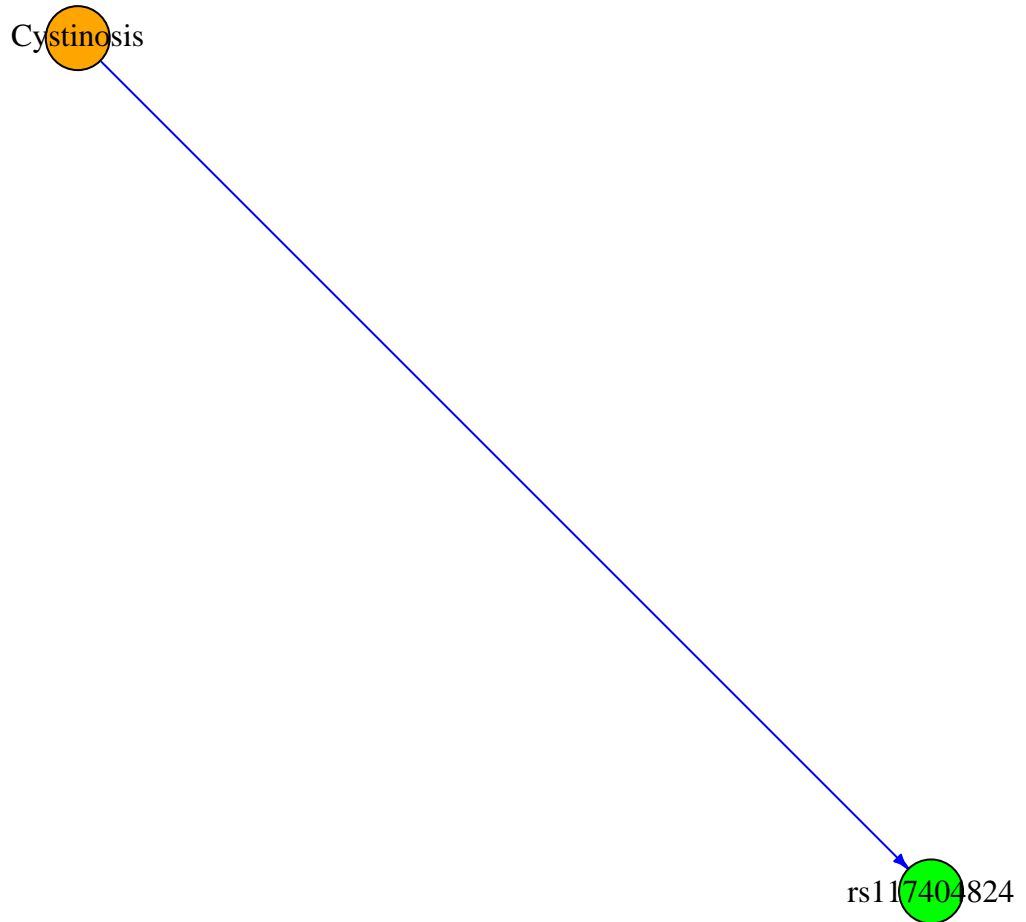



## Variant-Disease Network (Cystinuria)

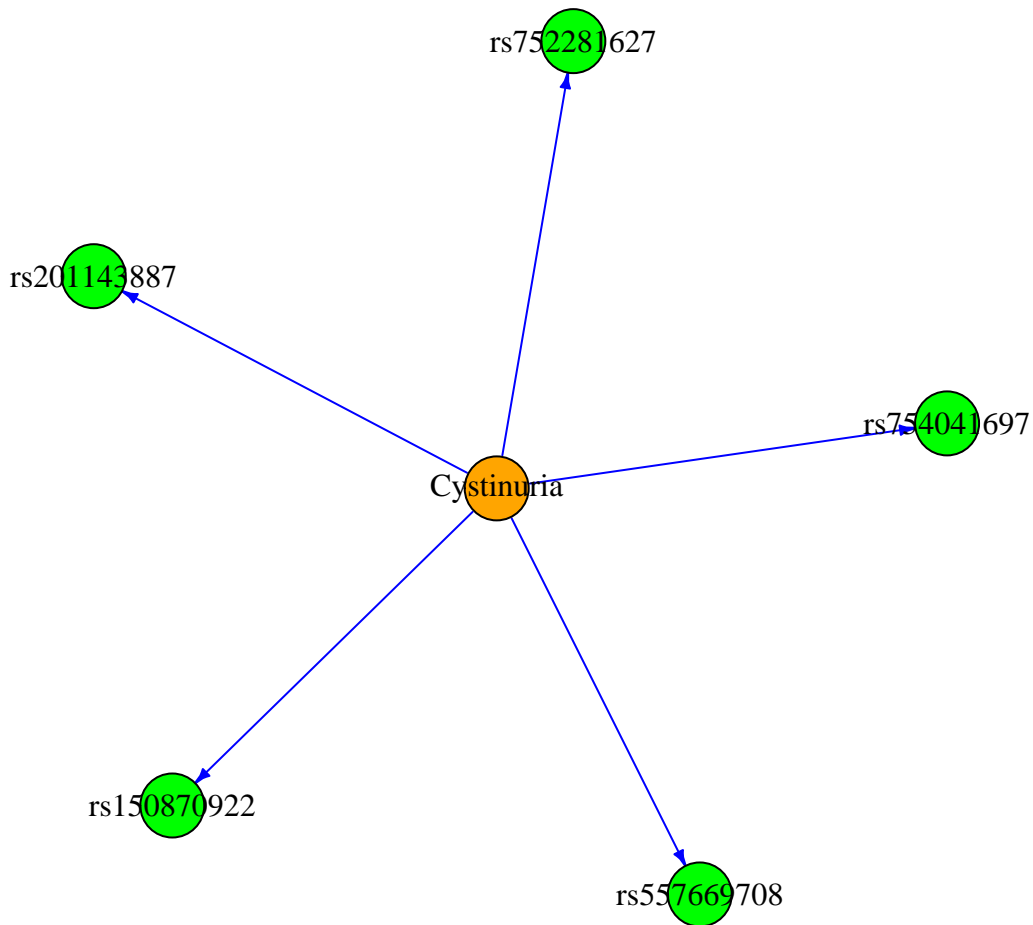

# Variant–Disease Network (Czech dysplasia metatarsal type)

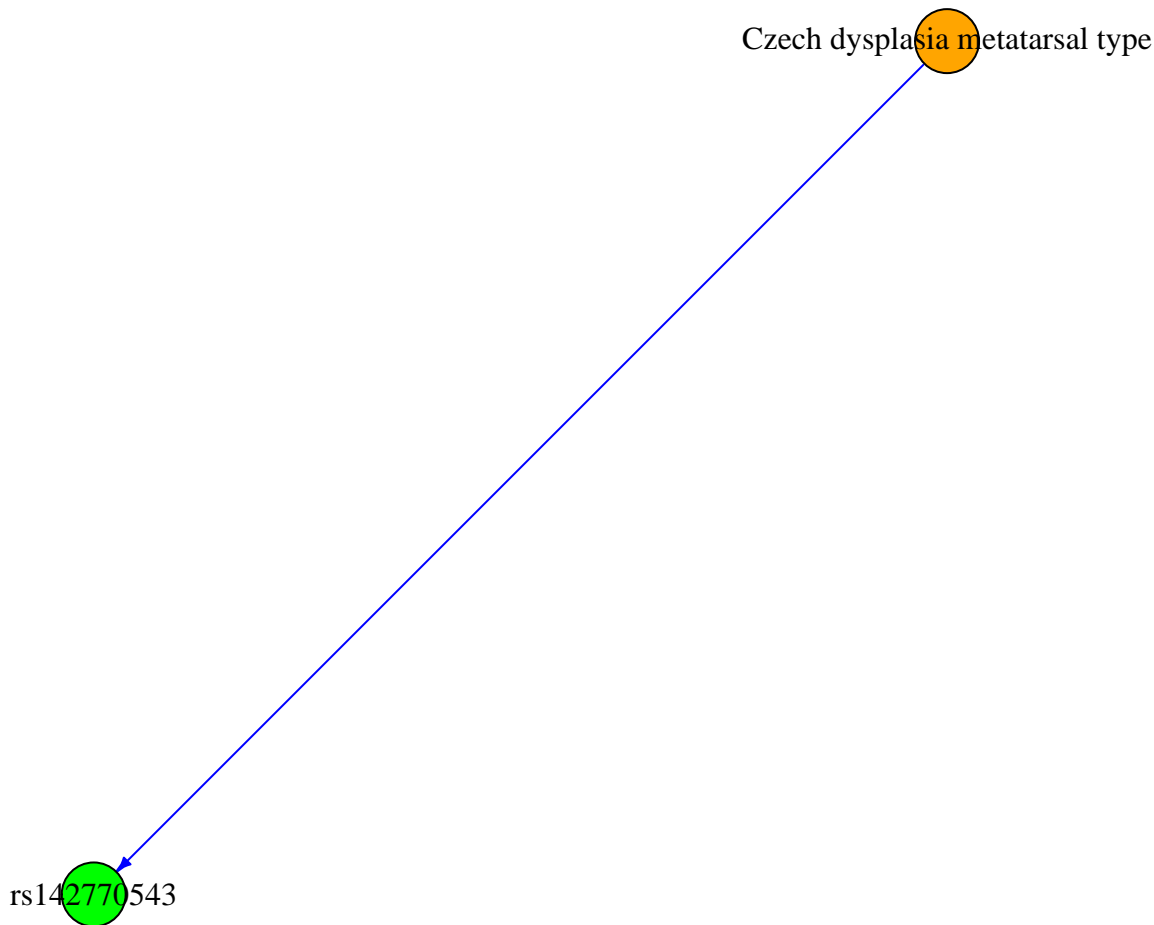

**Variant–Disease Network (D–2–hydroxyglutaric aciduria 2)**

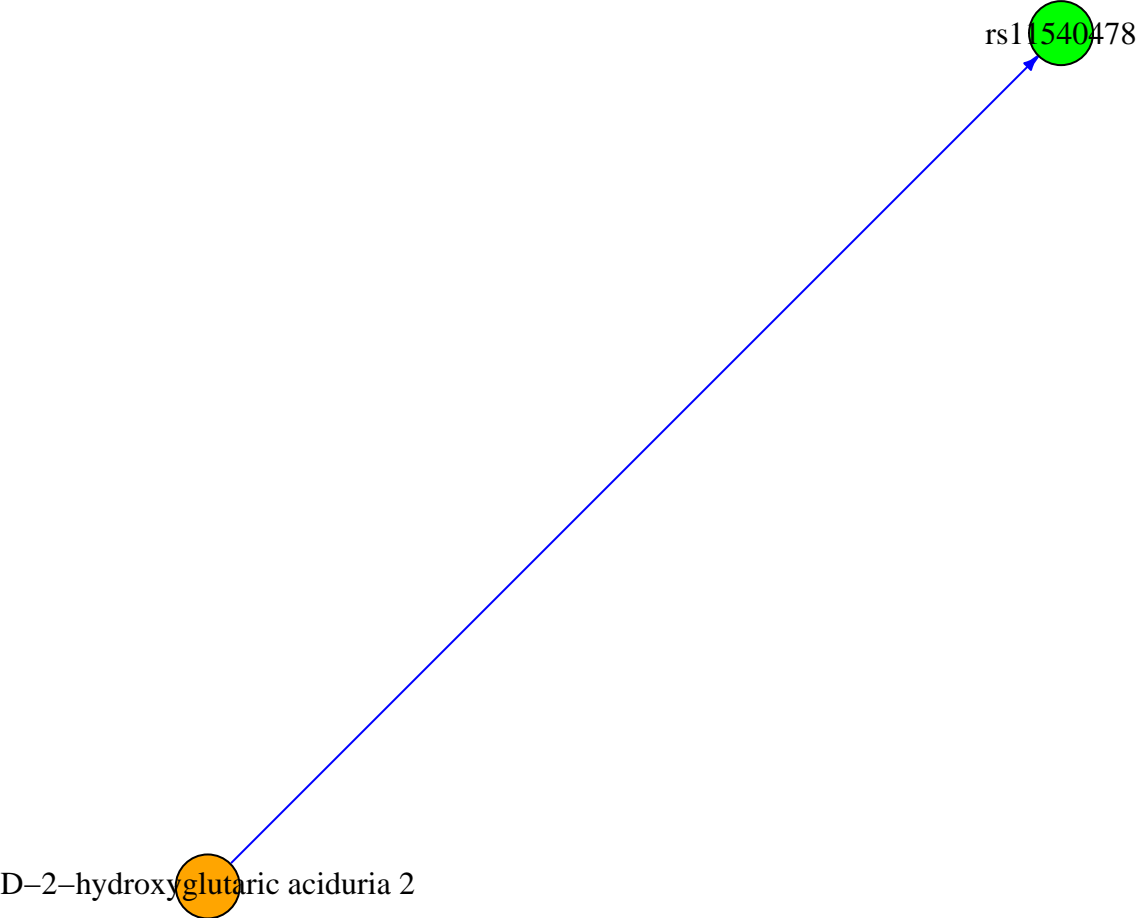

Variant–Disease Network (Danon disease)

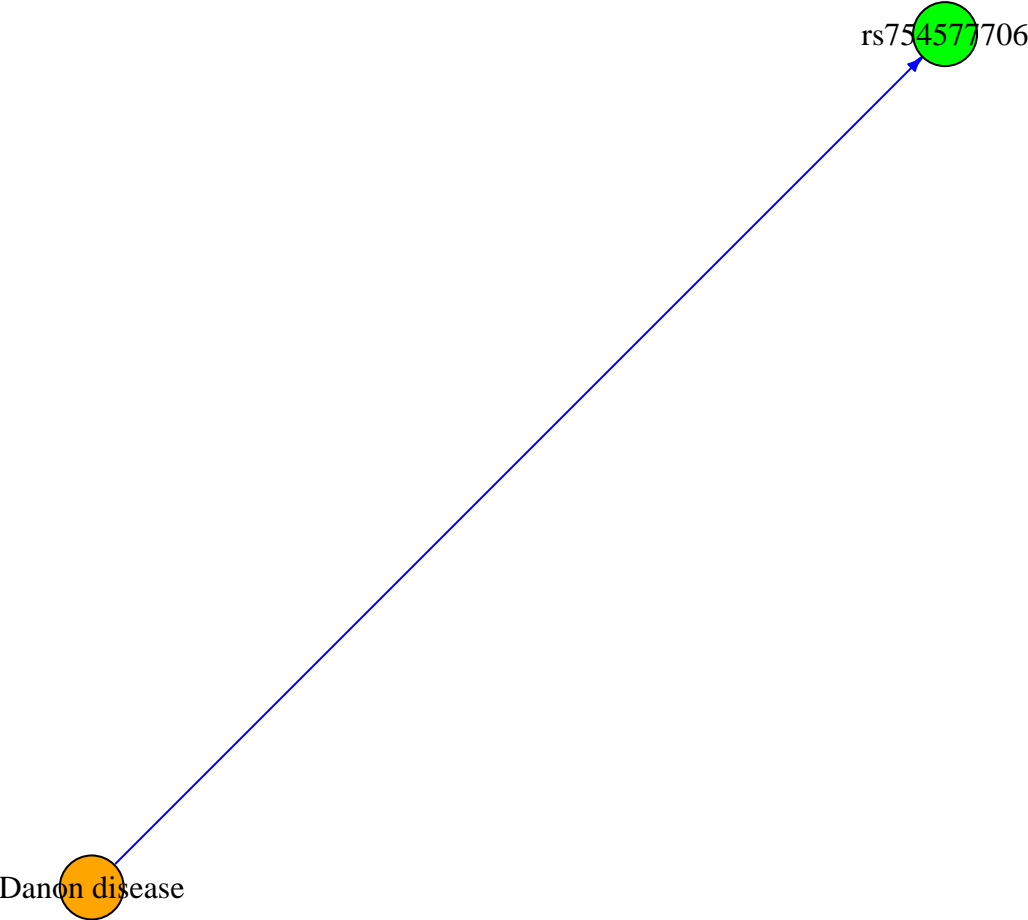

**Variant–Disease Network (Darier disease)**

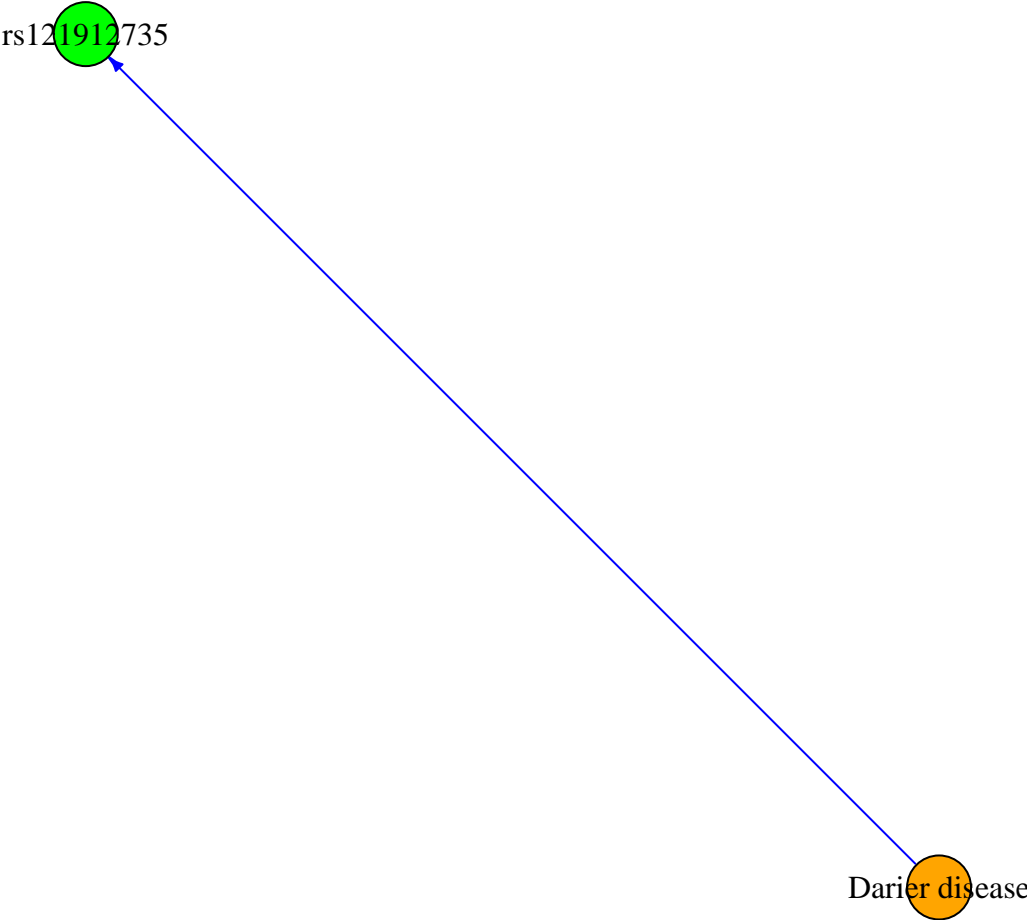

## Variant-Disease Network (Deafness)

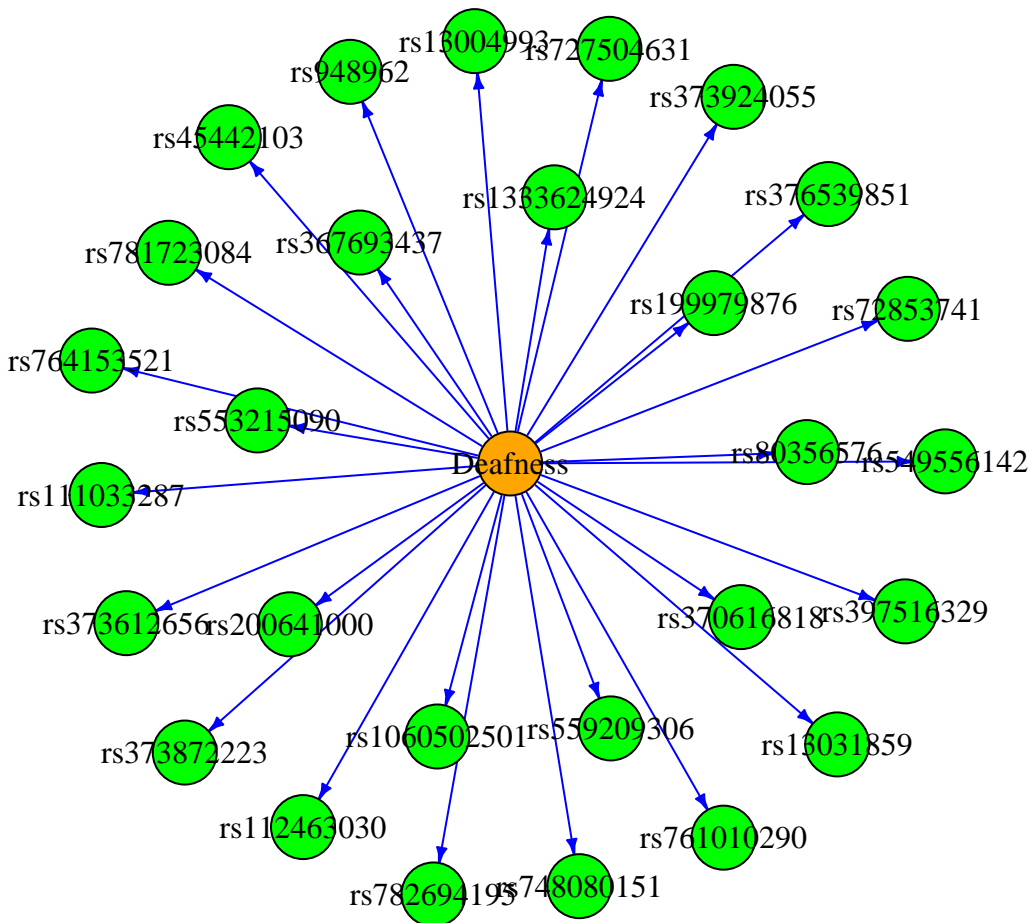

# Variant–Disease Network (Deafness enamel hypoplasia nail defects)

Deafness enamel hypoplasia nail defects

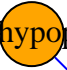

rs61750428

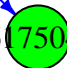

Variant–Disease Network (Deficiency of 2–methylbutyryl–CoA dehydrogenase)

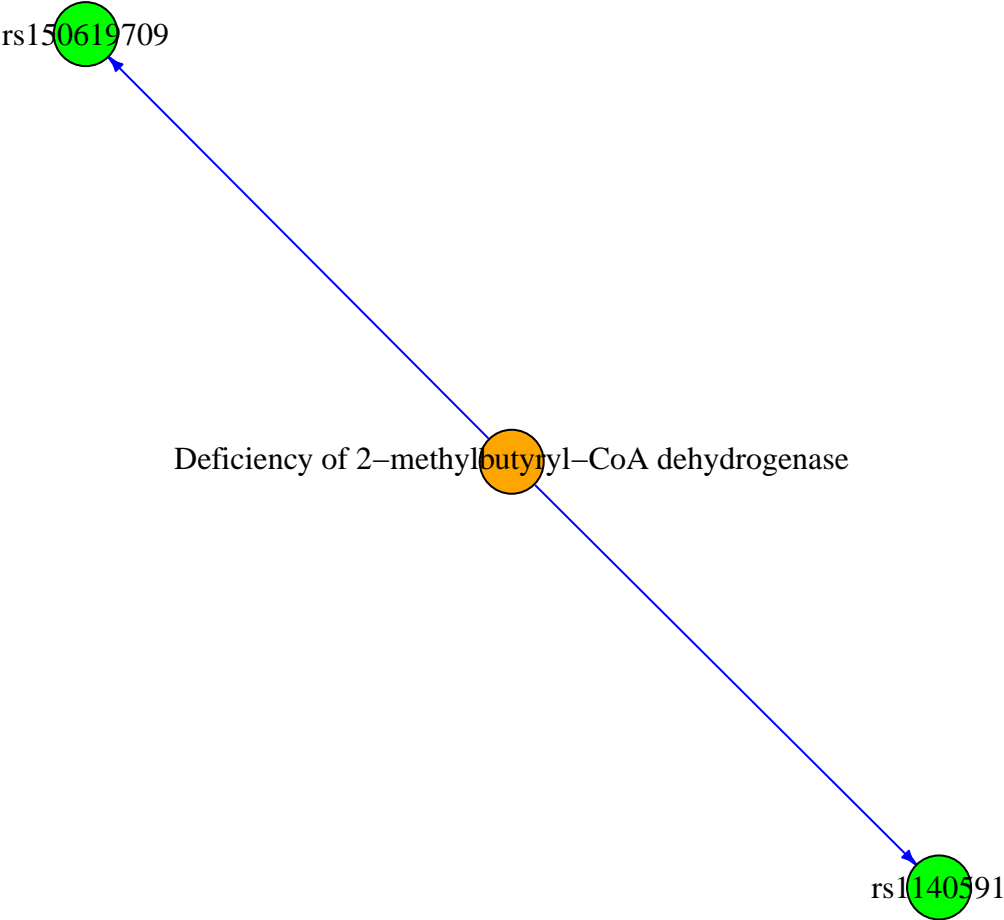



# Variant–Disease Network (Deficiency of acetyl–CoA acetyltransferase)

rs747714452

Deficiency of acetyl–CoA acetyltransf



**Variant–Disease Network (Deficiency of alpha-mannosidase)**

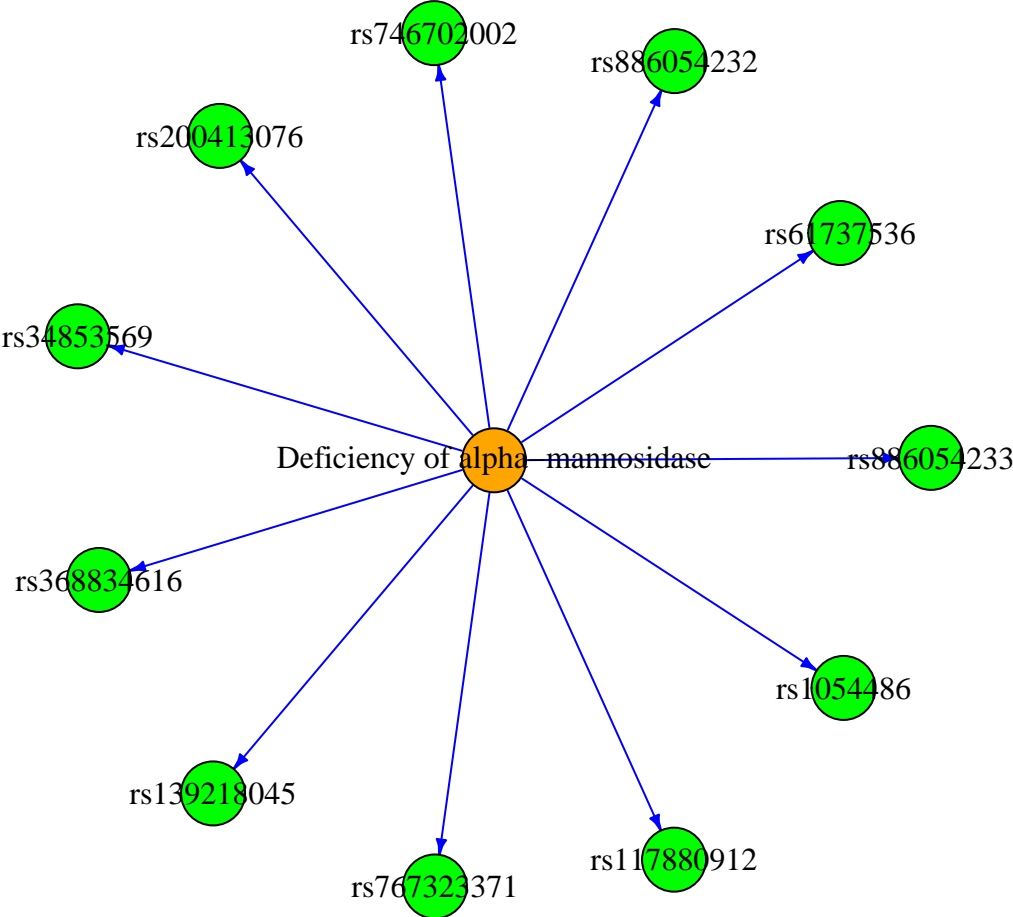

# Variant–Disease Network (Deficiency of aromatic–L–amino–acid decarboxylase)

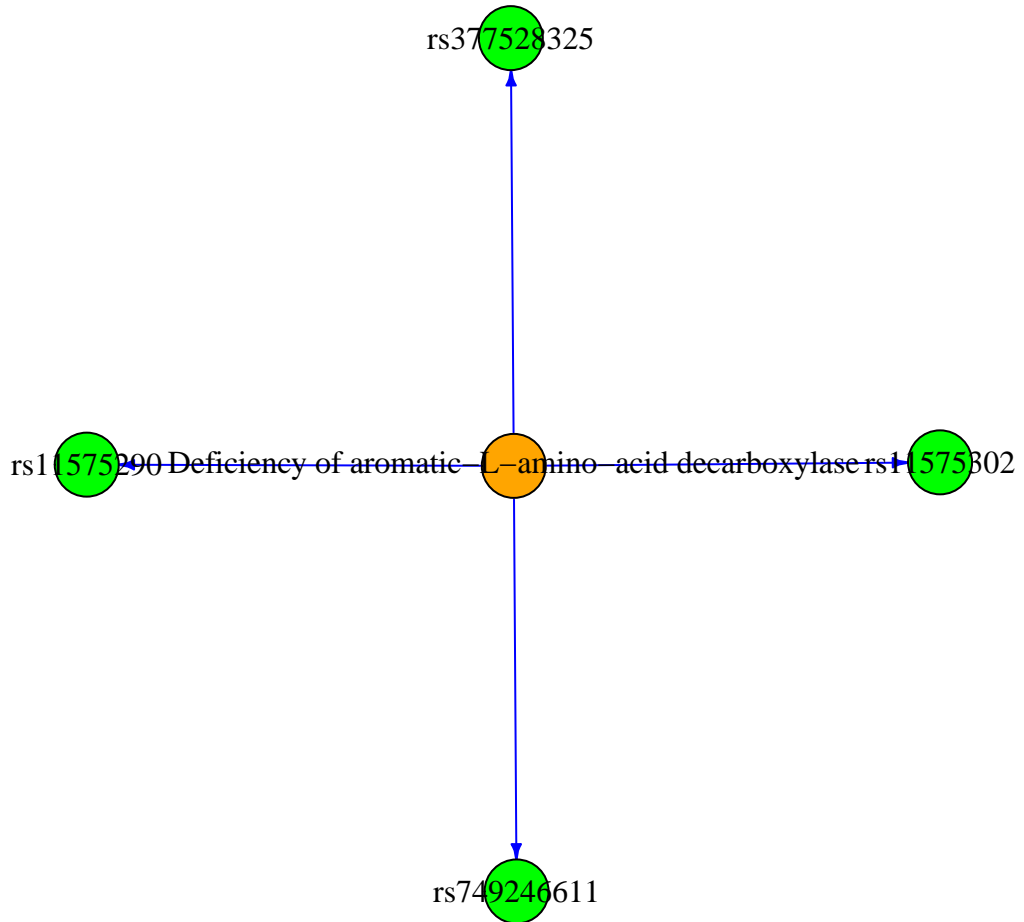

**Variant–Disease Network (Deficiency of butyryl–CoA dehydrogenase)**

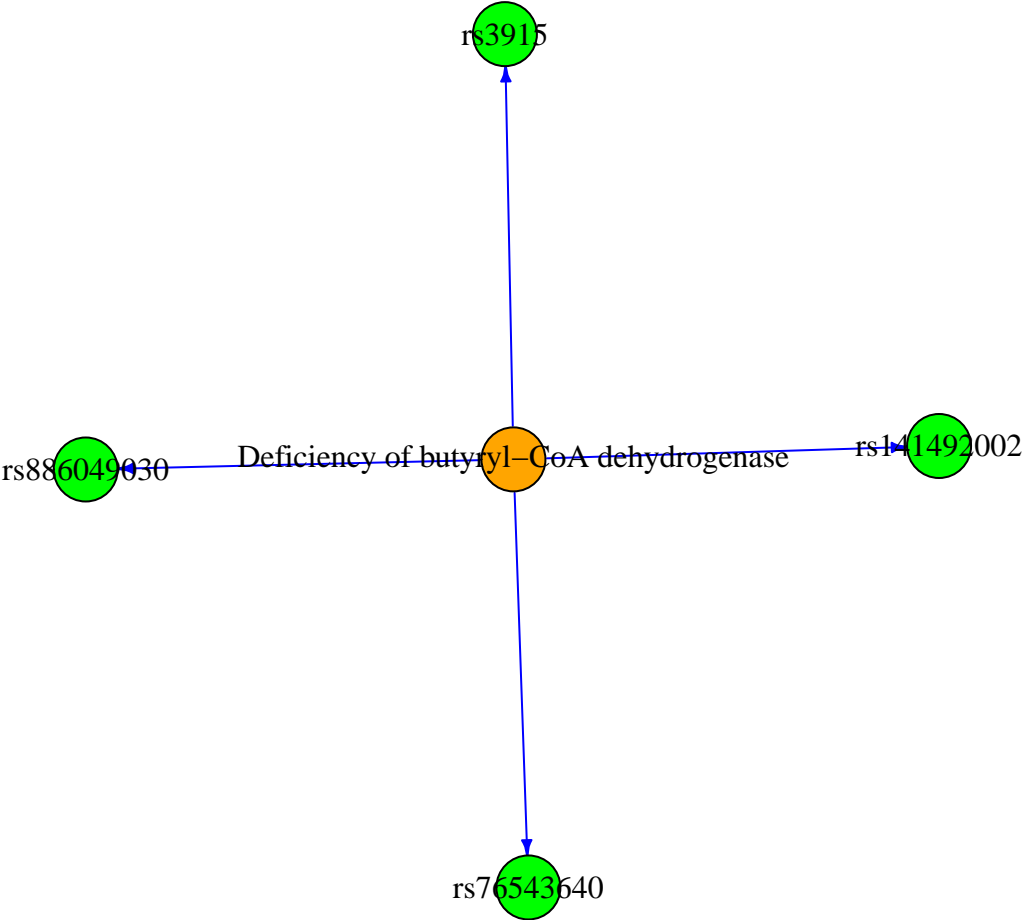

# Variant–Disease Network (Deficiency of ferroxidase)

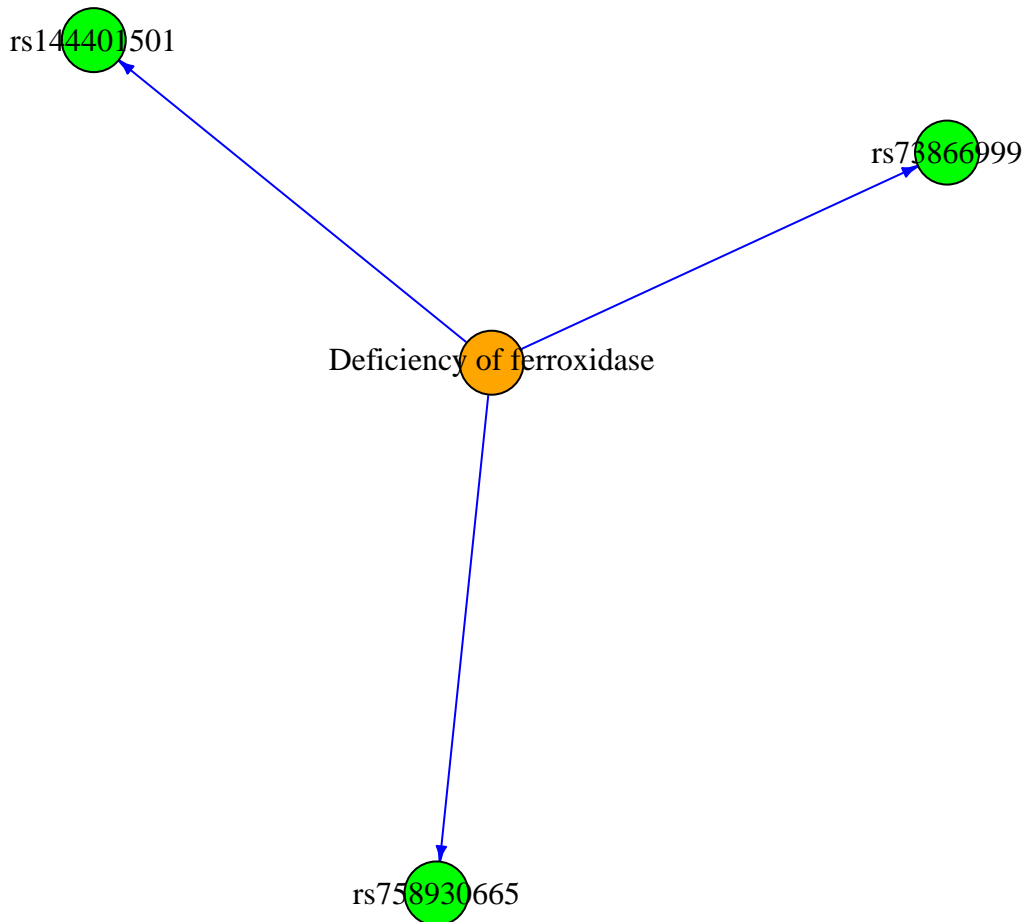

## Variant–Disease Network (Deficiency of galactokinase)

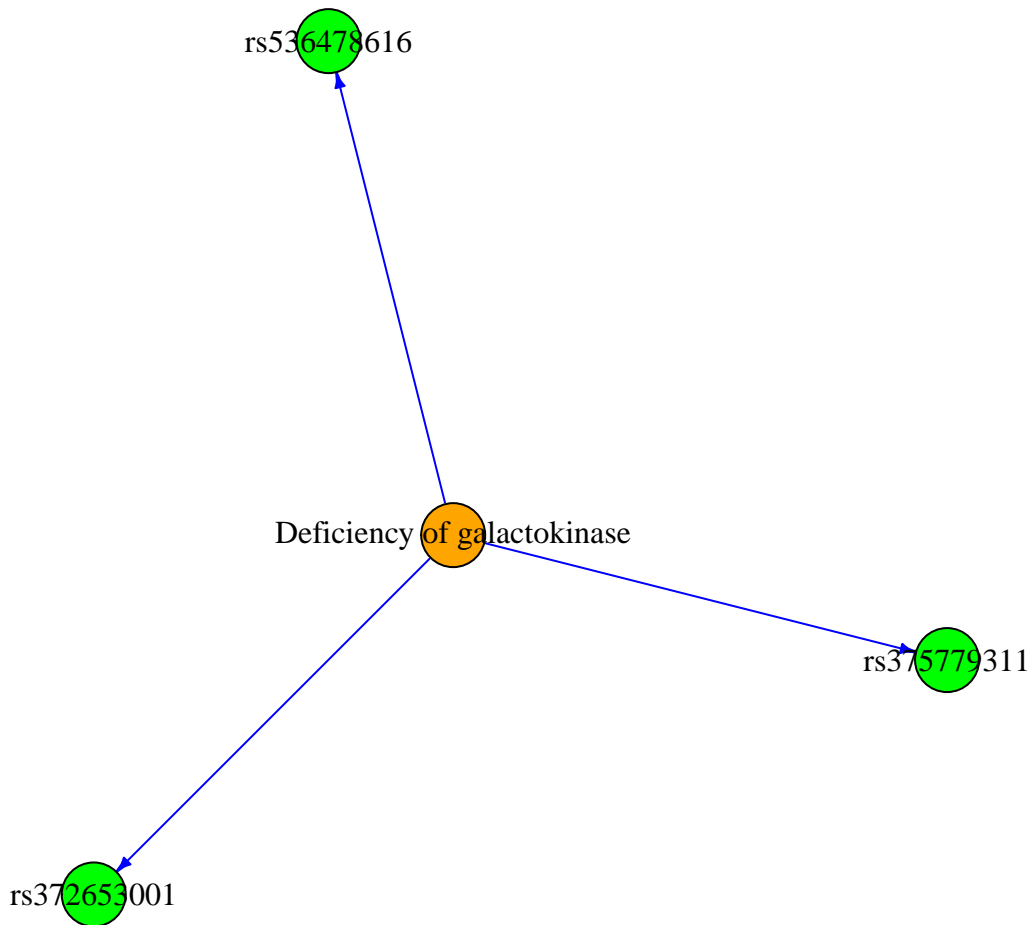

Variant–Disease Network (Deficiency of hyaluronoglucosaminidase)

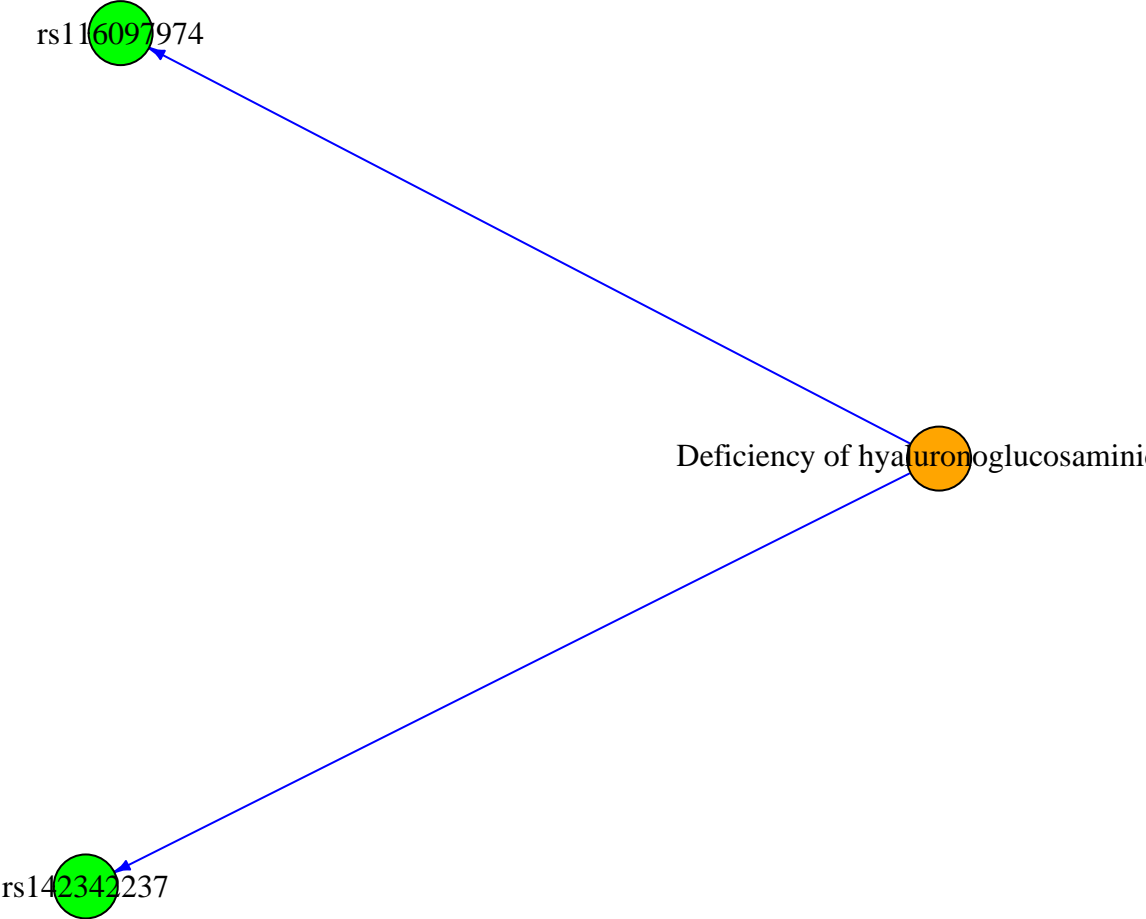

Variant–Disease Network (Deficiency of hydroxymethylglutaryl–CoA lyase)

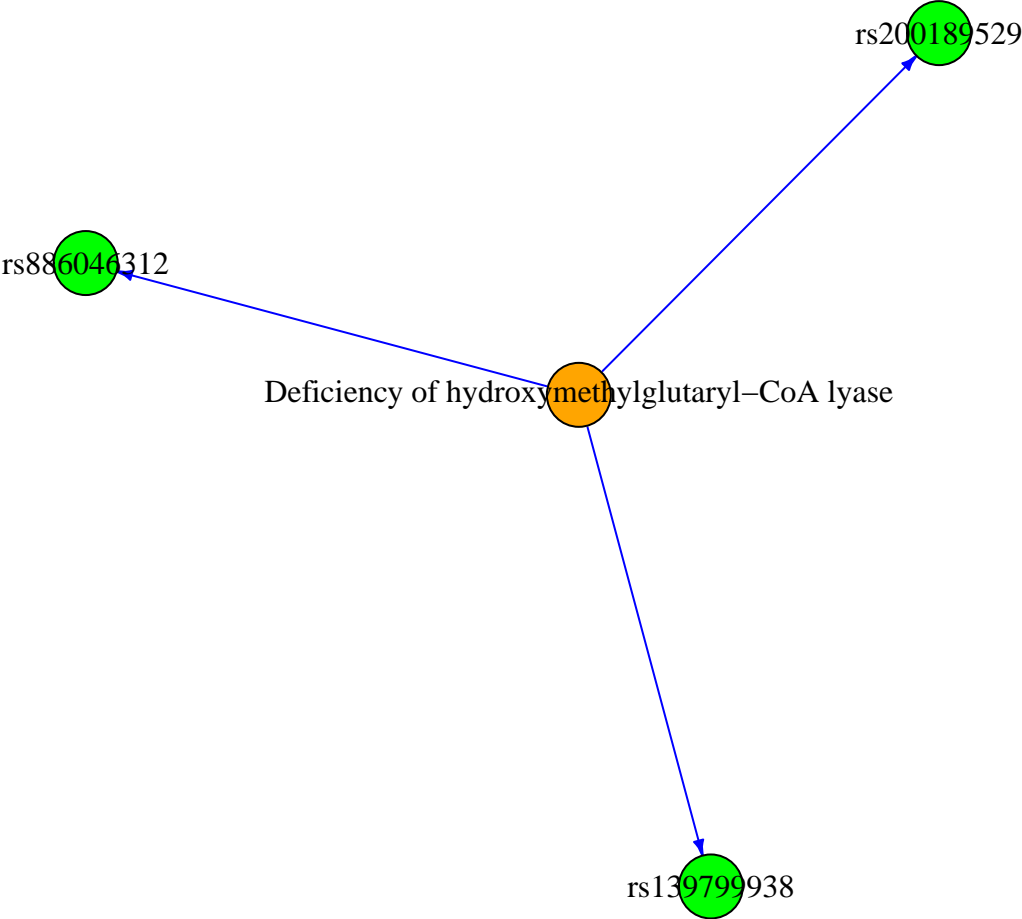



Variant–Disease Network (Deficiency of iodide peroxidase)

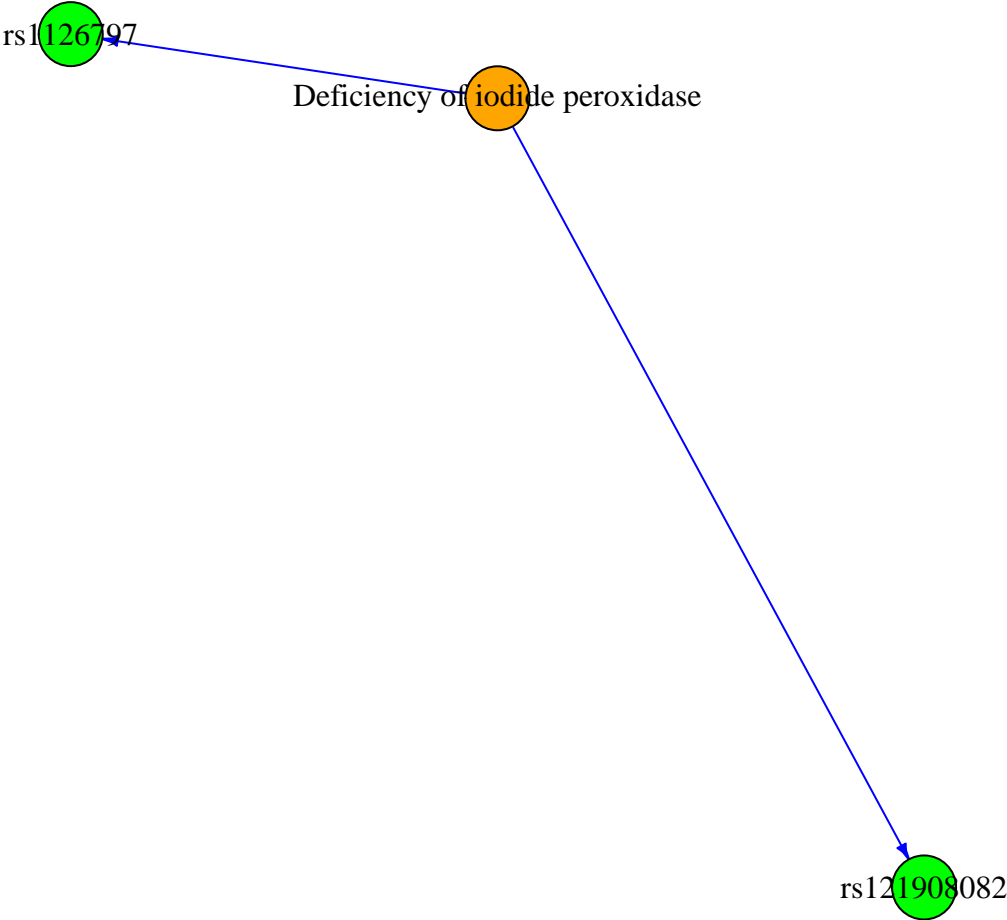

# -Disease Network (Deficiency of UDPglucose–hexose–1–phosphate uridylyltransferase)

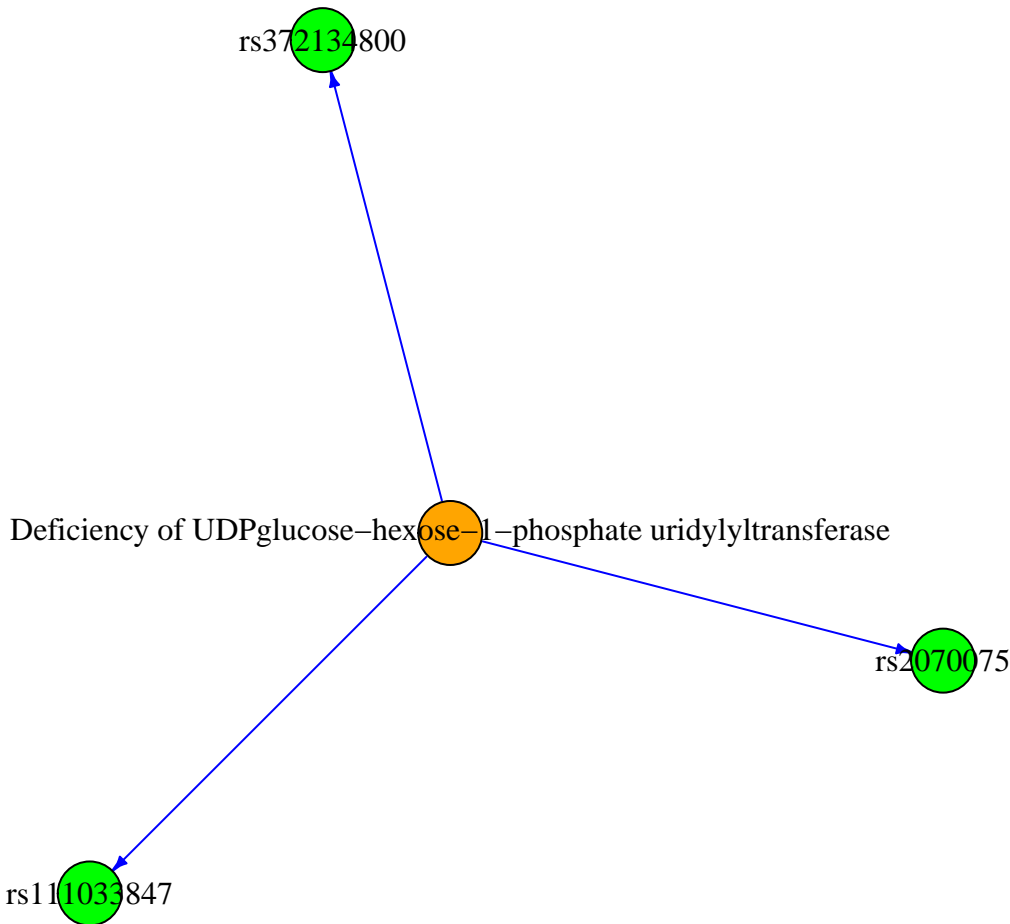

Variant–Disease Network (Delayed gross motor development)

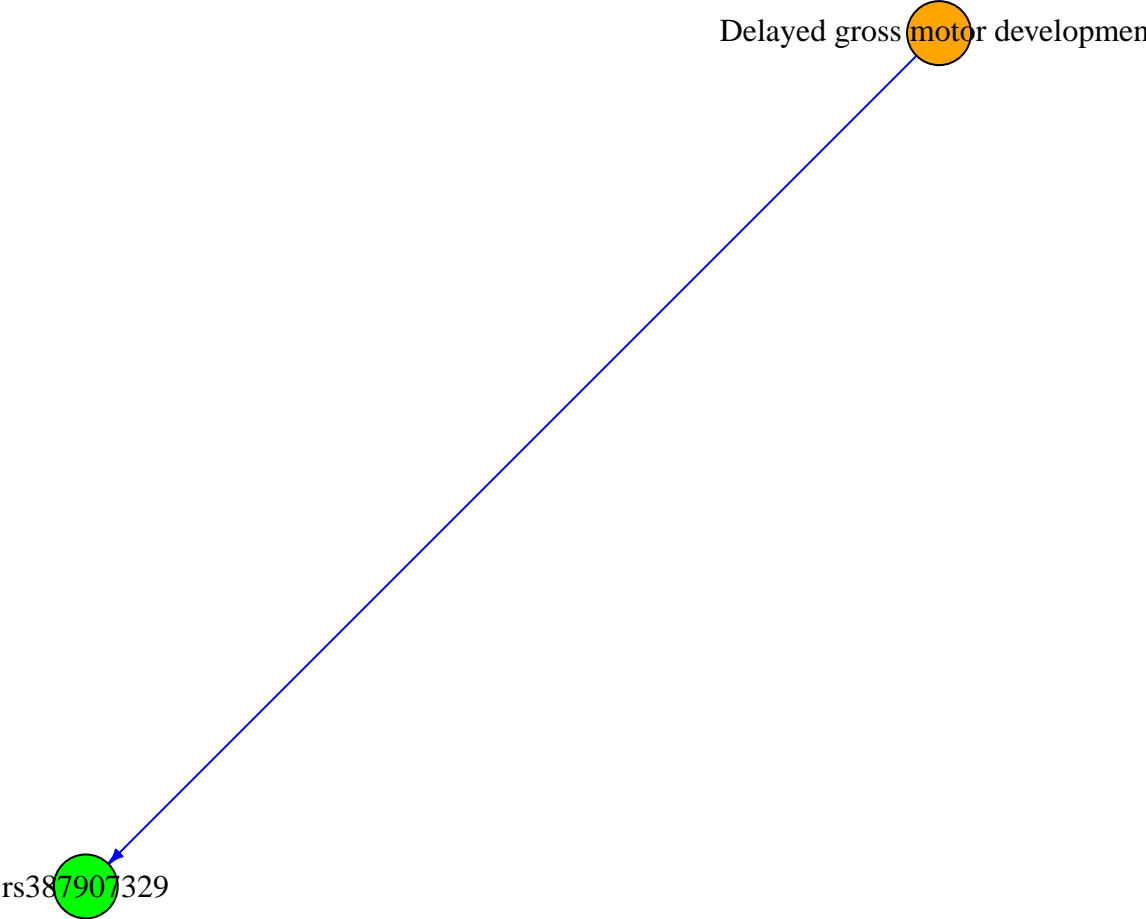

**Variant–Disease Network (Delayed speech and language development)**

rs387907329

Delayed speech and language develop

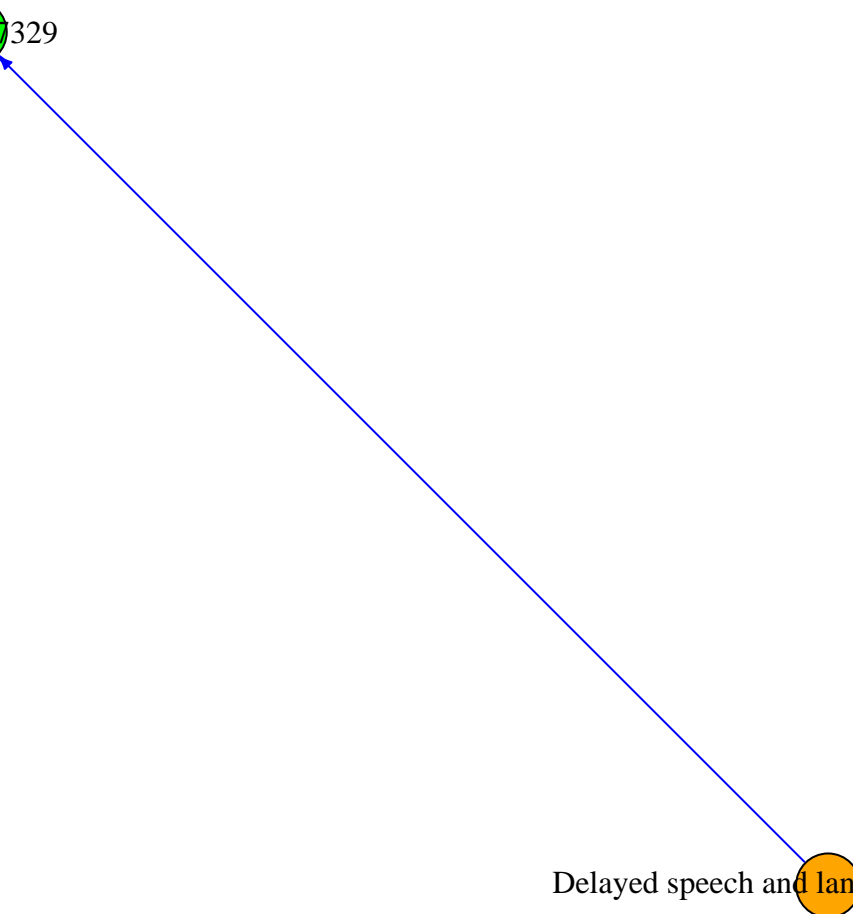

## Variant–Disease Network (Dementia)

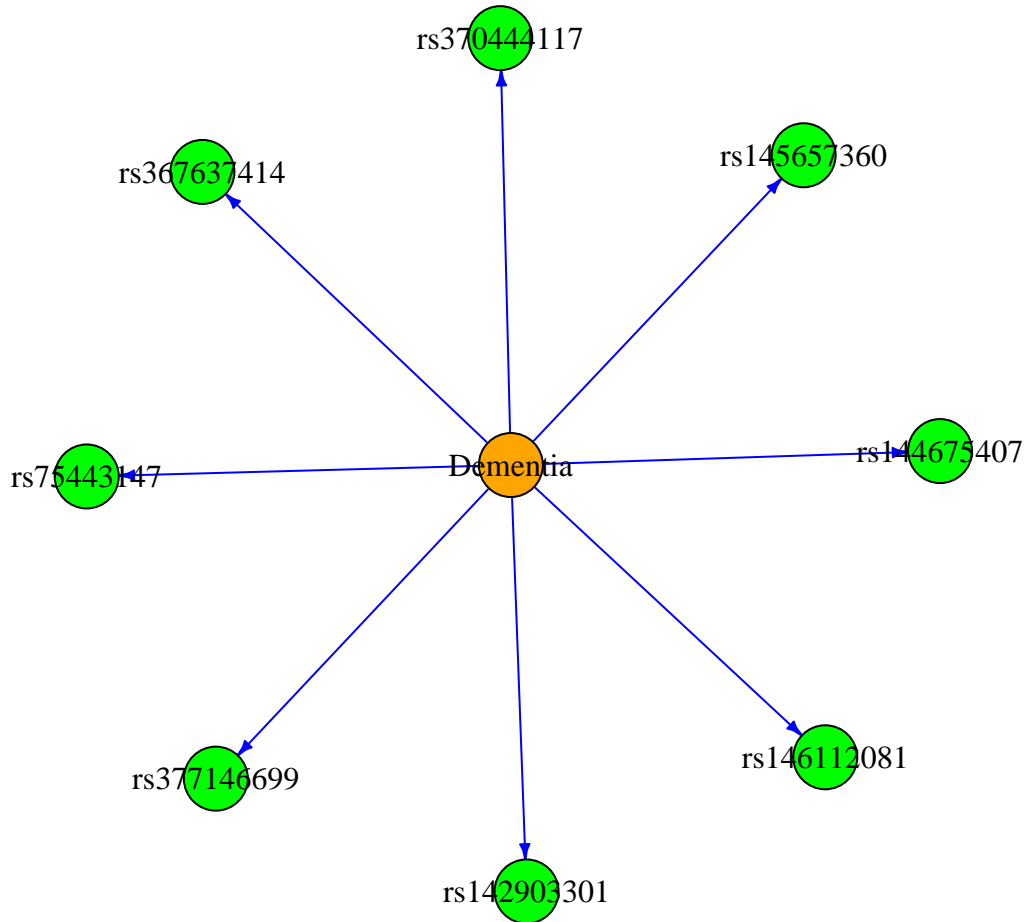

## Variant–Disease Network (Dendritic cell)

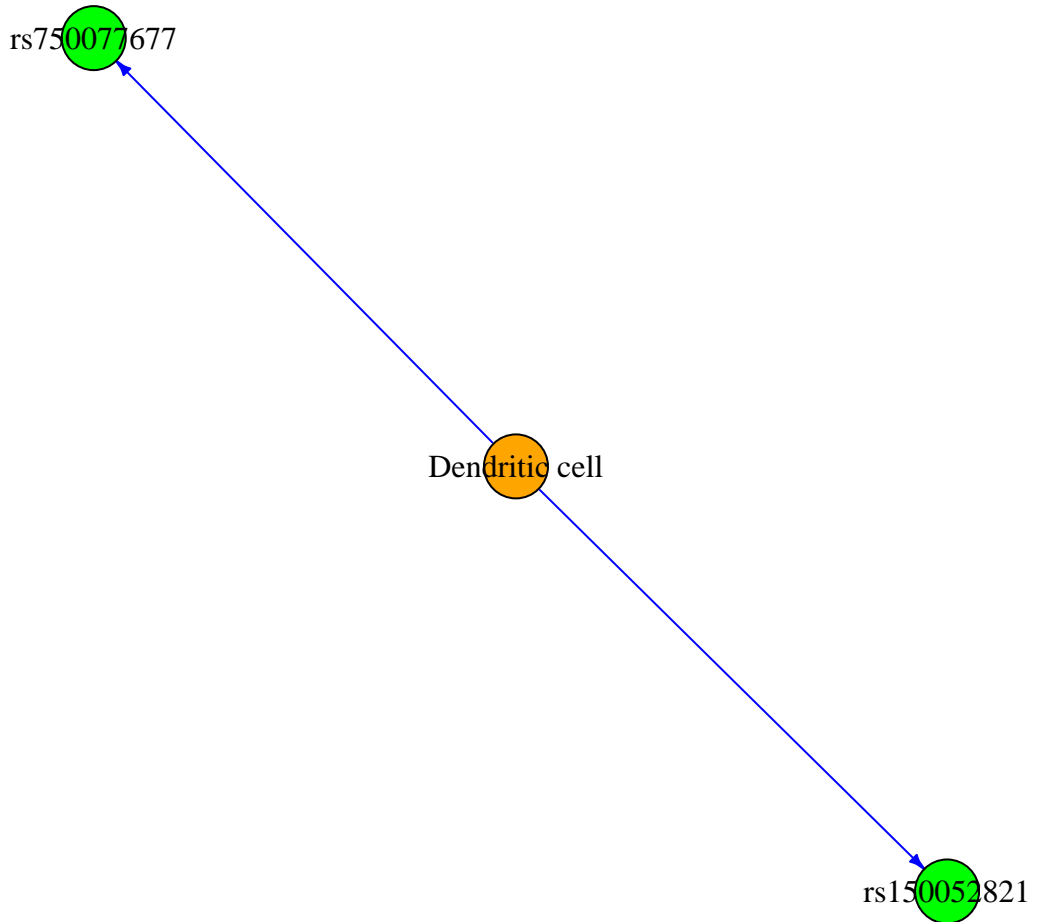

## Variant–Disease Network (Dental anomalies and short stature)

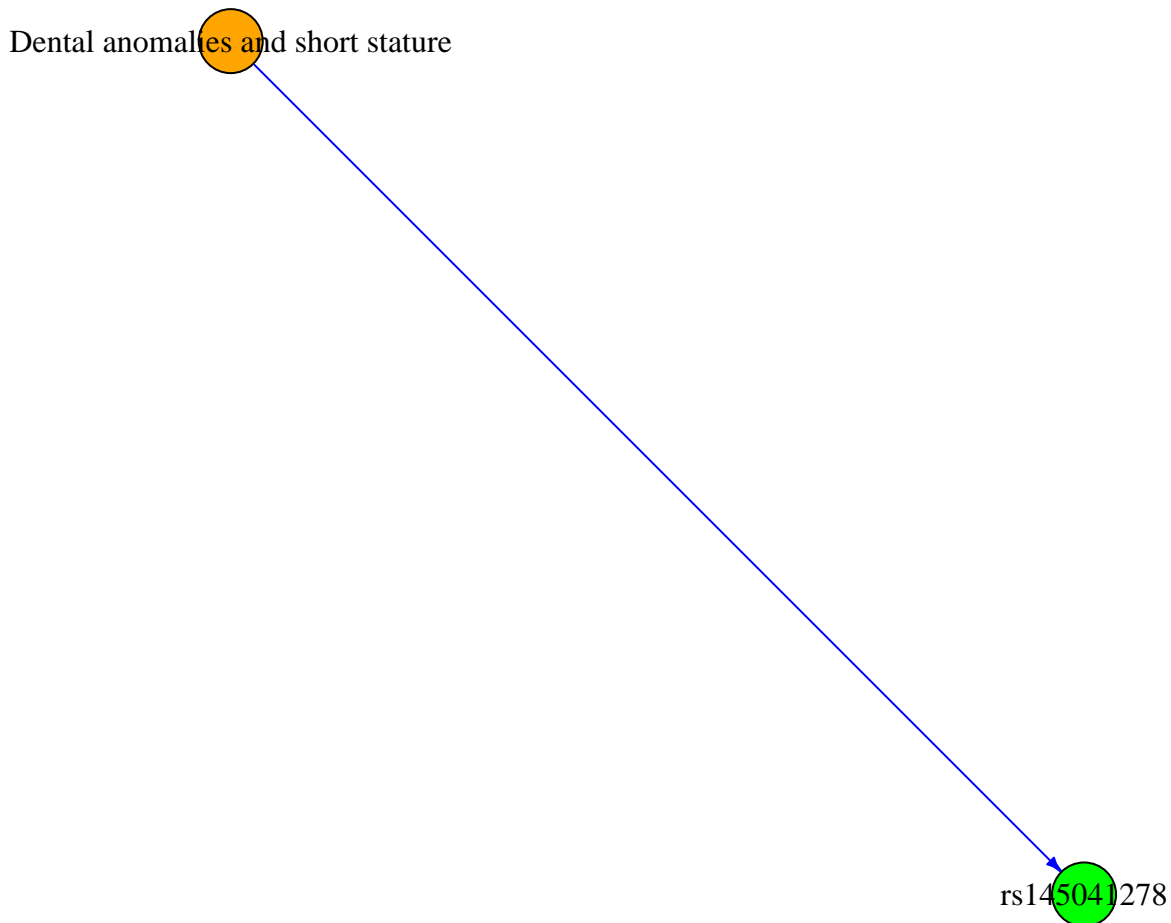

# Variant–Disease Network (Developmental regression)

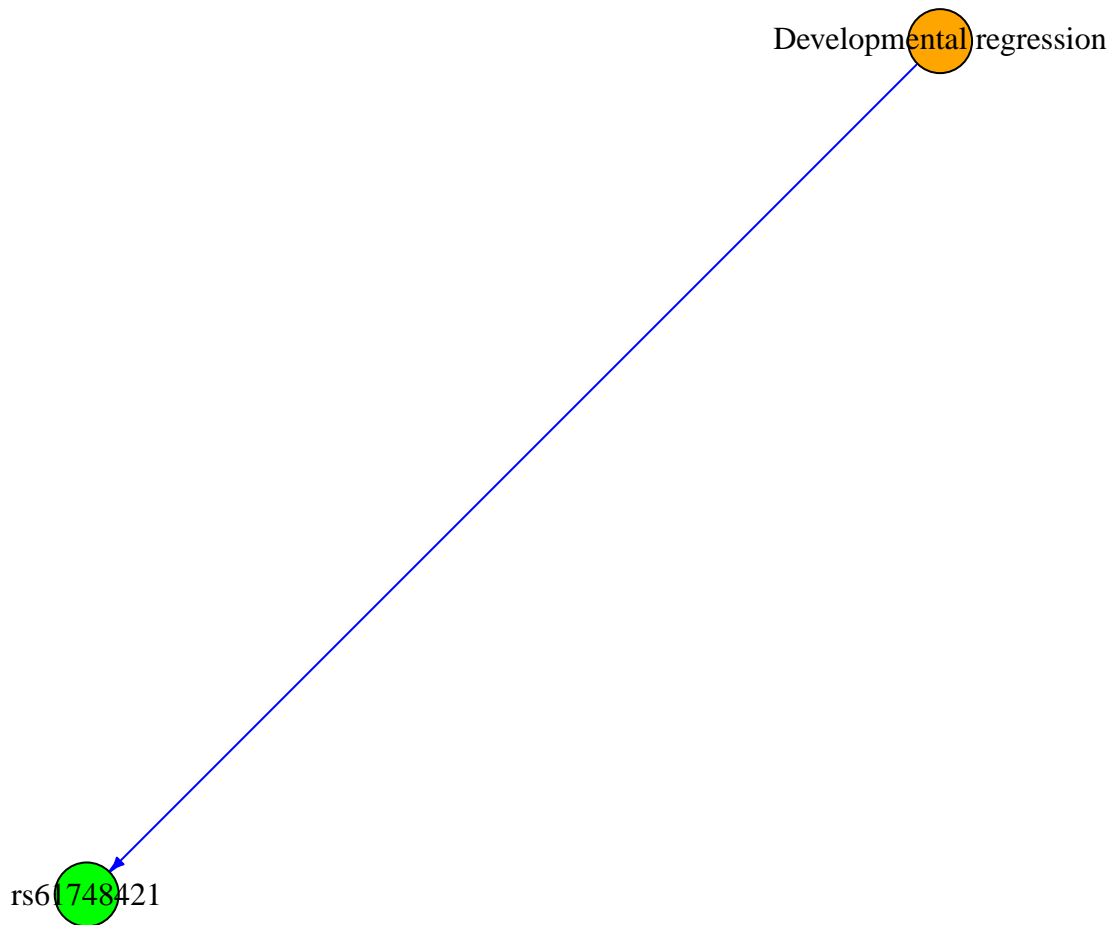



Variant–Disease Network (DFNA 2 Nonsyndromic Hearing Loss)

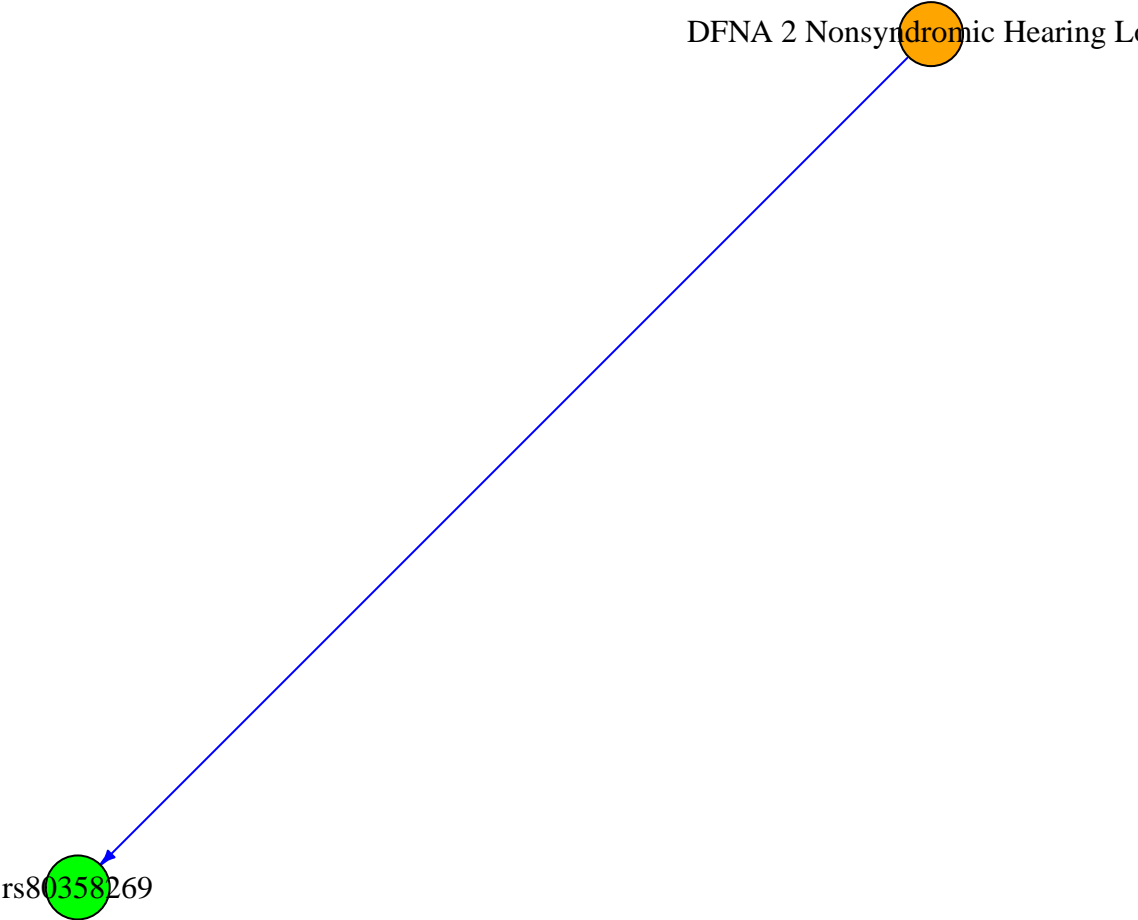

Variant–Disease Network (Diabetes mellitus)

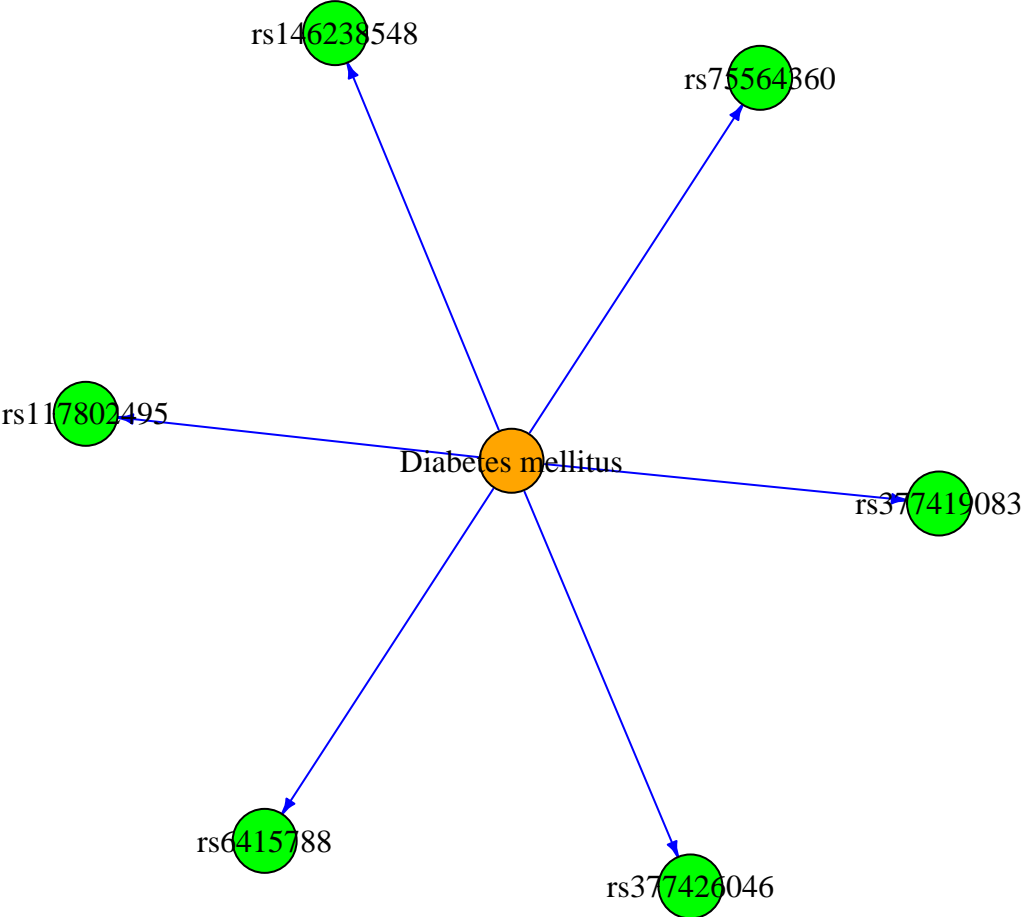

**Variant–Disease Network (Diamond–Blackfan anemia)**

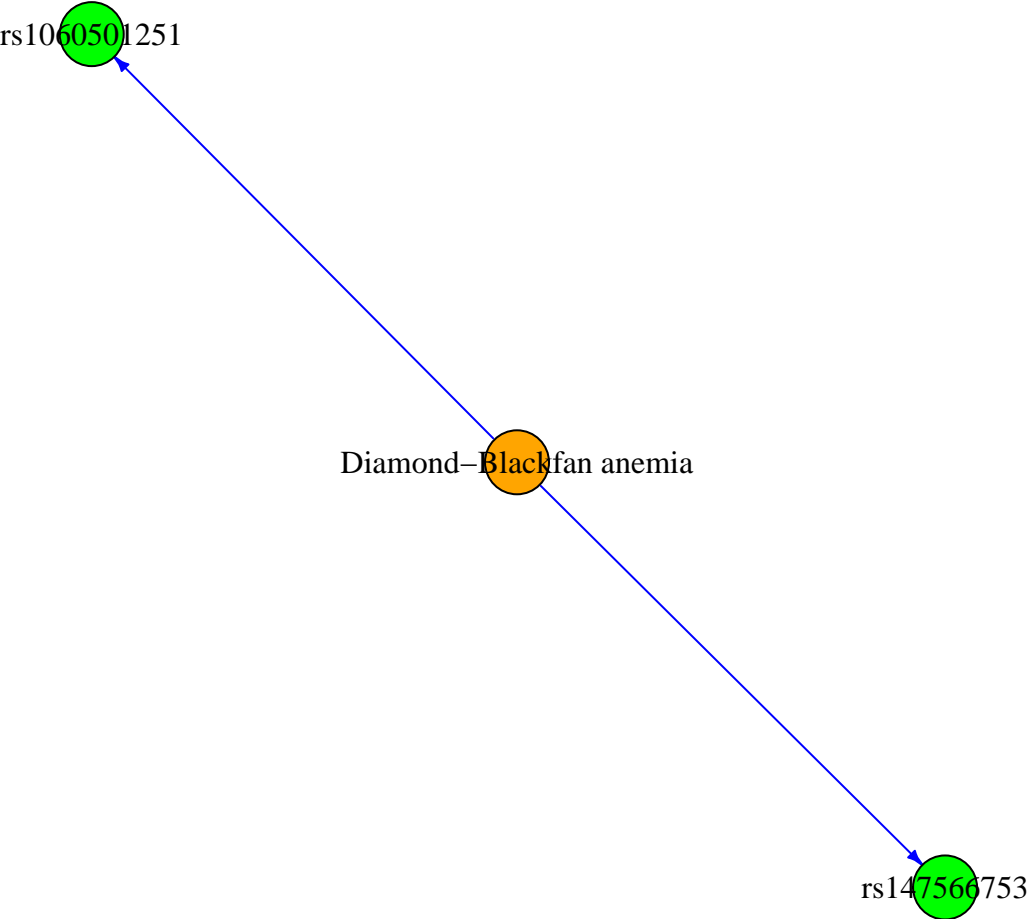

## Variant–Disease Network (Diamond–Blackfan anemia 1)

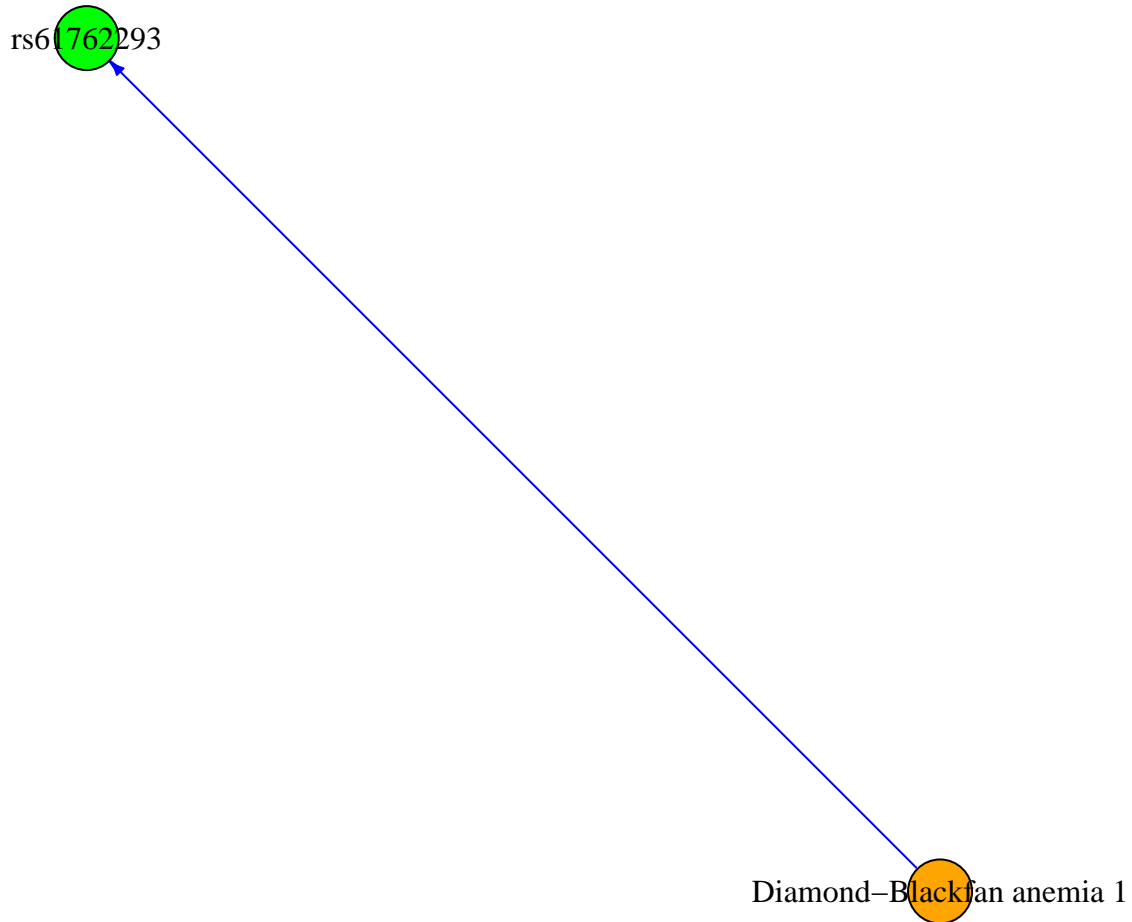

Variant–Disease Network (Diaphanospondylodysostosis)

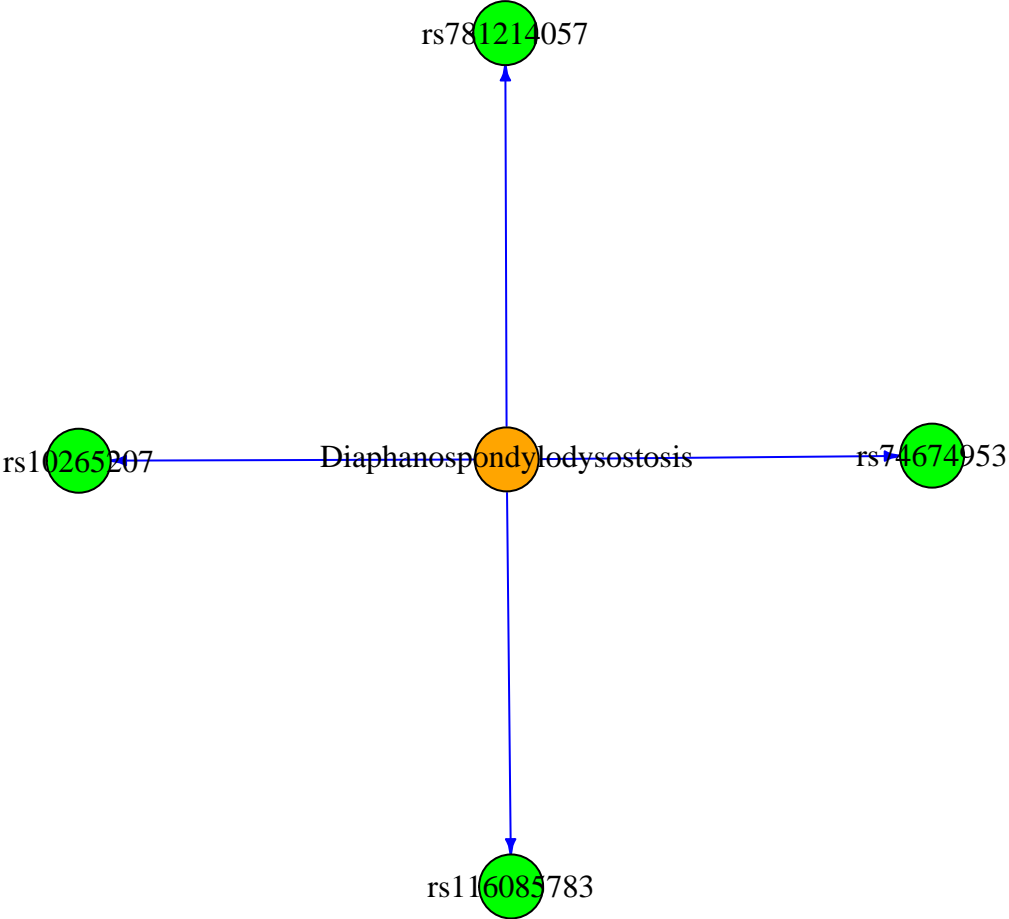

## Variant–Disease Network (Diarrhea with Microvillus Atrophy)

Diarrhea with Microvillus Atrophy

rs11082795

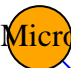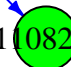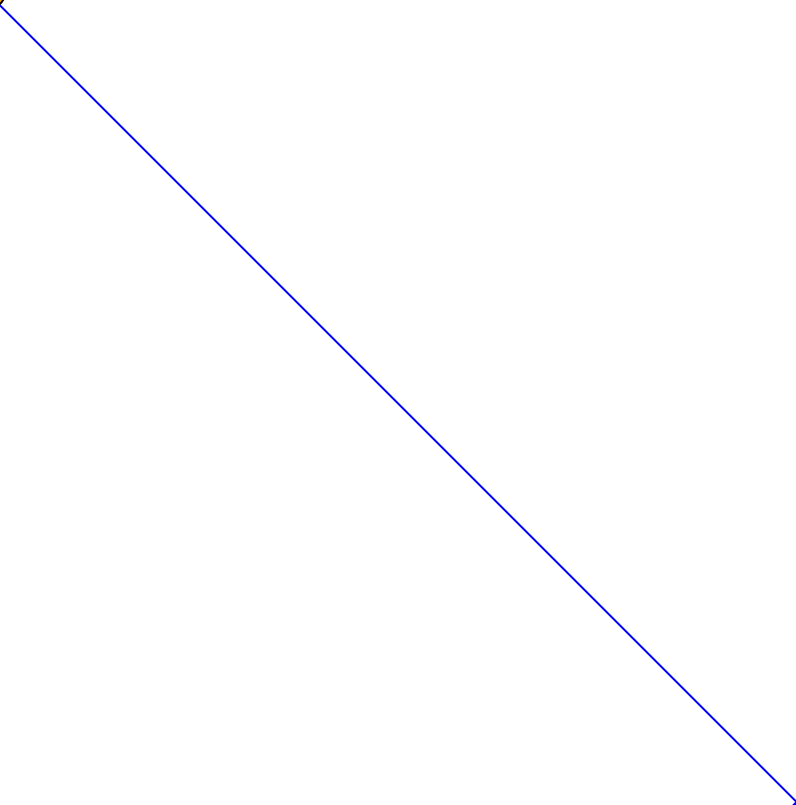

## Variant–Disease Network (Dicarboxylic aminoaciduria)

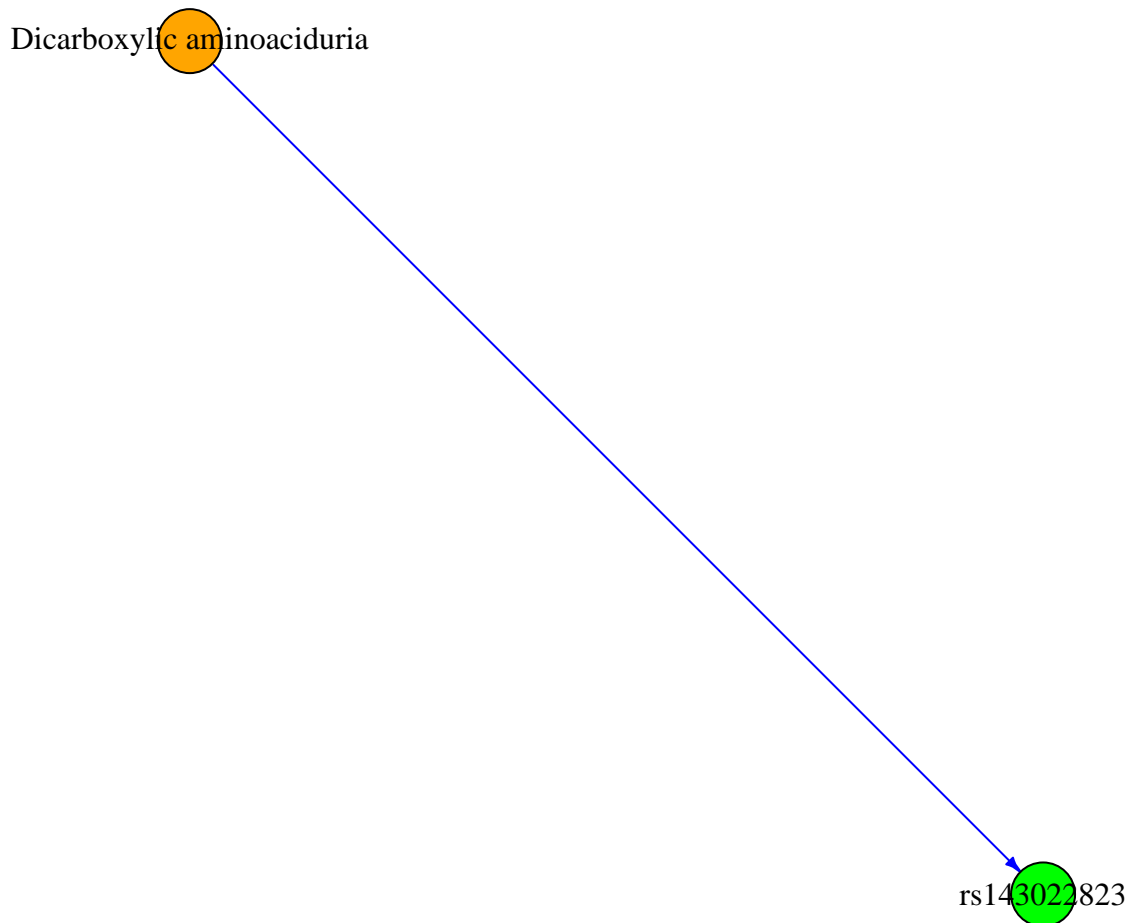

# Disease Network (DICER1-related pleuropulmonary blastoma cancer predispos

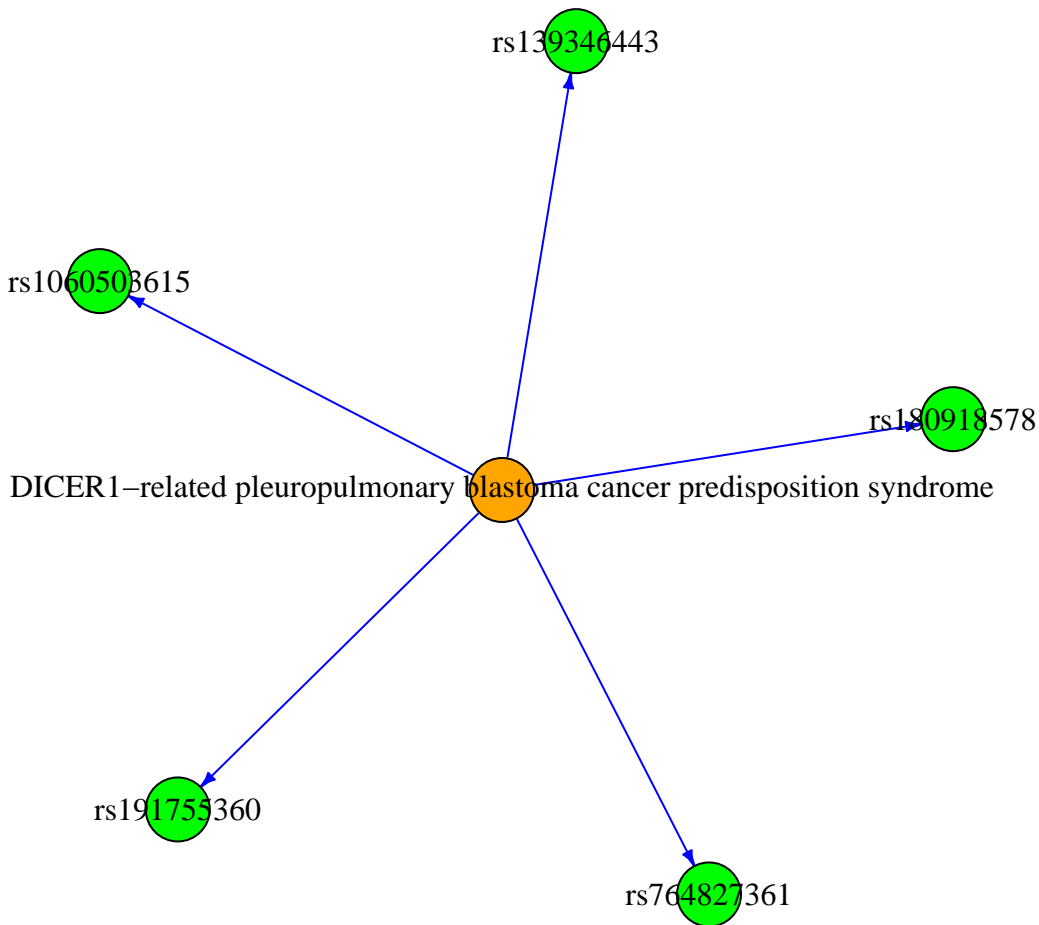



## Variant–Disease Network (Diffuse mesangial sclerosis)

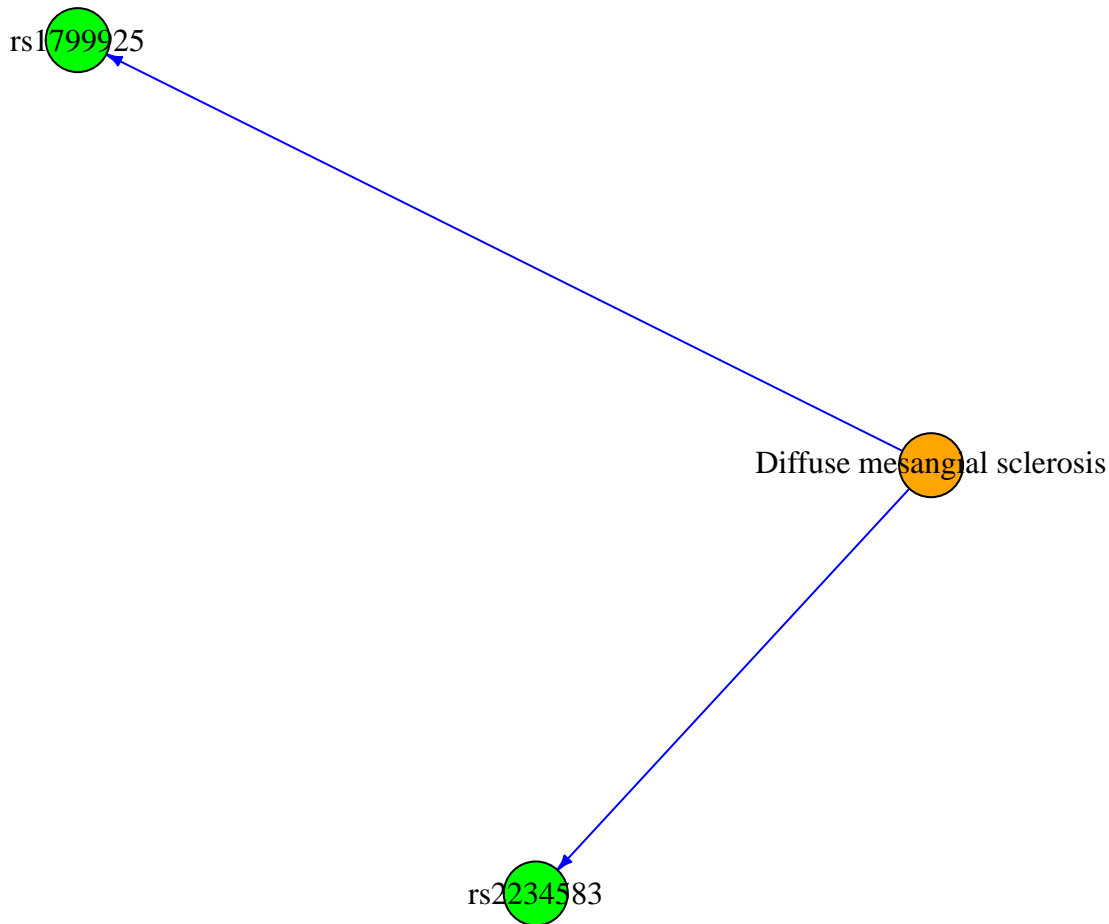

Variant–Disease Network (Digital clubbing)

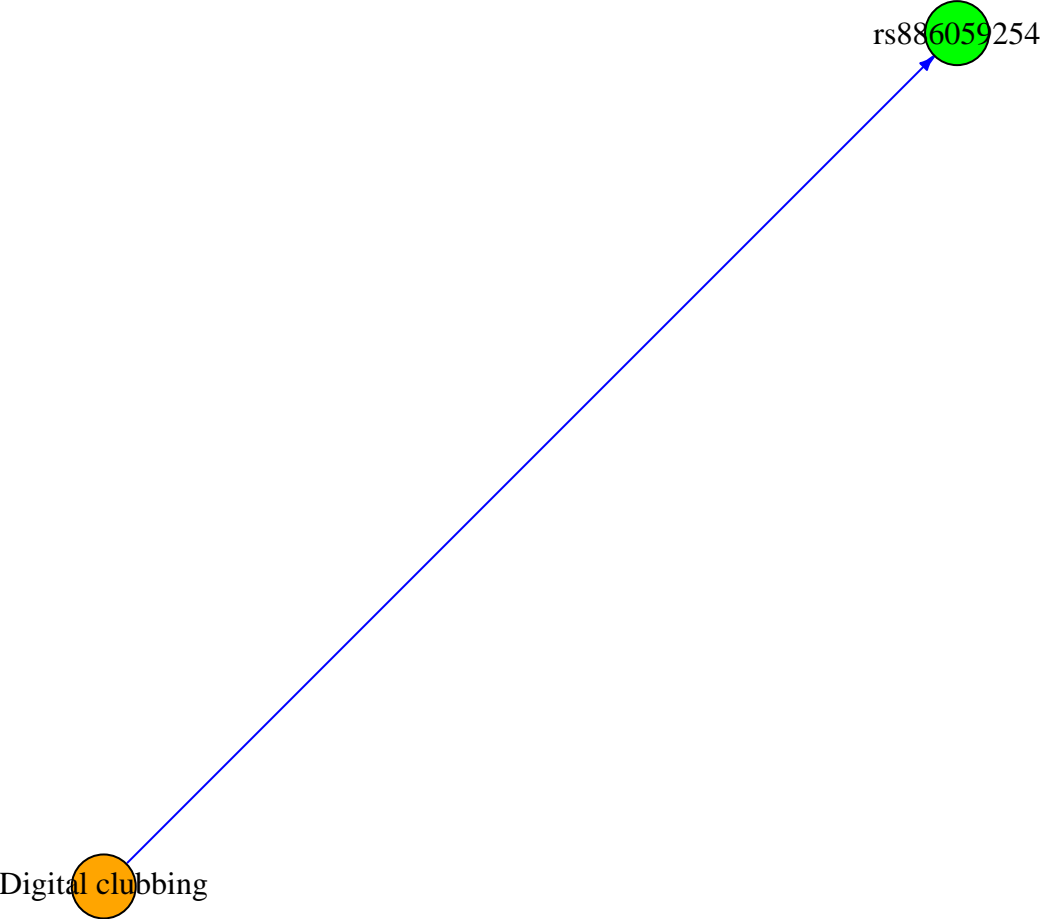

## Variant–Disease Network (Dihydropteridine reductase deficiency)

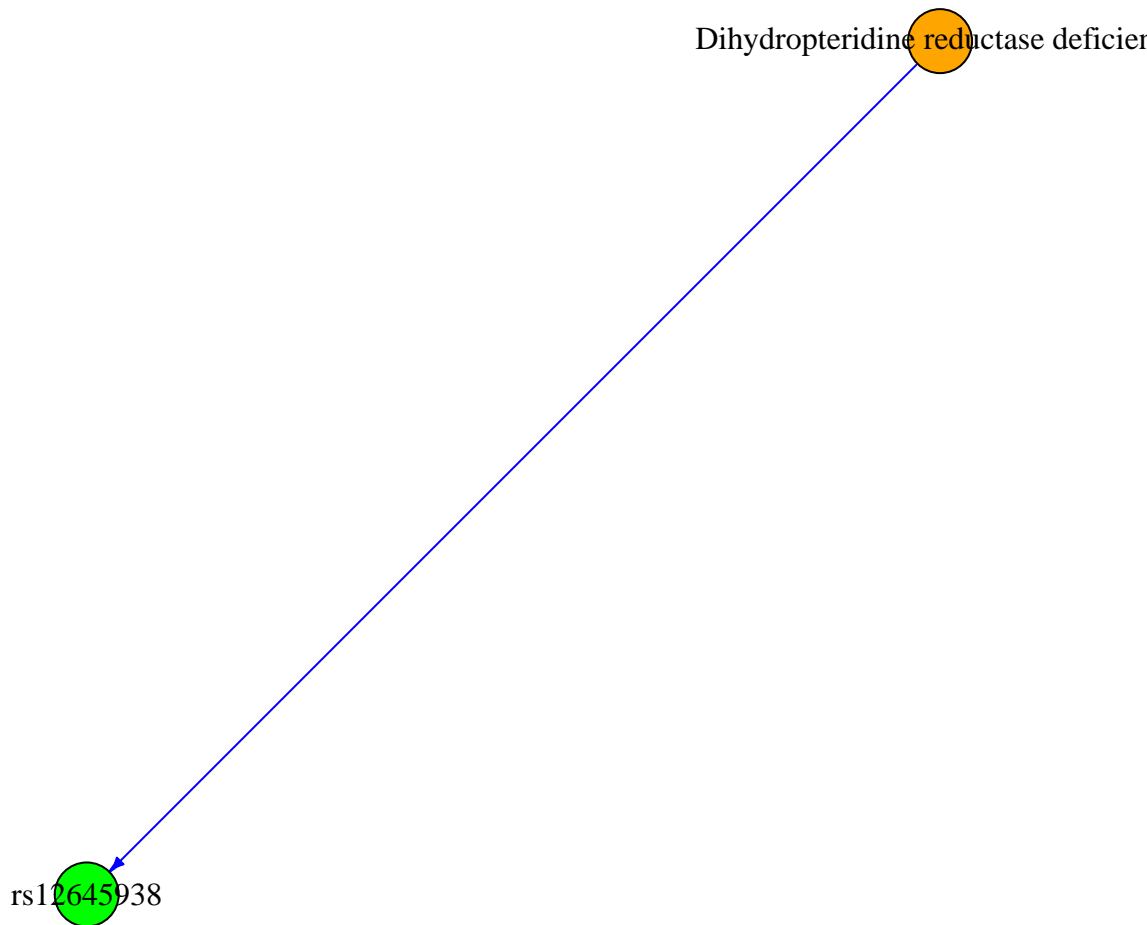

Variant–Disease Network (Dihydropyrimidine dehydrogenase deficiency)

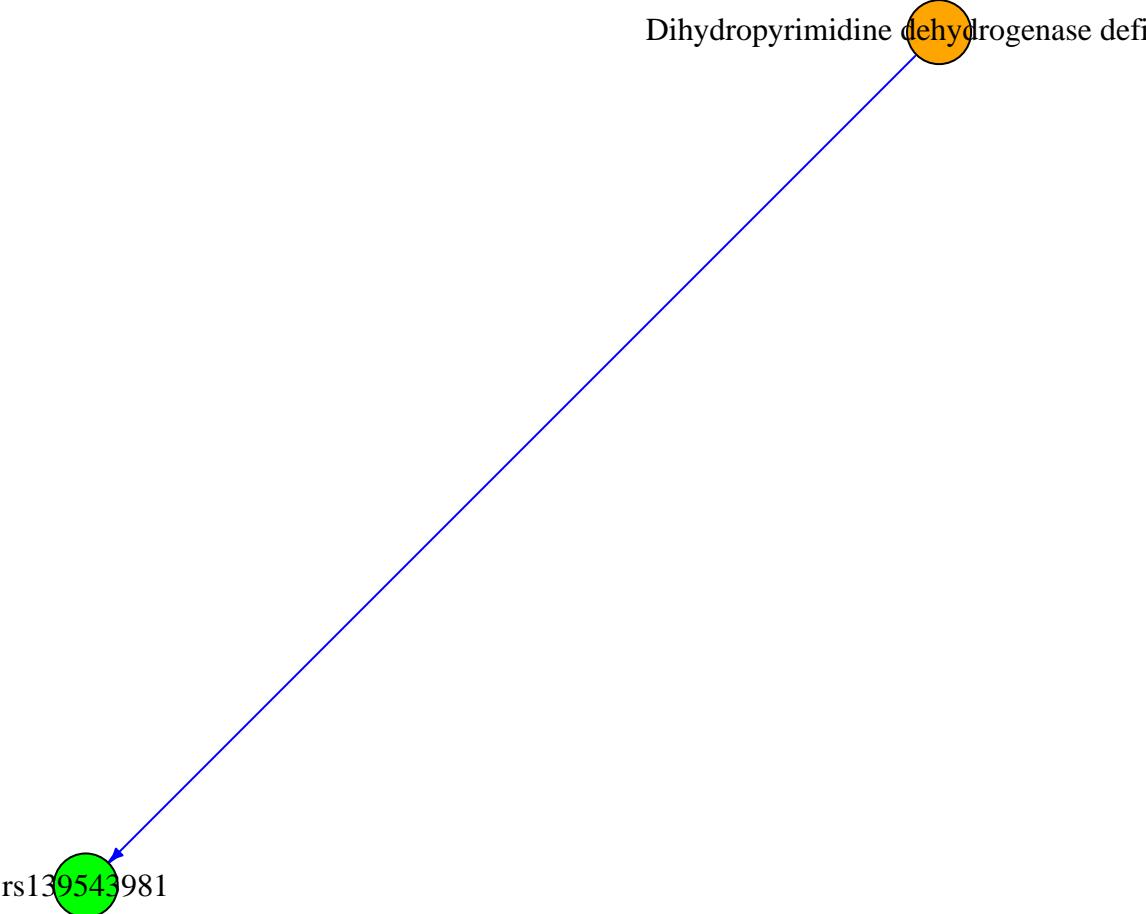

## Variant–Disease Network (Dilated Cardiomyopathy)

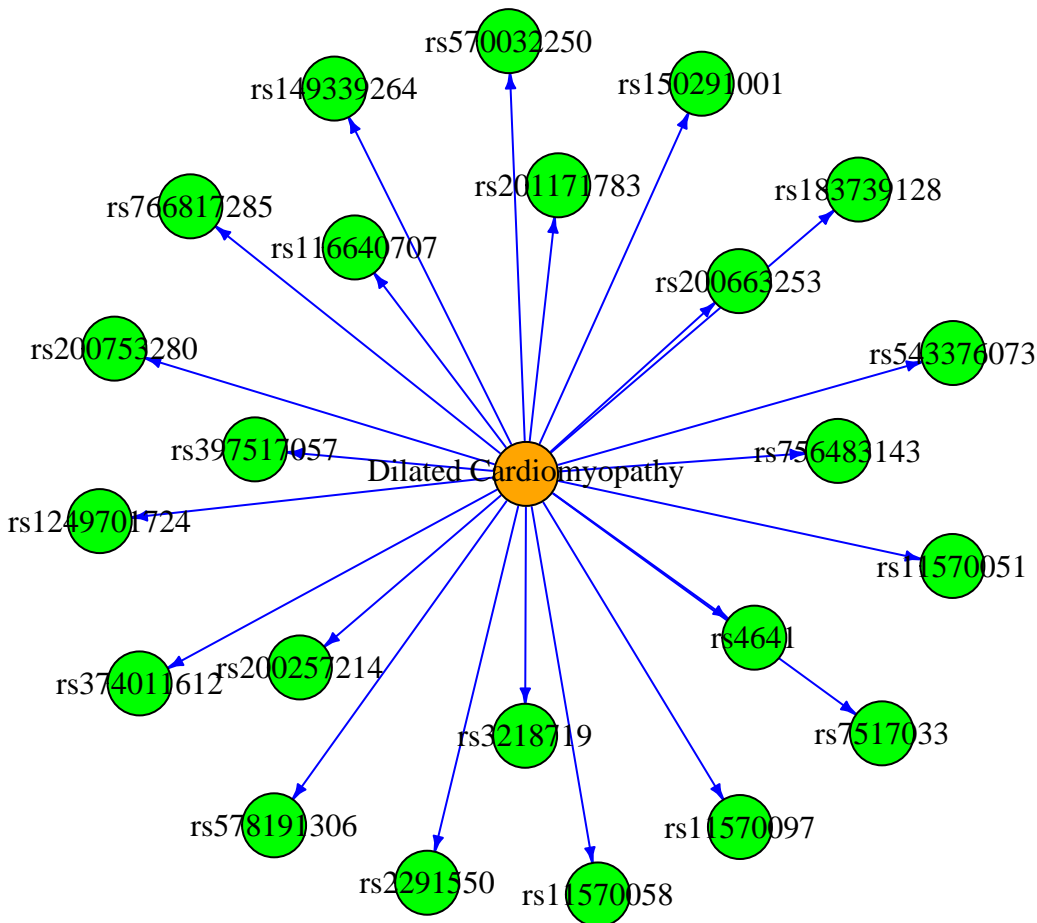

**Variant–Disease Network (Dilated cardiomyopathy 1AA)**

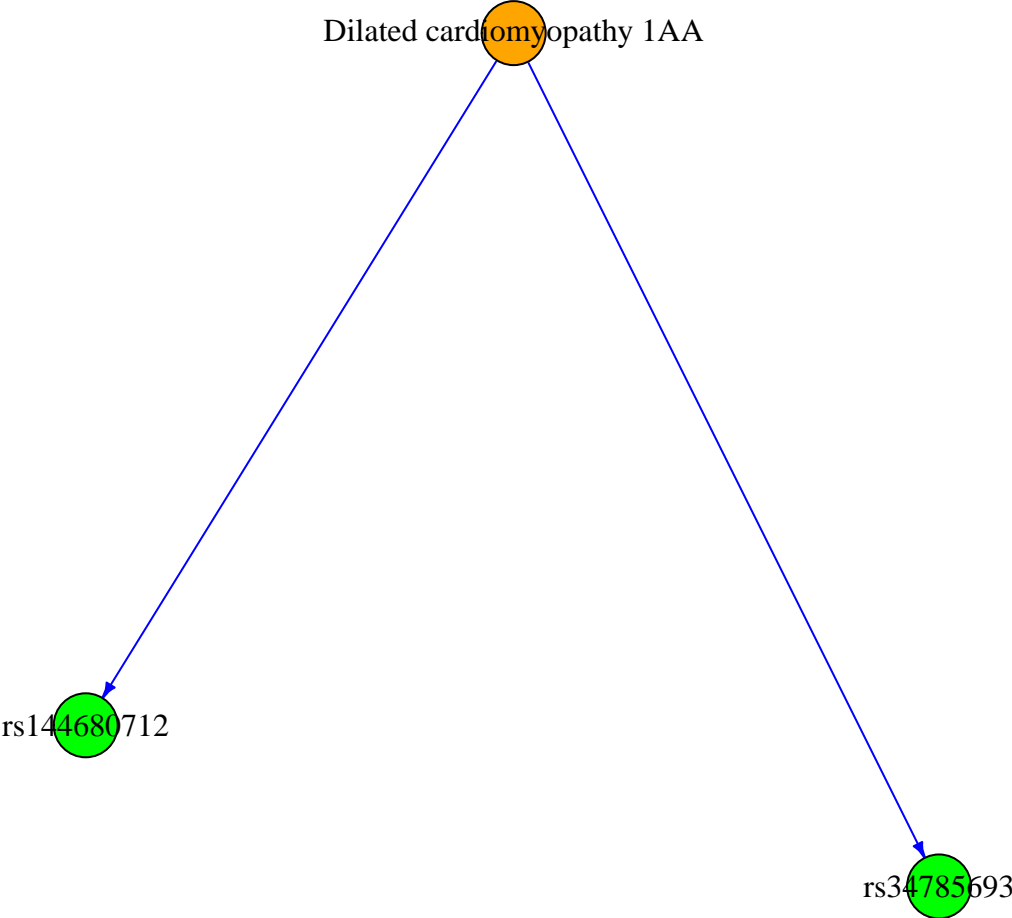

## Variant-Disease Network (Dilated cardiomyopathy 1CC)

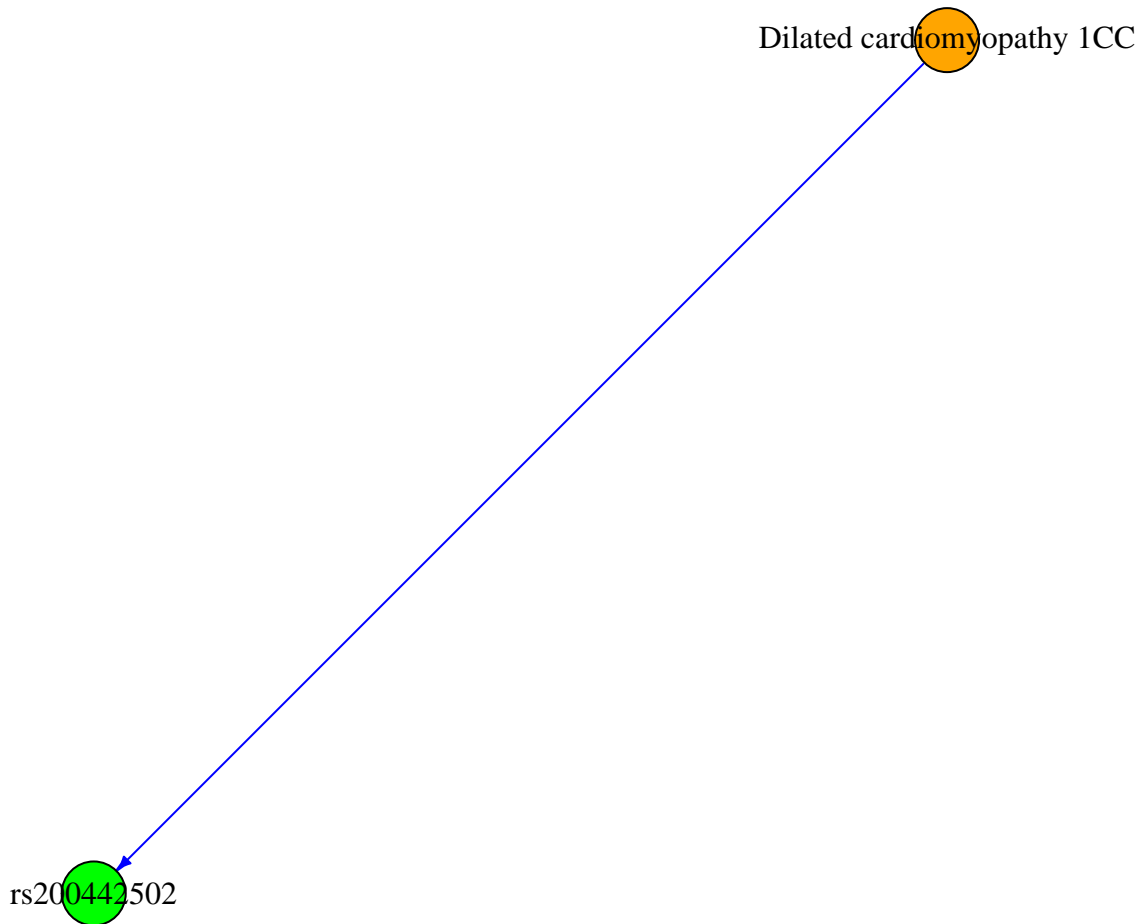

## Variant–Disease Network (Dilated cardiomyopathy 1GG)

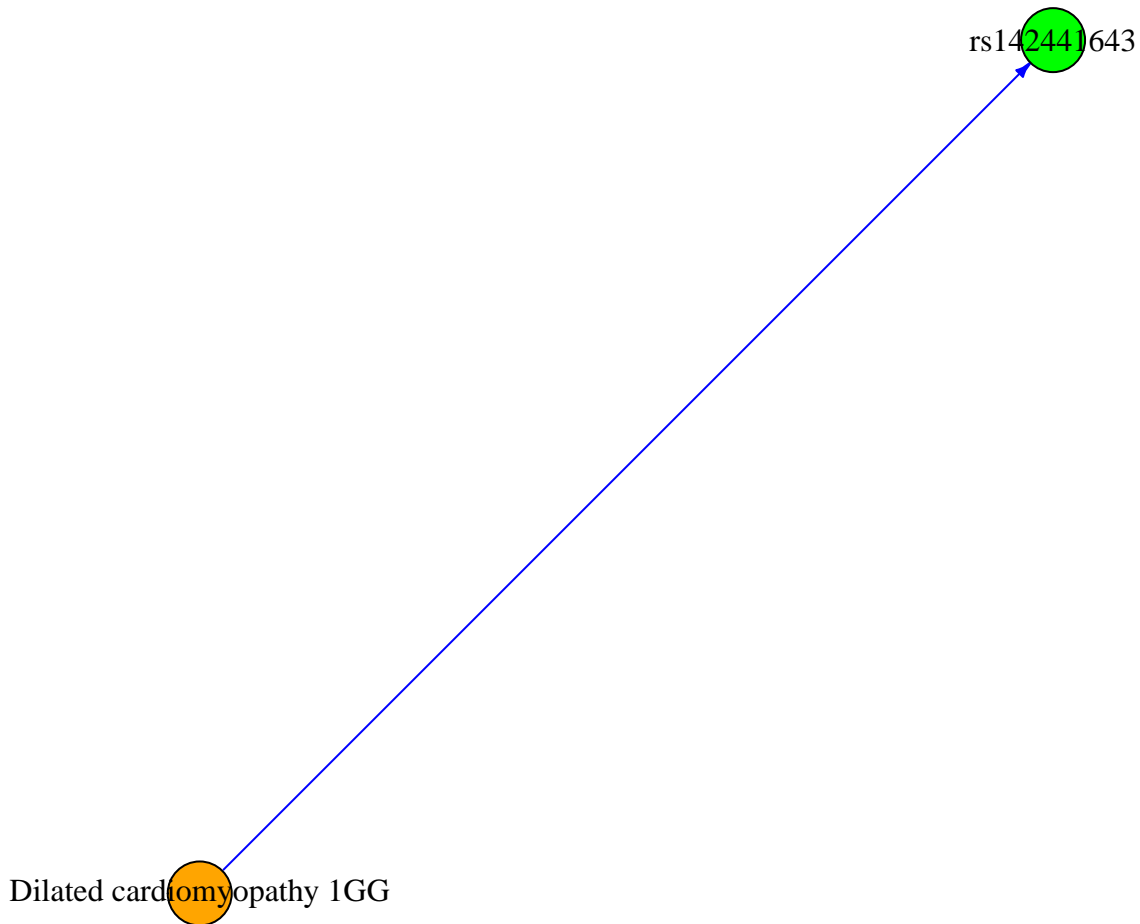



## Variant–Disease Network (Dilated cardiomyopathy 1HH)

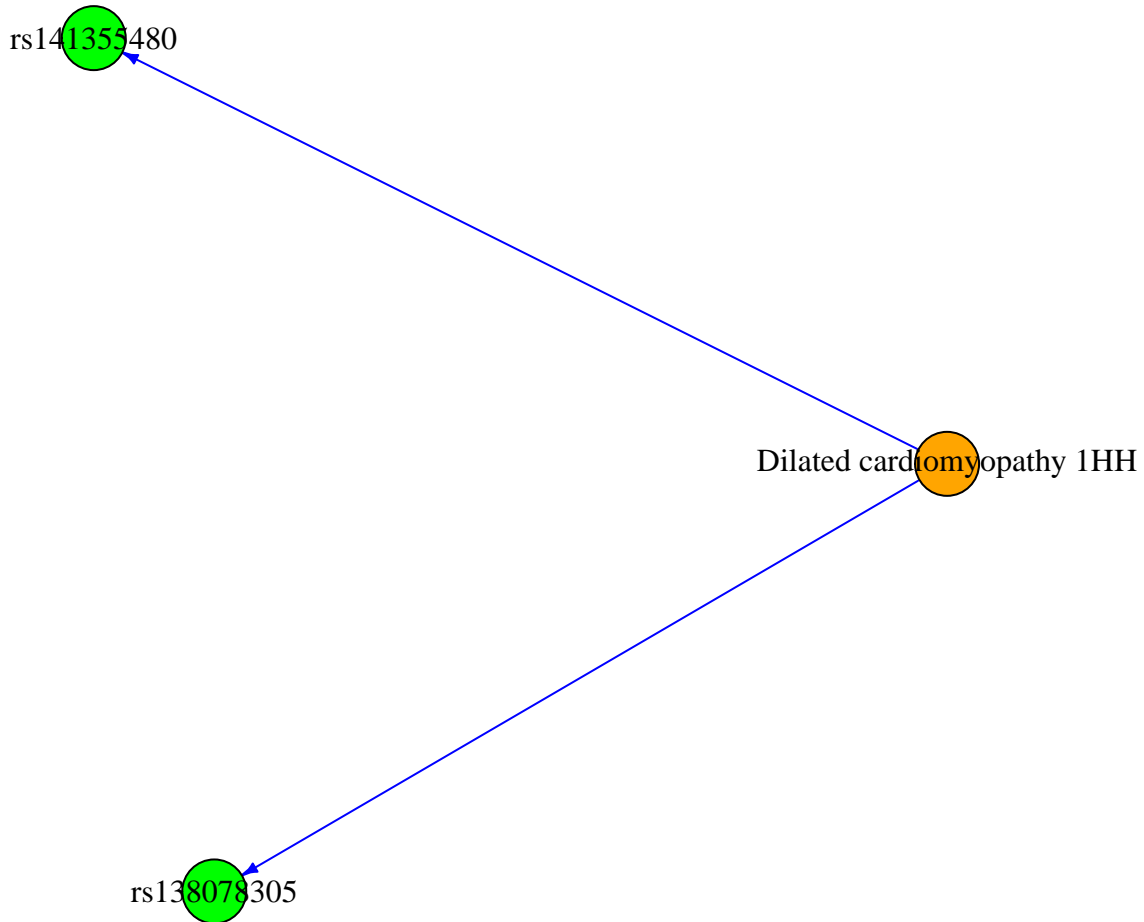

## Variant–Disease Network (Dilated cardiomyopathy 1I)

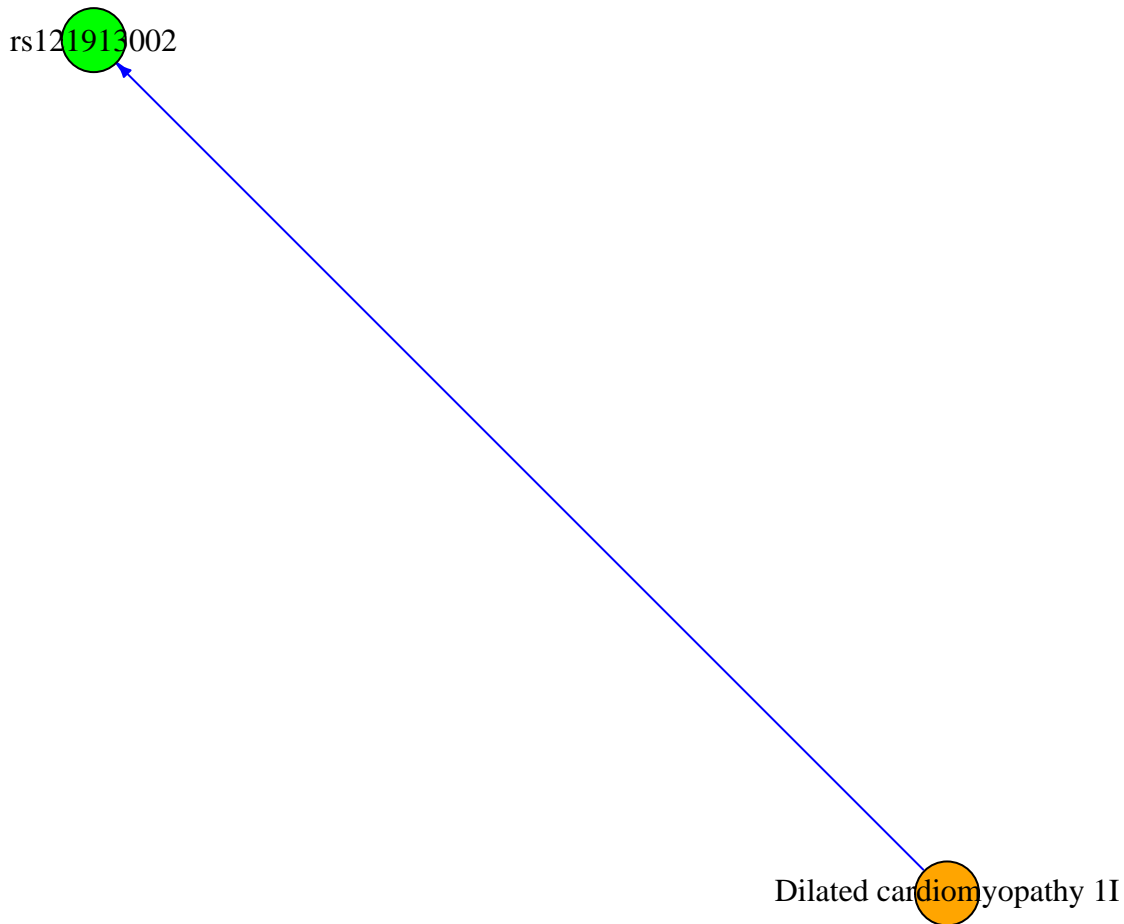

**Variant–Disease Network (Dilated cardiomyopathy 1II)**

rs145768025

Dilated cardiomyopathy 1II

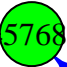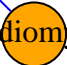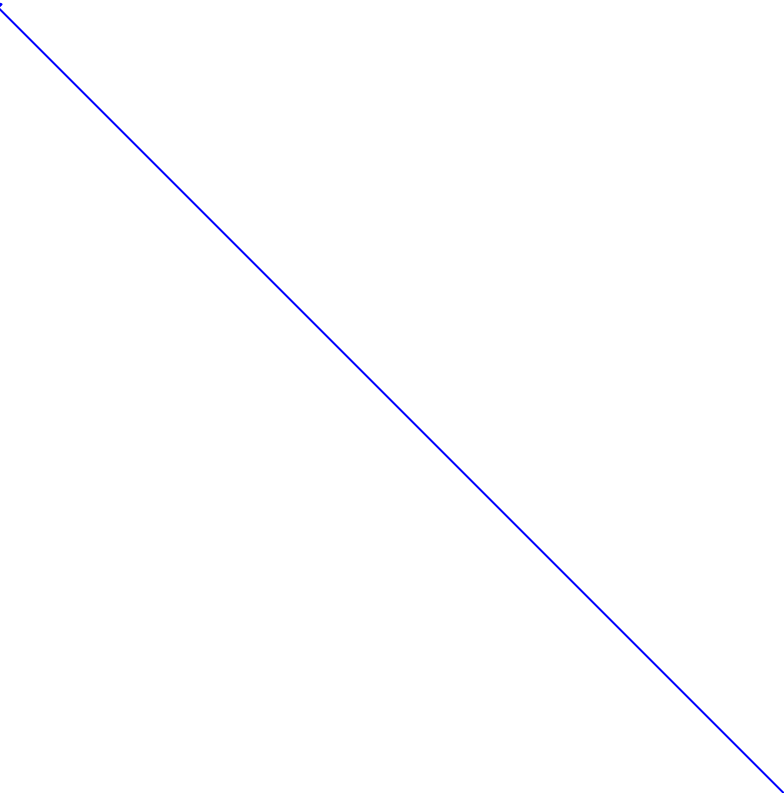

**Variant–Disease Network (Dilated cardiomyopathy 1J)**

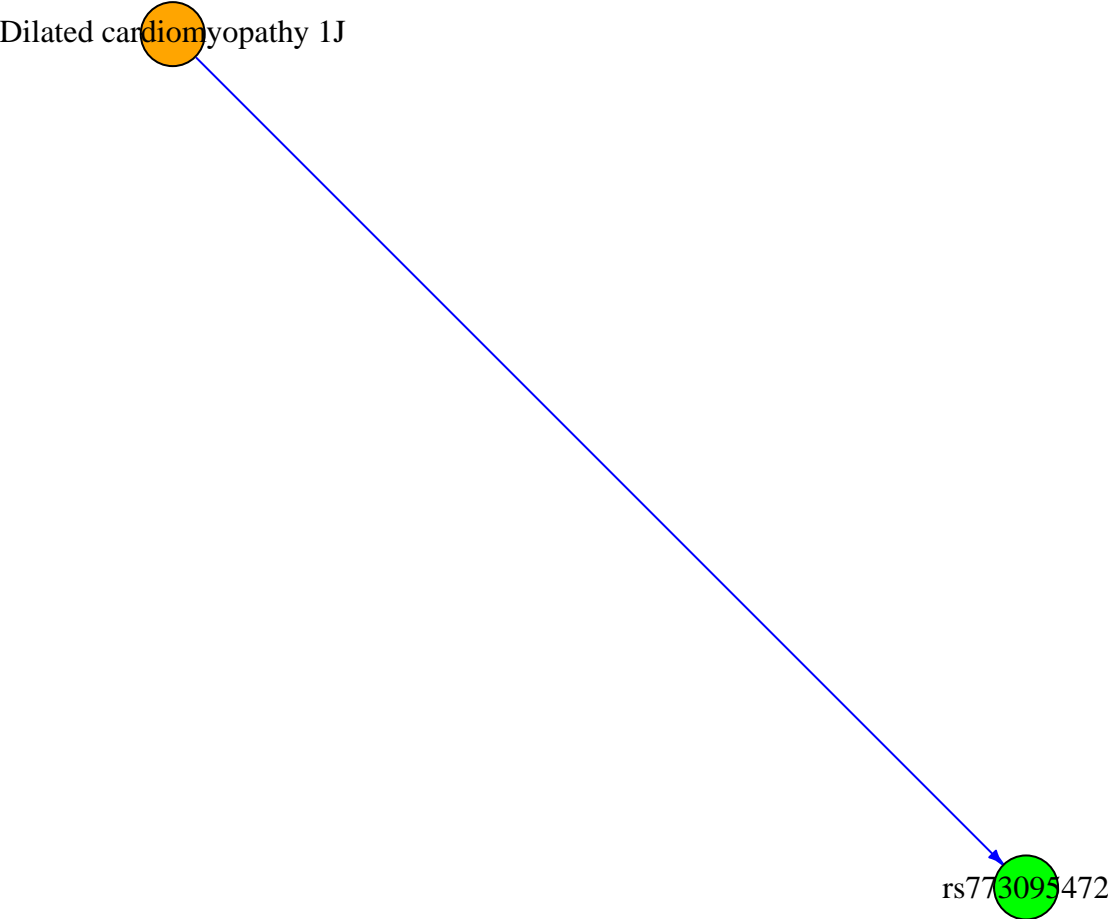

**Variant–Disease Network (Dilated cardiomyopathy 1JJ)**

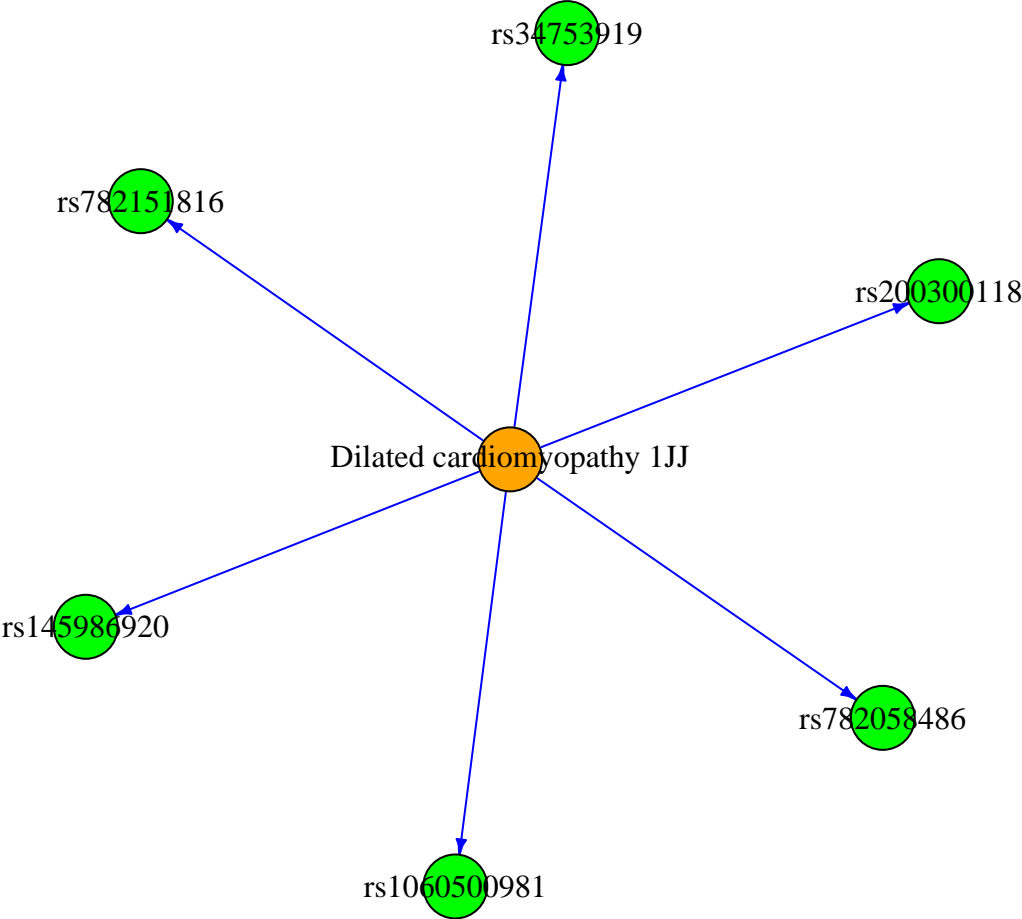

Variant–Disease Network (Dilated cardiomyopathy 1KK)

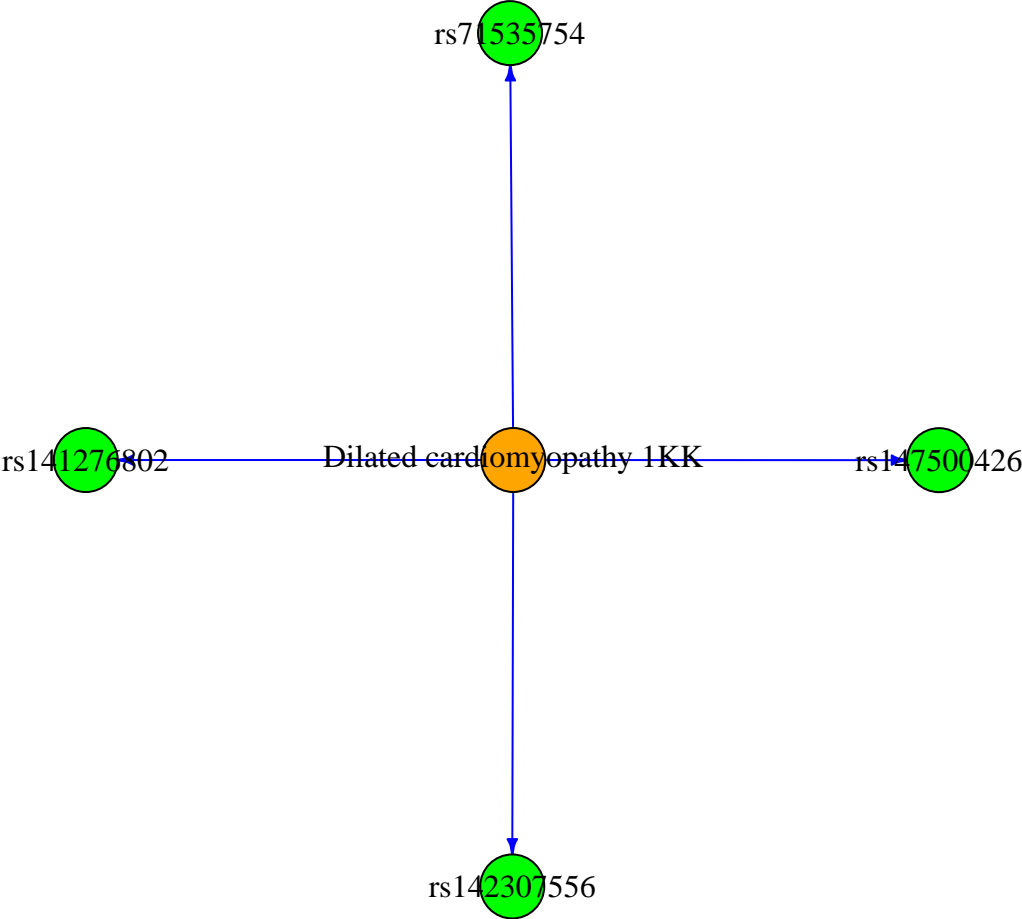

**Variant–Disease Network (Dilated cardiomyopathy 1L)**

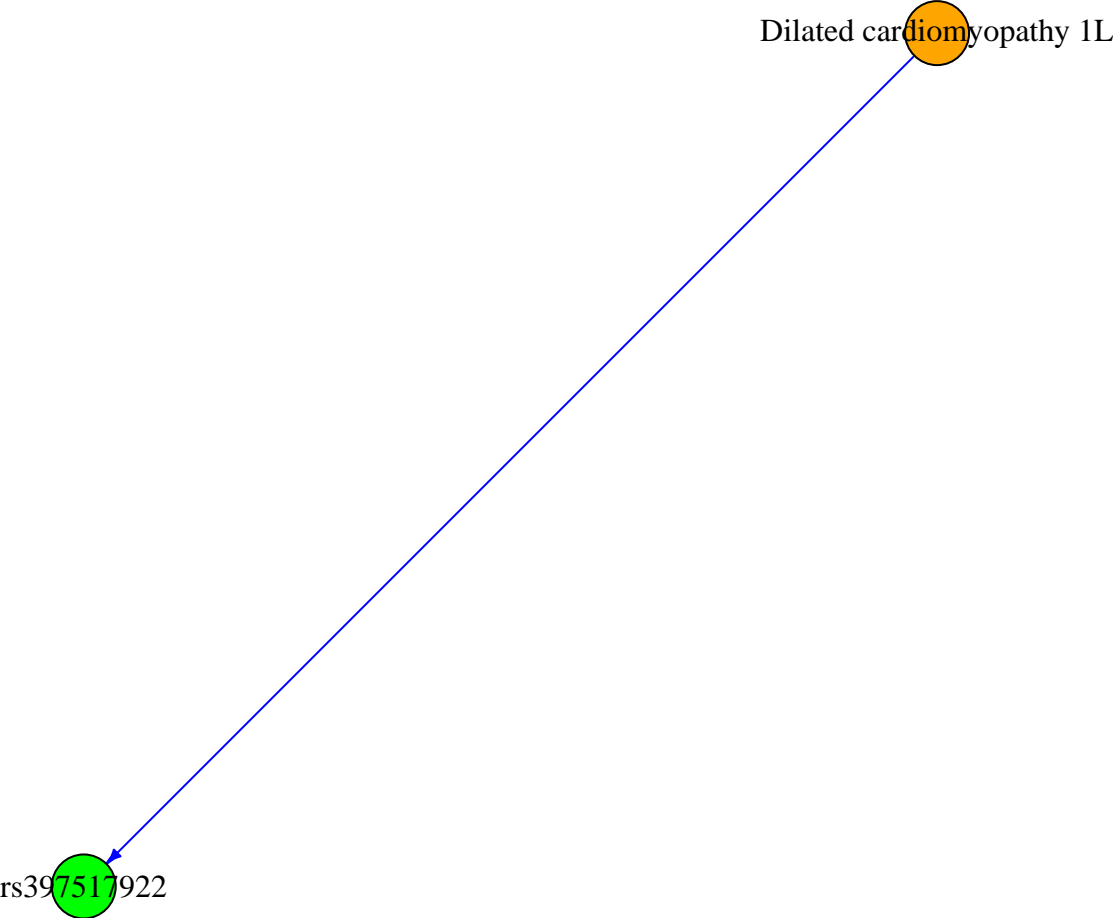

## Variant–Disease Network (Dilated cardiomyopathy 10)

rs1273498300

Dilated cardiomyopathy 10

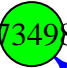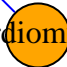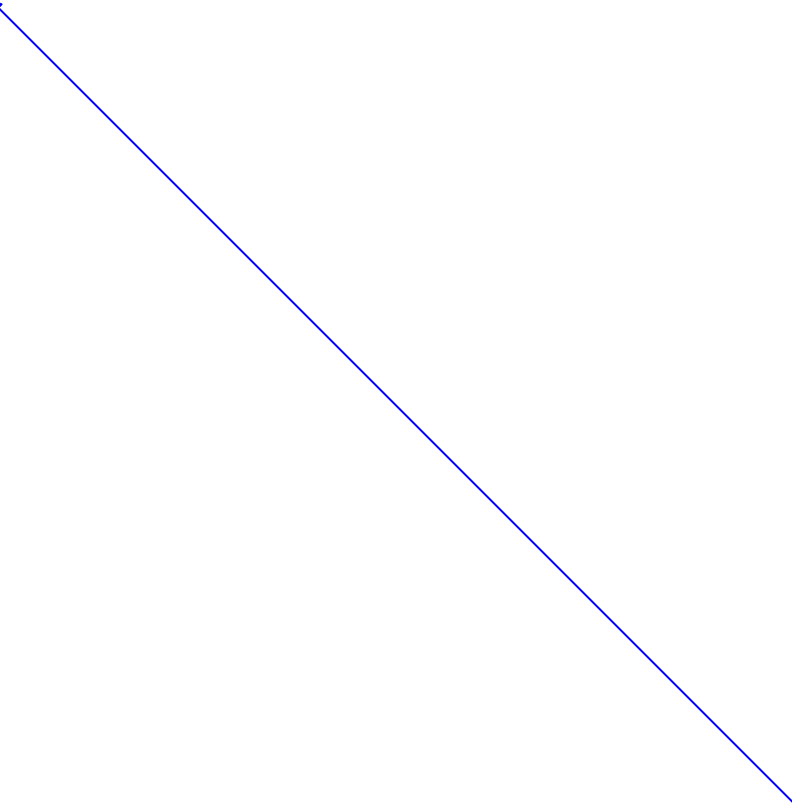



## Variant–Disease Network (Dilated cardiomyopathy 1R)

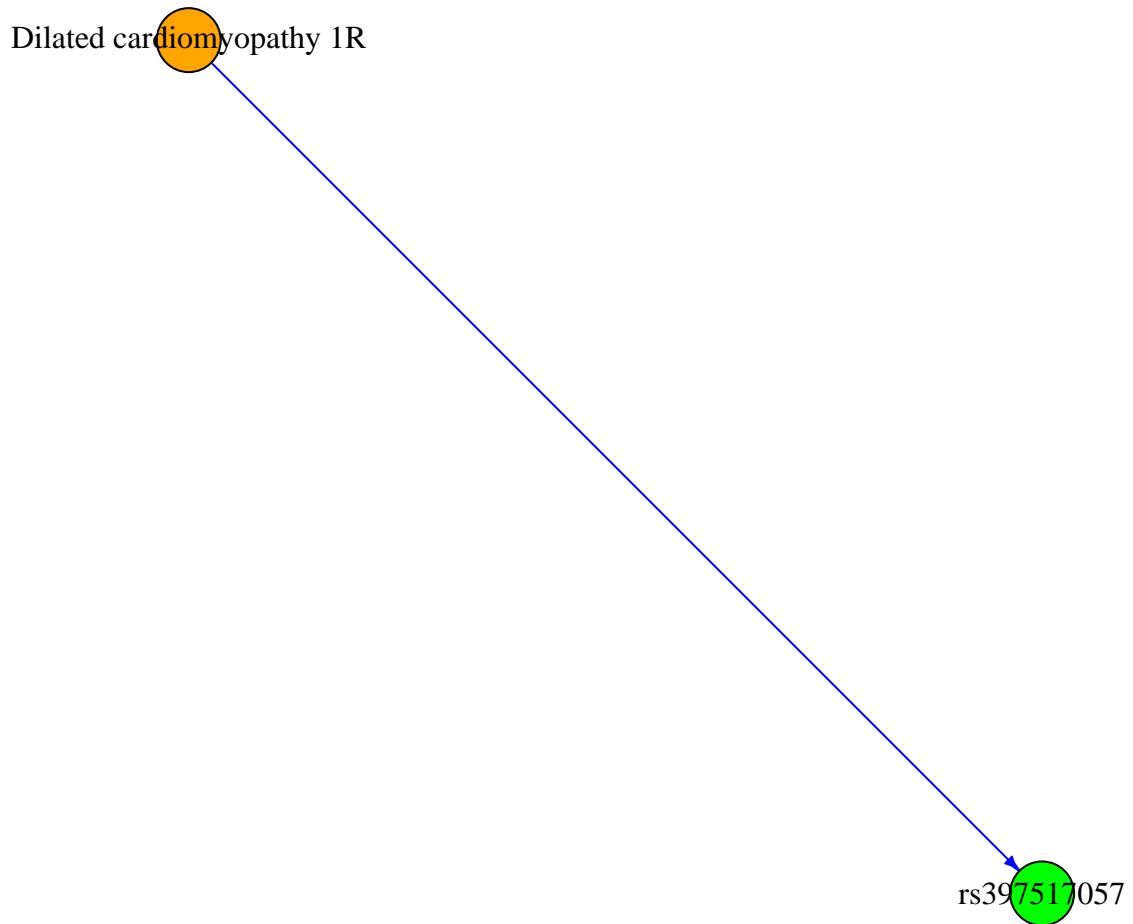

**Variant–Disease Network (Dilated cardiomyopathy 1S)**

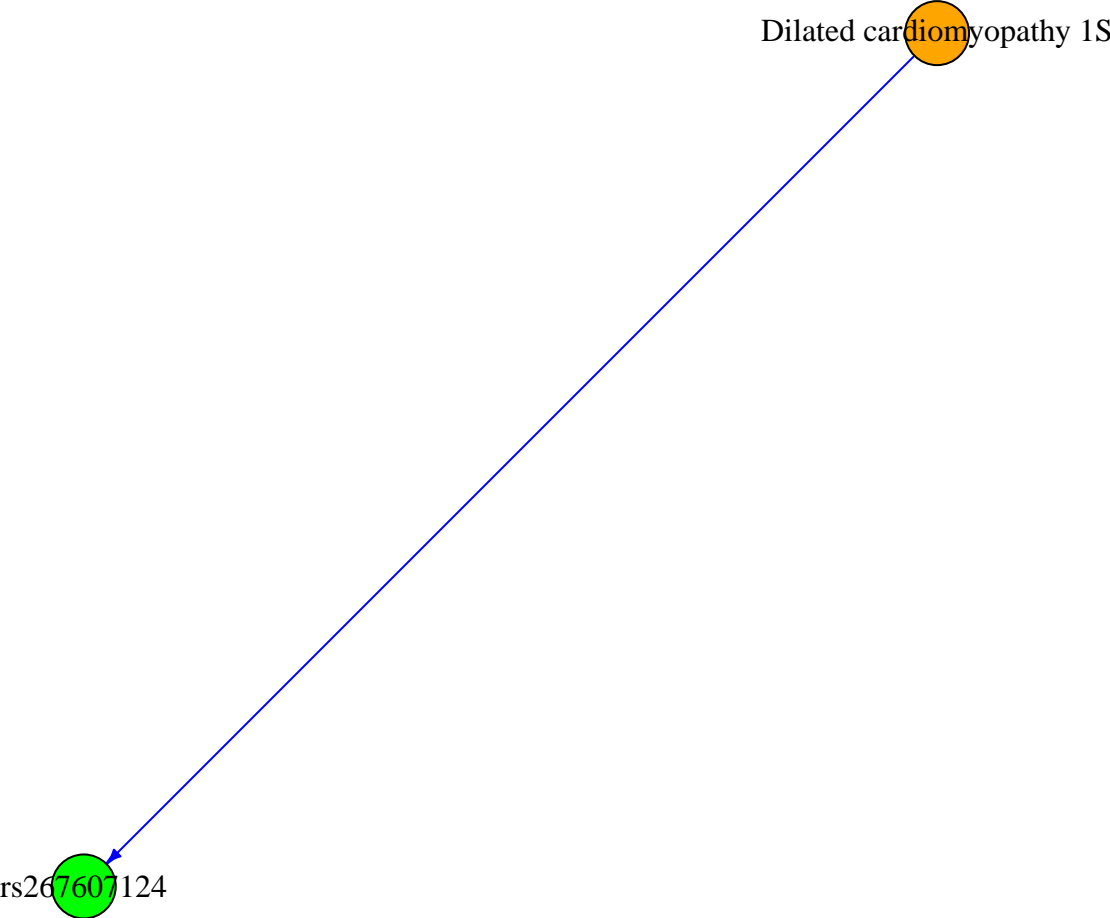

## Variant–Disease Network (Dilated cardiomyopathy 1W)

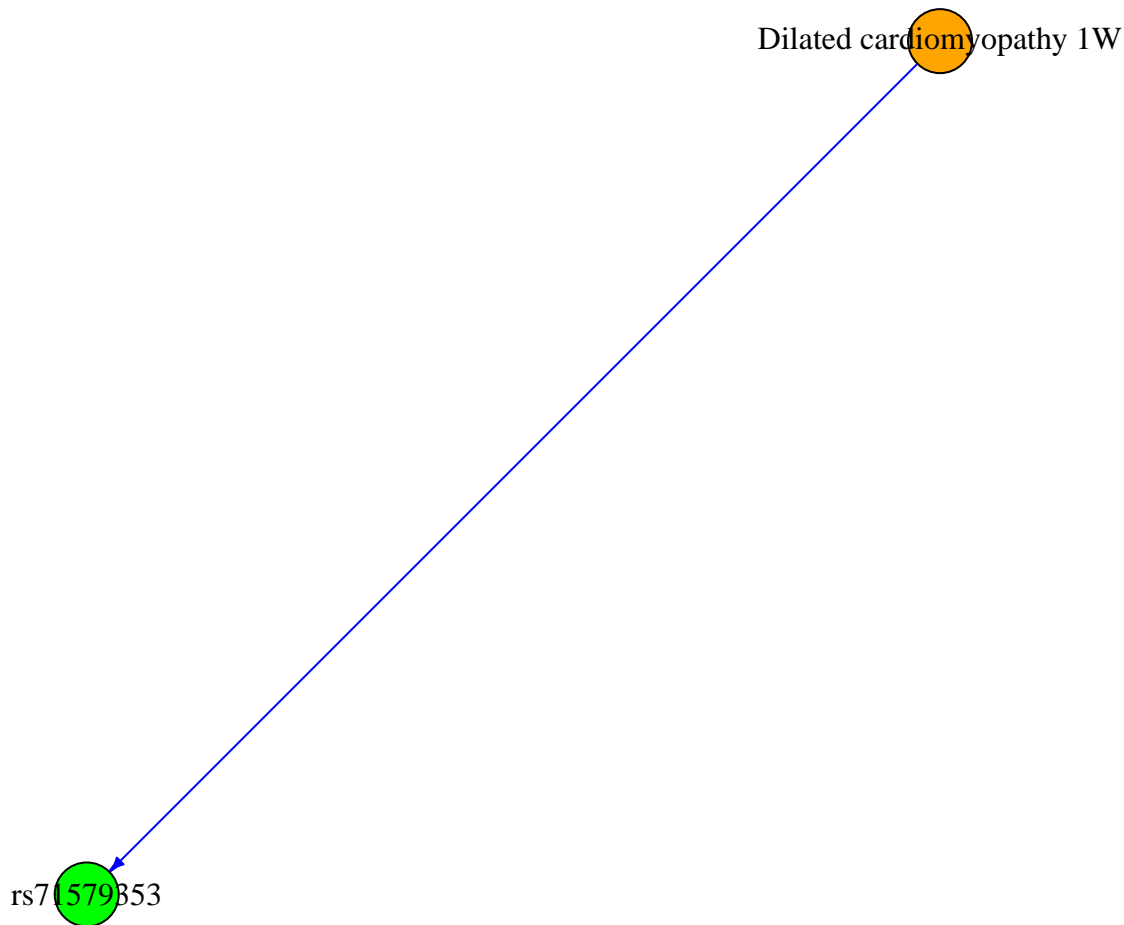

**Variant–Disease Network (Dilated cardiomyopathy 1Z)**

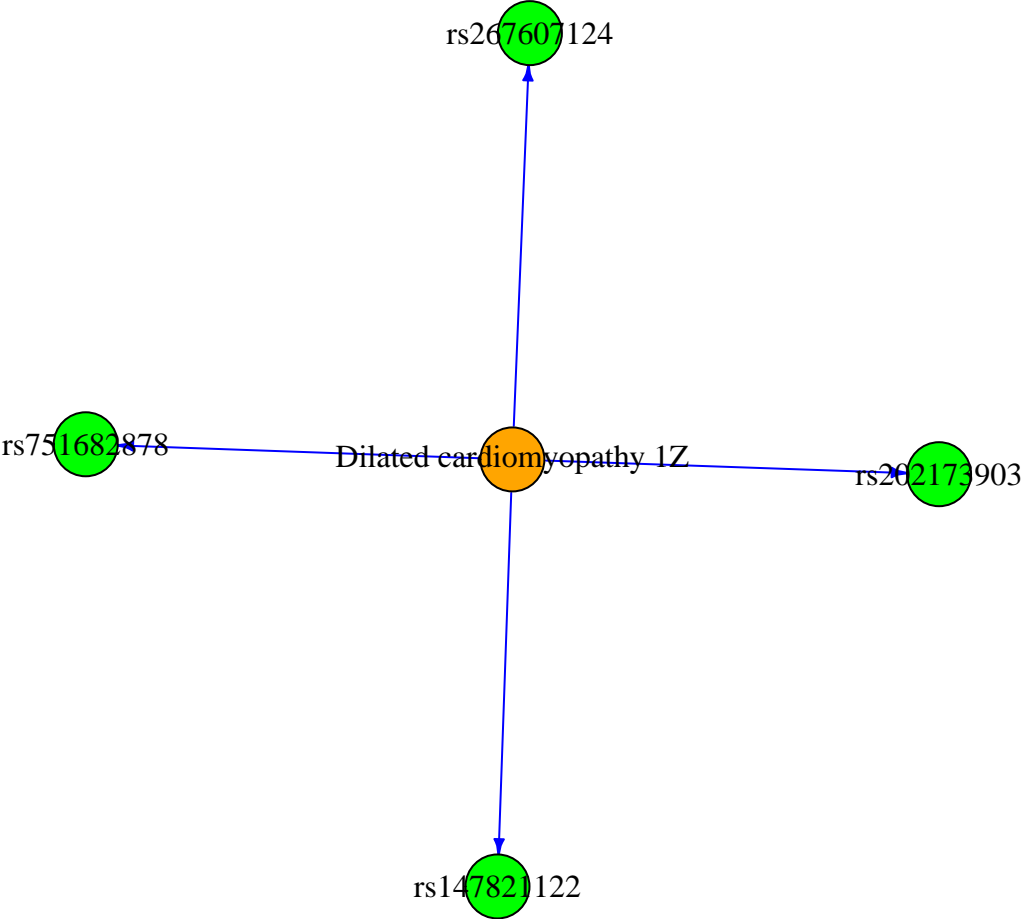

## Variant–Disease Network (Dilated cardiomyopathy 3B)

rs1057515869

Dilated cardiomyopathy 3B

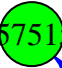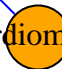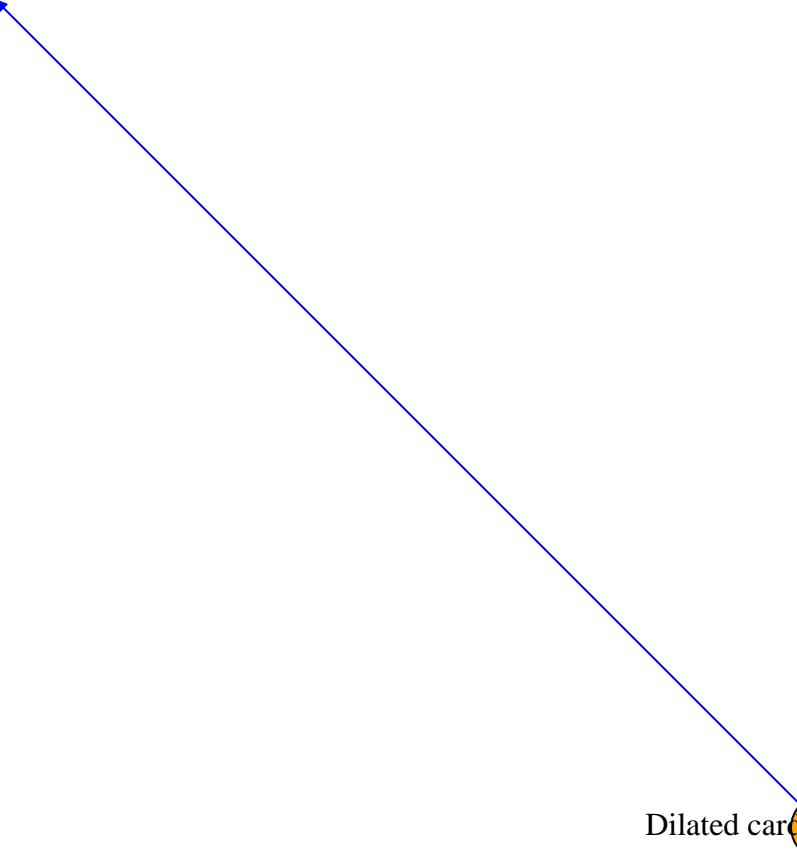

# Variant–Disease Network (Dilated cardiomyopathy with woolly hair and keratoderma)

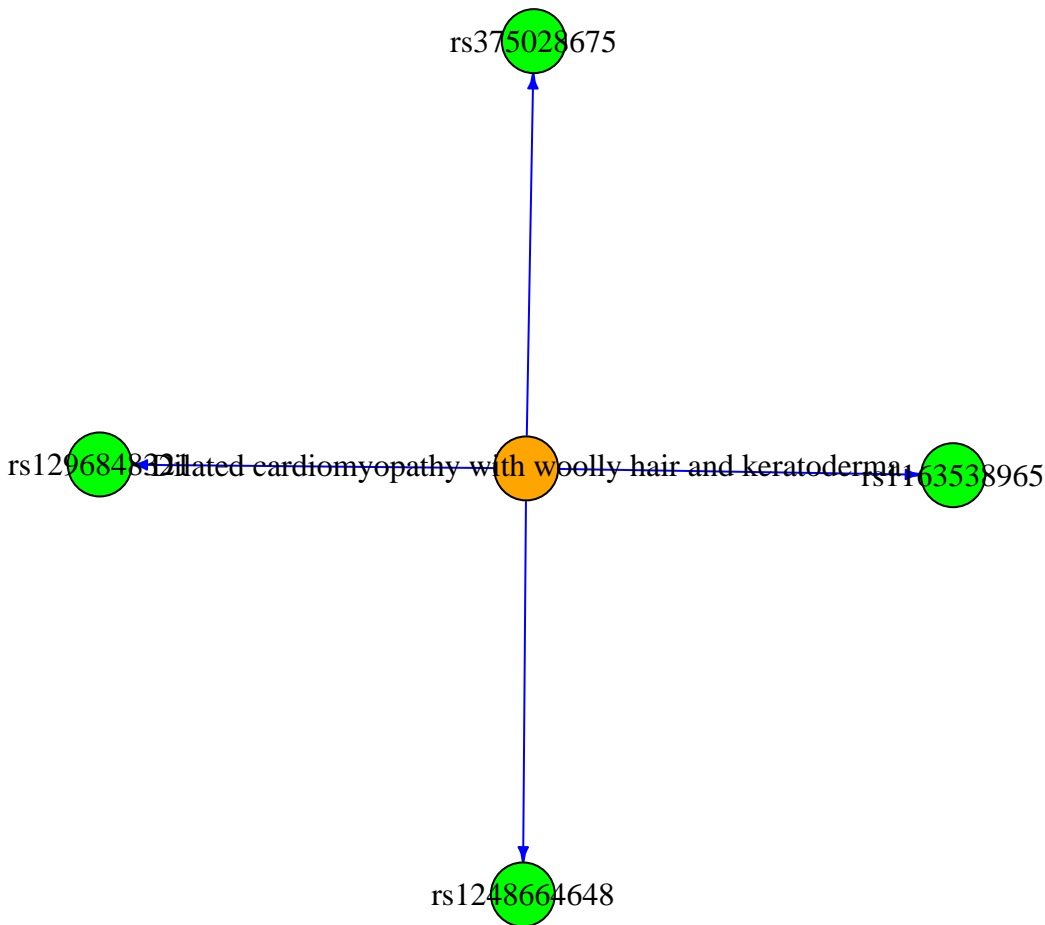

Variant–Disease Network (Disorders of Intracellular Cobalamin Metabolism)

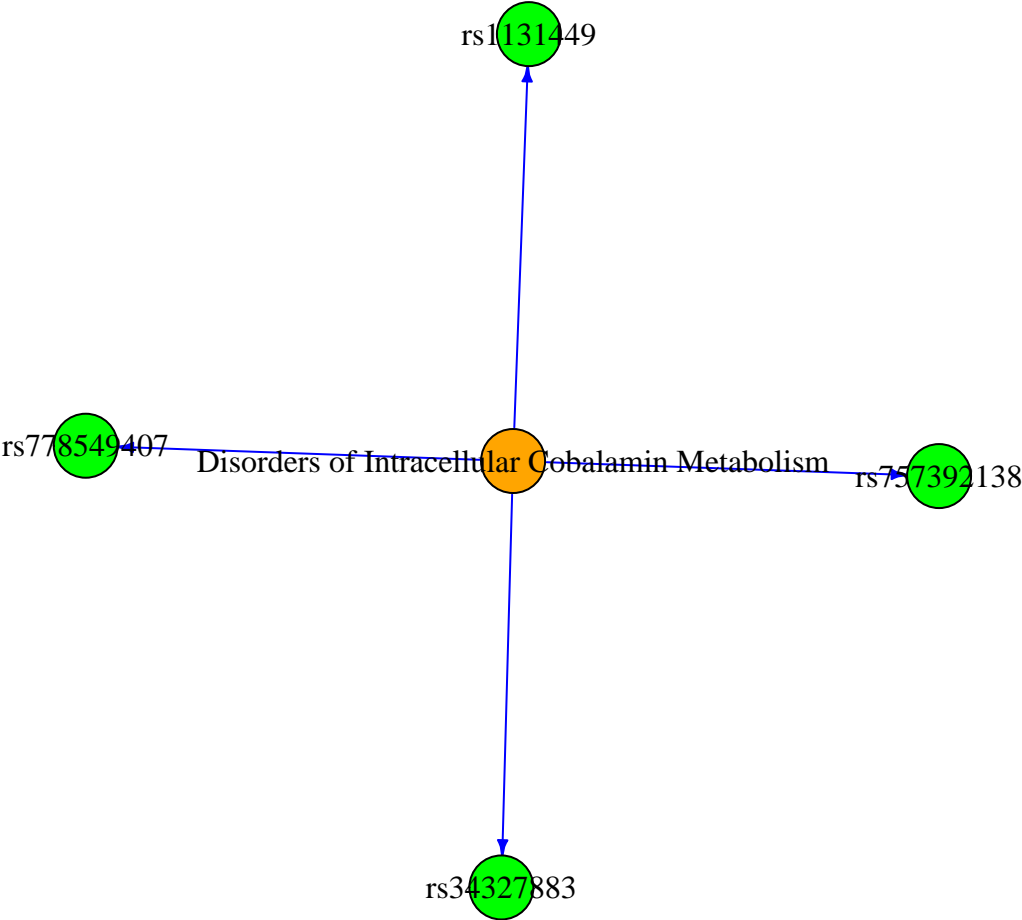

## Variant–Disease Network (Distal arthrogryposis)

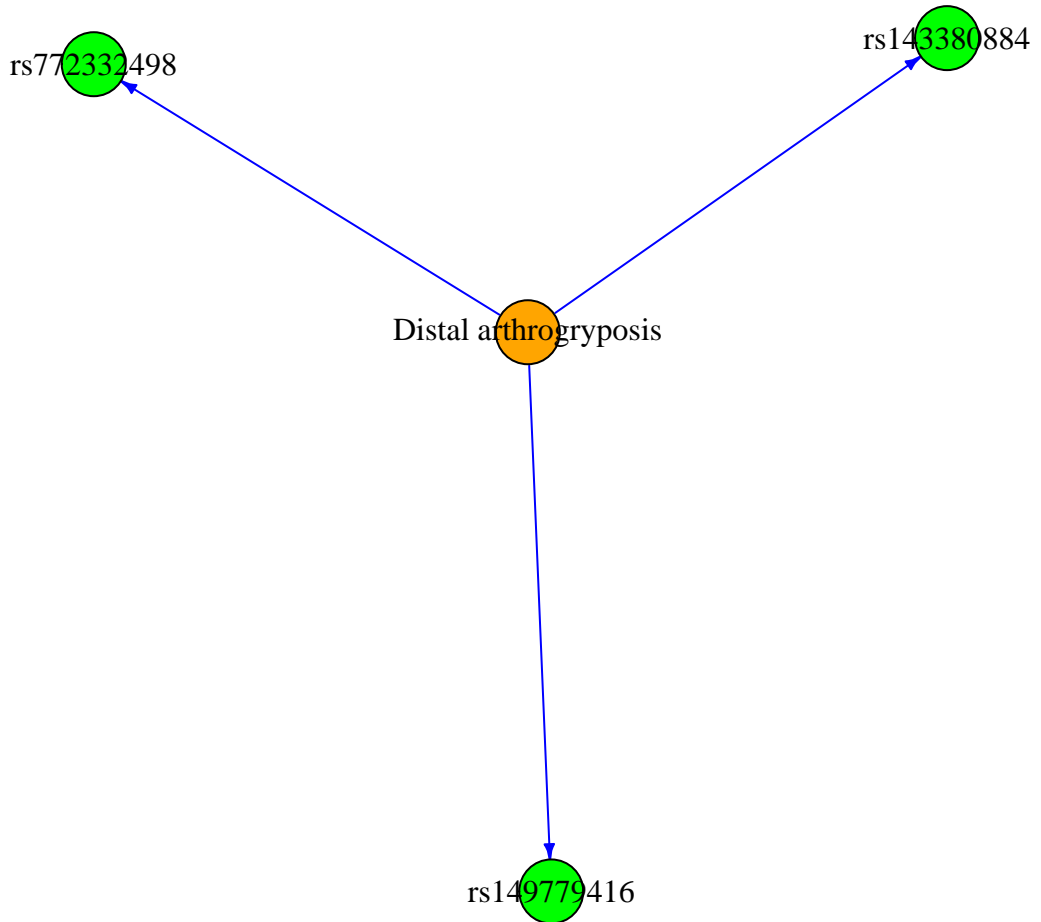



# Variant–Disease Network (Distal arthrogryposis type 1A)

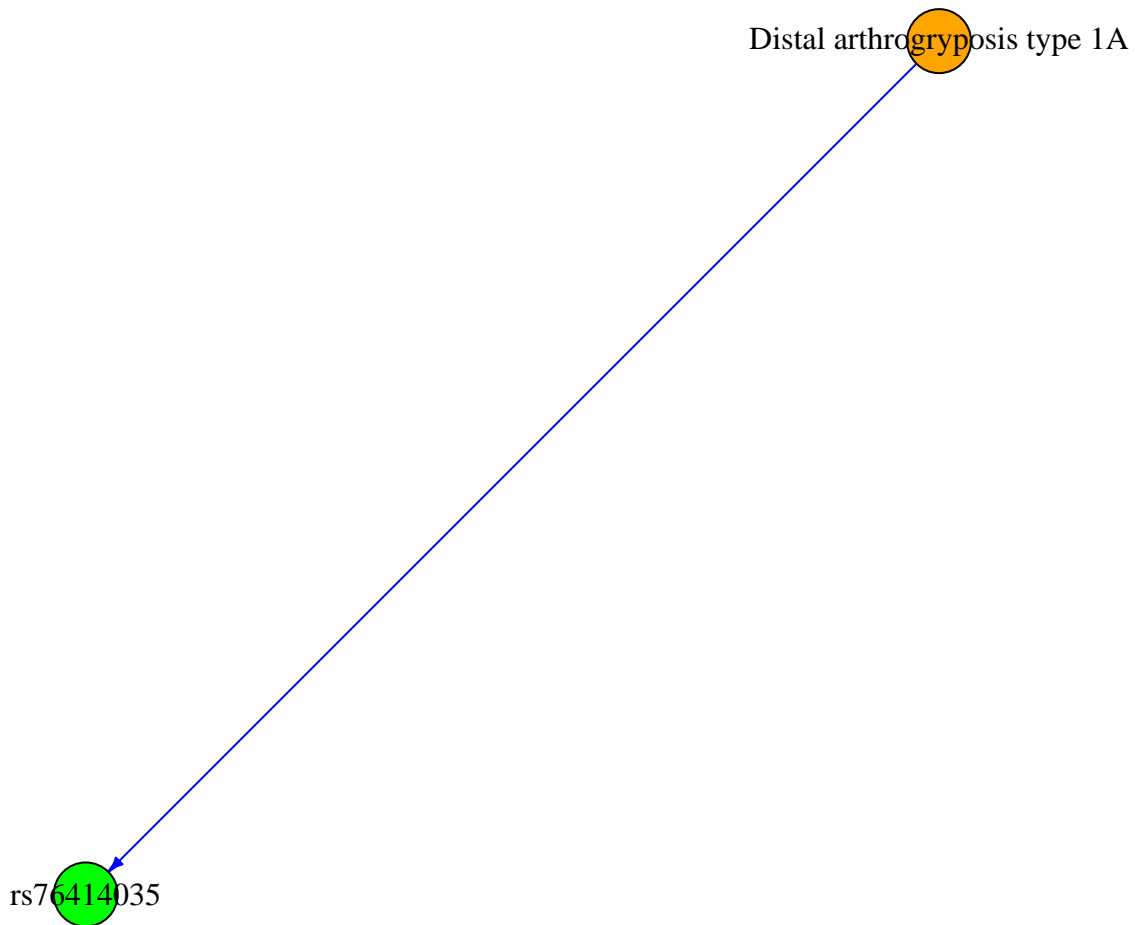

# Variant–Disease Network (Distal arthrogryposis type 2B)

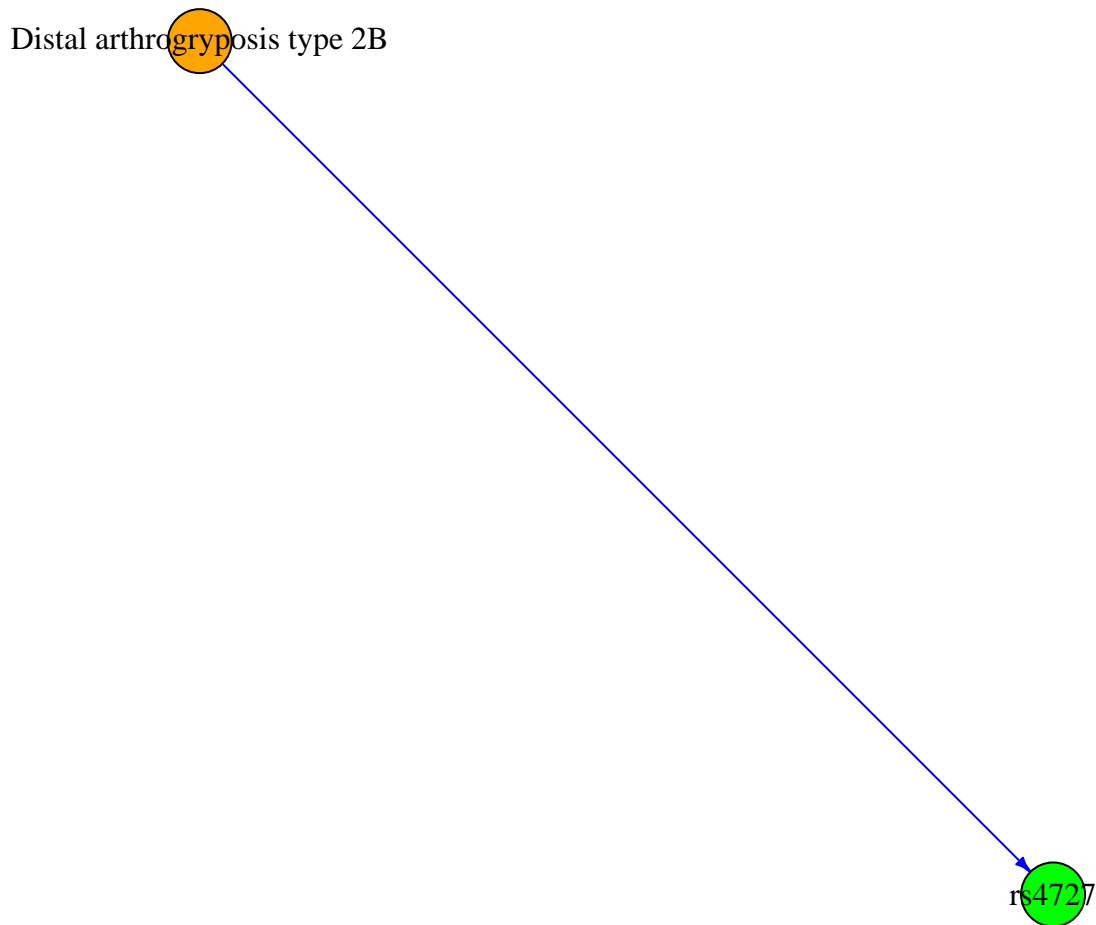

# Variant–Disease Network (Distal hereditary motor neuropathy 2D)

Distal hereditary motor neuropathy 2D

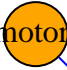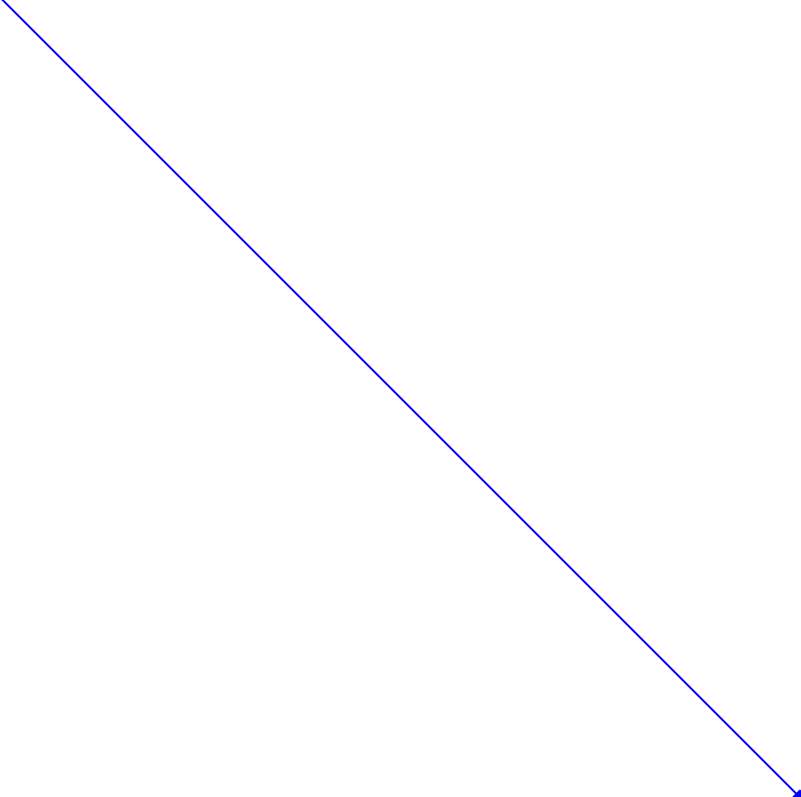

rs748051444

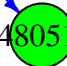

**Variant–Disease Network (Distal hereditary motor neuropathy type 5)**

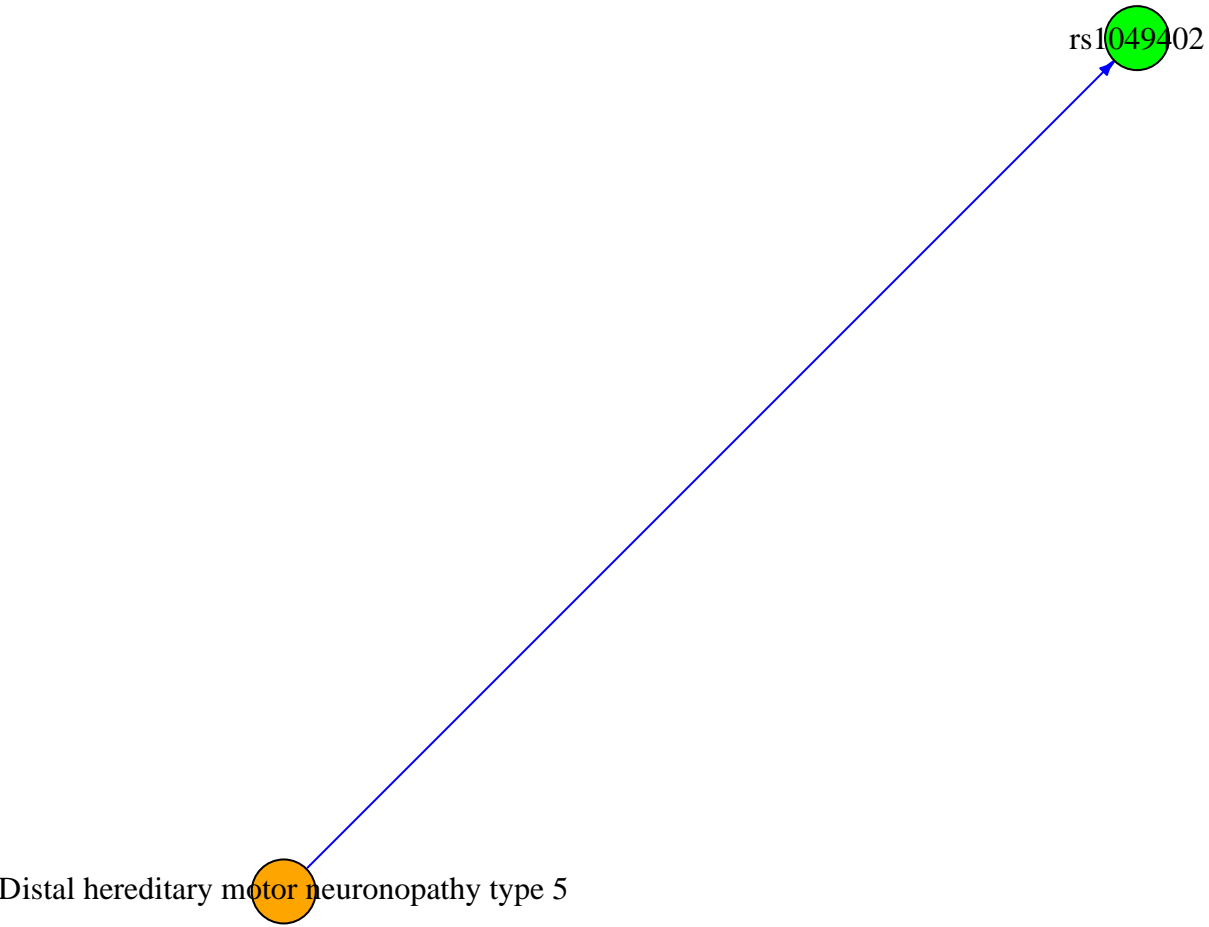

Variant–Disease Network (Distal hereditary motor neuropathy type 7B)

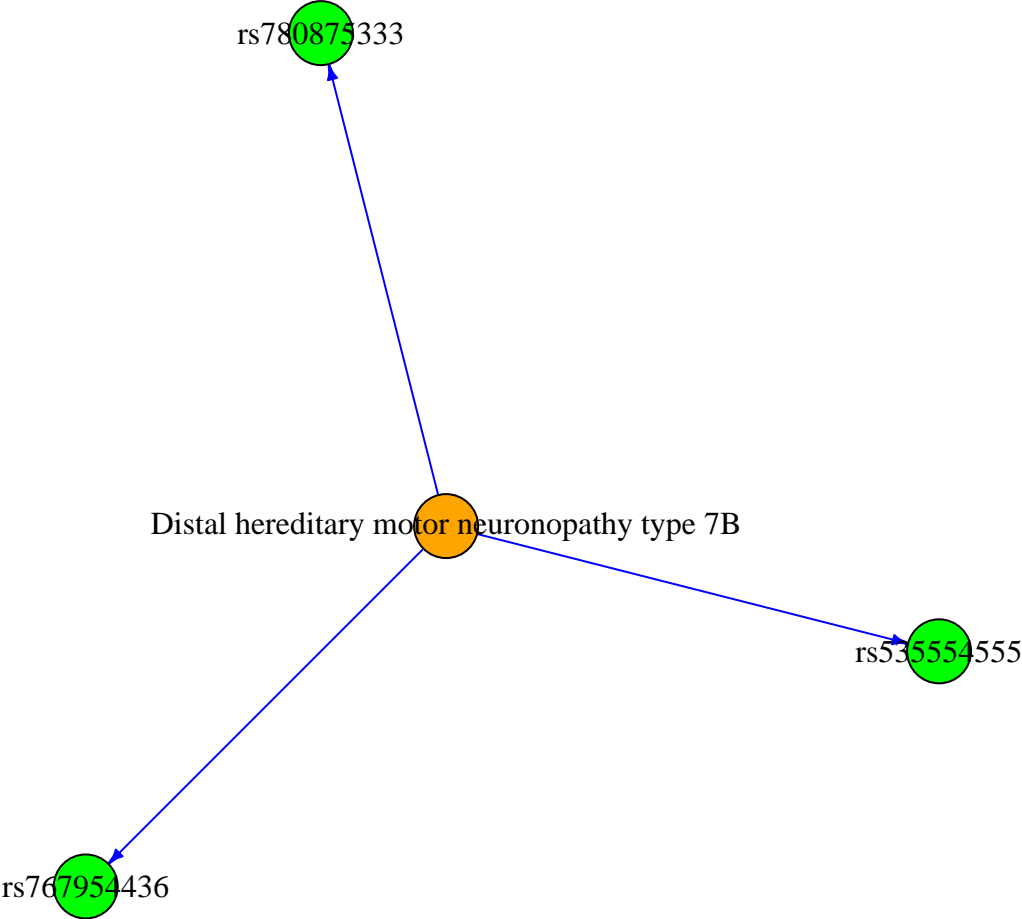

Variant–Disease Network (Distal myopathy)

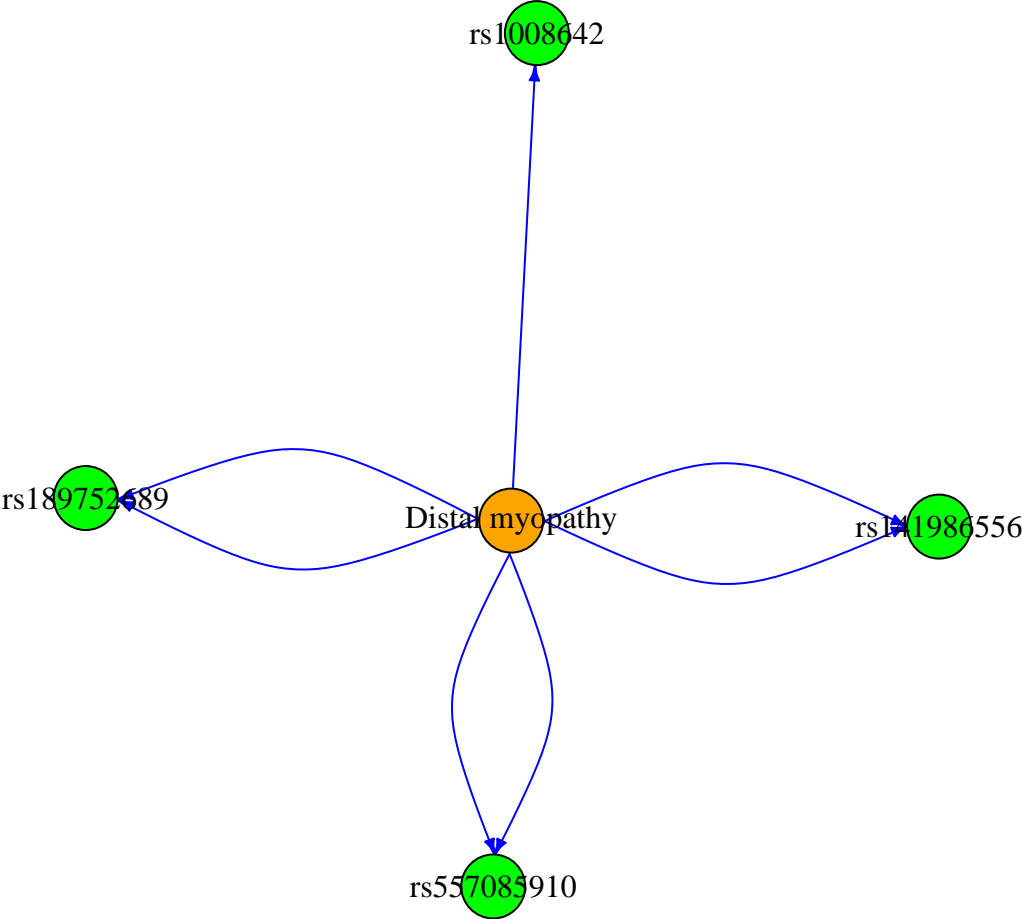

**Variant–Disease Network (Distal Renal Tubular Acidosis)**

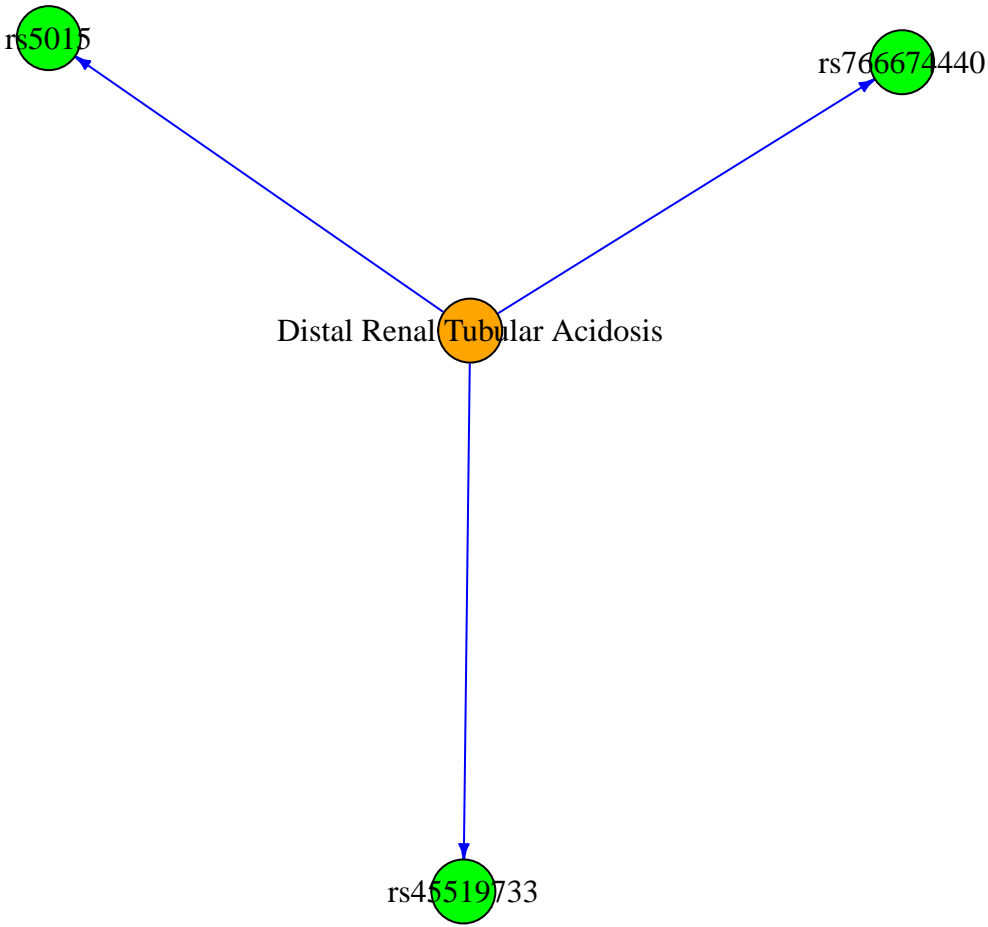

Variant–Disease Network (Distal spinal muscular atrophy)

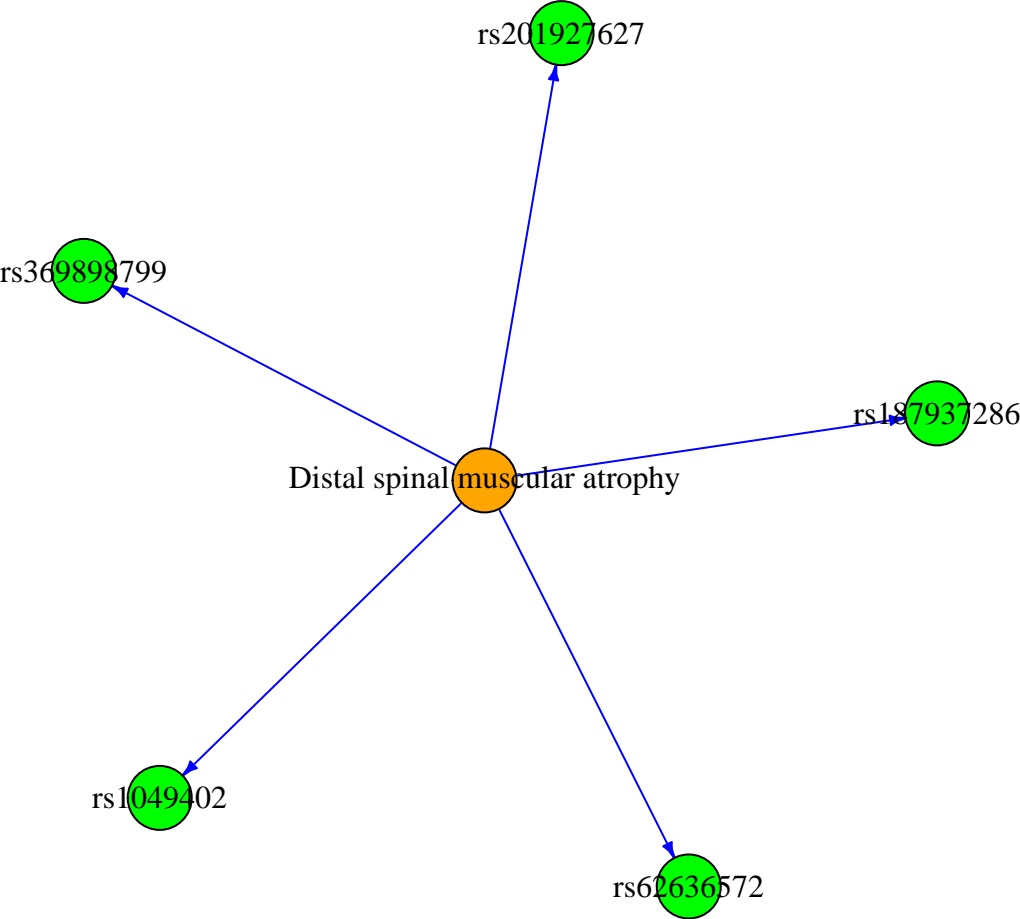



**Variant–Disease Network (Donnai Barrow syndrome)**

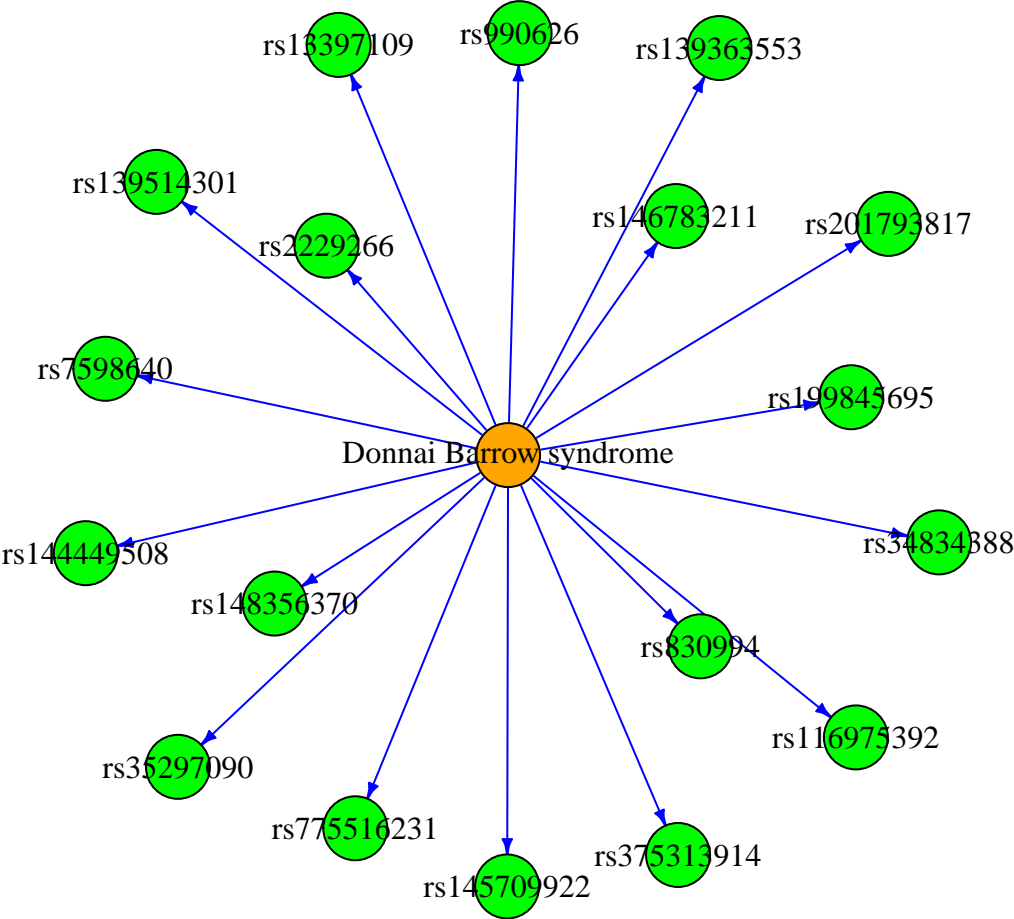

Variant–Disease Network (Doyme honeycomb retinal dystrophy)

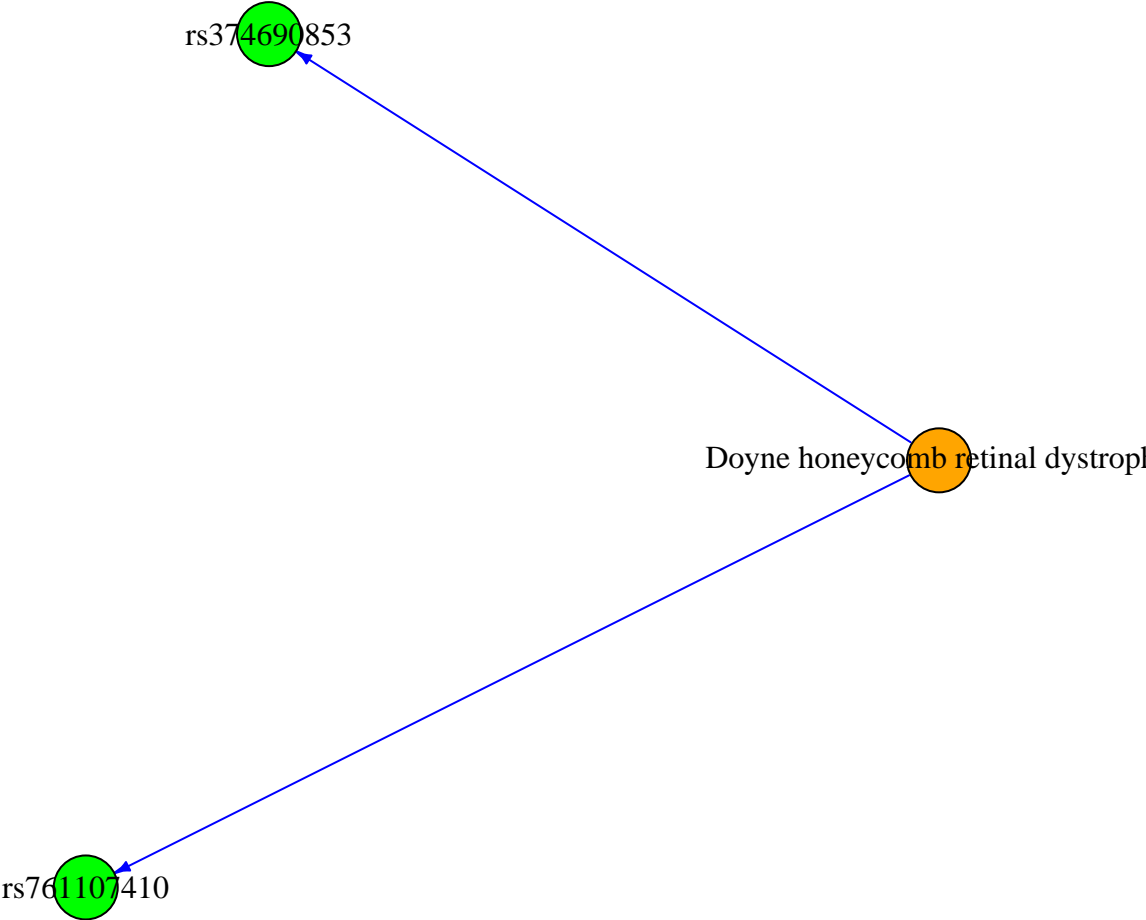

## Variant–Disease Network (Drash syndrome)

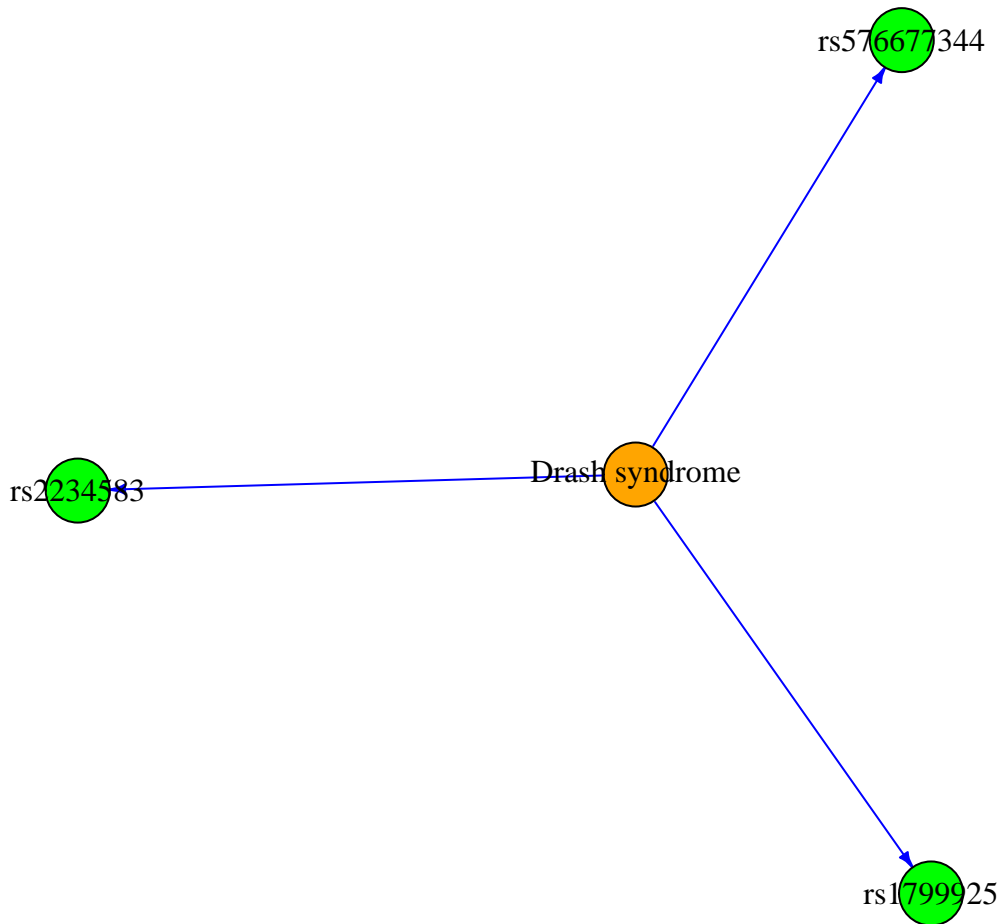

**Variant–Disease Network (Dubin–Johnson syndrome)**

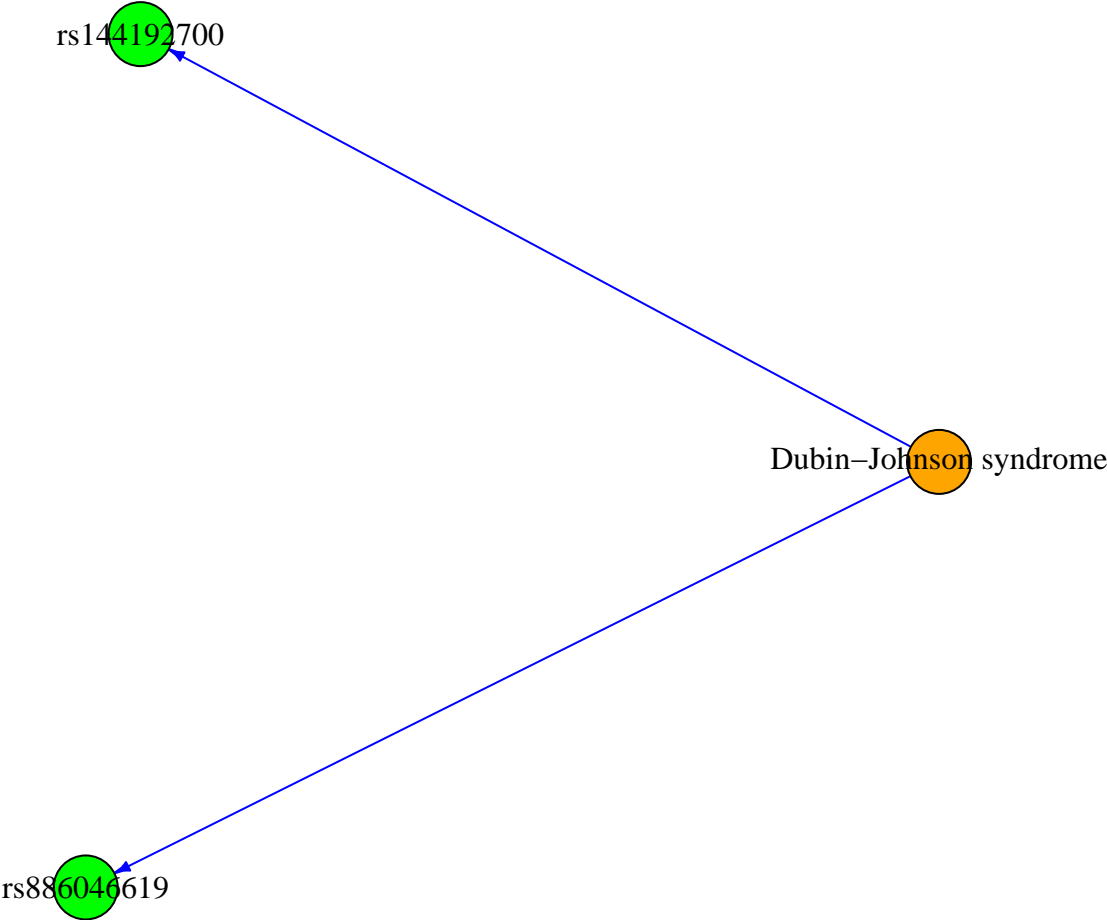

# Variant–Disease Network (Duchenne muscular dystrophy)

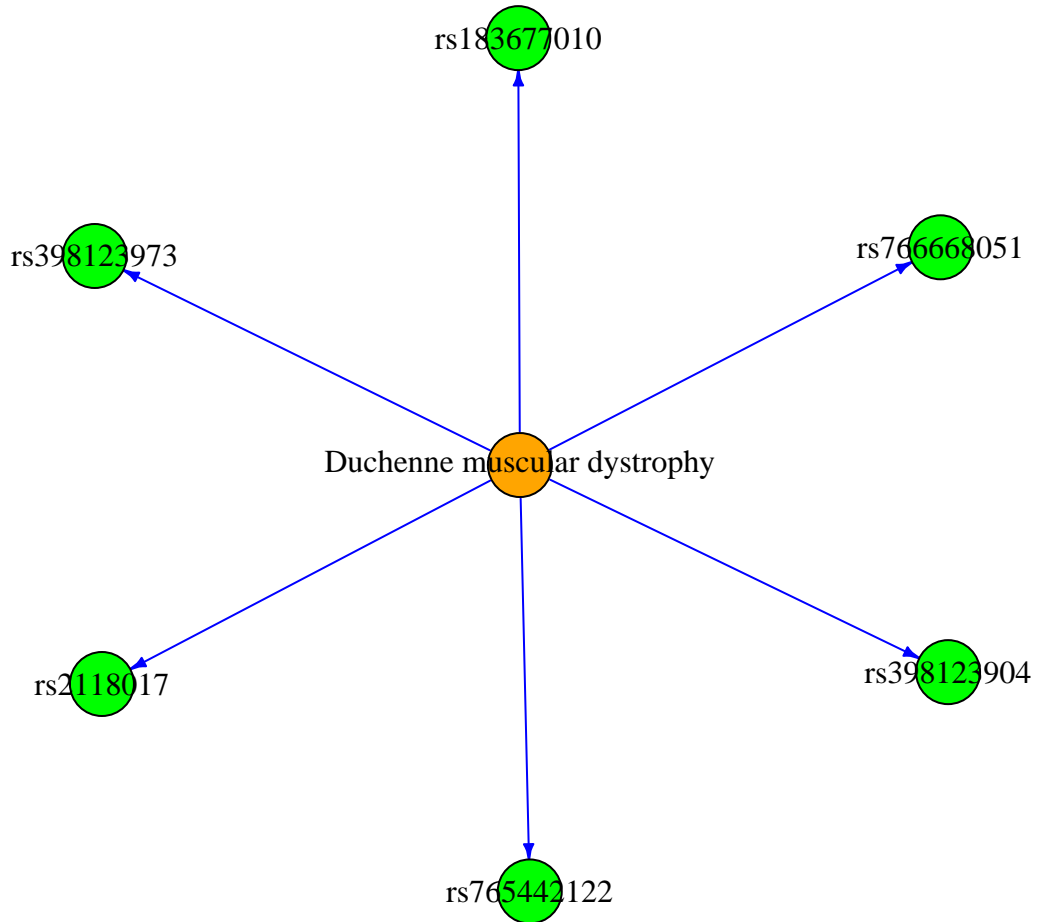

Variant–Disease Network (Dyggve–Melchior–Clausen syndrome)

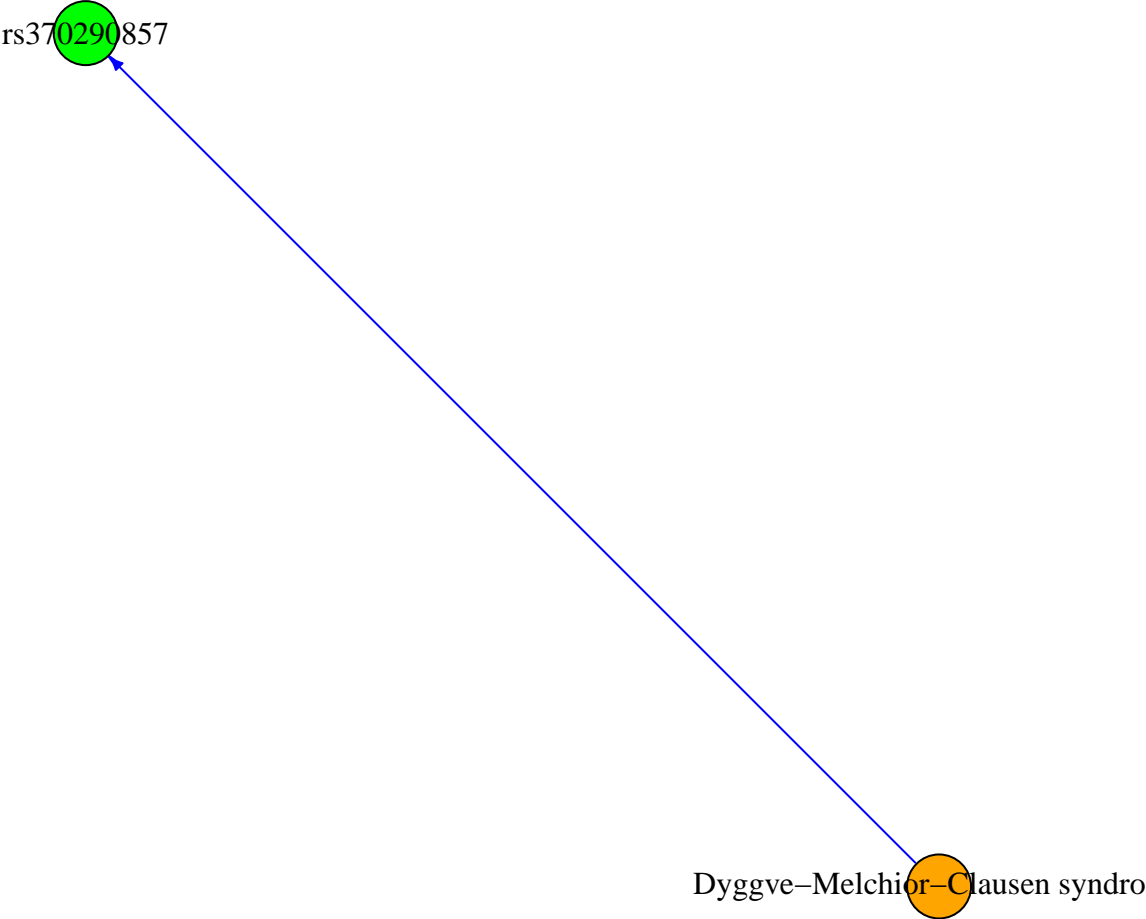

Variant–Disease Network (Dyskeratosis congenita)

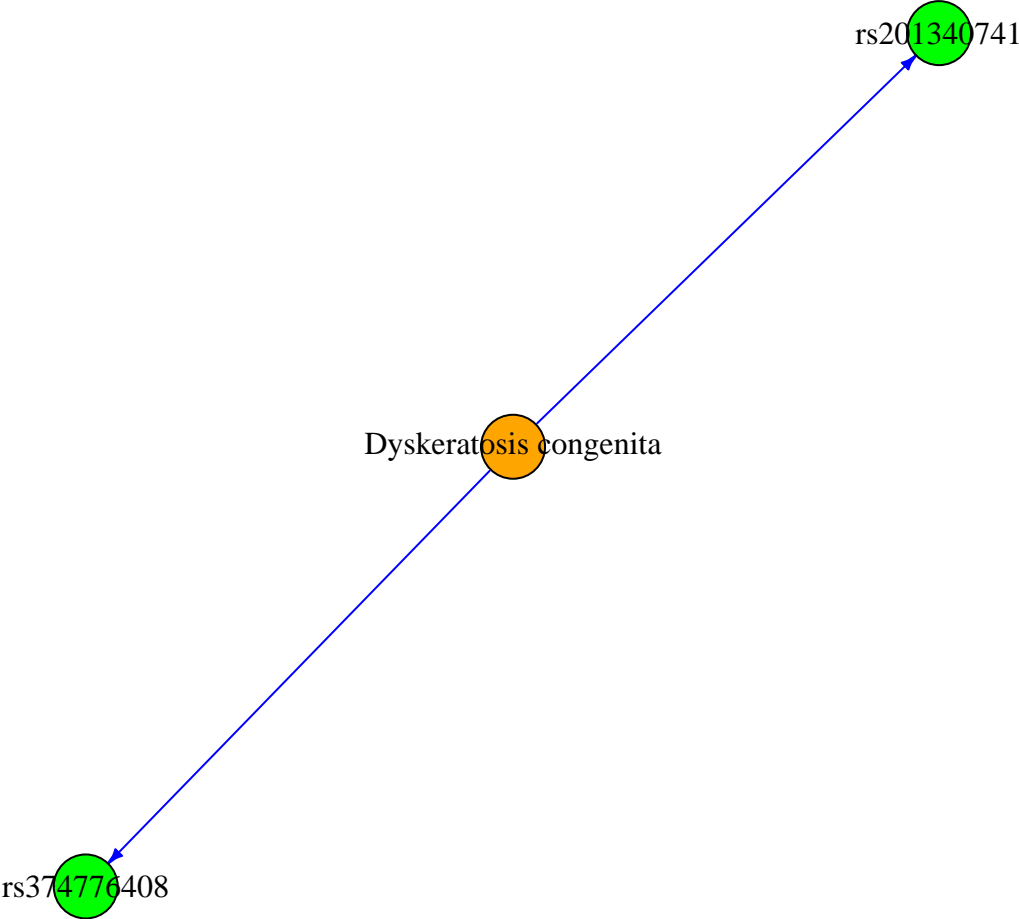

Variant–Disease Network (Dyssegmental Dysplasia)

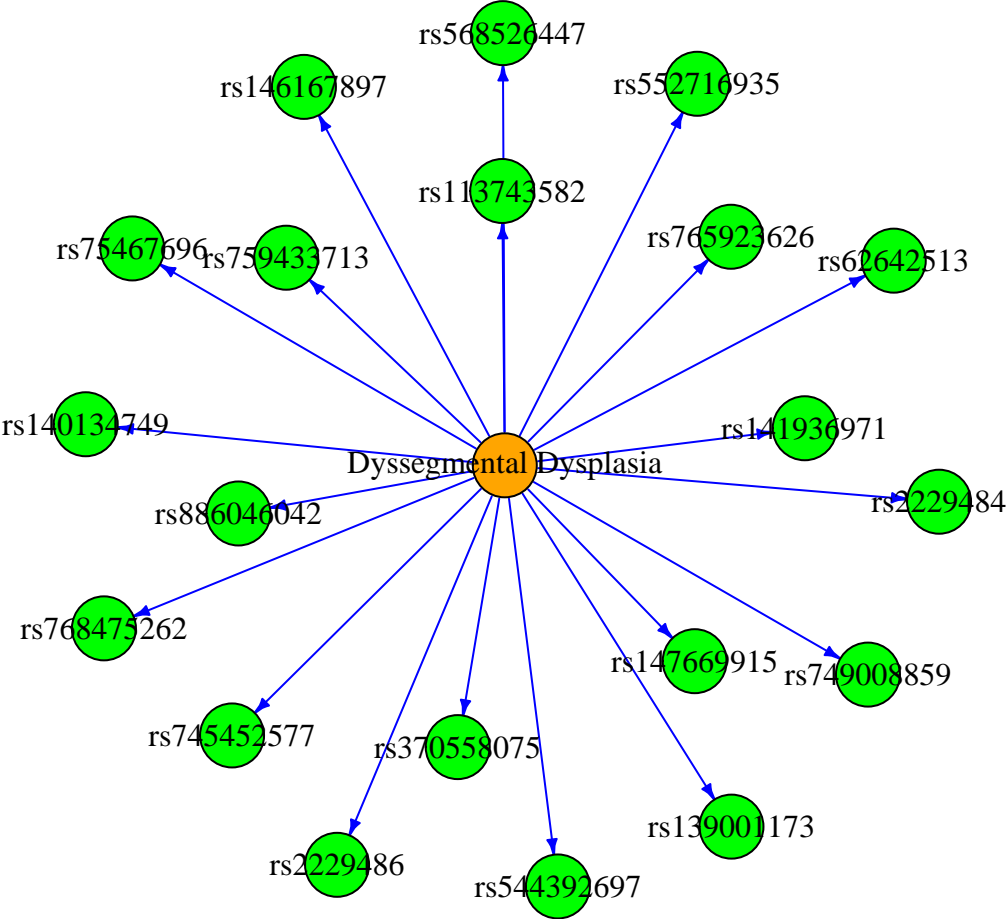



## Variant–Disease Network (Dystonia)

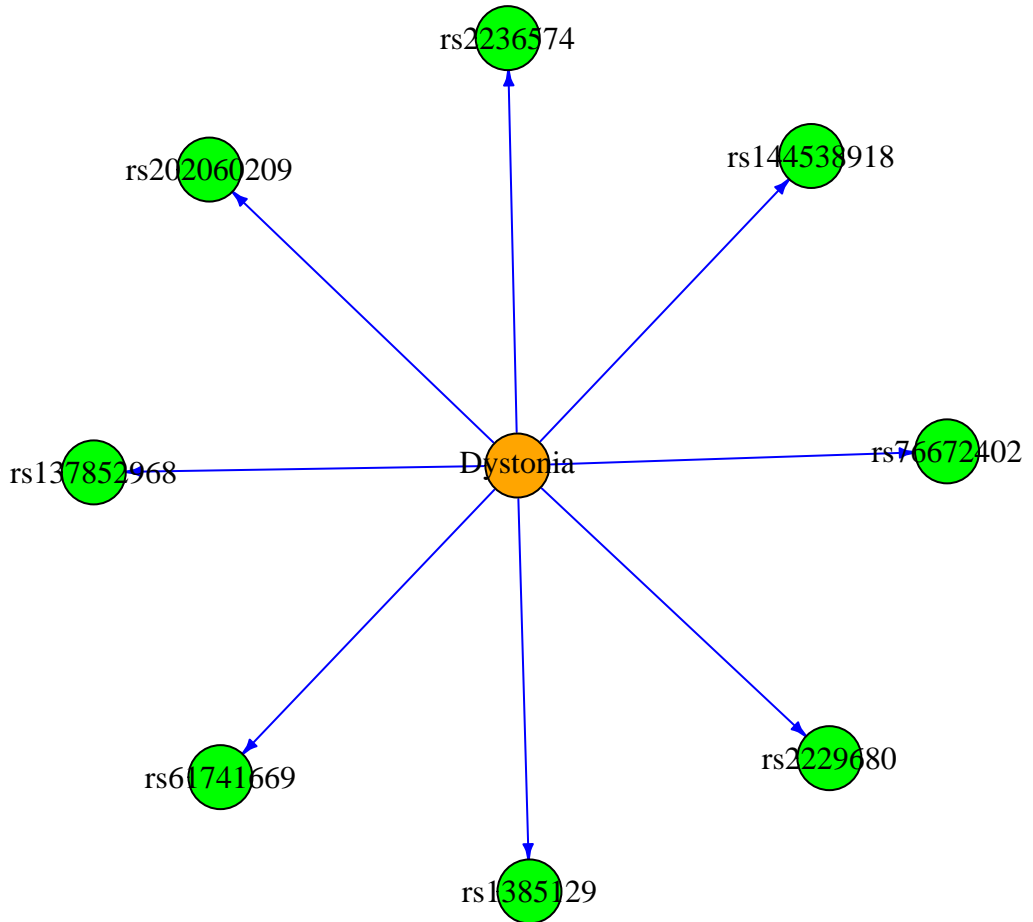

## Variant-Disease Network (Dystonia 24)

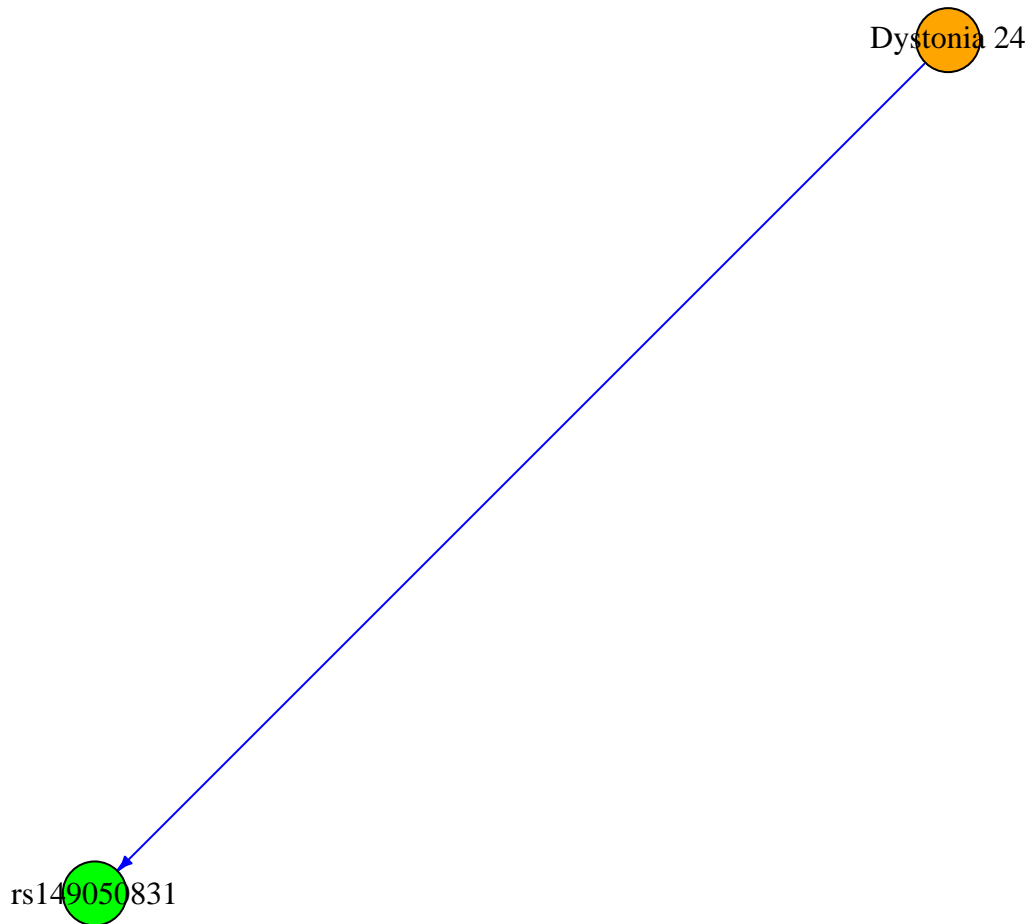

## Variant–Disease Network (Dystonia 5)

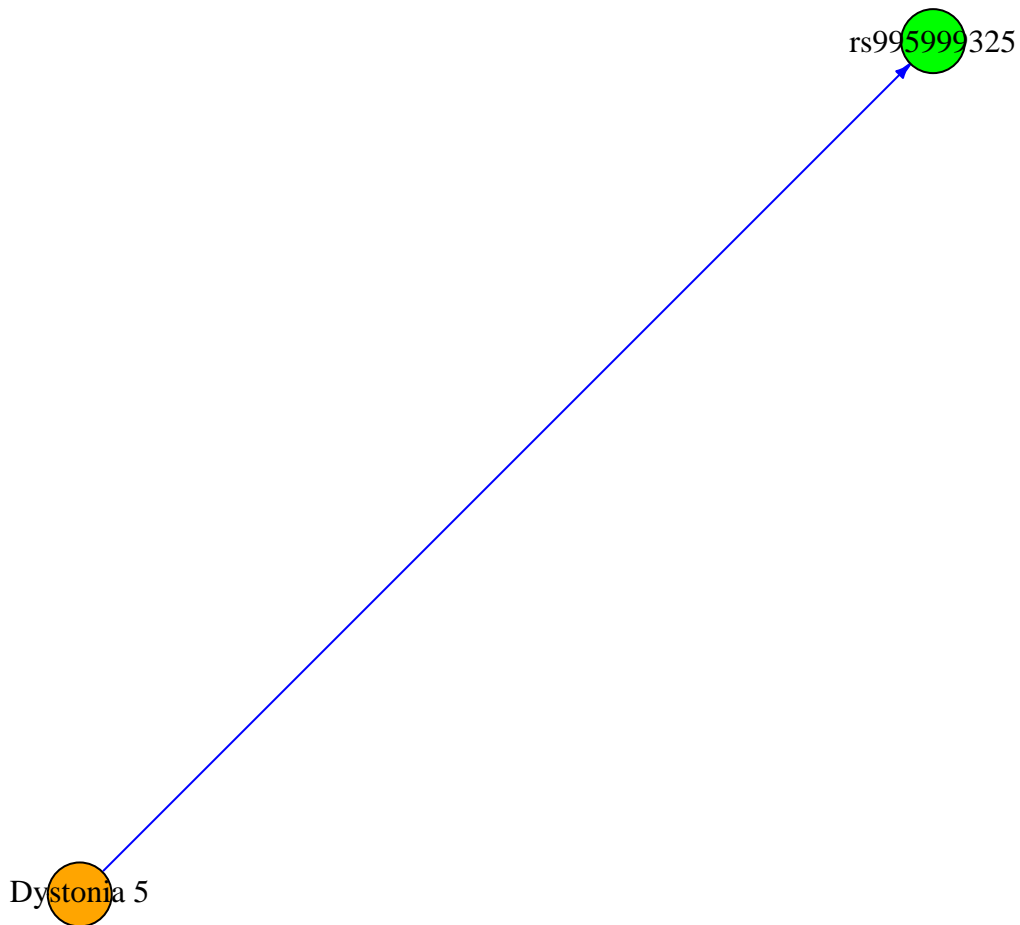

# Variant–Disease Network (Early infantile epileptic encephalopathy)

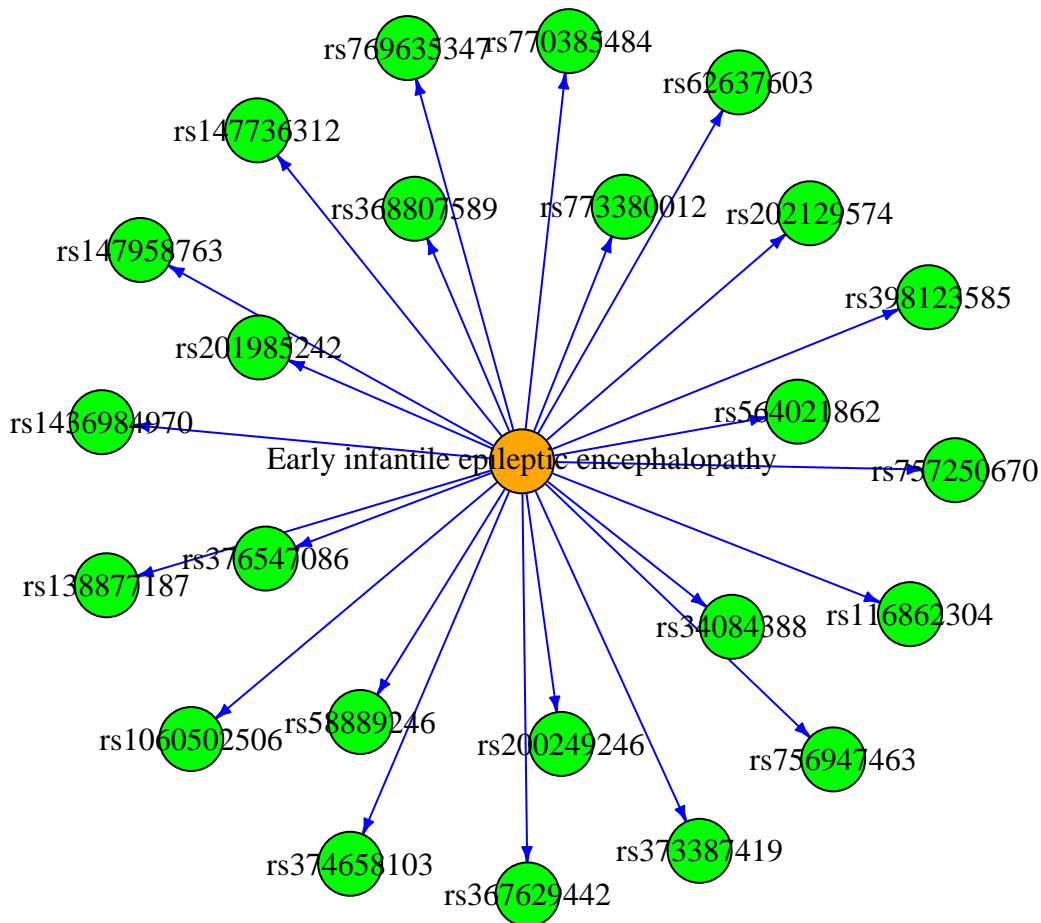

**Variant–Disease Network (Early infantile epileptic encephalopathy 12)**

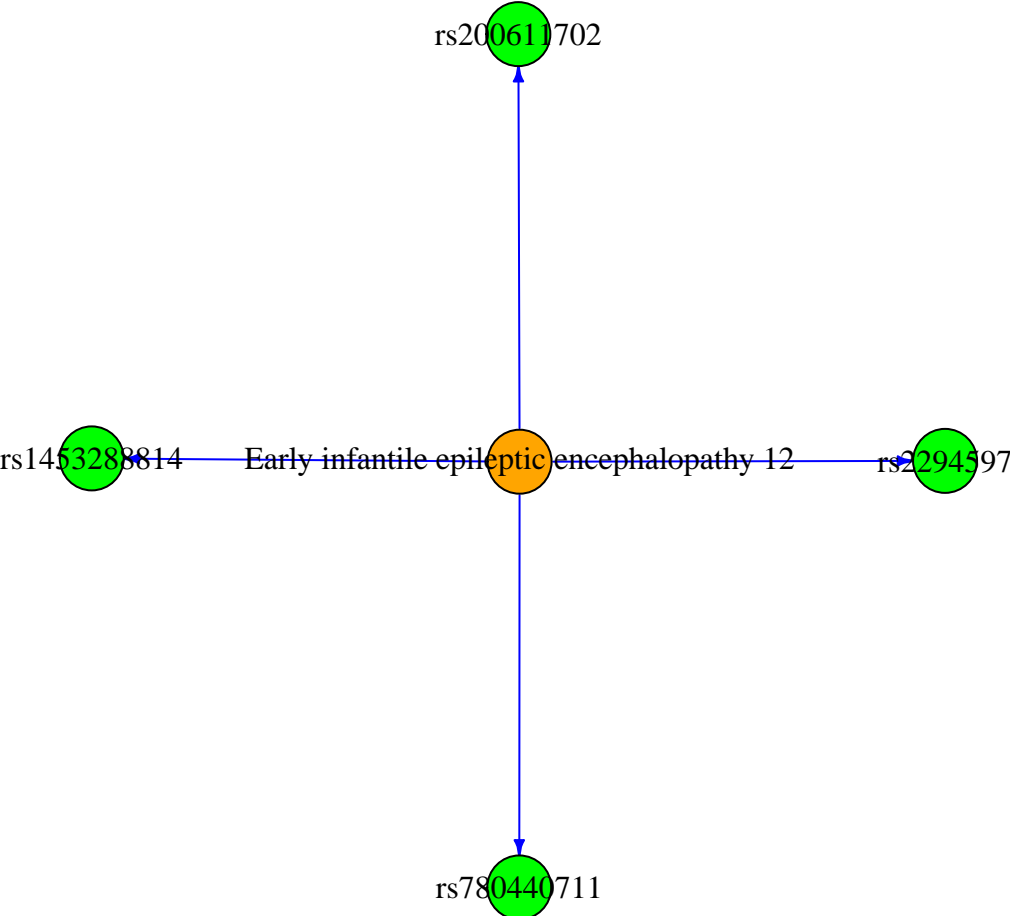

**Variant–Disease Network (Early infantile epileptic encephalopathy 14)**

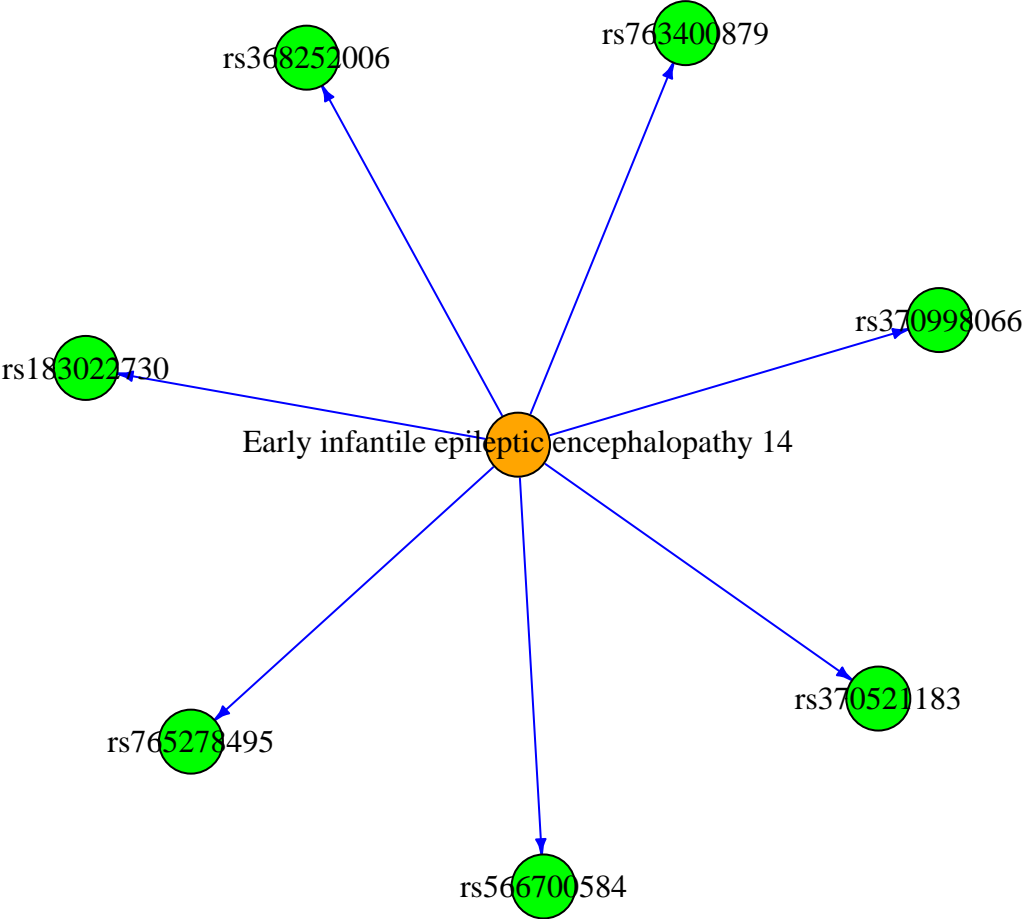

**Variant–Disease Network (Early infantile epileptic encephalopathy 2)**

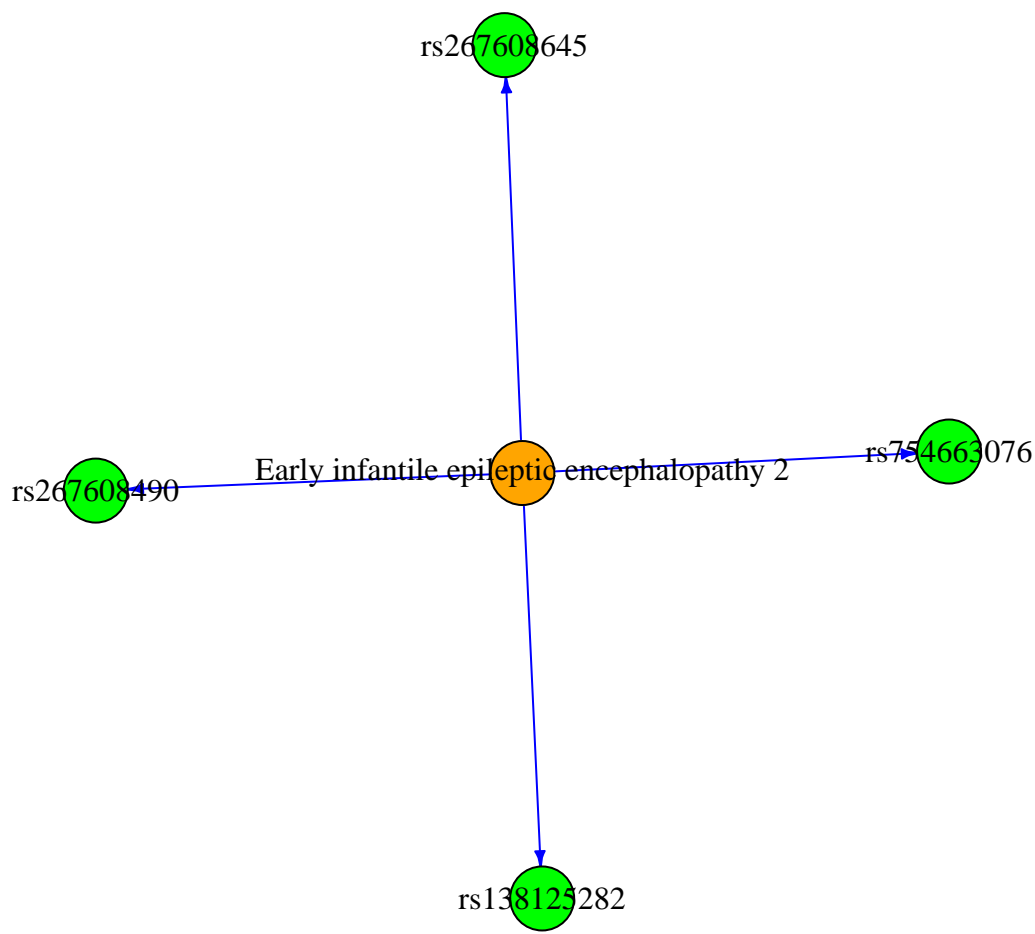

**Variant–Disease Network (Early infantile epileptic encephalopathy 34)**

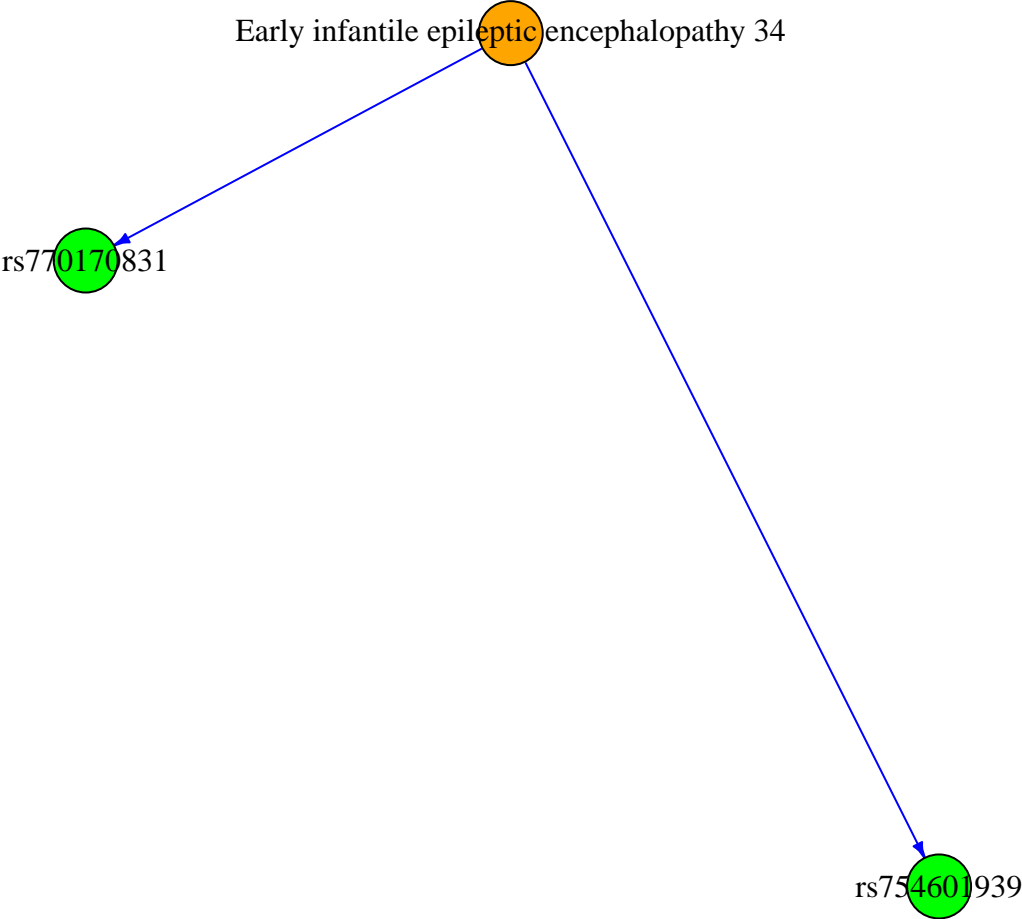



## Variant–Disease Network (Early infantile epileptic encephalopathy 4)

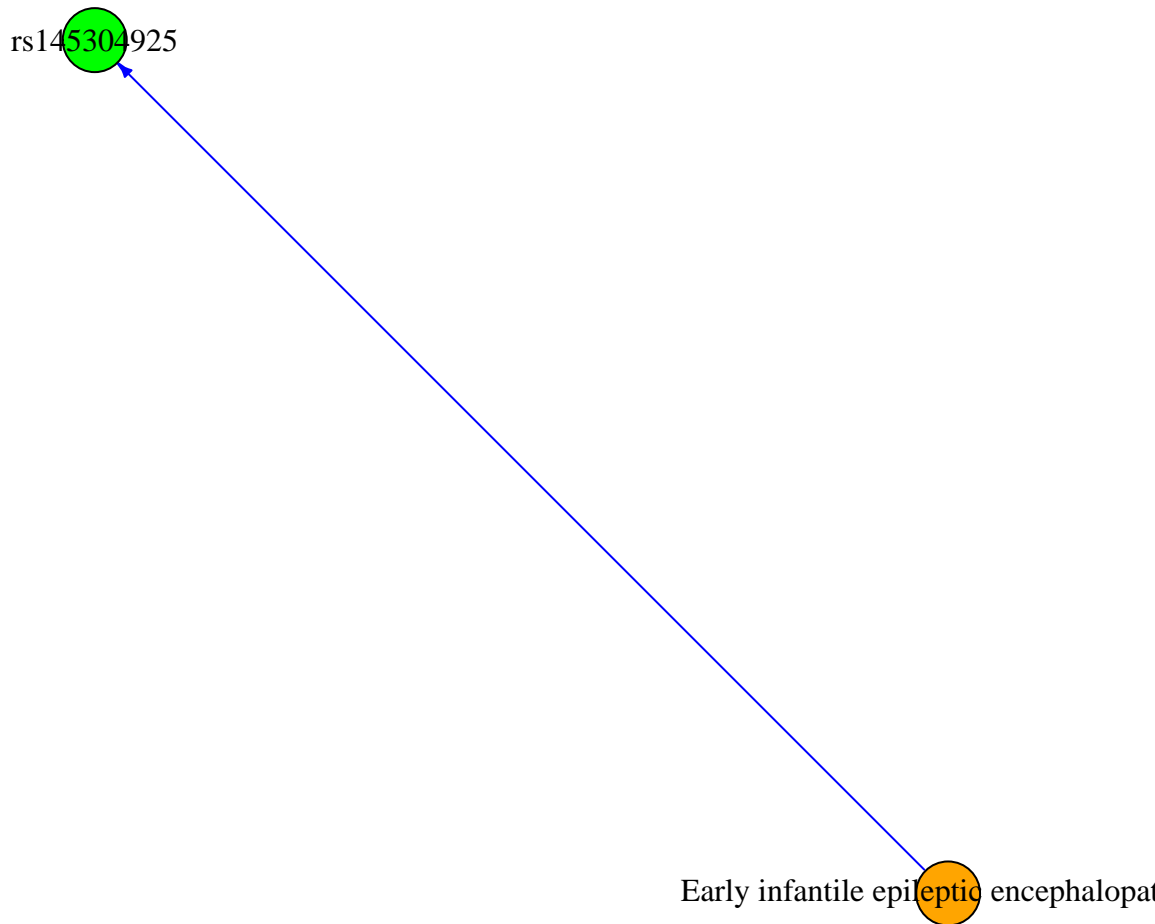

## Variant–Disease Network (Early infantile epileptic encephalopathy 5)

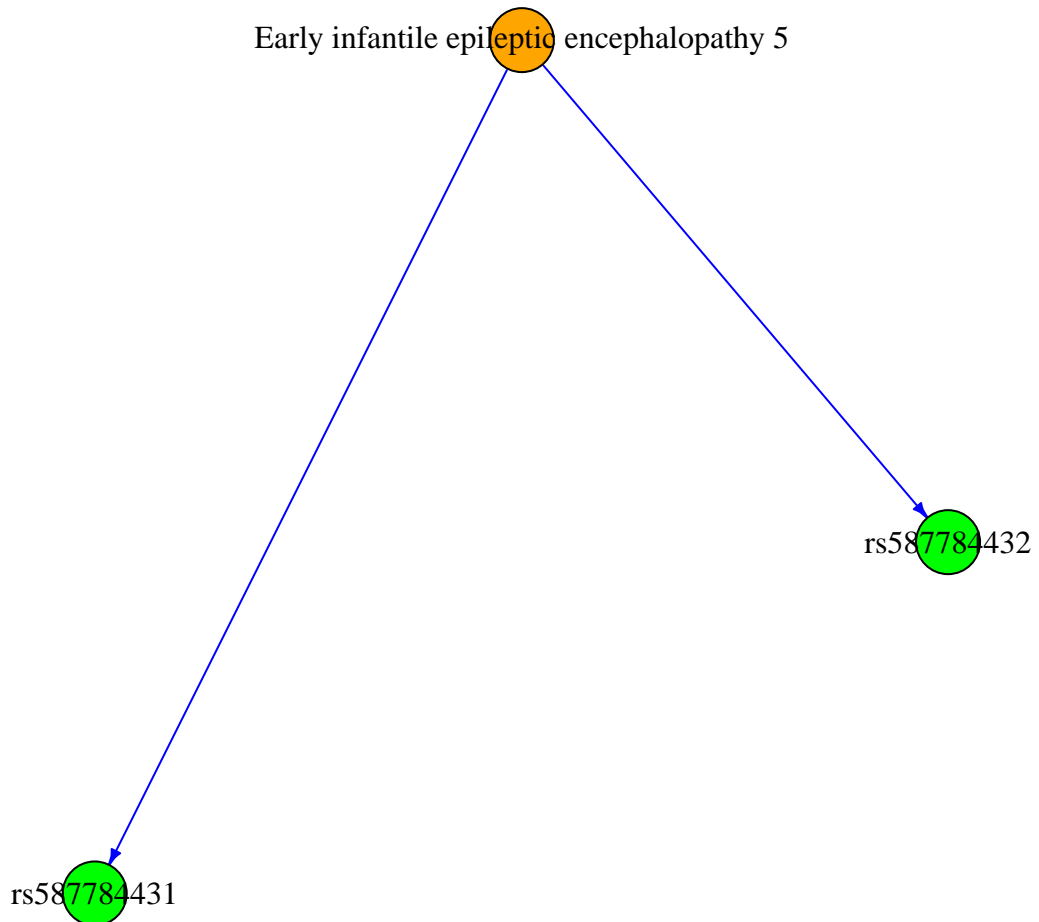

**Variant–Disease Network (Early infantile epileptic encephalopathy 9)**

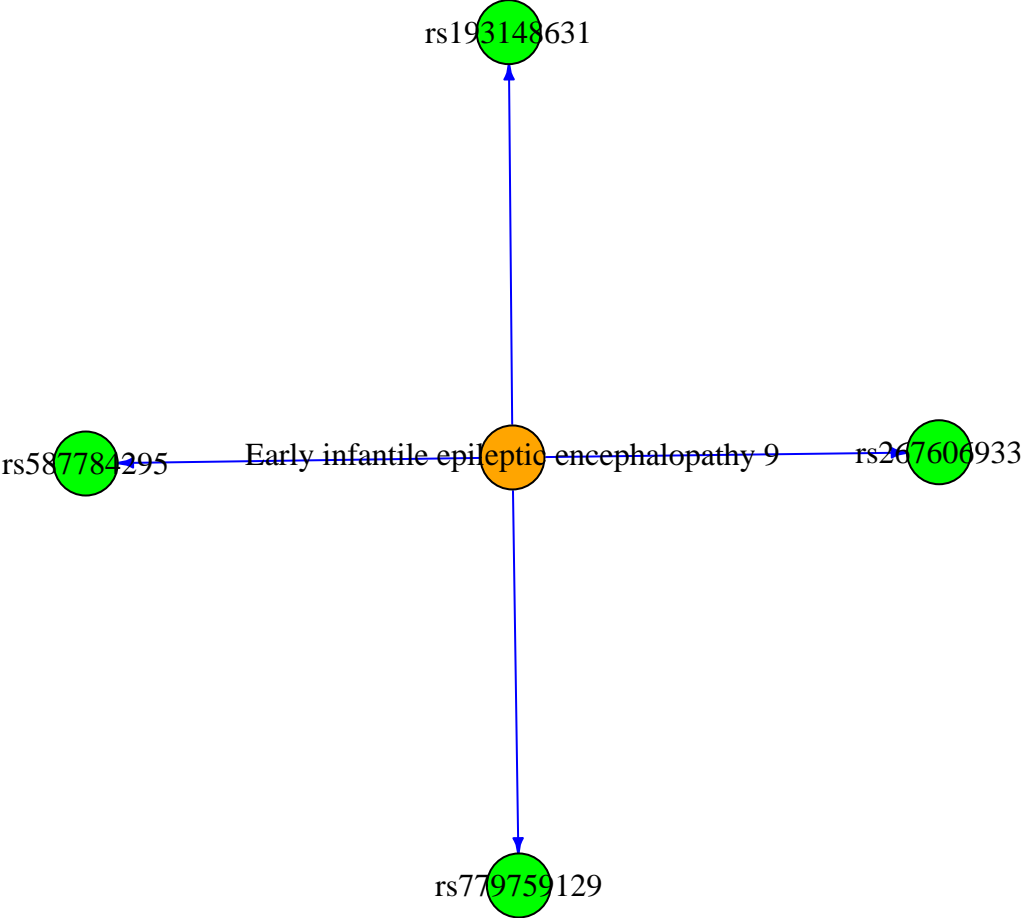

# Variant–Disease Network (Early myoclonic encephalopathy)

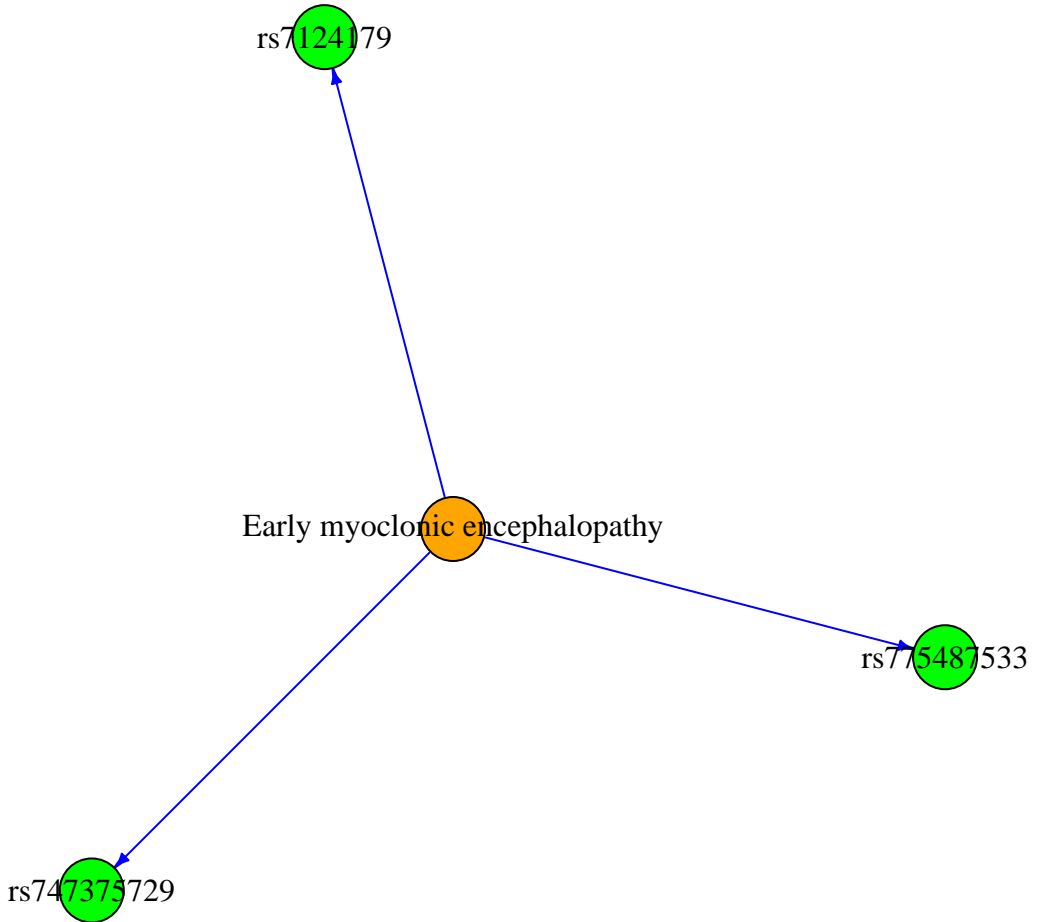

# Variant–Disease Network (Early–Onset Familial Alzheimer Disease)

Early–Onset Familial Alzheimer Disease

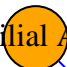

rs116640707

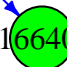

**Variant–Disease Network (Ectodermal dysplasia skin fragility syndrome)**

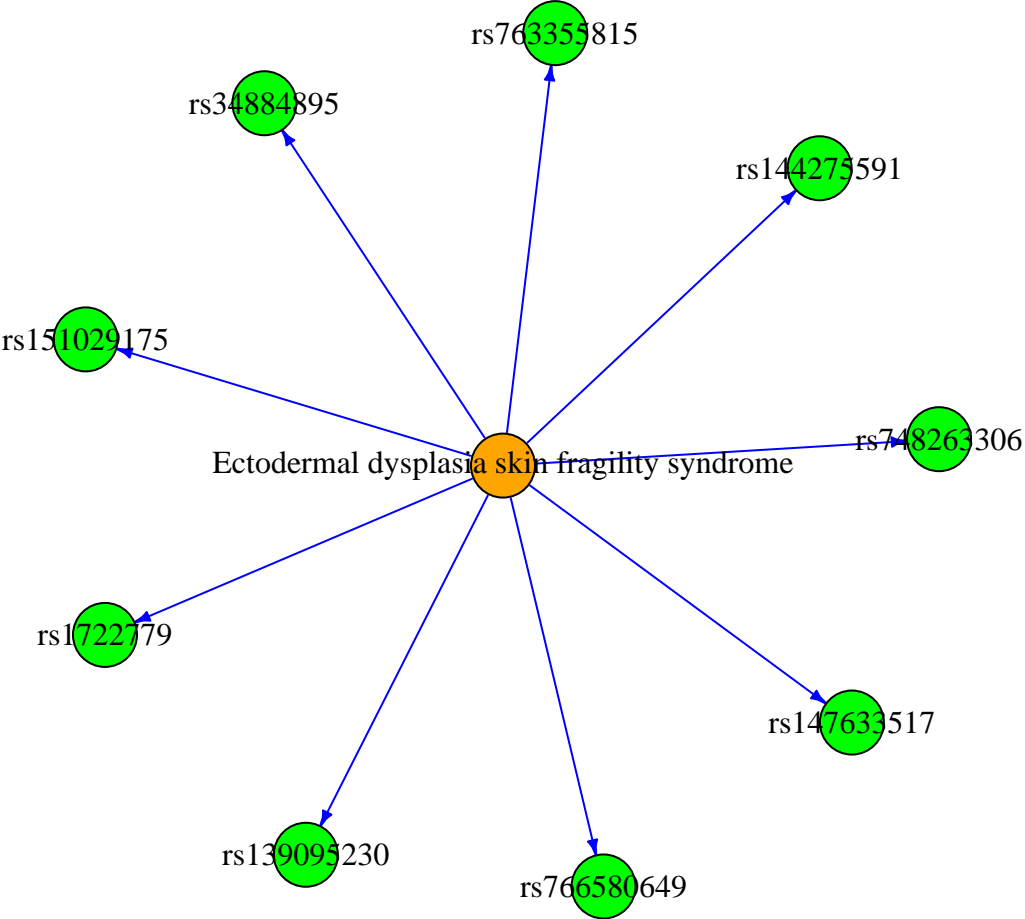

## Variant-Disease Network (Ectopia lentis)

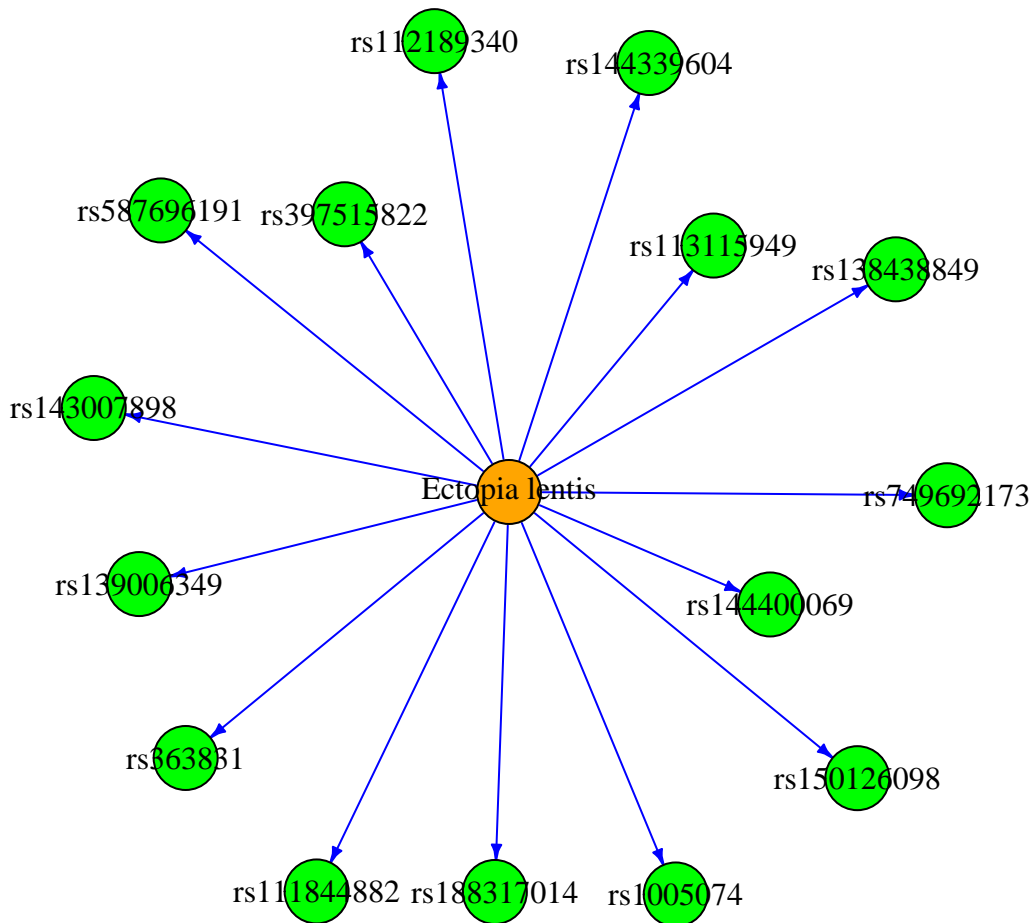

## Variant-Disease Network (Eculizumab)

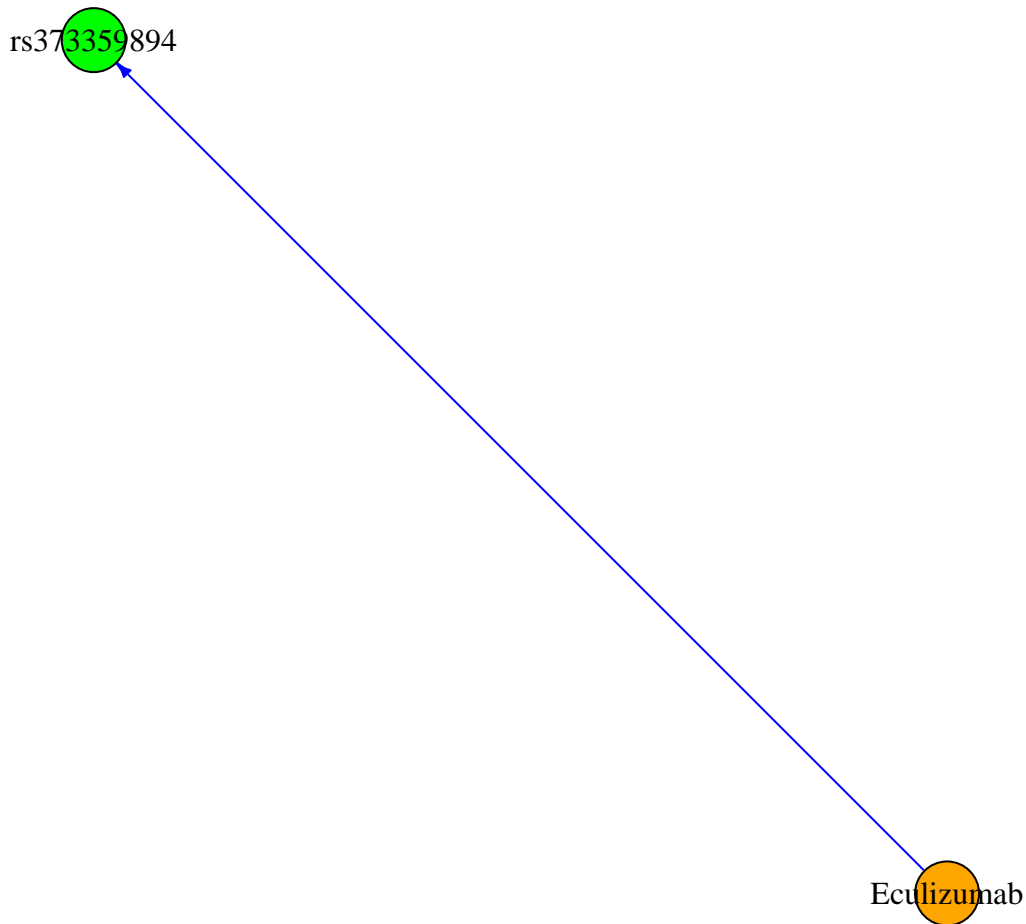



## Variant–Disease Network (EEG abnormality)

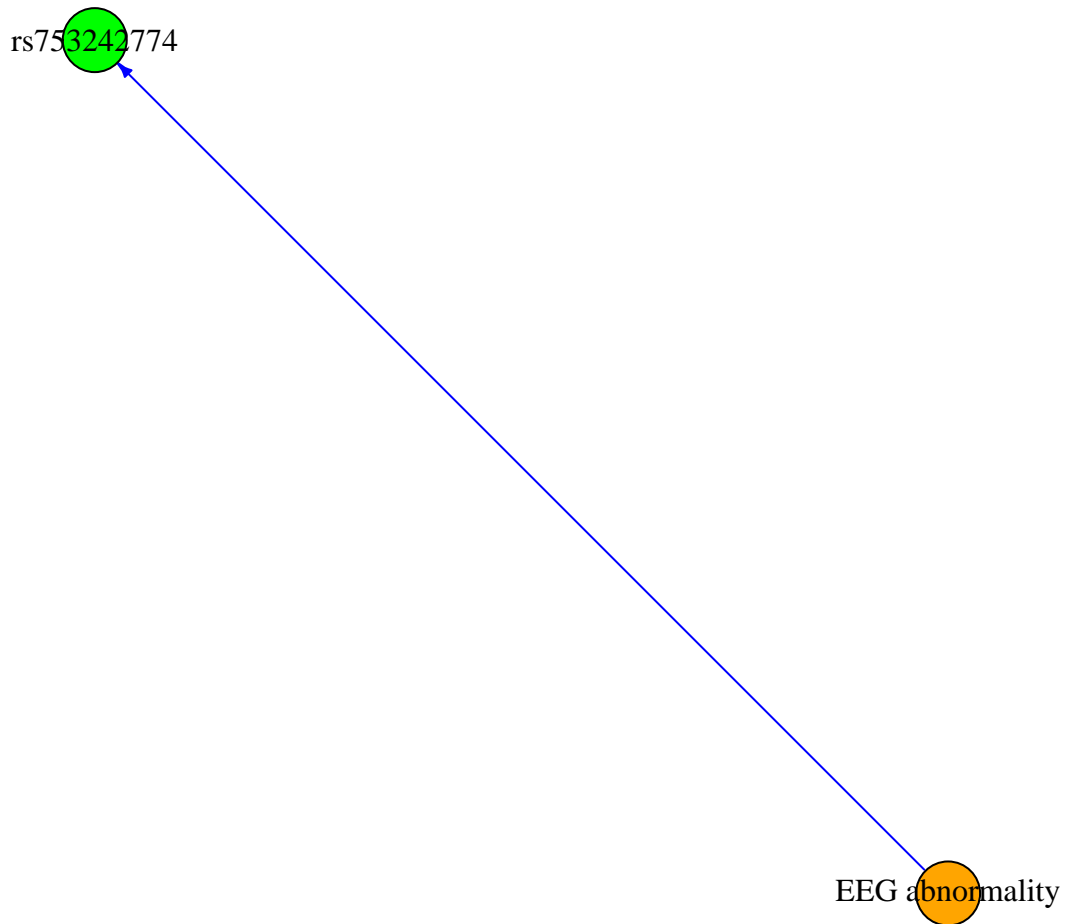

## Variant–Disease Network (Ehlers–Danlos syndrome)

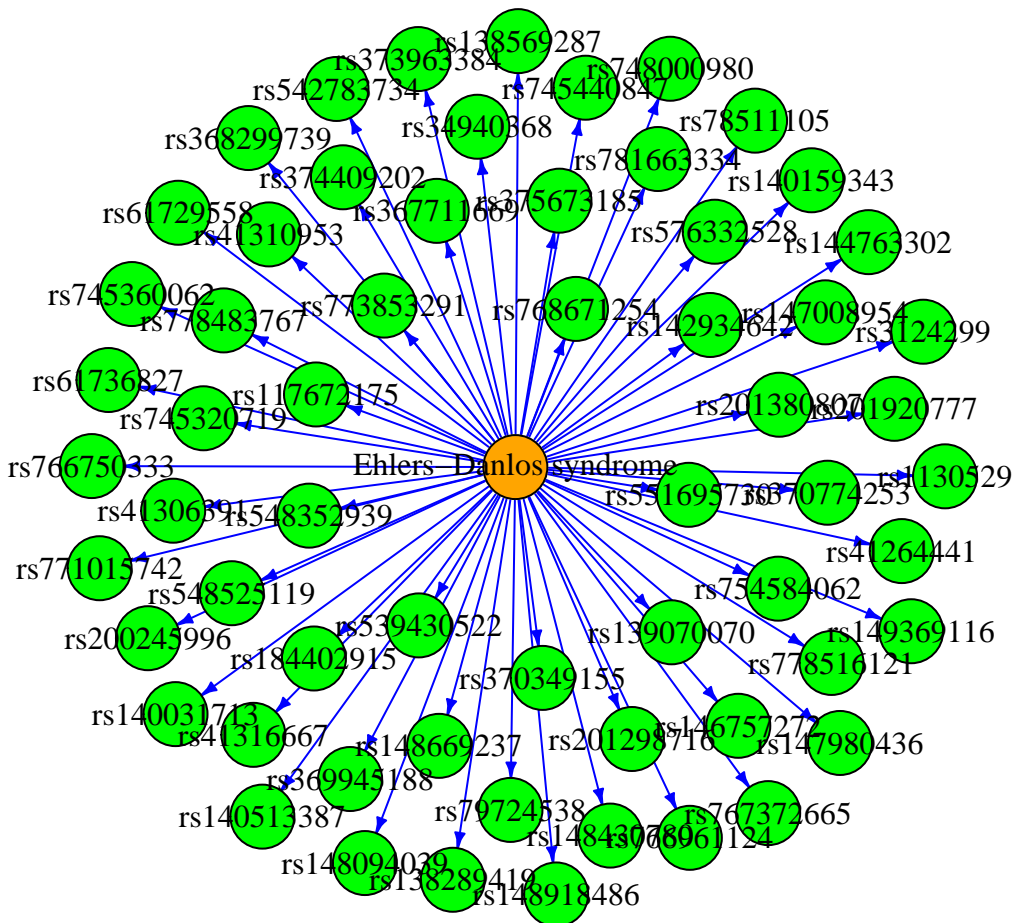

## Variant–Disease Network (Ehlers–Danlos syndrome classic type 2)

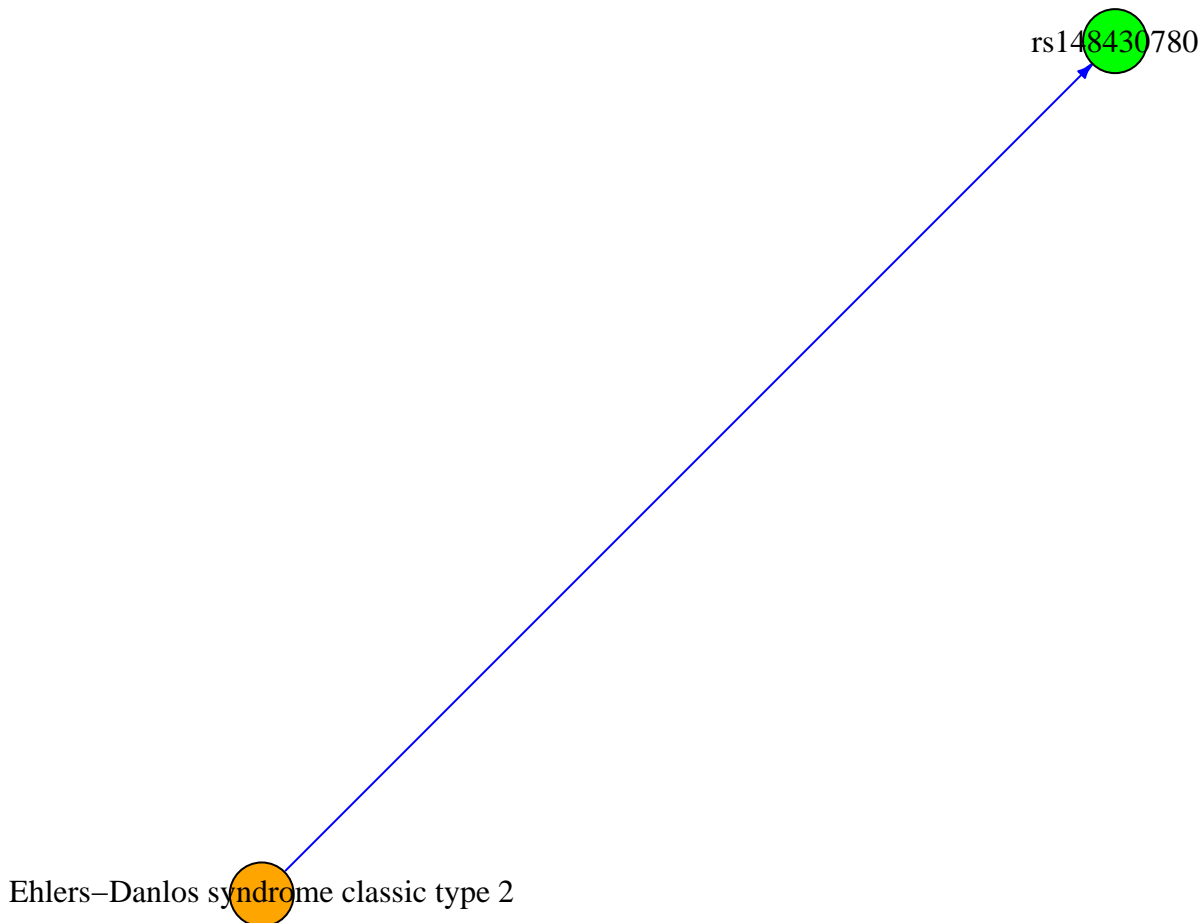

Variant–Disease Network (Ehlers–Danlos syndrome dermatosparaxis type)

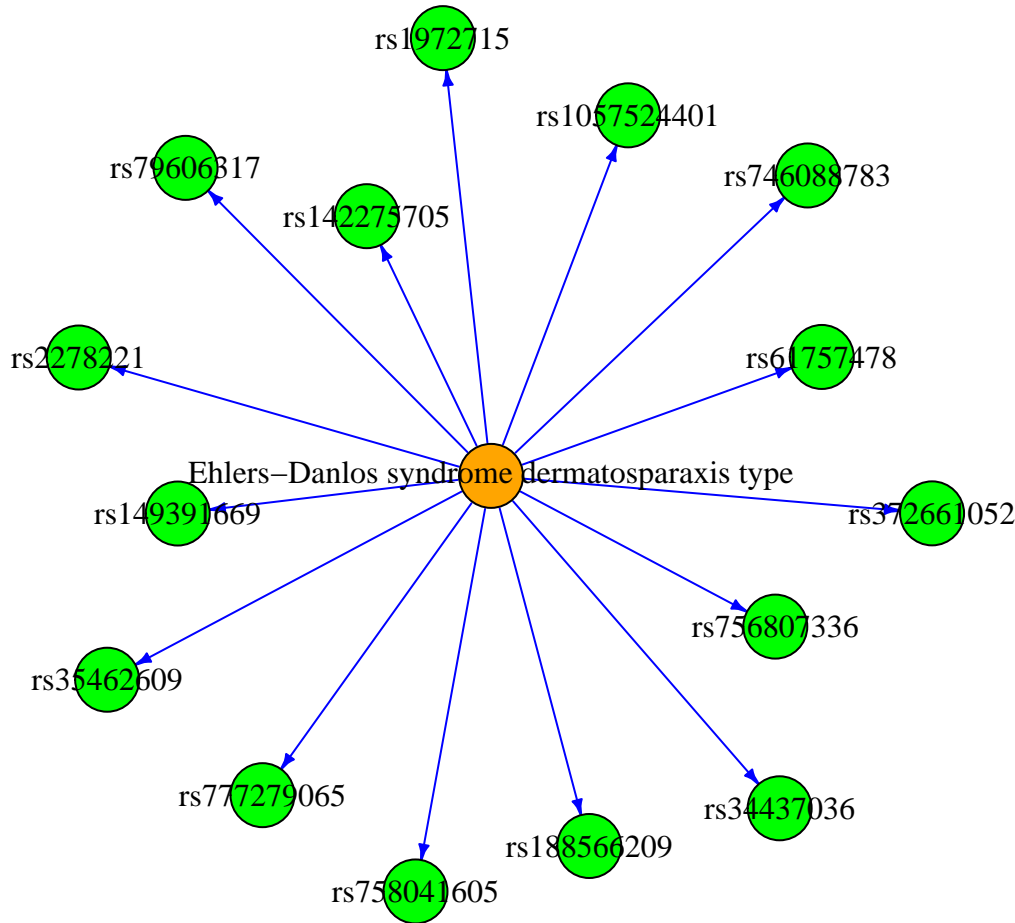

**Variant–Disease Network (Ehlers–Danlos syndrome progeroid type)**

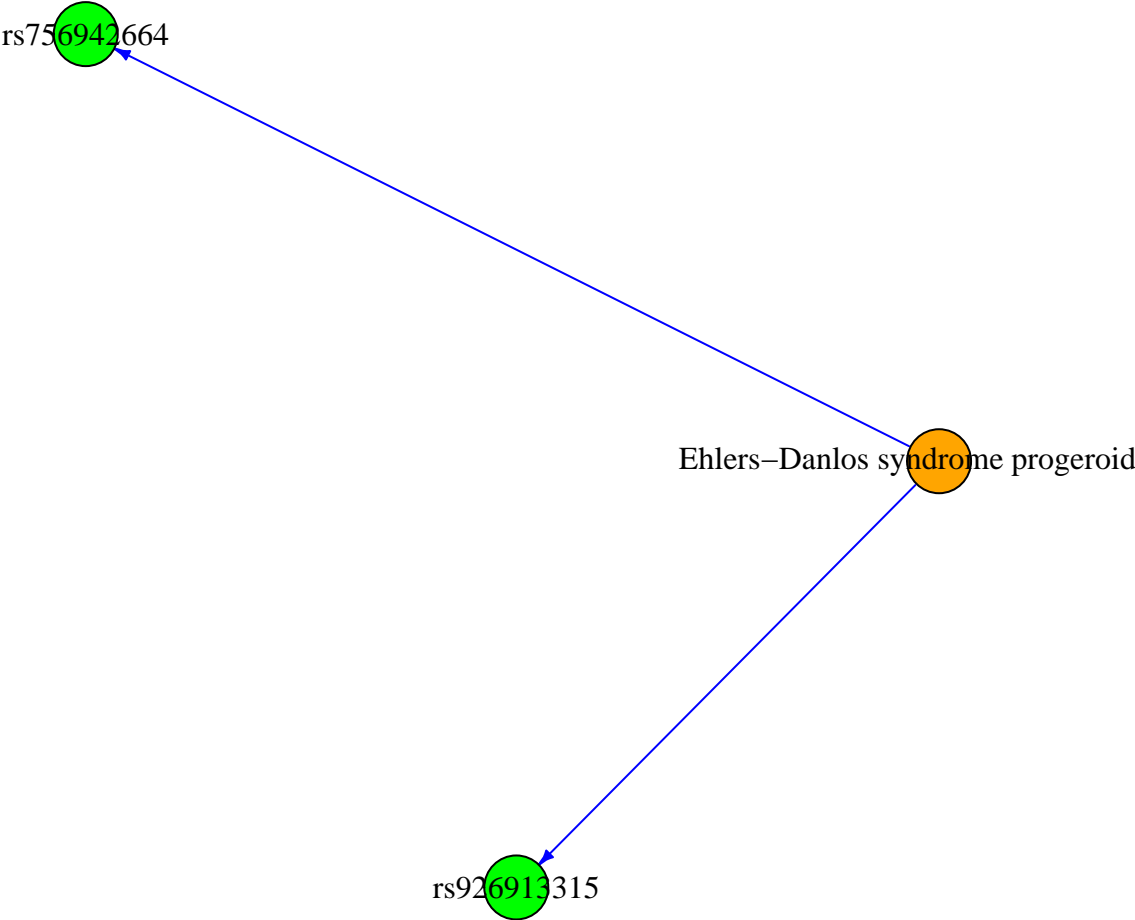

# Variant-Disease Network (Ehlers-Danlos syndrome with progressive kyphoscoliosis)

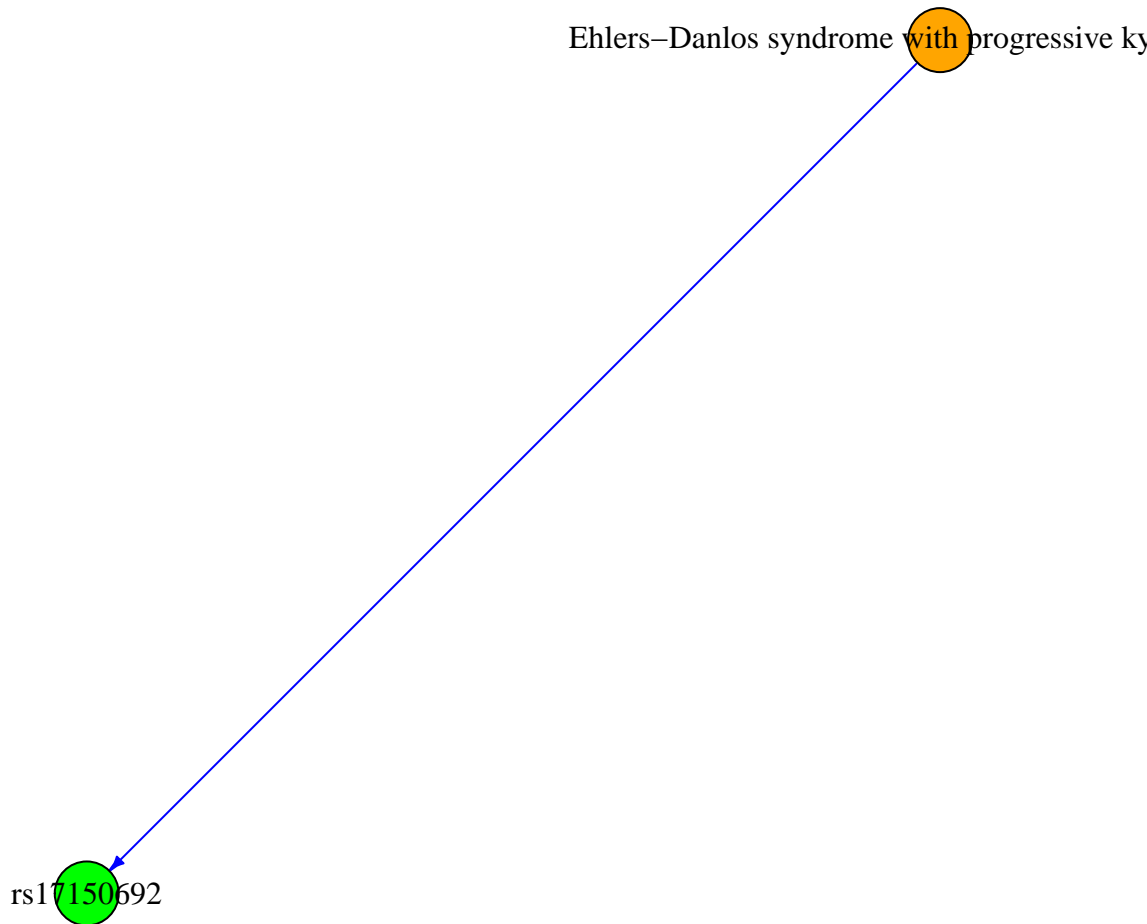

## Variant-Disease Network (Elliptocytosis)

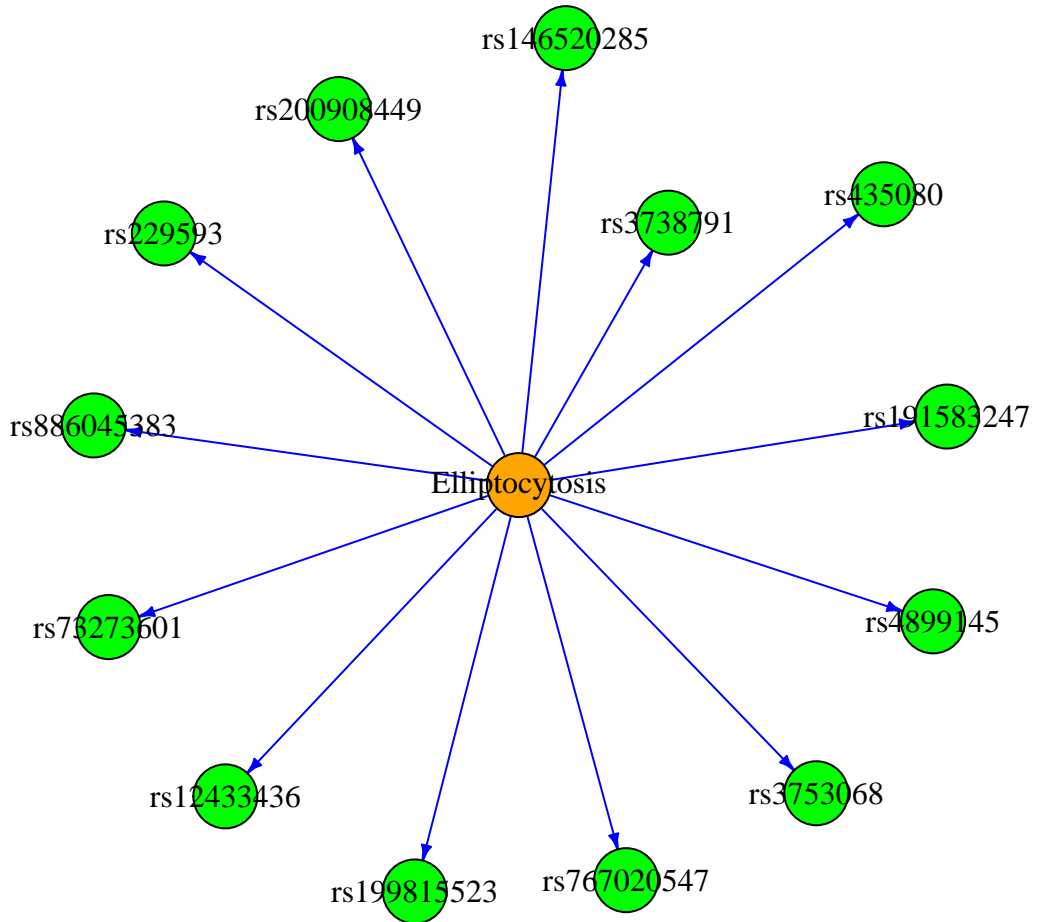

## Variant-Disease Network (Elliptocytosis 2)

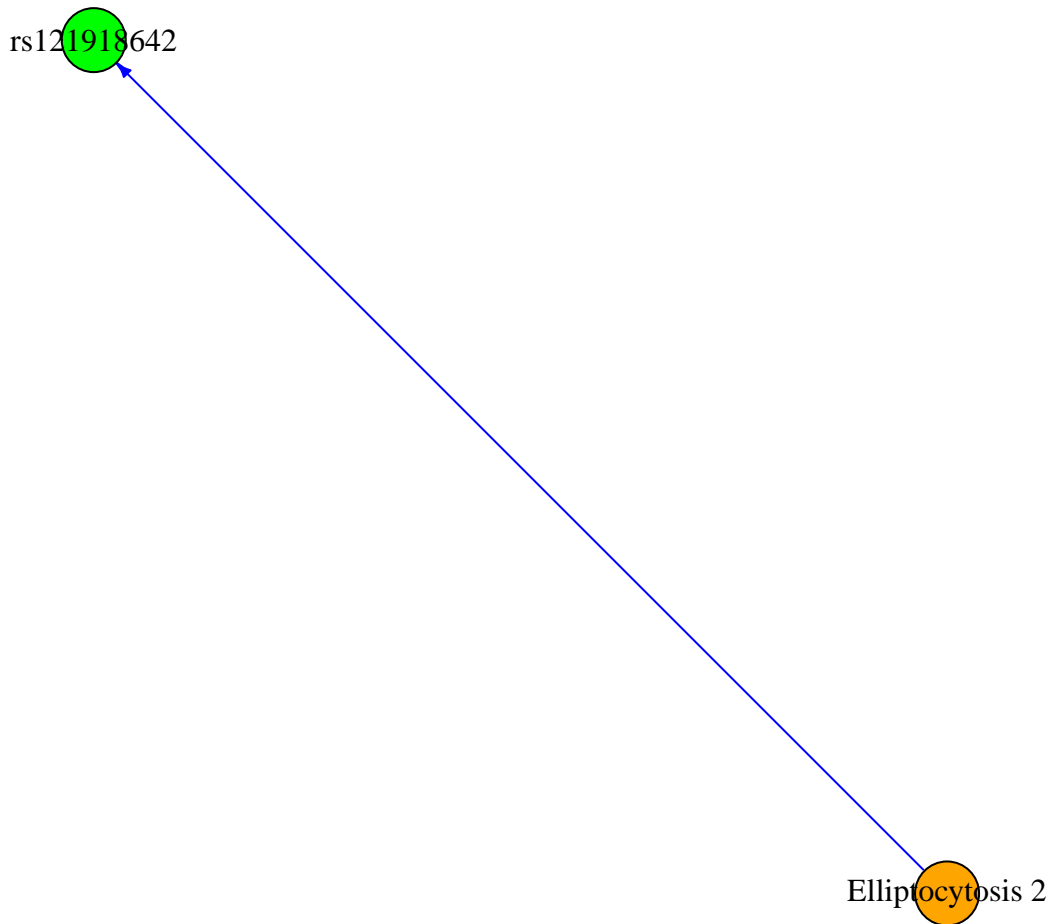



# Variant-Disease Network (Ellis-van Creveld syndrome)

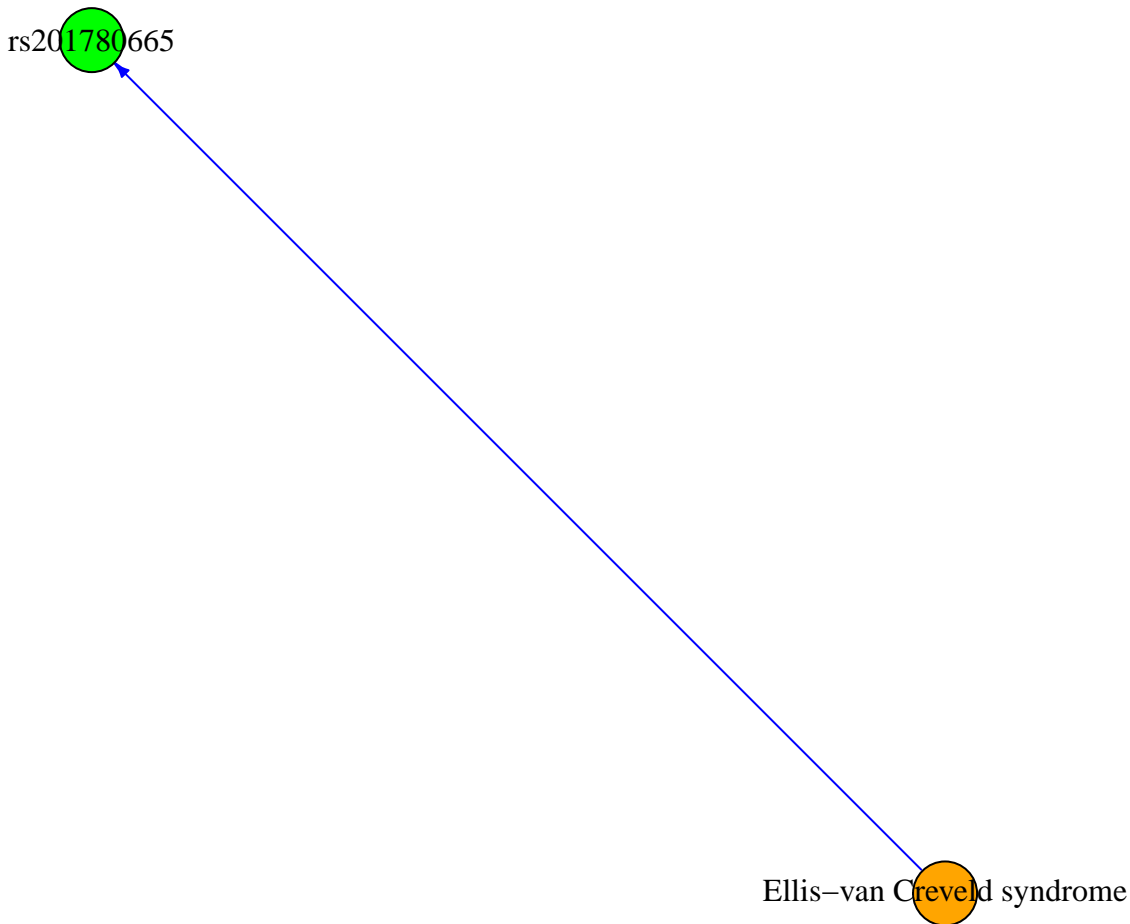

# Variant–Disease Network (Emery–Dreifuss muscular dystrophy)

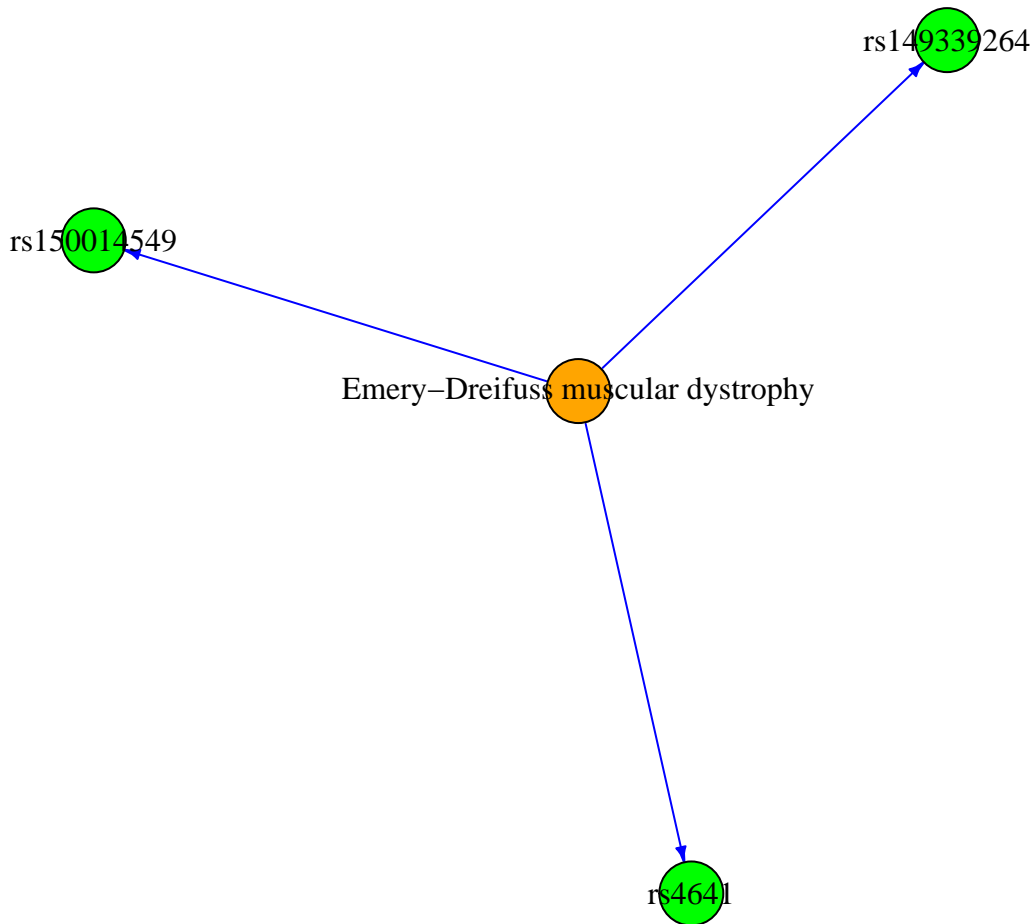

# Variant–Disease Network (Emery–Dreifuss muscular dystrophy 3)

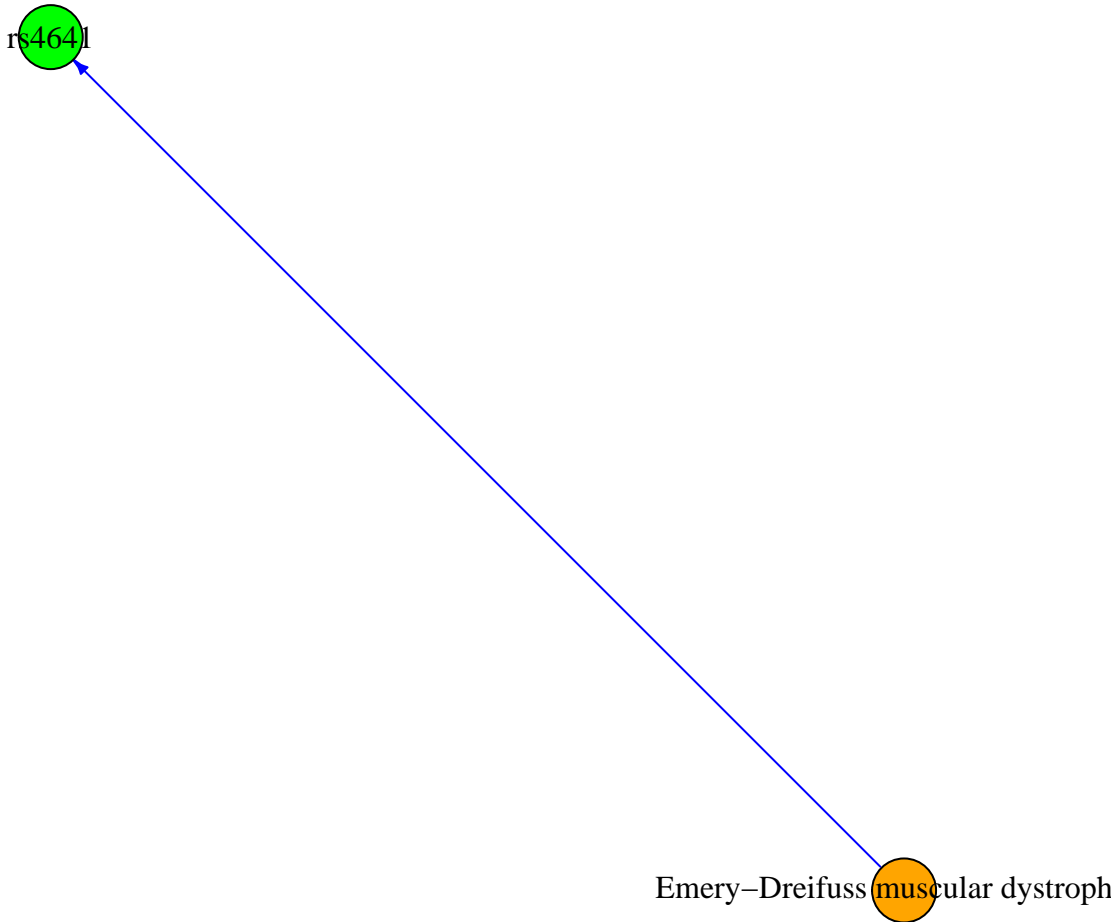

Variant–Disease Network (Encephalopathy)

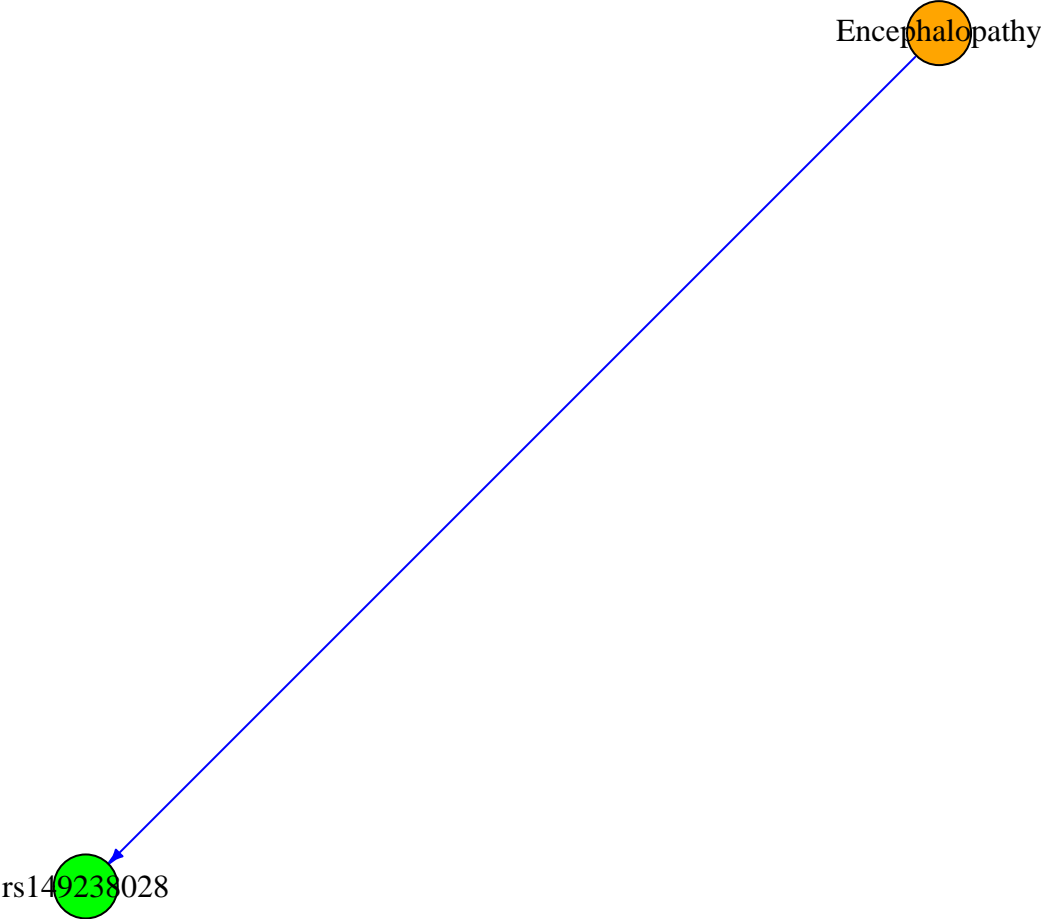

**Variant–Disease Network (Enhanced s–cone syndrome)**

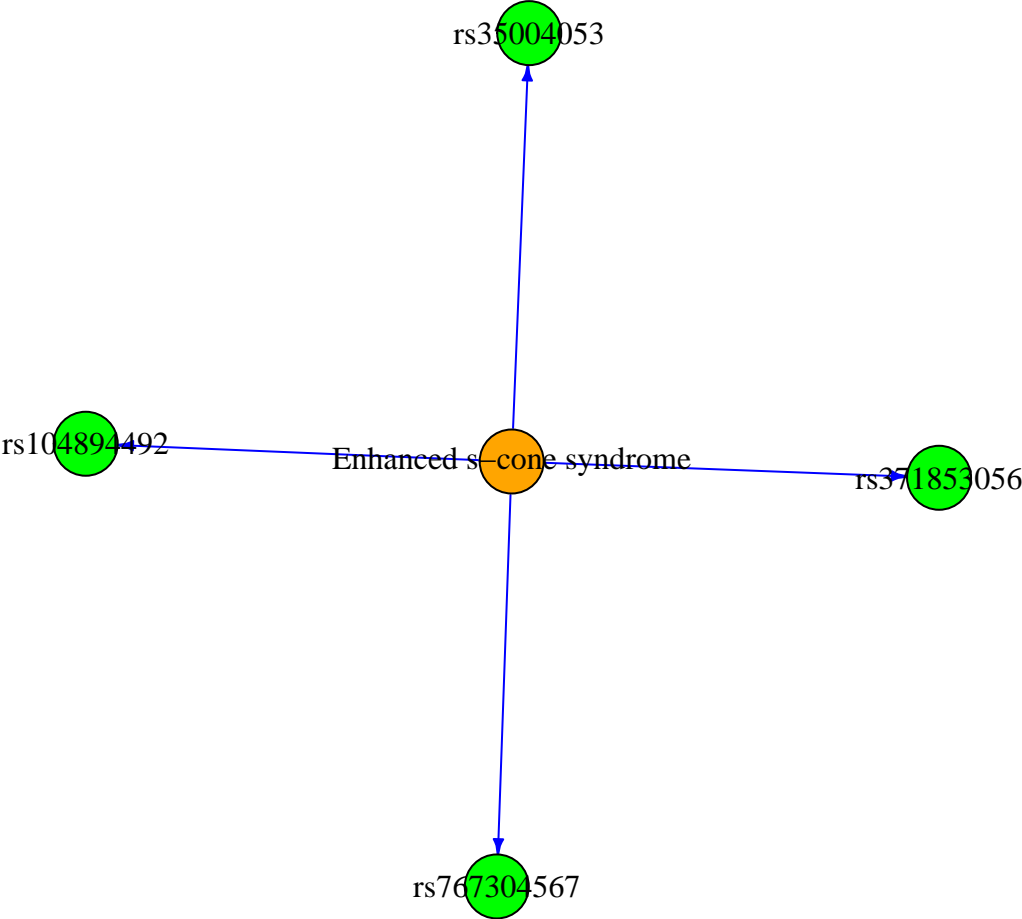

**Variant–Disease Network (EPIDERMODYSPLASIA VERRUCIFORMIS)**

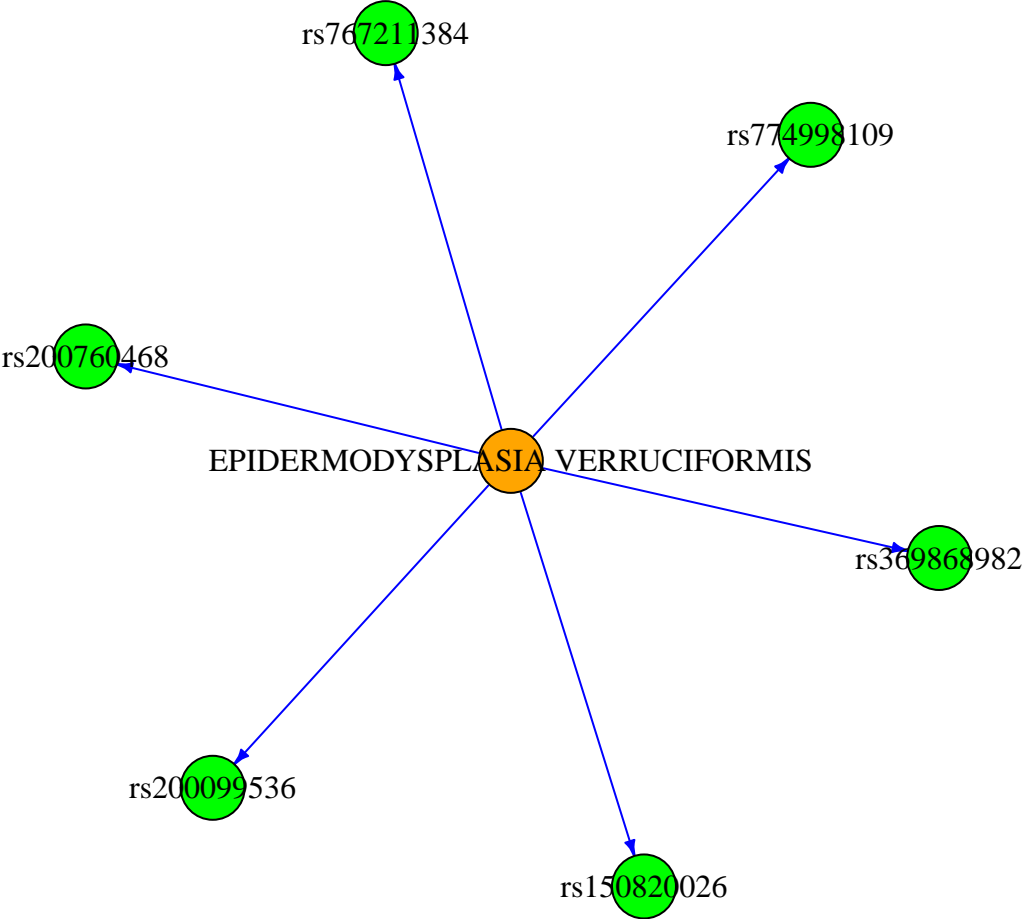

## Variant–Disease Network (Epidermolysis bullosa)

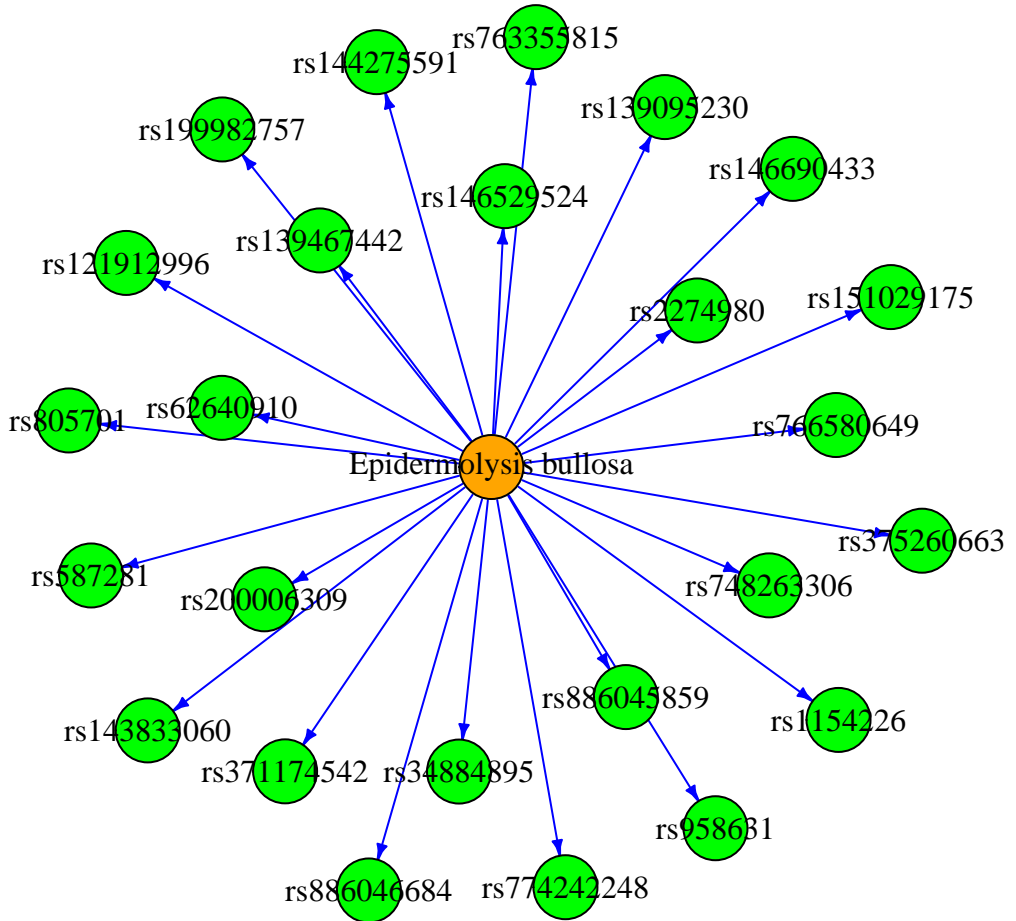

# Variant–Disease Network (Epidermolysis bullosa junctionalis with pyloric atresia)

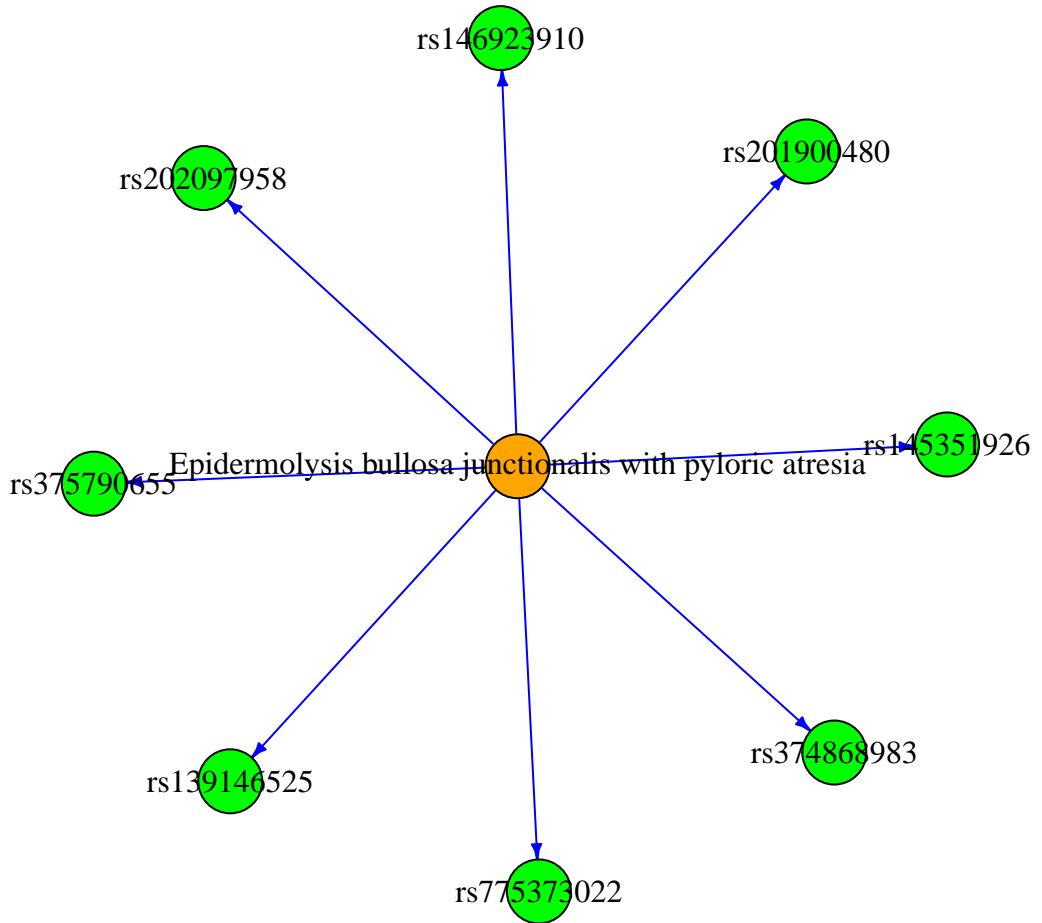



**Variant–Disease Network (Epidermolysis bullosa simplex)**

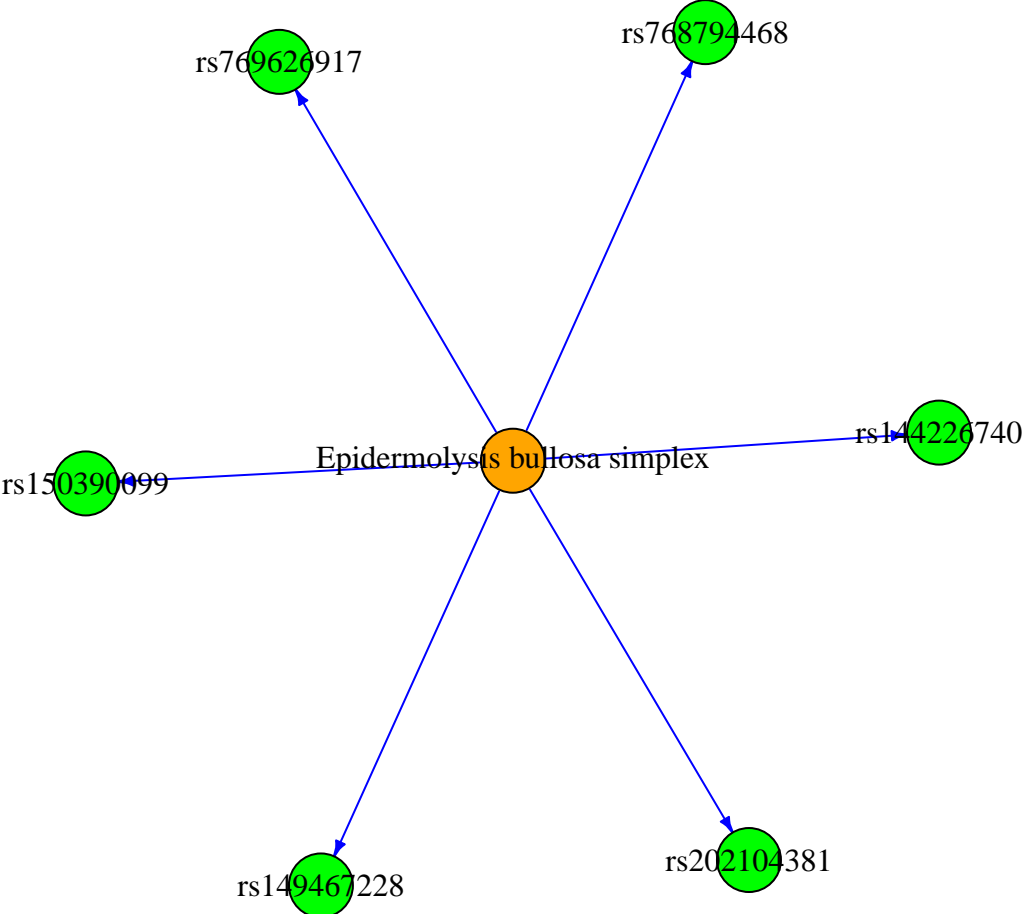

## Variant–Disease Network (Epilepsy)

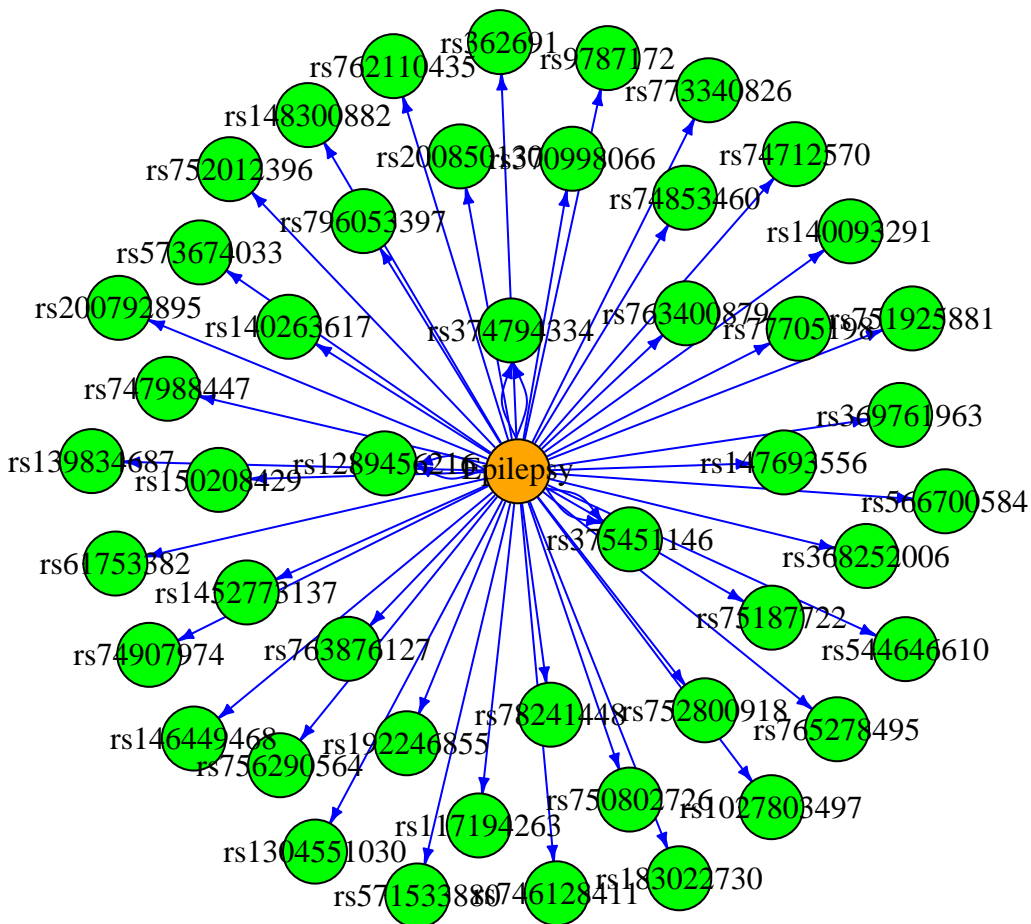

**Variant–Disease Network (Epileptic encephalopathy)**

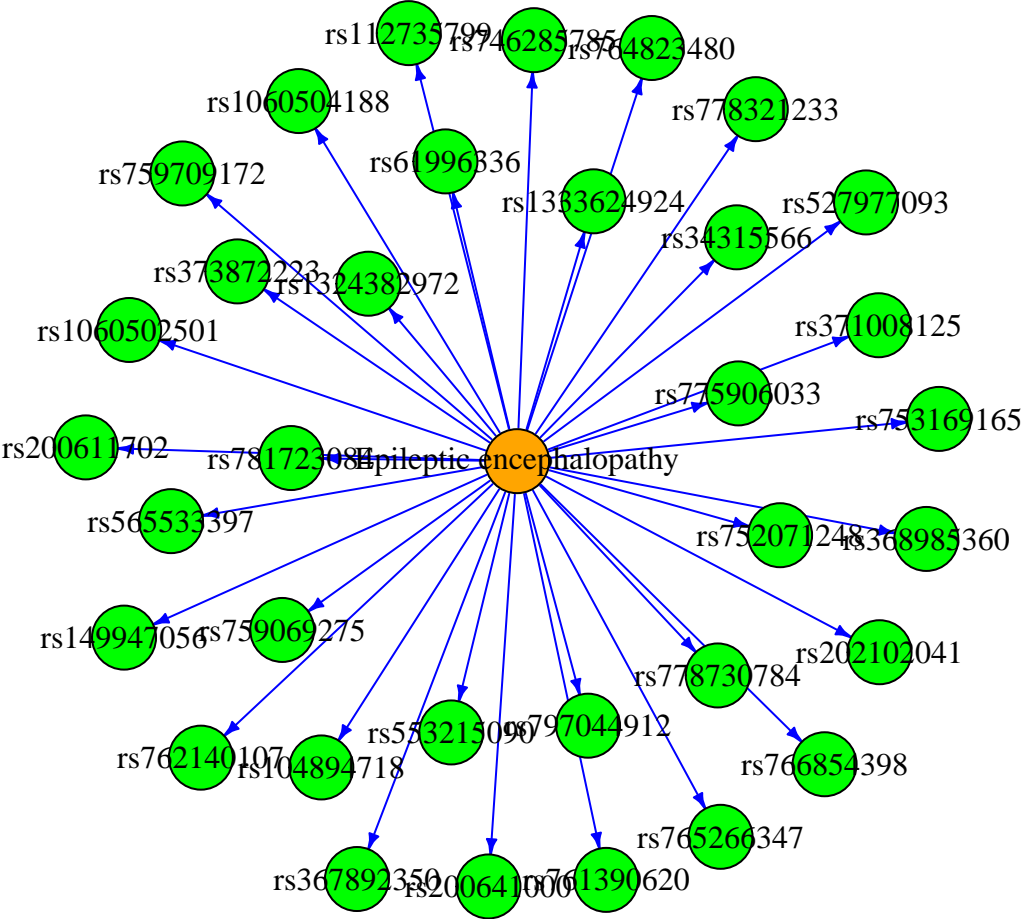

**Variant–Disease Network (Epiphyseal chondrodysplasia)**

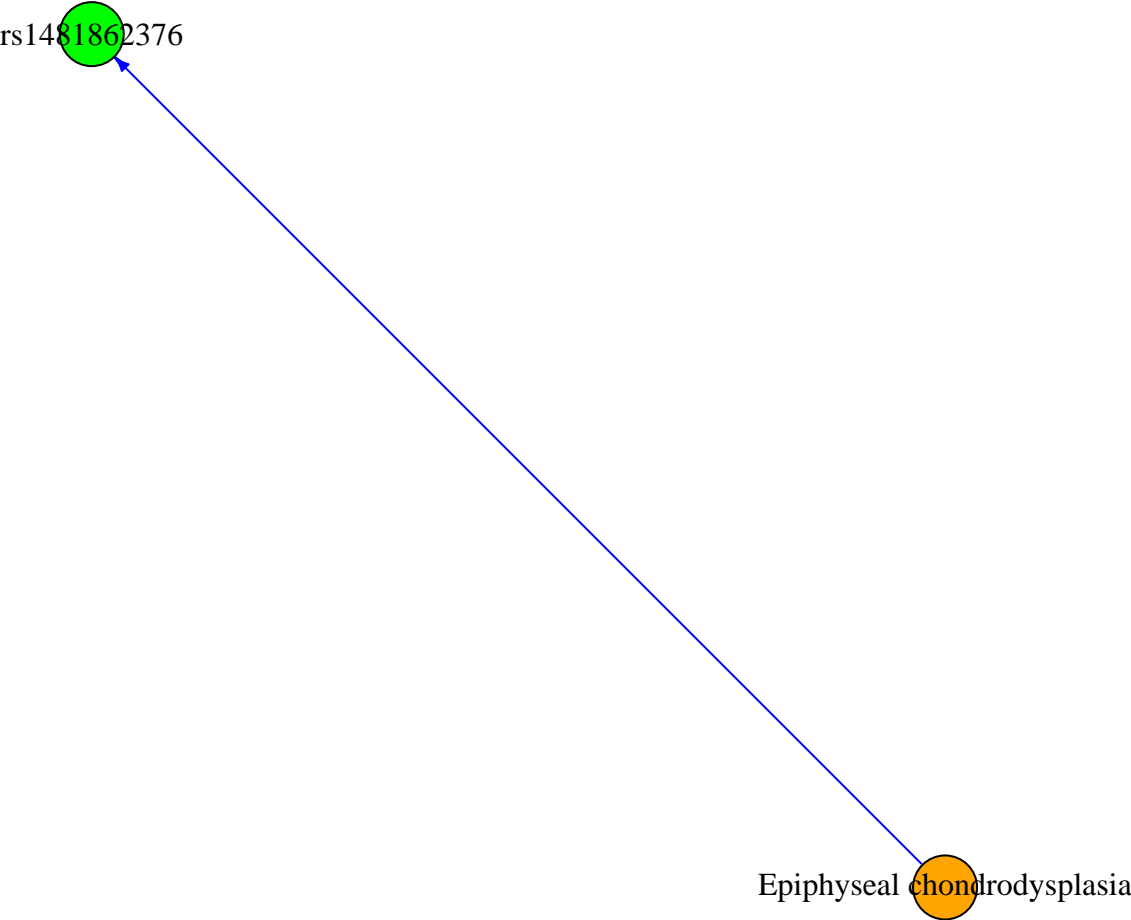

## Variant-Disease Network (Epiphyseal dysplasia)

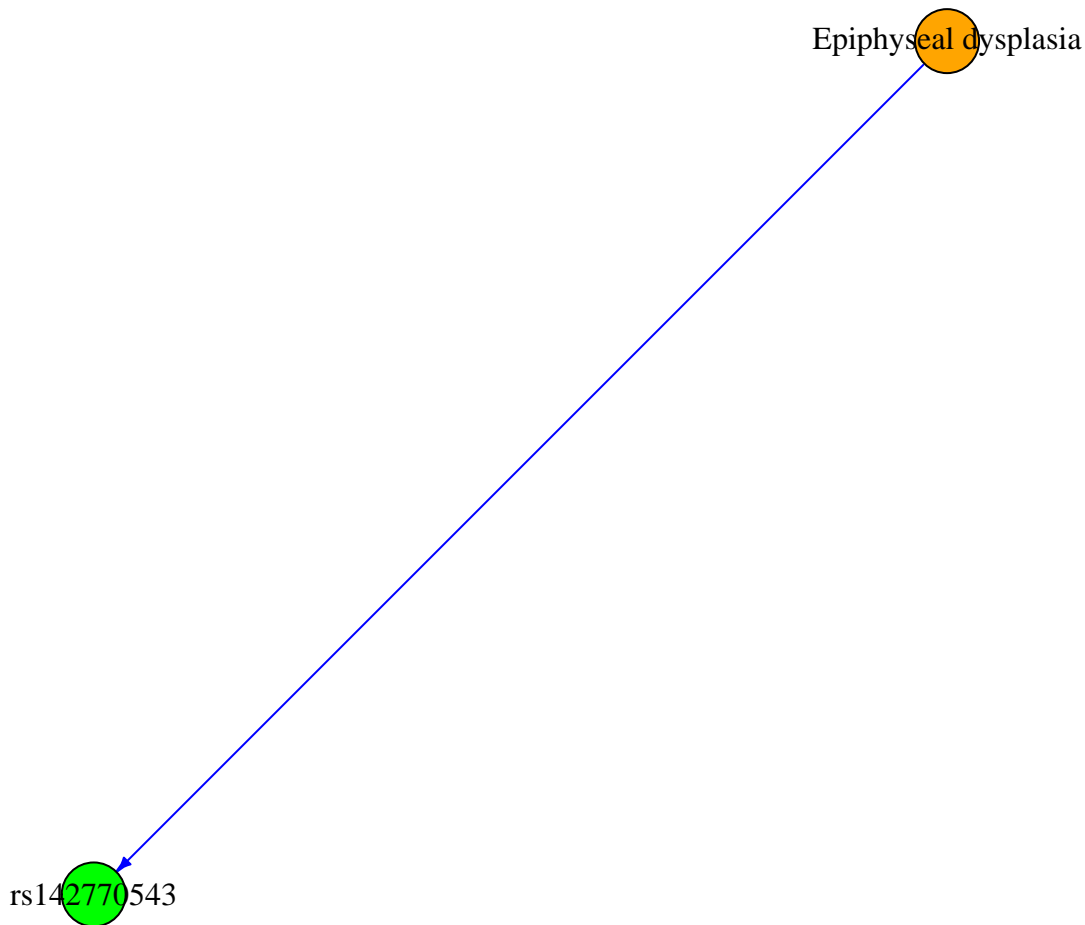

**Variant–Disease Network (Erythrocyte AMP deaminase deficiency)**

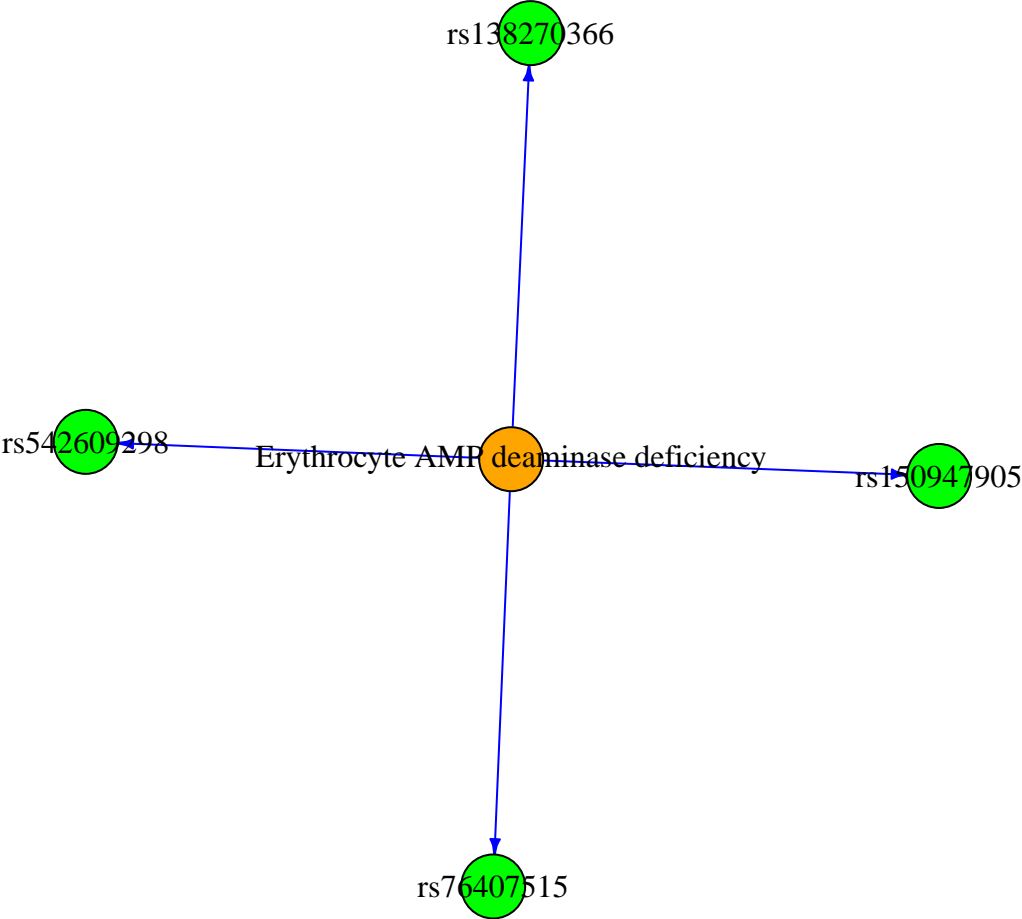

Variant–Disease Network (Erythrocytosis)

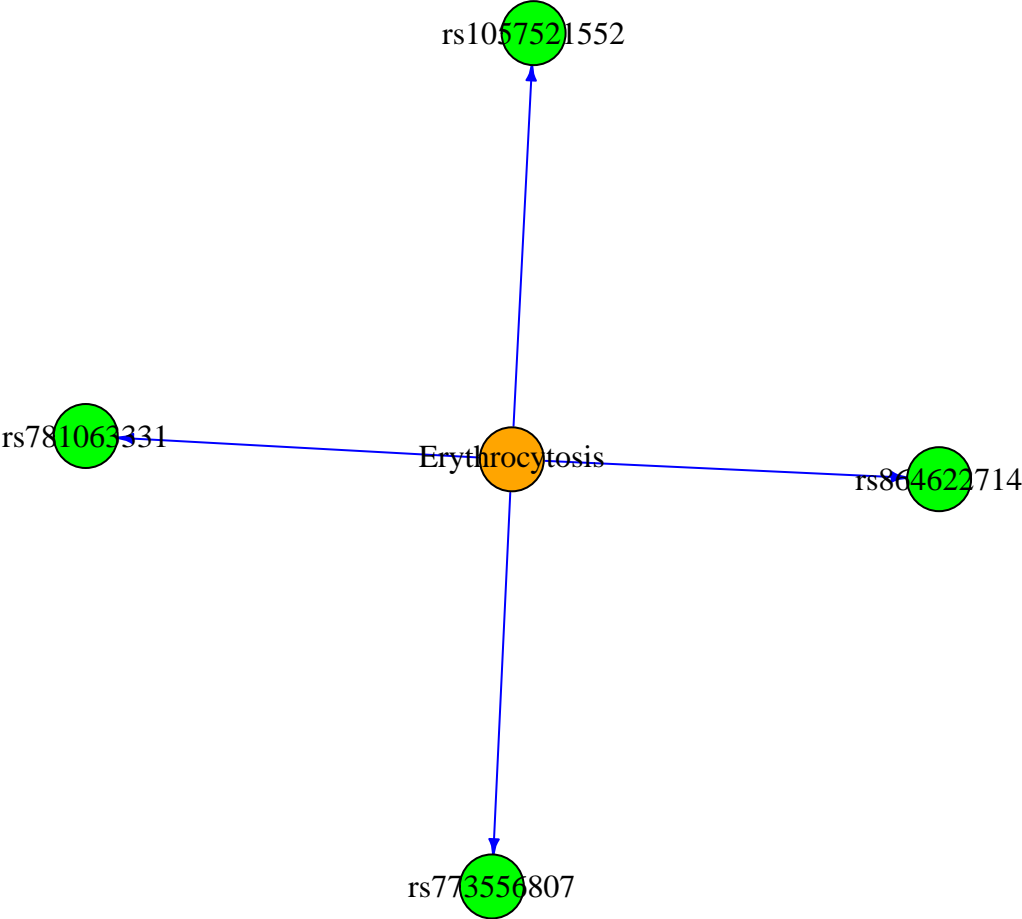

## Variant-Disease Network (Esophageal atresia)

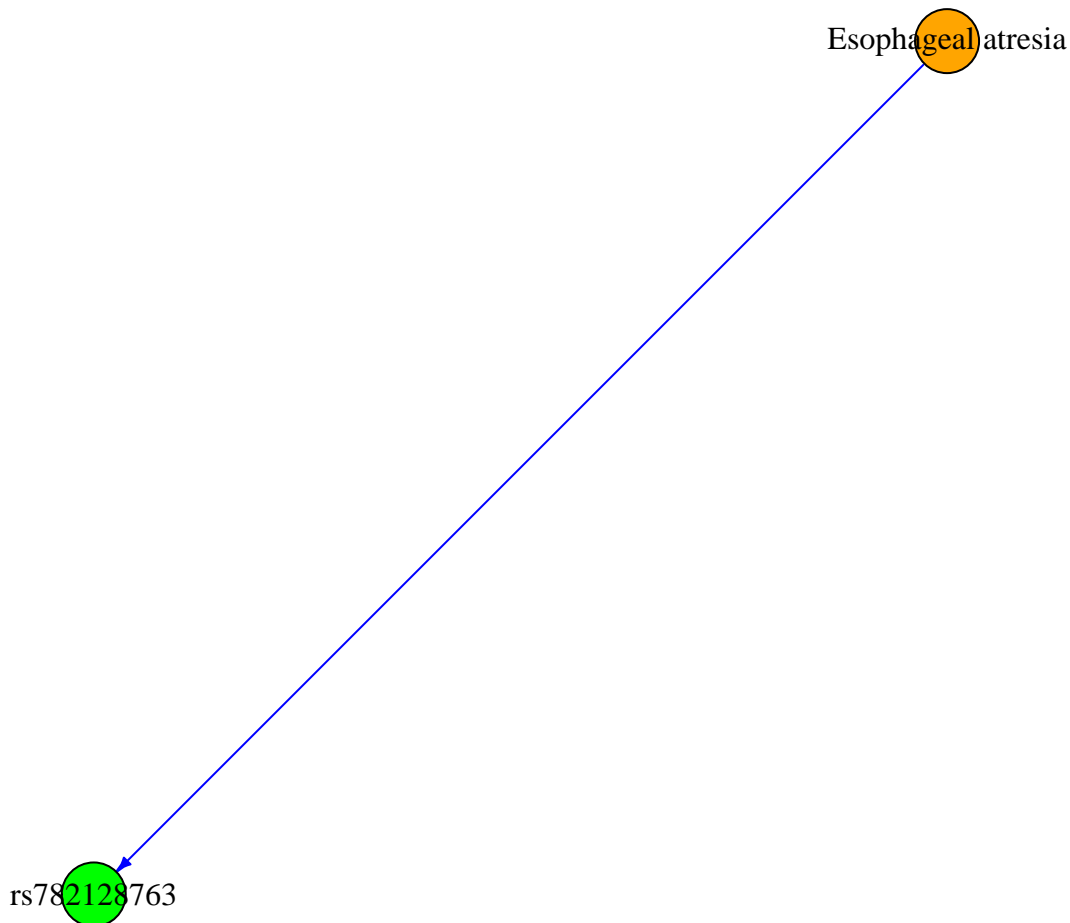



## Variant–Disease Network (Evans syndrome)

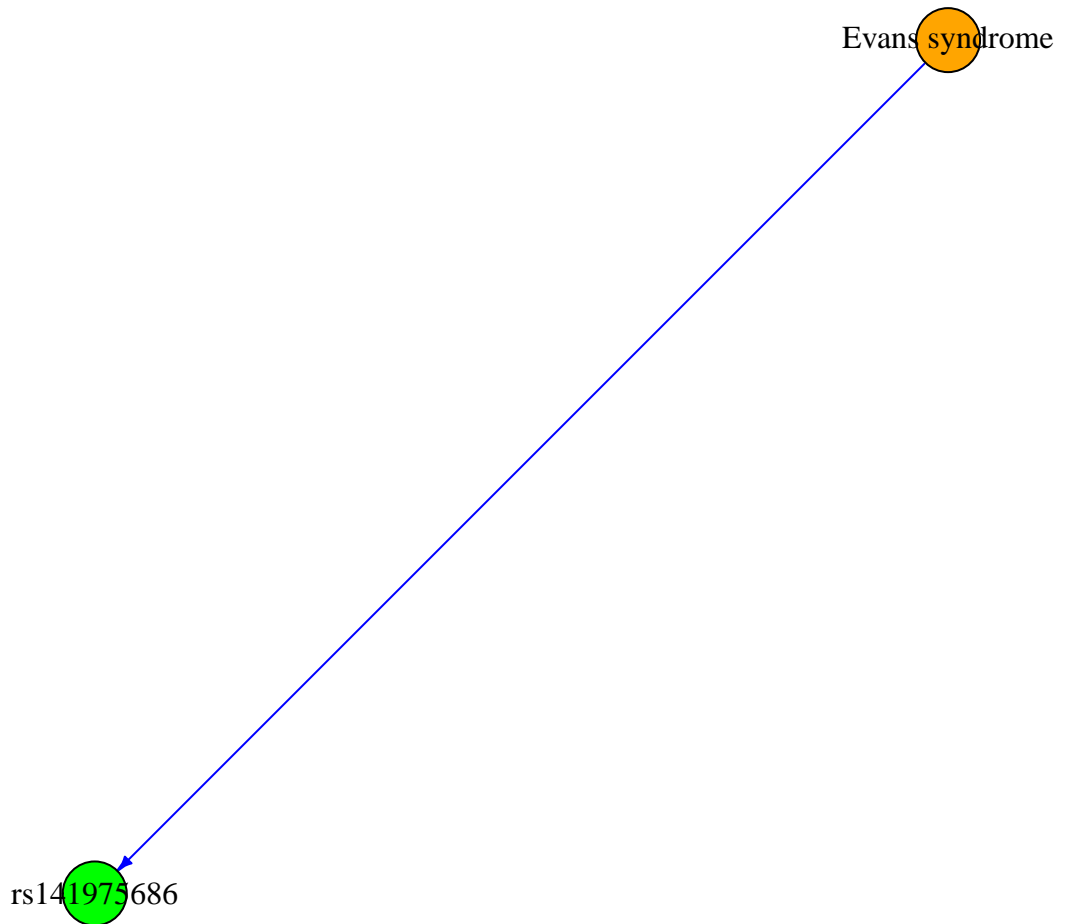

## Variant-Disease Network (Fabry disease)

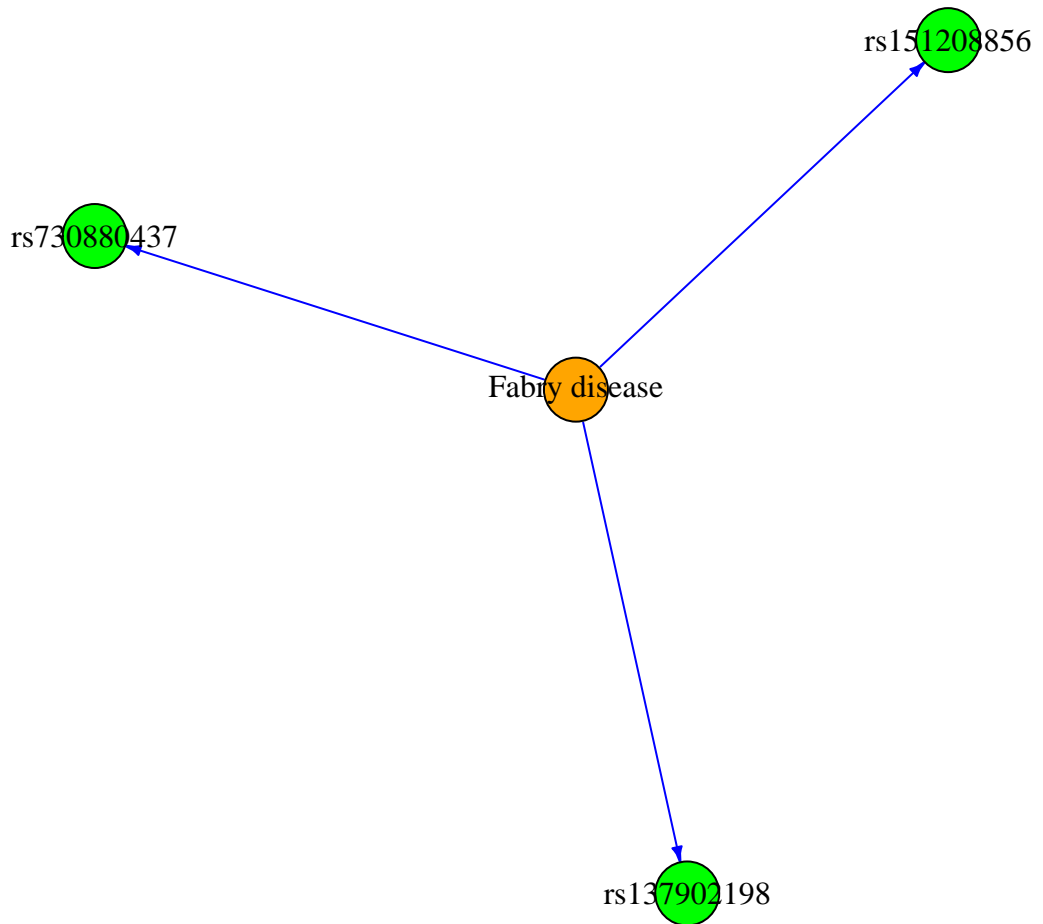

## Variant–Disease Network (Facial dysmorphism)

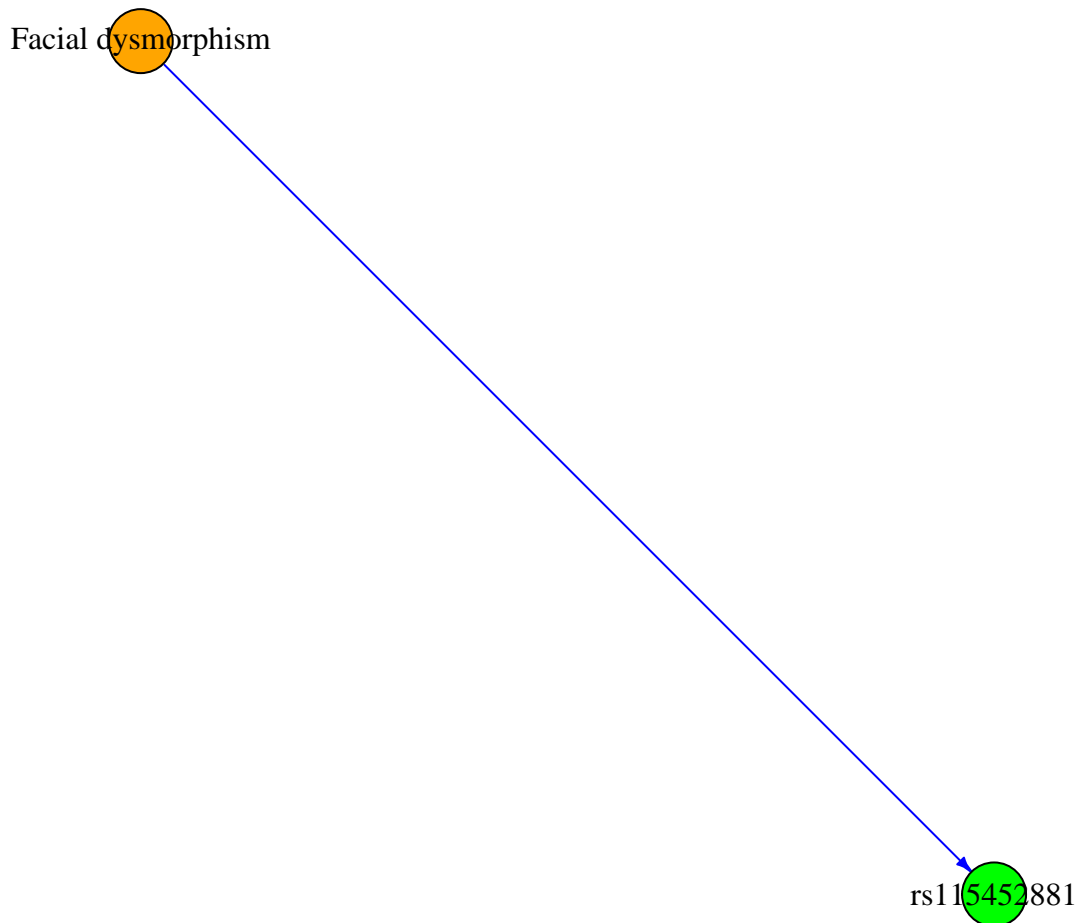

# Variant–Disease Network (Facioscapulohumeral muscular dystrophy 2)

Facioscapulohumeral muscular dystrophy 2

rs1365539591

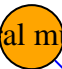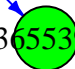

Variant–Disease Network (Failure to thrive)

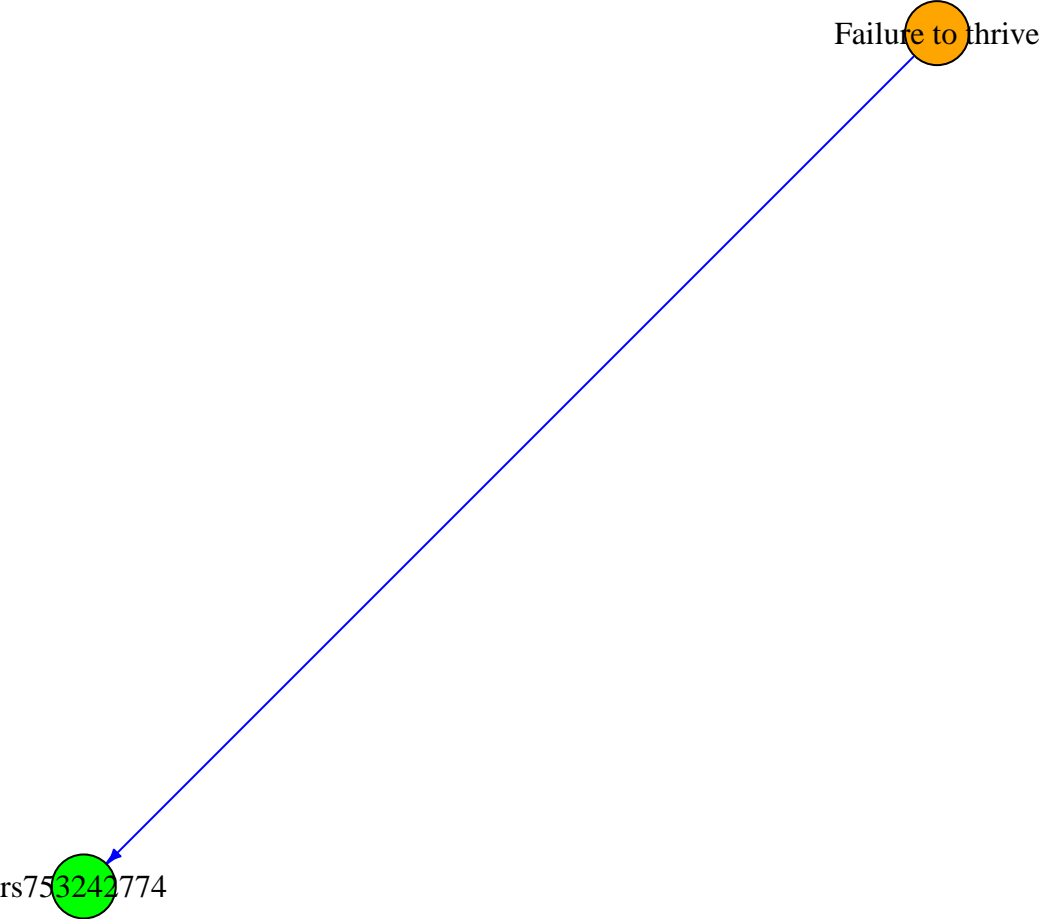

**Variant–Disease Network (Familial adenomatous polyposis 1)**

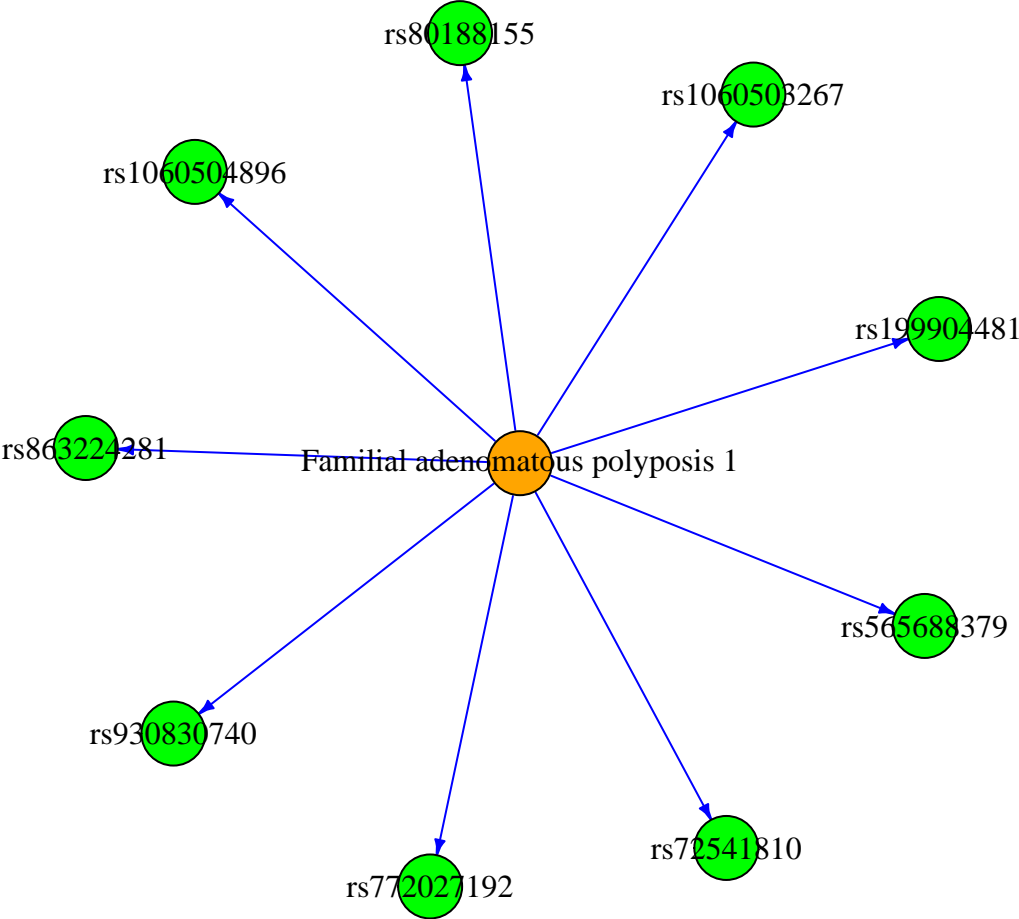

# Variant-Disease Network (Familial amyloid nephropathy with urticaria AND deafness)

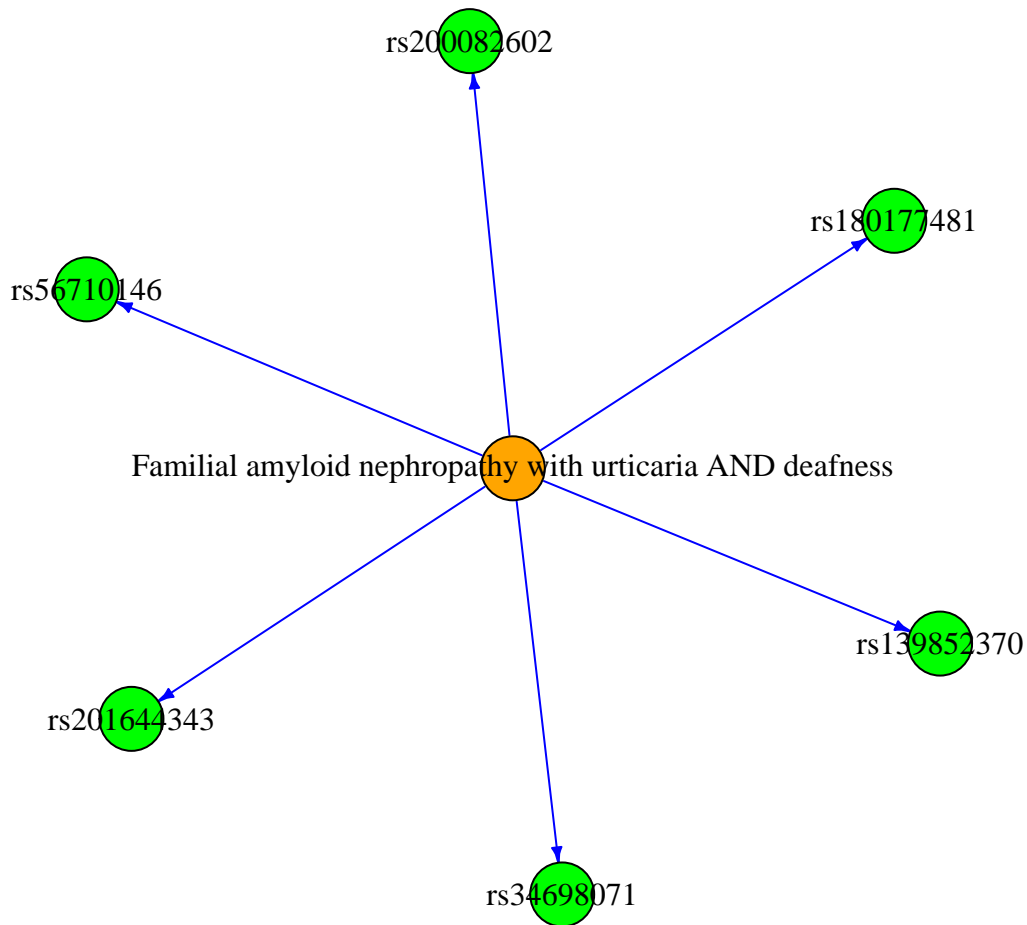

## Variant–Disease Network (Familial atrial fibrillation)

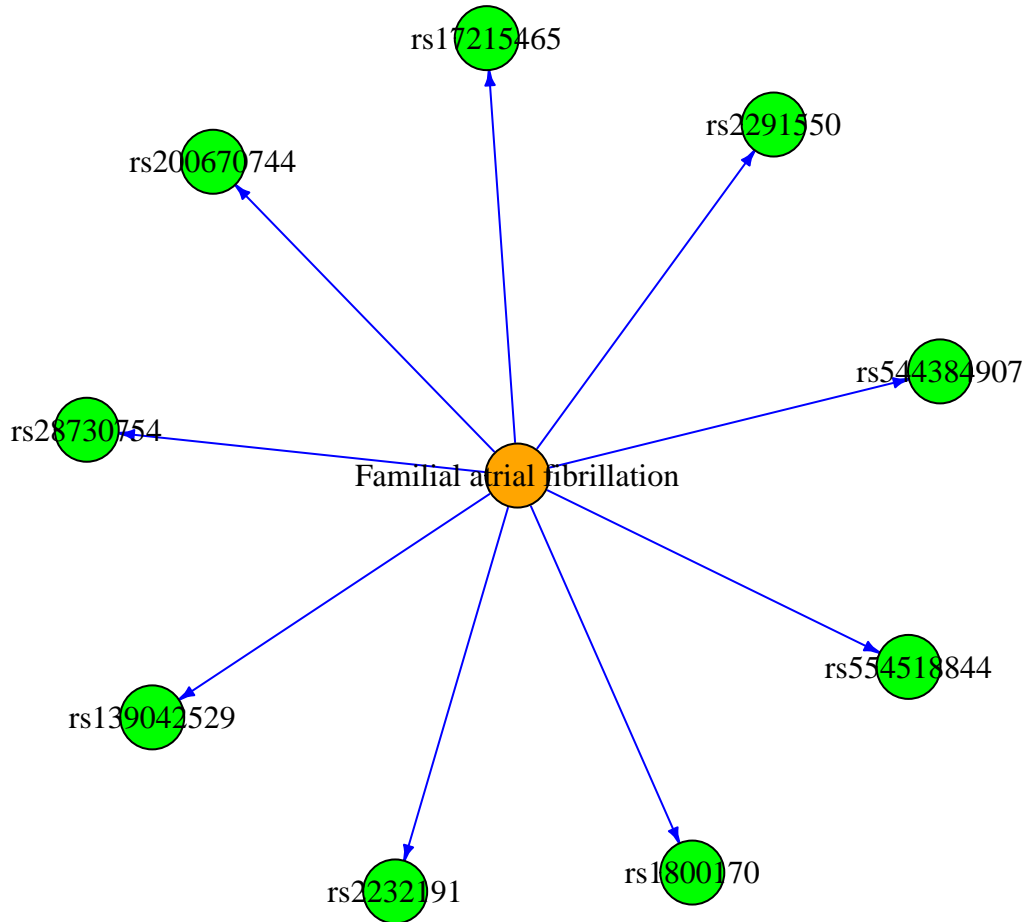



Variant–Disease Network (Familial Atypical Mycobacteriosis)

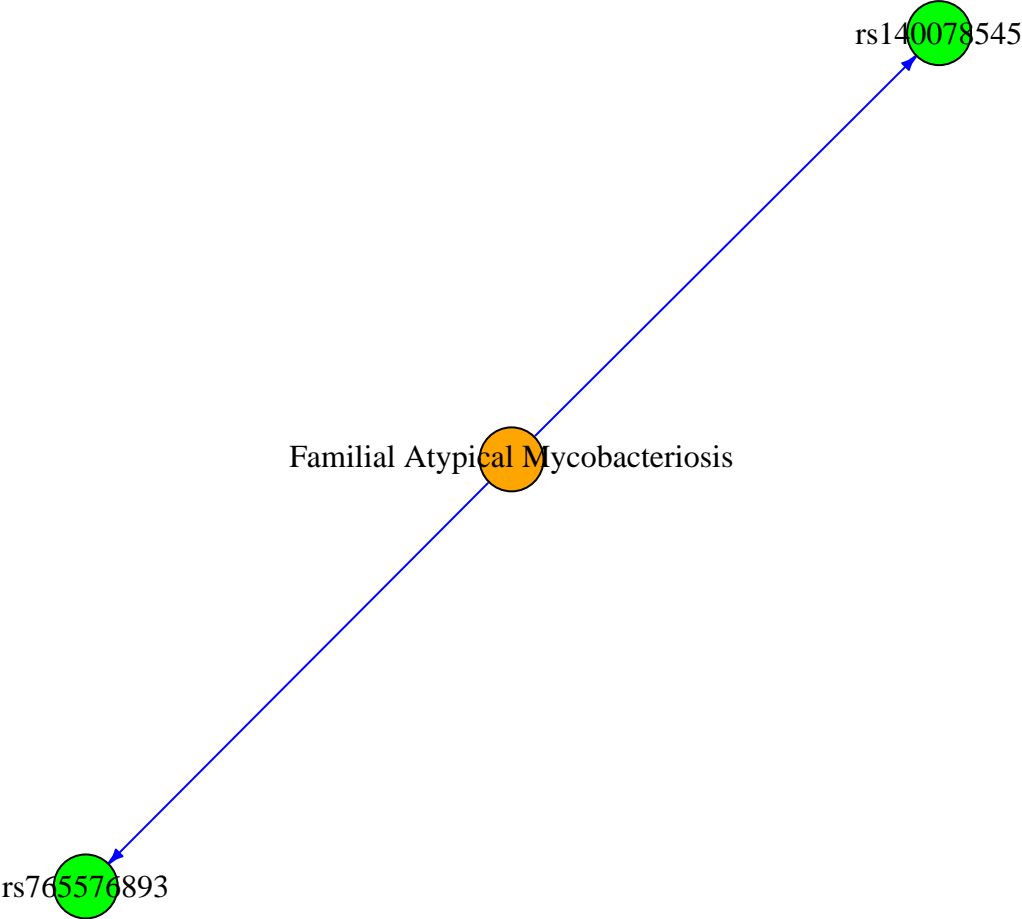

**Variant–Disease Network (Familial cancer of breast)**

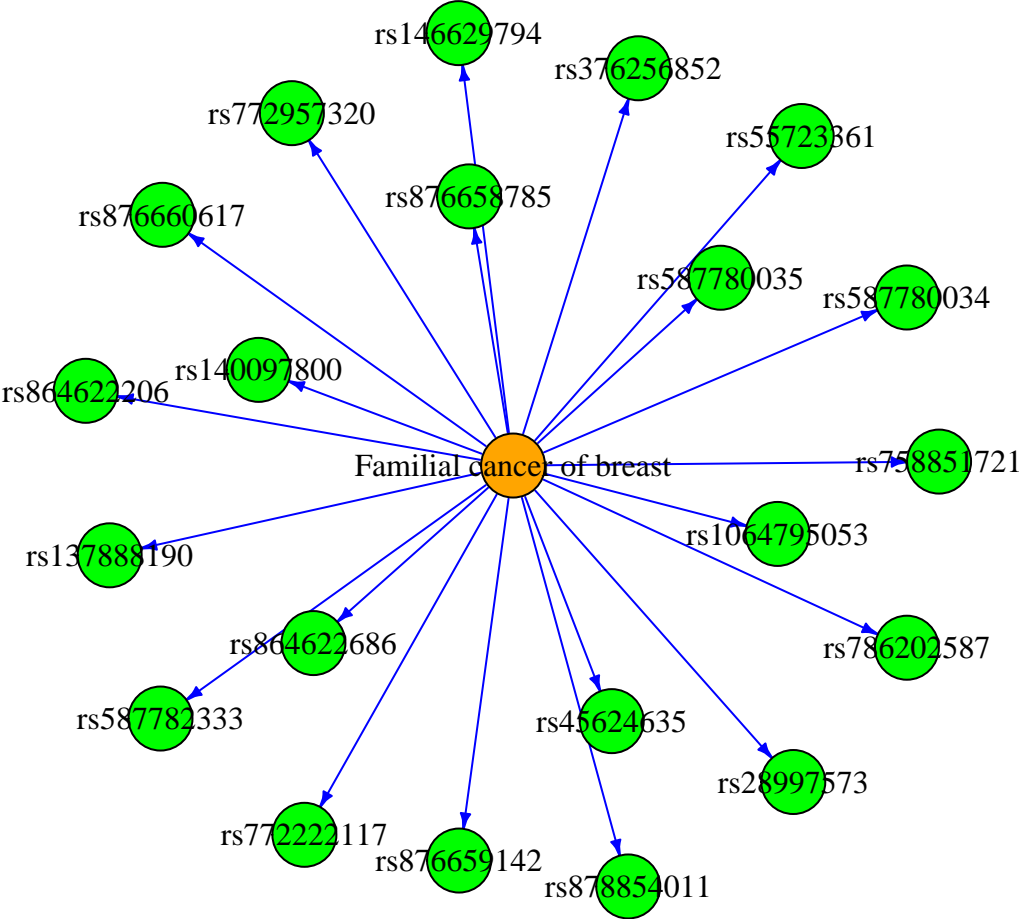

## Variant-Disease Network (Familial Candidiasis)

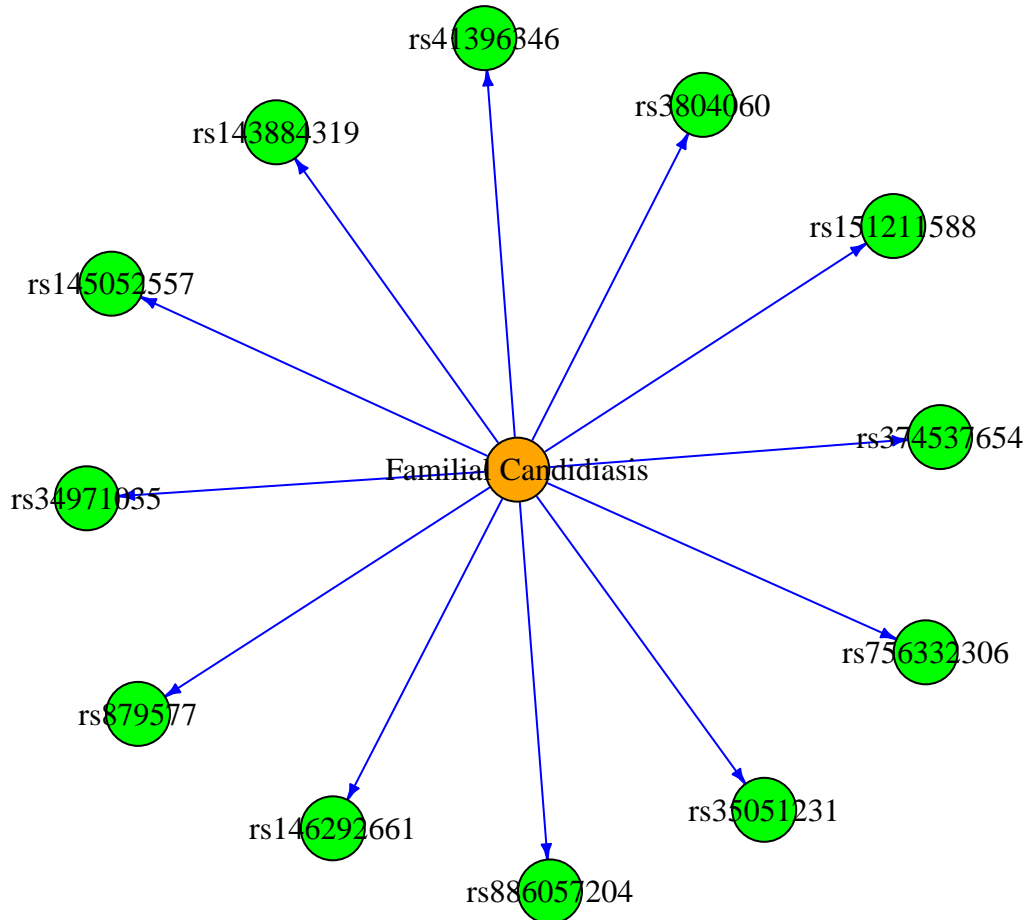

# Variant–Disease Network (Familial cold autoinflammatory syndrome)

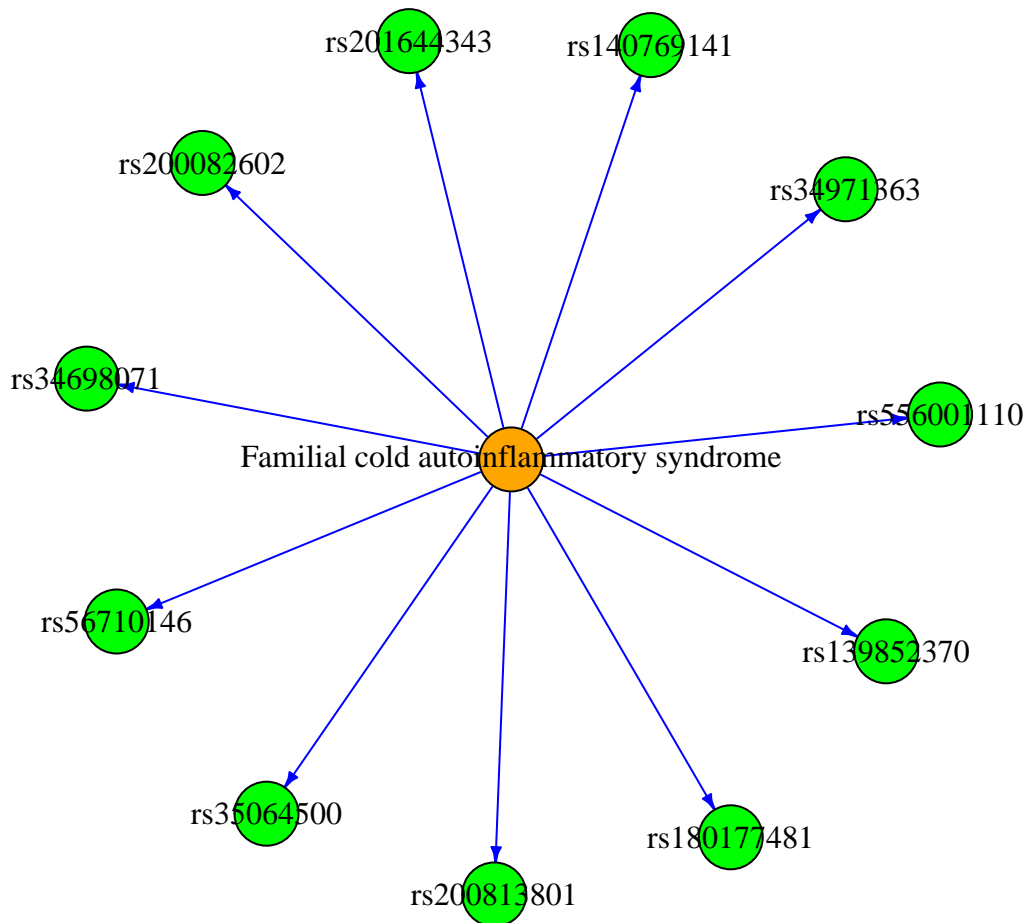

# Variant–Disease Network (Familial cold autoinflammatory syndrome 2)

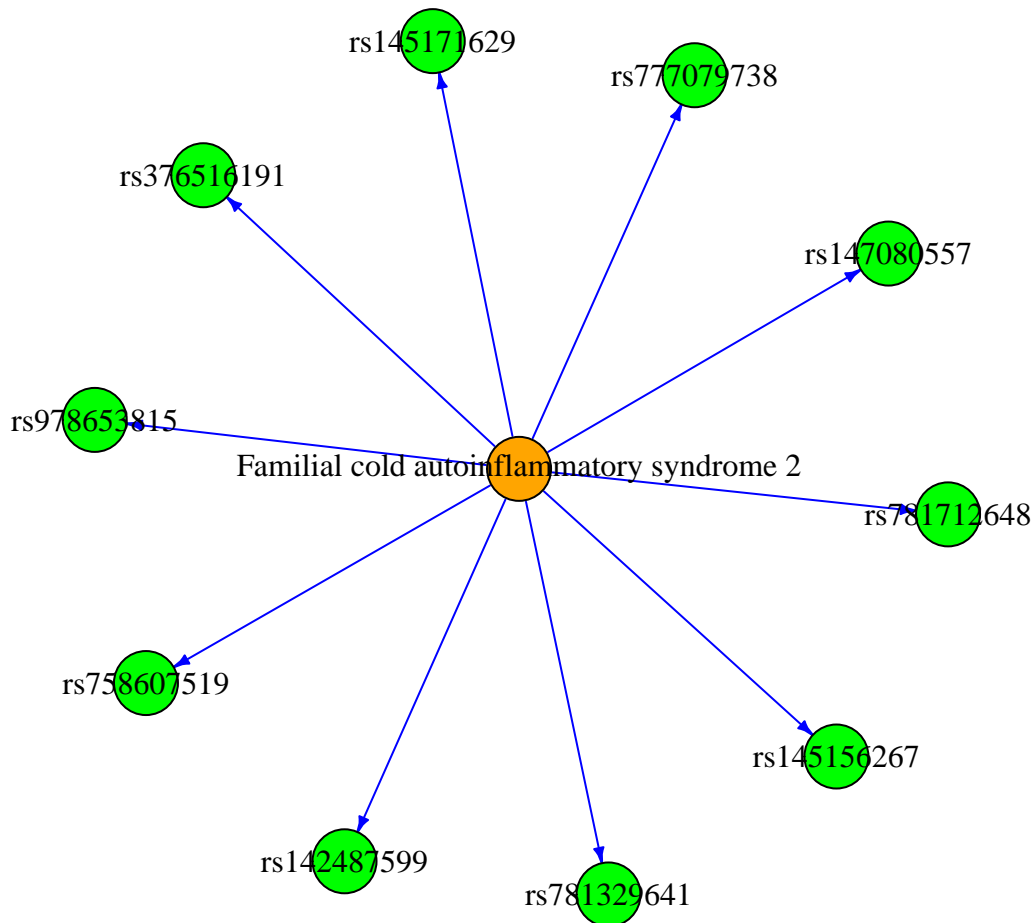

**Variant–Disease Network (Familial cold autoinflammatory syndrome 3)**

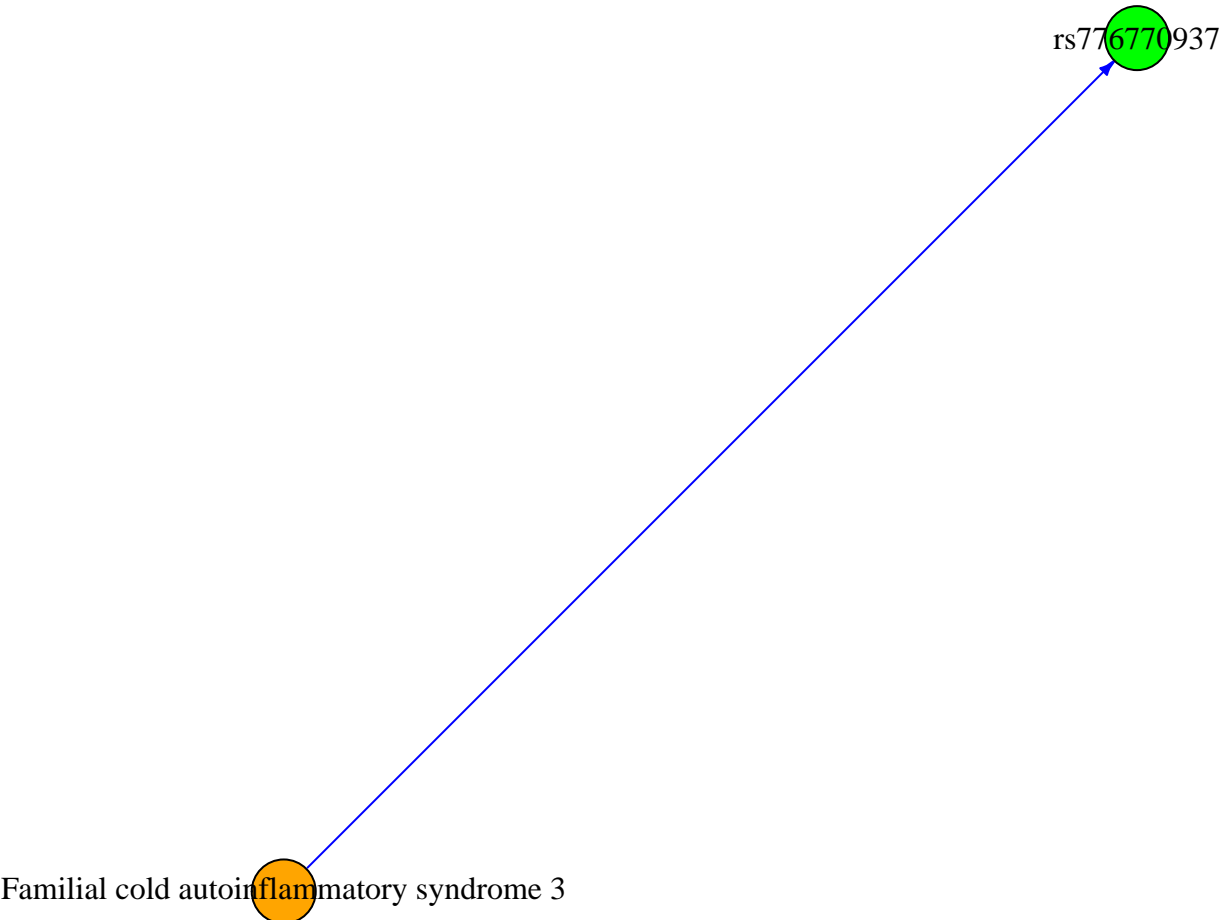

## Variant–Disease Network (Familial cold urticaria)

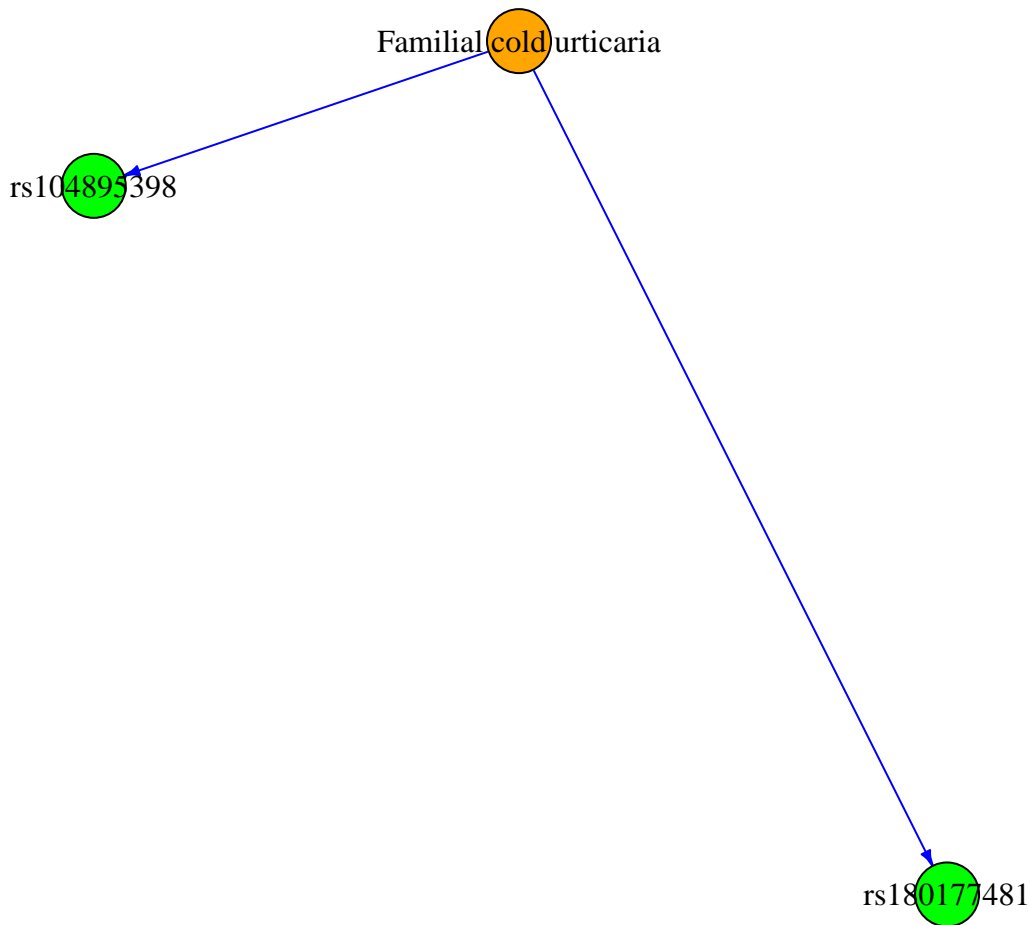

## Variant–Disease Network (Familial colorectal cancer)

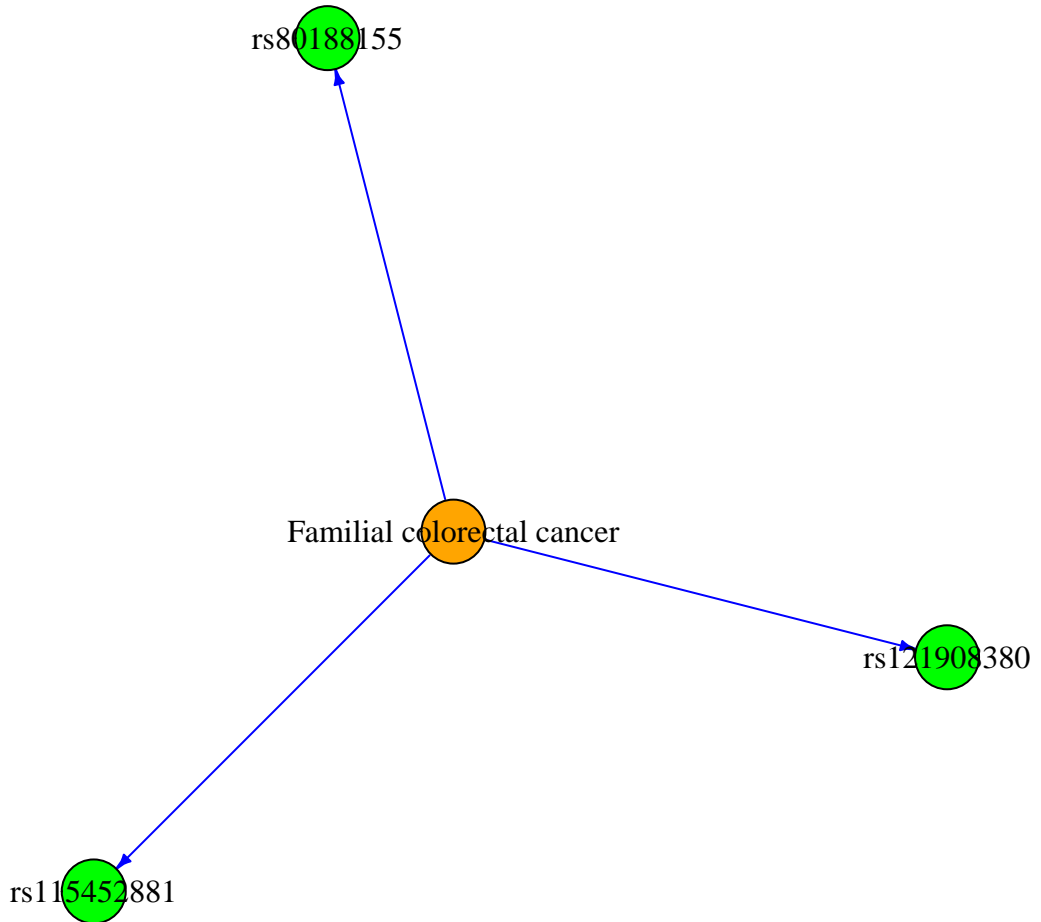



## Variant–Disease Network (Familial dilated cardiomyopathy)

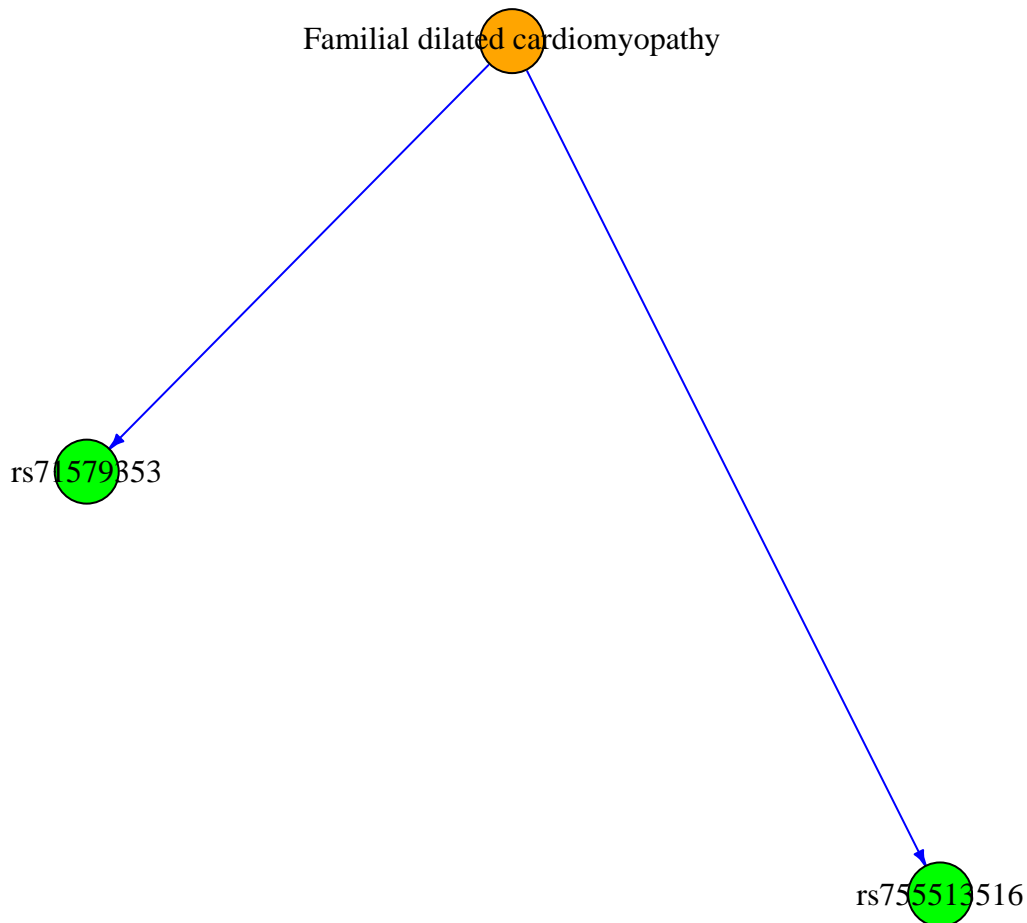

## Variant–Disease Network (Familial erythrocytosis)

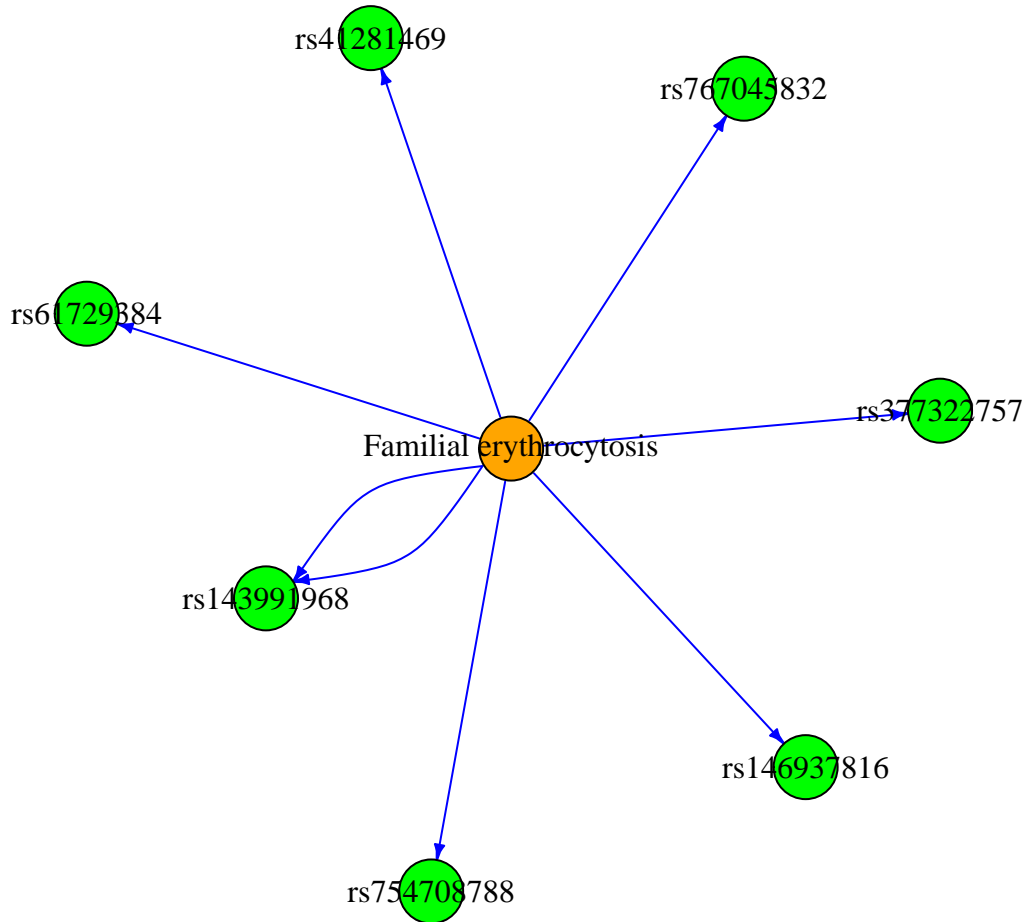

**Variant–Disease Network (Familial febrile seizures 8)**

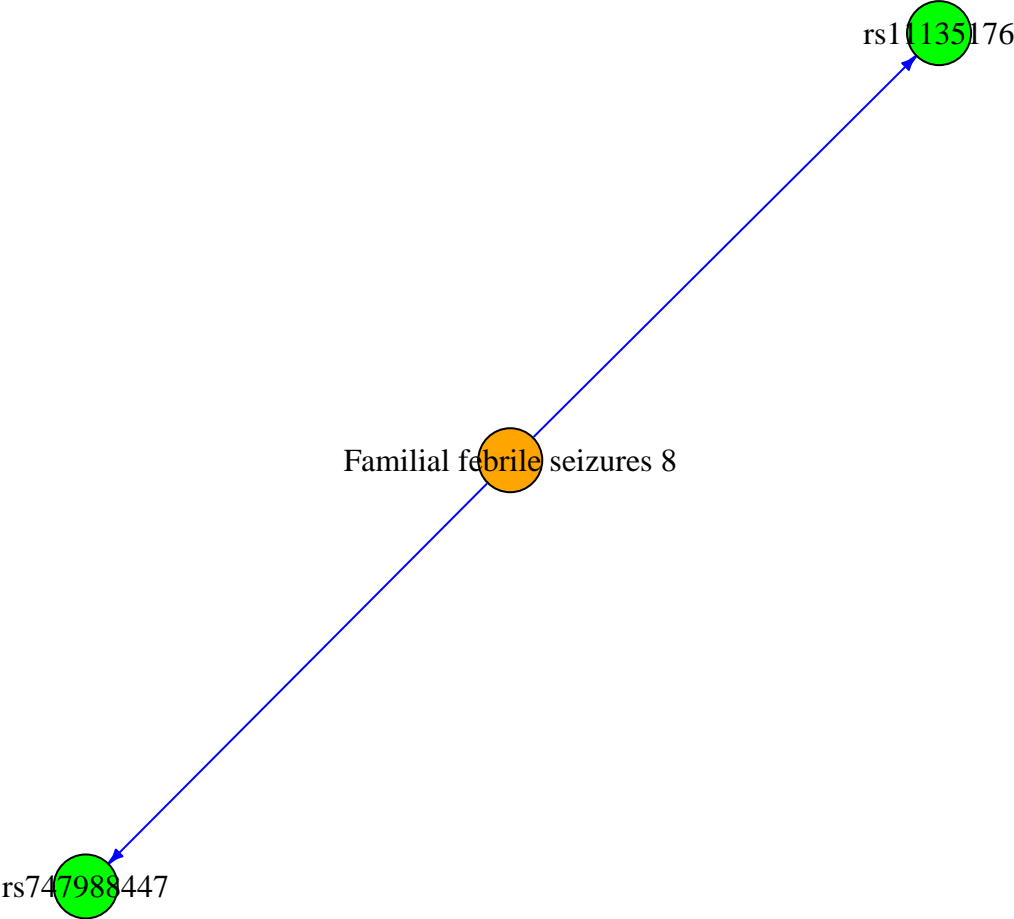

# Variant–Disease Network (Familial hemiplegic migraine type 3)

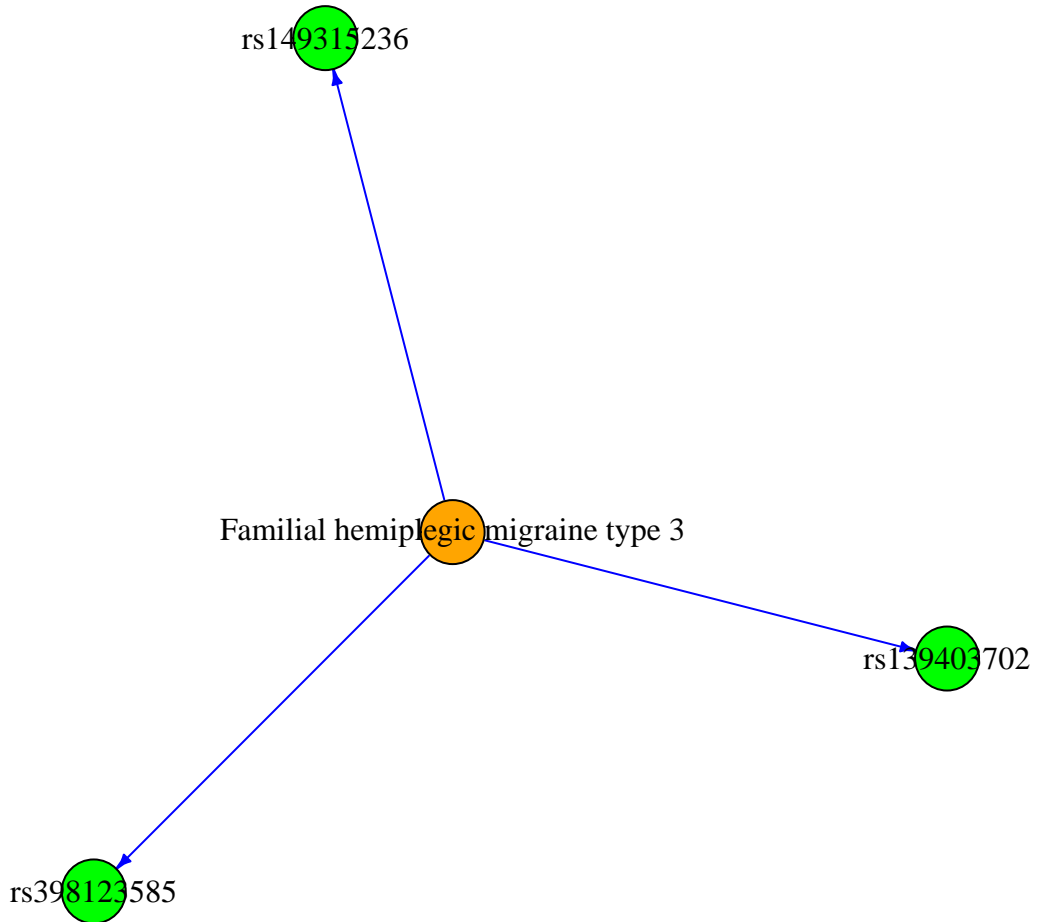

Variant–Disease Network (Familial hemophagocytic lymphohistiocytosis)

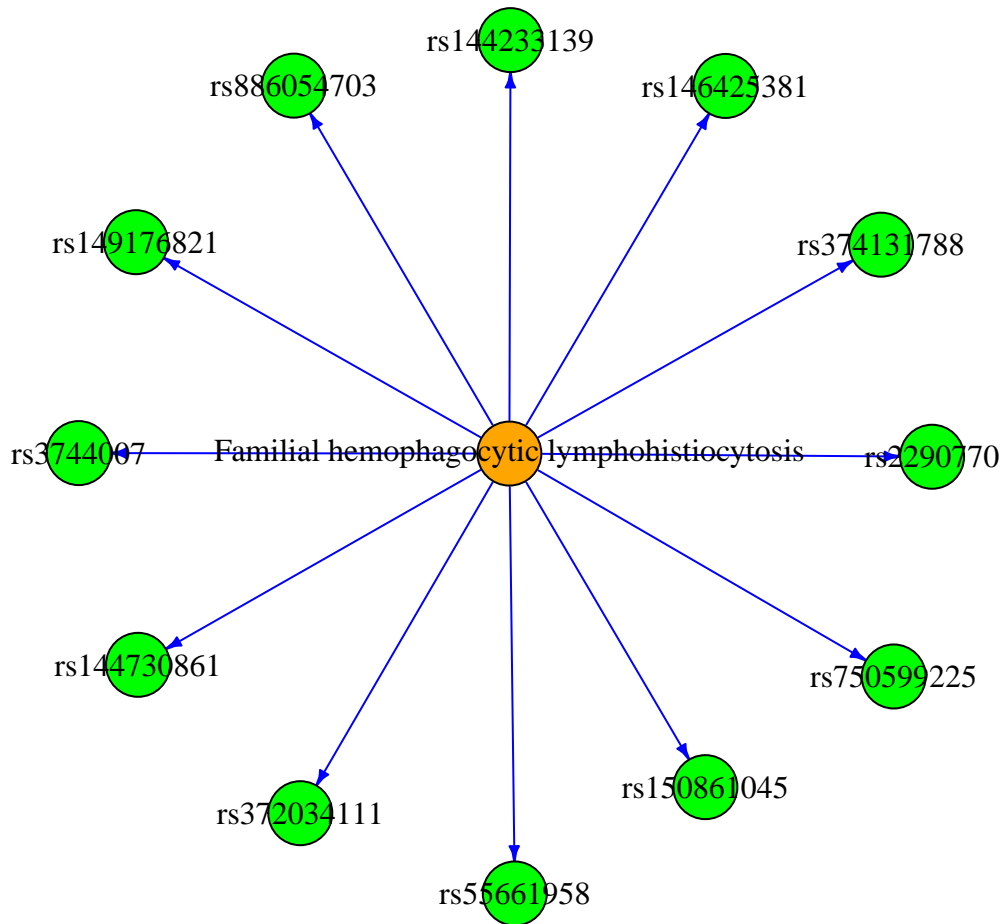

# Variant–Disease Network (Familial High Density Lipoprotein Deficiency)

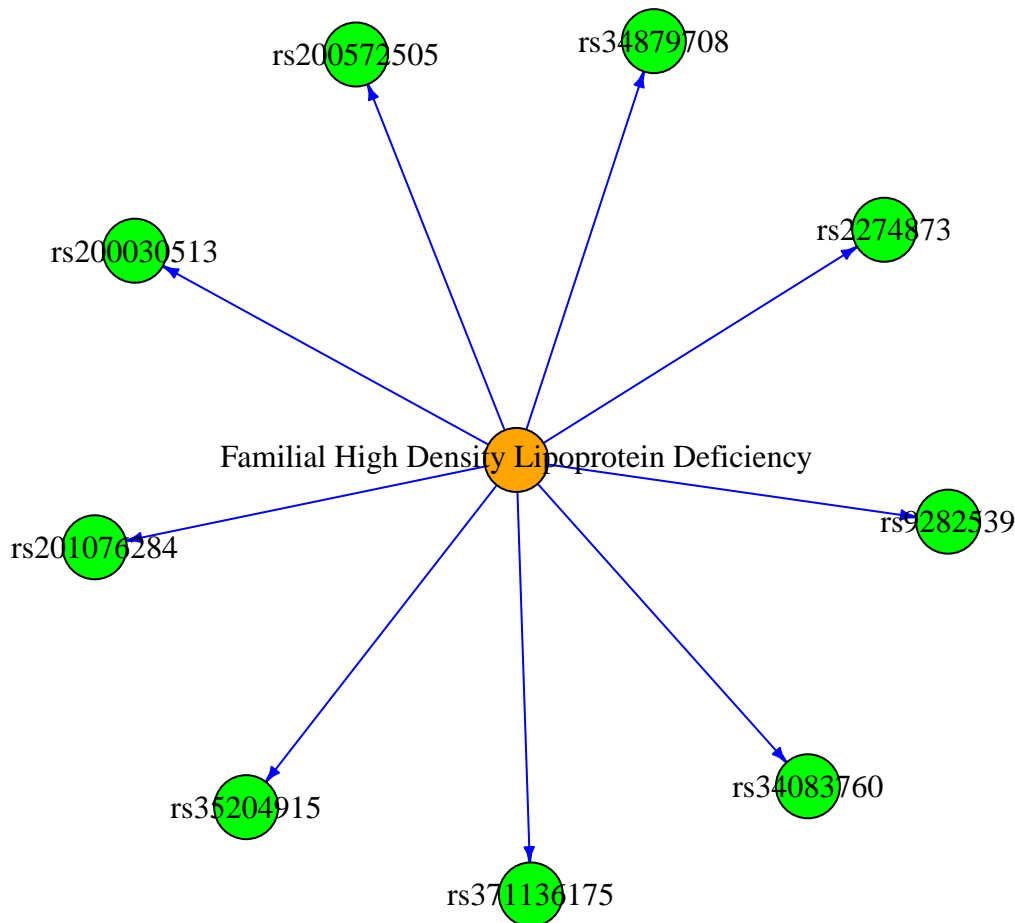

## Variant–Disease Network (Familial hyperaldosteronism)

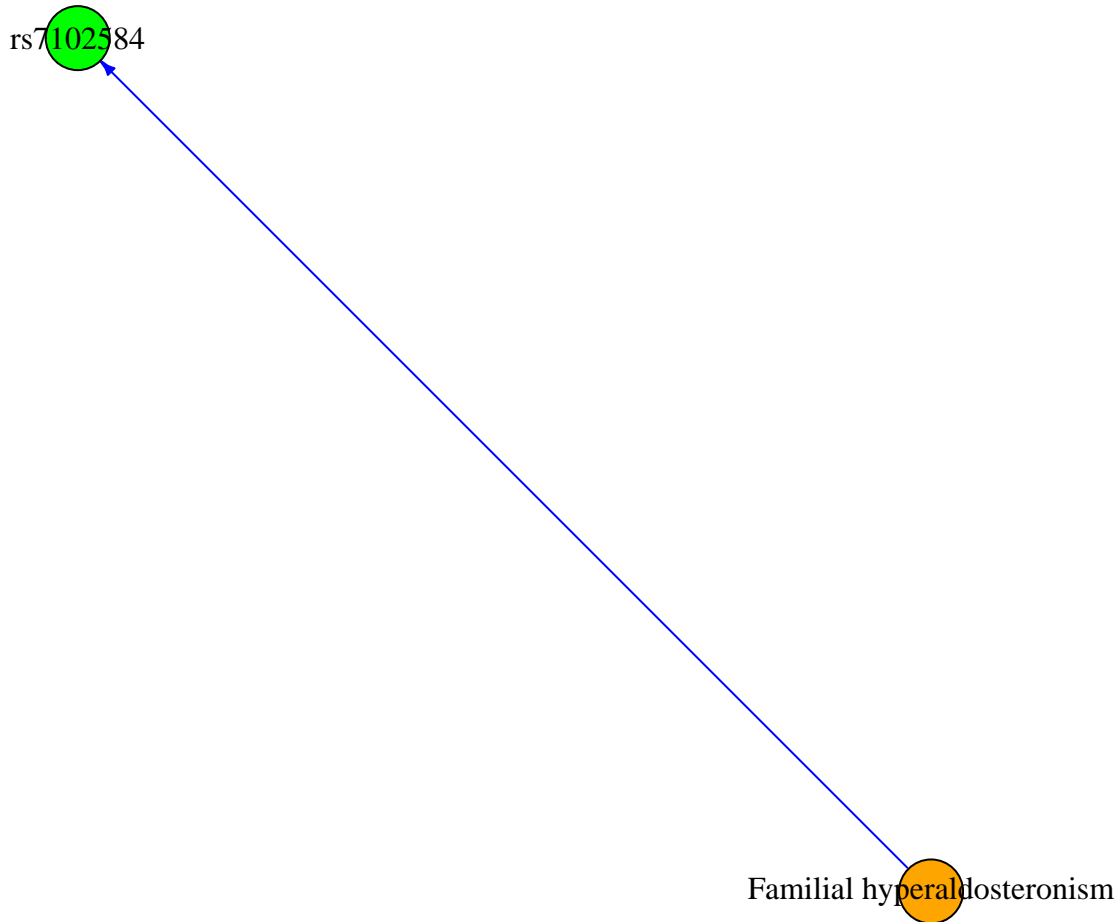

### Variant–Disease Network (Familial hypercholesterolemia)

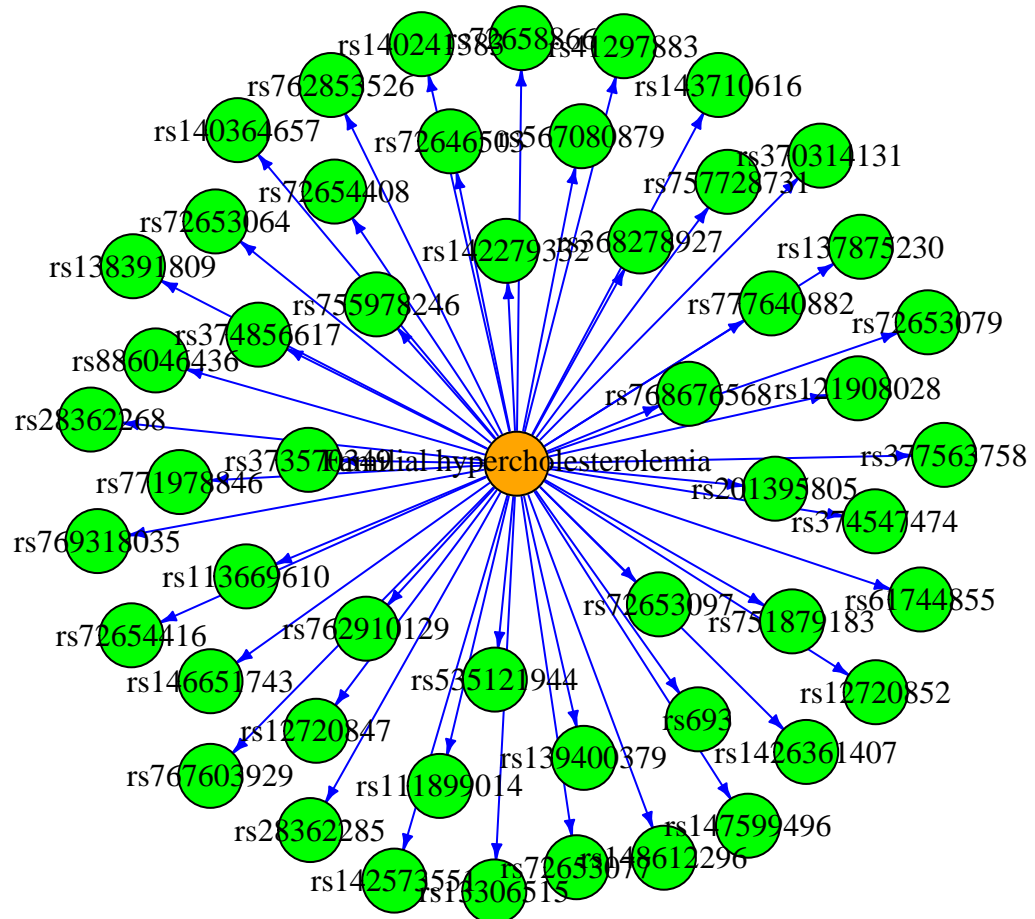



**Variant–Disease Network (Familial hypercholesterolemia – homozygous)**

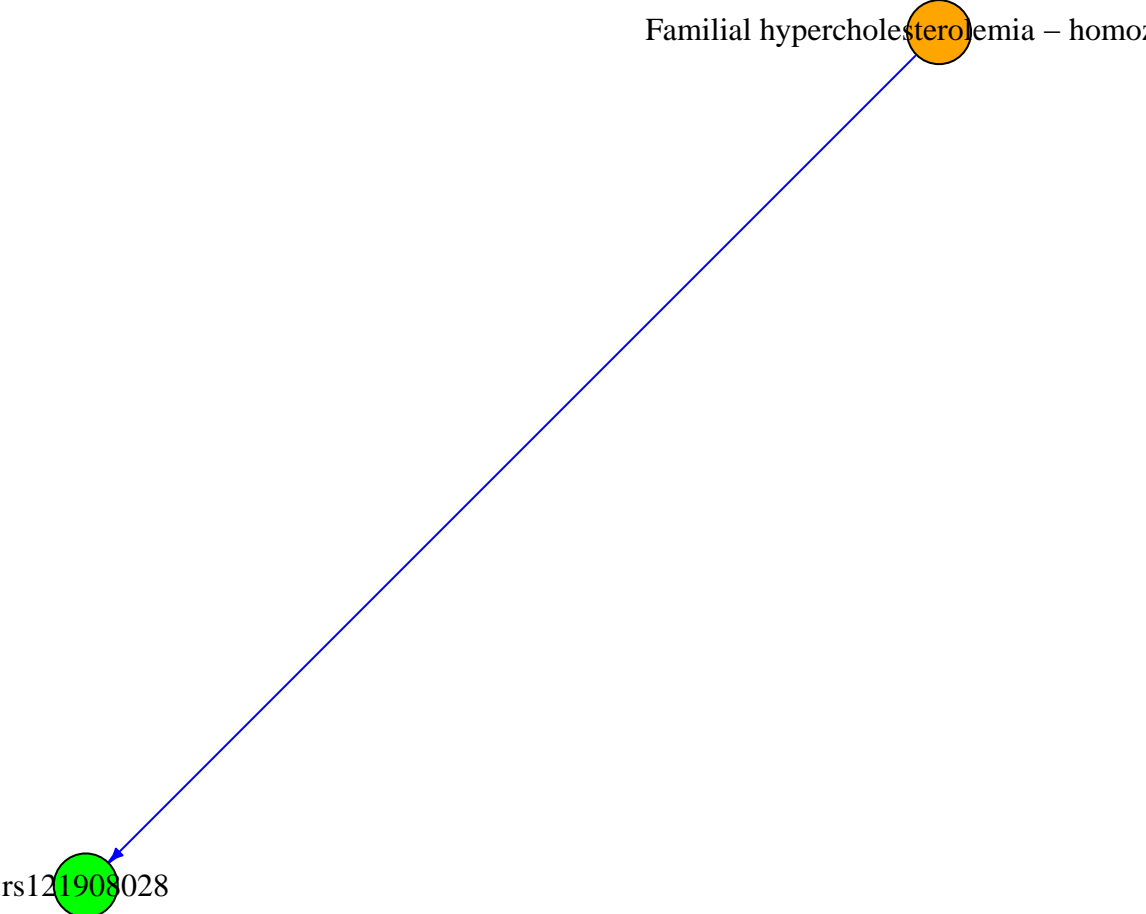

## Variant–Disease Network (Familial hypercholesterolemia 1)

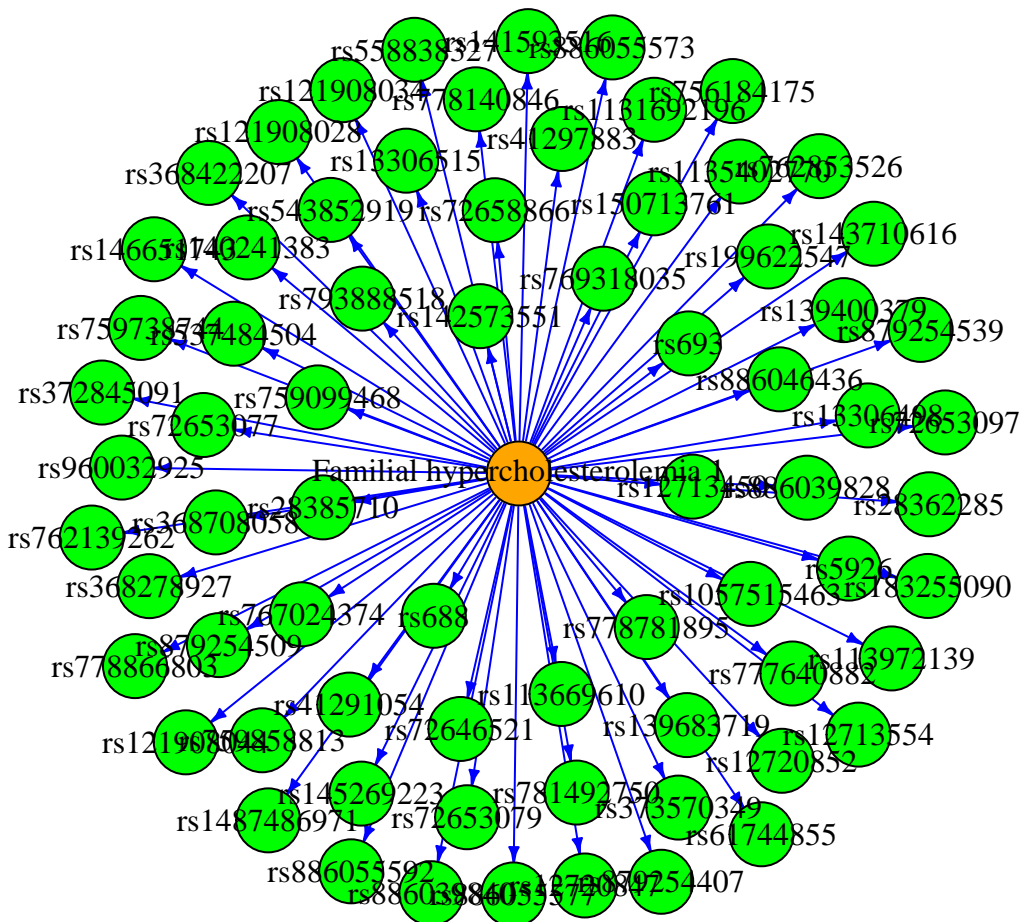

Variant–Disease Network (Familial hypercholesterolemia 2)

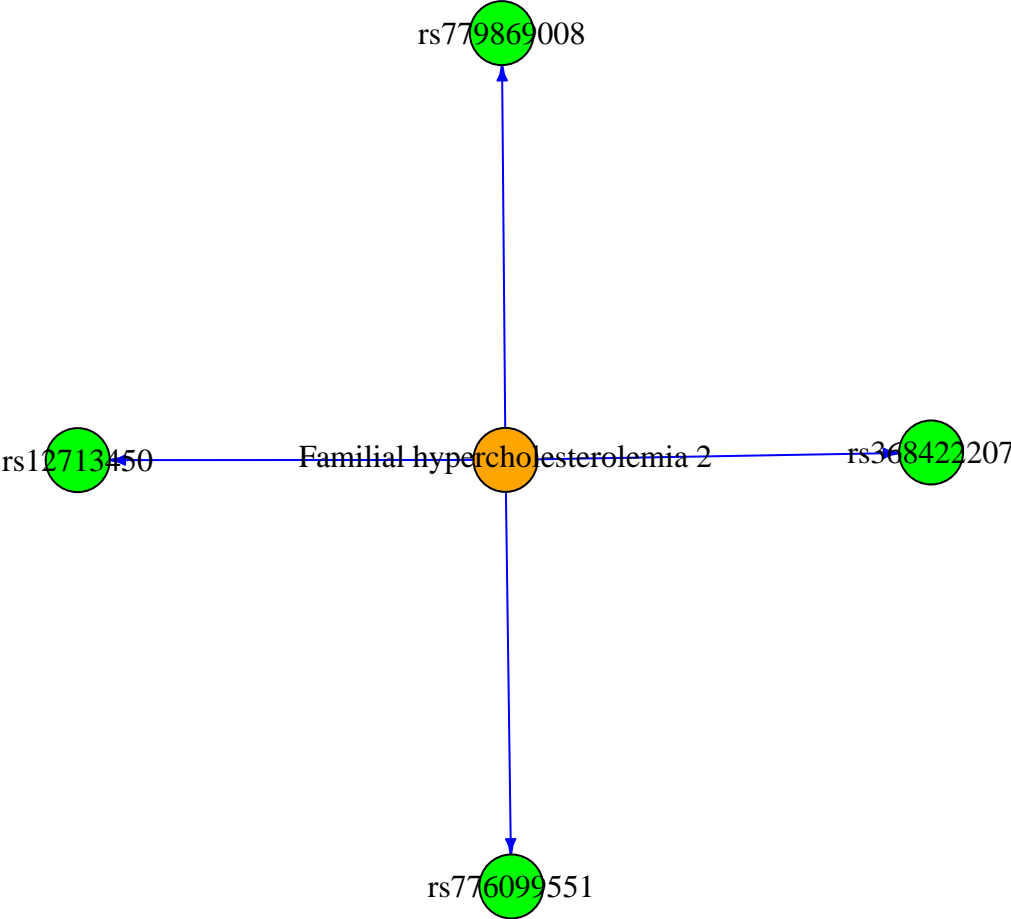

## Variant–Disease Network (Familial hypercholesterolemia 3)

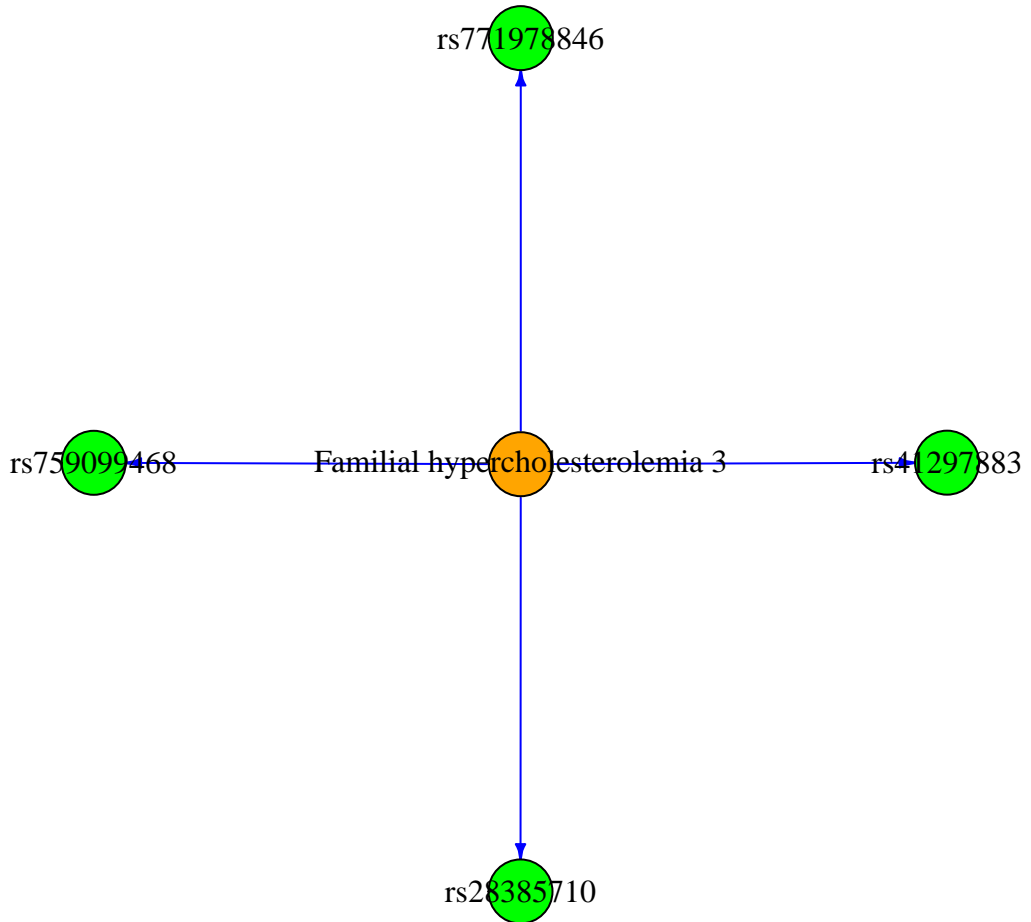

## Variant–Disease Network (Familial hypercholesterolemia 4)

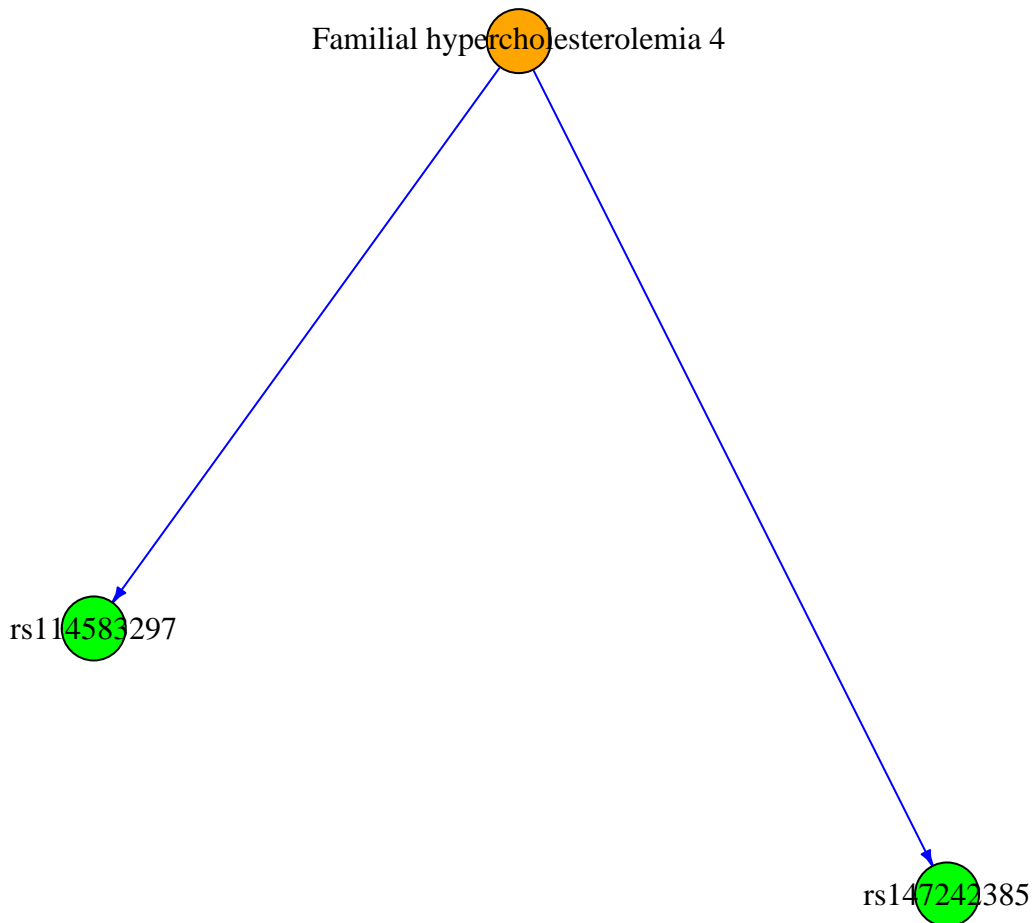

**Variant–Disease Network (Familial hypertrophic cardiomyopathy 1)**

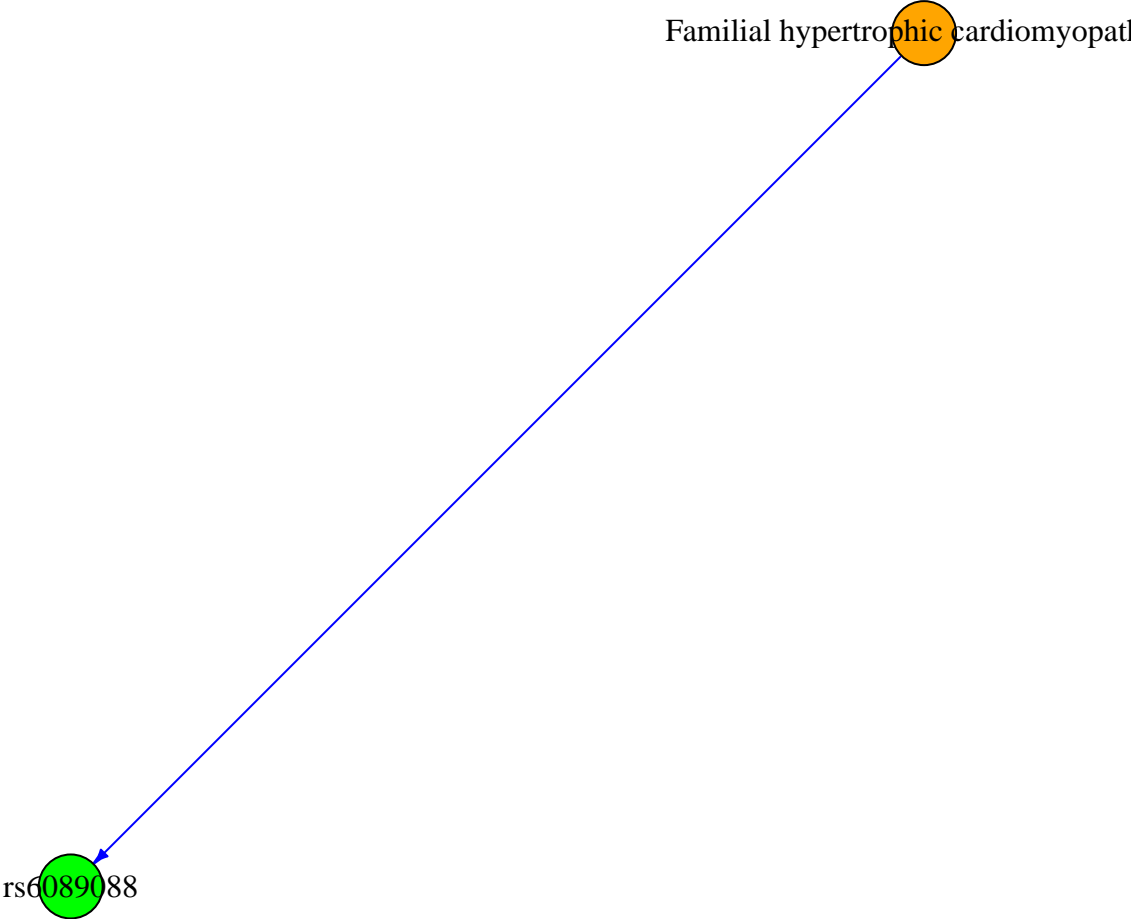

**Variant–Disease Network (Familial hypertrophic cardiomyopathy 11)**

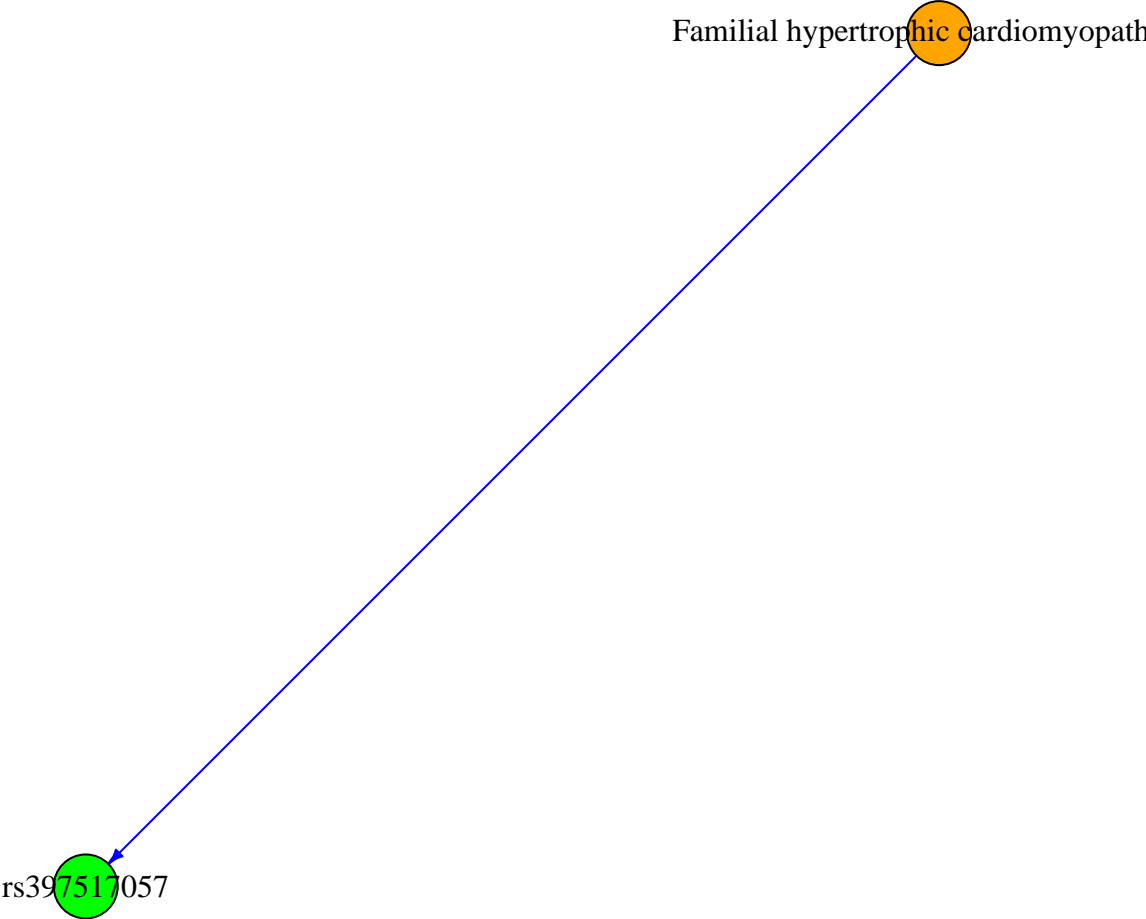

**Variant–Disease Network (Familial hypertrophic cardiomyopathy 13)**

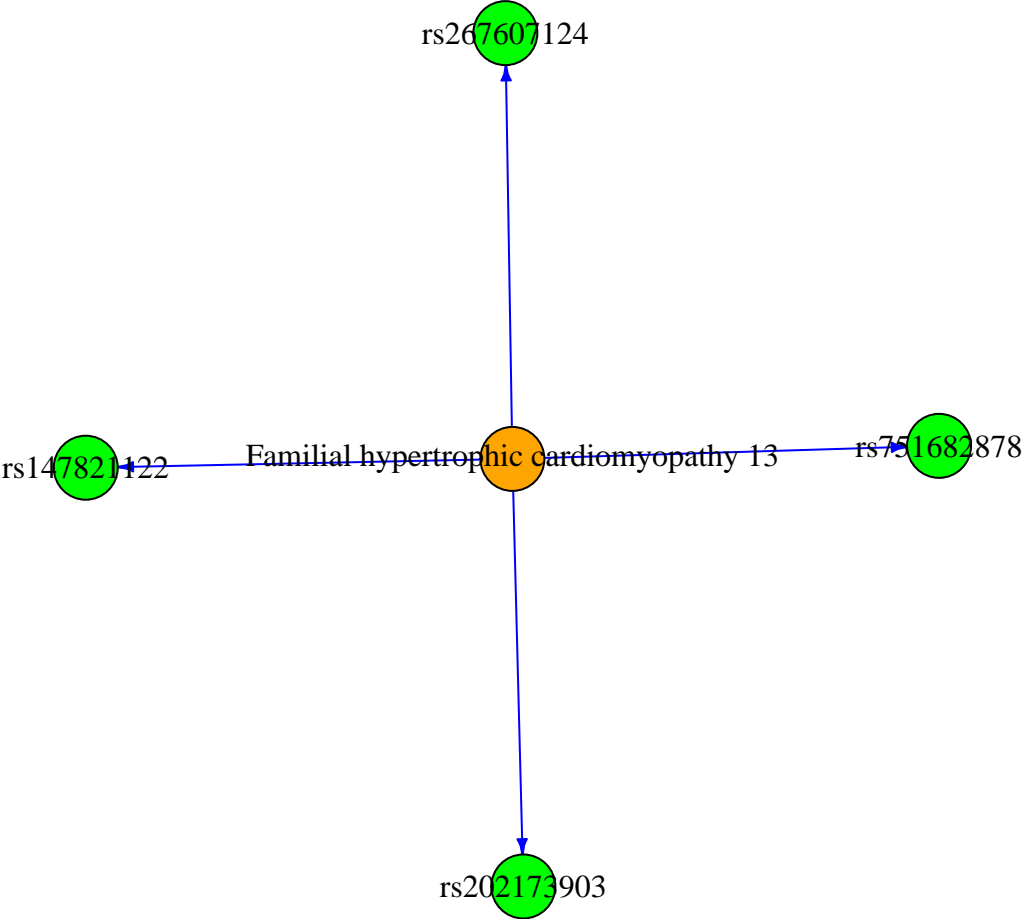



**Variant–Disease Network (Familial hypertrophic cardiomyopathy 15)**

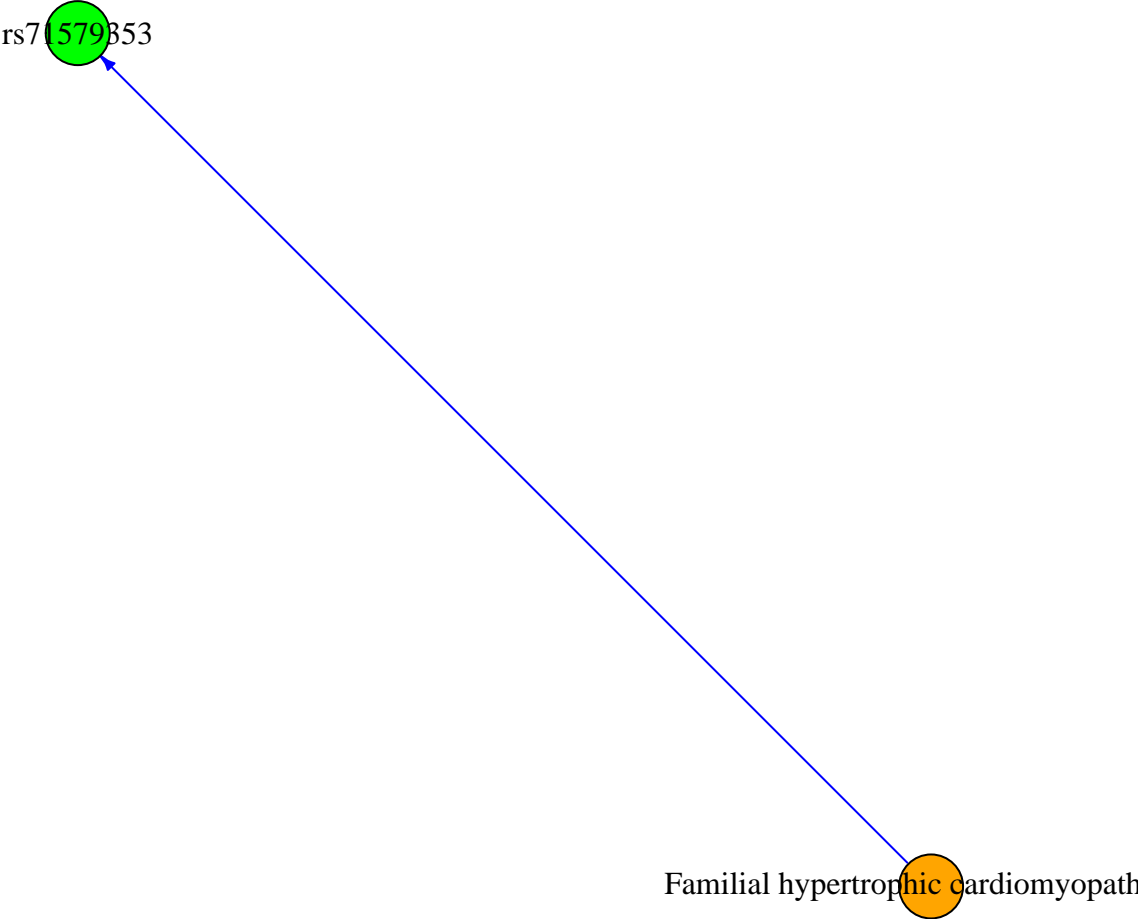

**Variant–Disease Network (Familial hypertrophic cardiomyopathy 16)**

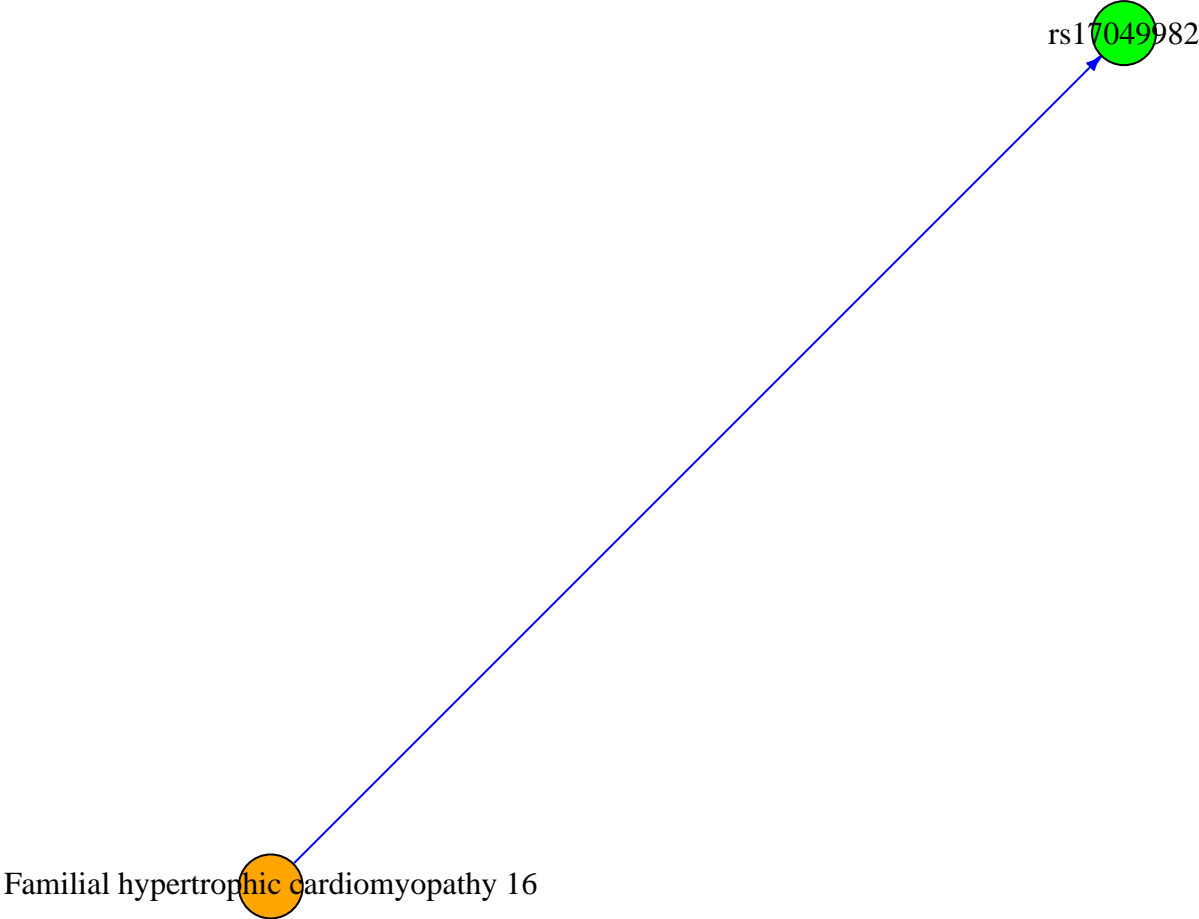

**Variant–Disease Network (Familial hypertrophic cardiomyopathy 19)**

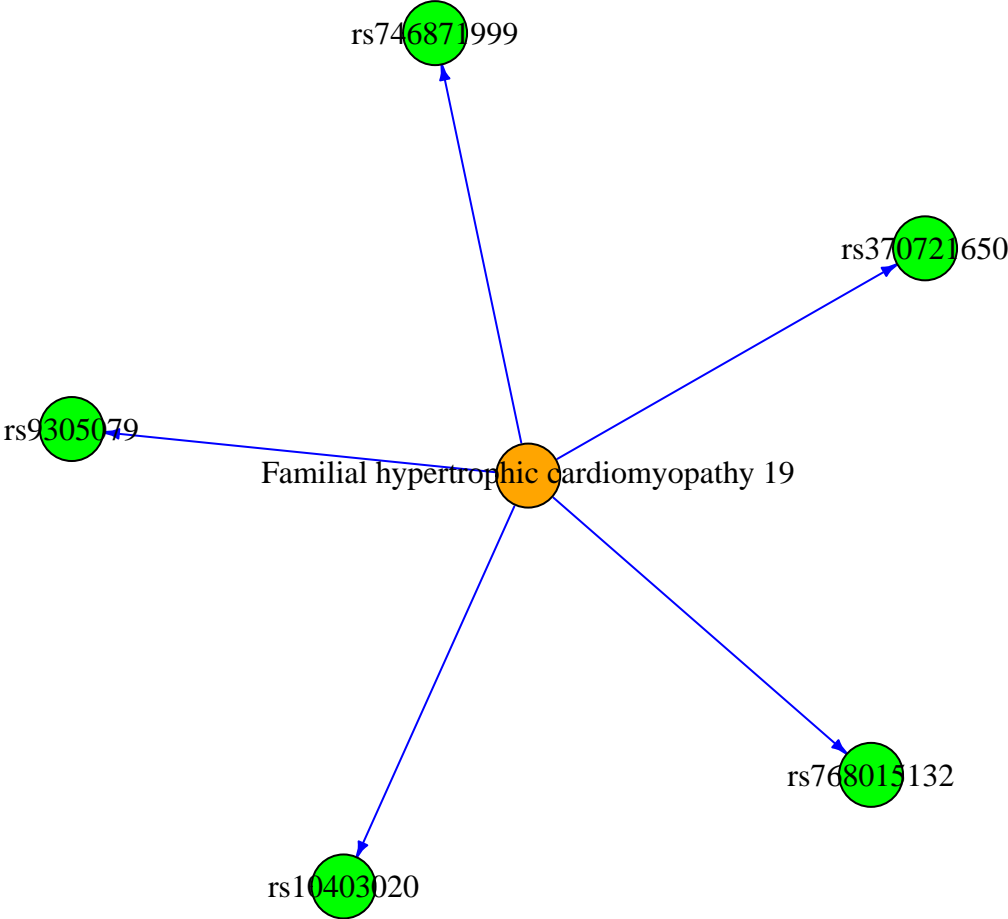

**Variant–Disease Network (Familial hypertrophic cardiomyopathy 2)**

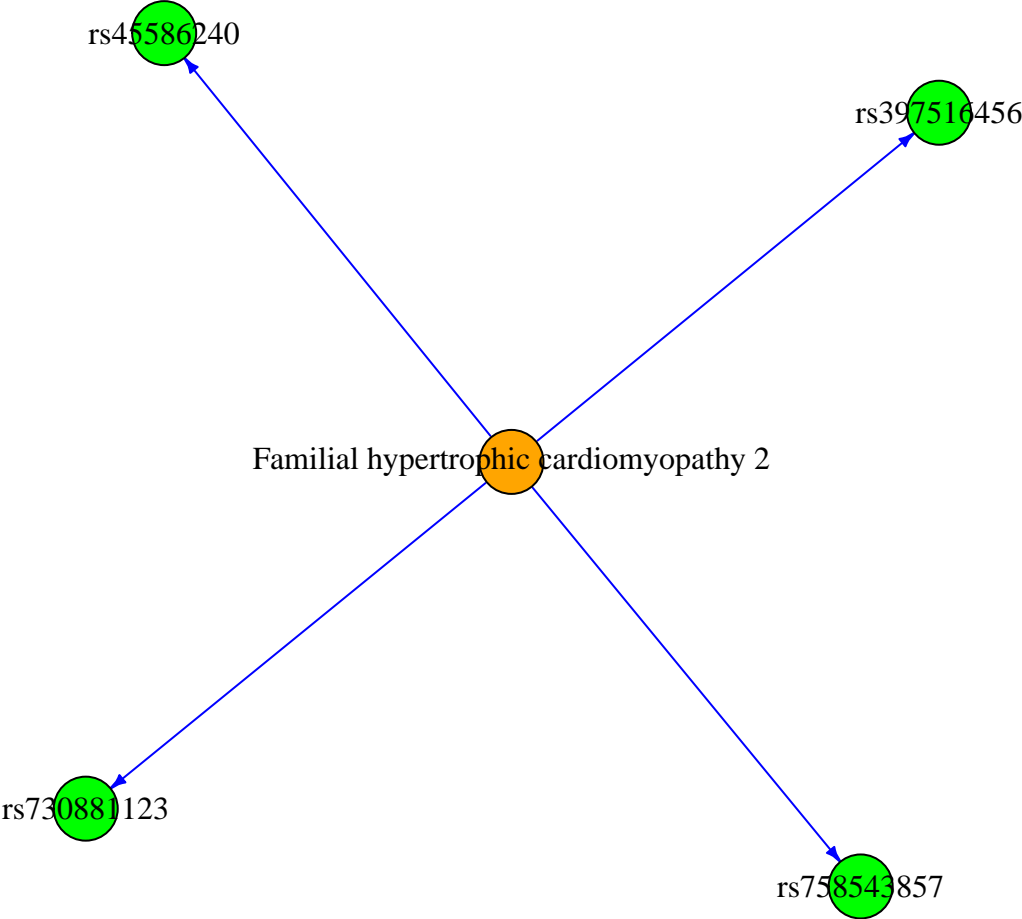

**Variant–Disease Network (Familial hypertrophic cardiomyopathy 20)**

rs200442502

Familial hypertrophic cardiomyopath

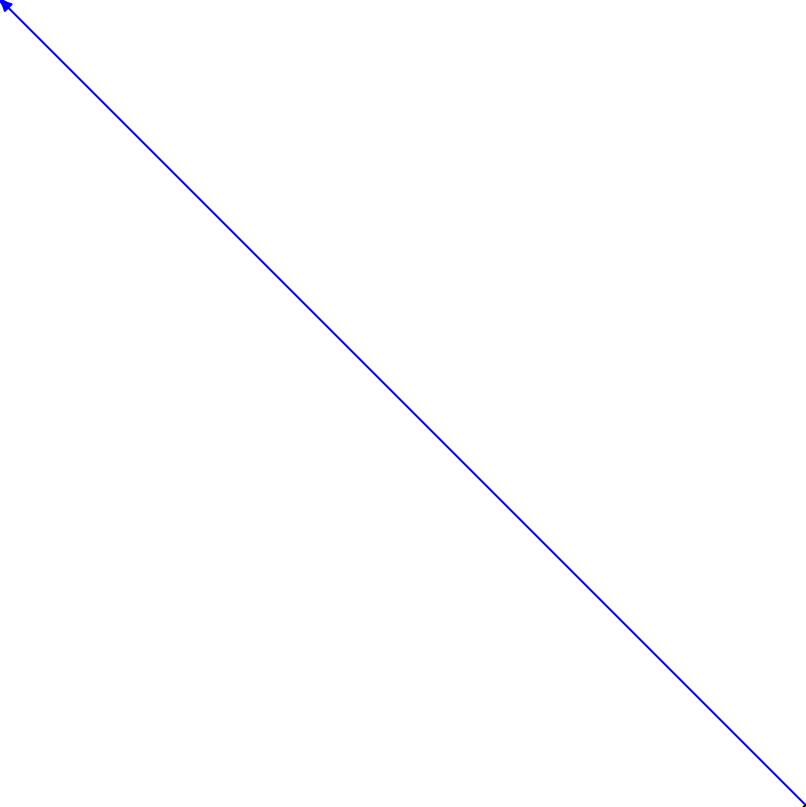

**Variant–Disease Network (Familial hypertrophic cardiomyopathy 4)**

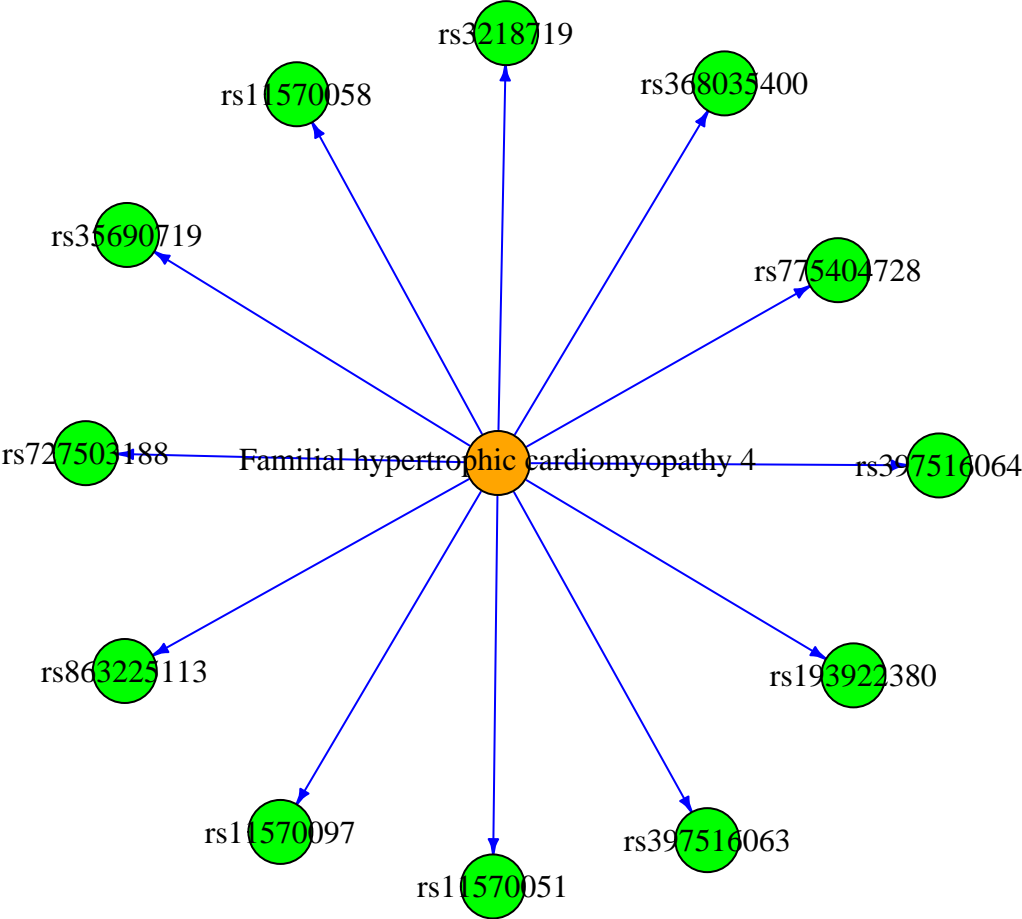

## Variant–Disease Network (Familial hypertrophic cardiomyopathy 8)

rs2233264

Familial hypertrophic cardiomyopathy

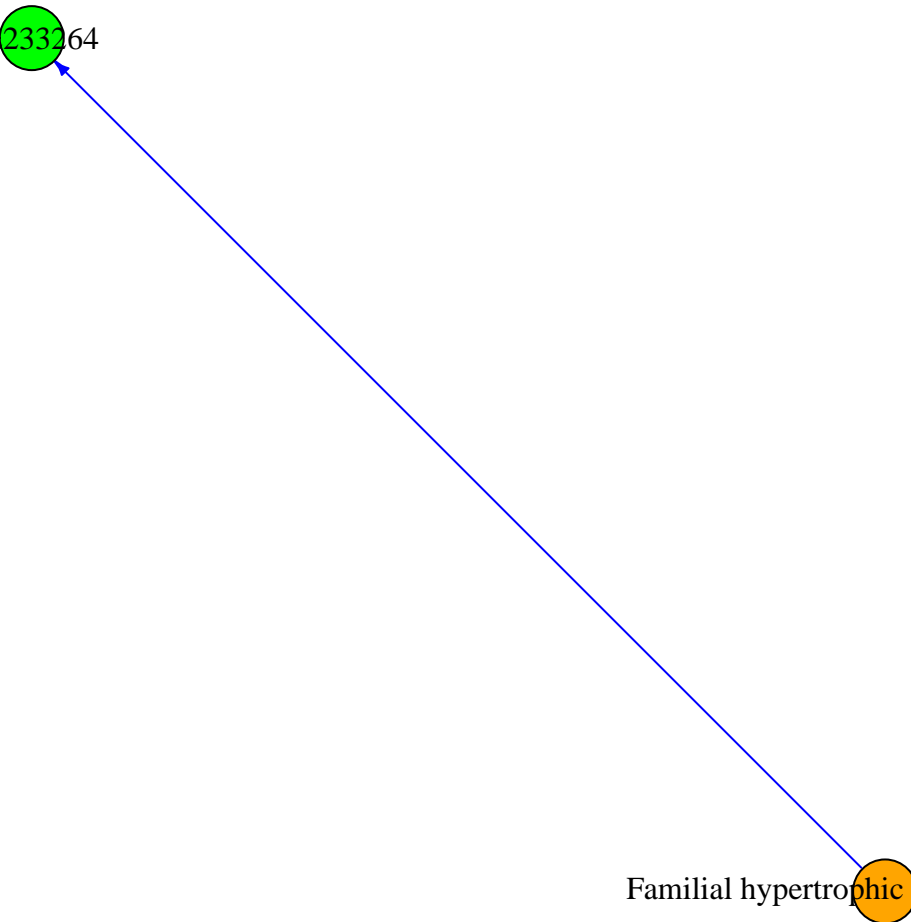

# Case Network (Familial Hypertrophic Cardiomyopathy with Wolff–Parkinson–V

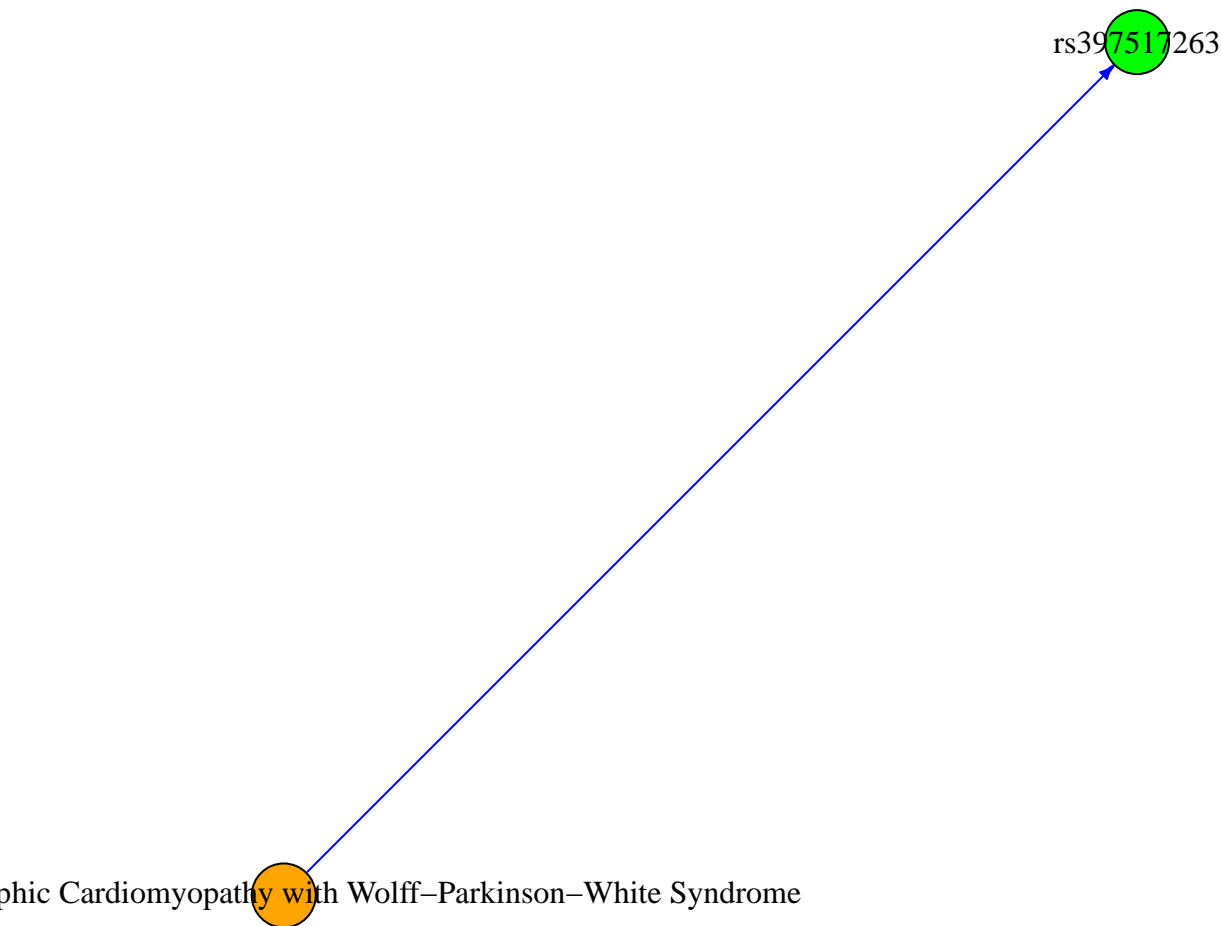



# Variant–Disease Network (Familial hypobetalipoproteinemia)

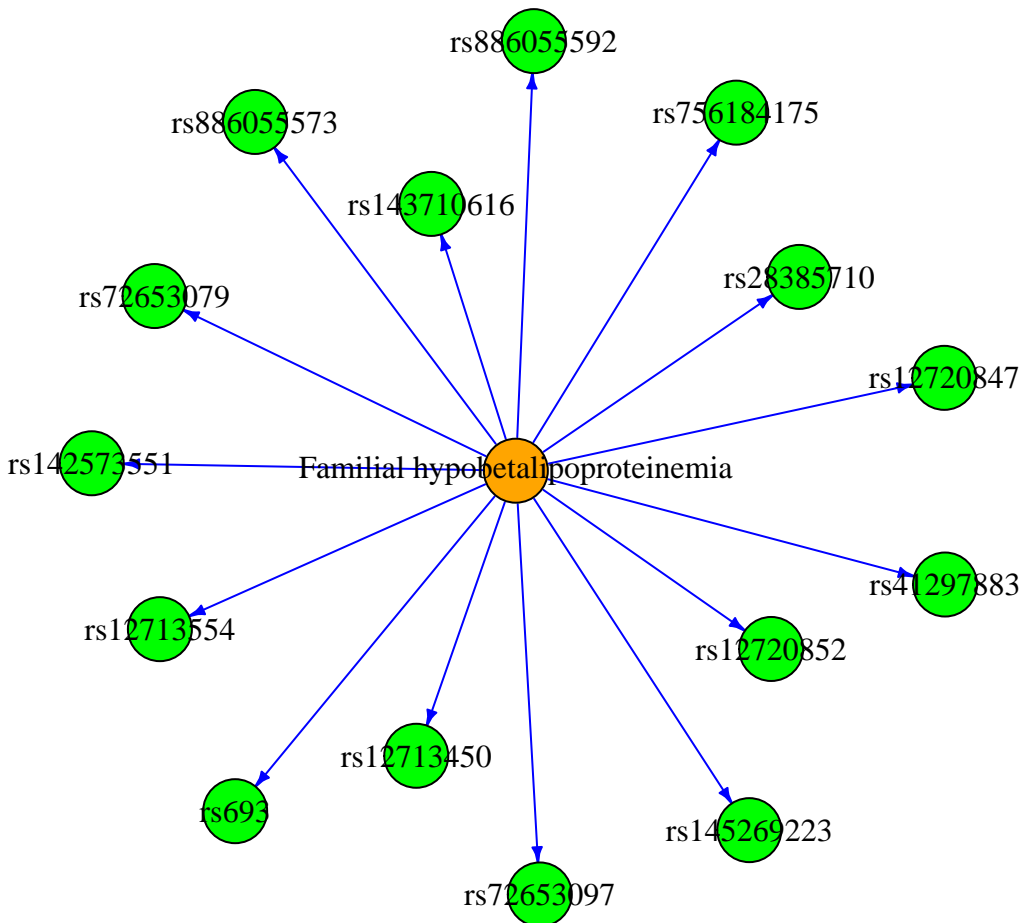

# Variant–Disease Network (Familial hypokalemia–hypomagnesemia)

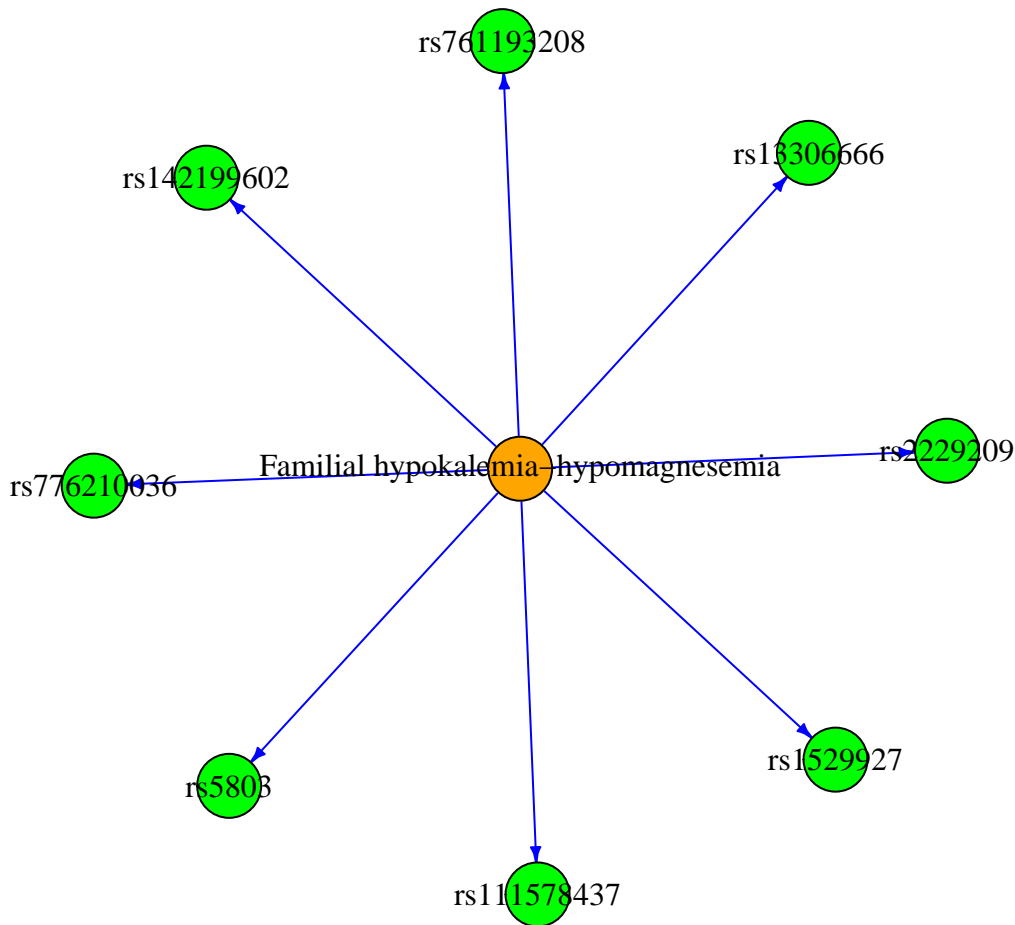

## Variant–Disease Network (Familial infantile myasthenia)

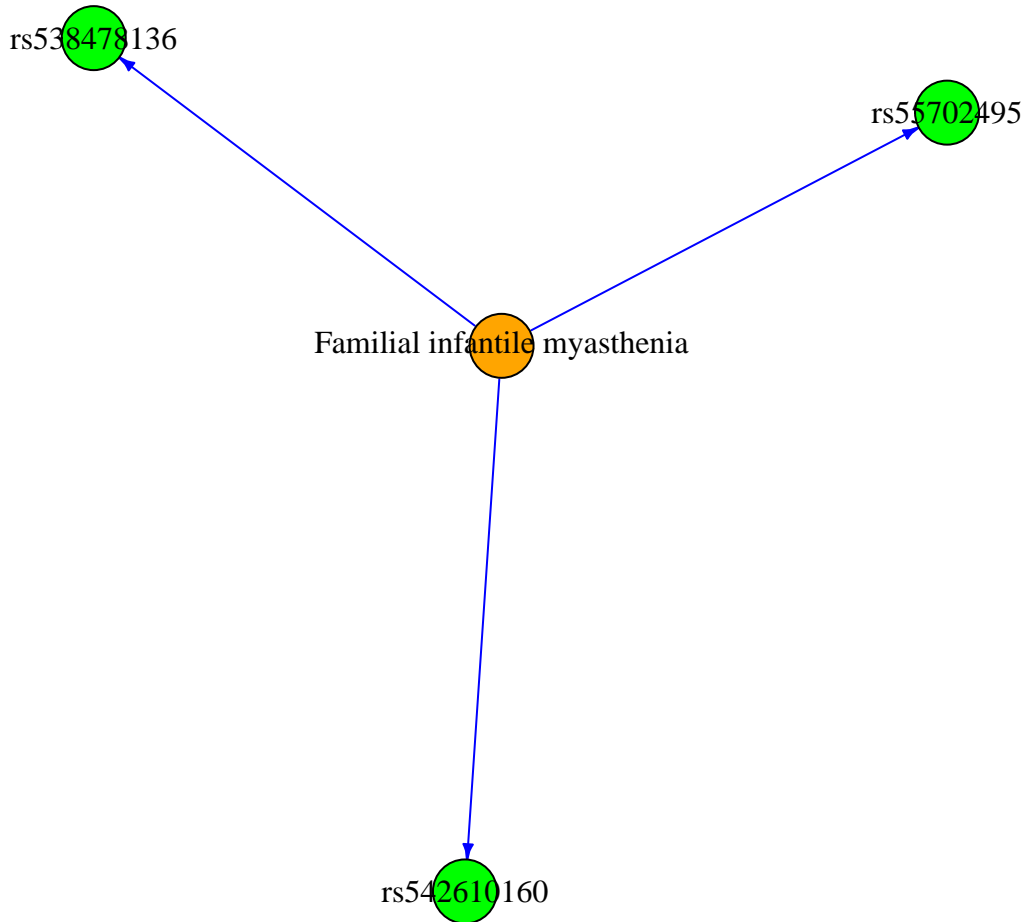

# Variant–Disease Network (Familial isolated hypoparathyroidism)

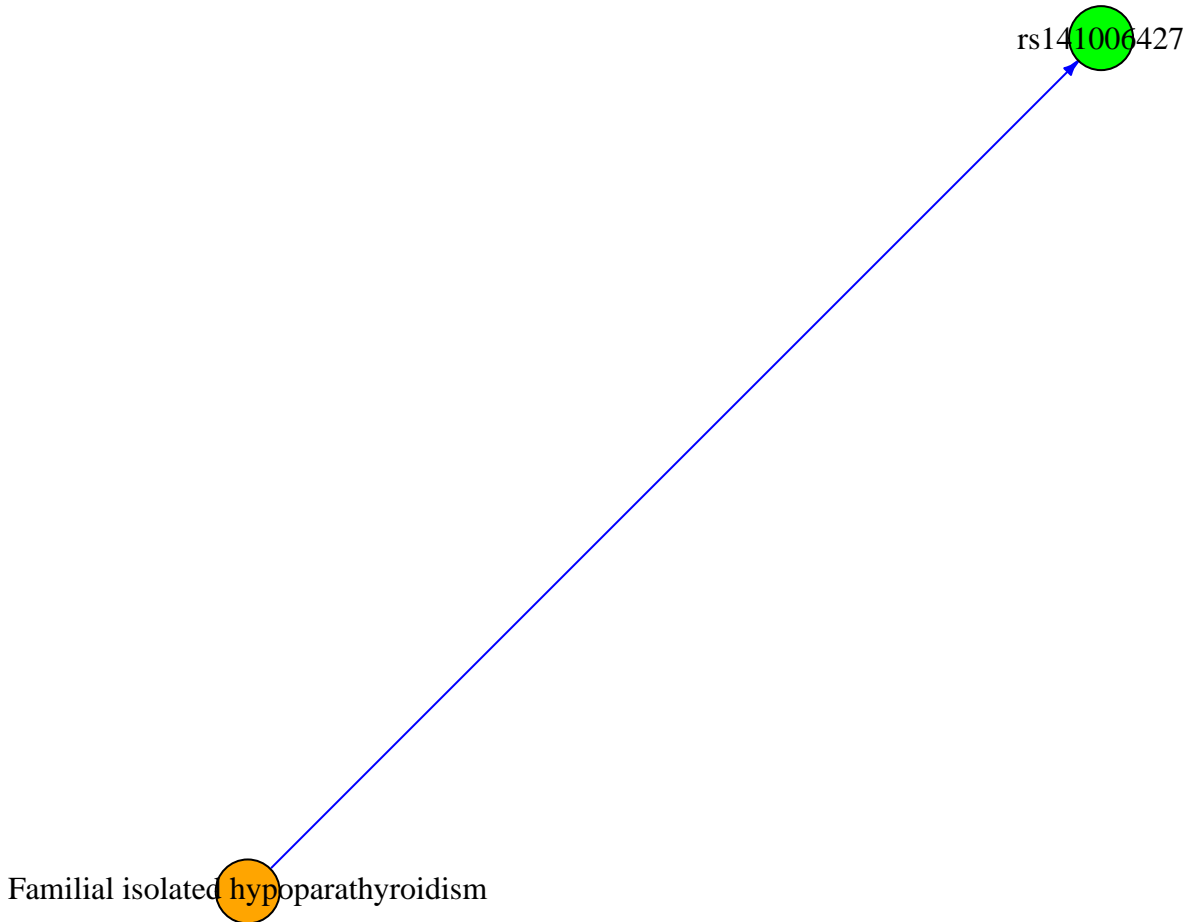

Variant–Disease Network (Familial Isolated Pituitary Adenomas)

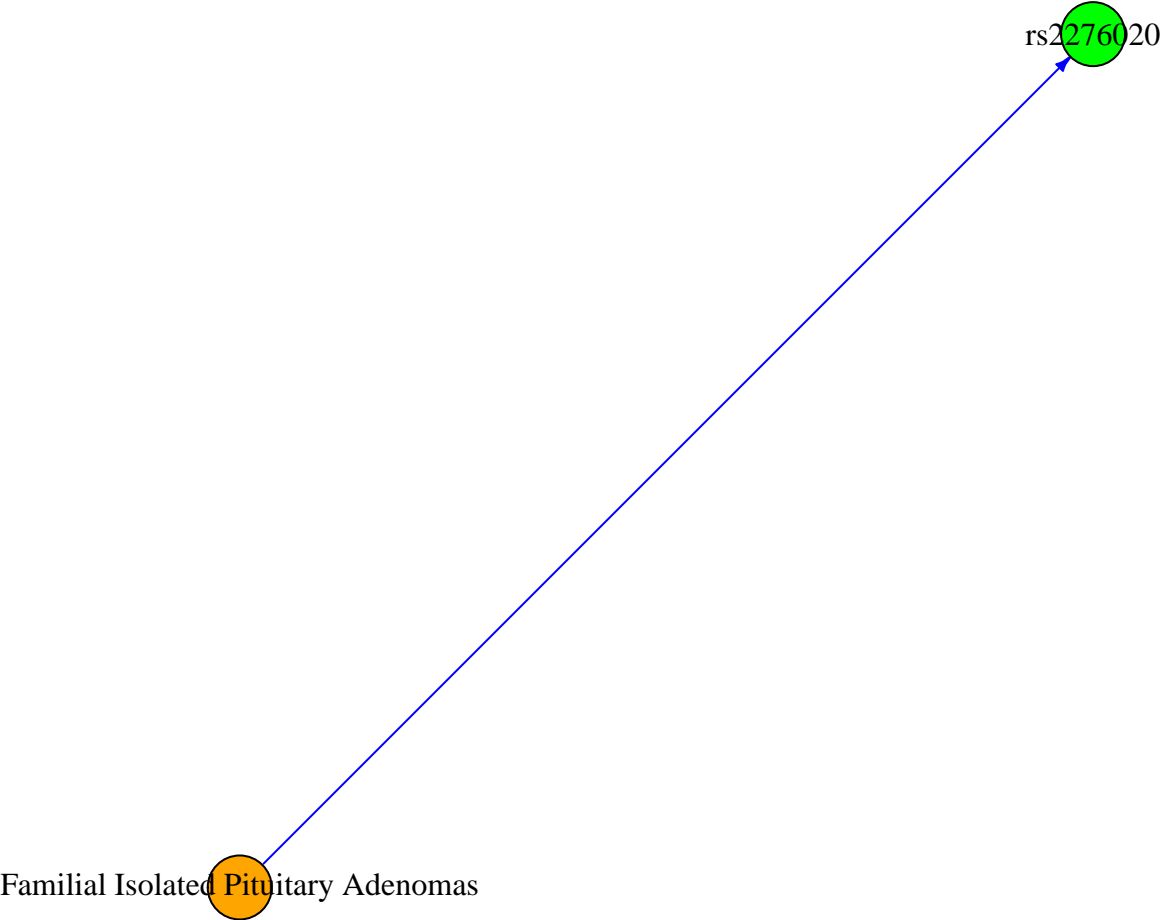

## Variant–Disease Network (Familial juvenile gout)

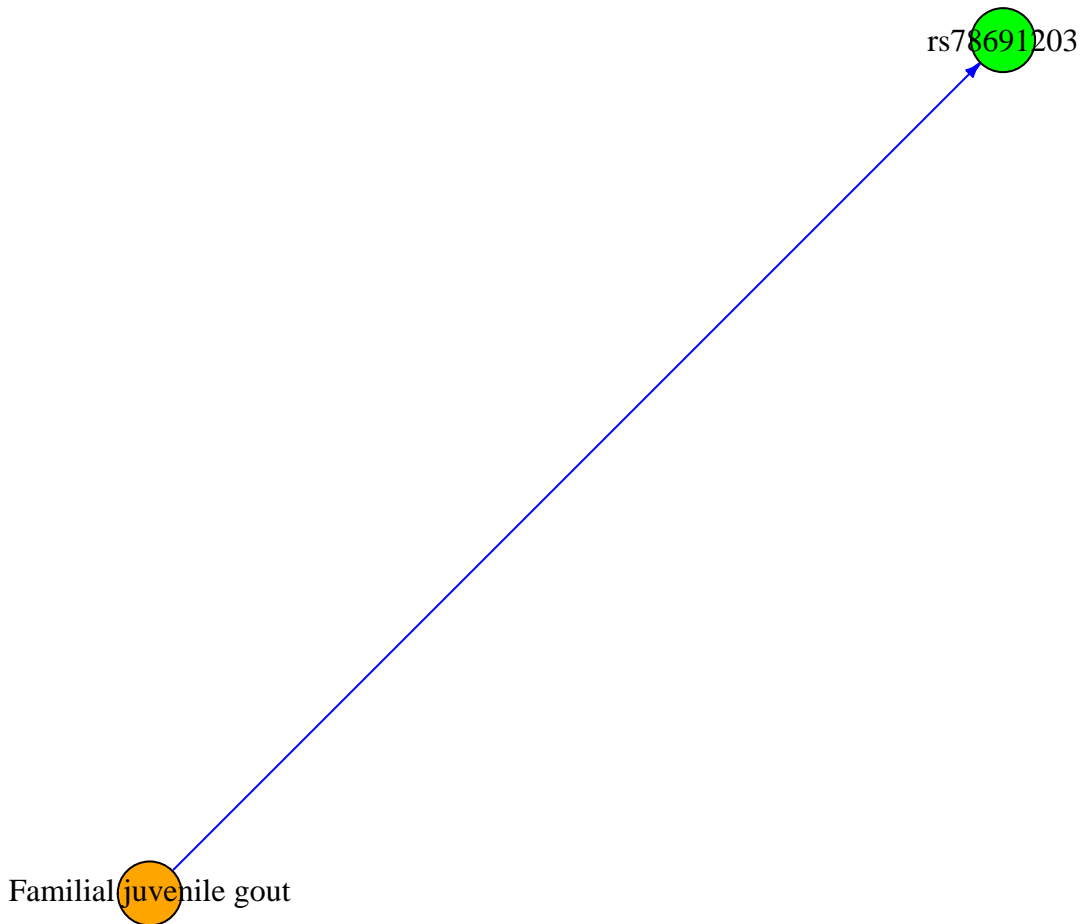

Variant–Disease Network (Familial multiple polyposis syndrome)

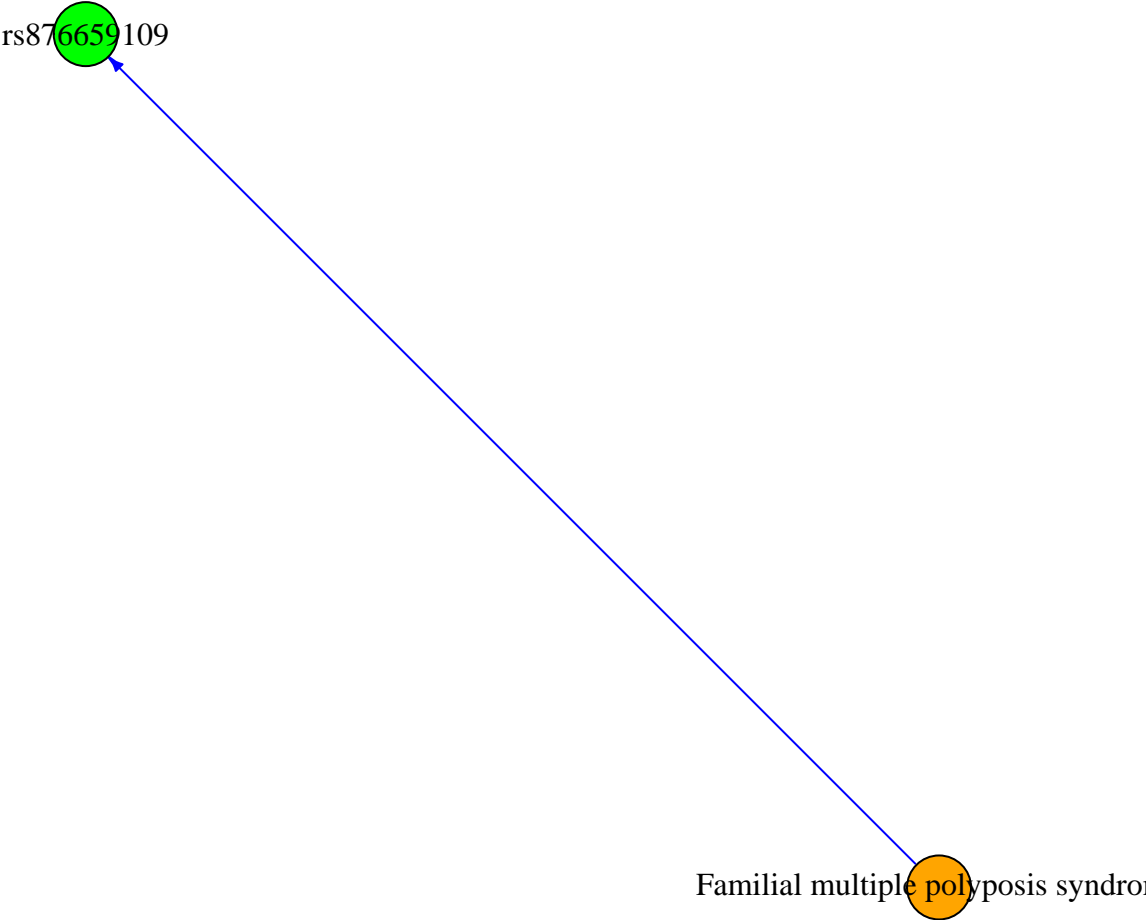

## Variant–Disease Network (Familial partial lipodystrophy)

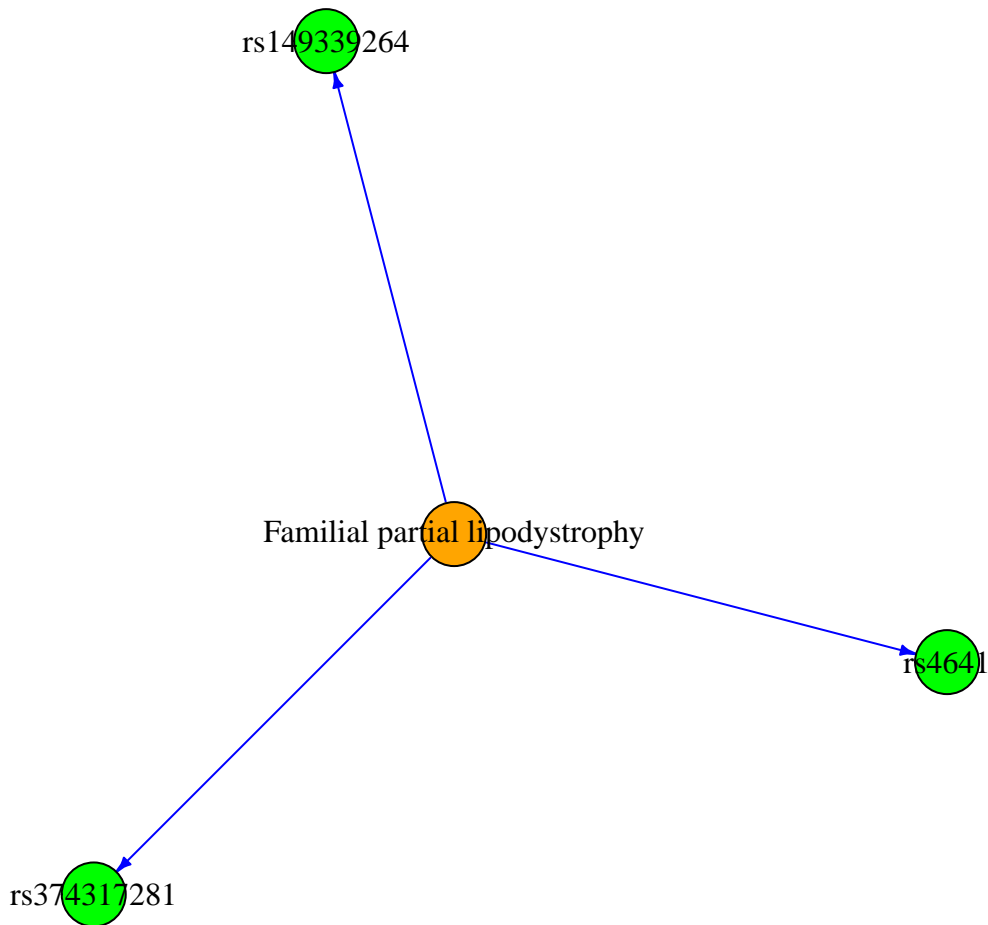



# ant-Disease Network (Familial platelet disorder with associated myeloid mal

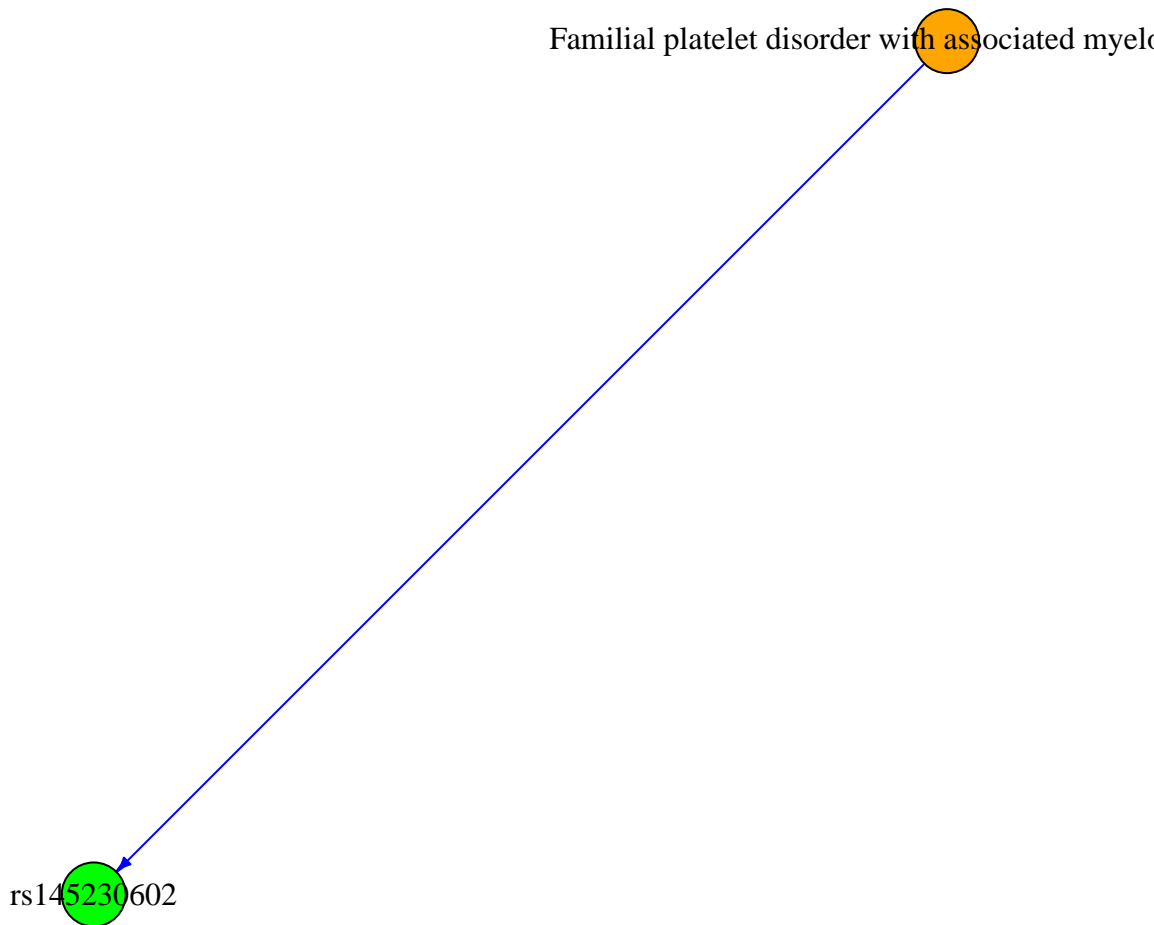

## Variant-Disease Network (Familial renal glucosuria)

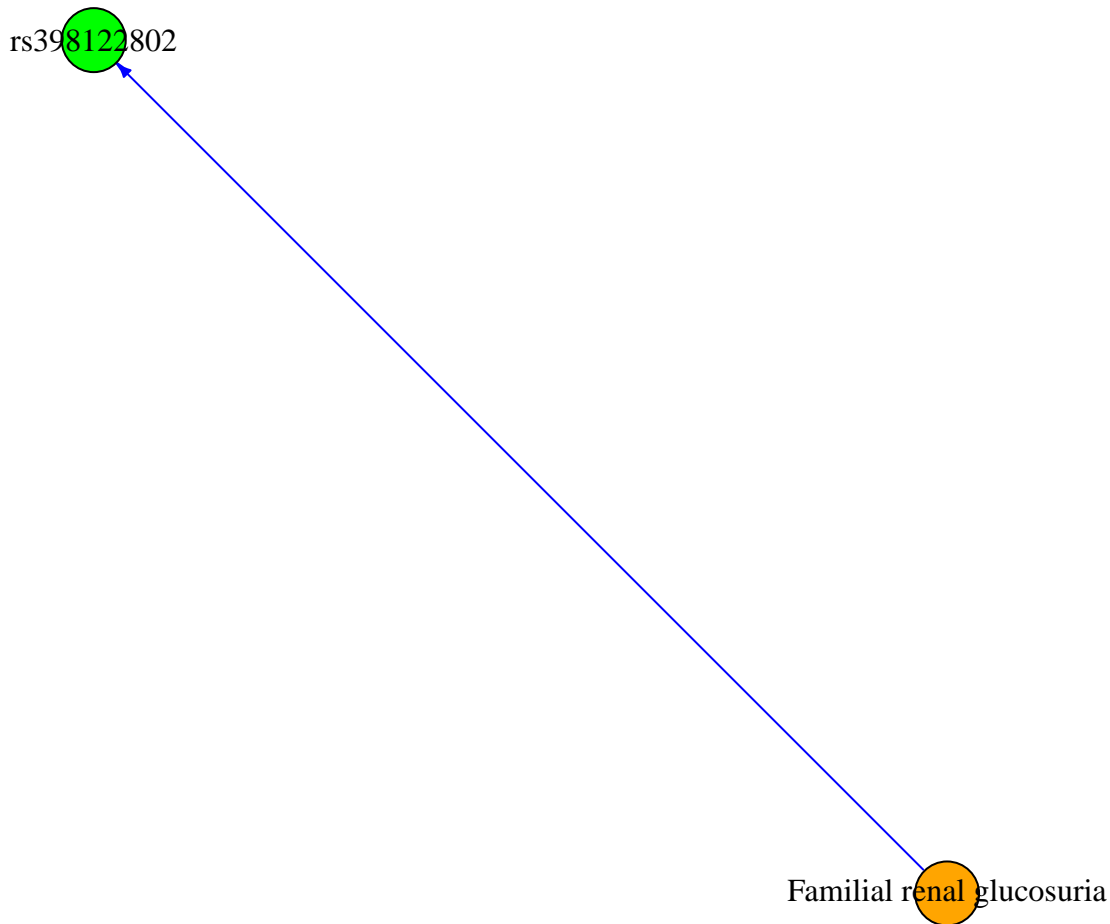

# Variant–Disease Network (Familial restrictive cardiomyopathy)

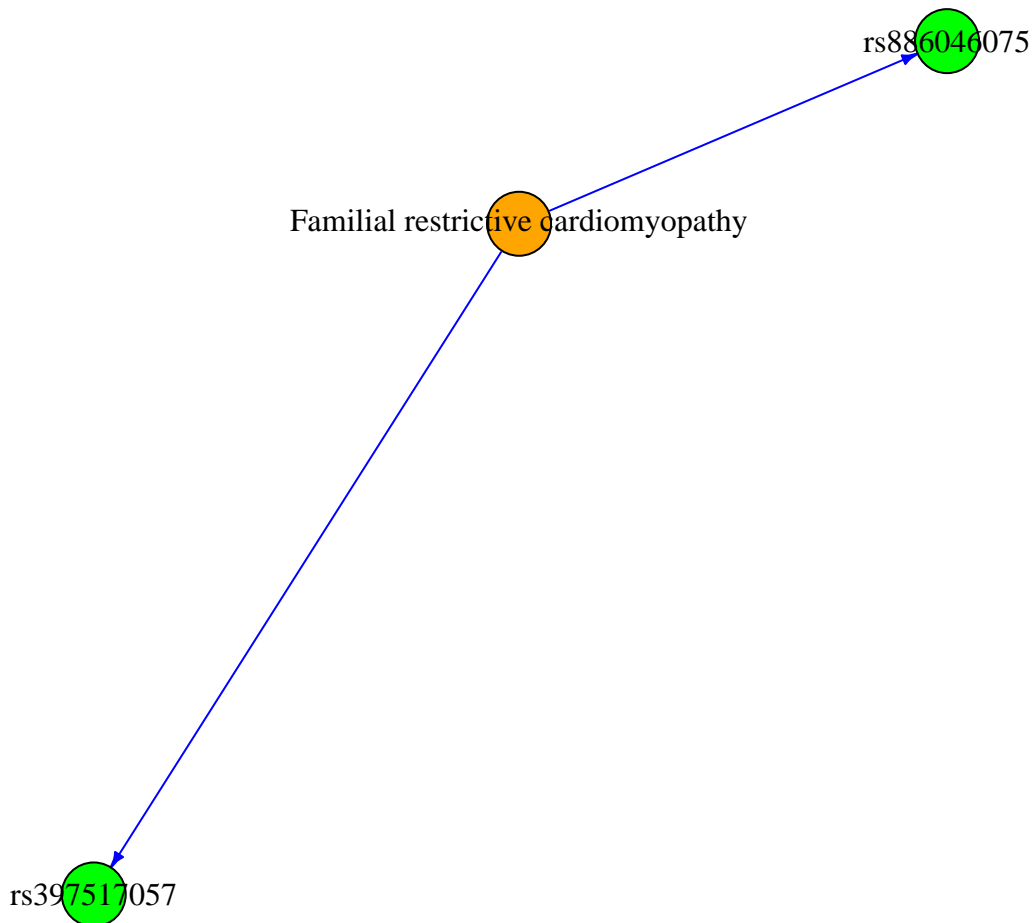

Variant–Disease Network (Familial restrictive cardiomyopathy 3)

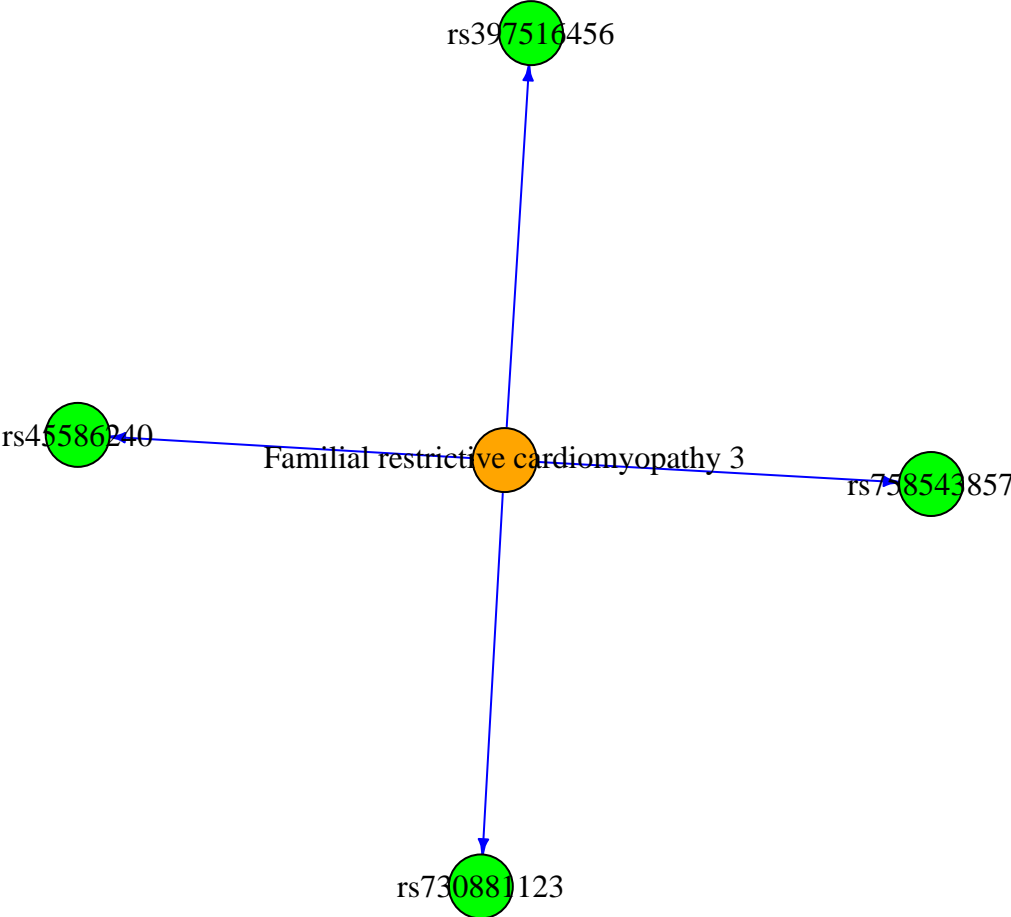

# nt-Disease Network (Familial X-linked hypophosphatemic vitamin D refracto

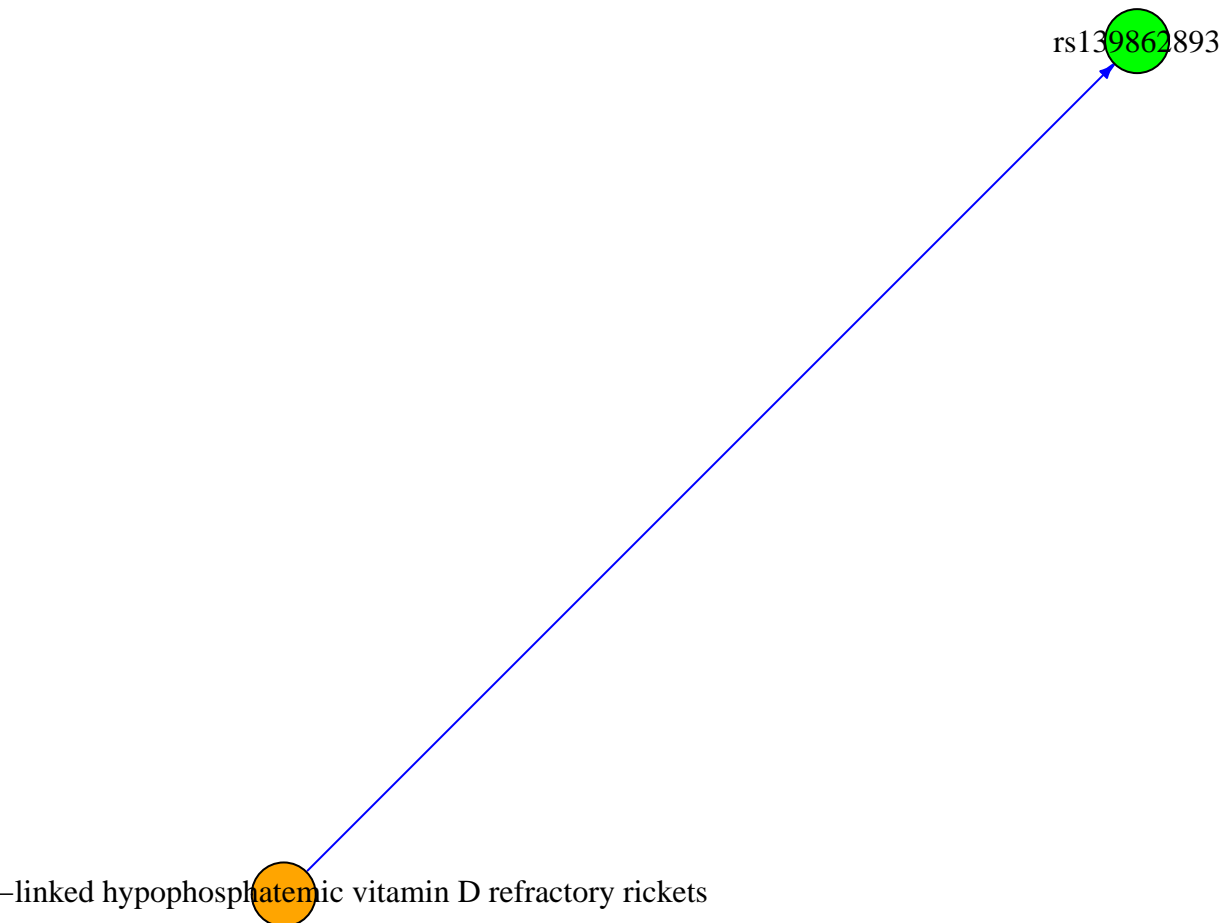

## Variant-Disease Network (Fanconi anemia)

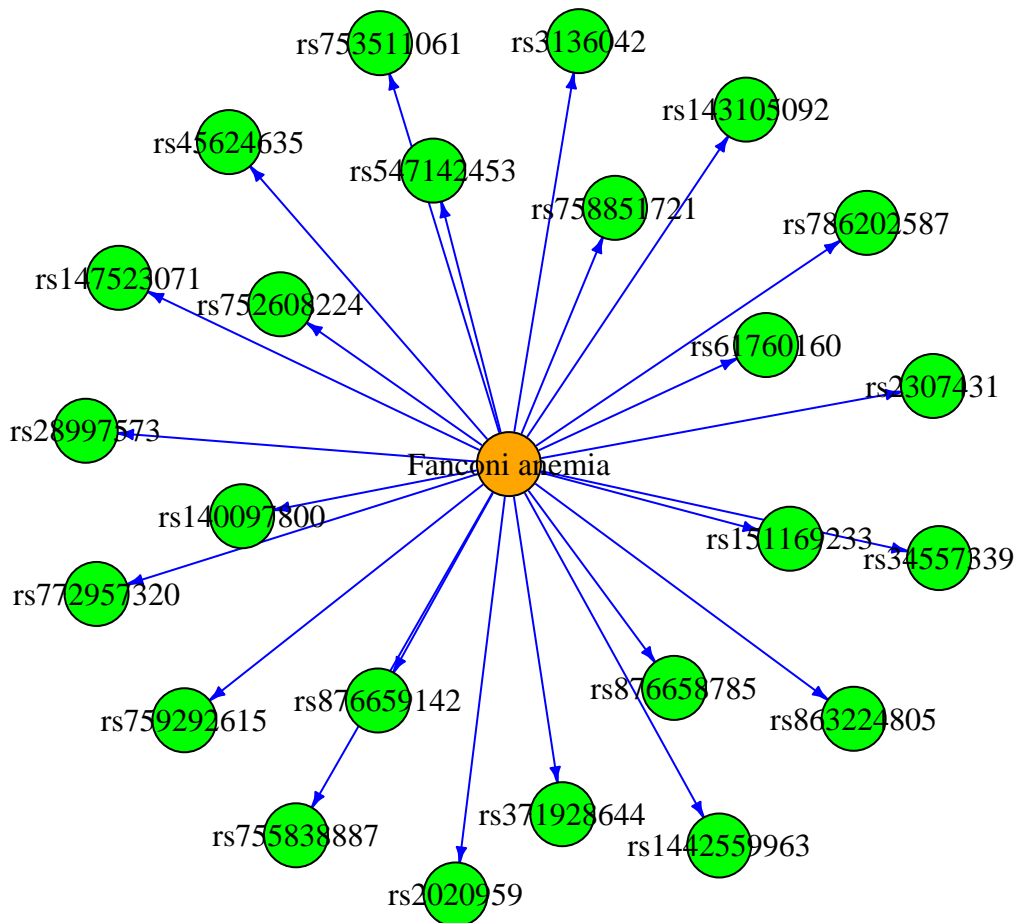

## Variant–Disease Network (Fanconi–Bickel syndrome)

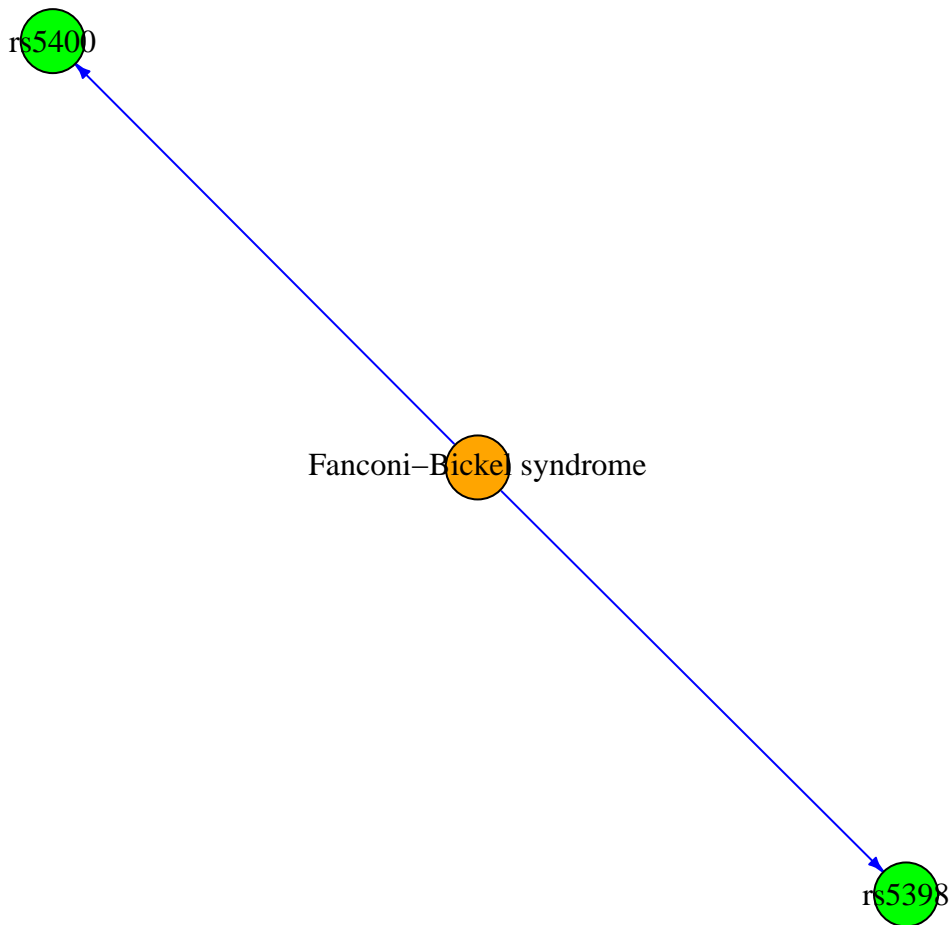

Variant–Disease Network (Farber disease)

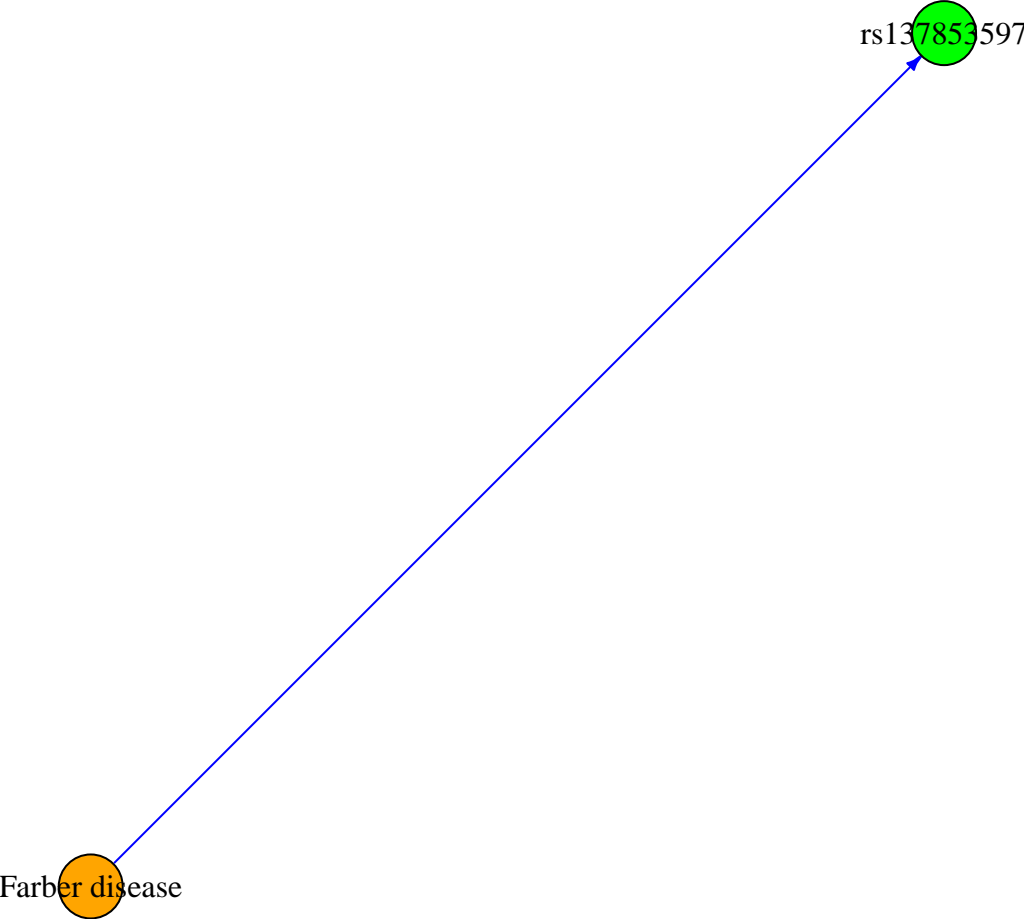



**Variant–Disease Network (Fatal infantile hypertonic myofibrillar myopathy)**

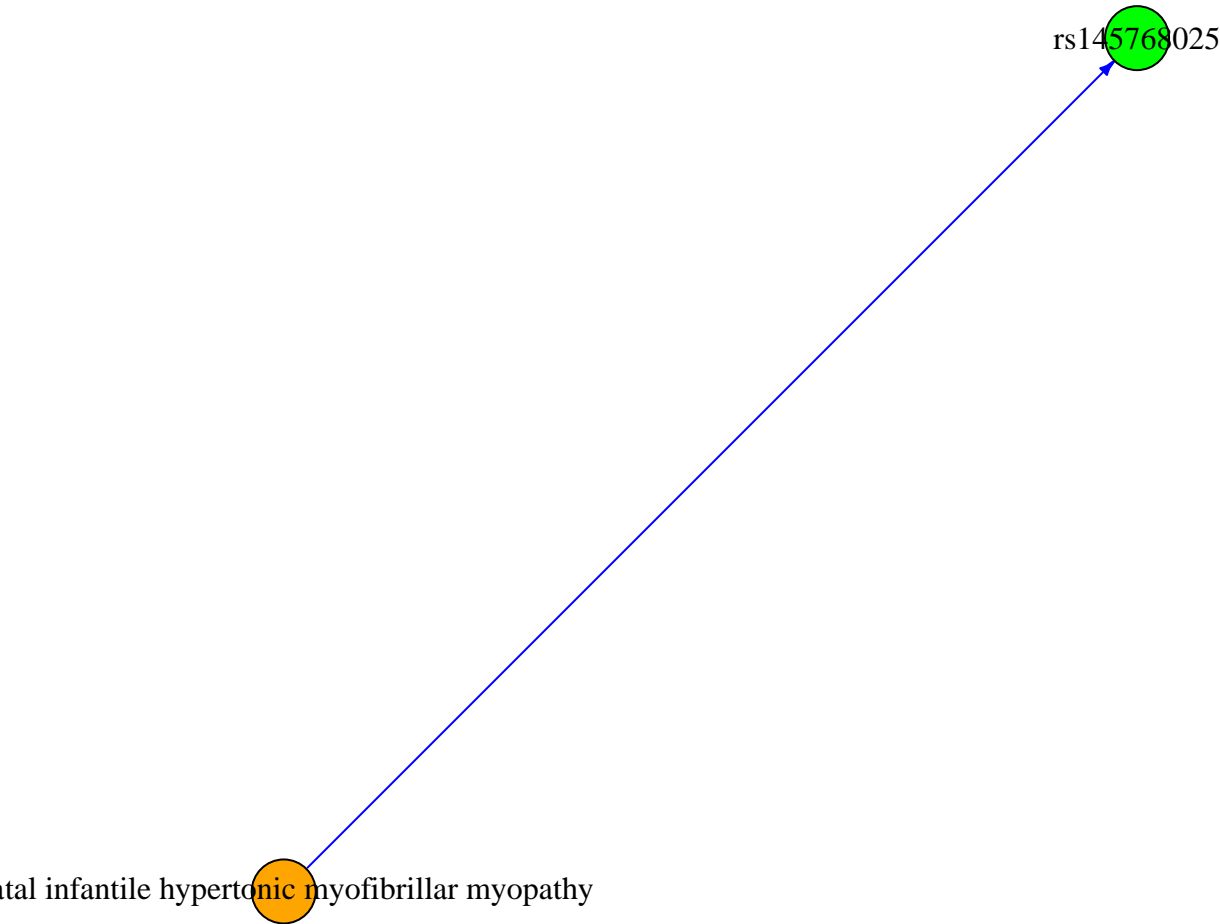

## Variant–Disease Network (Fetal akinesia sequence)

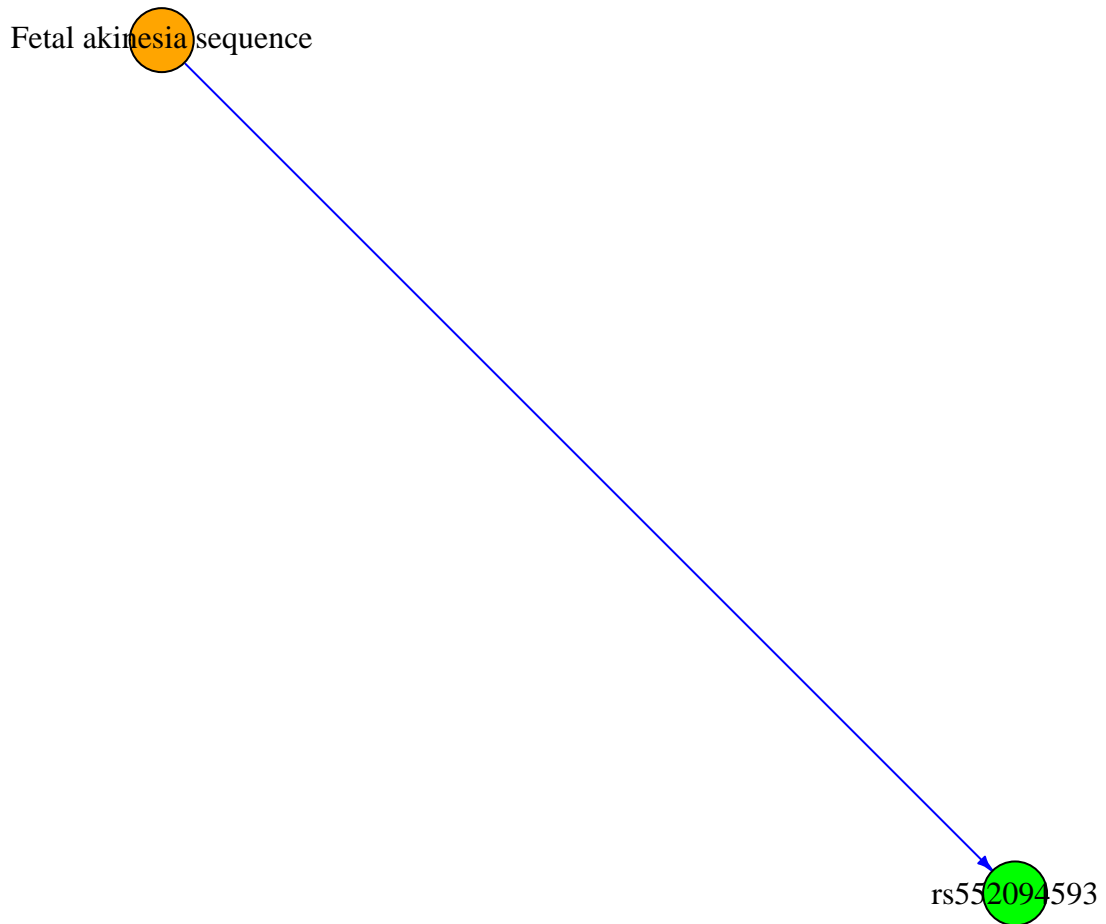

# Variant–Disease Network (Fibrochondrogenesis 1)

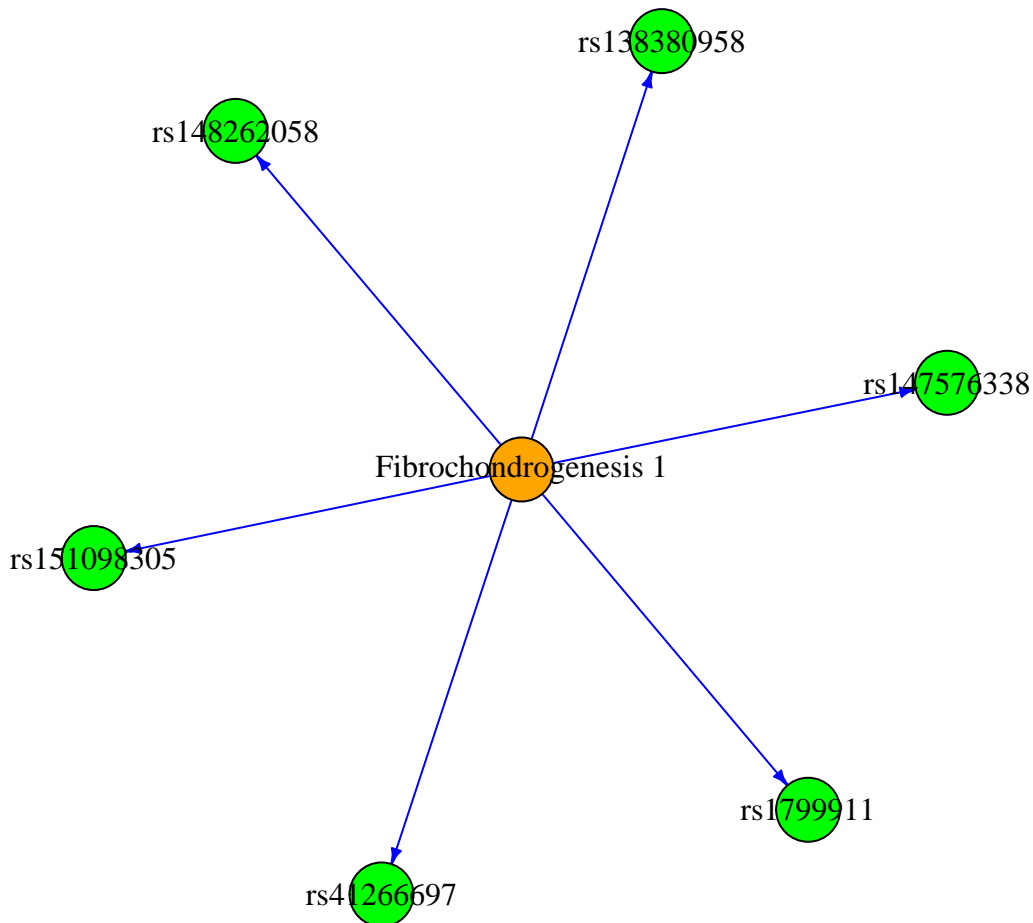

## Variant-Disease Network (Fibrous dysplasia of jaw)

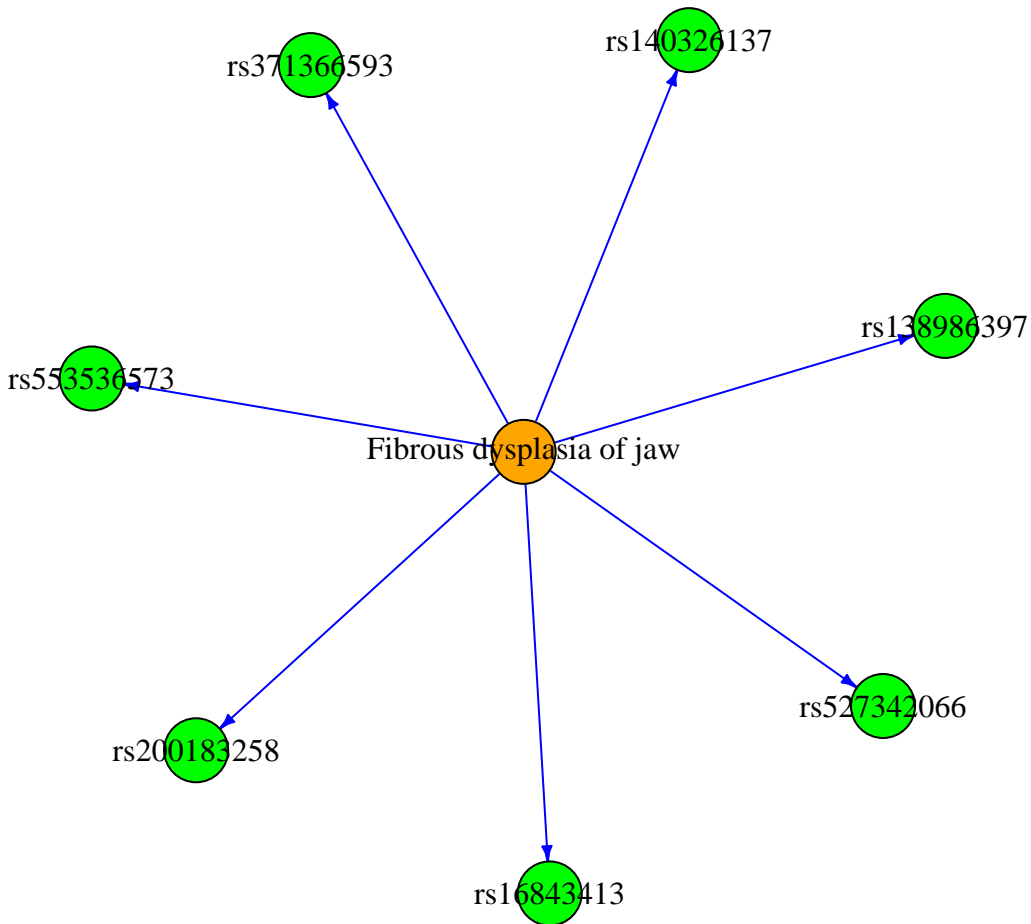

# Variant–Disease Network (Finnish congenital nephrotic syndrome)

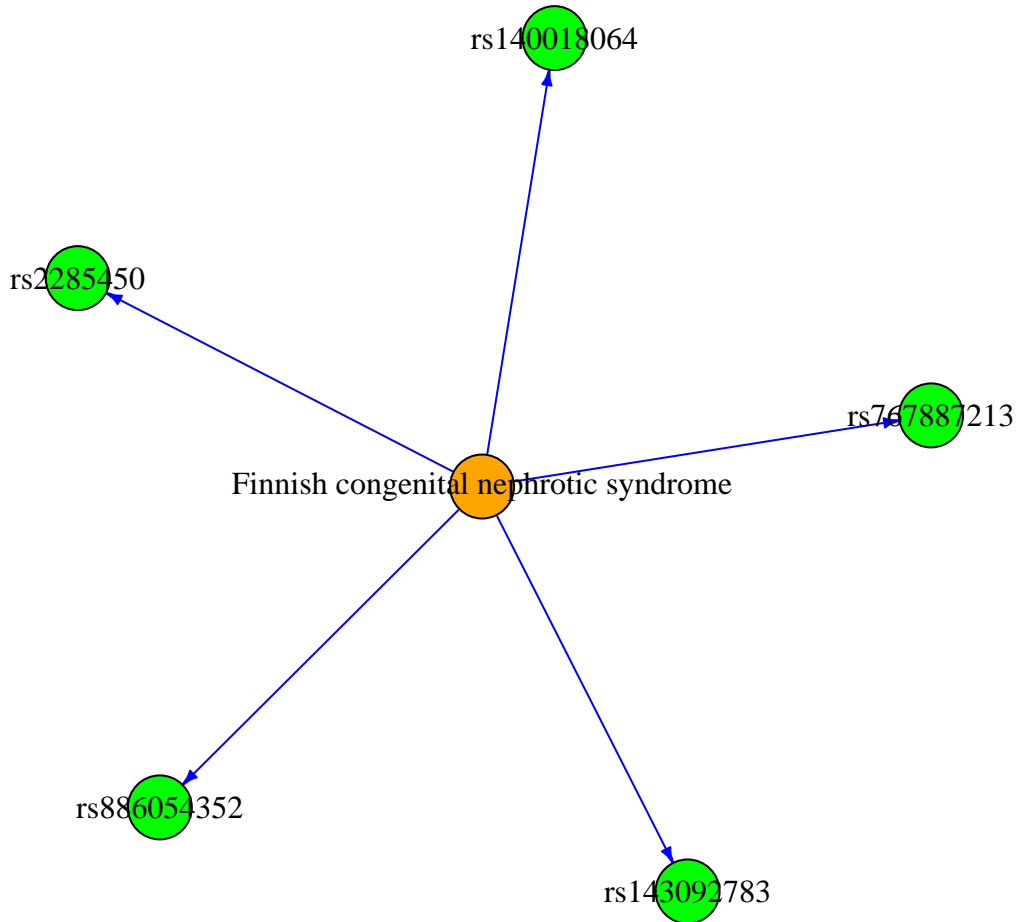

## Variant–Disease Network (Fleck corneal dystrophy)

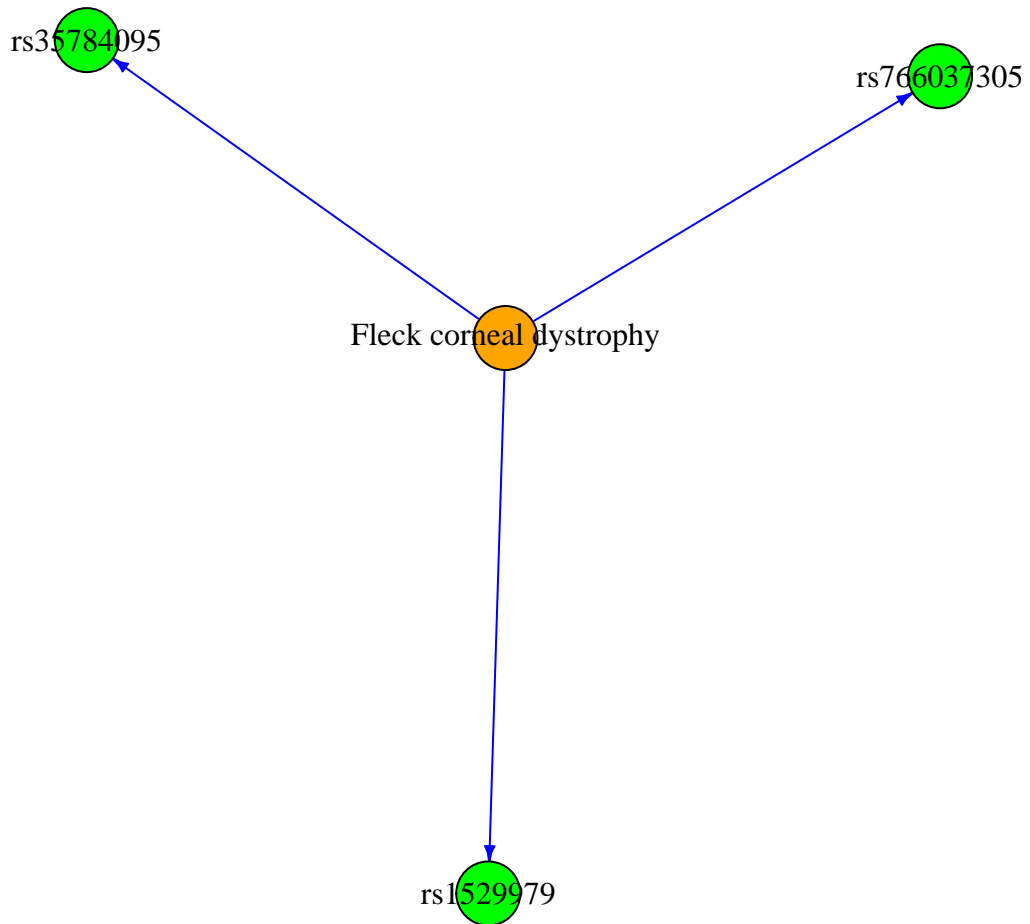

# Variant–Disease Network (FLNB–Related Spectrum Disorders)

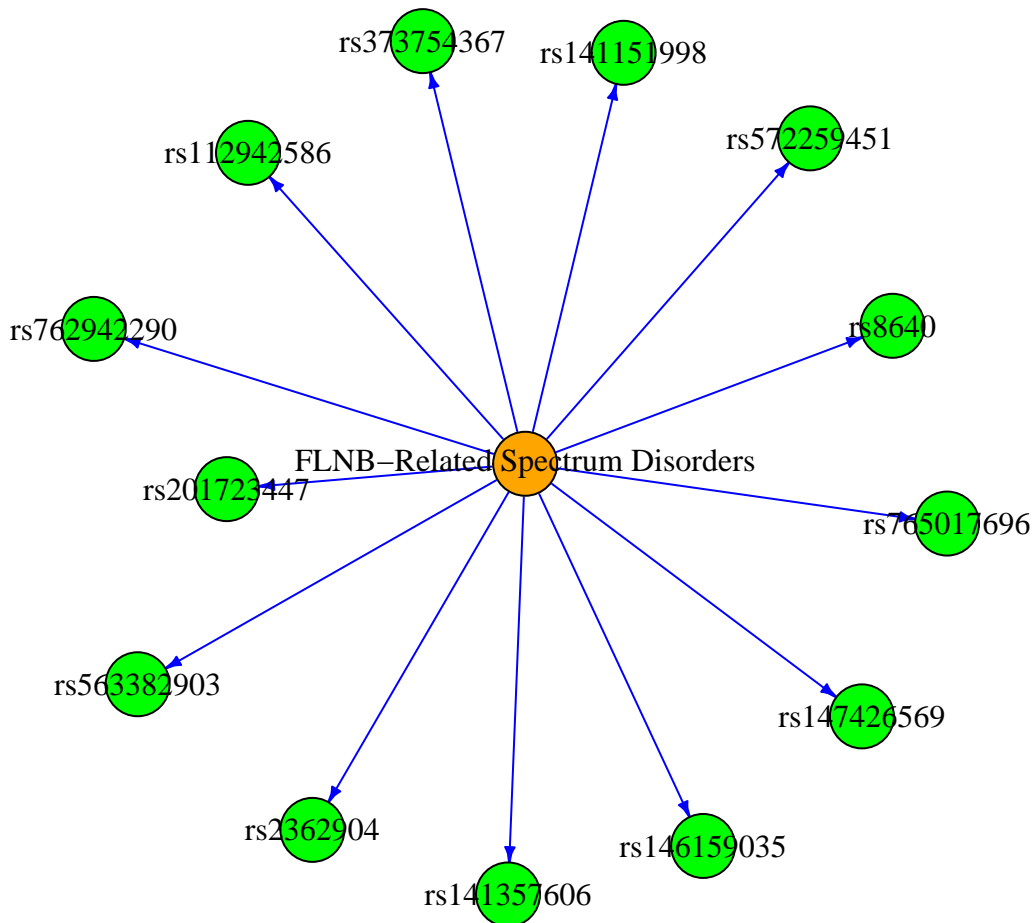

## Variant–Disease Network (Focal cortical dysplasia type II)

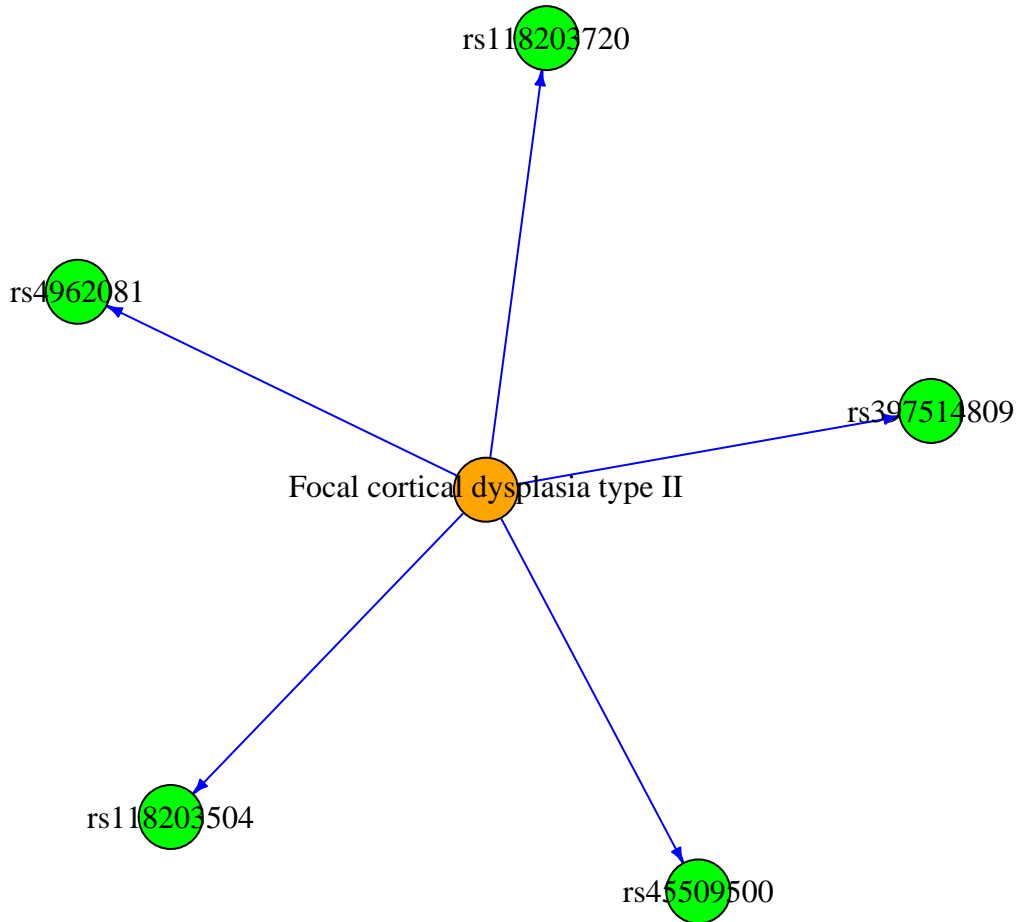



Variant–Disease Network (Focal segmental glomerulosclerosis)

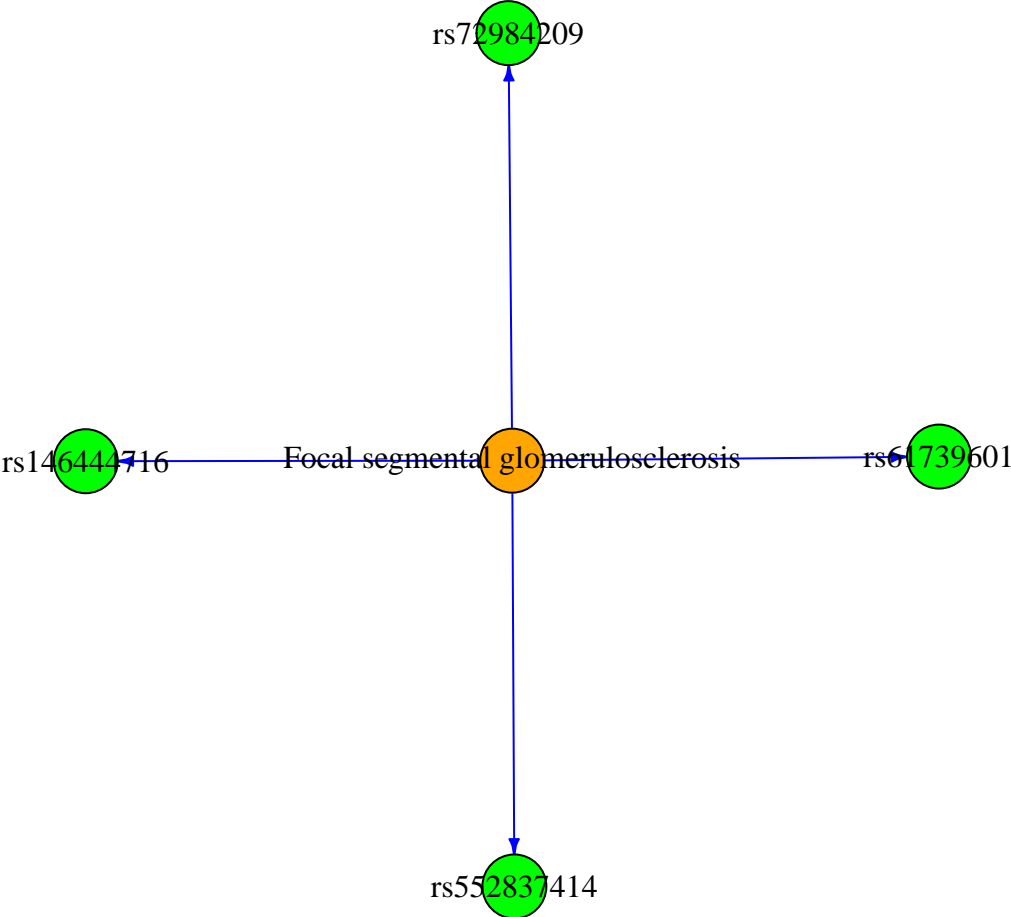

## Variant–Disease Network (Focal segmental glomerulosclerosis 2)

Focal segmental glomerulosclerosis 2

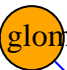

rs72984209

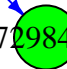

# Variant–Disease Network (Follicle–stimulating hormone deficiency)

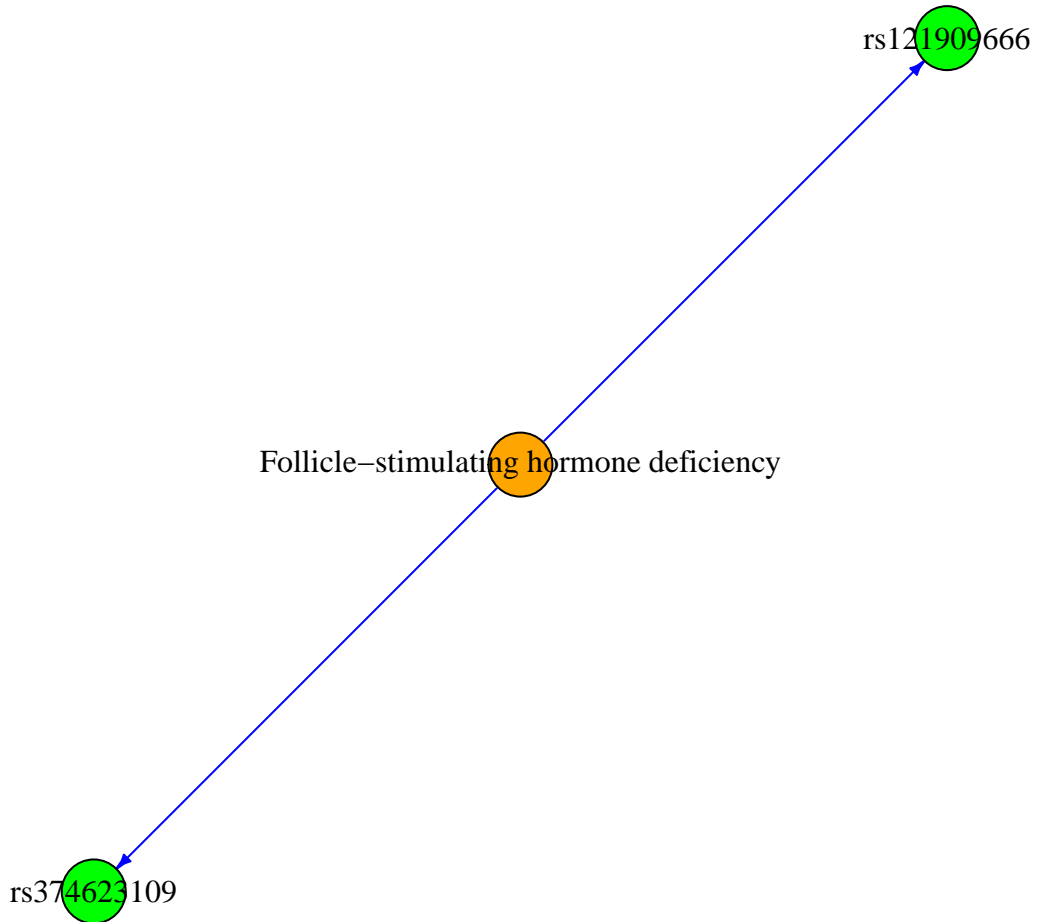

Variant–Disease Network (Frank Ter Haar syndrome)

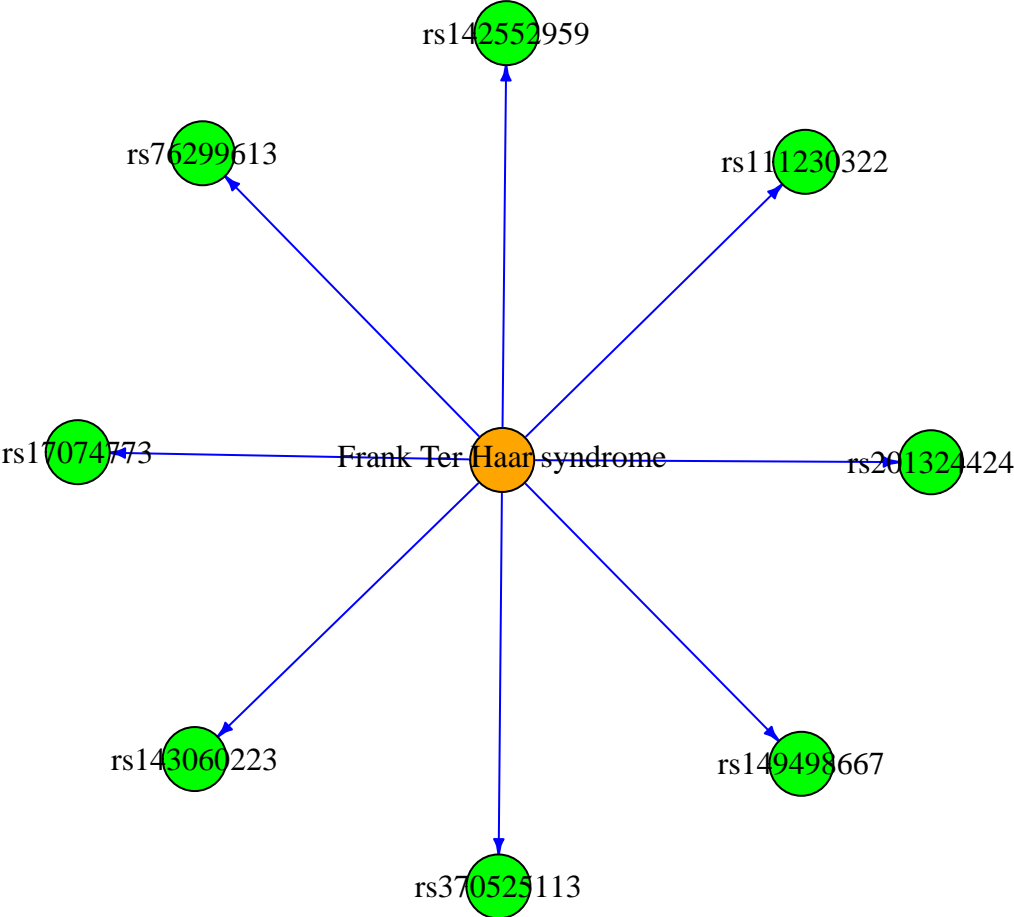

## Variant-Disease Network (Fraser syndrome 1)

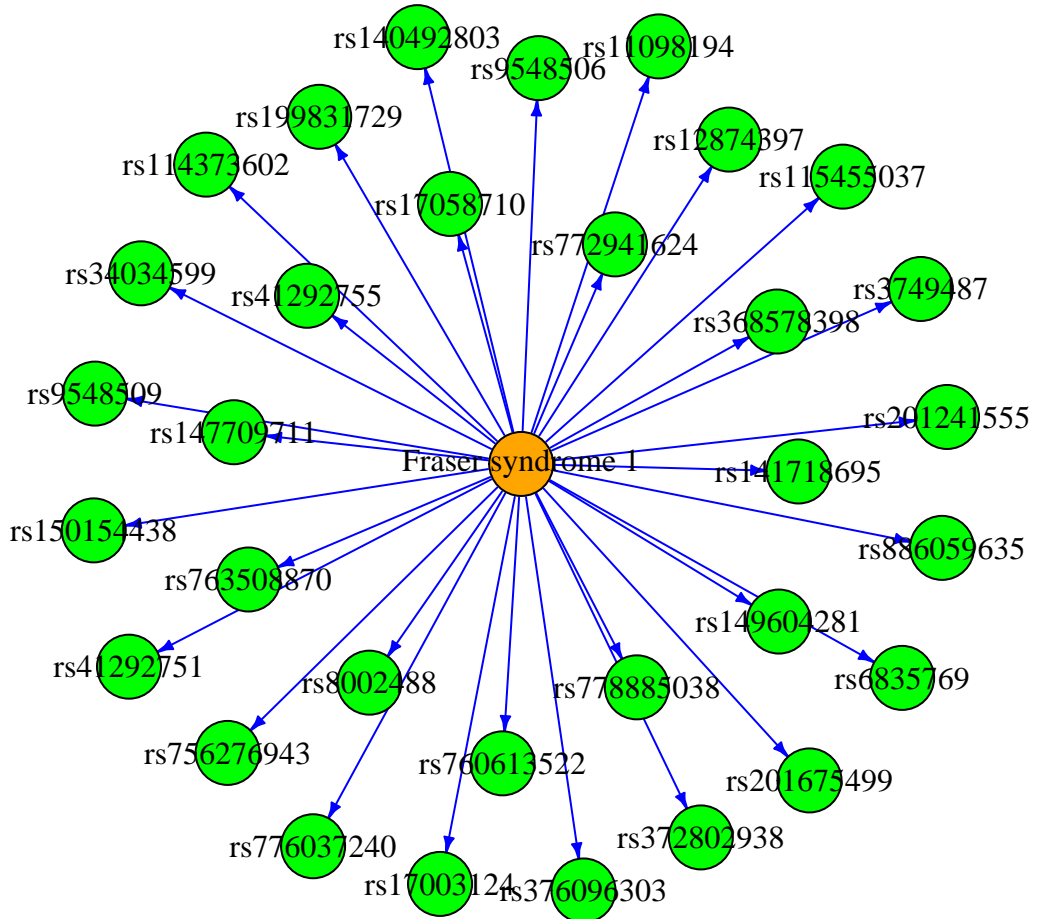

## Variant-Disease Network (FRASER SYNDROME 2)

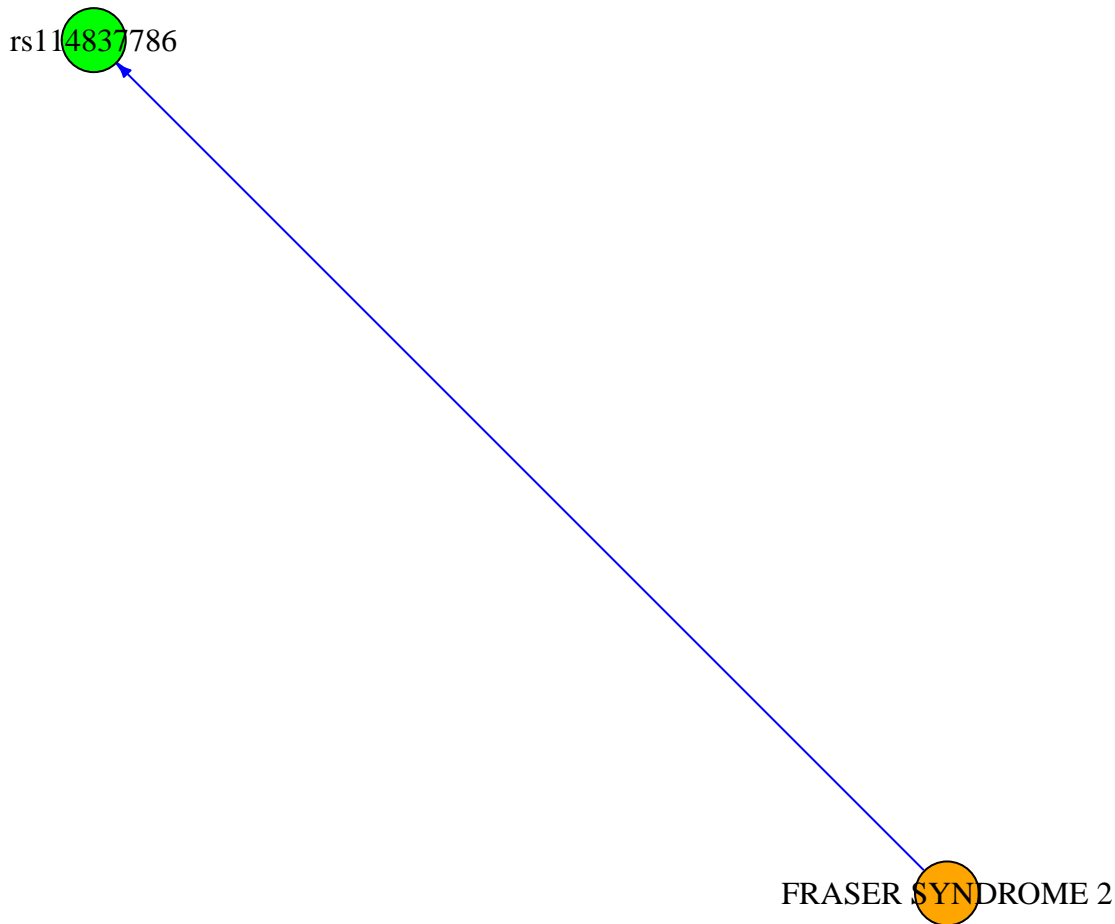

## Variant–Disease Network (Frasier syndrome)

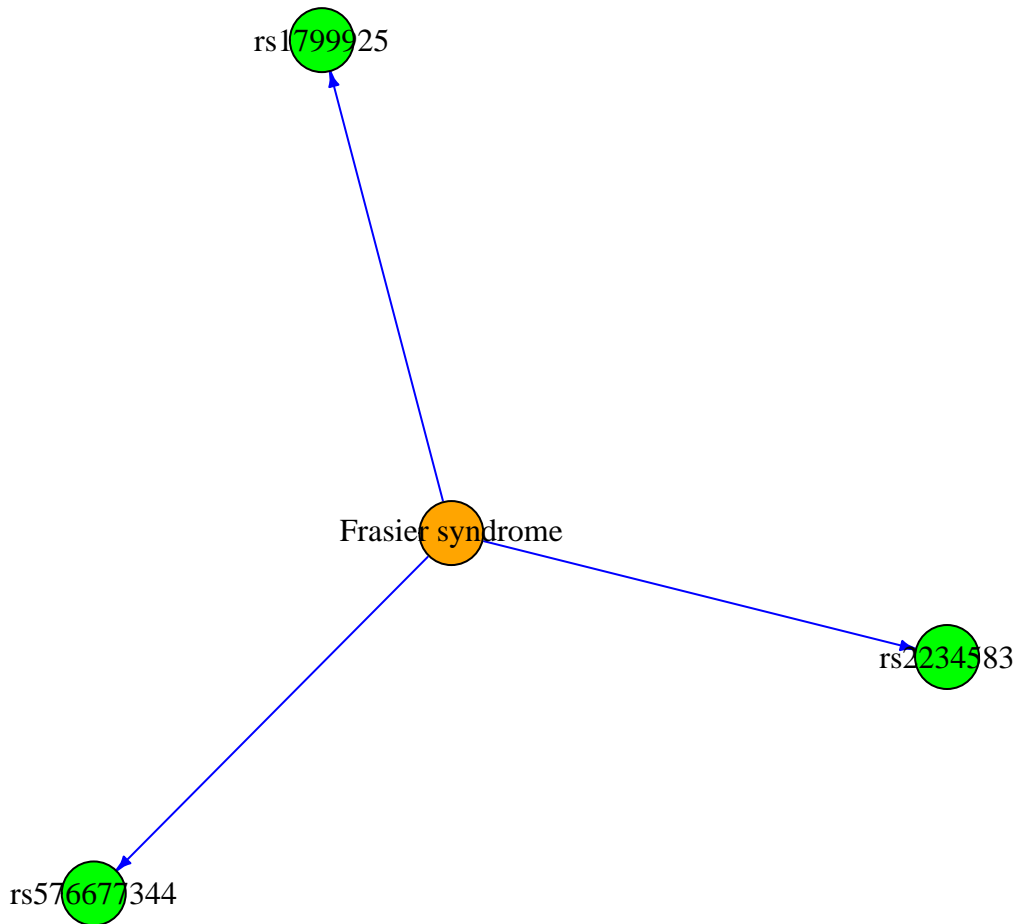

# Variant–Disease Network (Freeman–Sheldon syndrome)

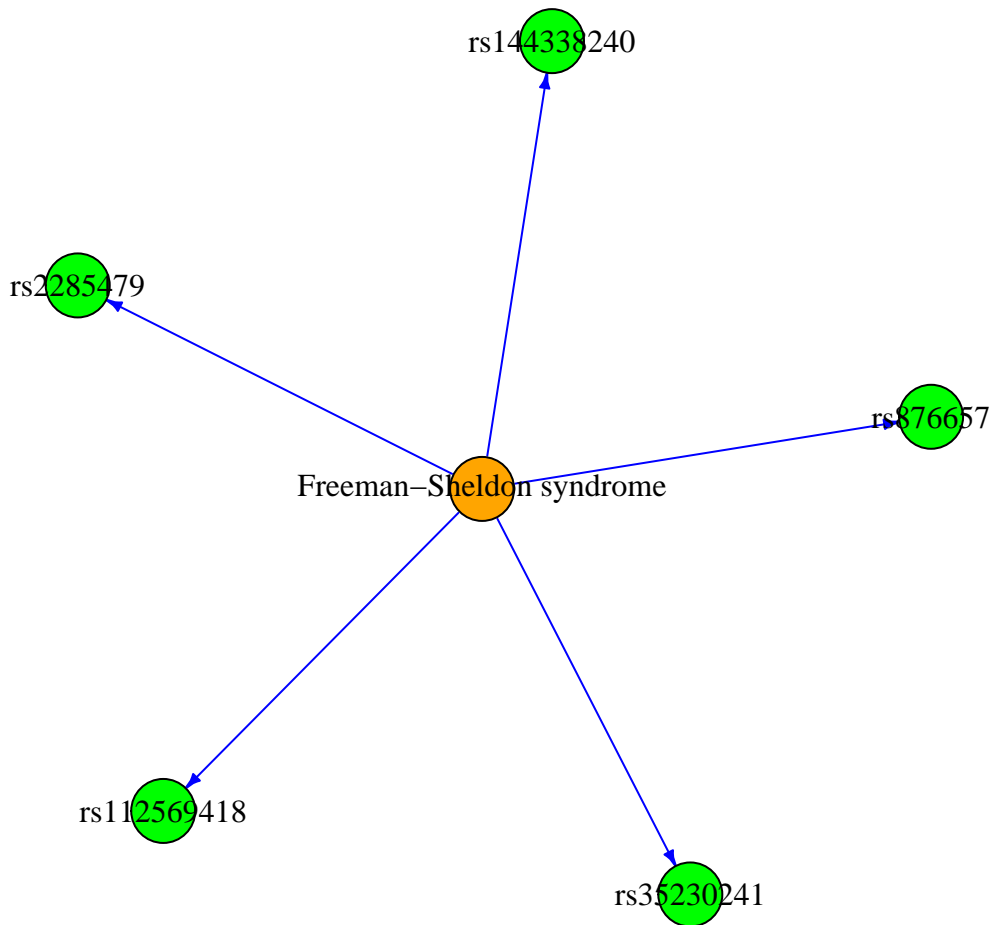



Variant–Disease Network (Frontometaphyseal dysplasia 1)

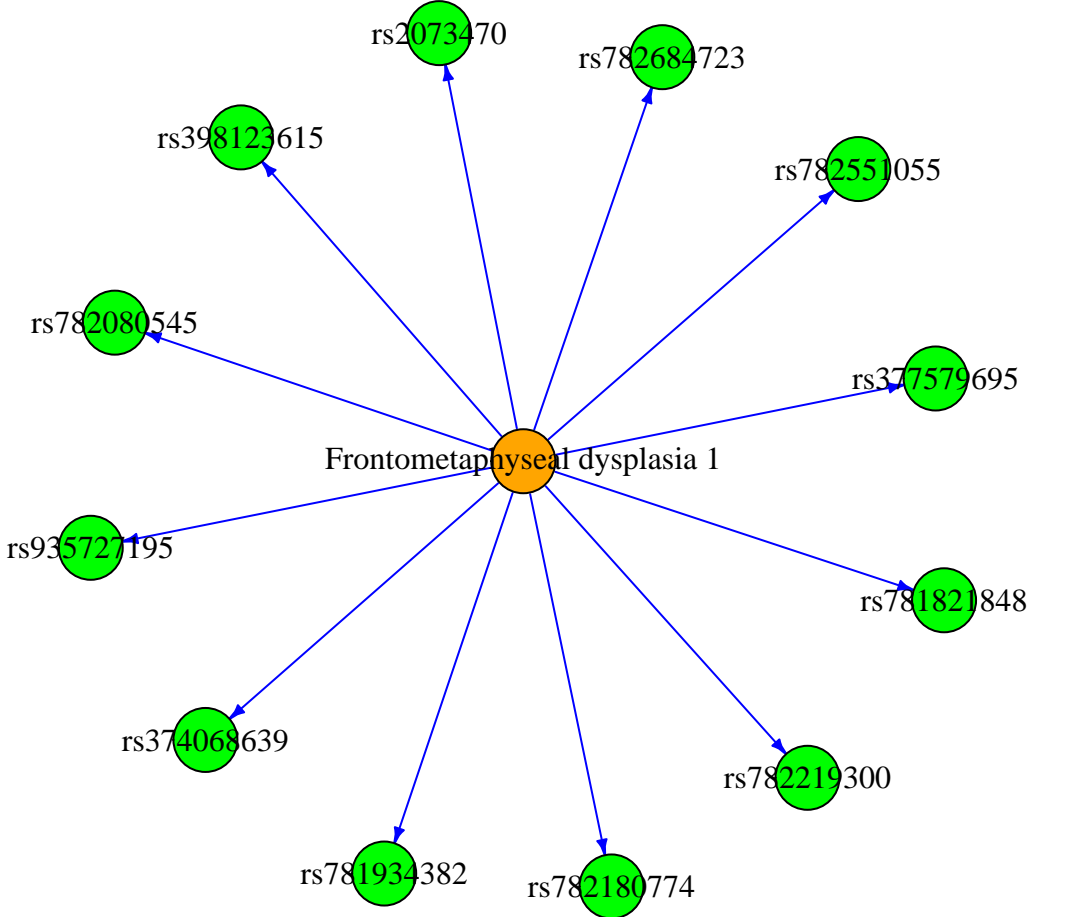

Variant–Disease Network (Frontotemporal dementia)

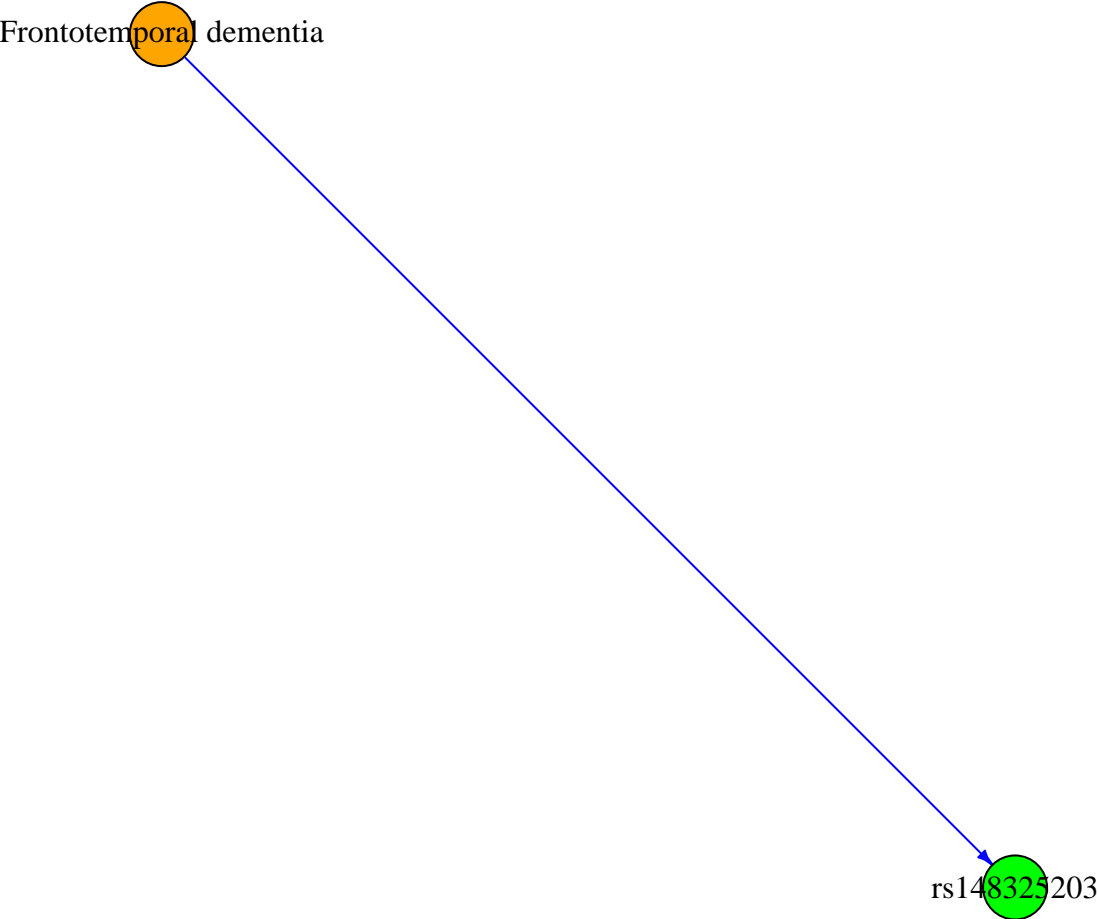

## Variant-Disease Network (Fucosidosis)

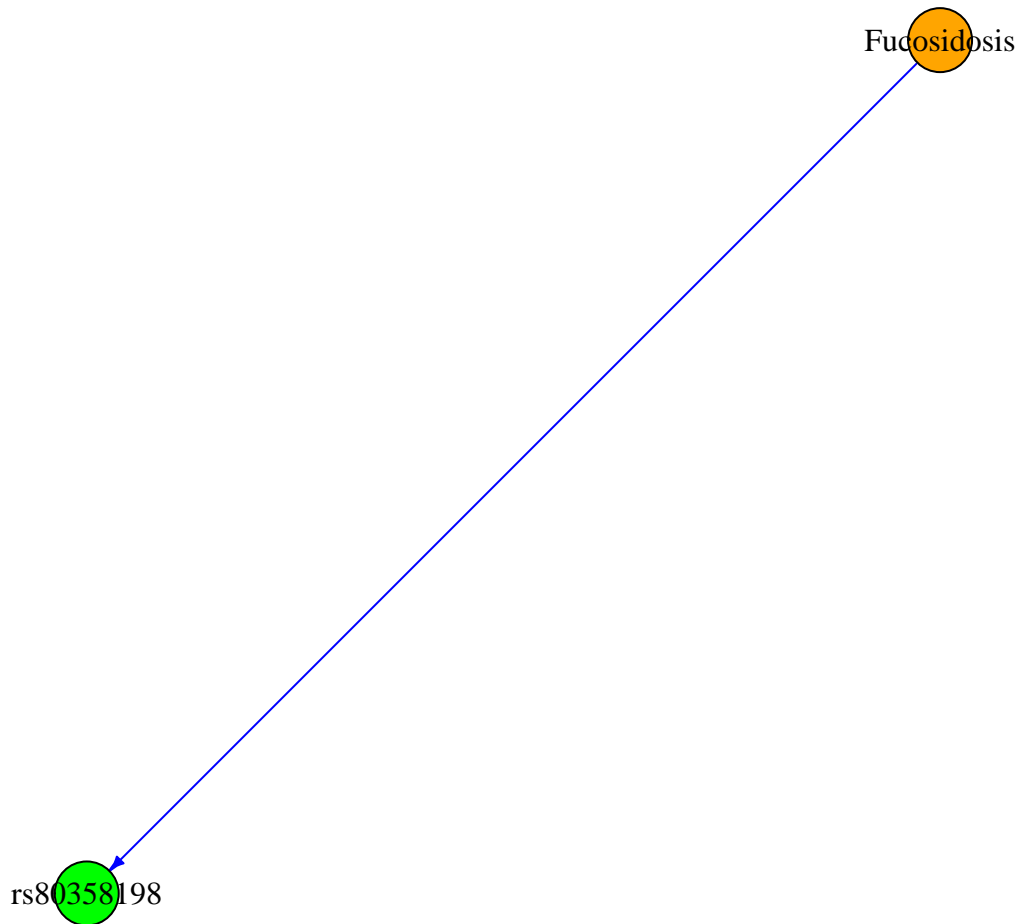

## Variant-Disease Network (Fumarase deficiency)

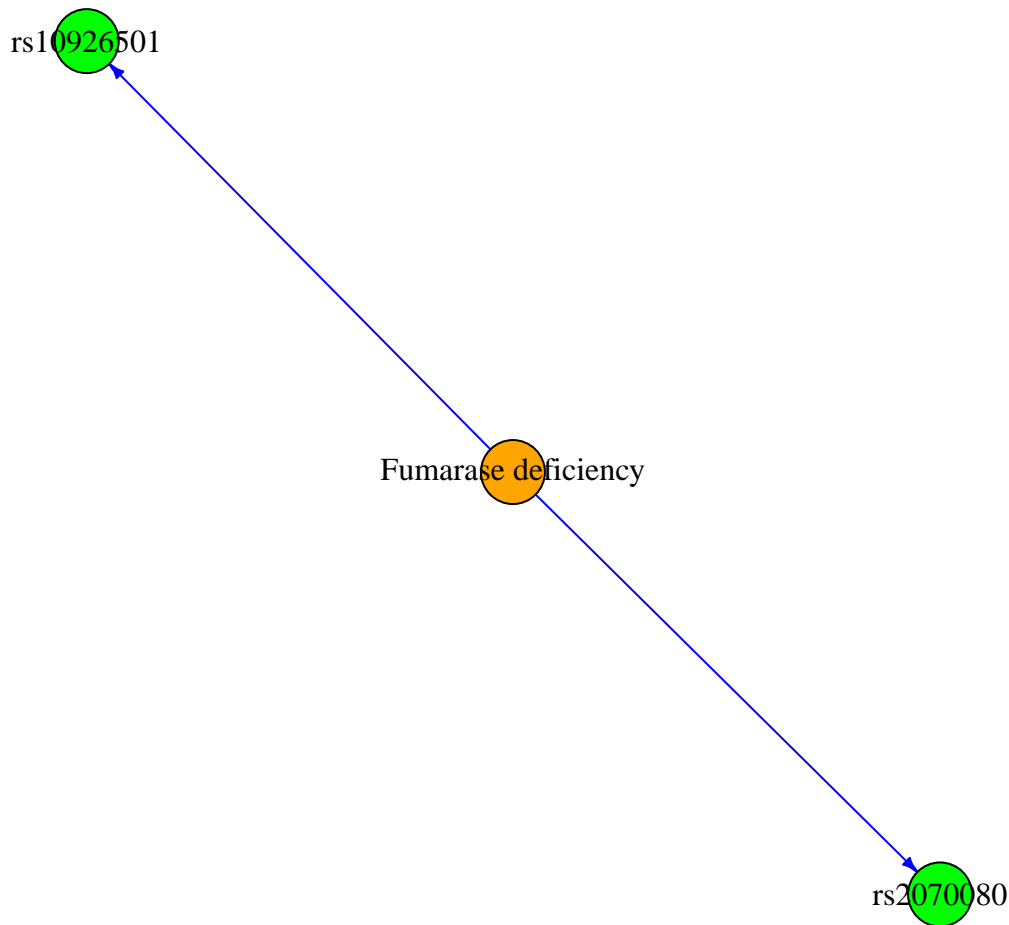

# Variant–Disease Network (Fumarylacetoacetase pseudodeficiency)

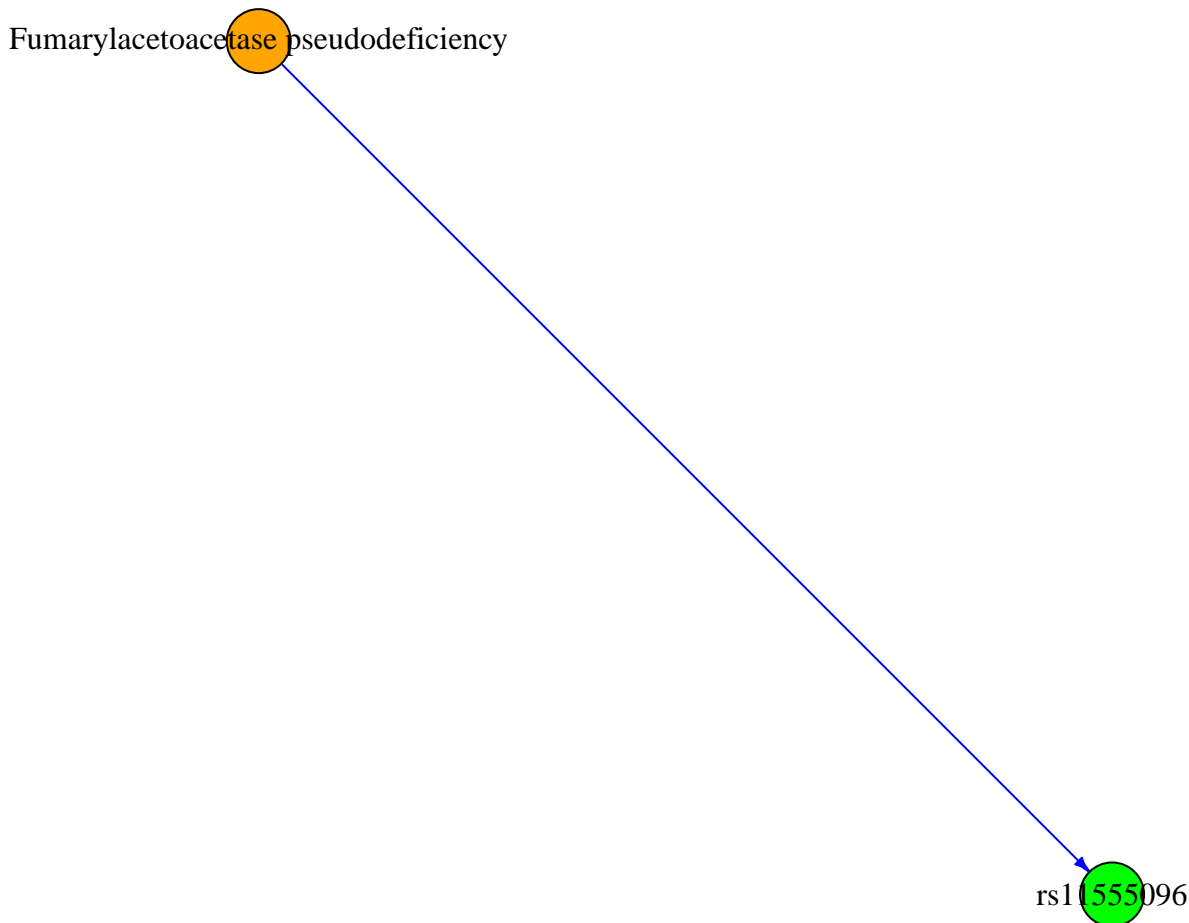

## Variant-Disease Network (Galactosemia)

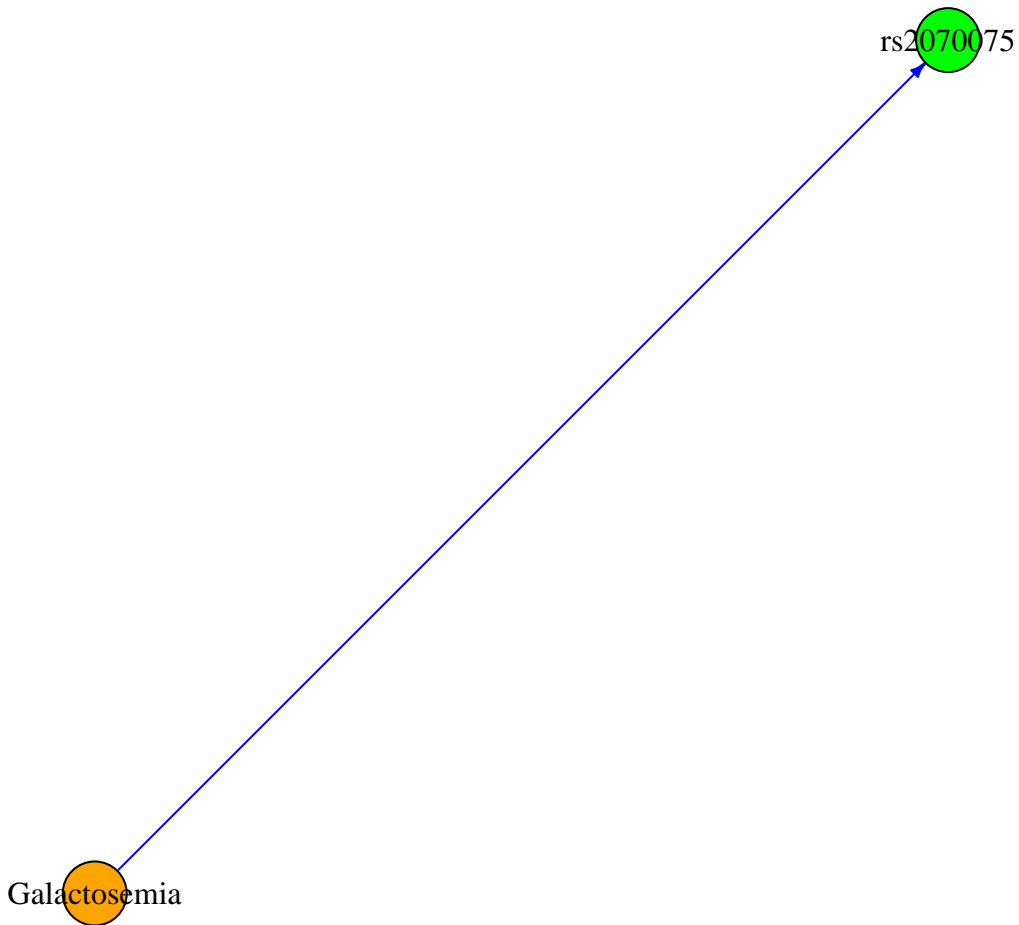

Variant–Disease Network (Galactosylceramide beta–galactosidase deficiency)

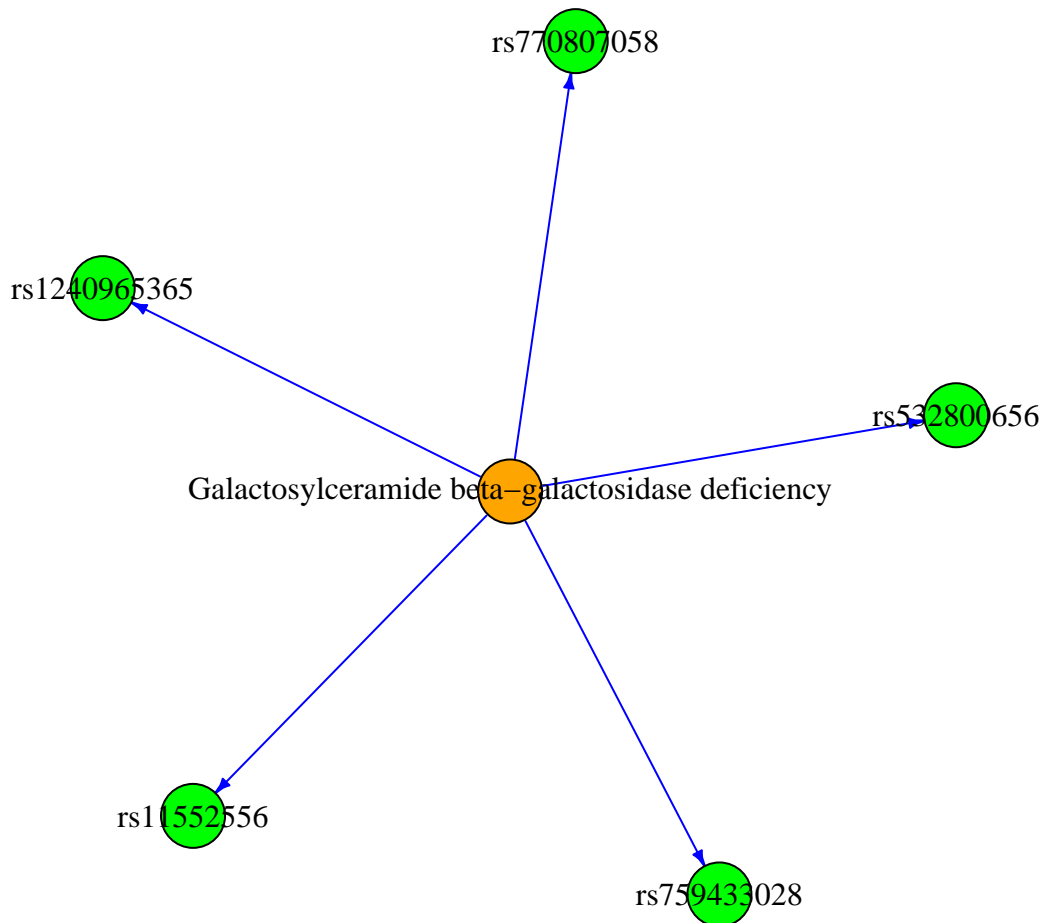

## Variant–Disease Network (Gallbladder disease 1)

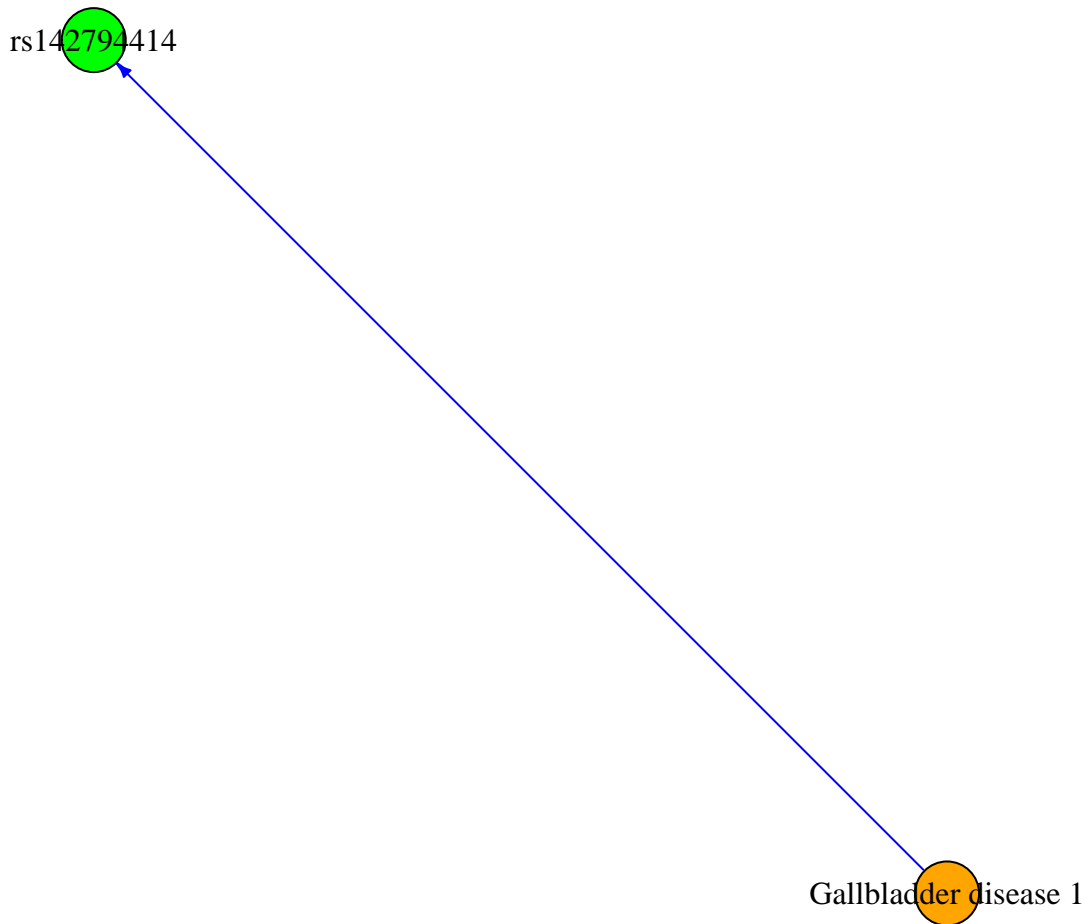



Variant–Disease Network (Gamma-aminobutyric acid transaminase deficiency)

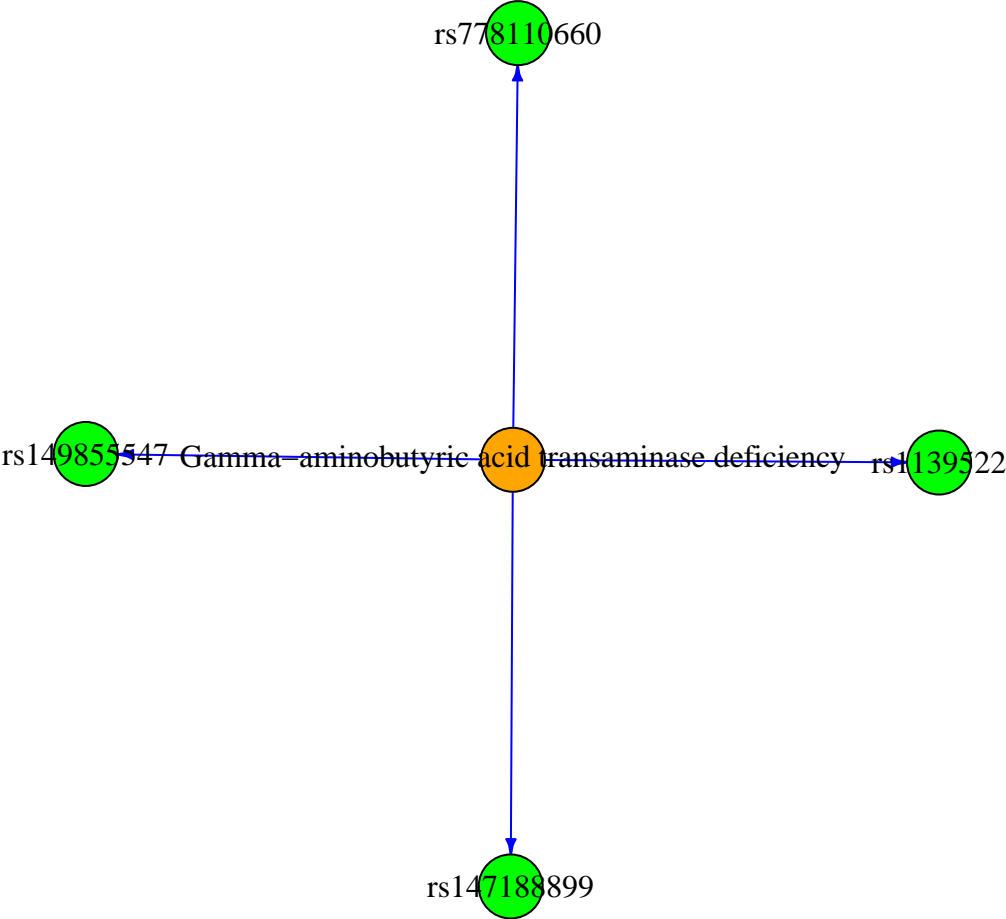

**Variant–Disease Network (Gangliosidosis GM1 type 3)**

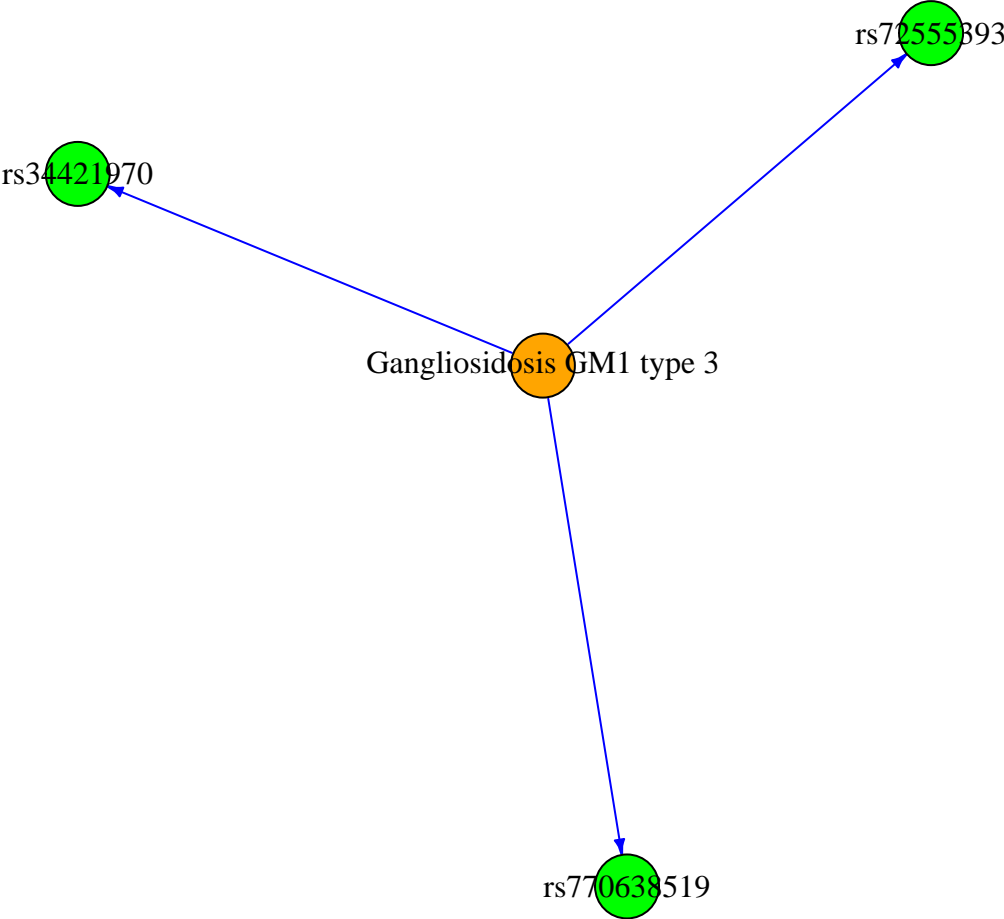

**Variant–Disease Network (Gastrointestinal stroma tumor)**

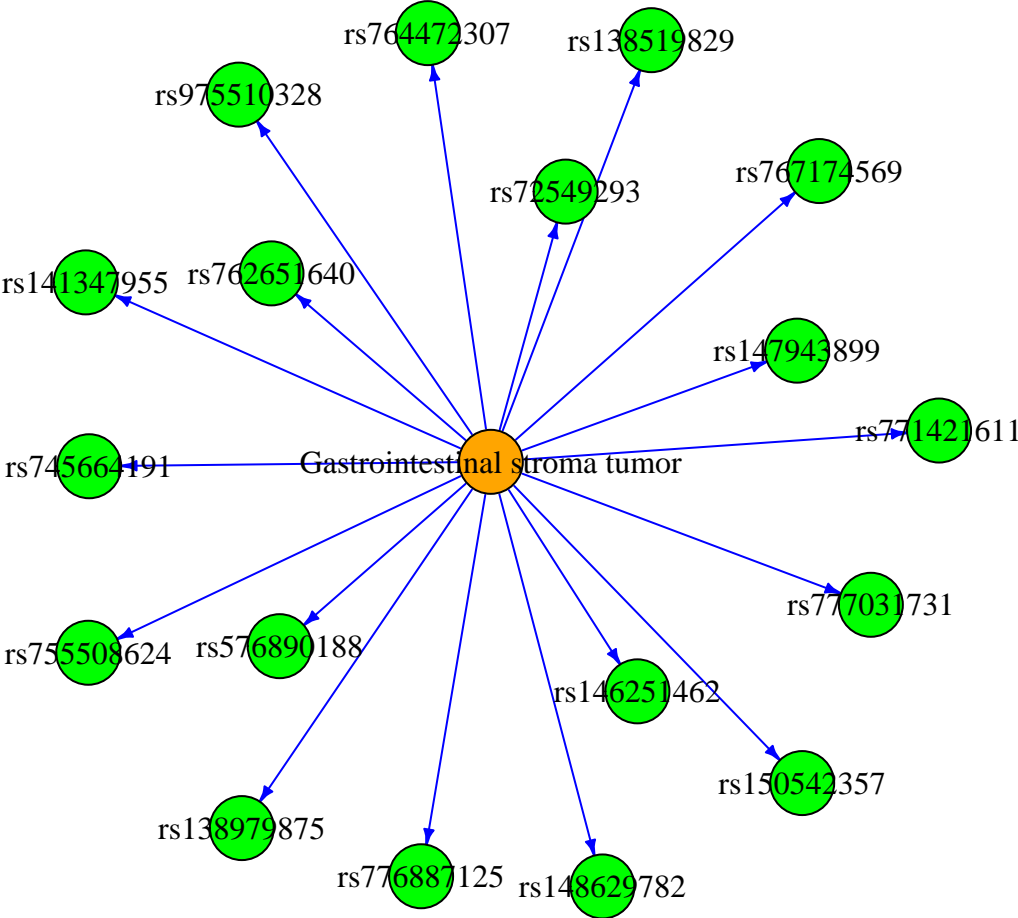

# Variant-Disease Network (GATA-1-related thrombocytopenia with dyserythropoiesis)

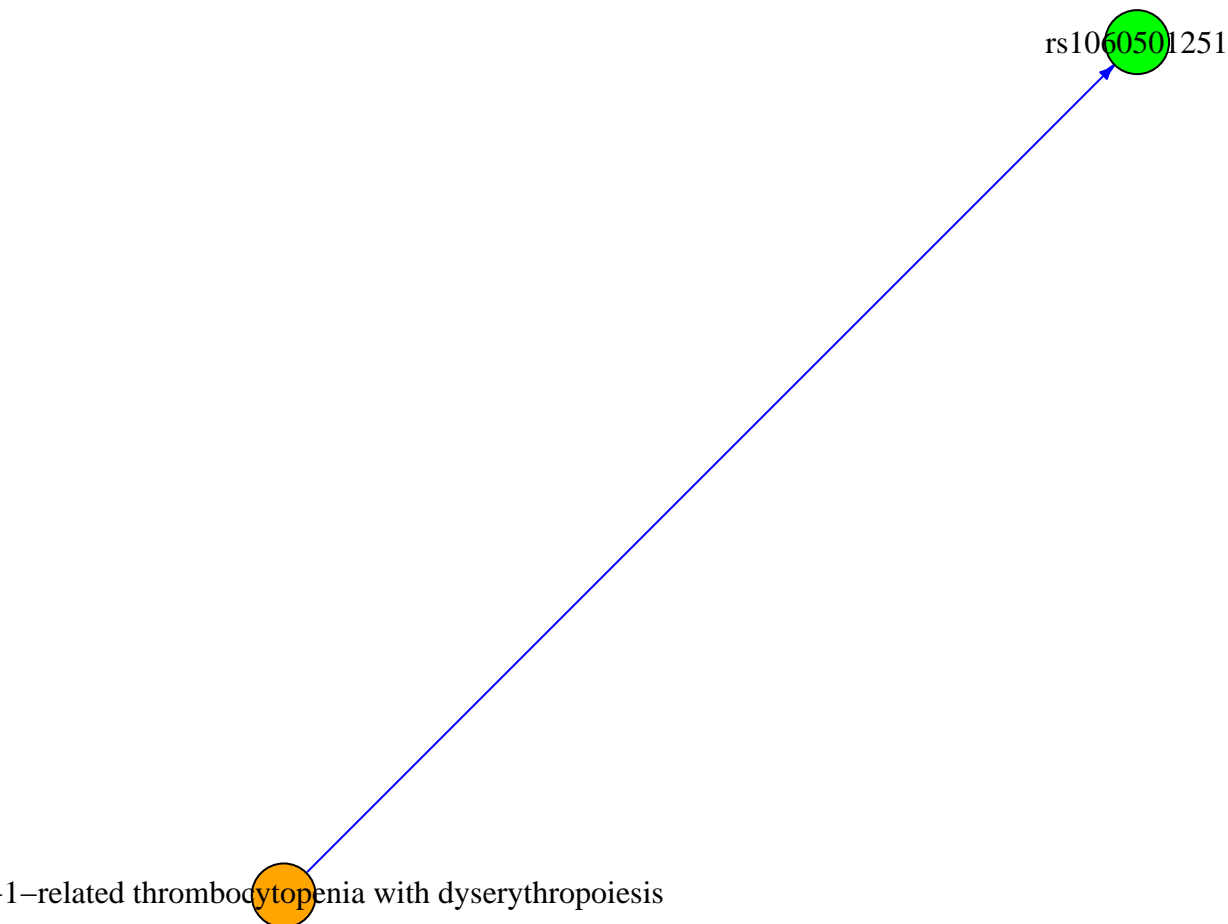

## Variant–Disease Network (Gaze palsy)

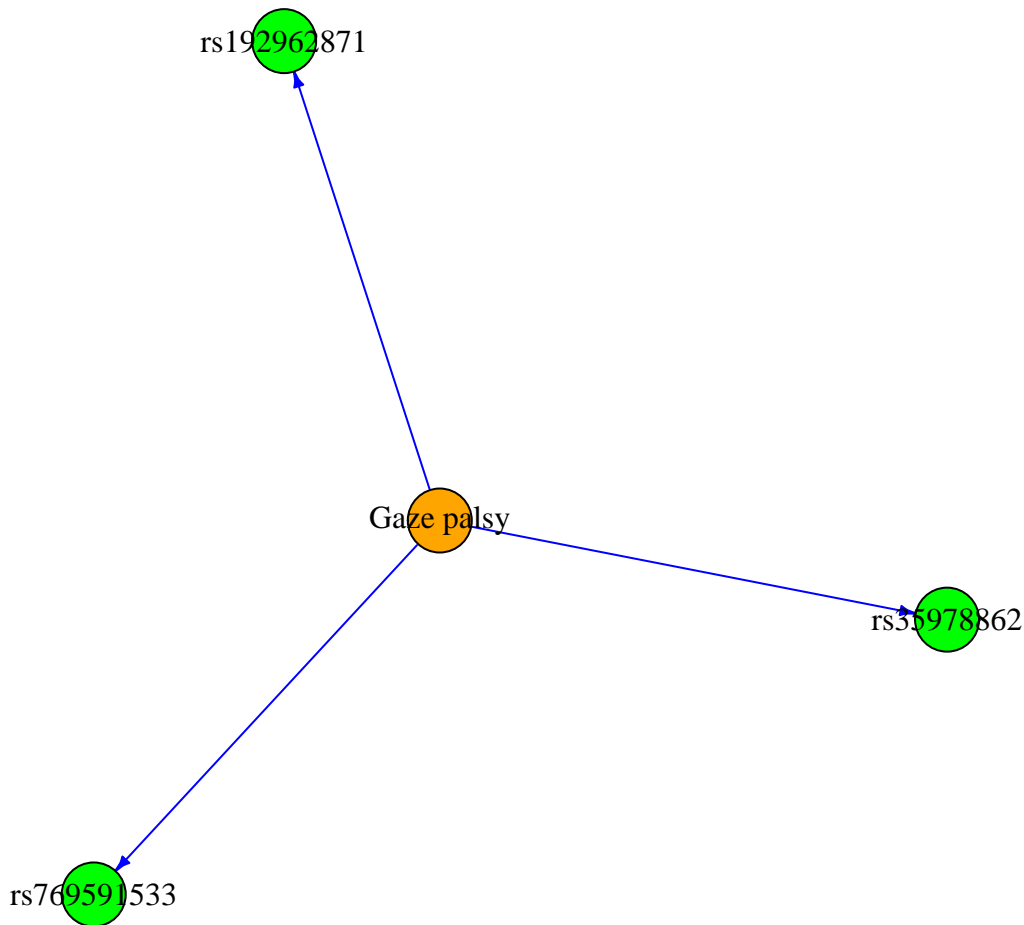

## Variant-Disease Network (Geleophysic dysplasia)

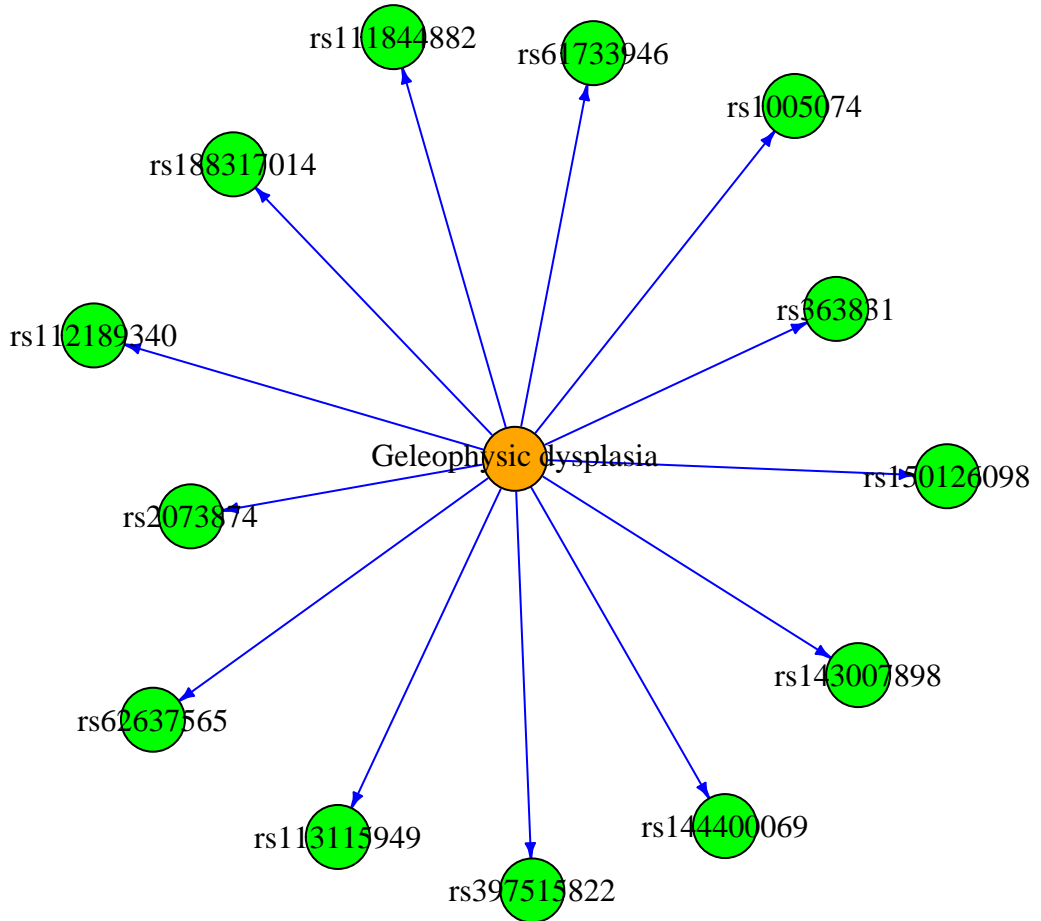

## Variant-Disease Network (Geleophysic dysplasia 1)

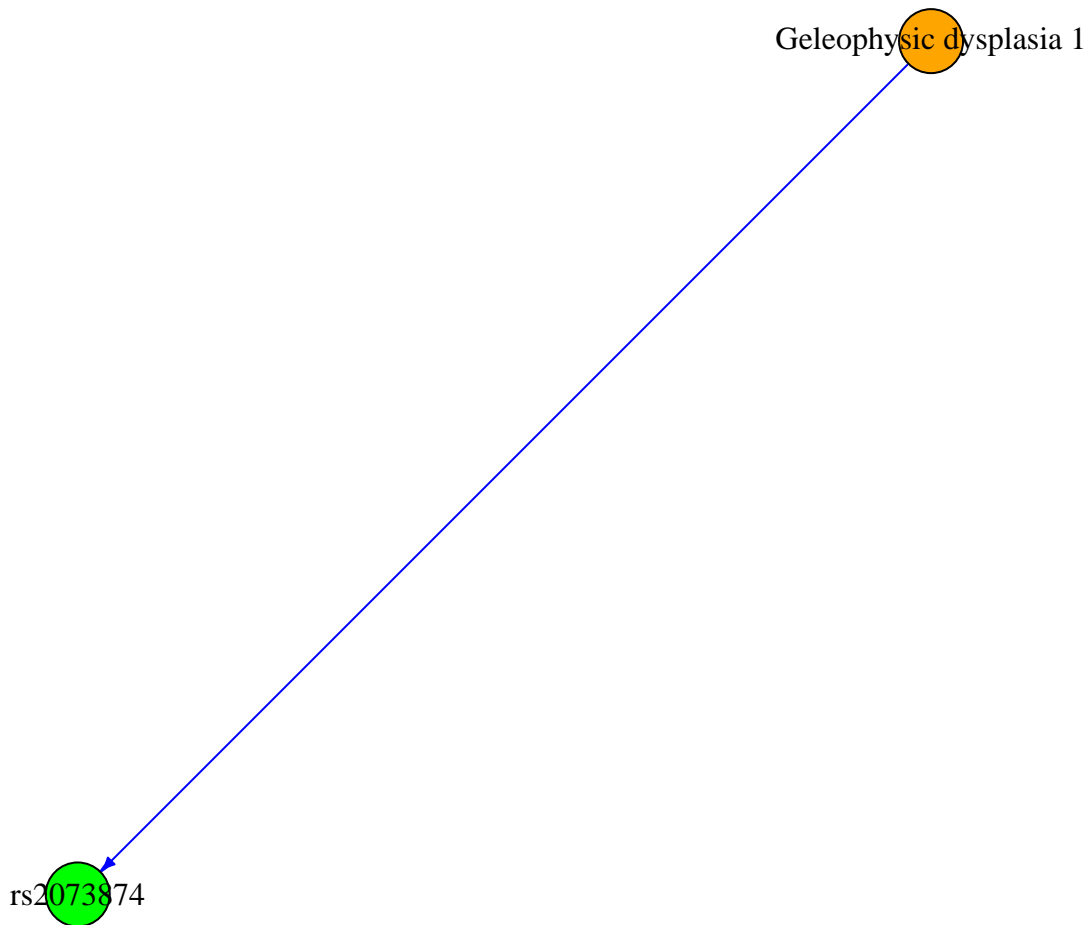

Variant–Disease Network (Geleophysic dysplasia 2)

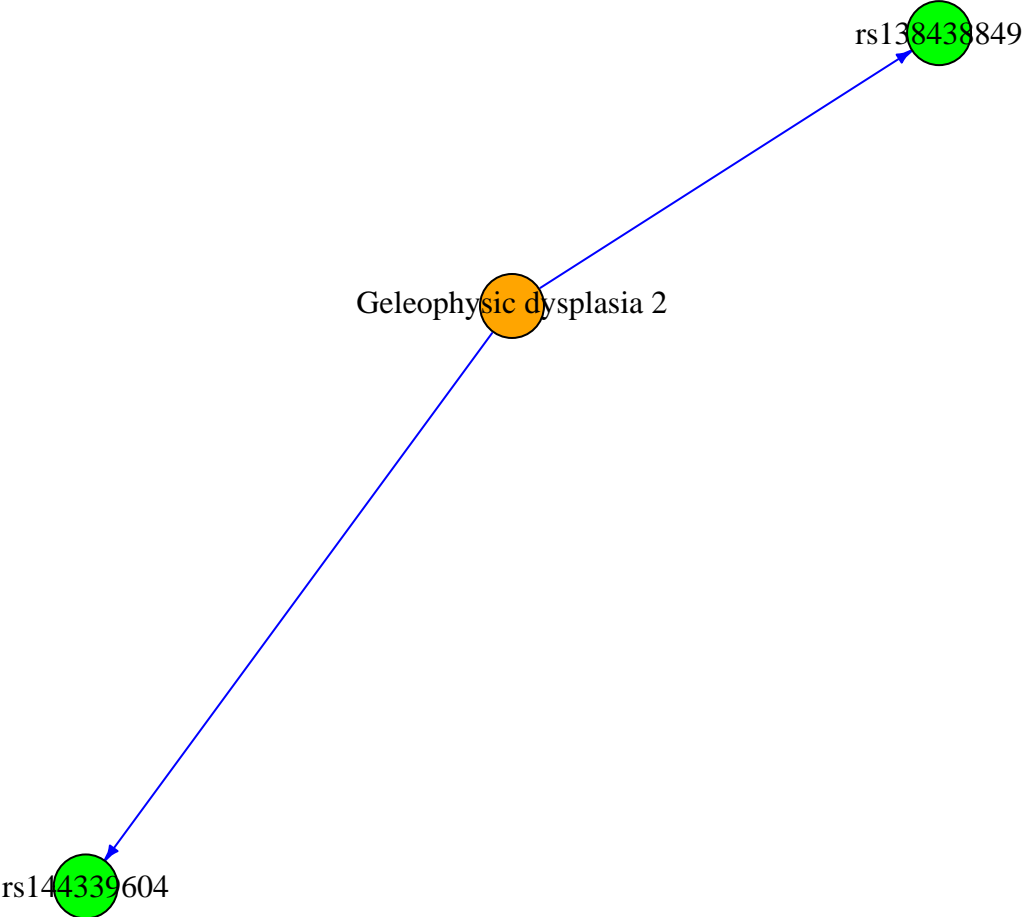



Variant–Disease Network (Generalized epilepsy and paroxysmal dyskinesia)

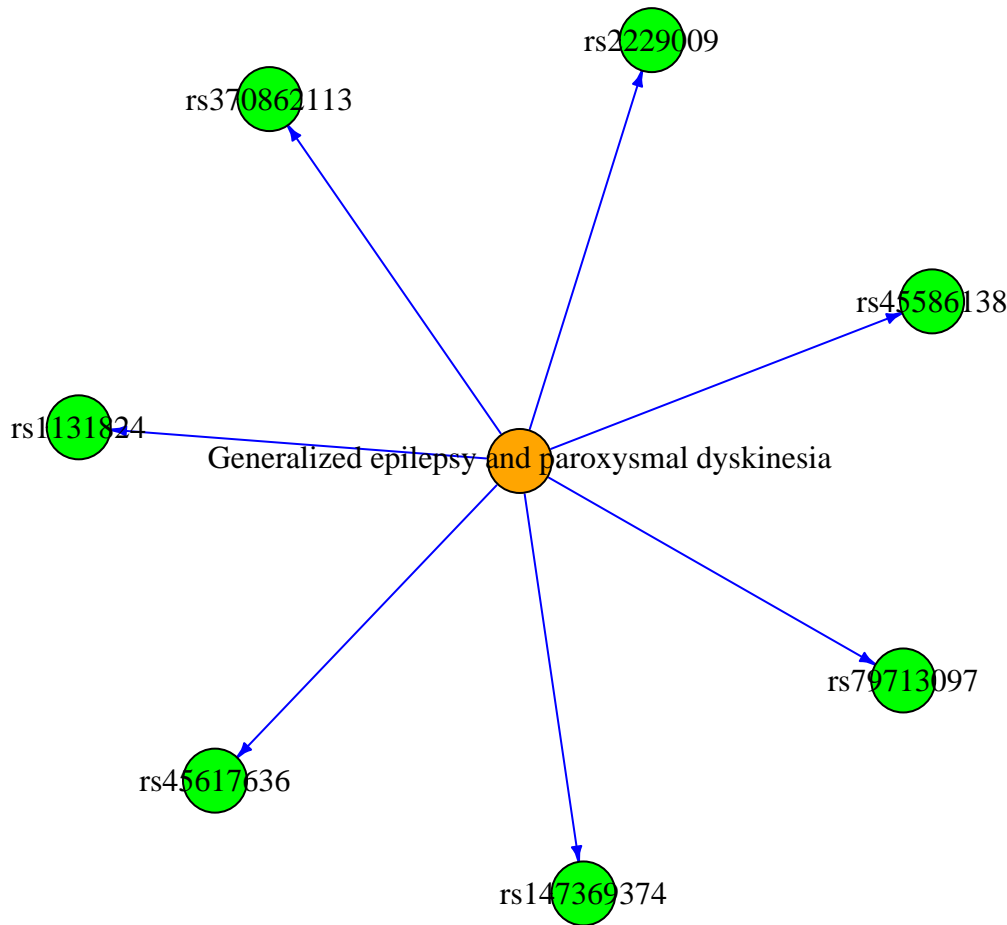

Variant–Disease Network (Generalized epilepsy with febrile seizures plus

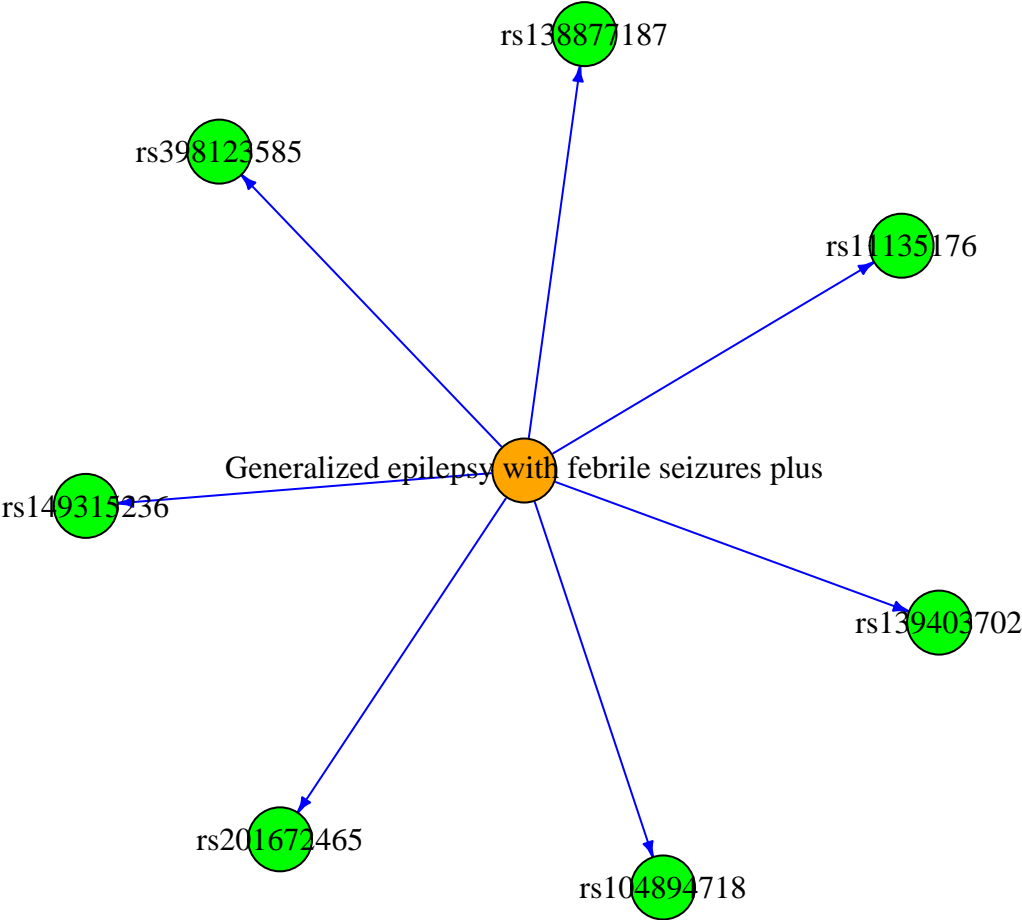

## Variant-Disease Network (Generalized hypotonia)

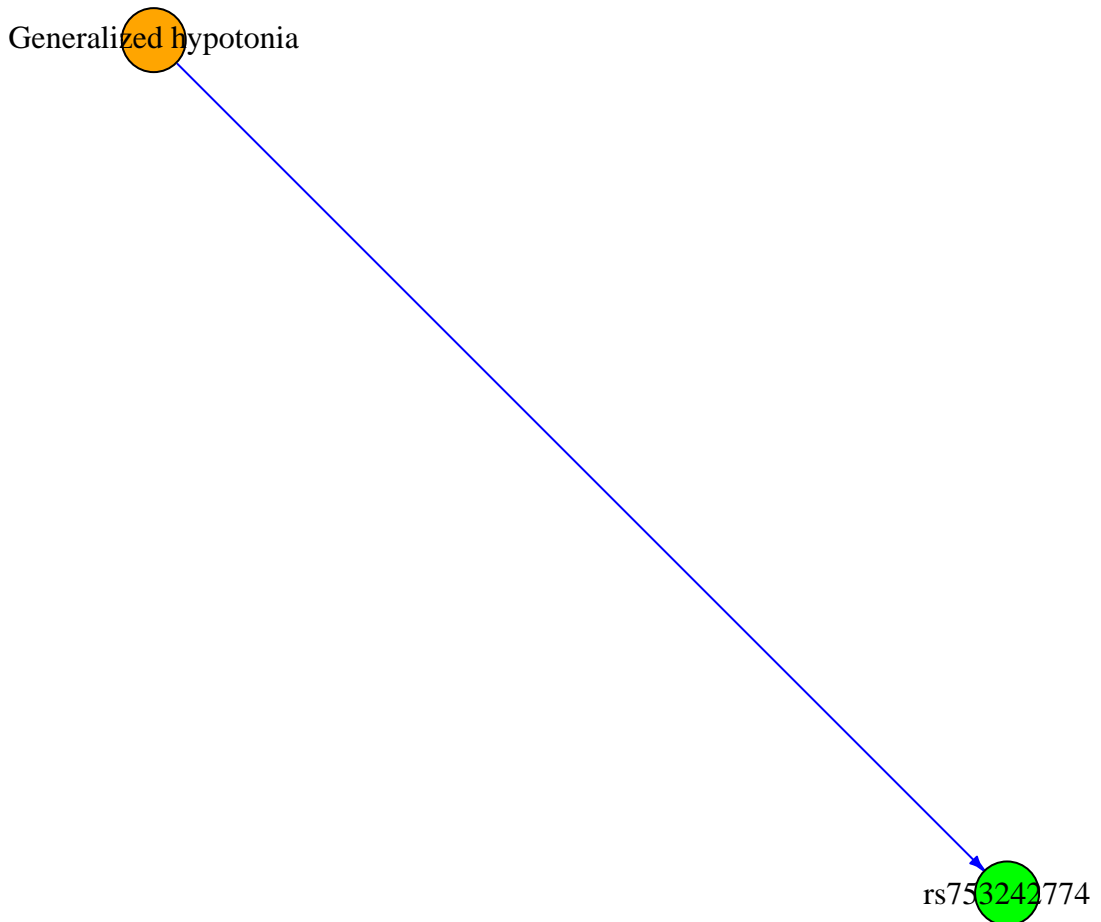

# Variant–Disease Network (Generalized tonic–clonic seizures)

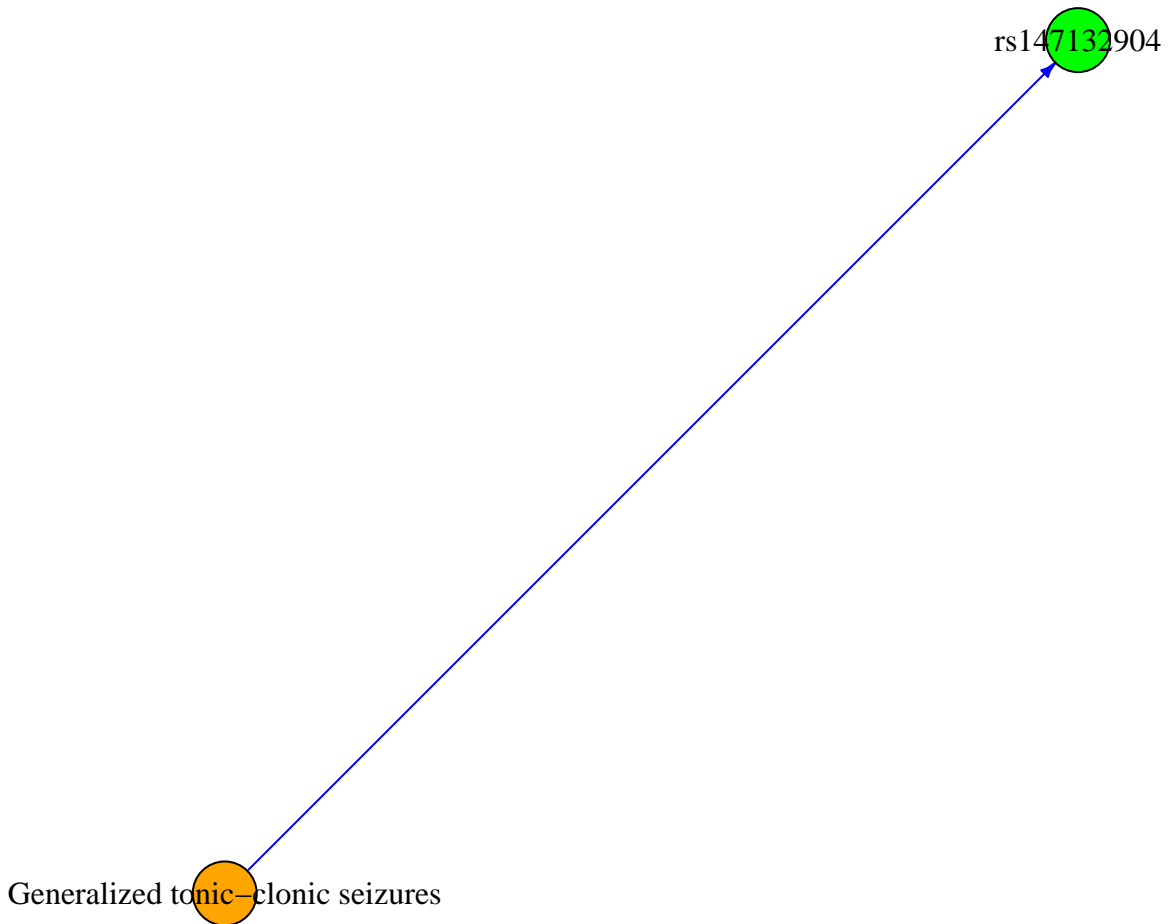

# Variant–Disease Network (Giant axonal neuropathy 1)

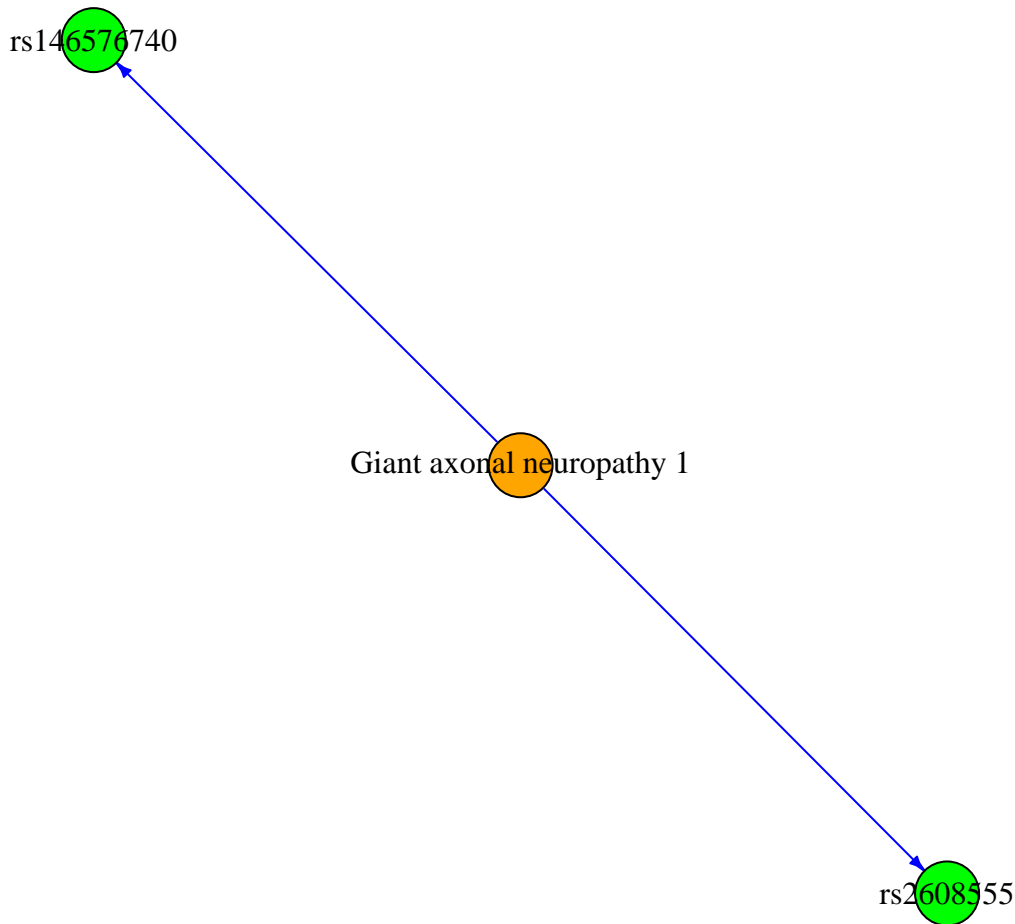

Variant–Disease Network (Gillespie syndrome)

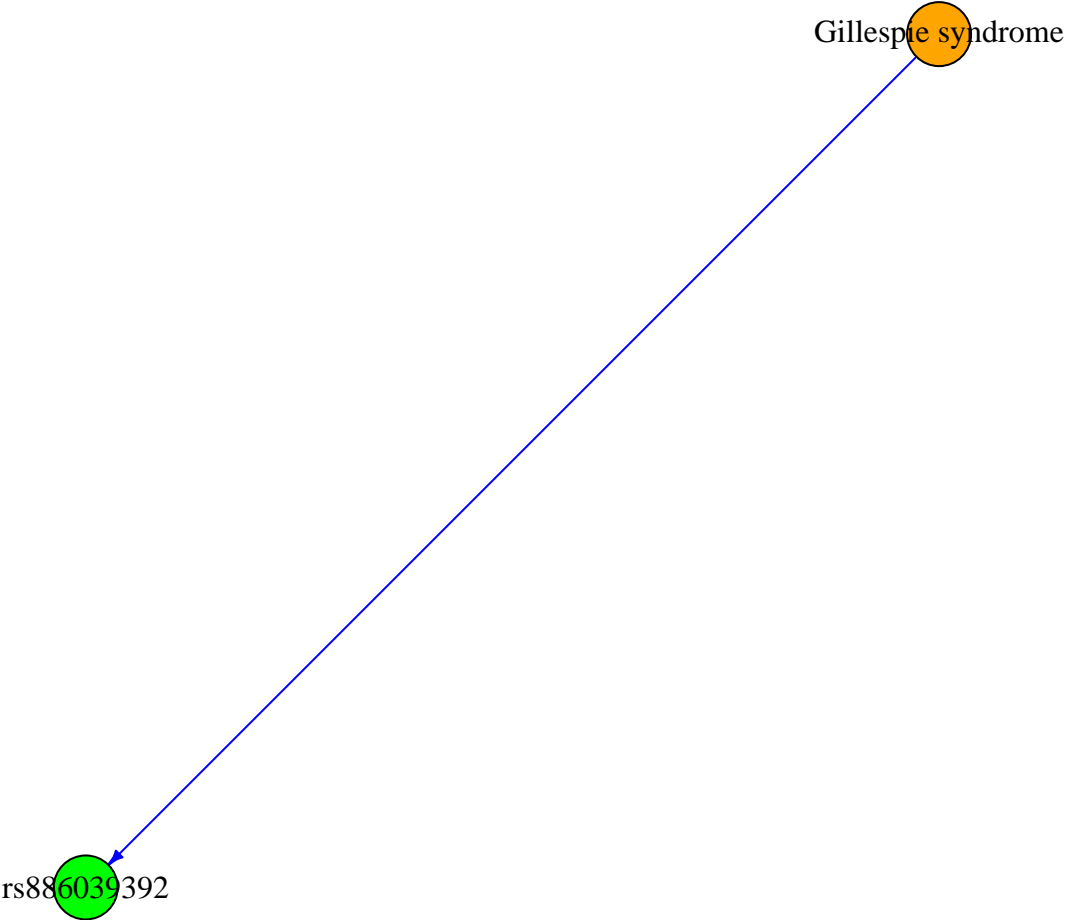

## Variant–Disease Network (Gingival fibromatosis)

Gingival fibromatosis

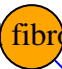

rs55980502

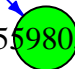

## Variant–Disease Network (Glanzmann thrombasthenia)

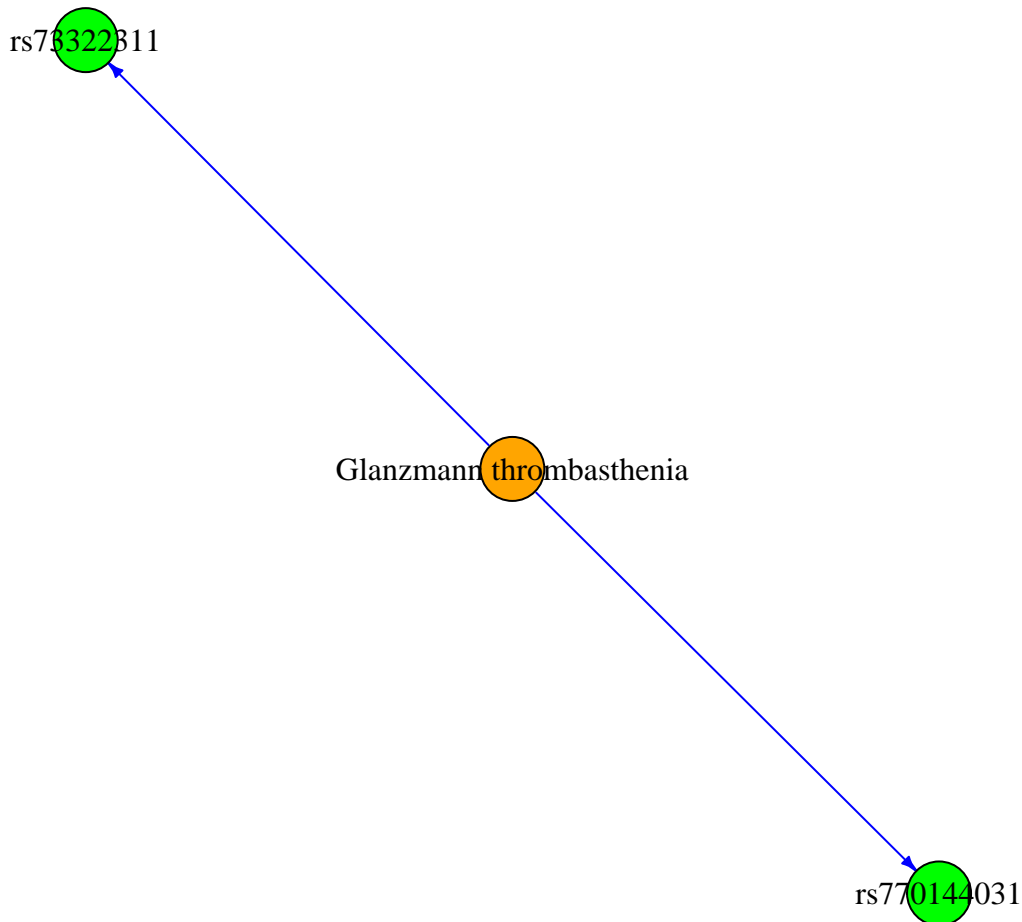



## Variant-Disease Network (Glaucoma 1)

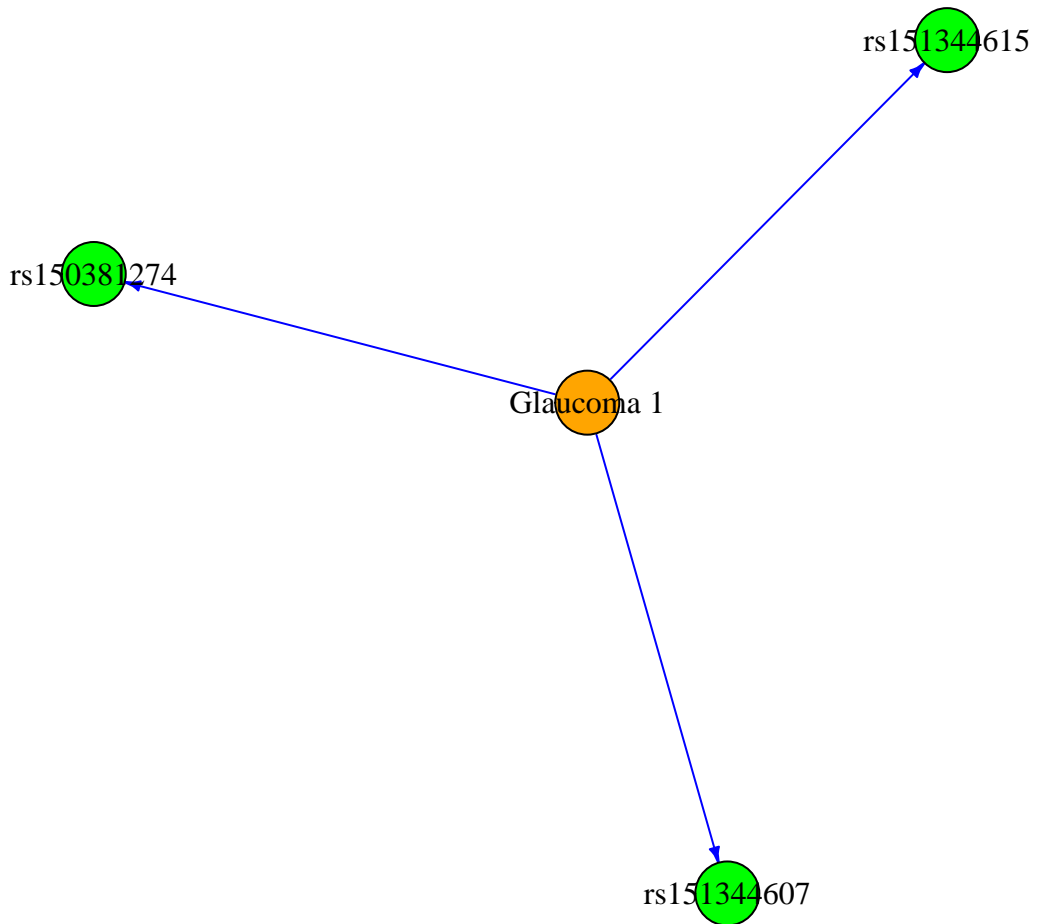

Variant–Disease Network (Global developmental delay)

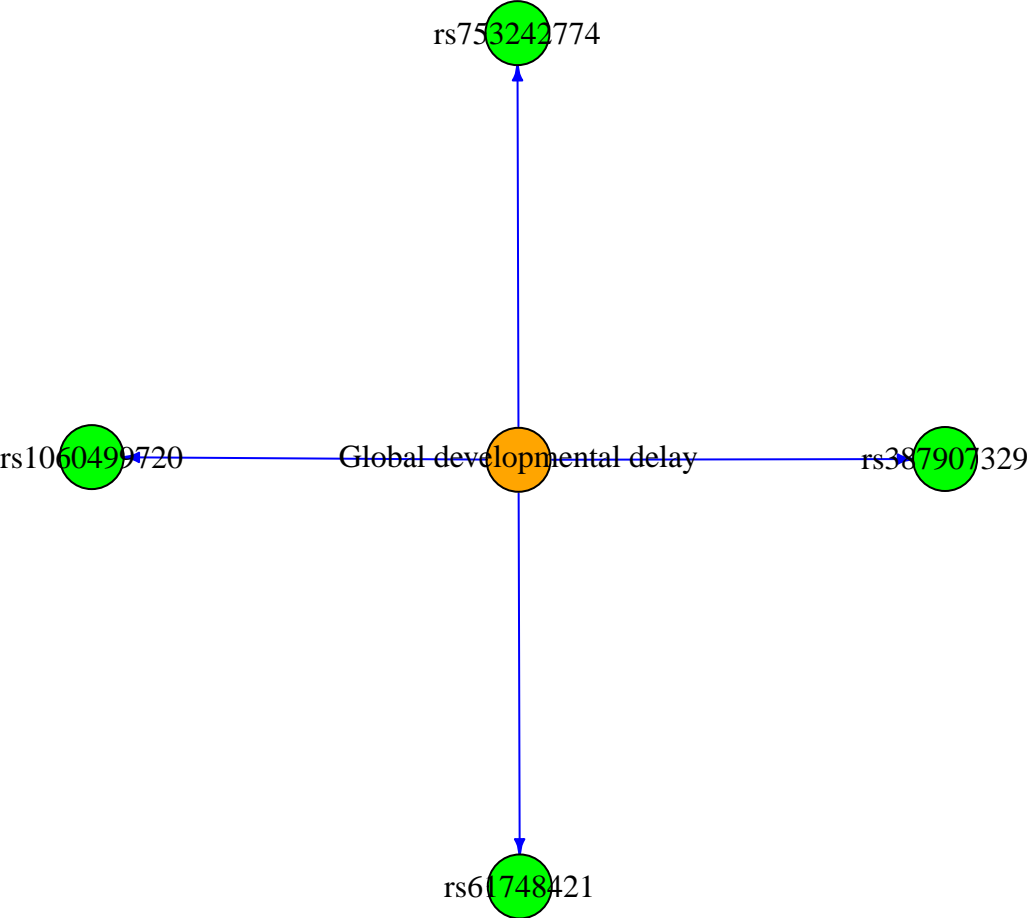

Variant–Disease Network (Glucocorticoid deficiency with achalasia)

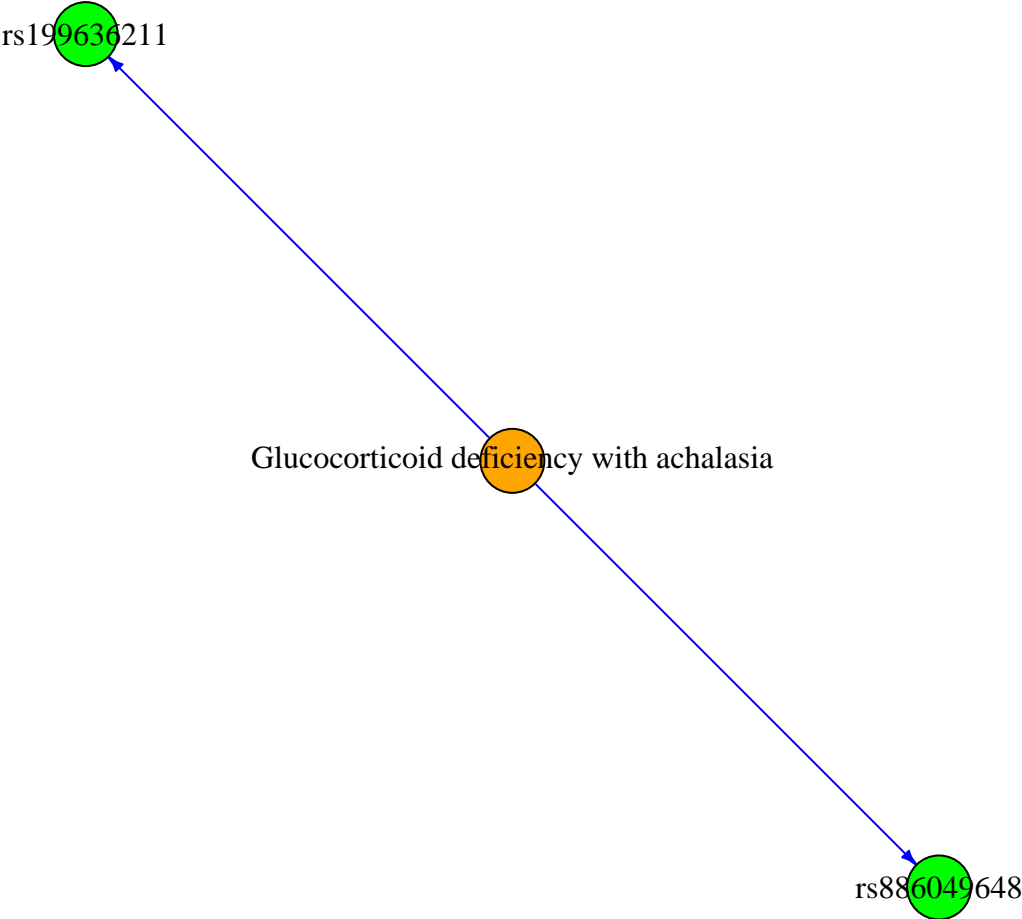

Variant–Disease Network (Glucose transporter type 1 deficiency syndrome)

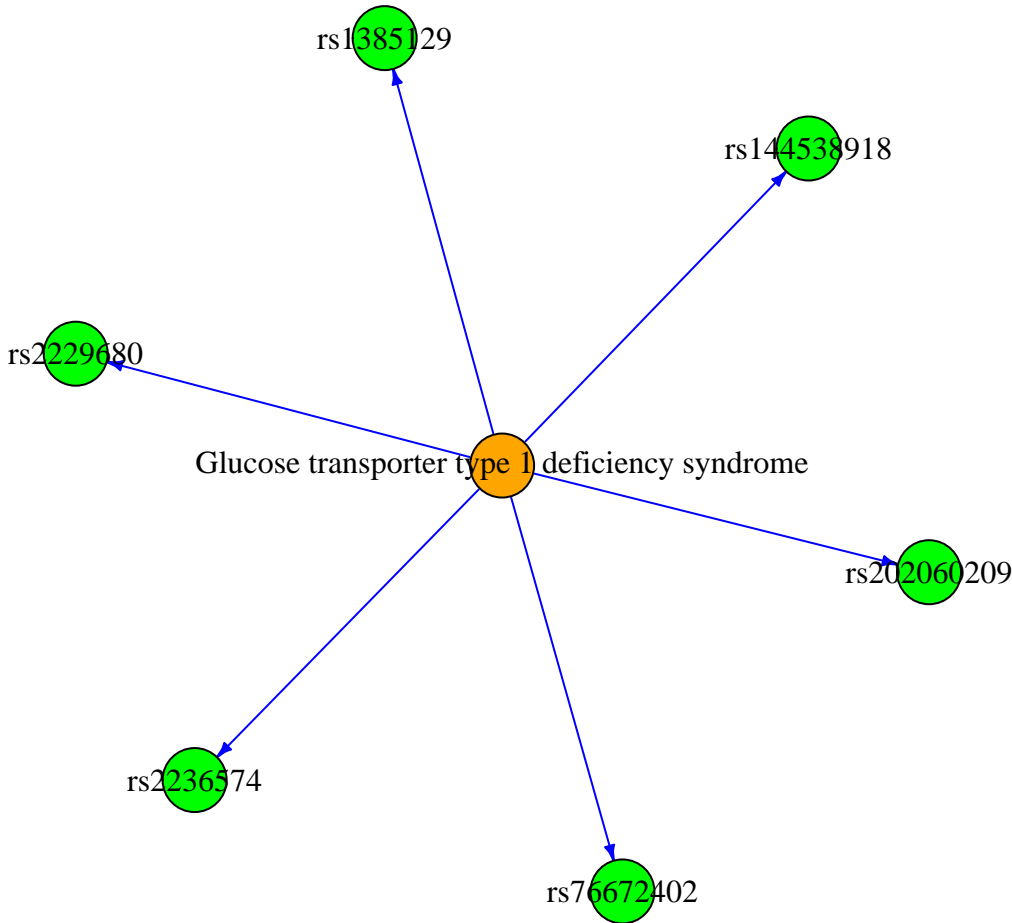

Variant–Disease Network (Glucose–6–phosphate transport defect)

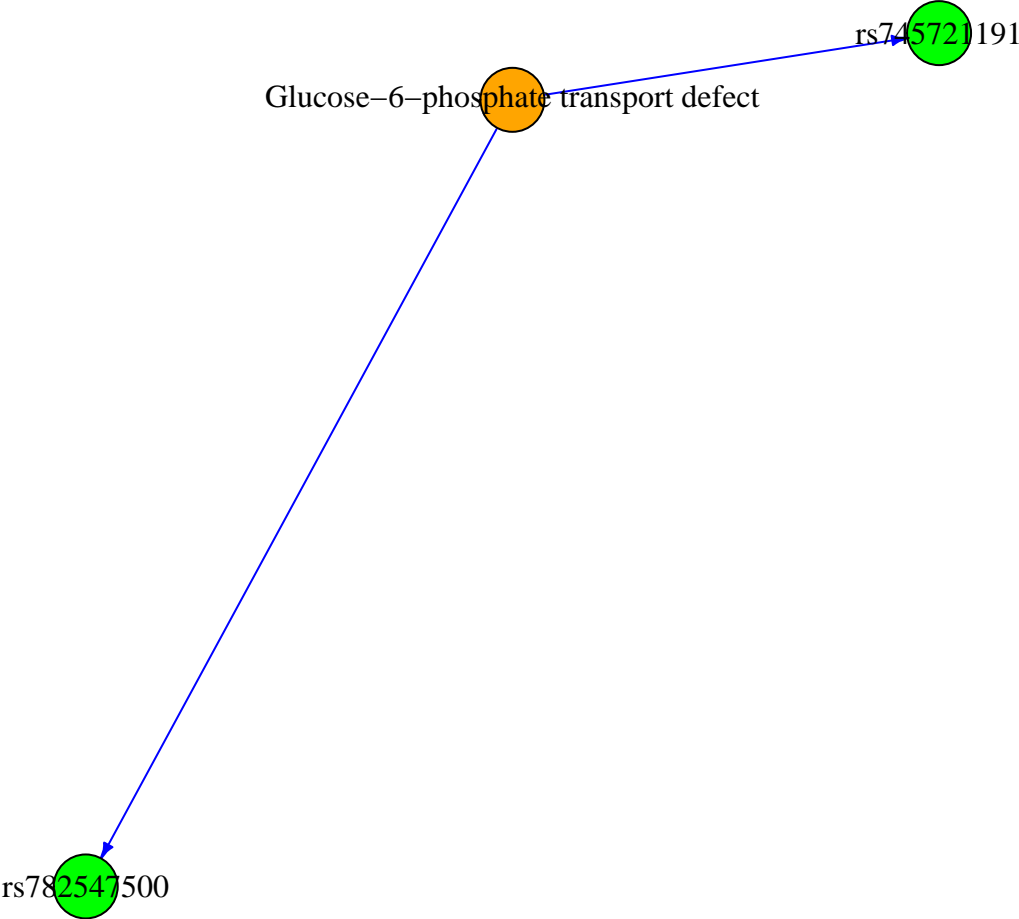

Variant–Disease Network (GLUT1 deficiency syndrome 1)

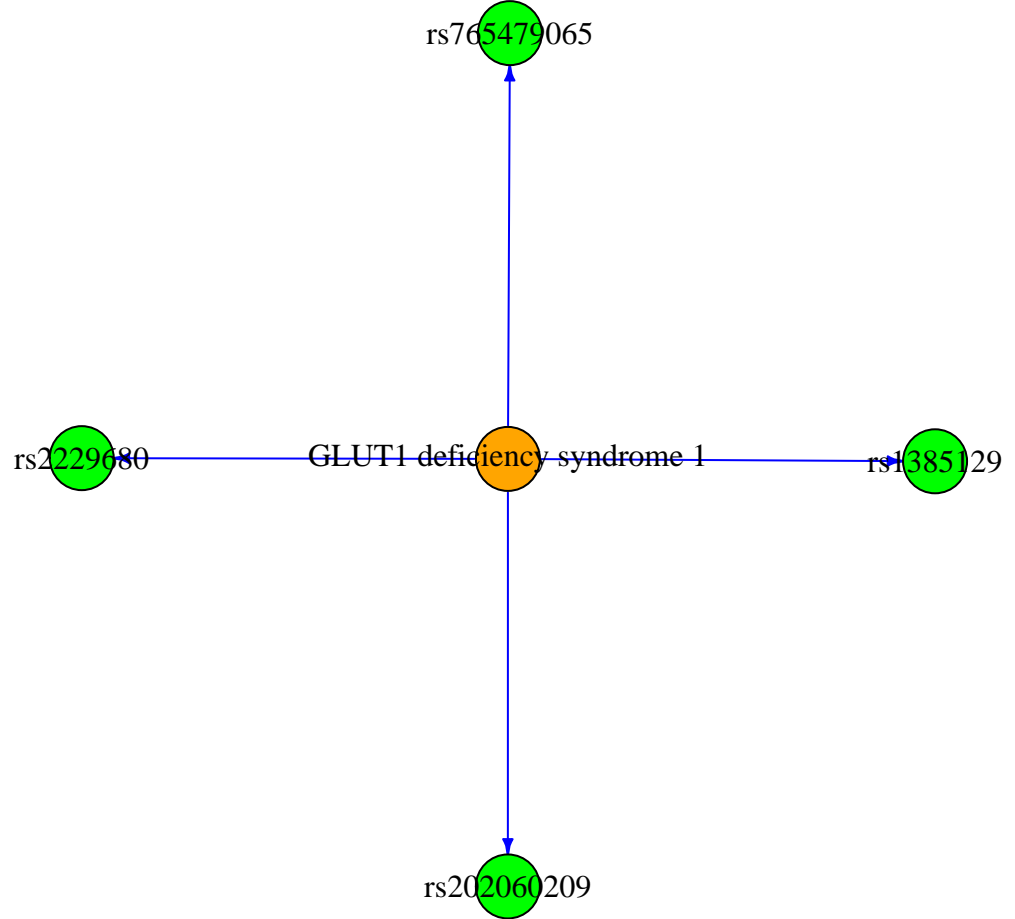

Variant–Disease Network (GLUT1 deficiency syndrome 2)

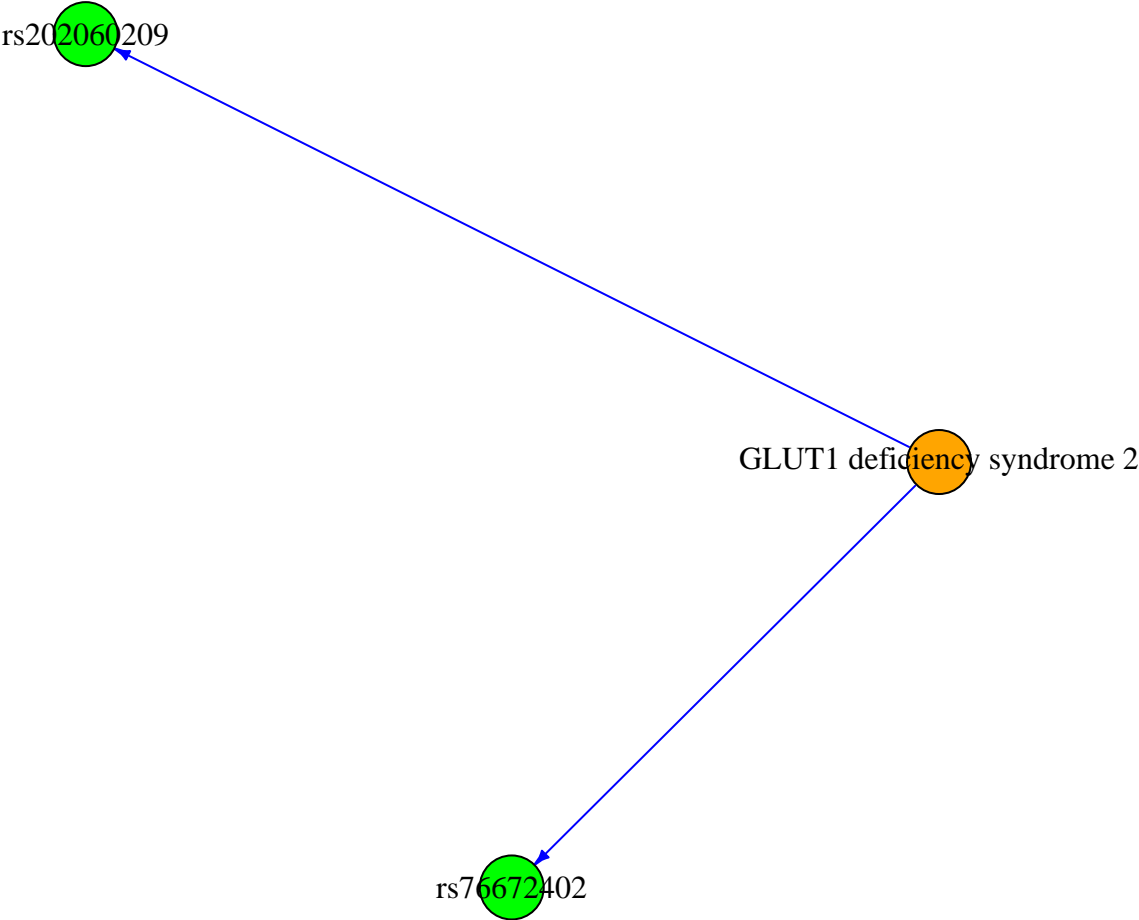

# Variant-Disease Network (GLUTAMIC PYRUVATE TRANSAMINASE POLYMORPHISM)

GLUTAMIC PYRUVATE TRANSAMINASE POLYMORPHISM

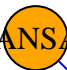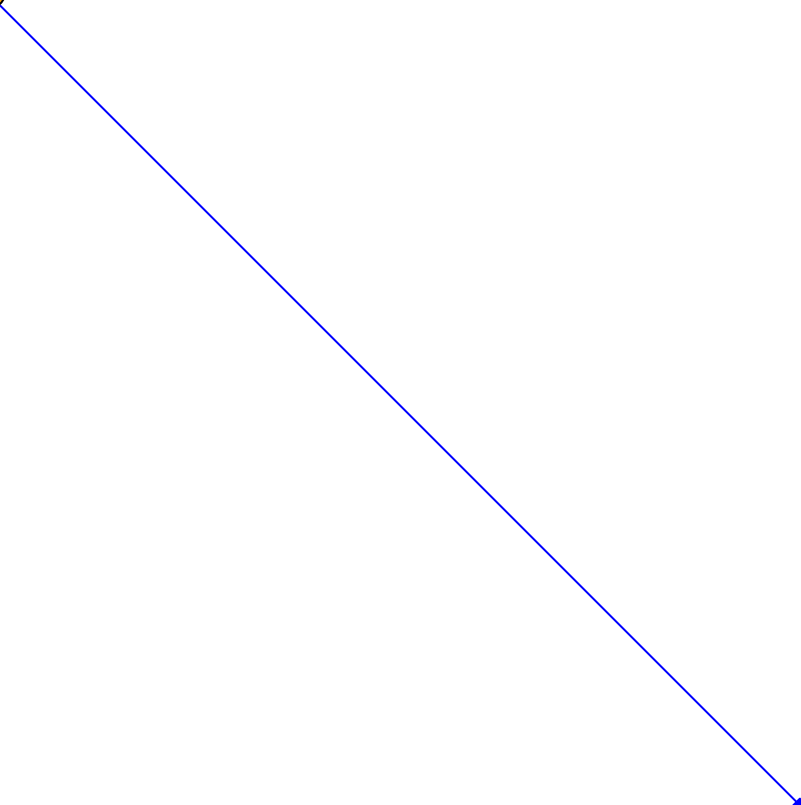

rs1063739

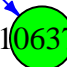



## Variant–Disease Network (Gluthathione synthetase deficiency)

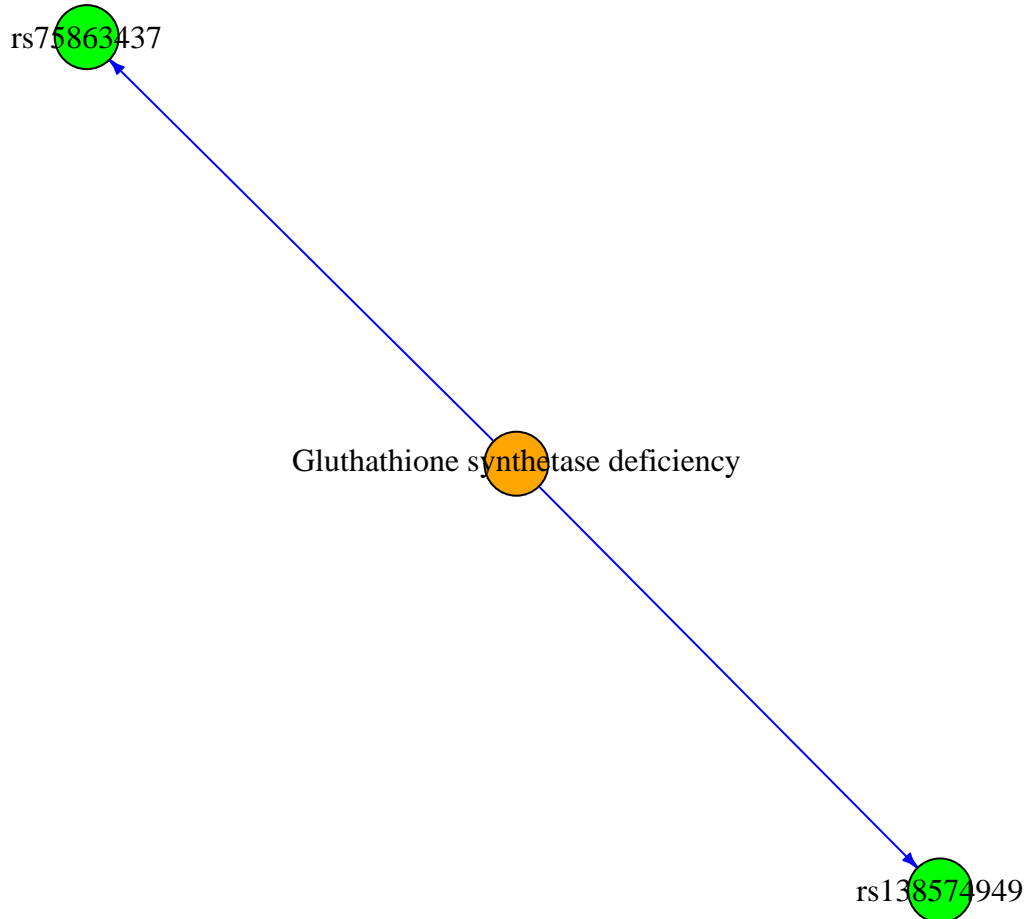

**Variant–Disease Network (Glycogen phosphorylase kinase deficiency)**

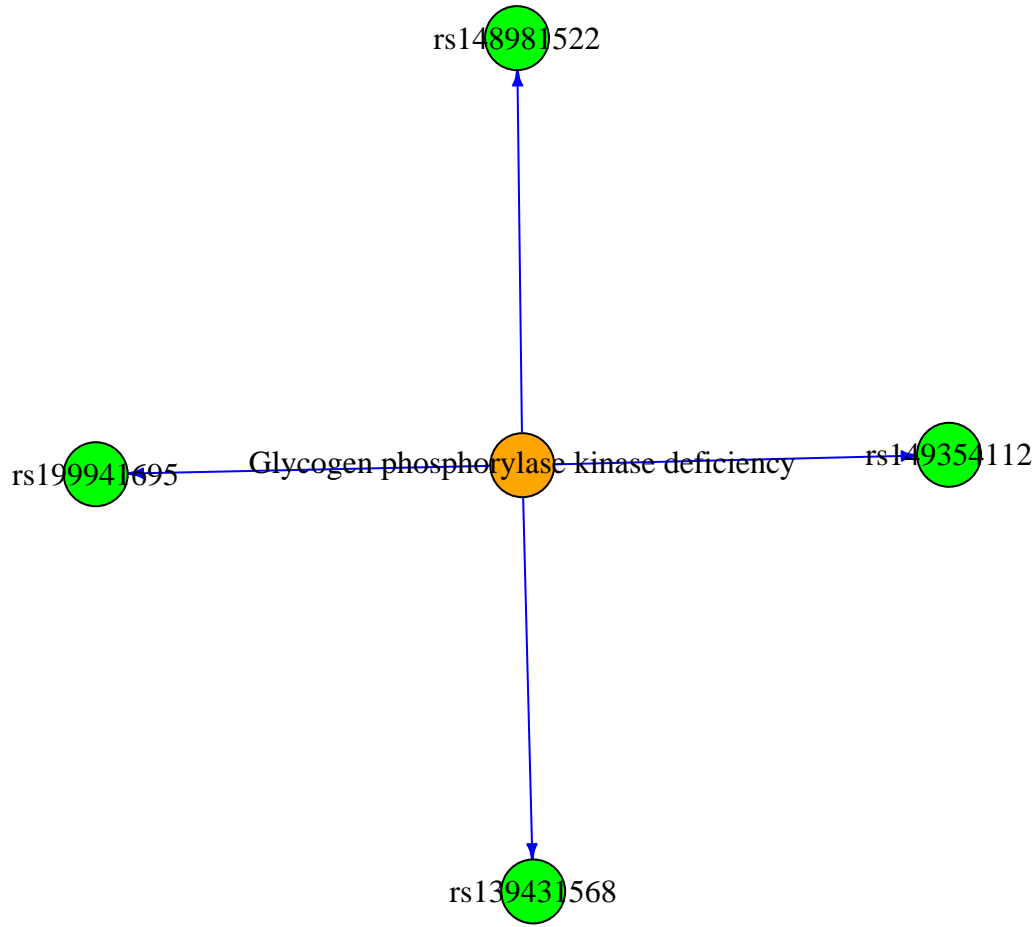

## Variant–Disease Network (Glycogen storage disease)

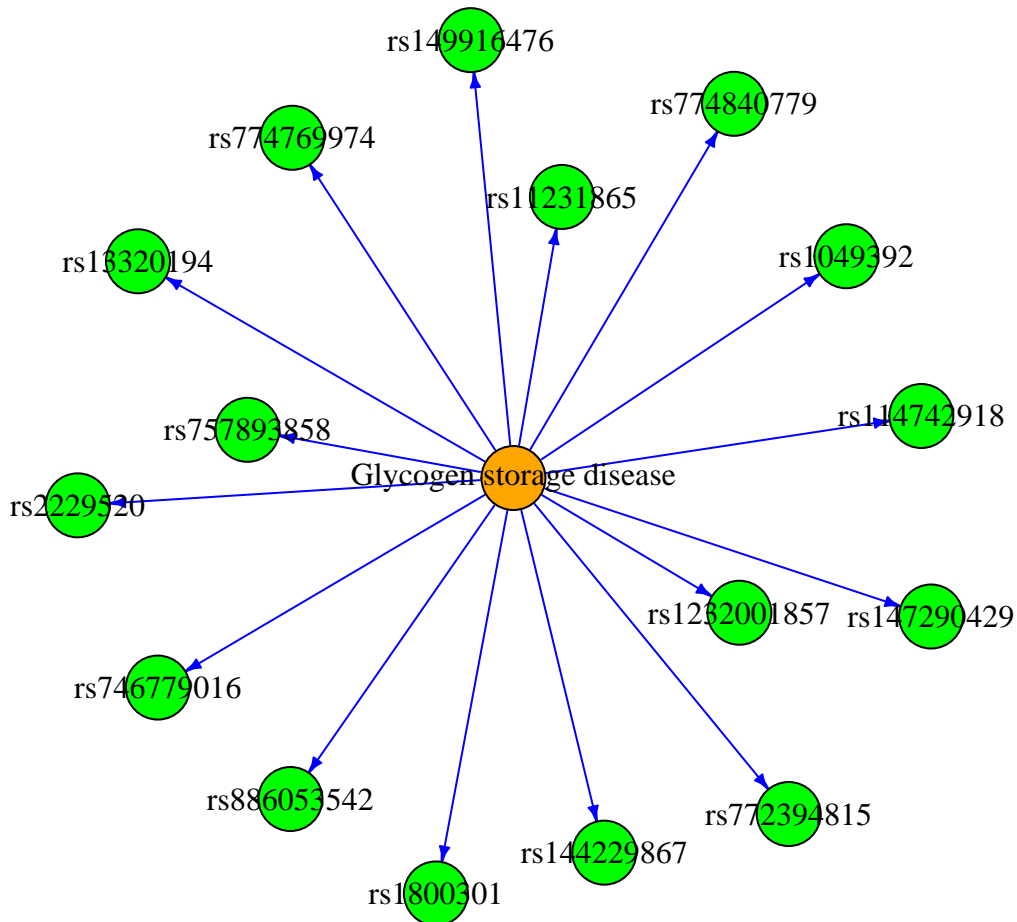

## Variant–Disease Network (Glycogen storage disease 0)

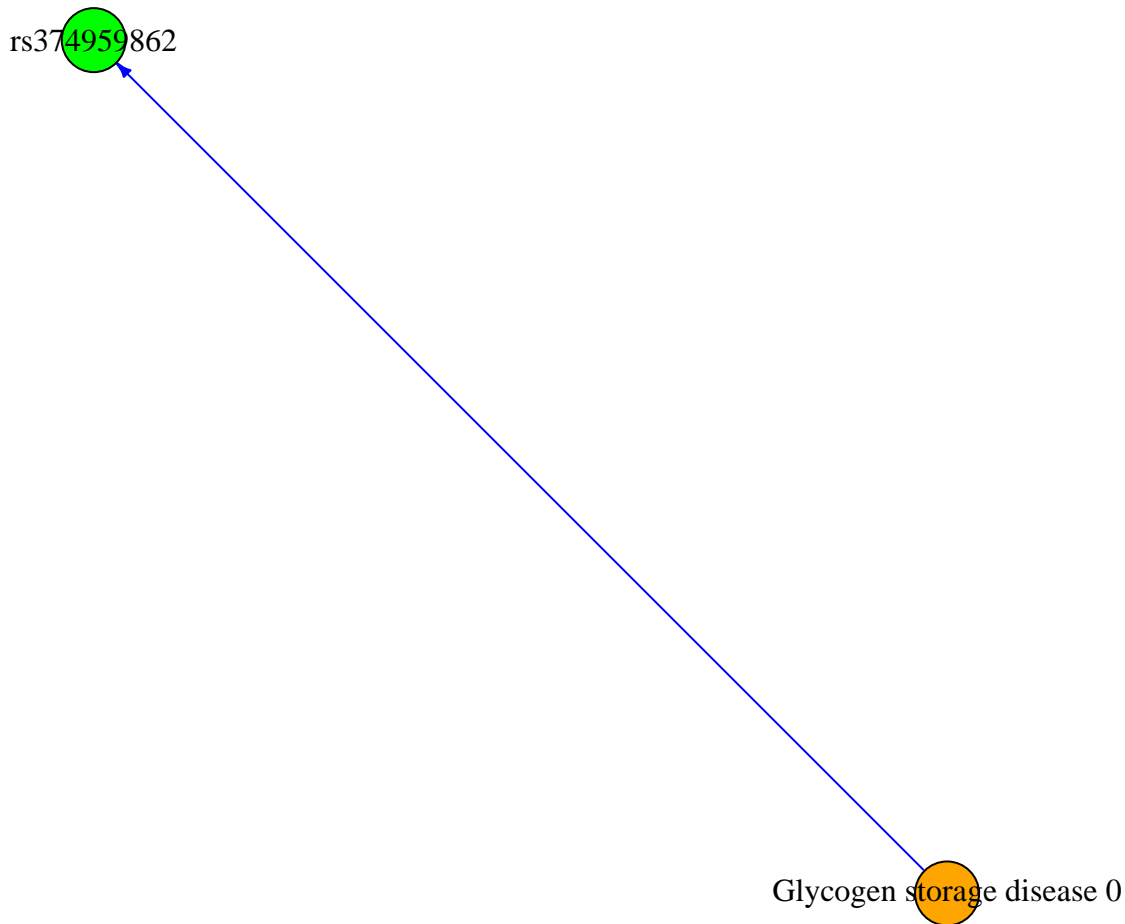

Variant–Disease Network (Glycogen storage disease of heart)

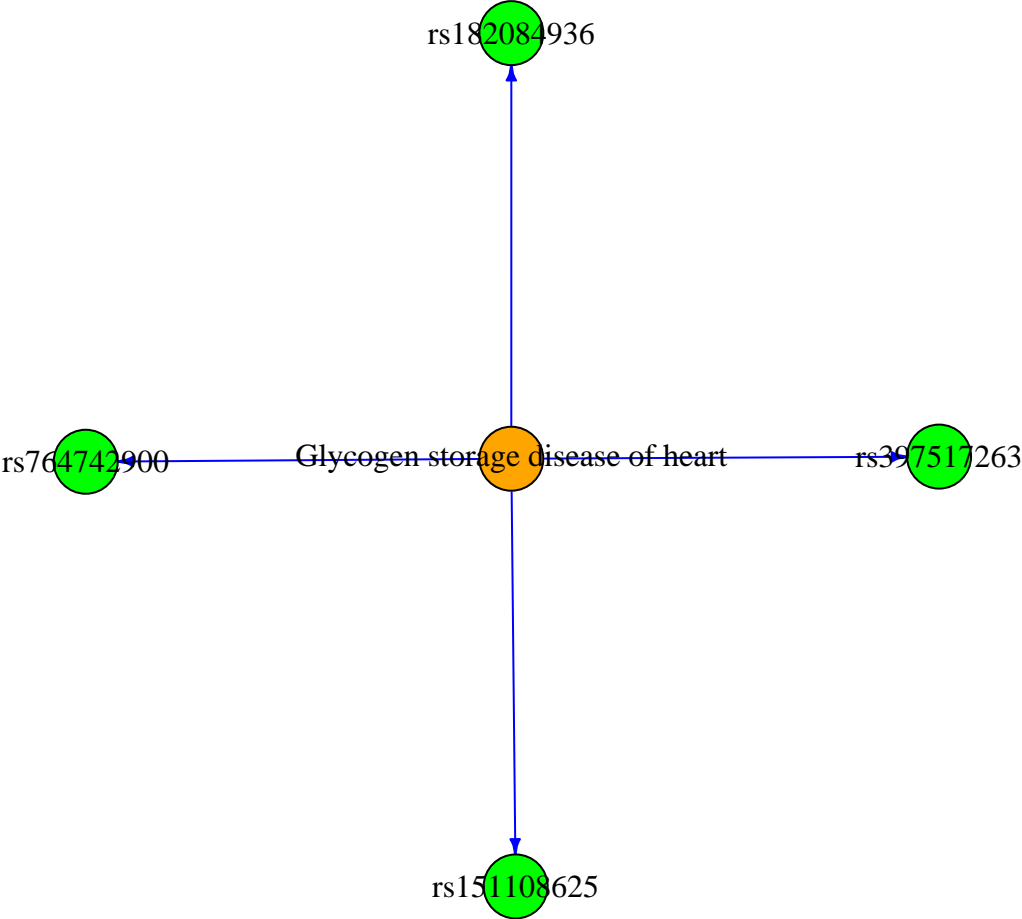

## Variant–Disease Network (Glycogen storage disease type 13)

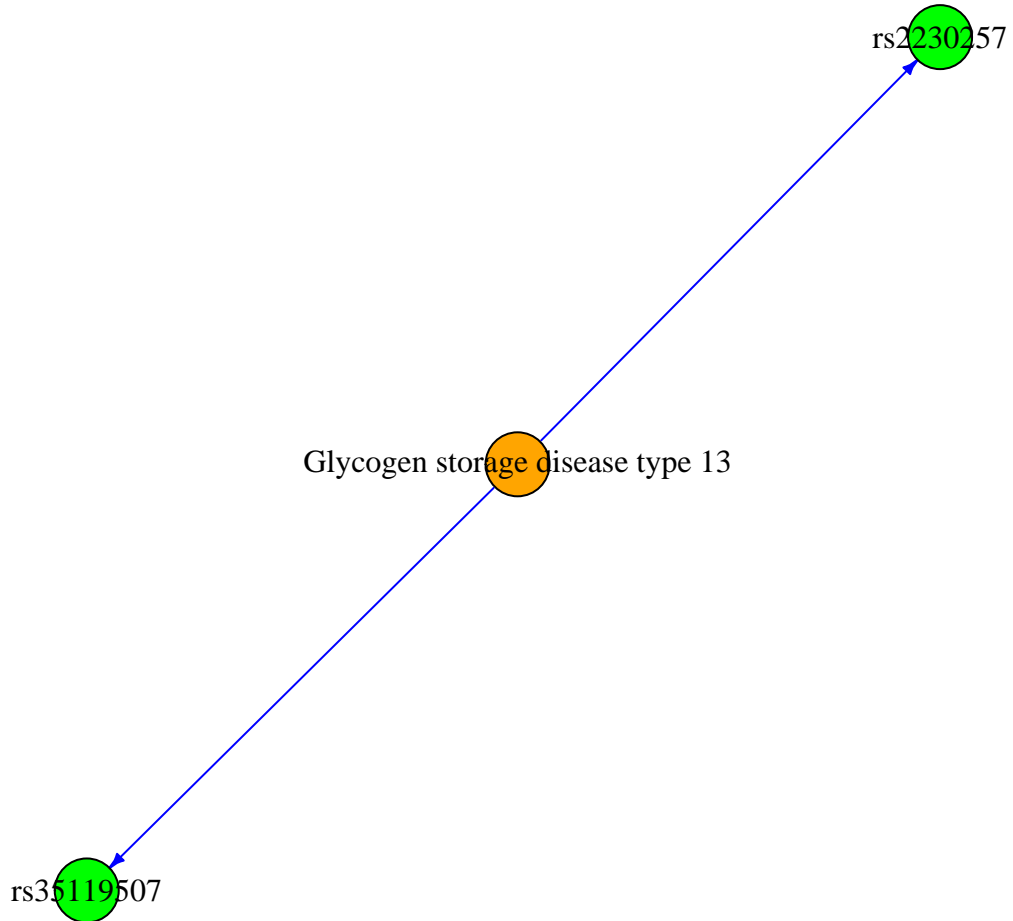

## Variant–Disease Network (Glycogen storage disease type III)

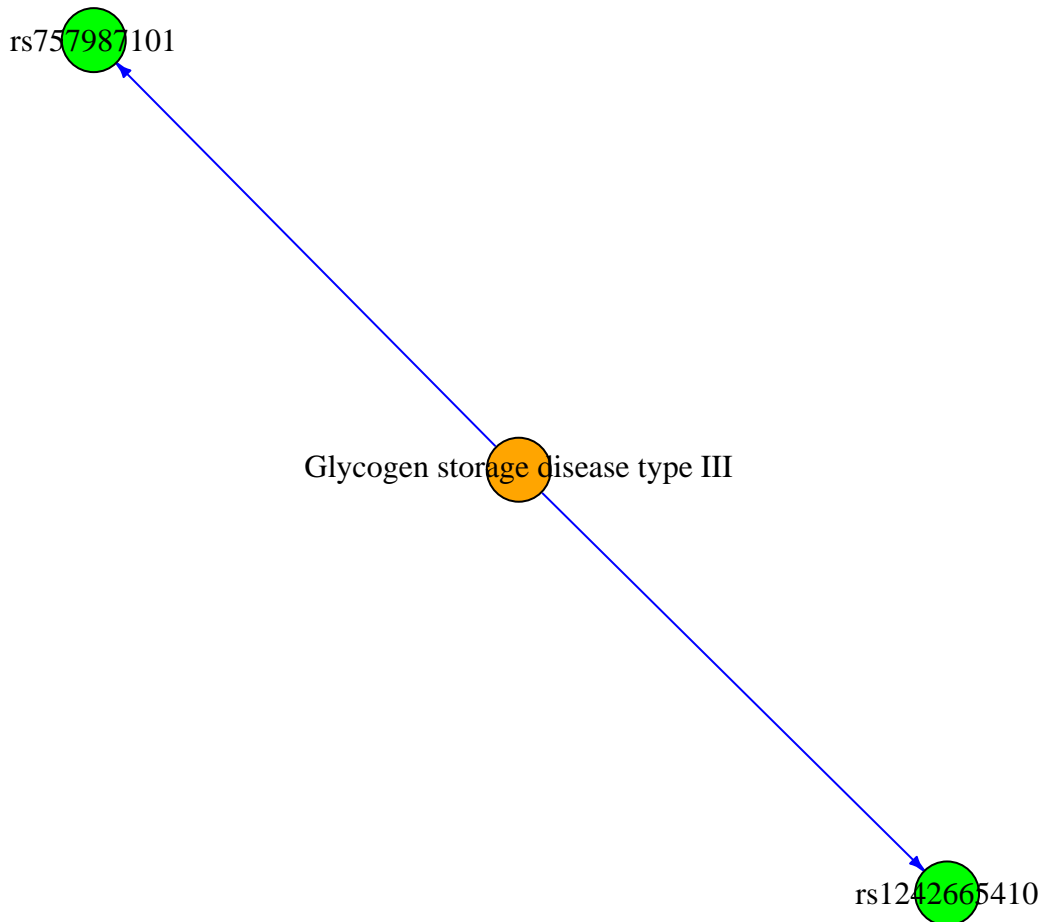

**Variant–Disease Network (Glycogen storage disease type X)**

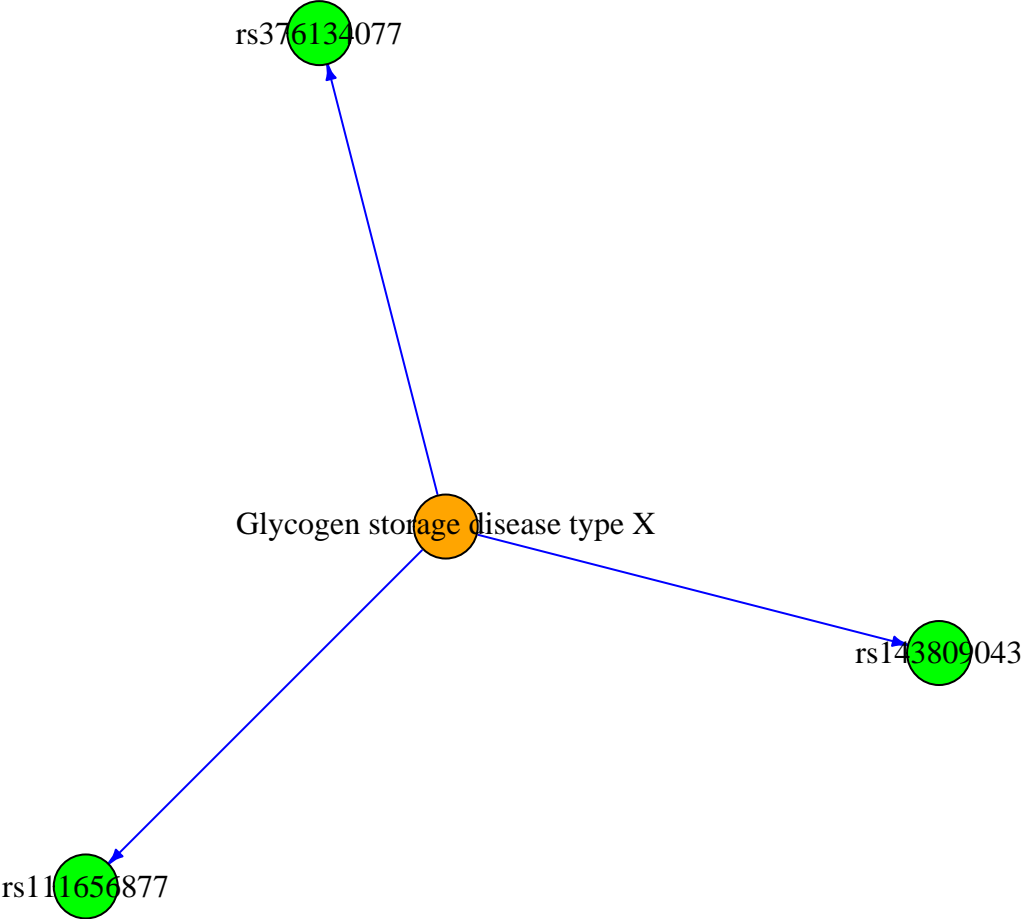



## Variant–Disease Network (Glycogen storage disease XI)

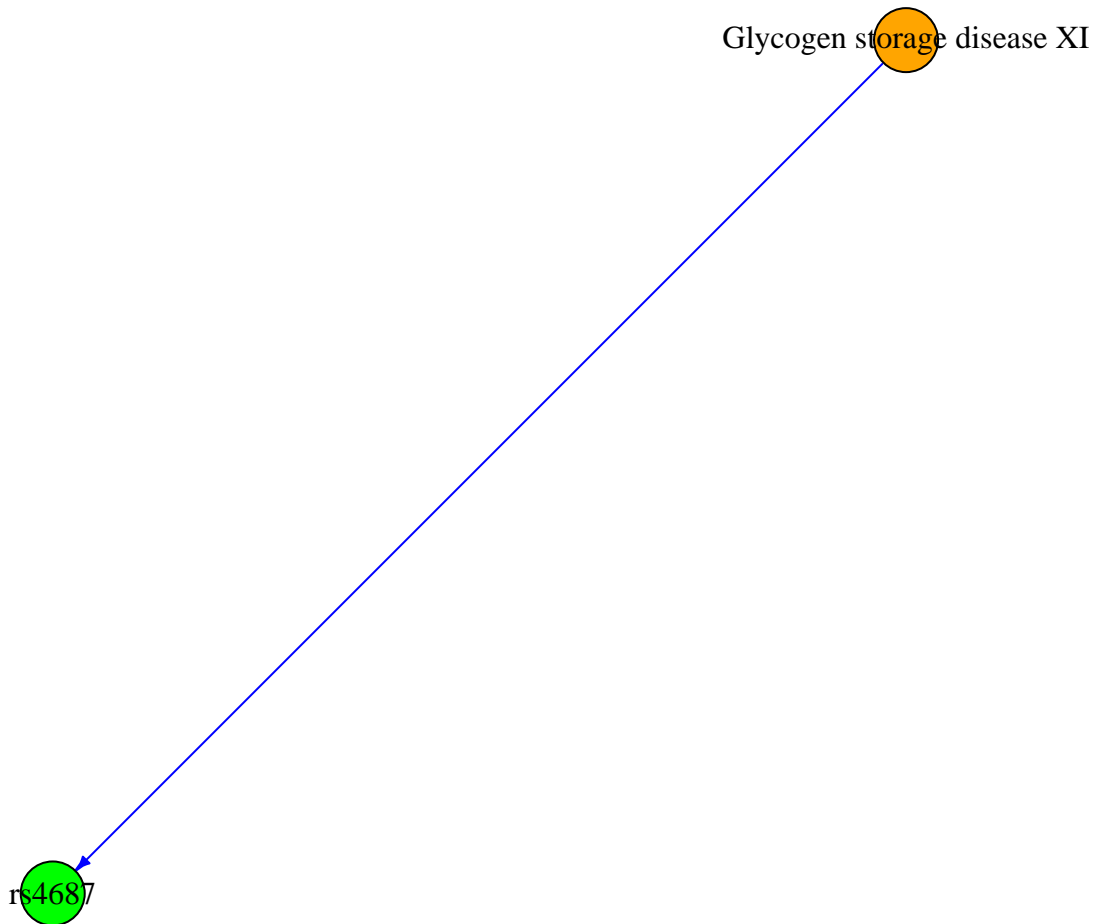

**Variant–Disease Network (GM1 gangliosidosis type 2)**

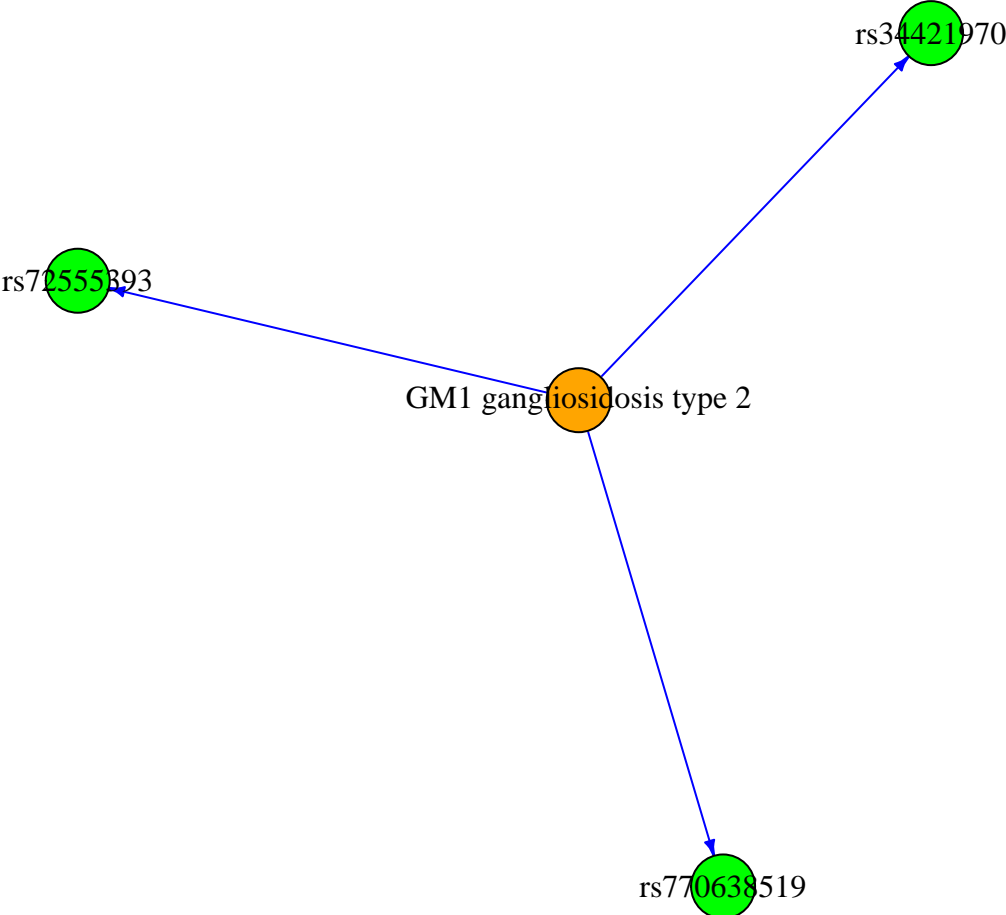

Variant–Disease Network (GNE myopathy)

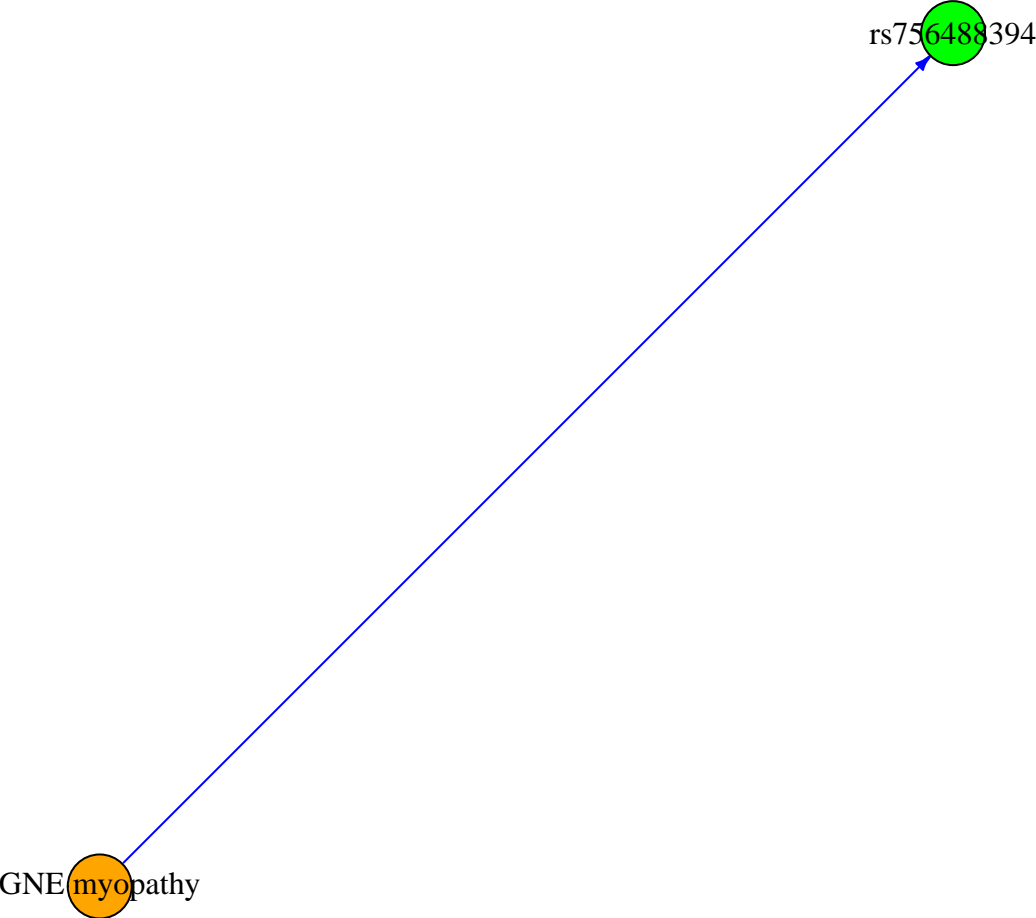

# Variant–Disease Network (Gonadotropin-independent familial sexual precociousness)

rs61996322

Gonadotropin-independent familial sexual precociousness



## Variant-Disease Network (Gorlin syndrome)

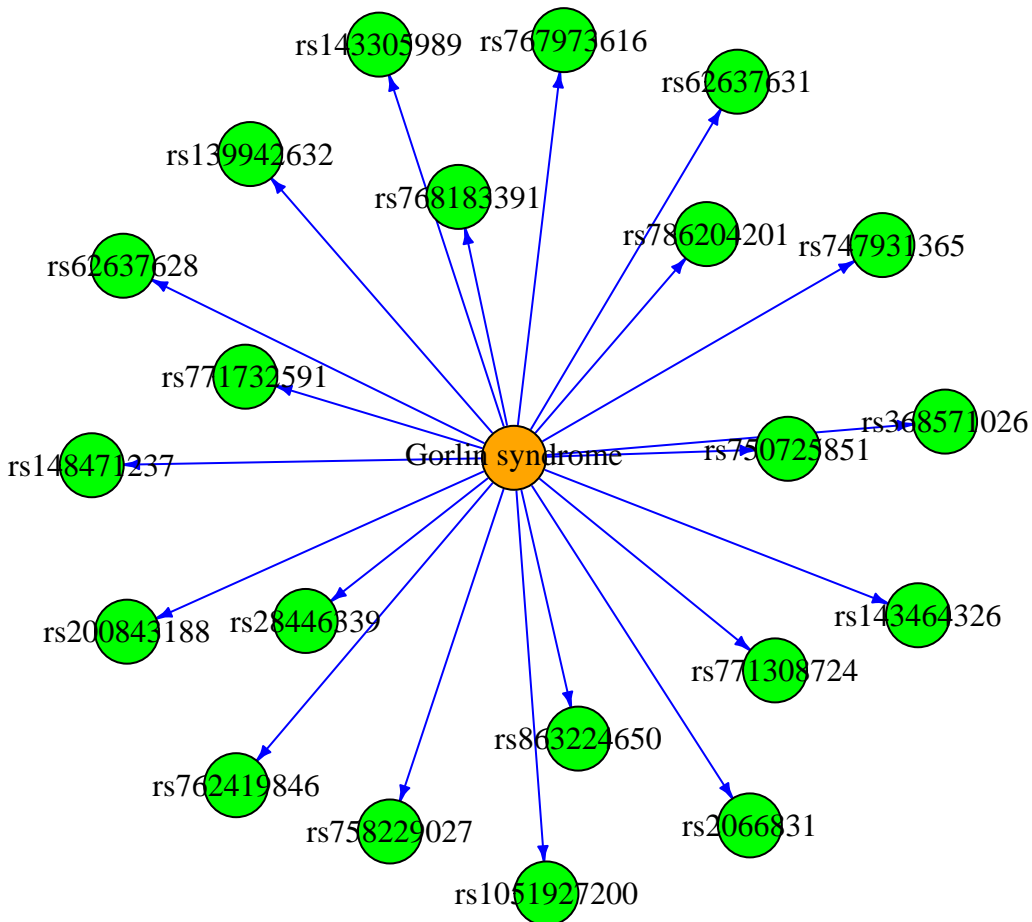

## Variant–Disease Network (GRACILE syndrome)

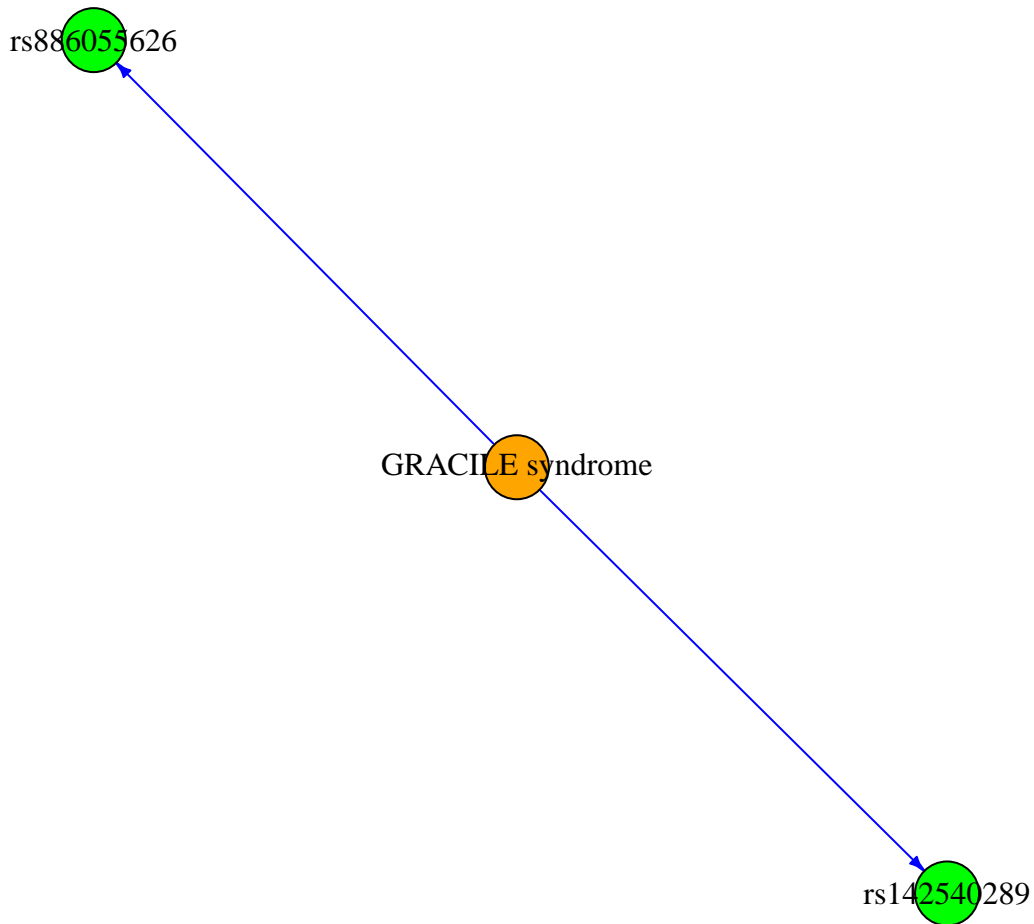

## Variant–Disease Network (Gray platelet syndrome)

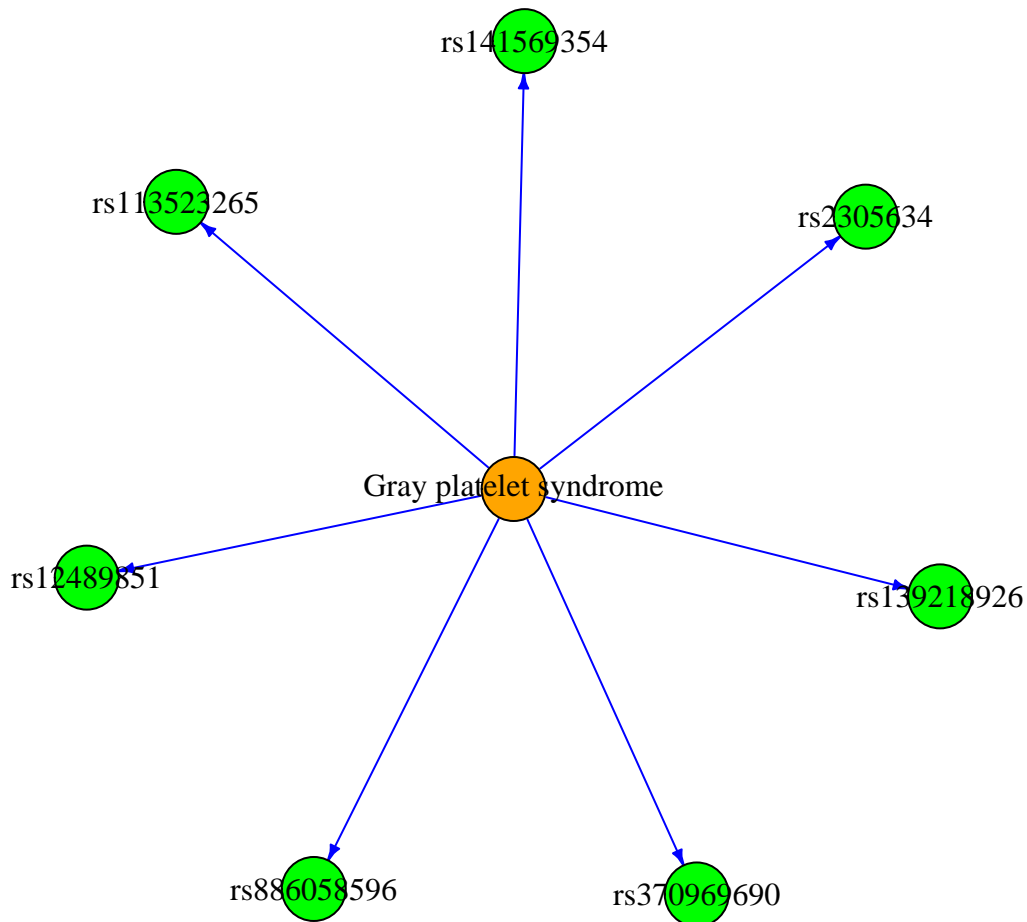

## Variant–Disease Network (Greenberg dysplasia)

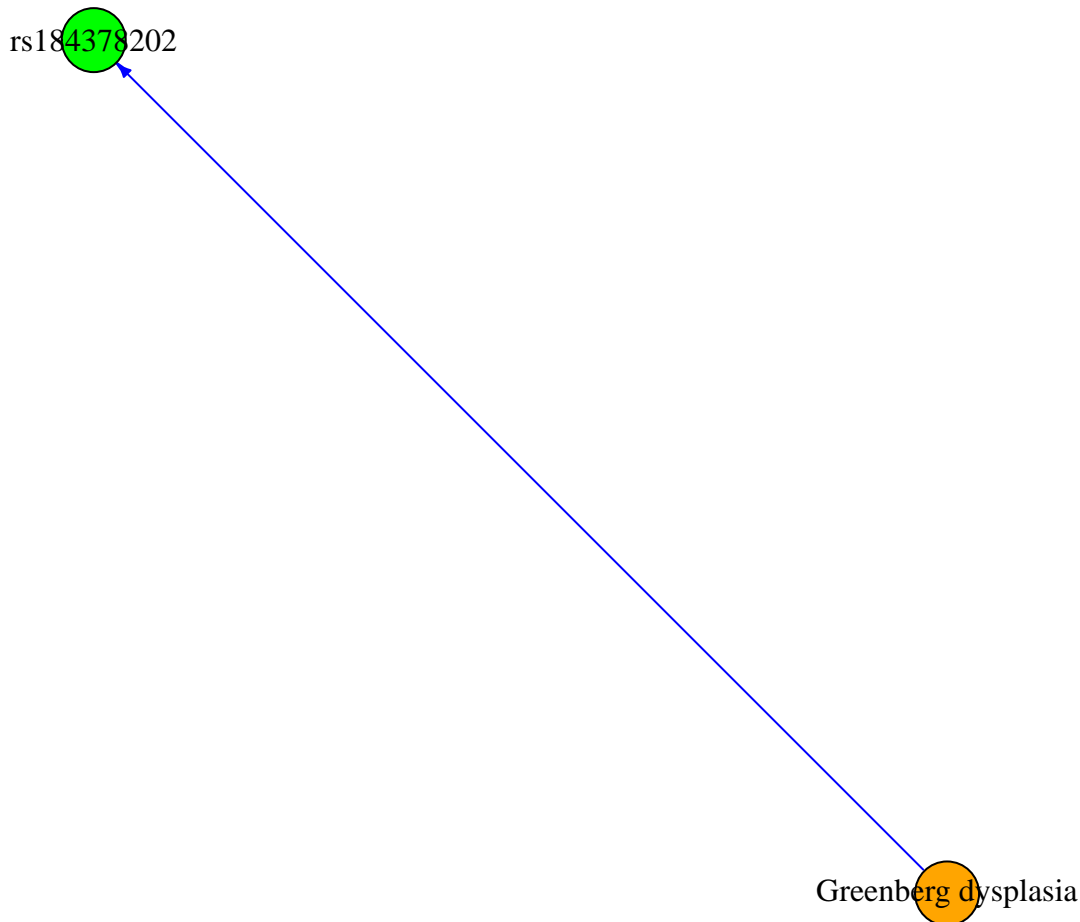



**Variant–Disease Network (Greig cephalopolysyndactyly syndrome)**

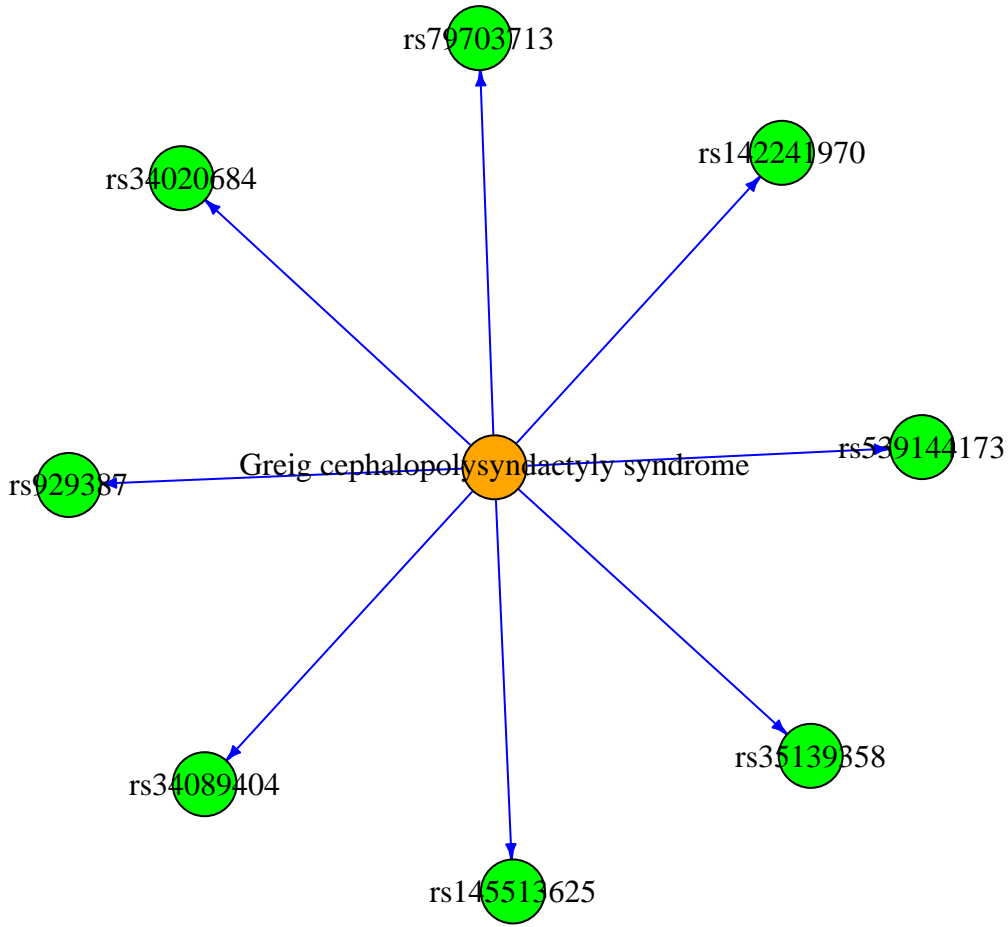

# Variant-Disease Network (Growth hormone insensitivity with immunodeficiency)

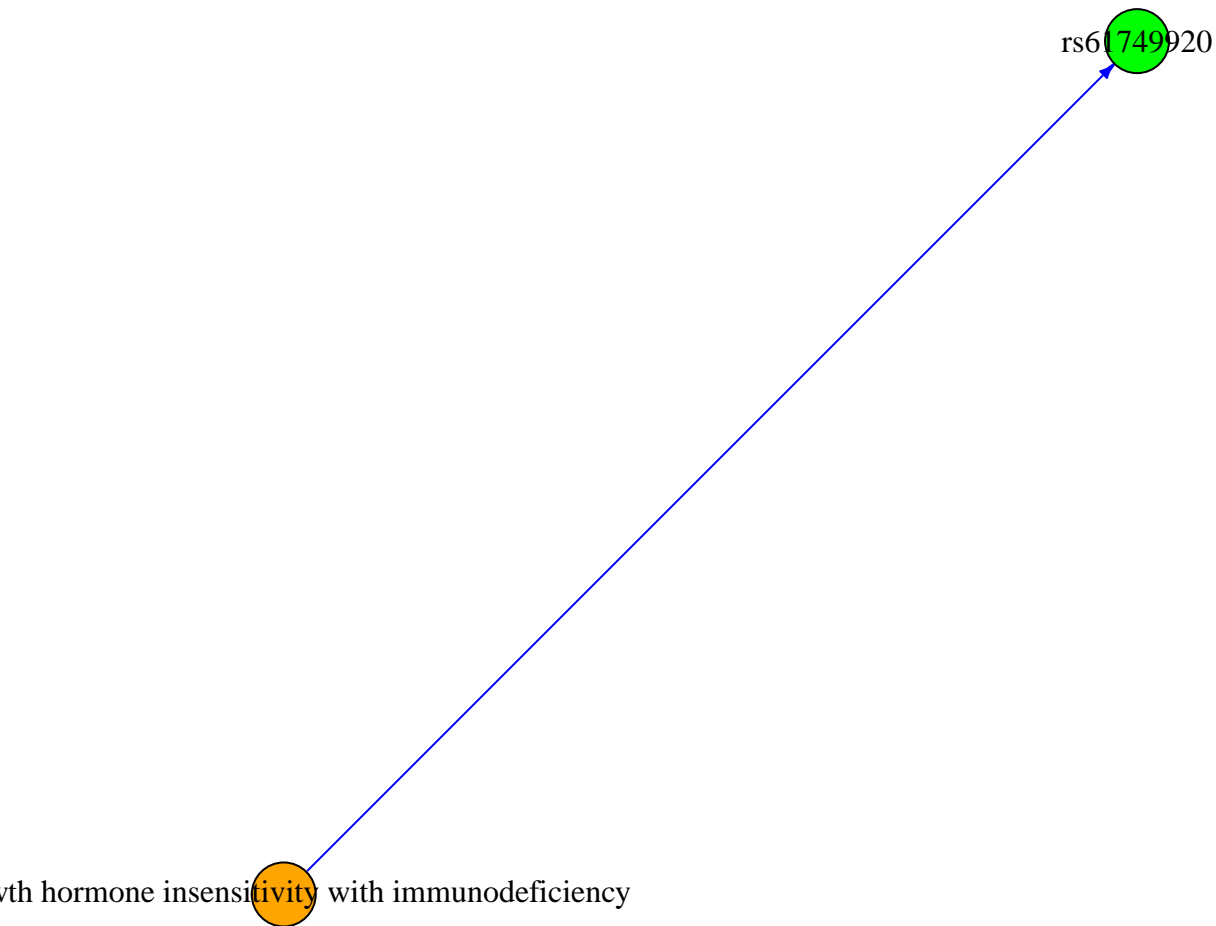

# Variant-Disease Network (GTP cyclohydrolase I deficiency)

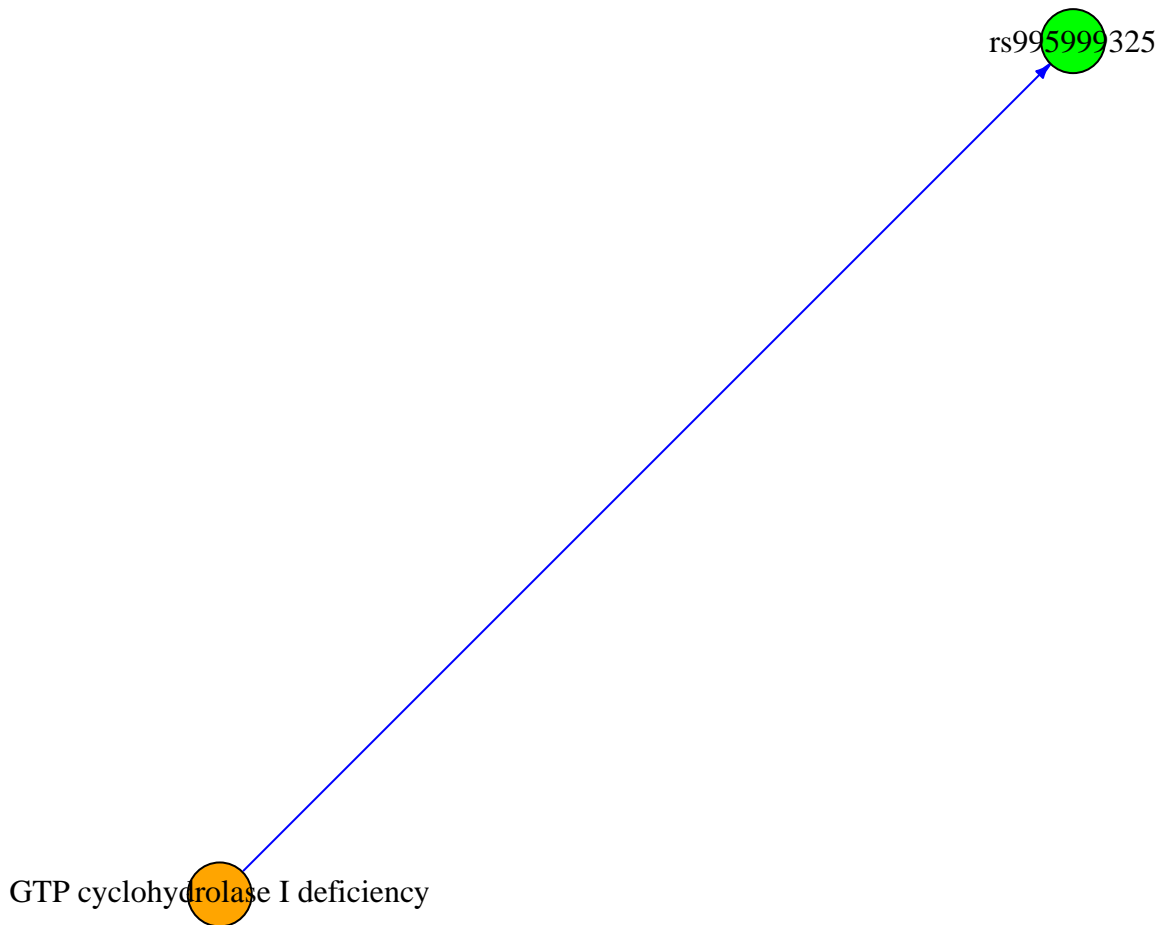

## Variant–Disease Network (Haemorrhagic telangiectasia 1)

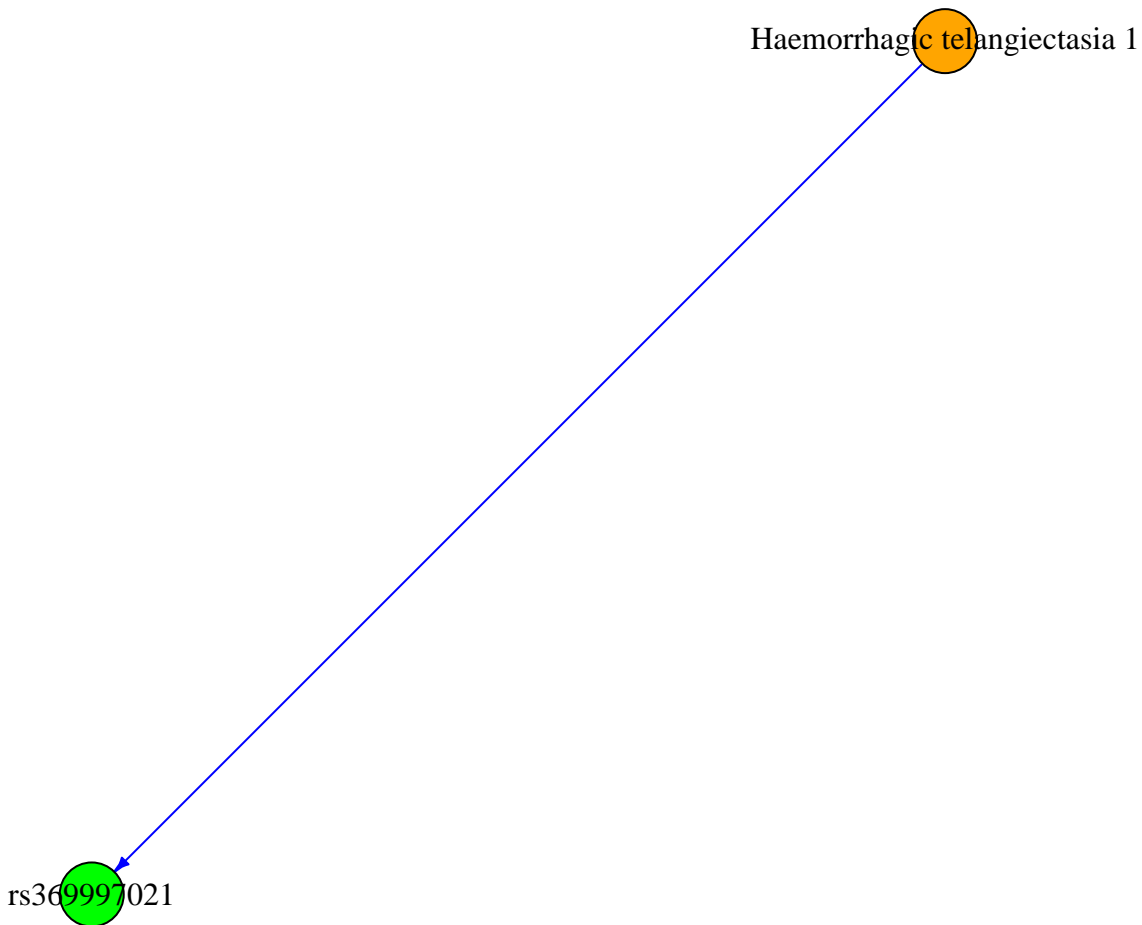

## Variant–Disease Network (Hajdu–Cheney syndrome)

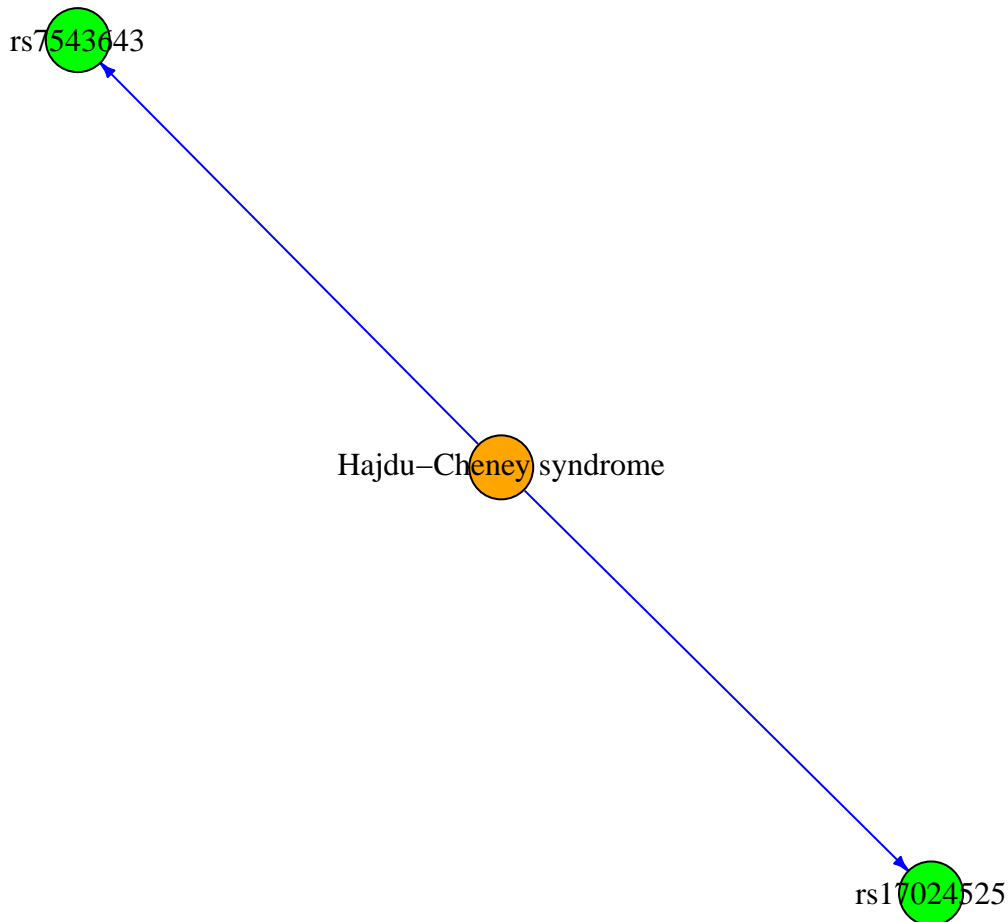

## Variant–Disease Network (Heart failure)

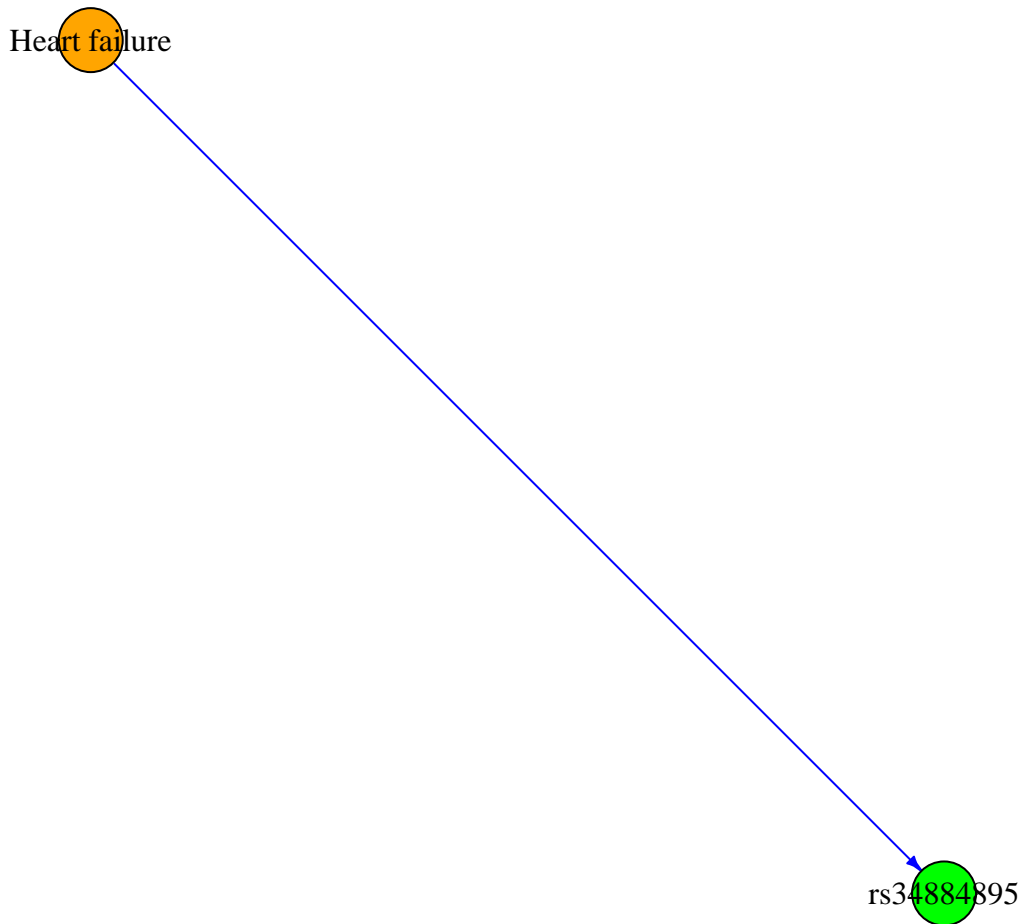

## Variant–Disease Network (Hecht syndrome)

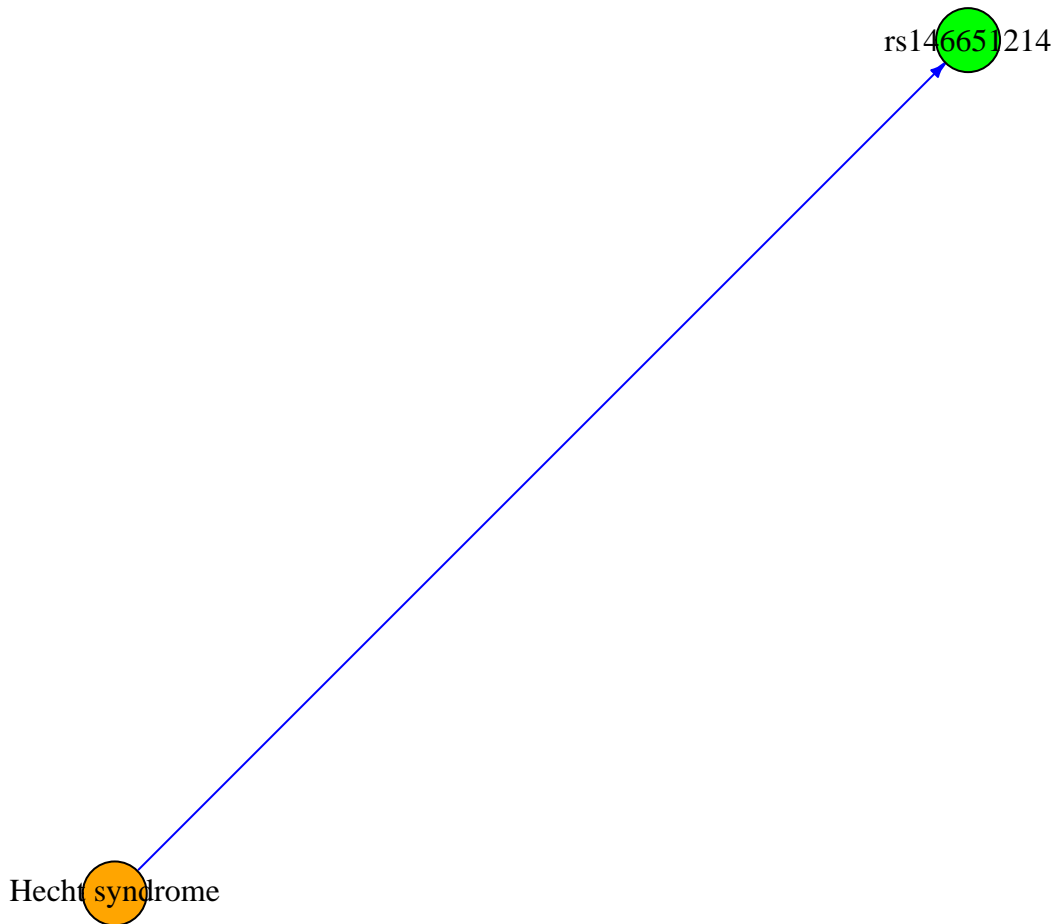

# Variant–Disease Network (Helsmoortel–Van der Aa Syndrome)

Helsmoortel–Van der Aa Syndrome

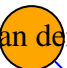

rs587777526

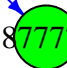



Variant–Disease Network (Hemochromatosis type 3)

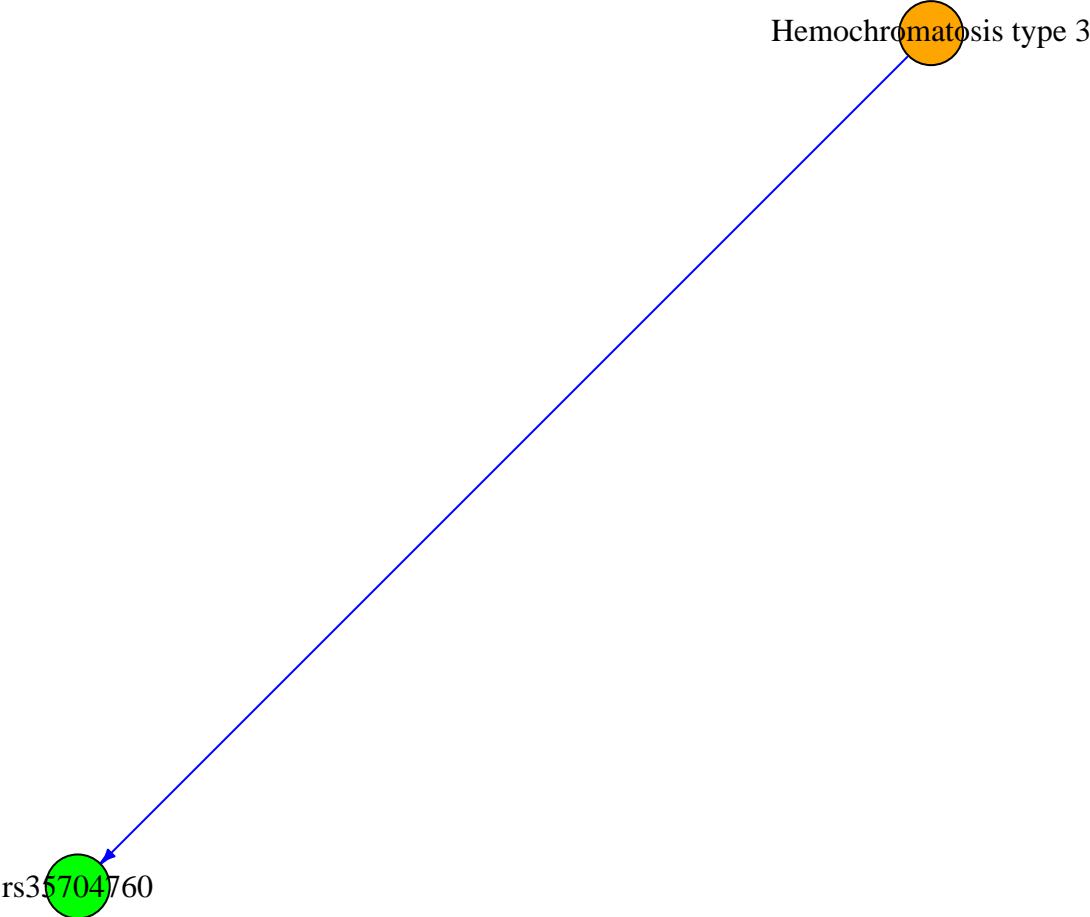

Variant–Disease Network (Hemochromatosis type 4)

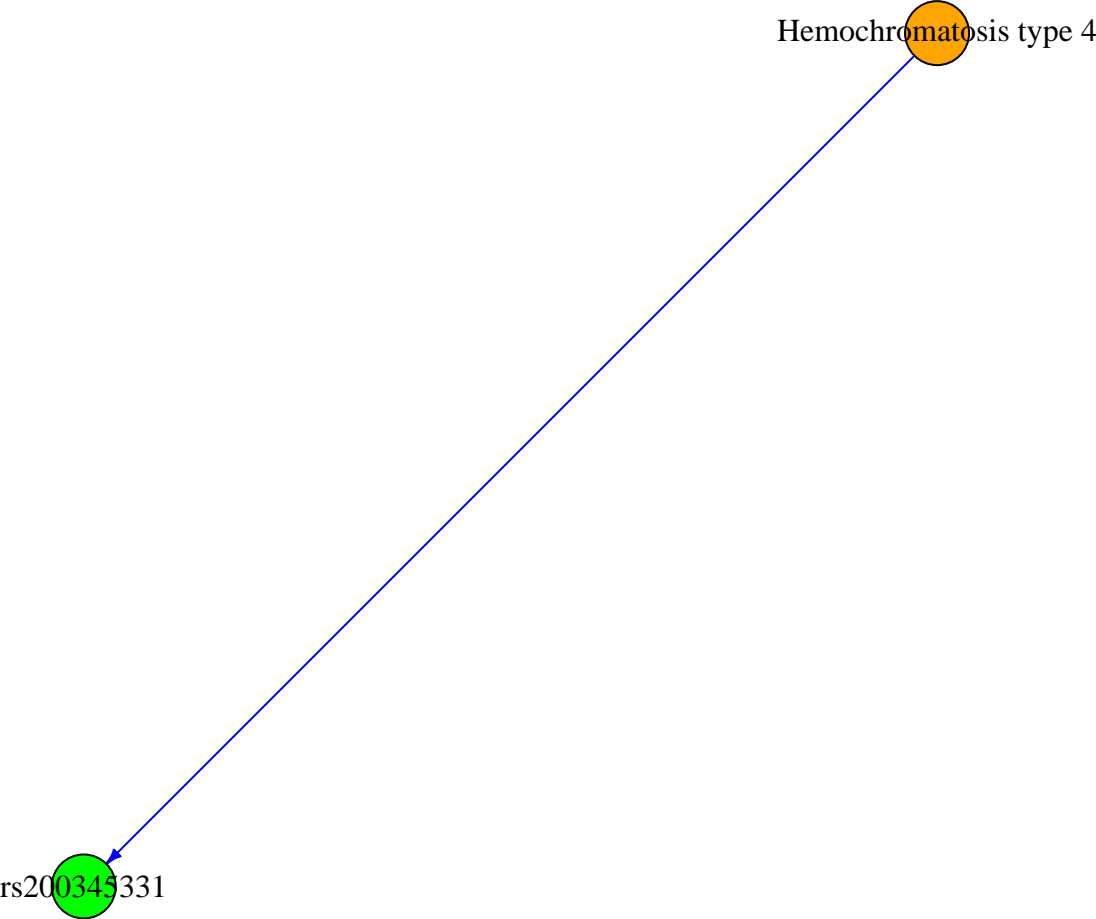

**Variant–Disease Network (HEMOGLOBIN D (IBADAN))**

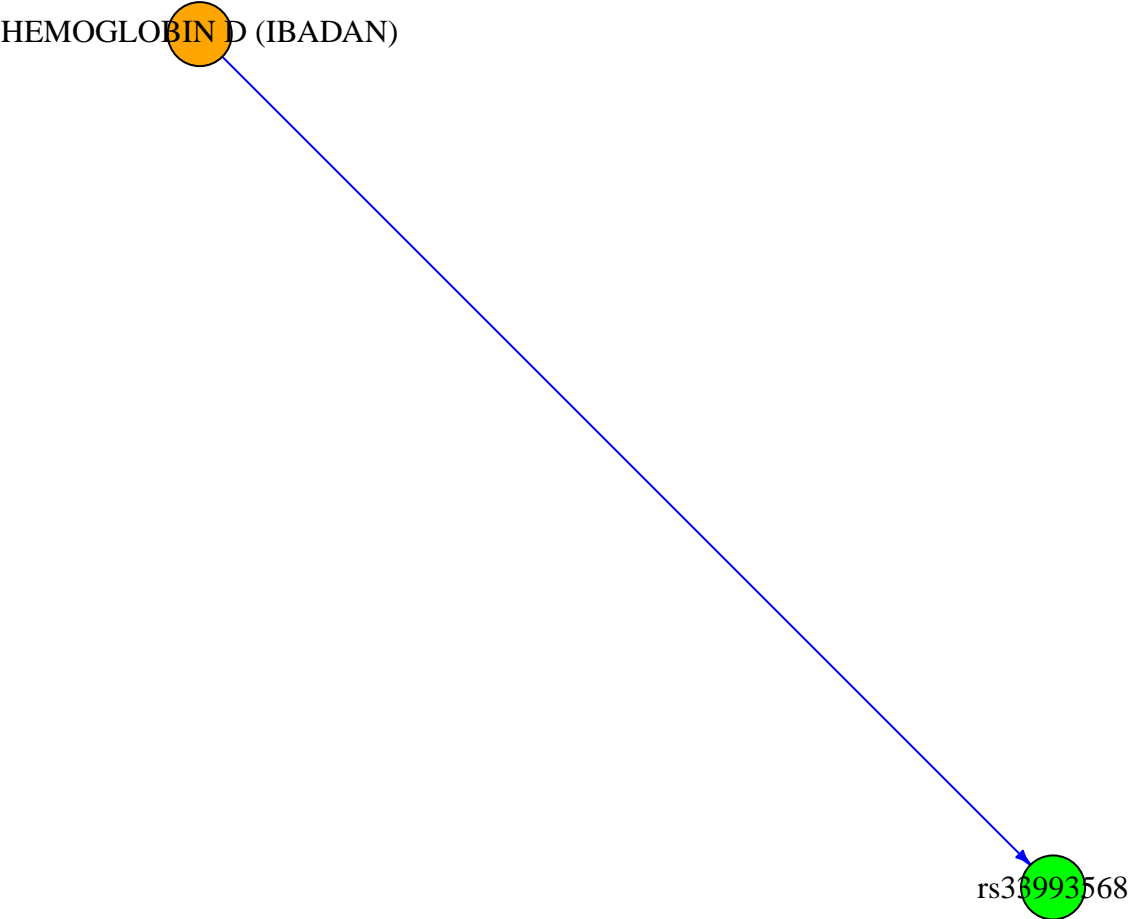

# Variant–Disease Network (HEMOGLOBIN G (FERRARA))

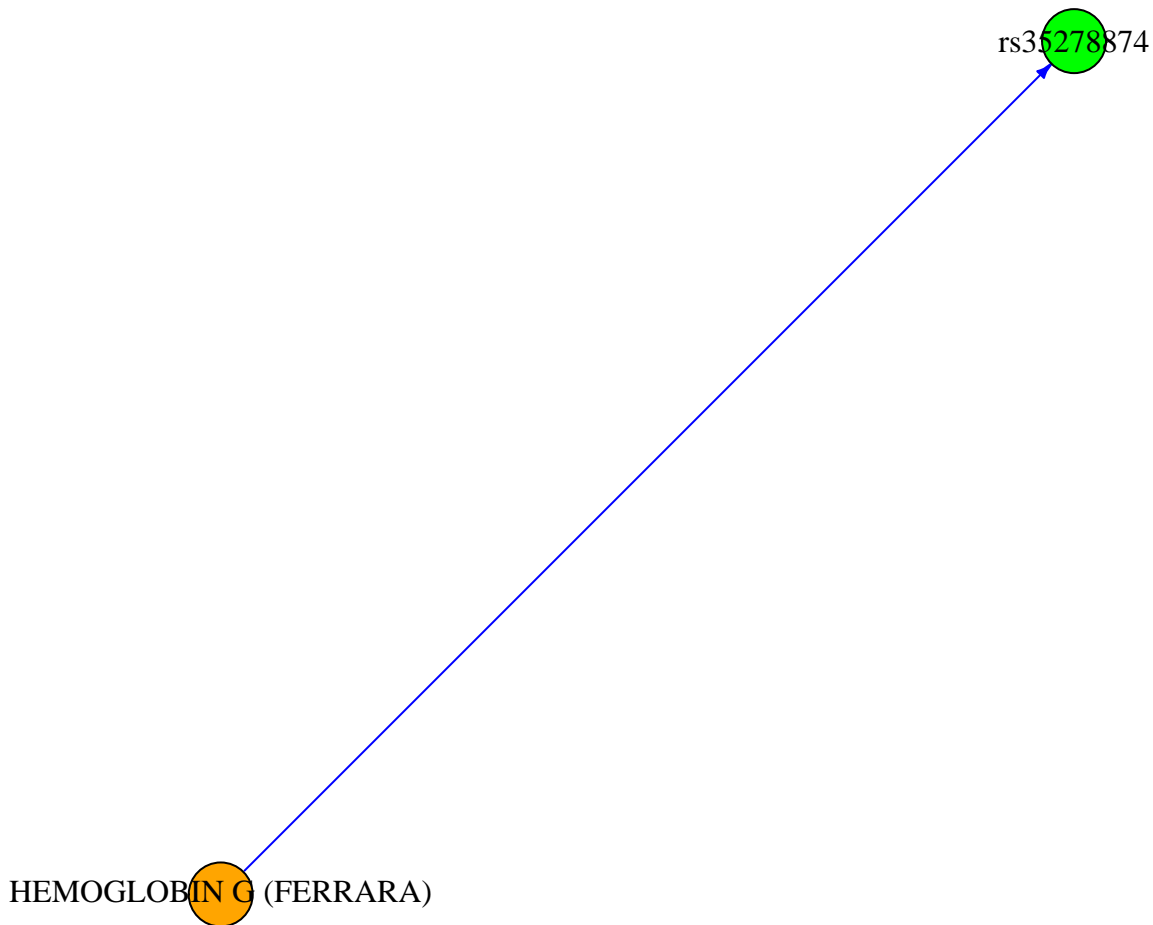

Variant–Disease Network (HEMOGLOBIN J (CHICAGO))

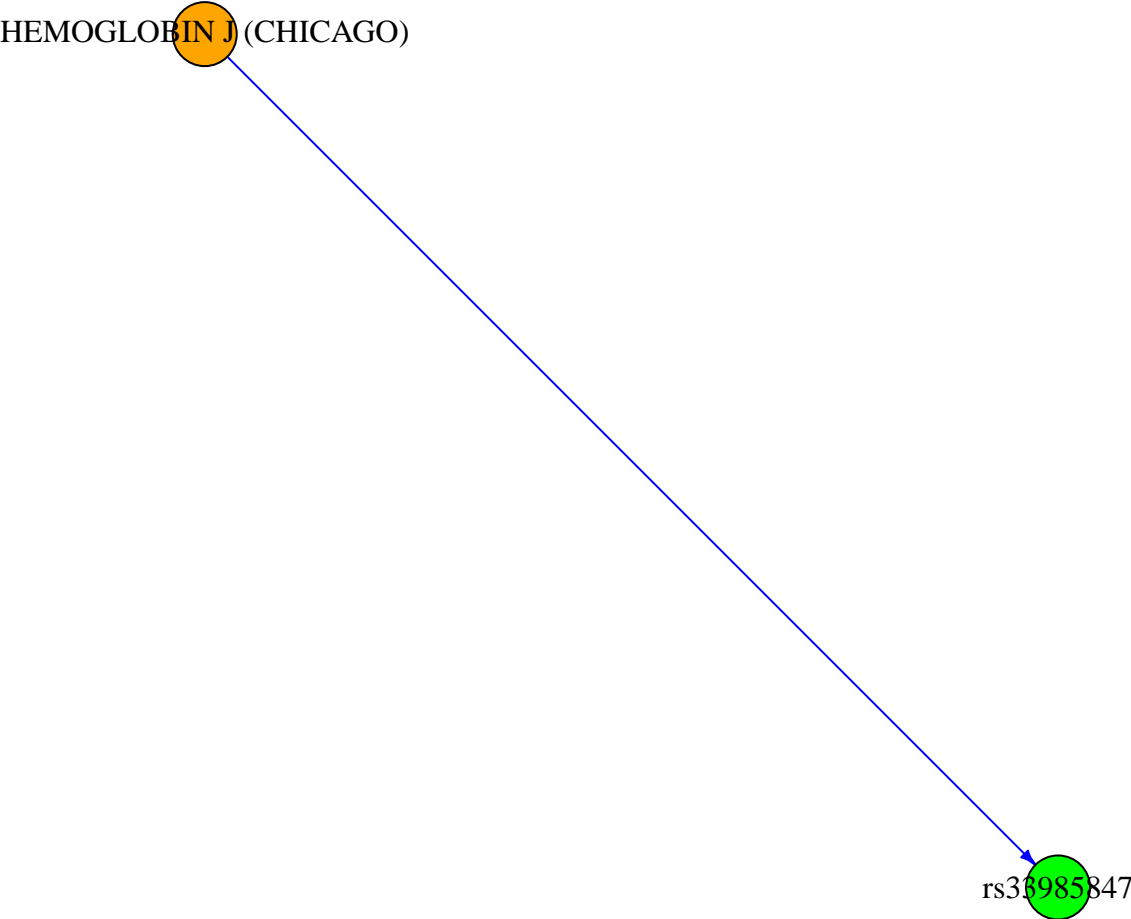

Variant–Disease Network (HEMOGLOBIN J (LENS))

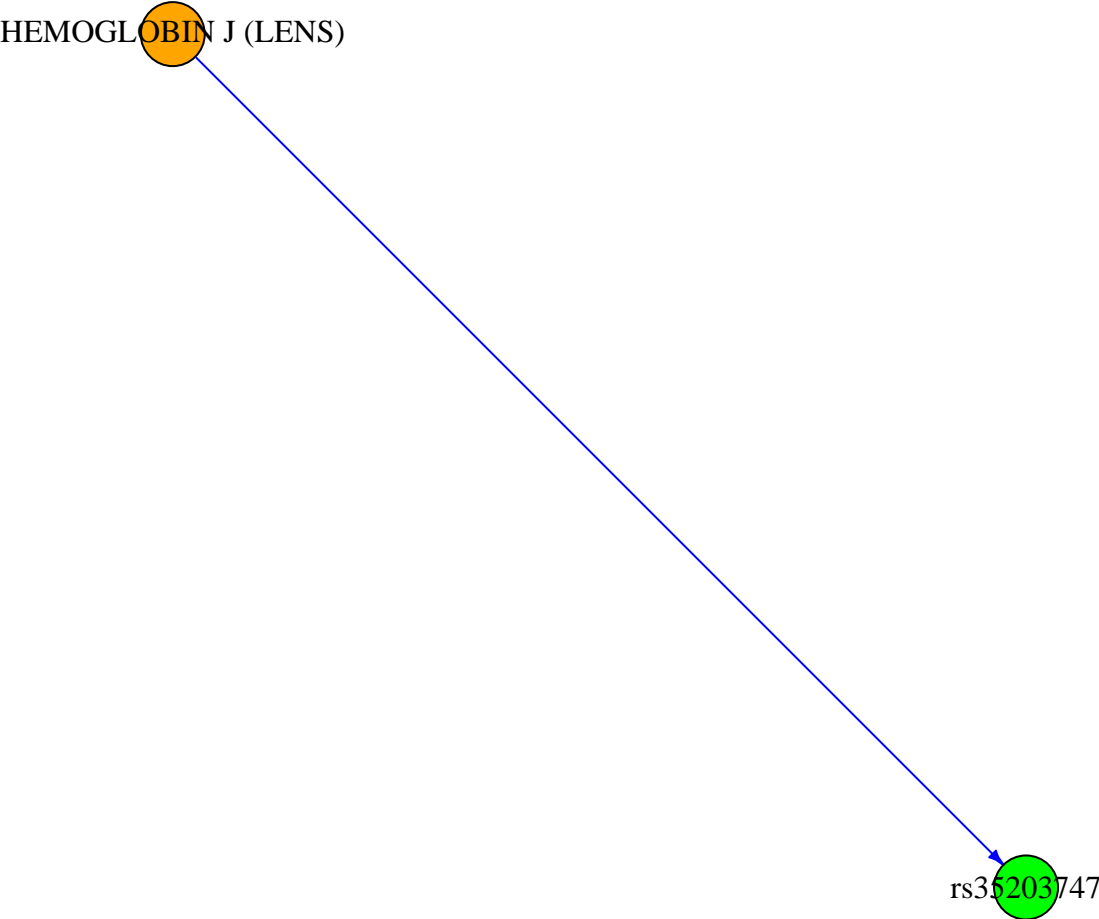

Variant–Disease Network (HEMOGLOBIN TYNE)

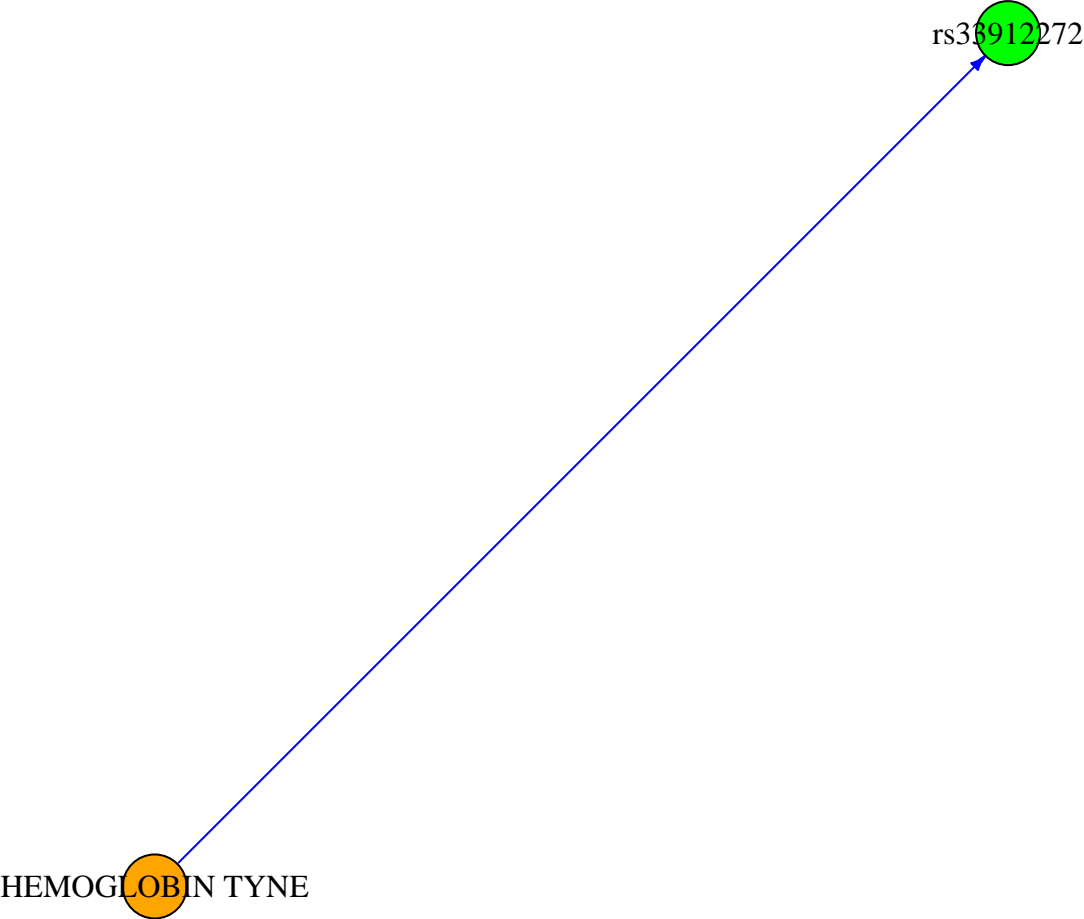

# Variant-Disease Network (HEMOGLOBIN WARWICKSHIRE)

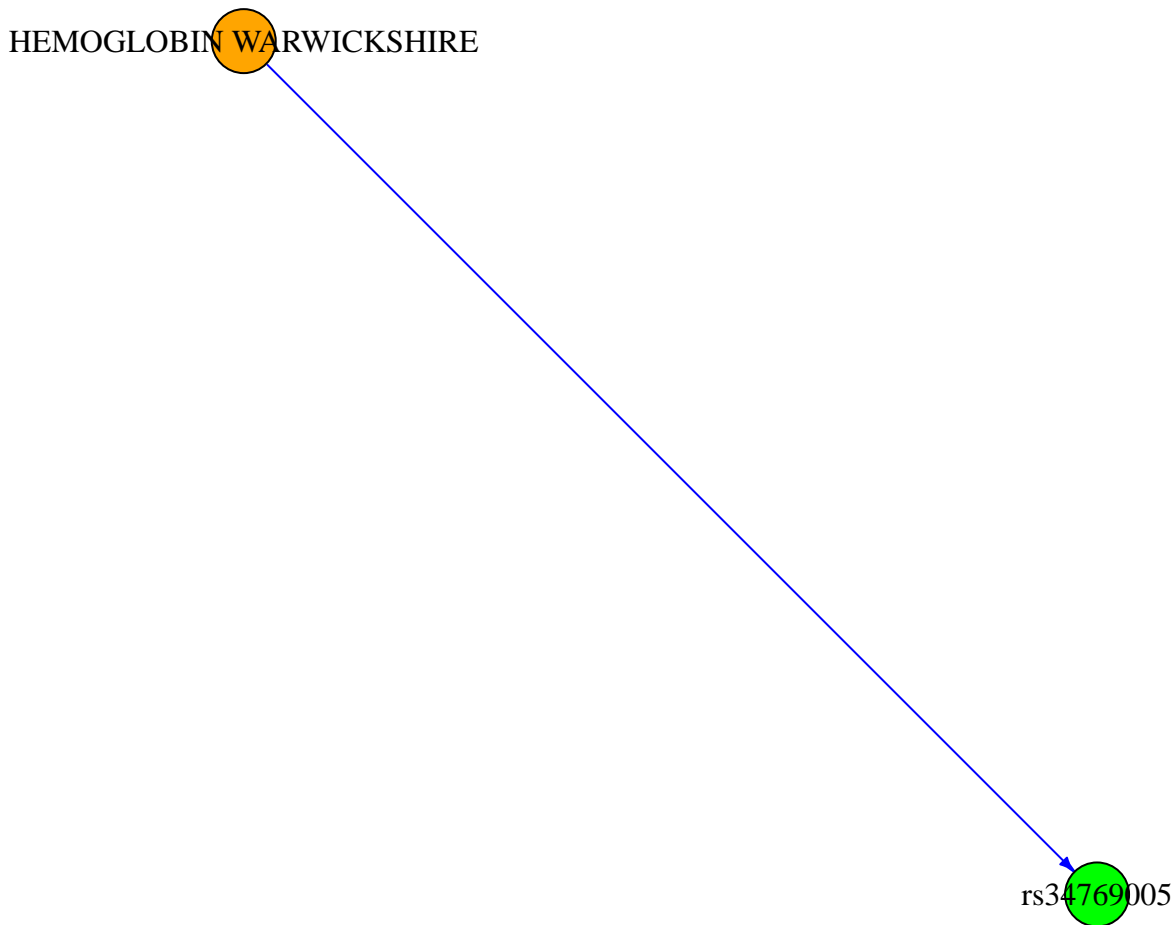



## Variant–Disease Network (Hemolytic anemia)

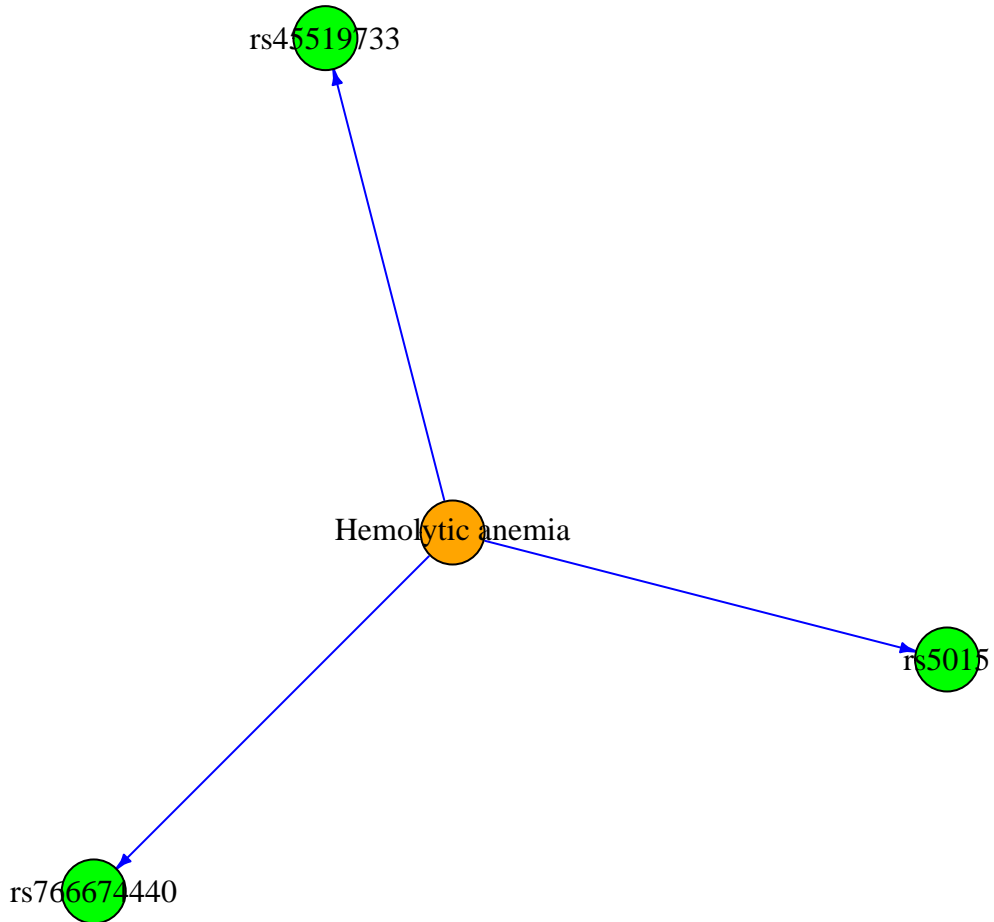

Variant–Disease Network (Hemophagocytic lymphohistiocytosis)

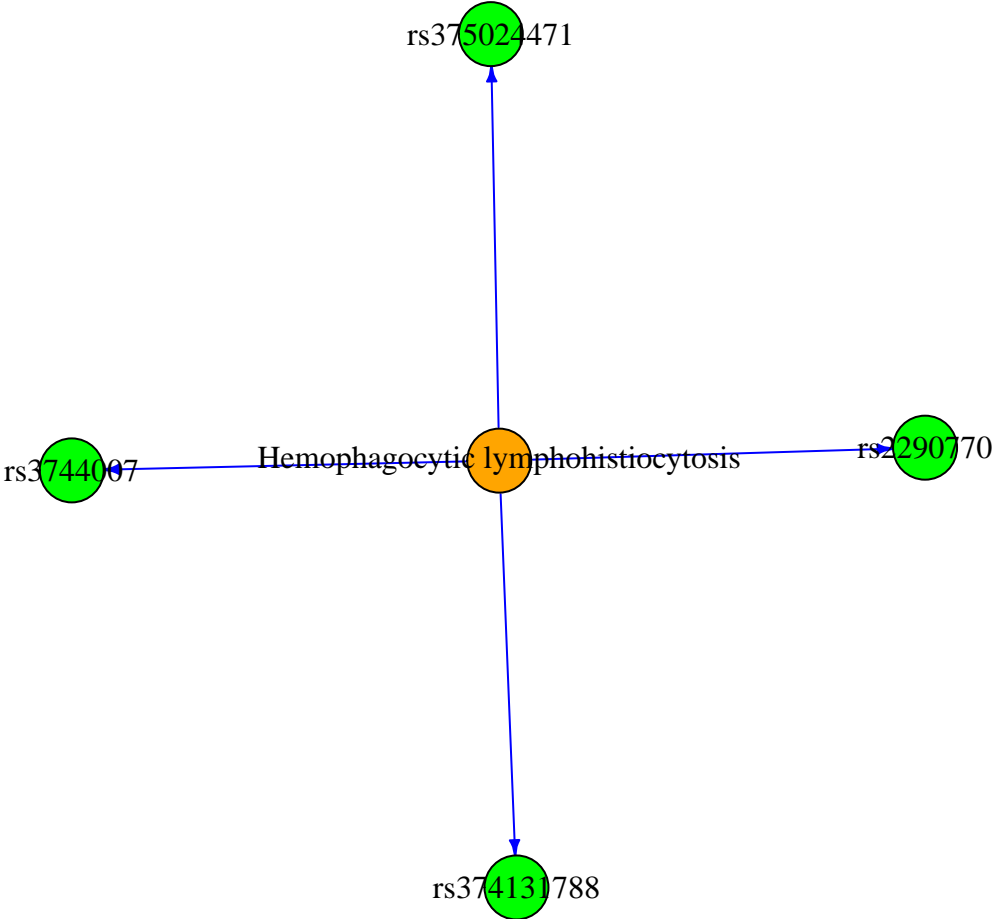

## Variant-Disease Network (Hemophilia B)

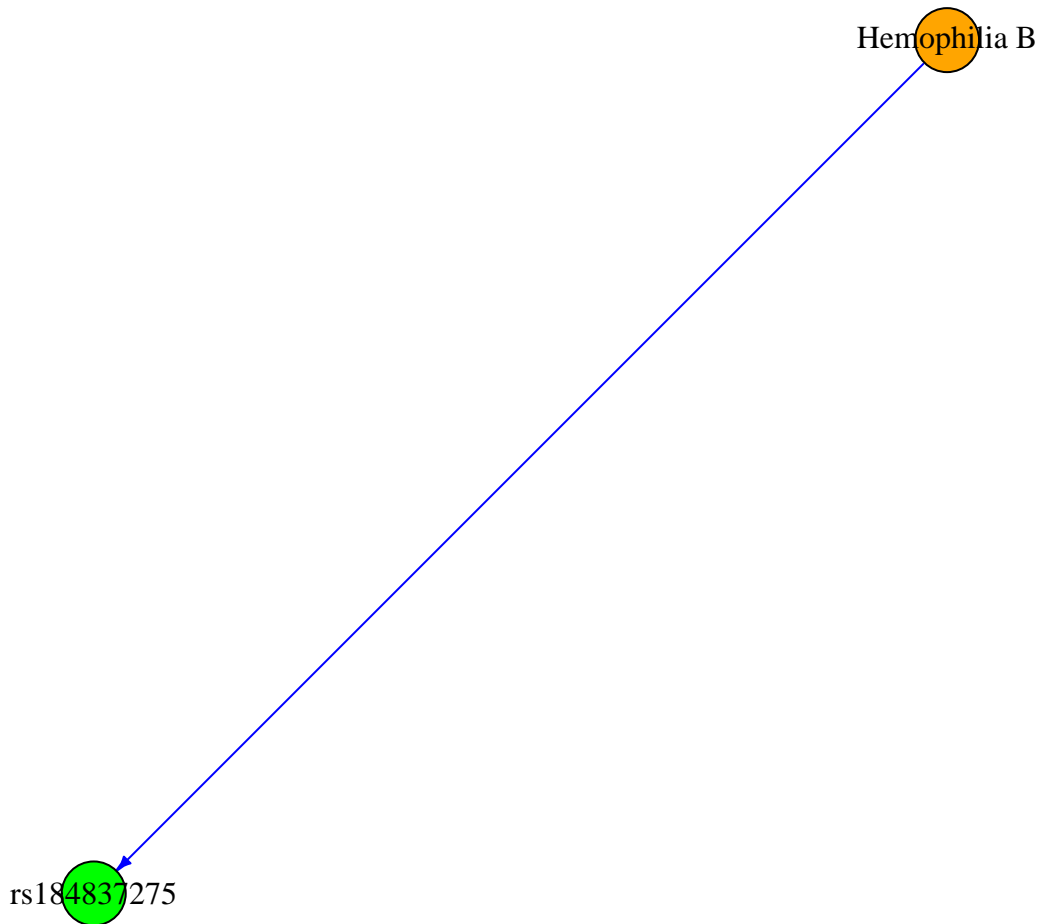

**Variant–Disease Network (Hepatic failure)**

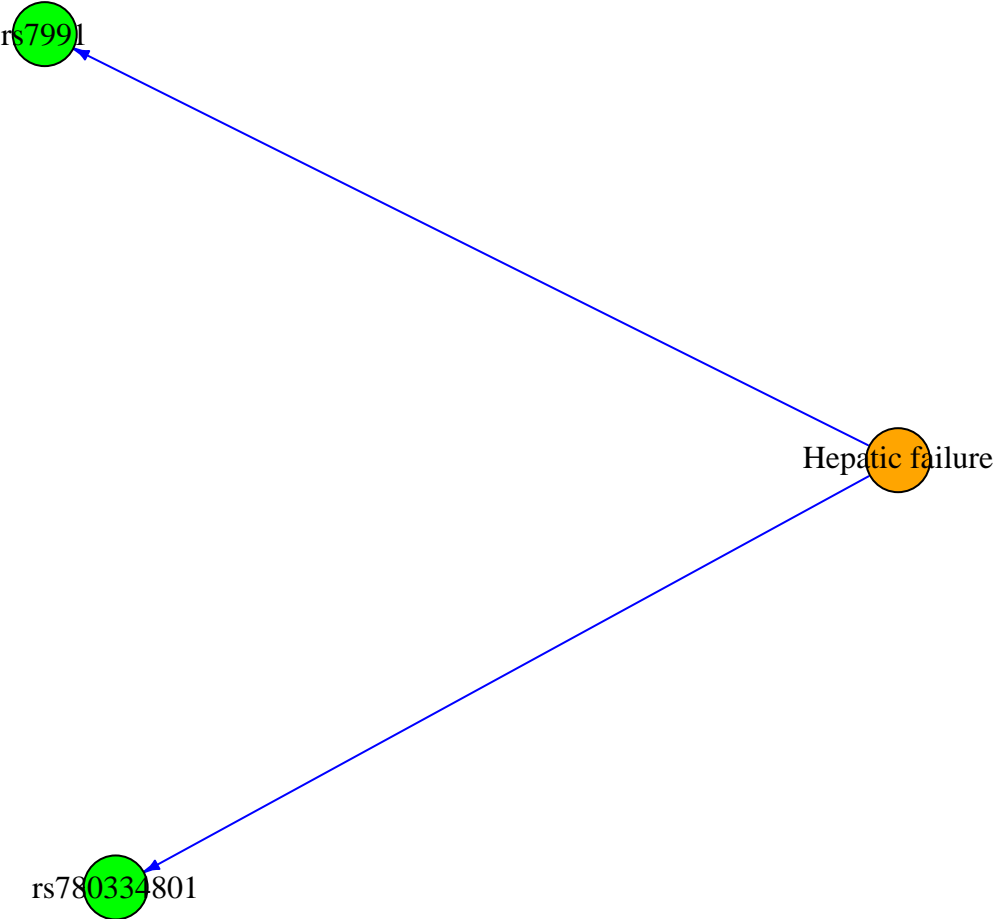

Variant–Disease Network (Hepatic methionine adenosyltransferase deficiency)

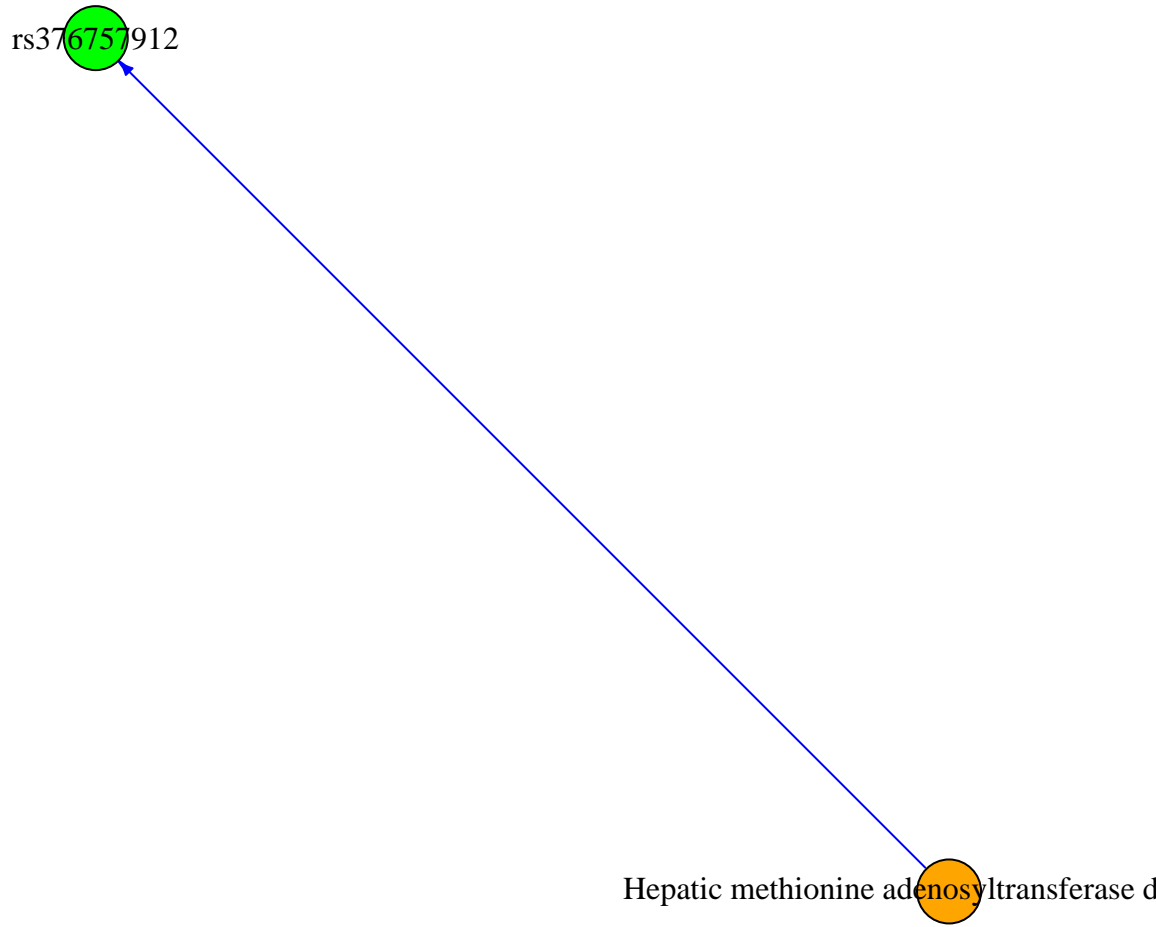

Variant–Disease Network (Hepatoblastoma)

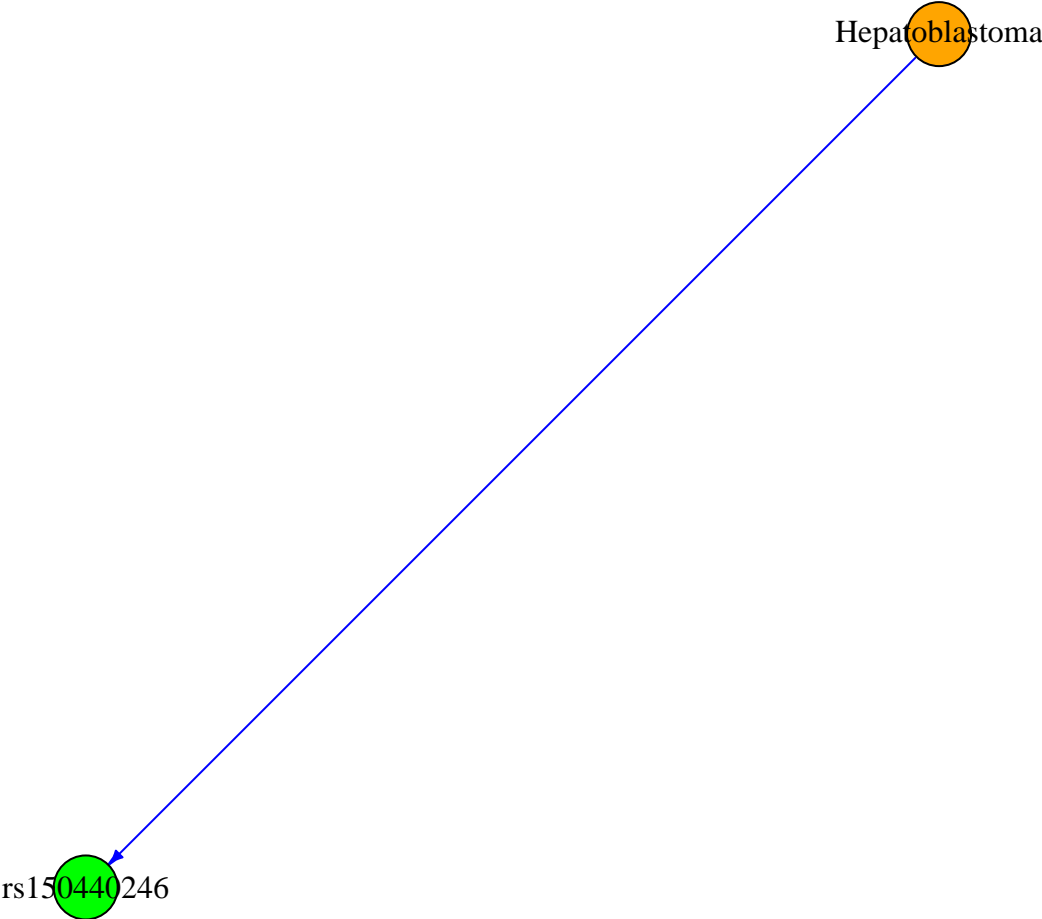

Variant–Disease Network (Hereditary breast and ovarian cancer syndrome)

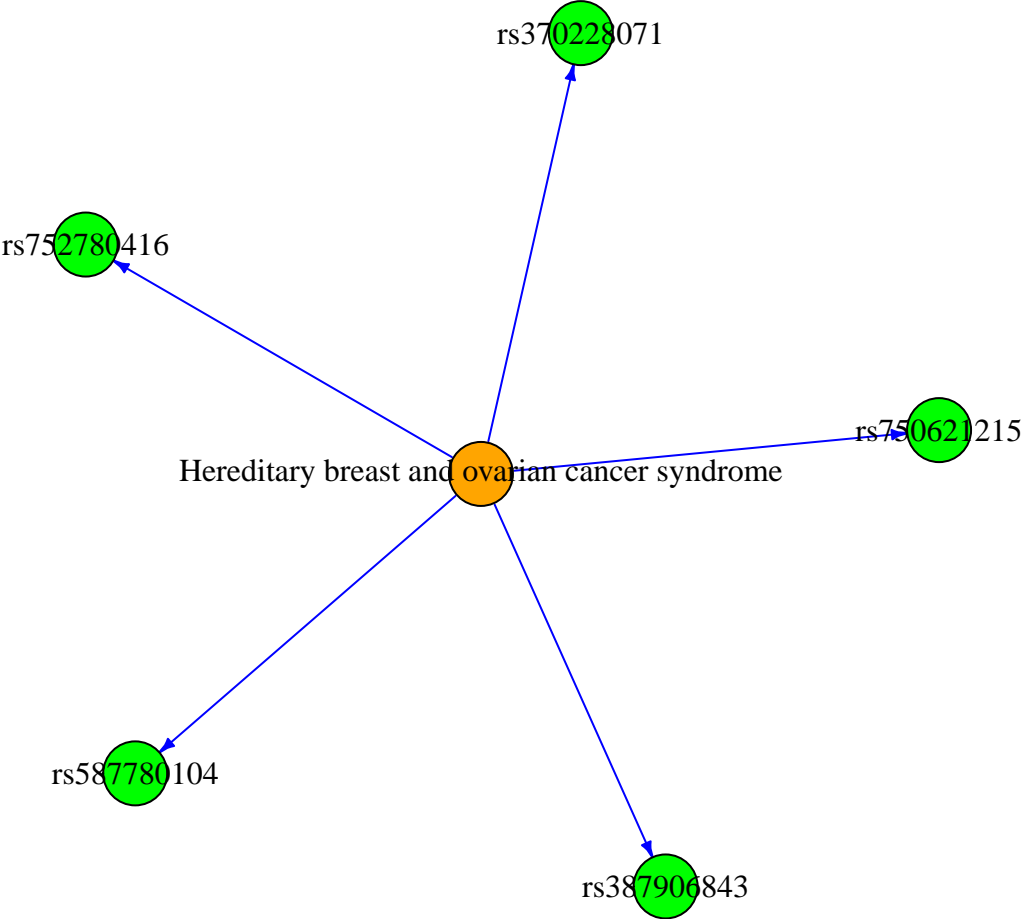

## Variant–Disease Network (Hereditary cancer–predisposing syndrome)



## Variant–Disease Network (Hereditary coproporphryia)

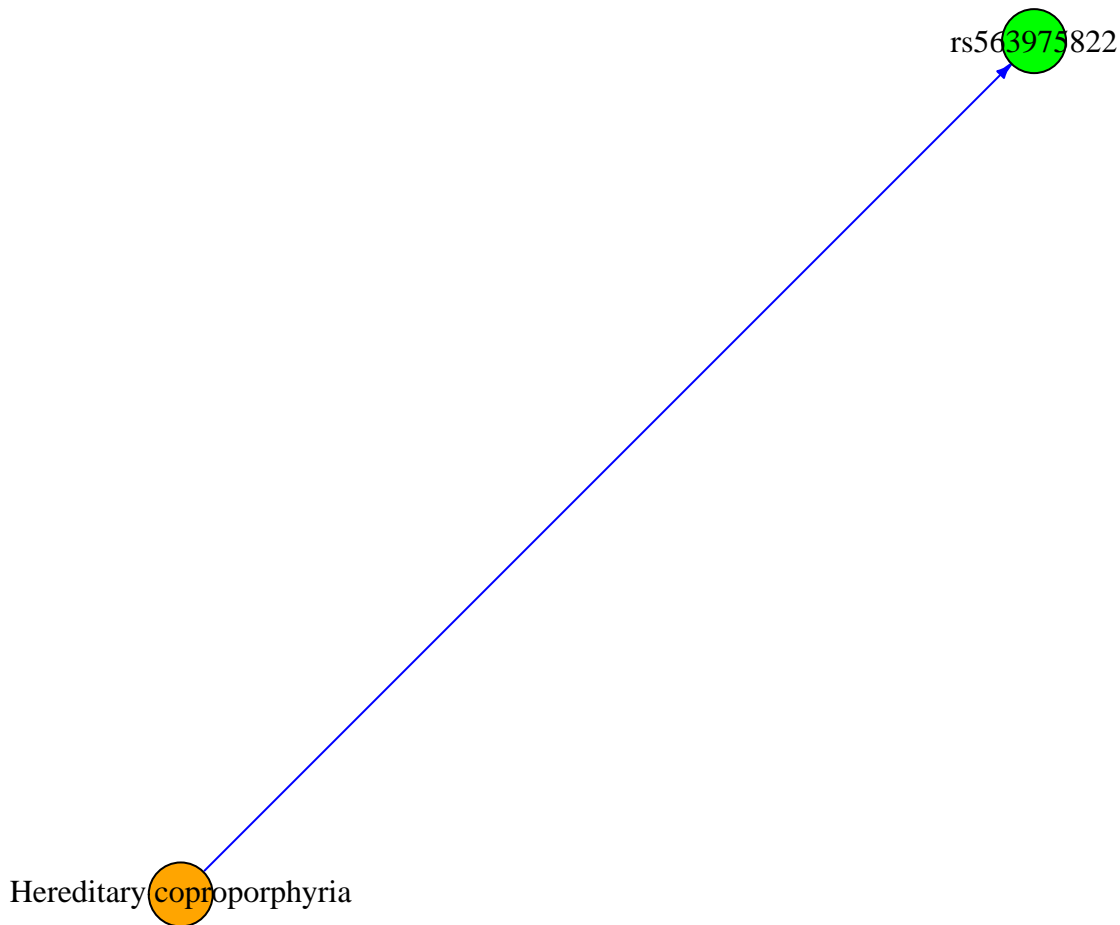

Variant–Disease Network (Hereditary cutaneous melanoma)

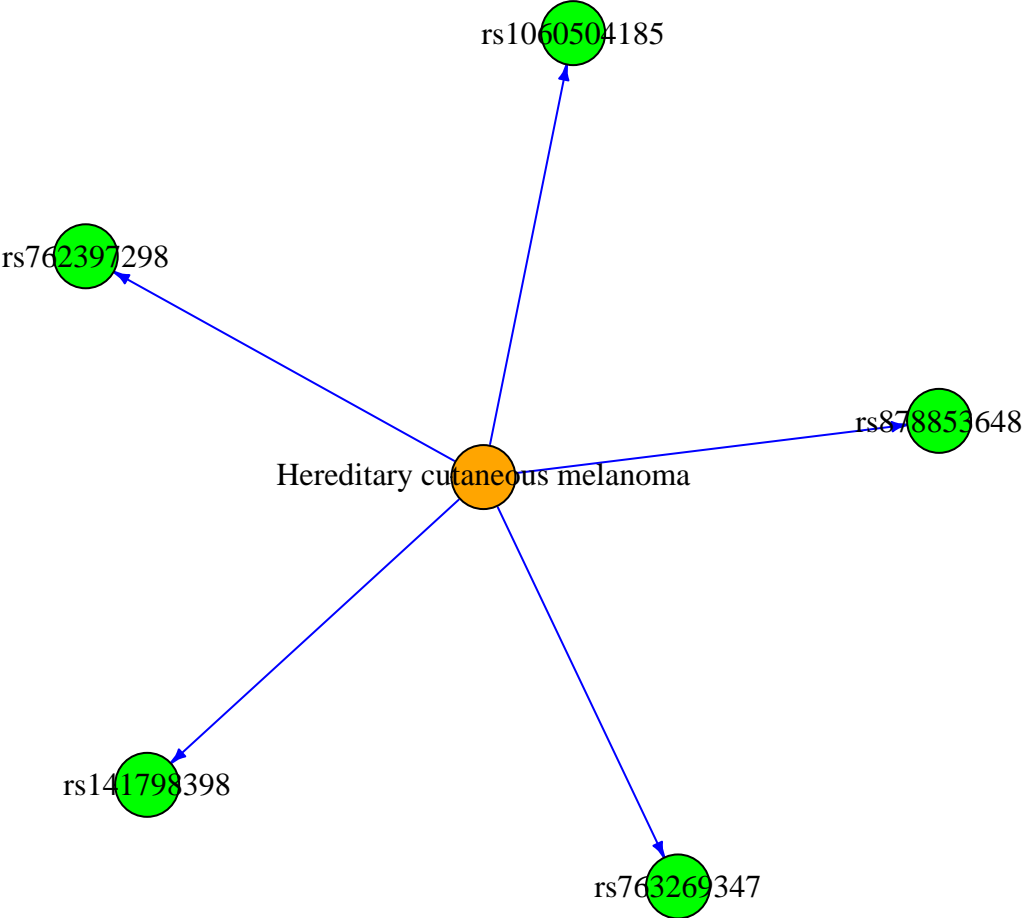

**Variant–Disease Network (Hereditary diffuse gastric cancer)**

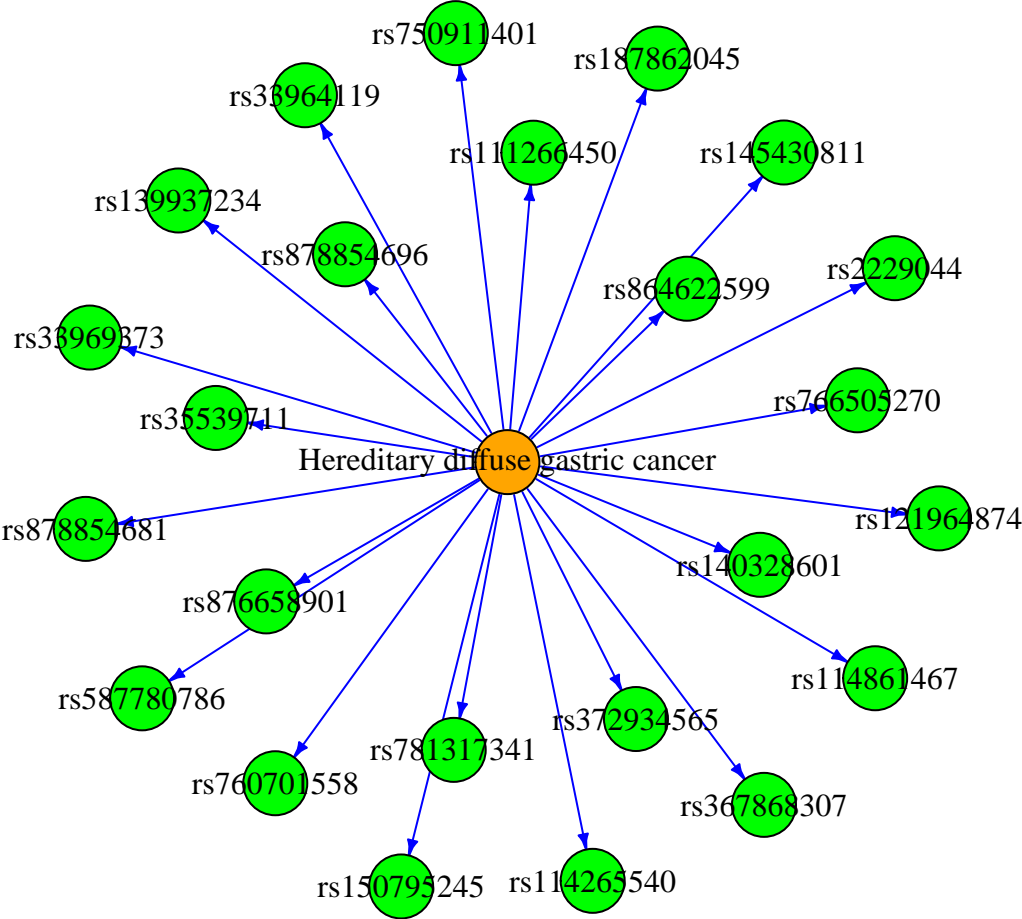

# Variant-Disease Network (Hereditary diffuse leukoencephalopathy with spheroids)

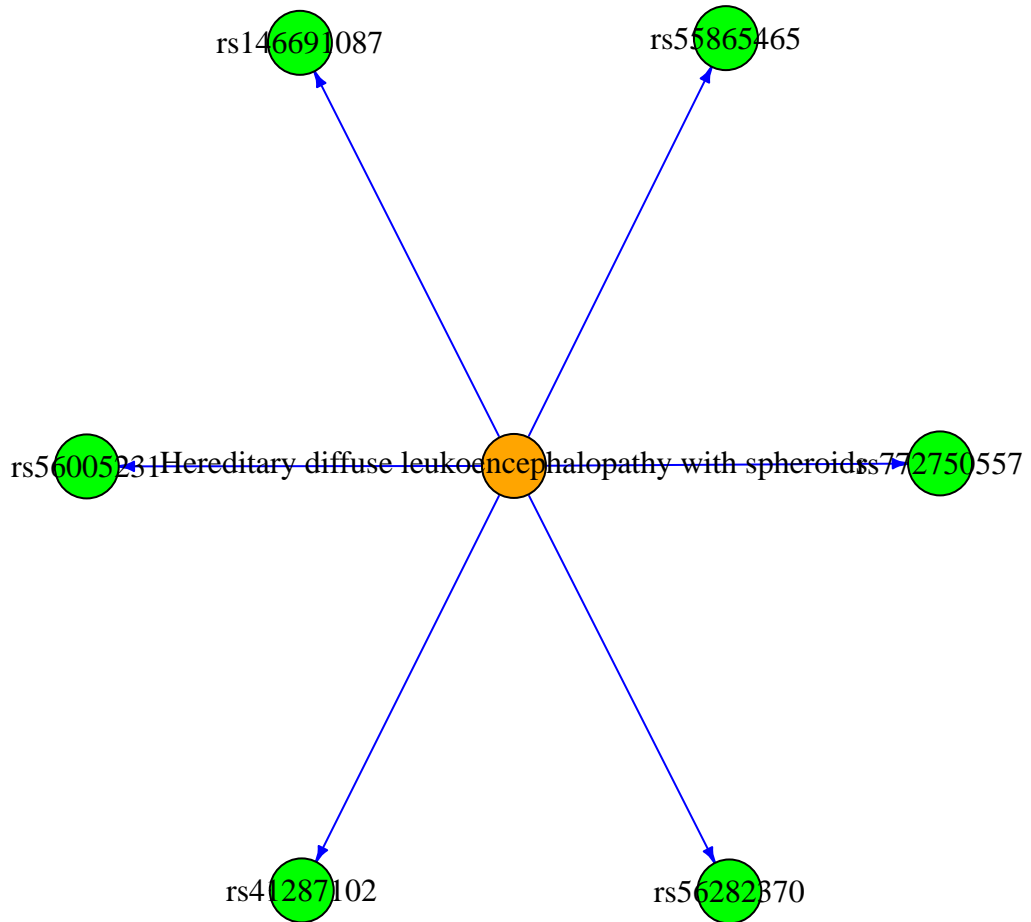

Variant–Disease Network (Hereditary factor II deficiency disease)

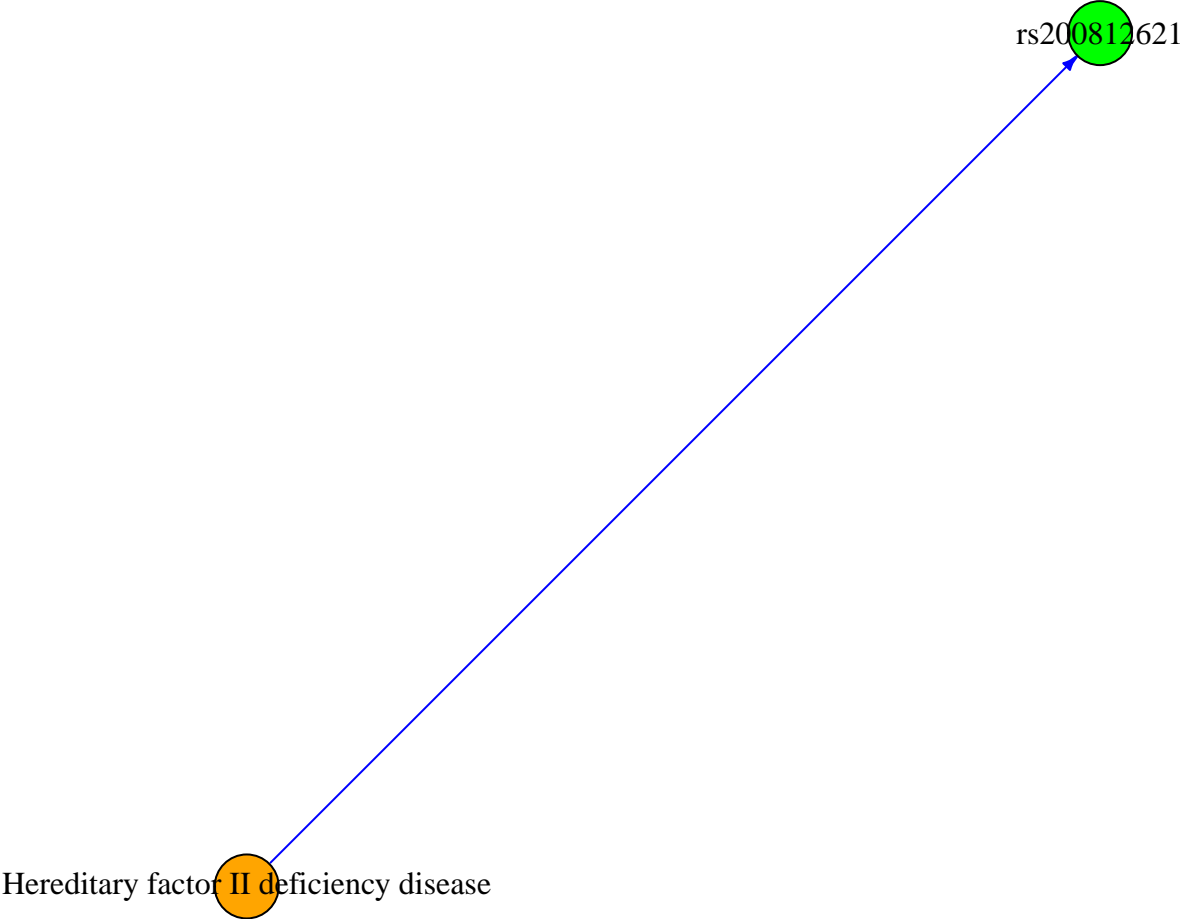

# Variant–Disease Network (Hereditary factor IX deficiency disease)

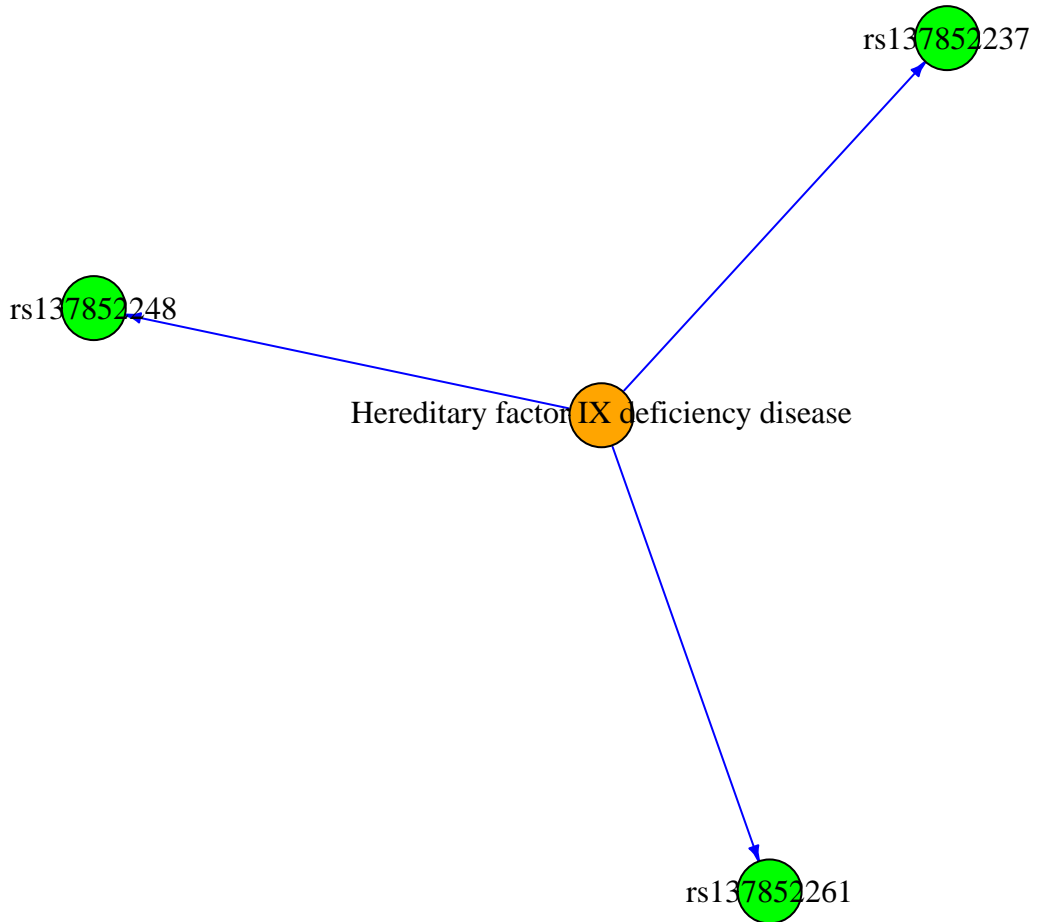

Variant–Disease Network (Hereditary factor XI deficiency disease)

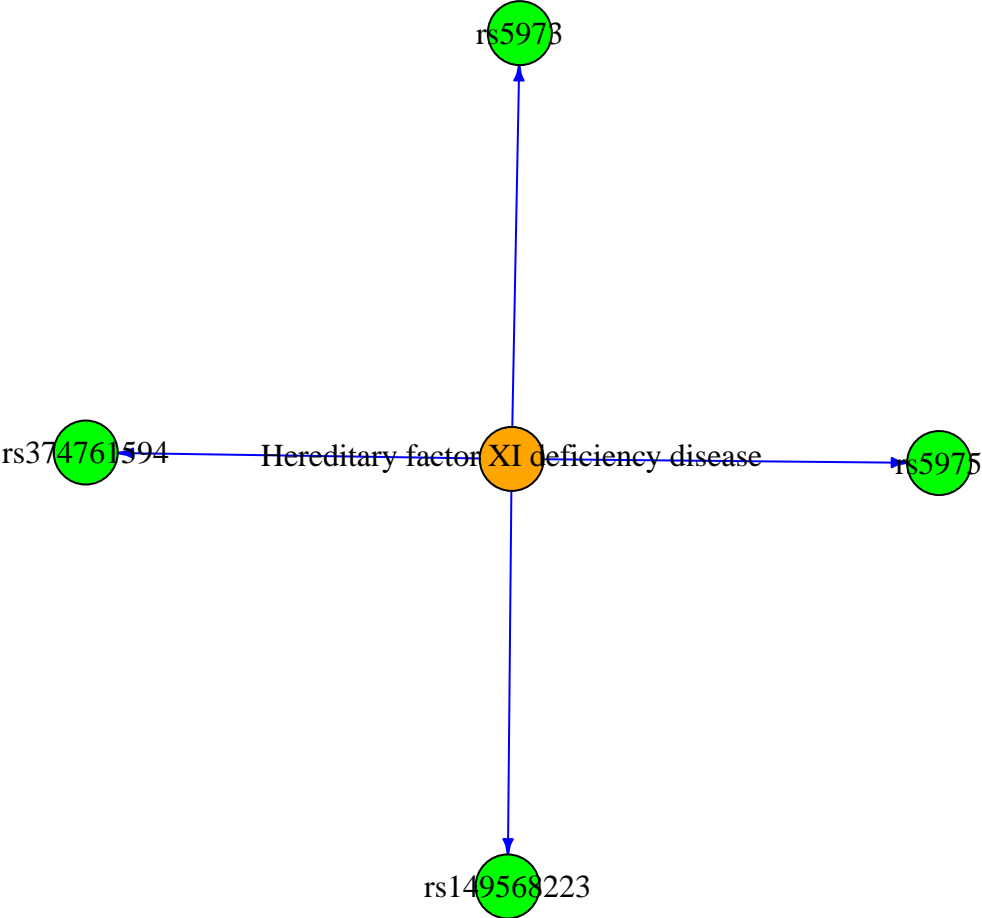

**Variant–Disease Network (Hereditary fructosuria)**

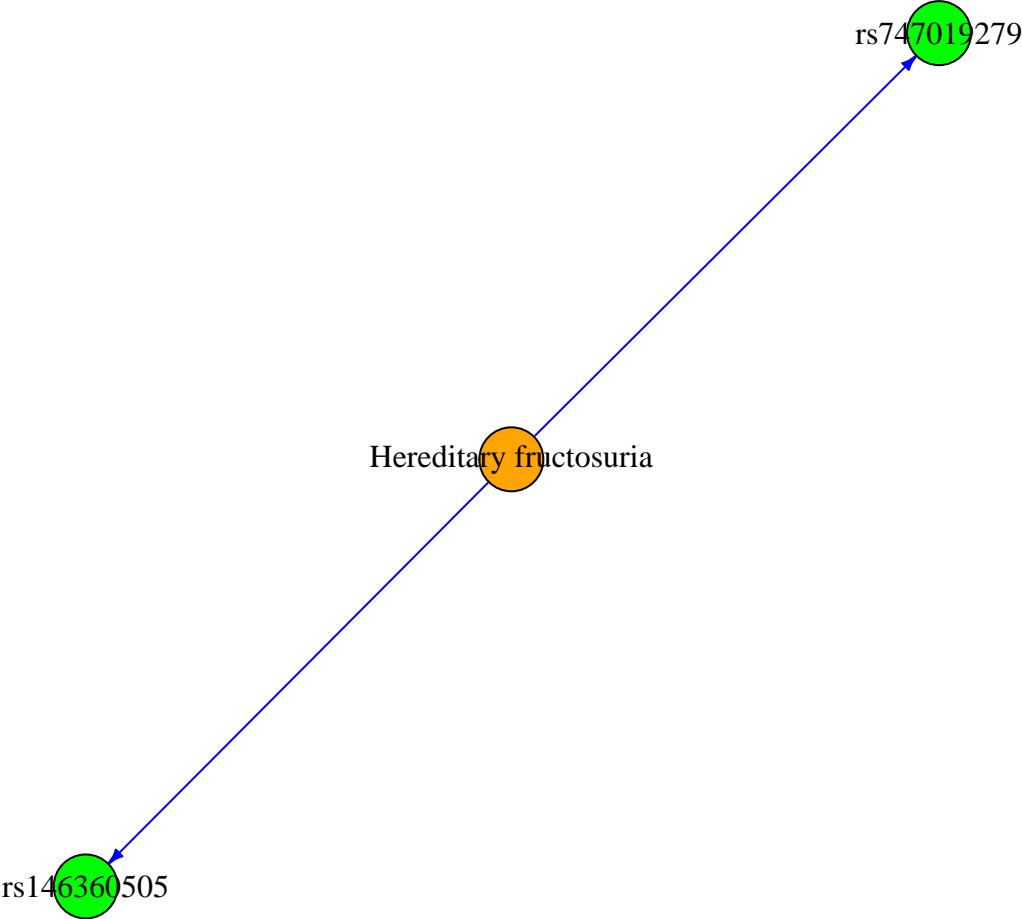



# Variant–Disease Network (Hereditary hemochromatosis)

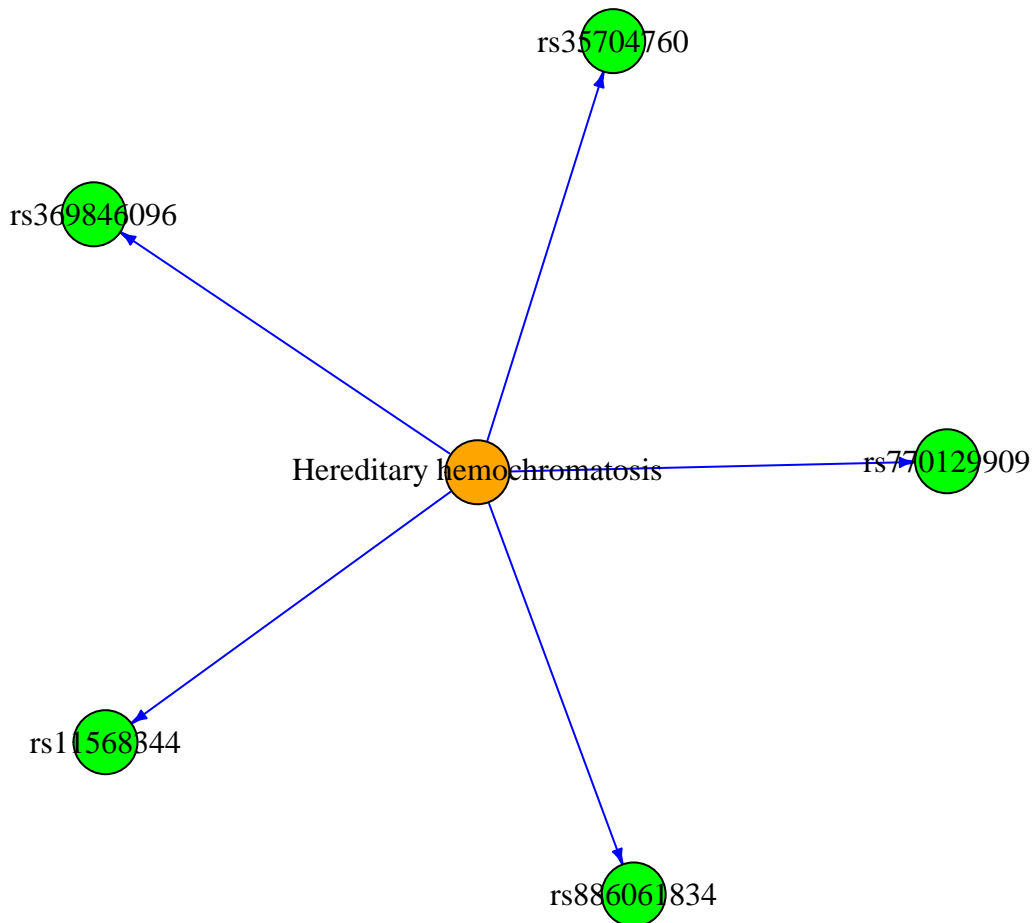

# Variant–Disease Network (Hereditary hemorrhagic telangiectasia)

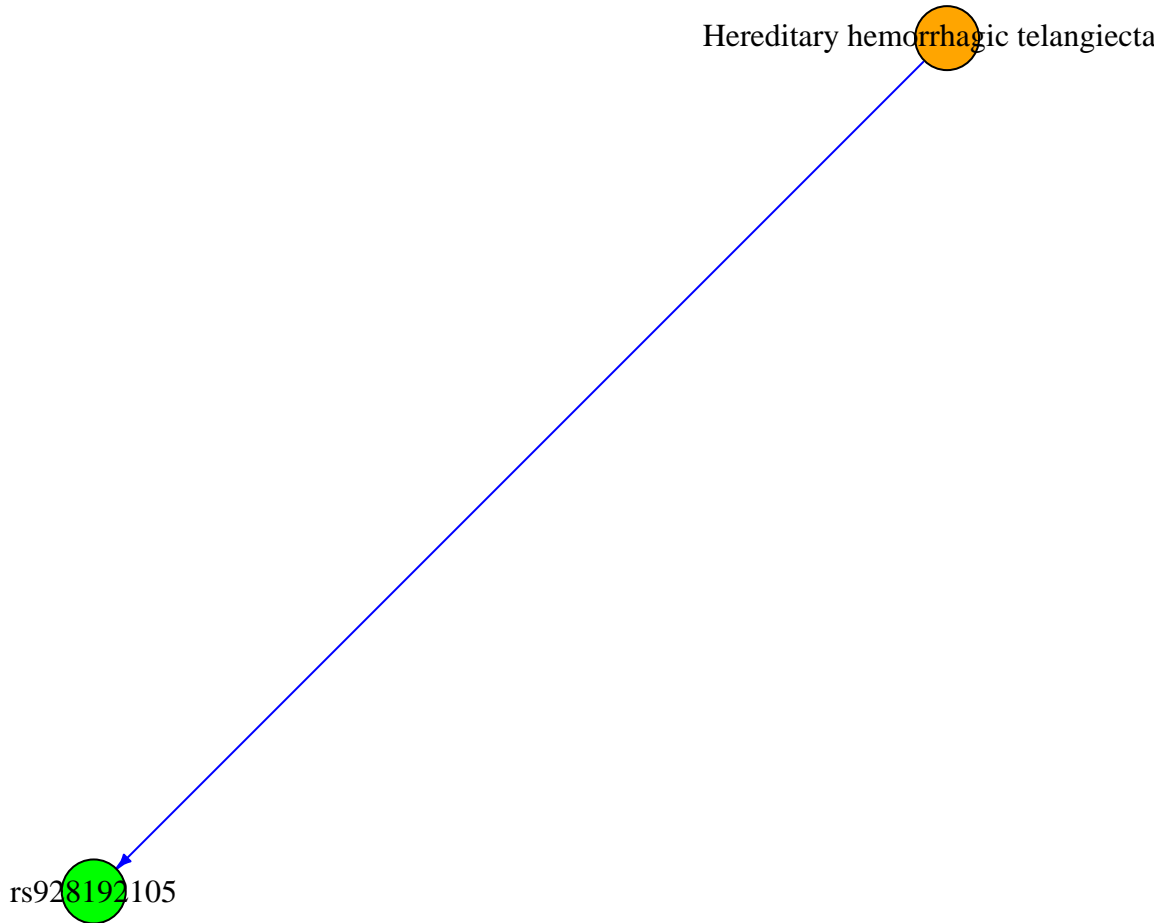

**Variant–Disease Network (Hereditary hemorrhagic telangiectasia type 1)**

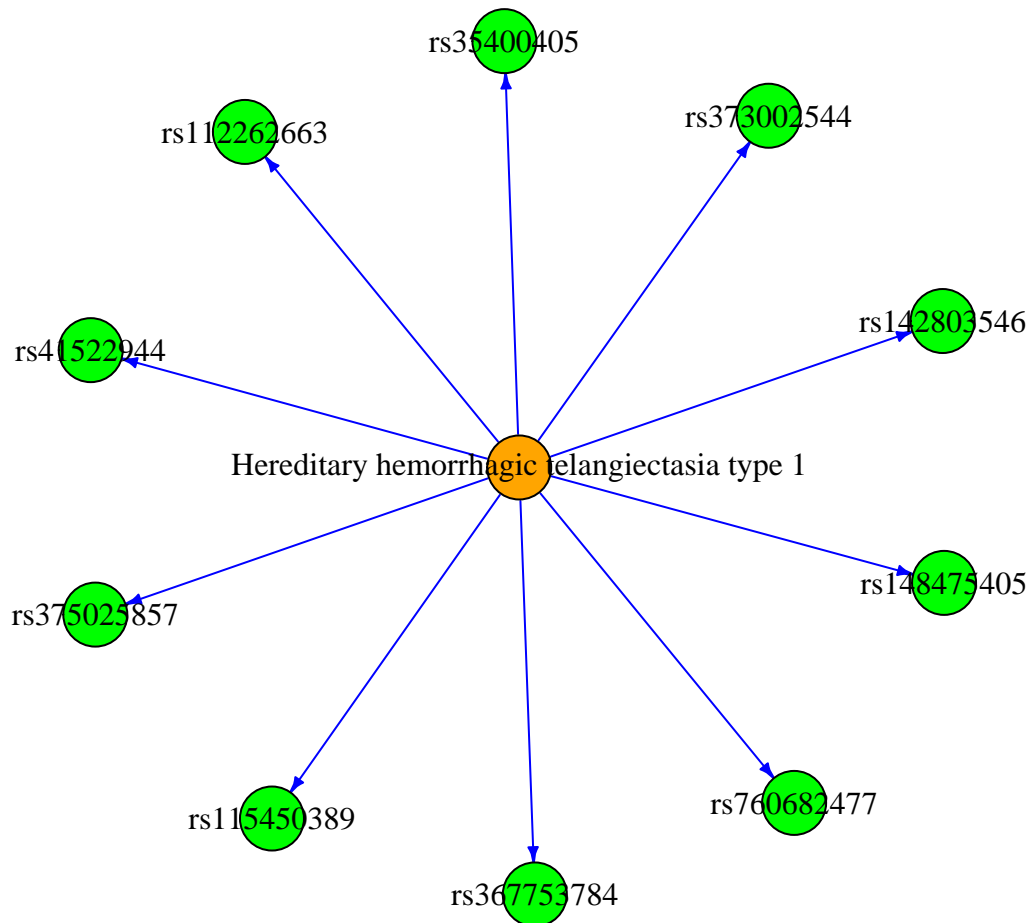

**Variant–Disease Network (Hereditary hemorrhagic telangiectasia type 2)**

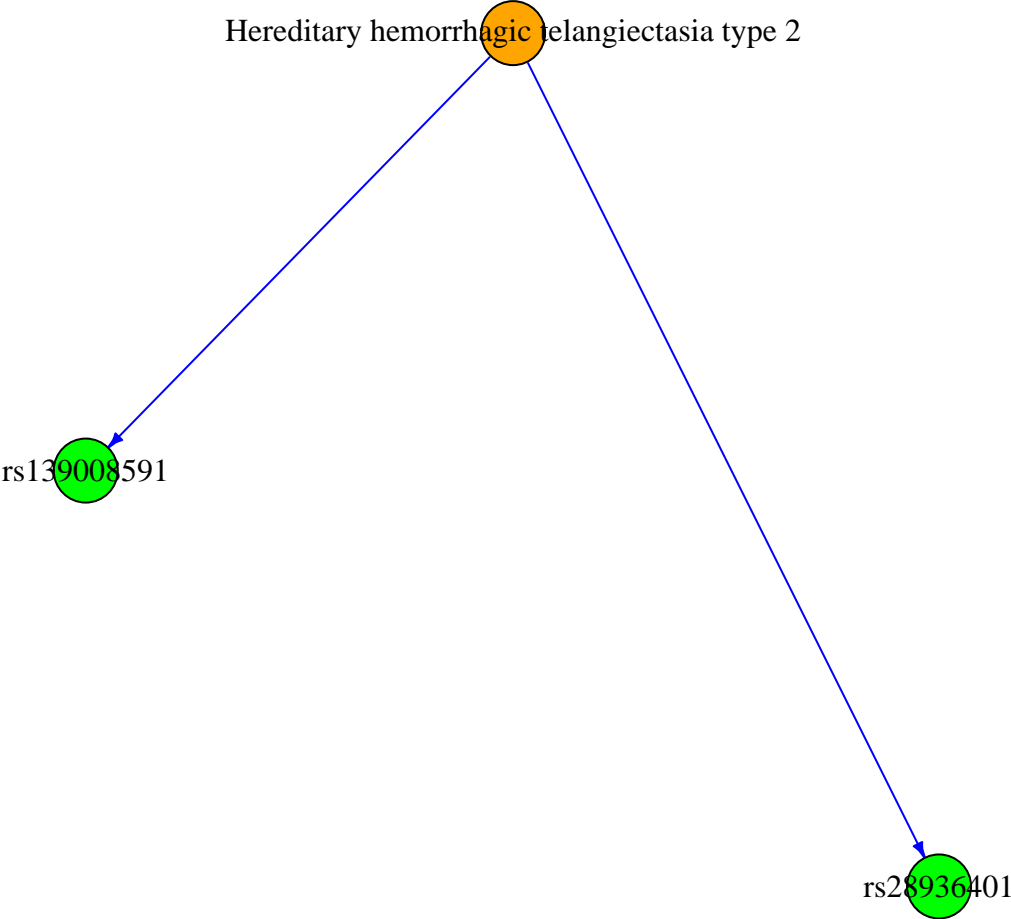

Variant–Disease Network (Hereditary insensitivity to pain with anhidrosis)

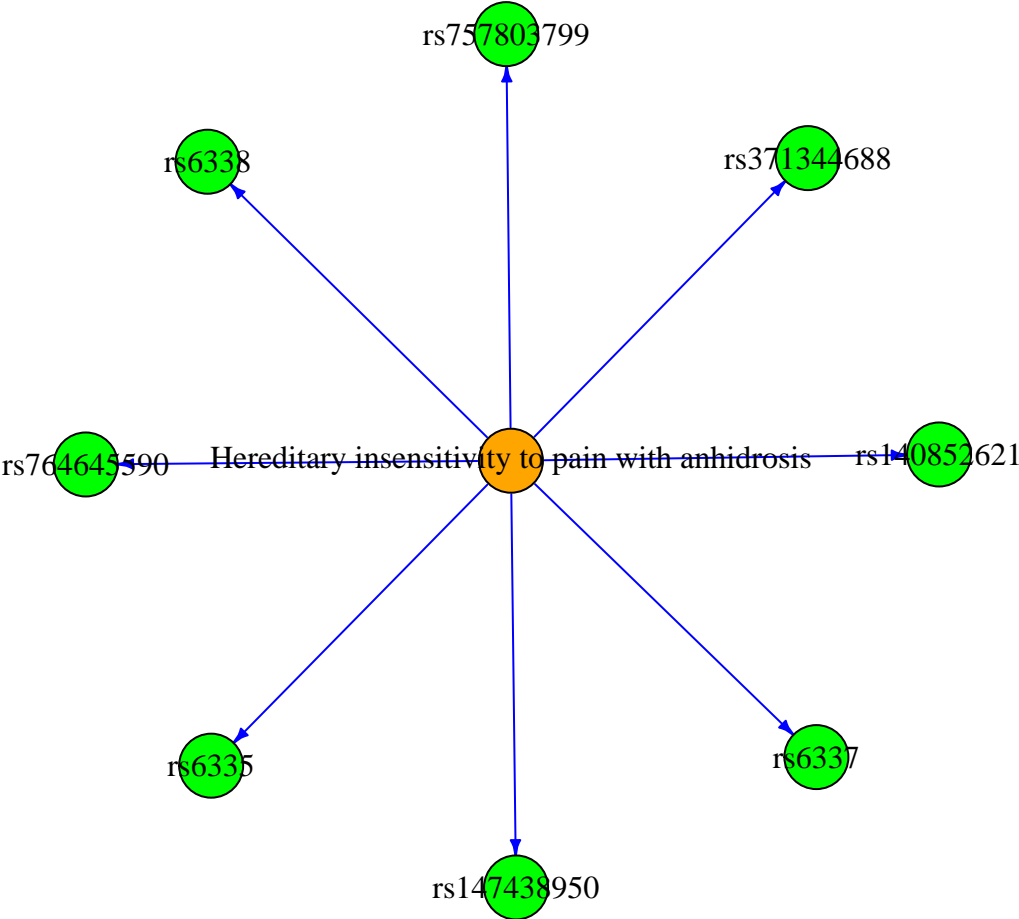

**Variant–Disease Network (Hereditary motor and sensory neuropathy)**

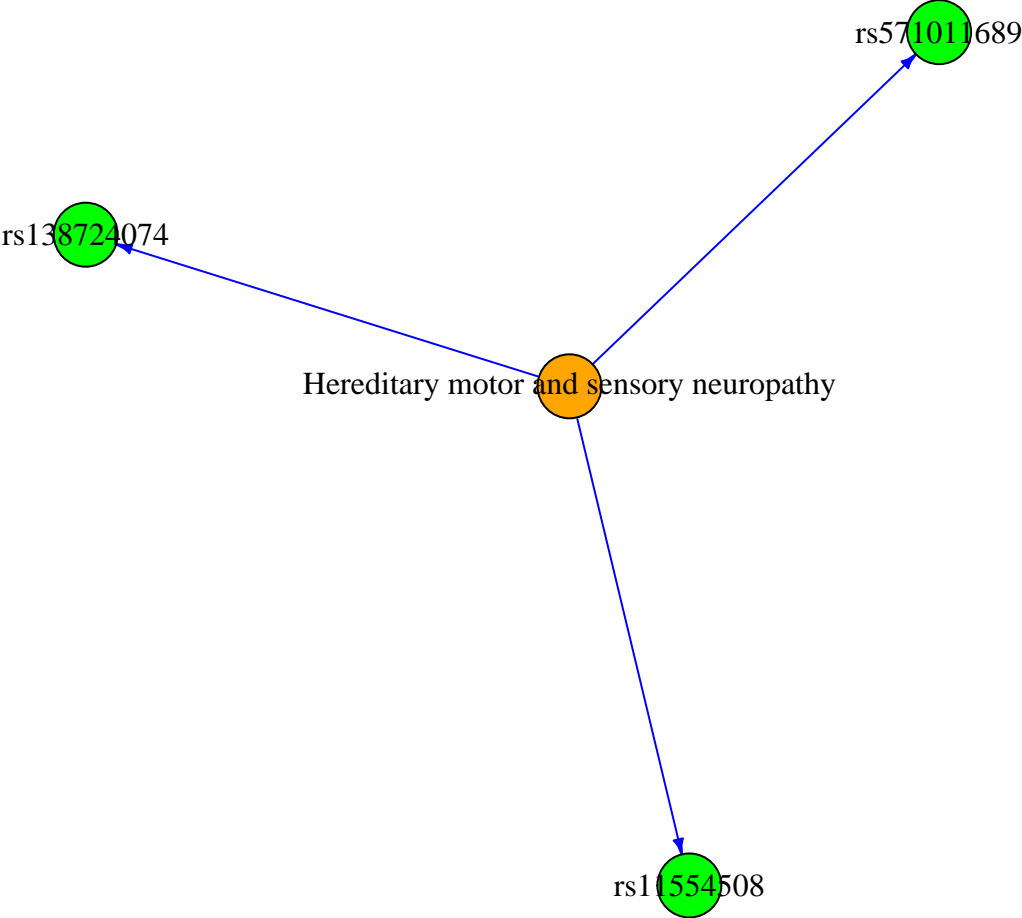

**Variant–Disease Network (Hereditary Multiple Osteochondromatosis)**

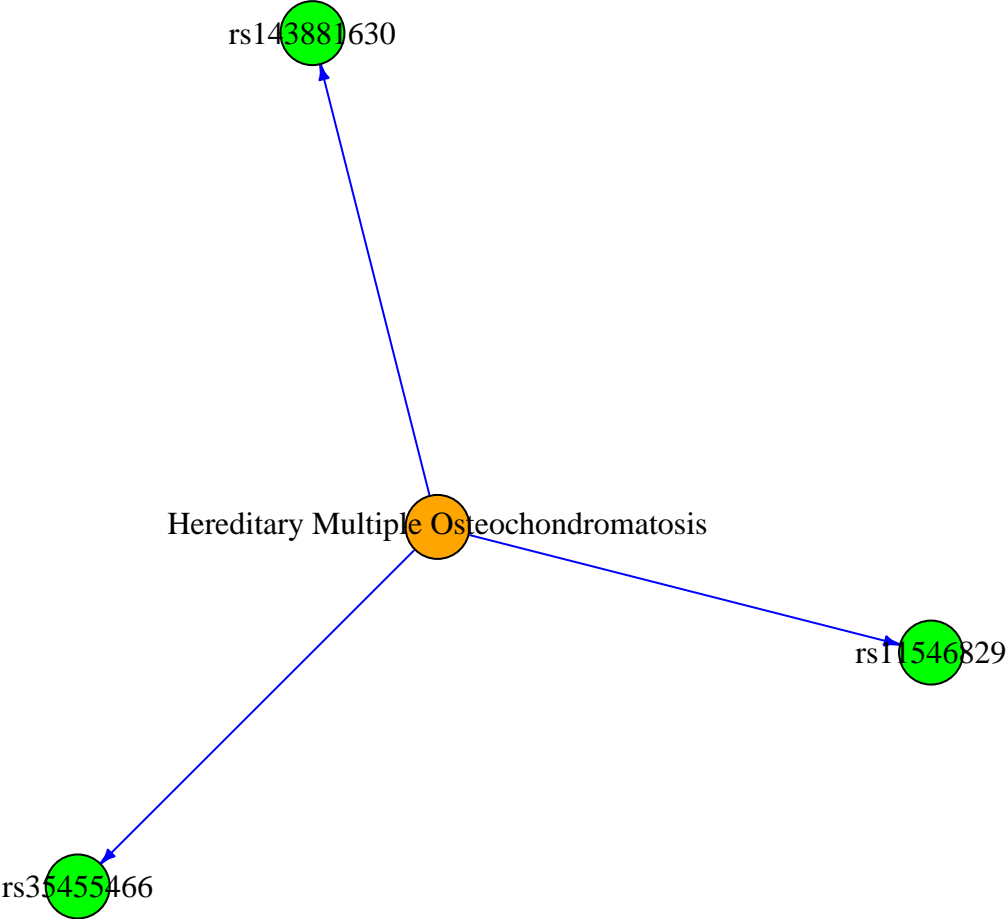

# Variant–Disease Network (Hereditary Neuralgic Amyotrophy (HNA))

rs187657144

Hereditary Neuralgic Amyotrophy (HNA)





# Variant–Disease Network (Hereditary nonpolyposis colon cancer)

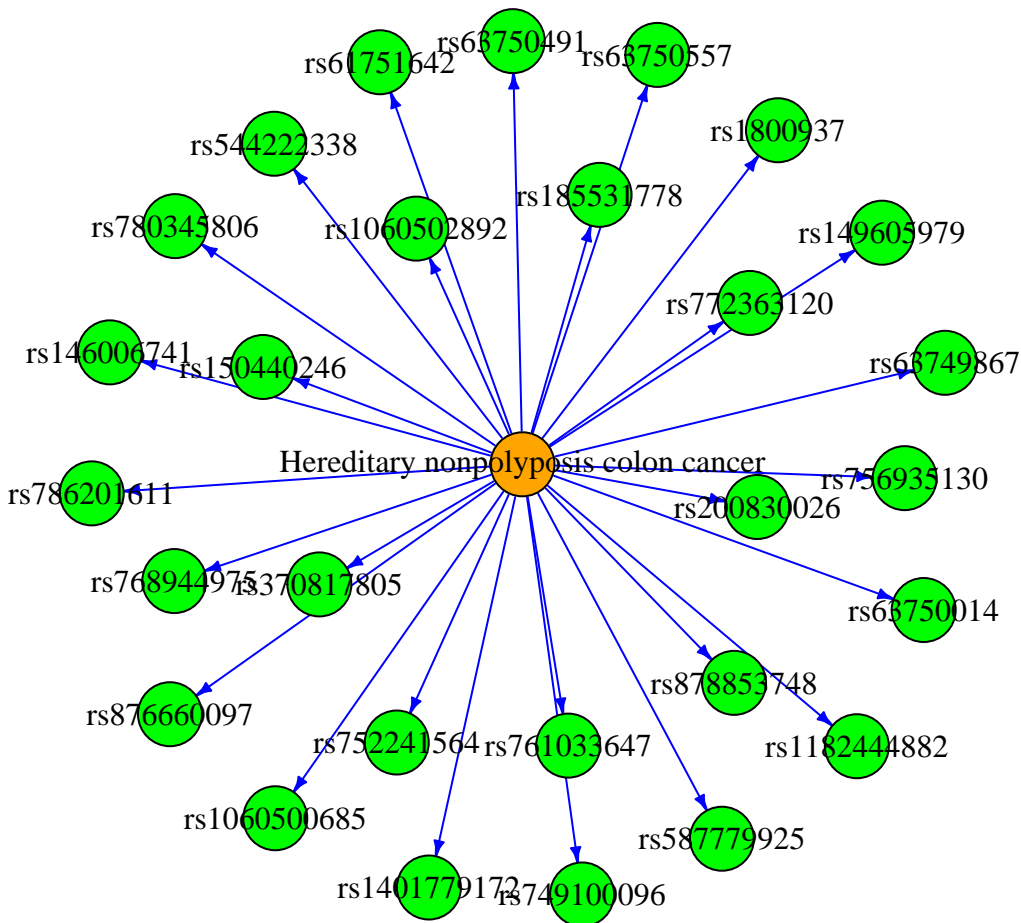

Variant–Disease Network (Hereditary nonpolyposis colorectal cancer type

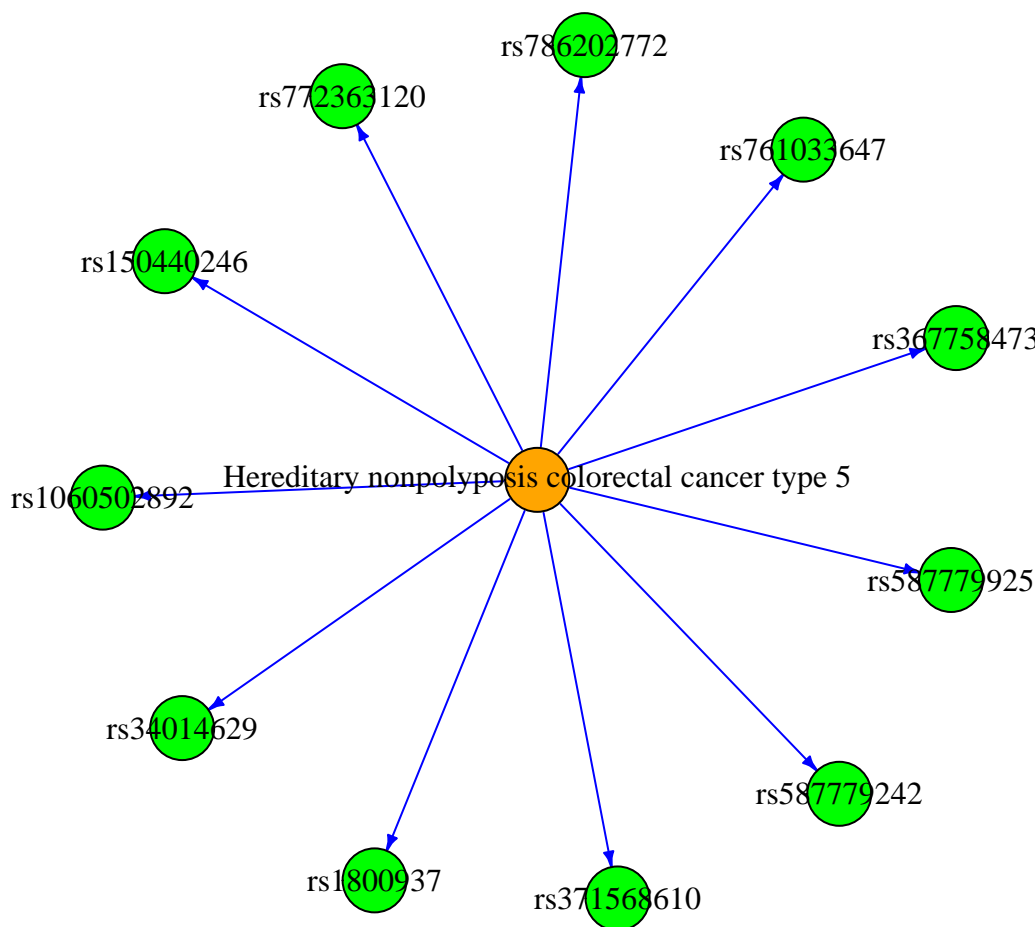

Variant–Disease Network (Hereditary nonpolyposis colorectal cancer type

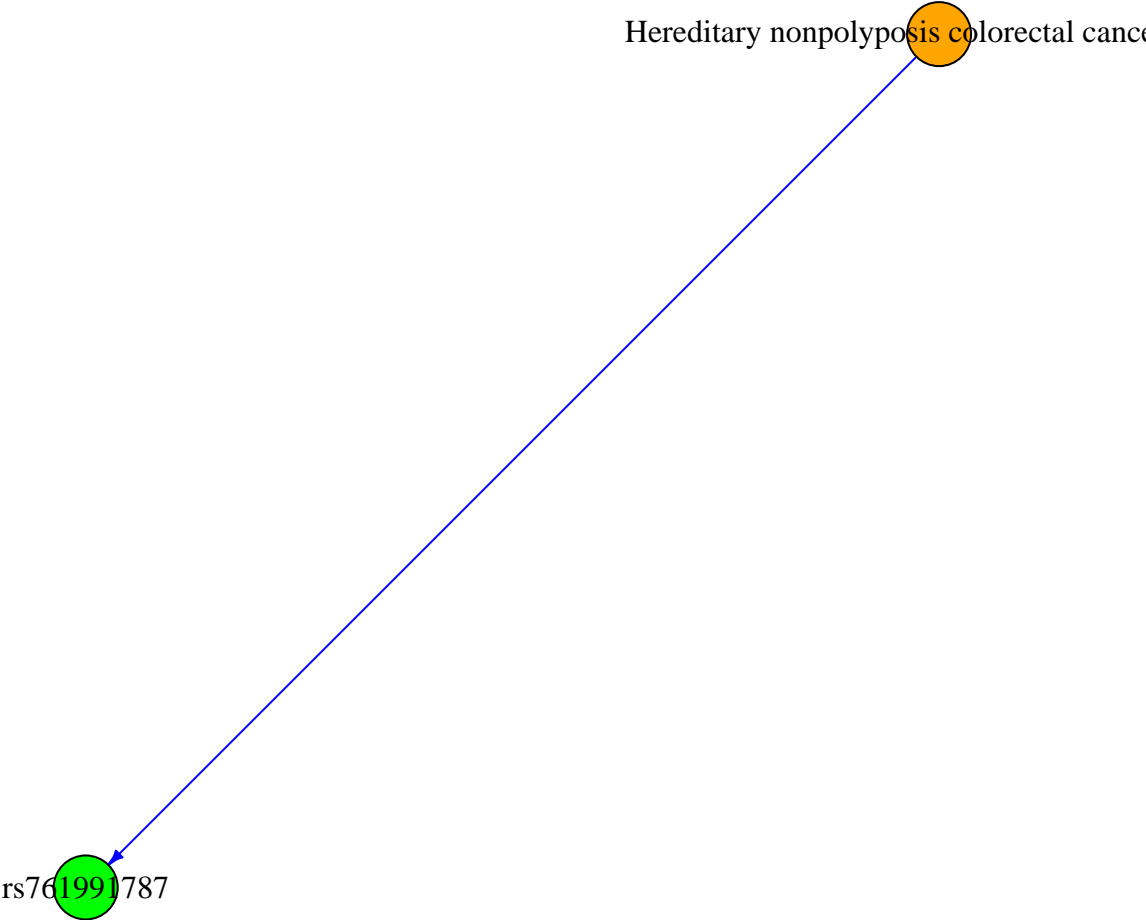

## Variant–Disease Network (Hereditary pancreatitis)

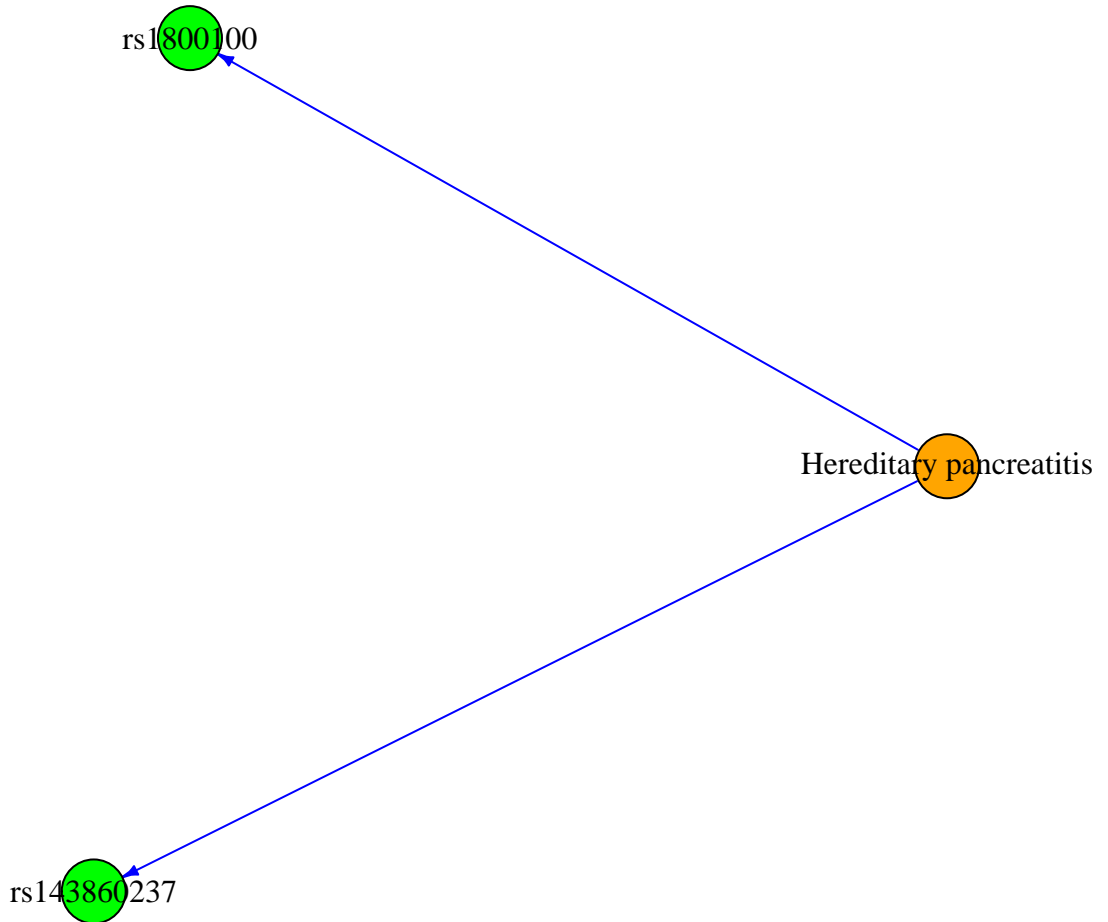

# Variant-Disease Network (Hereditary Paraganglioma-Pheochromocytoma Syndromes)

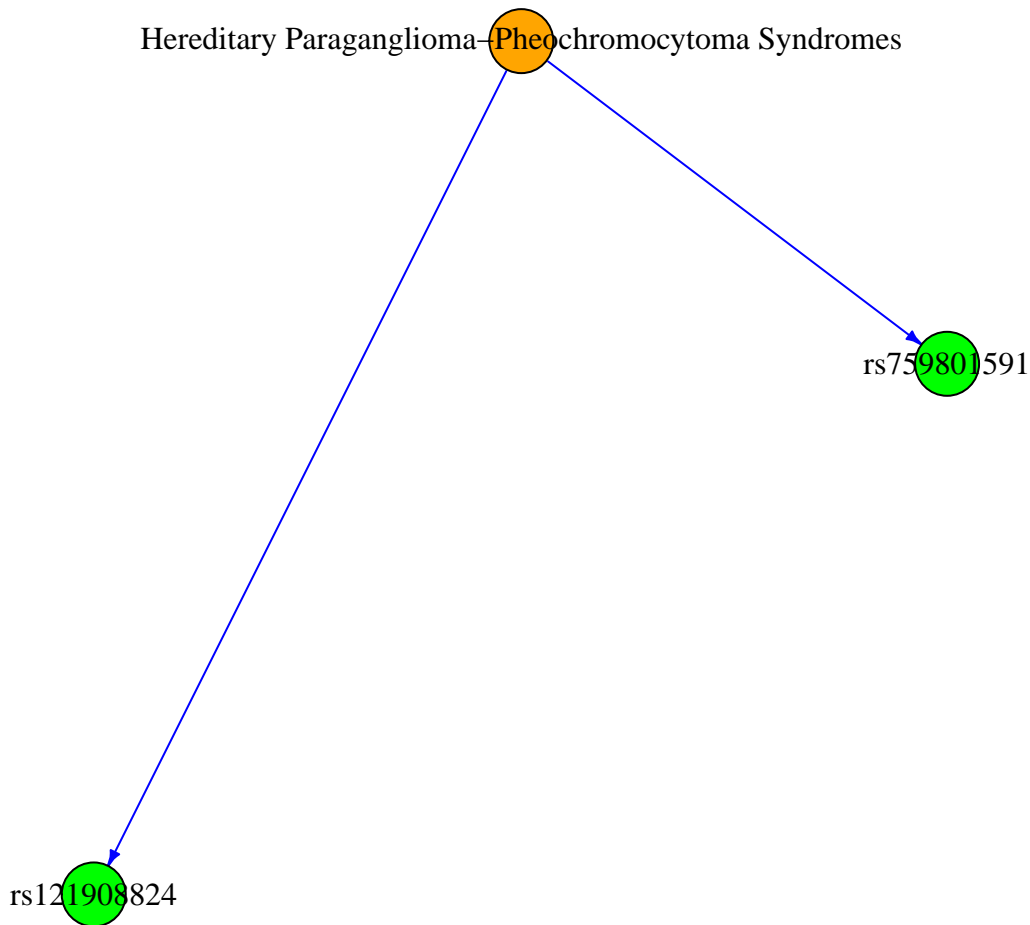

**Variant–Disease Network (Hereditary pyropoikilocytosis)**

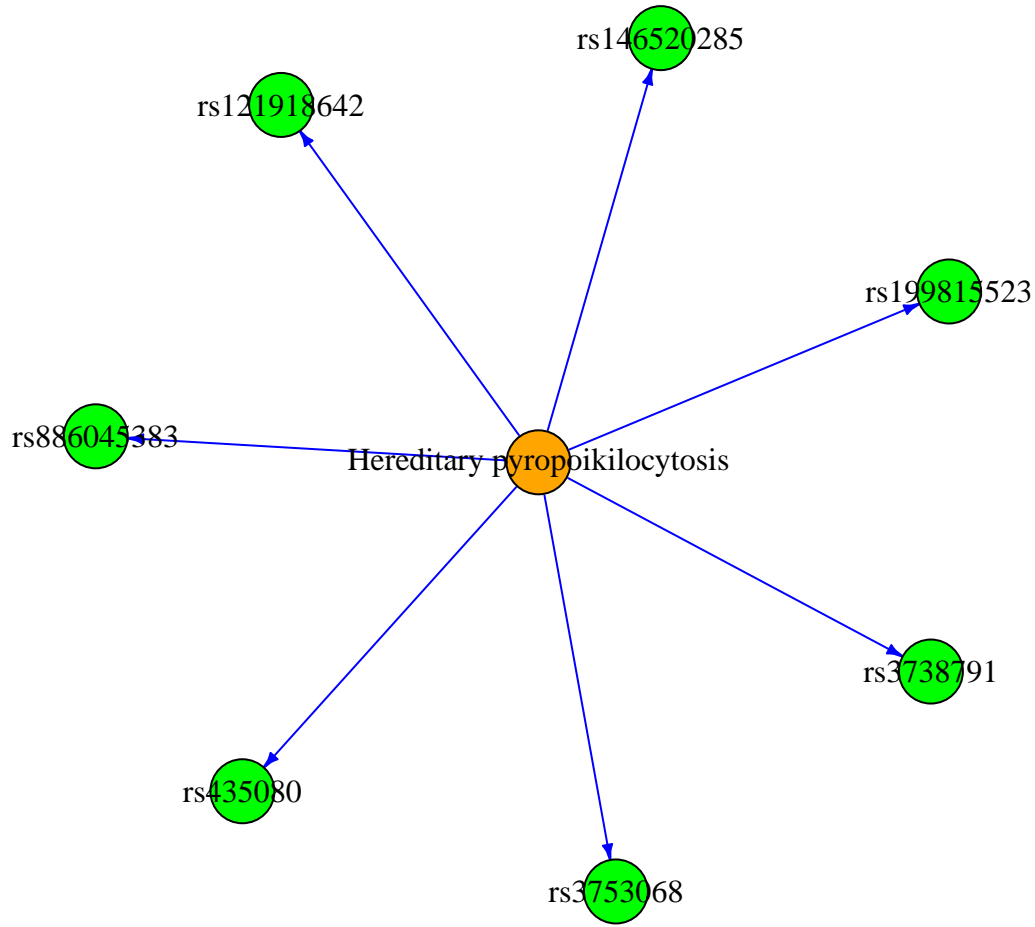

# Variant-Disease Network (Hereditary sensory and autonomic neuropathy type 1)

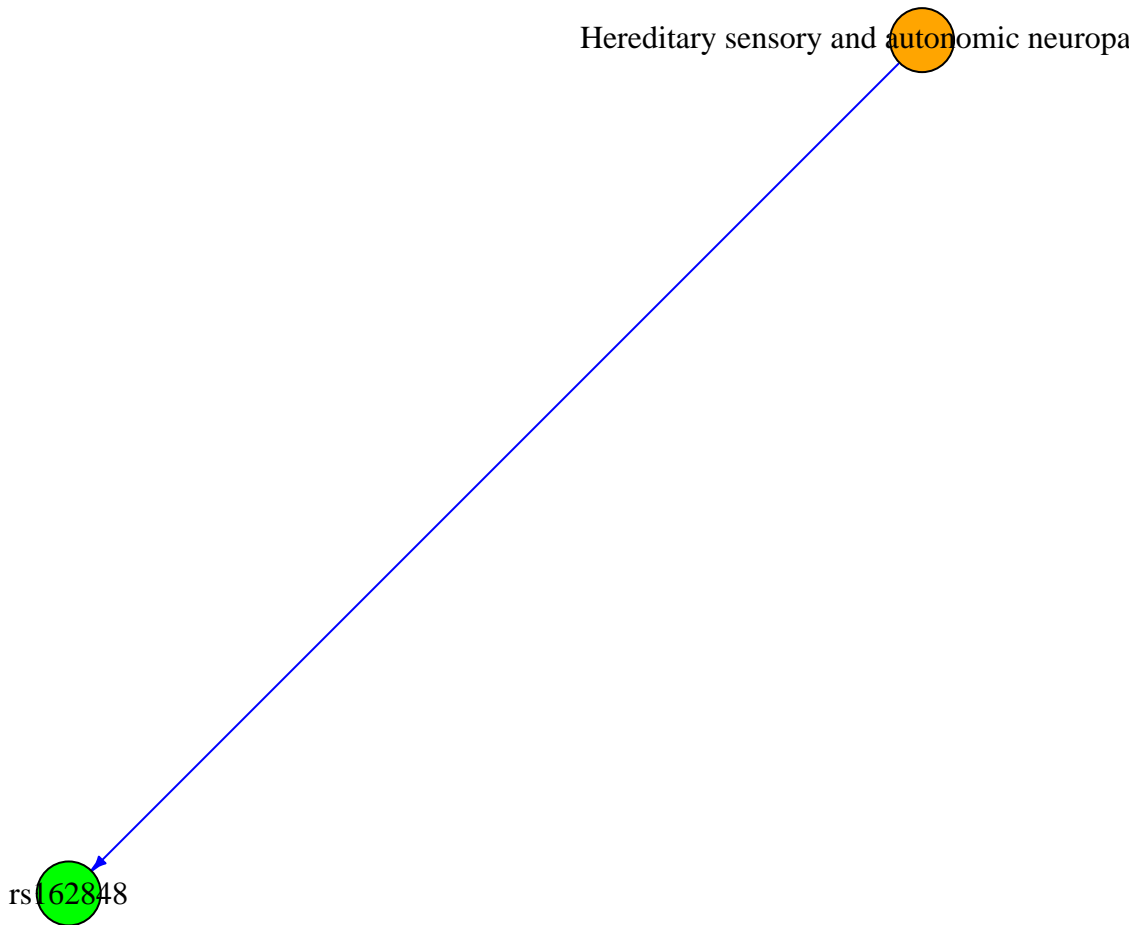

# Variant-Disease Network (Hereditary sensory and autonomic neuropathy type 1)

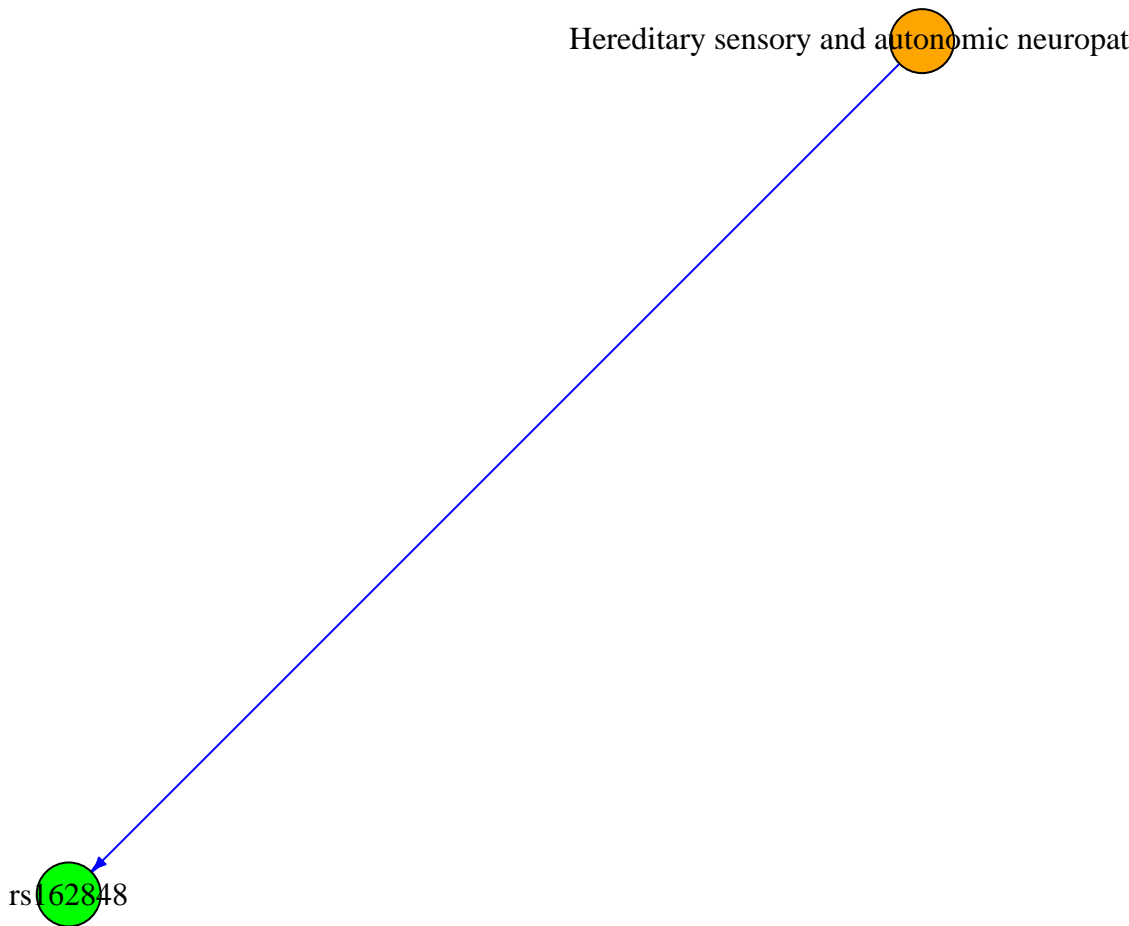



# Variant–Disease Network (Hereditary sensory neuropathy type IE)

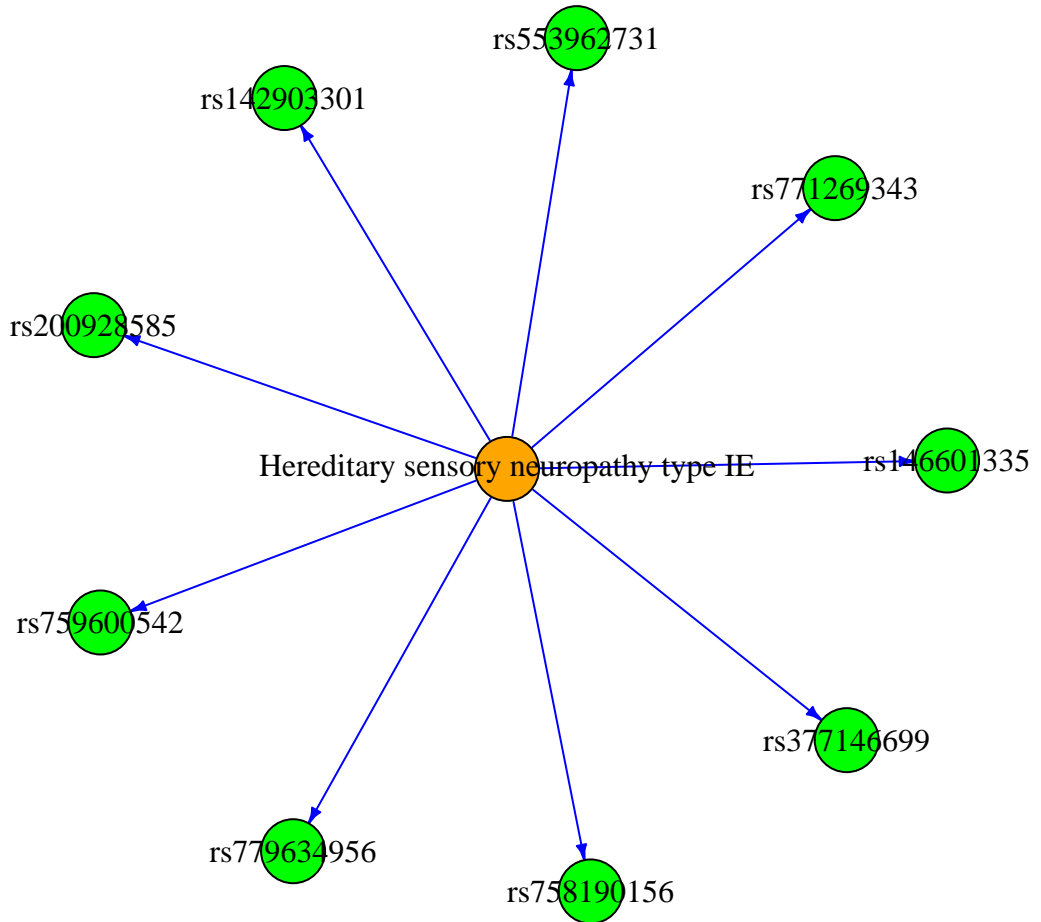

**Variant–Disease Network (Hermansky Pudlak syndrome 2)**

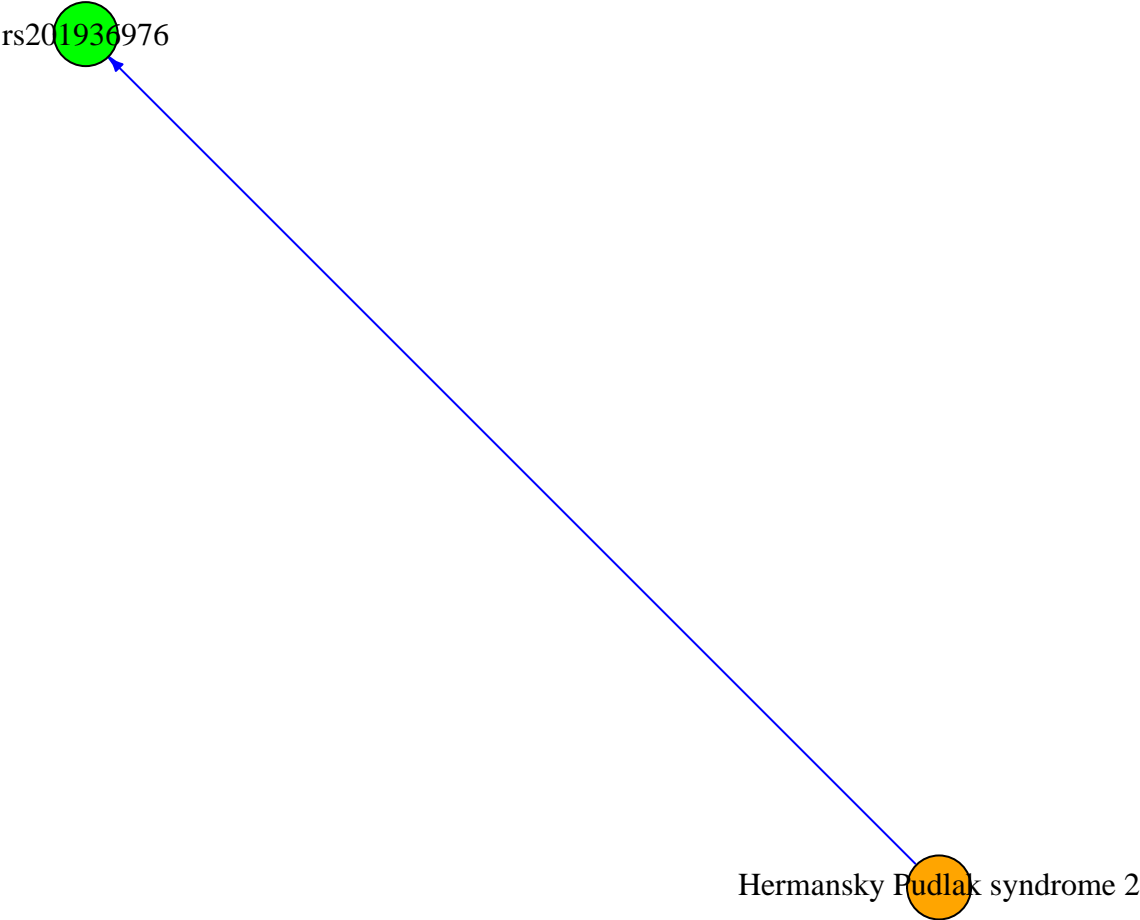

Variant–Disease Network (Hermansky–Pudlak syndrome)

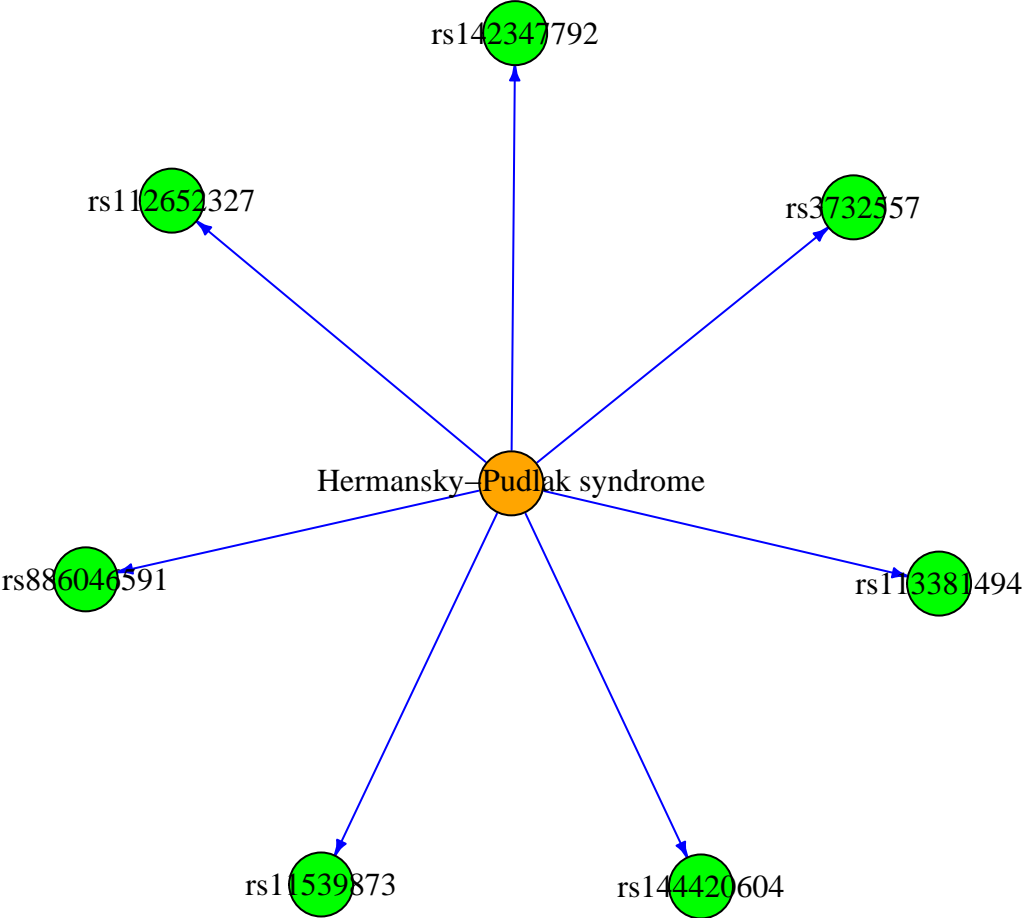

Variant–Disease Network (Herpes simplex encephalitis 1)

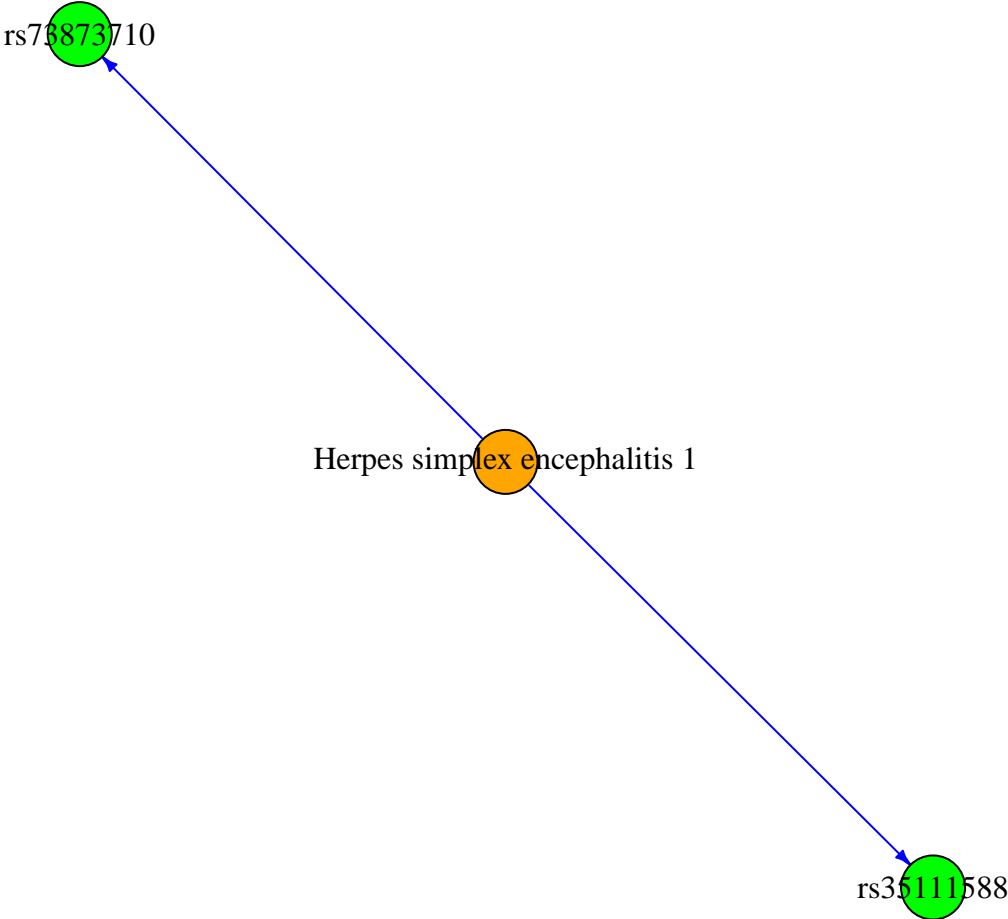

# Variant–Disease Network (heterogeneous nuclear ribonucleoprotein G)

heterogeneous nuclear ribonucleoprotein G

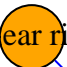

rs753169165

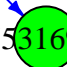

Variant–Disease Network (Heterotaxia)

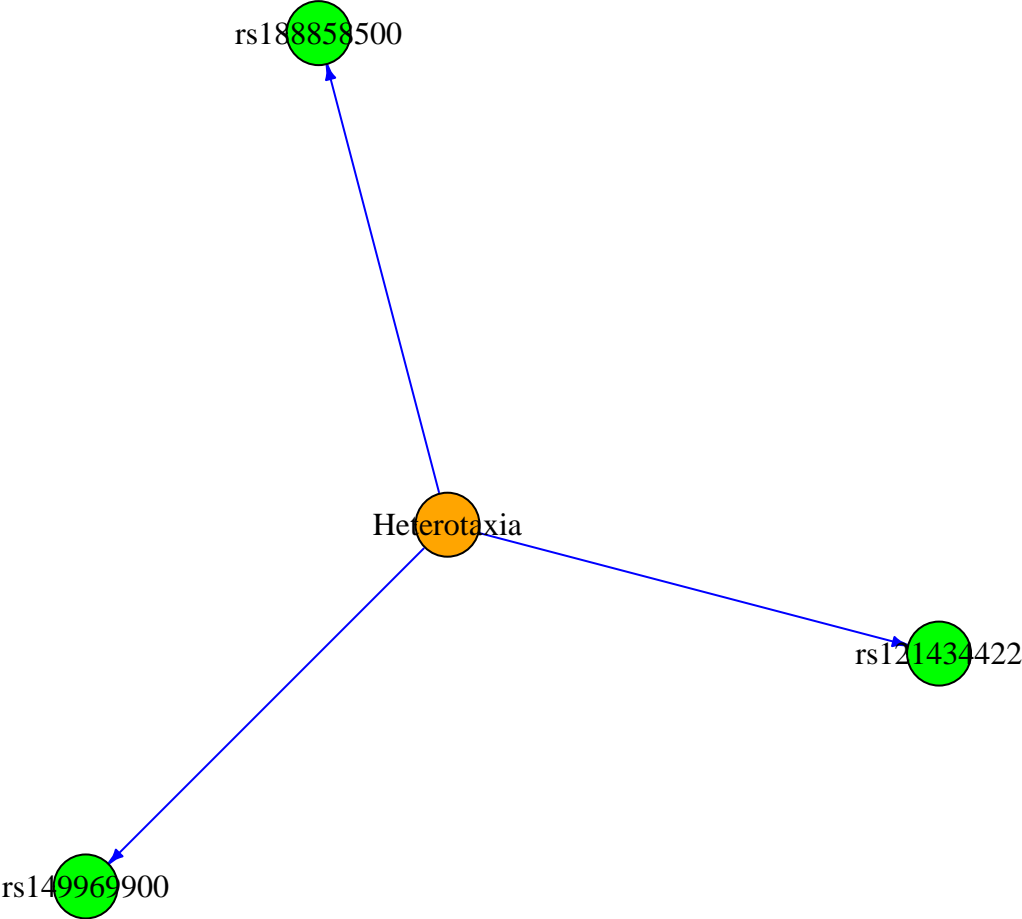

## Variant–Disease Network (Heterotaxy)

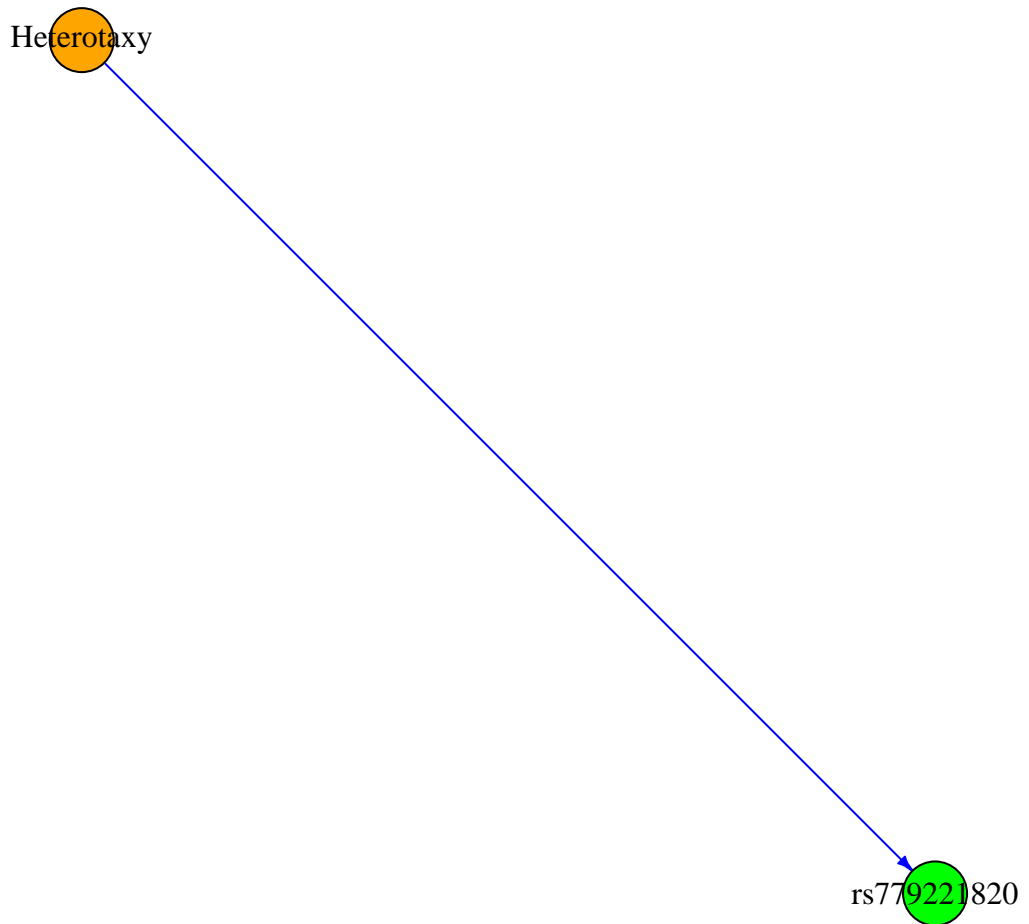

## Variant–Disease Network (Heterotopia)

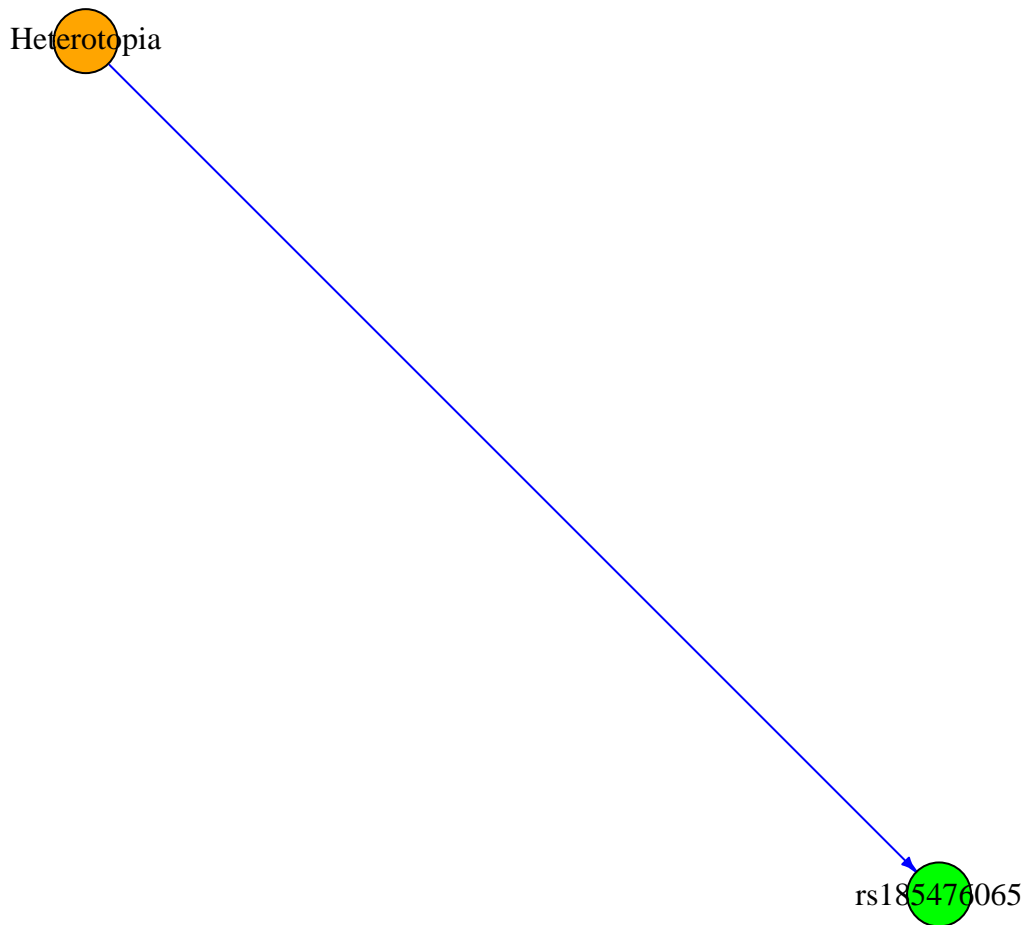



## Variant–Disease Network (Hirschsprung Disease)

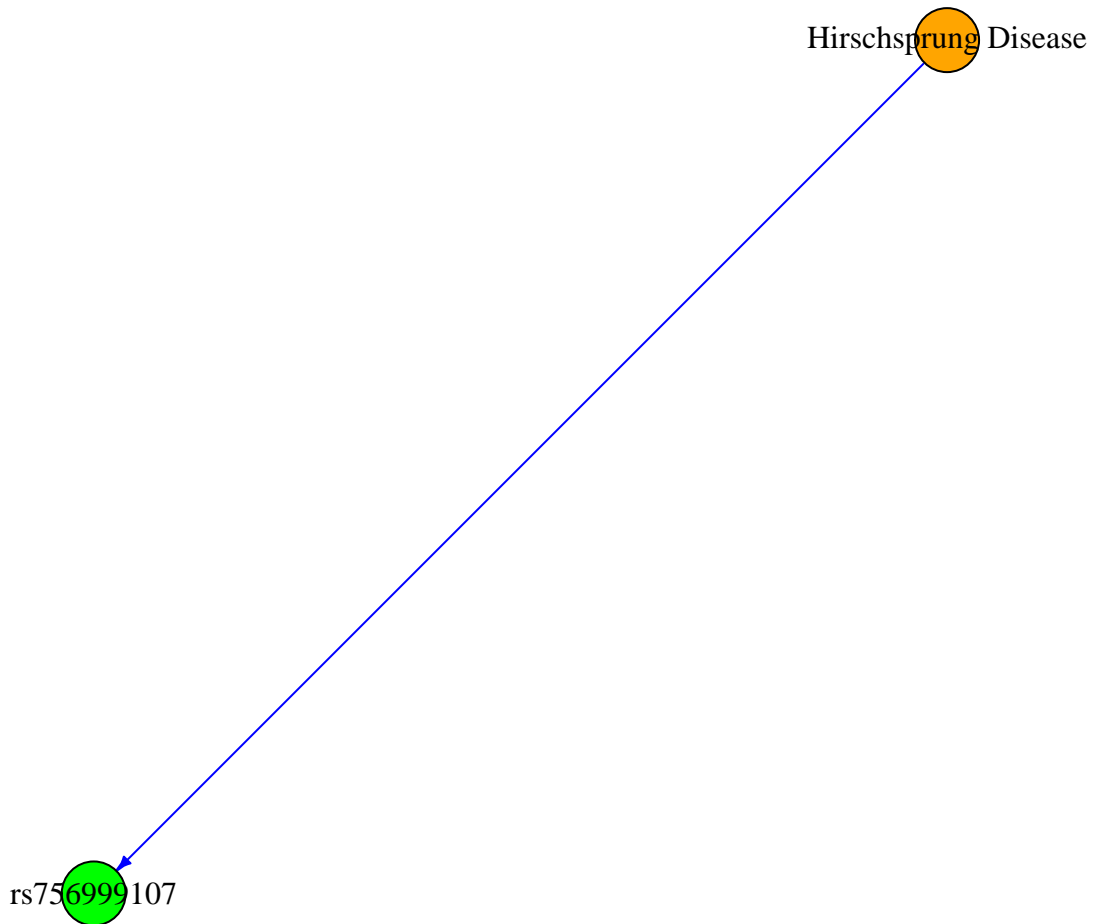

## Variant–Disease Network (Hirschsprung disease 1)

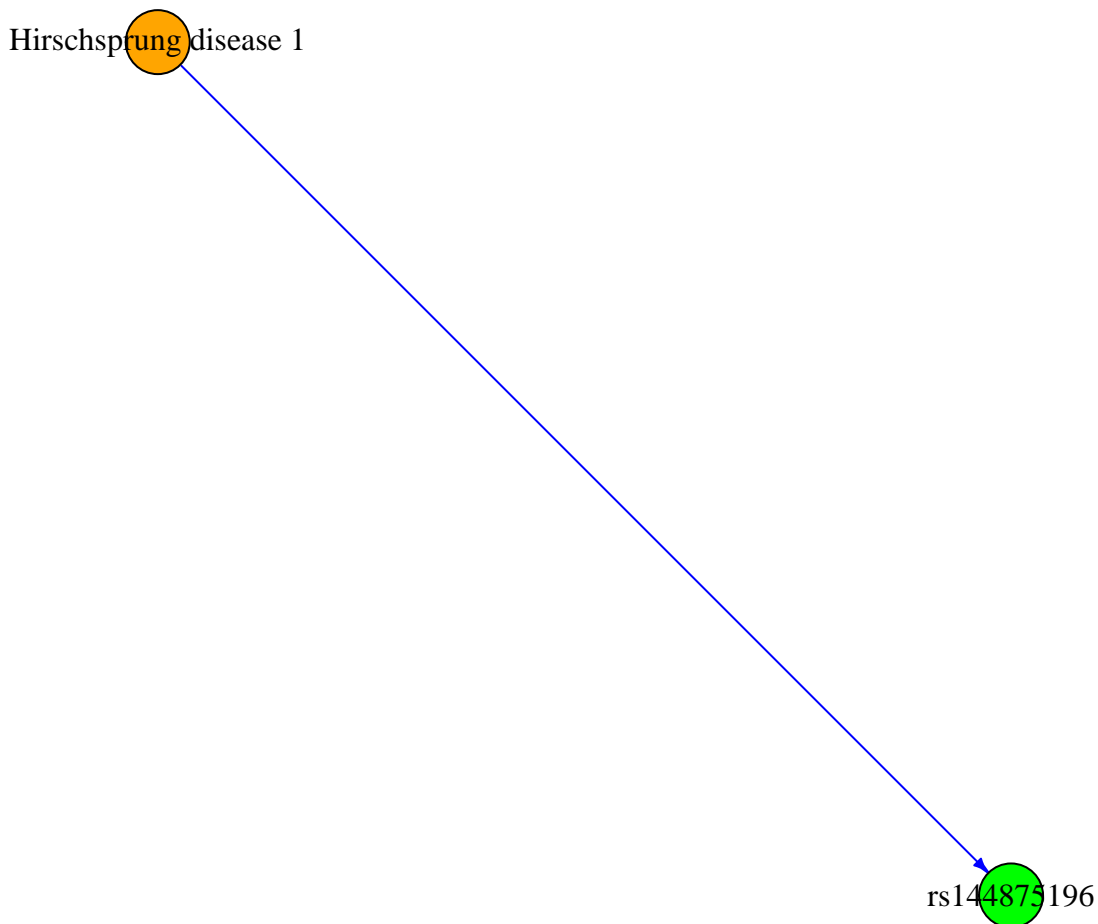

## Variant-Disease Network (Hirsutism)

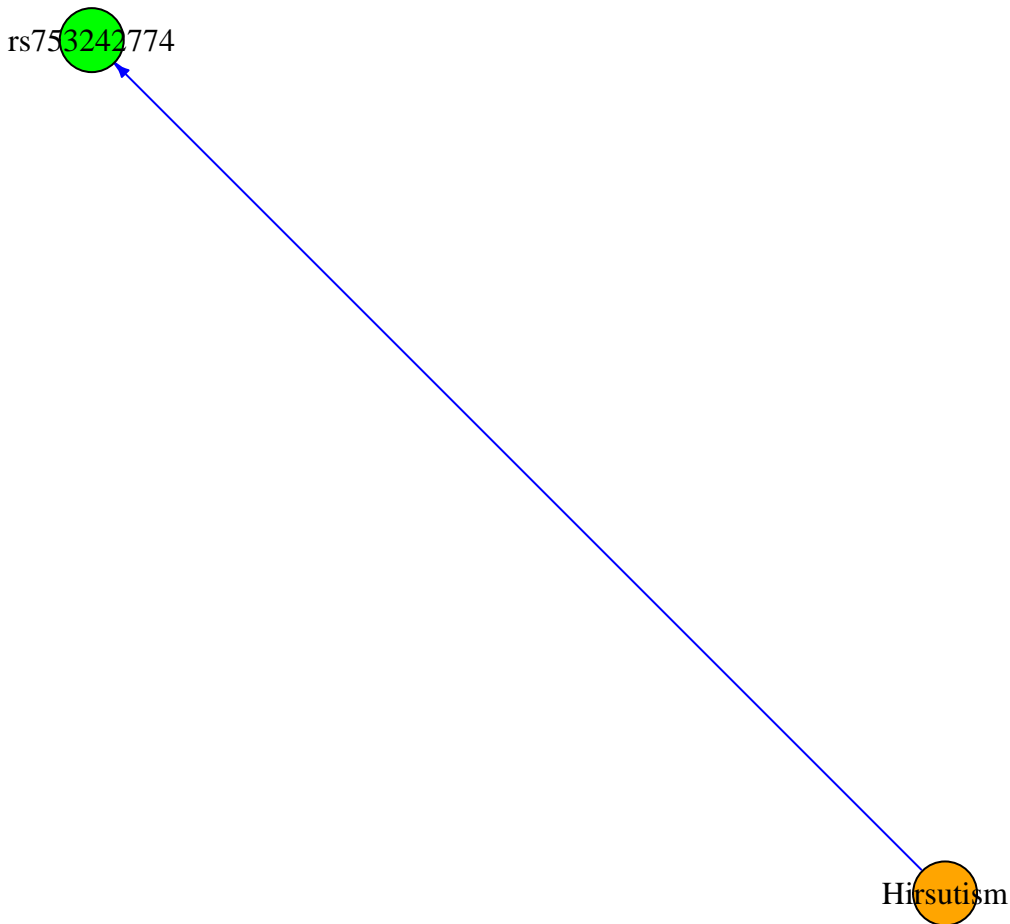

## Variant–Disease Network (Histidinemia)

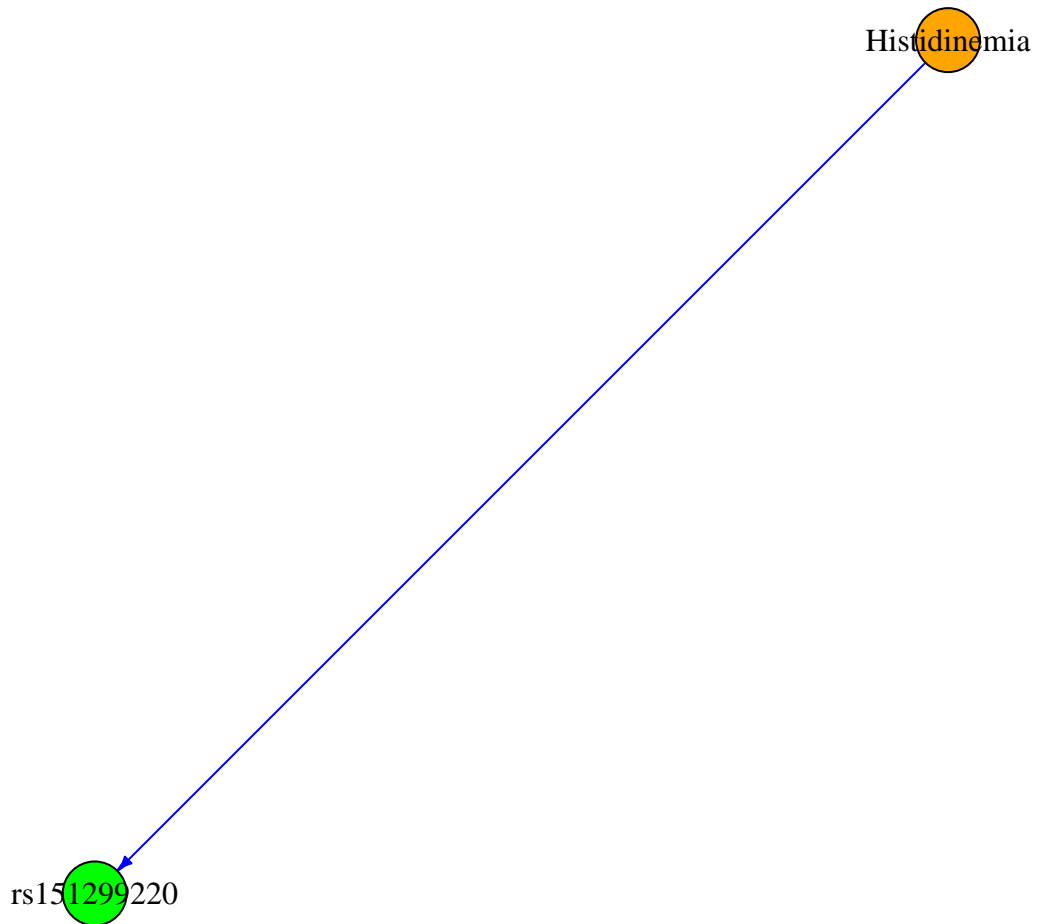

## Variant–Disease Network (Histiocytic medullary reticulosis)

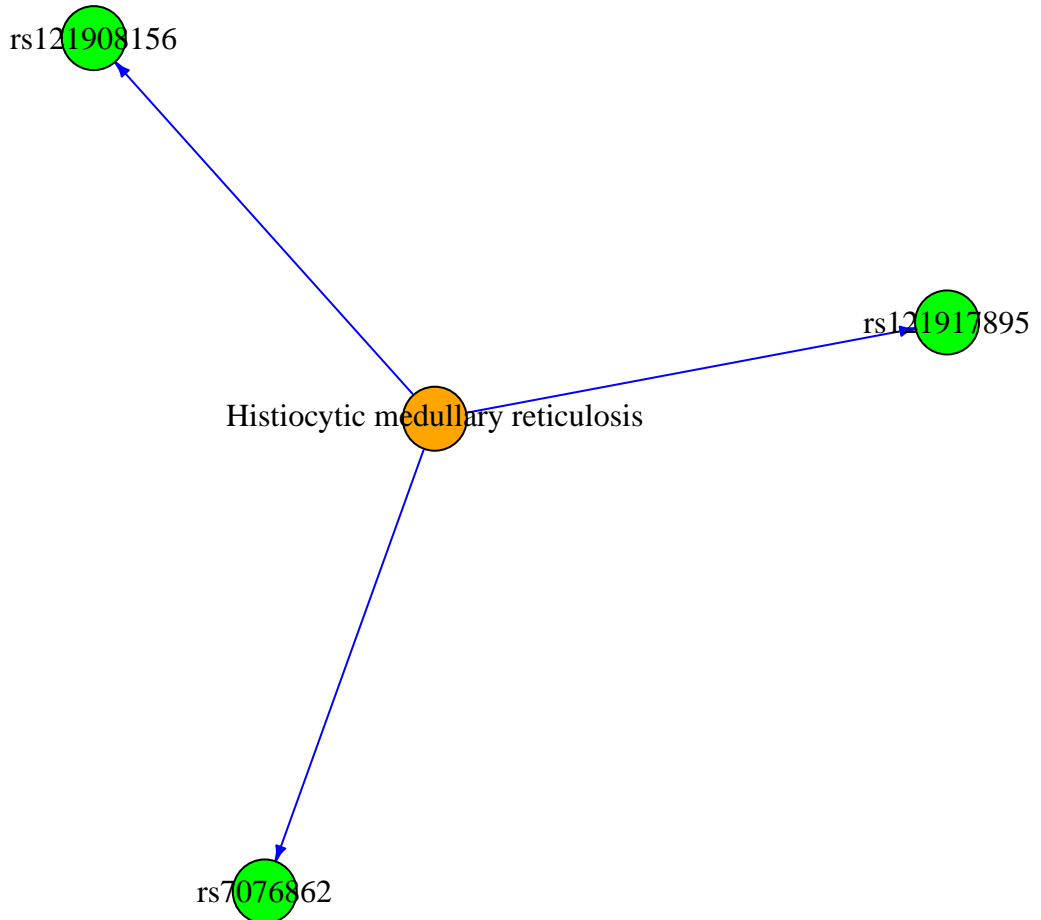

Variant–Disease Network (Histiocytosis–lymphadenopathy plus syndrome)

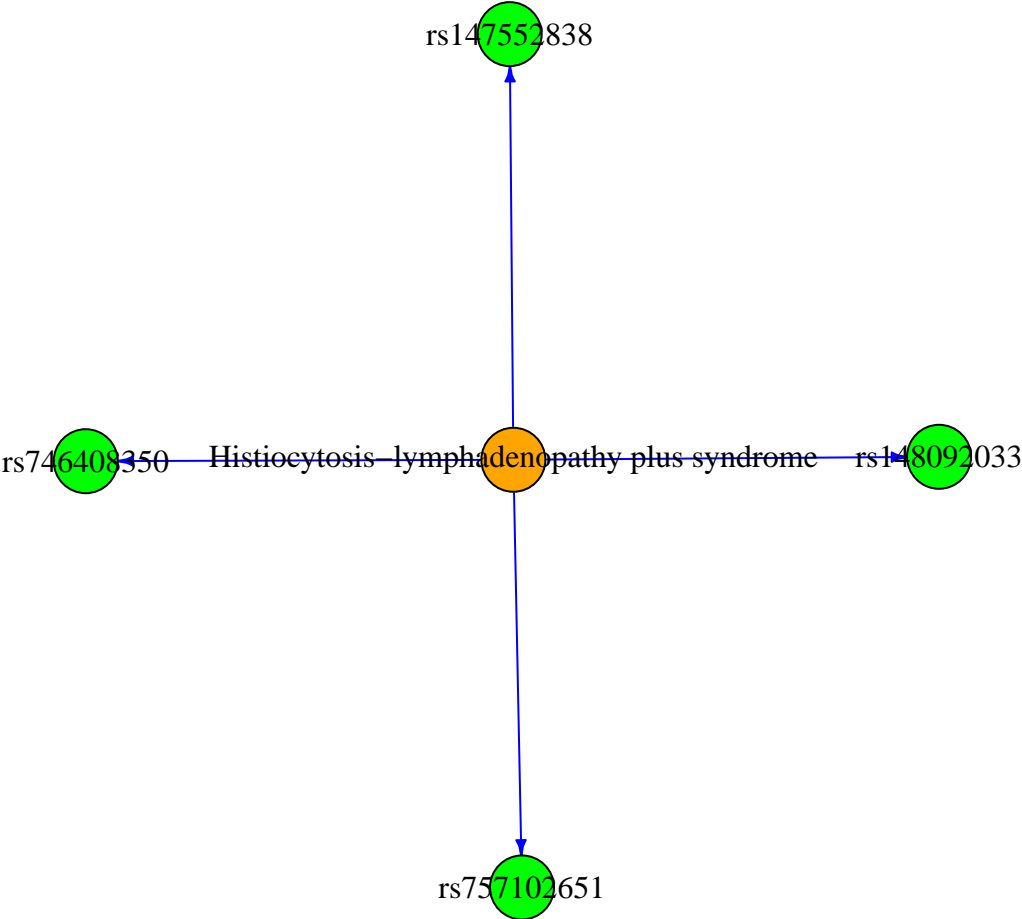

# Variant–Disease Network (History of neurodevelopmental disorder)

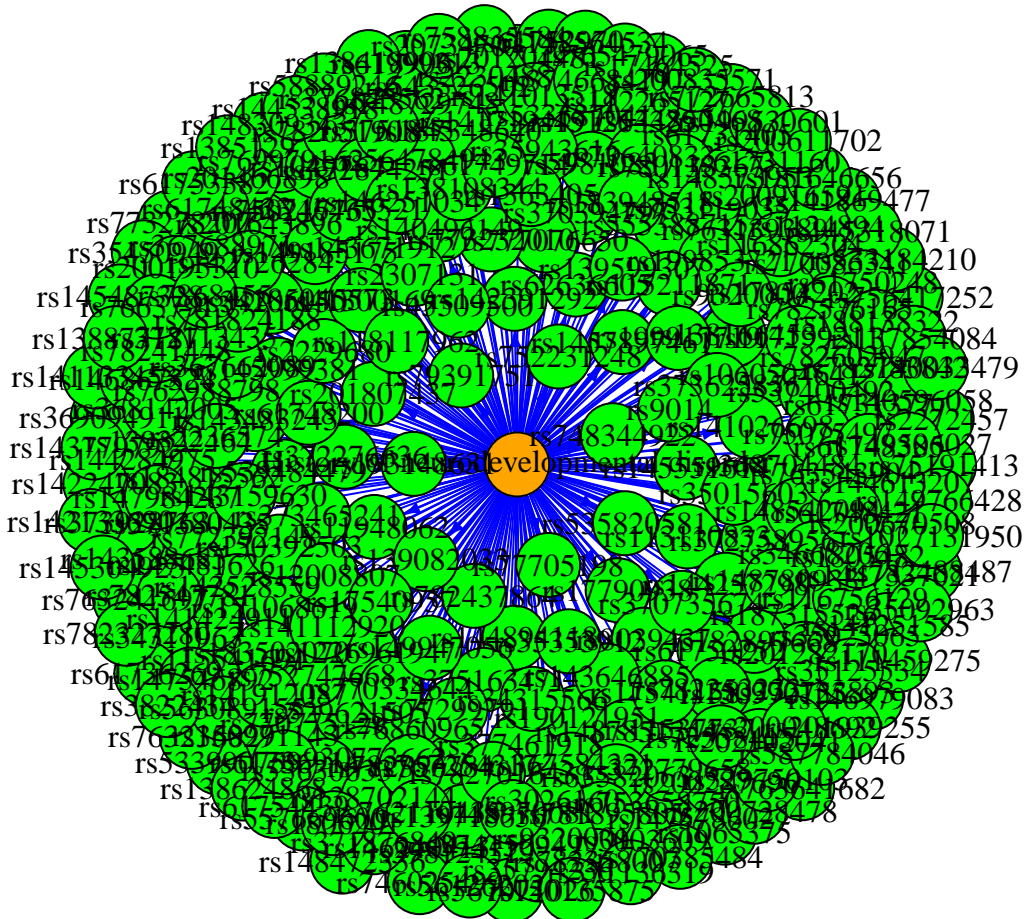

# Variant–Disease Network (HNSHA due to aldolase A deficiency)

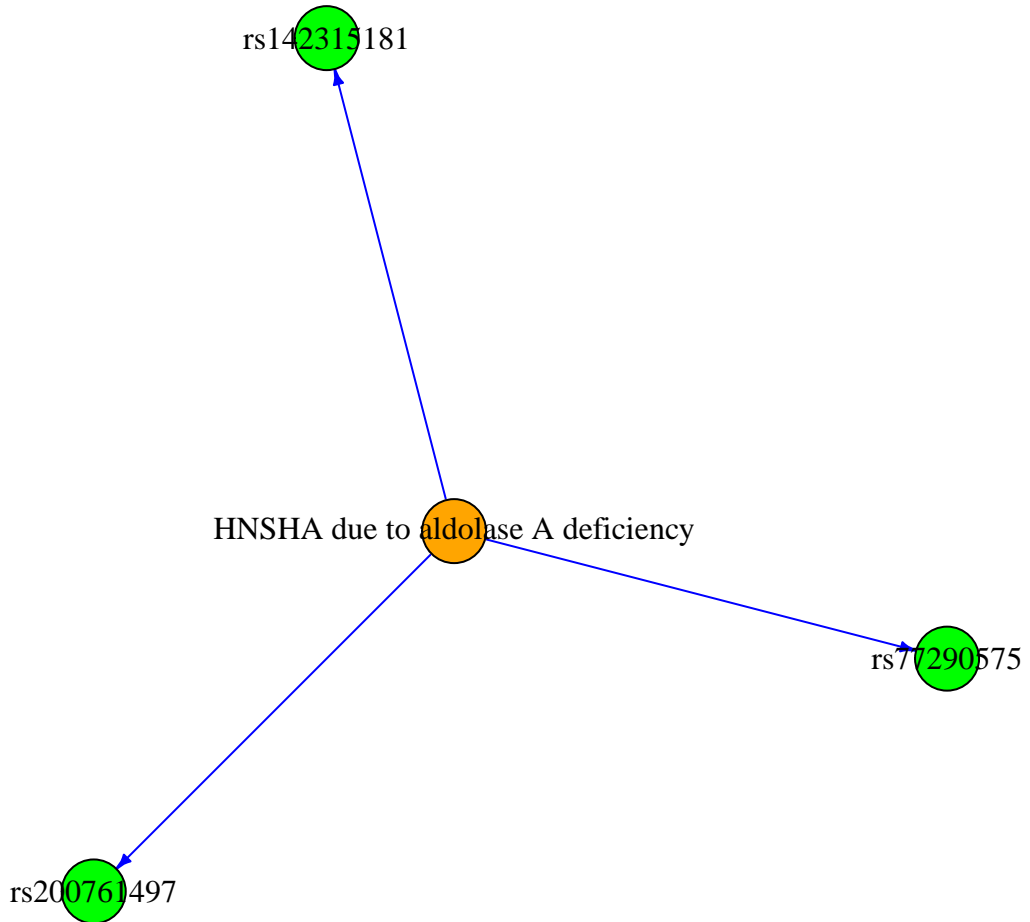



**Variant–Disease Network (Holocarboxylase synthetase deficiency)**

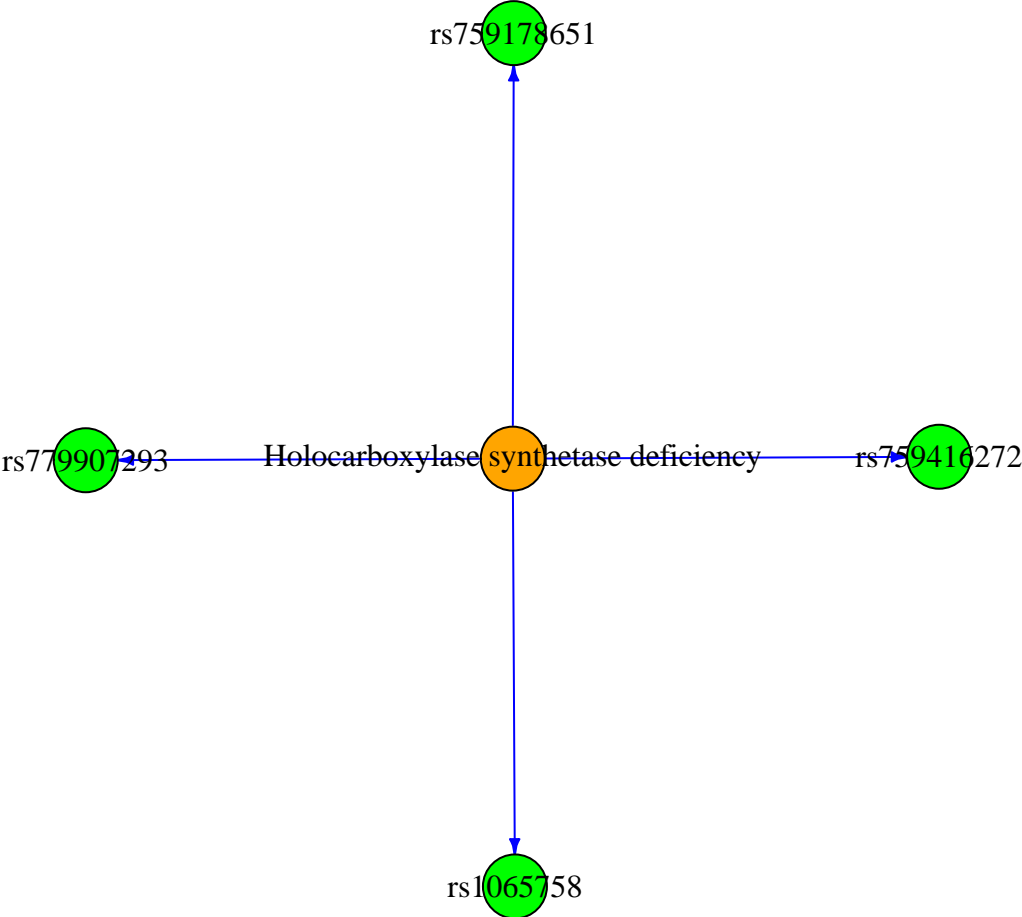

## Variant–Disease Network (Holoprosencephaly 3)

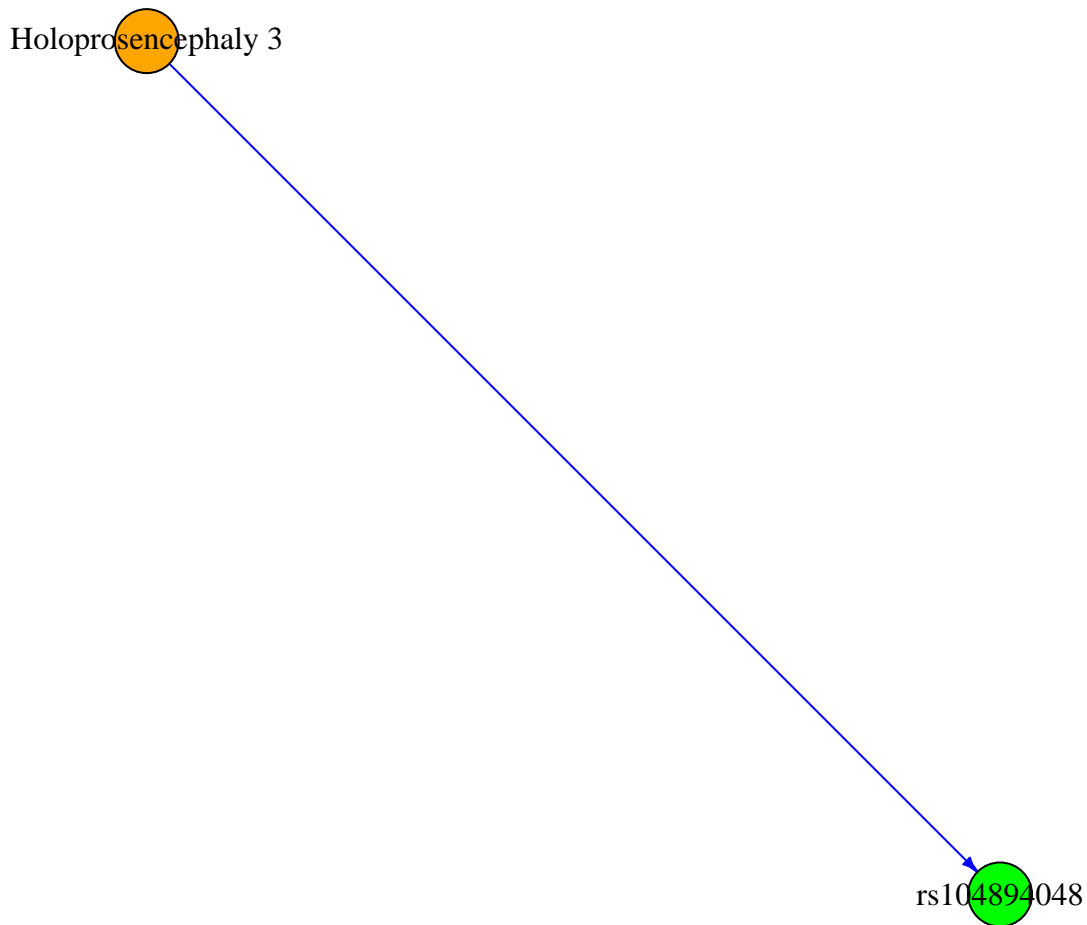

## Variant-Disease Network (Holoprosencephaly 4)

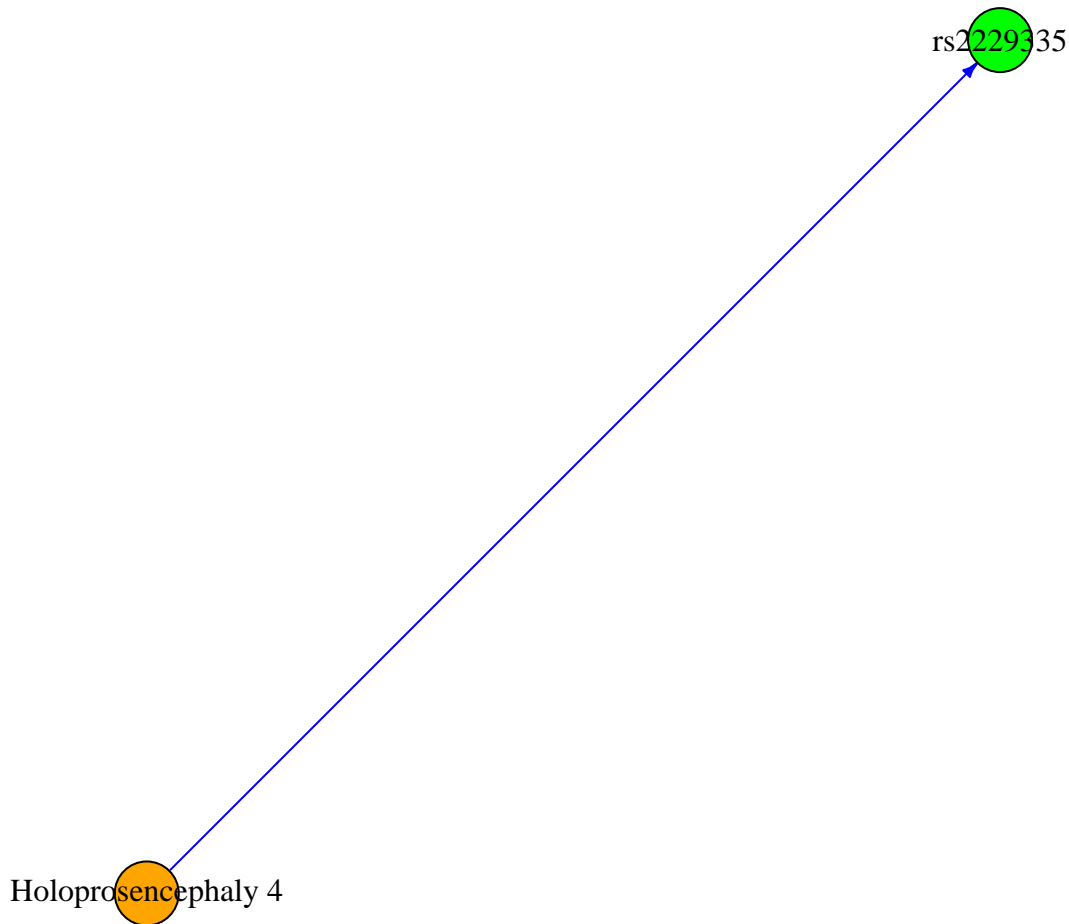

Variant–Disease Network (Holoprosencephaly sequence)

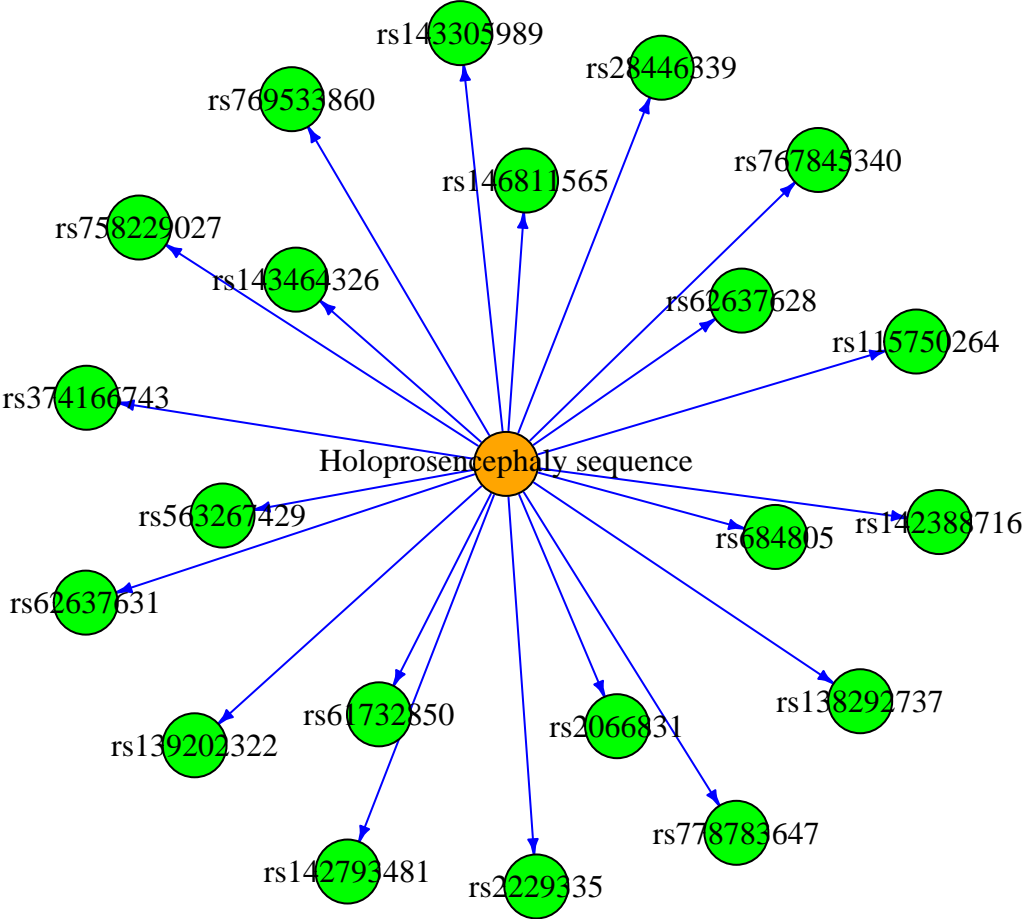

## Variant–Disease Network (Holt–Oram syndrome)

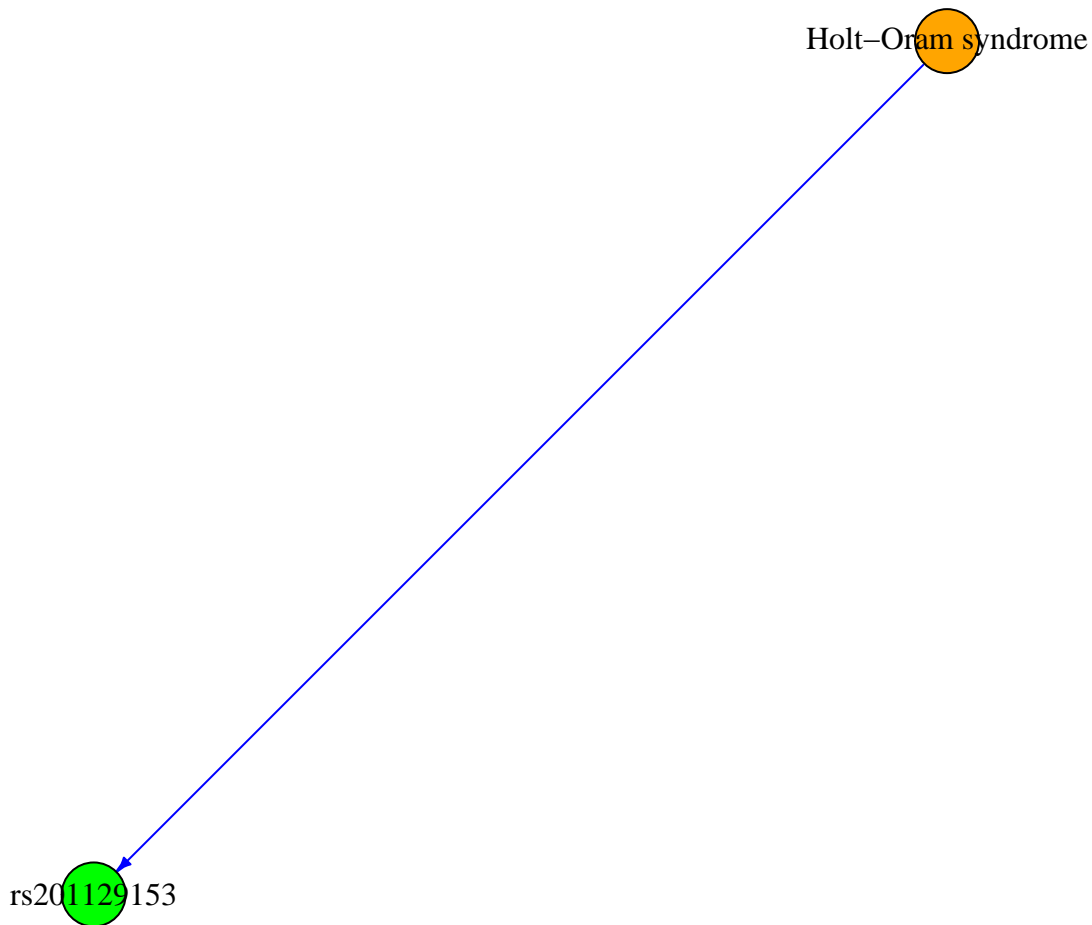

Variant–Disease Network (Homocystinuria)

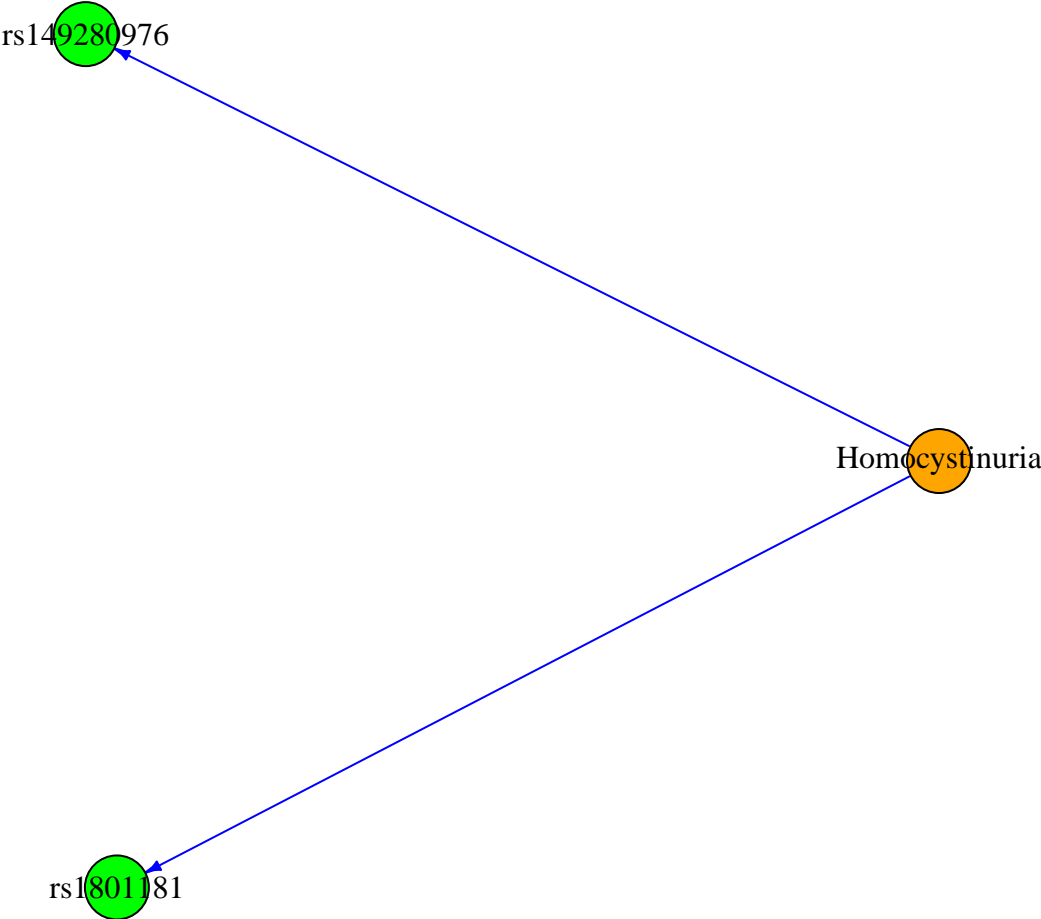

**Variant–Disease Network (Homocystinuria due to CBS deficiency)**

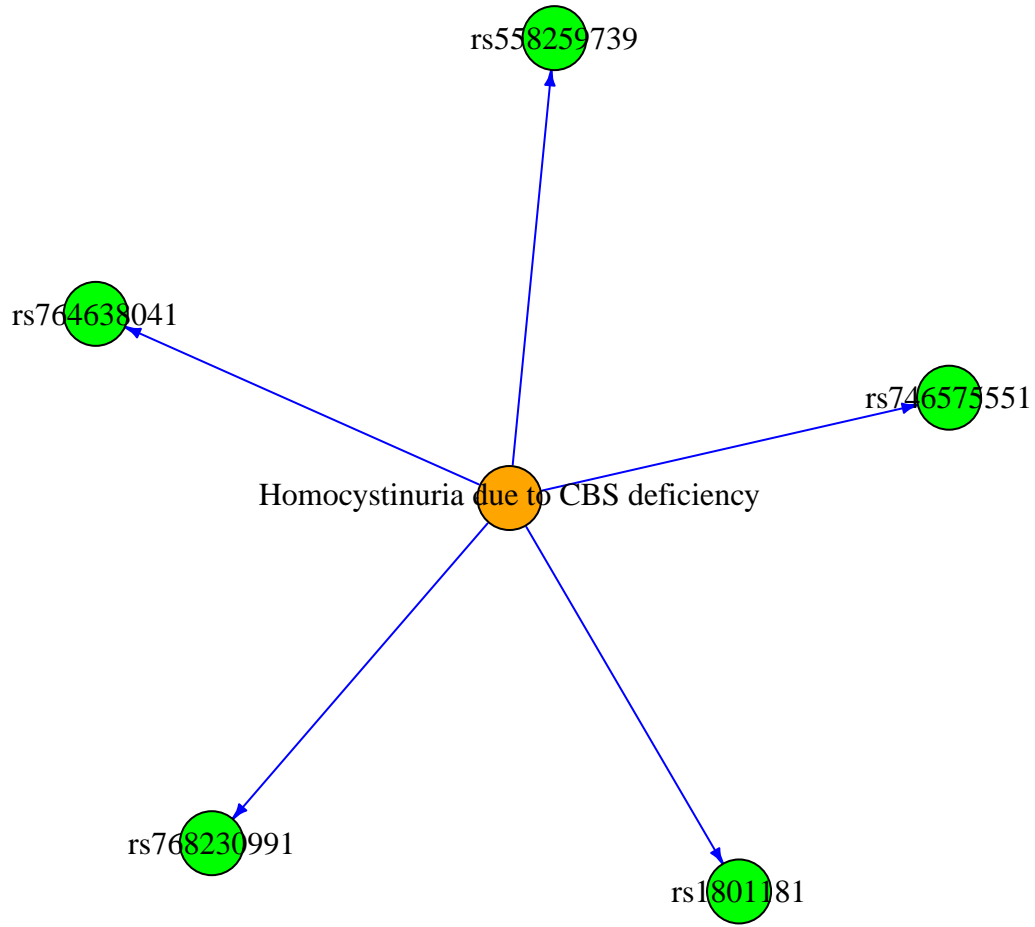

## Variant–Disease Network (Howel–Evans syndrome)

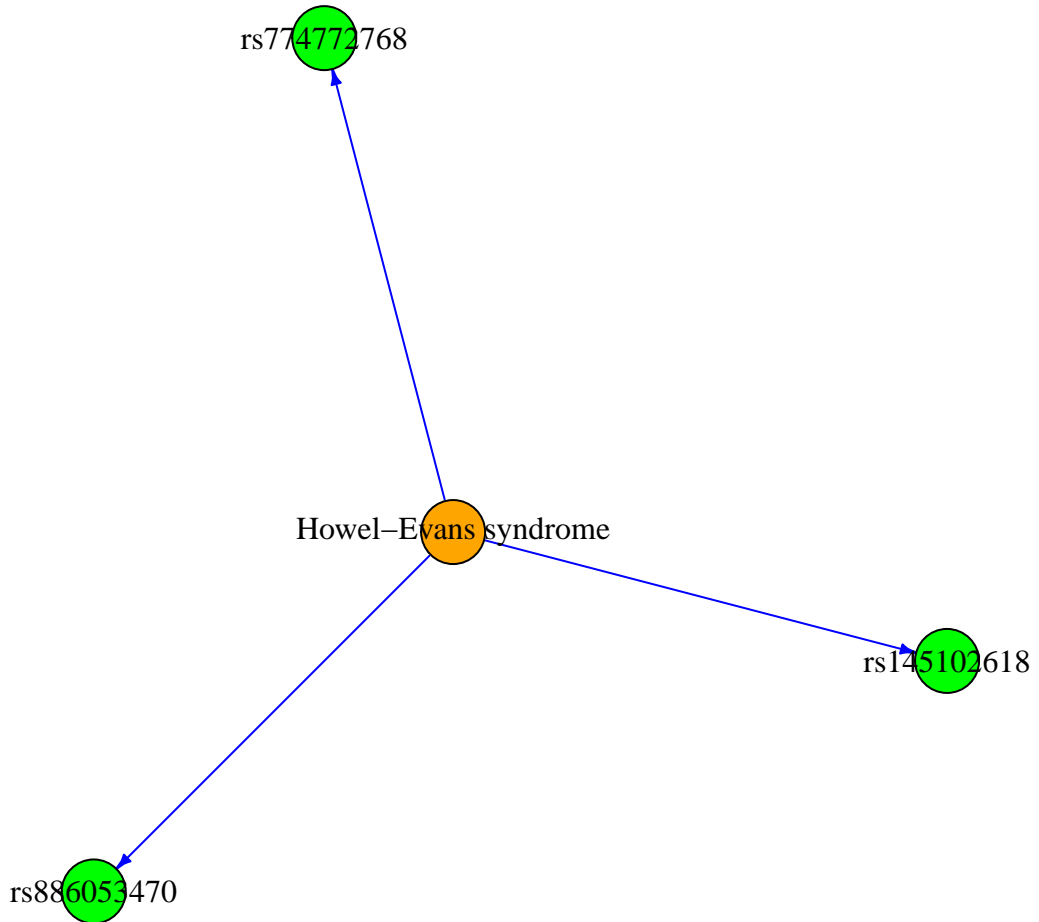



## Variant–Disease Network (Hurler syndrome)

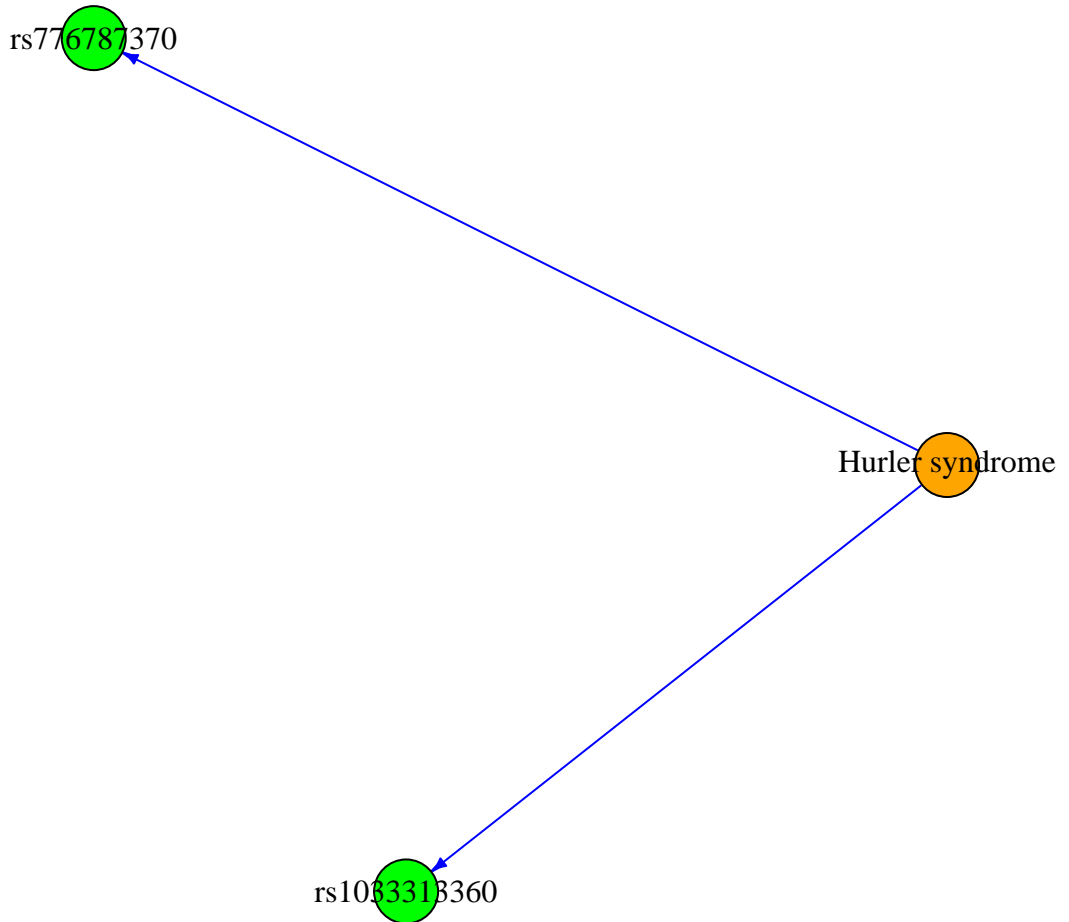

Variant–Disease Network (Hutchinson–Gilford syndrome)

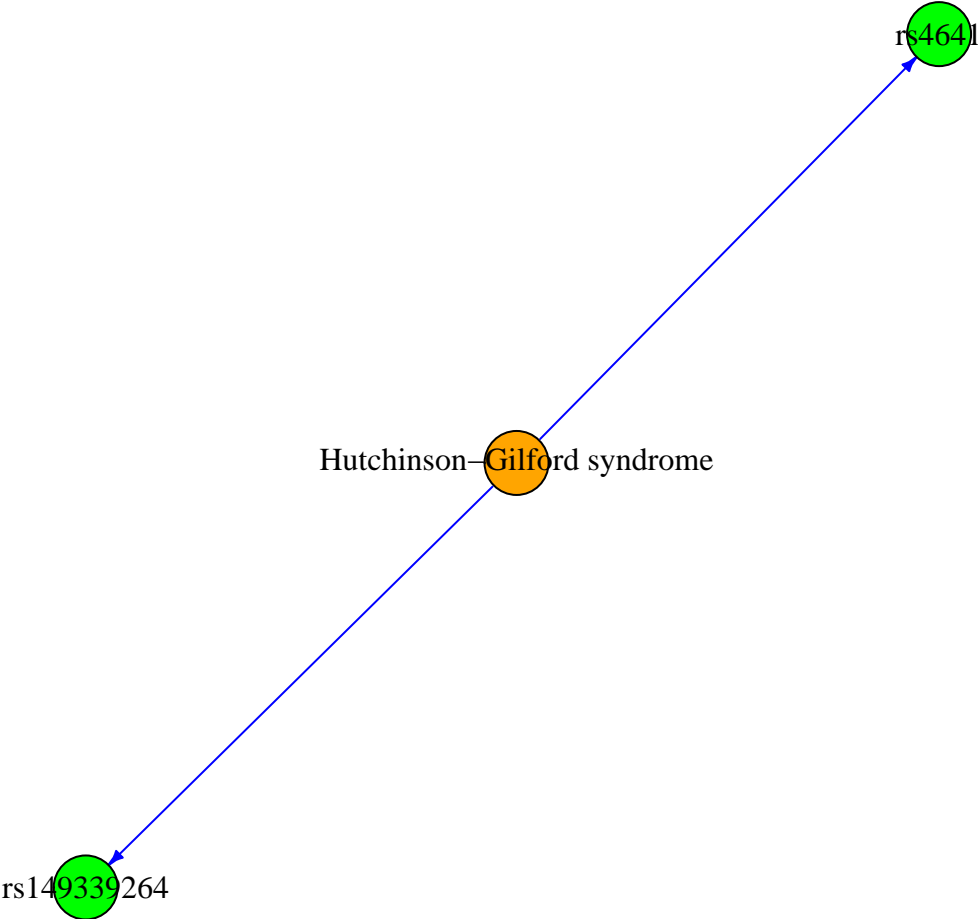

## Variant–Disease Network (Hydronephrosis)

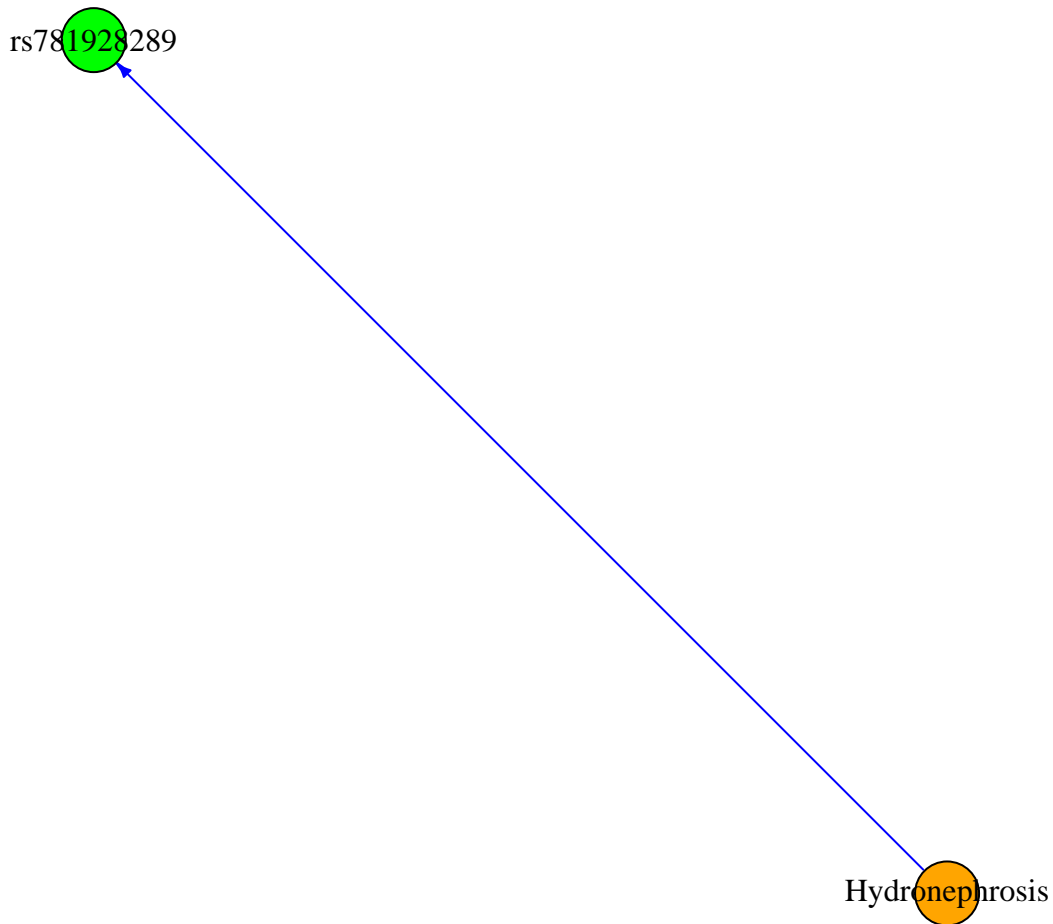

# Variant-Disease Network (Hyperaldosteronism)

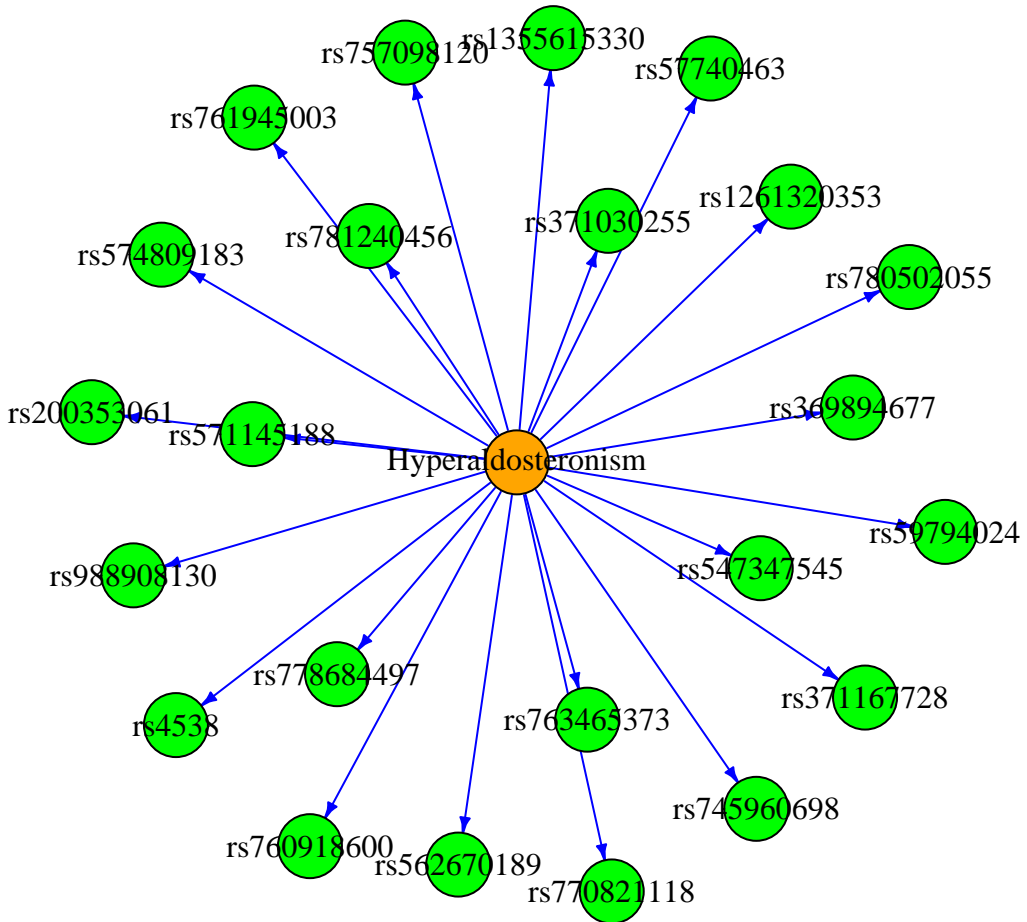

## Variant–Disease Network (Hyperammonemia)

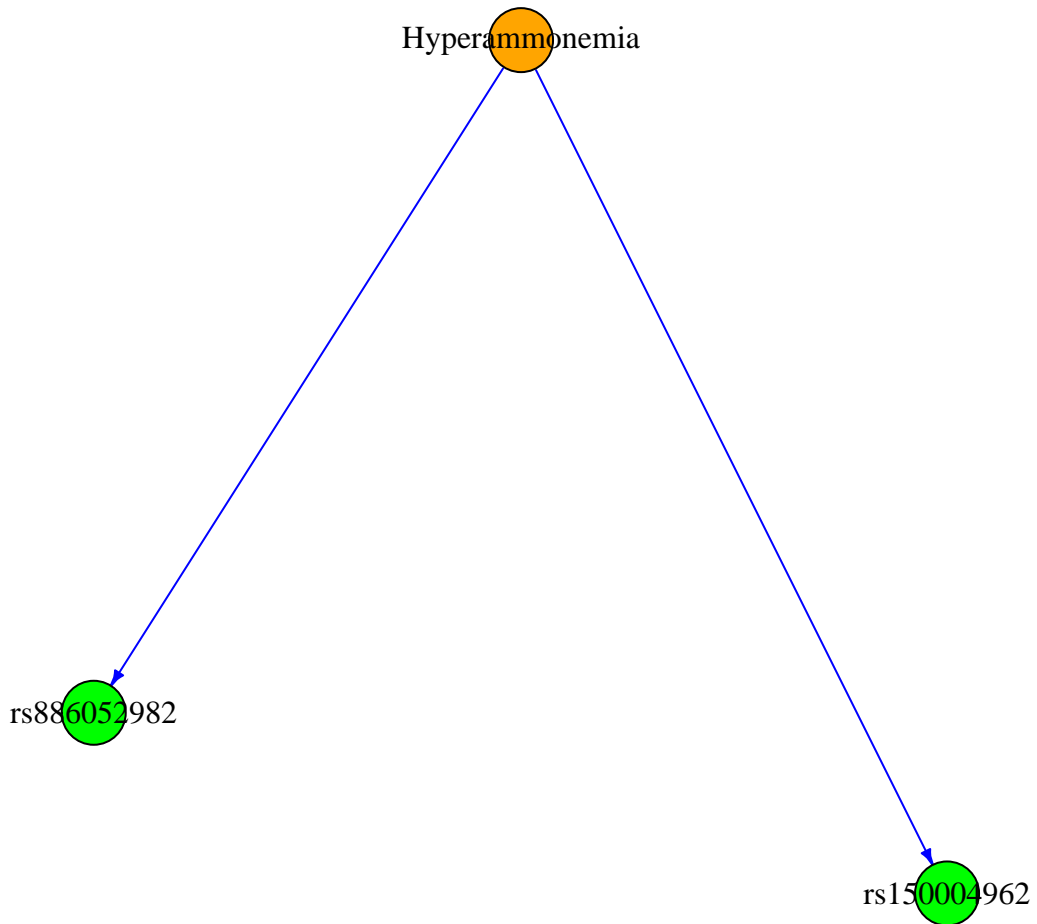

## Variant–Disease Network (Hyperekplexia)

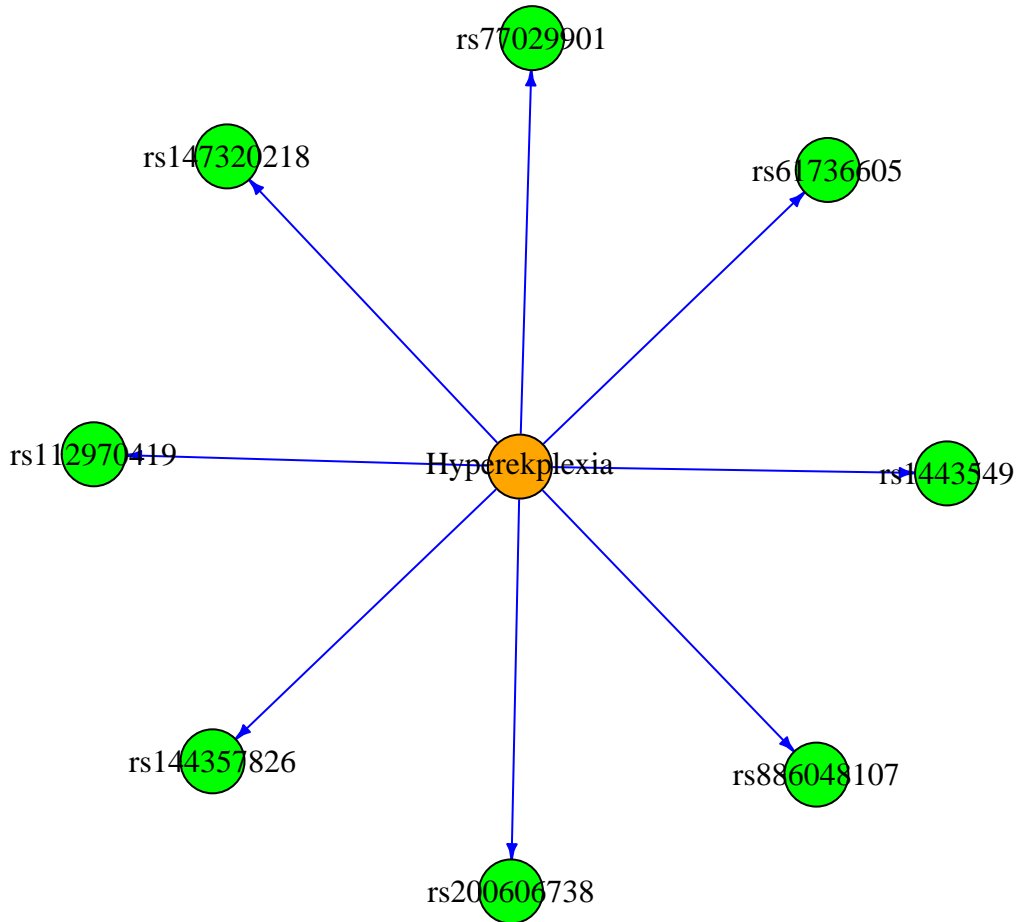

Variant–Disease Network (Hyperekplexia 1)

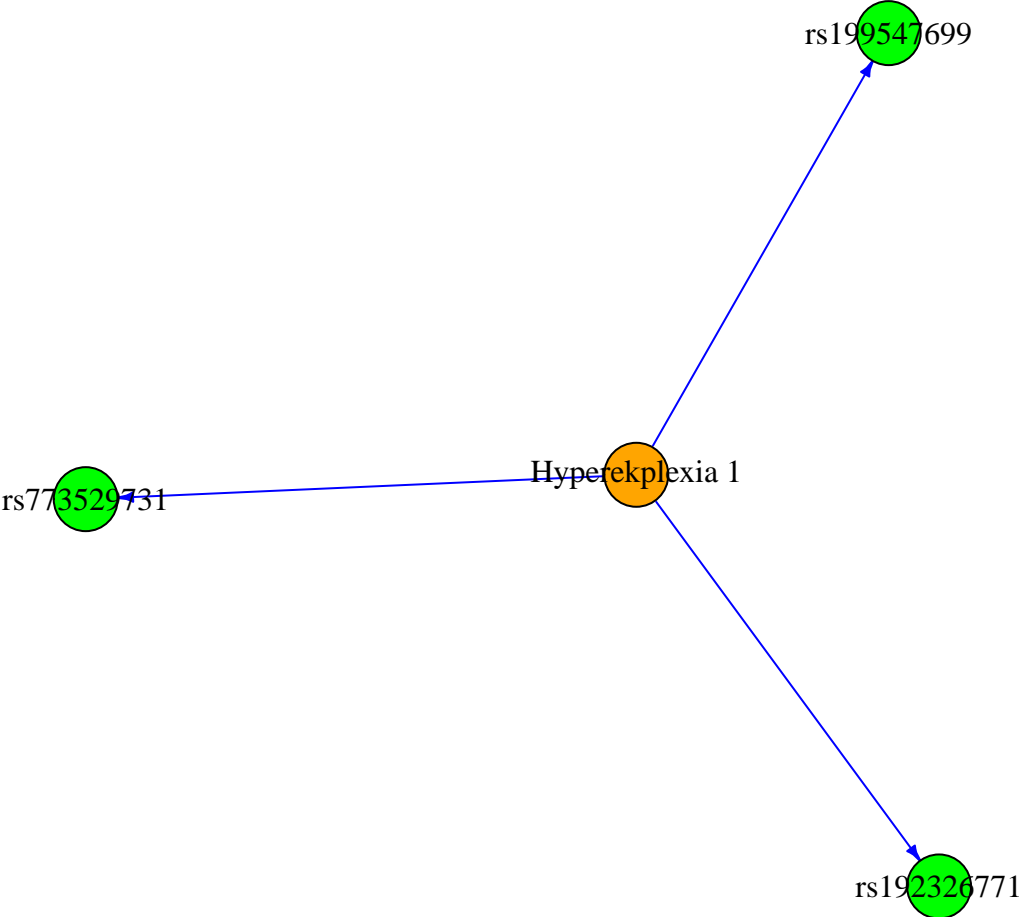

Variant–Disease Network (Hyperekplexia 2)

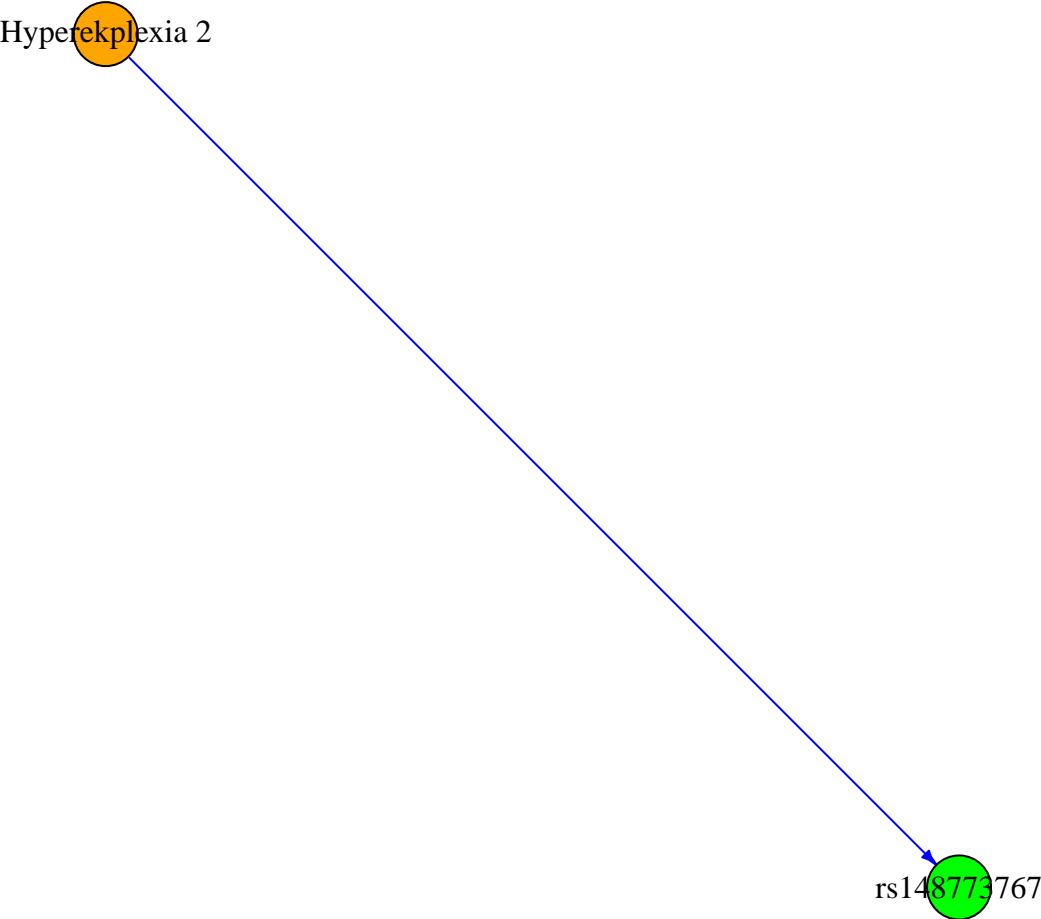



## Variant–Disease Network (Hyperekplexia 3)

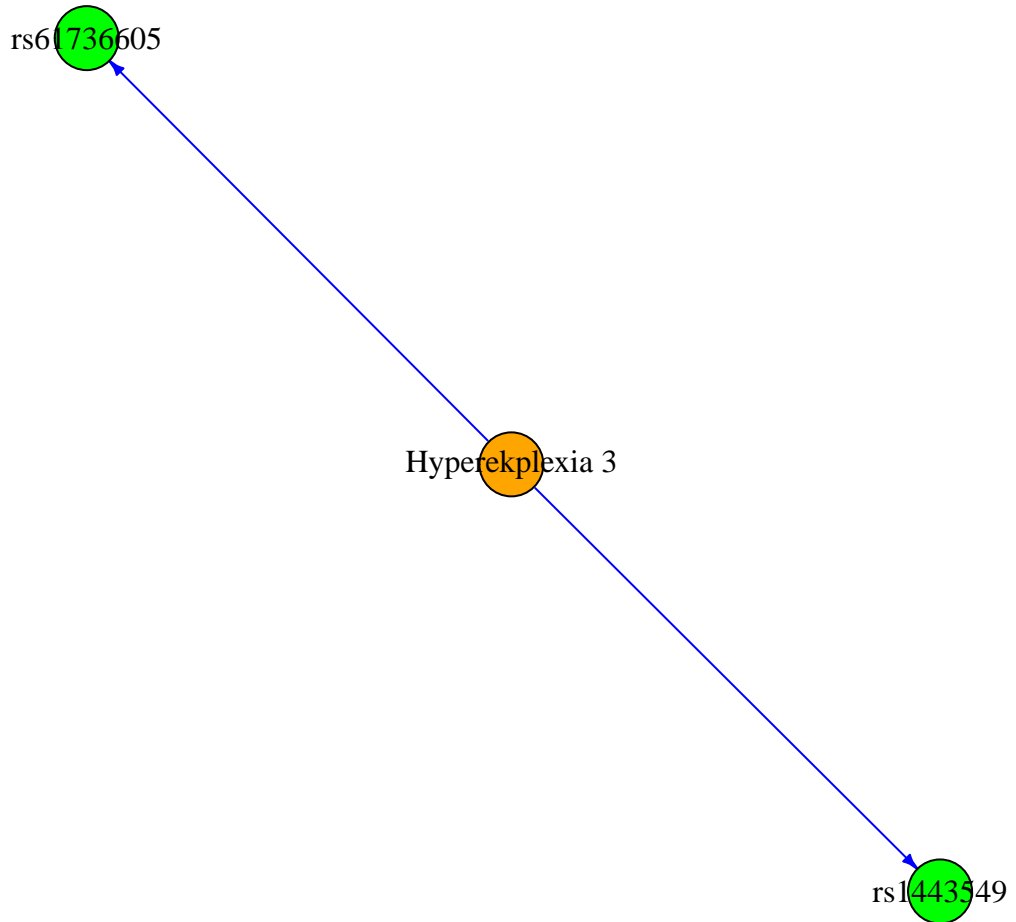

Variant–Disease Network (Hyperferritinemia cataract syndrome)

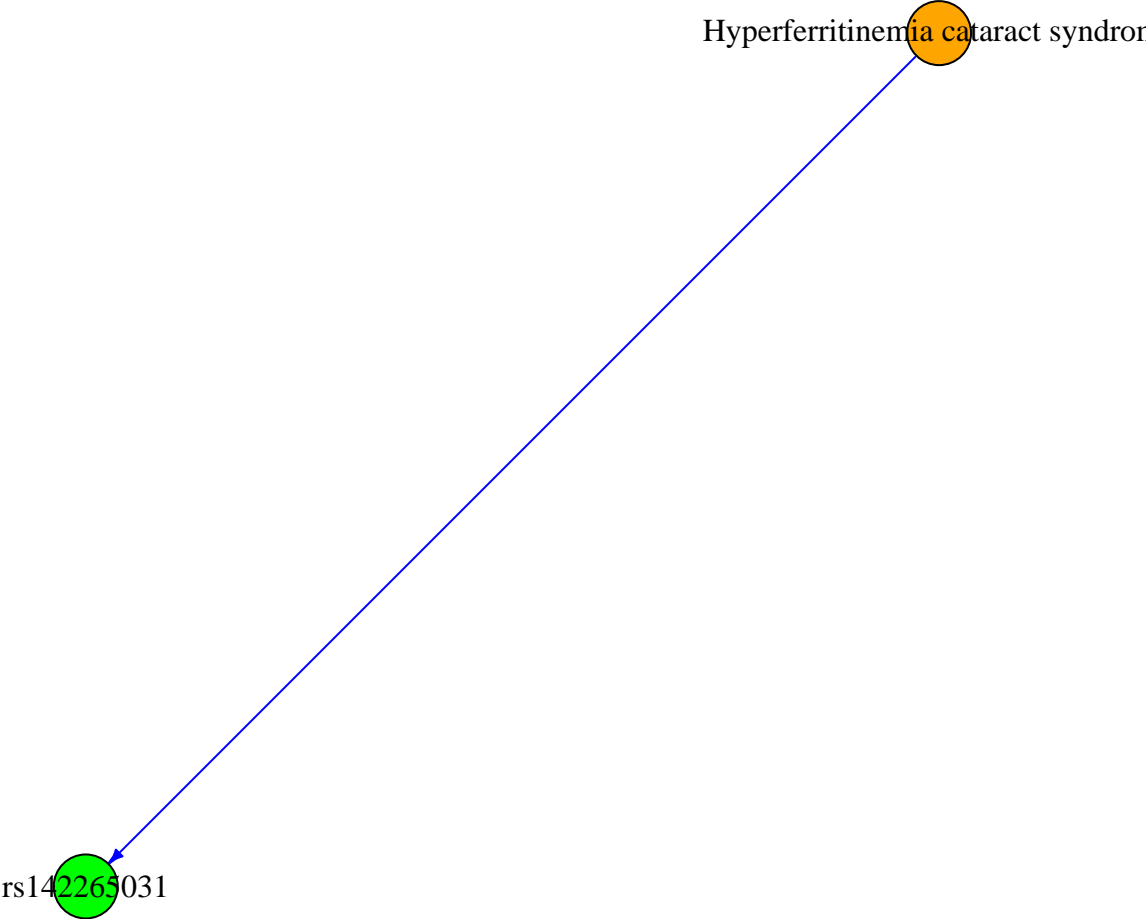

Variant–Disease Network (Hyperglycinuria)

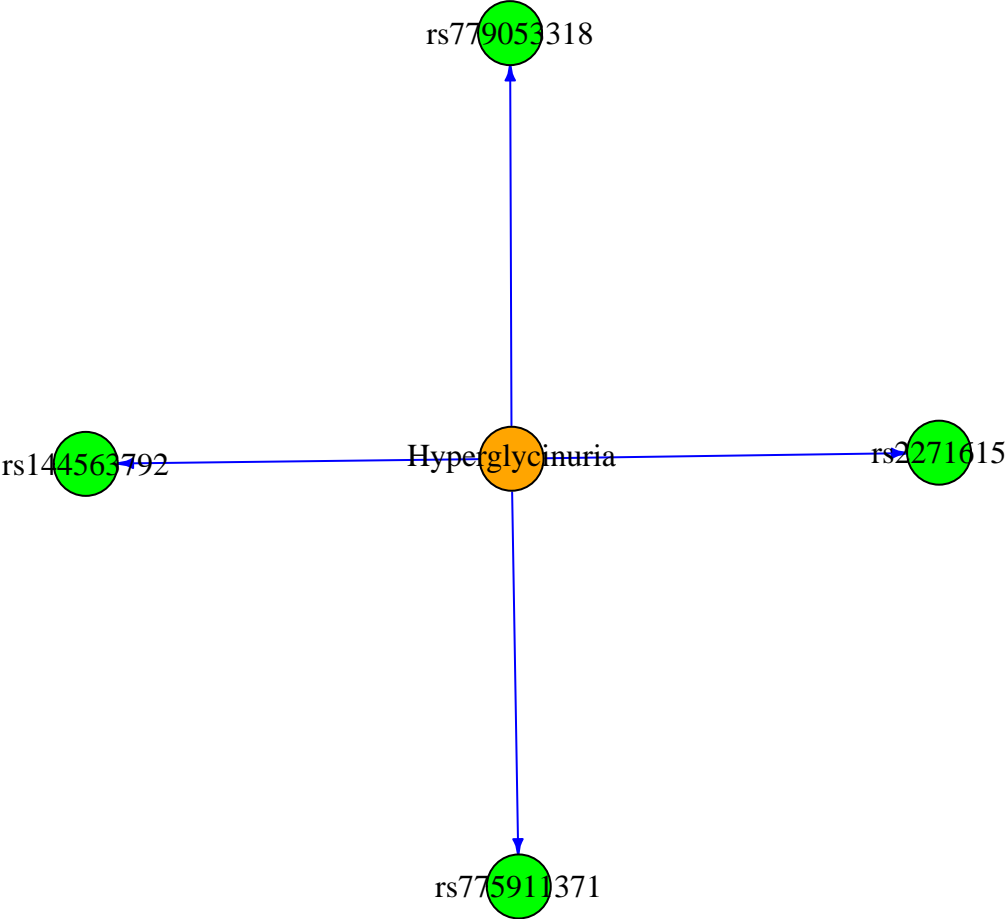

# Variant–Disease Network (Hypergonadotropic hypogonadism)

Hypergonadotropic hypogonadism

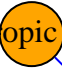

rs61996822

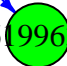

**Variant–Disease Network (Hyper–IgE recurrent infection syndrome 1)**

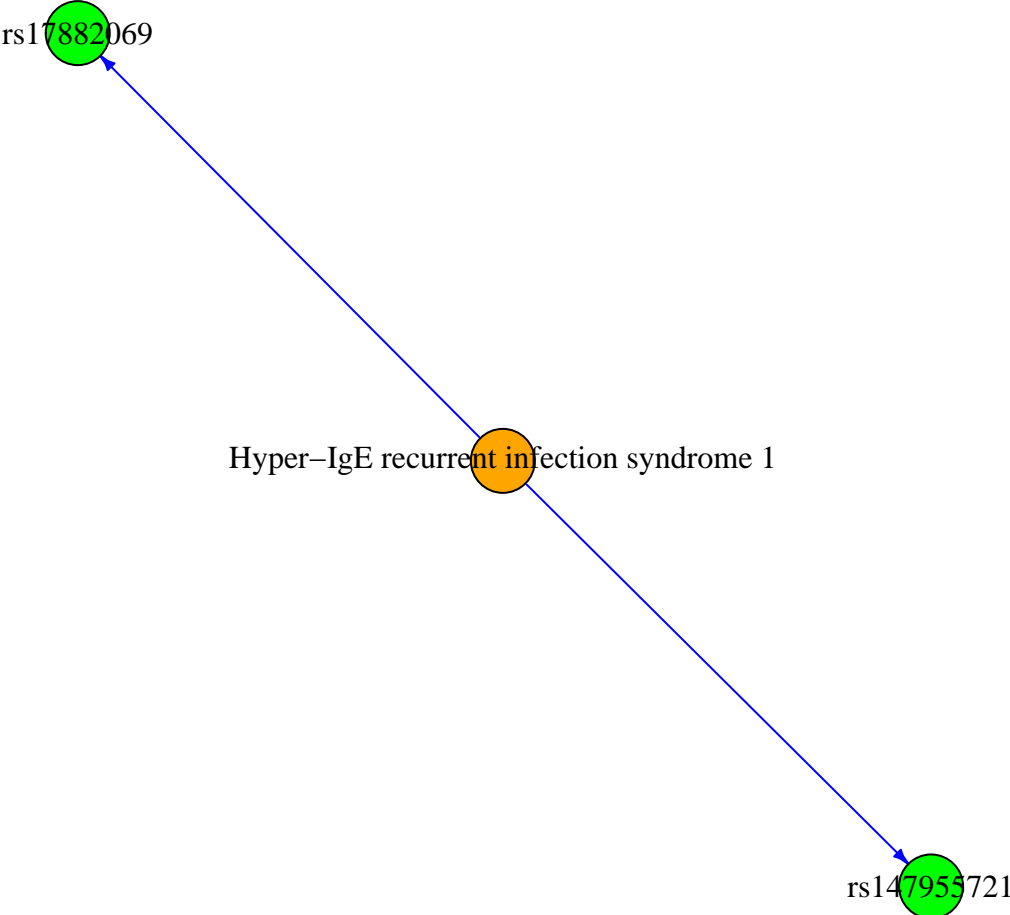

# Variant–Disease Network (Hyperinsulinemic hypoglycemia)

Hyperinsulinemic hypoglycemia

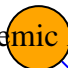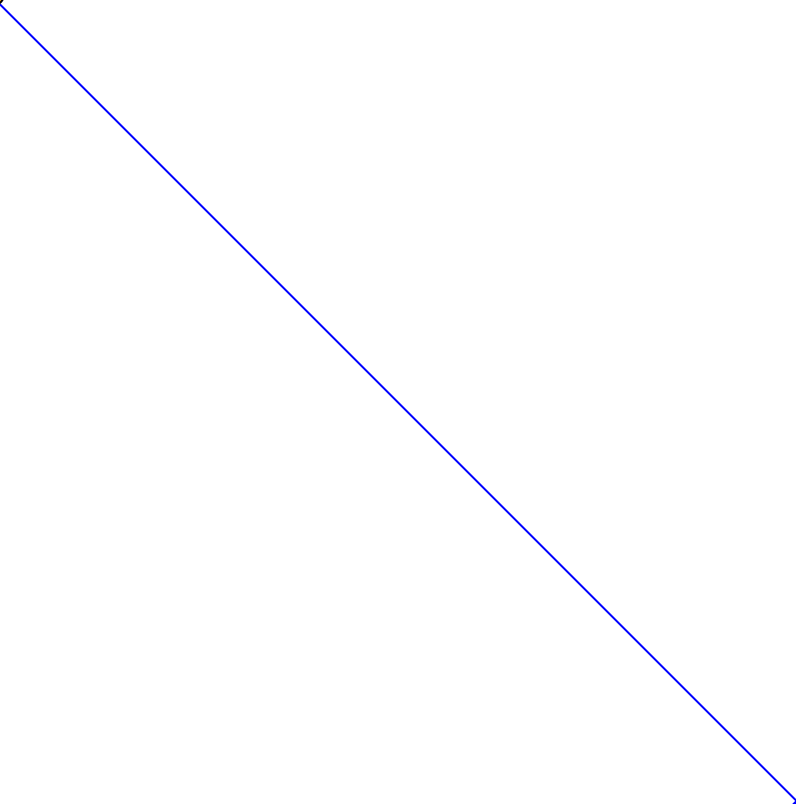

rs1805036

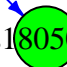

Variant–Disease Network (Hyperinsulinism)

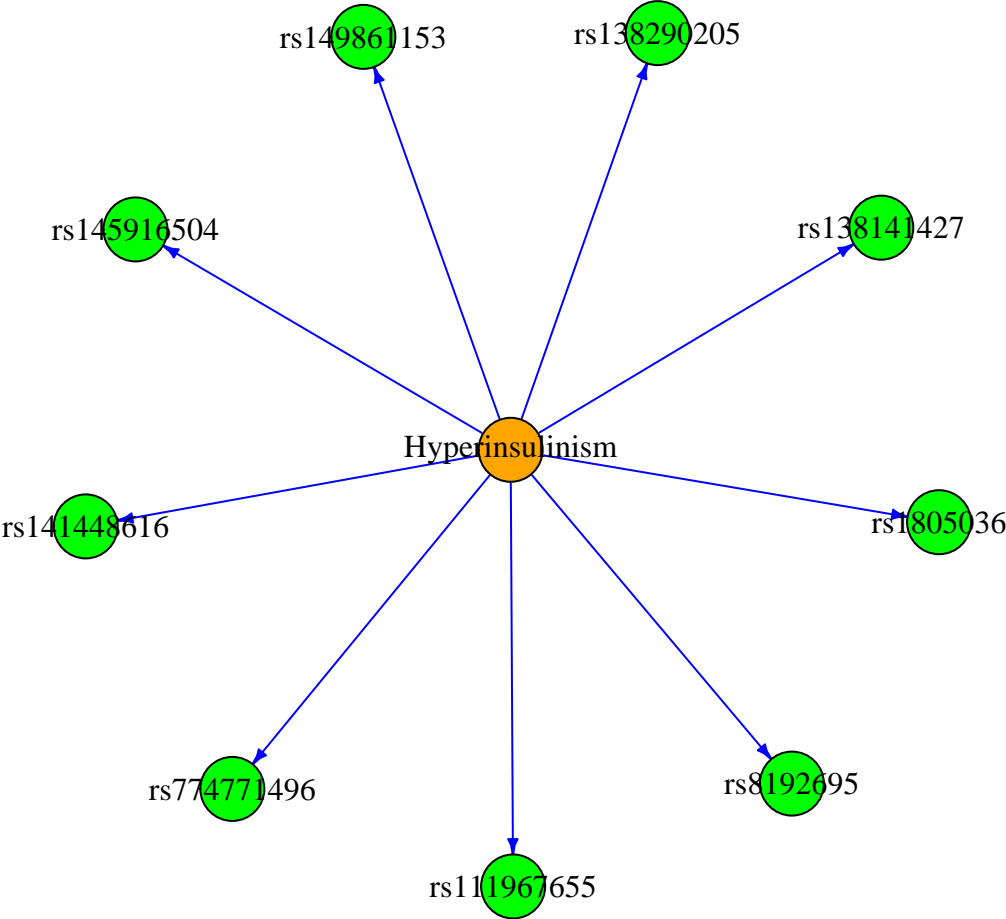

# Variant–Disease Network (Hyperkalemic Periodic Paralysis)

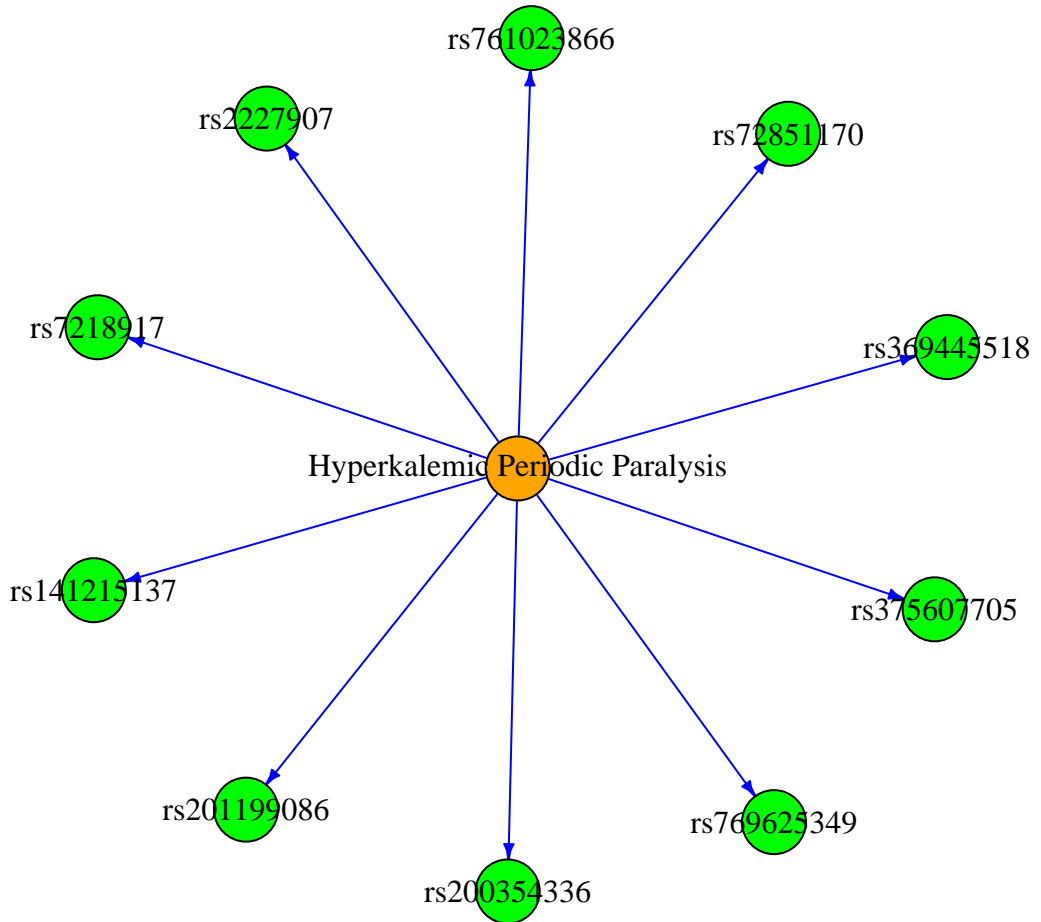



# Variant–Disease Network (Hyperkalemic Periodic Paralysis Type 1)

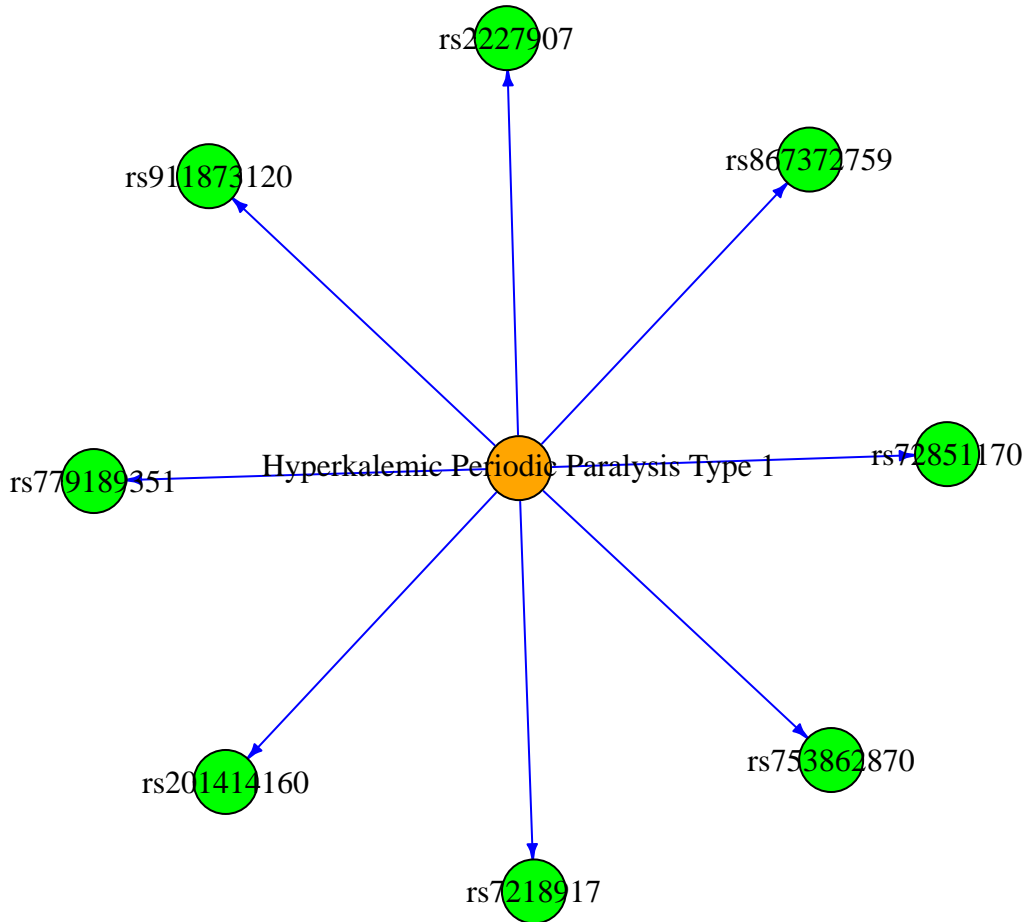

## Variant–Disease Network (Hyperlipoproteinemia)

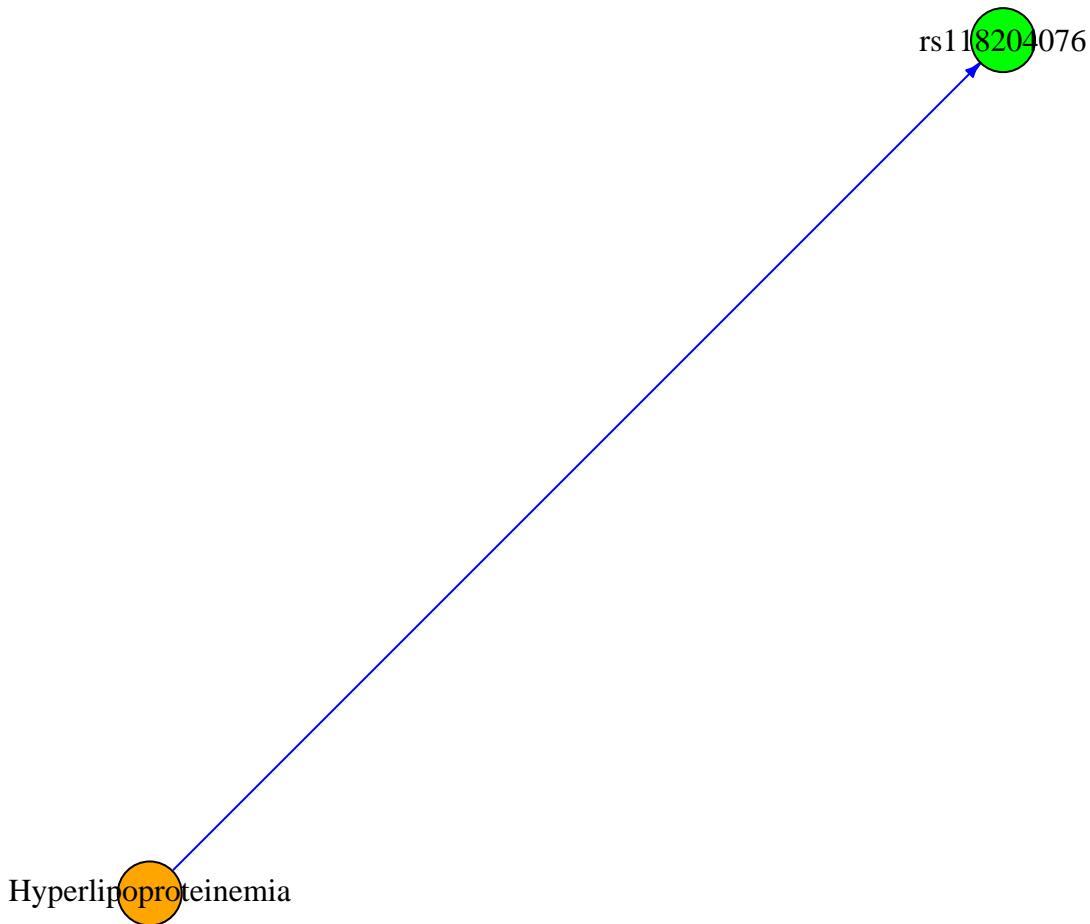

## Variant–Disease Network (Hypermanganesemia with dystonia 2)

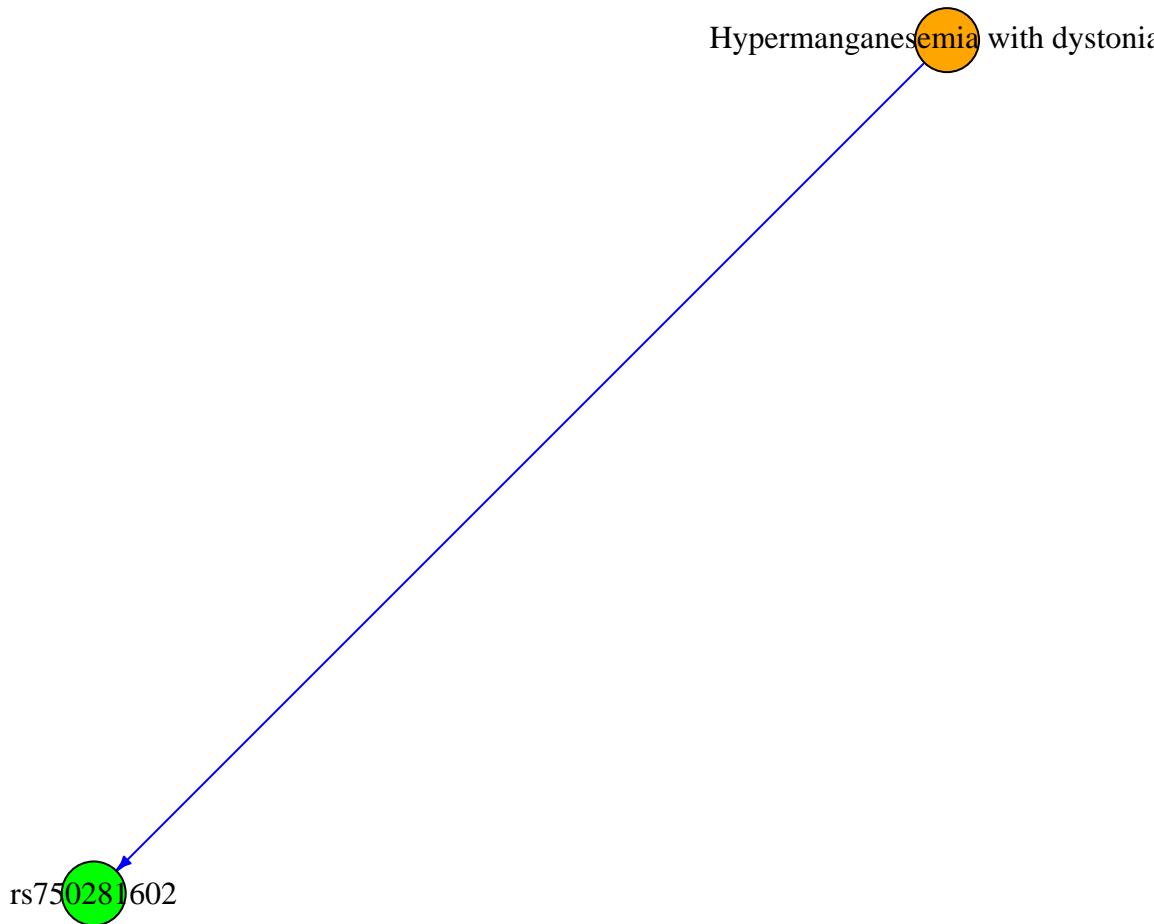

Variant–Disease Network (Hypermethioninemia)

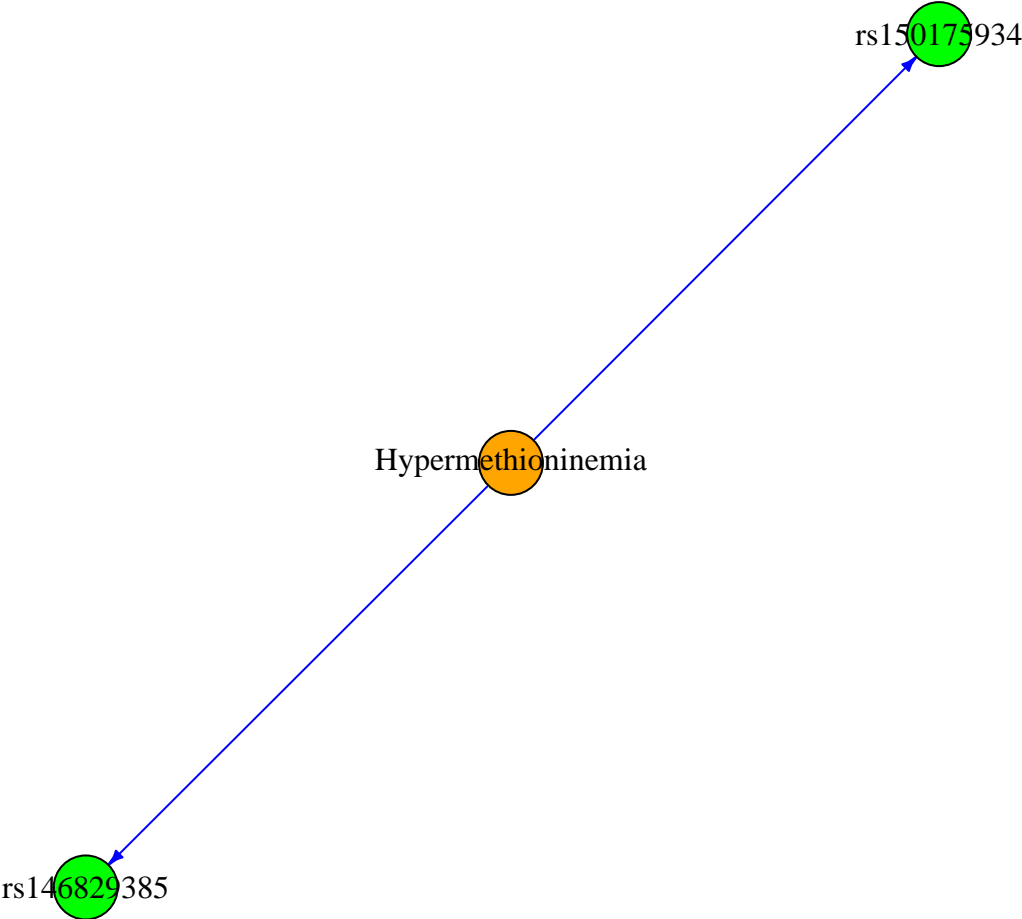

# Disease Network (Hypermethioninemia with s-adenosylhomocysteine hydrolase deficiency)

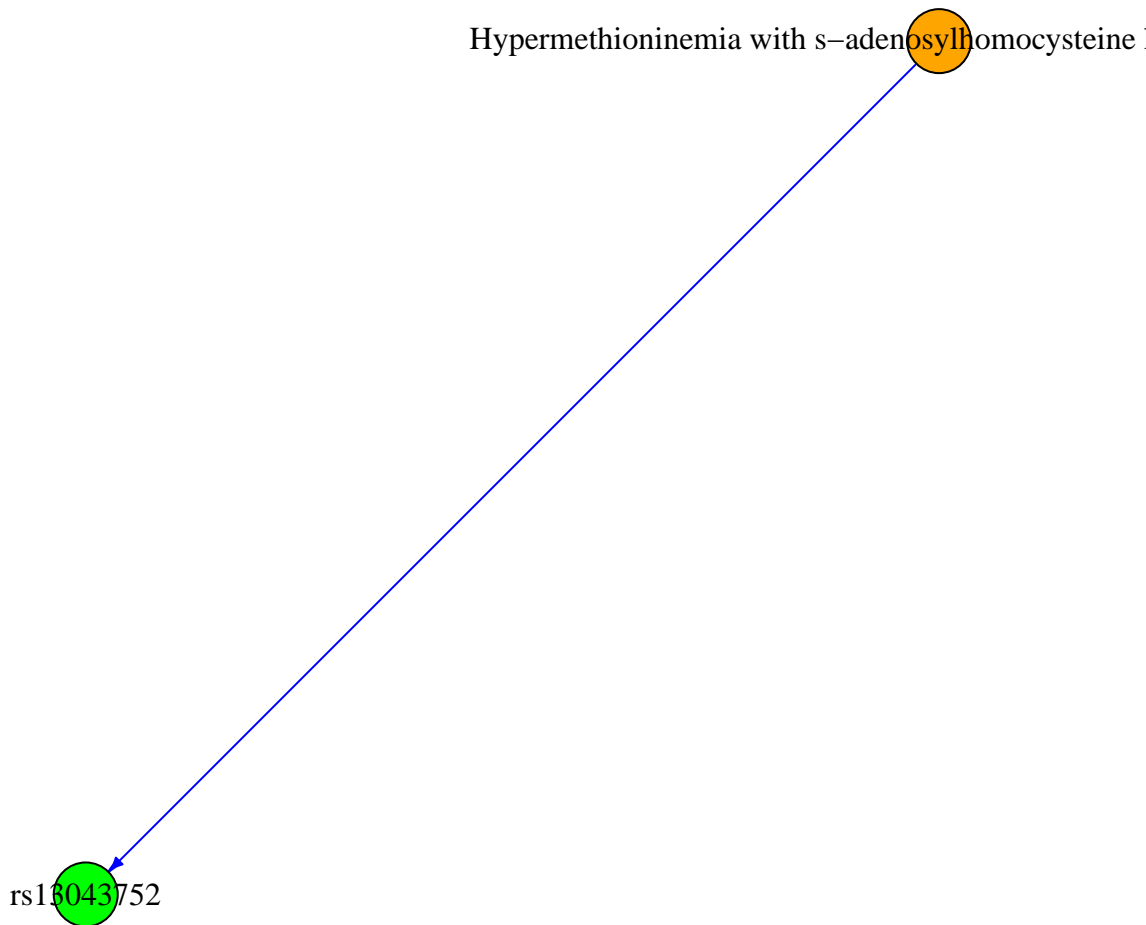

# -Disease Network (Hyperornithinemia–hyperammonemia–homocitrullinuria

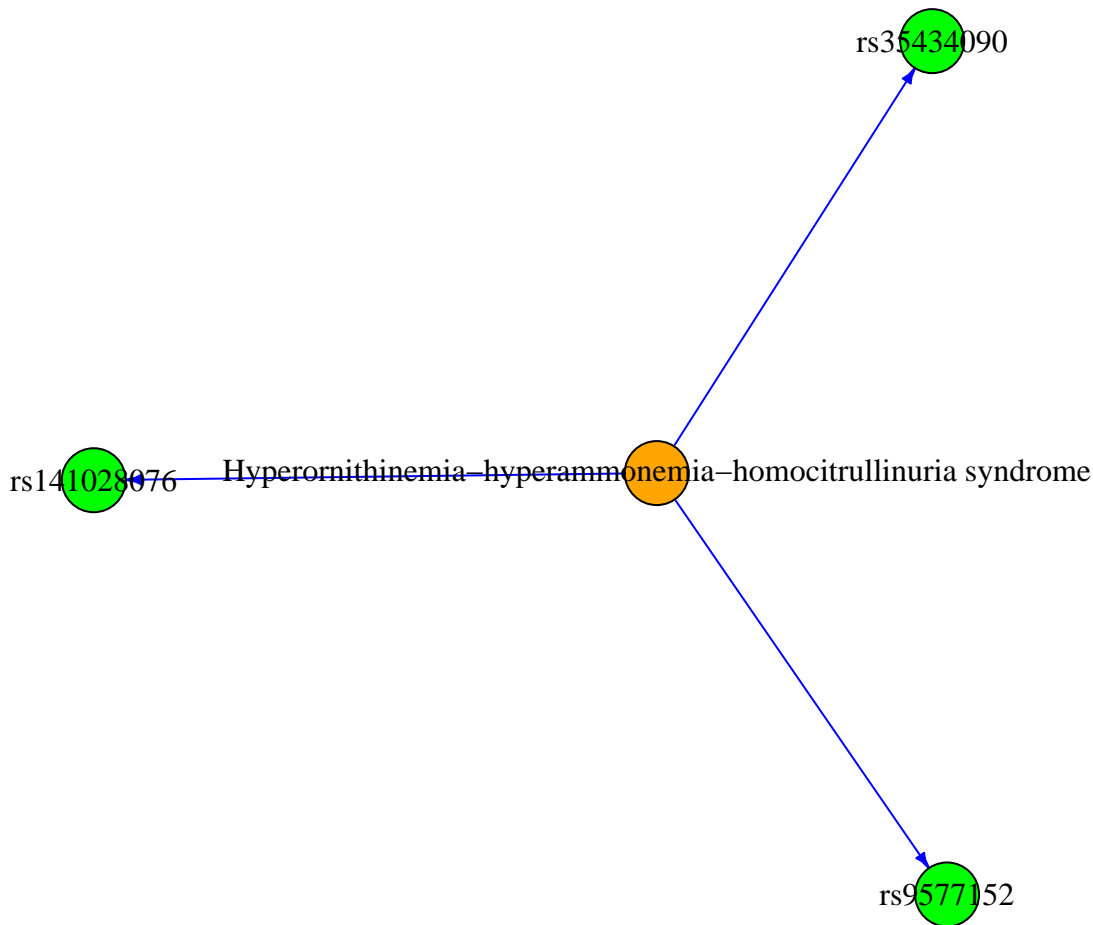

## Variant-Disease Network (Hyperparathyroidism)

Hyperparathyroidism

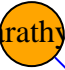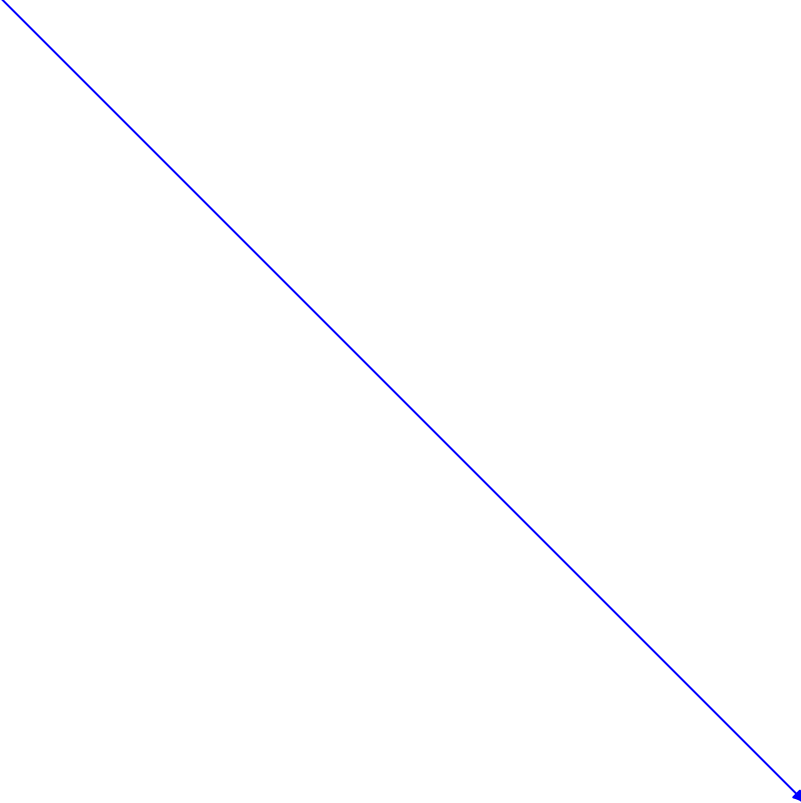

rs2071313

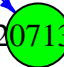

## Variant-Disease Network (Hyperparathyroidism 2)

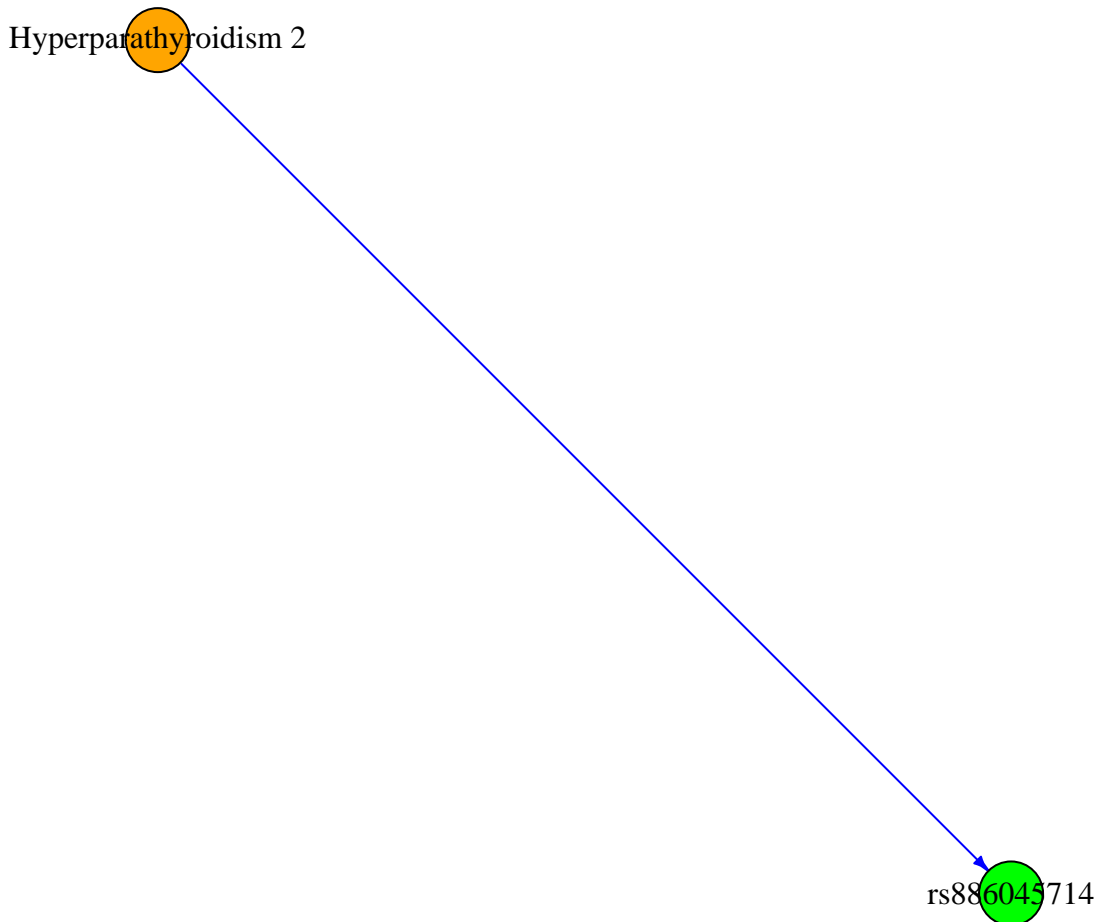



# Variant-Disease Network (Hyperphosphatasia with mental retardation syndrome 2)

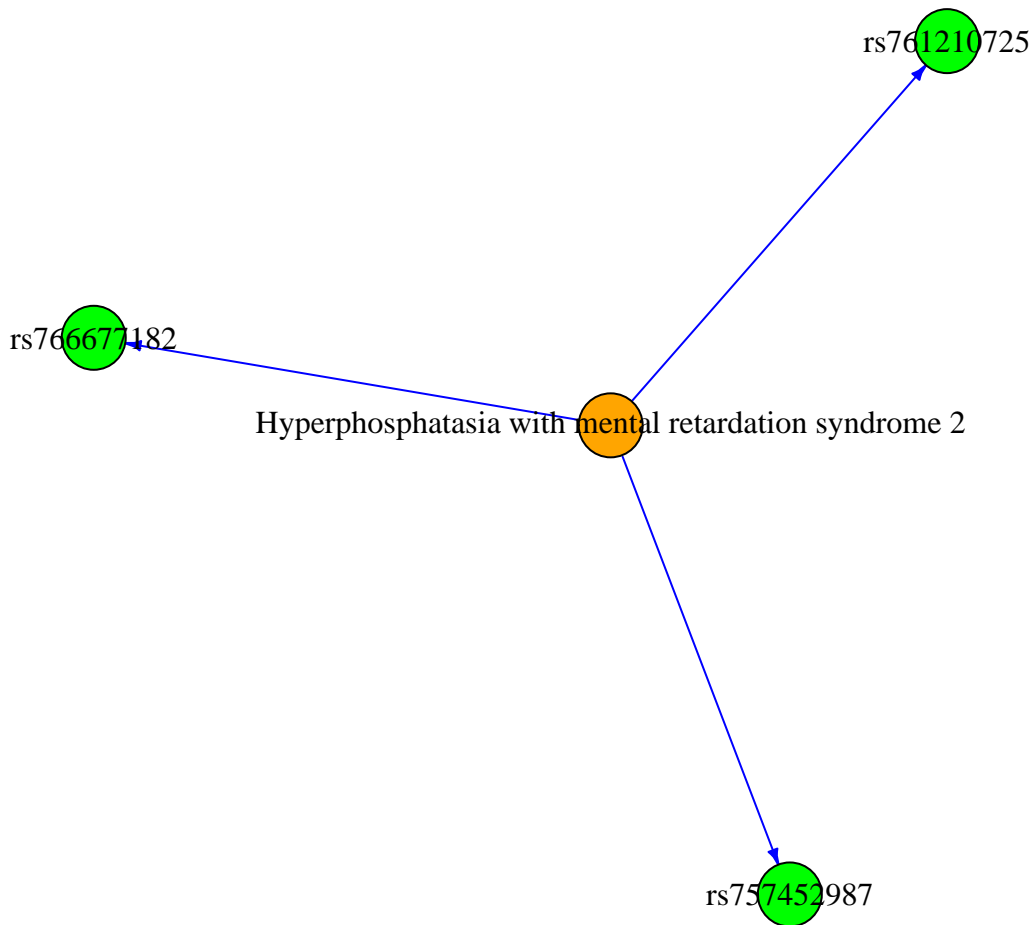

Variant–Disease Network (Hyperphosphatasia–intellectual disability syndrome)

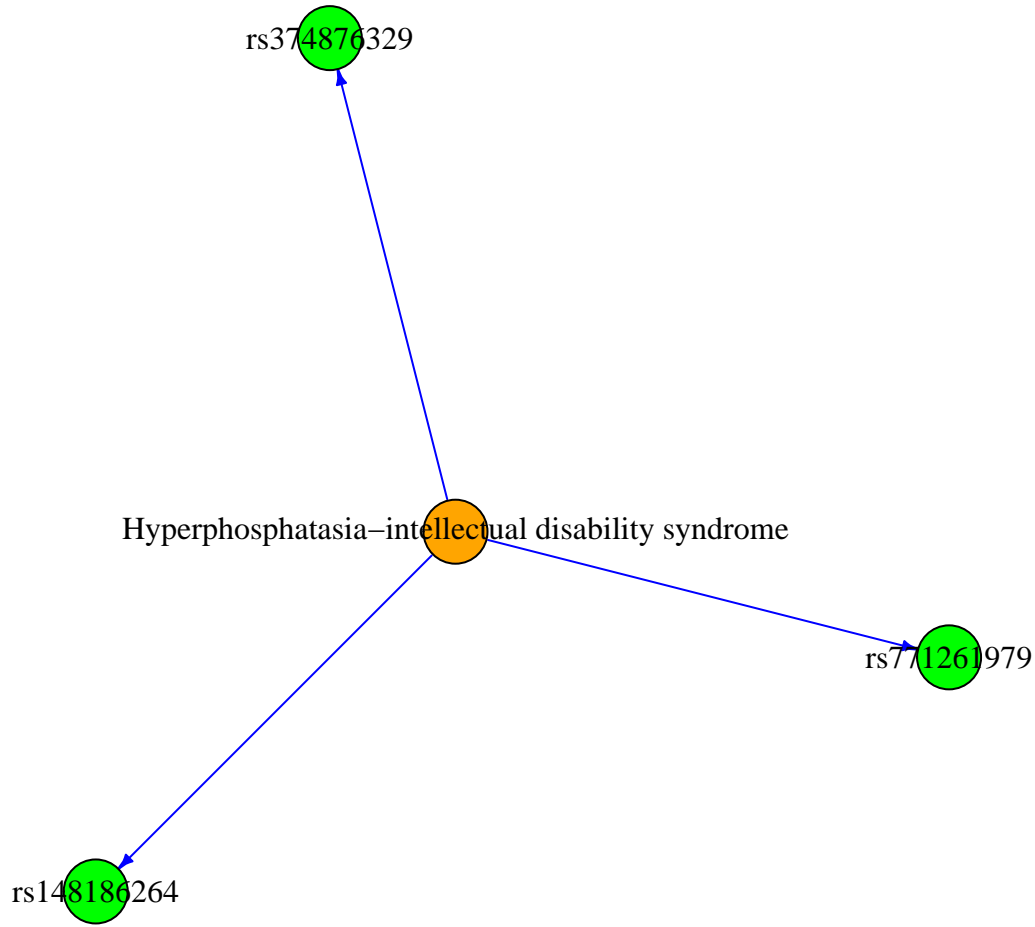

## Variant–Disease Network (Hyperprolinemia)

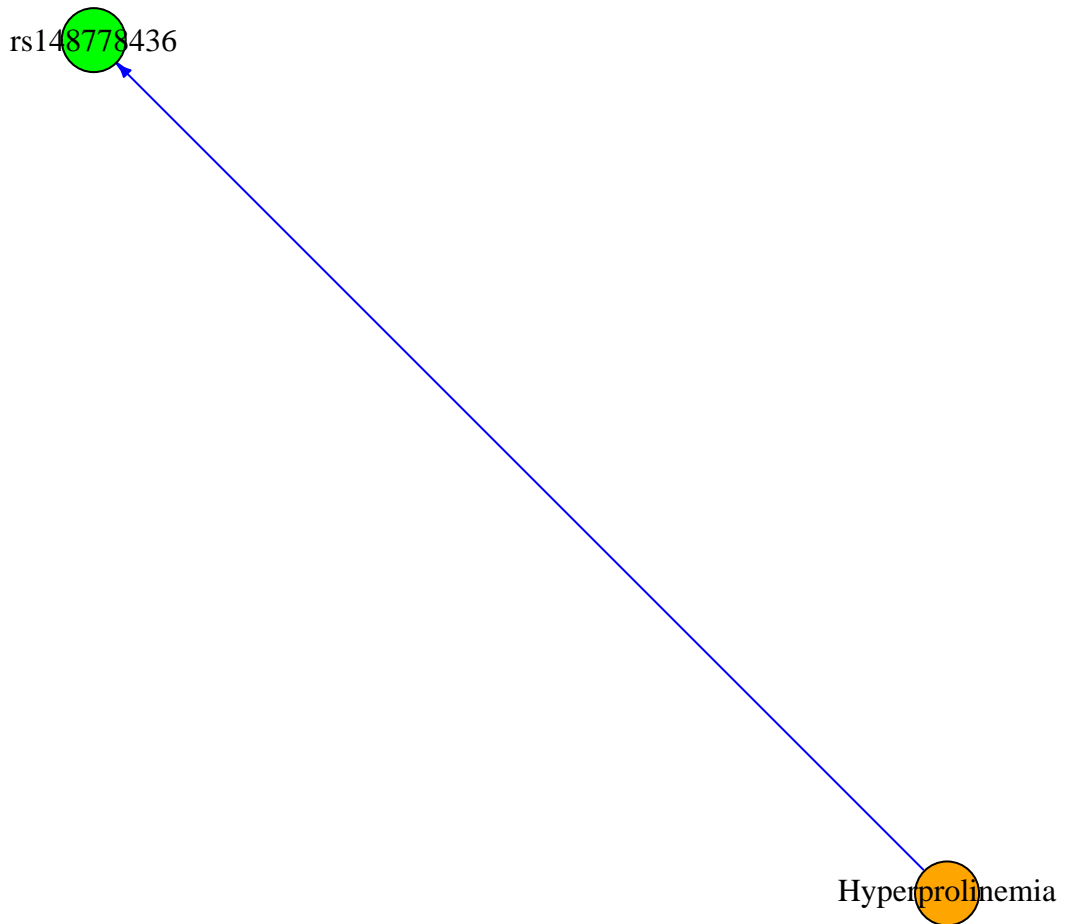

# Variant–Disease Network (Hypertrichotic osteochondrodysplasia)

rs2291550

Hypertrichotic osteochondrodysplasia



**Variant–Disease Network (Hypertrophic cardiomyopathy)**

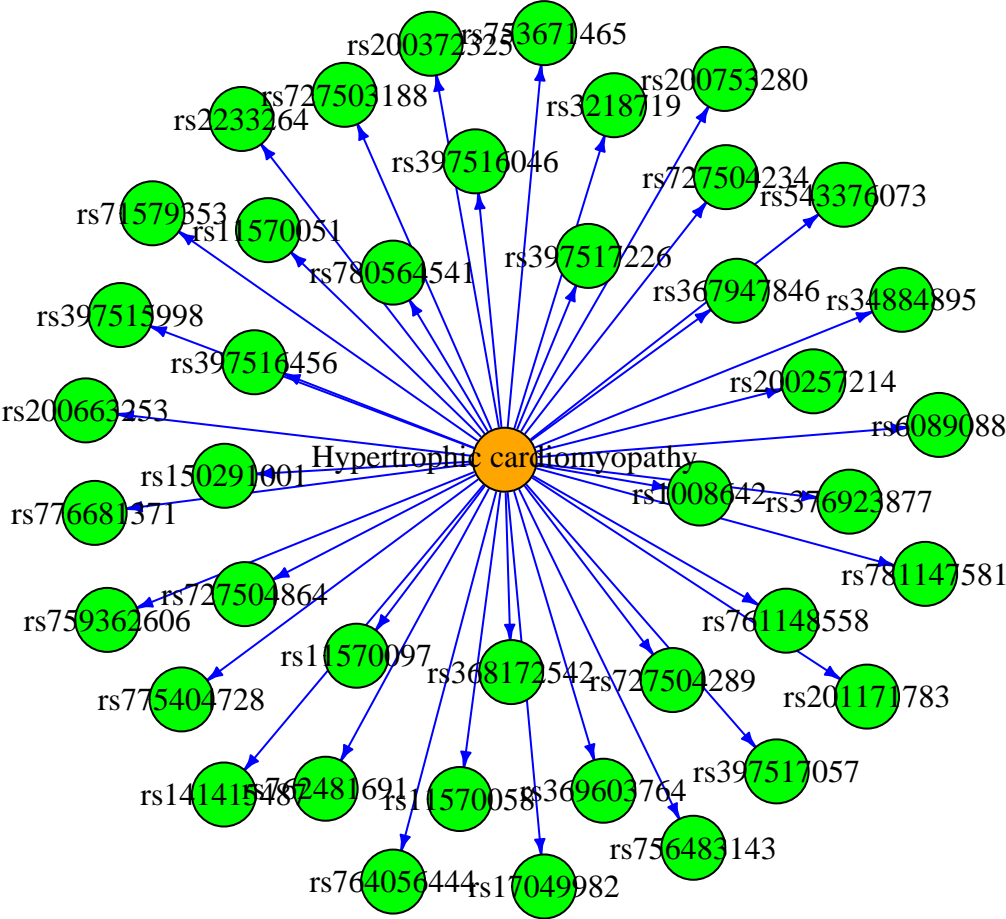

Variant–Disease Network (Hypertrophic osteoarthropathy)

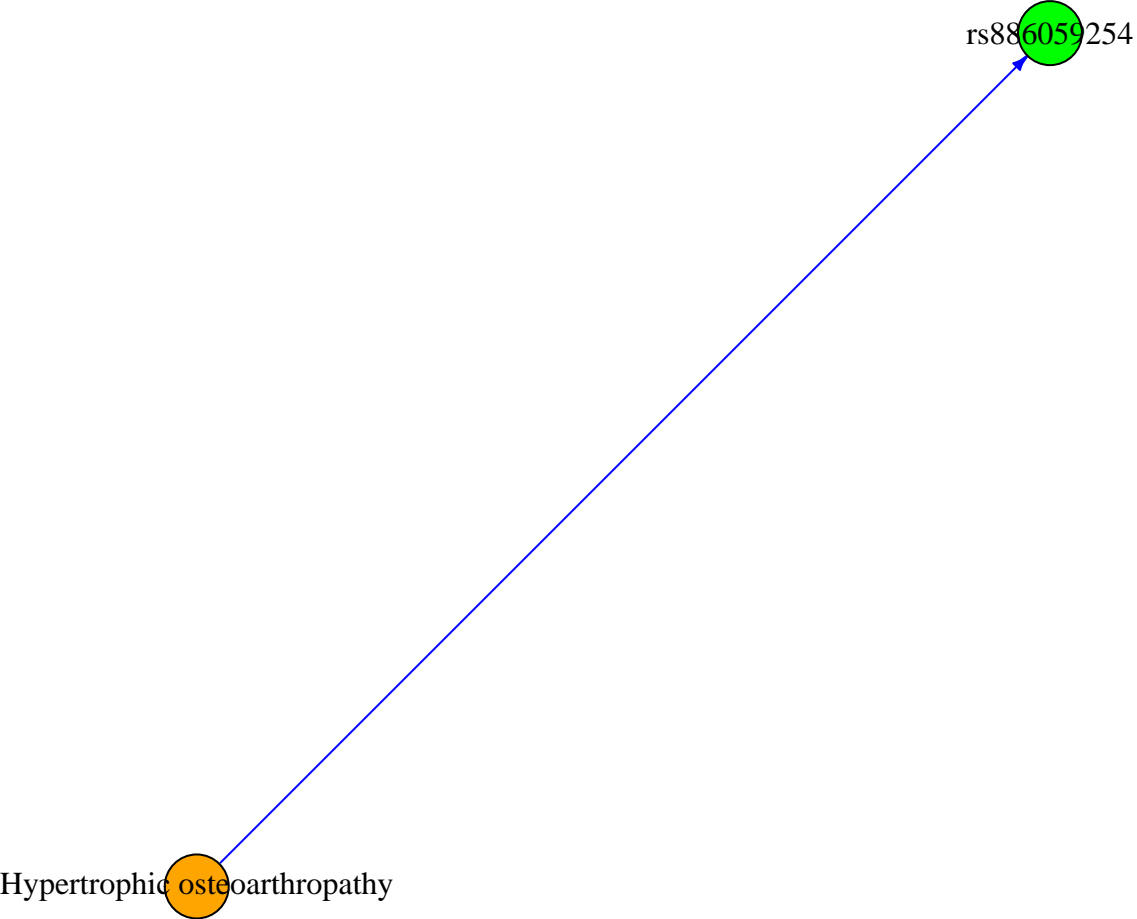

Variant–Disease Network (Hypertyrosinemia)

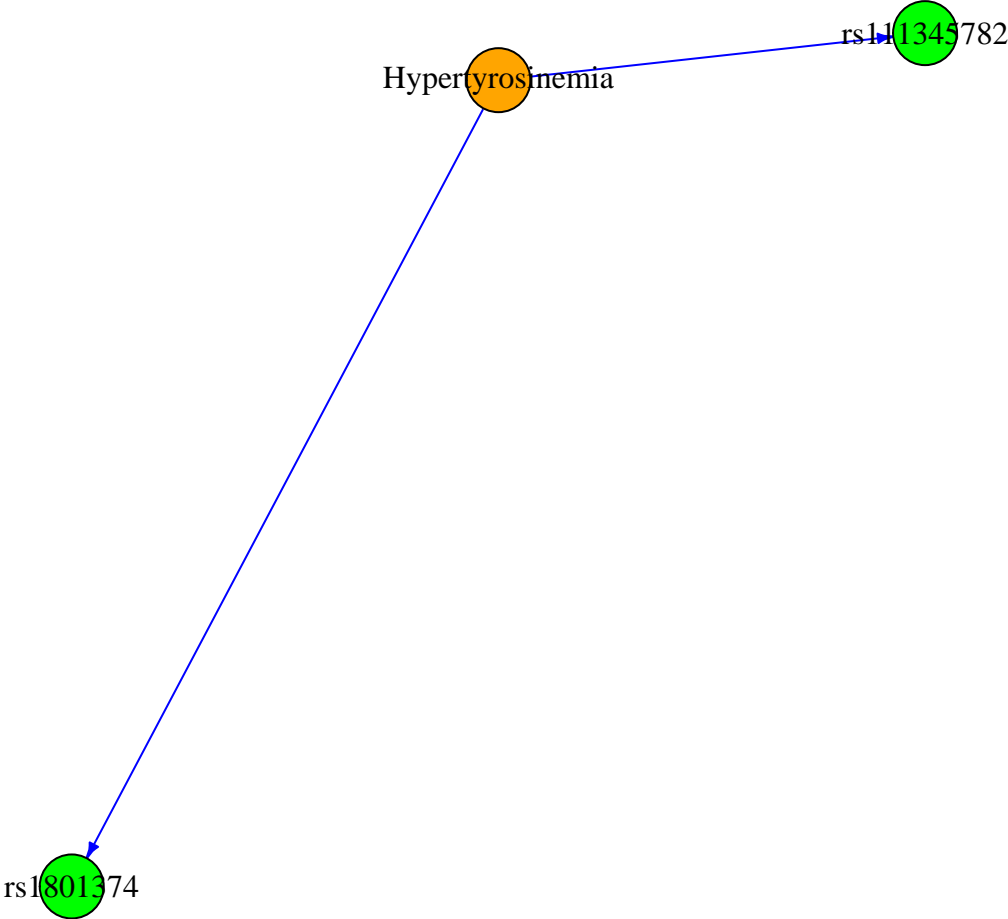

Variant–Disease Network (Hypobetalipoproteinemia)

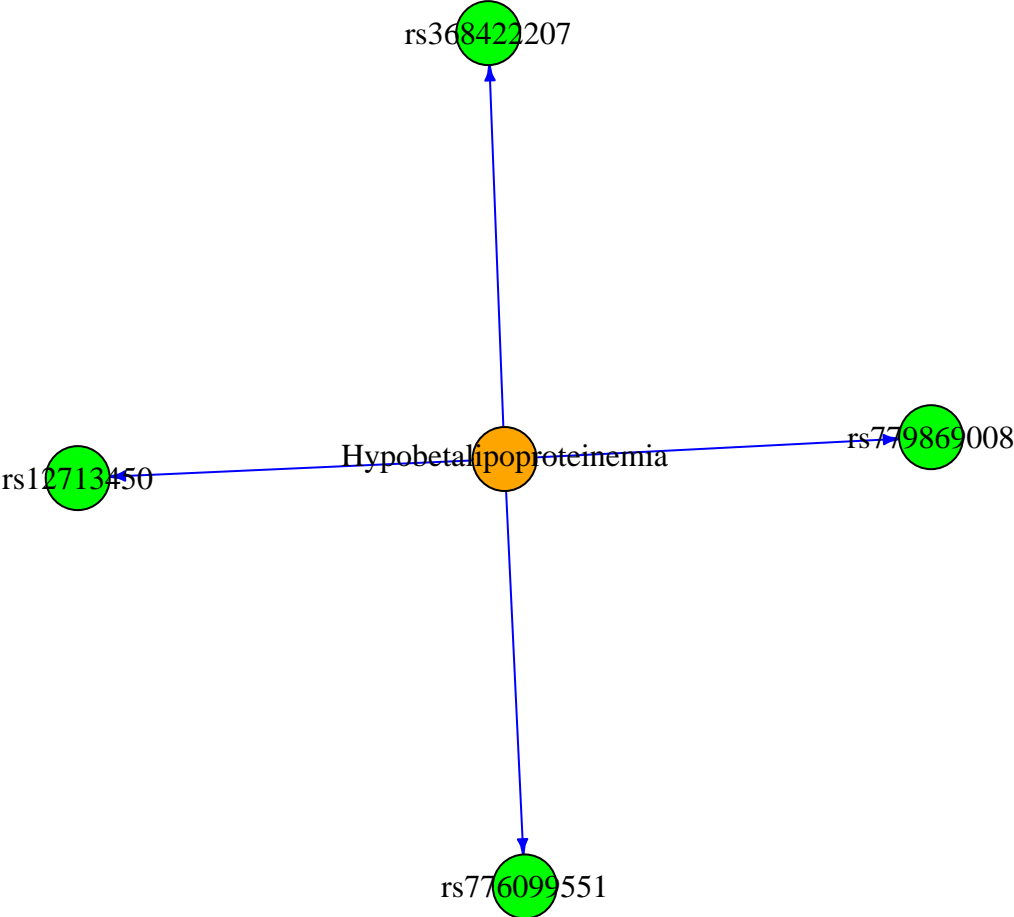



# nt-Disease Network (Hypoglycemia with deficiency of glycogen synthetase in

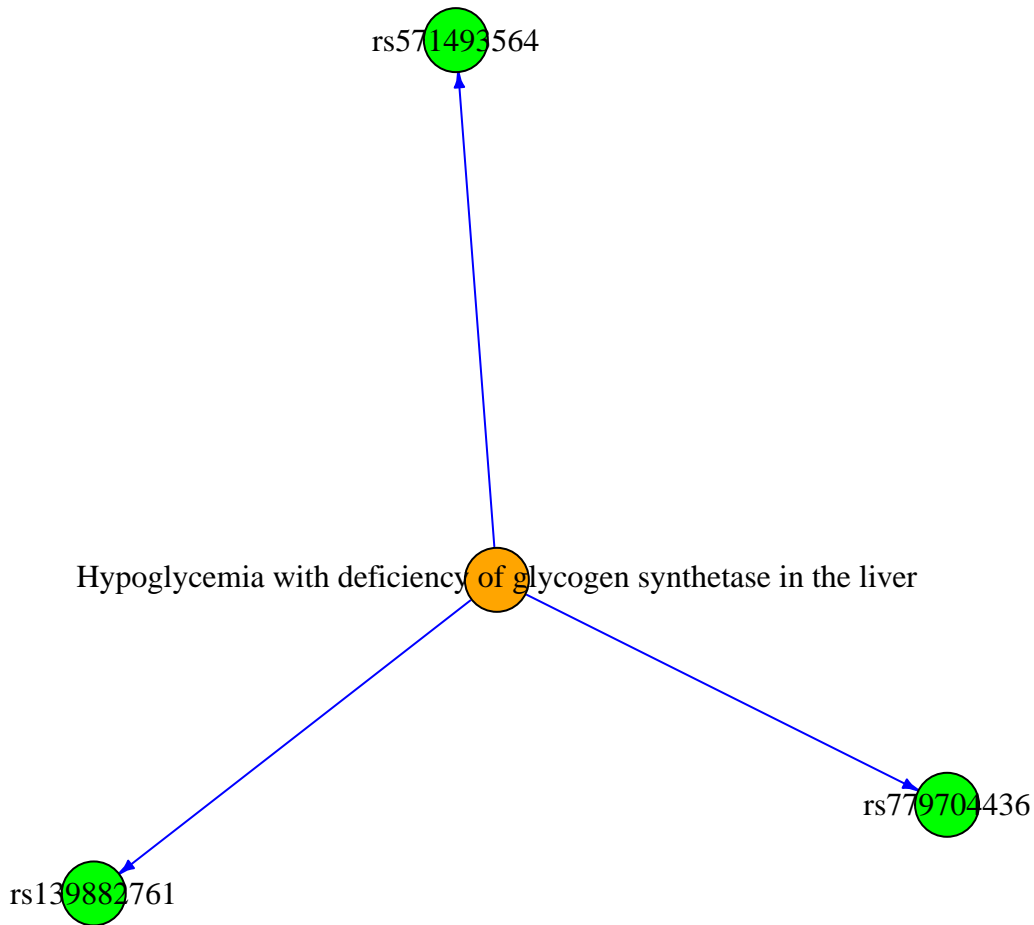

## Variant–Disease Network (Hypogonadism)

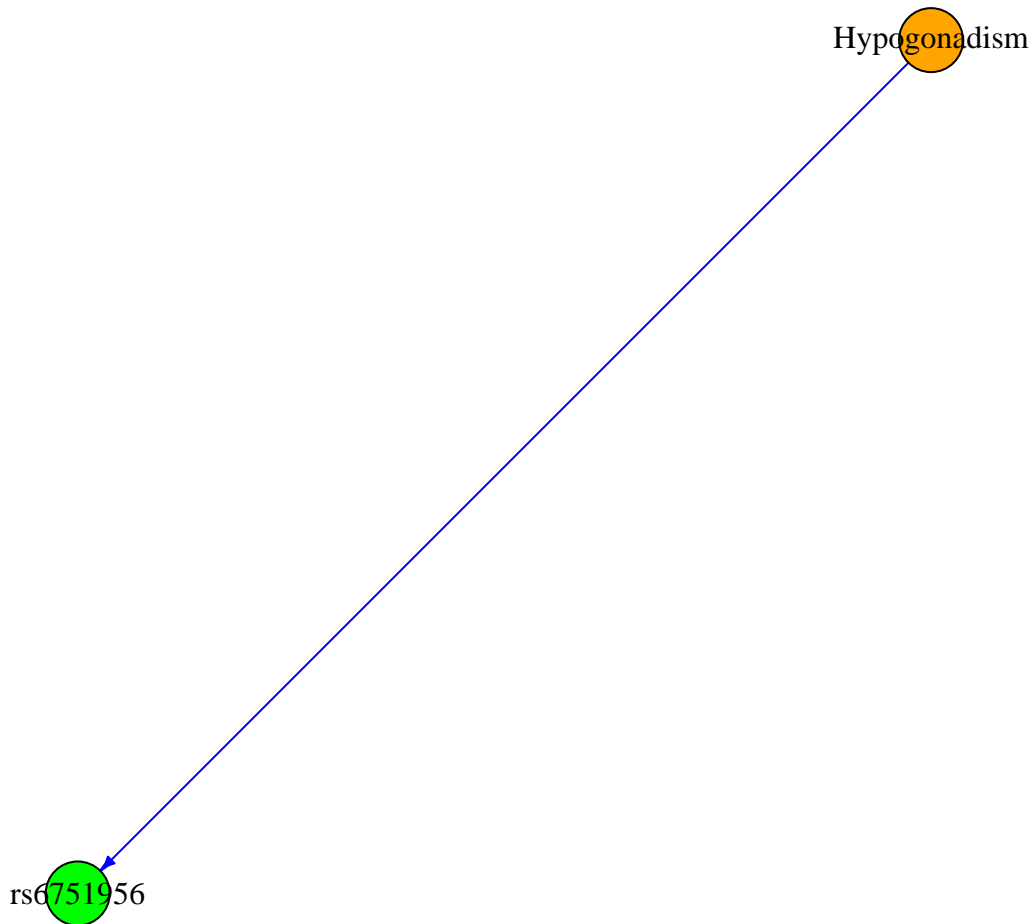

# ant-Disease Network (Hypogonadotropic hypogonadism 11 with or without a

rs200736098

Hypogonadotropic hypogonadism 11 with or w

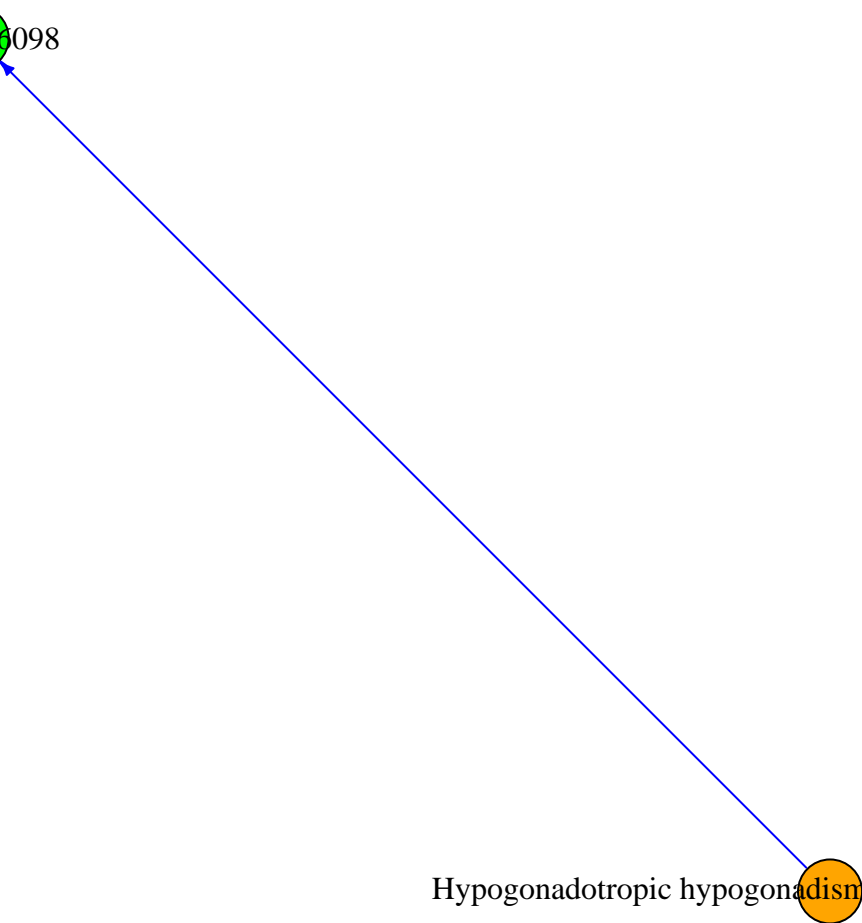

Variant–Disease Network (Hypokalemic periodic paralysis)

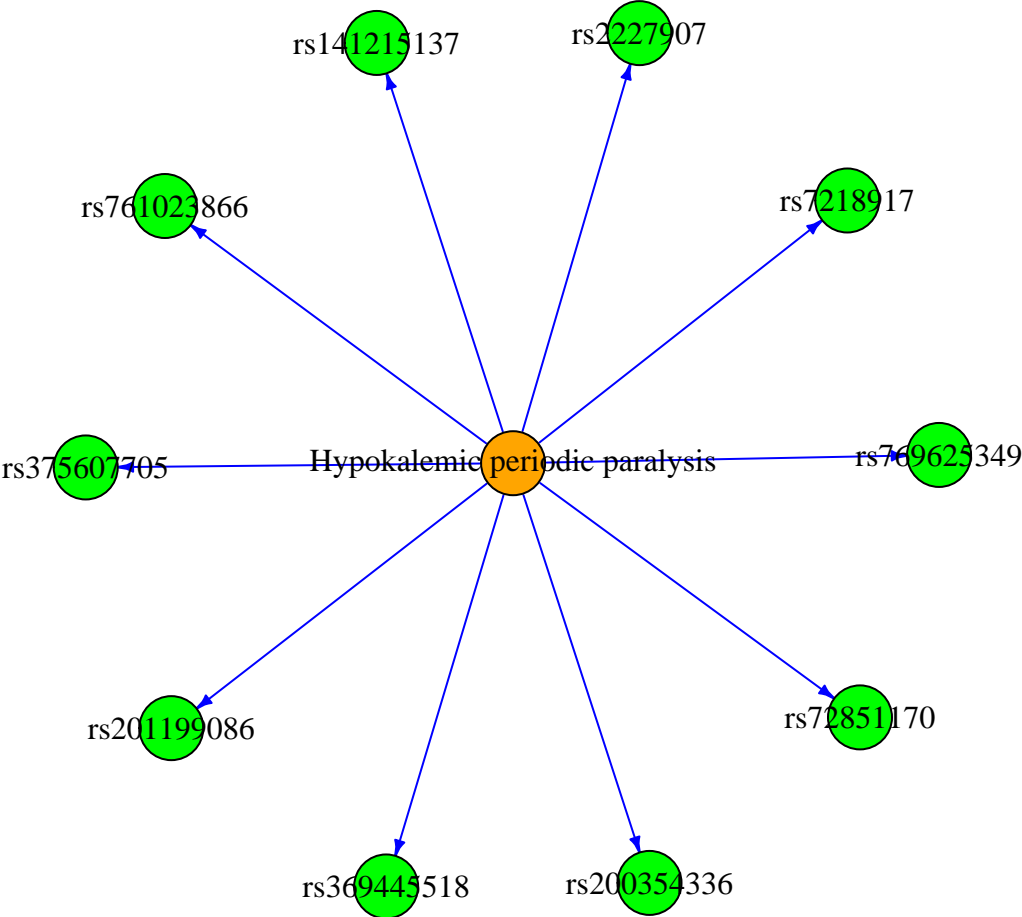

# Variant–Disease Network (Hypophosphatemic Rickets)

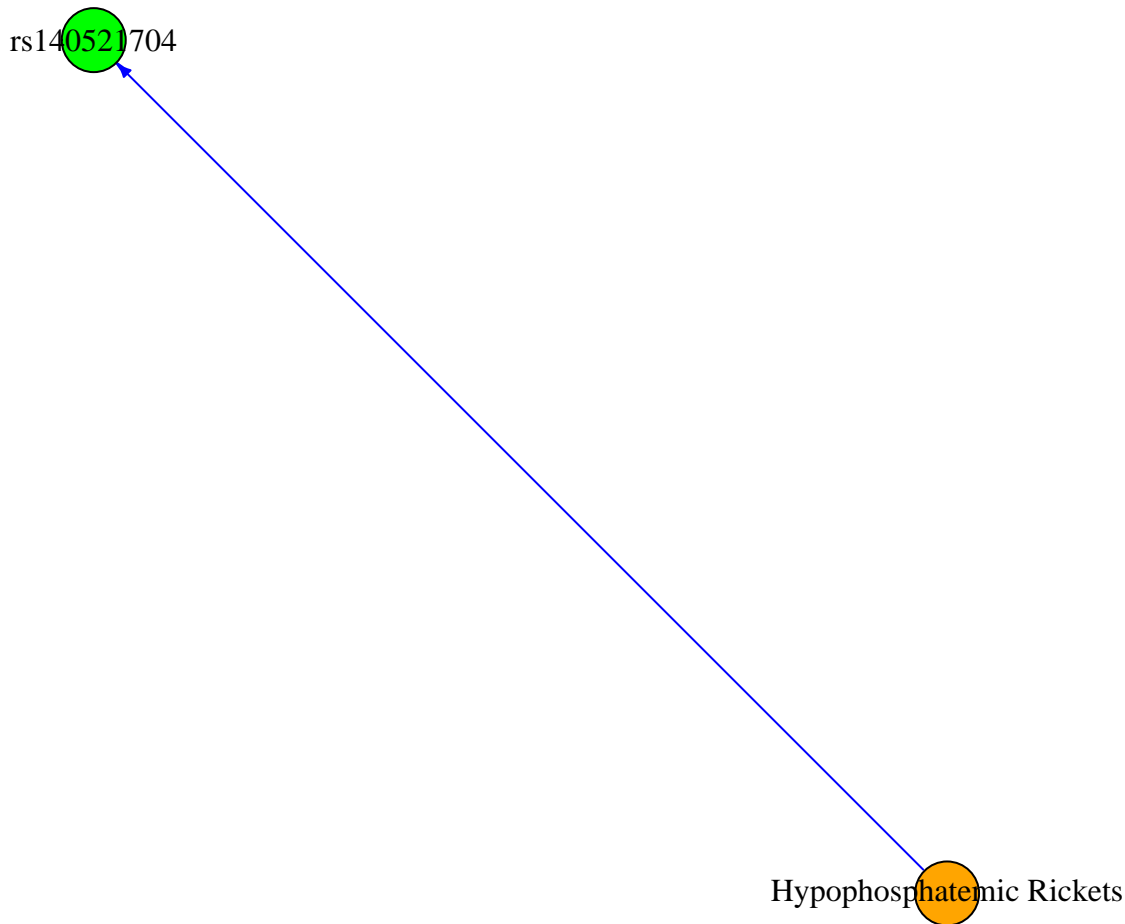

## Variant–Disease Network (Hypoplasia of the corpus callosum)

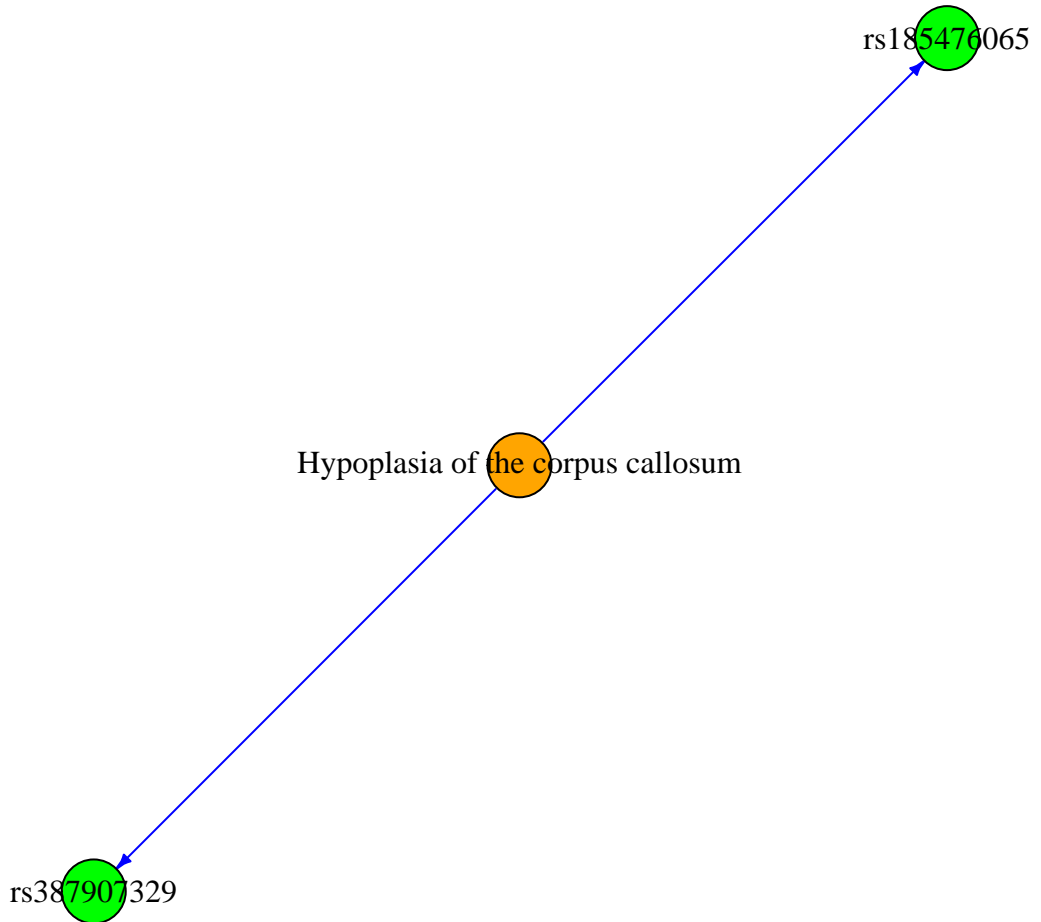

## Variant–Disease Network (Hypoprebetalipoproteinemia)

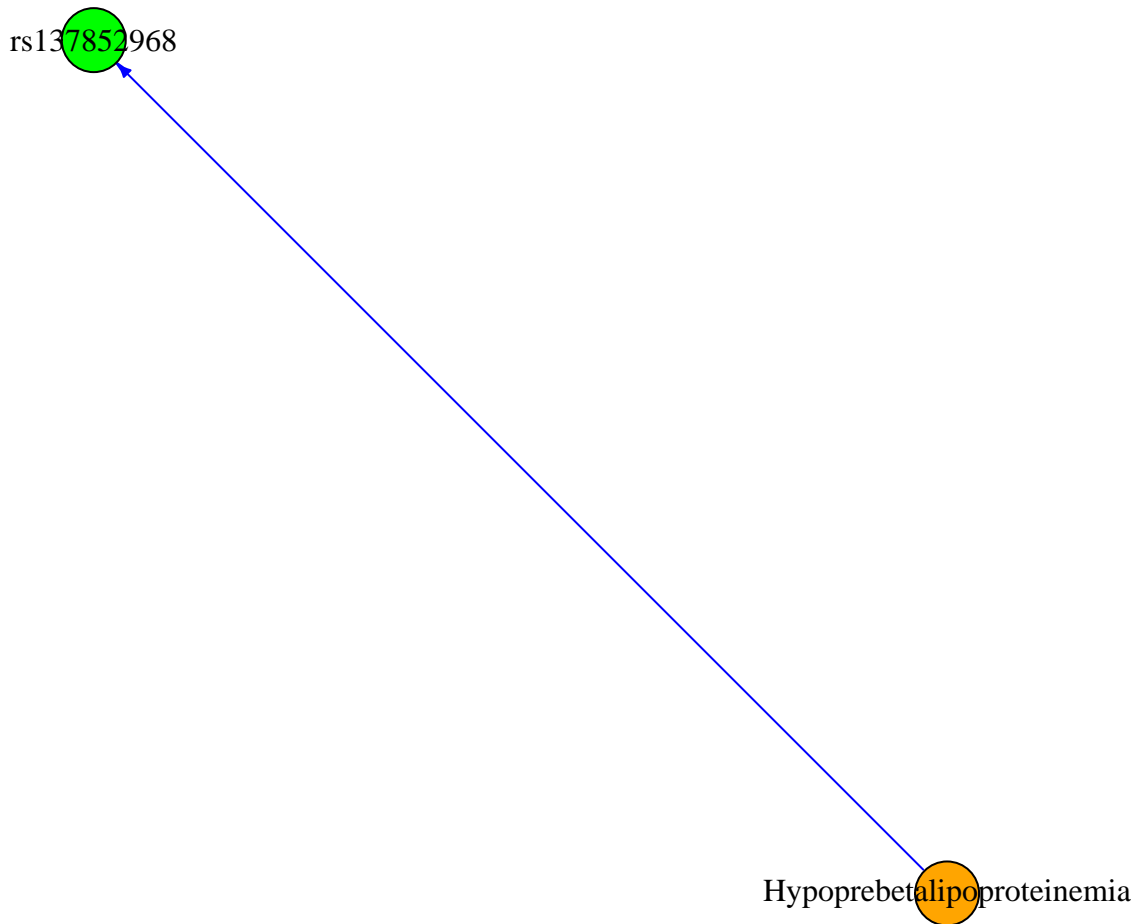

**Variant–Disease Network (Hypotension)**

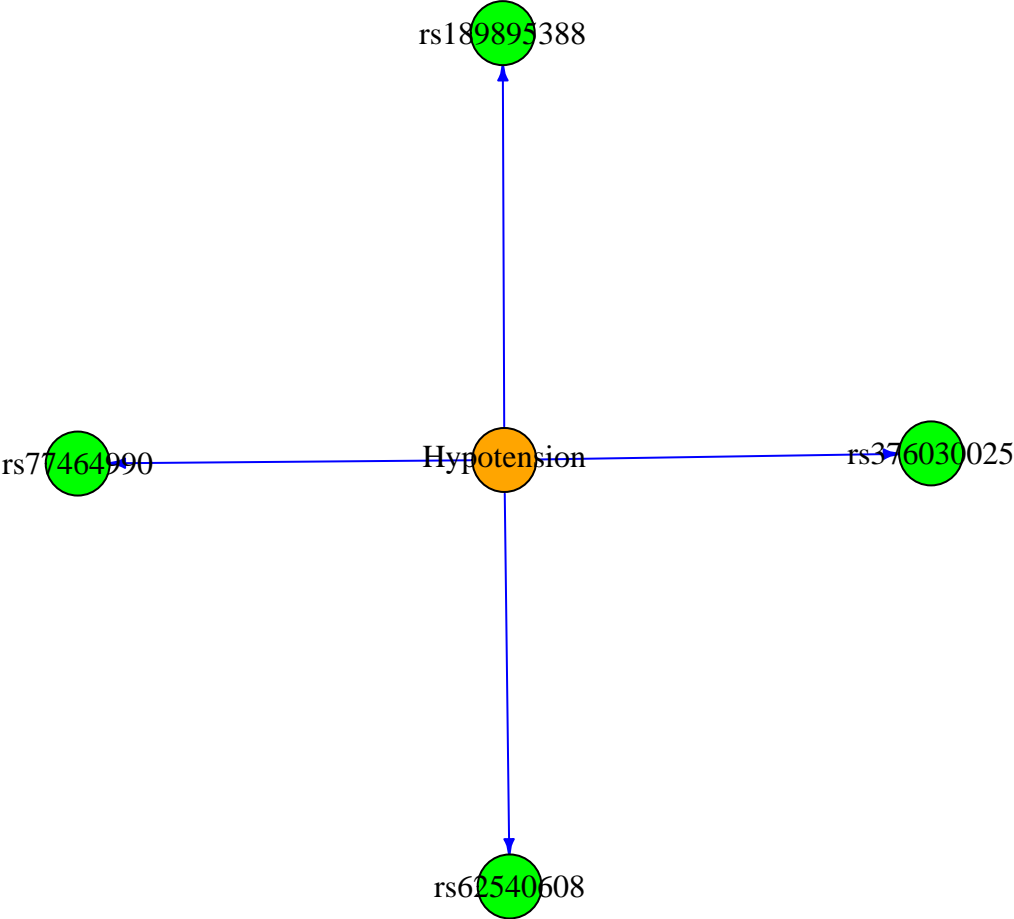



## Variant-Disease Network (Hypotonia)

Hypotonia



```
graph TD; Hypotonia((Hypotonia)) --> rs3775091((rs3775091));
```

The diagram illustrates a directed edge in a network. The source node, labeled 'Hypotonia', is an orange circle with a black outline. The target node, labeled 'rs3775091', is a green circle with a black outline. A blue arrow points from the source node to the target node, indicating a directed relationship.

rs3775091

# nt-Disease Network (Hypotonia–speech impairment–severe cognitive delay s

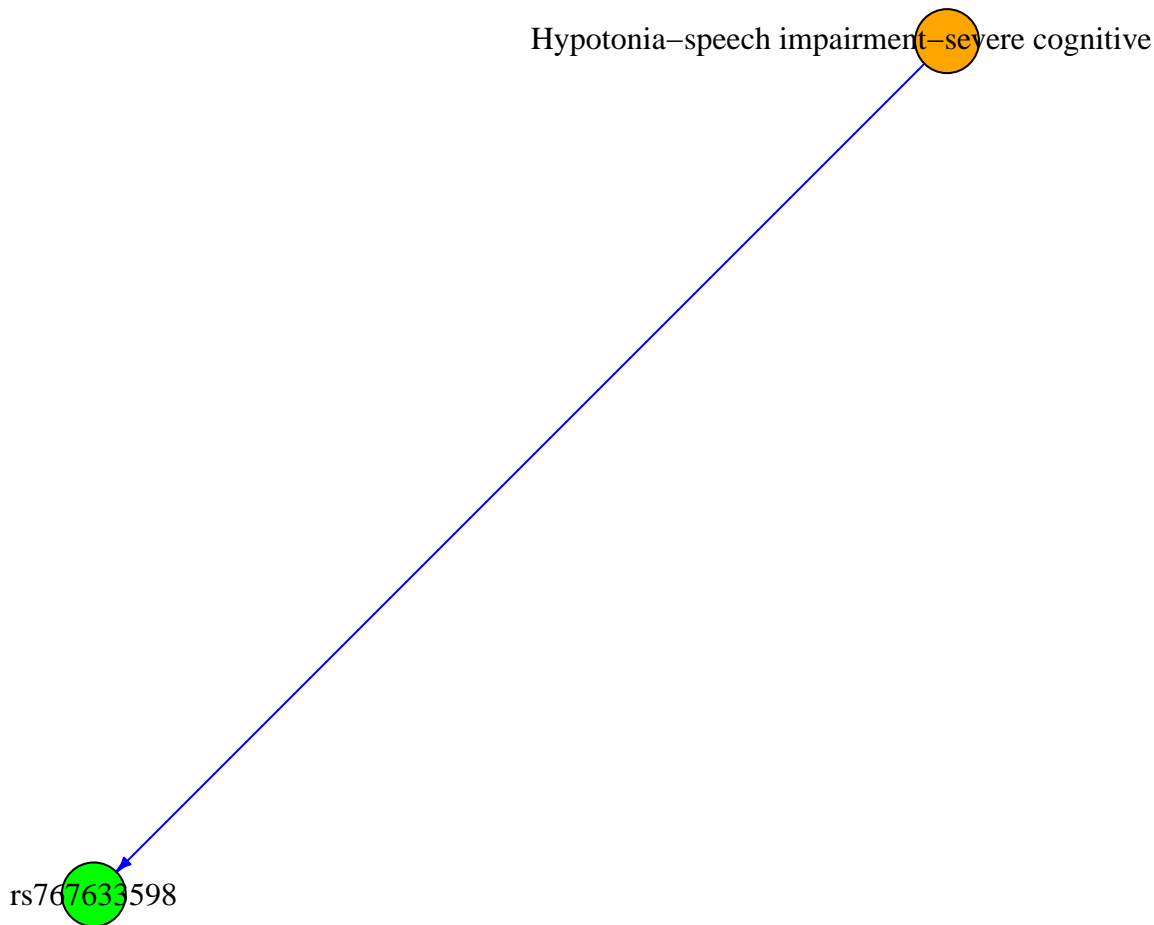

**Variant–Disease Network (Ichthyosis prematurity syndrome)**

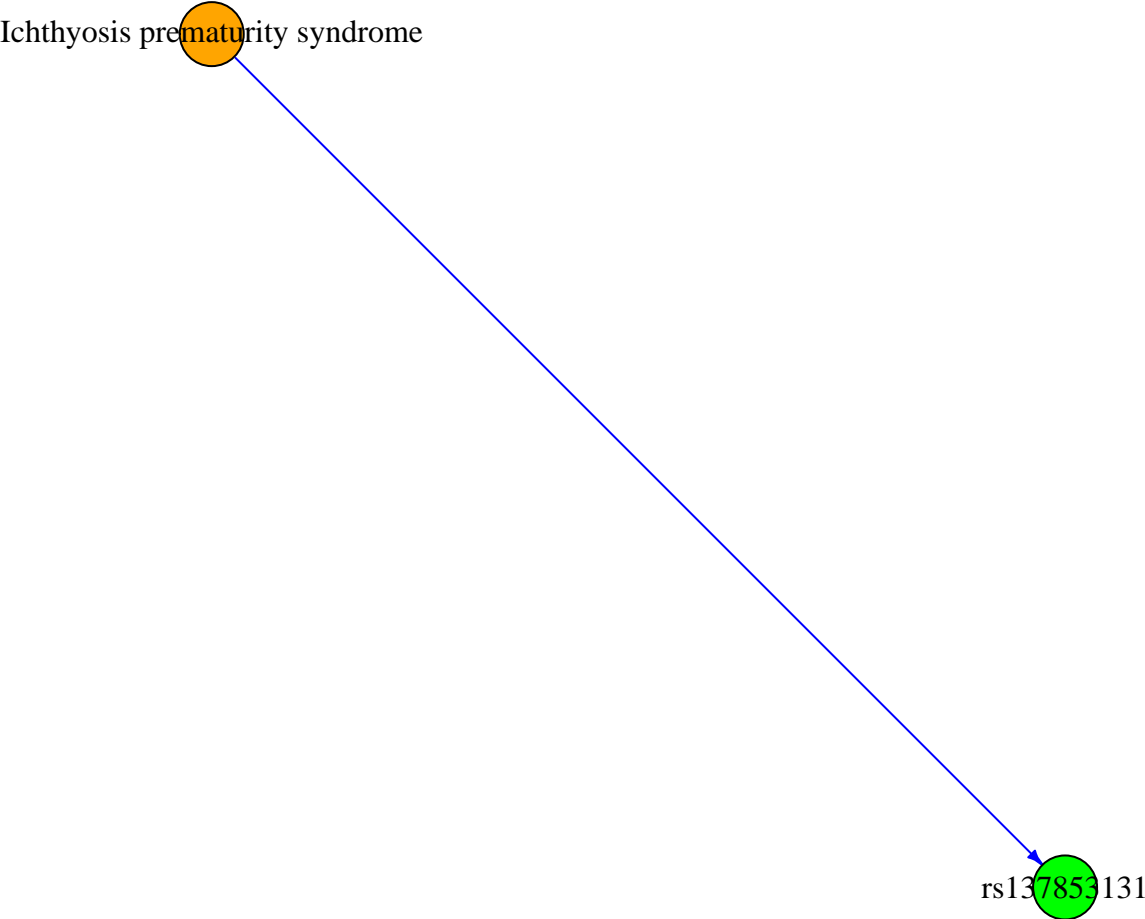

**Variant–Disease Network (Idiopathic basal ganglia calcification 1)**

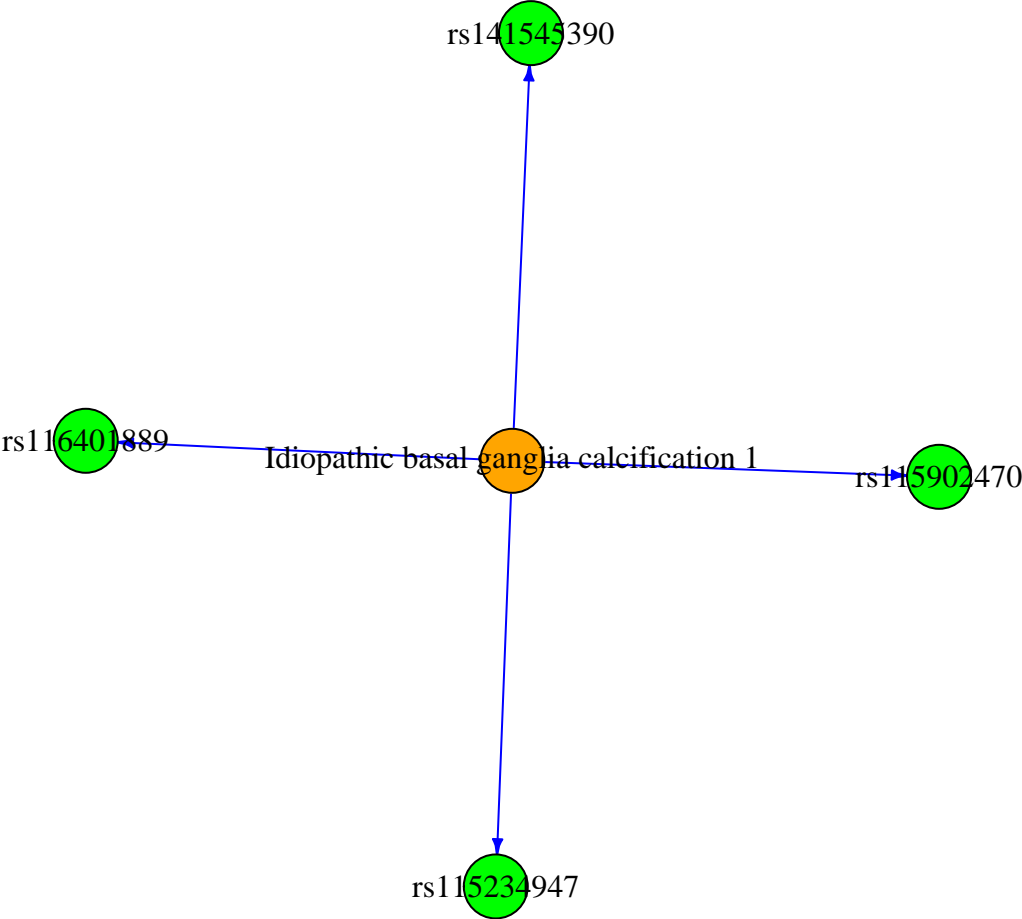

## Variant–Disease Network (Idiopathic fibrosing alveolitis)

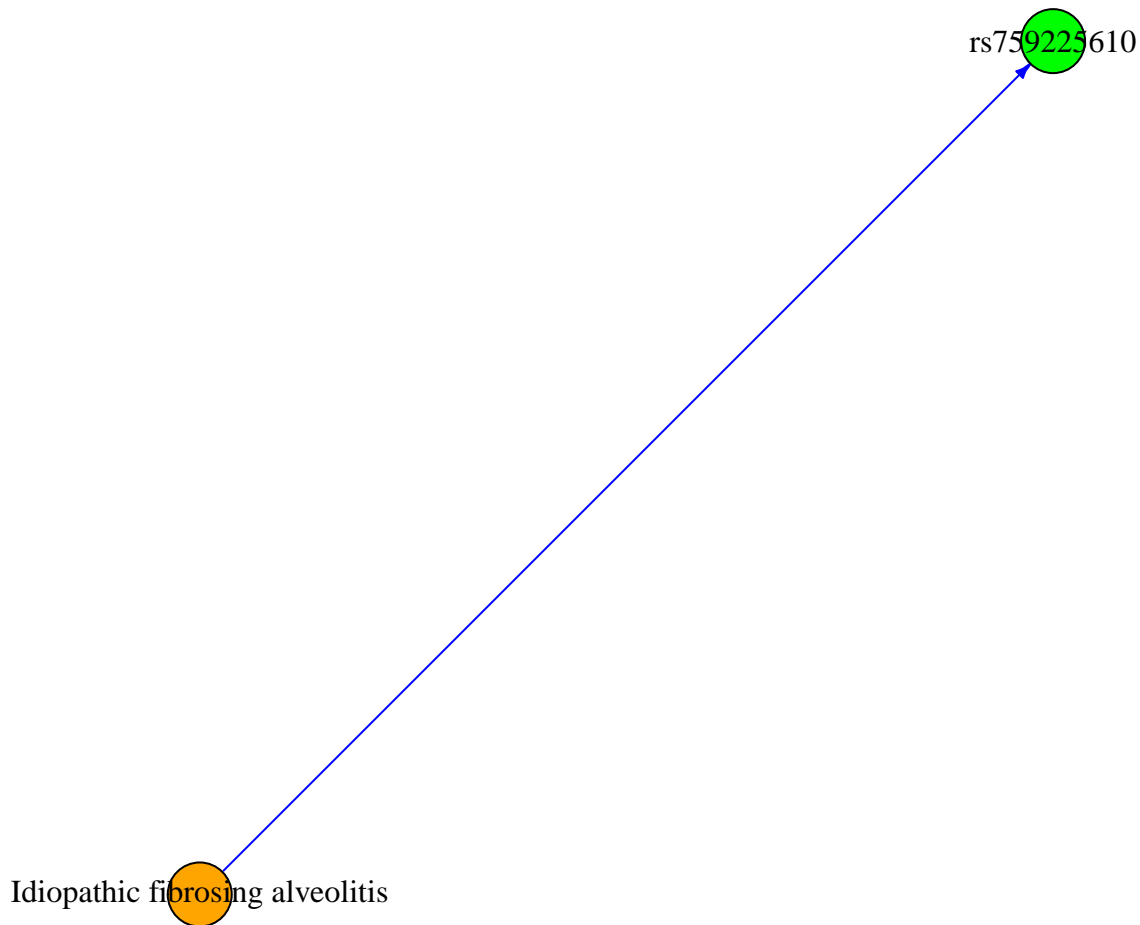

**Variant–Disease Network (Idiopathic generalized epilepsy)**

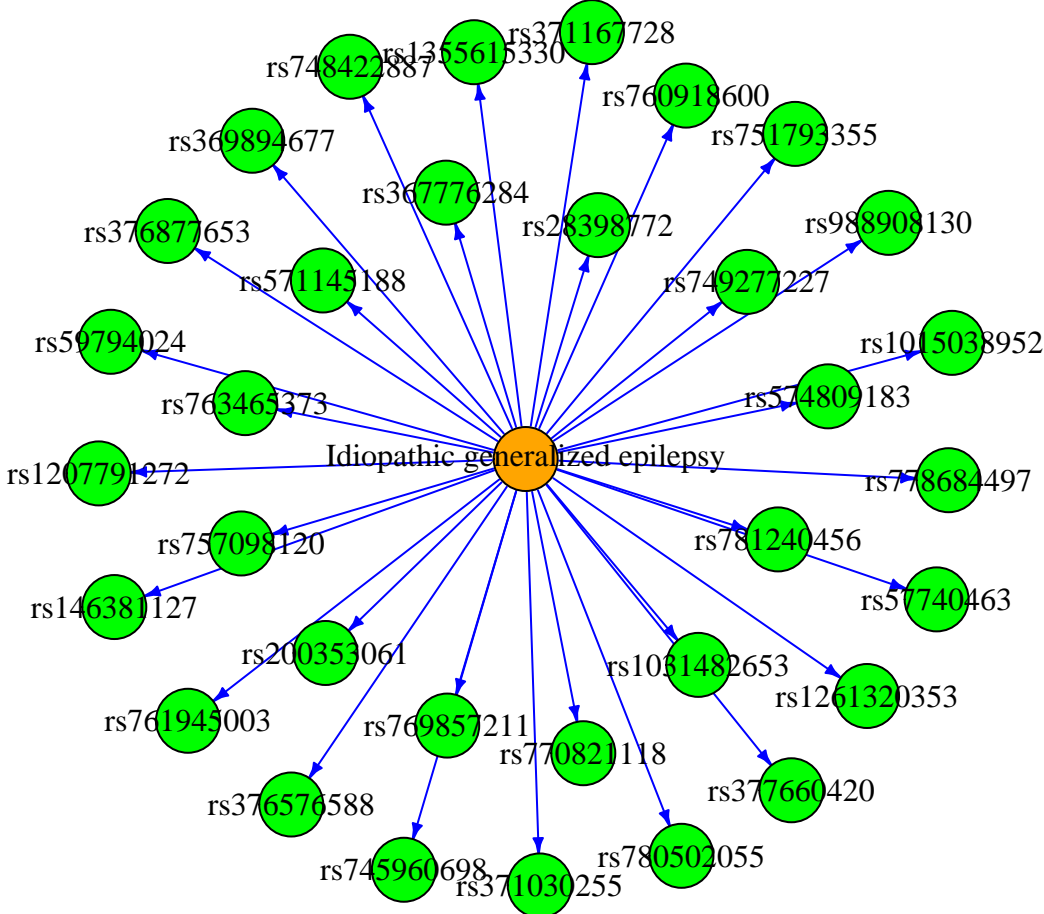

Variant–Disease Network (Idiopathic hypereosinophilic syndrome)

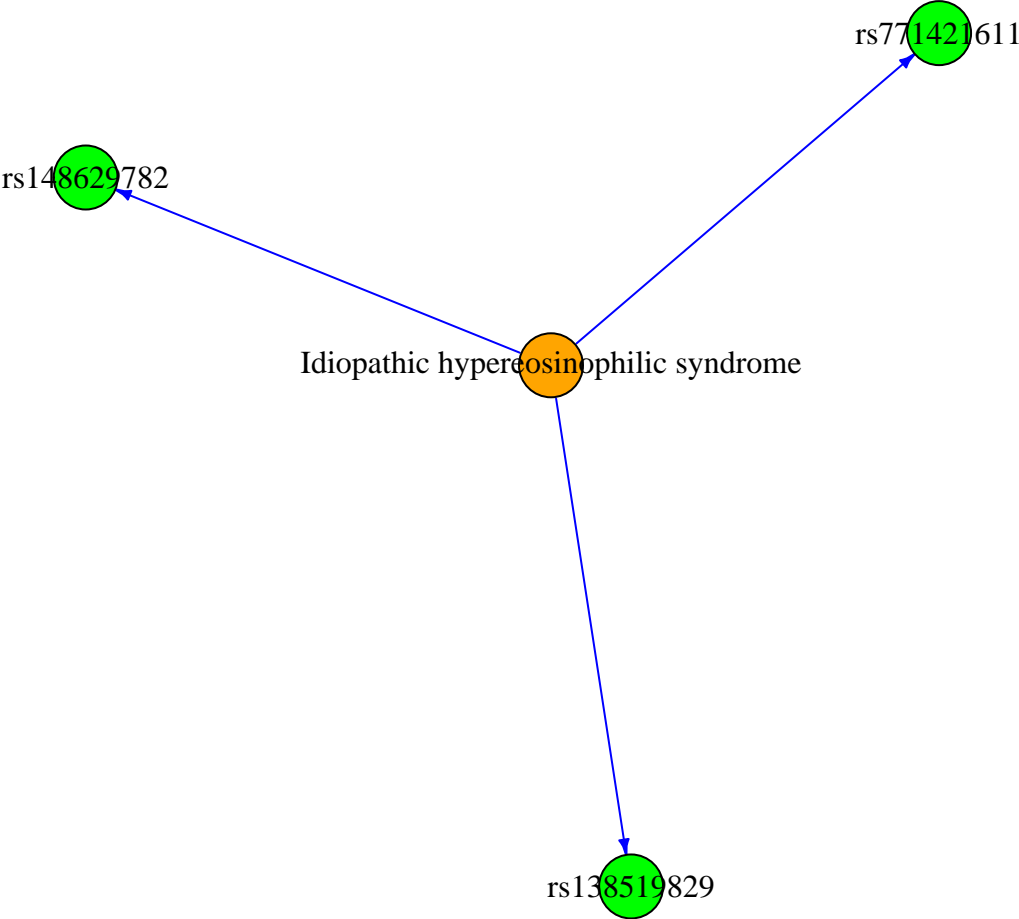

## Variant–Disease Network (Immunodeficiency)

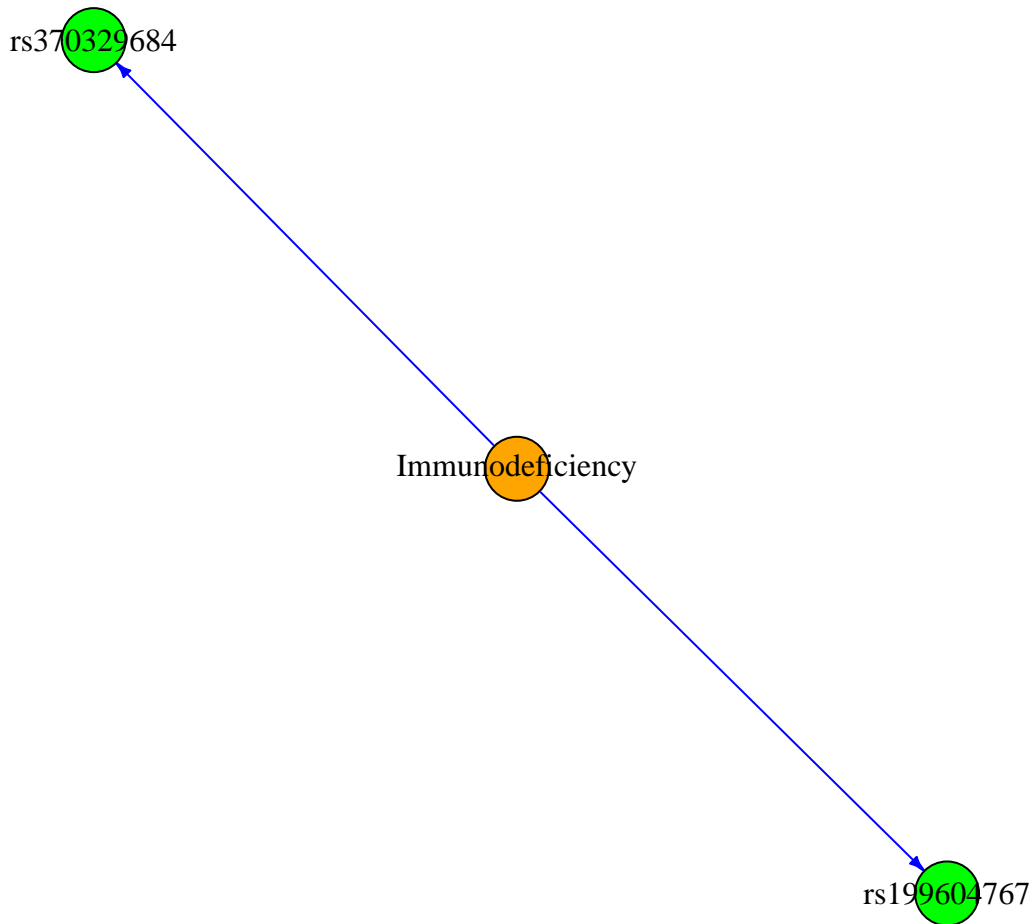



## Variant–Disease Network (Immunodeficiency 24)

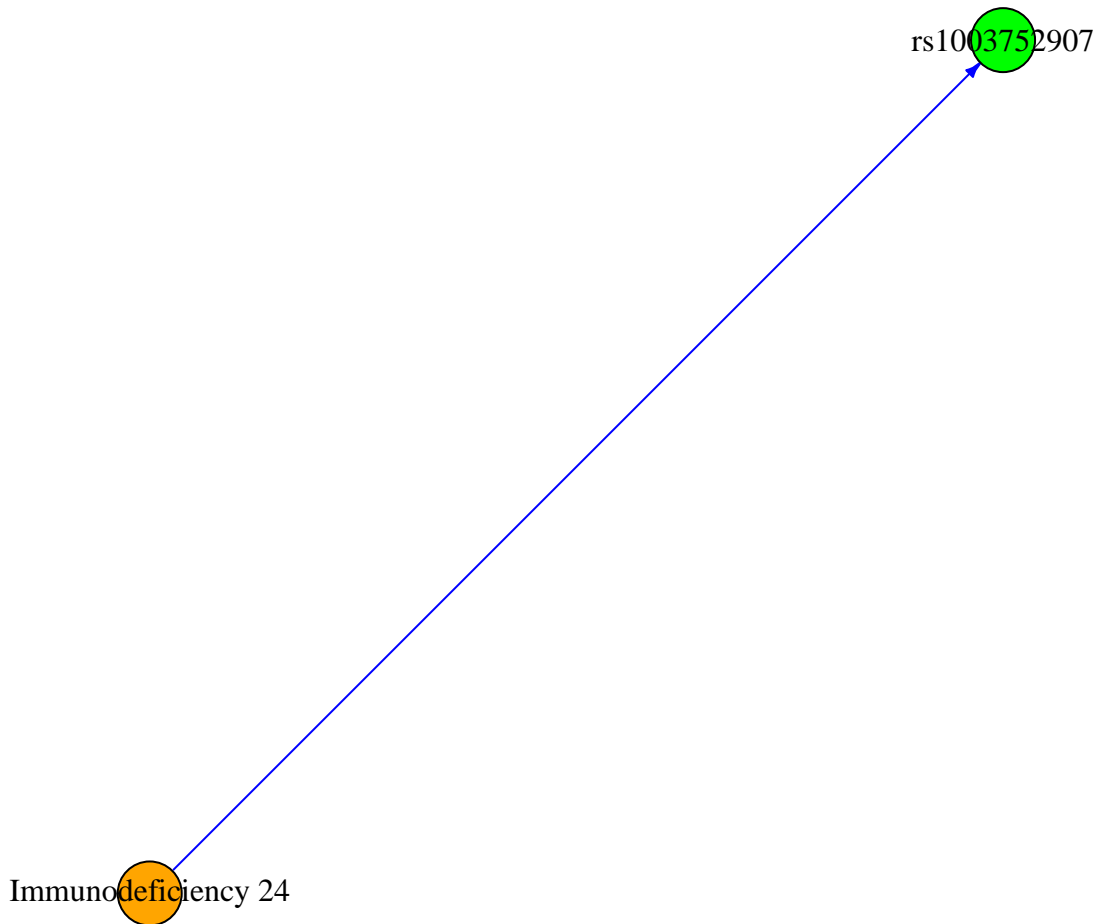

# Ant-Disease Network (Immunodeficiency 26 with or without neurologic abnormalities)

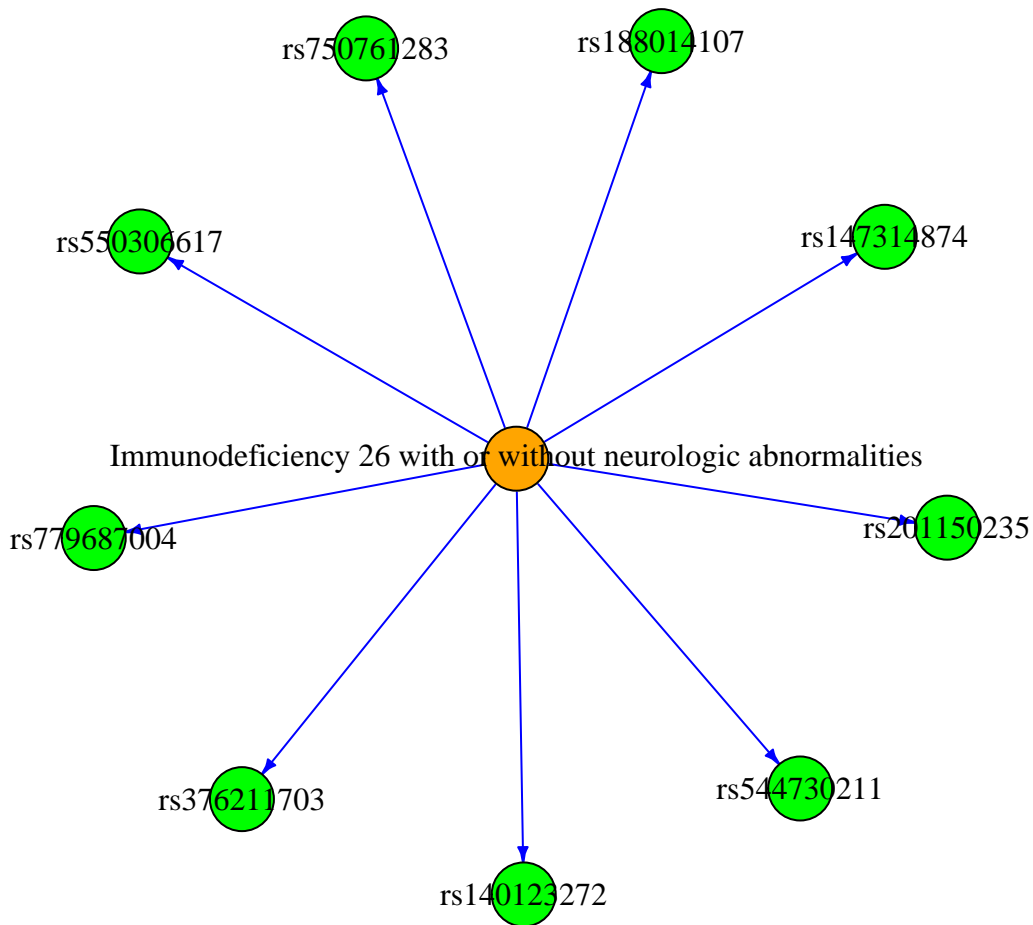

## Variant–Disease Network (Immunodeficiency 32a)

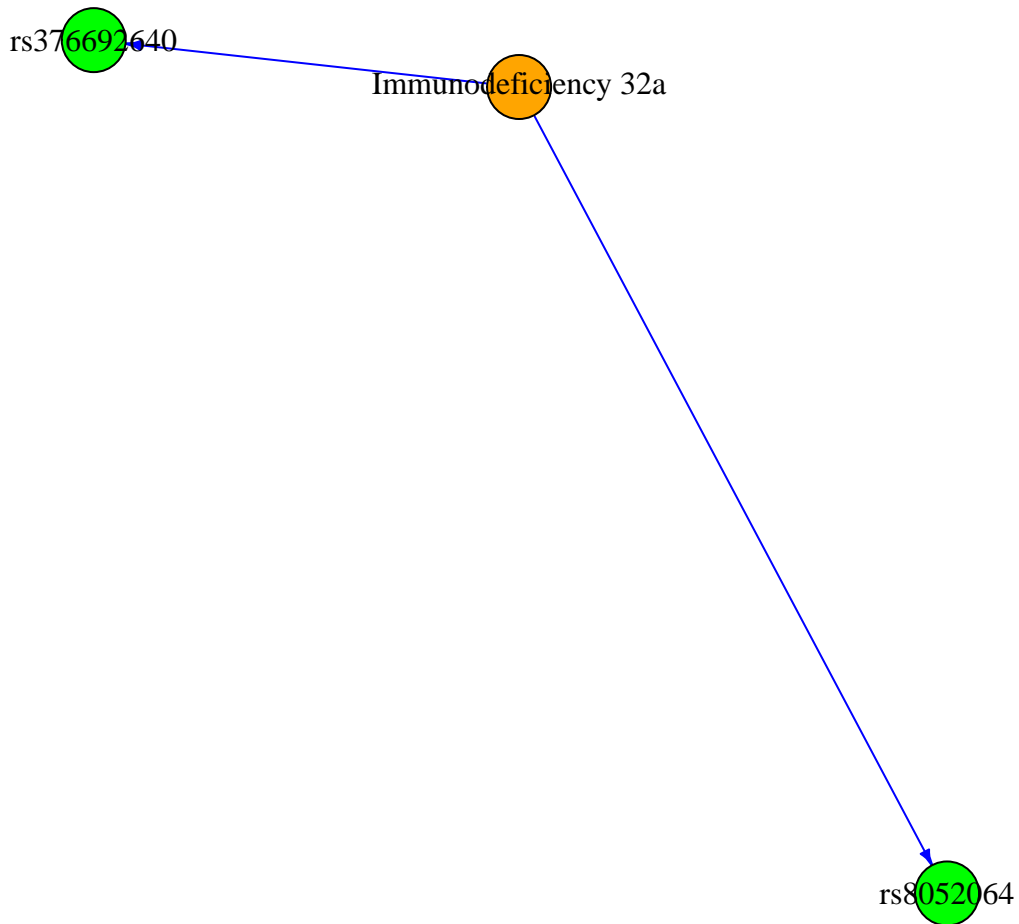

## Variant-Disease Network (Immunodeficiency 32b)

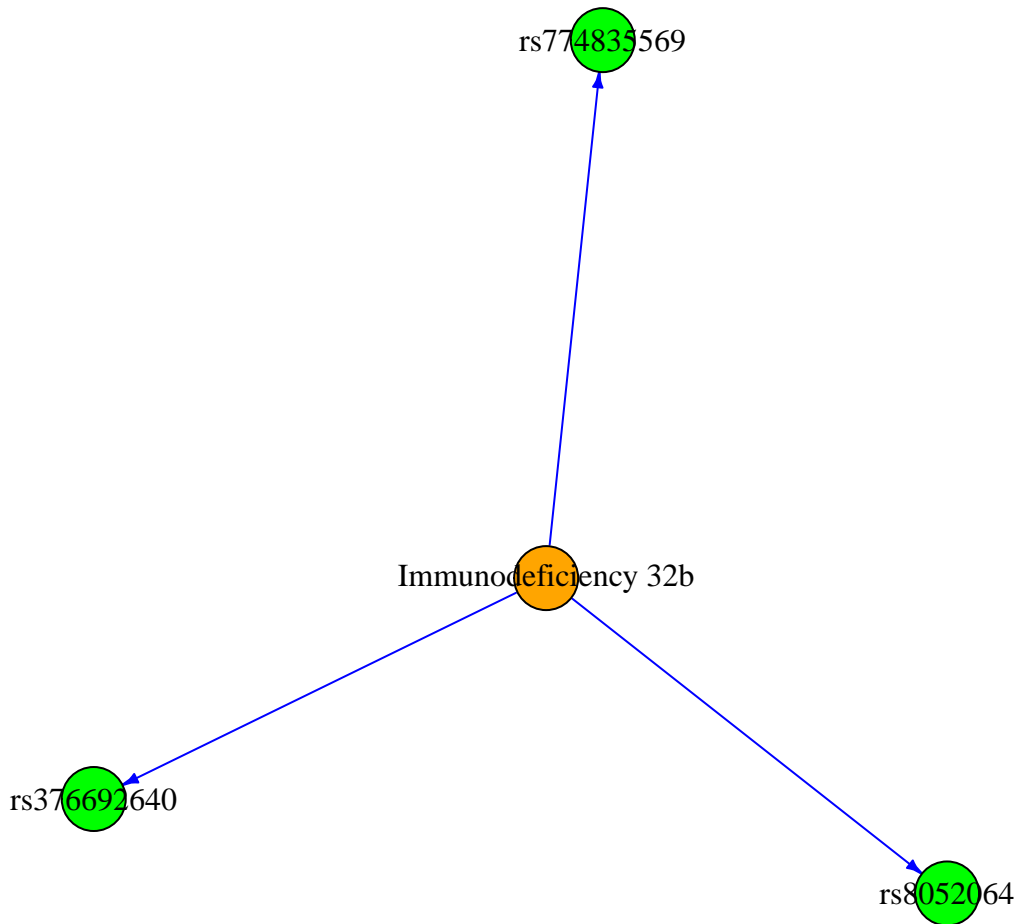

## Variant–Disease Network (Immunodeficiency 44)

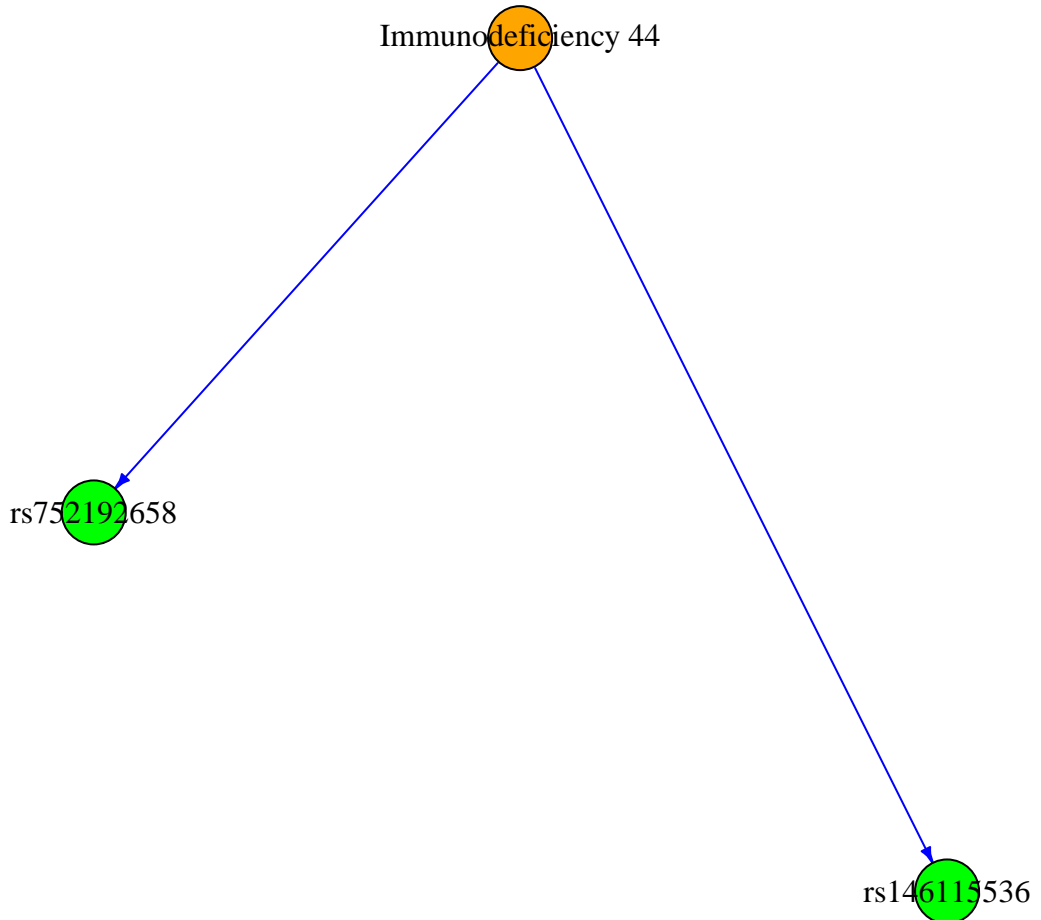

## Variant–Disease Network (Immunodeficiency 51)

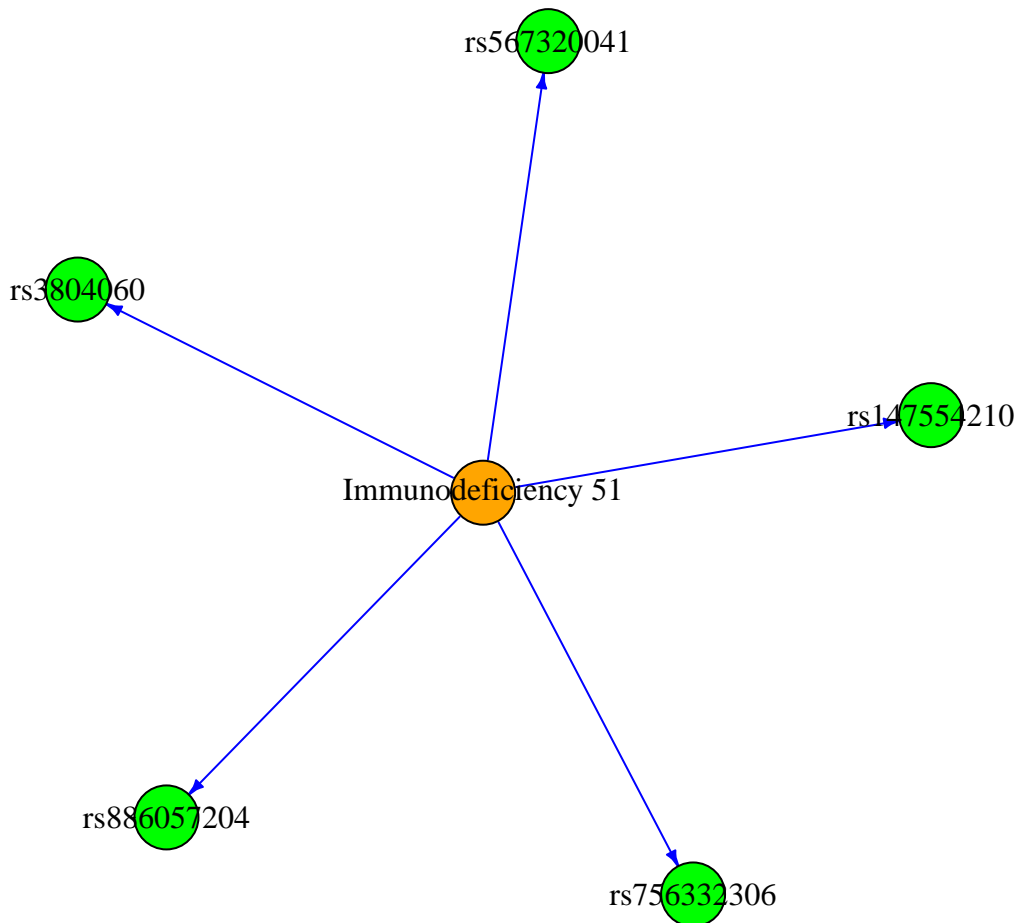

## Variant–Disease Network (Immunodeficiency 8)

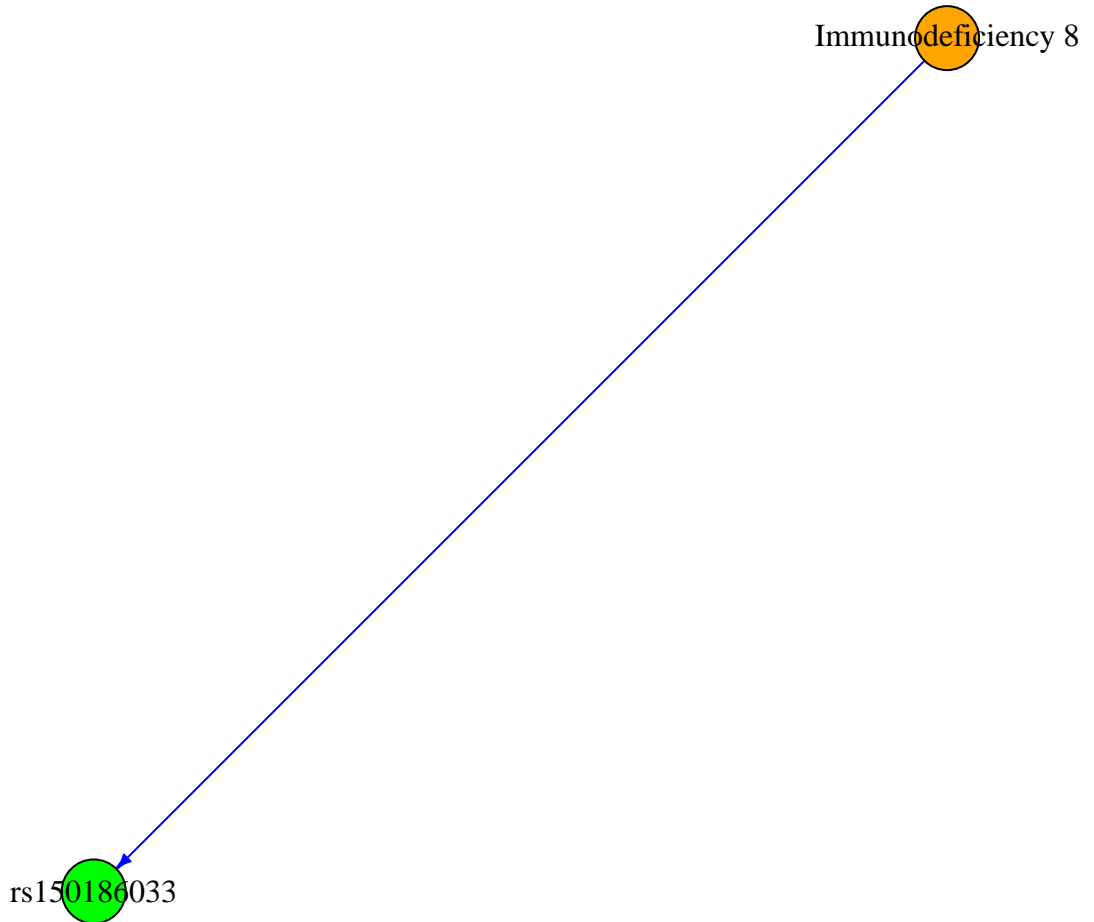

**Variant–Disease Network (Immunodeficiency with hyper IgM type 2)**

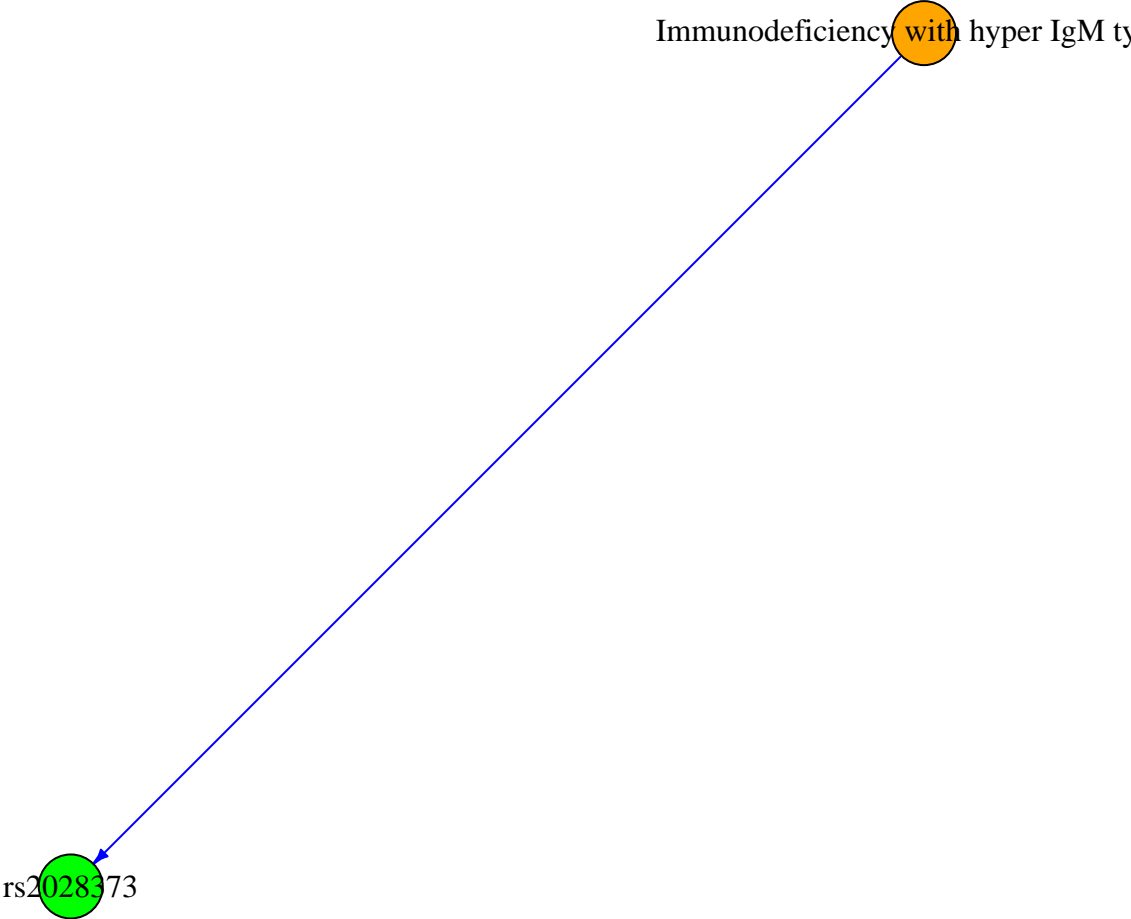



Variant–Disease Network (Immunodeficiency with Hyper–IgM)

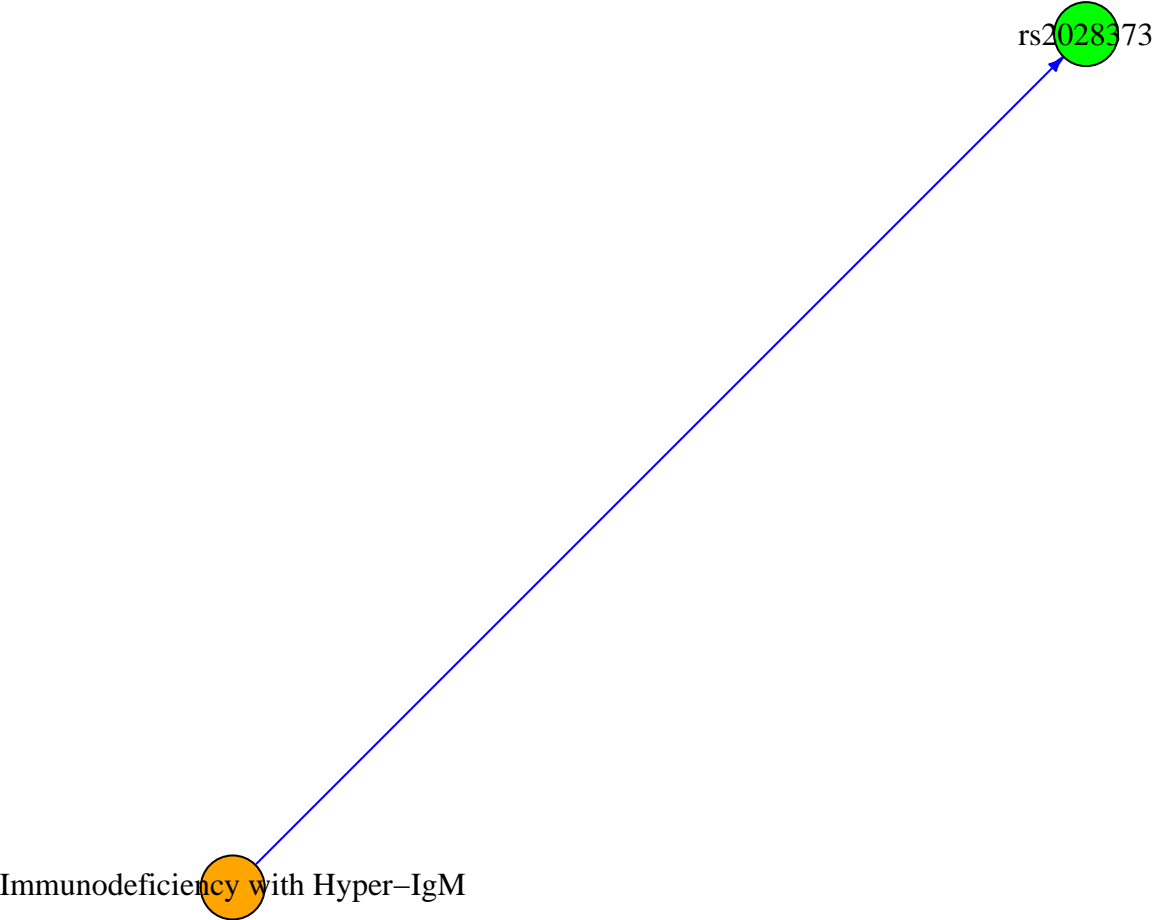

# Disease Network (Immunodeficiency–centromeric instability–facial anomalies

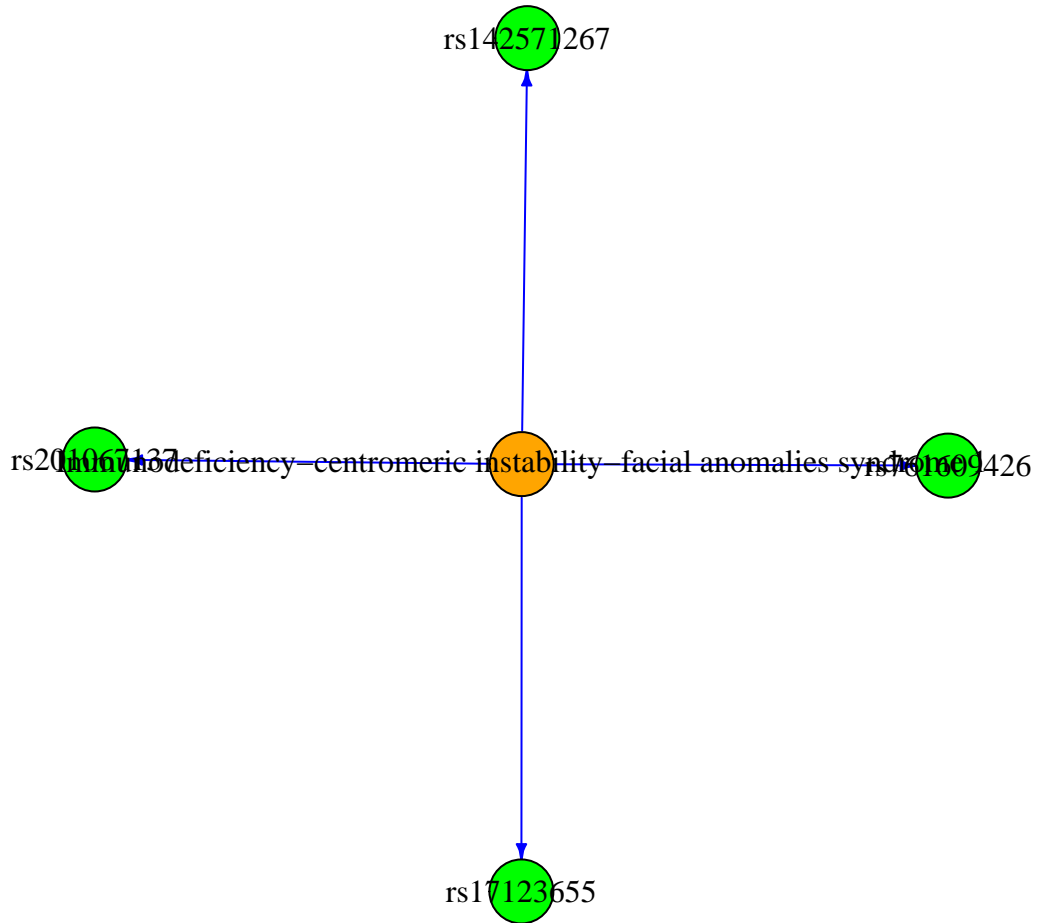

## Variant–Disease Network (Impaired use of nonverbal behaviors)

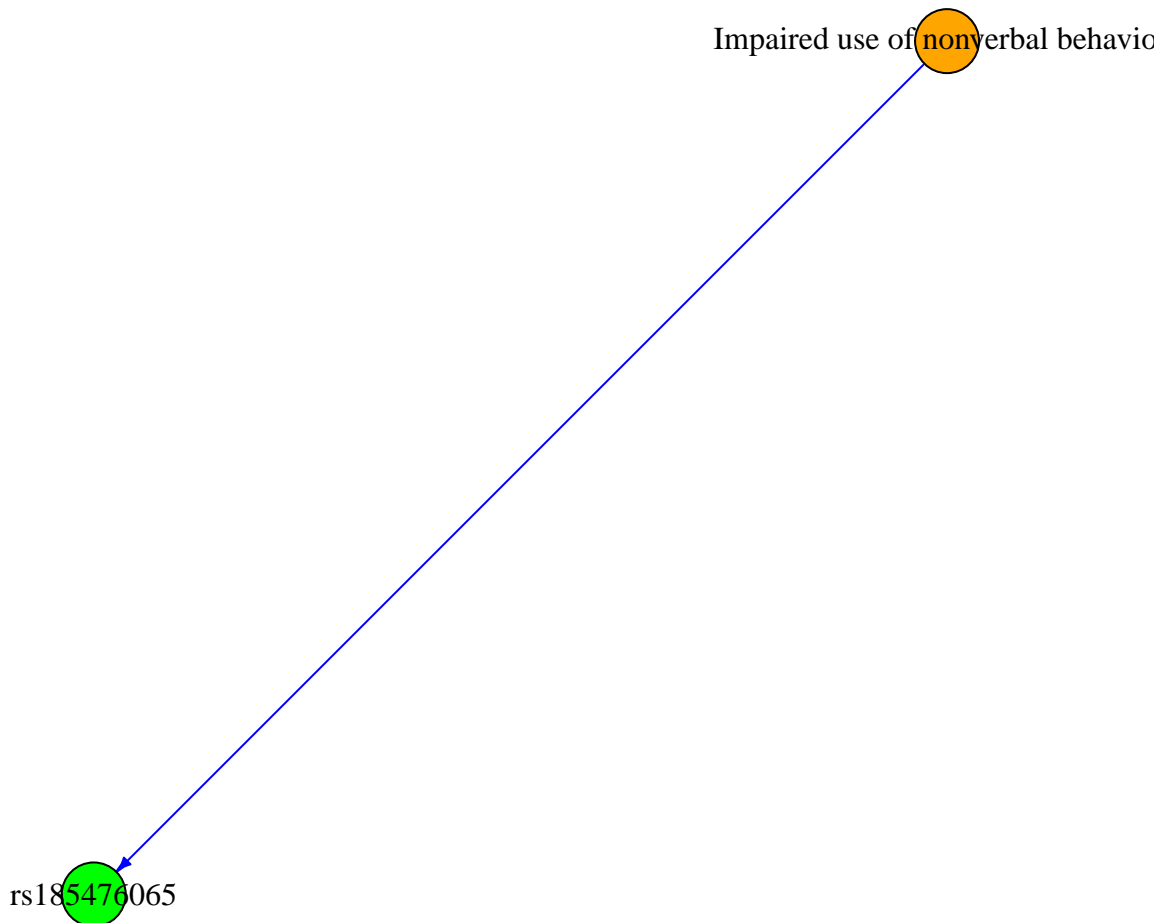

## Variant–Disease Network (Inborn genetic diseases)

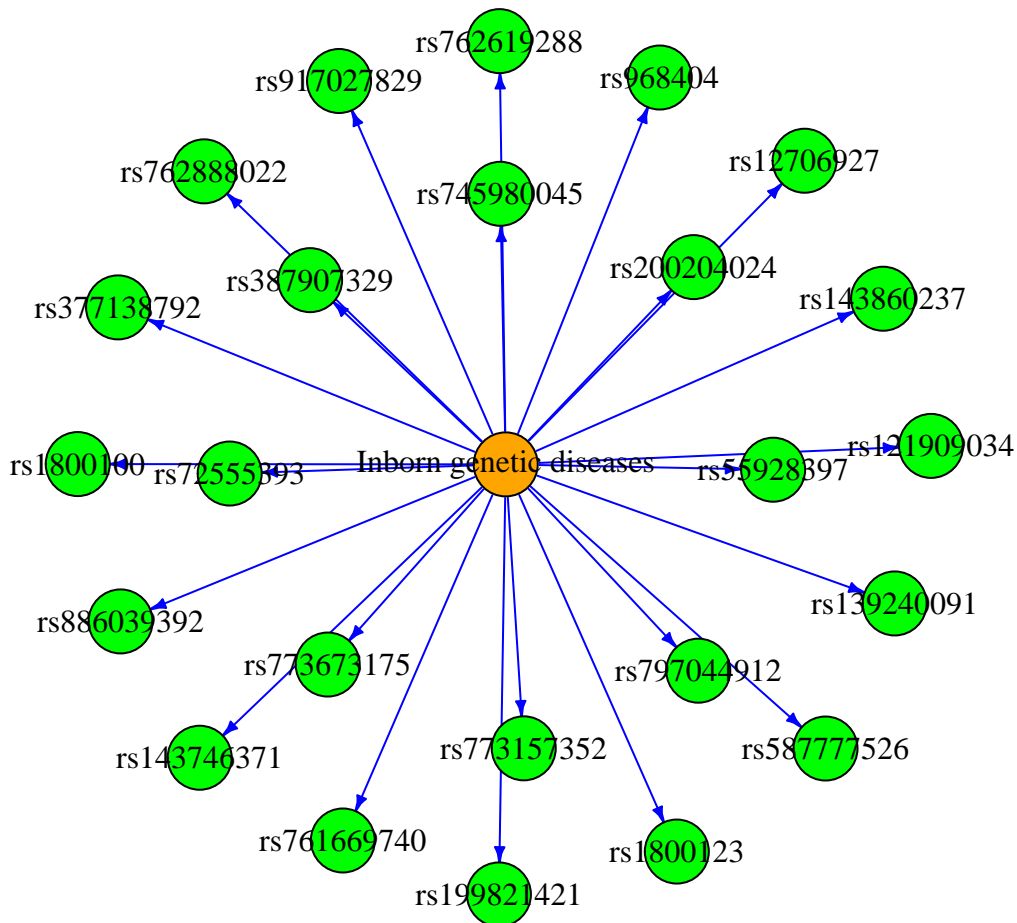

Variant–Disease Network (Inclusion Body Myopathy)

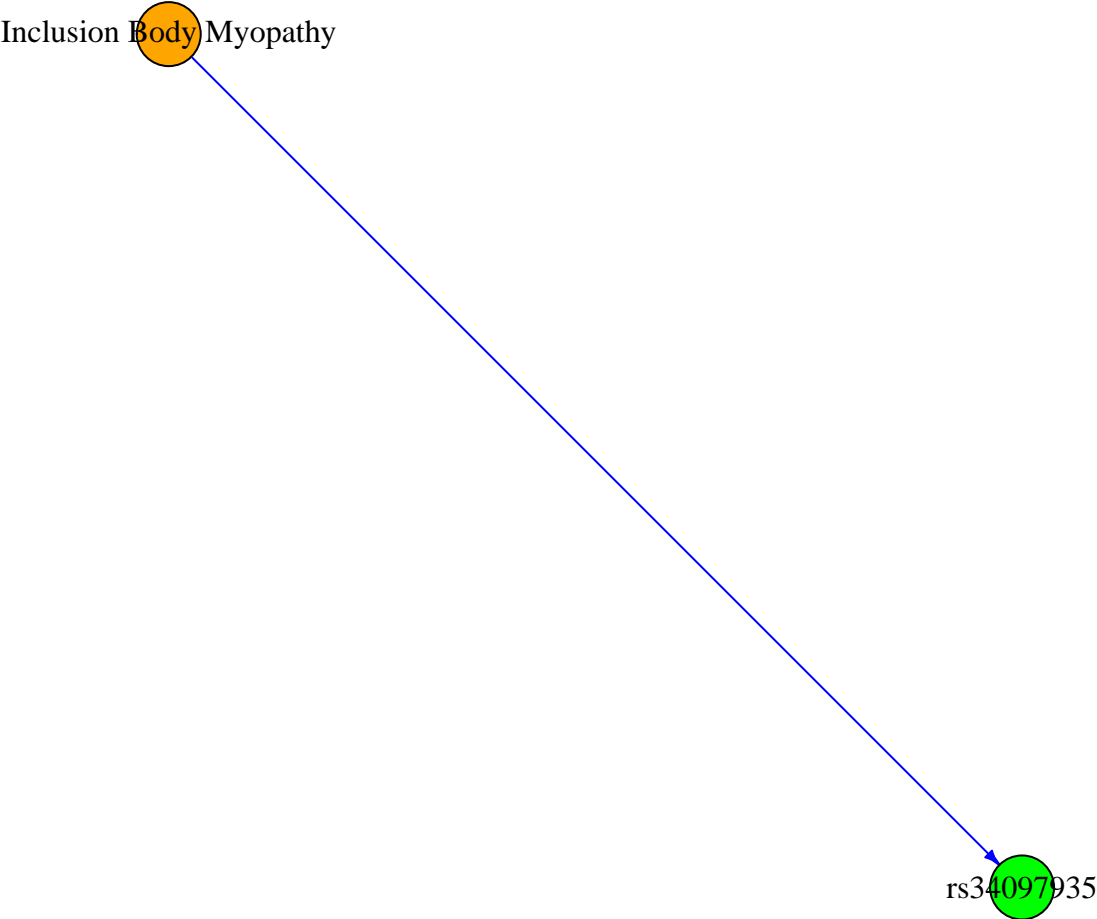

**Variant–Disease Network (Inclusion body myopathy 3)**

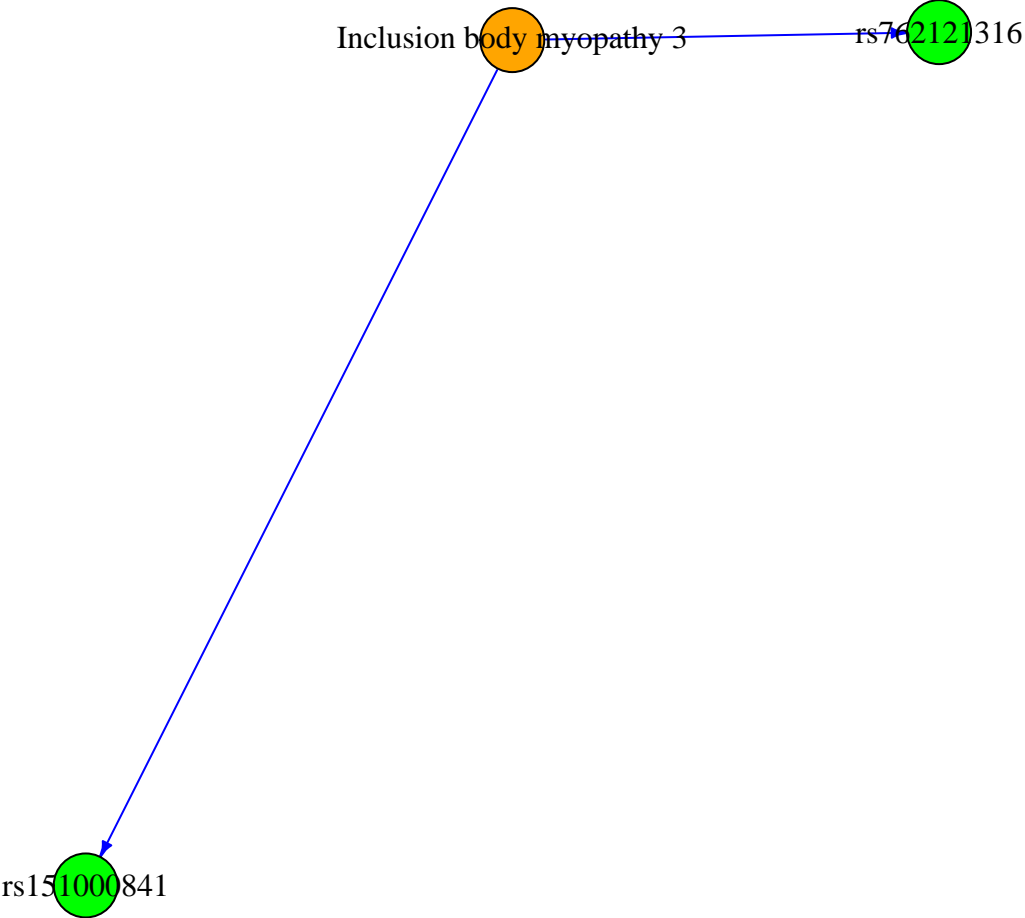

rk (Inclusion body myopathy with early-onset Paget disease with or without

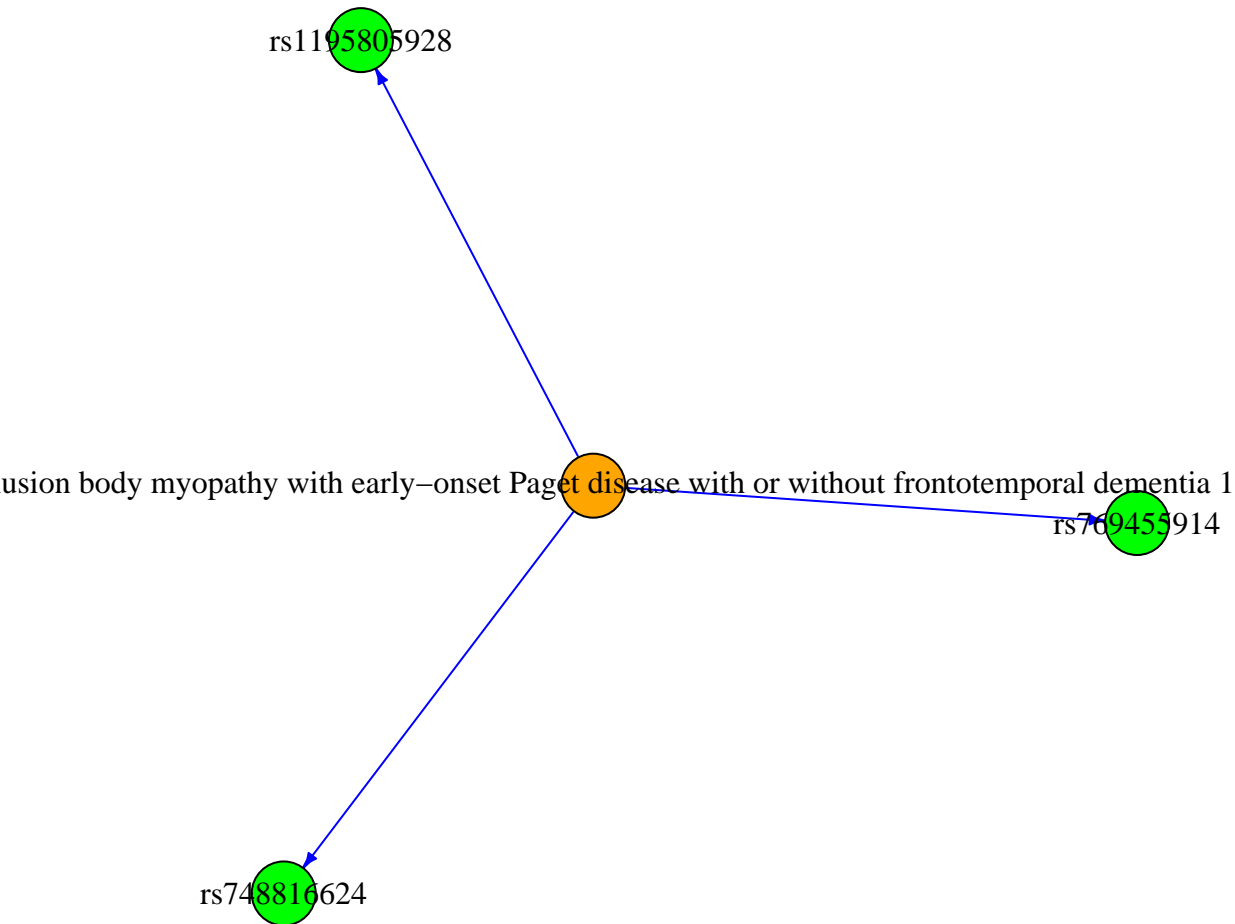

# Variant–Disease Network (Increased left ventricular wall thickness)

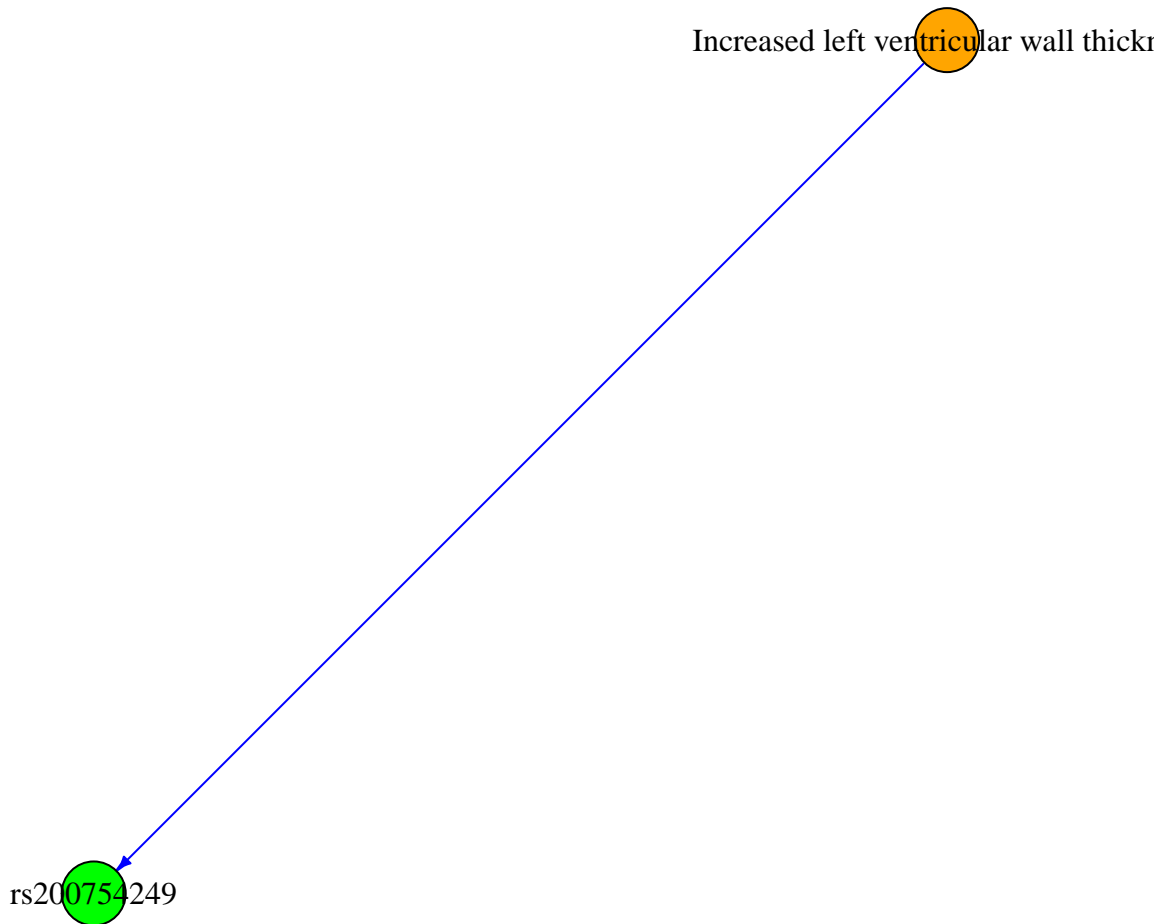



Variant–Disease Network (Infantile cortical hyperostosis)

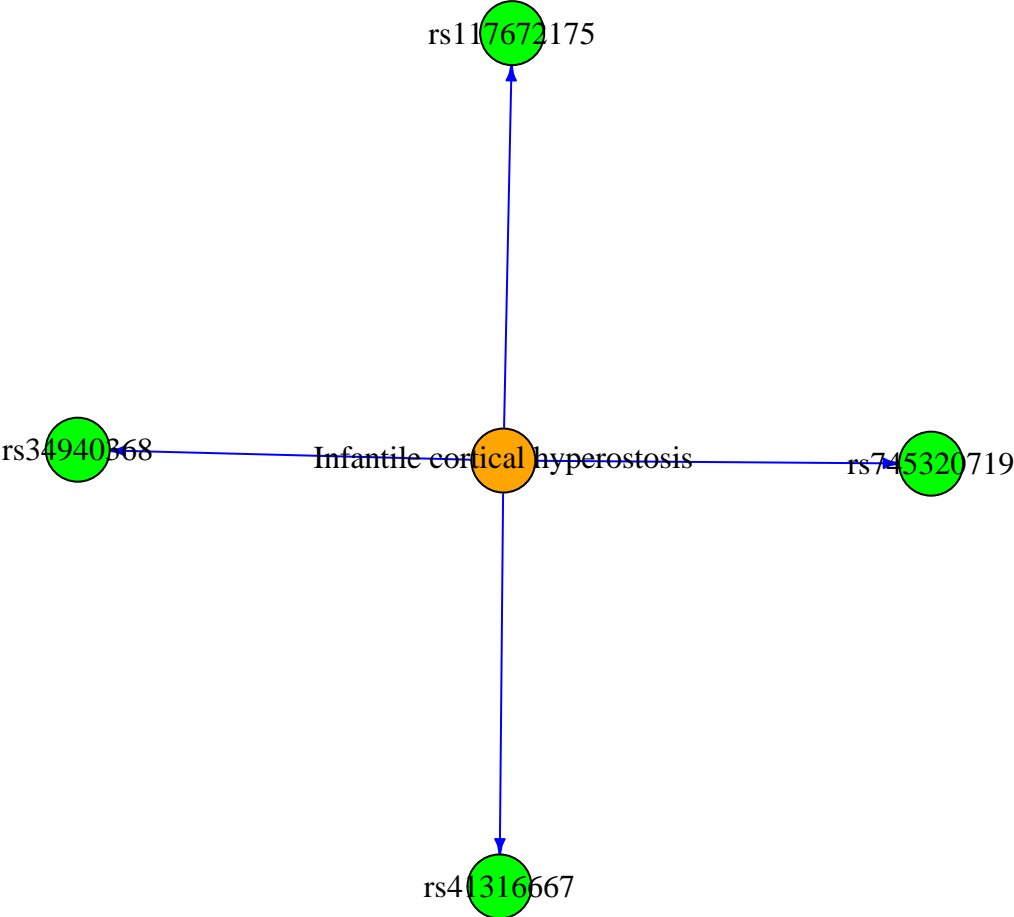

## Variant–Disease Network (Infantile GM1 gangliosidosis)

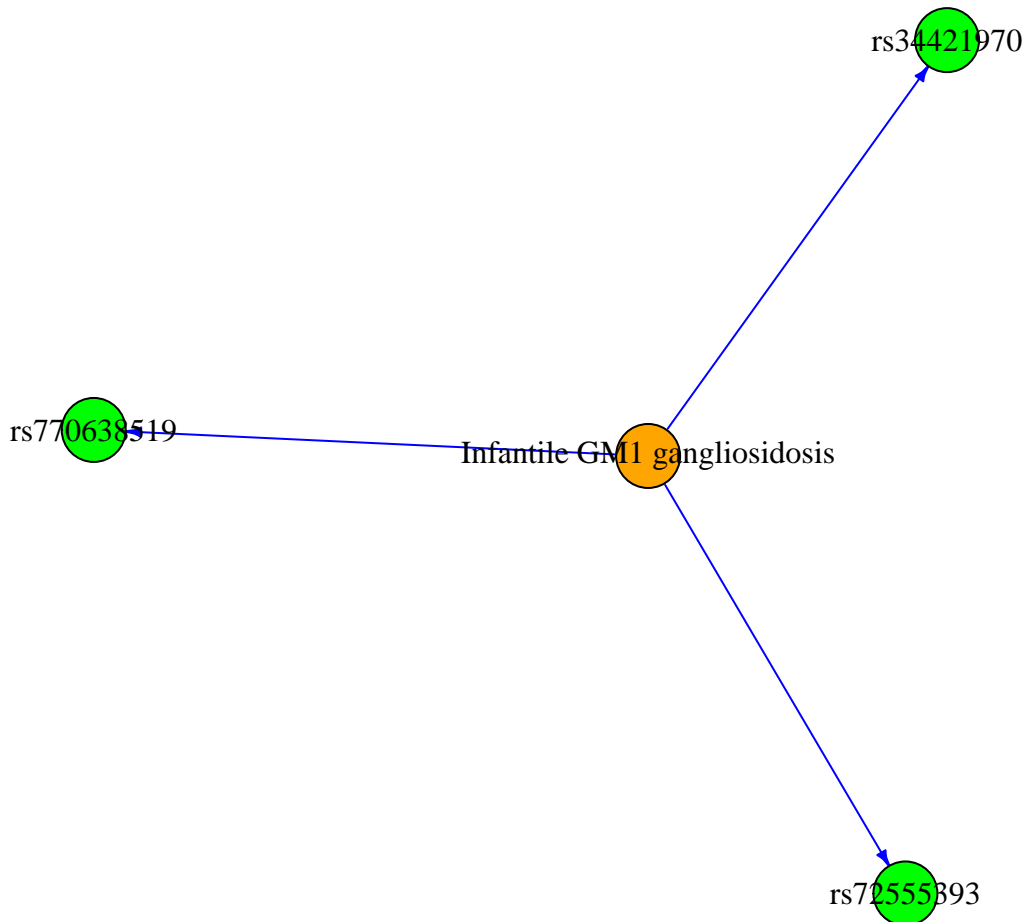

## Variant-Disease Network (Infantile Nystagmus)

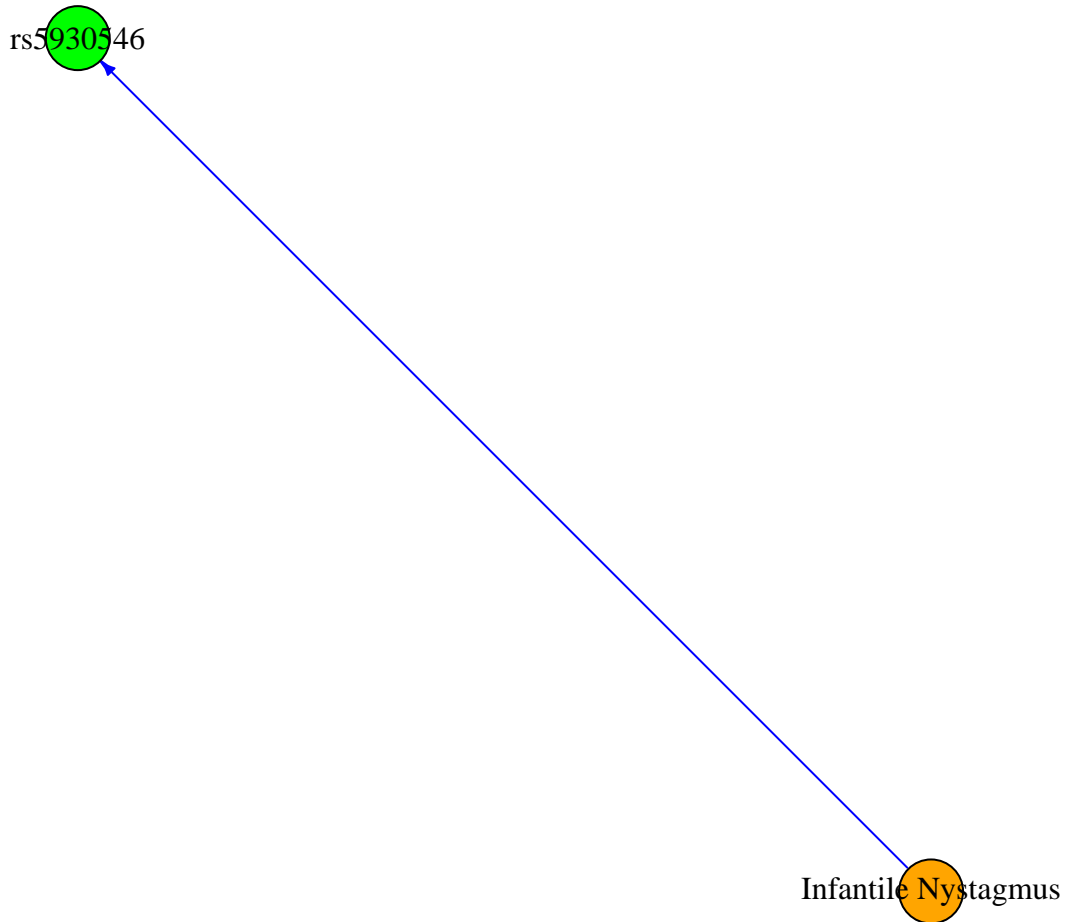

## Variant–Disease Network (Infantile spasms)

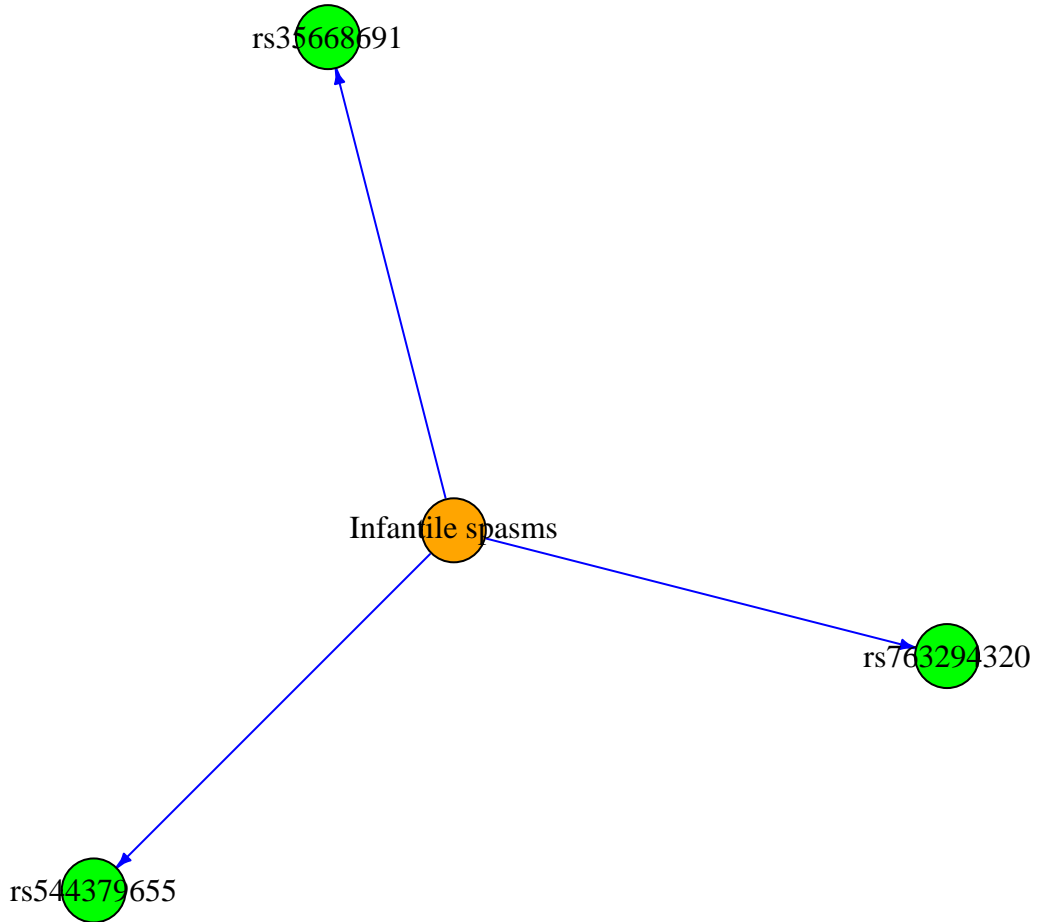

## Variant-Disease Network (Insomnia)

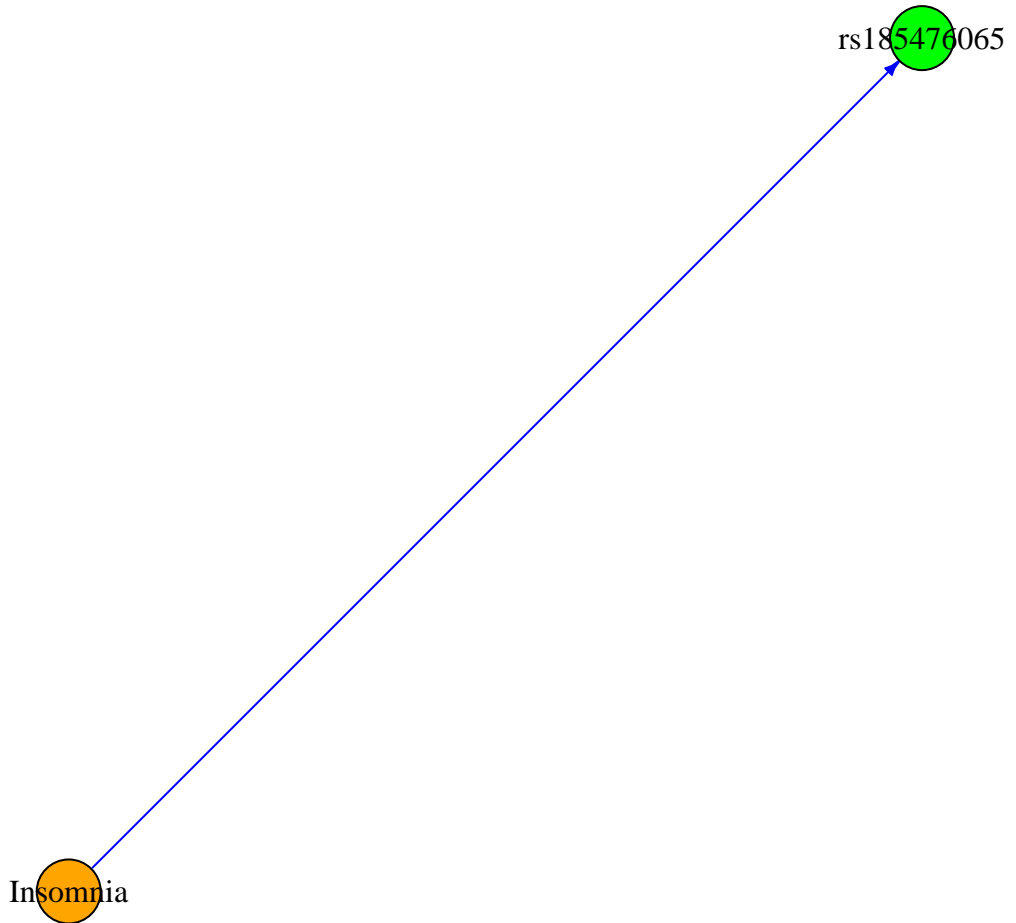

# Variant–Disease Network (Insulin–like growth factor 1 resistance to)

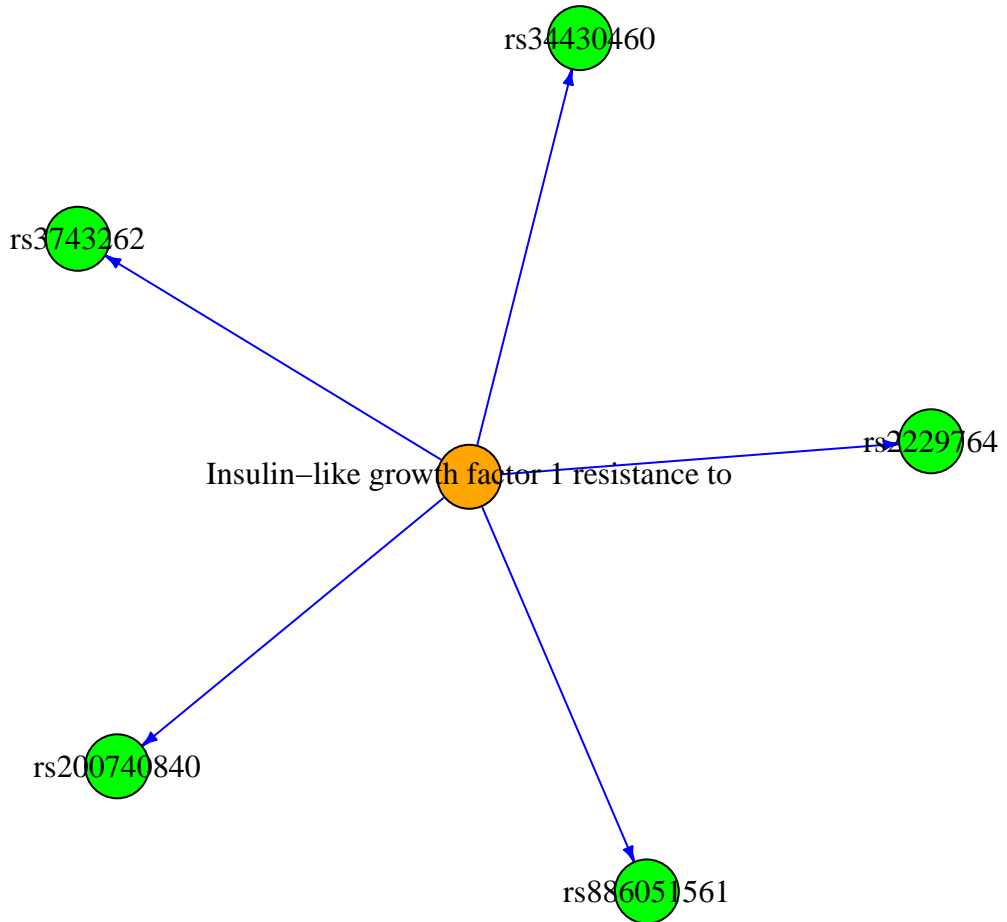

Variant–Disease Network (INTELLECTUAL DEVELOPMENTAL DISORDER

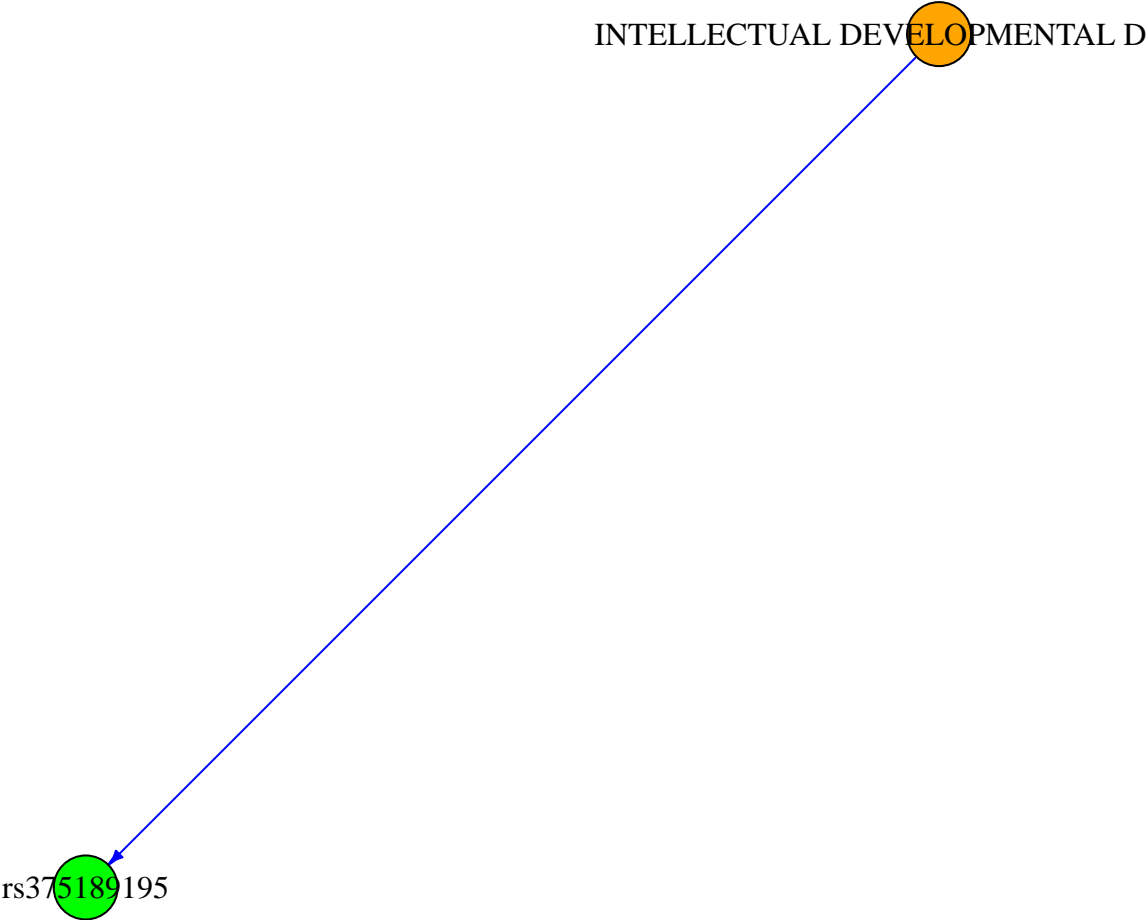

## Variant-Disease Network (Intellectual Disability)

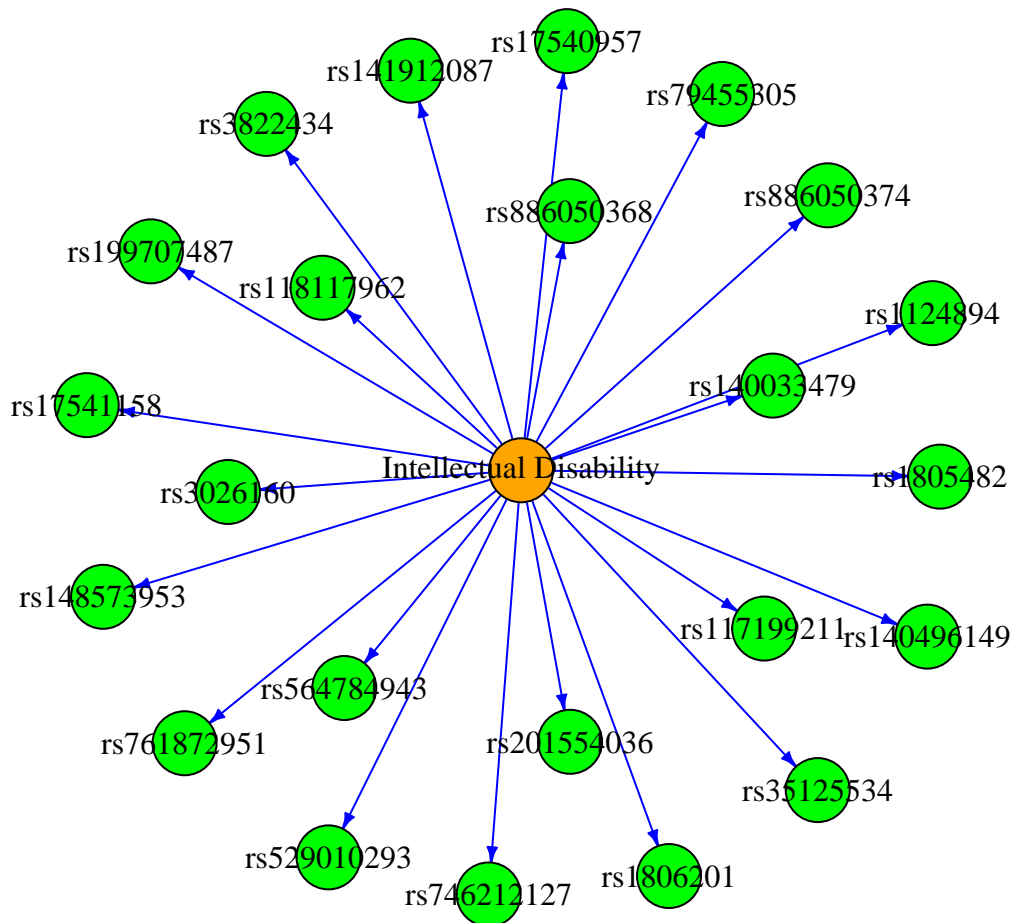



## Variant–Disease Network (Intrinsic factor deficiency)

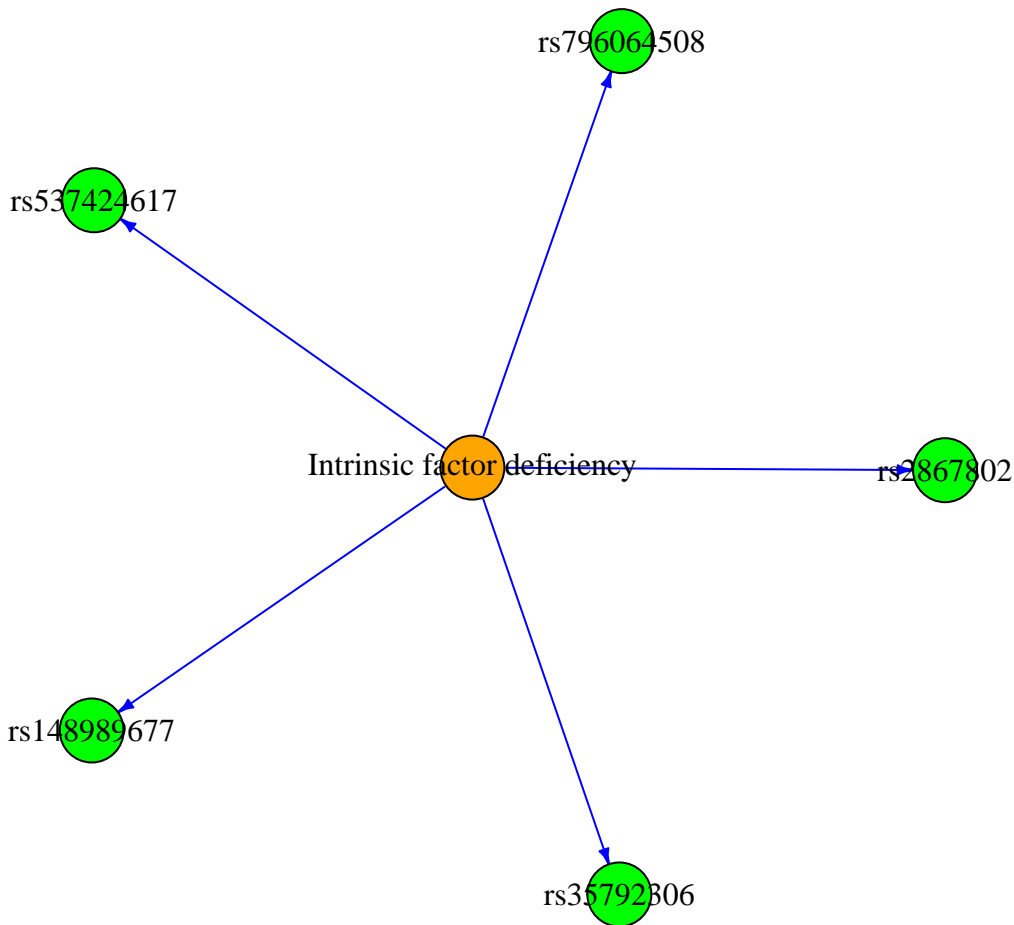

## Variant–Disease Network (Iodotyrosyl coupling defect)

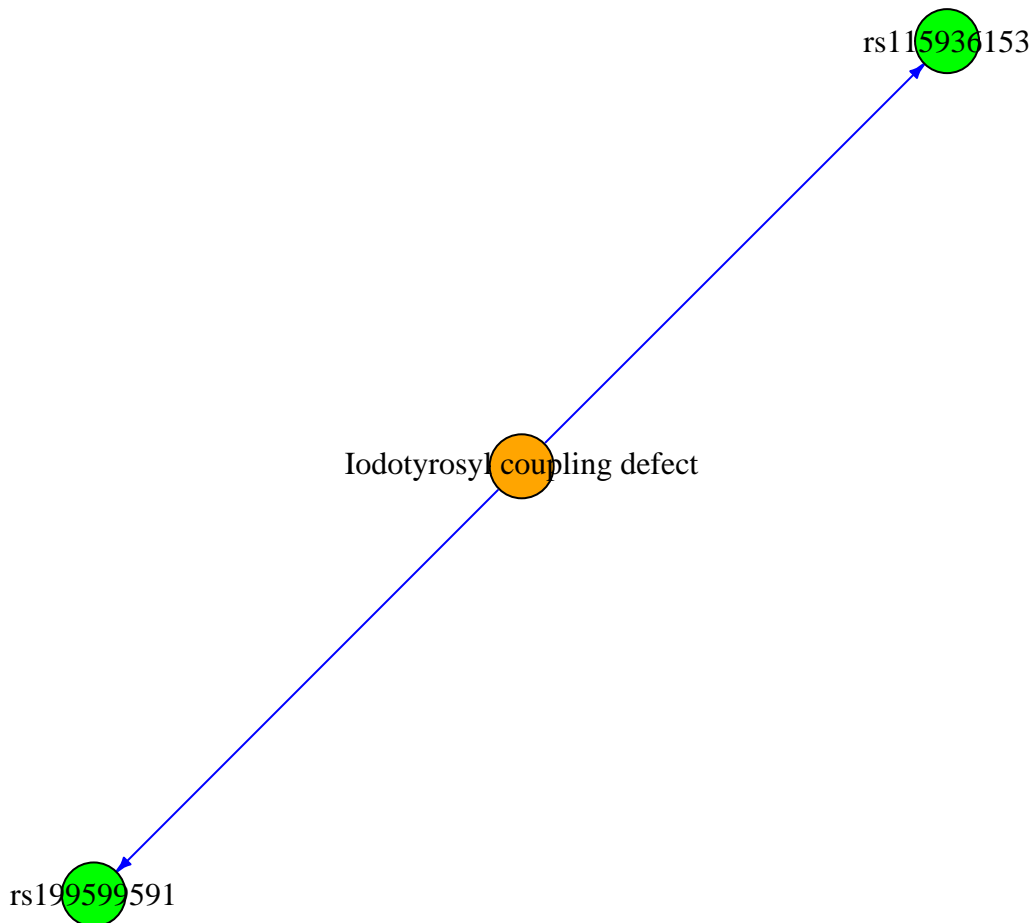

**Variant–Disease Network (Irido–corneo–trabecular dysgenesis)**

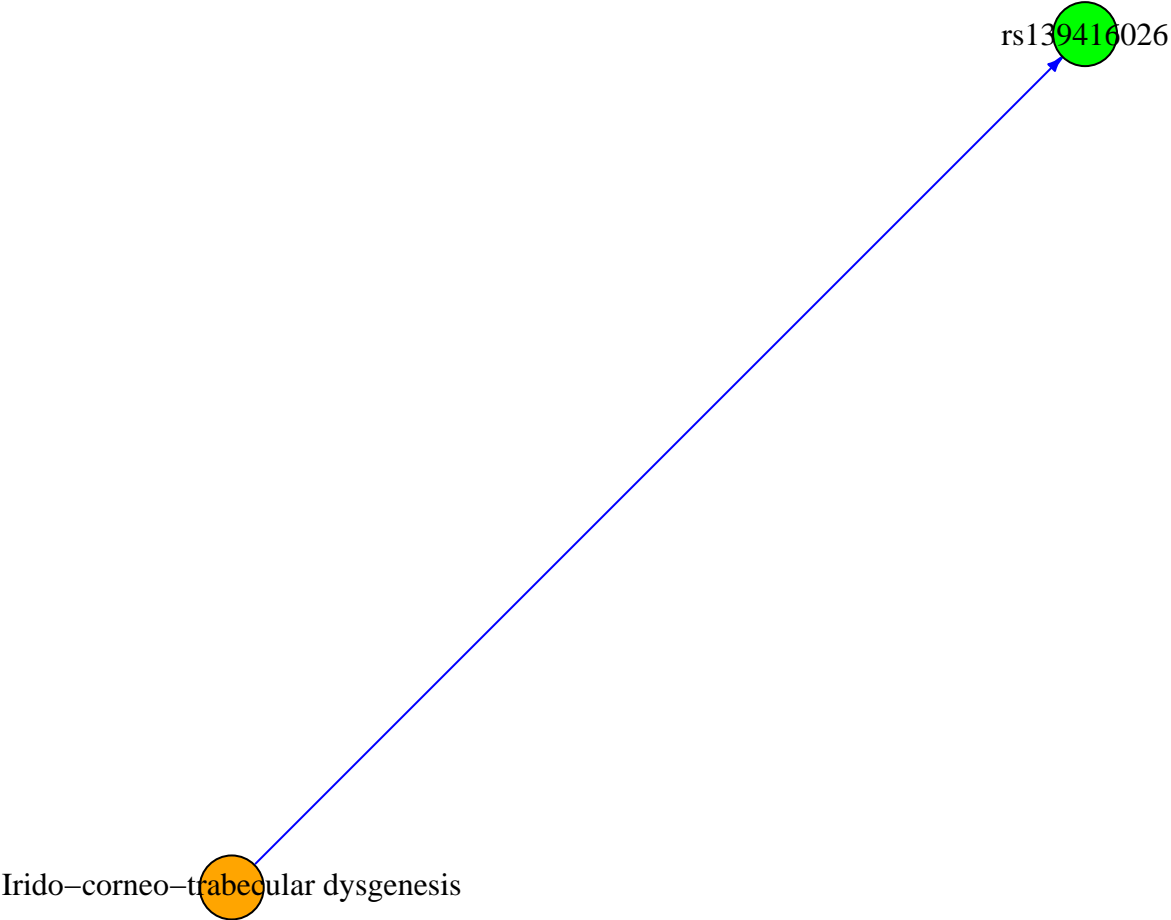

## Variant-Disease Network (Iron Overload)

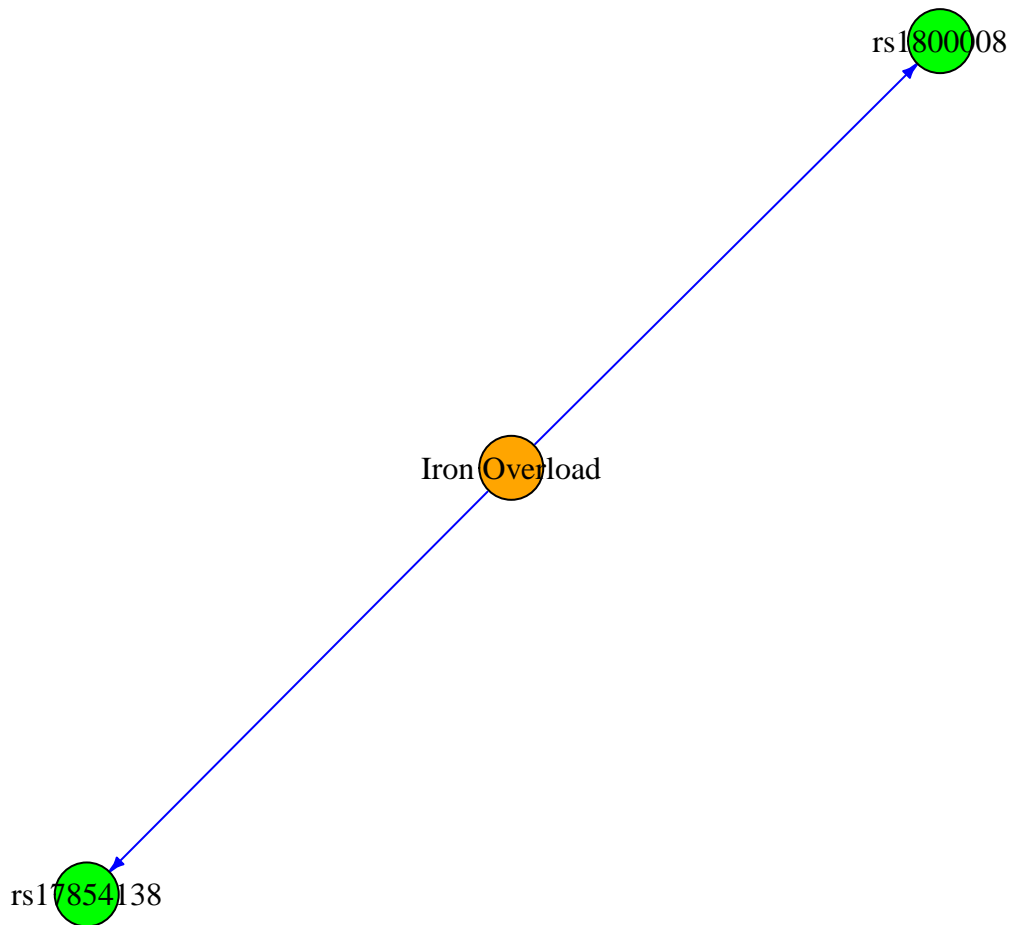

## Variant–Disease Network (Ischiopatellar dysplasia)

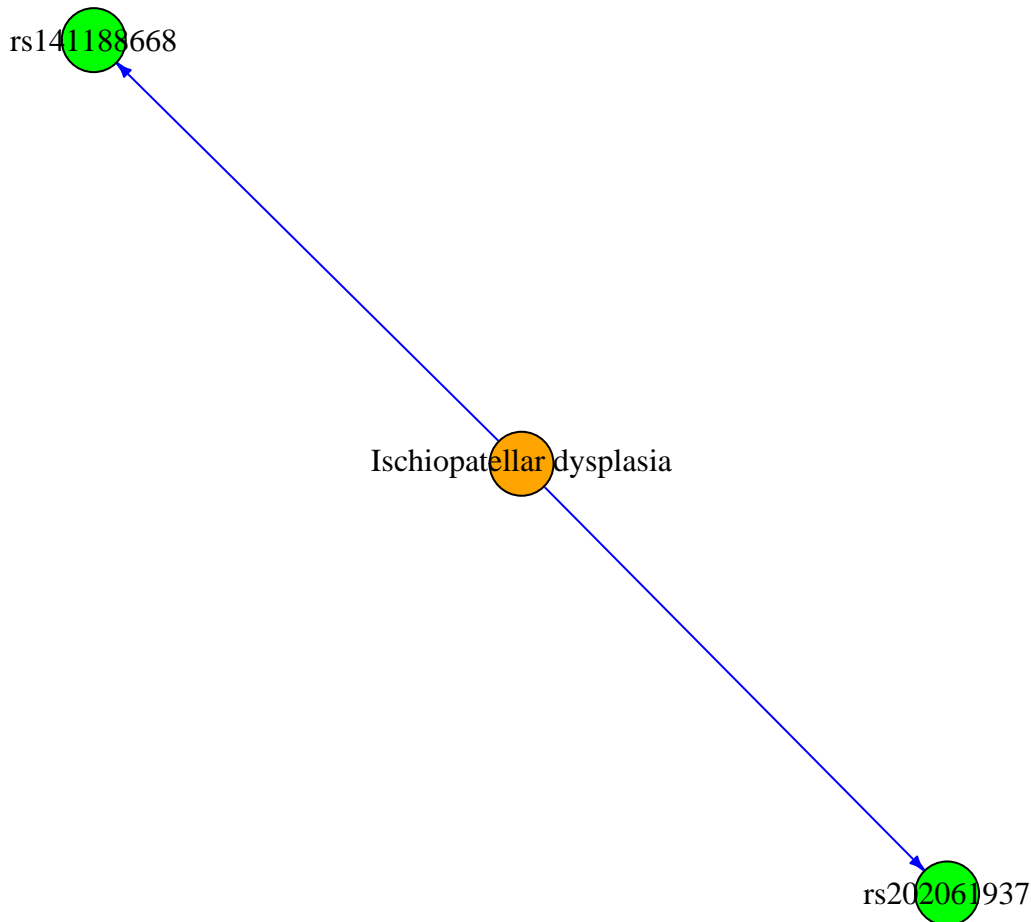

## Variant–Disease Network (Isolated coronal synostosis)

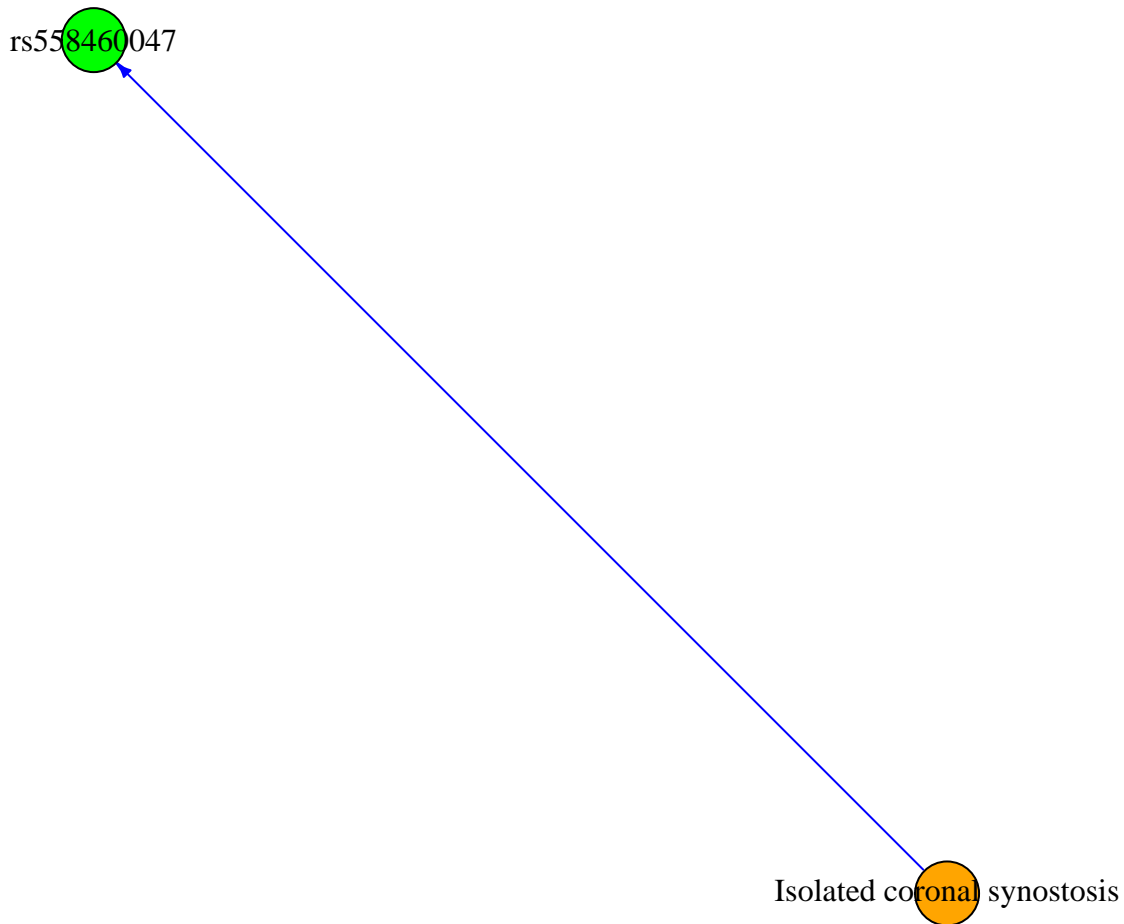

**Variant–Disease Network (Isolated Hyperparathyroidism)**

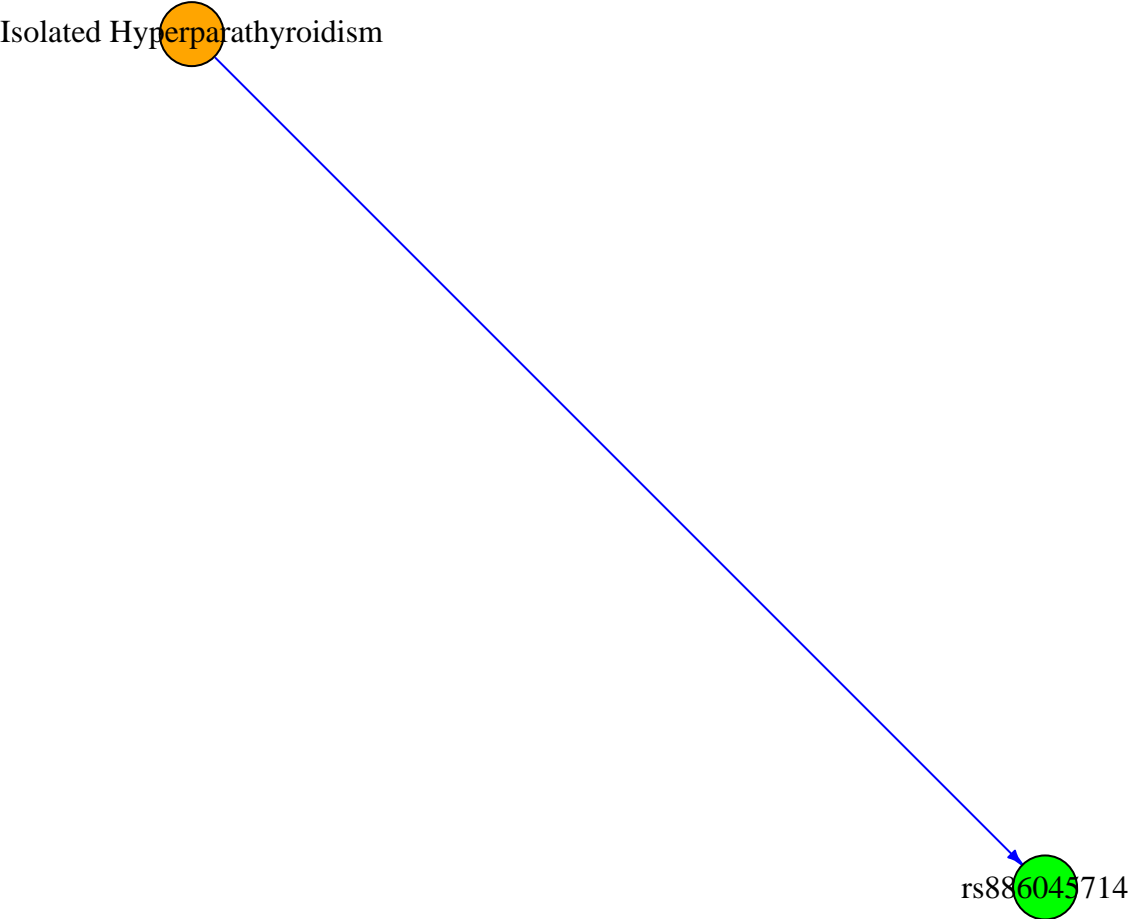

Variant–Disease Network (Isolated Nonsyndromic Congenital Heart Diseases)

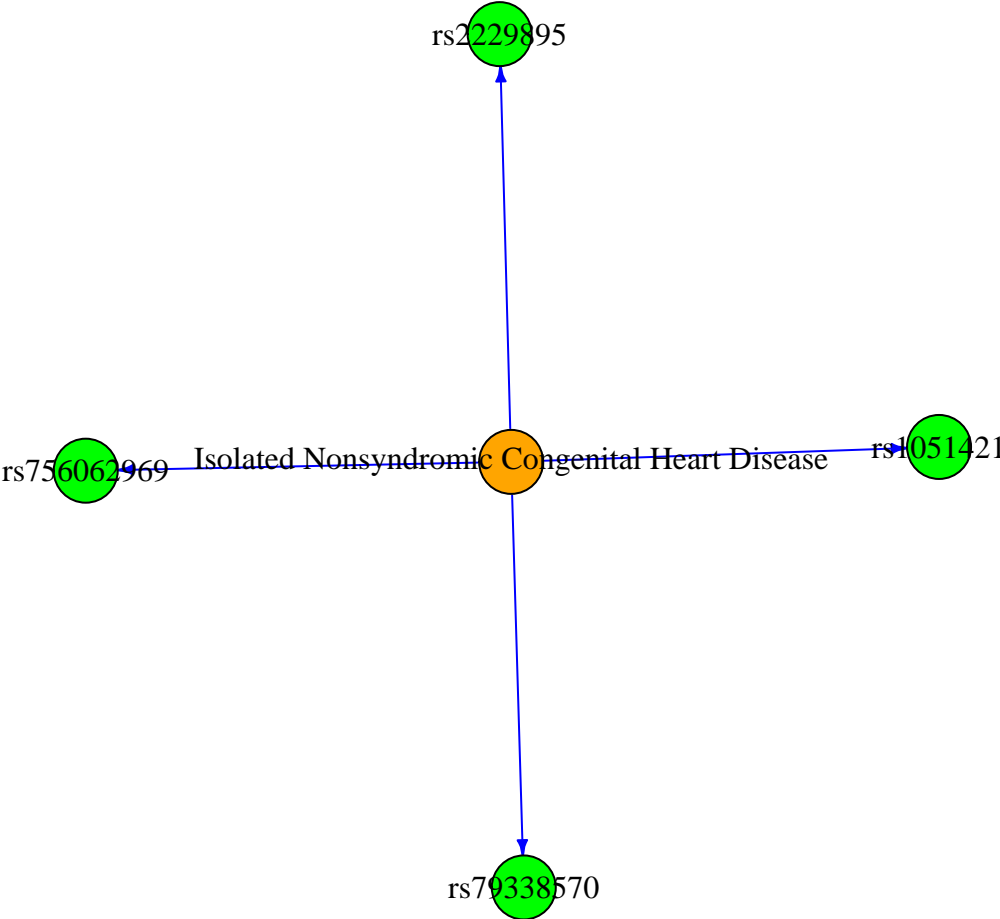



# Variant–Disease Network (Jackson–Weiss syndrome)

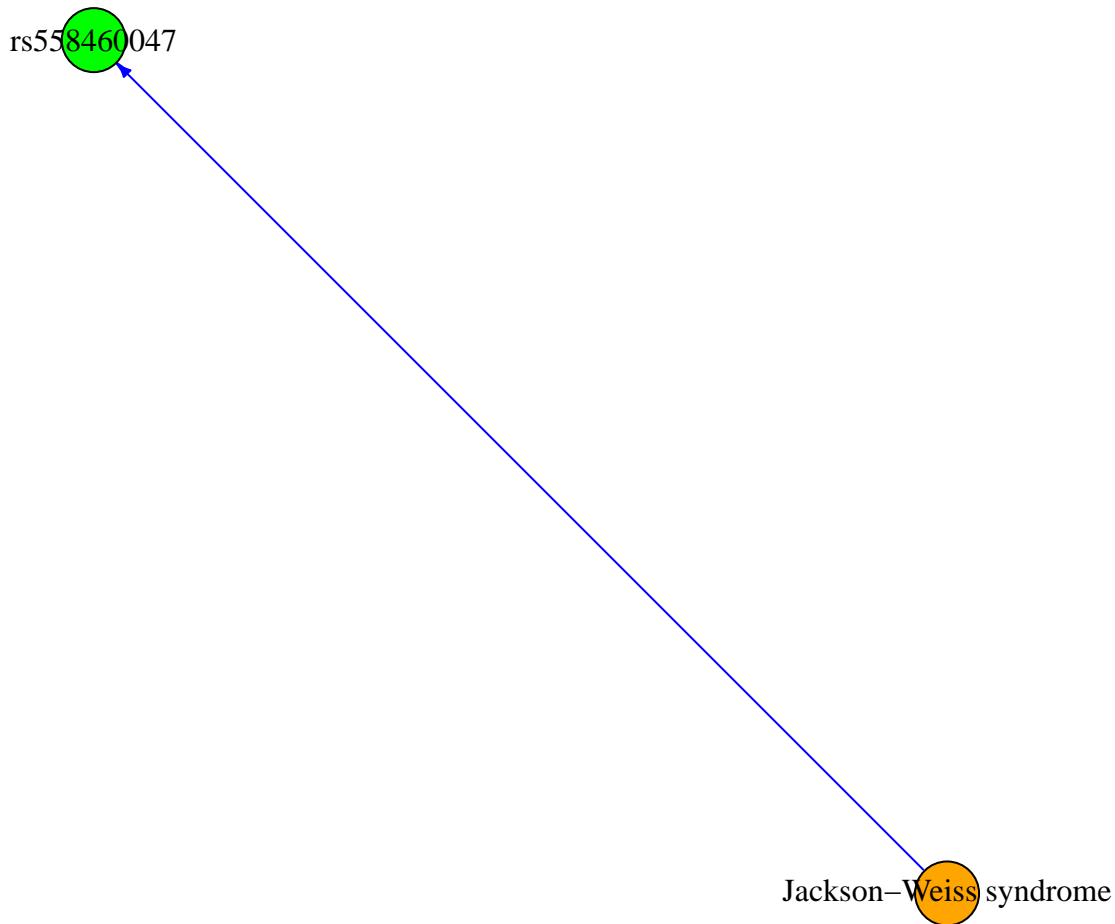

## Variant–Disease Network (Jarcho–Levin syndrome)

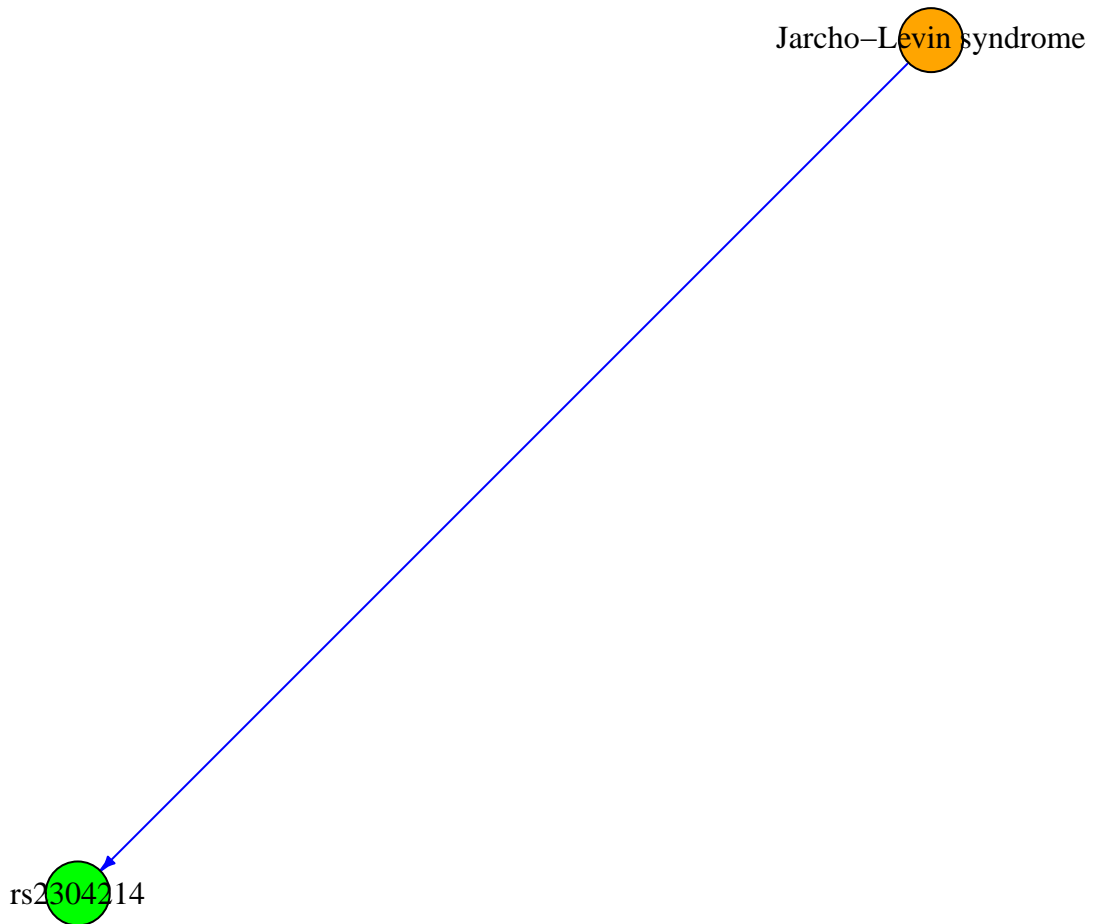

Variant–Disease Network (Jervell and Lange–Nielsen syndrome)

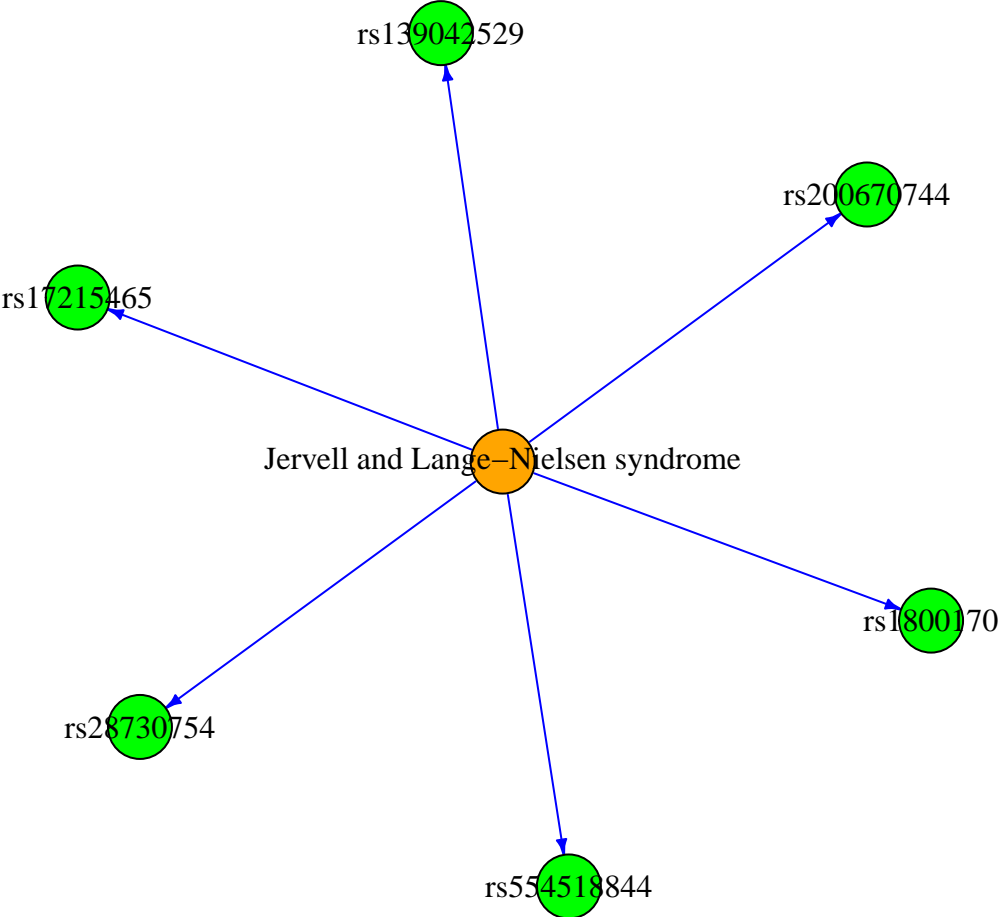

**Variant–Disease Network (Jeune thoracic dystrophy)**

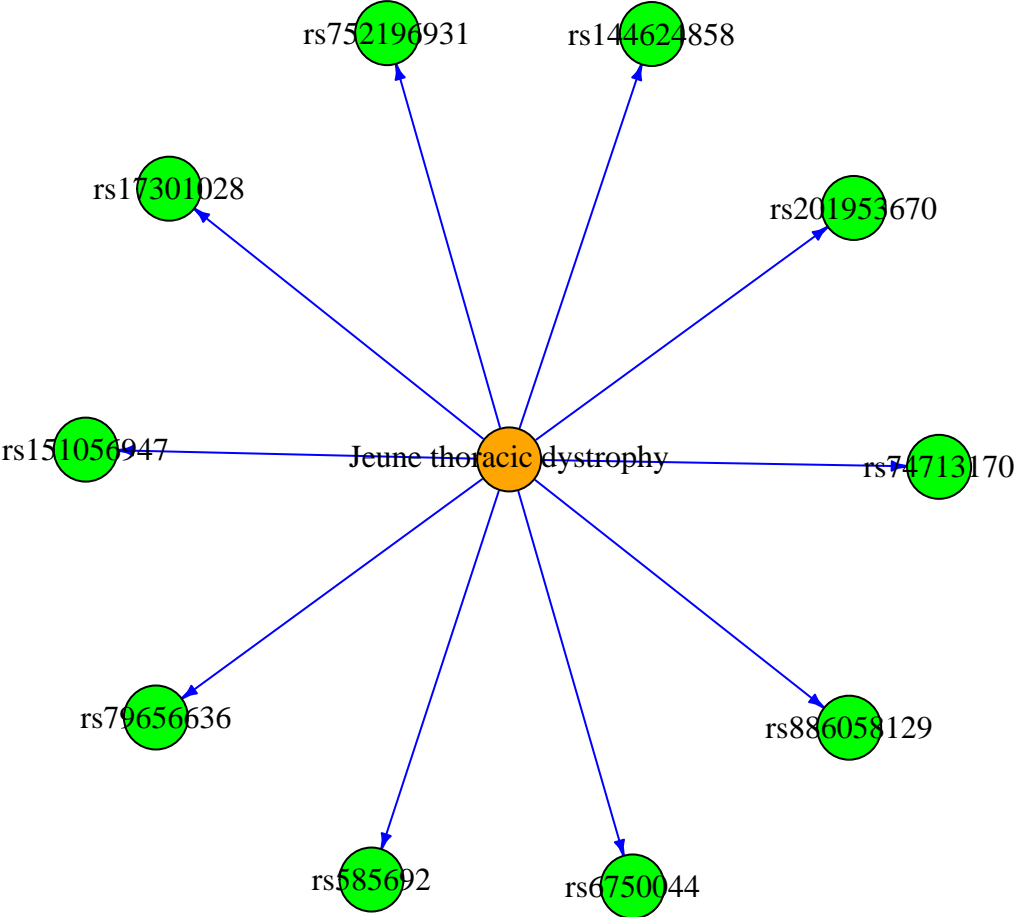

## Variant–Disease Network (Joubert syndrome)

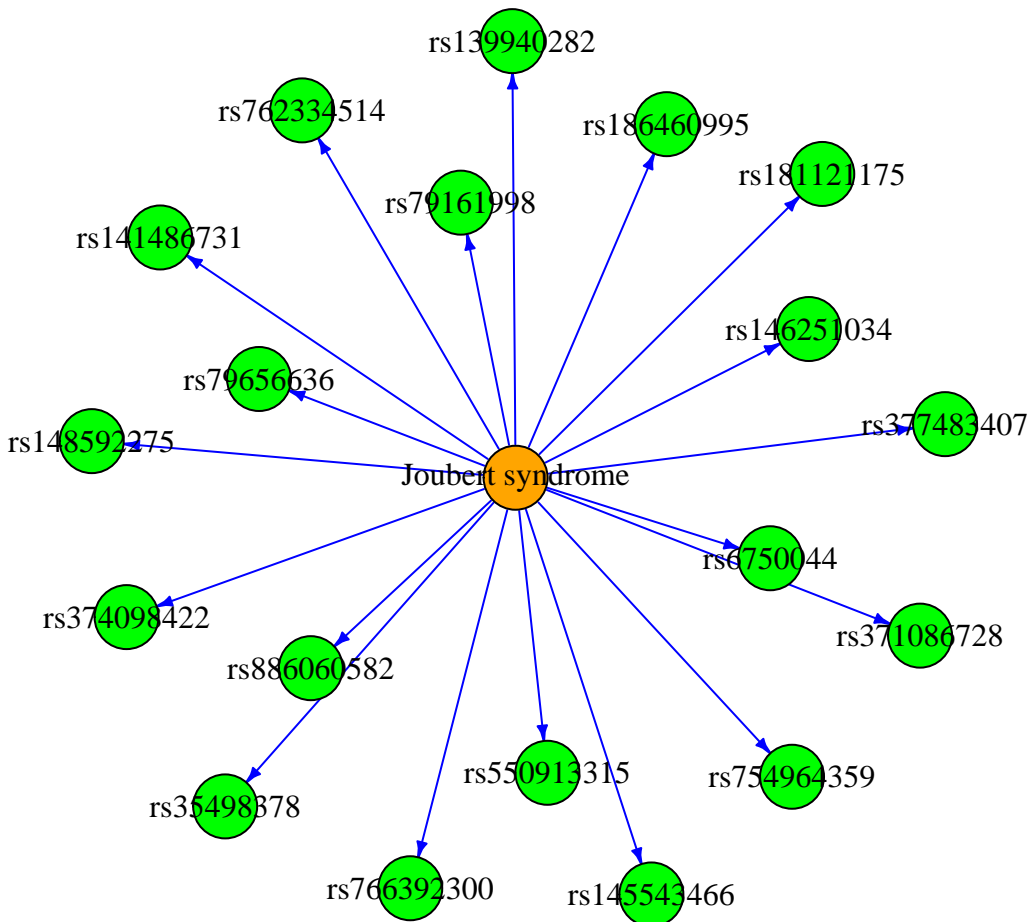

## Variant-Disease Network (Joubert syndrome 1)

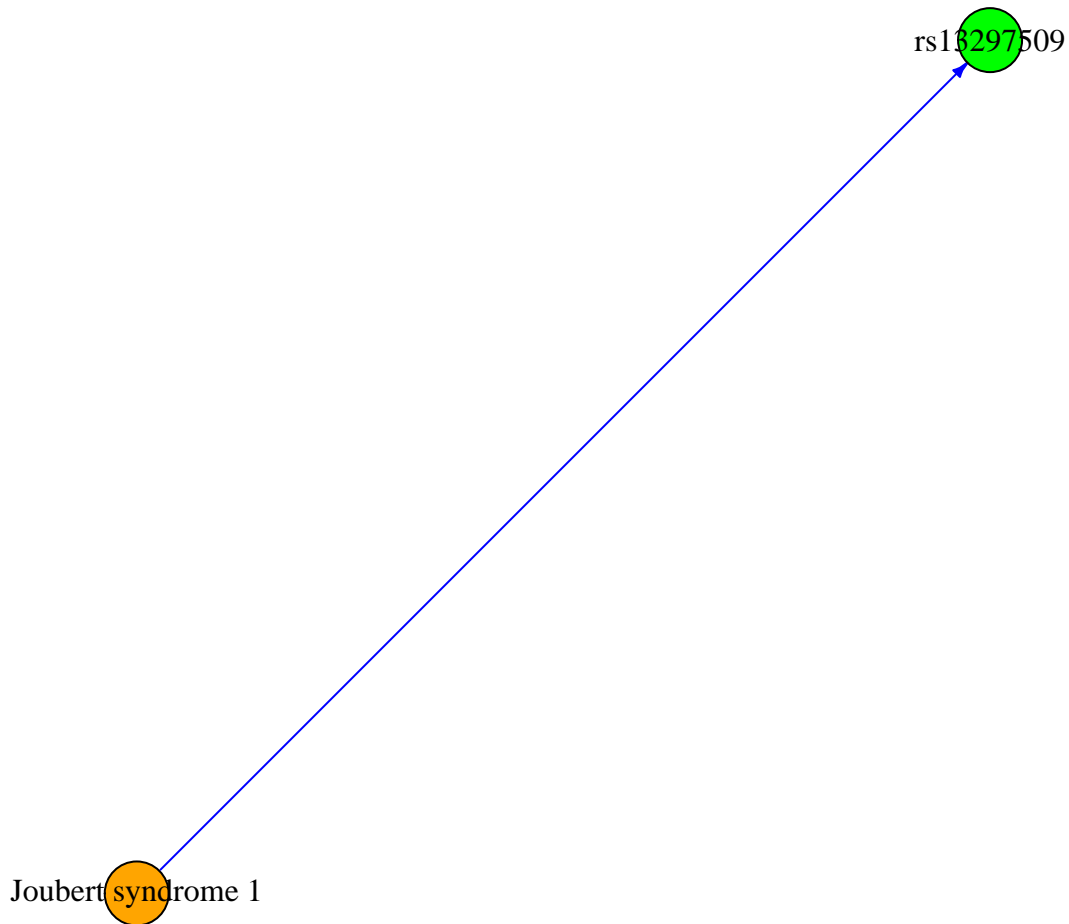

## Variant–Disease Network (Joubert syndrome 16)

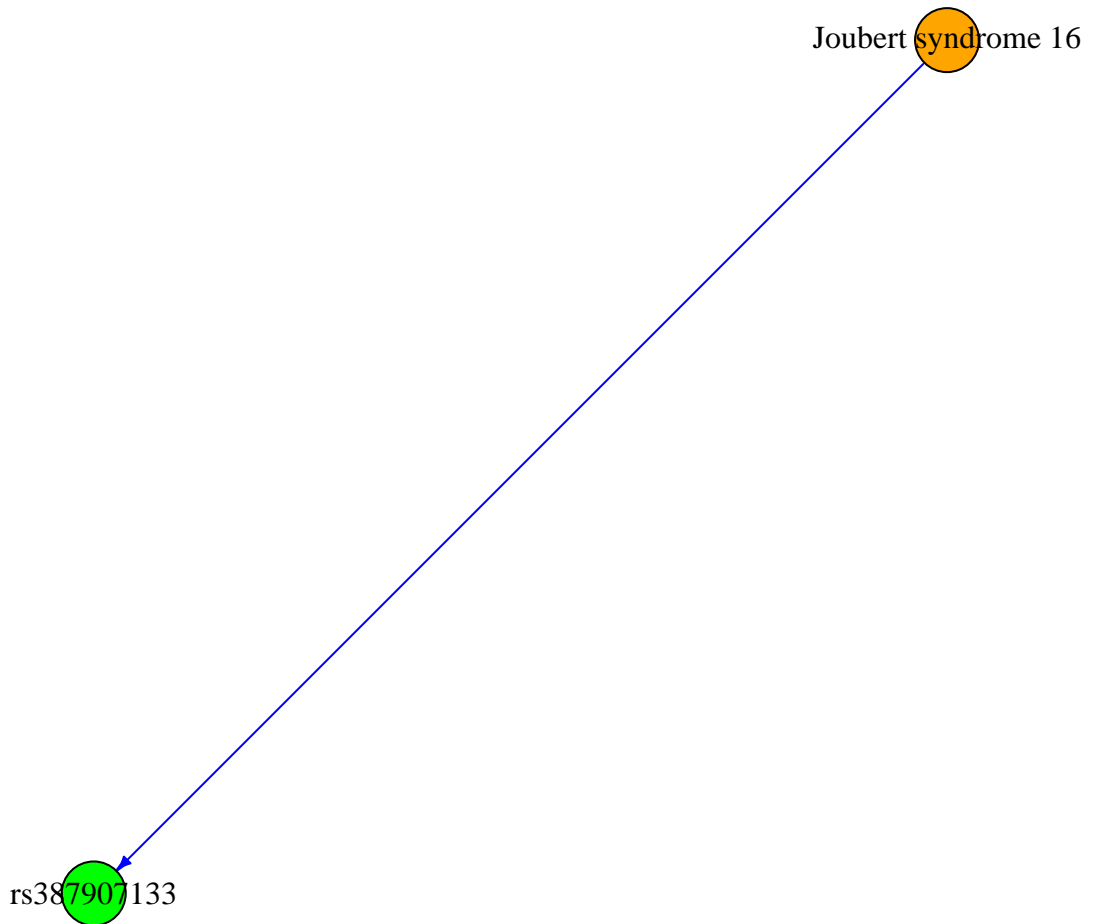

## Variant–Disease Network (Joubert syndrome 17)

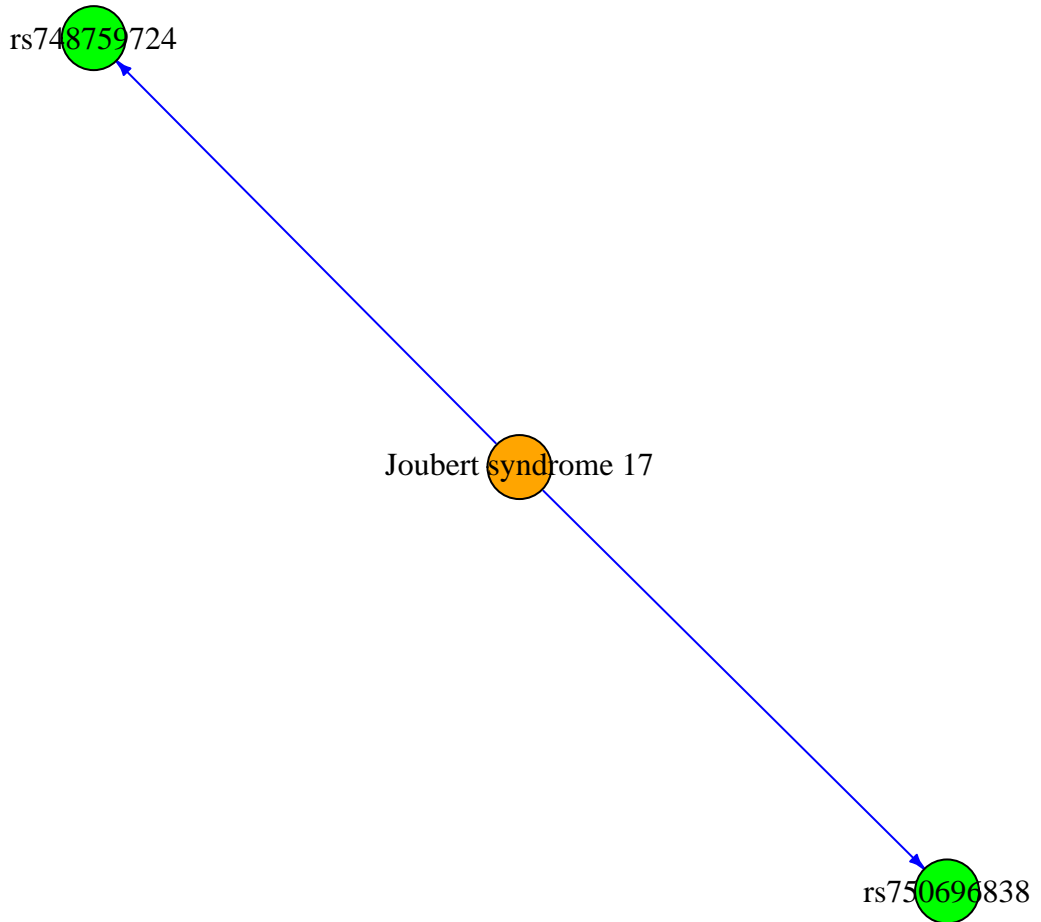



## Variant–Disease Network (JOUBERT SYNDROME 30)

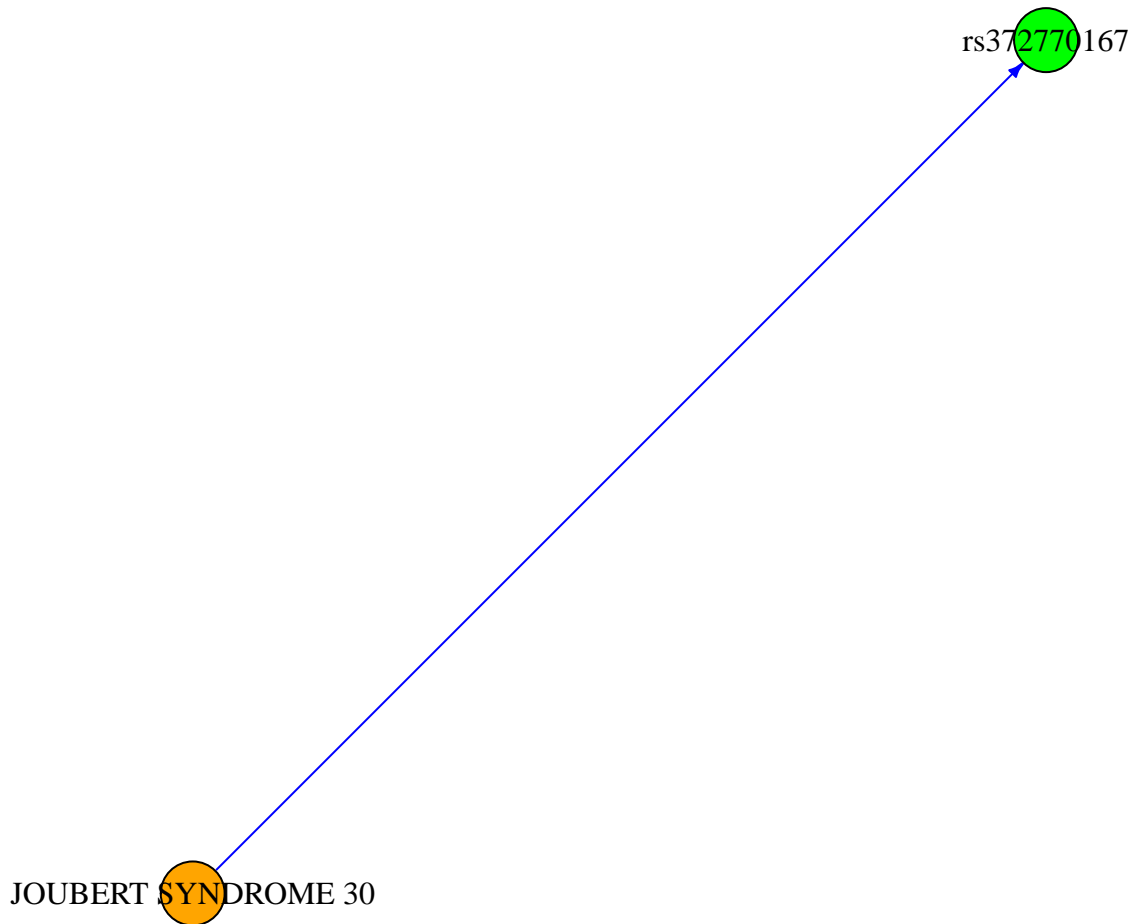

## Variant–Disease Network (Joubert syndrome 6)

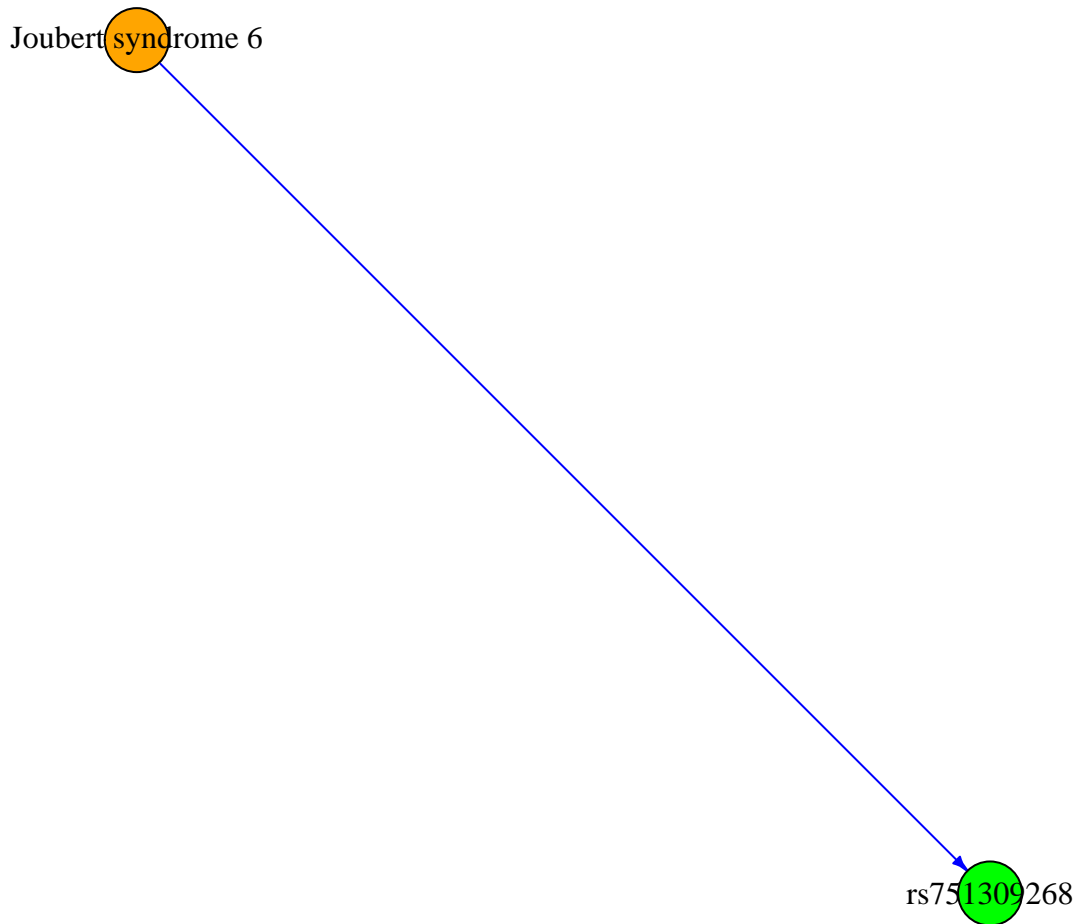

Variant–Disease Network (Junctional epidermolysis bullosa gravis of Herli

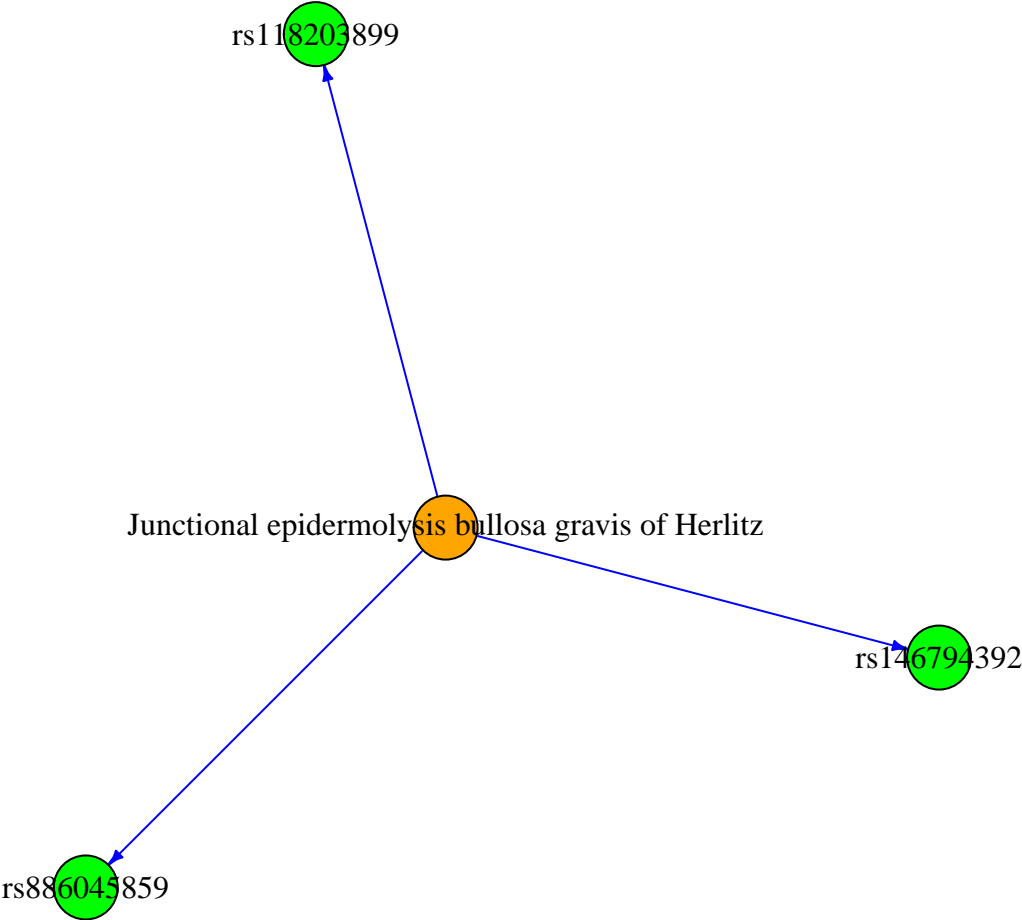

Variant–Disease Network (Juvenile myoclonic epilepsy)

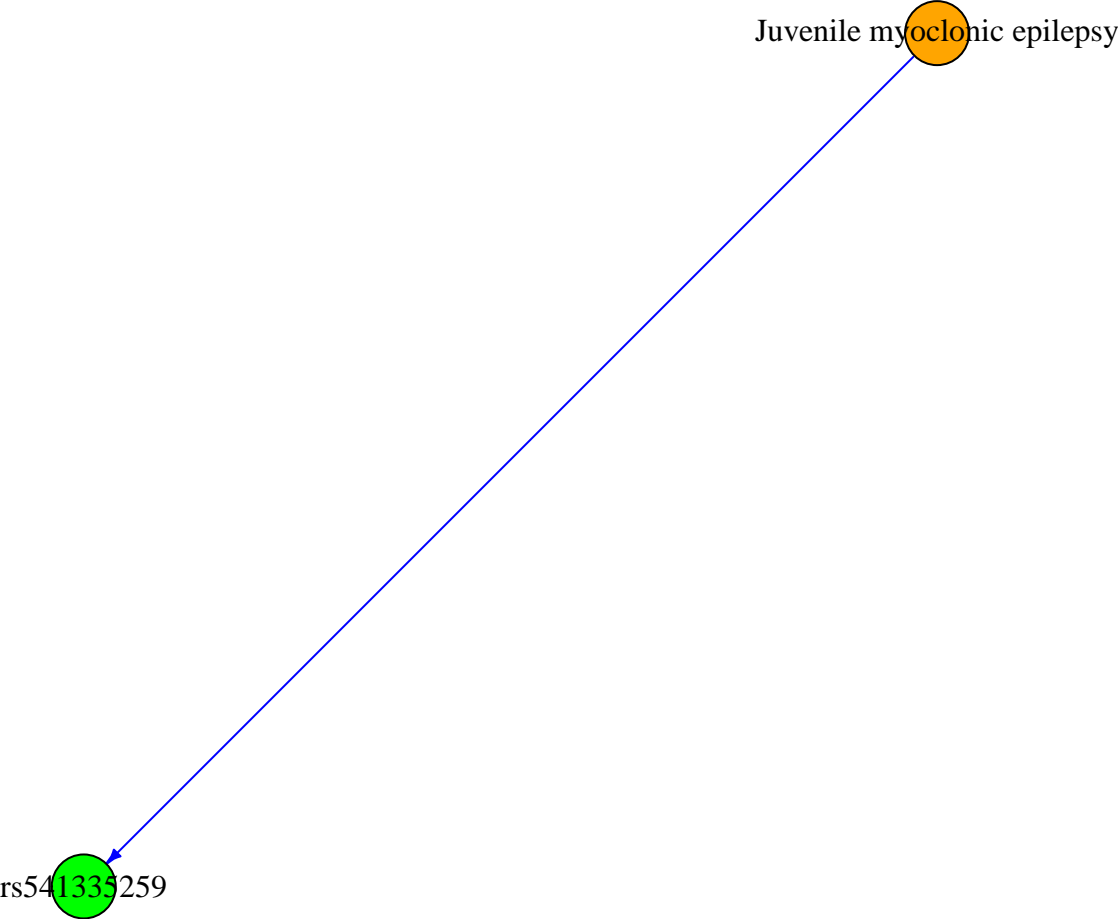

Variant–Disease Network (Juvenile nephropathic cystinosis)

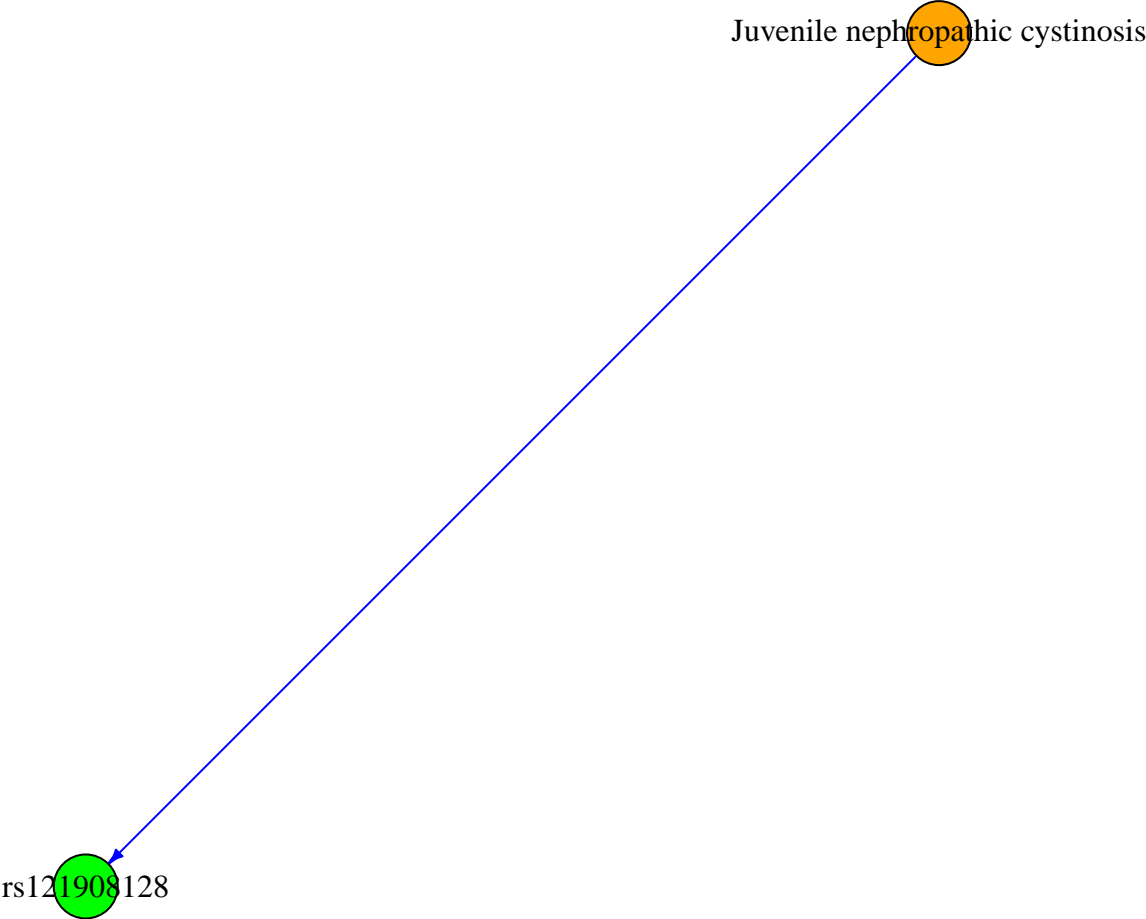

## Variant–Disease Network (Juvenile Polyposis)

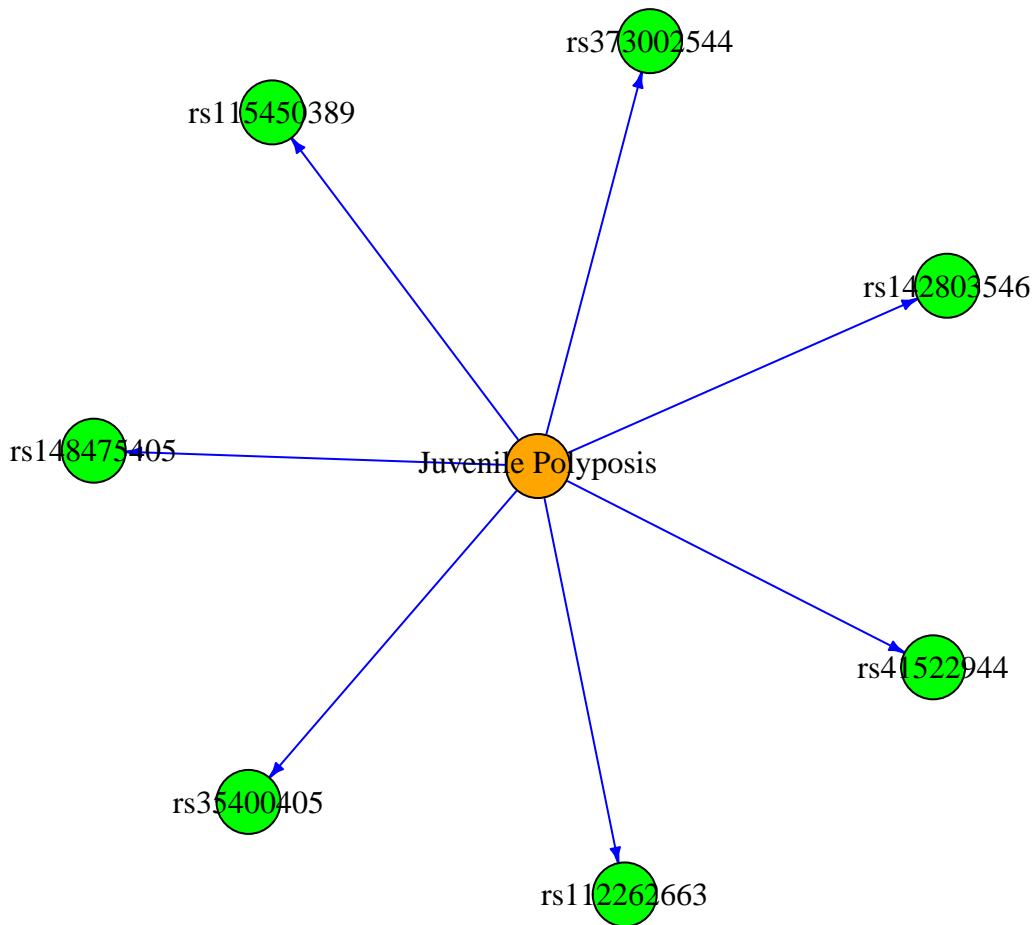

# Variant–Disease Network (Juvenile polyposis syndrome)

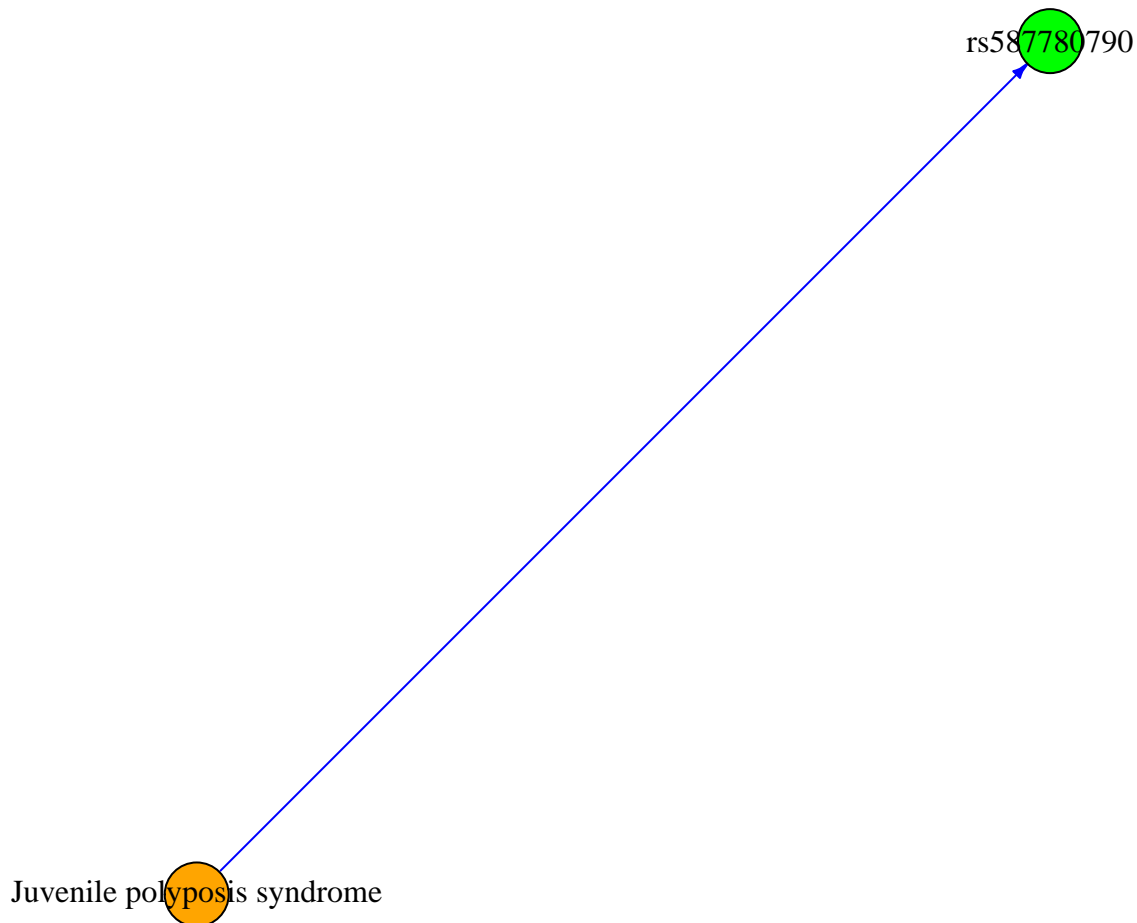

## Variant-Disease Network (Kanzaki disease)

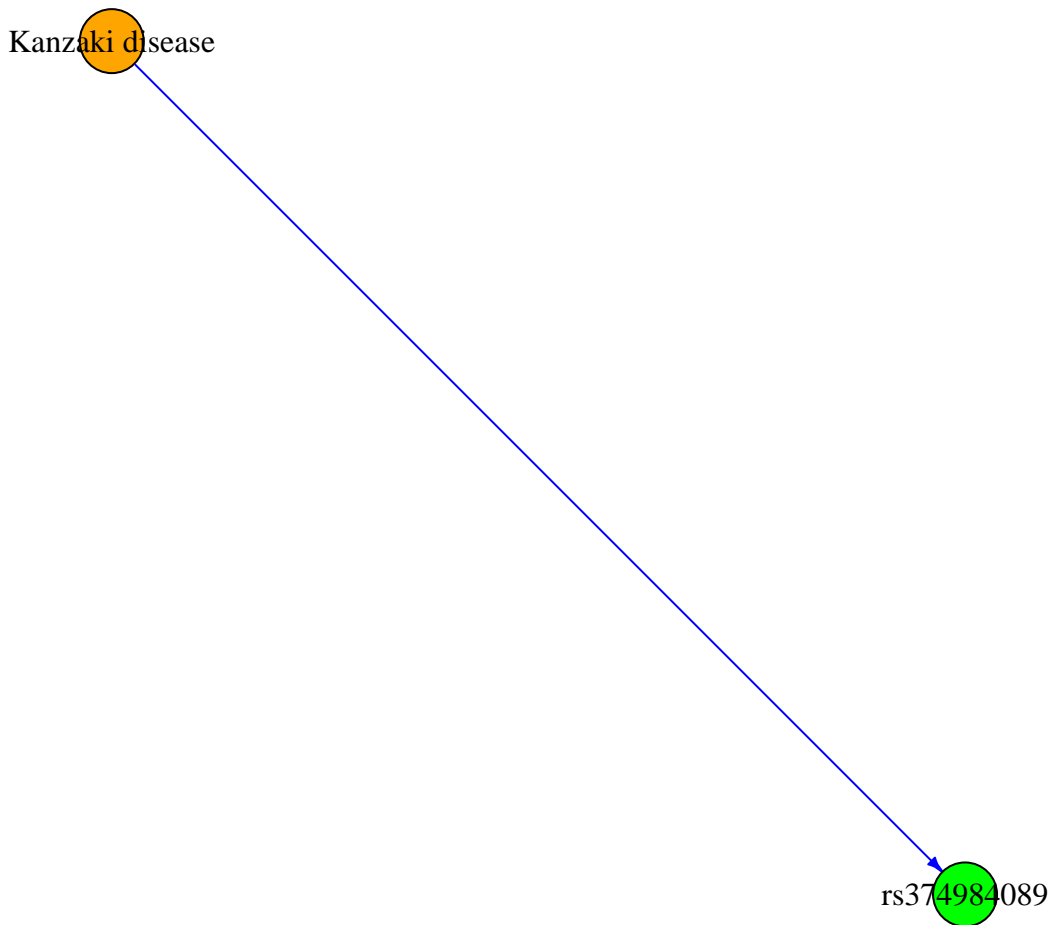



**Variant–Disease Network (Keratosis follicularis)**

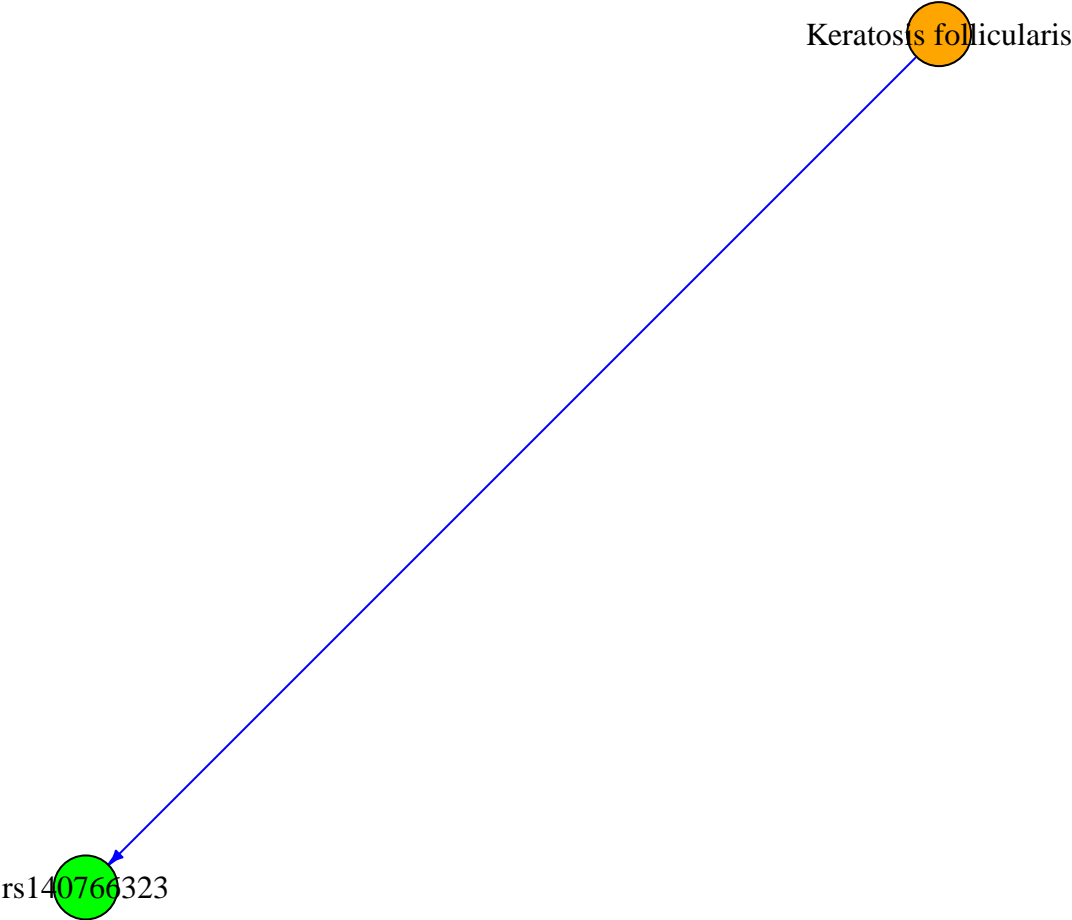

Variant–Disease Network (Kindlers syndrome)

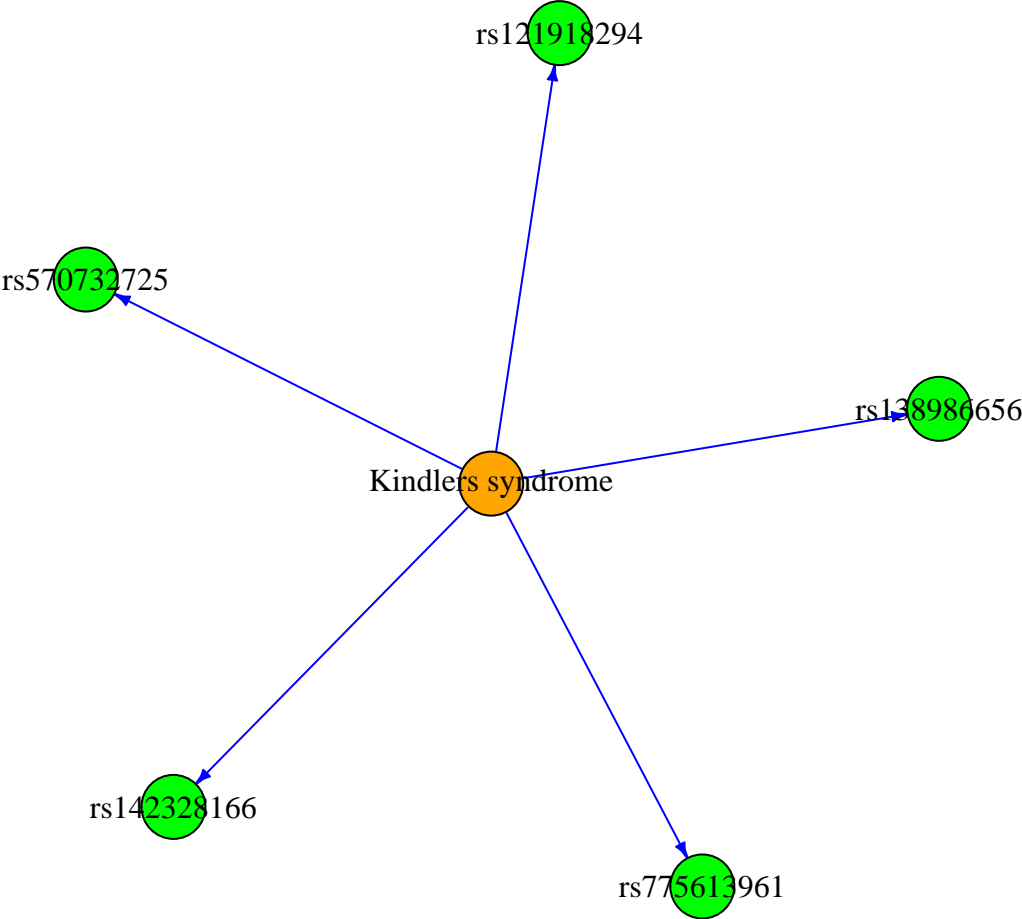

## Variant–Disease Network (Kleefstra syndrome 1)

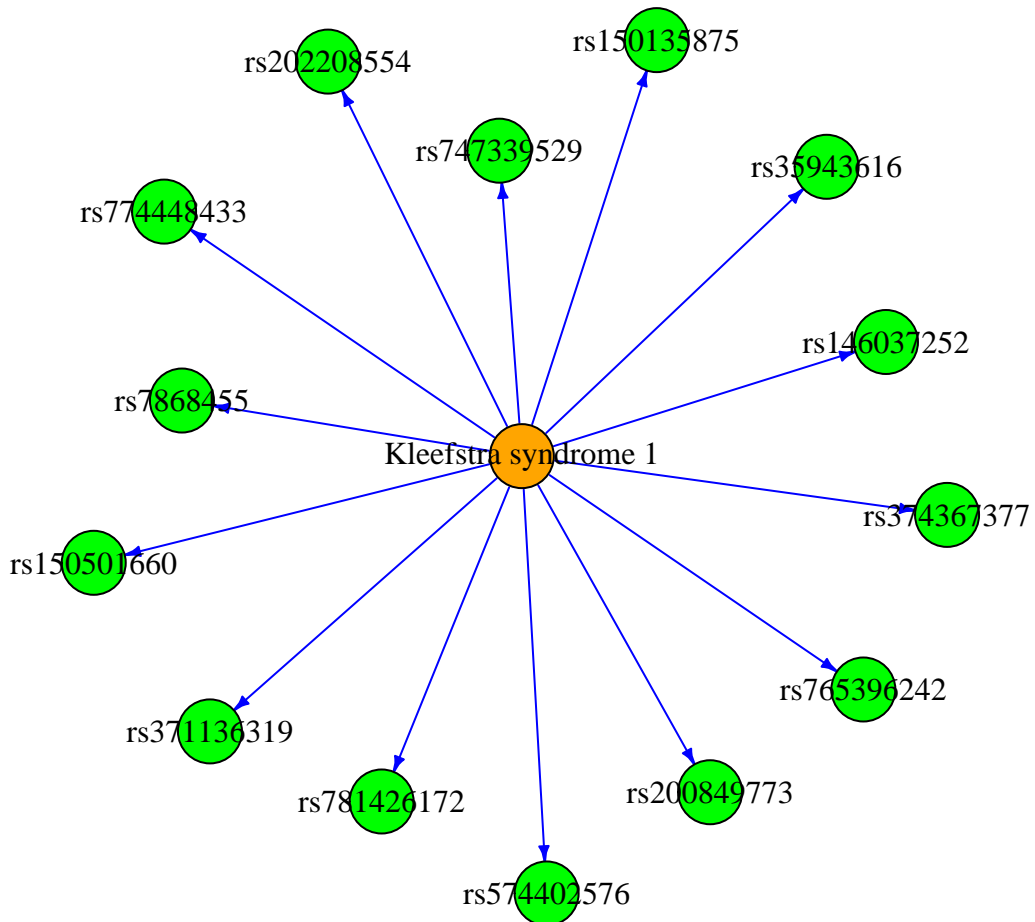

## Variant–Disease Network (Kniest dysplasia)

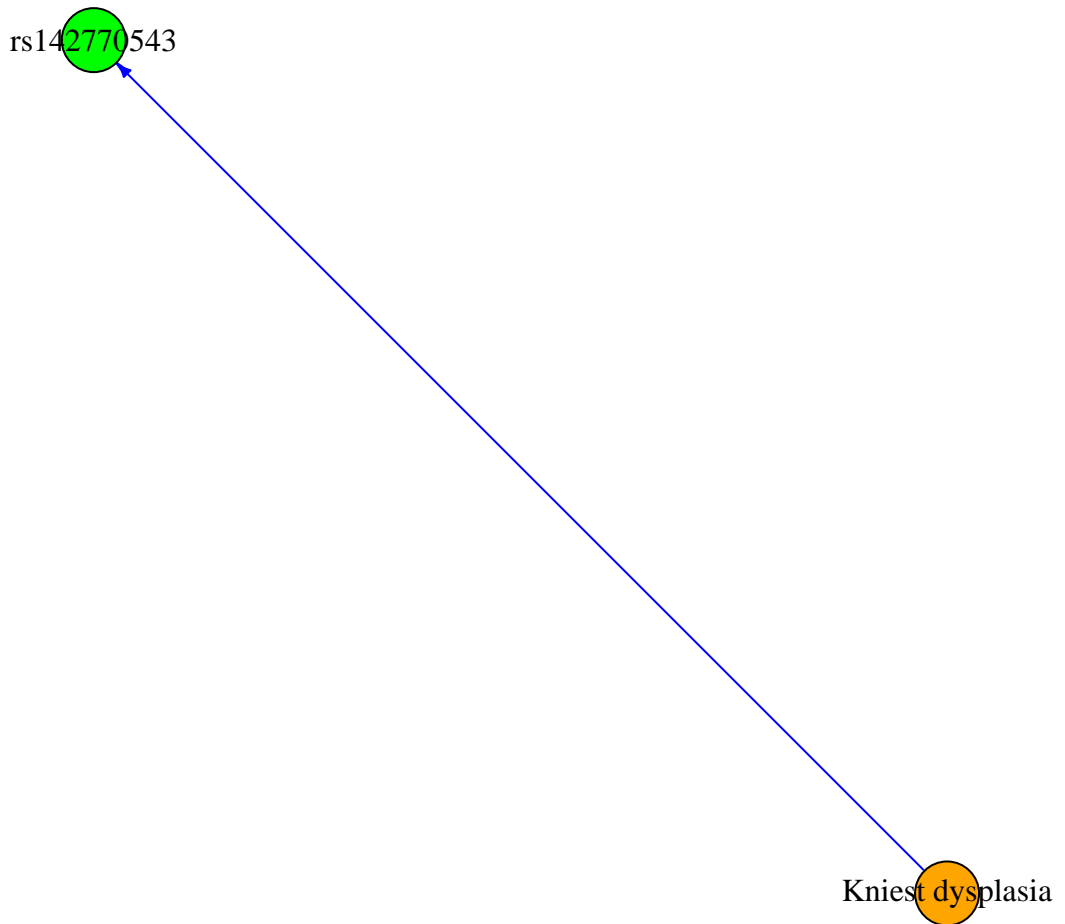

## Variant-Disease Network (Kohlschutters syndrome)

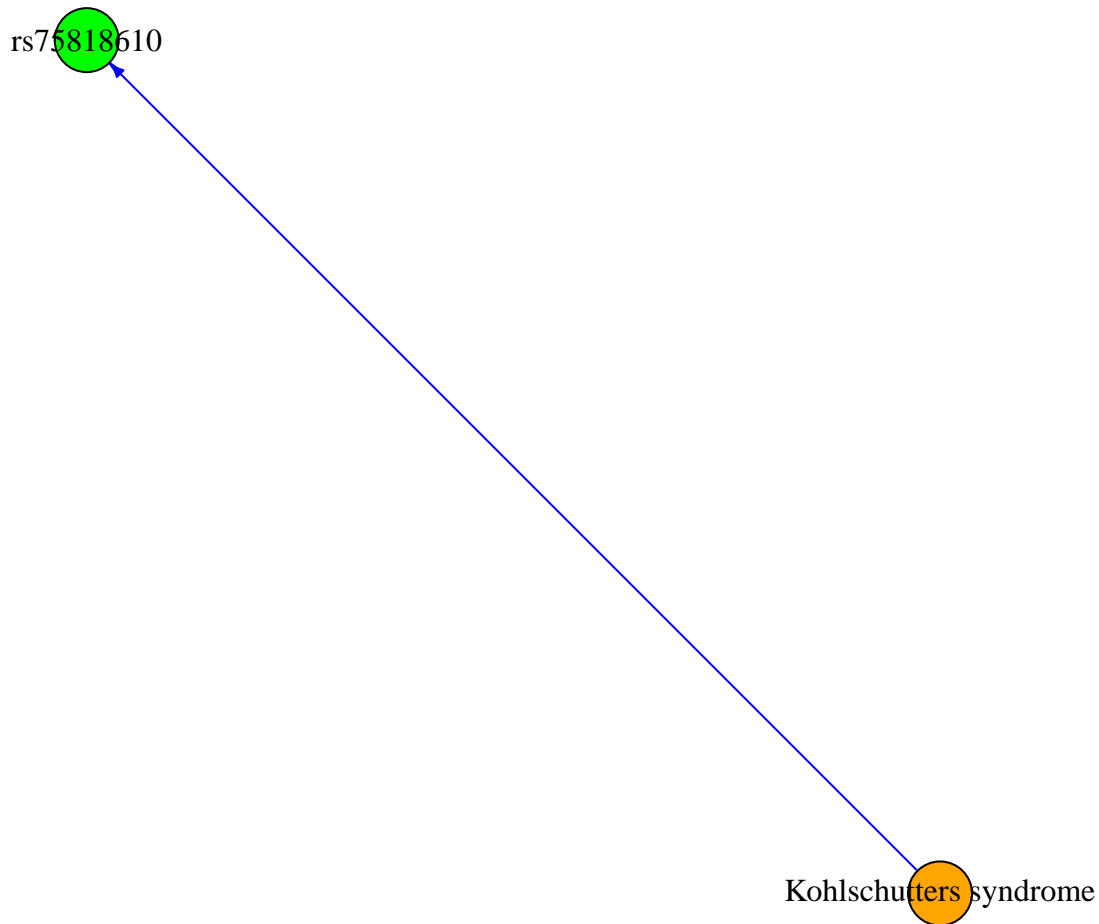

## Variant–Disease Network (Koolen–de Vries syndrome)

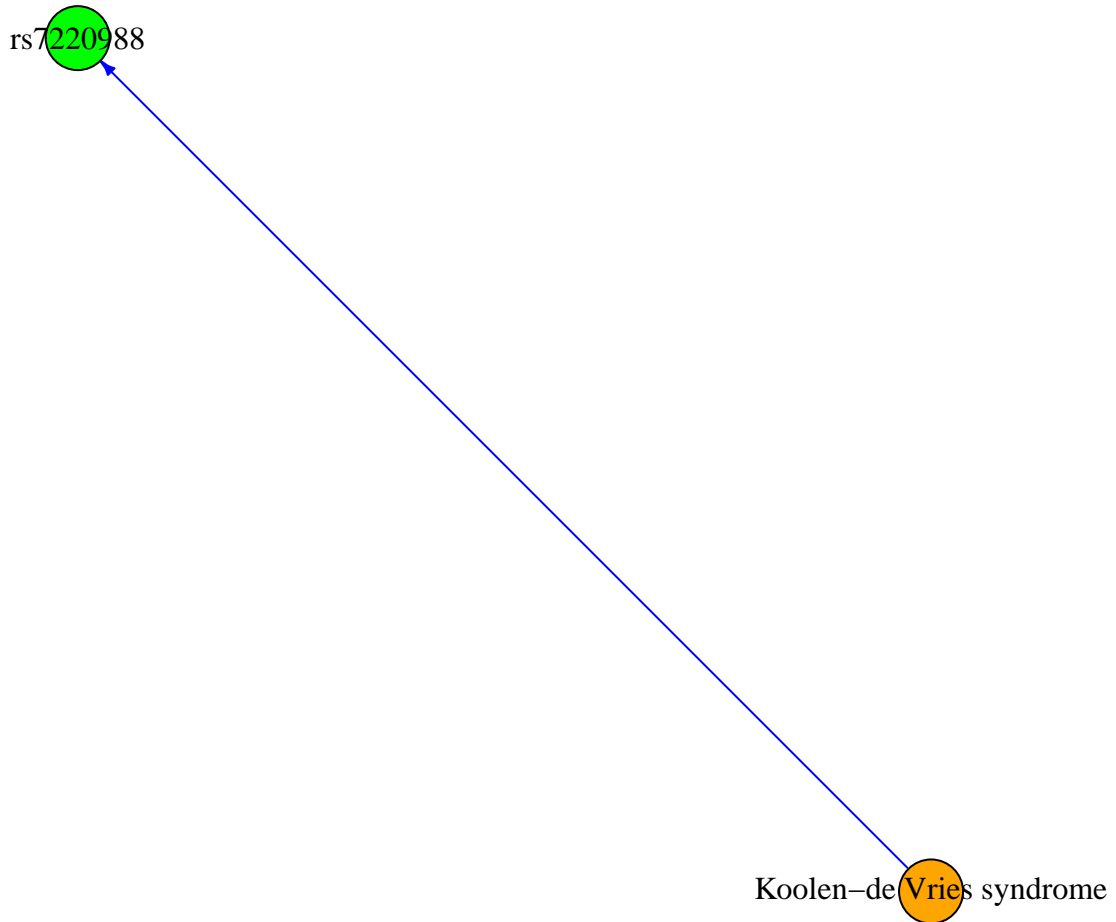

# Variant–Disease Network (Lactate dehydrogenase B deficiency)

rs141629567

Lactate dehydrogenase B deficiency



## Variant–Disease Network (Lactose intolerance)

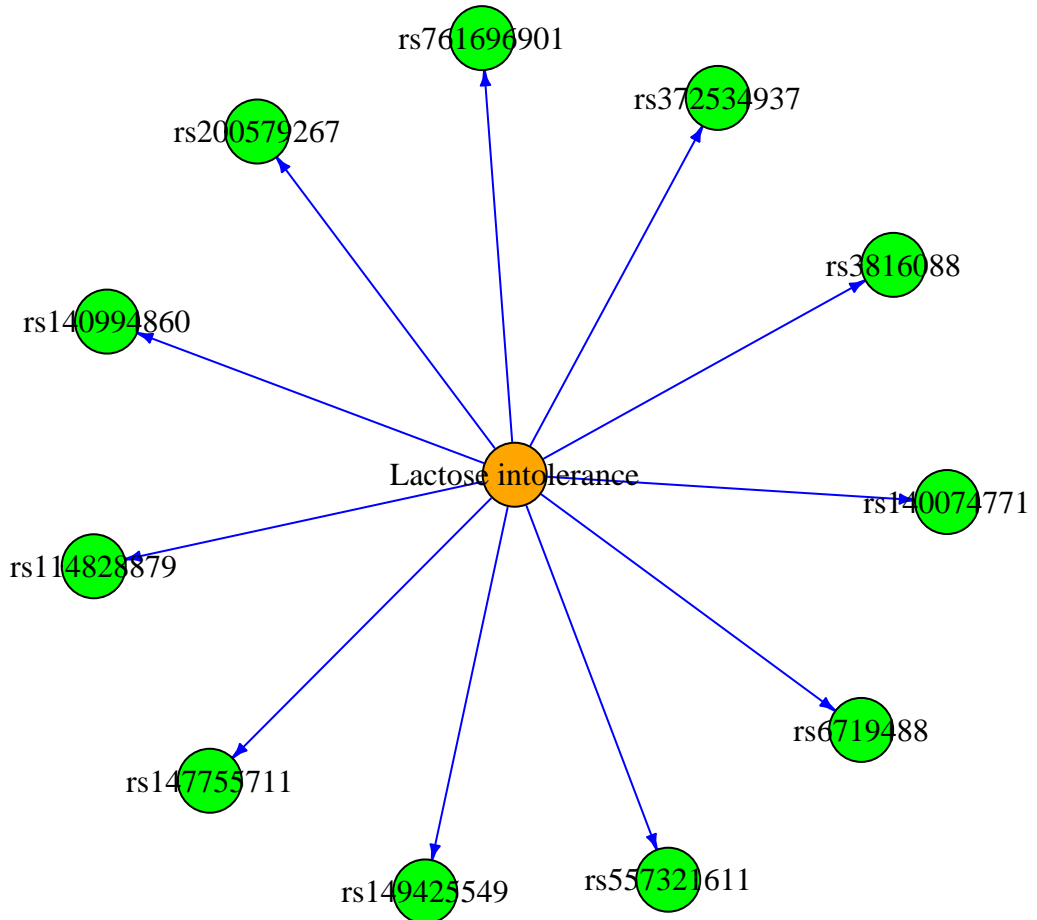



**Variant–Disease Network (Lafora disease)**

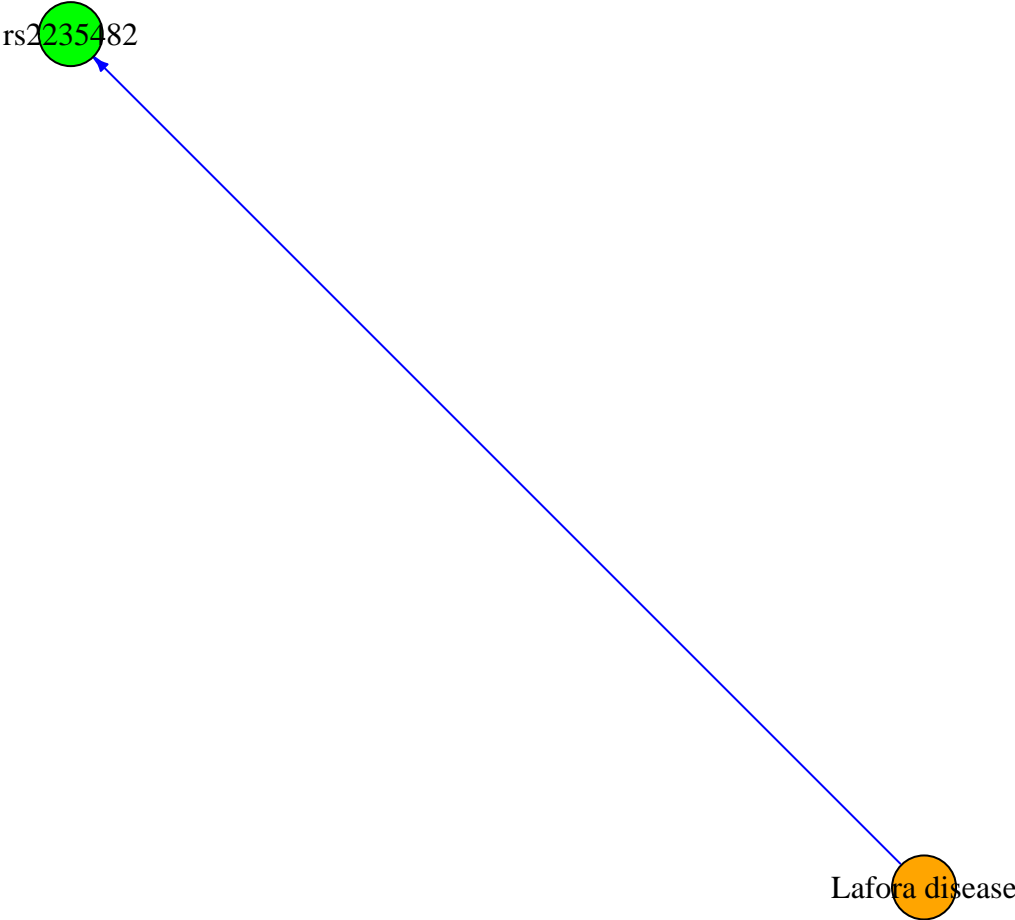

**Variant–Disease Network (Lamellar cataract)**

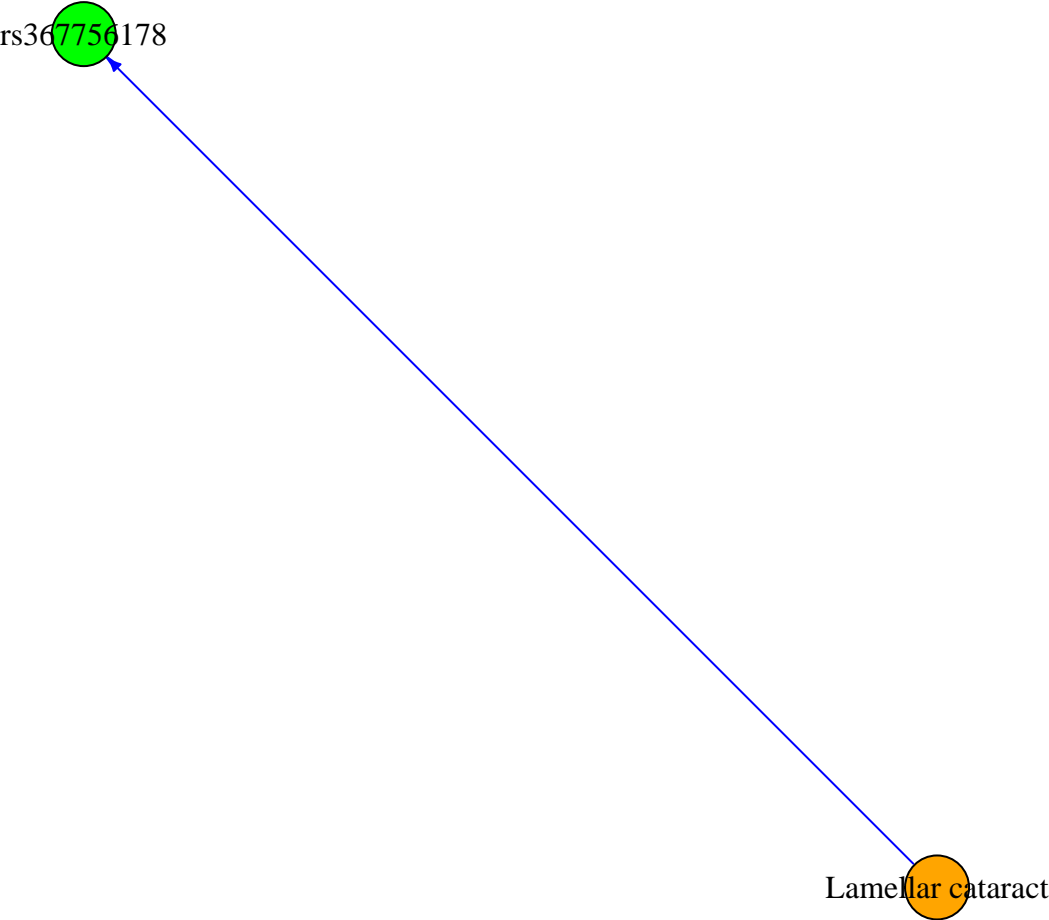

**Variant–Disease Network (Langer–Giedion syndrome)**

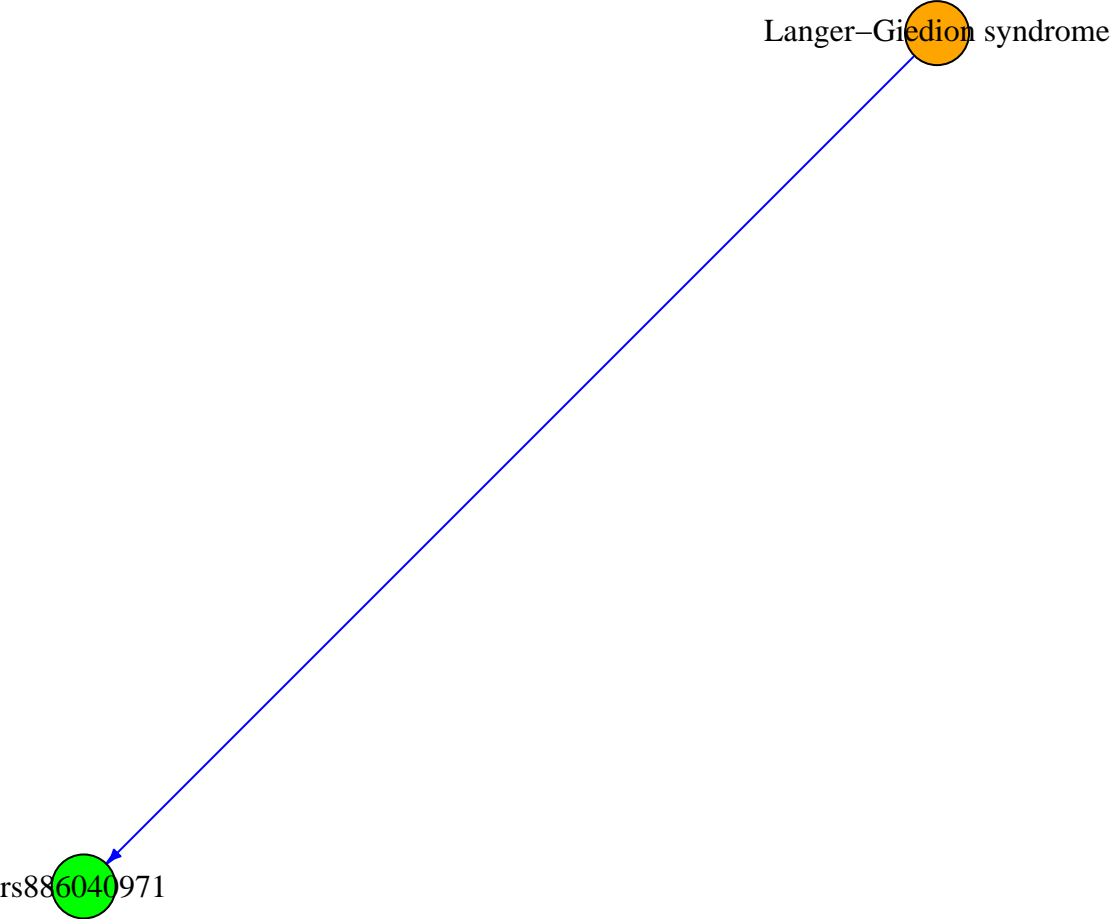

## Variant-Disease Network (Larsen syndrome)

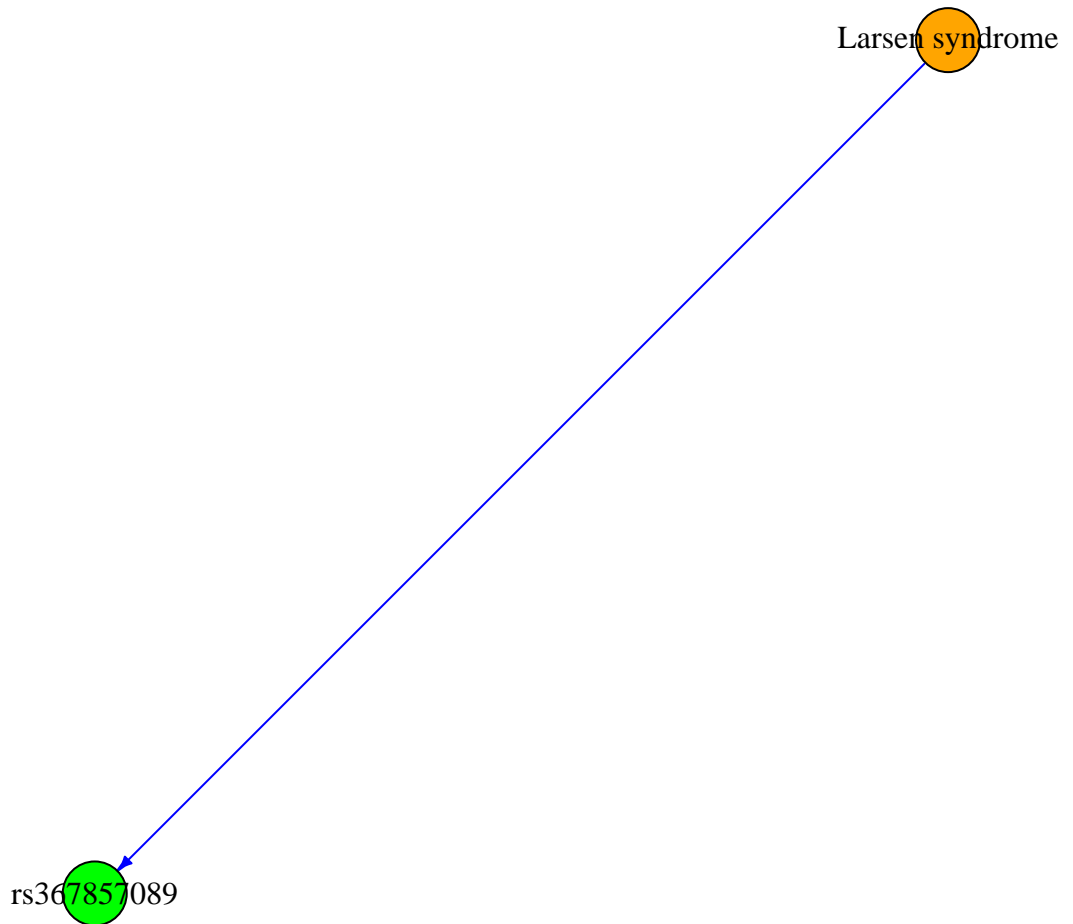

Variant–Disease Network (Laryngoonychocutaneous syndrome)

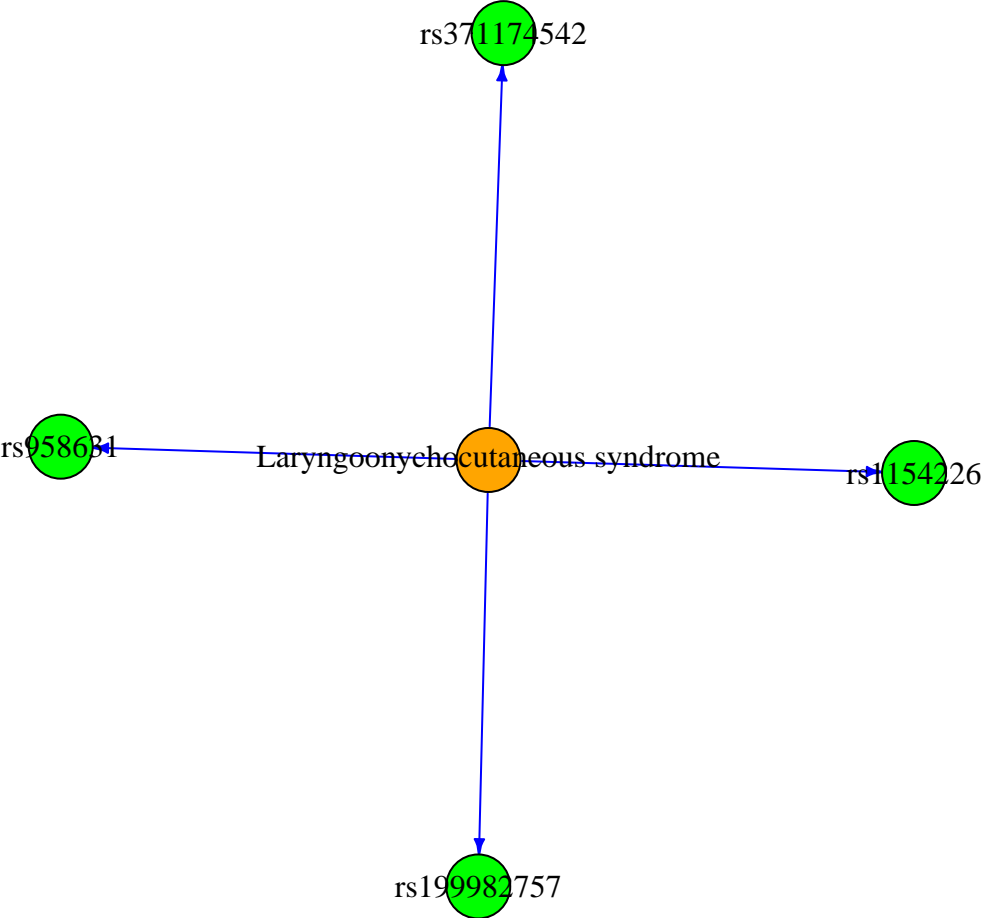

Variant–Disease Network (Leber congenital amaurosis)

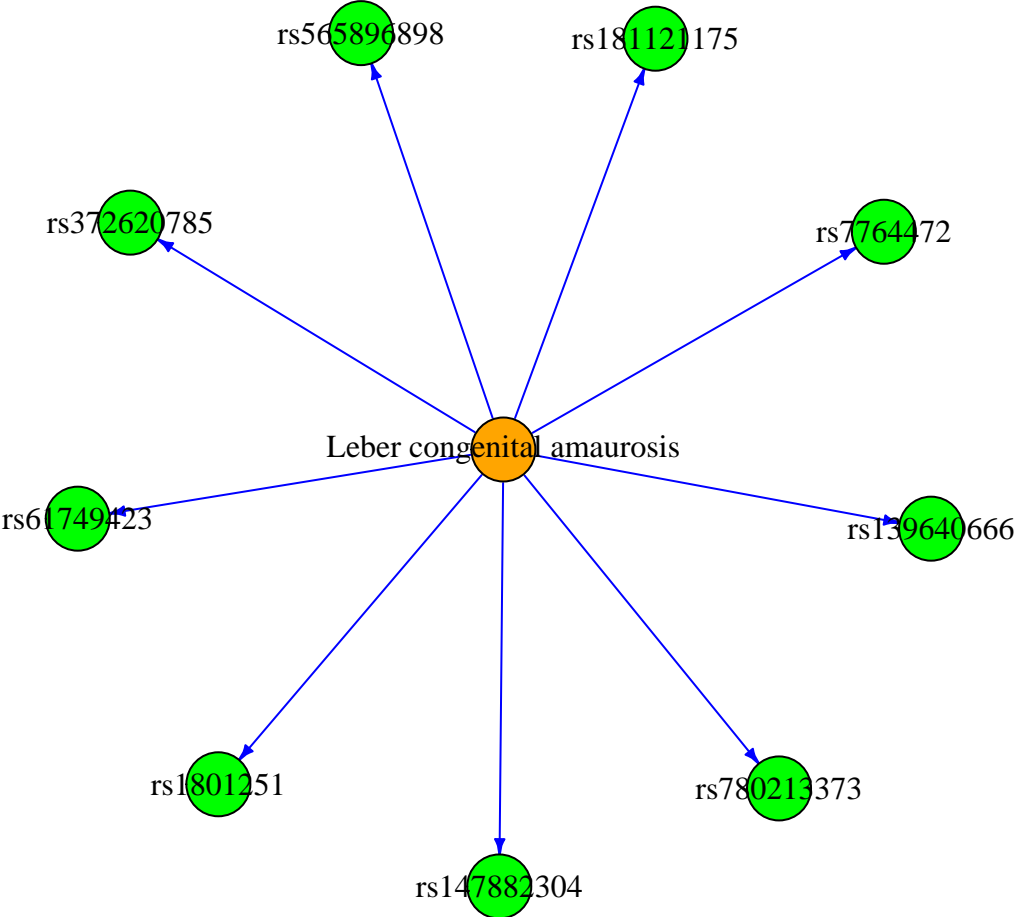

**Variant–Disease Network (Leber congenital amaurosis 2)**

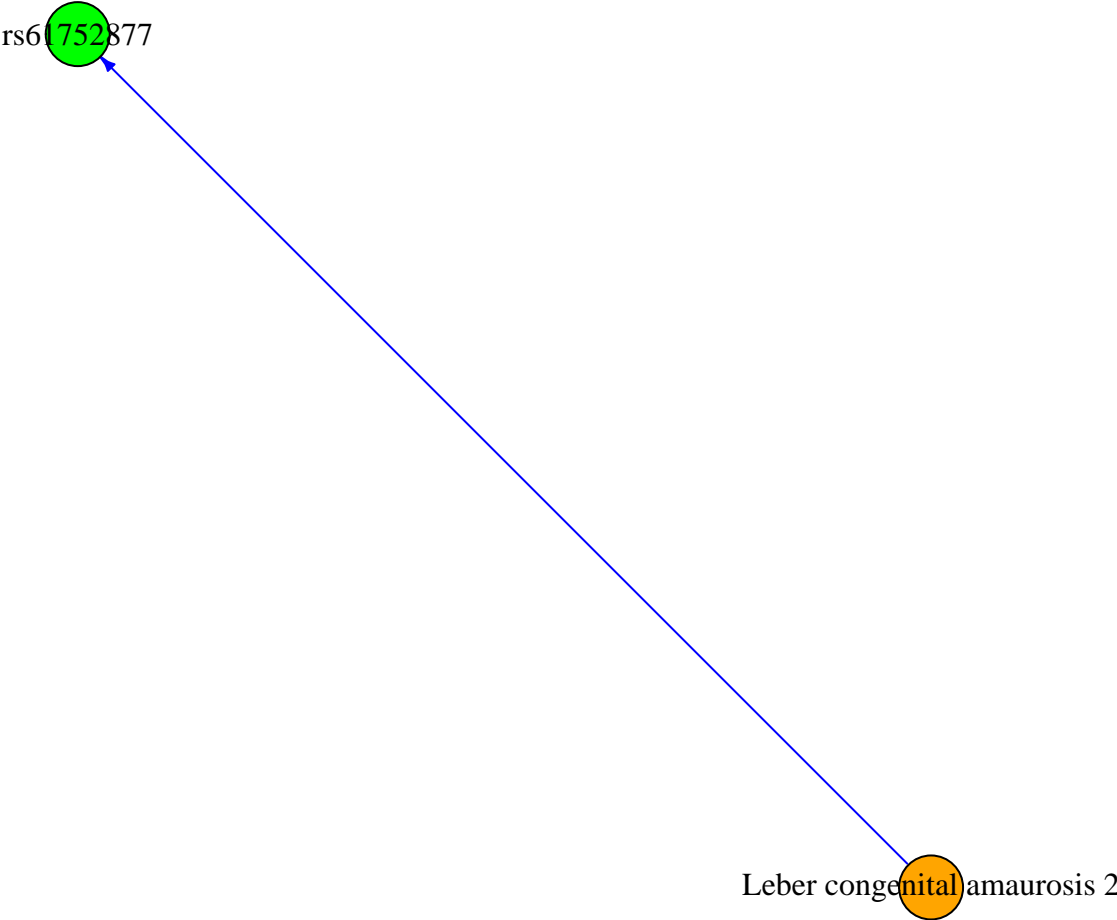

Variant–Disease Network (Left ventricular noncompaction 10)

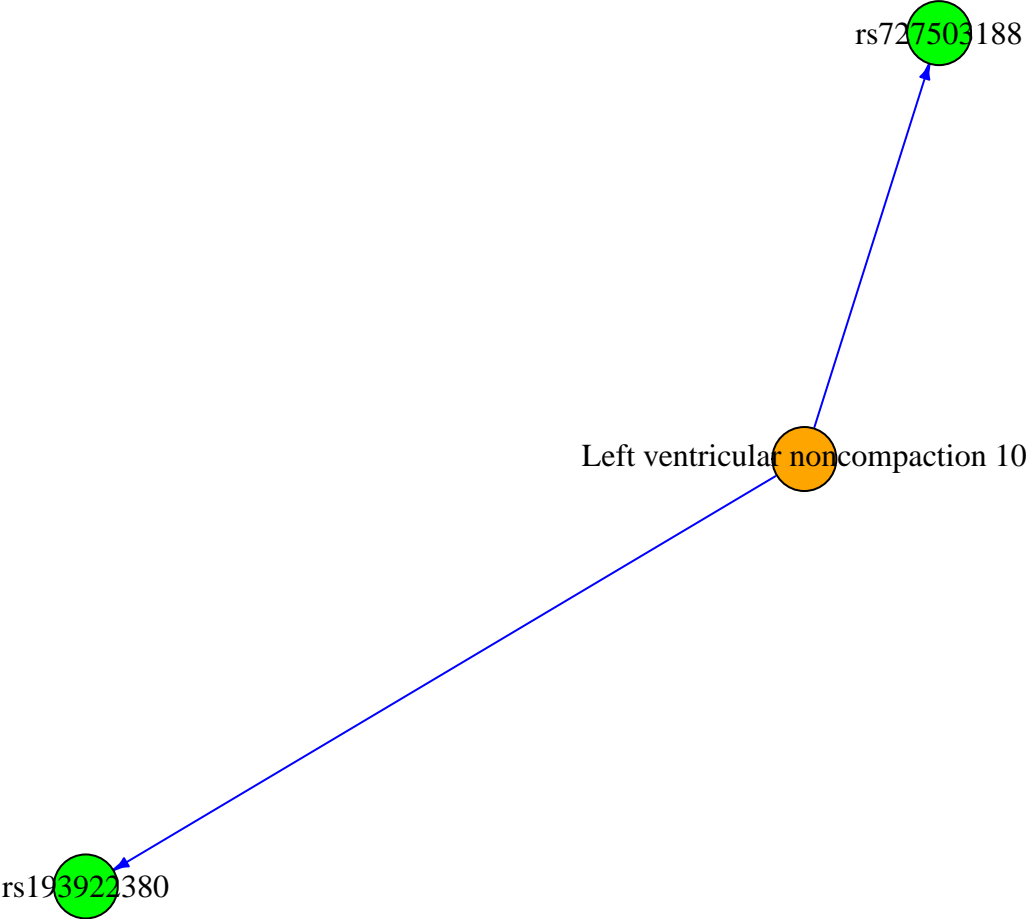



Variant–Disease Network (Left ventricular noncompaction 6)

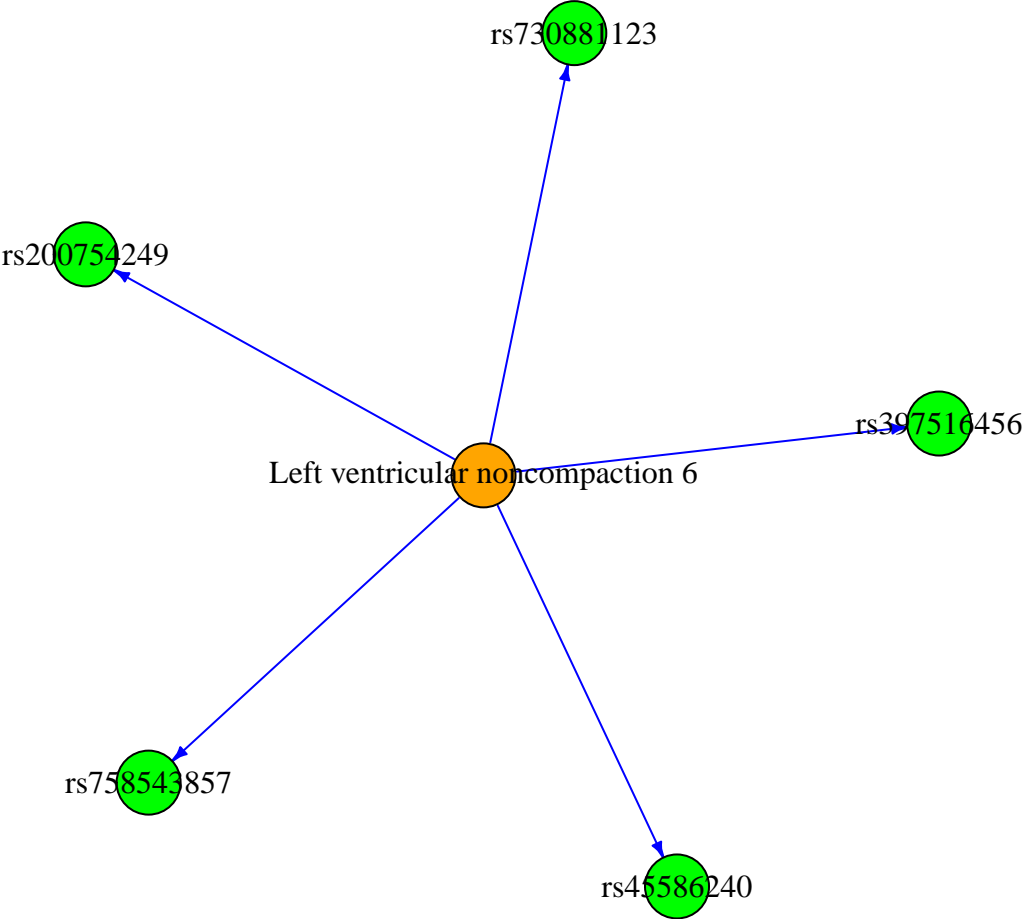

## Variant–Disease Network (Left ventricular noncompaction 7)

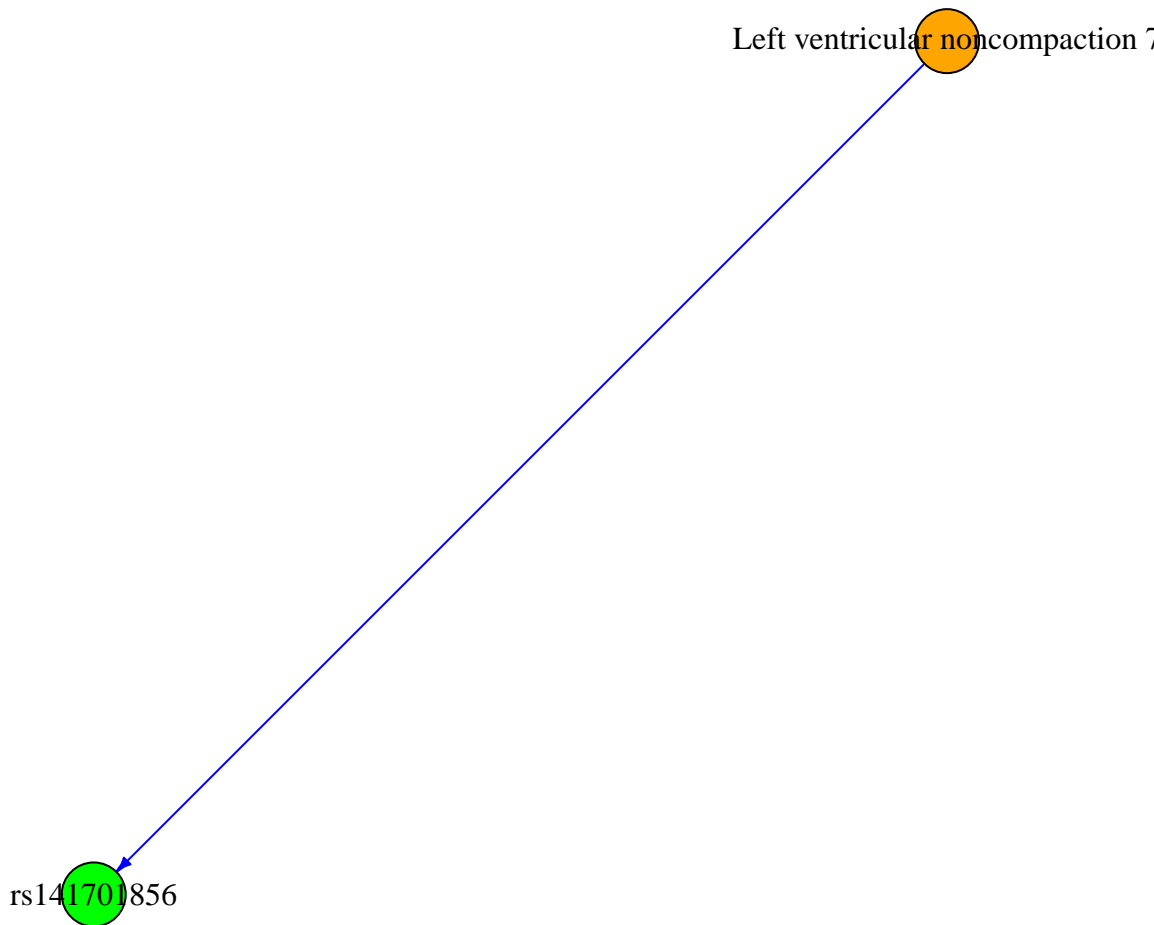

**Variant–Disease Network (Left ventricular noncompaction 8)**

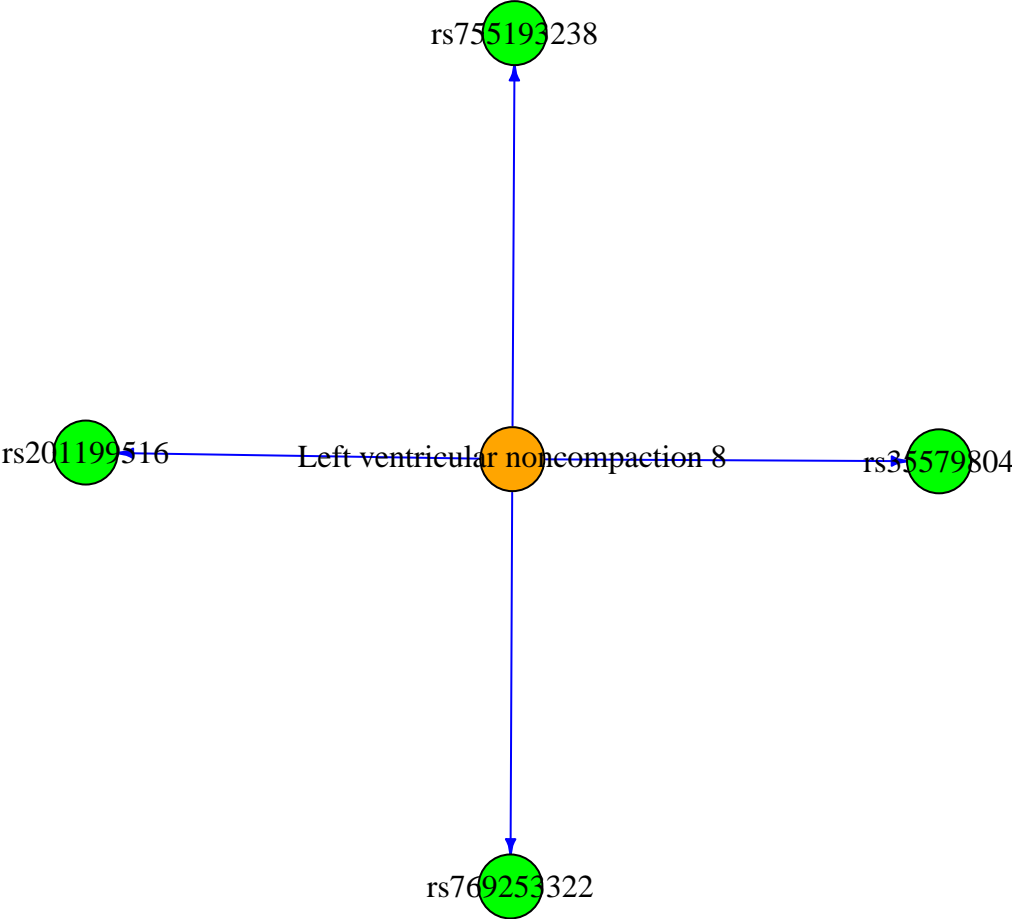

Variant–Disease Network (Left ventricular noncompaction cardiomyopath

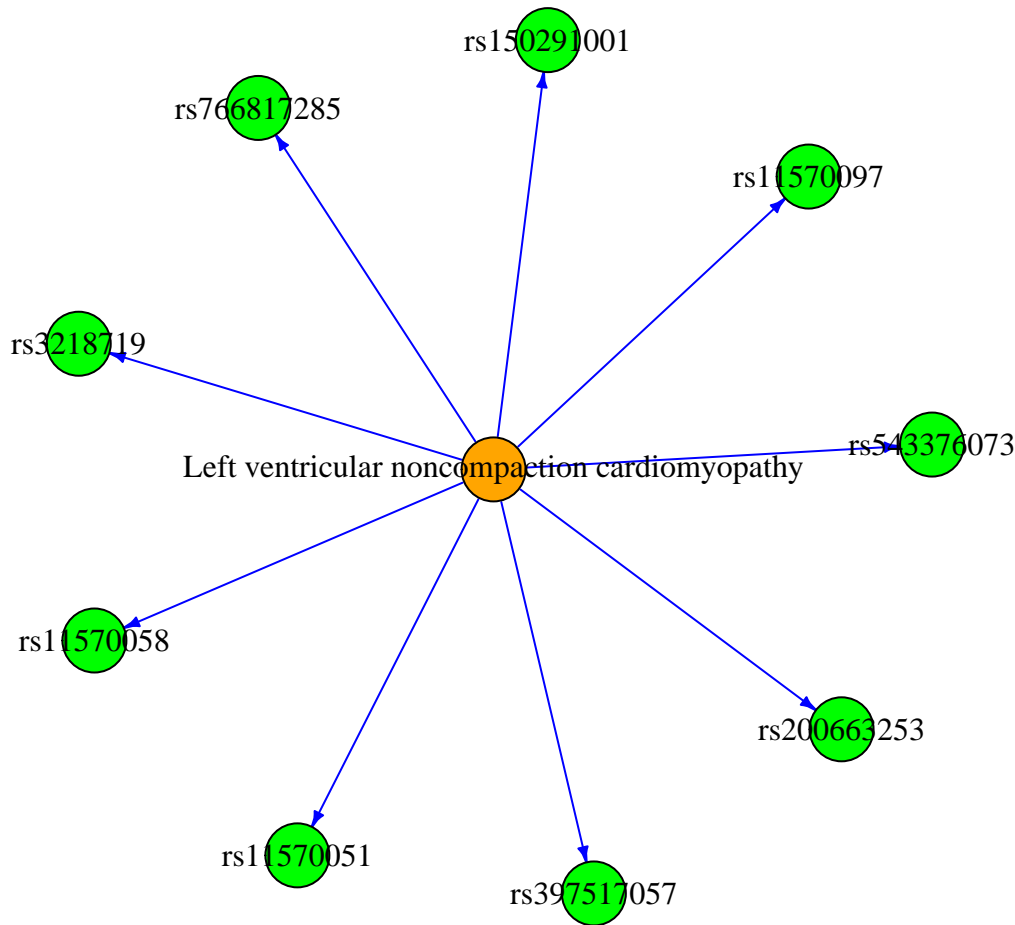

**Variant–Disease Network (Left–right axis malformations)**

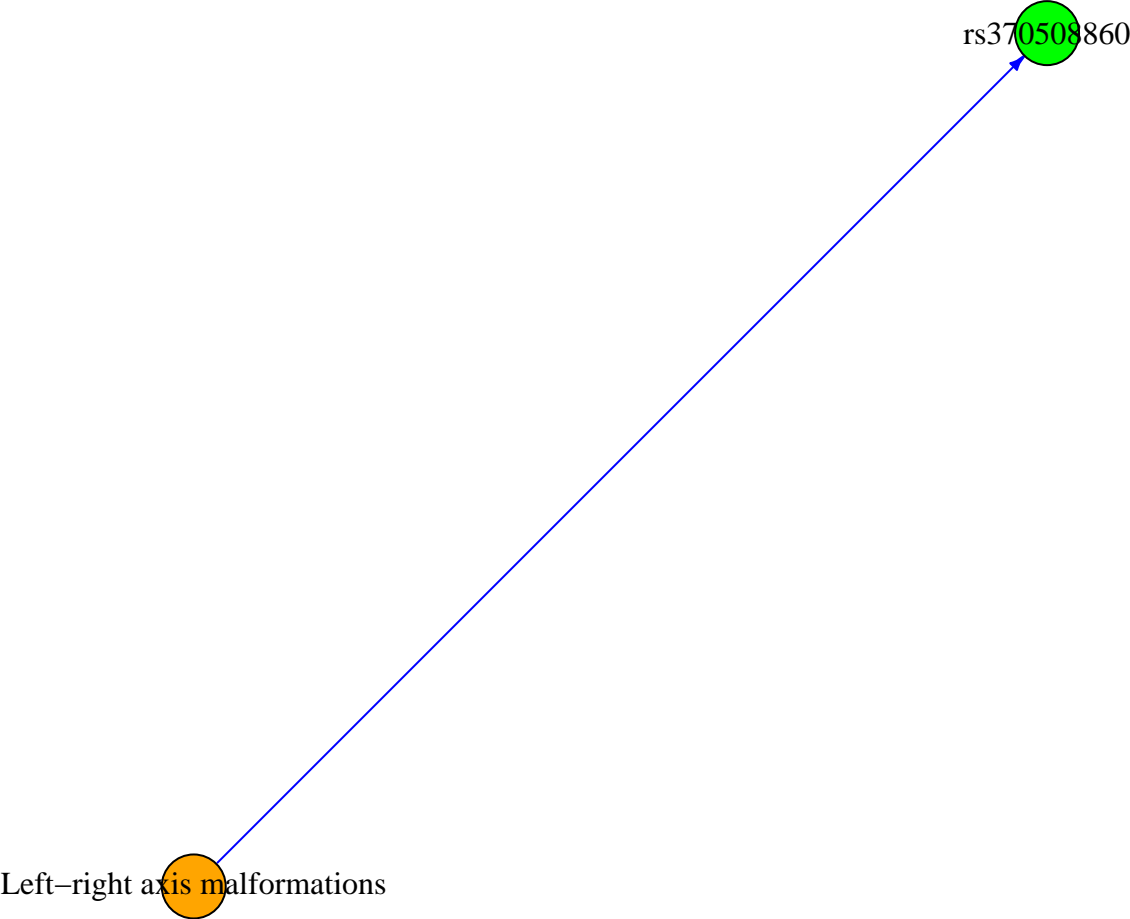

Variant–Disease Network (Leigh syndrome)

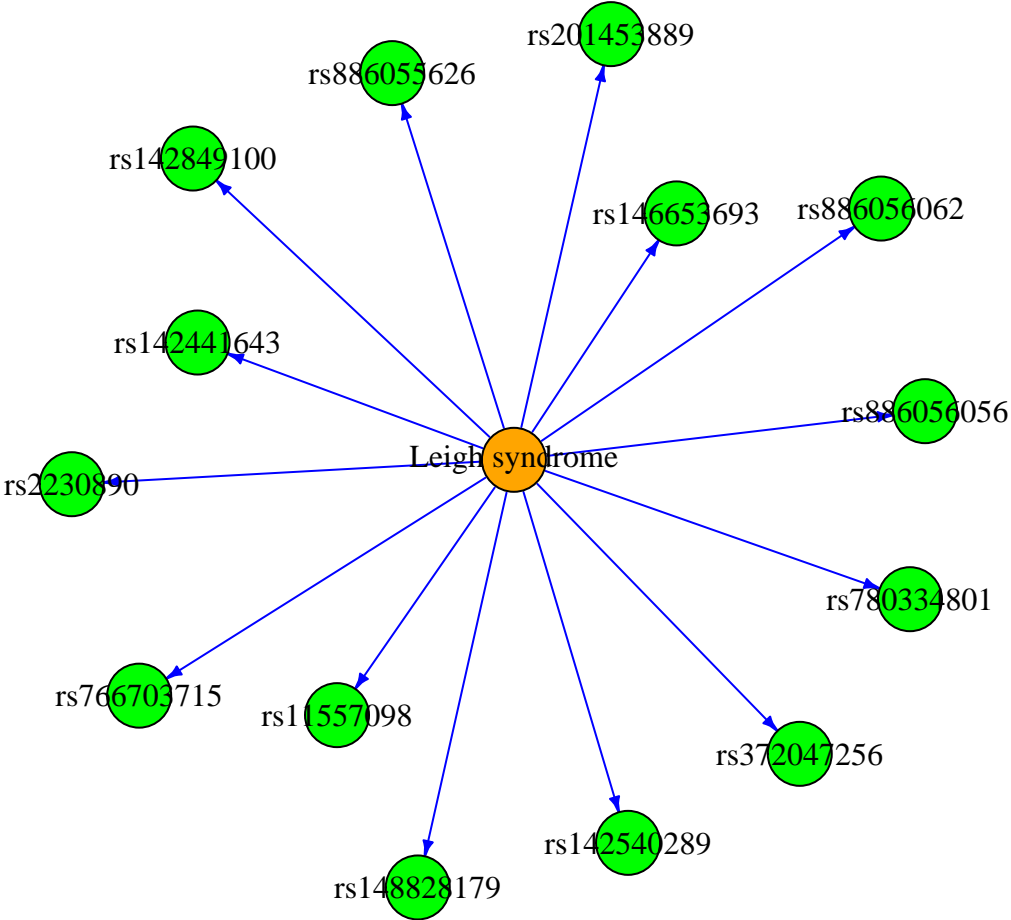

## Variant–Disease Network (Leptin deficiency or dysfunction)

Leptin deficiency or dysfunction

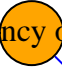

rs201523305

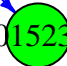

**Variant–Disease Network (Lethal congenital contracture syndrome 9)**

Lethal congenital contracture syndrome 9

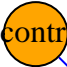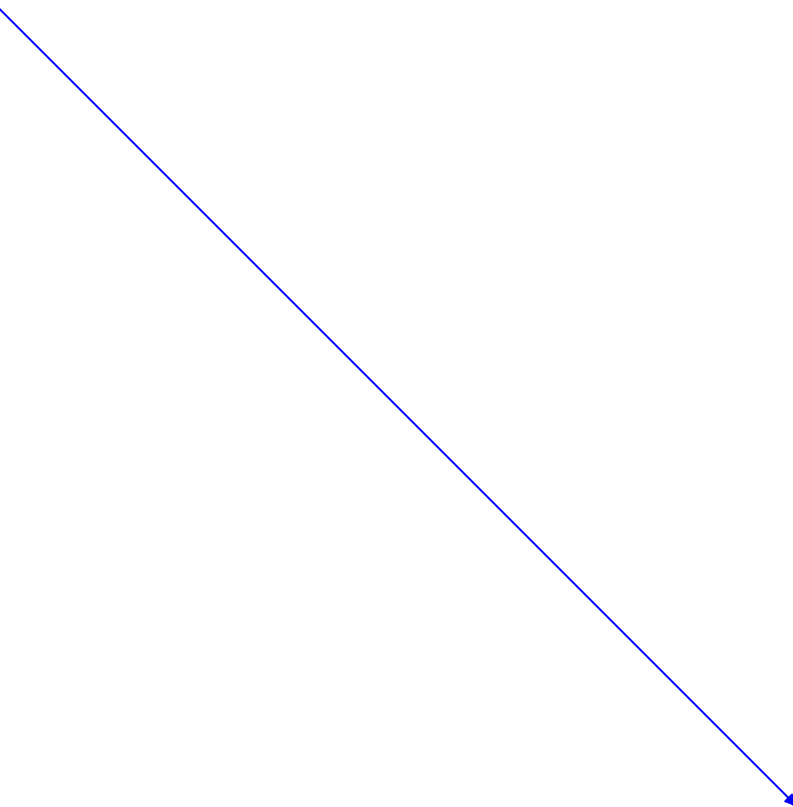

rs749355583

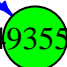



## Variant-Disease Network (Lethal Encephalopathy)

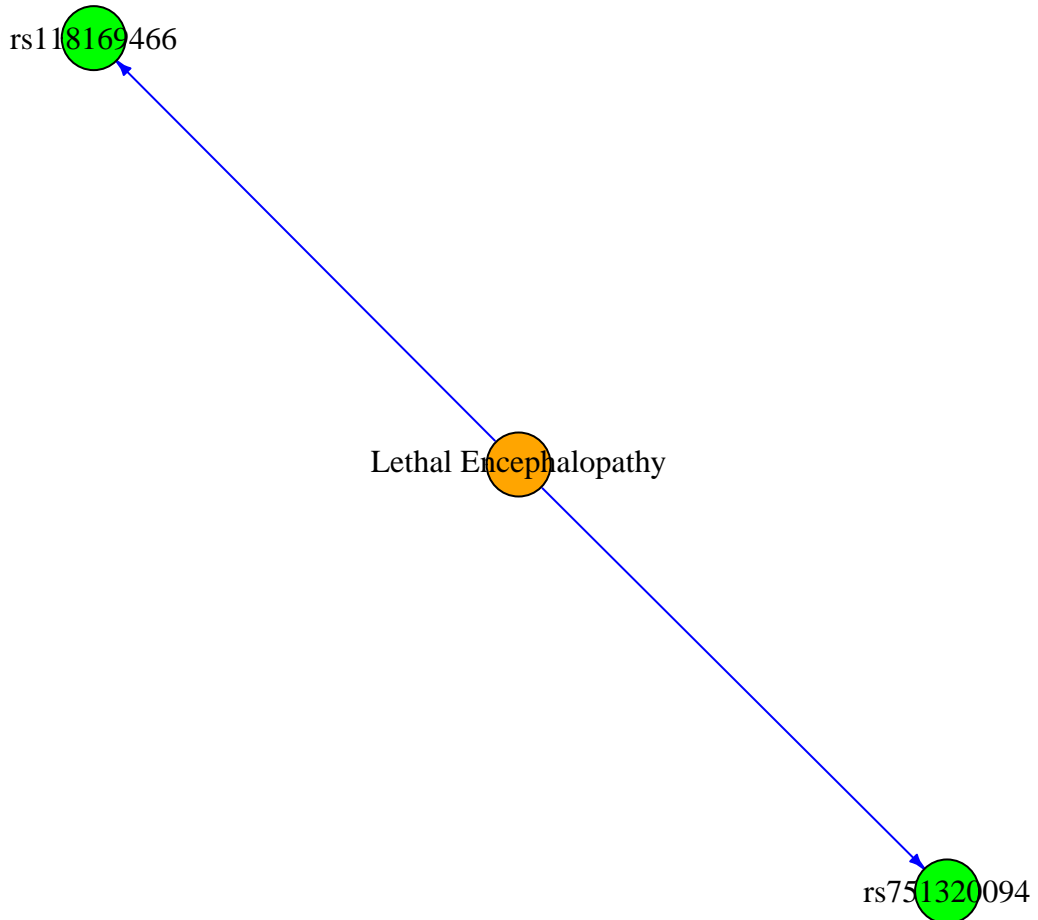

Variant–Disease Network (Lethal multiple pterygium syndrome)

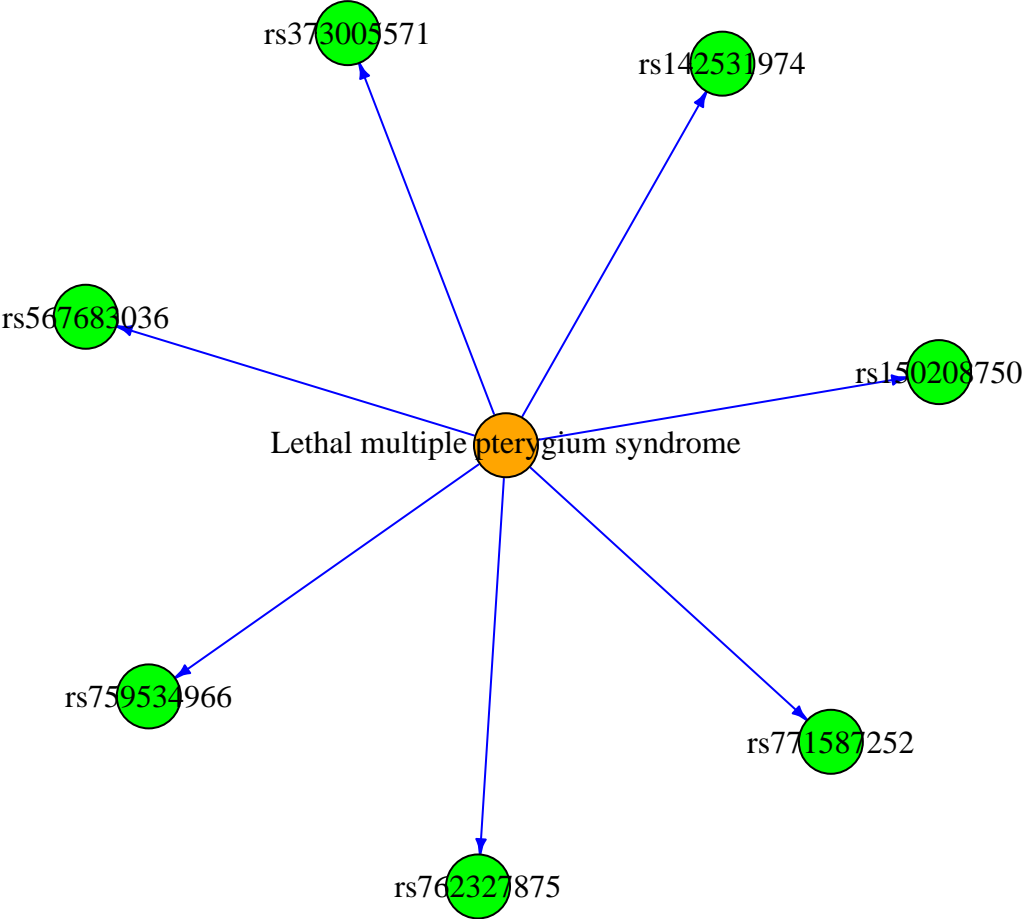

Variant–Disease Network (Lethal tight skin contracture syndrome)

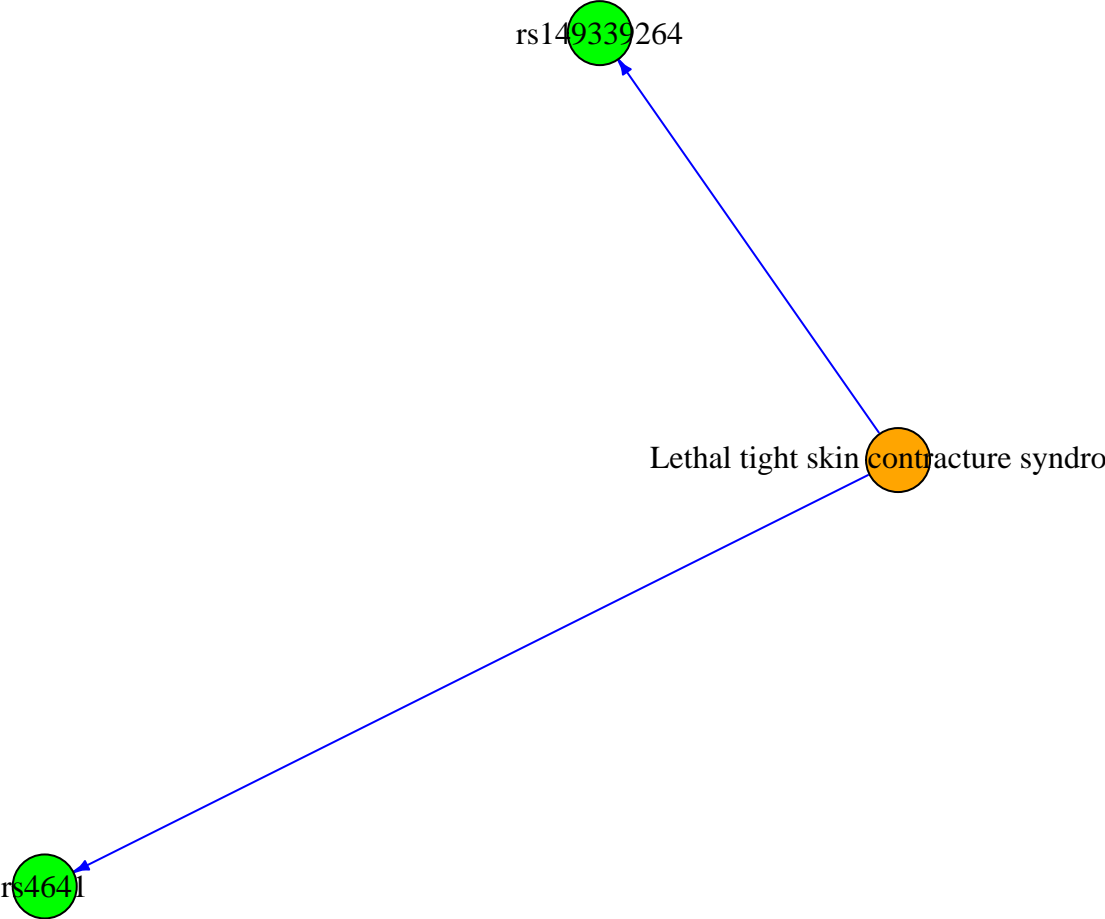

## Variant–Disease Network (Leukodystrophy)

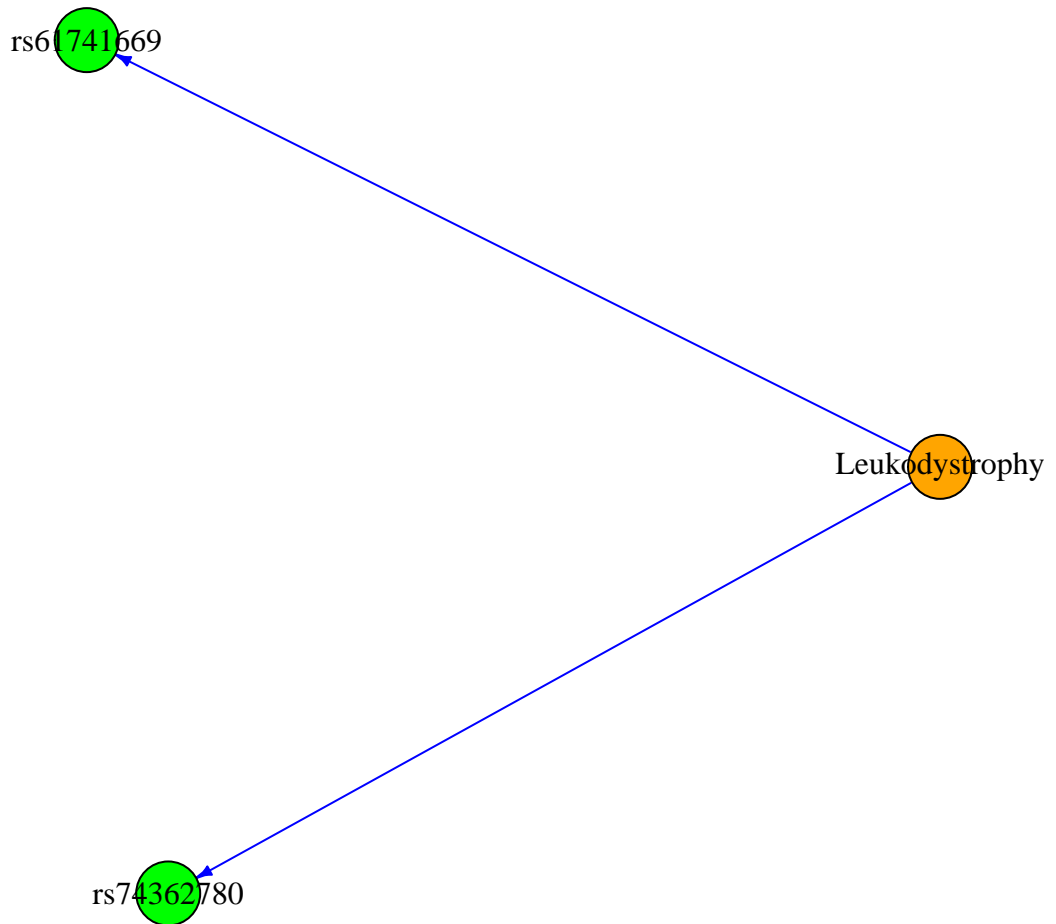

**Variant–Disease Network (Leukoencephalopathy with ataxia)**

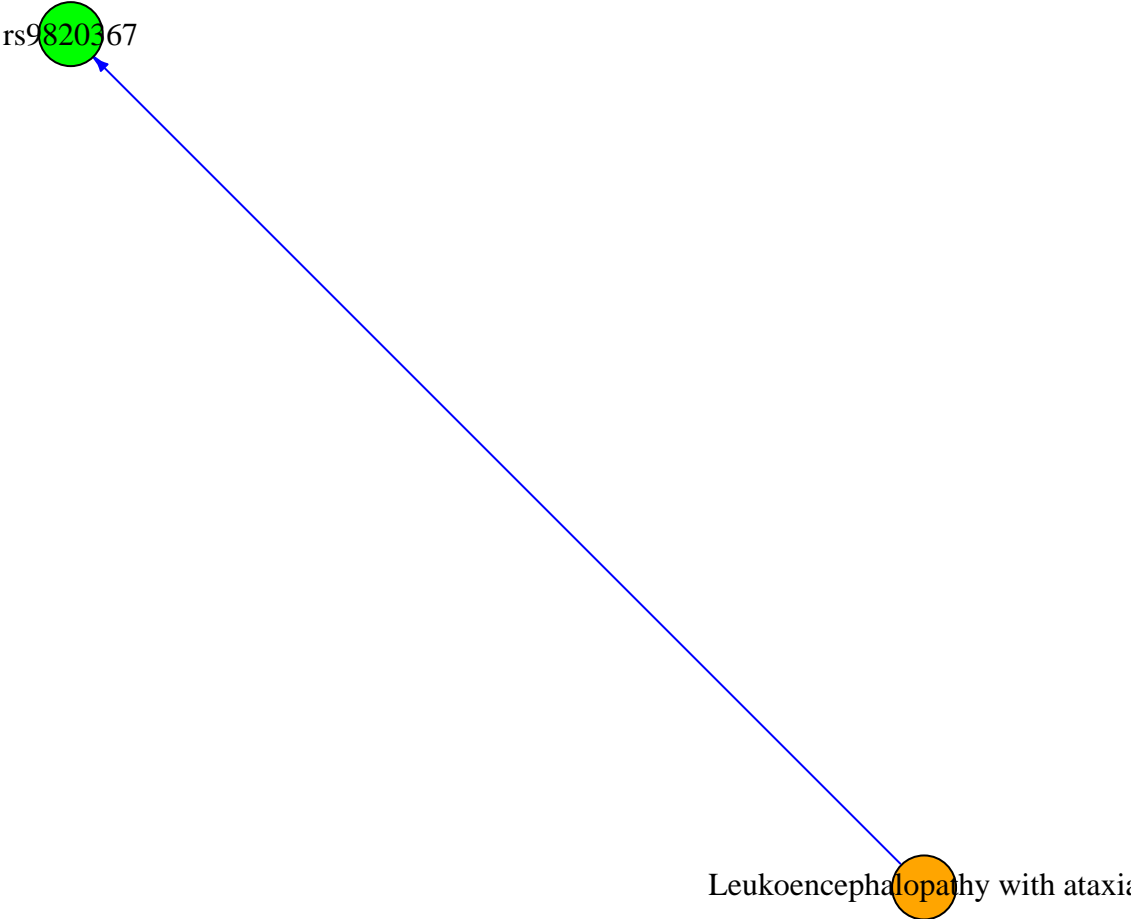

Variant–Disease Network (Leukoencephalopathy with vanishing white matter)

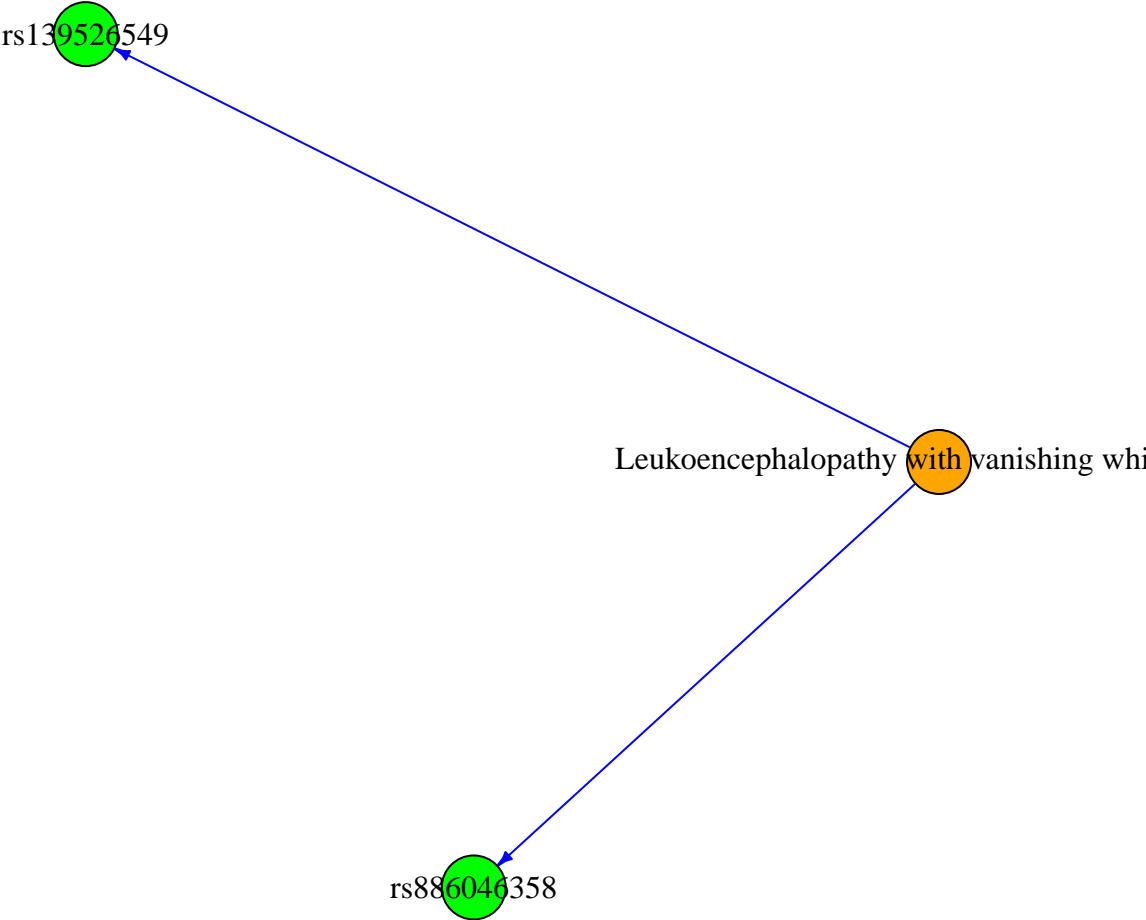

Variant–Disease Network (Levy–Hollister syndrome)

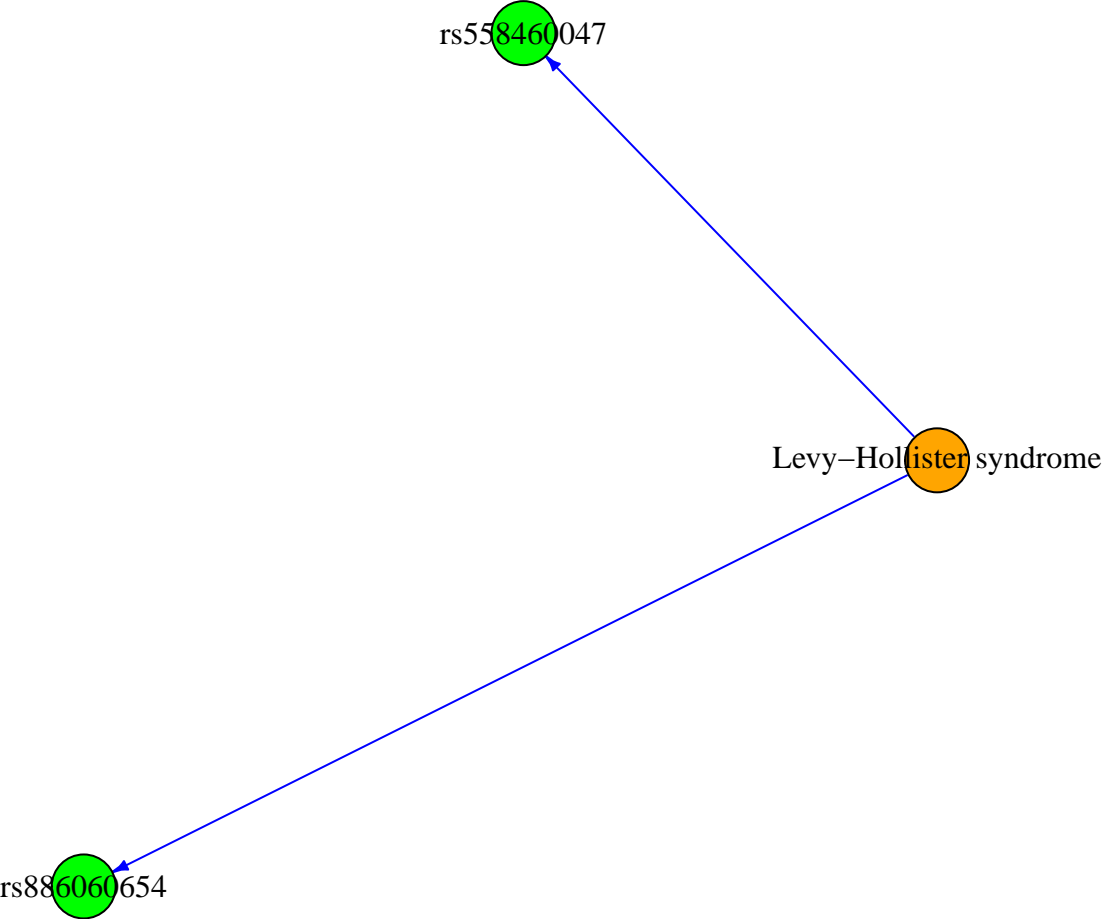

**Variant–Disease Network (Leydig cell agenesis)**

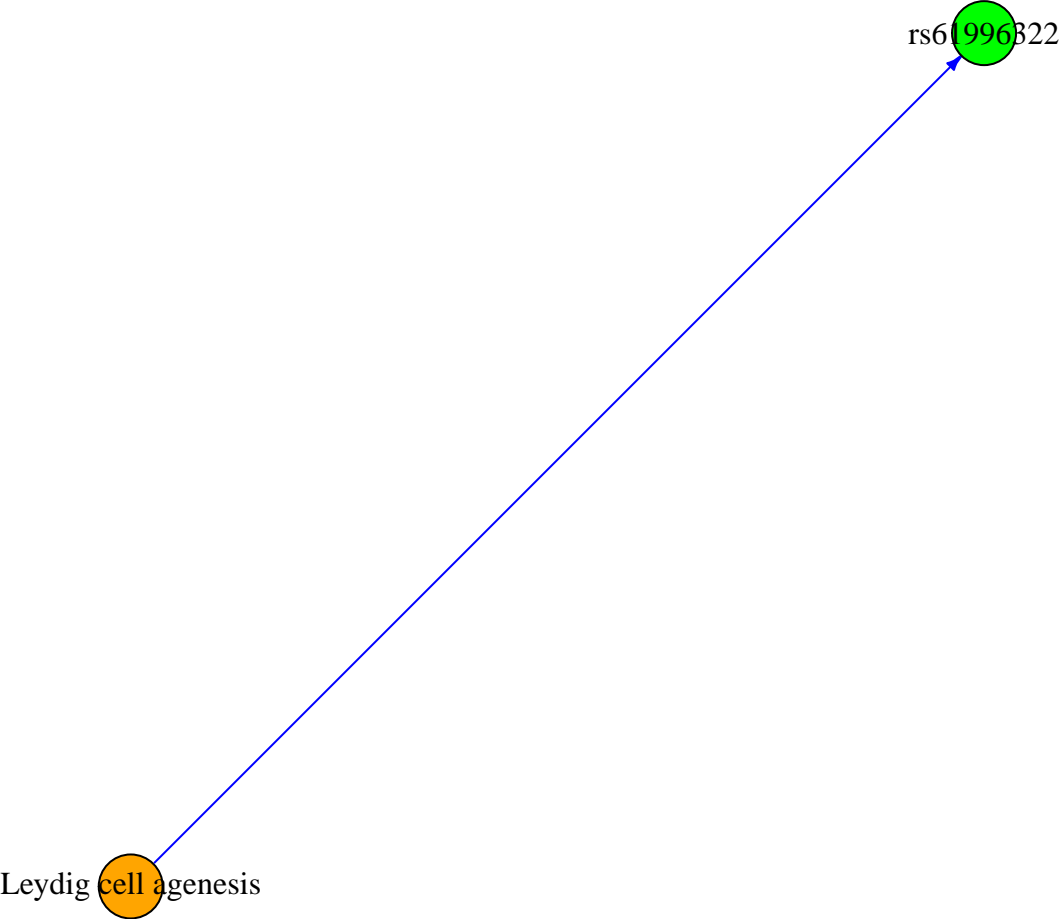



## Variant–Disease Network (Liddle syndrome 1)

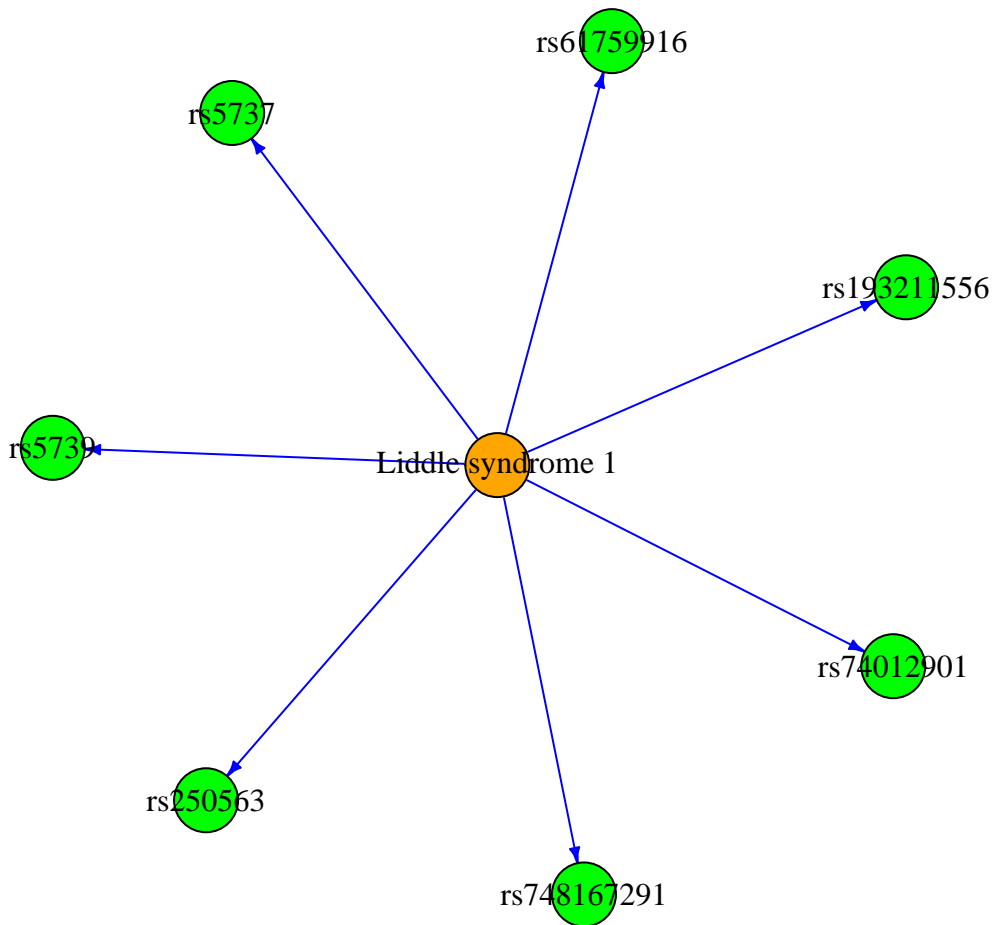

# Variant-Disease Network (Li-Fraumeni syndrome)

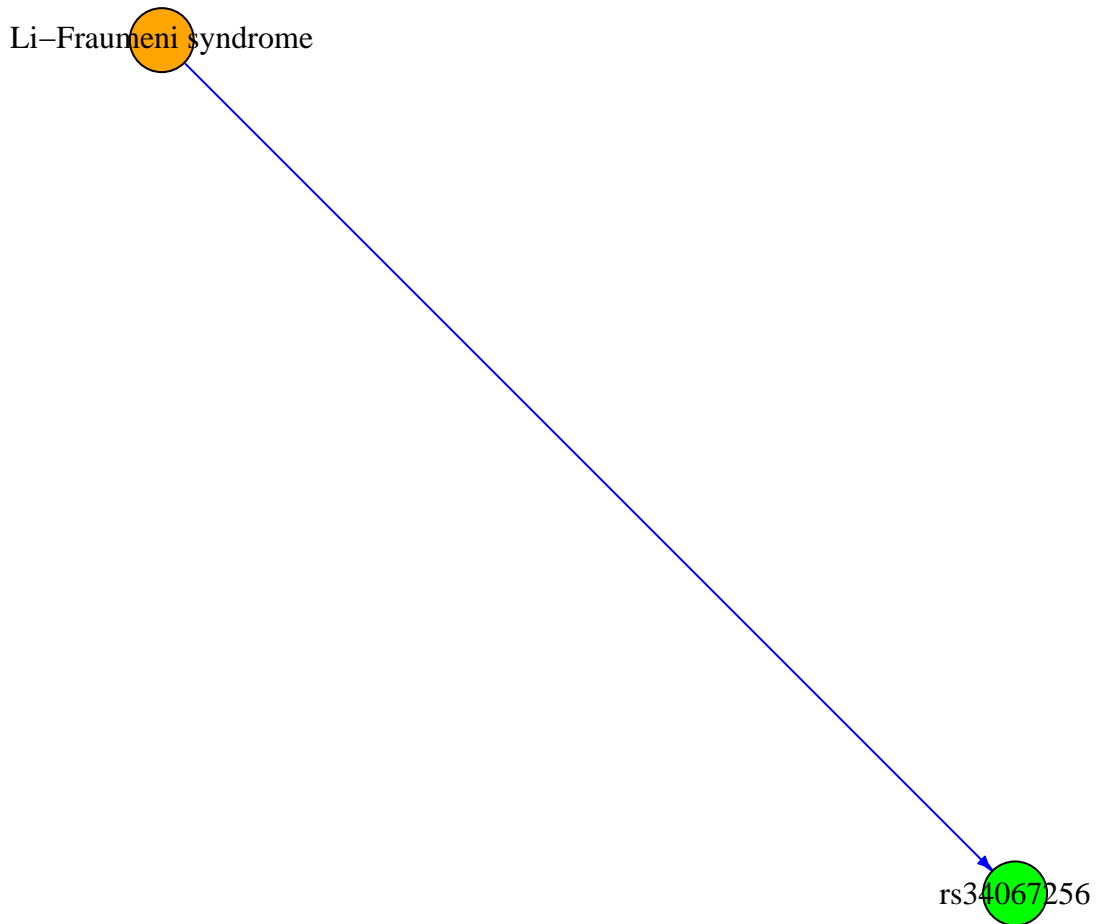

Variant–Disease Network (Lig4 syndrome)

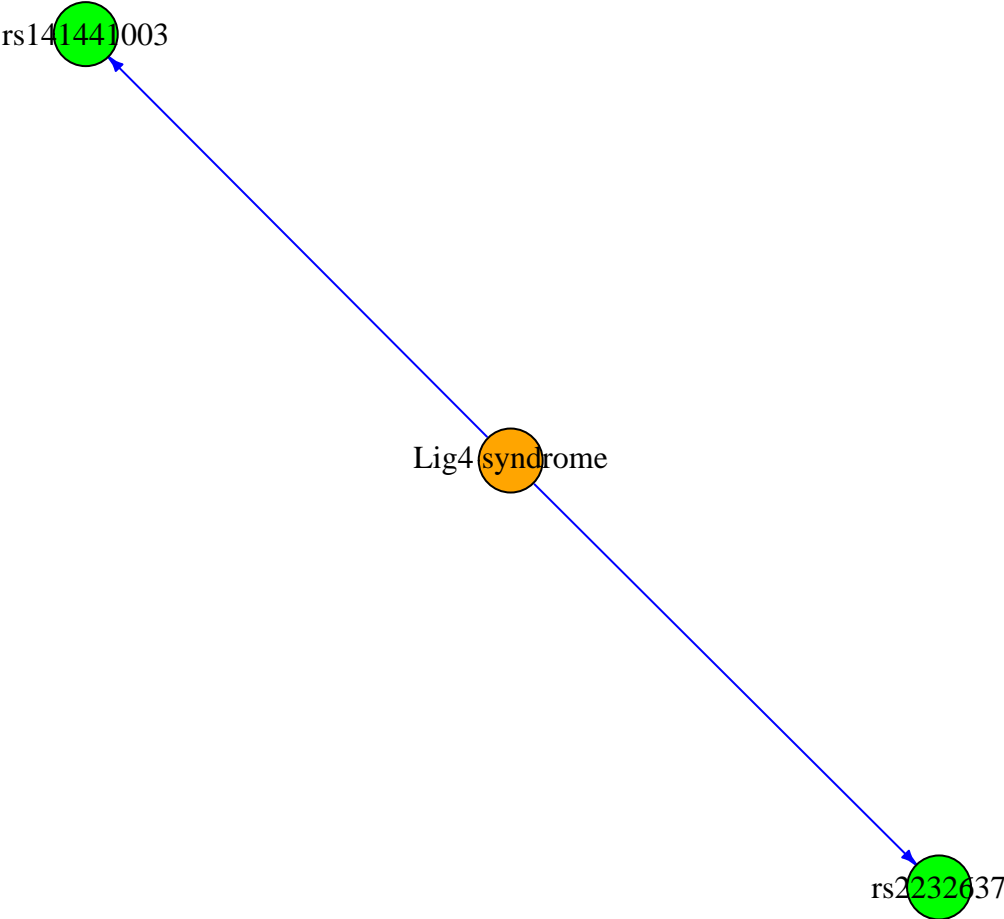

**Variant–Disease Network (Limb–Girdle Muscular Dystrophy)**

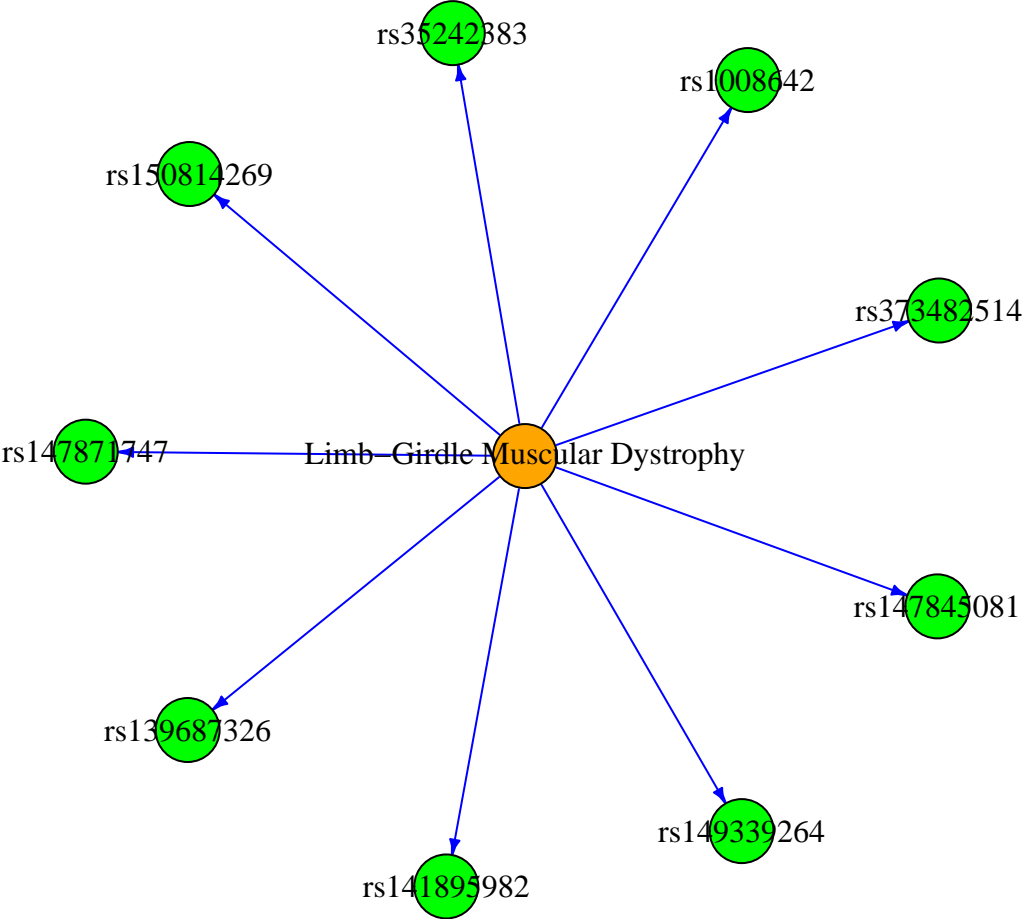

# Variant-Disease Network (Limb-girdle muscular dystrophy-dystroglycanopathy)

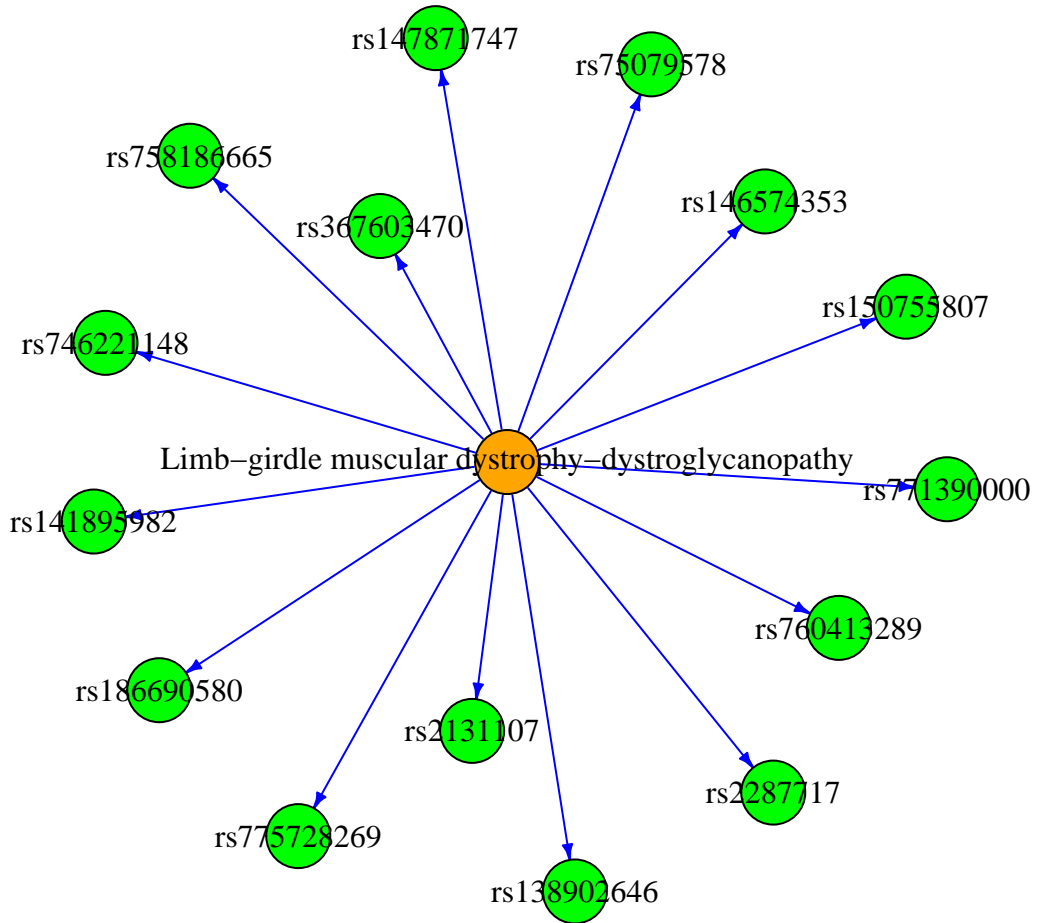

# Variant–Disease Network (Lipoatrophy with Diabetes)

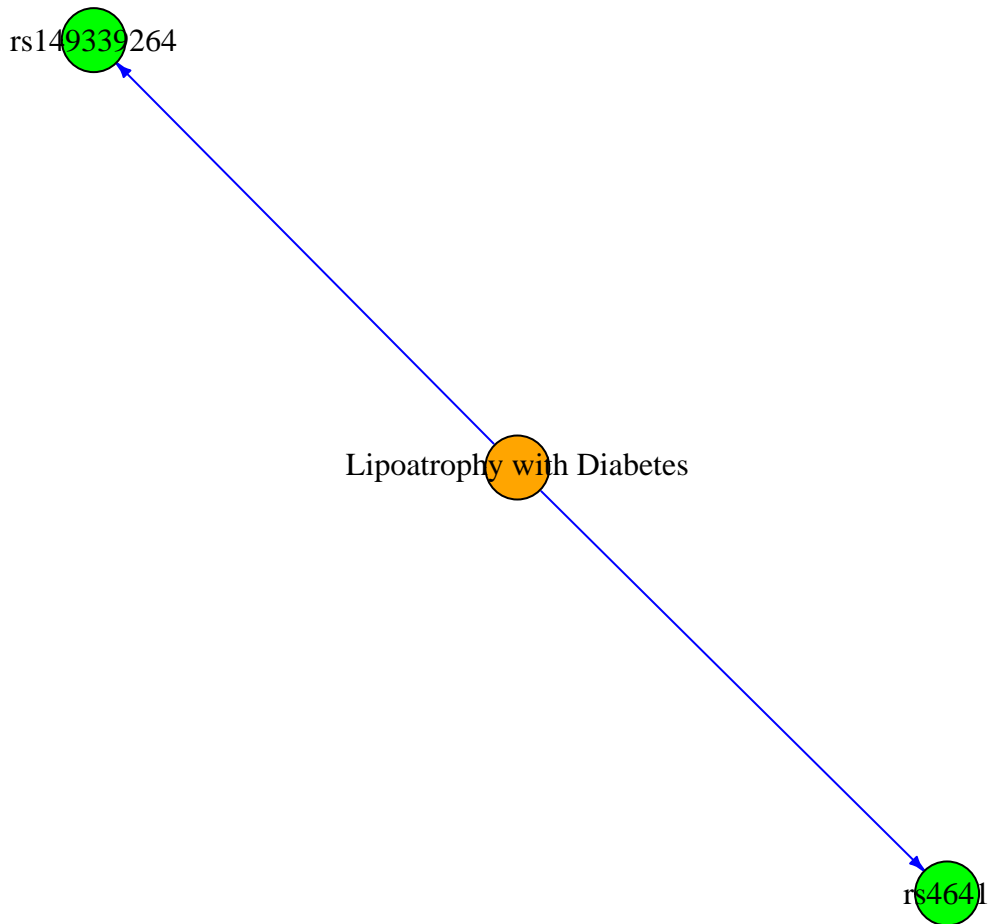

Variant–Disease Network (Lissencephaly)

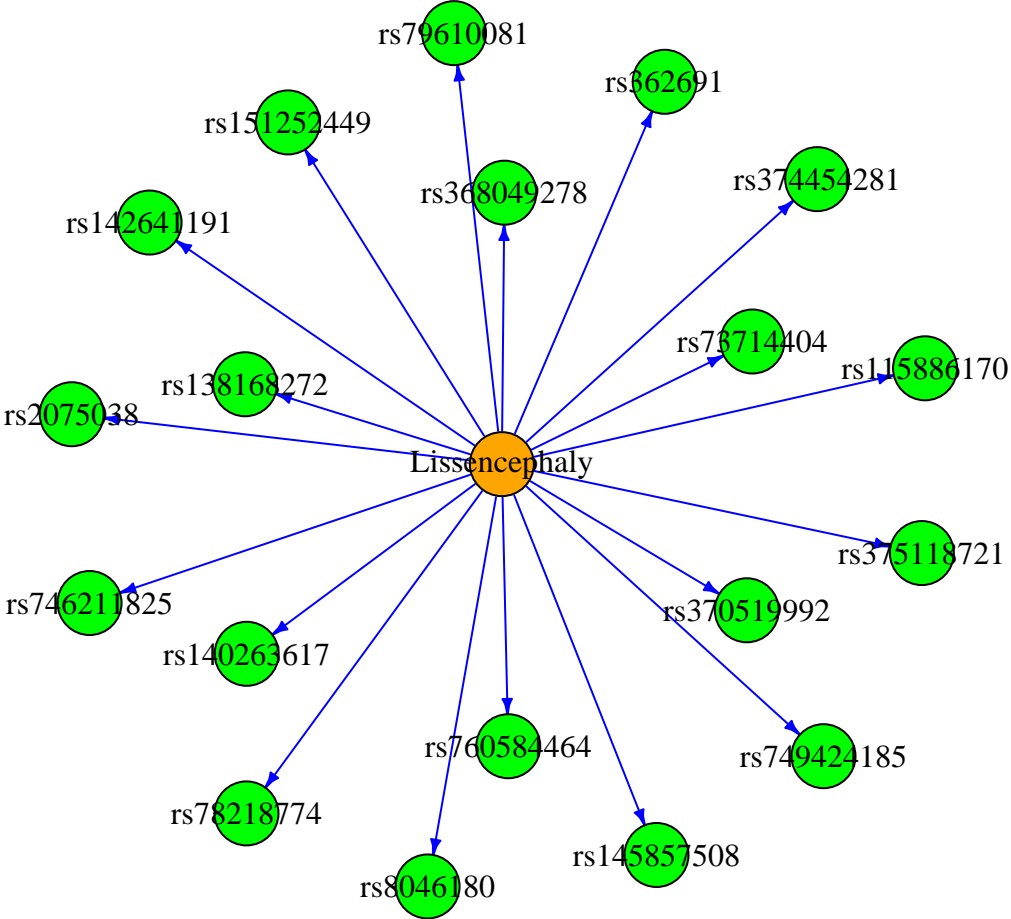

## Variant-Disease Network (Lissencephaly 1)

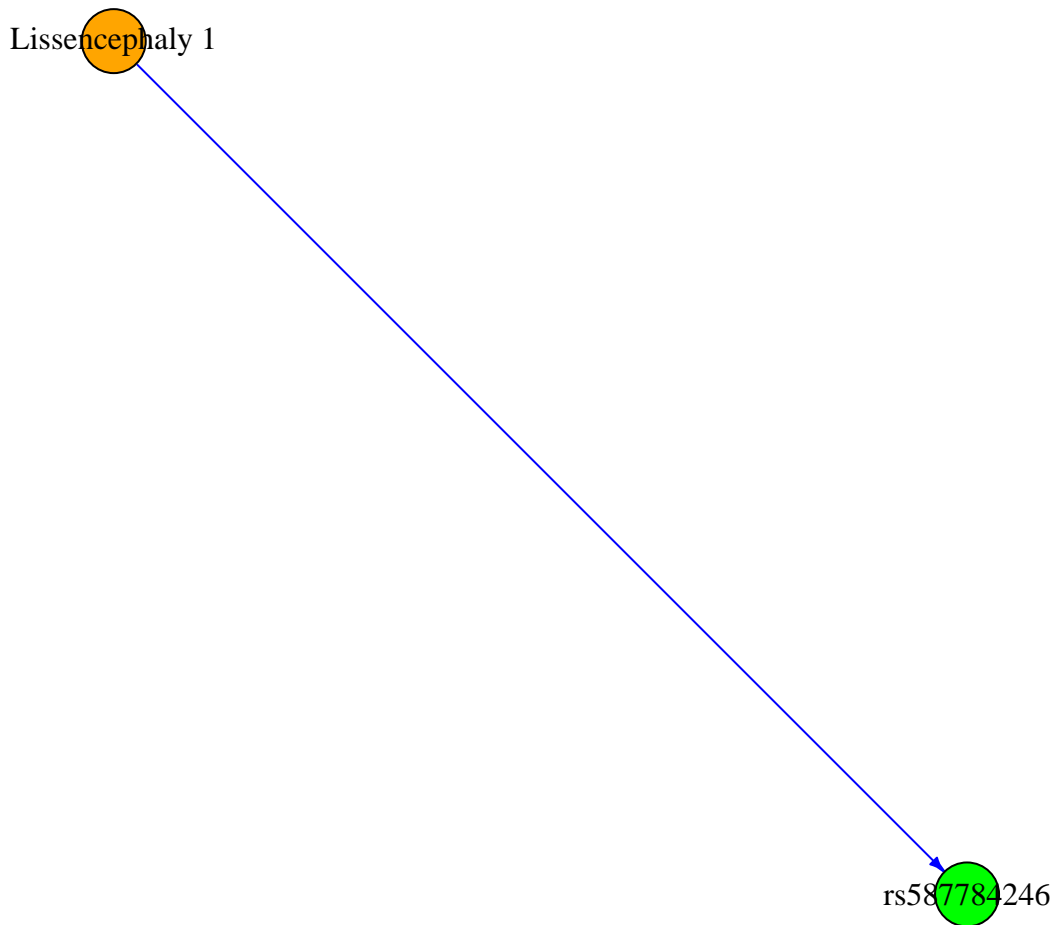



Variant–Disease Network (Lissencephaly 2)

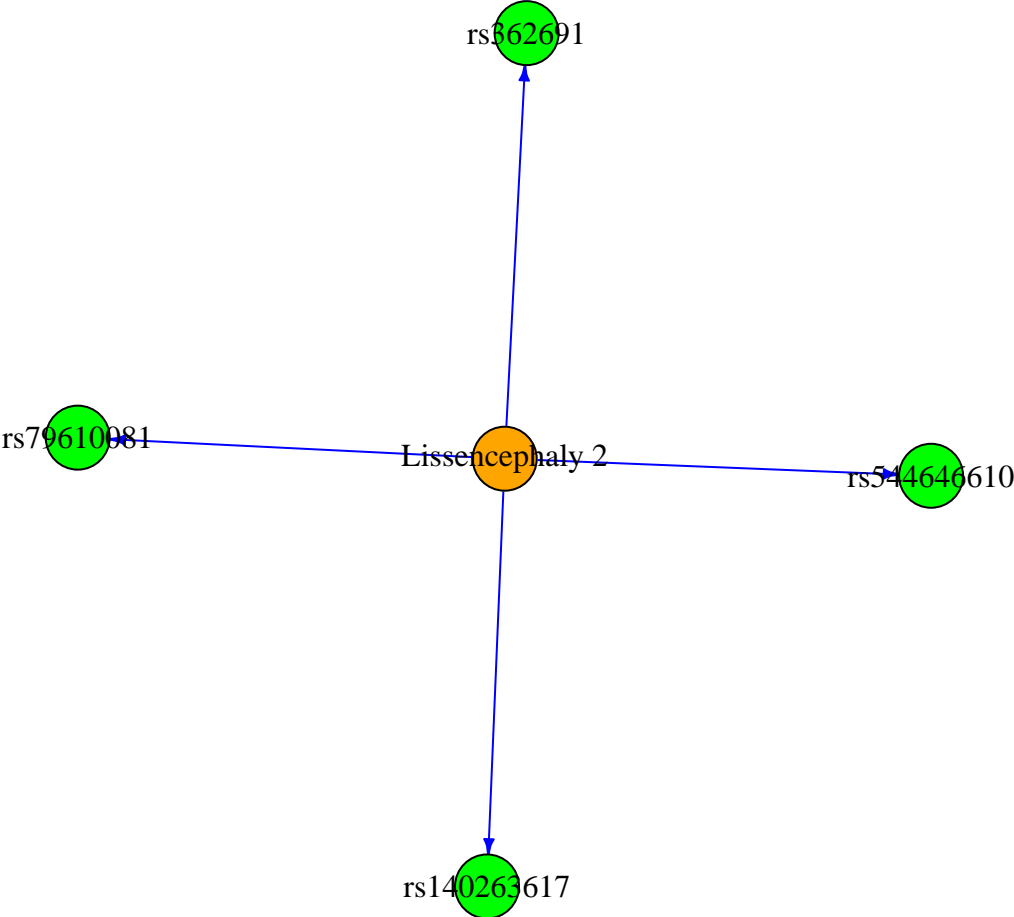

Variant–Disease Network (Lissencephaly 3)

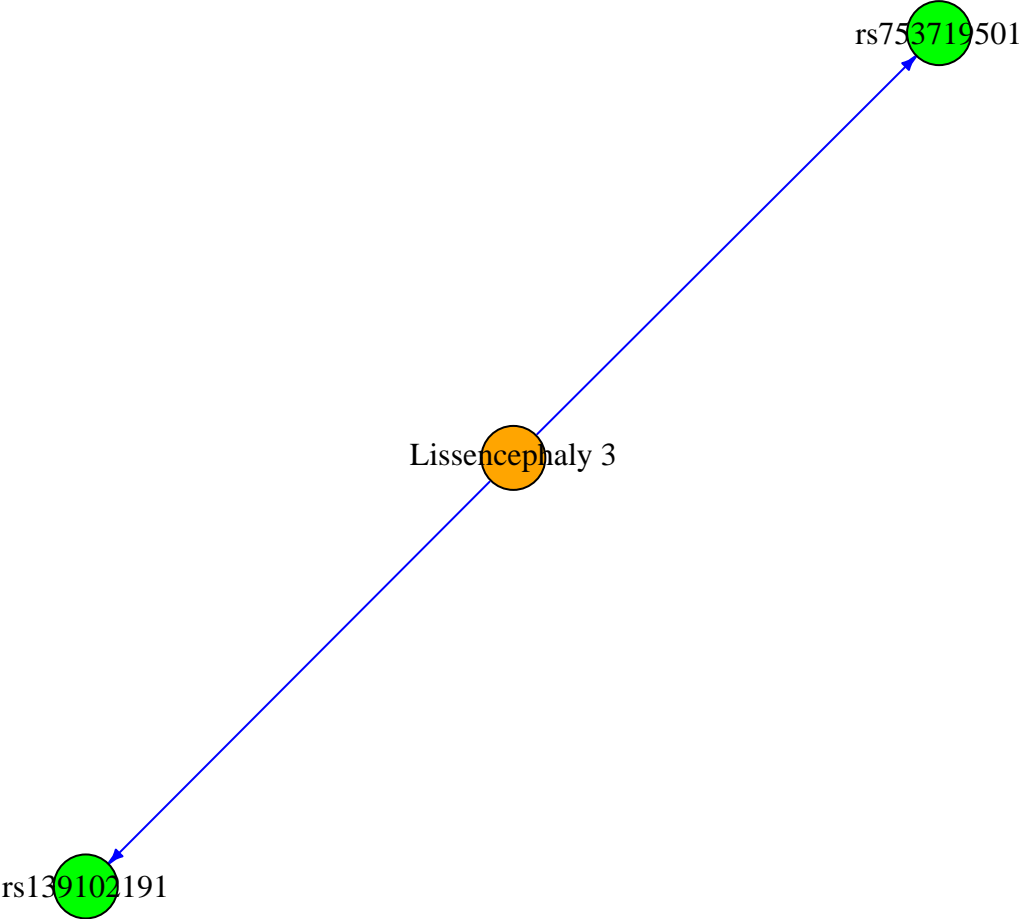

**Variant–Disease Network (Lissencephaly/Subcortical Band Heterotopia)**

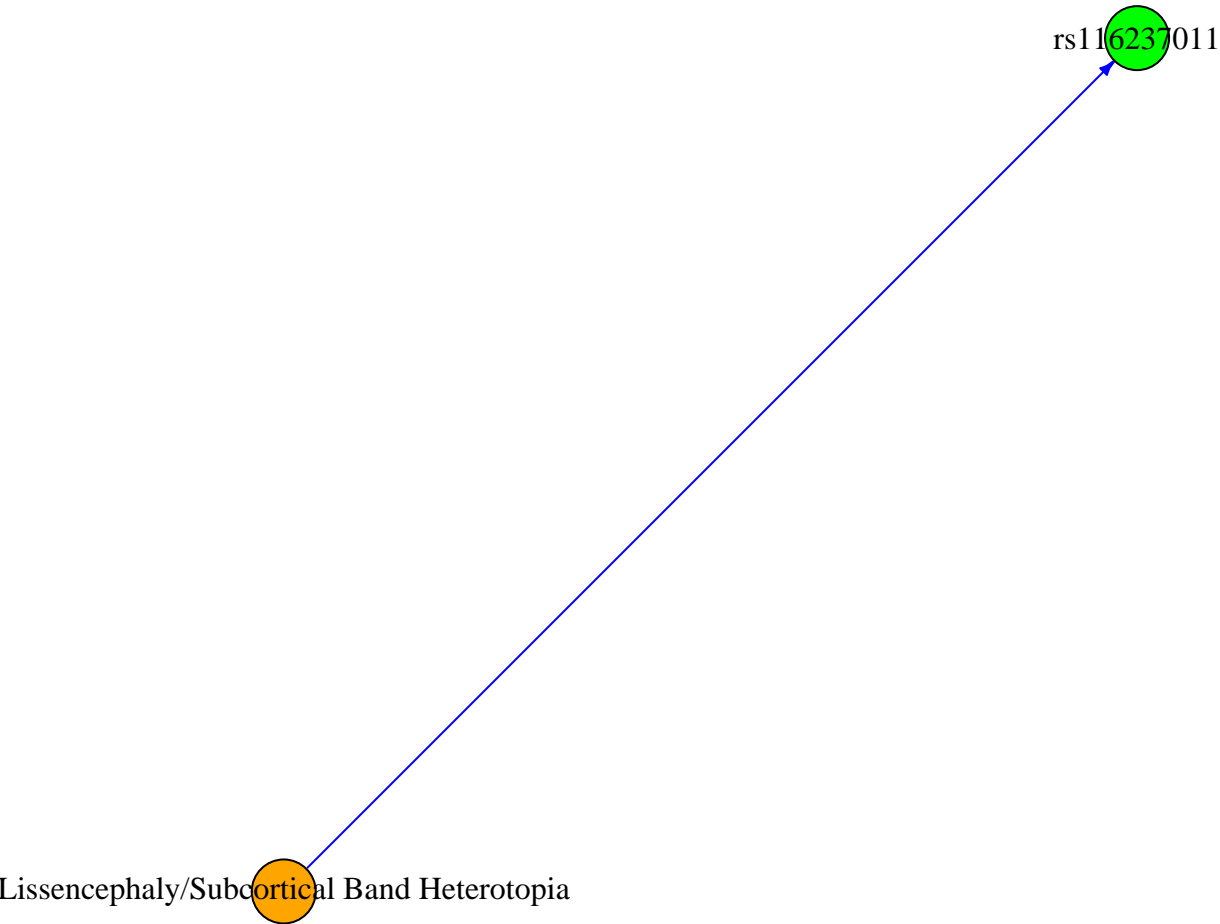

**Variant–Disease Network (Liver failure acute infantile)**

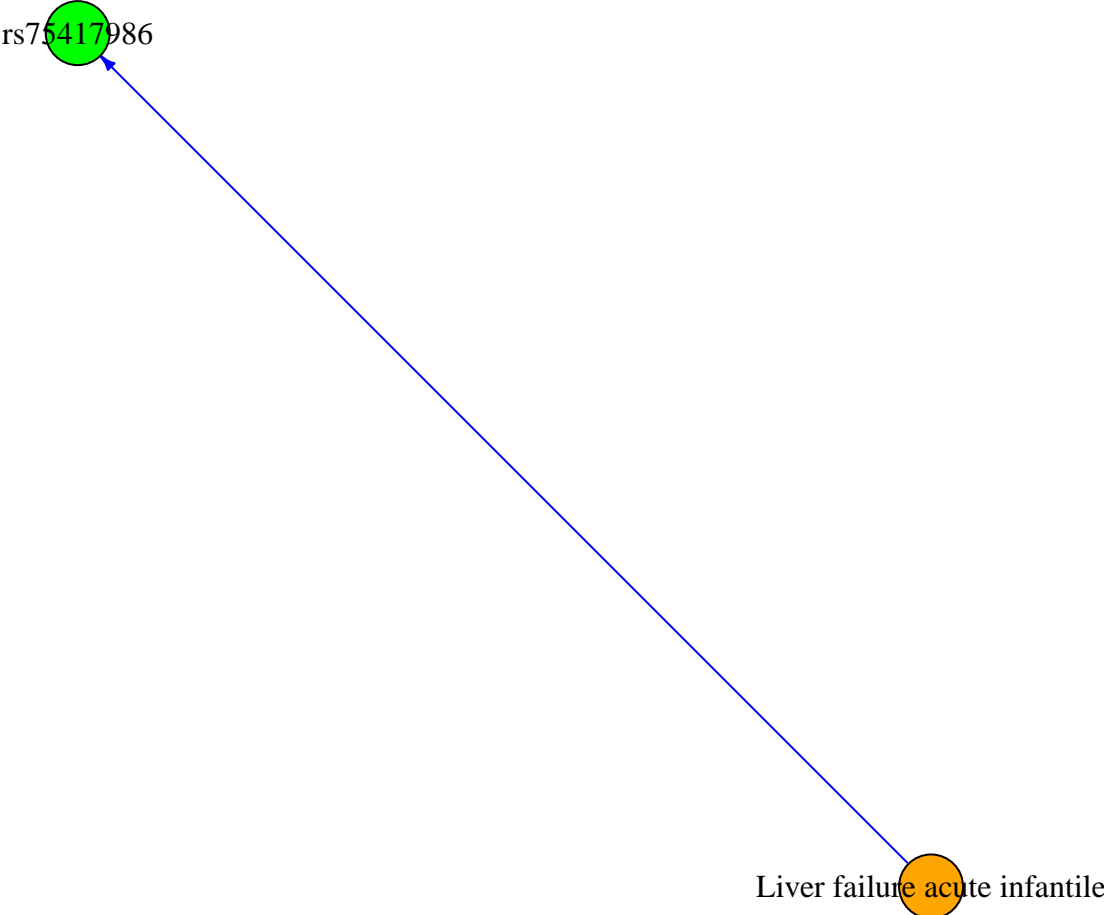

Variant–Disease Network (Localized AR Hypotrichosis)

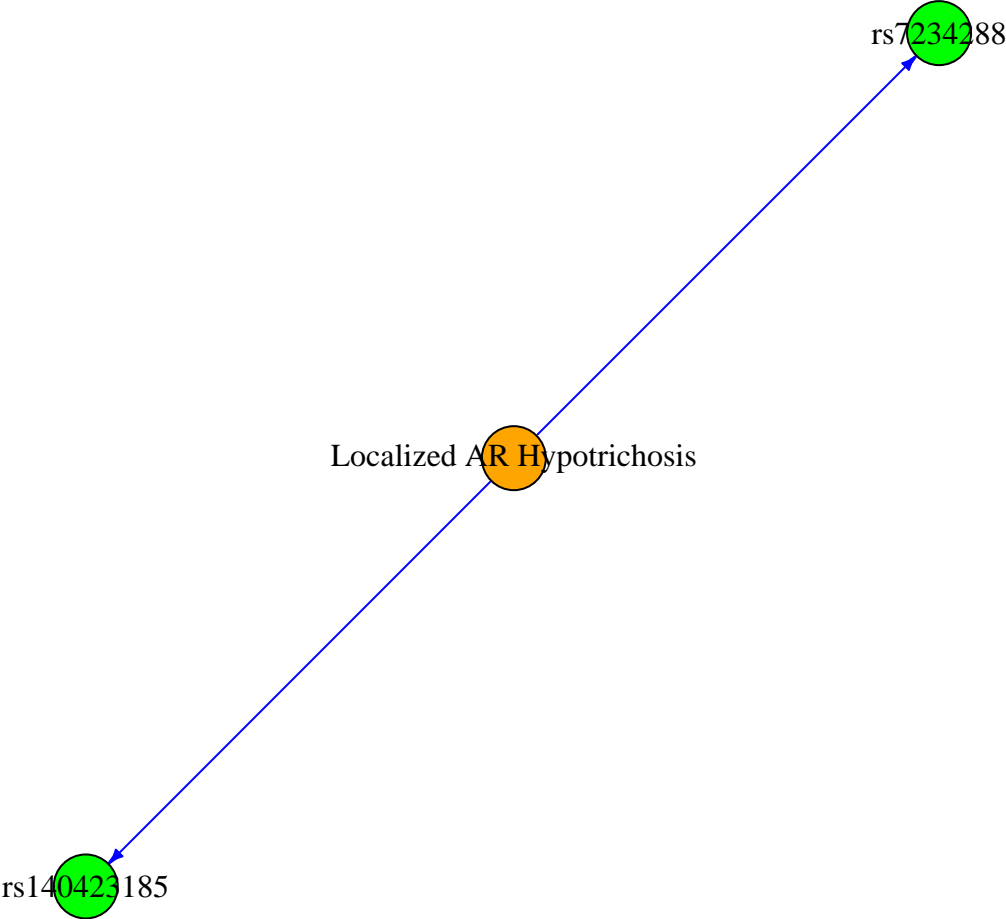

## Variant–Disease Network (Loeys–Dietz syndrome)

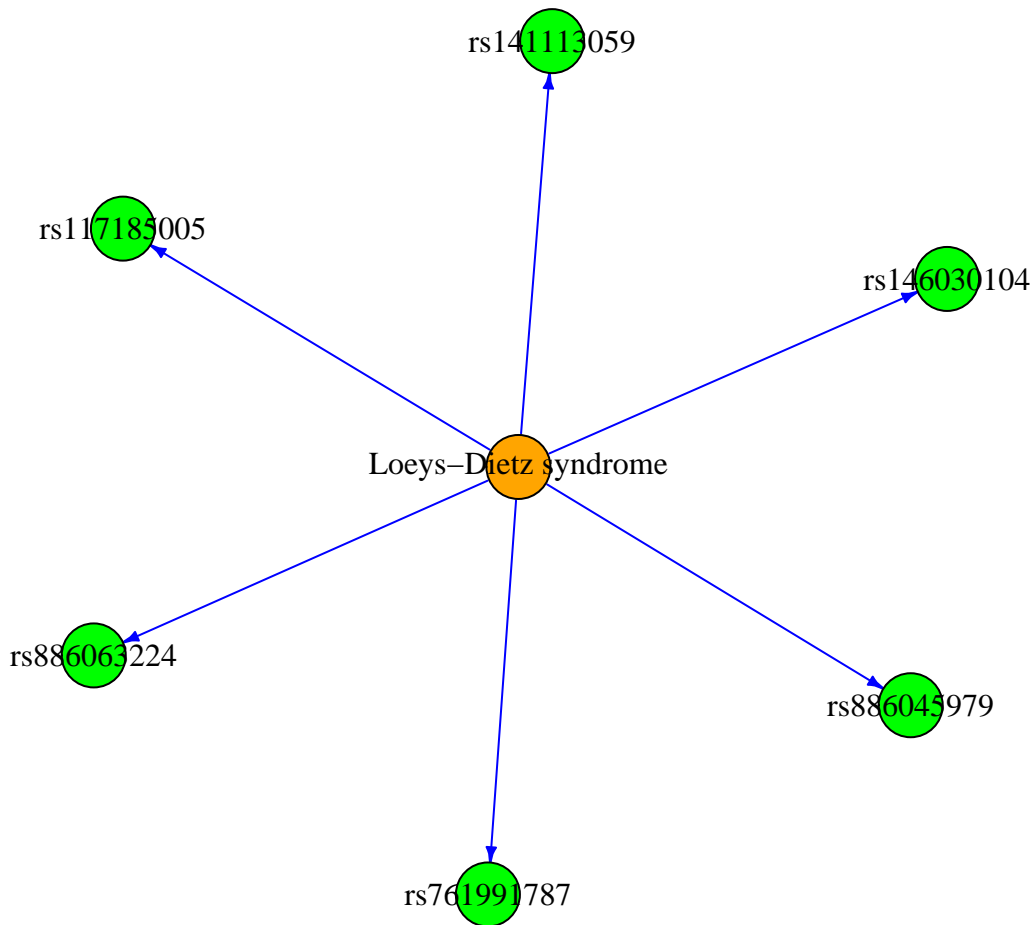

## Variant–Disease Network (Loeys–Dietz syndrome 1)

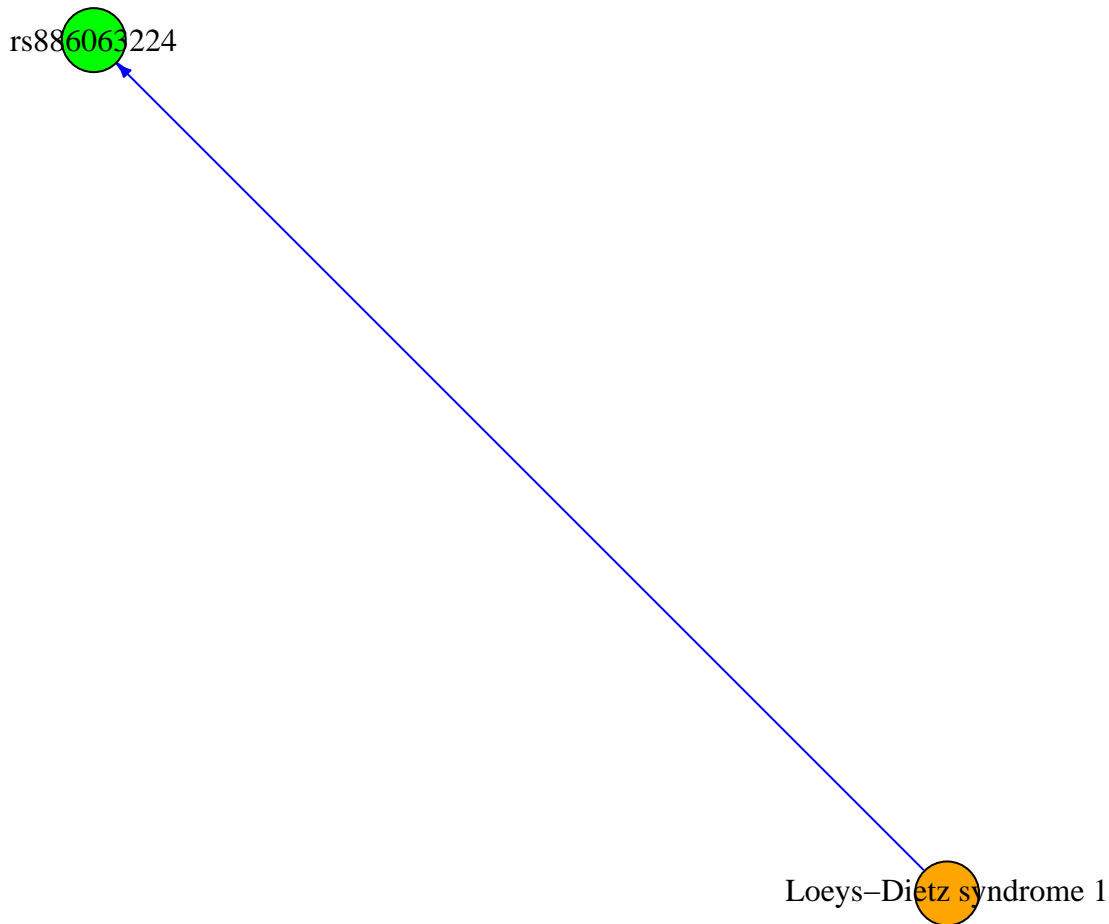

## Variant–Disease Network (Loeys–Dietz syndrome 2)

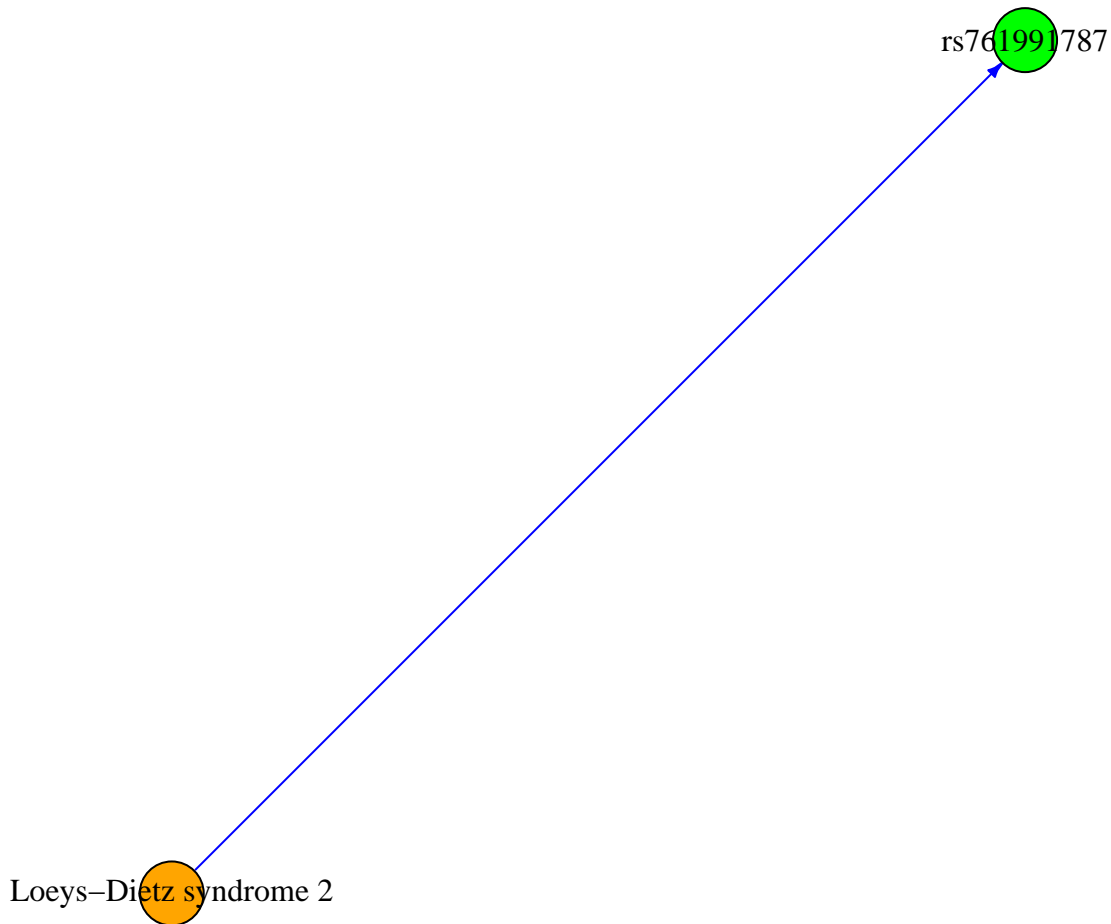



## Variant-Disease Network (Loeys-Dietz syndrome 3)

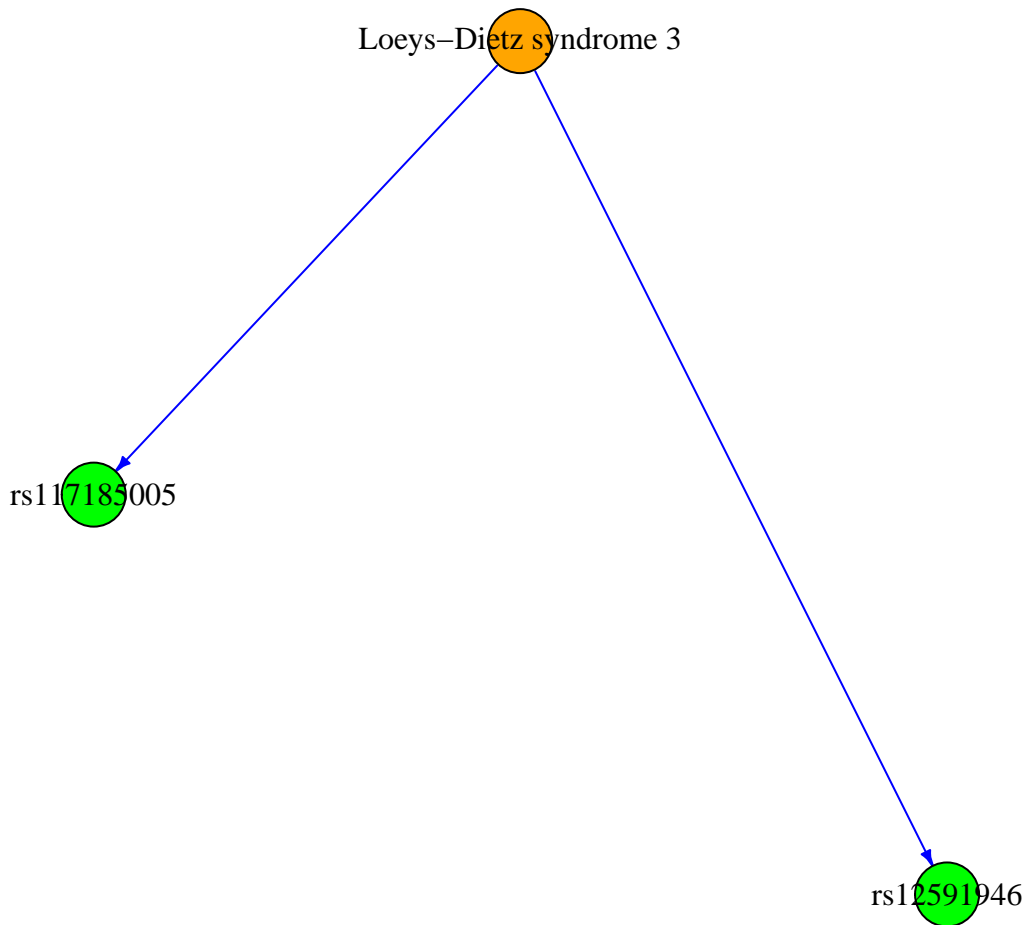

## Variant–Disease Network (Loeys–Dietz syndrome 4)

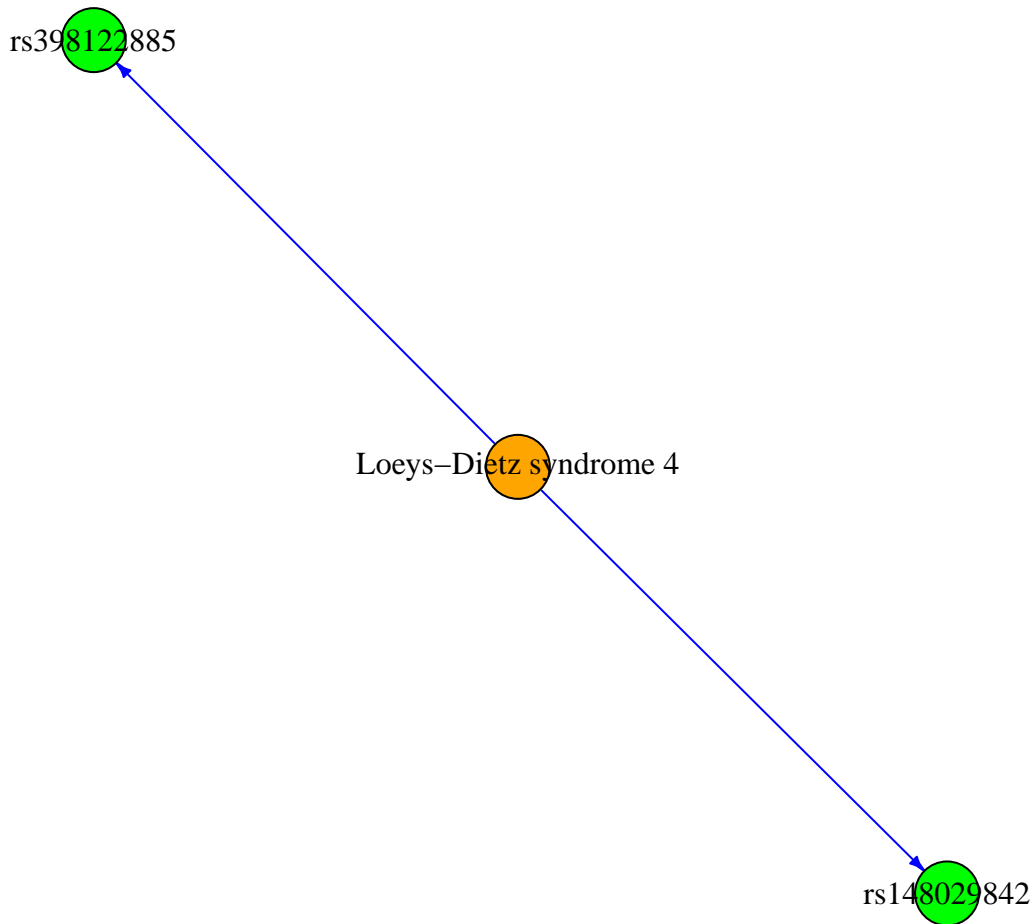

Variant–Disease Network (Long QT syndrome)

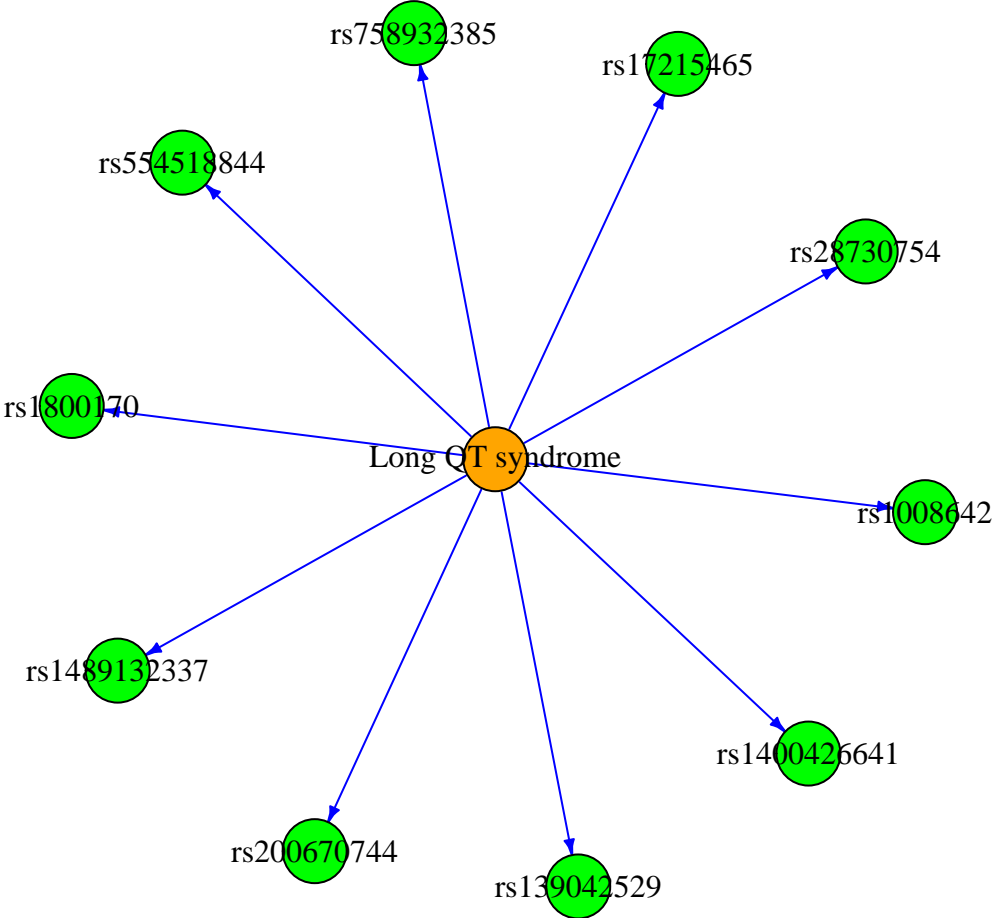

## Variant-Disease Network (Long QT syndrome 1)

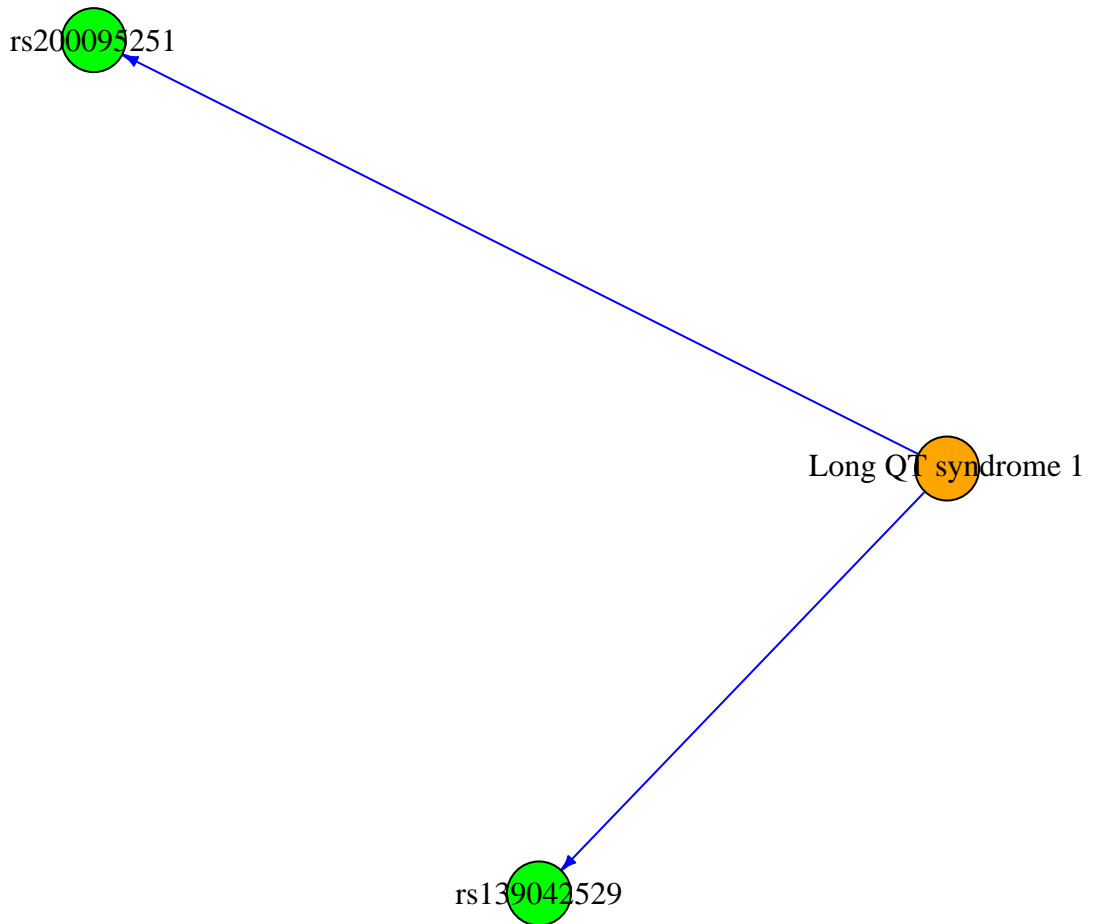

## Variant–Disease Network (Long QT syndrome 14)

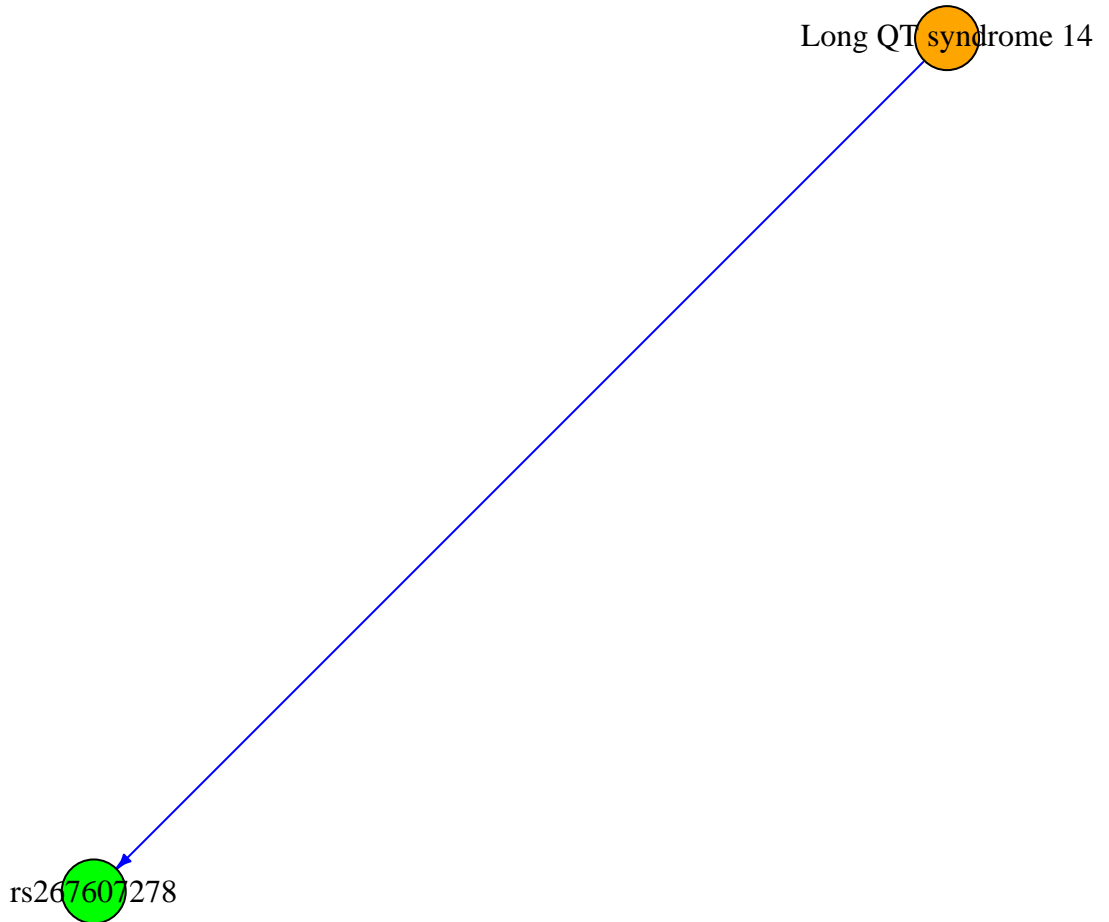

# Variant-Disease Network (Long-chain 3-hydroxyacyl-CoA dehydrogenase defi

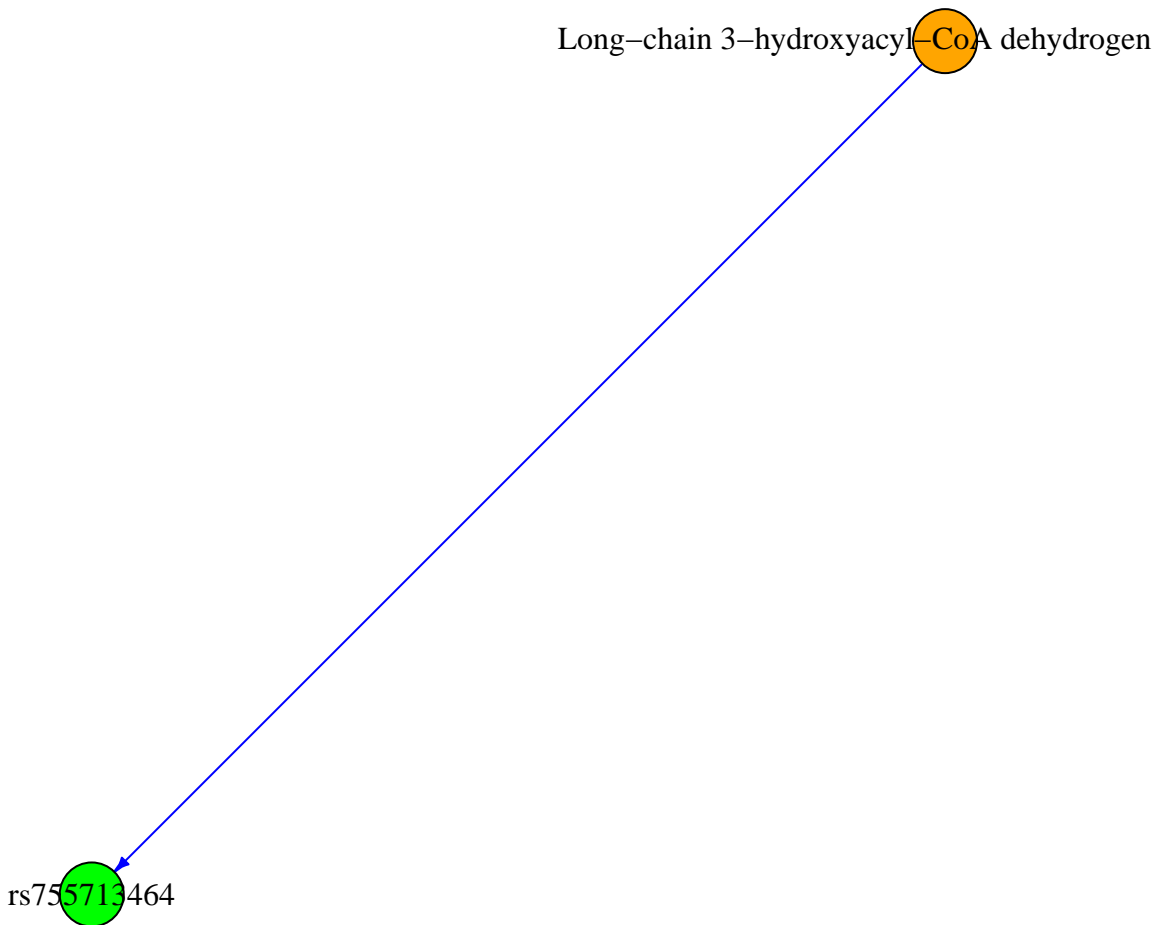

## Variant–Disease Network (Lowe syndrome)

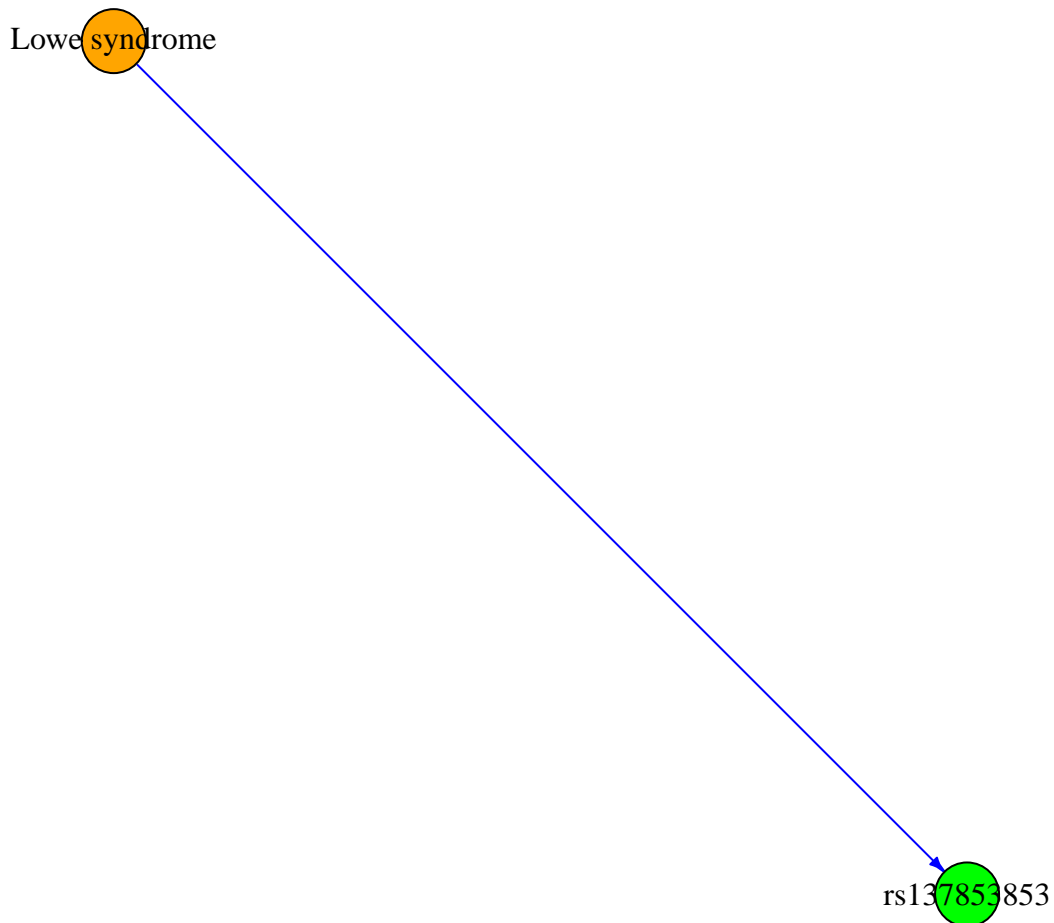

## Variant–Disease Network (Lung cancer)

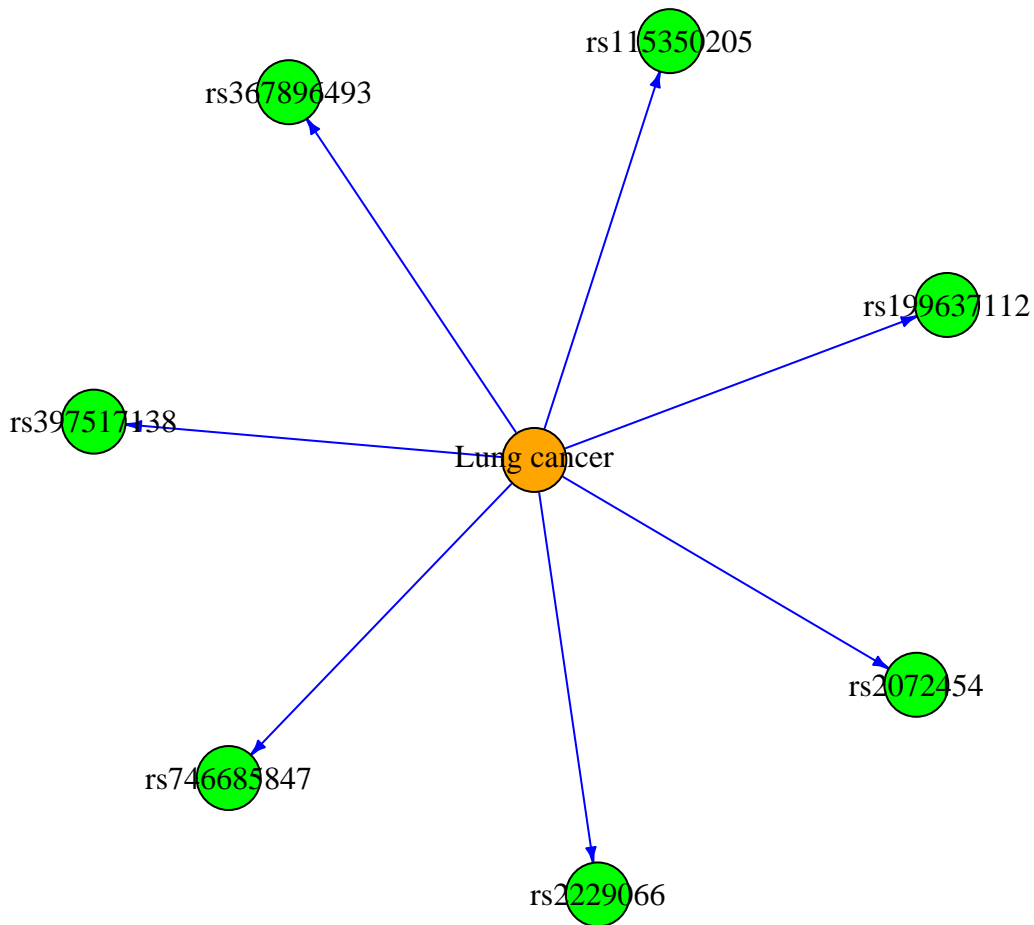



## Variant-Disease Network (Lung disease)

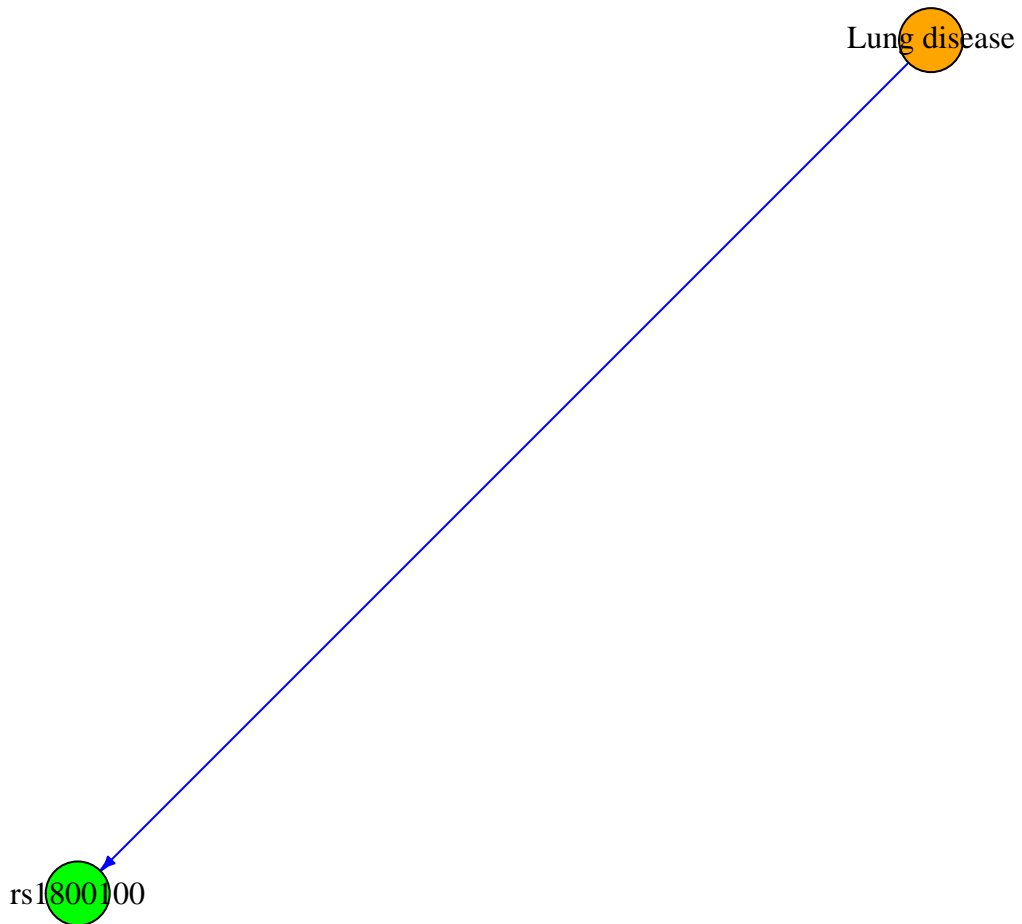

## Variant–Disease Network (Luscan–lumish syndrome)

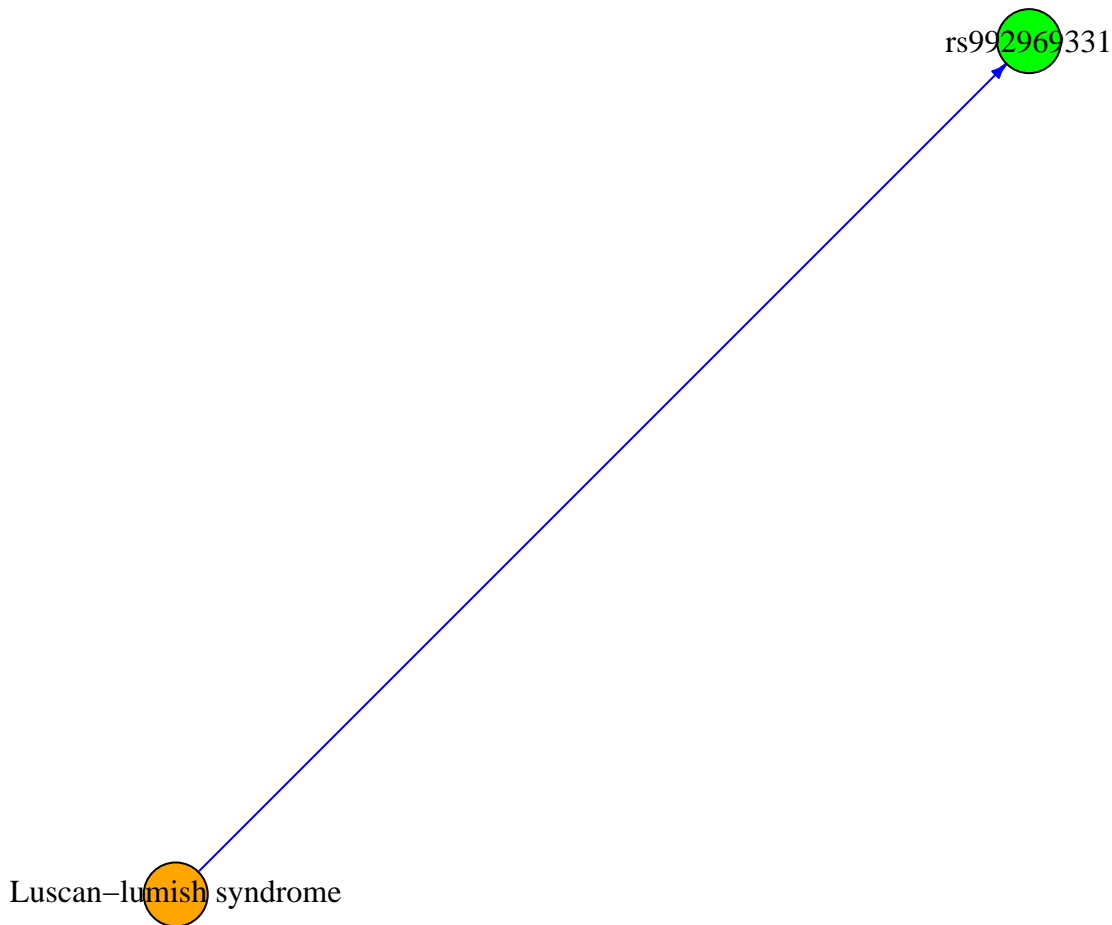

Variant–Disease Network (Lymphangiomyomatosis)

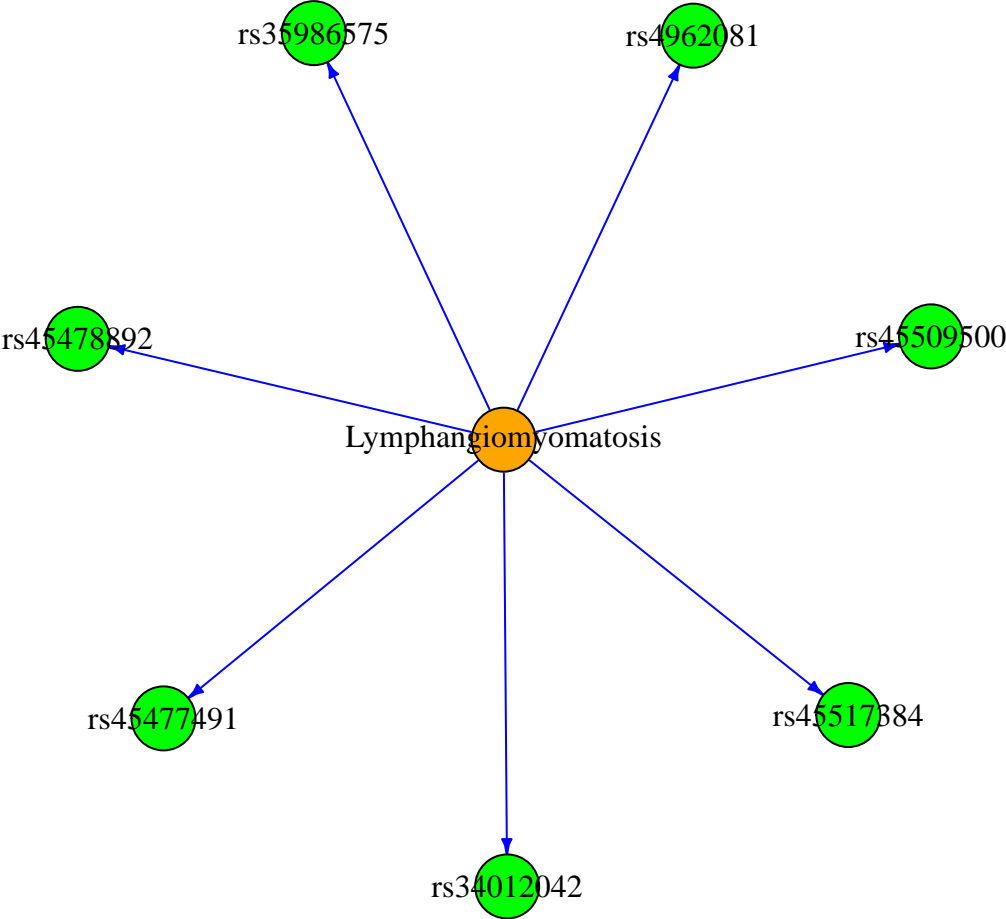

## Variant-Disease Network (Lymphedema)

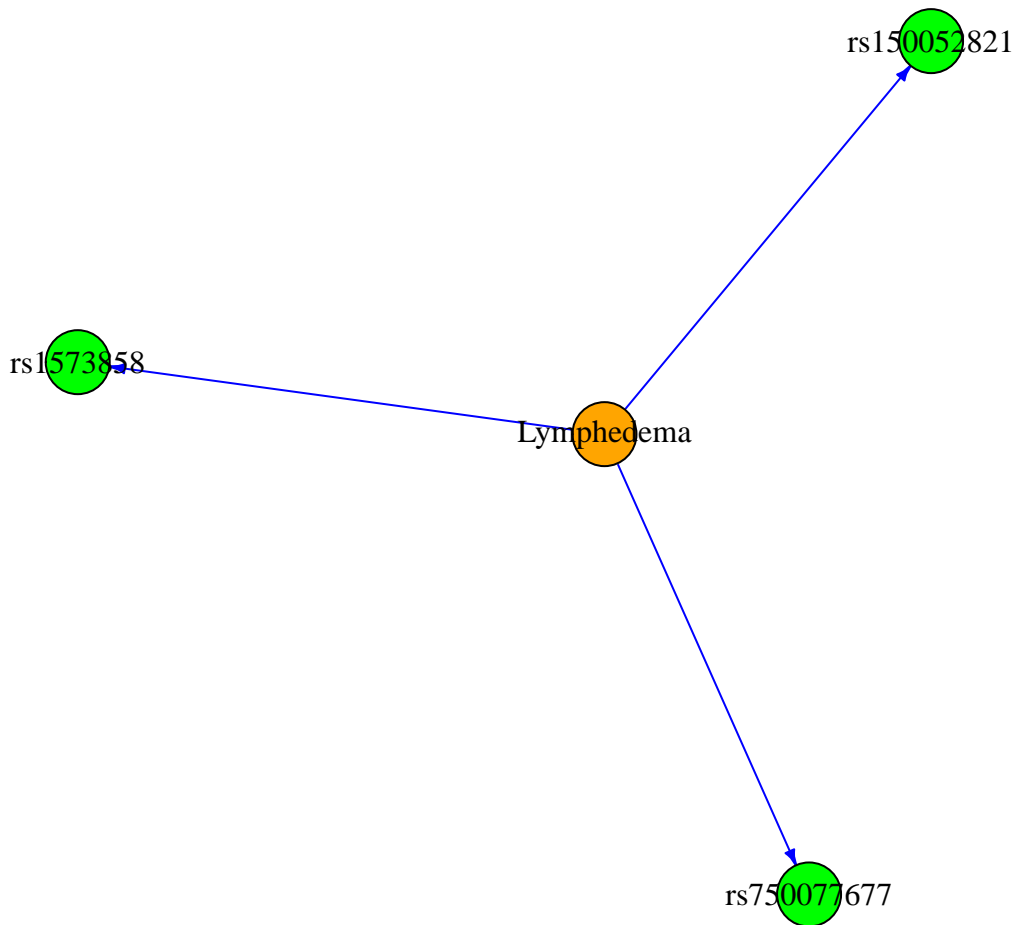

# Variant–Disease Network (Lymphoproliferative syndrome 1)

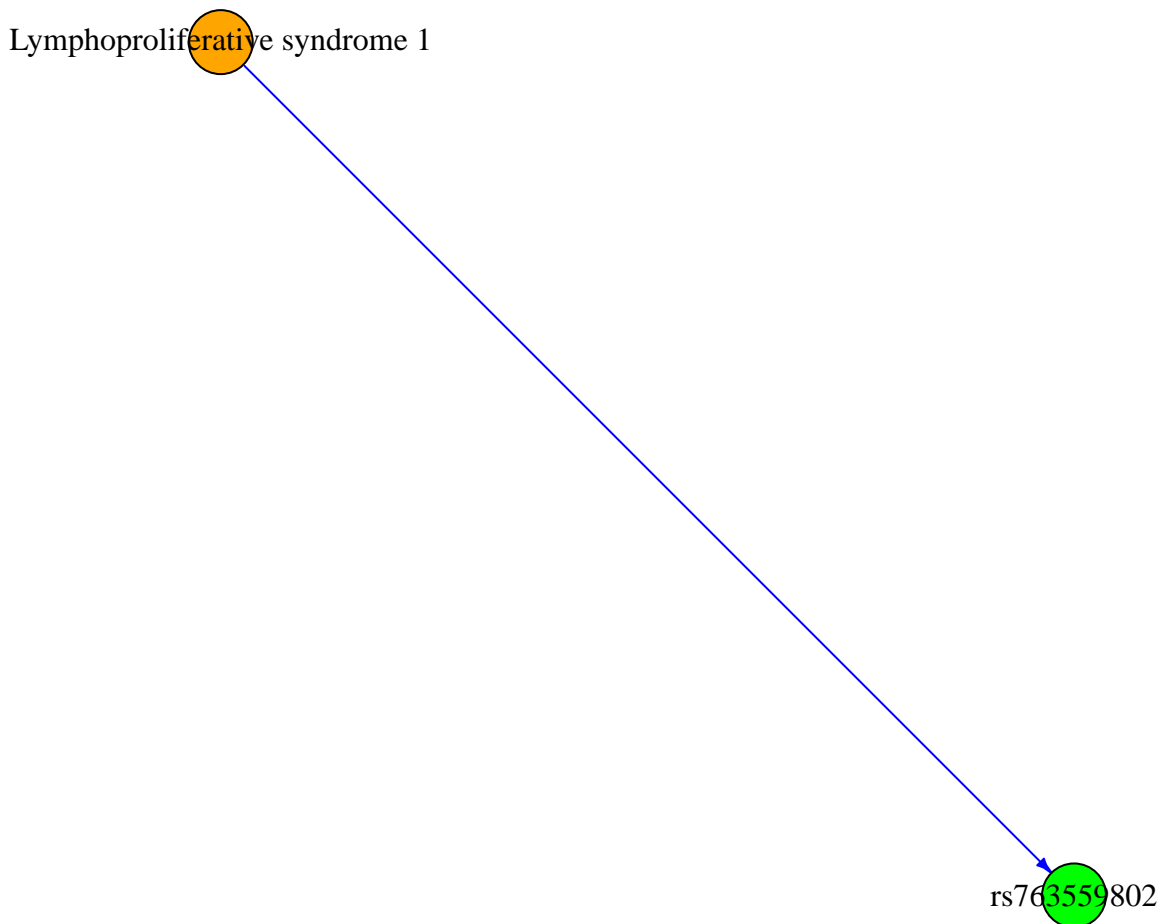

## Variant–Disease Network (Lynch syndrome)

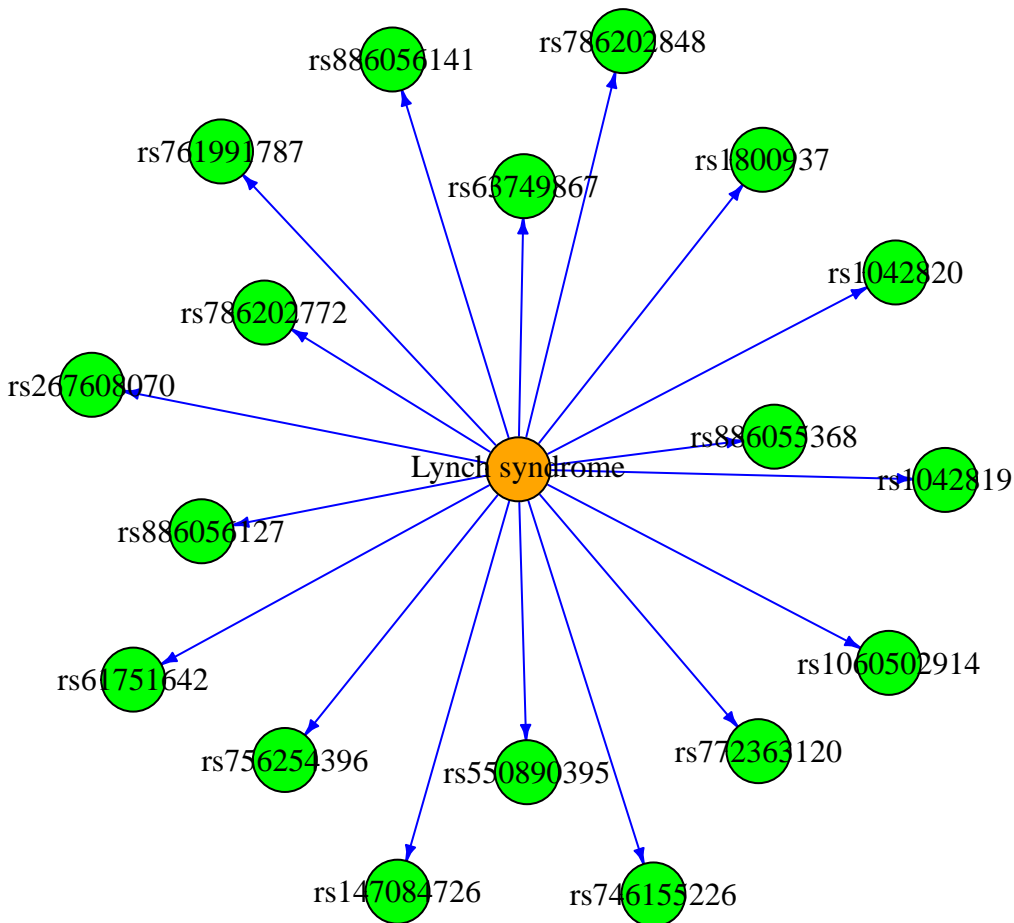

## Variant–Disease Network (Lynch syndrome II)

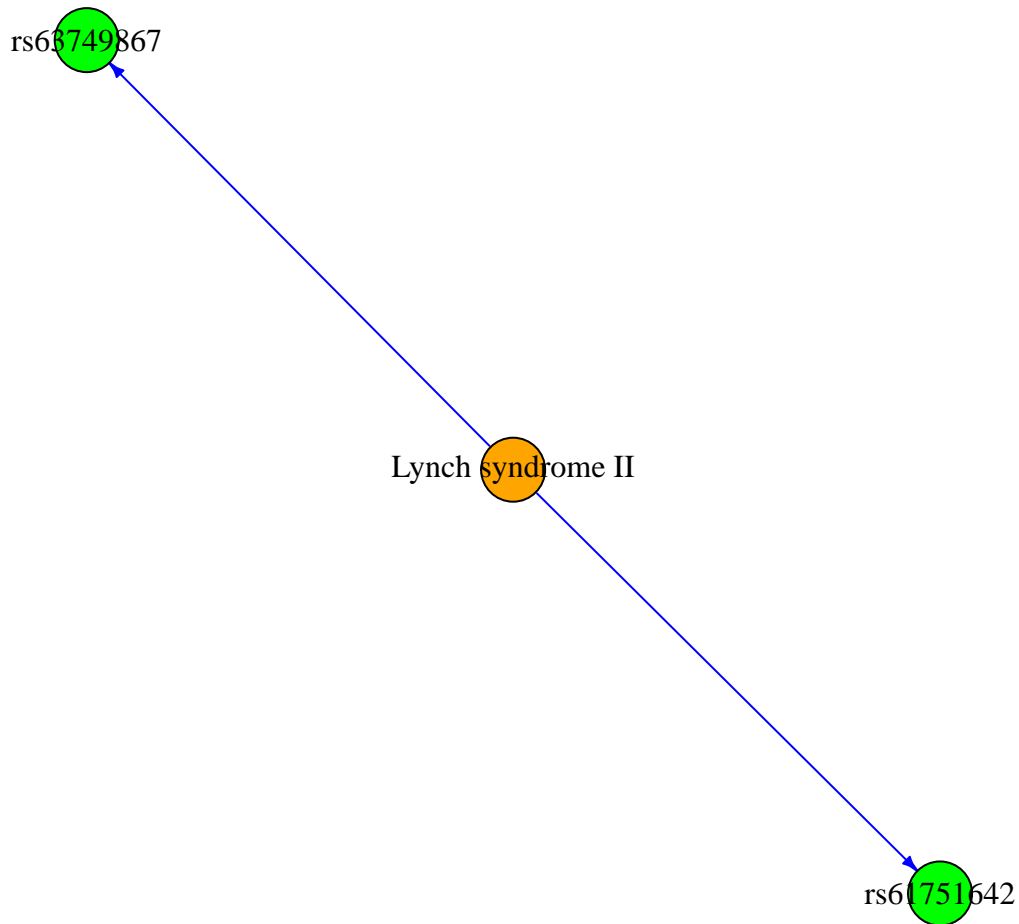

**Variant–Disease Network (Lysosomal acid lipase deficiency)**

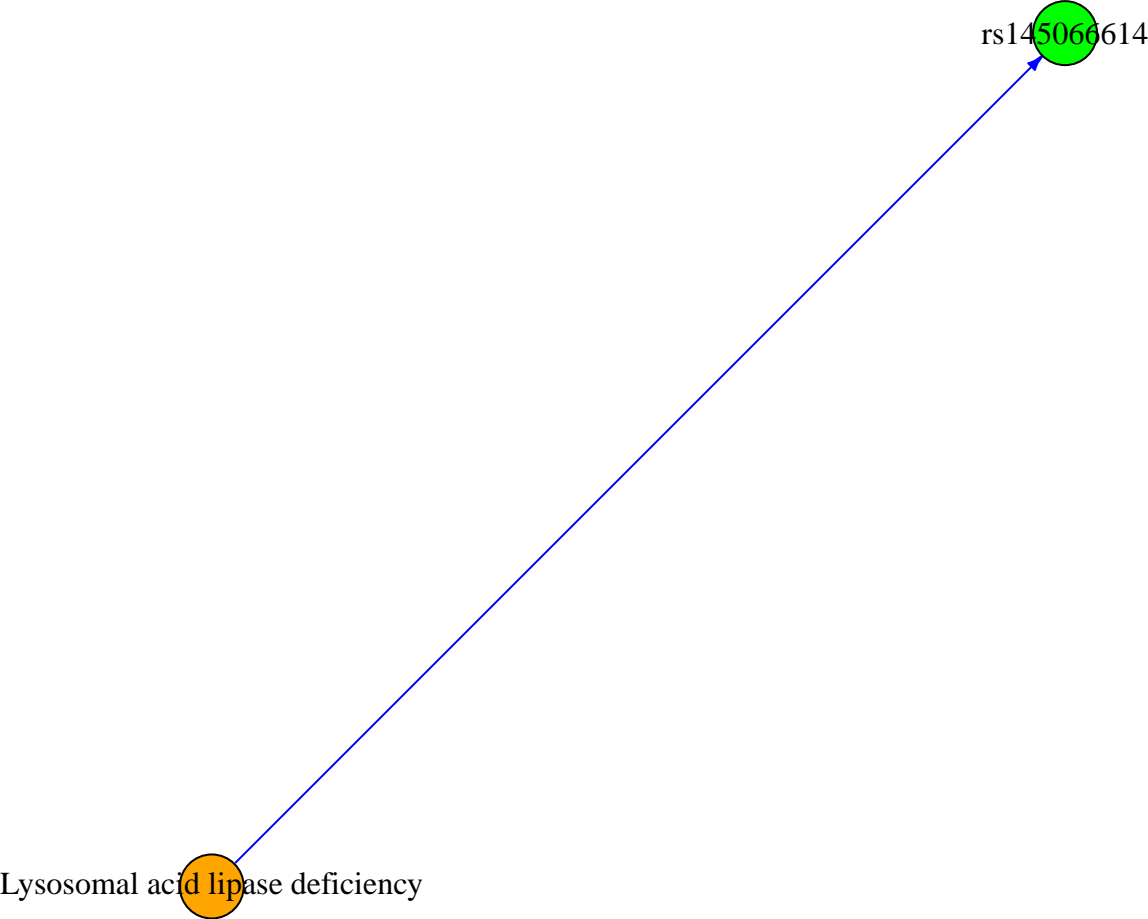



## Variant–Disease Network (Macular degeneration)

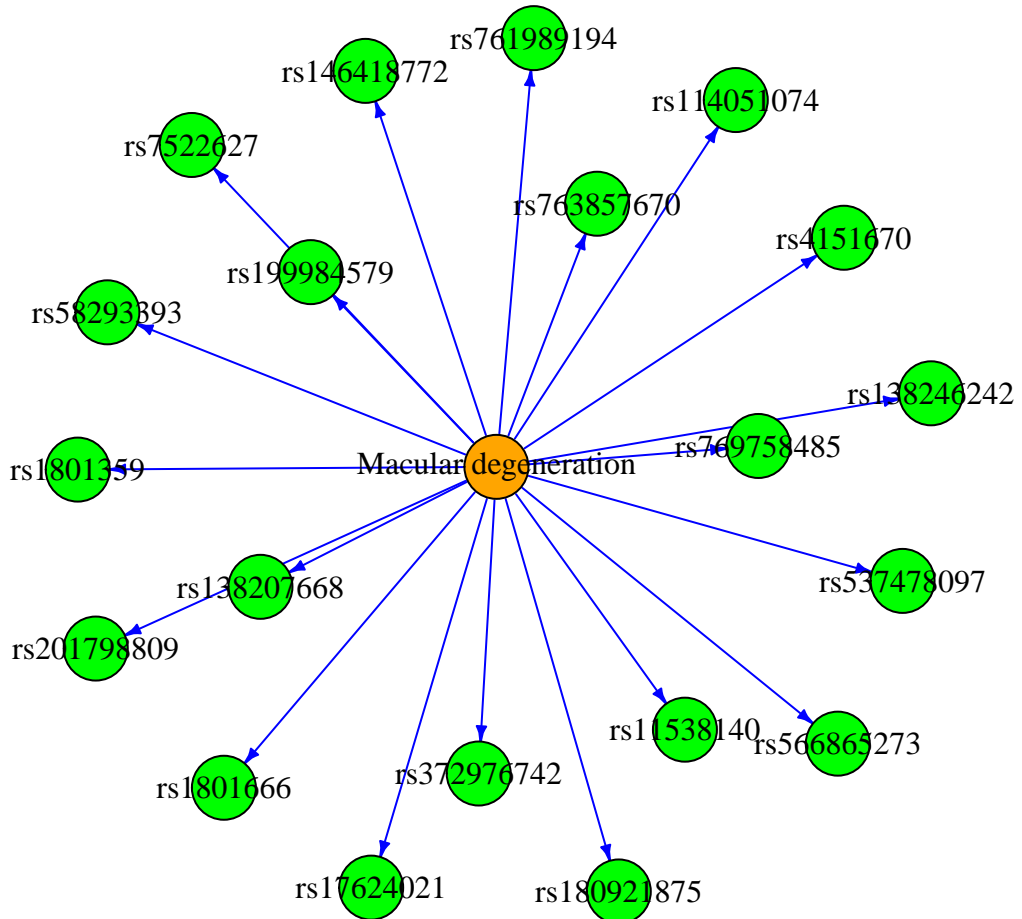

## Variant–Disease Network (Majeed syndrome)

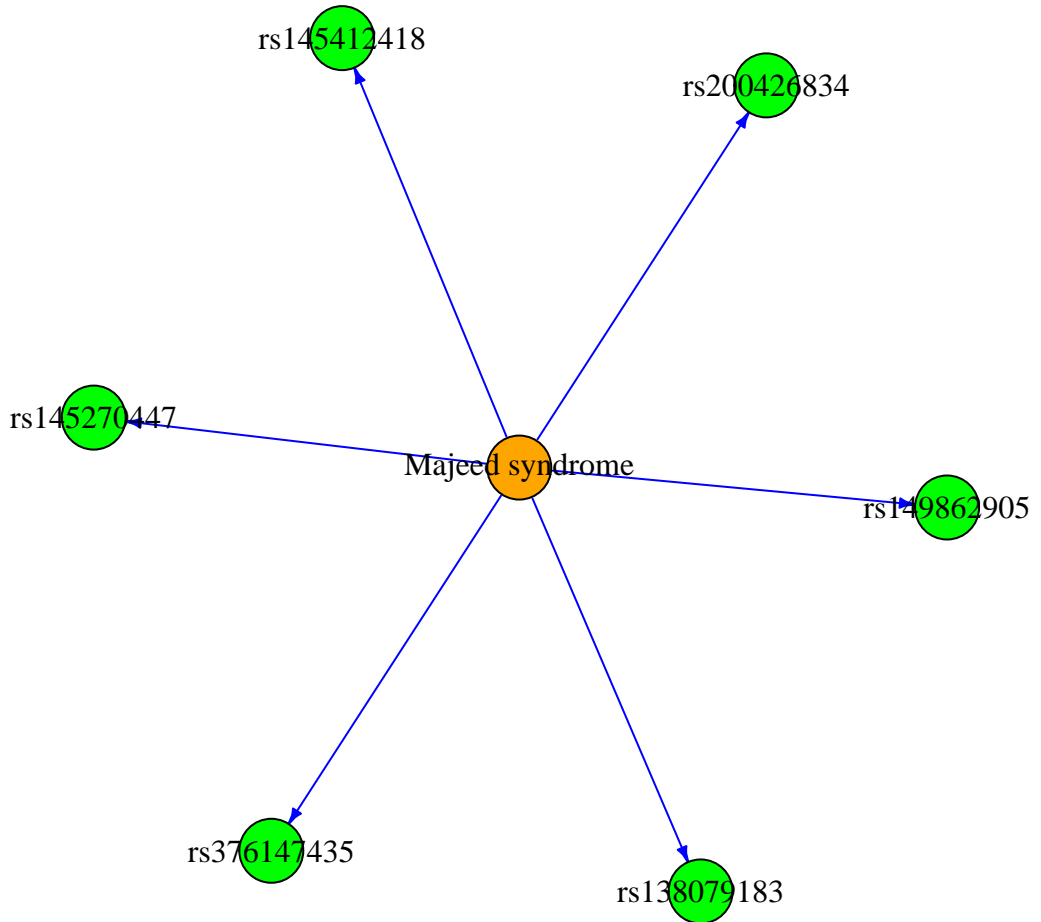

**Variant–Disease Network (Malignant tumor of esophagus)**

Malignant tumor of esophagus

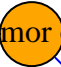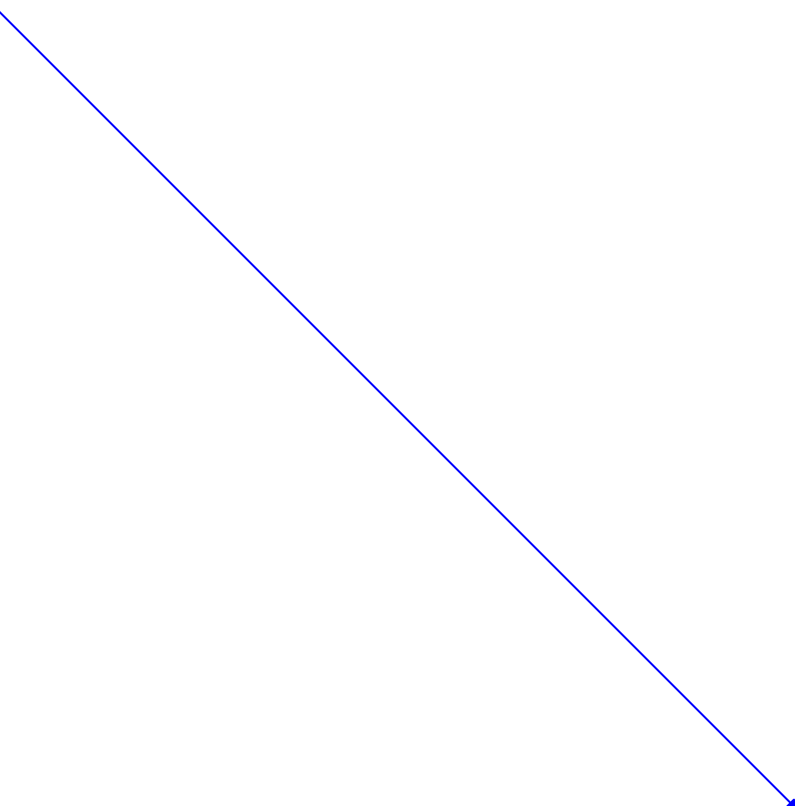

rs761991787

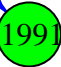

# Variant-Disease Network (Malignant tumor of prostate)

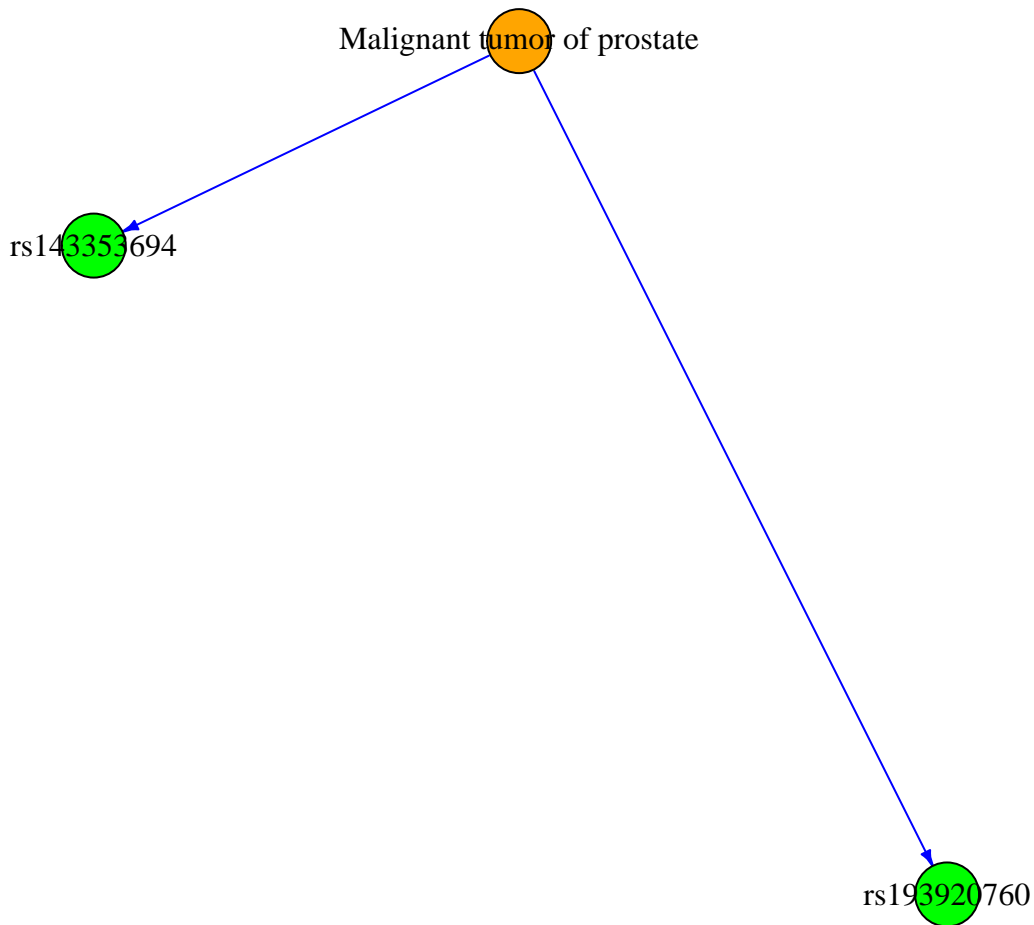

## Variant–Disease Network (Mandibuloacral dysplasia)

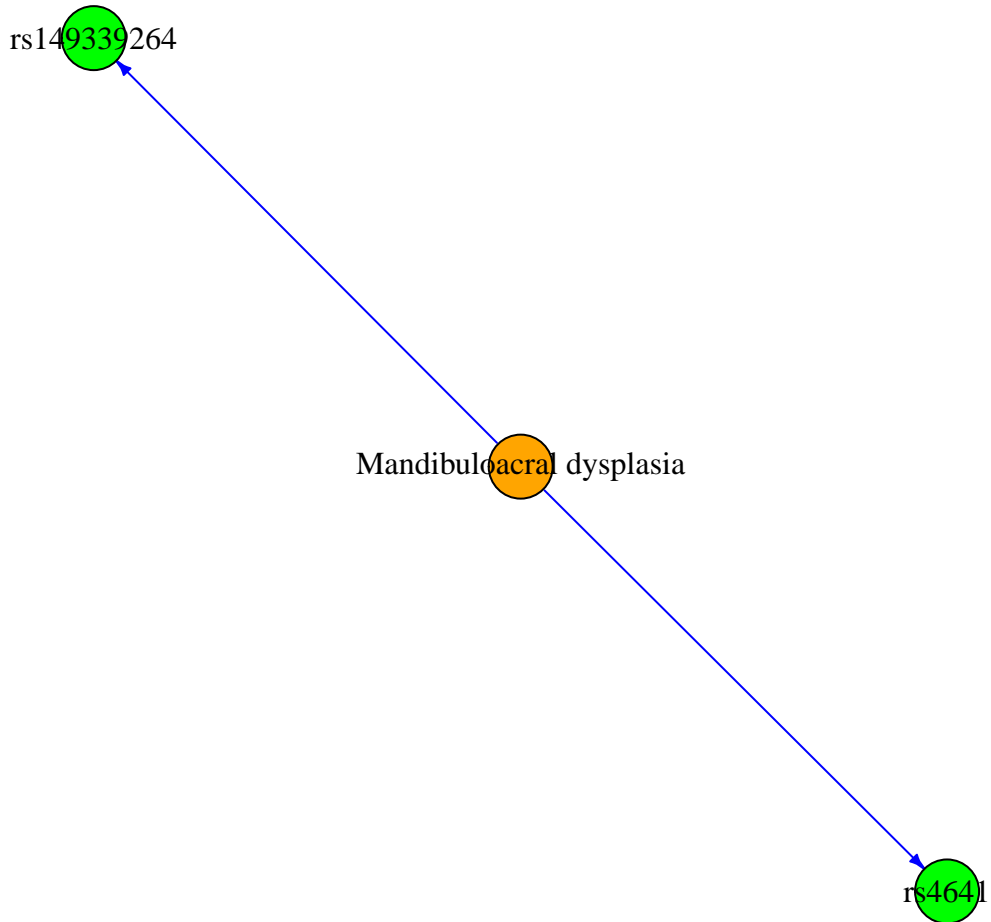

Variant–Disease Network (Mandibuloacral dysplasia with type A lipodystrophy)

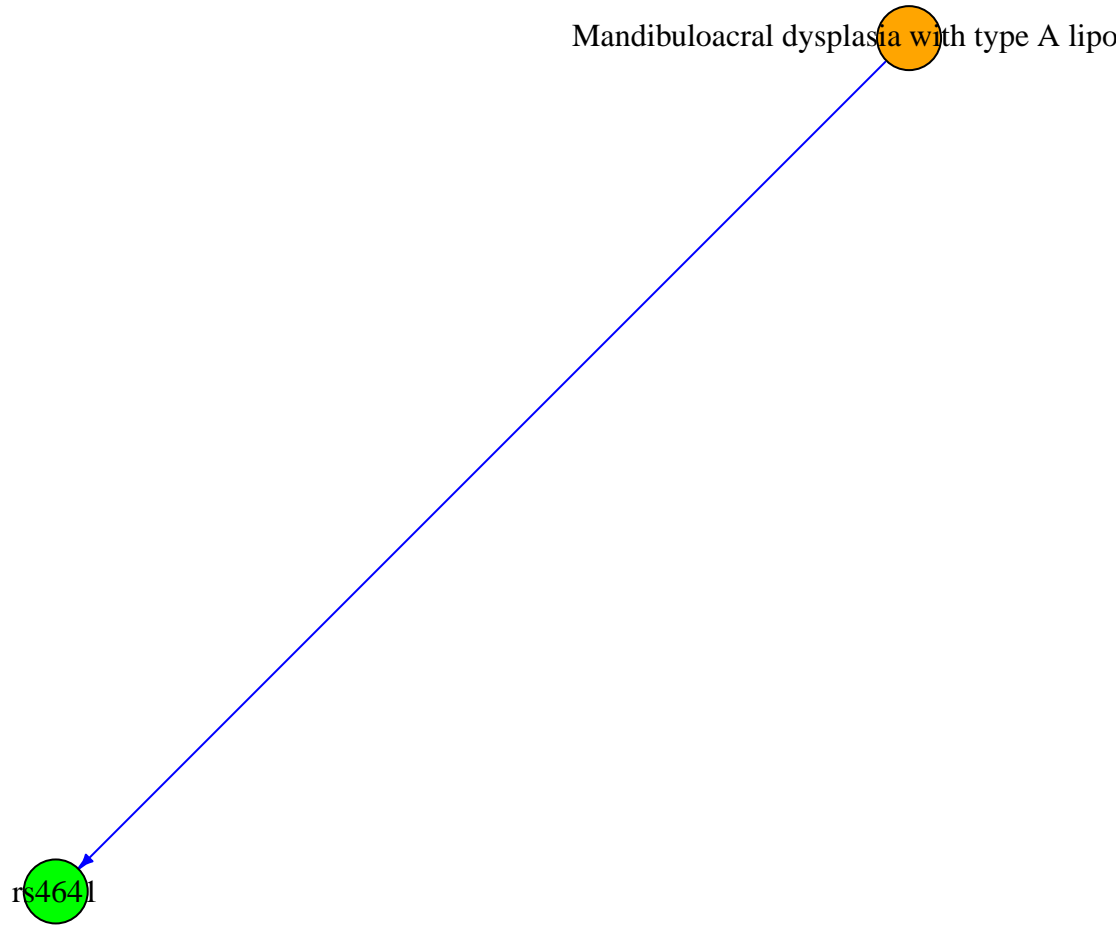

## Variant–Disease Network (Maple syrup urine disease)

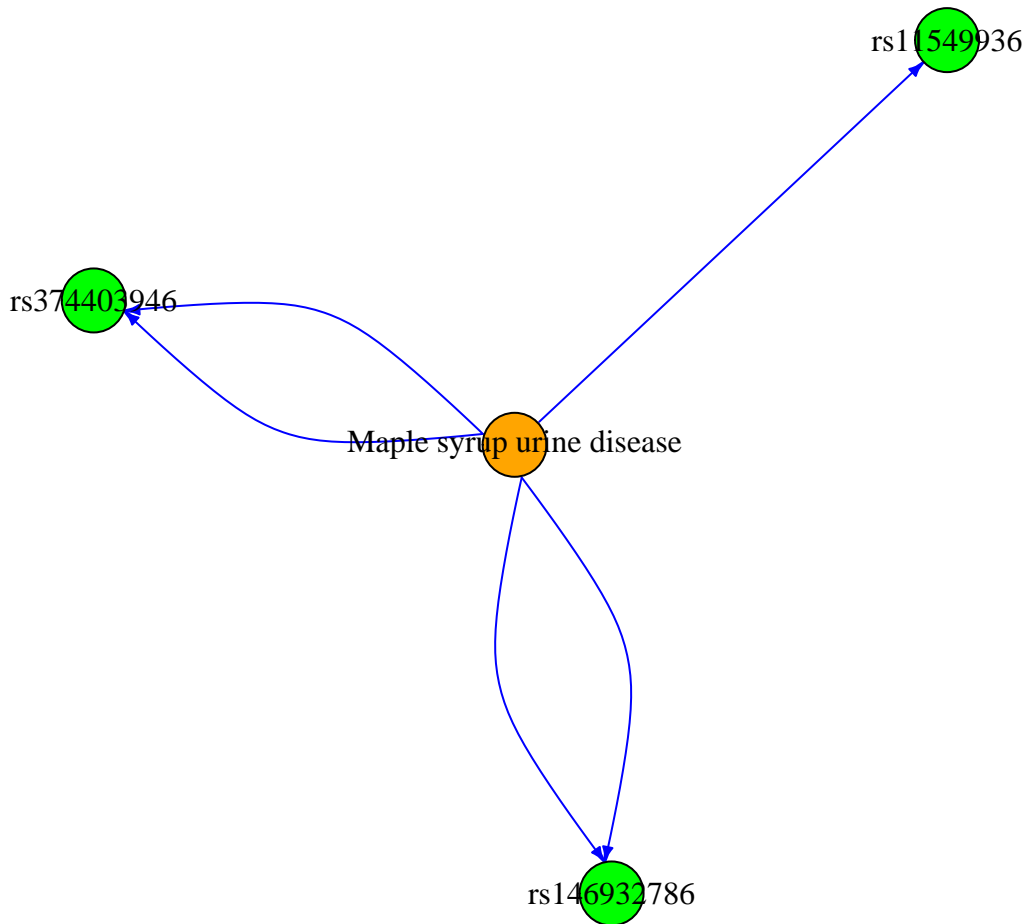

# Variant-Disease Network (MAPT-Related Spectrum Disorders)

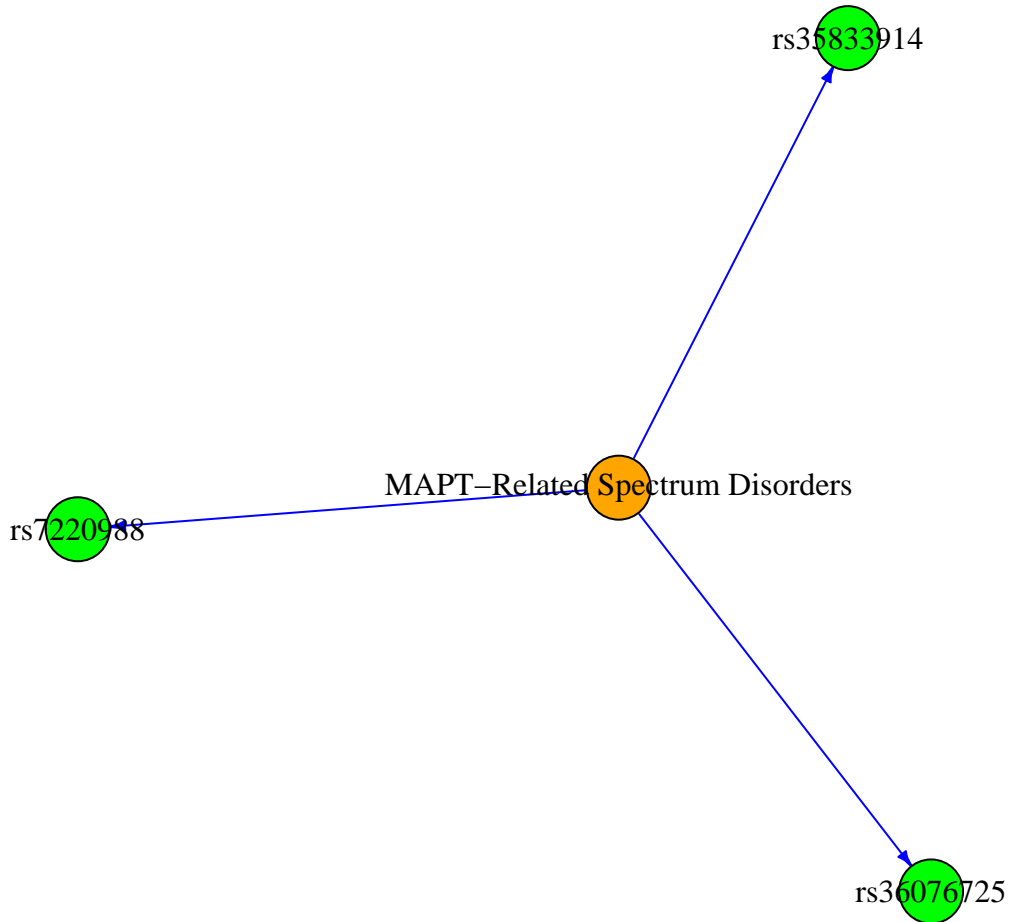



## Variant–Disease Network (Marfan lipodystrophy syndrome)

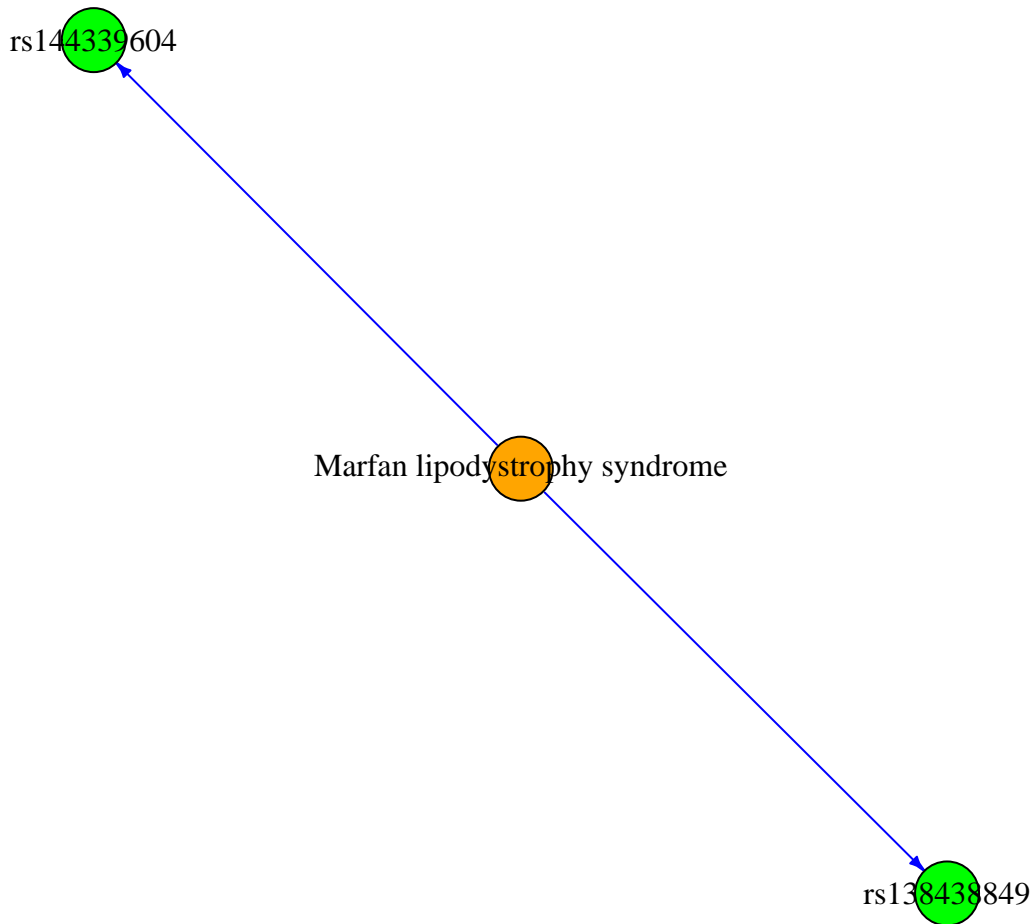

Variant–Disease Network (Marfan syndrome)

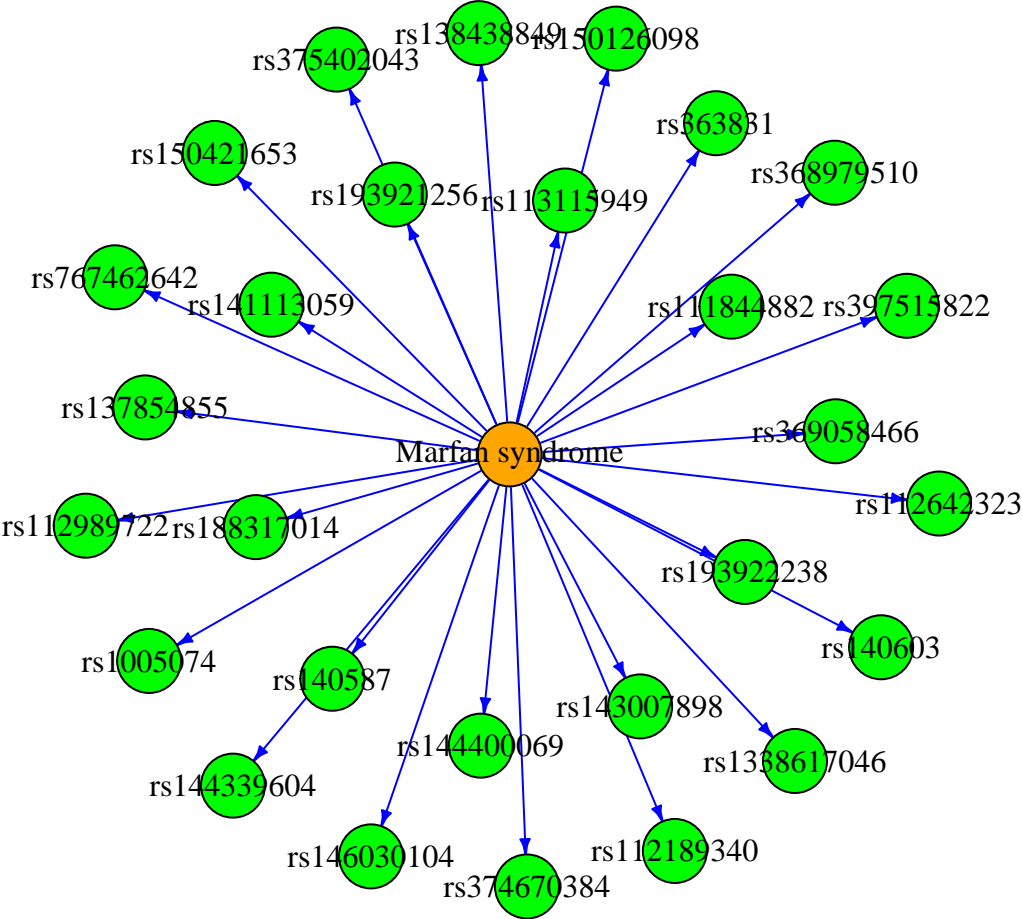

# work (Marfan Syndrome/Loeys–Dietz Syndrome/Familial Thoracic Aortic Aneurysms and Dissections)

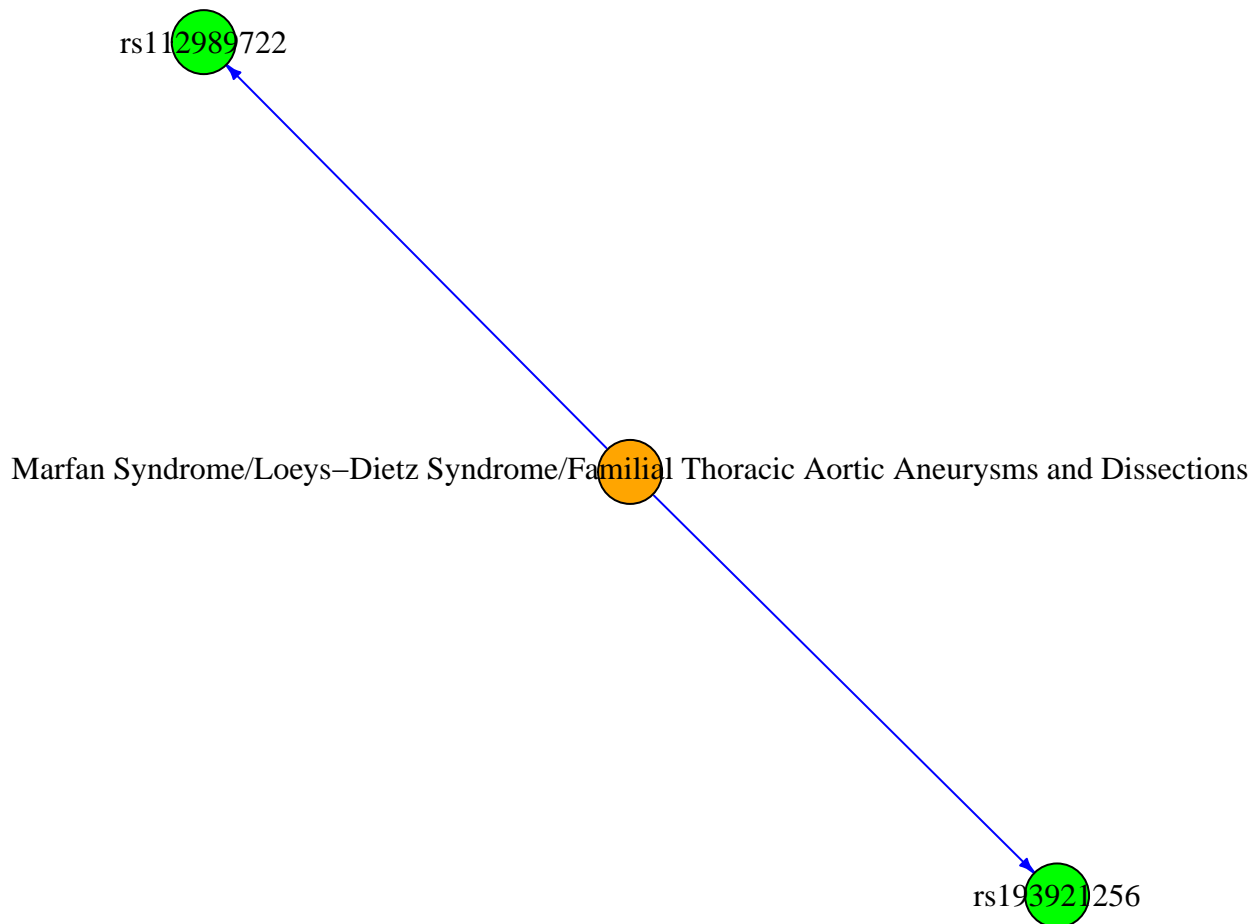

# Variant–Disease Network (Martsolf syndrome)

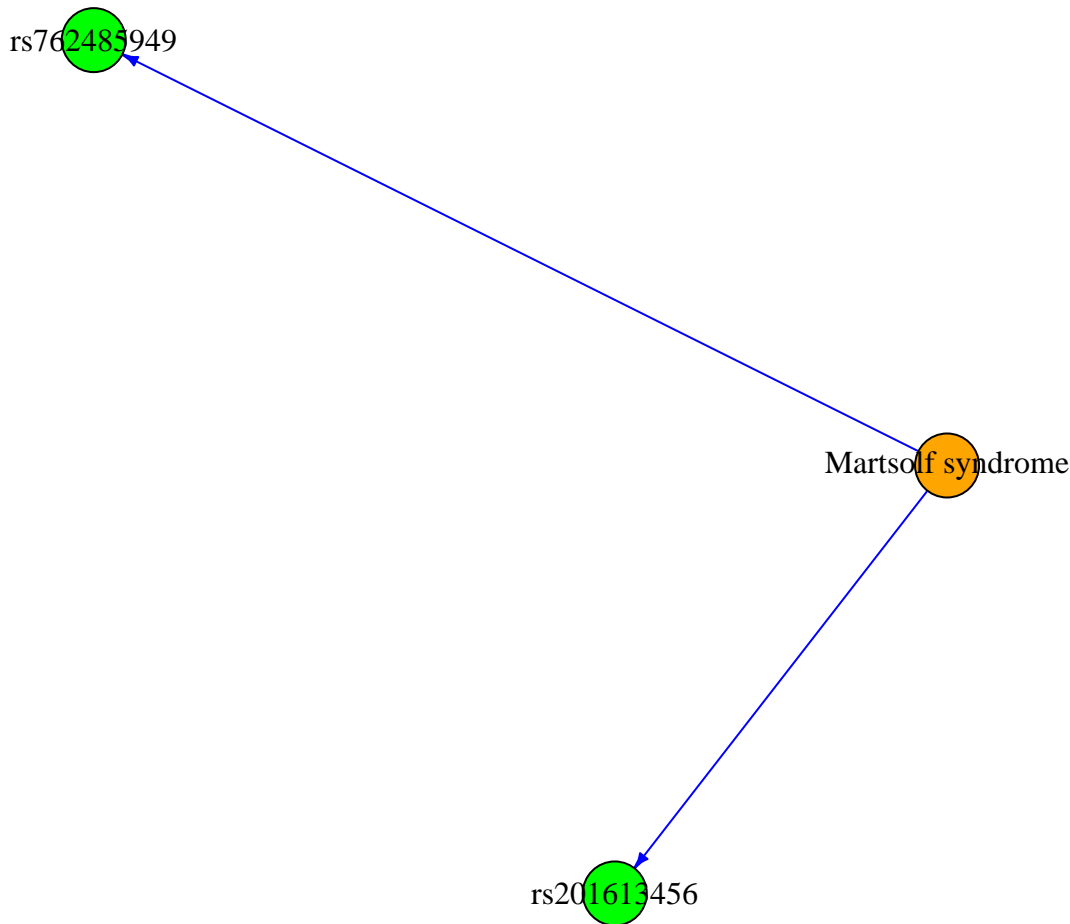

## Variant–Disease Network (MASP2 deficiency)

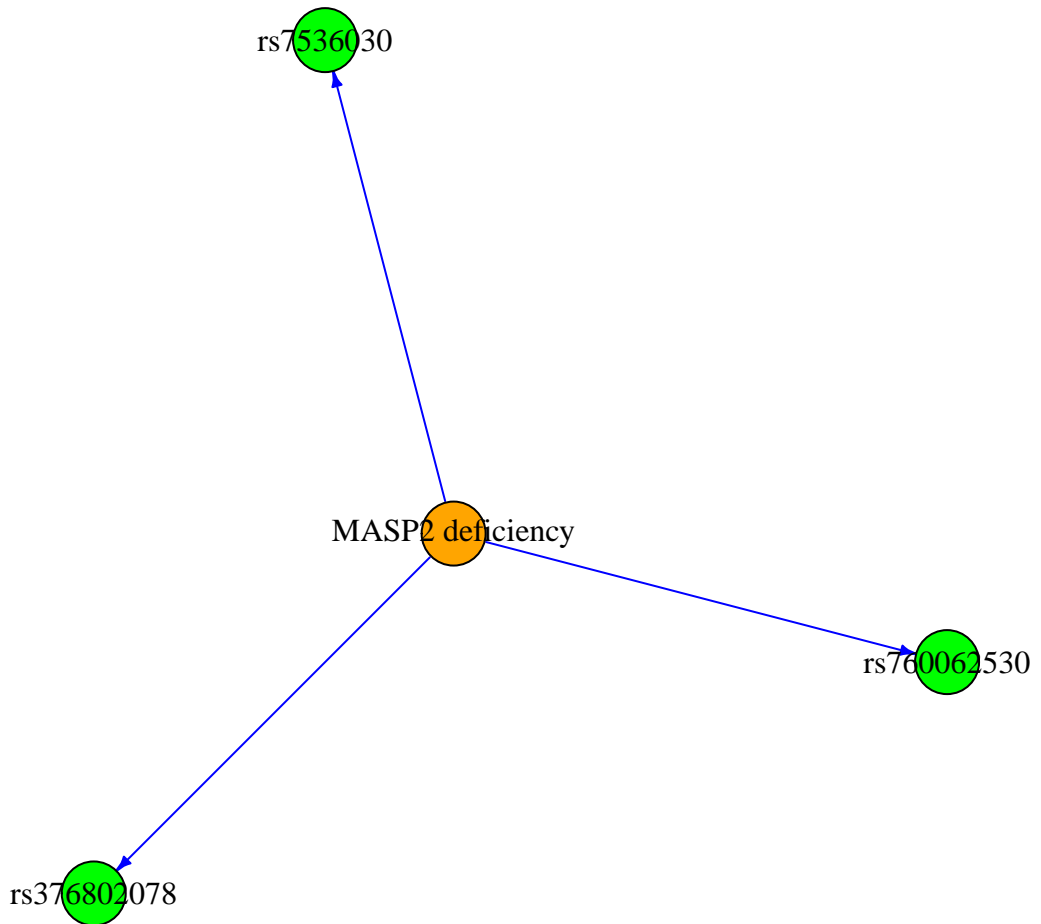

## Variant–Disease Network (MASS syndrome)

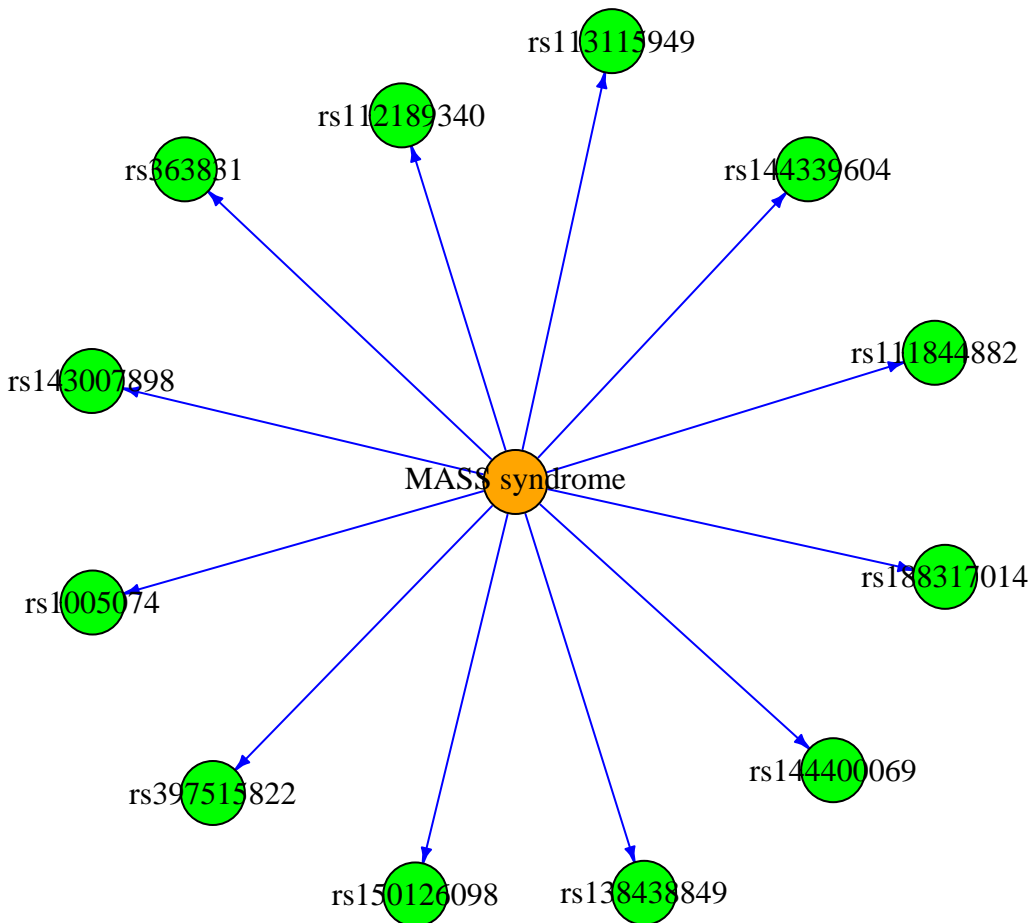

## Variant-Disease Network (Mastocytosis)

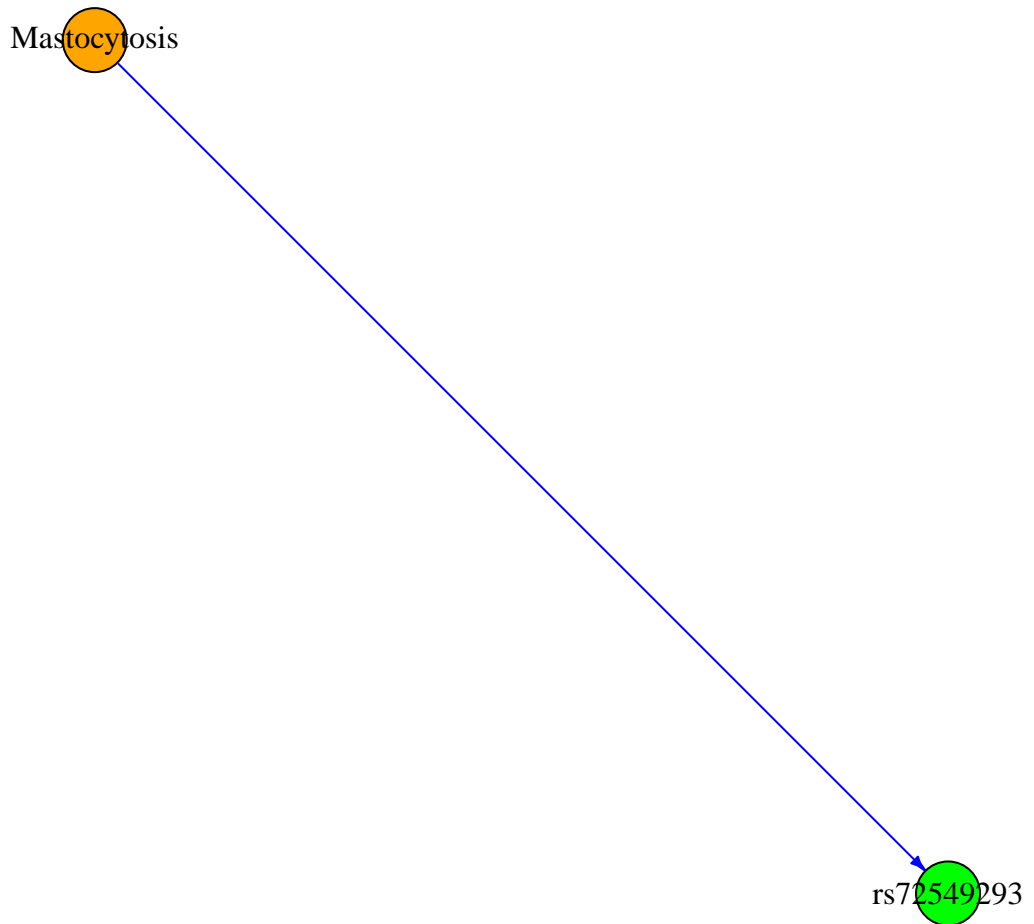

# Variant–Disease Network (Maturity onset diabetes mellitus in young)

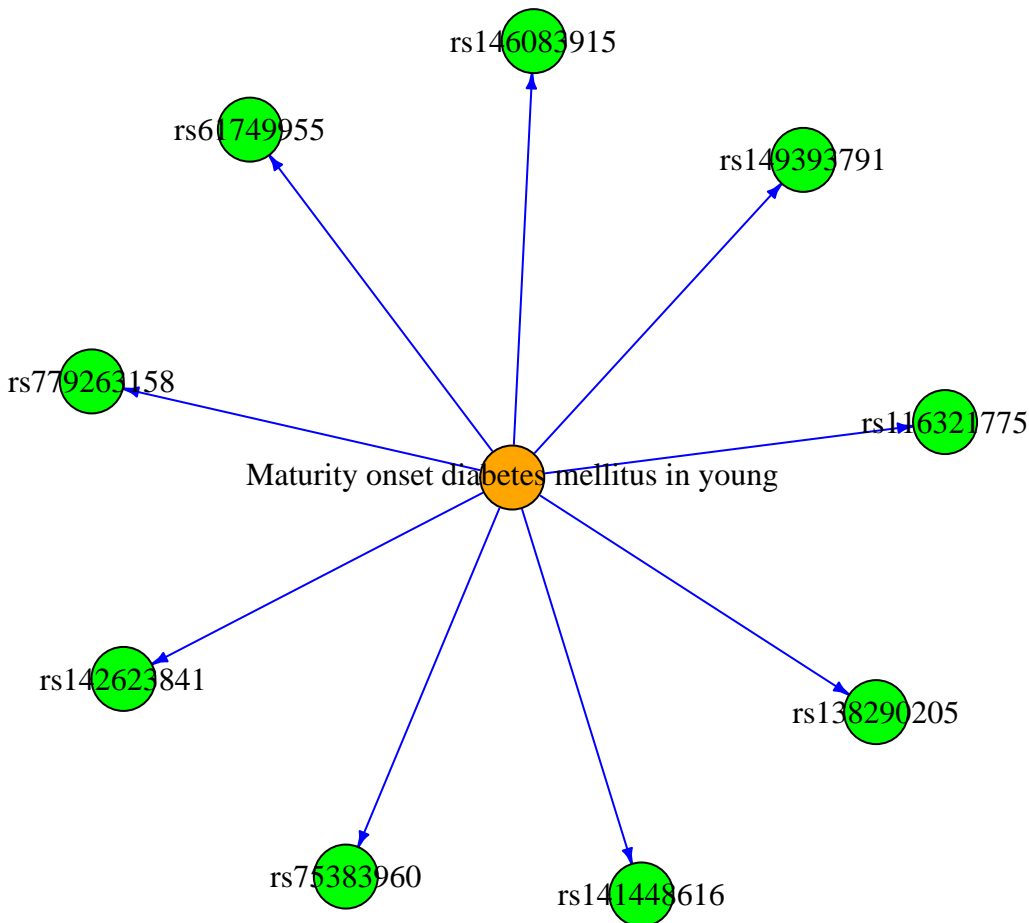



Variant–Disease Network (Maturity–onset diabetes of the young)

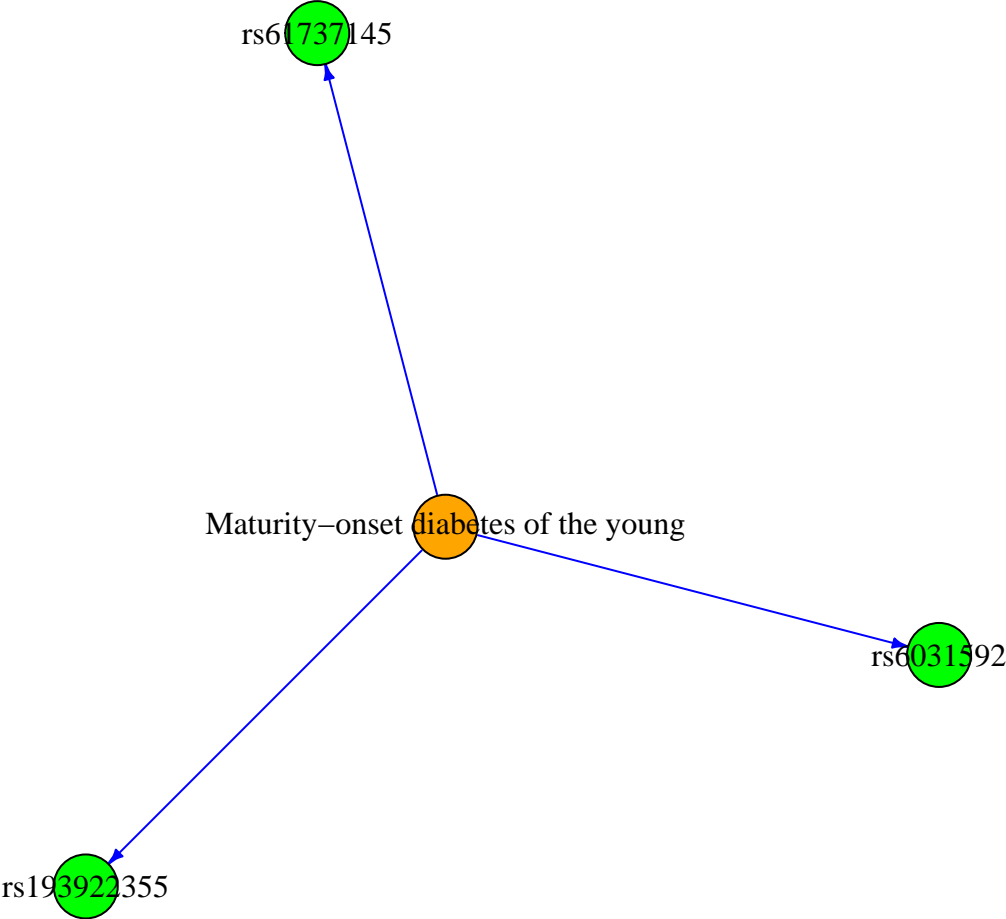

Variant–Disease Network (McKusick Kaufman syndrome)

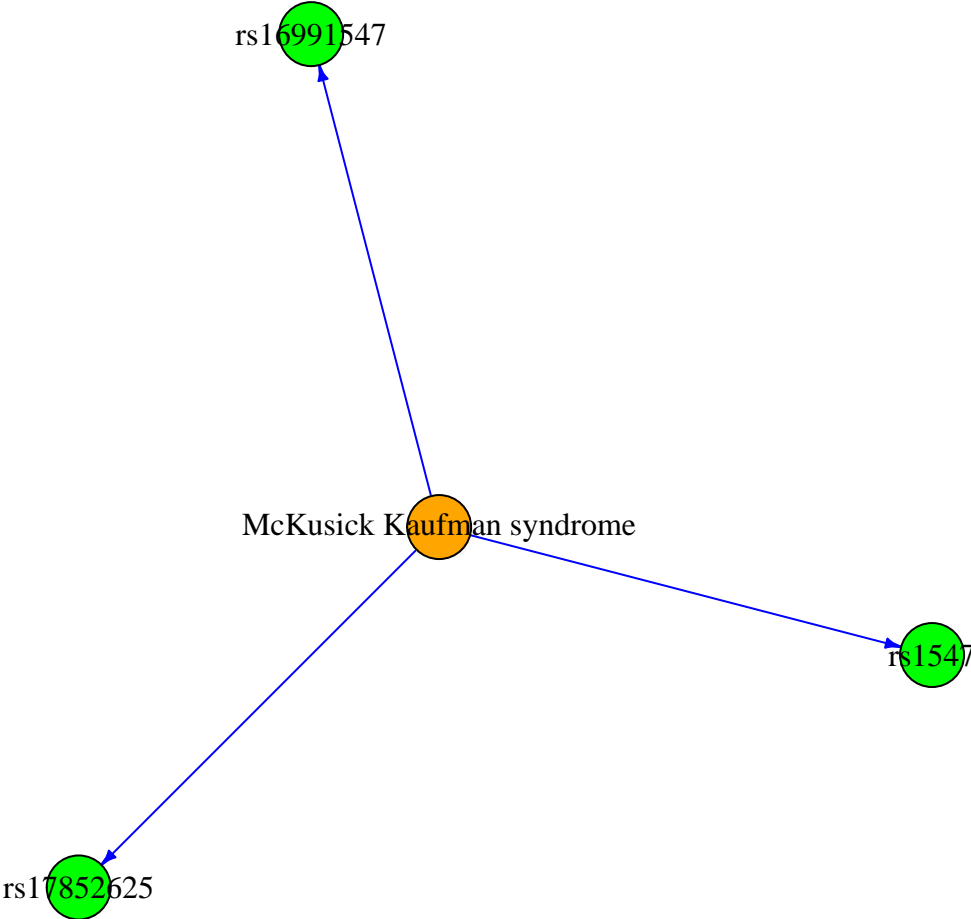

## Variant–Disease Network (Meacham syndrome)

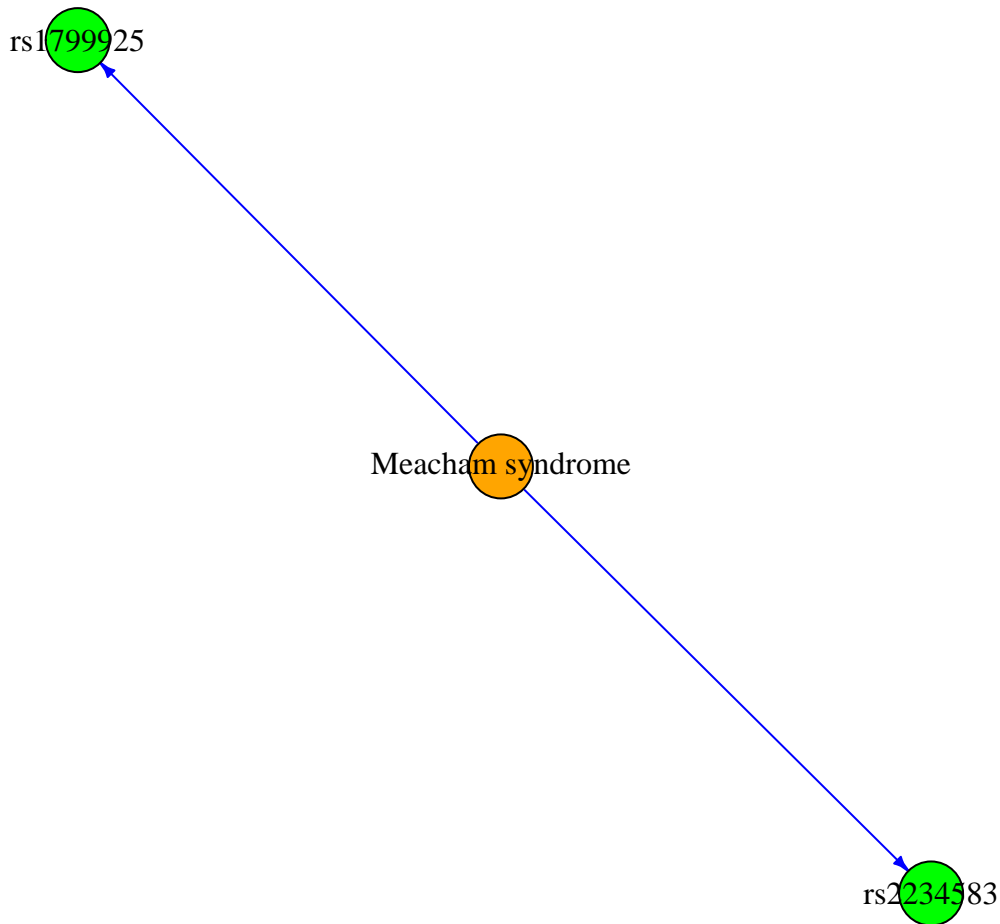

## Variant–Disease Network (Meckel–Gruber syndrome)

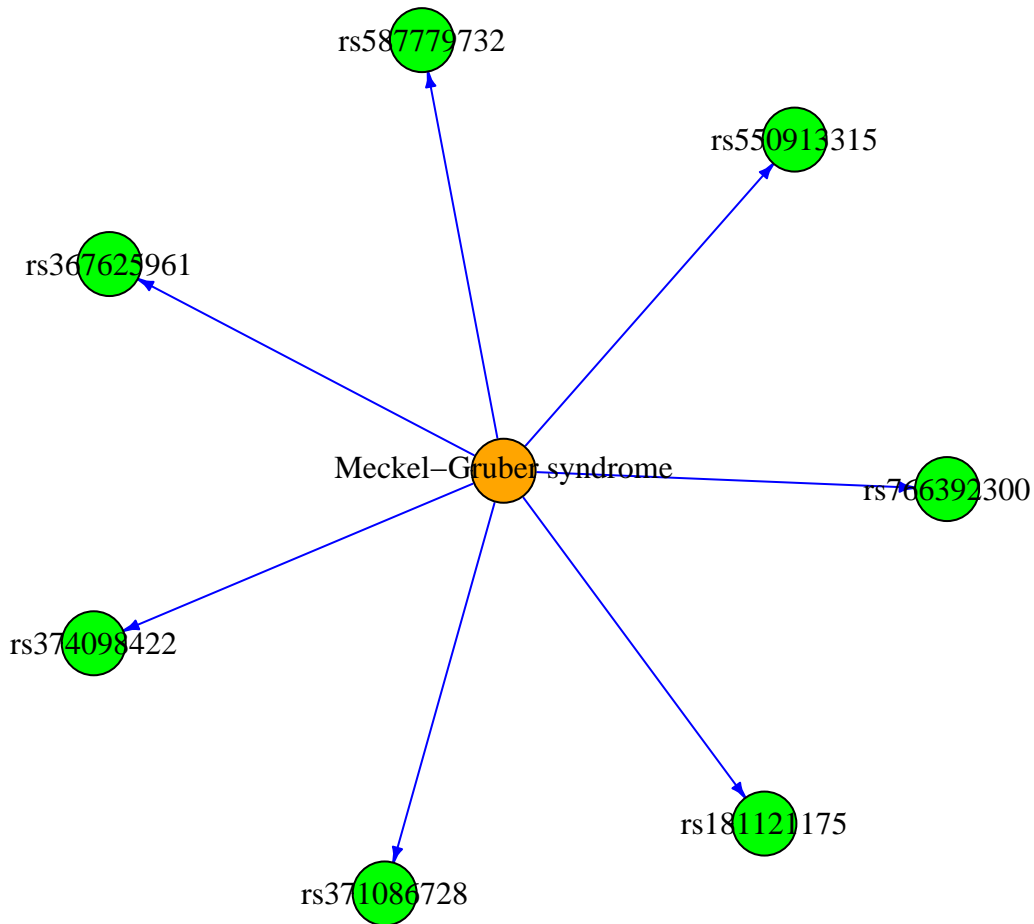

**Variant–Disease Network (Medullary cystic kidney disease 2)**

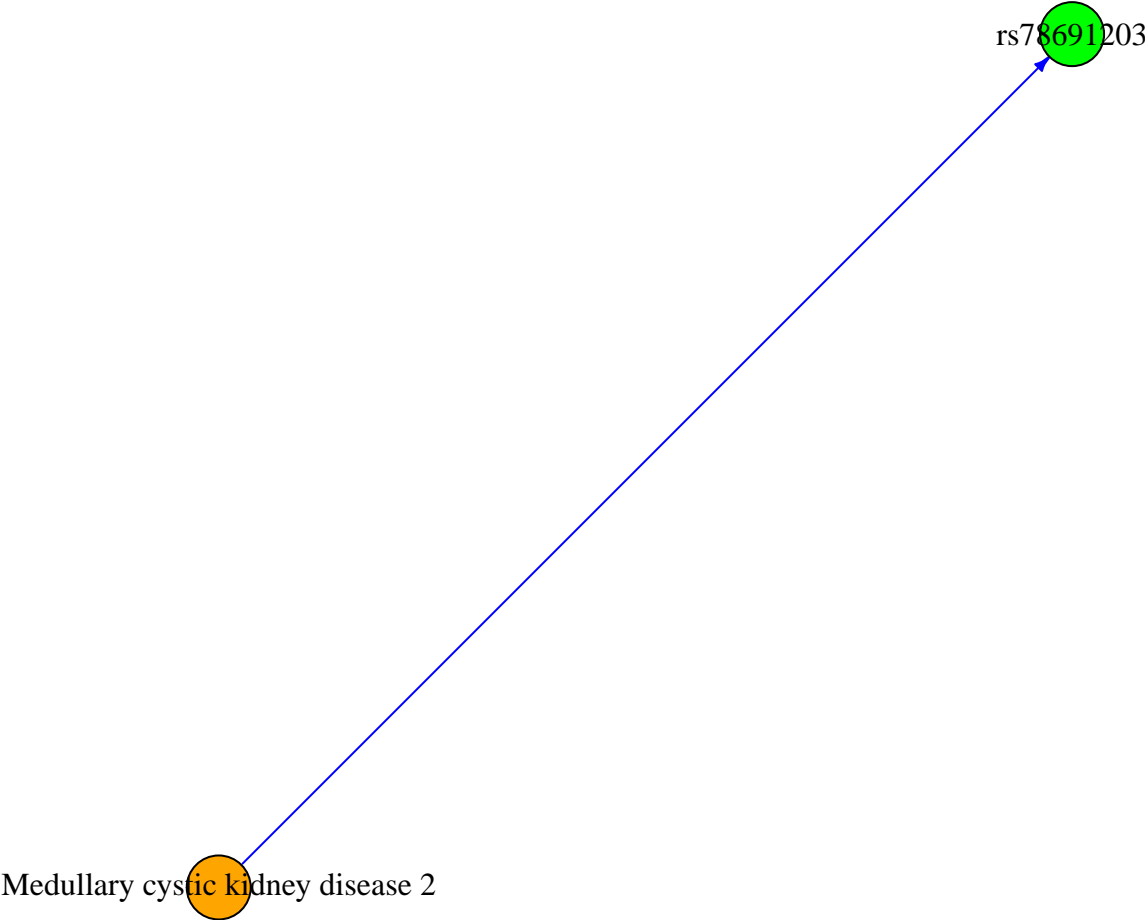

# ant-Disease Network (Megalencephalic leukoencephalopathy with subcortical

rs201011094

Megalencephalic leukoencephalopathy with su

rs777480834

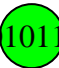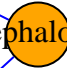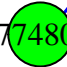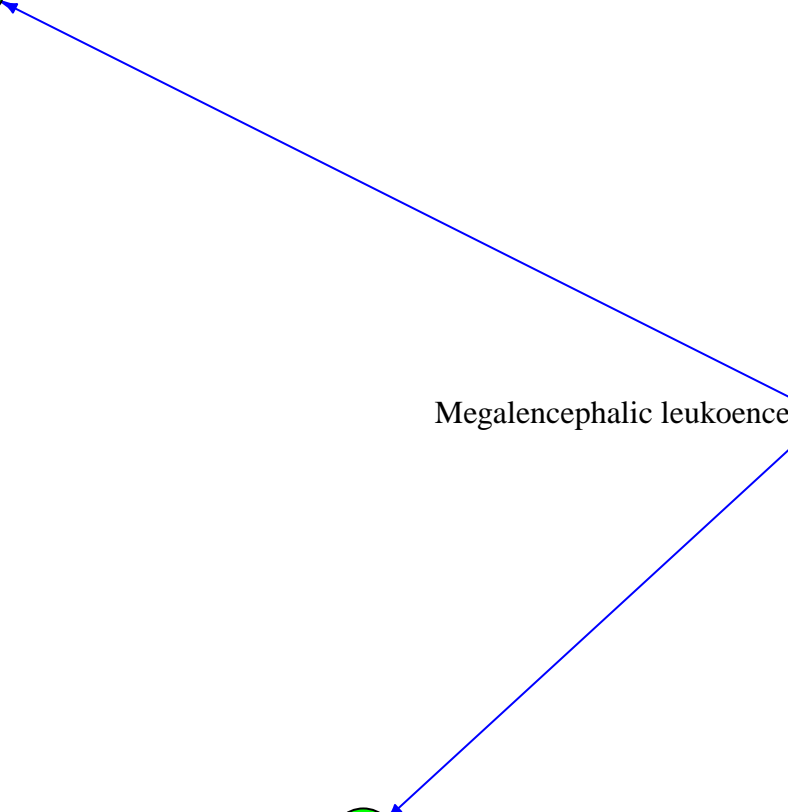

# Disease Network (Megalencephaly-polymicrogyria-polydactyly-hydrocephalus syndrome 1)

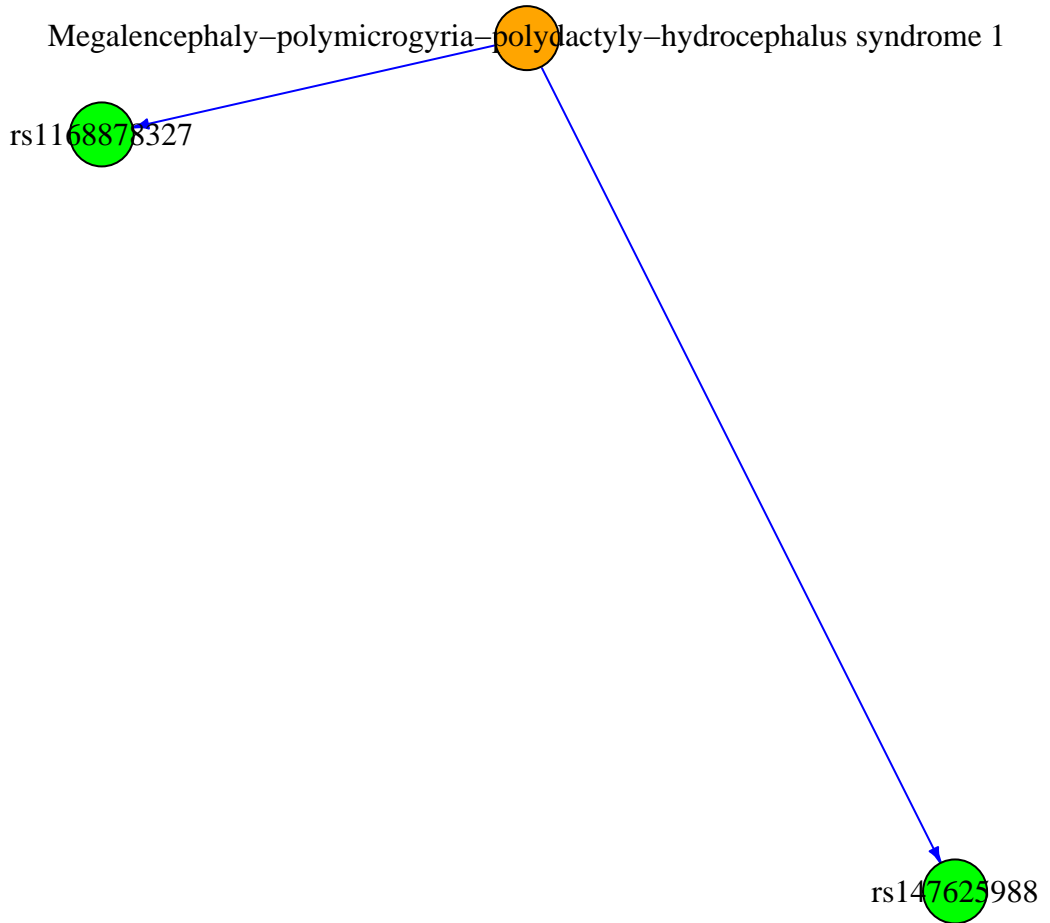

# sease Network (Megalencephaly-polymicrogyria-polydactyly-hydrocephalus)

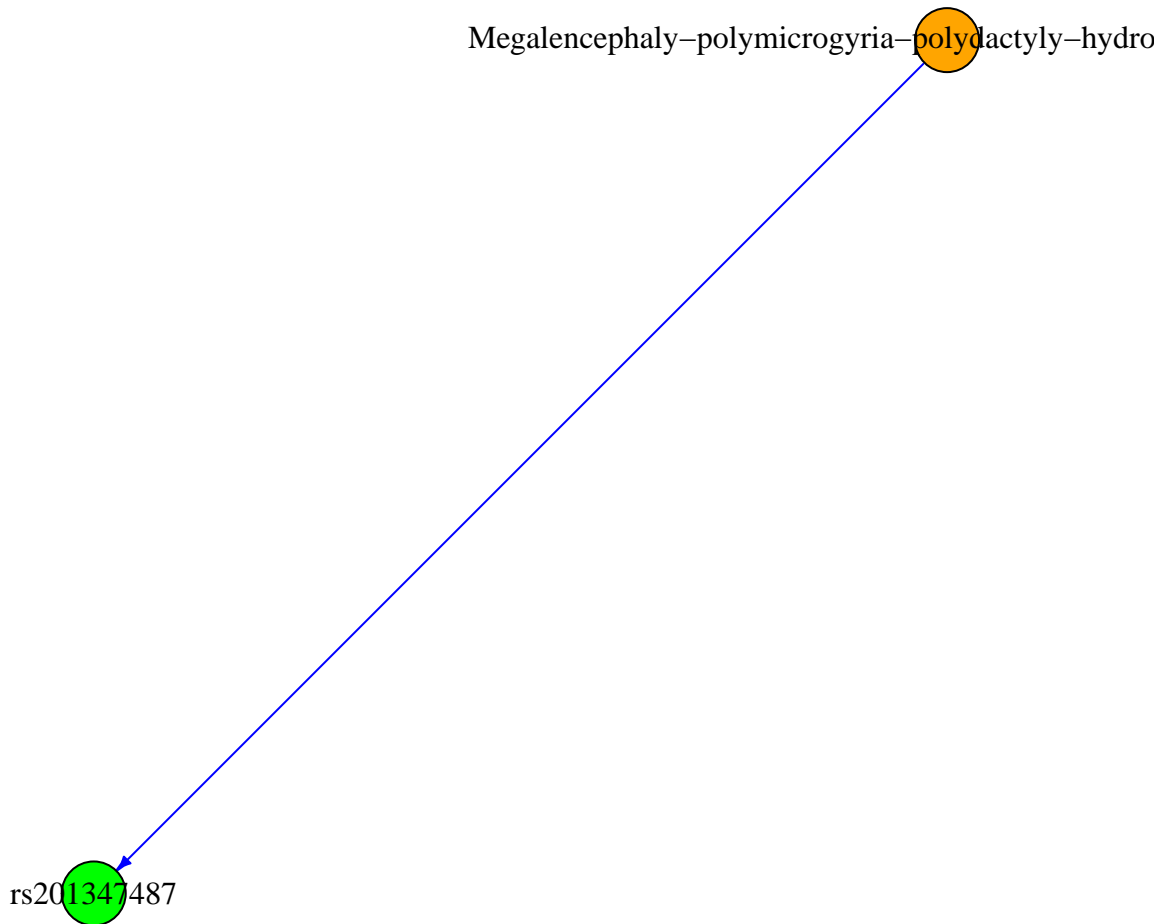



Variant–Disease Network (Megaloblastic anemia)

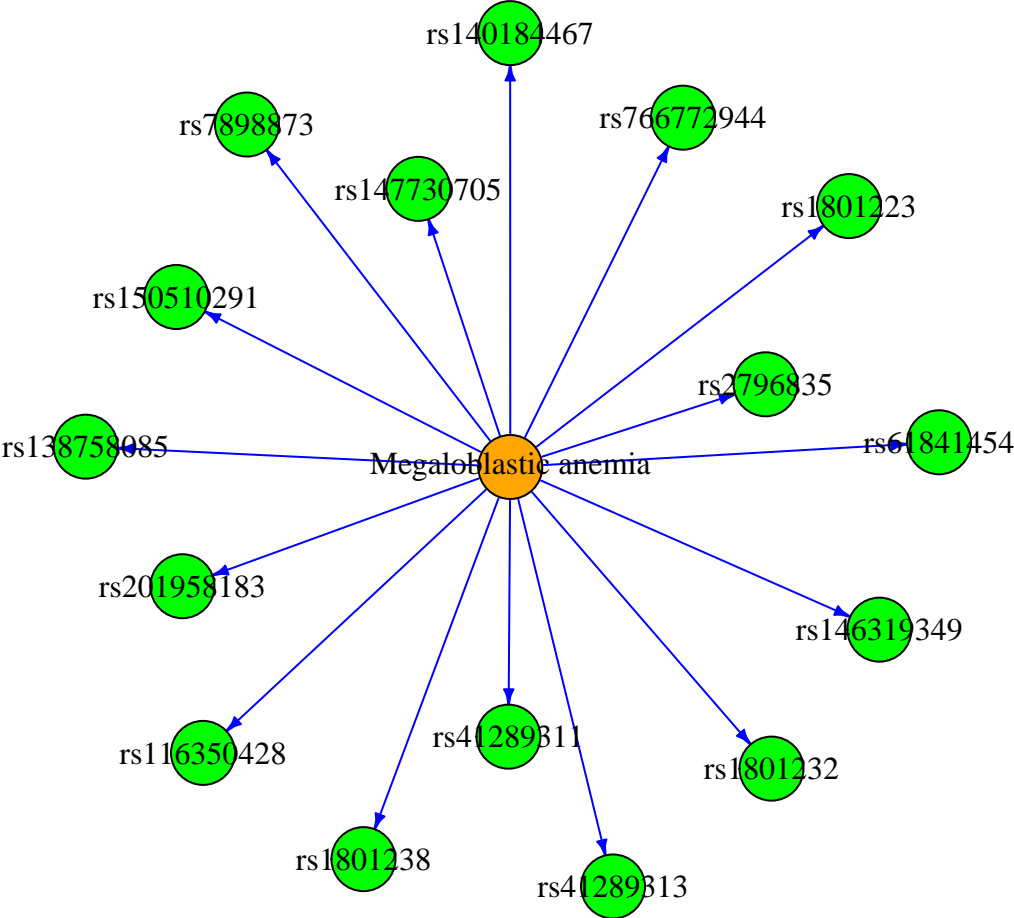

# Variant-Disease Network (Megaloblastic anemia due to inborn errors of metab

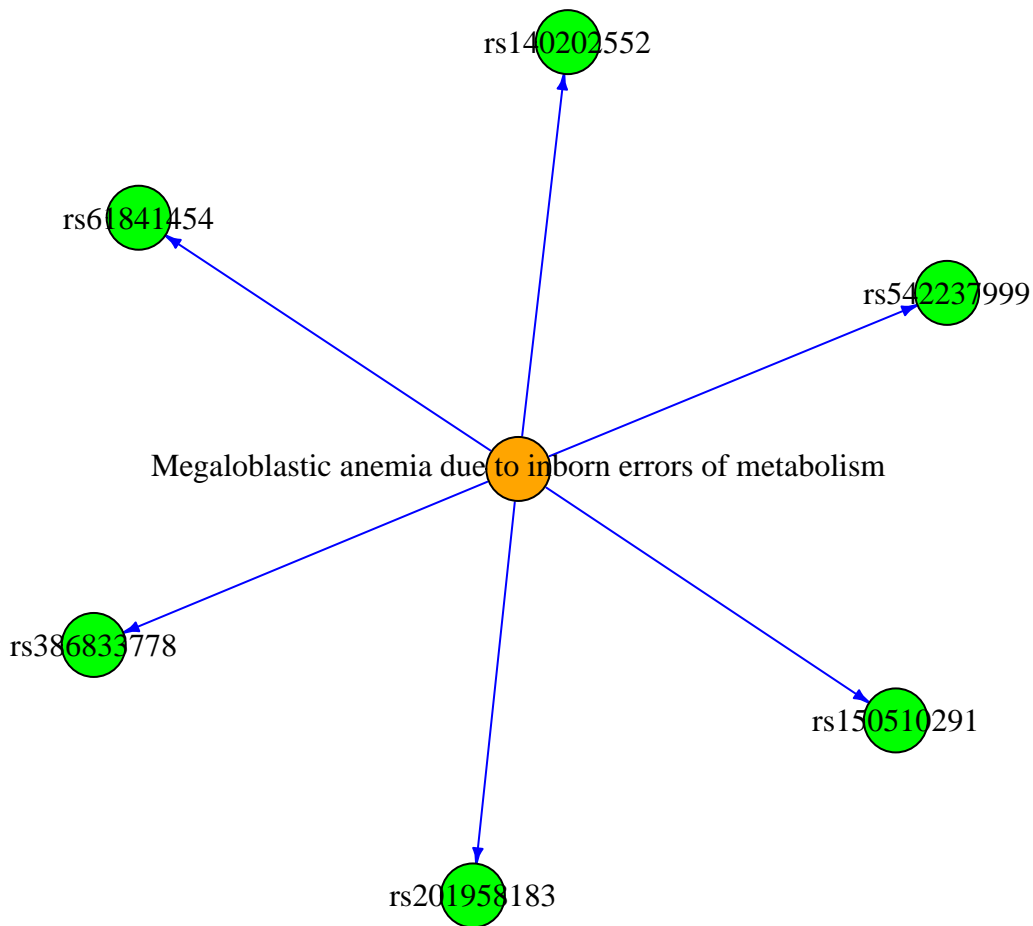

# Variant-Disease Network (Meier-gorlin syndrome 7)

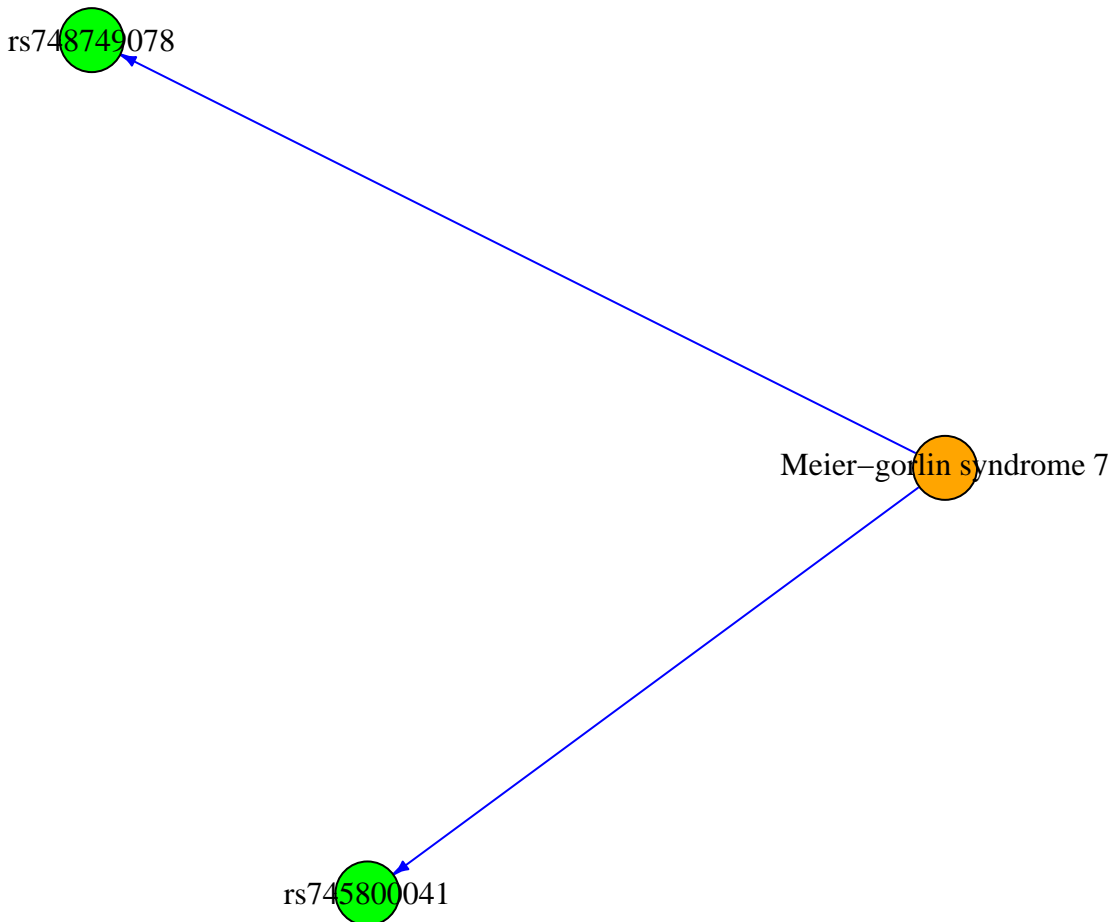

## Variant-Disease Network (Melanoma)

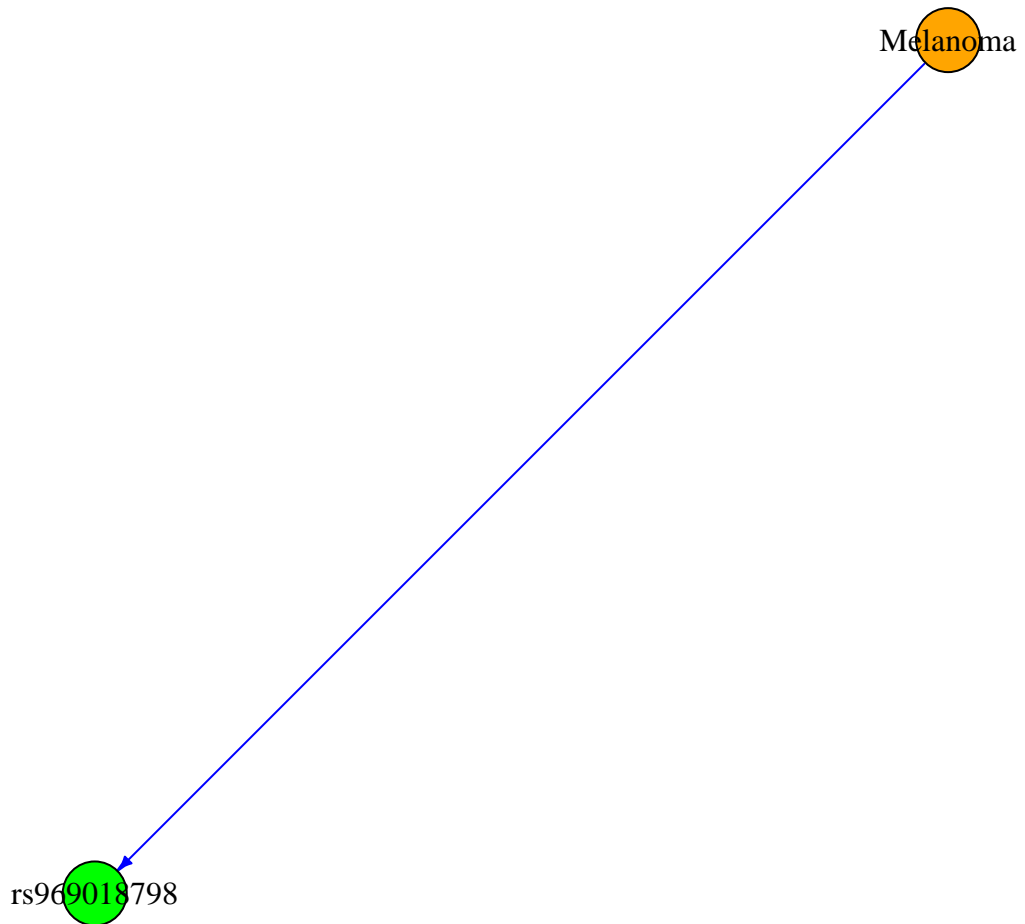

# Variant–Disease Network (Melanoma–pancreatic cancer syndrome)

rs763269347

Melanoma–pancreatic cancer syndrome

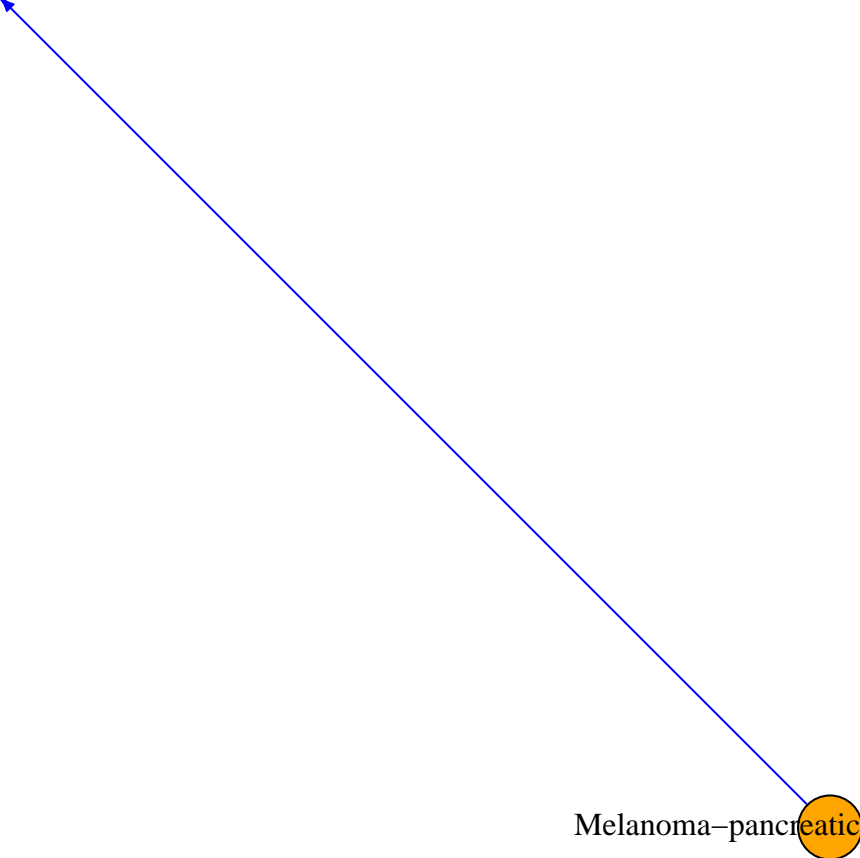

# Variant–Disease Network (Melnick–Needles syndrome)

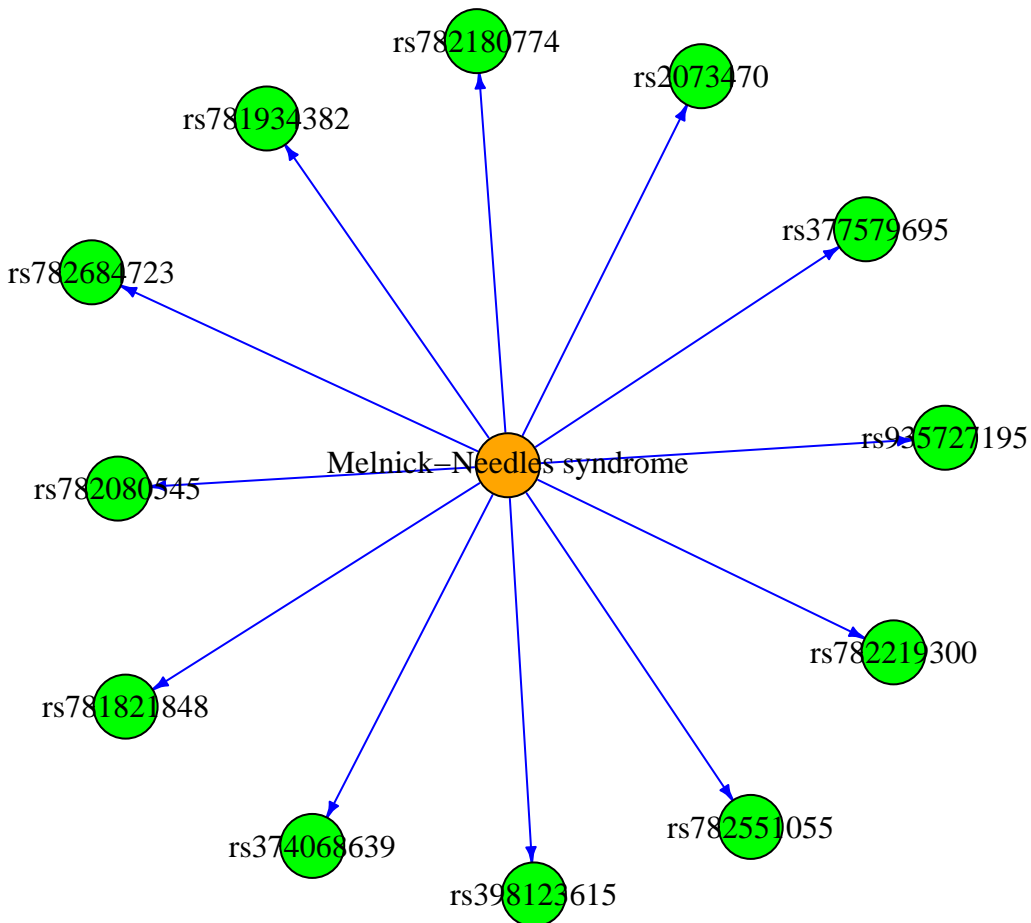

## Variant–Disease Network (Mental retardation)

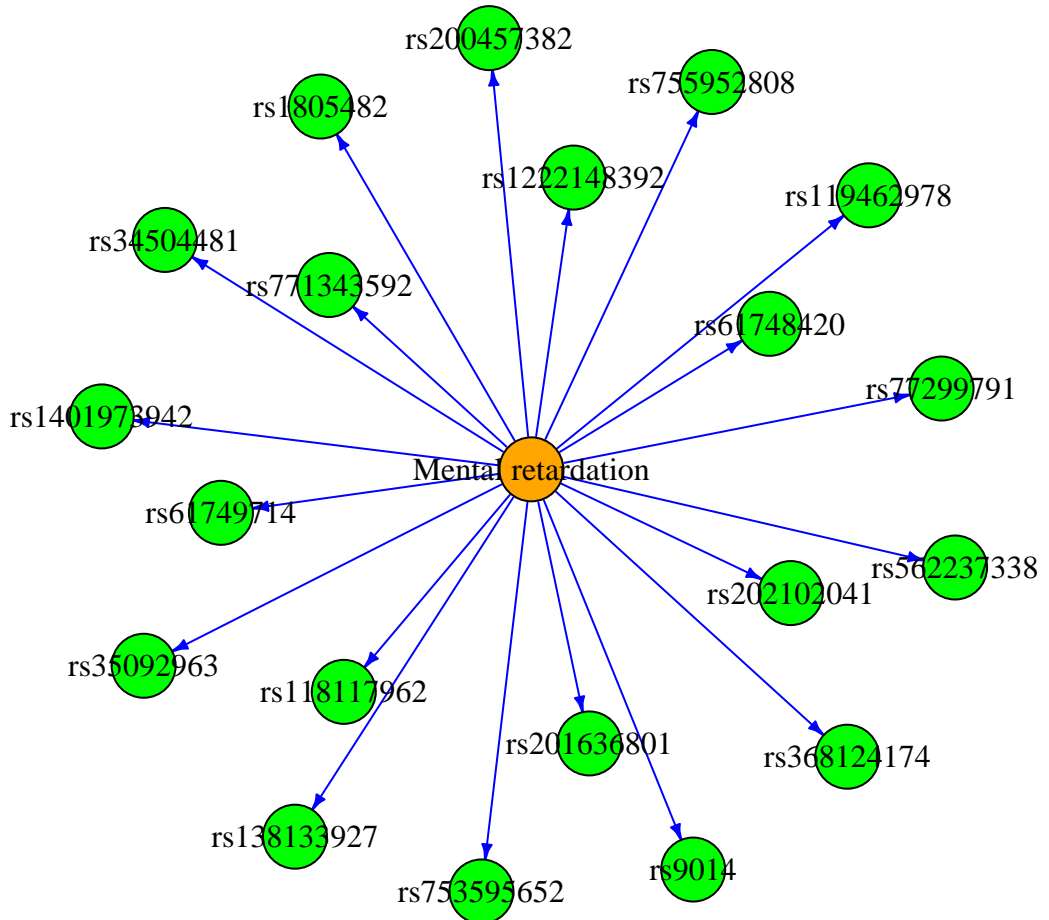

# Disease Network (Mental retardation and microcephaly with pontine and cerebe

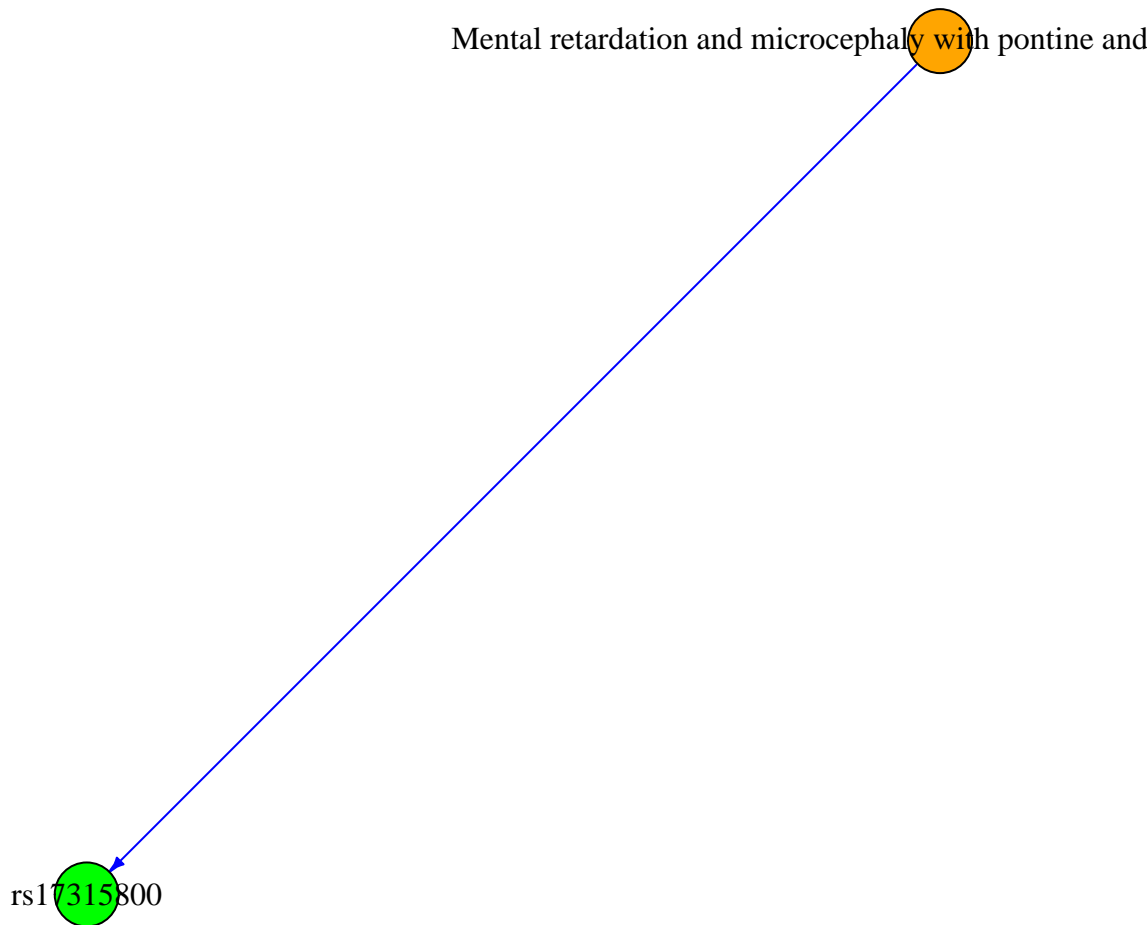



# Network (Mental retardation X-linked with cerebellar hypoplasia and distinctive facial appearance)

linked with cerebellar hypoplasia and distinctive facial appearance

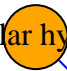

rs138108344

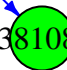

## Variant-Disease Network (Metachondromatosis)

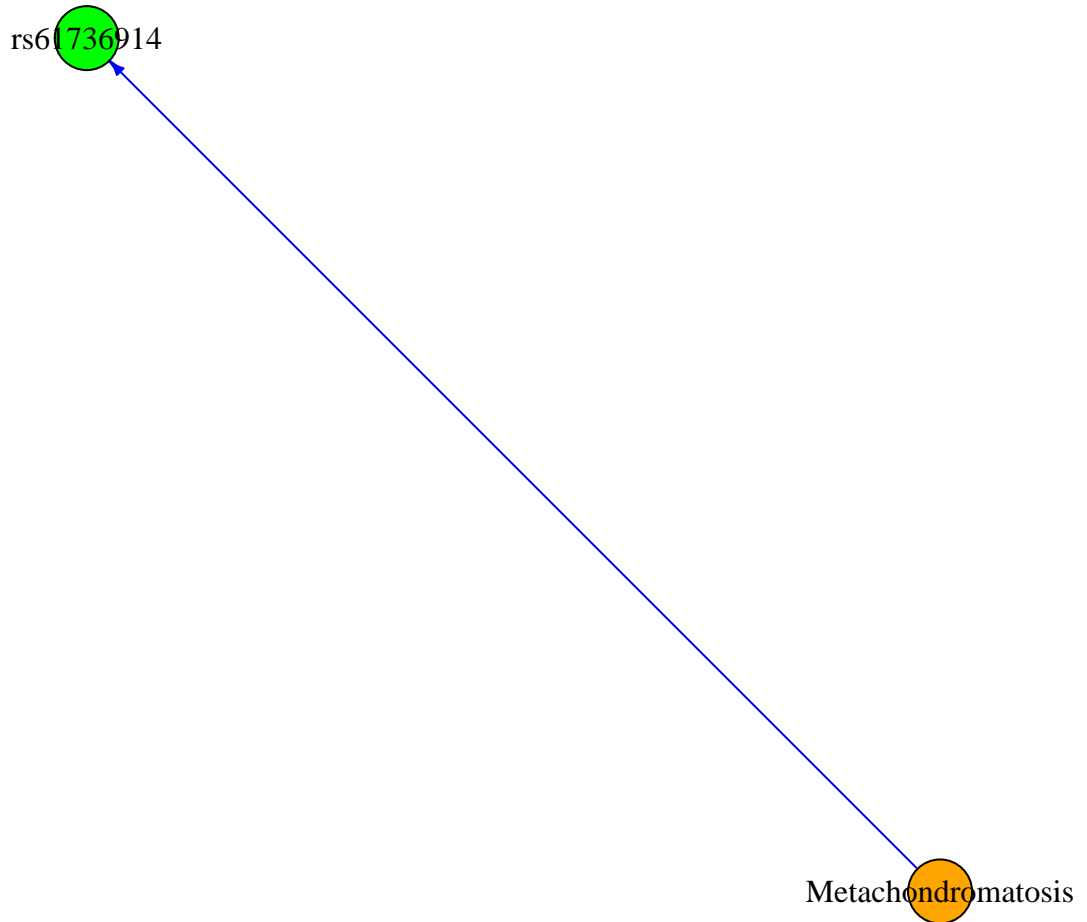

# Variant–Disease Network (Metaphyseal anadysplasia)

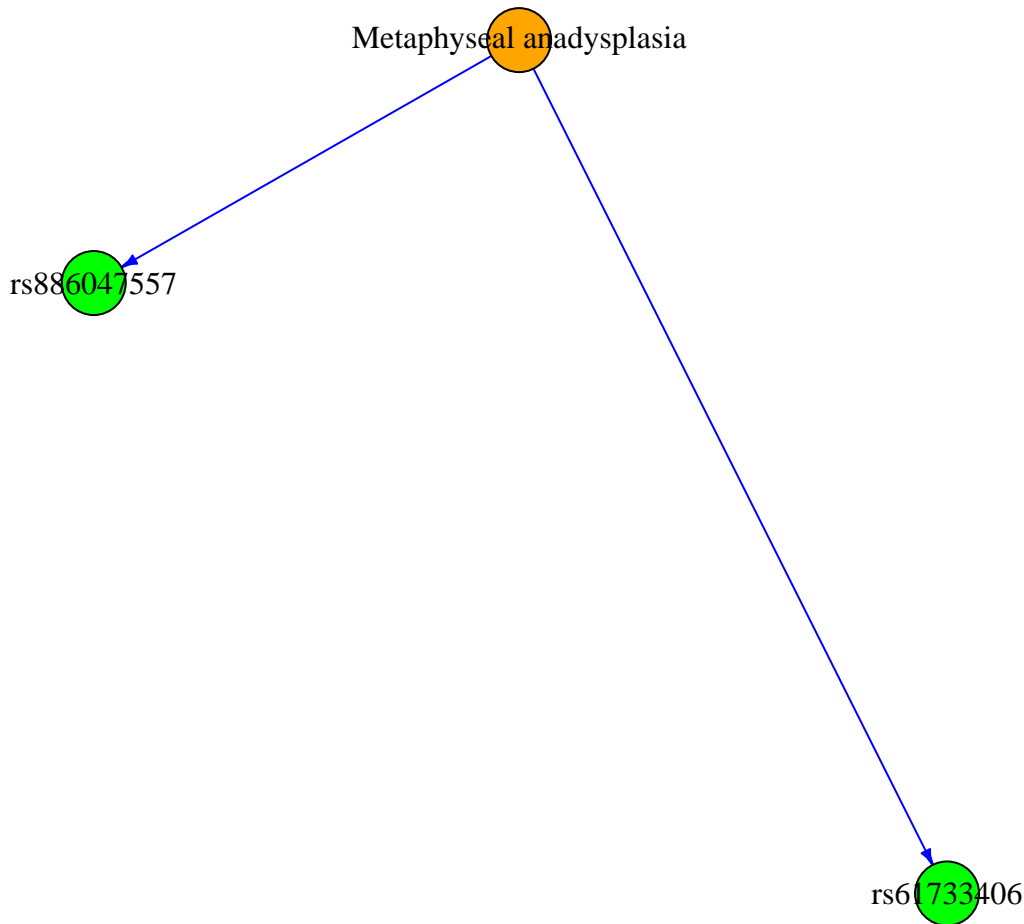

Variant–Disease Network (Metaphyseal chondrodysplasia)

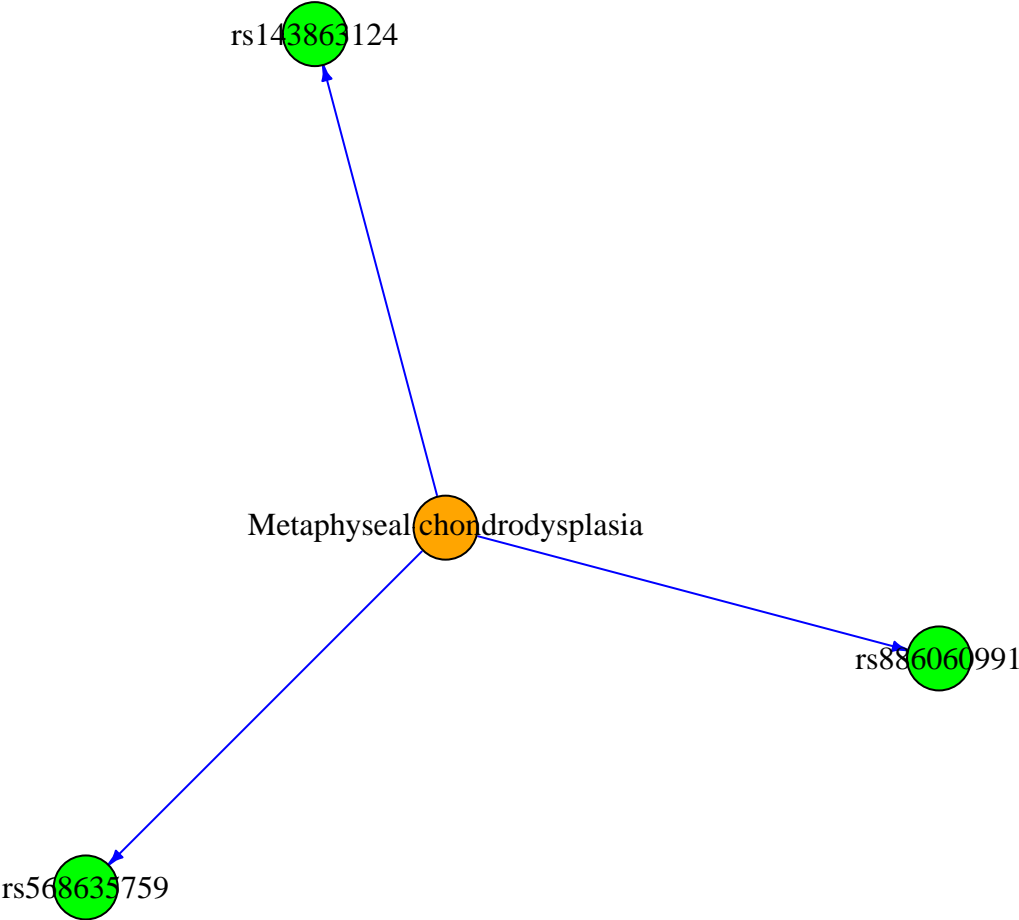

## Variant–Disease Network (Methylmalonic acidemia)

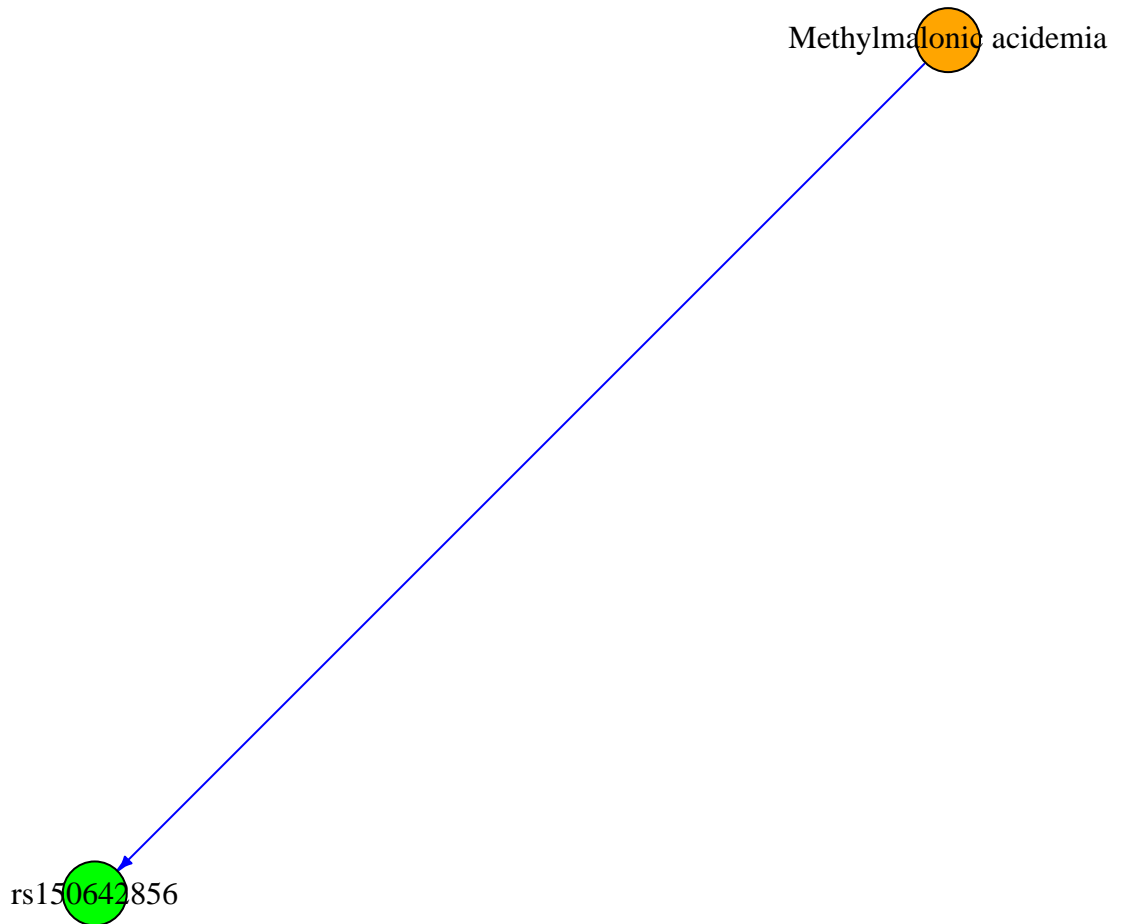

**Variant–Disease Network (Methylmalonic acidemia with homocystinuria)**

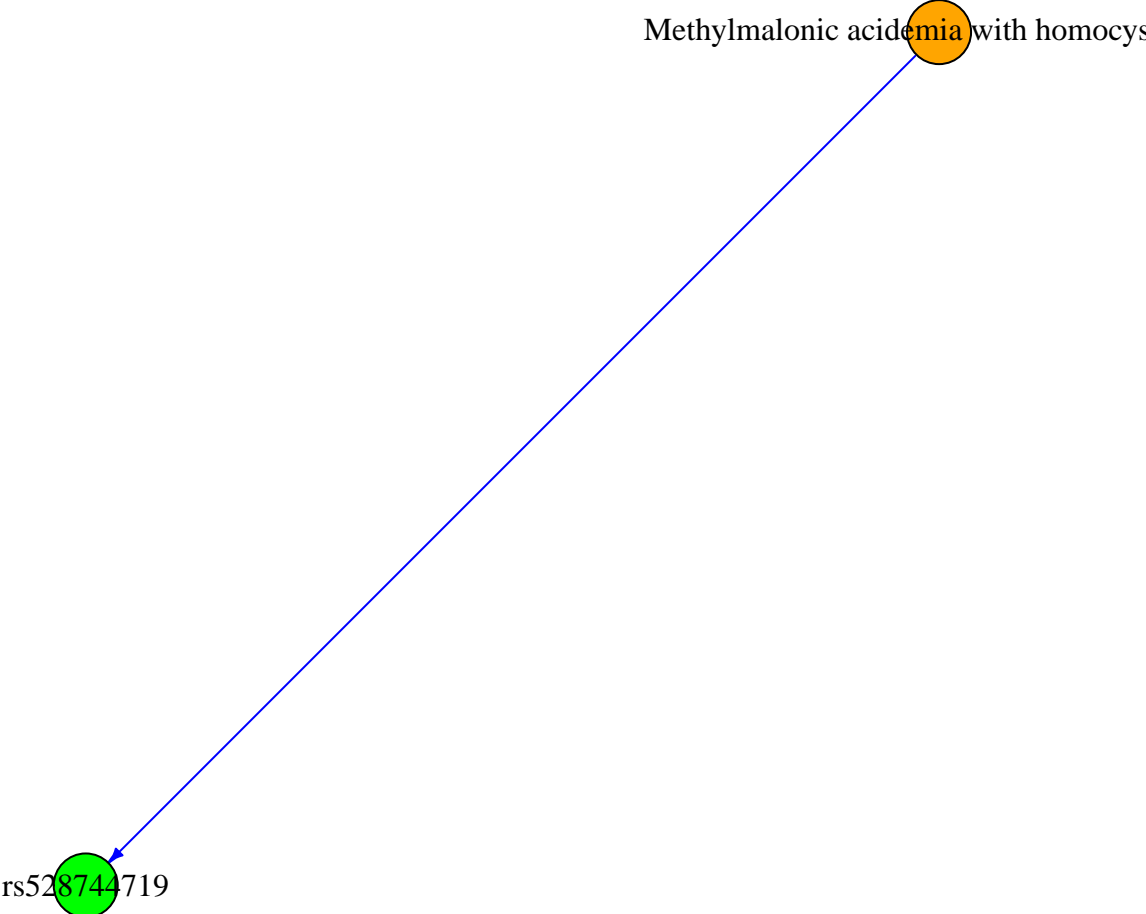

# Disease Network (Methylmalonic aciduria due to methylmalonyl-CoA mutase deficiency)

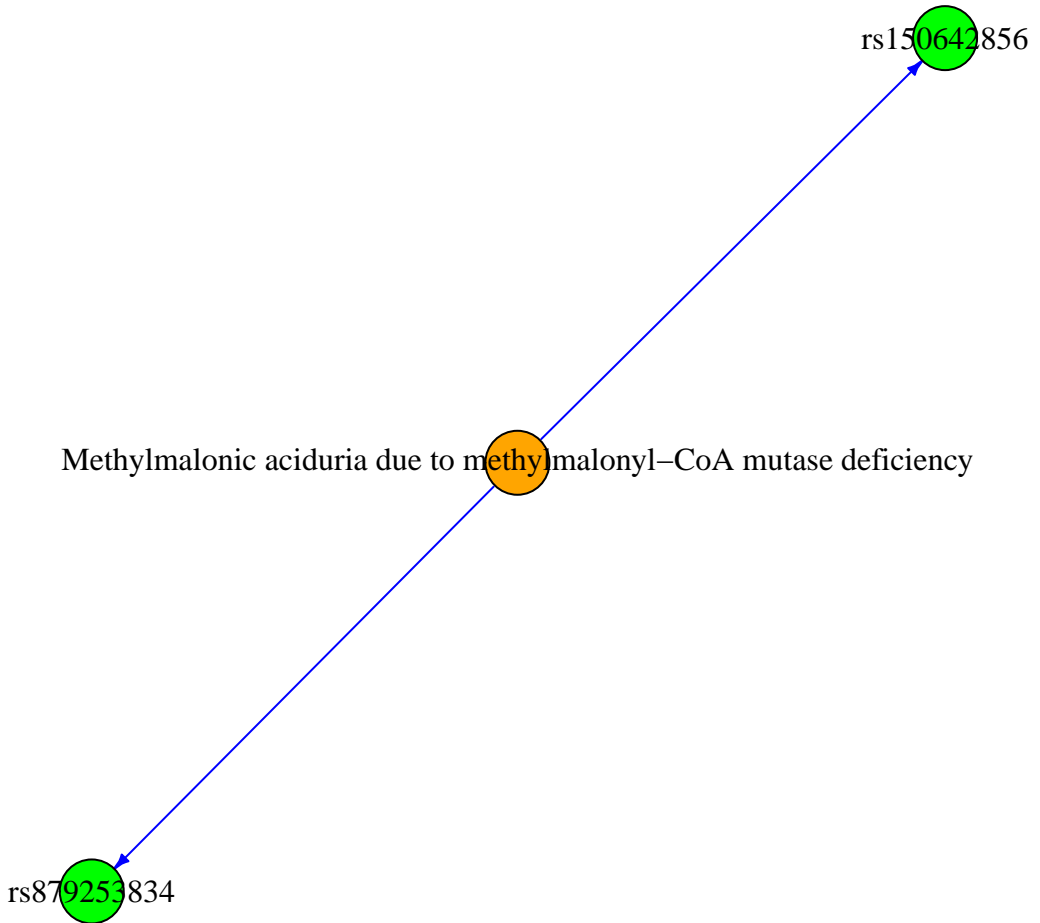

## Variant-Disease Network (Microcephaly)

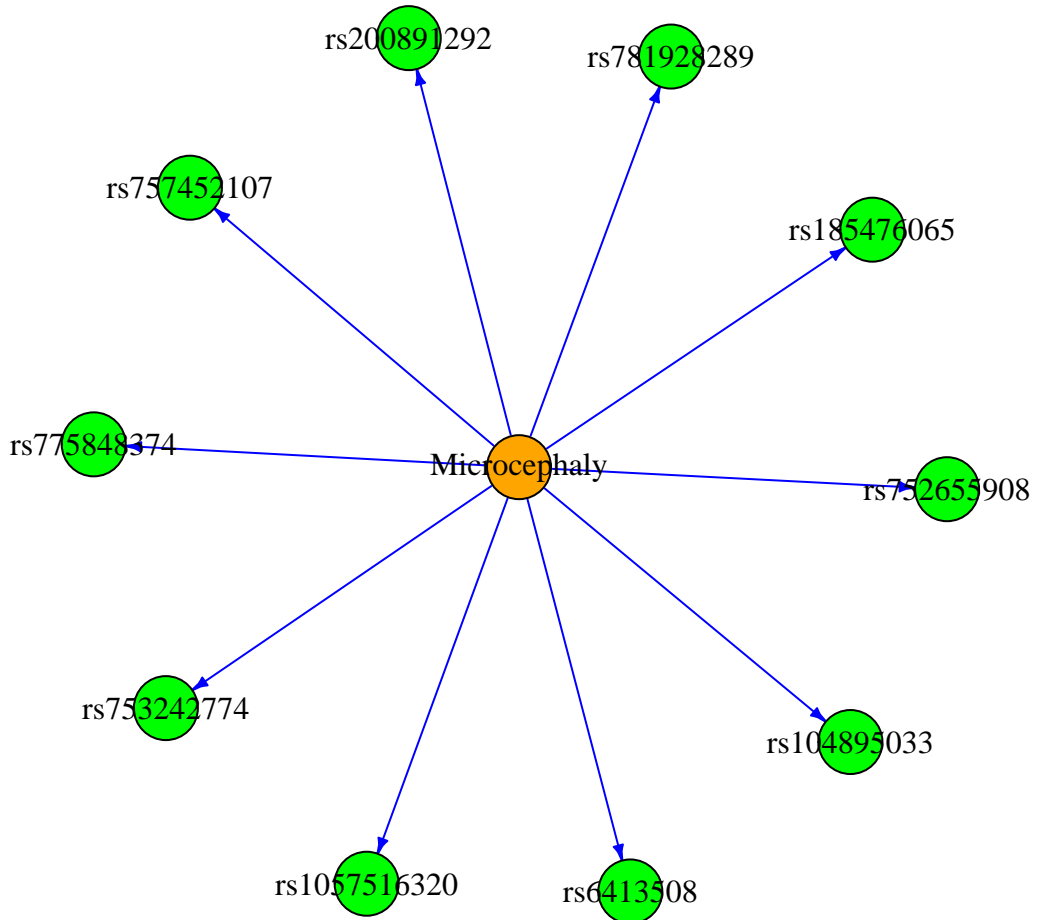



# Variant-Disease Network (Microcephaly with mental retardation and digital anomalies)

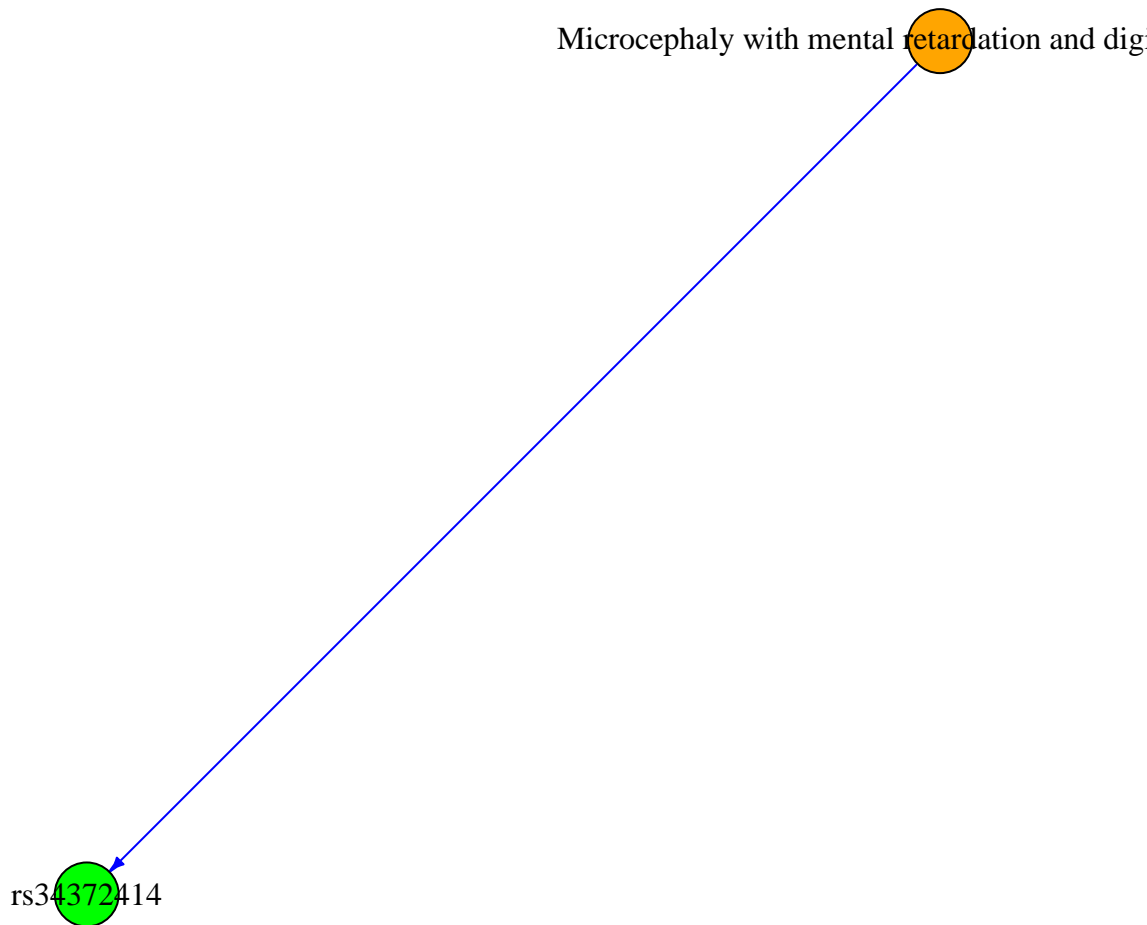

Variant–Disease Network (Microcephaly–capillary malformation syndrome)

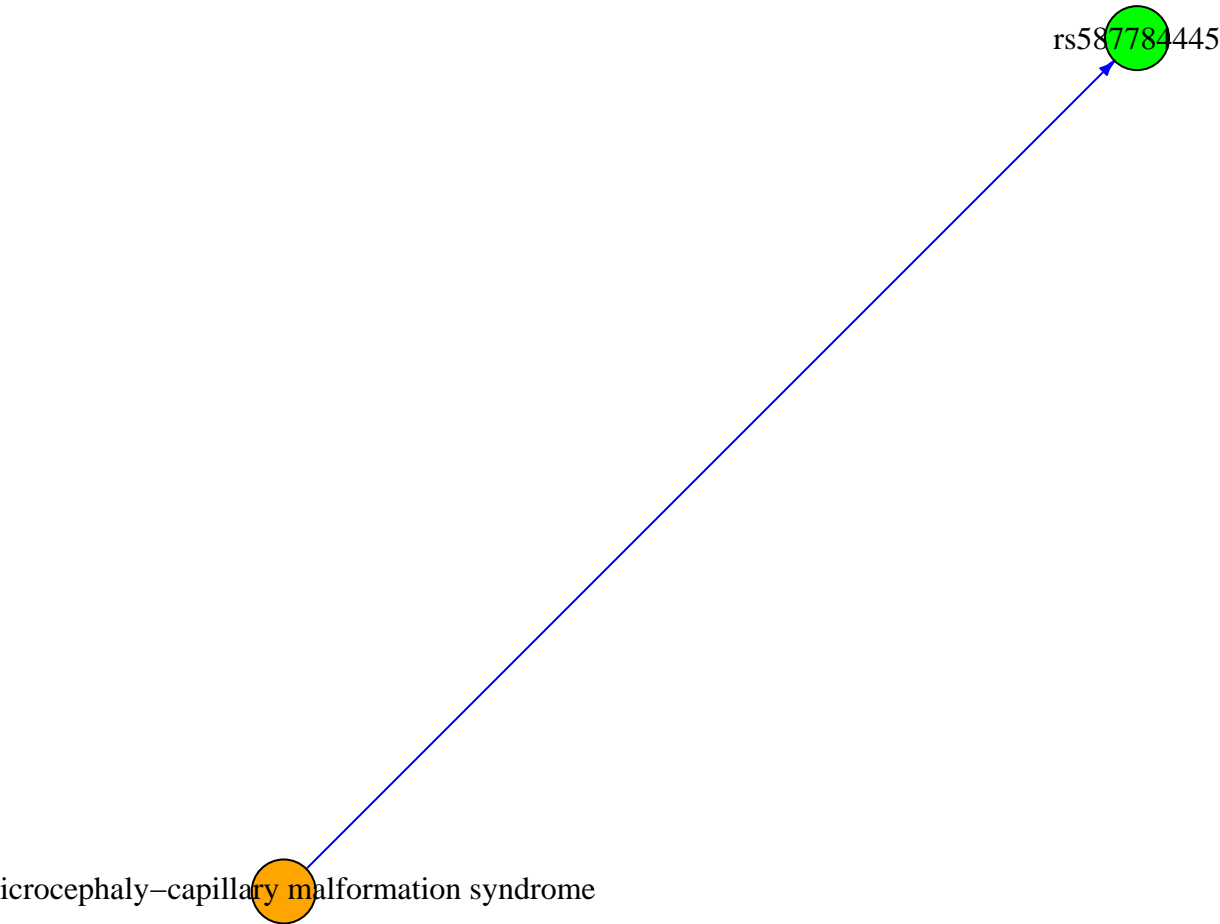

## Variant–Disease Network (Microcytic anemia)

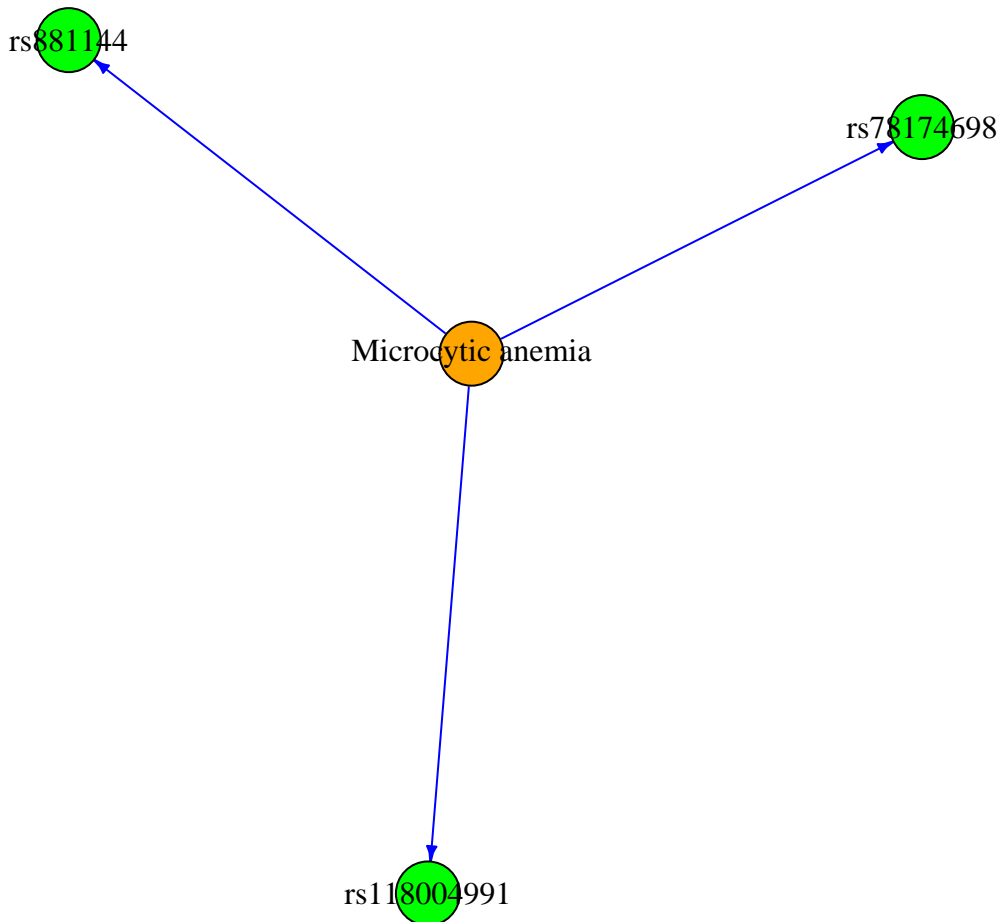

## Variant–Disease Network (Miller syndrome)

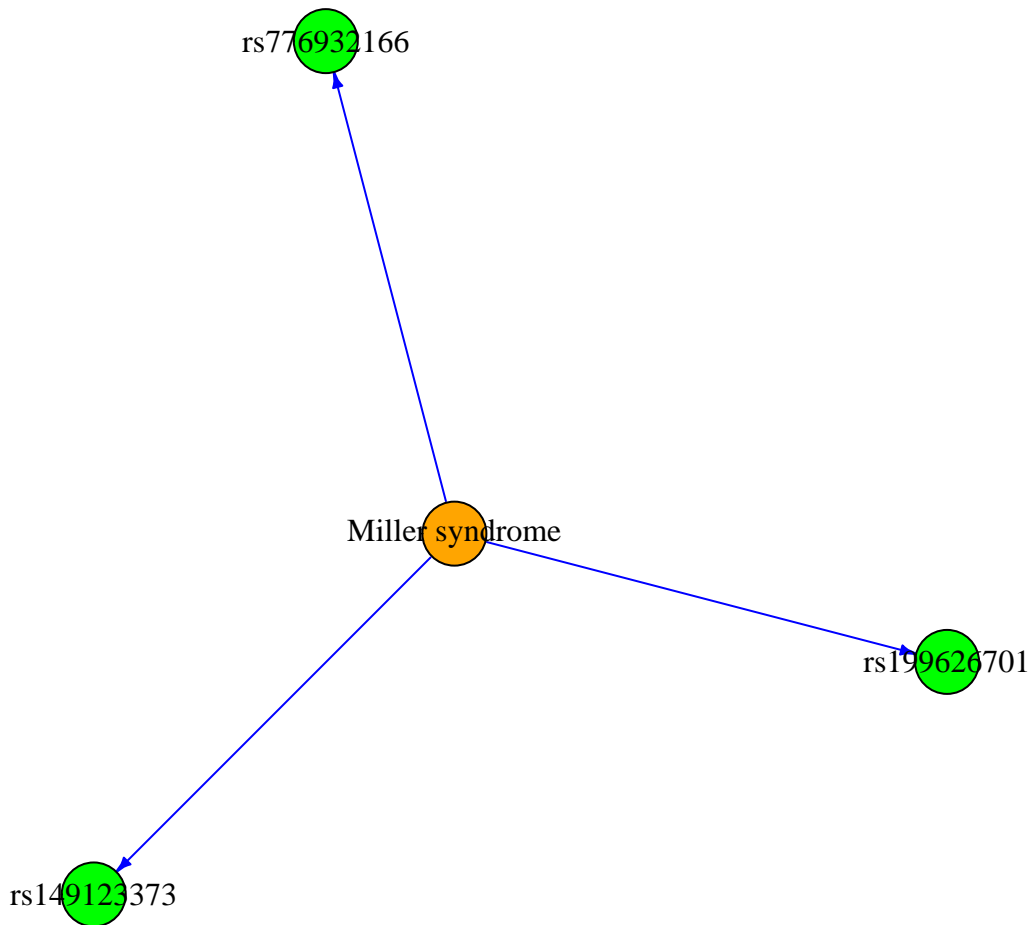

# Disease Network (mitochondrial 3-hydroxy-3-methylglutaryl-CoA synthase

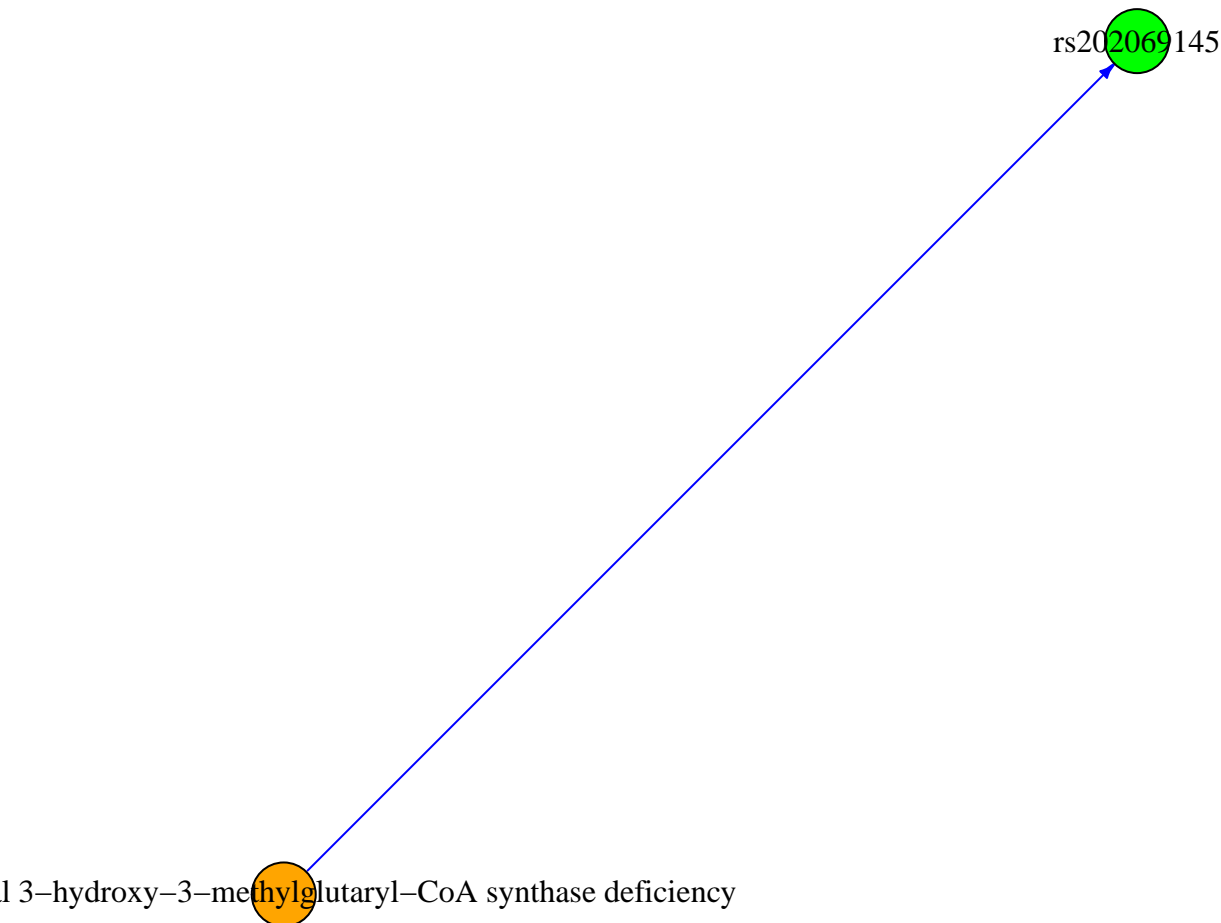

# Variant–Disease Network (Mitochondrial complex I deficiency)

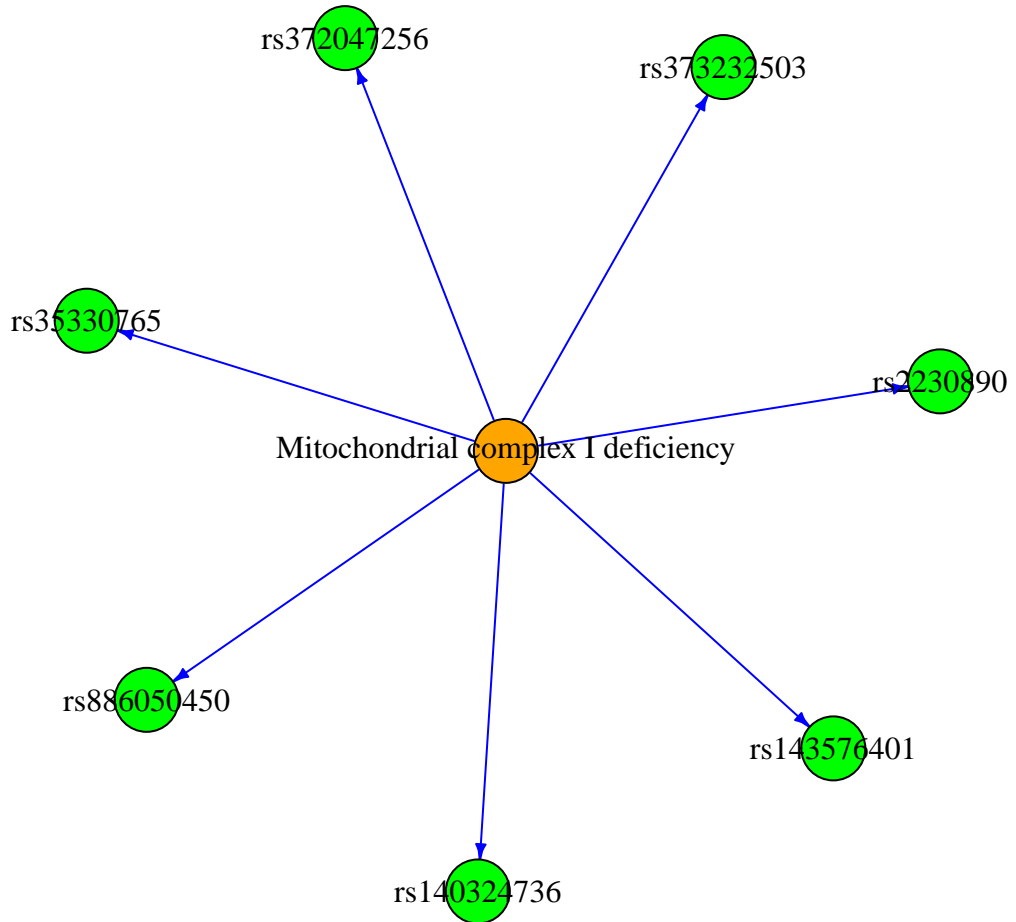

# Variant–Disease Network (Mitochondrial complex II deficiency)

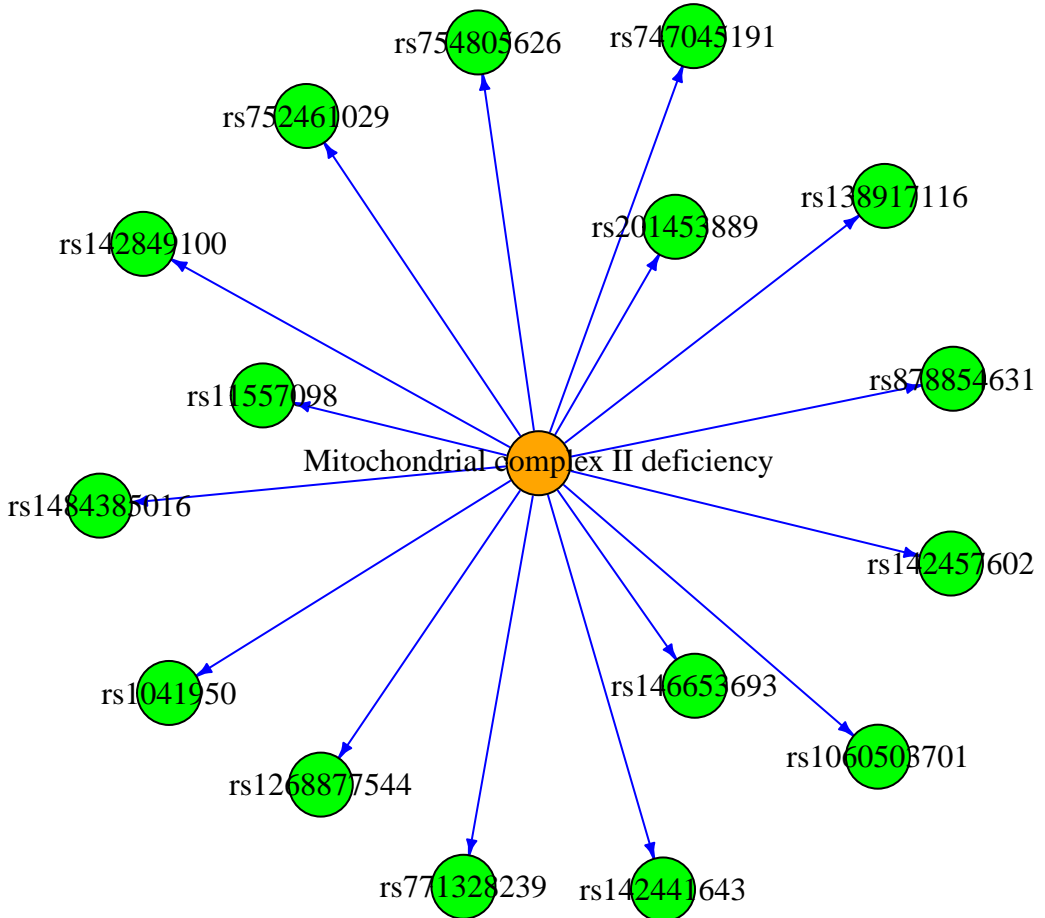

Variant–Disease Network (Mitochondrial complex III deficiency)

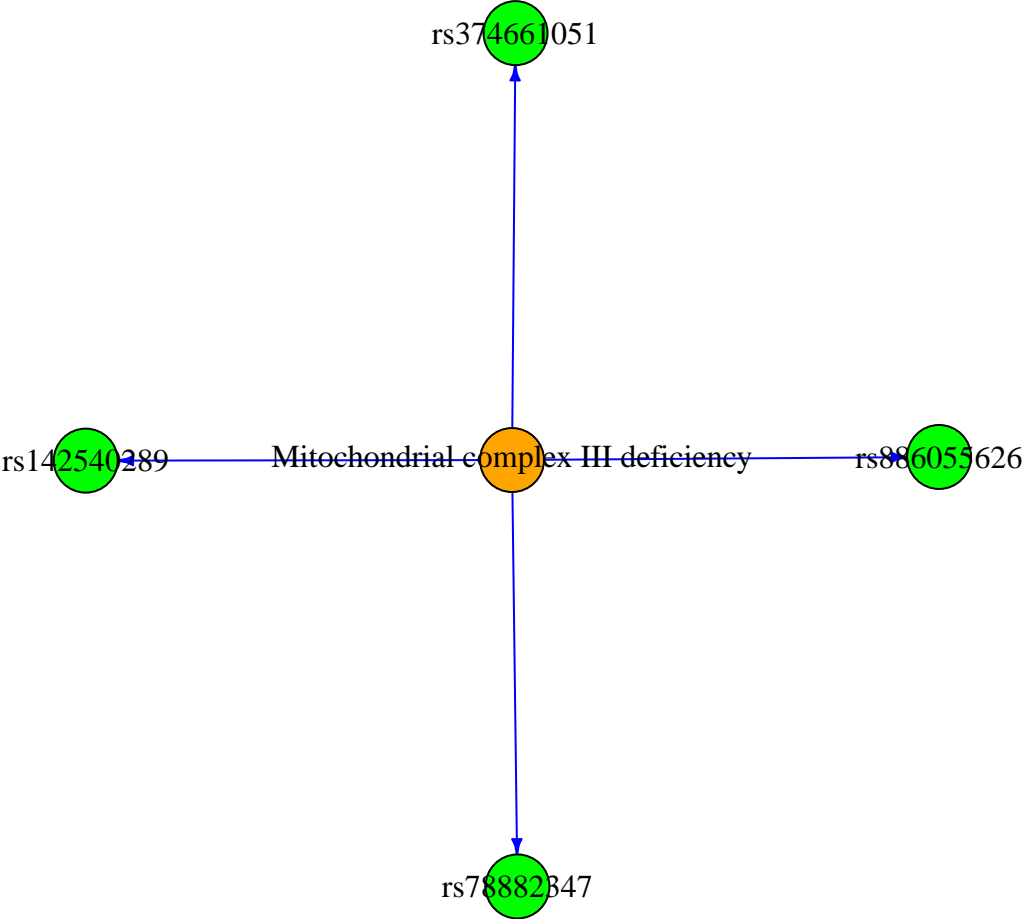



# Variant–Disease Network (Mitochondrial Complex V (ATP Synthase) Deficiency)

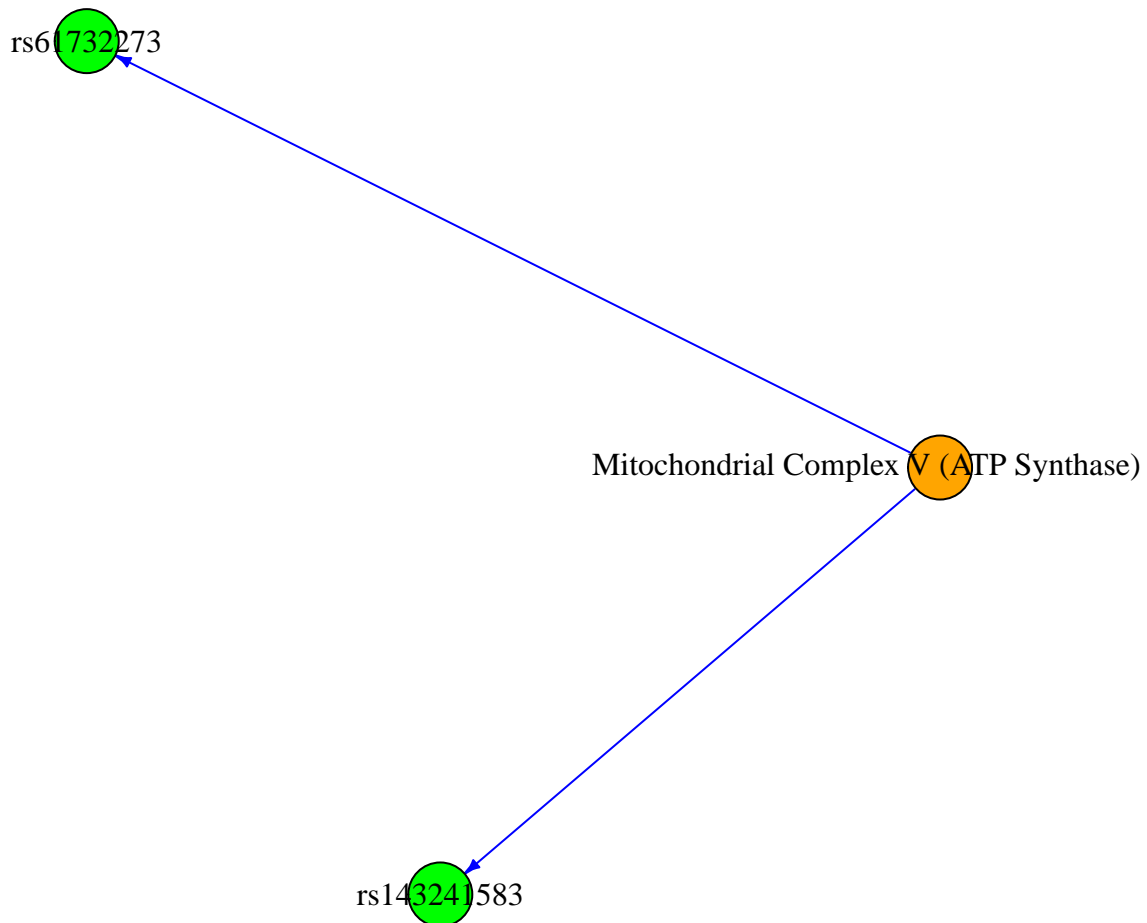

# Variant–Disease Network (Mitochondrial DNA depletion syndrome)

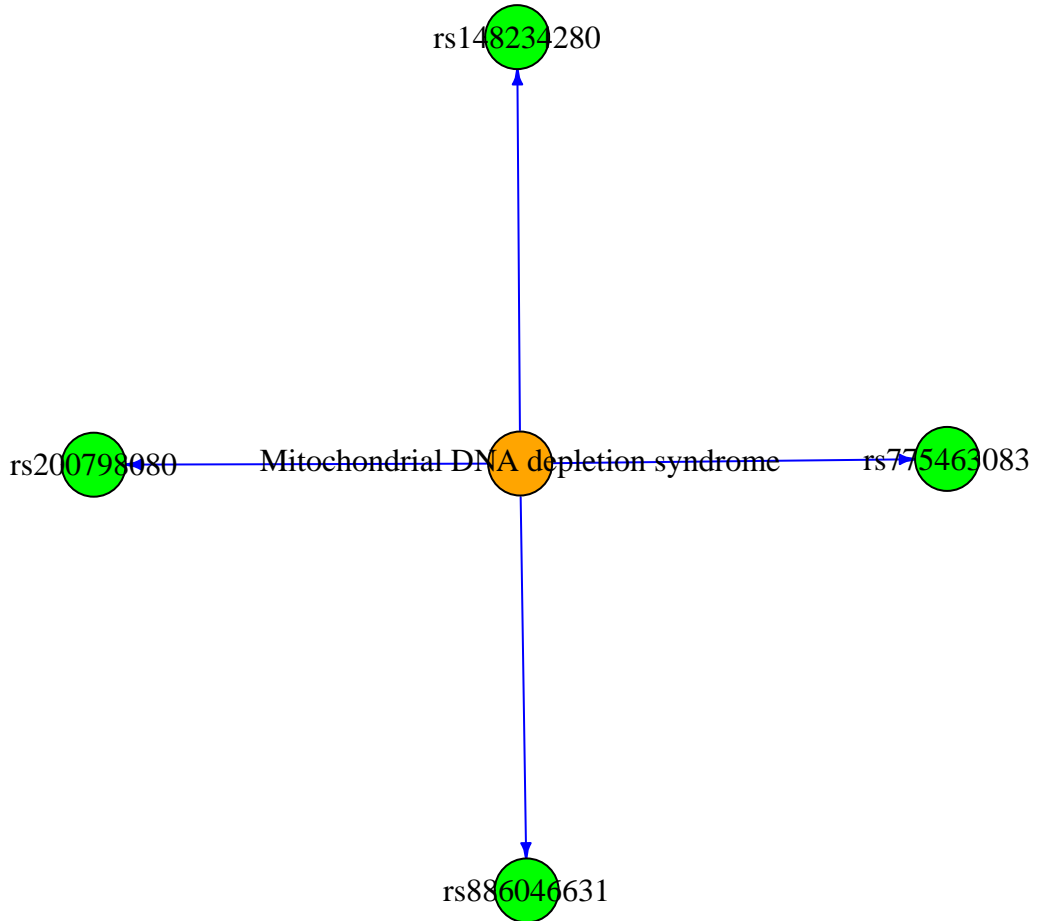

# Disease Network (Mitochondrial DNA depletion syndrome 13 (encephalomyopathy

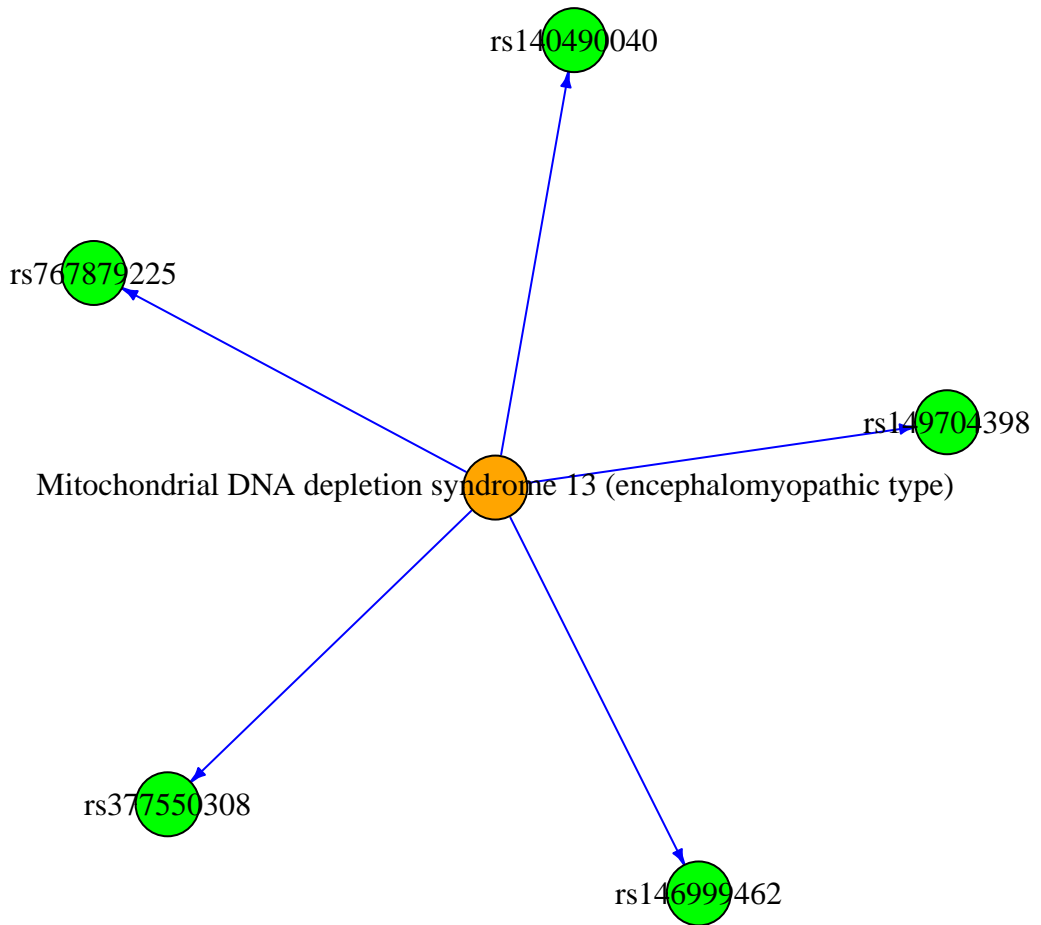

Variant–Disease Network (Mitochondrial myopathy and sideroblastic anemia)

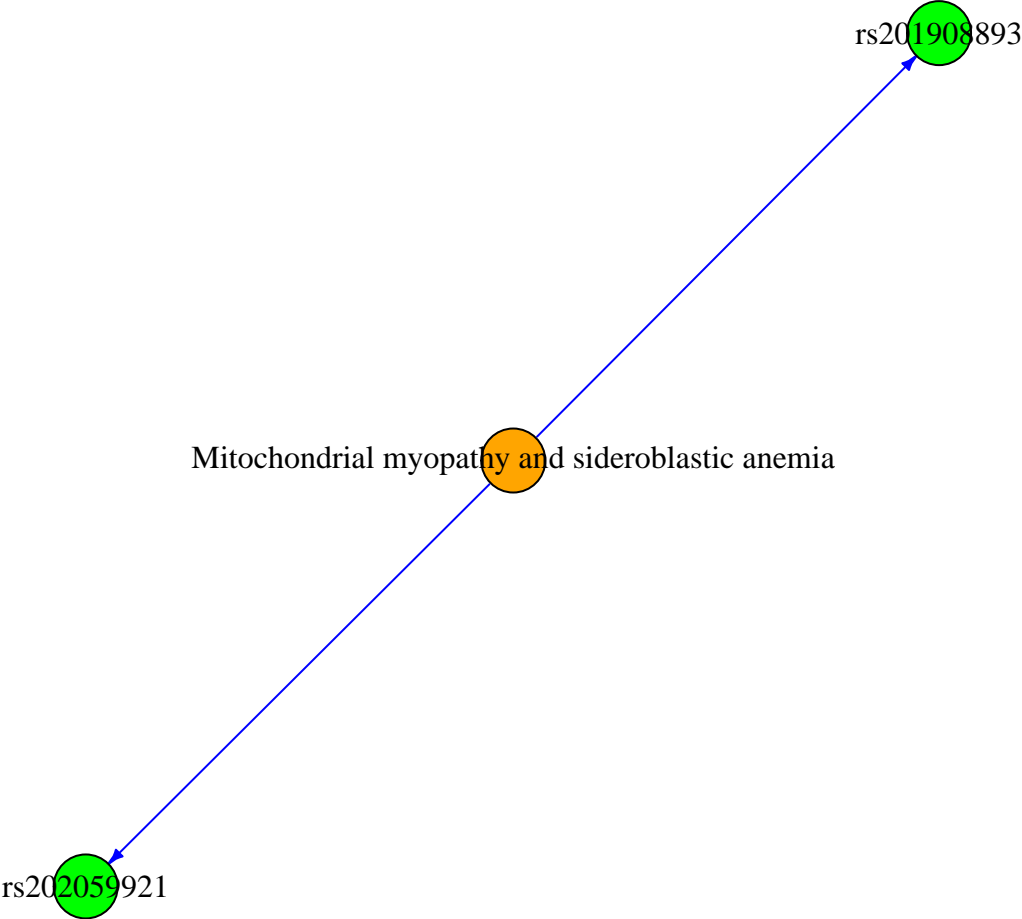

**Variant–Disease Network (Mitochondrial trifunctional protein deficiency)**

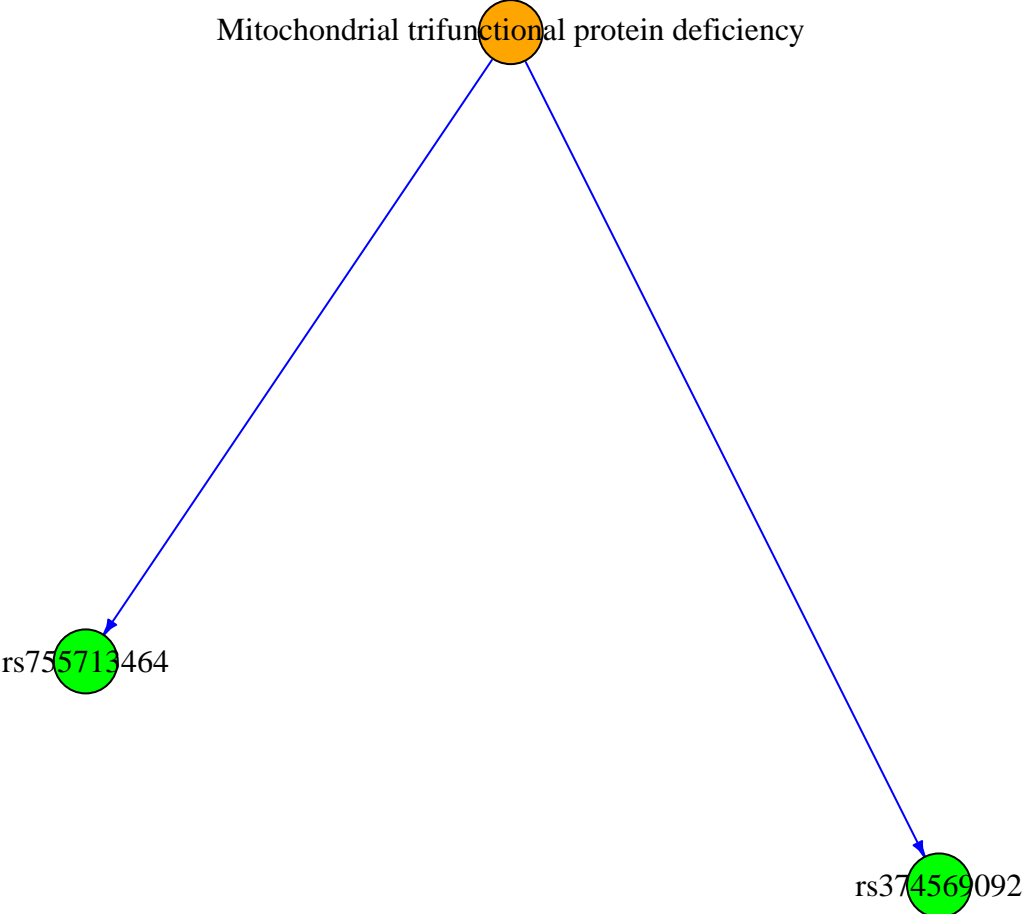

# Variant–Disease Network (MLH3–Related Lynch Syndrome)

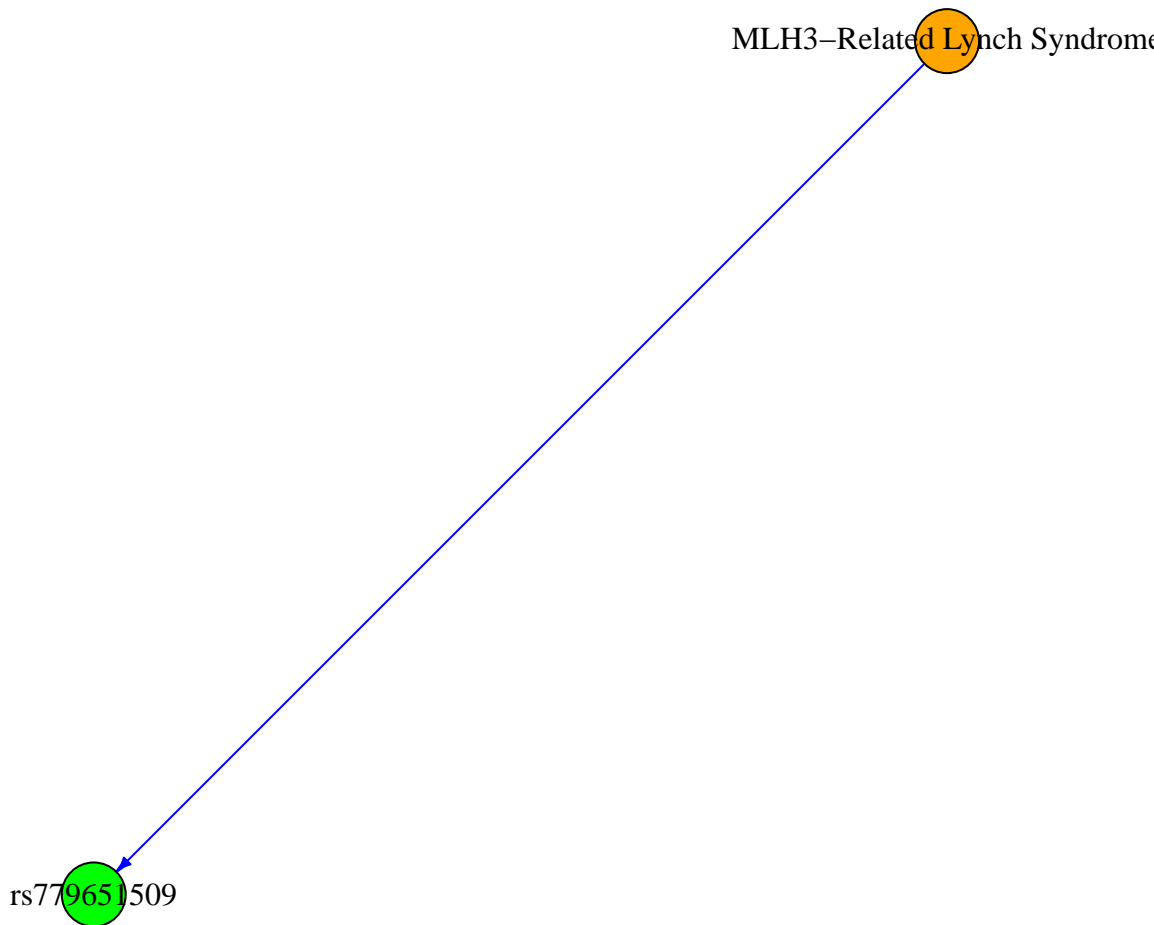

**Variant–Disease Network (Monocarboxylate transporter 1 deficiency)**

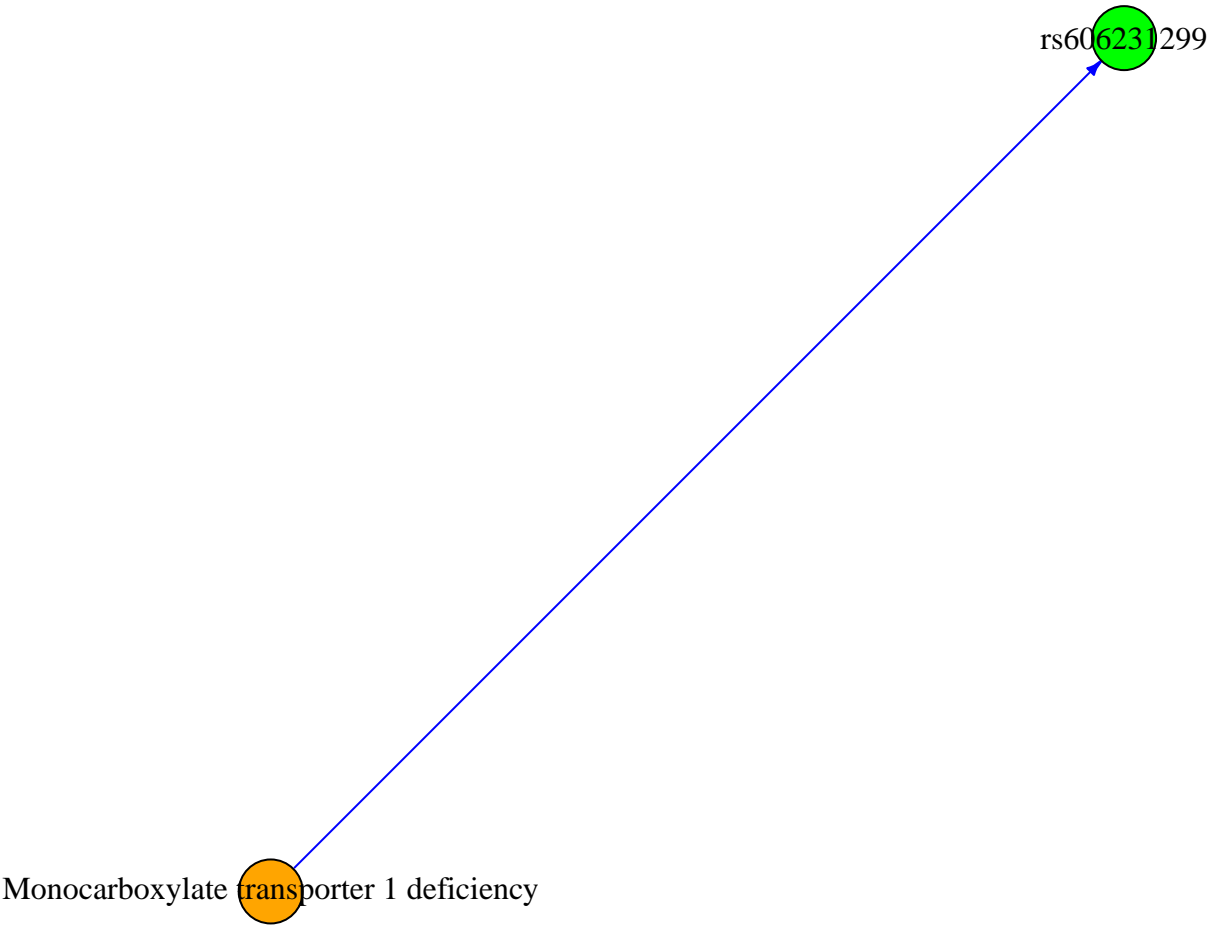

## Variant–Disease Network (Monogenic diabetes)

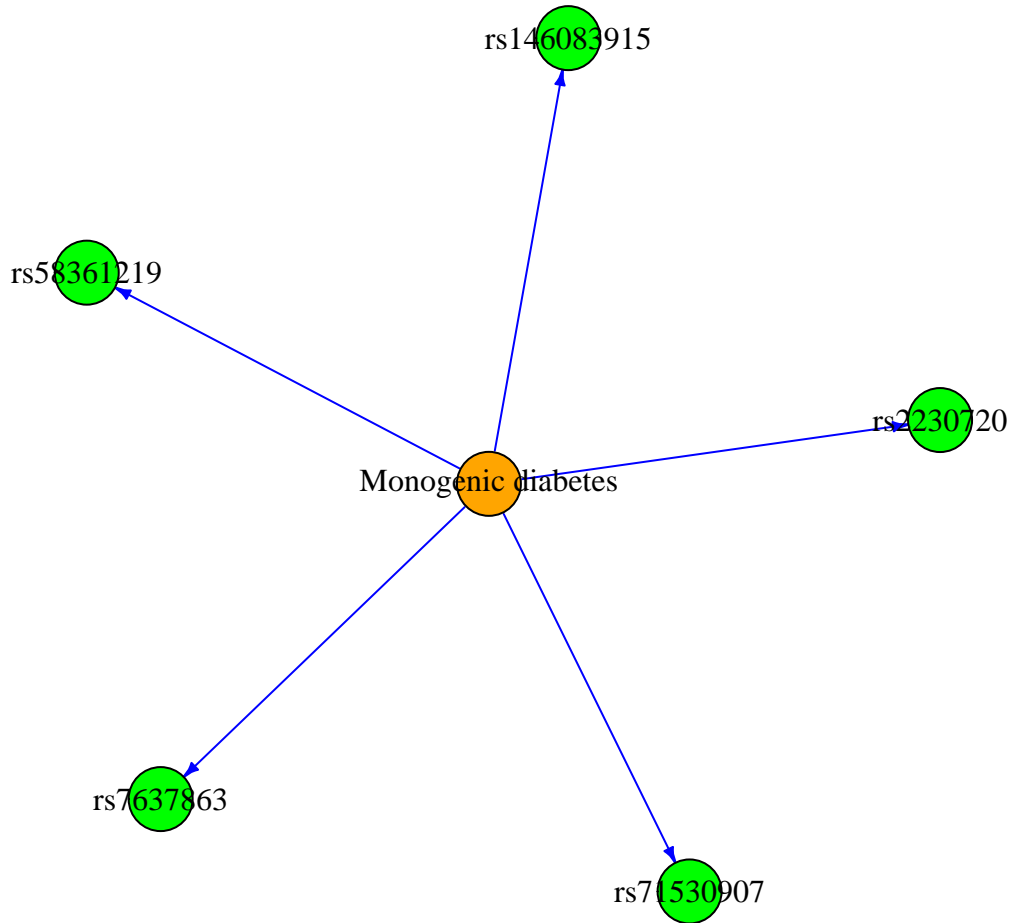



Variant–Disease Network (Monogenic Non–Syndromic Obesity)

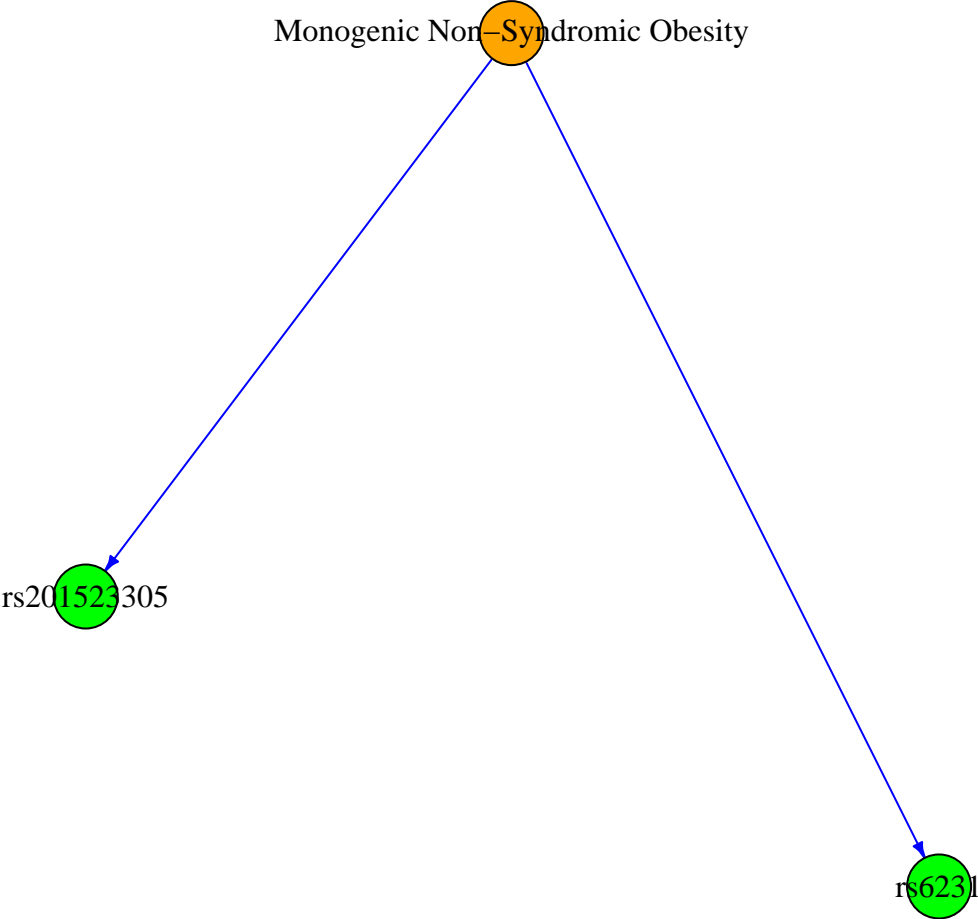

Variant–Disease Network (Mononeuropathy of the Median Nerve)

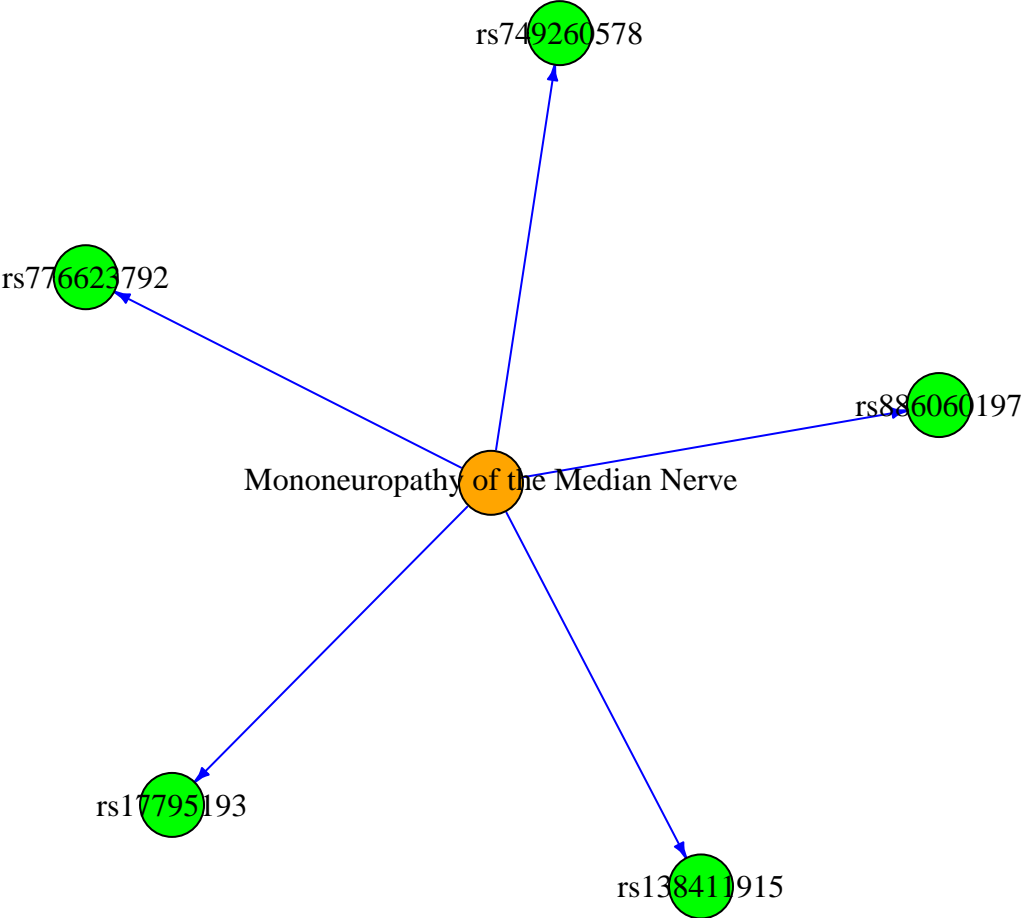

## Variant–Disease Network (Morquio syndrome)

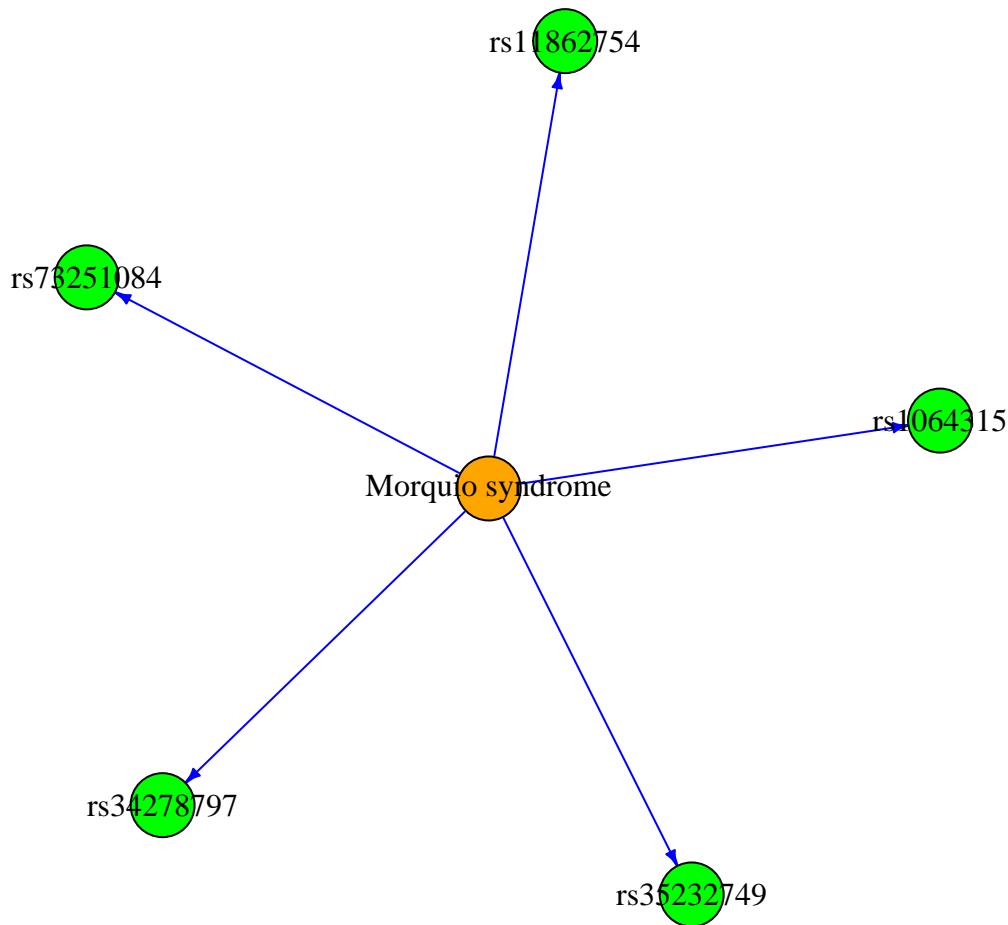

**Variant–Disease Network (Mosaic variegated aneuploidy syndrome)**

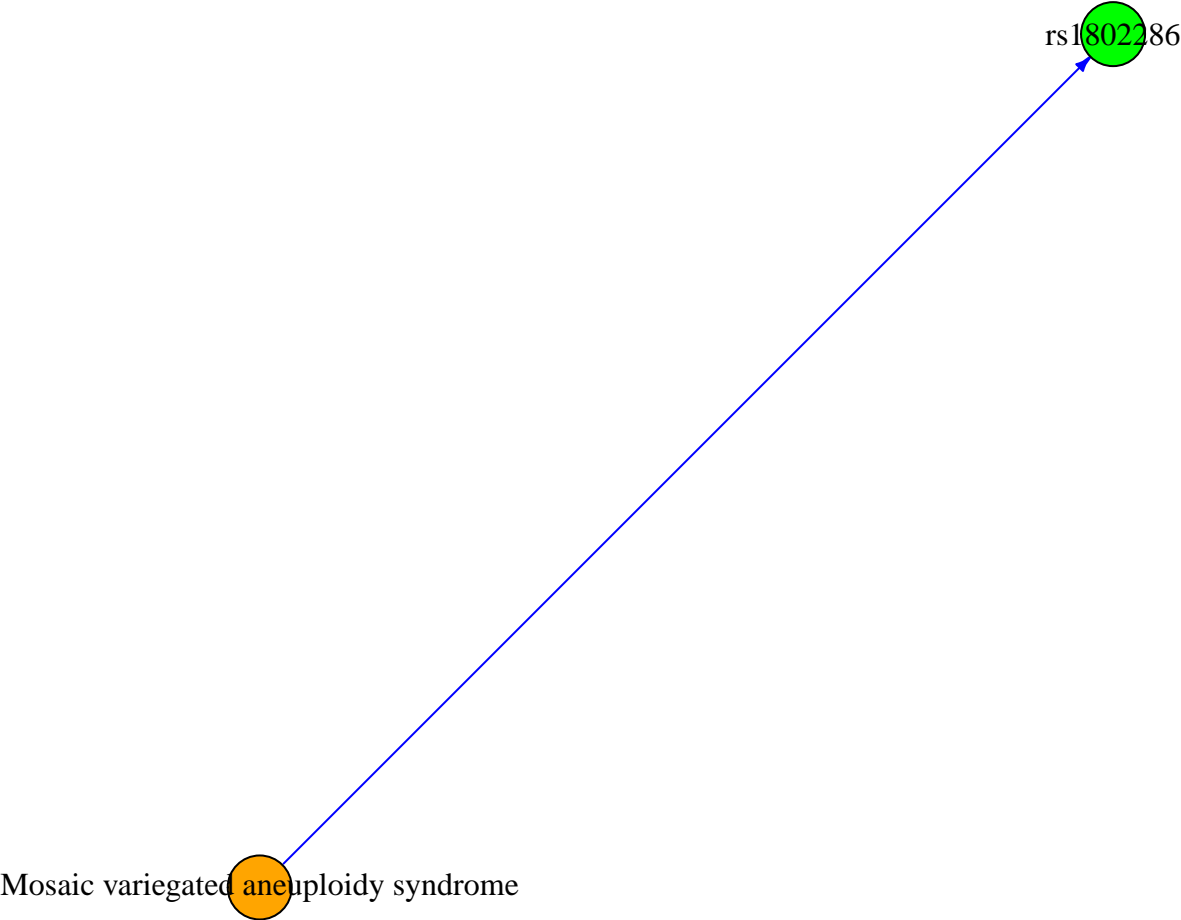

**Variant–Disease Network (Mosaic variegated aneuploidy syndrome 2)**

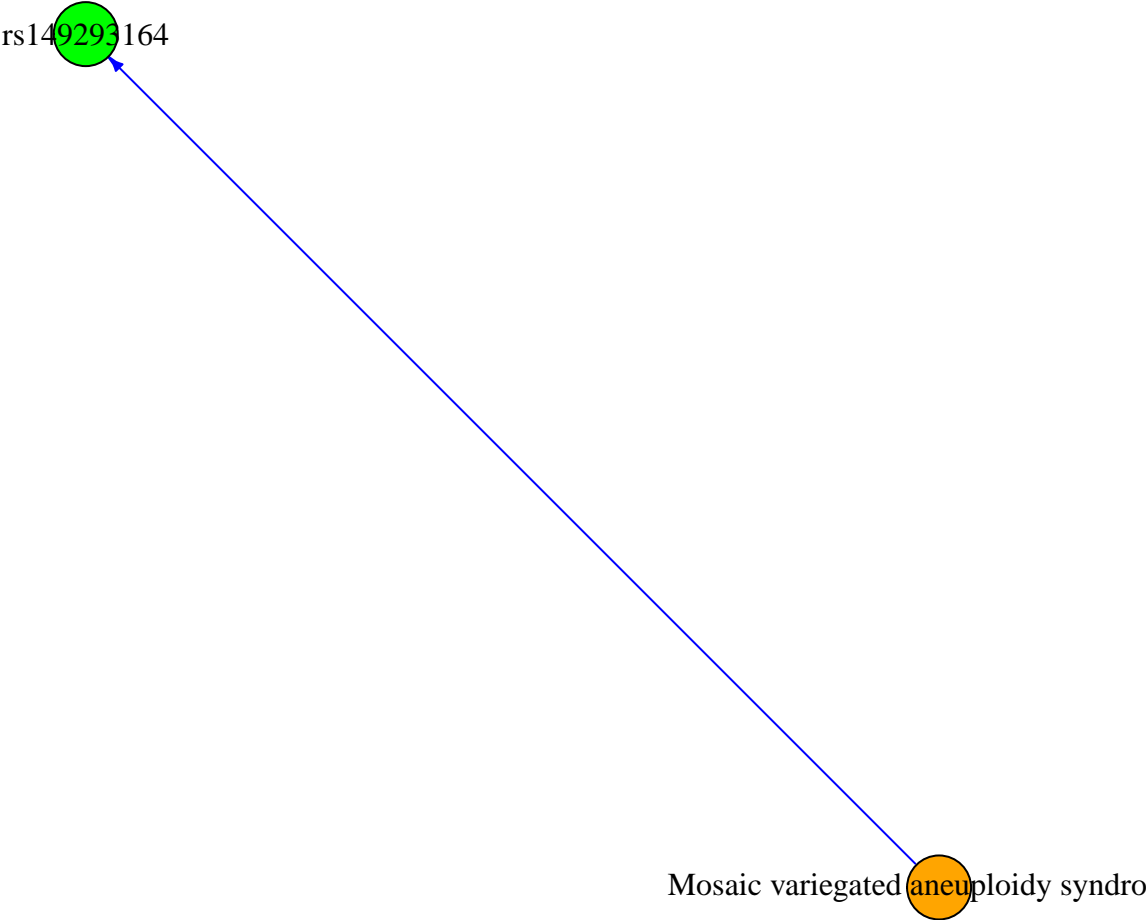

## Variant–Disease Network (Mowat–Wilson syndrome)

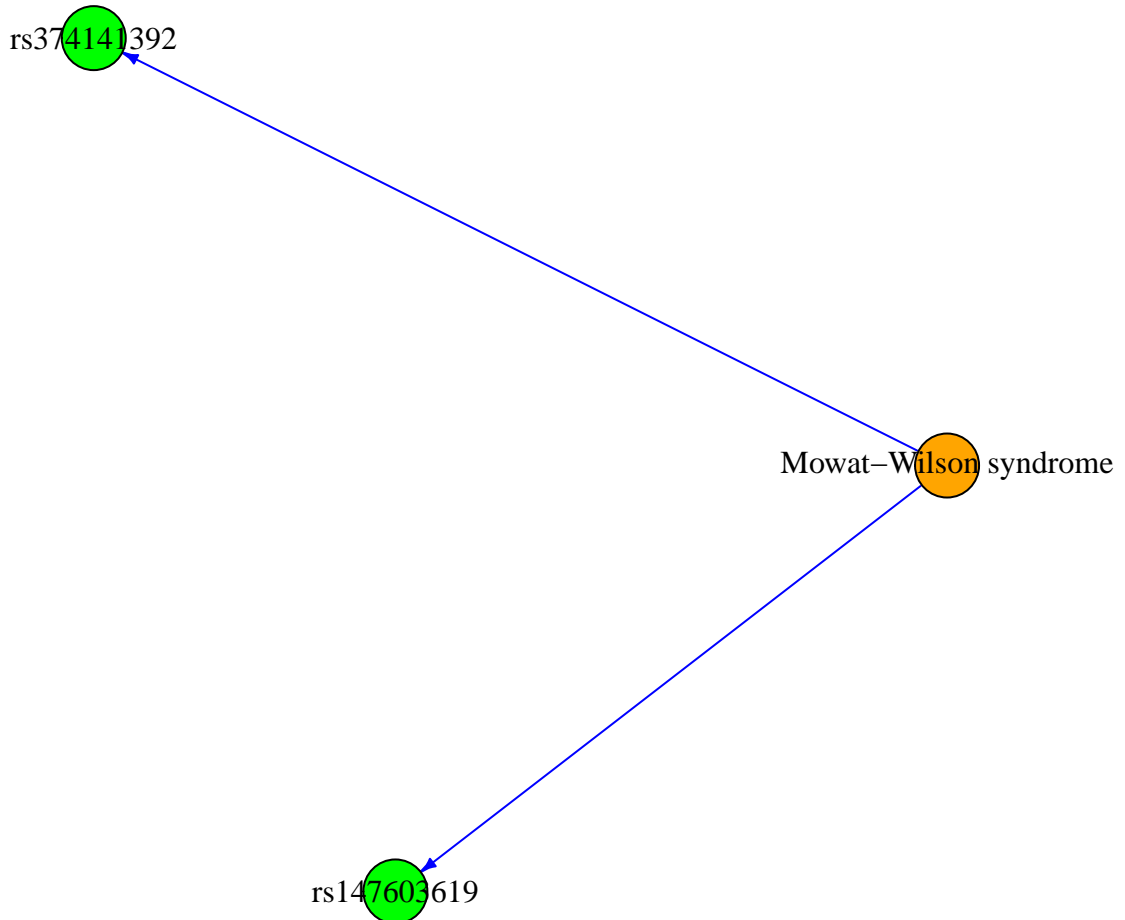

Variant–Disease Network (Mucopolipidosis III Gamma)

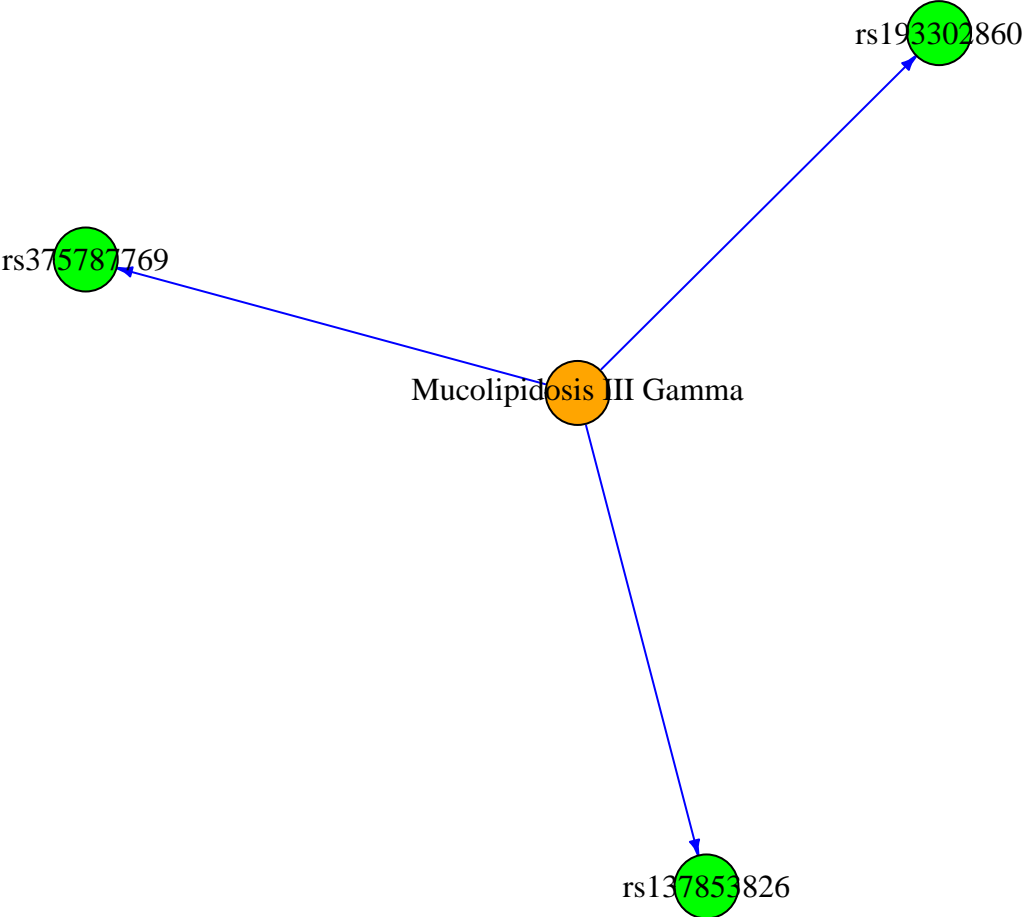

## Variant–Disease Network (Mucopolipidosis type IV)

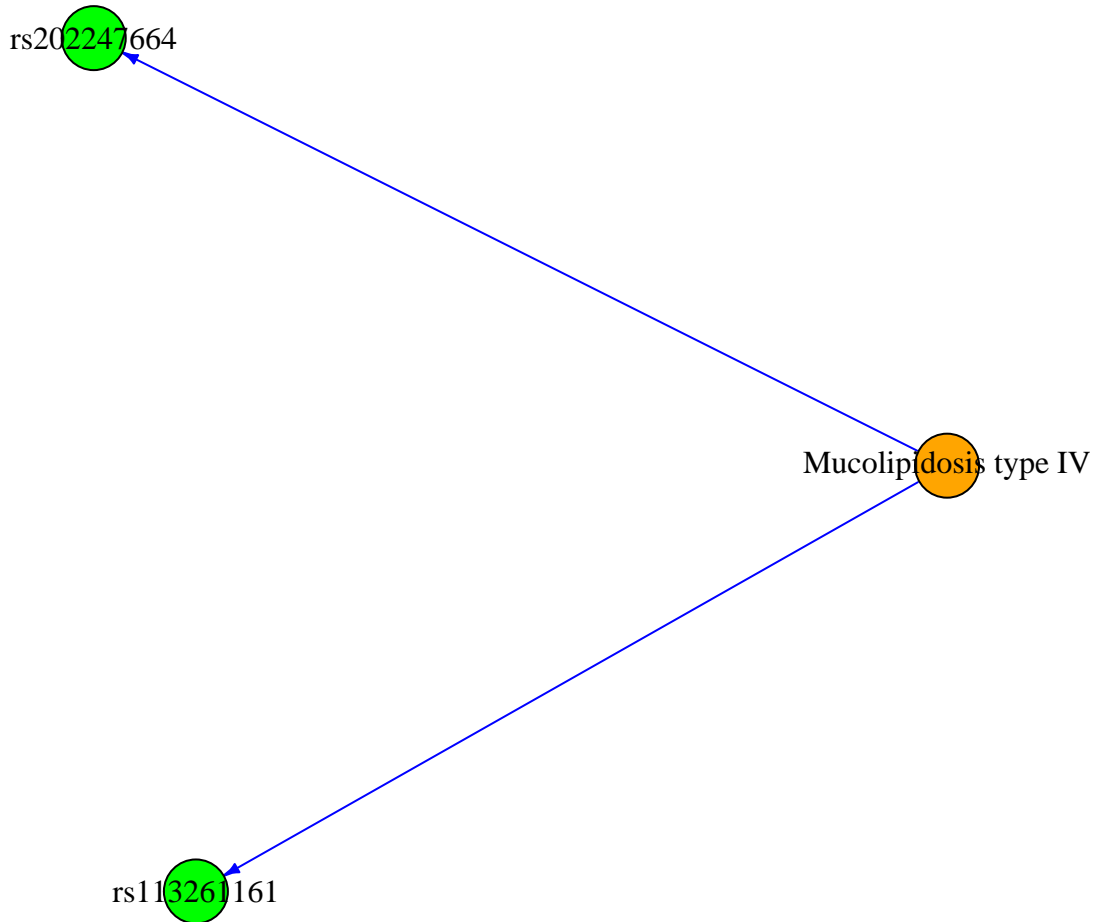



Variant–Disease Network (Mucopolysaccharidosis)

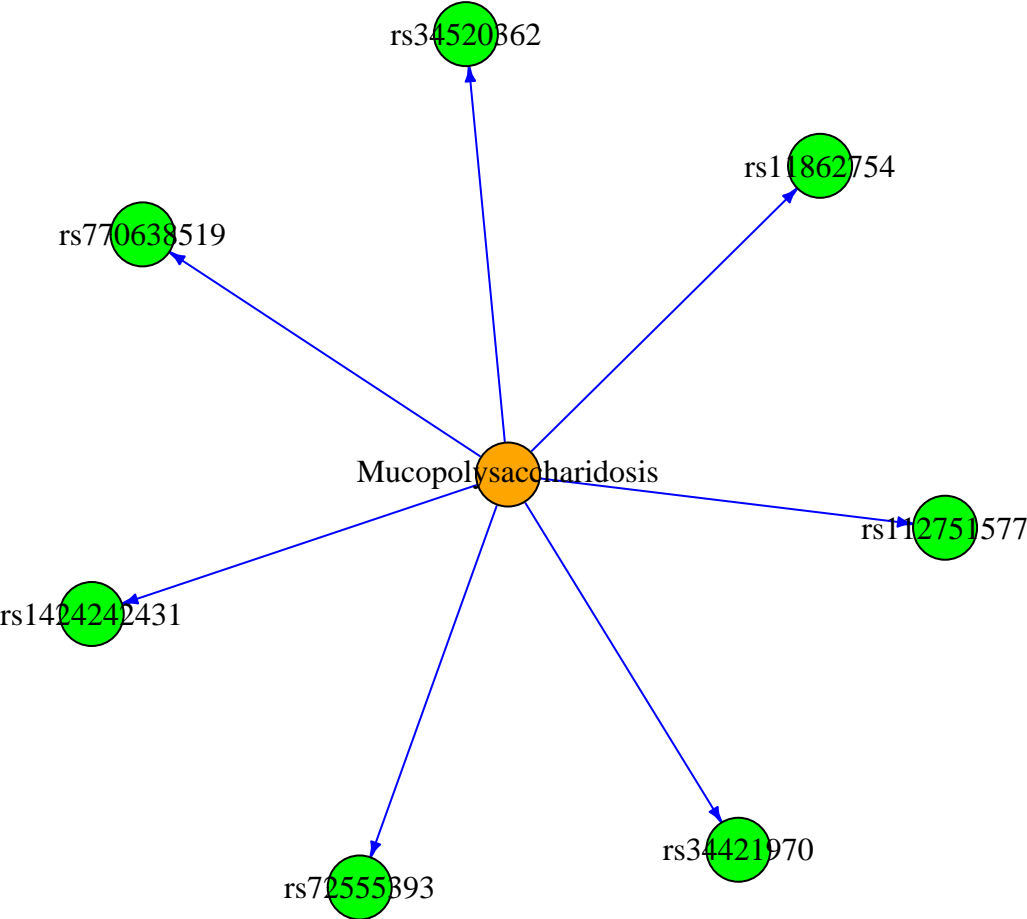

Variant–Disease Network (Mucopolysaccharidosis type I)

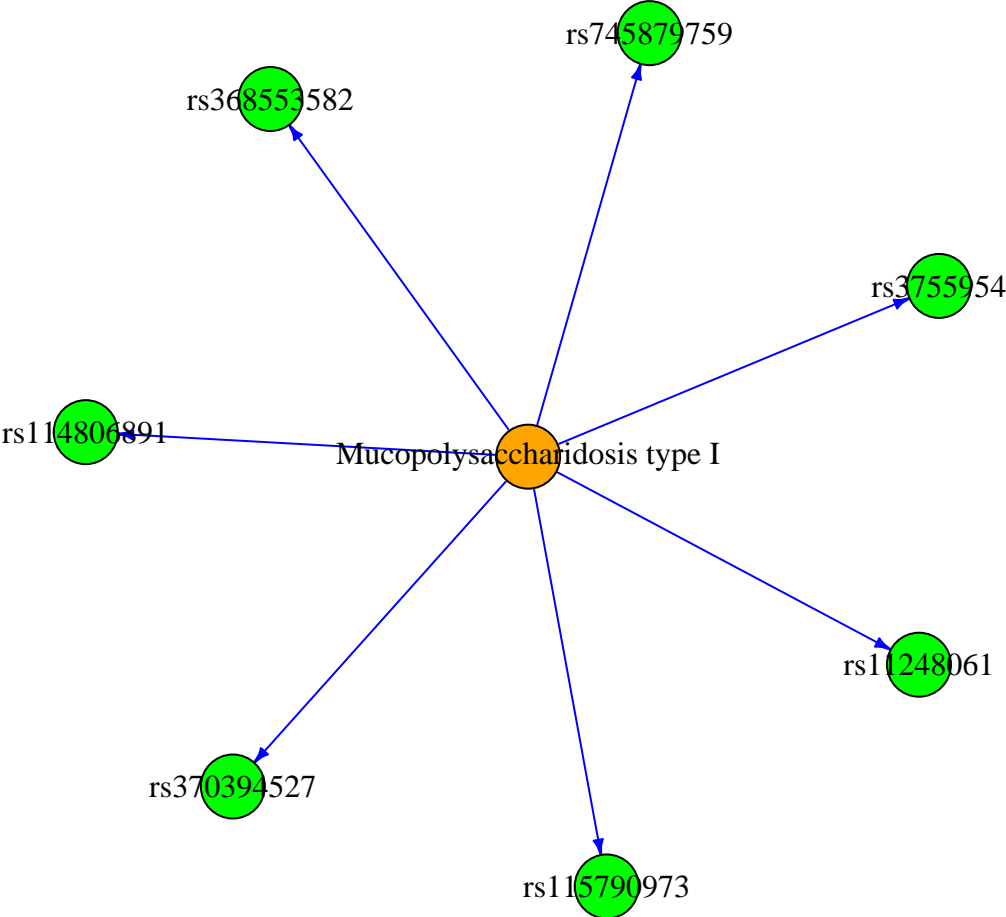

## Variant–Disease Network (Mulibrey nanism syndrome)

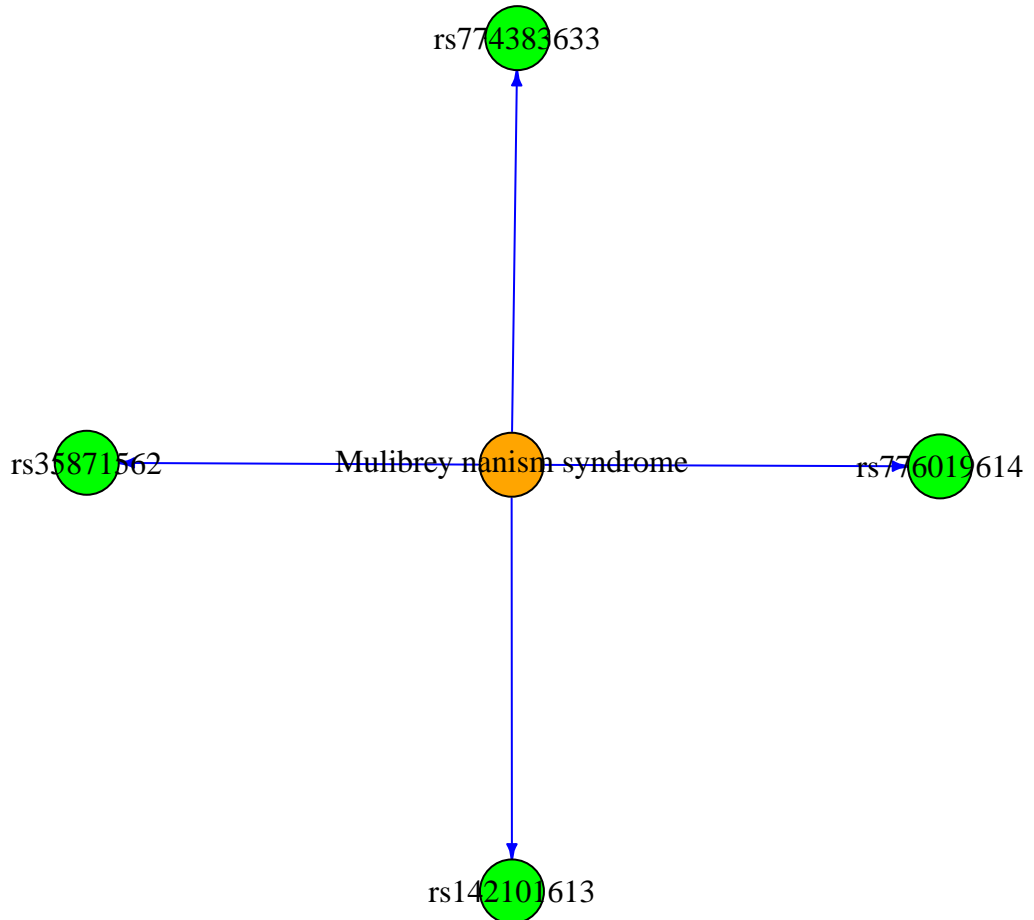

# Disease Network (Multicentric Osteolysis–Nodulosis–Arthropathy (MONA) Spec

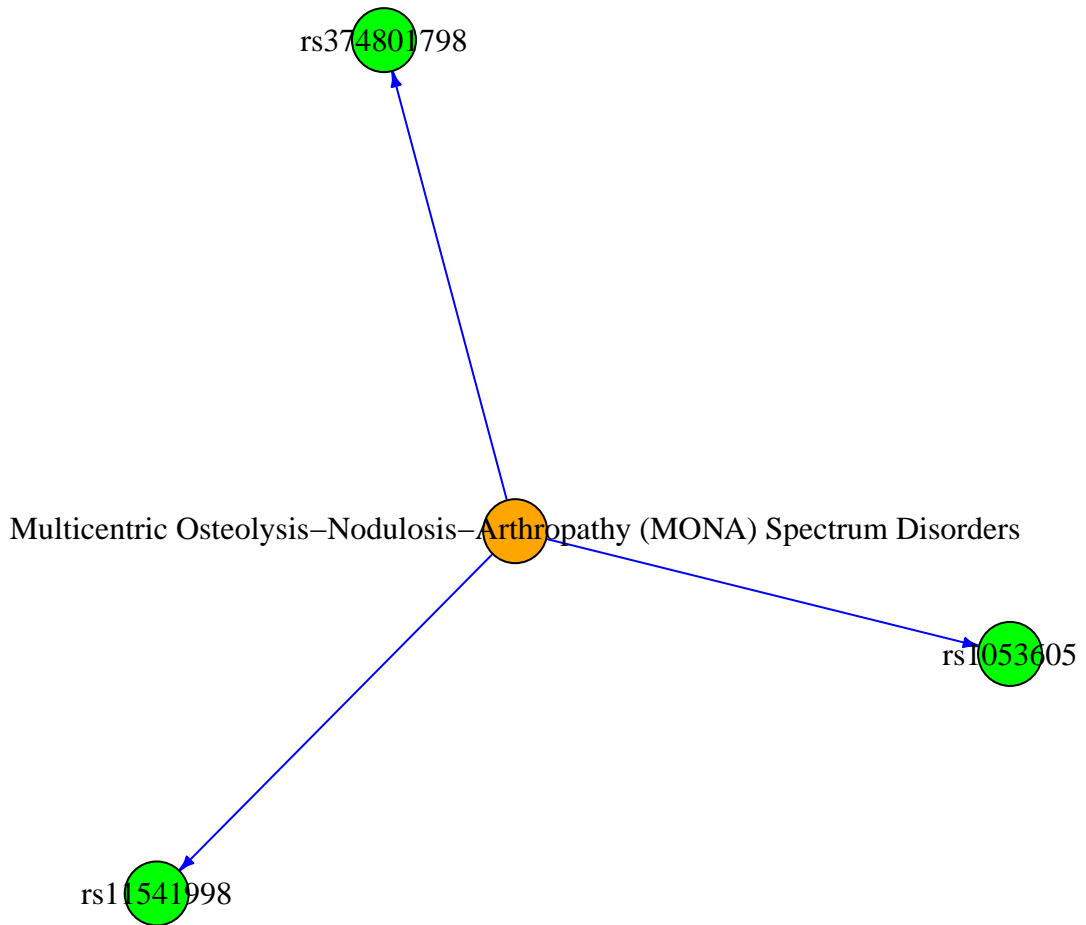

# nt-Disease Network (Multiple congenital anomalies–hypotonia–seizures syn

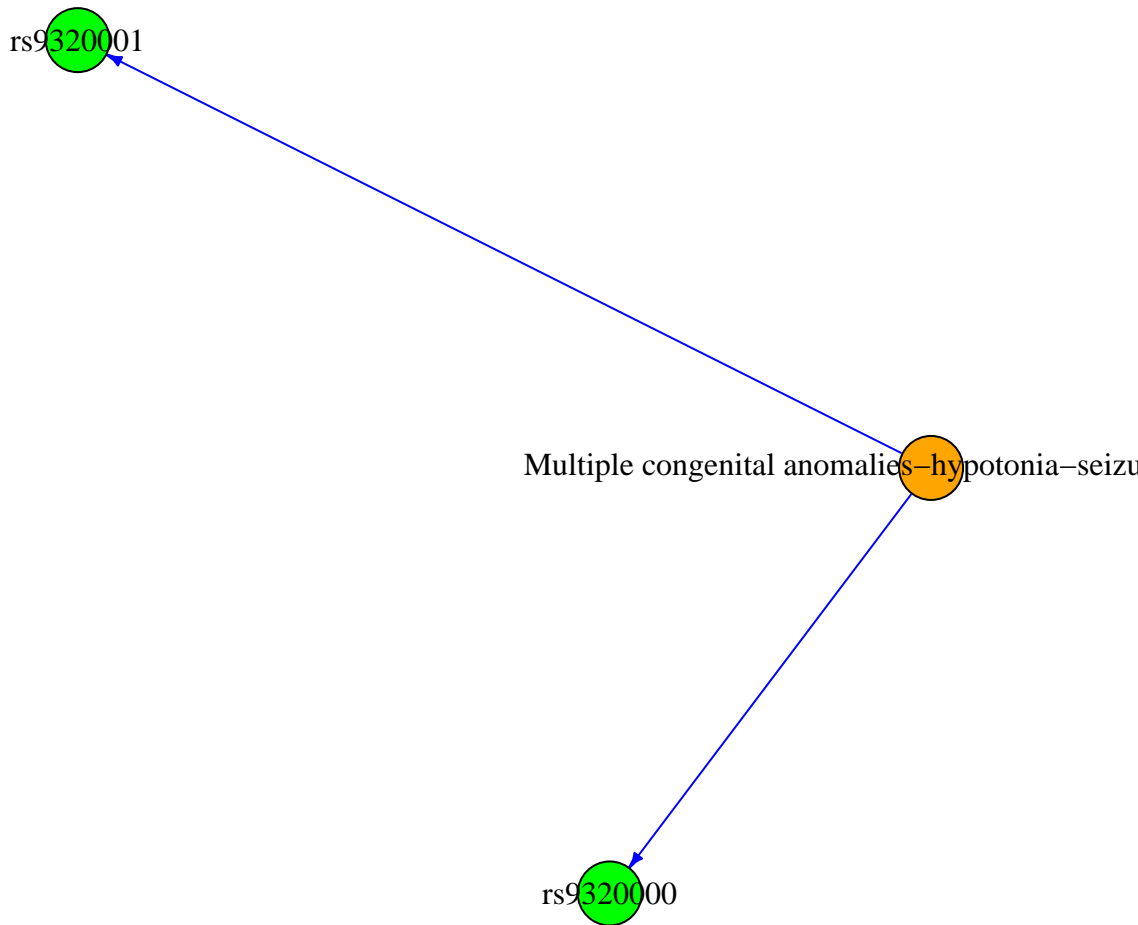

# nt-Disease Network (Multiple congenital anomalies–hypotonia–seizures syn

rs387906726

Multiple congenital anomalies–hypotonia–seizures

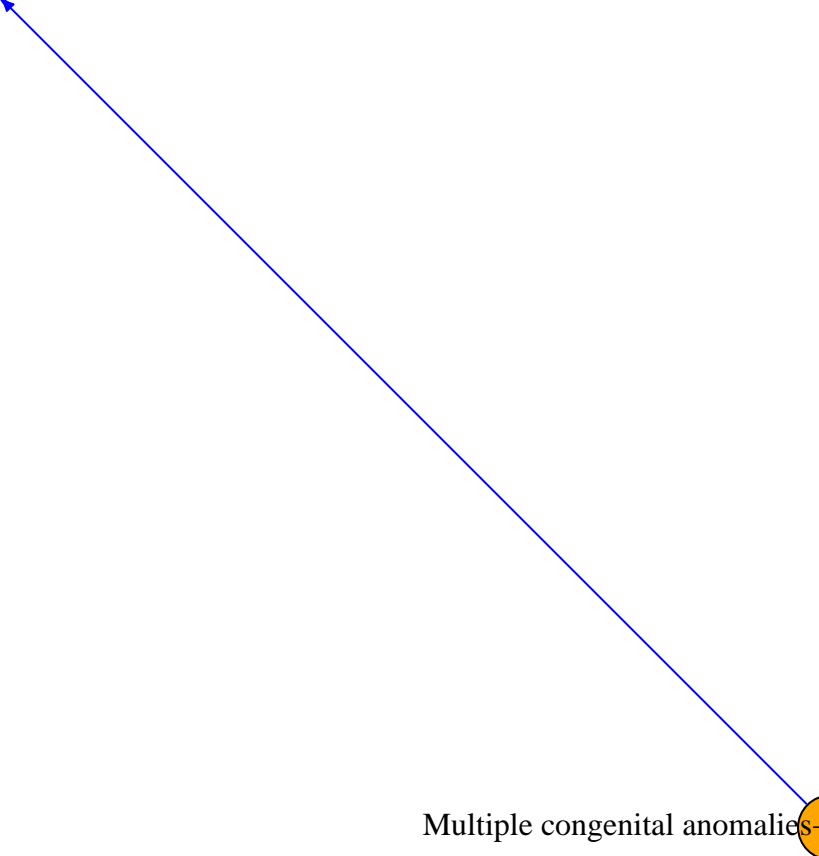

# Variant-Disease Network (Multiple Cutaneous and Mucosal Venous Malformations)

Multiple Cutaneous and Mucosal Venous Malformations

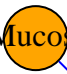

rs886063824

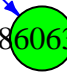

# Variant–Disease Network (Multiple Cutaneous and Uterine Leiomyomas)

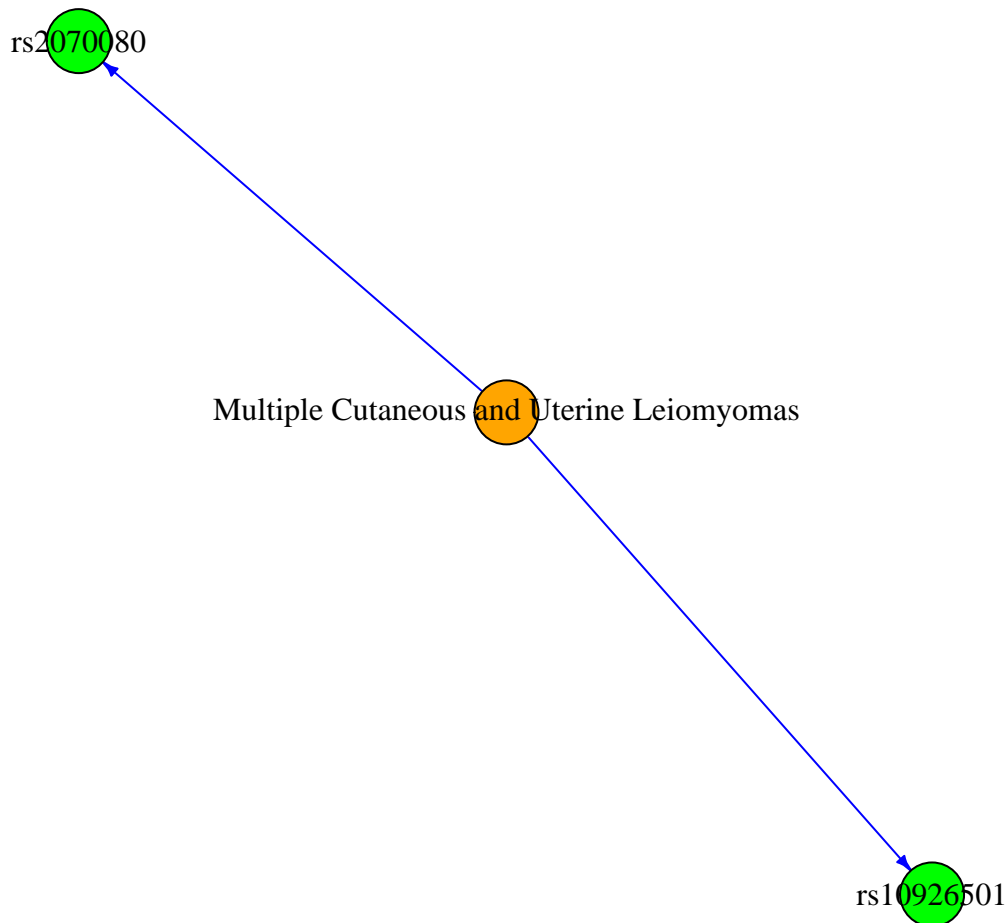



## Variant–Disease Network (Multiple cutaneous leiomyomas)

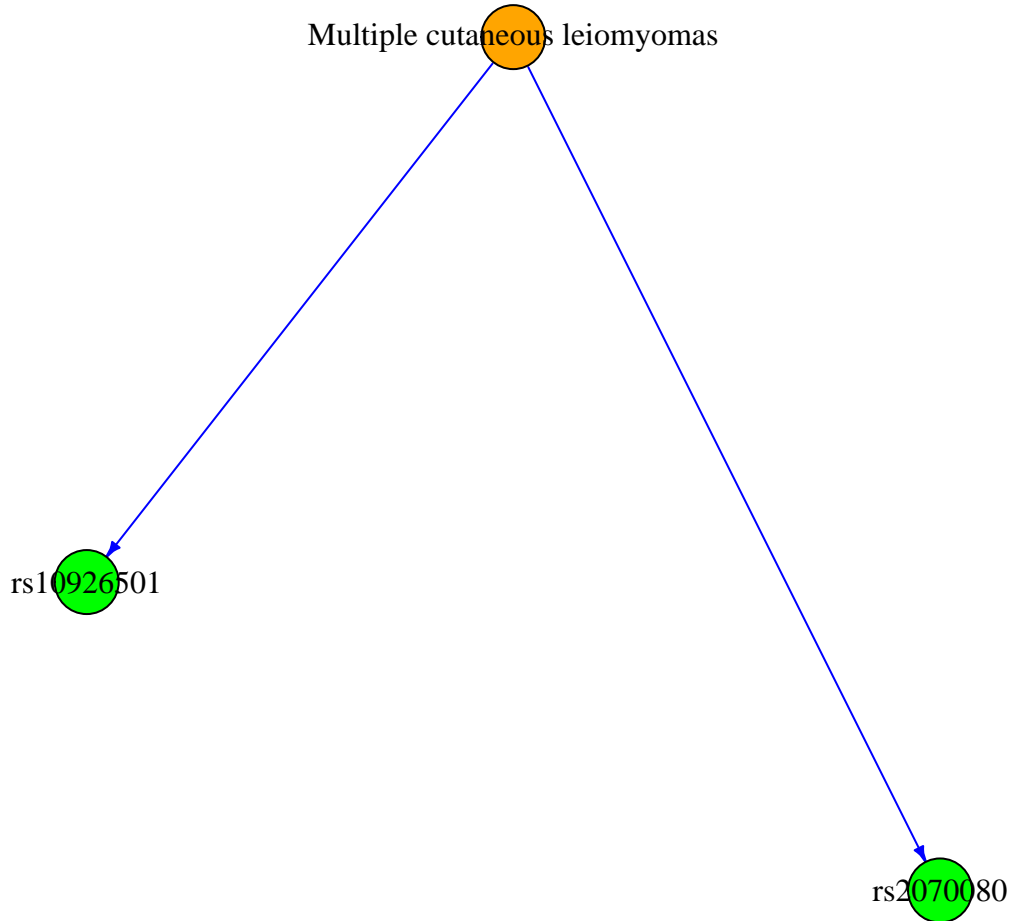

## Variant–Disease Network (Multiple endocrine neoplasia)

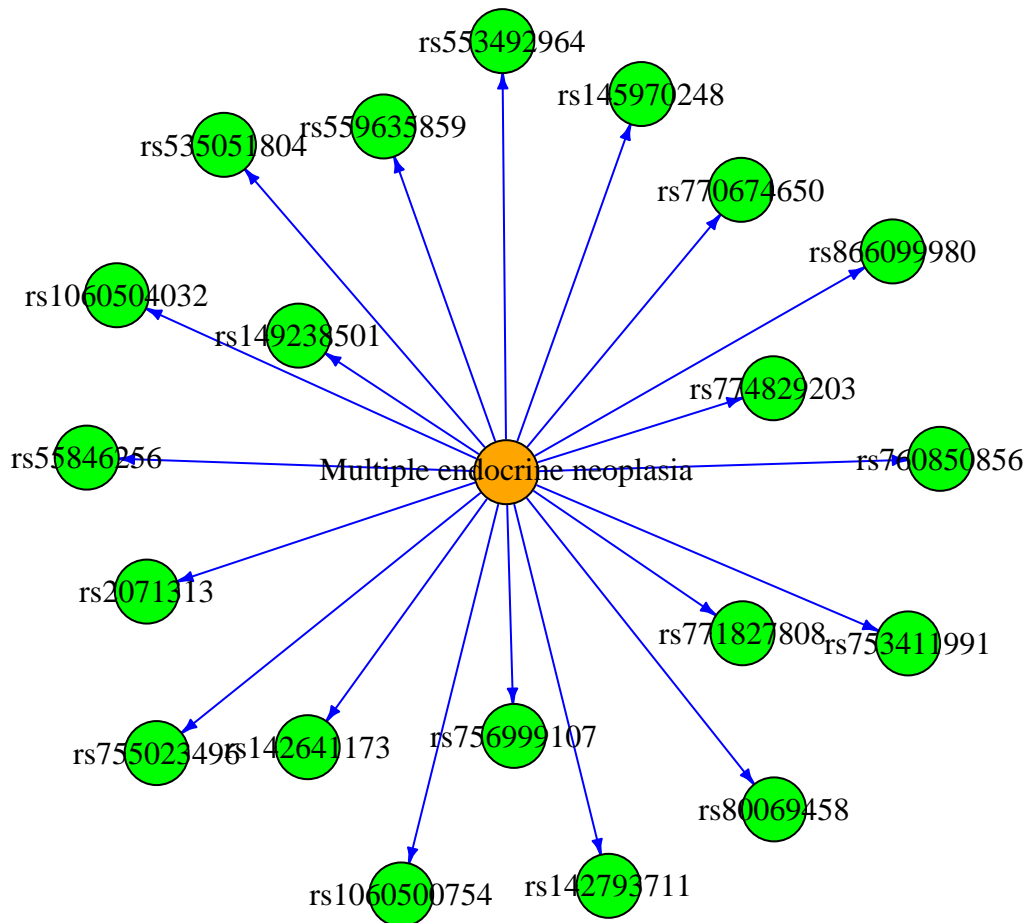

**Variant–Disease Network (Multiple Epiphyseal Dysplasia)**

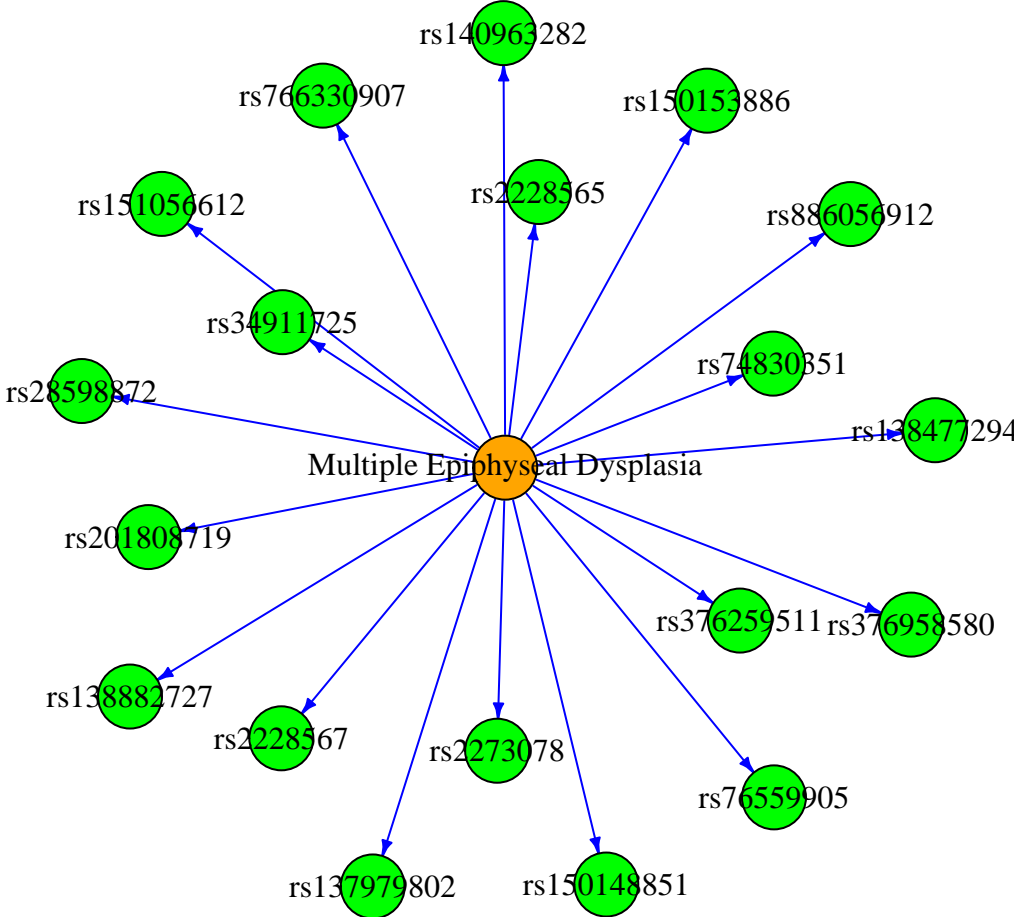

**Variant–Disease Network (Multiple exostoses type 1)**

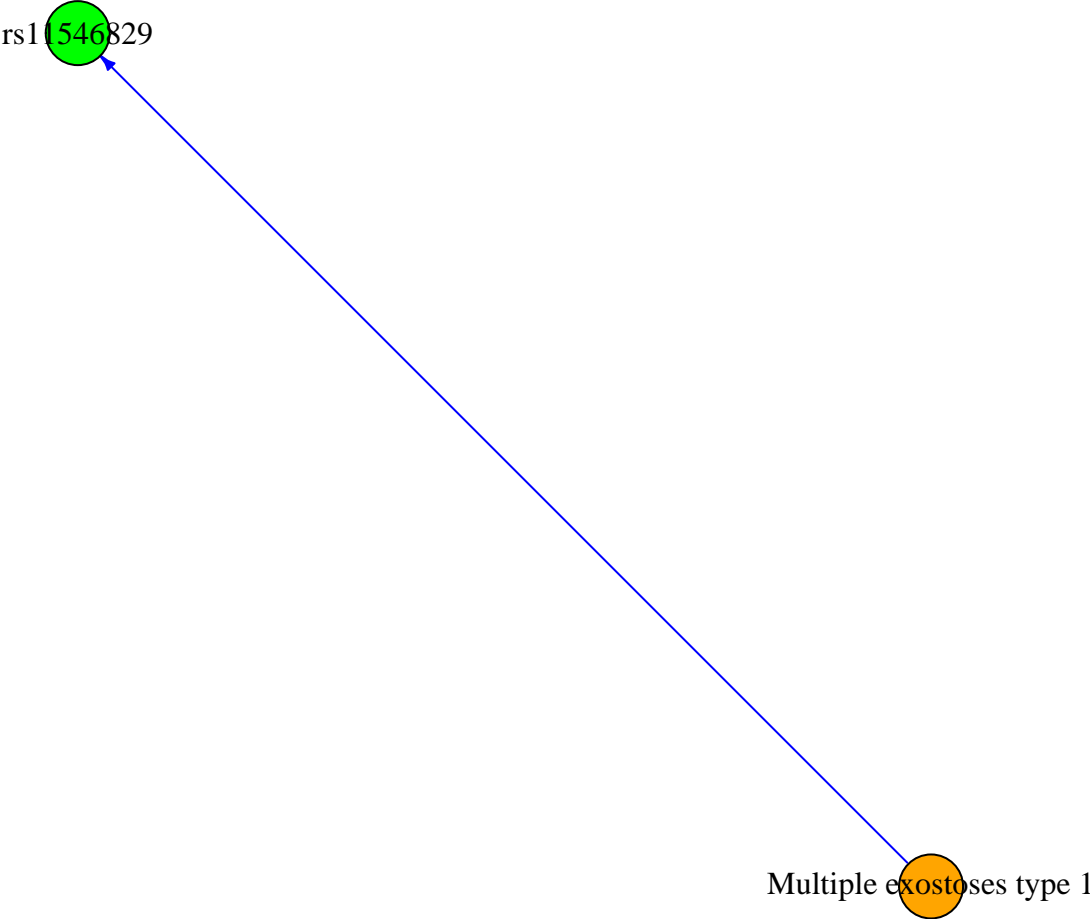

**Variant–Disease Network (Multiple gastrointestinal atresias)**

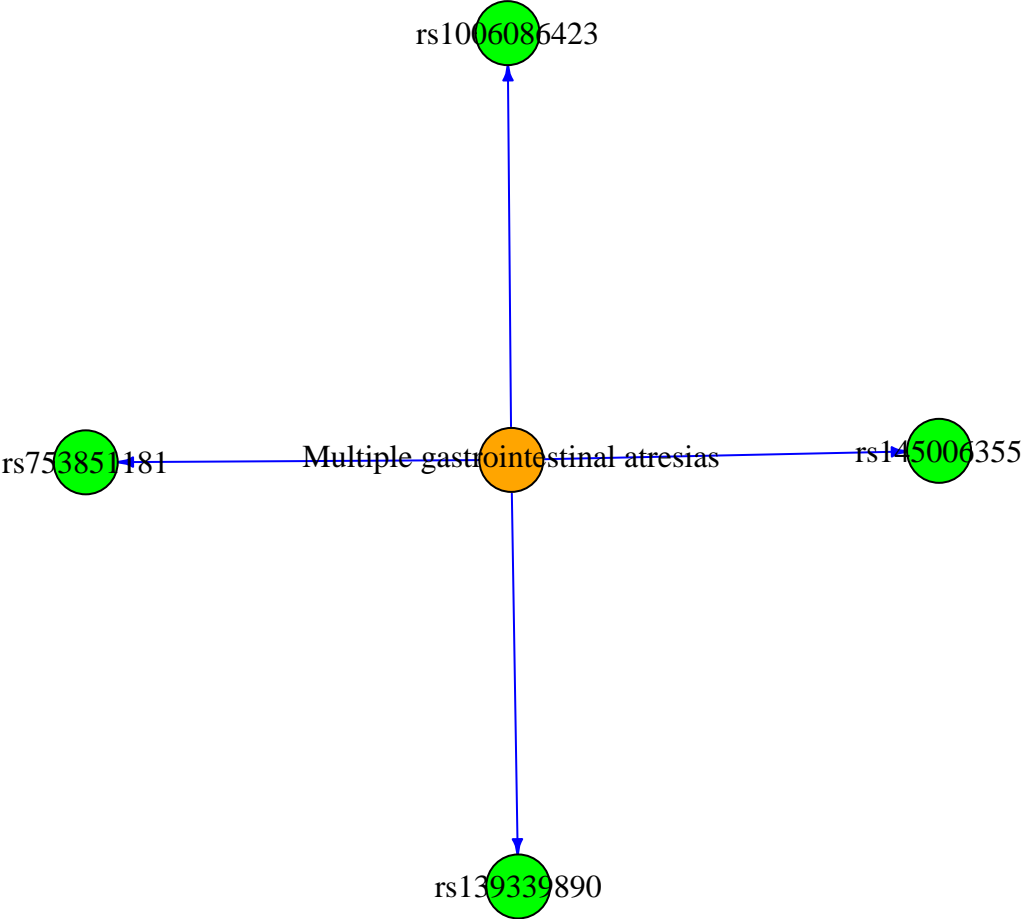

**Variant–Disease Network (Multiple pterygium syndrome Escobar type)**

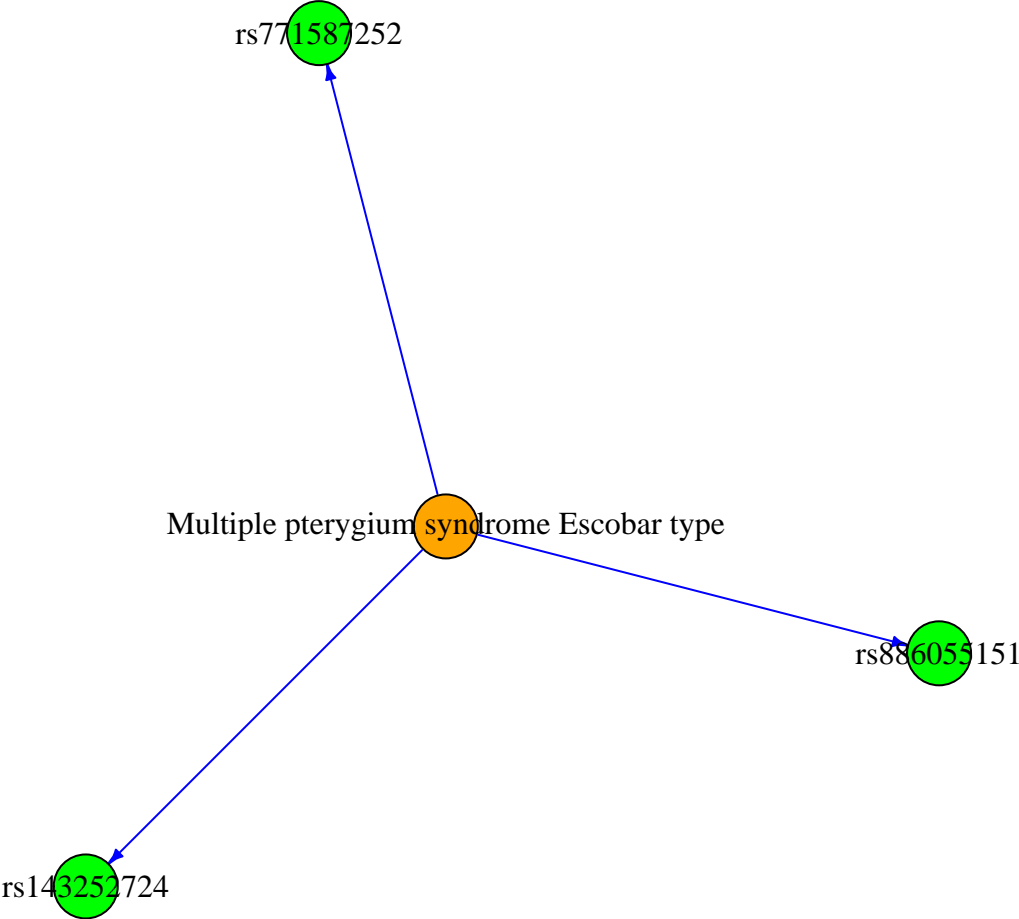

## Variant–Disease Network (Muscular dystrophy)

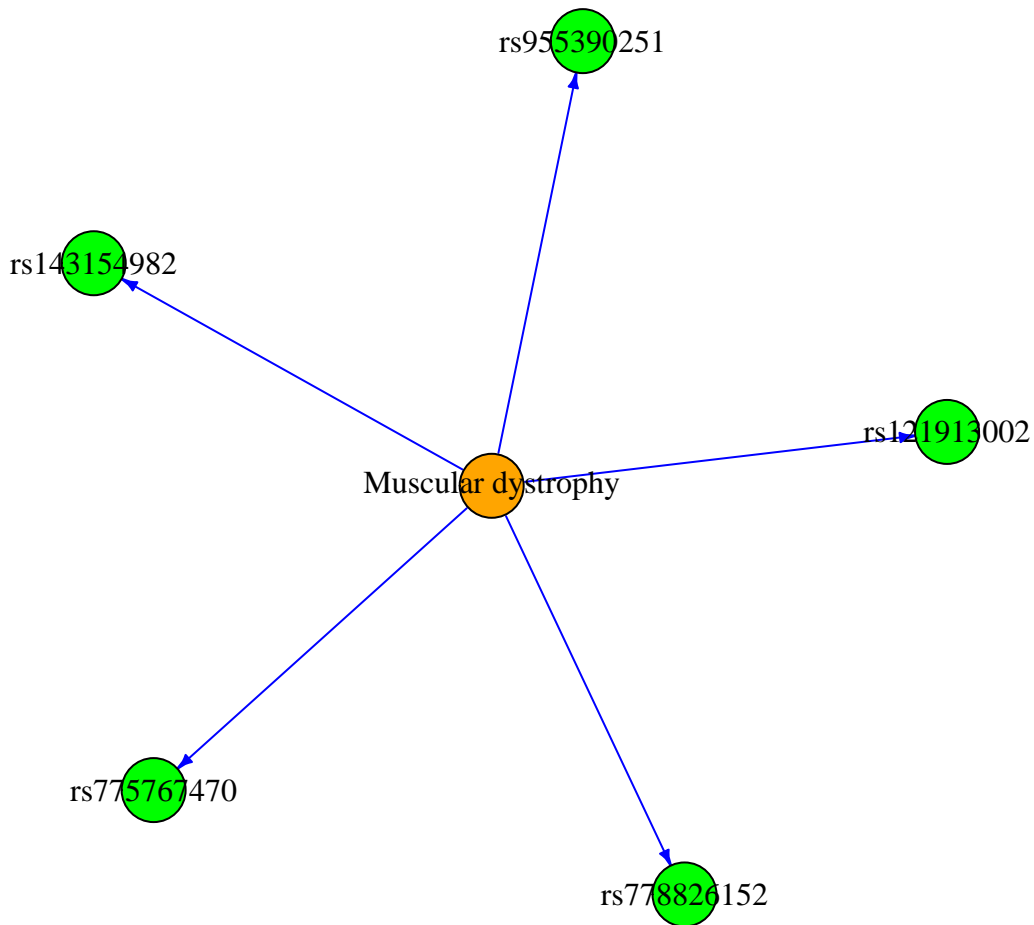

# e Network (Muscular dystrophy–dystroglycanopathy (congenital with brain a

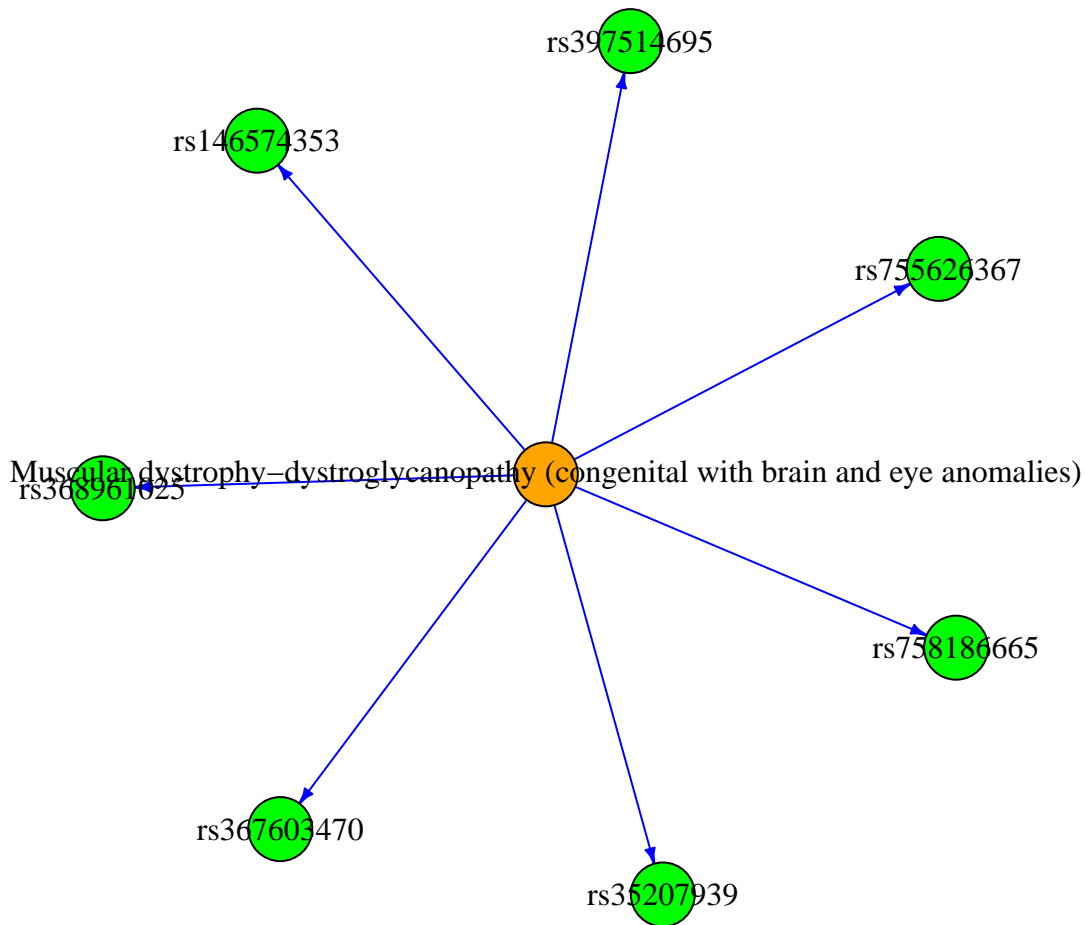



Variant–Disease Network (MUTYH–associated polyposis)

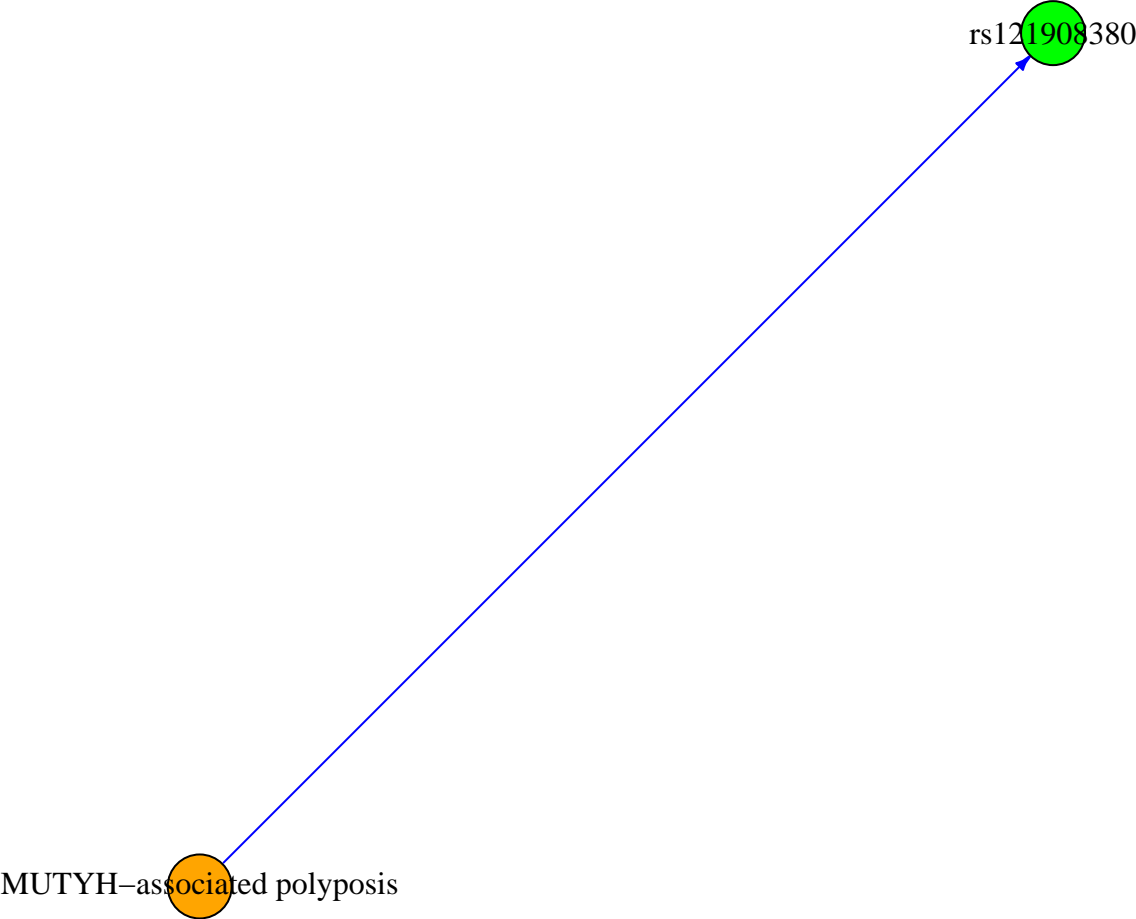

**Variant–Disease Network (Myasthenia)**

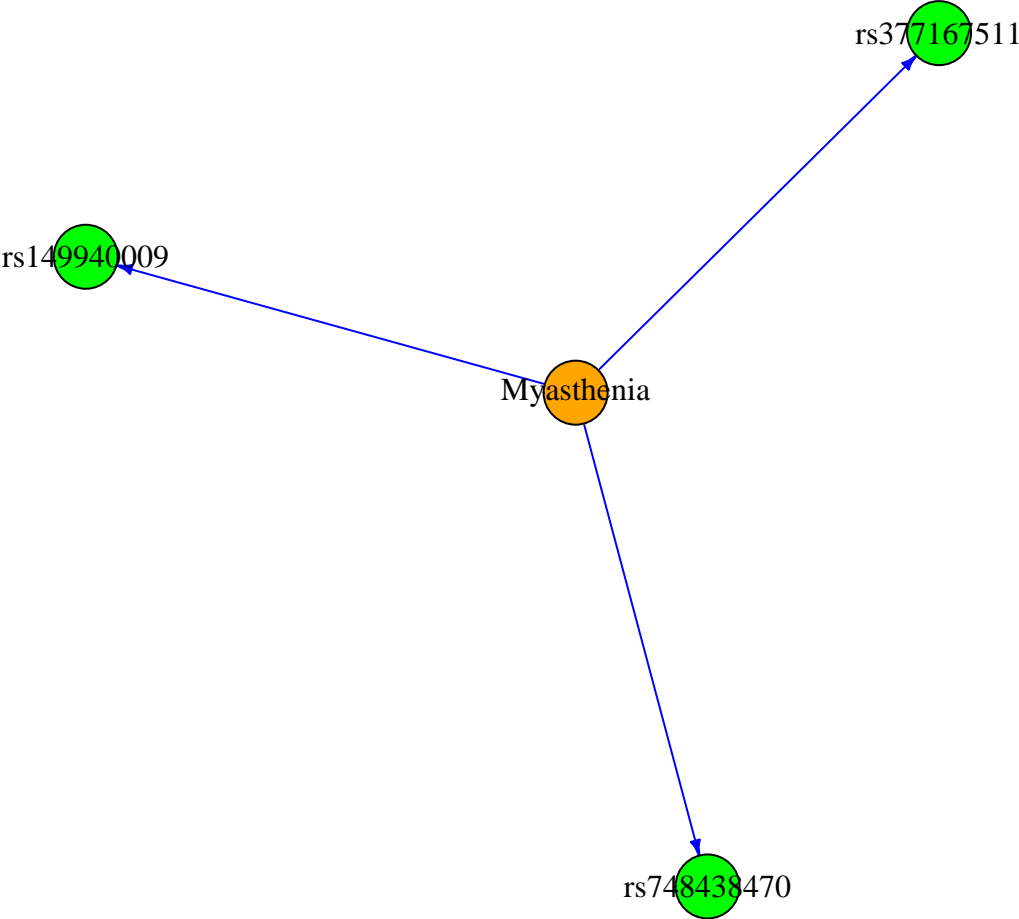

**Variant–Disease Network (Myasthenic syndrome)**

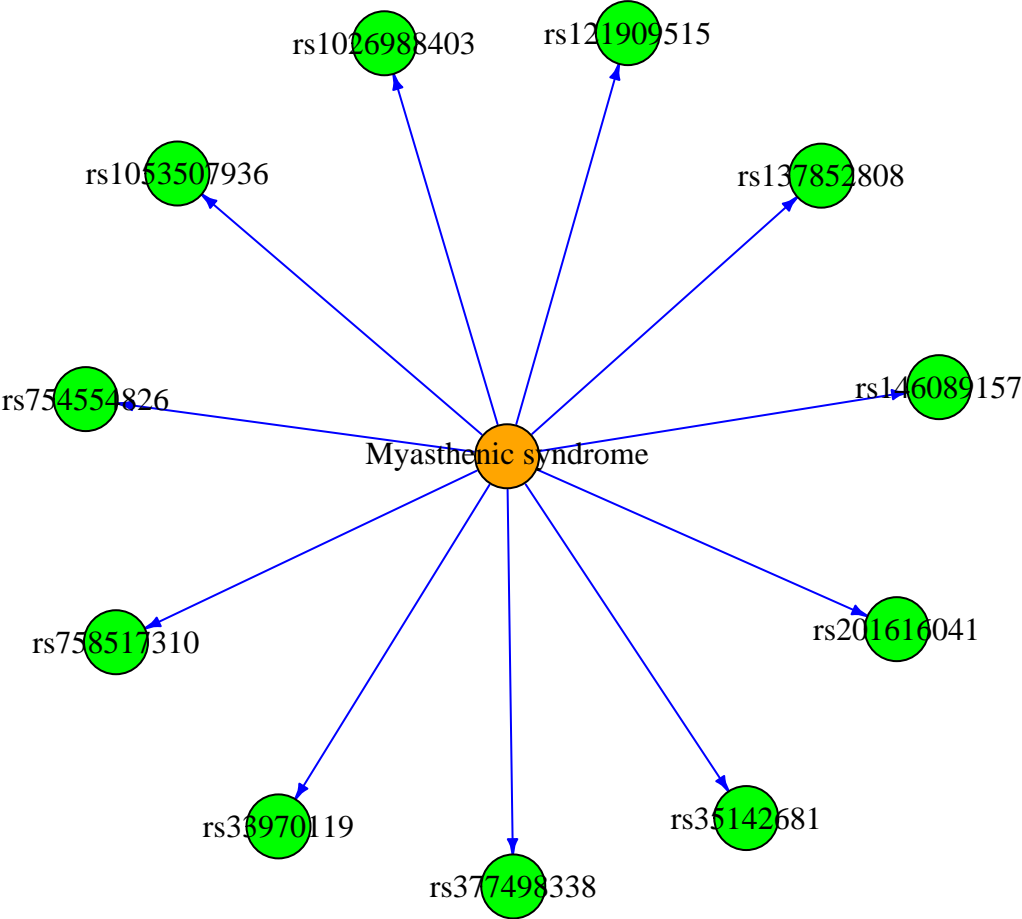

# Variant-Disease Network (Myelocerebellar disorder)

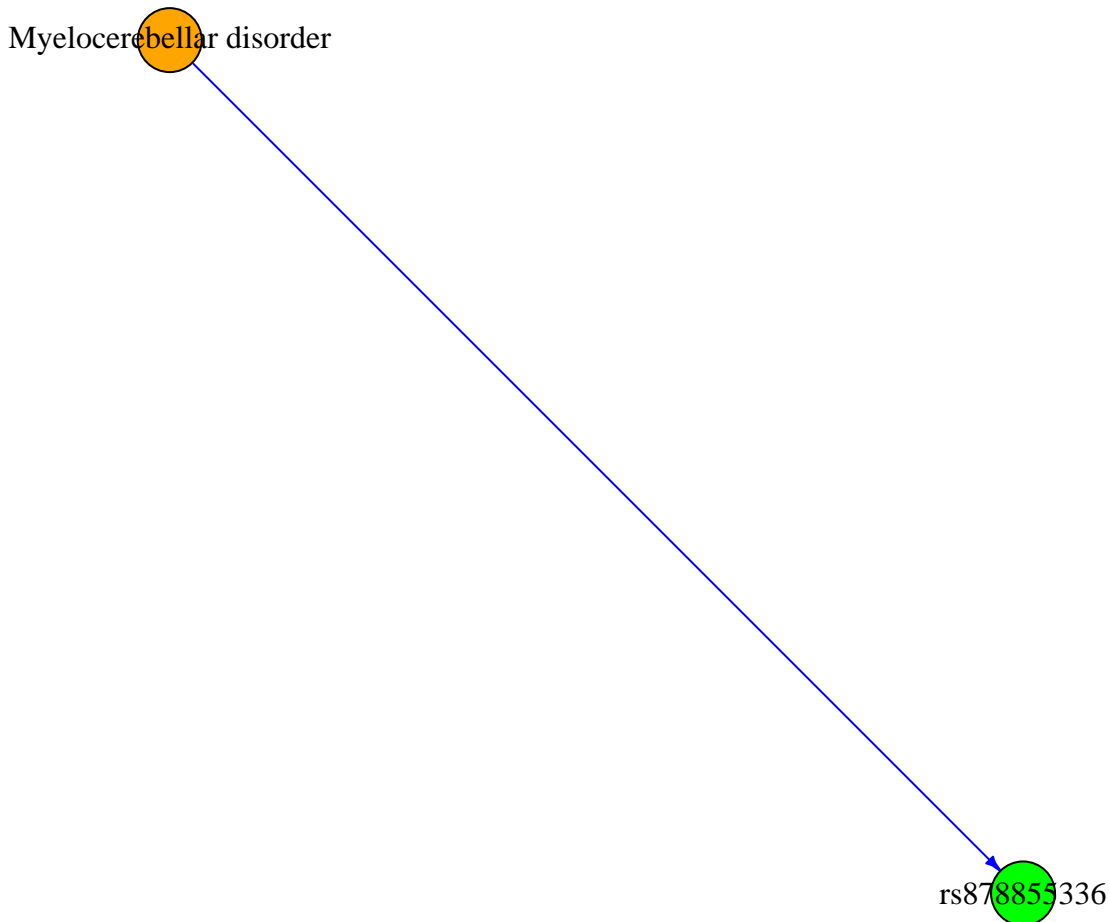

## Variant–Disease Network (MYH-associated polyposis)

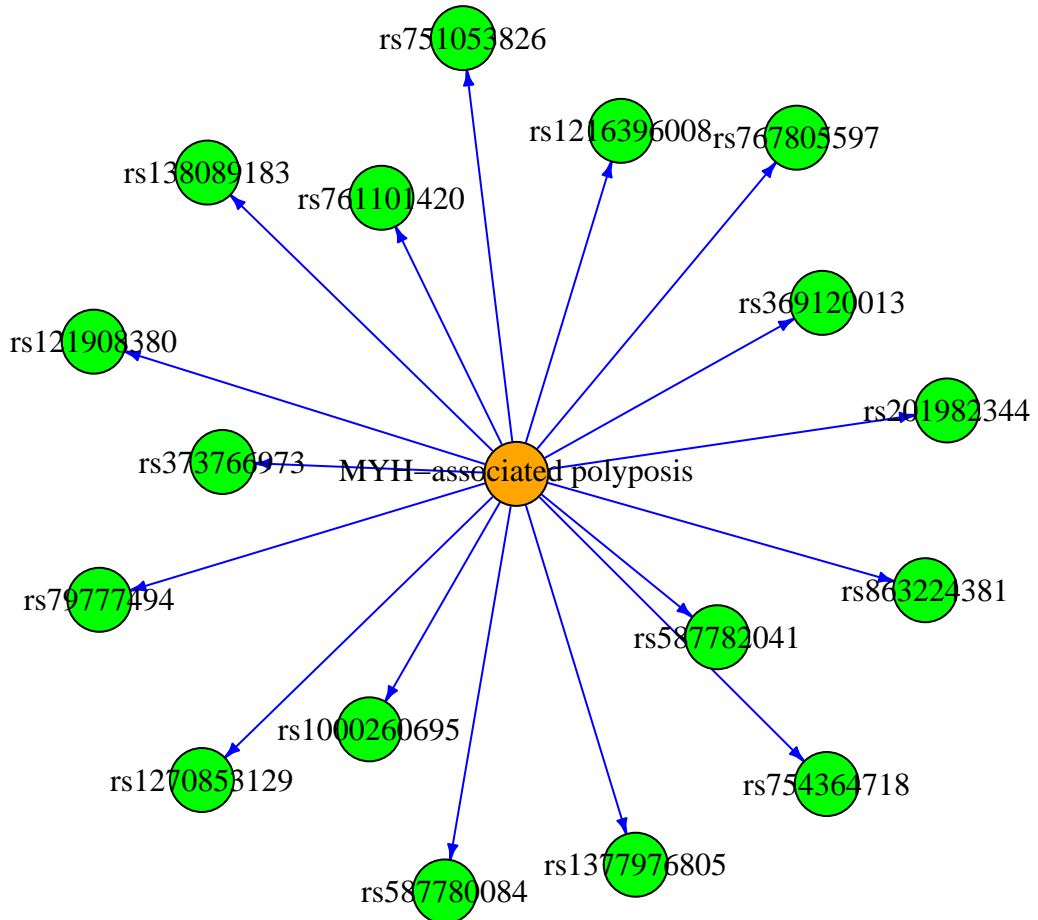

## Variant–Disease Network (Myoclonic epilepsy)

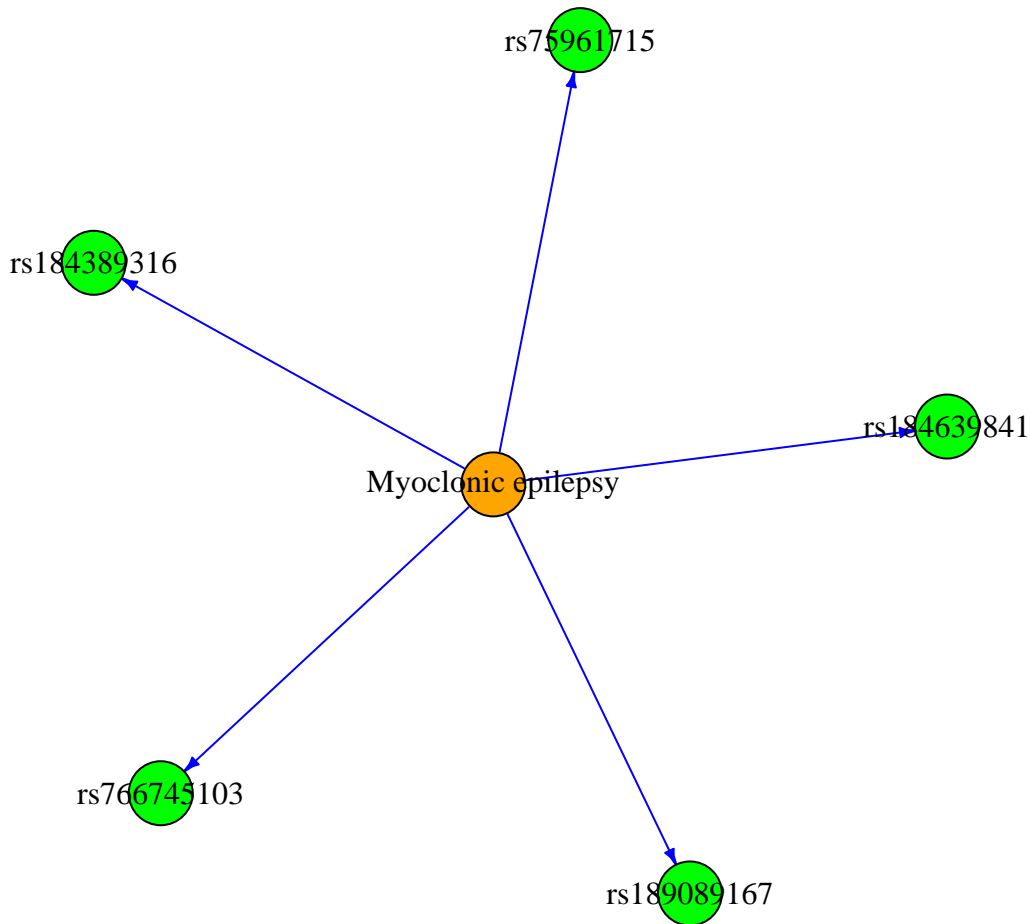

**Variant–Disease Network (Myoclonic–atonic epilepsy)**

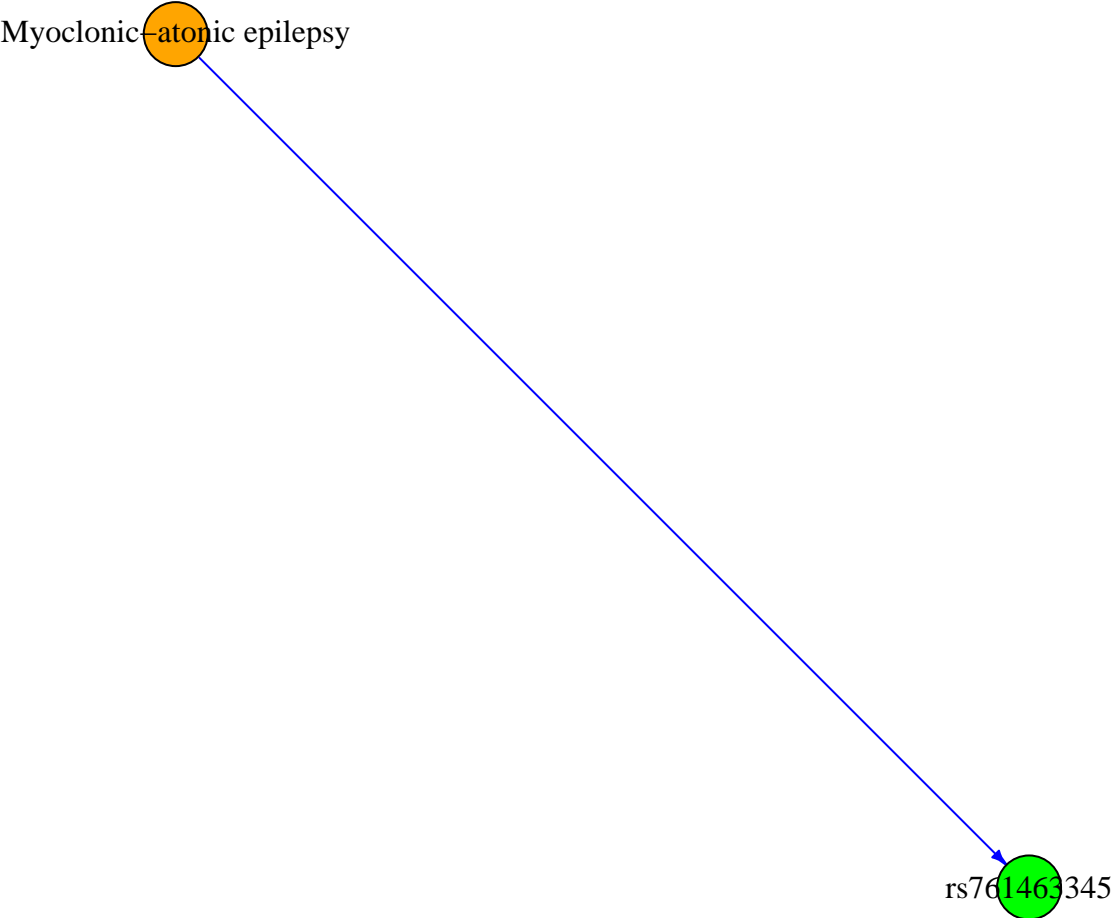

## Variant–Disease Network (Myofibrillar myopathy)

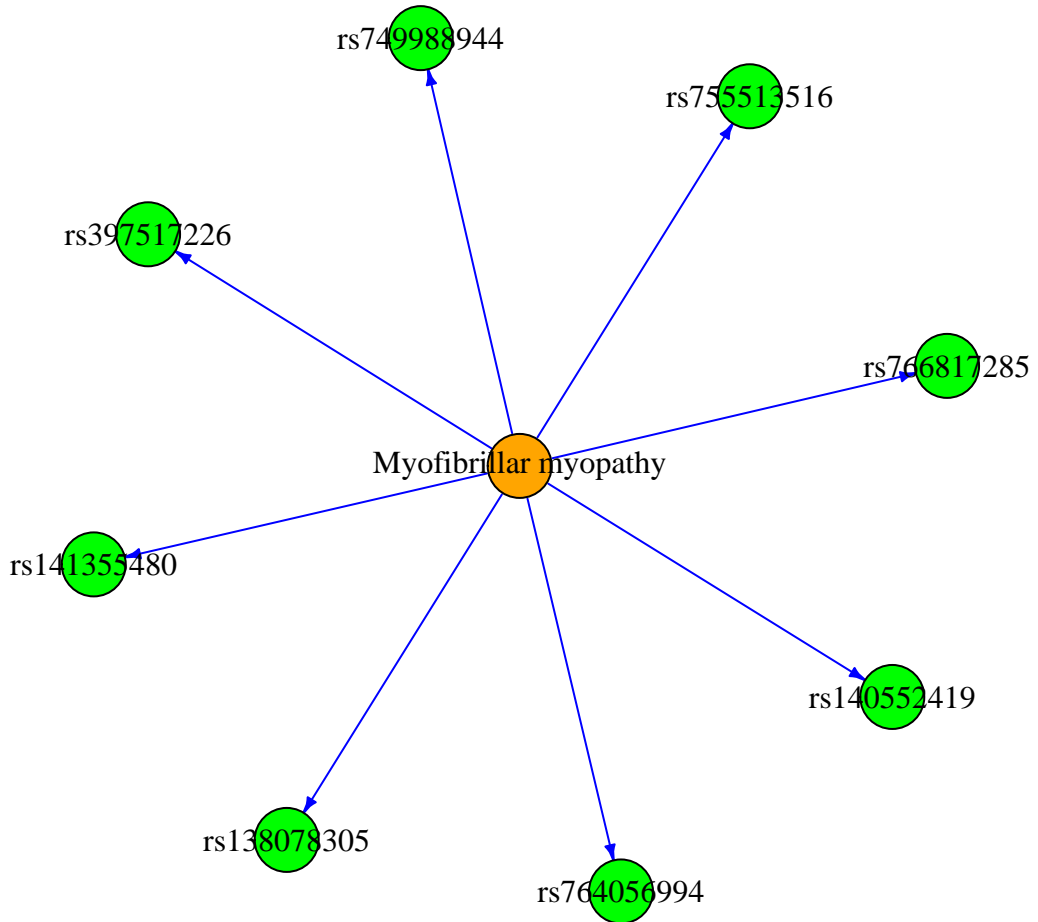



Variant–Disease Network (Myofibrillar myopathy 1)

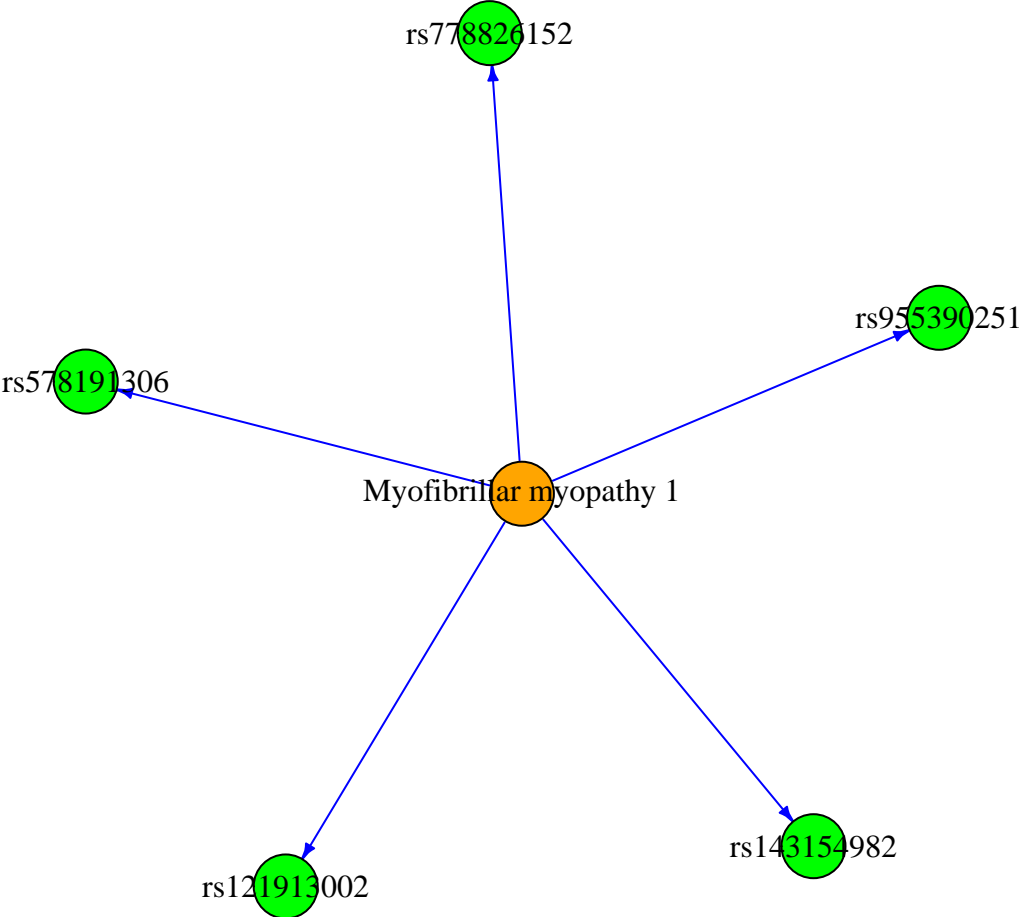

## Variant–Disease Network (Myopathy with postural muscle atrophy)

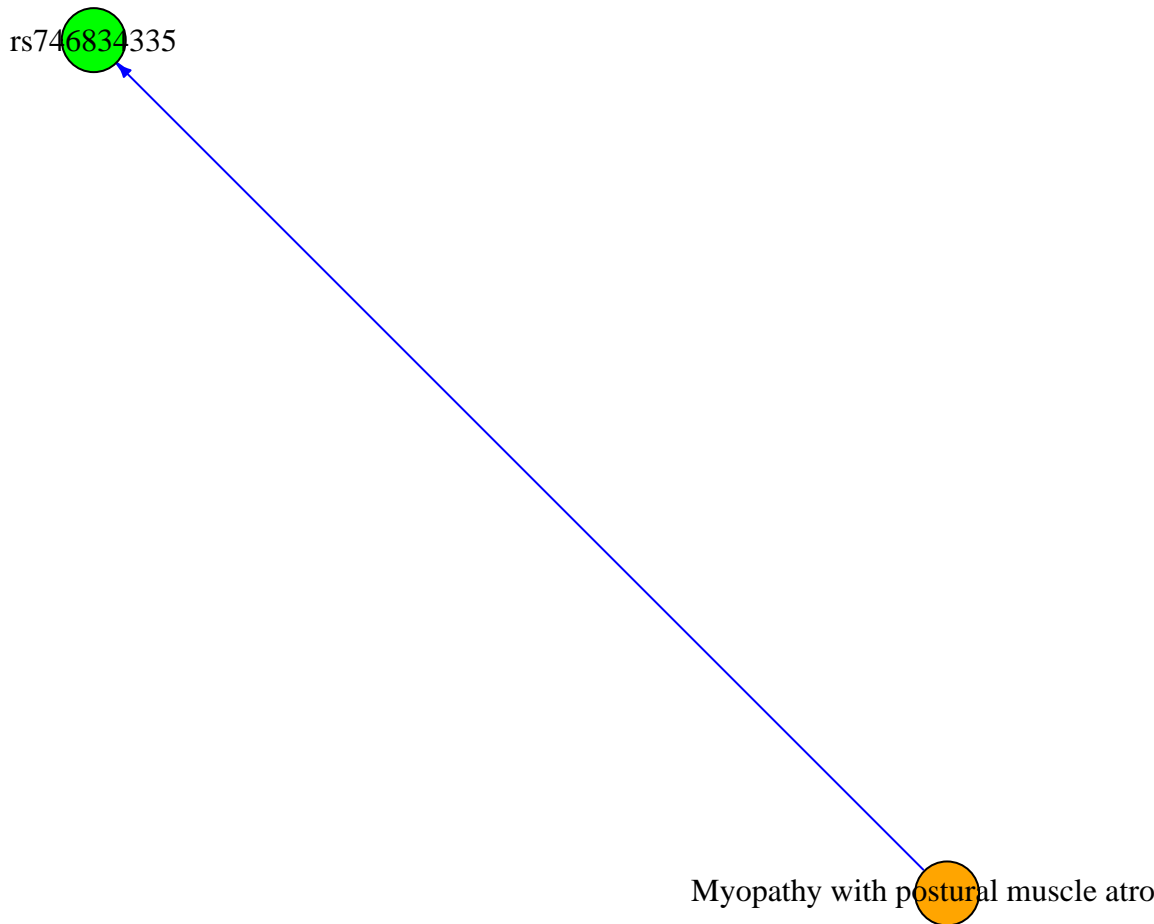

## Variant–Disease Network (Myopia)

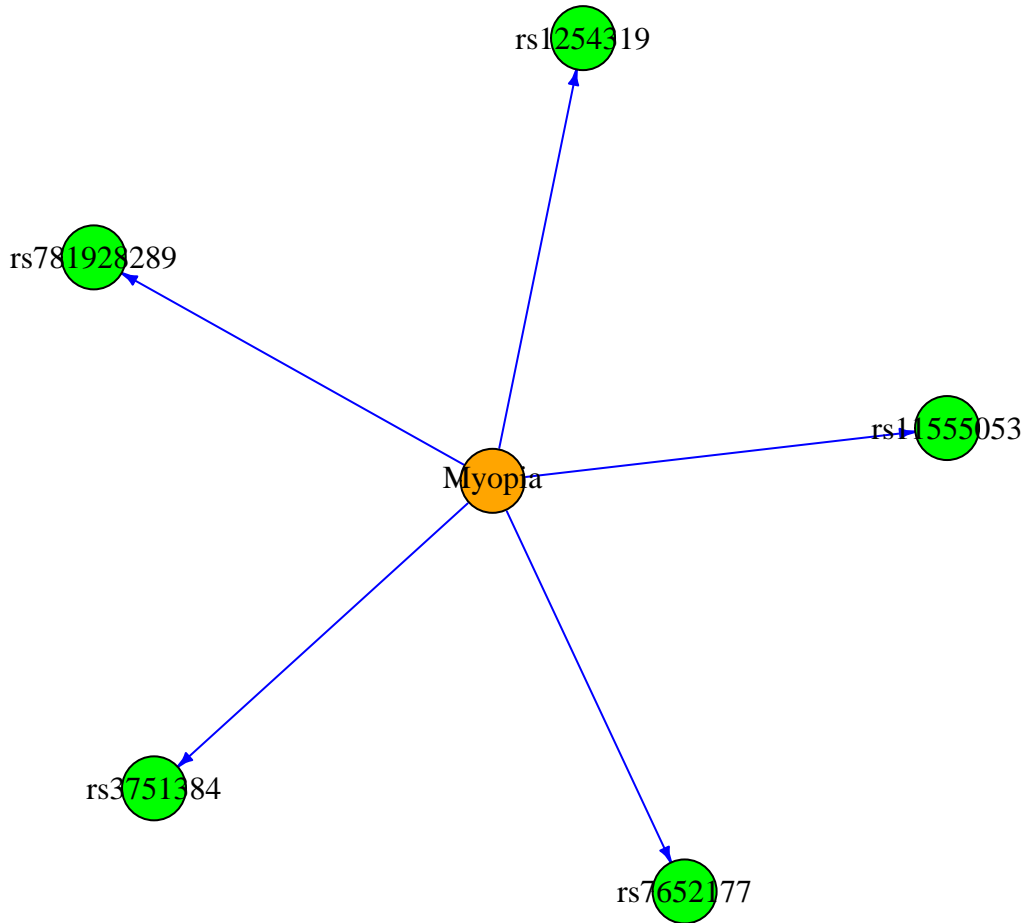

## Variant–Disease Network (Myopia 24)

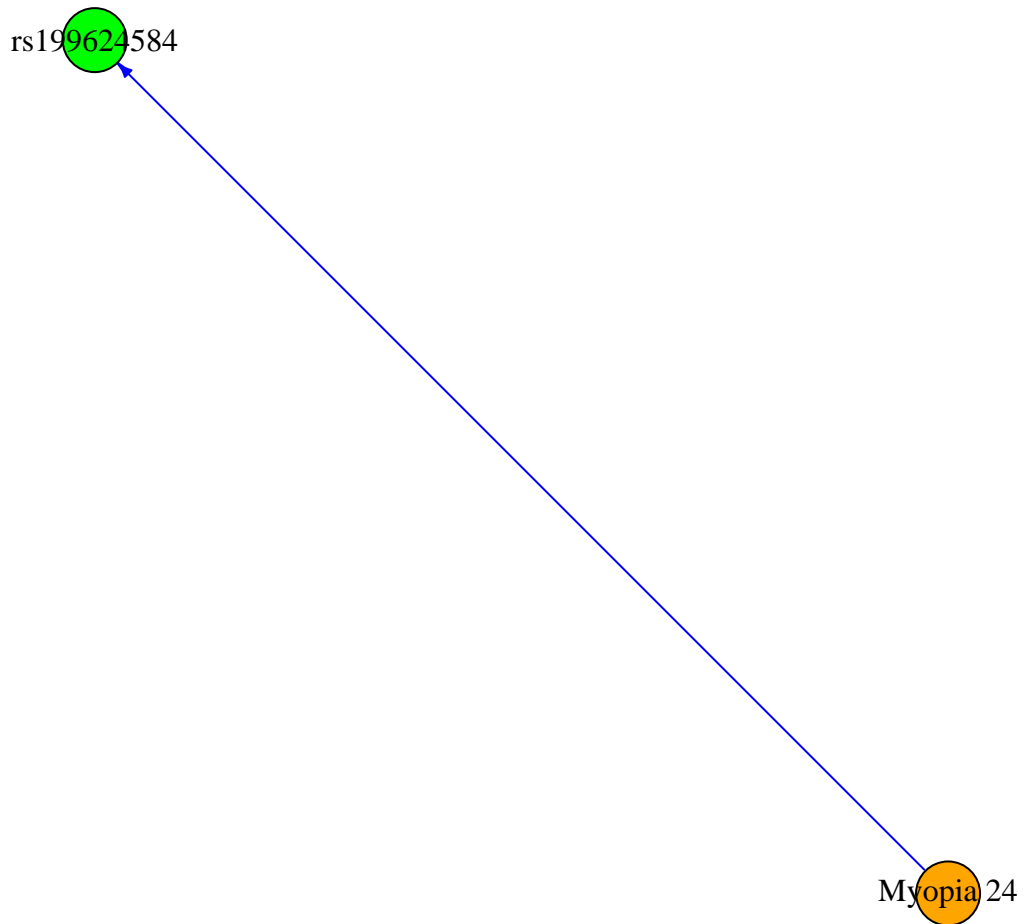

# Variant–Disease Network (Myostatin–related muscle hypertrophy)

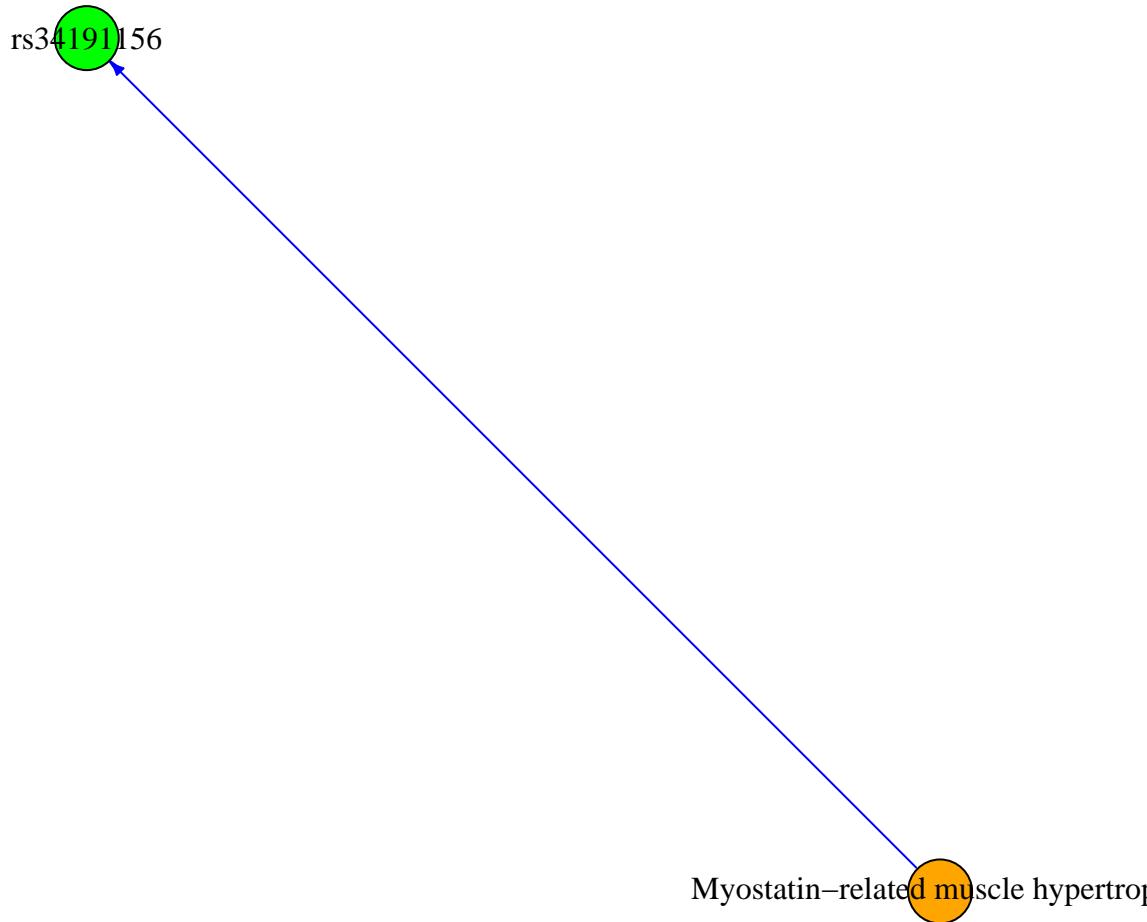

## Variant–Disease Network (Myotonia congenita)

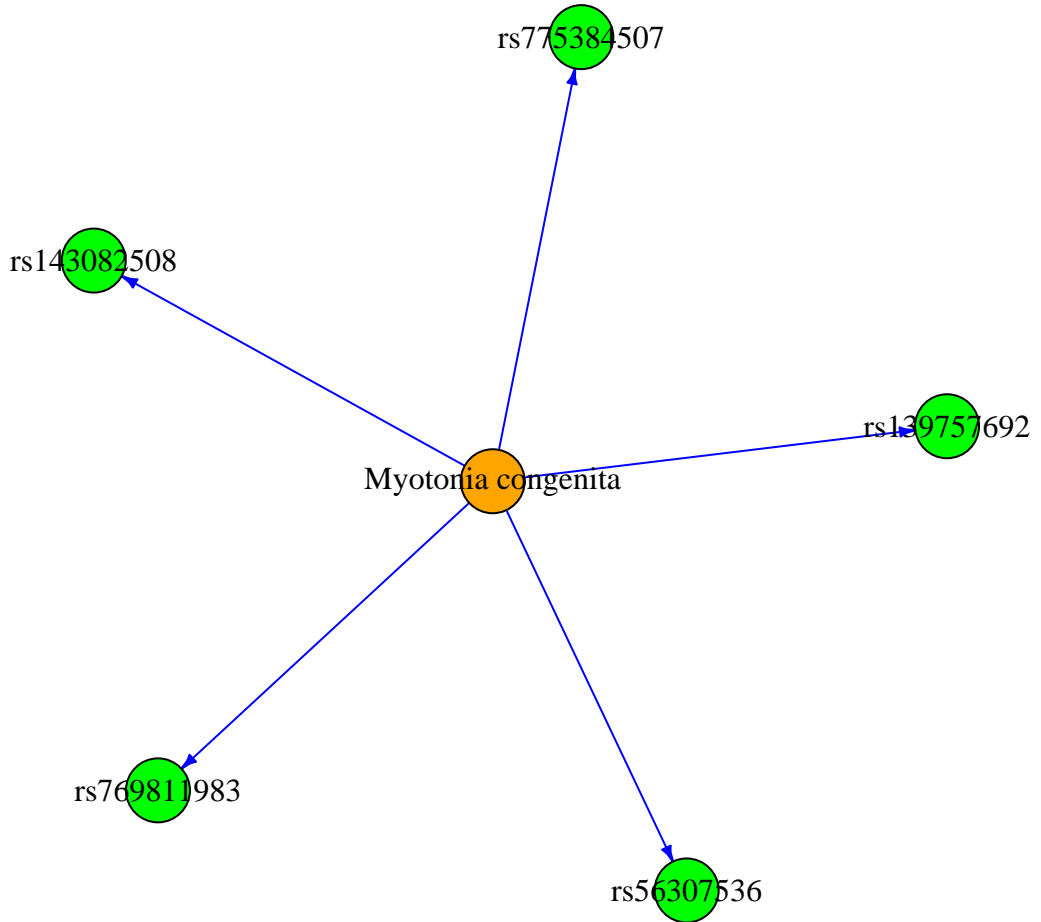

## Variant–Disease Network (Nager syndrome)

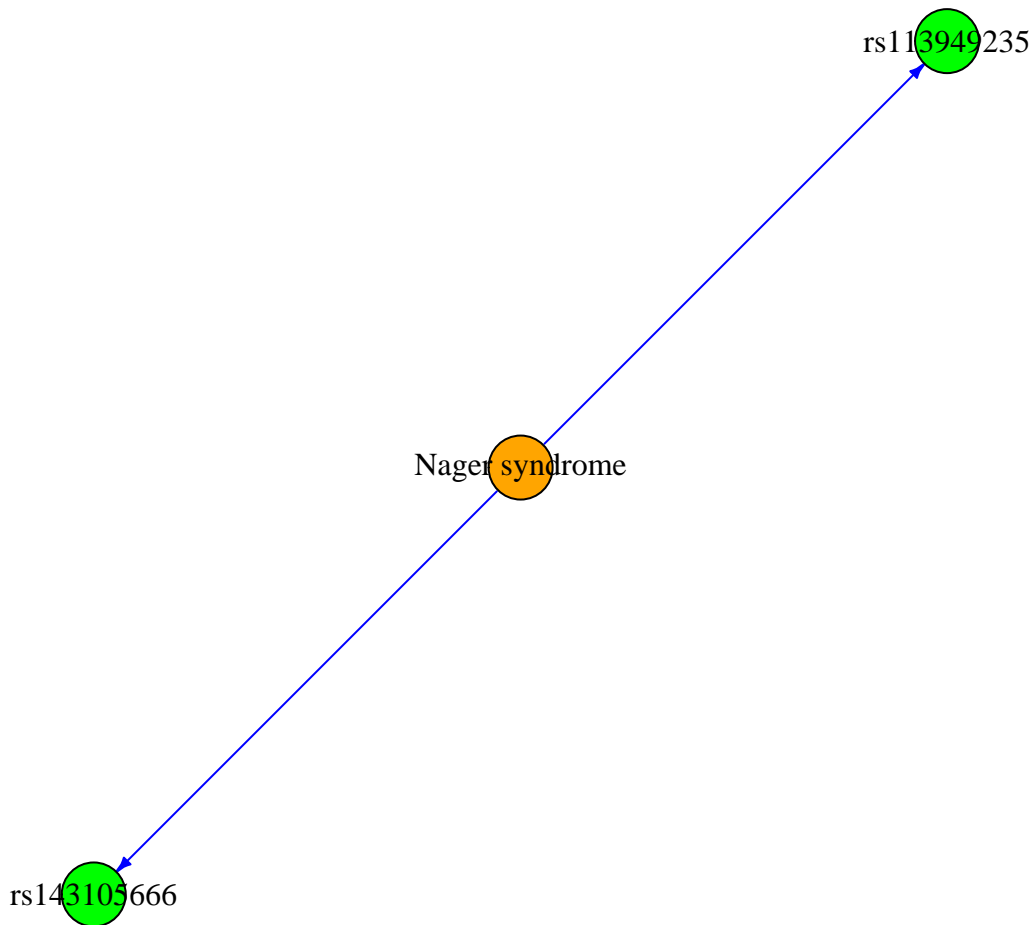

## Variant–Disease Network (Nail–patella syndrome)

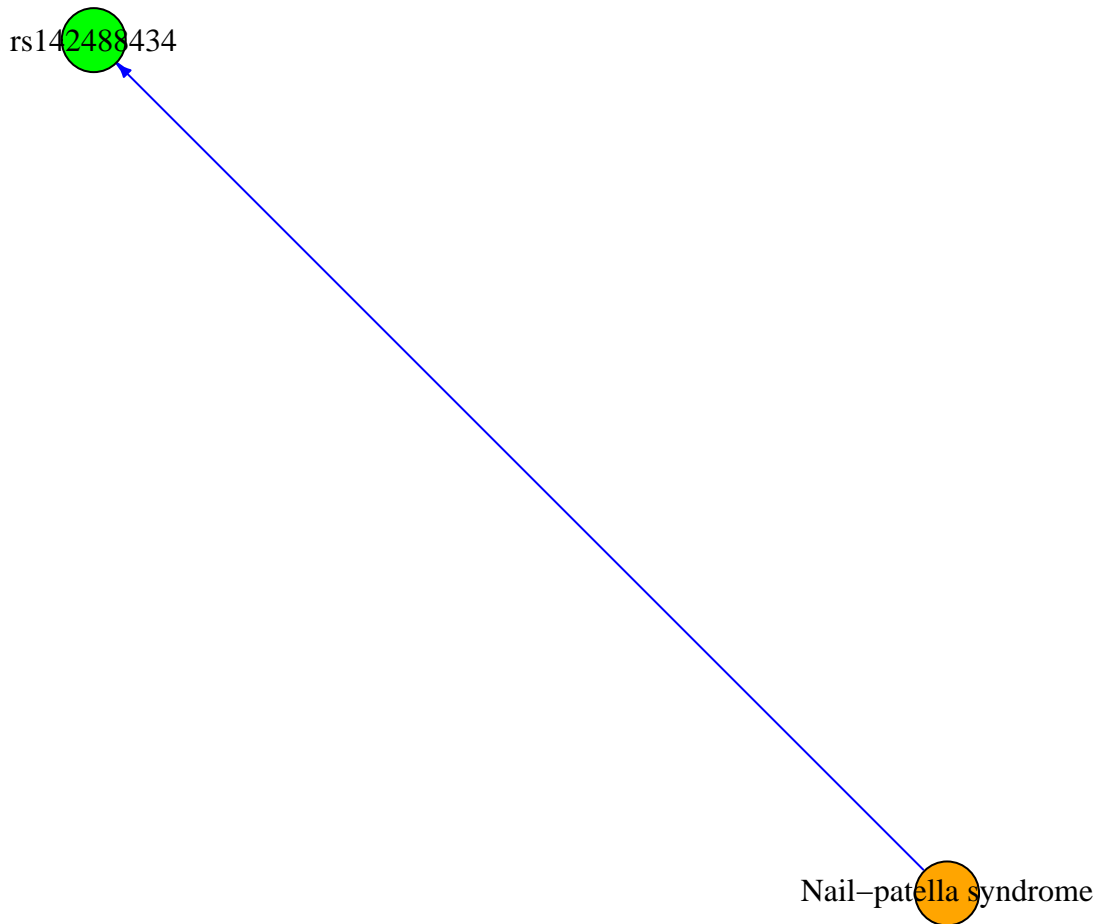



Variant–Disease Network (Naxos disease)

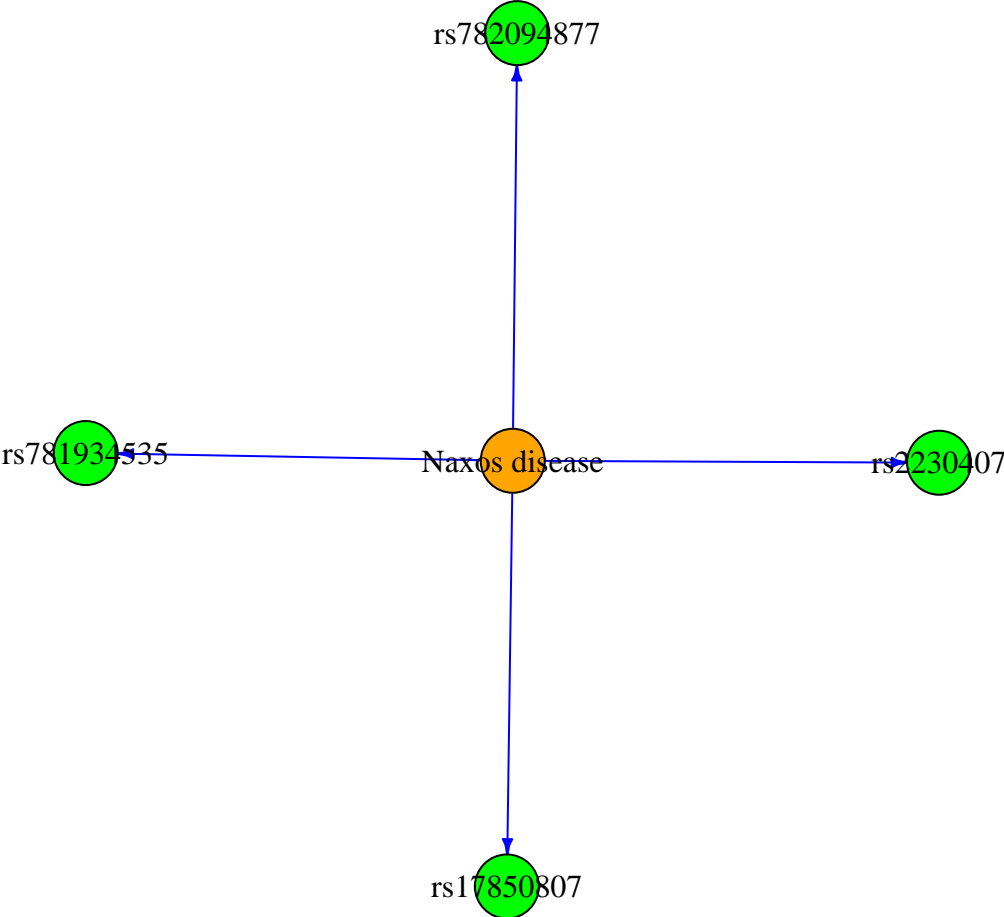

## Variant–Disease Network (Nemaline myopathy)

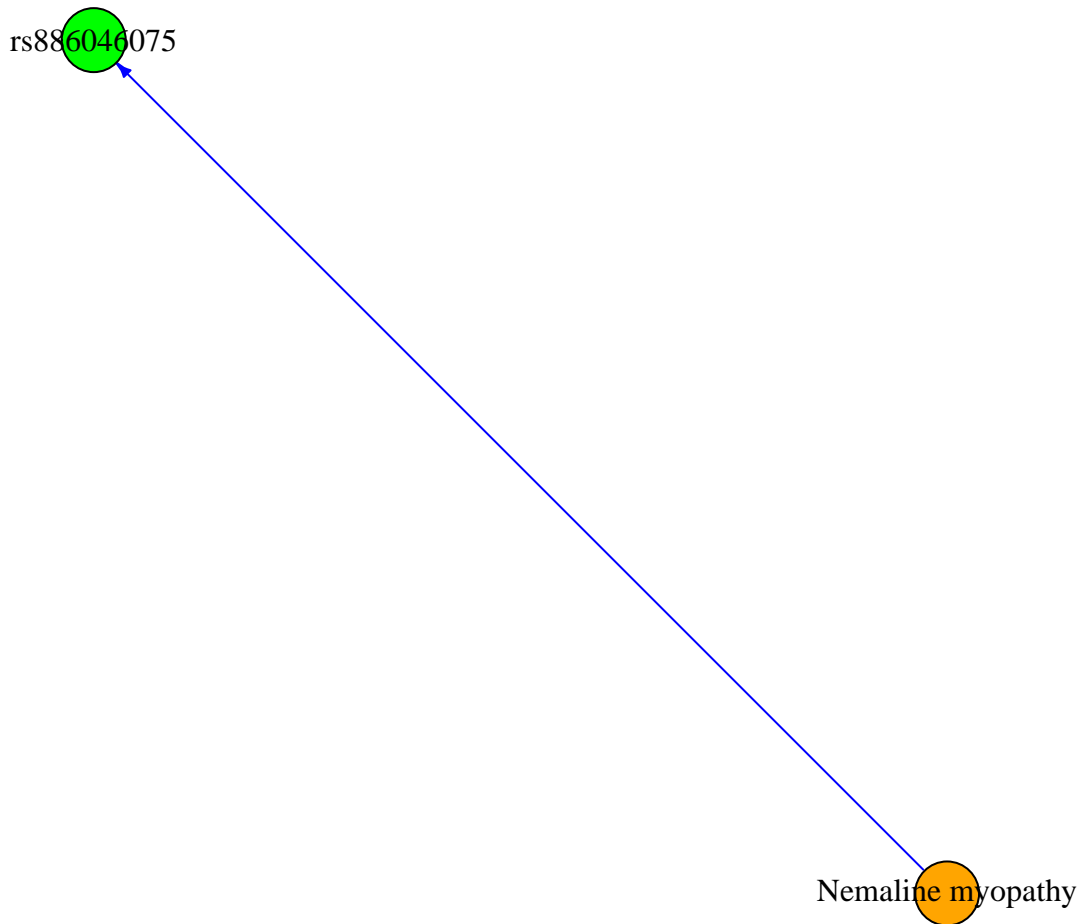

## Variant–Disease Network (Nemaline myopathy 3)

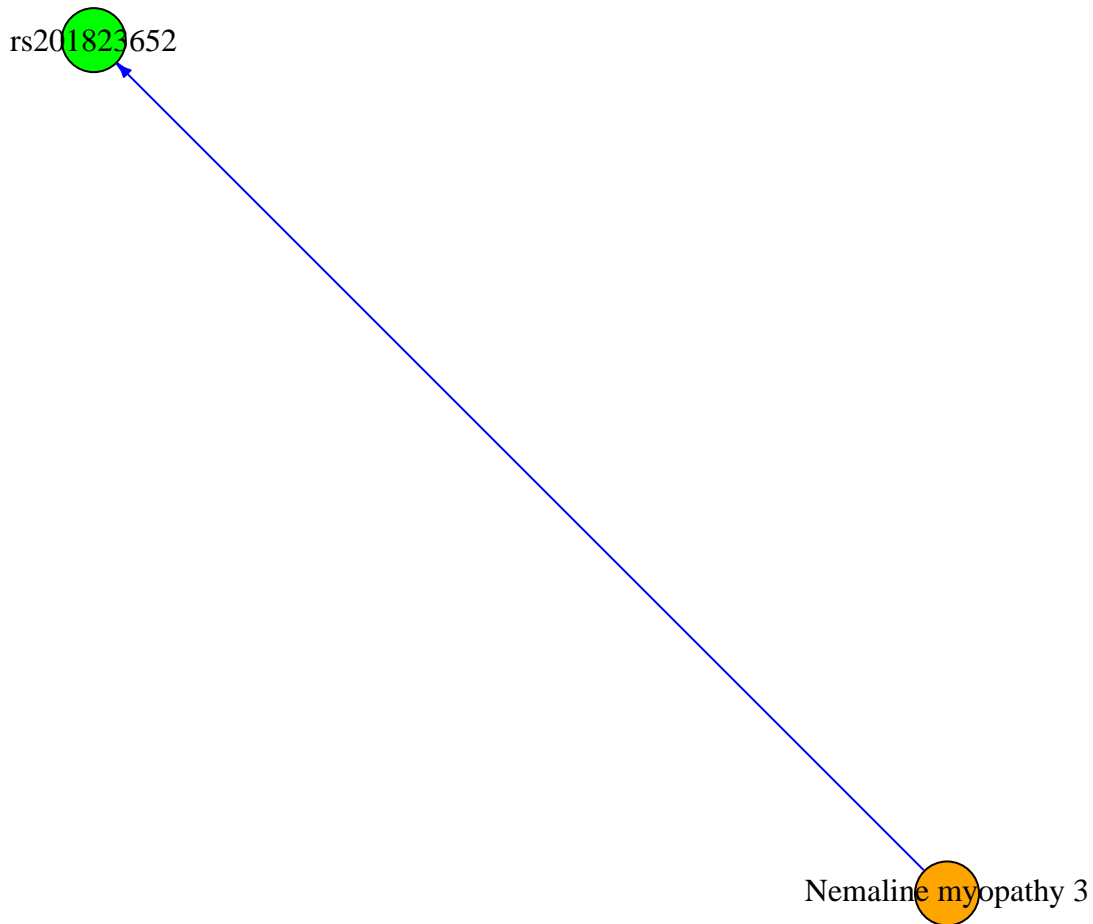

## Variant–Disease Network (Nemaline myopathy 8)

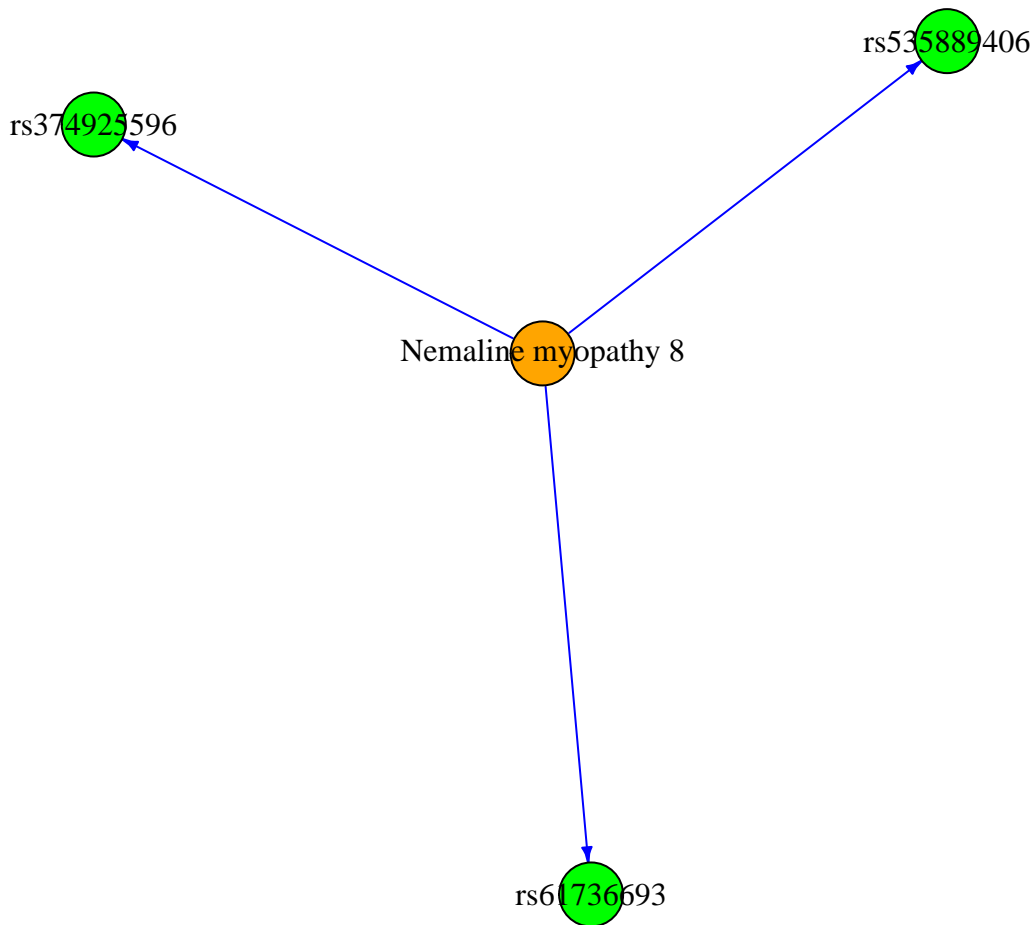

# Ant-Disease Network (Neonatal intrahepatic cholestasis caused by citrin deficiency)

Neonatal intrahepatic cholestasis caused by citrin deficiency

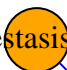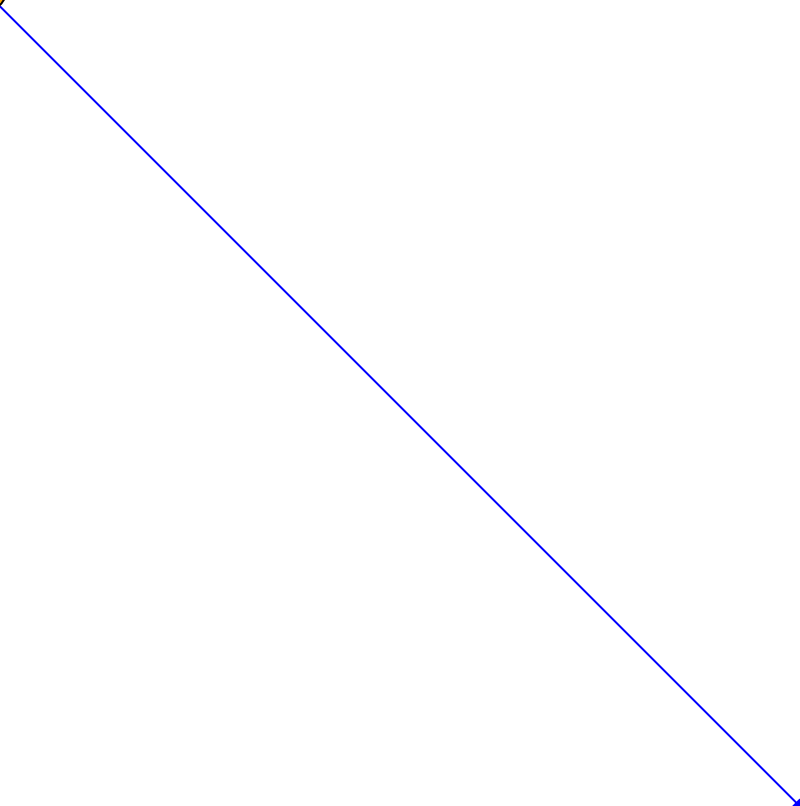

rs879255502

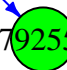

## Variant–Disease Network (Neoplasm of ovary)

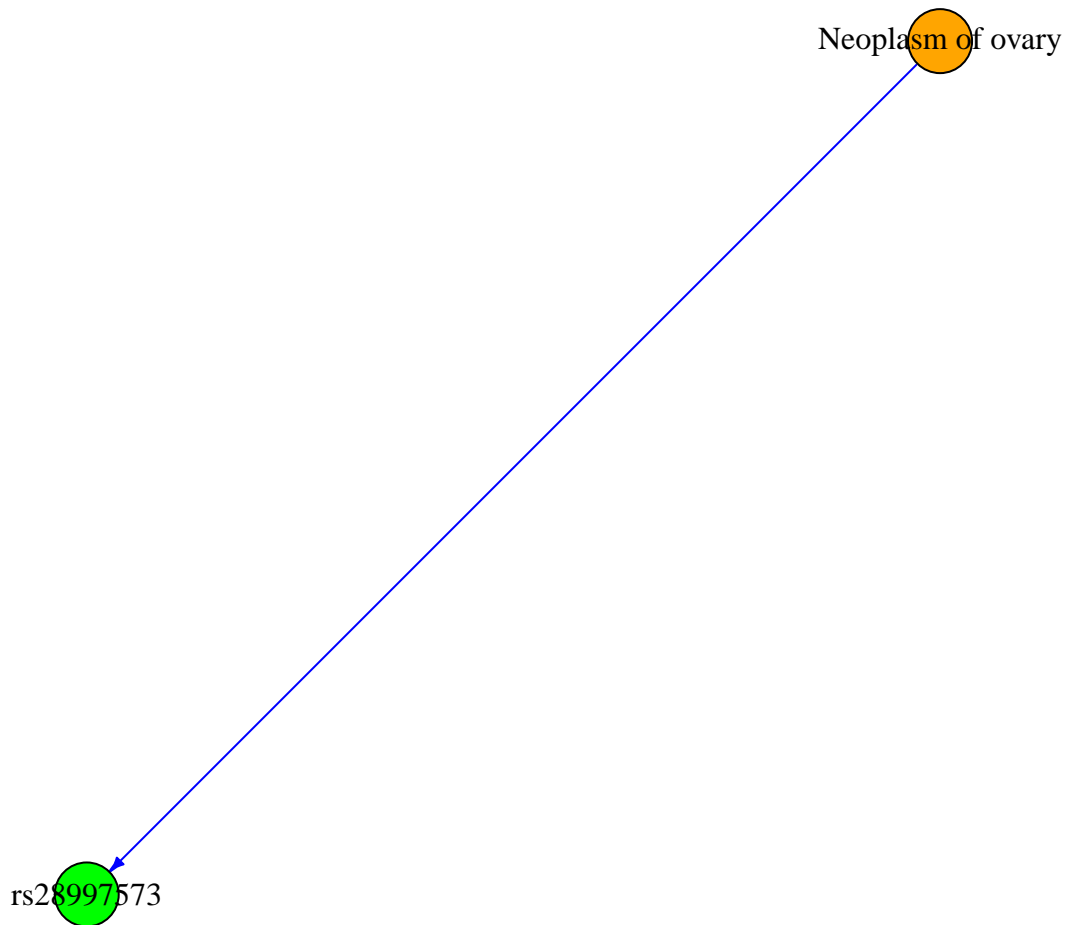

## Variant–Disease Network (Neoplasm of stomach)

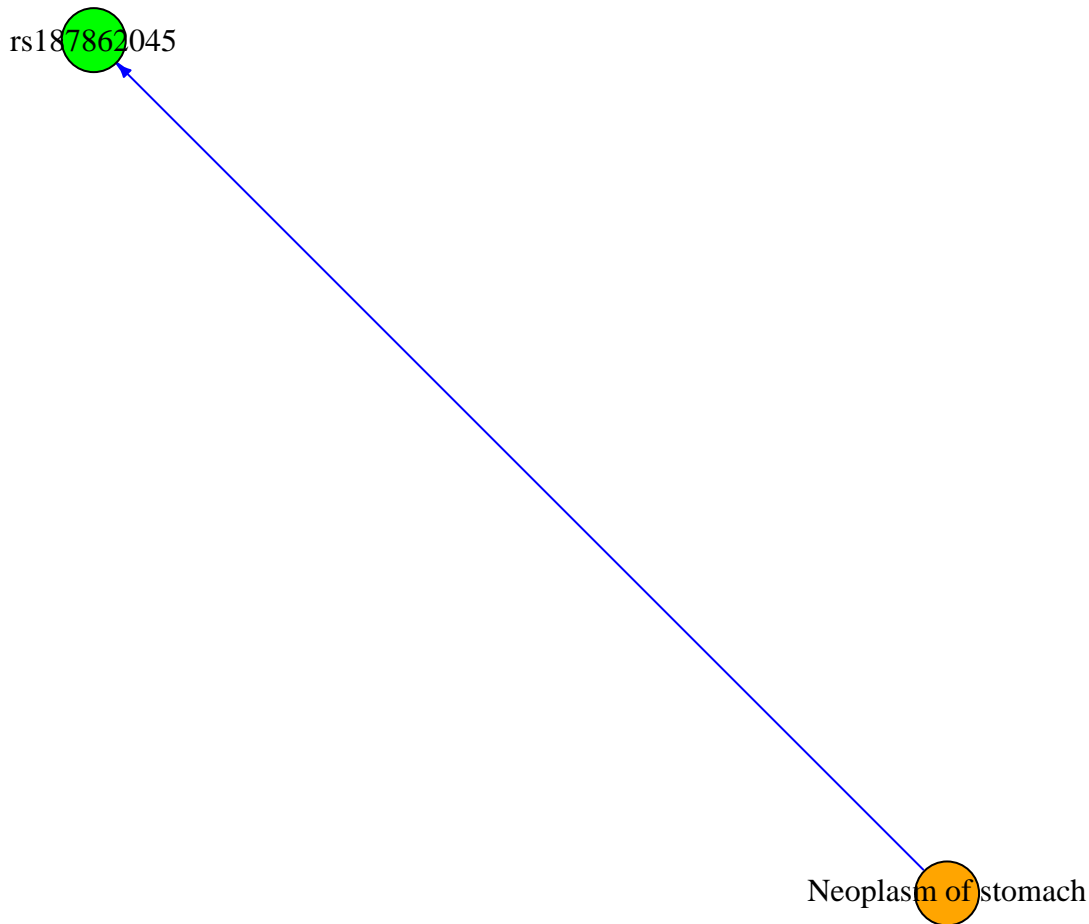

# Variant-Disease Network (Nephrogenic diabetes insipidus)

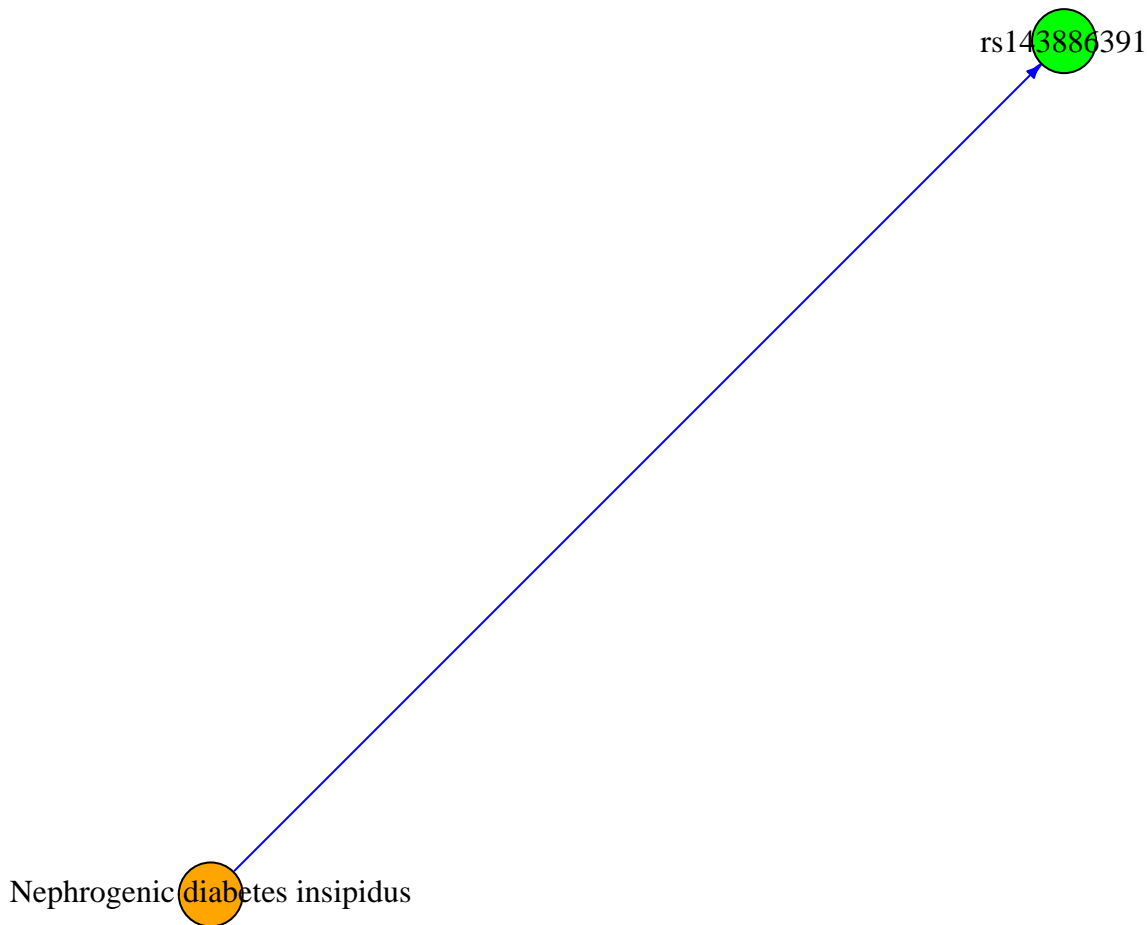



## Variant–Disease Network (Nephronophthisis)

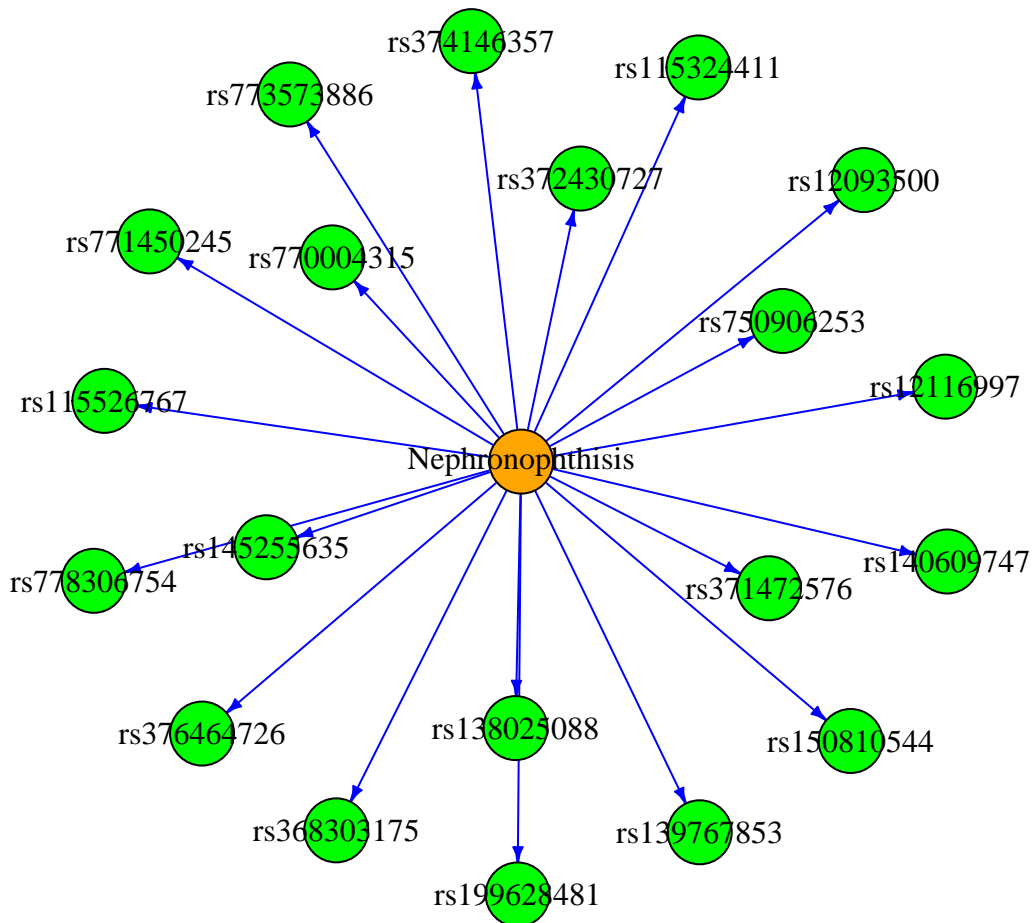

## Variant–Disease Network (Nephronophthisis 14)

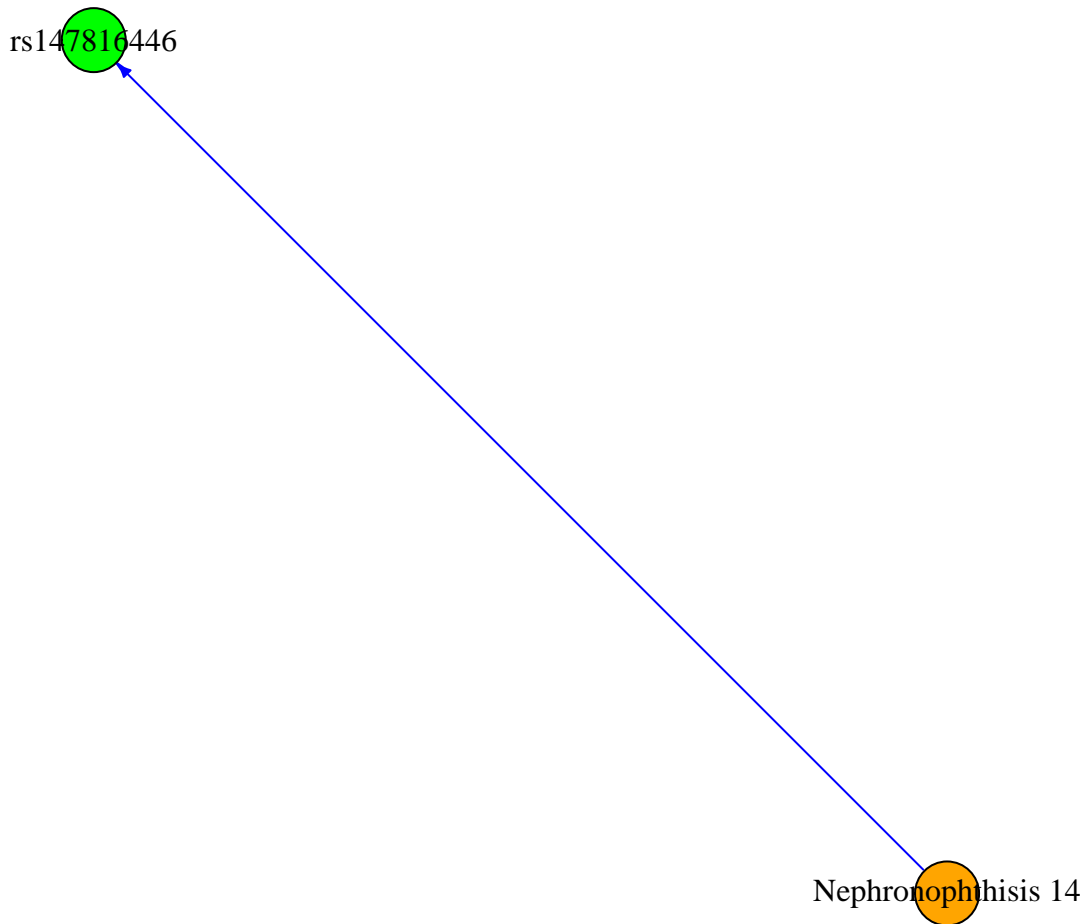

## Variant–Disease Network (Nephronophthisis 4)

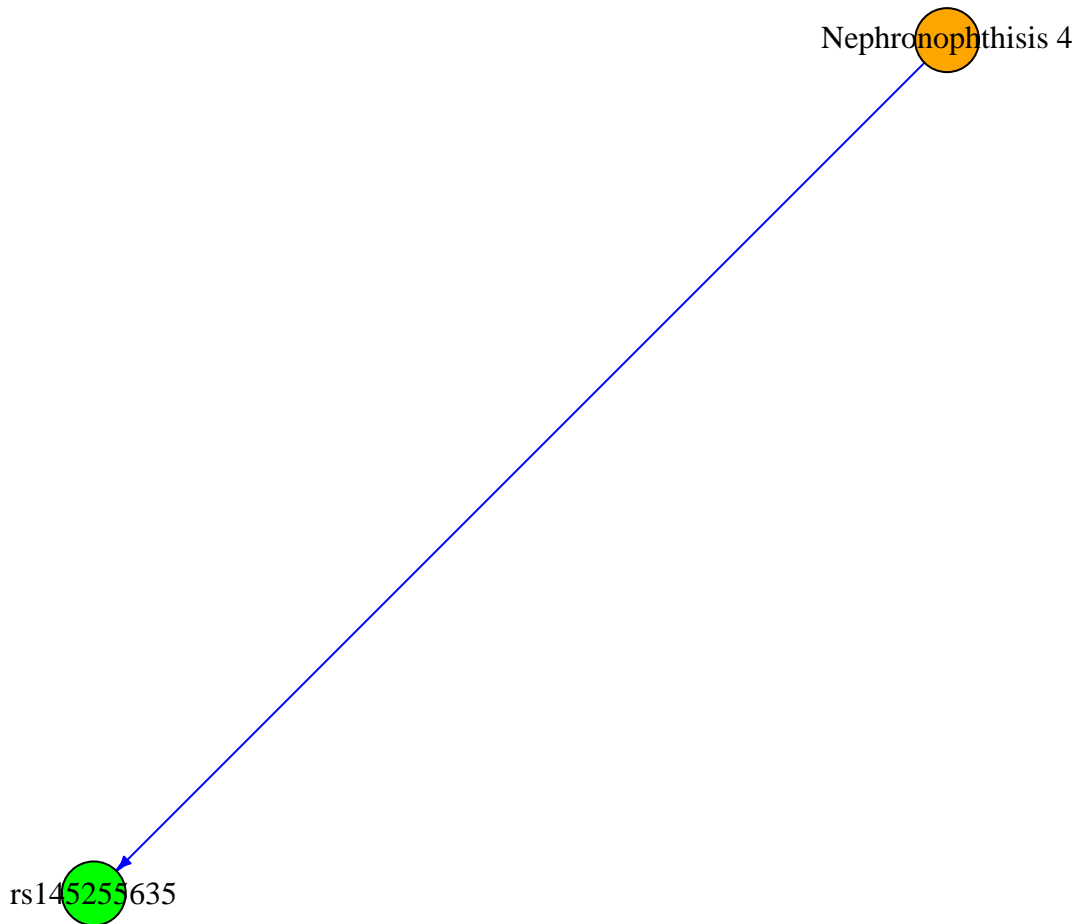

## Variant-Disease Network (Nephropathic cystinosis)

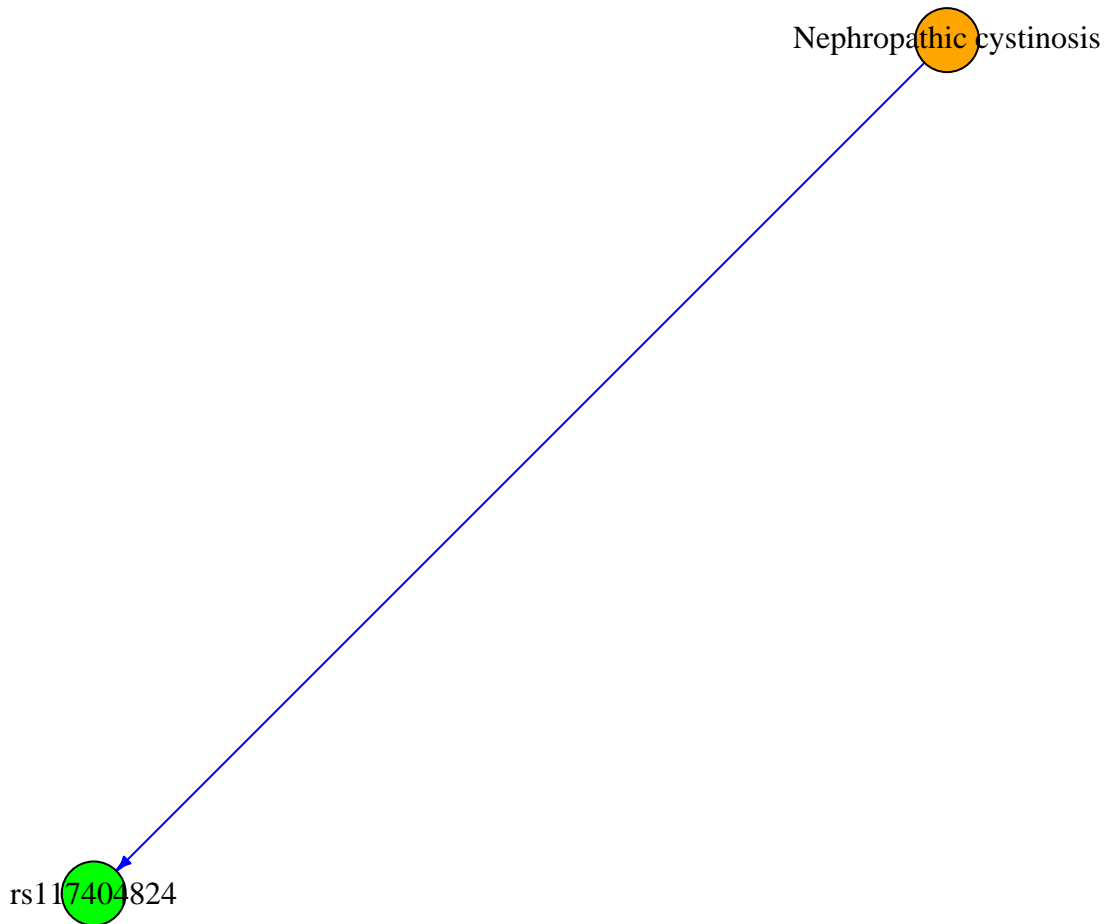

## Variant–Disease Network (Nephrotic syndrome)

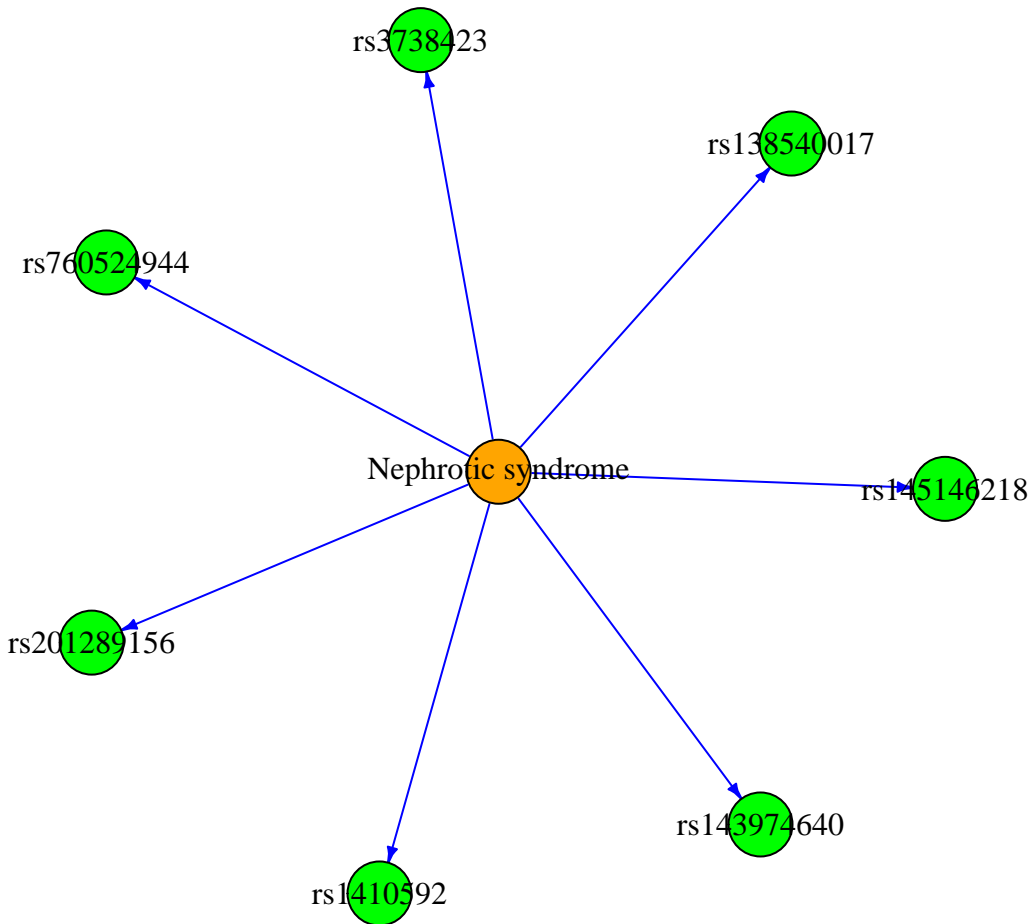

## Variant–Disease Network (Neural tube defect)

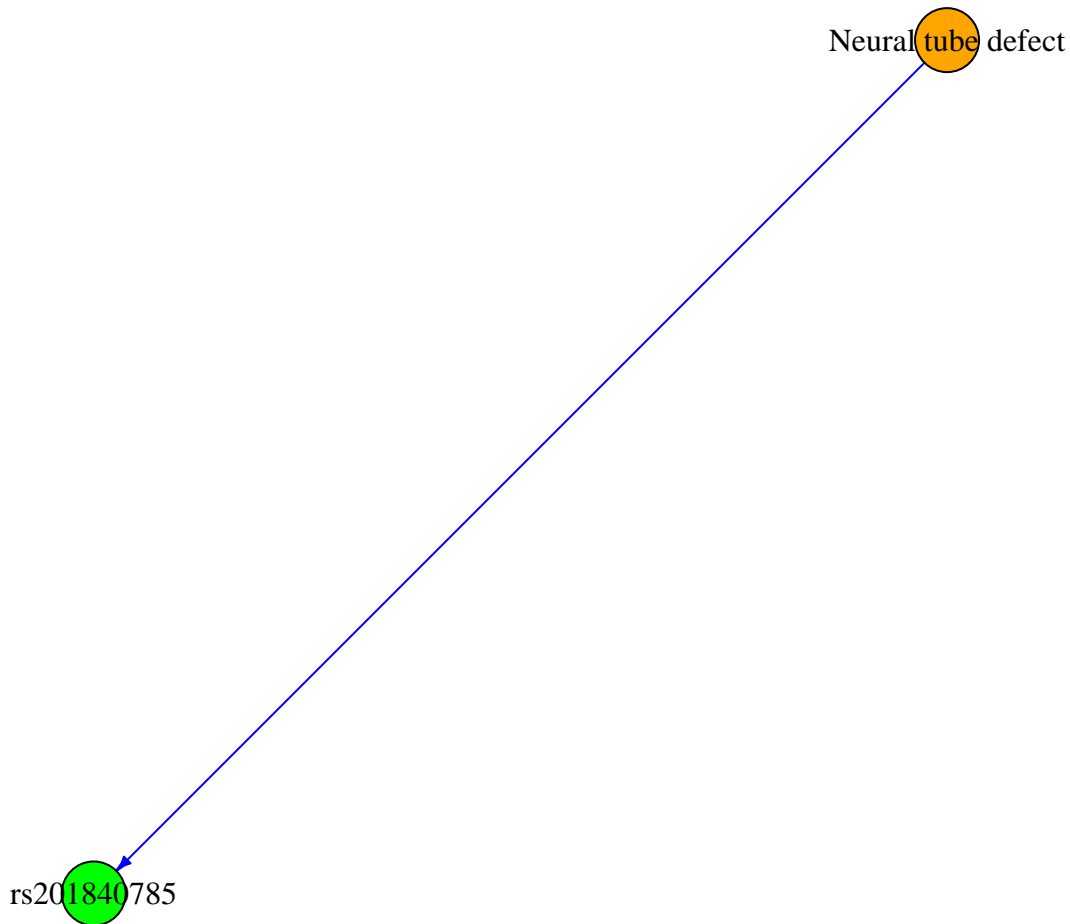

## Variant–Disease Network (Neural tube defects)

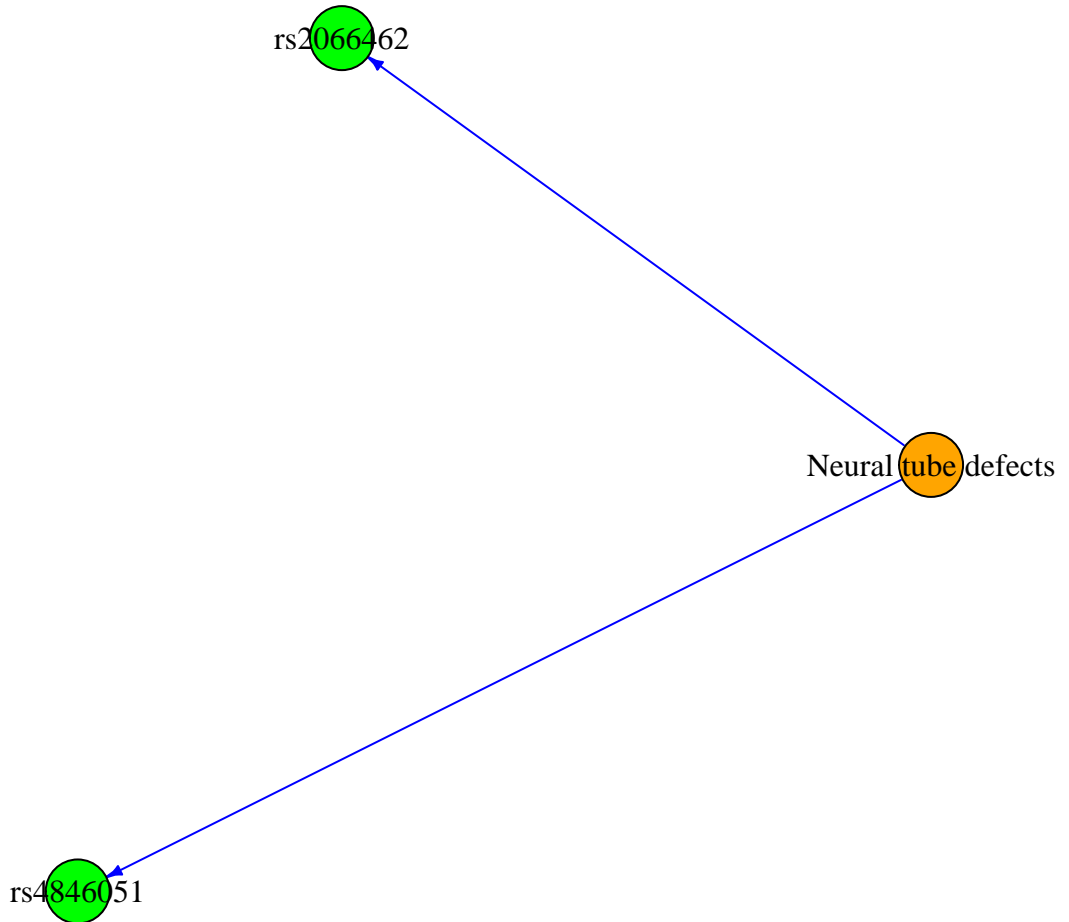

## Variant-Disease Network (Neuroblastoma)

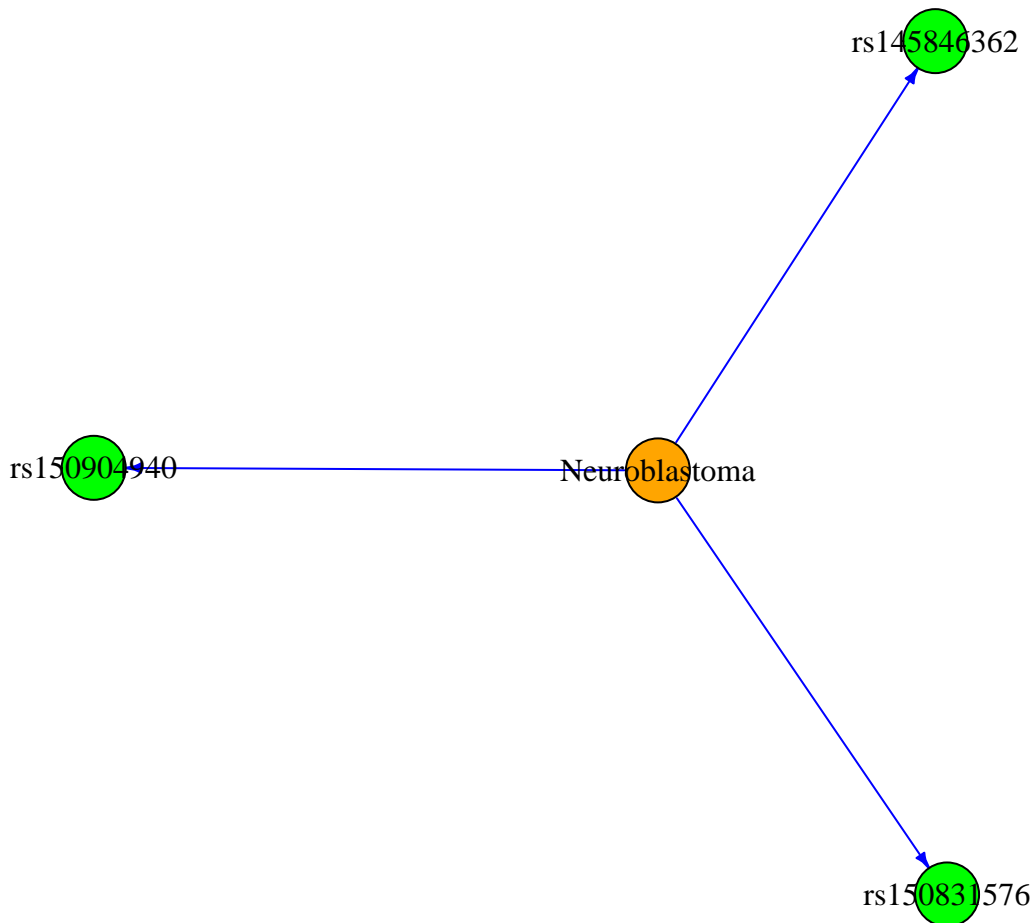



# Variant-Disease Network (Neuroblastoma 3)

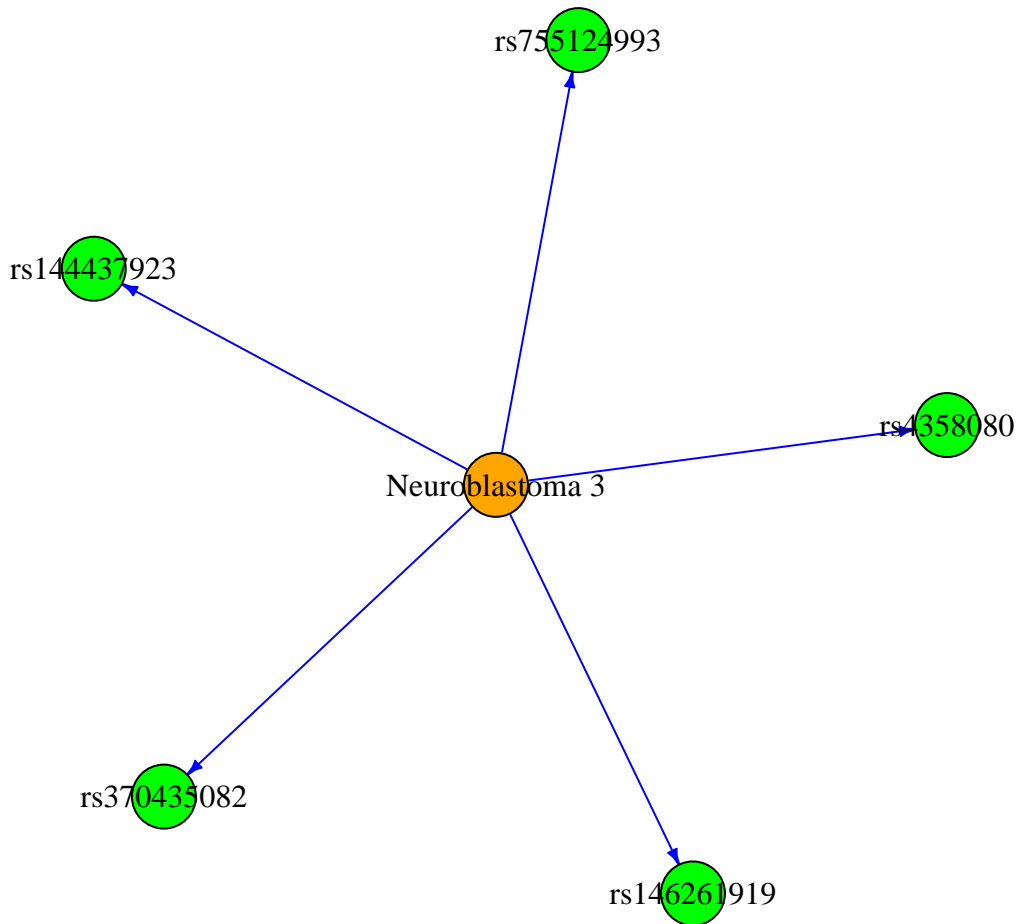

**Variant–Disease Network (Neuroblastoma Susceptibility)**

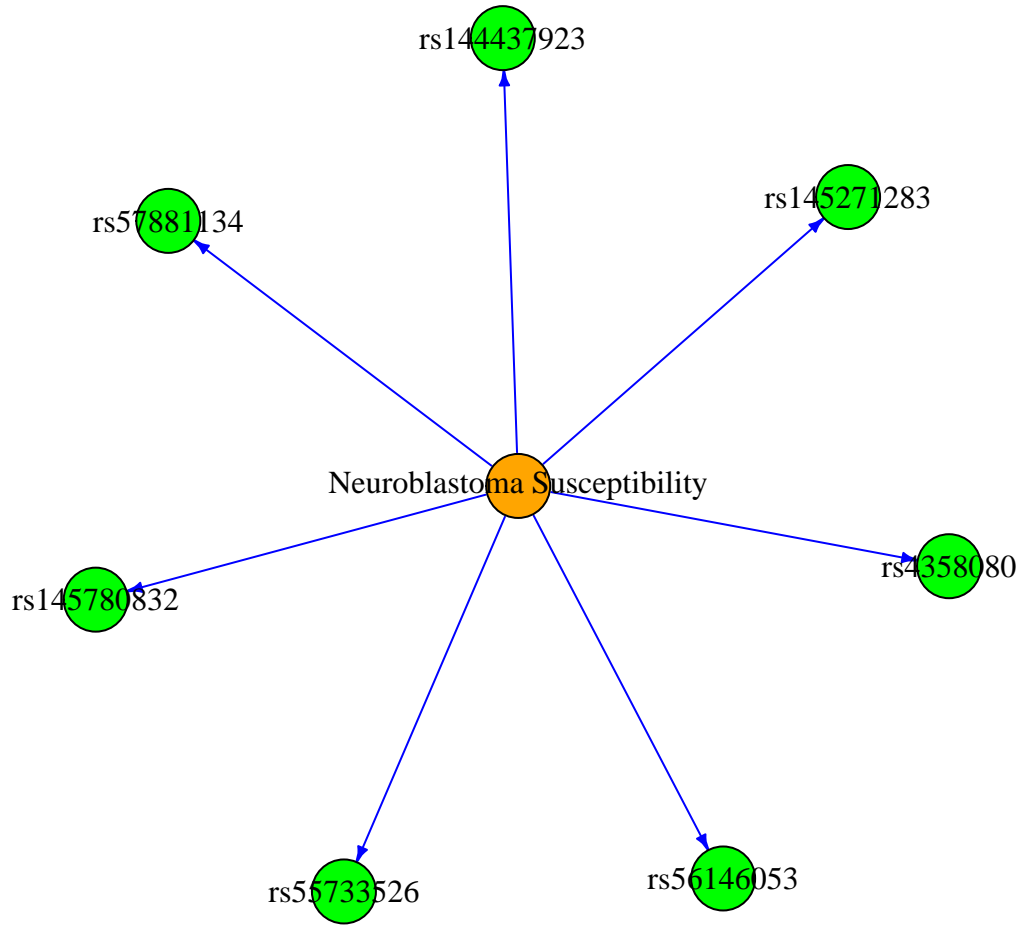

Variant–Disease Network (Neurodegeneration with brain iron accumulation

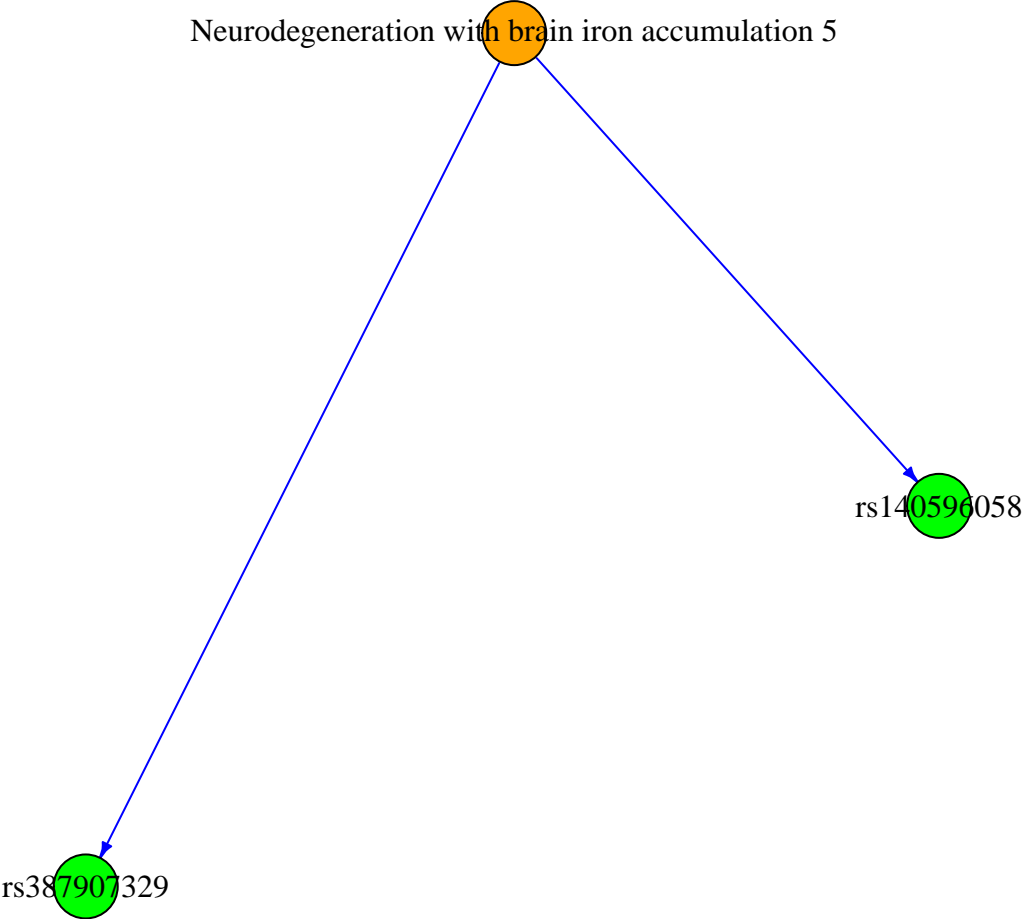

Variant–Disease Network (Neurodegeneration with brain iron accumulation)

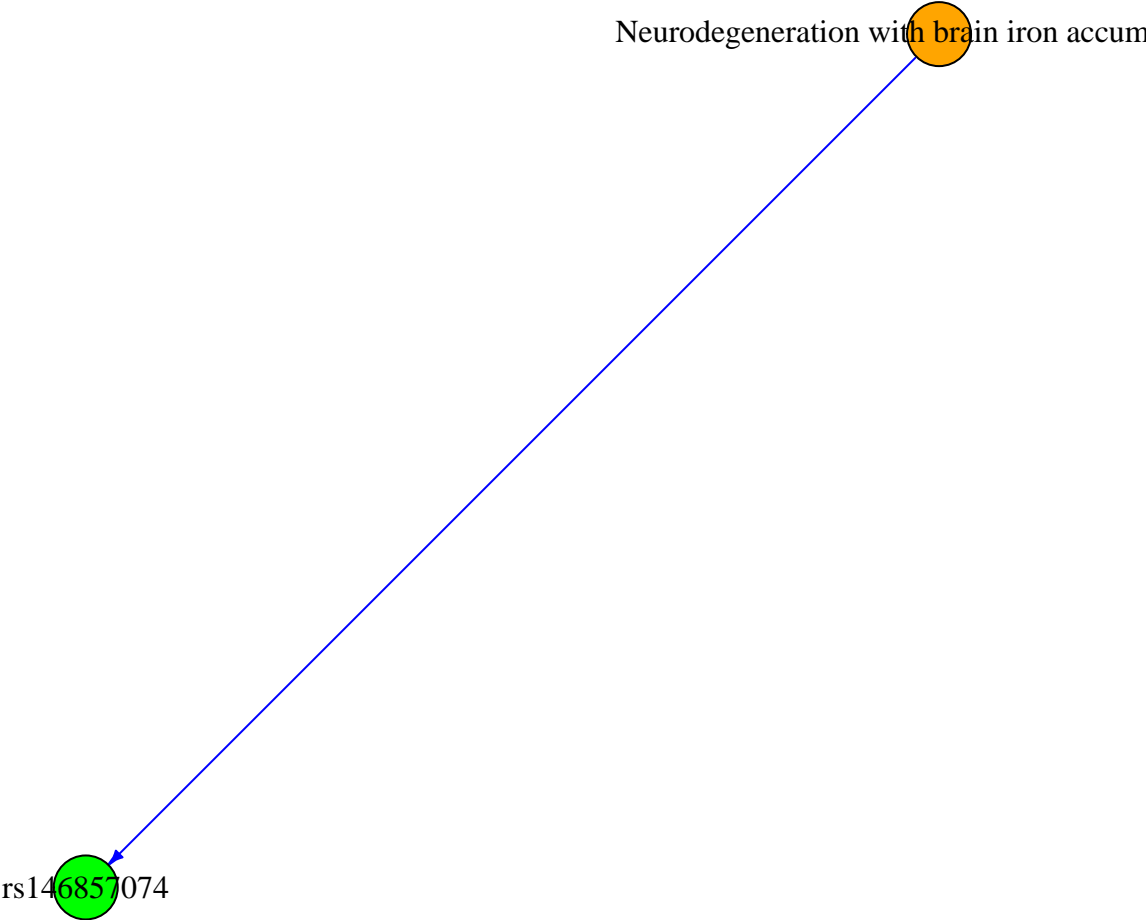

# e Network (Neurodevelopmental disorder with or without hyperkinetic movement)

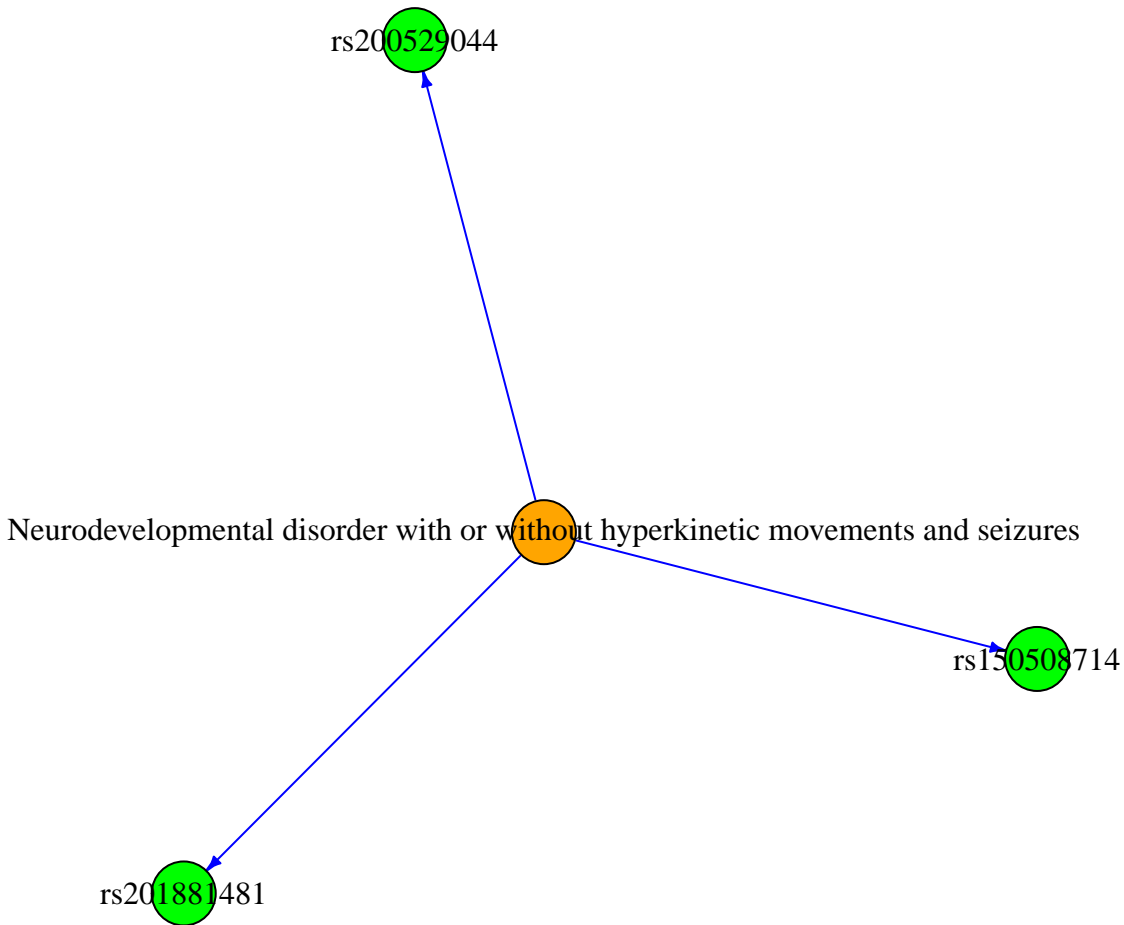

# rs753242774 (NEURODEVELOPMENTAL DISORDER WITH SEVERE MOTOR IMPAIRMENT)

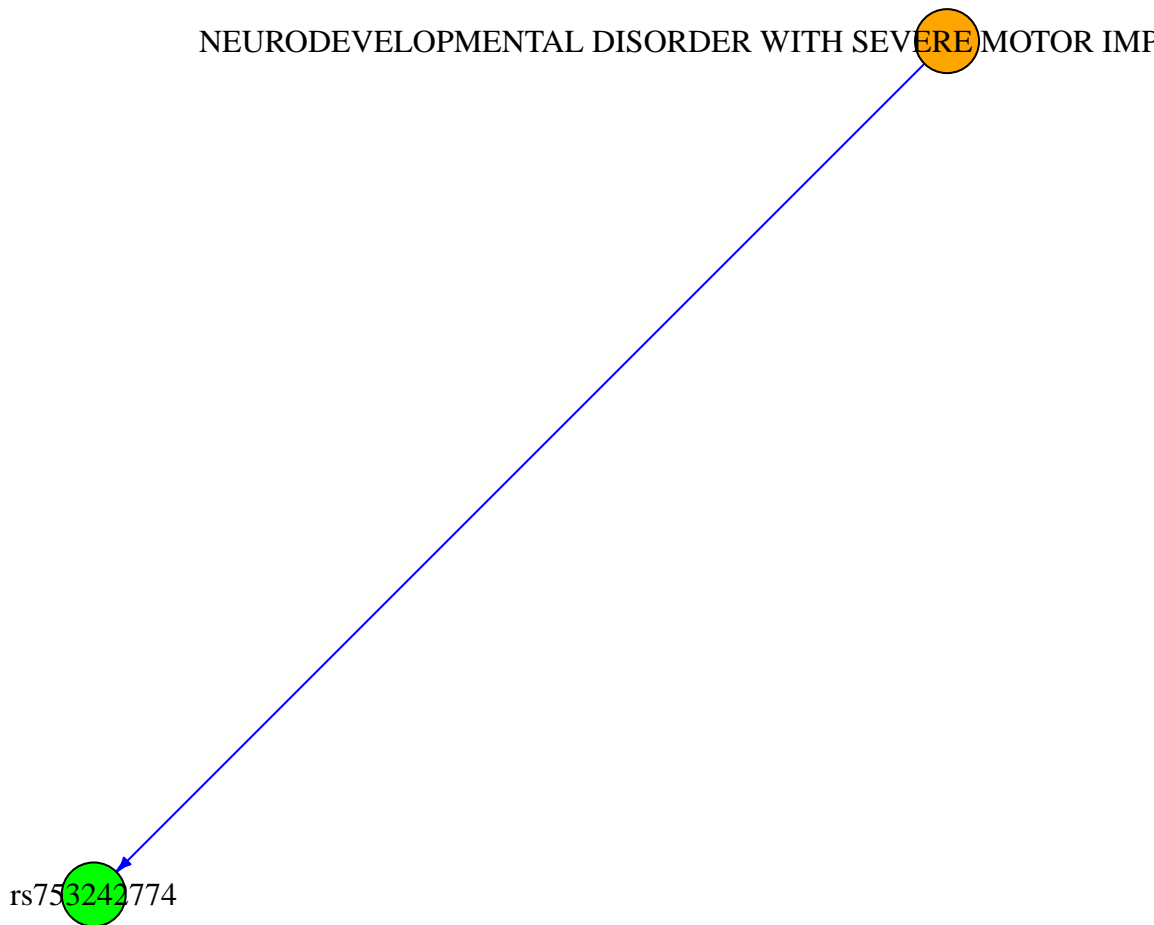

## Variant–Disease Network (Neuroferritinopathy)

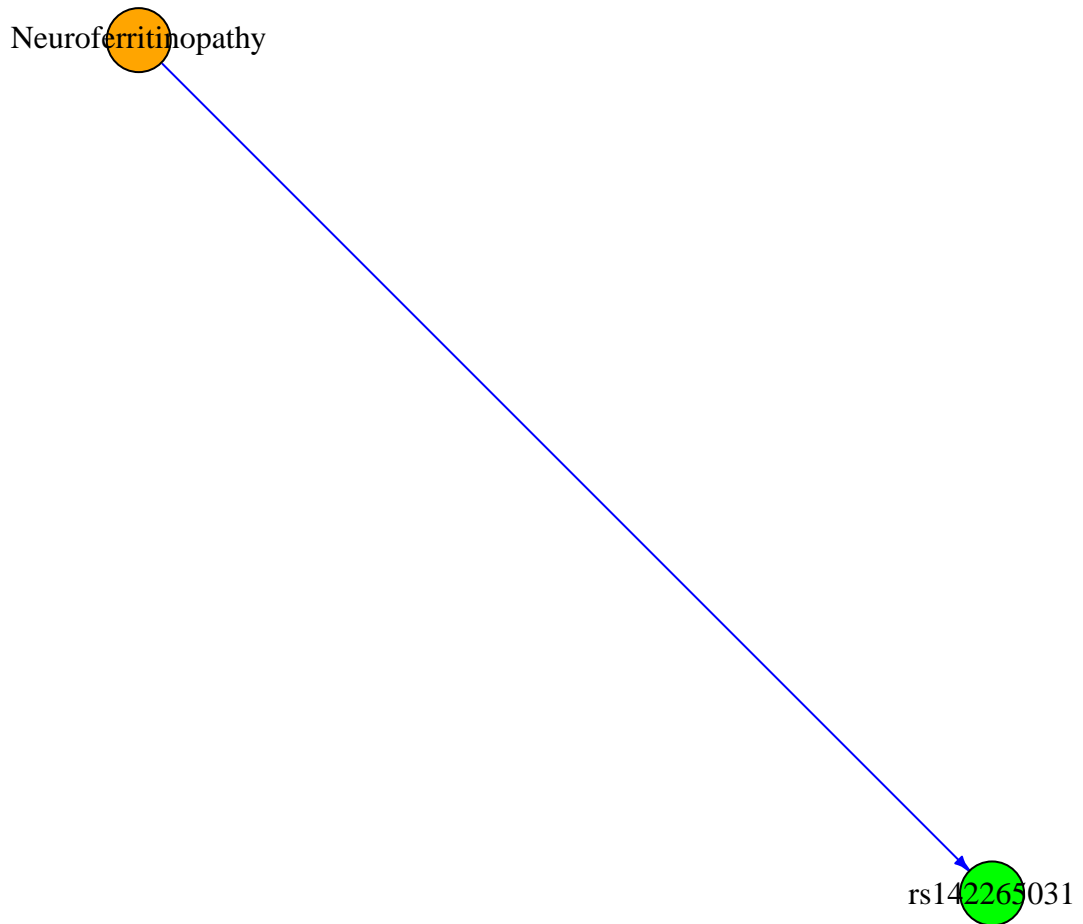

## Variant–Disease Network (Neurofibromatosis)

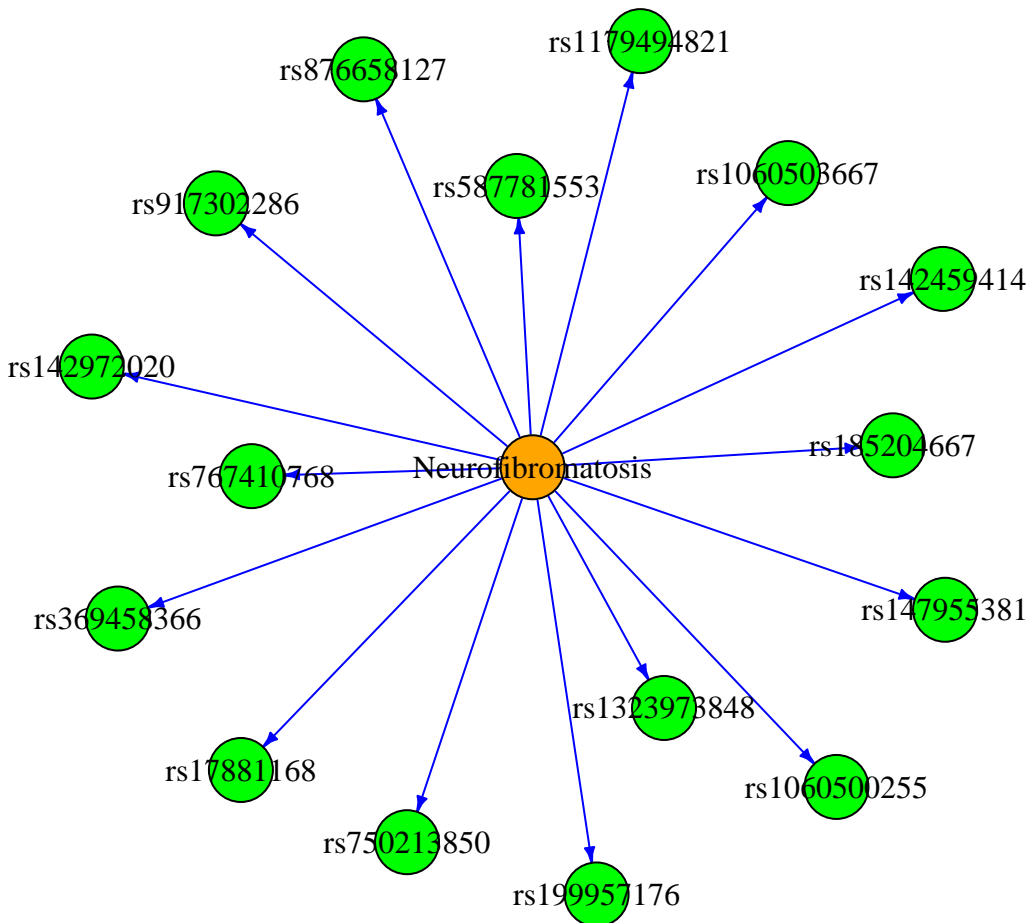



# Variant–Disease Network (Neurofibromatosis–Noonan syndrome)

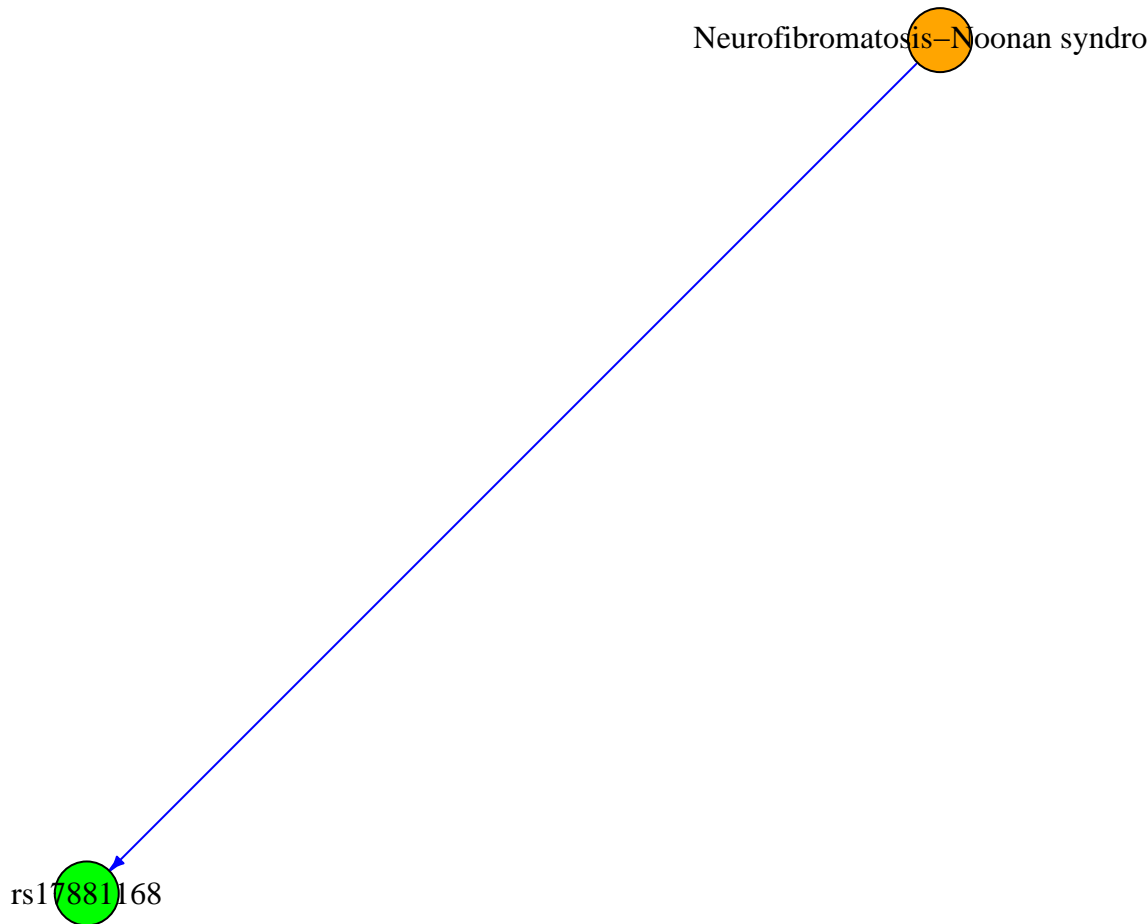

**Variant–Disease Network (Neuronal ceroid lipofuscinosis)**

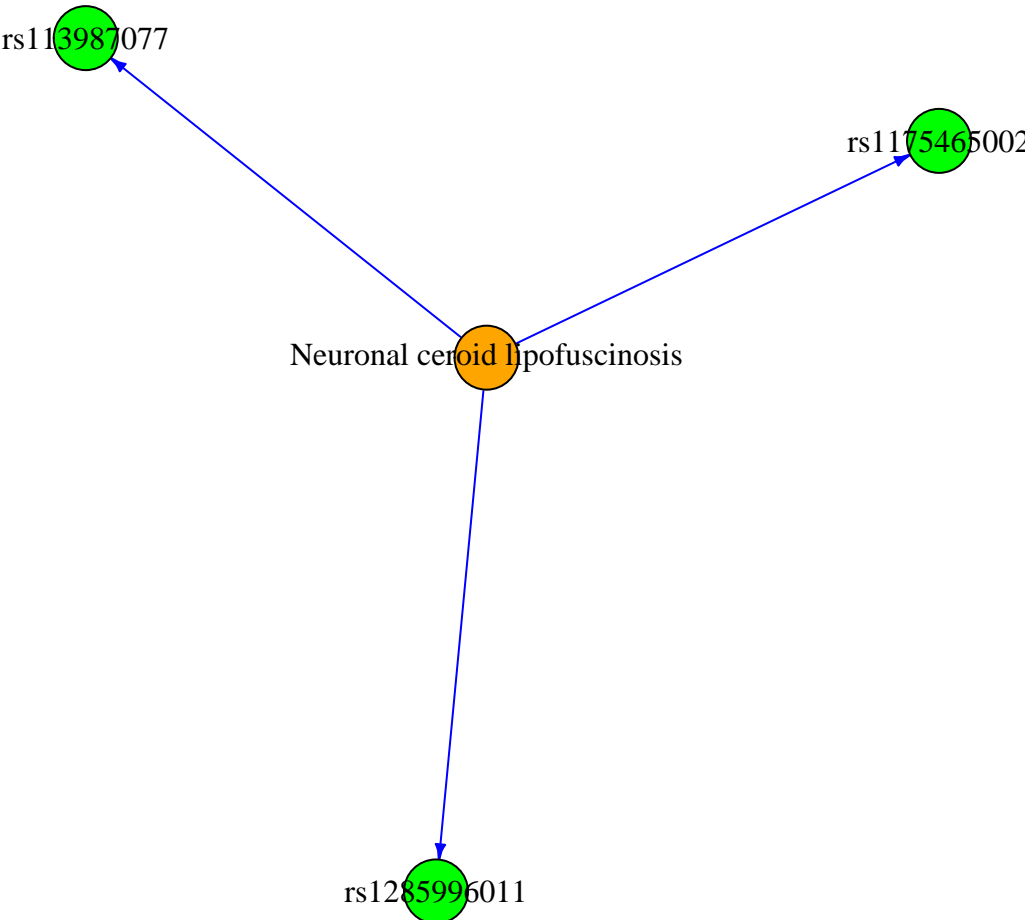

# Variant–Disease Network (Neuronal Ceroid–Lipofuscinosis)

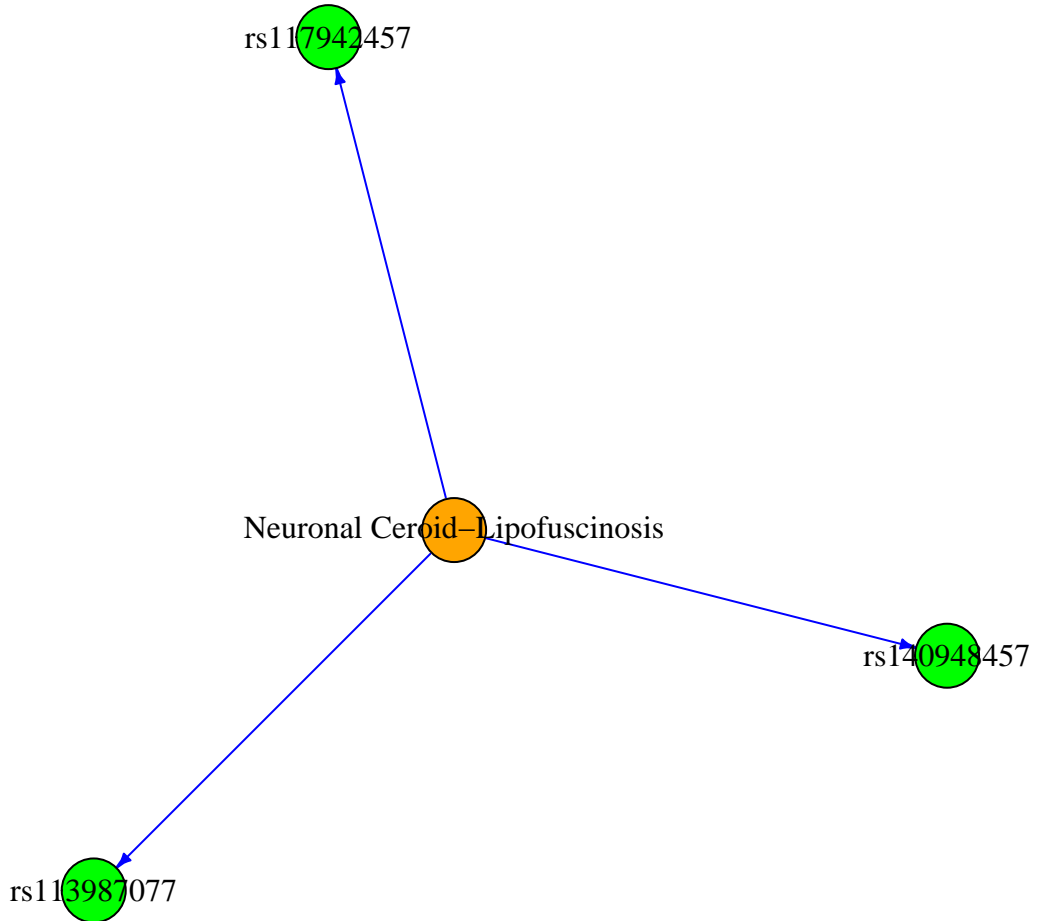

## Variant–Disease Network (Neuronopathy)

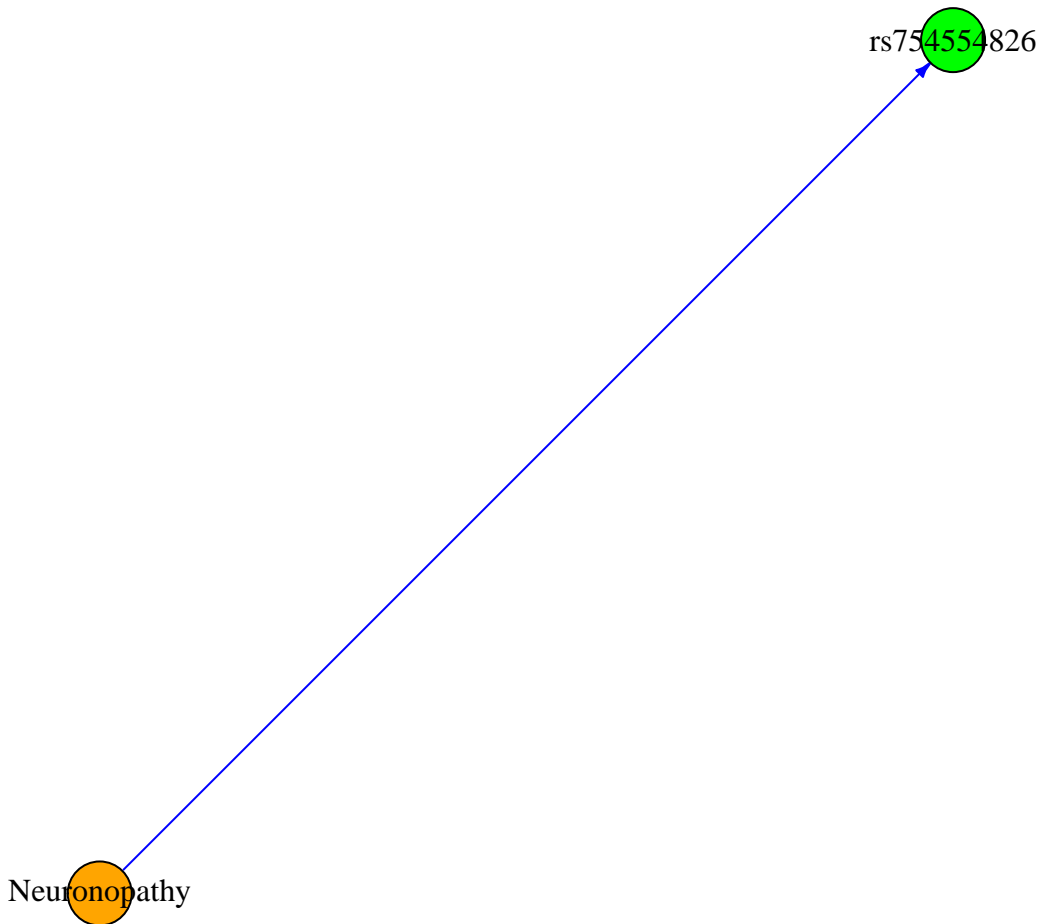

Variant–Disease Network (Neuropathy)

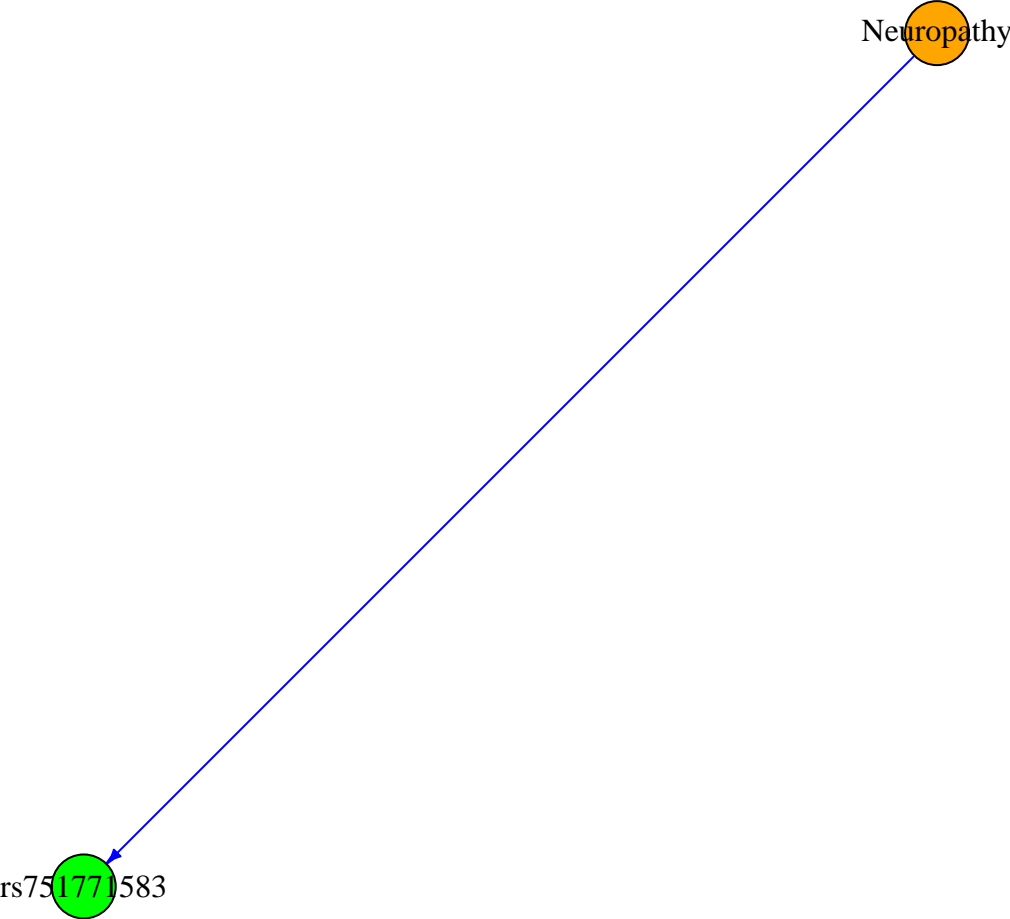

# Variant-Disease Network (Neuropathy hereditary sensory and autonomic type 1)

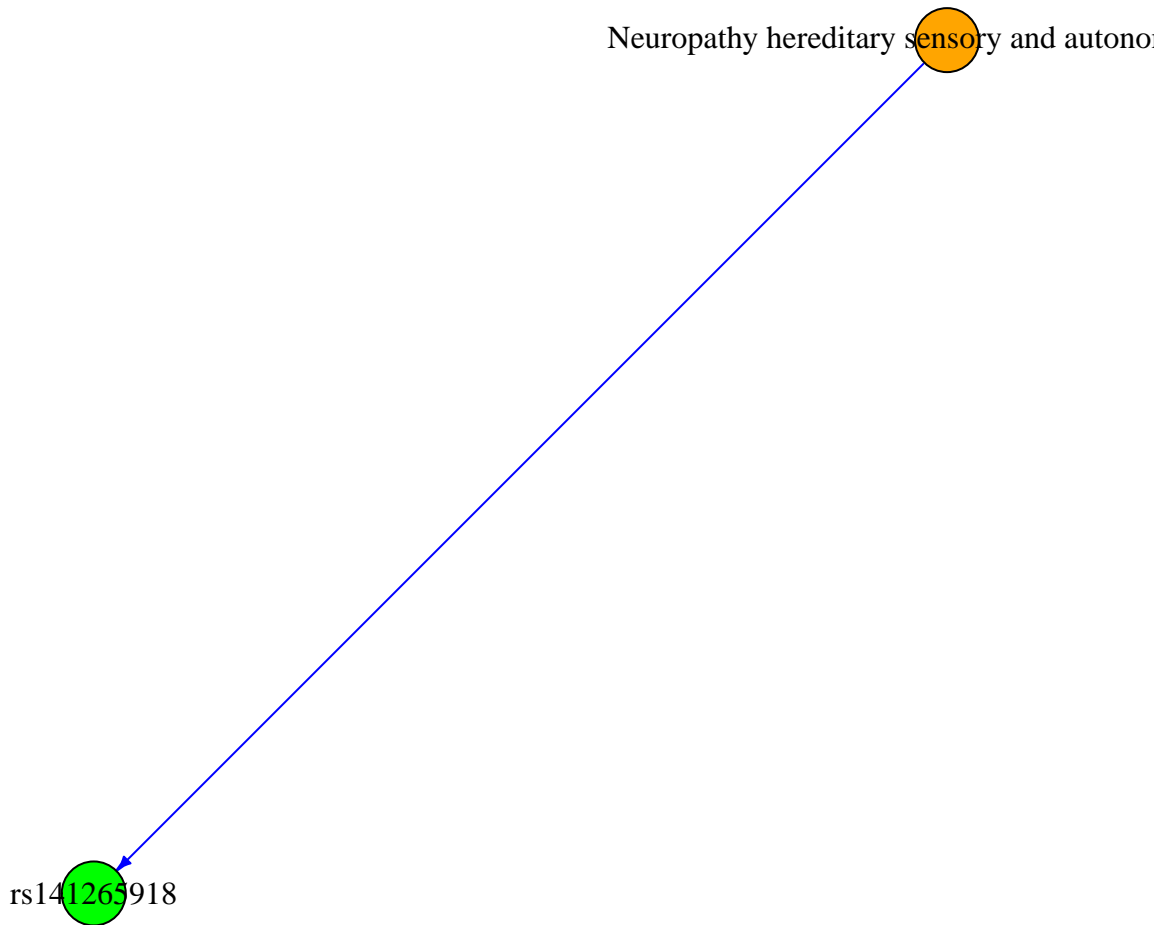

**Variant–Disease Network (Neutral lipid storage disease with myopathy)**

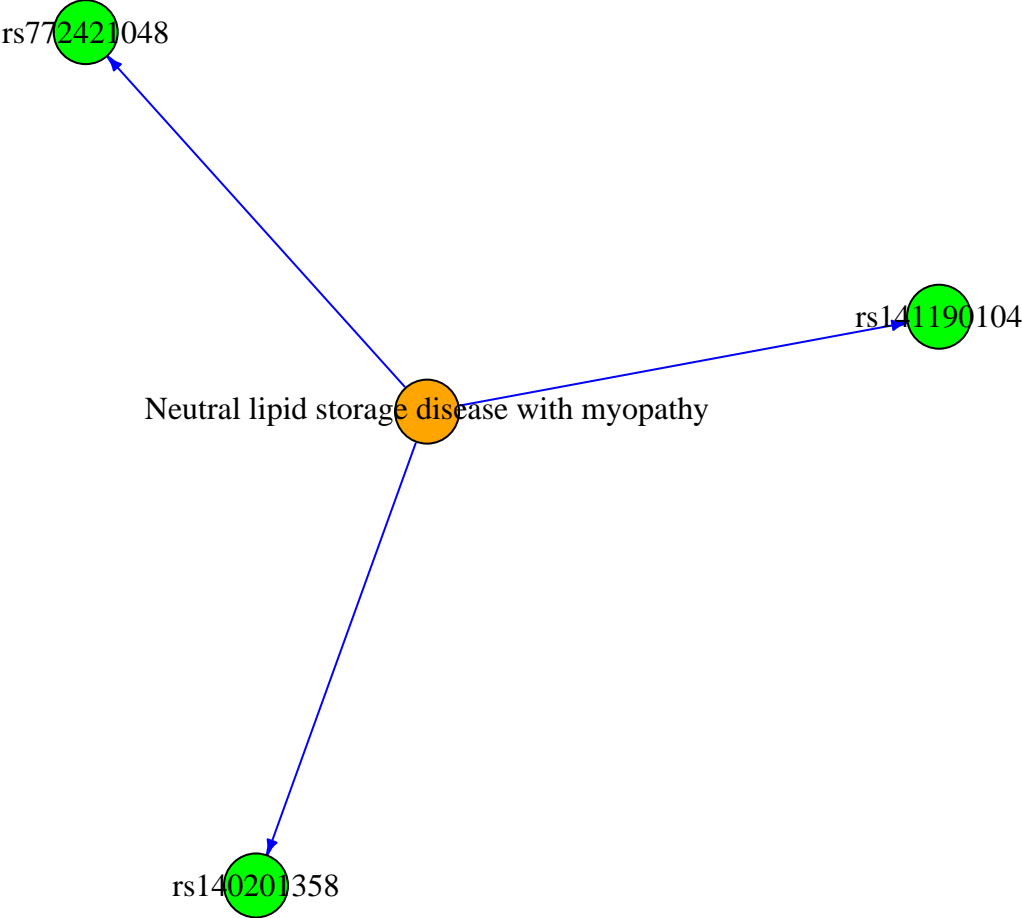

## Variant–Disease Network (Newfoundland rod–cone dystrophy)

rs144254383

Newfoundland rod–cone dystrophy

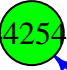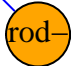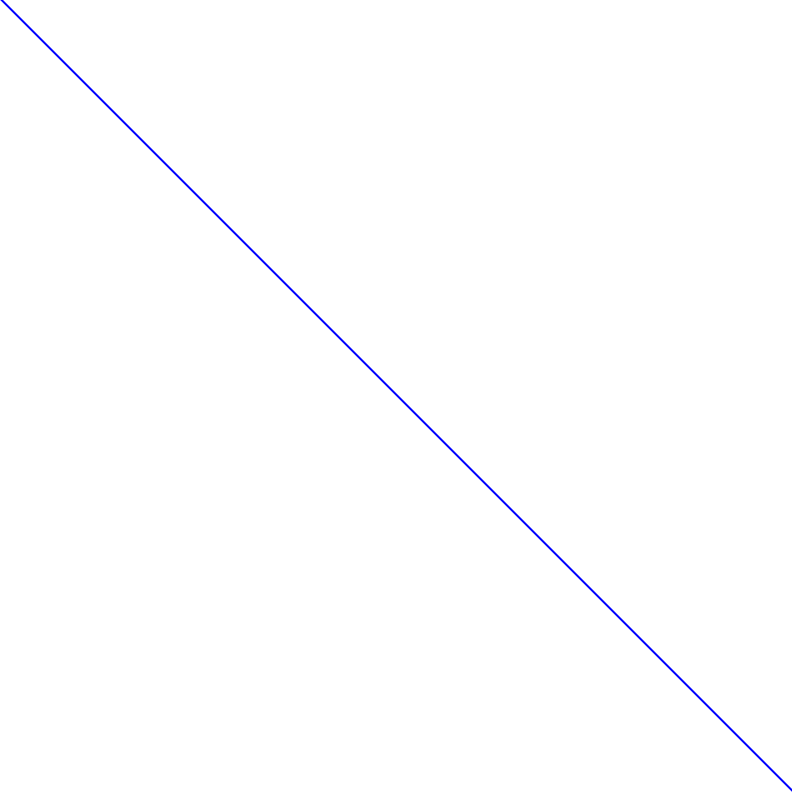



## Variant–Disease Network (Niemann–Pick disease)

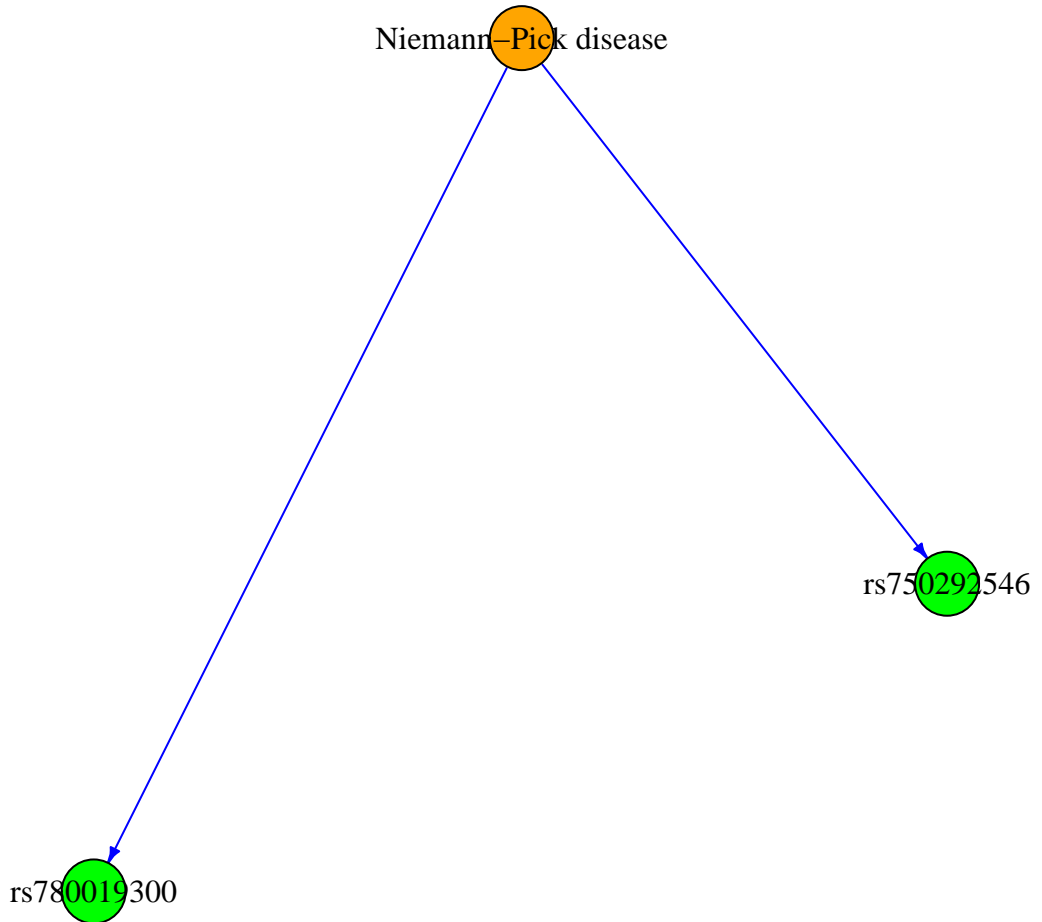

**Variant–Disease Network (Niemann–Pick disease type C1)**

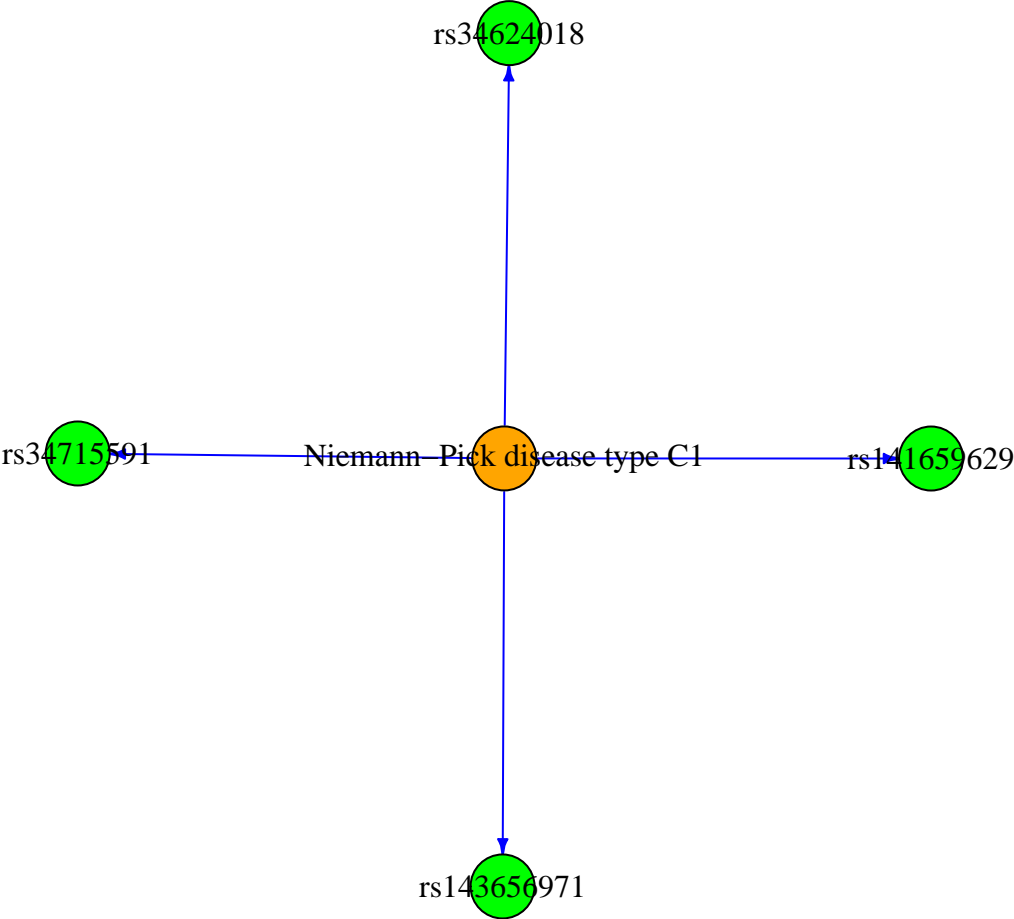

**Variant–Disease Network (Nijmegen breakage syndrome–like disorder)**

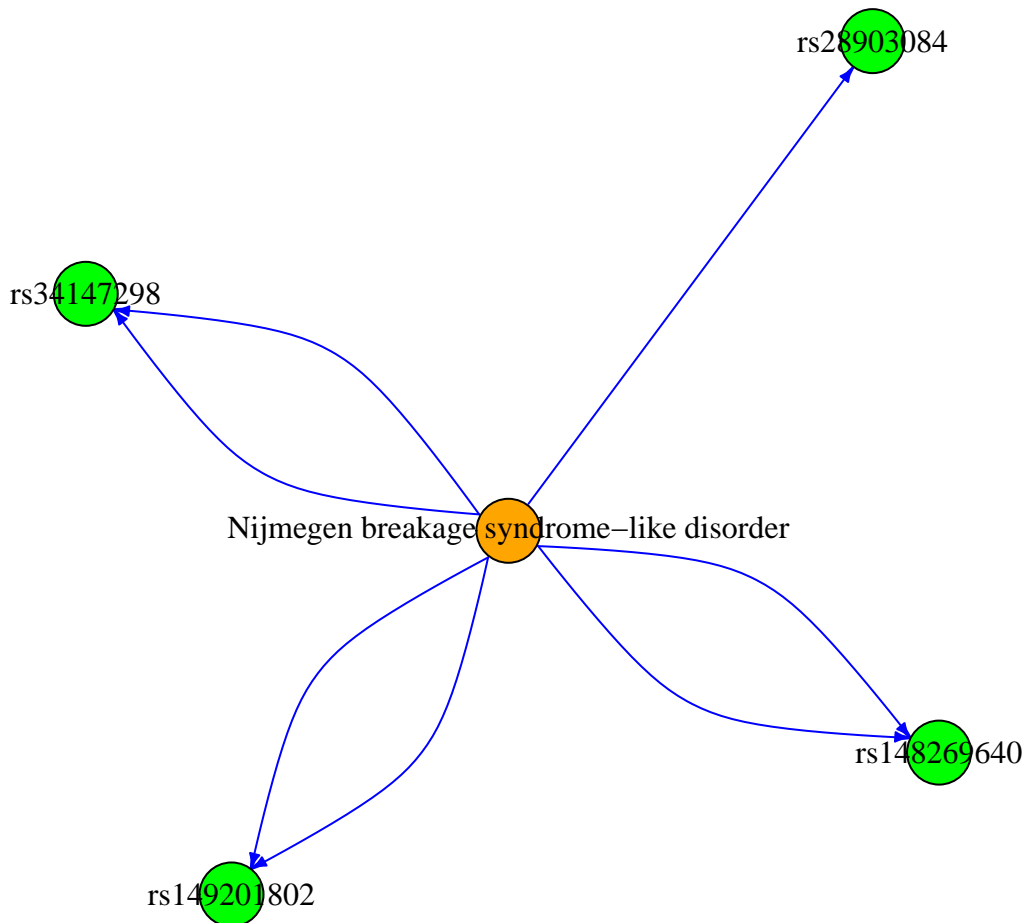

**Variant–Disease Network (Nocturnal frontal lobe epilepsy)**

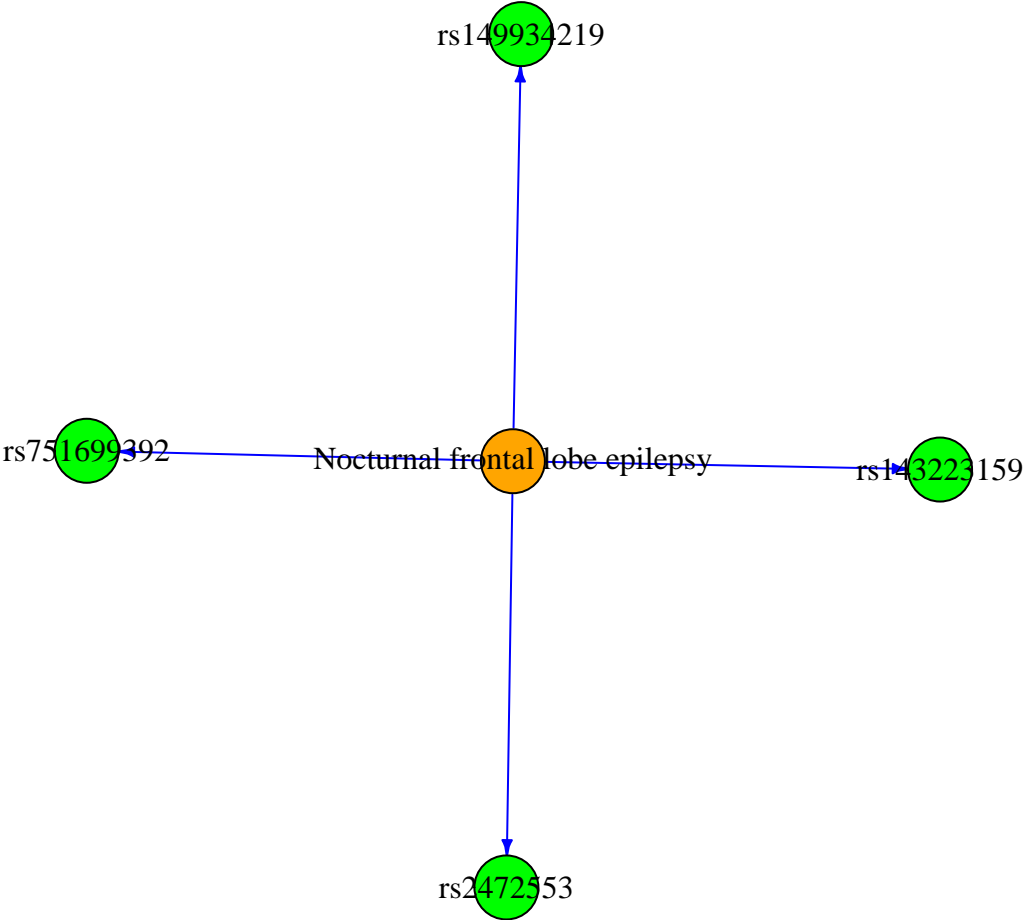

**Variant–Disease Network (Nonepidermolytic palmoplantar keratoderma)**

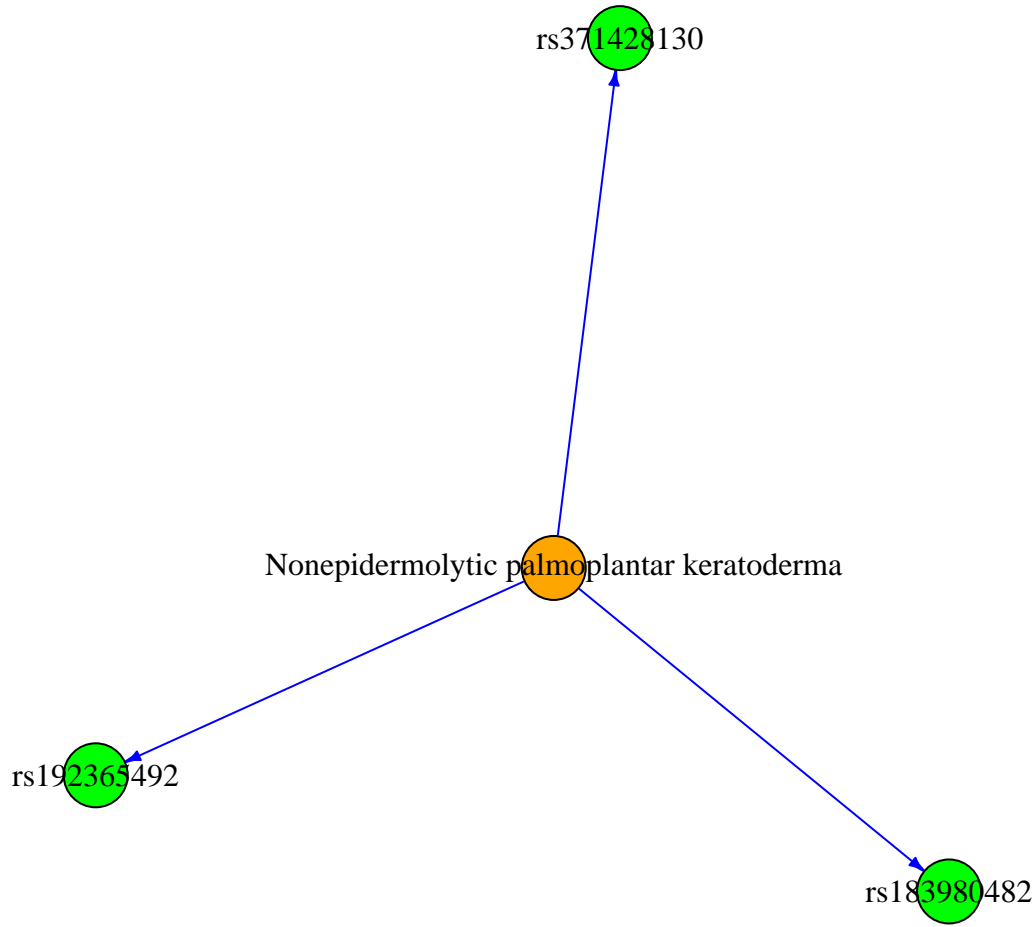

# Variant–Disease Network (Non–ketotic hyperglycinemia)

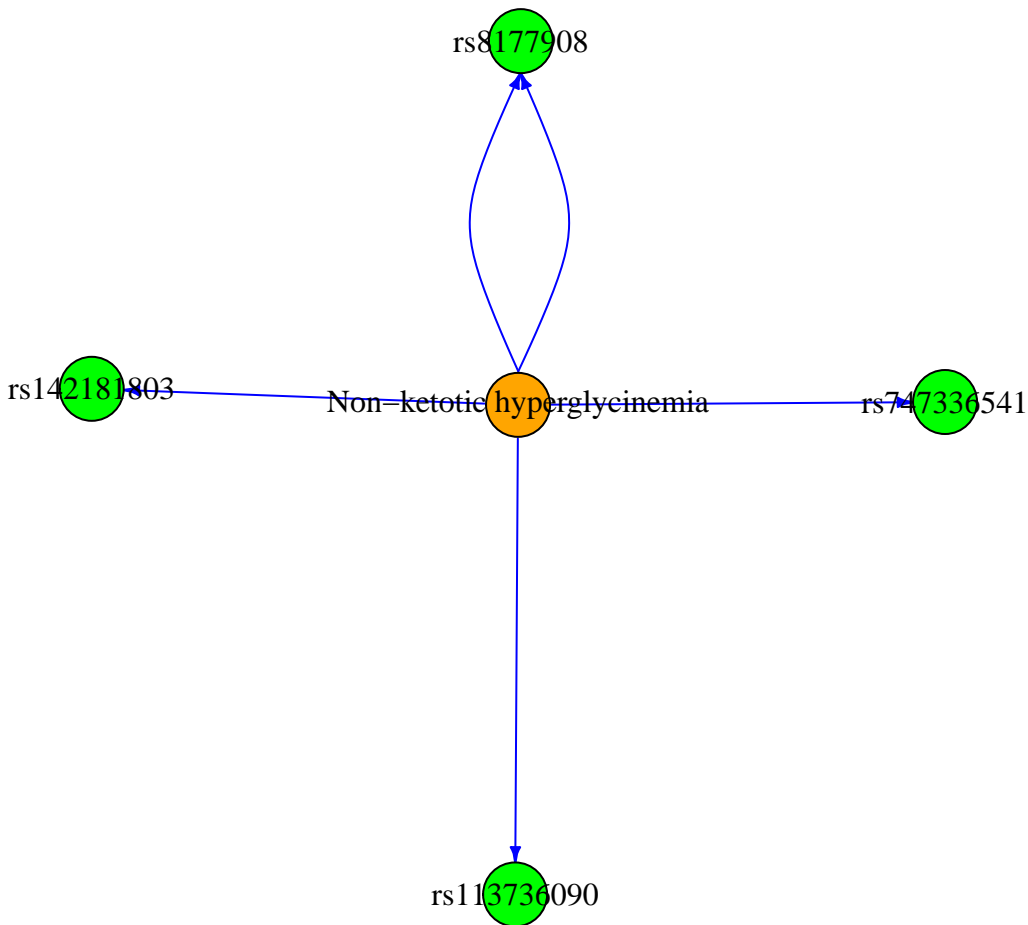

# Variant-Disease Network (Nonsyndromic Hearing Loss)

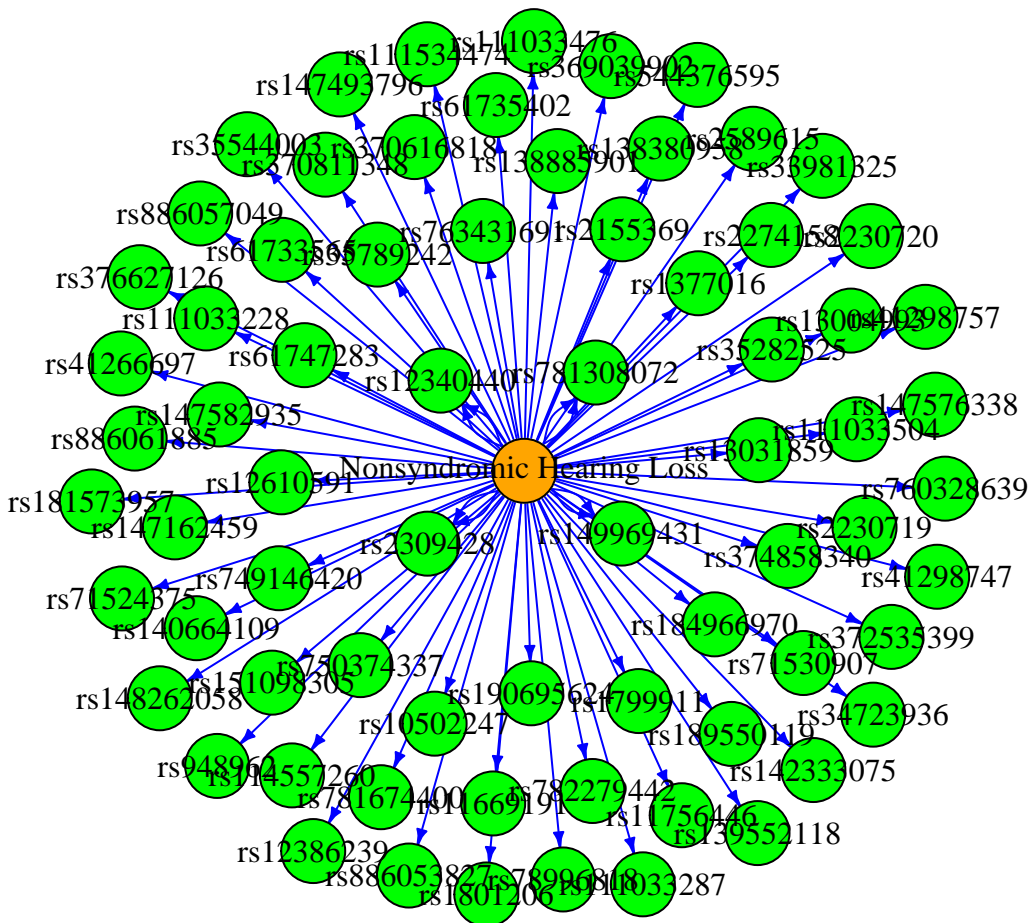

**Variant–Disease Network (Nonsyndromic Oculocutaneous Albinism)**

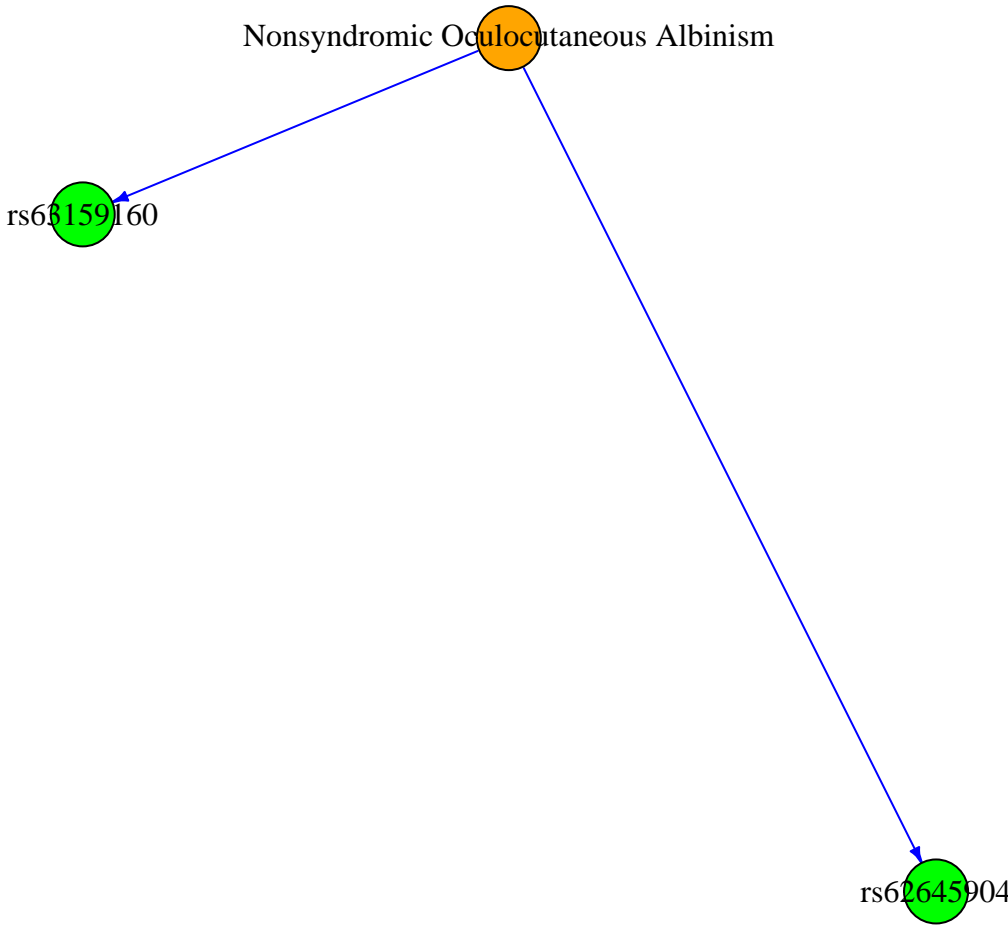



Variant–Disease Network (Non–syndromic X–linked intellectual disability)

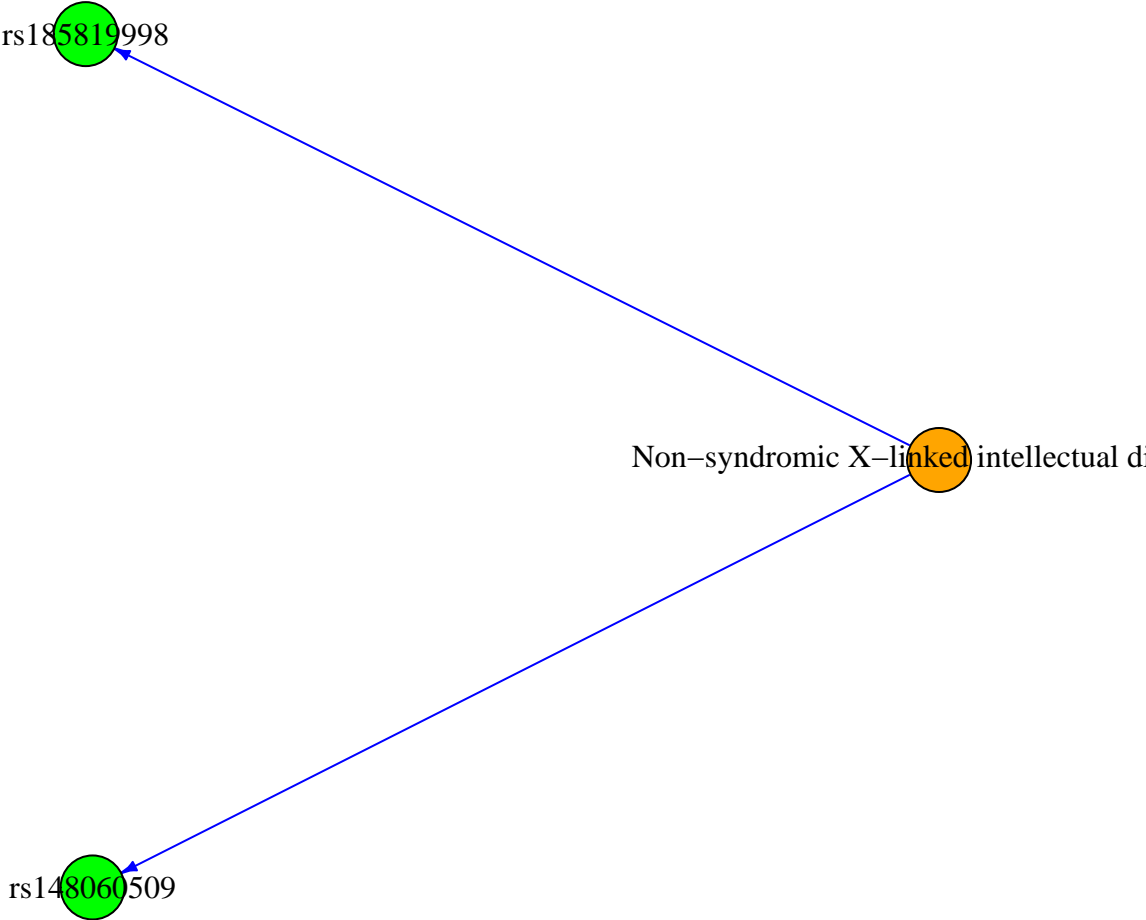

## Variant–Disease Network (Noonan syndrome)

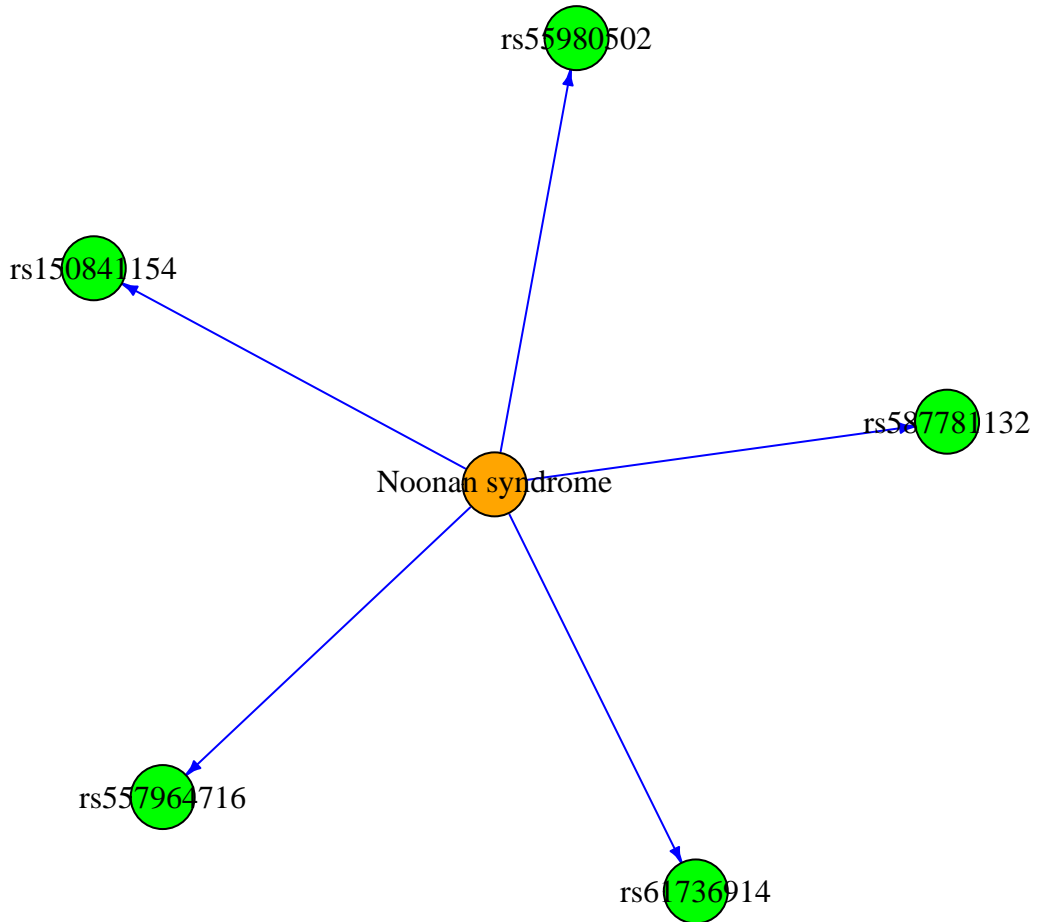

Variant–Disease Network (Noonan syndrome and Noonan–related syndromes)

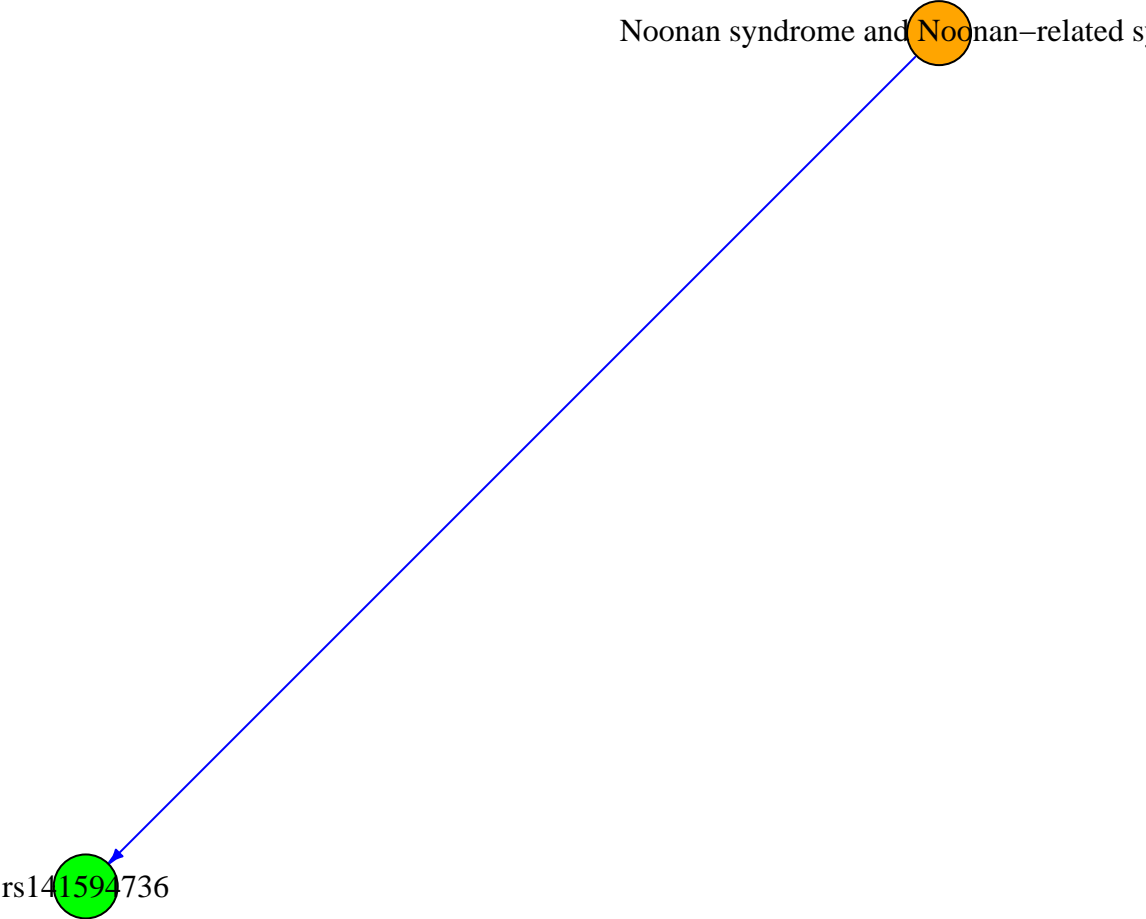

**Variant–Disease Network (Noonan syndrome with multiple lentigines)**

Noonan syndrome with multiple lentigines

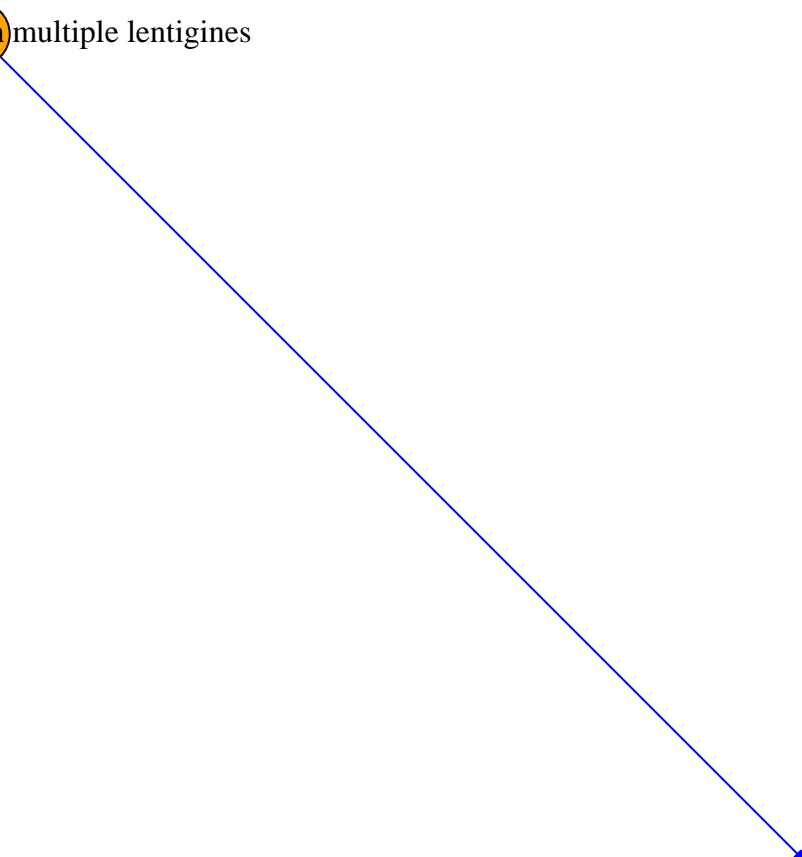

rs61736914

Variant–Disease Network (Noonan–Like Syndrome Disorder)

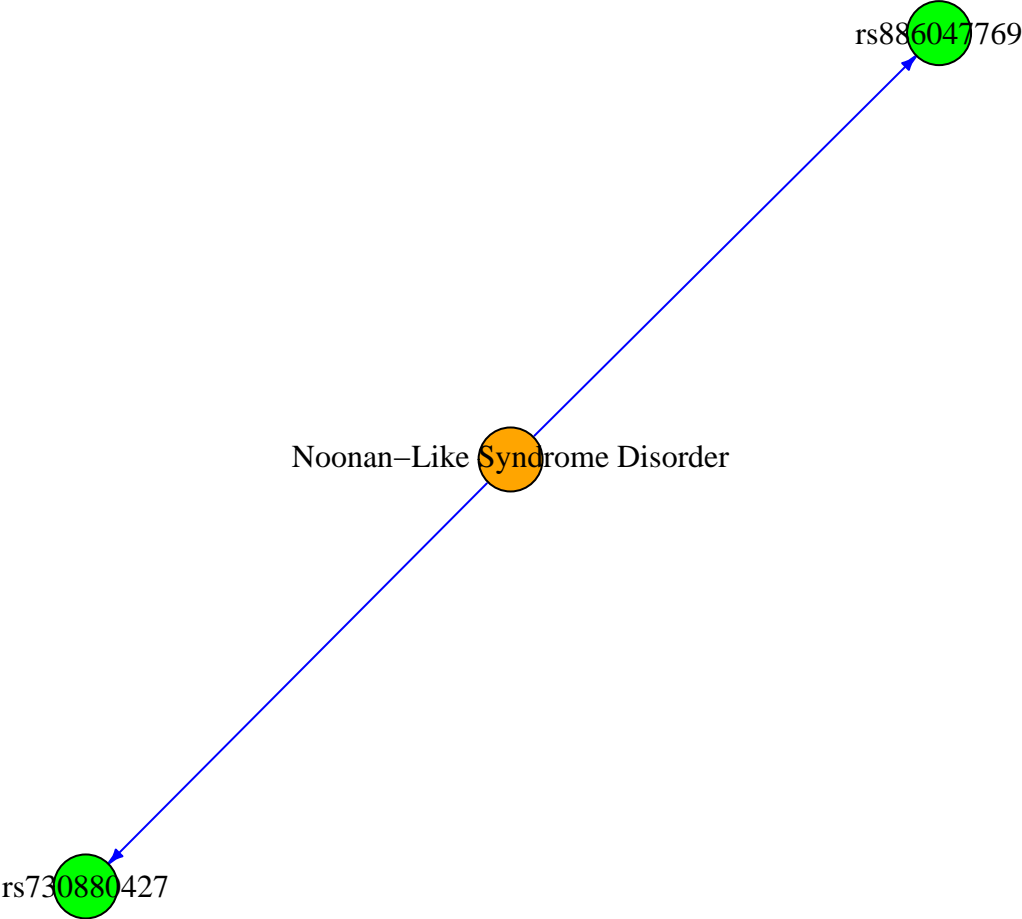

## Variant–Disease Network (Norum disease)

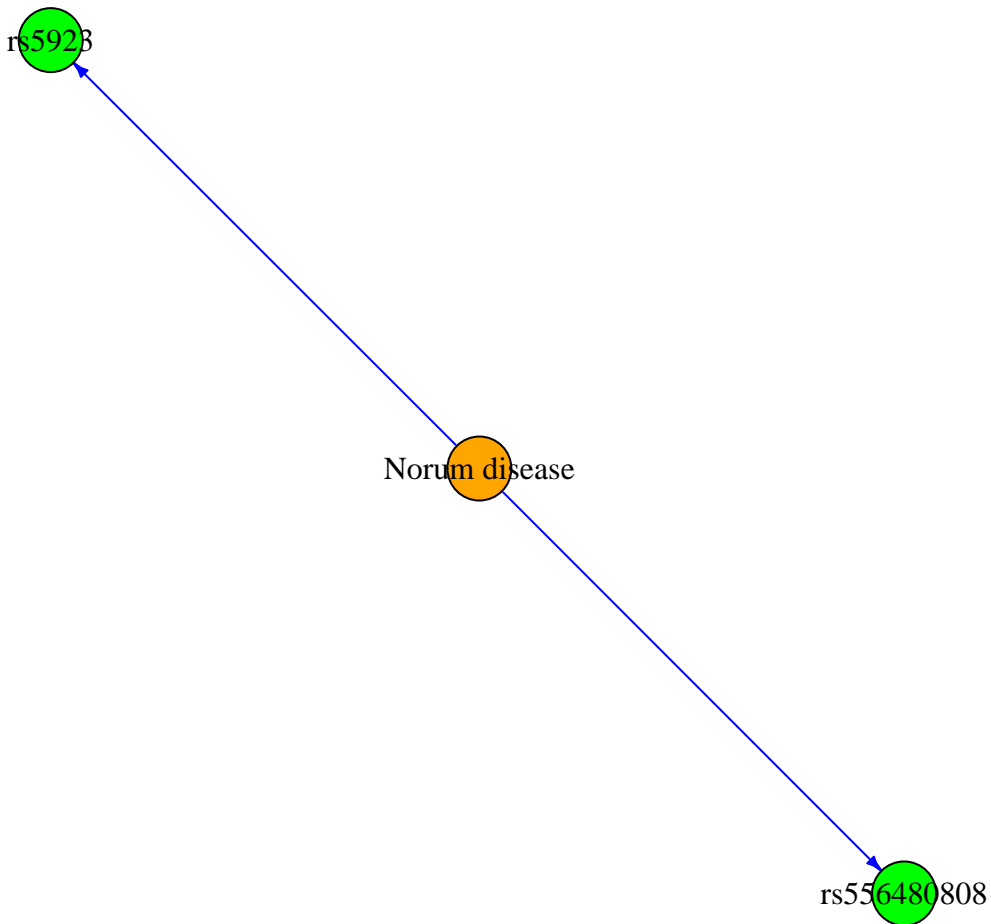

# Disease Network (Nuclearly-encoded mitochondrial complex V (ATP synthase

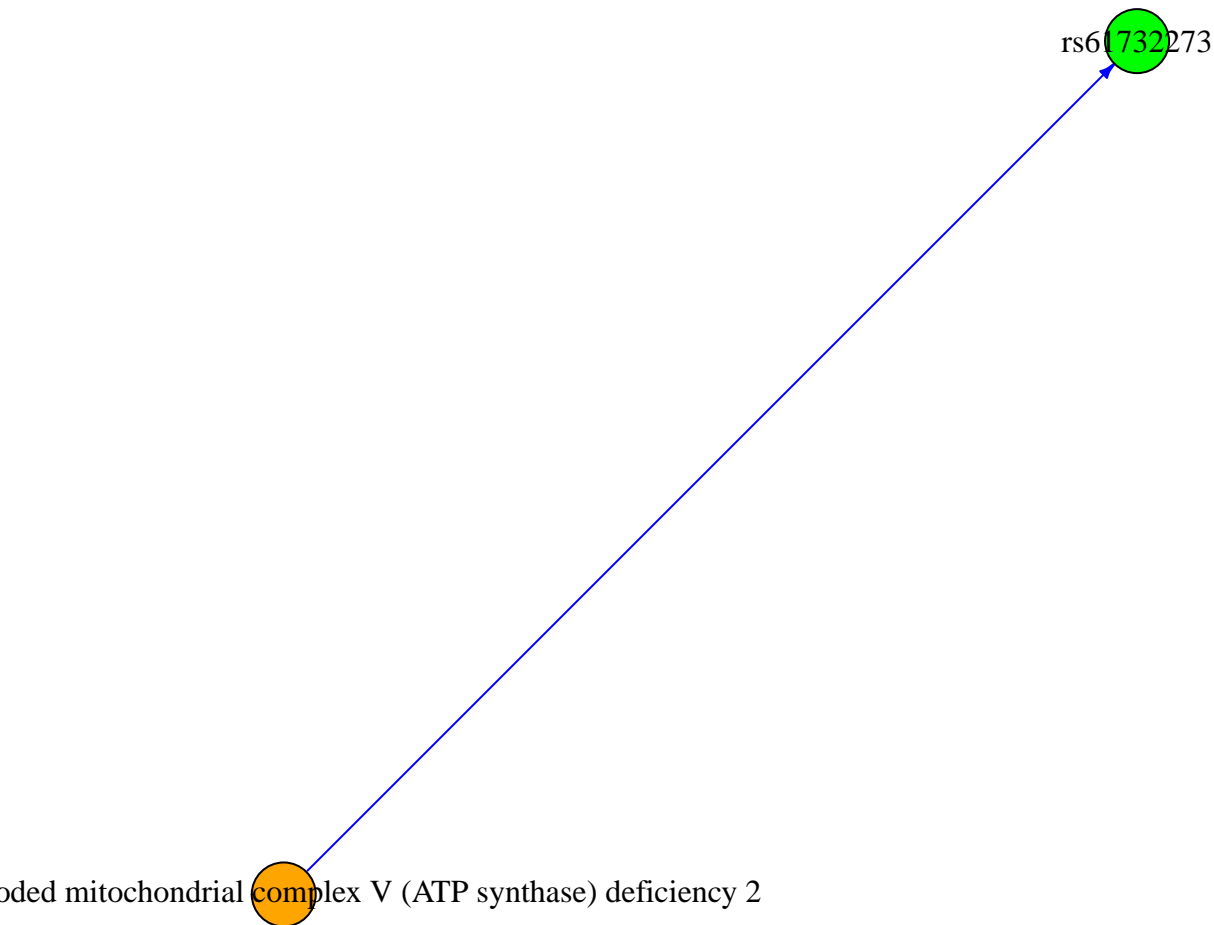

## Variant–Disease Network (Obesity)

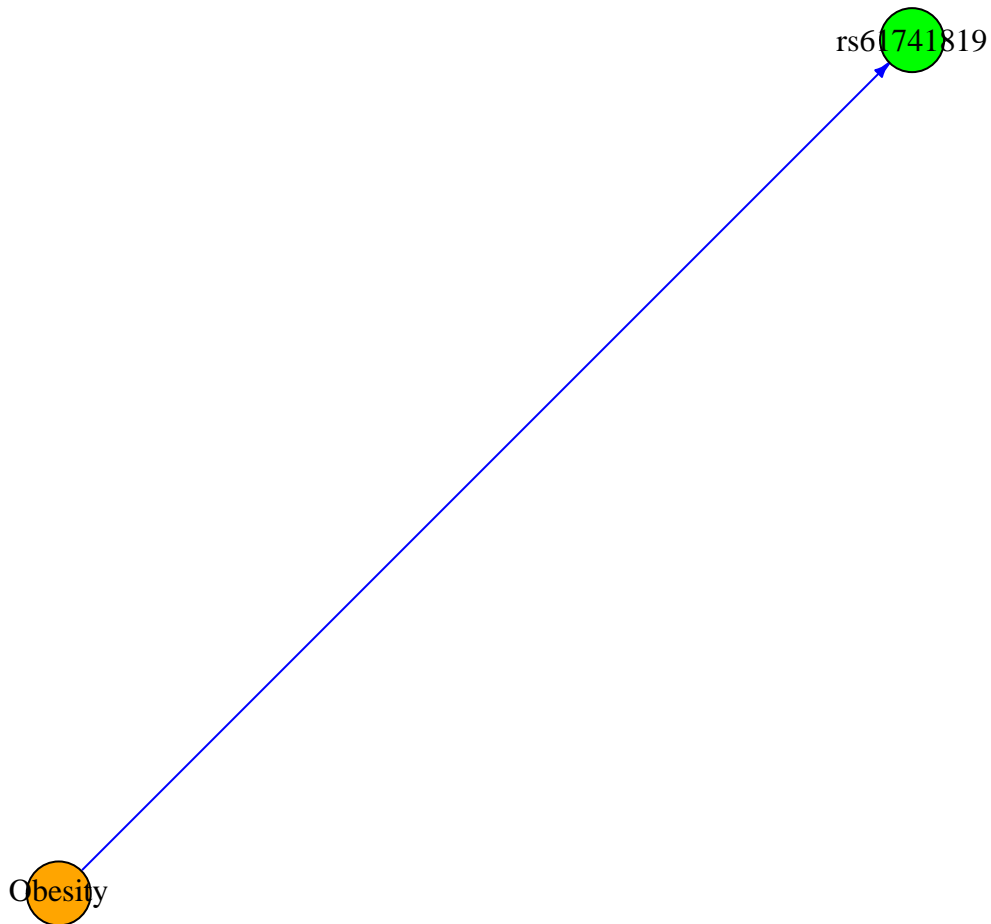



## Variant–Disease Network (Oculocutaneous albinism)

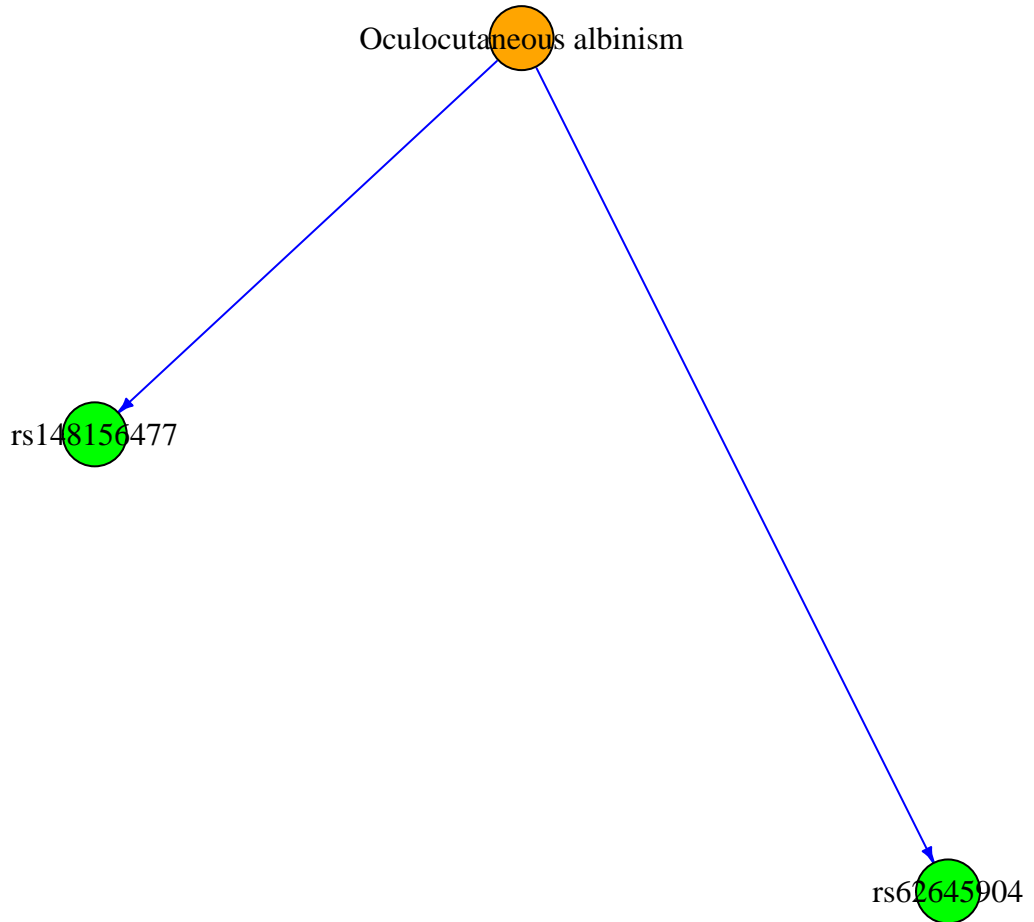

# Variant–Disease Network (Oculocutaneous albinism type 1B)

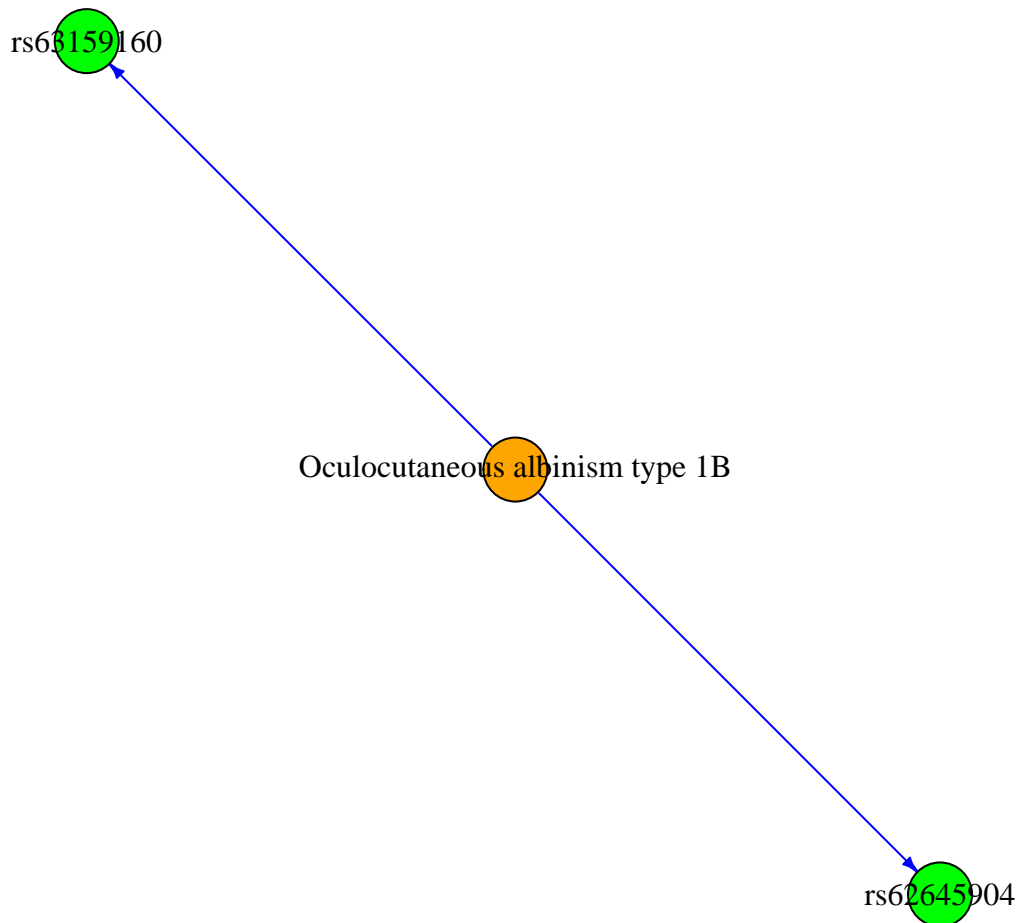

## Variant-Disease Network (Odontoonychodermal dysplasia)

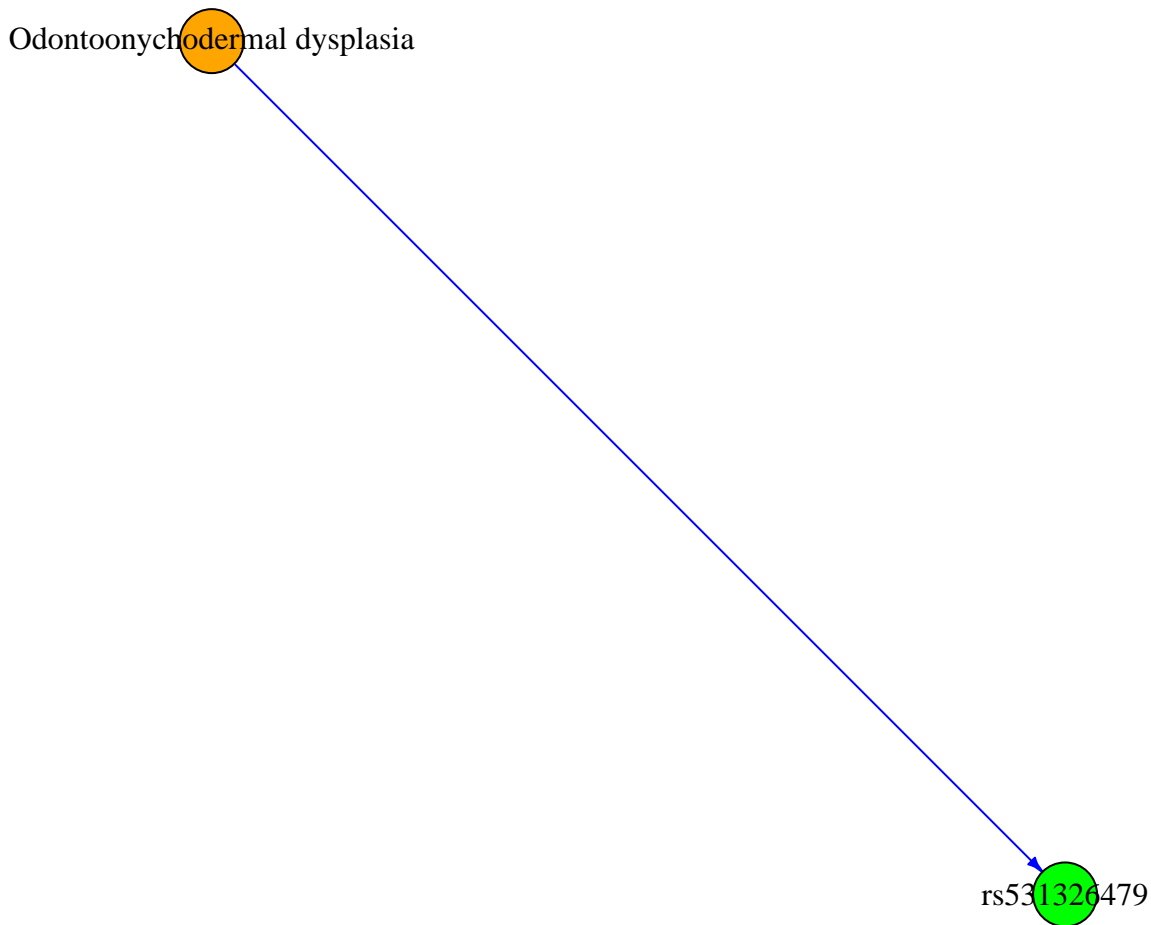

## Variant–Disease Network (Oguchis disease)

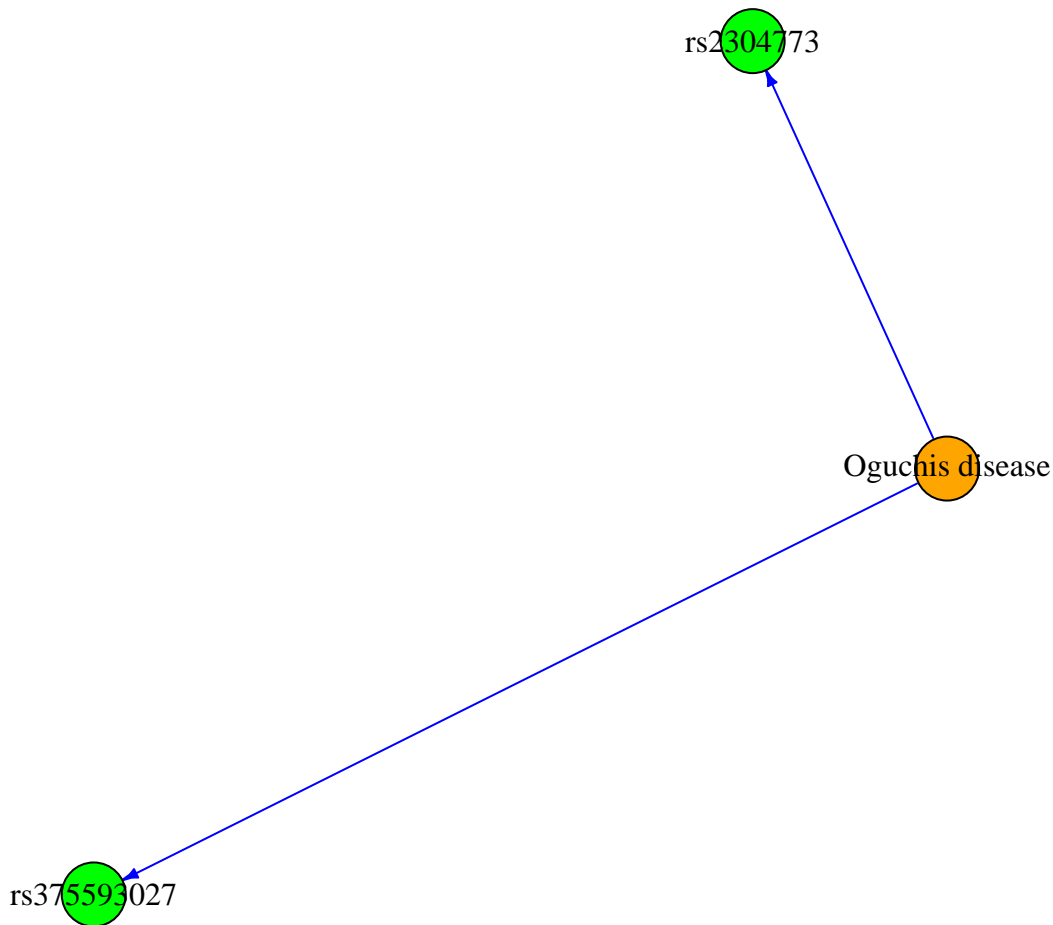

# Variant–Disease Network (Oligodontia–colorectal cancer syndrome)

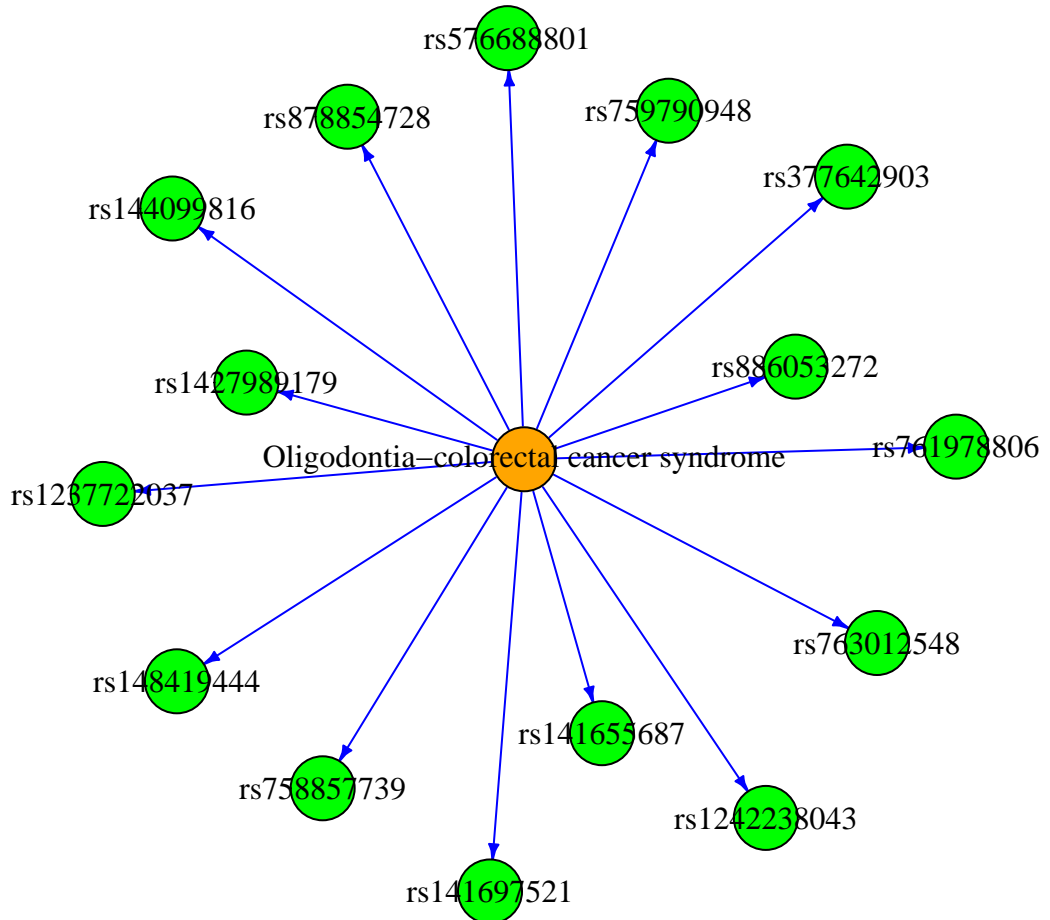

Variant–Disease Network (Omodysplasia)

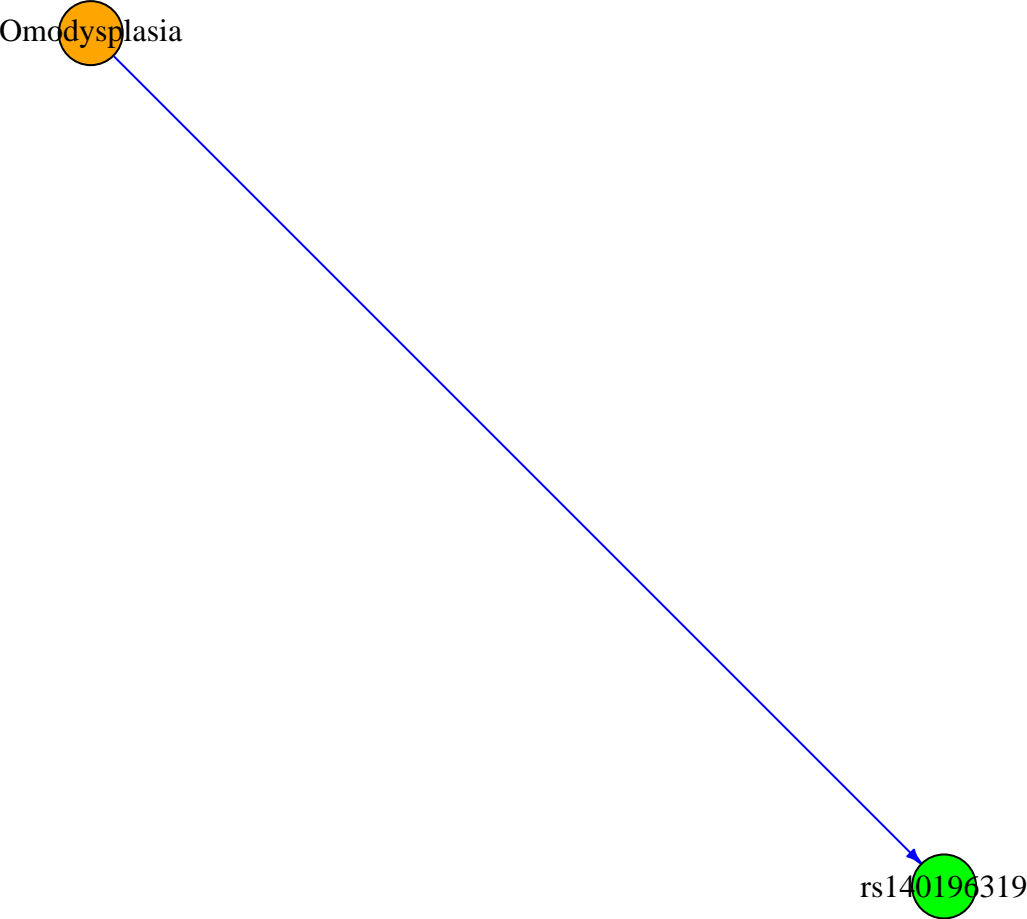

## Variant–Disease Network (Optic Atrophy)

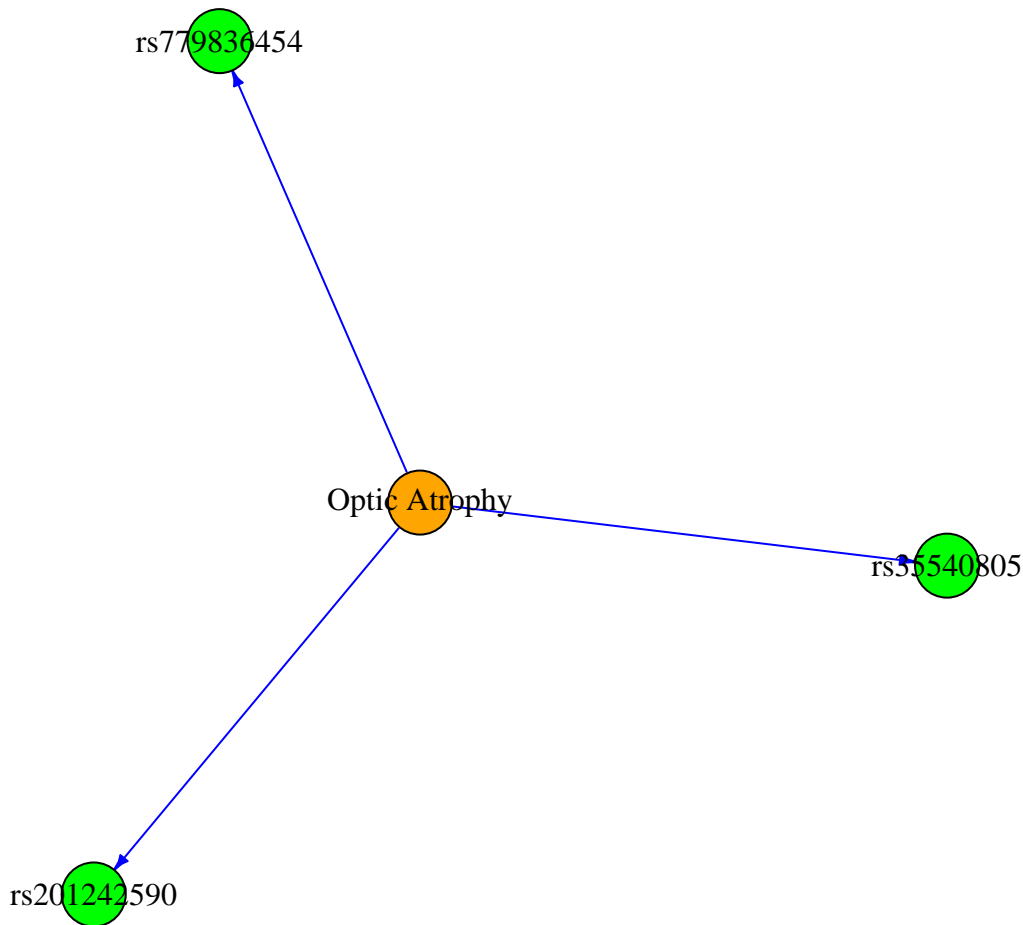

# Variant–Disease Network (Ornithine aminotransferase deficiency)

rs11461



```
graph TD; A((rs11461)) --> B((Ornithine aminotransferase deficiency));
```

A network diagram illustrating the relationship between a genetic variant and a disease. The variant, rs11461, is represented by a green circle at the top left. The disease, Ornithine aminotransferase deficiency, is represented by an orange circle at the bottom right. A blue arrow points from the disease node to the variant node, indicating a causal or associative link.

Ornithine aminotransferase deficiency



# Variant-Disease Network (Ornithine carbamoyltransferase deficiency)

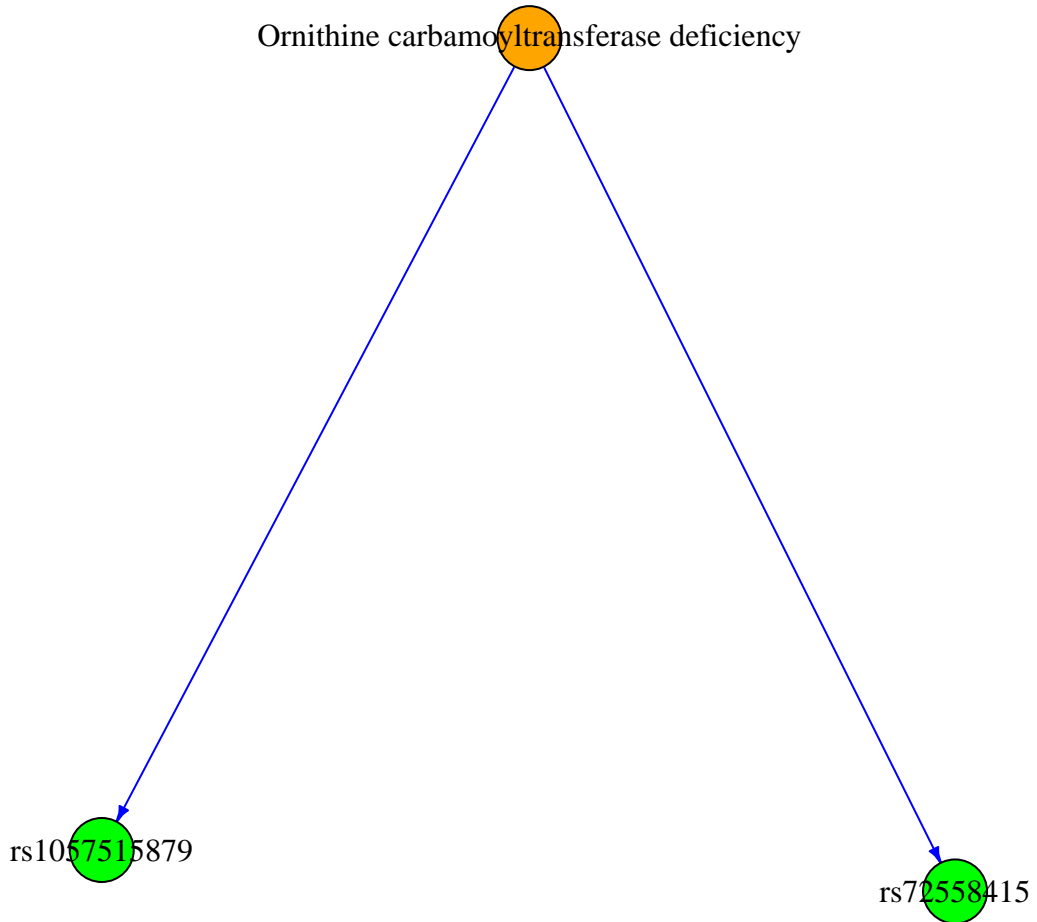

## Variant–Disease Network (Orofaciodigital syndrome 6)

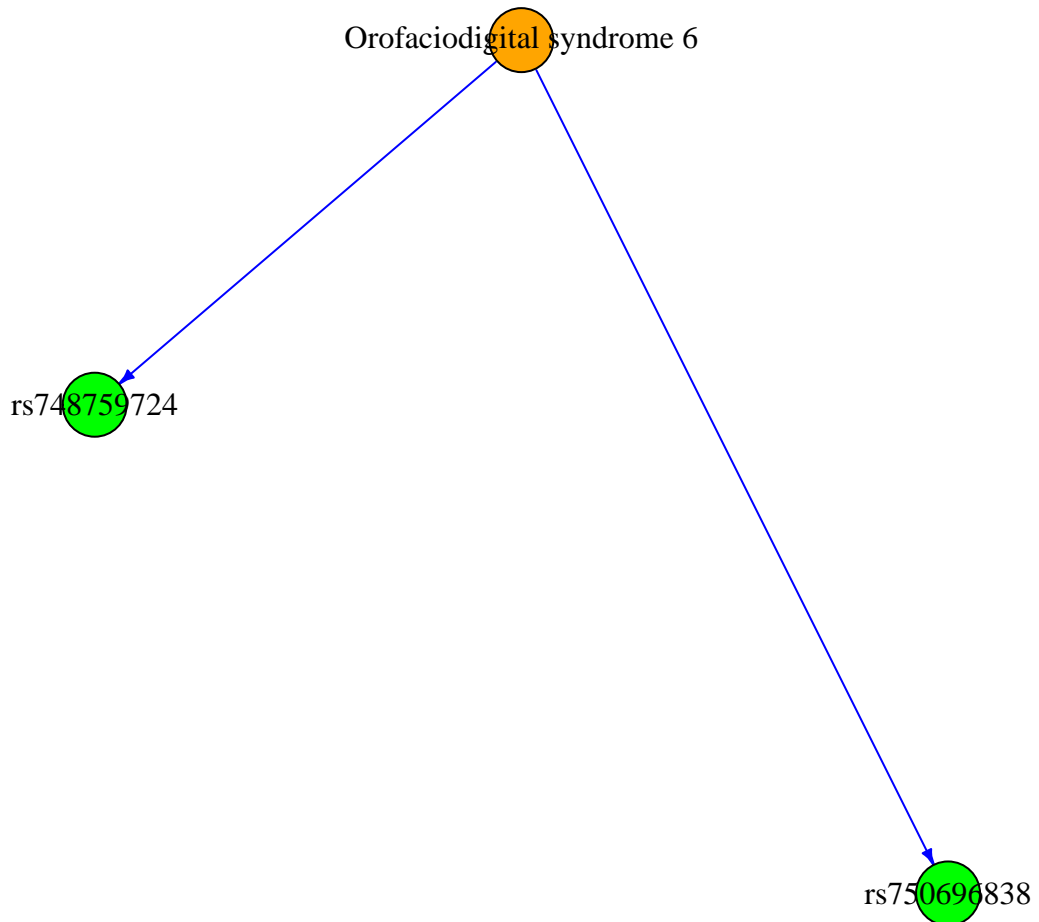

**Variant–Disease Network (Orofaciodigital syndrome I)**

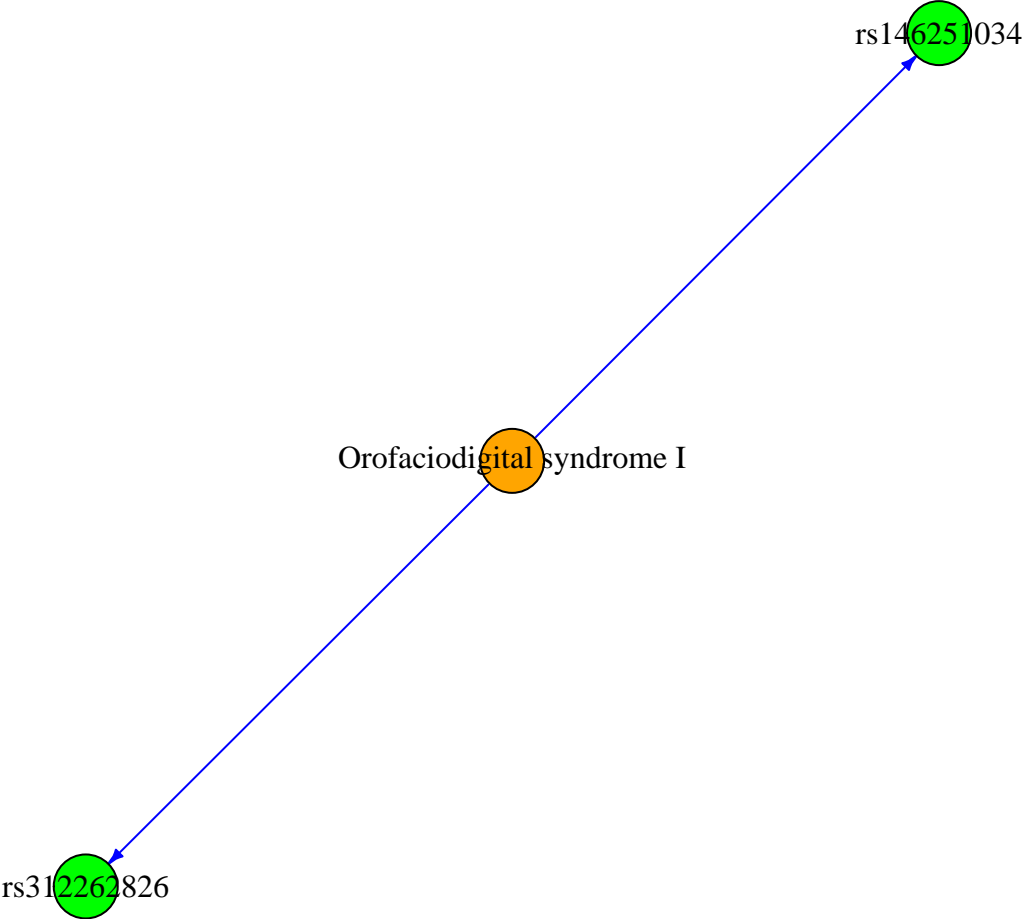

## Variant–Disease Network (Orthostatic hypotension 1)

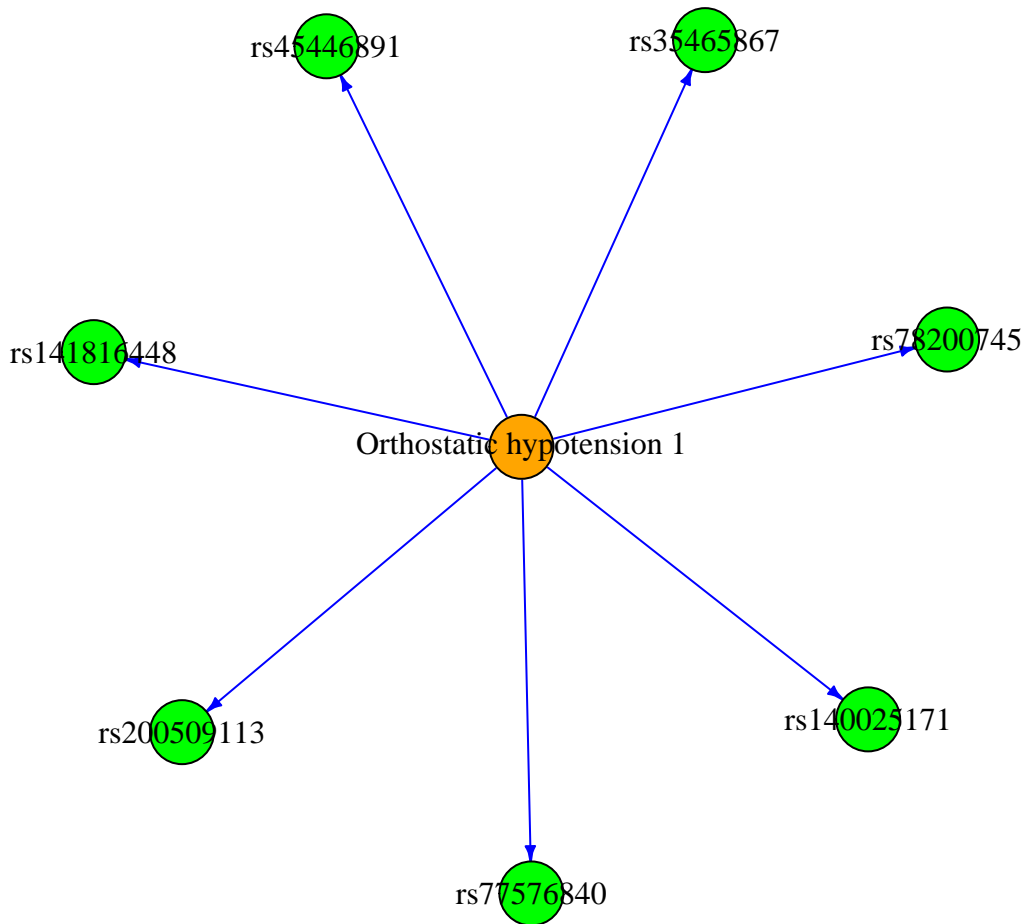

## Variant–Disease Network (Orthostatic intolerance)

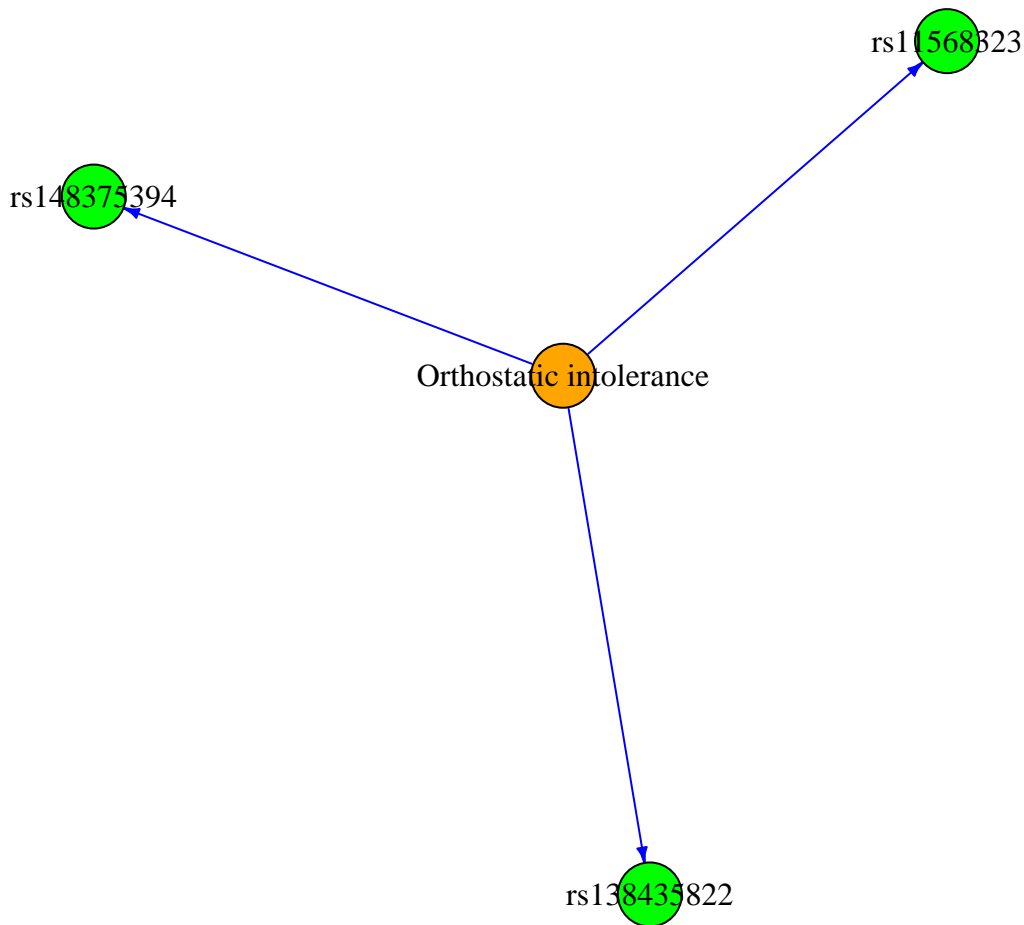

**Variant–Disease Network (Osteoarthritis with mild chondrodysplasia)**

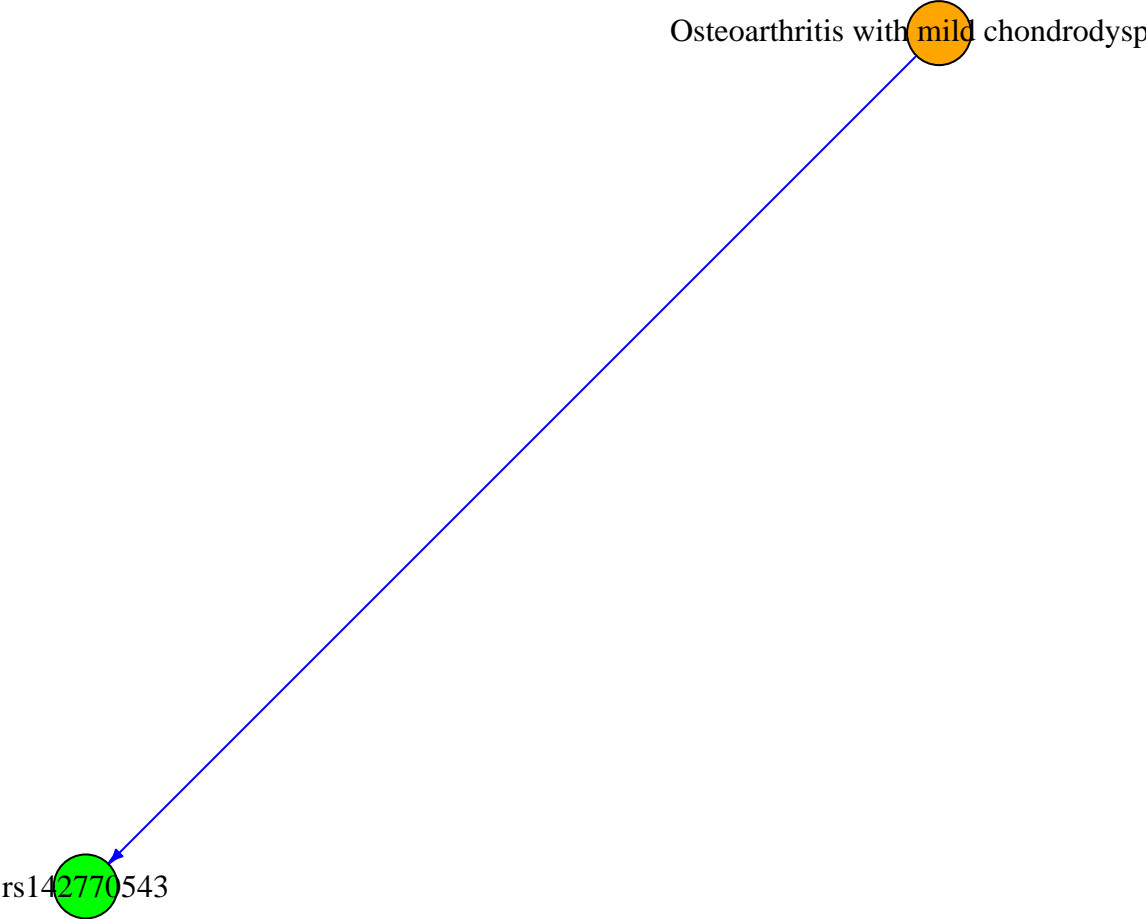

Variant–Disease Network (Osteogenesis Imperfecta)

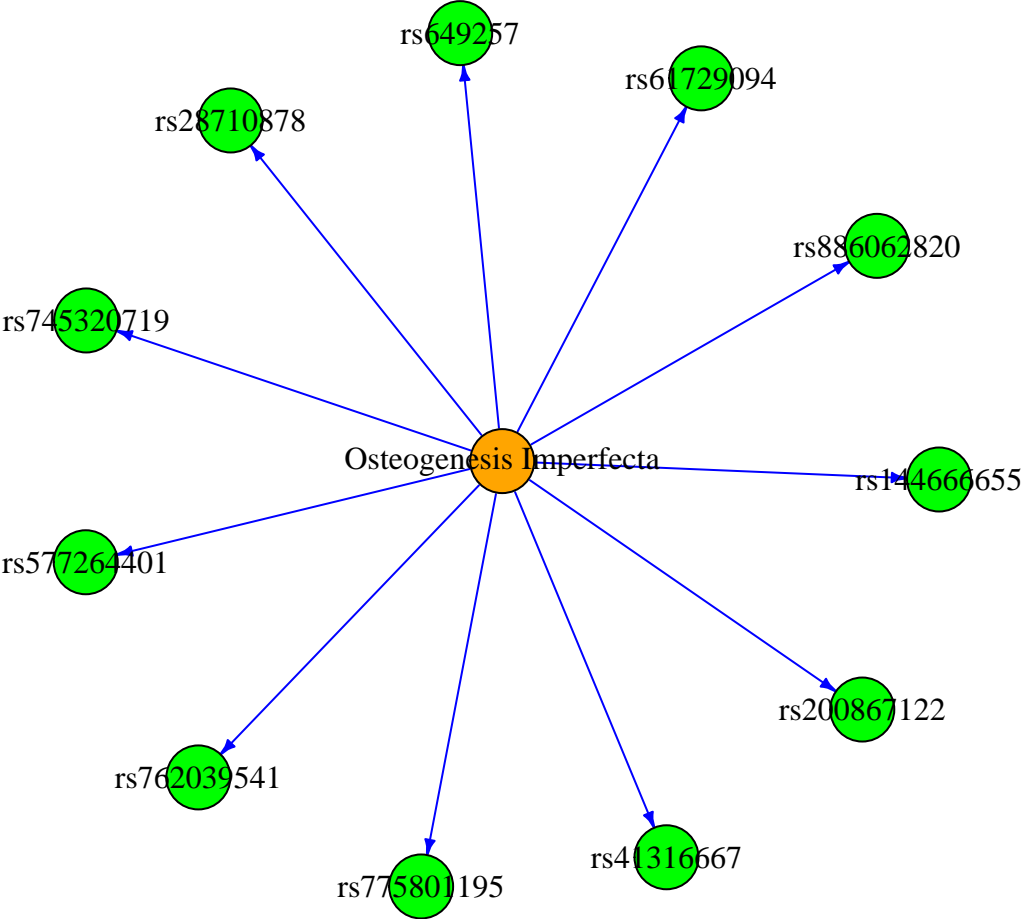

## Variant-Disease Network (Osteogenesis imperfecta type 7)

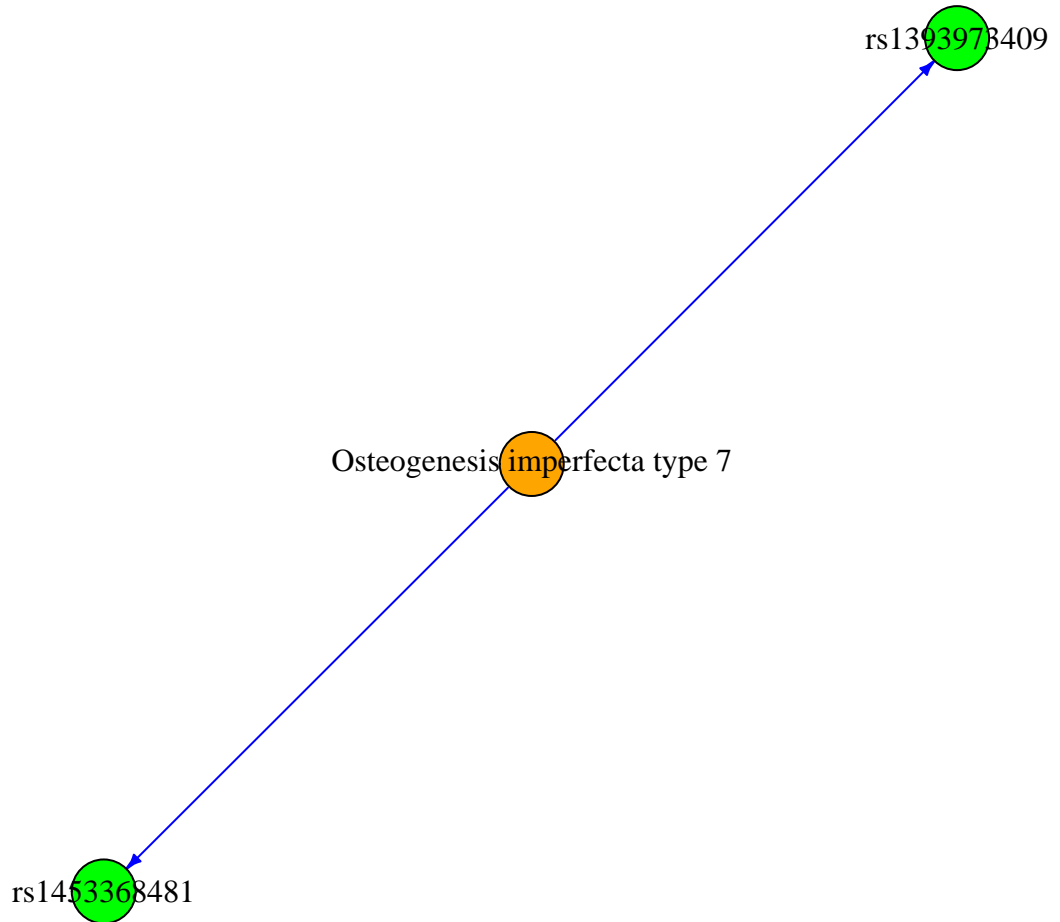



Variant–Disease Network (Osteogenesis imperfecta type I)

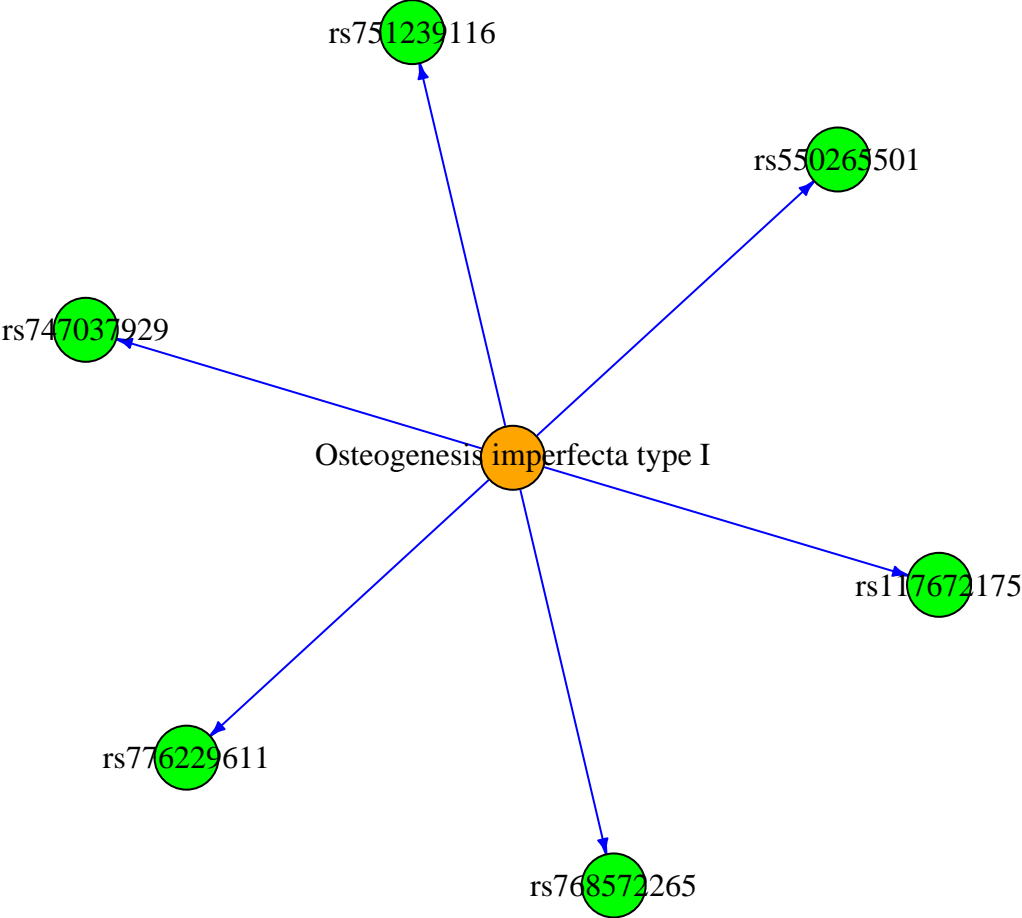

Variant–Disease Network (Osteogenesis imperfecta with normal sclerae)

rs34940368

Osteogenesis imperfecta with normal s

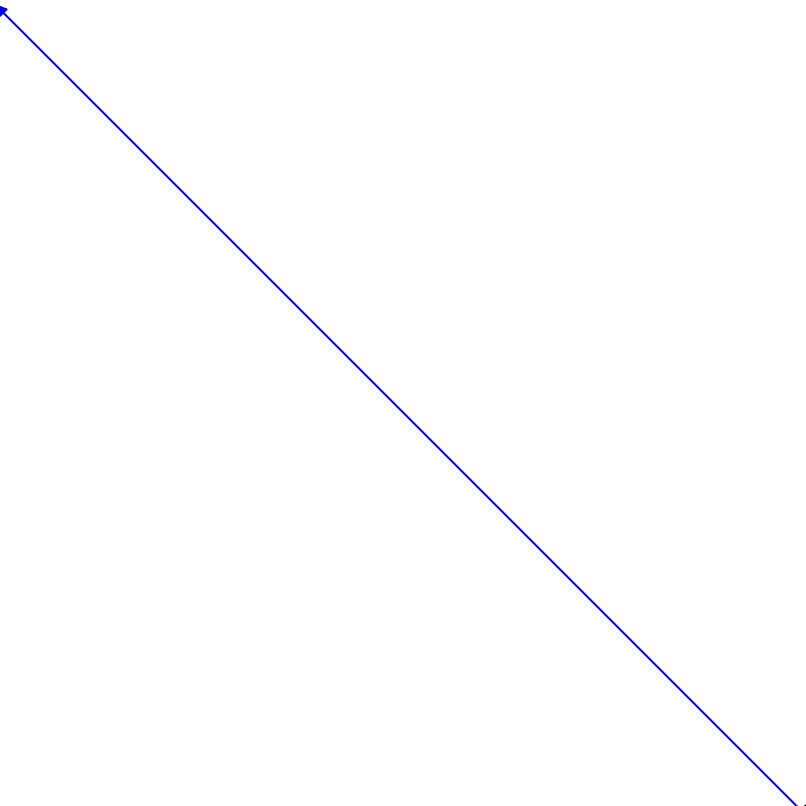

## Variant–Disease Network (Osteopetrosis)

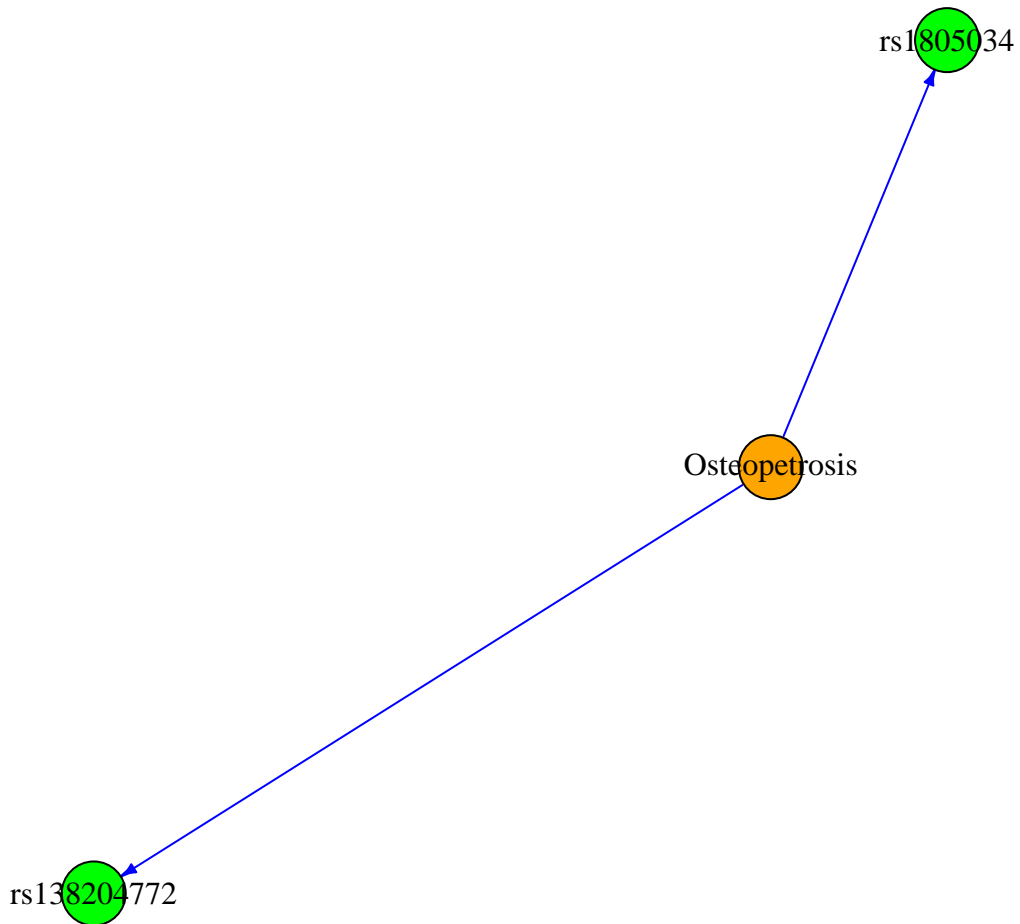

# Variant–Disease Network (Osteopetrosis with renal tubular acidosis)

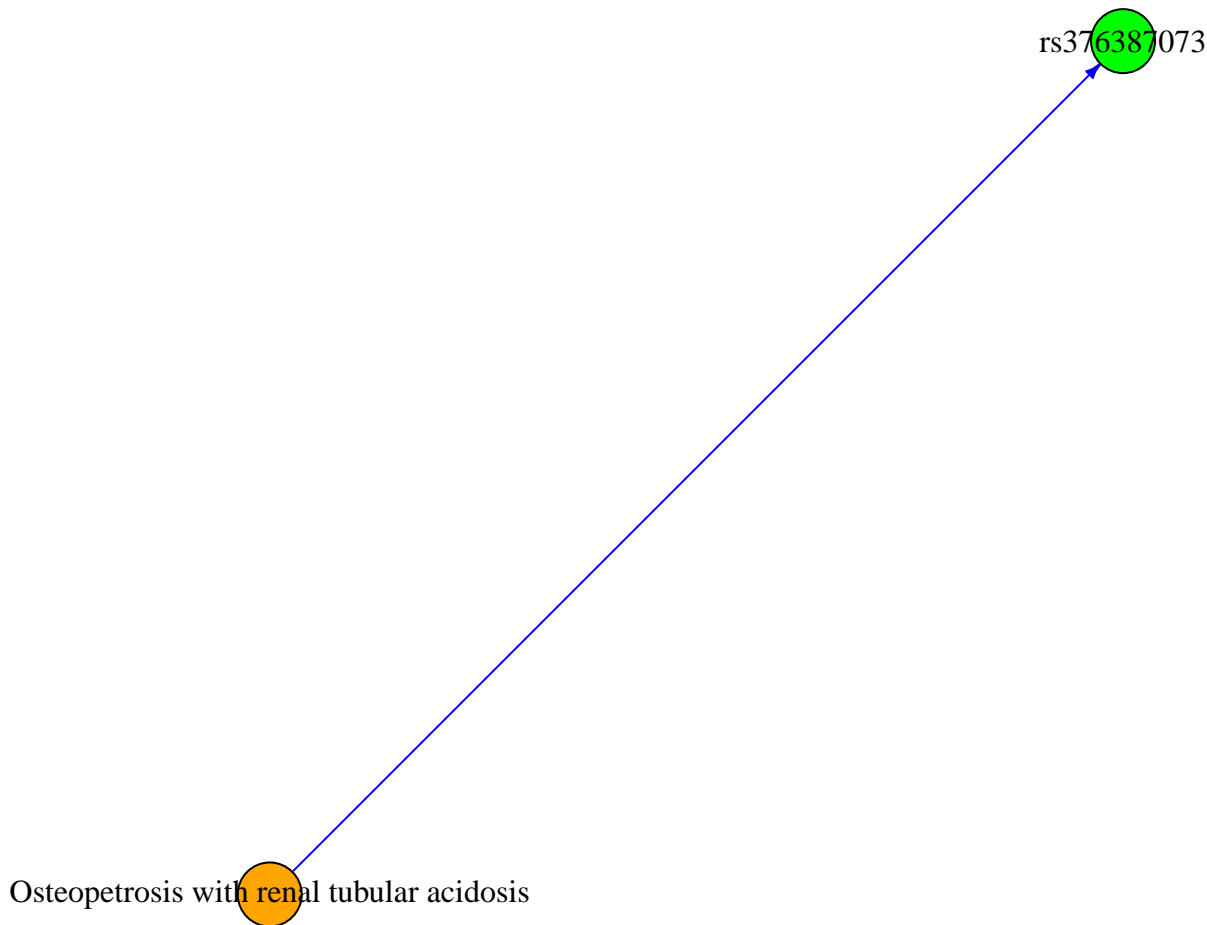

# Variant–Disease Network (Oto–palato–digital syndrome)

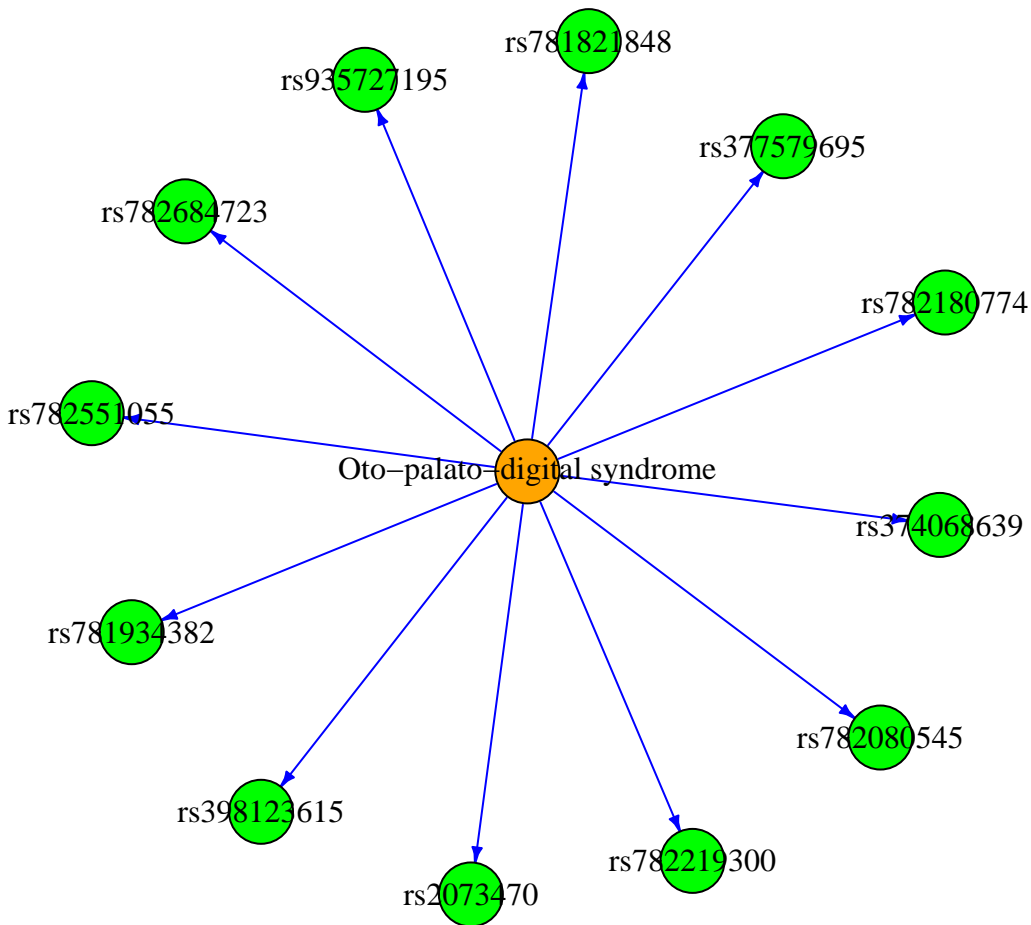

# Variant–Disease Network (Otospondylomegacepiphyseal dysplasia)

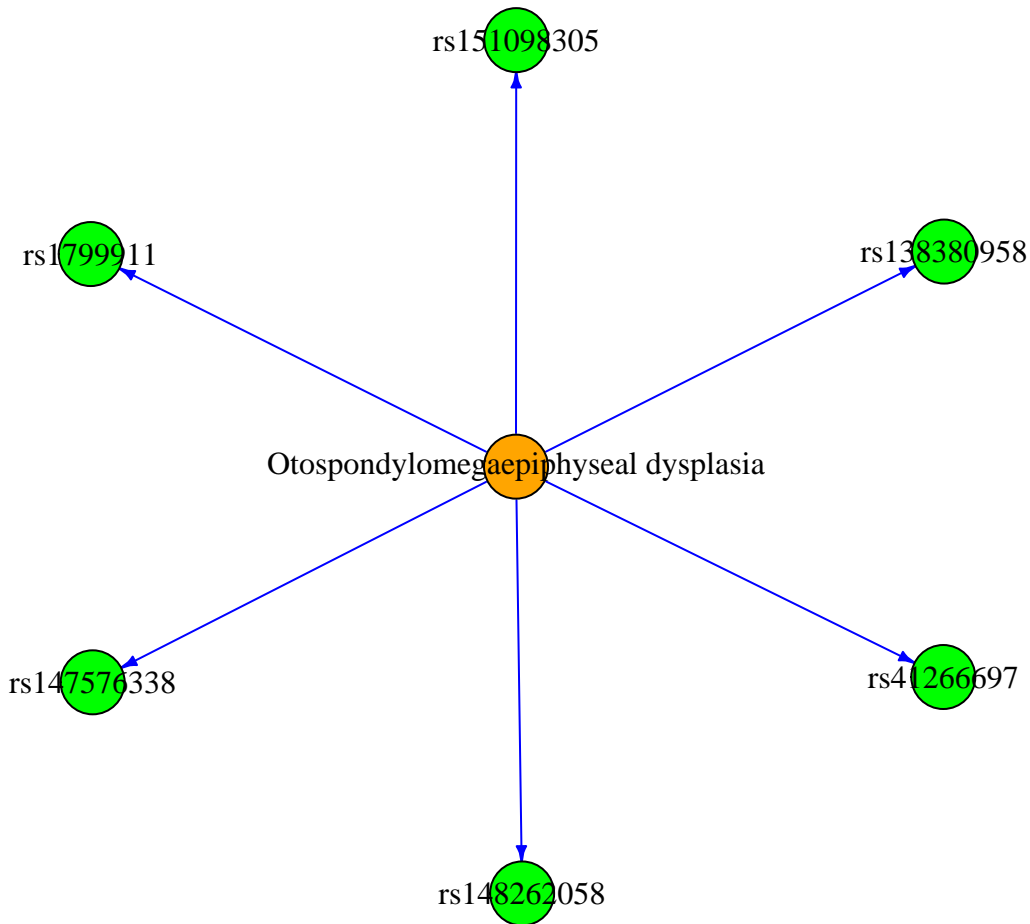

## Variant–Disease Network (Ovarian dysgenesis)

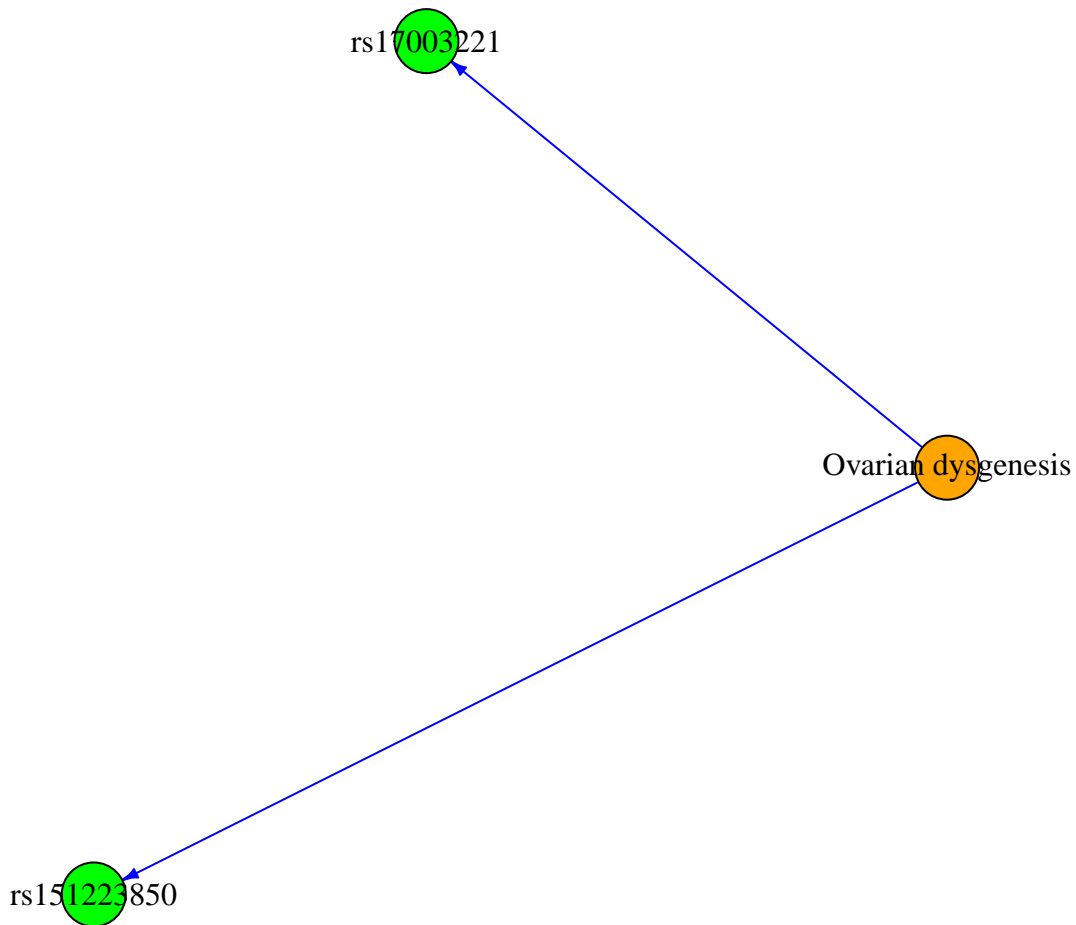

## Variant–Disease Network (Ovarian Neoplasms)

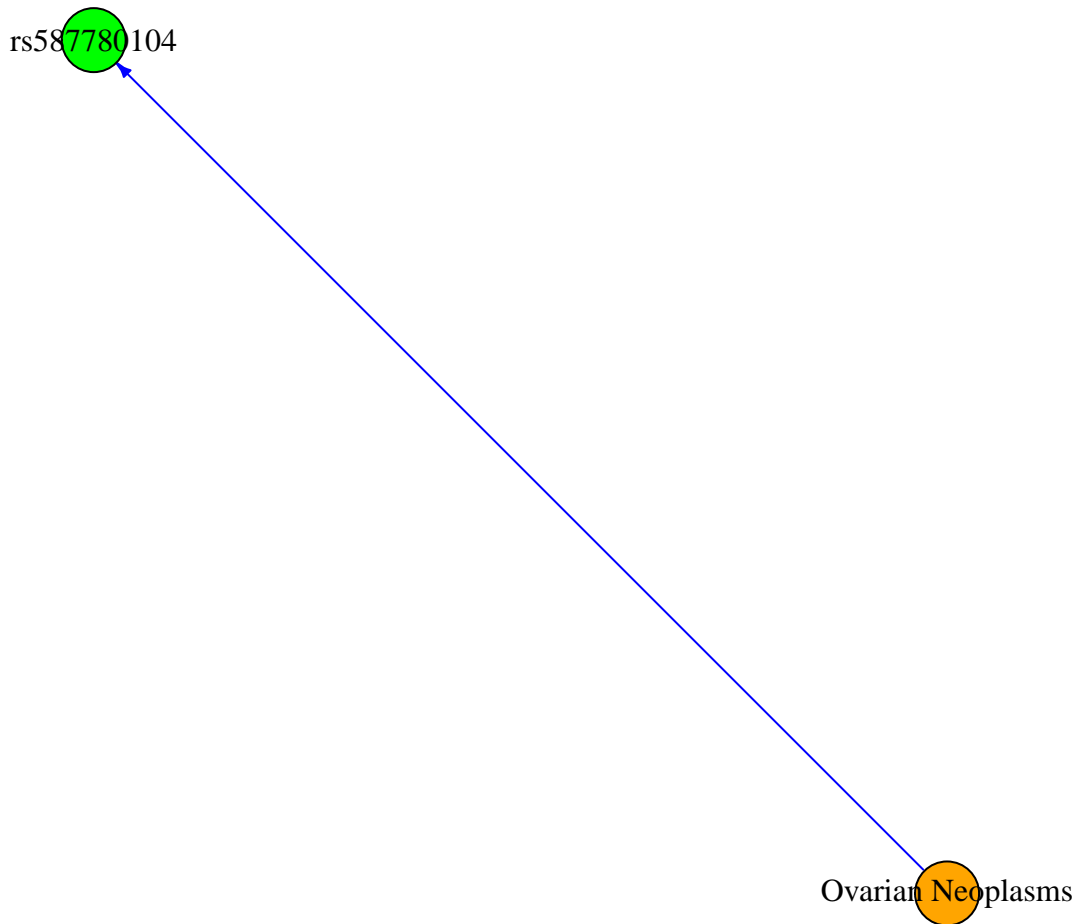



## Variant–Disease Network (Paget disease of bone)

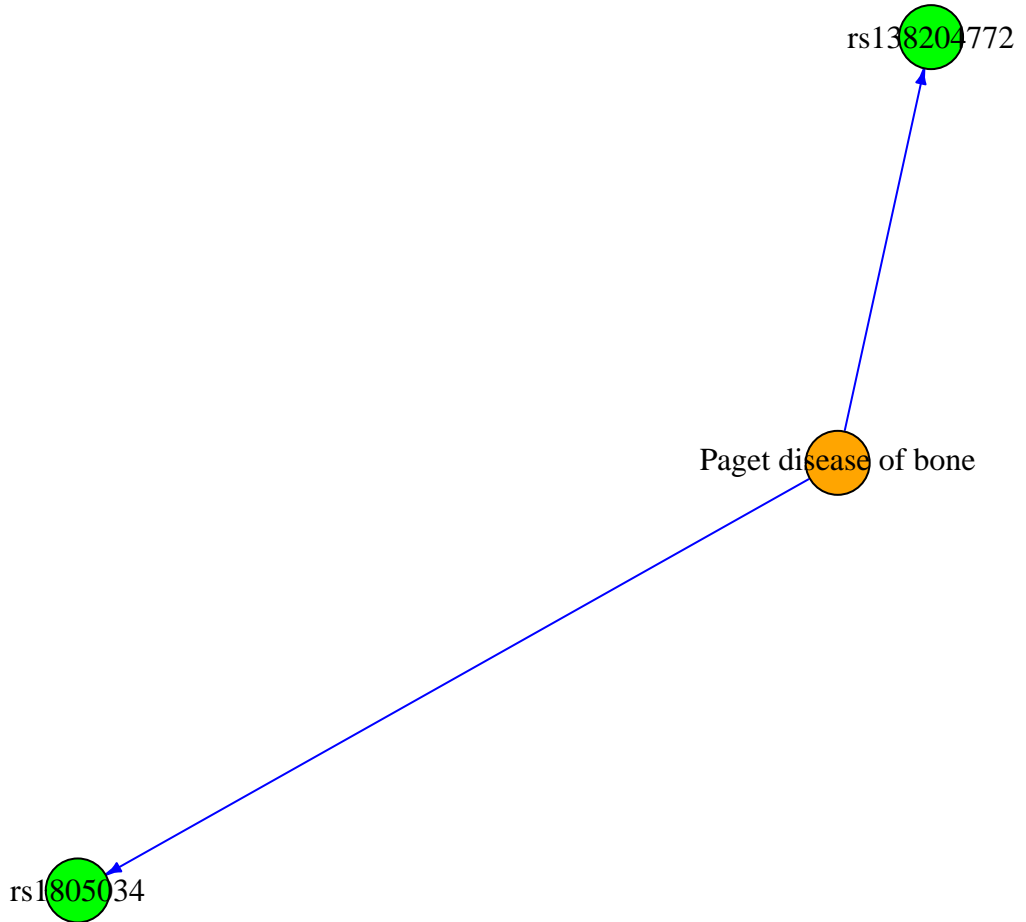

**Variant–Disease Network (Pallister–Hall syndrome)**

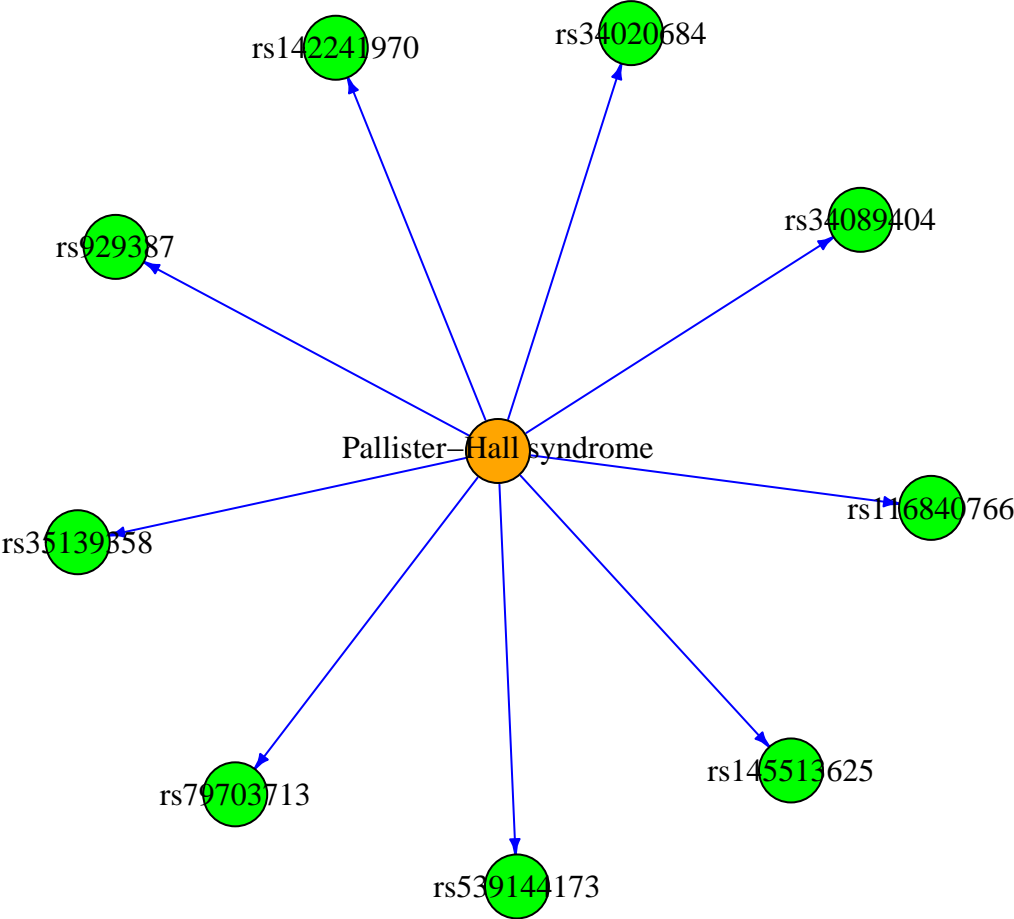

# Variant–Disease Network (Palmoplantar keratoderma)

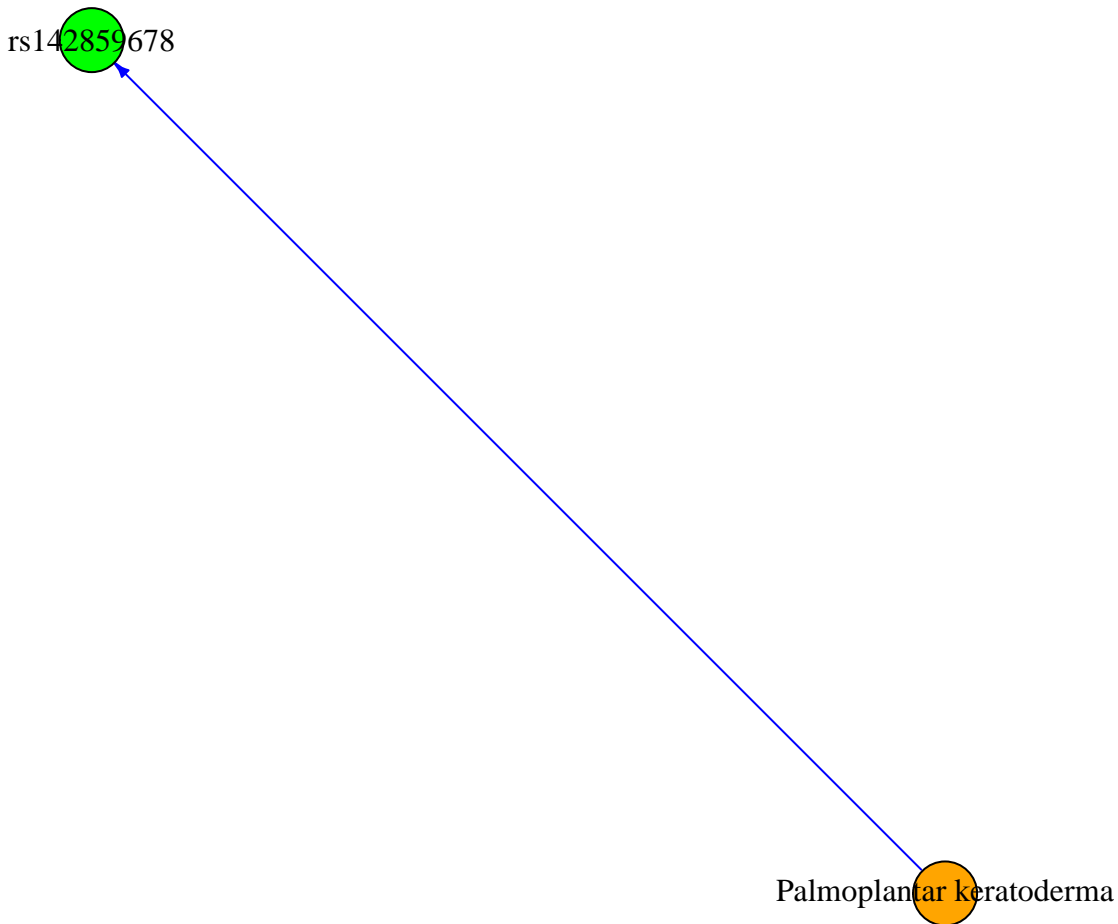

# Variant–Disease Network (Paraganglioma and gastric stromal sarcoma)

Paraganglioma and gastric stromal sarcoma

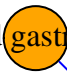

rs2746462

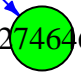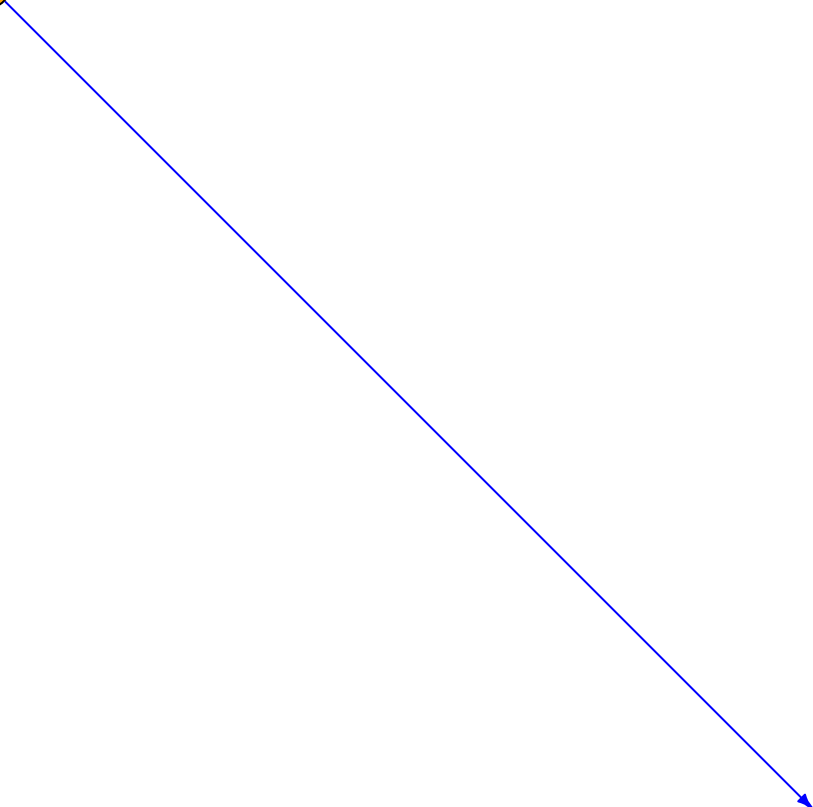

## Variant–Disease Network (Paragangliomas 4)

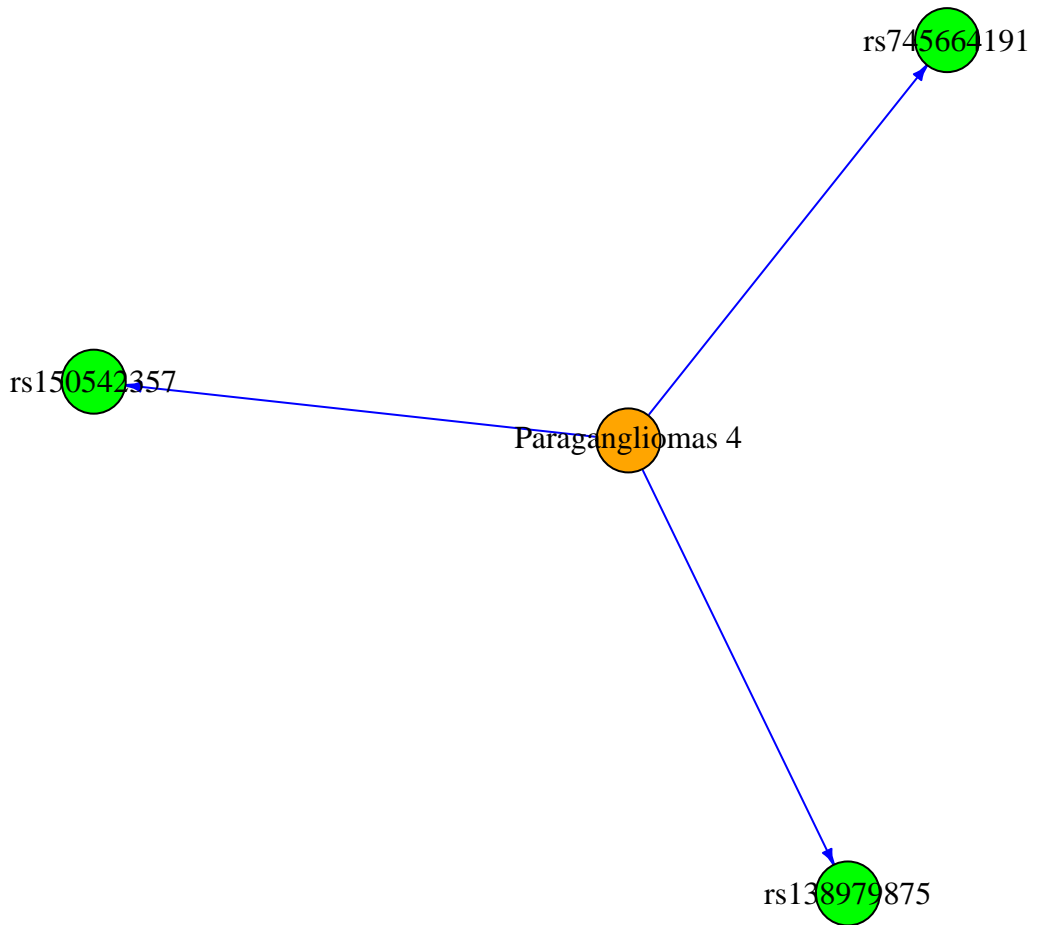

## Variant–Disease Network (Paragangliomas 5)

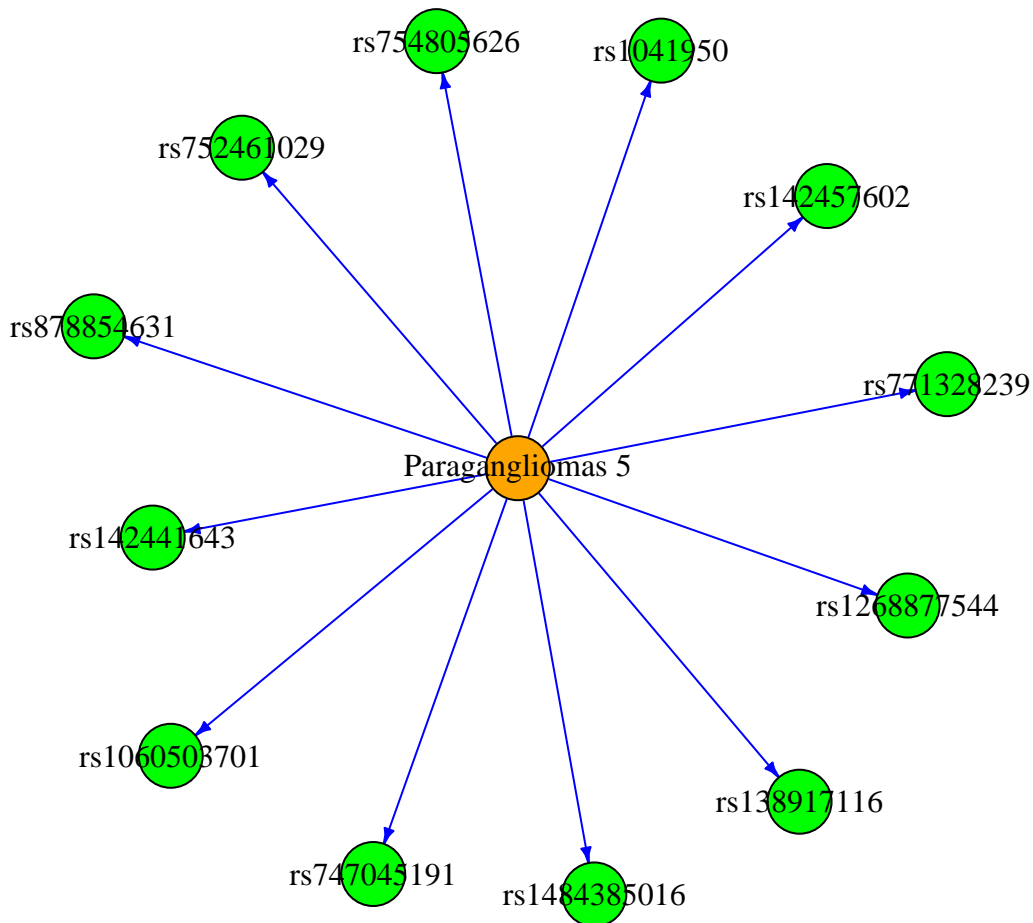

**Variant–Disease Network (Paramyotonia congenita of von Eulenburg)**

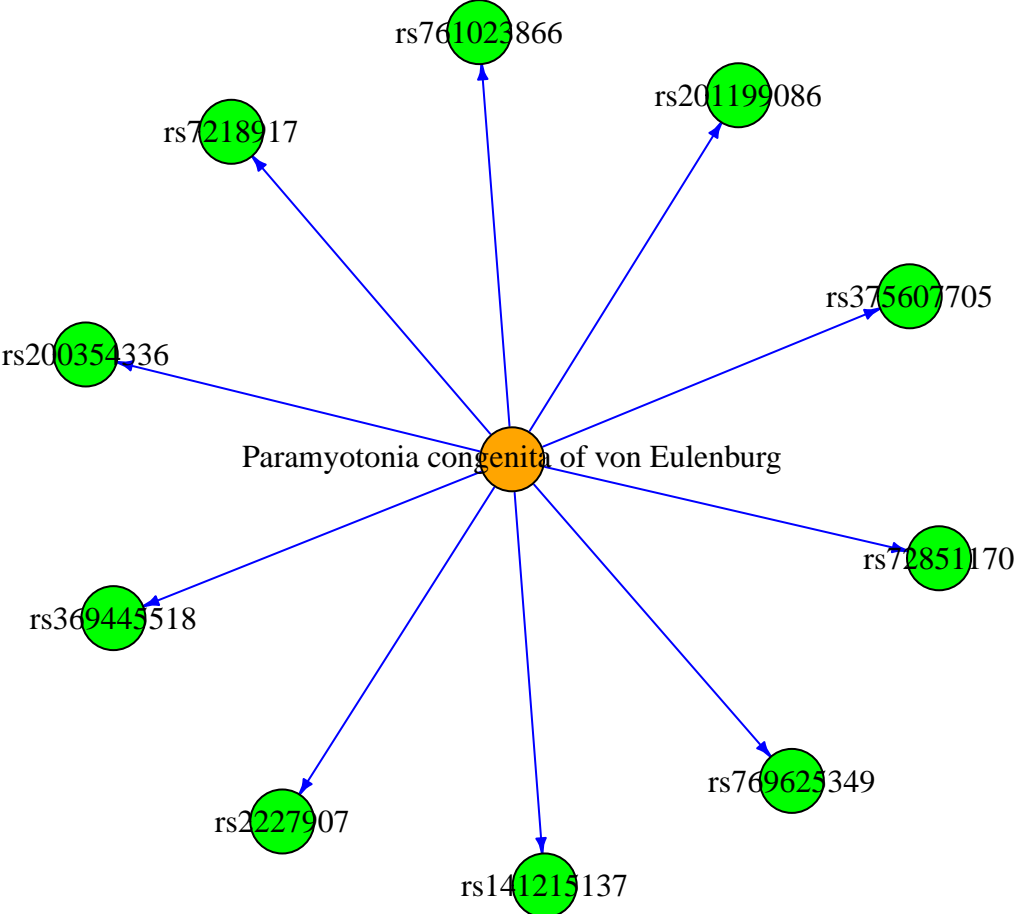

## Variant-Disease Network (Parathyroid carcinoma)

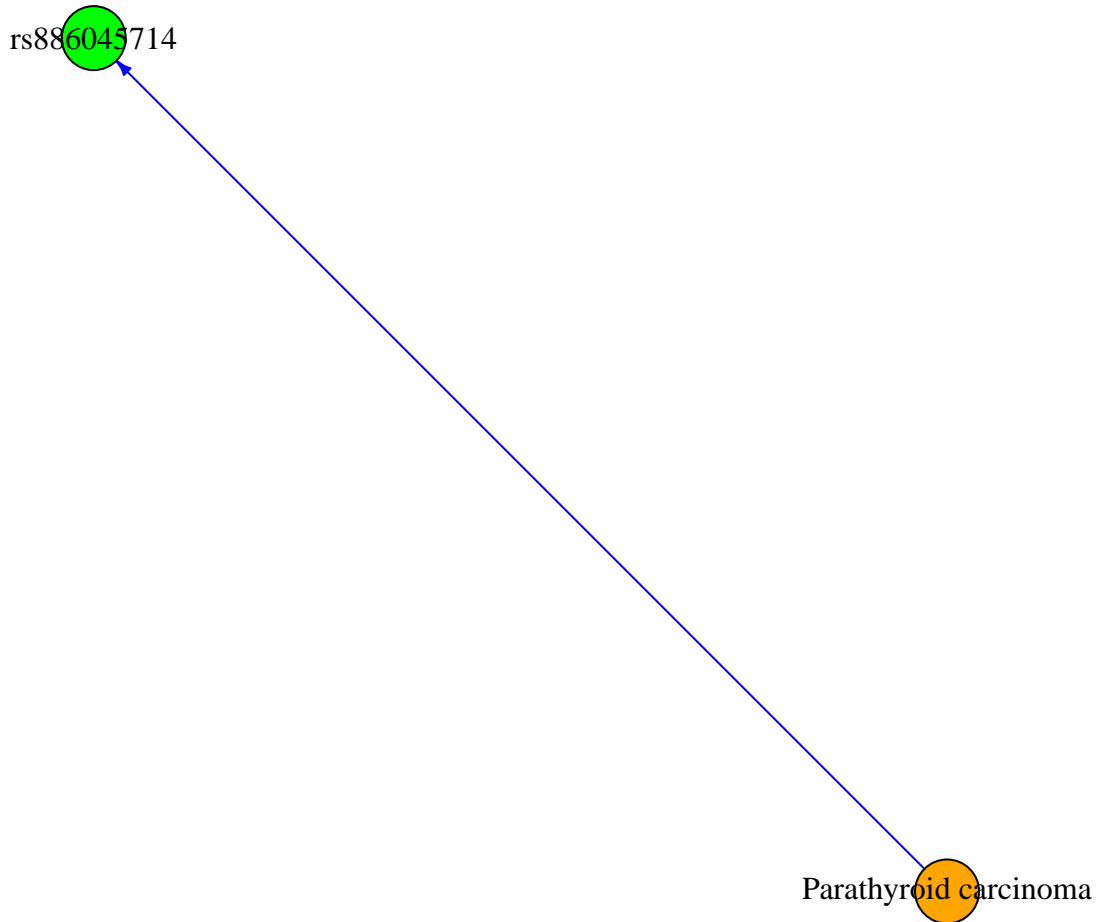



## Variant–Disease Network (Parkinson Disease)

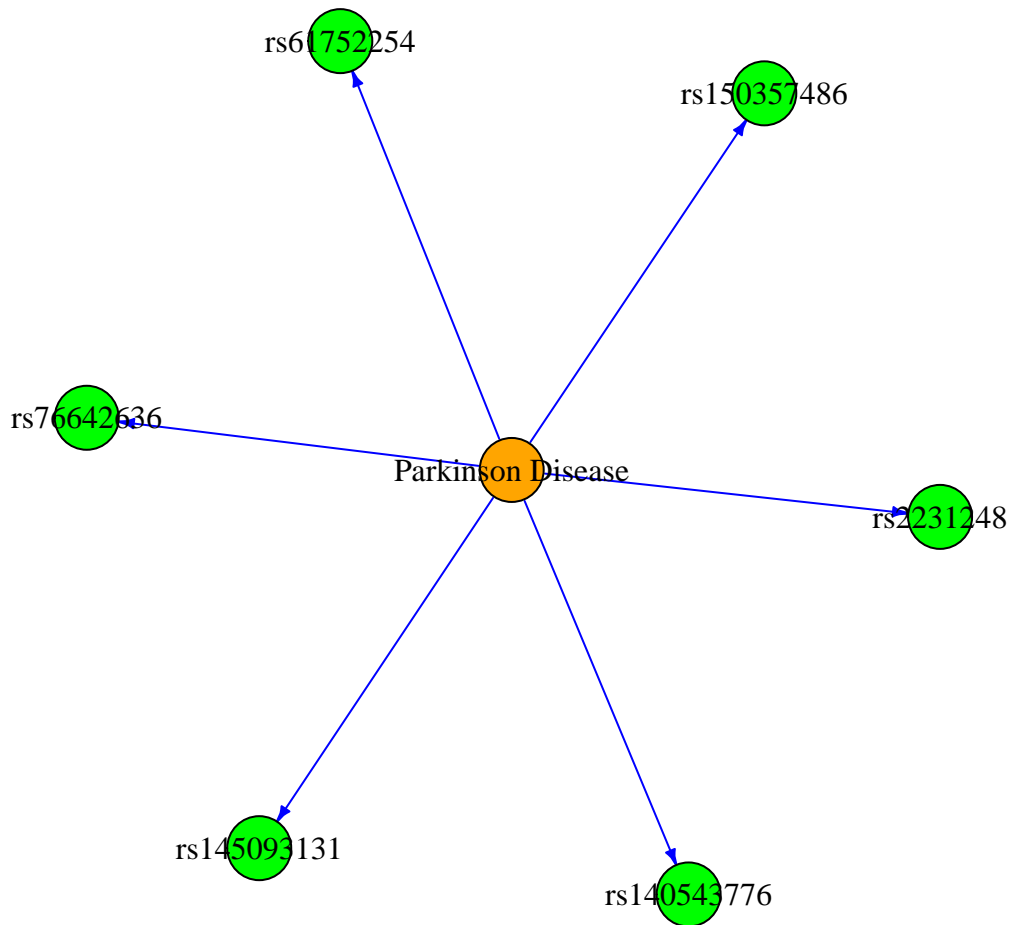

## Variant–Disease Network (Parkinson disease 15)

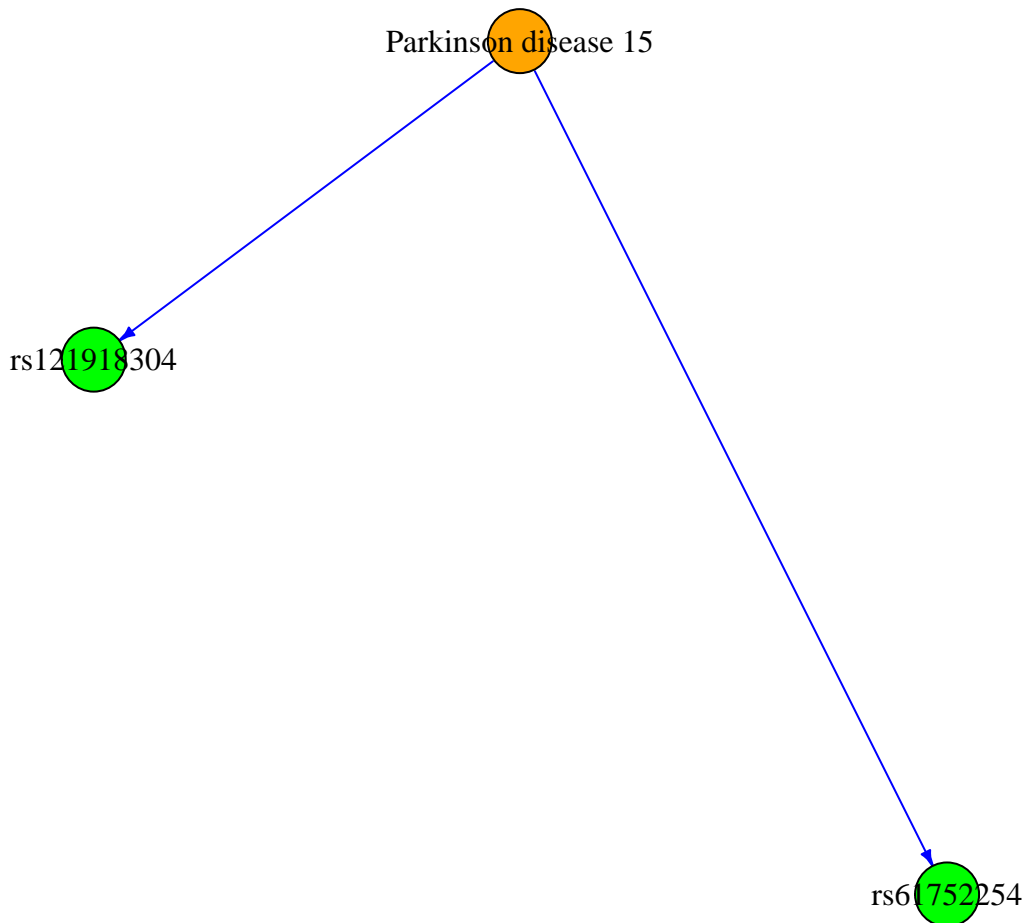

## Variant-Disease Network (Parkinson disease 17)

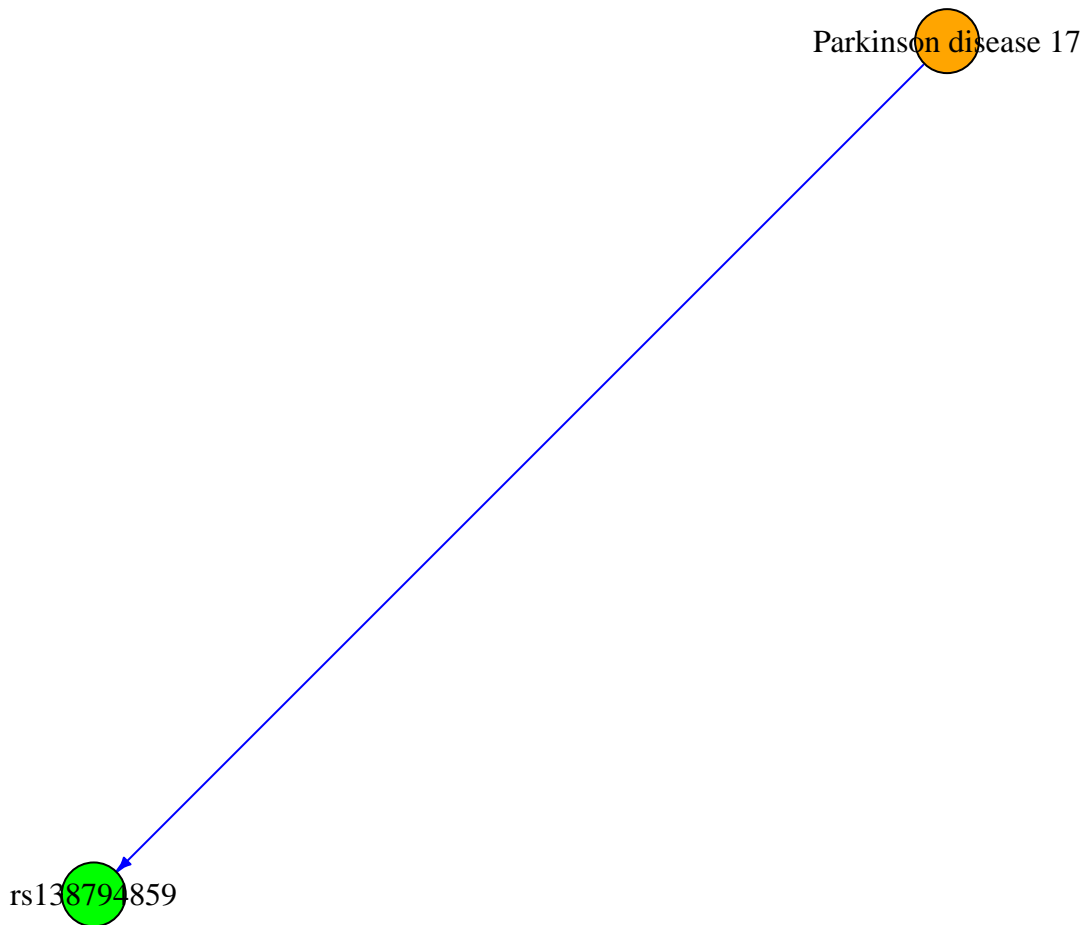

## Variant-Disease Network (Parkinson disease 8)

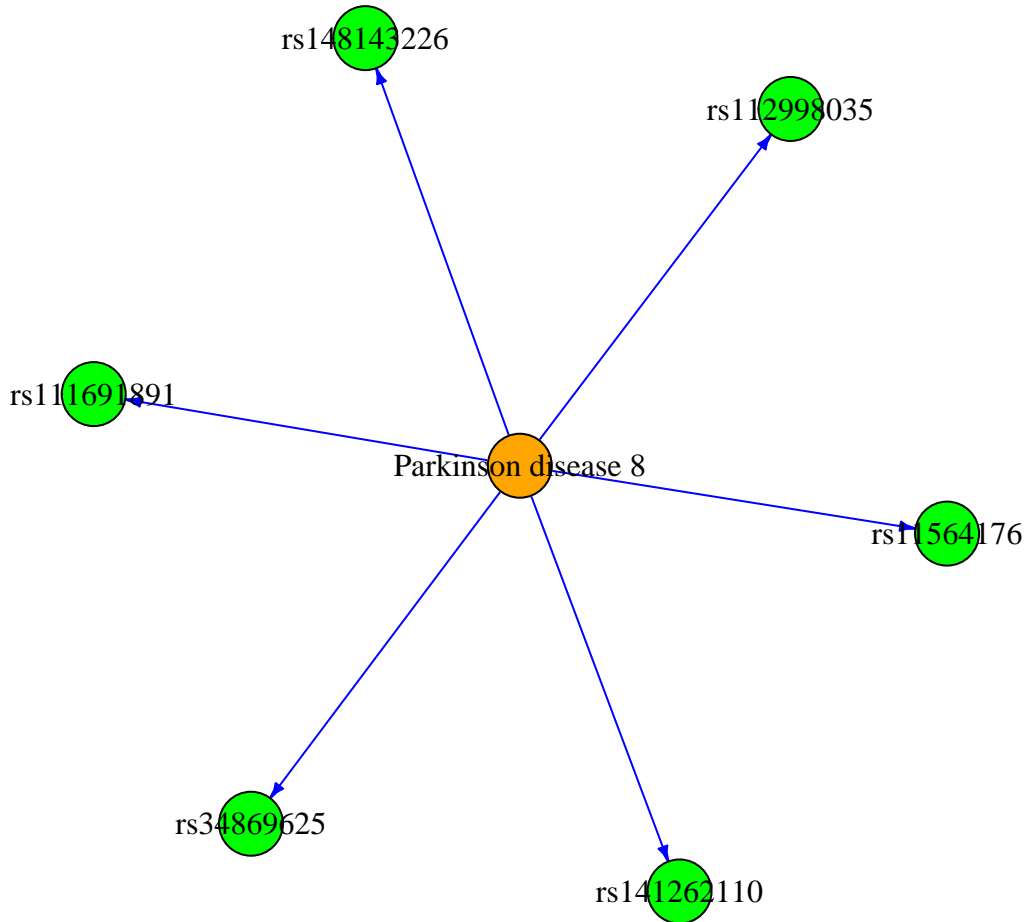

## Variant-Disease Network (Parkinson disease 9)

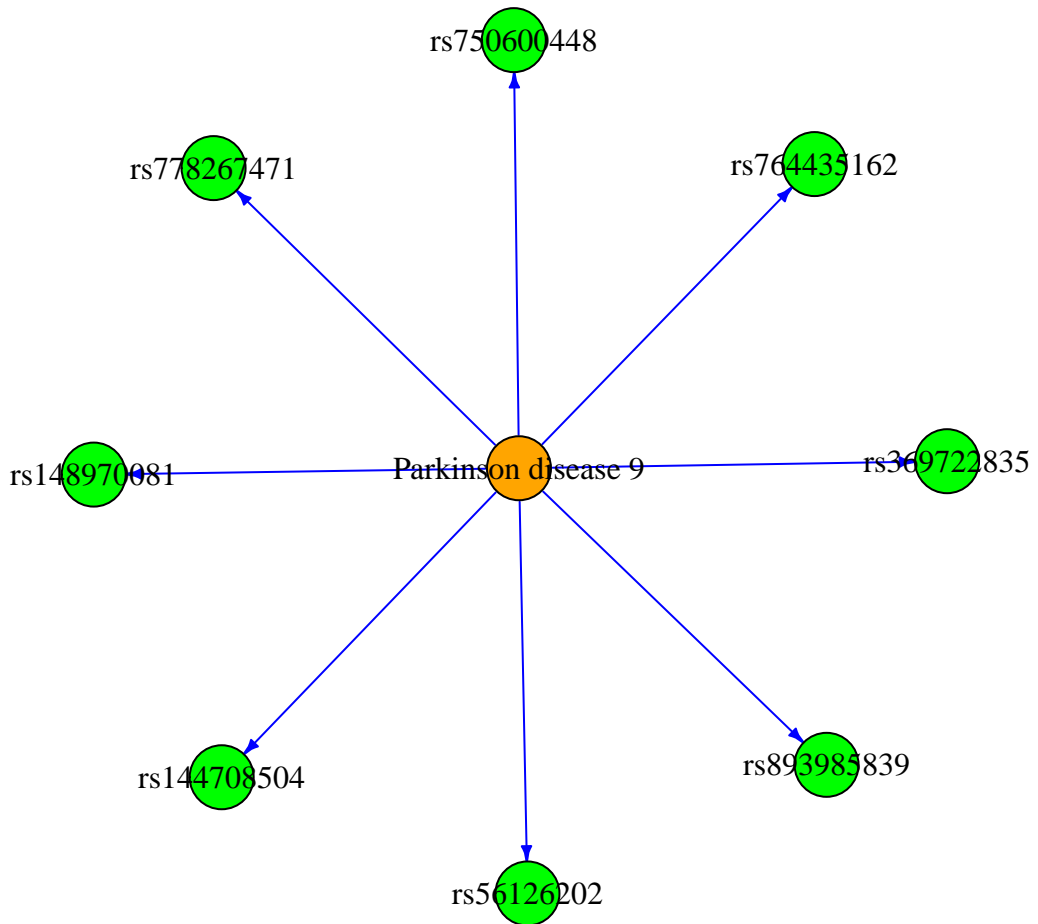

**Variant–Disease Network (Parkinsonism–dystonia)**

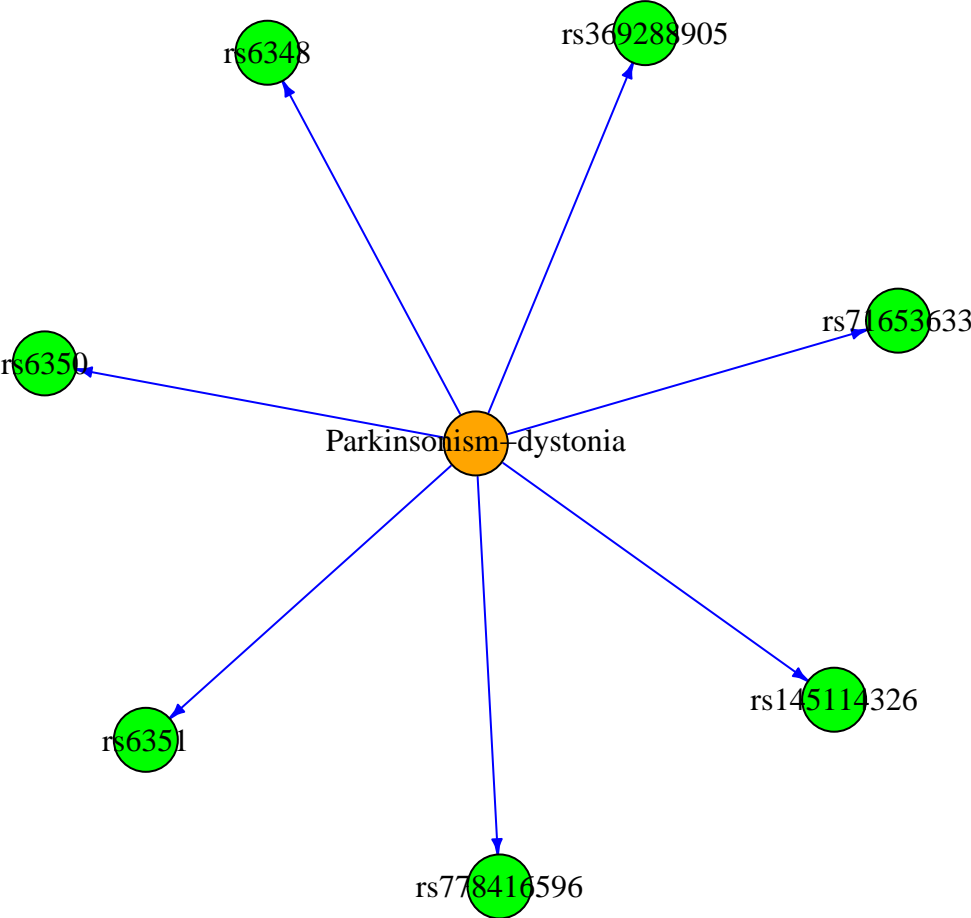

**Variant–Disease Network (Paroxysmal nonkinesigenic dyskinesia 1)**

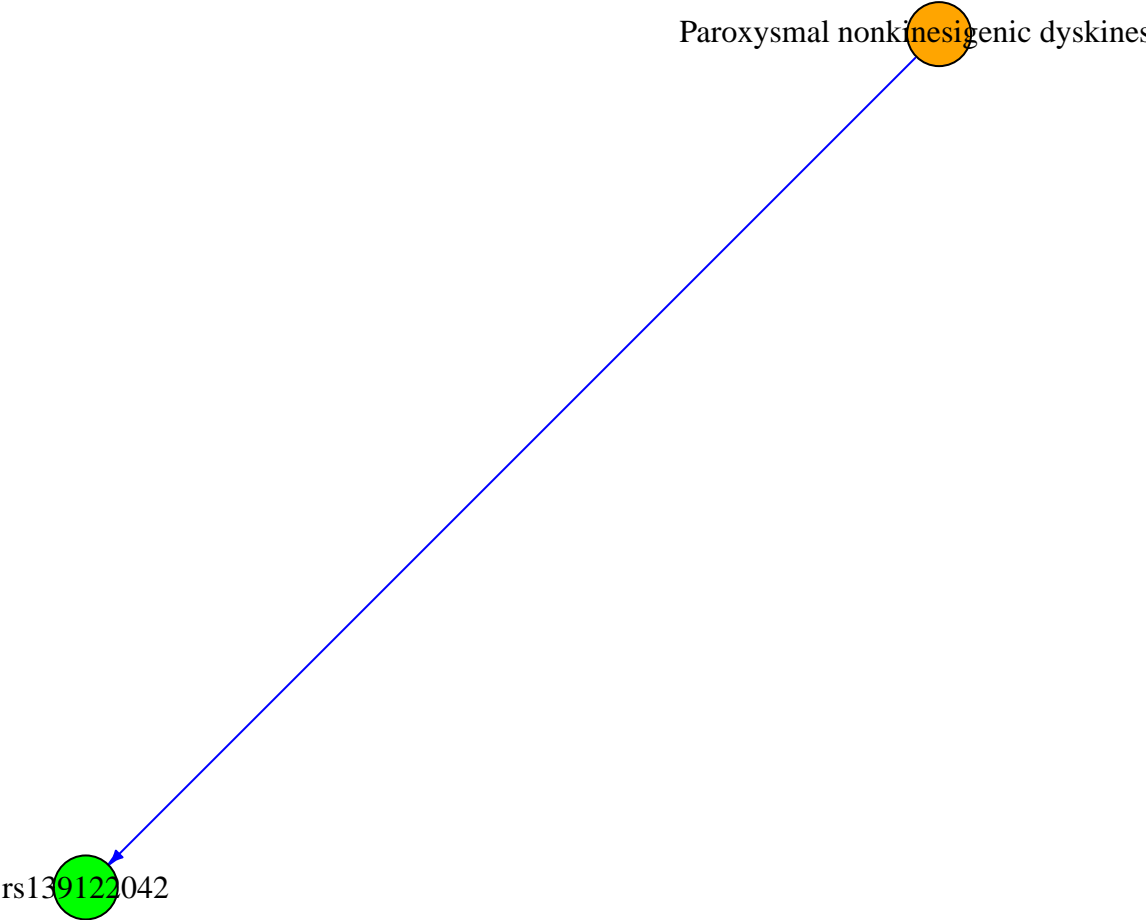

## Variant–Disease Network (Partial albinism)

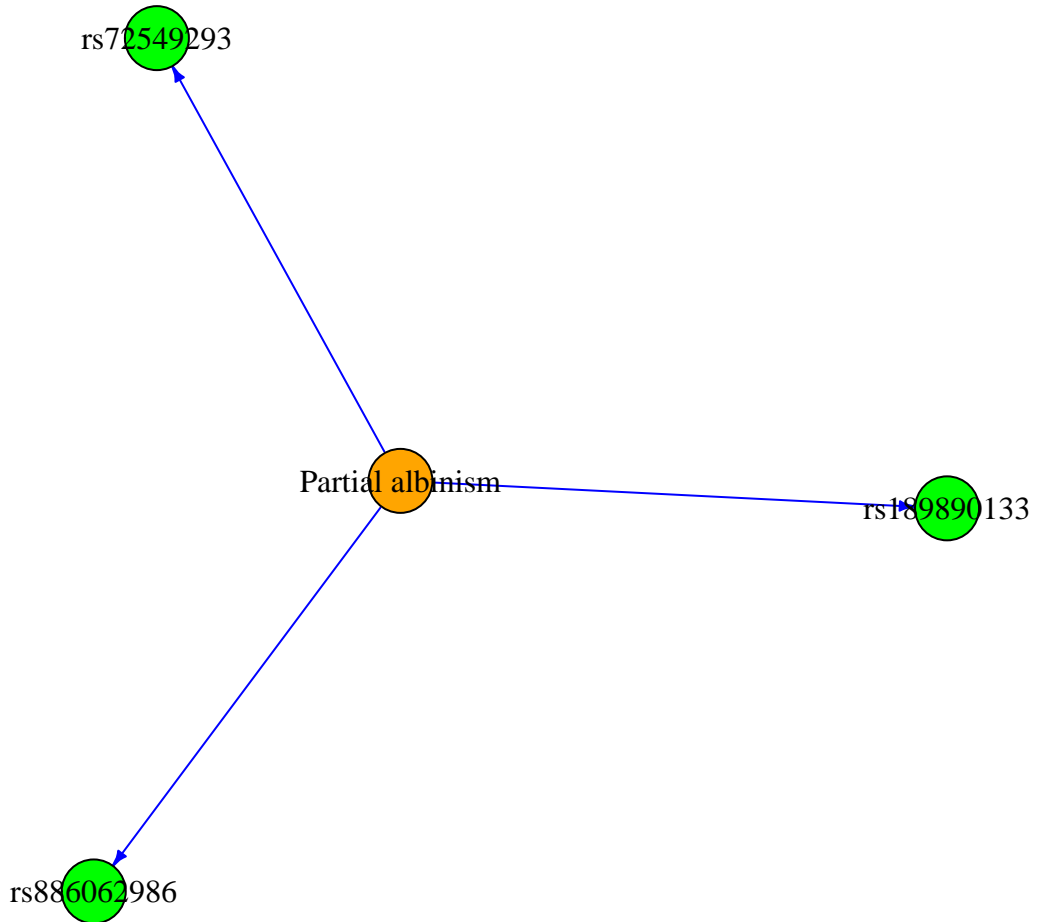



**Variant–Disease Network (Peeling skin syndrome 1)**

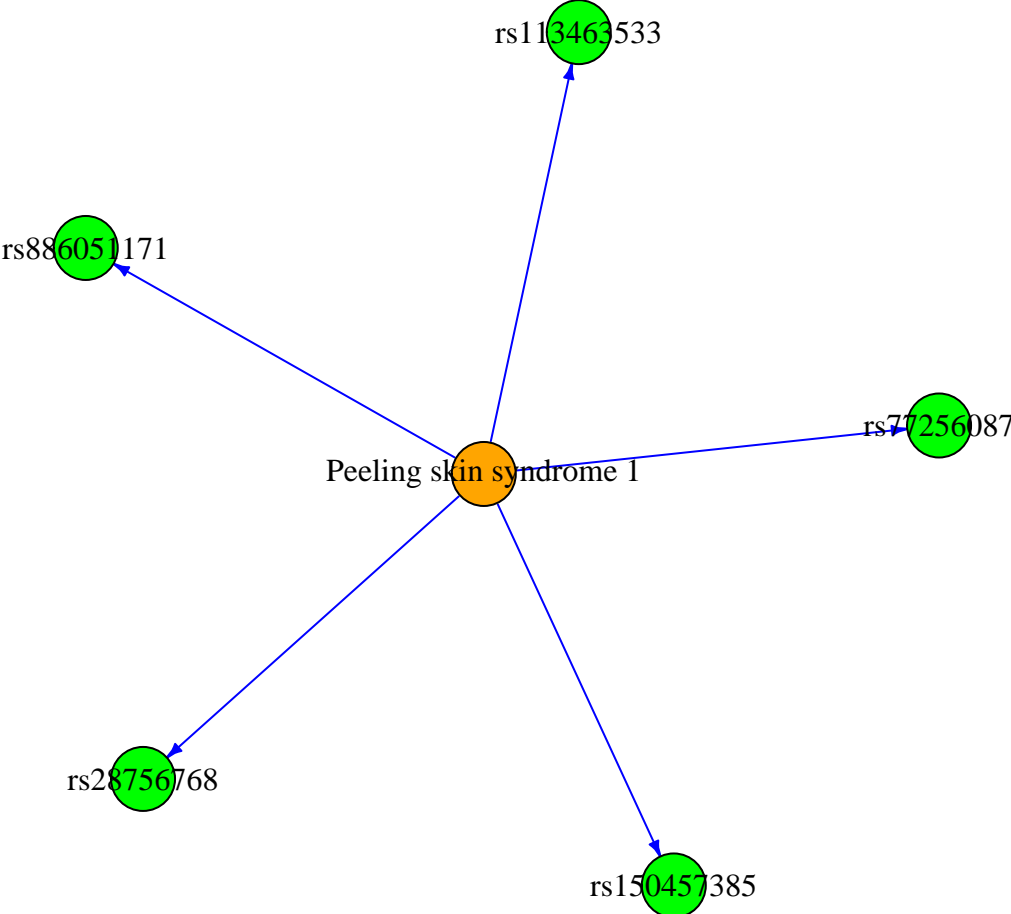

## Variant-Disease Network (Peeling skin syndrome 2)

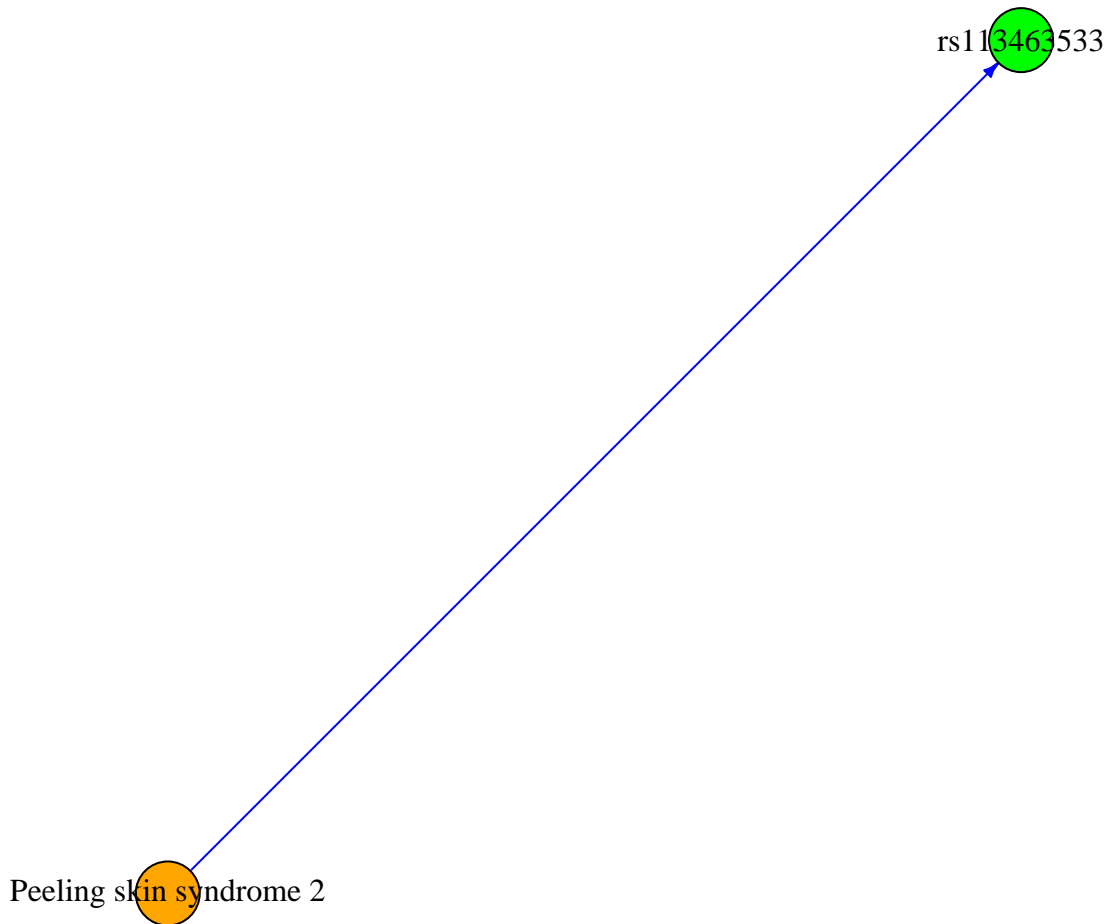

**Variant–Disease Network (Pena–Shokeir syndrome type I)**

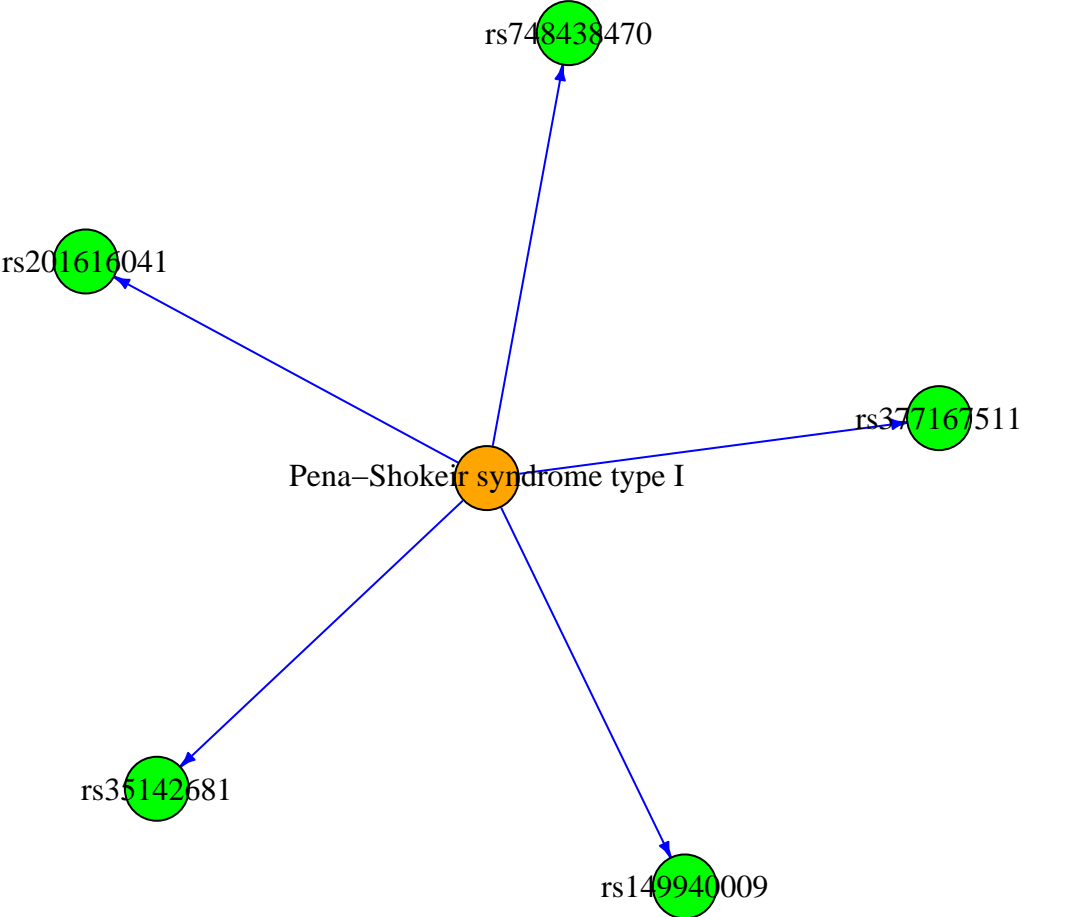

**Variant–Disease Network (Pendred syndrome)**

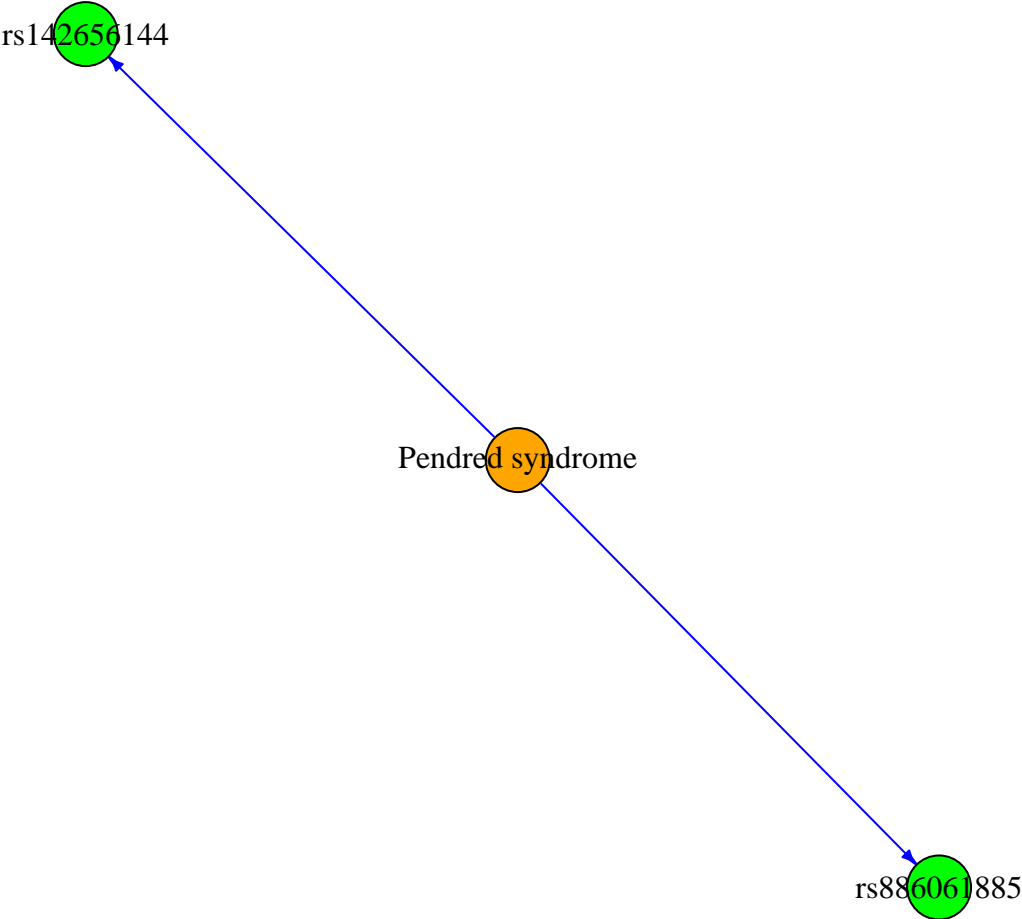

## Variant–Disease Network (PERCHING syndrome)

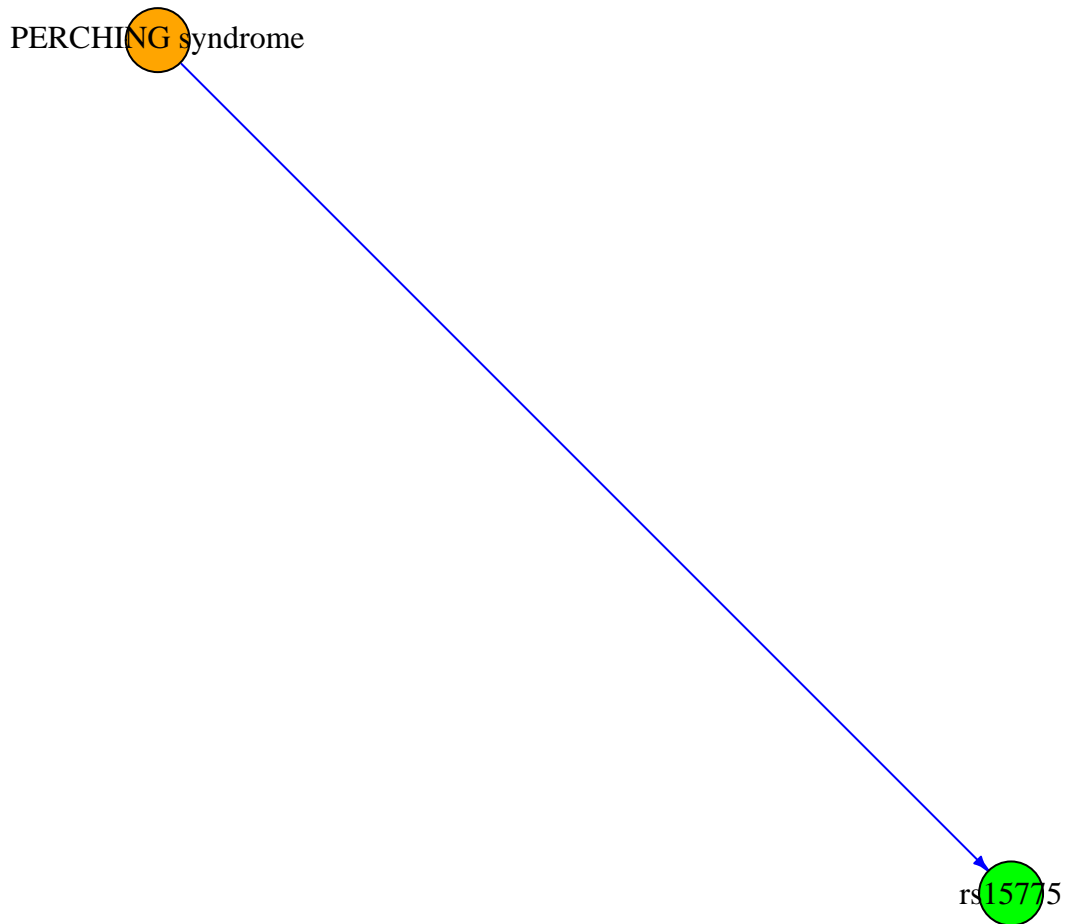

Variant–Disease Network (Peripheral axonal neuropathy)

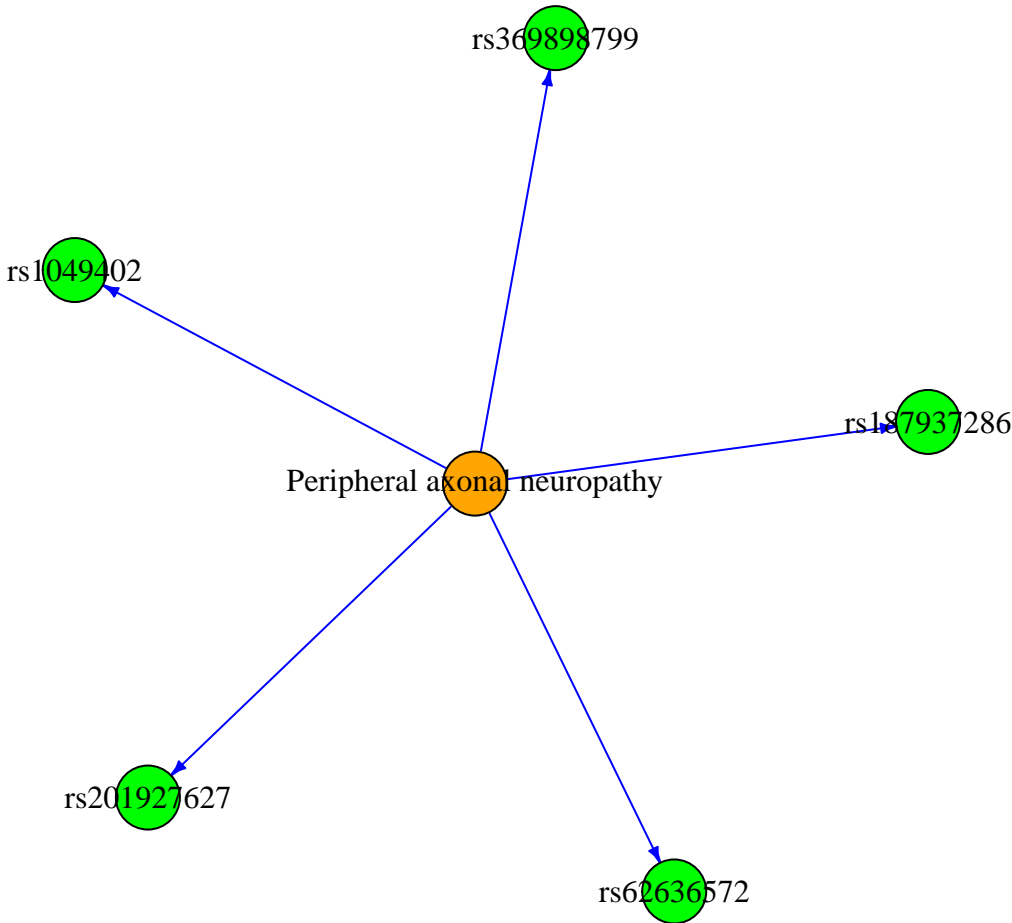

## Variant–Disease Network (Peripheral neuropathy)

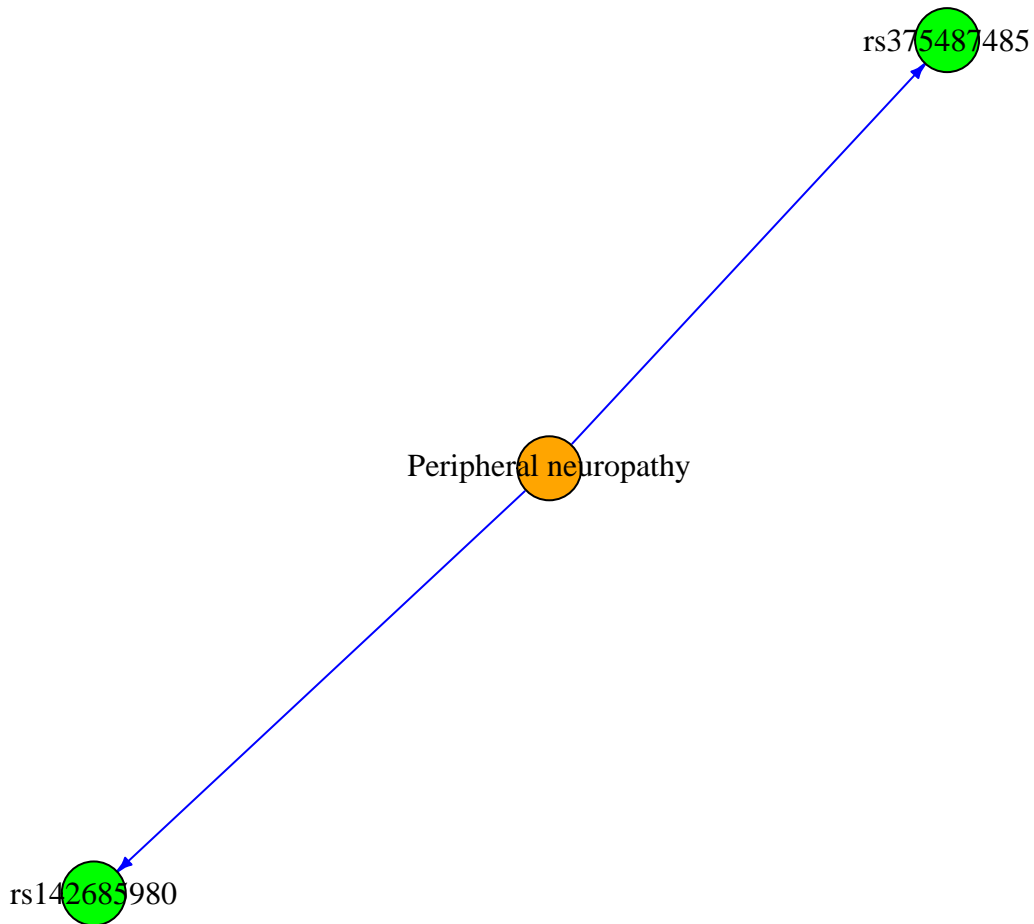

Variant–Disease Network (Periventricular nodular heterotopia 1)

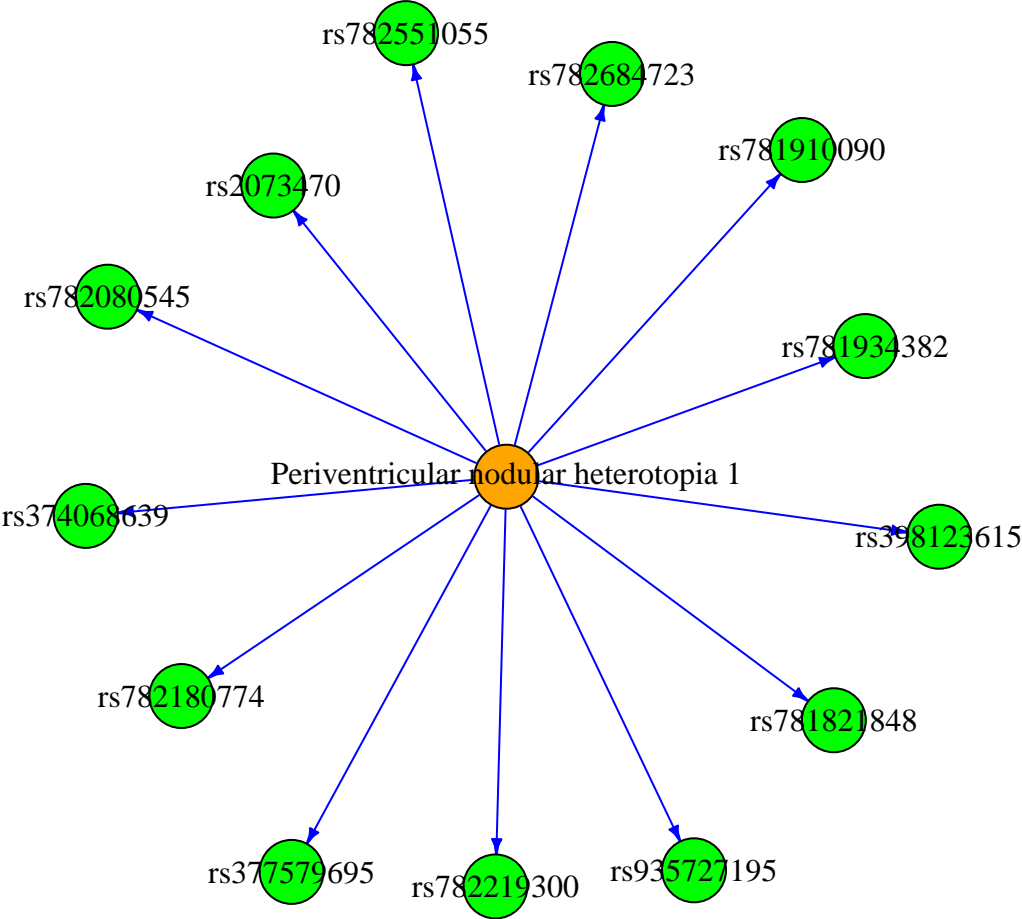



Variant–Disease Network (Permanent neonatal diabetes mellitus)

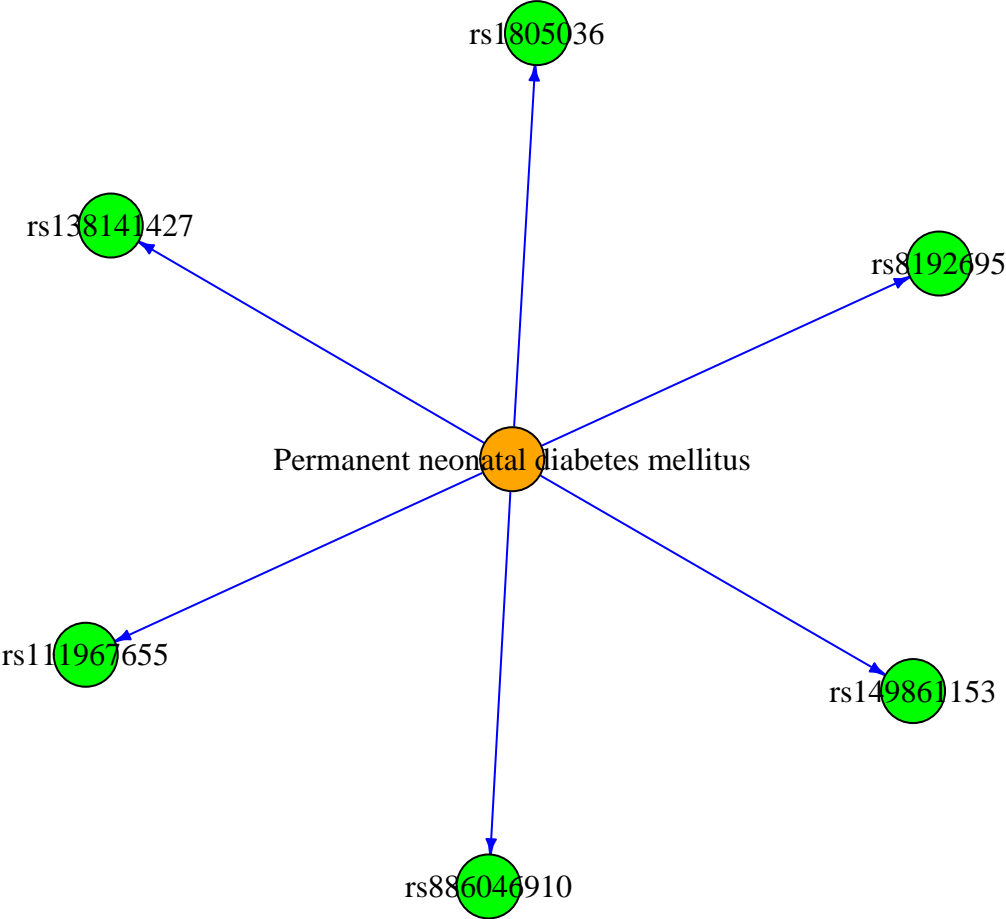

Variant–Disease Network (Peroxisome biogenesis disorder 1A (Zellweger

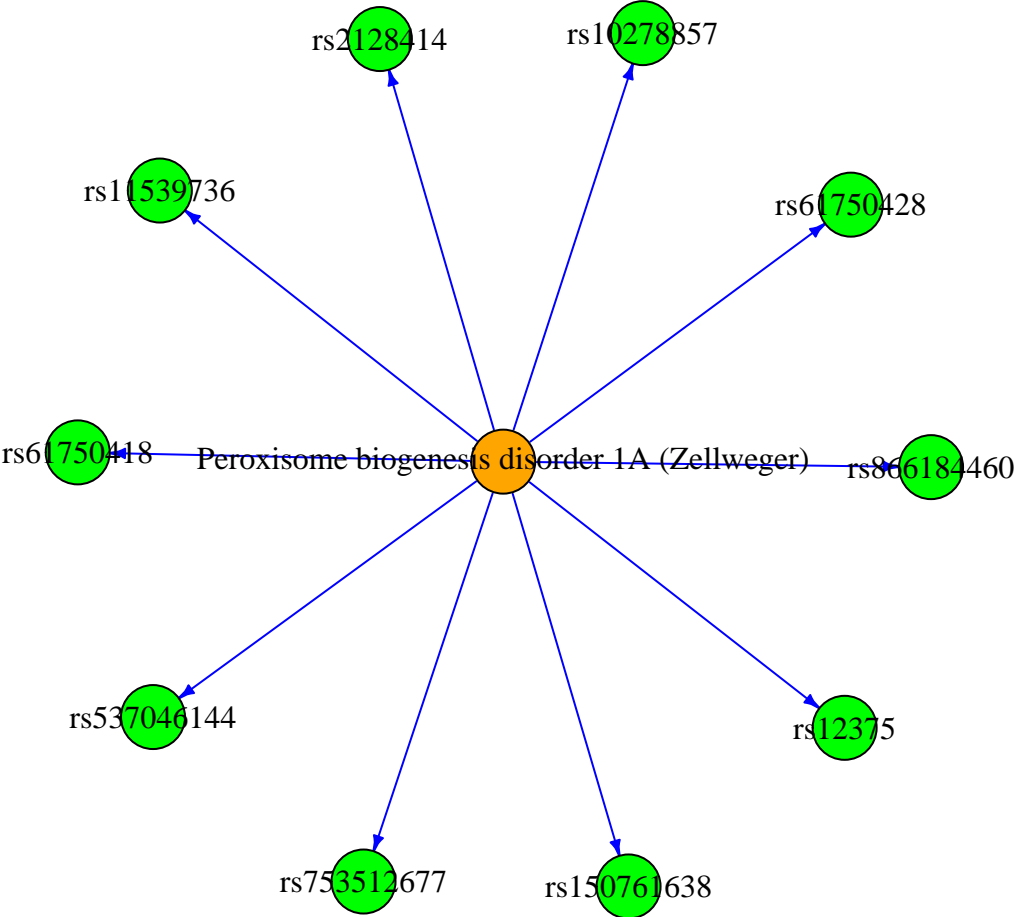

Variant–Disease Network (Peroxisome biogenesis disorder 1B)

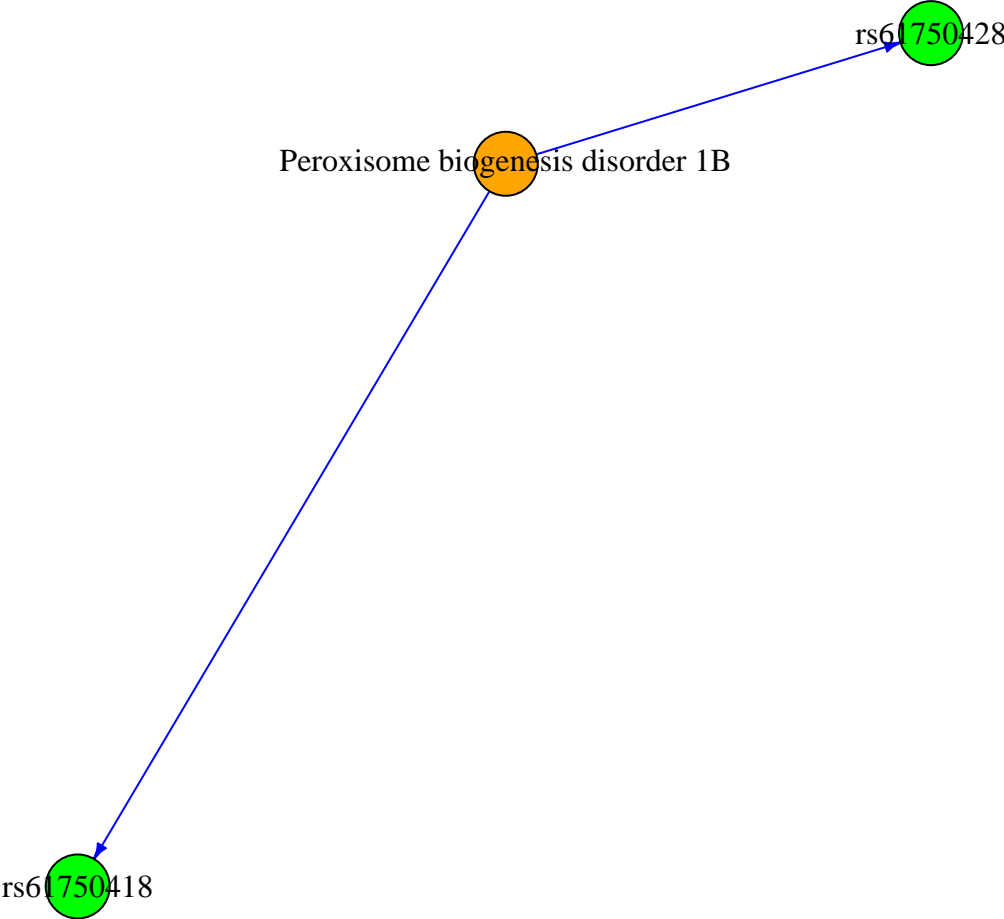

## Variant-Disease Network (Peroxisome biogenesis disorders)

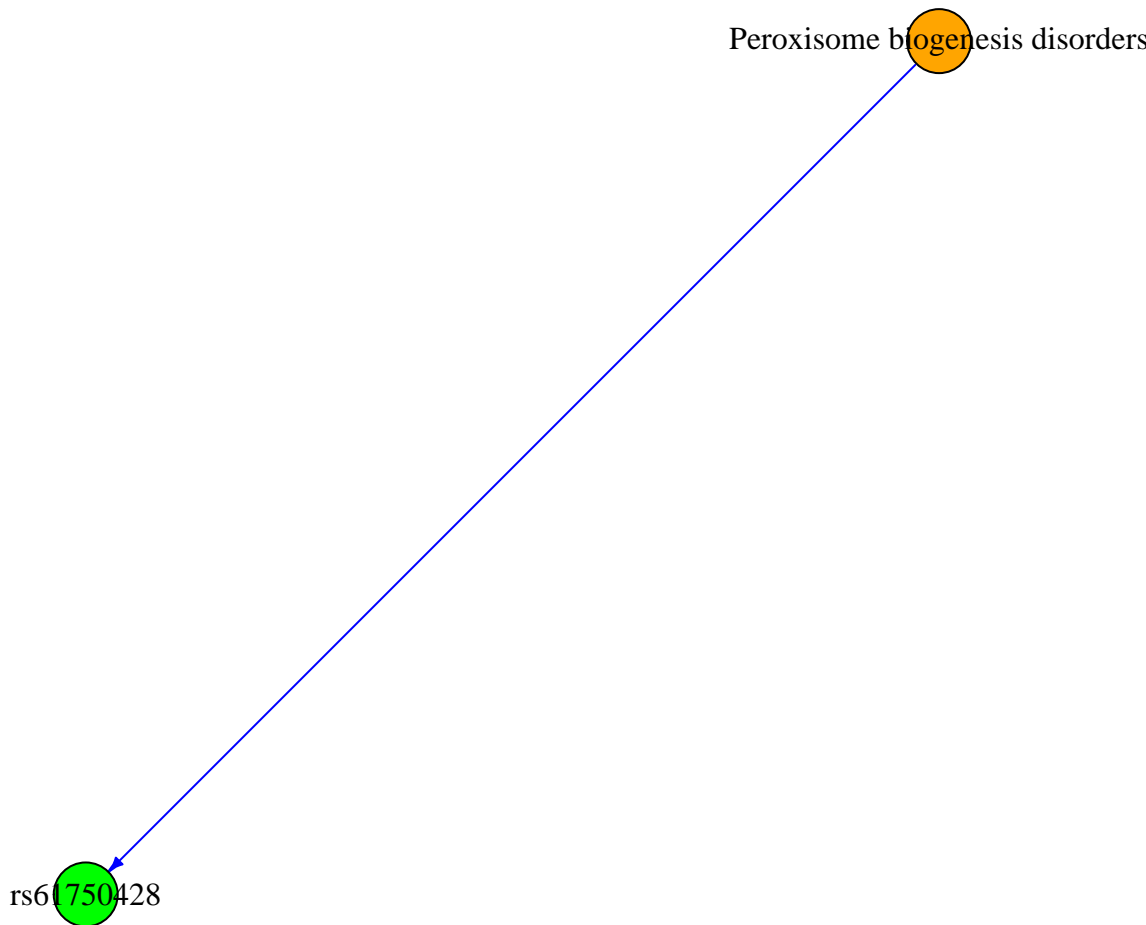

## Variant–Disease Network (Perrault syndrome)

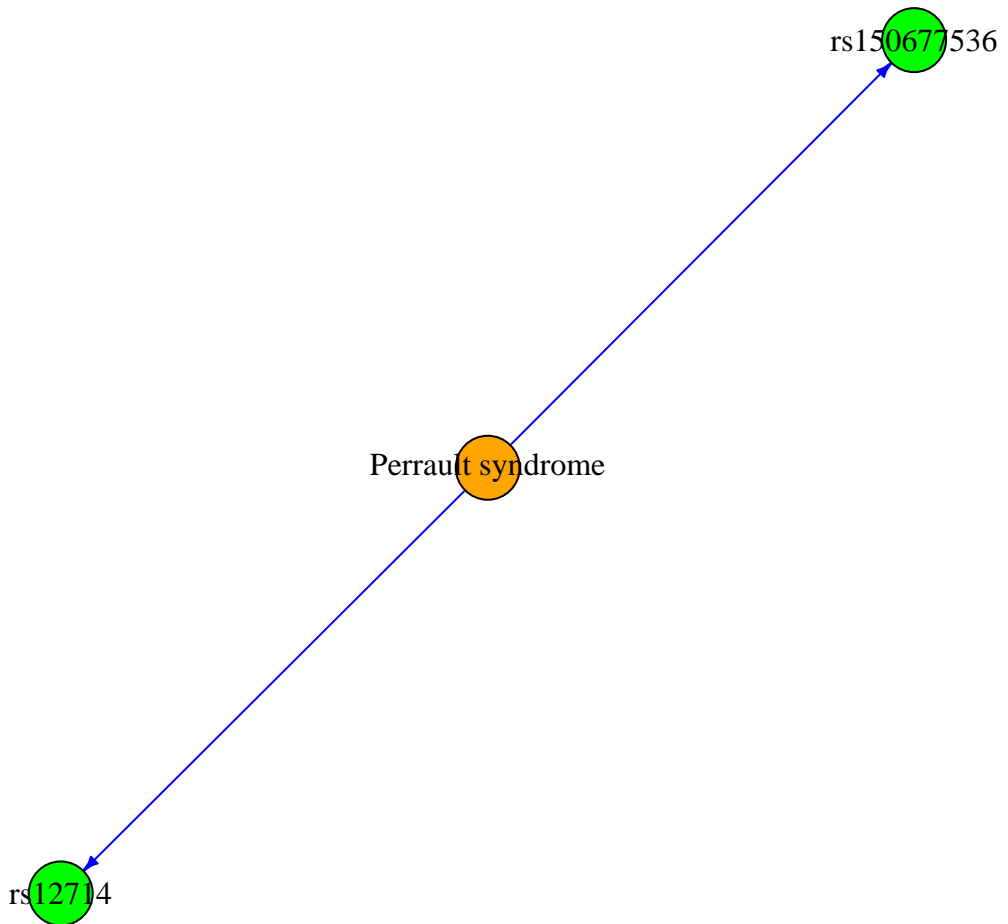

## Variant–Disease Network (Perrault syndrome 1)

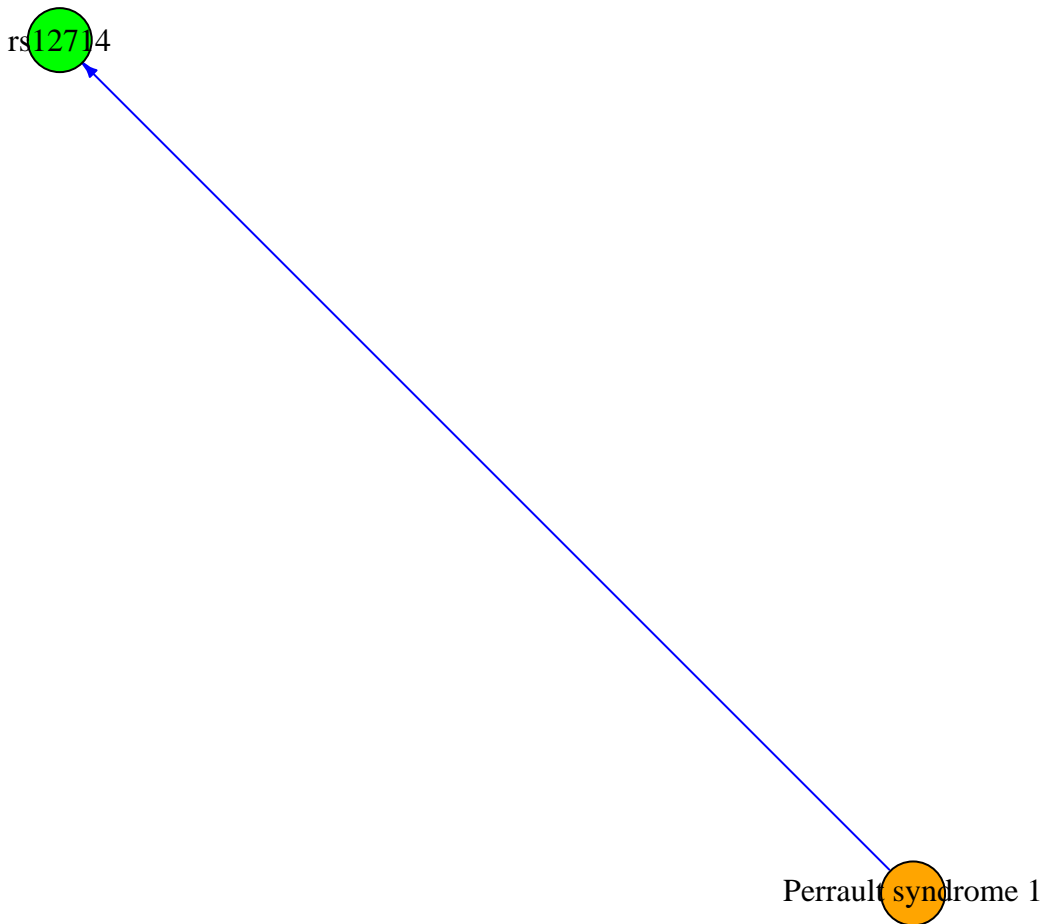

## Variant–Disease Network (Perrault syndrome 4)

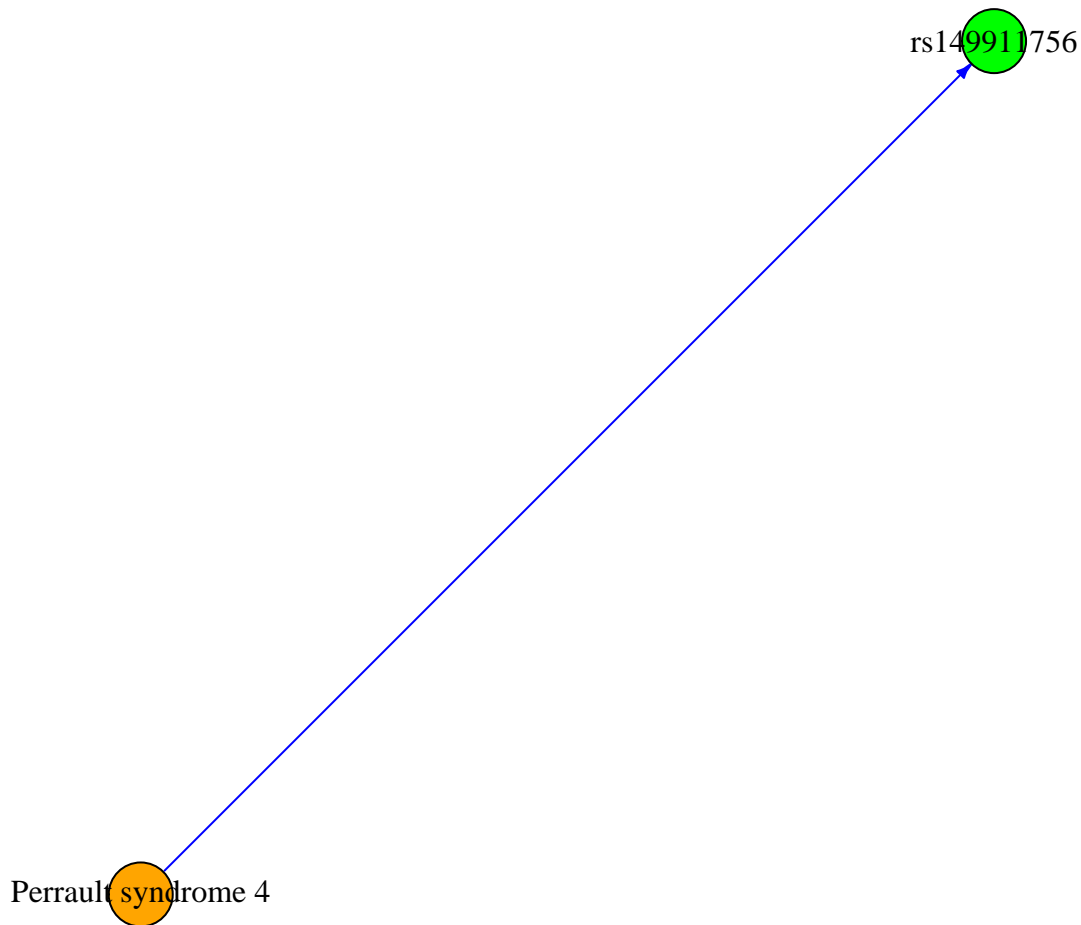

Variant–Disease Network (Perry syndrome)

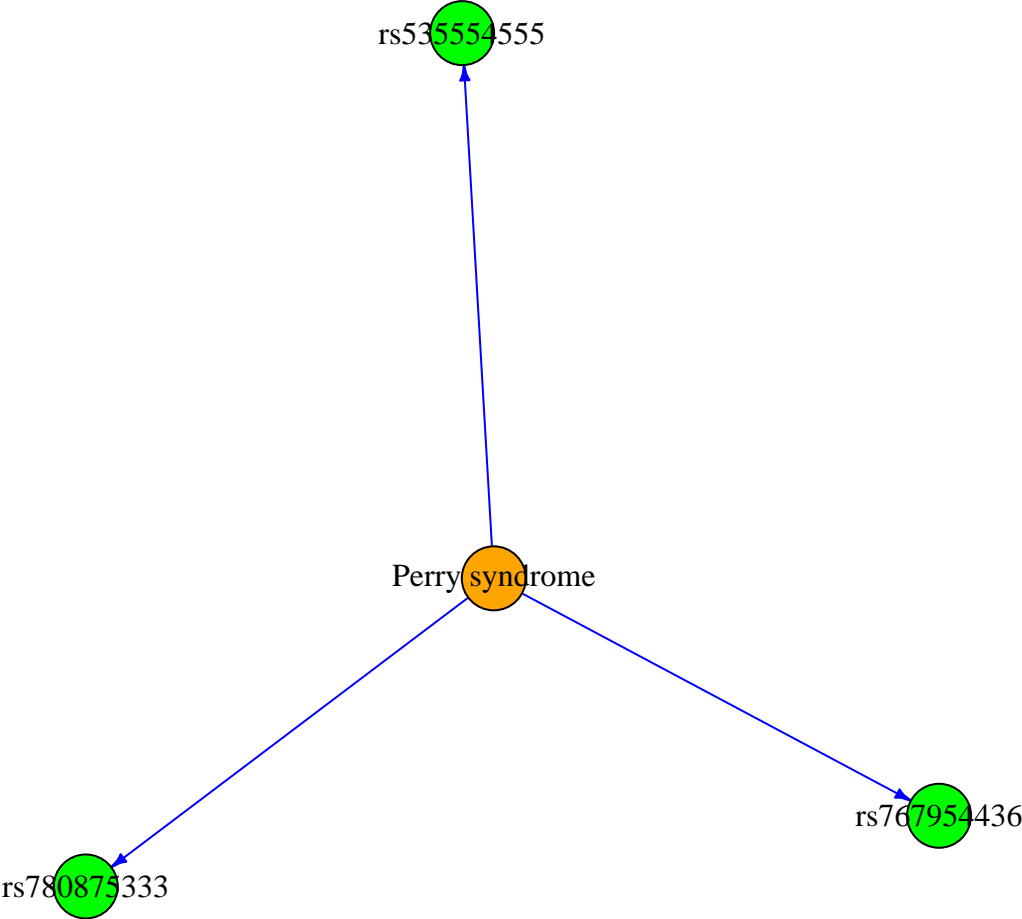



## Variant–Disease Network (Peutz–Jeghers syndrome)

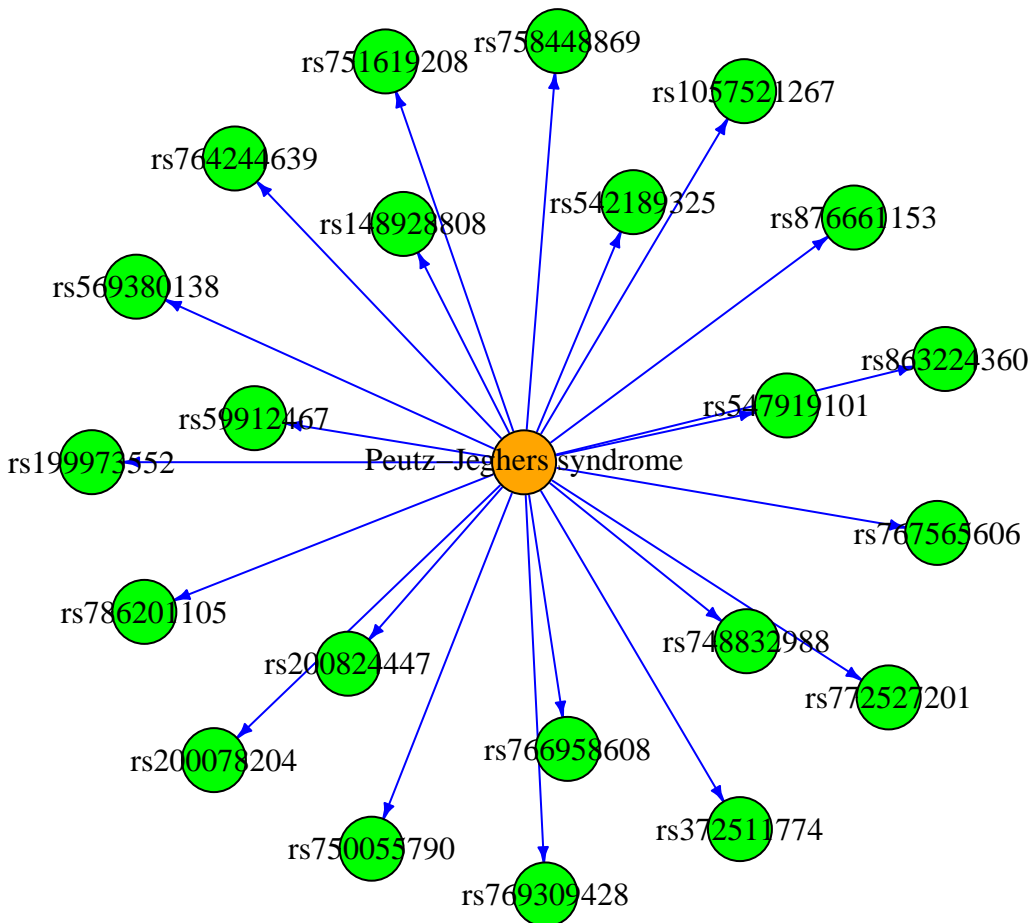

## Variant–Disease Network (Pfeiffer syndrome)

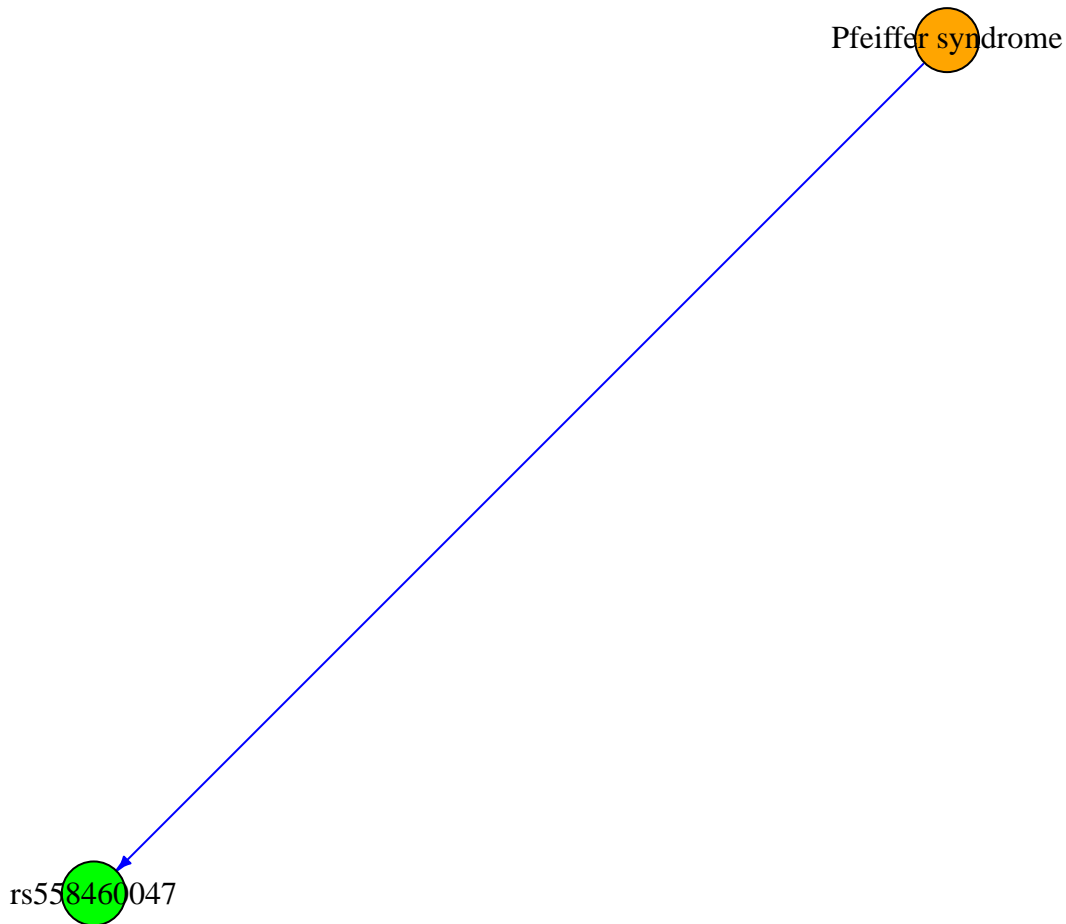

## Variant–Disease Network (Phenylketonuria)

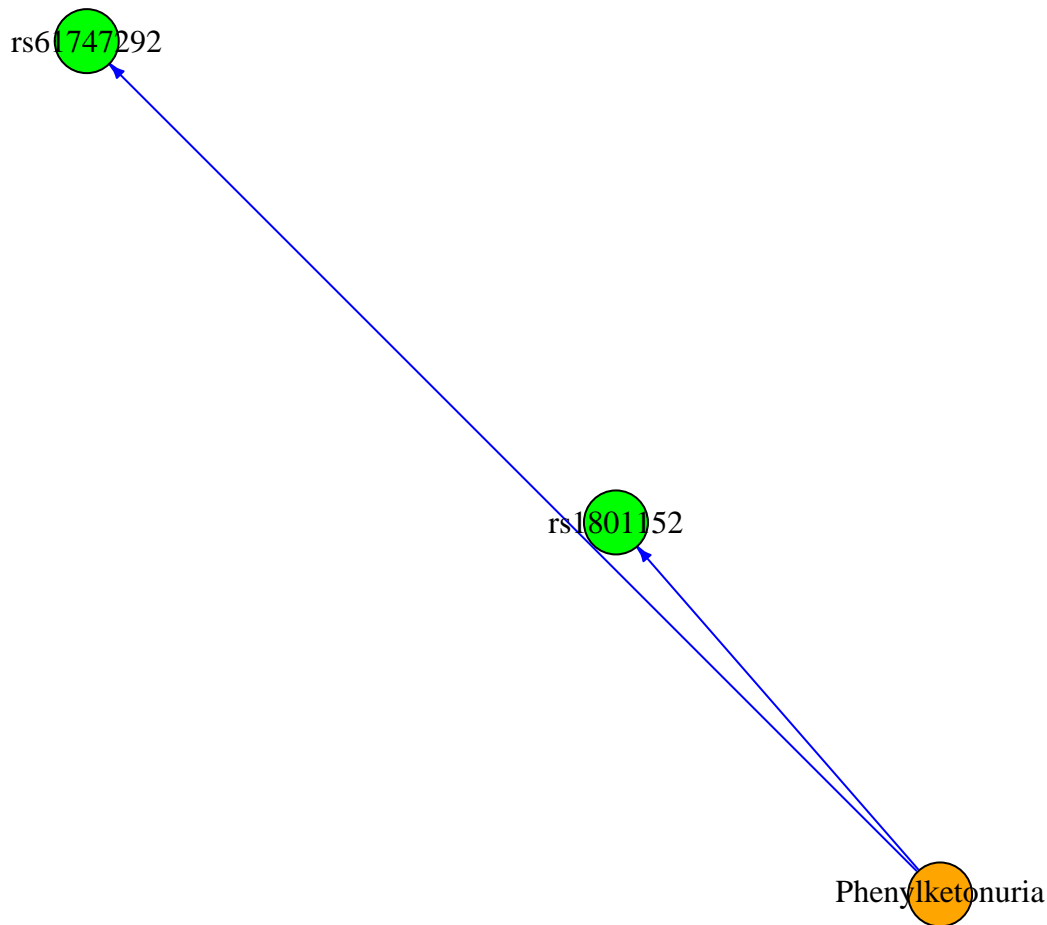

## Variant-Disease Network (Pheochromocytoma)

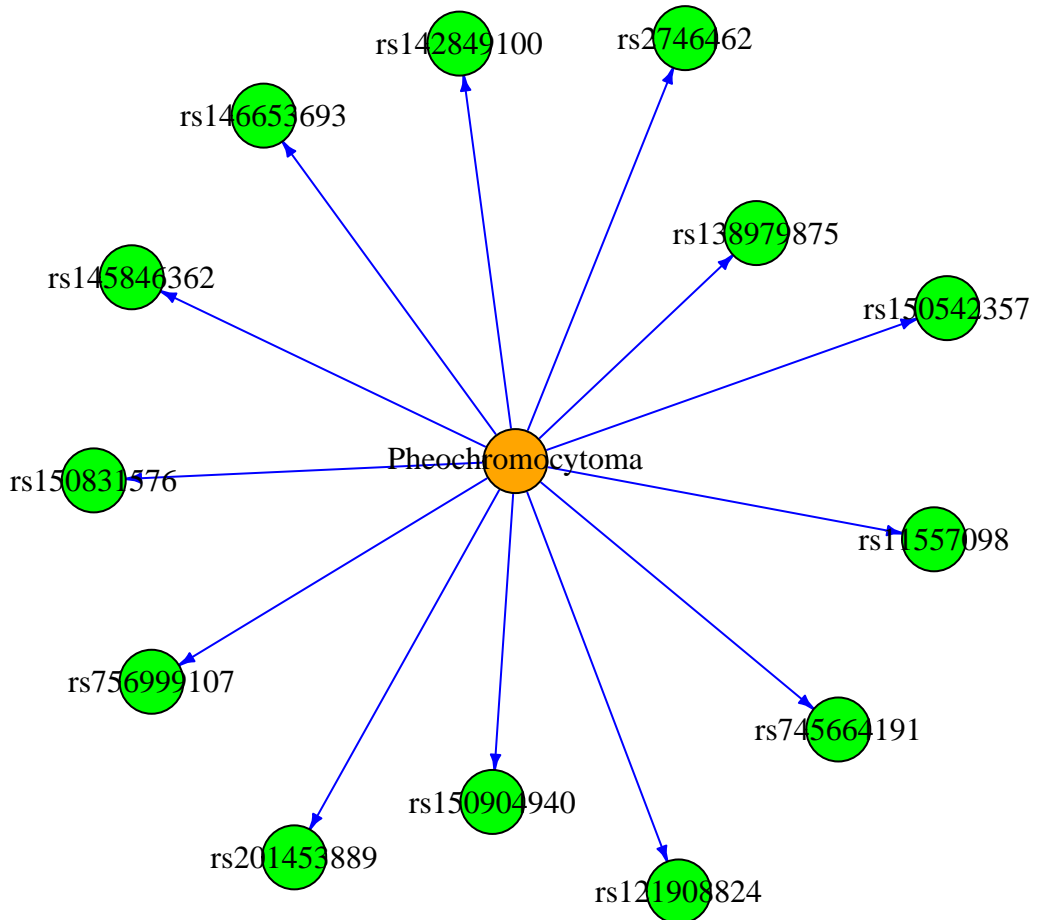

# Variant-Disease Network (Phosphoenolpyruvate carboxykinase (GTP) deficiency)

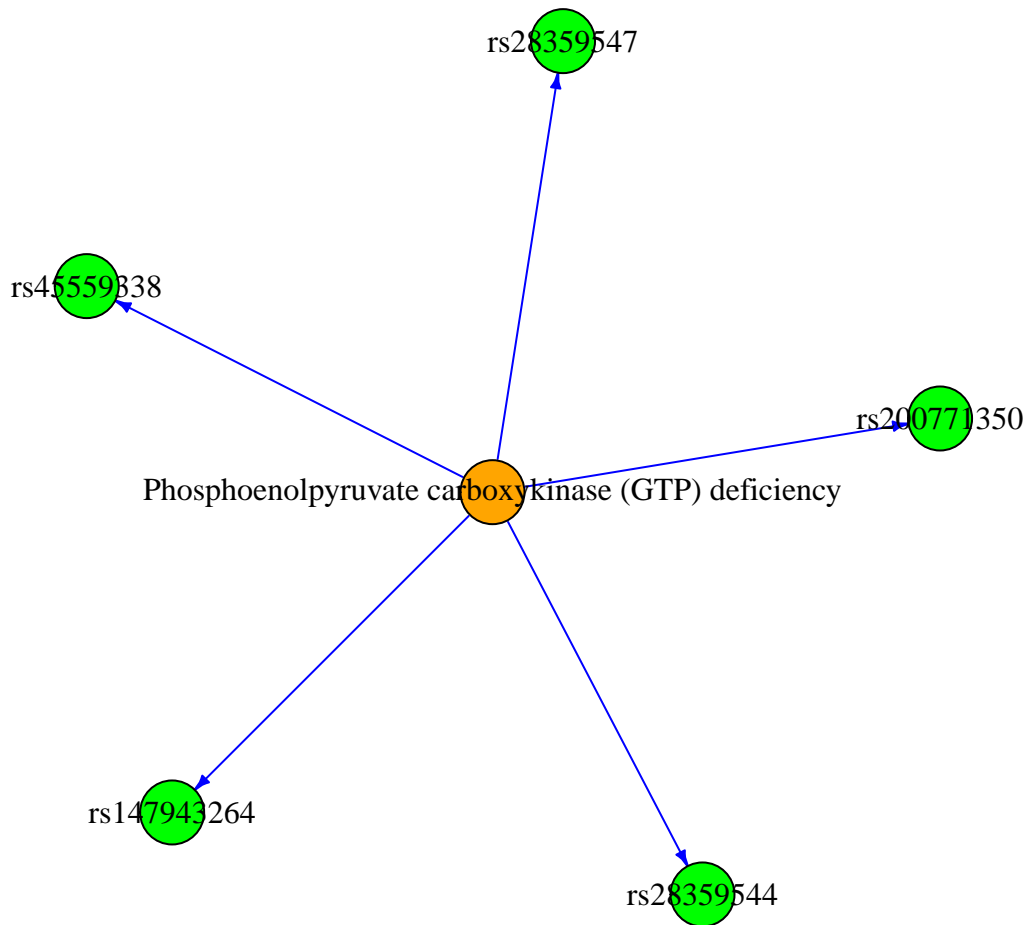

**Variant–Disease Network (Phosphoglycerate dehydrogenase deficiency)**

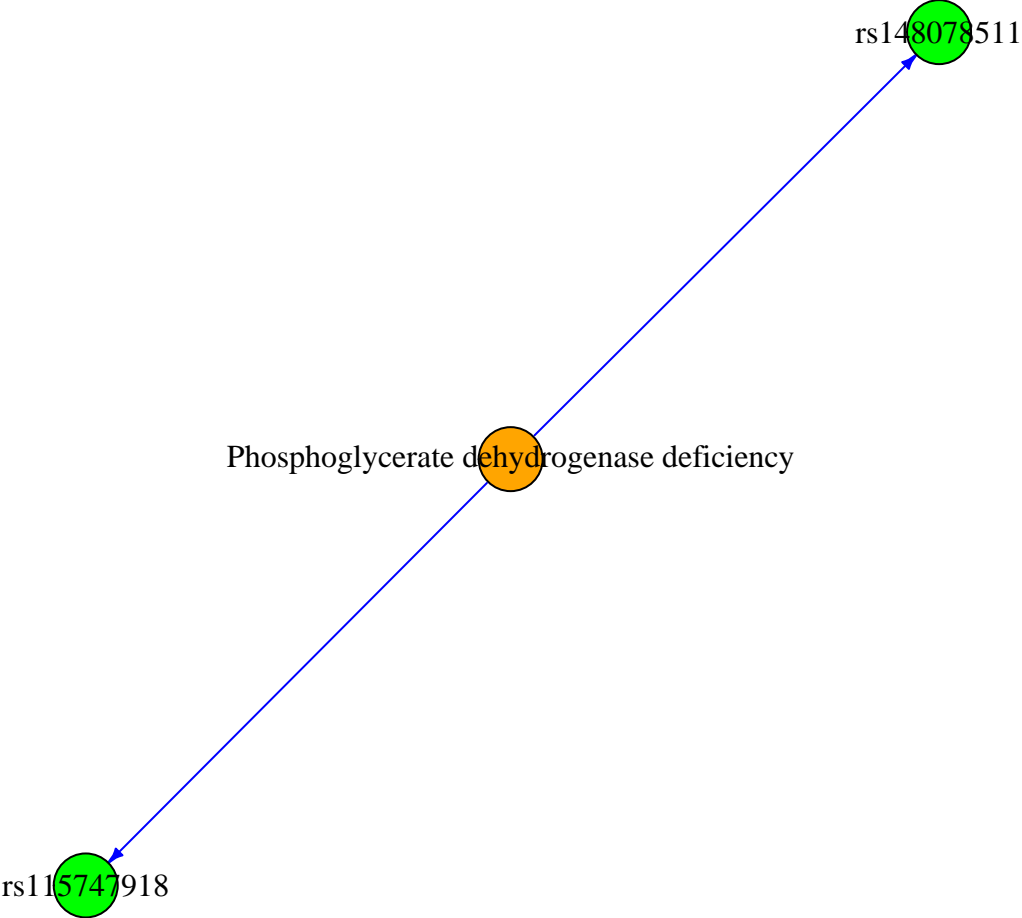

Variant–Disease Network (Phytanic acid storage disease)

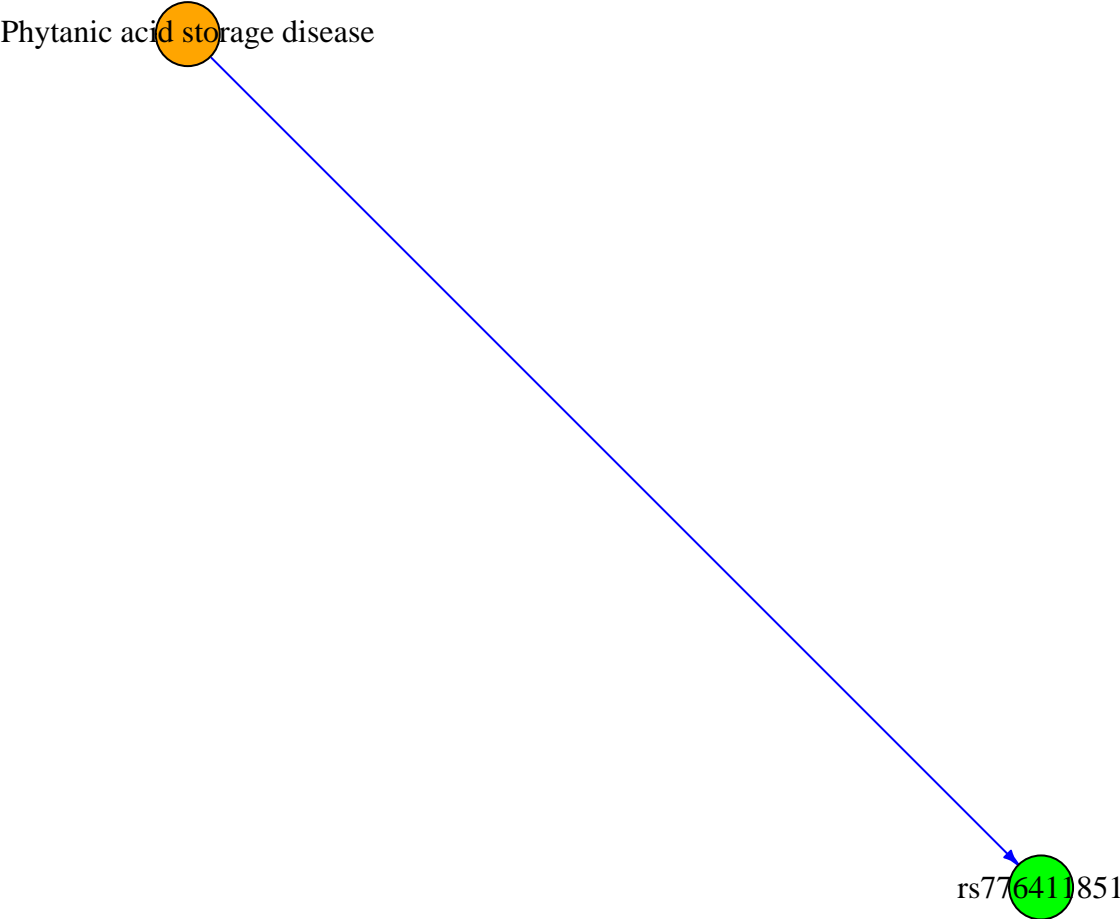

## Variant–Disease Network (Pierson syndrome)

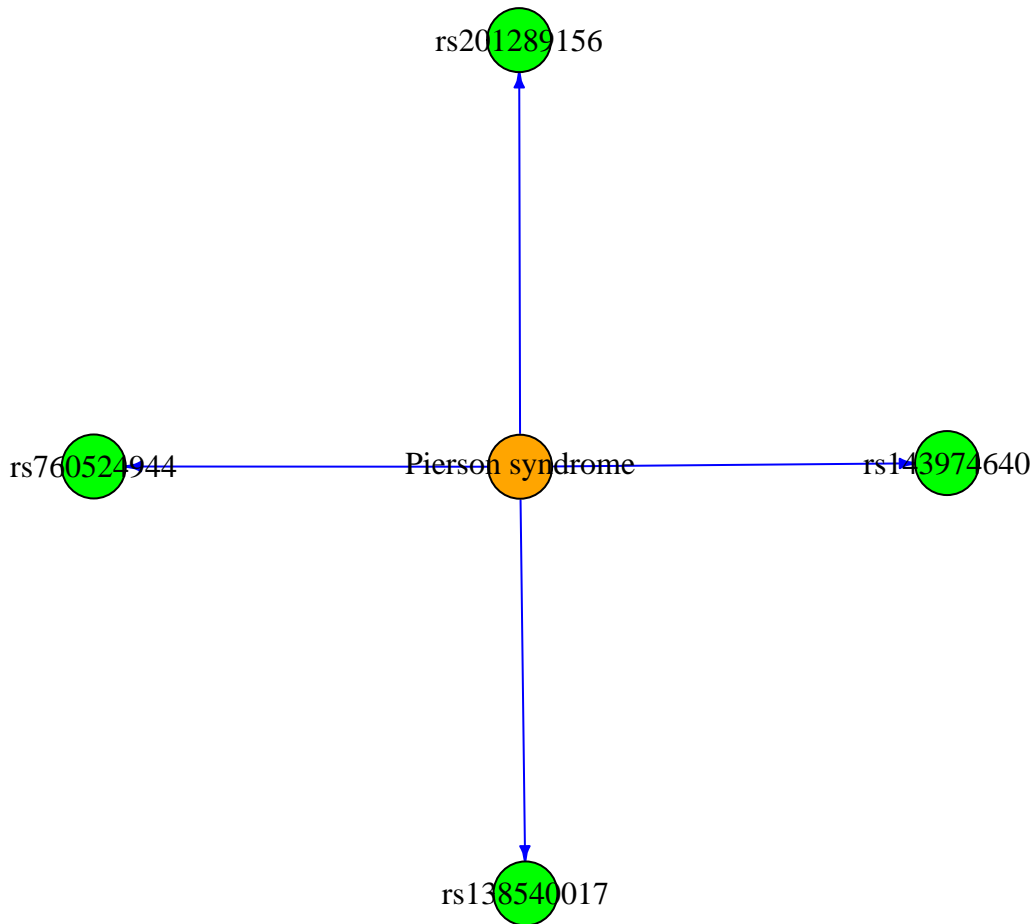



Variant–Disease Network (Pigmentary pallidal degeneration)

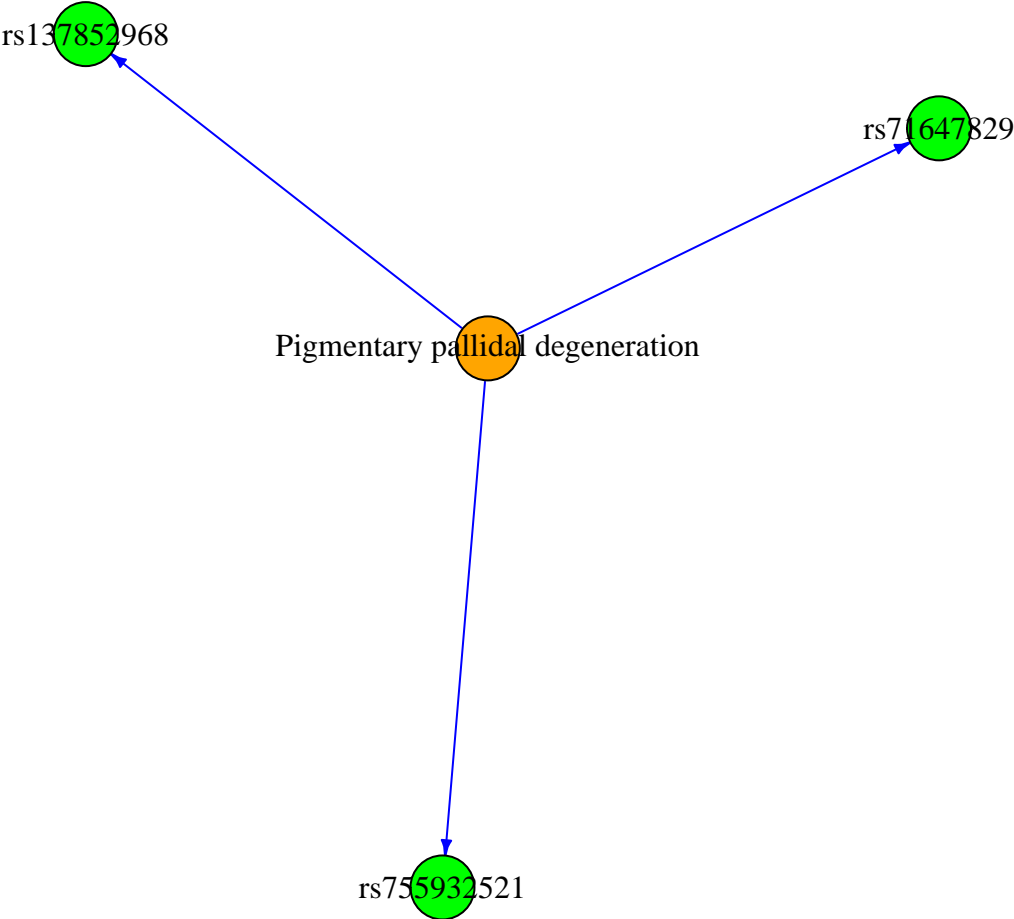

## Variant–Disease Network (Pigmentary retinal dystrophy)

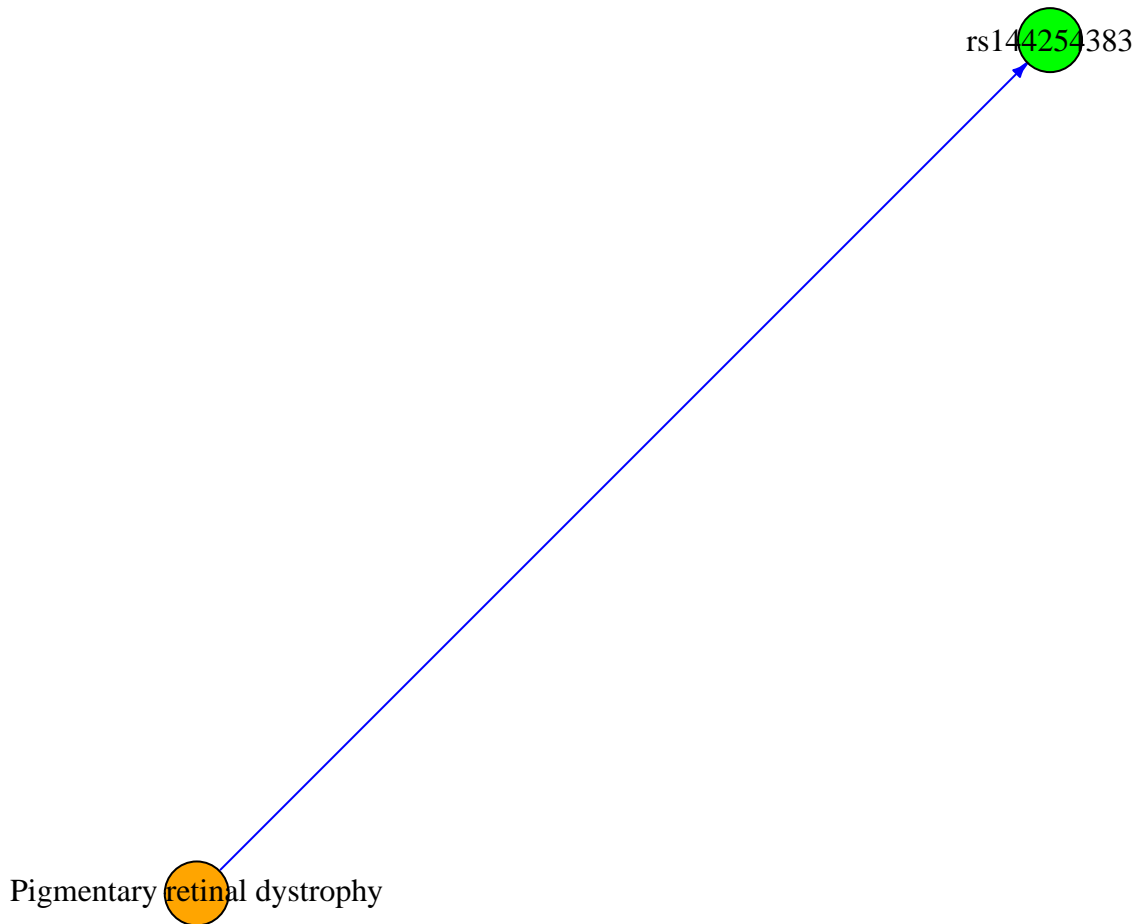

## Variant–Disease Network (Pilocytic astrocytoma)

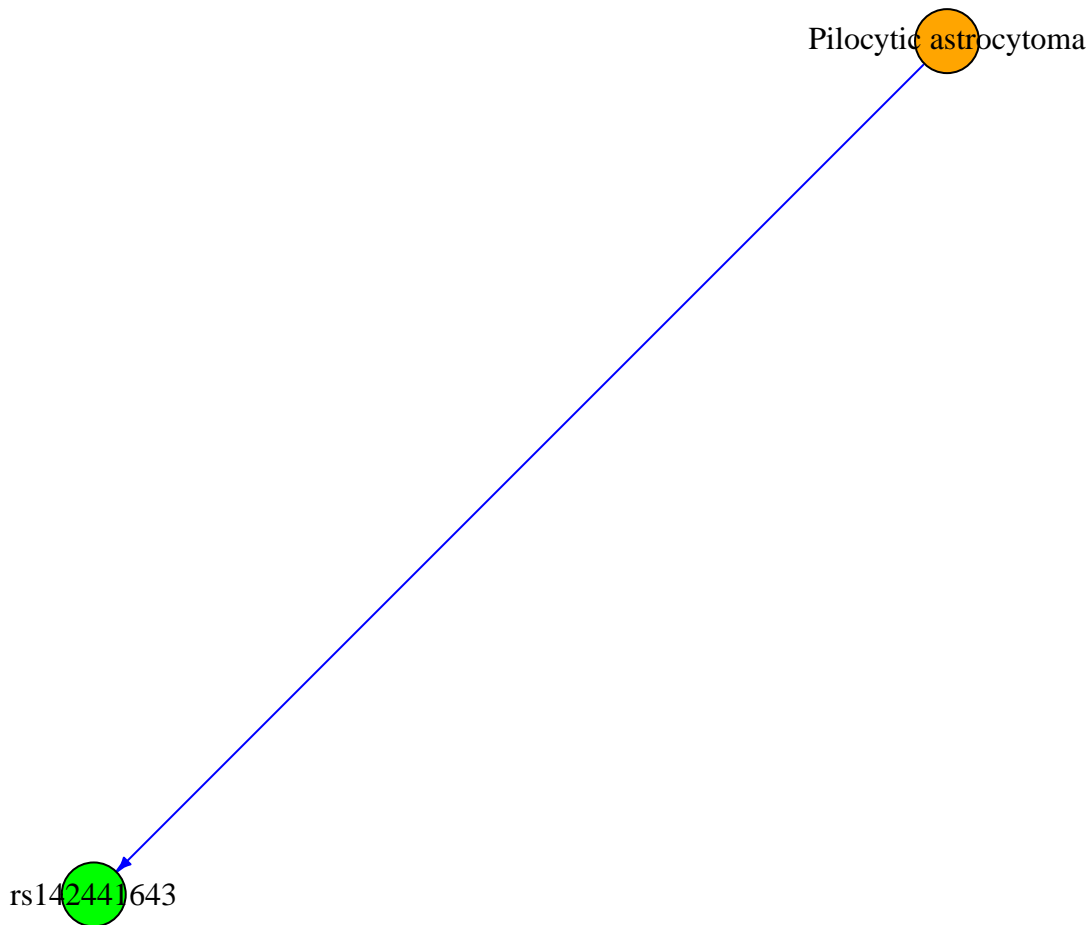

Variant–Disease Network (Pitt–Hopkins–like syndrome)

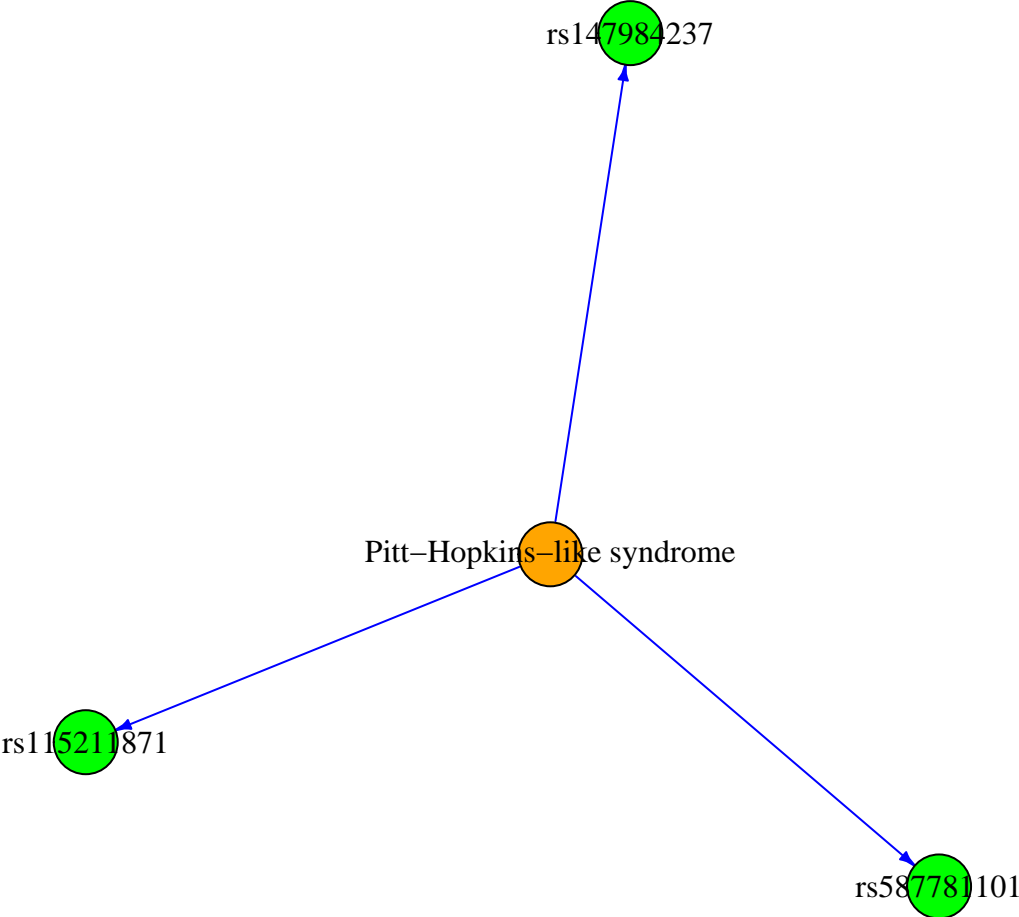

Variant–Disease Network (Pitt–Hopkins–like syndrome 2)

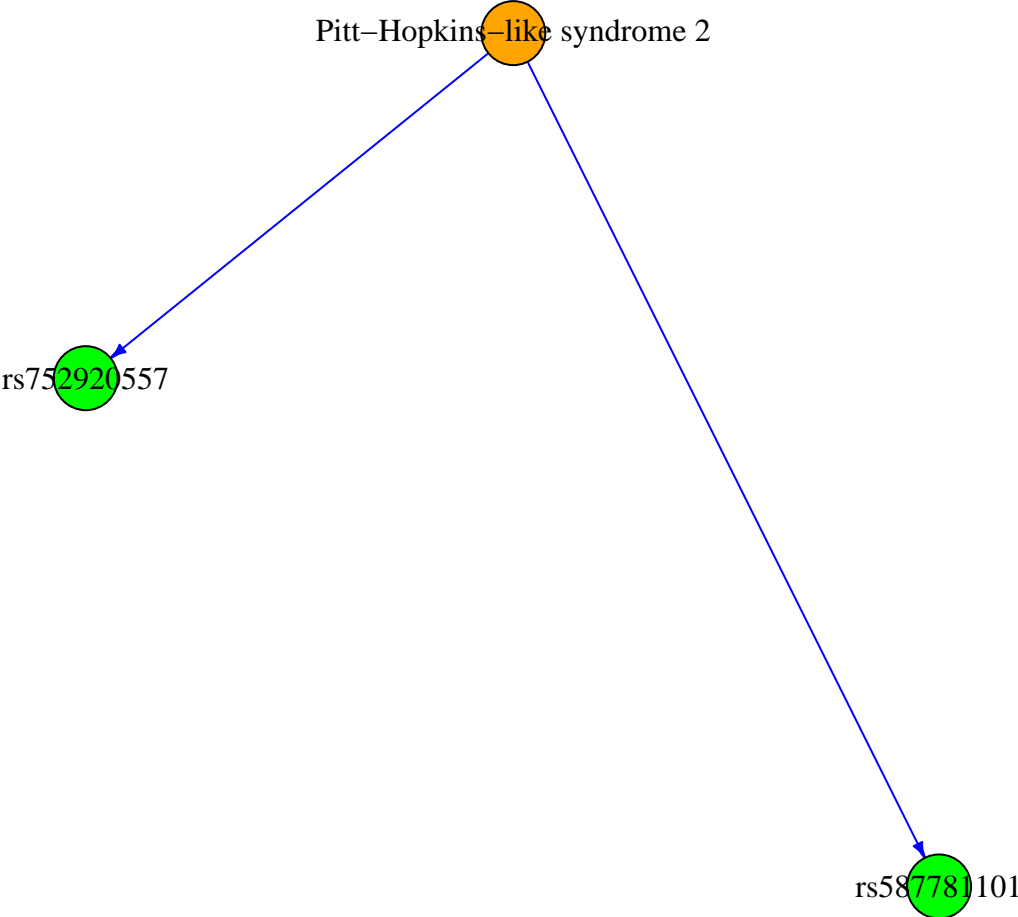

## Variant–Disease Network (Pityriasis rubra pilaris)

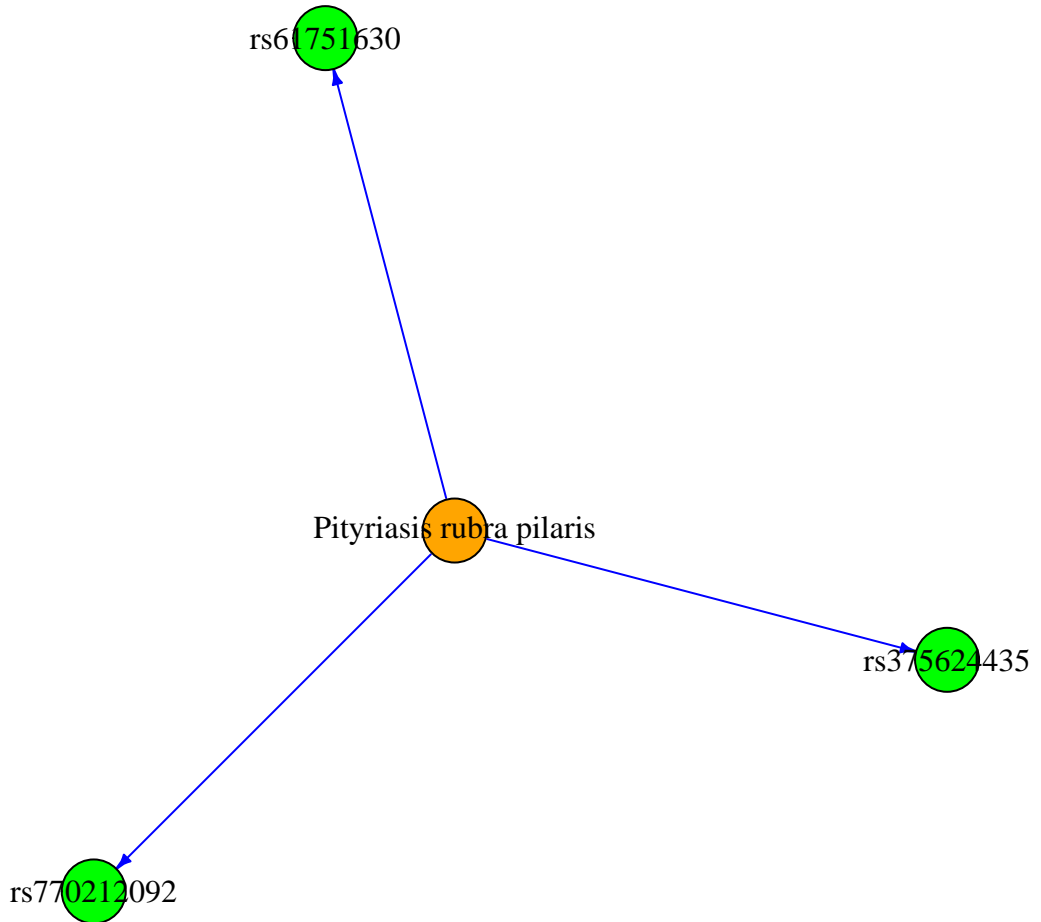

Variant–Disease Network (Plasminogen activator inhibitor type 1 deficiency)

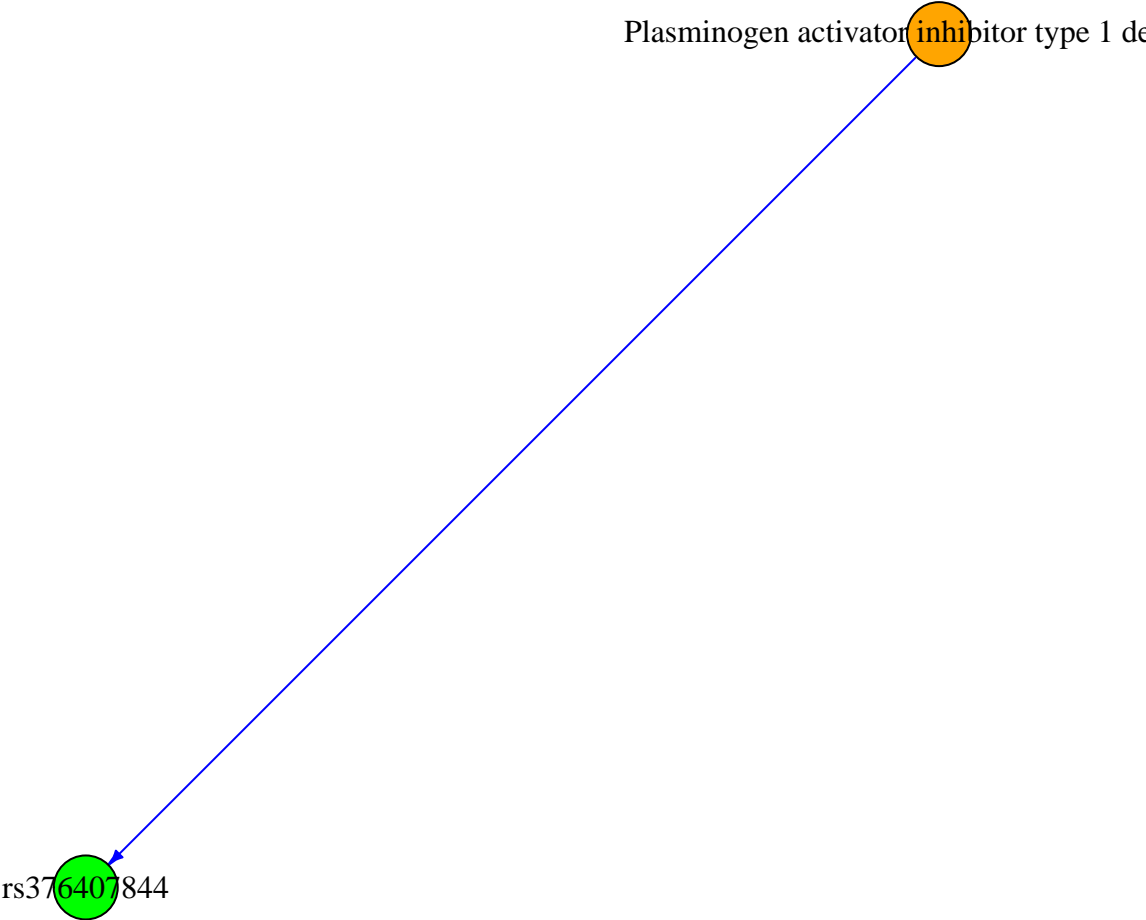

**Variant–Disease Network (Platelet–type bleeding disorder 9)**

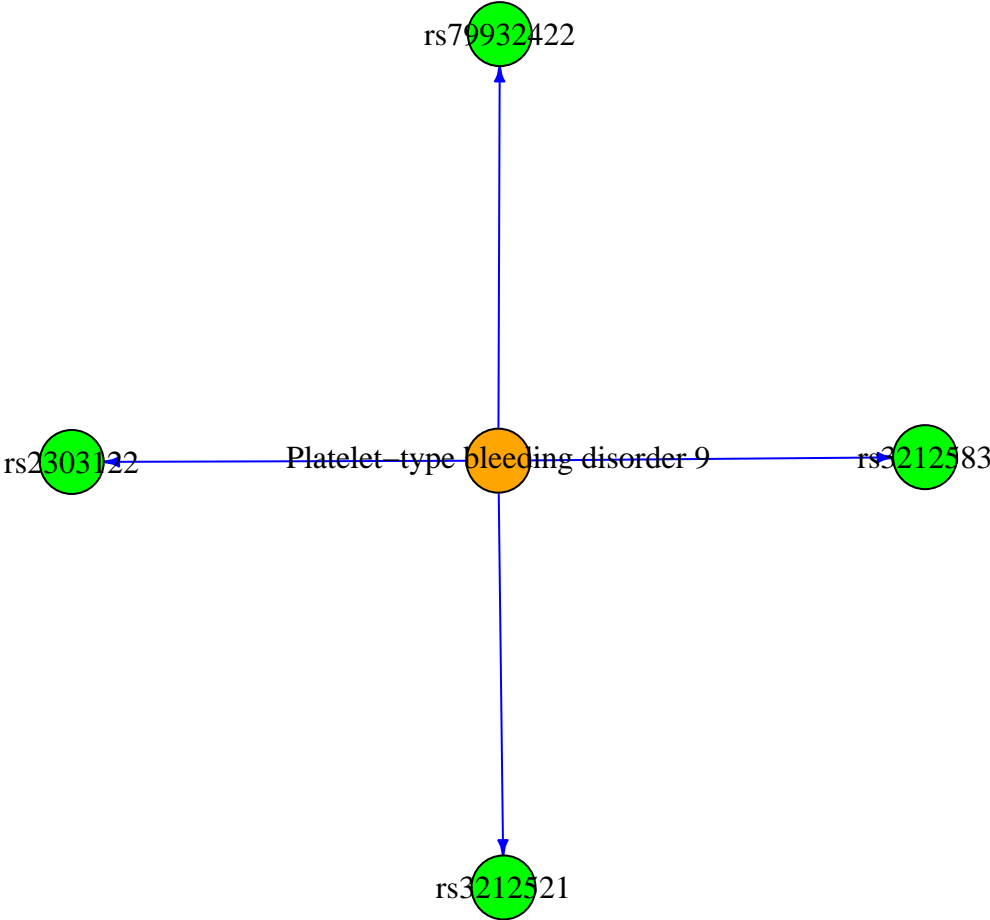



# Variant-Disease Network (Platyspondylic lethal skeletal dysplasia Torrance t

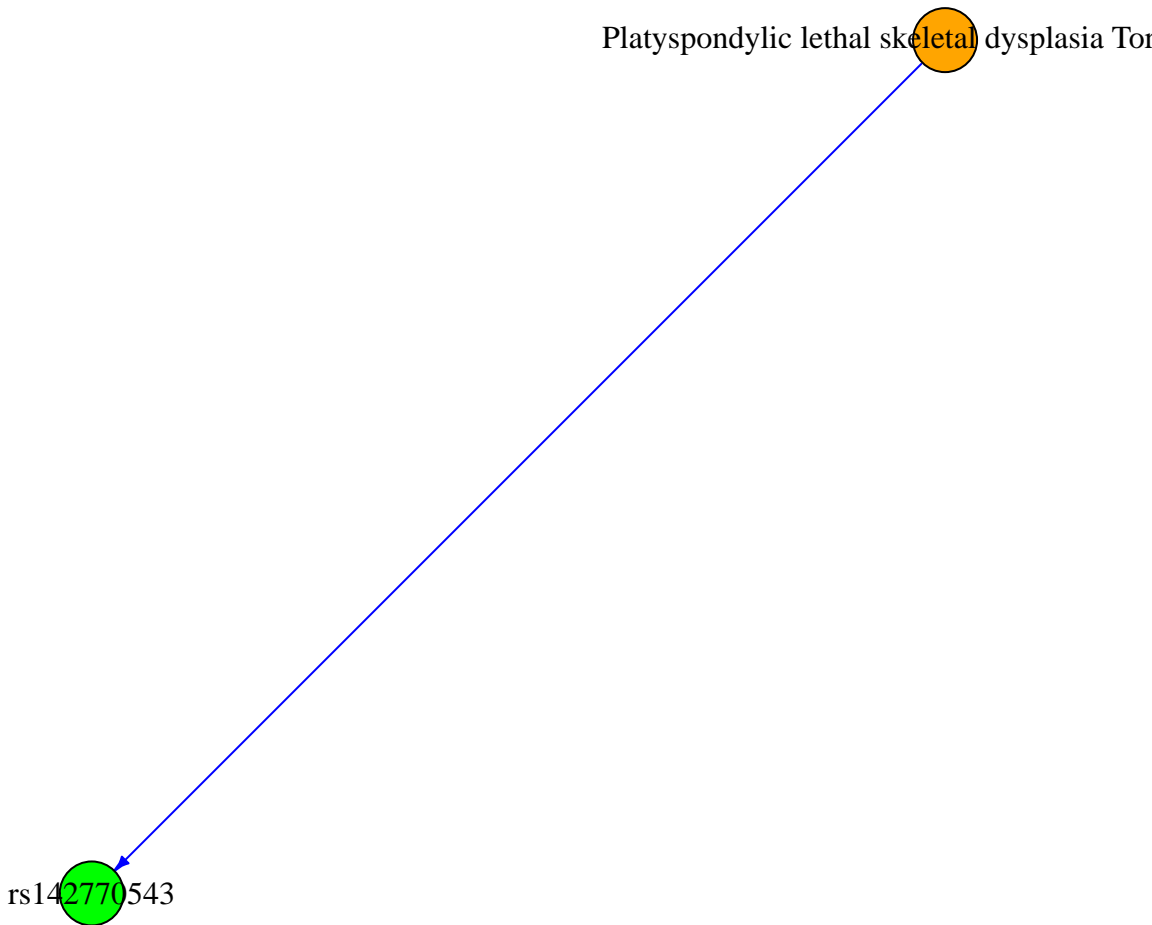

## Variant–Disease Network (Pleuropulmonary blastoma)

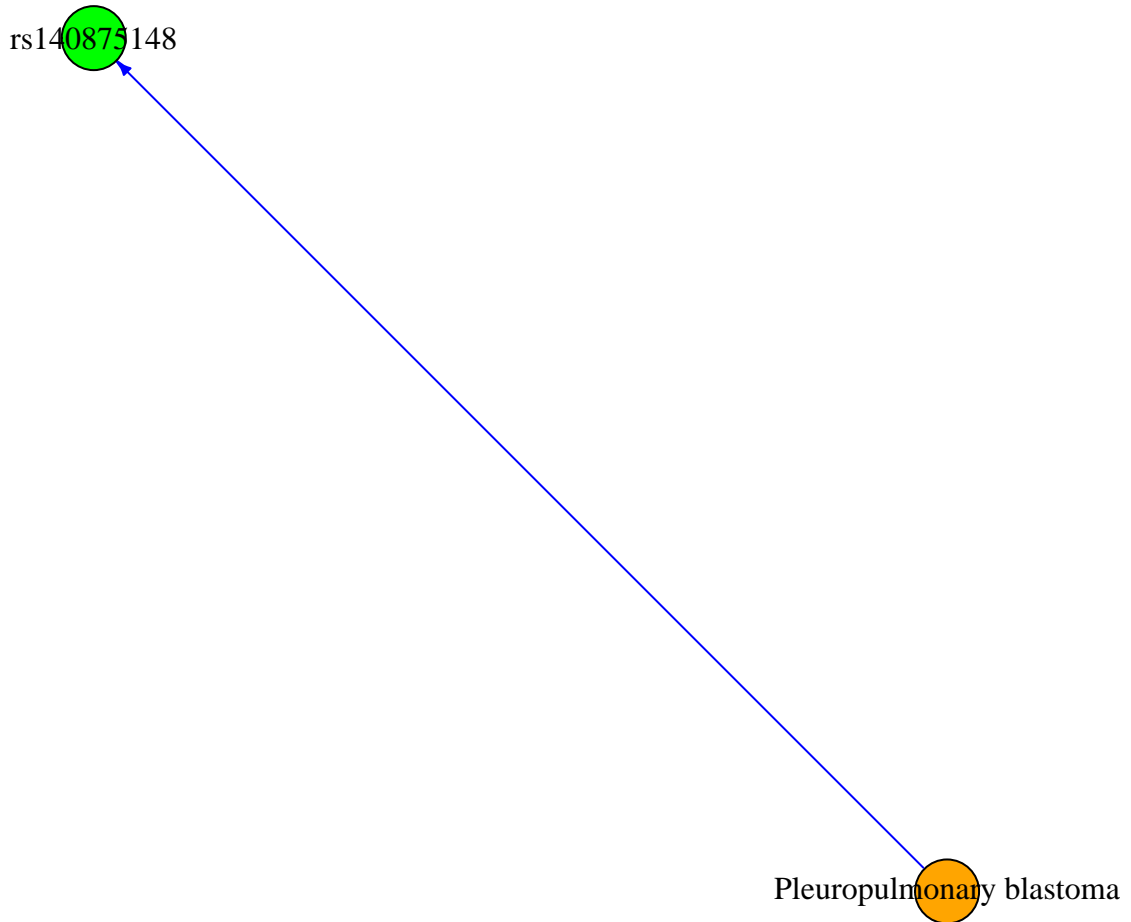

Variant–Disease Network (Pol III–related leukodystrophy)

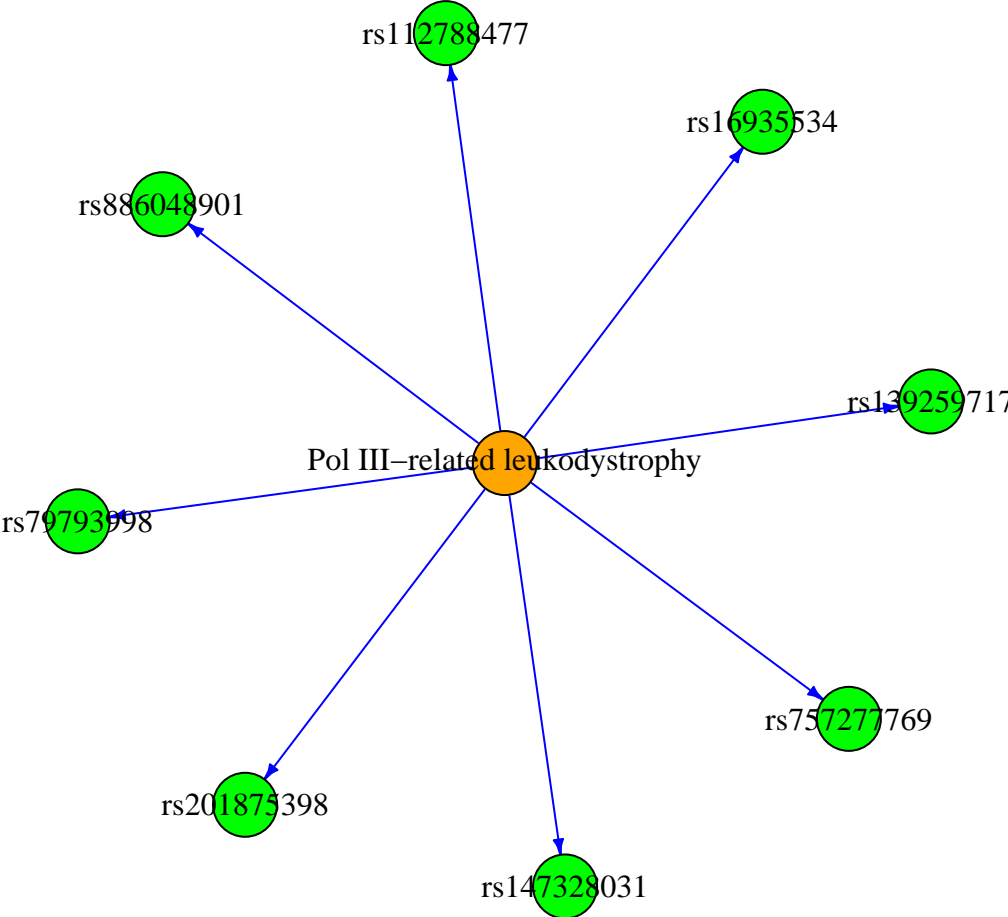

Variant–Disease Network (POLG–Related Spectrum Disorders)

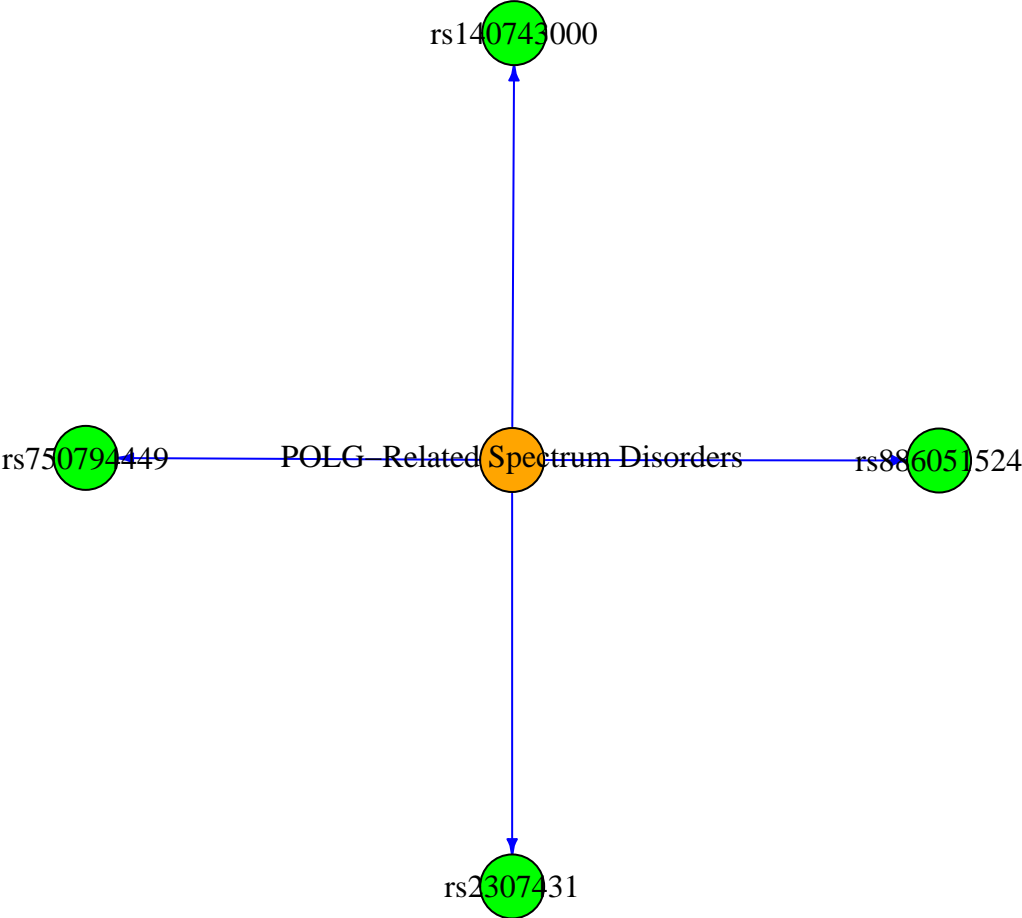

## Variant–Disease Network (Polycystic kidney disease)

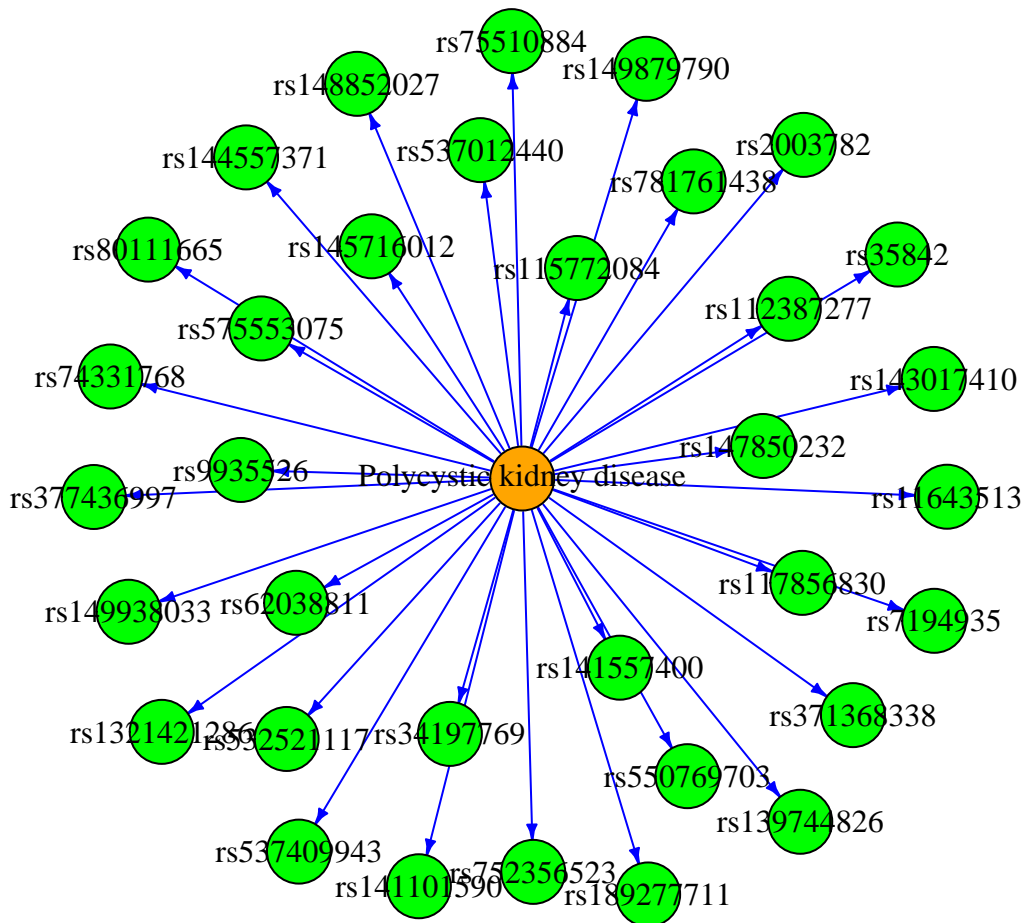

## Variant–Disease Network (Polycystic kidney disease 2)

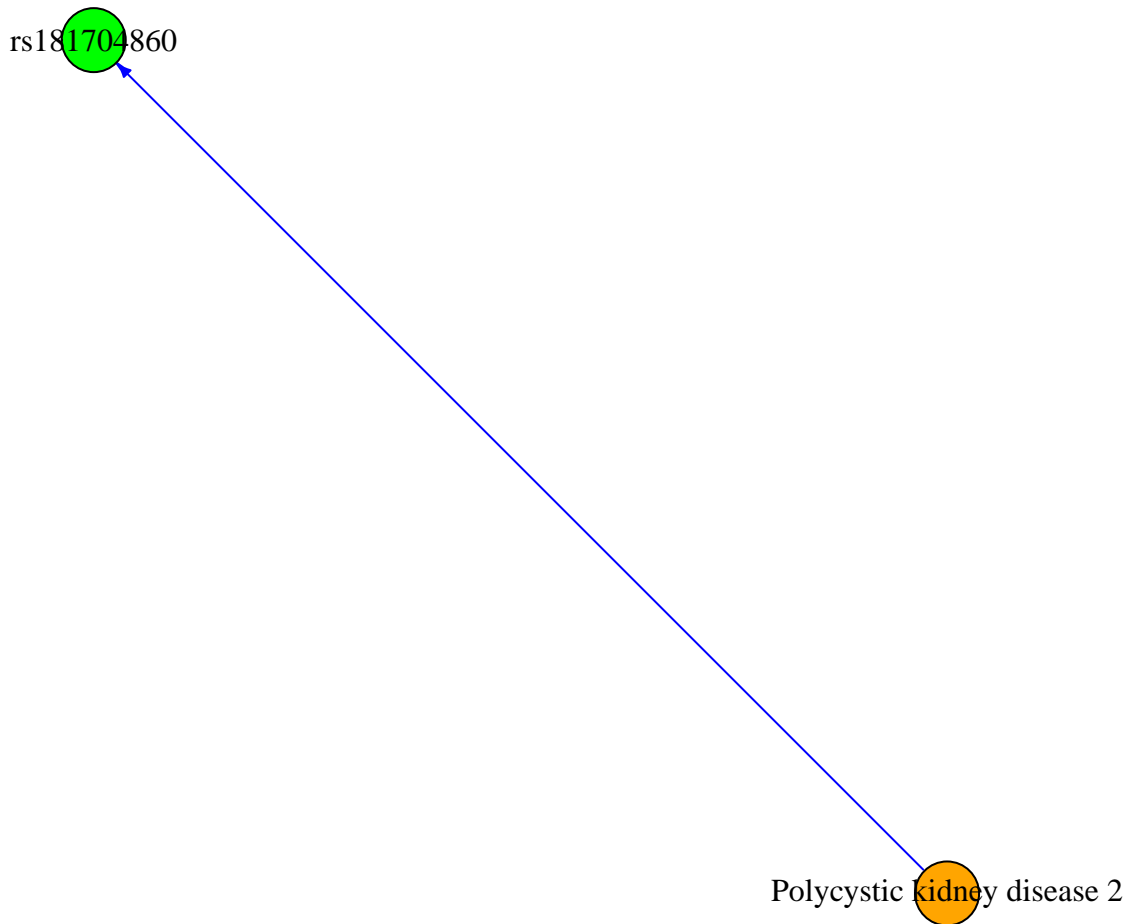

Variant–Disease Network (Polycystic liver disease 1)

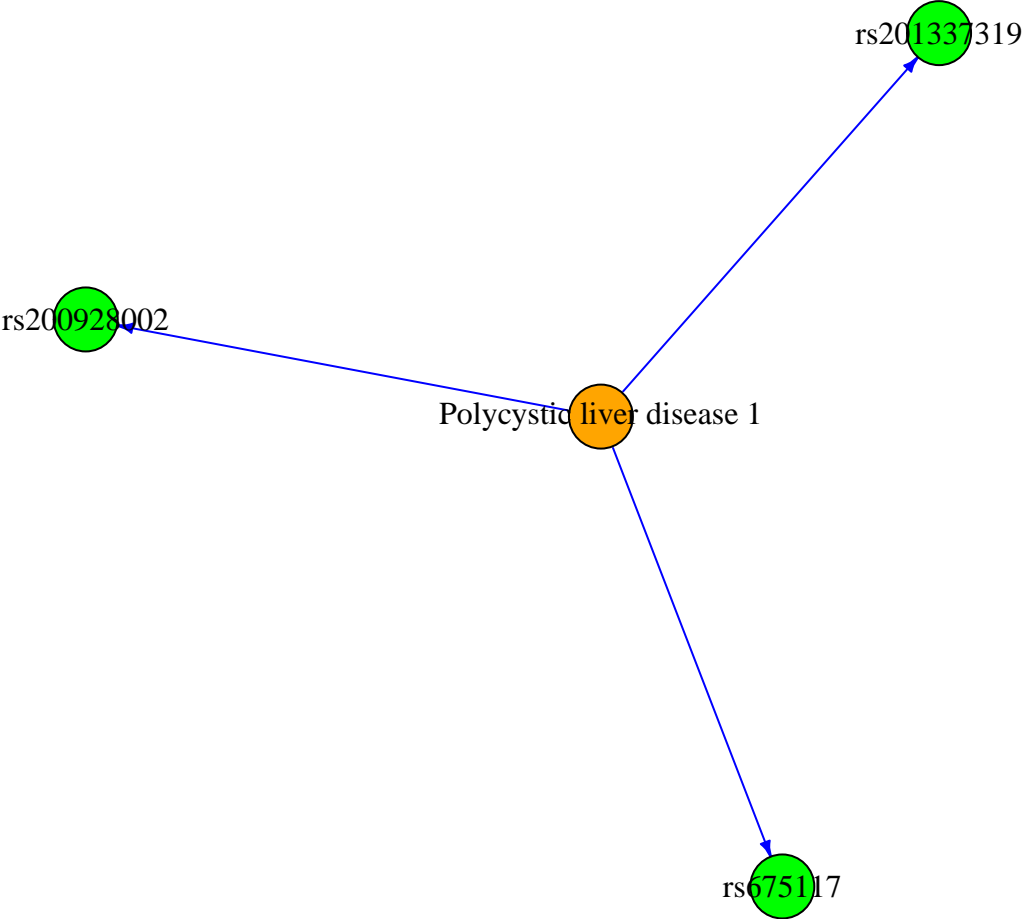

Variant–Disease Network (Polydactyly)

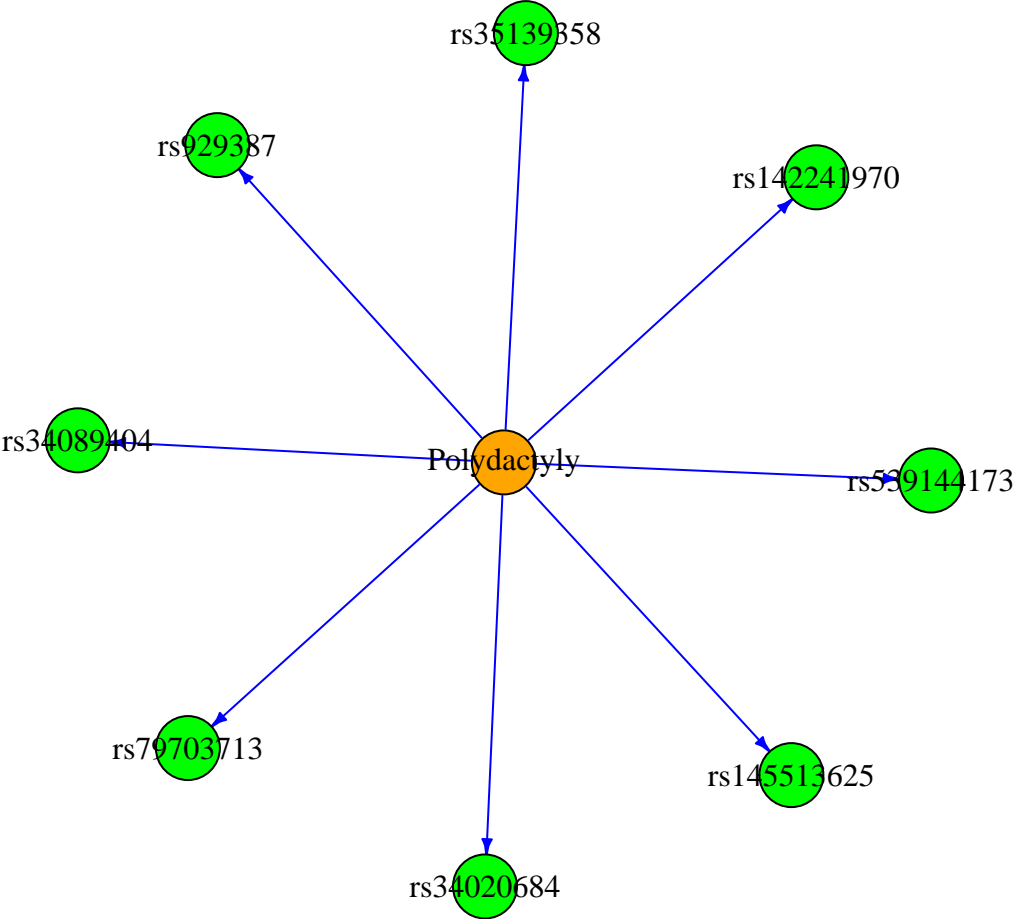



Variant–Disease Network (Polyglandular autoimmune syndrome)

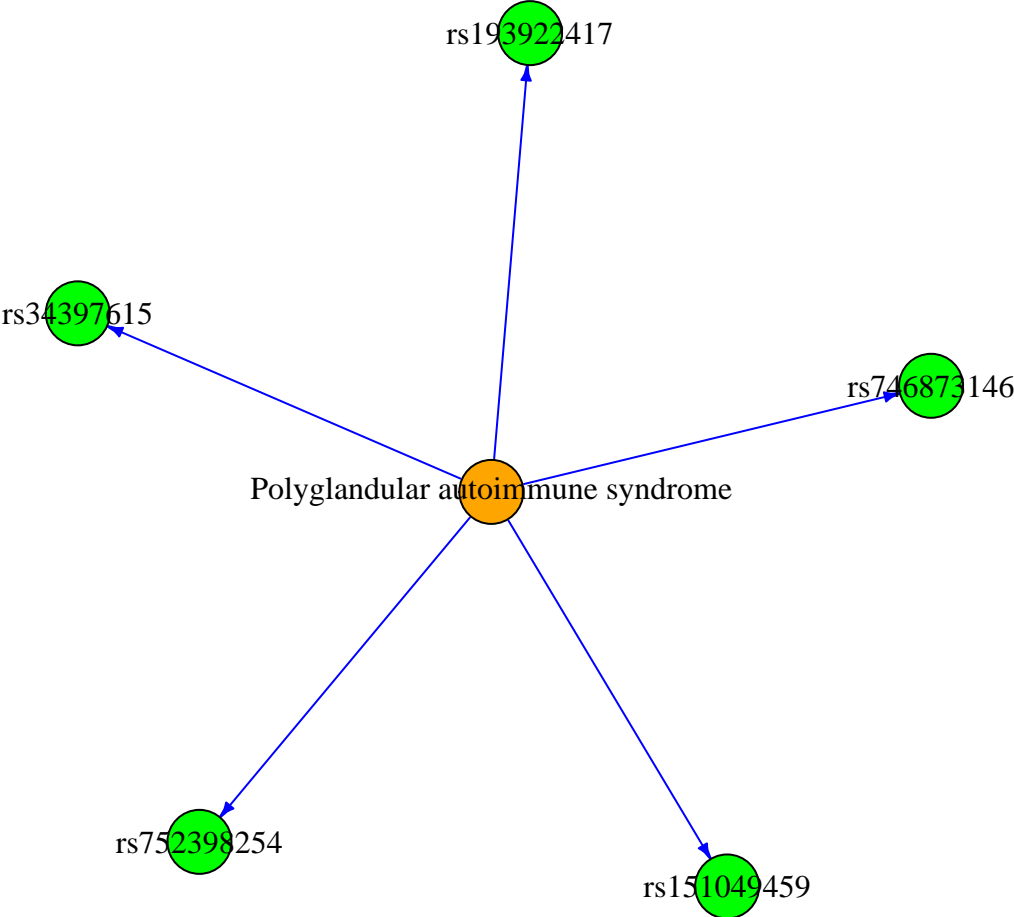

## Variant–Disease Network (Polyglucosan body disease)

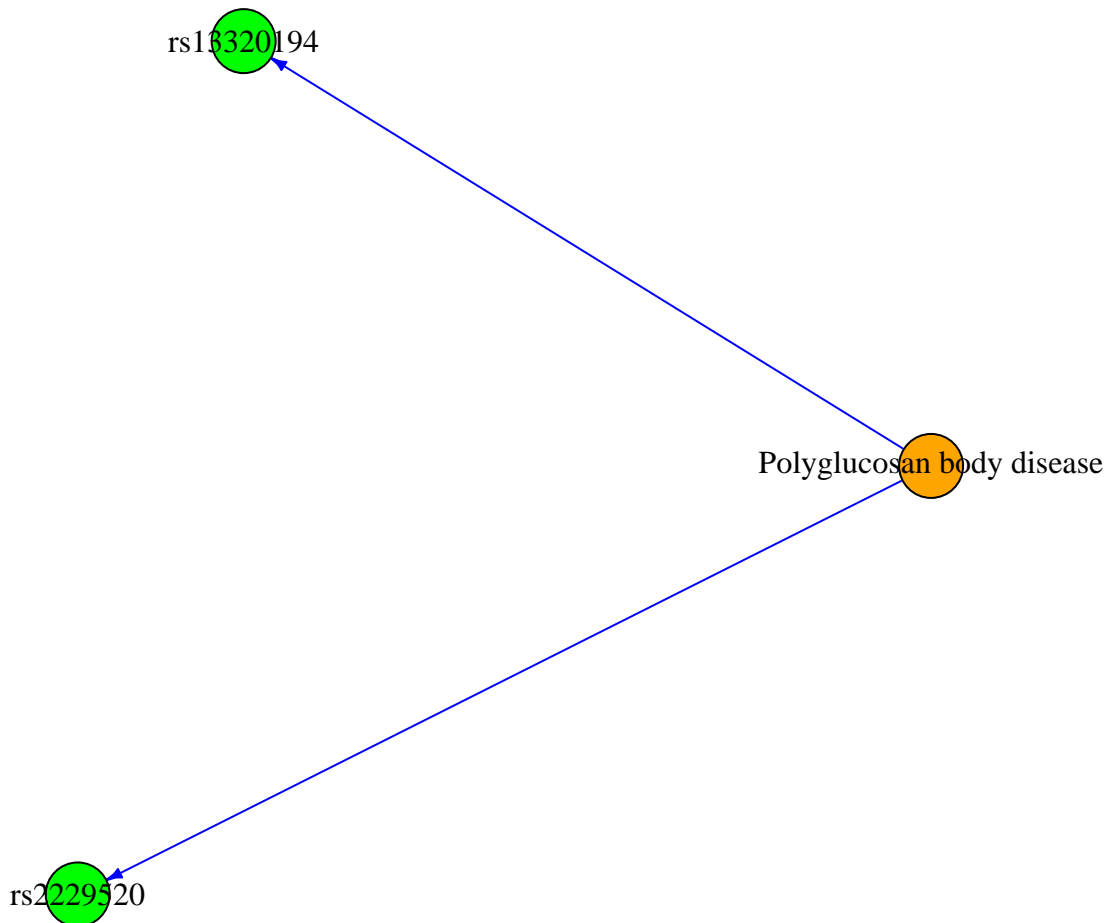

# t-Disease Network (Polyglucosan body myopathy 1 with or without immunodeficiency)

an body myopathy 1 with or without immunodeficiency

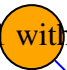

rs757115540

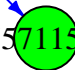

## Variant–Disease Network (Polymicrogyria)

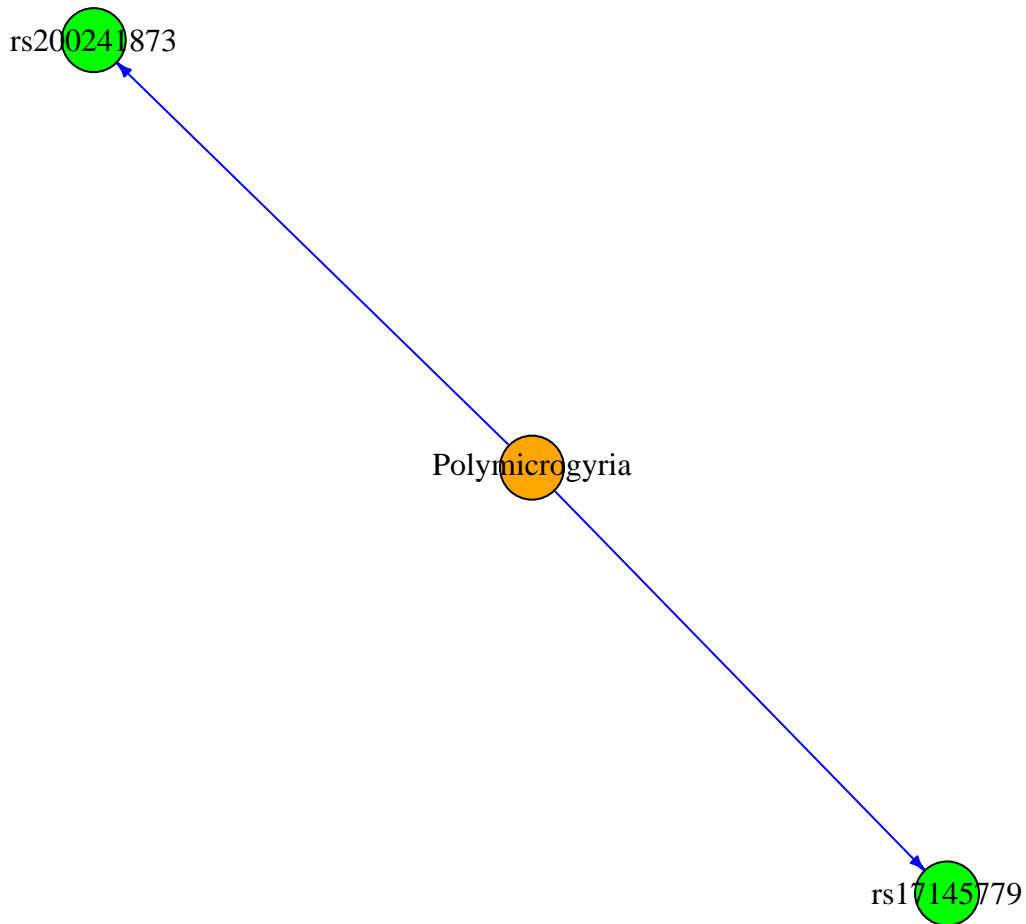

Variant–Disease Network (Polyneuropathy)

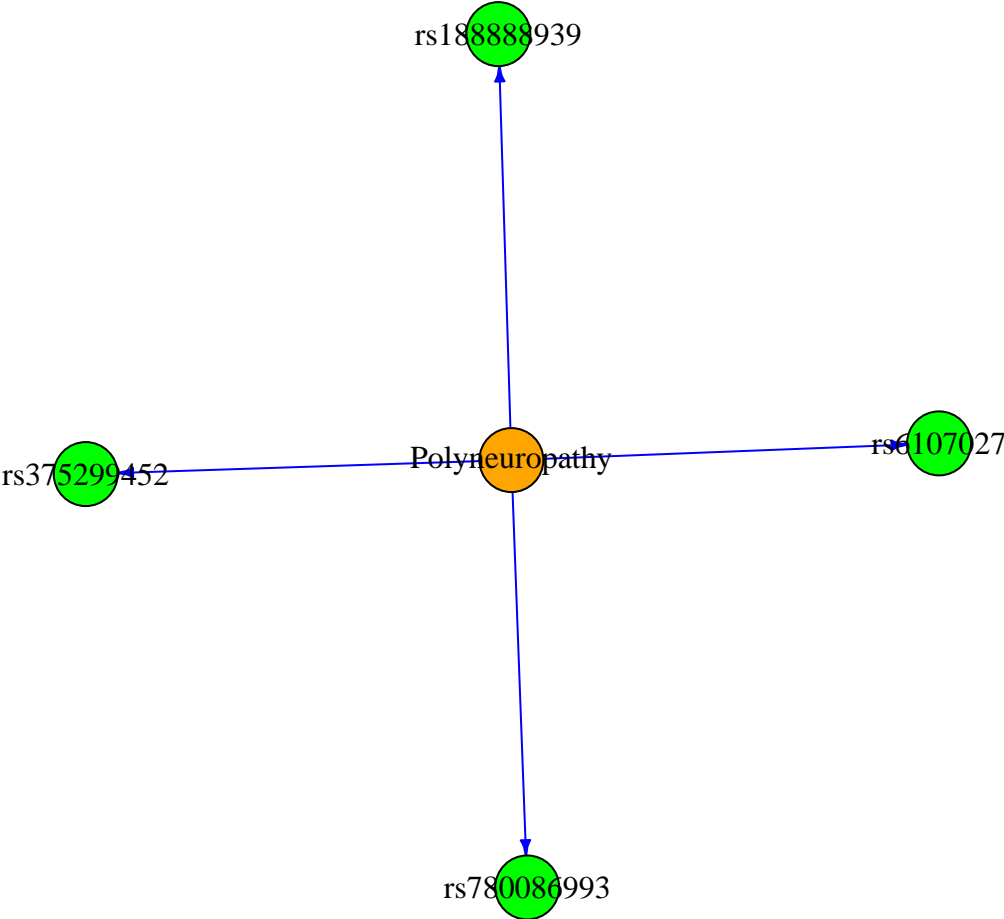

**Variant–Disease Network (Pontocerebellar hypoplasia type 1)**

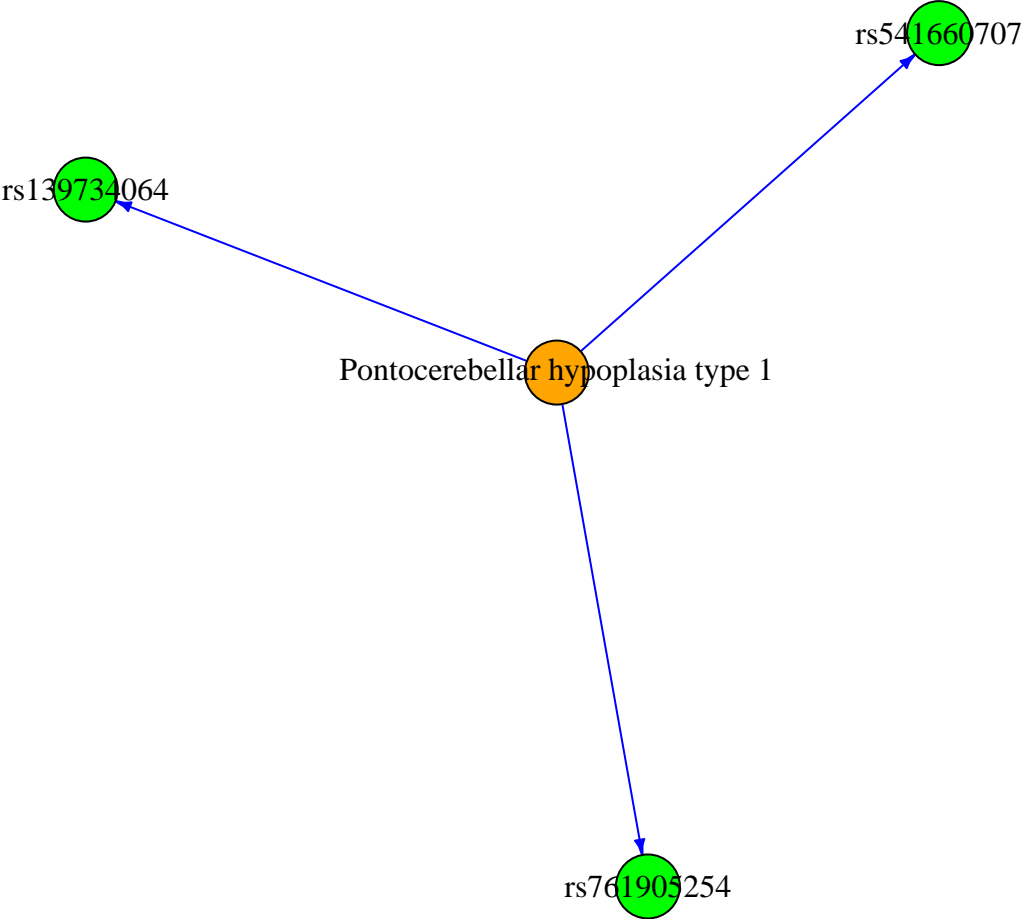

Variant–Disease Network (Pontoneocerebellar hypoplasia)

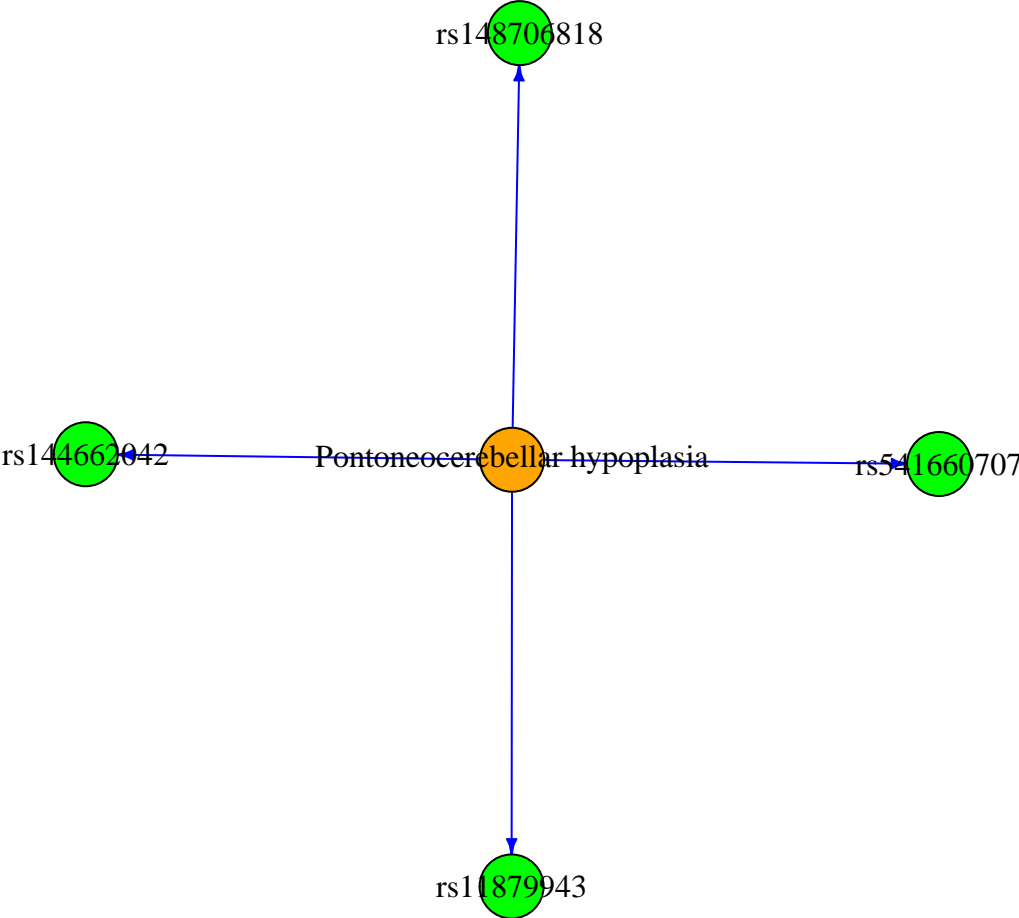

Variant–Disease Network (Popliteal pterygium syndrome)

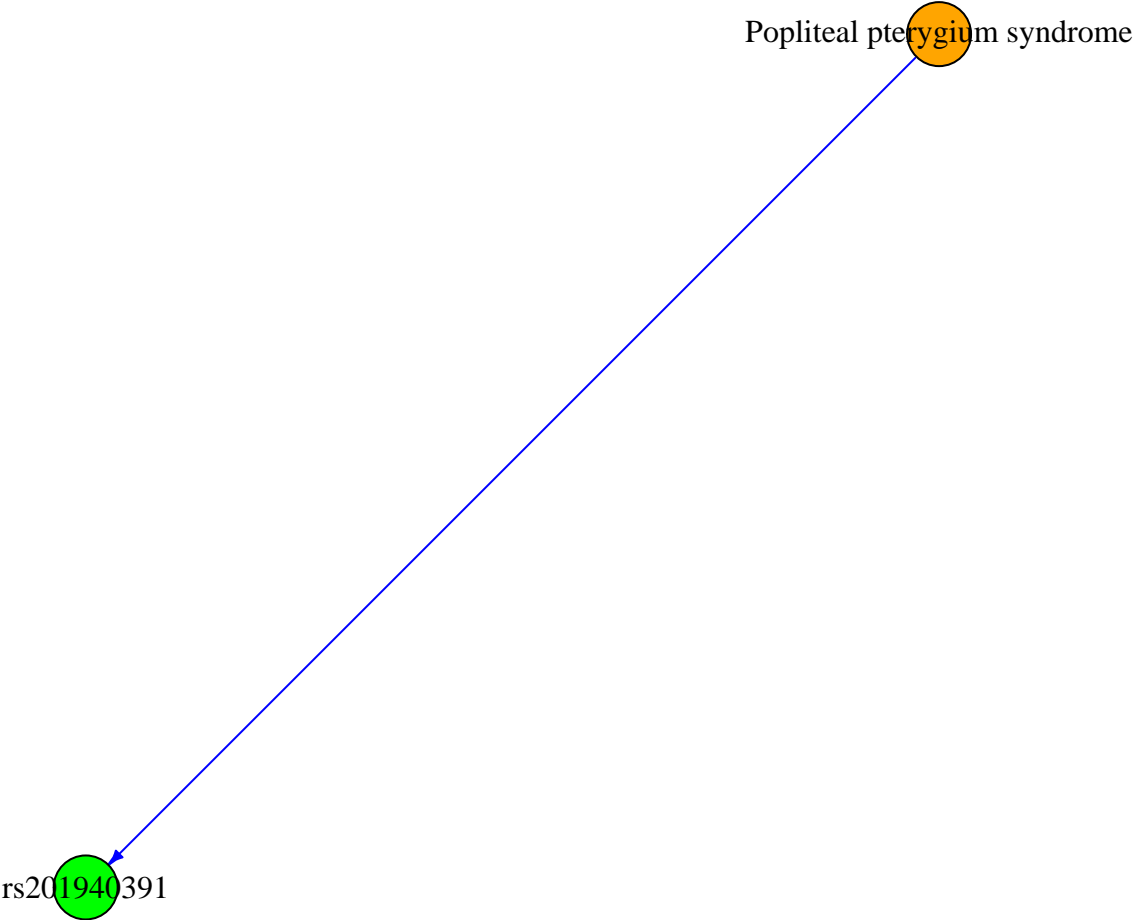



## Variant–Disease Network (Porencephalic cyst)

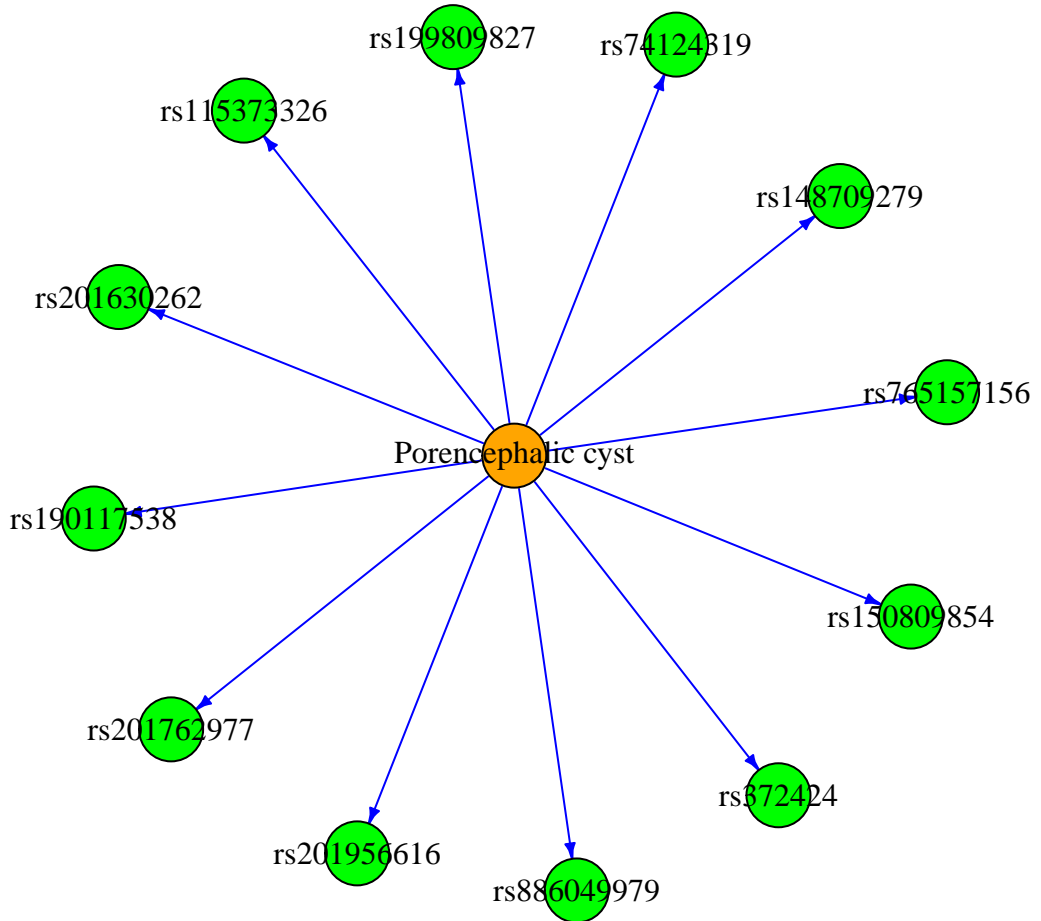

Variant–Disease Network (Porphobilinogen synthase deficiency)

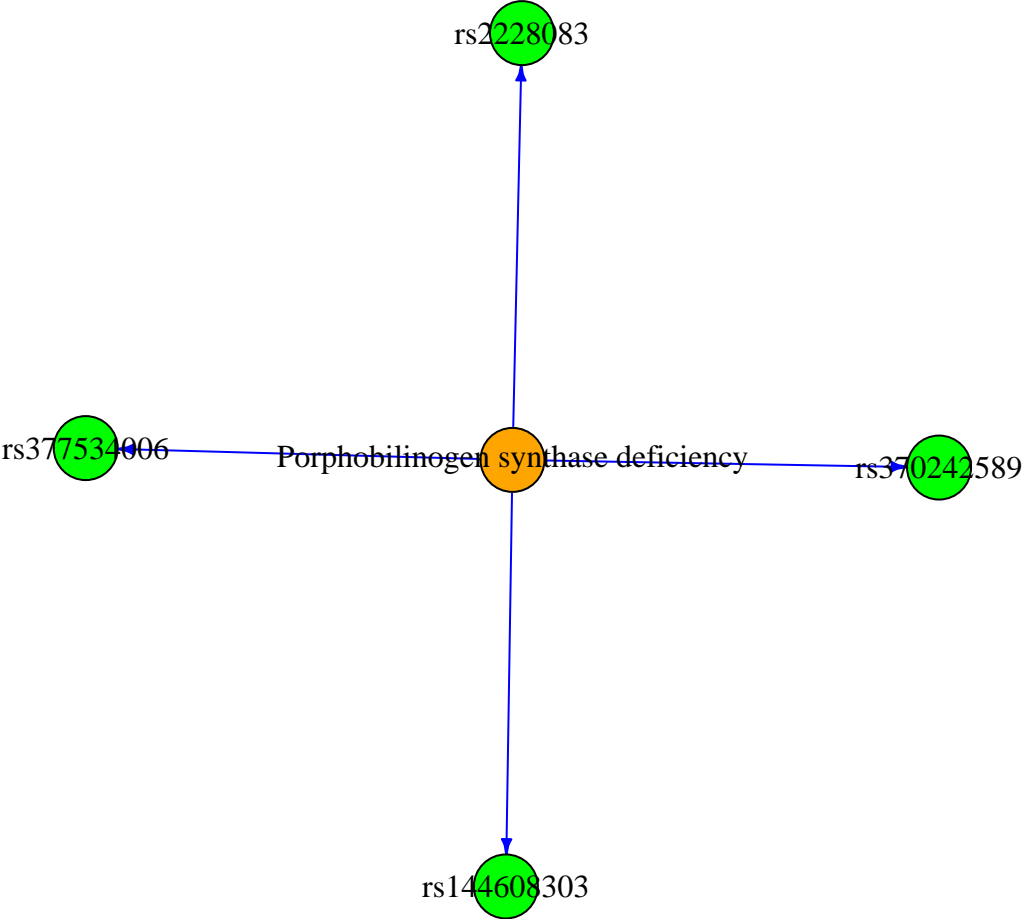

## Variant-Disease Network (Porphyria)

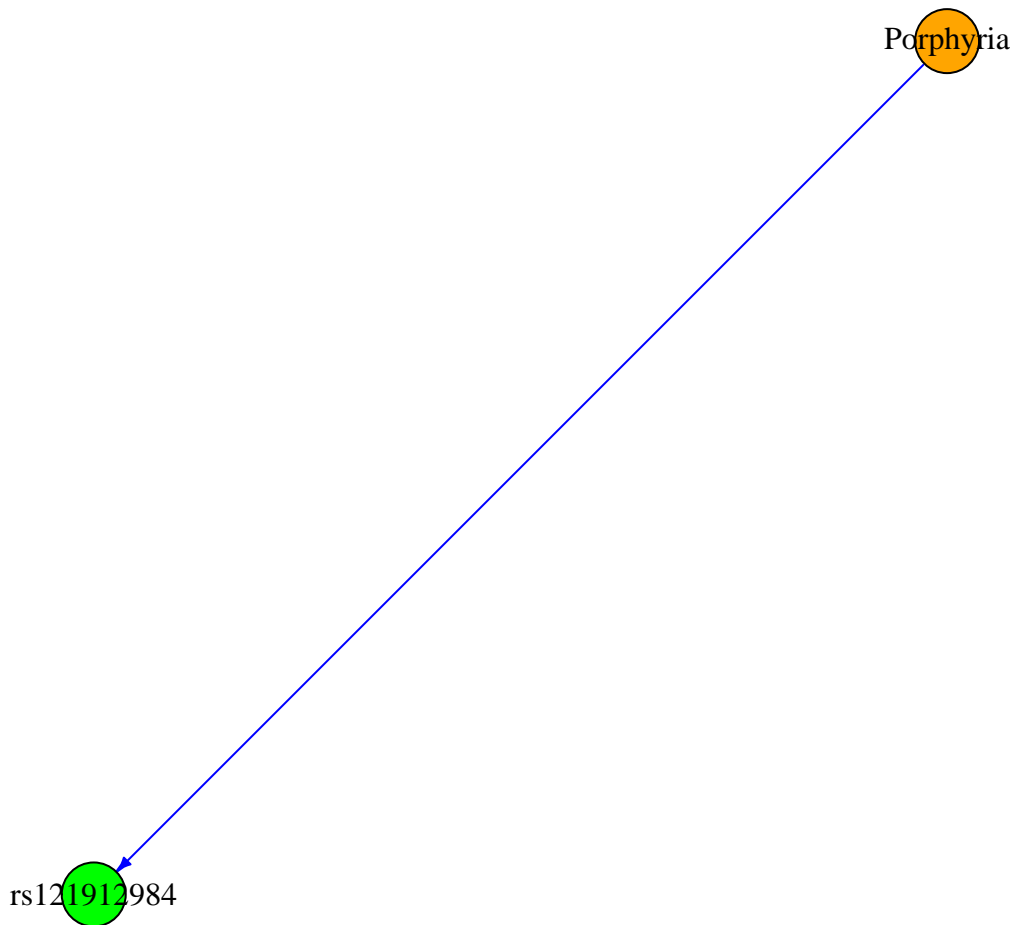

Variant–Disease Network (Porphyria cutanea tarda)

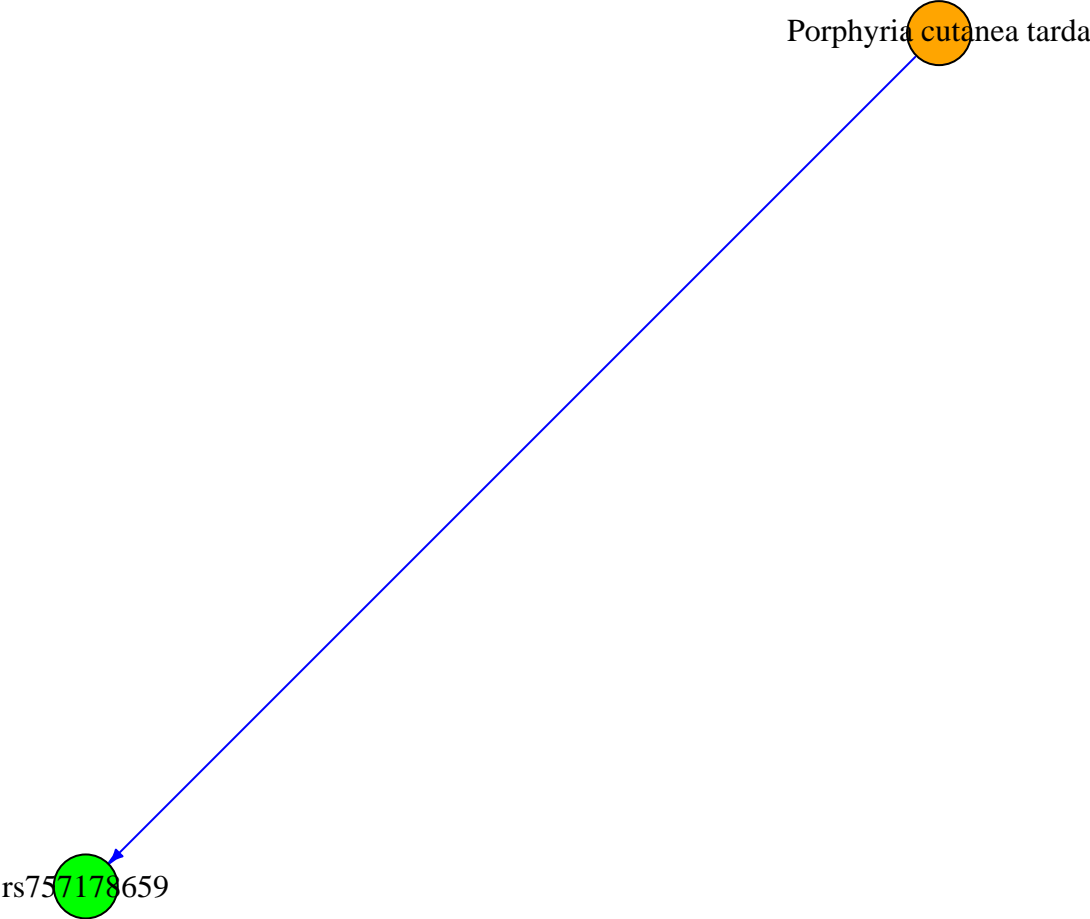

## Variant–Disease Network (Posterior polar cataract)

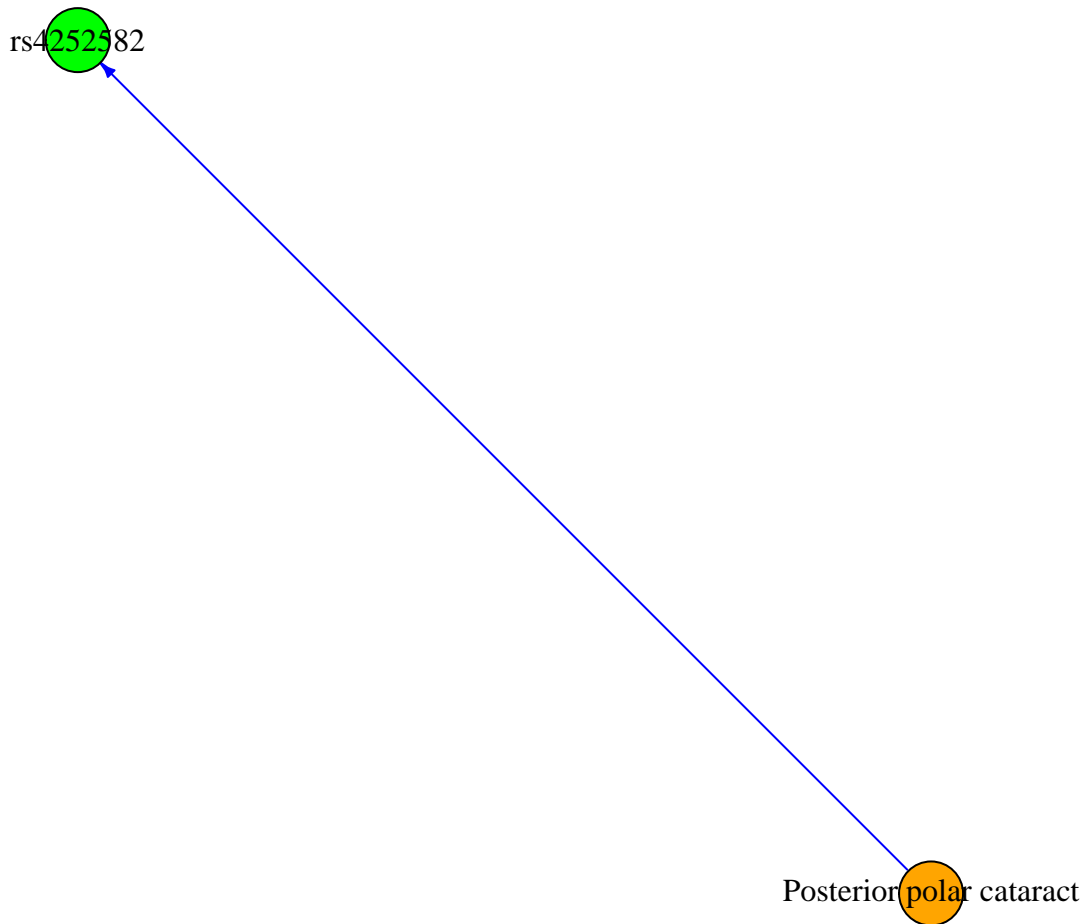

## Variant–Disease Network (Potassium aggravated myotonia)

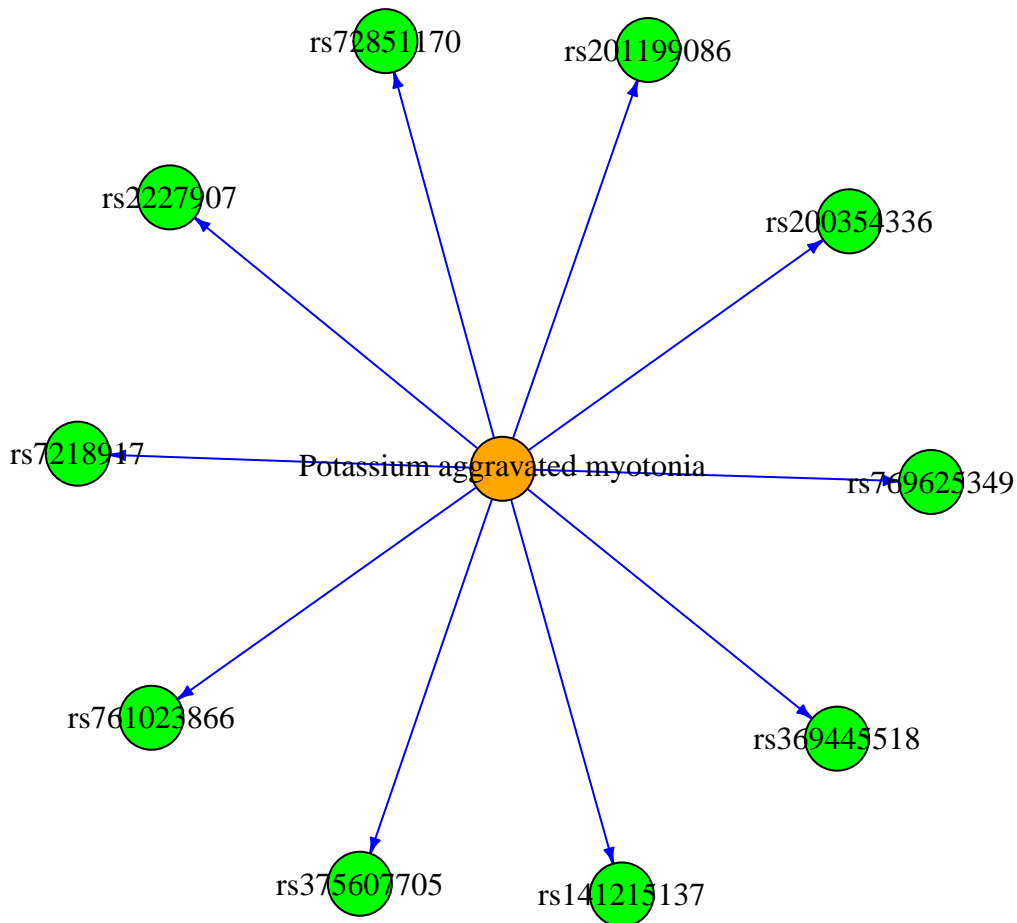

## Variant-Disease Network (Premature ovarian failure 2b)

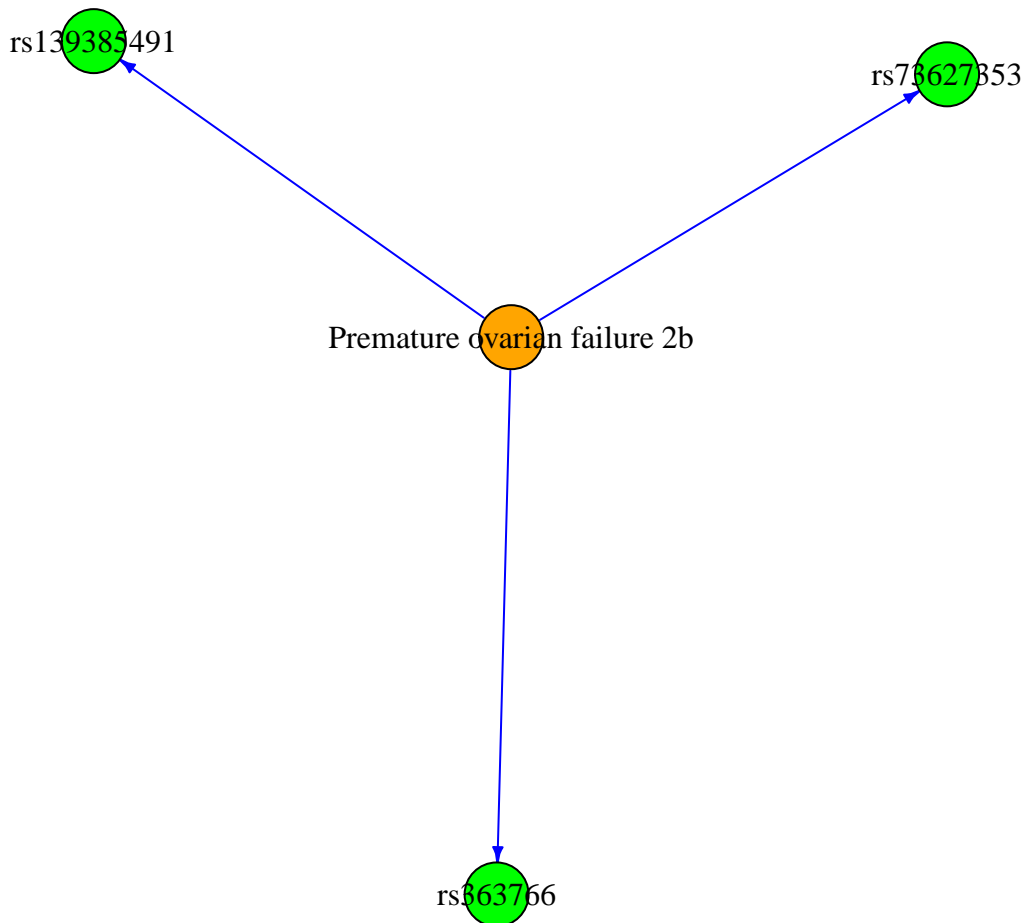

**Variant–Disease Network (Primary autosomal recessive microcephaly 2)**

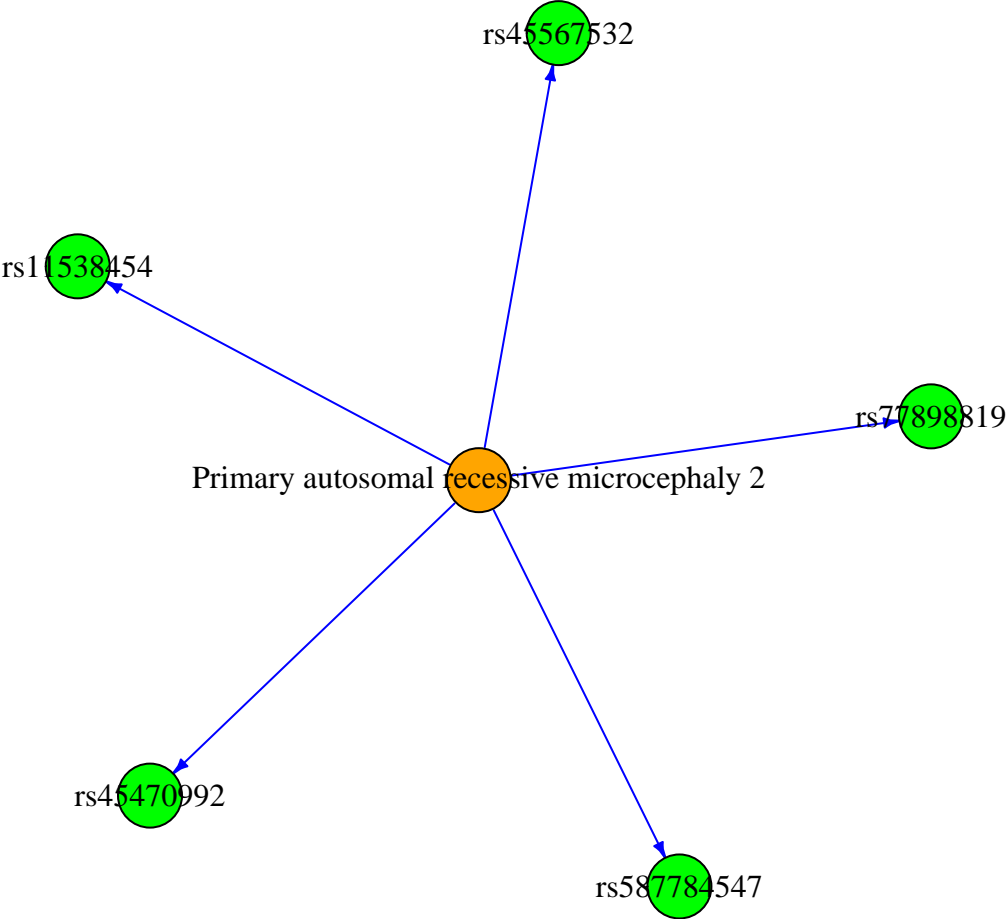



## Variant–Disease Network (Primary ciliary dyskinesia)

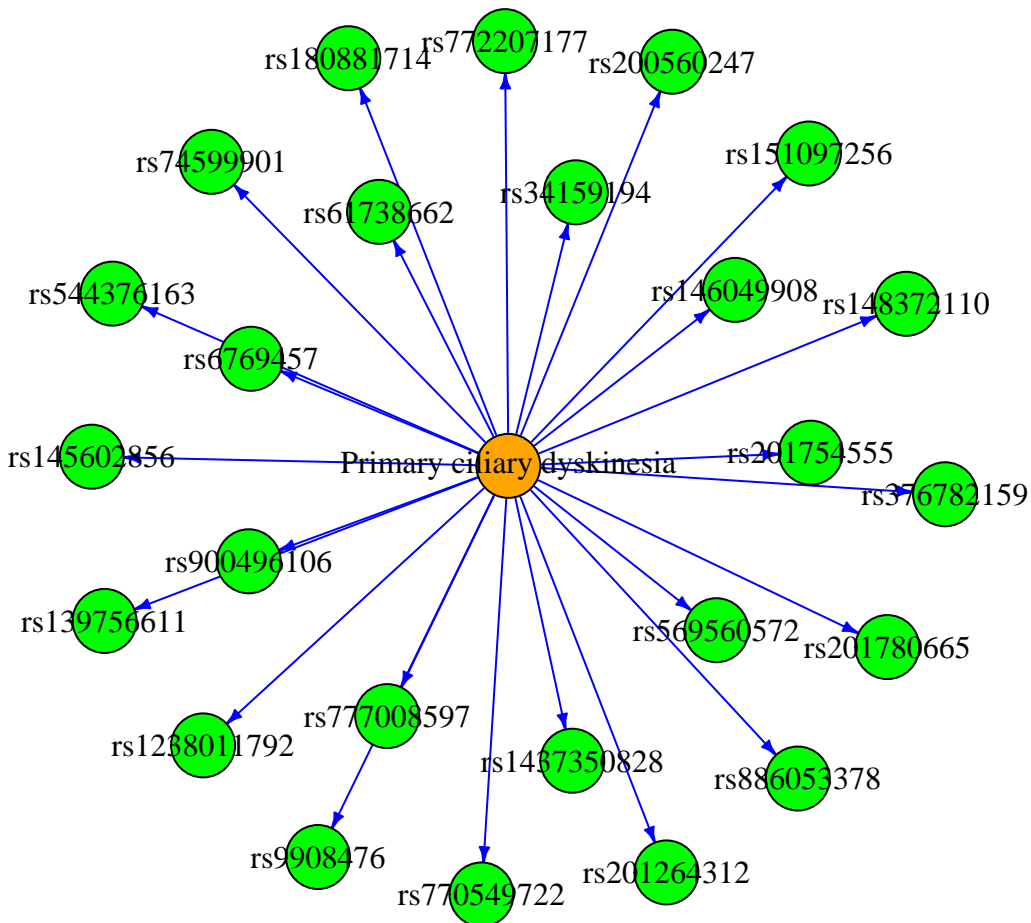

## Variant–Disease Network (Primary ciliary dyskinesia 23)

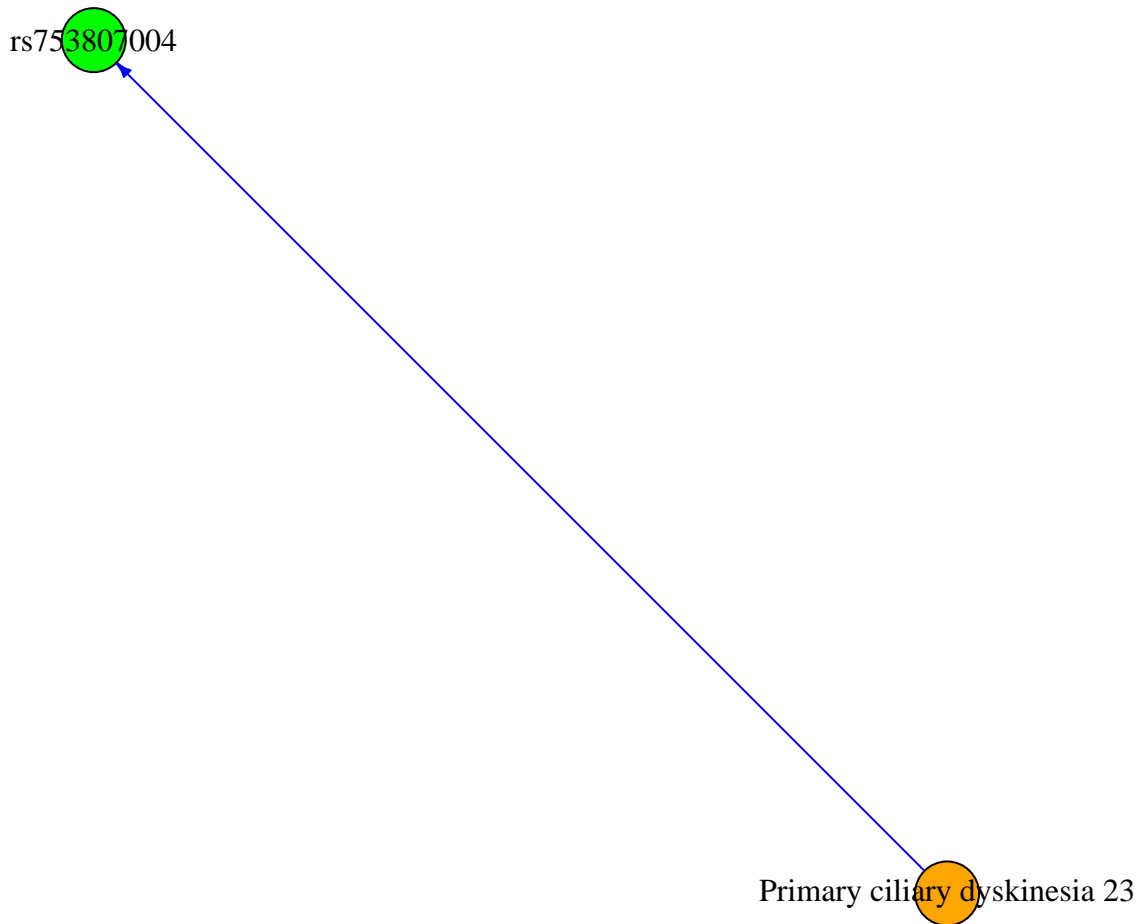

## Variant–Disease Network (Primary congenital glaucoma)

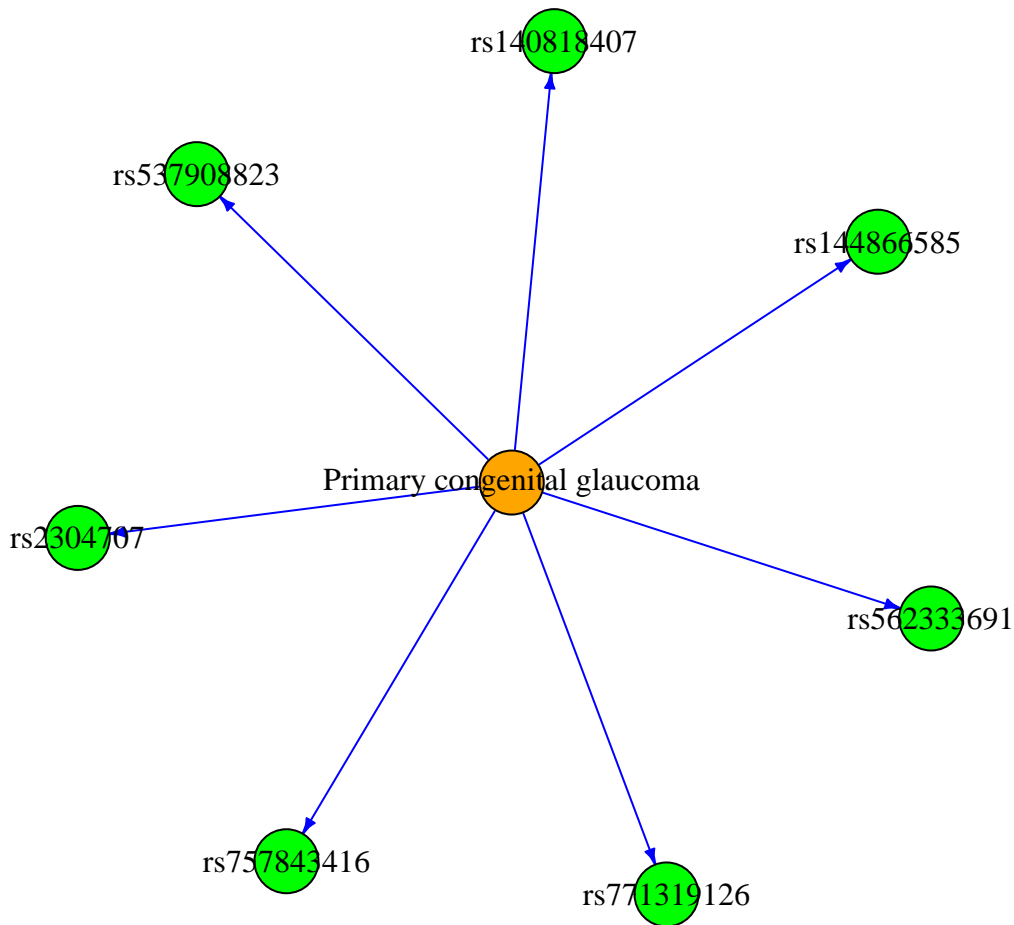

## Variant–Disease Network (Primary dilated cardiomyopathy)

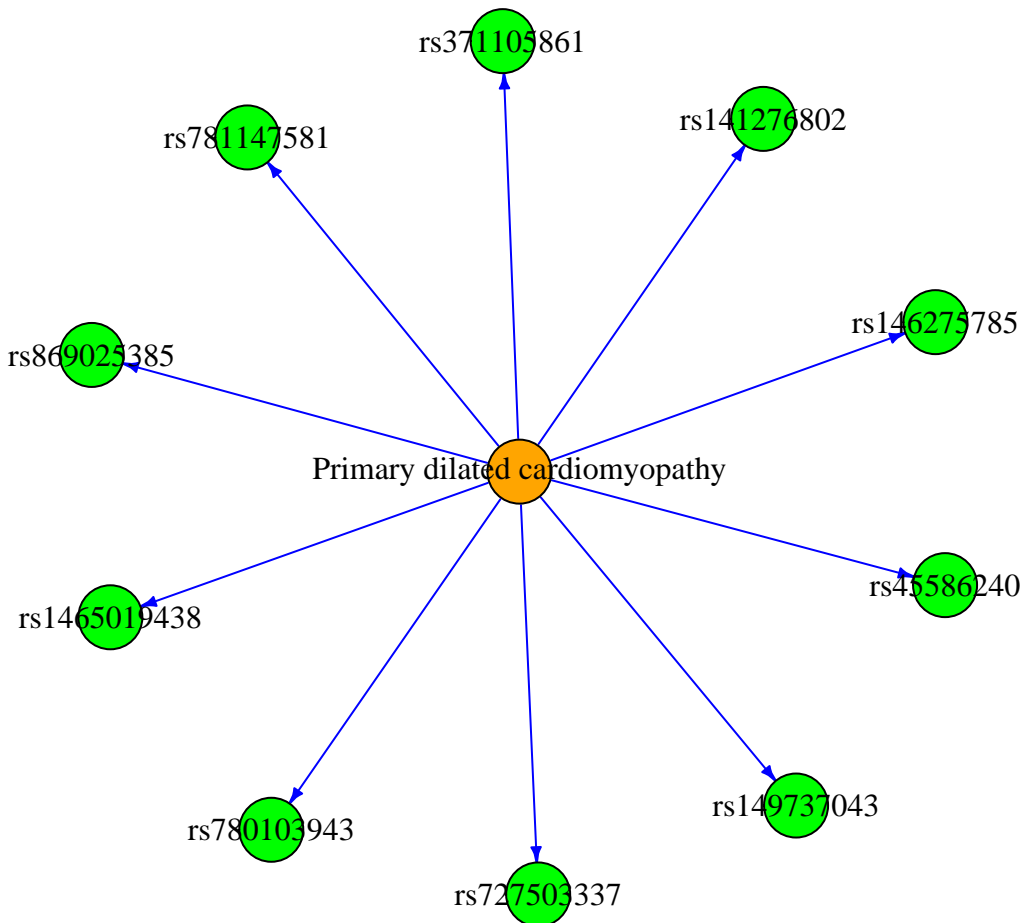

Variant–Disease Network (Primary familial hypertrophic cardiomyopathy)

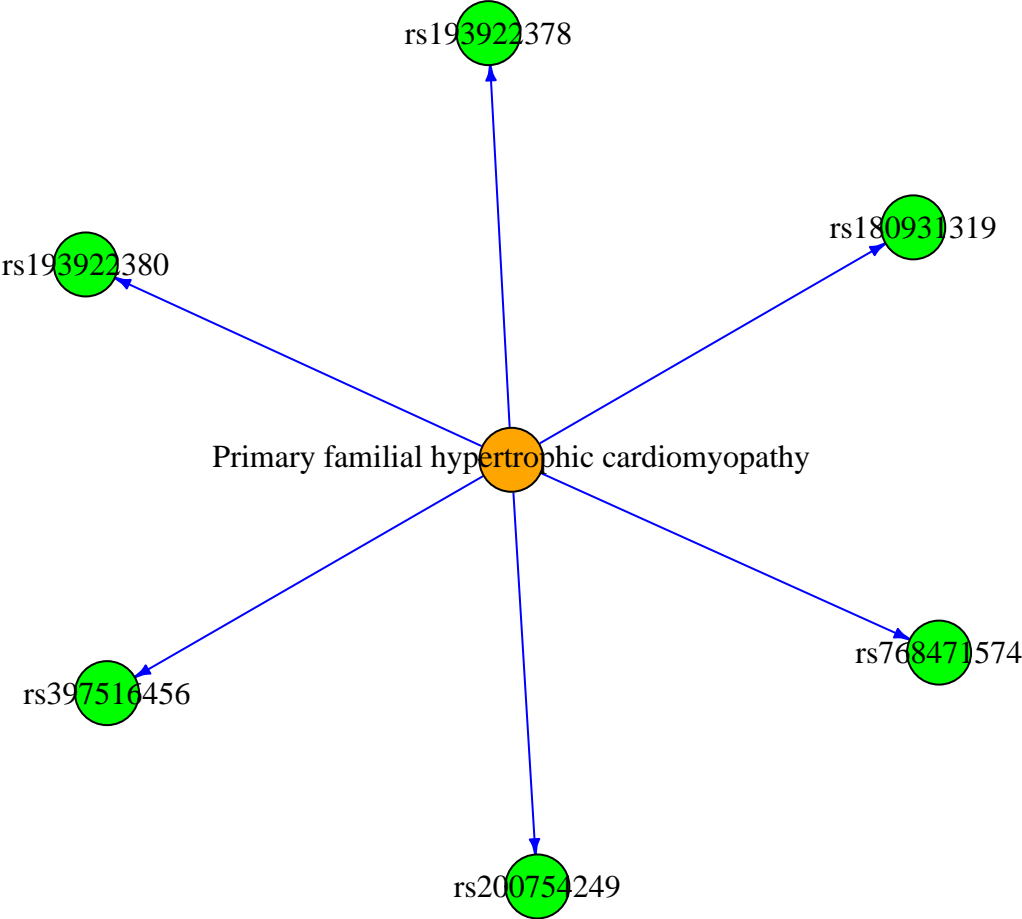

## Variant–Disease Network (Primary hyperoxaluria)

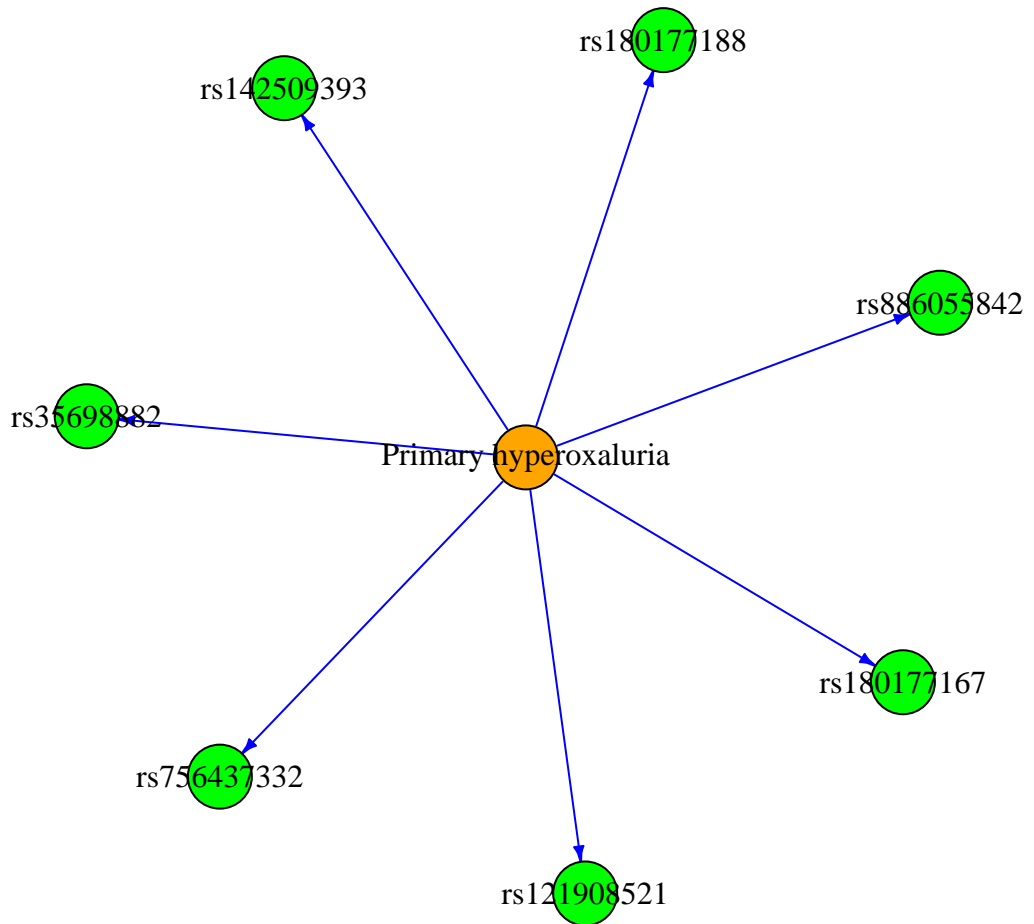

## Variant–Disease Network (Primary immunodeficiency)

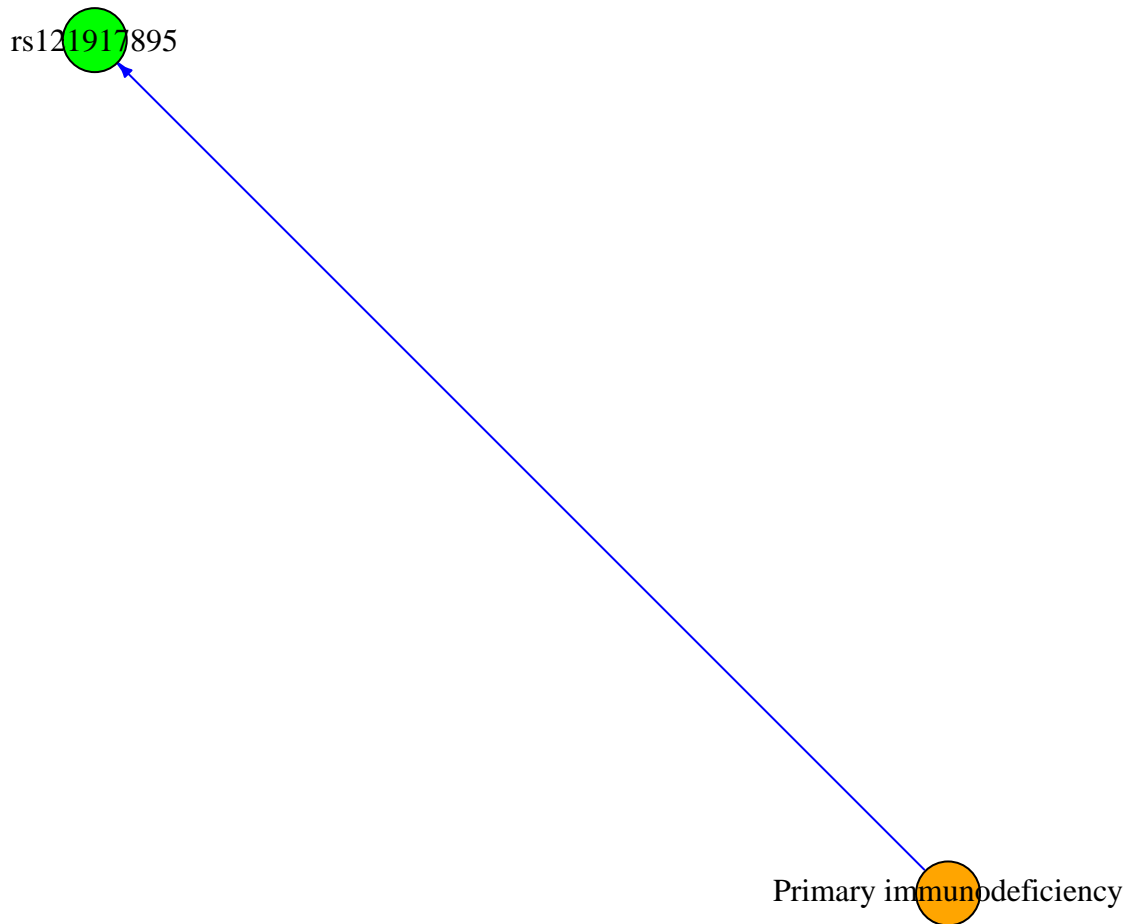

# nt-Disease Network (Primary Microcephaly 2 With or Without Cortical Malfo

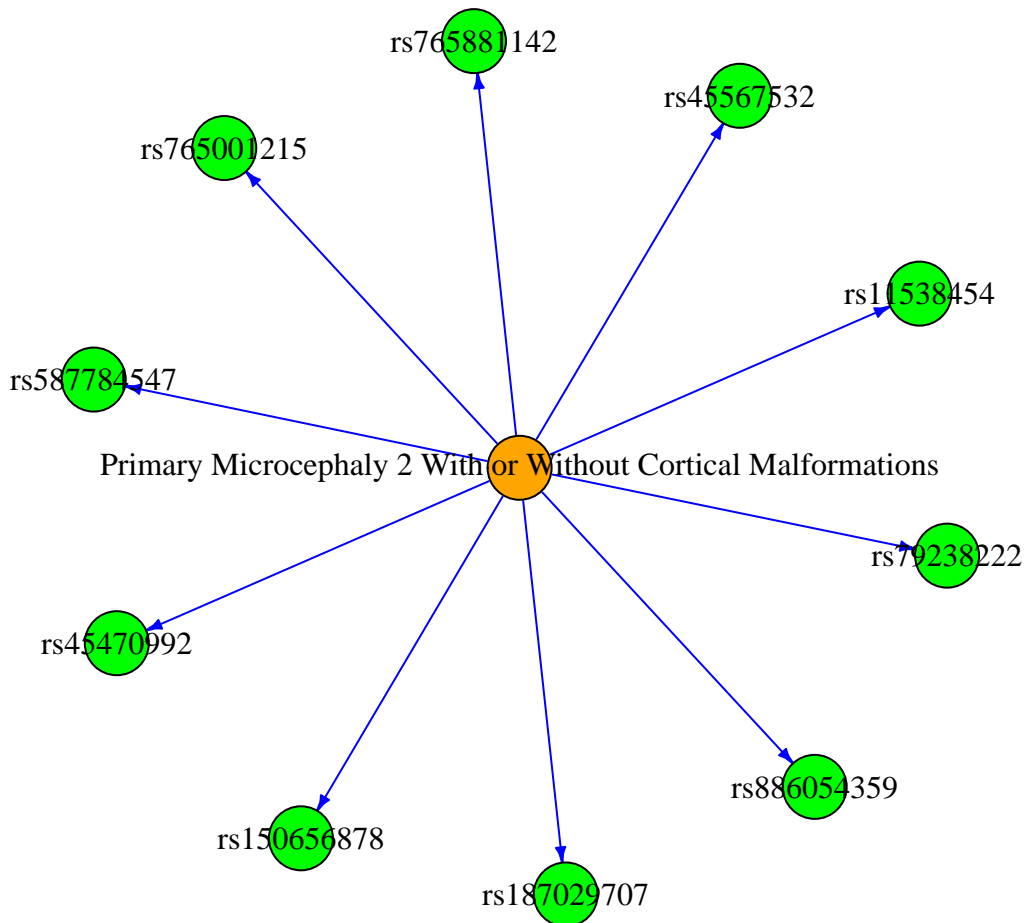



Variant–Disease Network (Primary open angle glaucoma)

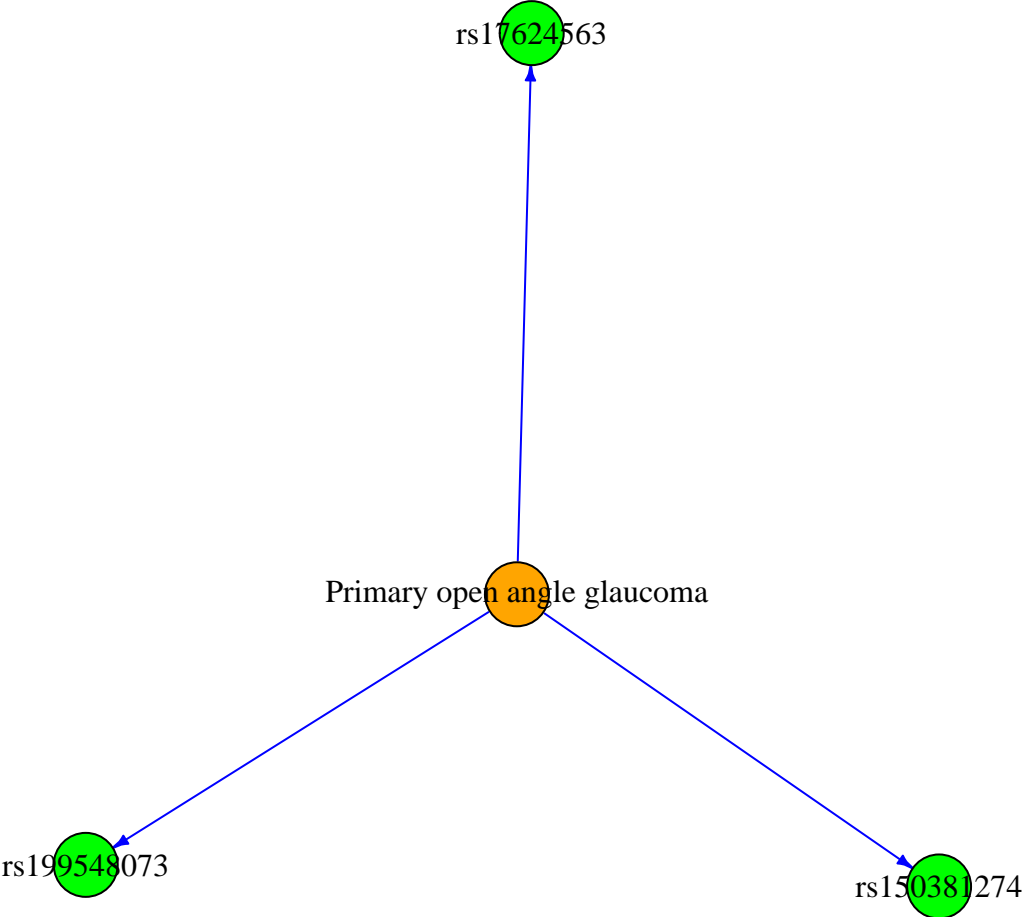

Variant–Disease Network (Primary pulmonary hypertension)

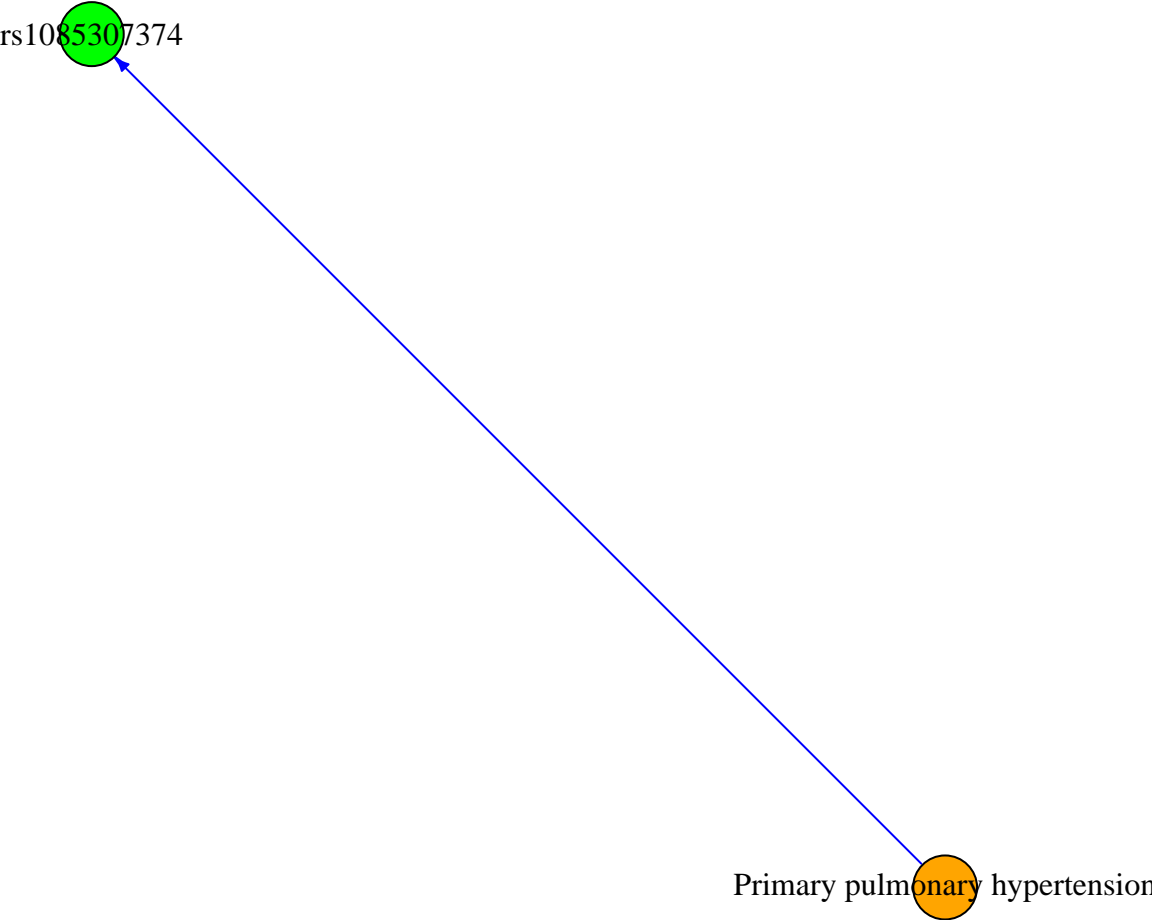

Variant–Disease Network (Profound global developmental delay)

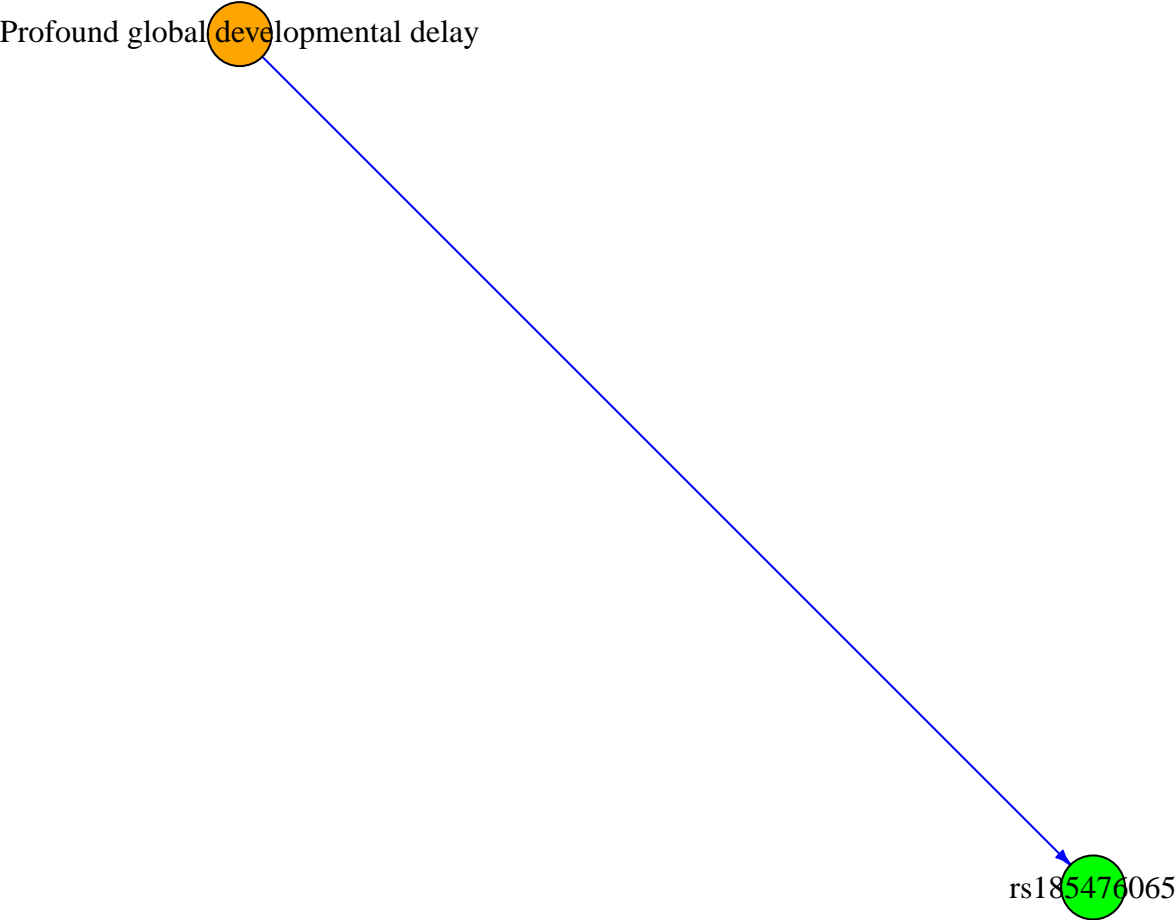

# Disease Network (Progressive External Ophthalmoplegia with Mitochondrial D

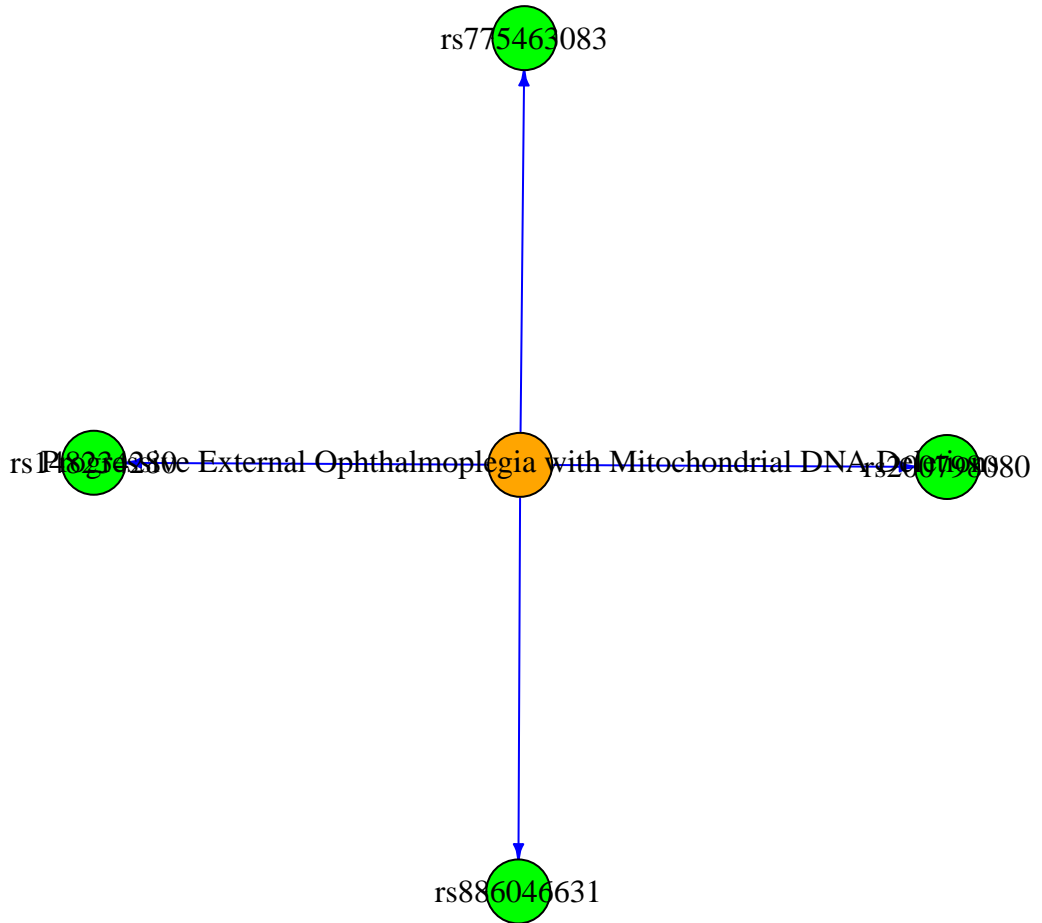

Variant–Disease Network (Progressive familial heart block)

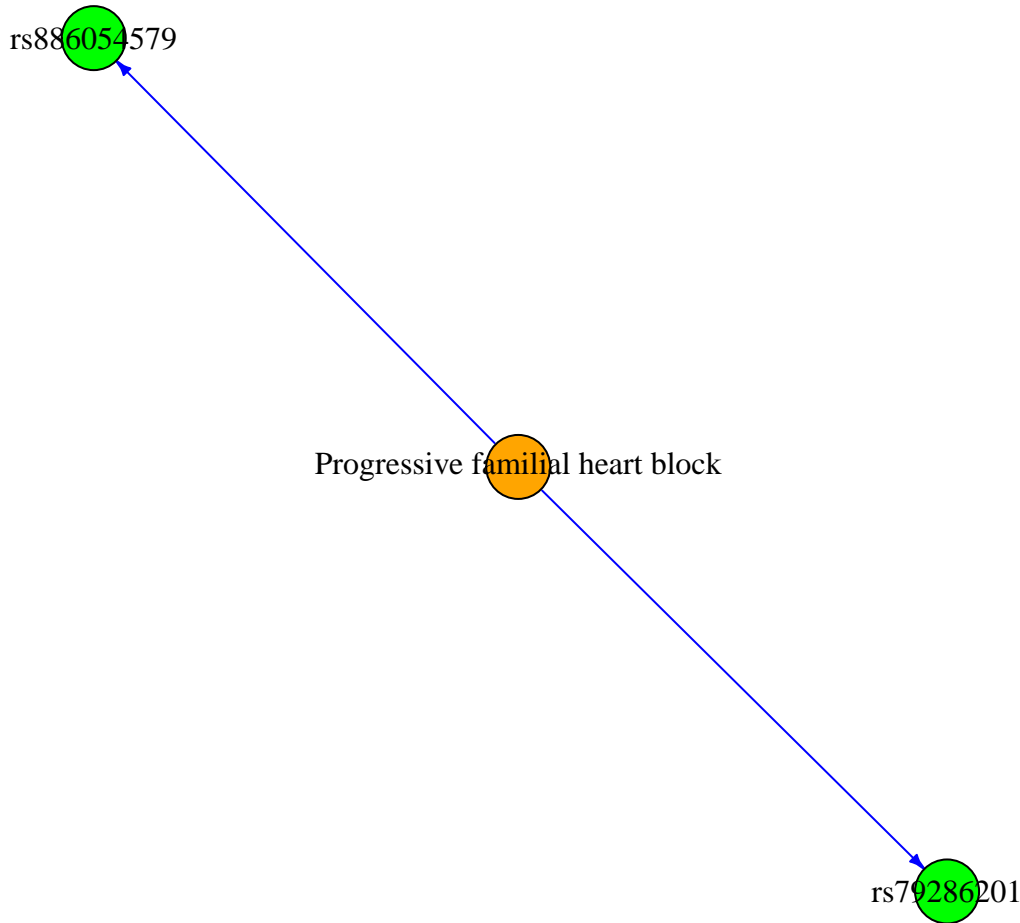

# Variant–Disease Network (Progressive familial heart block type 1B)

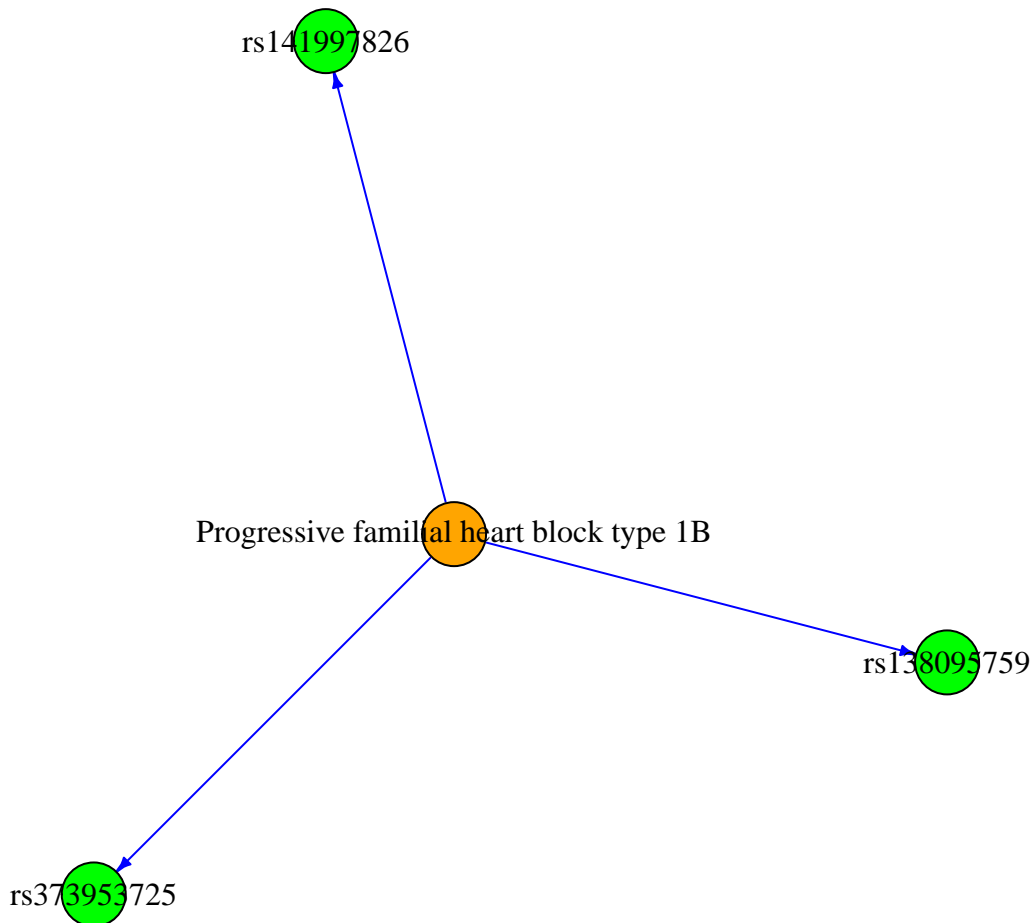

# Variant–Disease Network (Progressive familial intrahepatic cholestasis)

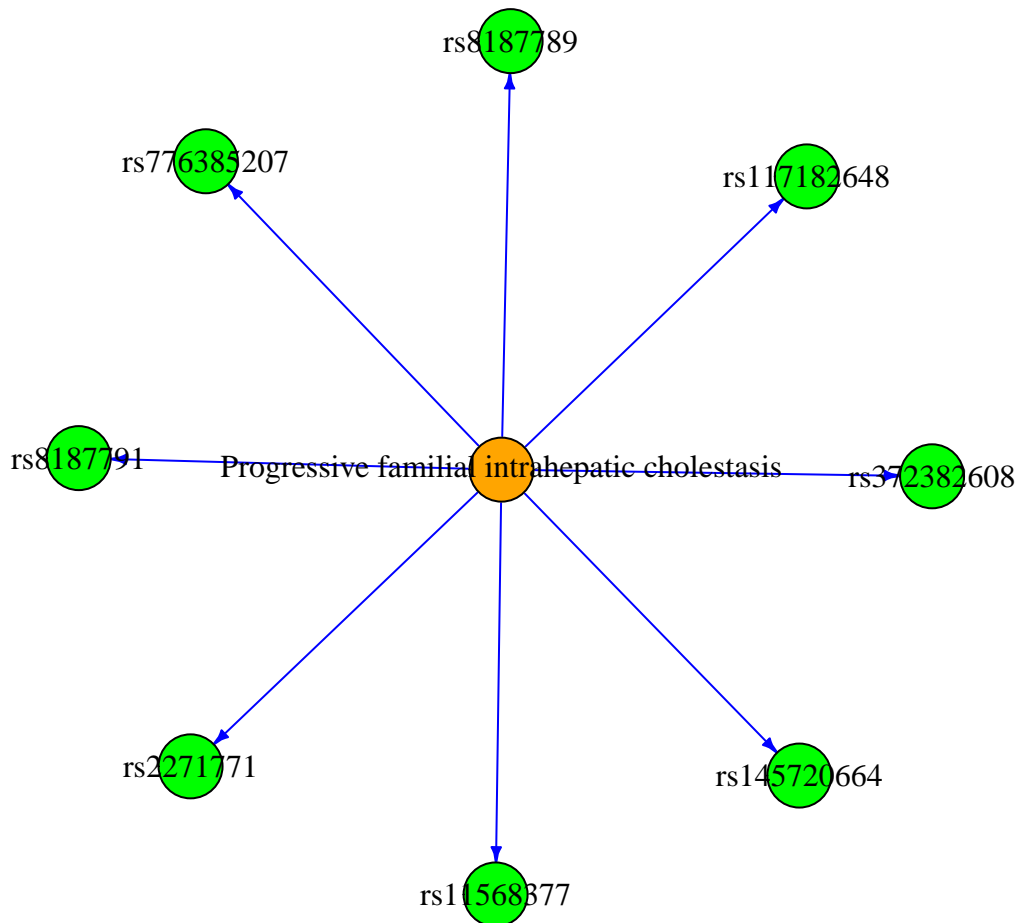

Variant–Disease Network (Progressive familial intrahepatic cholestasis 3)

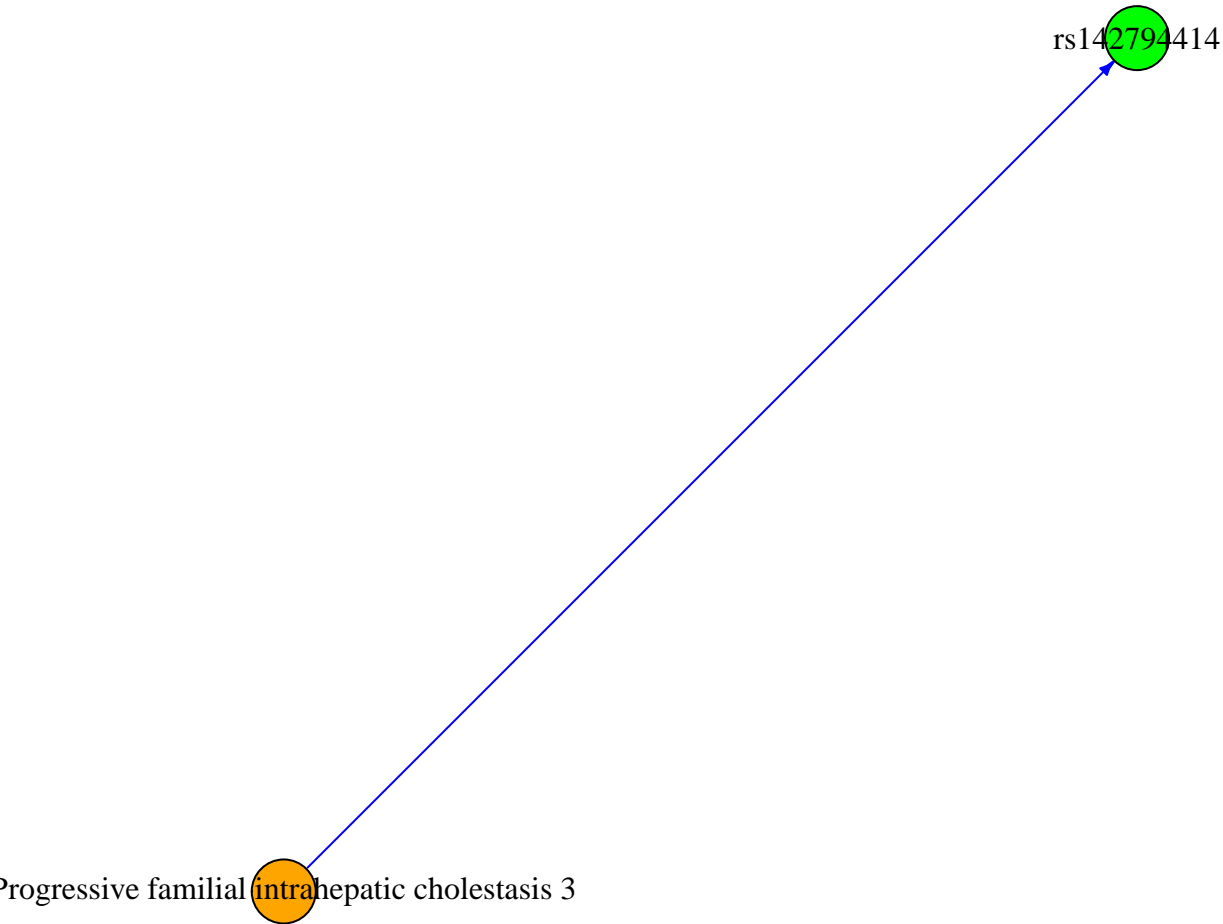



# Variant–Disease Network (Progressive myoclonic epilepsy)

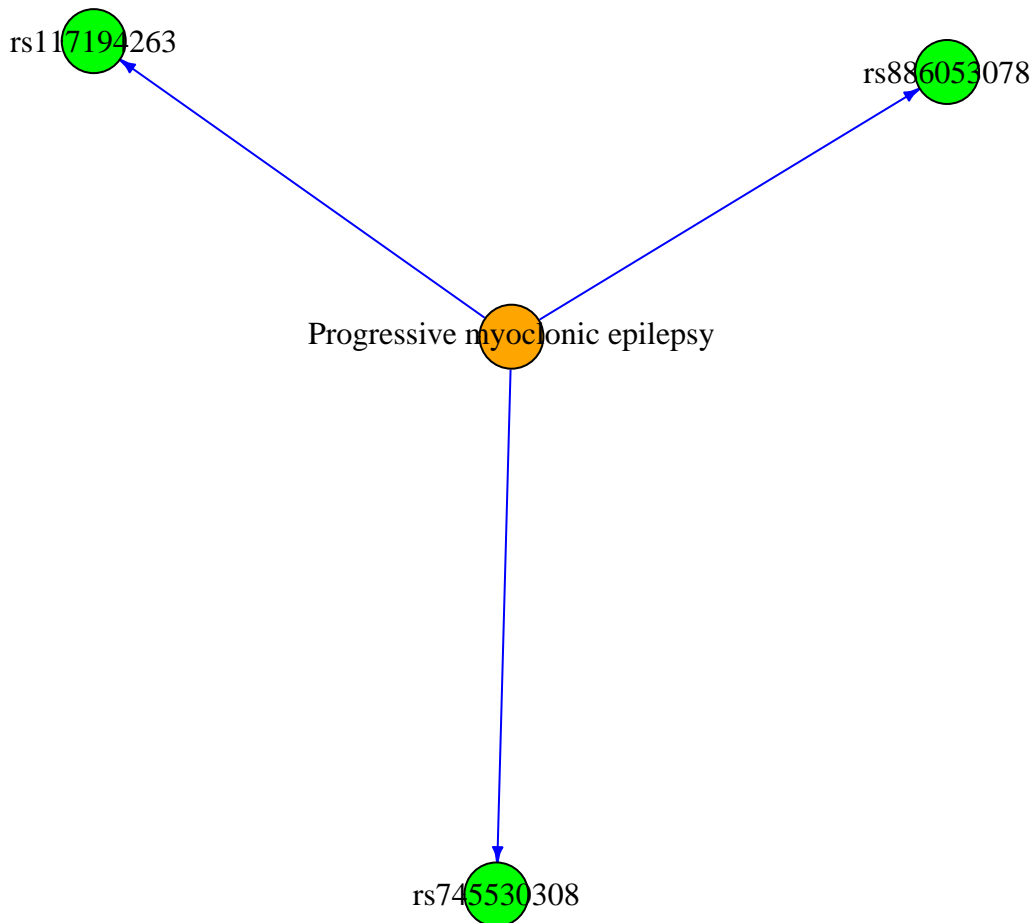

**Variant–Disease Network (Progressive myoclonus epilepsy with ataxia)**

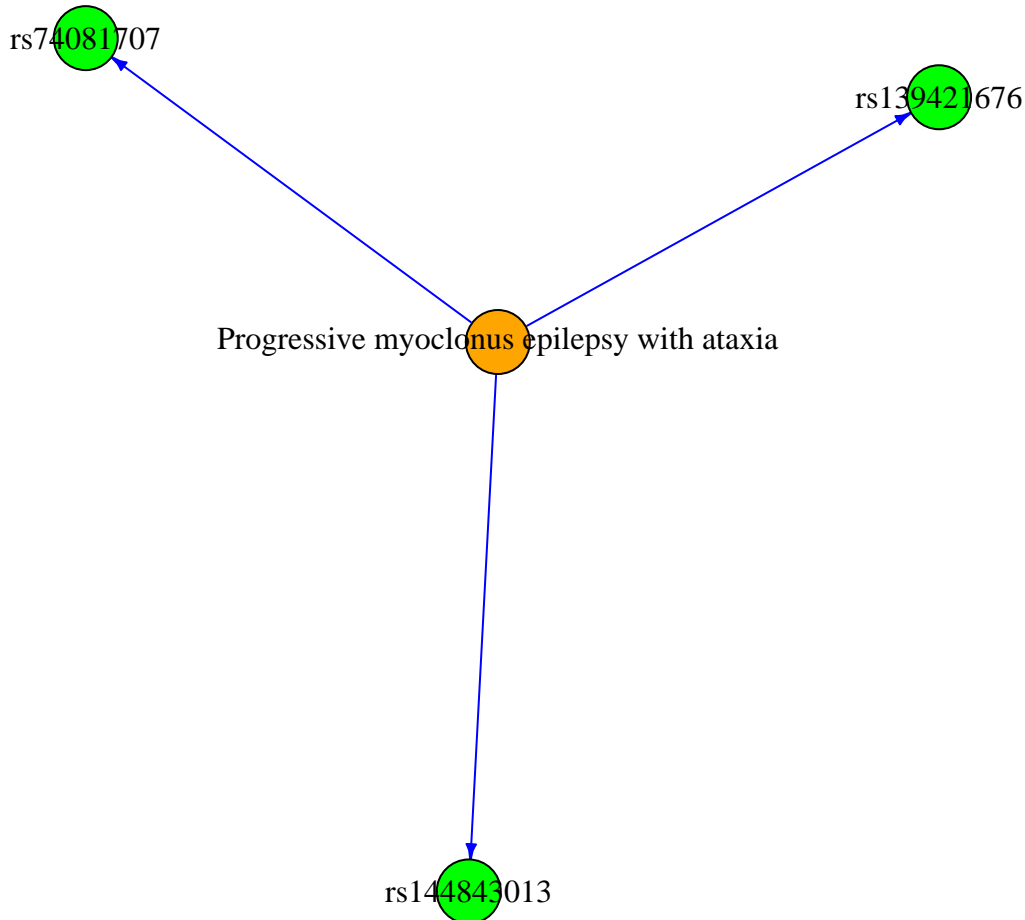

## Variant–Disease Network (Progressive myositis ossificans)

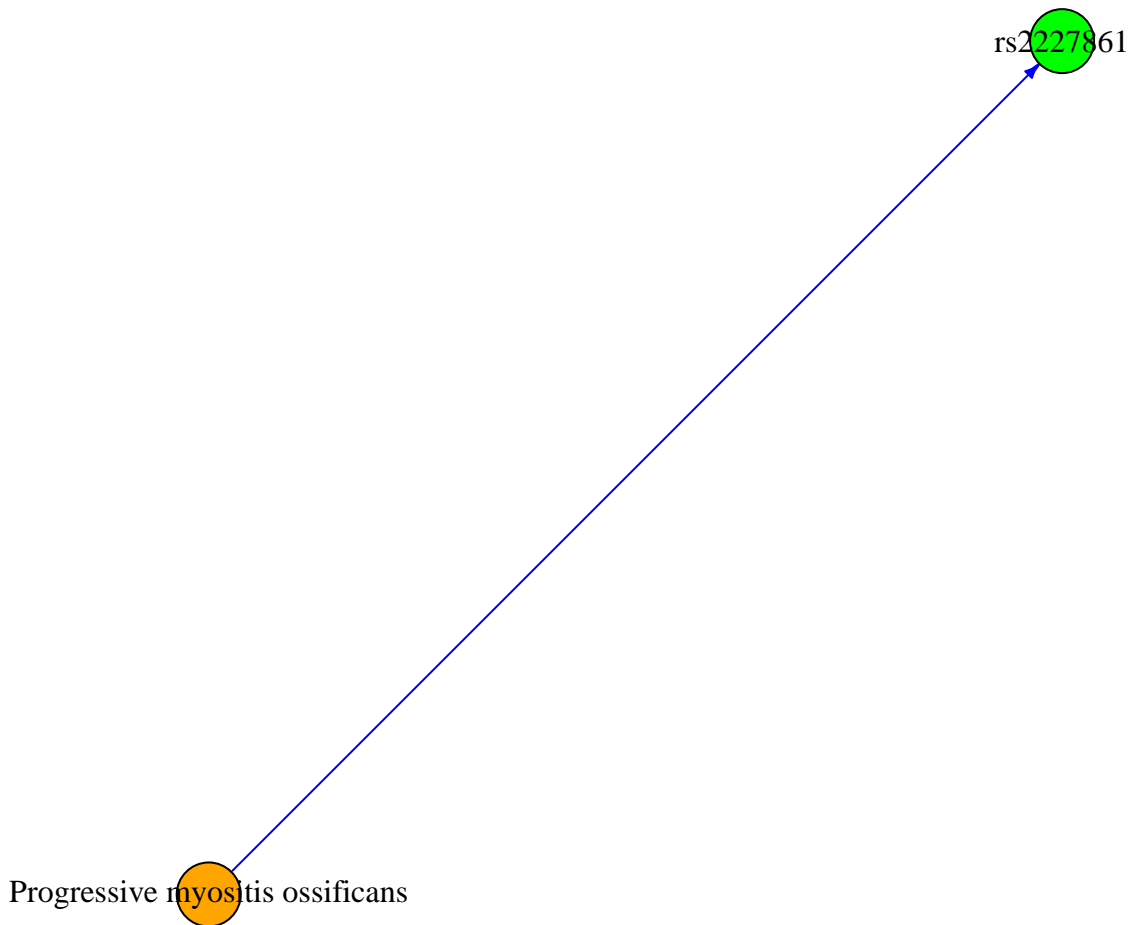

**Variant–Disease Network (Progressive sclerosing poliodystrophy)**

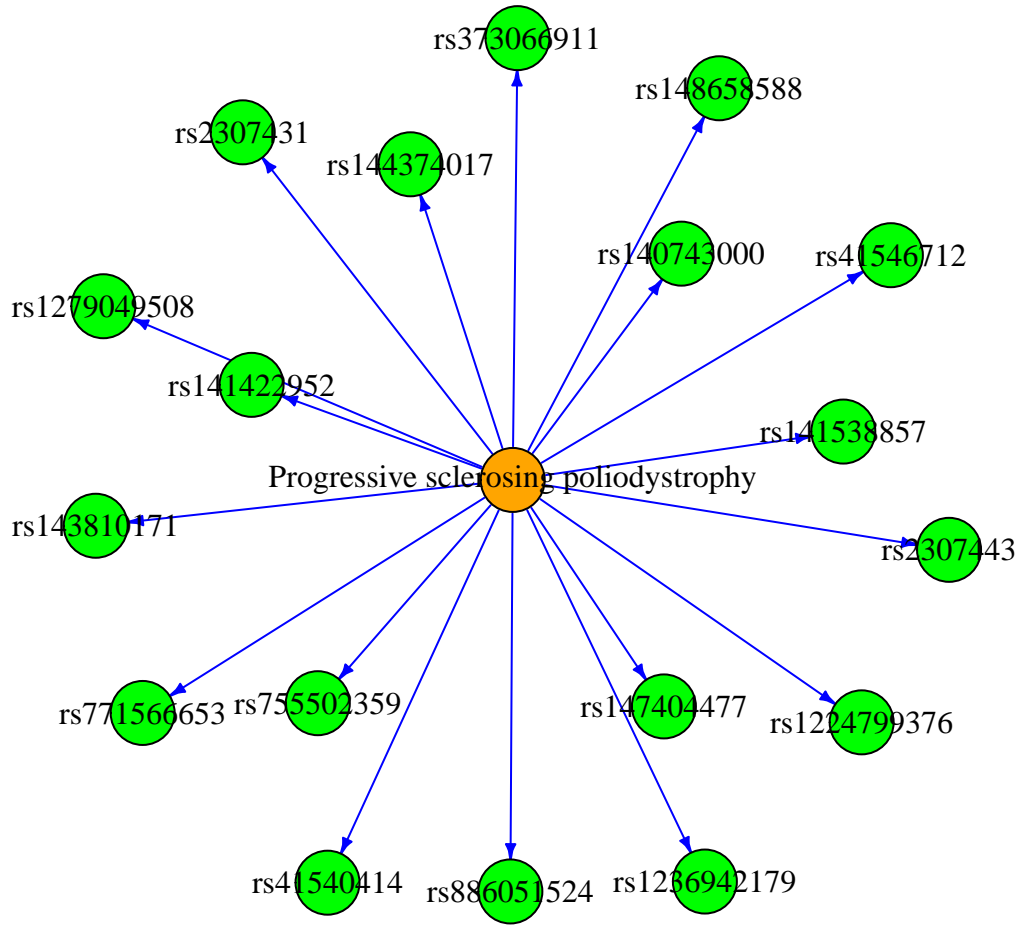

# Variant–Disease Network (Proline dehydrogenase deficiency)

Proline dehydrogenase deficiency

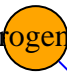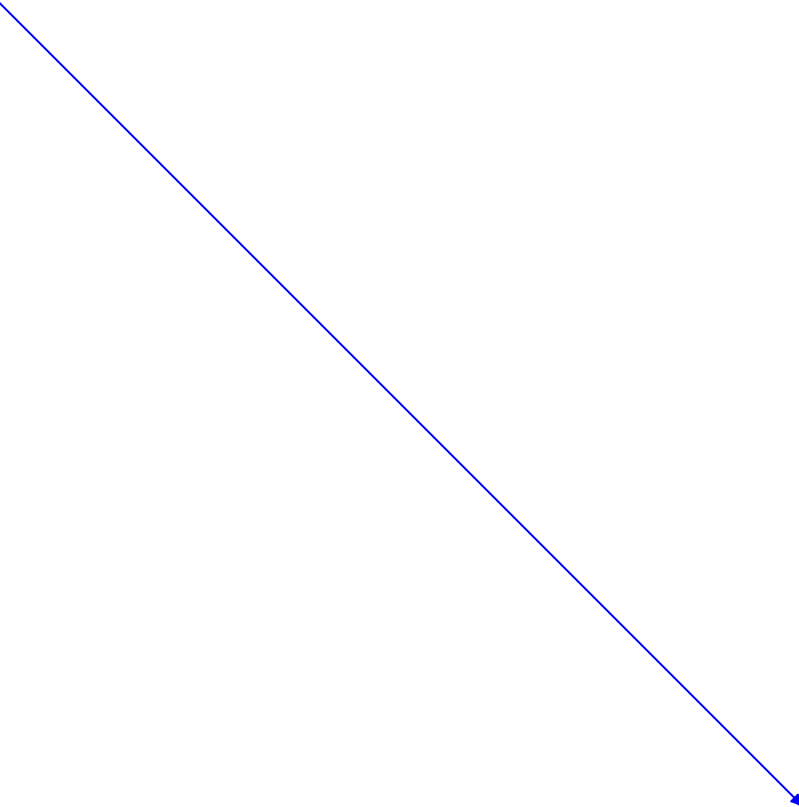

rs5992333

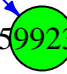

**Variant–Disease Network (Propionyl–CoA carboxylase deficiency)**

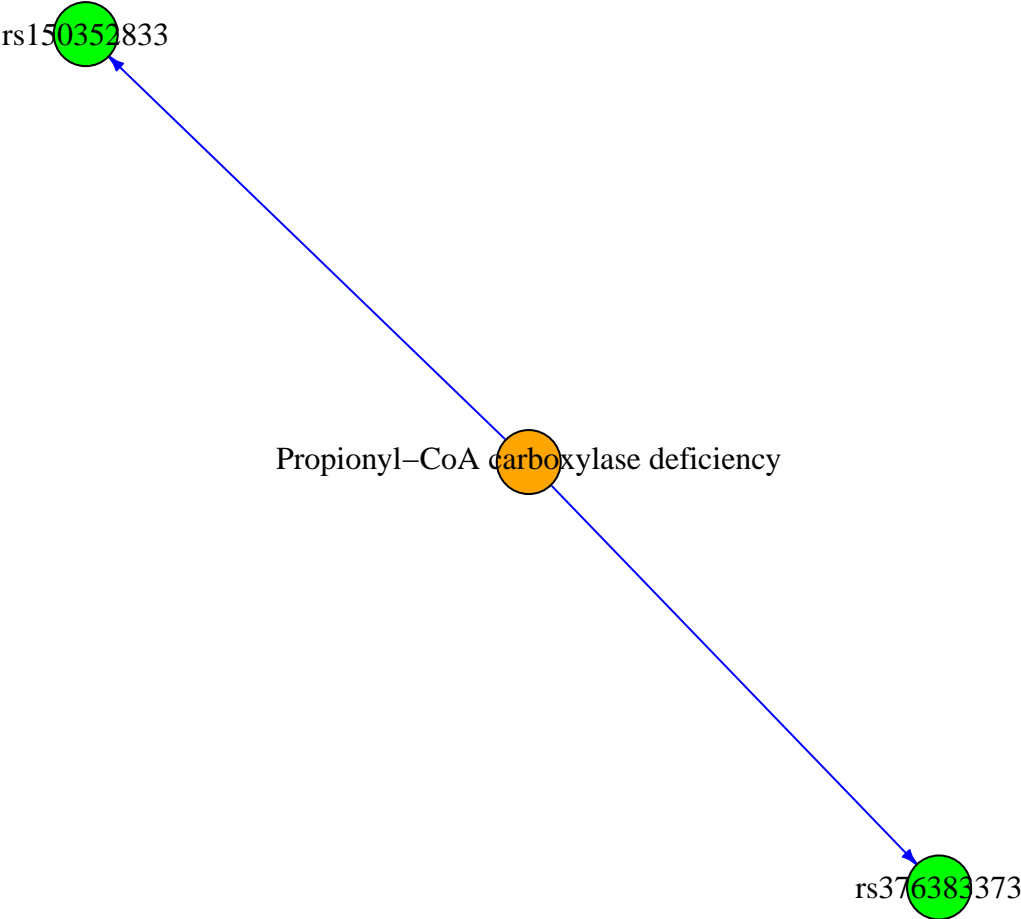

# Variant–Disease Network (Proprotein convertase 1/3 deficiency)

Proprotein convertase 1/3 deficiency

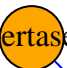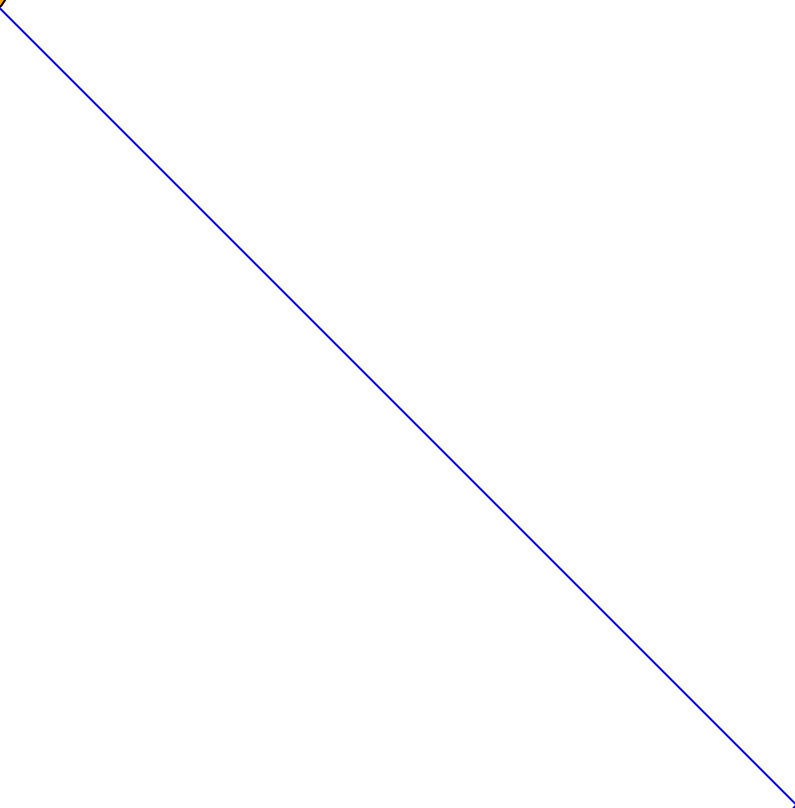

rs6231

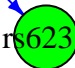

## Variant–Disease Network (Protein S deficiency)

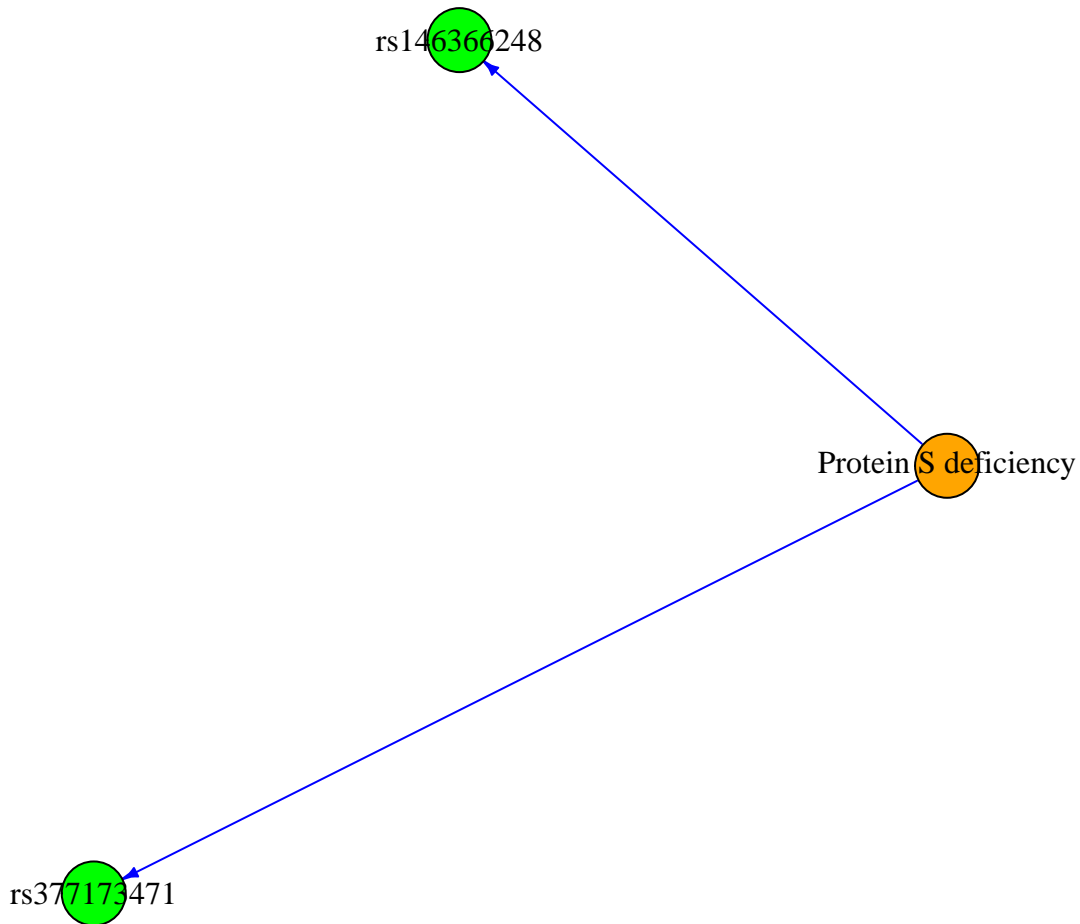



## Variant–Disease Network (Protoporphyrria)

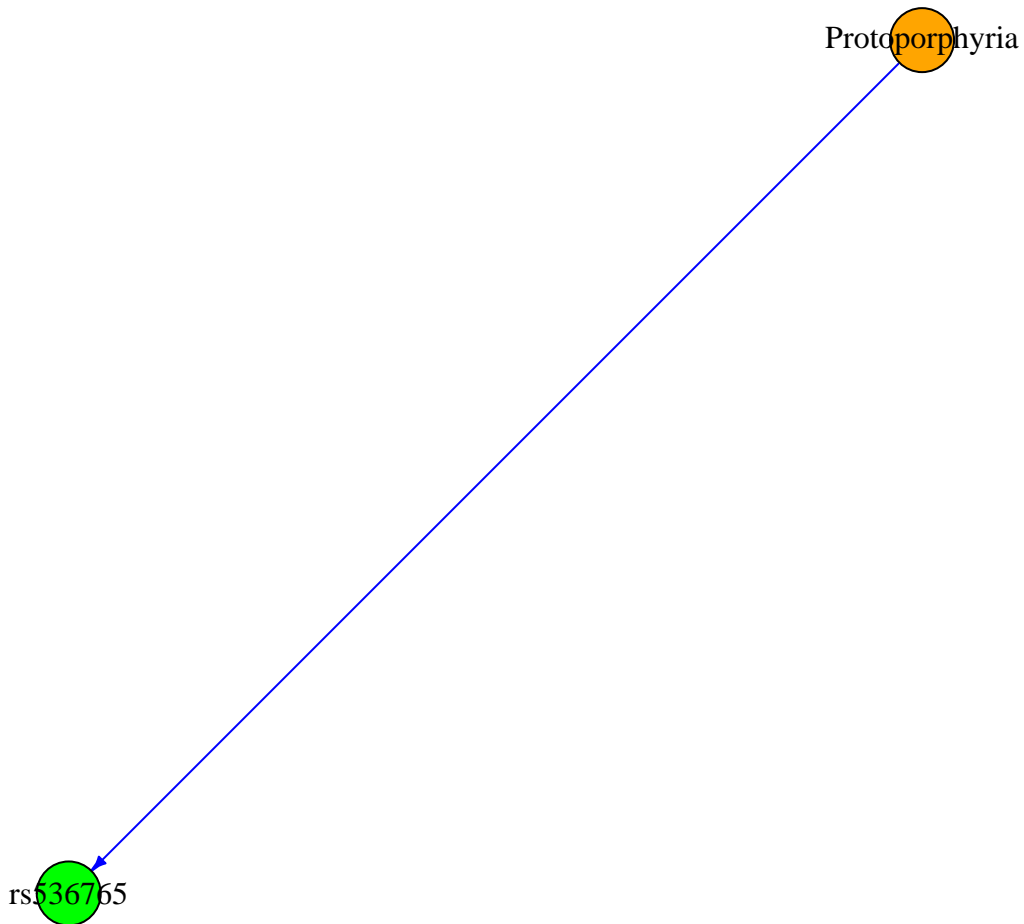

# Variant–Disease Network (Pseudohypoaldosteronism type 1 autosomal dominant)

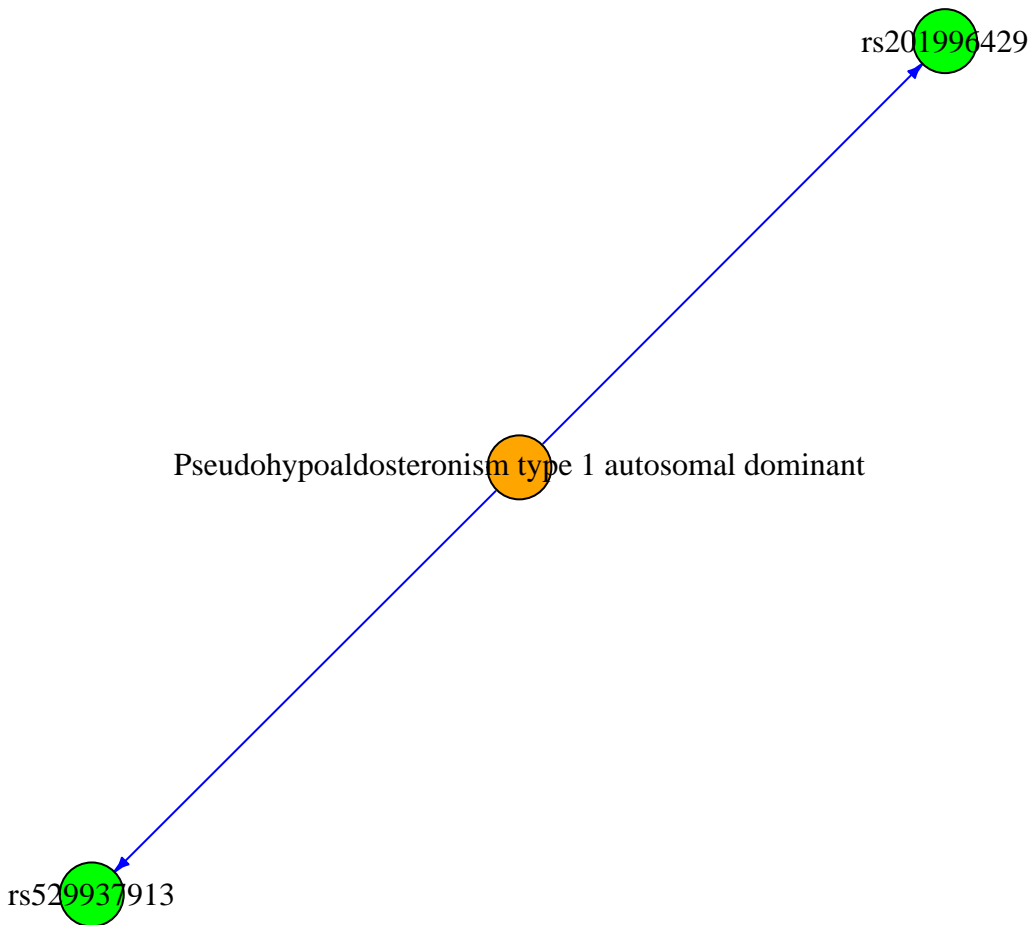

# Variant-Disease Network (Pseudohypoaldosteronism type 1 autosomal recessive)

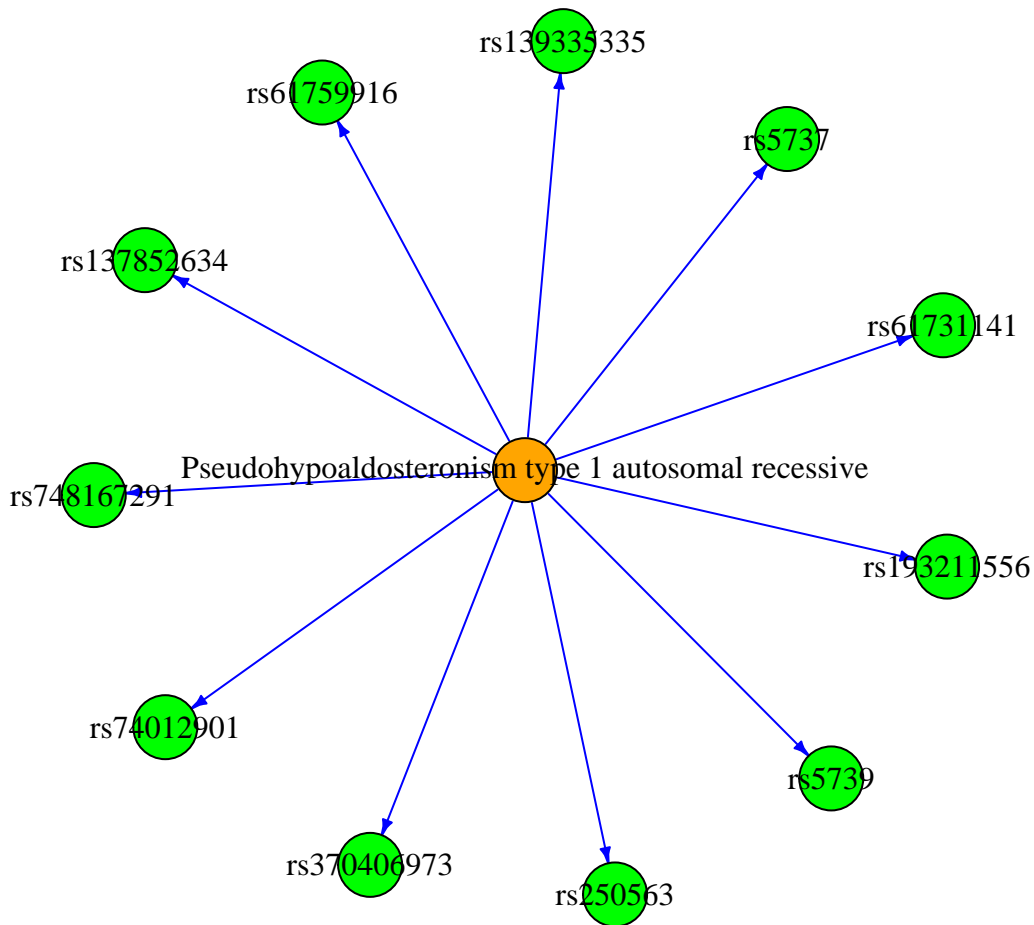

**Variant–Disease Network (Pseudoinflammatory fundus dystrophy)**

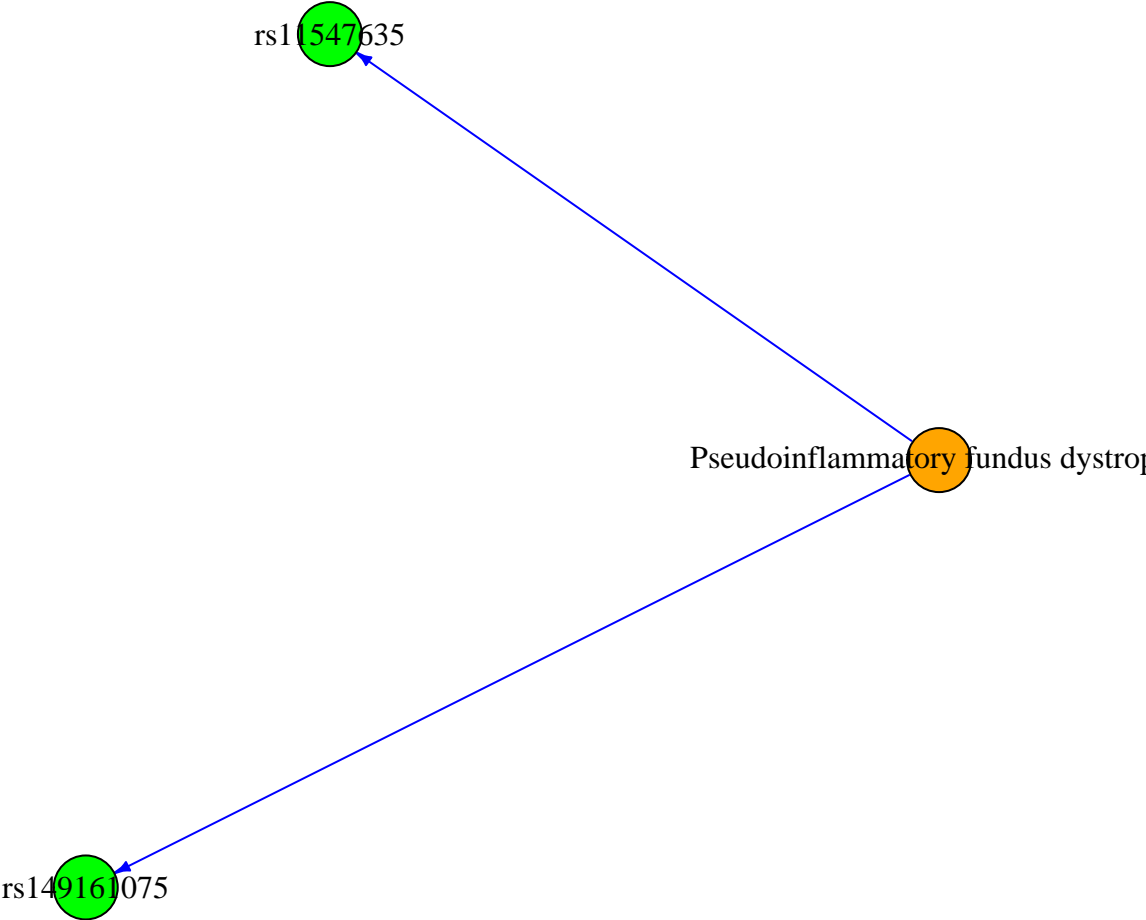

Variant–Disease Network (Pseudoneonatal adrenoleukodystrophy)

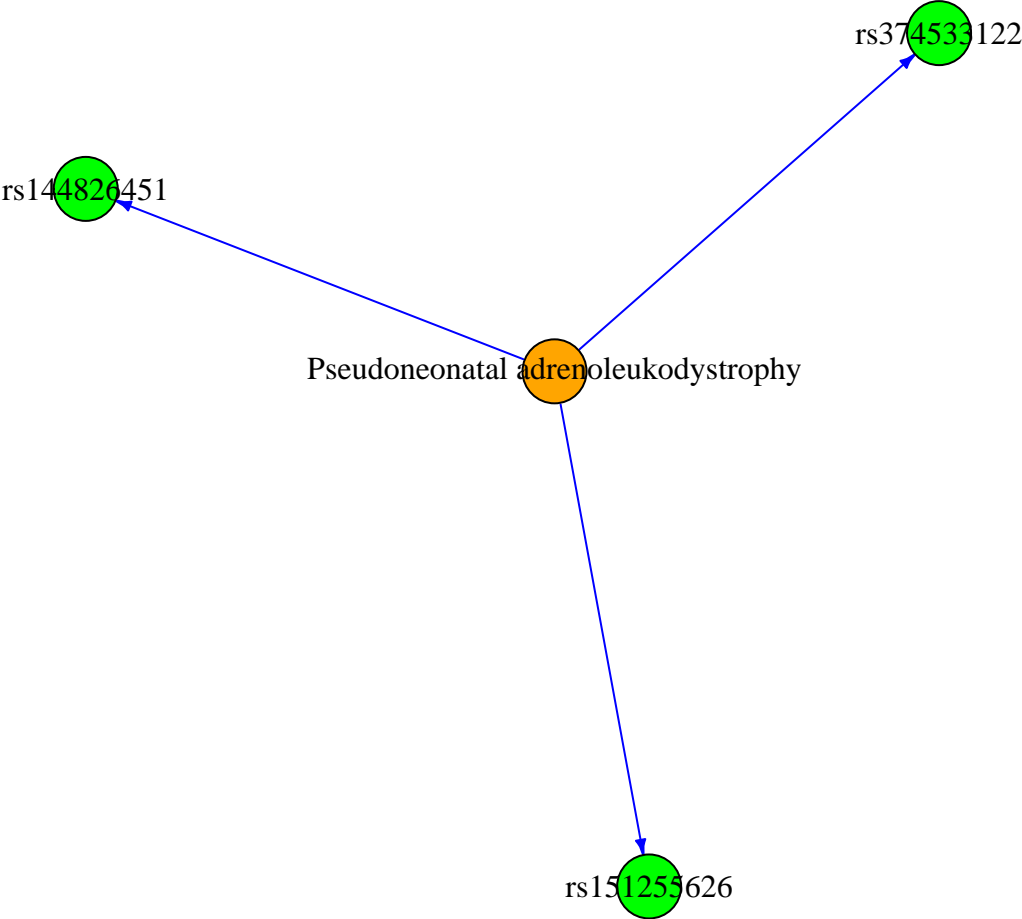

# Variant–Disease Network (Pseudo–TORCH syndrome 1)

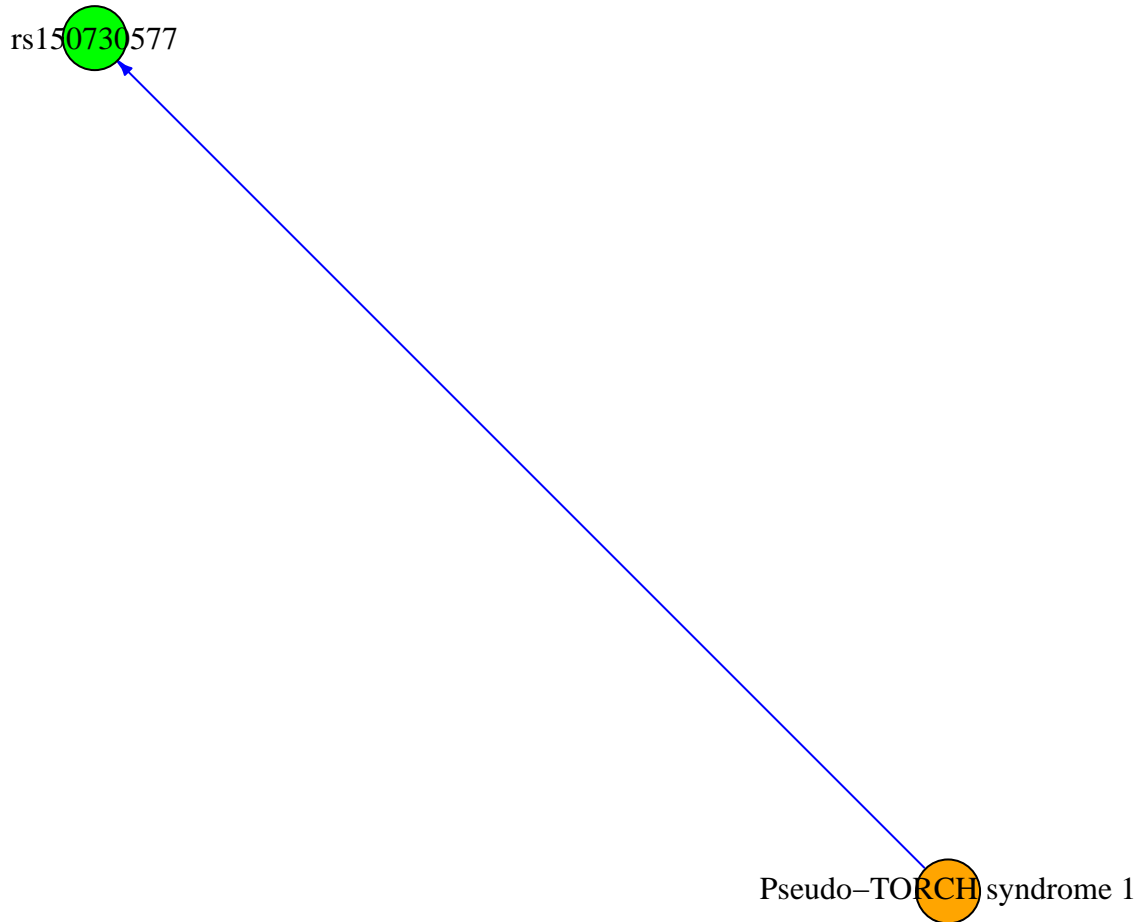

**Variant–Disease Network (Psoriasis susceptibility 2)**

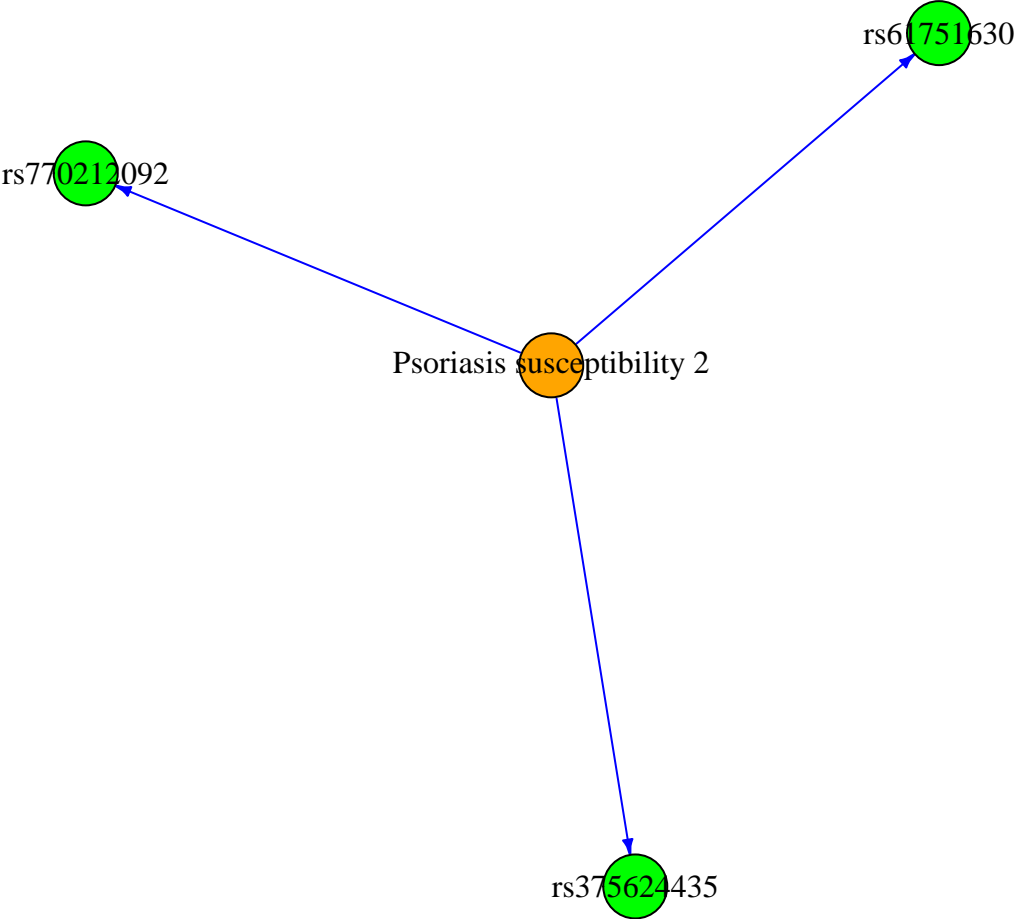

# Variant–Disease Network (PTEN hamartoma tumor syndrome)

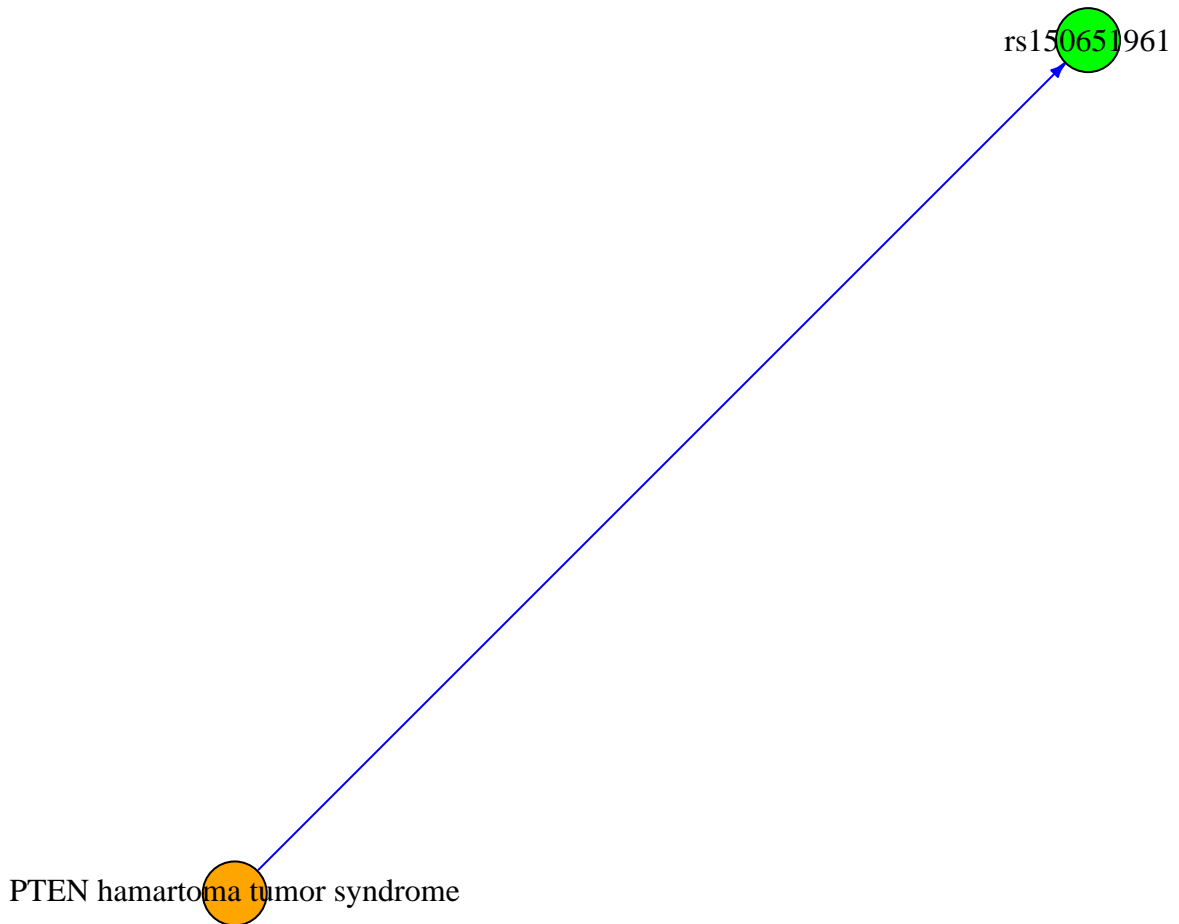



# se Network (Pulmonary arterial hypertension related to hereditary hemorrhagic telangiectasia)

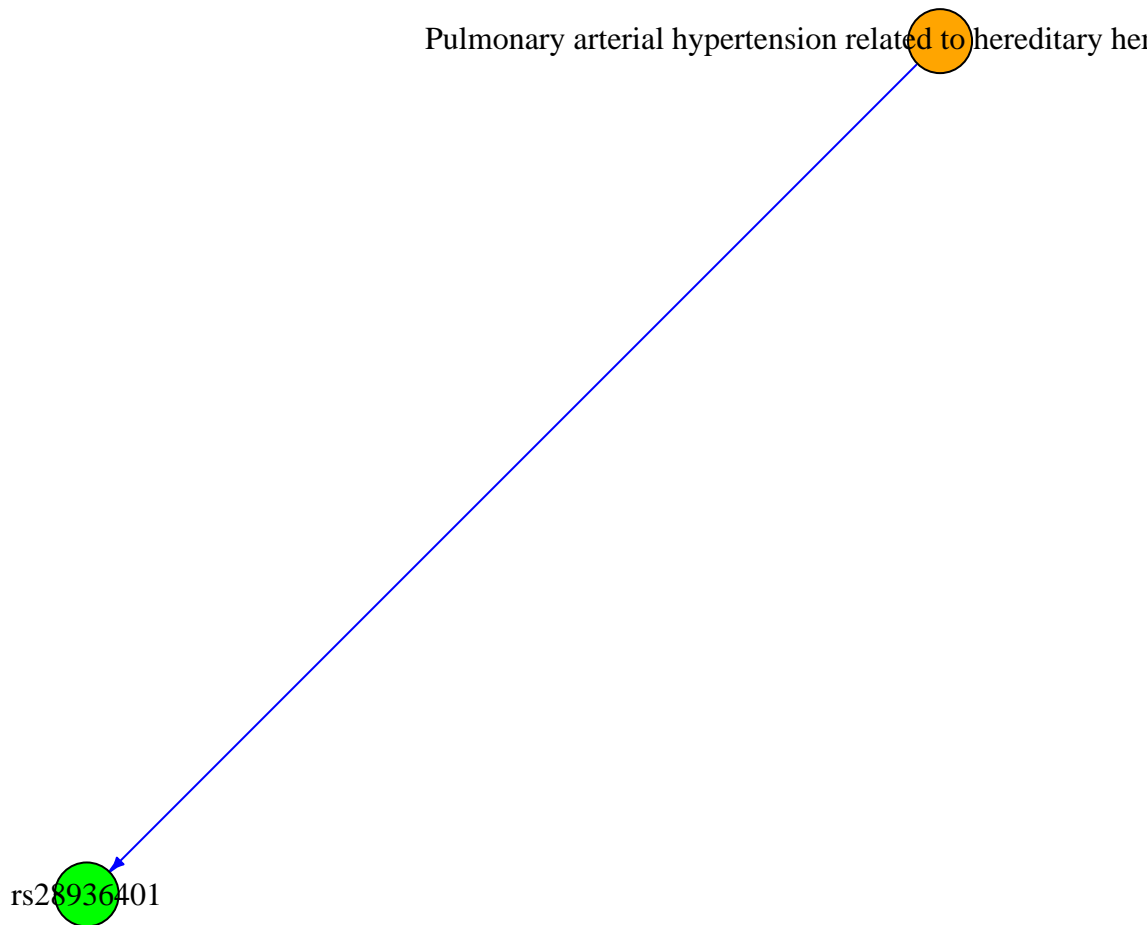

Variant–Disease Network (Pulmonary Surfactant Metabolism Dysfunction

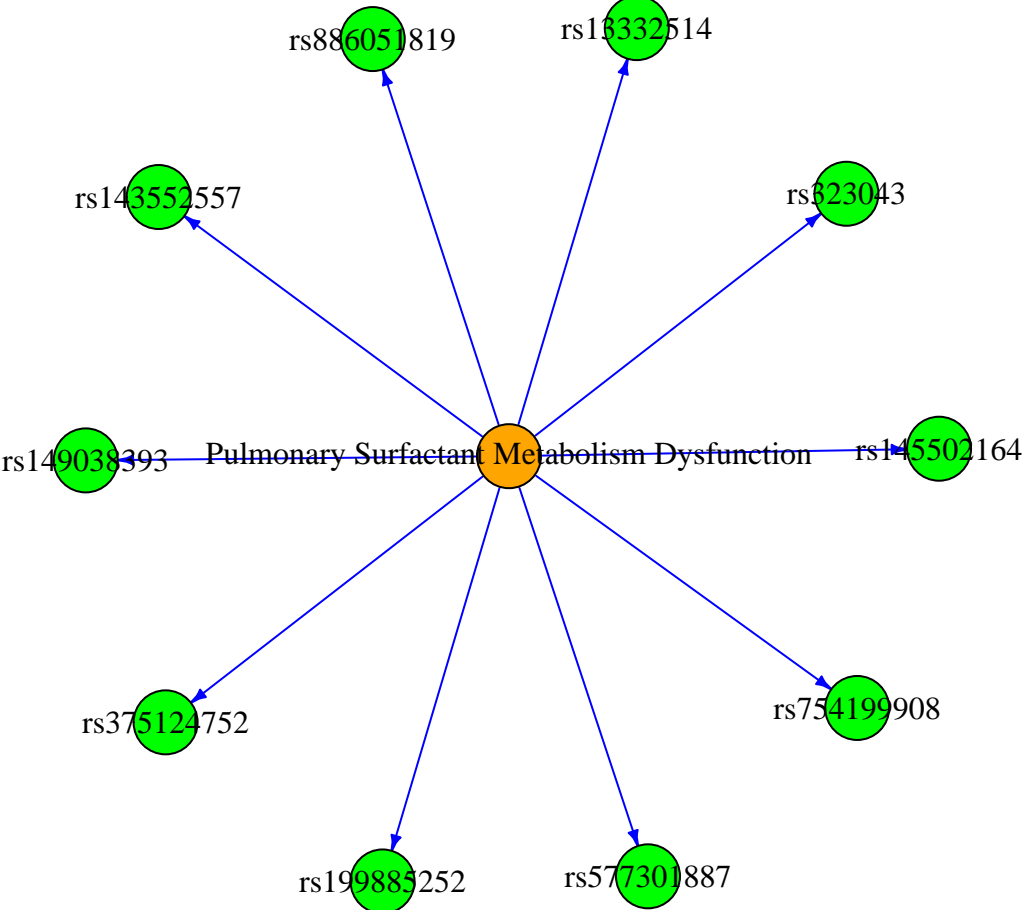

Variant–Disease Network (Pyloric stenosis)

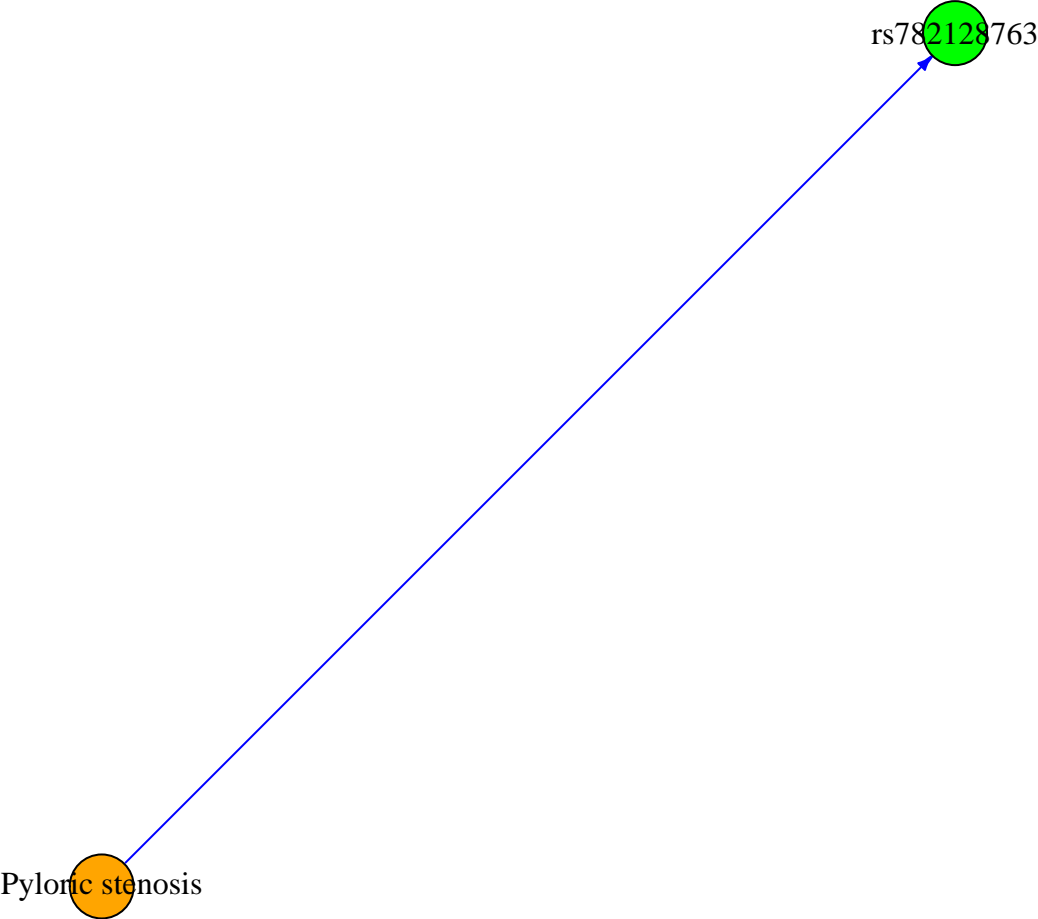

# Variant–Disease Network (Pyridoxal 5'–phosphate–dependent epilepsy)

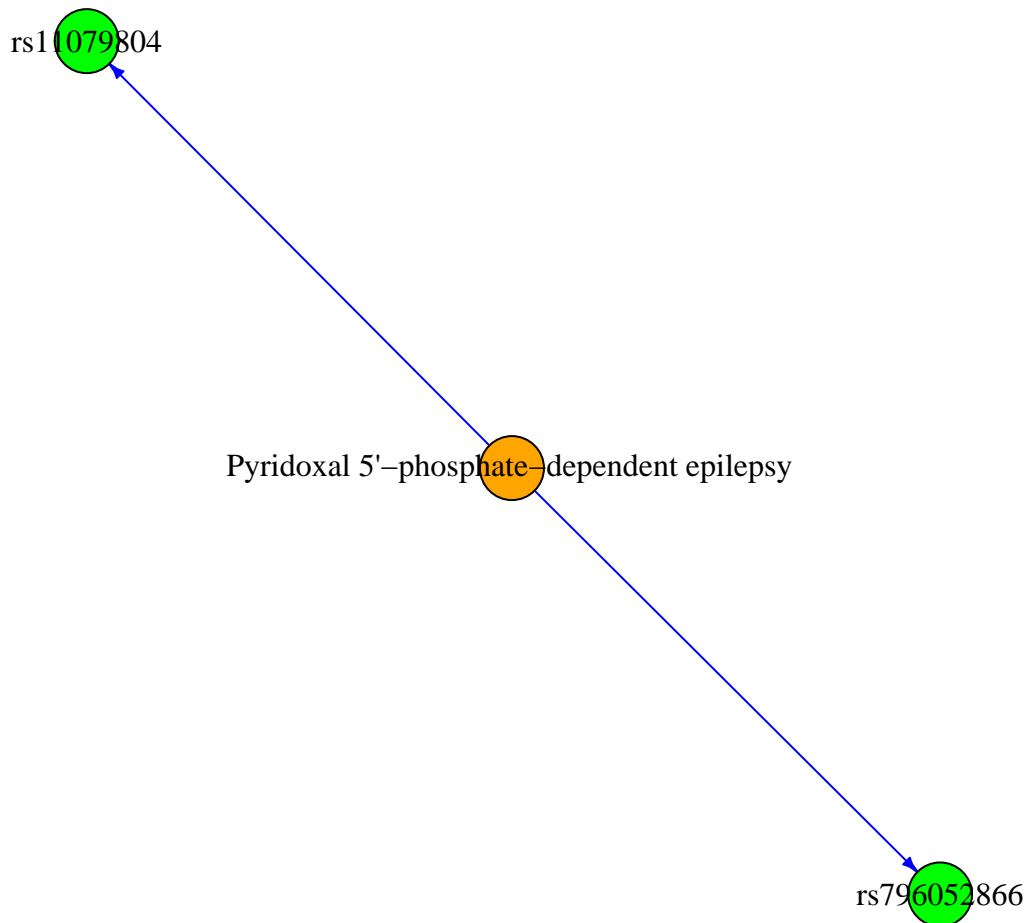

Variant–Disease Network (Pyridoxine–dependent epilepsy)

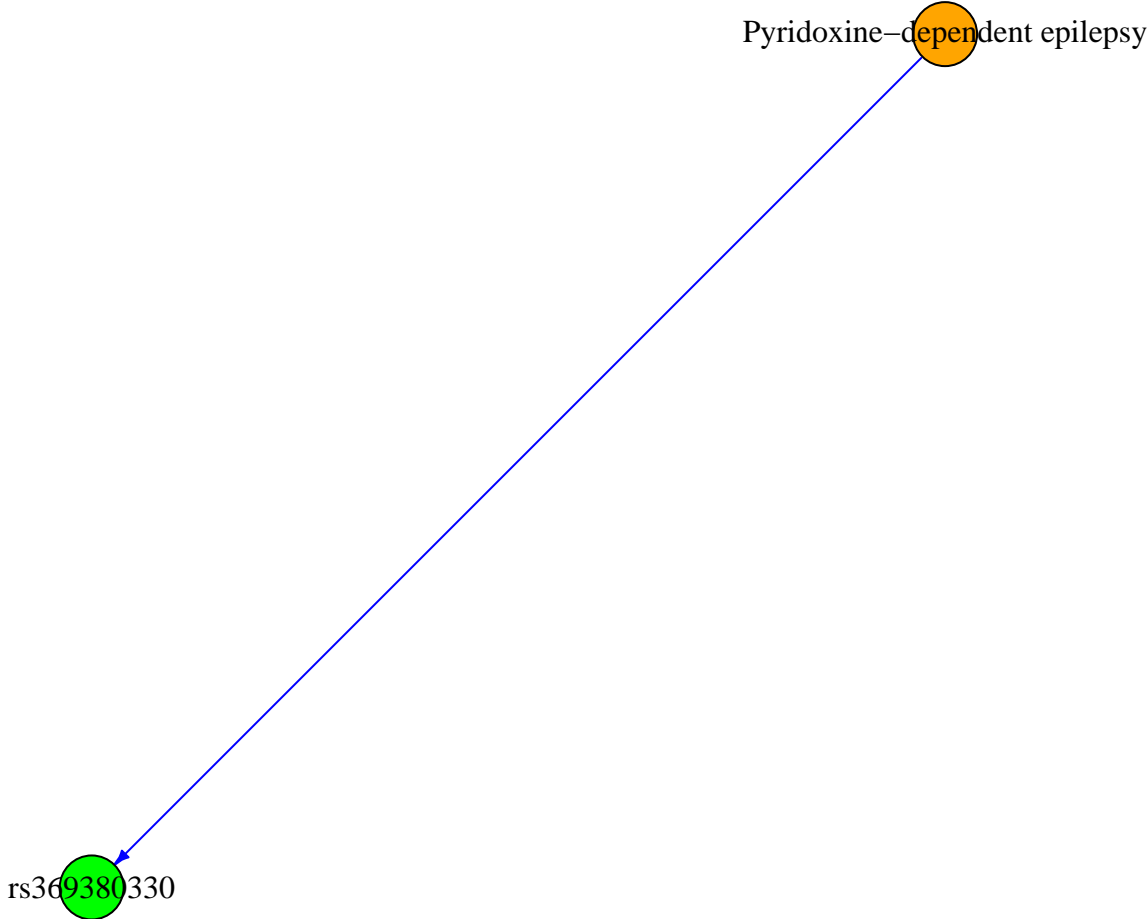

# Variant–Disease Network (Pyruvate carboxylase deficiency)

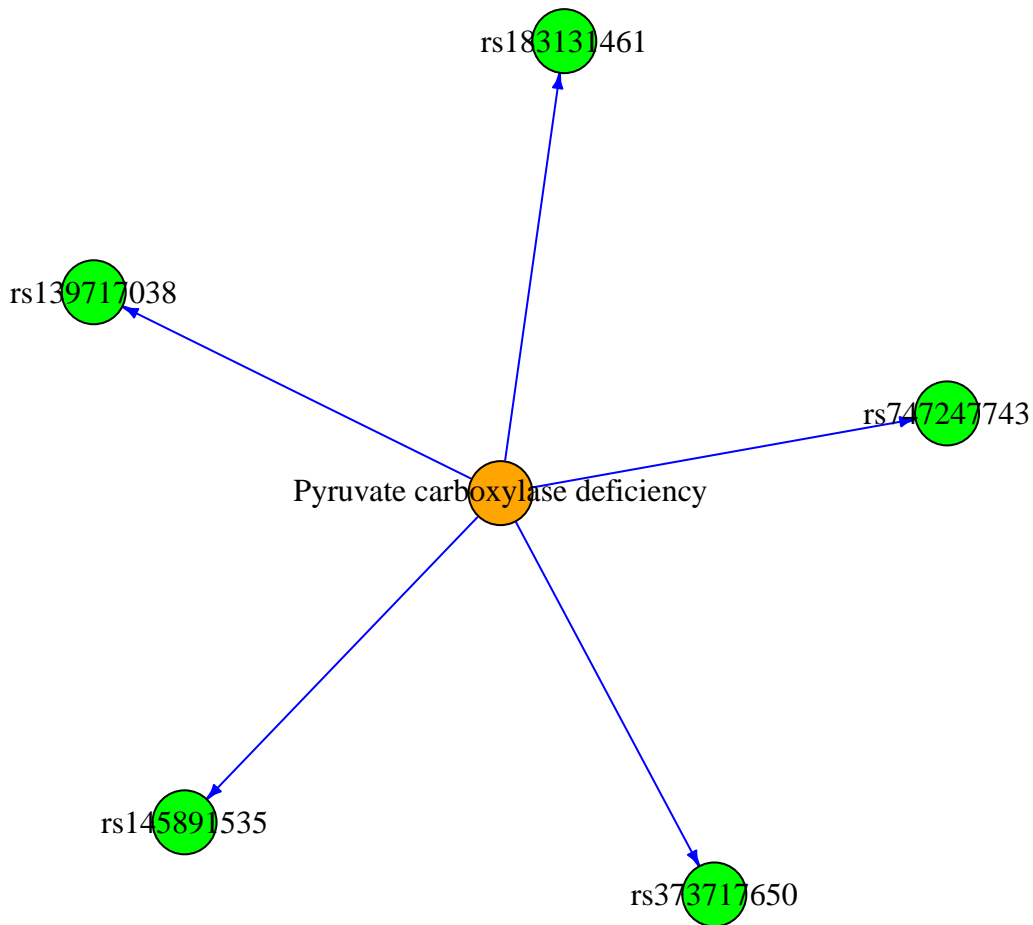

**Variant–Disease Network (Pyruvate dehydrogenase complex deficiency)**

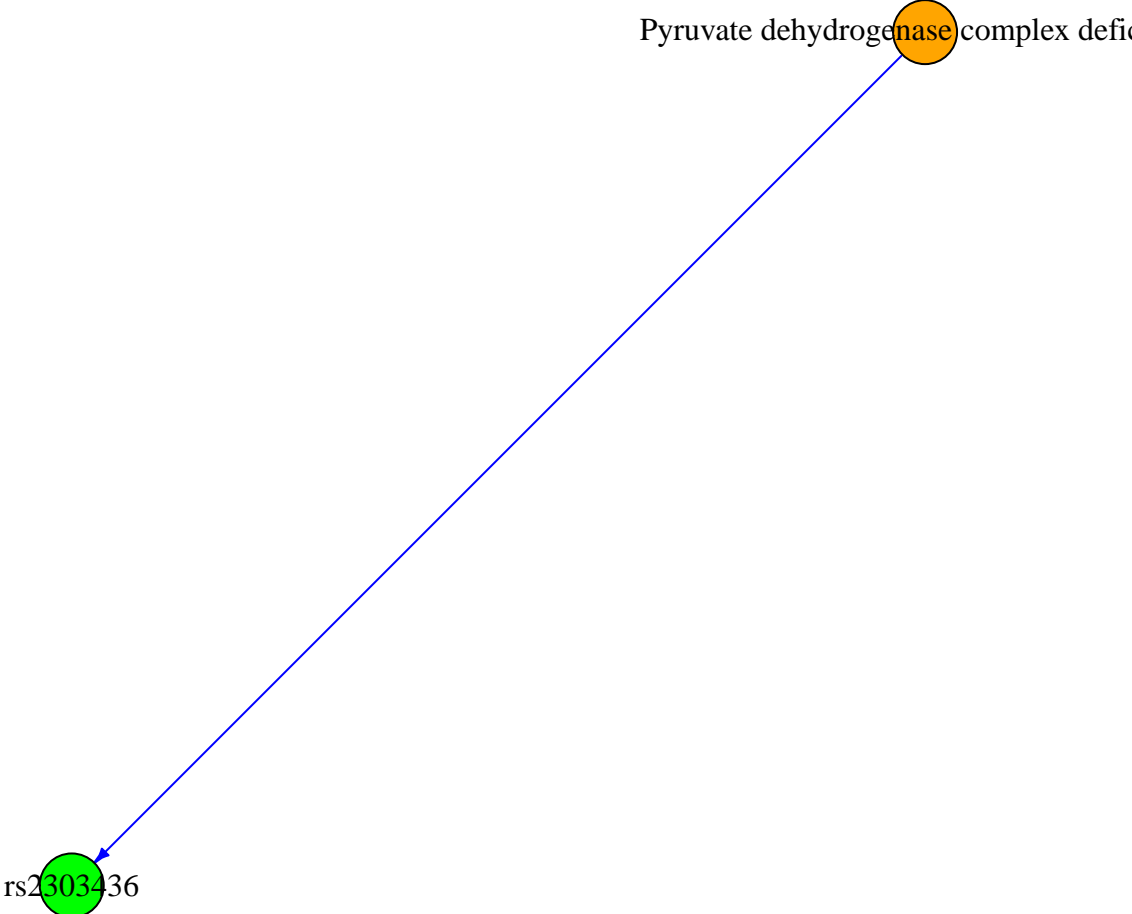

Variant–Disease Network (Pyruvate dehydrogenase phosphatase deficiency)

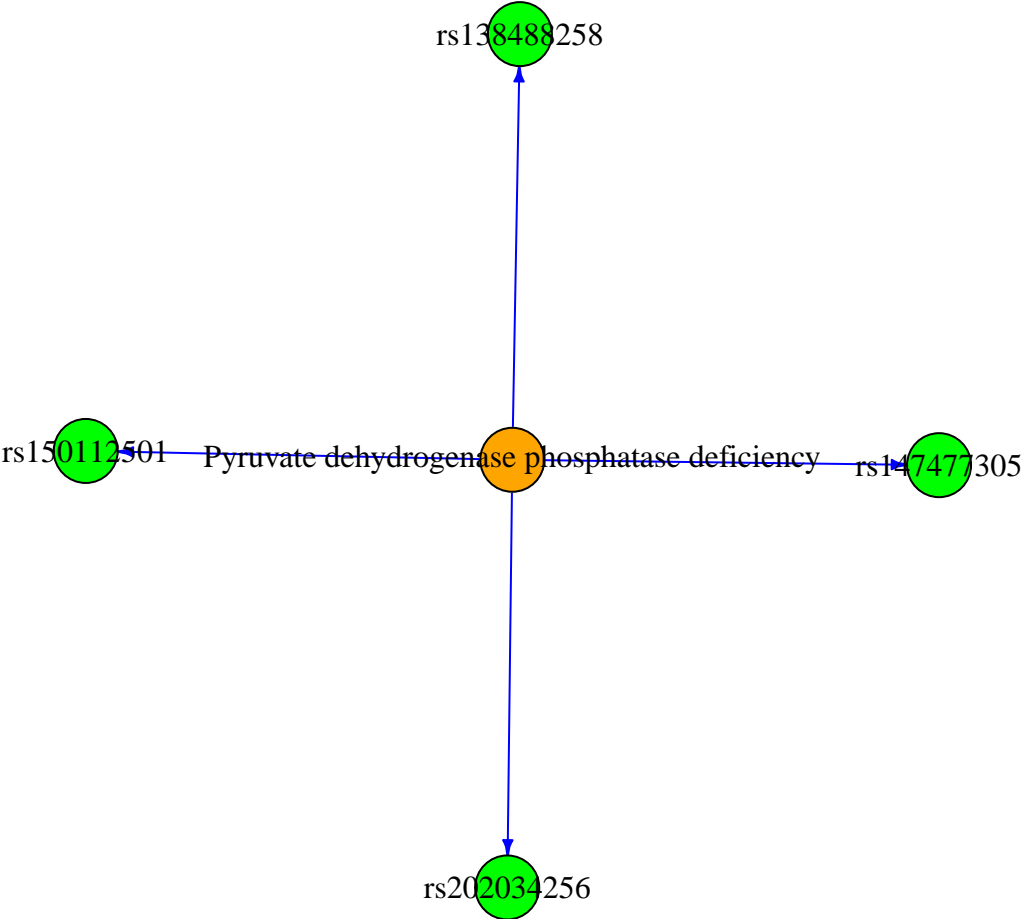



## Variant–Disease Network (Pyruvate kinase deficiency of red cells)

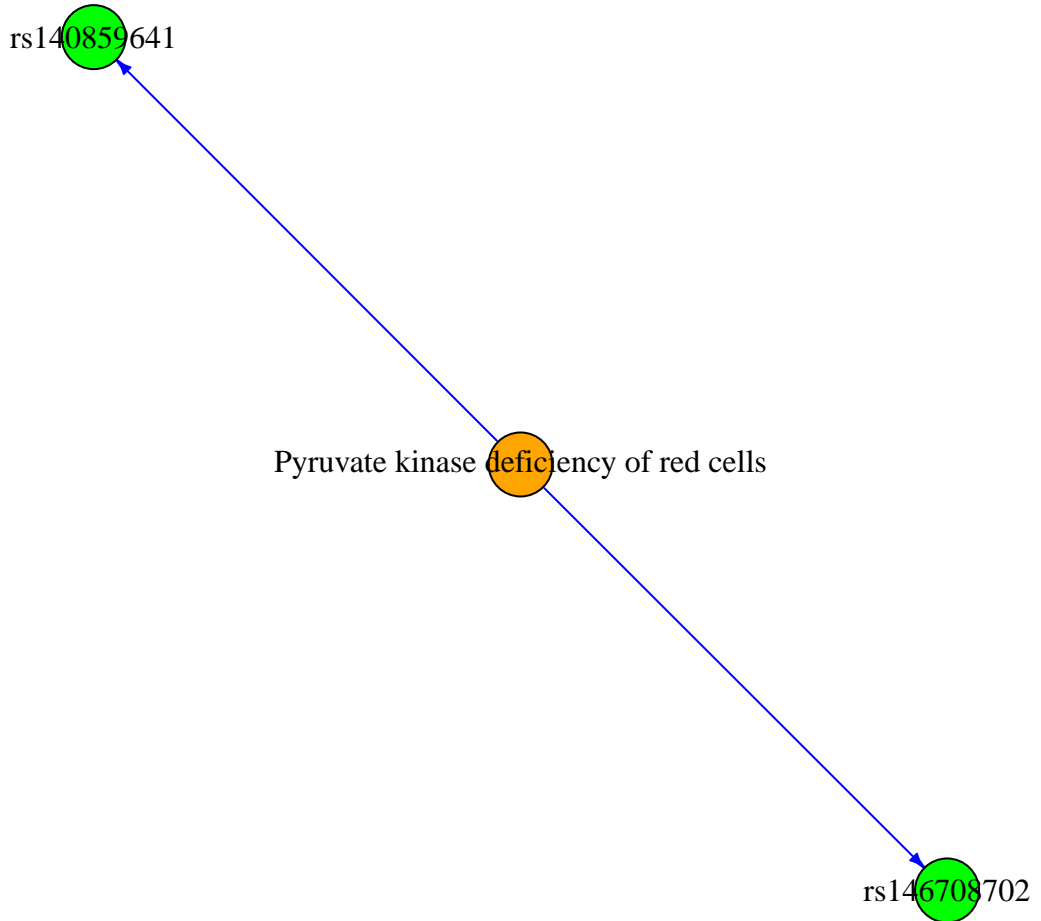

## Variant–Disease Network (Rare genetic deafness)

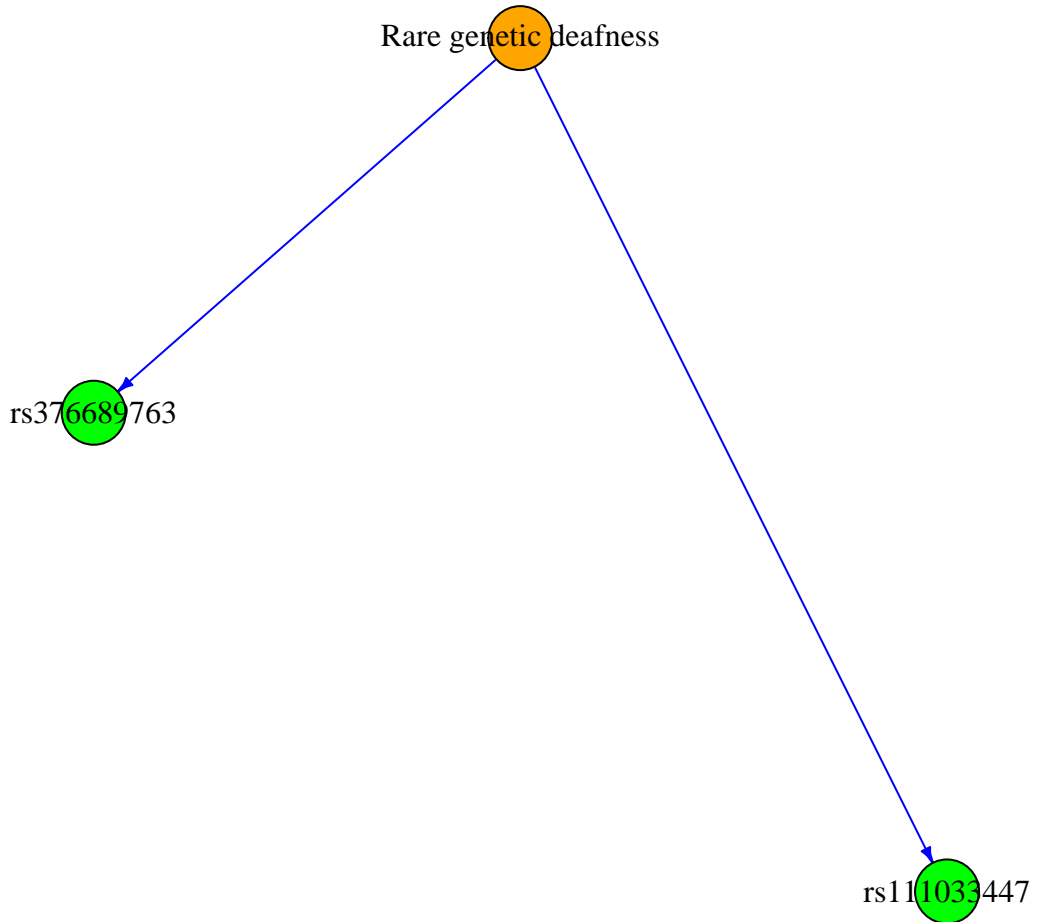

## Variant–Disease Network (Rasopathy)

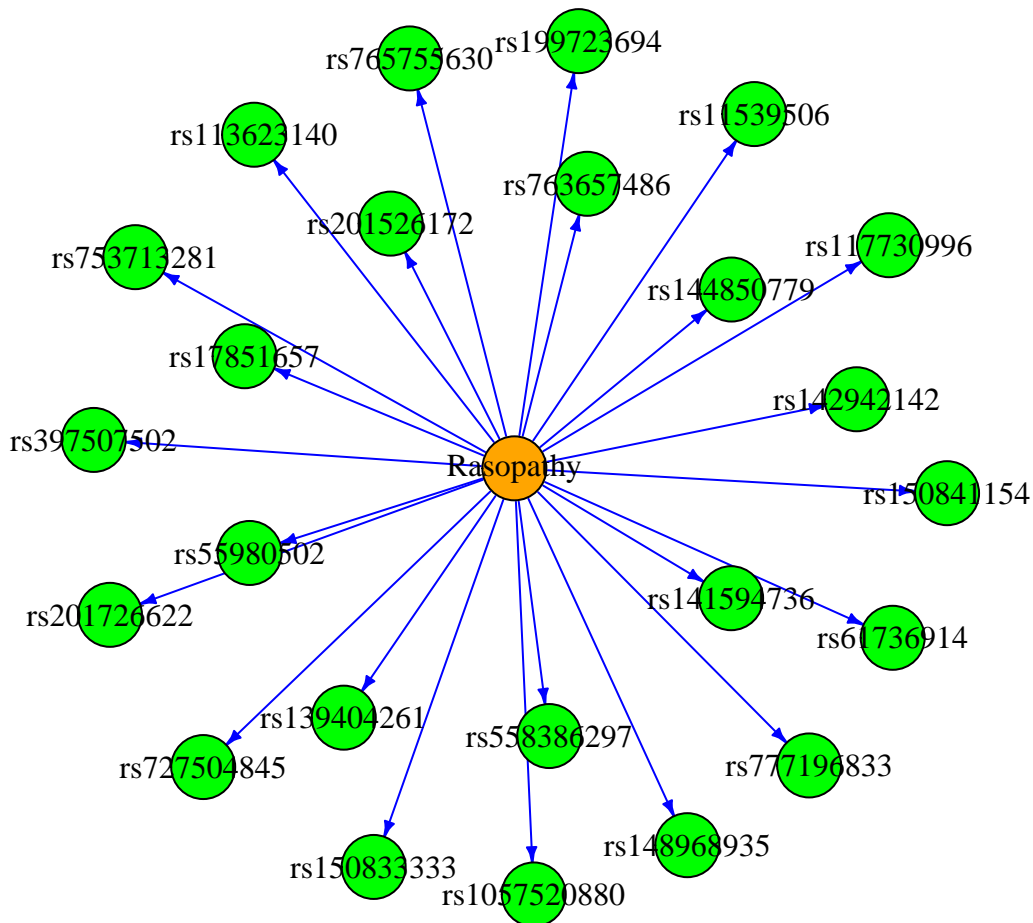

**Variant–Disease Network (Recombinase activating gene 2 deficiency)**

Recombinase activating gene 2 deficiency

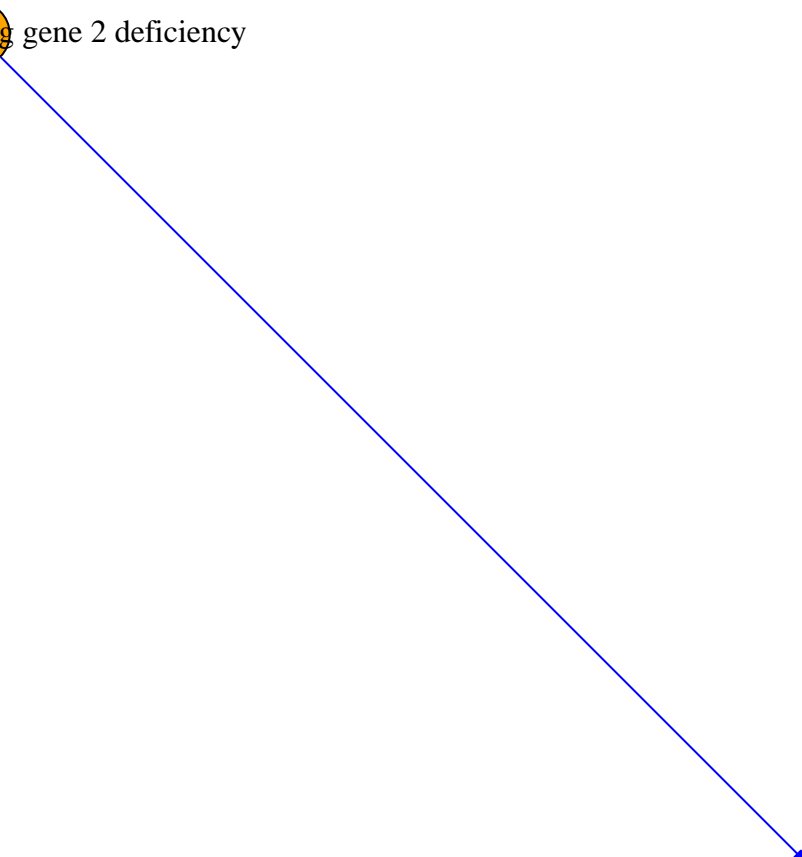

rs121917895

# Variant–Disease Network (Reduced antithrombin III activity)

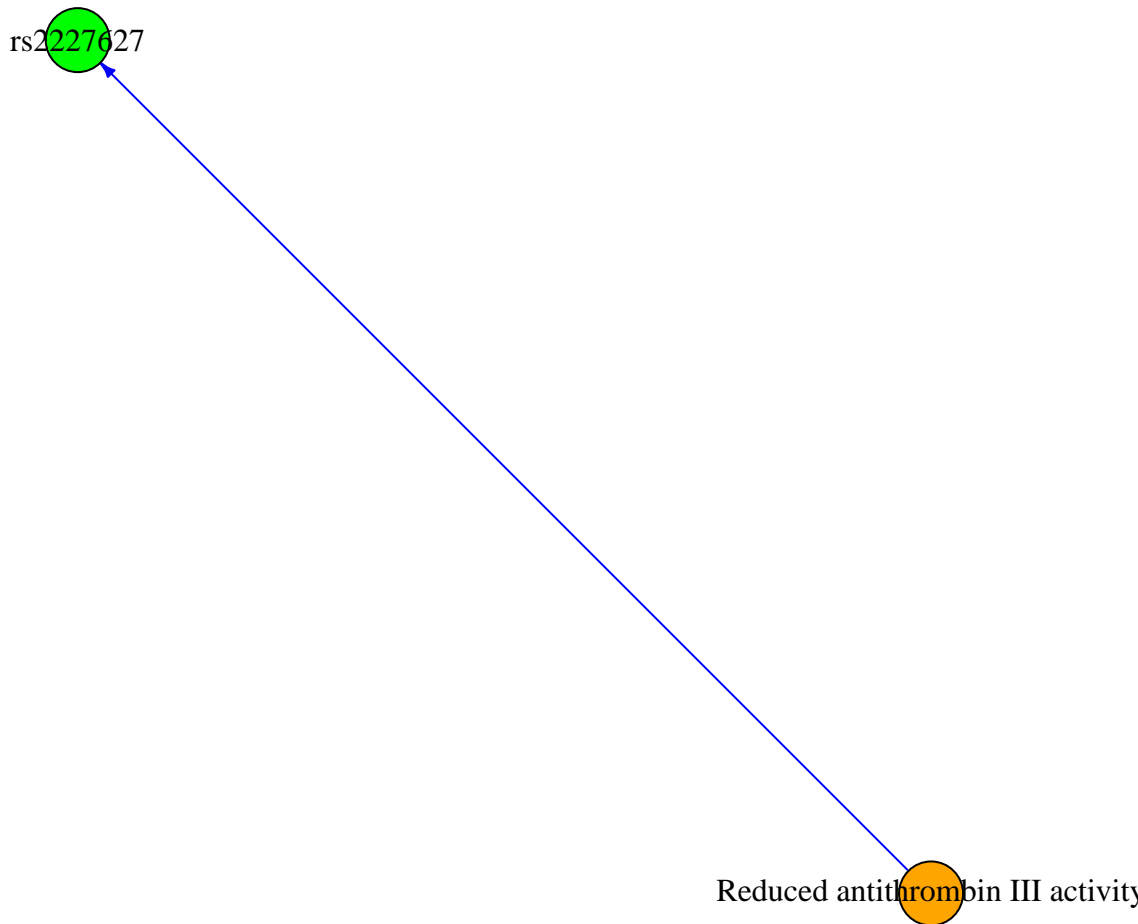

**Variant–Disease Network (Reduced protein C activity)**

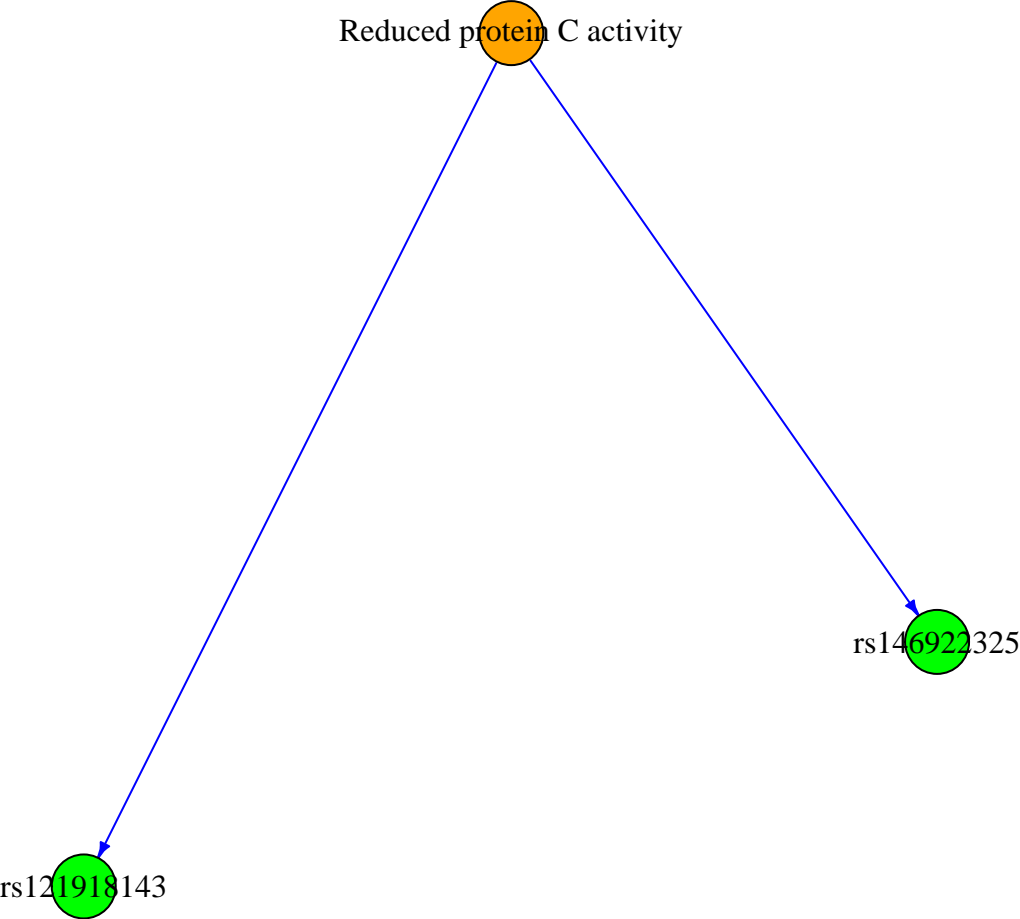

## Variant–Disease Network (Renal carnitine transport defect)

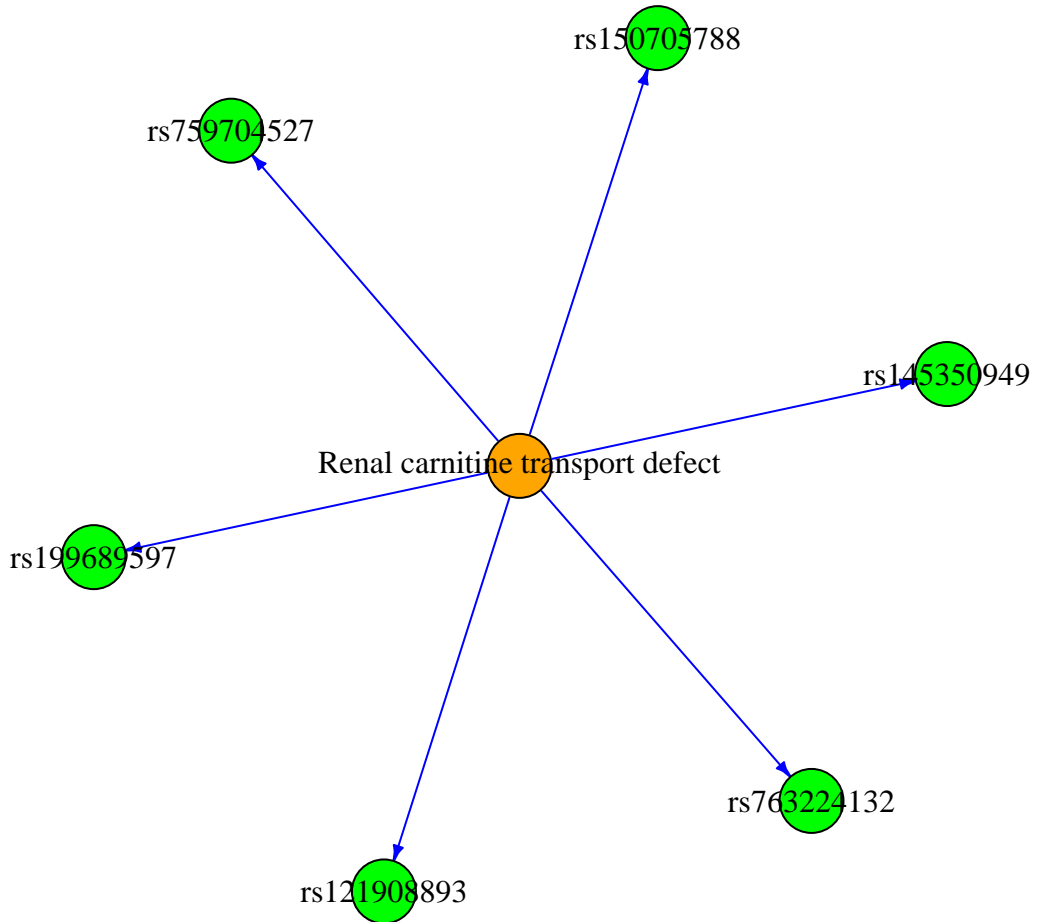

Variant–Disease Network (Renal dysplasia)

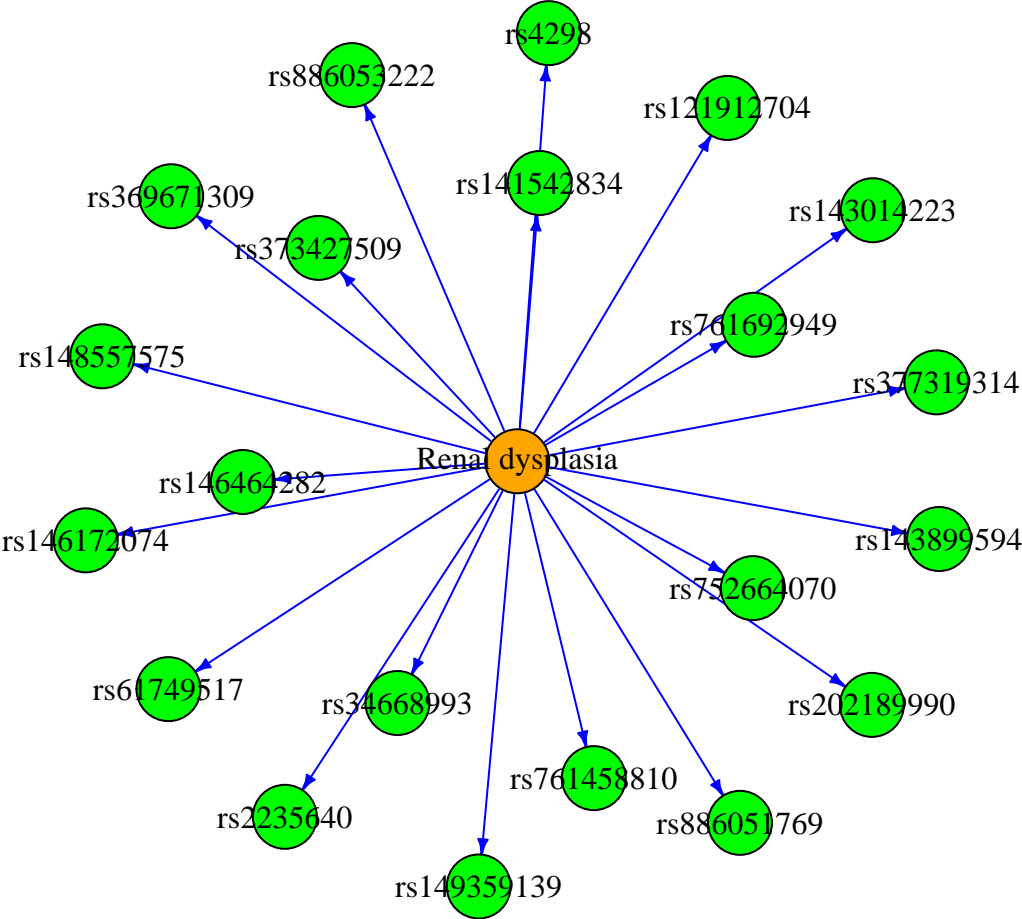



# Variant–Disease Network (Renal dysplasia and retinal aplasia)

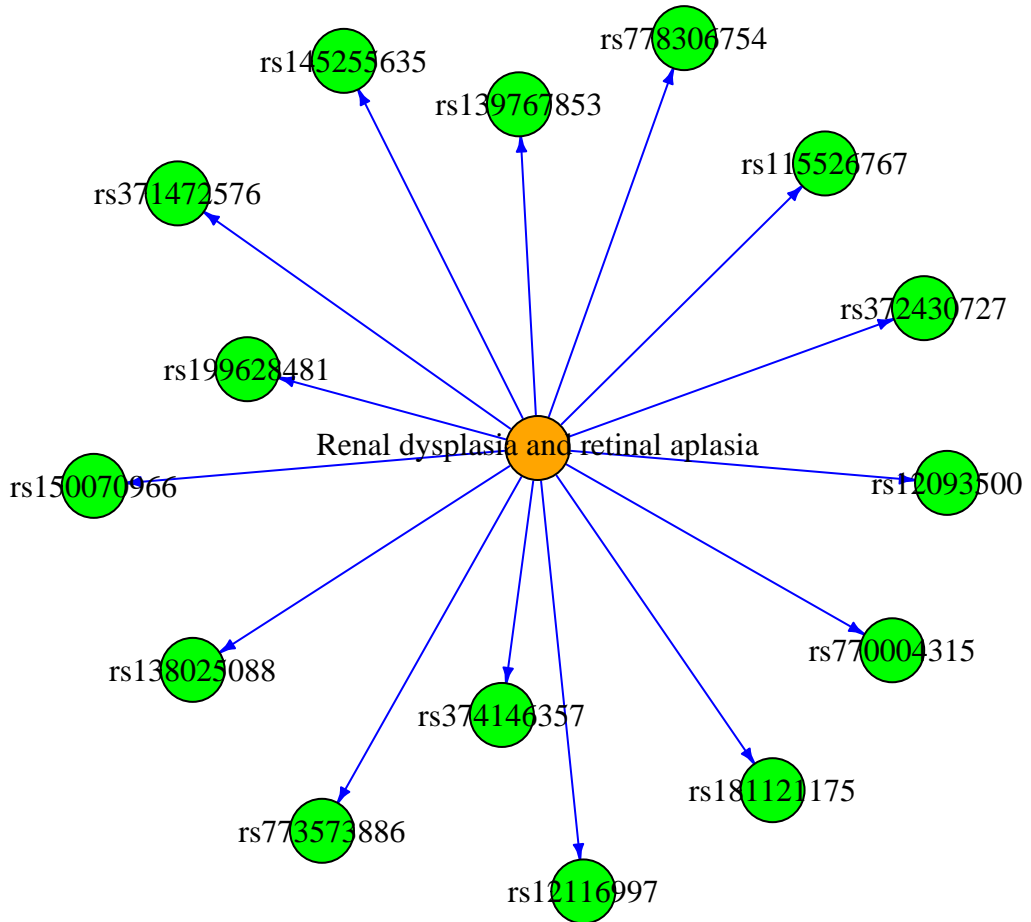

# ant-Disease Network (Renal hamartomas nephroblastomatosis and fetal gig

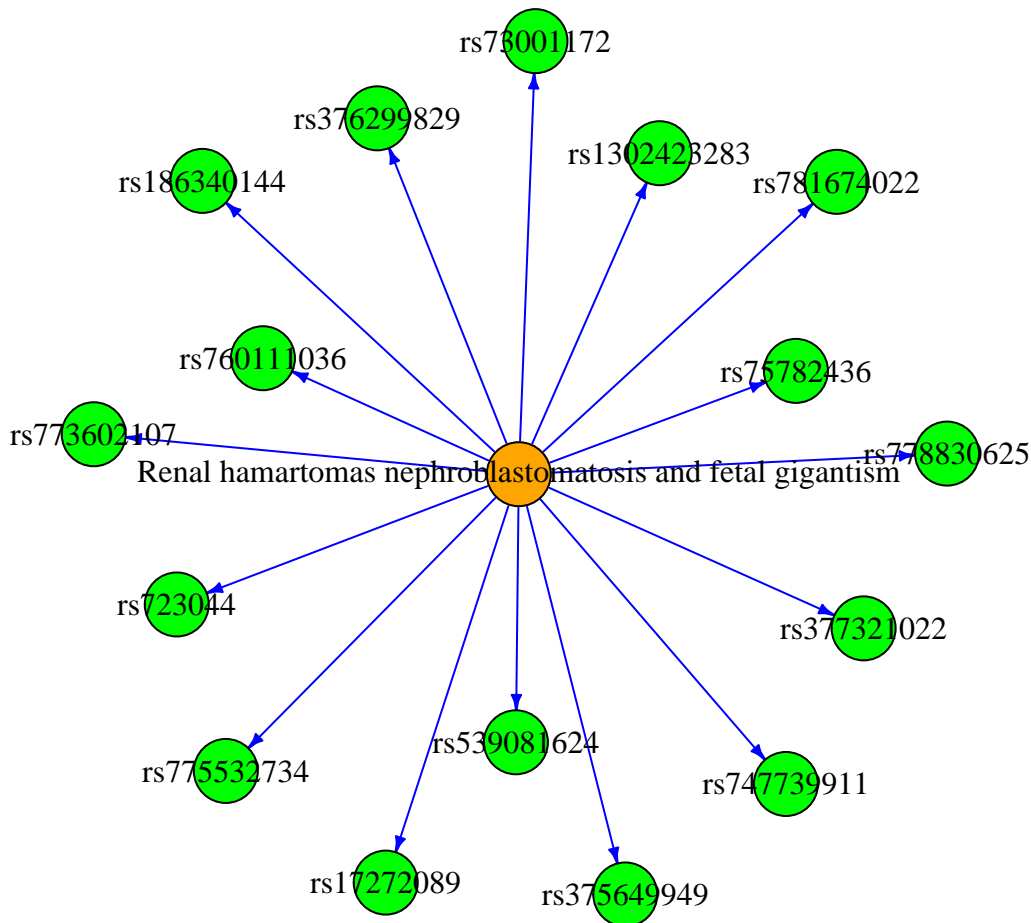

## Variant–Disease Network (Renal hypodysplasia/aplasia 1)

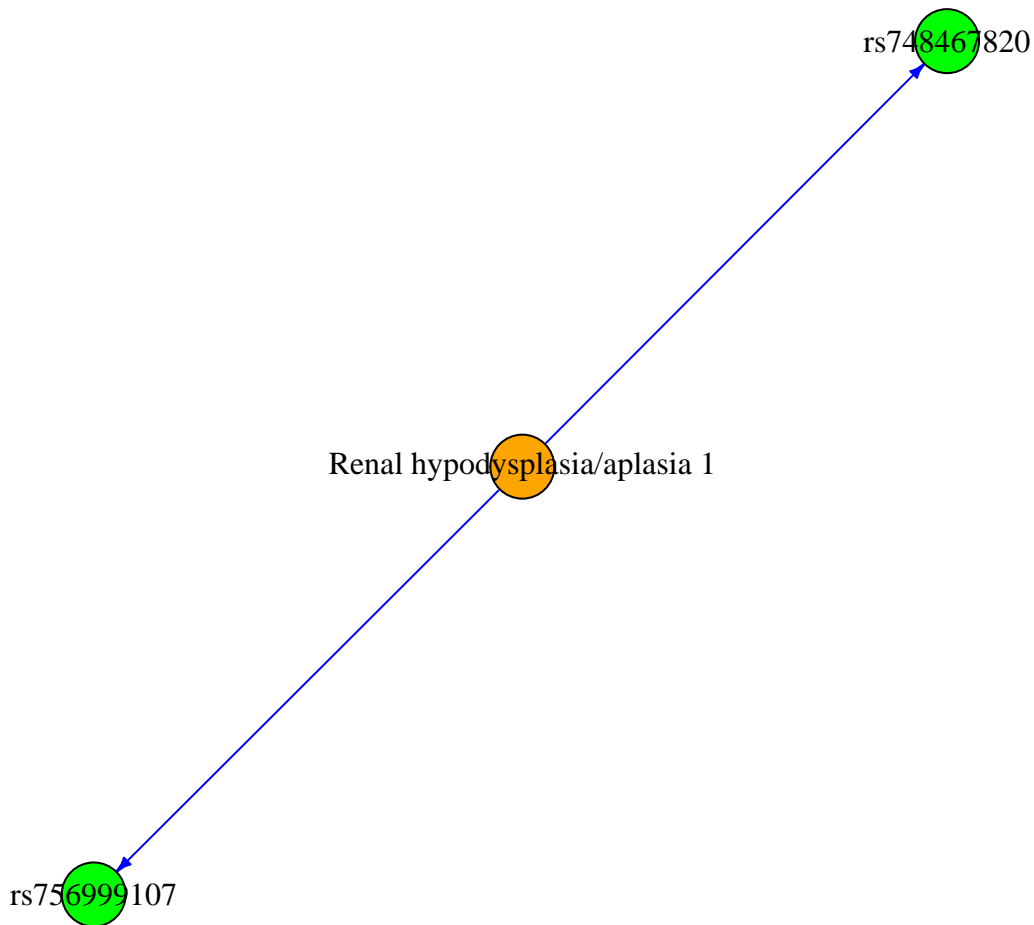

## Variant–Disease Network (Renal Hypomagnesemia)

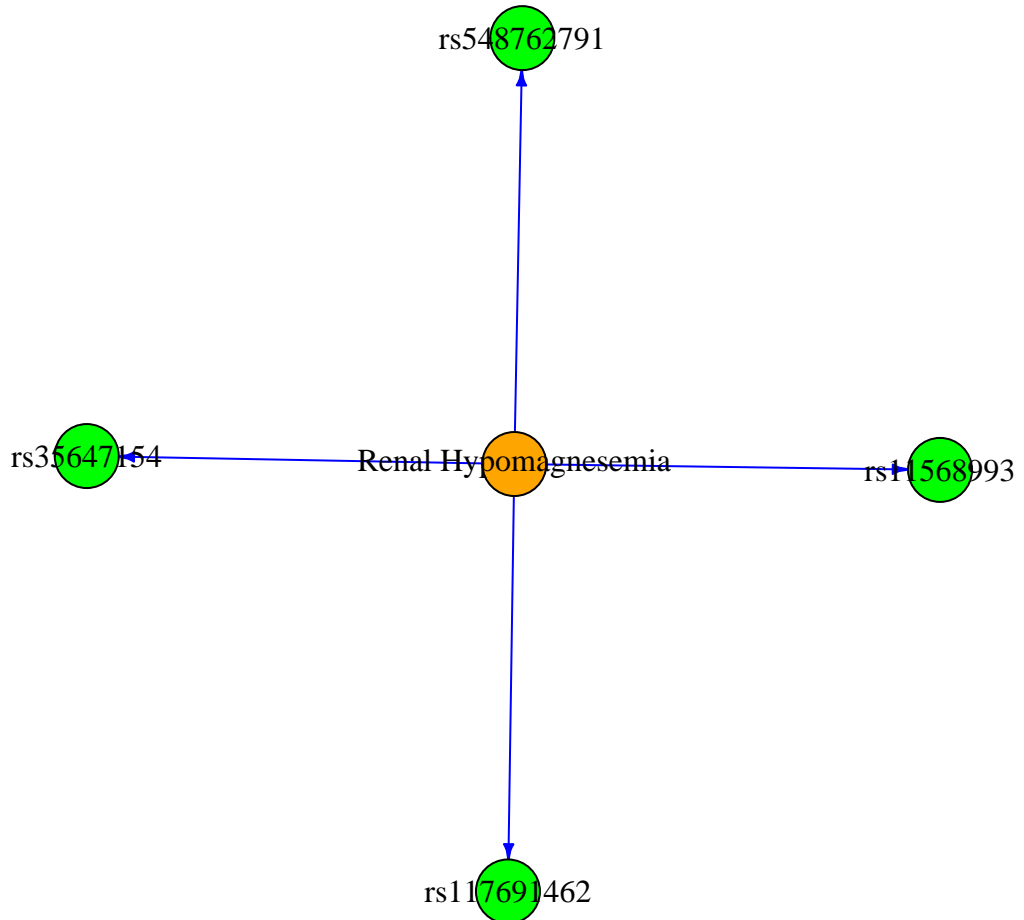

## Variant–Disease Network (Renal tubular acidosis)

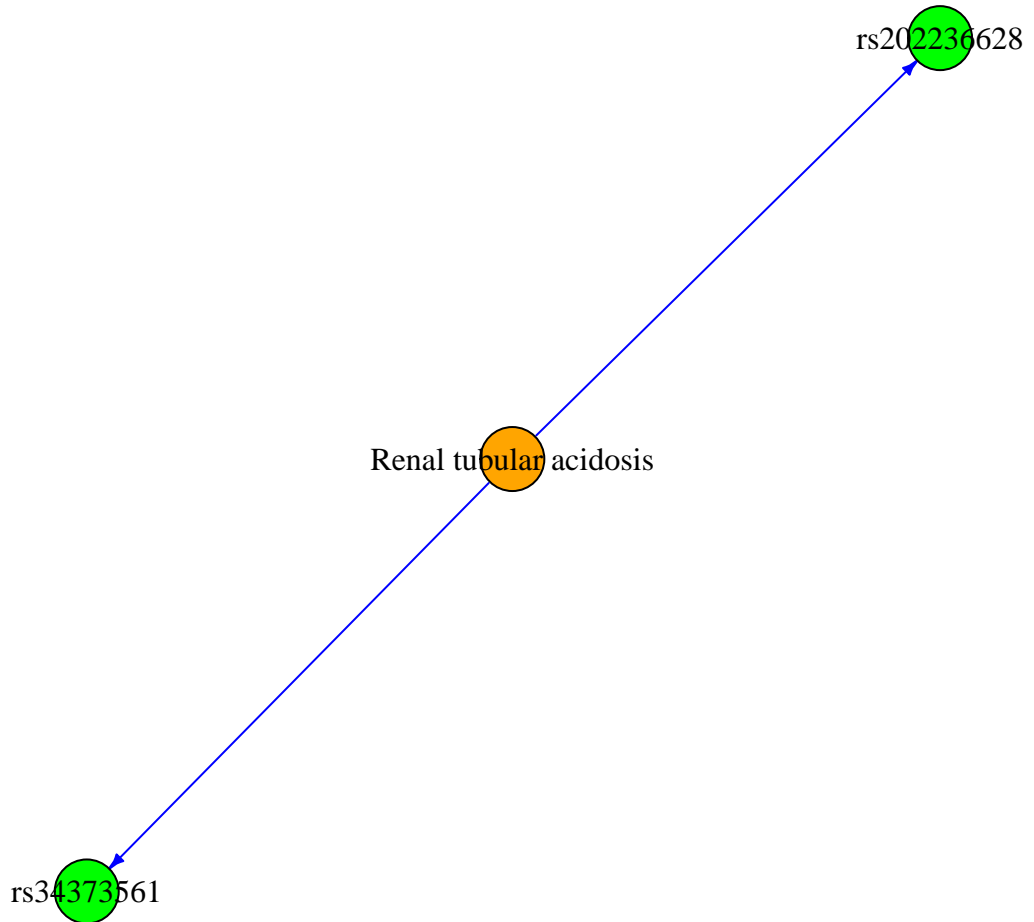

# Variant-Disease Network (Renal tubular acidosis with progressive nerve deafness)

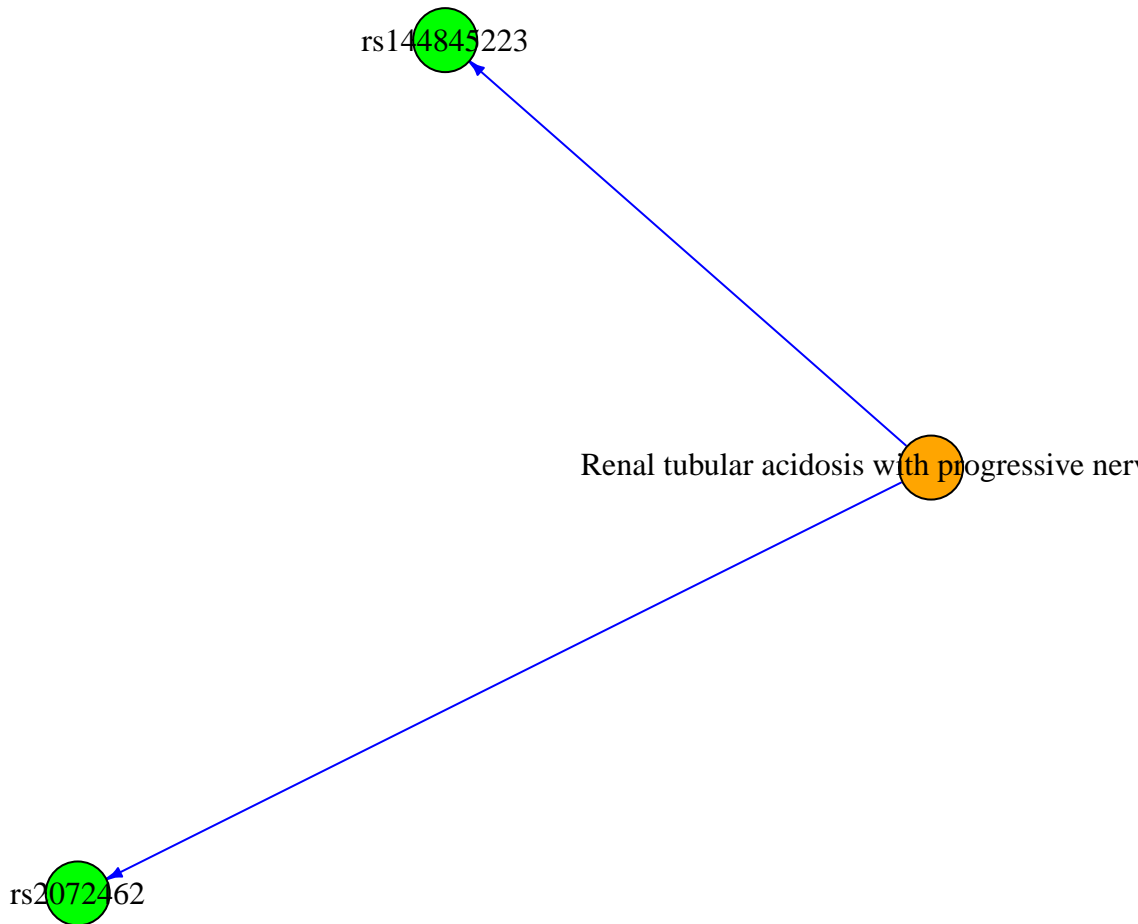

## Variant-Disease Network (Reticular dysgenesis)

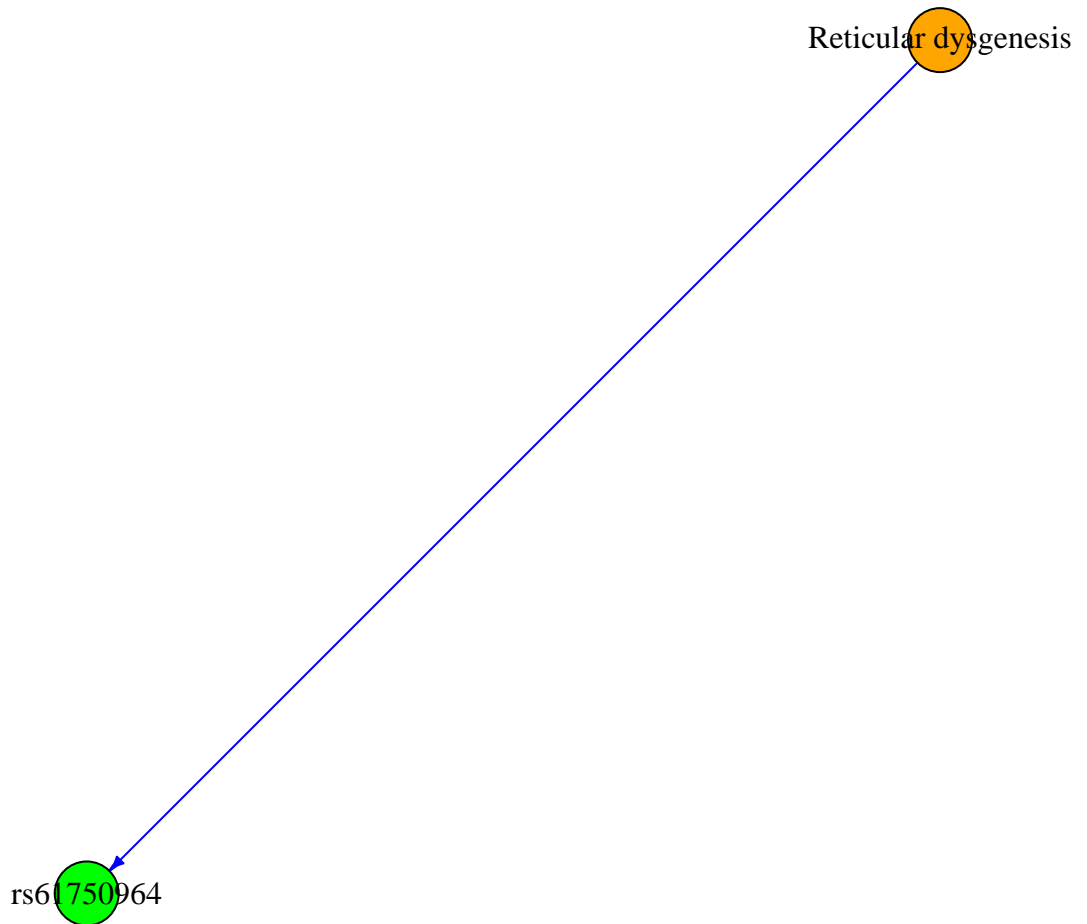

# Variant–Disease Network (Retinal cone dystrophy 4)

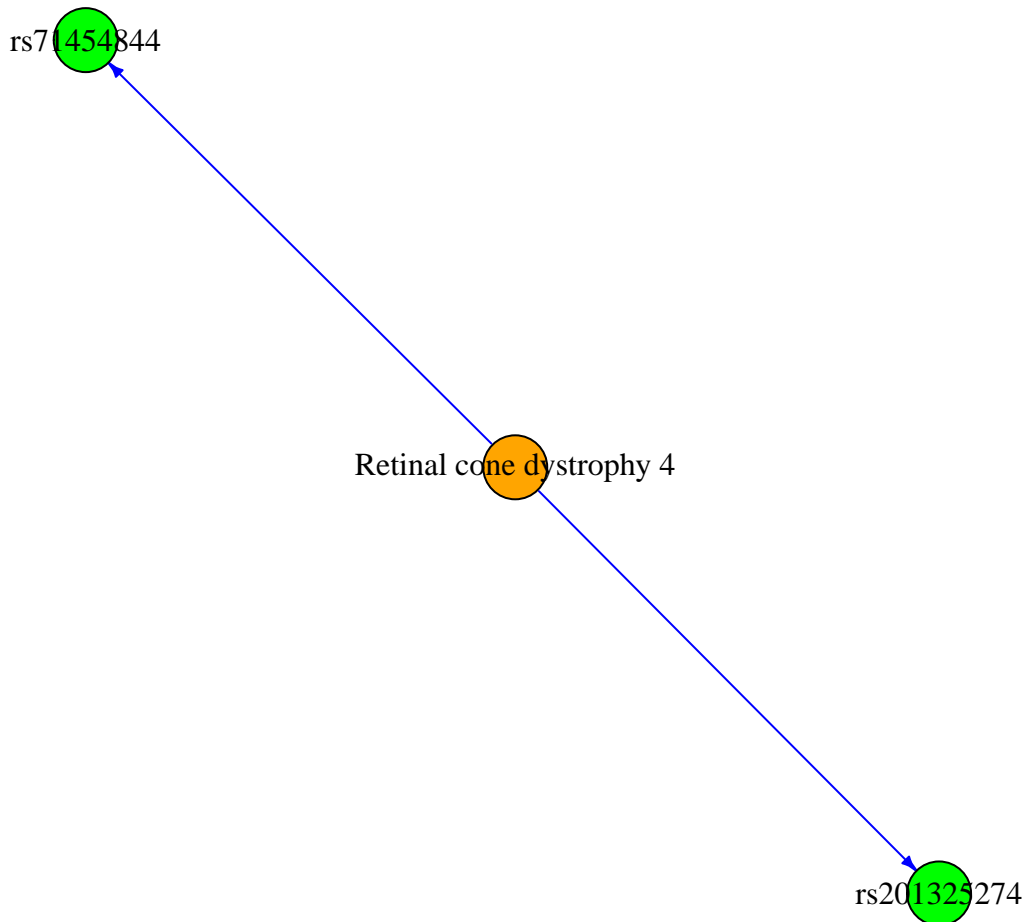



## Variant-Disease Network (Retinal dystrophy)

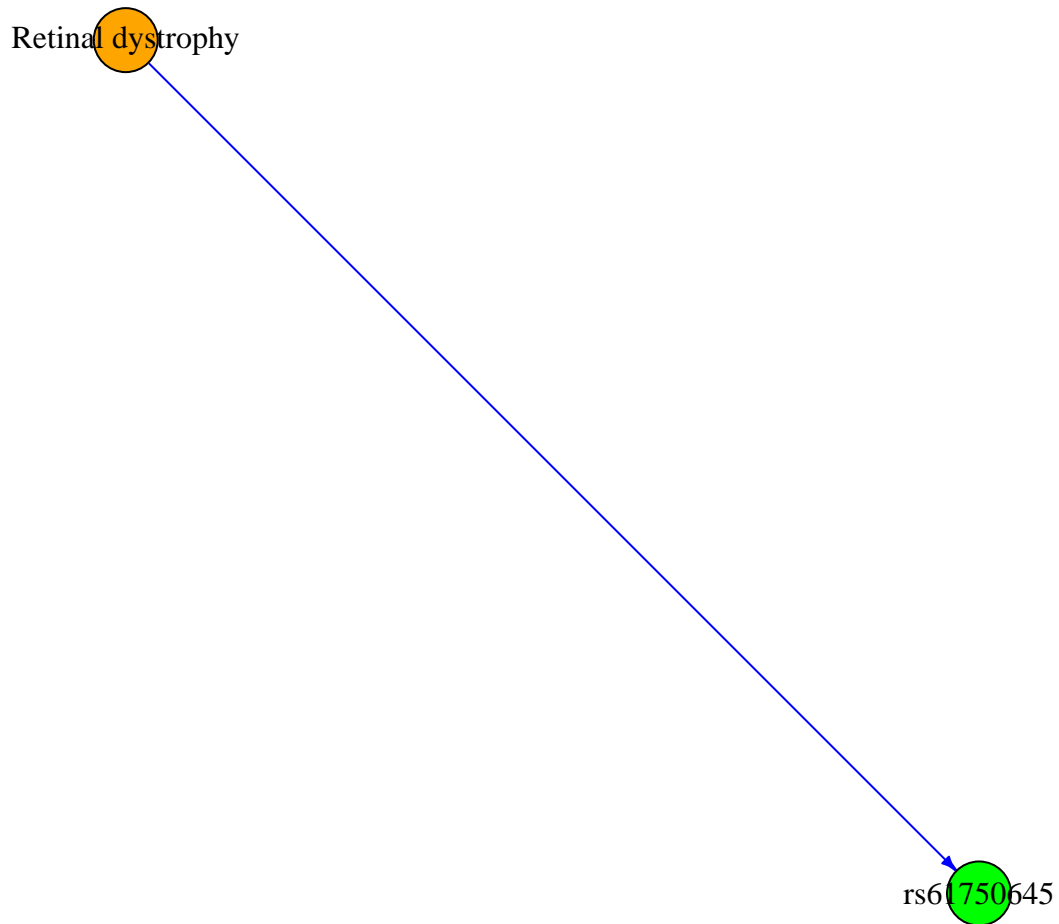

Variant–Disease Network (Retinitis pigmentosa)

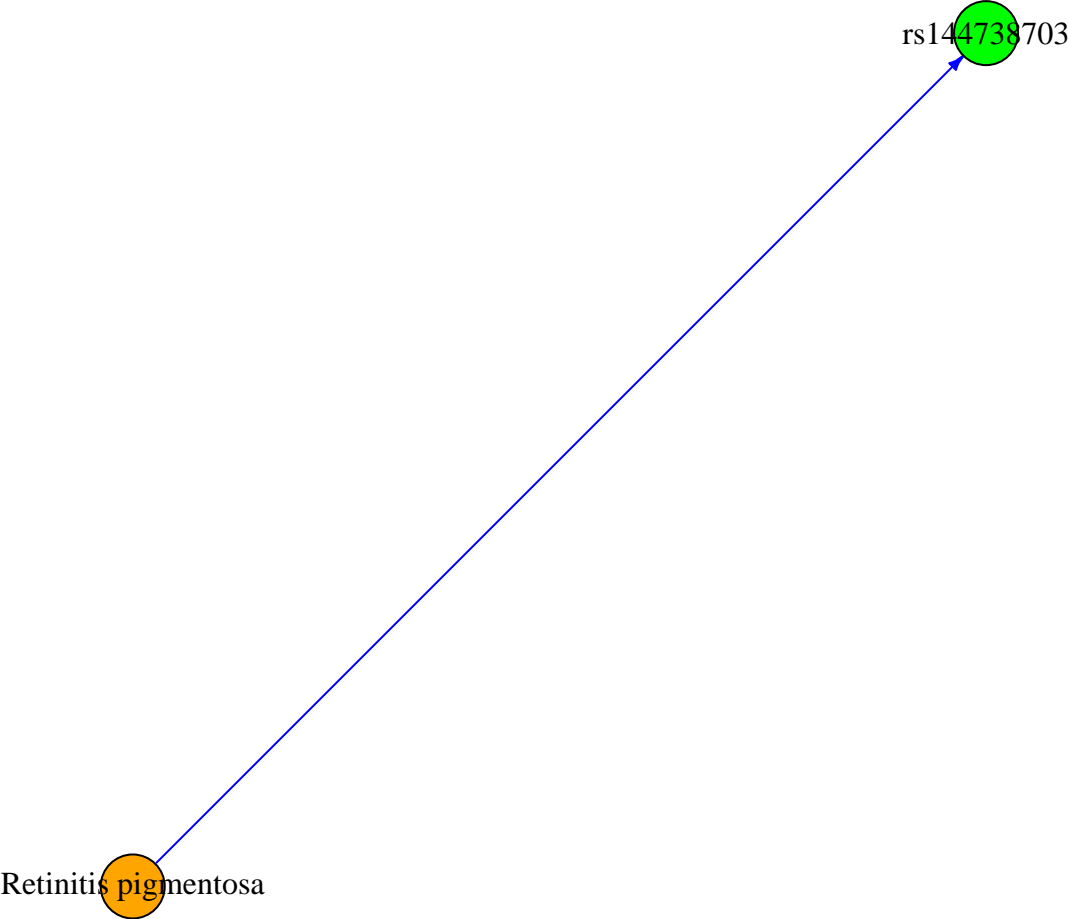

Variant–Disease Network (Retinitis pigmentosa 11)

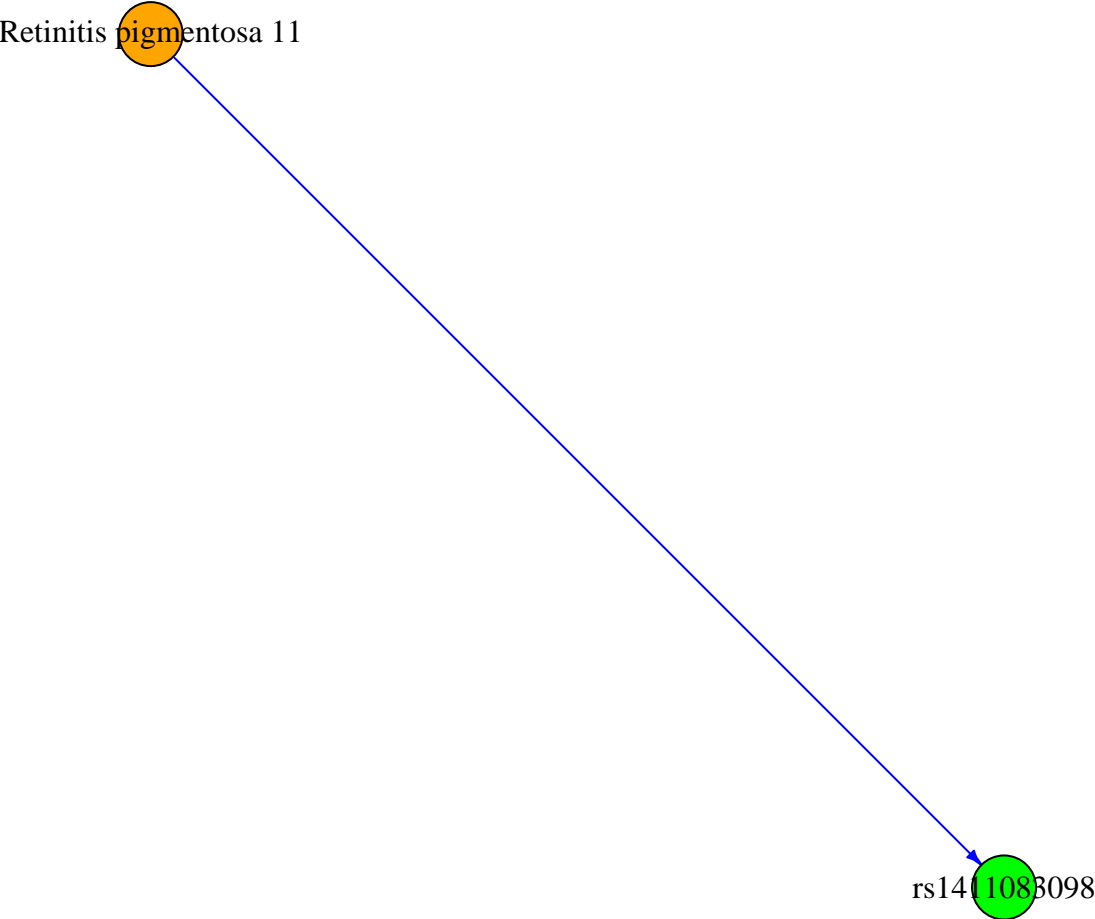

## Variant–Disease Network (Retinitis pigmentosa 20)

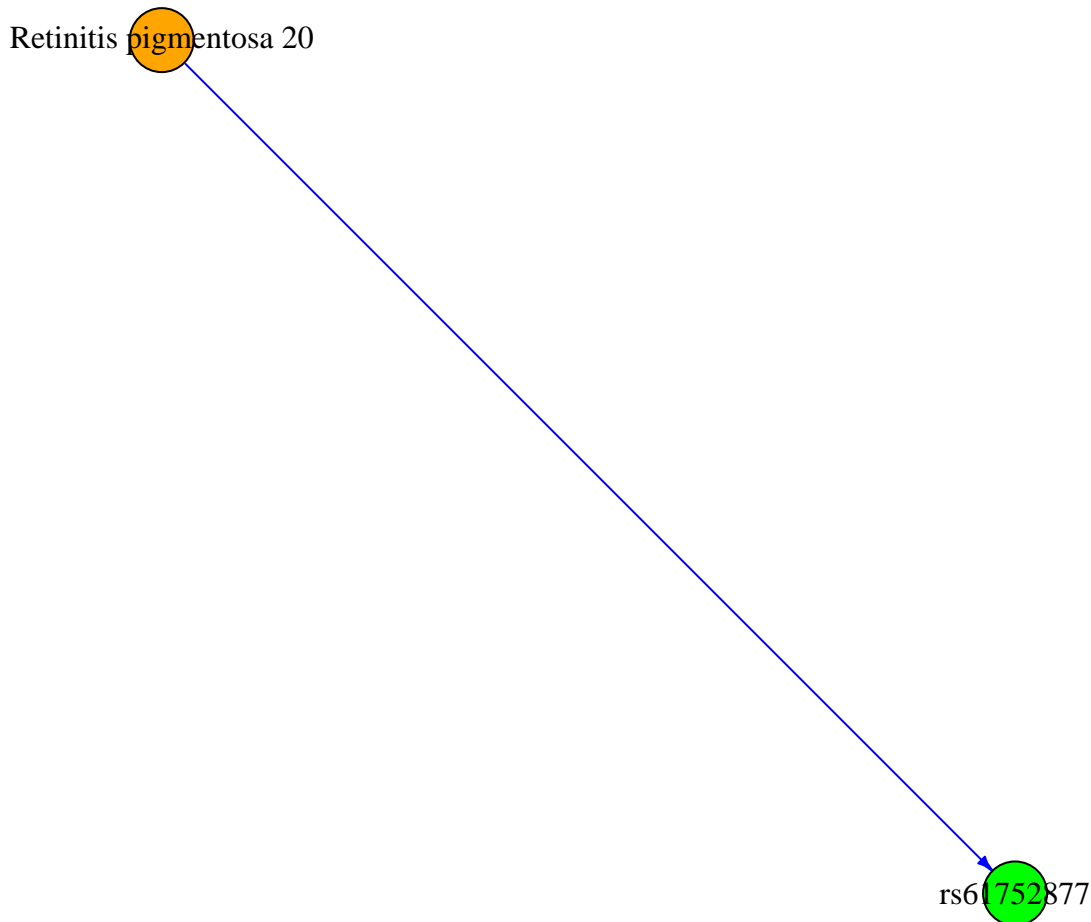

## Variant–Disease Network (Retinitis pigmentosa 30)

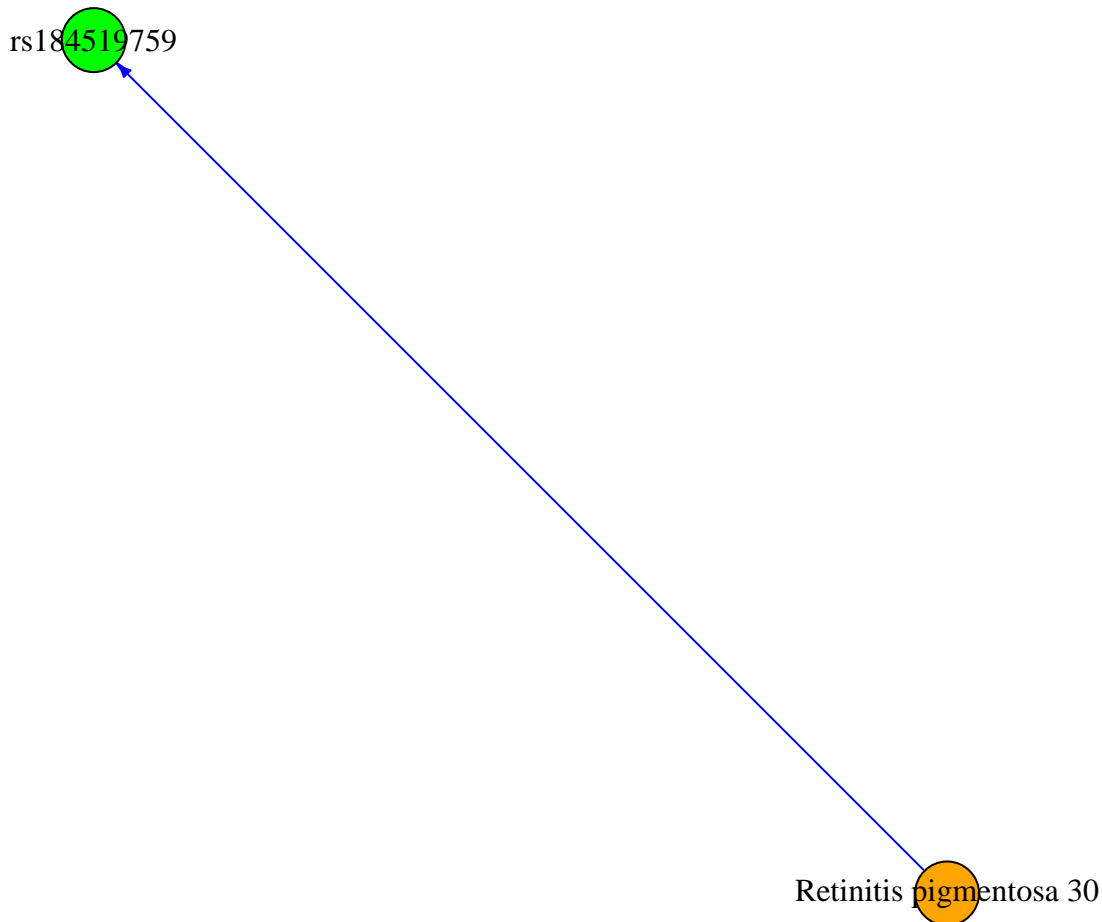

## Variant–Disease Network (Retinitis pigmentosa 37)

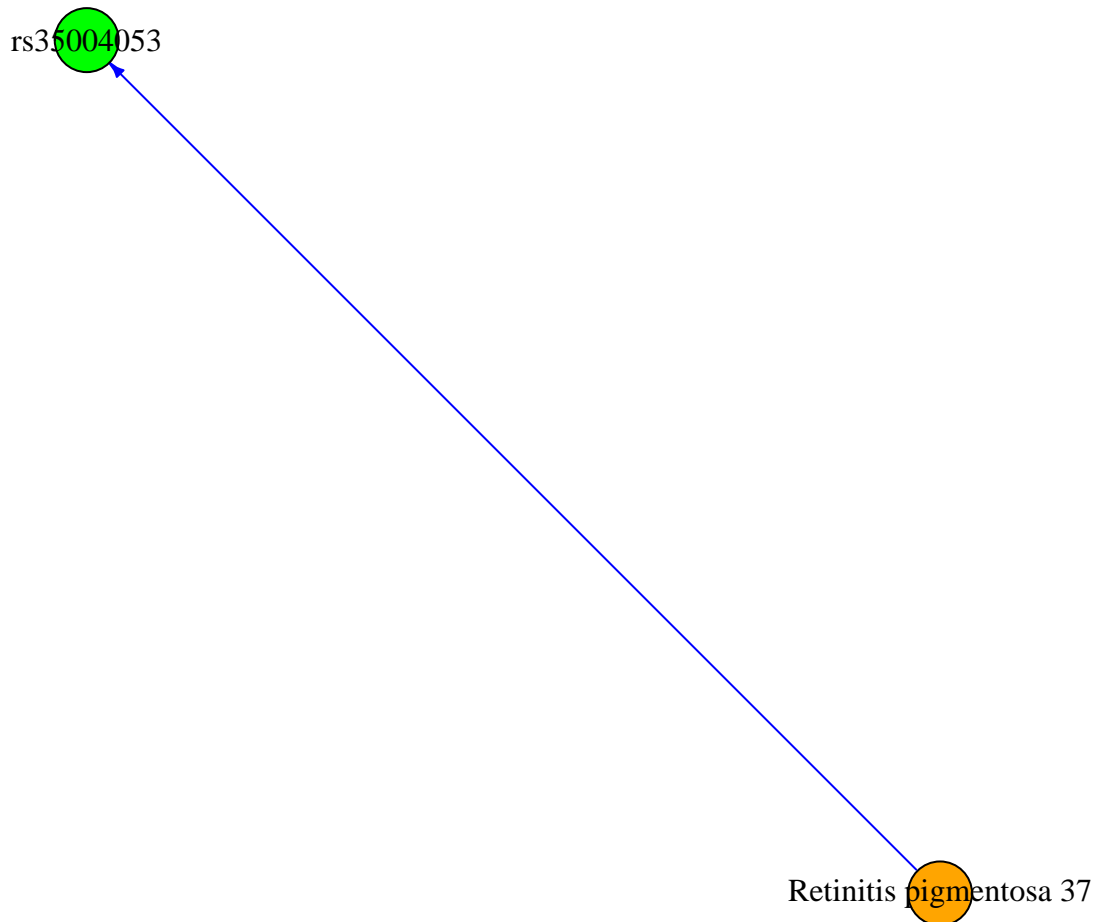

## Variant–Disease Network (Retinitis pigmentosa 43)

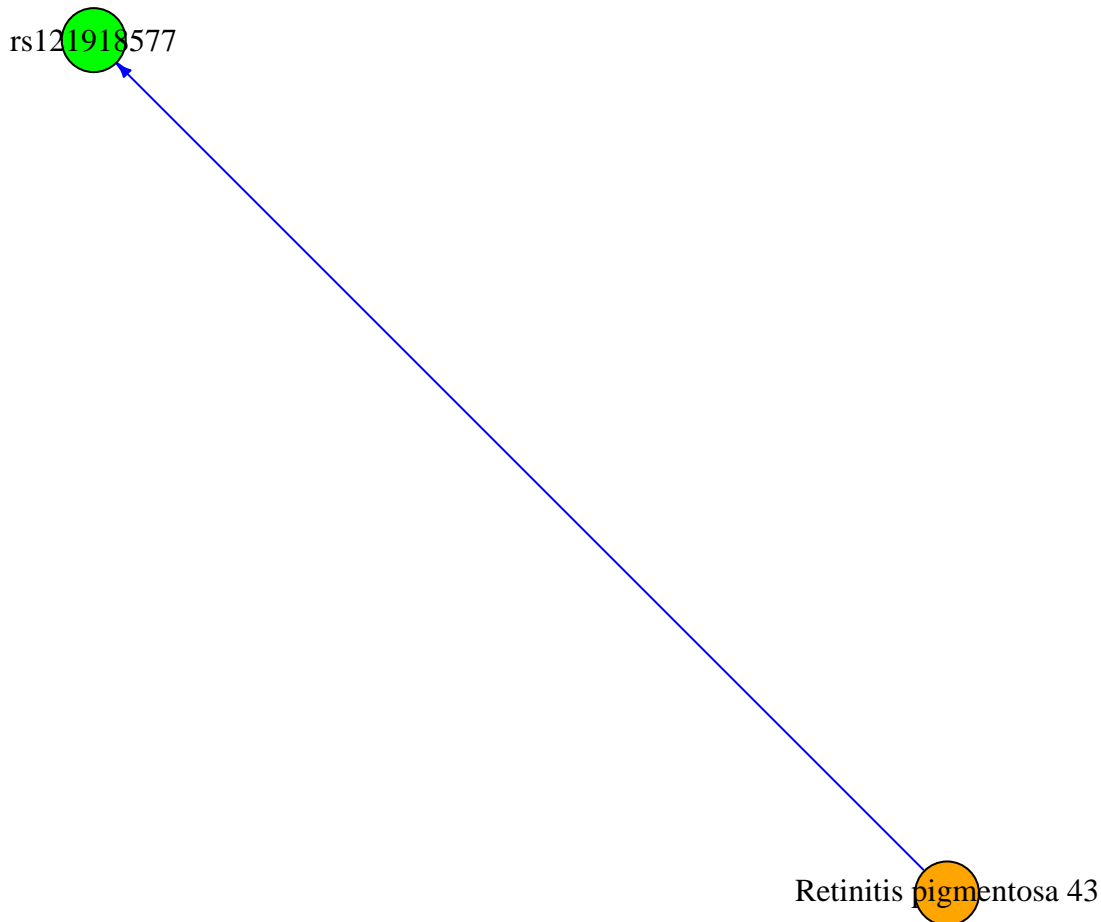

**Variant–Disease Network (Retinitis pigmentosa 66)**

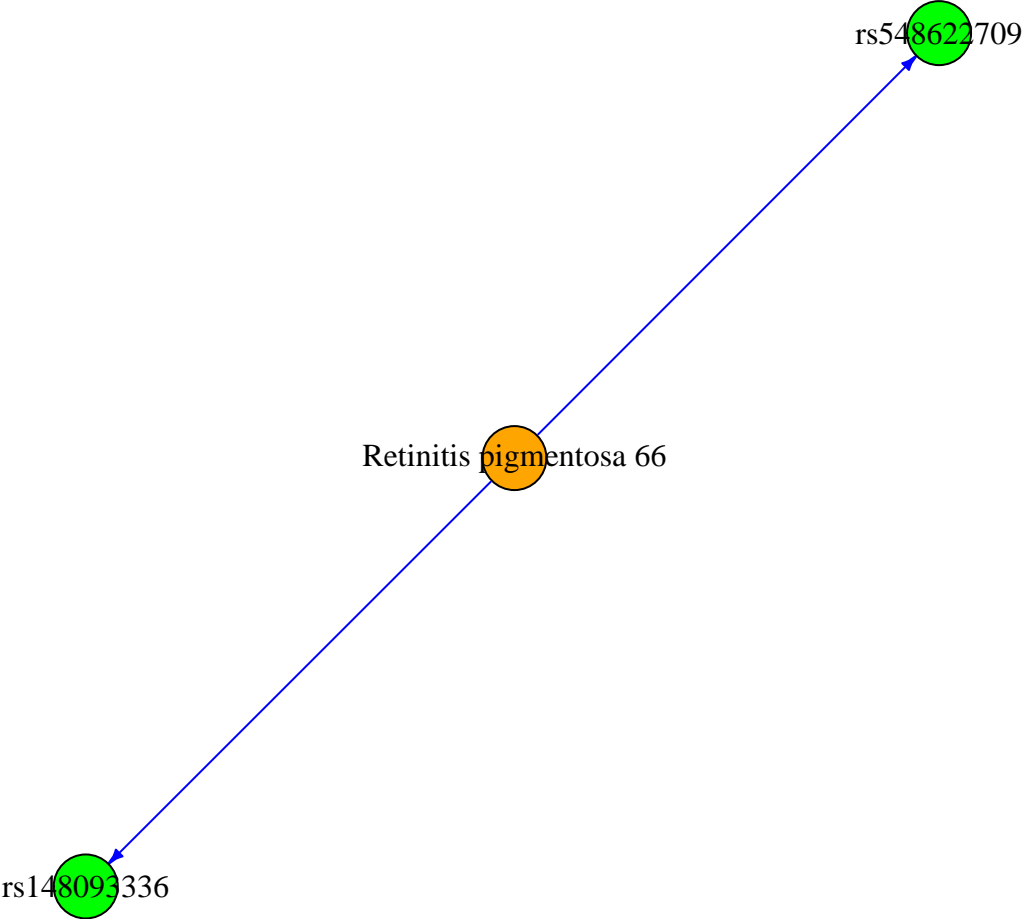



# Variant–Disease Network (Retinitis pigmentosa–deafness syndrome)

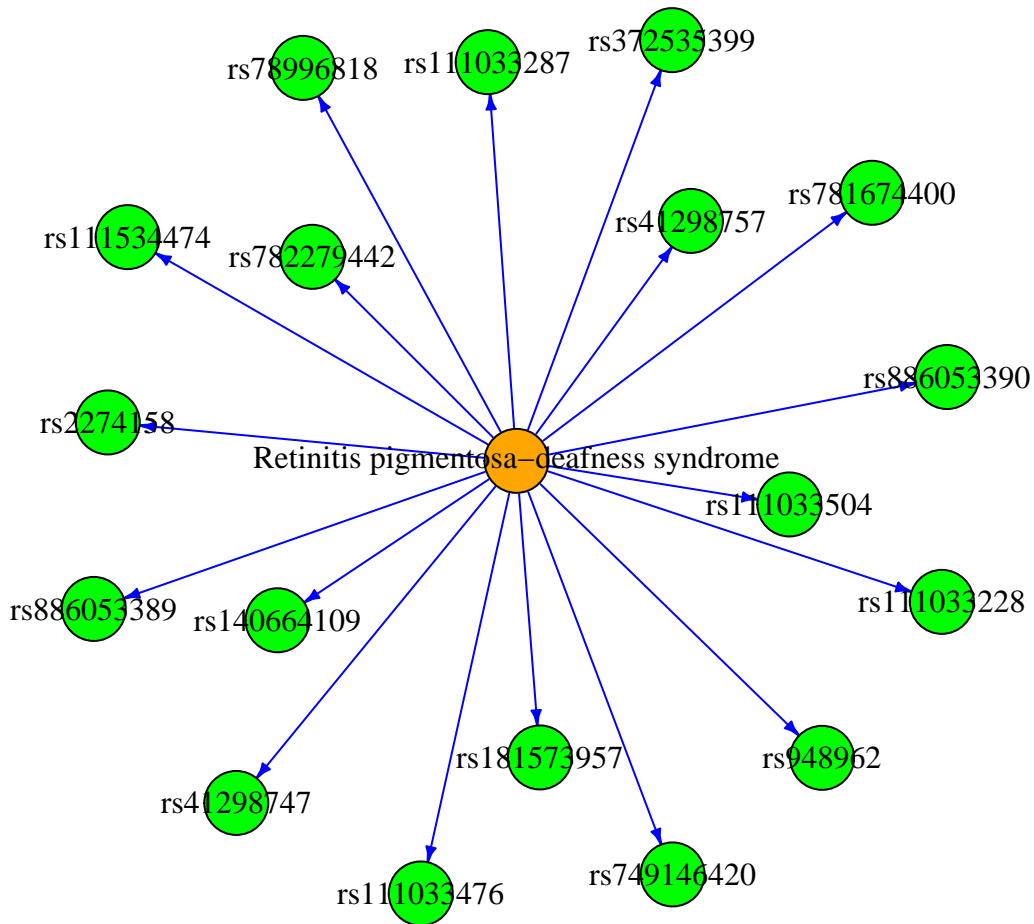

Variant–Disease Network (Retinoblastoma)

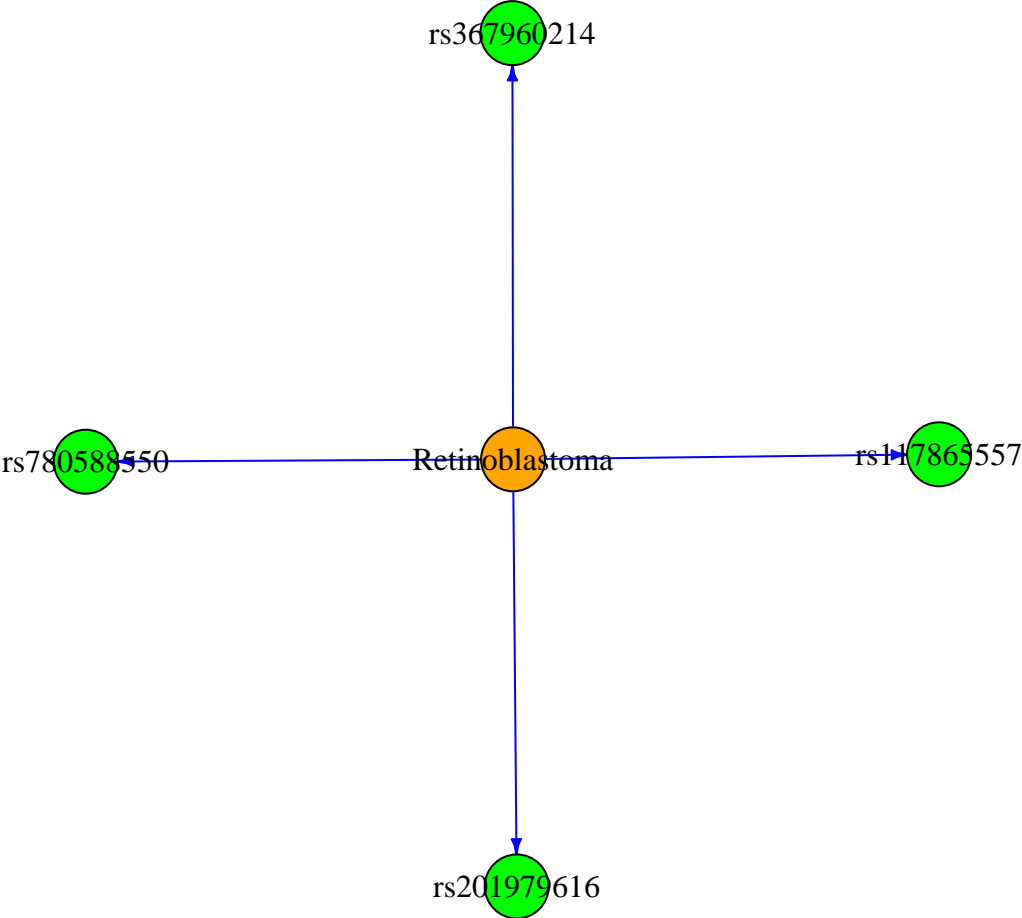

Variant–Disease Network (Rett syndrome)

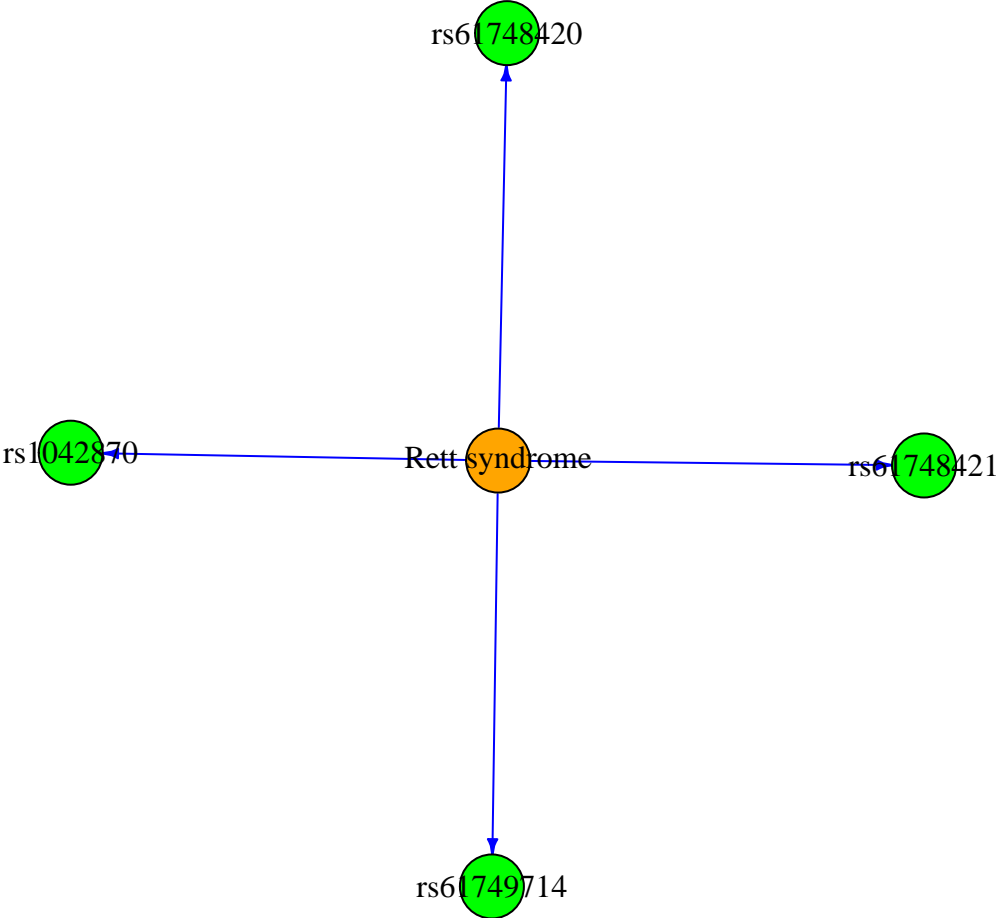

Variant–Disease Network (Rhabdoid tumor)

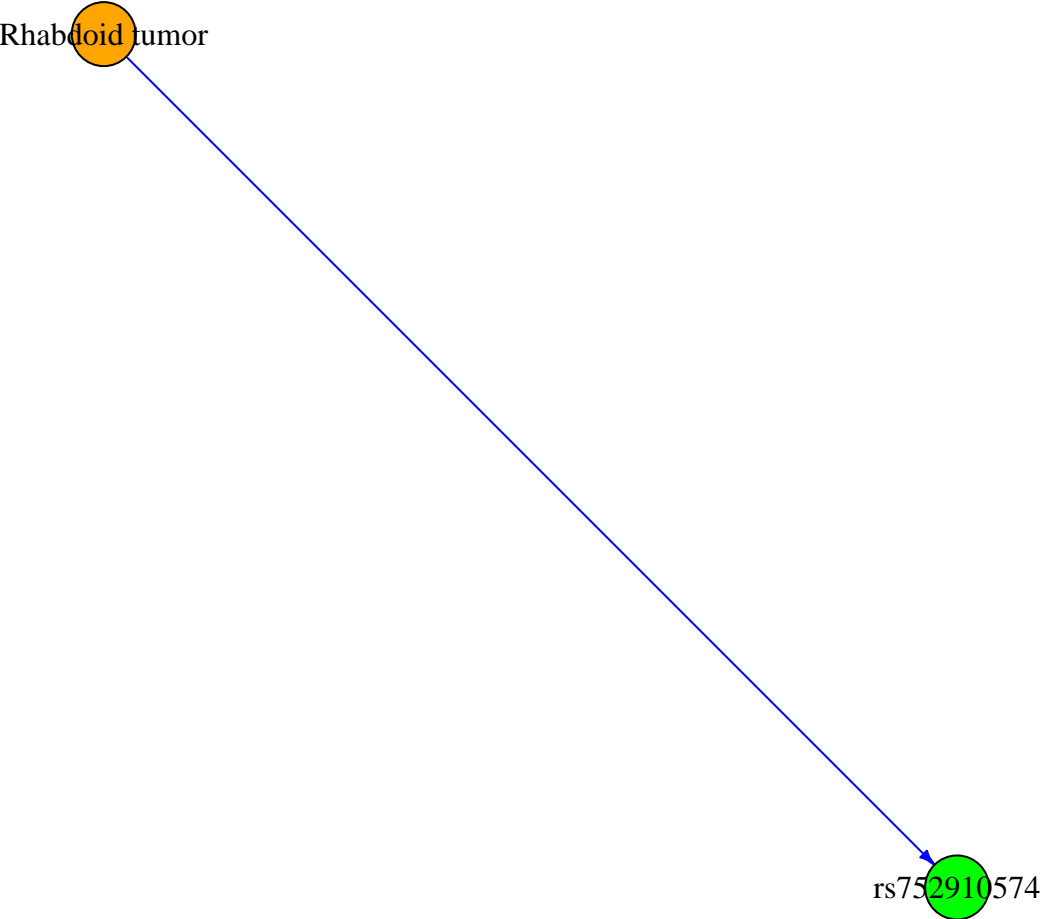

**Variant–Disease Network (Rhabdoid tumor predisposition syndrome 1)**

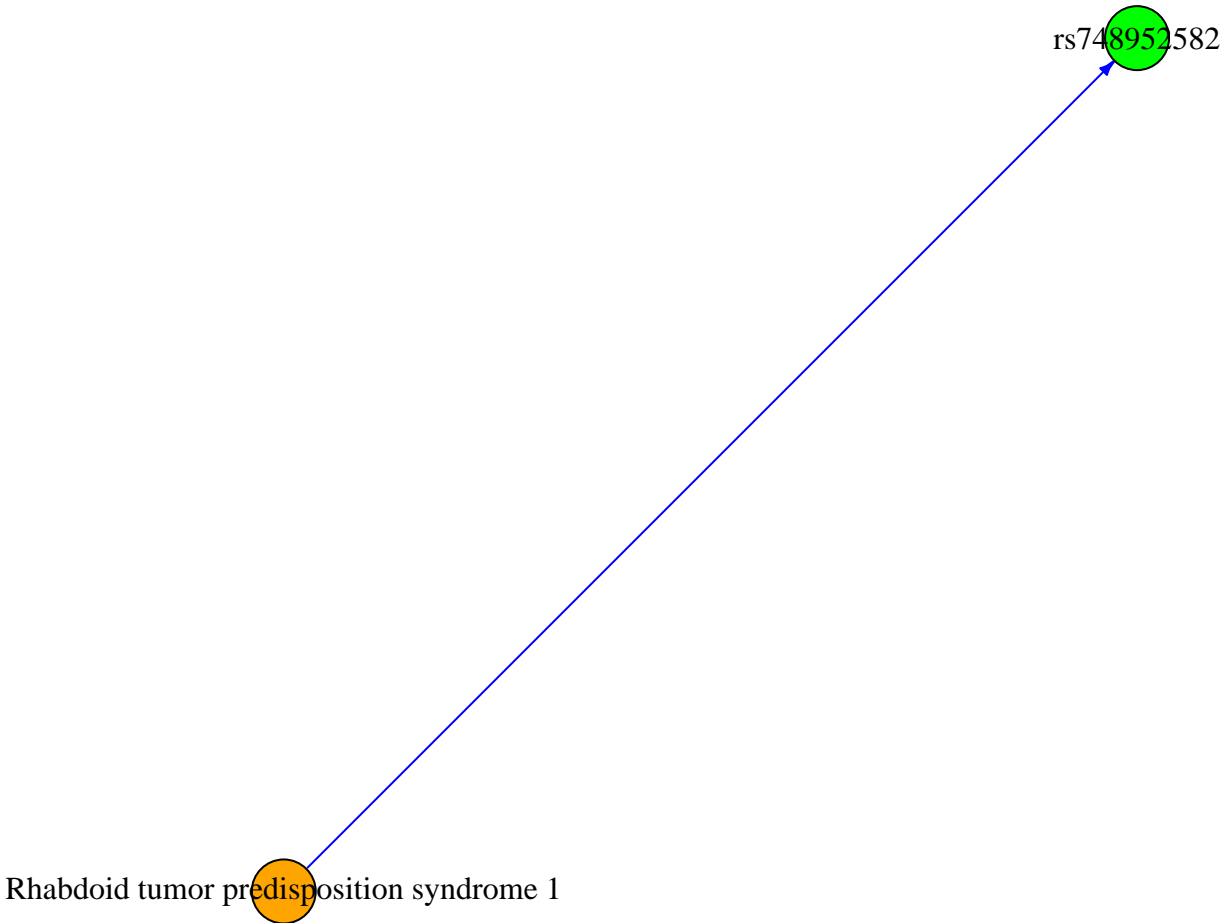

Variant–Disease Network (Rhizomelic chondrodysplasia punctata)

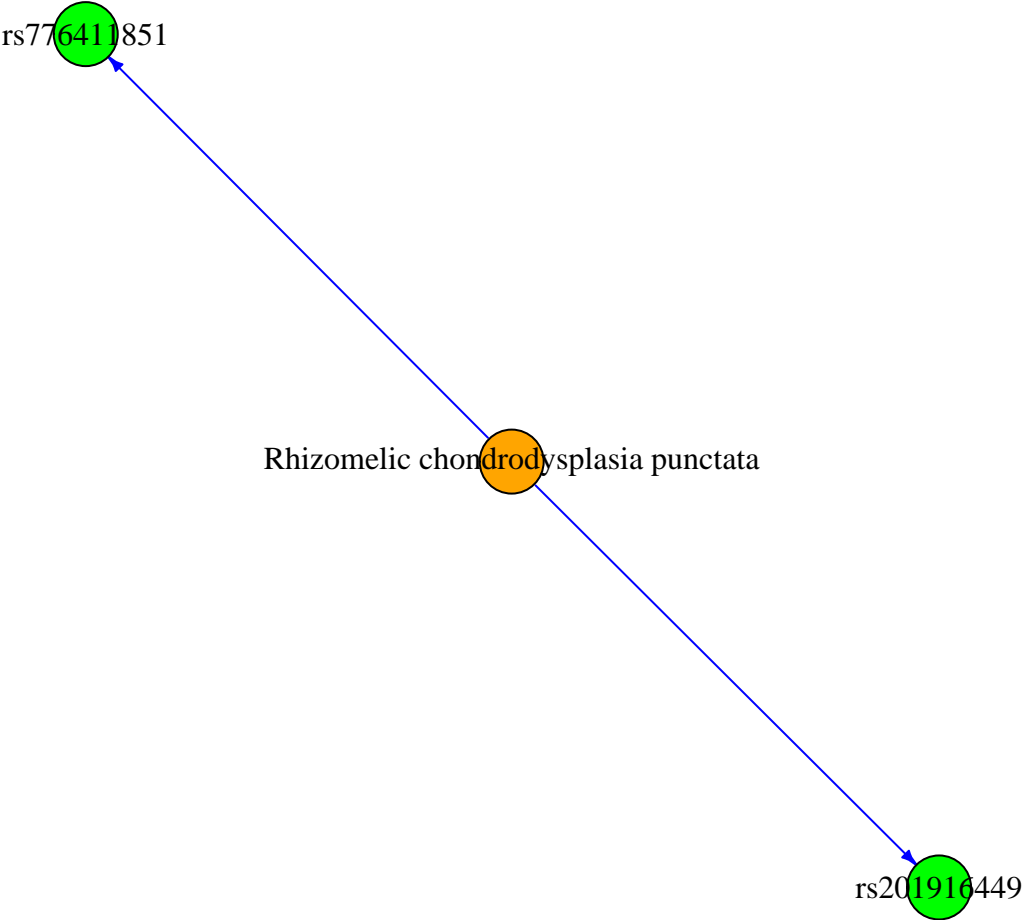

## Variant-Disease Network (Rippling muscle disease 2)

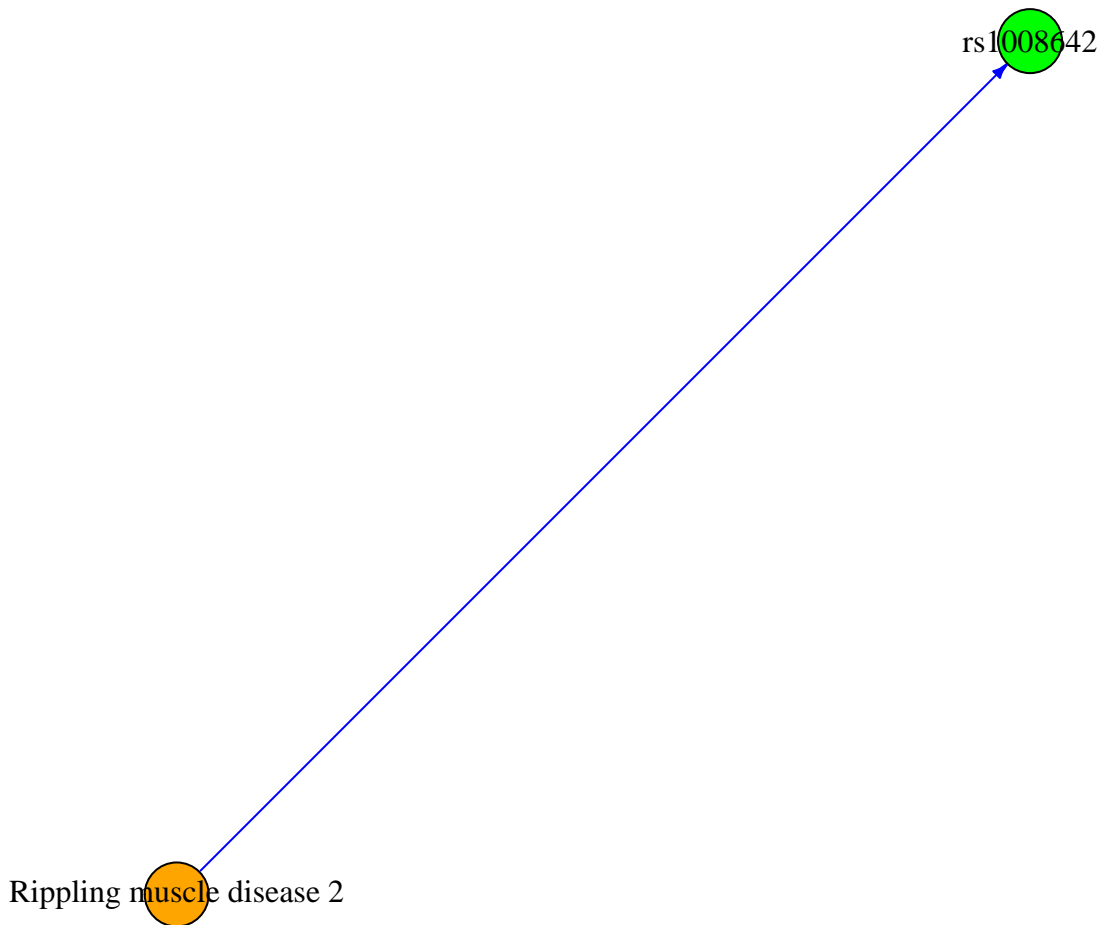

## Variant–Disease Network (Robinow syndrome)

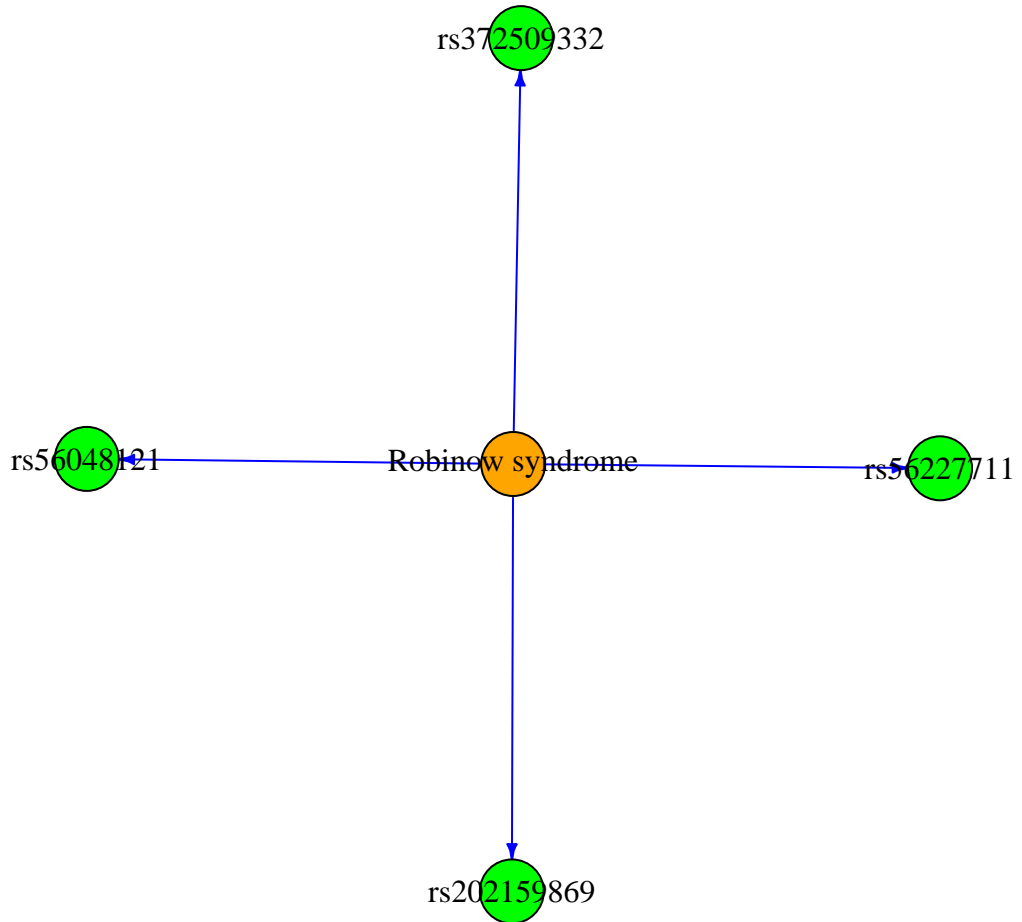



# nt-Disease Network (Rolandic epilepsy with mental retardation and speech c

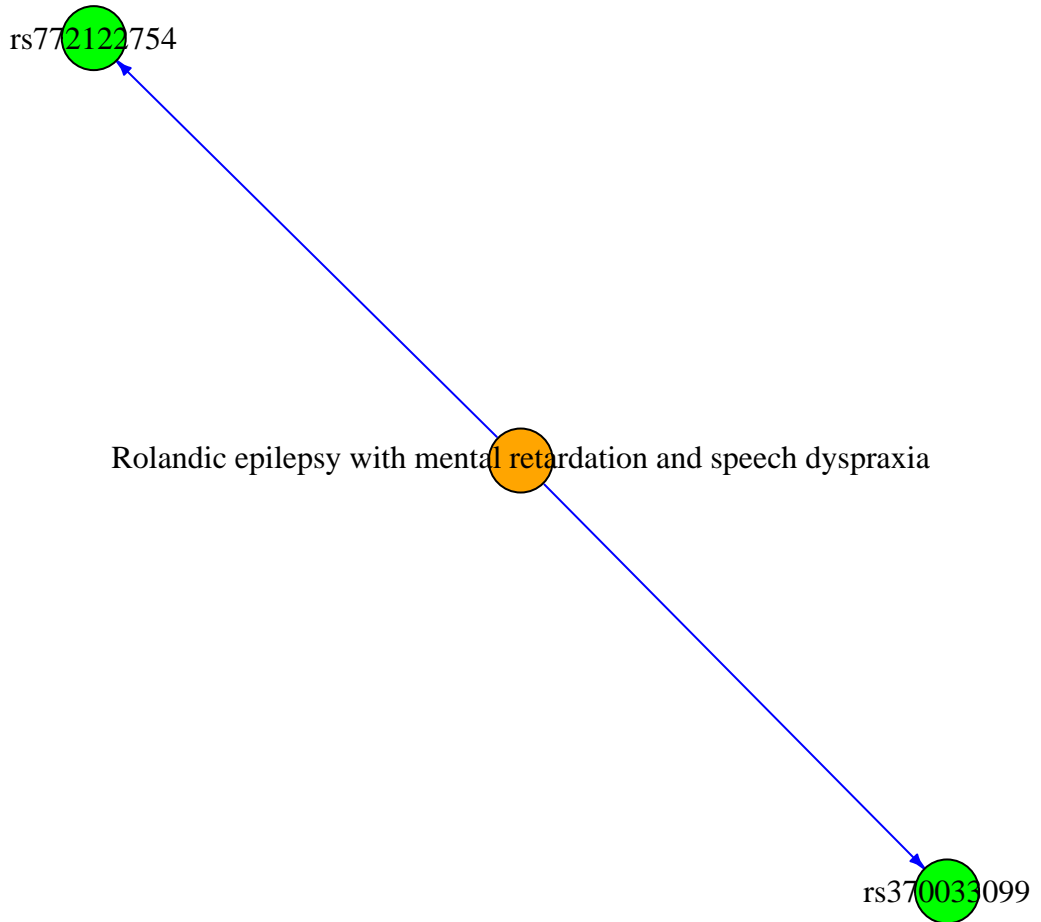

**Variant–Disease Network (Romano–Ward syndrome)**

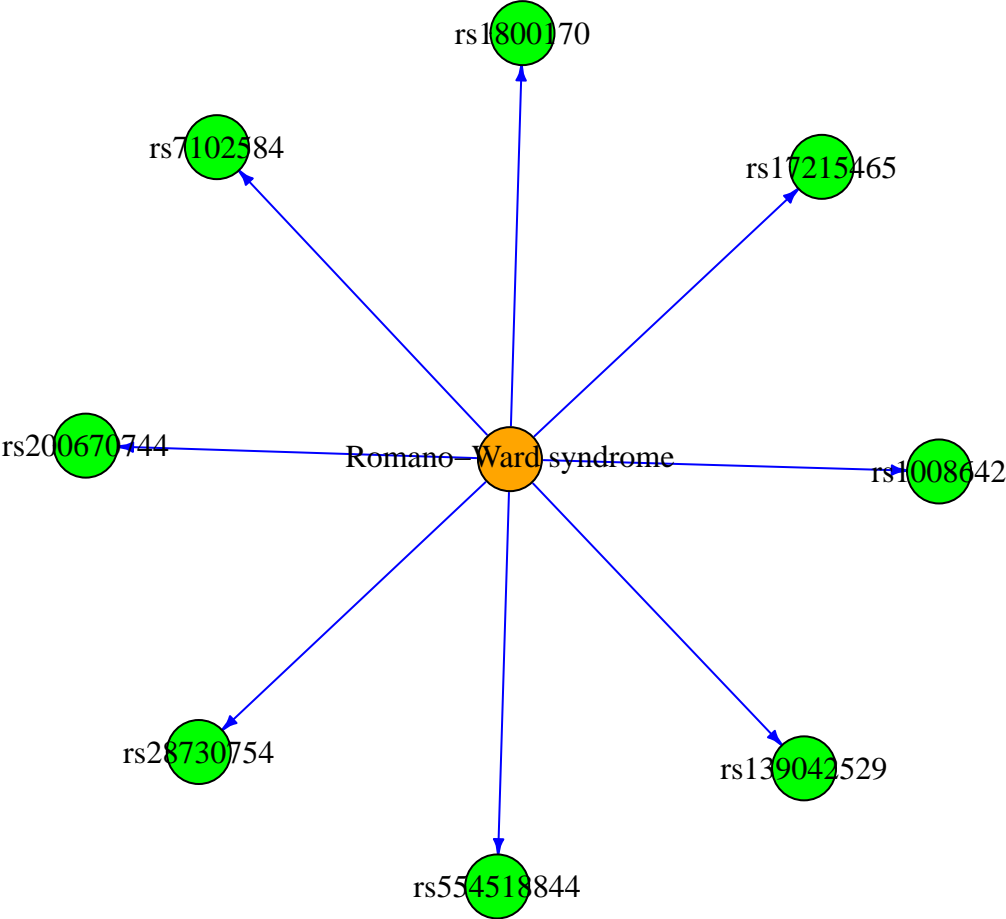

## Variant–Disease Network (Rotor syndrome)

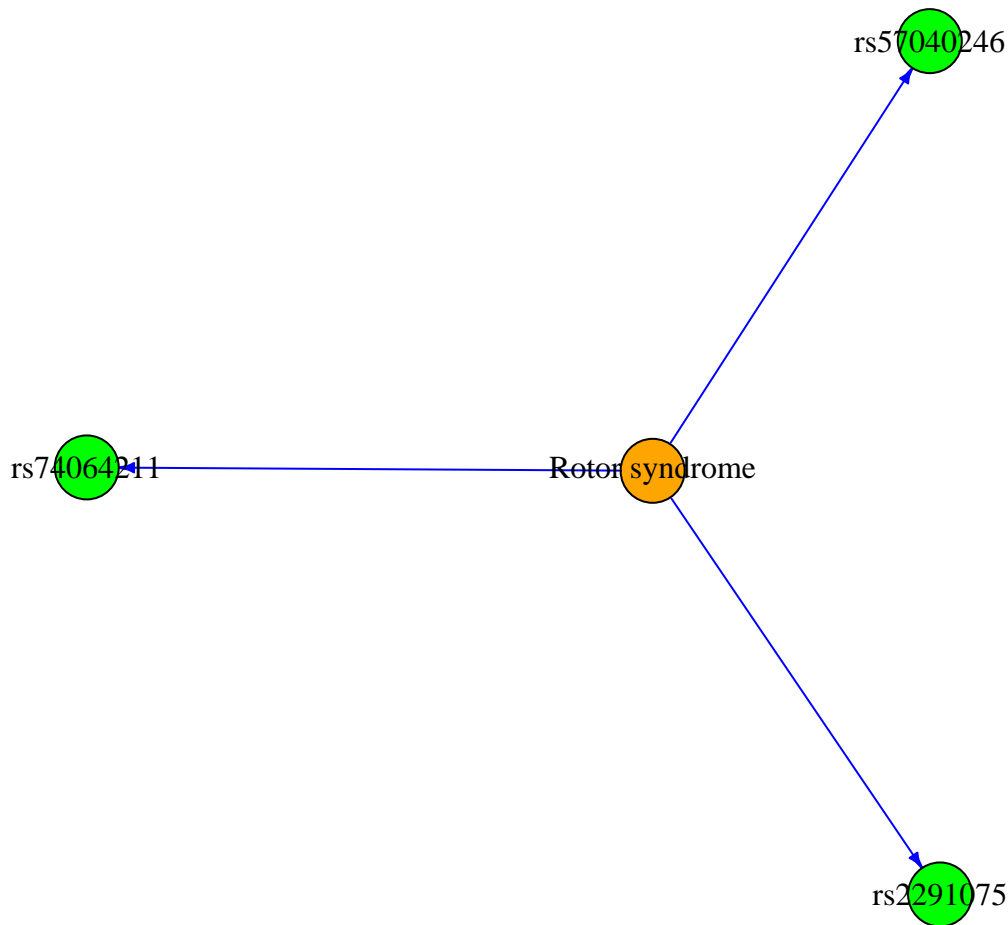

**Variant–Disease Network (Rubinstein–Taybi syndrome 1)**

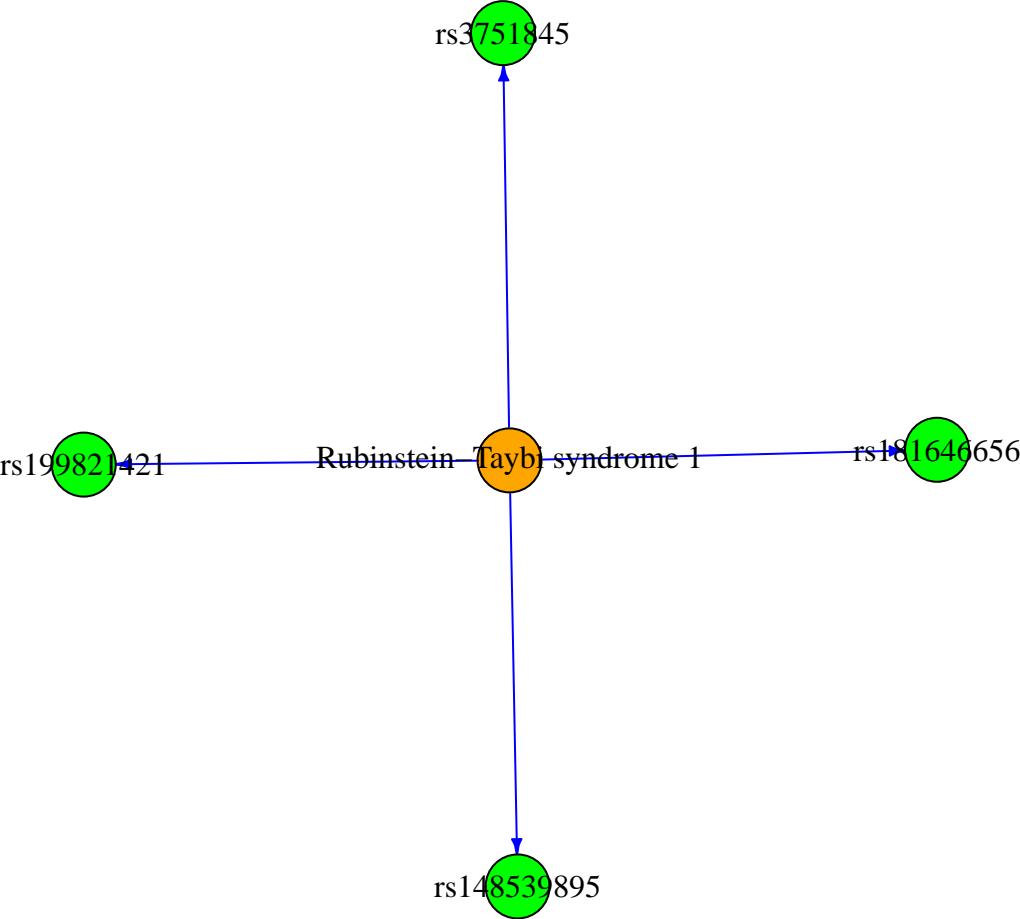

## Variant–Disease Network (Saethre–Chotzen syndrome)

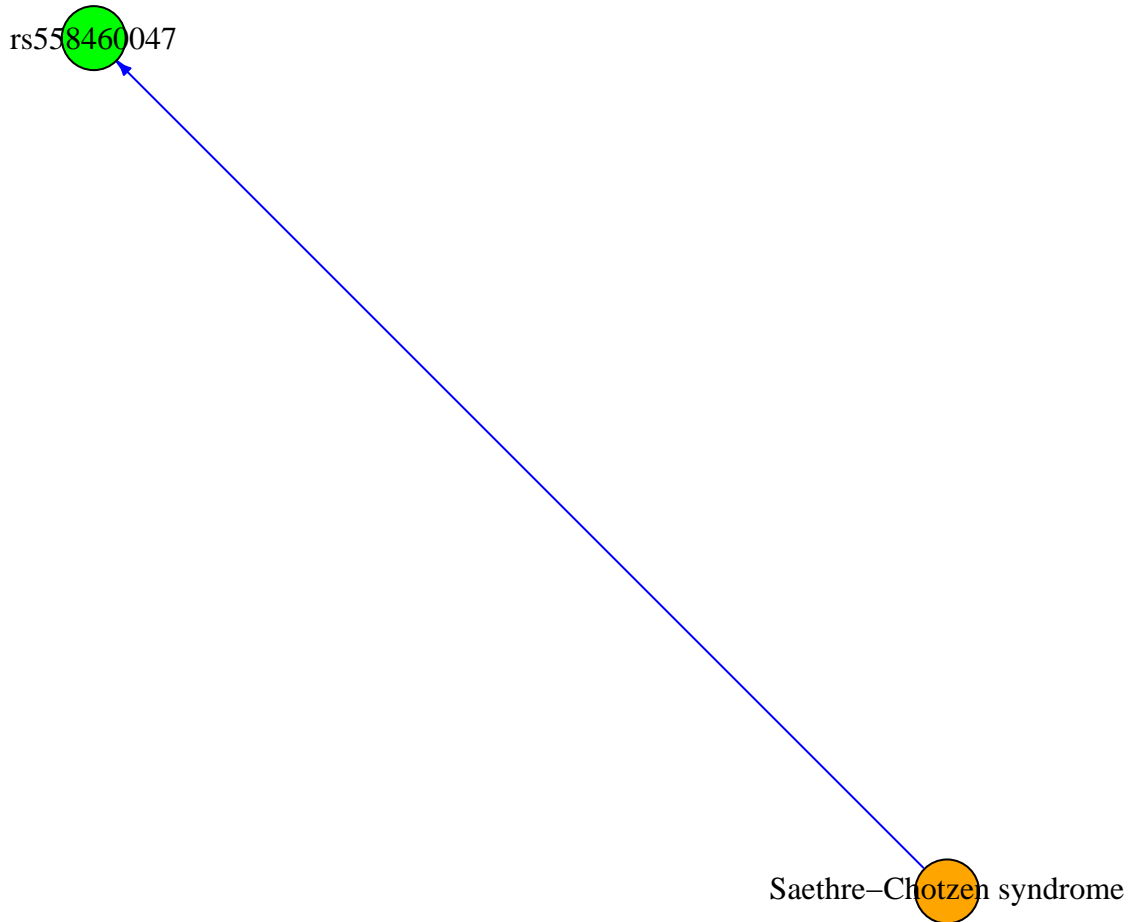

# Variant–Disease Network (Salt and pepper developmental regression syndrome)

rs149801673

Salt and pepper developmental regression



Variant–Disease Network (Sanfilippo syndrome)

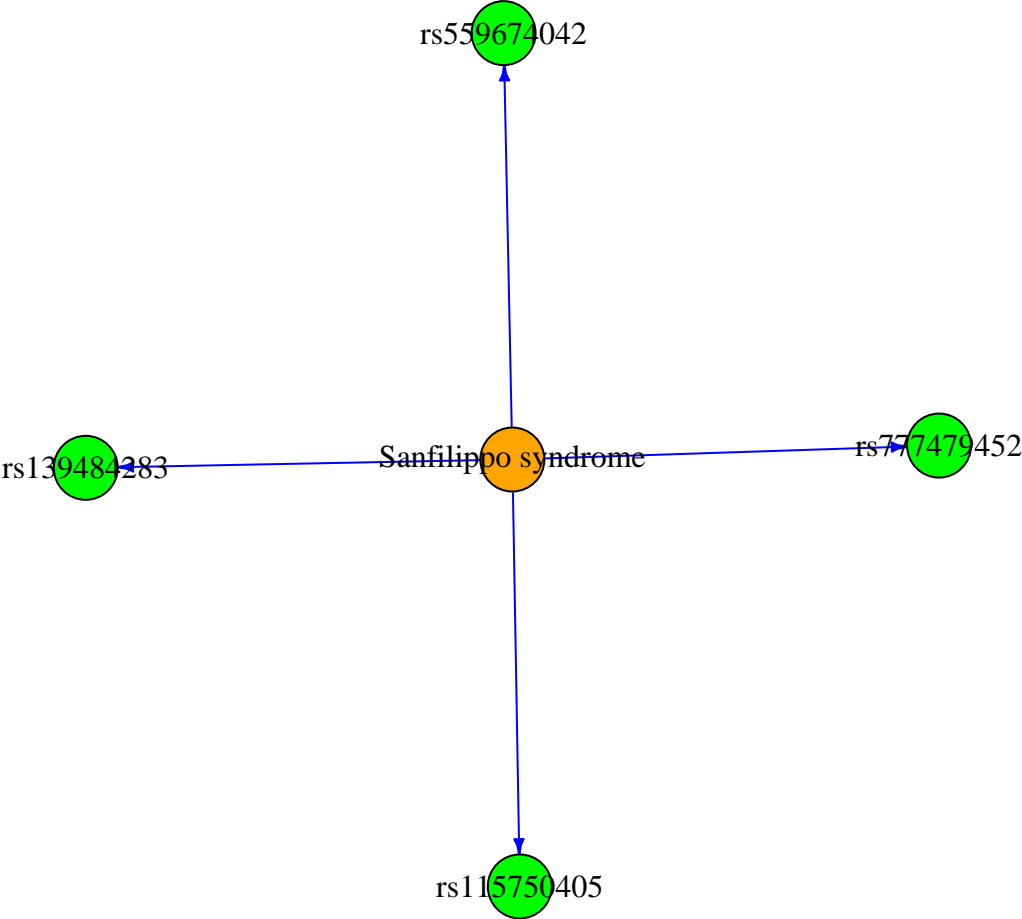

## Variant–Disease Network (Scapuloperoneal weakness)

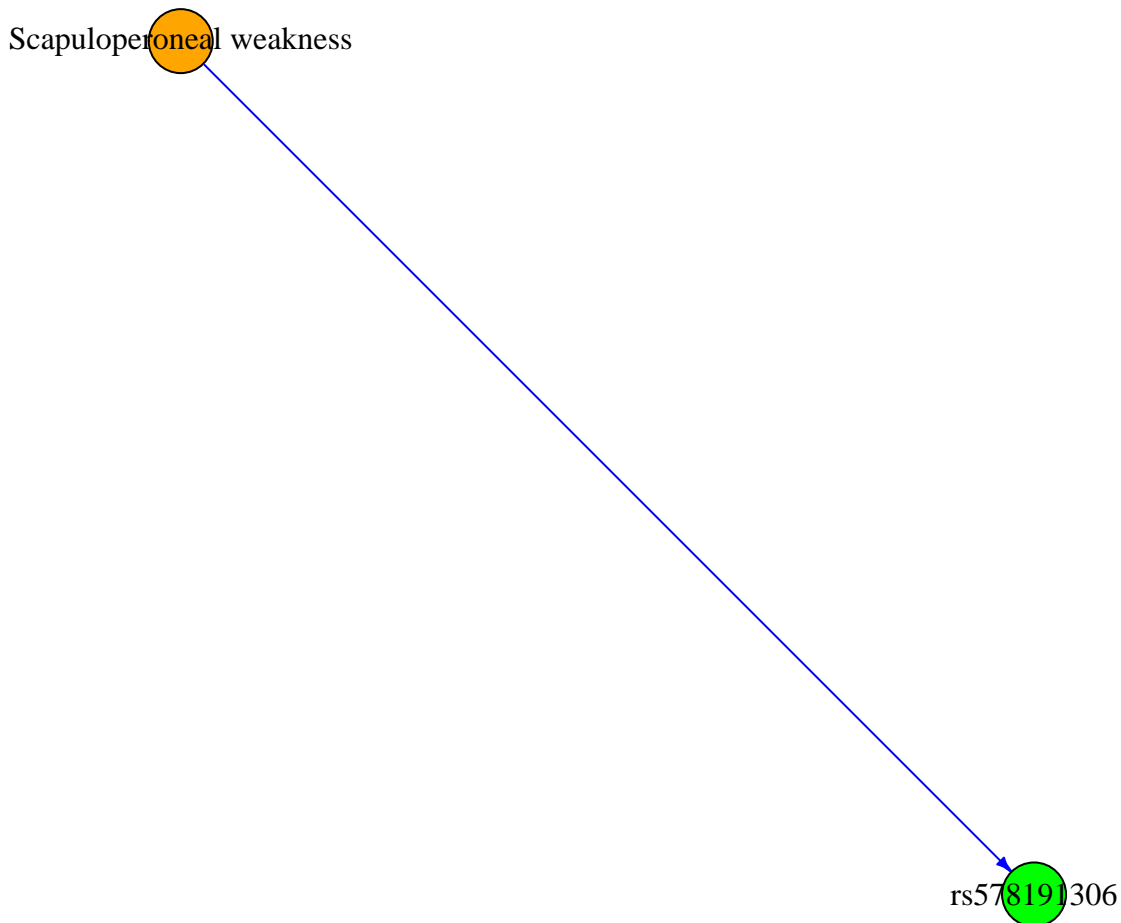



**Variant–Disease Network (Schaaf–yang syndrome)**

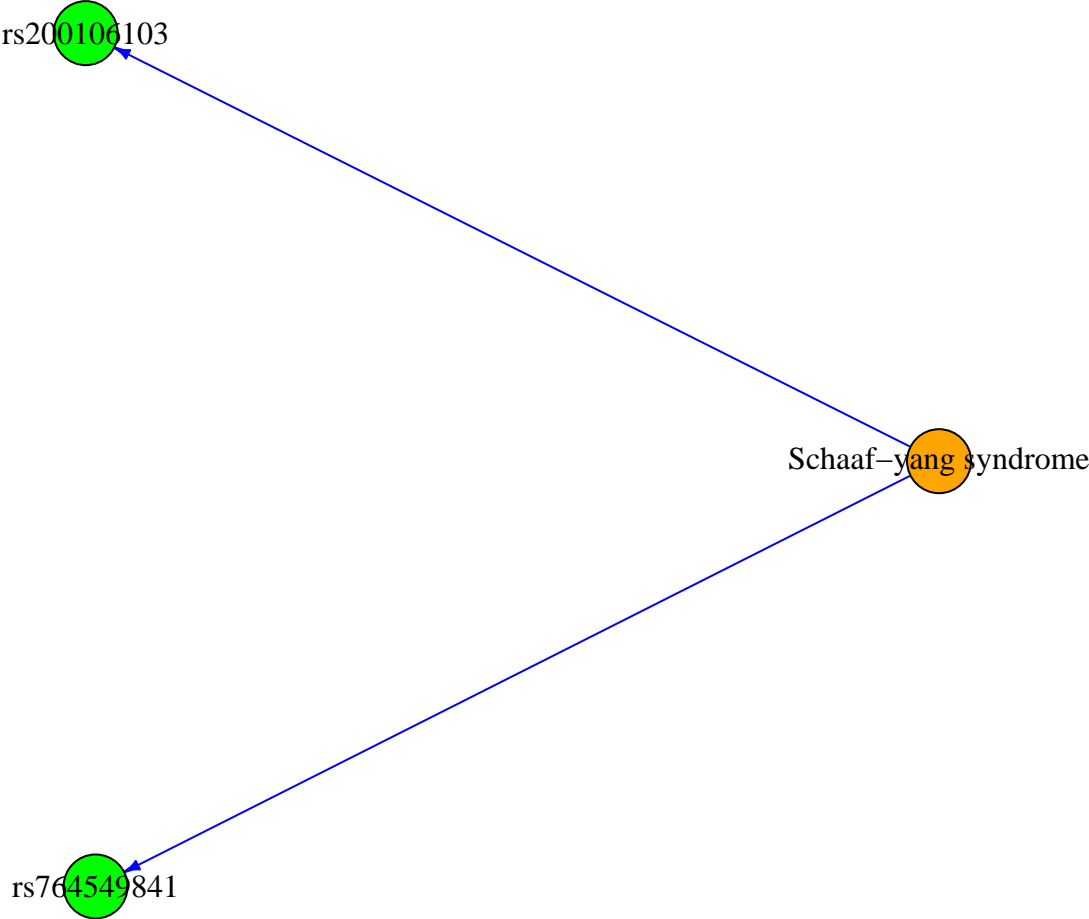

Variant–Disease Network (Schimke immunoosseous dysplasia)

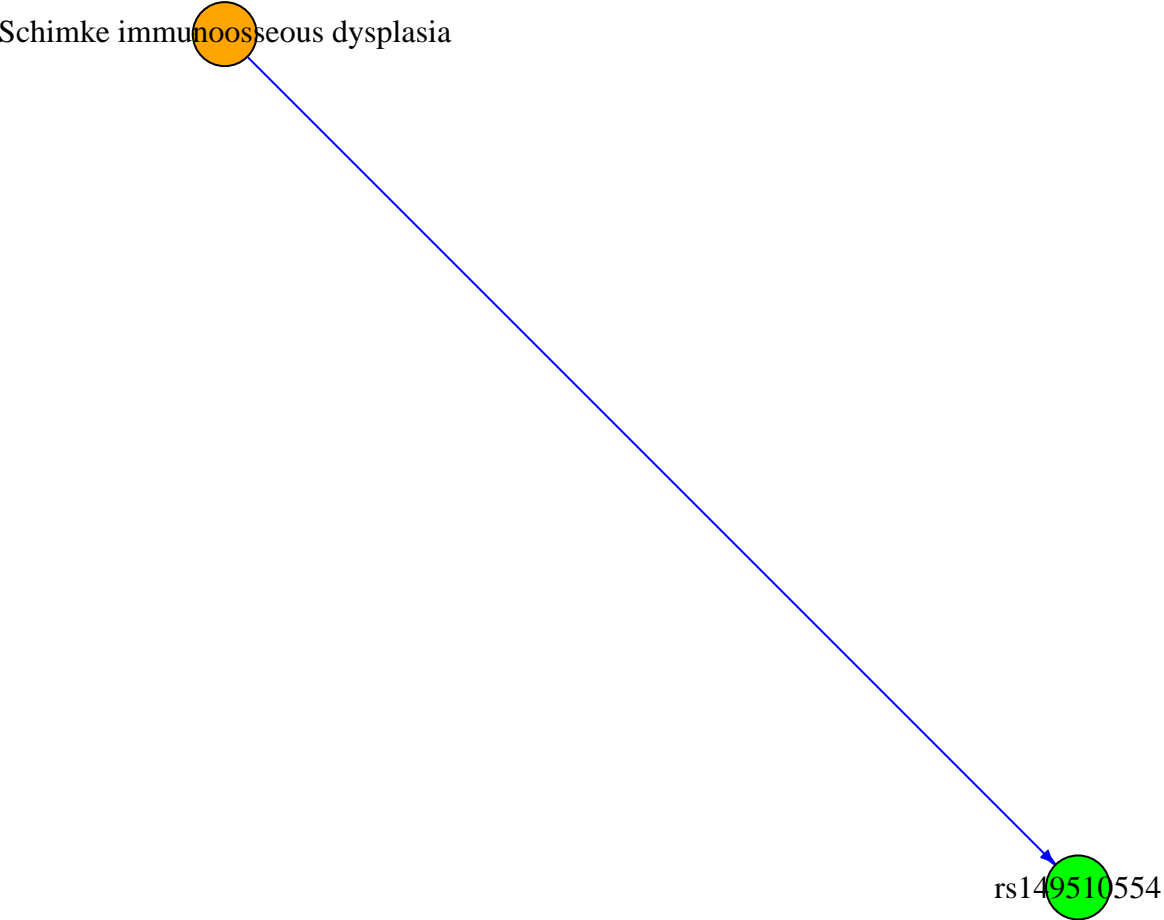

## Variant–Disease Network (Schindler disease)

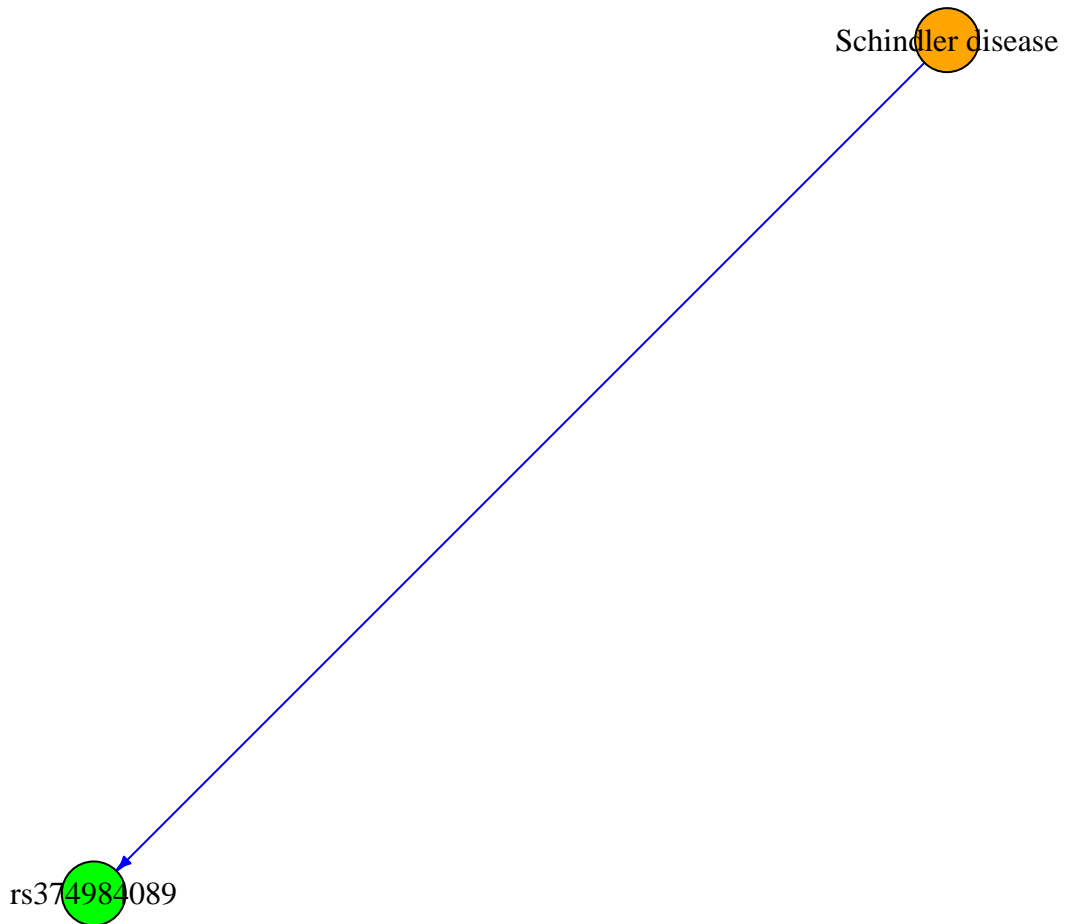

Variant–Disease Network (Schinzel–Giedion syndrome)

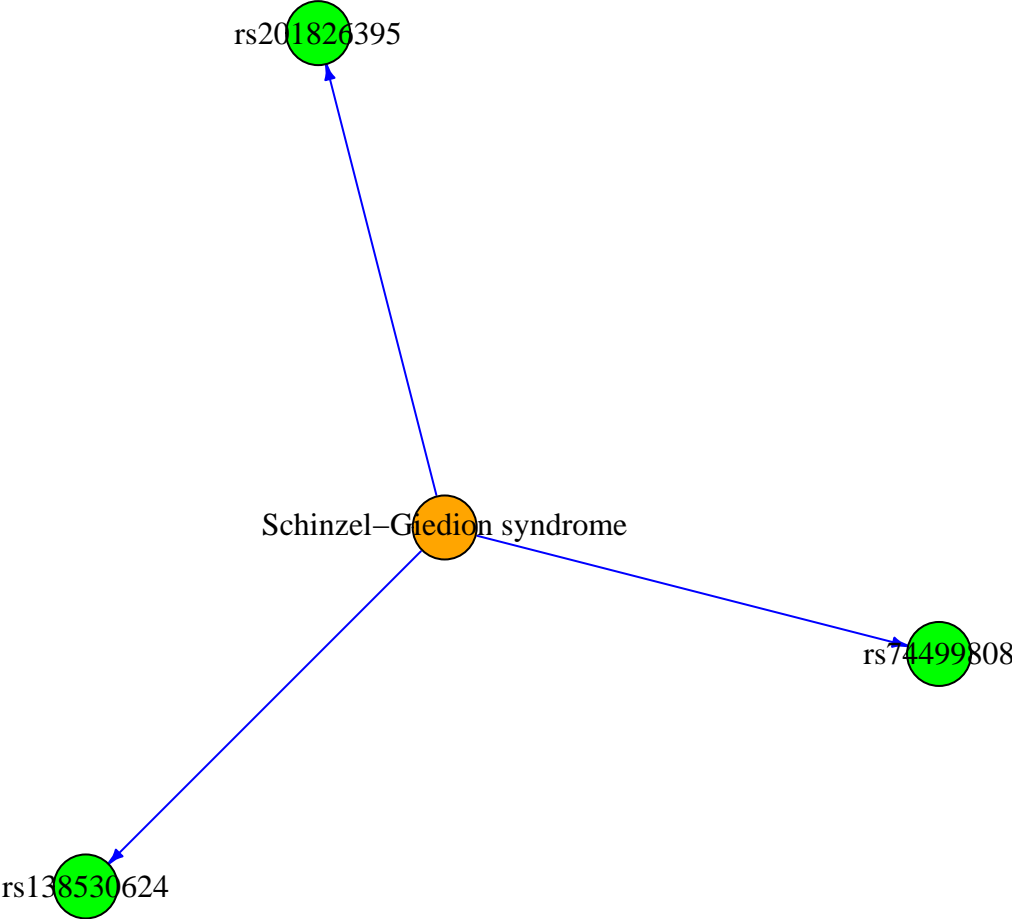

# Variant–Disease Network (Schizophrenia)

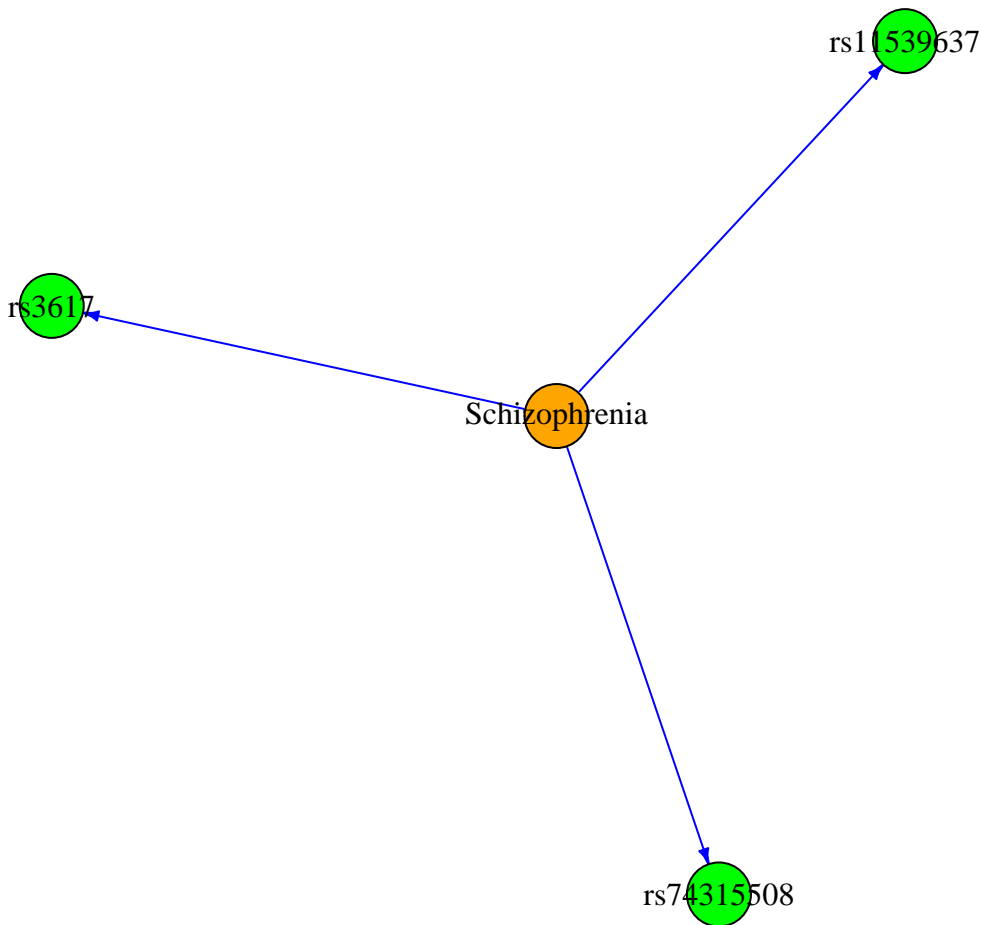

Variant–Disease Network (Schneckenbecken dysplasia)

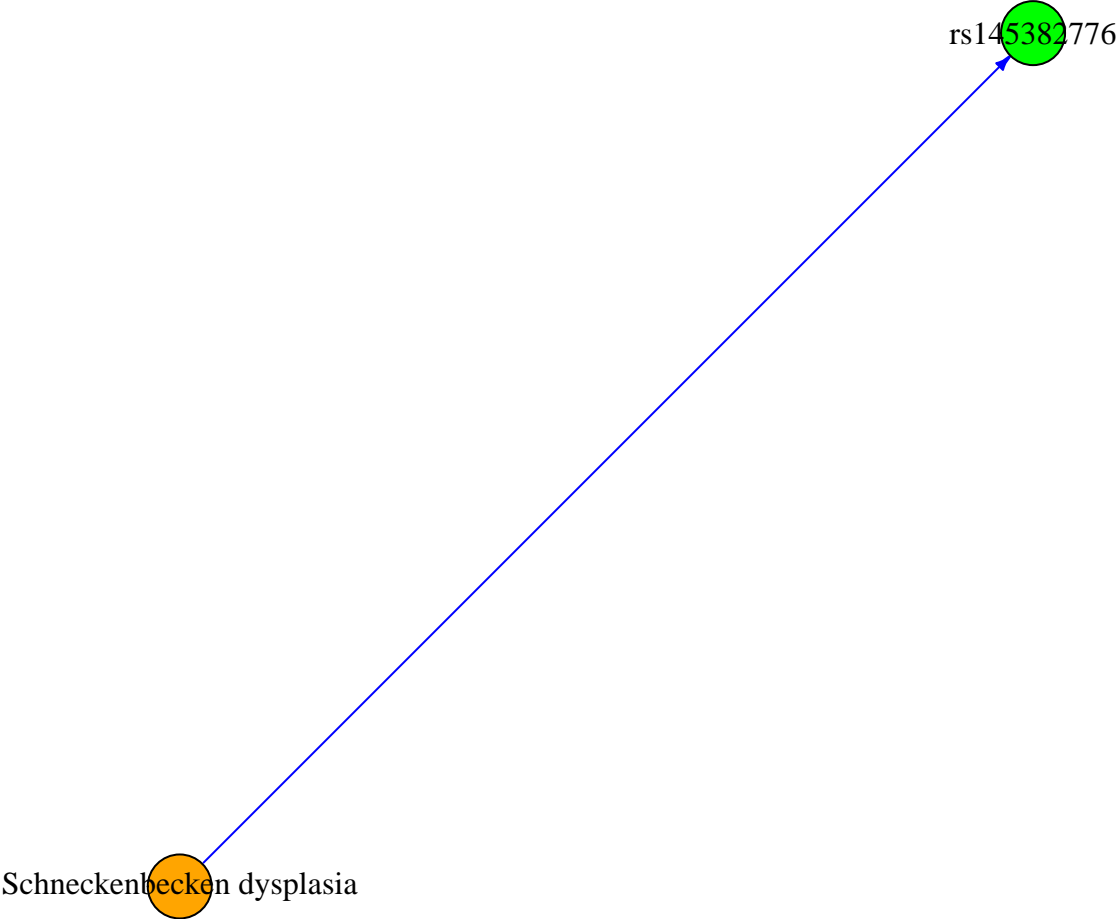

Variant–Disease Network (Schnyder crystalline corneal dystrophy)

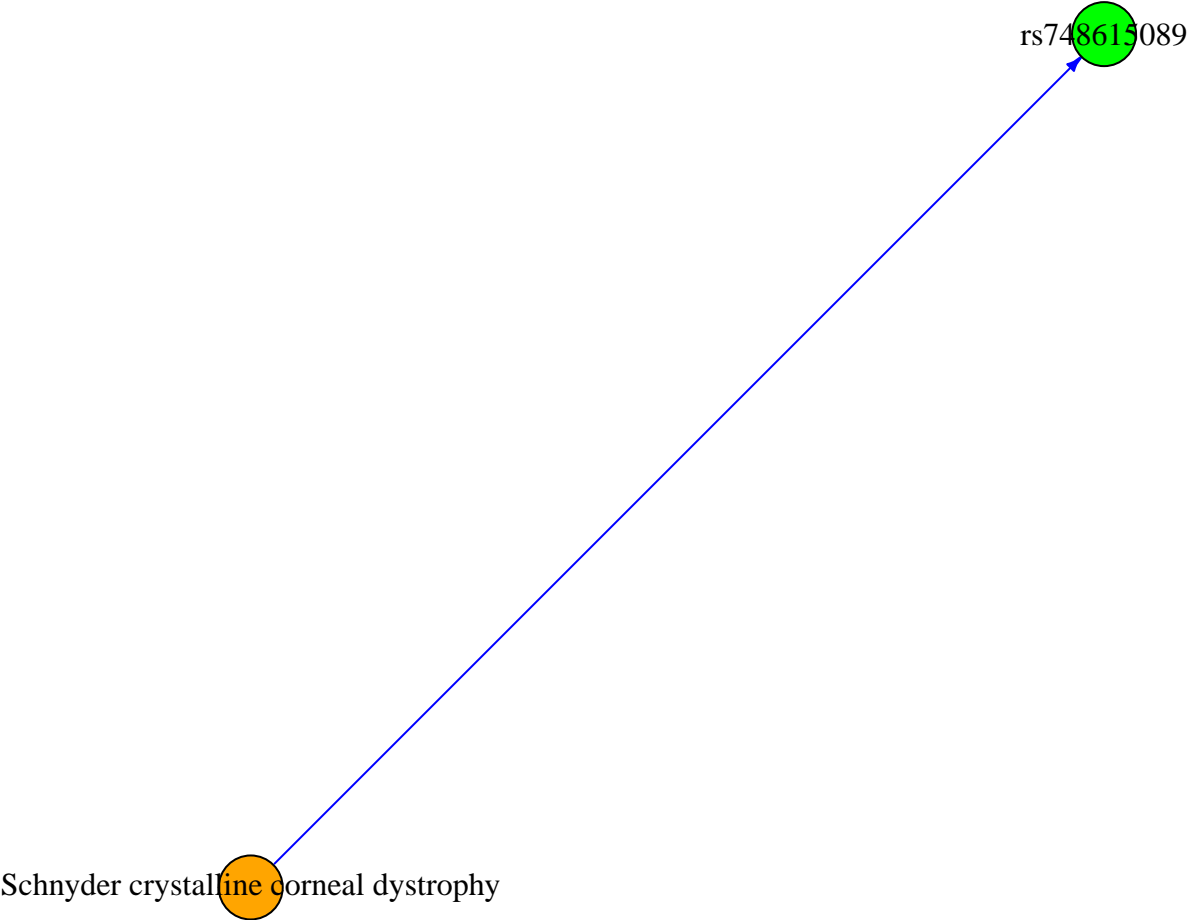

Variant–Disease Network (Schopf–Schulz–Passarge syndrome)

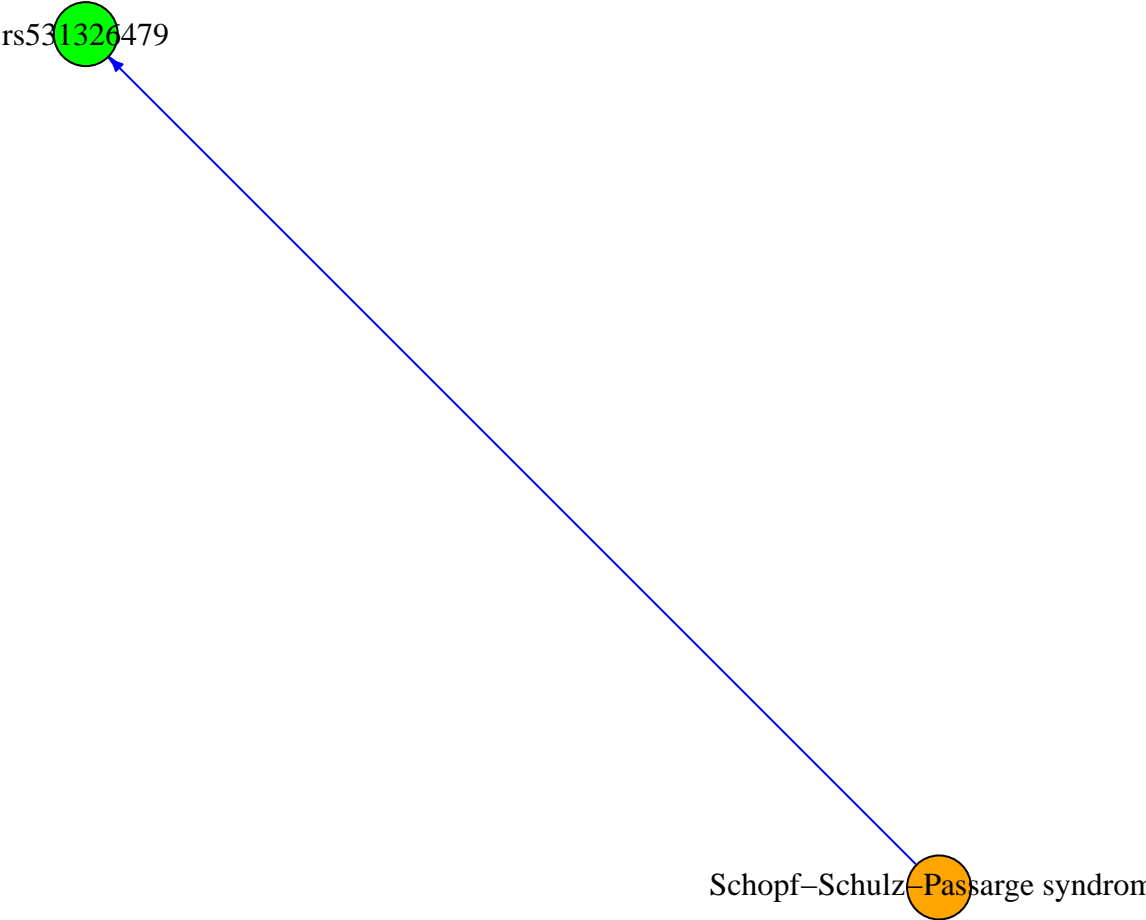



## Variant–Disease Network (Schwannomatosis)

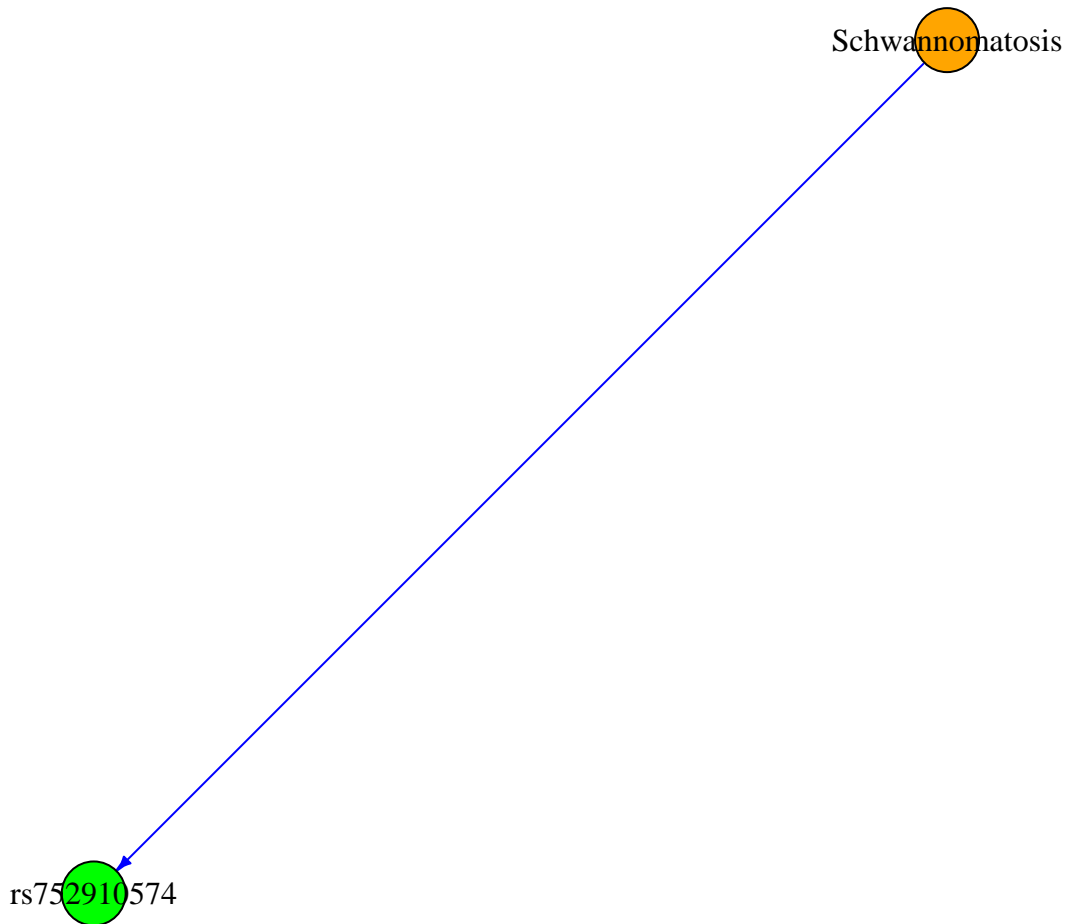

Variant–Disease Network (Schwartz Jampel syndrome type 1)

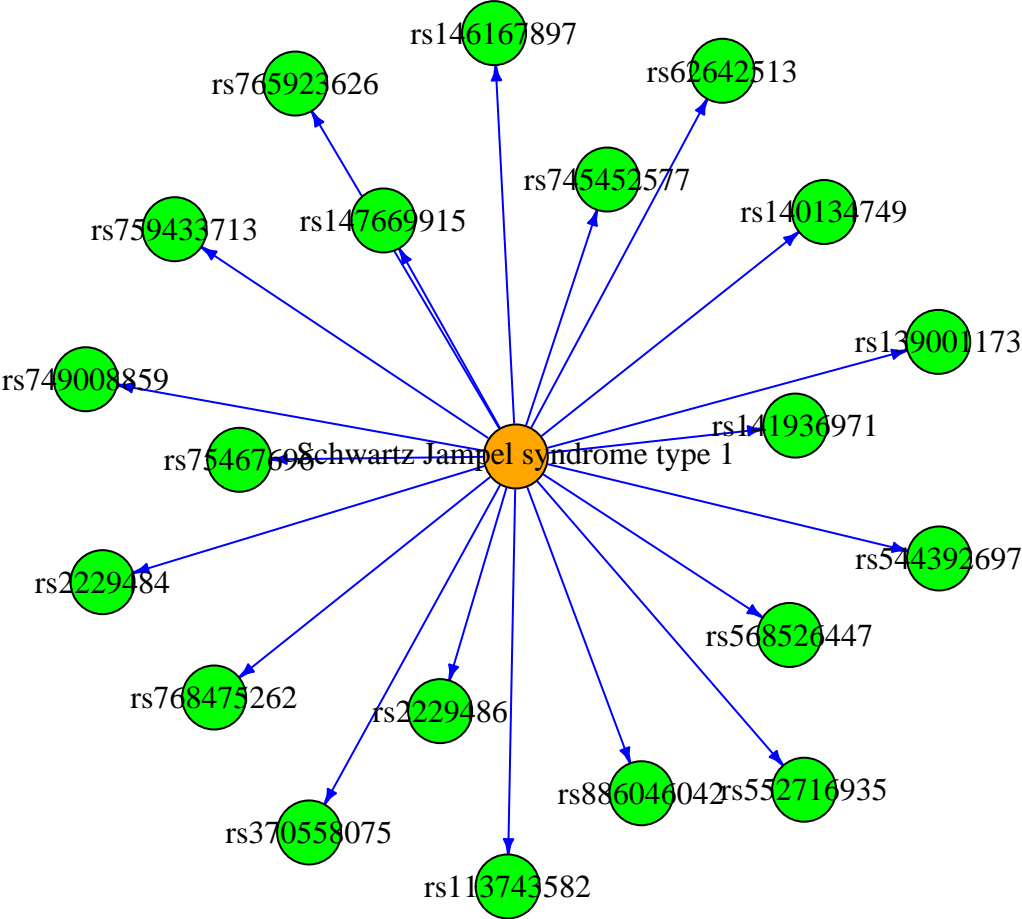

## Variant-Disease Network (Seckel syndrome)

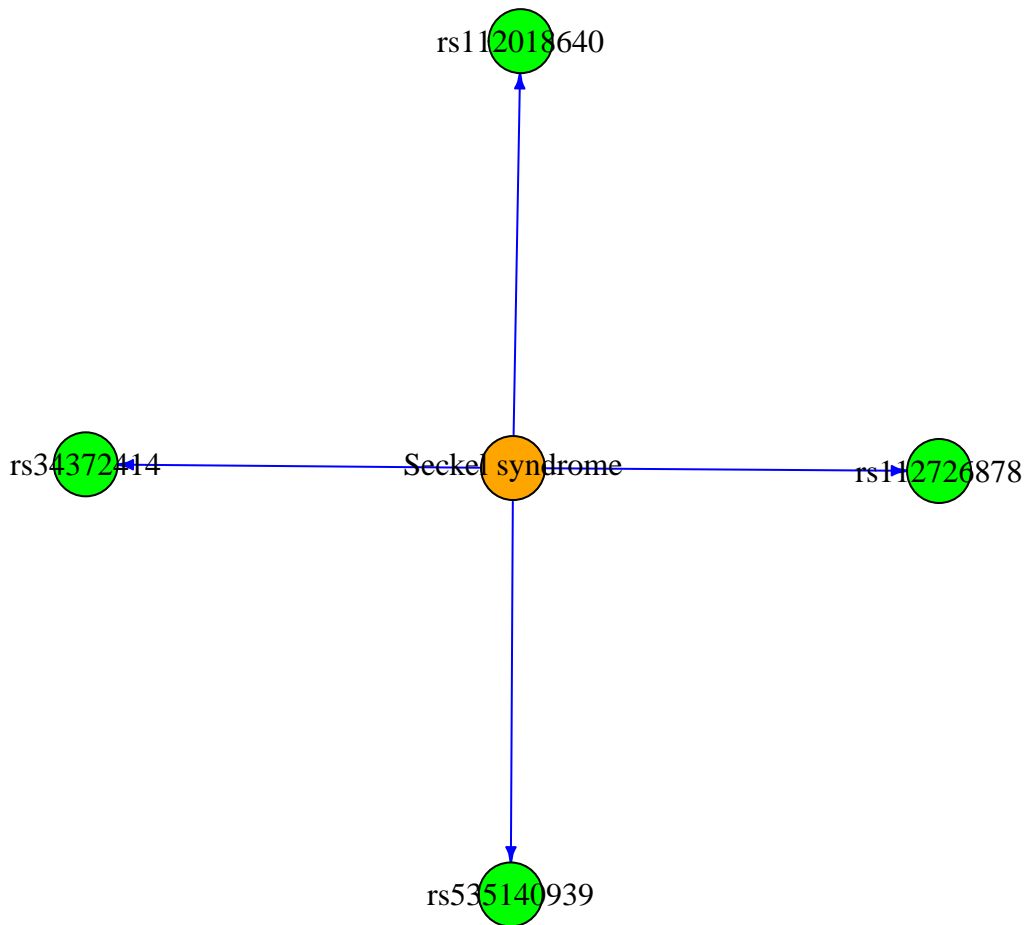

## Variant-Disease Network (Seizures)

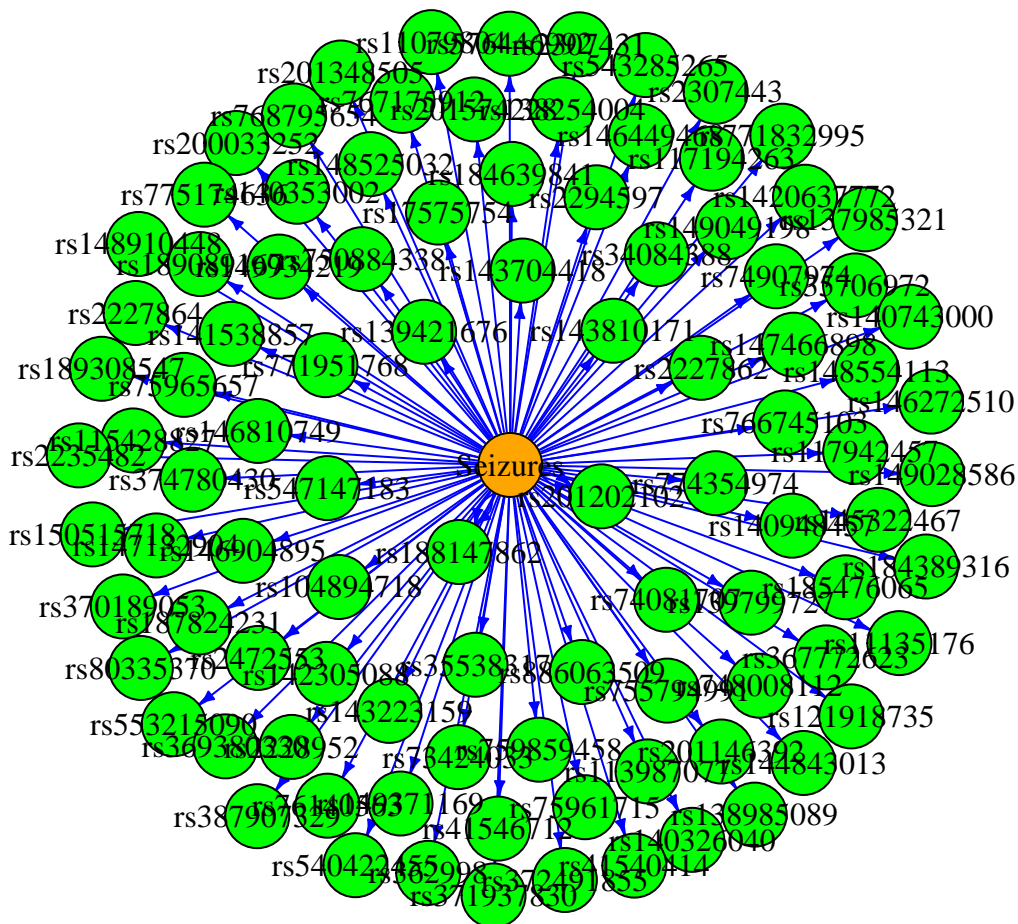

## Variant–Disease Network (Selective tooth agenesis)

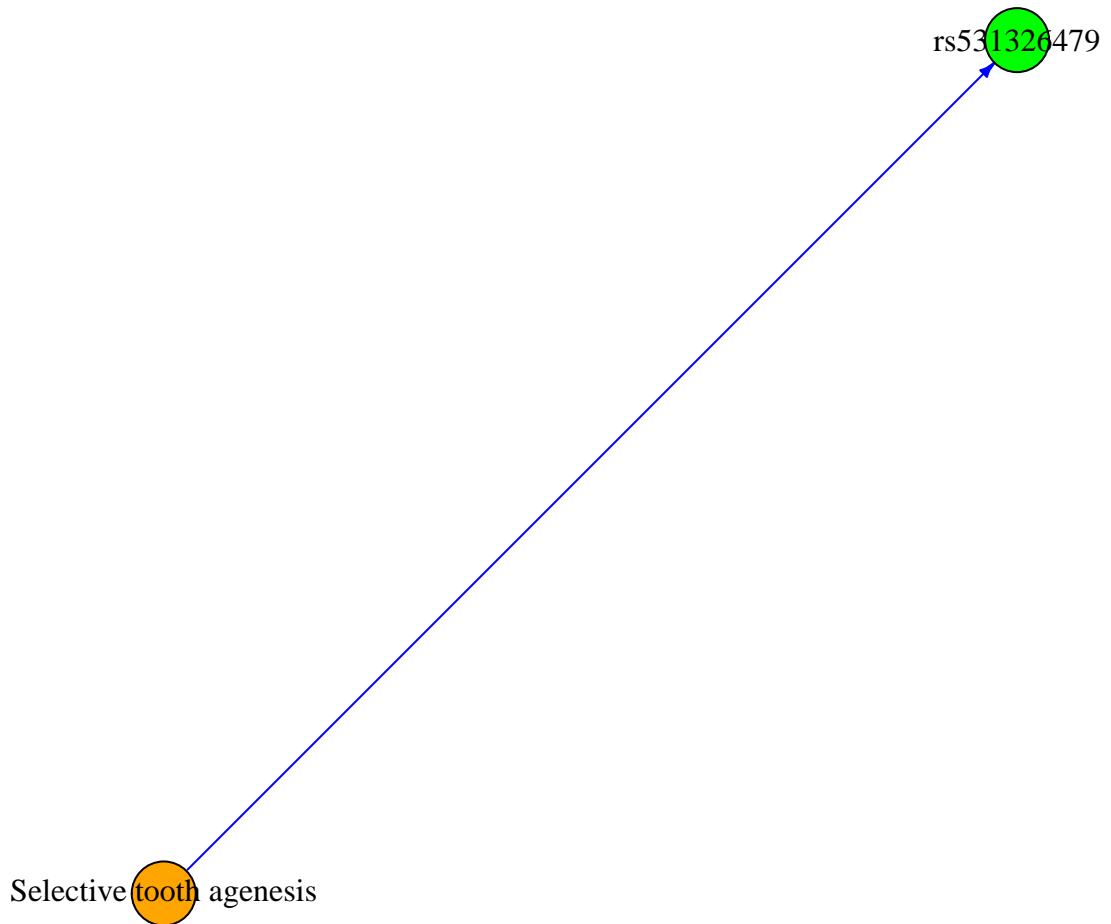

# Variant–Disease Network (Senior–Loken syndrome 7)

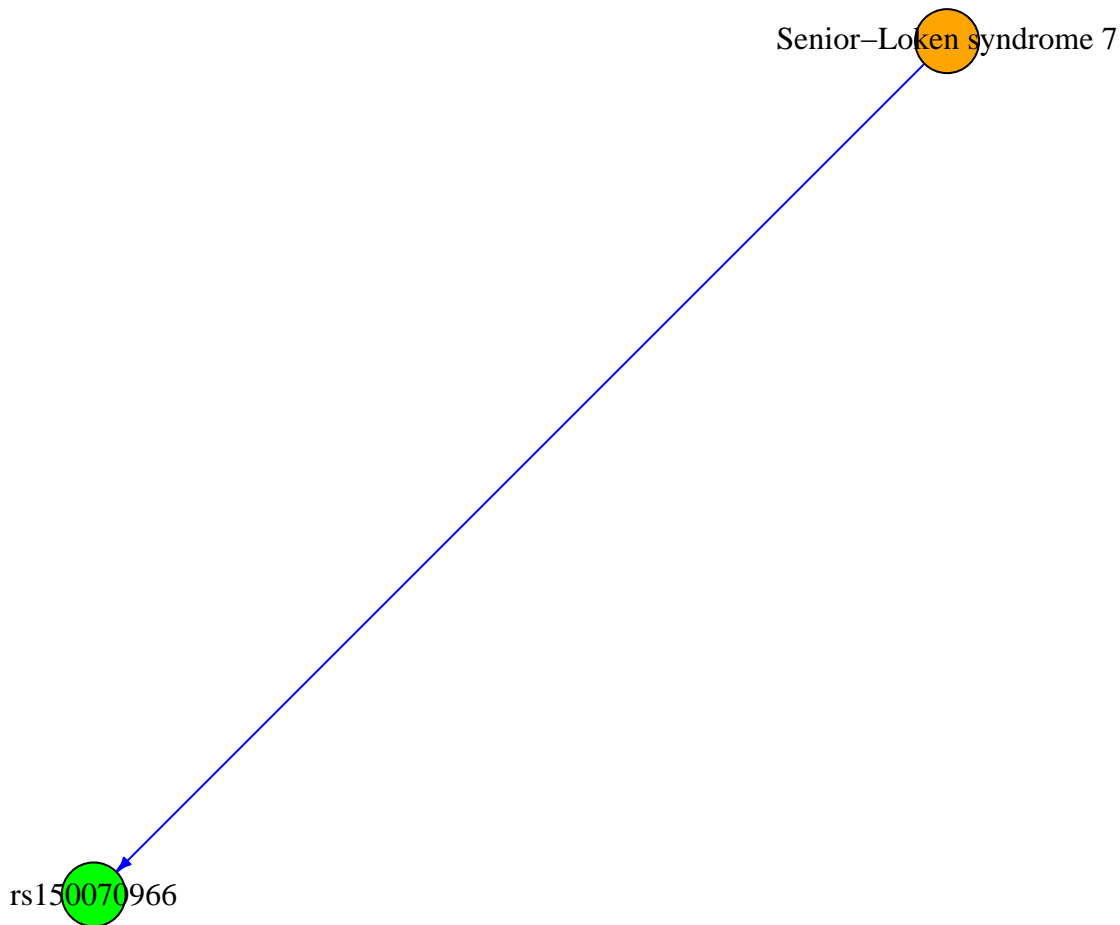

**Variant–Disease Network (Sensorineural hearing loss)**

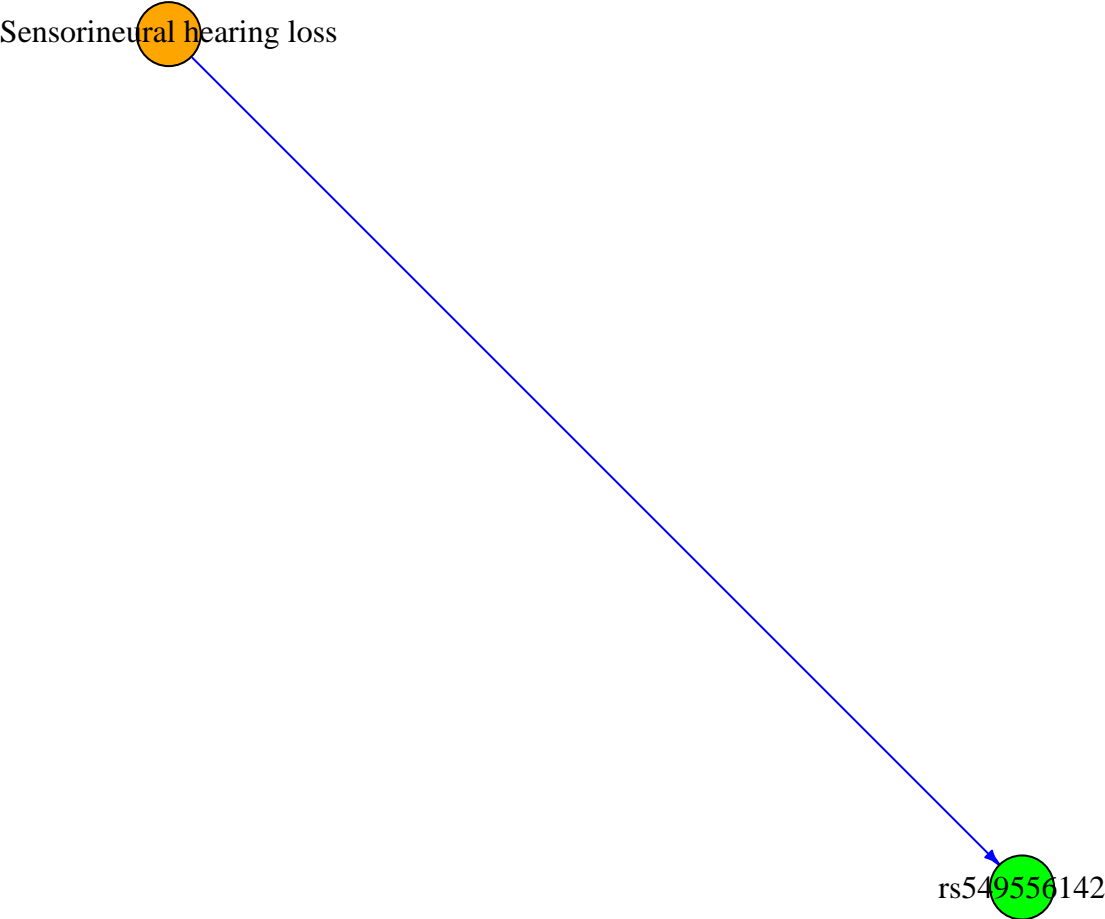

**Variant–Disease Network (Sensory ataxic neuropathy)**

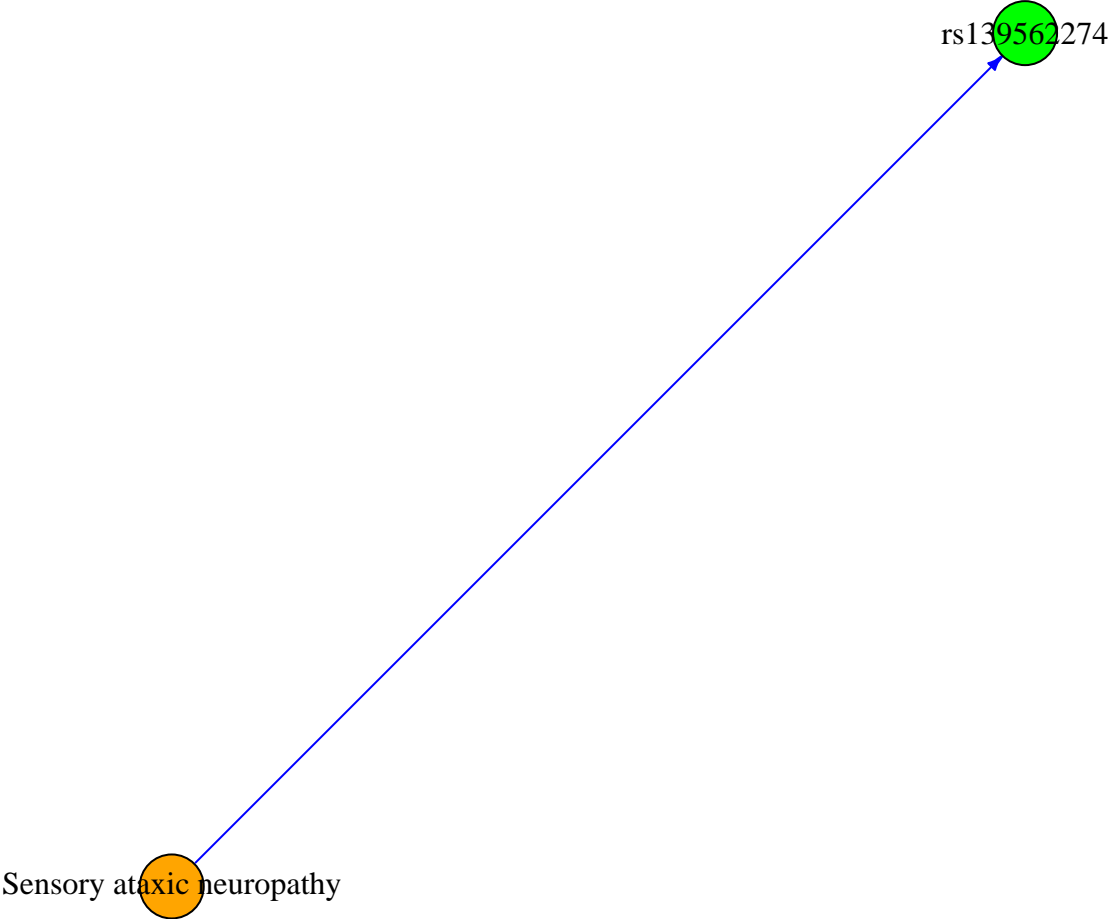



**Variant–Disease Network (Sensory Neuropathy with Spastic Paraplegia)**

Sensory Neuropathy with Spastic Paraplegia

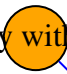

rs754143874

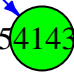

## Variant–Disease Network (SeSAME syndrome)

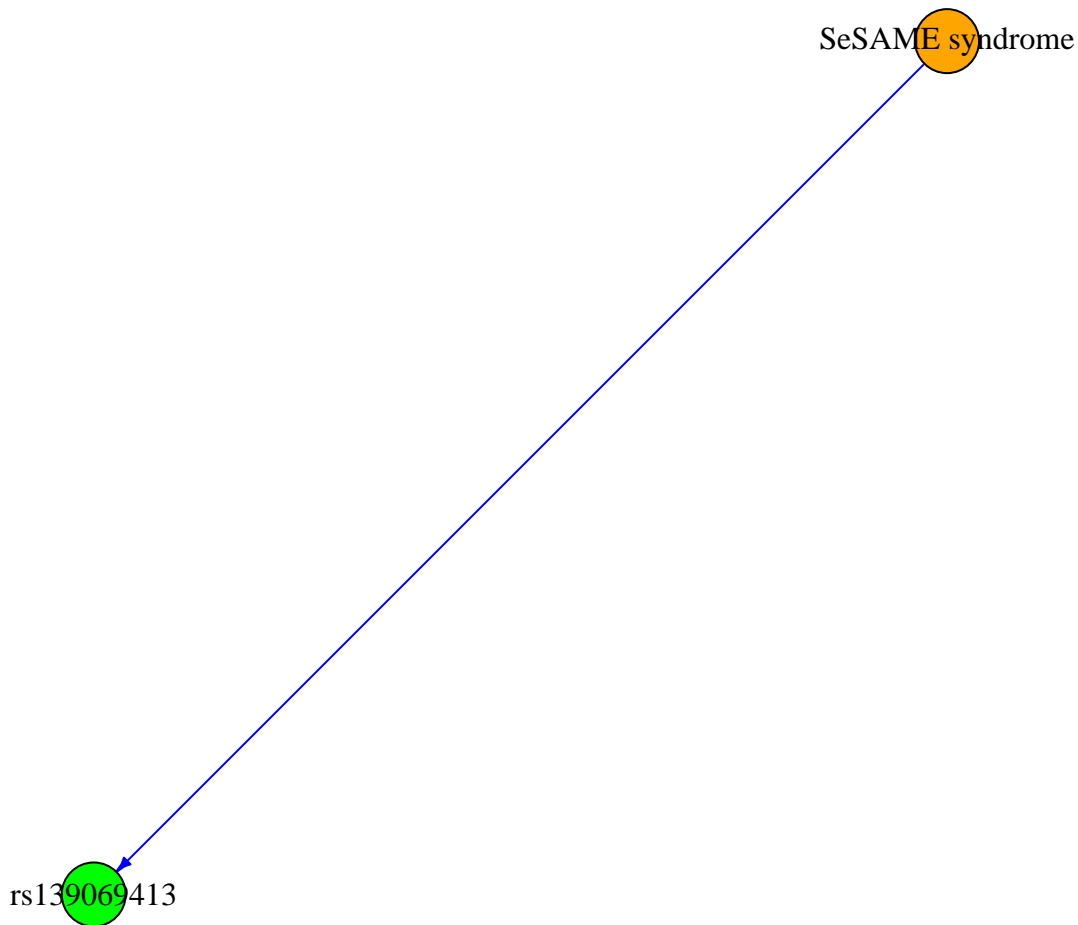

Variant–Disease Network (Severe Combined Immune Deficiency)

Severe Combined Immune Deficiency

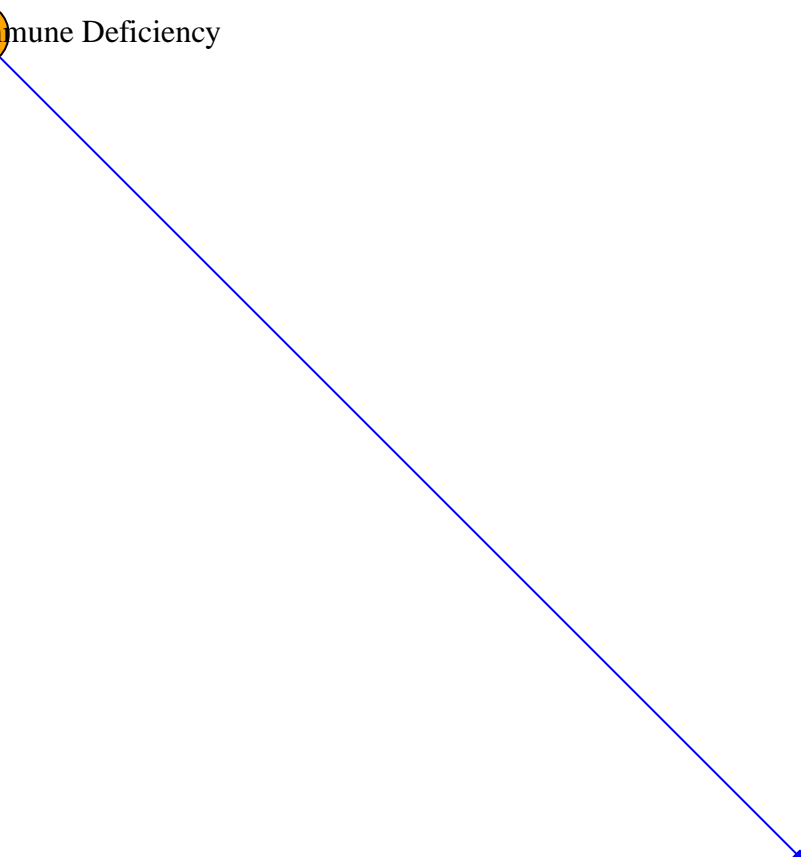

rs144203232

# Variant–Disease Network (Severe combined immunodeficiency)

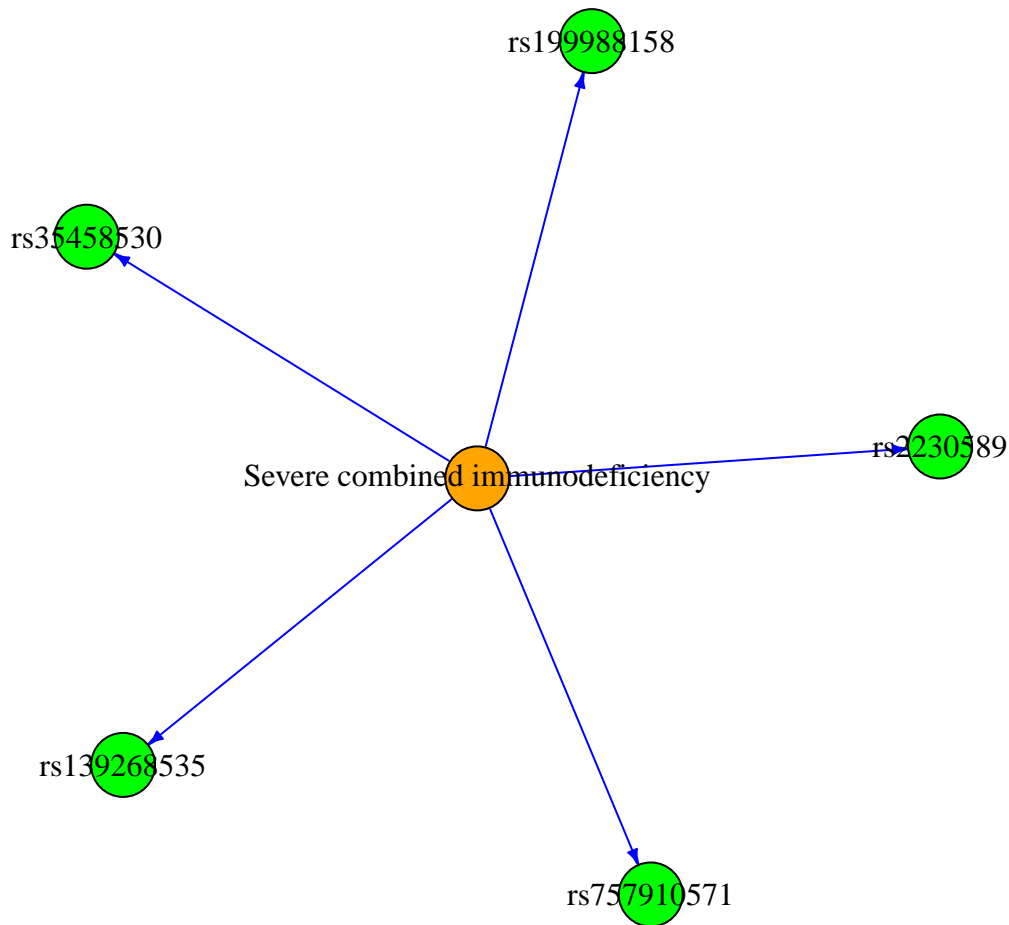

**Variant–Disease Network (Severe combined immunodeficiency disease)**

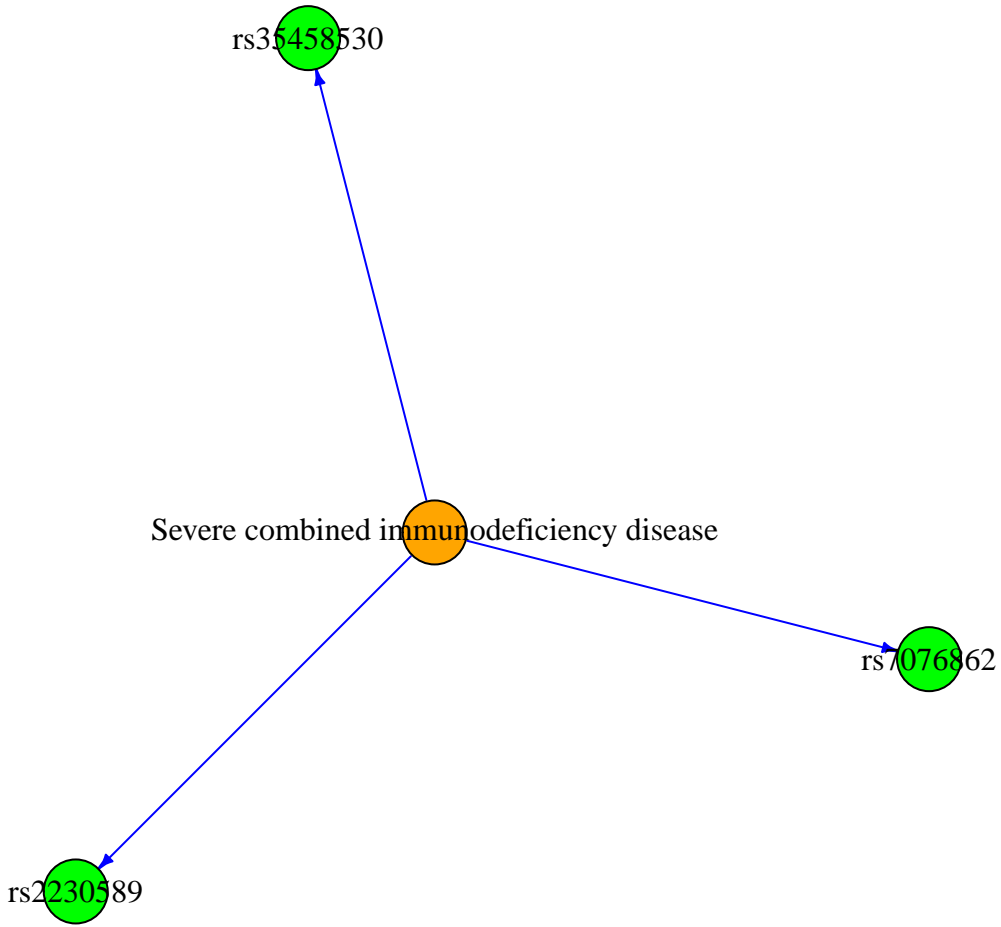

# Variant-Disease Network (Severe combined immunodeficiency due to ADA deficiency)

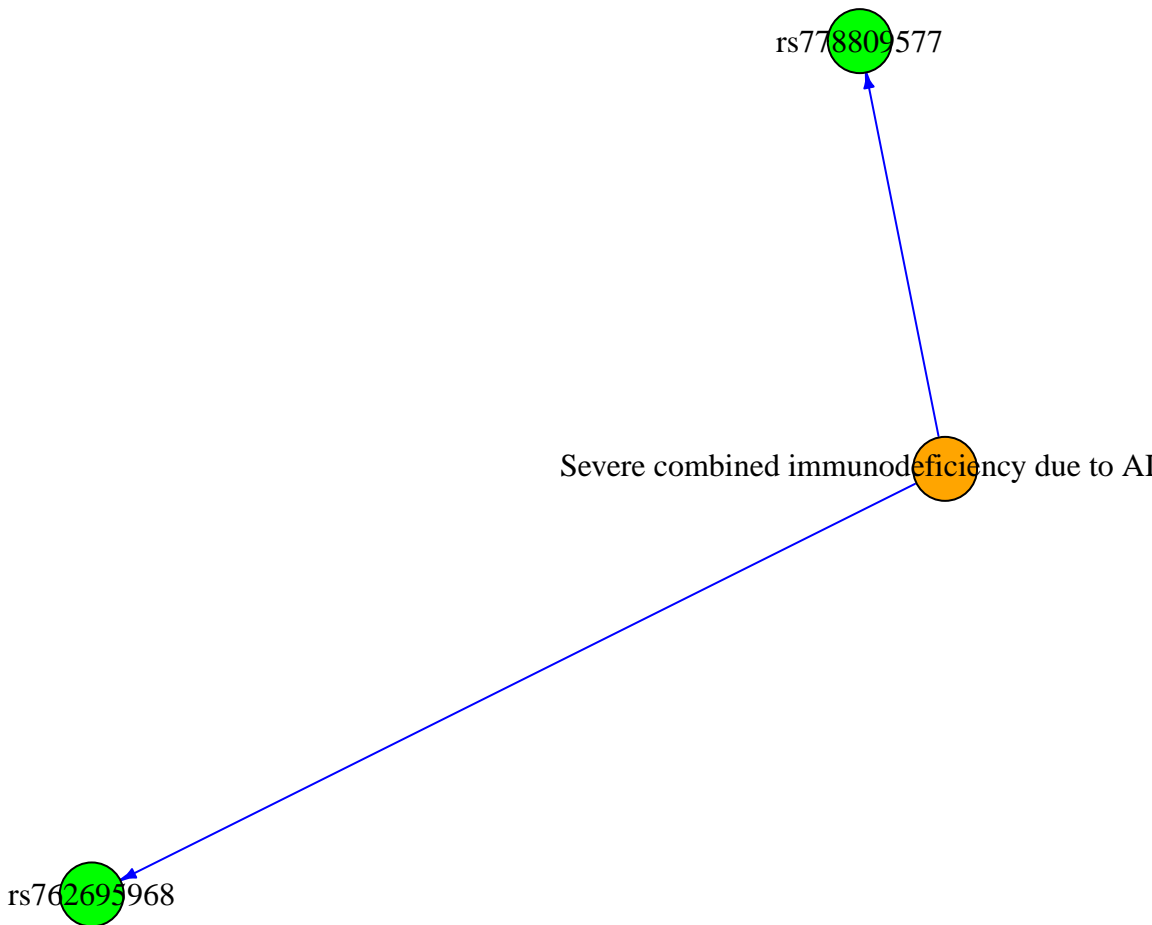

# Disease Network (Severe combined immunodeficiency with sensitivity to ionizing radiation)

rs121908156

Severe combined immunodeficiency with sensitivity to ionizing radiation

rs2232637

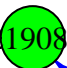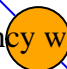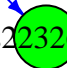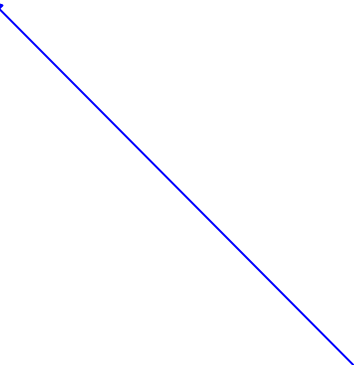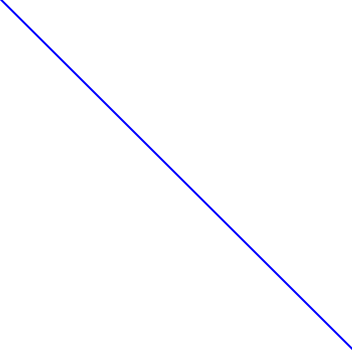

## Variant–Disease Network (Severe immunodeficiency)

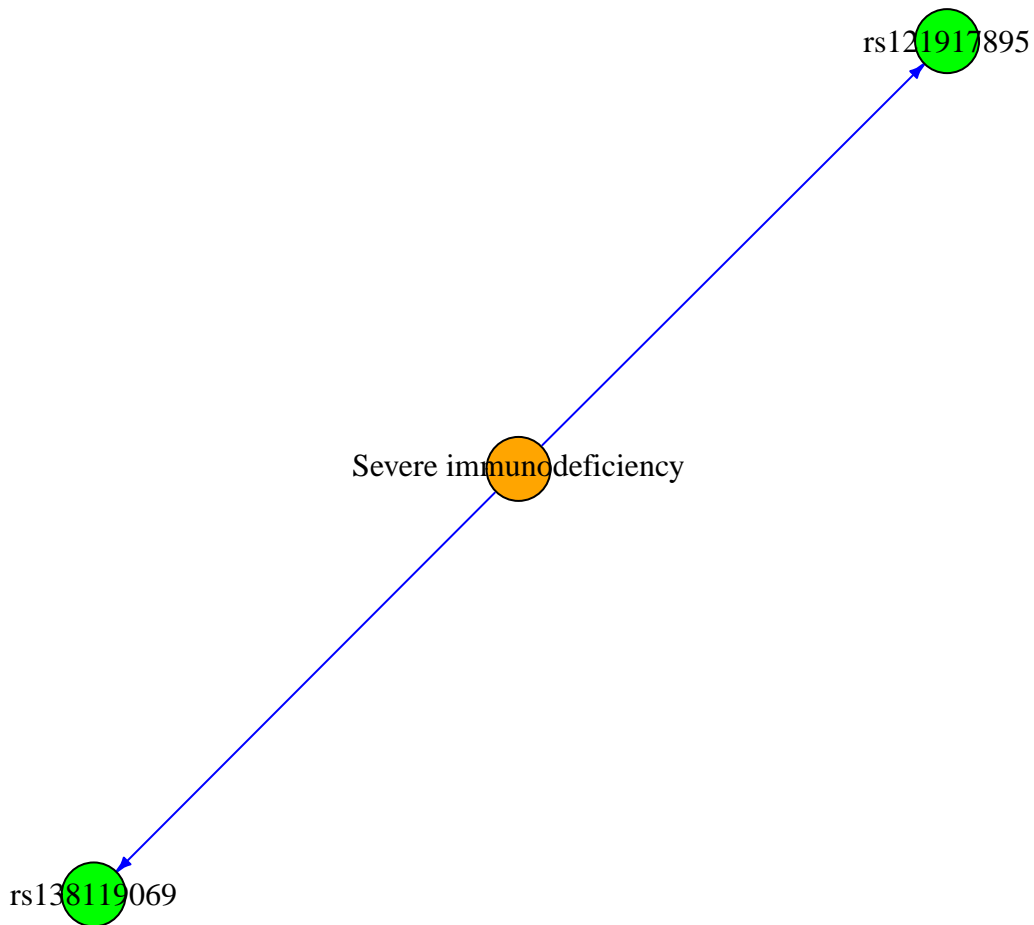



# Variant–Disease Network (Severe myoclonic epilepsy in infancy)

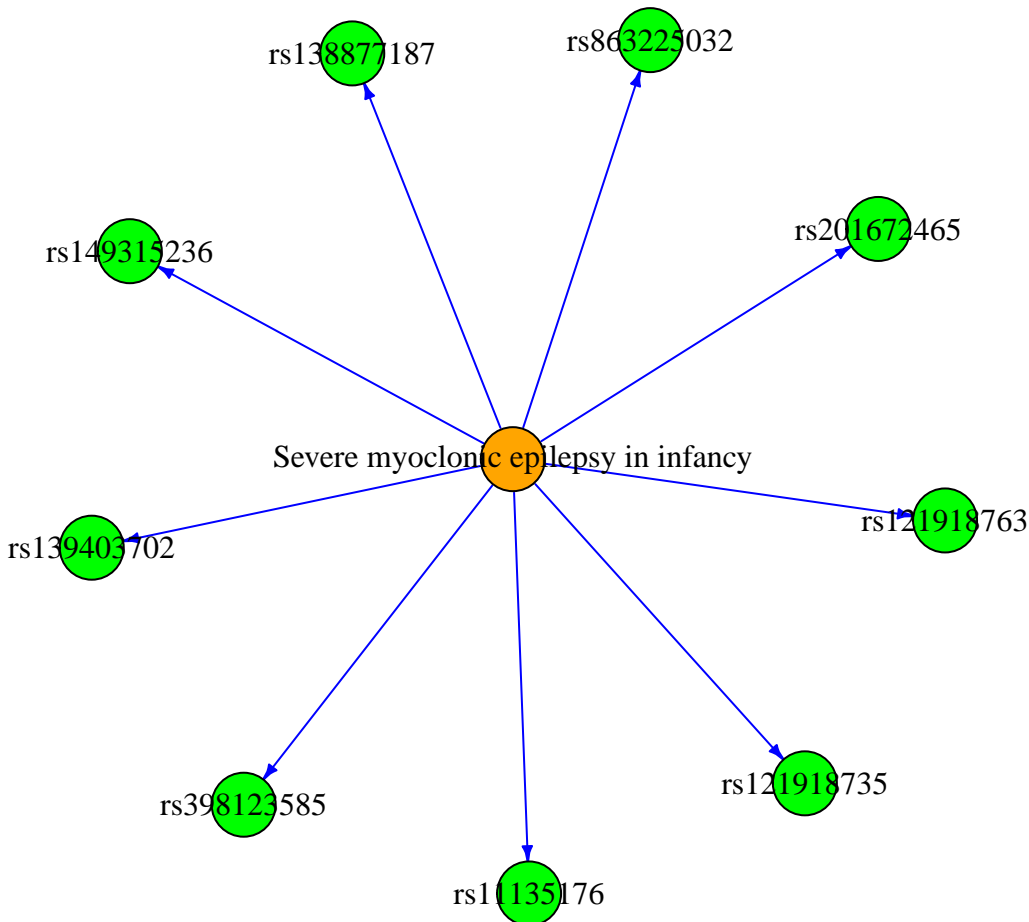

# Variant-Disease Network (Severe neonatal-onset encephalopathy with microcephaly)

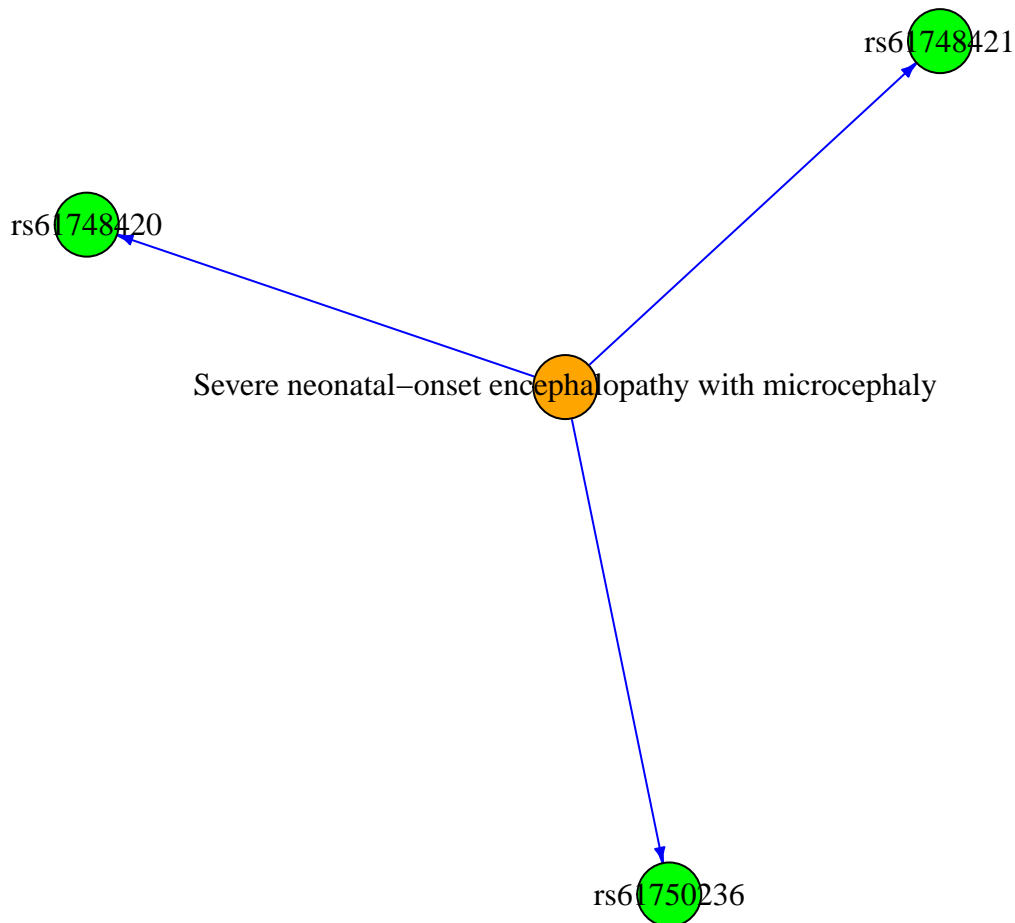

## Variant-Disease Network (Short foot)

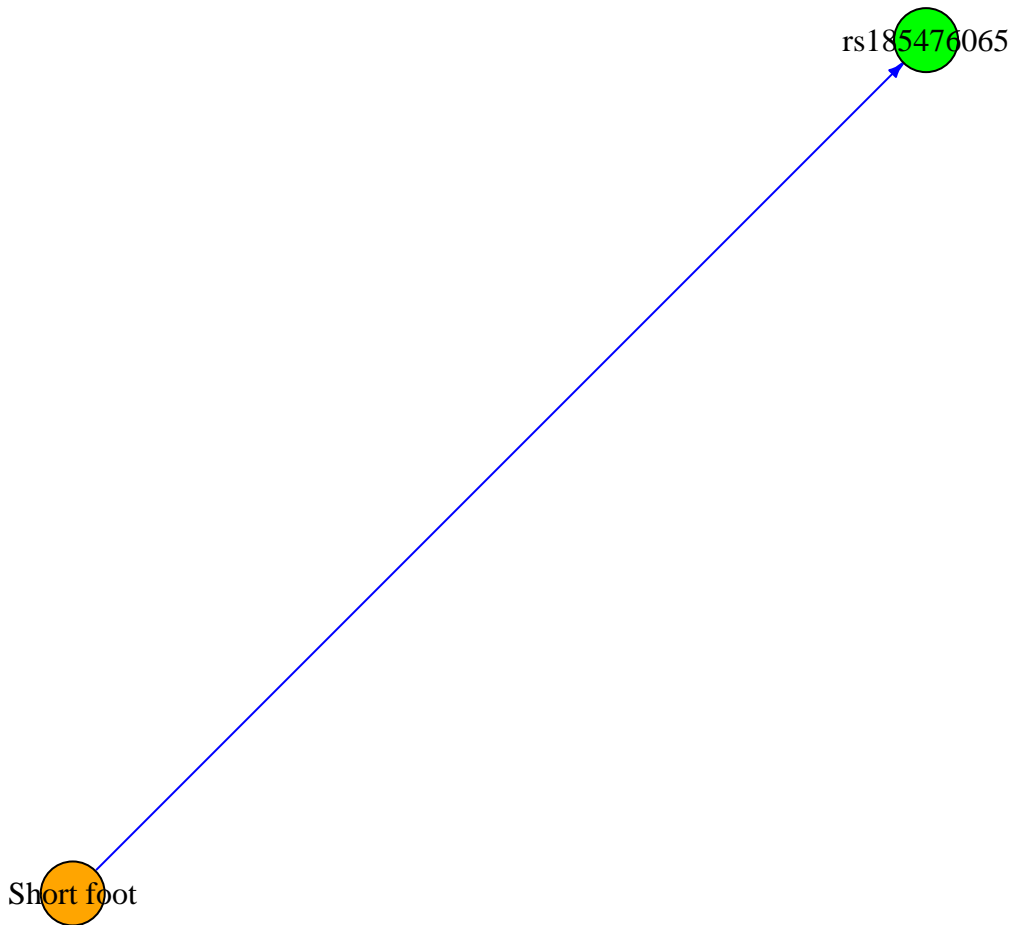

## Variant–Disease Network (short QT syndrome)

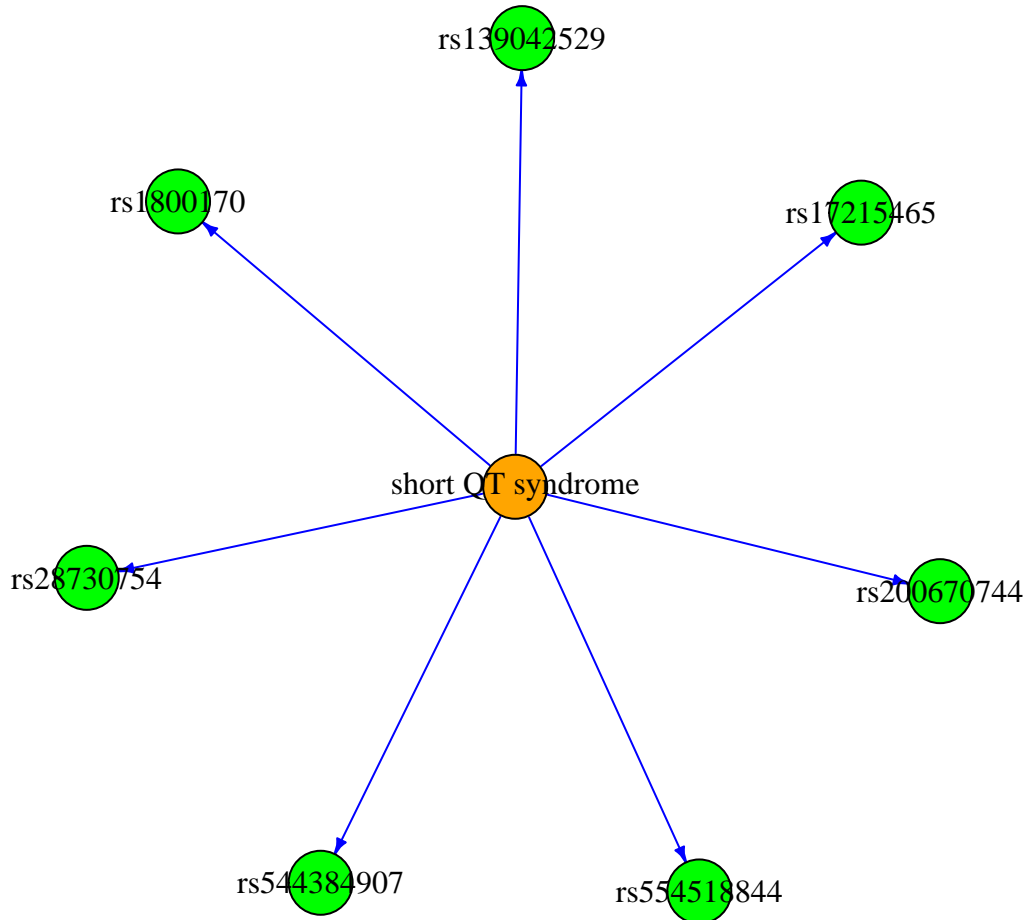

## Variant–Disease Network (Short QT syndrome 3)

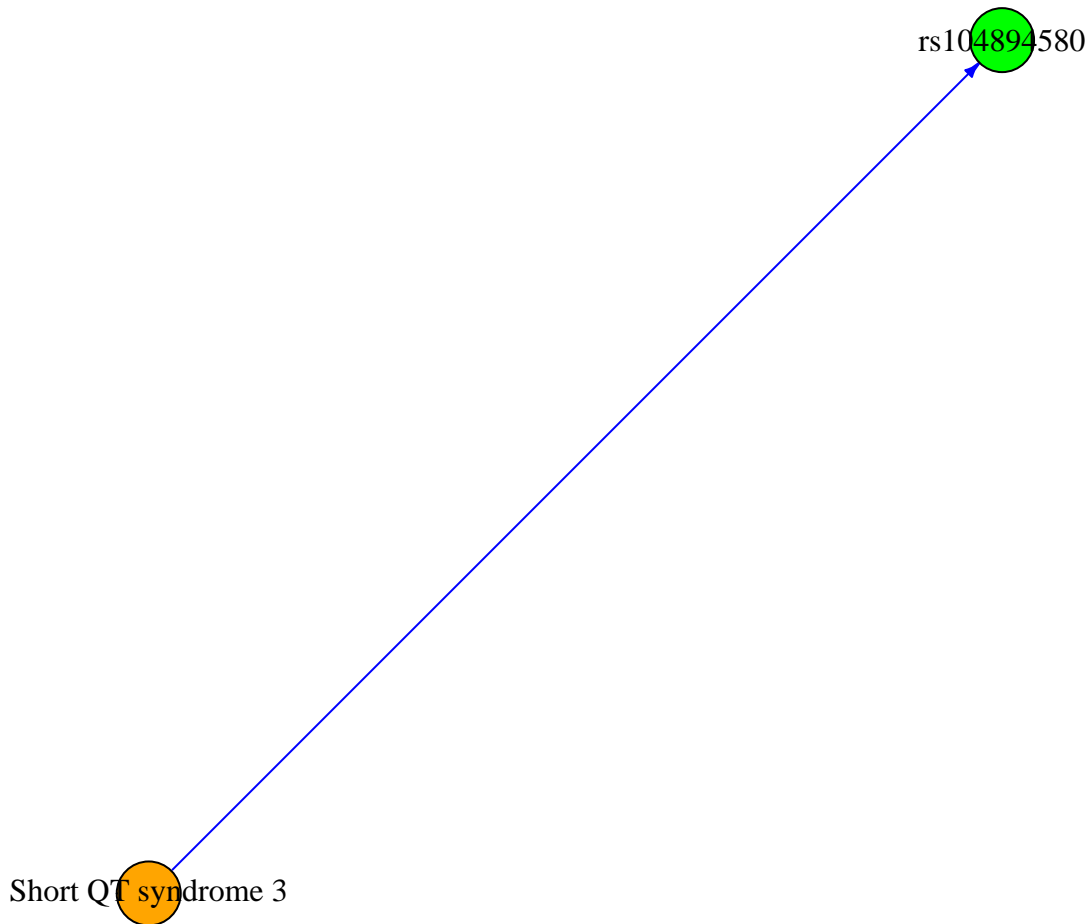

# Variant–Disease Network (Short Rib Polydactyly Syndrome)

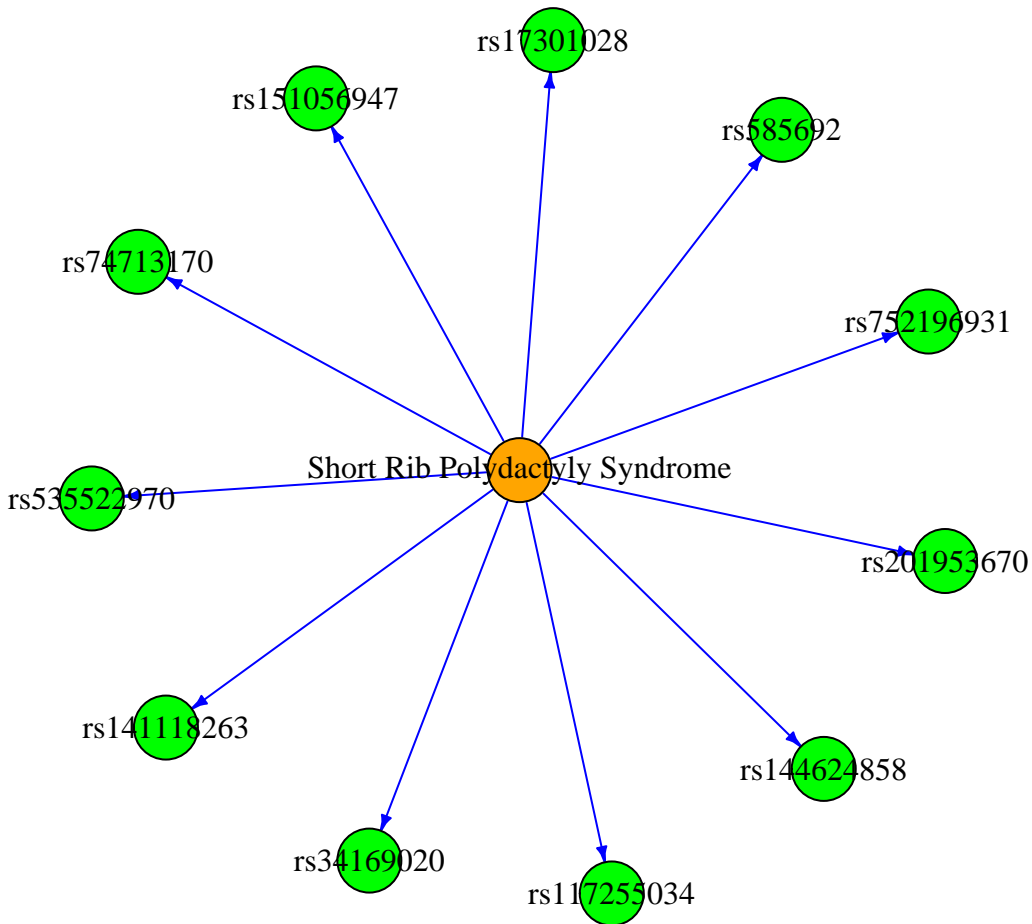

## Variant–Disease Network (Short rib polydactyly syndrome 5)

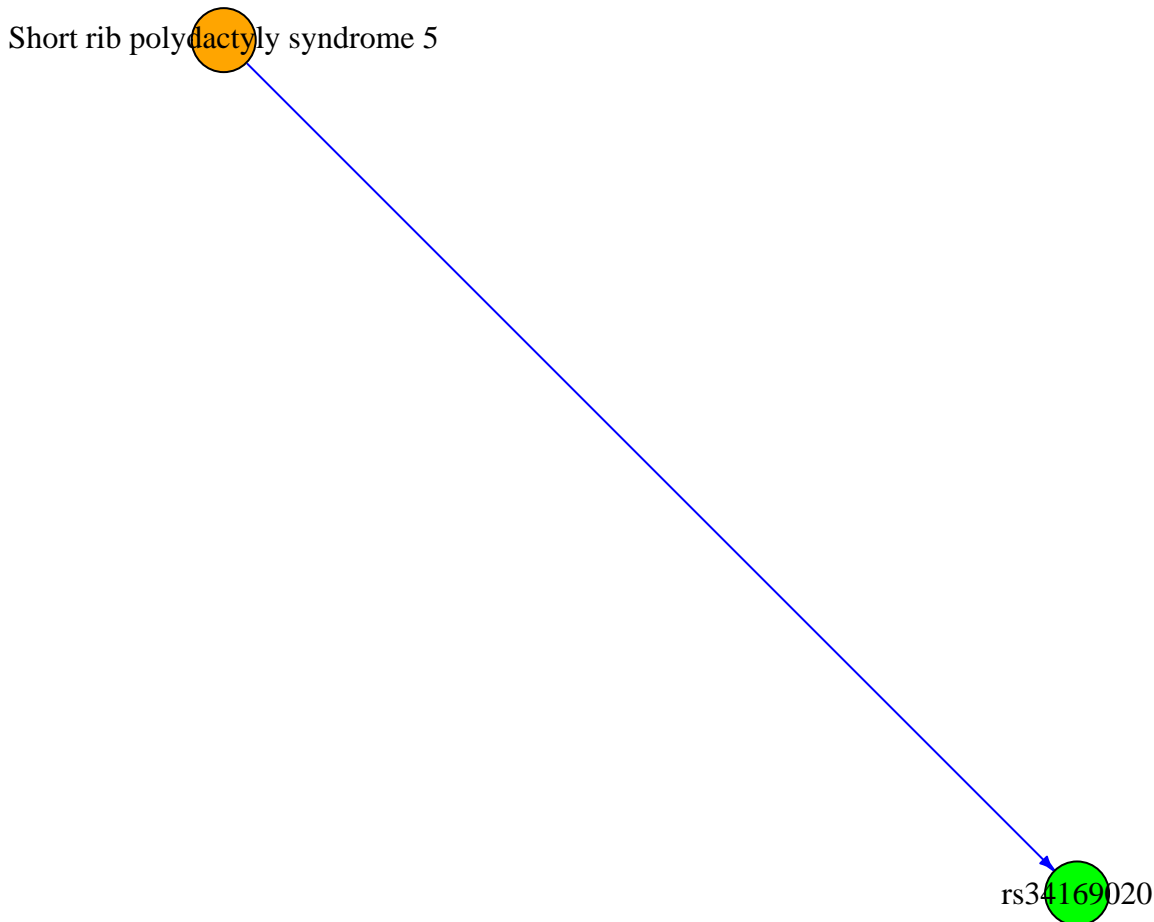

## Variant–Disease Network (Short stature)

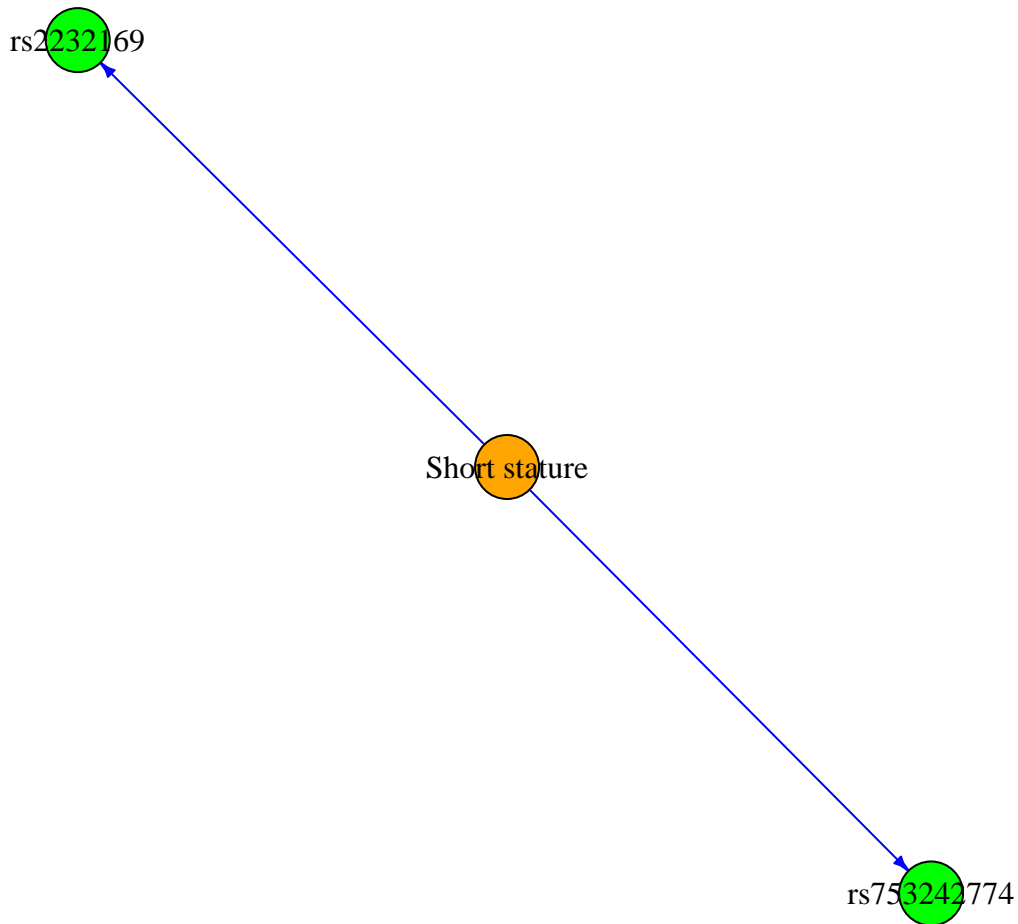



# Disease Network (Short stature due to growth hormone secretagogue receptor deficiency)

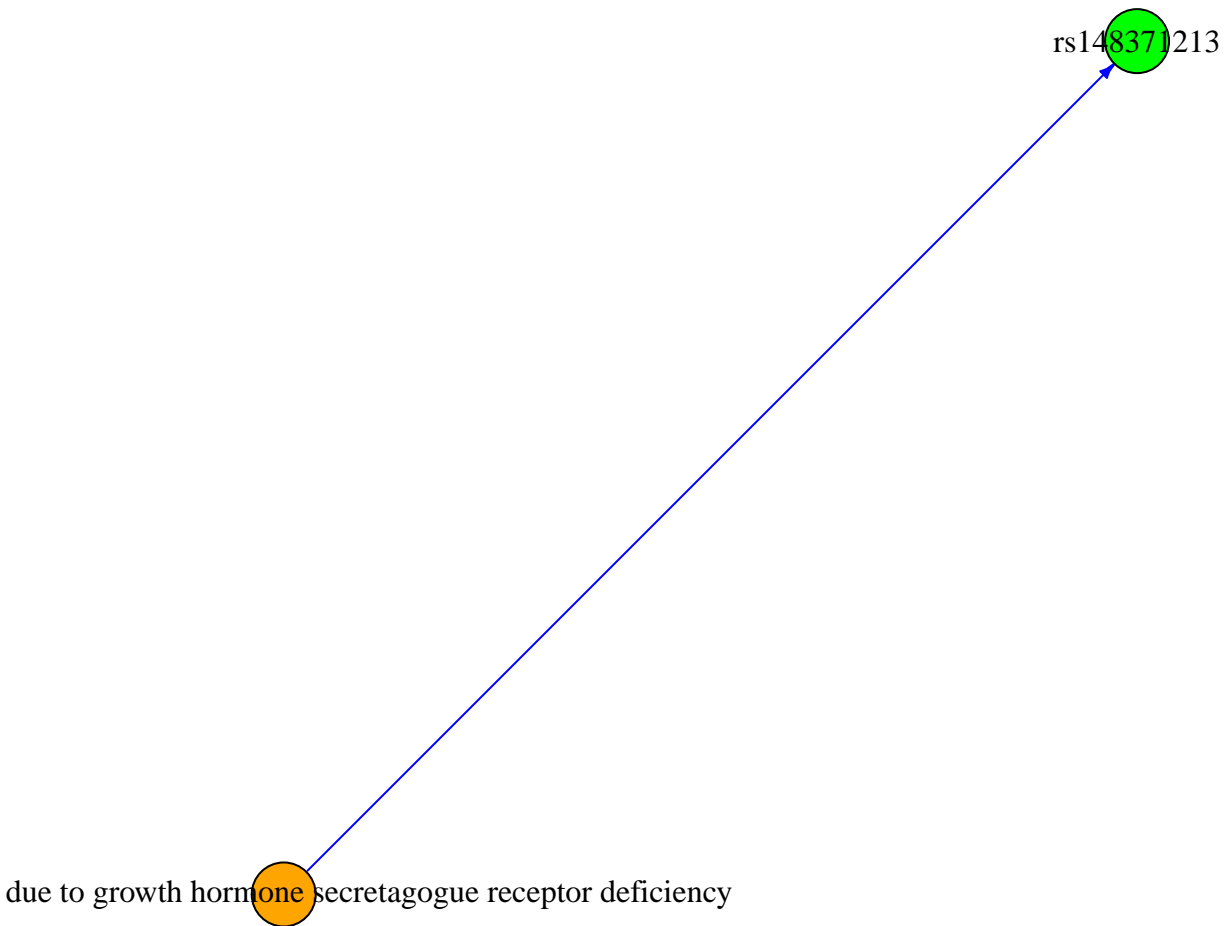

## Variant–Disease Network (Short-rib polydactyly syndrome type III)

rs137853032

Short-rib polydactyly syndrome type III

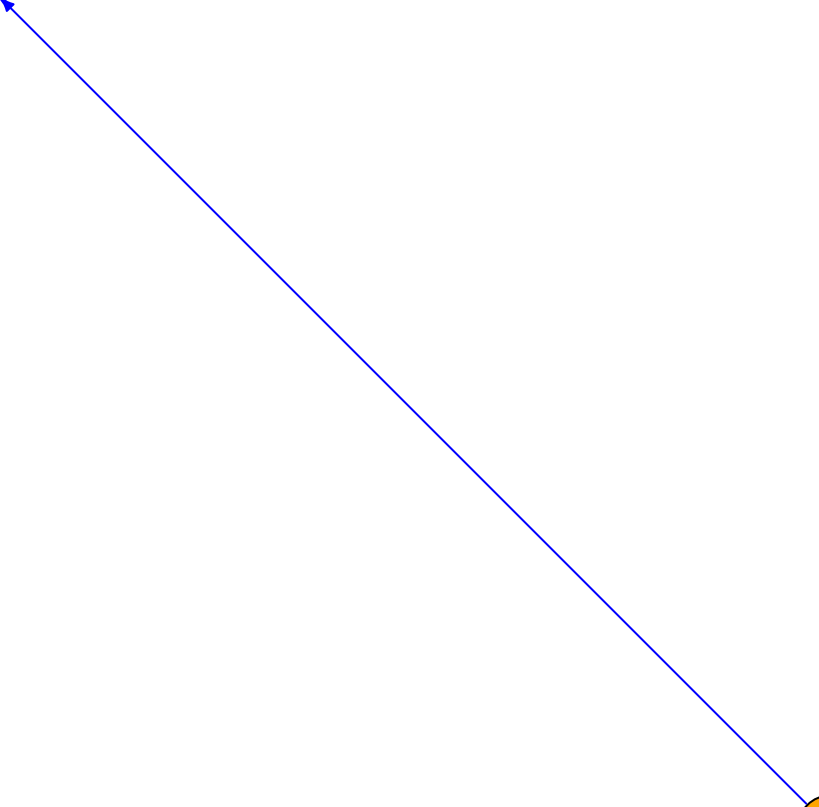

# Variant-Disease Network (Short-rib thoracic dysplasia 13 with or without polydactyly)

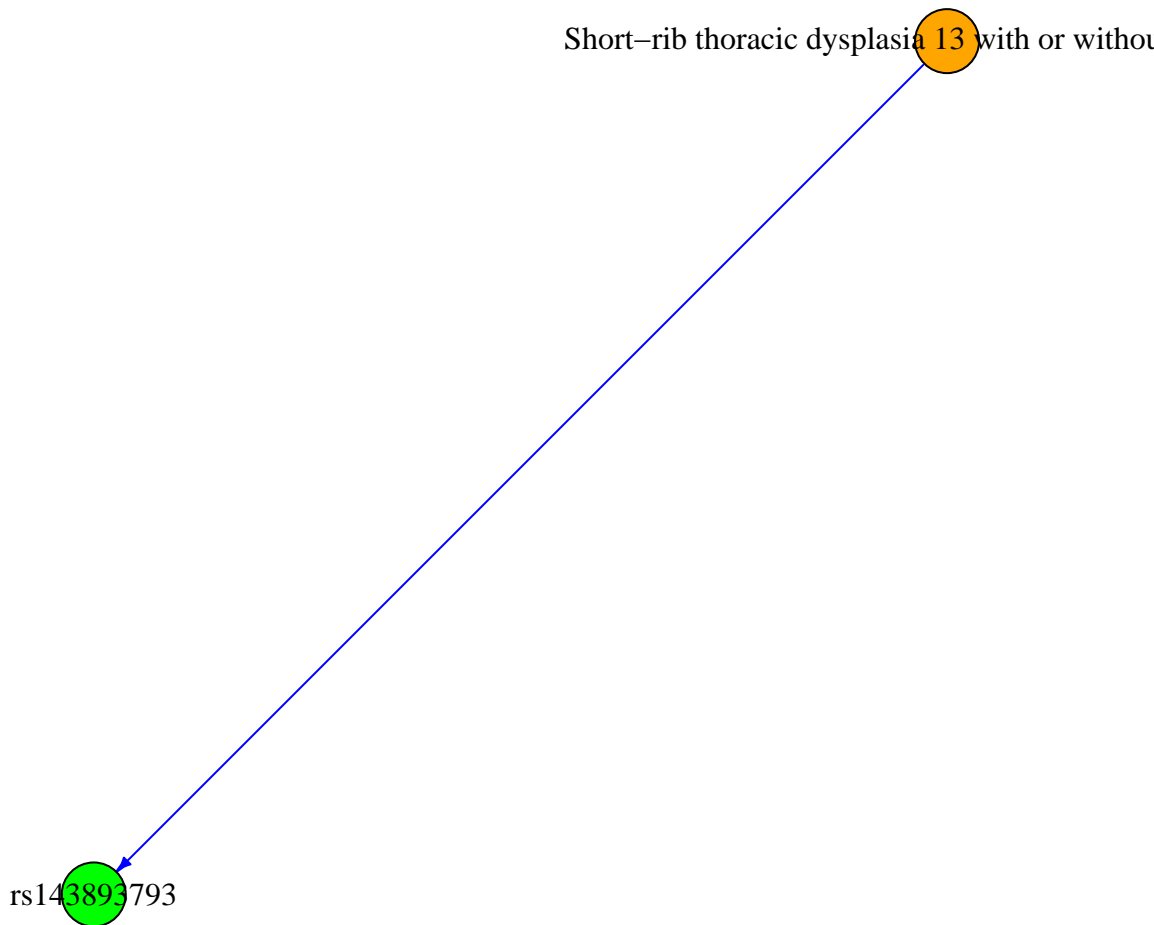

# Variant-Disease Network (Short-rib thoracic dysplasia 3 with or without polyd

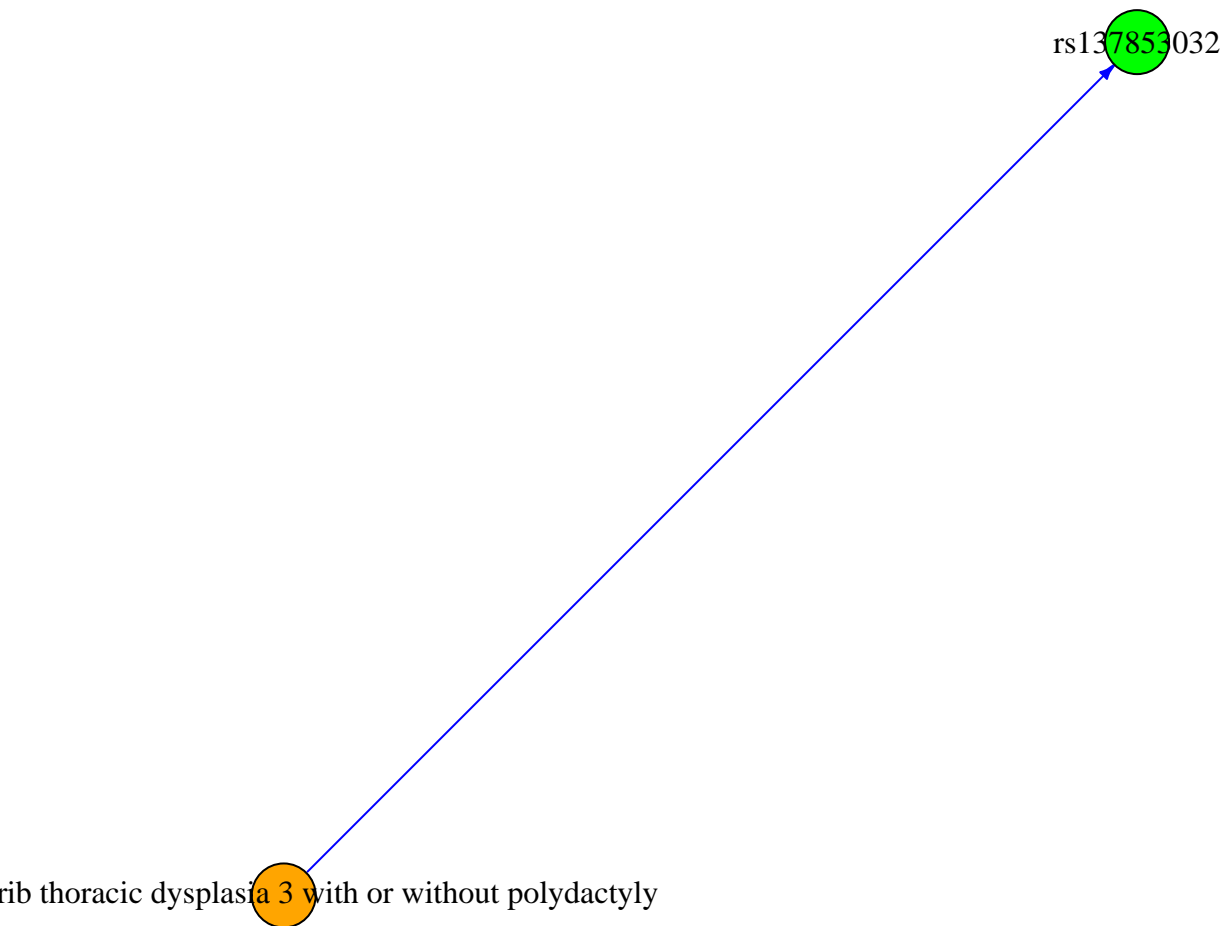

# Variant-Disease Network (Short-rib thoracic dysplasia 8 with or without polydactyly)

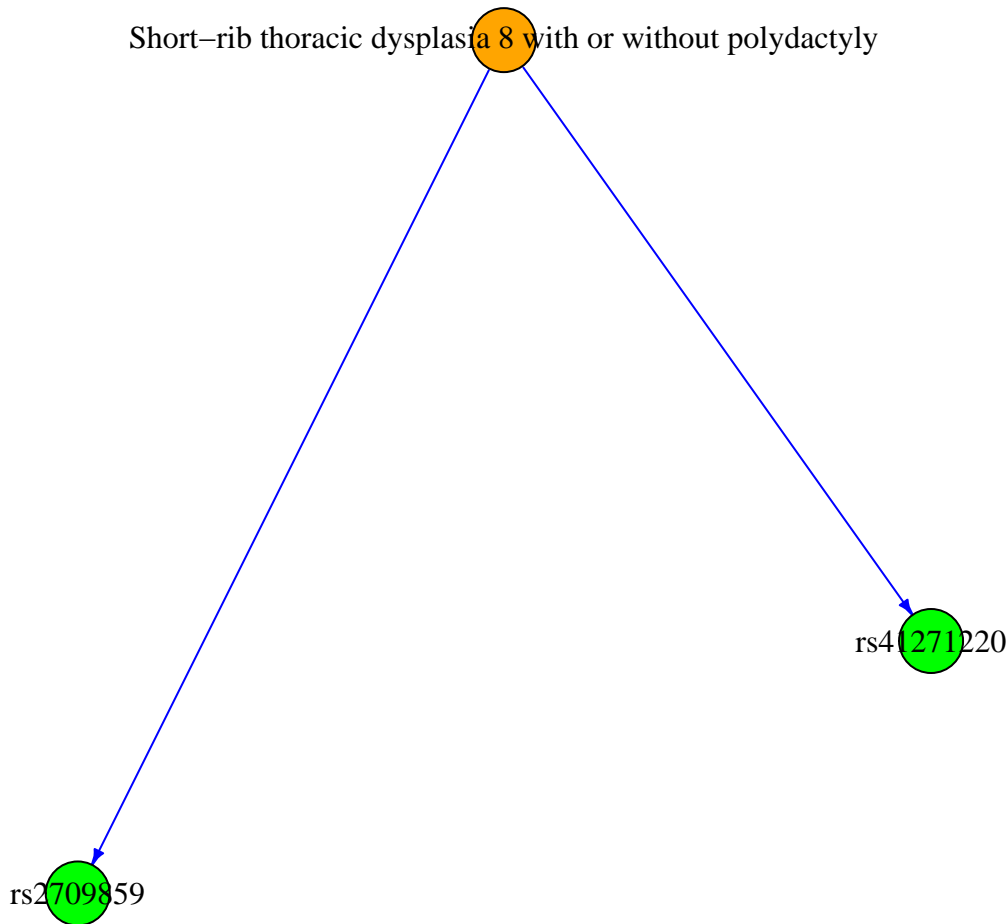

# Variant–Disease Network (Shprintzen–Goldberg syndrome)

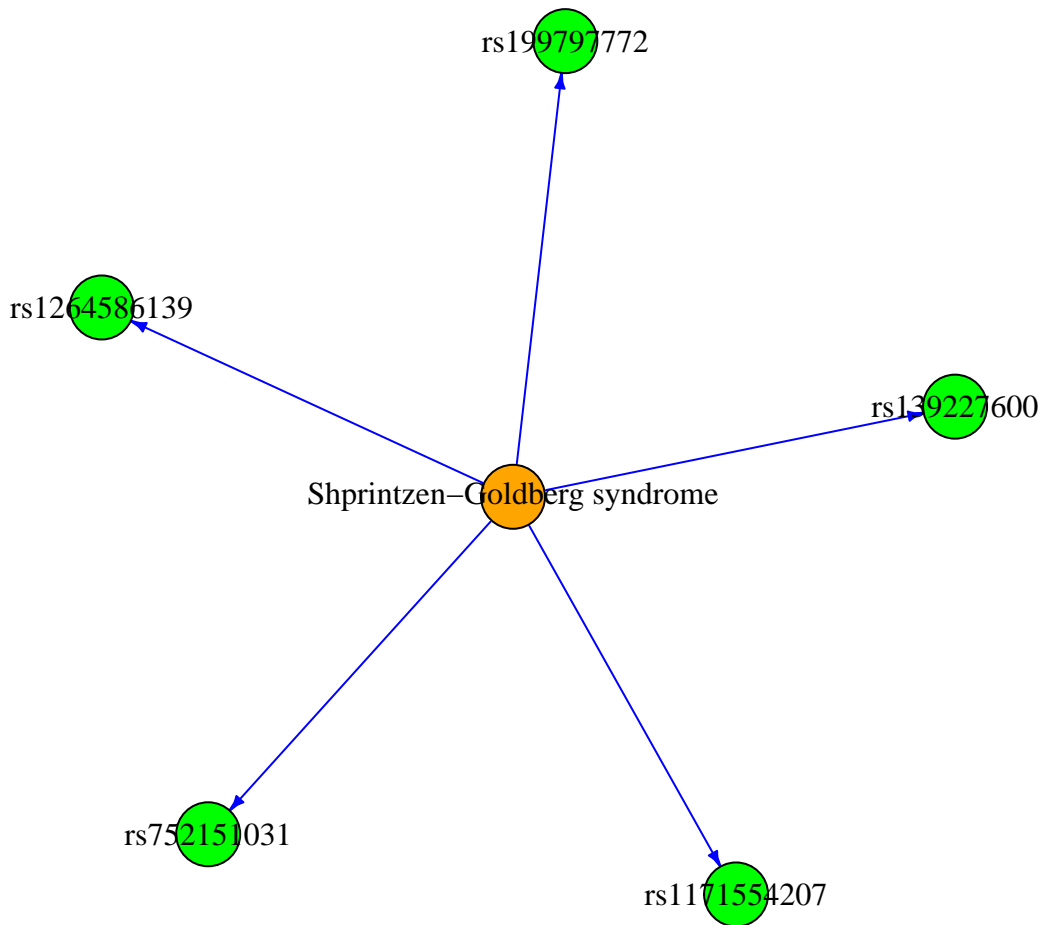

## Variant–Disease Network (Shwachman–Diamond syndrome 1)

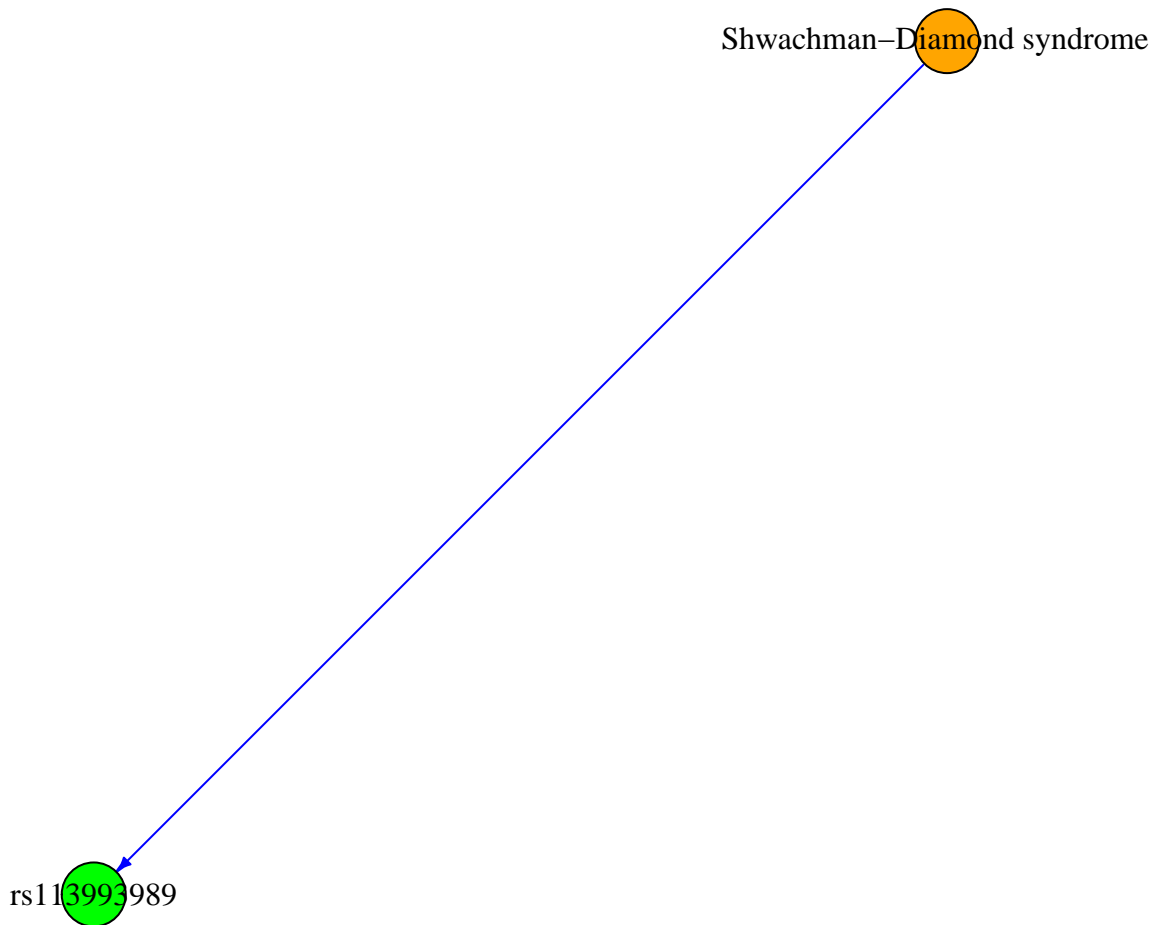

## Variant–Disease Network (Sialuria)

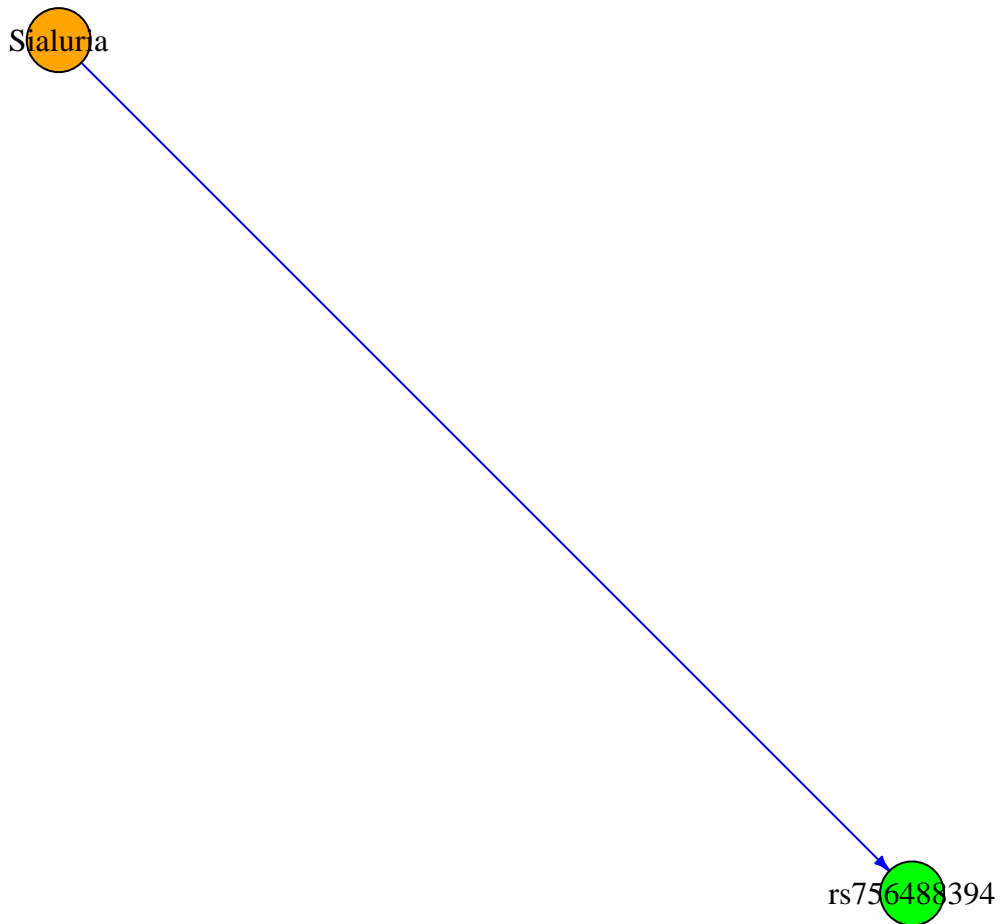



Variant–Disease Network (Sideroblastic Anemia and Ataxia)

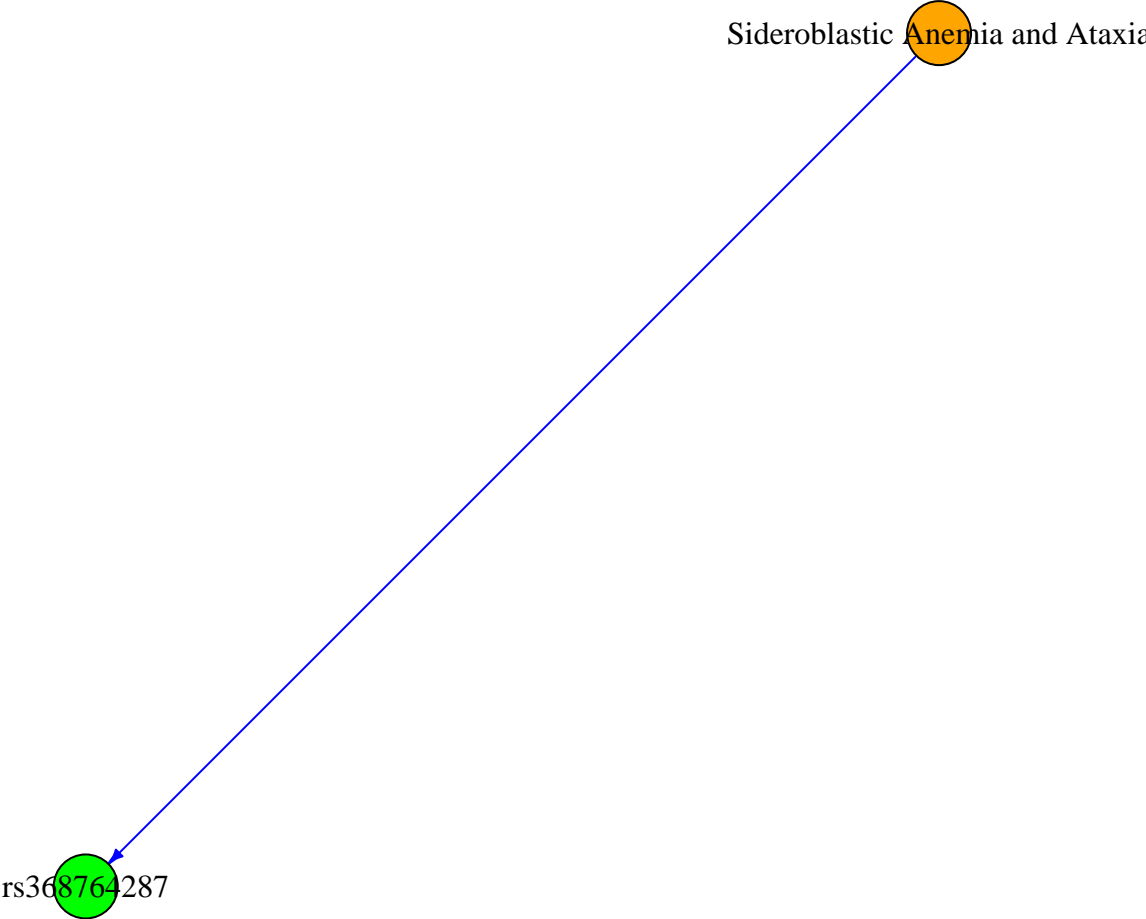

Variant–Disease Network (Sideroblastic anemia with B–cell immunodeficiency)

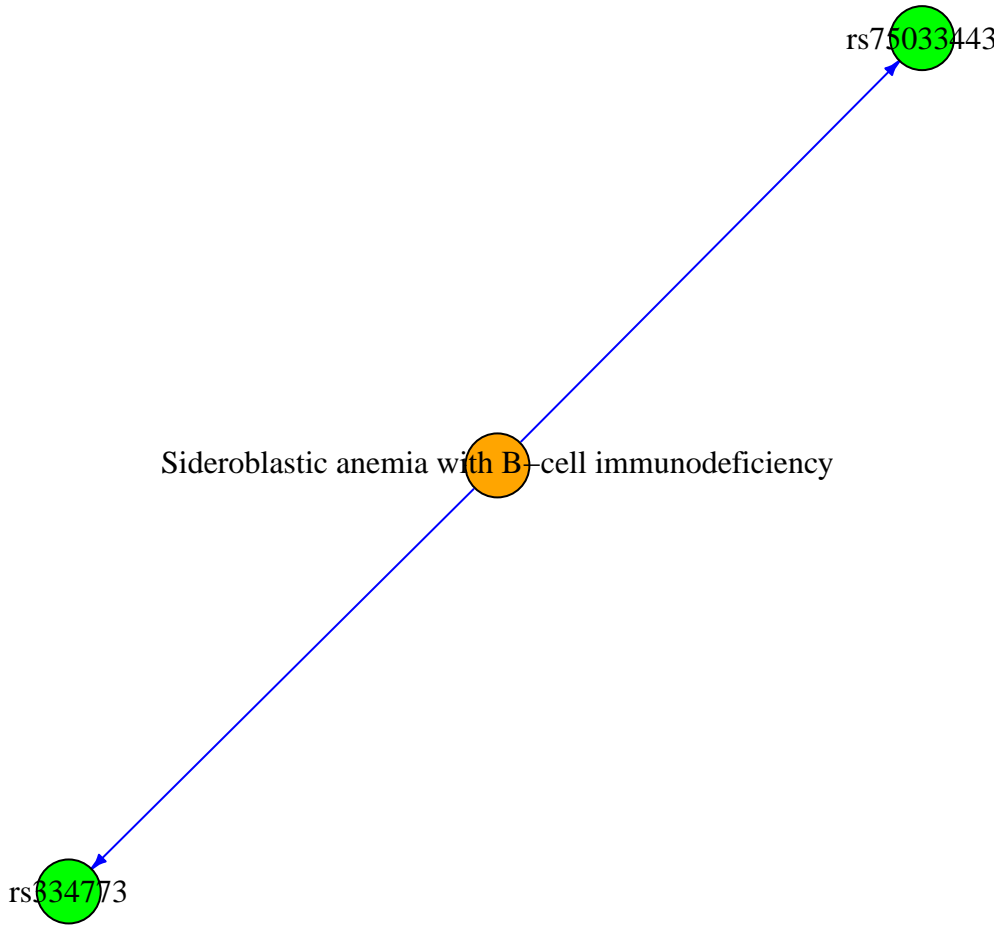

**Variant–Disease Network (Singleton–Merten syndrome 1)**

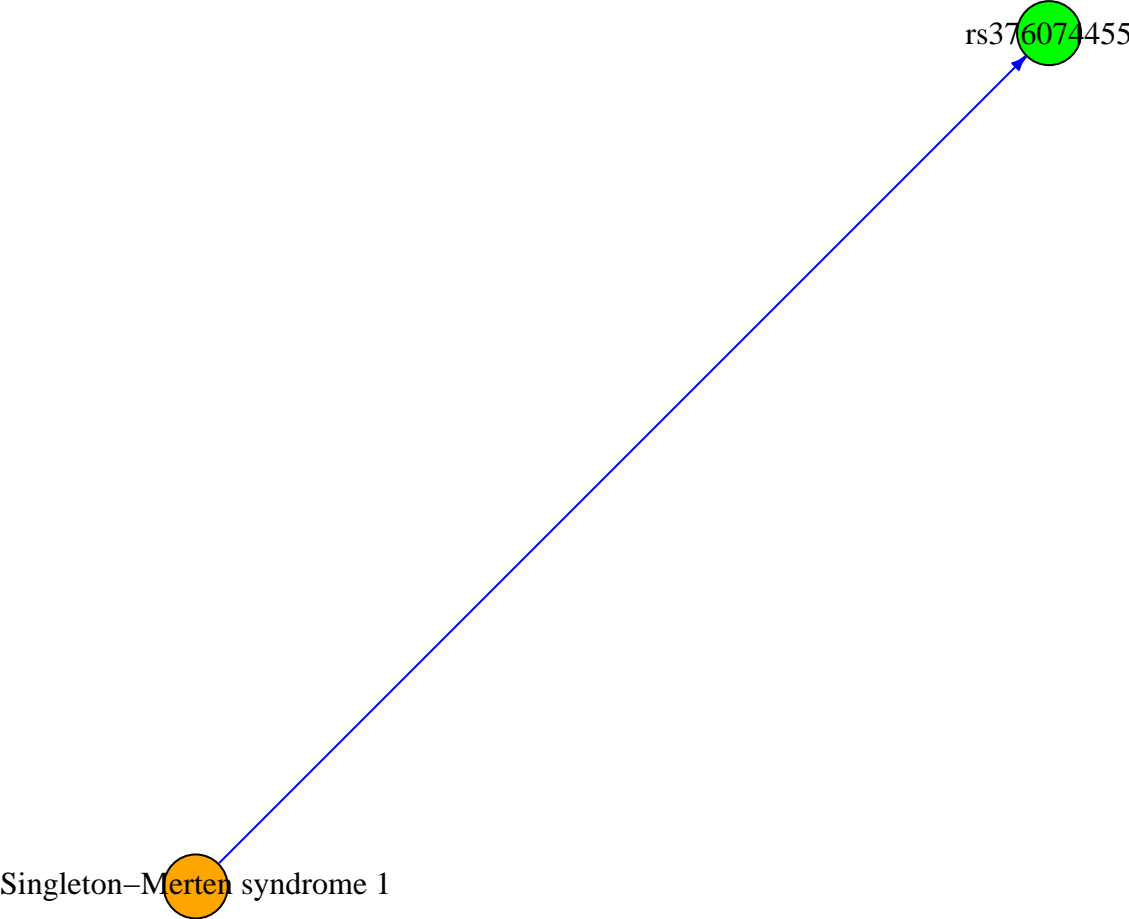

Variant–Disease Network (Sitosterolemia)

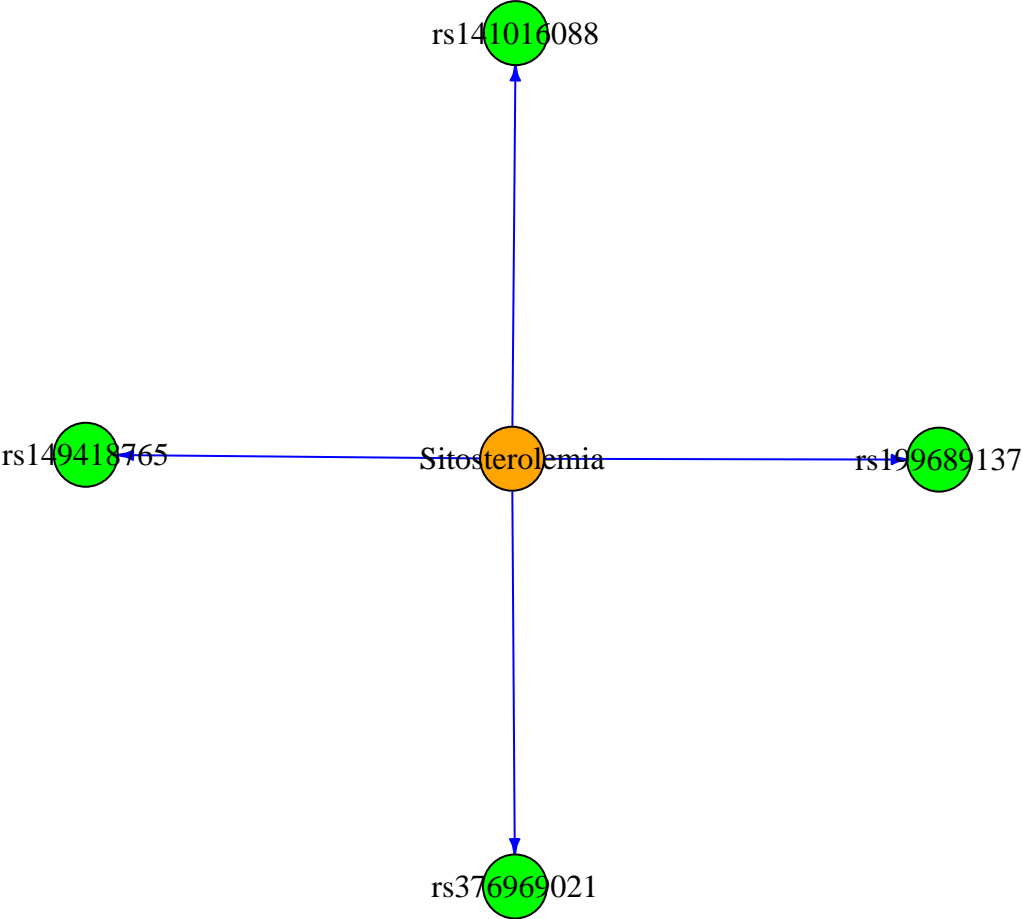

## Variant–Disease Network (SITOSTEROLEMIA 2)

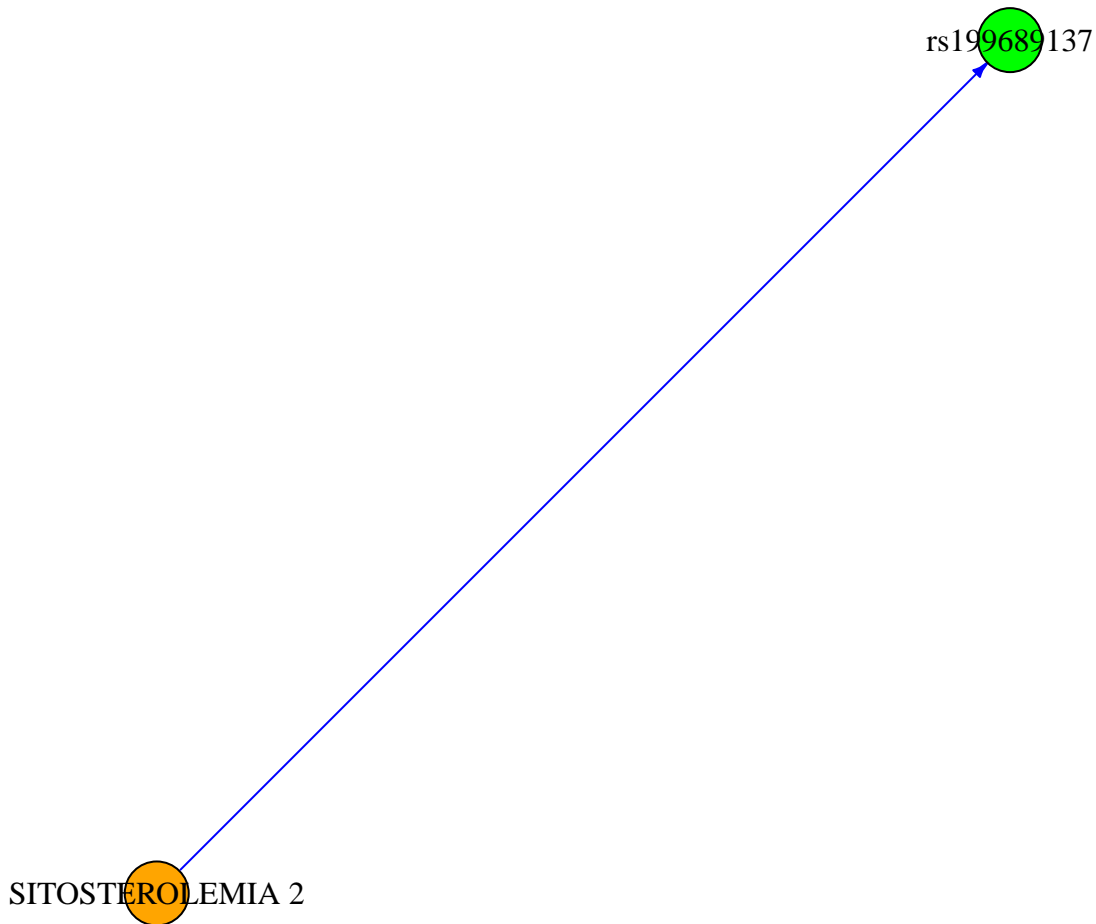

## Variant–Disease Network (Sjögren–Larsson syndrome)

## Variant–Disease Network (Skeletal dysplasia)

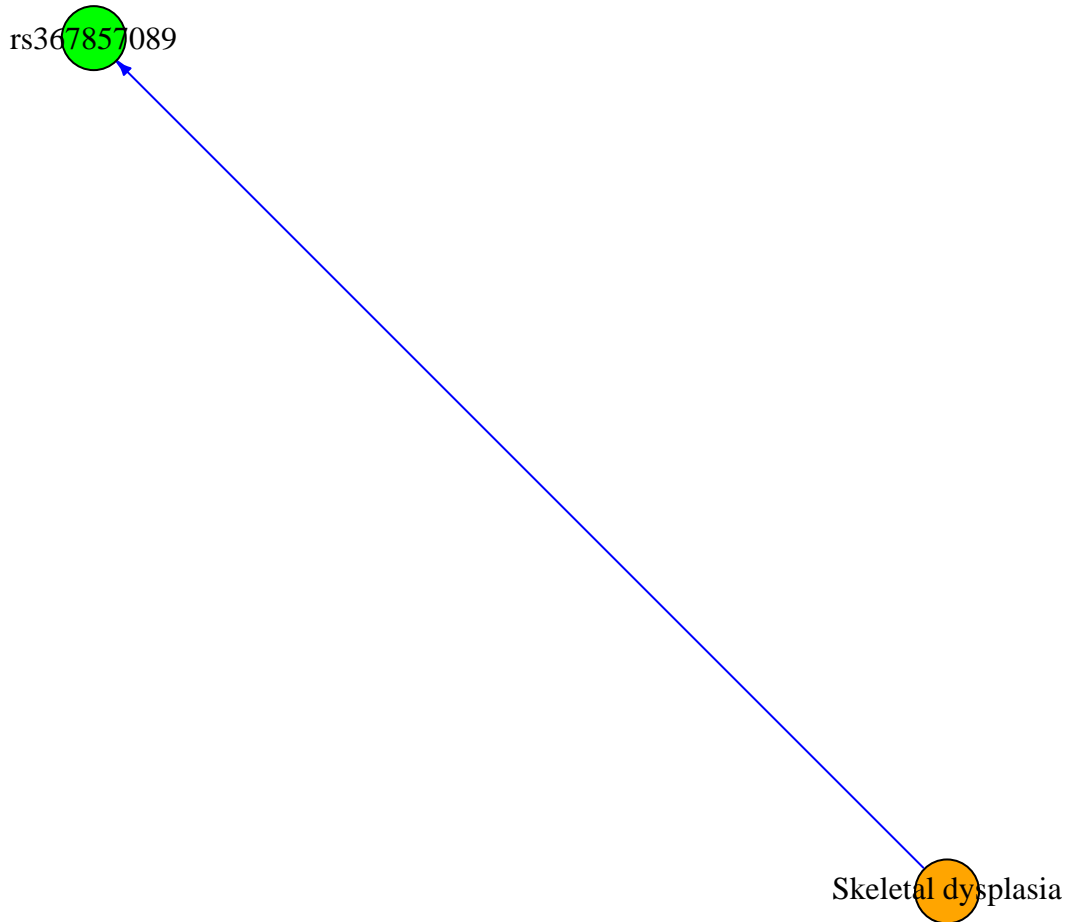

## Variant–Disease Network (Skin fragility woolly hair syndrome)

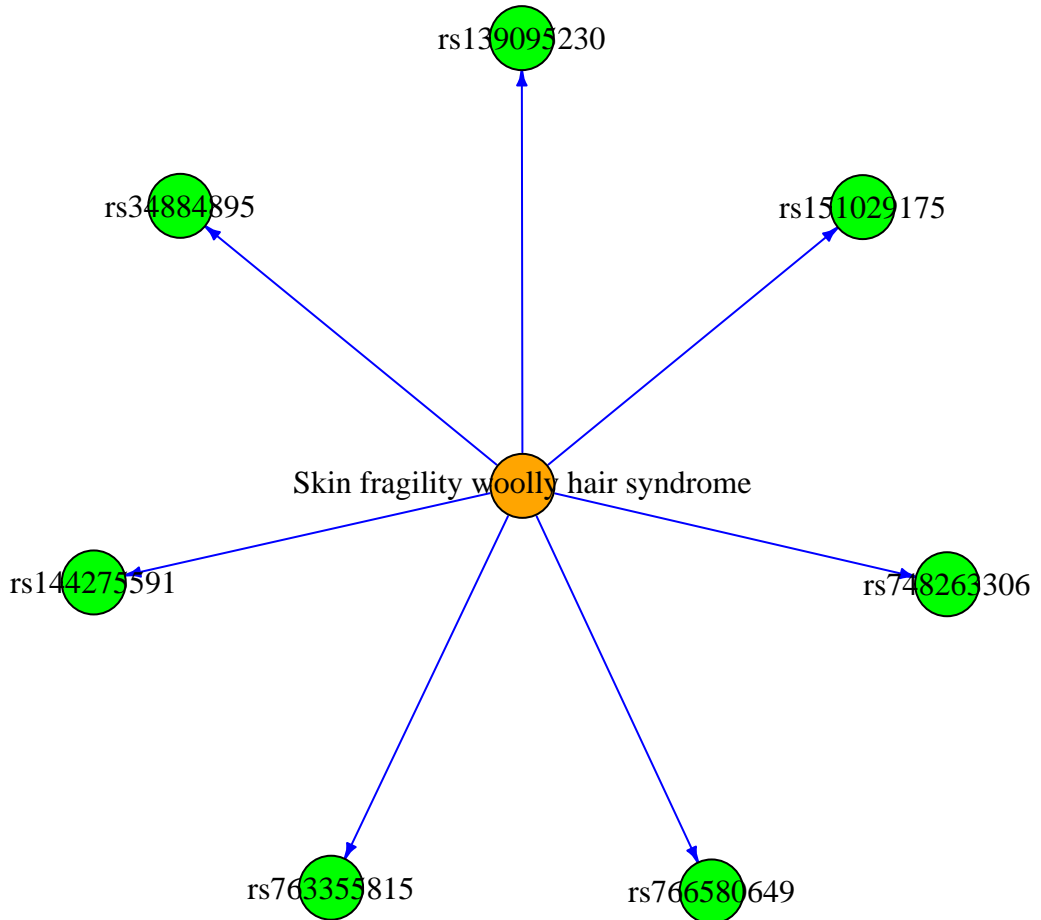



**Variant–Disease Network (Skin/hair/eye pigmentation)**

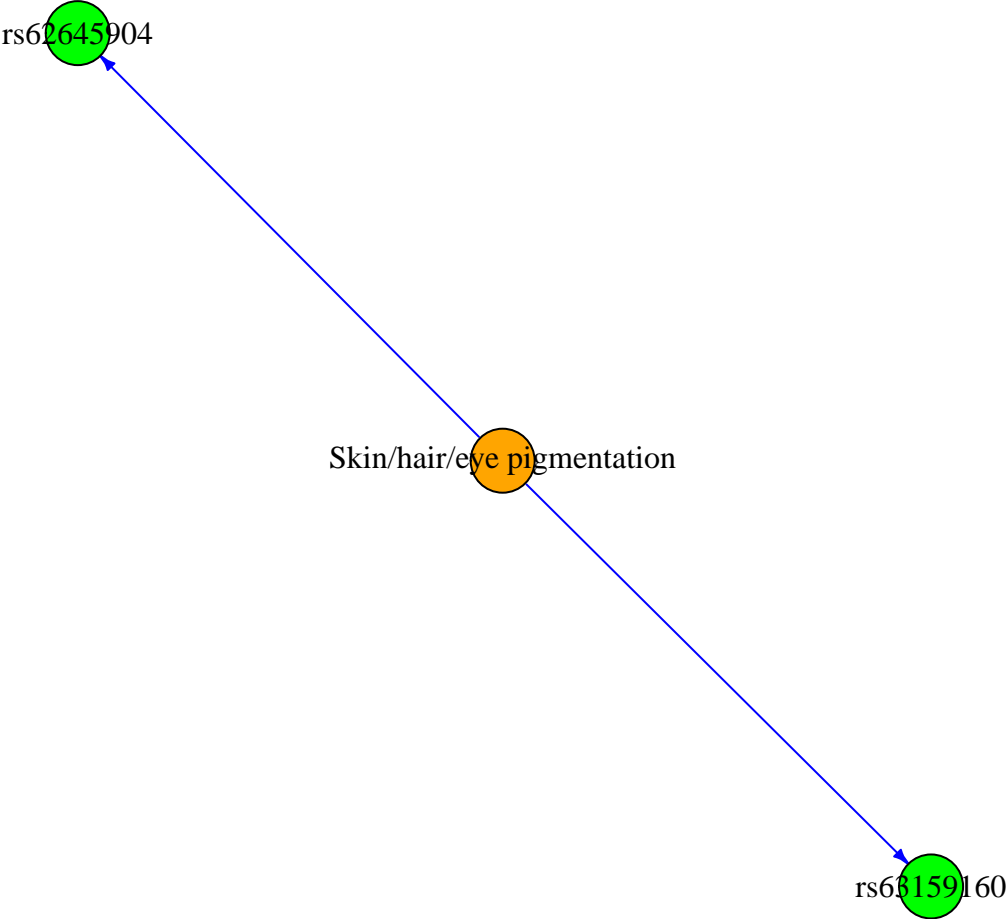

## Variant-Disease Network (Small hand)

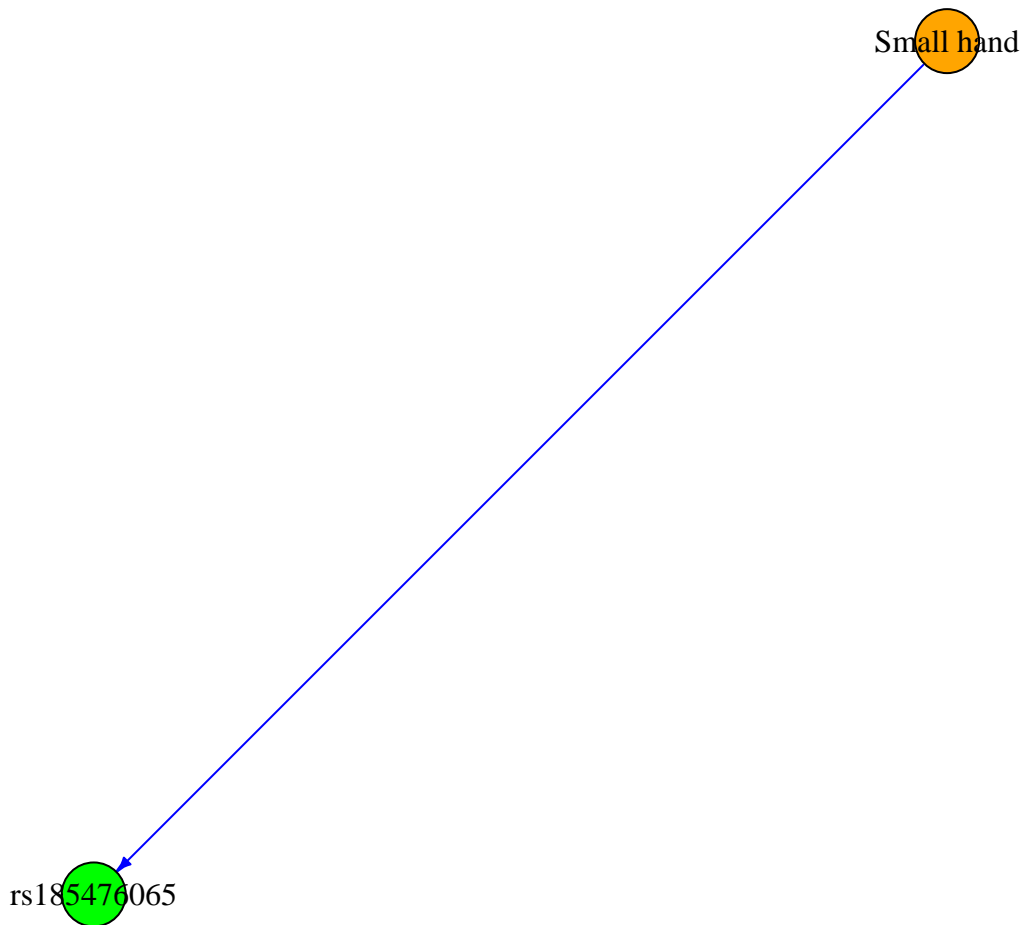

## Variant–Disease Network (Smith–McCort dysplasia)

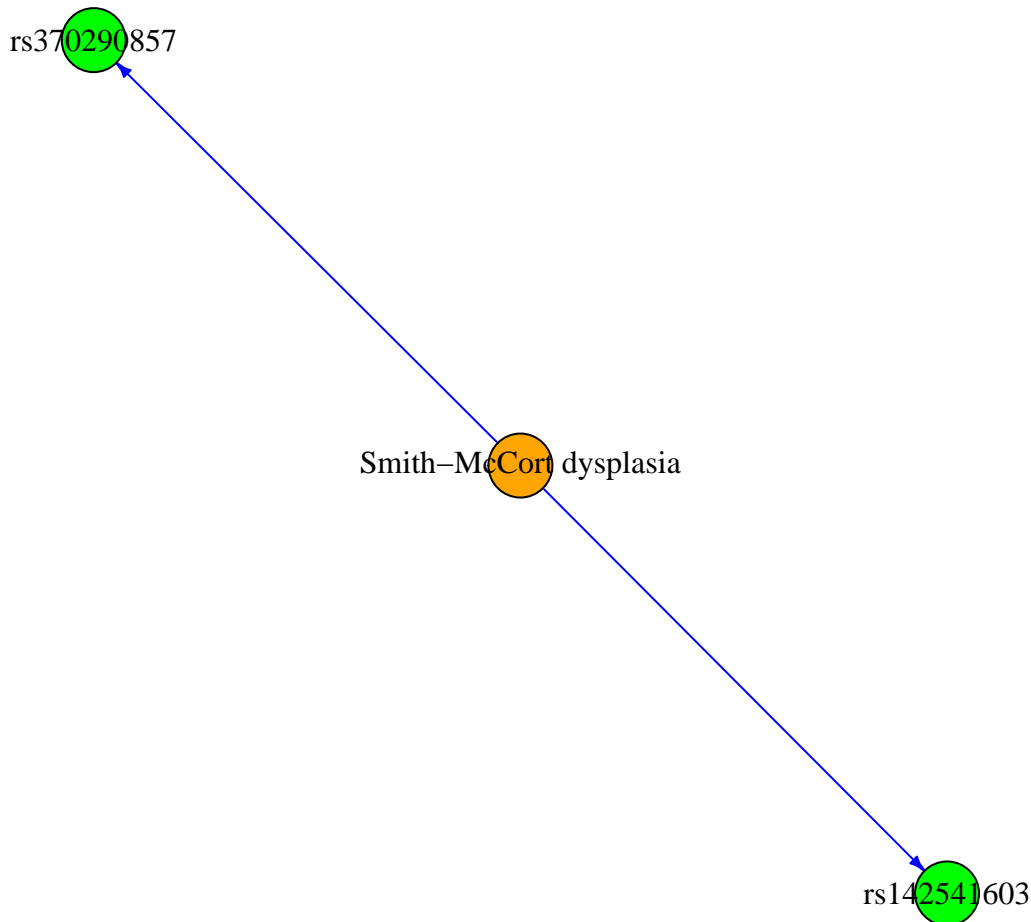

## Variant-Disease Network (Somatotroph adenoma)

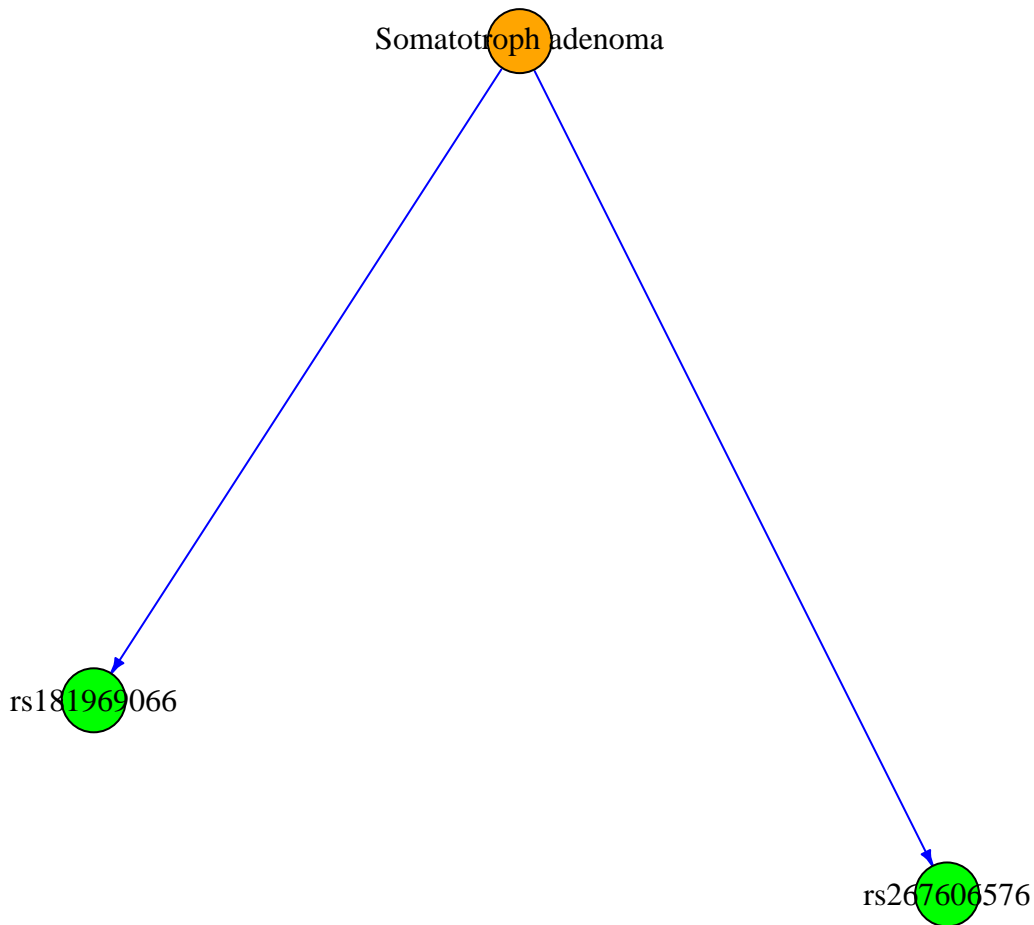

Variant–Disease Network (Sotos syndrome)

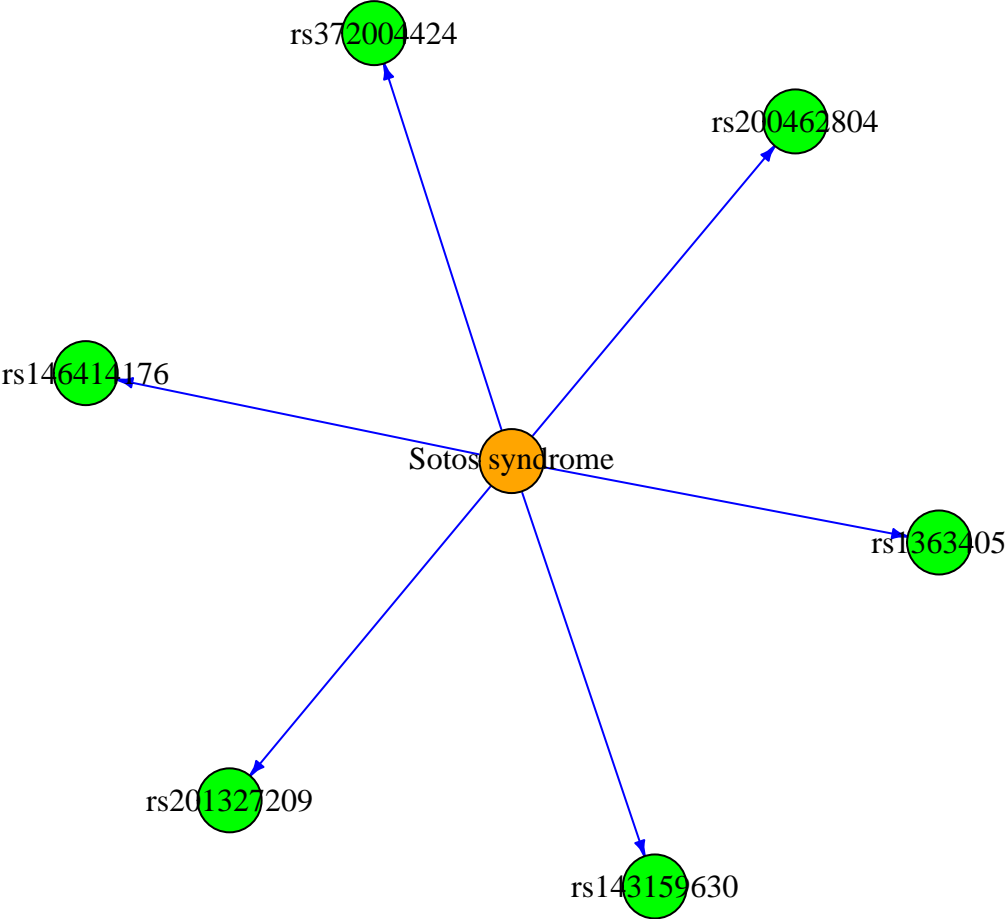

## Variant–Disease Network (Sotos syndrome 1)

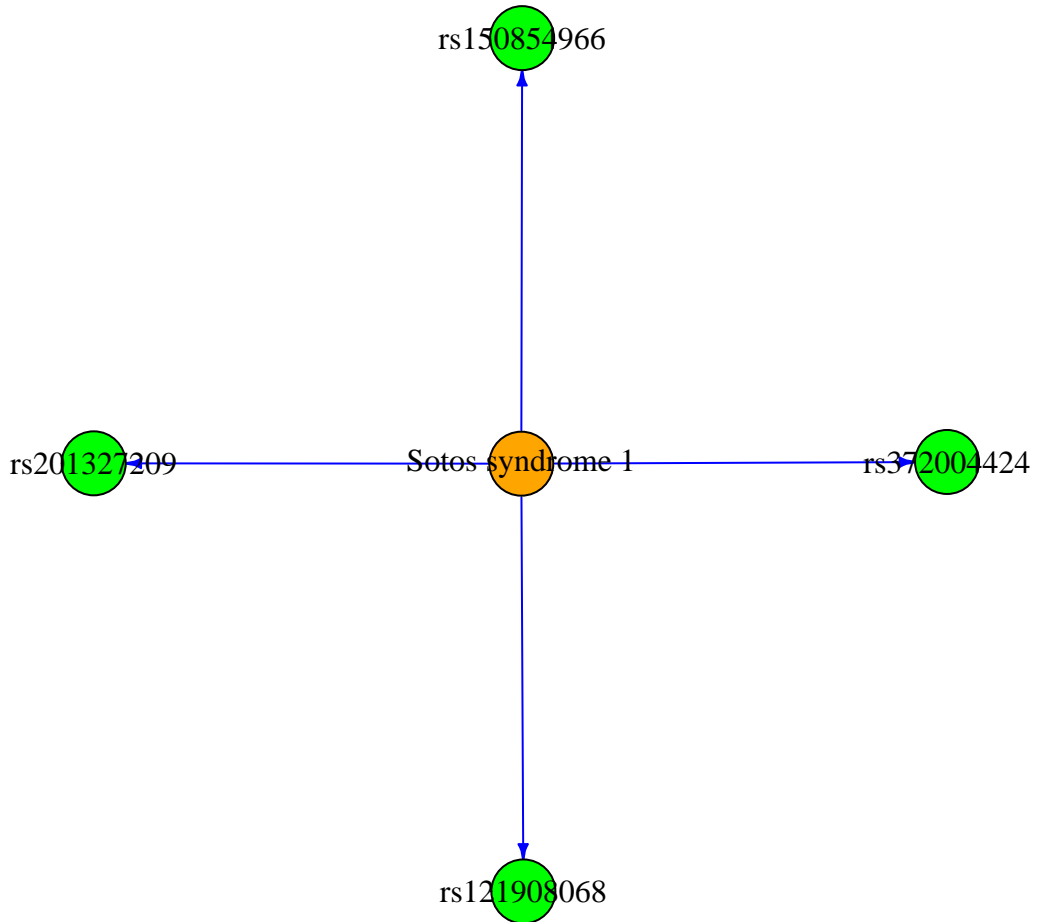

**Variant–Disease Network (Spastic ataxia Charlevoix–Saguenay type)**

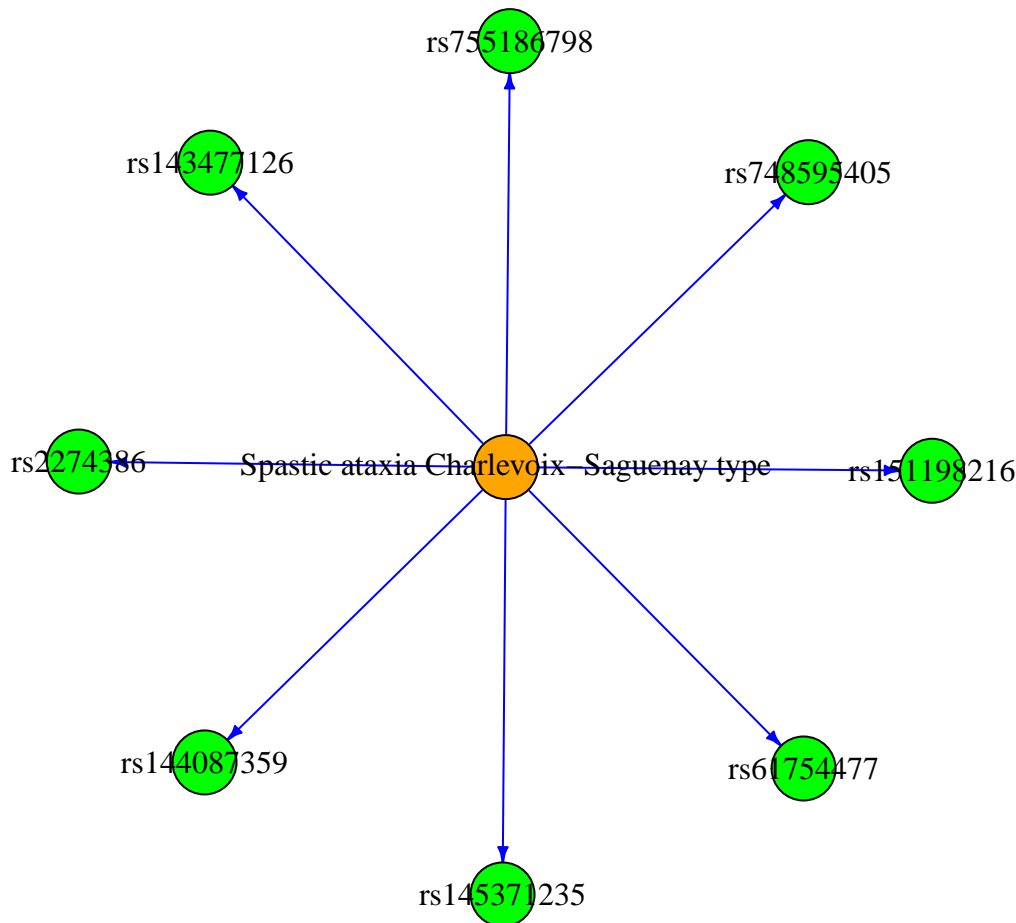

## Variant–Disease Network (Spastic paraplegia)

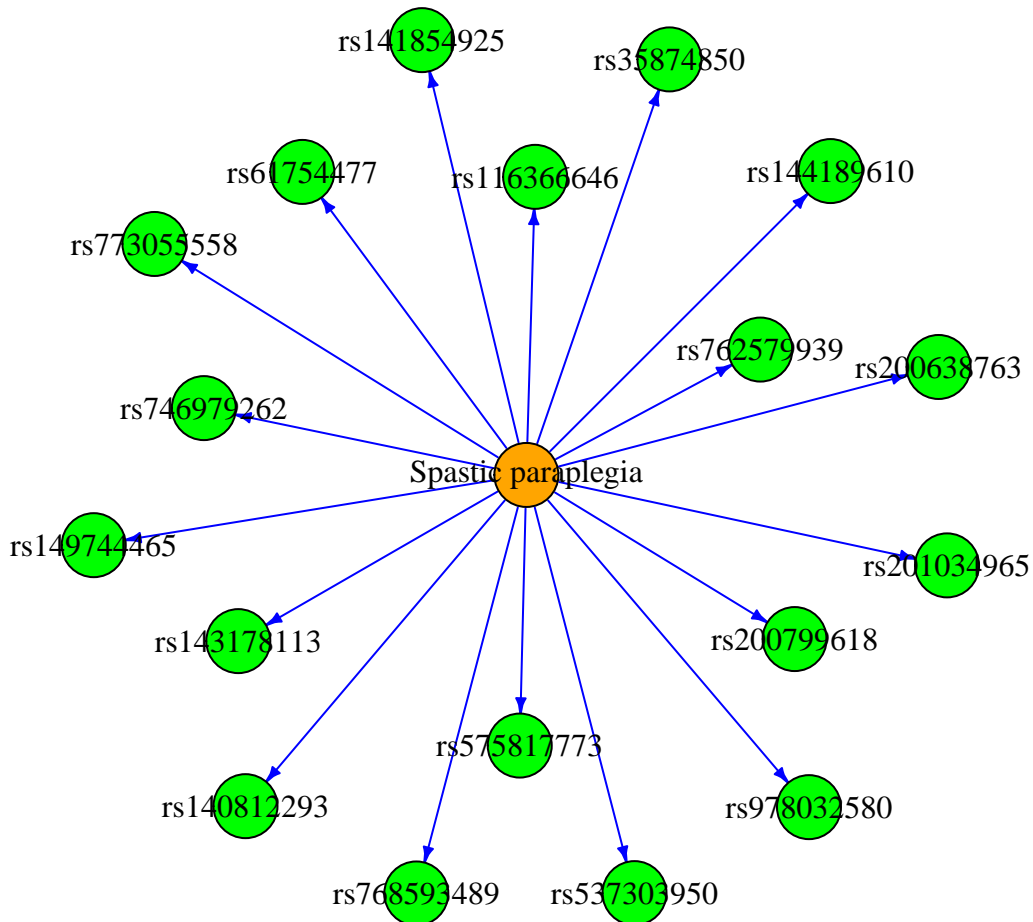



## Variant–Disease Network (Spastic paraplegia 1)

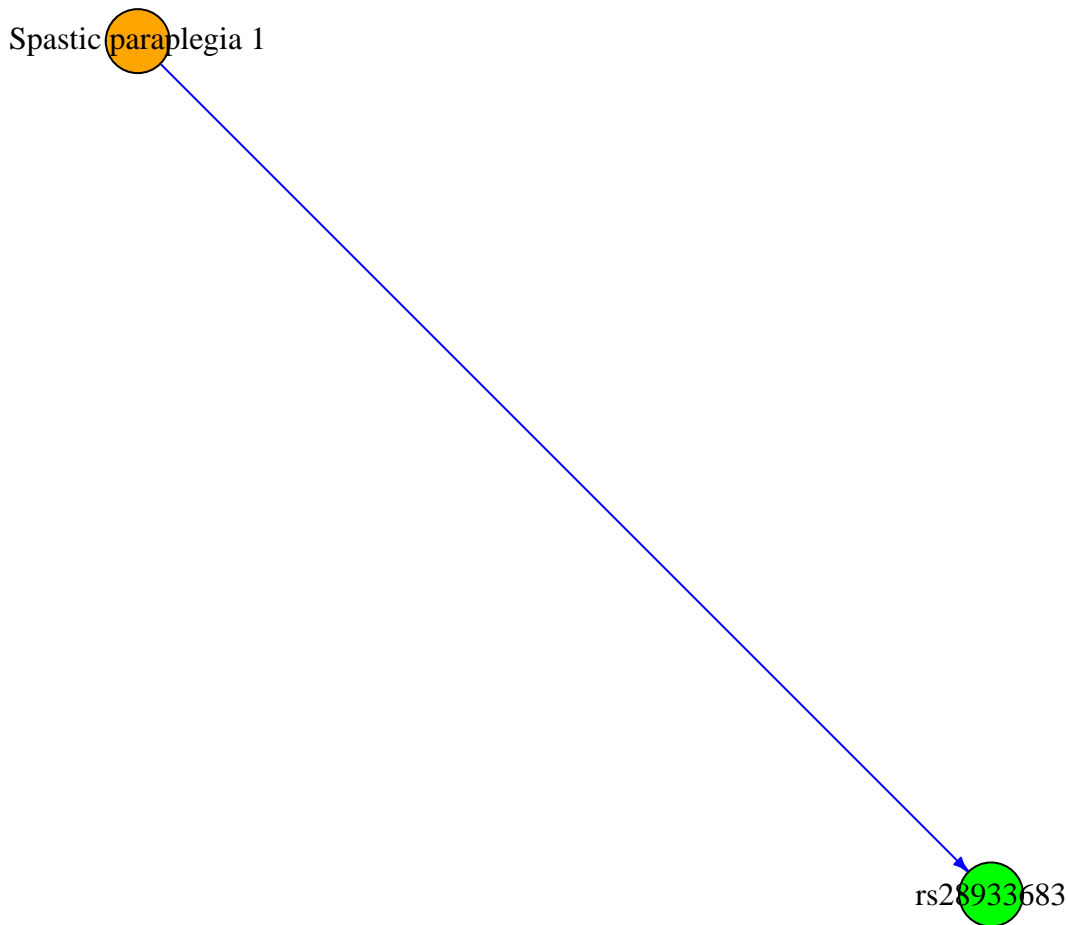

## Variant–Disease Network (Spastic paraplegia 11)

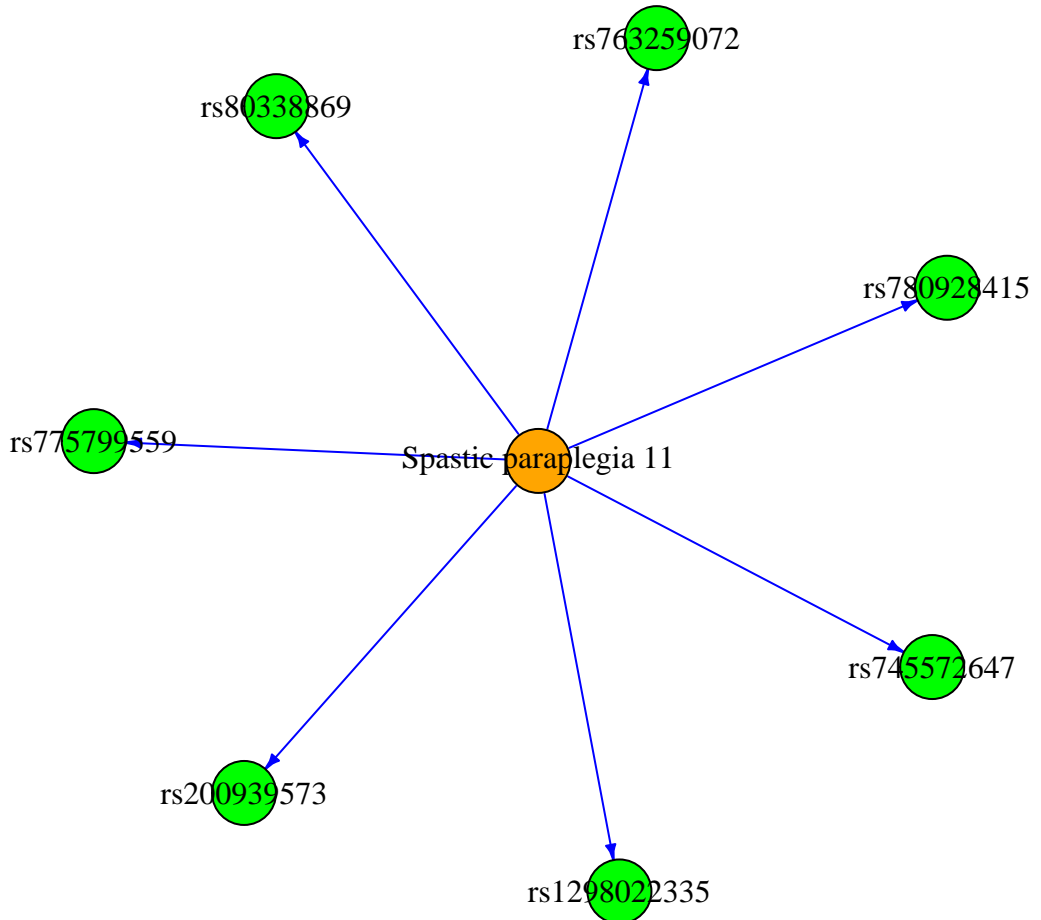

## Variant–Disease Network (Spastic paraplegia 15)

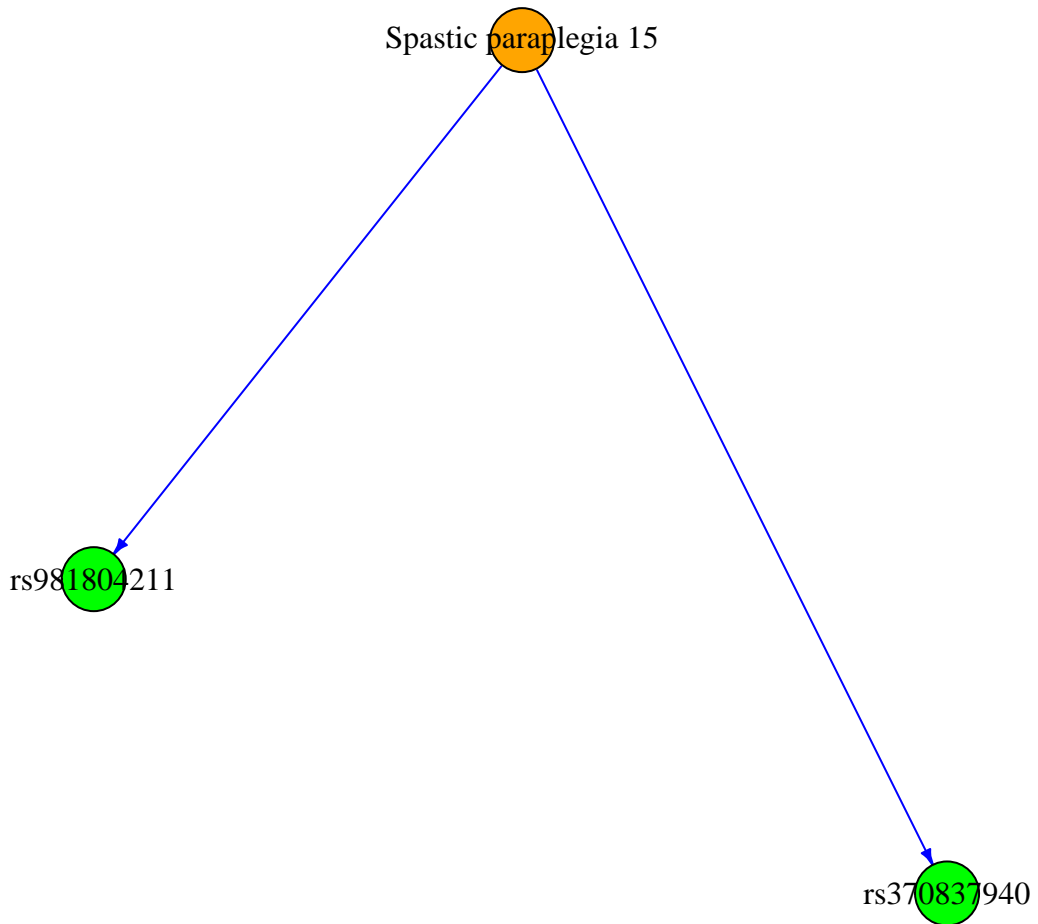

## Variant–Disease Network (Spastic paraplegia 3)

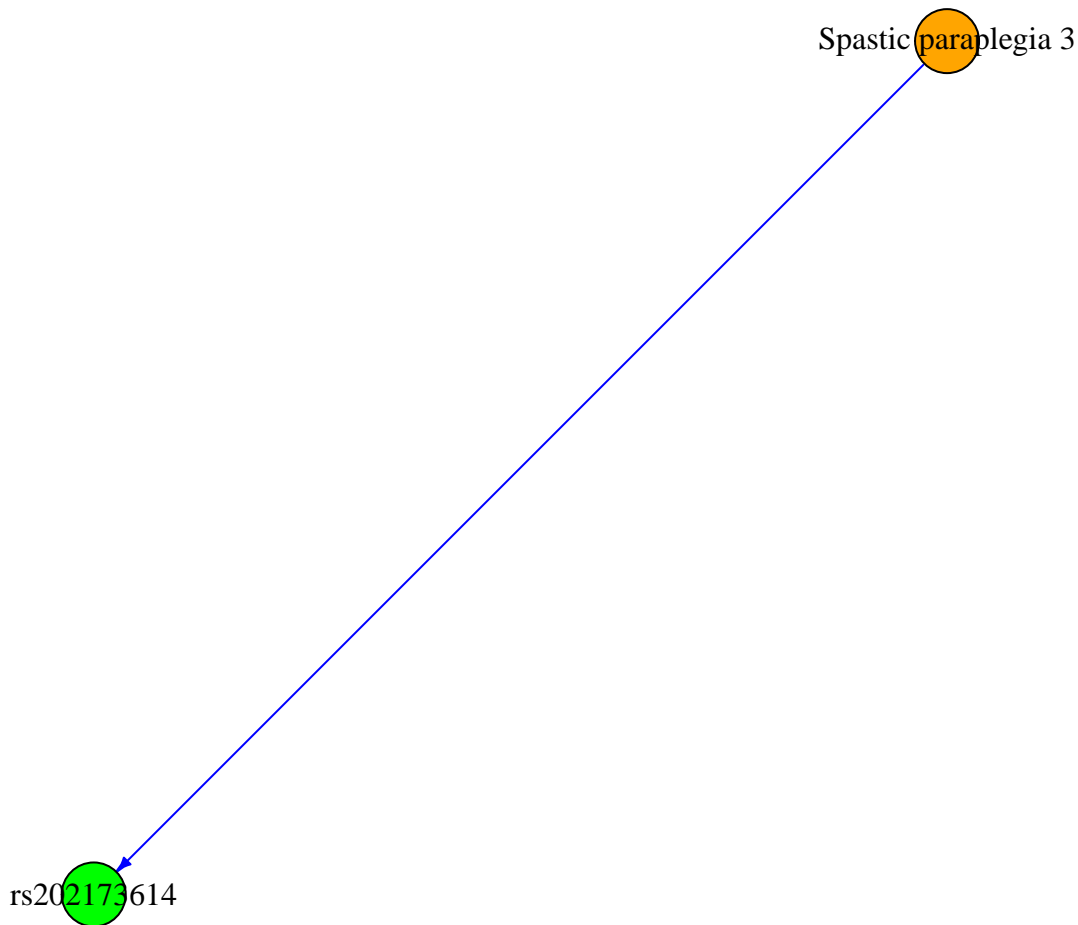

## Variant–Disease Network (Spastic paraplegia 33)

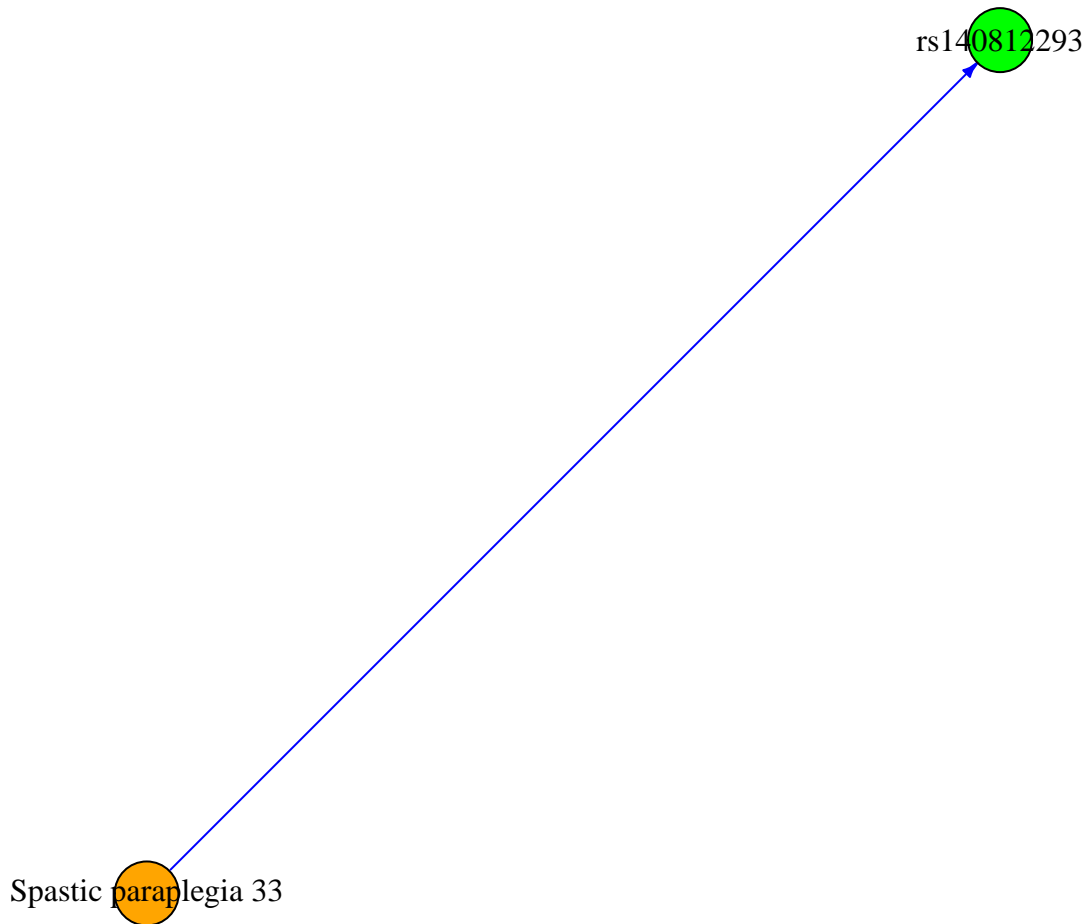

## Variant–Disease Network (Spastic paraplegia 35)

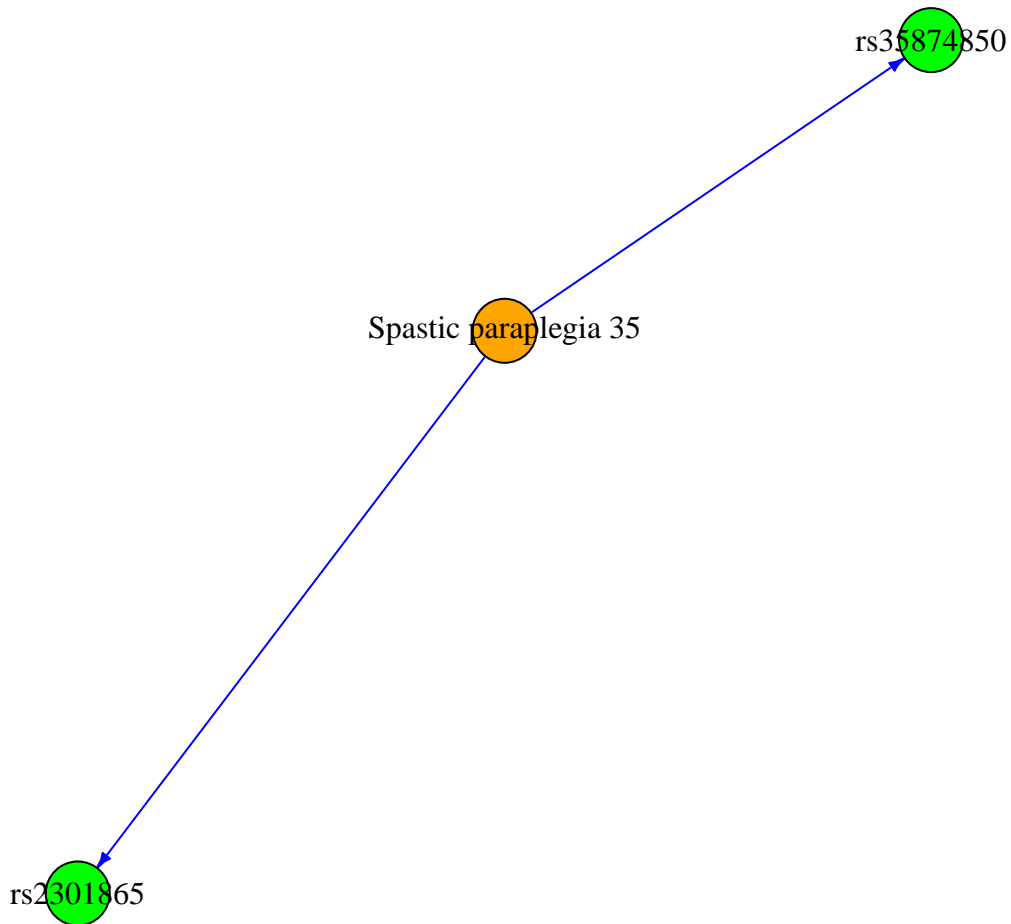

## Variant–Disease Network (Spastic paraplegia 39)

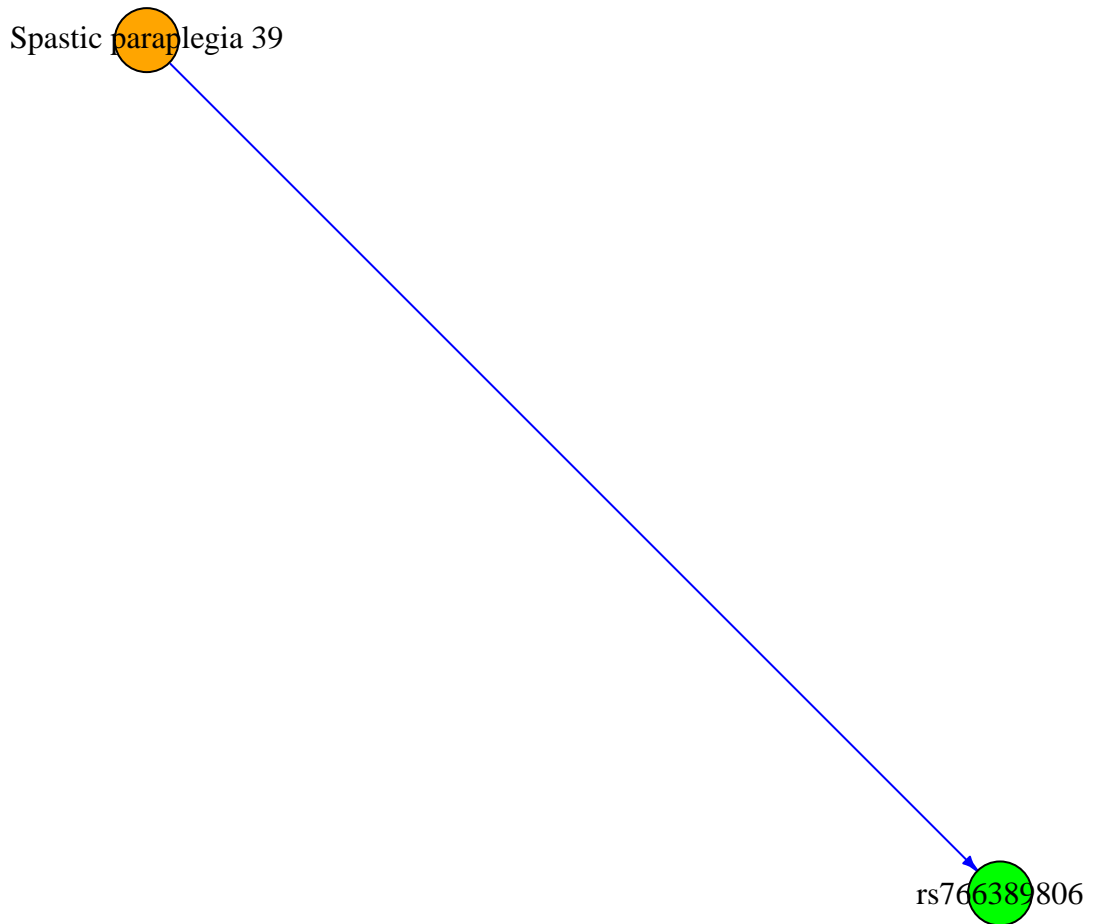

## Variant–Disease Network (Spastic paraplegia 4)

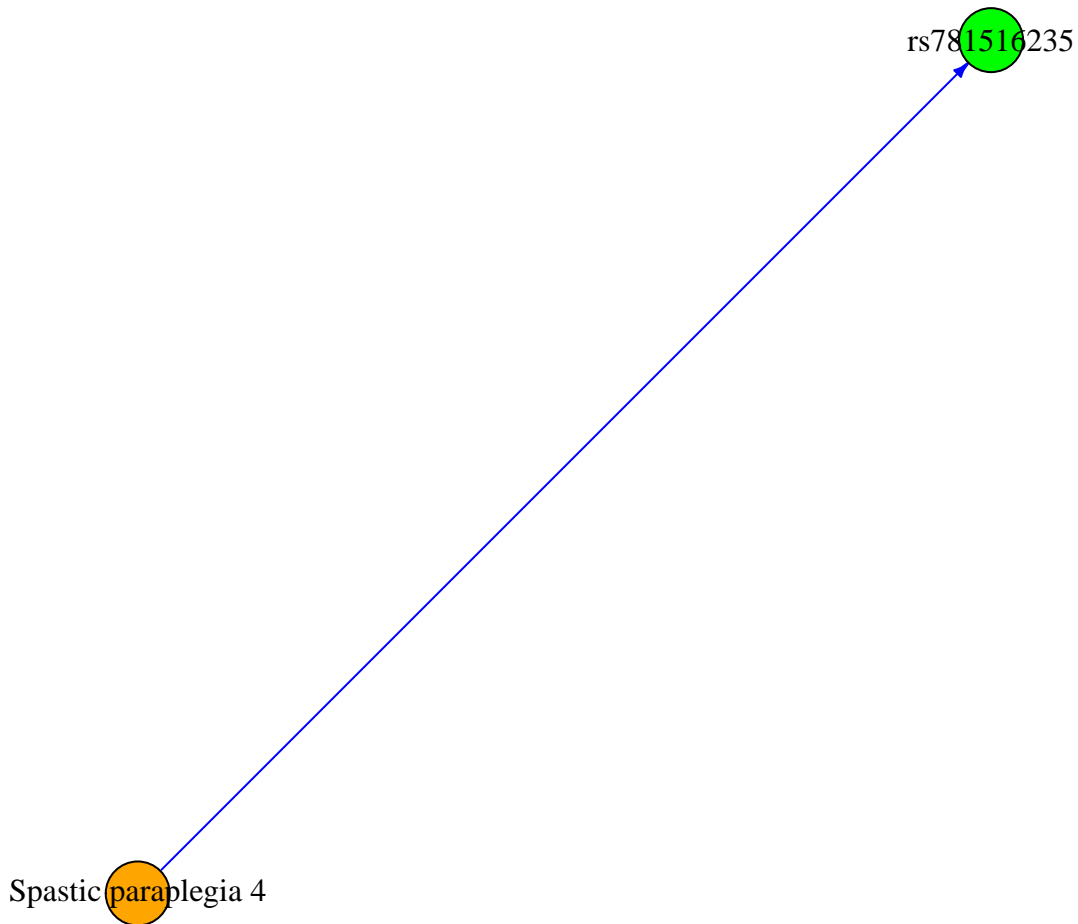



## Variant–Disease Network (Spastic paraplegia 44)

Spastic paraplegia 44

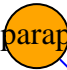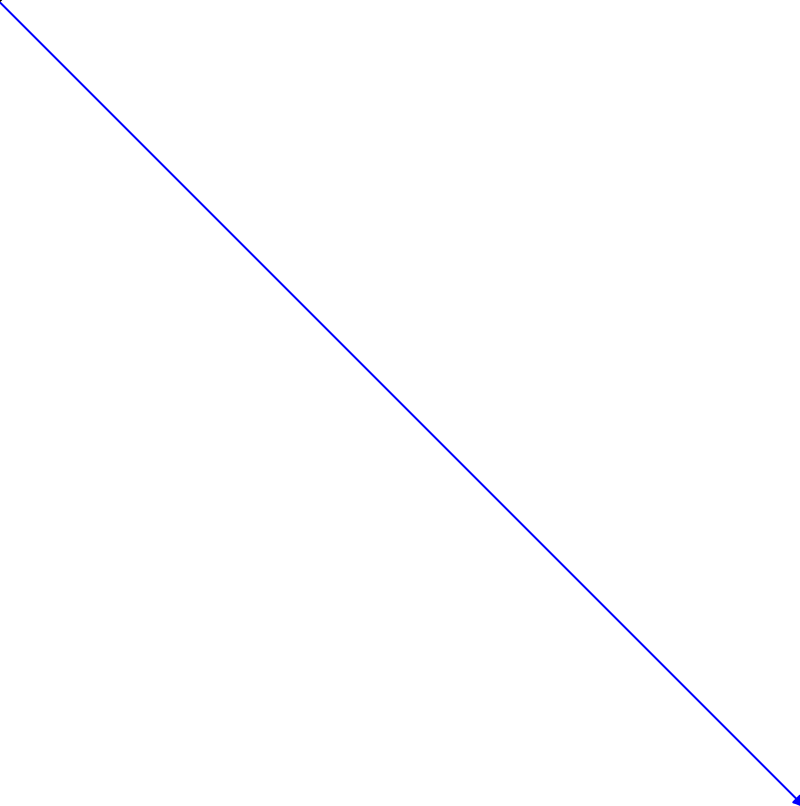

rs75469429

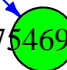

## Variant–Disease Network (Spastic paraplegia 50)

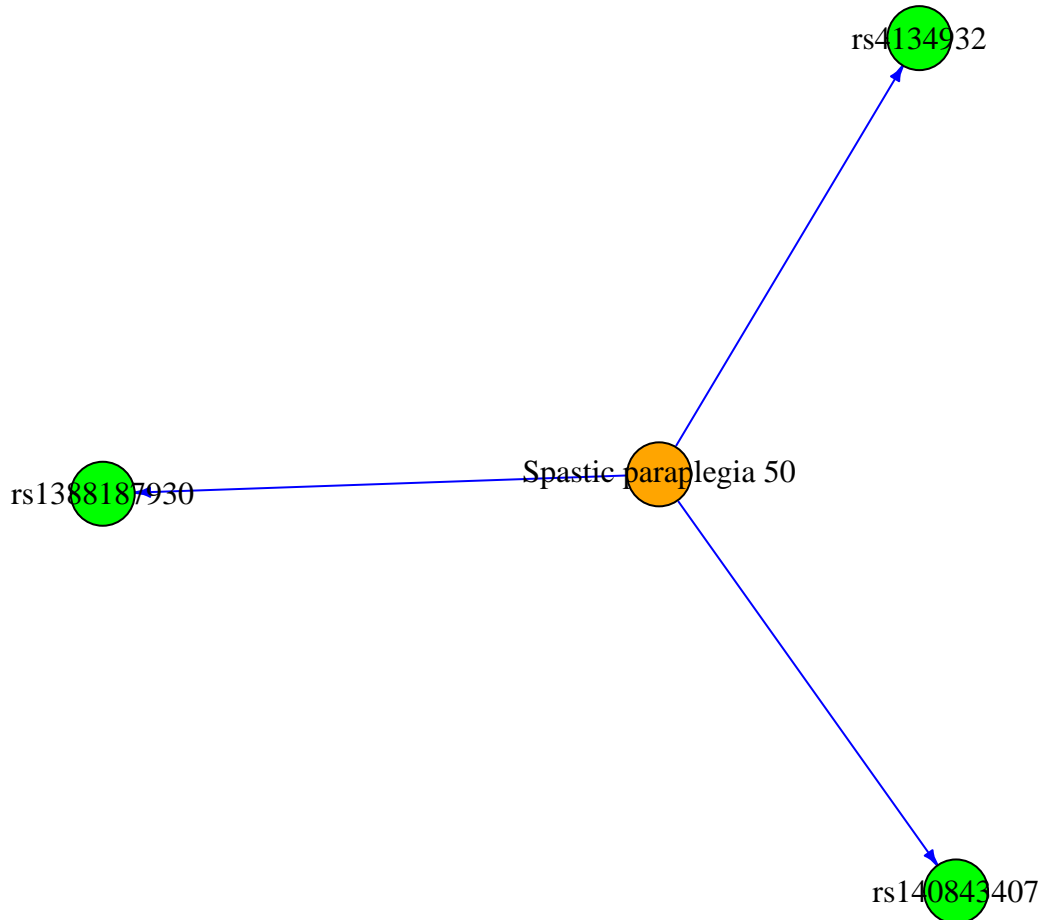

## Variant–Disease Network (Spastic paraplegia 54)

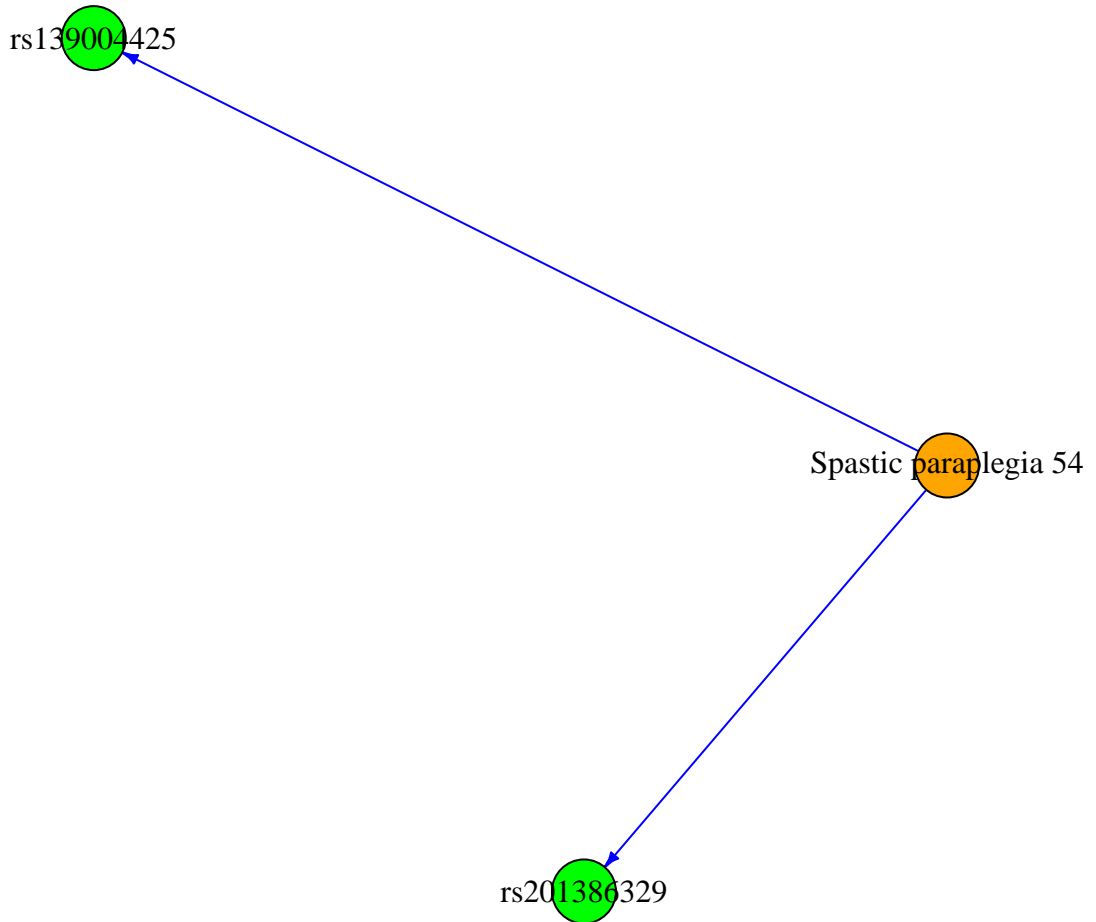

## Variant–Disease Network (Spastic paraplegia 73)

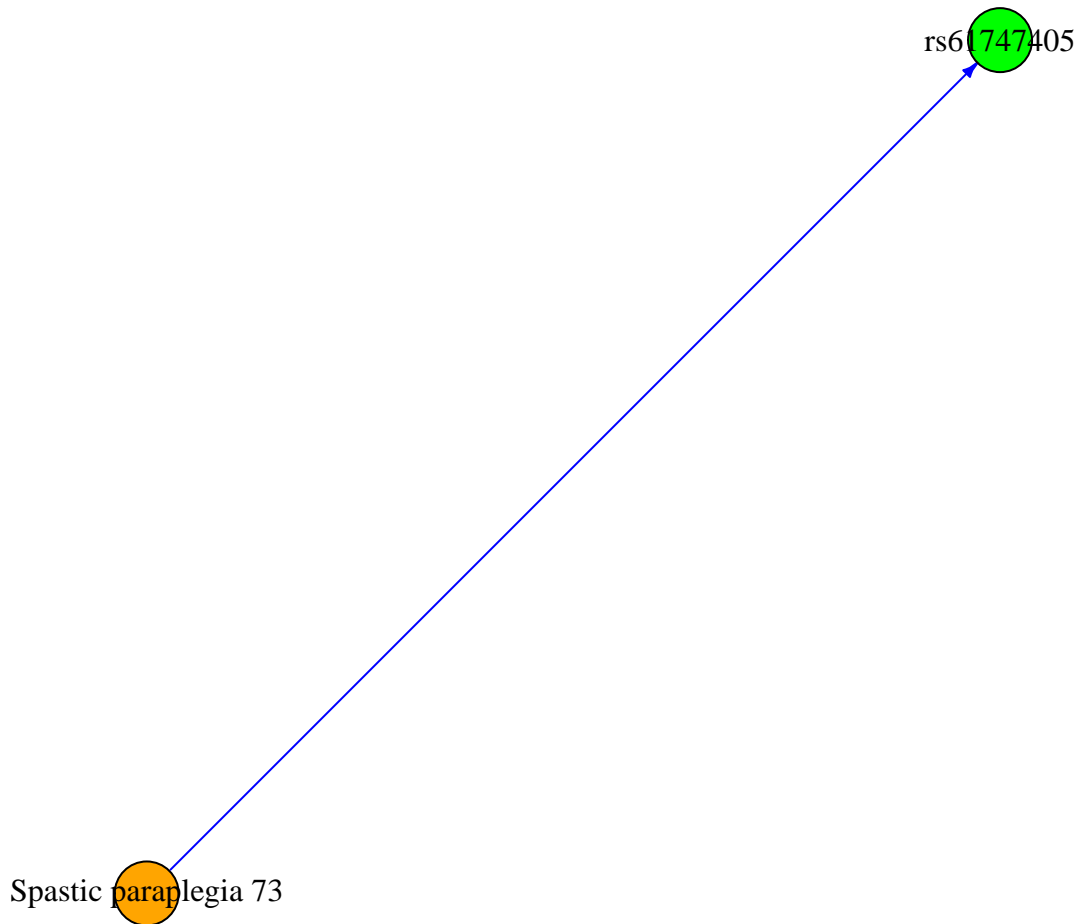

## Variant–Disease Network (Spastic paraplegia 78)

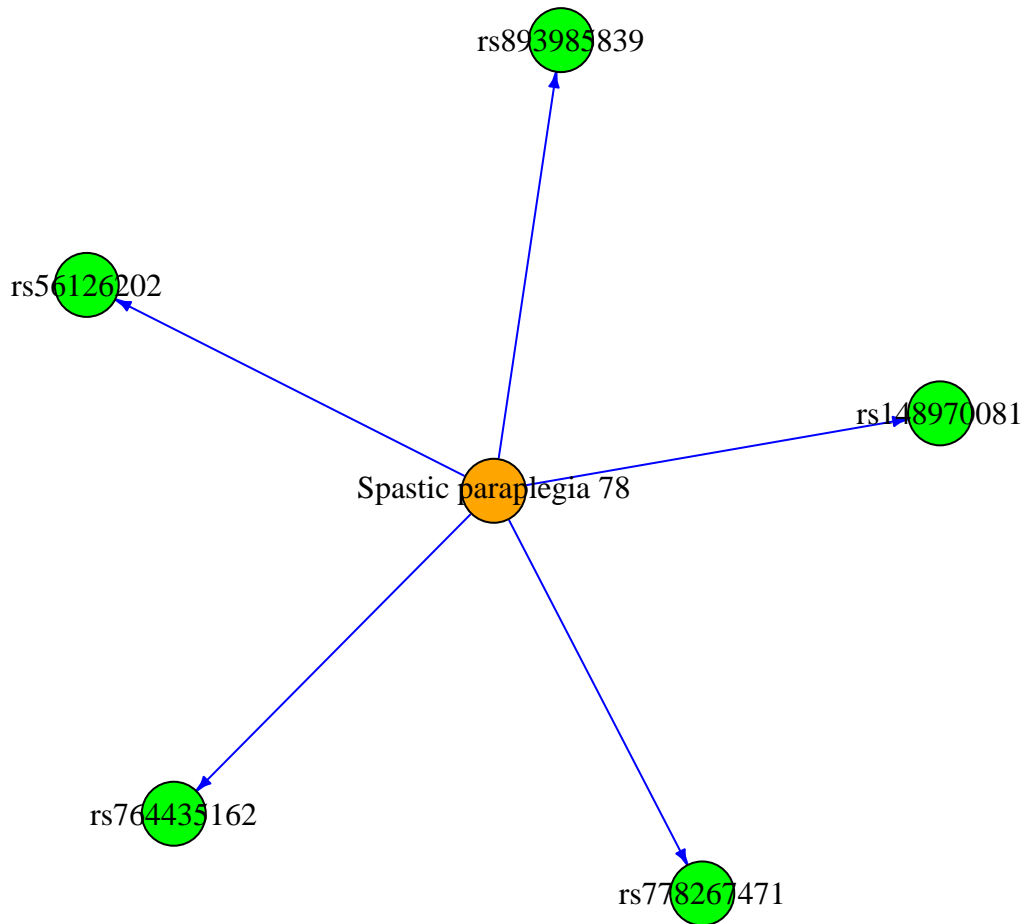

## Variant–Disease Network (Speech–language disorder 1)

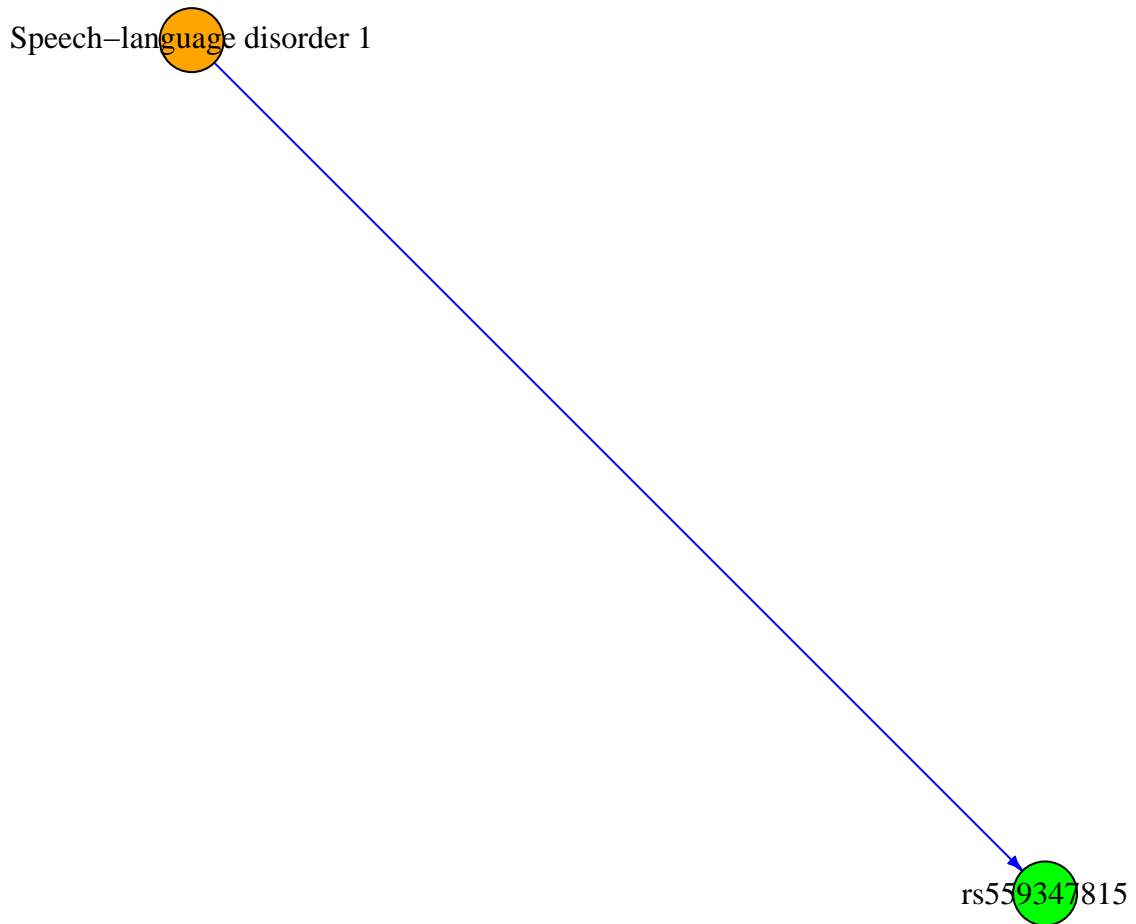

## Variant-Disease Network (Spermatogenic Failure)

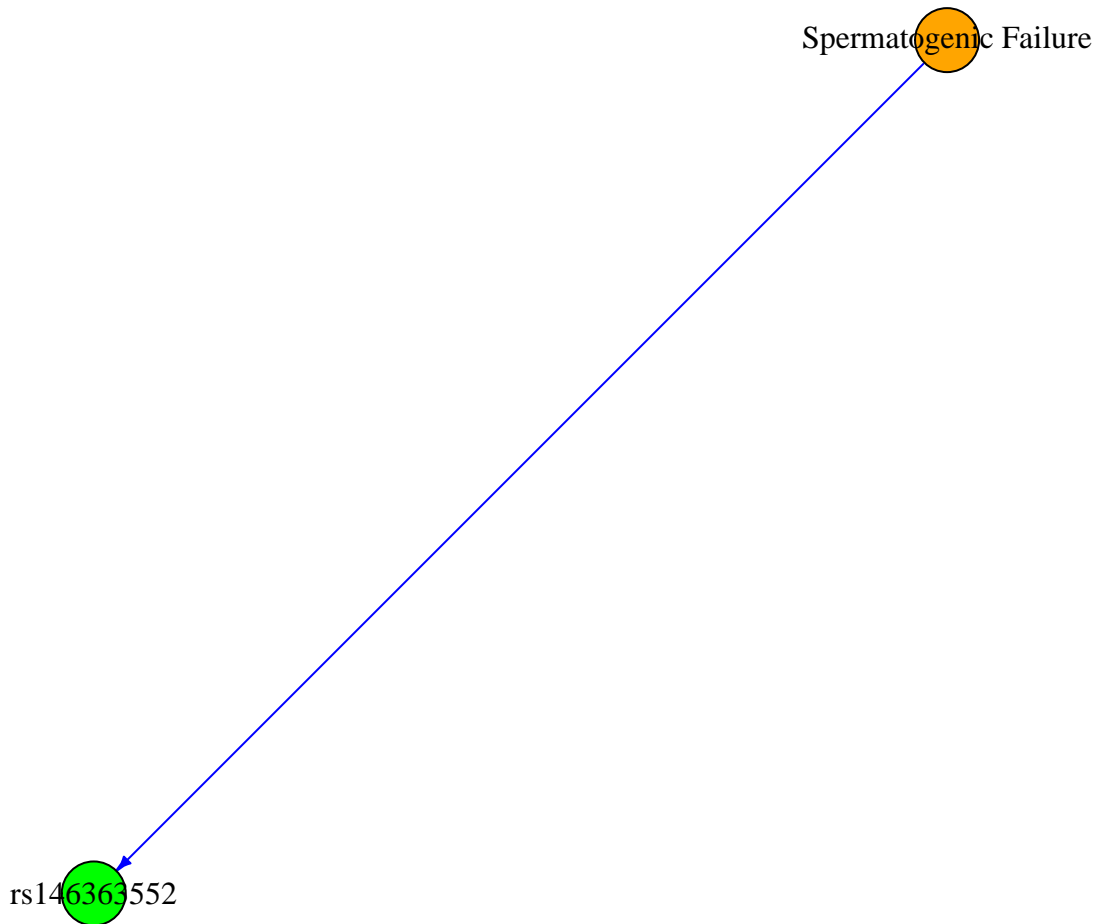

**Variant–Disease Network (Spermatogenic failure 13)**

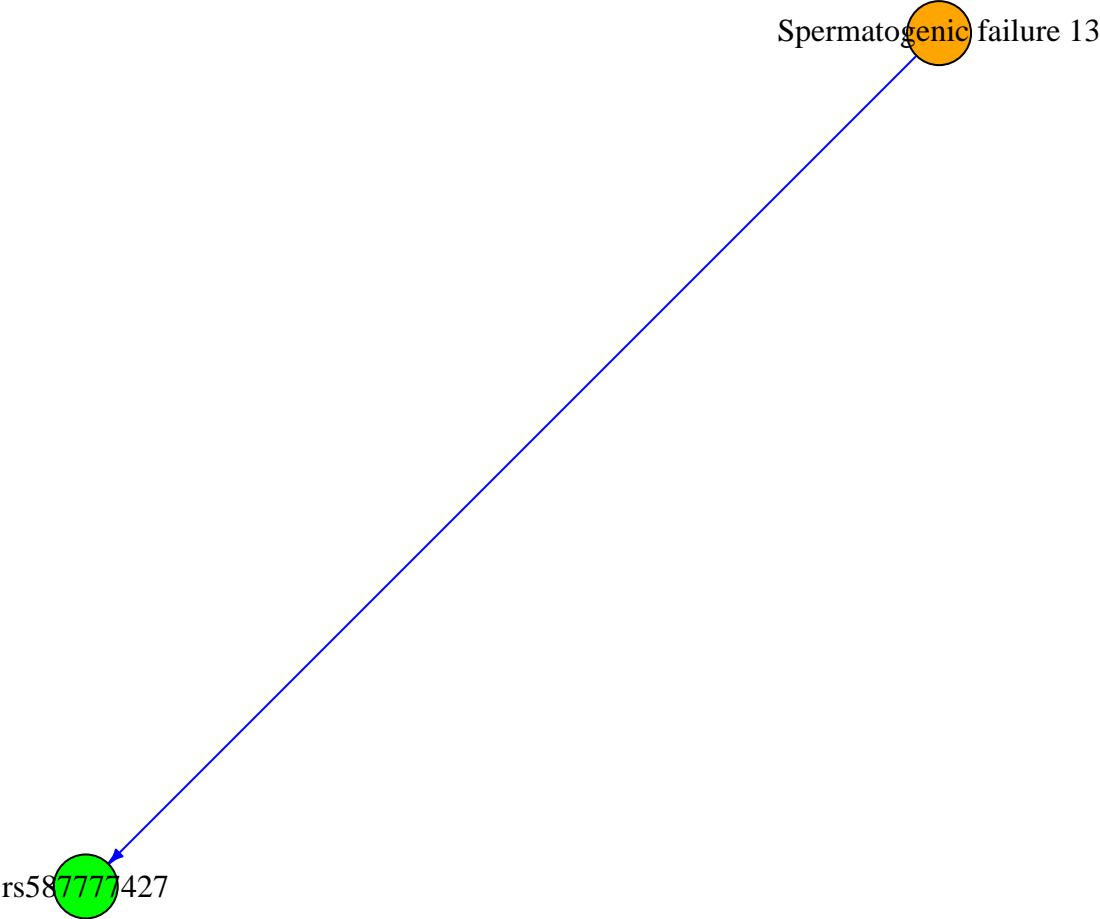



Variant–Disease Network (Spherocytosis)

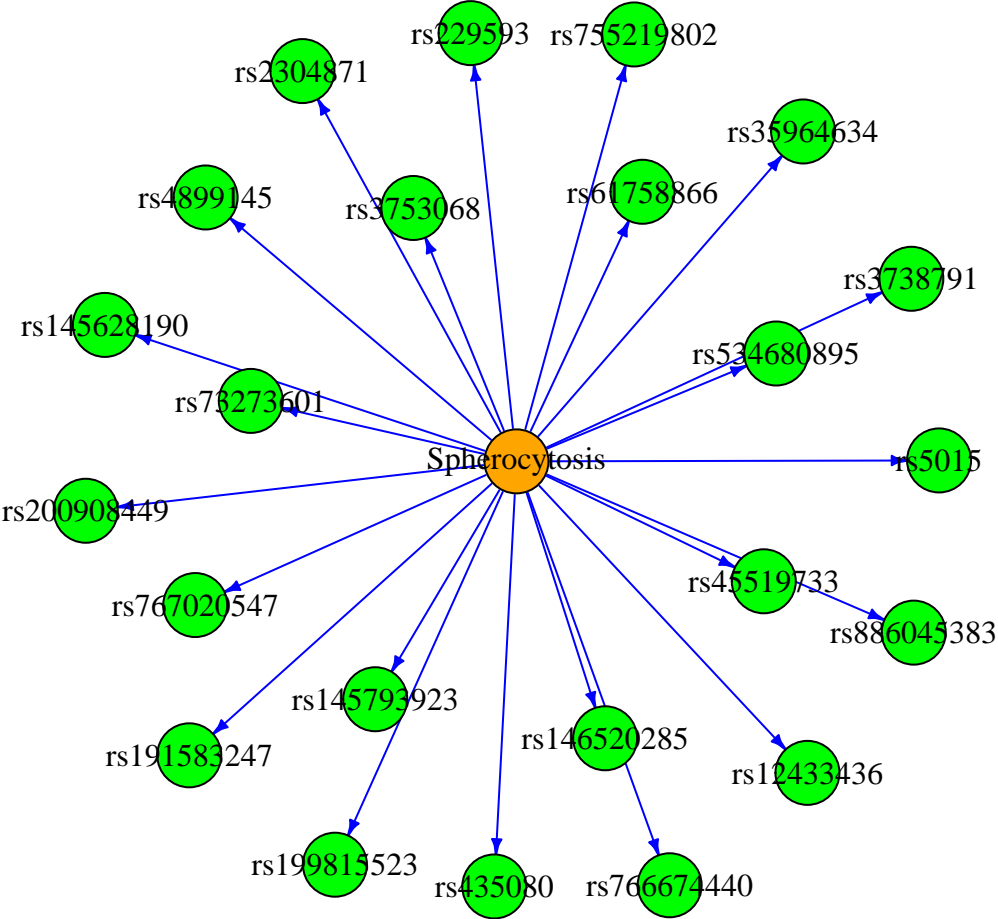

## Variant-Disease Network (Spherocytosis type 1)

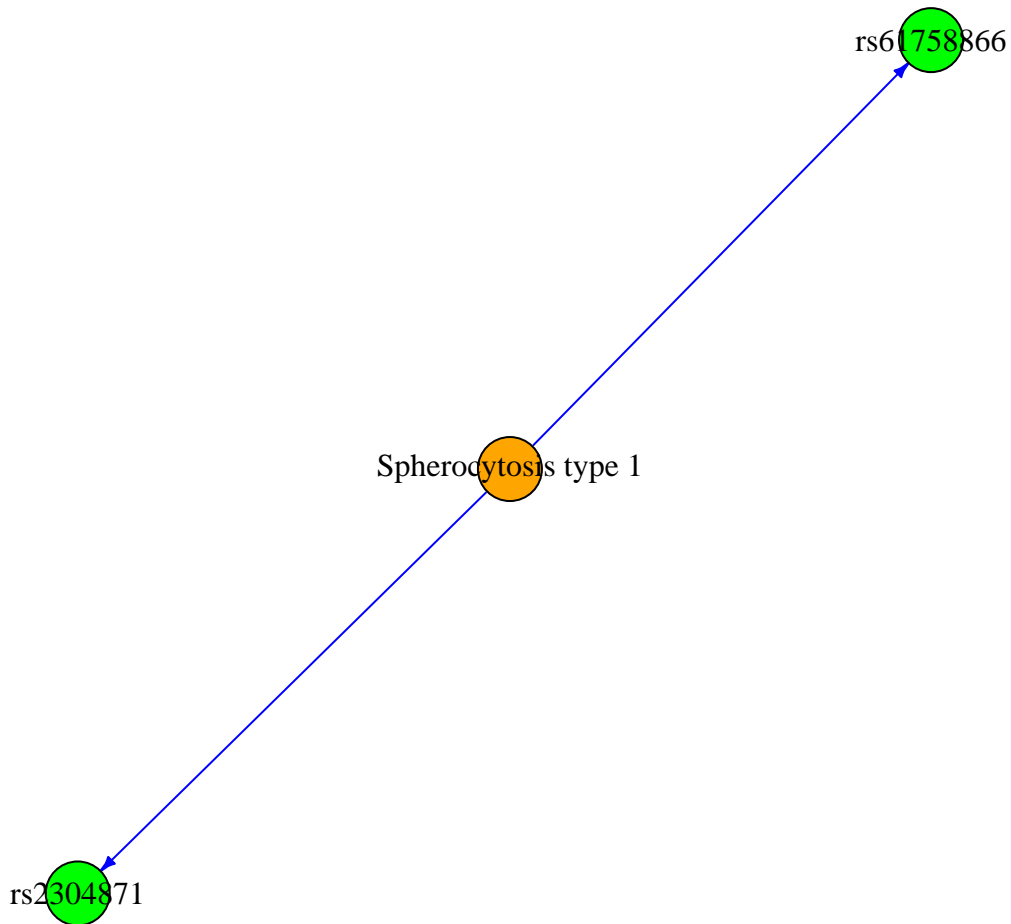

## Variant-Disease Network (Spherocytosis type 3)

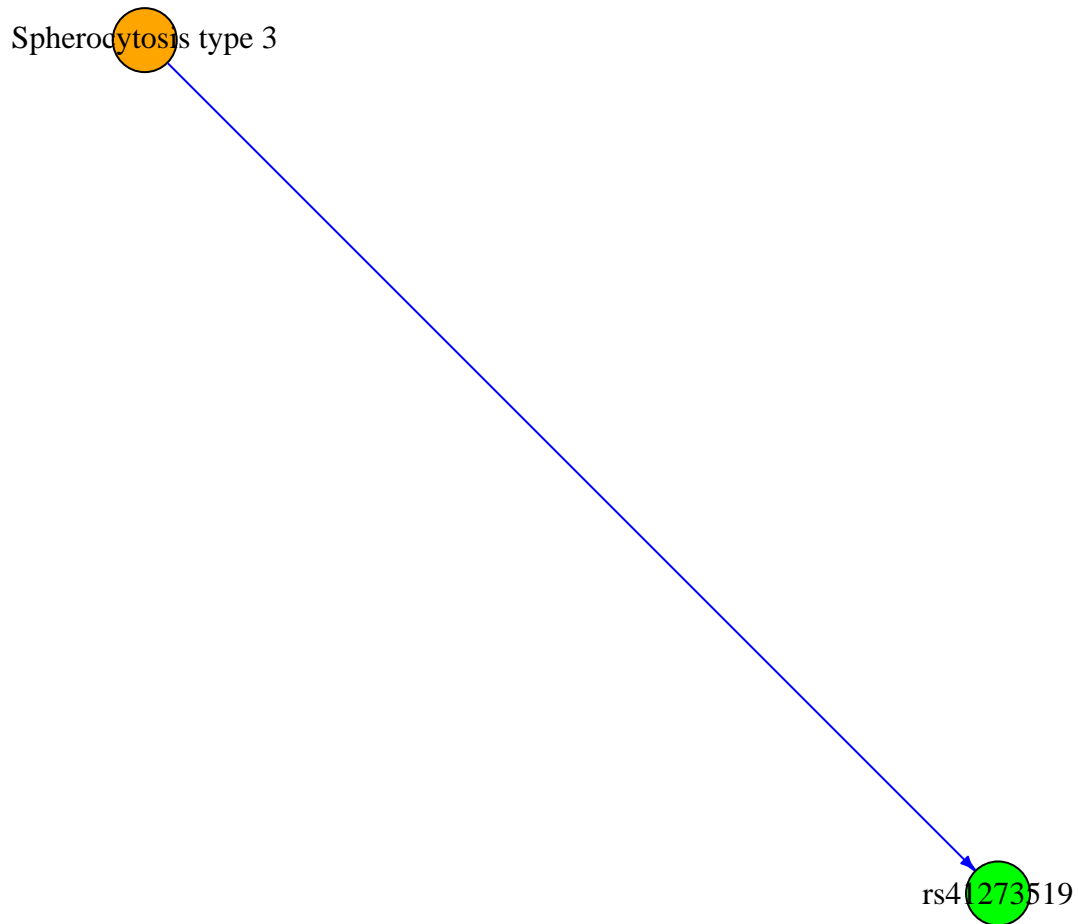

Variant–Disease Network (Sphingomyelin/cholesterol lipidosis)

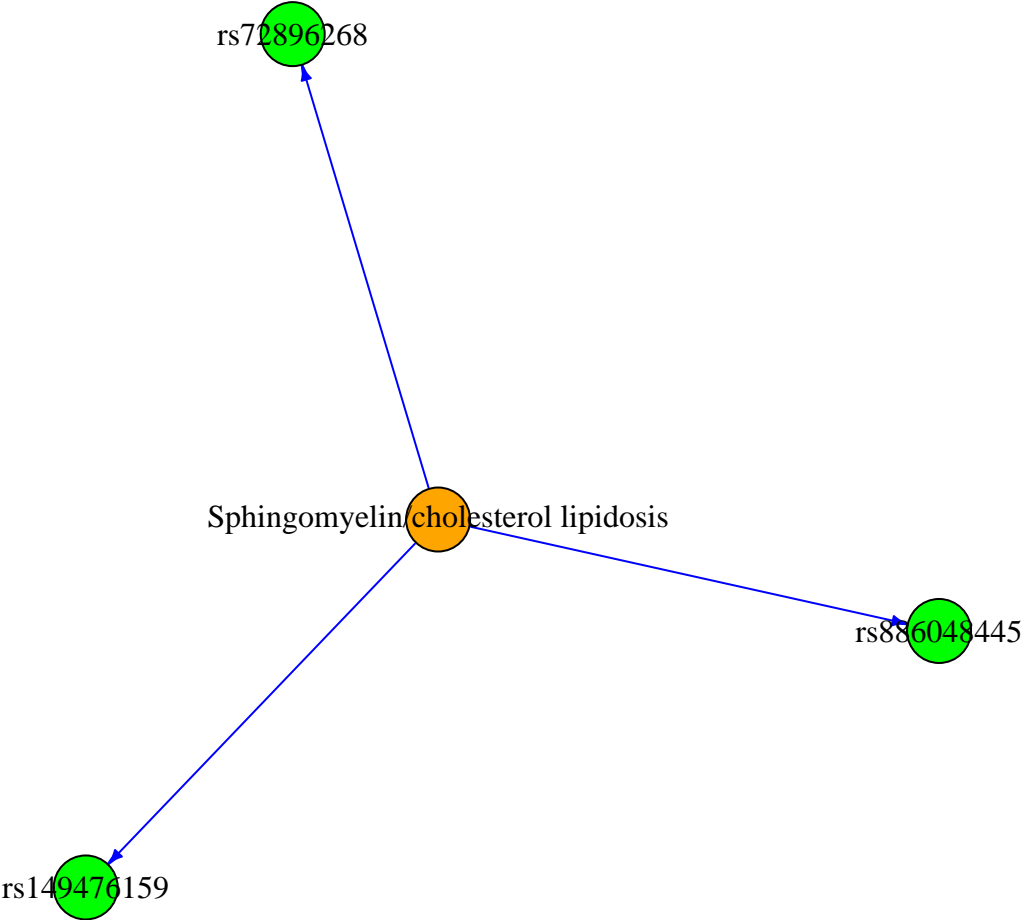

## Variant–Disease Network (Spiegler–Brooke syndrome)

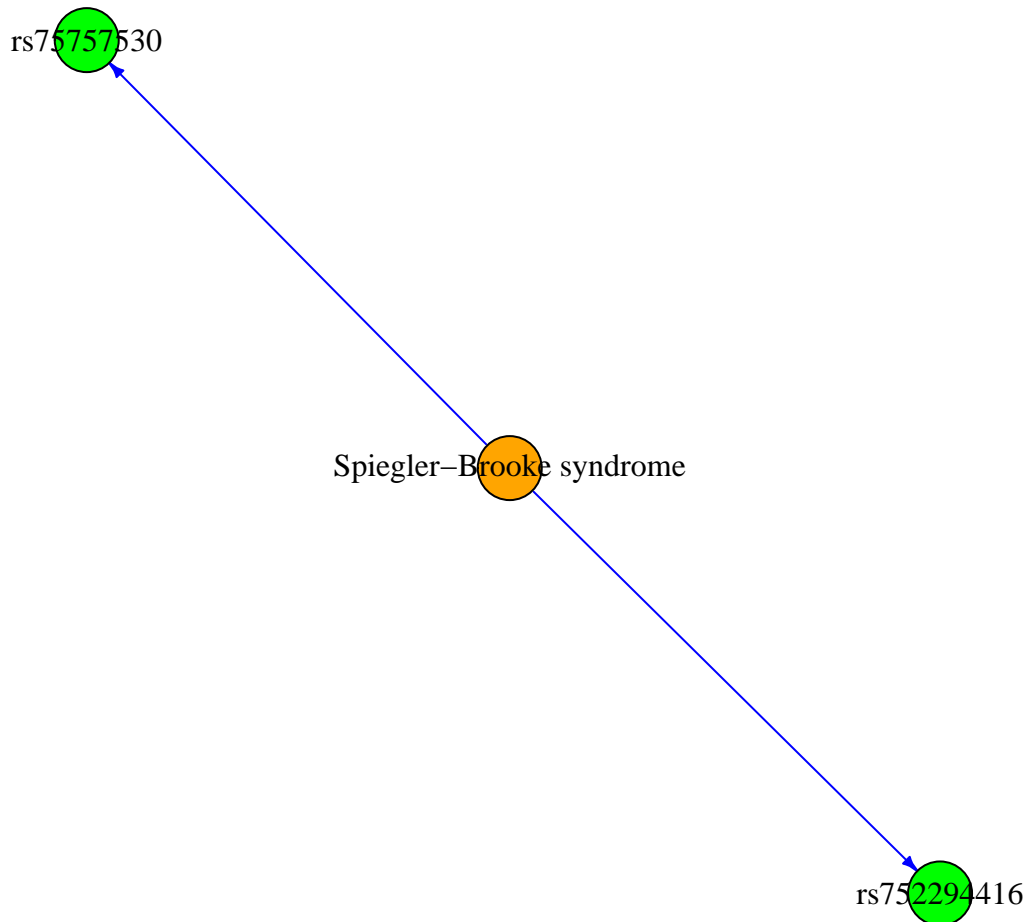

## Variant-Disease Network (Spinal muscular atrophy)

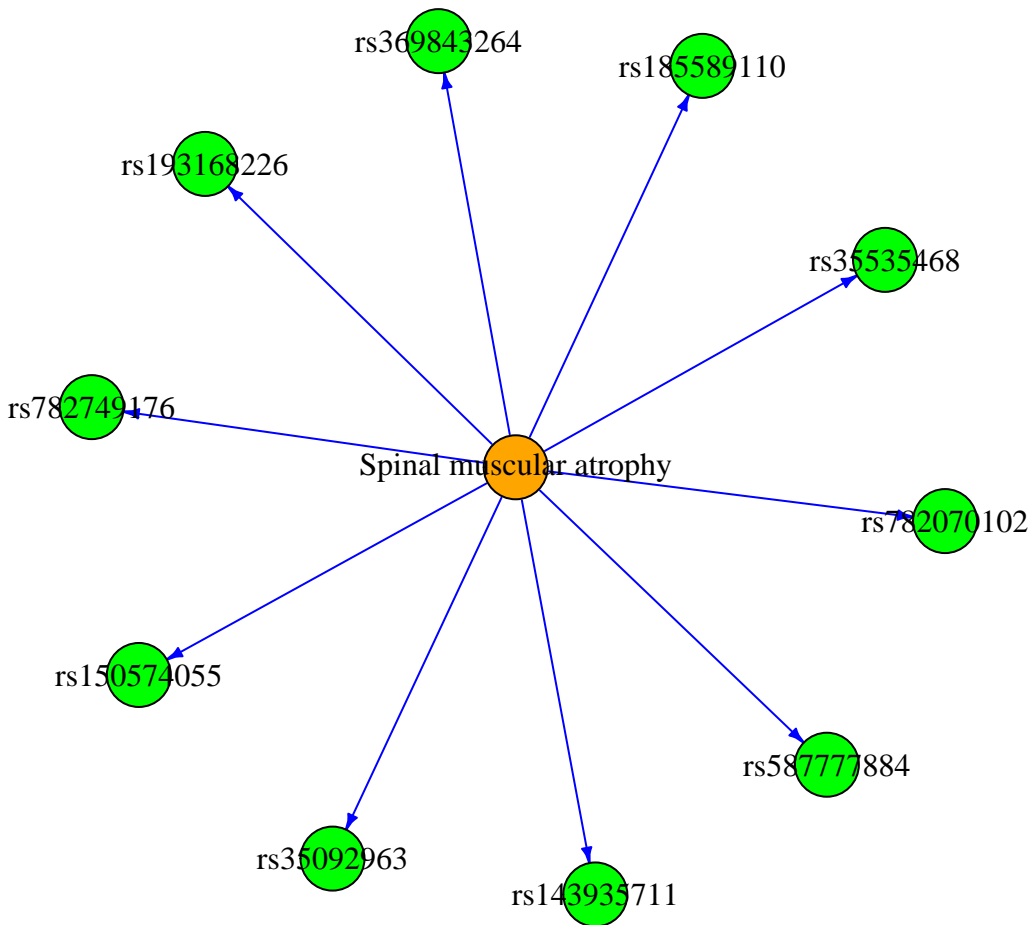

## Variant–Disease Network (Spinocerebellar ataxia)

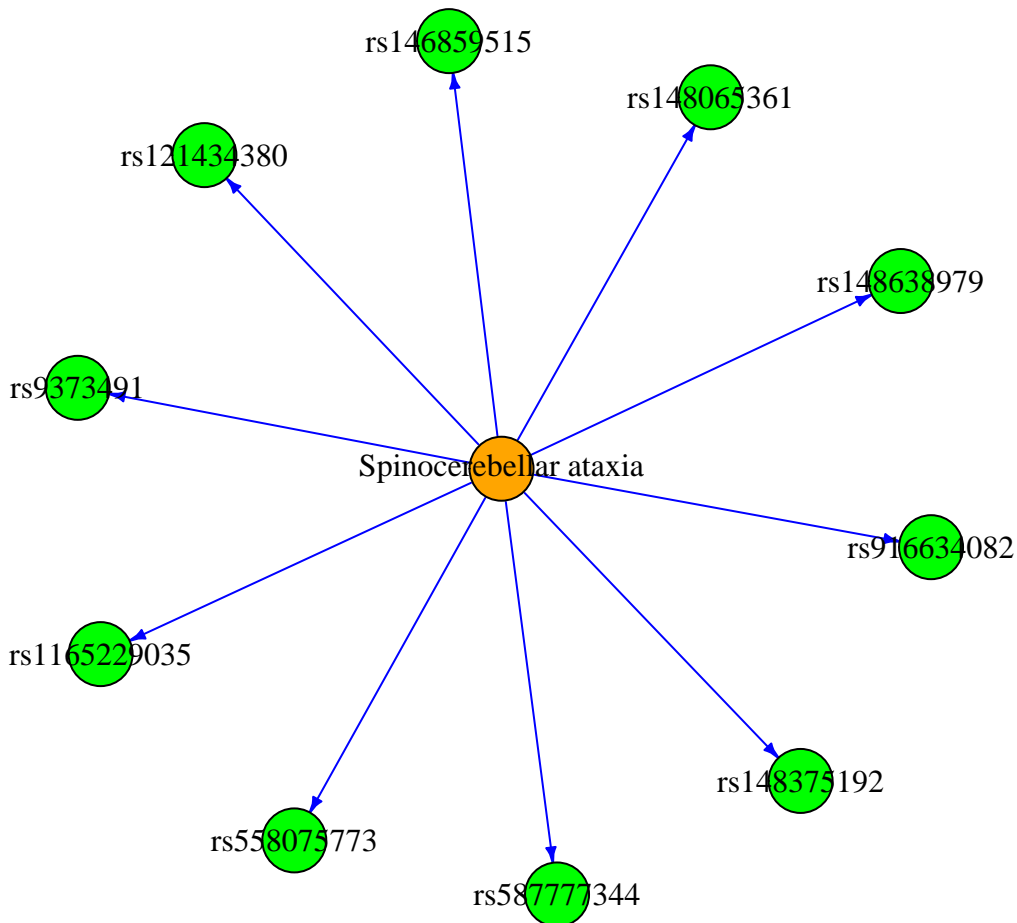

Variant–Disease Network (Spinocerebellar ataxia 13)

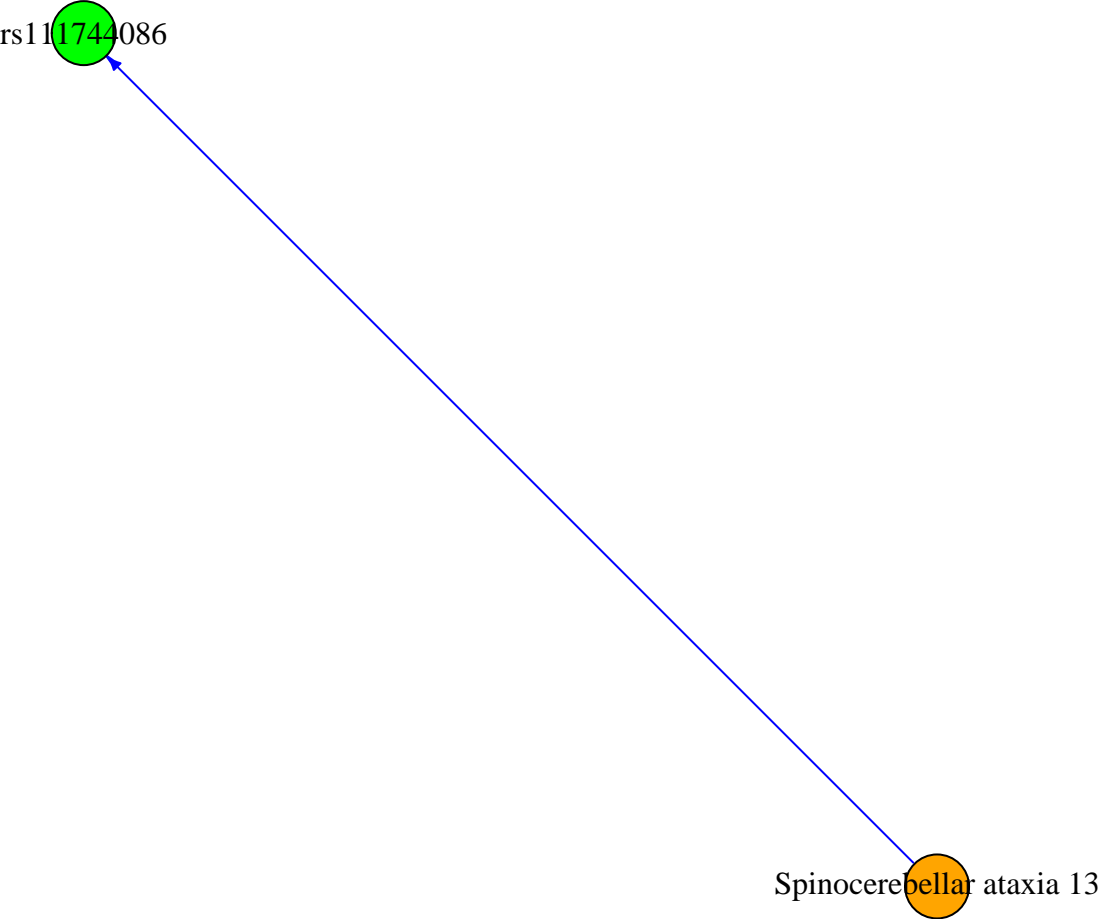



Variant–Disease Network (Spinocerebellar ataxia 14)

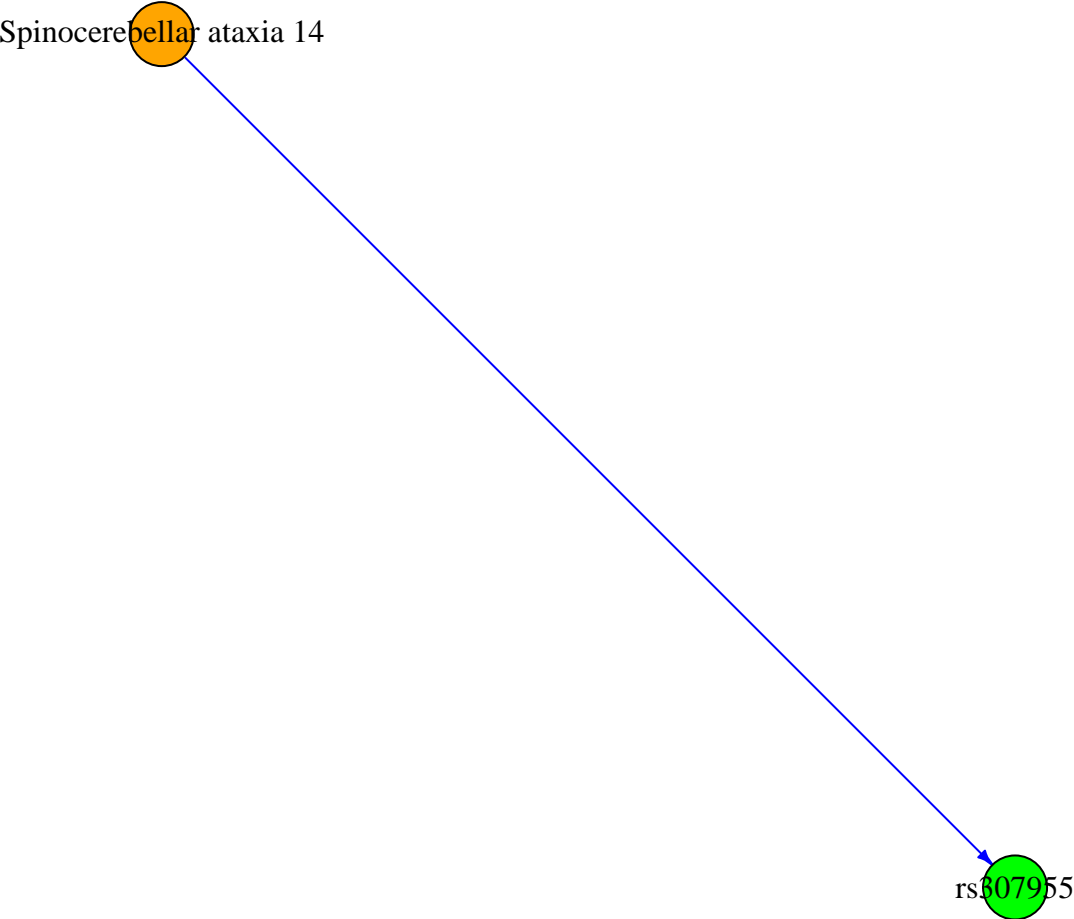

Variant–Disease Network (Spinocerebellar ataxia 15)

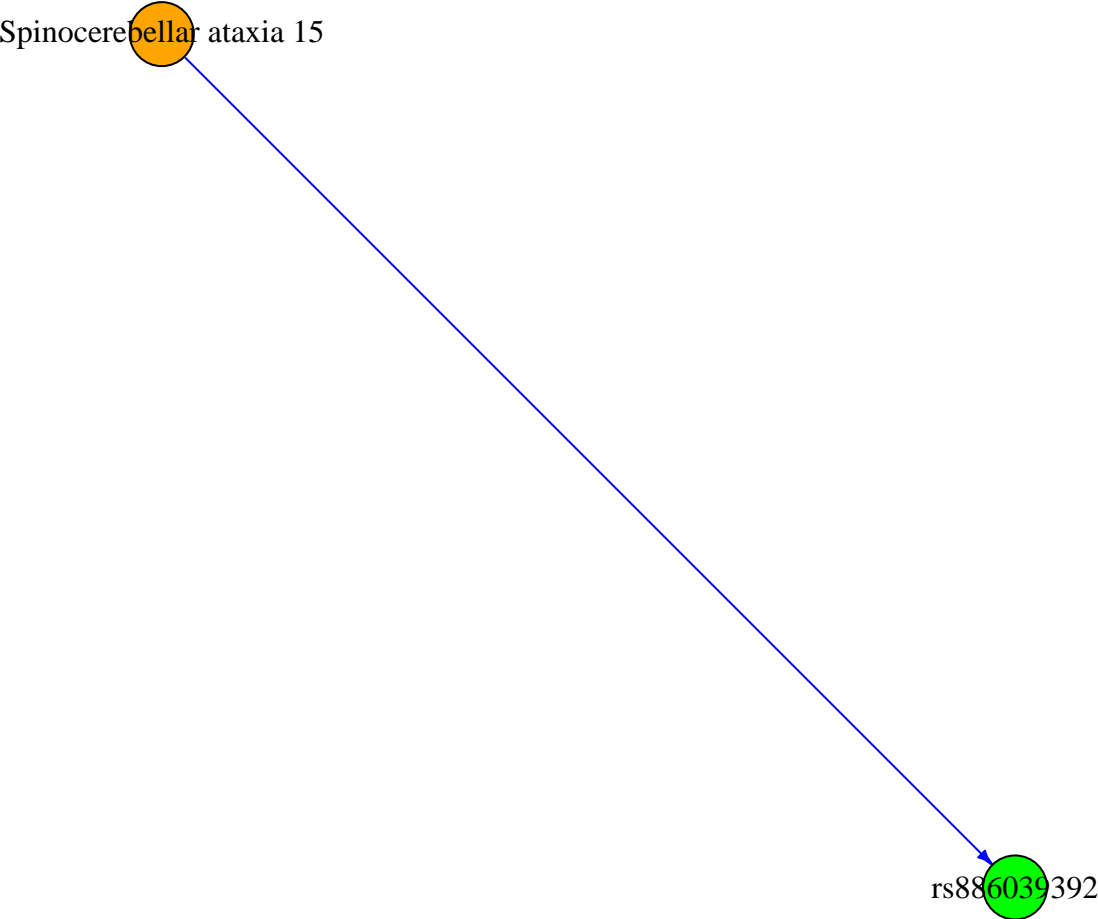

Variant–Disease Network (Spinocerebellar ataxia 29)

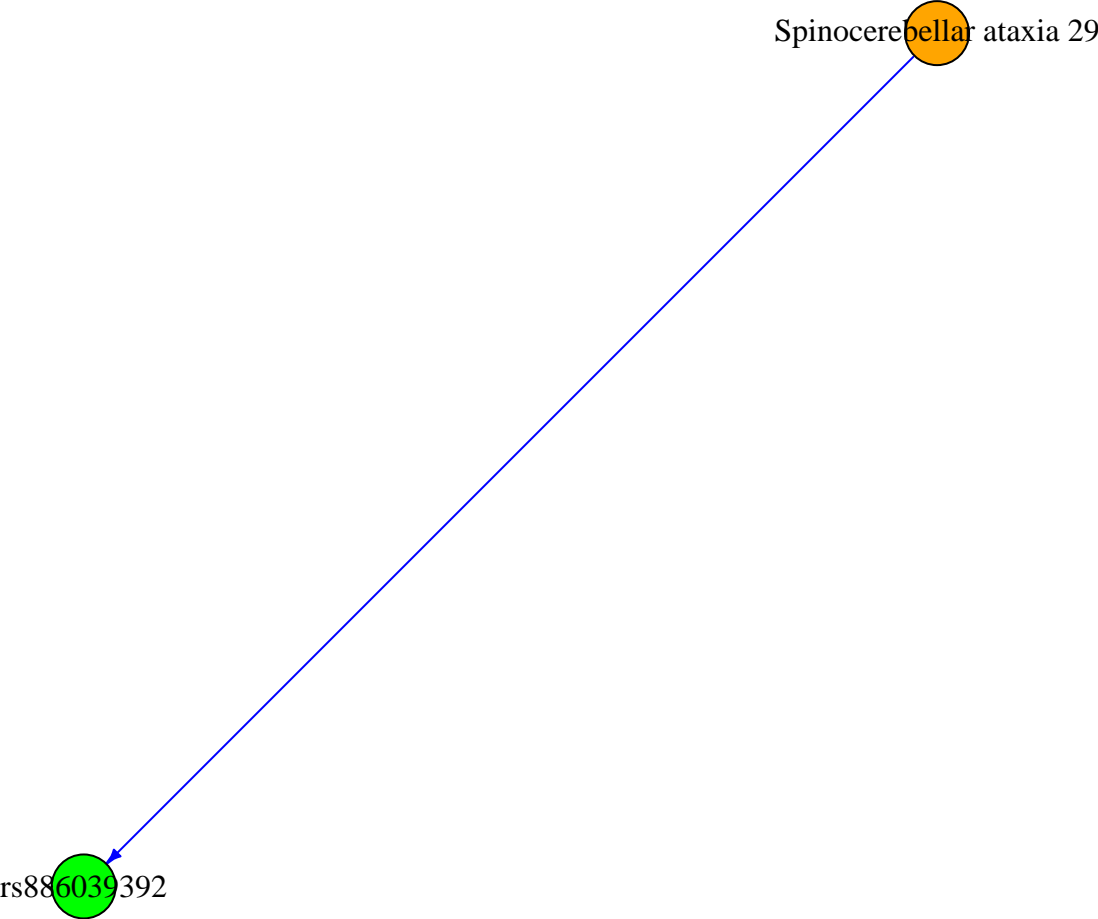

## Variant–Disease Network (Spinocerebellar ataxia 5)

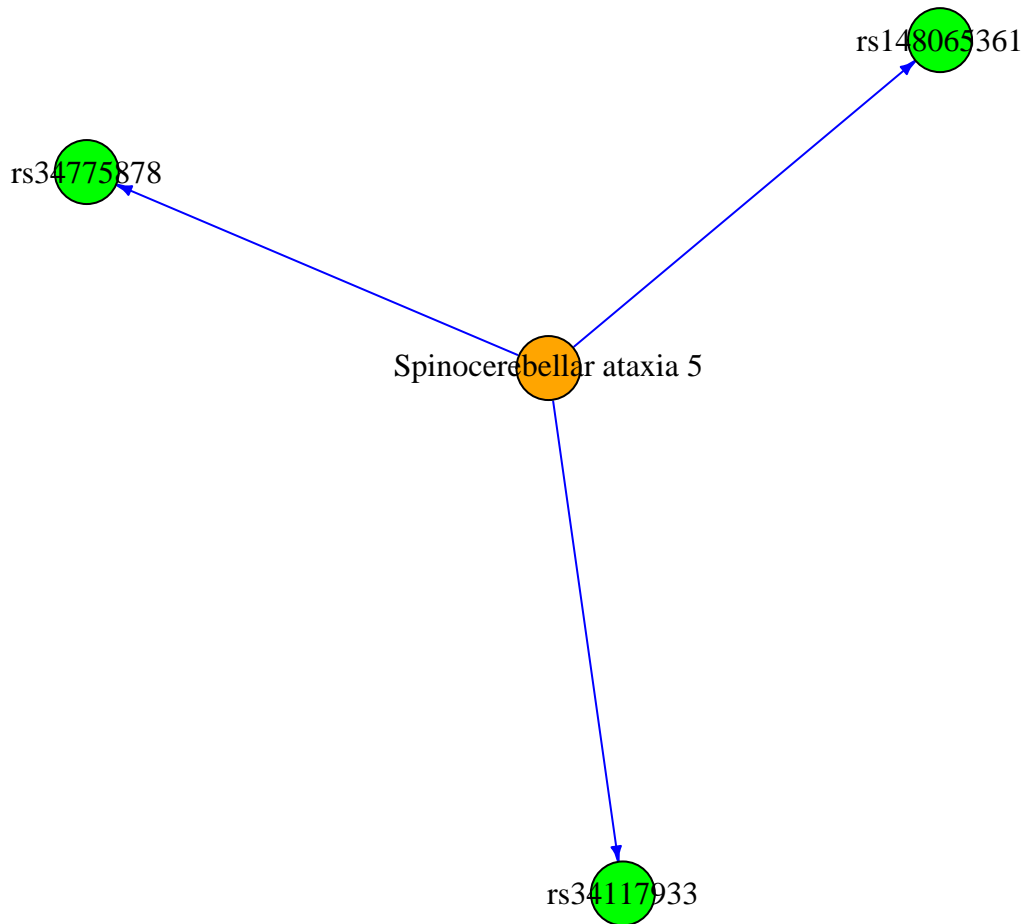

# Variant–Disease Network (Split–hand/foot malformation)

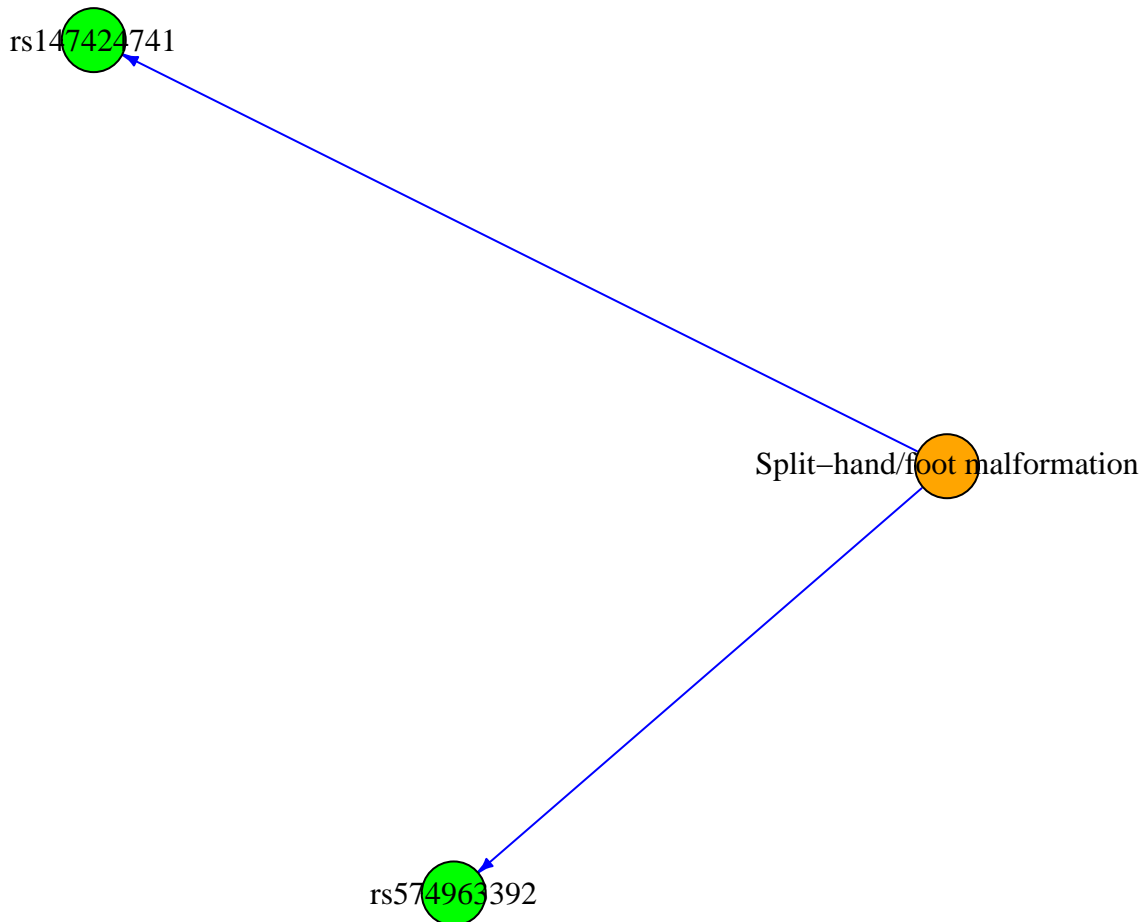

# Variant–Disease Network (Spondylocostal dysostosis 1)

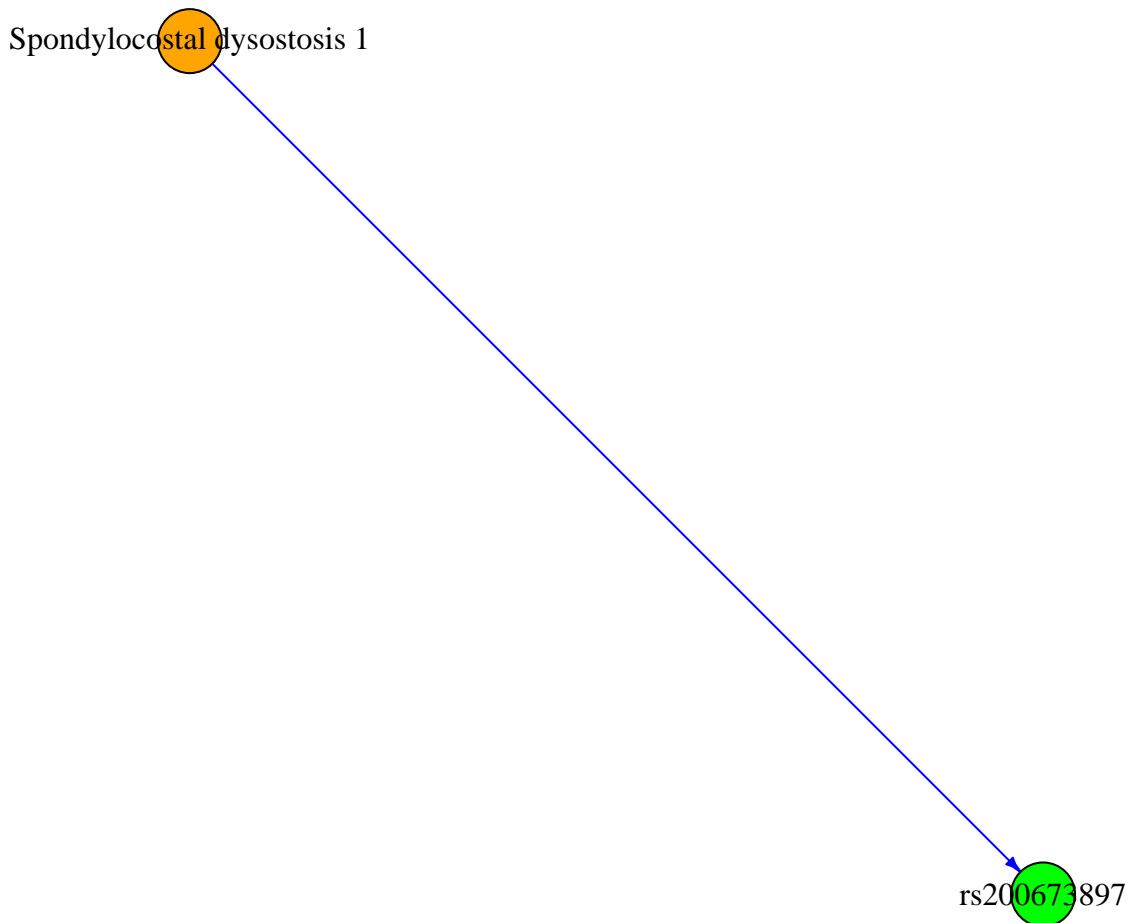

# Variant-Disease Network (Spondyloenchondrodysplasia with immune dysregulation)

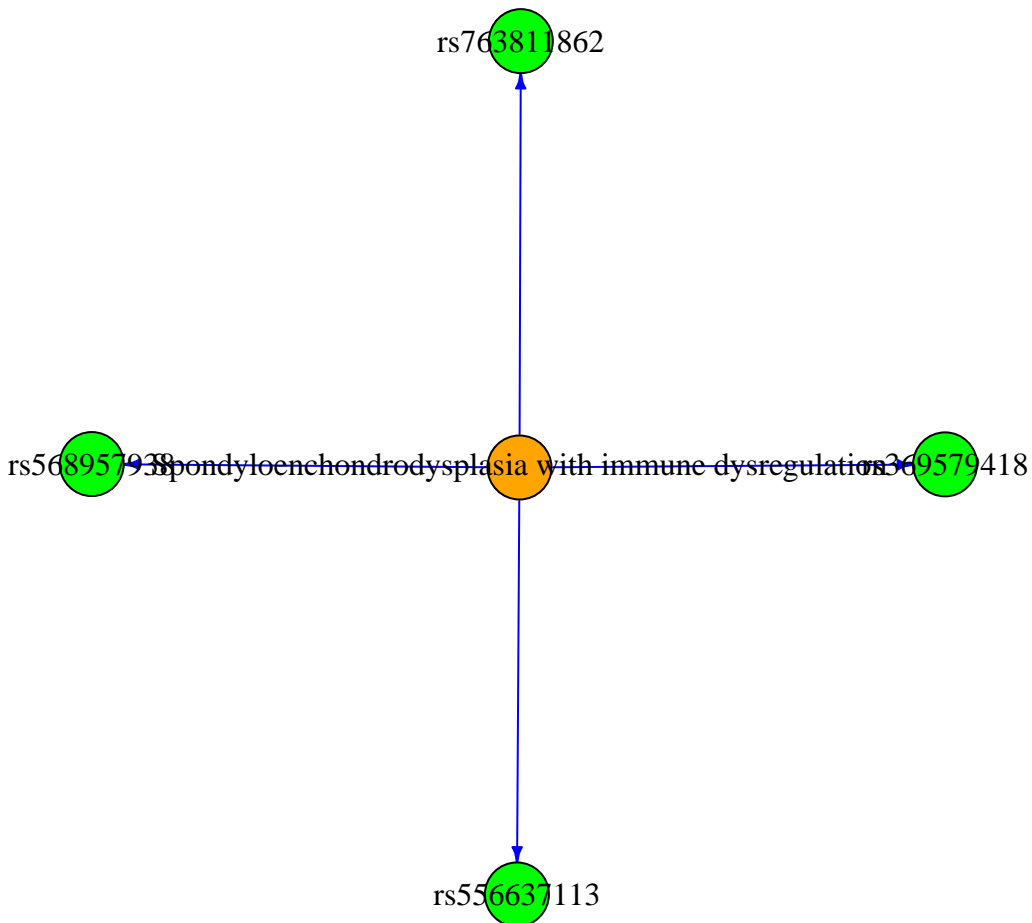

# Variant–Disease Network (Spondyloepimetaphyseal dysplasia)

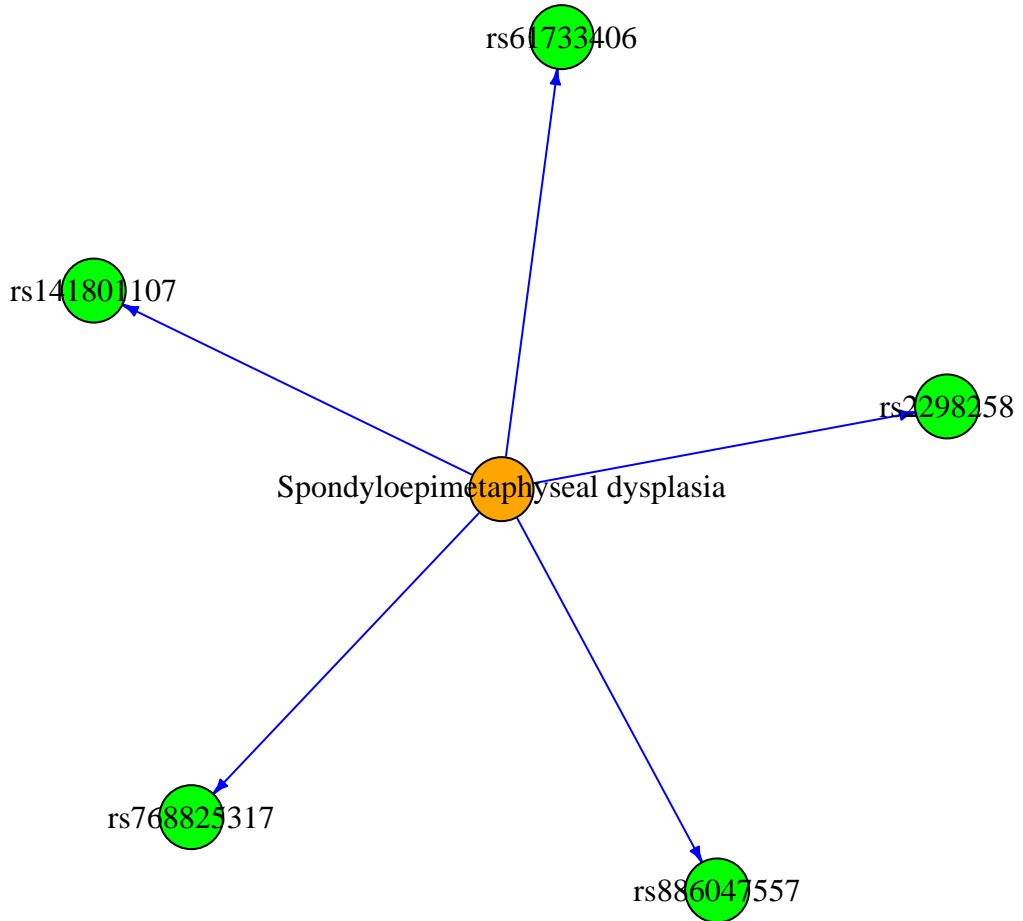



**Variant–Disease Network (Spondyloepiphyseal dysplasia)**

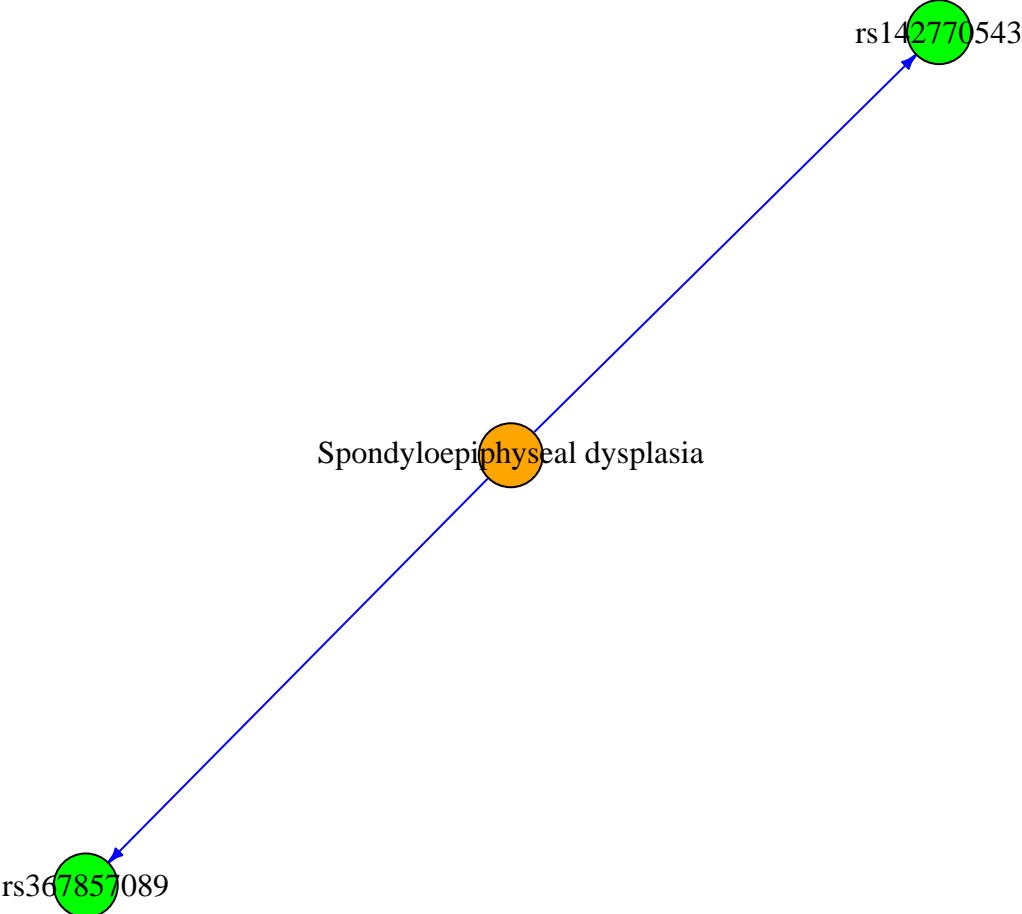

# nt-Disease Network (Spondyloepiphyseal dysplasia with congenital joint dis

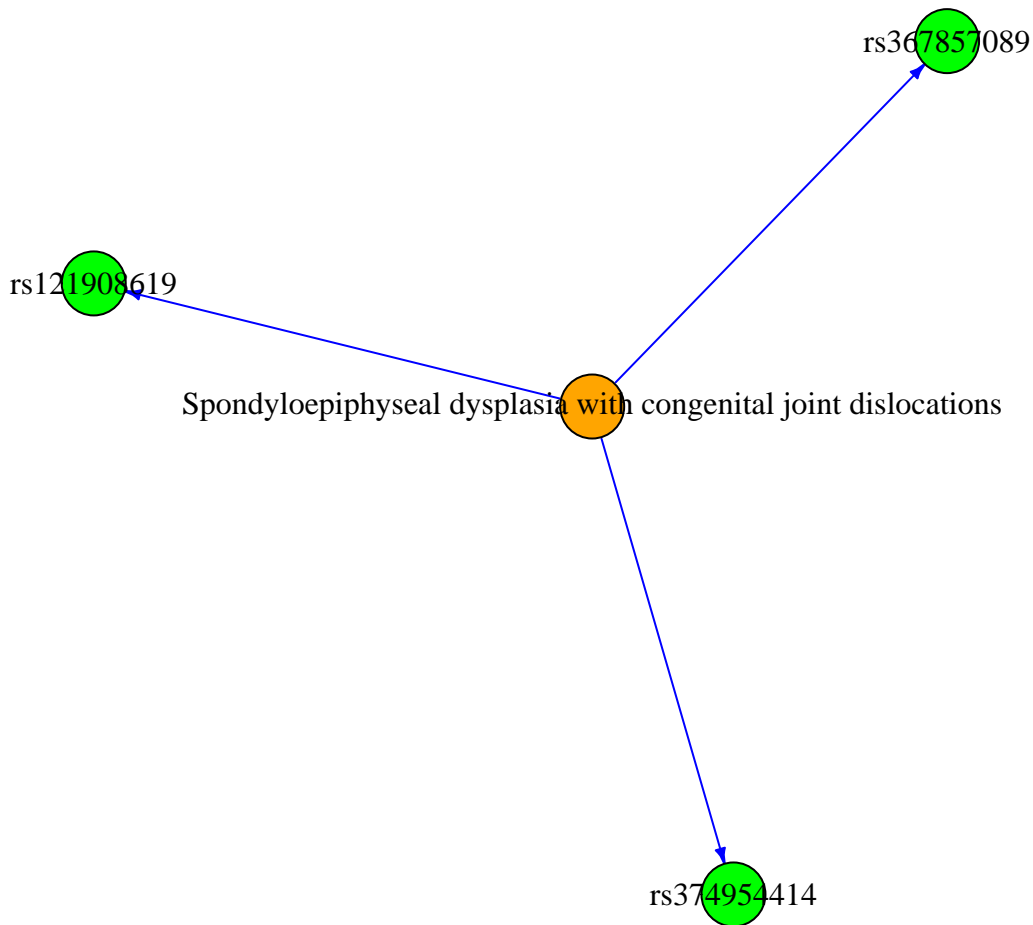

# Variant–Disease Network (Spondylometaphyseal dysplasia)

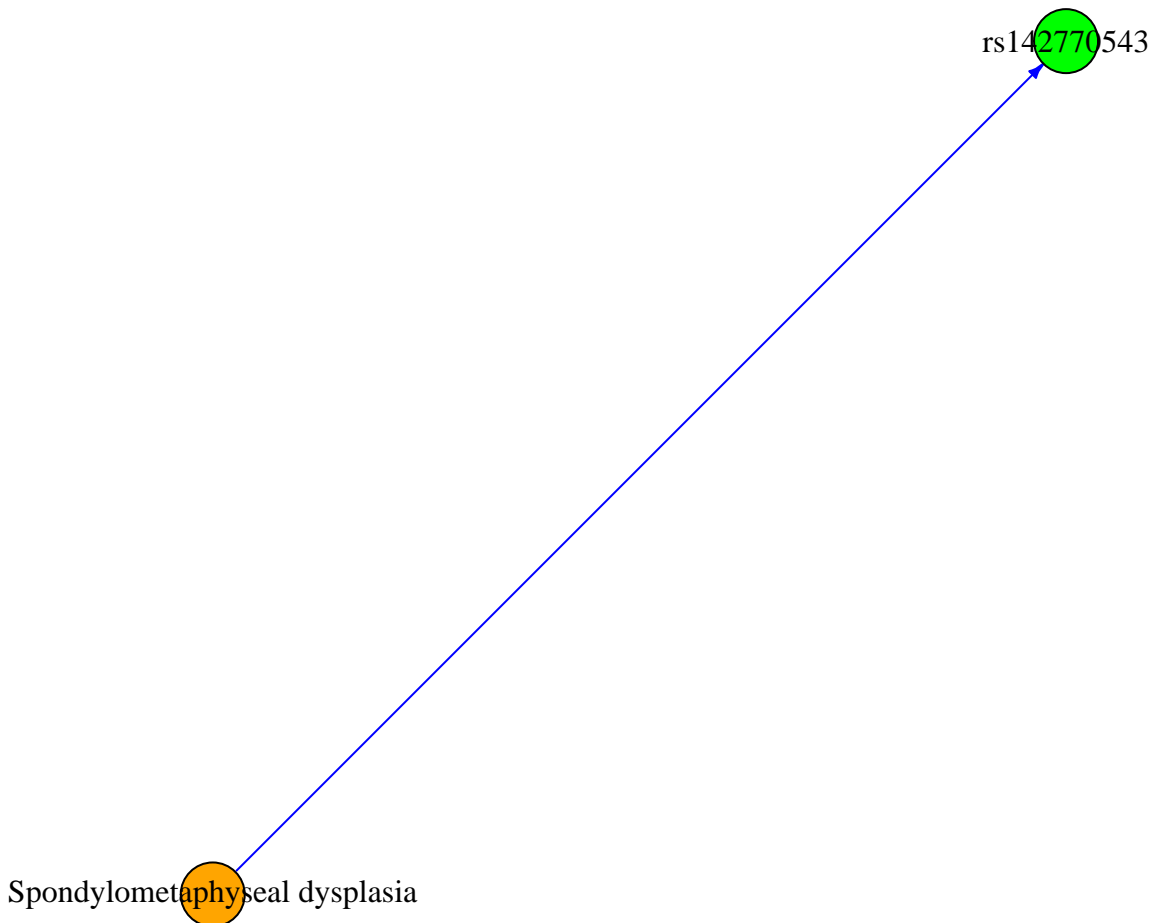

**Variant–Disease Network (Spondyloperipheral dysplasia)**

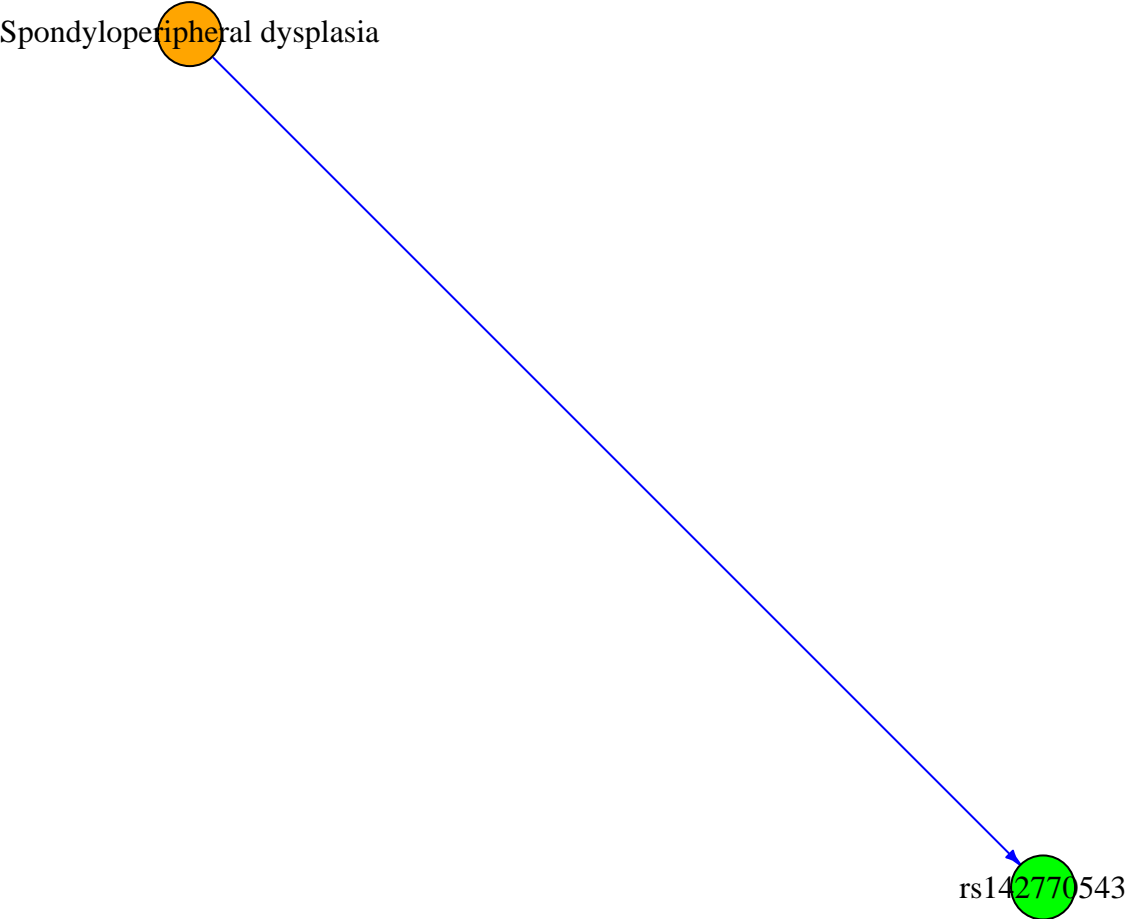

Variant–Disease Network (Spongy degeneration of central nervous system)

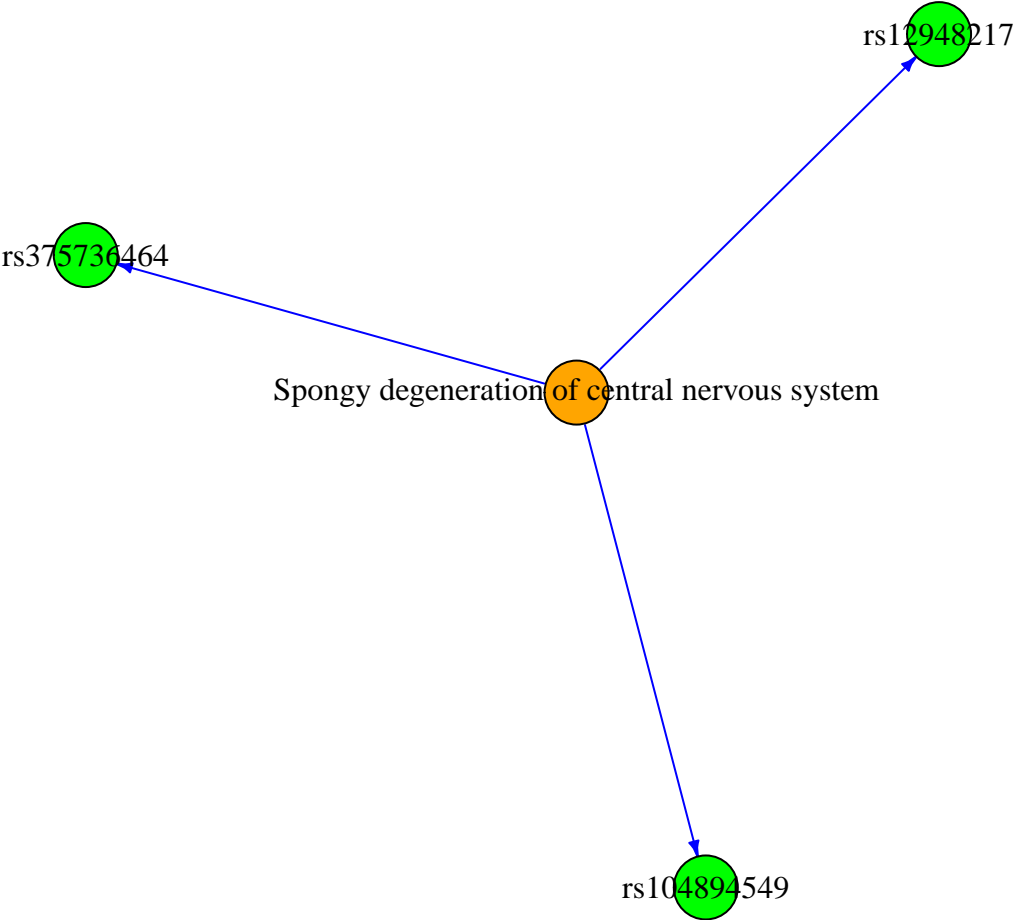

## Variant-Disease Network (Stargardt disease)

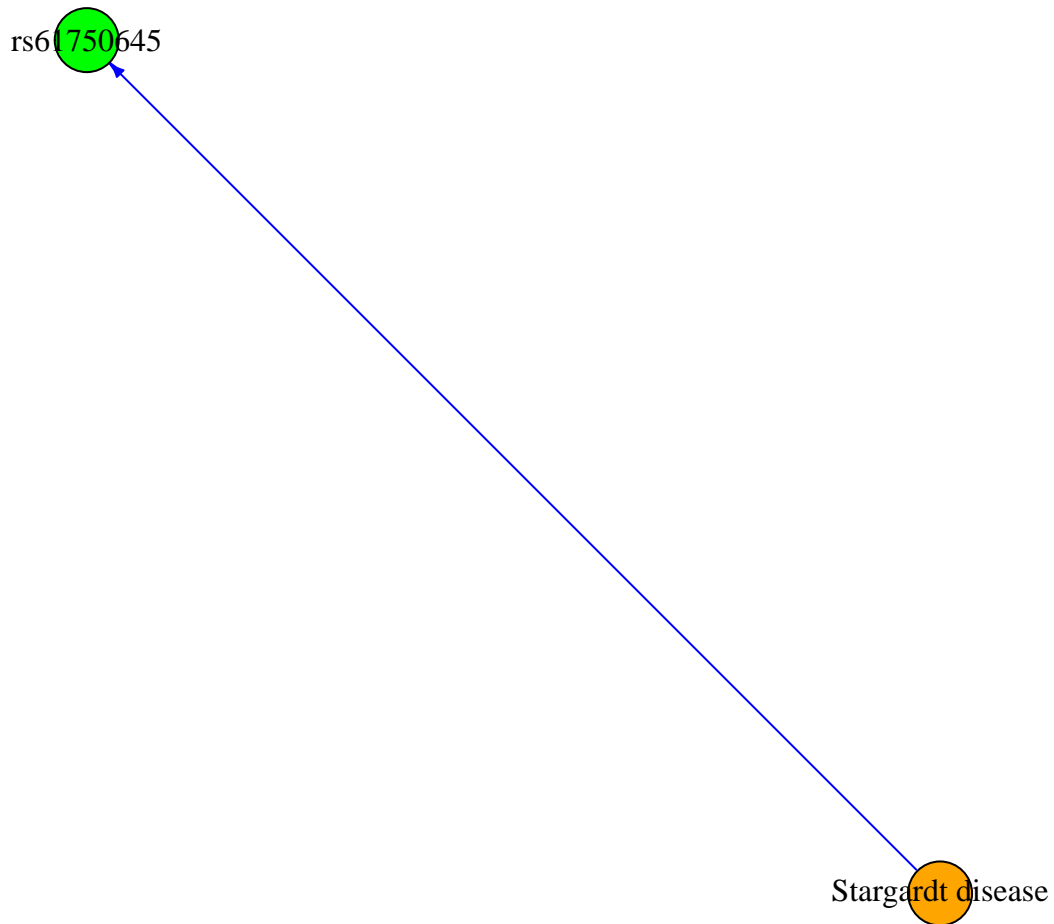

## Variant-Disease Network (Stargardt disease 1)

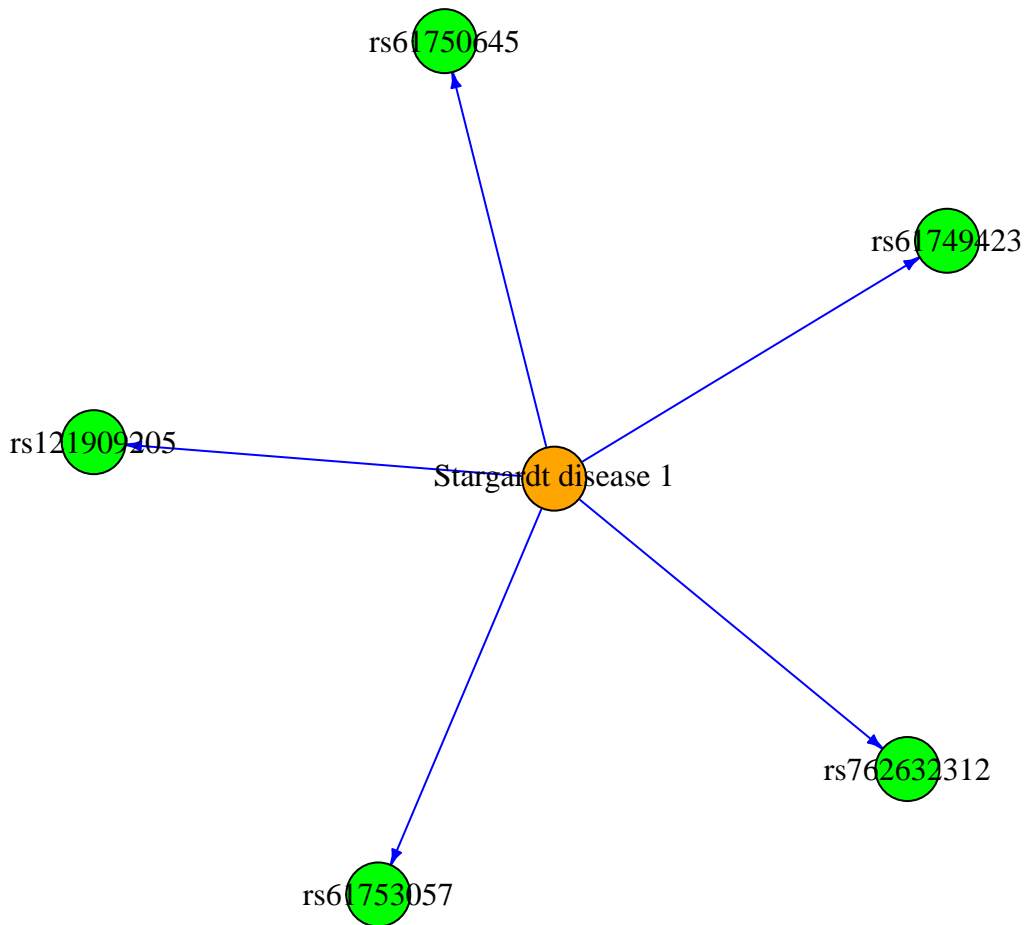

# Variant–Disease Network (Steroid-resistant nephrotic syndrome)

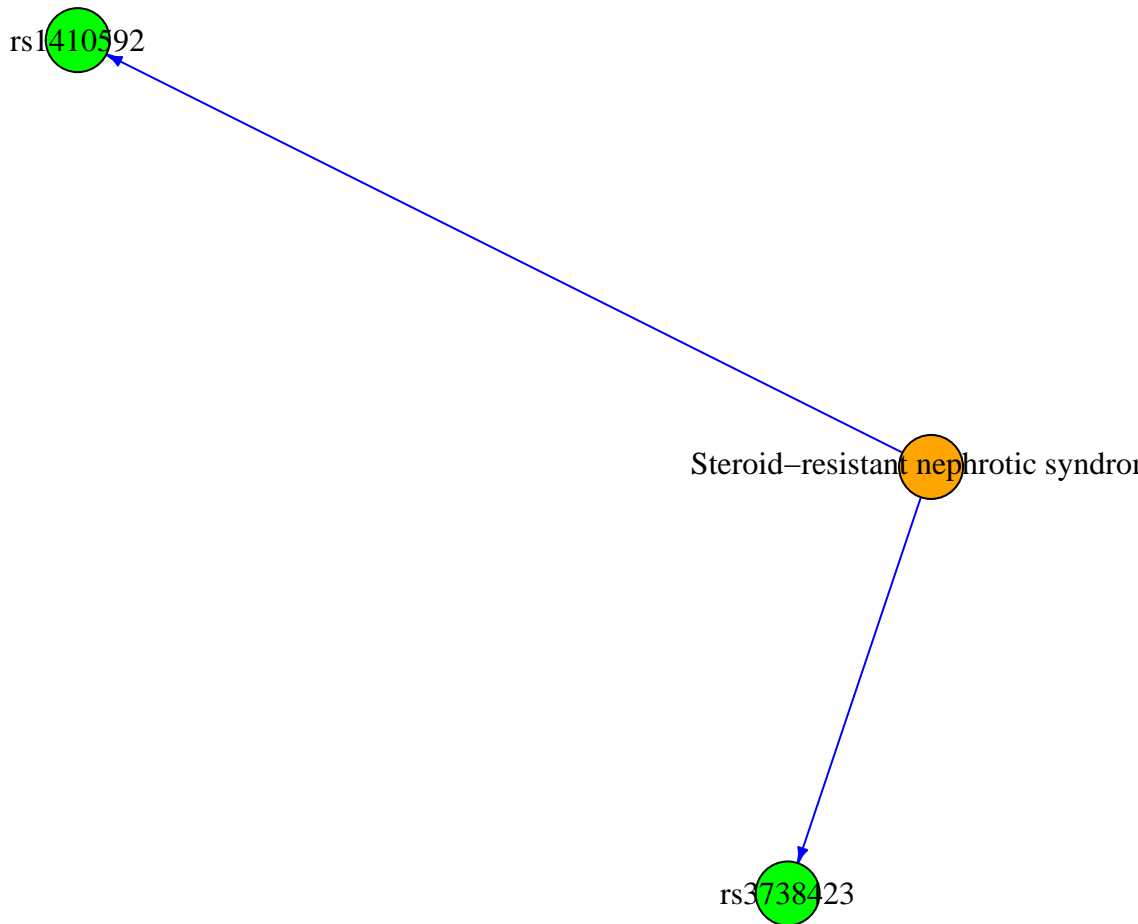



## Variant–Disease Network (Stickler Syndrome)

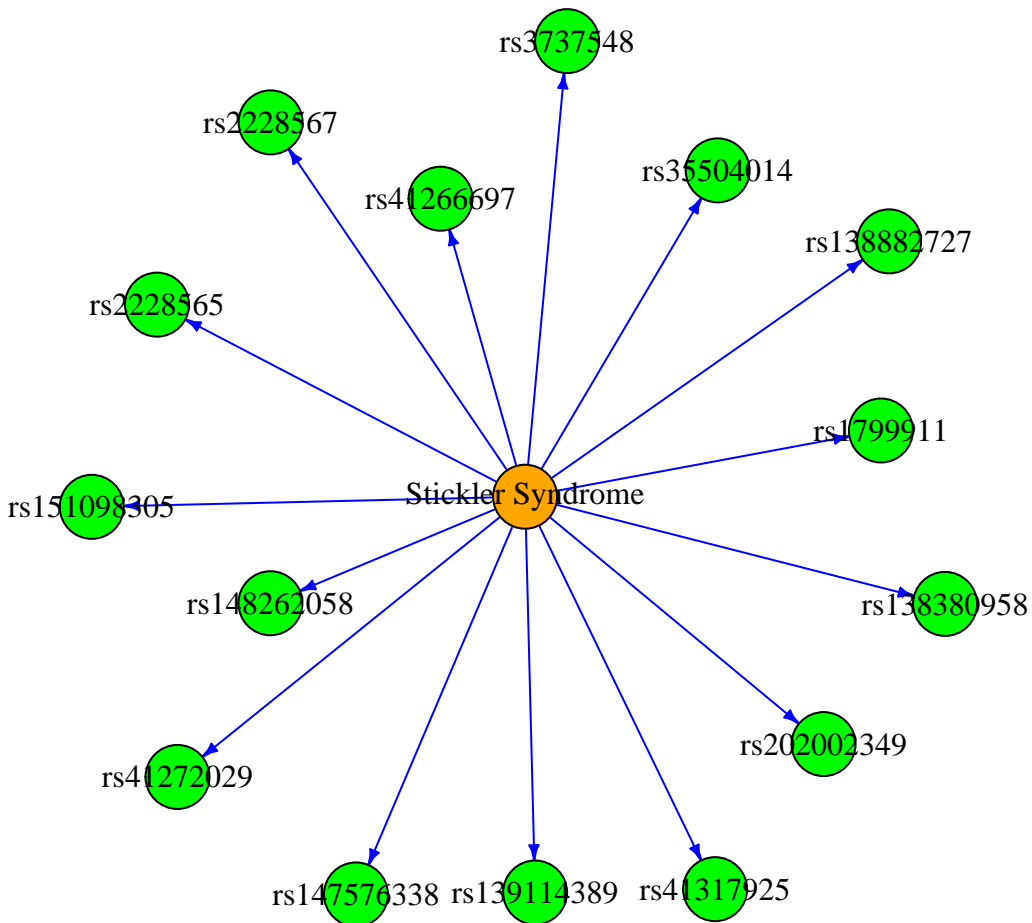

# Variant-Disease Network (Stickler syndrome type 1)

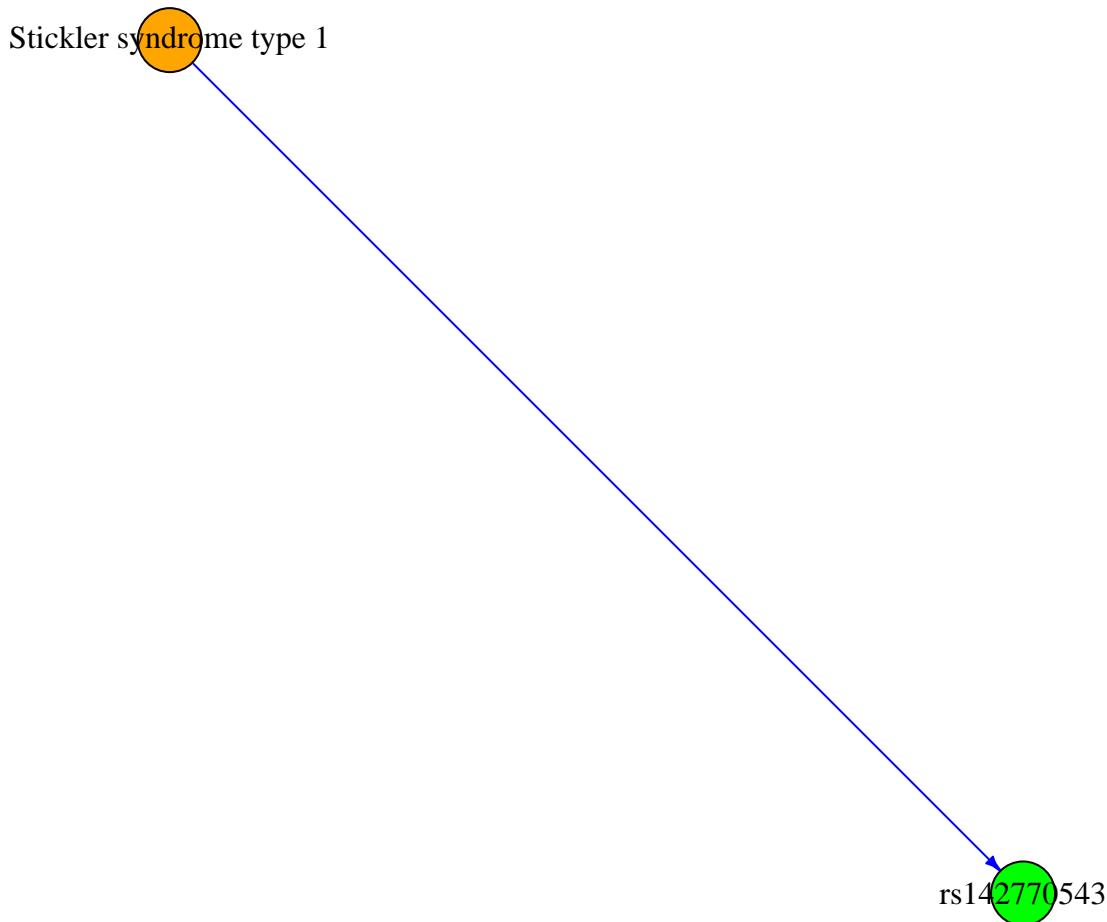

## Variant–Disease Network (Stiff skin syndrome)

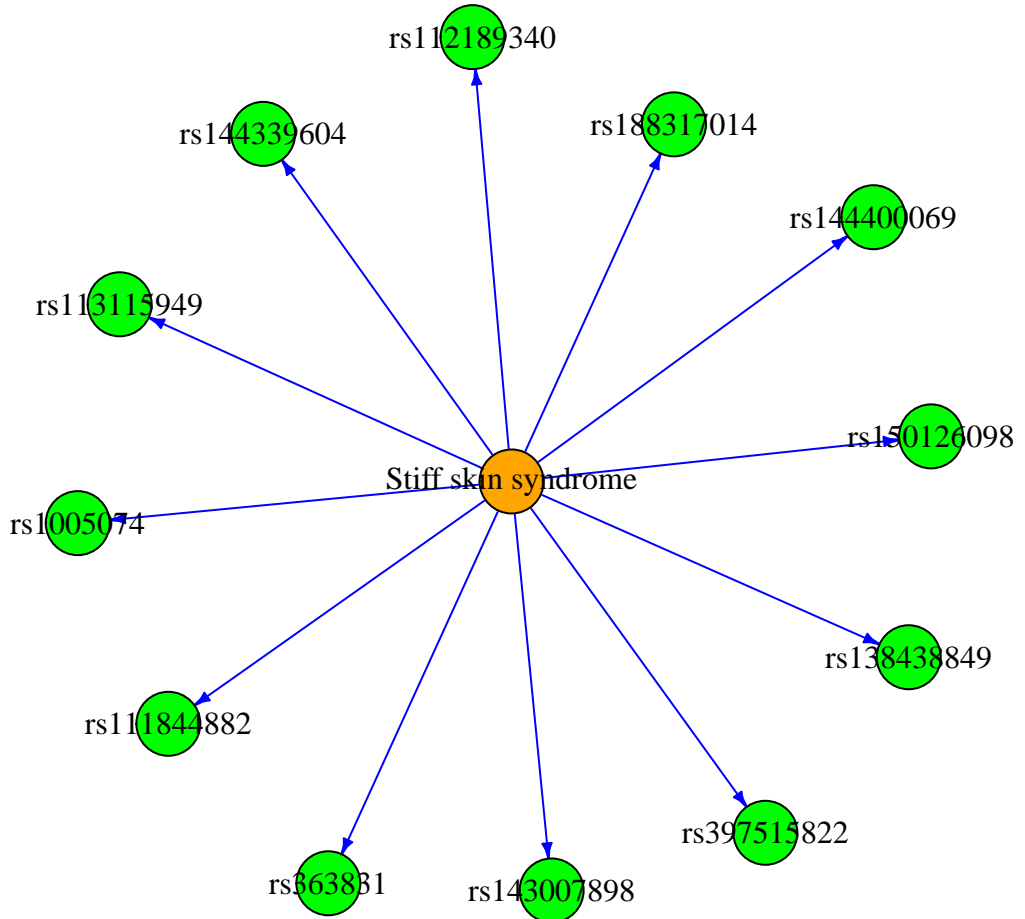

## Variant–Disease Network (Sting–associated vasculopathy)

rs1490896074

Sting–associated vasculopathy



**Variant–Disease Network (Strabismus)**

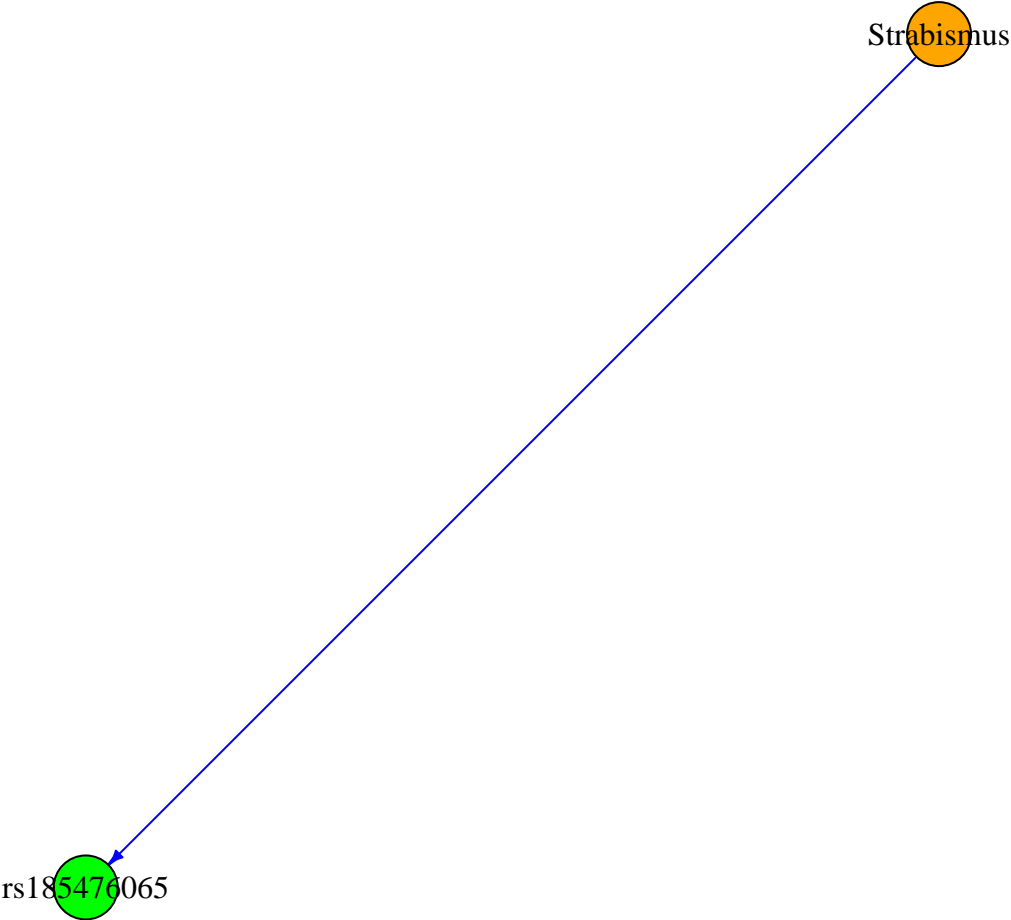

## Variant–Disease Network (Striatal Degeneration)

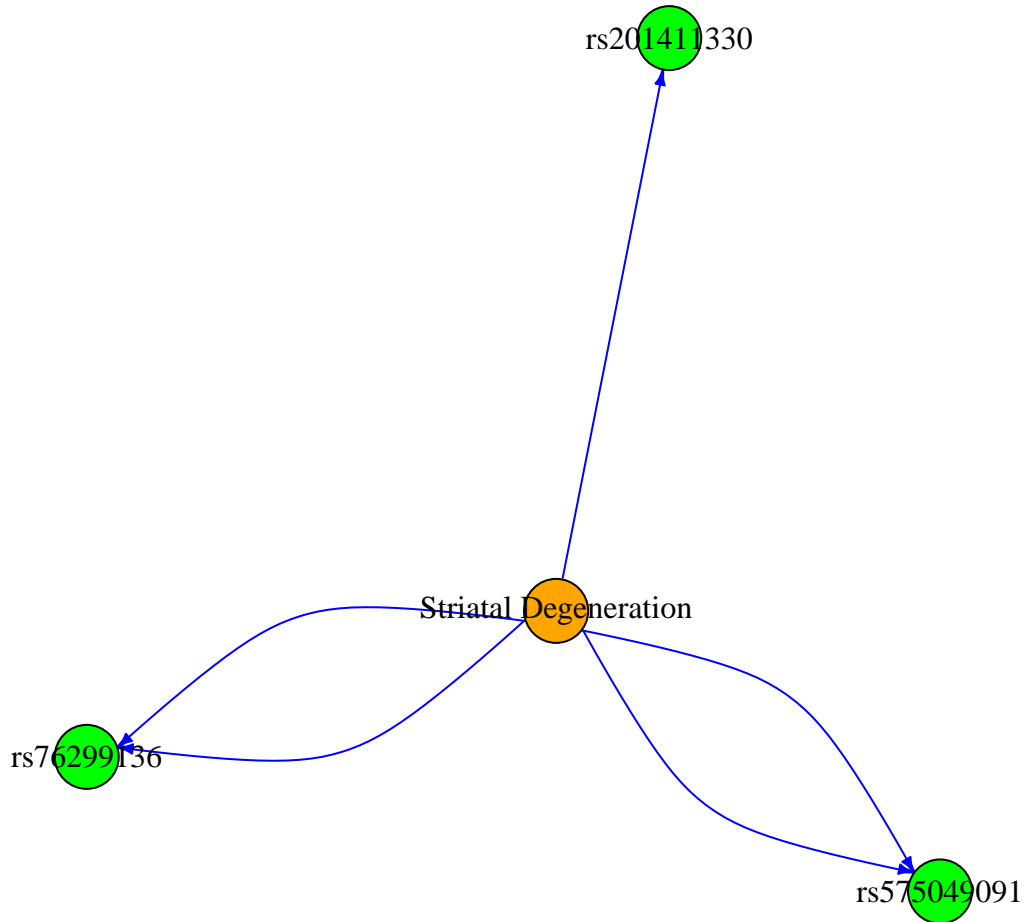

# Variant–Disease Network (Stuve–Wiedemann syndrome)

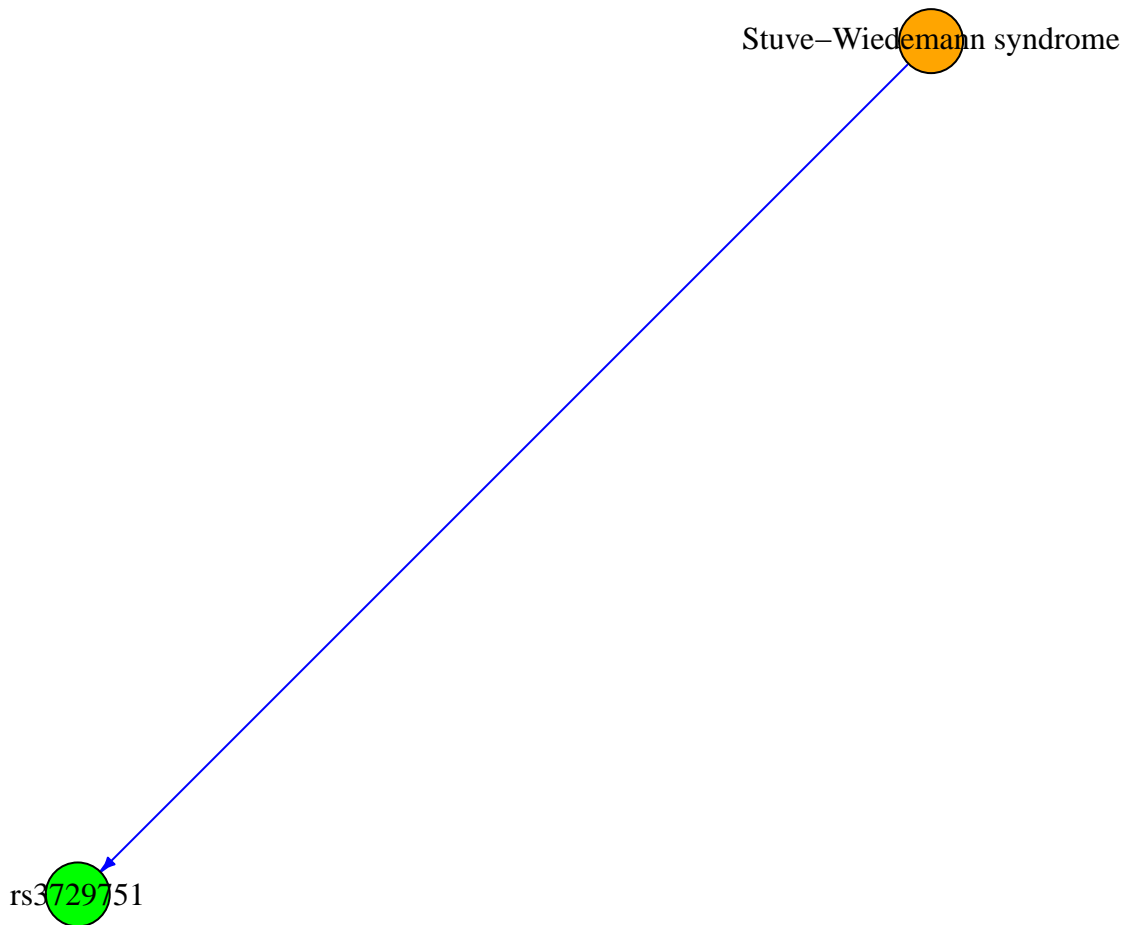

**Variant–Disease Network (Sucrase–isomaltase deficiency)**

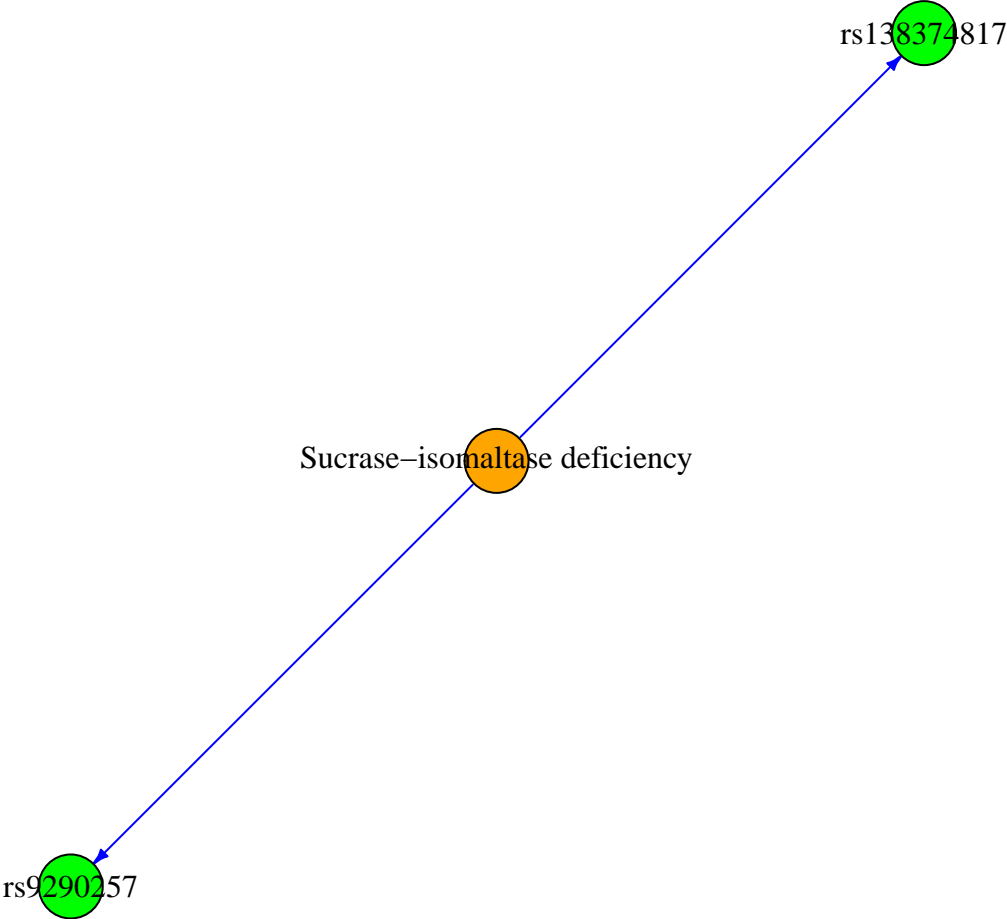



## Variant–Disease Network (Sudden cardiac death)

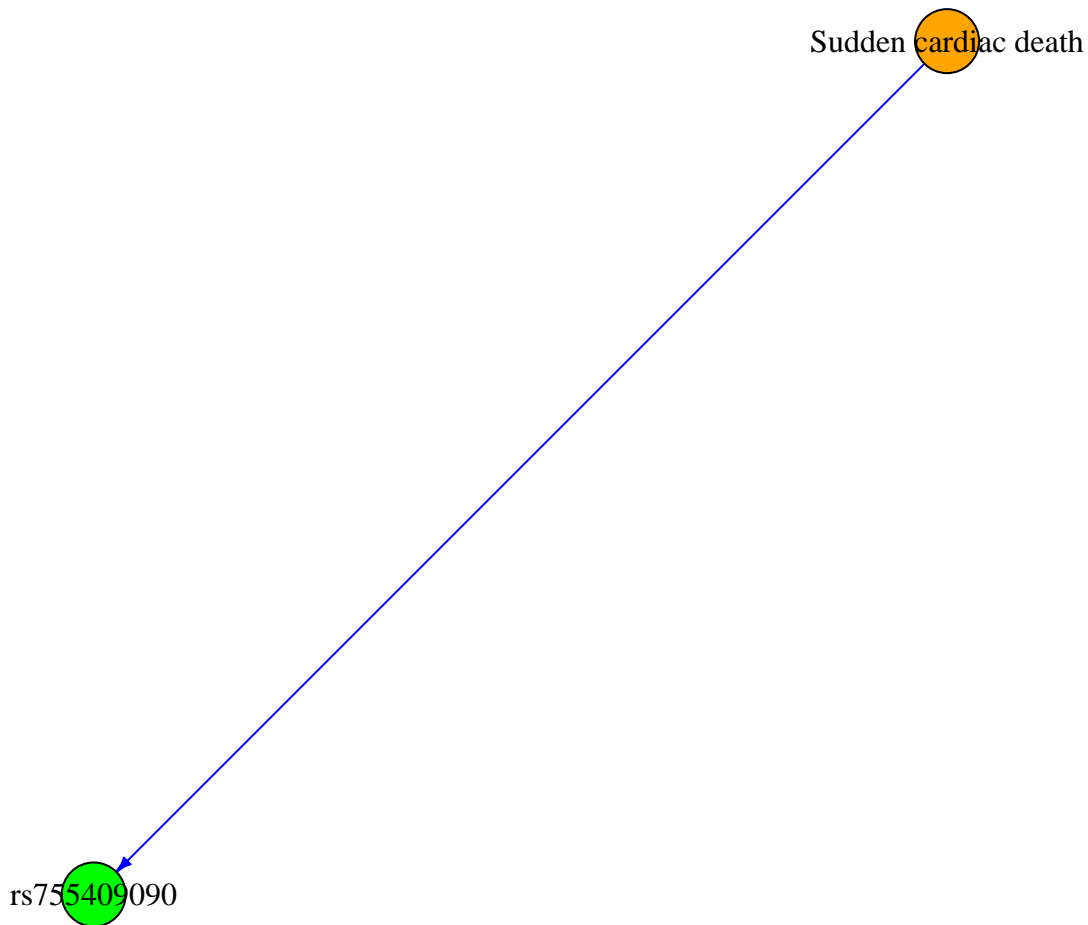

## Variant–Disease Network (Sulfite oxidase deficiency)

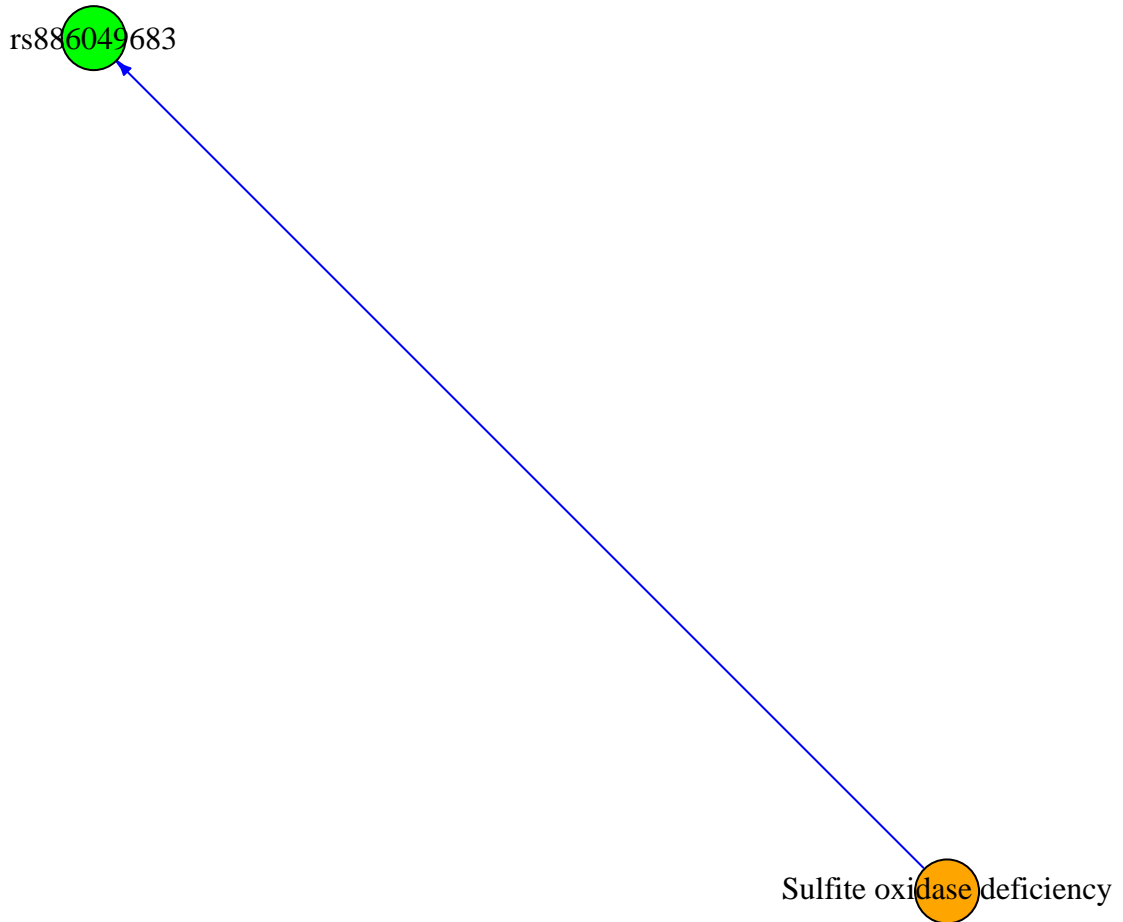

## Variant–Disease Network (Supraventricular tachycardia)

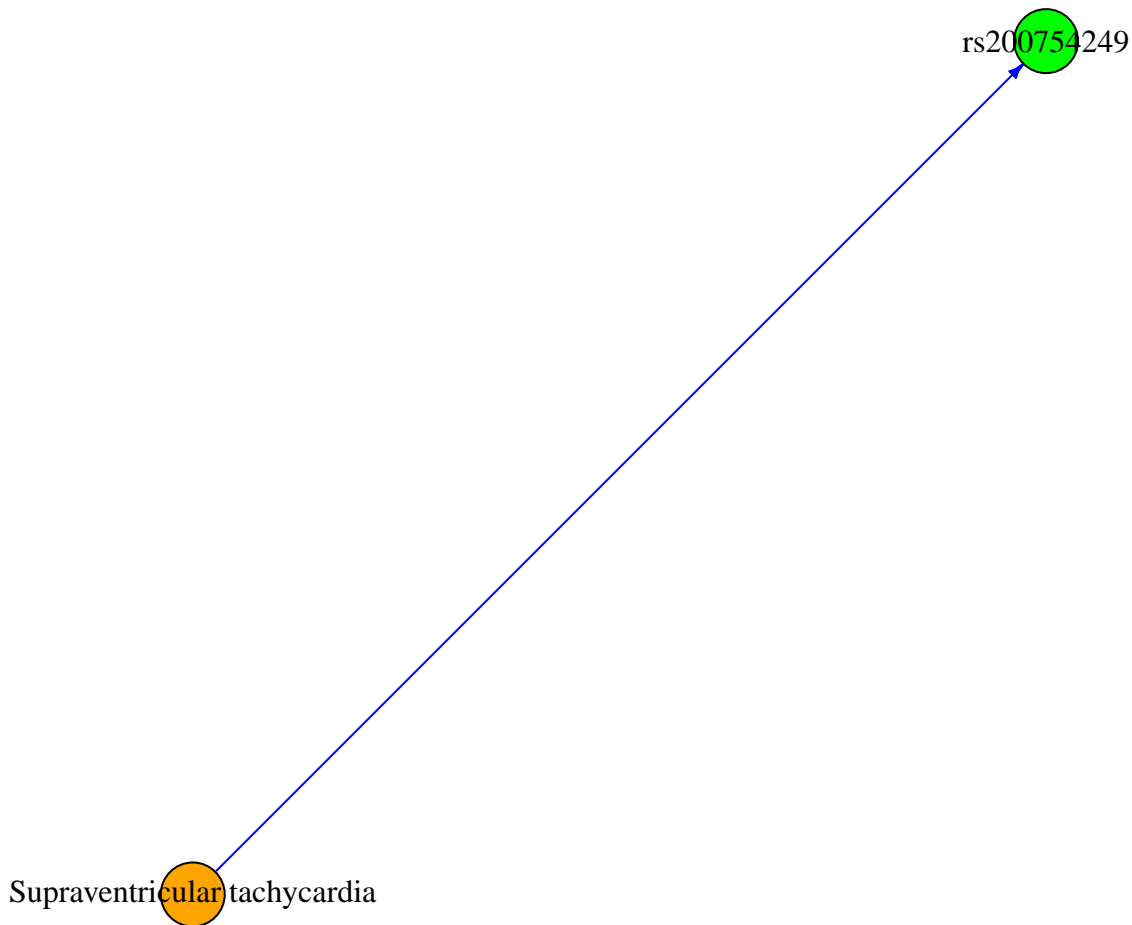

## Variant–Disease Network (Surfactant metabolism dysfunction)

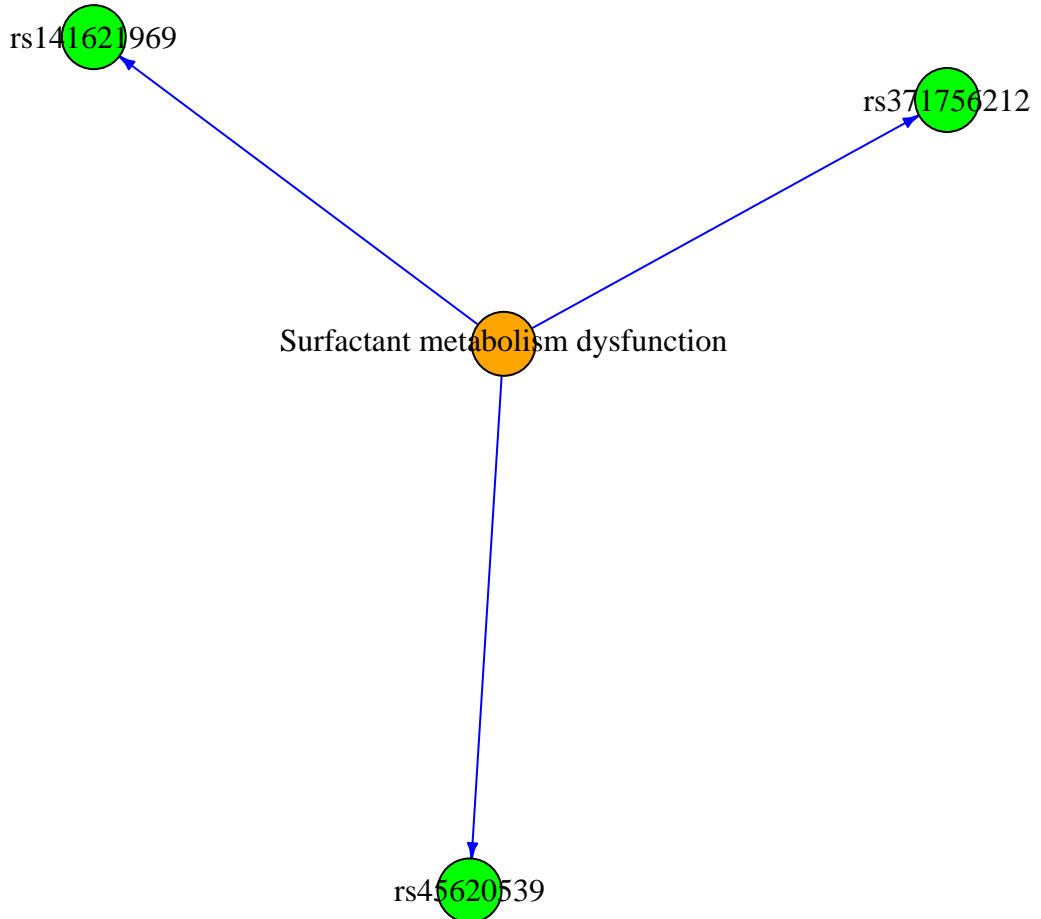

## Variant–Disease Network (Sveinsson chorioretinal atrophy)

rs148823826

Sveinsson chorioretinal atrophy

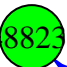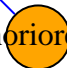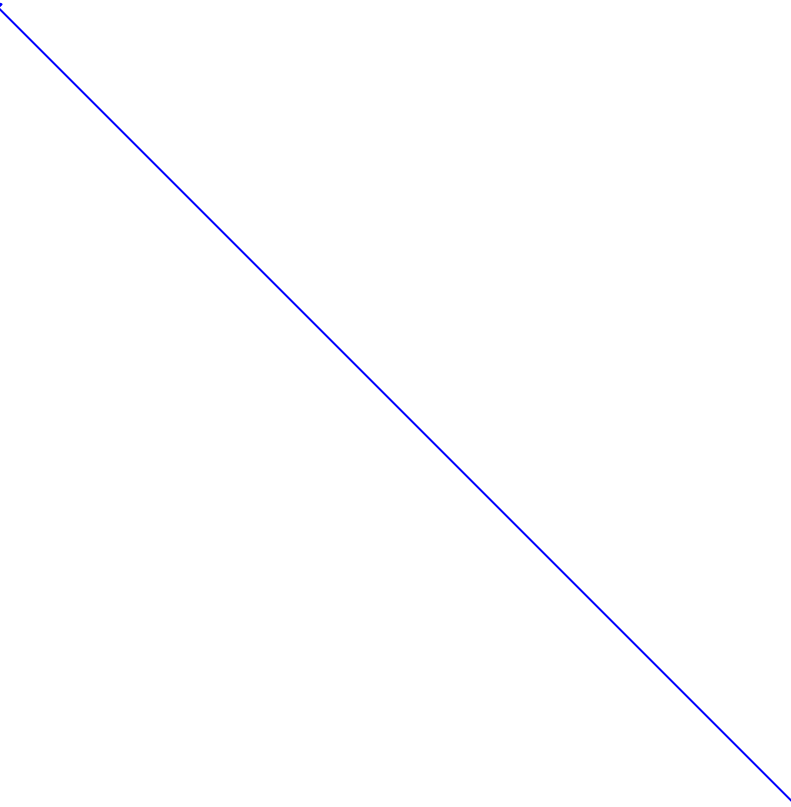

**Variant–Disease Network (Symmetrical dyschromatosis of extremities)**

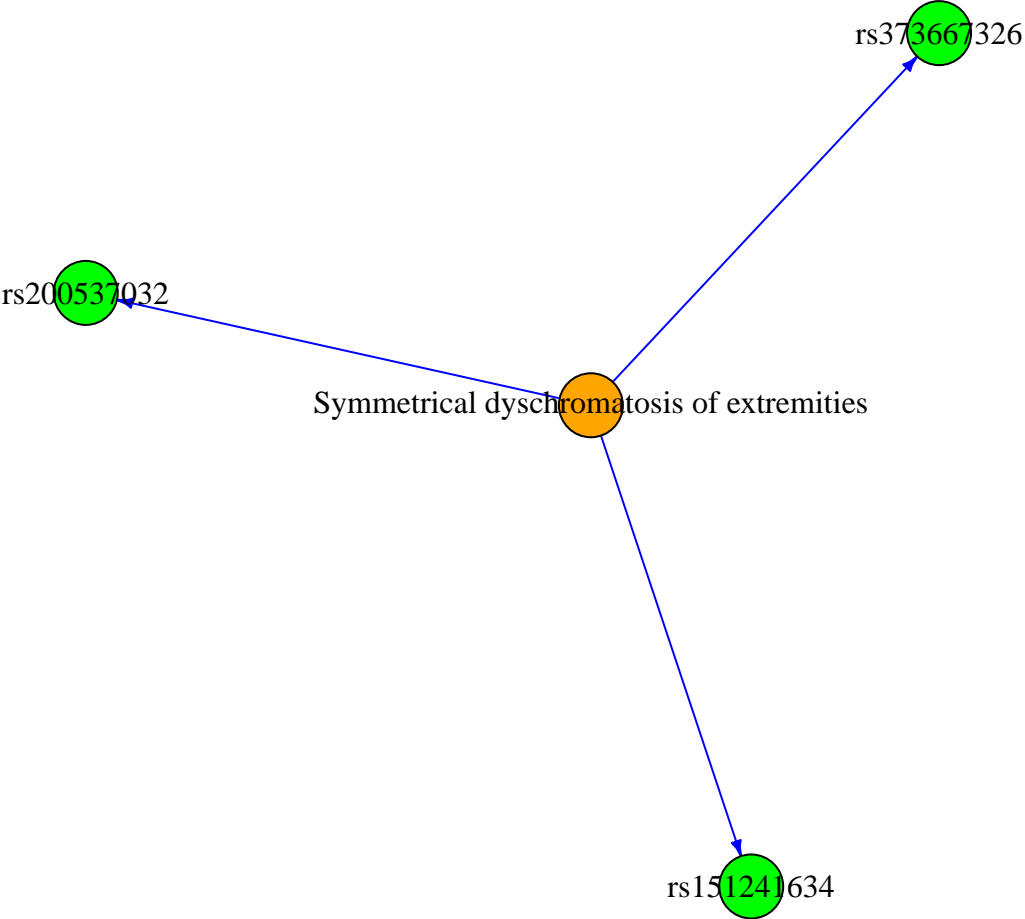

**Variant–Disease Network (Symphalangism–brachydactyly syndrome)**

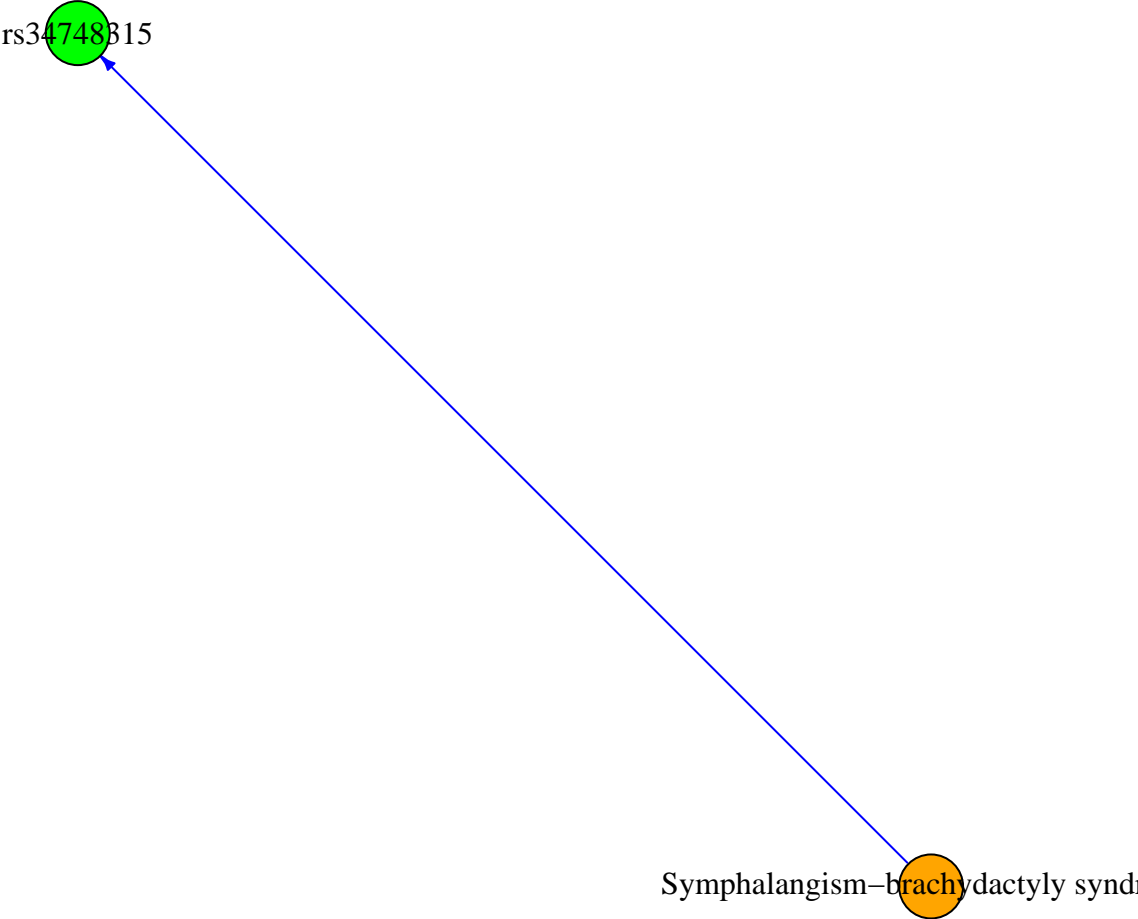

## Variant–Disease Network (Syndactyly)

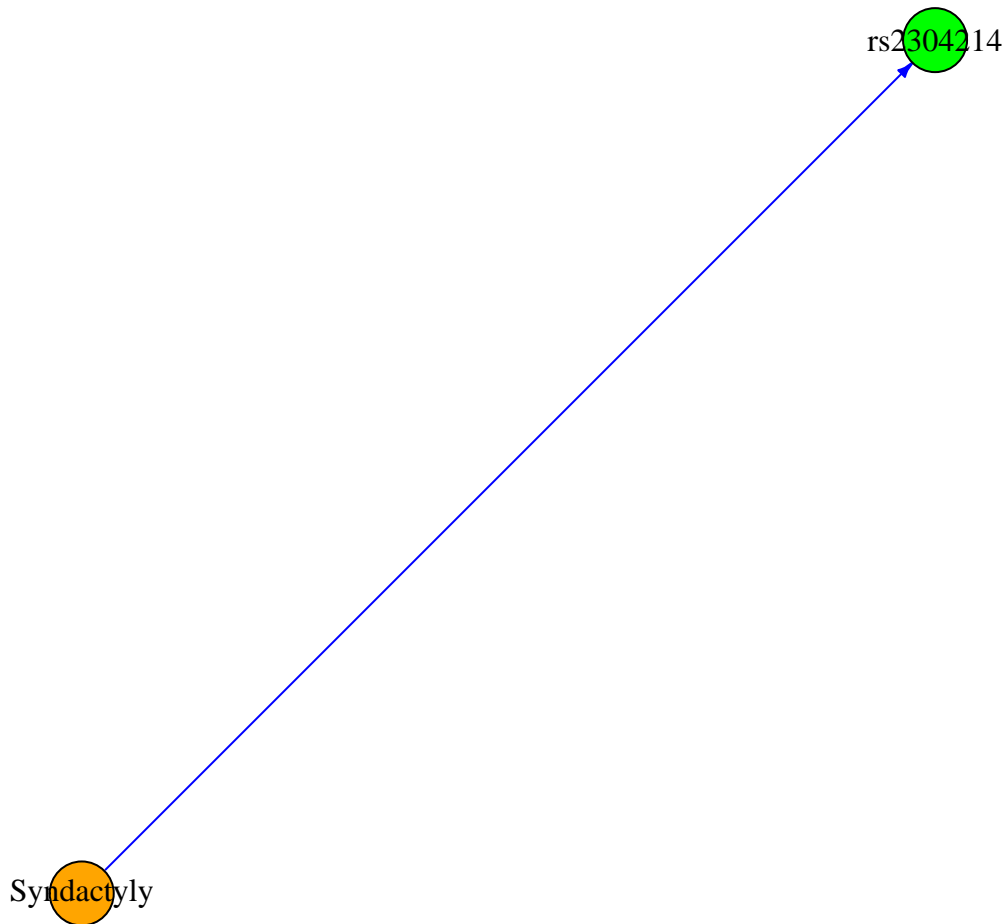



## Variant–Disease Network (Syndromic intellectual disability)

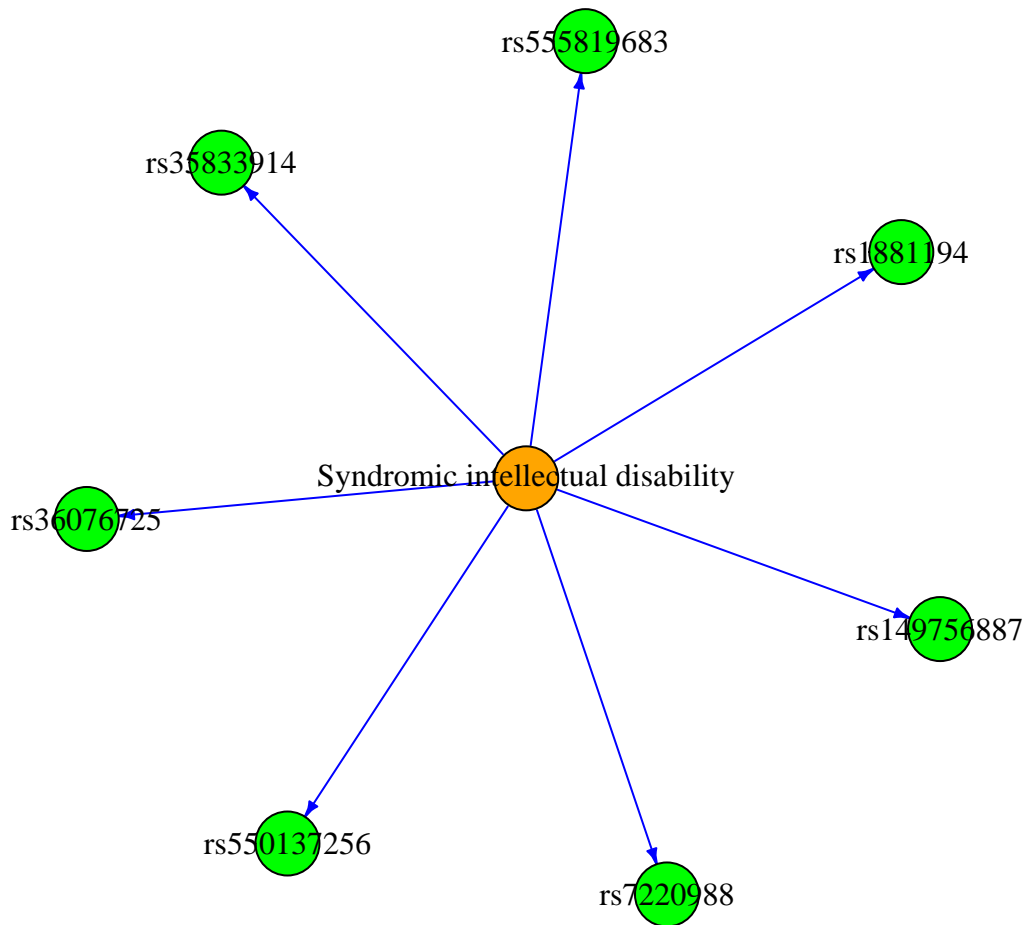

## Variant–Disease Network (Syndromic Microphthalmia)

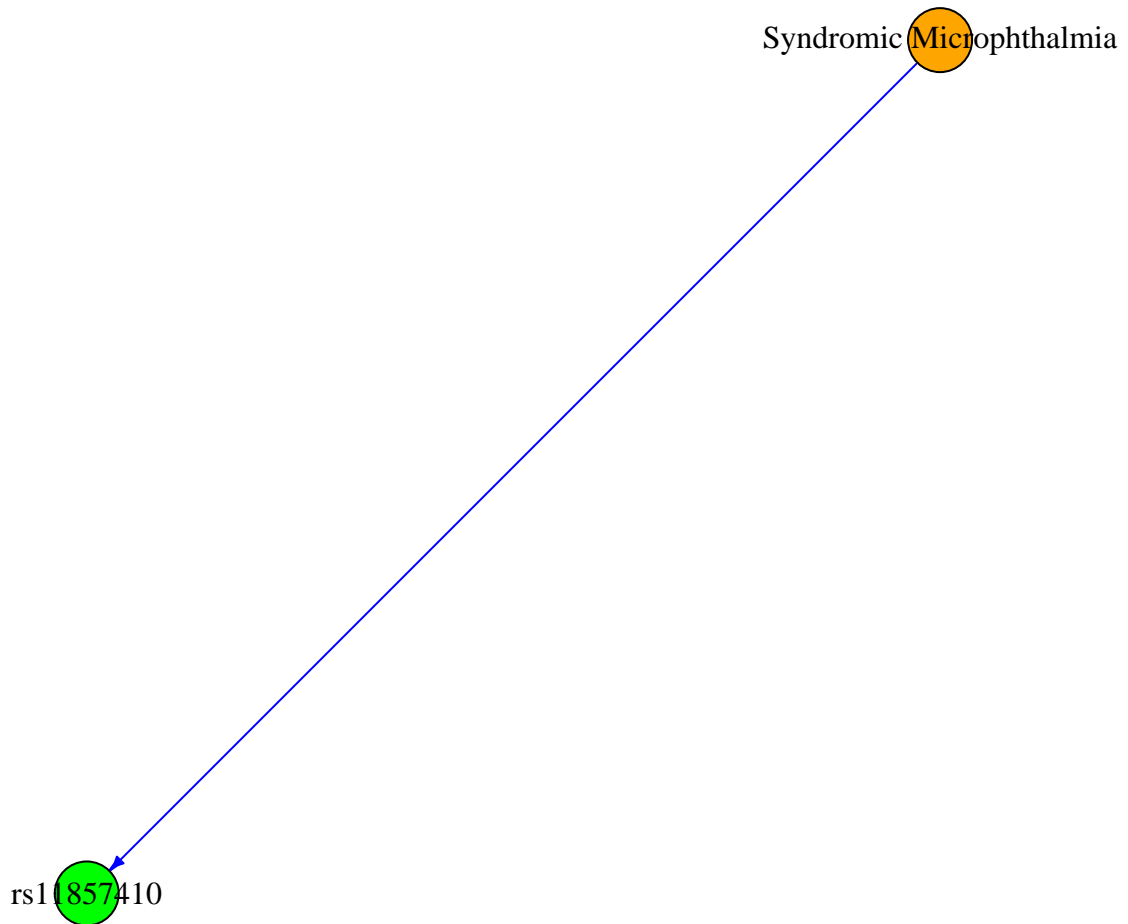

## Variant-Disease Network (Tangier disease)

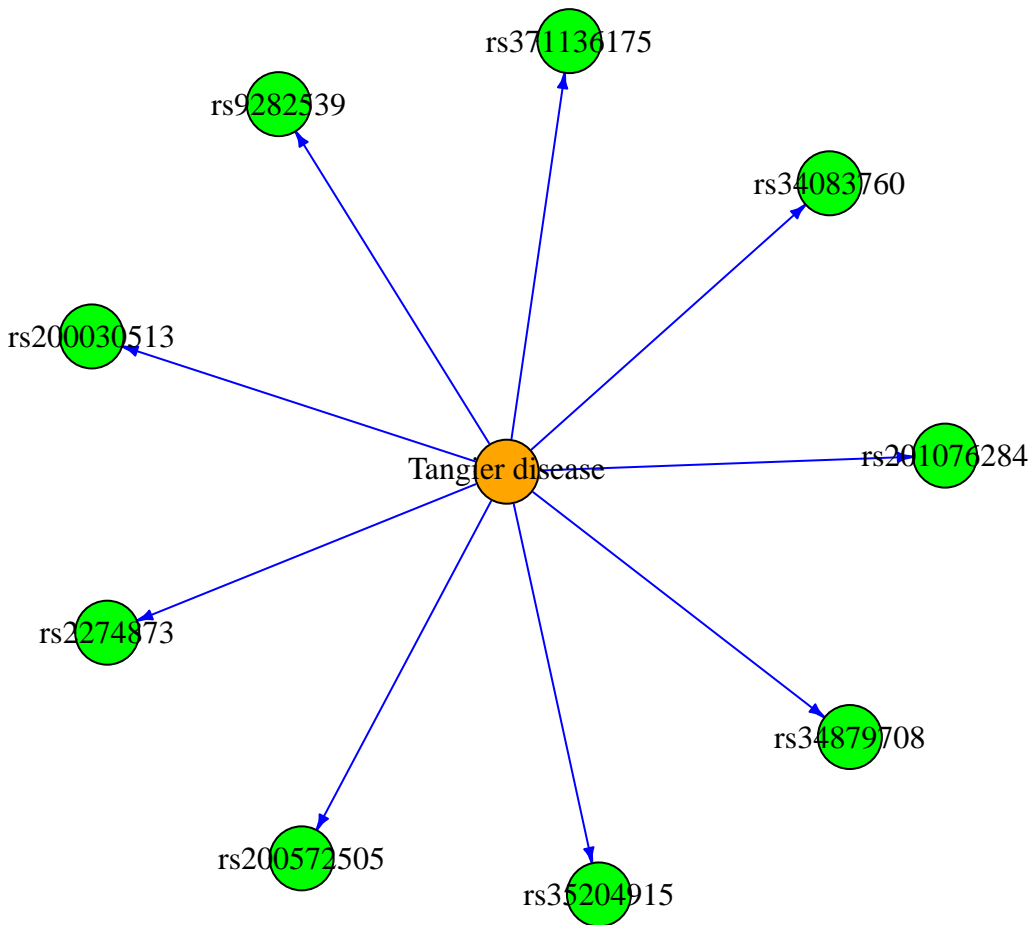

## Variant-Disease Network (Tay-Sachs disease)

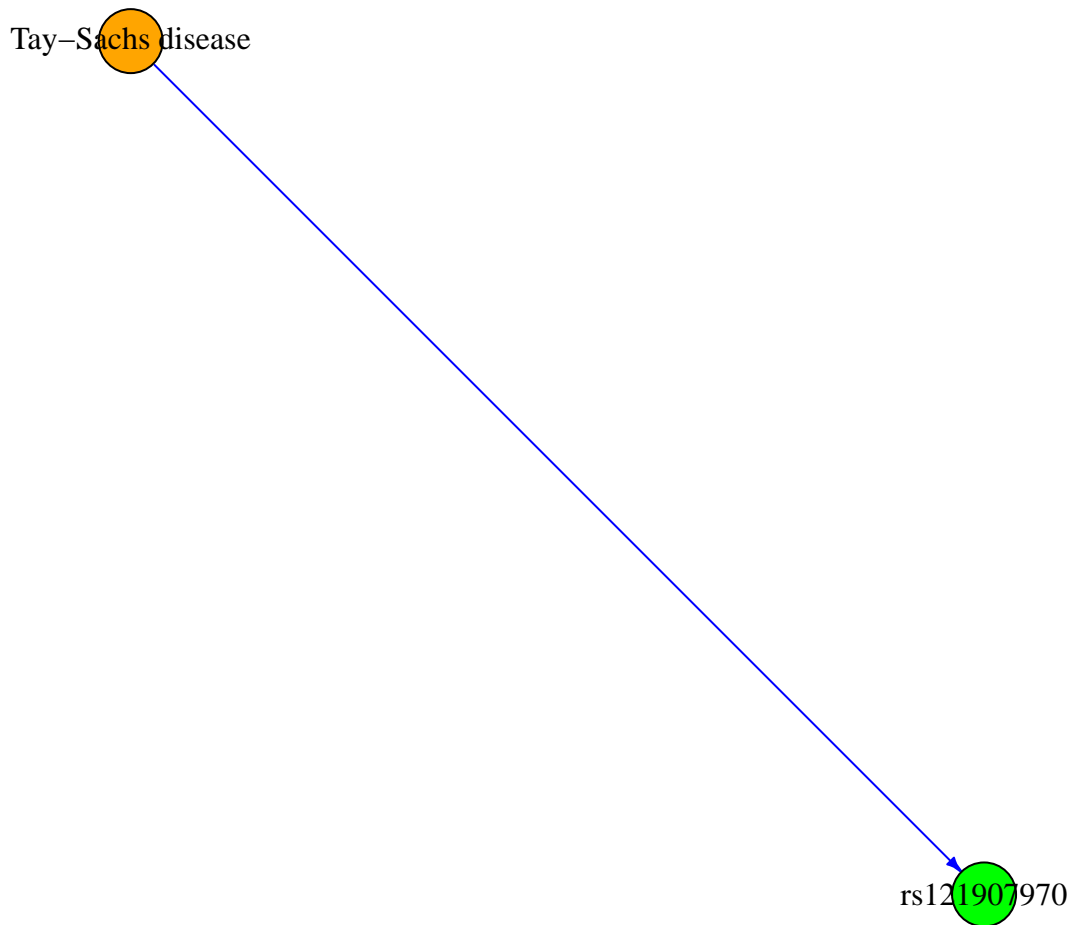

**Variant–Disease Network (T–cell immunodeficiency)**

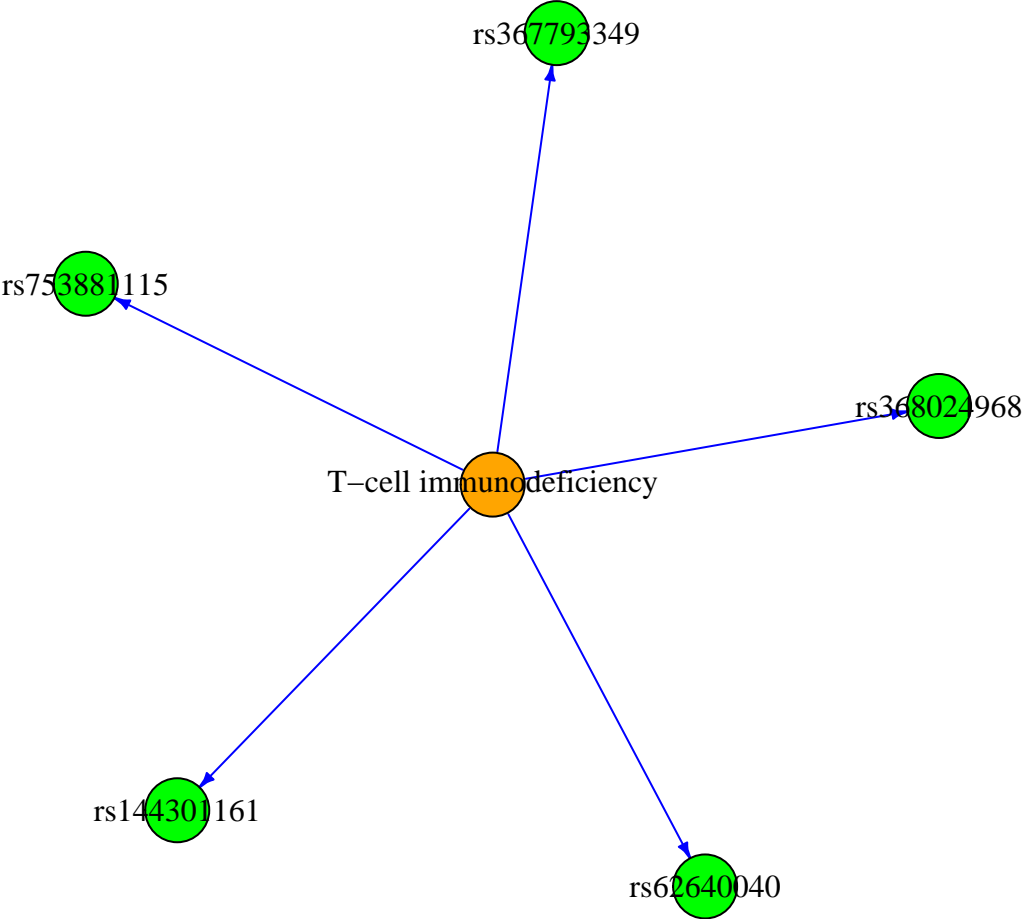

# nt-Disease Network (T-cell immunodeficiency with epidermodysplasia verru

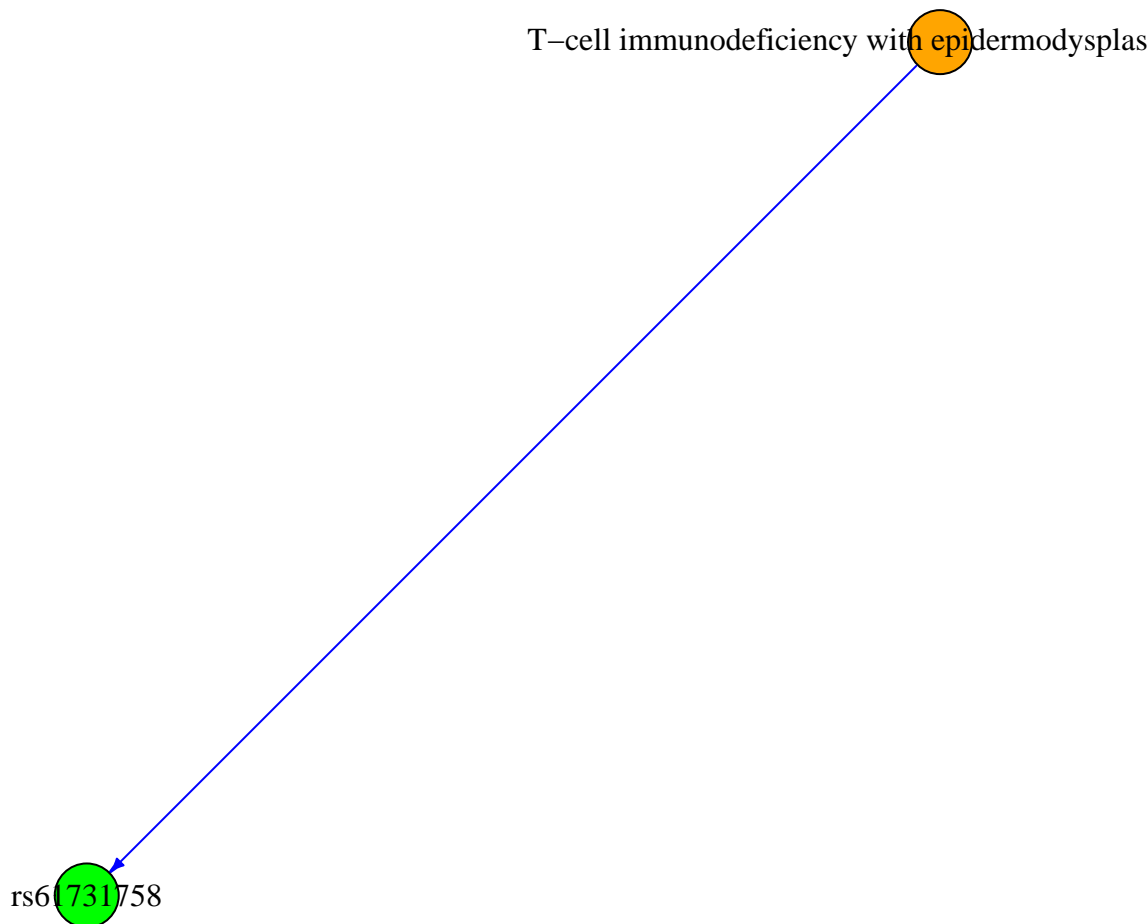

Variant–Disease Network (Telangiectasia)

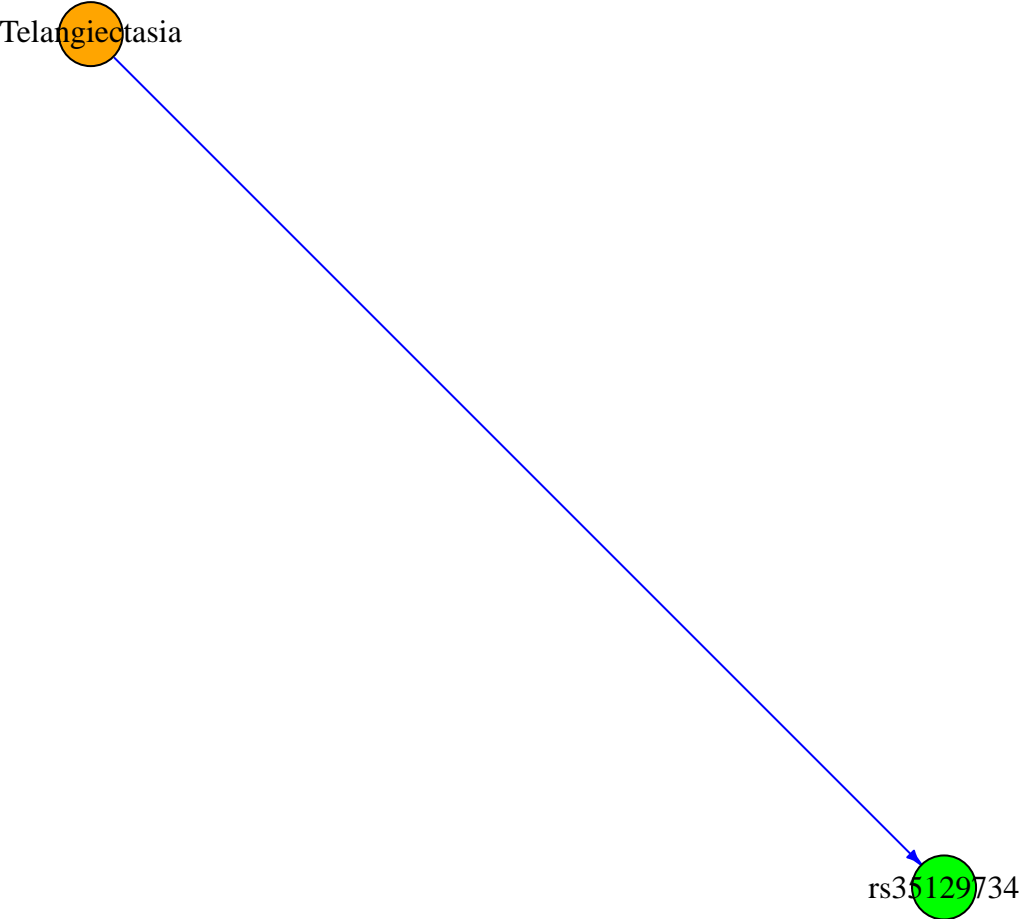

**Variant–Disease Network (Temptamy preaxial brachydactyly syndrome)**

Temptamy preaxial brachydactyly syndrome

rs3803423

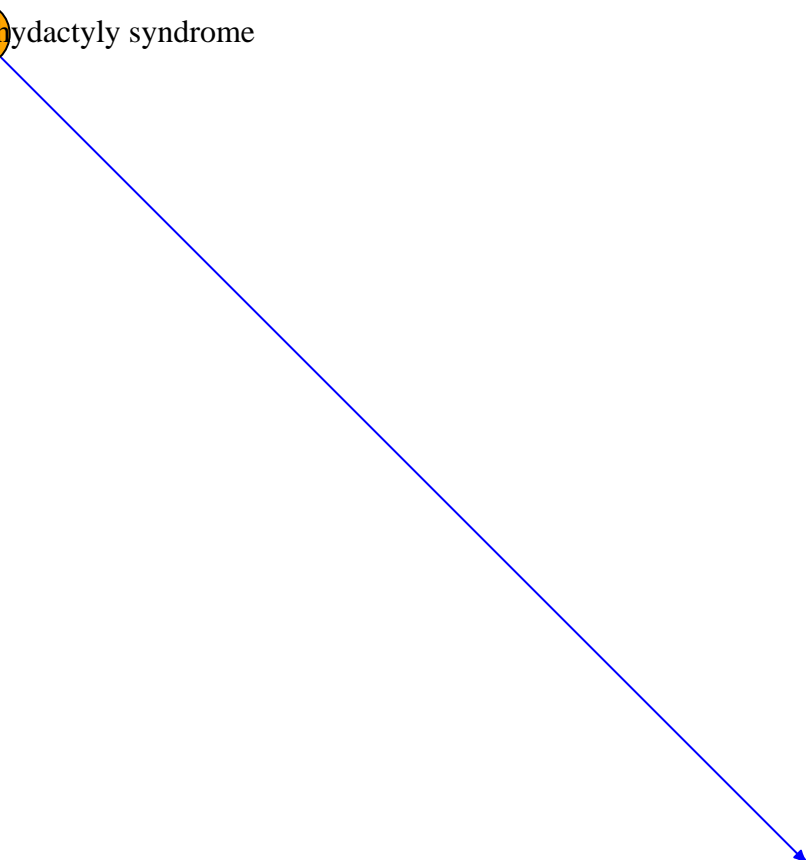



## Variant–Disease Network (Temtamy syndrome)

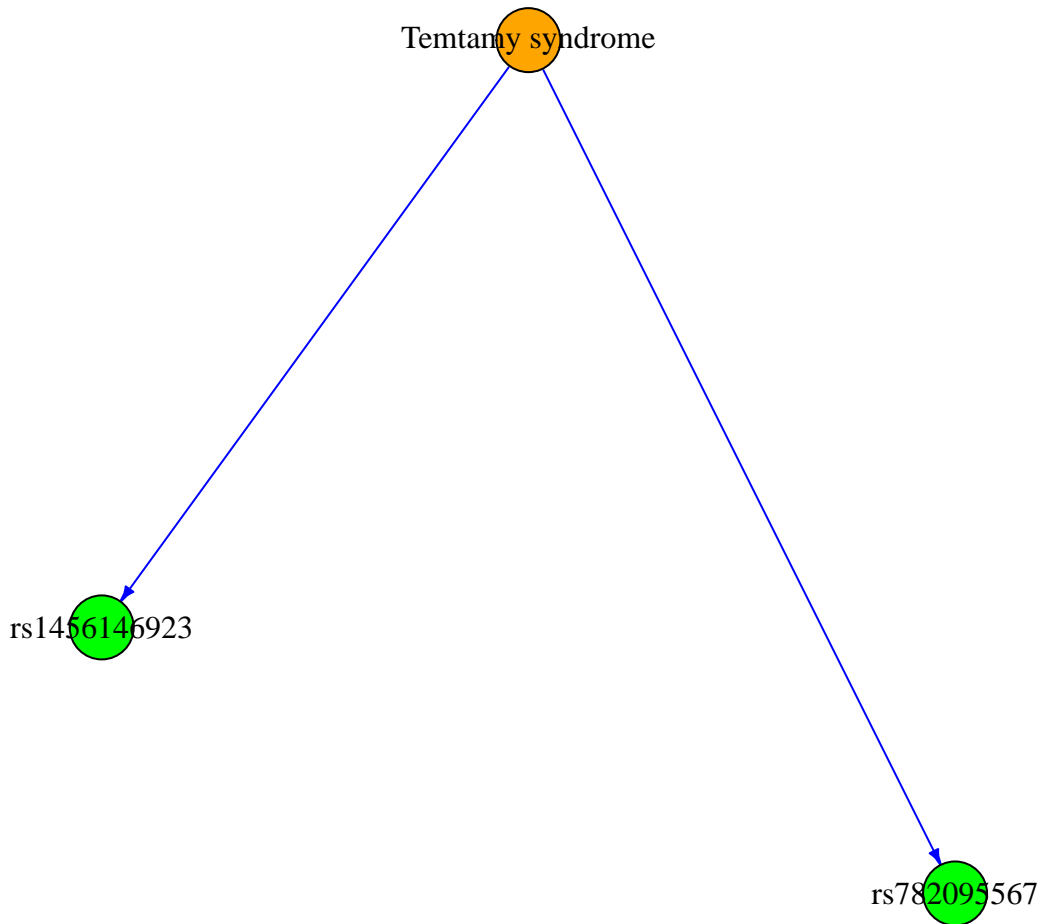

## Variant-Disease Network (Thoracic aortic aneurysm and aortic dissection)

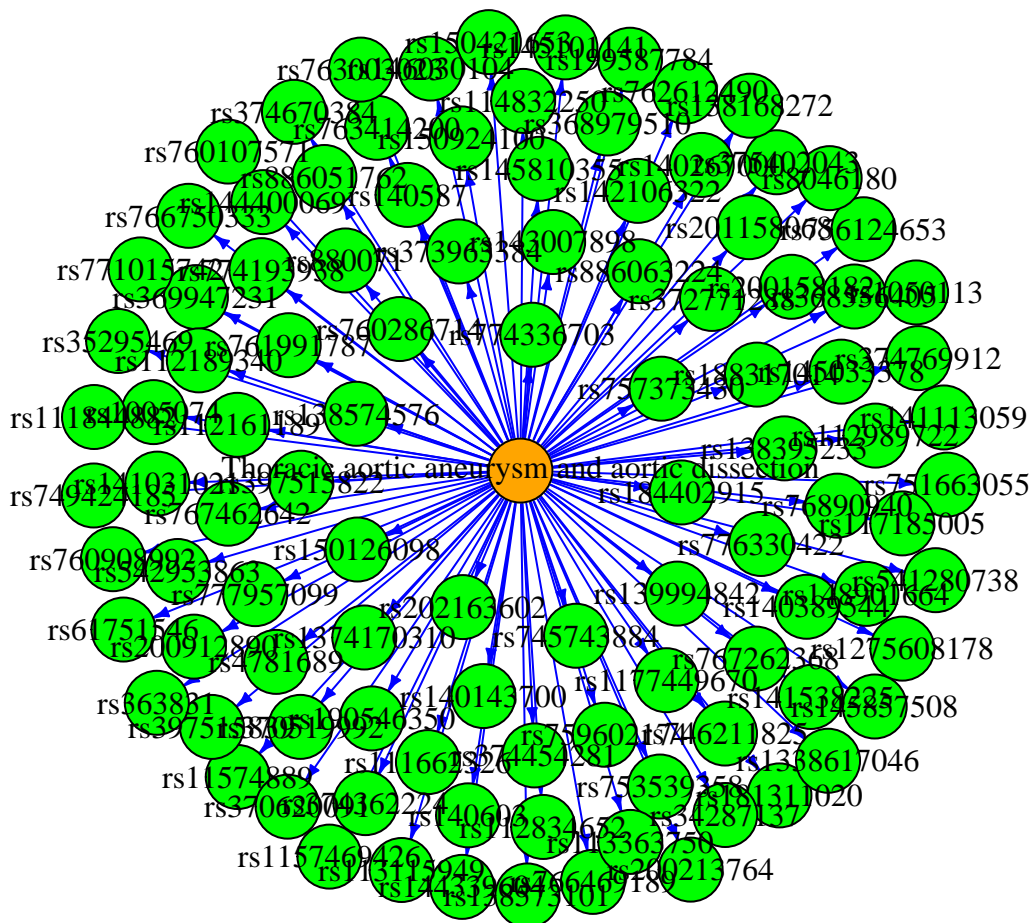

## Variant–Disease Network (Three M syndrome)

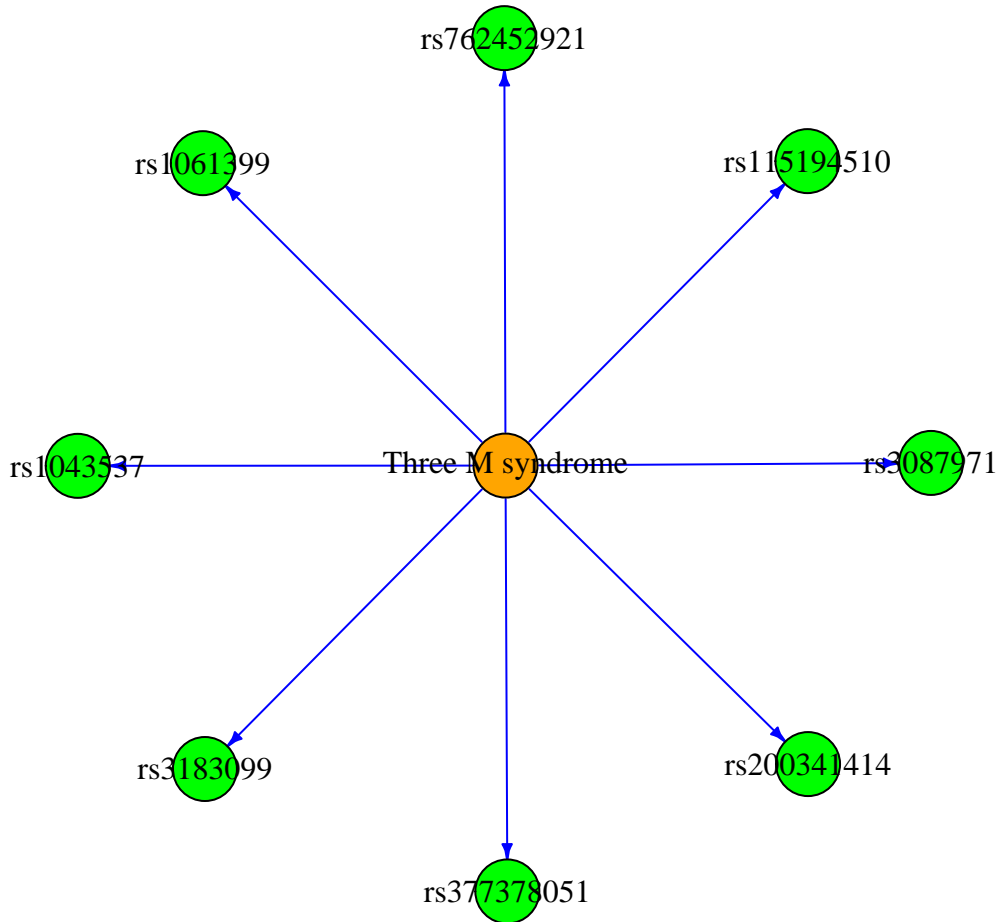

## Variant–Disease Network (Thrombocythemia 1)

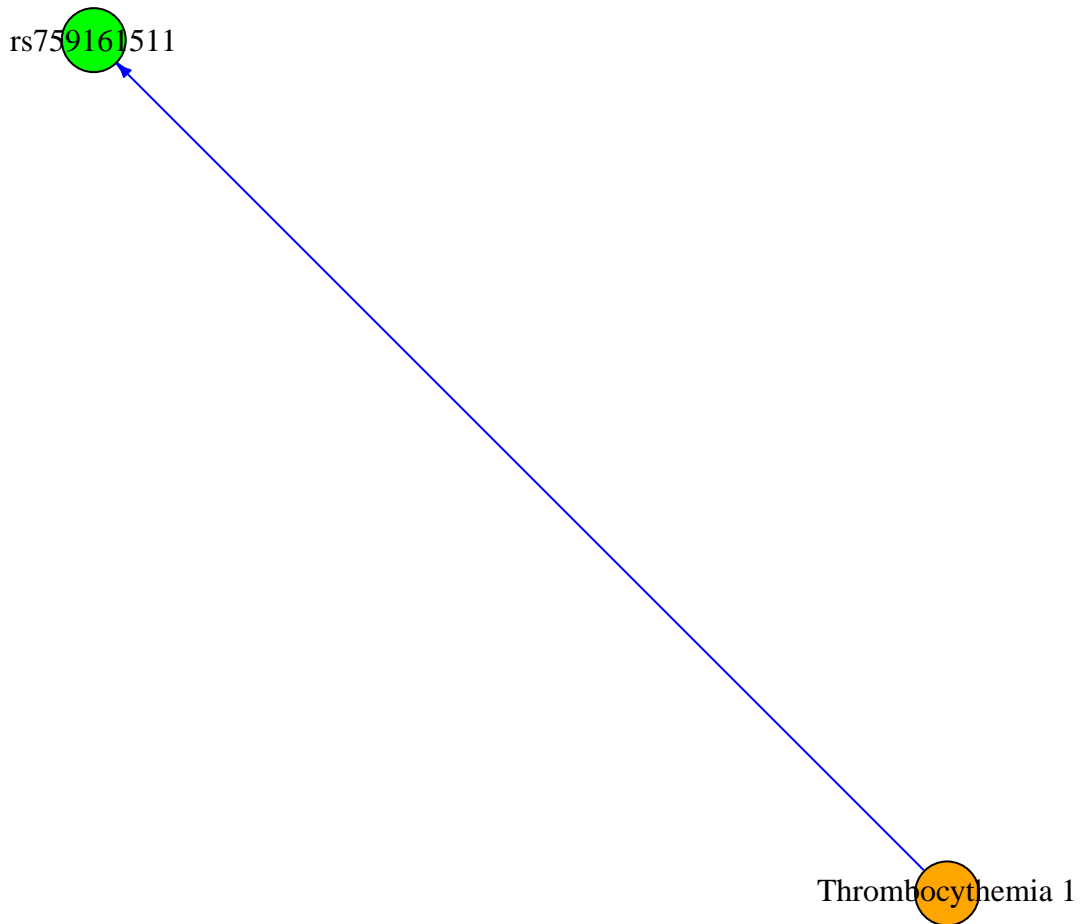

Variant–Disease Network (Thrombophilia)

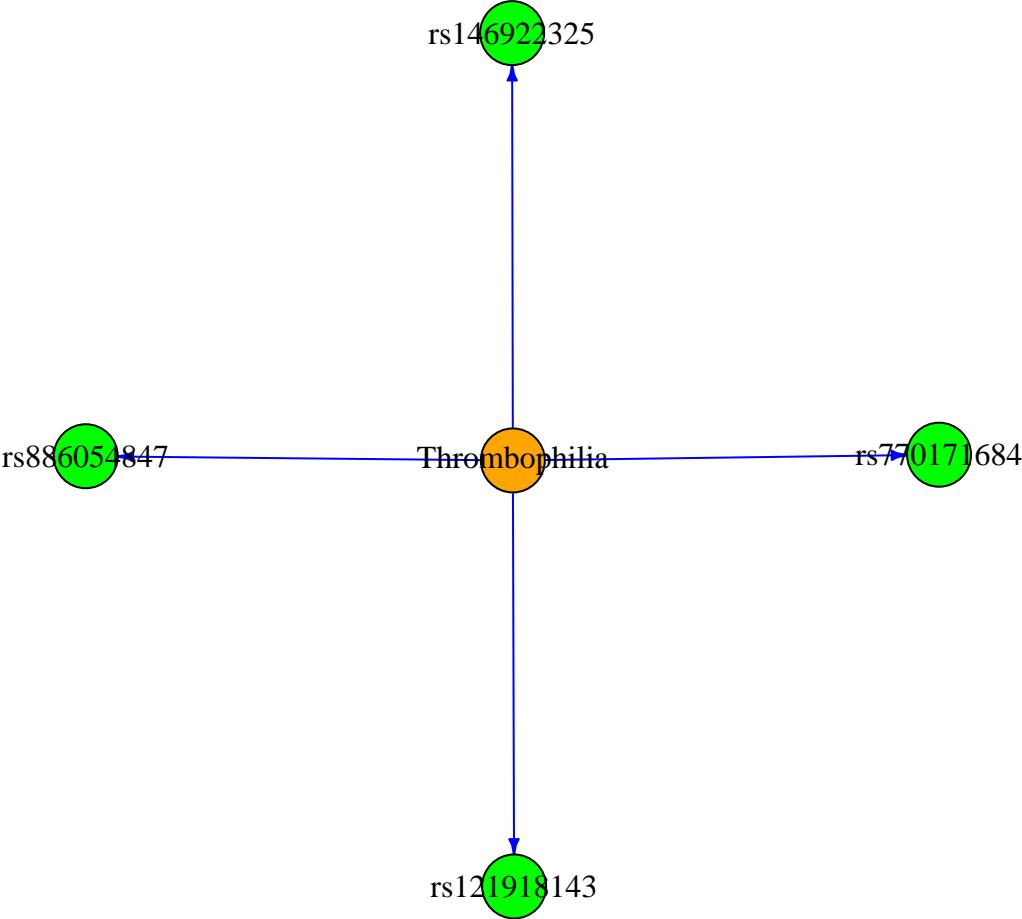

**Variant–Disease Network (Thrombophilia due to protein S deficiency)**

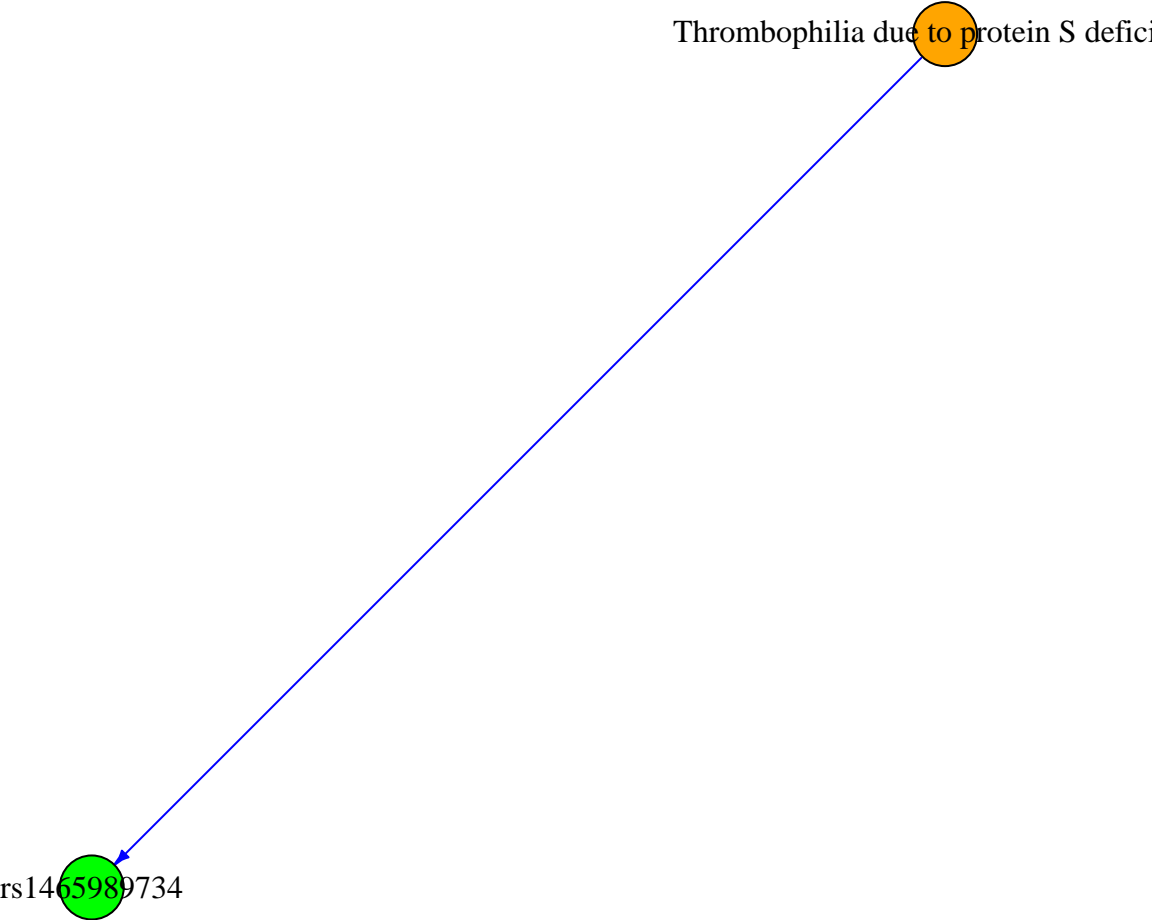

## Variant–Disease Network (Thyroid dysharmonogenesis)

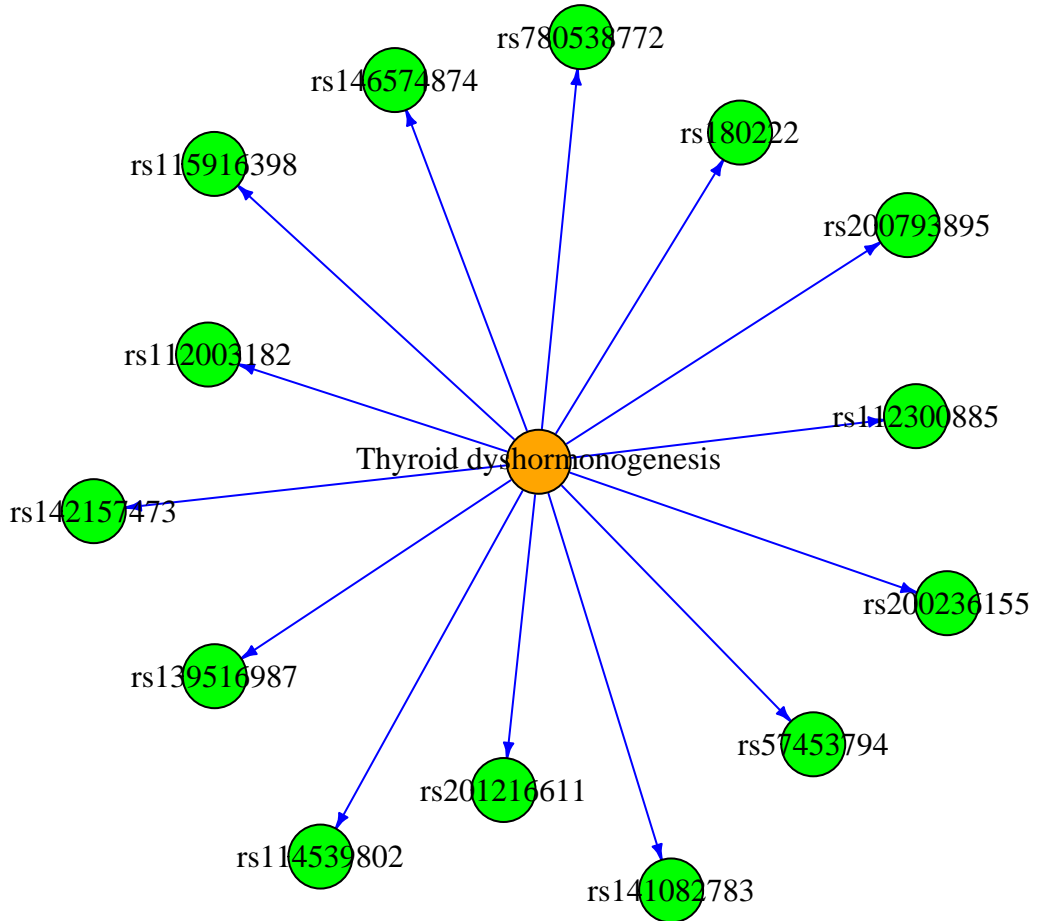

# Variant–Disease Network (Thyroid Hormone Resistance)

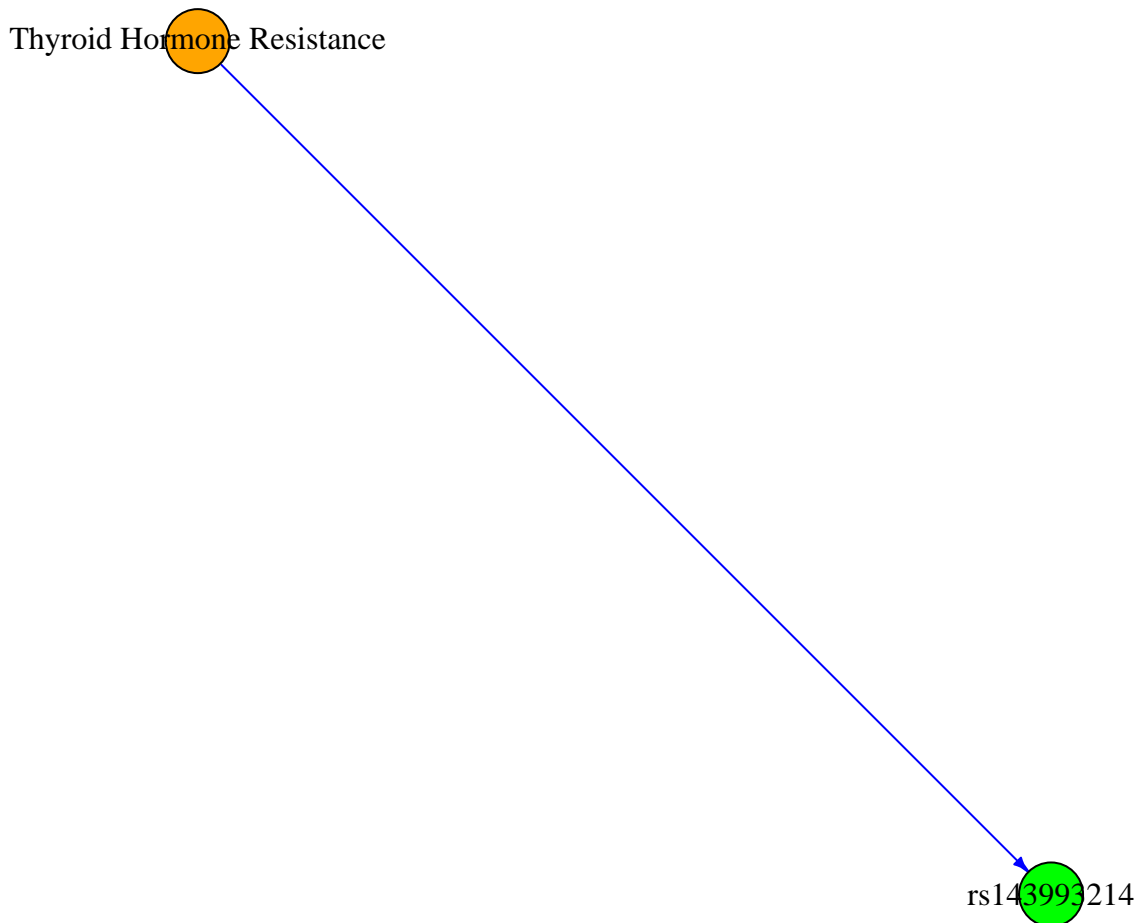



## Variant–Disease Network (Tobacco addiction)

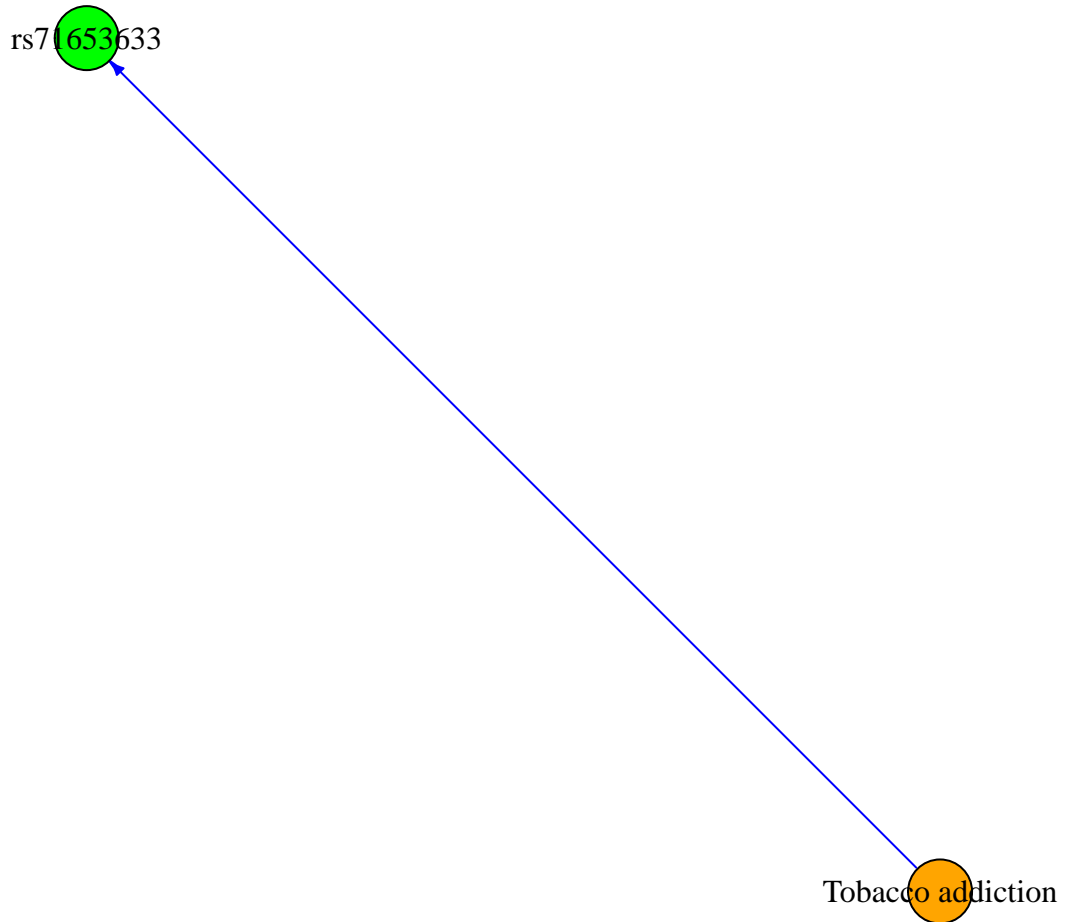

Variant–Disease Network (Transient Neonatal Diabetes)

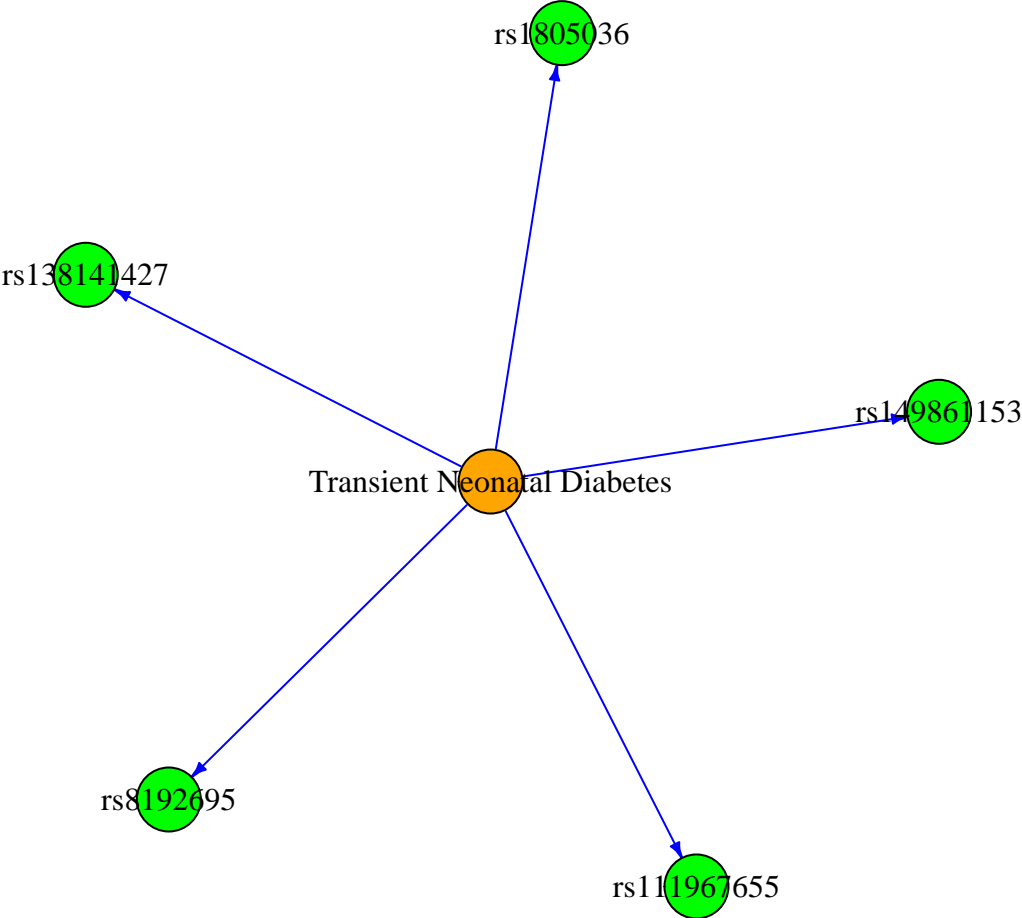

**Variant–Disease Network (Transposition of the great arteries)**

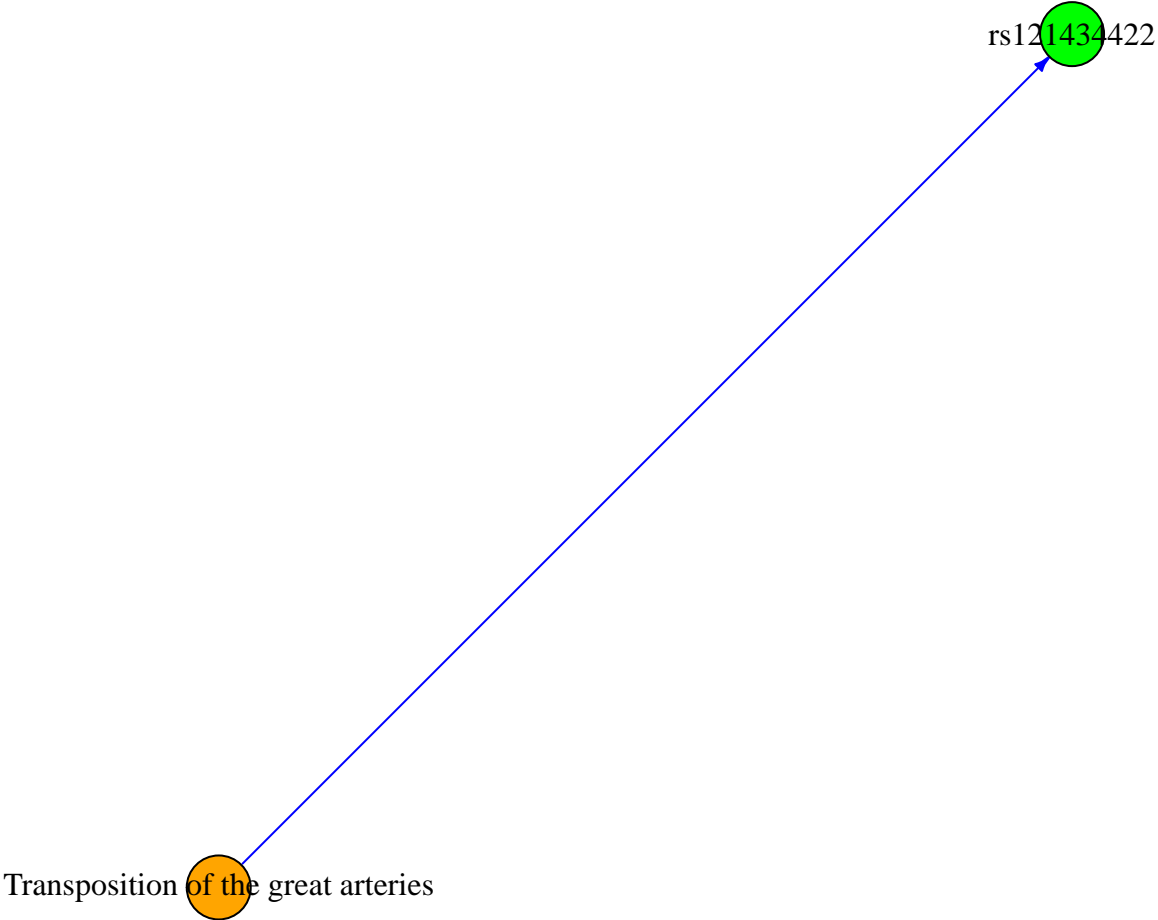

## Variant–Disease Network (Treacher Collins Syndrome)

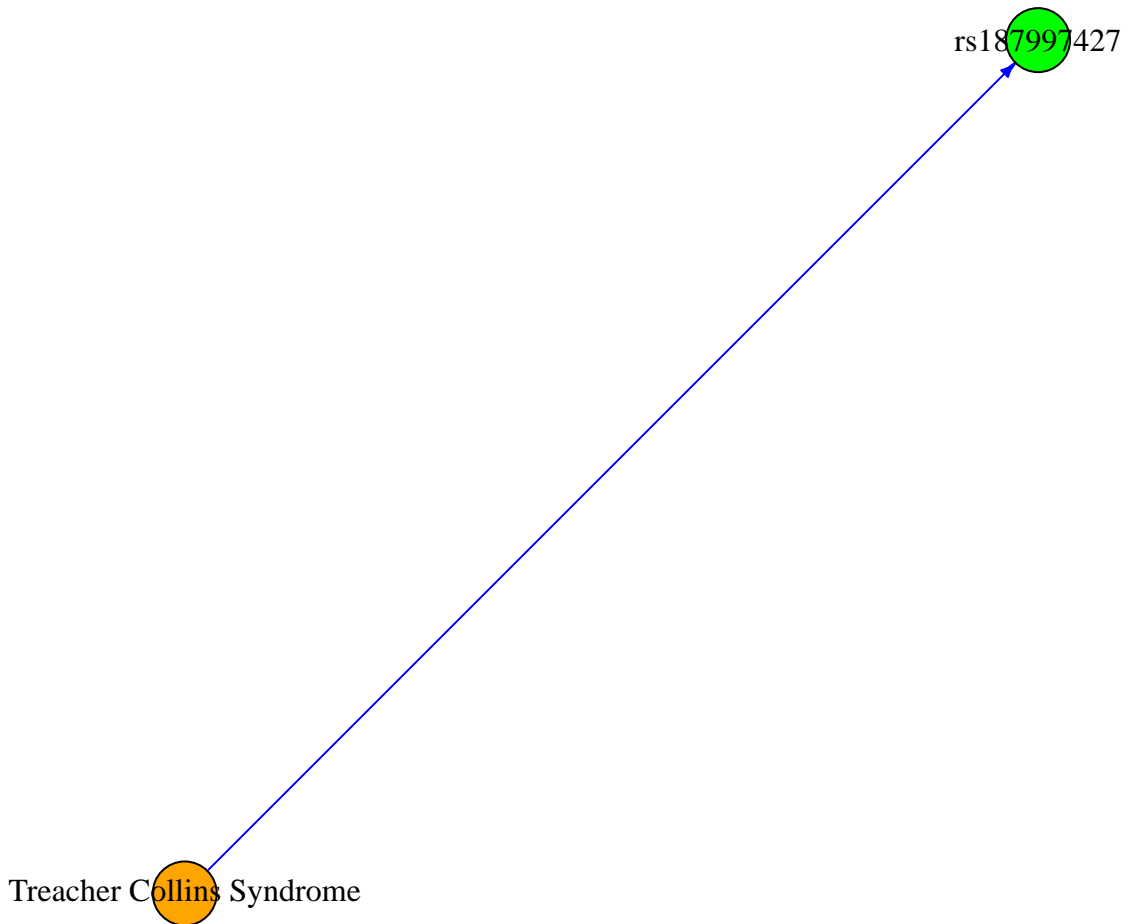

Variant–Disease Network (Trichoepithelioma multiple familial 2)

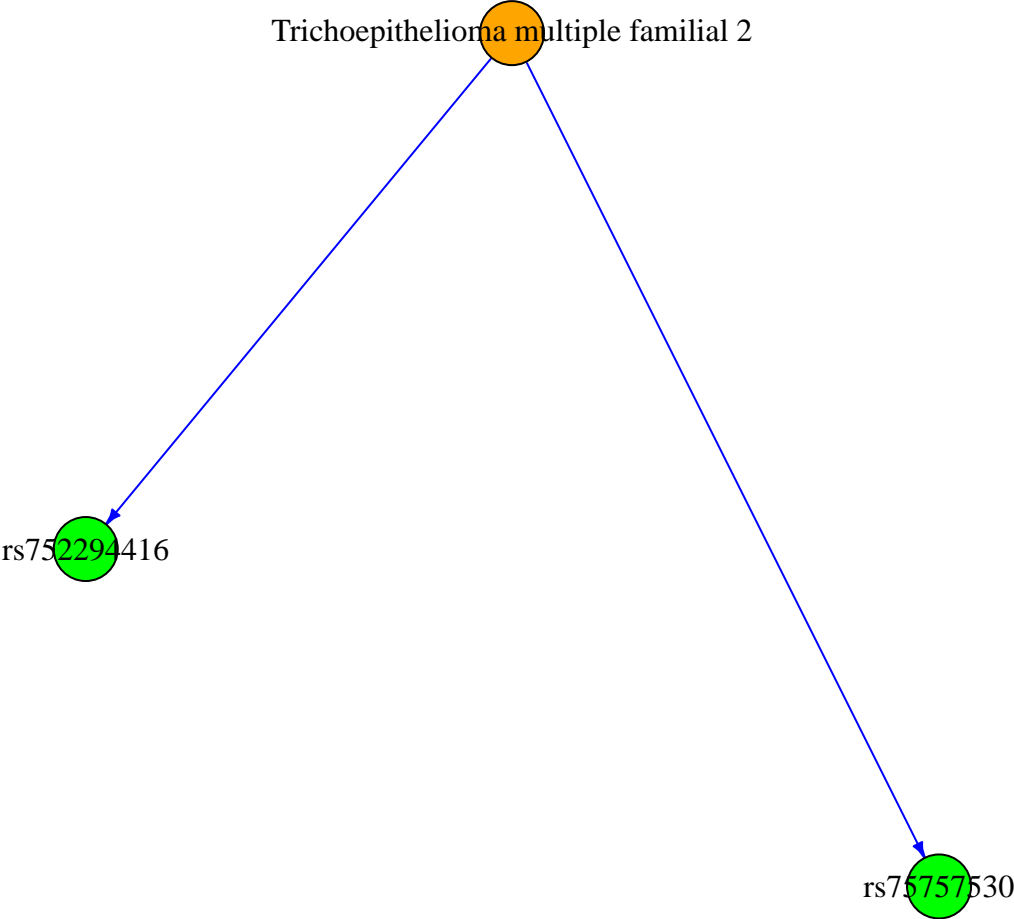

**Variant–Disease Network (Trichohepatoenteric syndrome)**

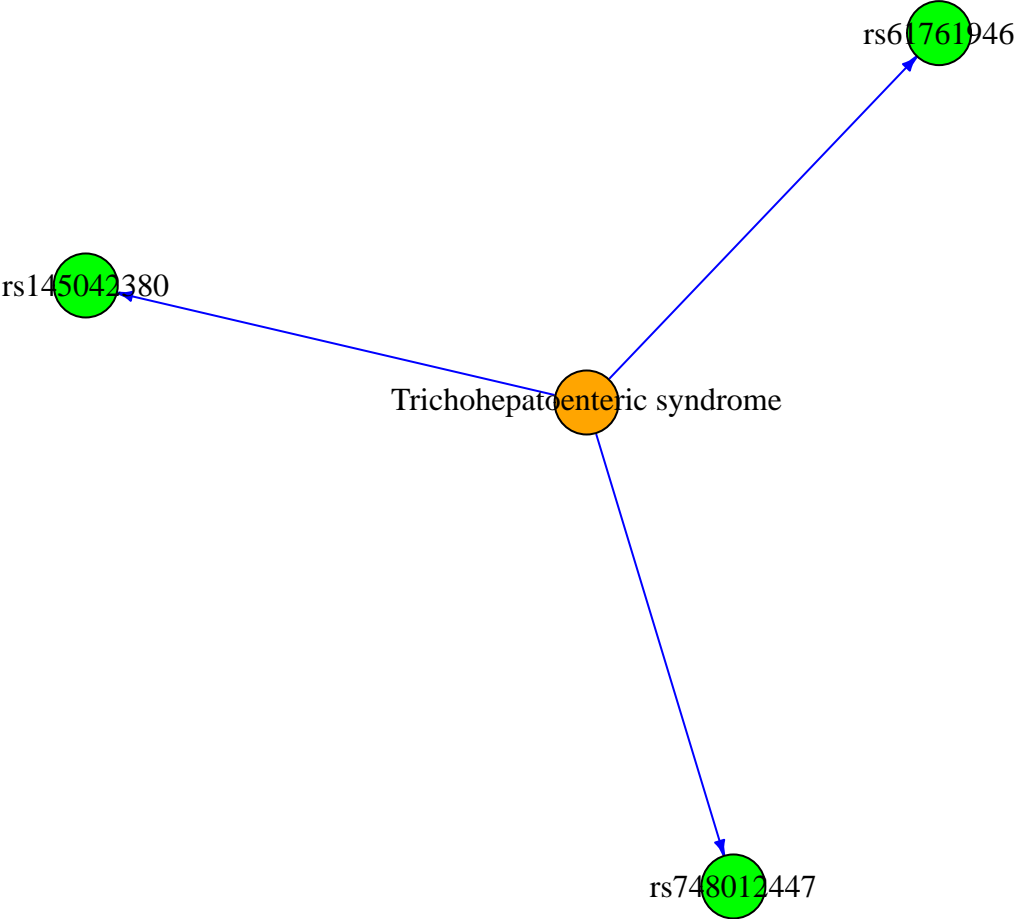

**Variant–Disease Network (Trichorhinophalangeal dysplasia type I)**

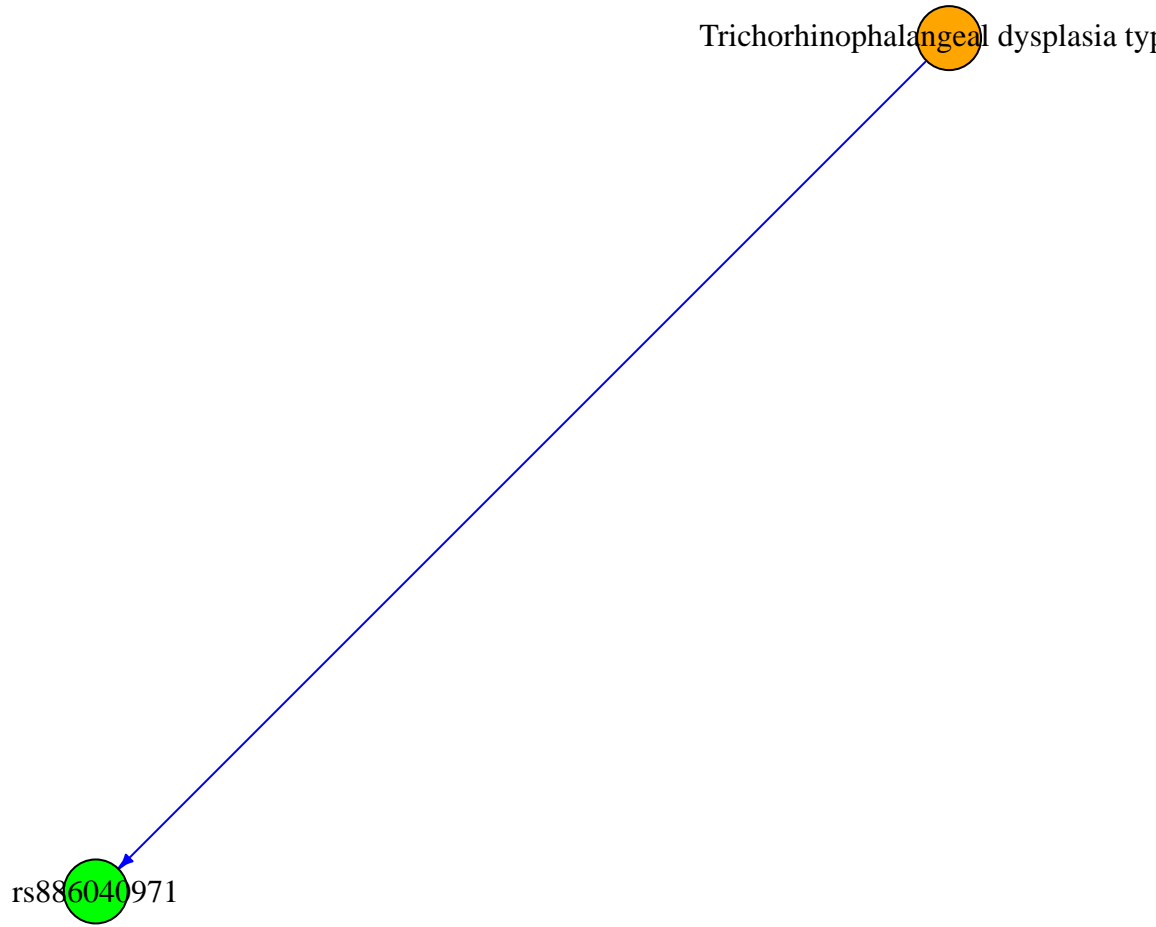

# Variant–Disease Network (Trichorhinophalangeal Syndrome)

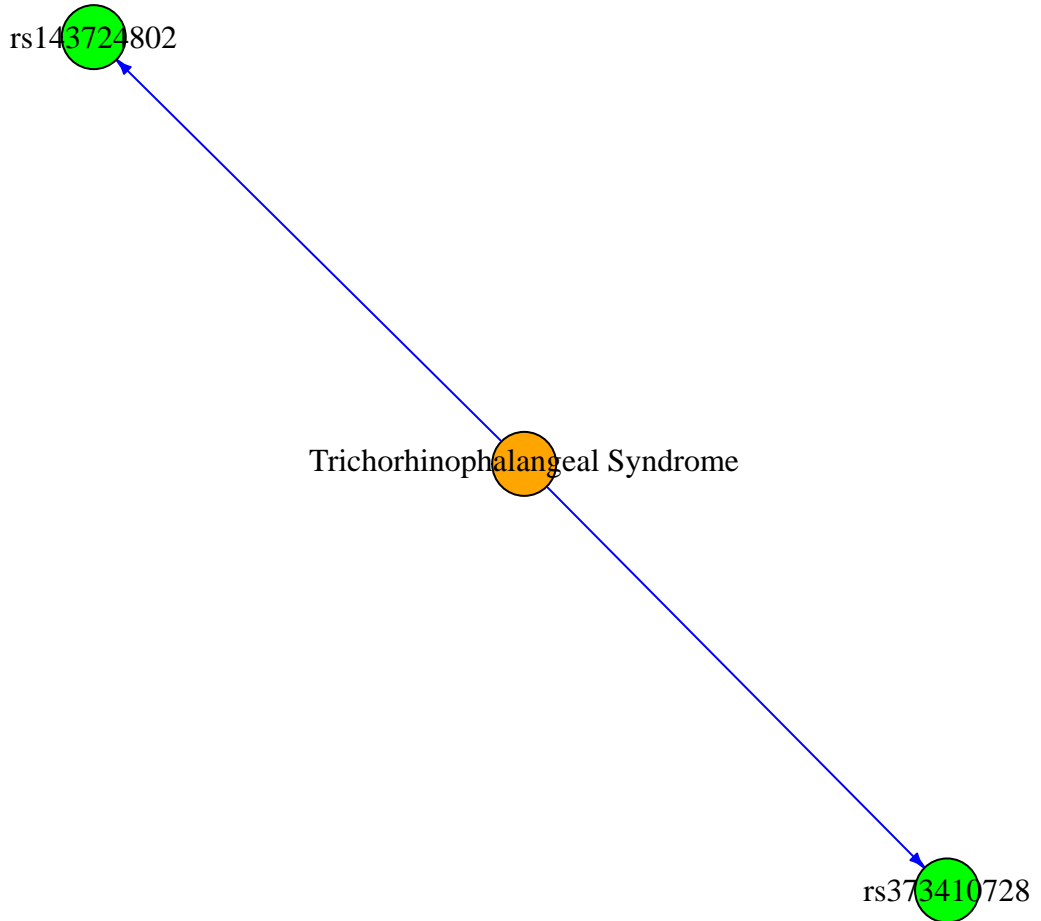



# Variant–Disease Network (Trichorhinophalangeal syndrome type 3)

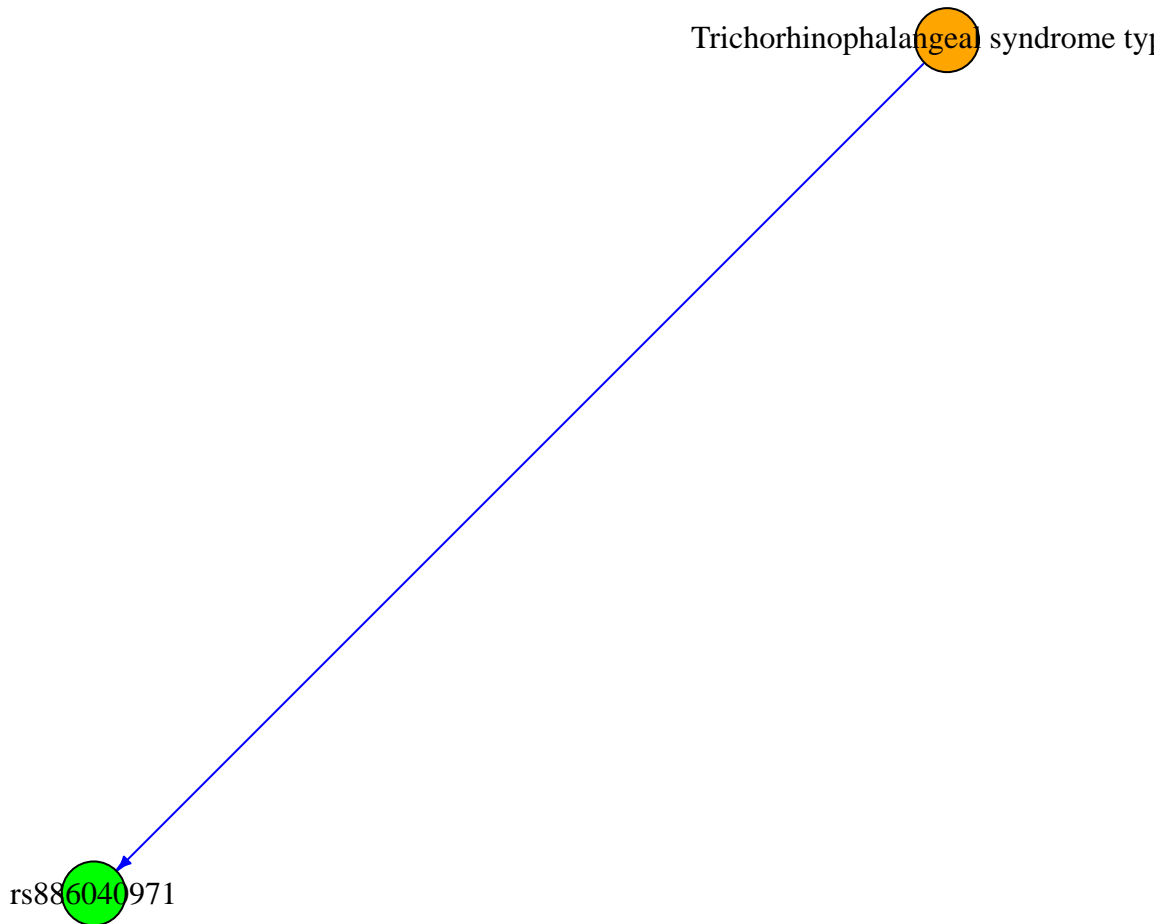

**Variant–Disease Network (Triglyceride storage disease with ichthyosis)**

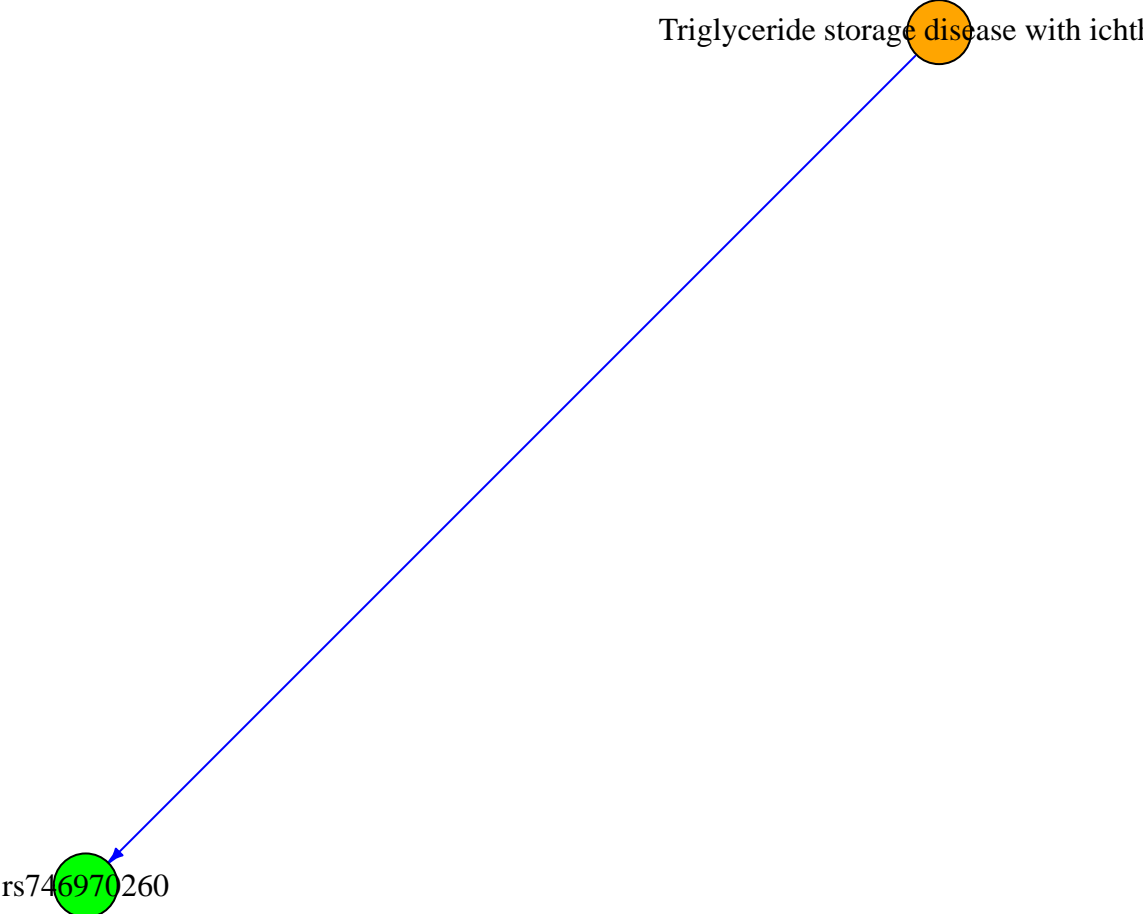

## Variant–Disease Network (Trimethylaminuria)

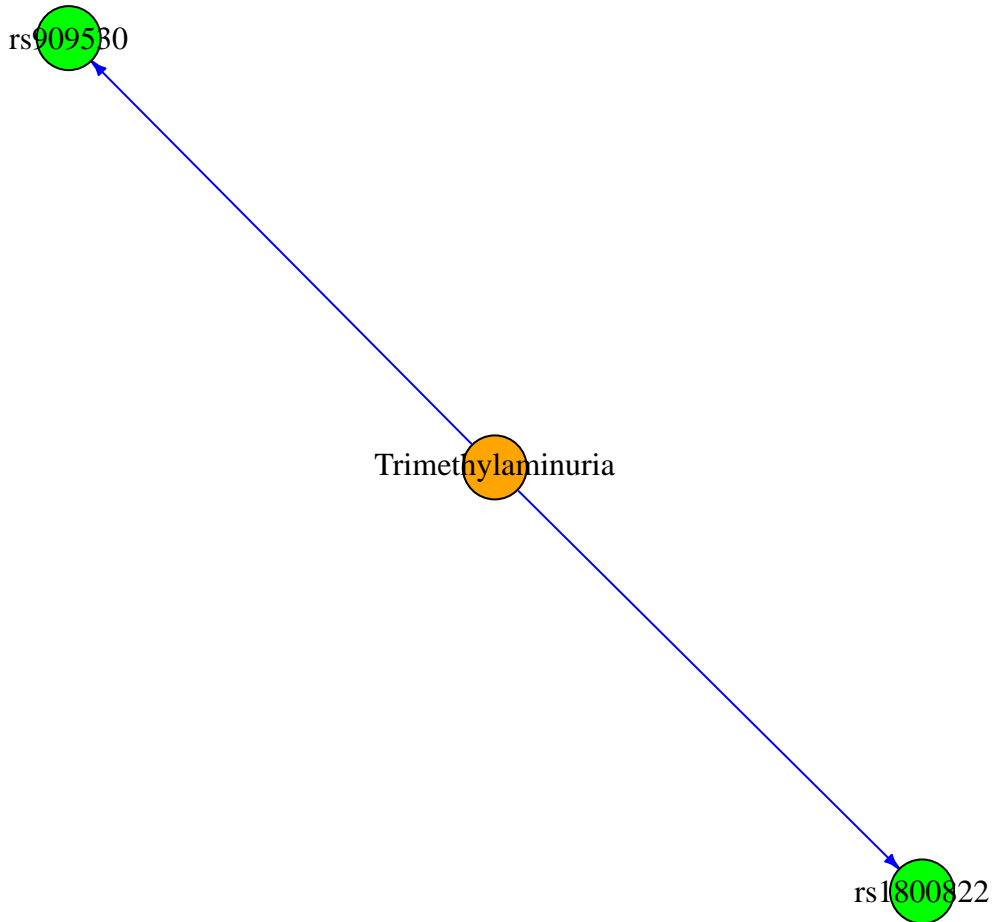

**Variant–Disease Network (Tryptophan 5–monooxygenase deficiency)**

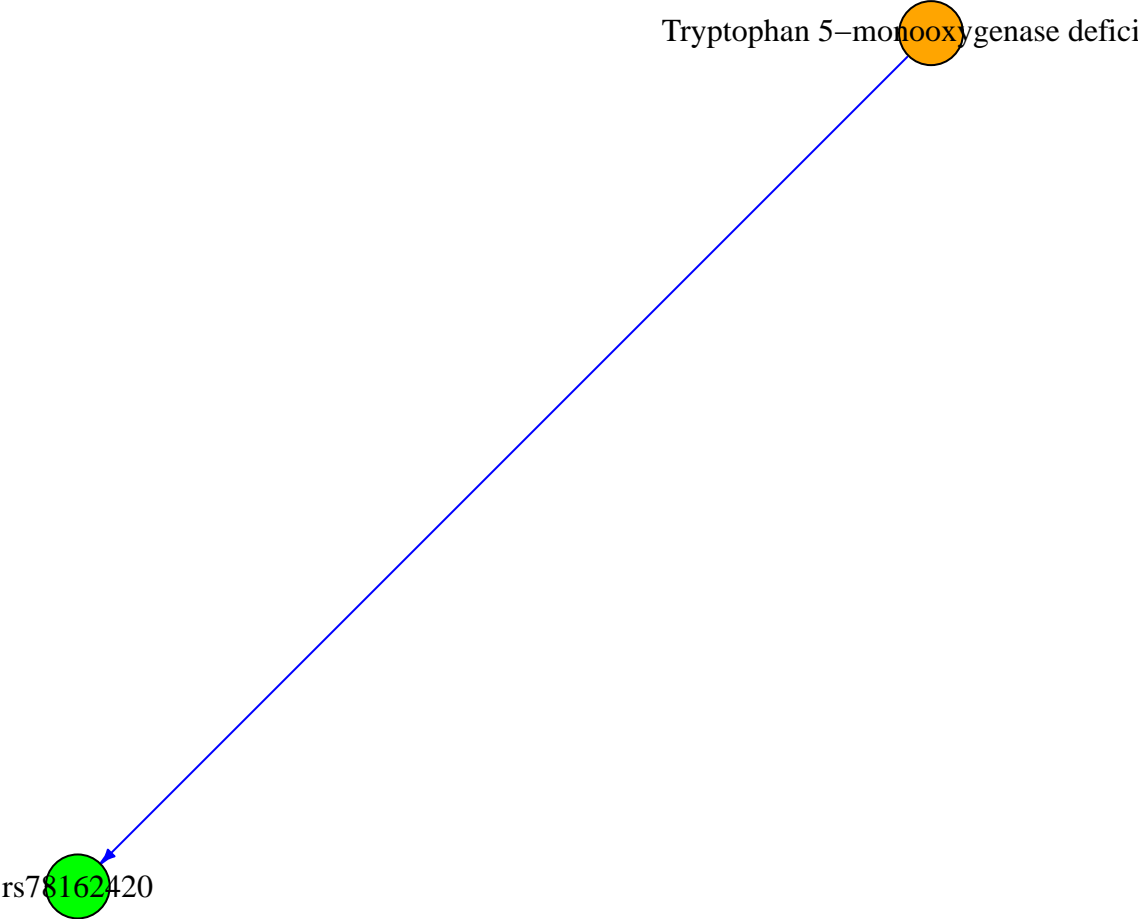

## Variant-Disease Network (Tuberous sclerosis 1)

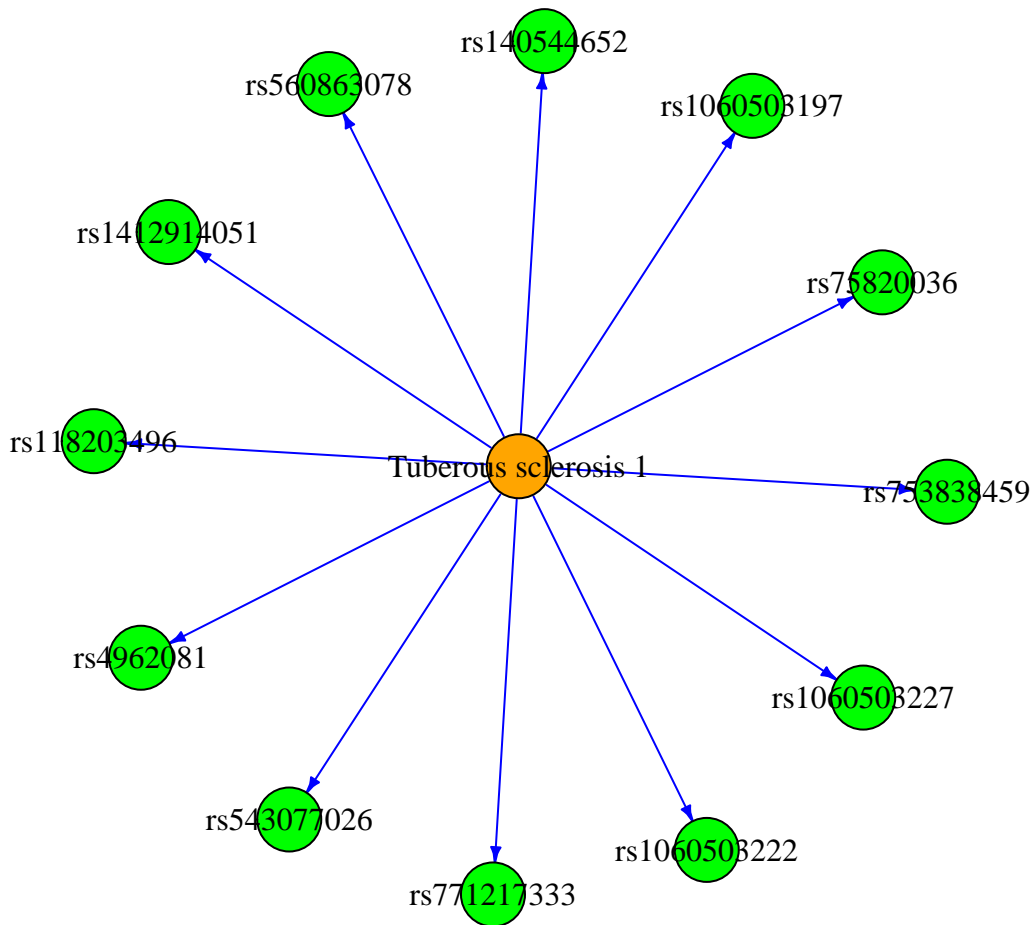

## Variant-Disease Network (Tuberous sclerosis 2)

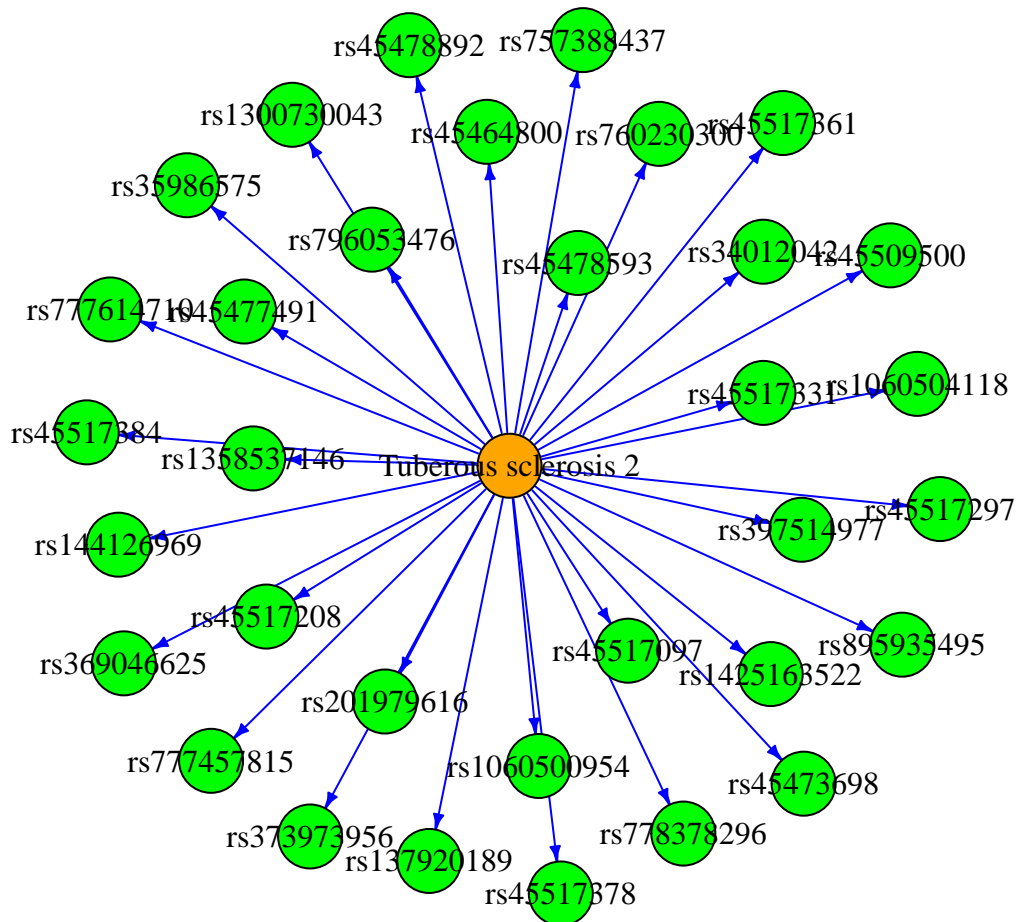

**Variant–Disease Network (Tuberous sclerosis syndrome)**

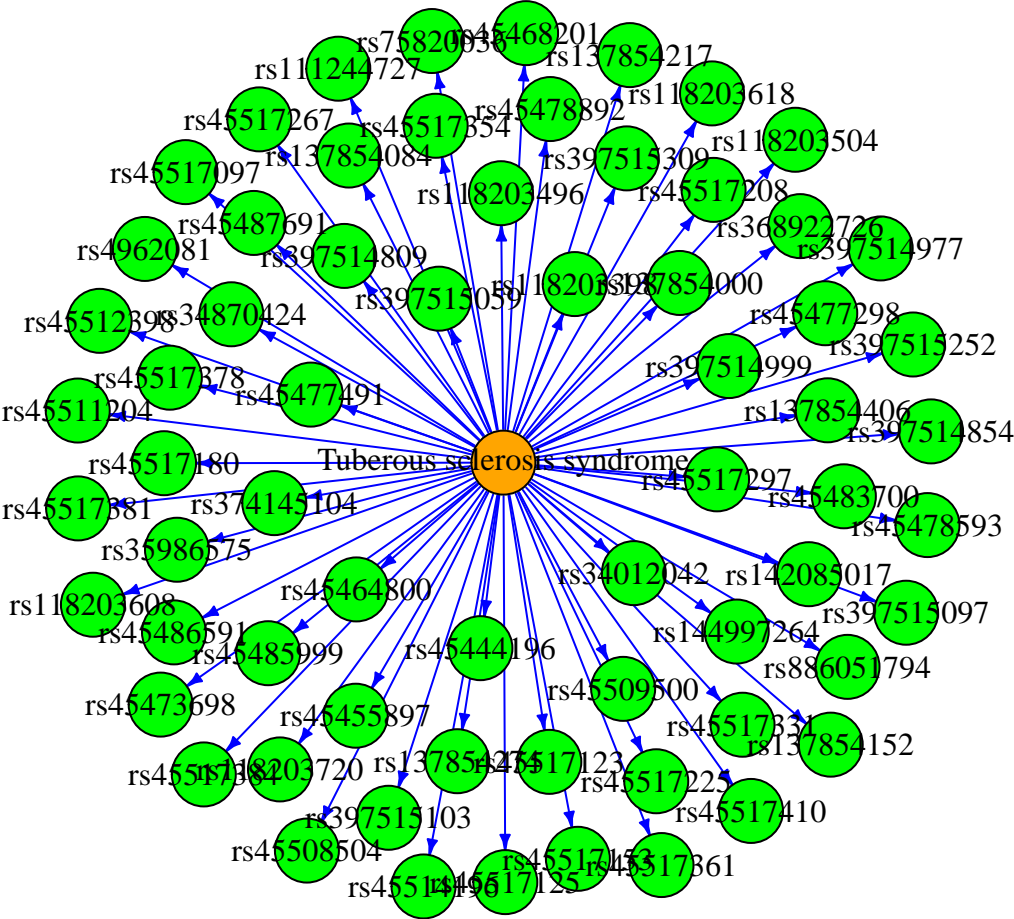

## Variant–Disease Network (Tubulinopathies)

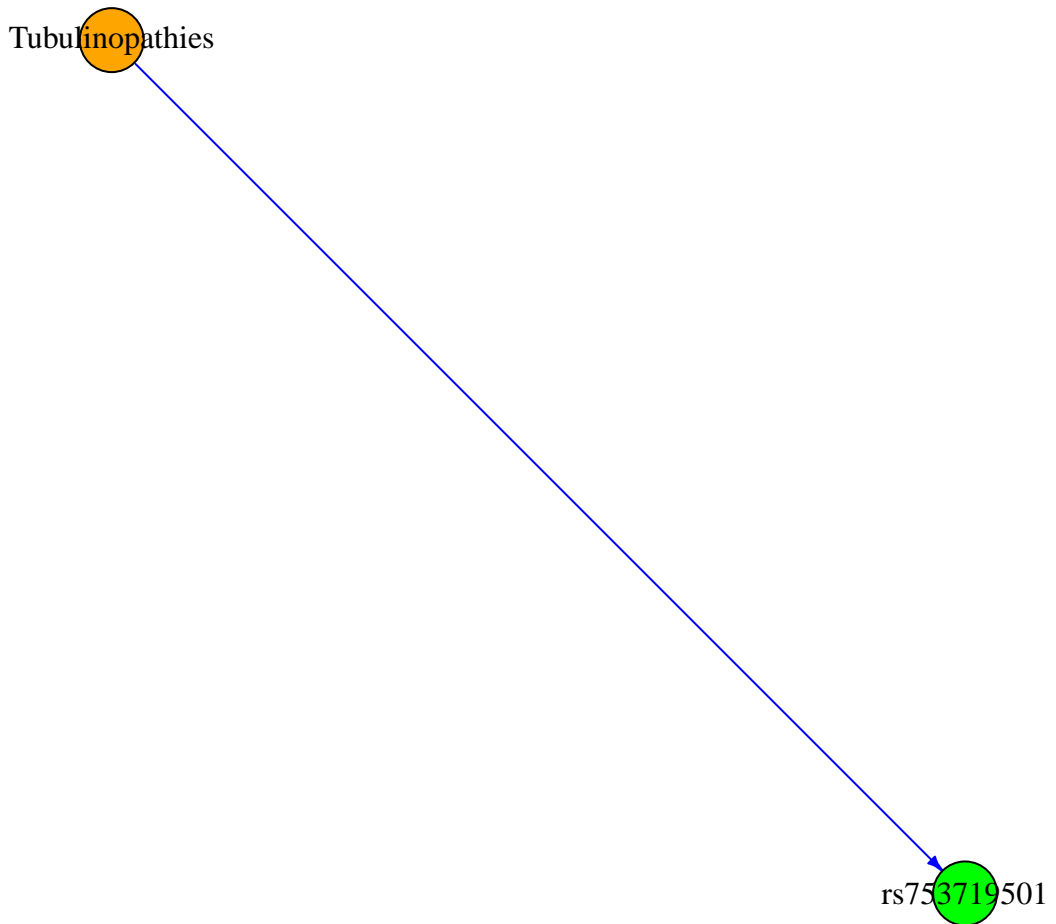



# Variant-Disease Network (Tumor susceptibility linked to germline BAP1 mutations)

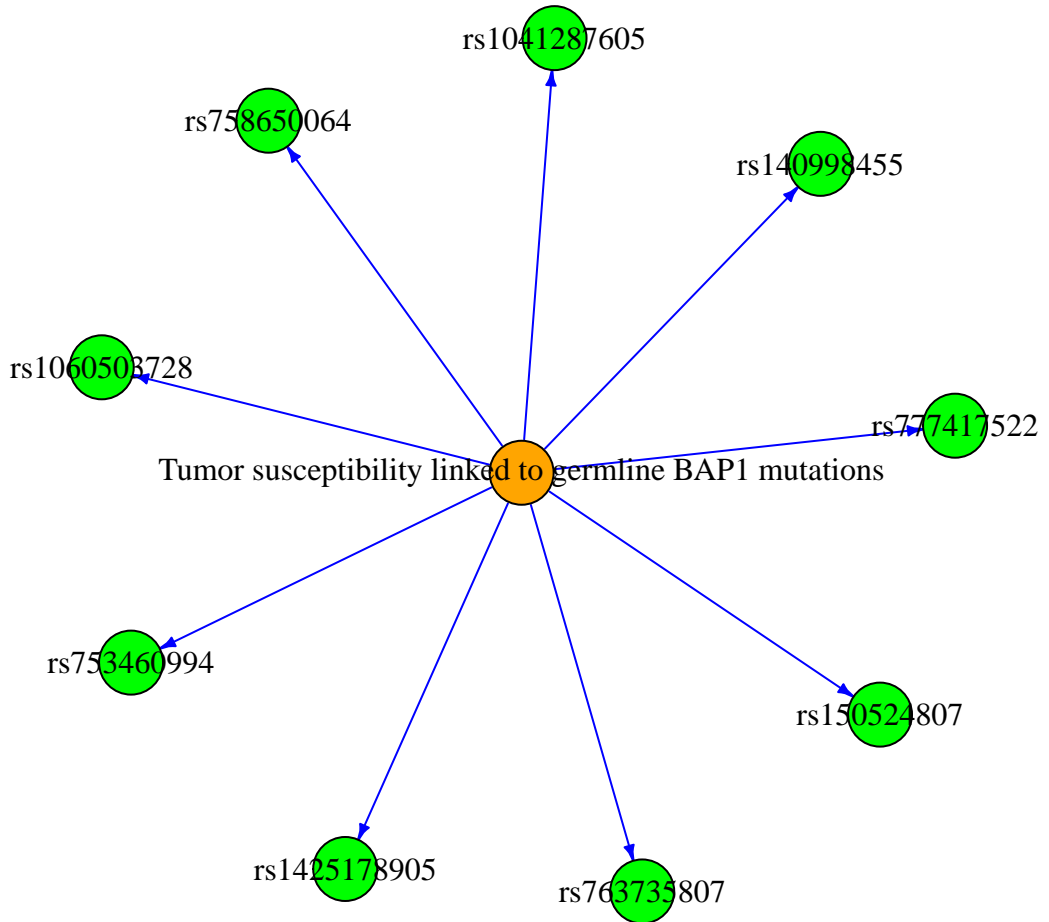

## Variant–Disease Network (Type B brachydactyly)

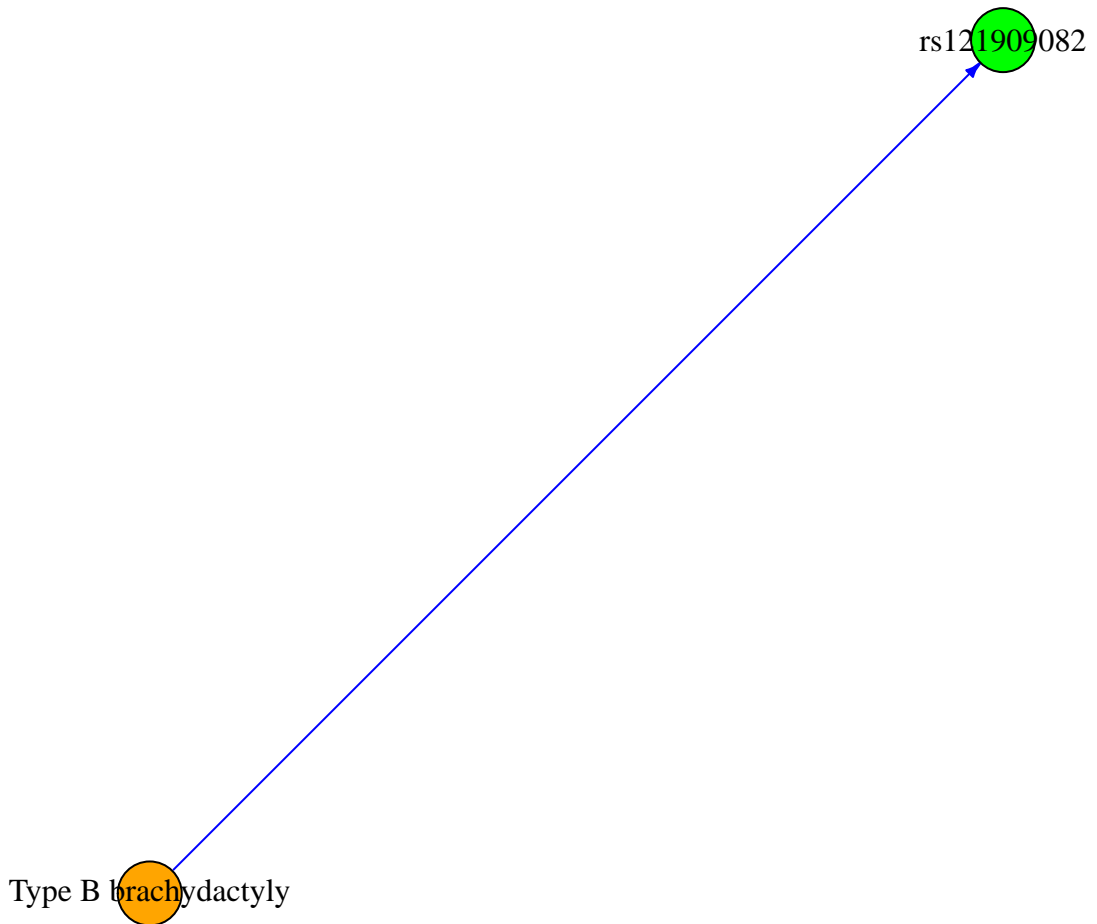

## Variant–Disease Network (Type II Collagenopathies)

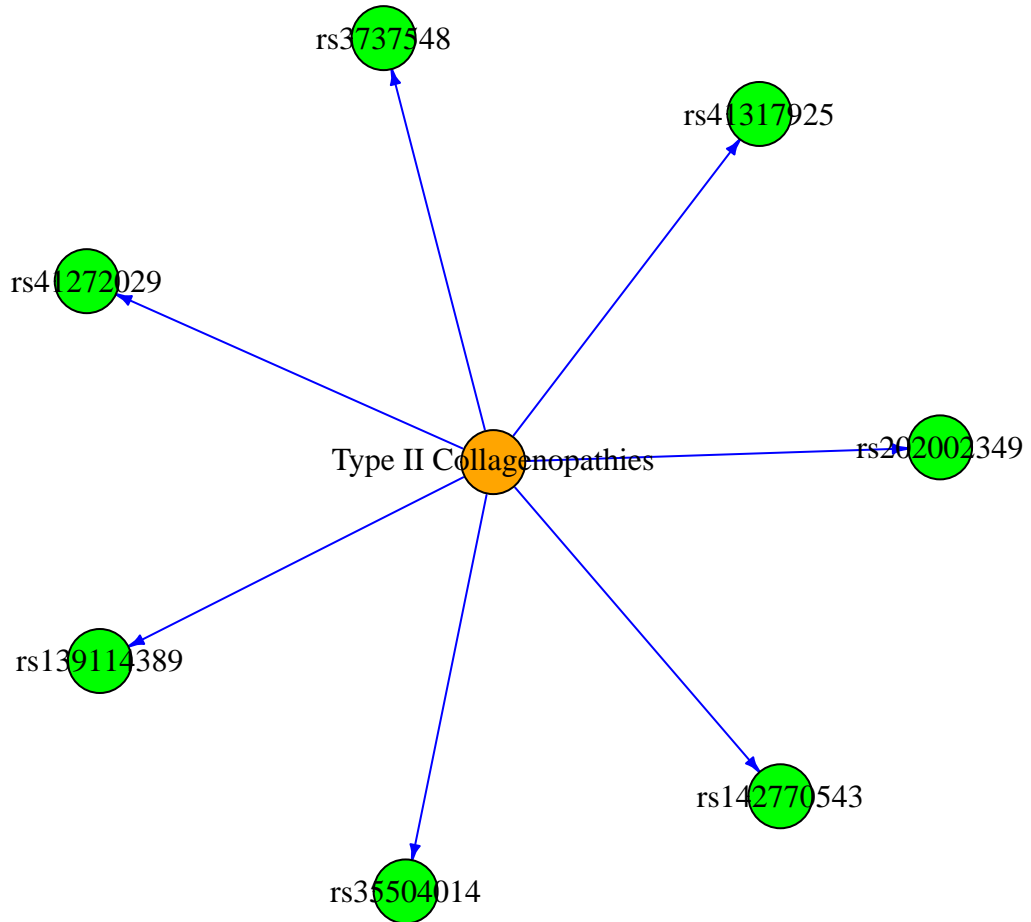

Variant–Disease Network (Tyrosinase–negative oculocutaneous albinism

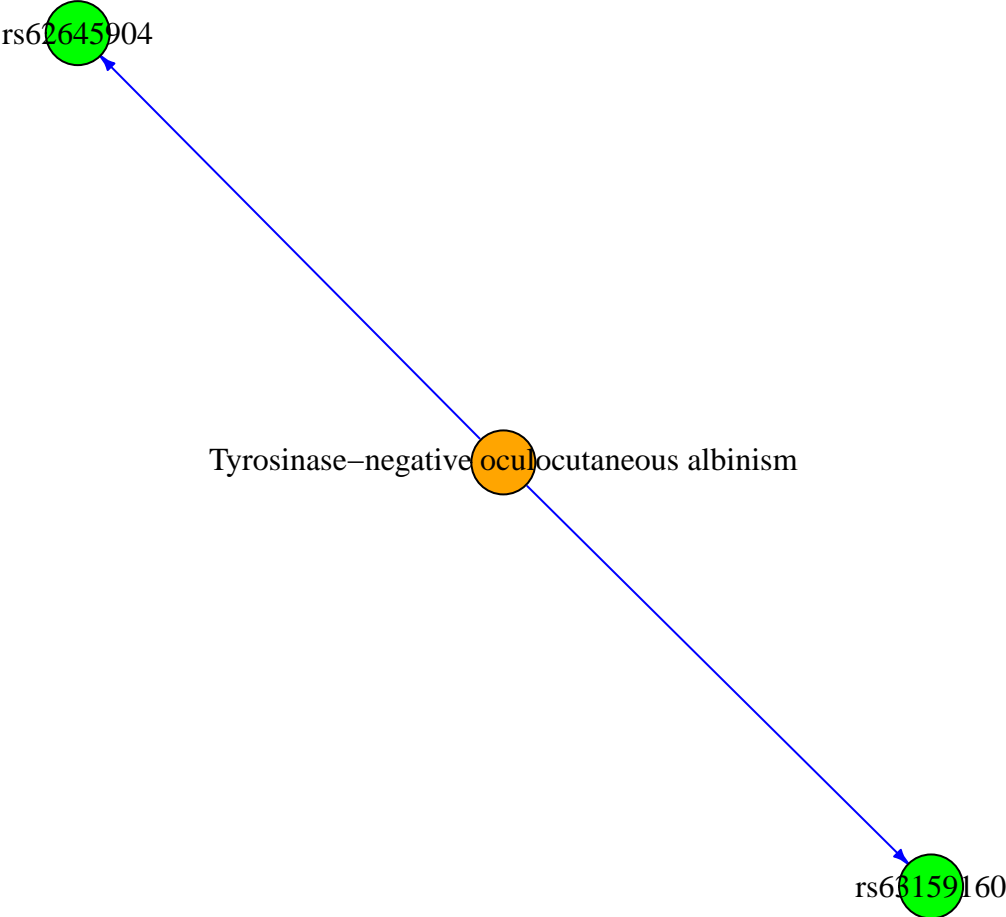

**Variant–Disease Network (Tyrosine kinase 2 deficiency)**

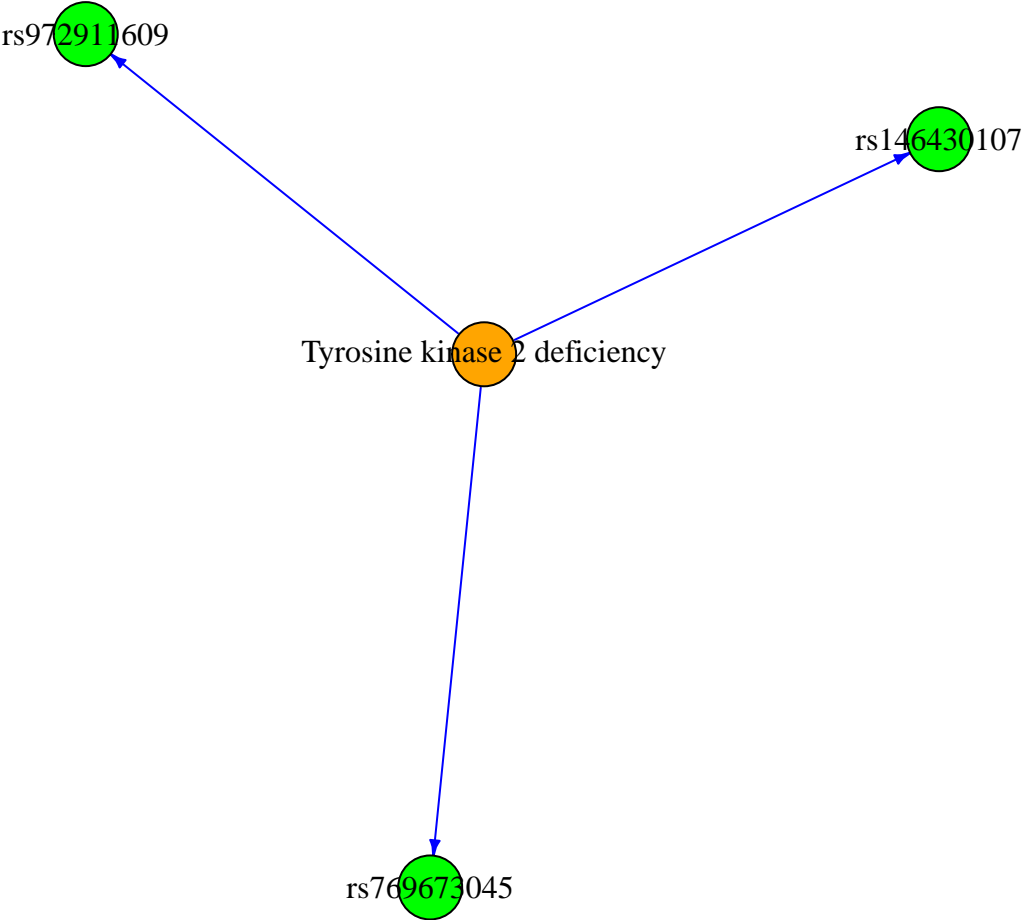

## Variant–Disease Network (Tyrosinemia type I)

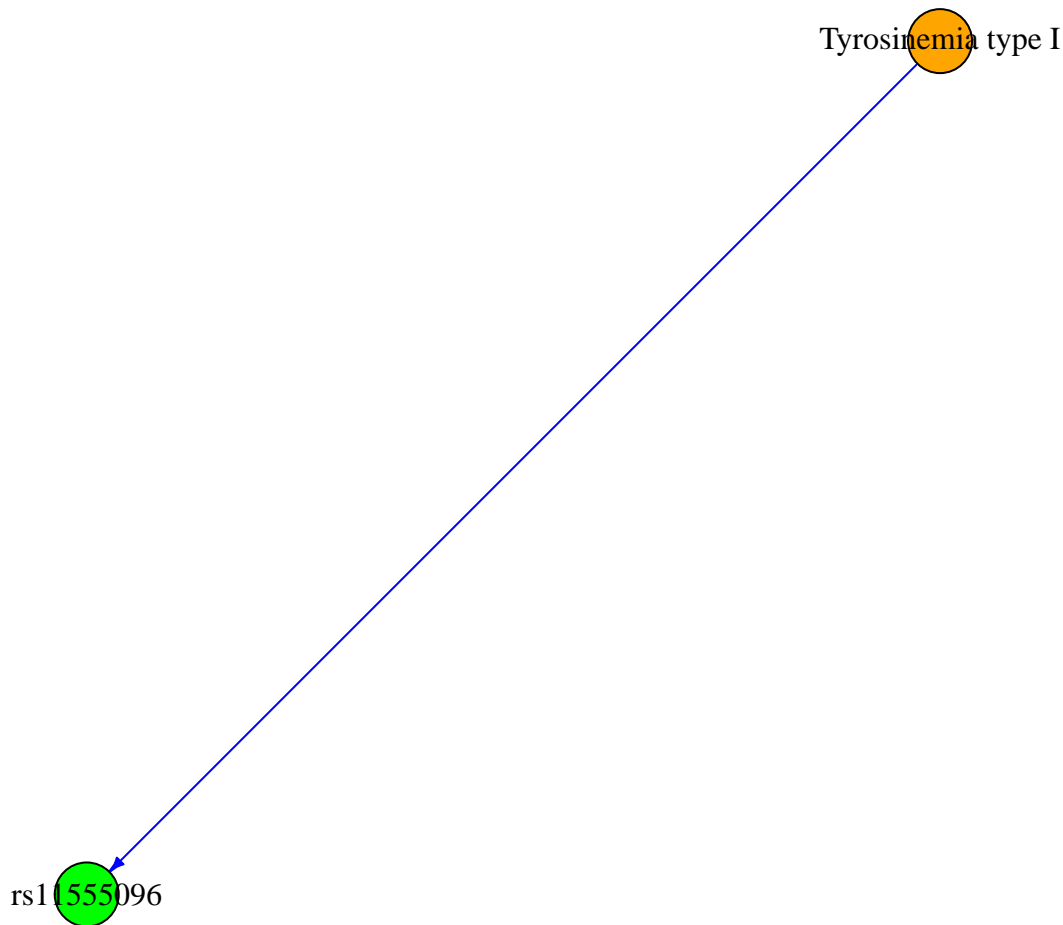

**Variant–Disease Network (Ullrich congenital muscular dystrophy 2)**

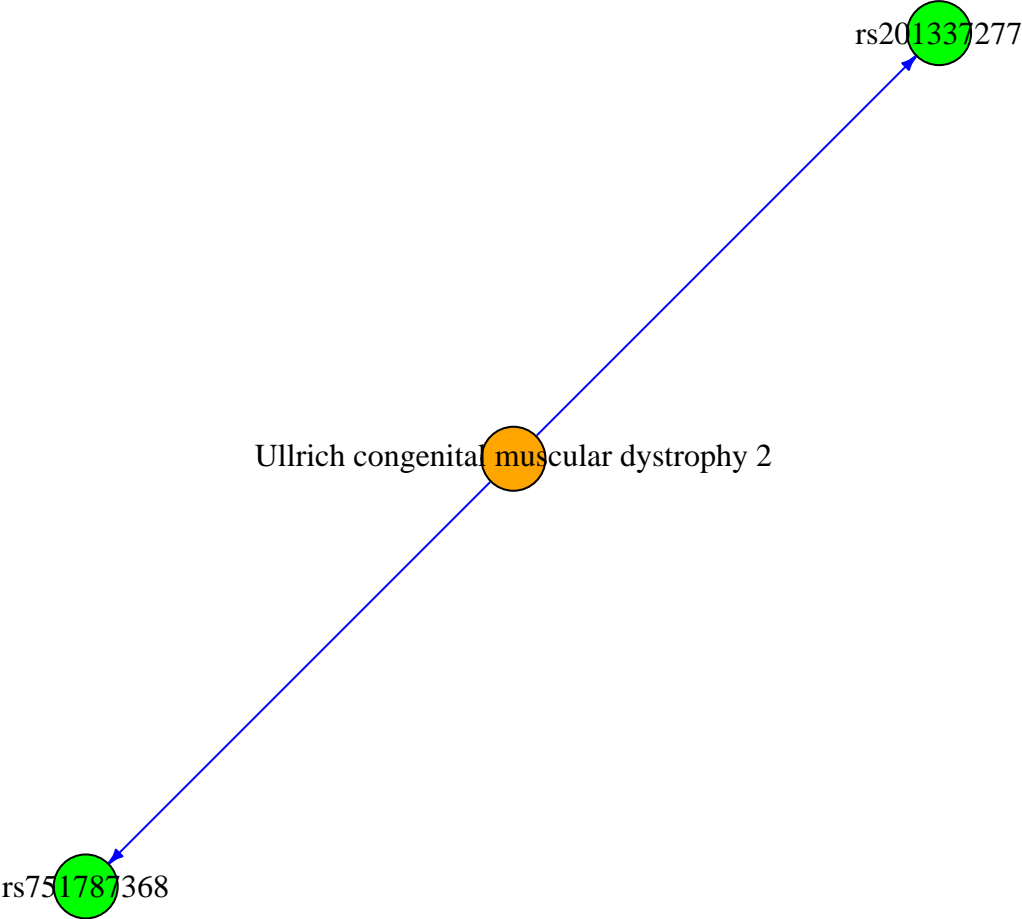

Variant–Disease Network (Upshaw–Schulman syndrome)

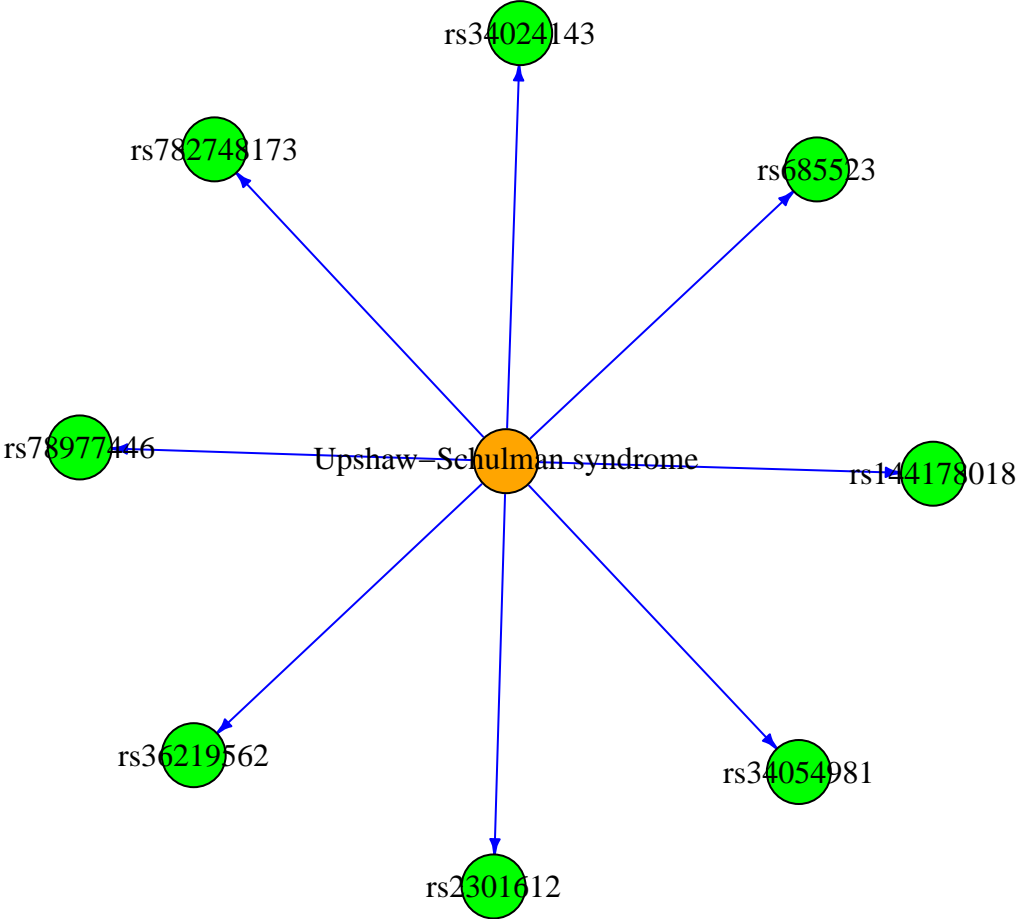



# Variant–Disease Network (Uromodulin–associated kidney disease)

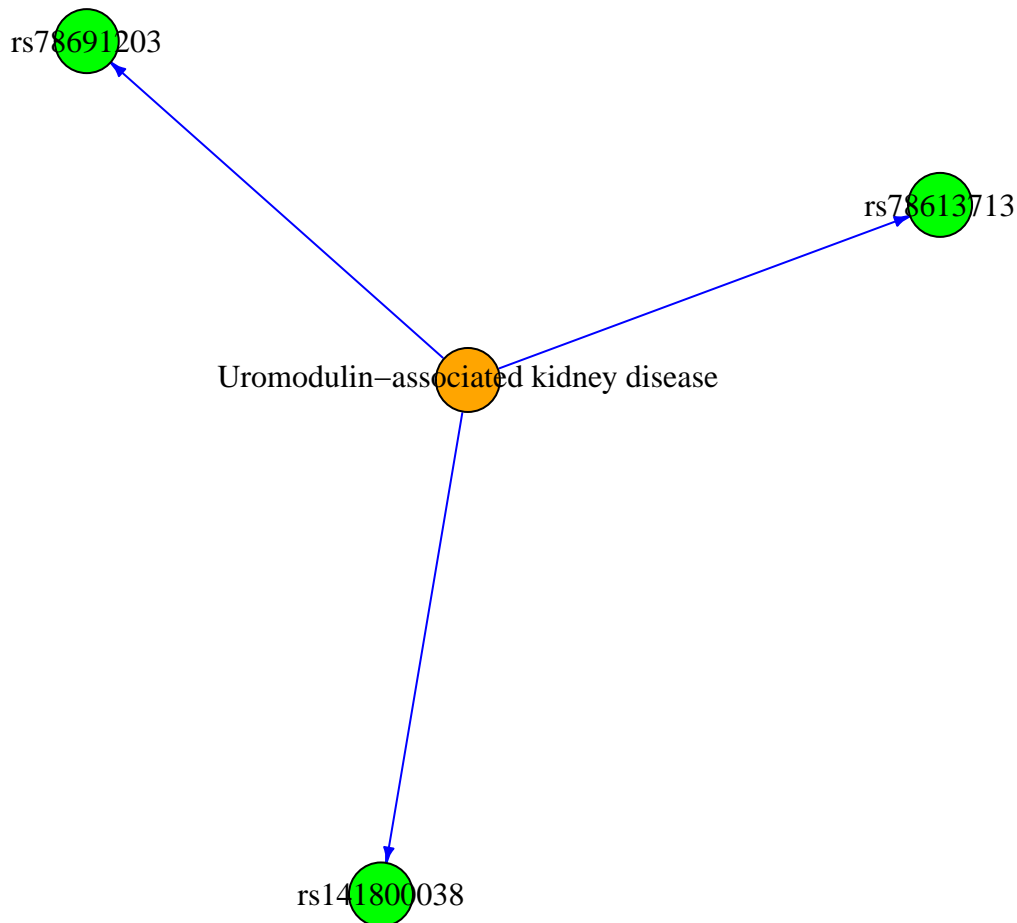

## Variant–Disease Network (Usher syndrome)

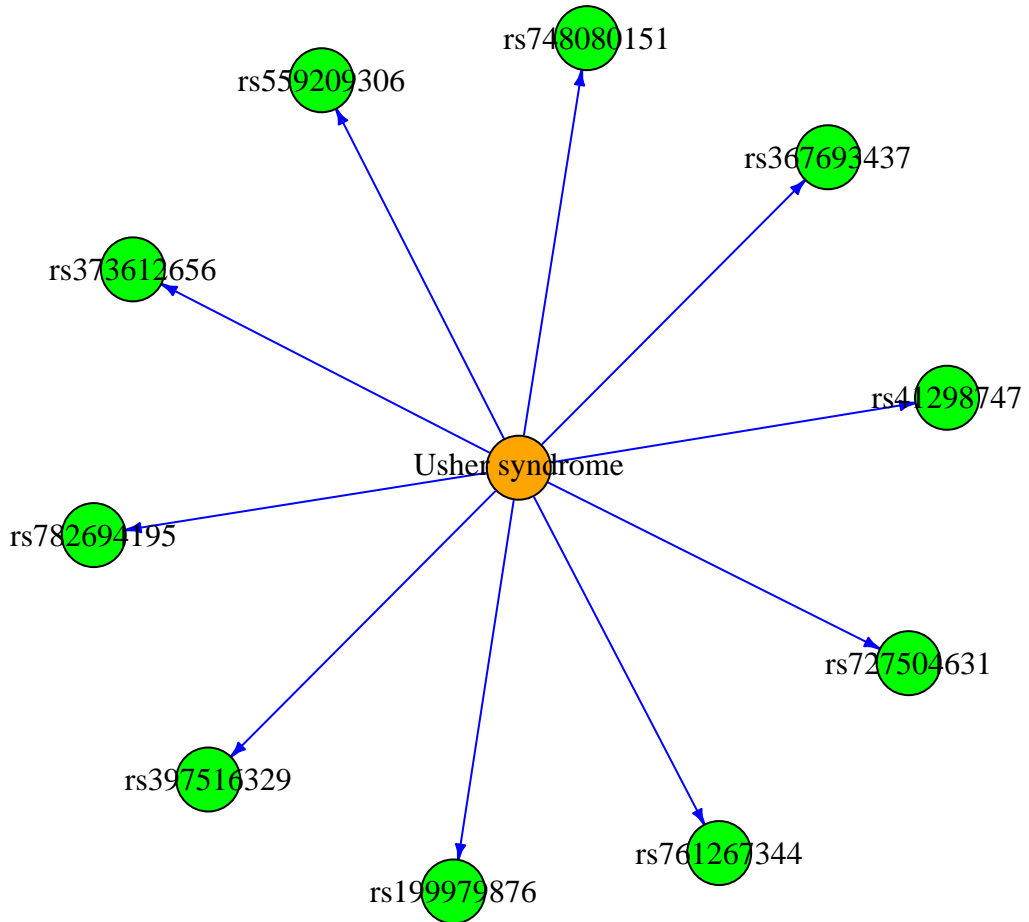

Variant–Disease Network (VACTERL association with hydrocephaly)

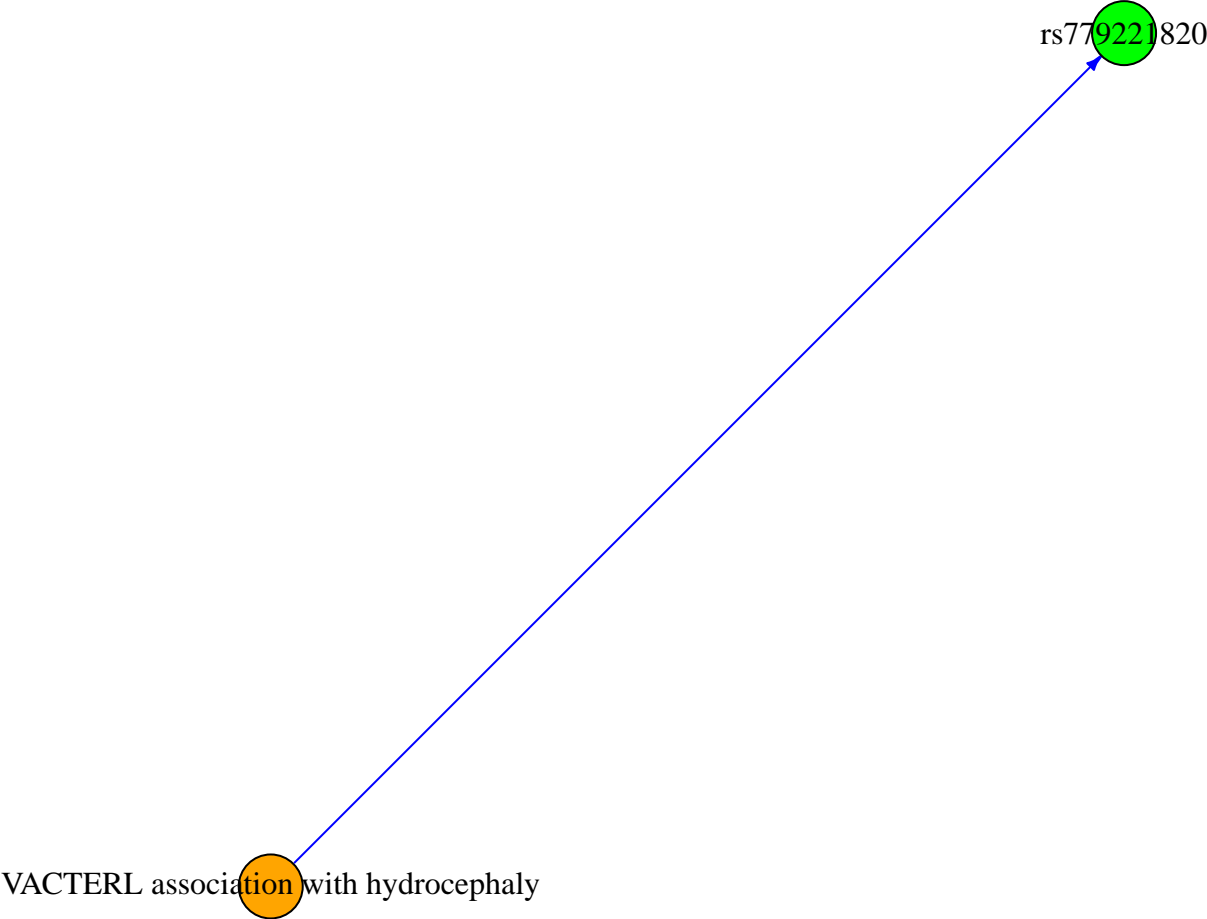

## Variant–Disease Network (Van der Woude syndrome)

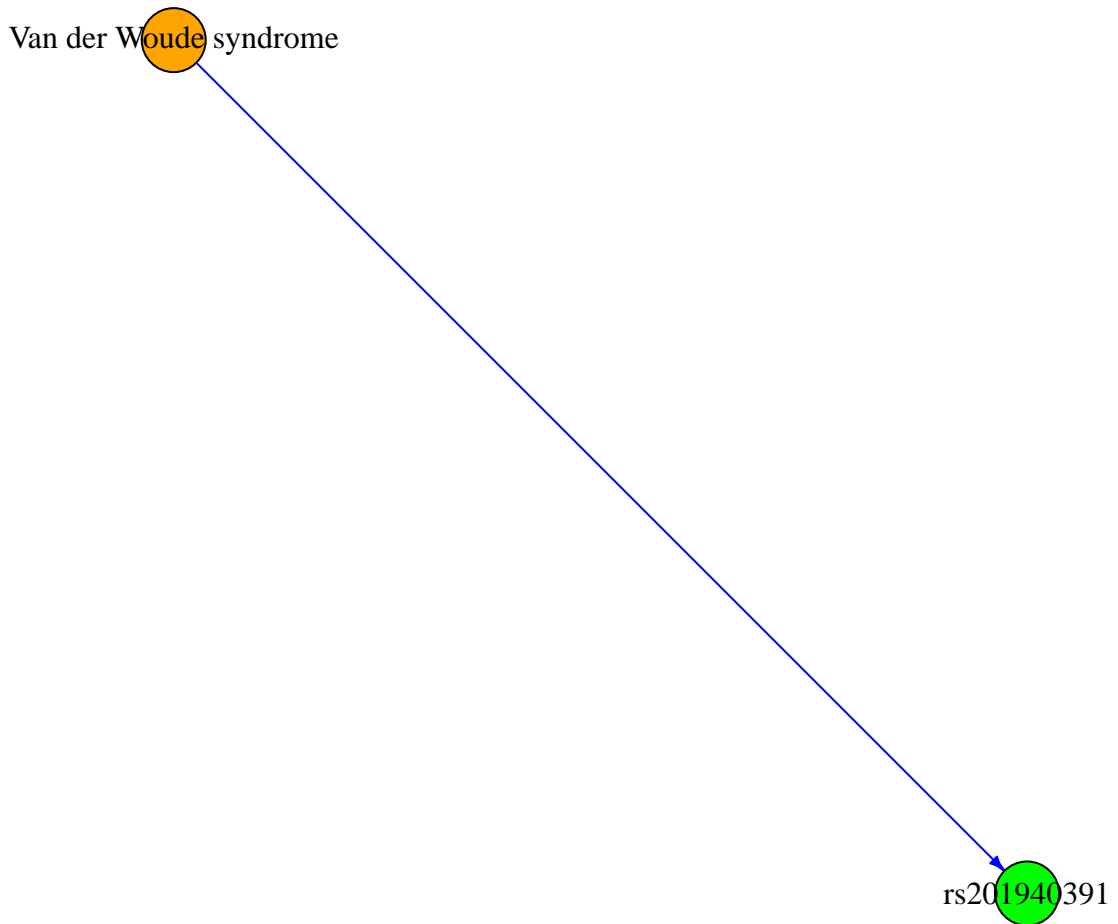

## Variant–Disease Network (Venous thrombosis)

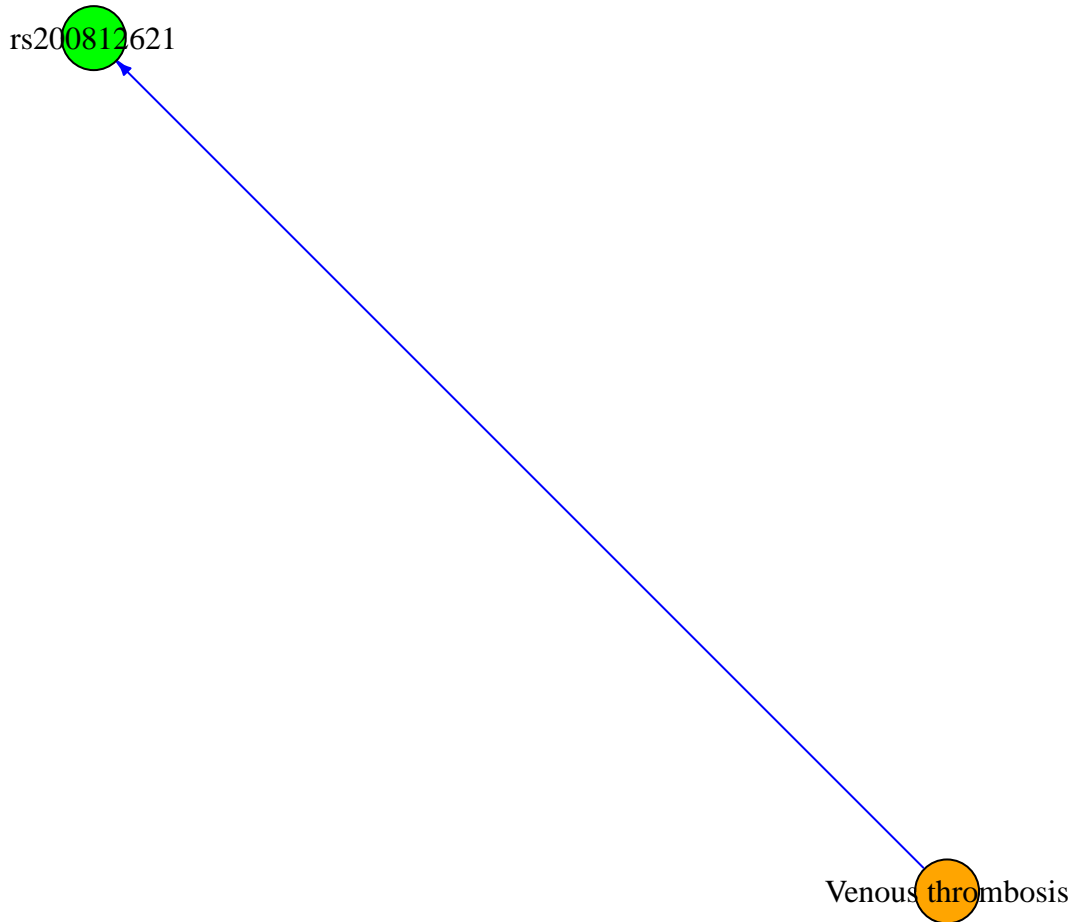

## Variant–Disease Network (Ventricular septal defect)

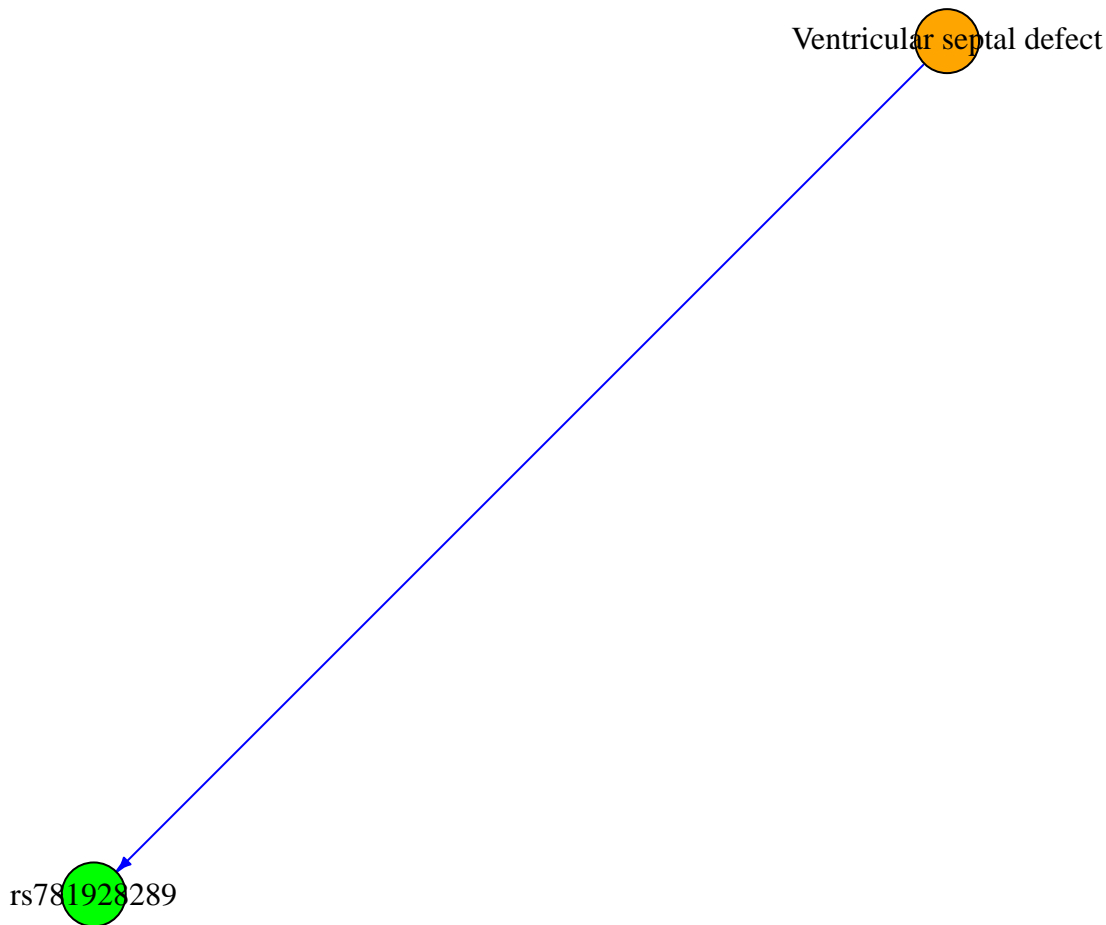

## Variant–Disease Network (Ventricular tachycardia)

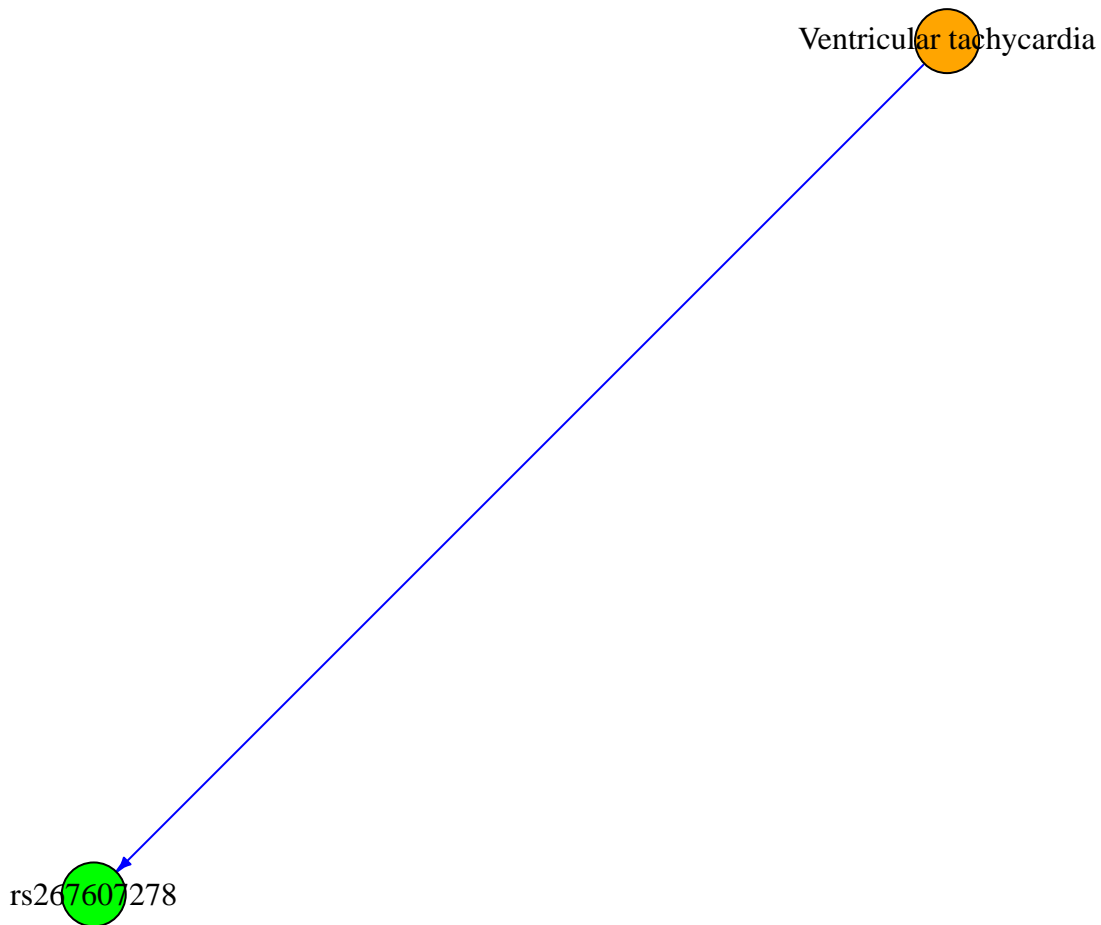

## Variant-Disease Network (Vertical talus)

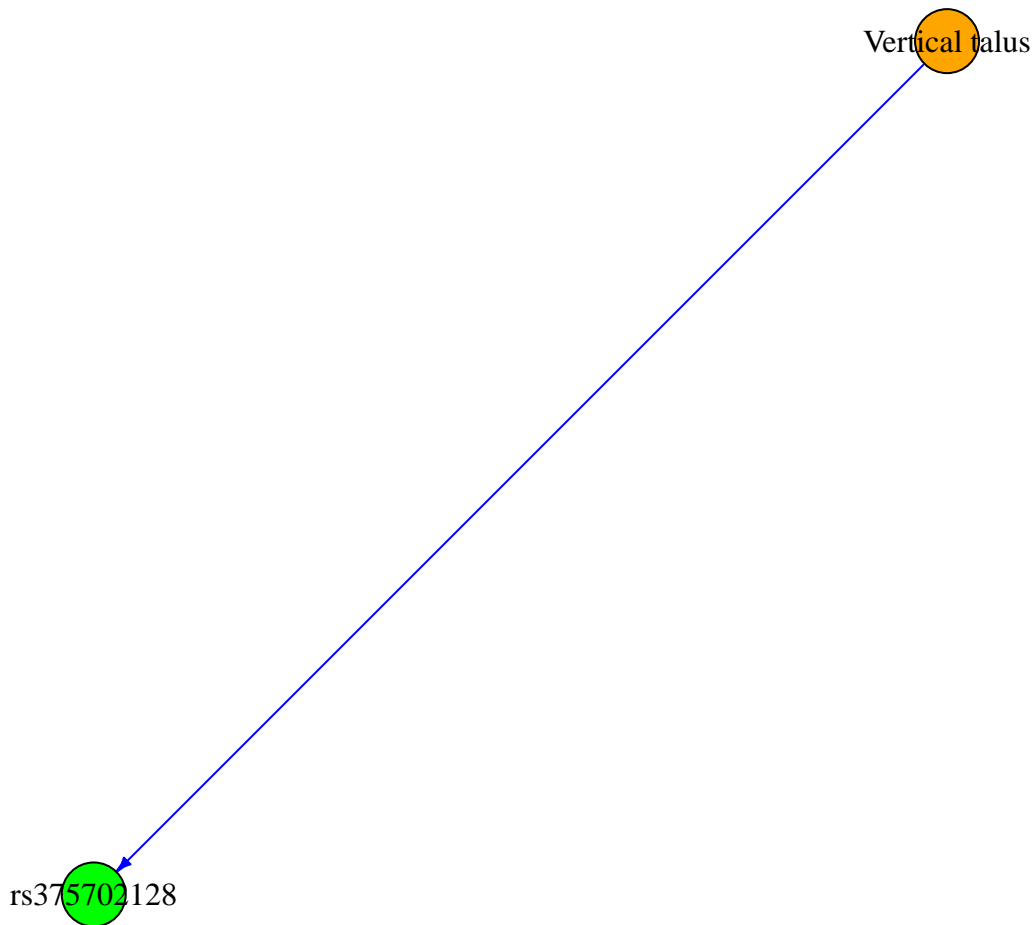



## Variant–Disease Network (Vesicoureteral reflux)

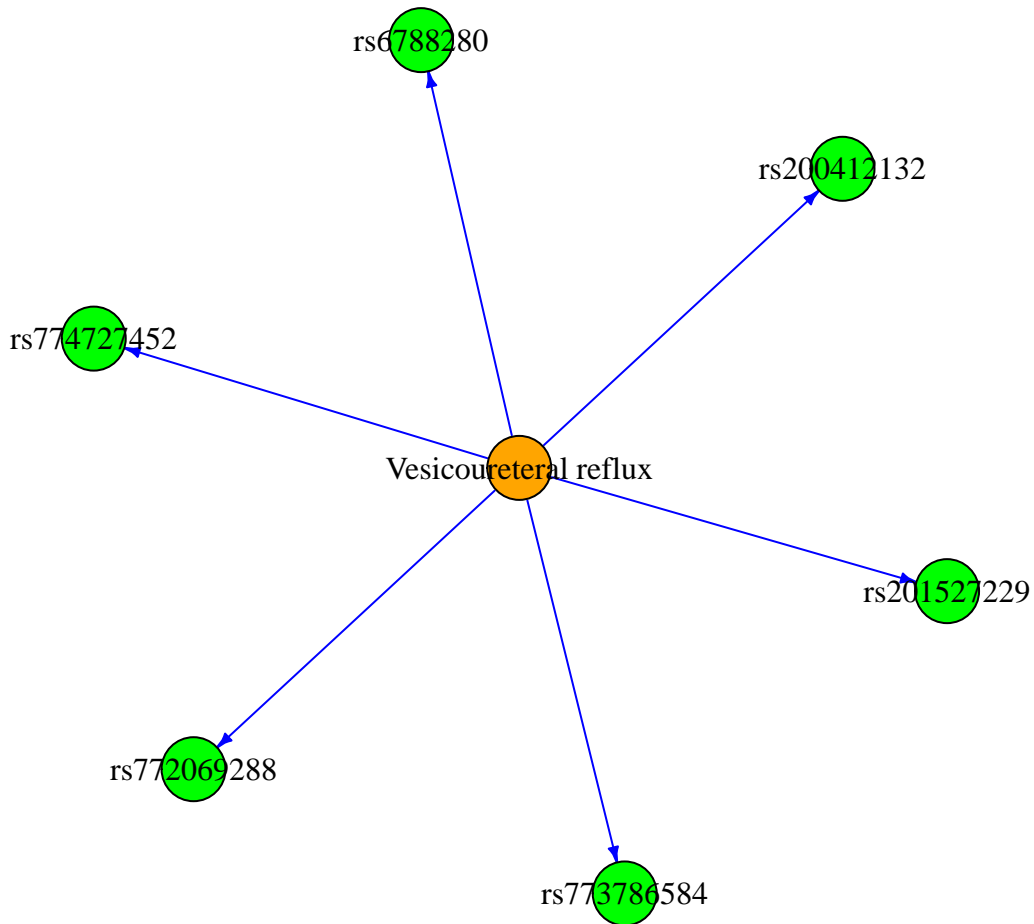

**Variant–Disease Network (Vici syndrome)**

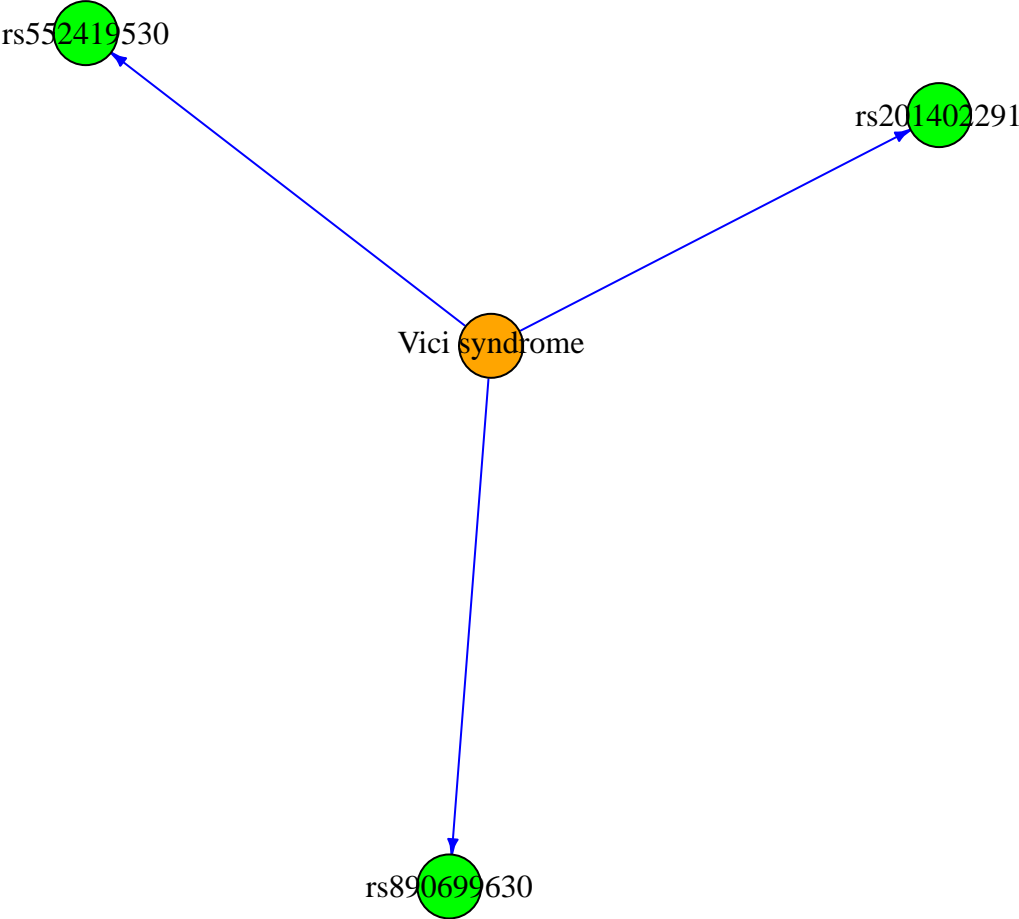

Variant–Disease Network (Vitamin D–Dependent Rickets)

Vitamin D–Dependent Rickets

rs12721865

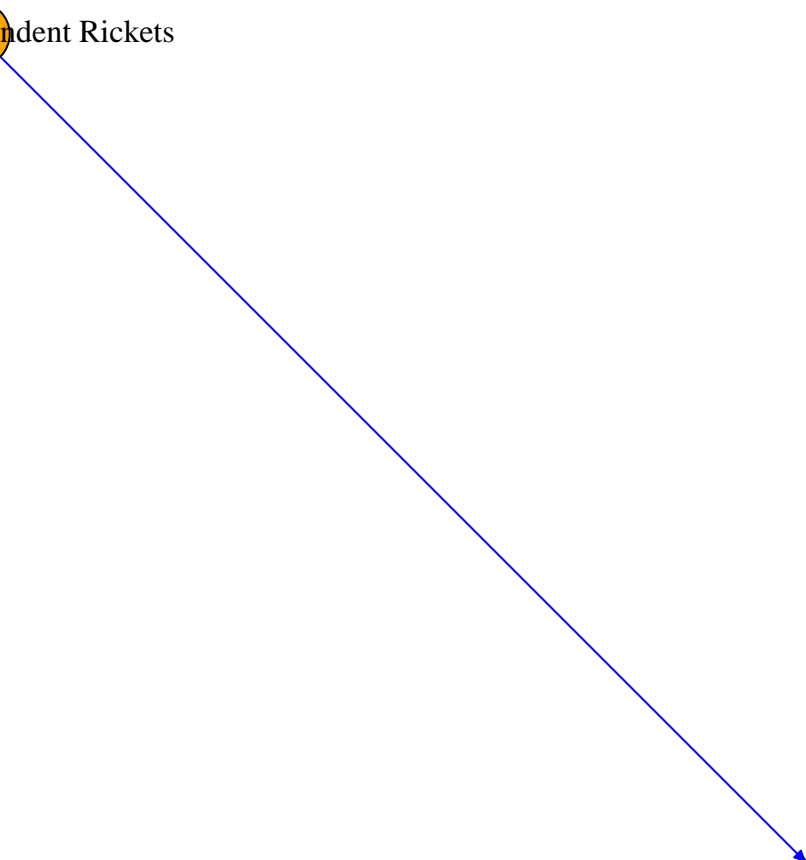

Variant–Disease Network (Vitelliform macular dystrophy type 2)

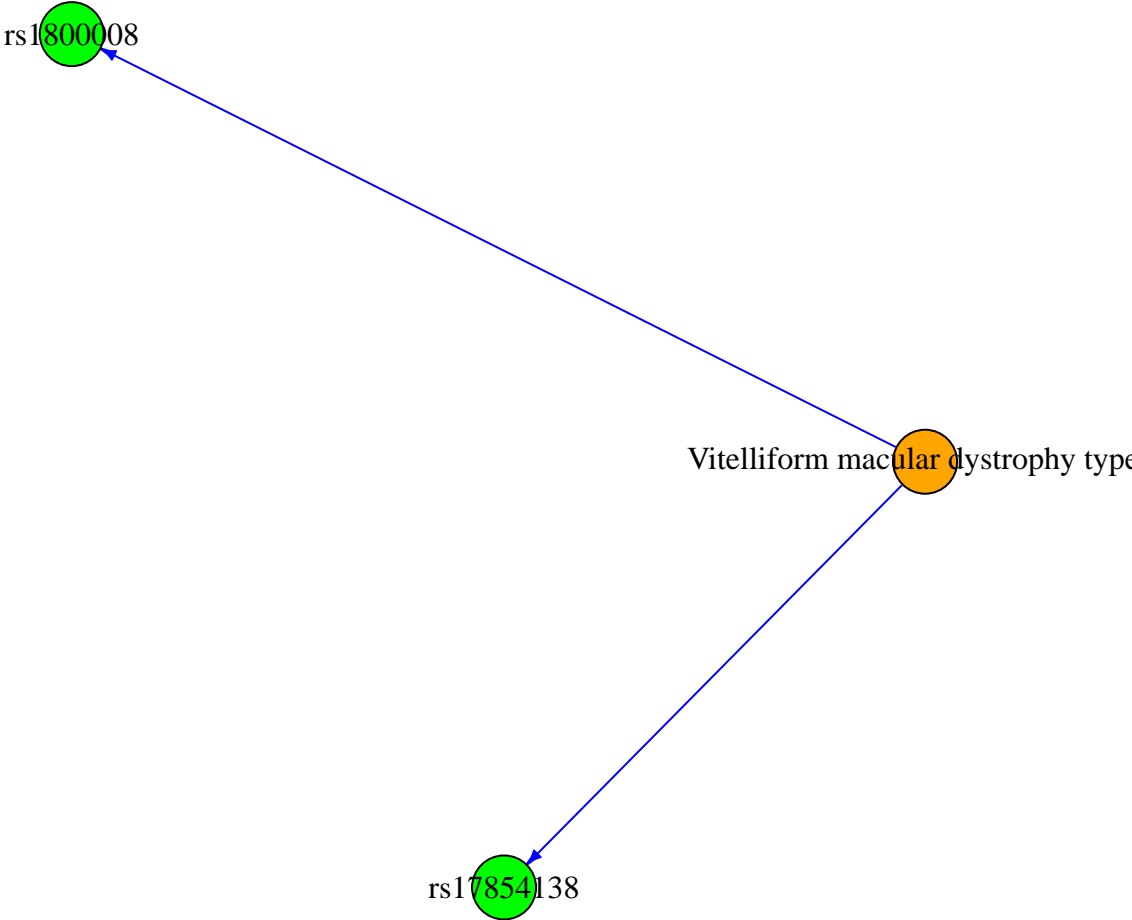

# Variant–Disease Network (Vitreoretinopathology)

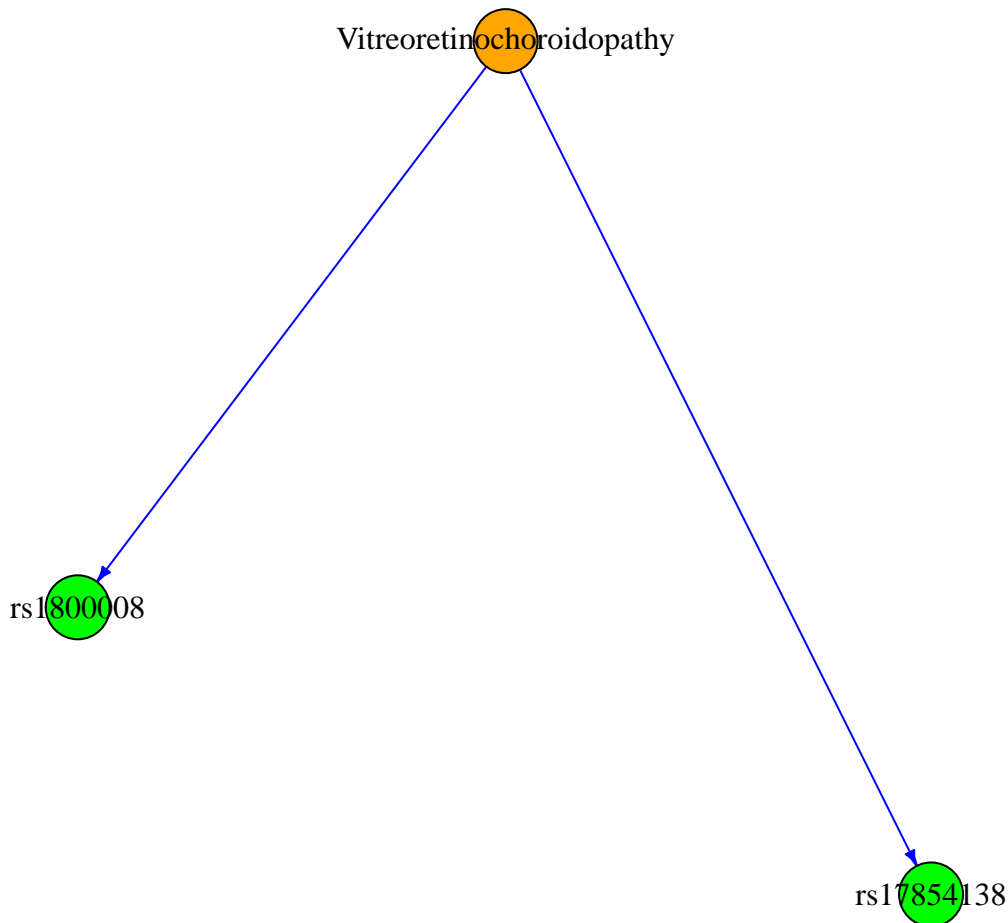

Variant–Disease Network (Vitreoretinopathy)

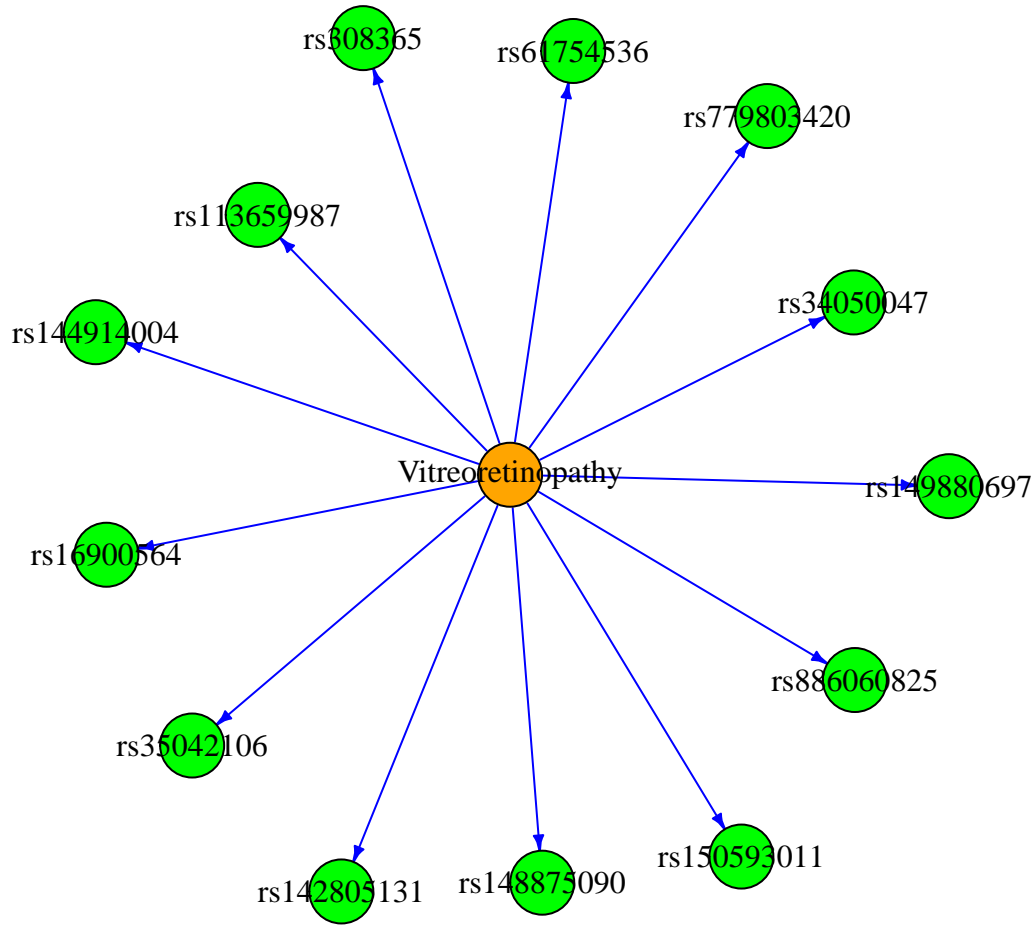

**Variant–Disease Network (Von Hippel–Lindau syndrome)**

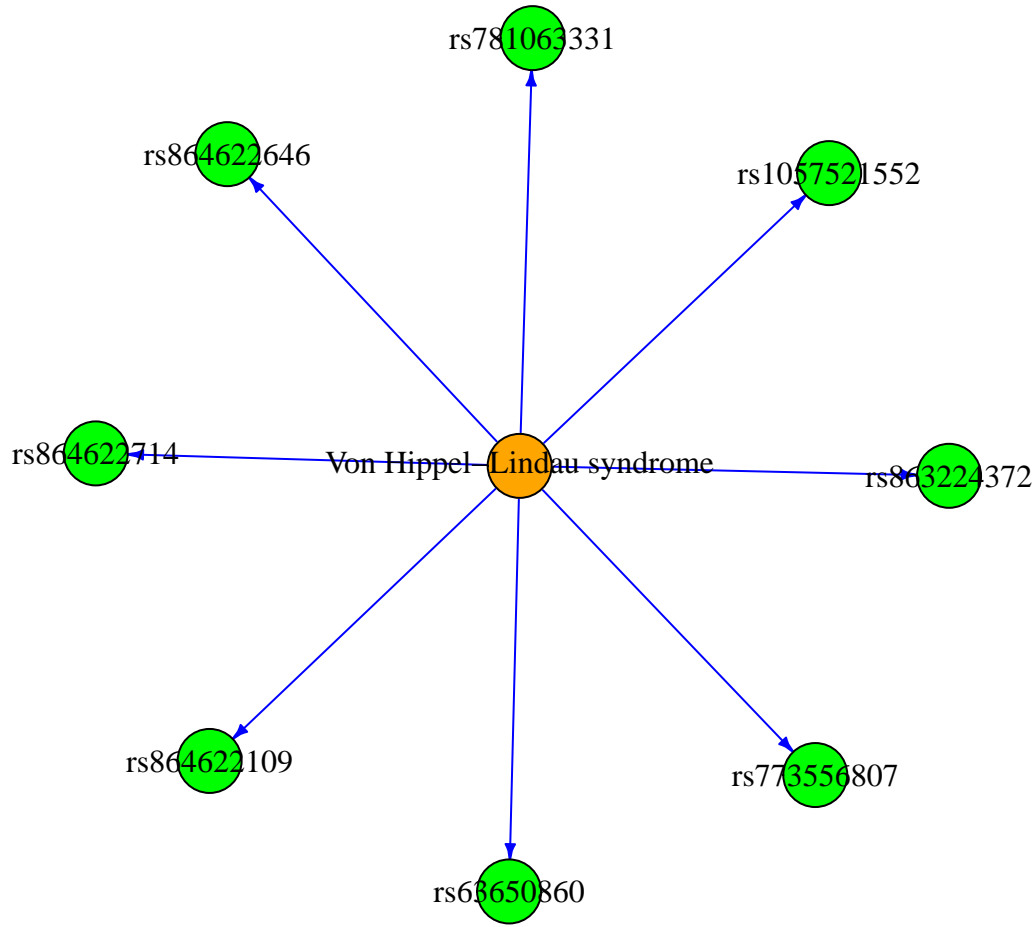

Variant–Disease Network (Von Willebrand disease)

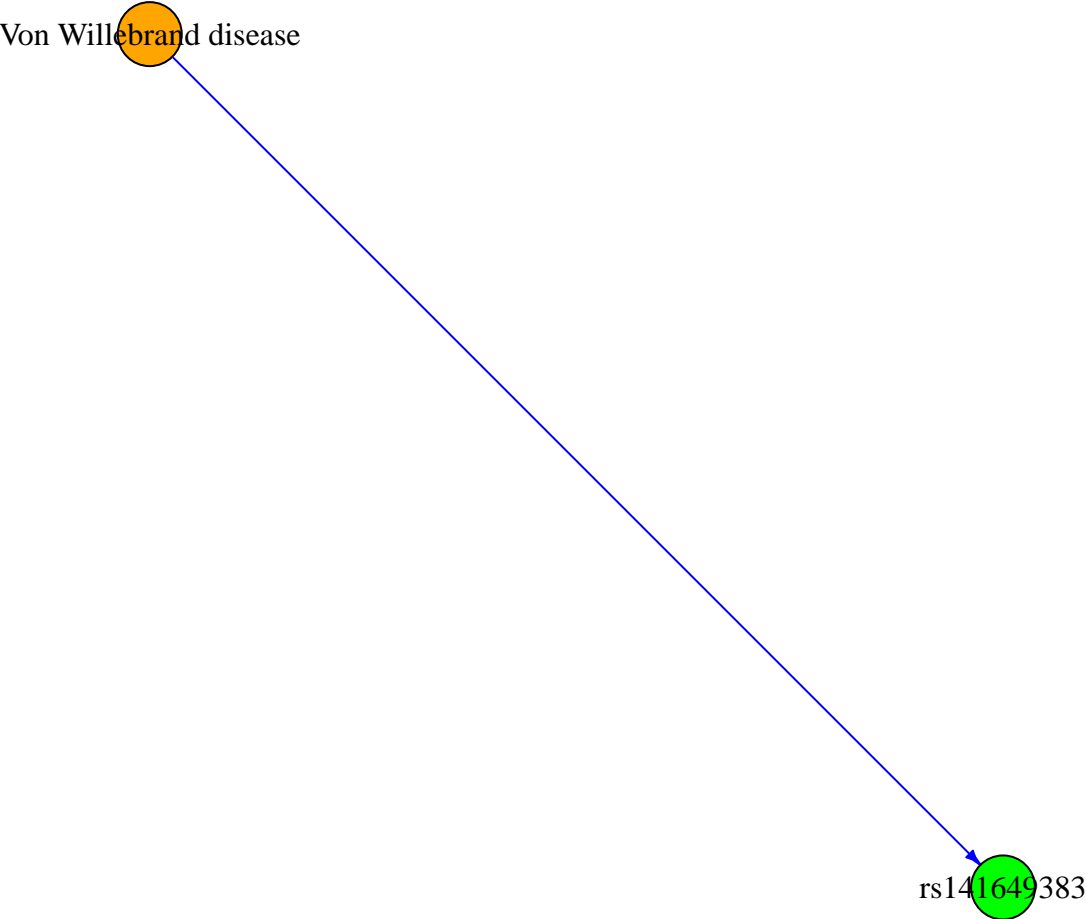



**Variant–Disease Network (von Willebrand disease type 1)**

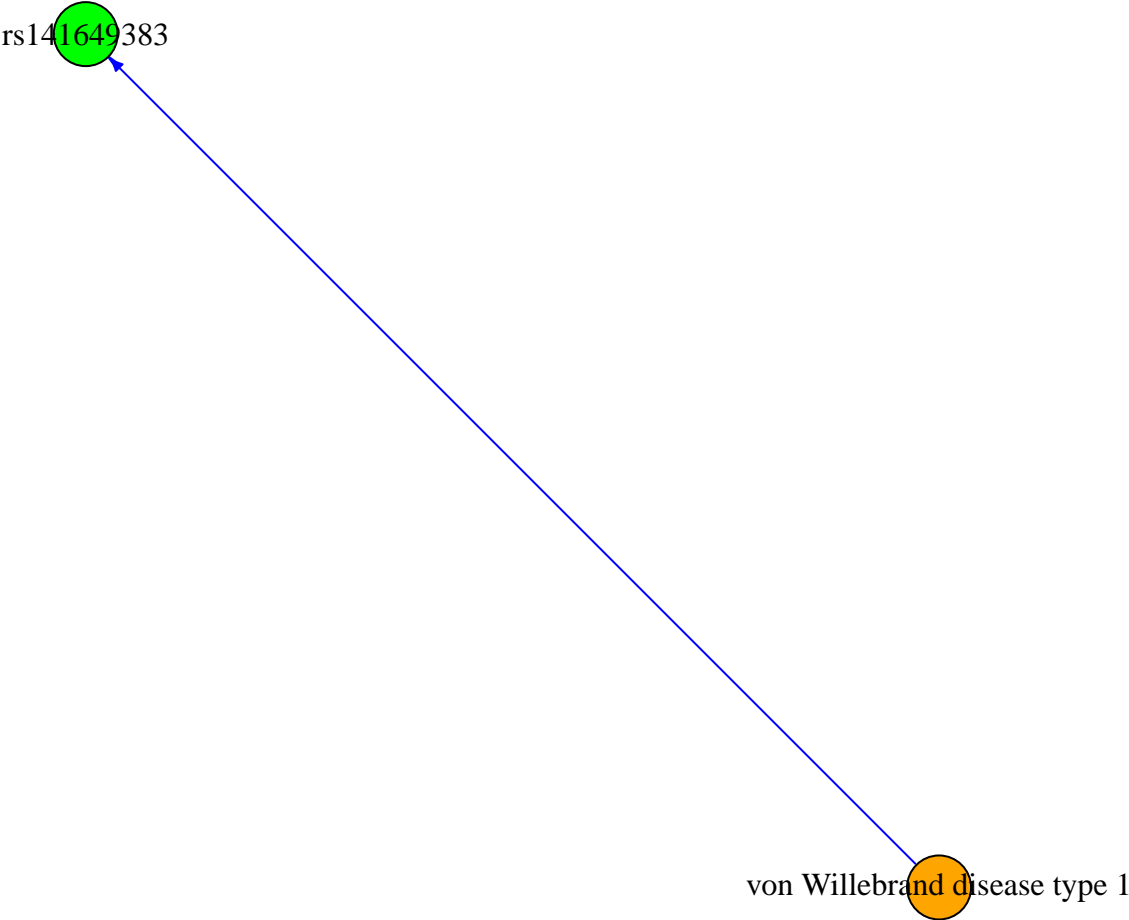

**Variant–Disease Network (von Willebrand disease type 2)**

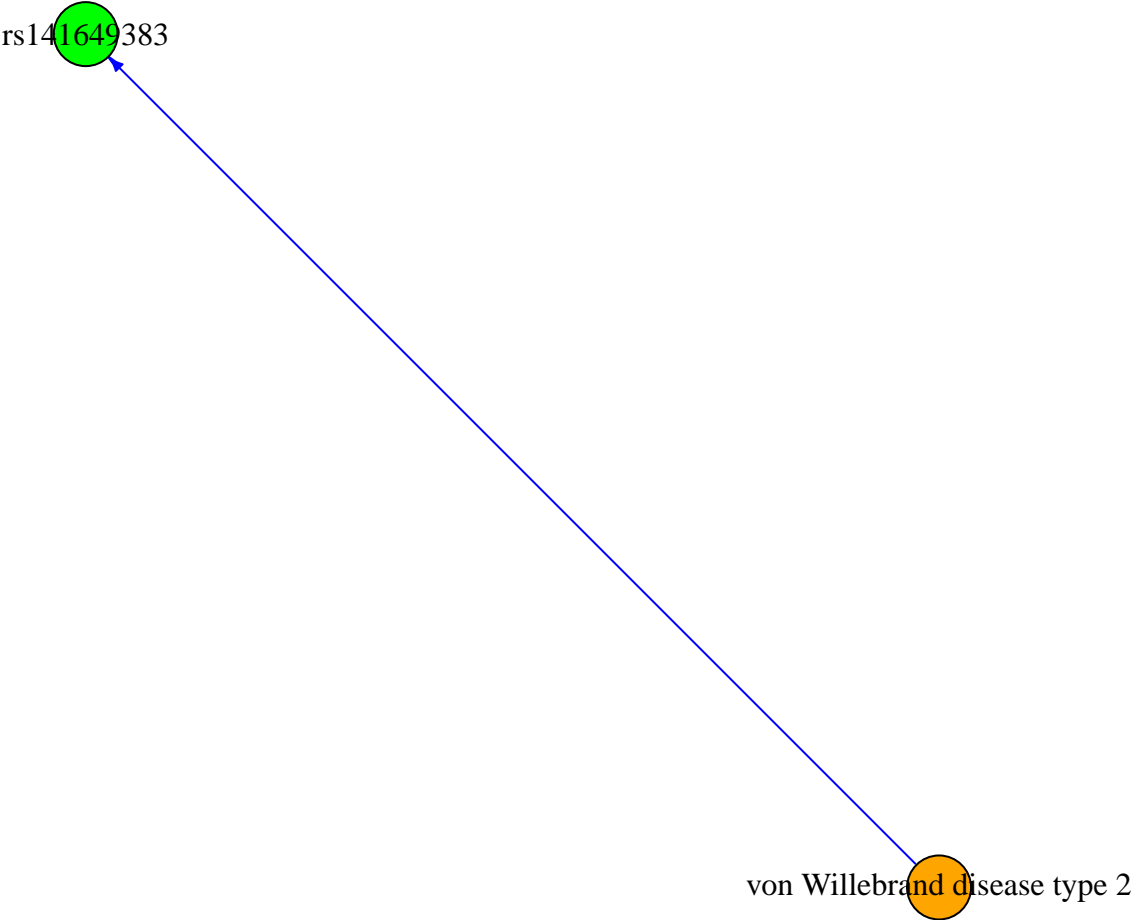

## Variant–Disease Network (von Willebrand disorder)

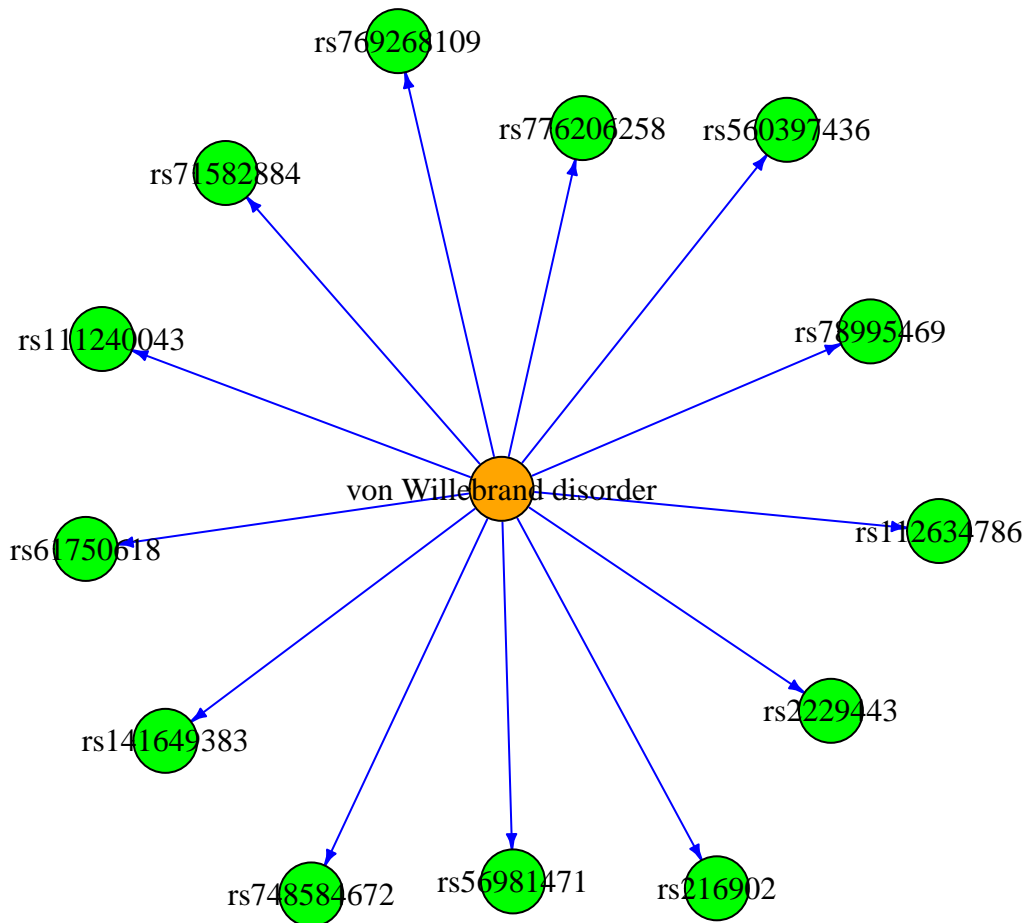

## Variant–Disease Network (Waardenburg syndrome)

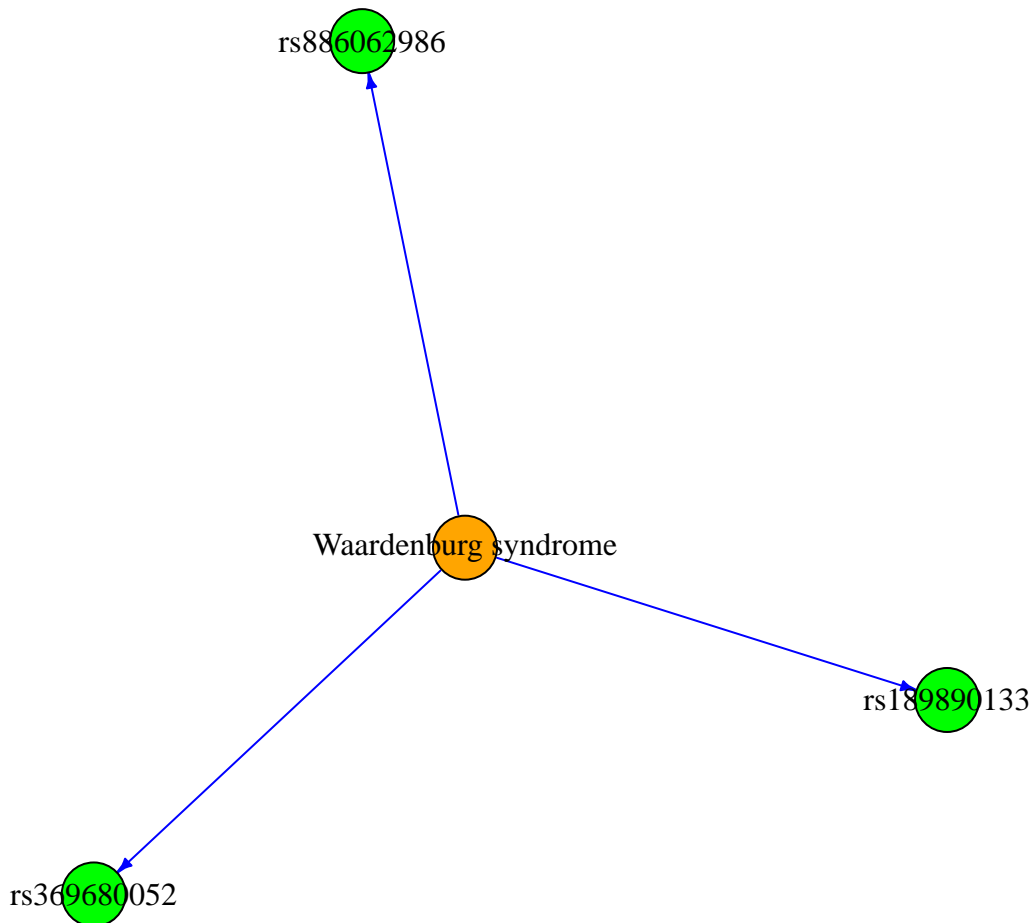

# Variant-Disease Network (Waardenburg syndrome type 2E)

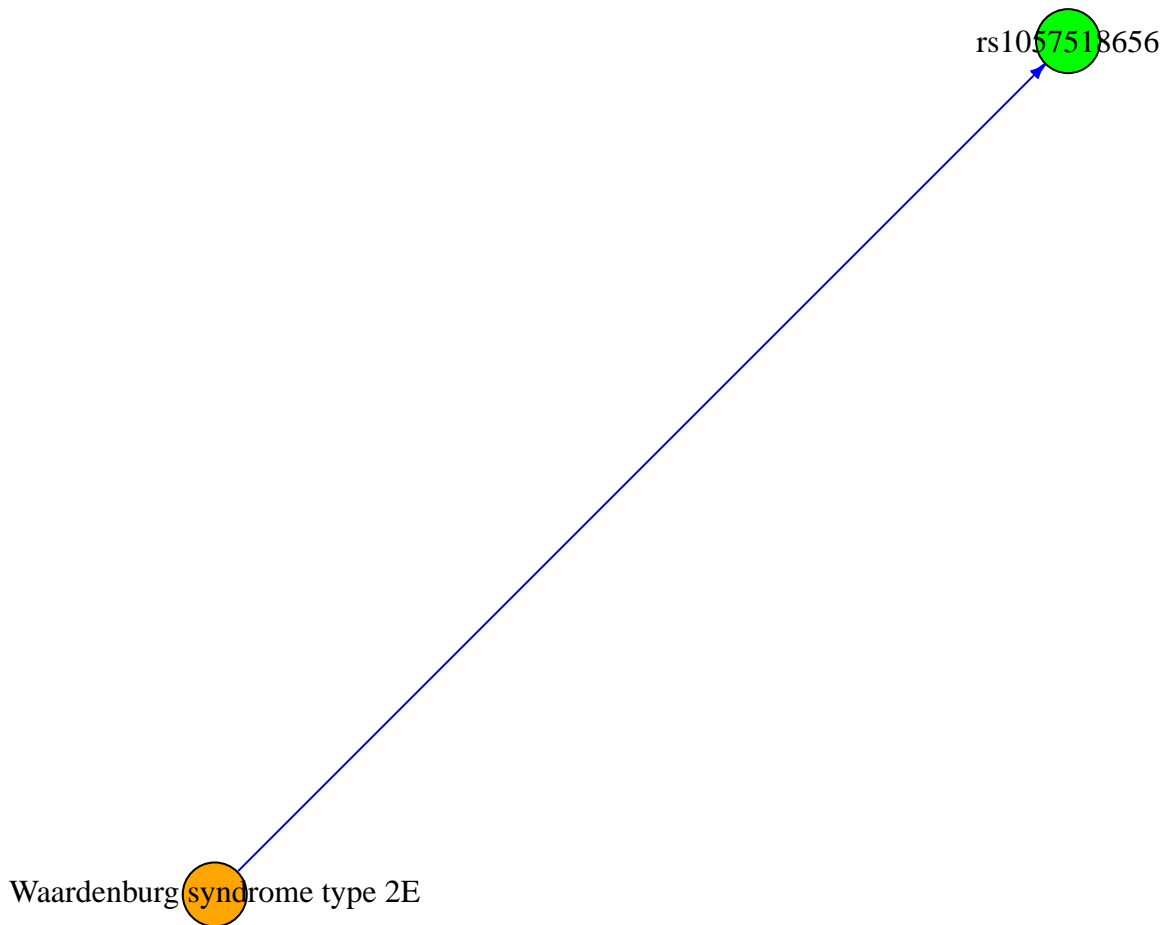

# Variant–Disease Network (Waardenburg syndrome type 4A)

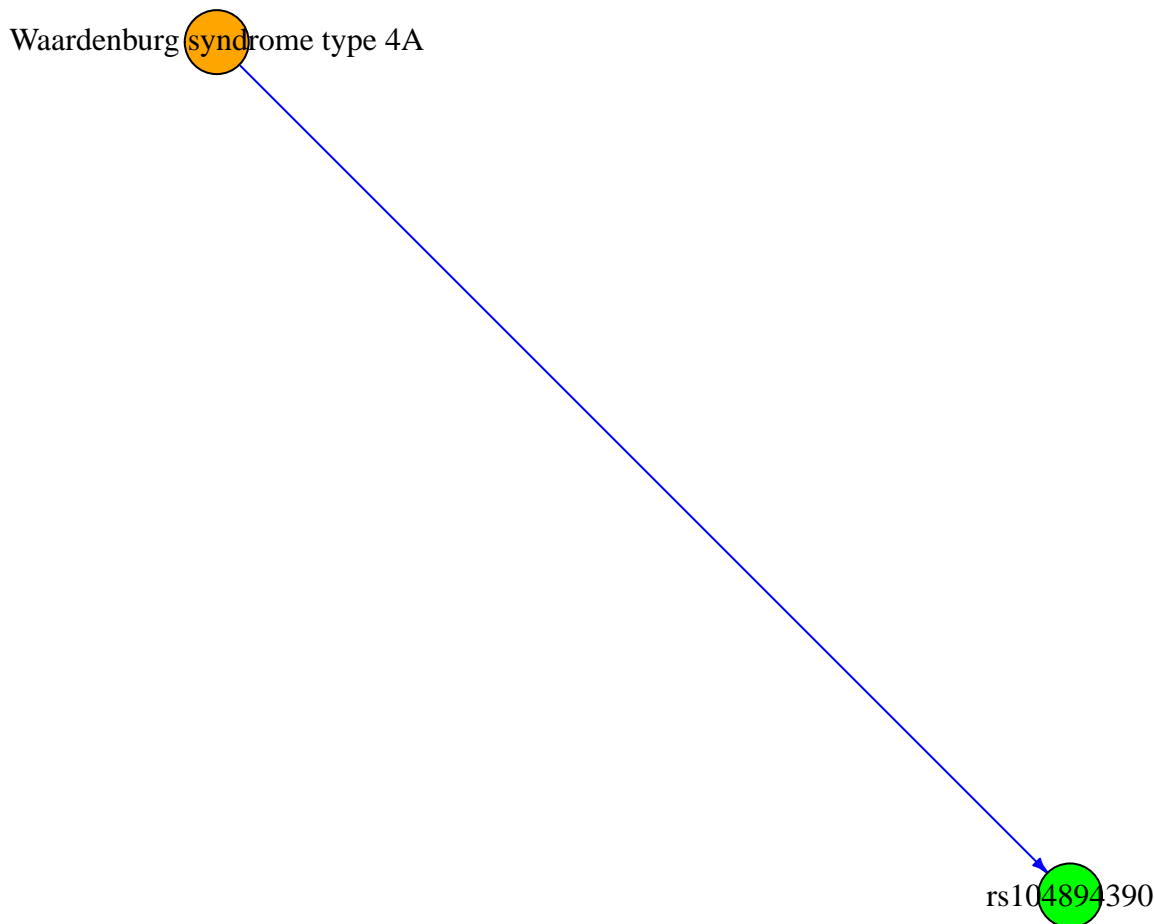

## Variant–Disease Network (Wagner syndrome)

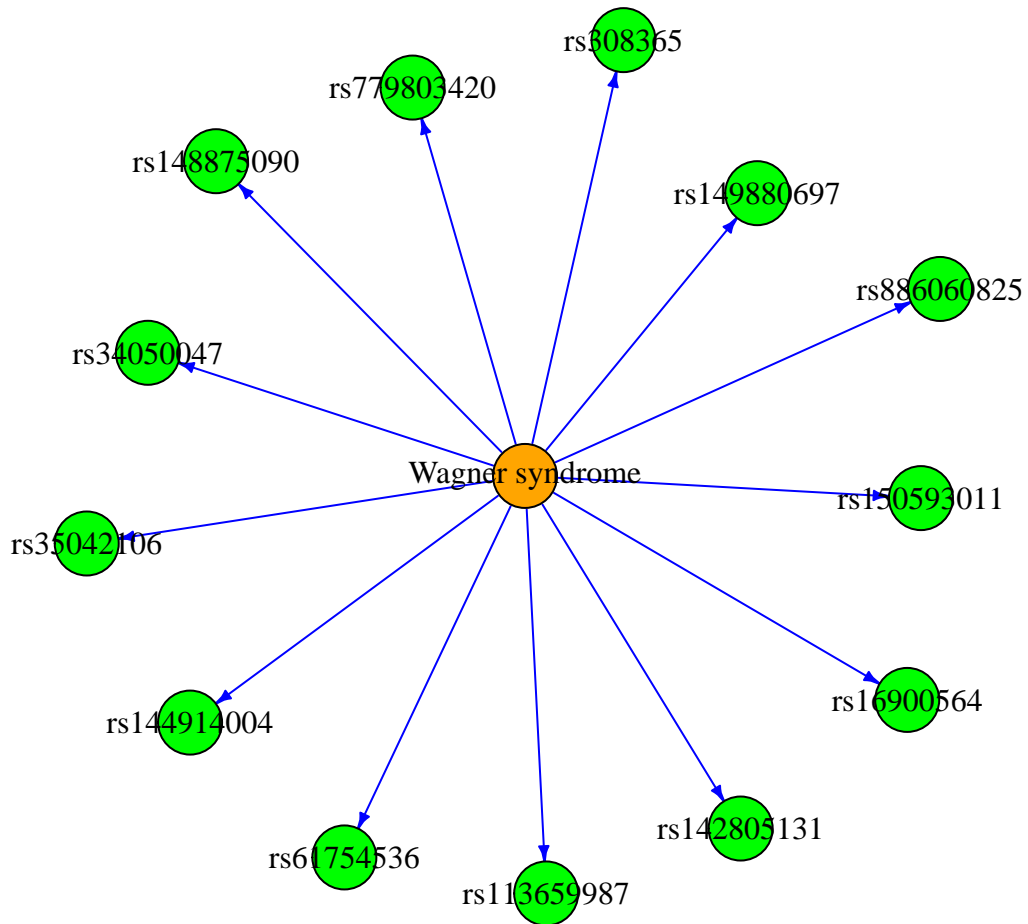

Variant–Disease Network (Walker–Warburg congenital muscular dystroph

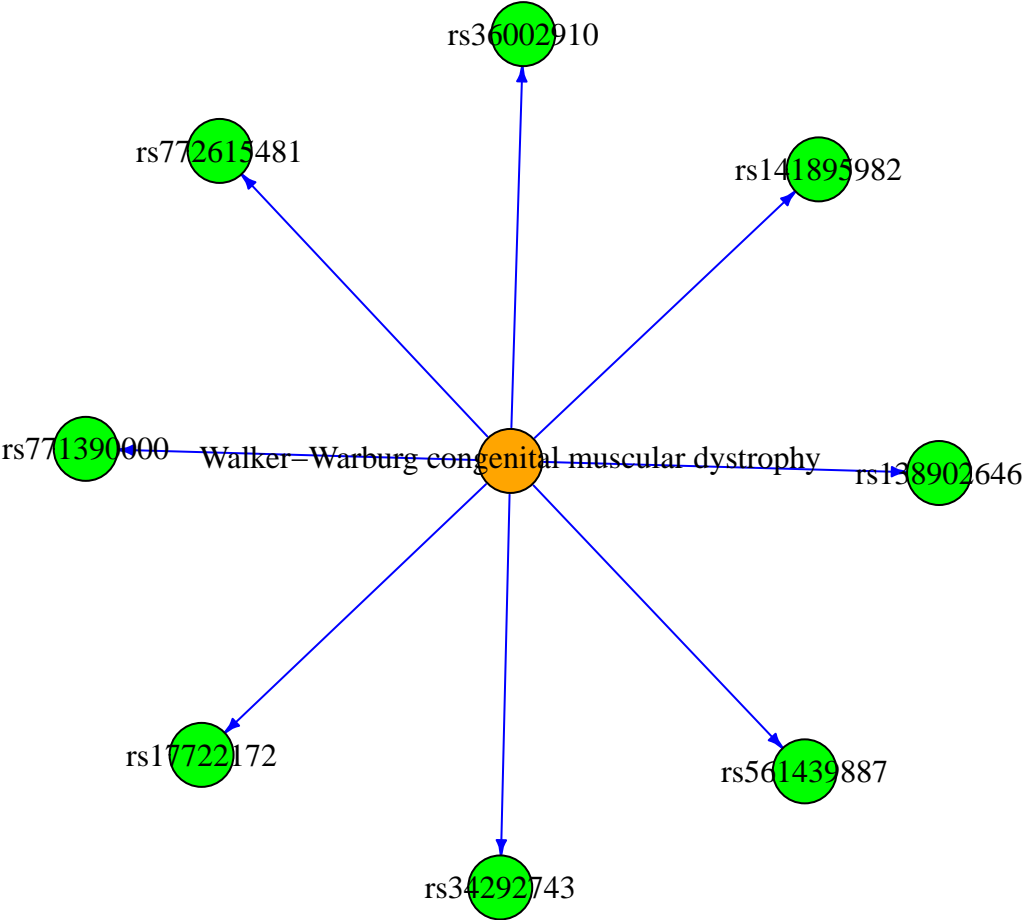



Variant–Disease Network (Warburg micro syndrome)

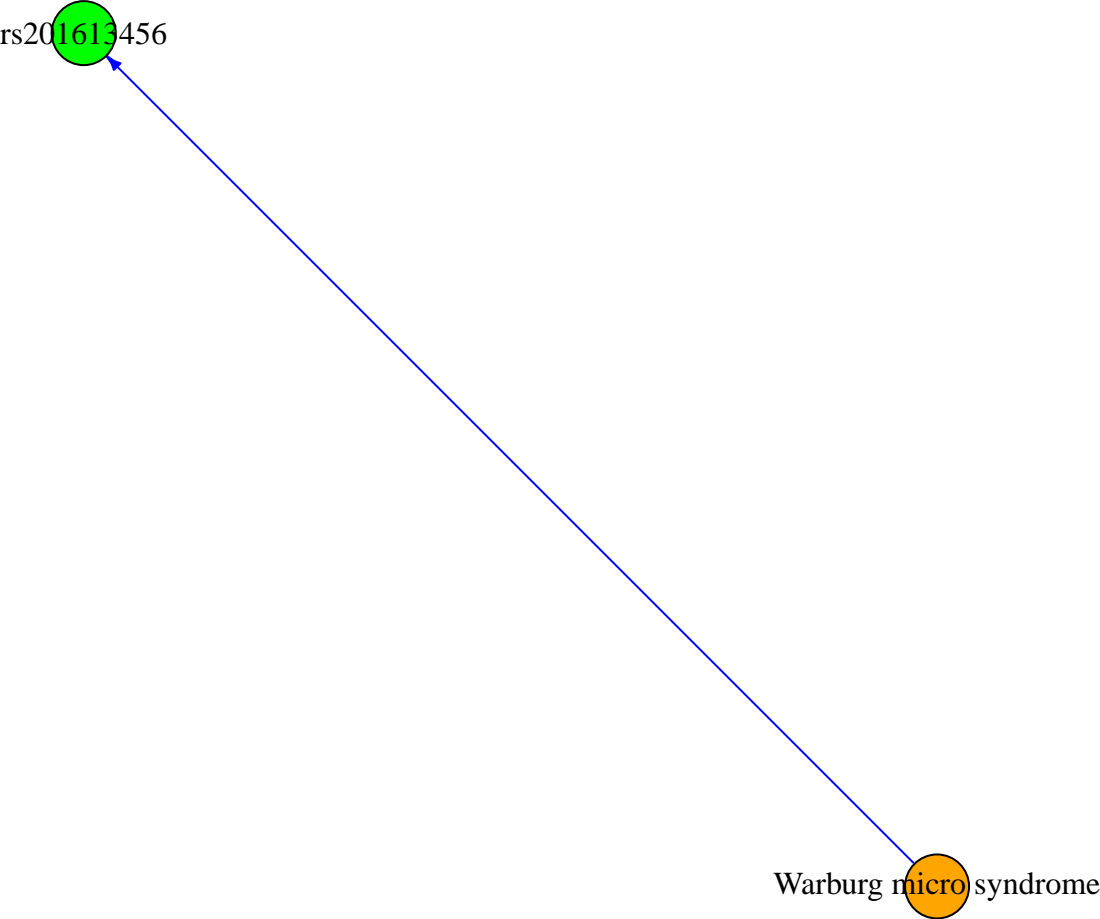

## Variant–Disease Network (Warburg micro syndrome 2)

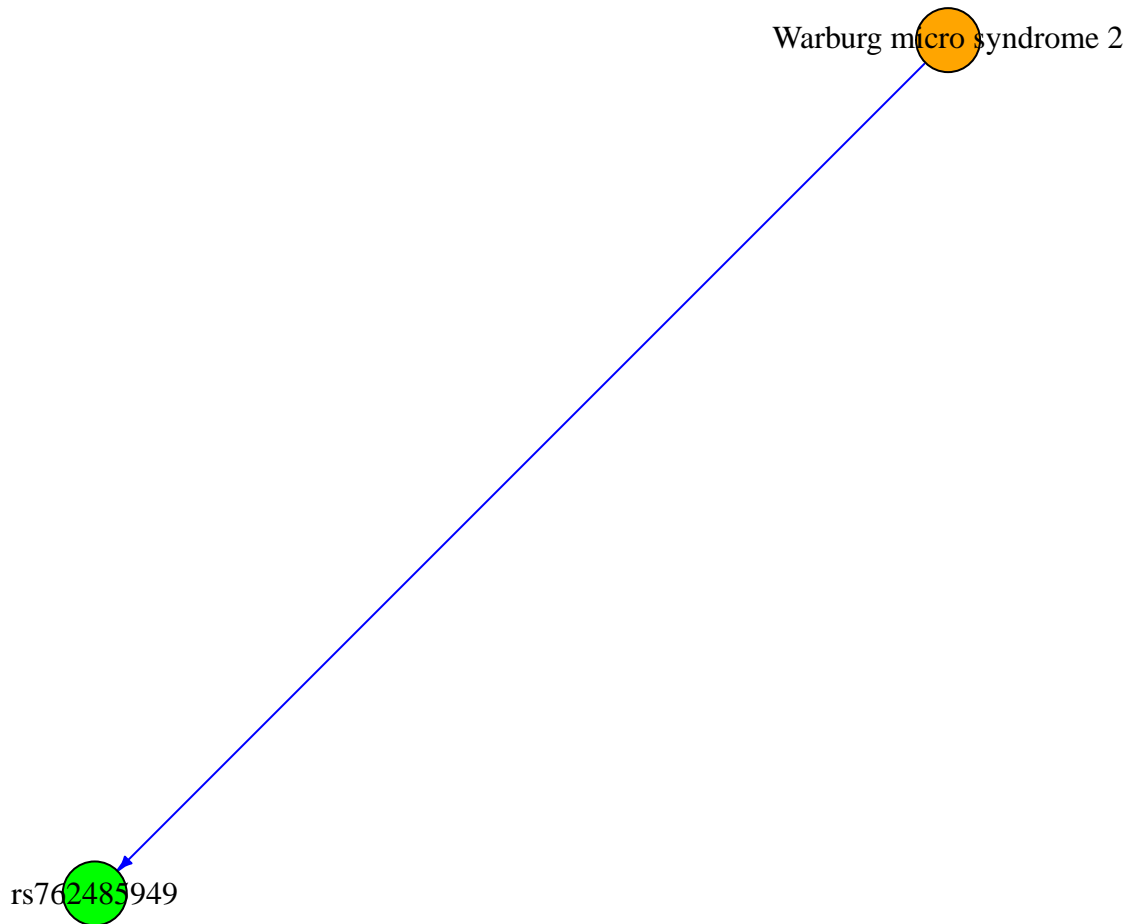

## Variant–Disease Network (Warfarin response)

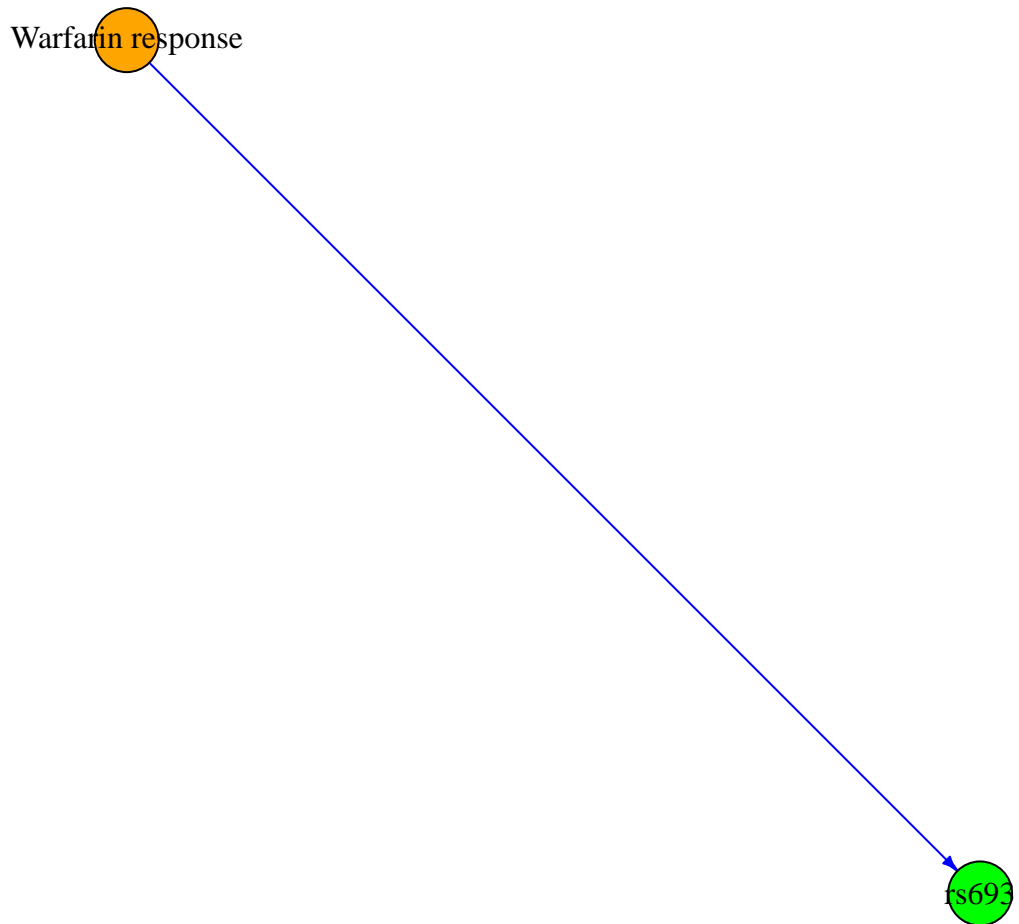

**Variant–Disease Network (Warsaw breakage syndrome)**

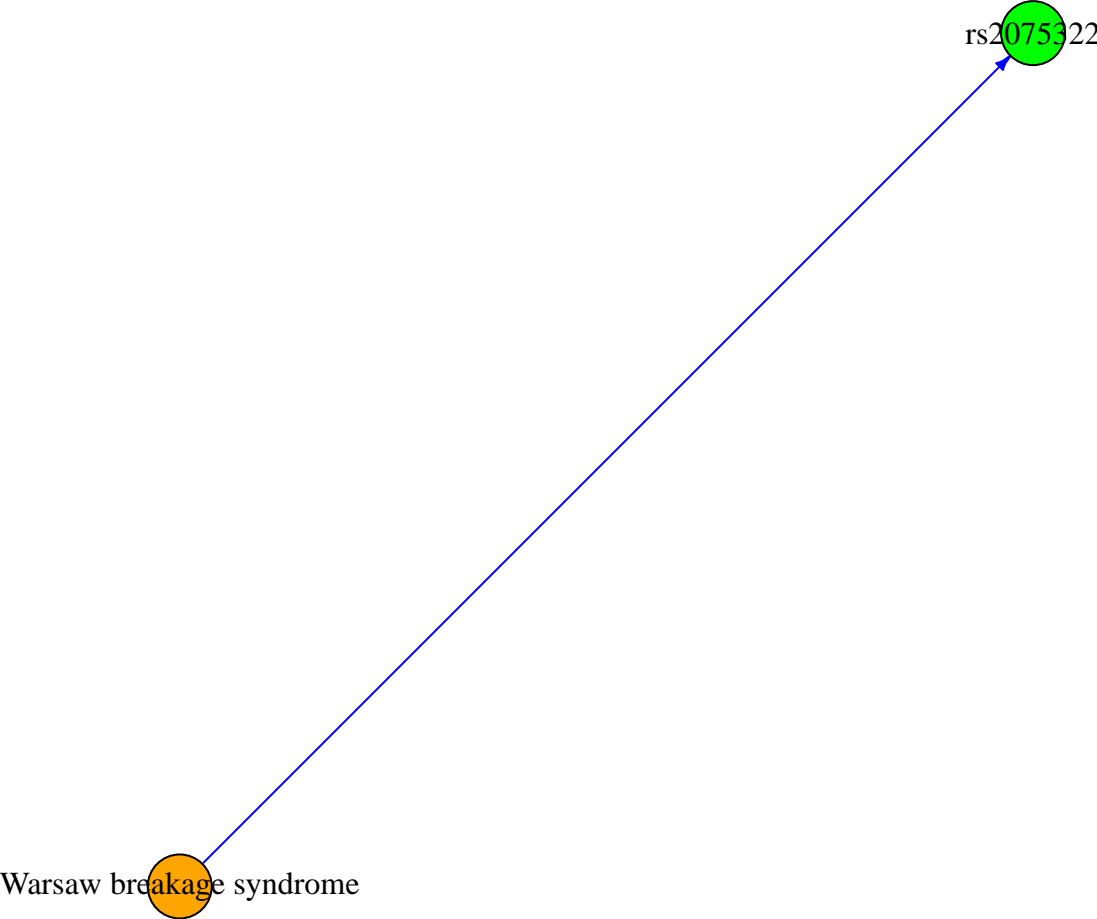

## Variant–Disease Network (Weaver syndrome)

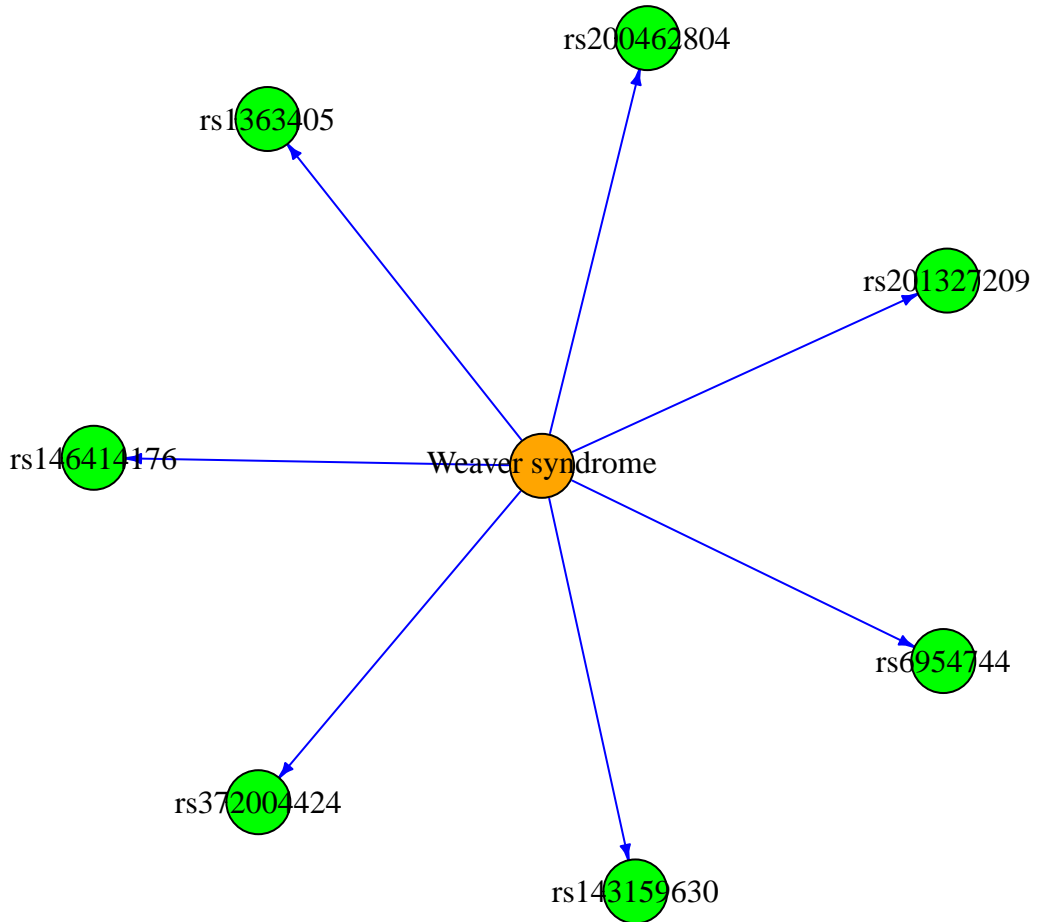

**Variant–Disease Network (Weill–Marchesani syndrome)**

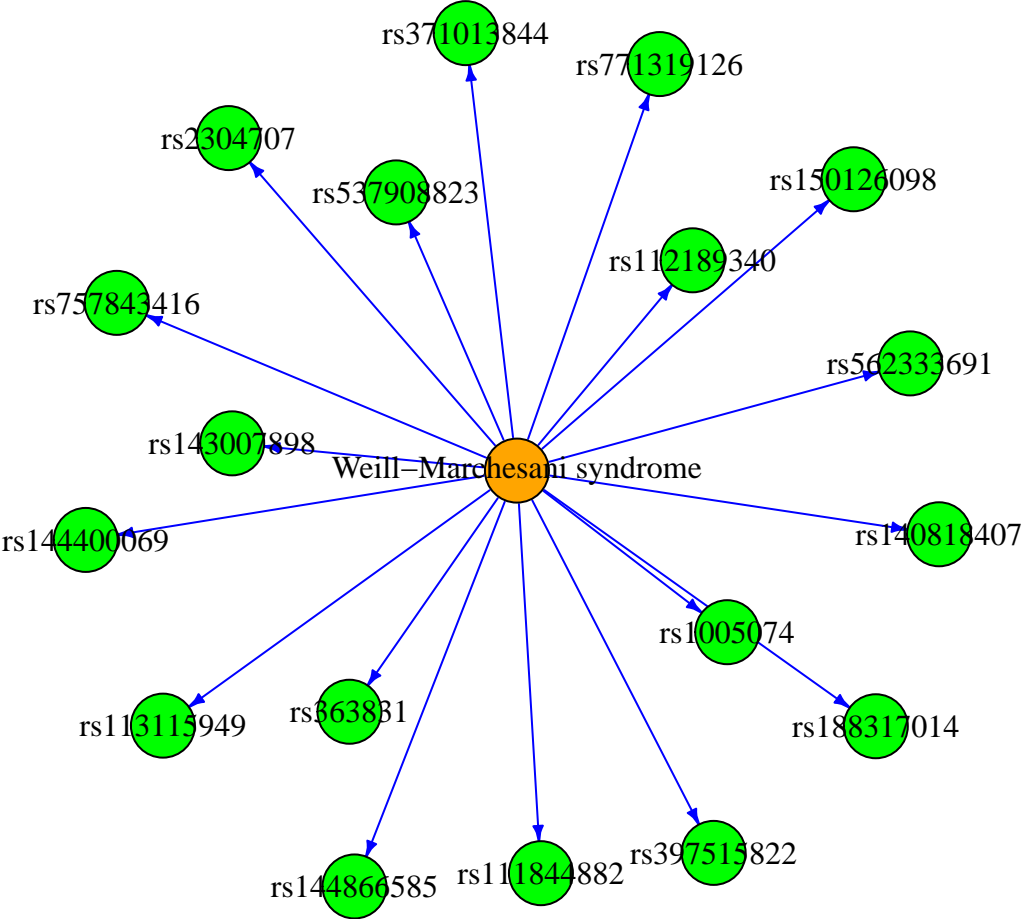

Variant–Disease Network (Weill–Marchesani syndrome 2)

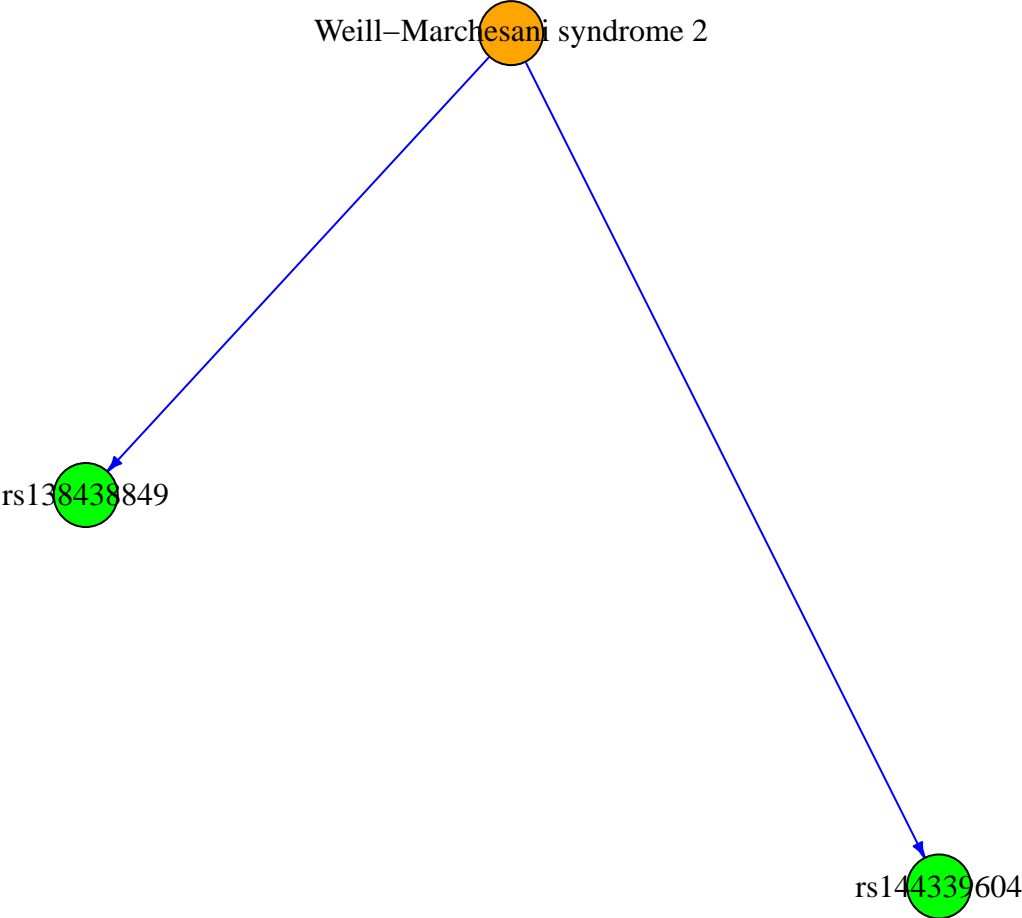

**Variant–Disease Network (Weill–Marchesani syndrome 4)**

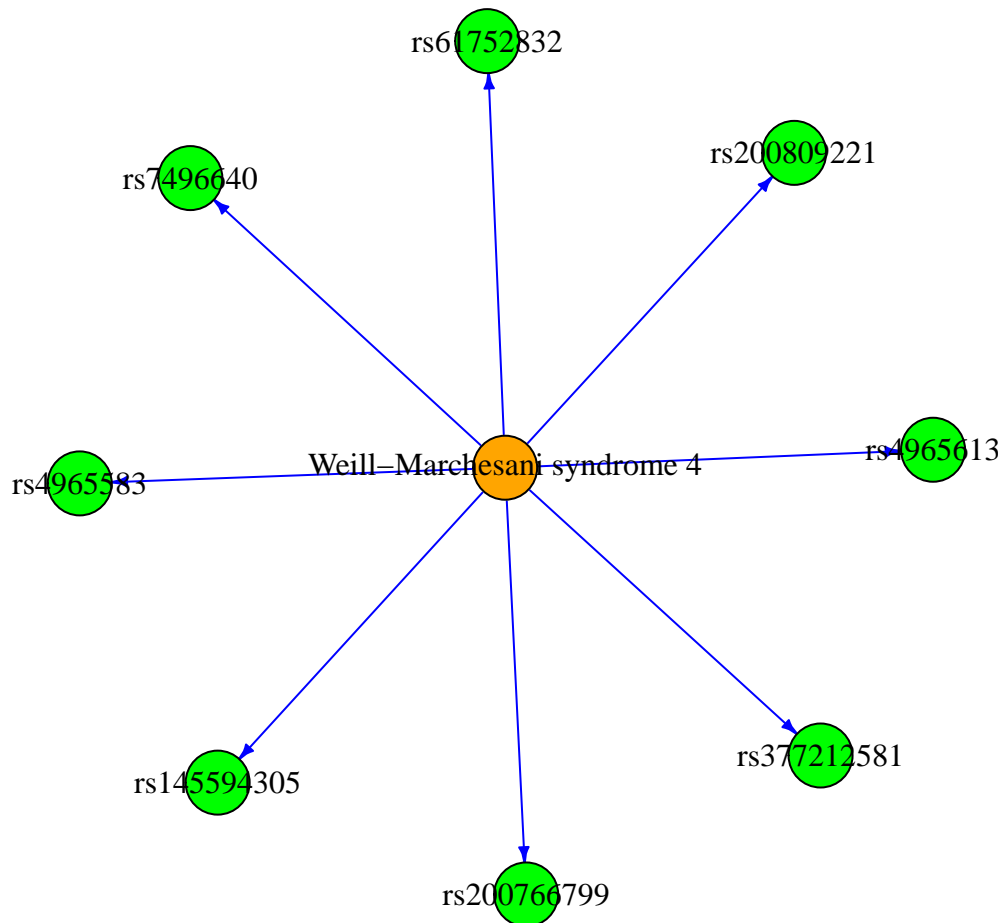



## Variant–Disease Network (Werner syndrome)

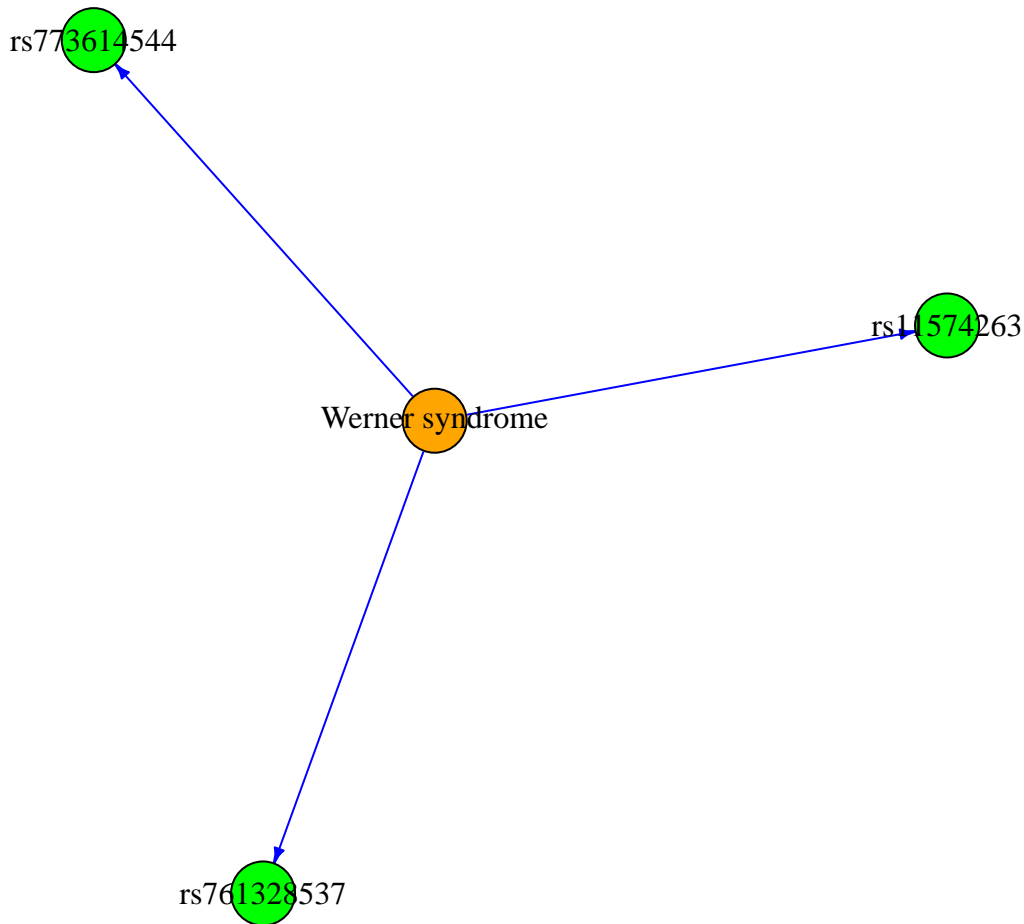

# Variant–Disease Network (WFS1–Related Spectrum Disorders)

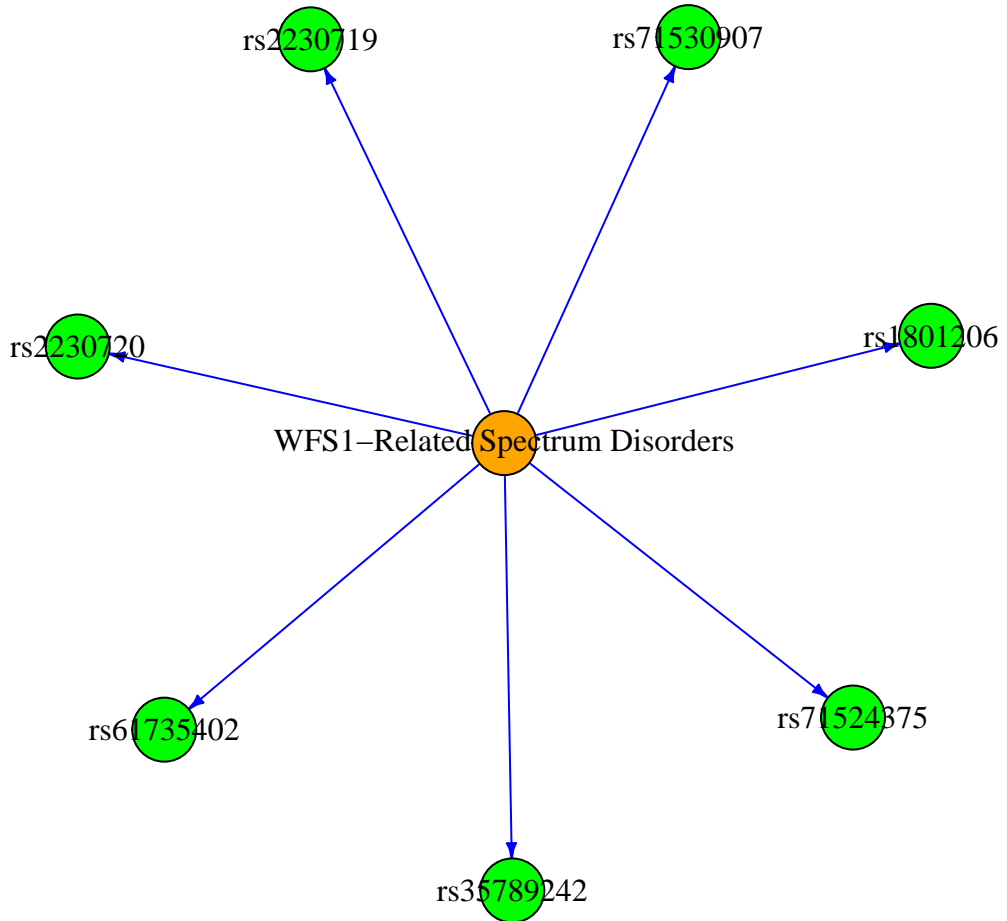

## Variant–Disease Network (Wilms tumor)

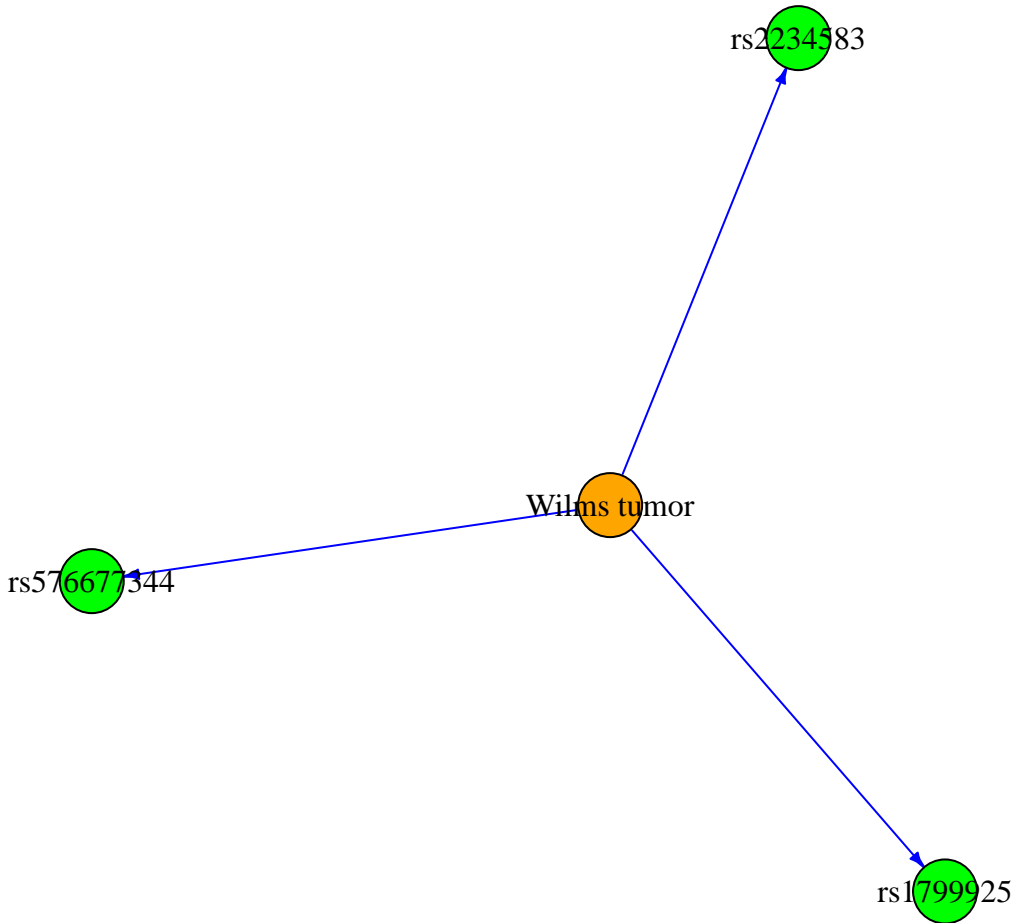

Variant–Disease Network (Wilms tumor 1)

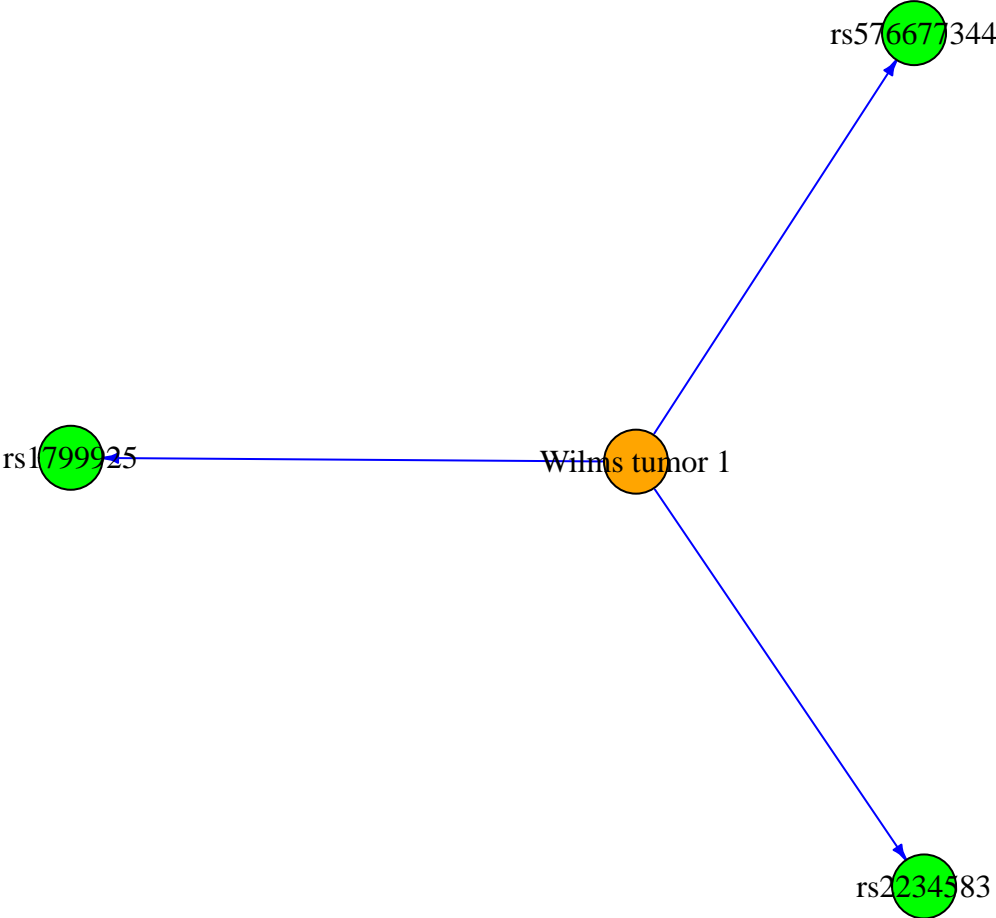

**Variant–Disease Network (Wiskott–Aldrich syndrome)**

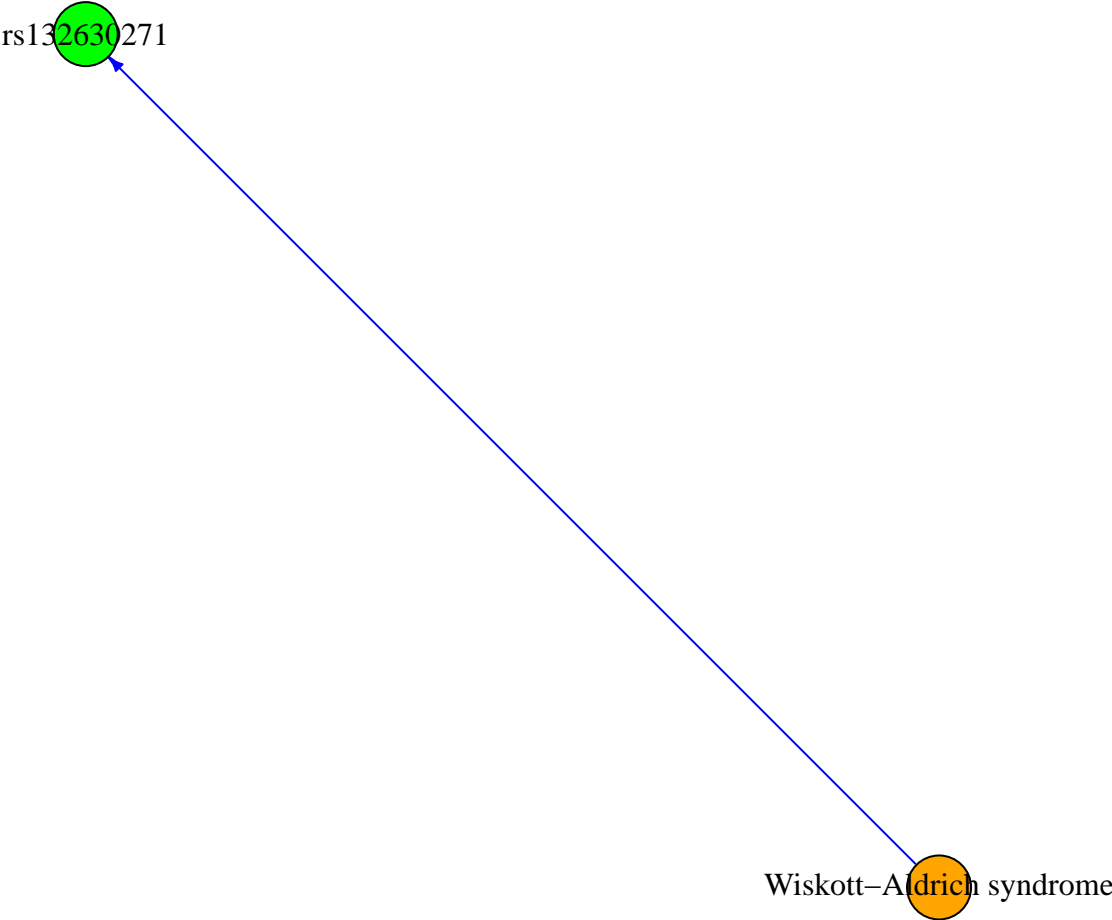

**Variant–Disease Network (Wolff–Parkinson–White syndrome)**

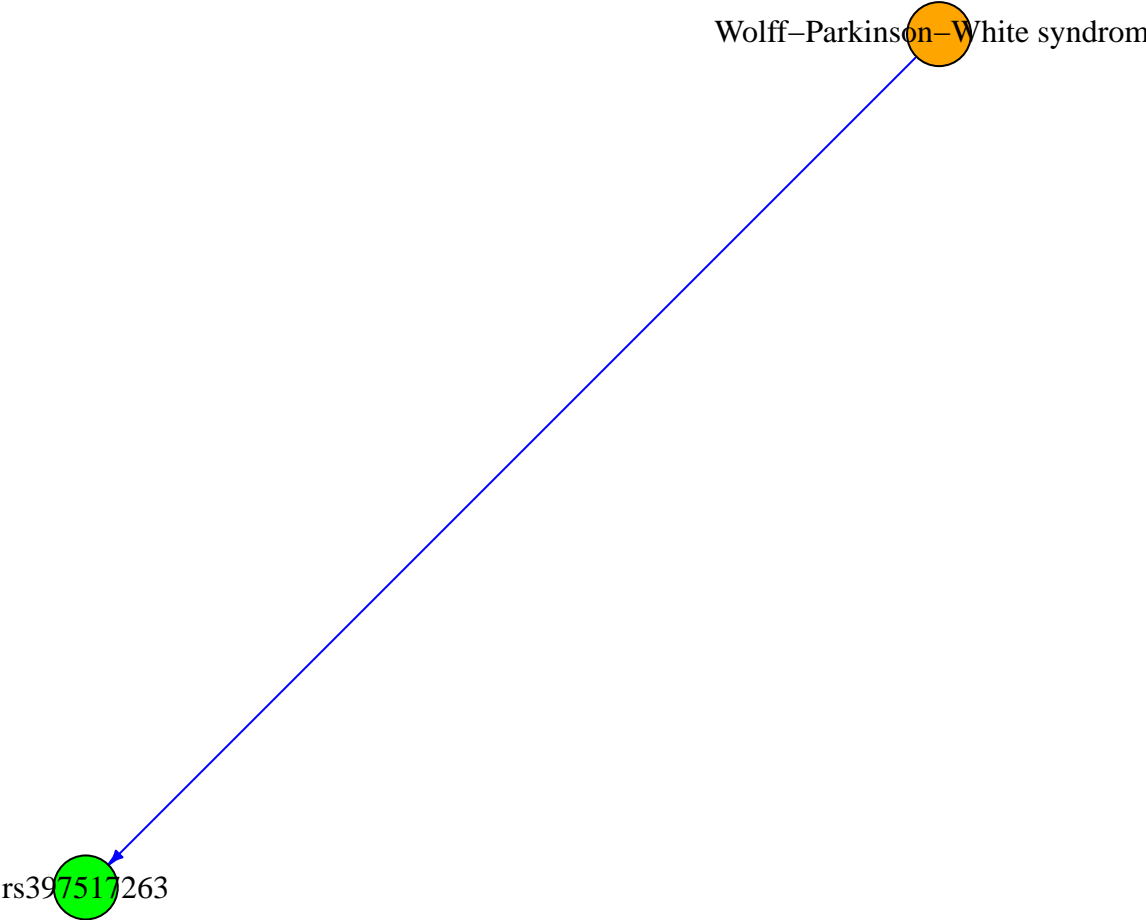

## Variant–Disease Network (Wolfram syndrome)

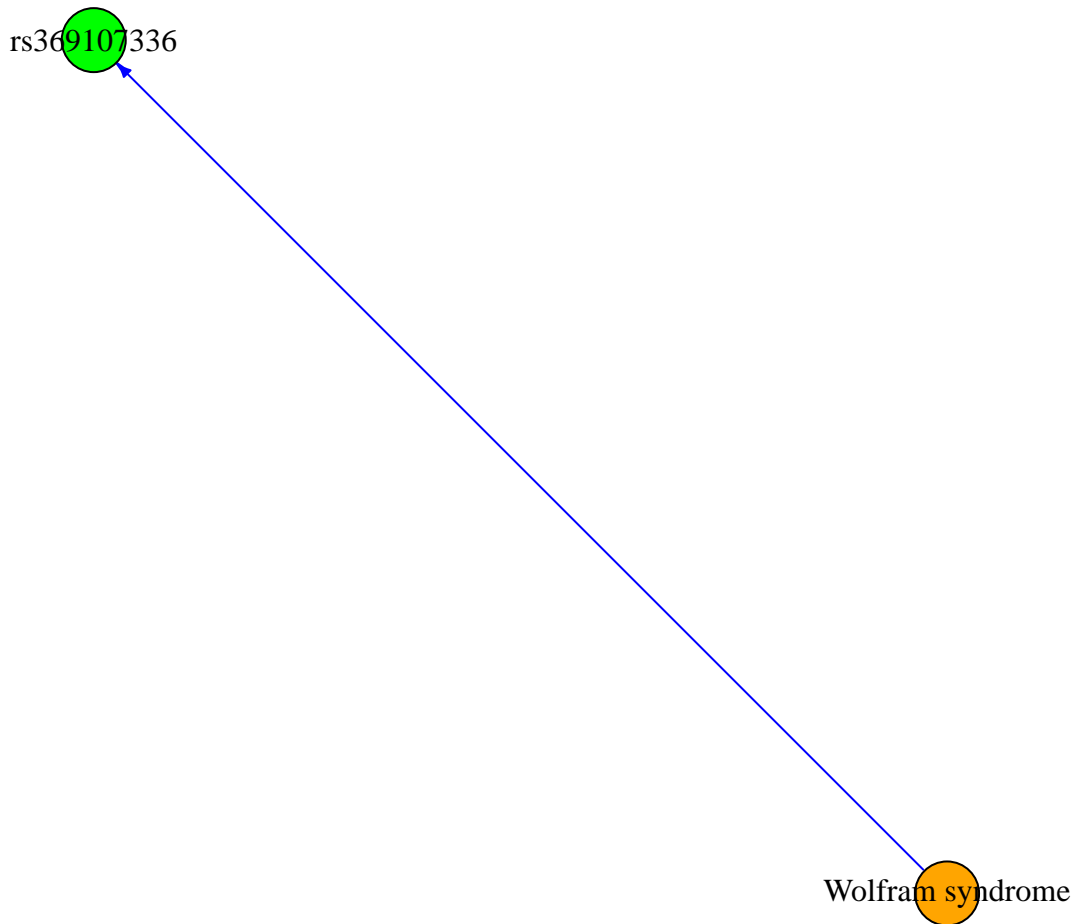

Variant–Disease Network (Wolman disease)

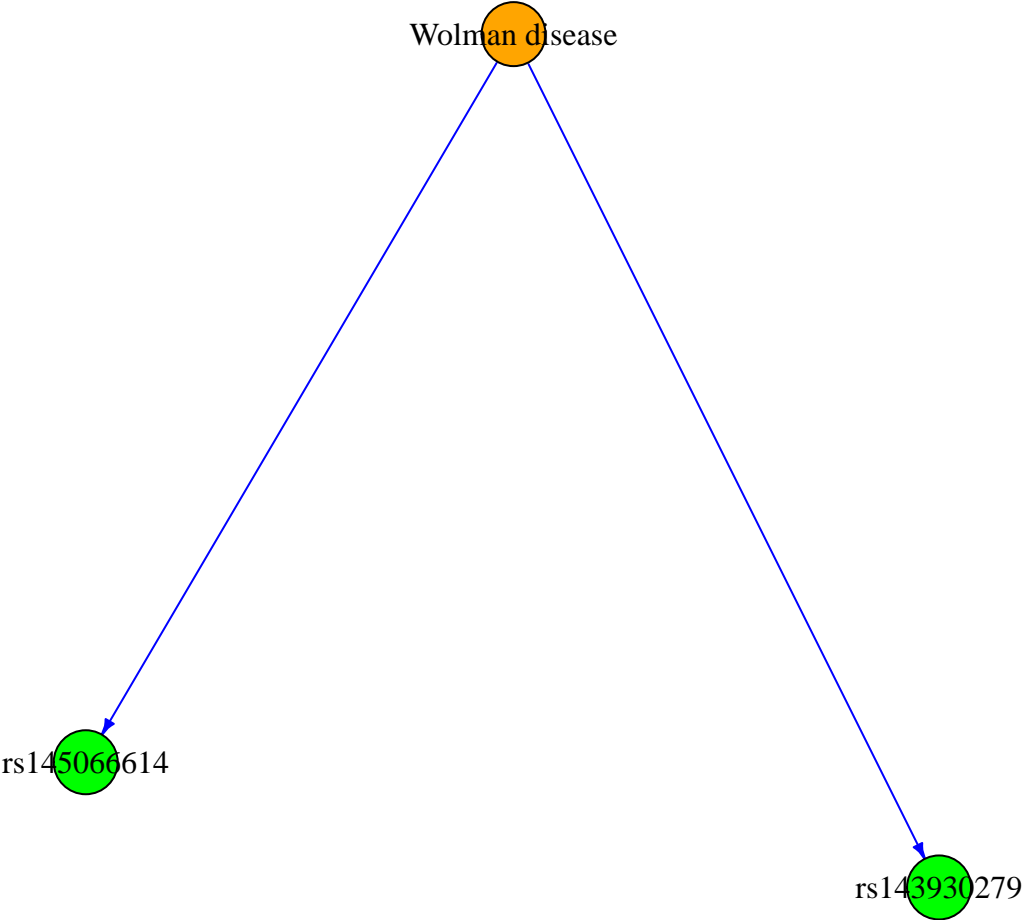



## Variant–Disease Network (Worster Drought syndrome)

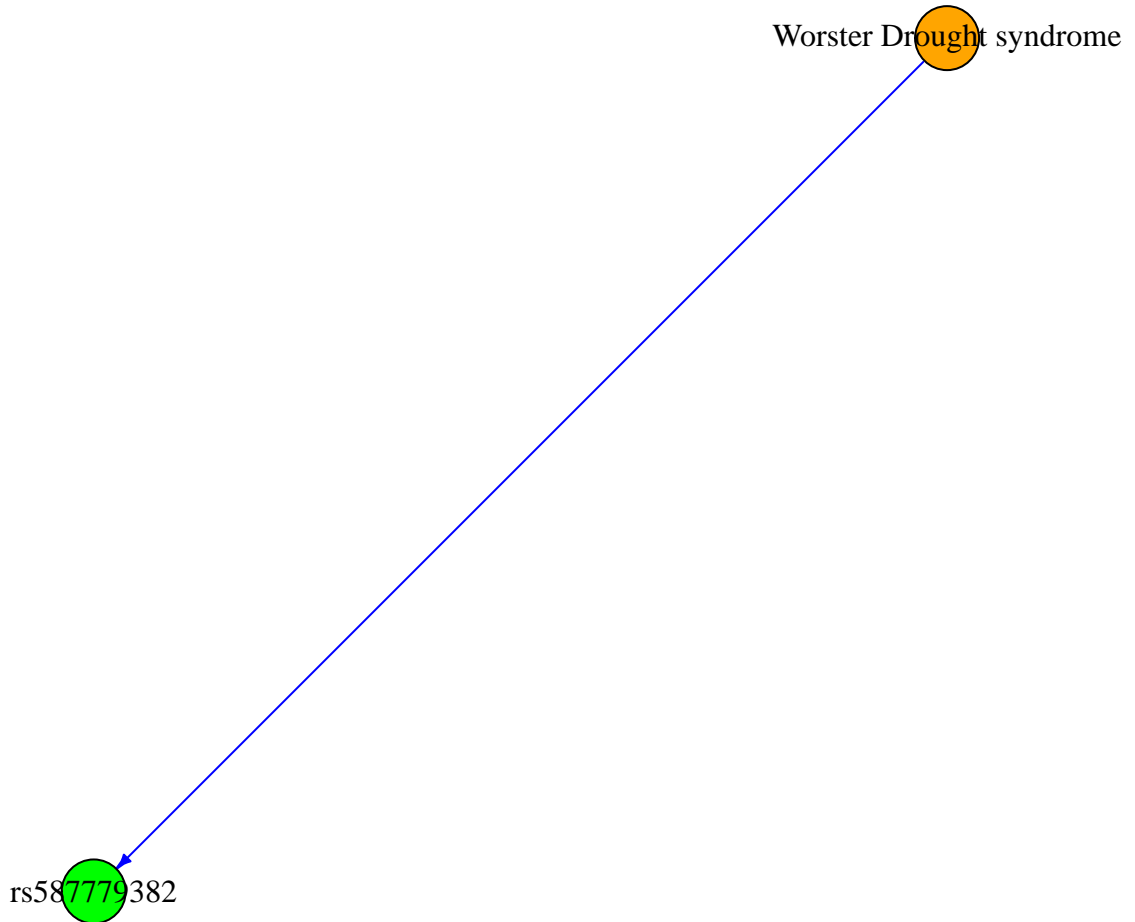

Variant–Disease Network (Xanthinuria)

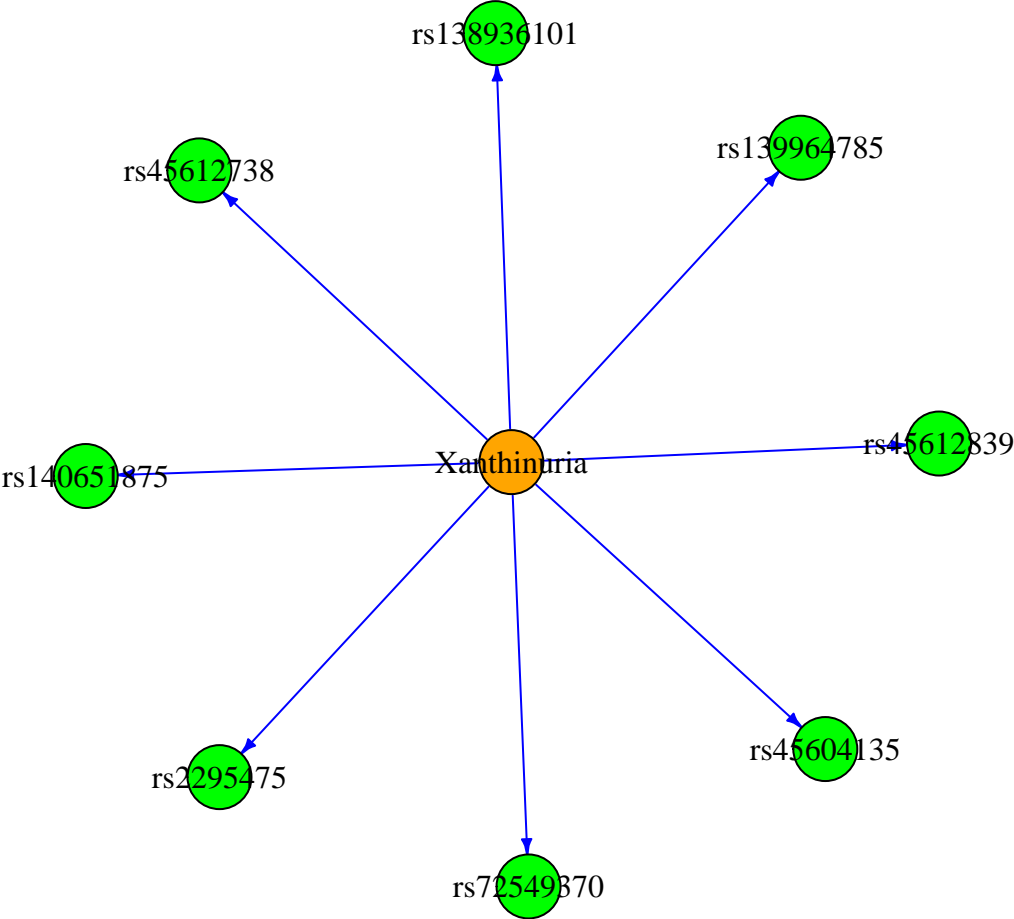

## Variant–Disease Network (Xanthinuria type 2)

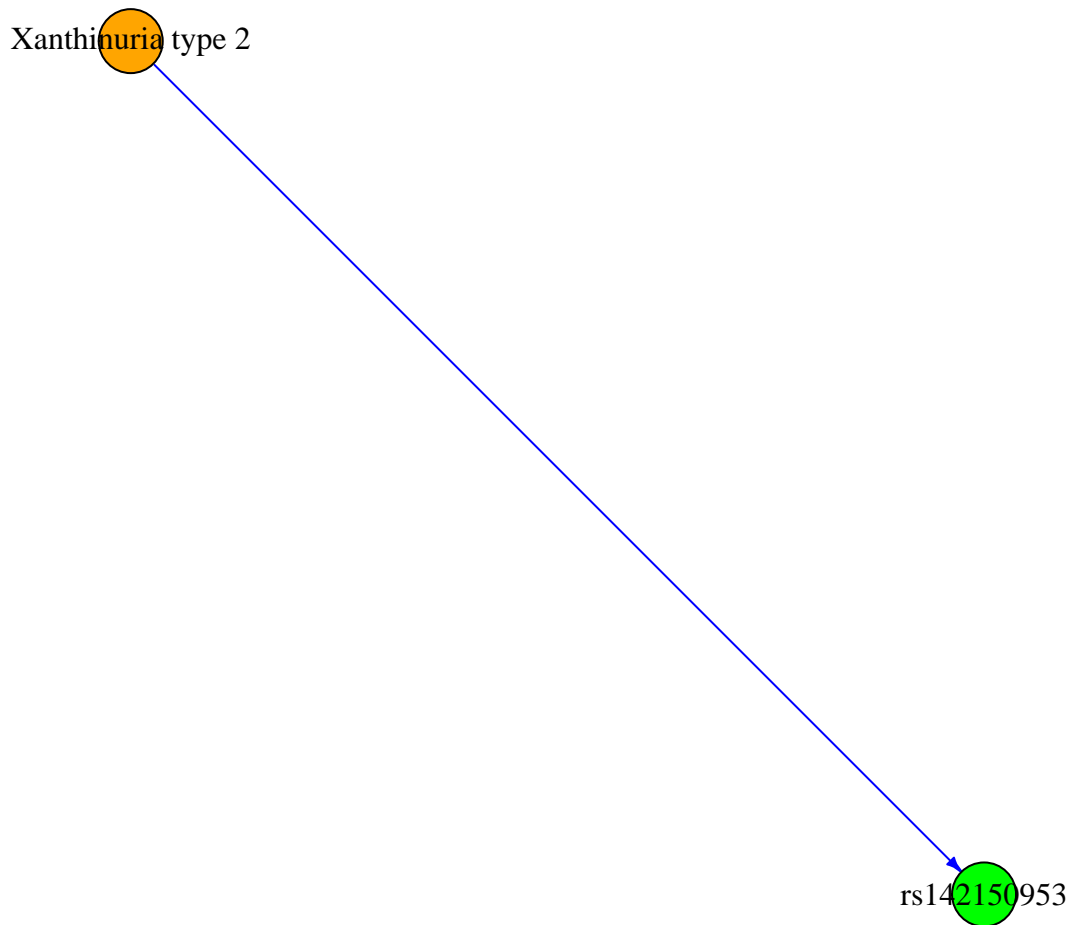

**Variant–Disease Network (Xeroderma pigmentosum)**

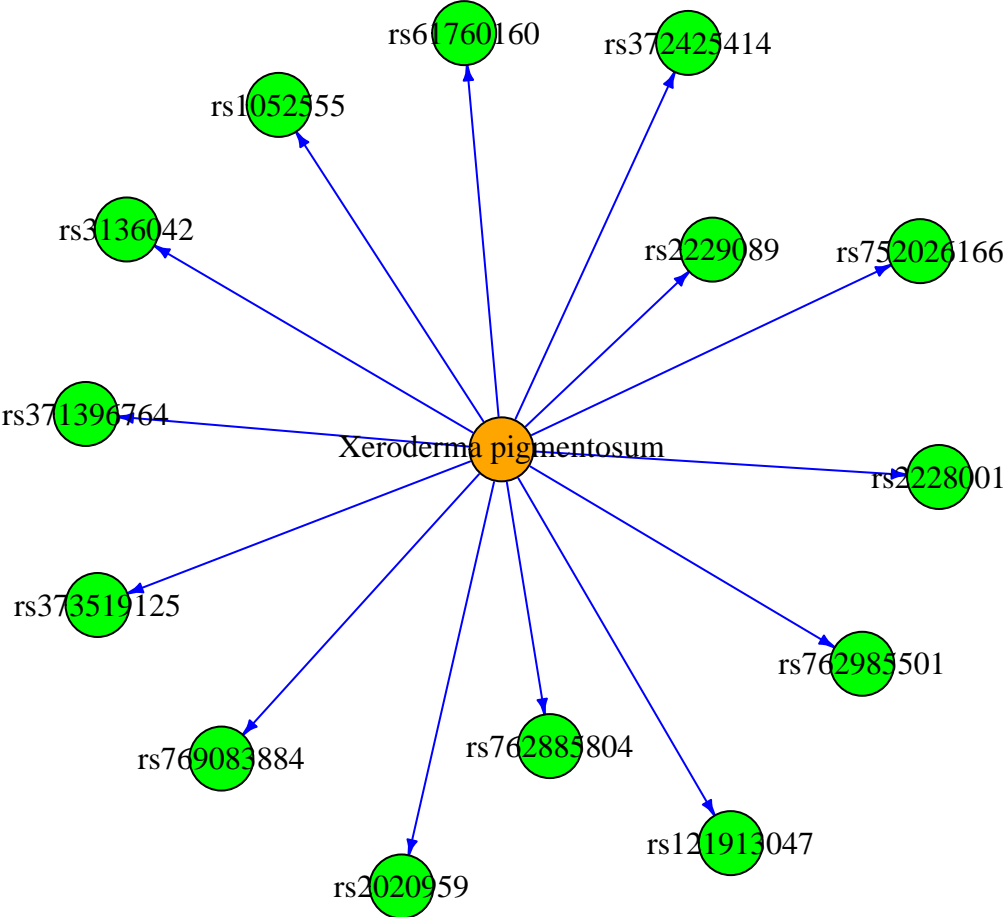

## Variant–Disease Network (X-linked agammaglobulinemia)

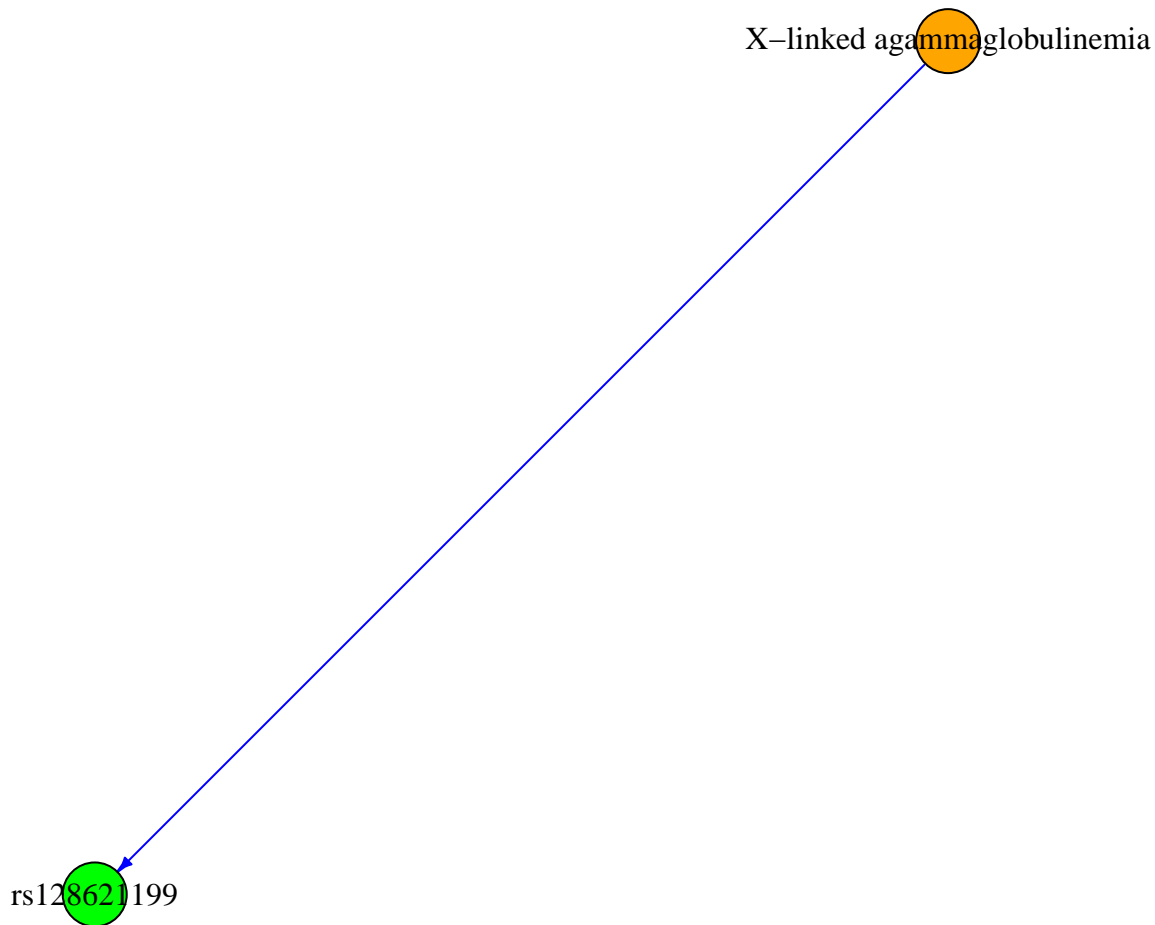

# nt-Disease Network (X-linked agammaglobulinemia with growth hormone d

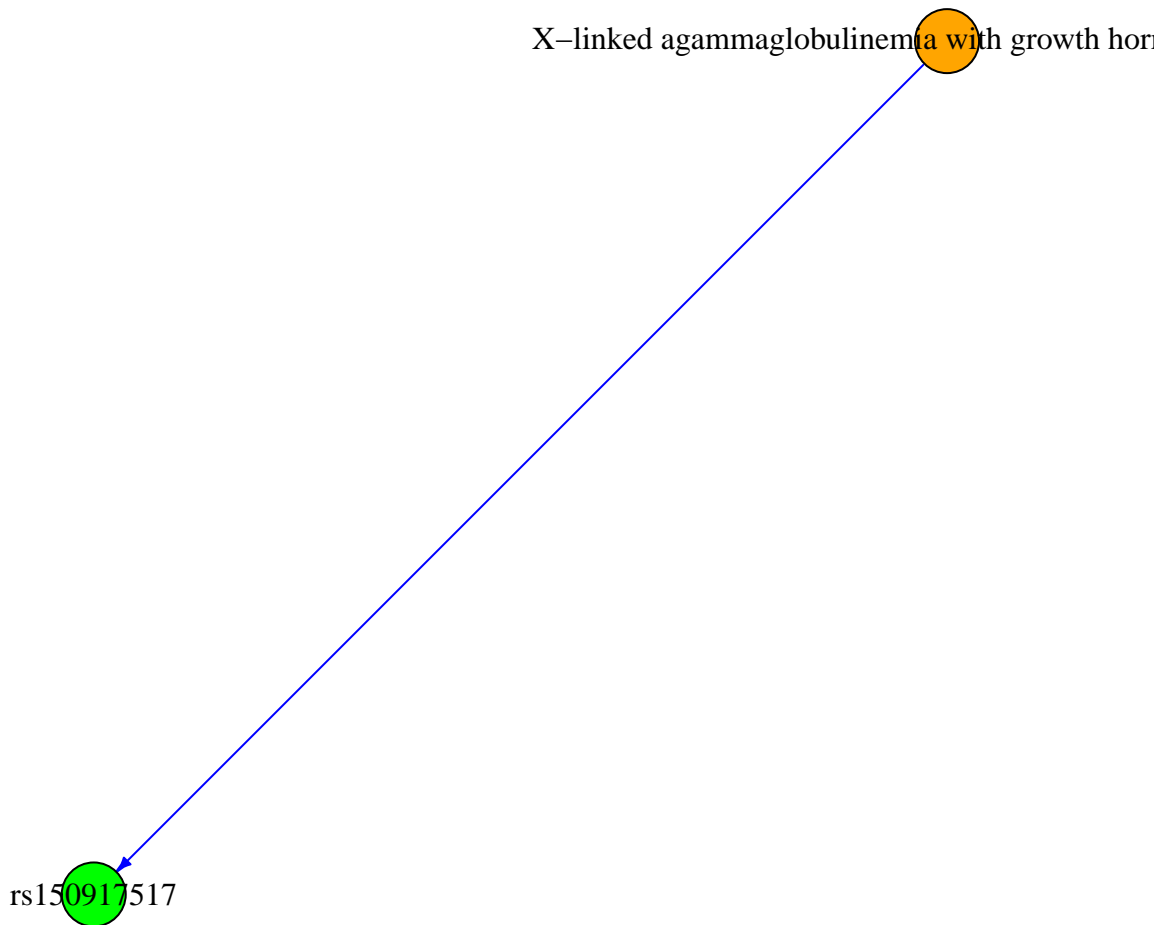

## Variant-Disease Network (XY sex reversal)

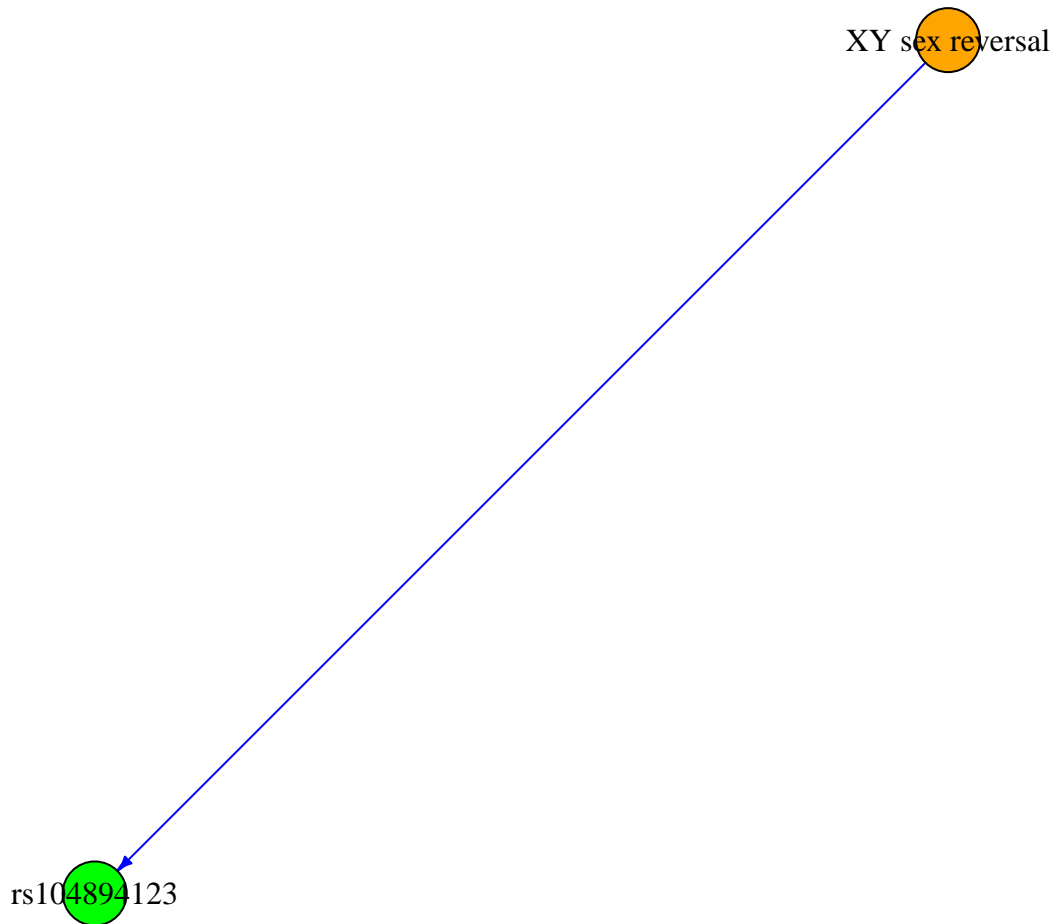

# Variant–Disease Network (Zonular Pulverulent Cataract)

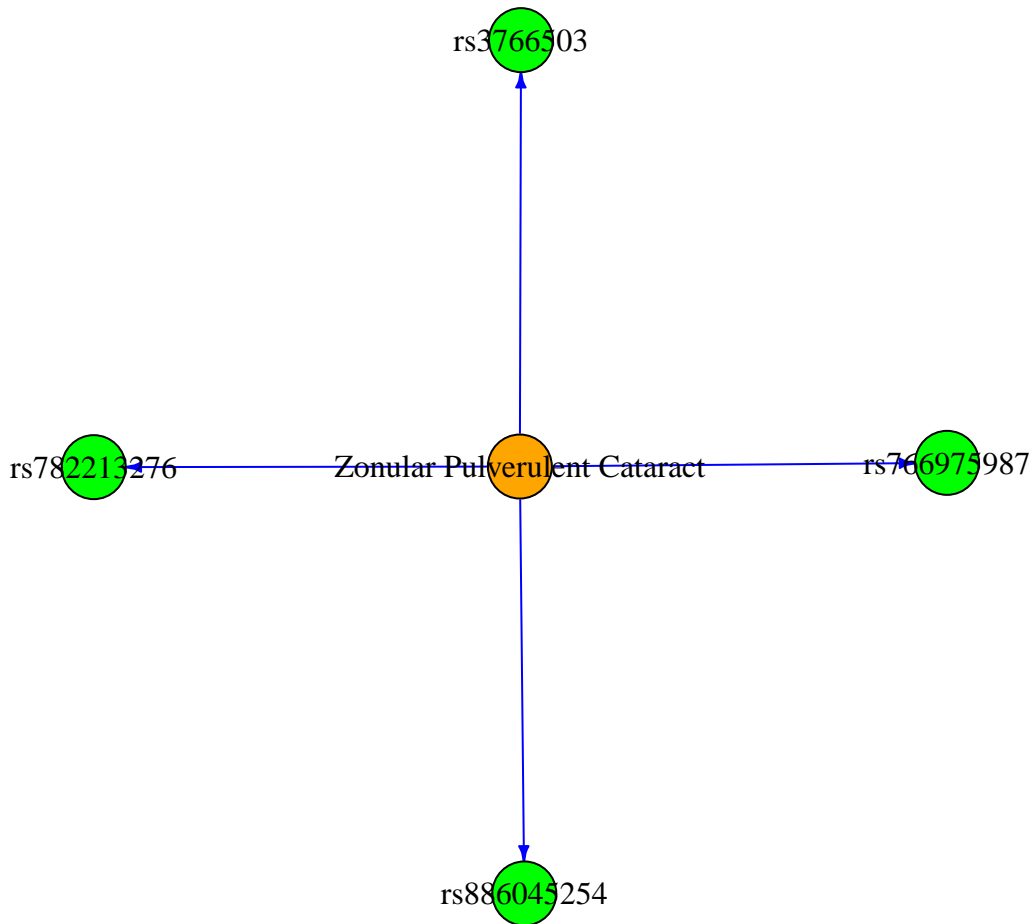



Variant–Disease Network (Zonular pulverulent cataract 3)

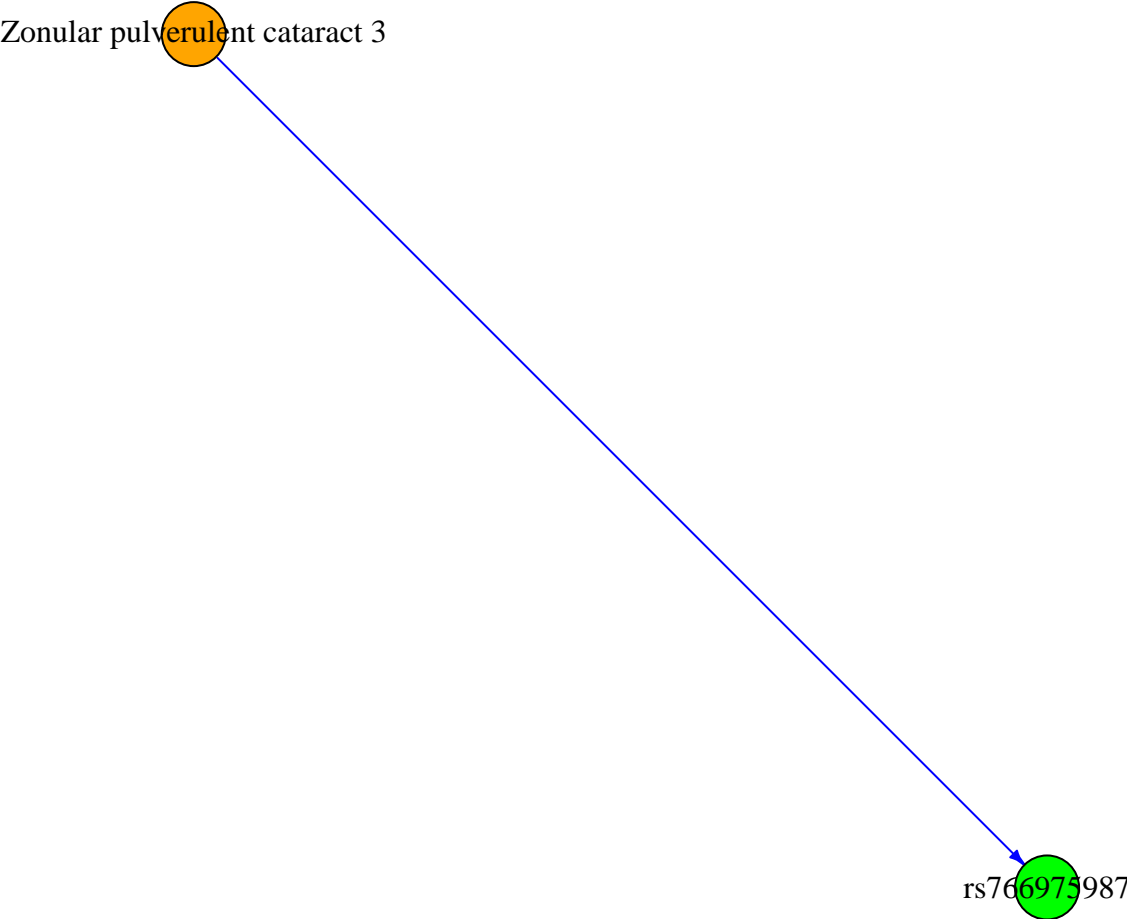

## Variant–Disease Network (Alcohol consumption)

rs7640



```
graph LR; A((Alcohol consumption)) --> B((rs7640))
```

A green circular node with a black outline, containing the text 'rs7640'.

Alcohol consumption



```
graph LR; A((Alcohol consumption)) --> B((rs7640))
```

An orange circular node with a black outline, containing the text 'Alcohol consumption'.

Variant–Disease Network (Alcoholic chronic pancreatitis)

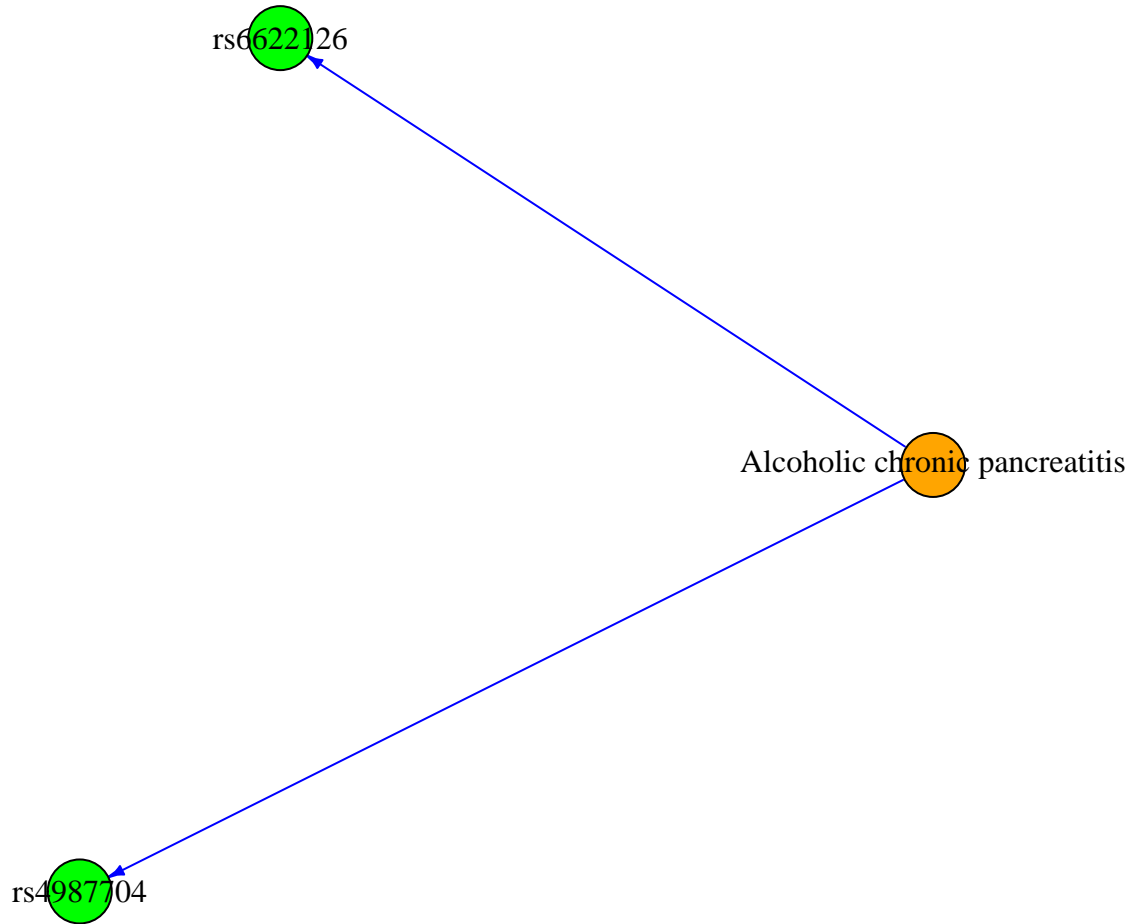

## Variant-Disease Network (Alzheimers disease)

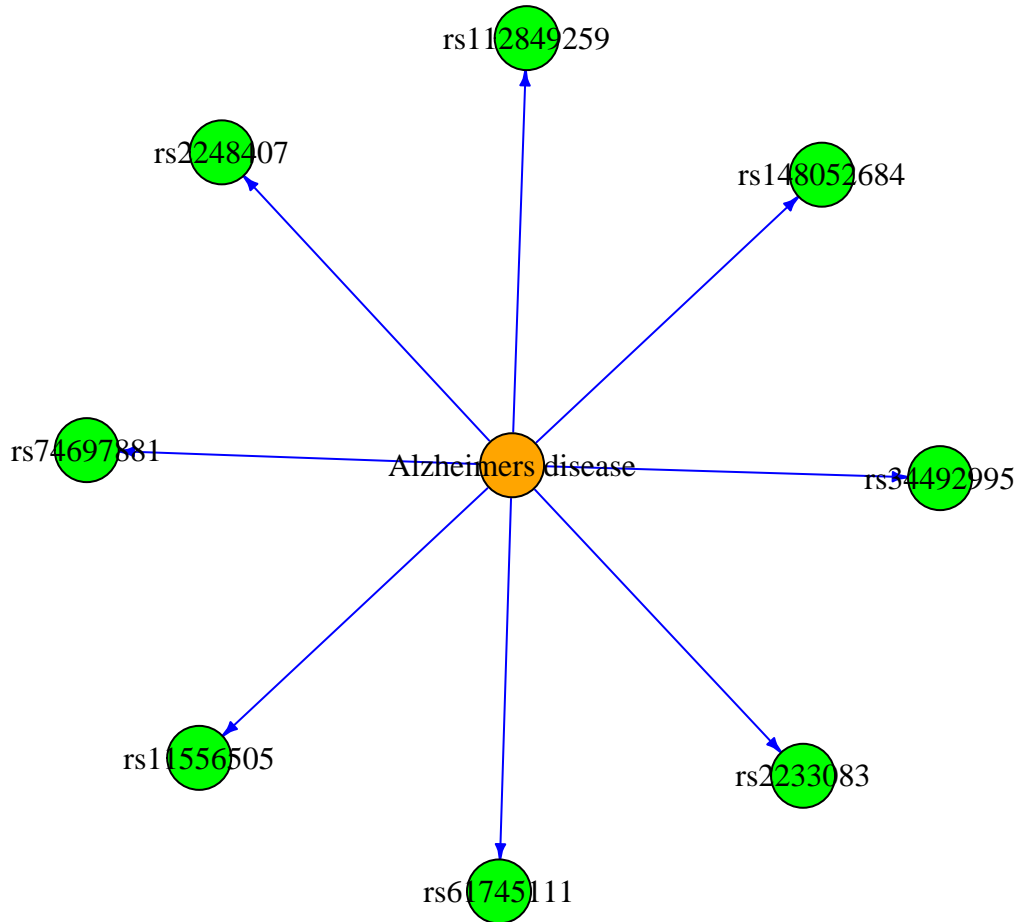

# Variant-Disease Network (Apolipoprotein A1 levels)

Apolipoprotein A1 levels

rs3814883

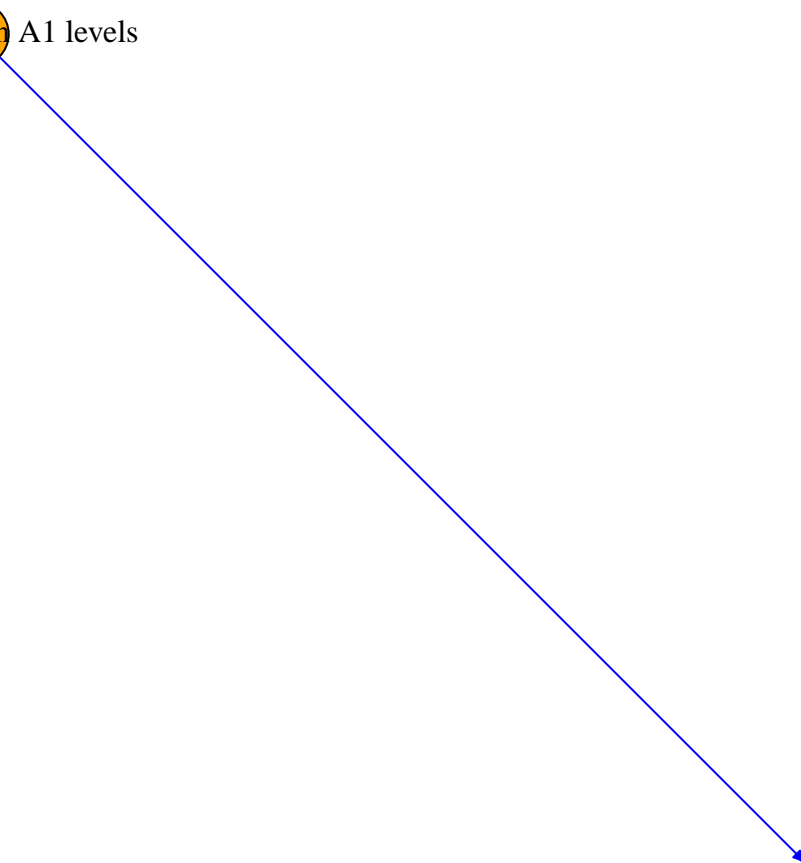

**Variant–Disease Network (Autism spectrum disorder or schizophrenia)**

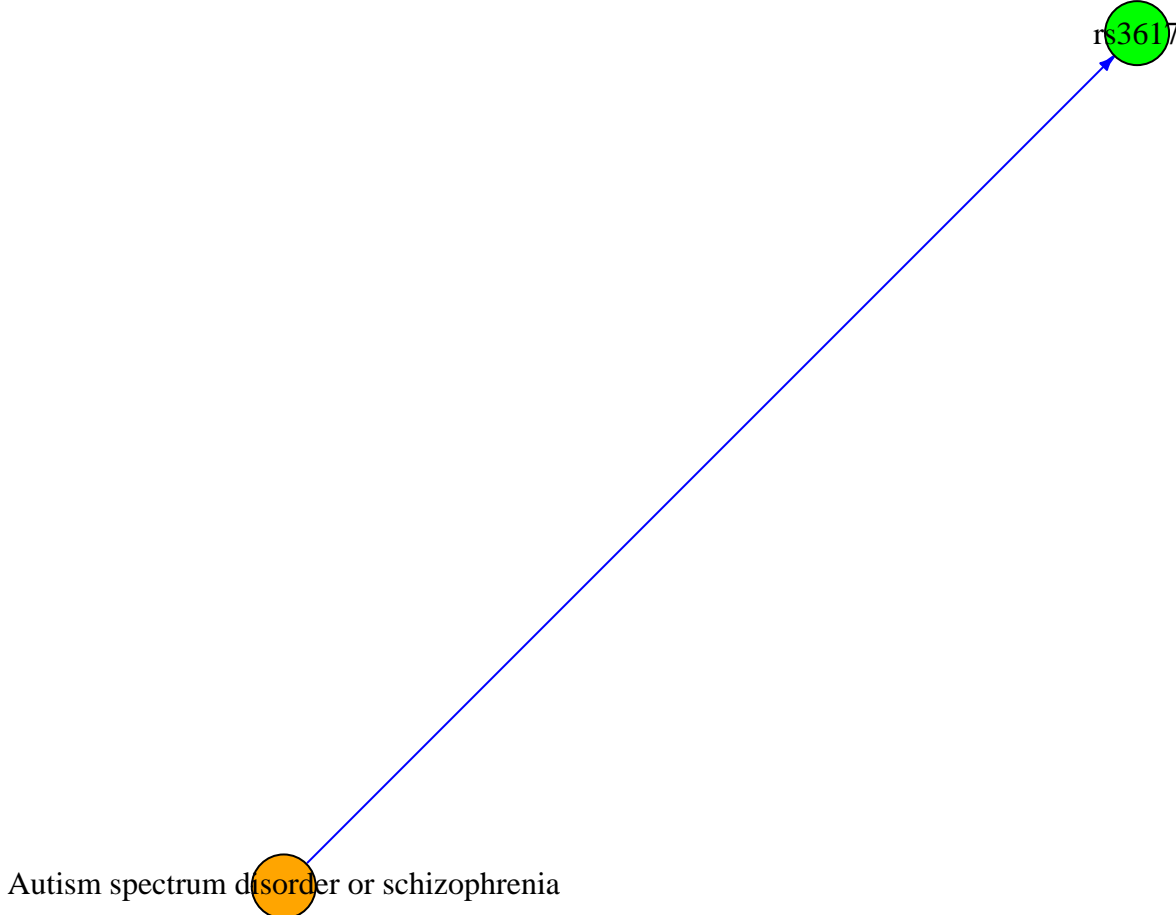

**Variant–Disease Network (Balding type 1)**

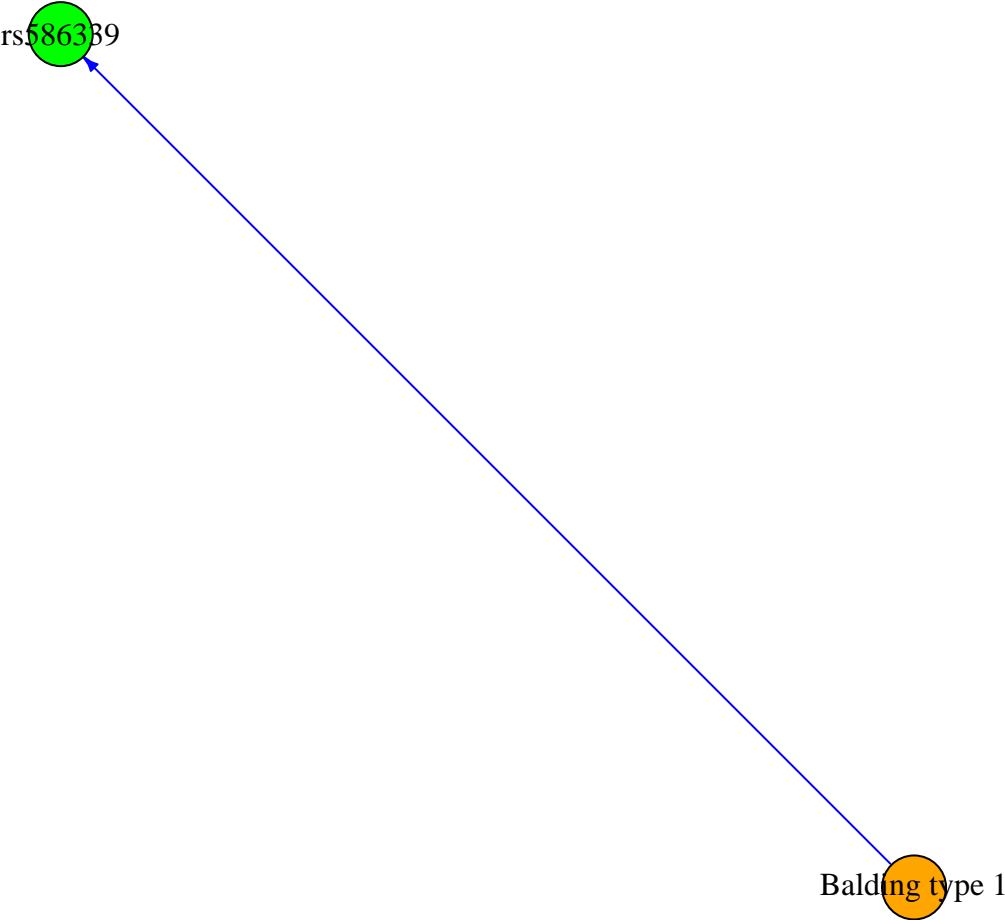

## Variant-Disease Network (Basal cell carcinoma)

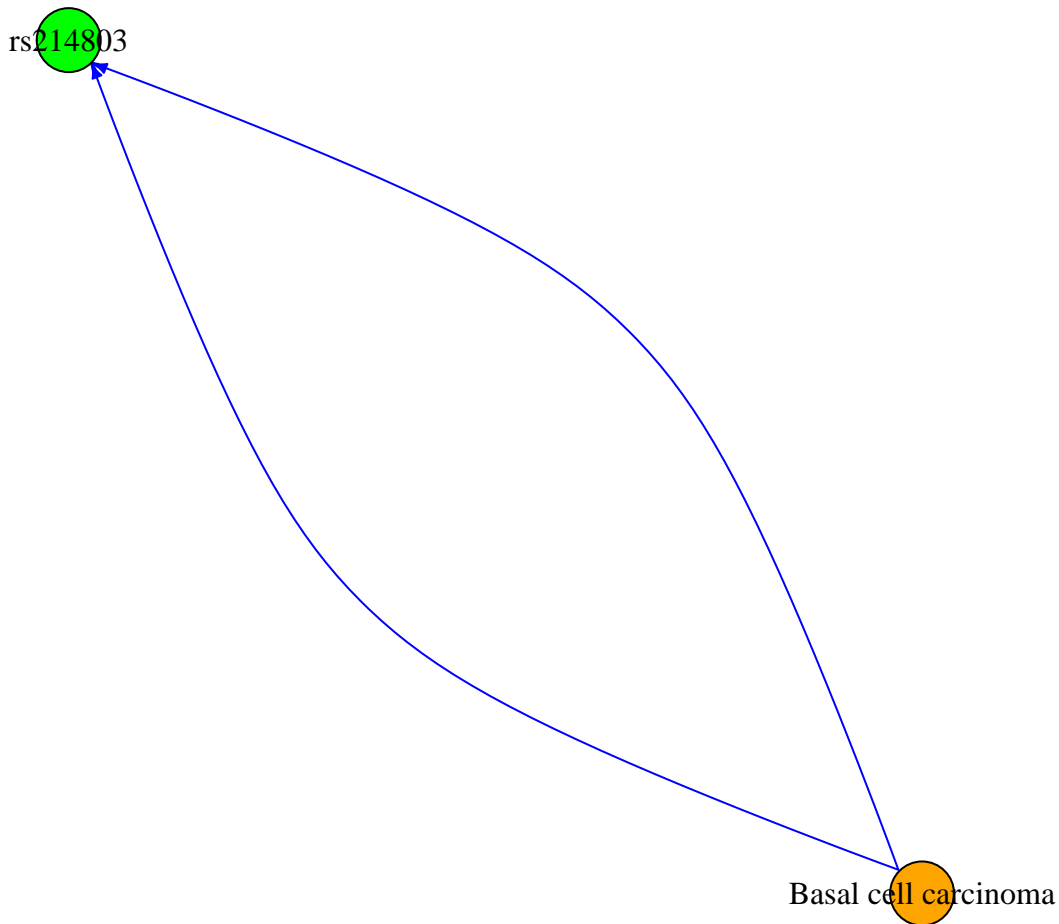



## Variant–Disease Network (Birth weight)

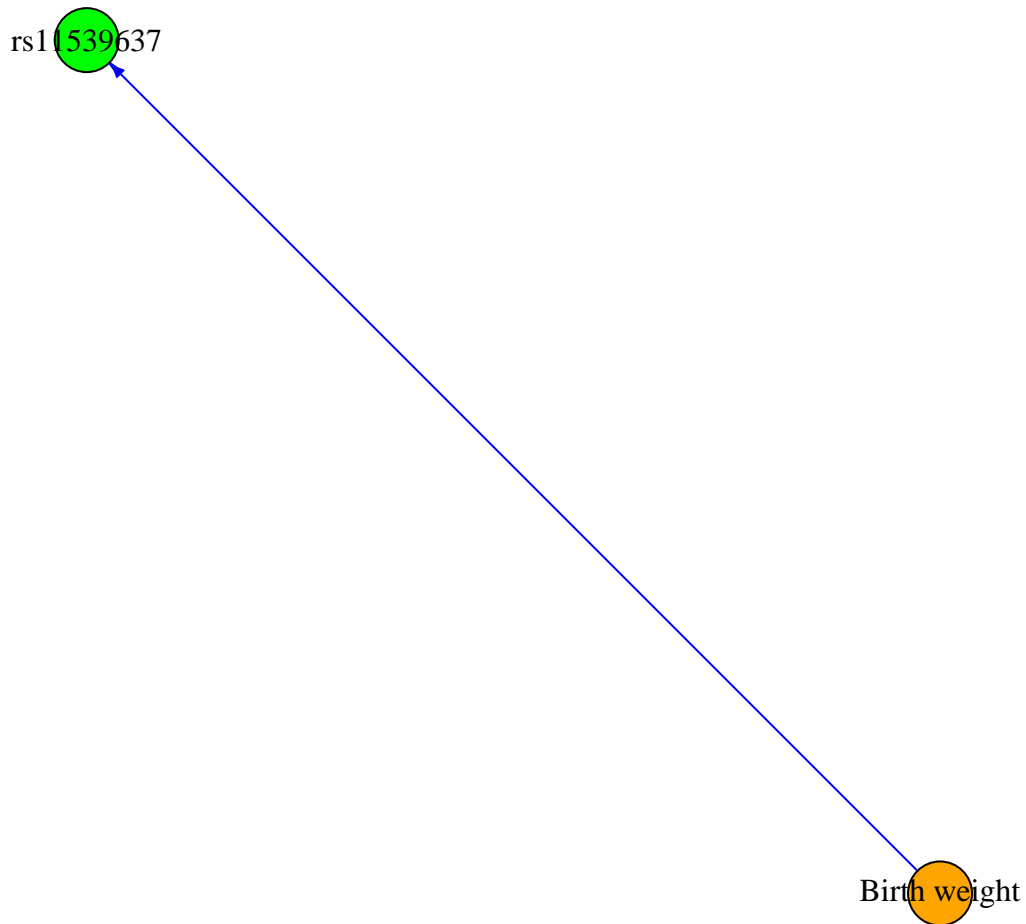

# Variant–Disease Network (Blond vs. brown/black hair color)

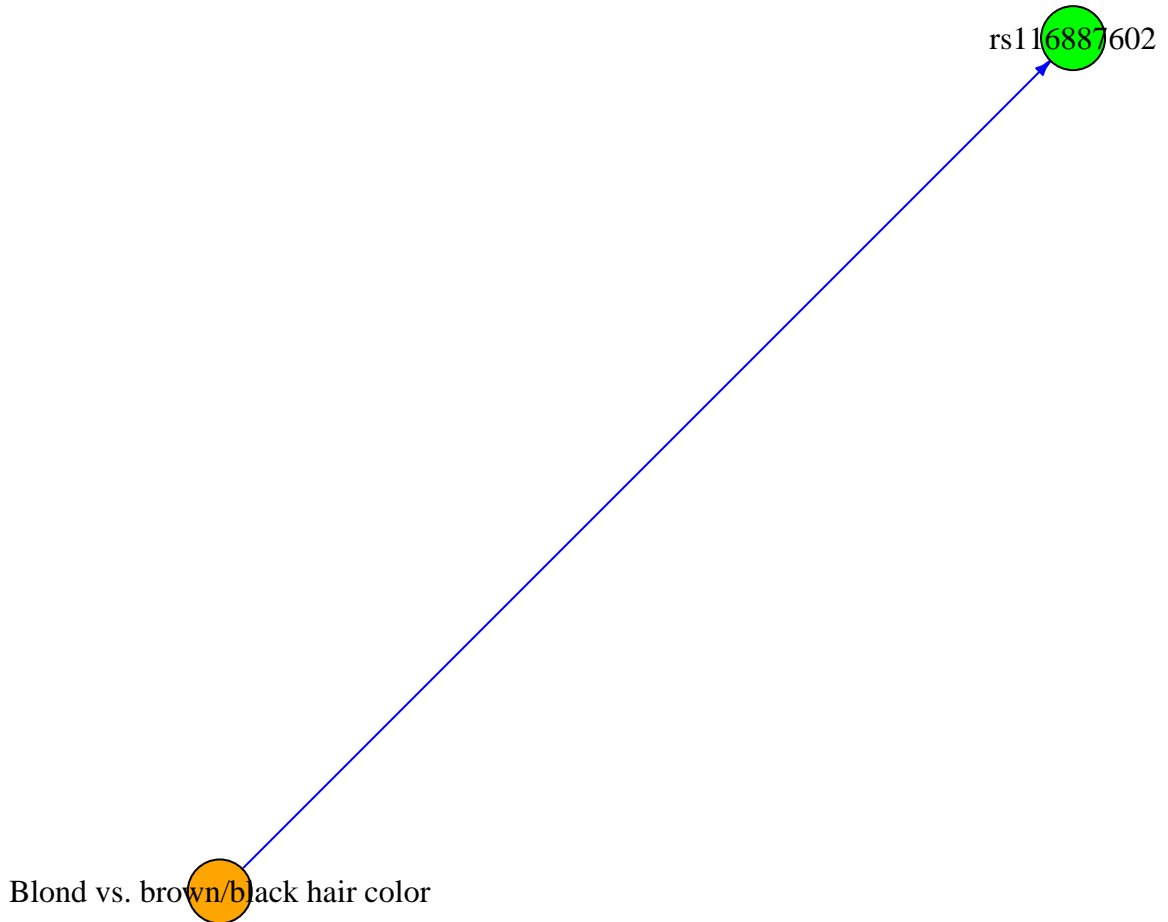

Variant–Disease Network (Blood metabolite ratios)

Blood metabolite ratios

rs1046080

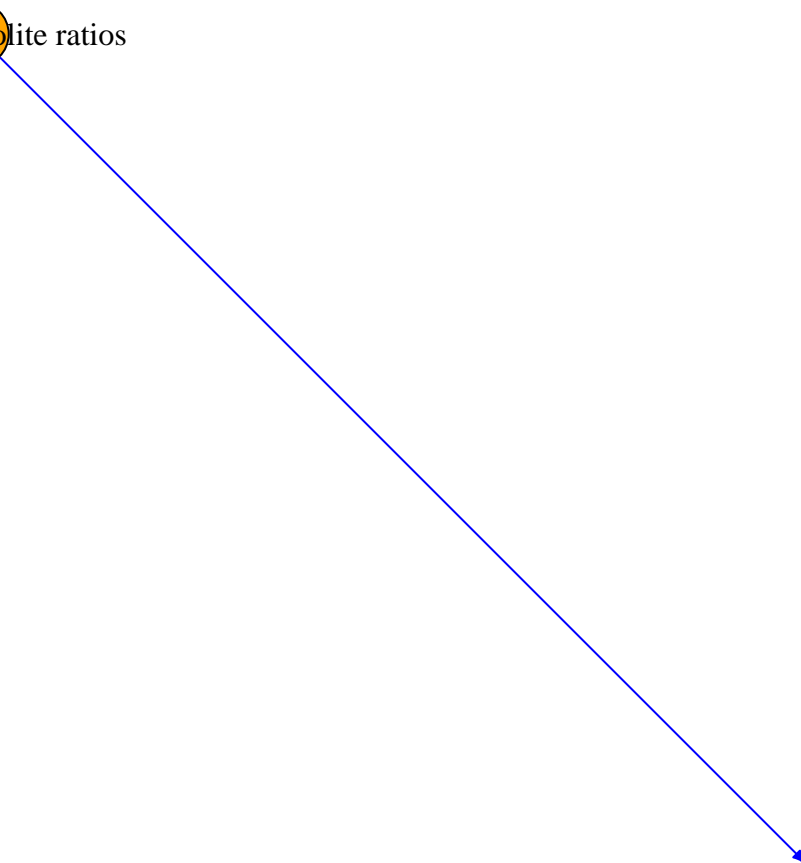

## Variant–Disease Network (Blood protein levels)

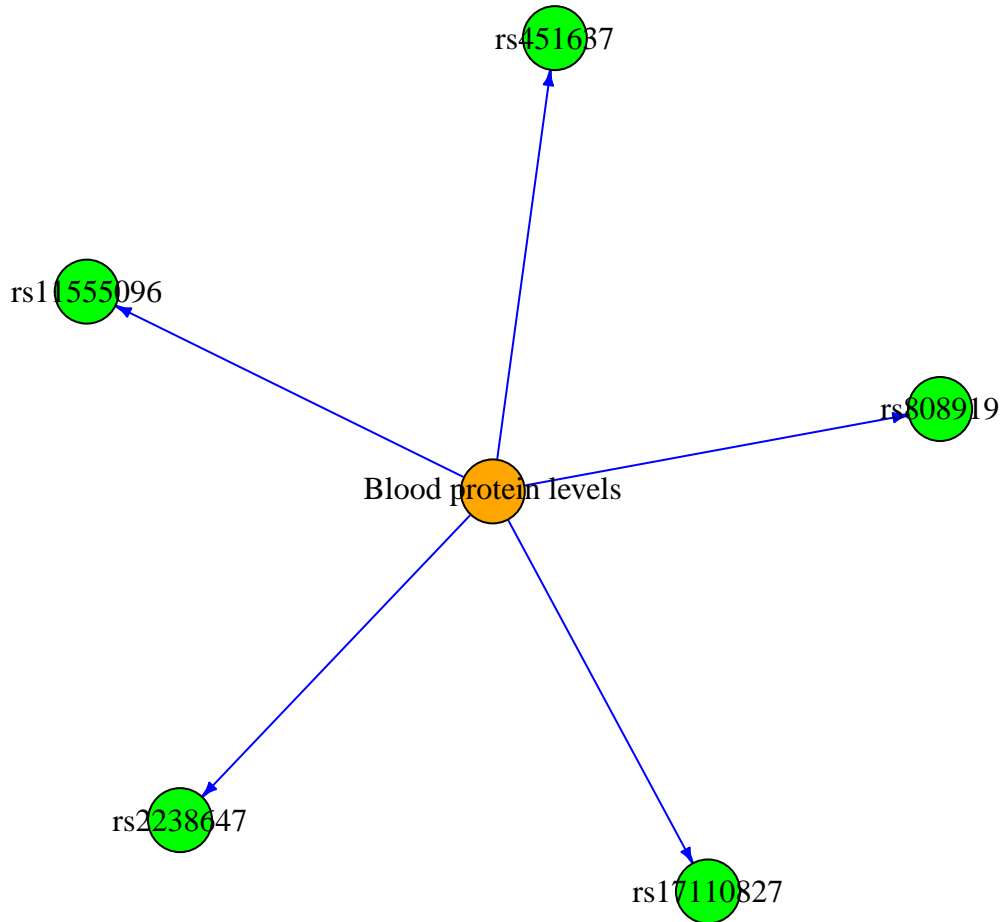

## Variant–Disease Network (Body fat percentage)

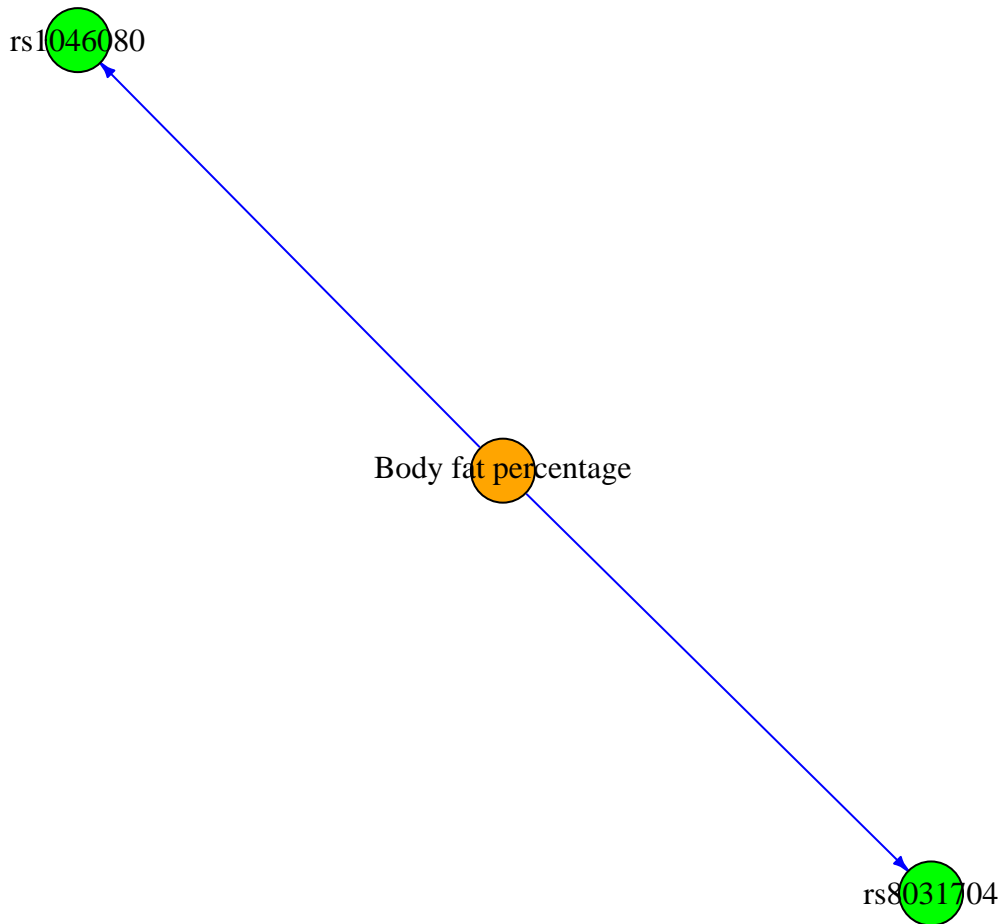

## Variant-Disease Network (Body mass index)

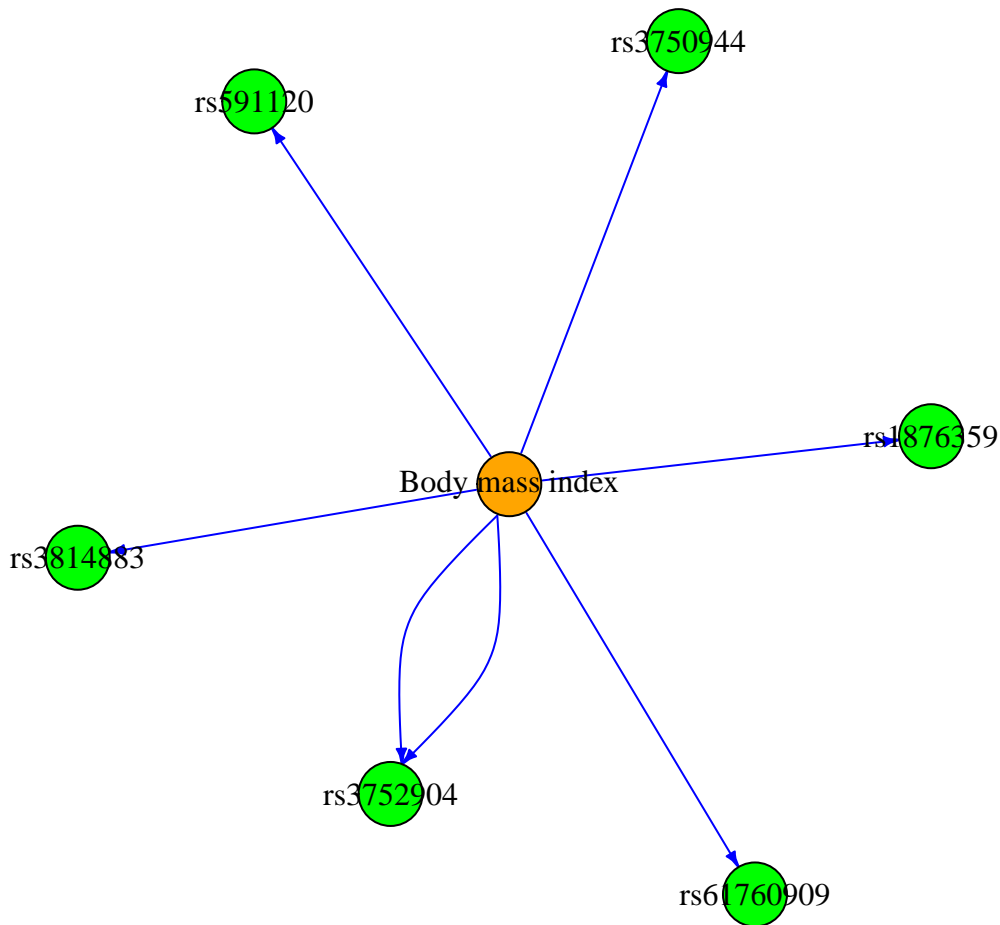

## Variant–Disease Network (Body mass index )

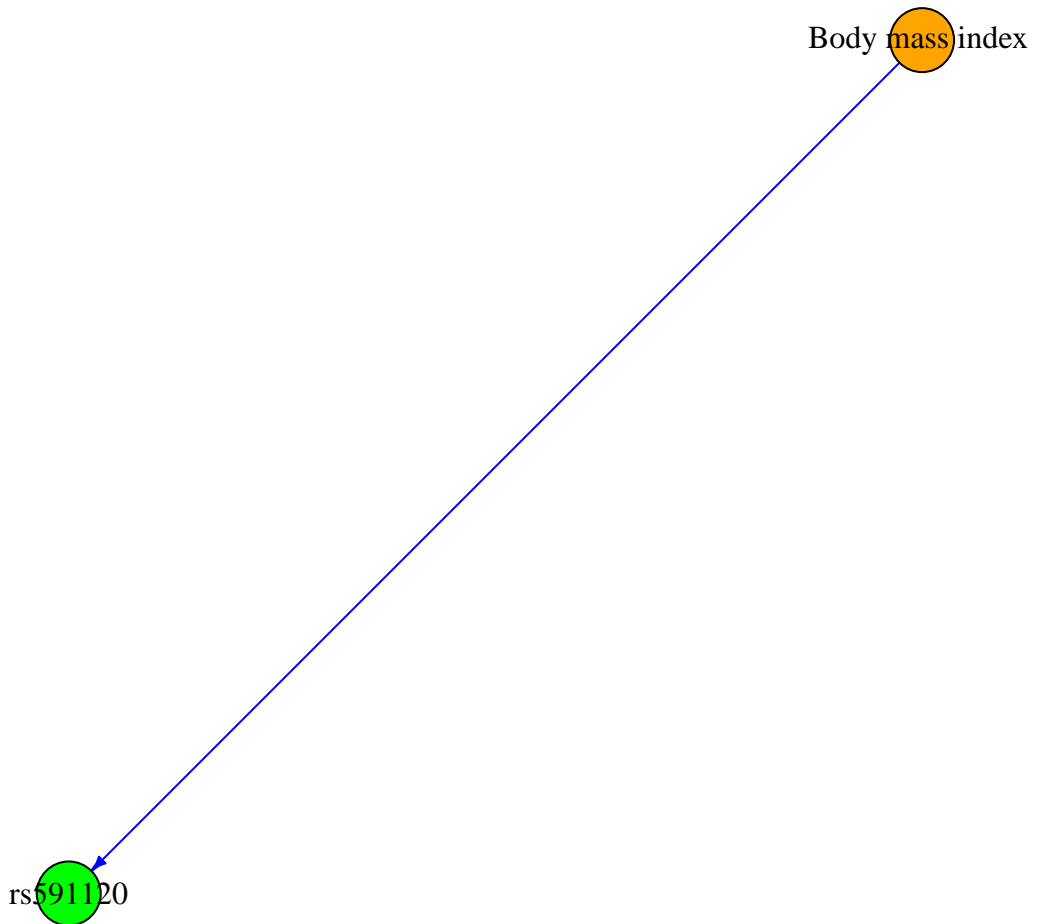

# Variant–Disease Network (Body mass index x sex x age interaction )

Body mass index x sex x age interaction

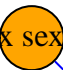

rs591120

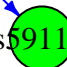



## Variant–Disease Network (Bone mineral content)

Bone mineral content

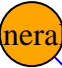

rs3729904

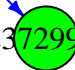

# Variant–Disease Network (Bone mineral density and hip bone size)

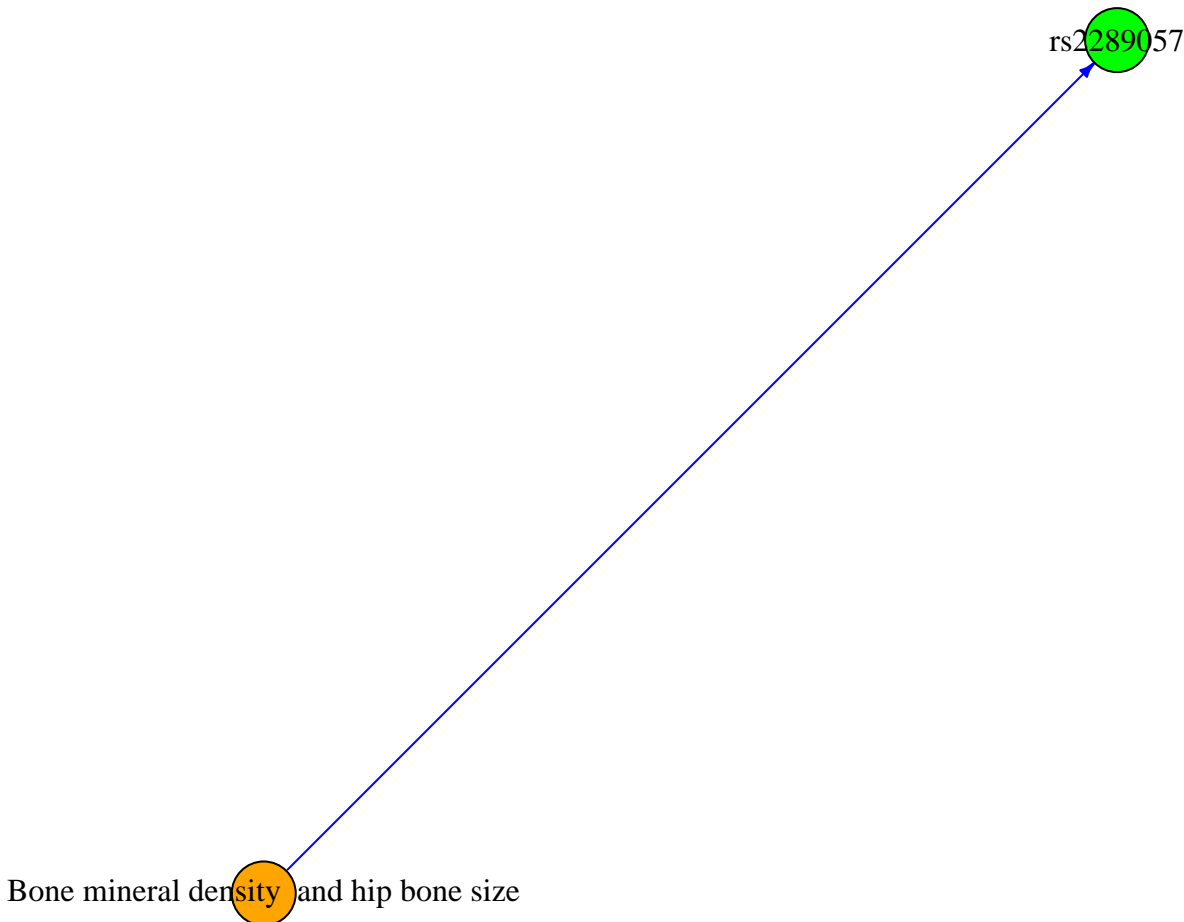

## Variant–Disease Network (Brain region volumes)

rs3741280

Brain region volumes



## Variant-Disease Network (Cataracts )

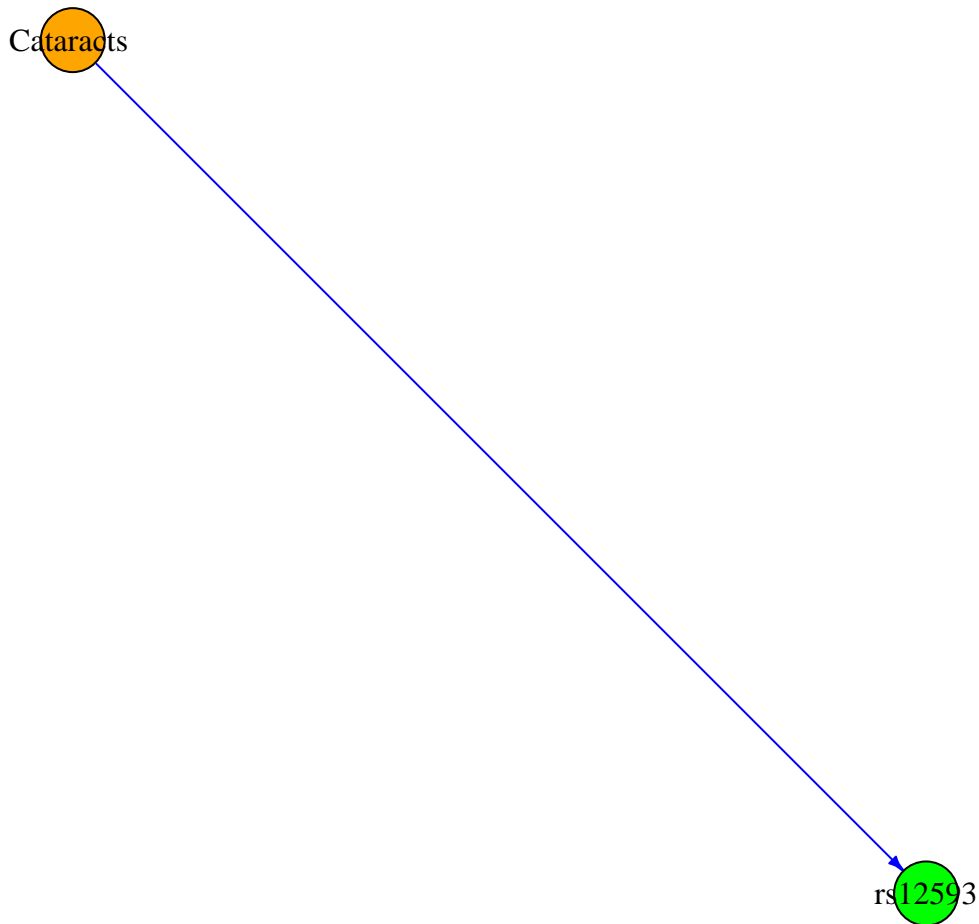

# Variant–Disease Network (Cerebral amyloid deposition )

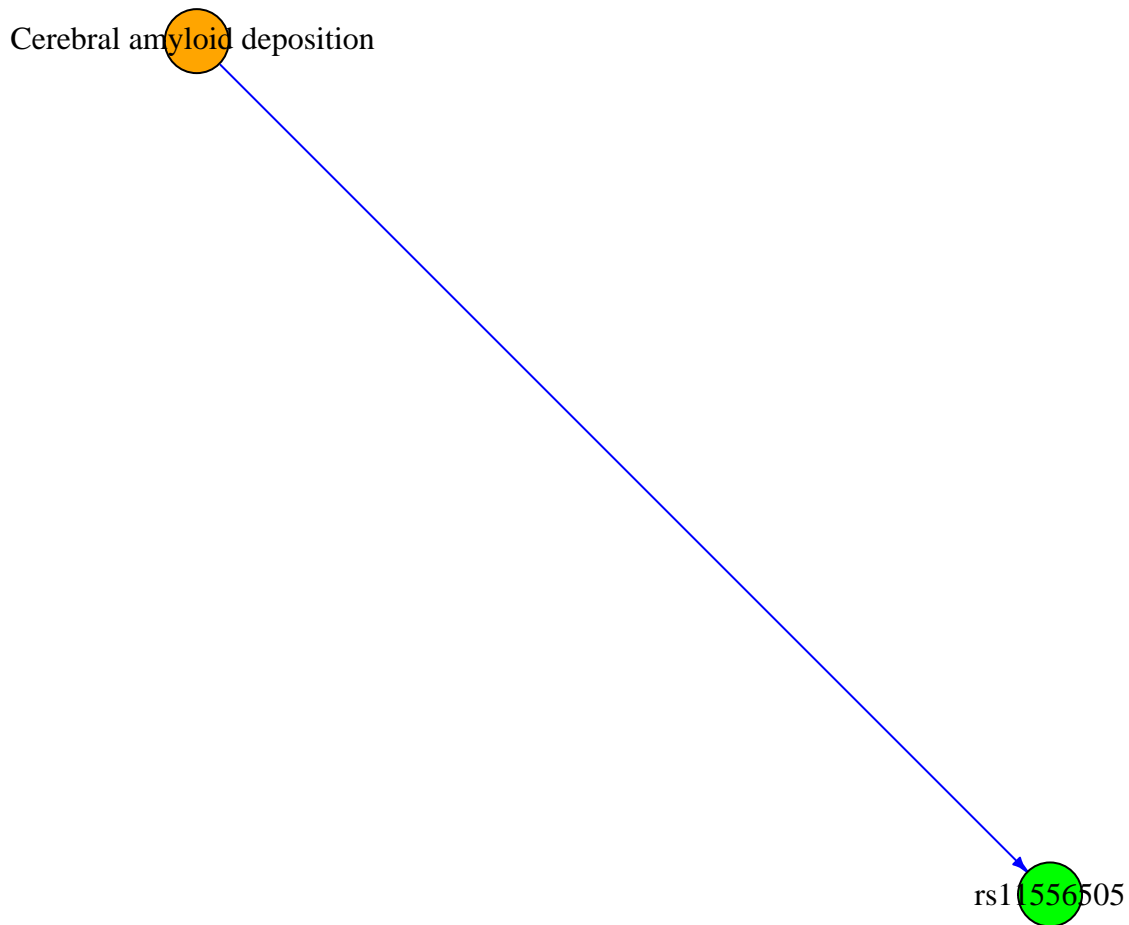

# Variant–Disease Network (Cerebrospinal fluid biomarker levels)

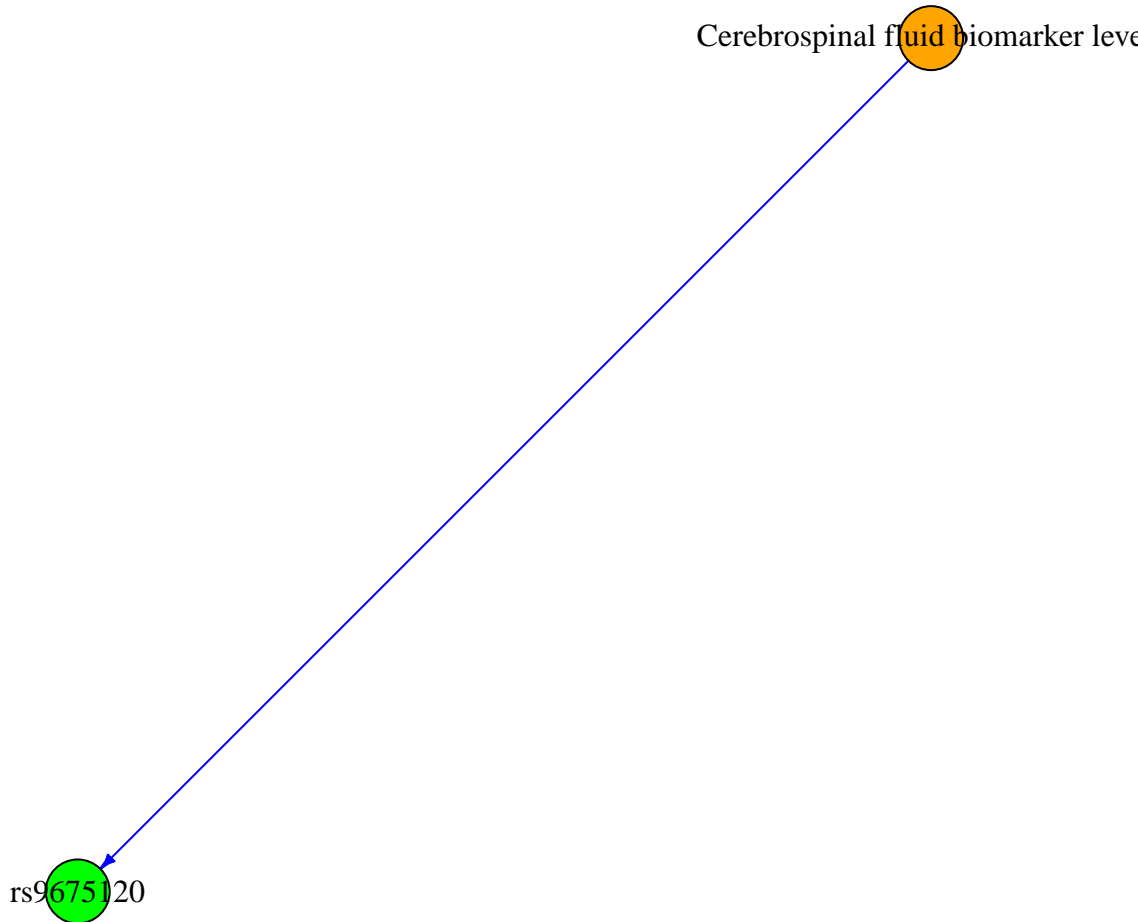

# Variant–Disease Network (Cerebrospinal fluid t-tau:AB1–42 ratio)

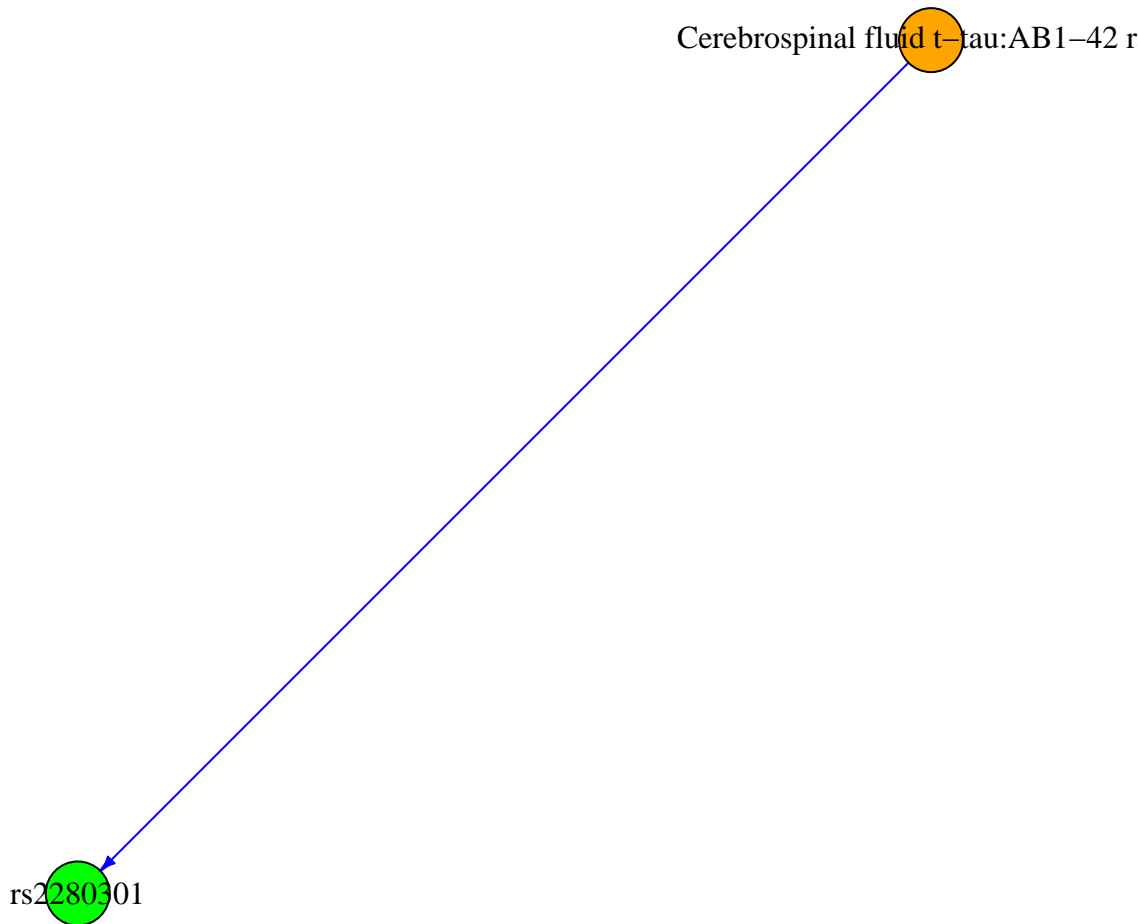

**Variant–Disease Network (Cholesterol)**

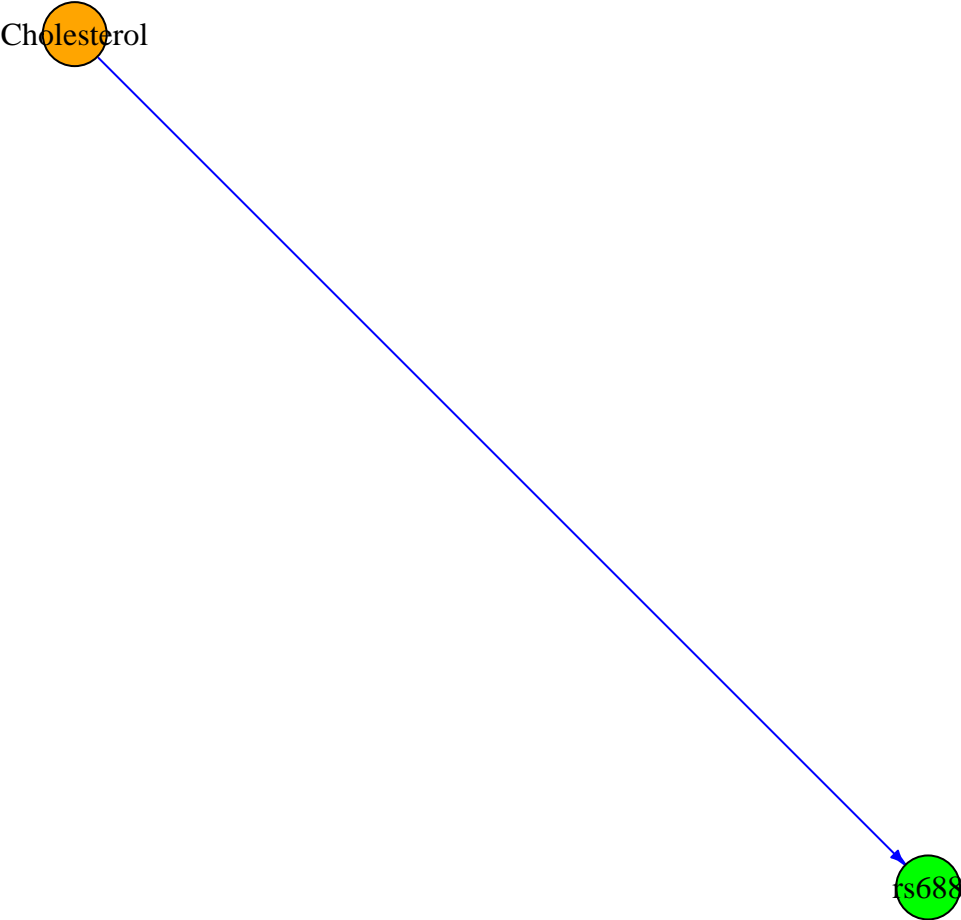



## Variant-Disease Network (Cholesterol, total)

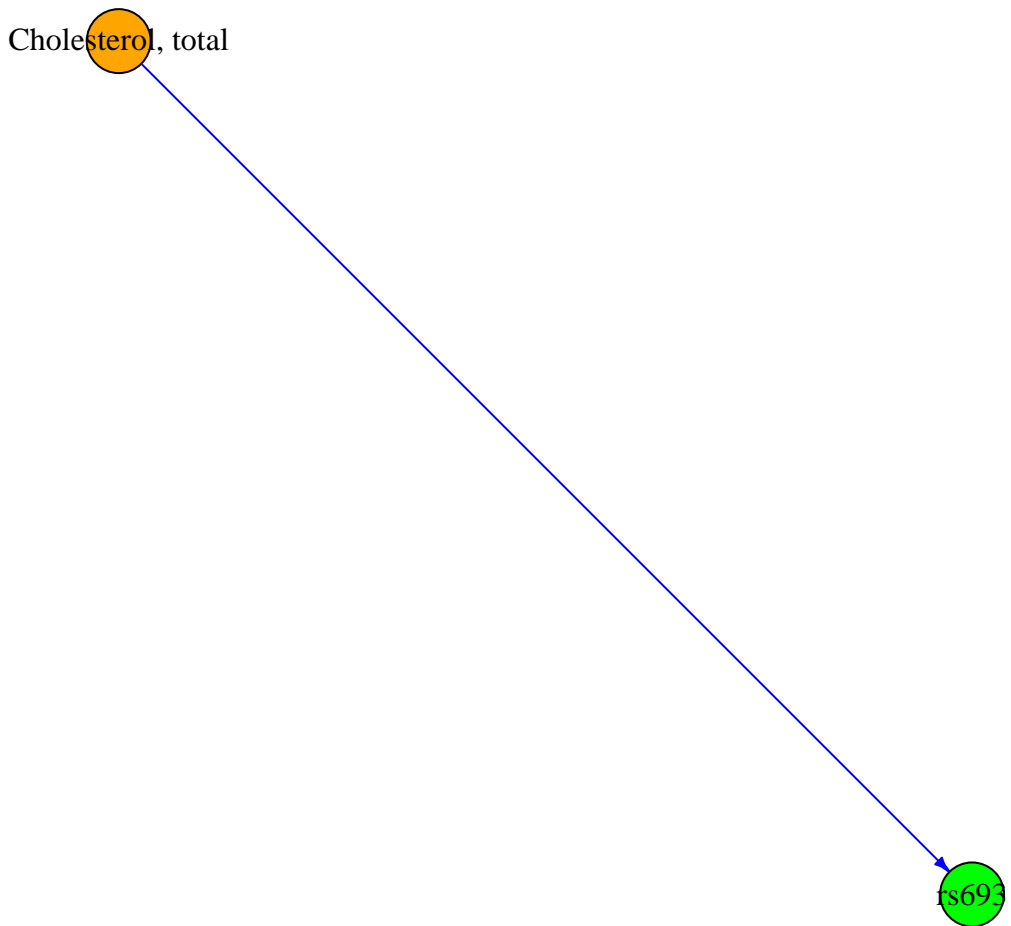

# -Disease Network (Cognitive ability, years of educational attainment or schizophrenia)

bility, years of educational attainment or schizophrenia

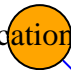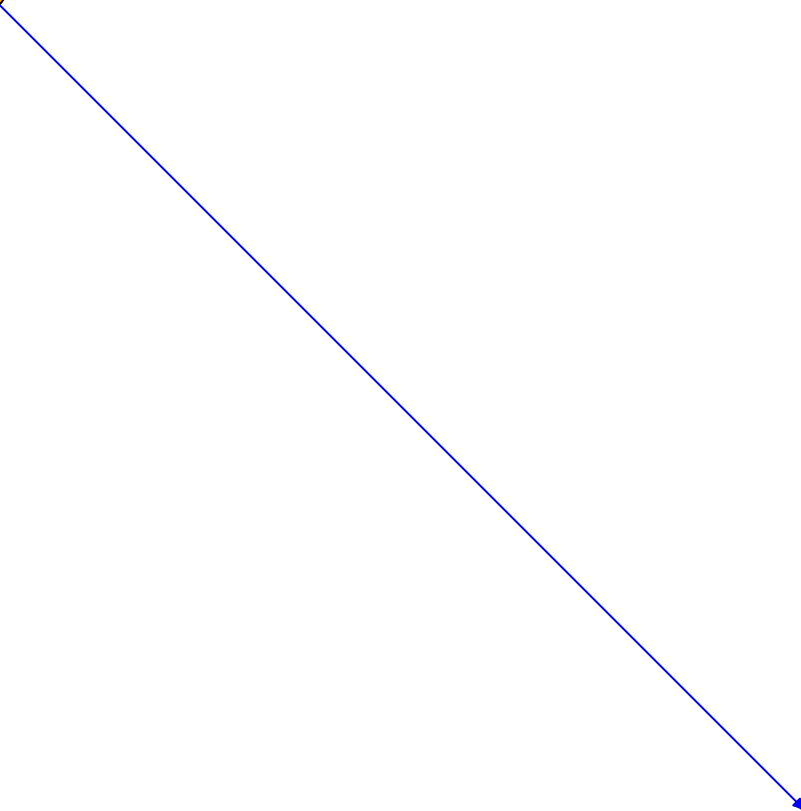

rs3814883

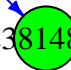

## Variant–Disease Network (Cognitive function)

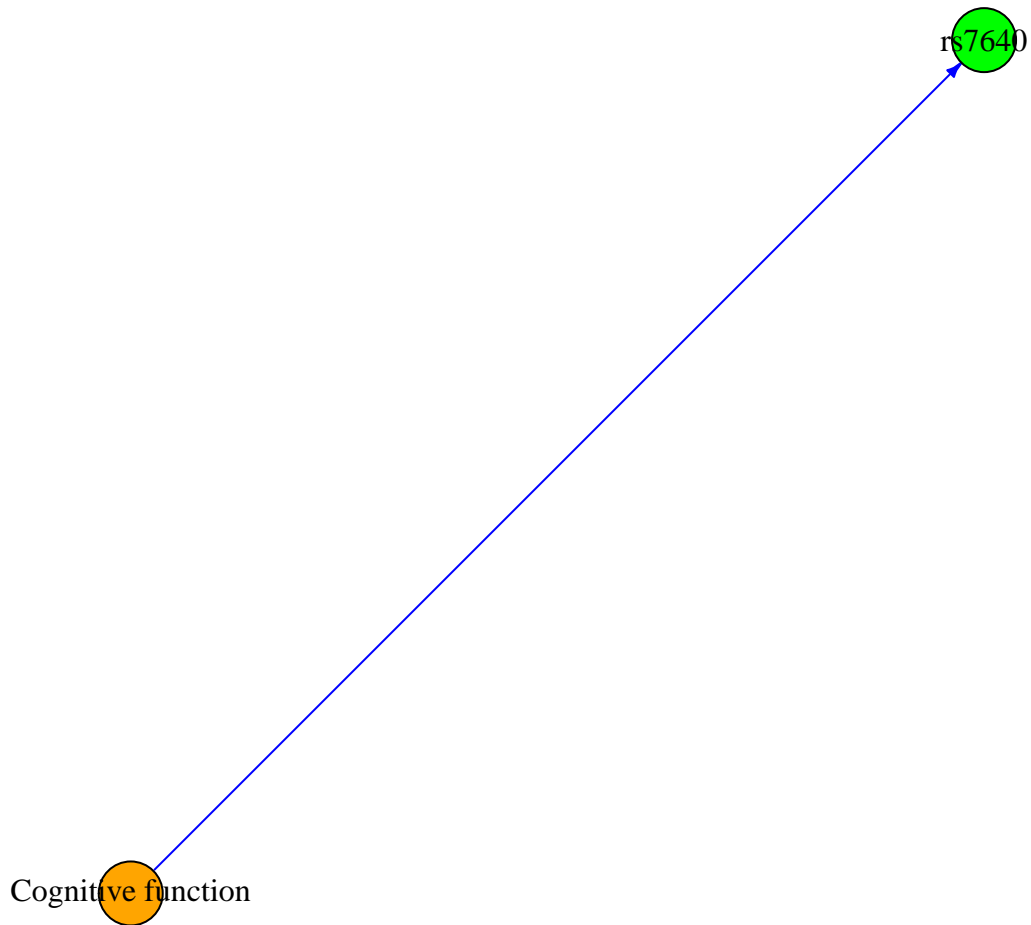

## Variant-Disease Network (Cognitive performance)

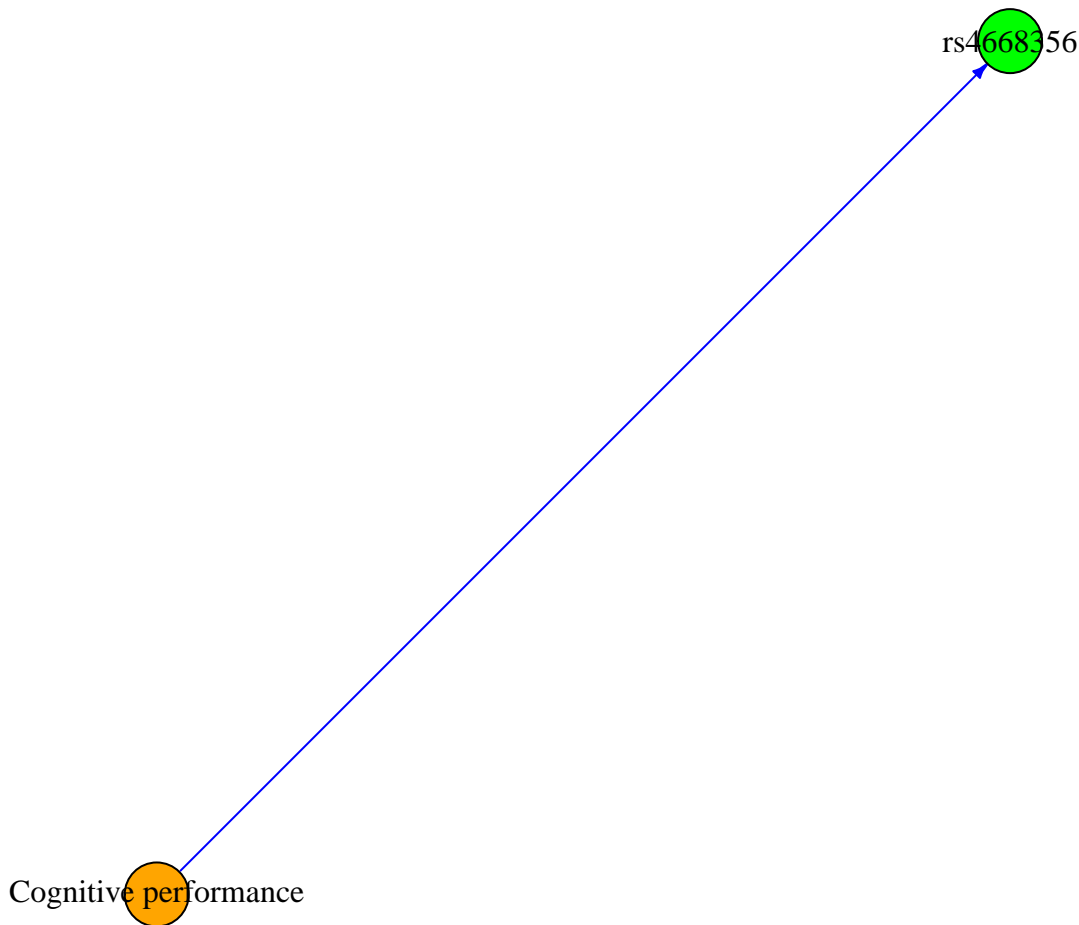

## Variant–Disease Network (Coronary artery disease)

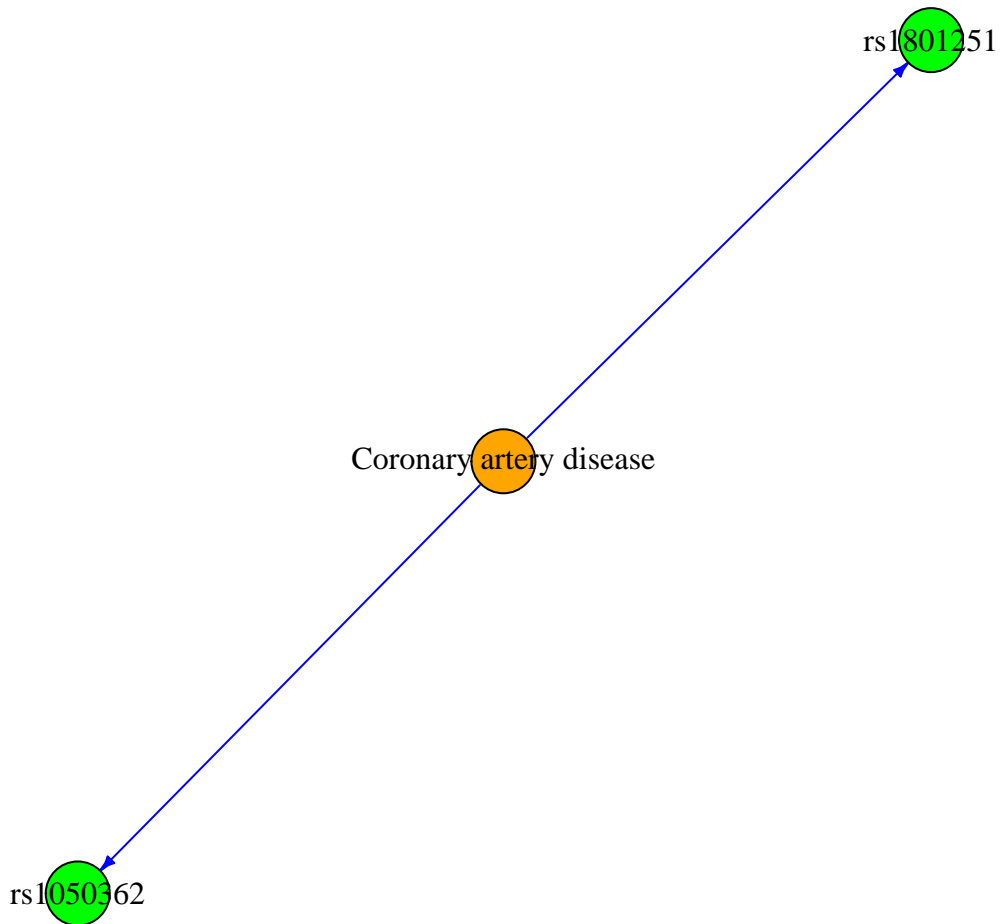

## Variant-Disease Network (Cortical surface area)

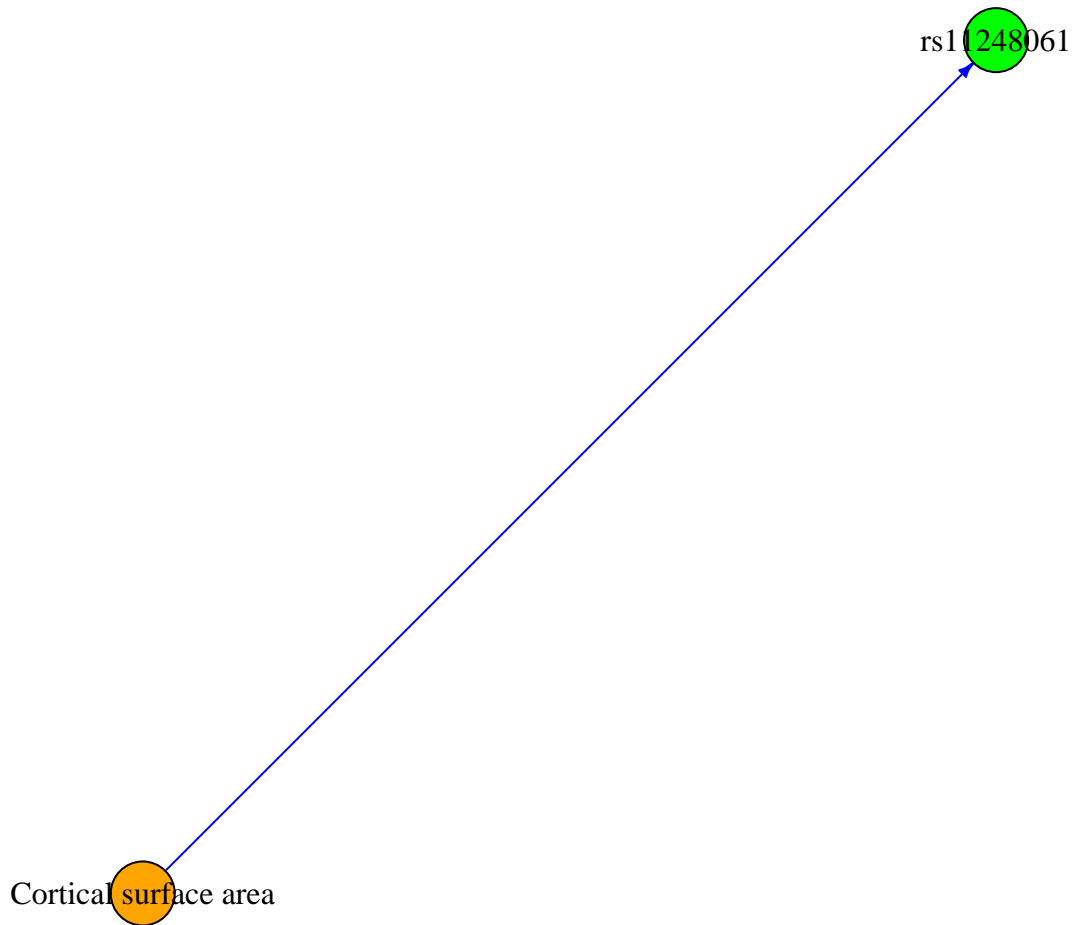

# Variant-Disease Network (C-reactive protein levels)

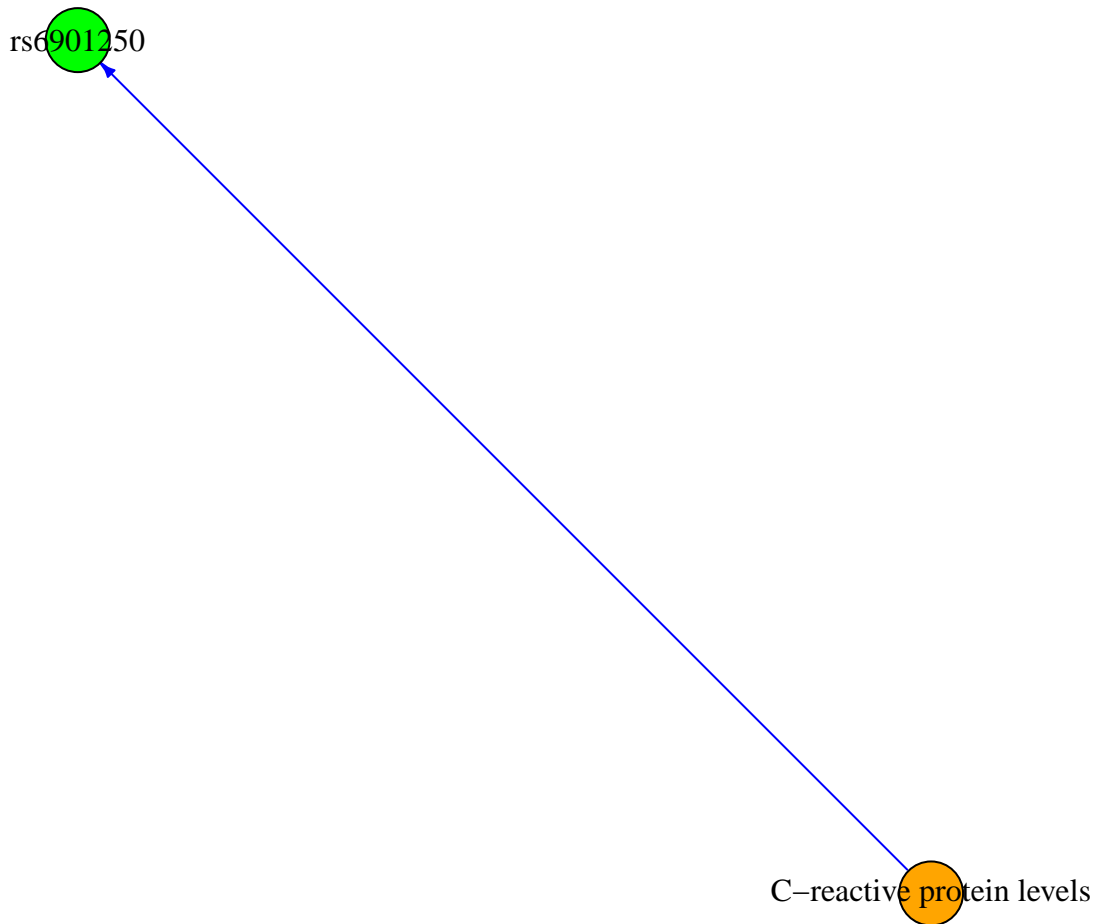

## Variant–Disease Network (Creatinine levels)

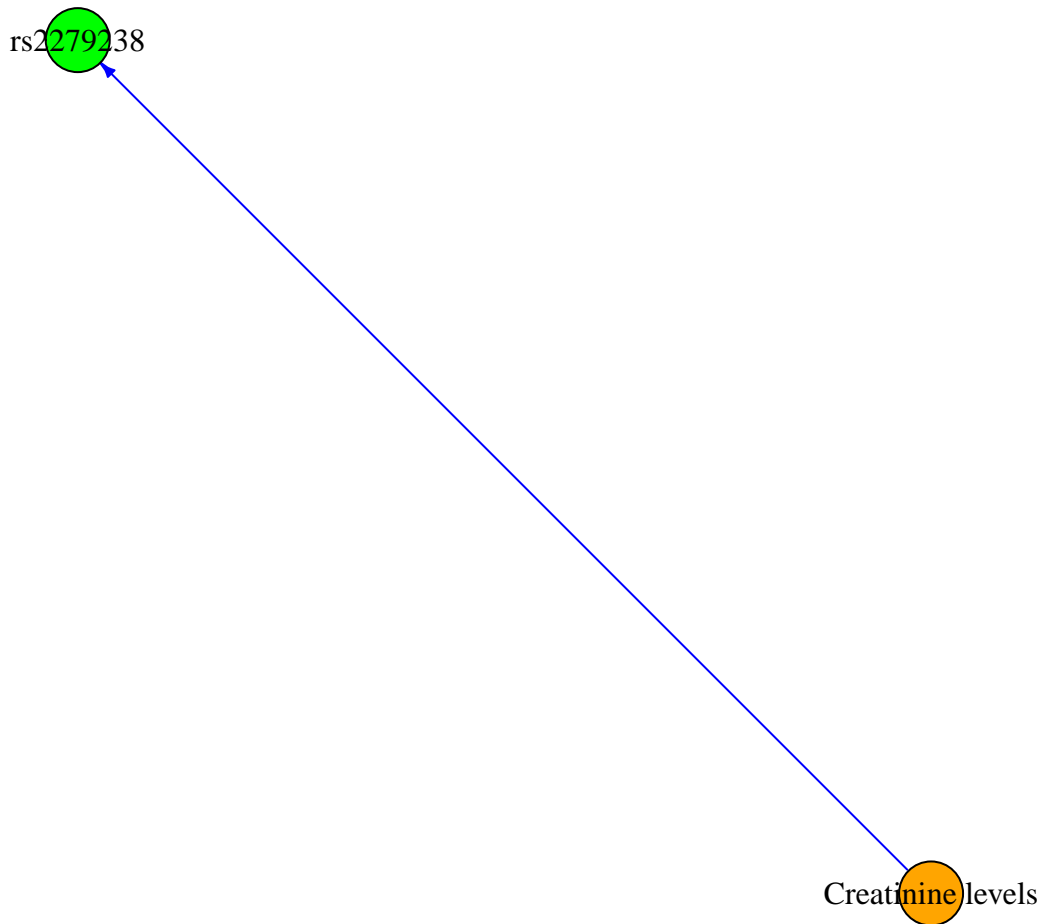



## Variant-Disease Network (Diastolic blood pressure)

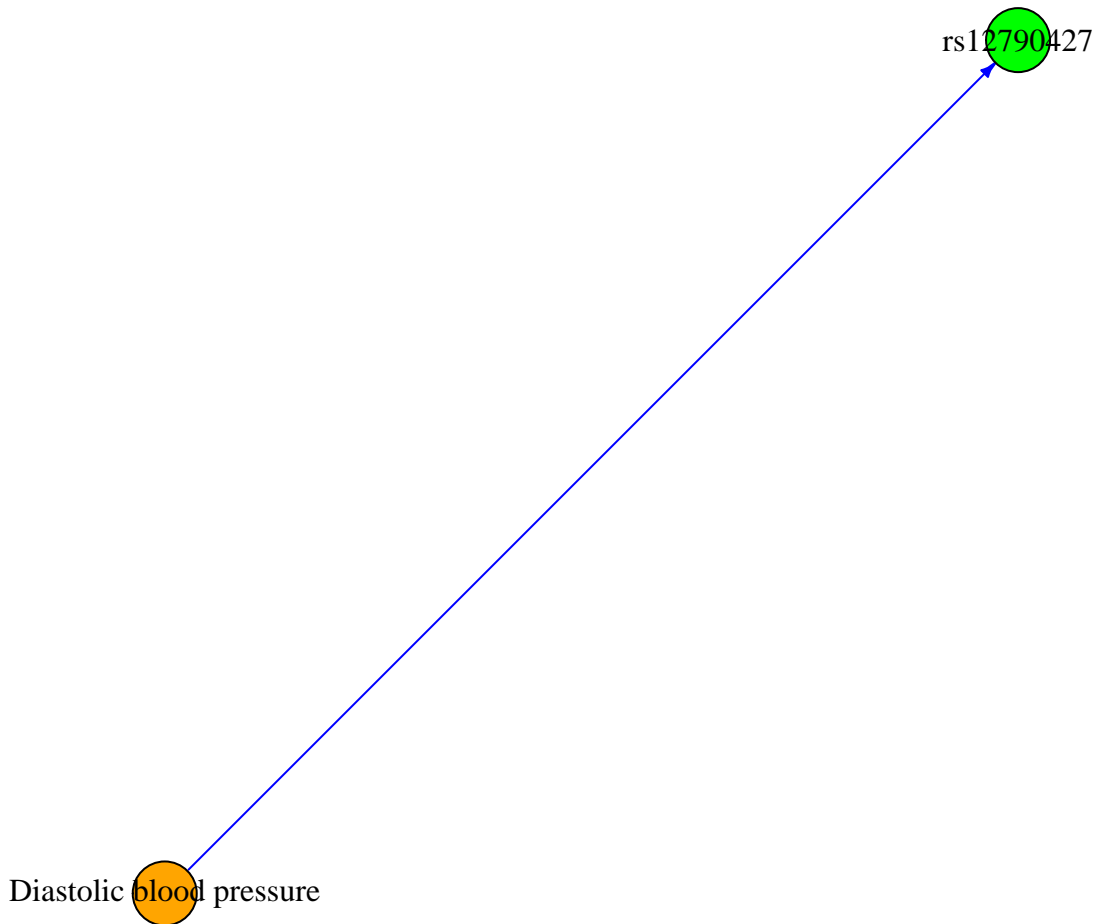

## Variant–Disease Network (Educational attainment )

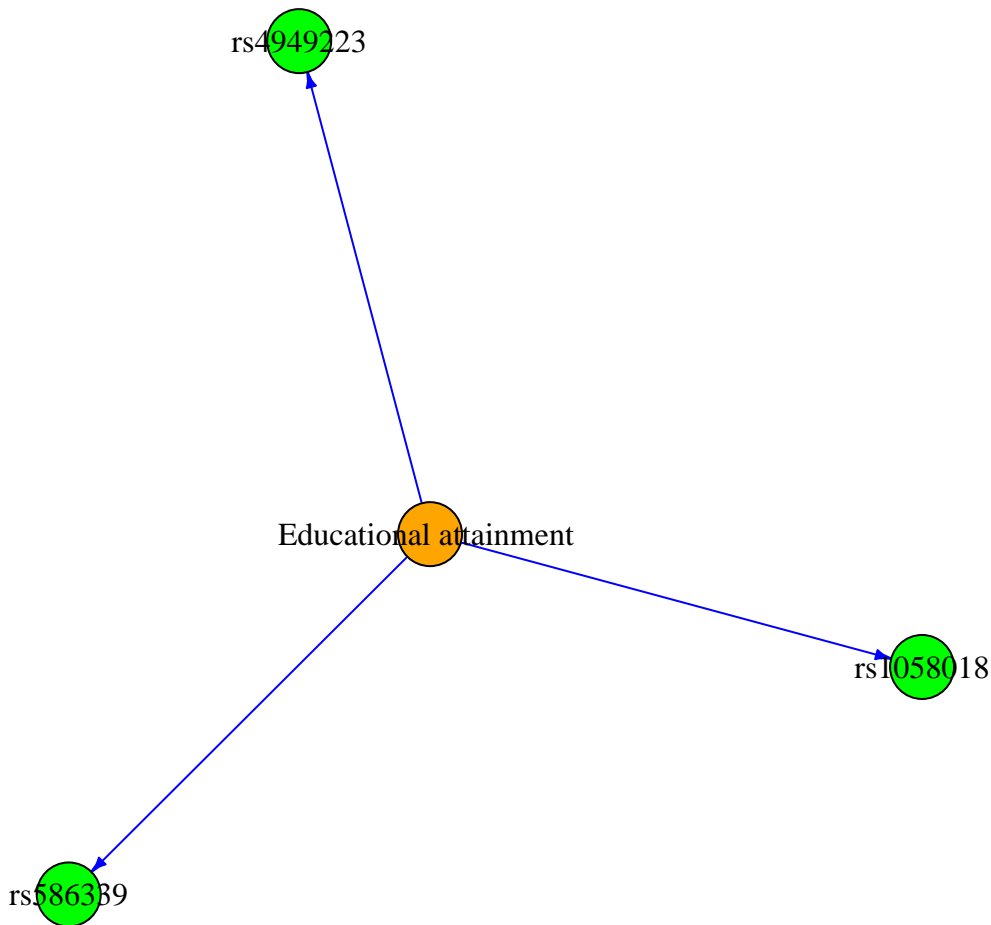

# nt-Disease Network (Elevated serum prostate-specific antigen levels in healthy men)

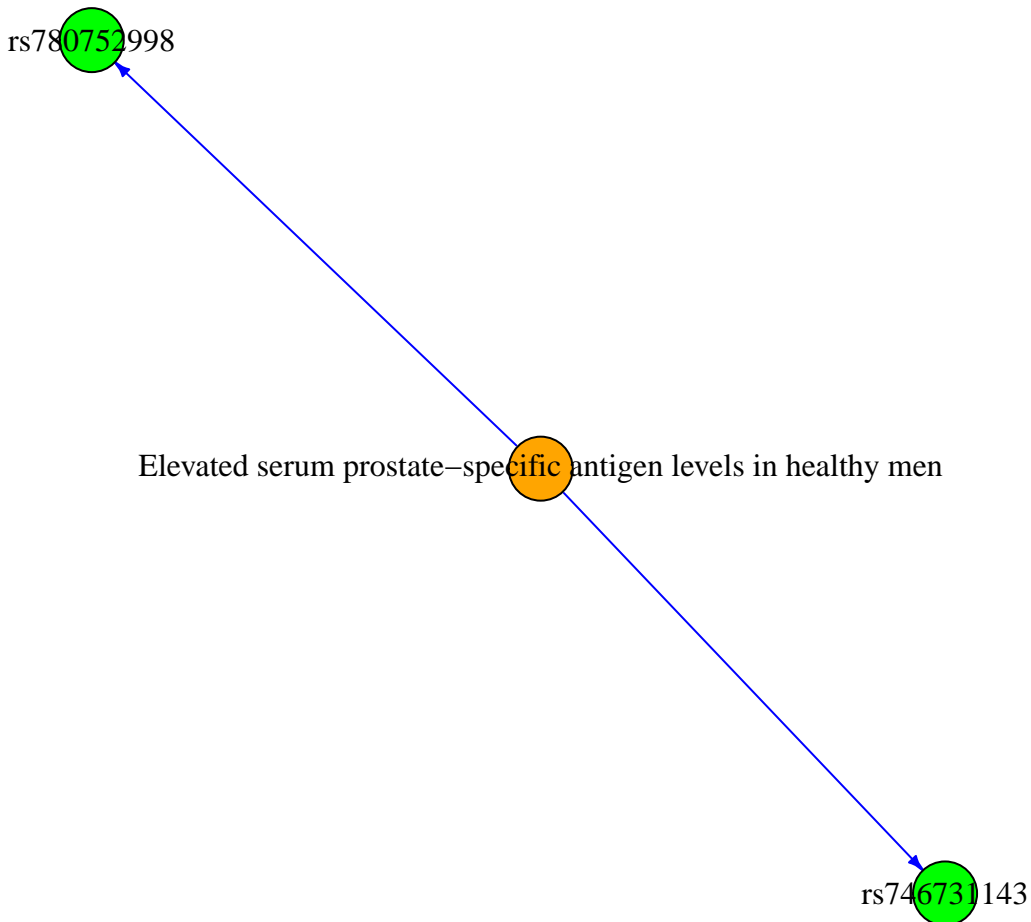

## Variant-Disease Network (Endometrial cancer)

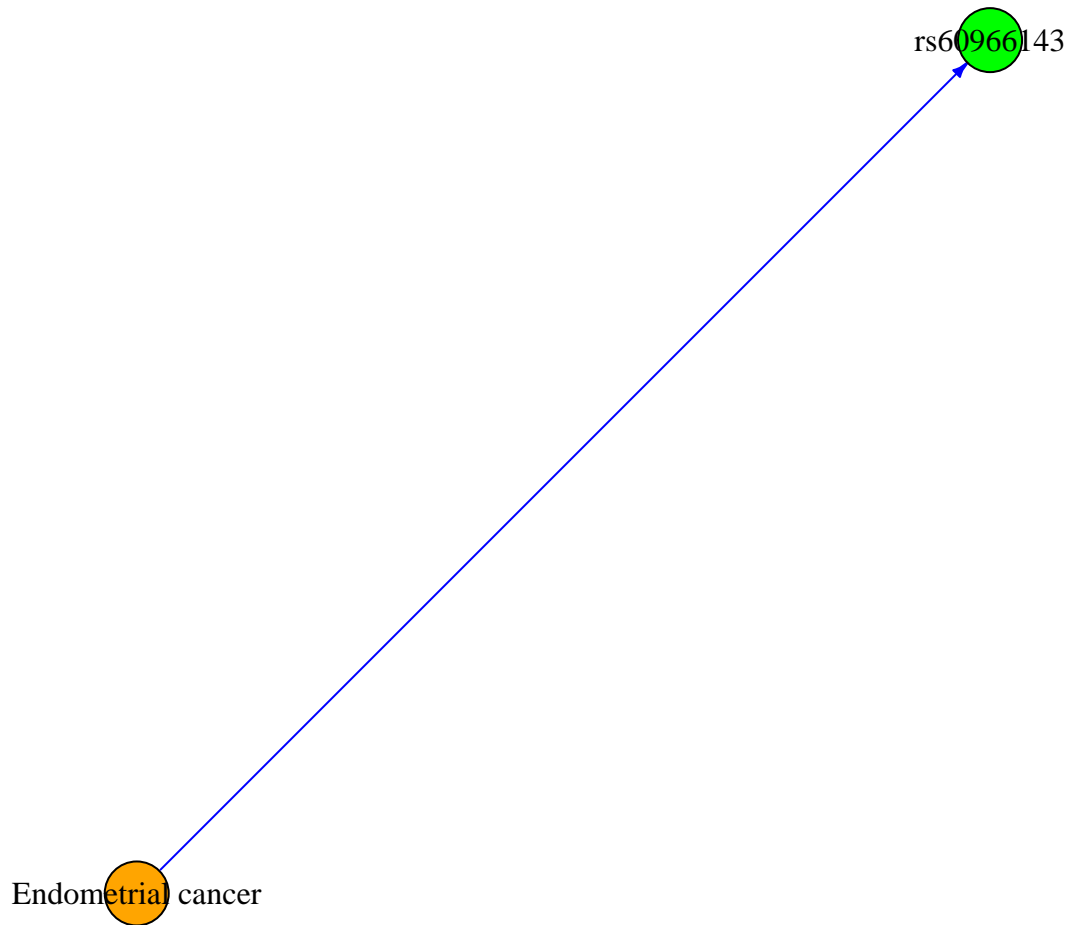

## Variant–Disease Network (Endometrial cancer )

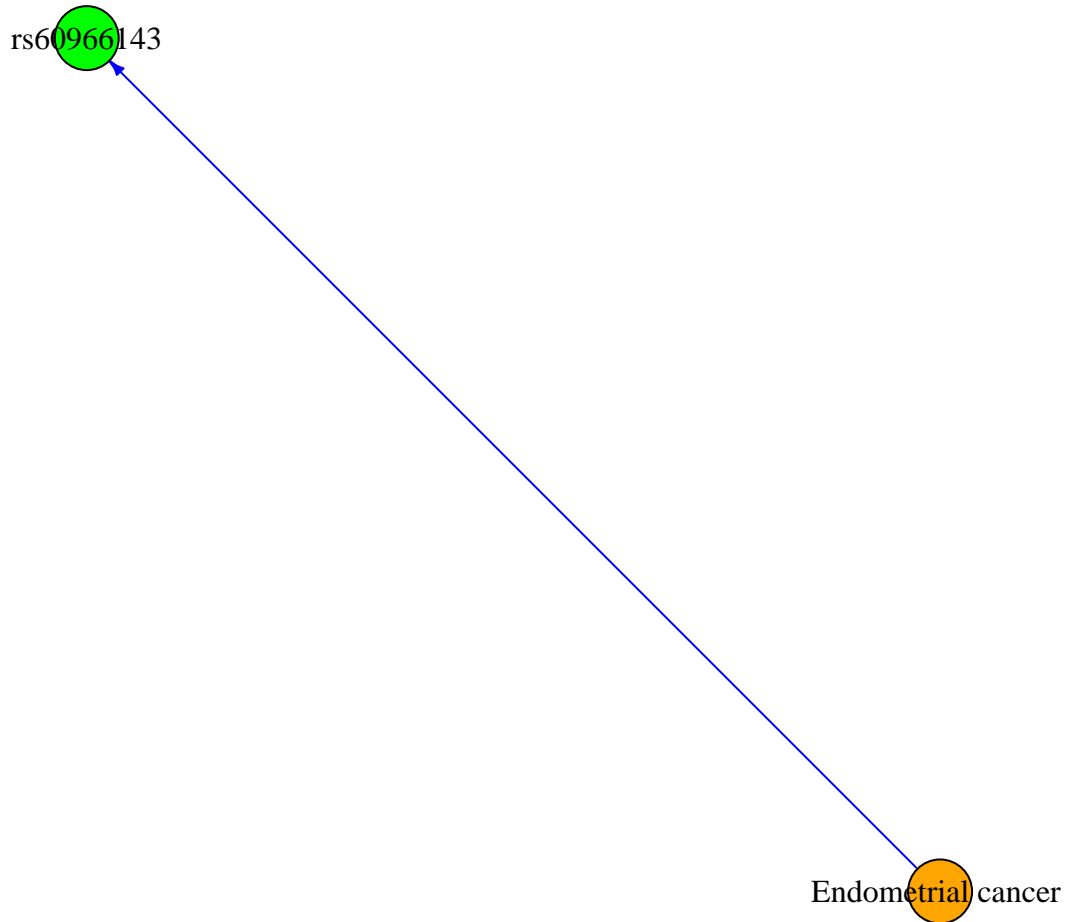

## Variant-Disease Network (Esophageal squamous cell cancer )

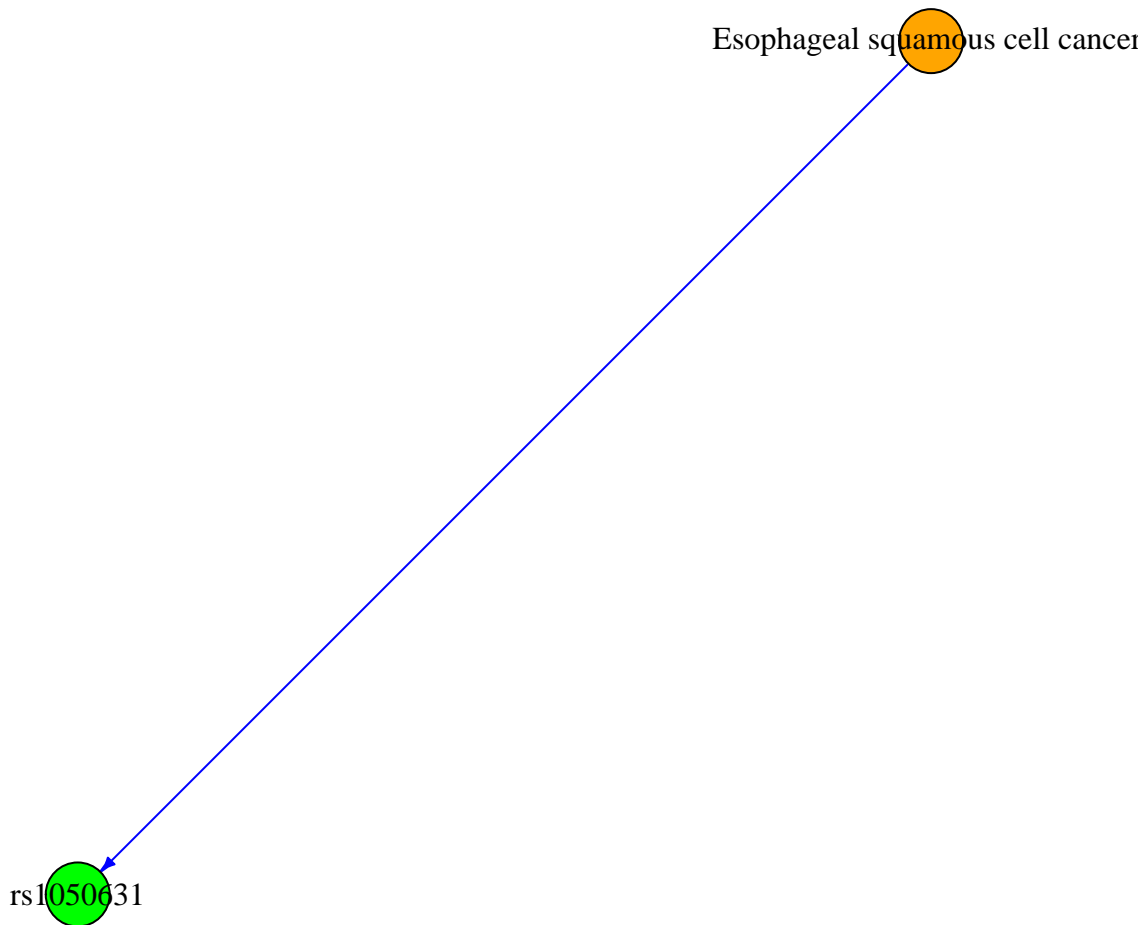

# Variant–Disease Network (Estimated glomerular filtration rate)

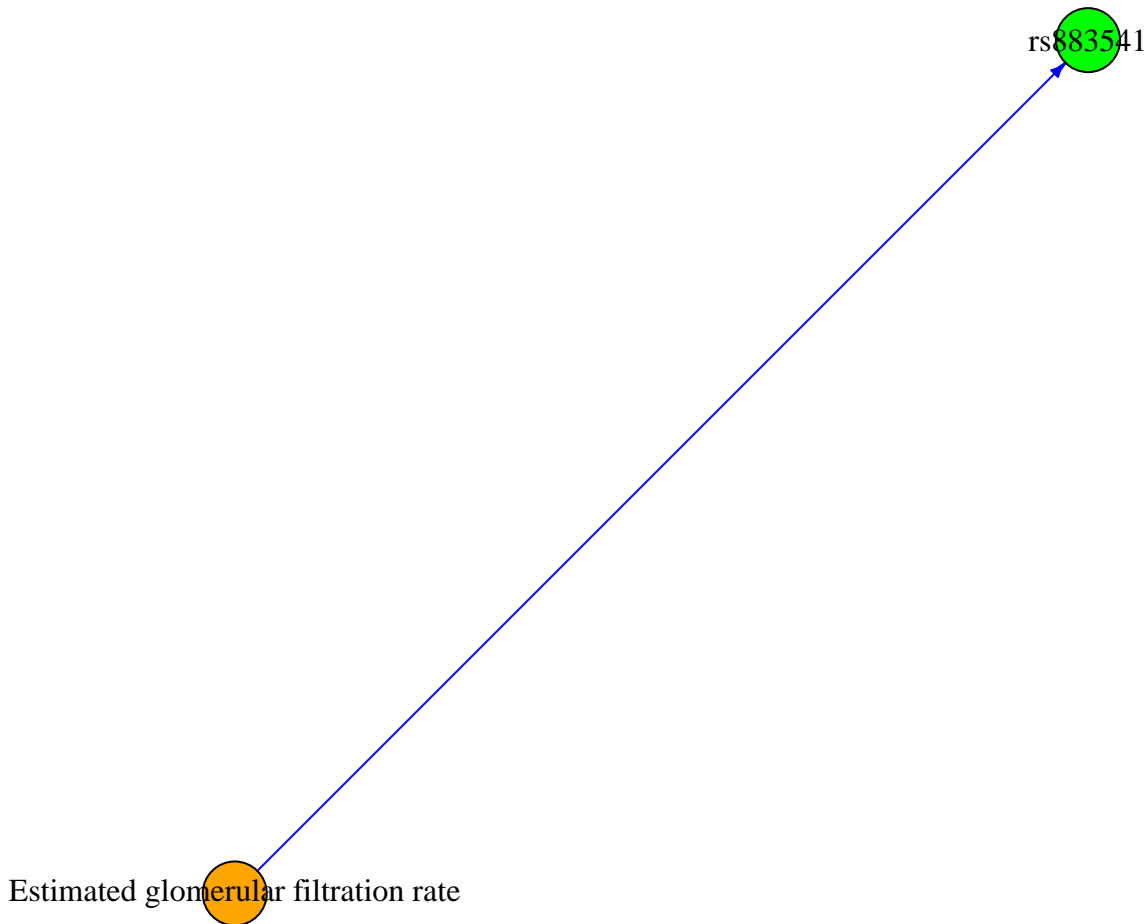

## Variant-Disease Network (Feeling guilty)

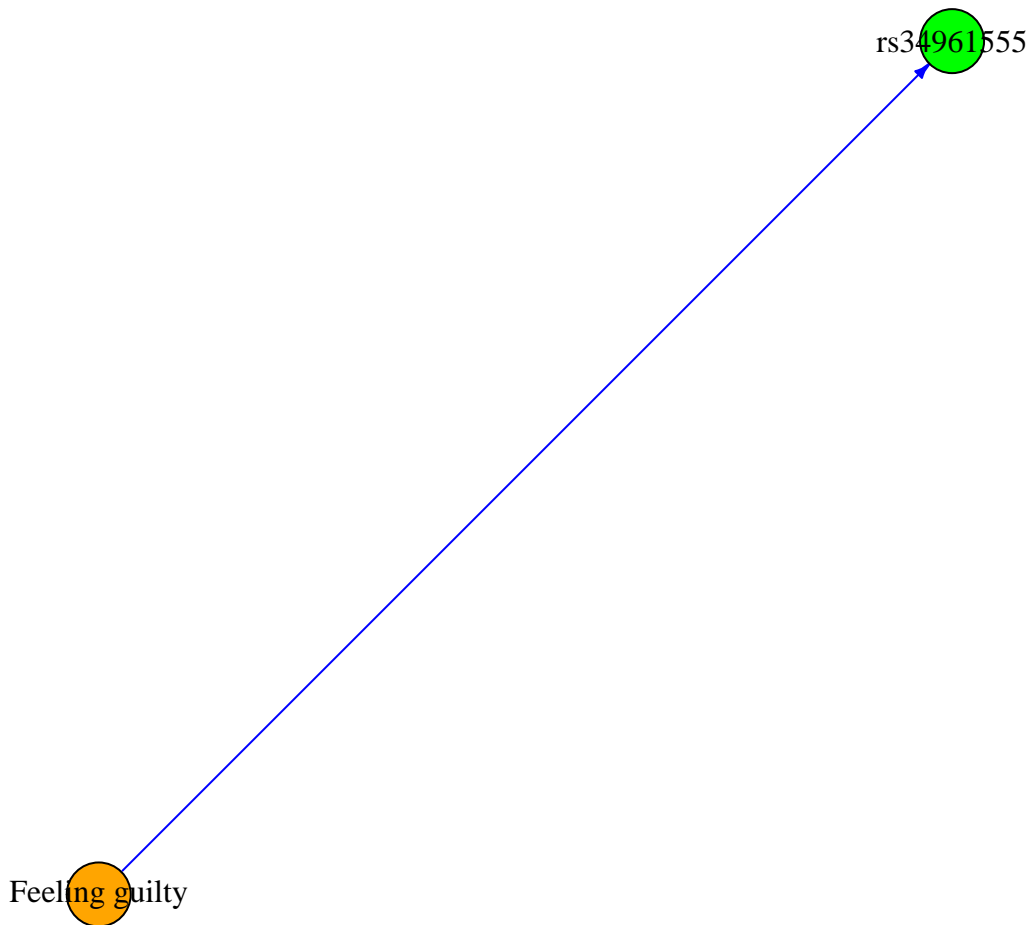



Variant–Disease Network (Fibrinogen levels)

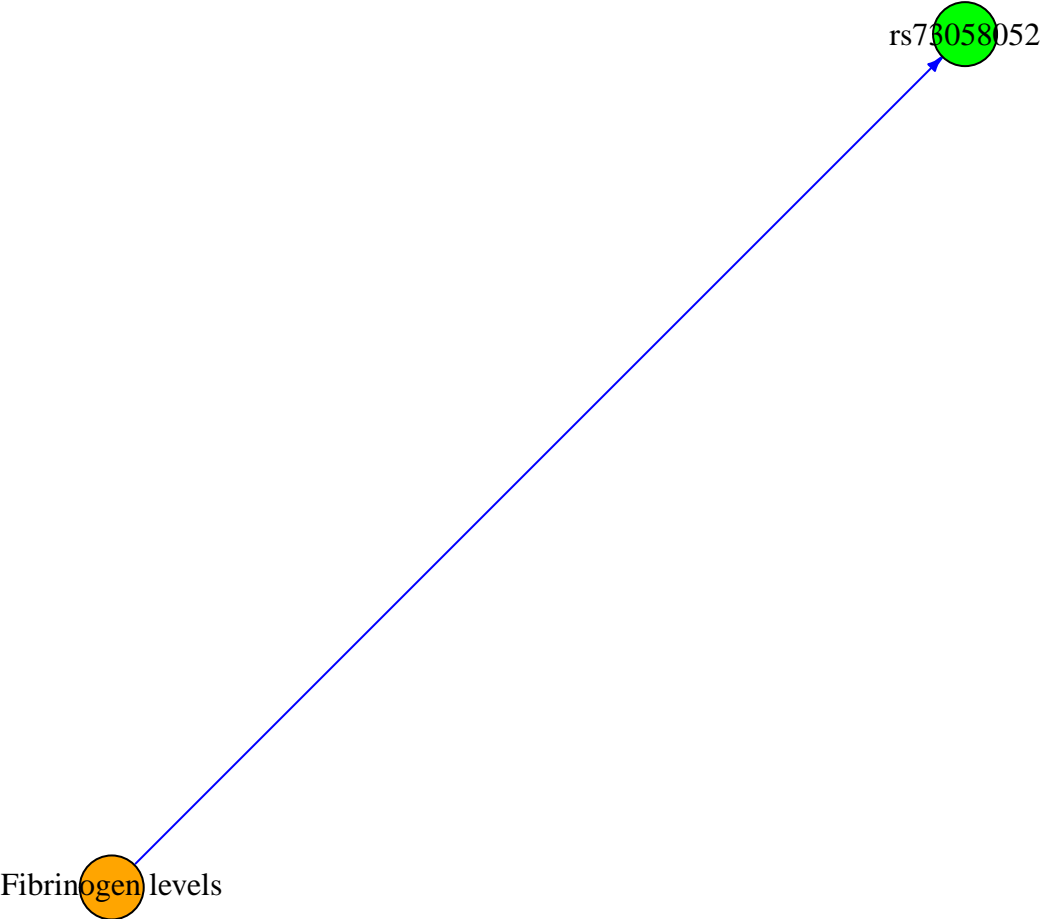

# Variant–Disease Network (Fish– and plant–related diet)

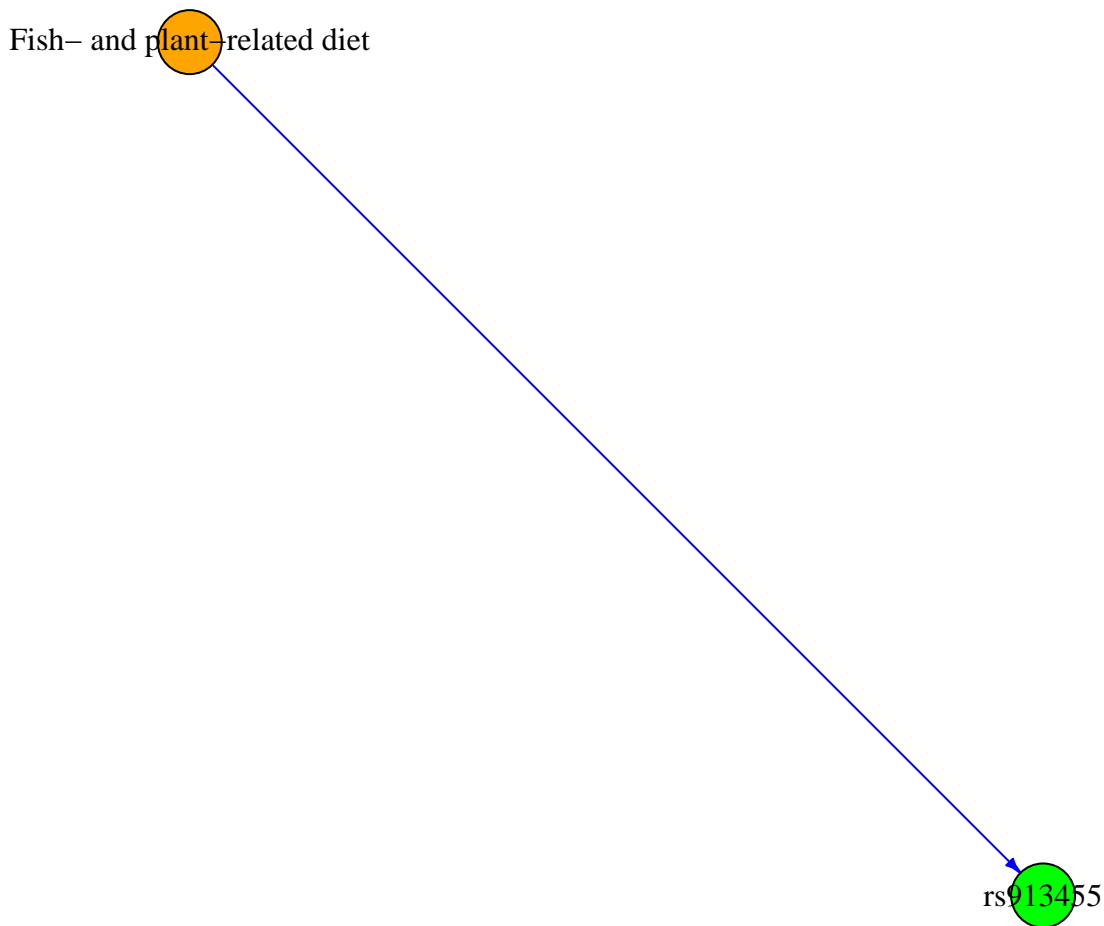

# Variant–Disease Network (General factor of neuroticism)

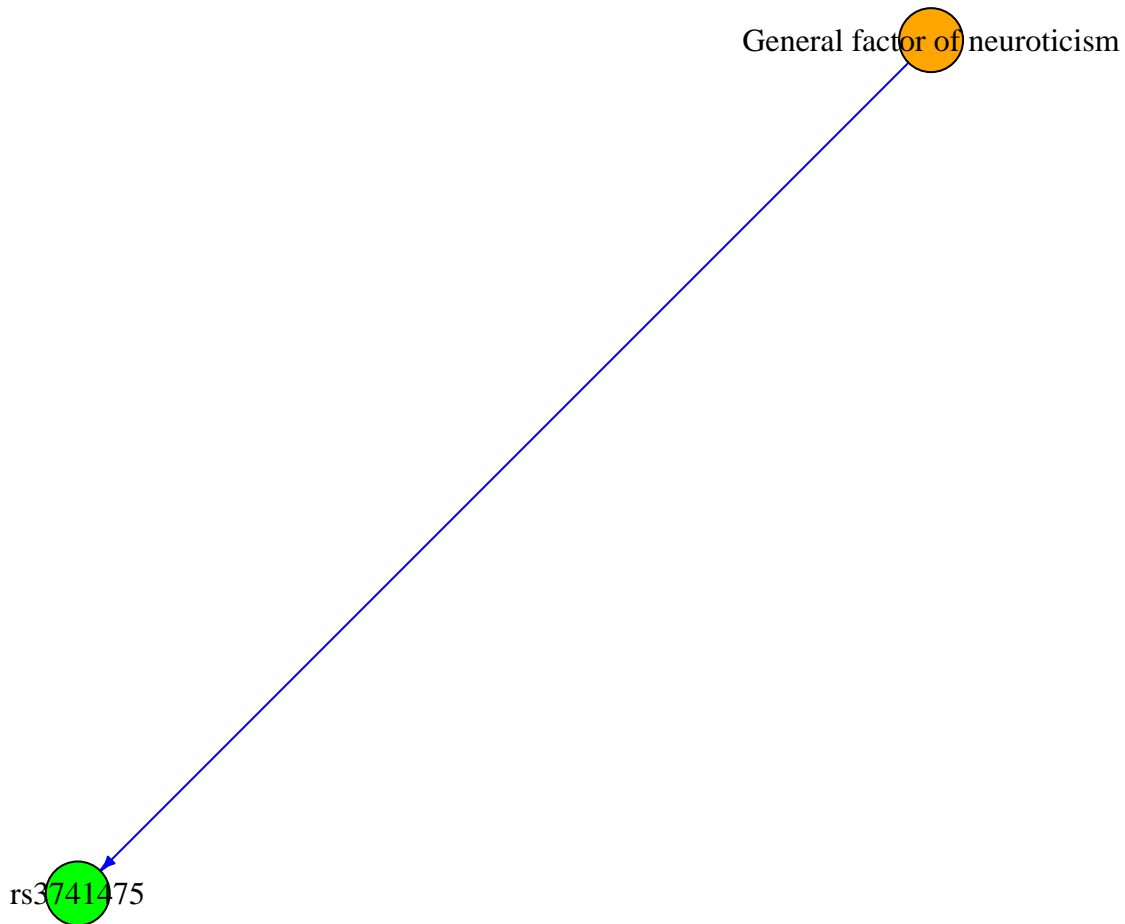

## Variant–Disease Network (Gut microbiota )

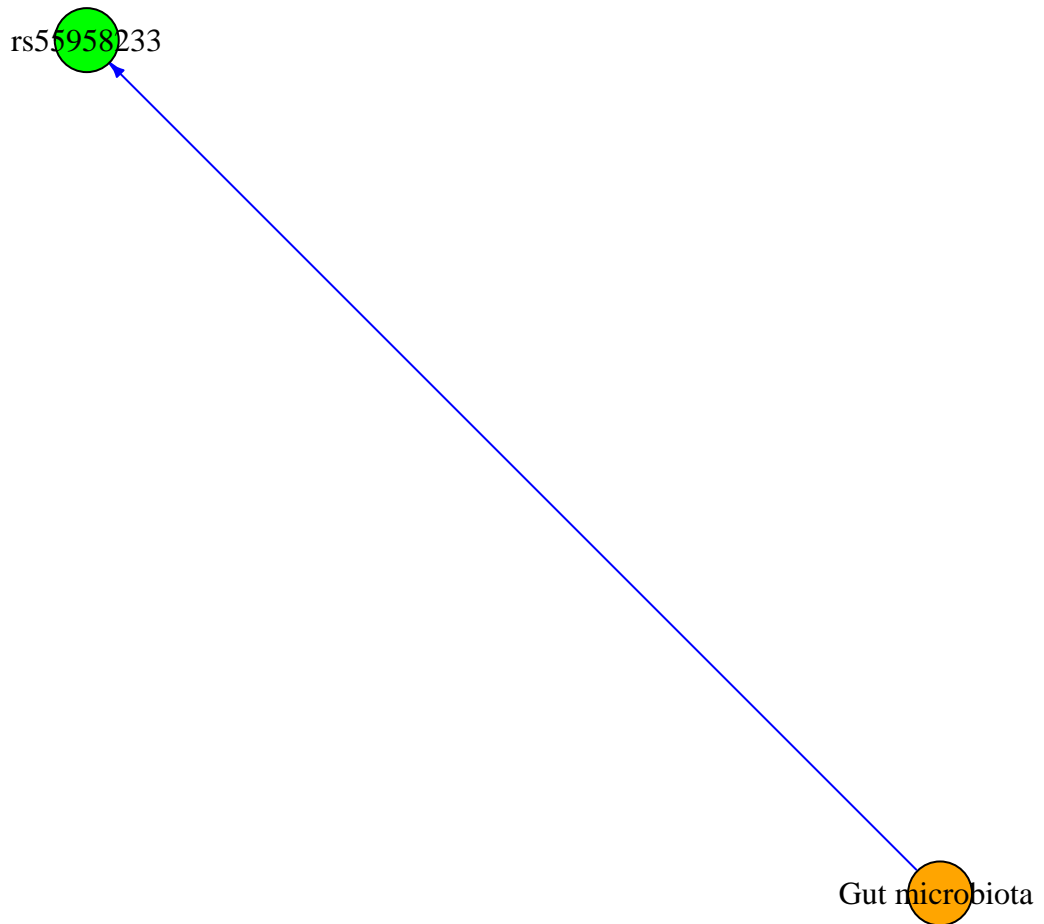

## Variant–Disease Network (Hay fever and/or eczema)

Hay fever and/or eczema

rs130071

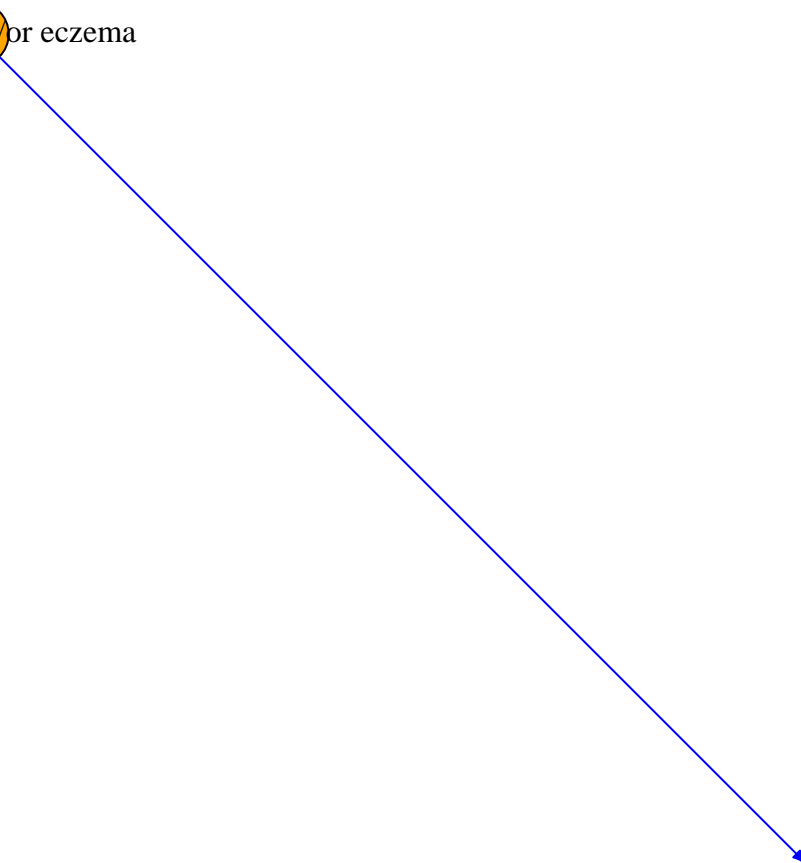

# Variant–Disease Network (HDL cholesterol levels)

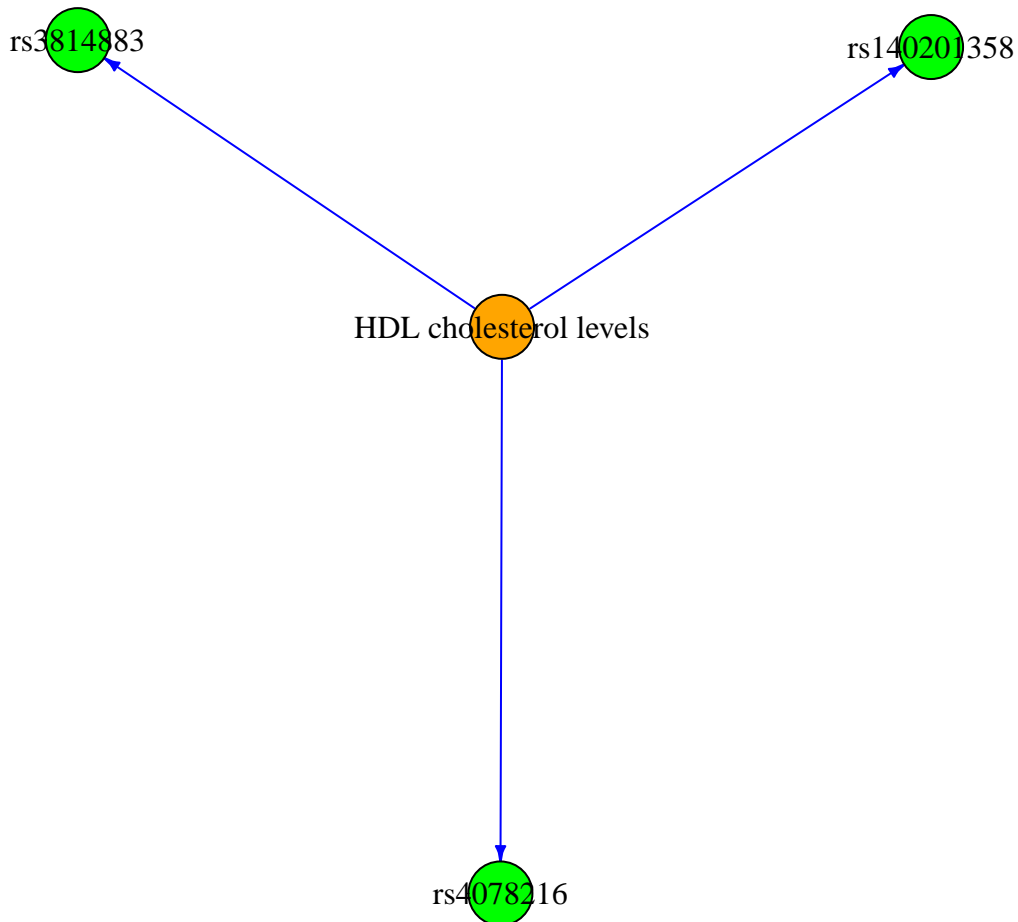

## Variant–Disease Network (Heel bone mineral density)

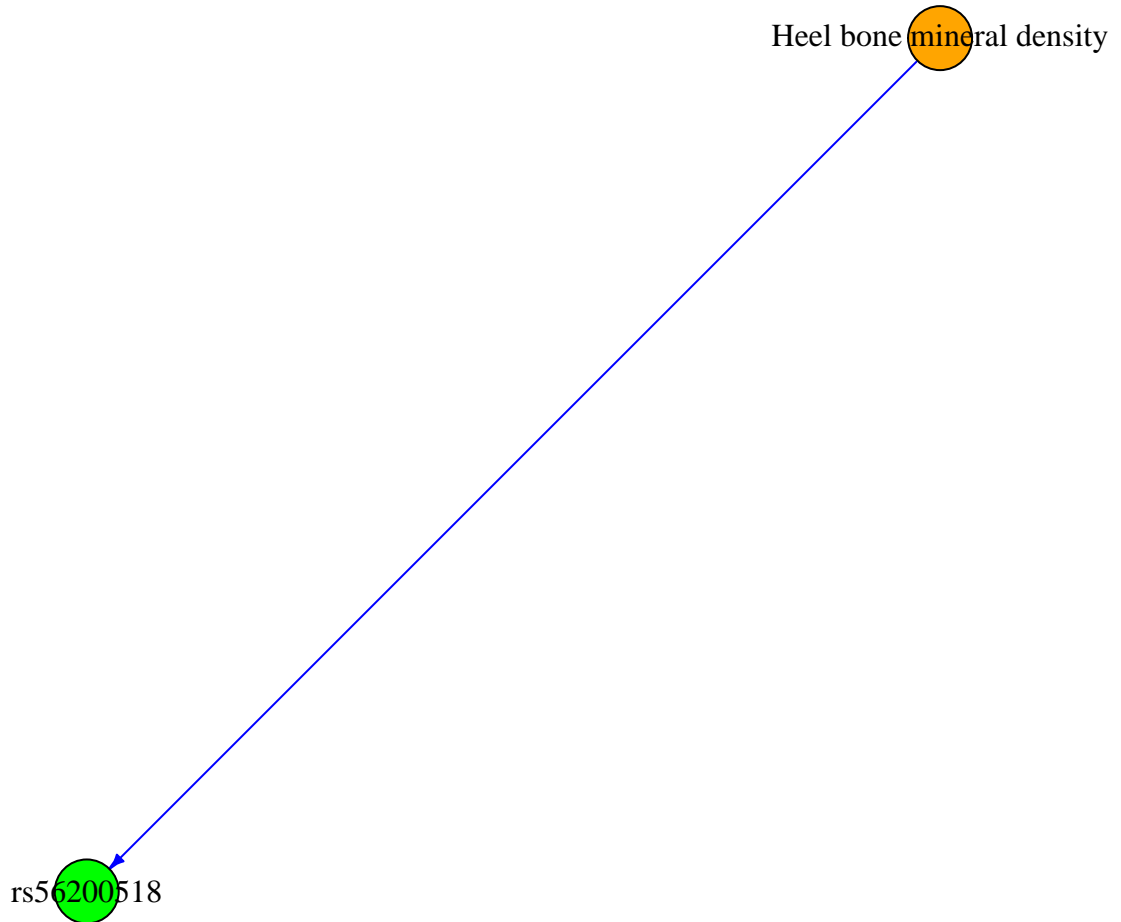

## Variant-Disease Network (Height)

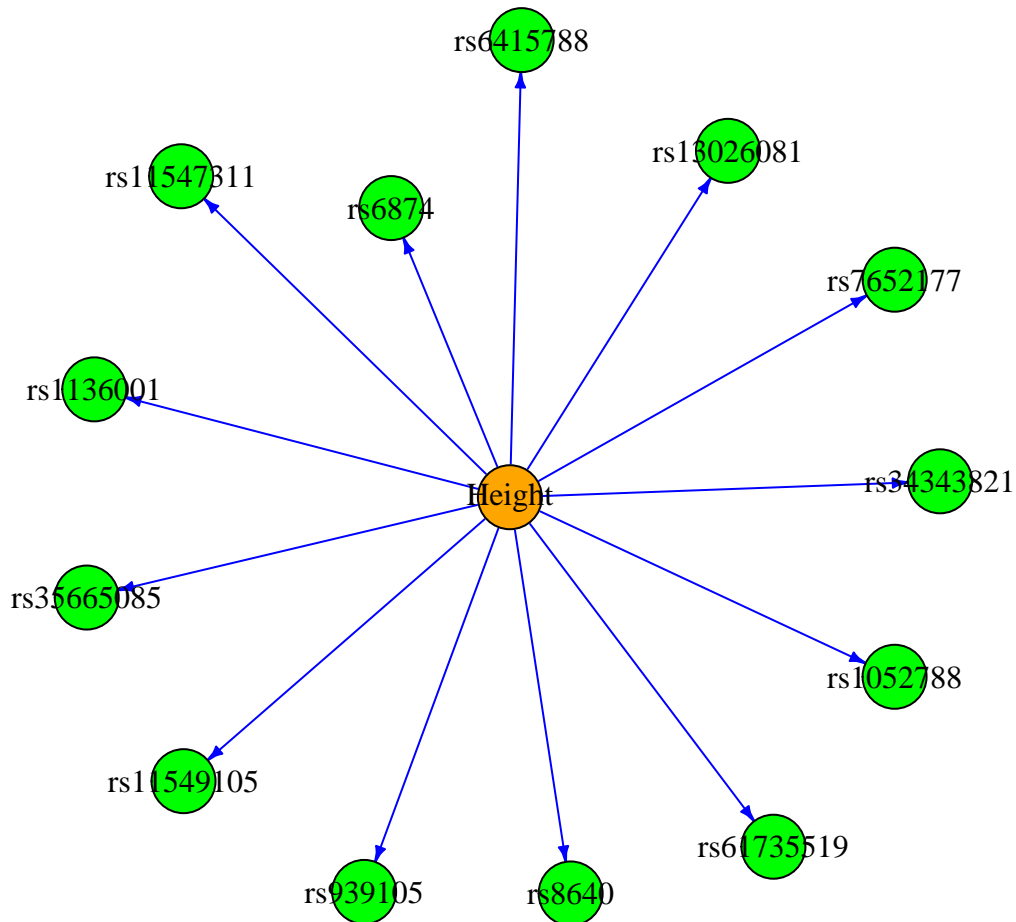



## Variant–Disease Network (Hematocrit)

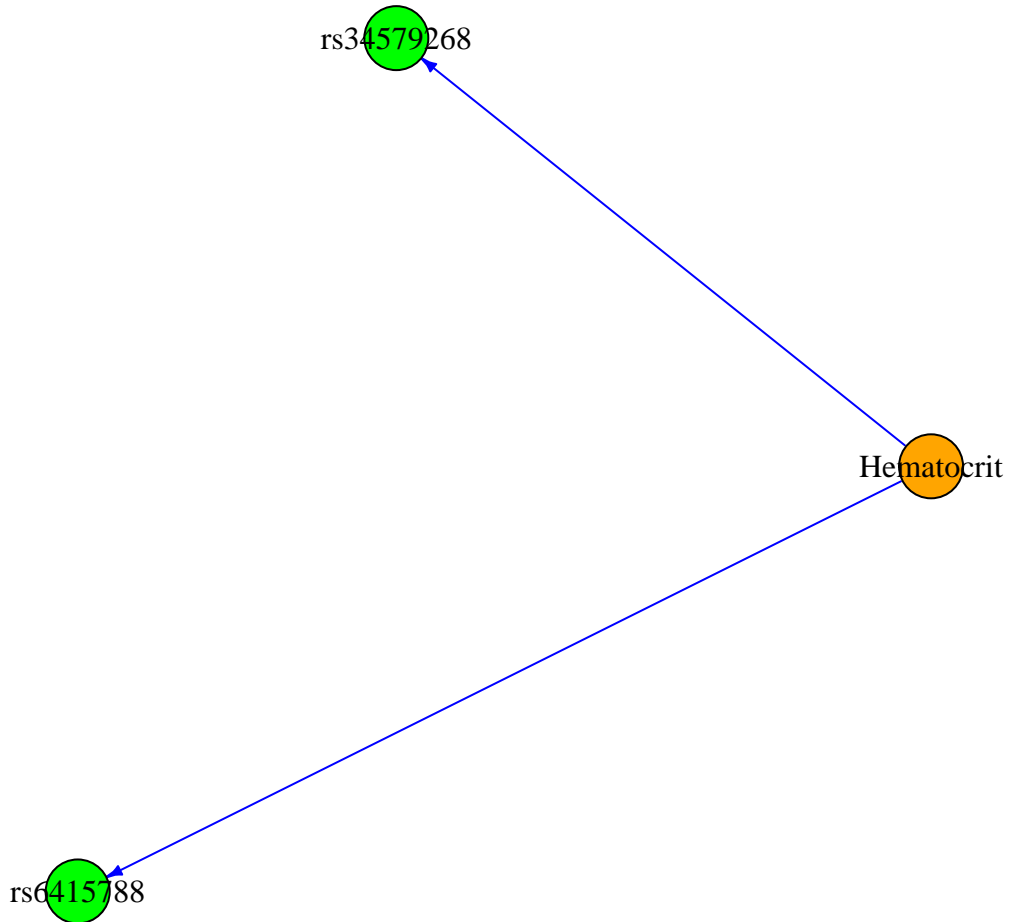

Variant–Disease Network (Hemoglobin concentration)

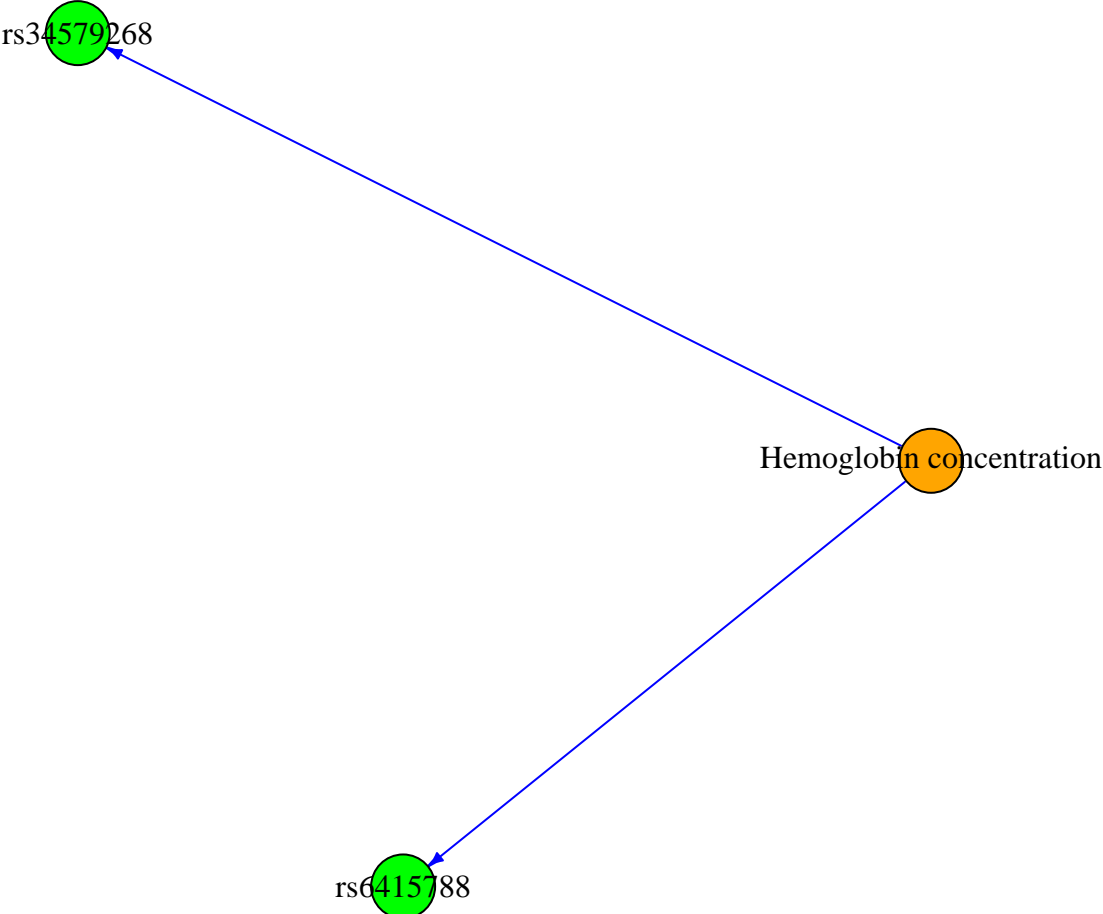

## Variant–Disease Network (Hemoglobin levels)

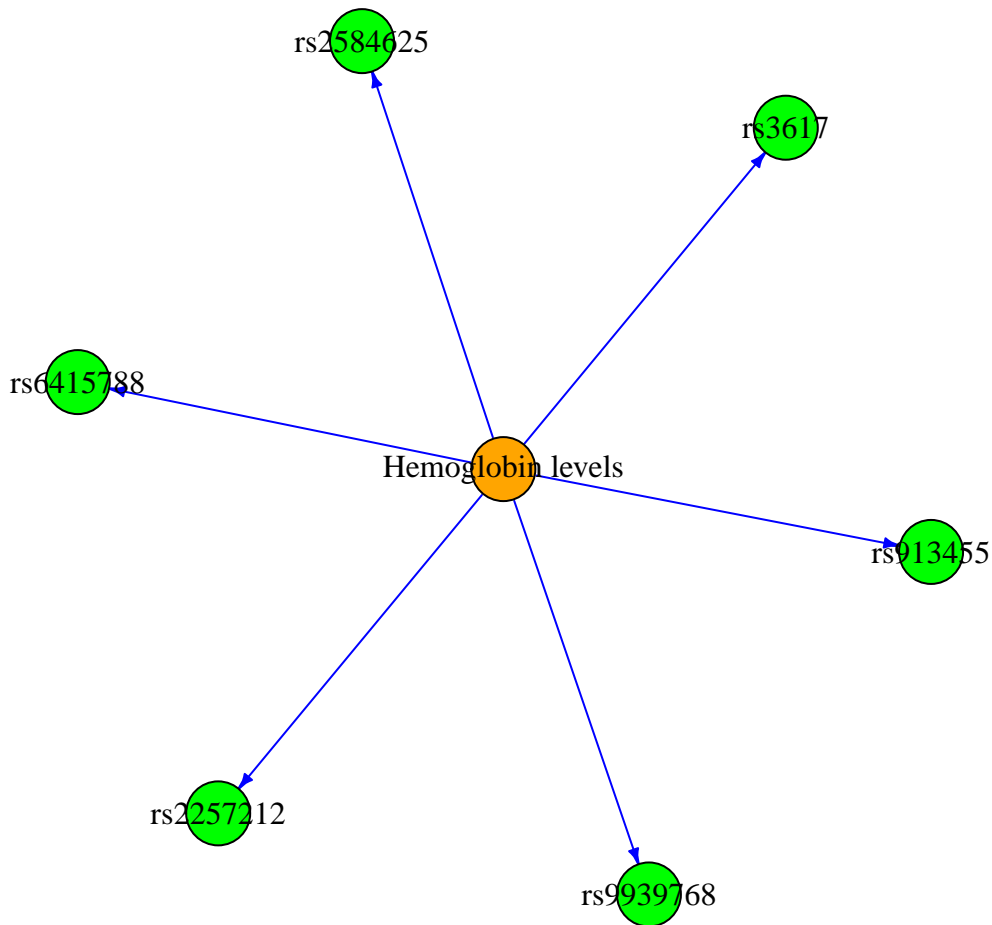

**Variant–Disease Network (High density lipoprotein cholesterol levels)**

rs693

High density lipoprotein cholesterol l

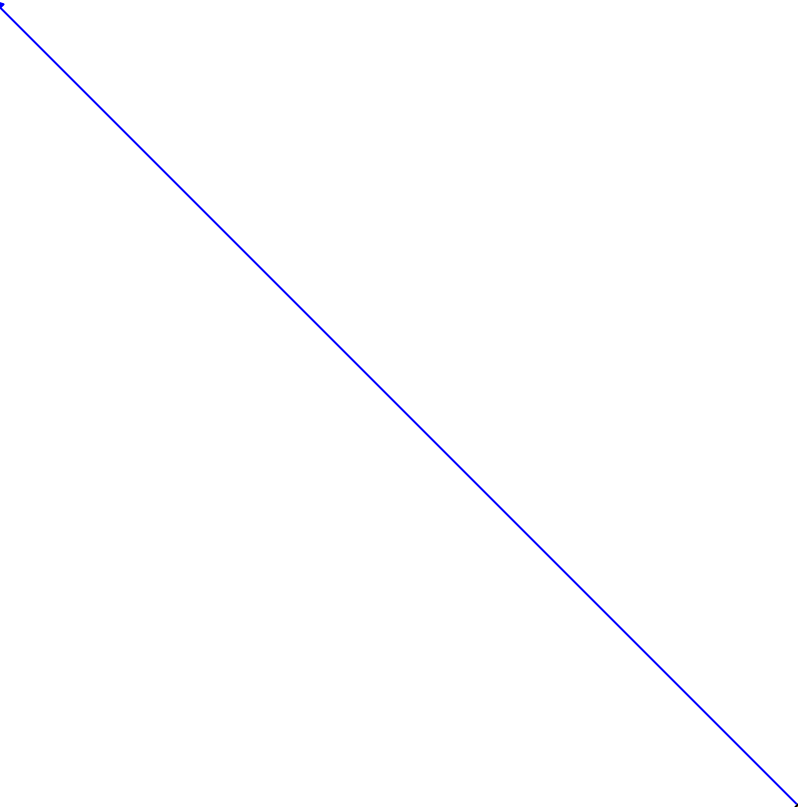

Variant–Disease Network (High light scatter reticulocyte count)

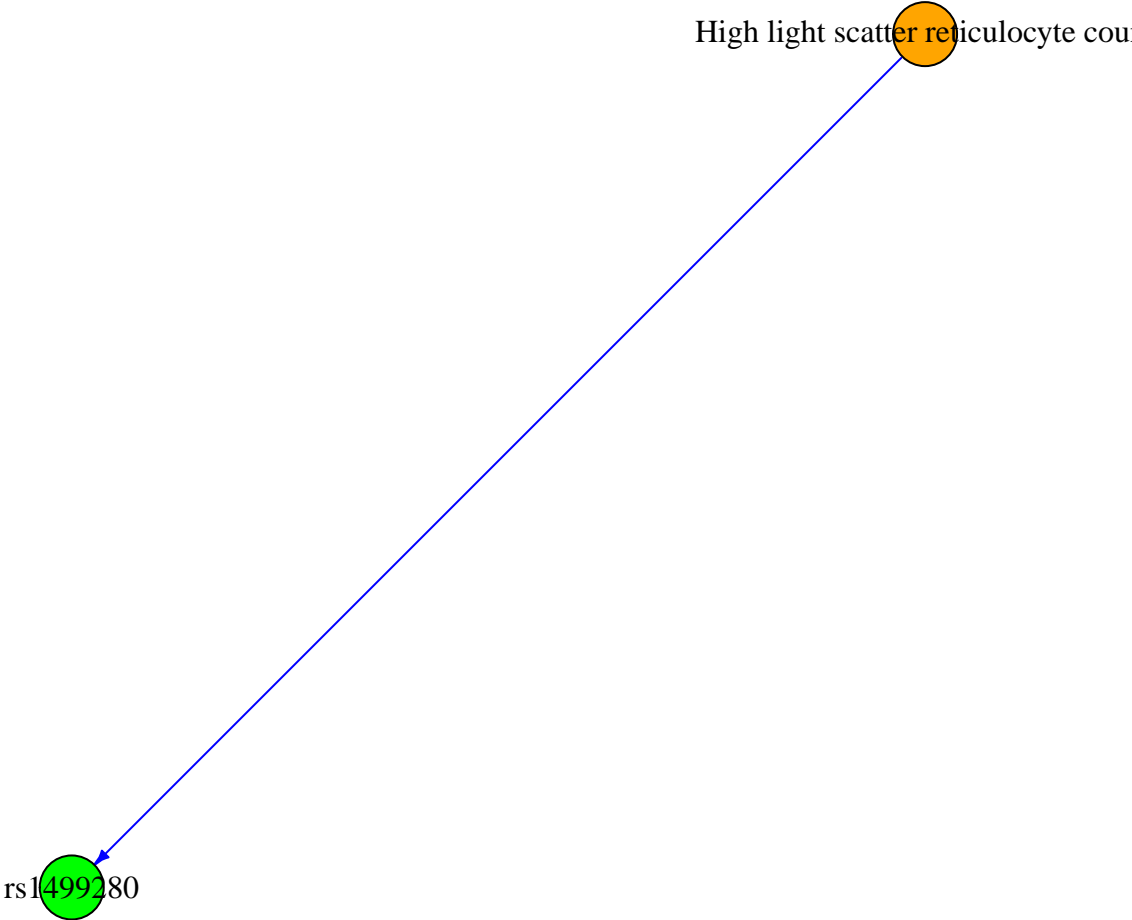

# Variant–Disease Network (High light scatter reticulocyte percentage of red c

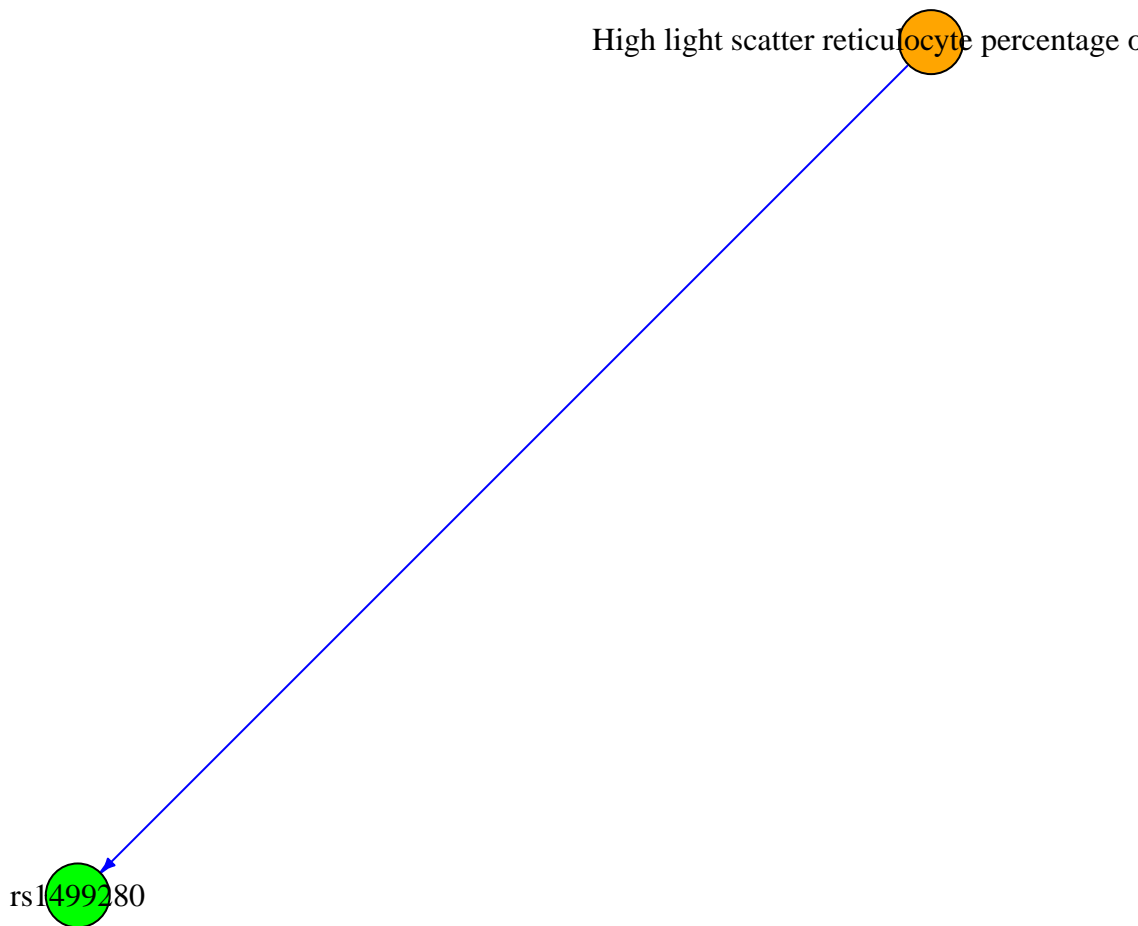

## Variant-Disease Network (Hip bone size)

Hip bone size

rs2289057



# Variant–Disease Network (Hip circumference adjusted for BMI)

Hip circumference adjusted for BMI

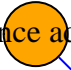

rs3748656

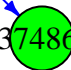



# Variant–Disease Network (Idiopathic dilated cardiomyopathy)

Idiopathic dilated cardiomyopathy

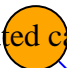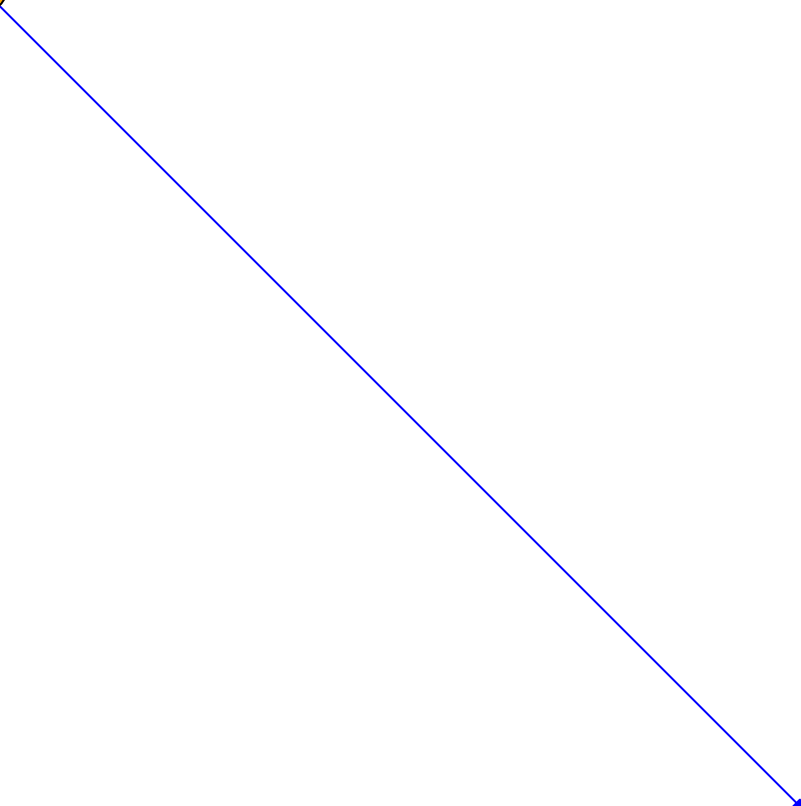

rs8051448

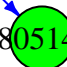

## Variant–Disease Network (IgG glycosylation)

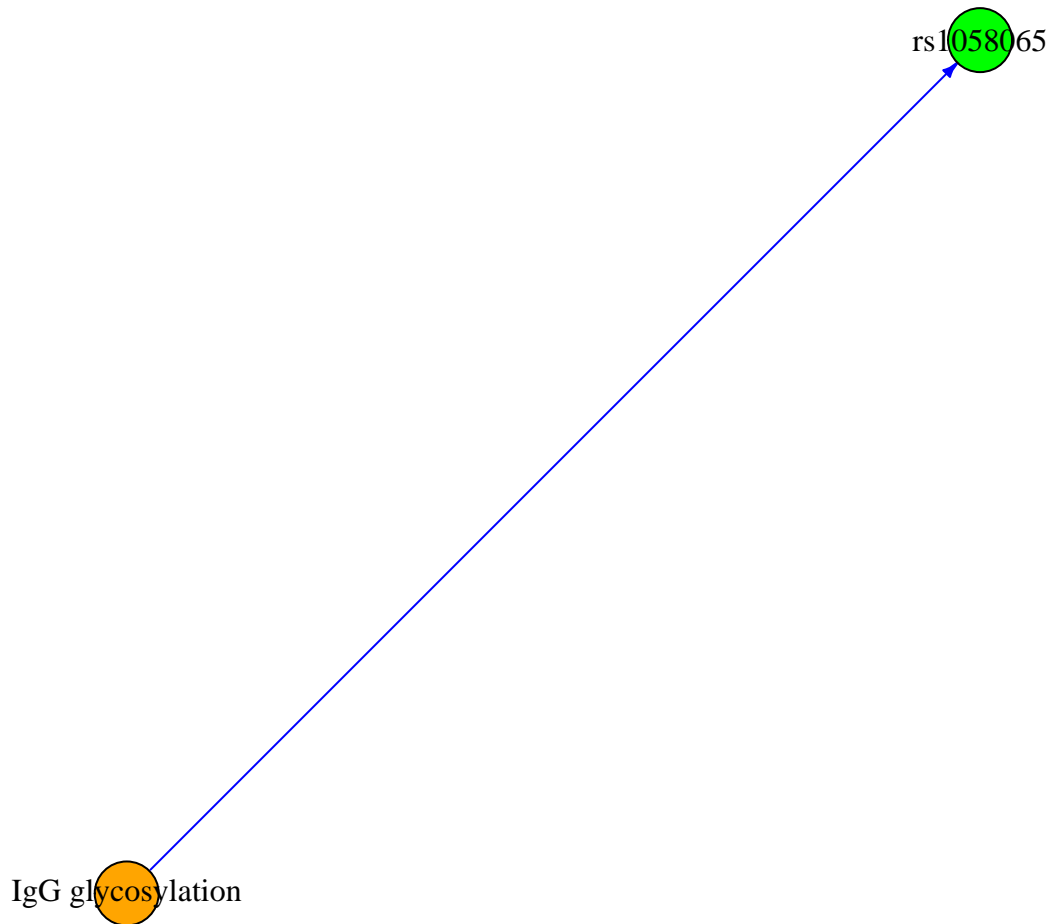

# Variant–Disease Network (Immature fraction of reticulocytes)

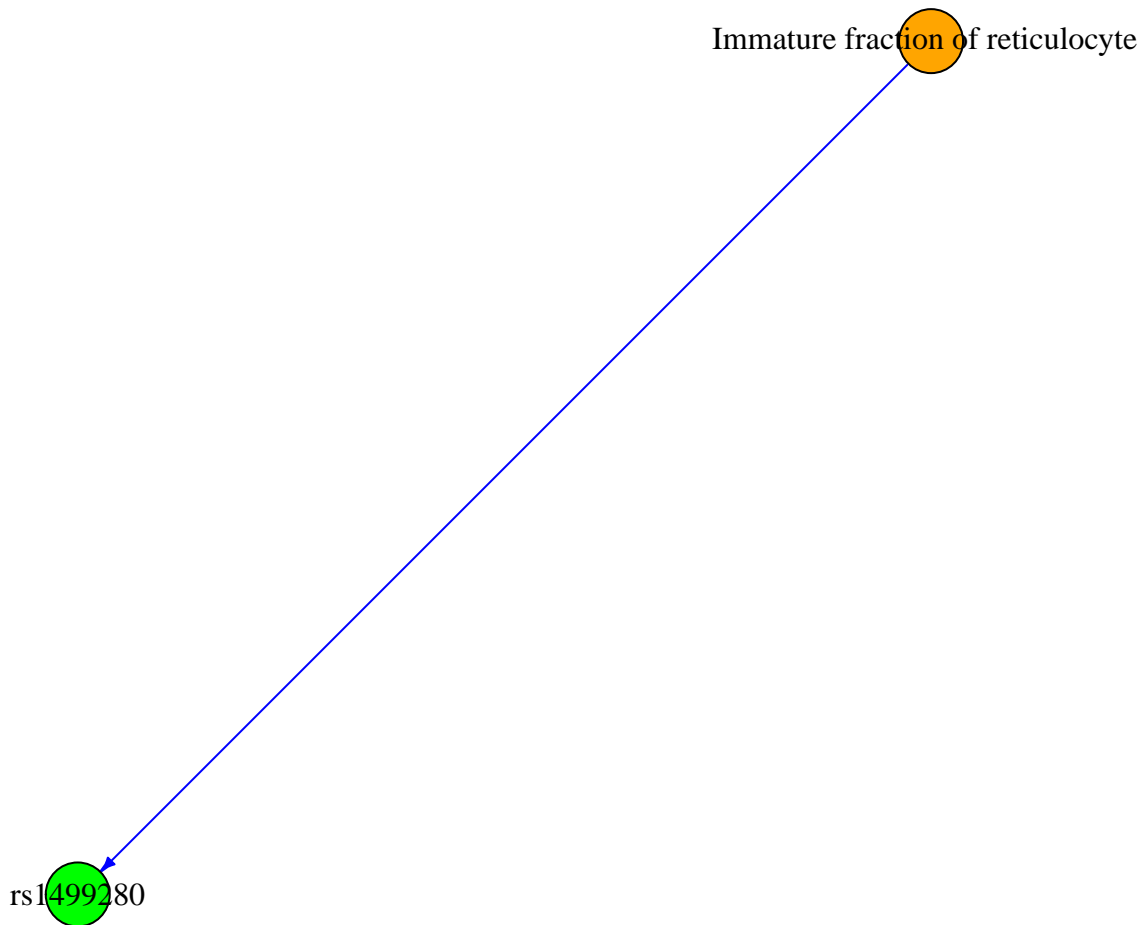

**Variant–Disease Network (Inflammatory bowel disease)**

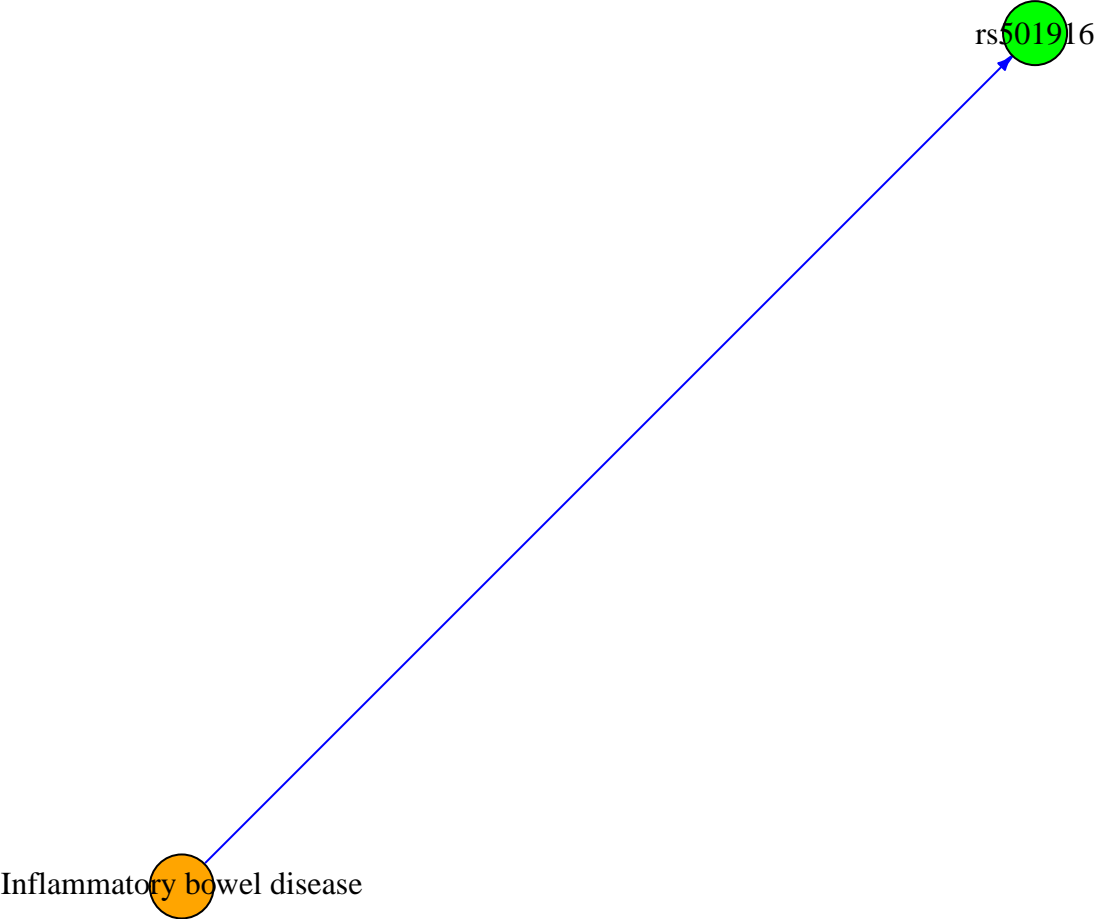

## Variant-Disease Network (Intelligence )

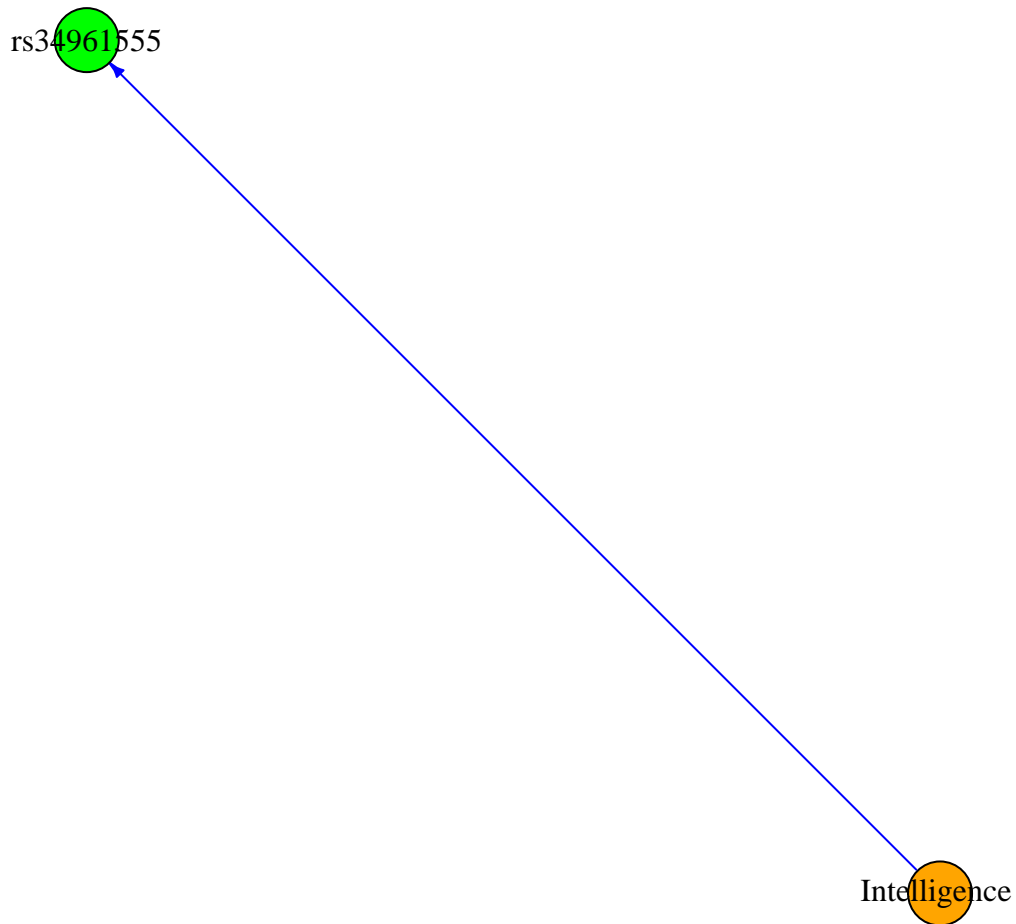

## Variant–Disease Network (Intracranial aneurysm)

Intracranial aneurysm

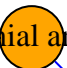

rs3737926

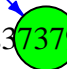

**Variant–Disease Network (Keratinocyte cancer )**

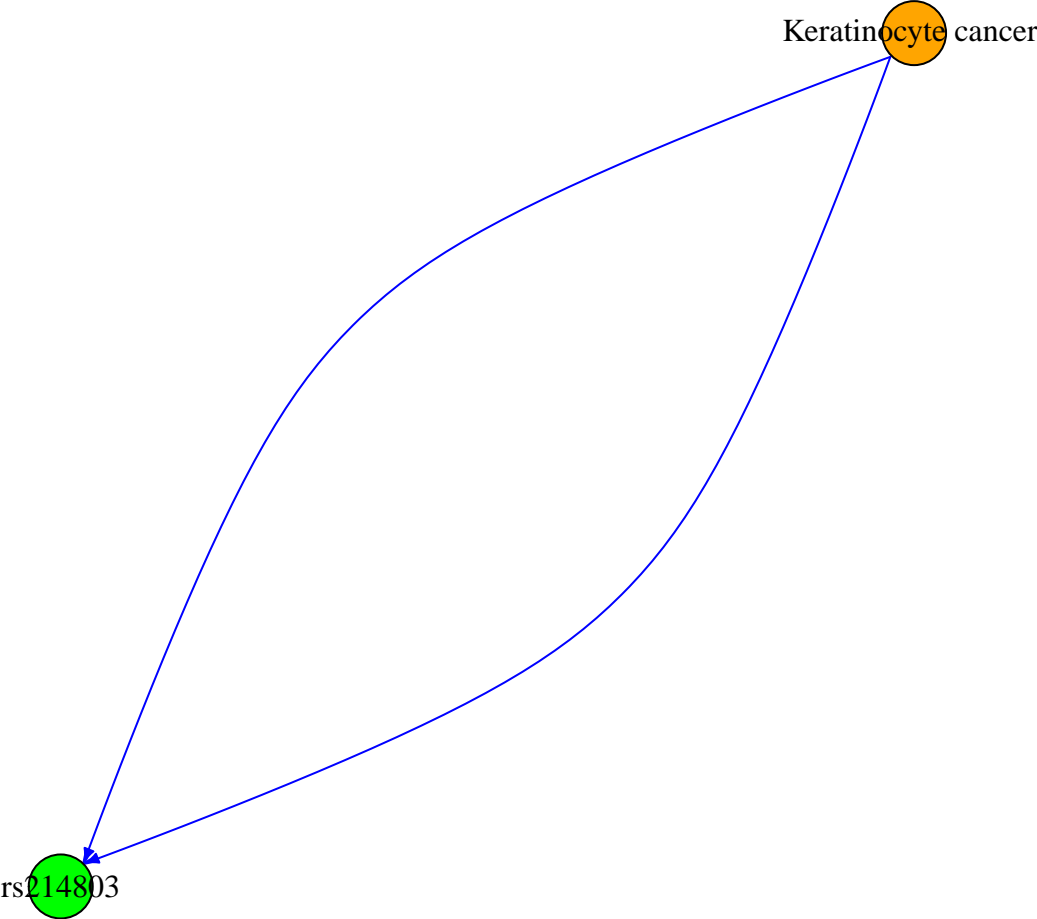

## Variant-Disease Network (LDL cholesterol)

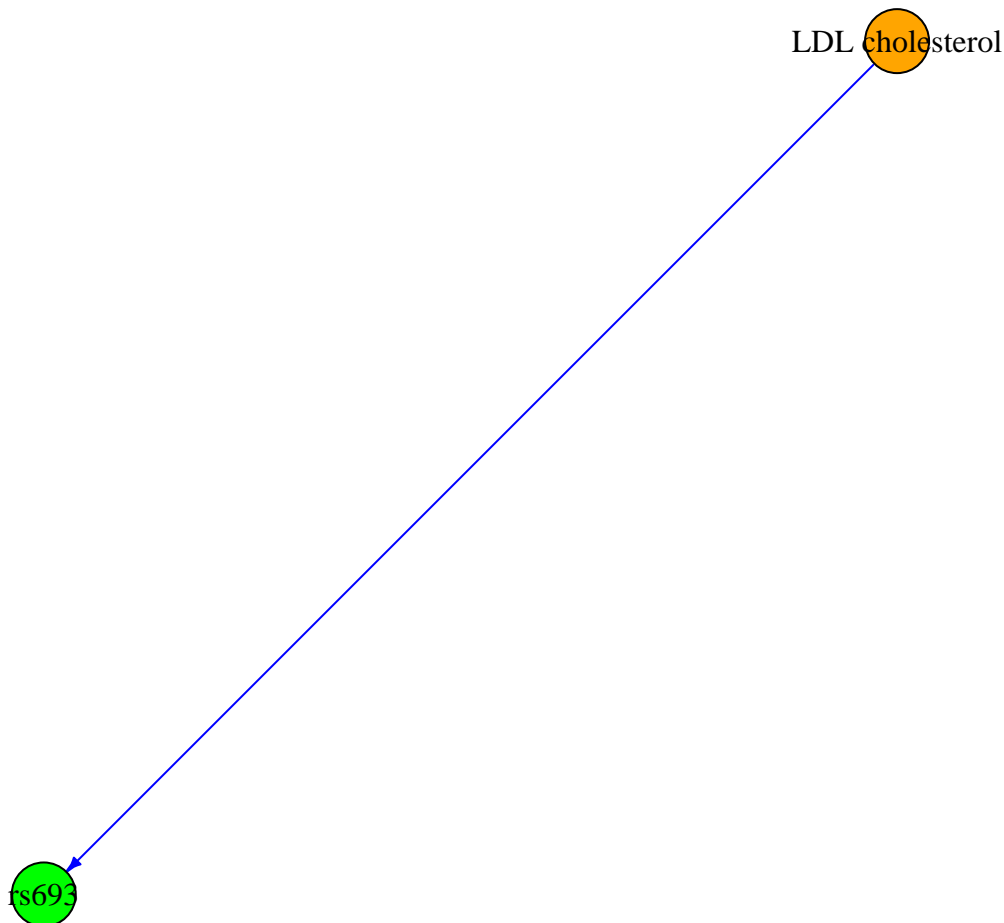



## Variant–Disease Network (LDL cholesterol levels)

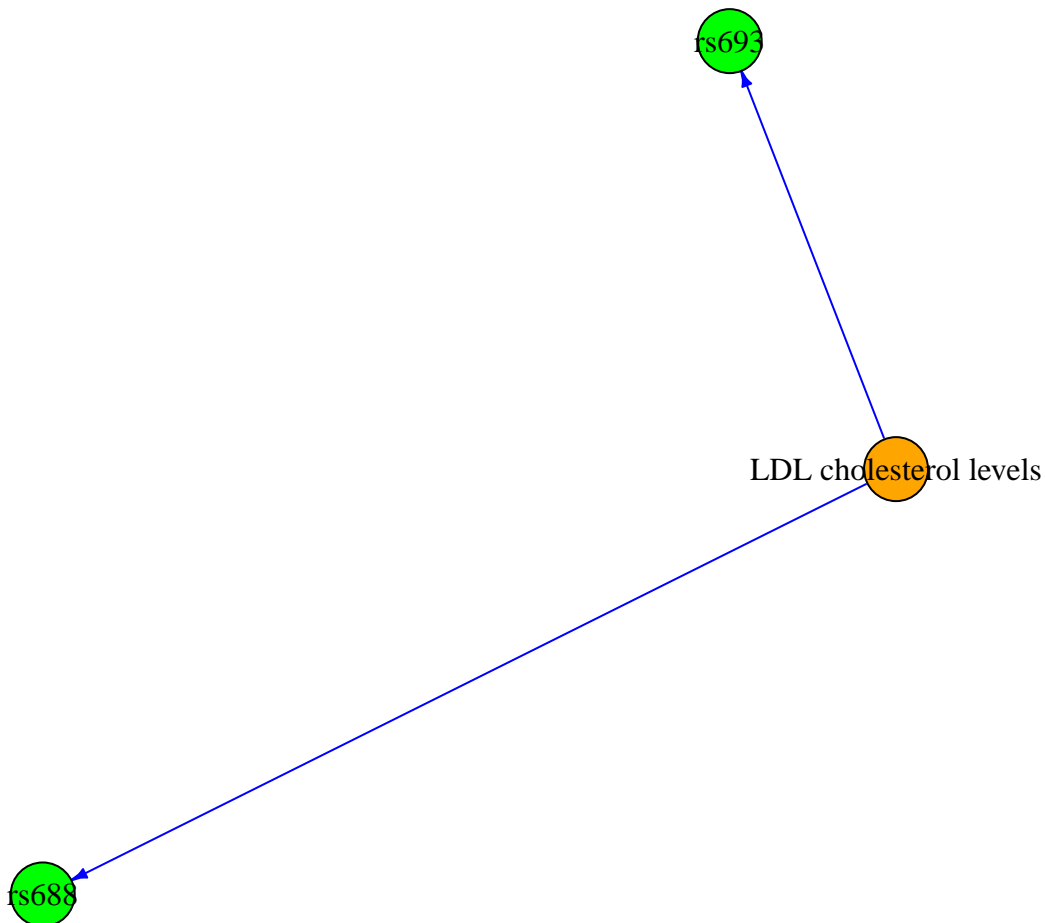

# Variant–Disease Network (Leisure sedentary behaviour )

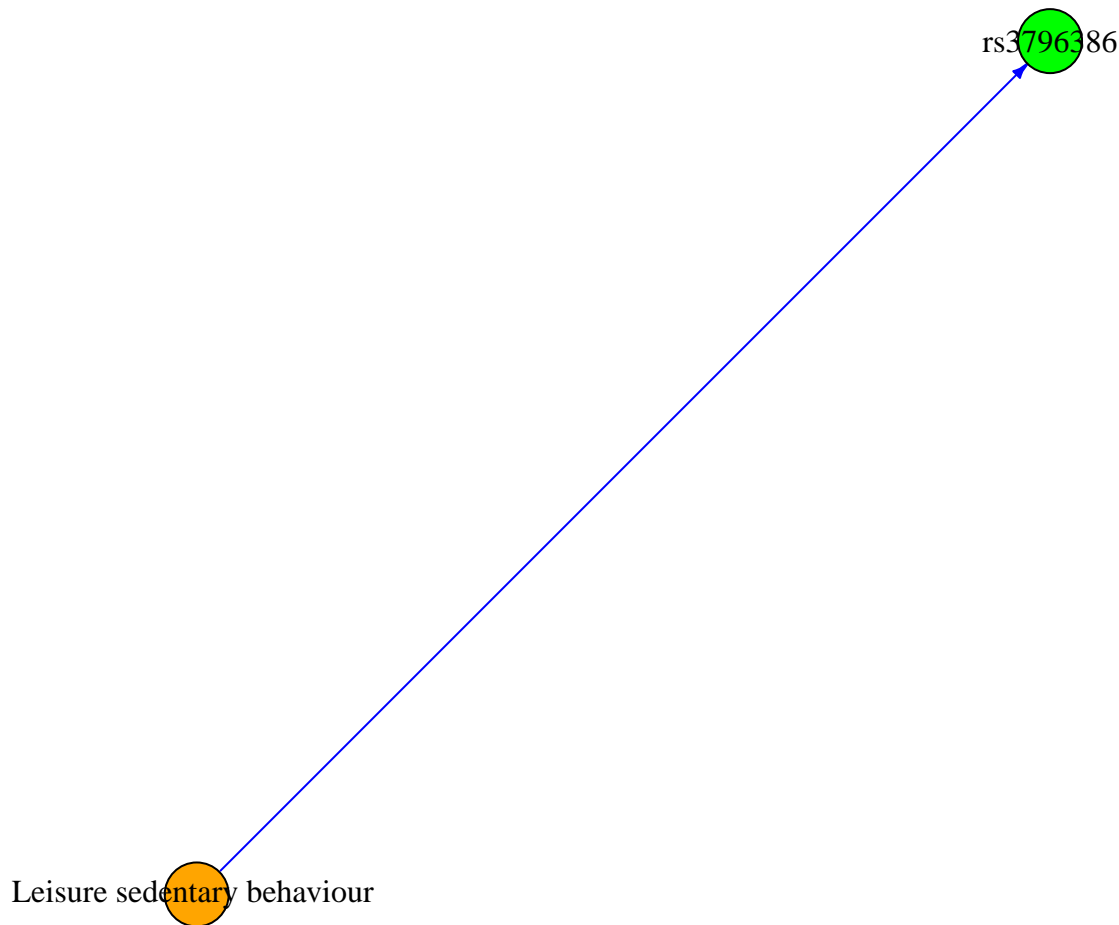

## Variant–Disease Network (Lipoprotein levels)

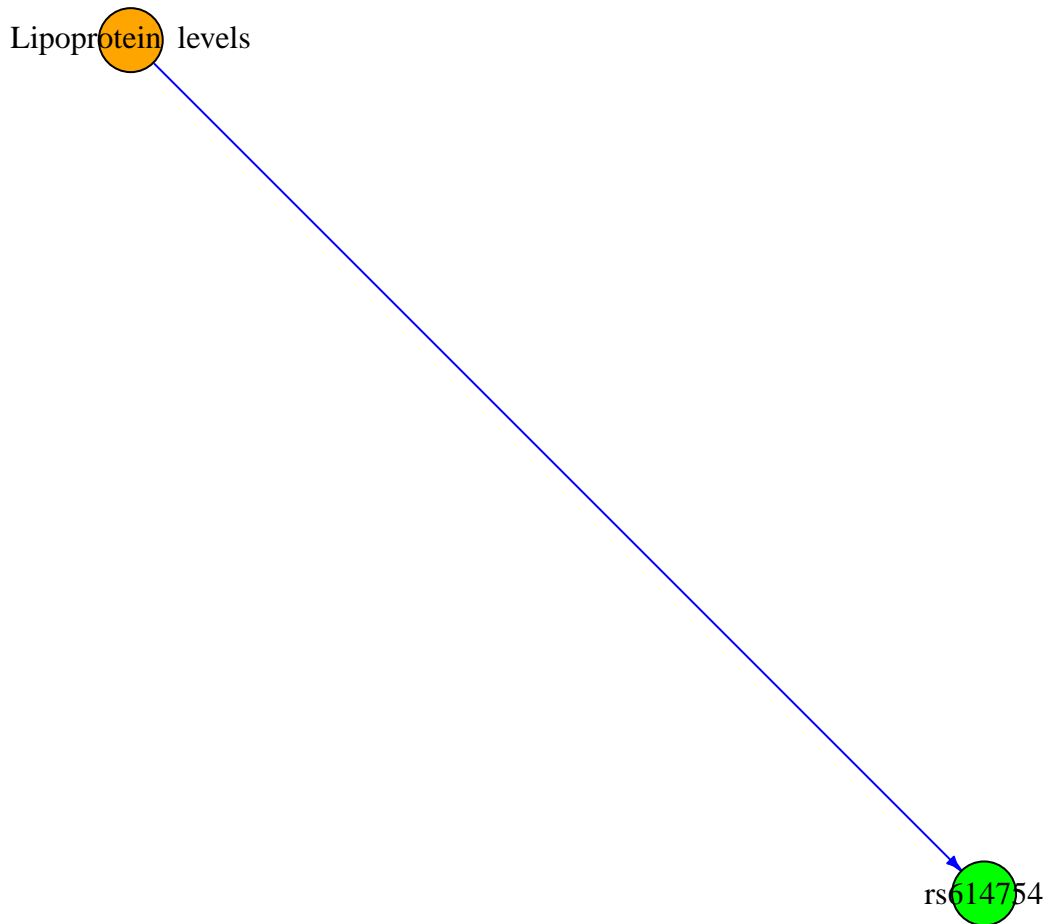

**Variant–Disease Network (Low density lipoprotein cholesterol levels)**

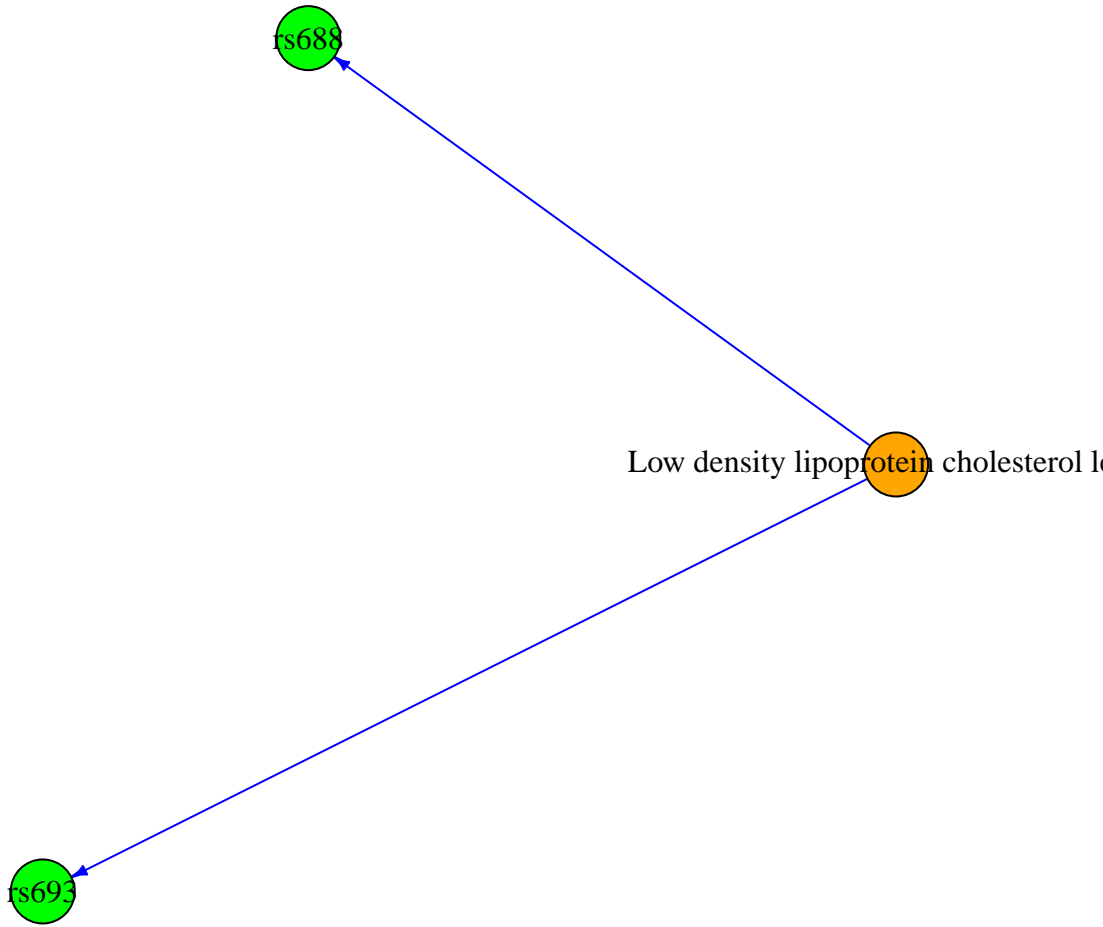

Variant–Disease Network (Lung function )

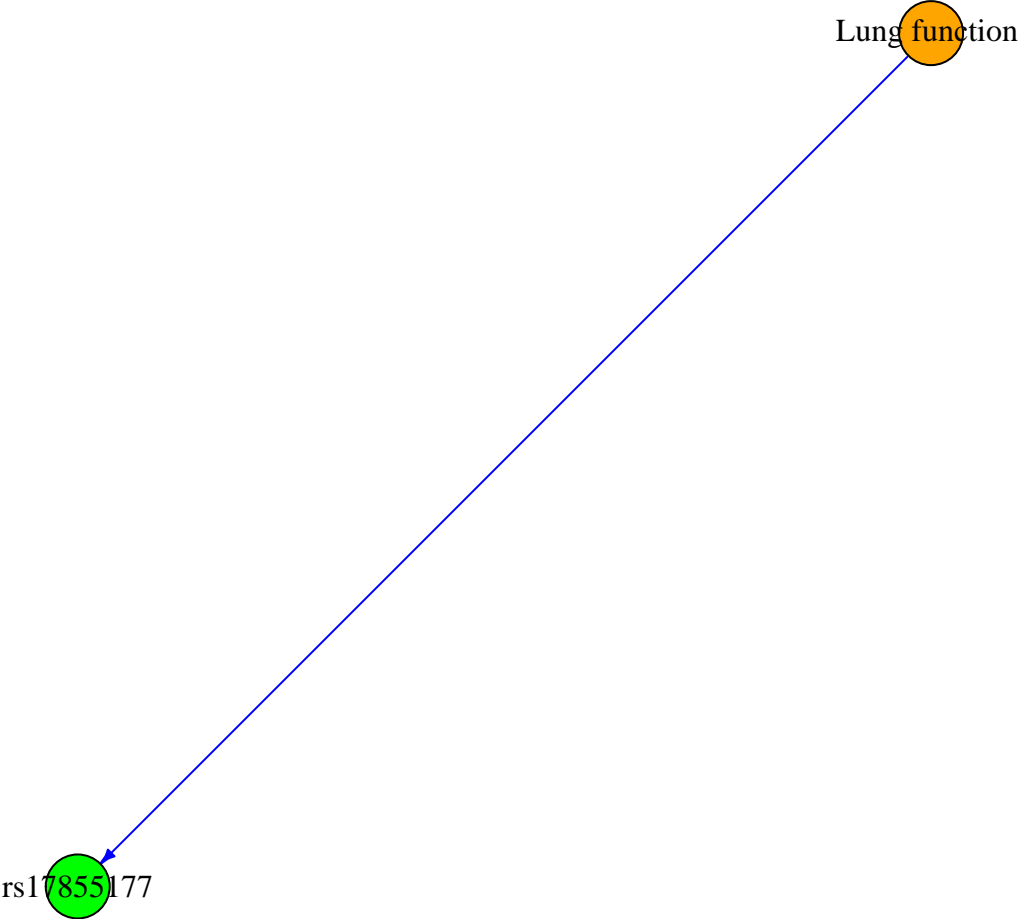

## Variant–Disease Network (Lymphocyte counts)

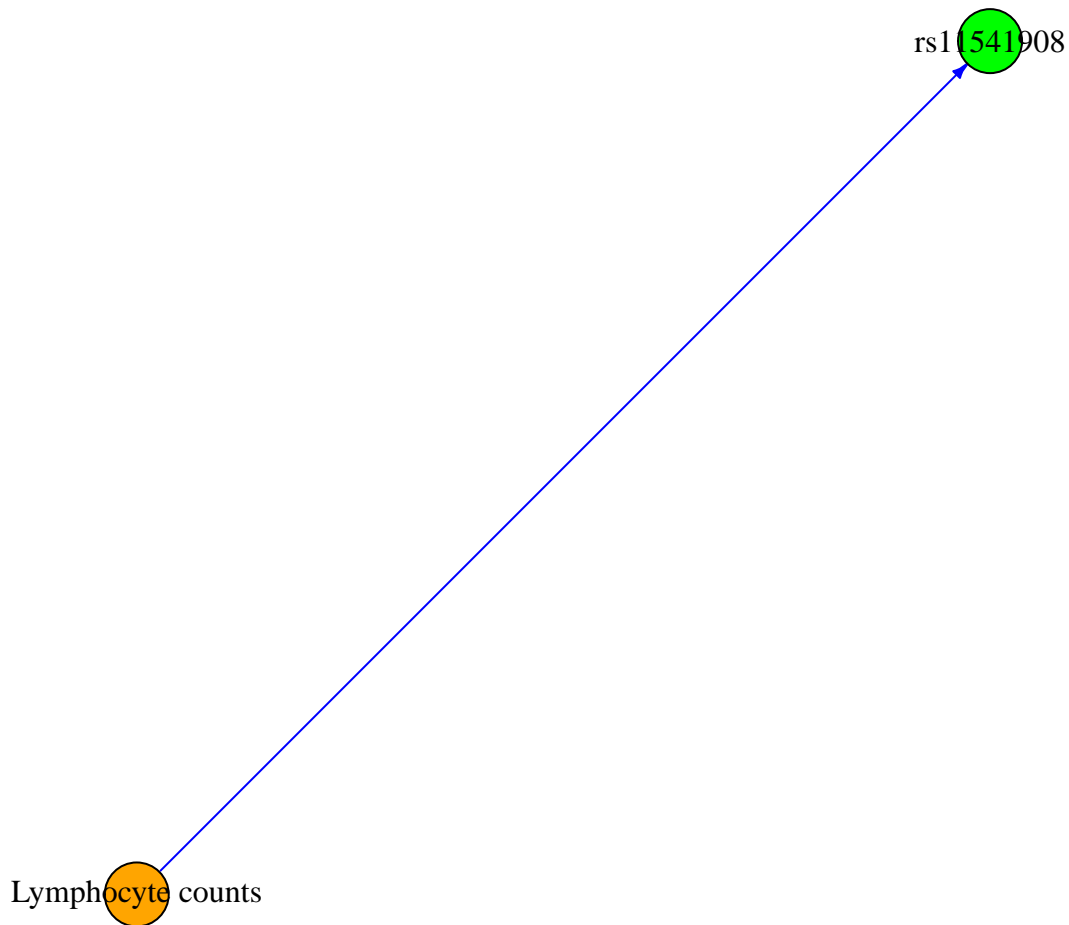

## Variant–Disease Network (Macular thickness)

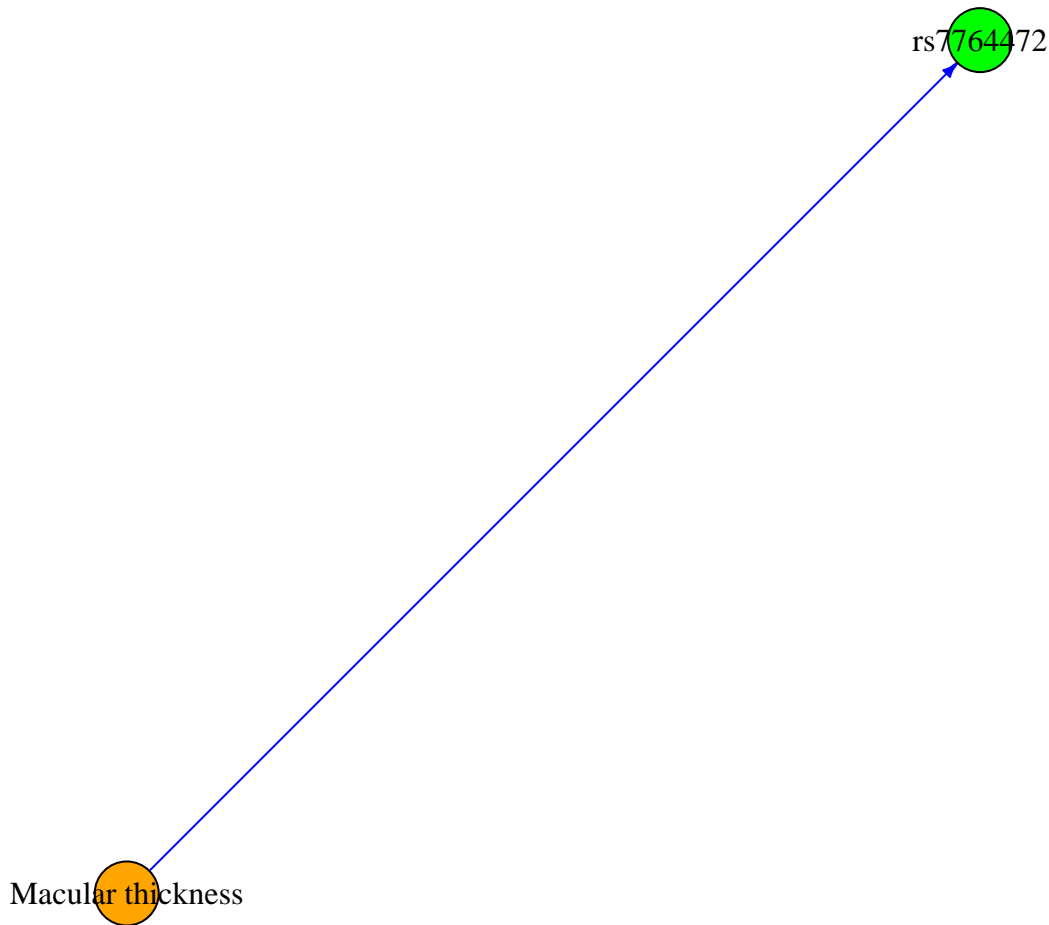

## Variant–Disease Network (Major depressive disorder)

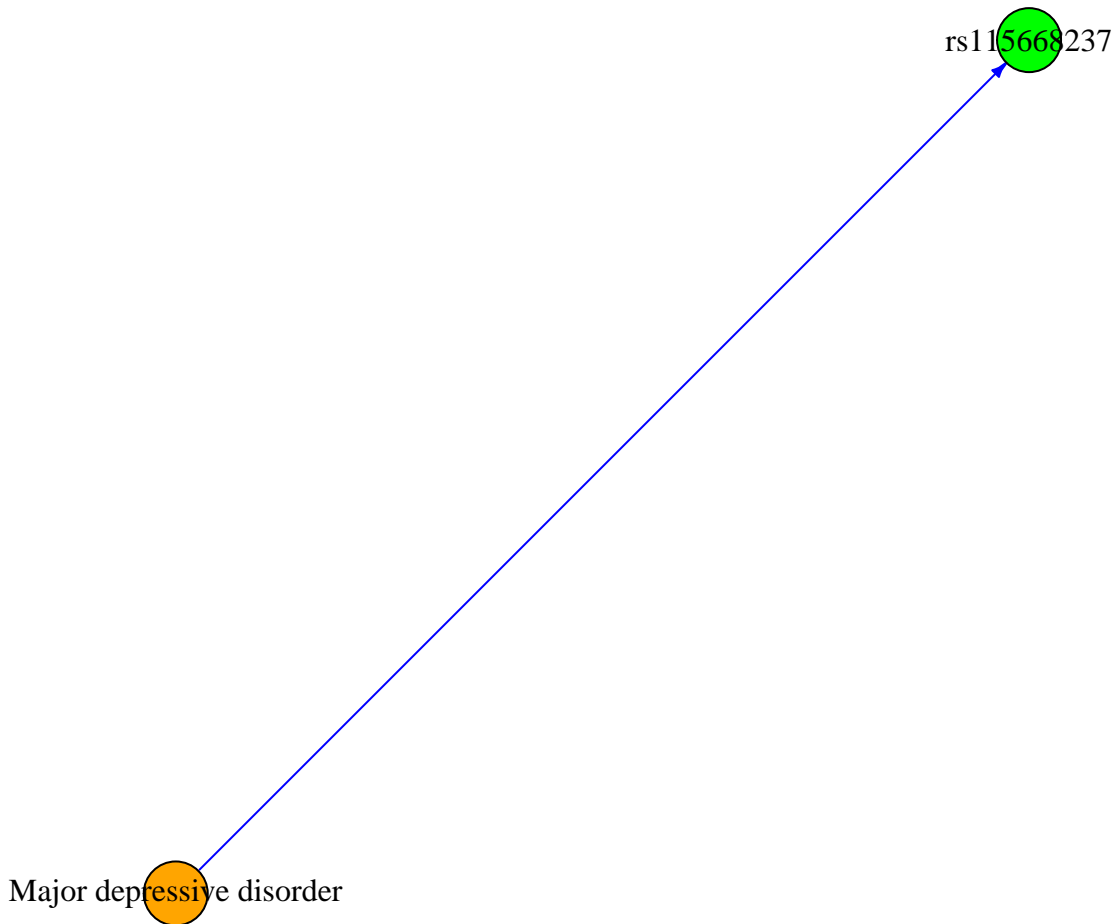



# Variant–Disease Network (Maximum habitual alcohol consumption)

Maximum habitual alcohol consumption

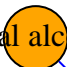

rs1058882

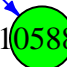

## Variant–Disease Network (Mean arterial pressure)

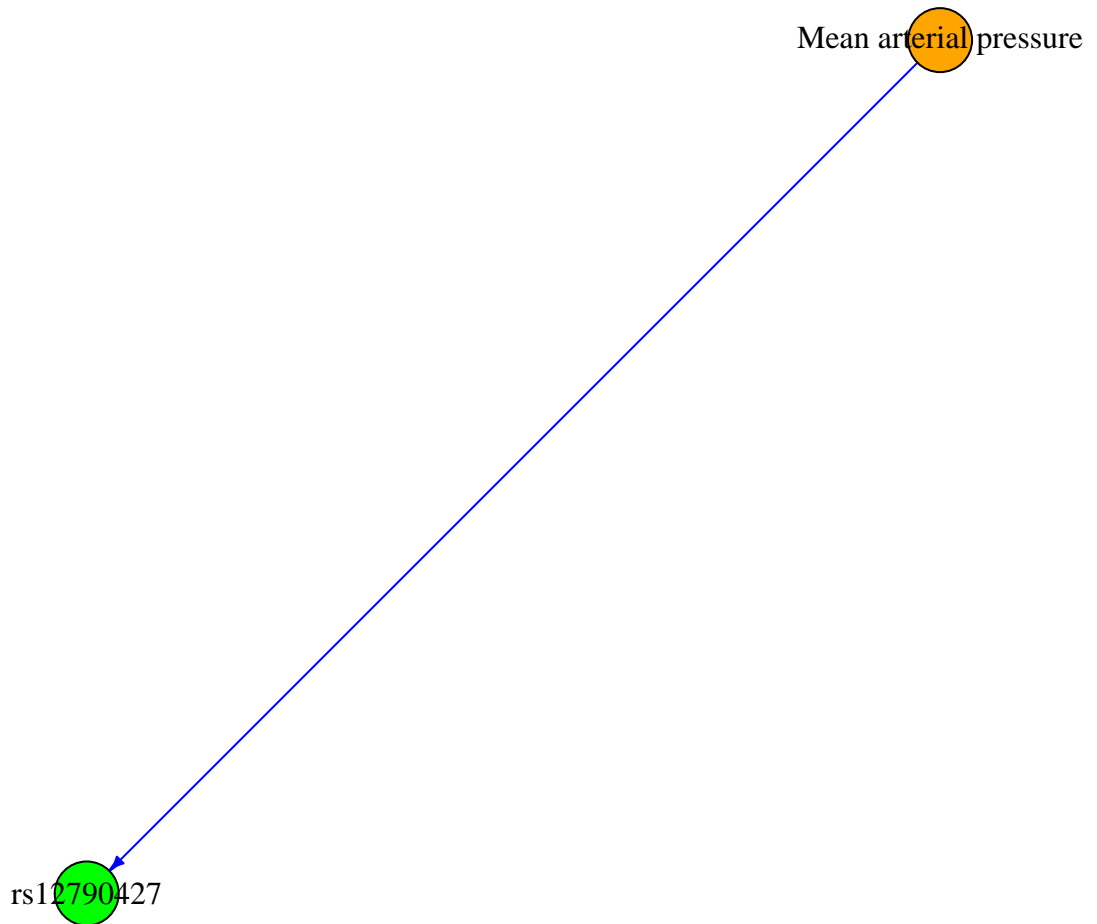

# Variant–Disease Network (Mean corpuscular hemoglobin)

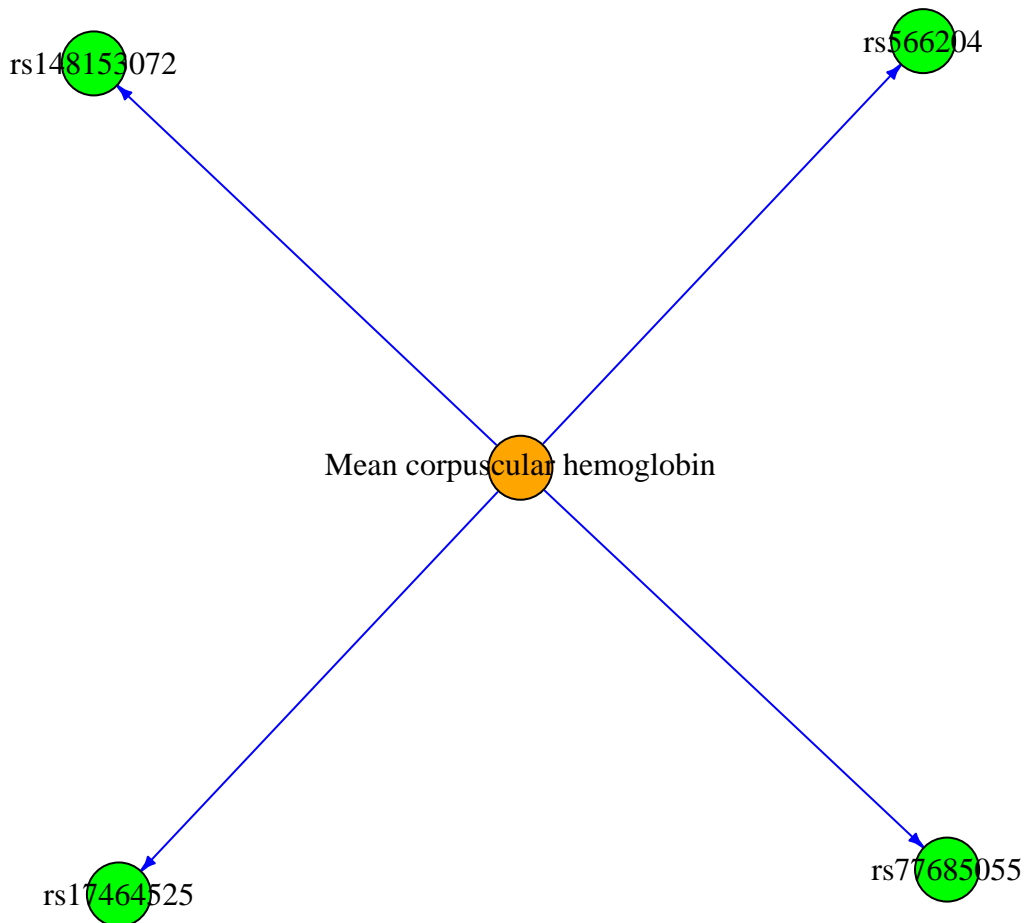

**Variant–Disease Network (Mean corpuscular hemoglobin concentration)**

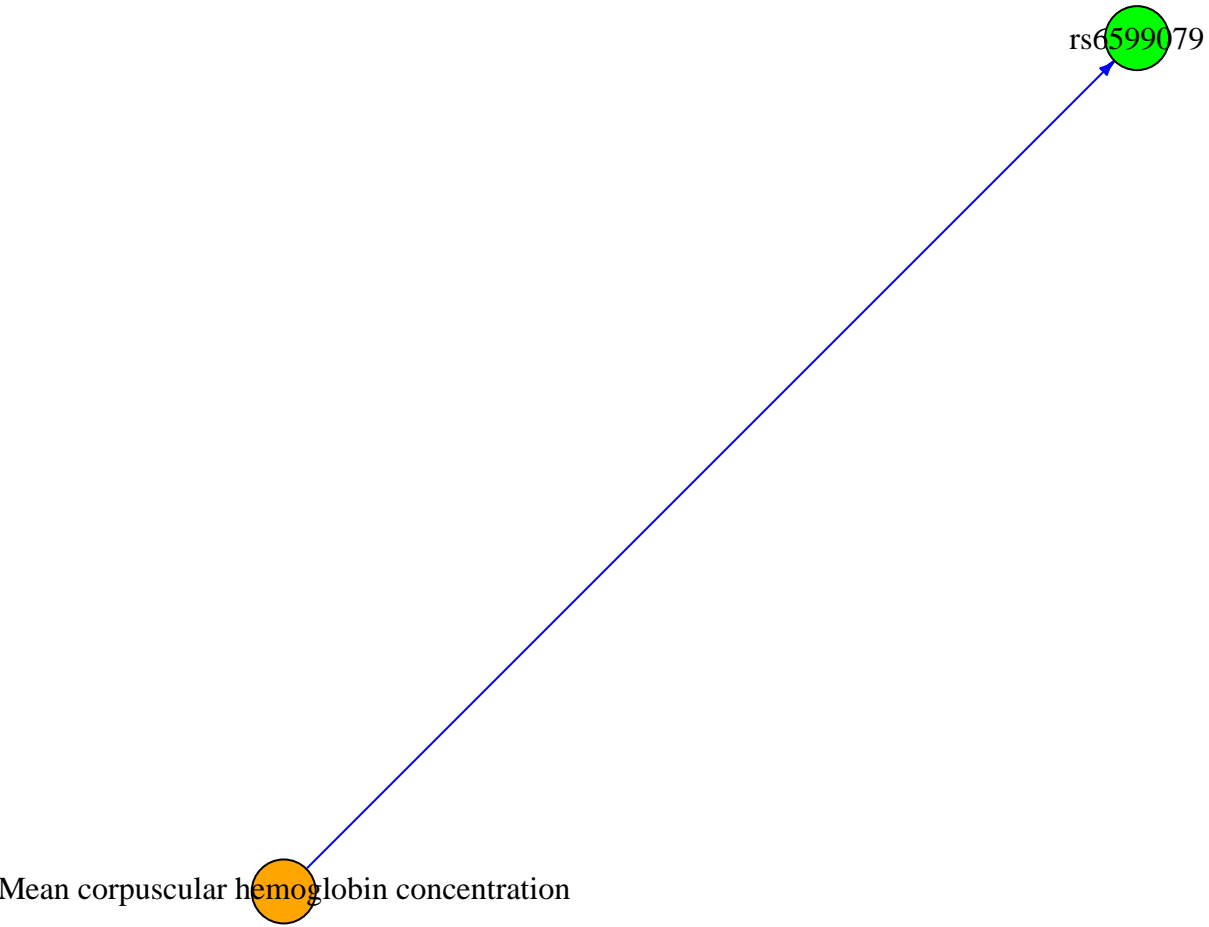

## Variant–Disease Network (Mean corpuscular volume)

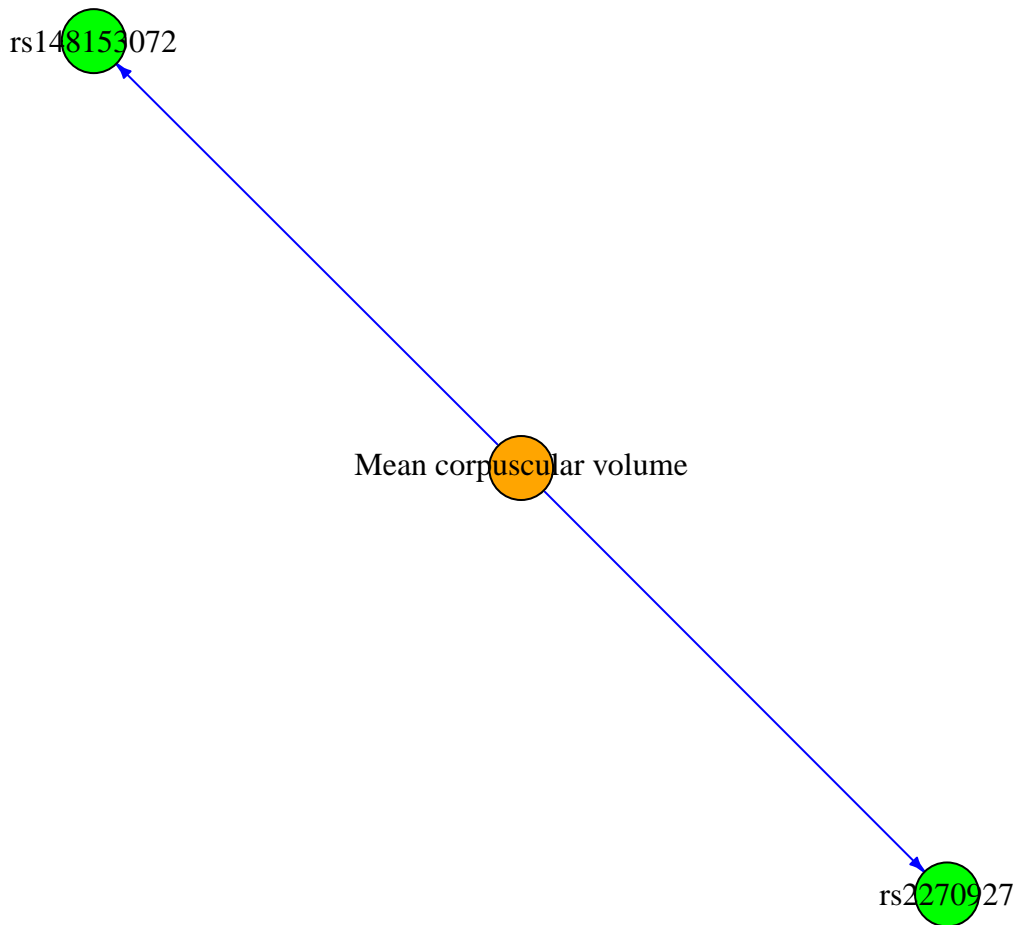

## Variant–Disease Network (Mean platelet volume)

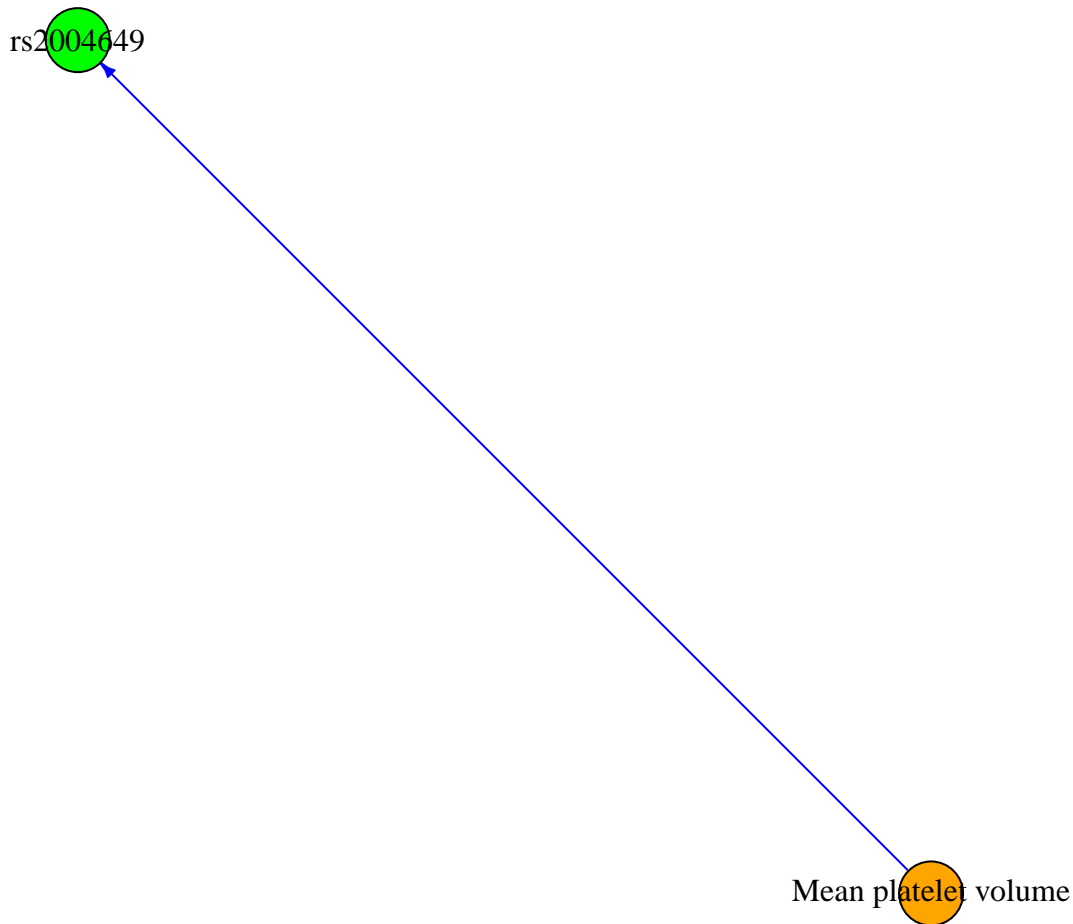

## Variant-Disease Network (Menarche )

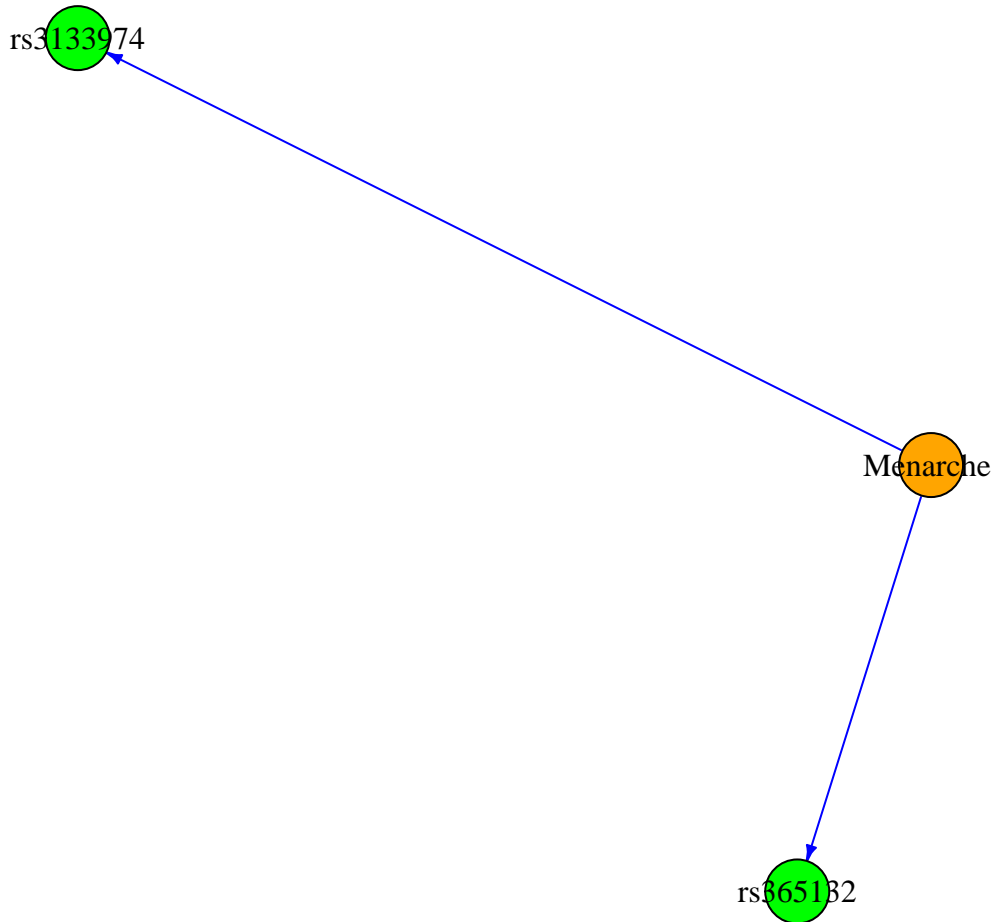

## Variant–Disease Network (Menarche and menopause )

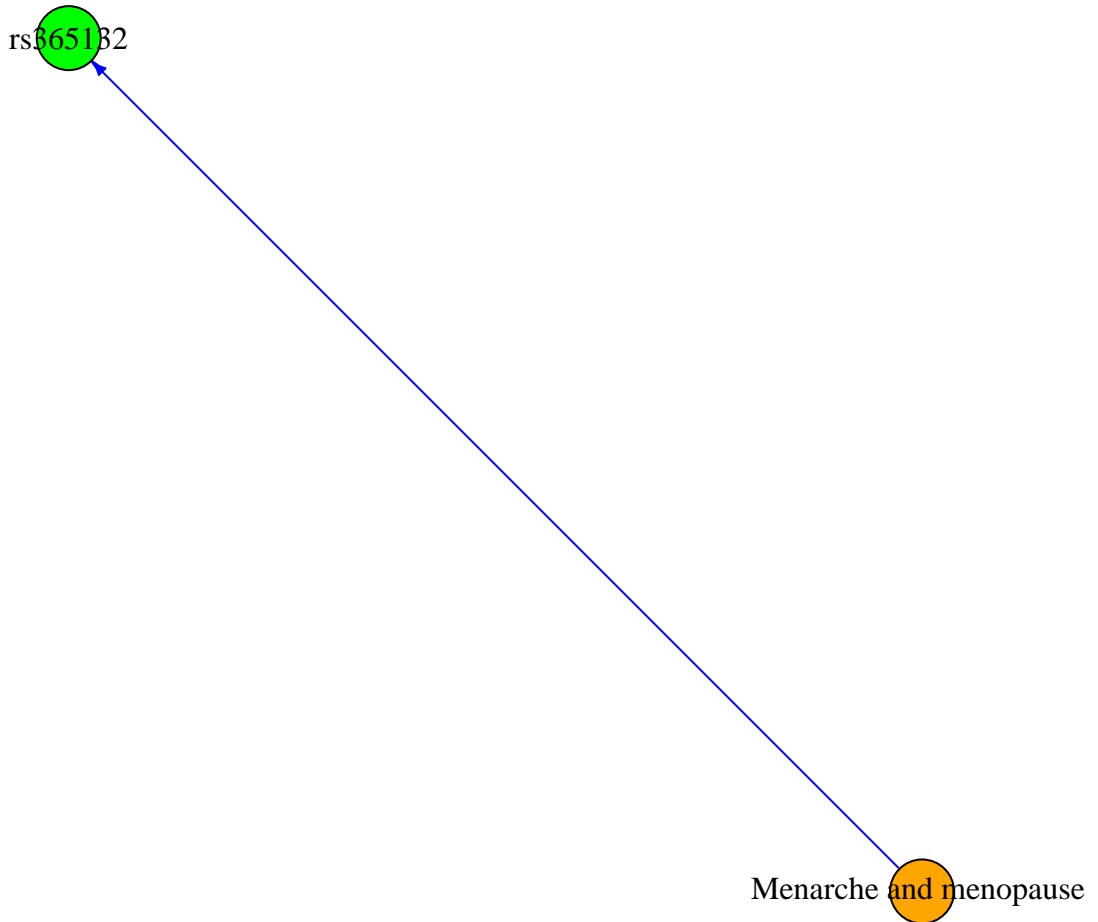



## Variant–Disease Network (Menopause )

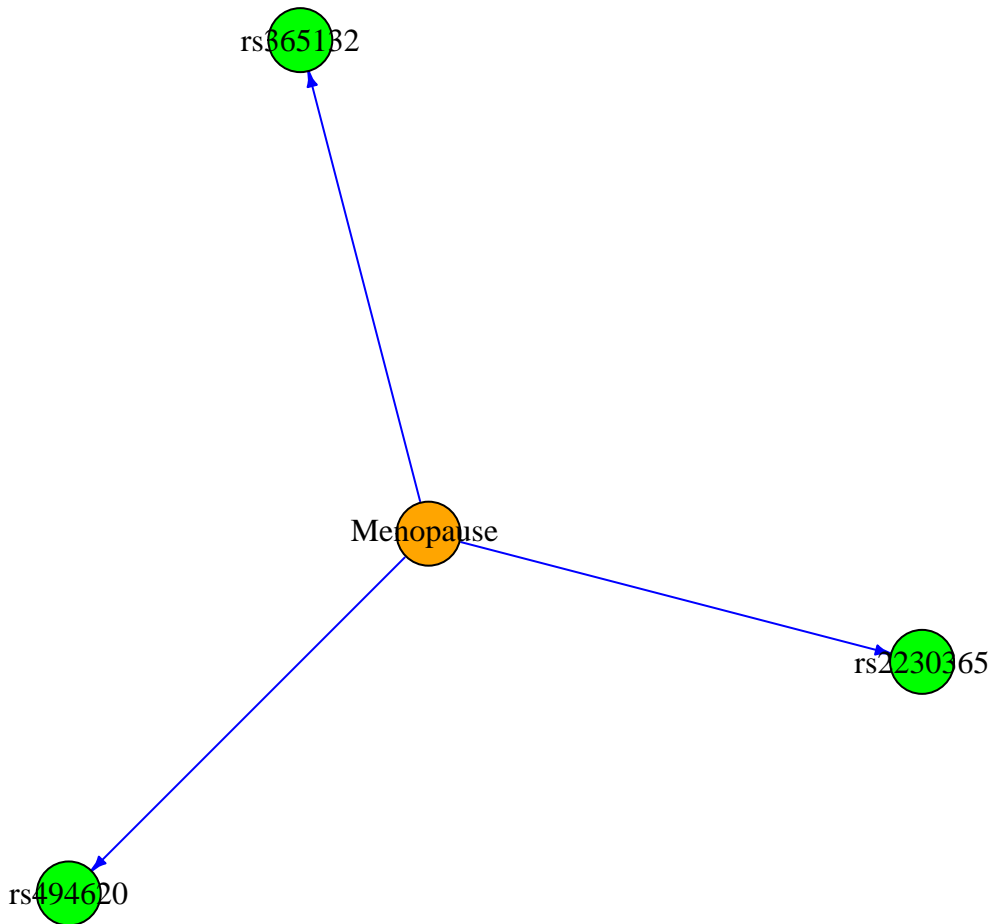

## Variant–Disease Network (Metabolic syndrome)

Metabolic syndrome

rs3814883

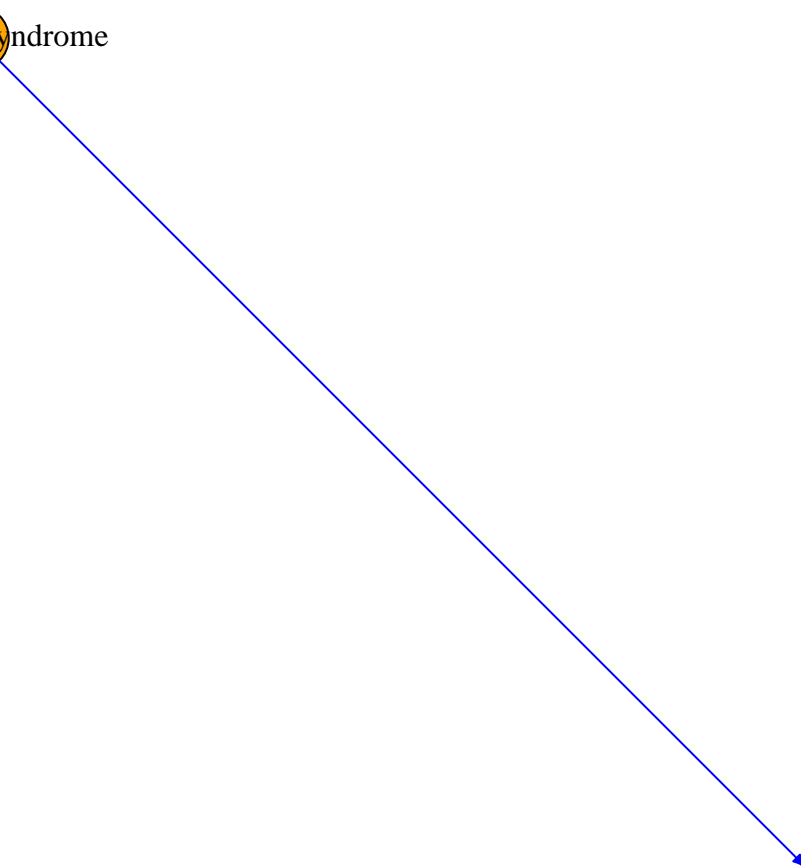

## Variant–Disease Network (Metabolite levels)

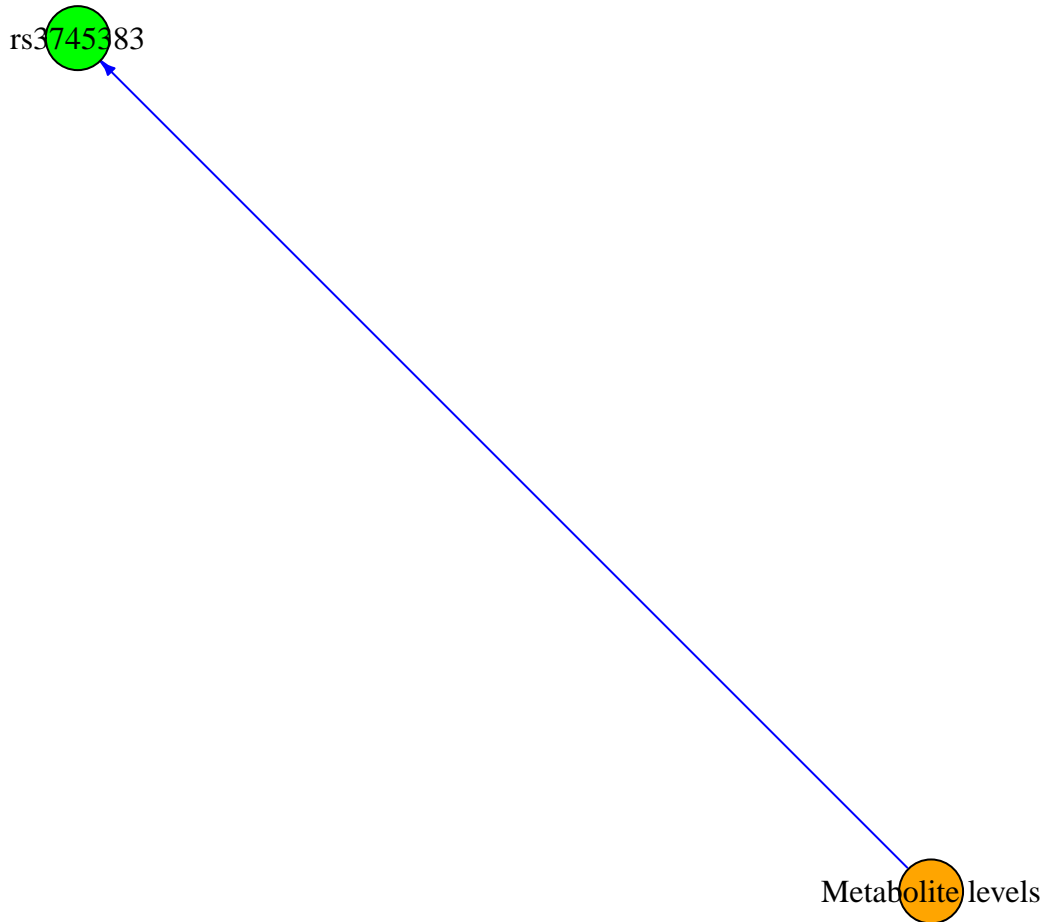

**Variant–Disease Network (Monocyte chemoattractant protein–1 levels)**

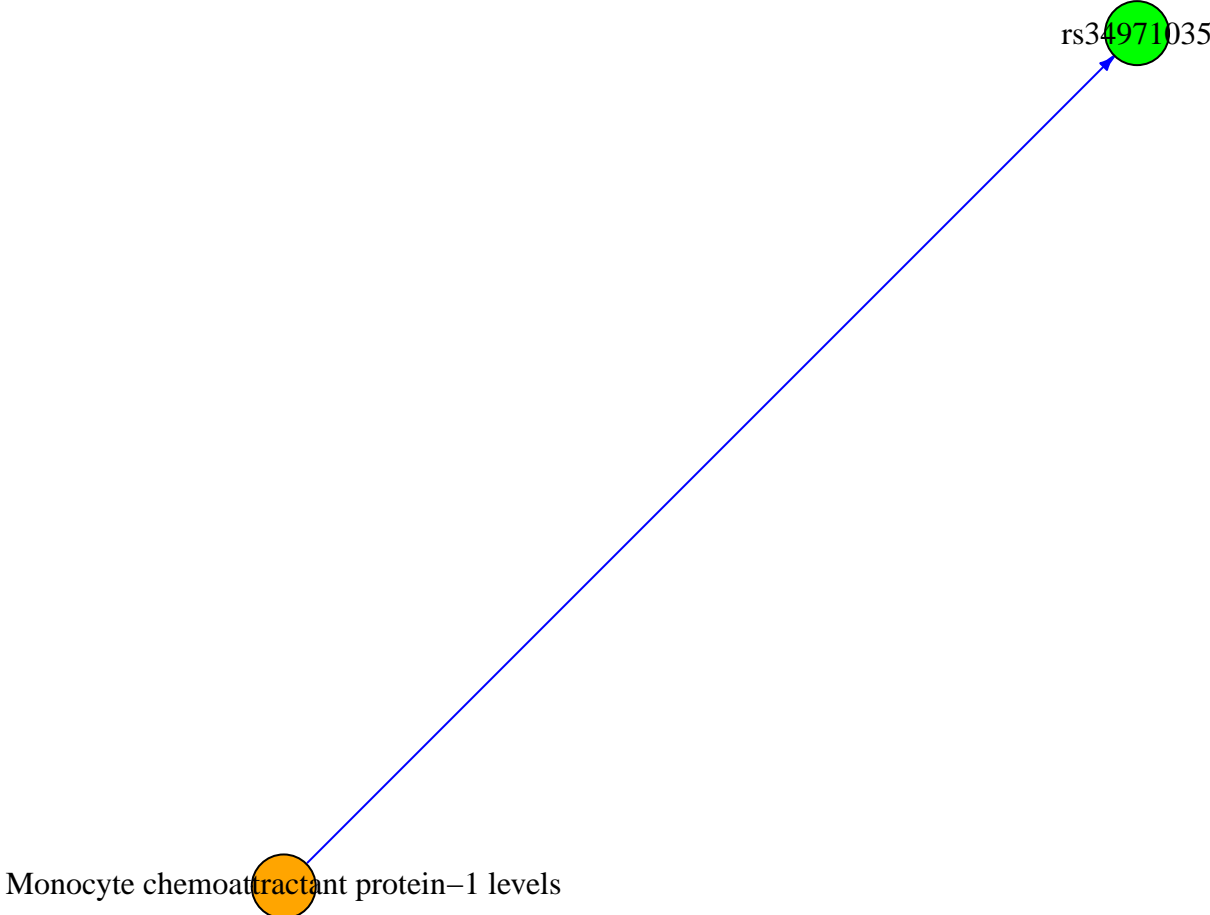

## Variant–Disease Network (Monocyte count)

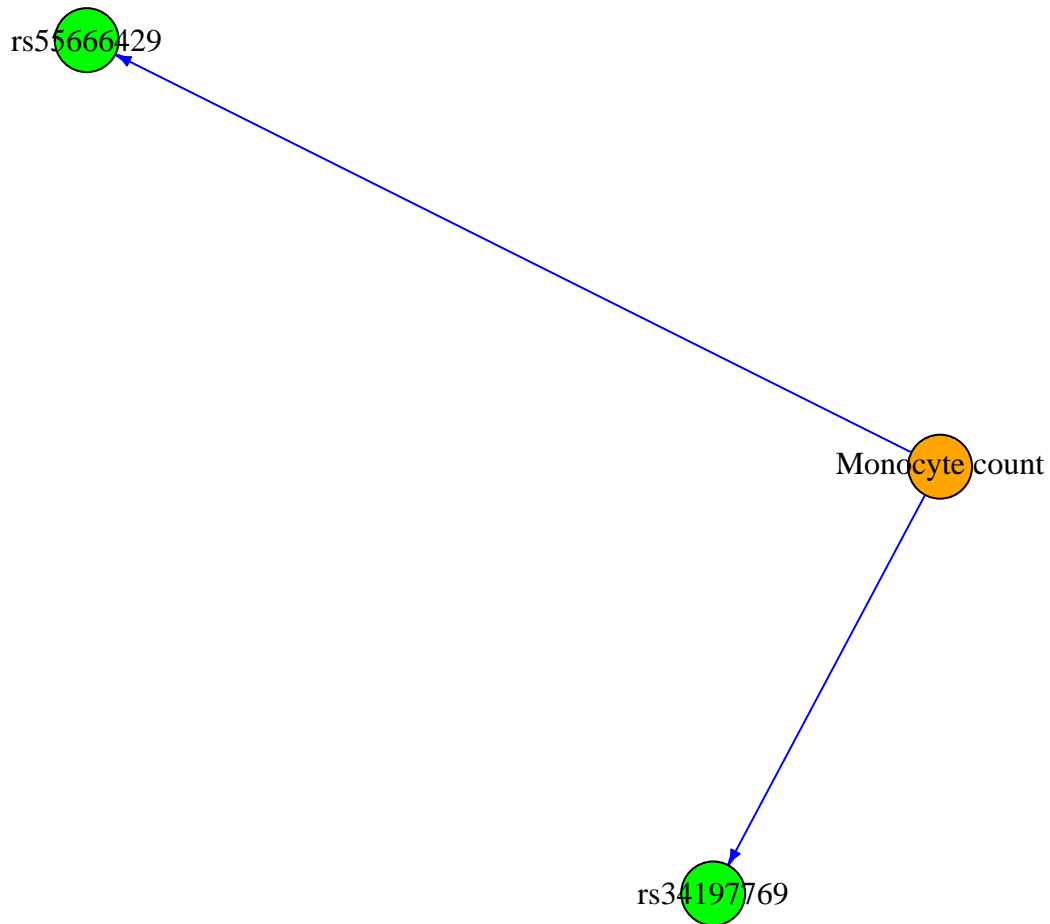

## Variant-Disease Network (Neurociticism)

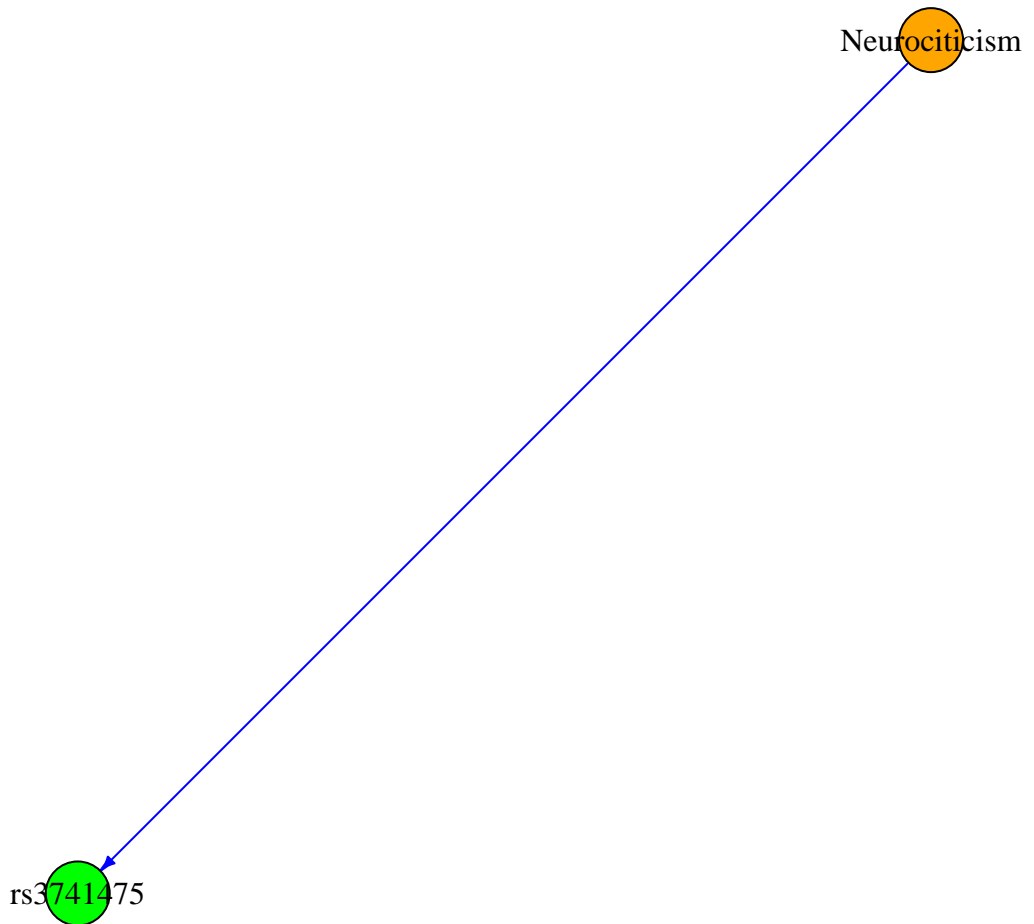

## Variant–Disease Network (Neuroticism)

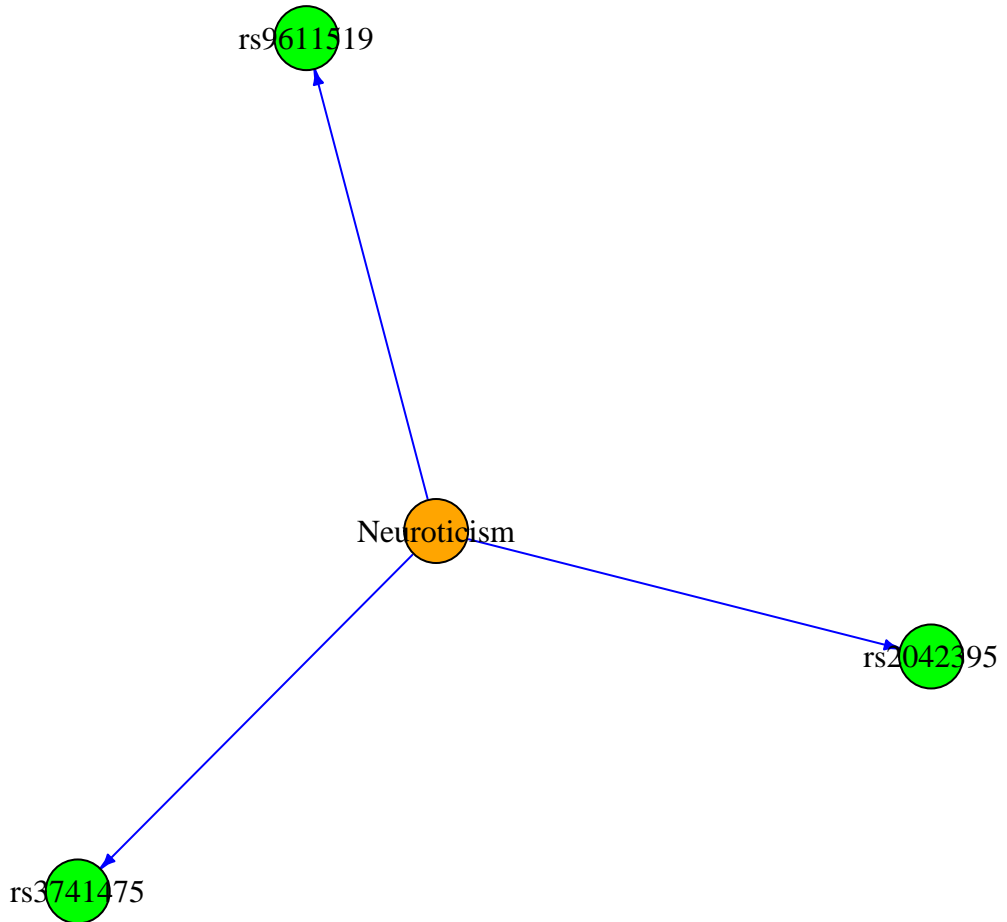

# Variant–Disease Network (Nonobstructive coronary artery disease)

Nonobstructive coronary artery disease

rs2301753

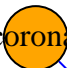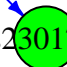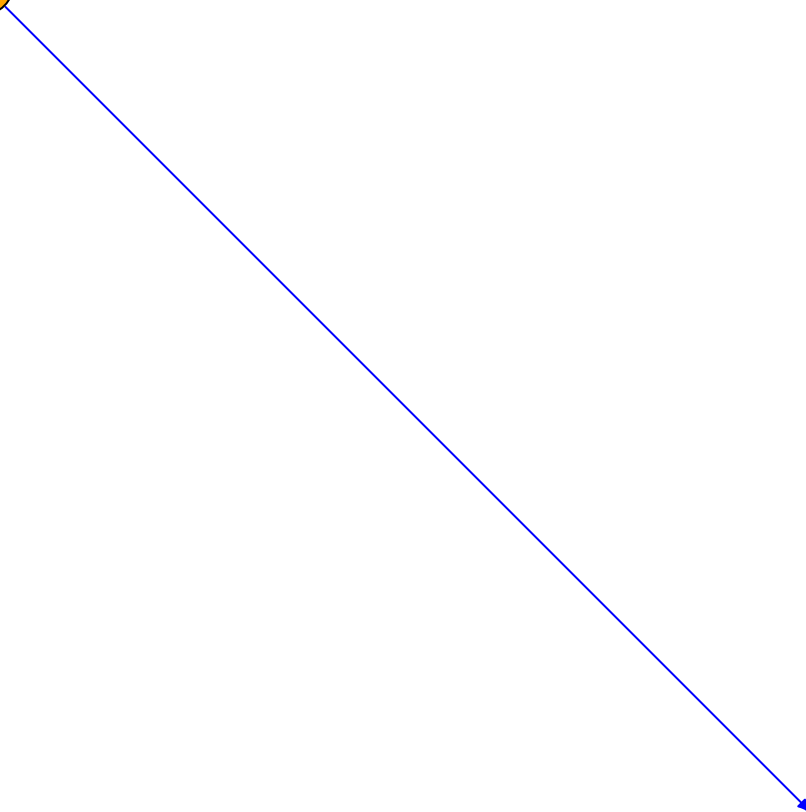



## Variant–Disease Network (Obesity–related traits)

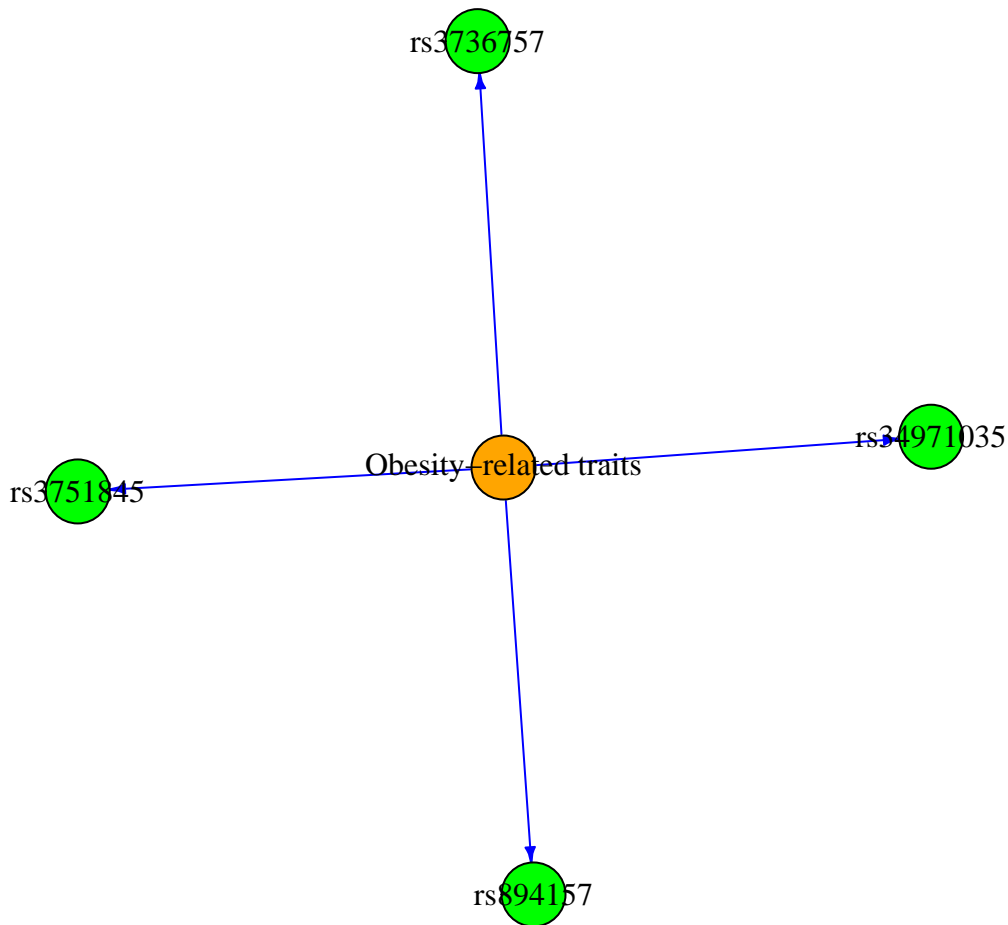

Variant–Disease Network (Plasma omega–6 polyunsaturated fatty acid levels)

Plasma omega–6 polyunsaturated fatty acid levels

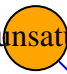

rs1136001

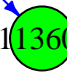

## Variant–Disease Network (Platelet aggregation)

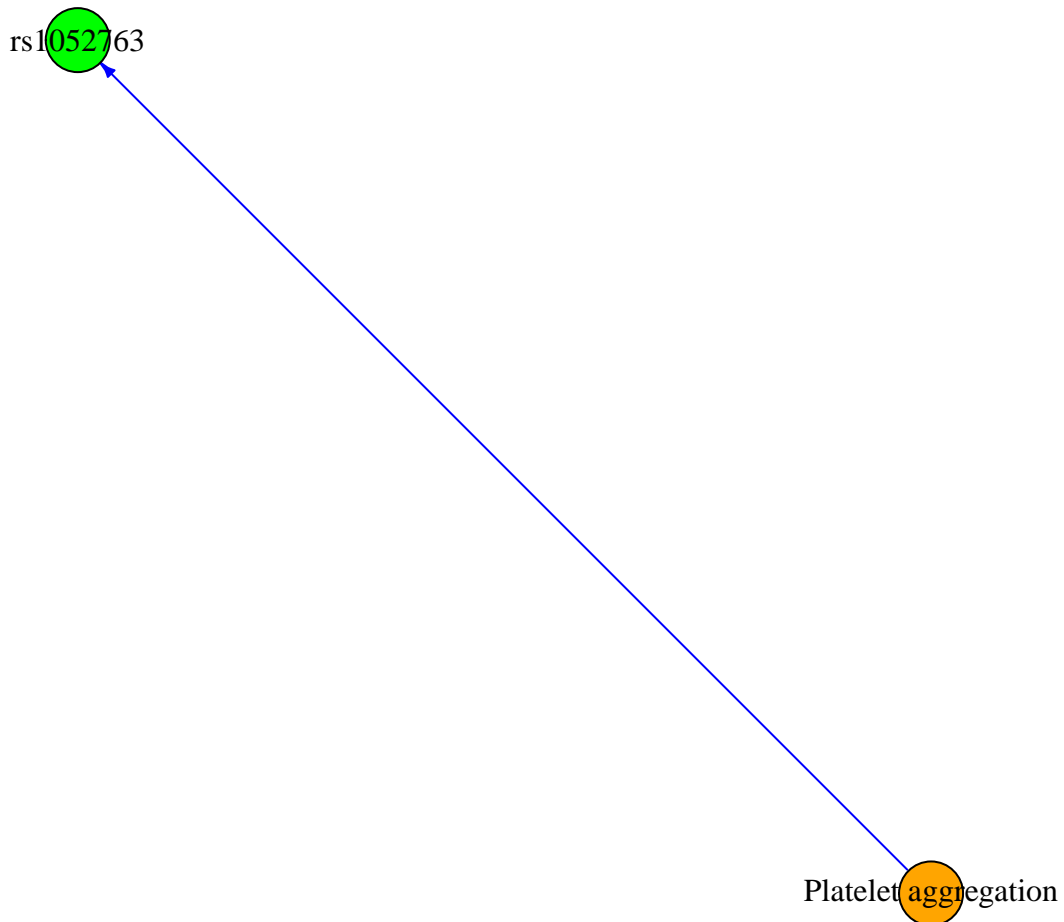

## Variant–Disease Network (Post bronchodilator FEV1)

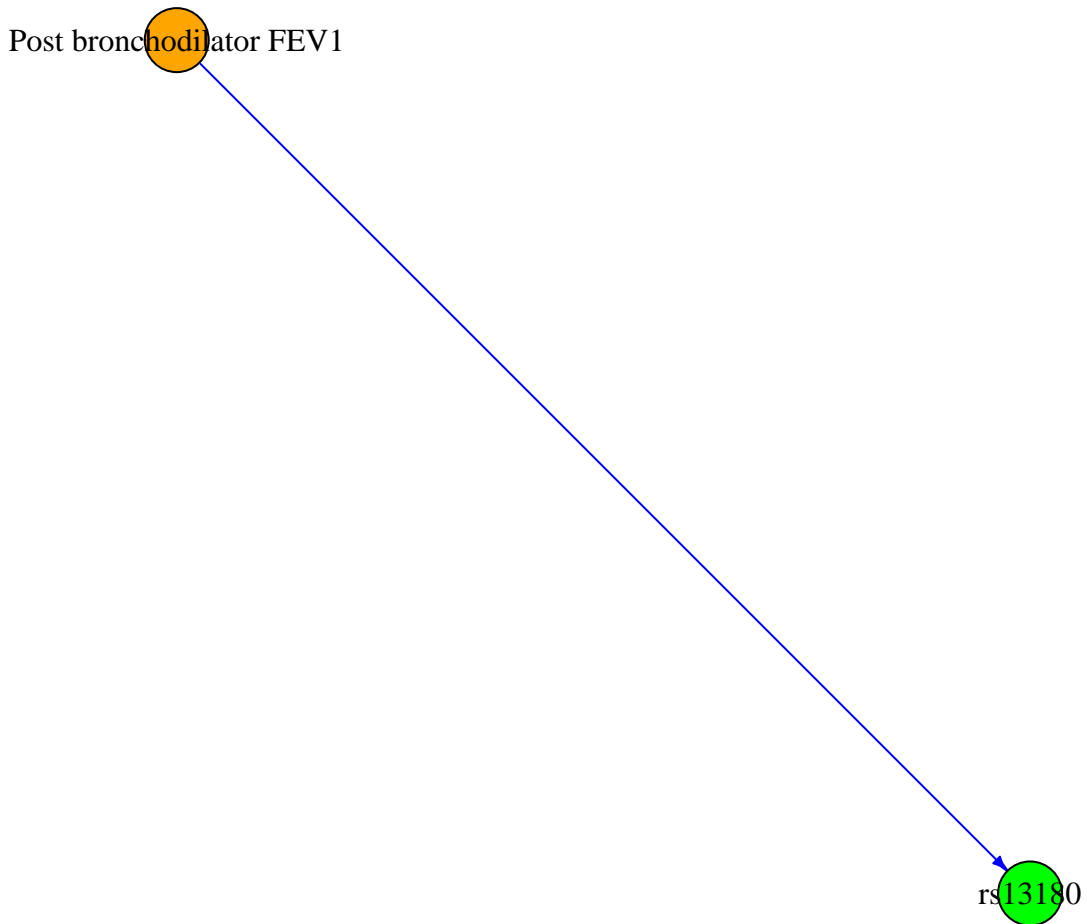

**Variant–Disease Network (Post bronchodilator FEV1/FVC ratio)**

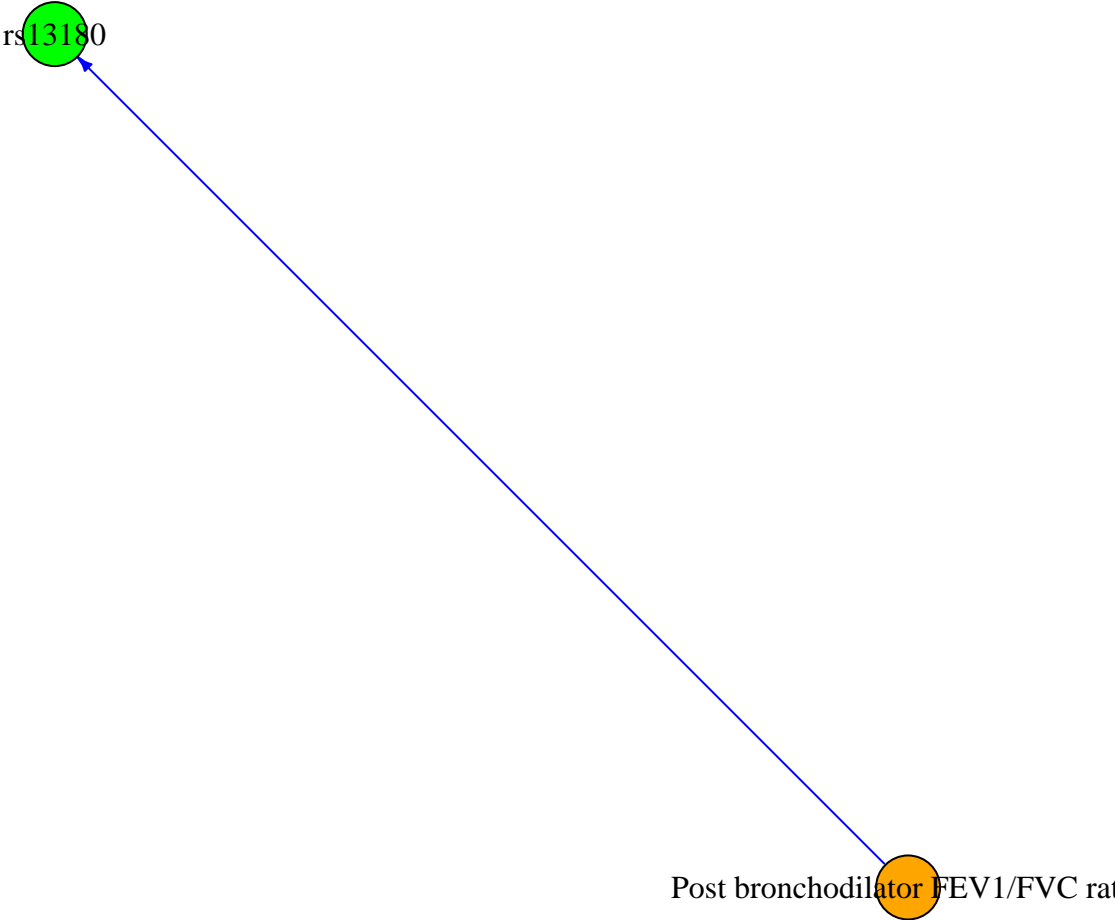

# Variant-Disease Network (Postoperative survival time in hepatocellular carcinoma)

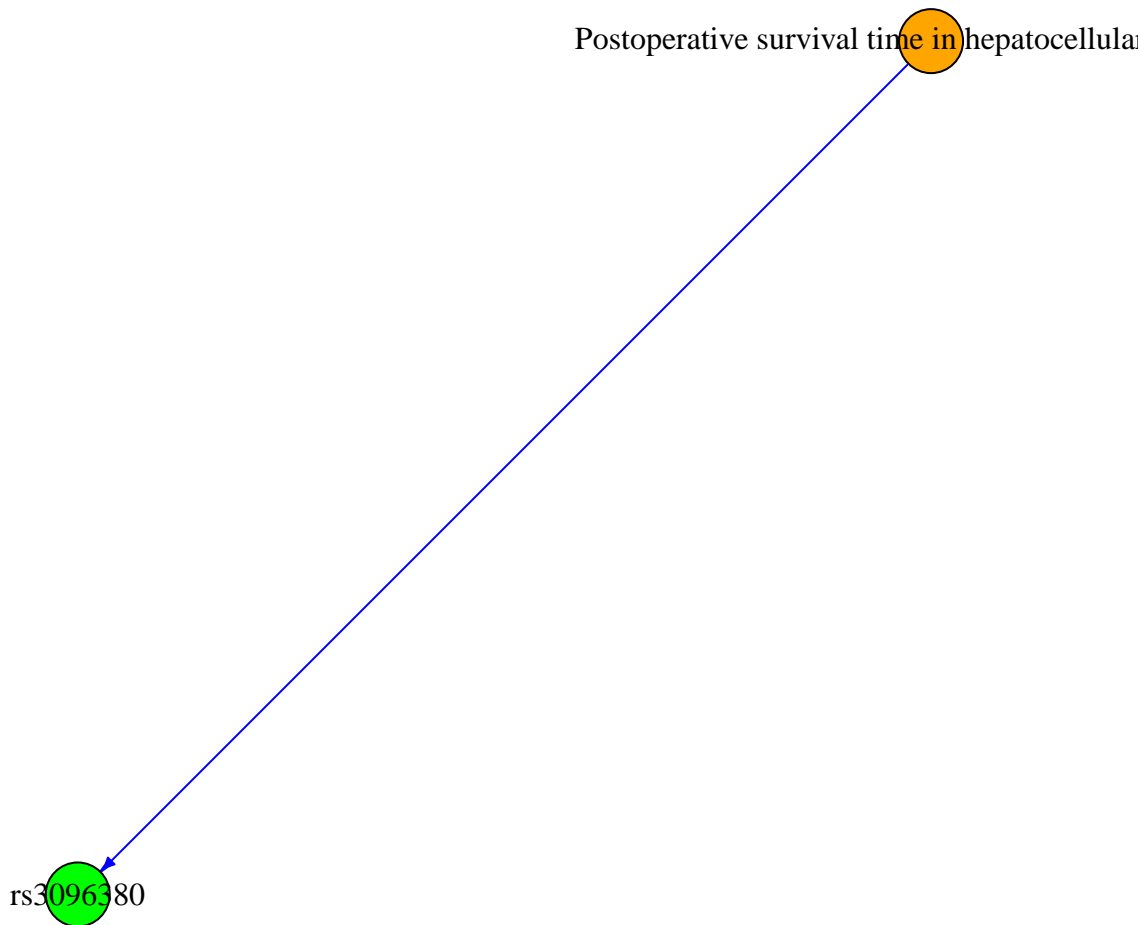

## Variant-Disease Network (Psoriasis)

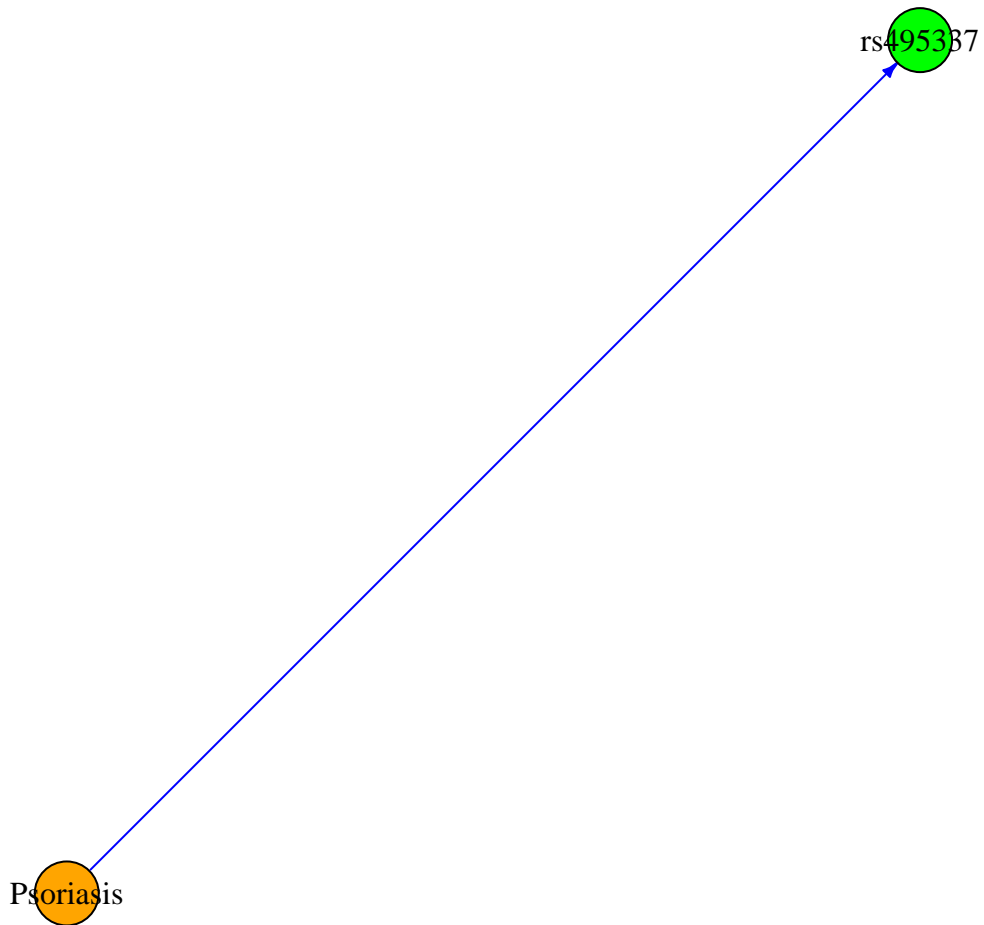

## Variant–Disease Network (Pulse pressure)

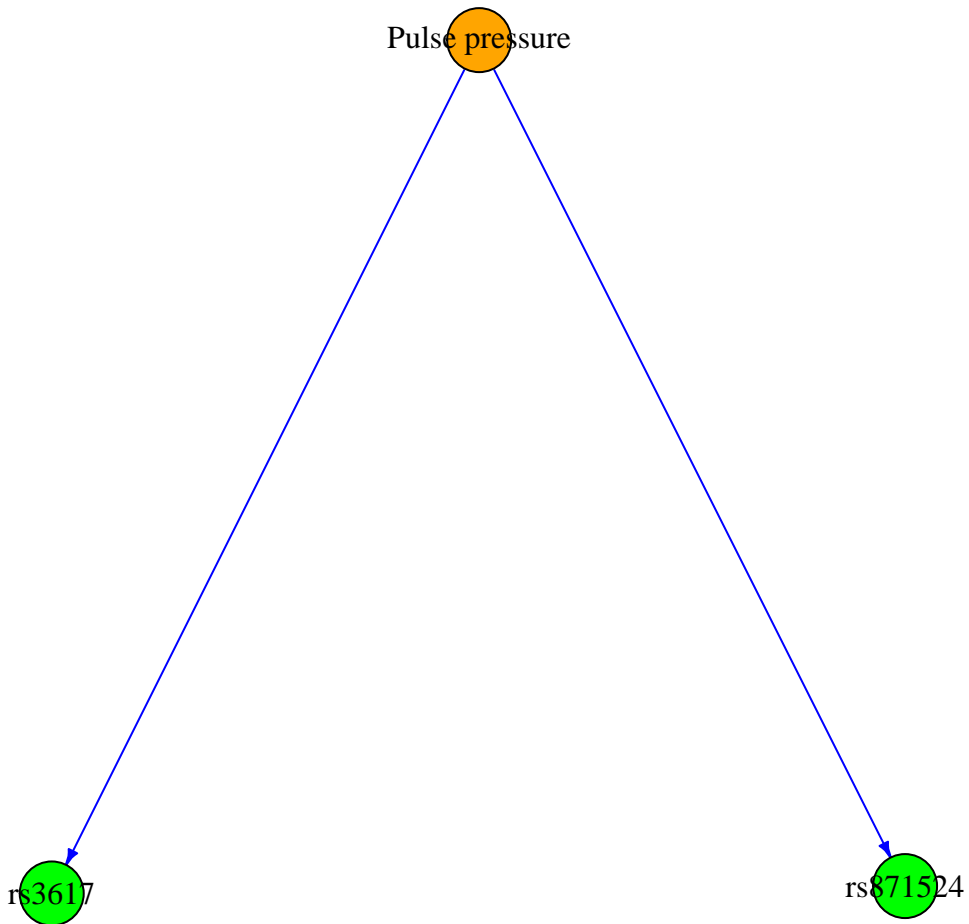



## Variant-Disease Network (QRS duration)

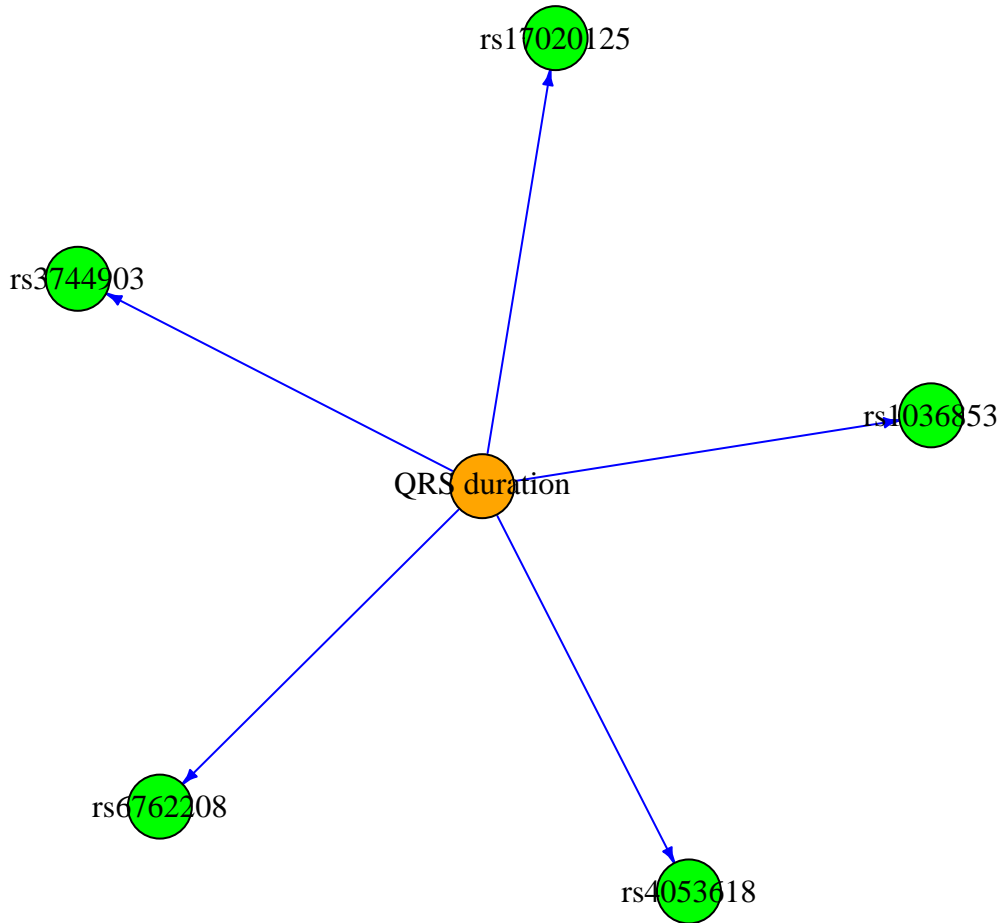

## Variant–Disease Network (Red blood cell count)

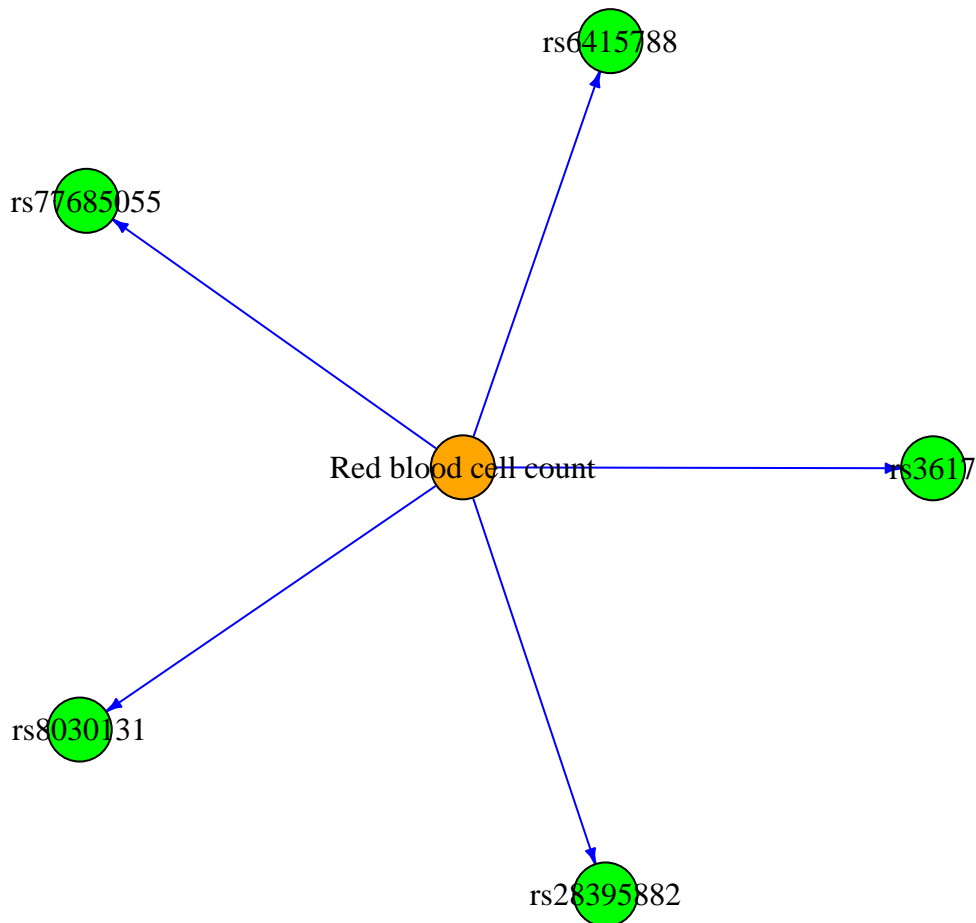

# Variant–Disease Network (Red cell distribution width)

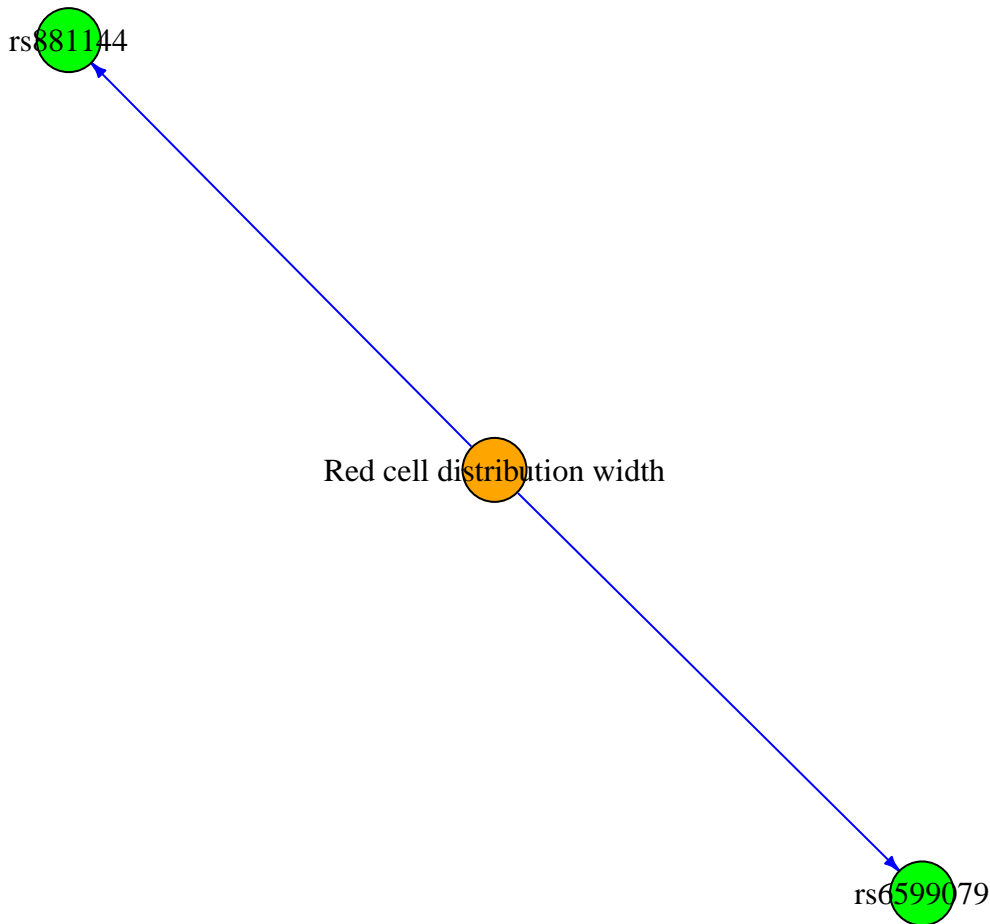

## Variant-Disease Network (Refractive error)

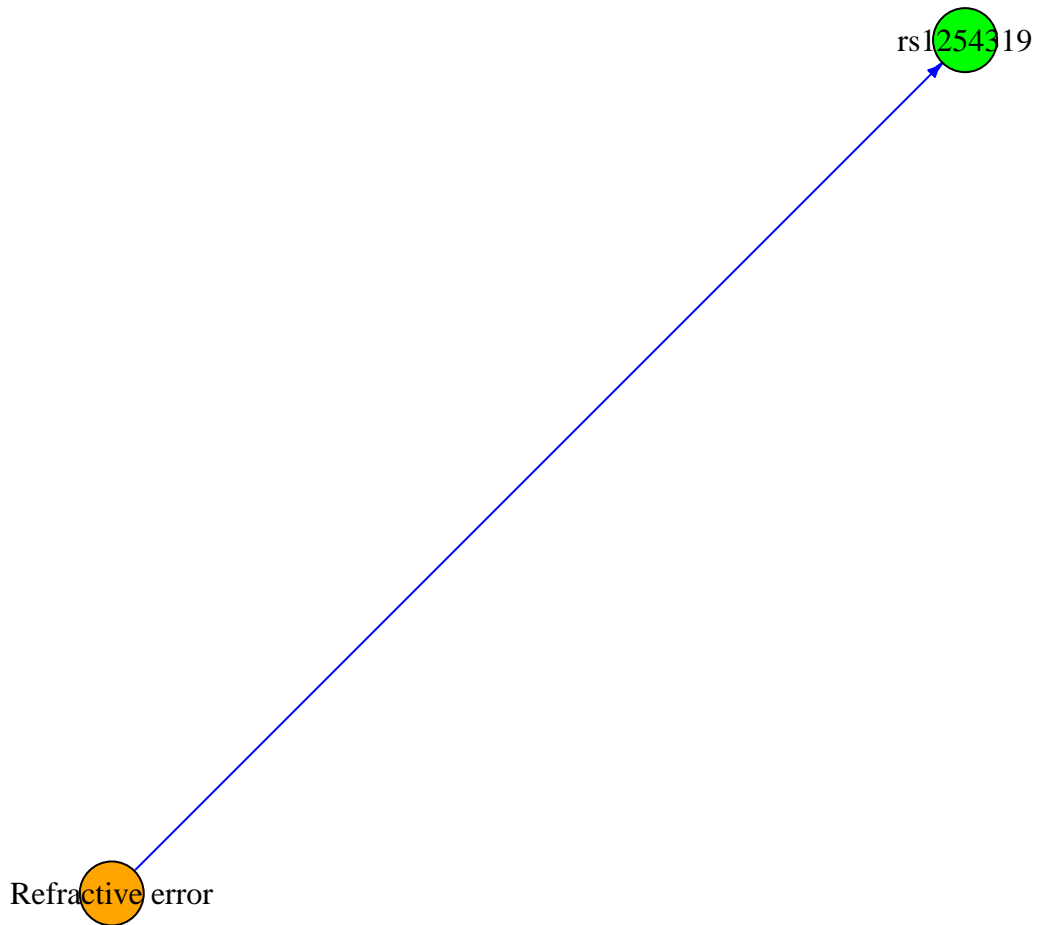

## Variant–Disease Network (Regular attendance at a religious group)

Regular attendance at a religious group

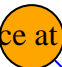

rs3747630

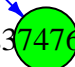

# nt-Disease Network (Response to cognitive-behavioural therapy in anxiety

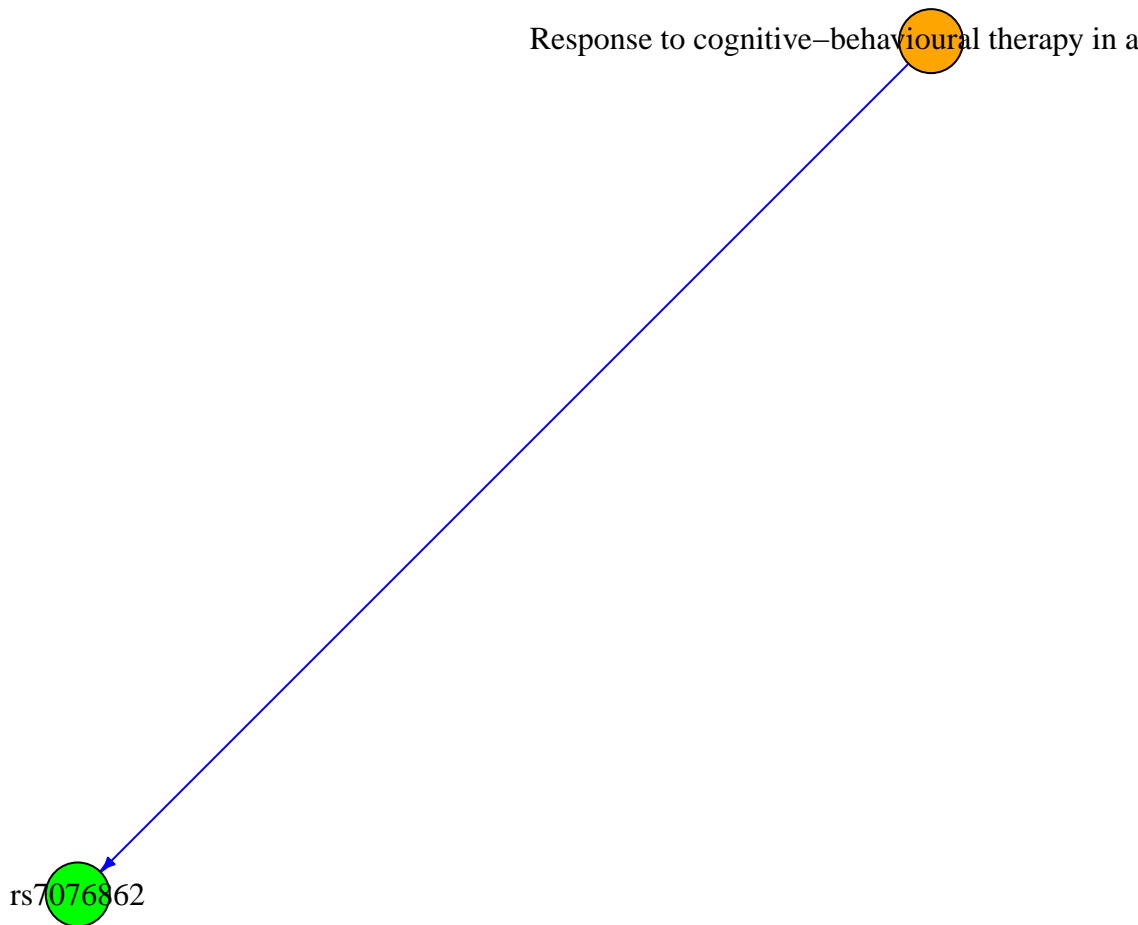

# Variant–Disease Network (Response to paliperidone in schizophrenia )

Response to paliperidone in schizophrenia

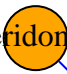

rs34272020

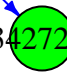

## Variant–Disease Network (Reticulocyte count)

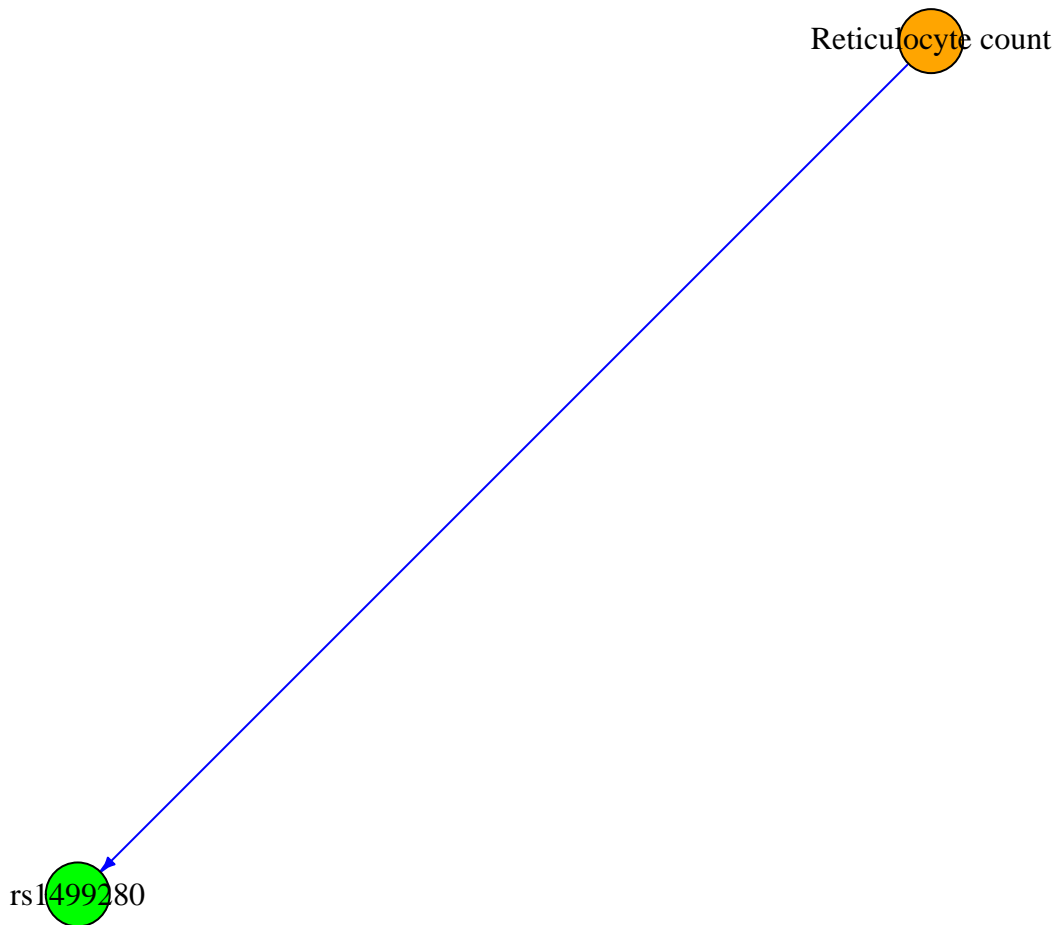



# Variant–Disease Network (Reticulocyte fraction of red cells)

rs1499280

Reticulocyte fraction of red cells



# Variant–Disease Network (Serum 25–Hydroxyvitamin D levels)

Serum 25–Hydroxyvitamin D levels

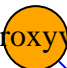

rs8018720

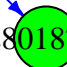

## Variant–Disease Network (Serum uric acid levels)

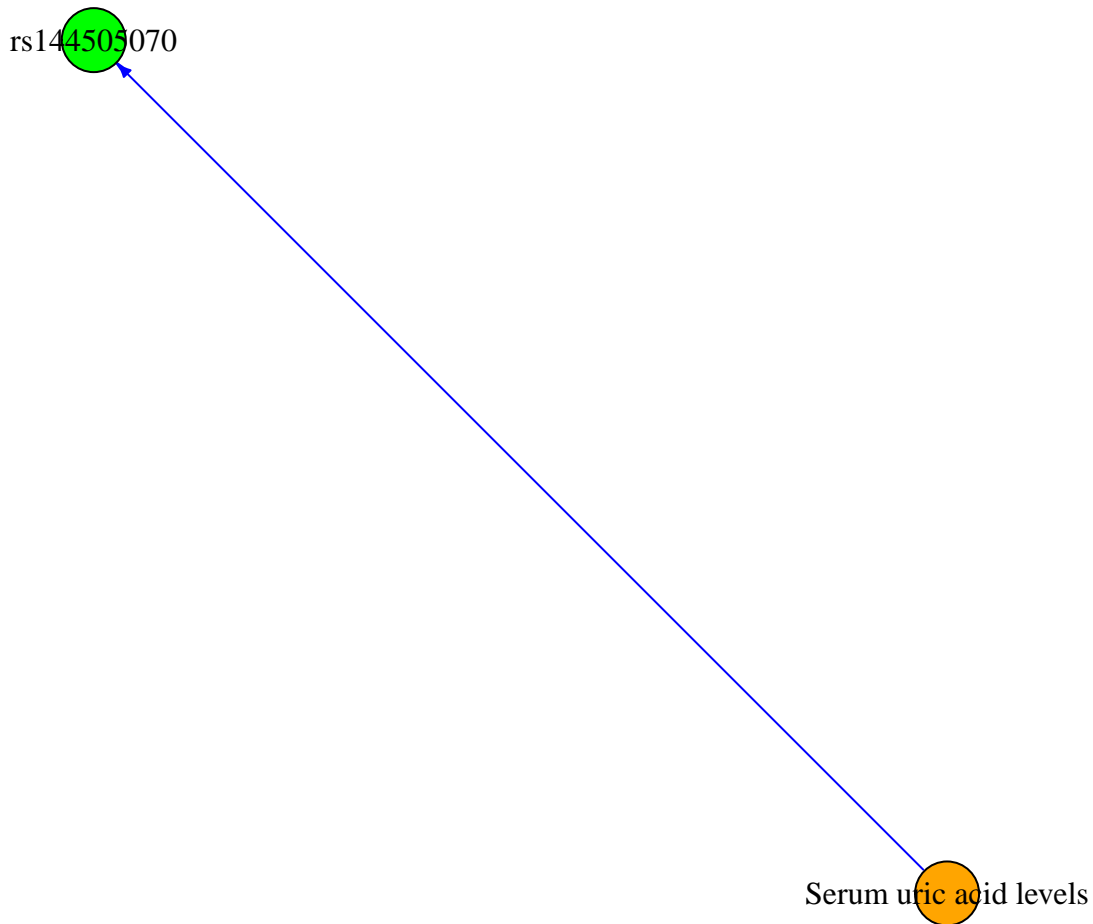

## Variant-Disease Network (Smoking initiation )

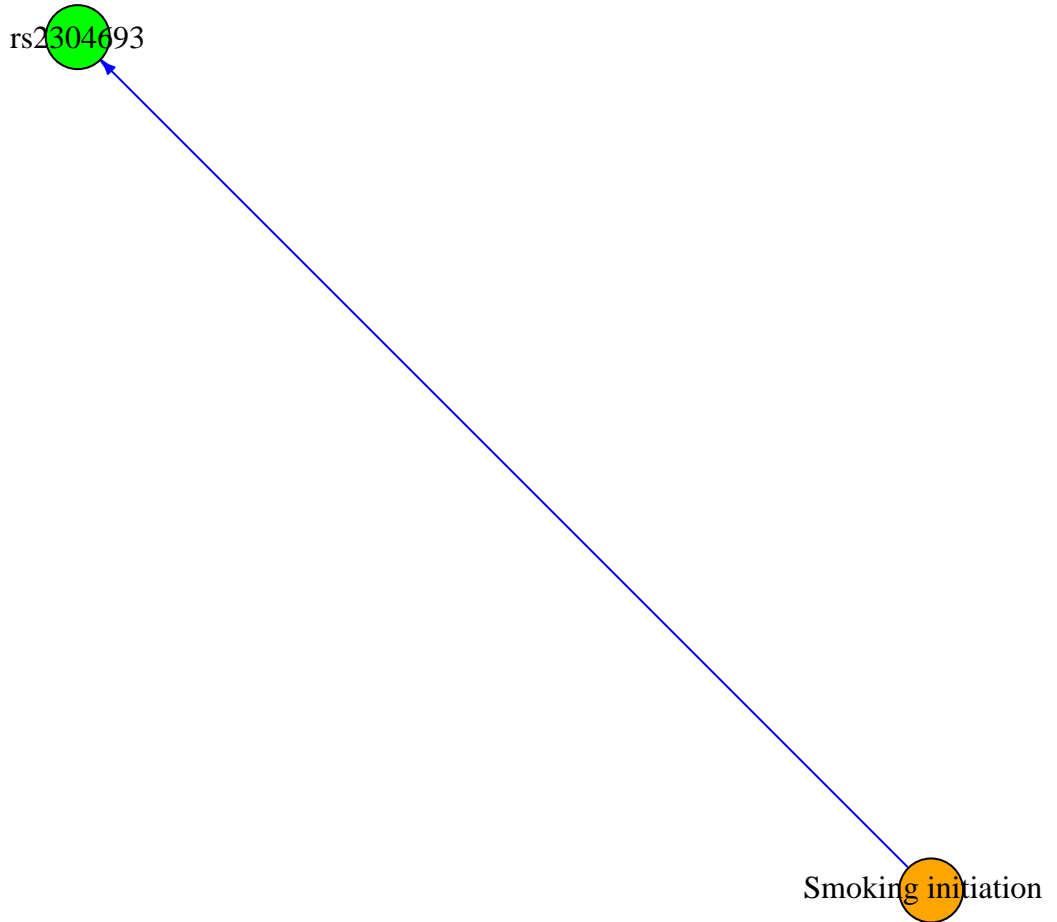

## Variant–Disease Network (Suicide behavior)

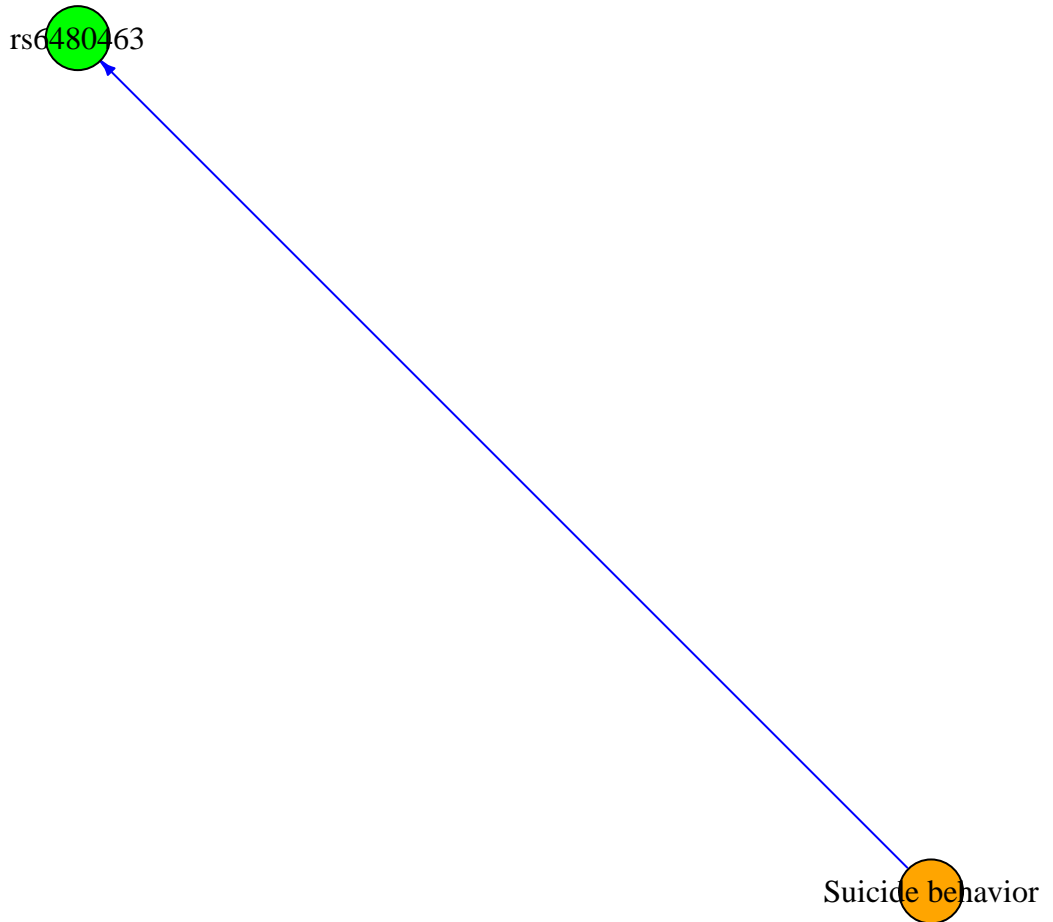

Variant–Disease Network (Systemic lupus erythematosus)

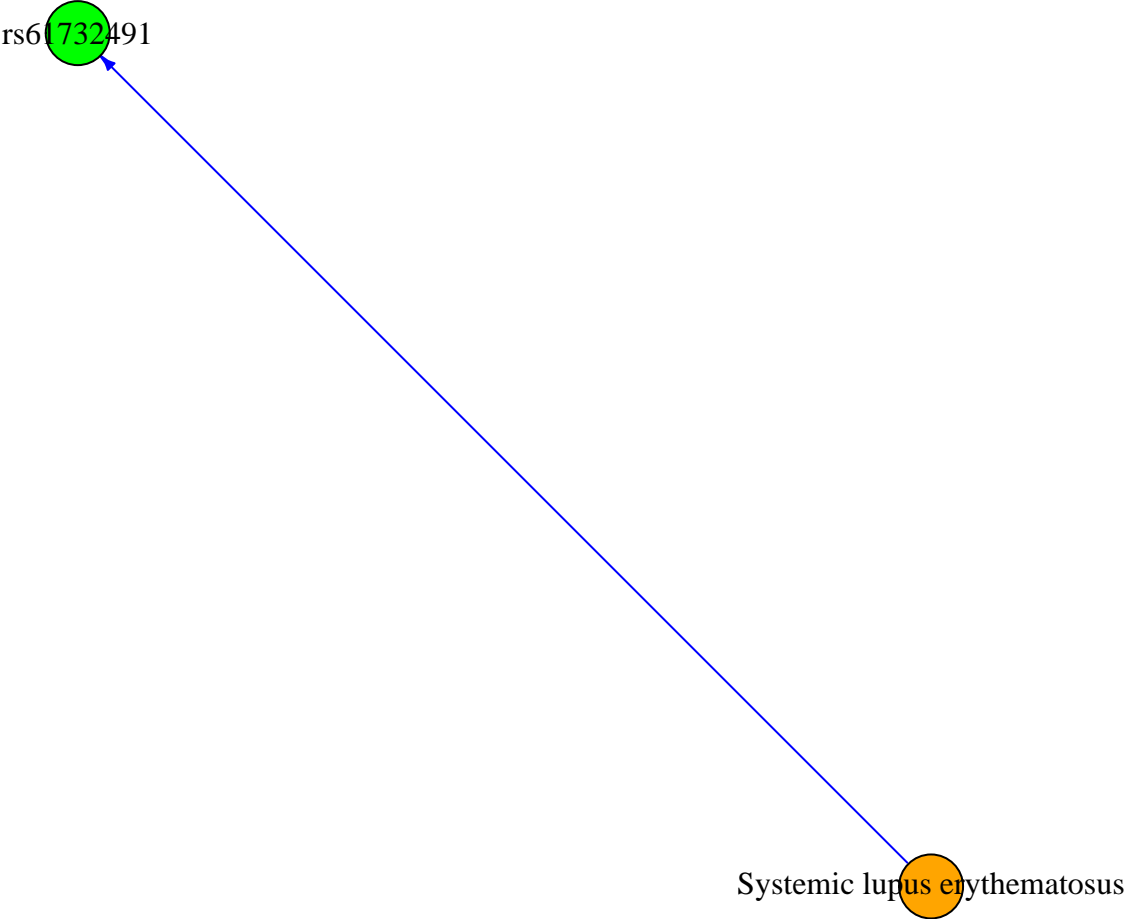

## Variant–Disease Network (Systolic blood pressure)

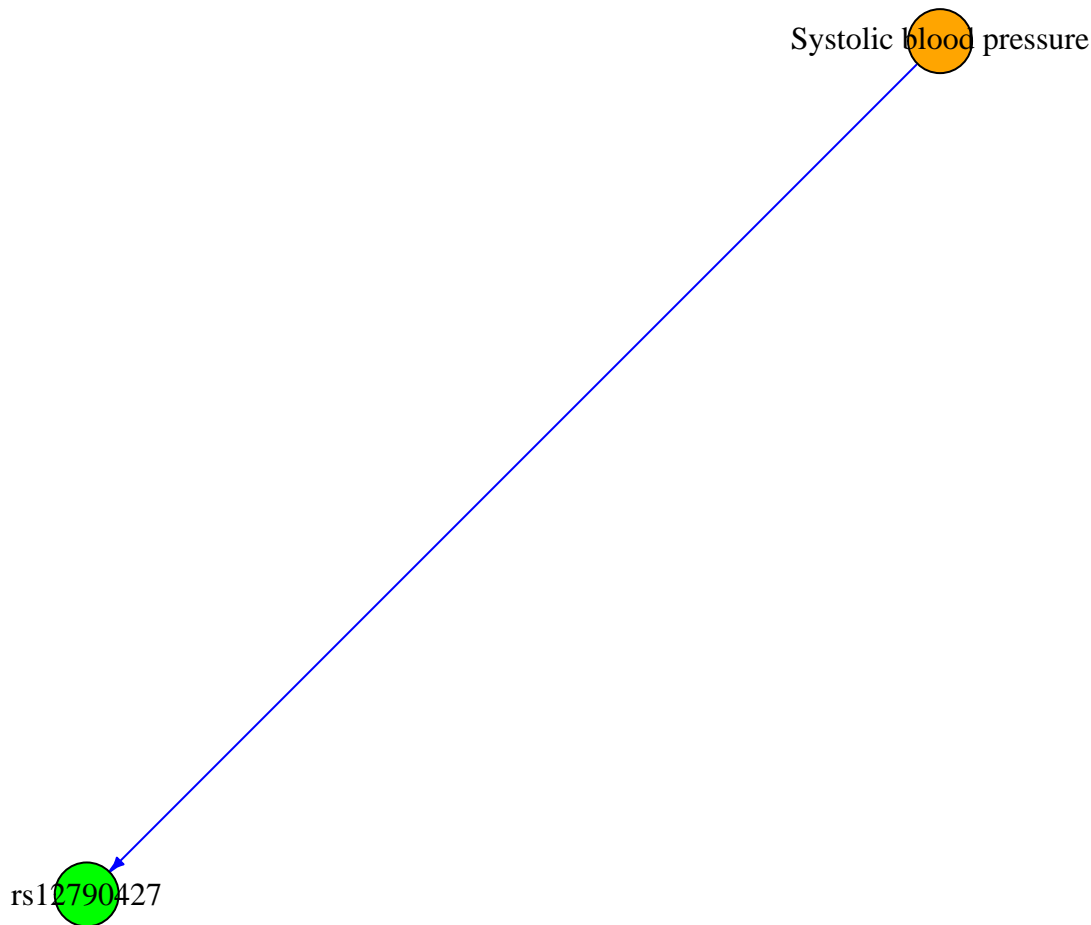

**Variant–Disease Network (Systolic blood pressure in sickle cell anemia)**

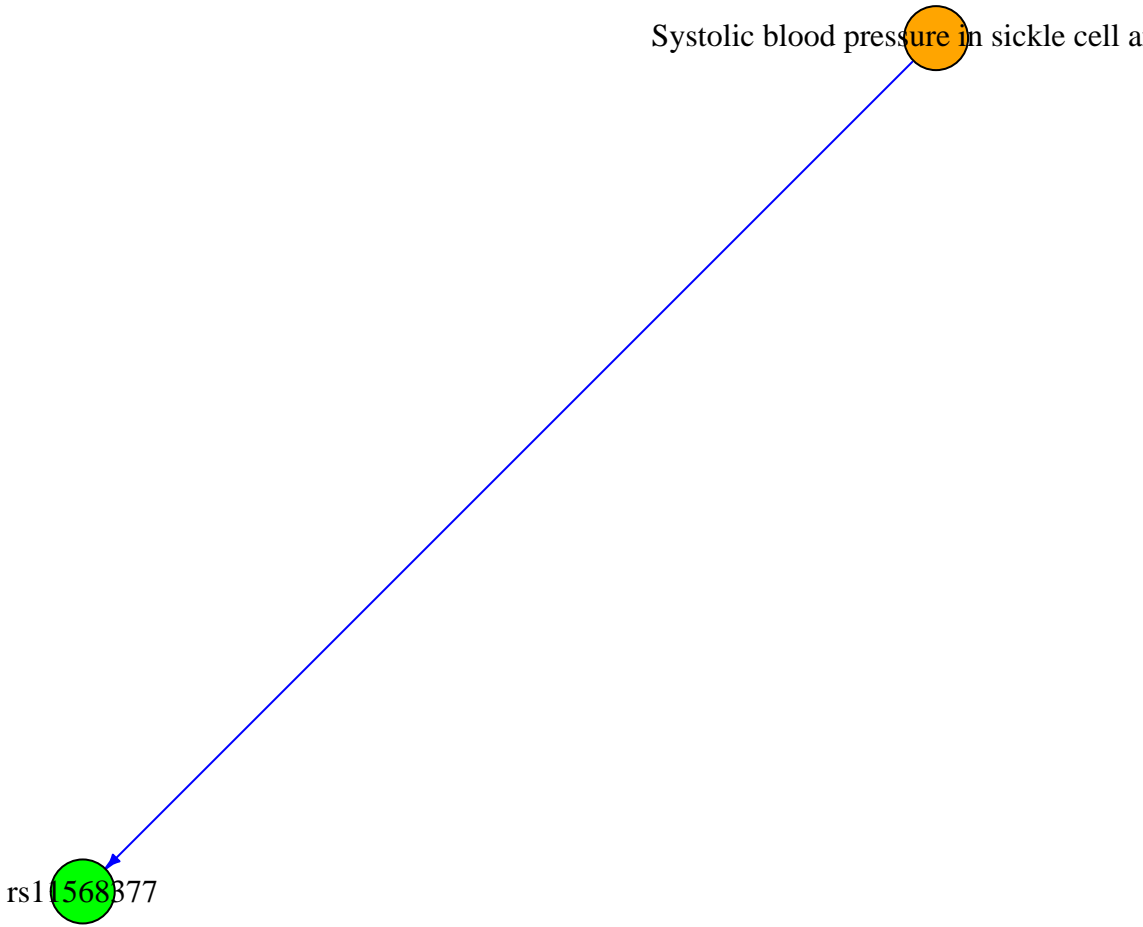



## Variant–Disease Network (Total cholesterol levels)

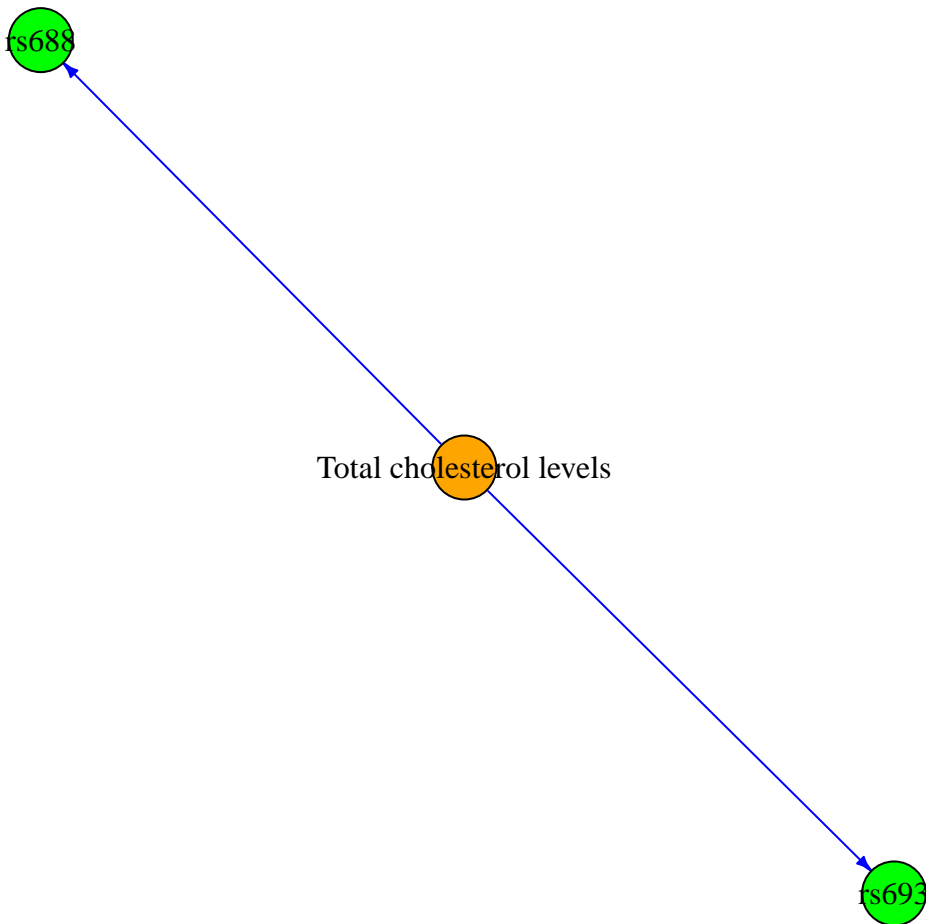

## Variant–Disease Network (Triglyceride levels)

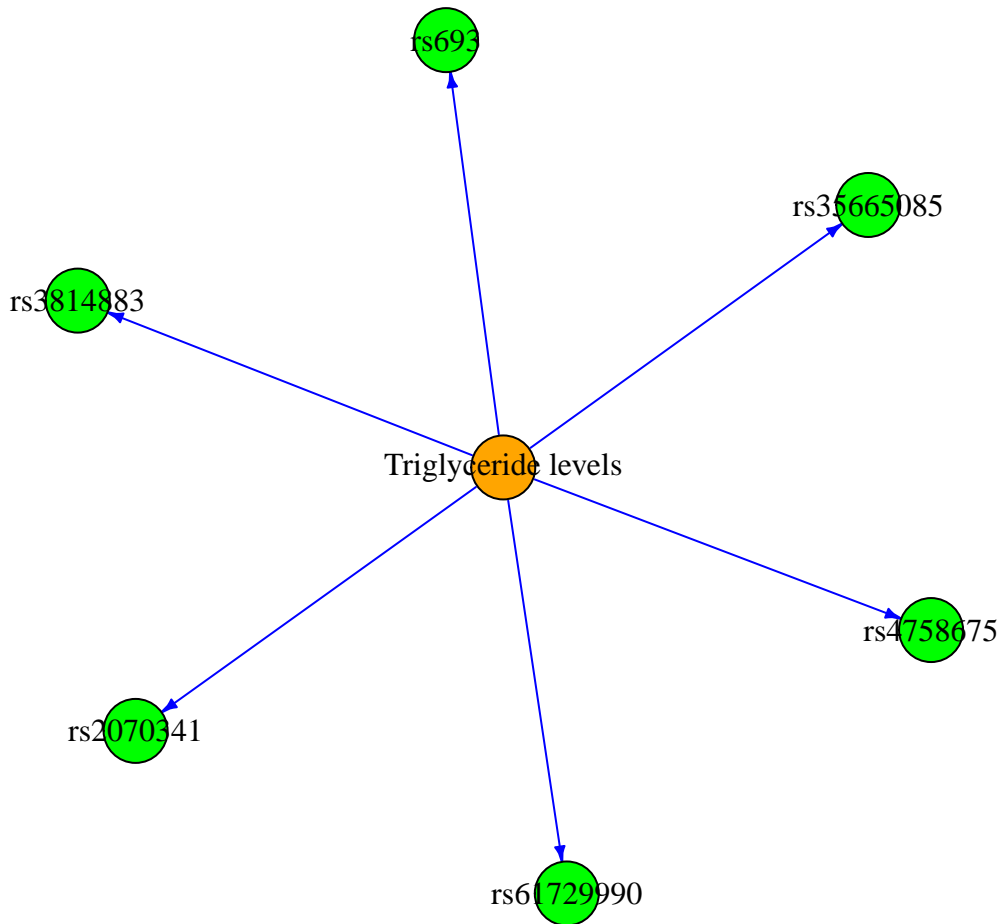

## Variant–Disease Network (Triglyceride levels in non smokers)

Triglyceride levels in non smokers

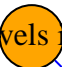

rs4758675

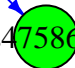

# Variant–Disease Network (Triglyceride levels x smoking interaction )

Triglyceride levels x smoking interaction

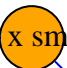

rs4758675

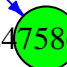

## Variant–Disease Network (Triglycerides)

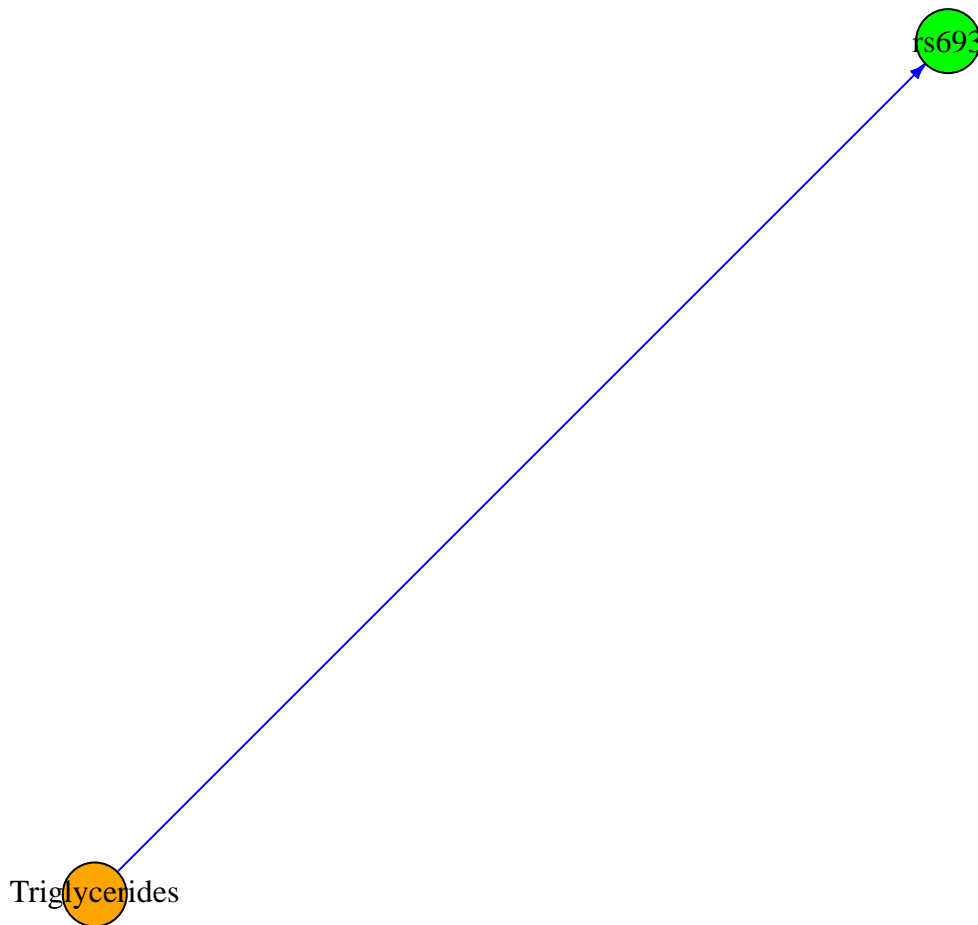

## Variant–Disease Network (Type 1 diabetes)

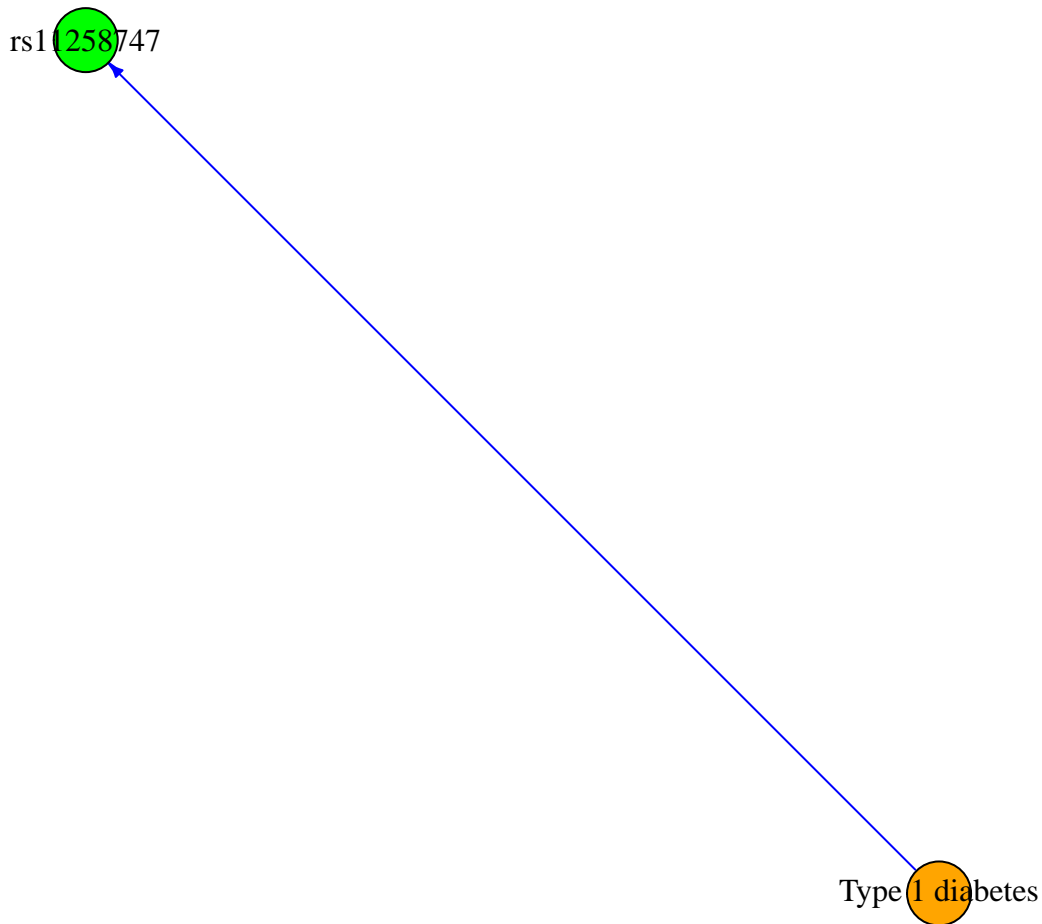

## Variant–Disease Network (Type 2 diabetes)

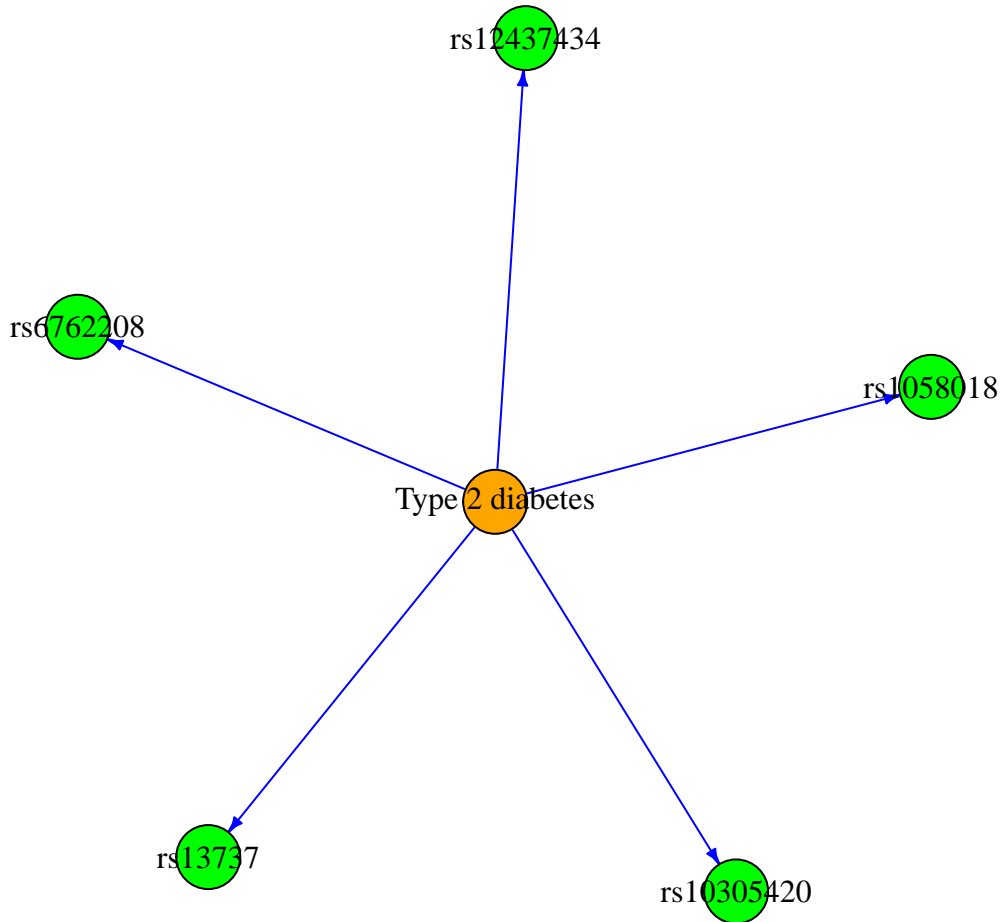

Variant–Disease Network (Type 2 diabetes )

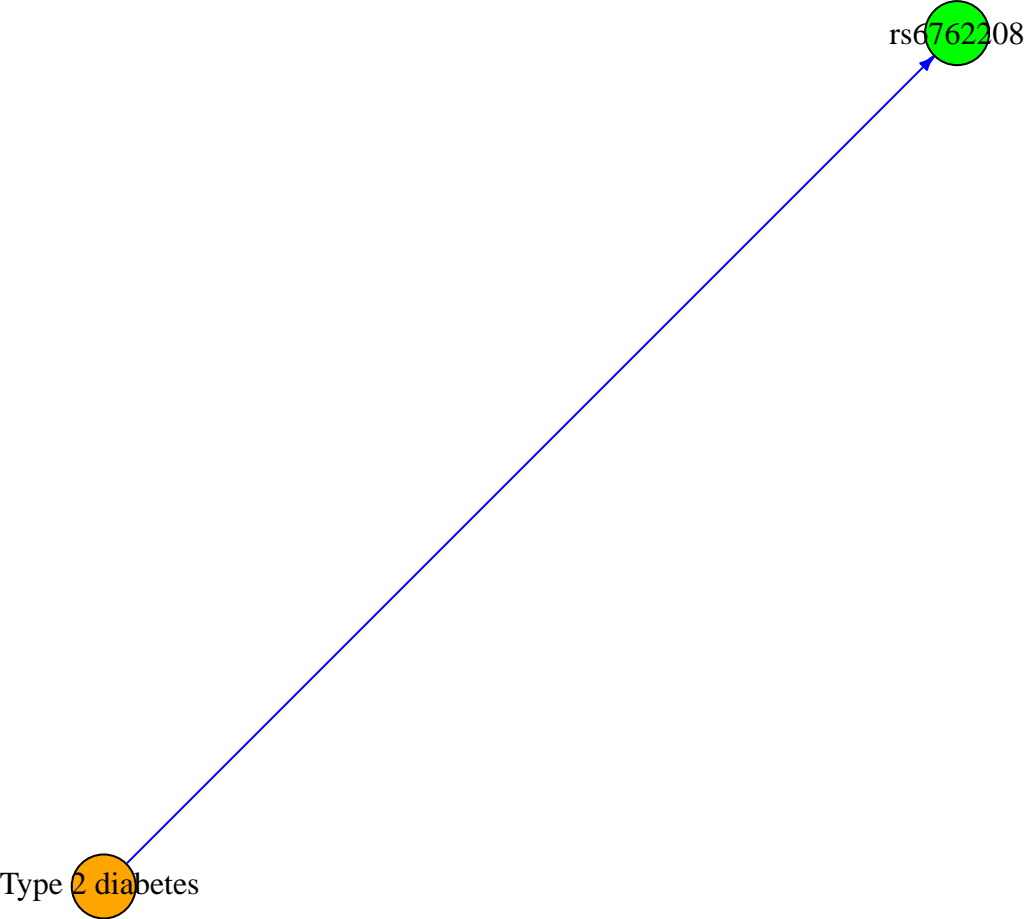



## Variant–Disease Network (Ulcerative colitis)

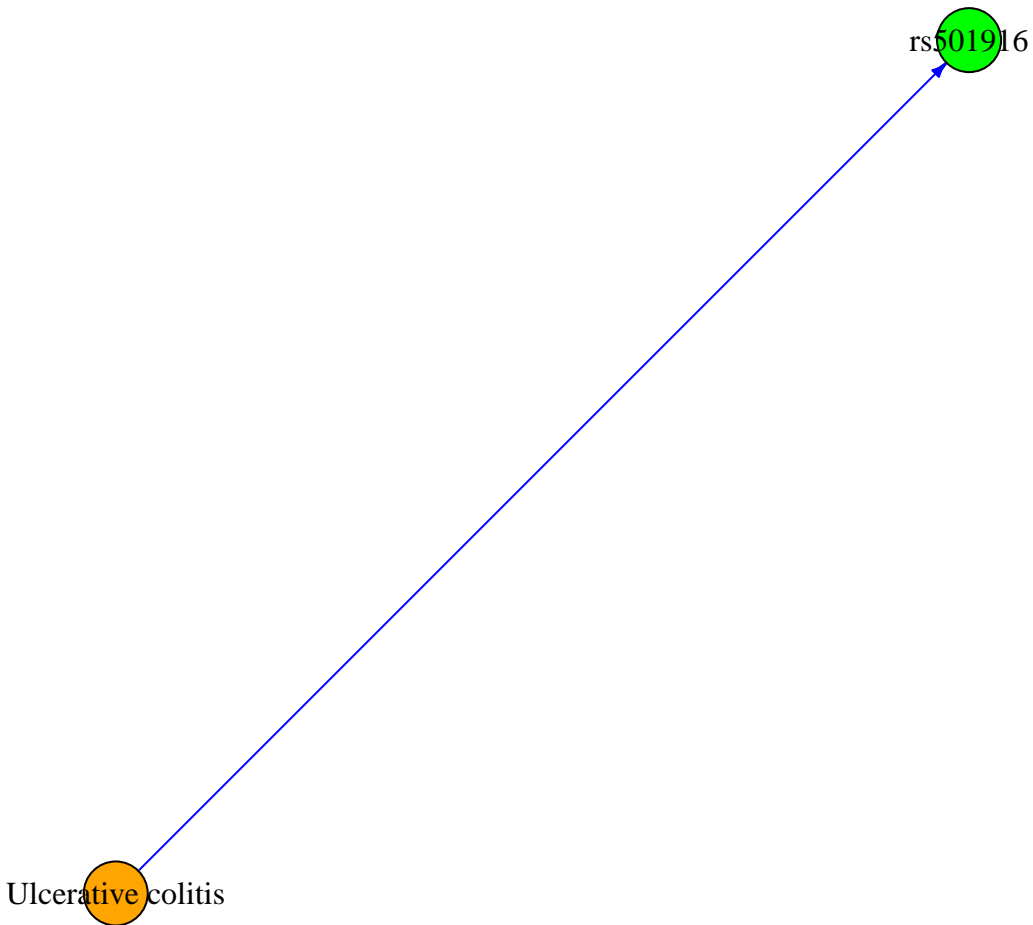

## Variant-Disease Network (Urate levels)

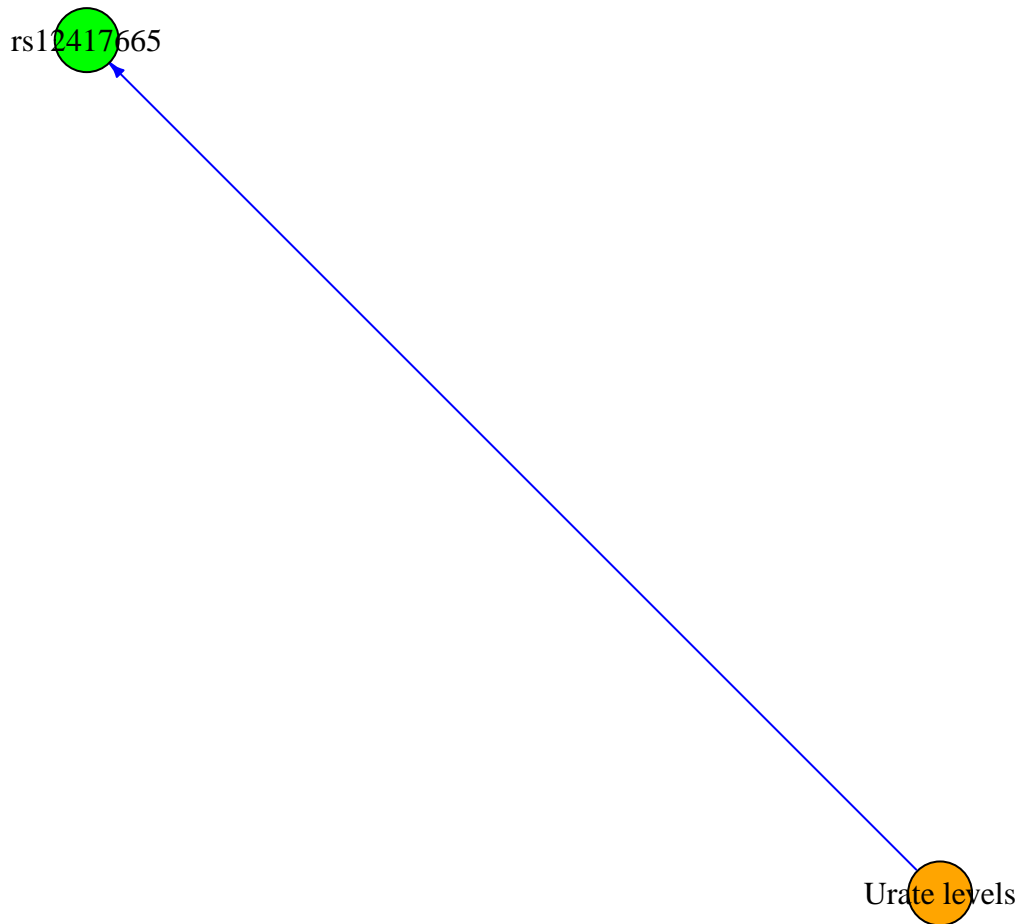

## Variant–Disease Network (Vitamin D levels)

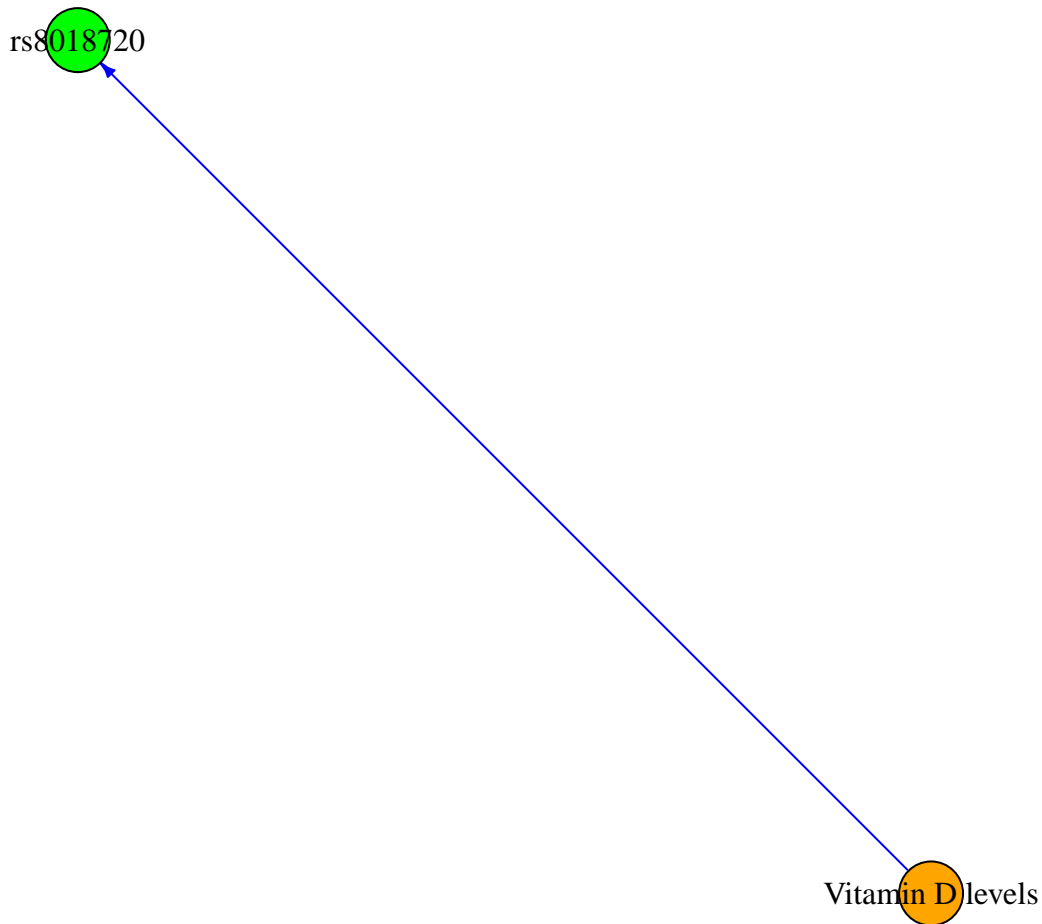

**Variant–Disease Network (Waist circumference adjusted for body mass index)**

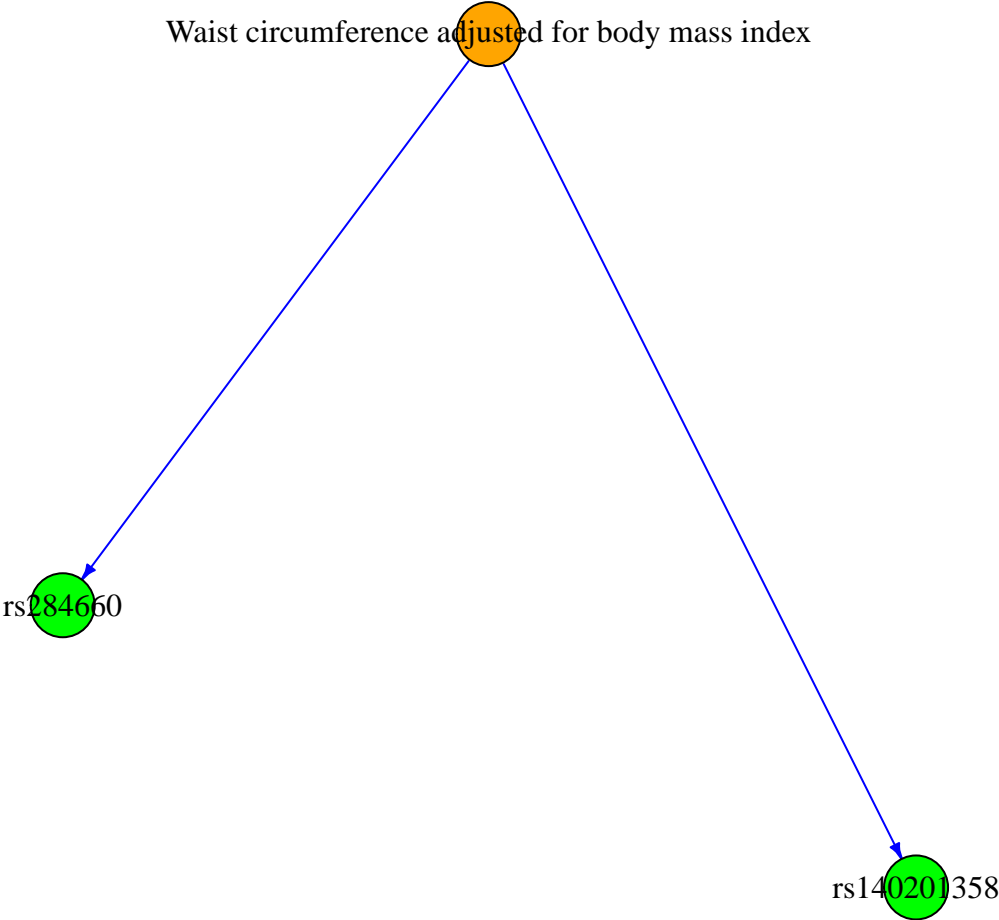

## Variant–Disease Network (Waist–hip ratio)

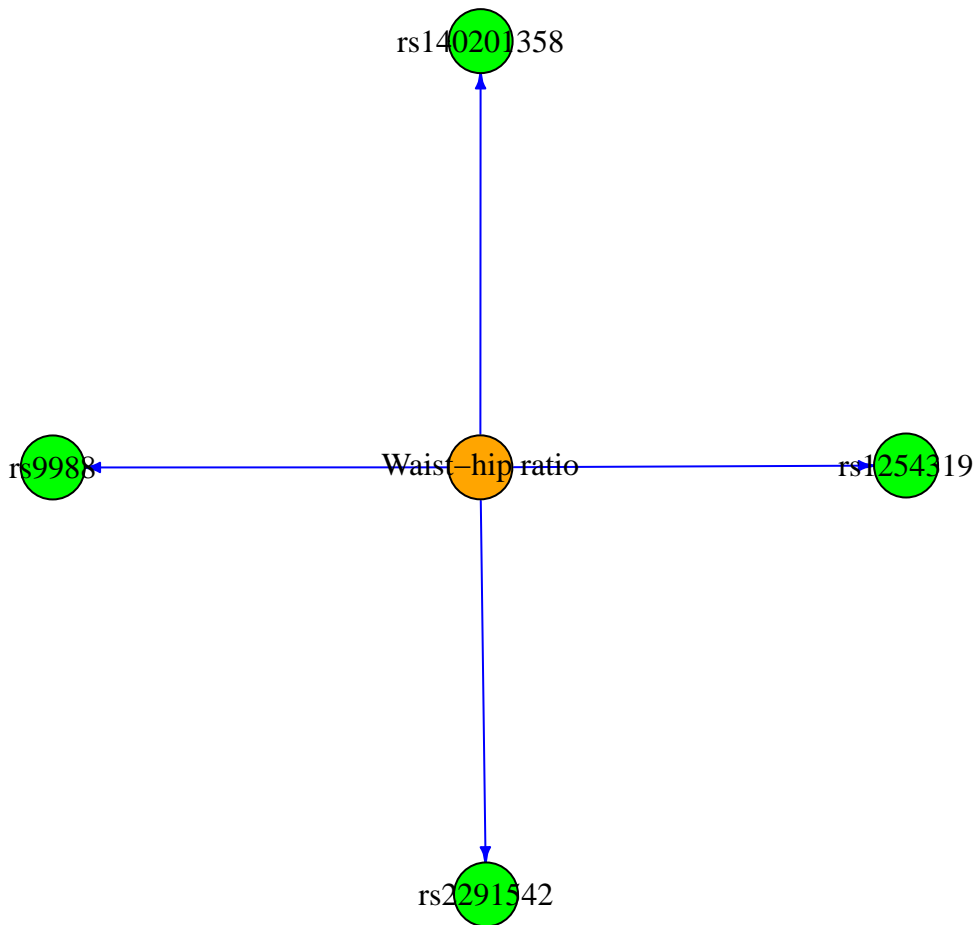

# Variant–Disease Network (Waist-to-hip ratio adjusted for BMI)

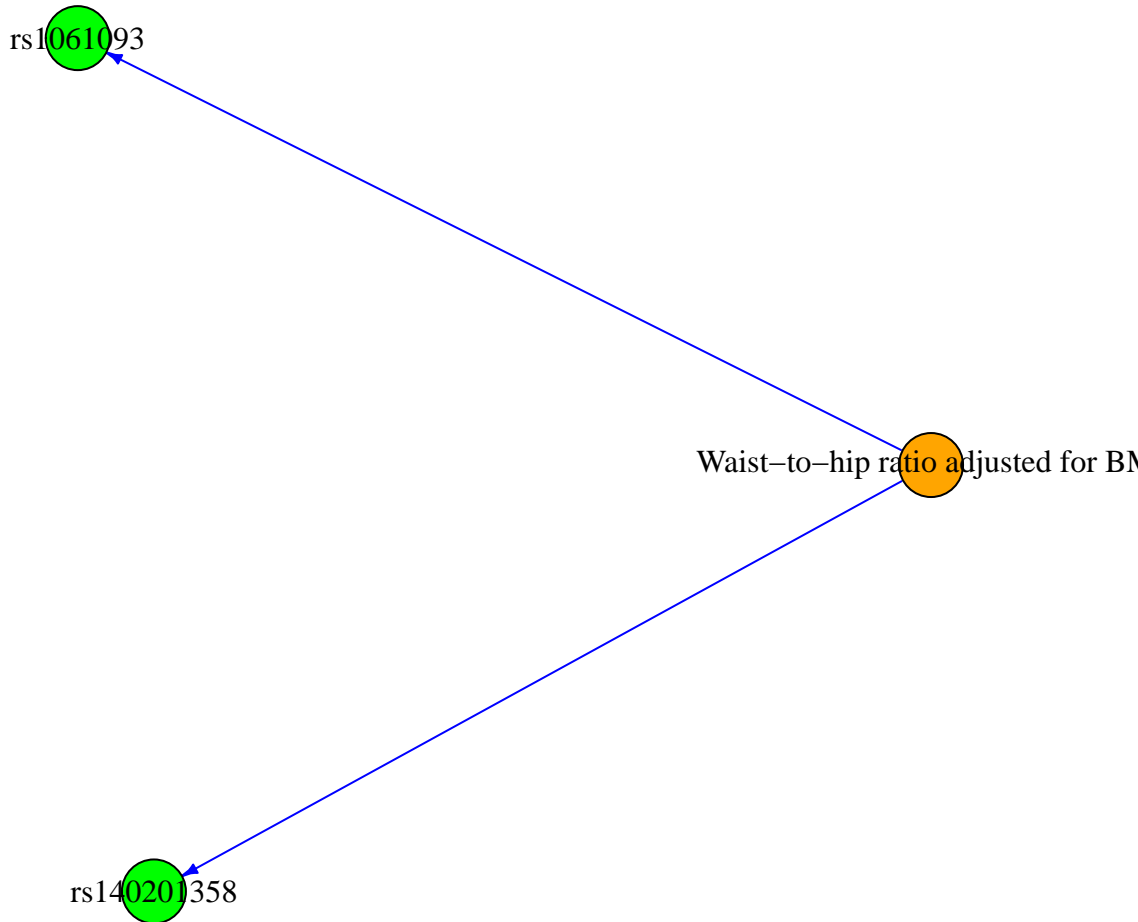

Variant–Disease Network (Waist–to–hip ratio adjusted for BMI )

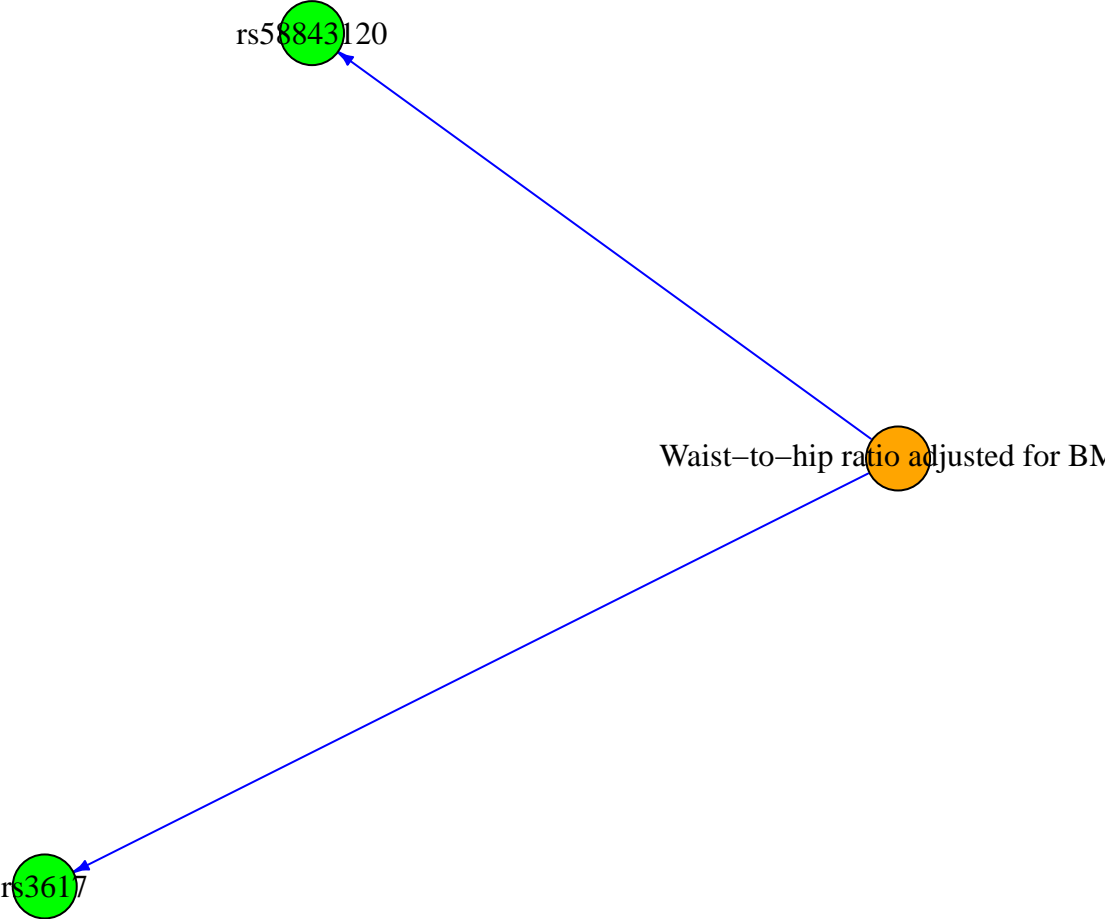

# Variant-Disease Network (Waist-to-hip ratio adjusted for BMI x sex x age interaction)

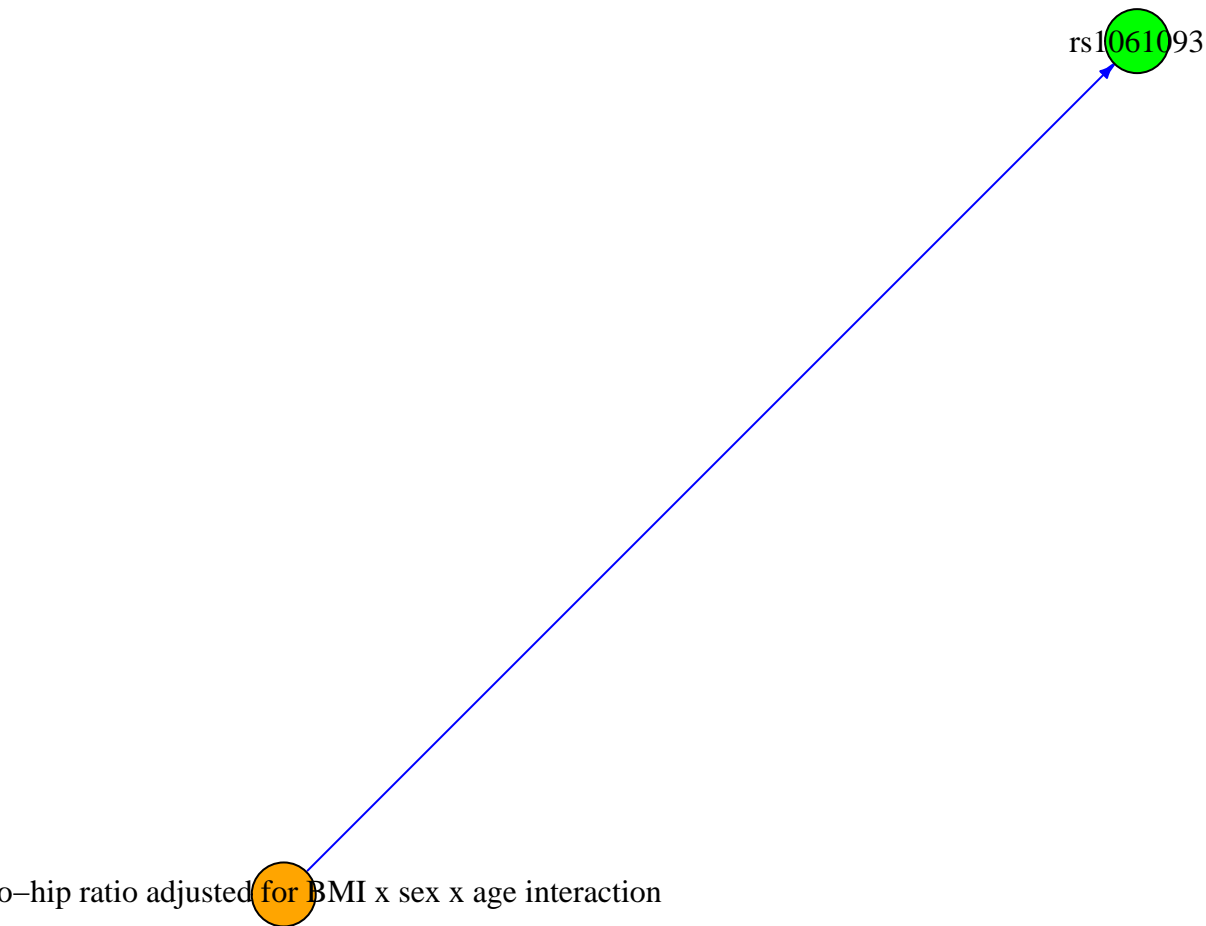



# Variant–Disease Network (Well–being spectrum )

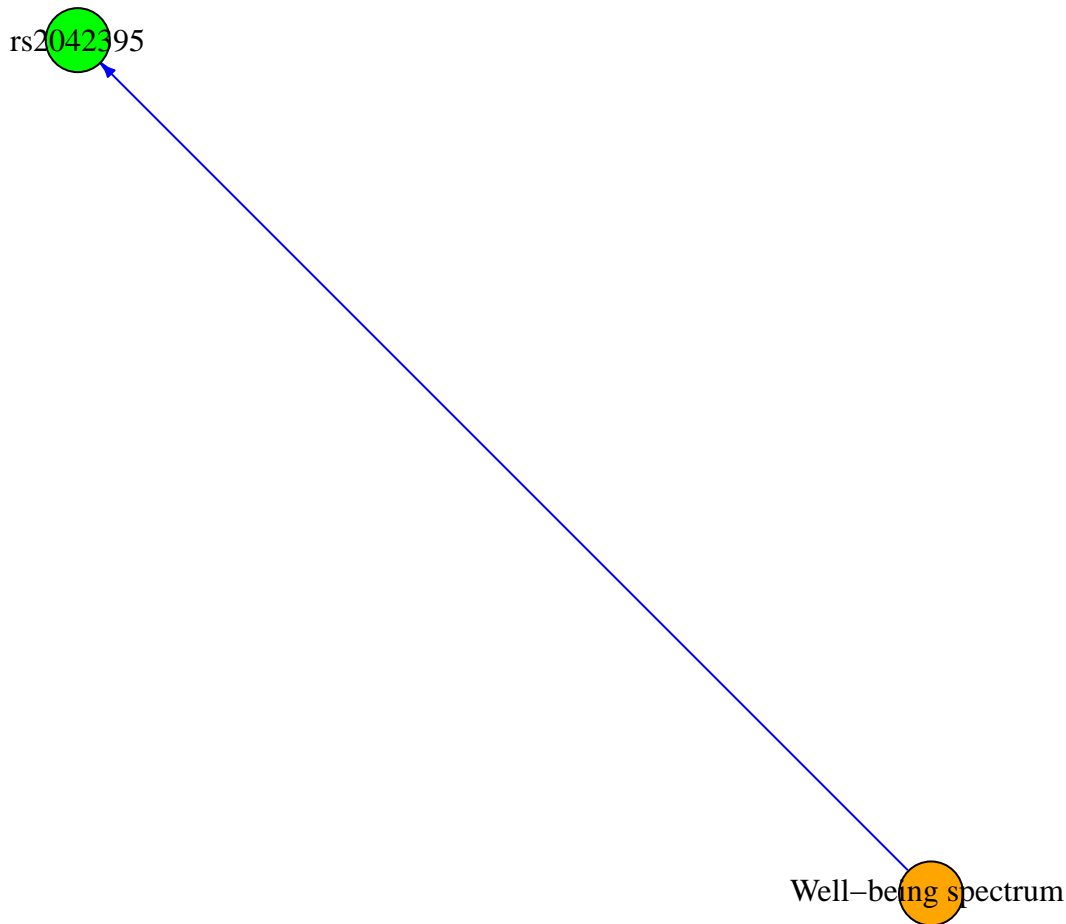

# Variant–Disease Network (tonsillectomy risk measurement)

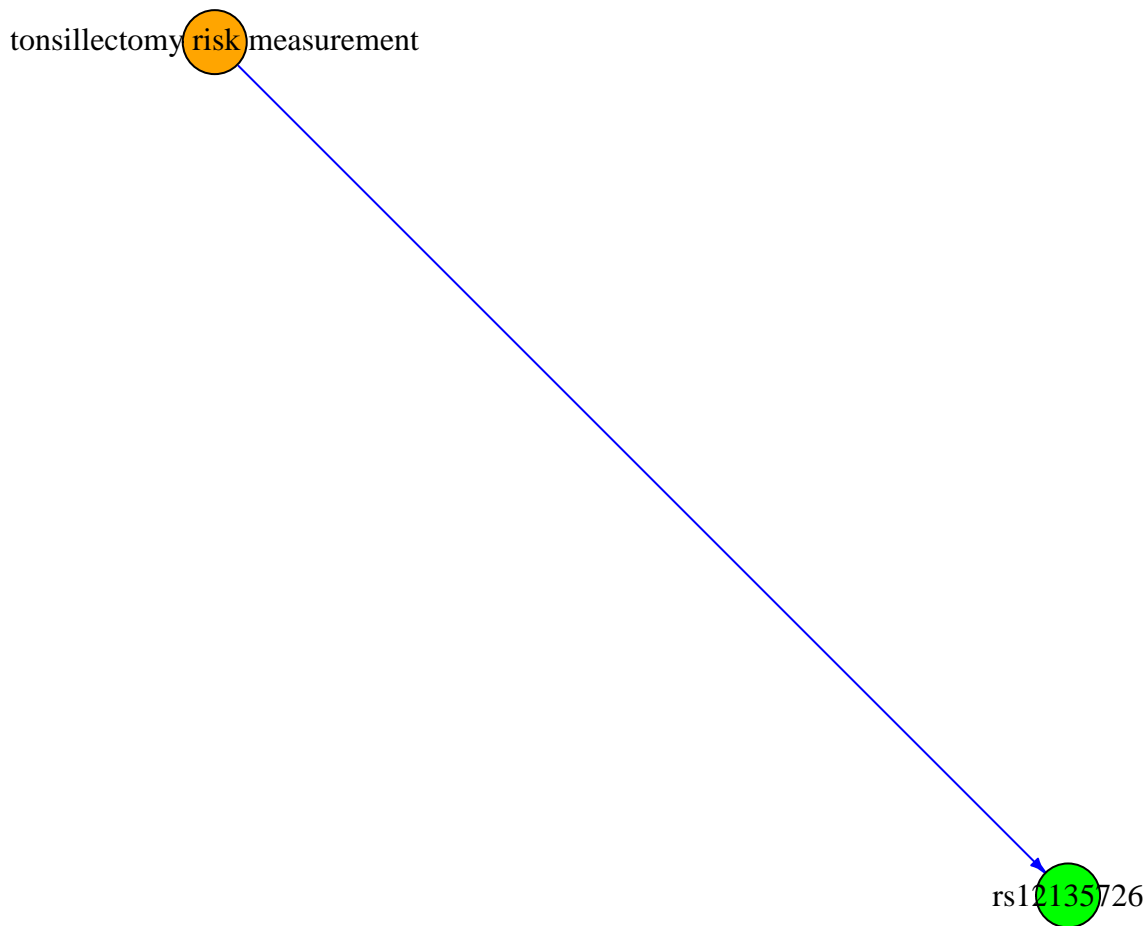

# Variant–Disease Network (attention deficit hyperactivity disorder)

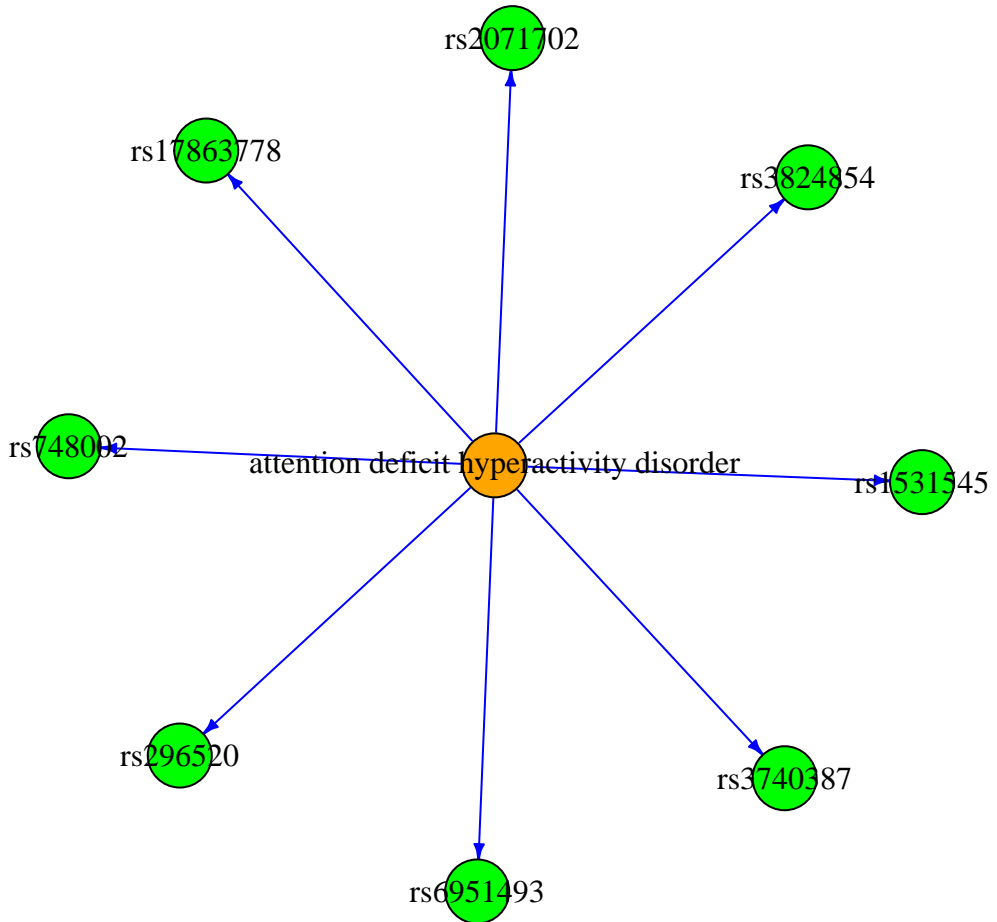

## Variant–Disease Network (bipolar disorder)

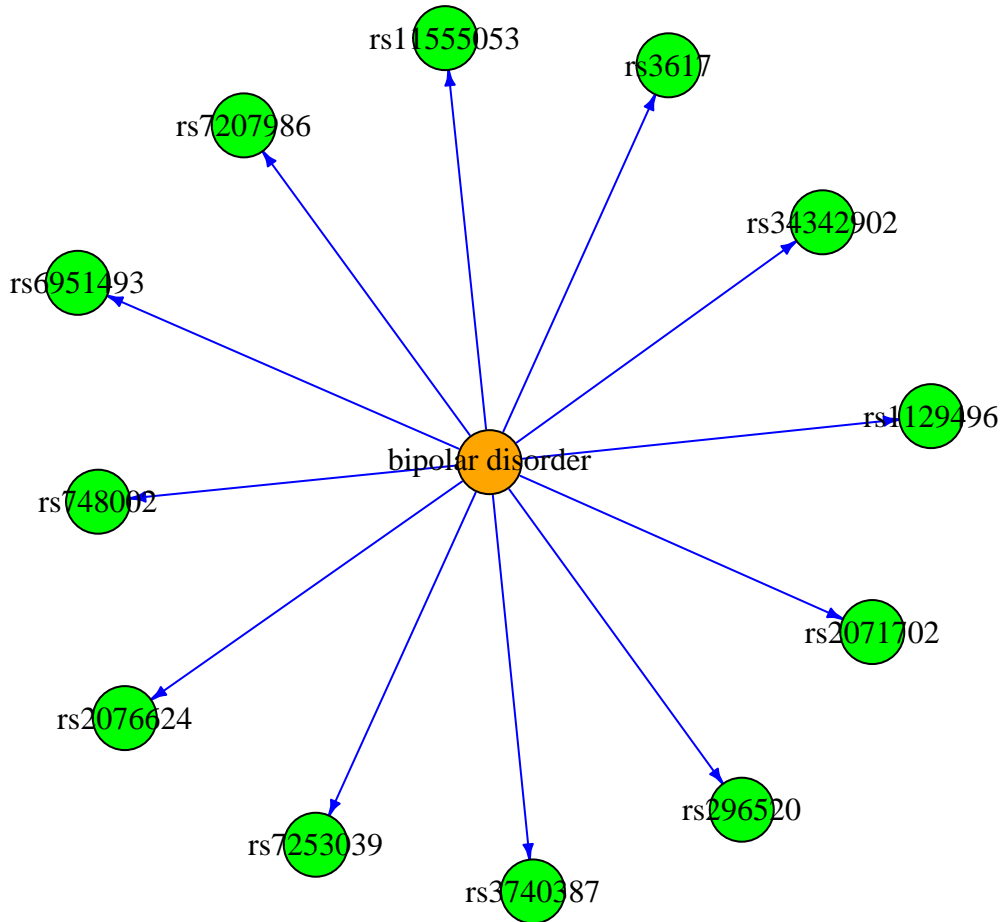

## Variant–Disease Network (unipolar depression)

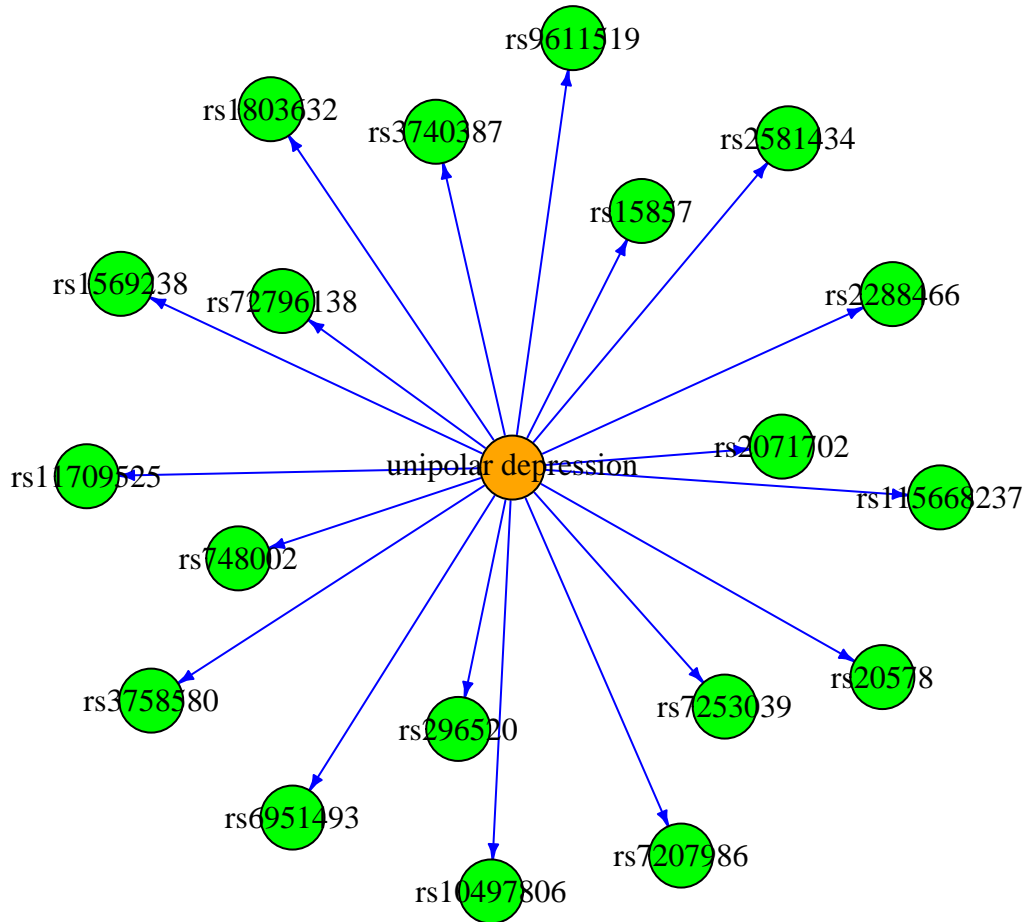

## Variant–Disease Network (response to statin)

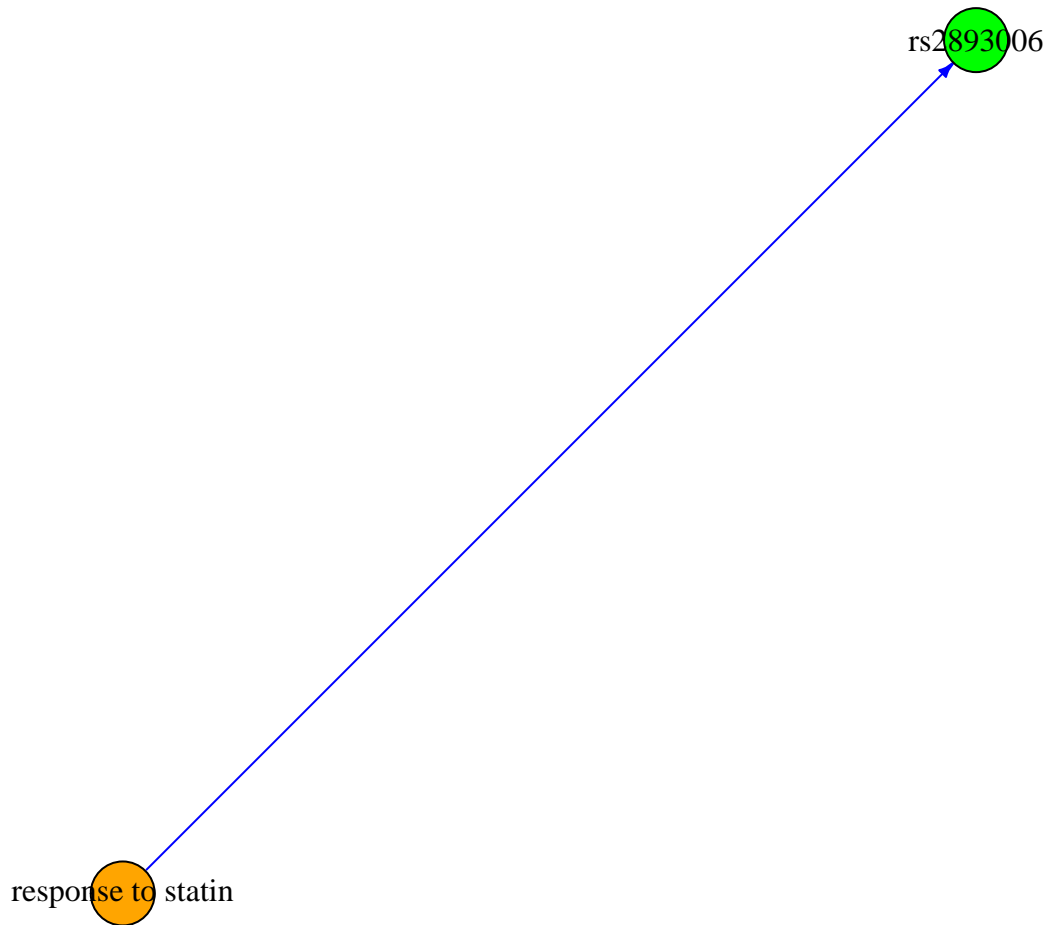

## Variant–Disease Network (igfbp–3 measurement)

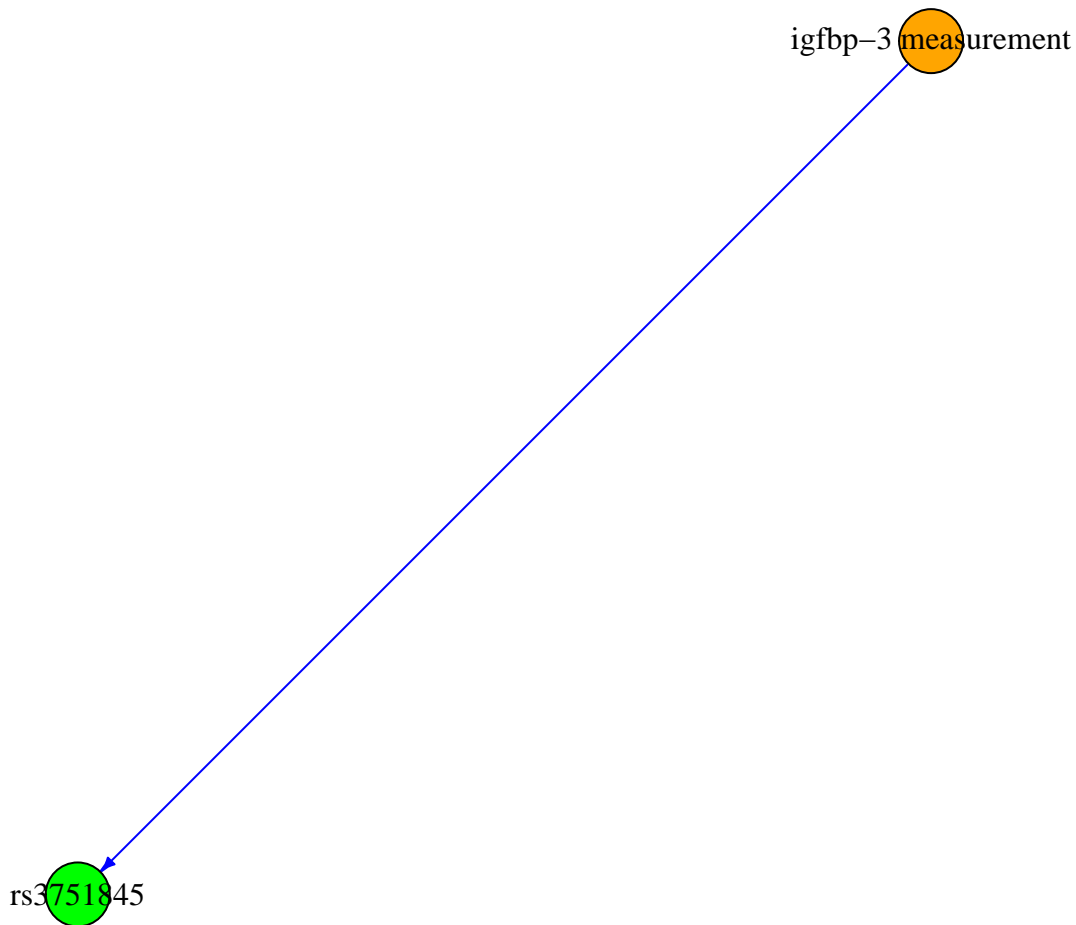

**Variant–Disease Network (joint hypermobility measurement)**

joint hypermobility measurement

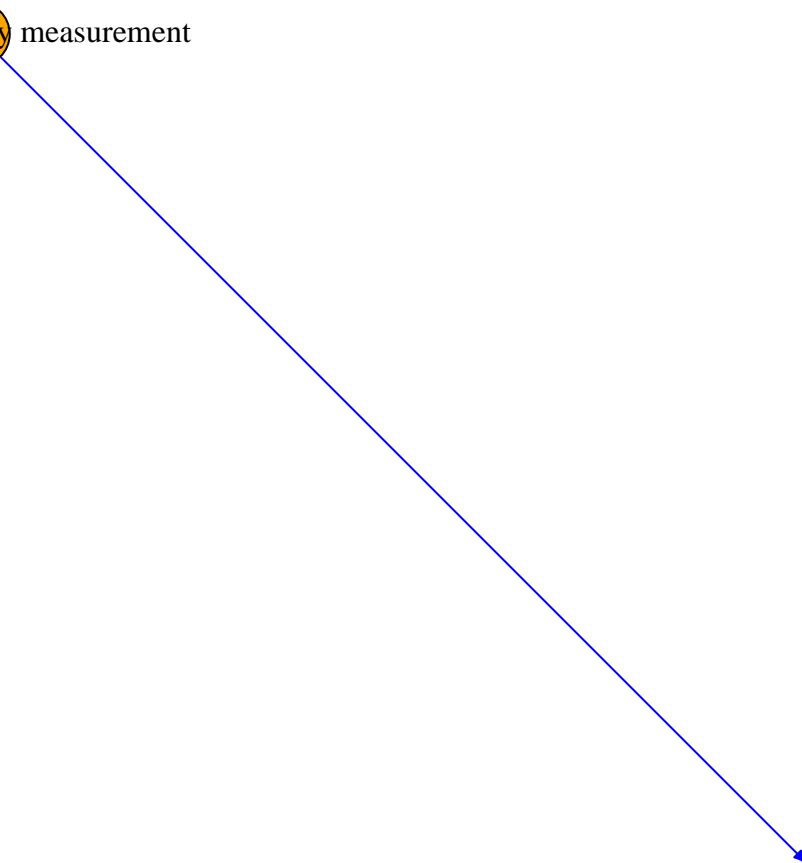

rs3213687



**Variant–Disease Network (blood metabolite measurement)**

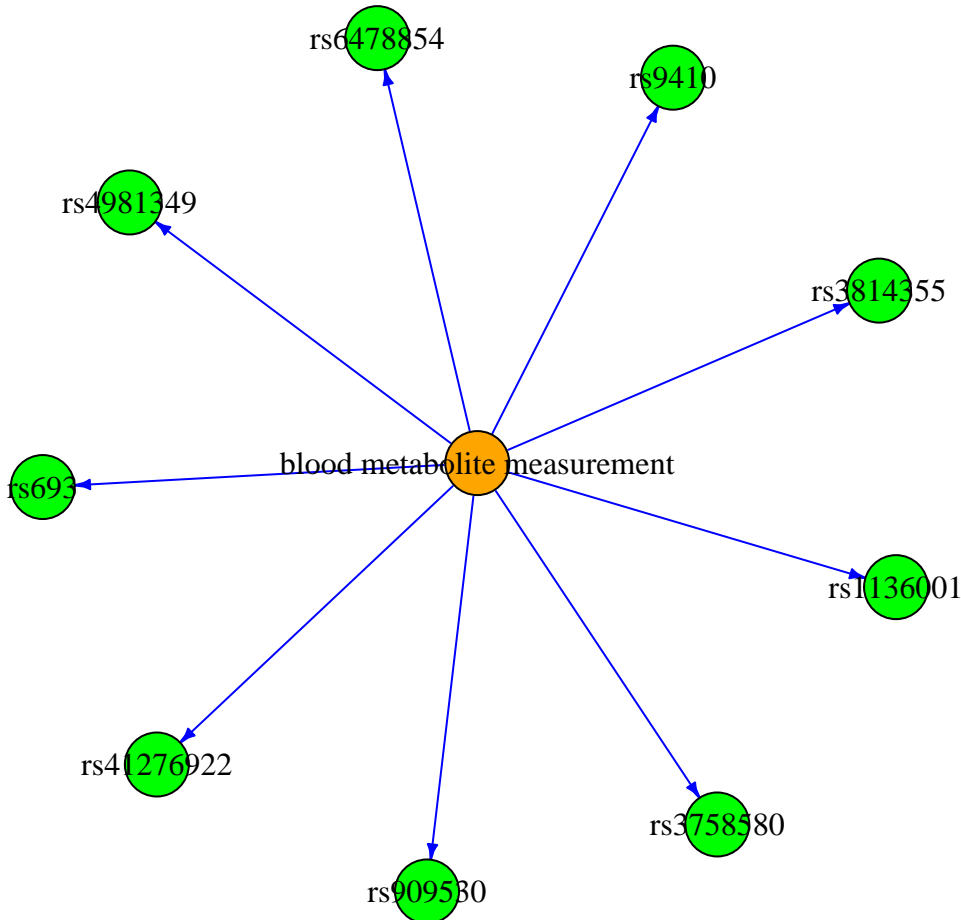

## Variant-Disease Network (QRS complex)

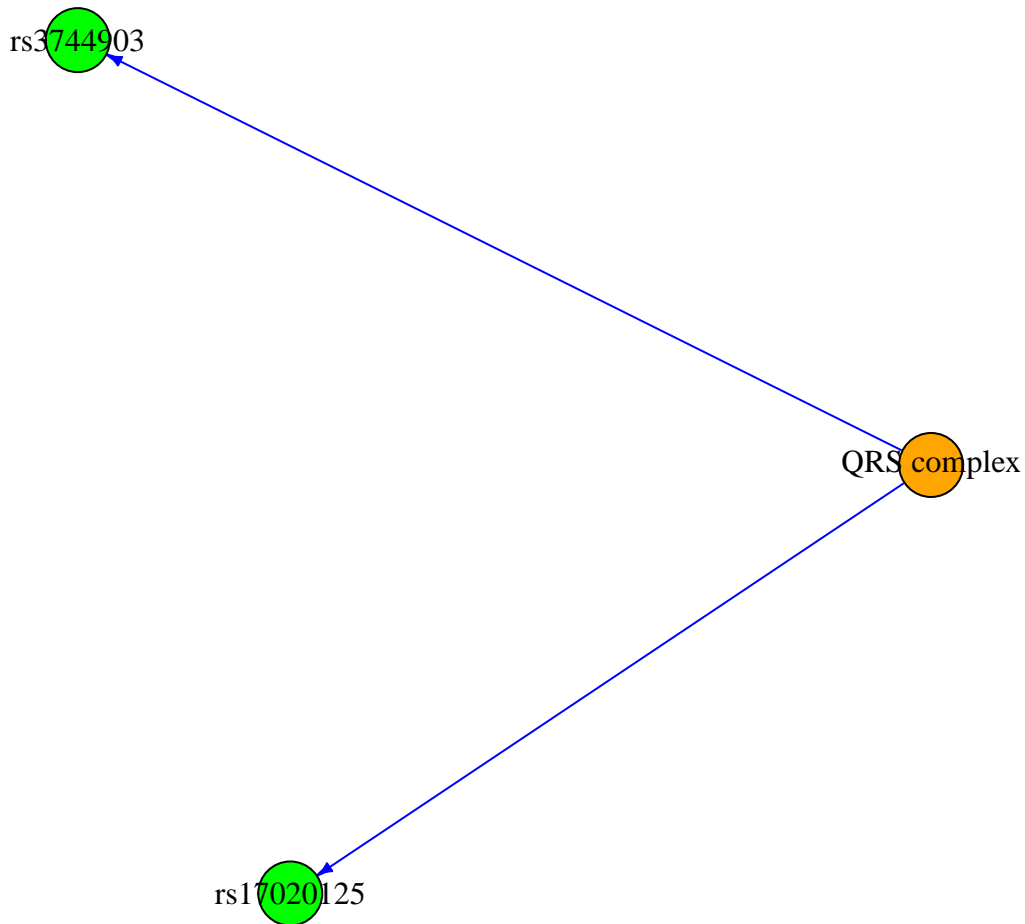

## Variant-Disease Network (cleft lip)

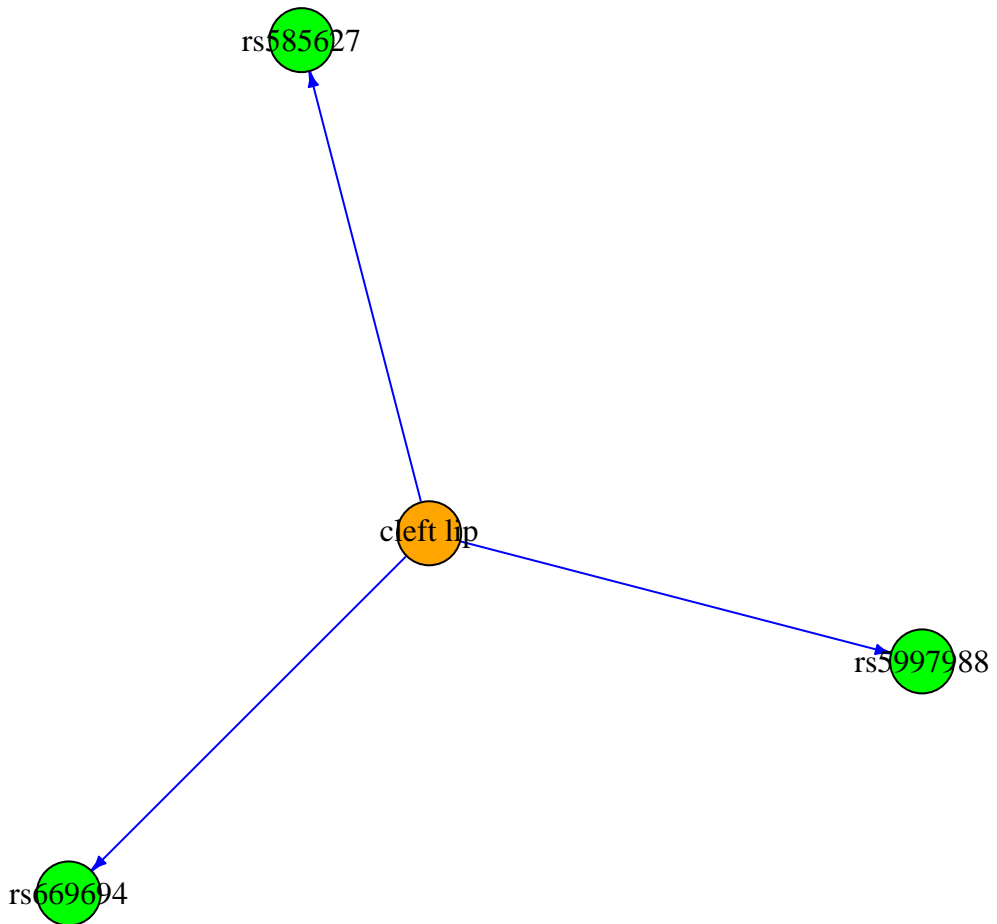

## Variant–Disease Network (progranulin measurement)

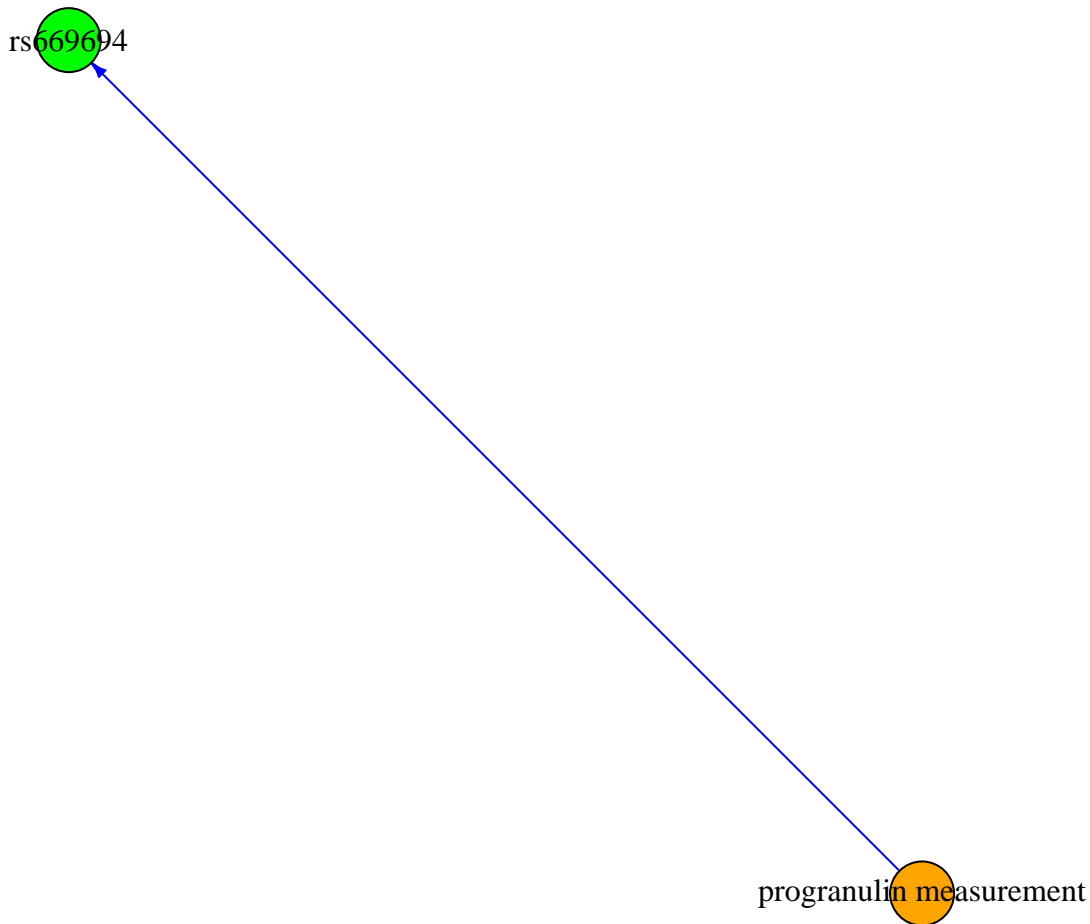

Variant–Disease Network (helping behavior measurement)

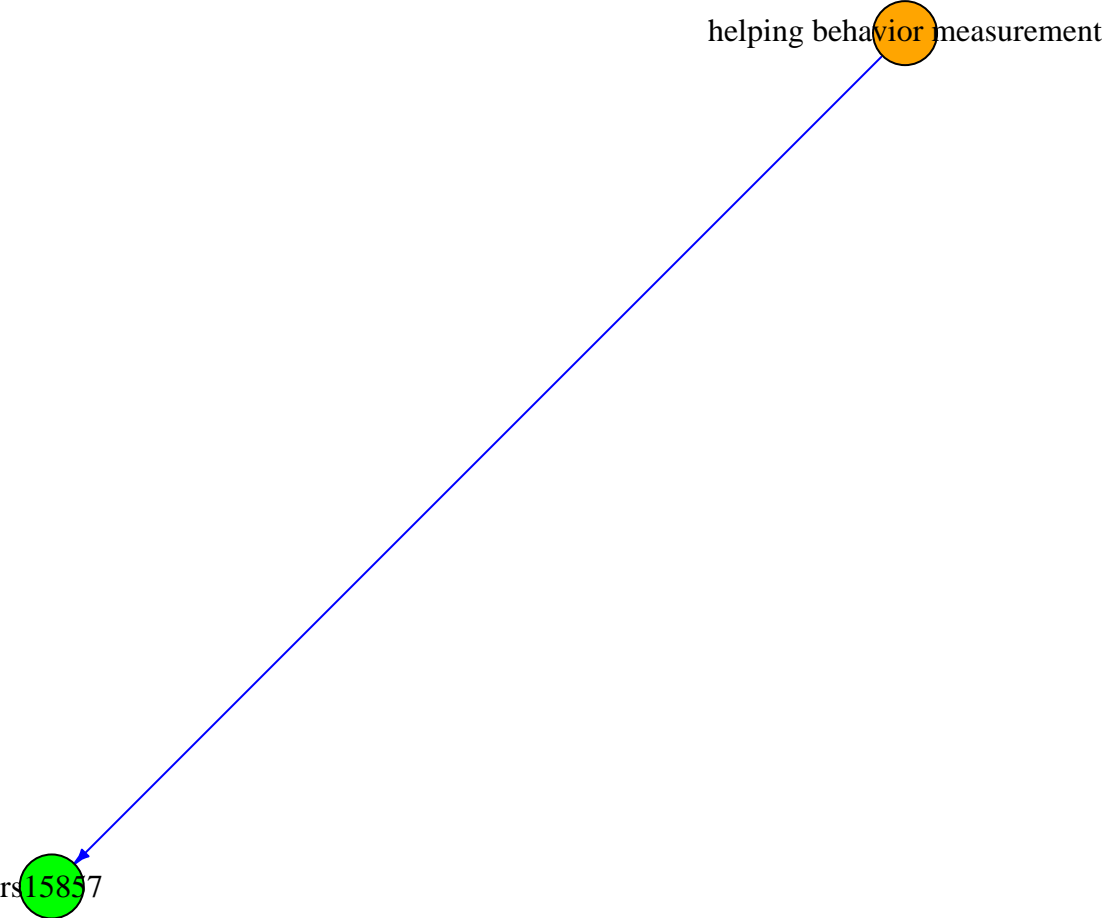

## Variant–Disease Network (crohns disease)

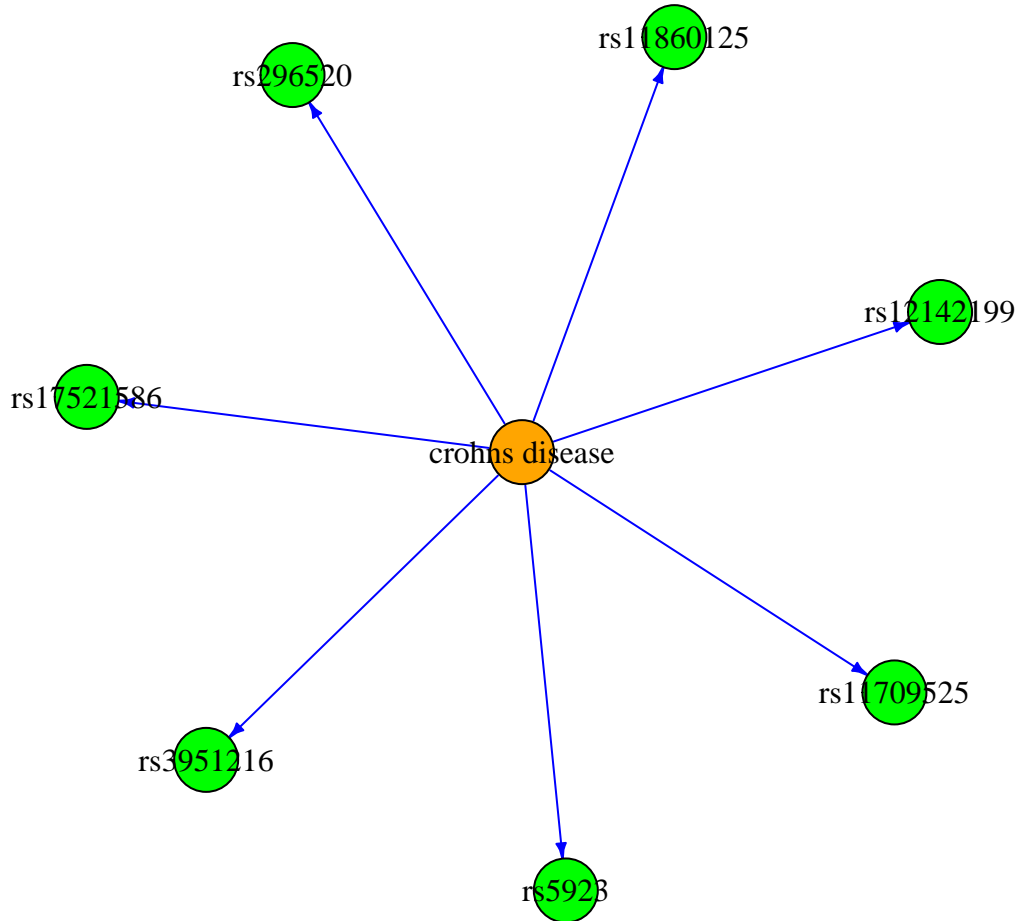

## Variant–Disease Network (cognitive function measurement)

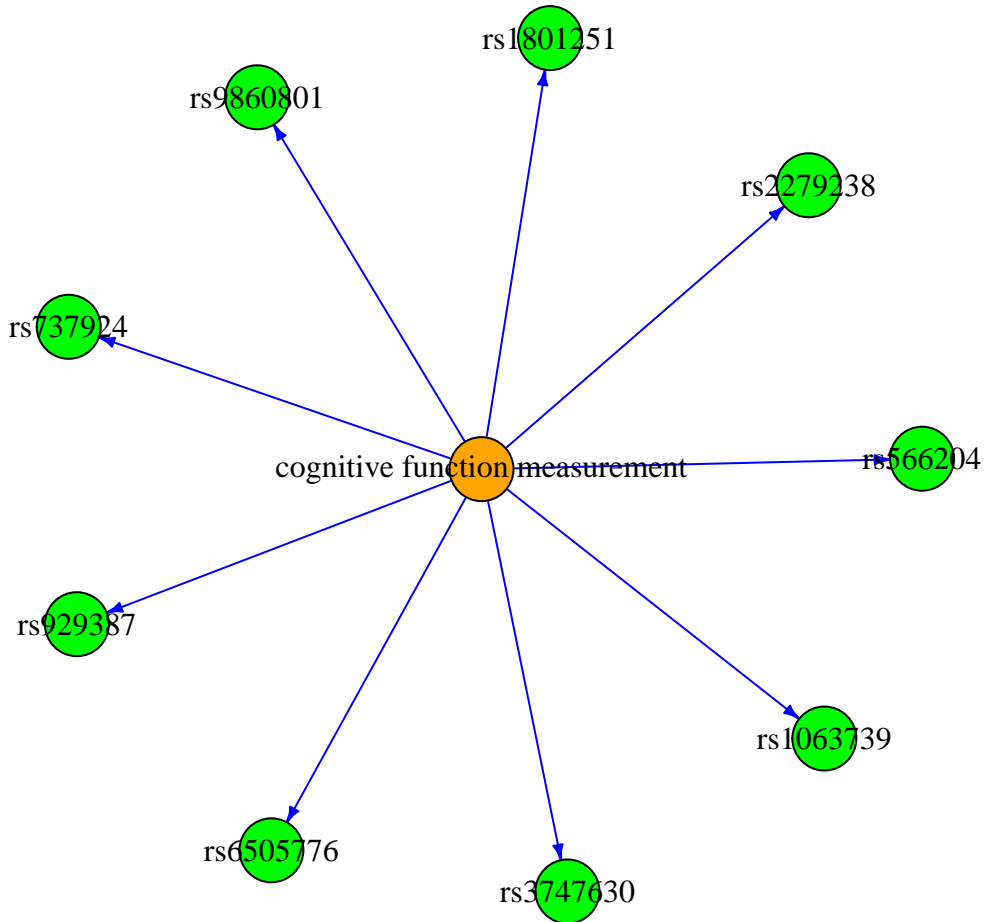

## Variant–Disease Network (corneal astigmatism)

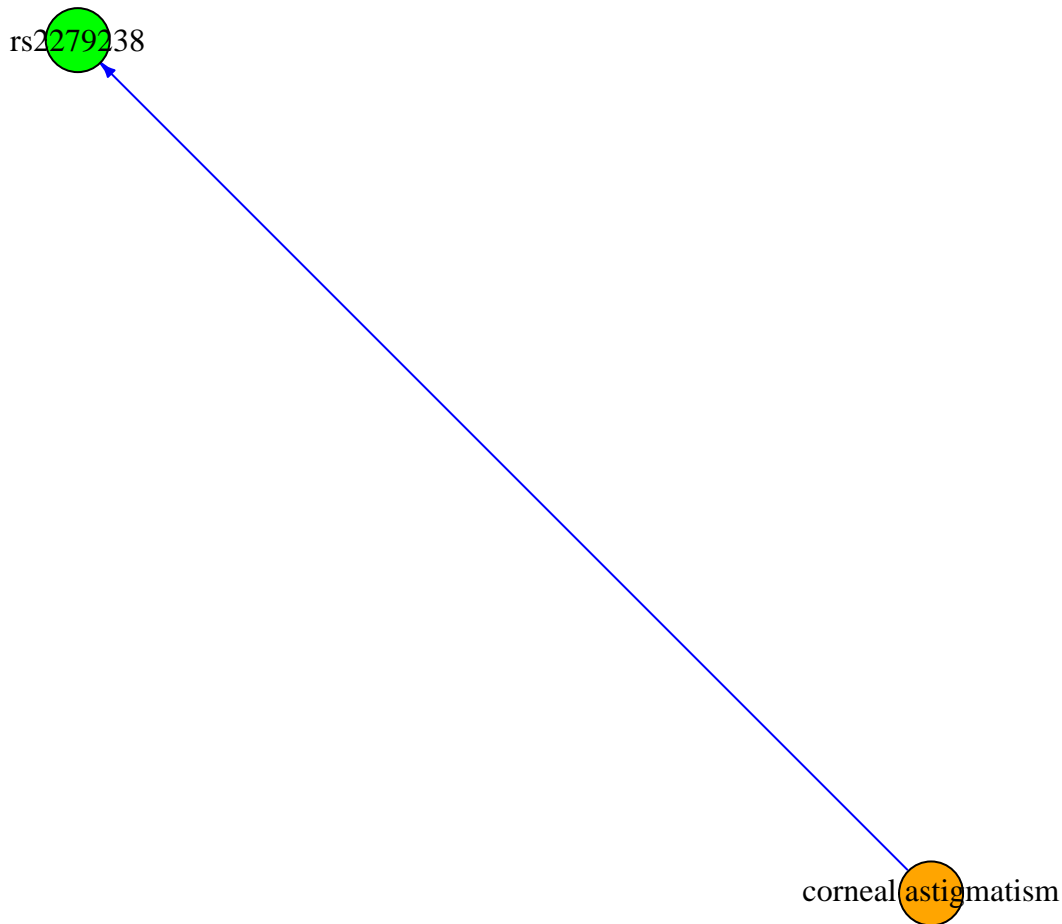



Variant–Disease Network (high density lipoprotein cholesterol measurement)

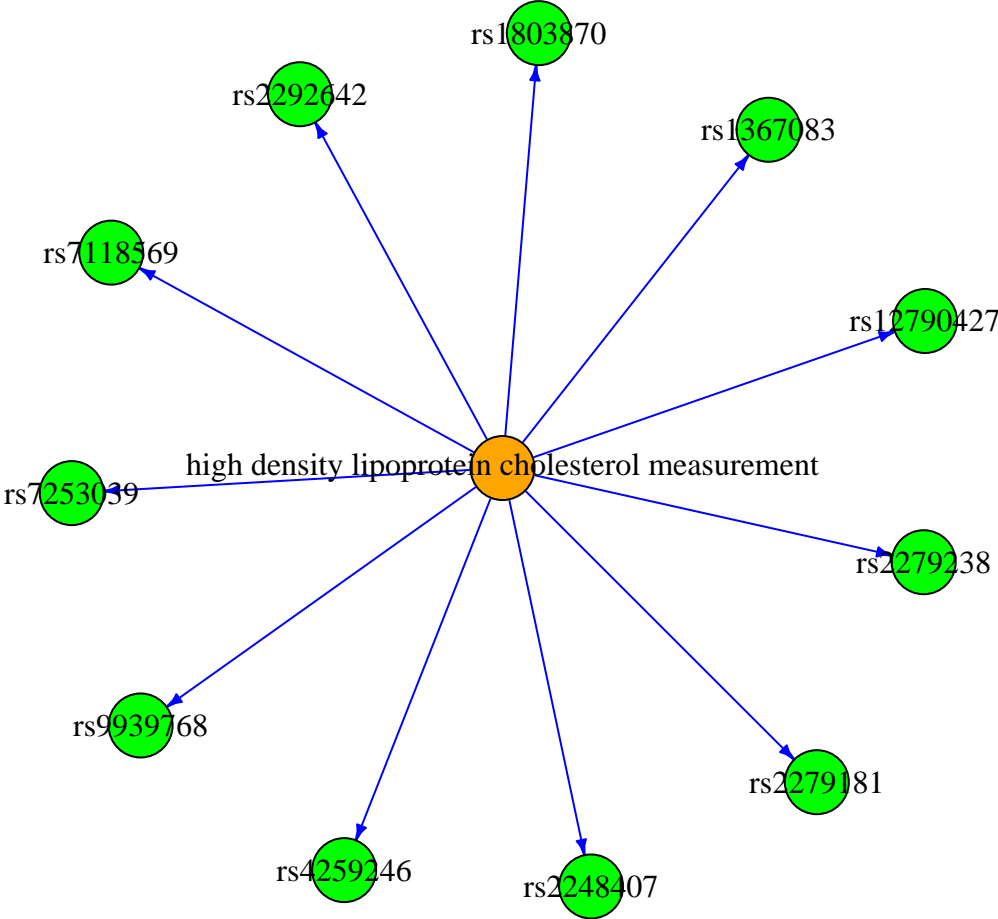

## Variant–Disease Network (insulin measurement)

insulin measurement

rs2279238

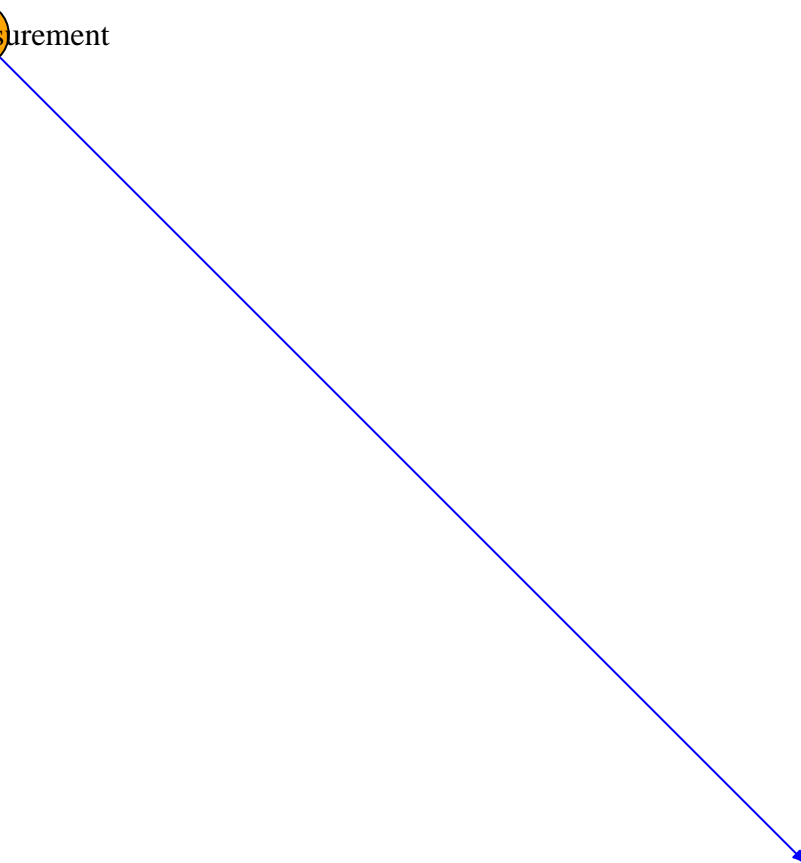

Variant–Disease Network (lymphocyte percentage of white cells)

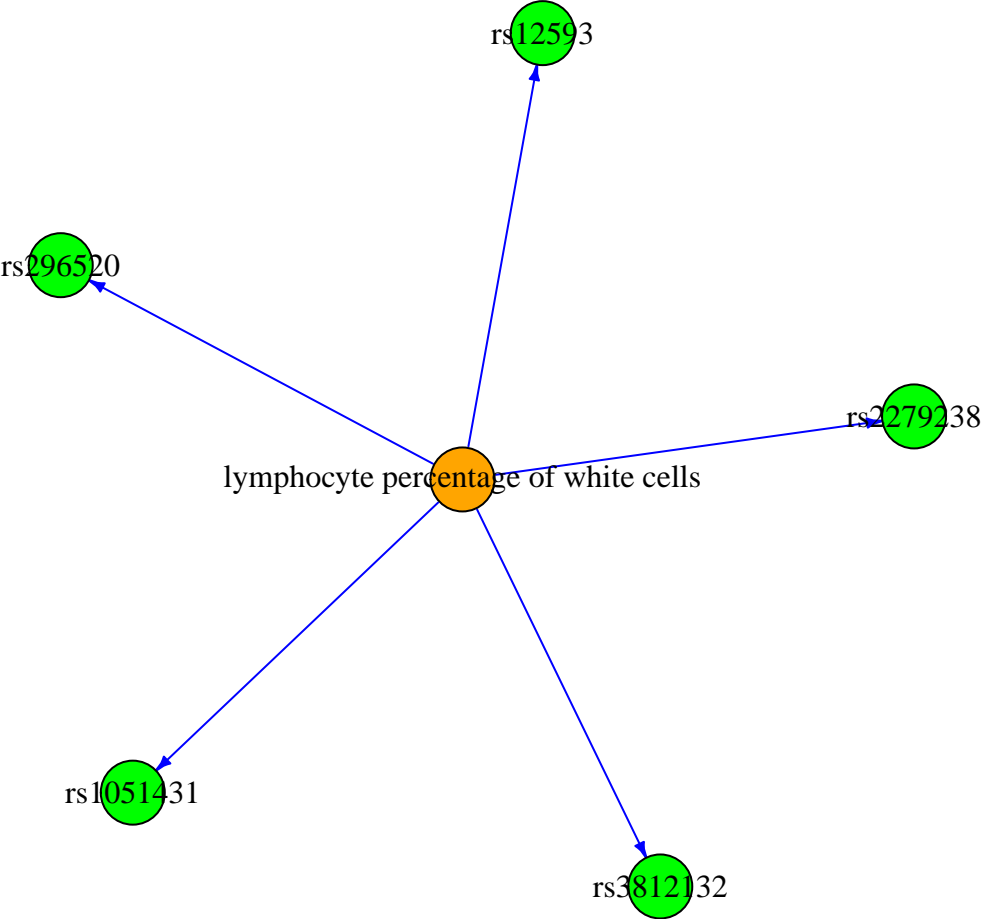

Variant–Disease Network (serum creatinine measurement)

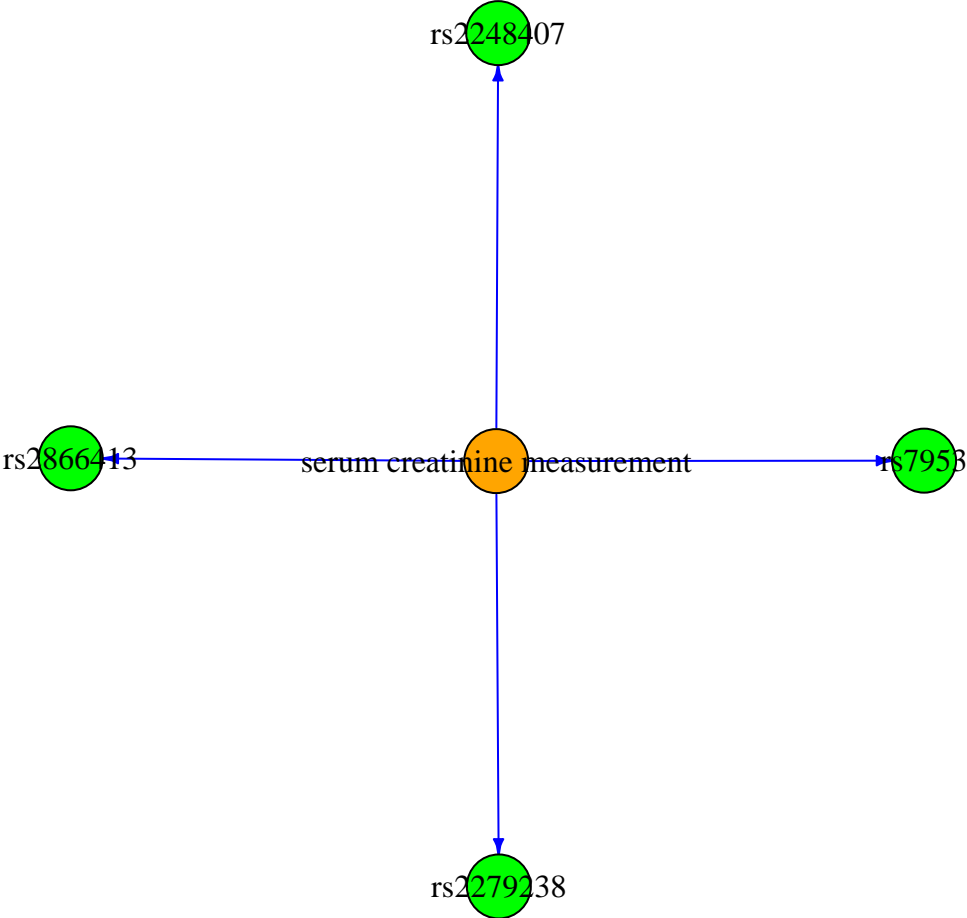

**Variant–Disease Network (red blood cell density measurement)**

red blood cell density measurement

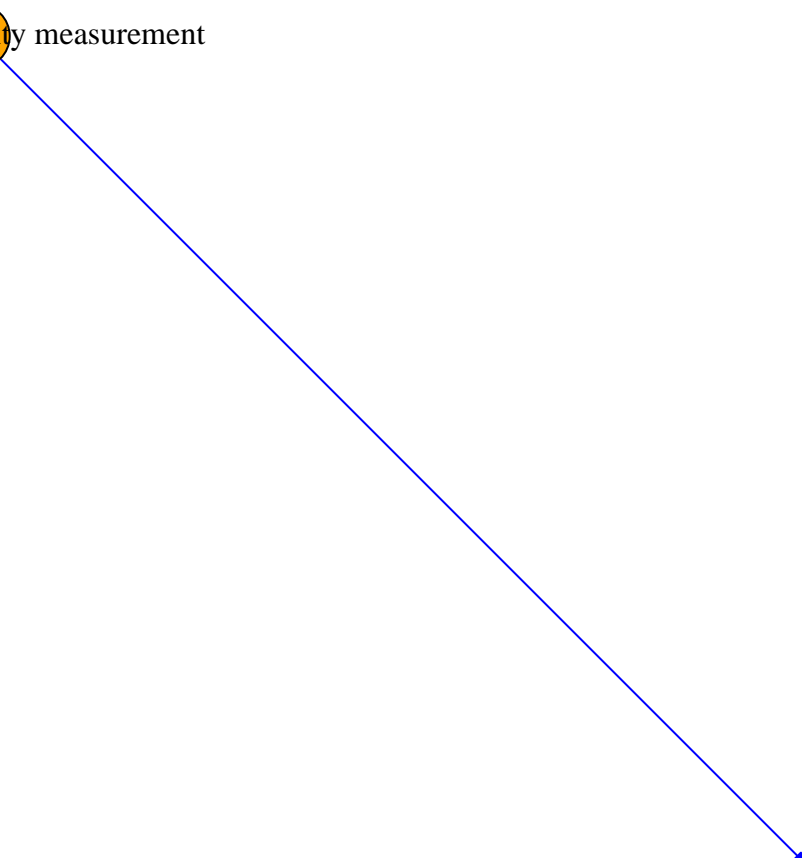

rs344594998

## Variant–Disease Network (sickle cell anemia)

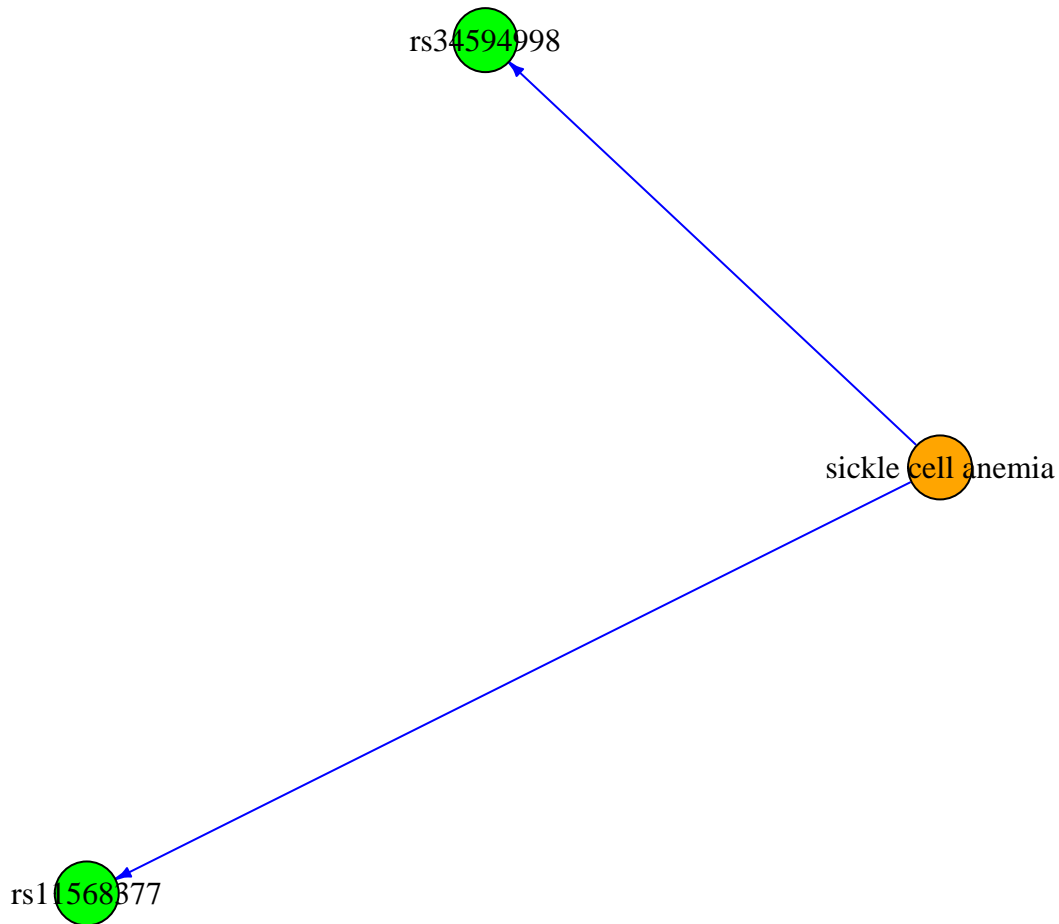

## Variant–Disease Network (age at menarche)

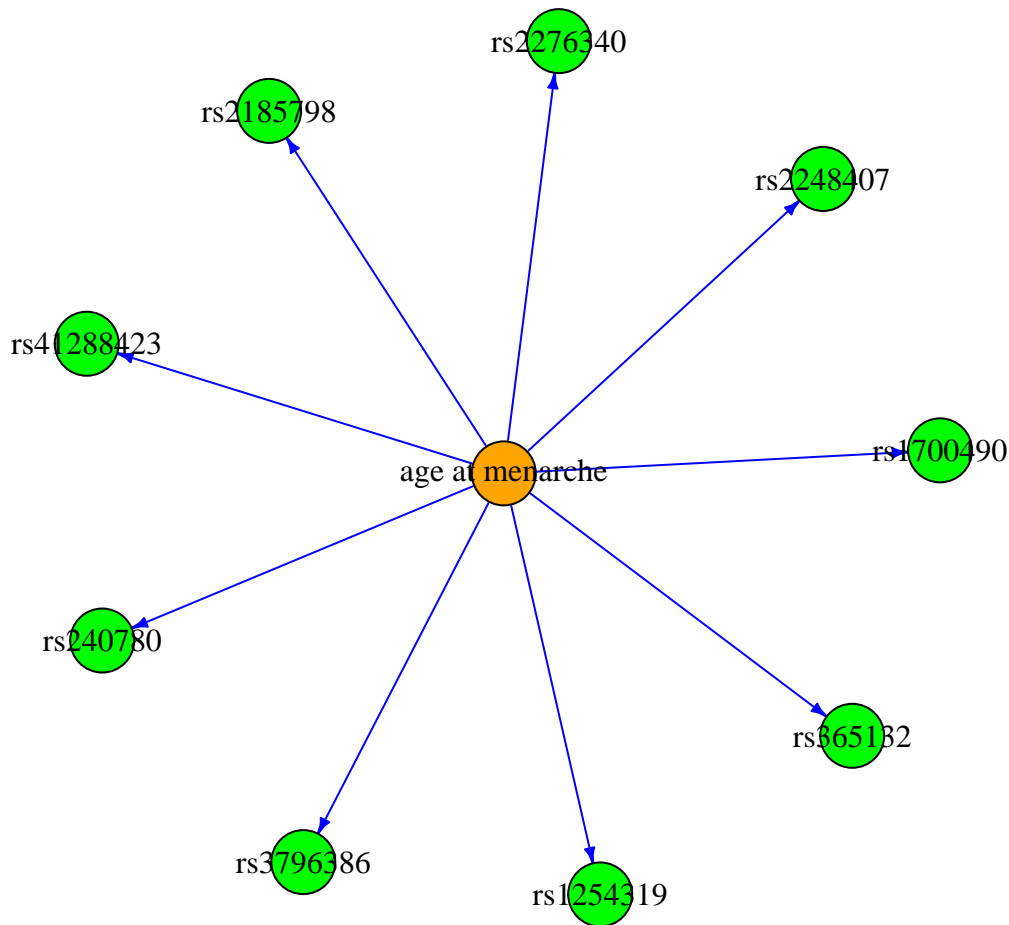

**Variant–Disease Network (creatine kinase measurement)**

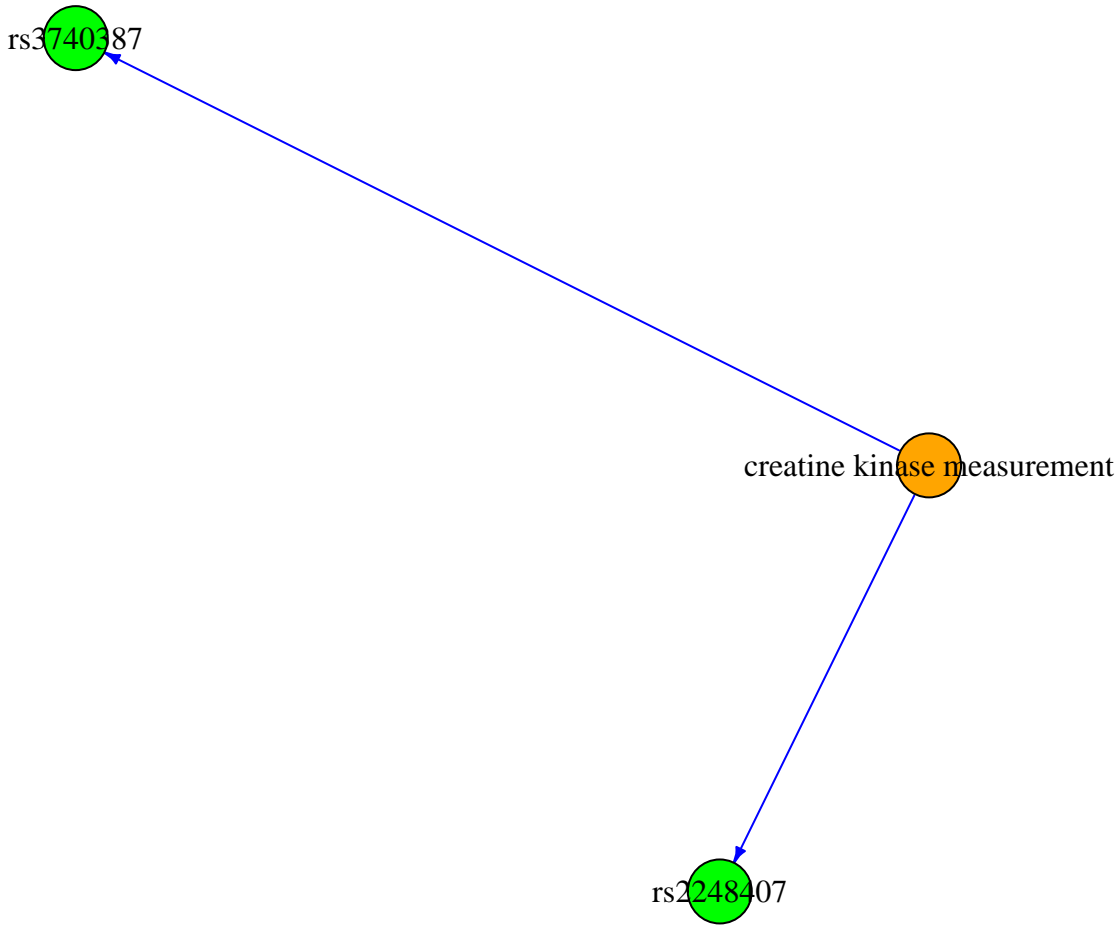



## Variant–Disease Network (glomerular filtration rate)

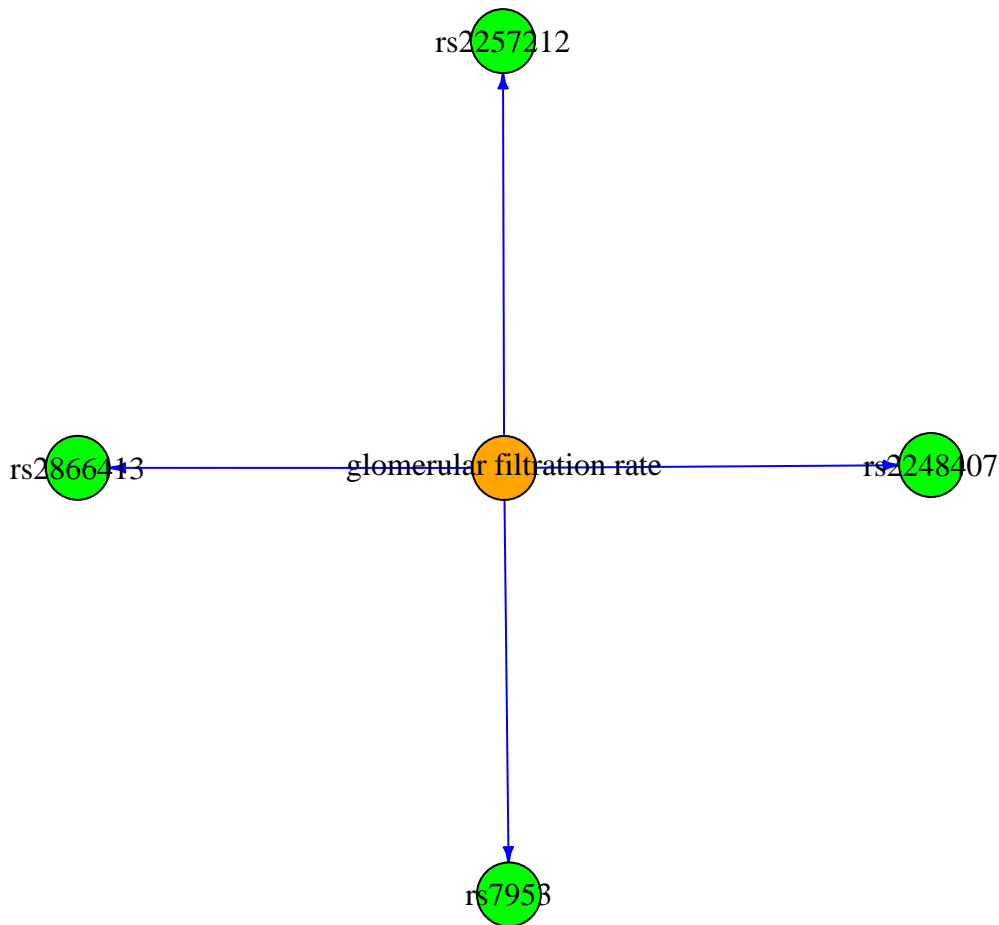

# Variant–Disease Network (hair colour measurement)

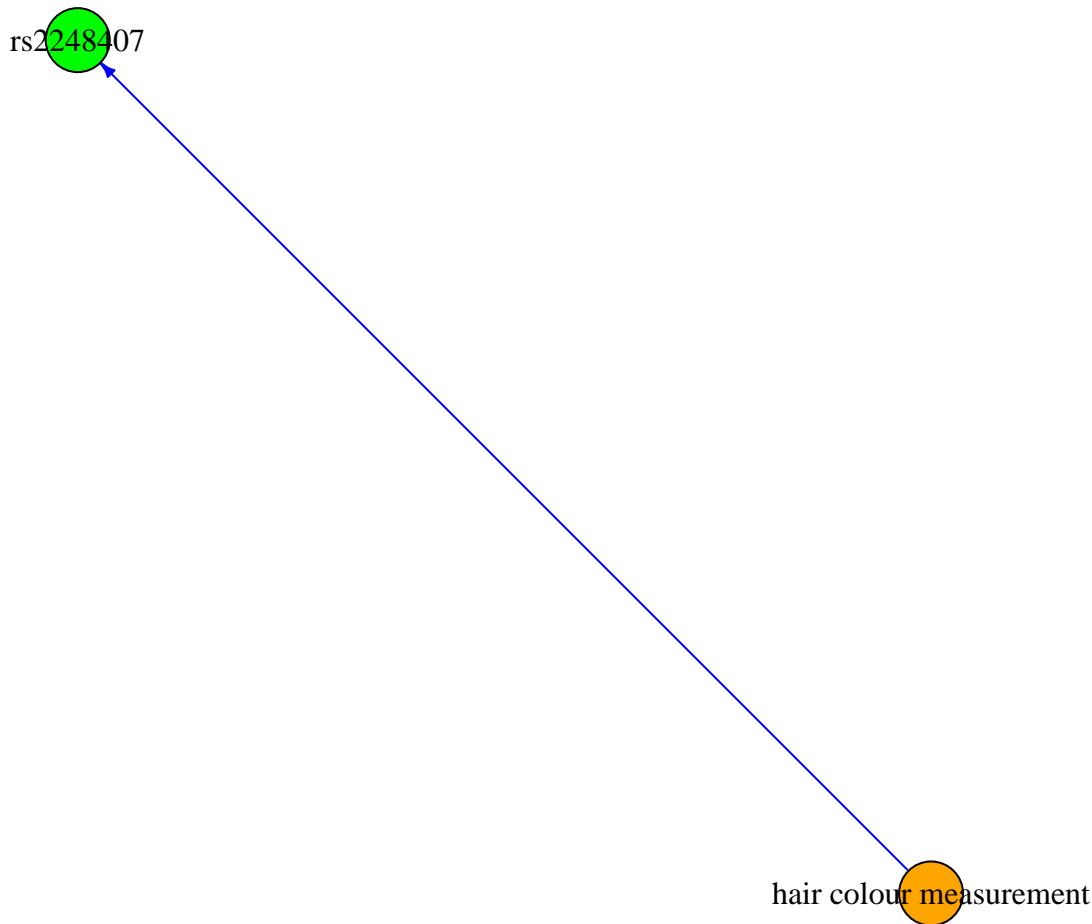

Variant–Disease Network (intraocular pressure measurement)

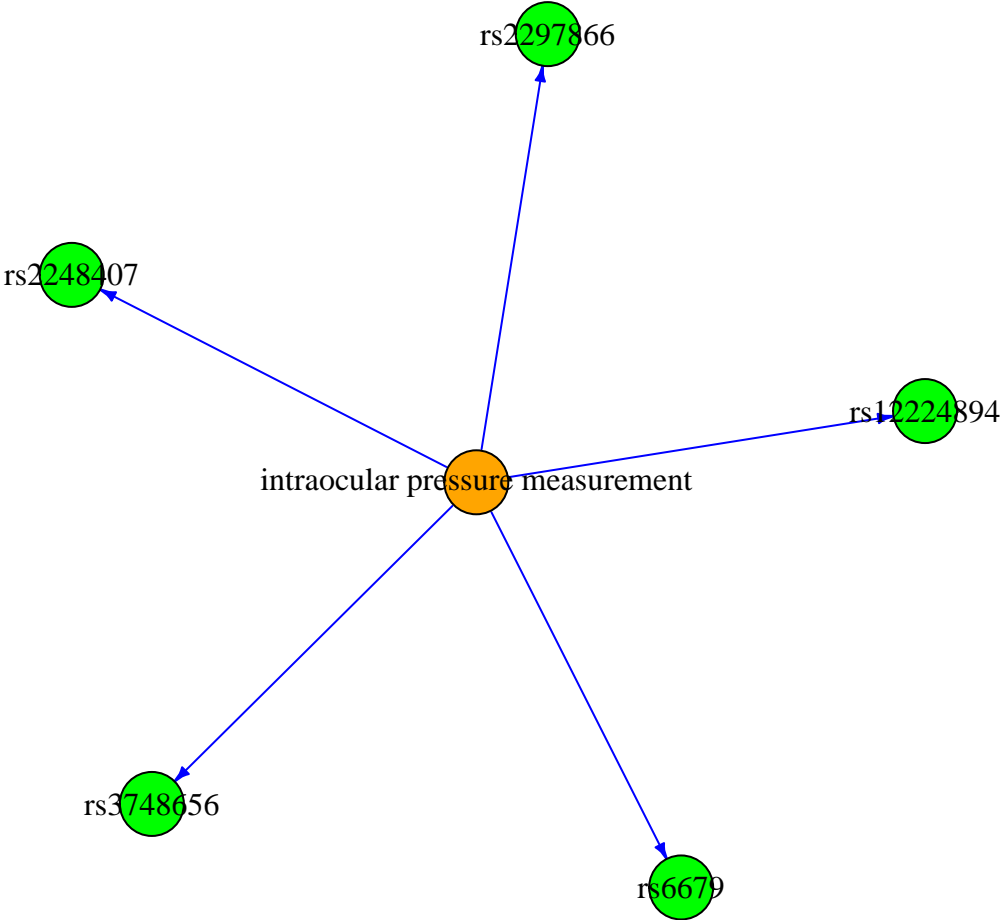

## Variant–Disease Network (l lactate dehydrogenase measurement)

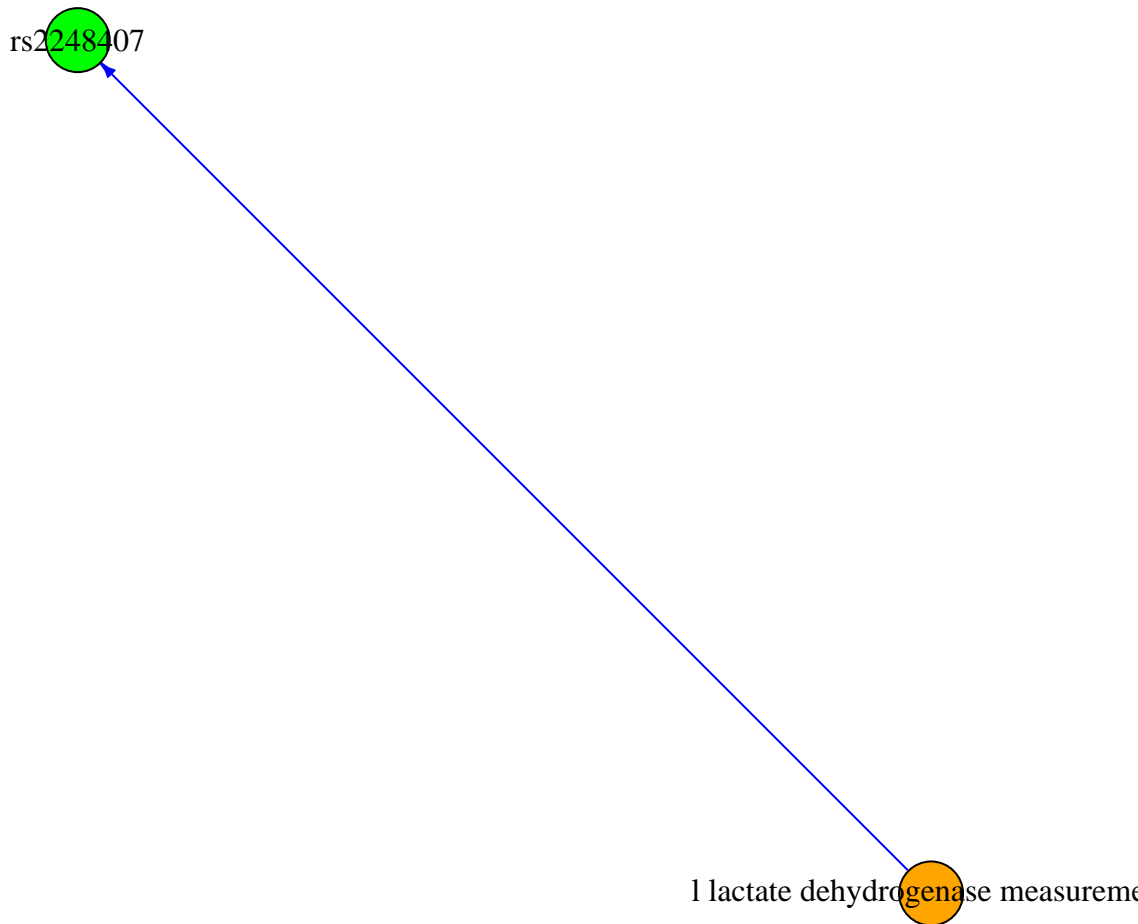

Variant–Disease Network (low density lipoprotein cholesterol measurement

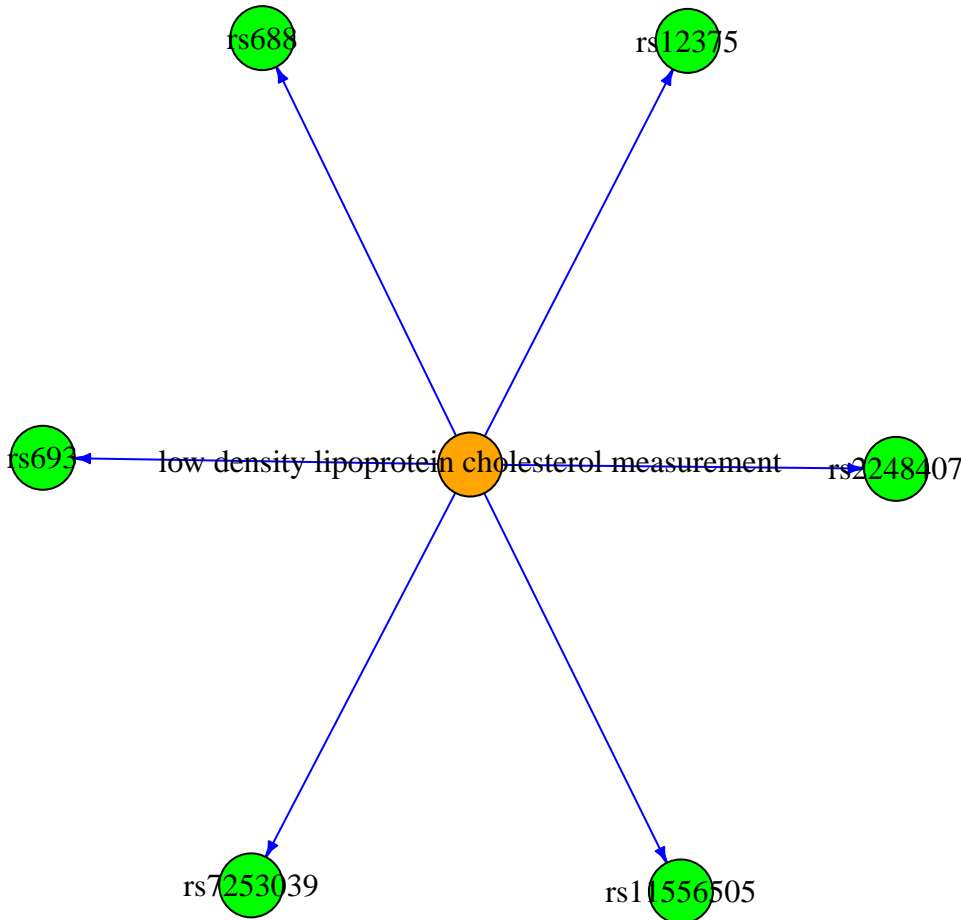

## Variant–Disease Network (Testicular Germ Cell Tumor)

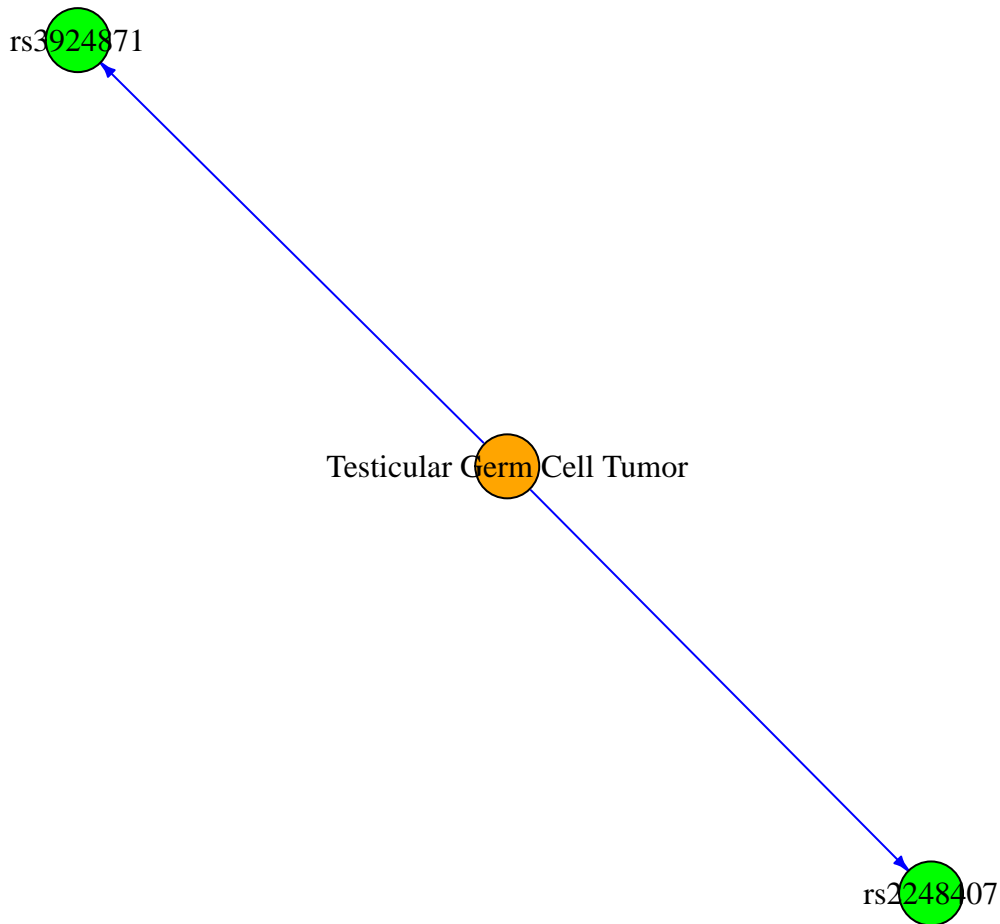

## Variant–Disease Network (total cholesterol measurement)

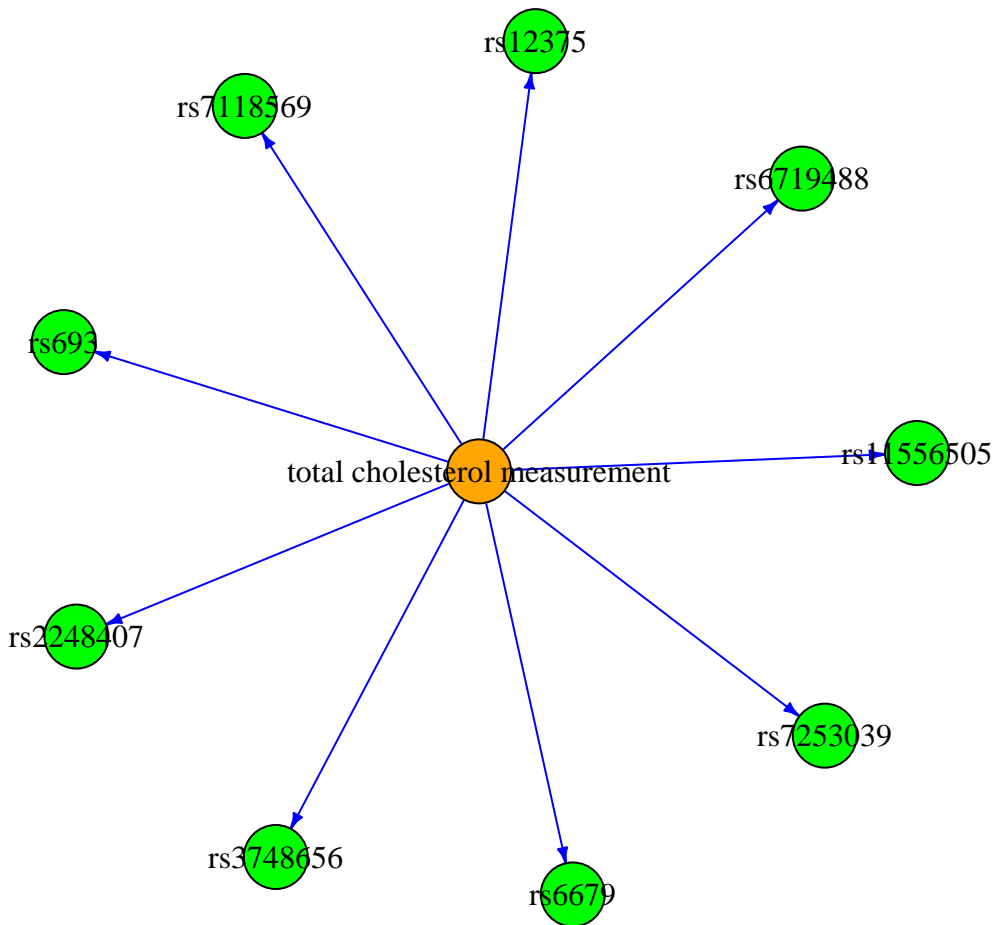

## Variant–Disease Network (triglyceride measurement)

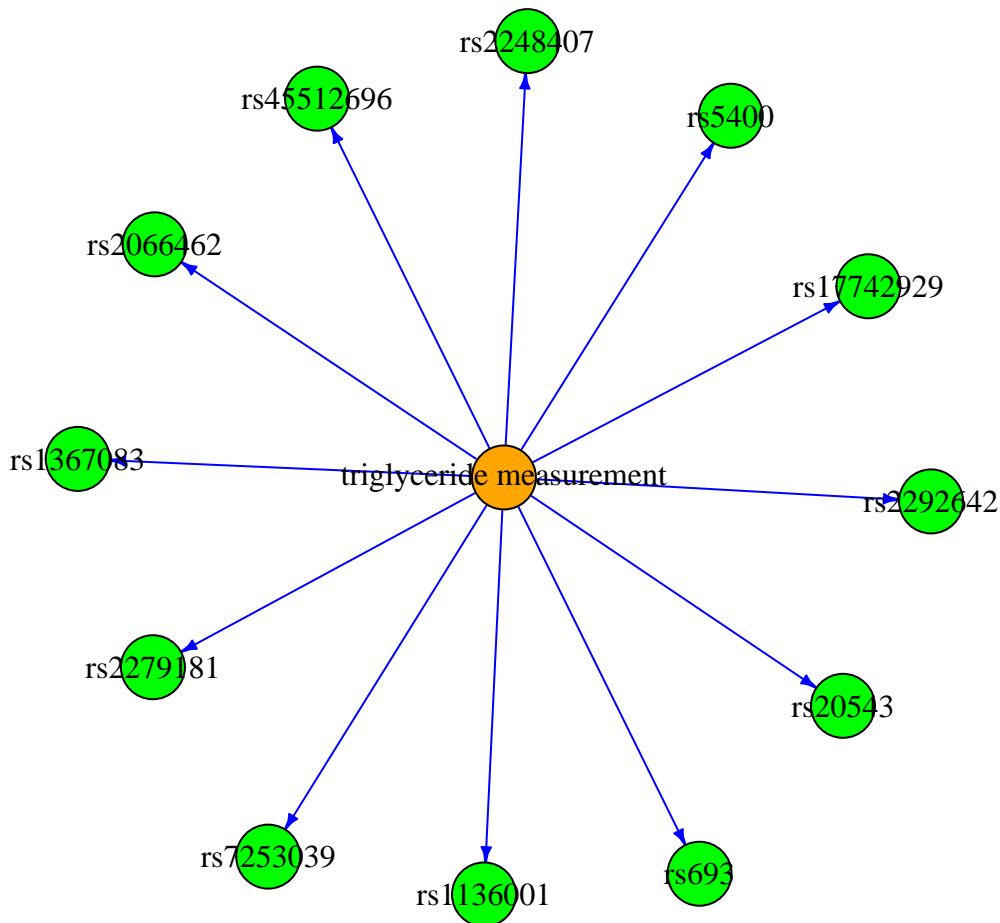



**Variant–Disease Network (susceptibility to pneumonia measurement)**

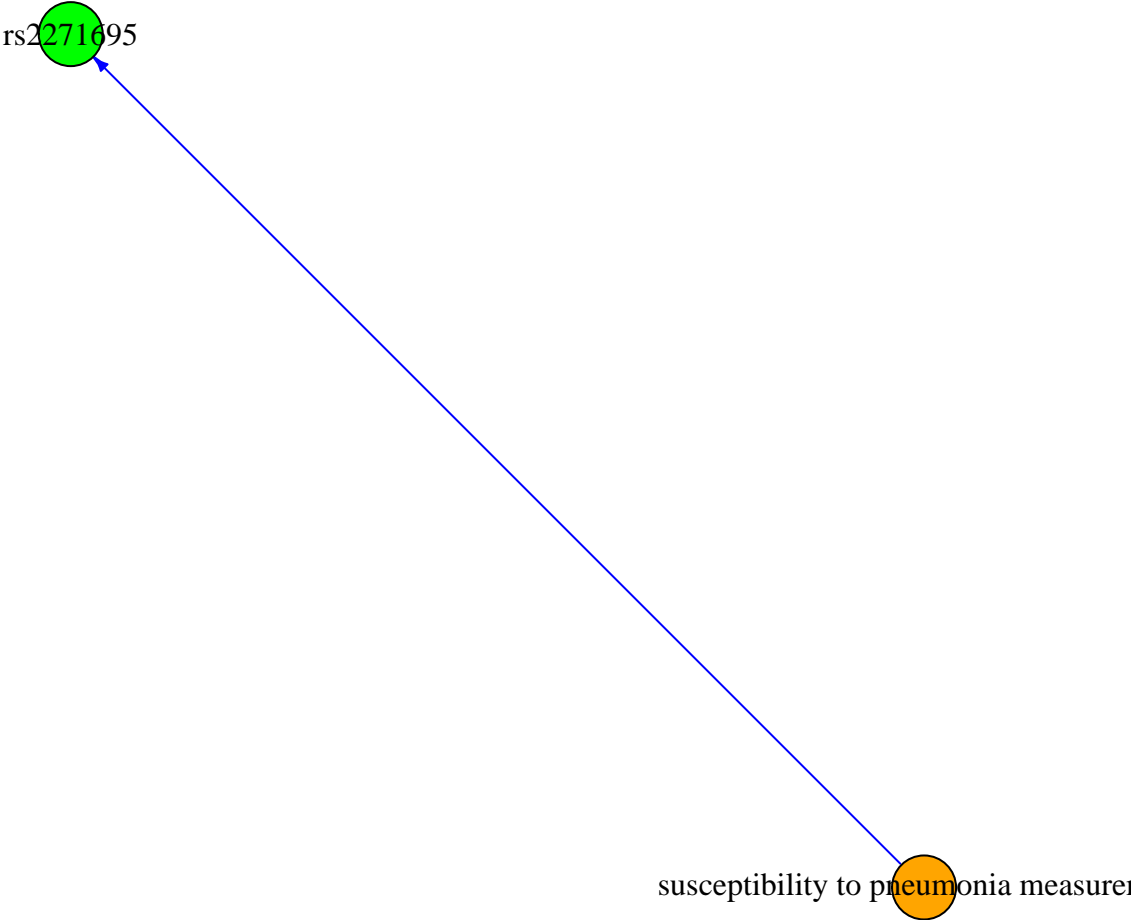

# Variant–Disease Network (parathyroid hormone measurement)

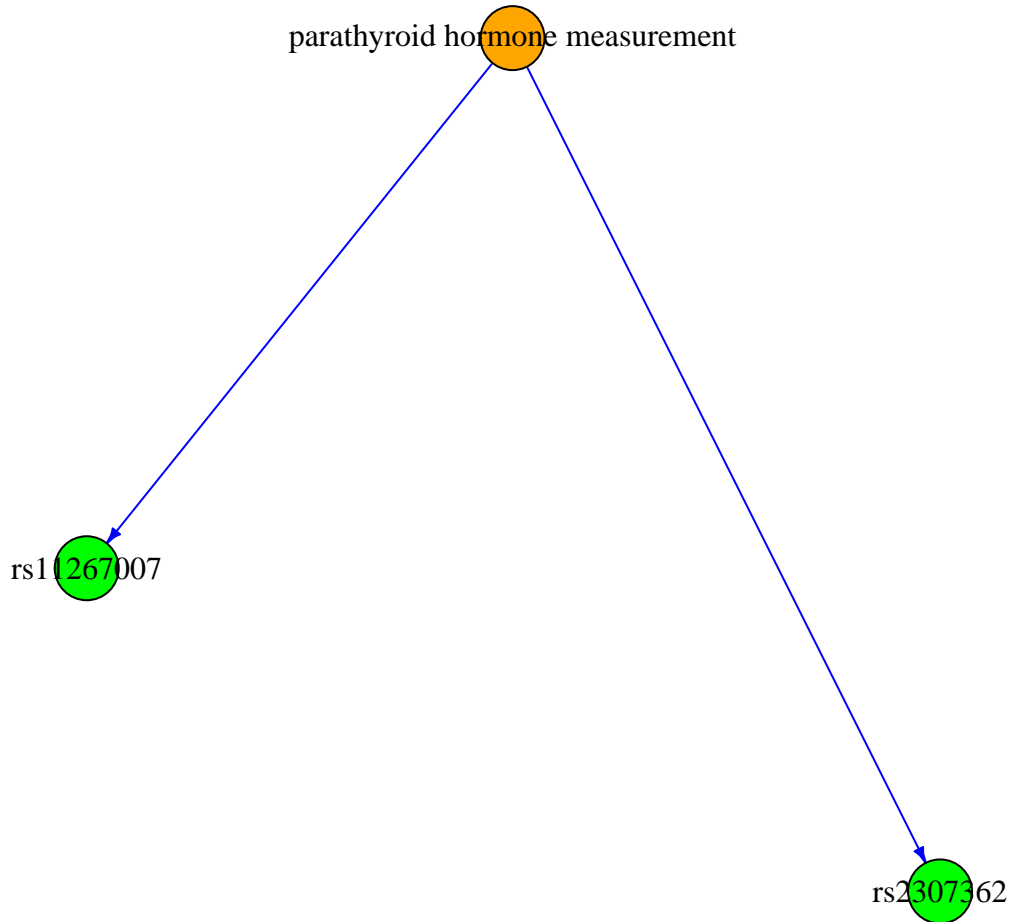

Variant–Disease Network (albumin:globulin ratio measurement)

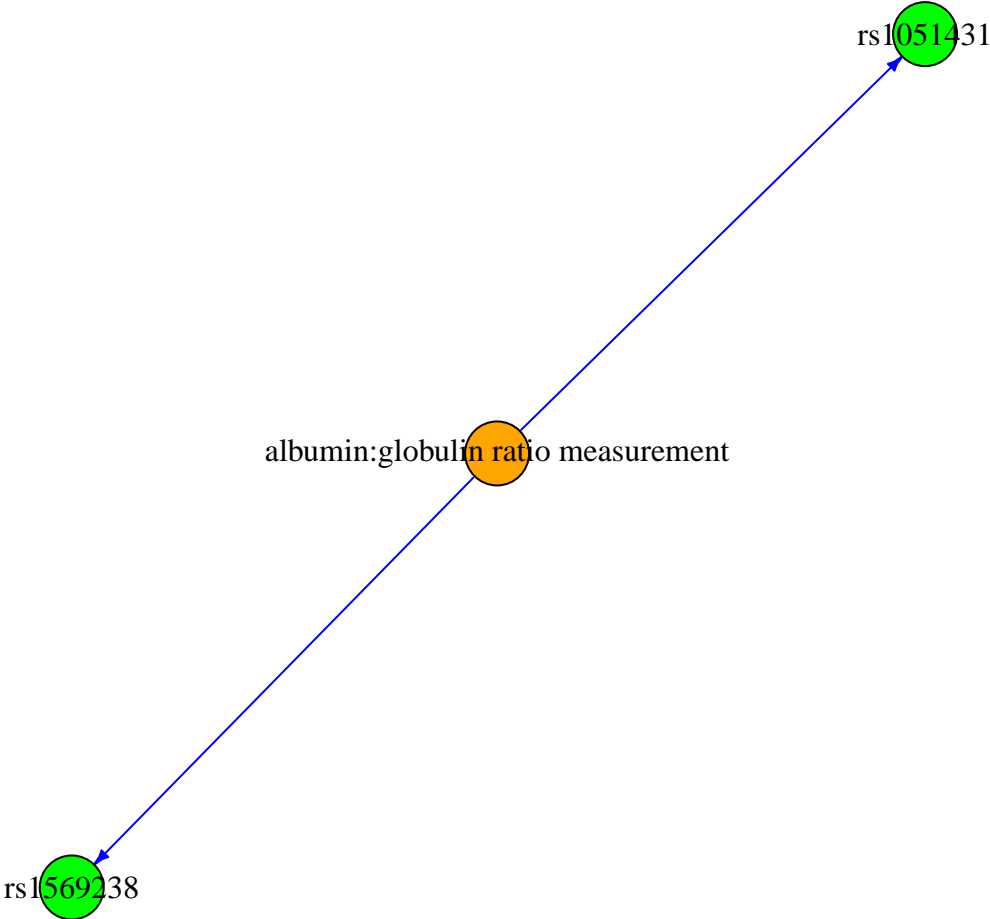

## Variant–Disease Network (allergic rhinitis)

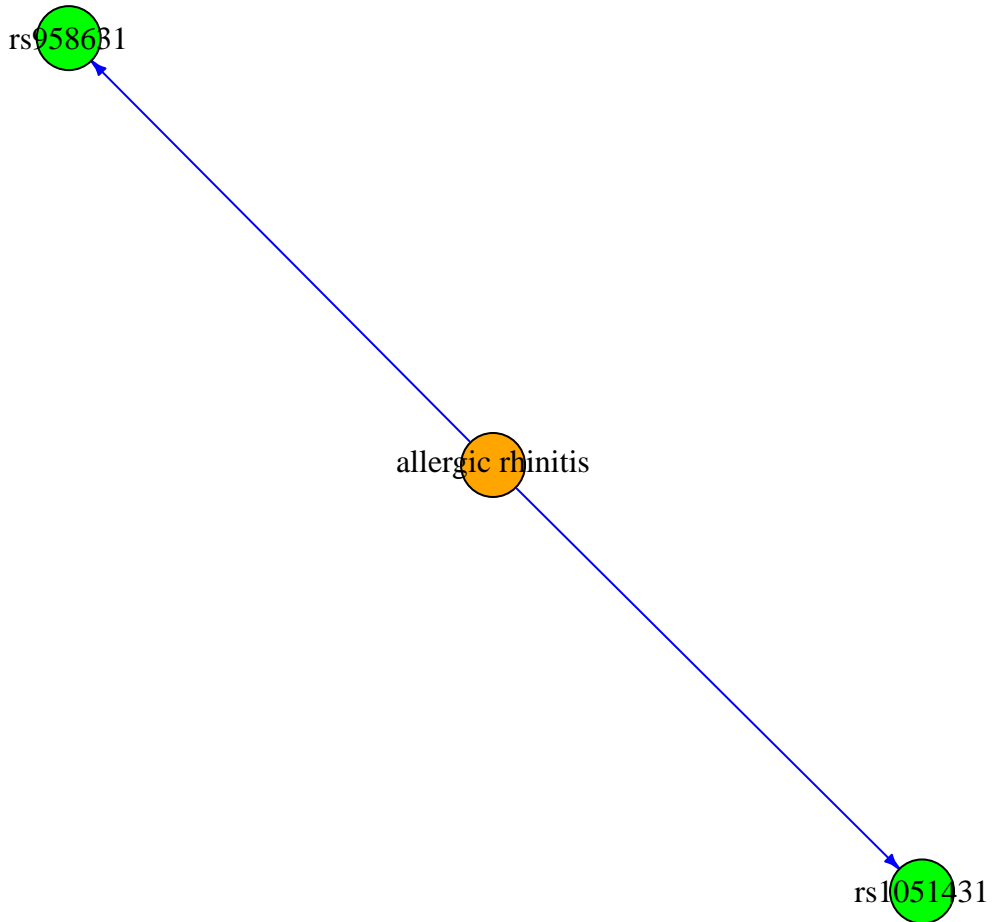

Variant-Disease Network (allergy)

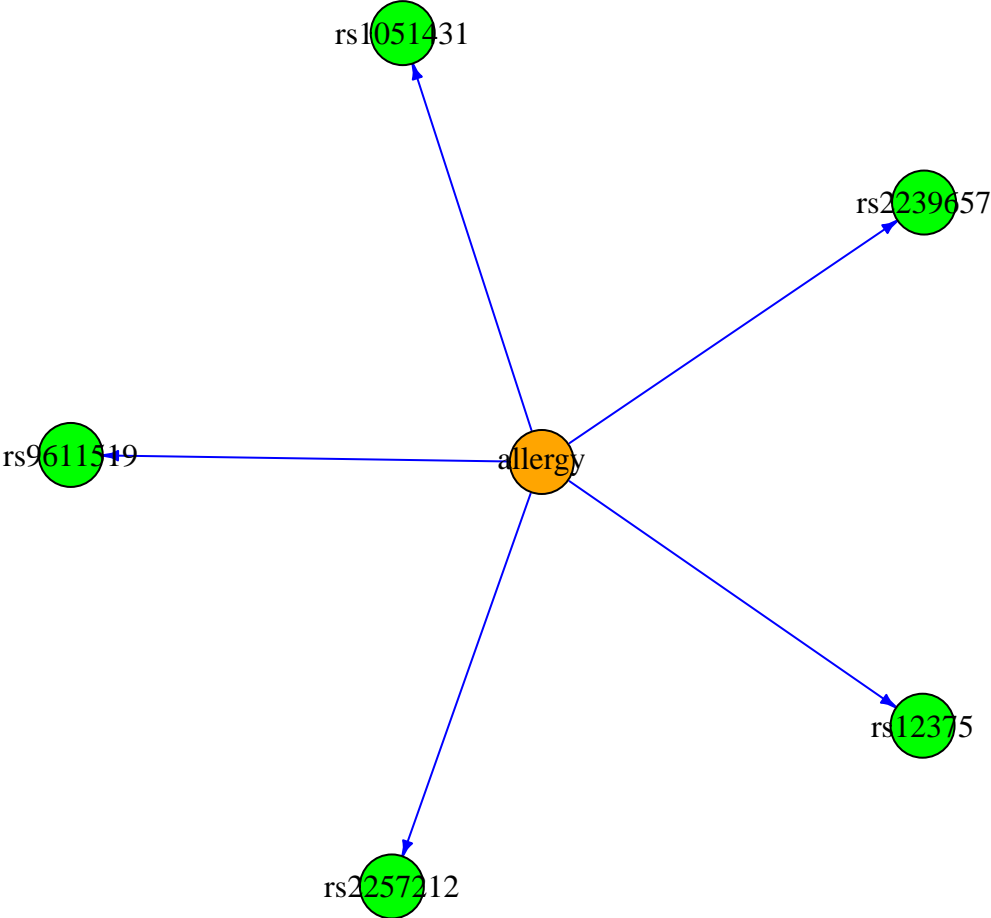

## Variant-Disease Network (body height)

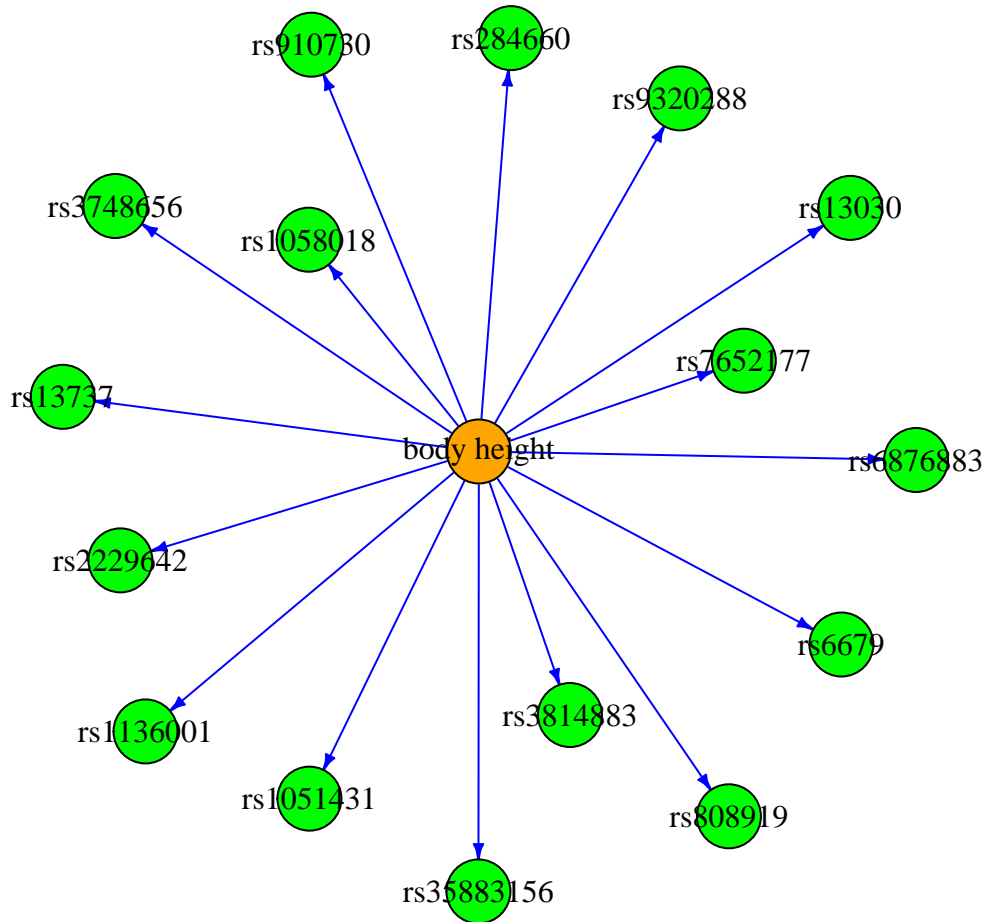

## Variant–Disease Network (hip circumference)

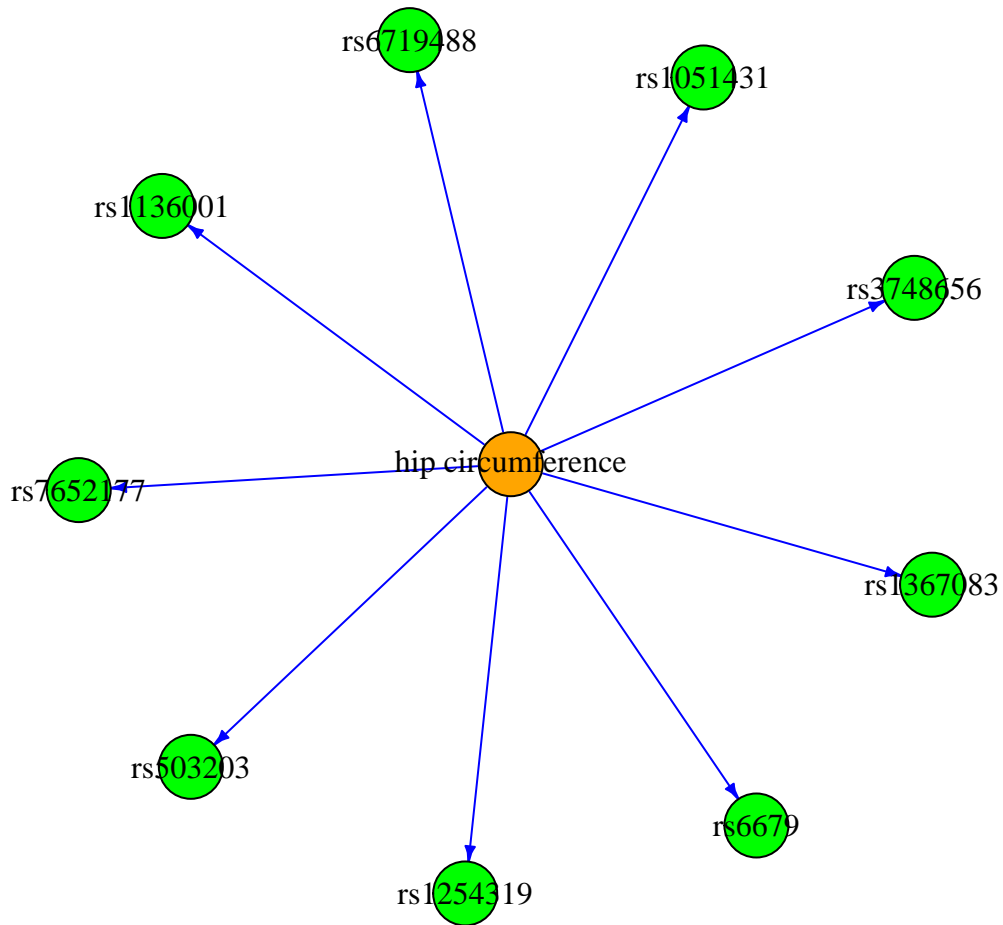

## Variant–Disease Network (infant head circumference)

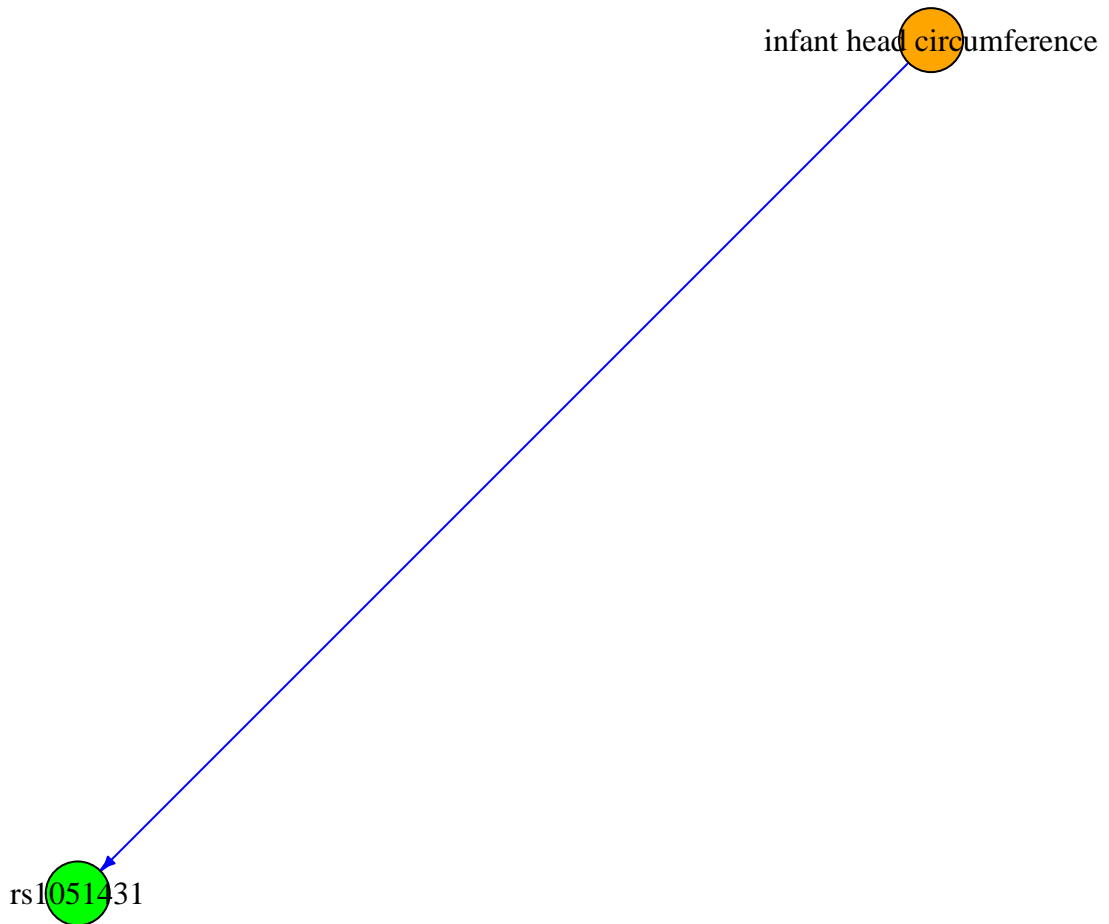



## Variant-Disease Network (multiple sclerosis)

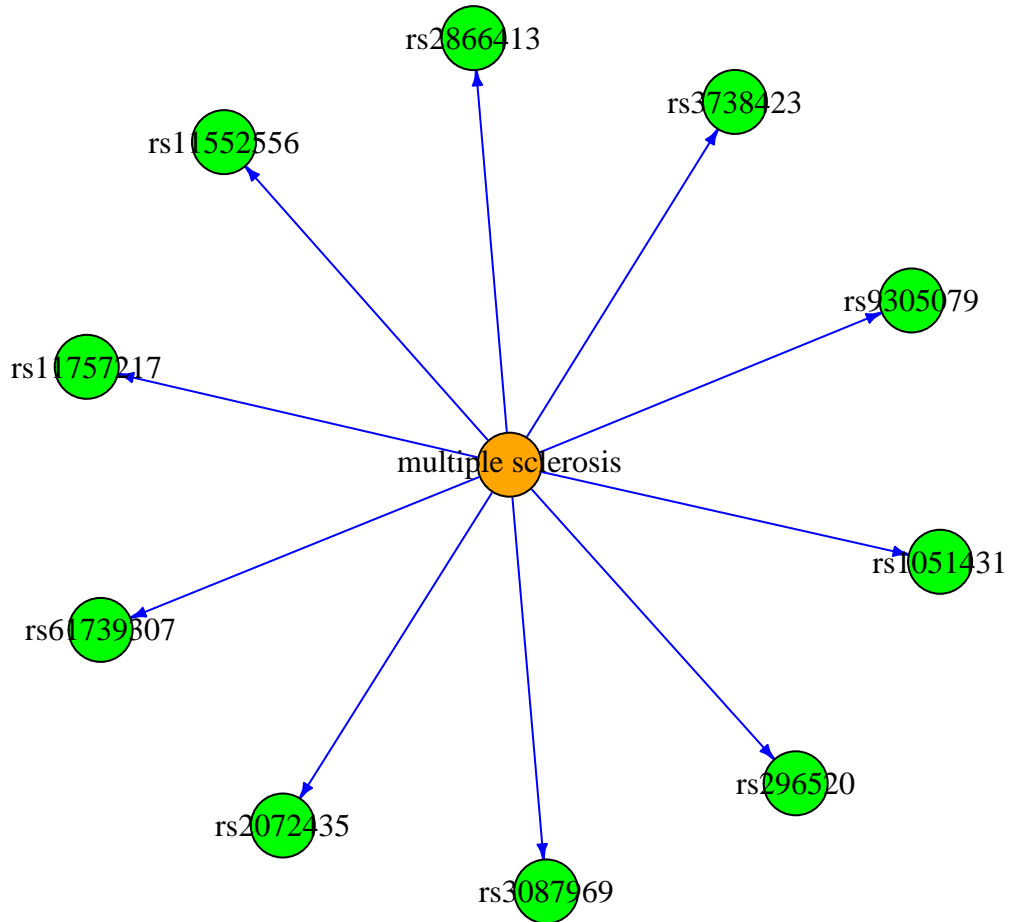

## Variant-Disease Network (platelet count)

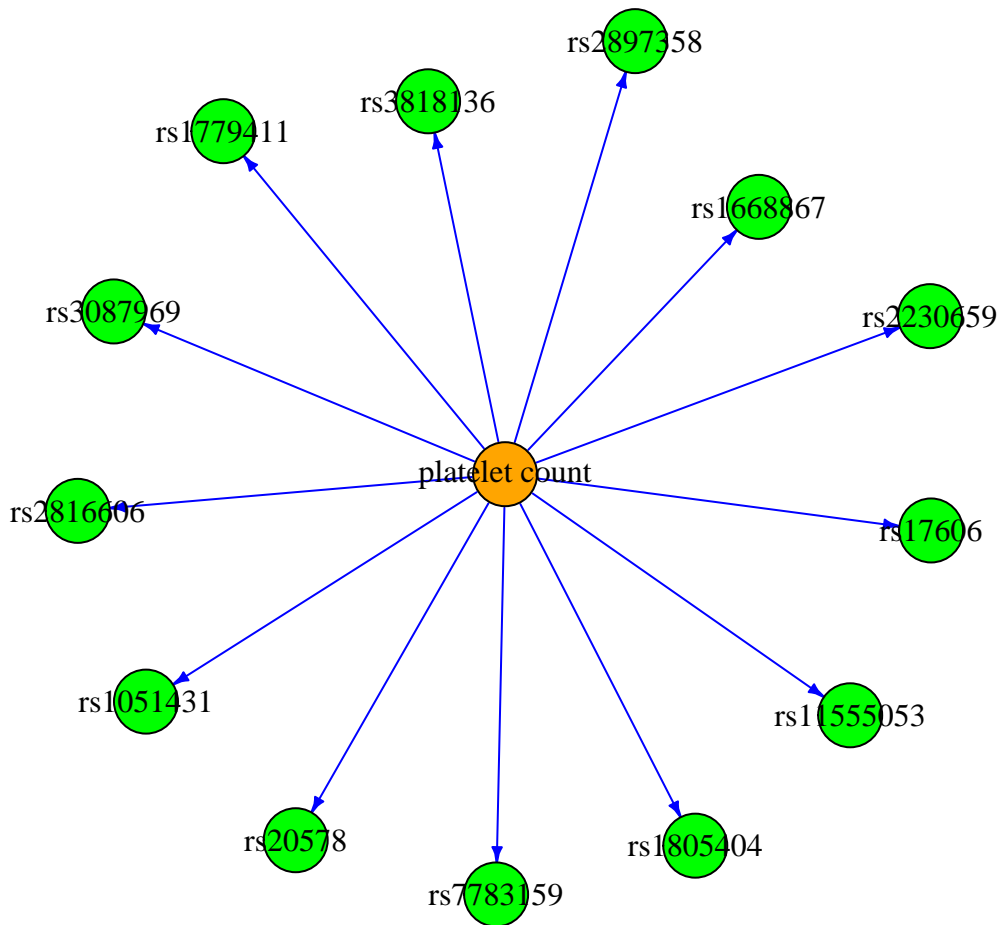

## Variant–Disease Network (plateletcrit)

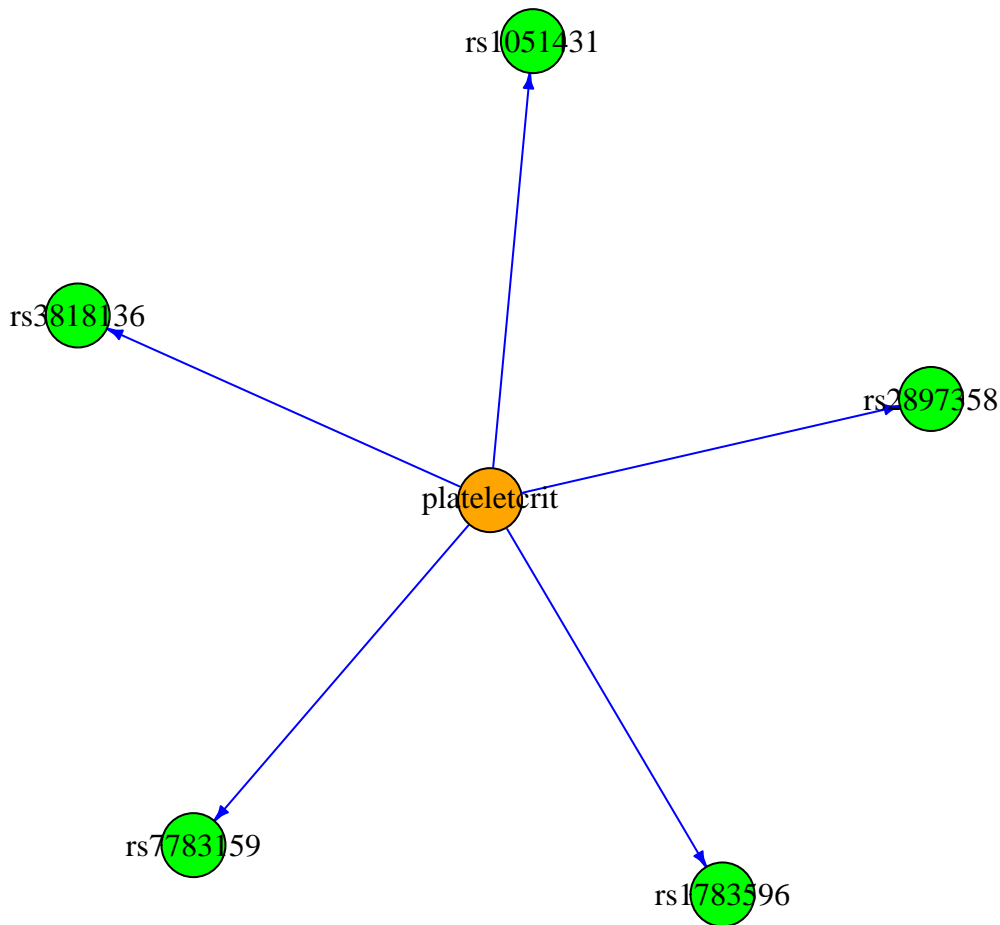

## Variant–Disease Network (type ii diabetes mellitus)

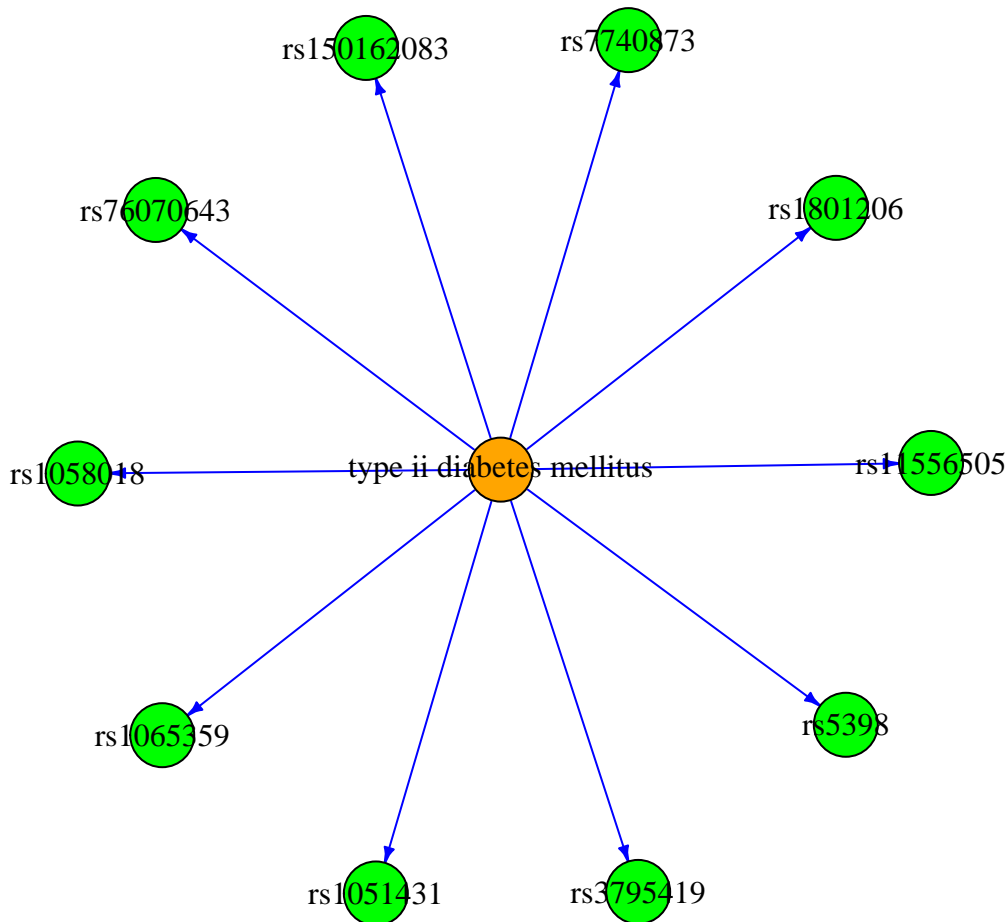

Variant–Disease Network (granulocyte percentage of myeloid white cells)

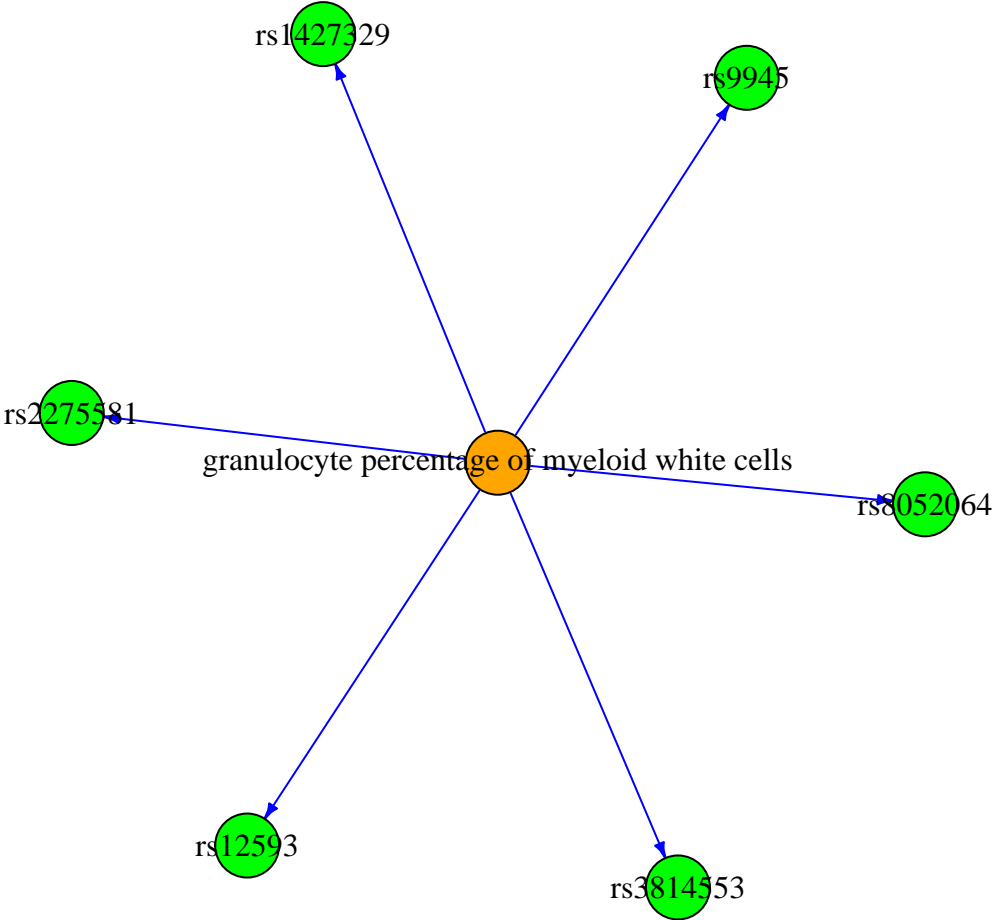

## Variant–Disease Network (monocyte percentage of white cells)

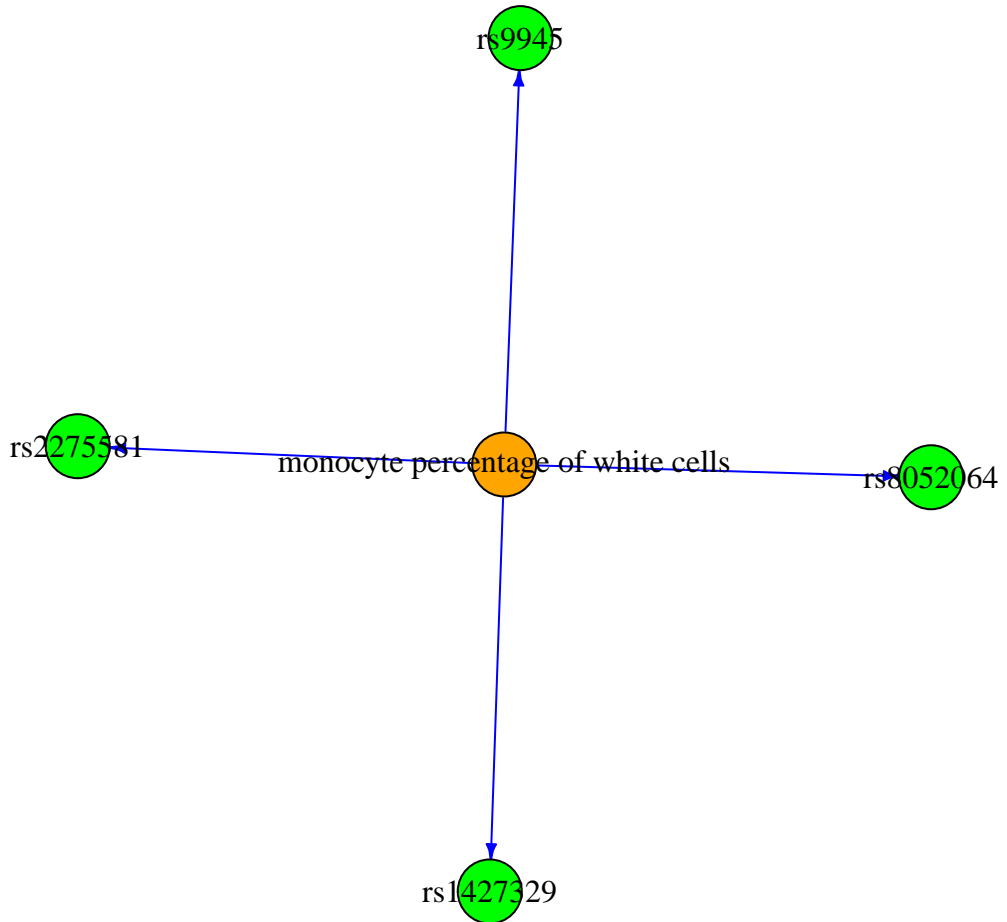

**Variant–Disease Network (cranial vault morphology measurement)**

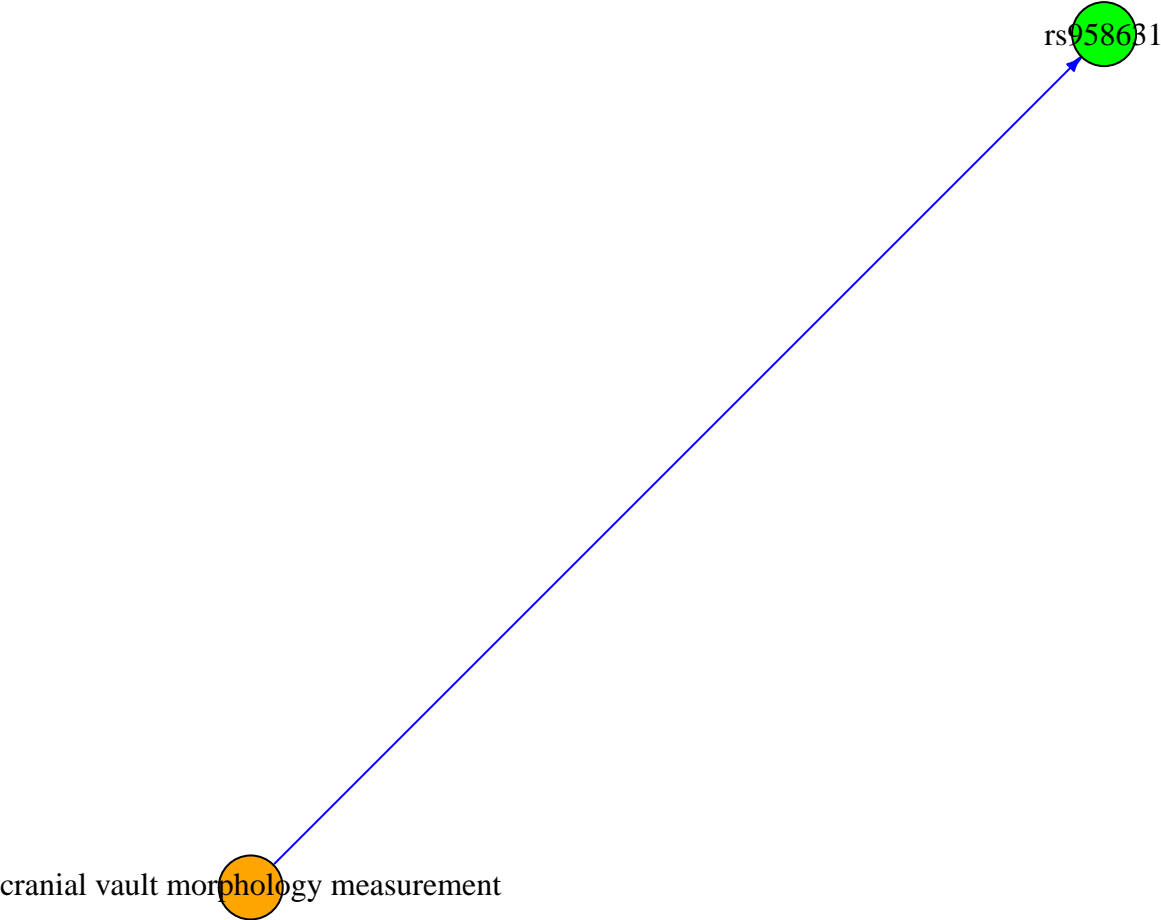

## Variant–Disease Network (ovarian carcinoma)

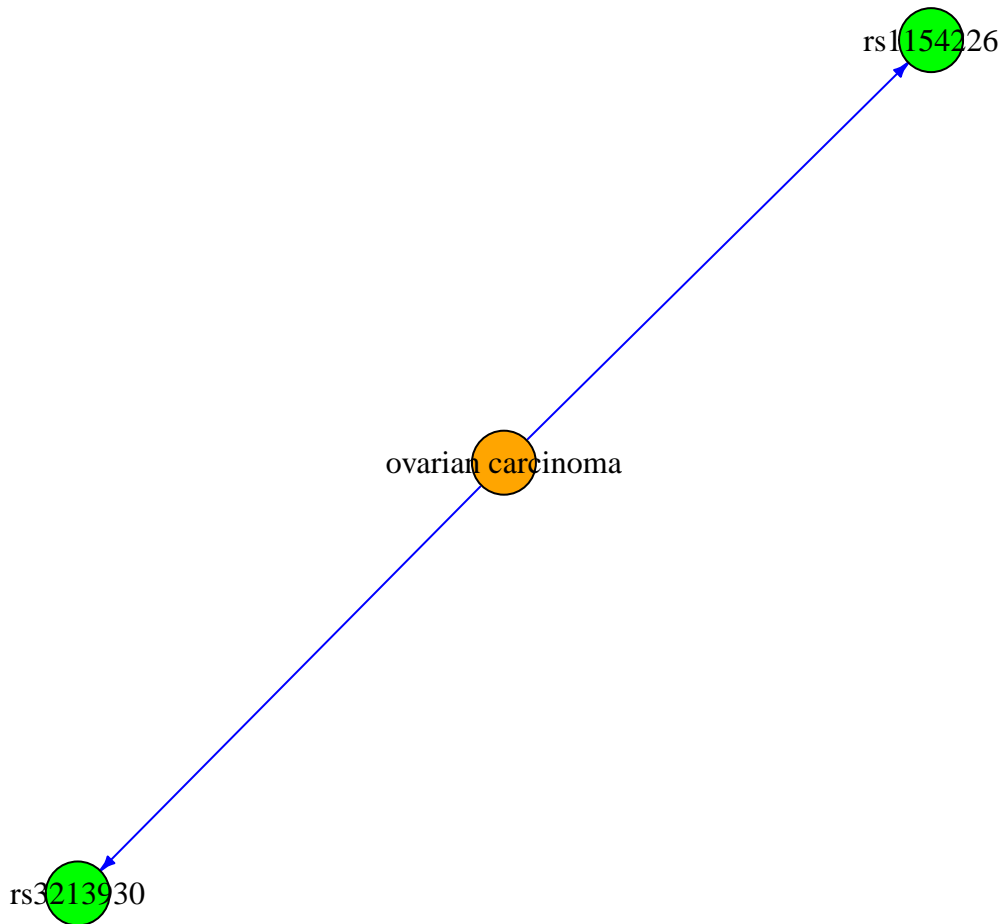



## Variant–Disease Network (ovarian serous carcinoma)

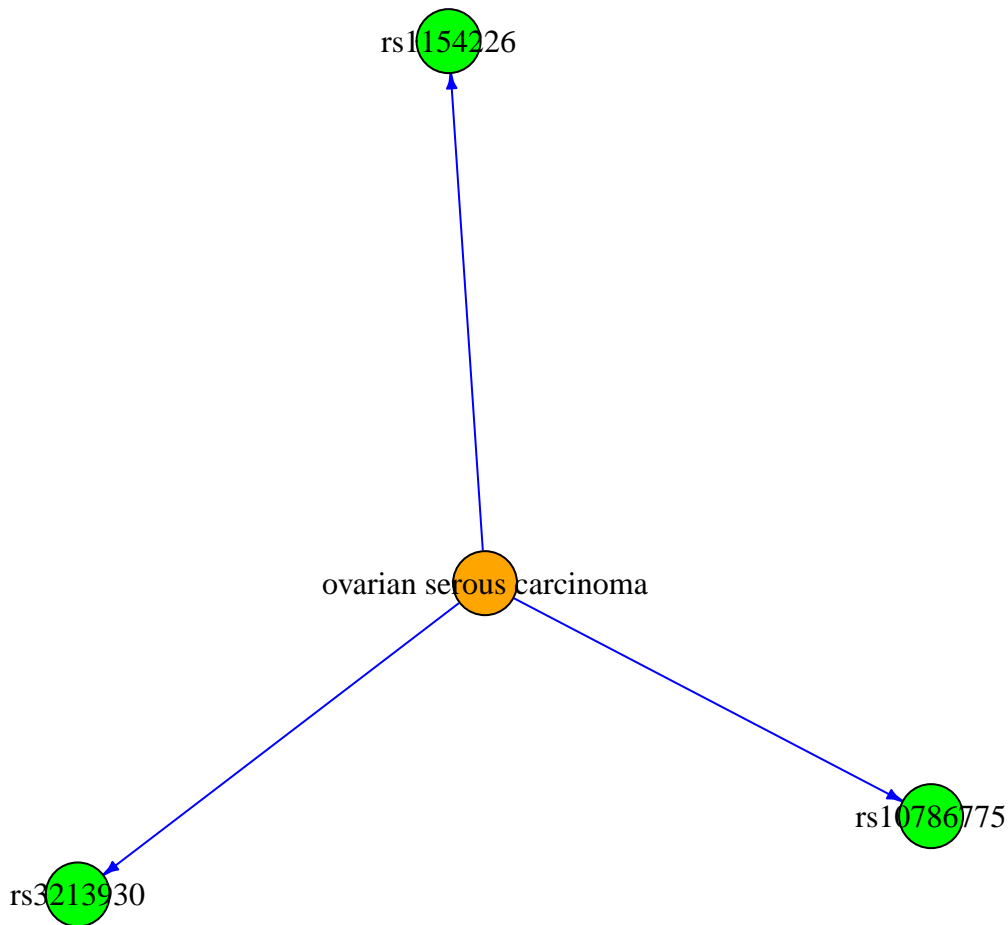

## Variant–Disease Network (erythema nodosum)

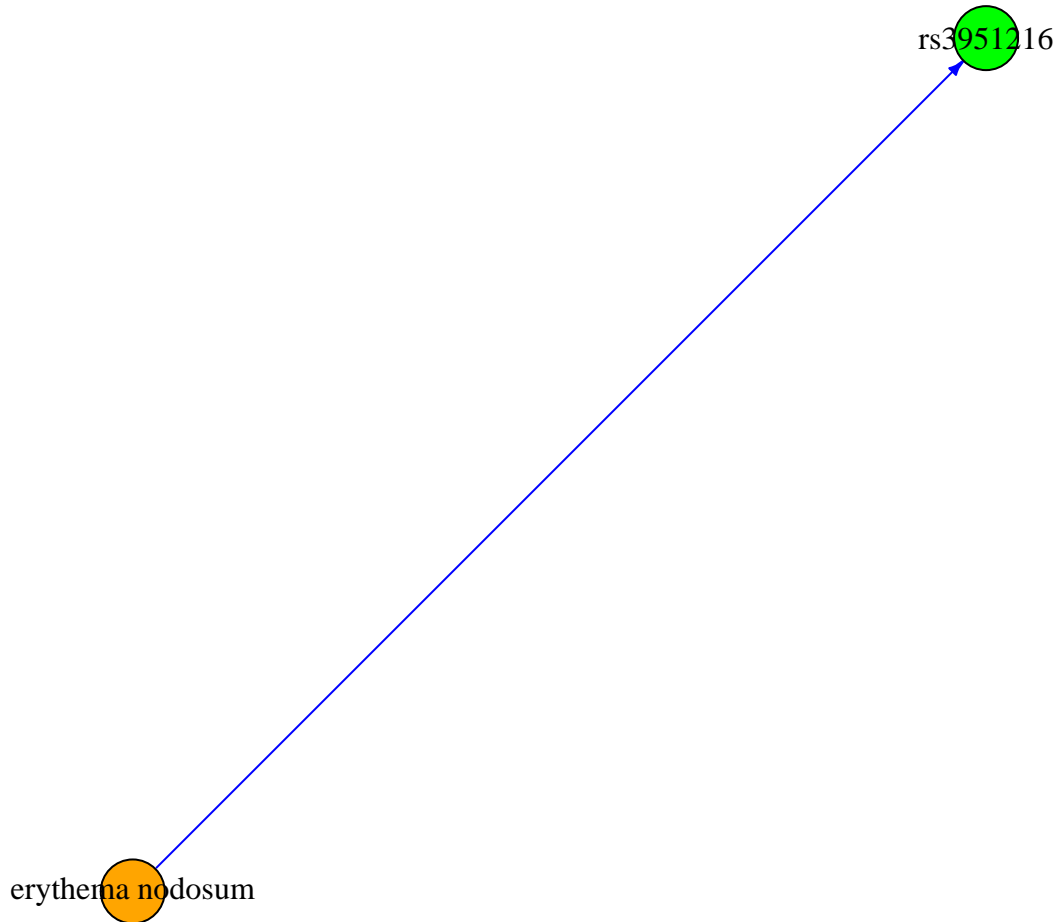

## Variant–Disease Network (leukocyte count)

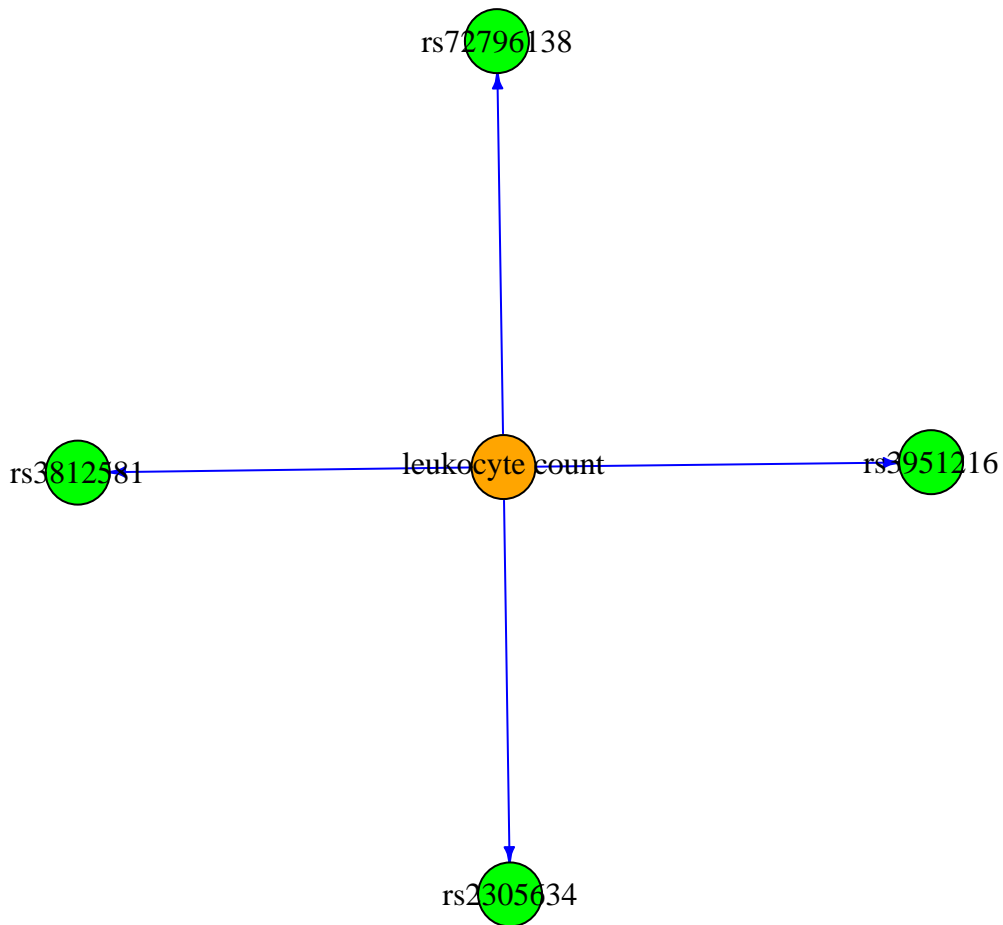

**Variant–Disease Network (head and neck squamous cell carcinoma)**

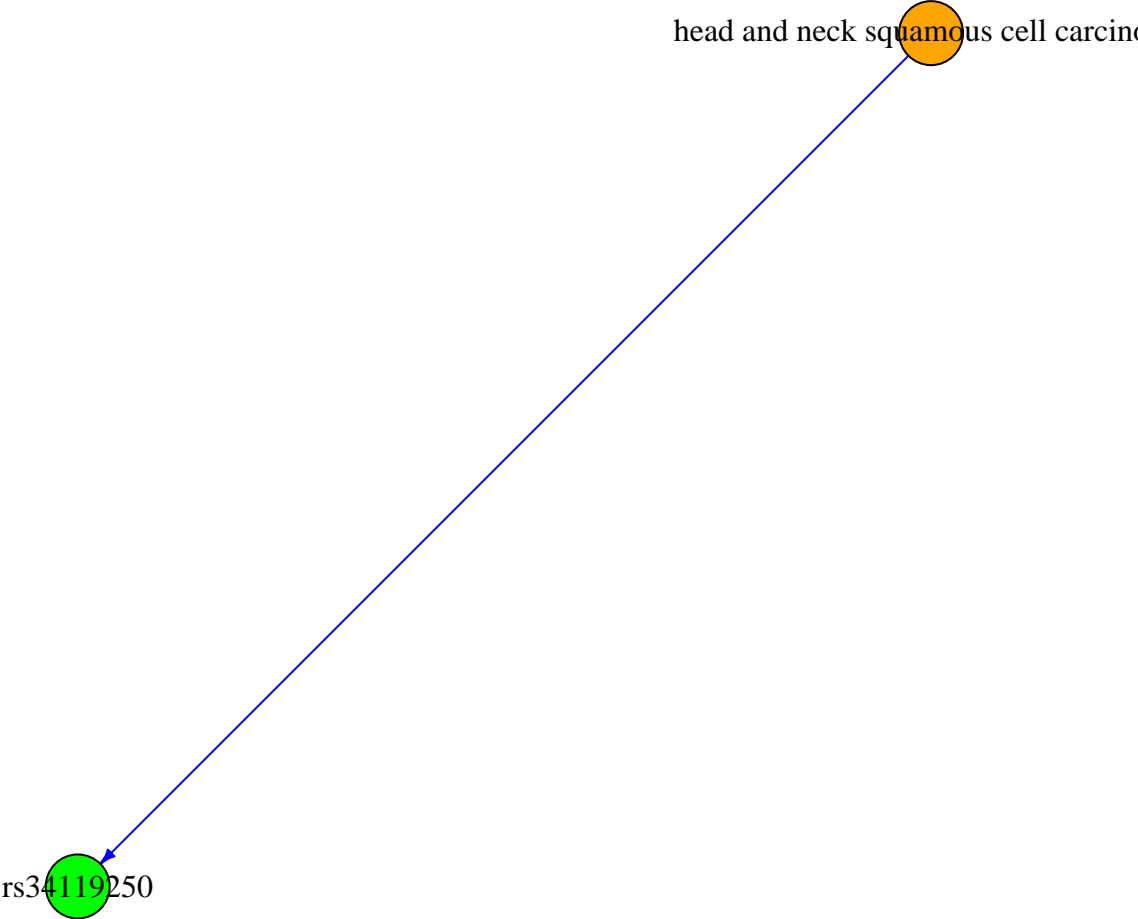

## Variant-Disease Network (pain)

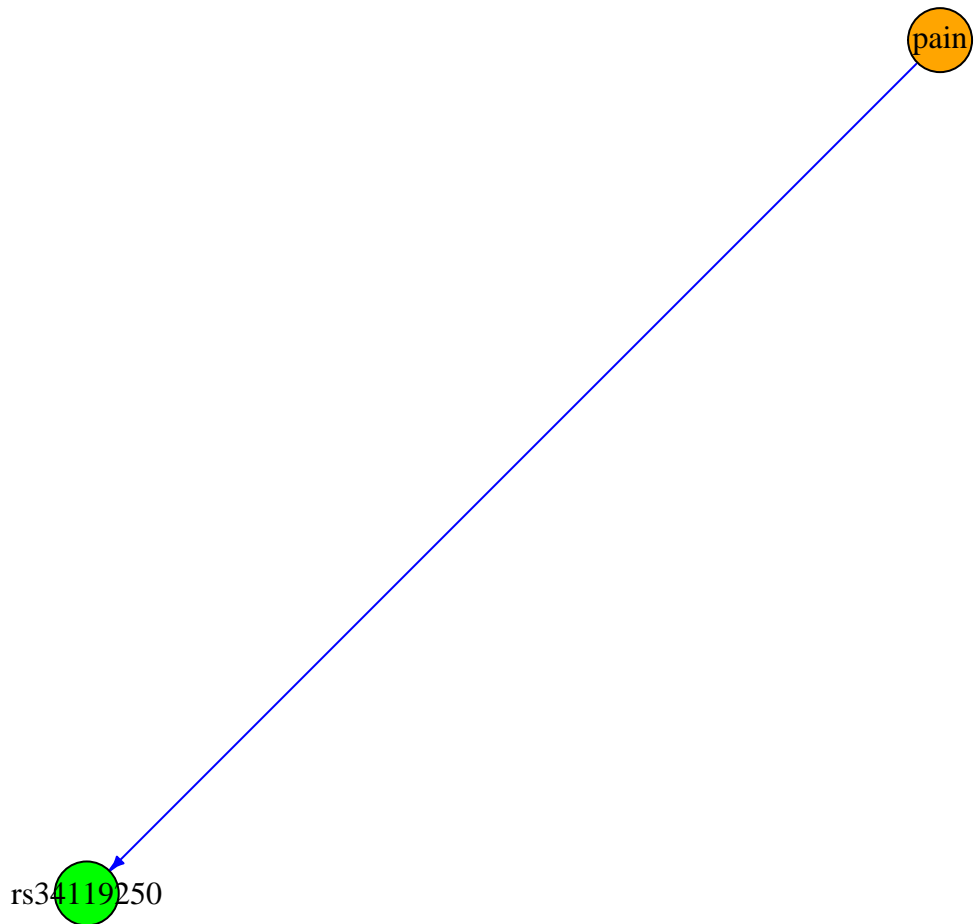

## Variant–Disease Network (immune system disease)

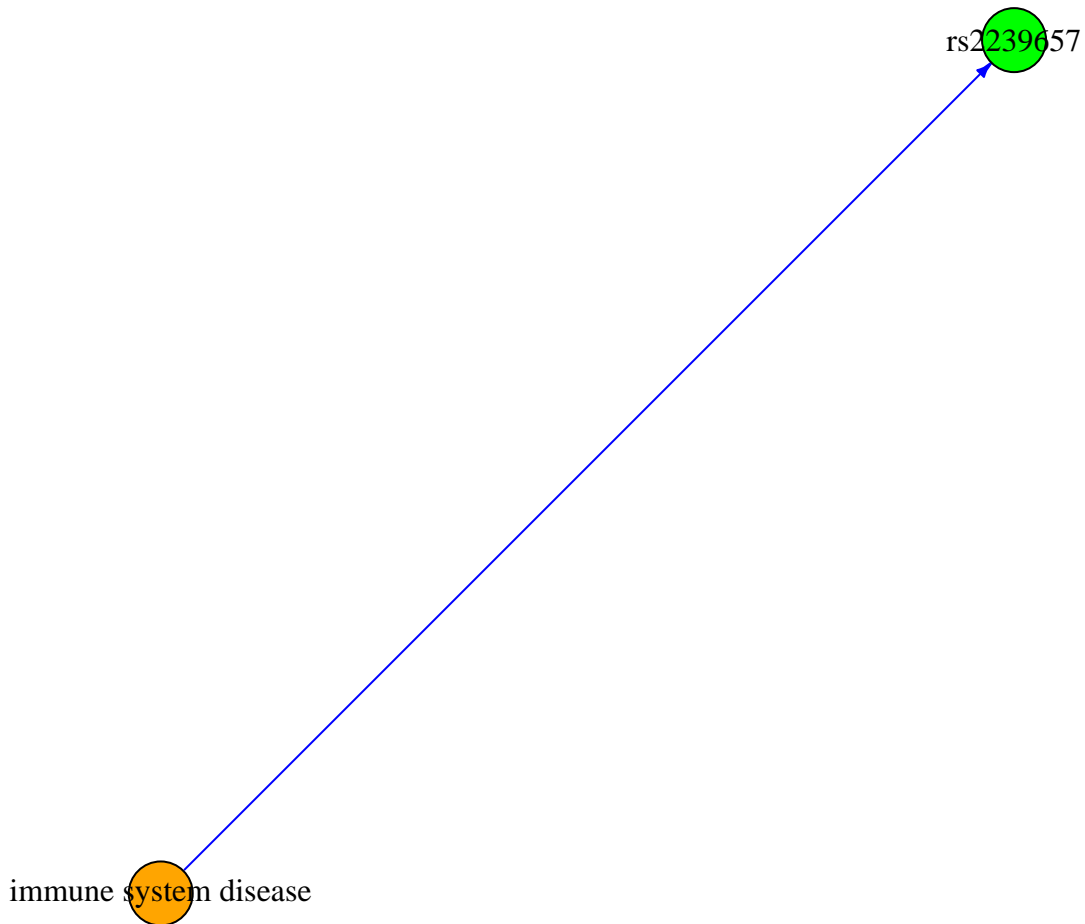

## Variant–Disease Network (lymphocyte count)

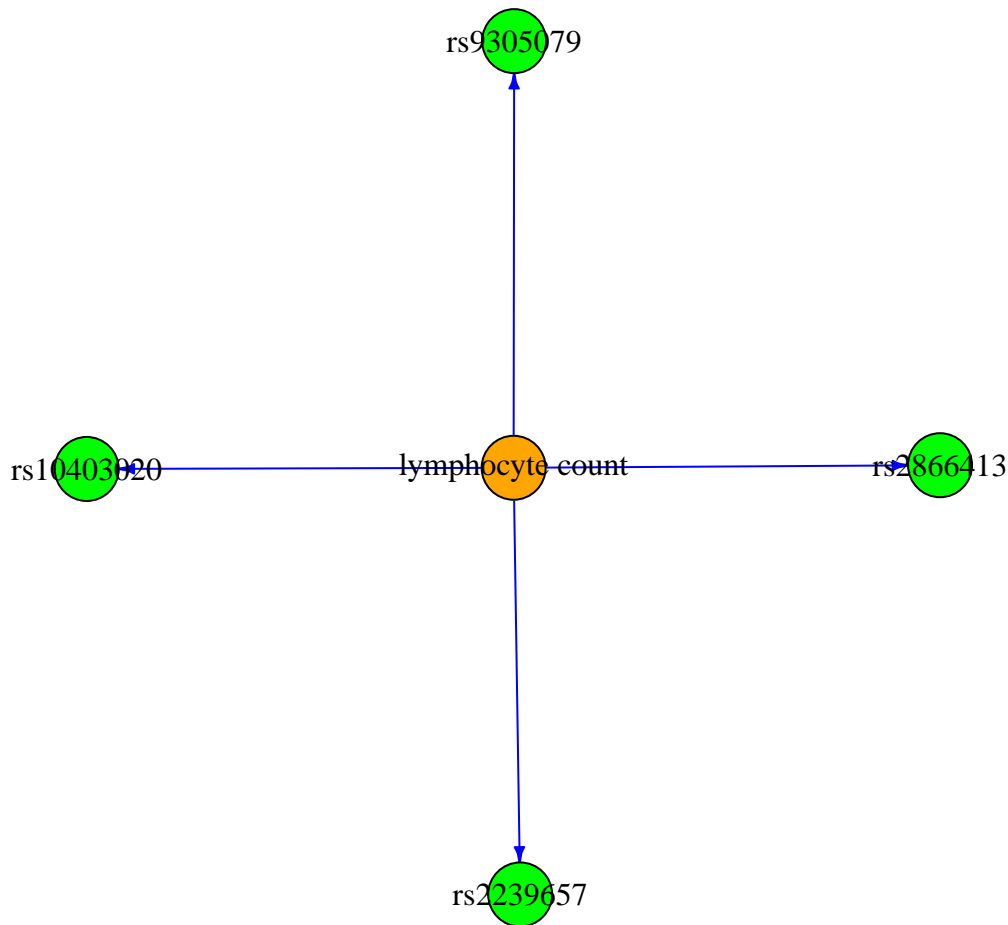

**Variant–Disease Network (prostate specific antigen measurement)**

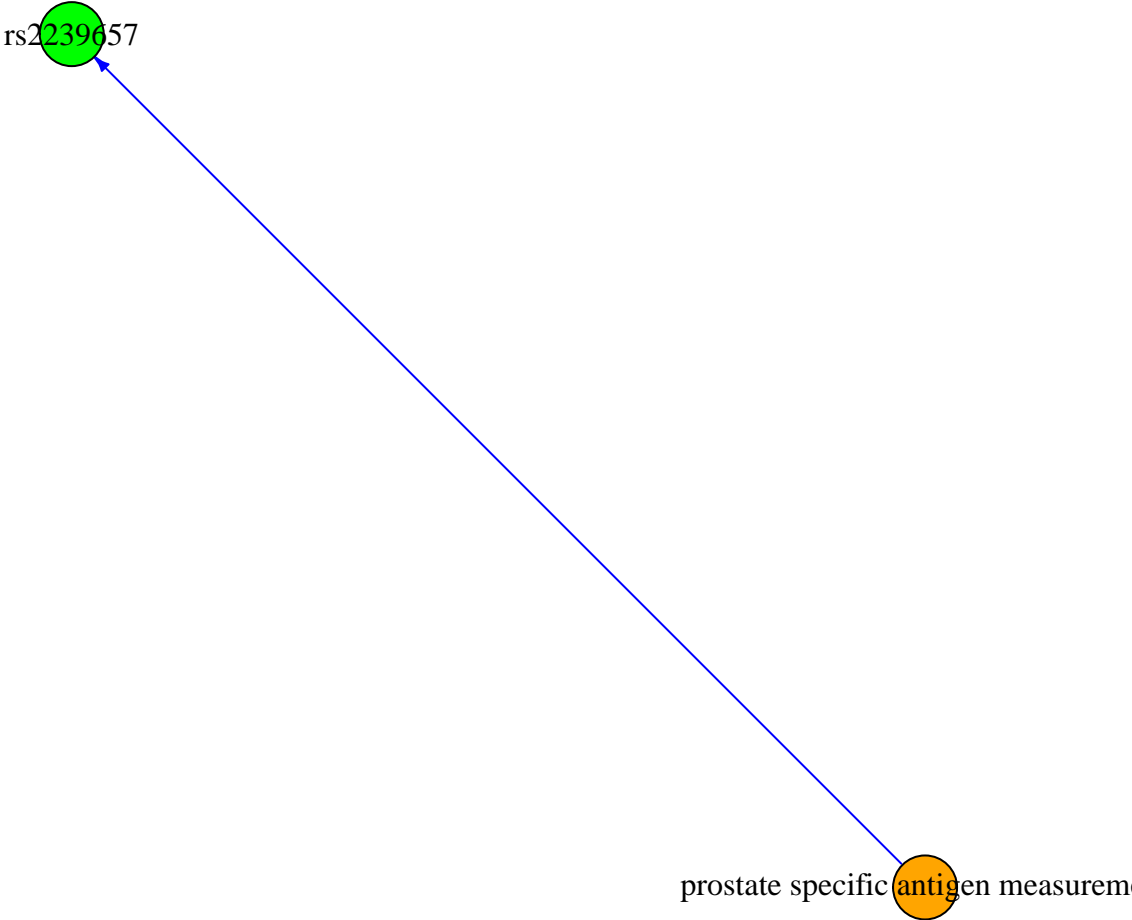



# Variant–Disease Network (pulse pressure measurement)

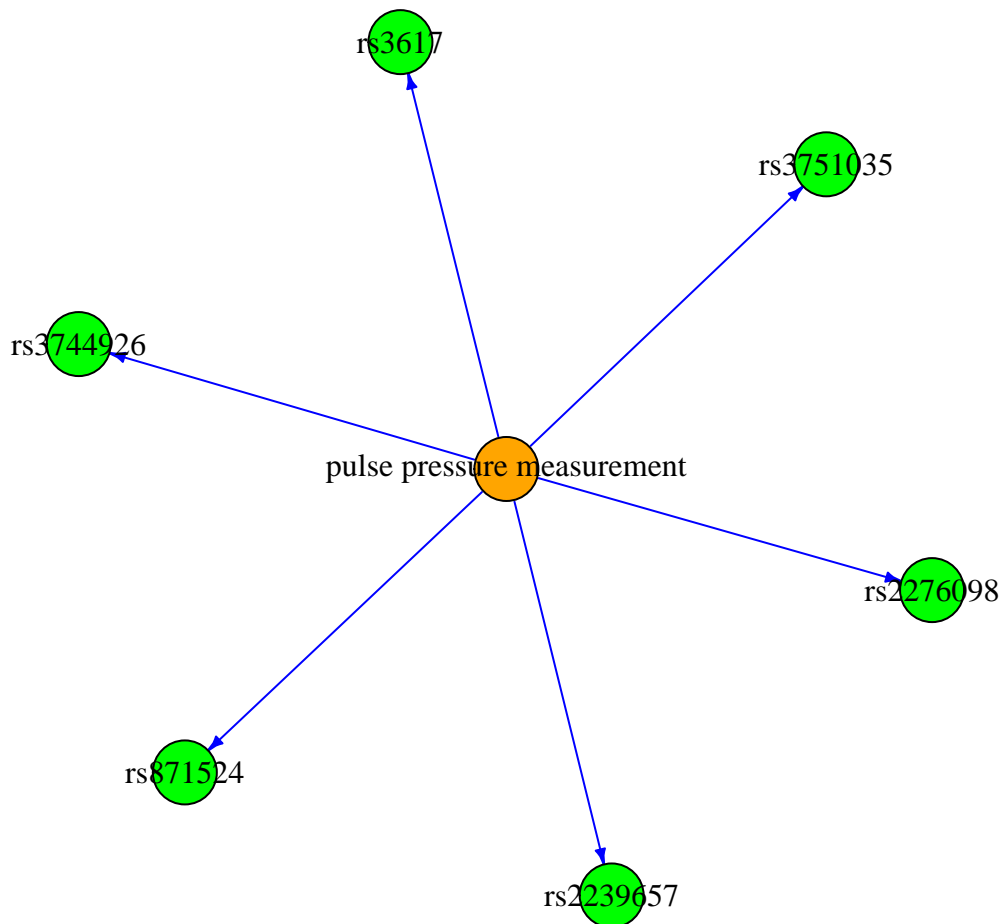

## Variant–Disease Network (rheumatoid arthritis)

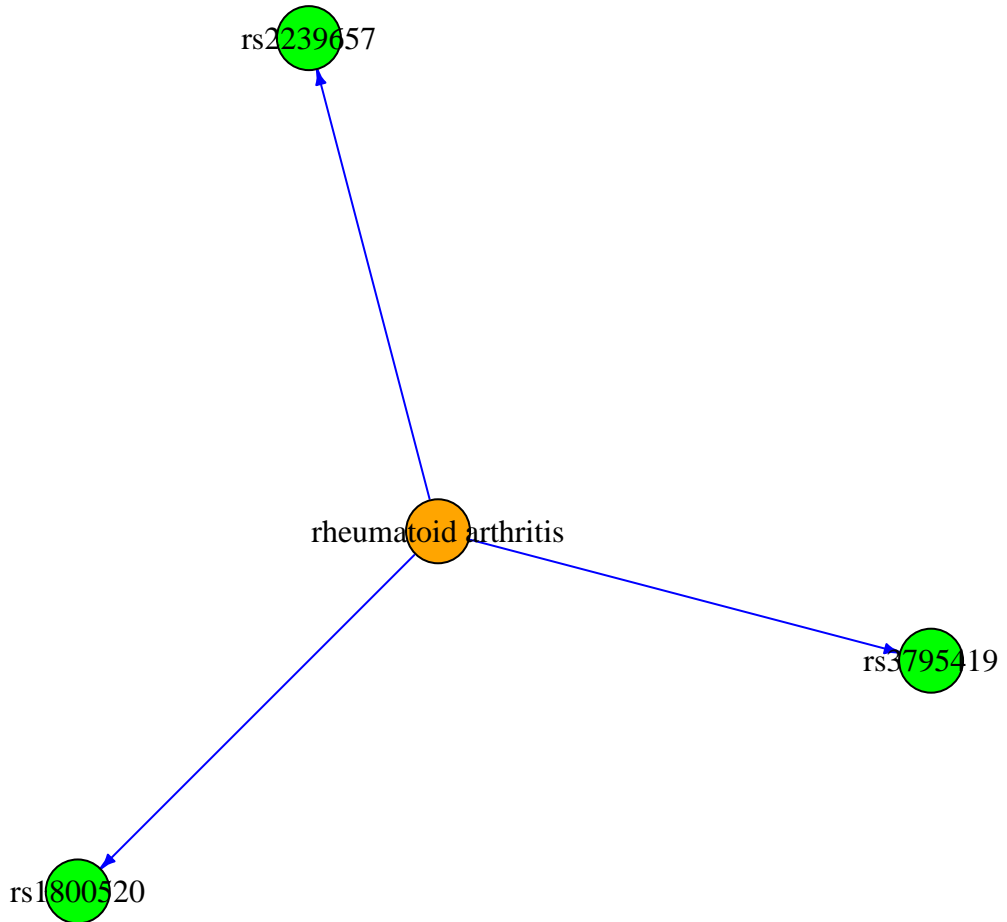

## Variant–Disease Network (a1c measurement)

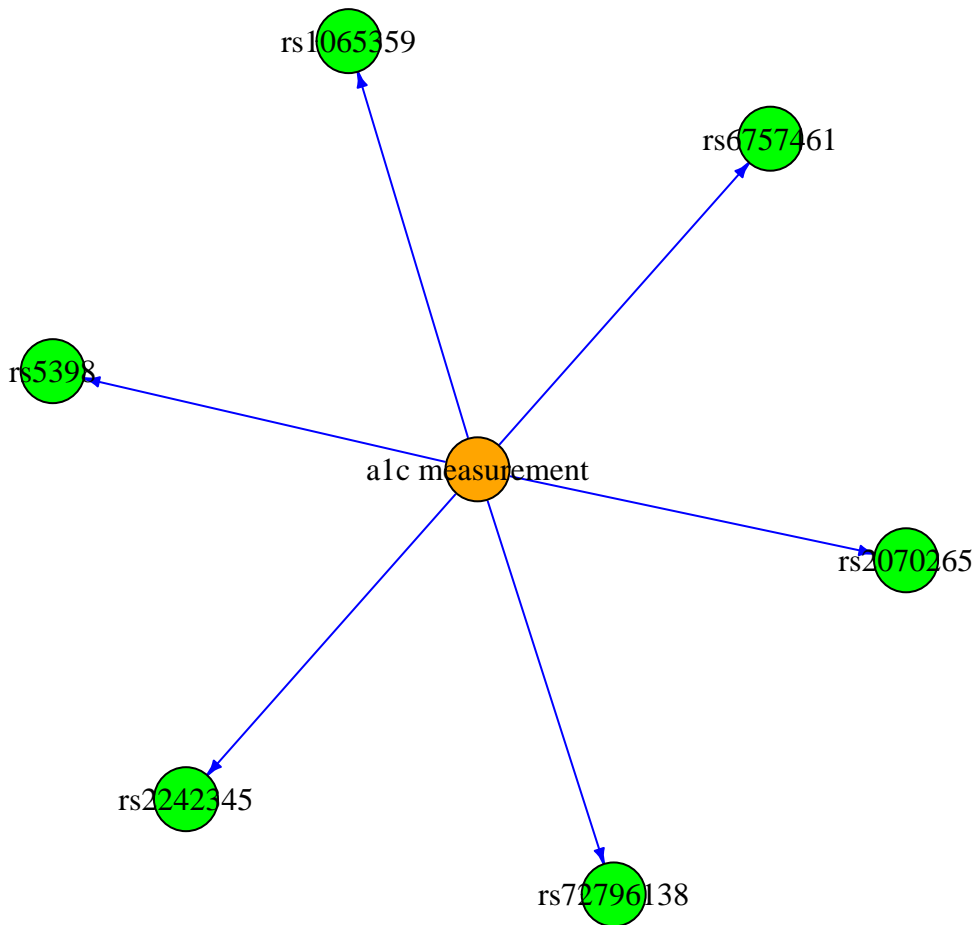

## Variant–Disease Network (HIV–1 infection)

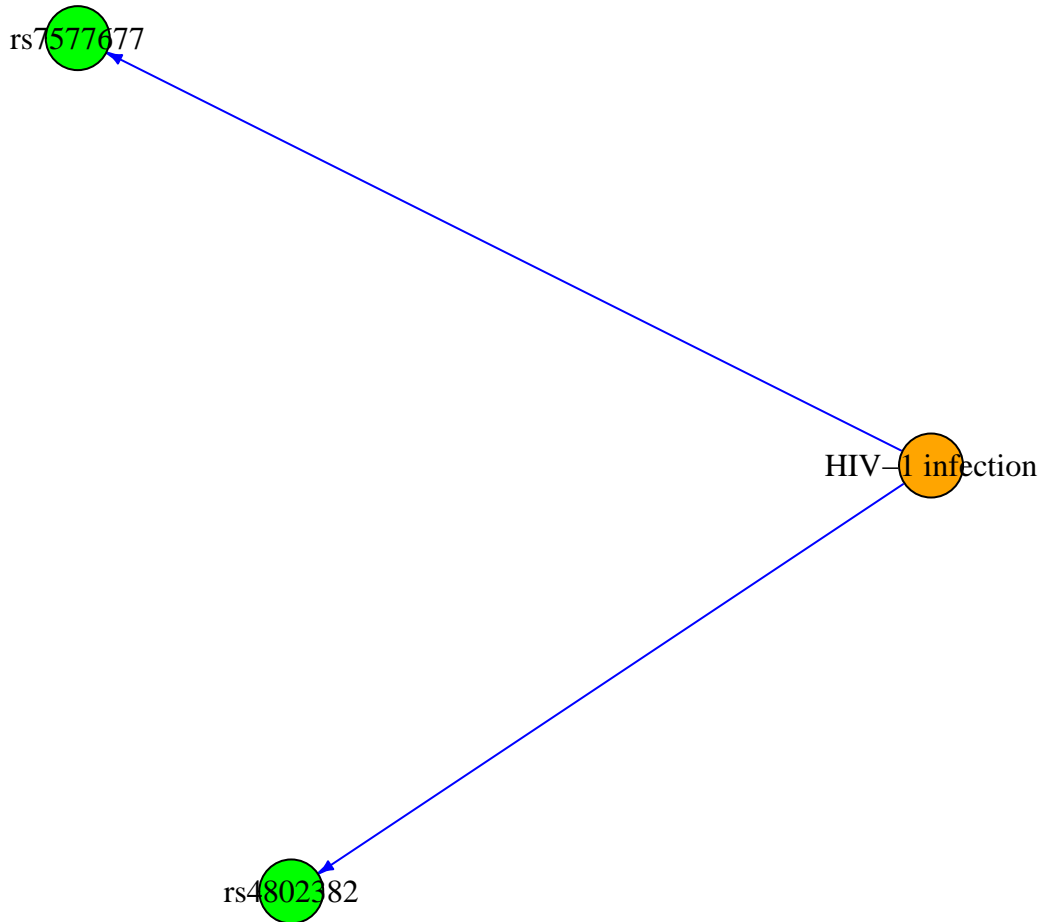

Variant–Disease Network (susceptibility to viral and mycobacterial infection)

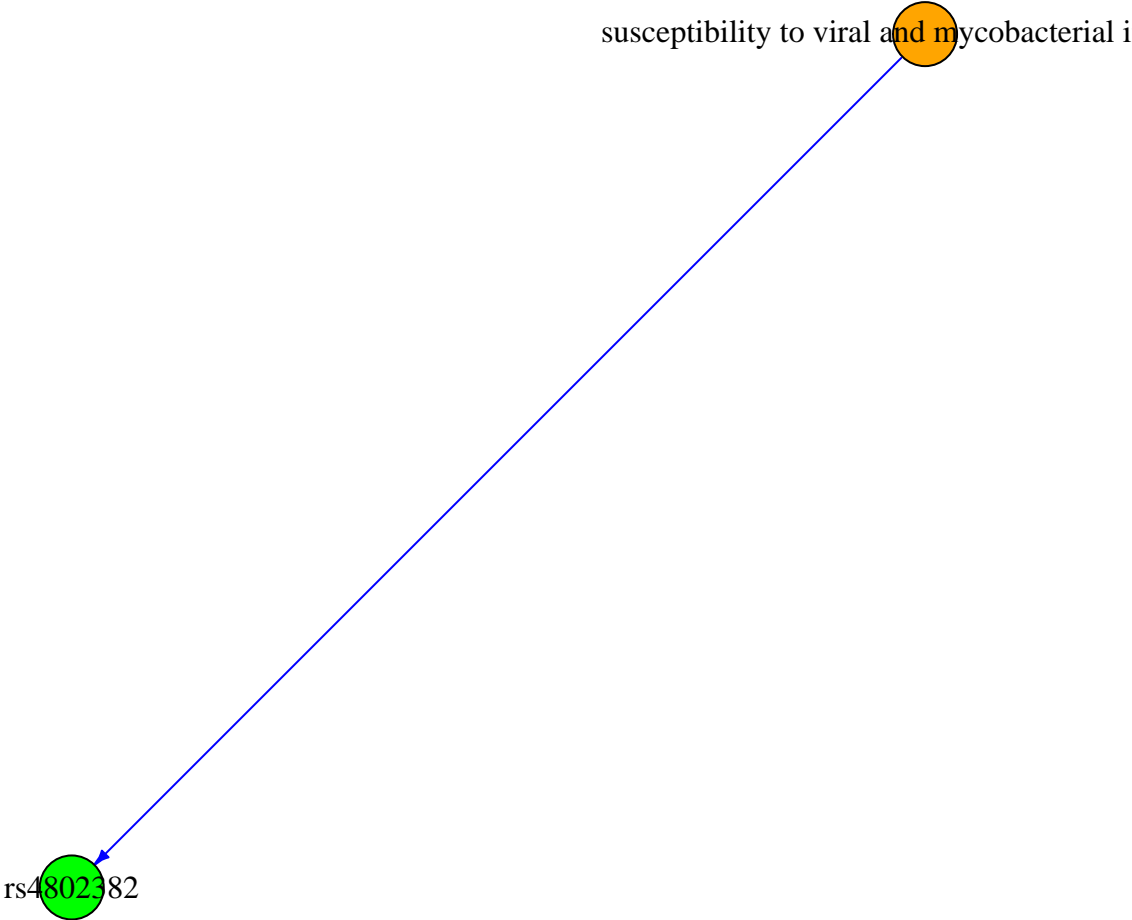

## Variant–Disease Network (response to paliperidone)

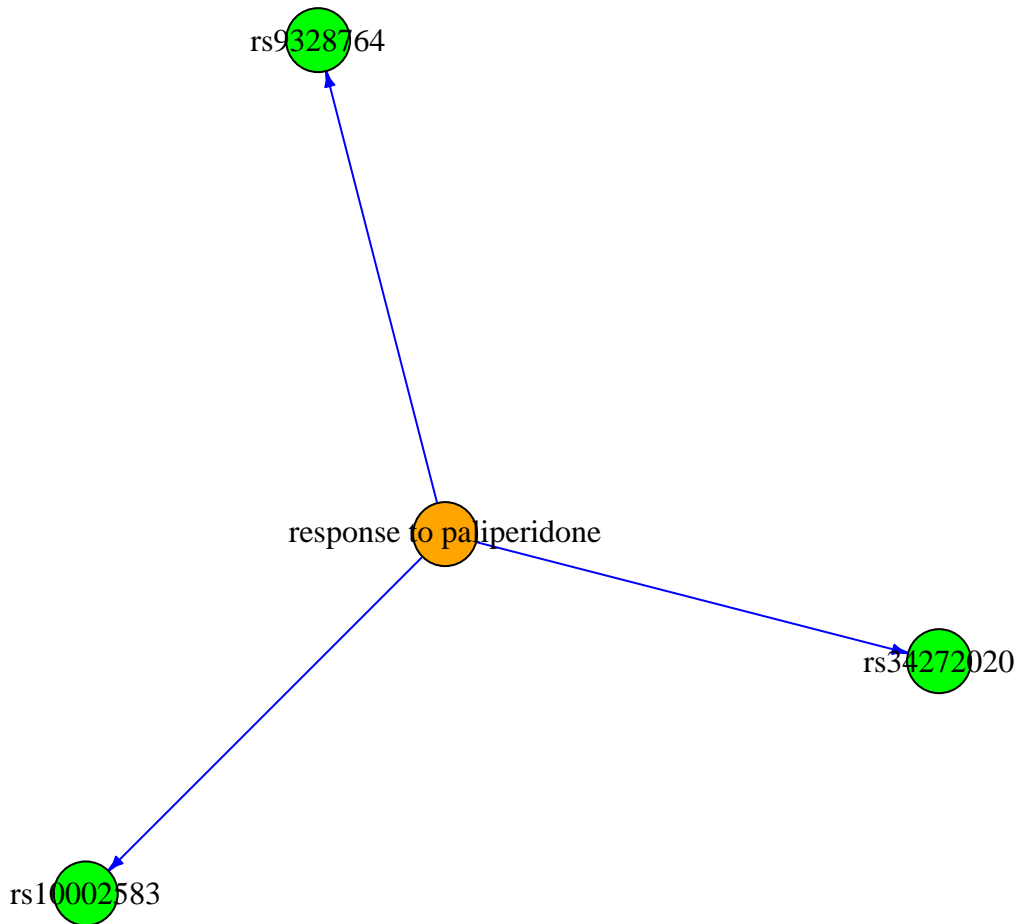

Variant–Disease Network (schizophrenia symptom severity measurement)

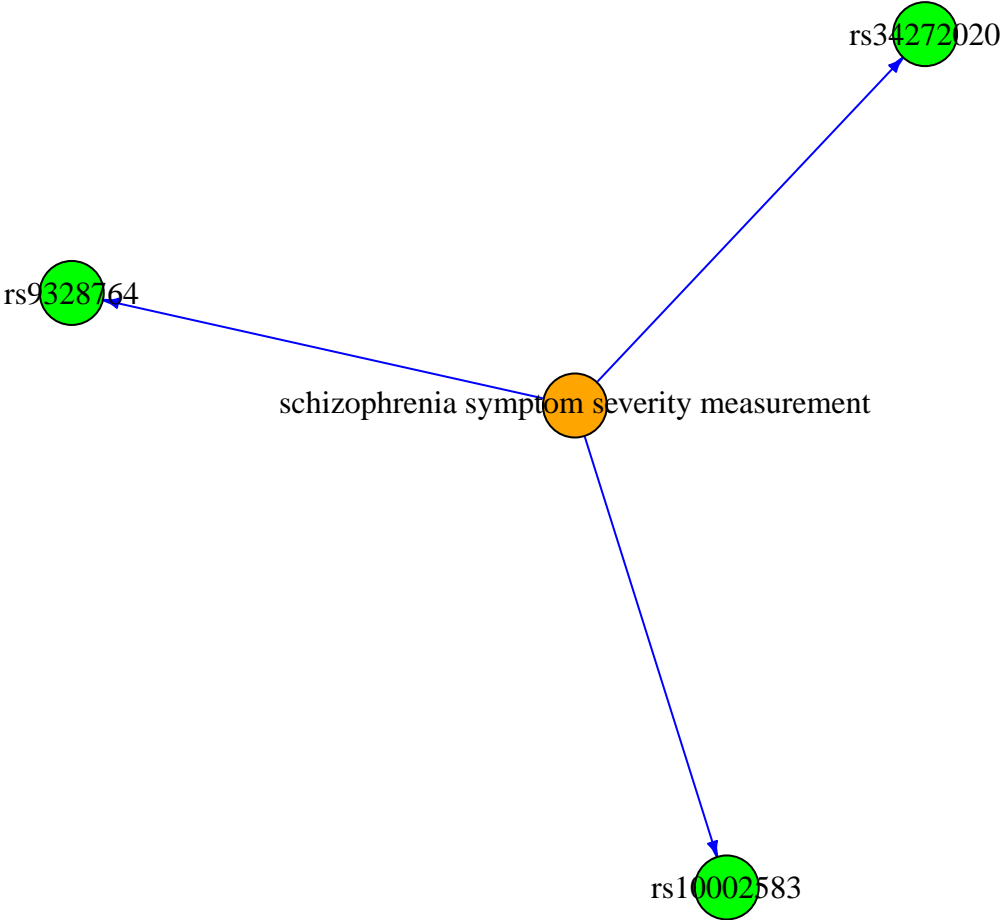

## Variant–Disease Network (grip strength measurement)

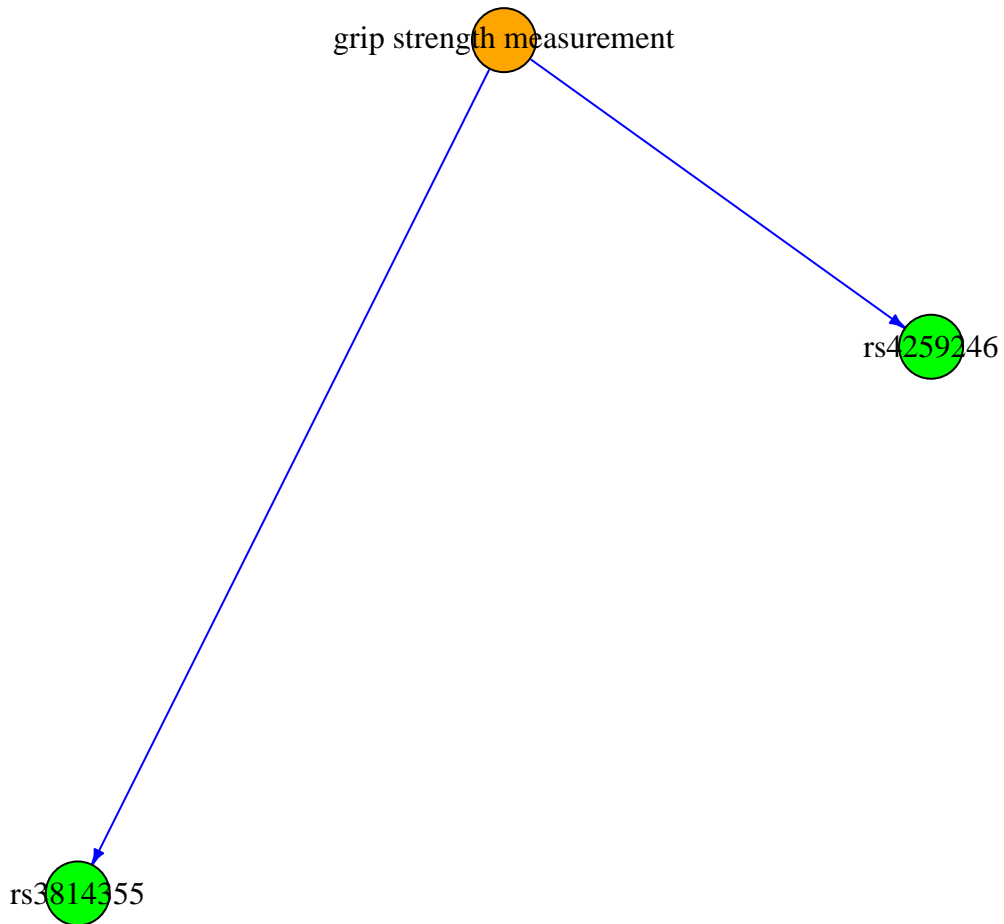



## Variant–Disease Network (smoking behavior)

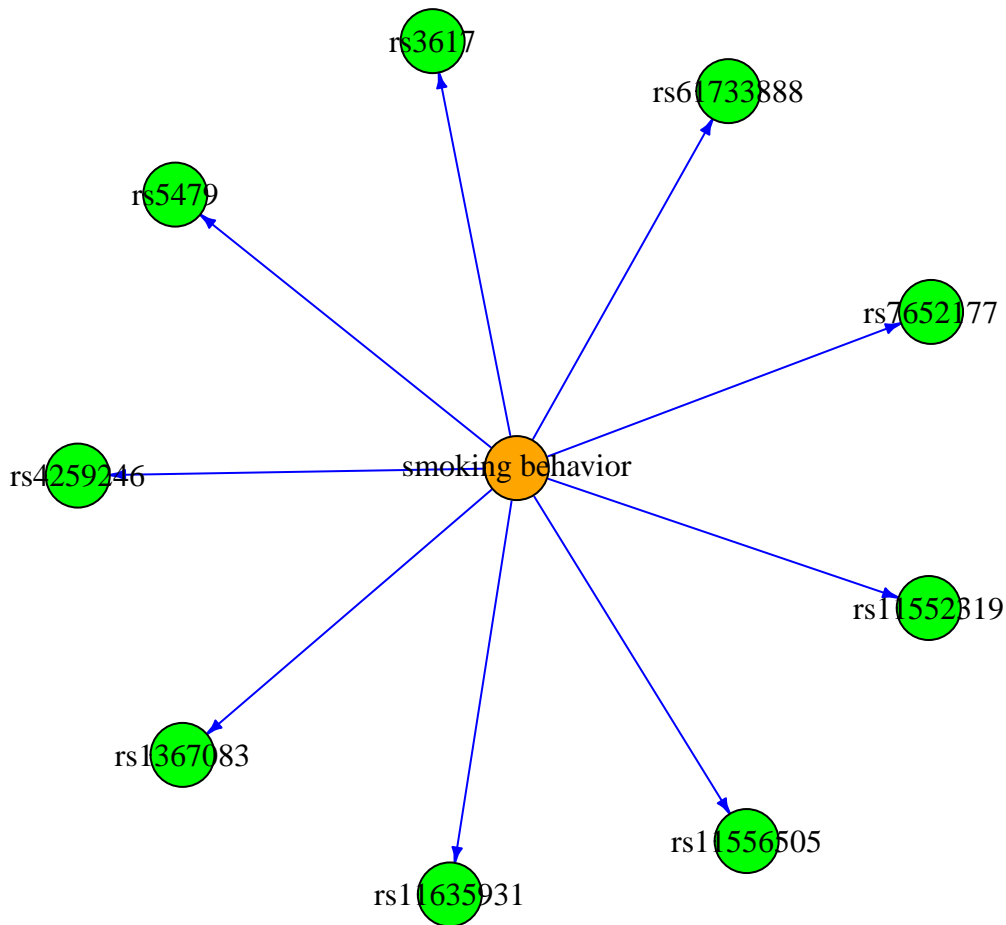

## Variant–Disease Network (type i diabetes mellitus)

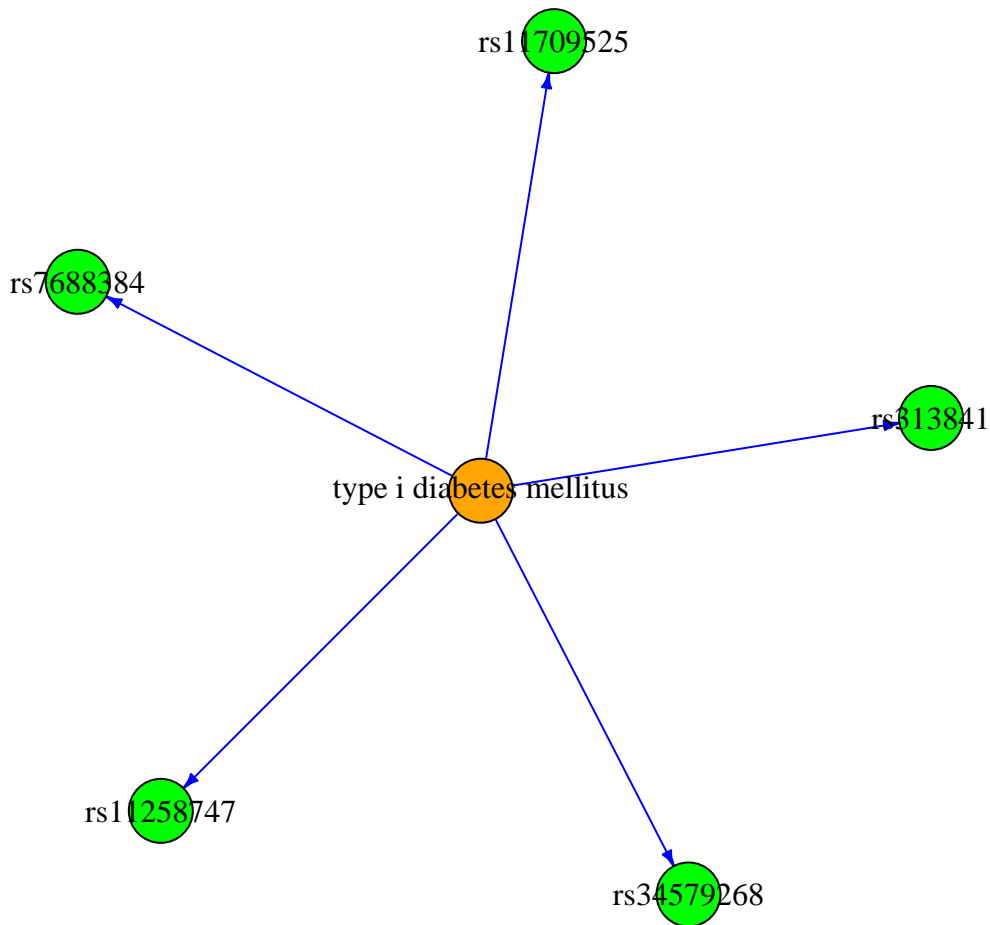

## Variant–Disease Network (lobe attachment)

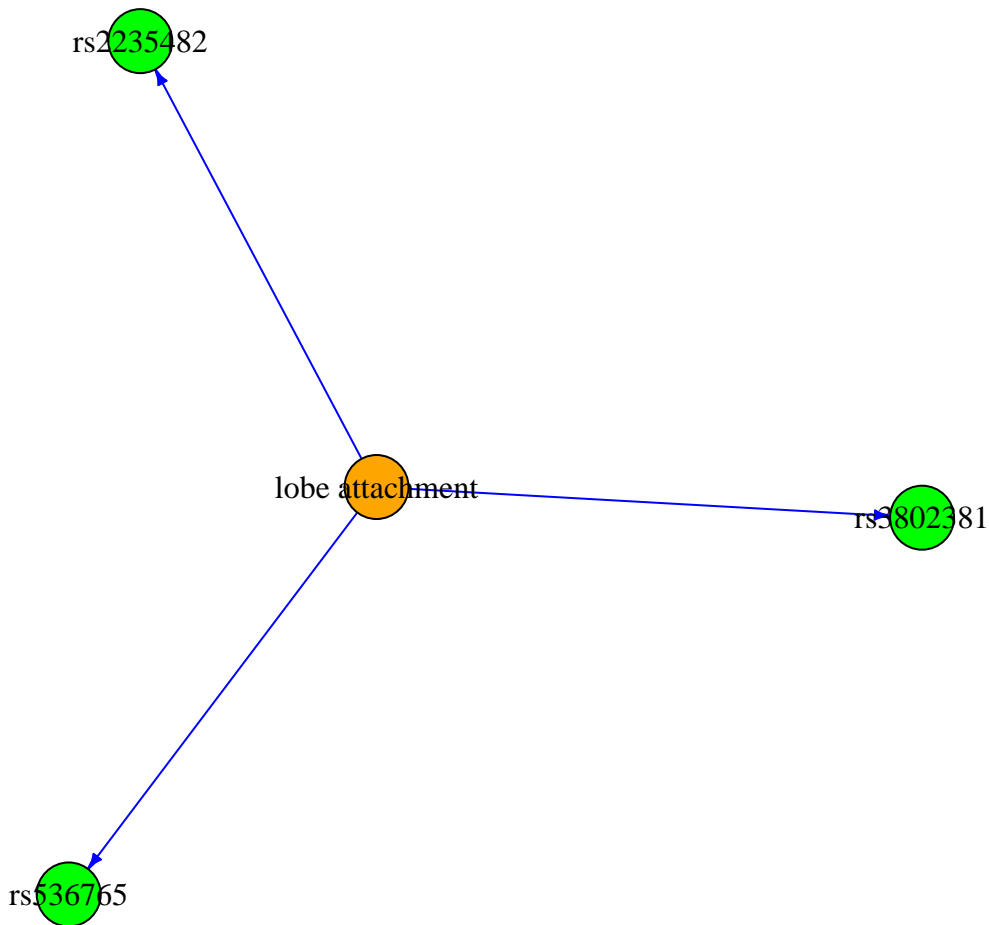

**Variant–Disease Network (facial emotion recognition measurement)**

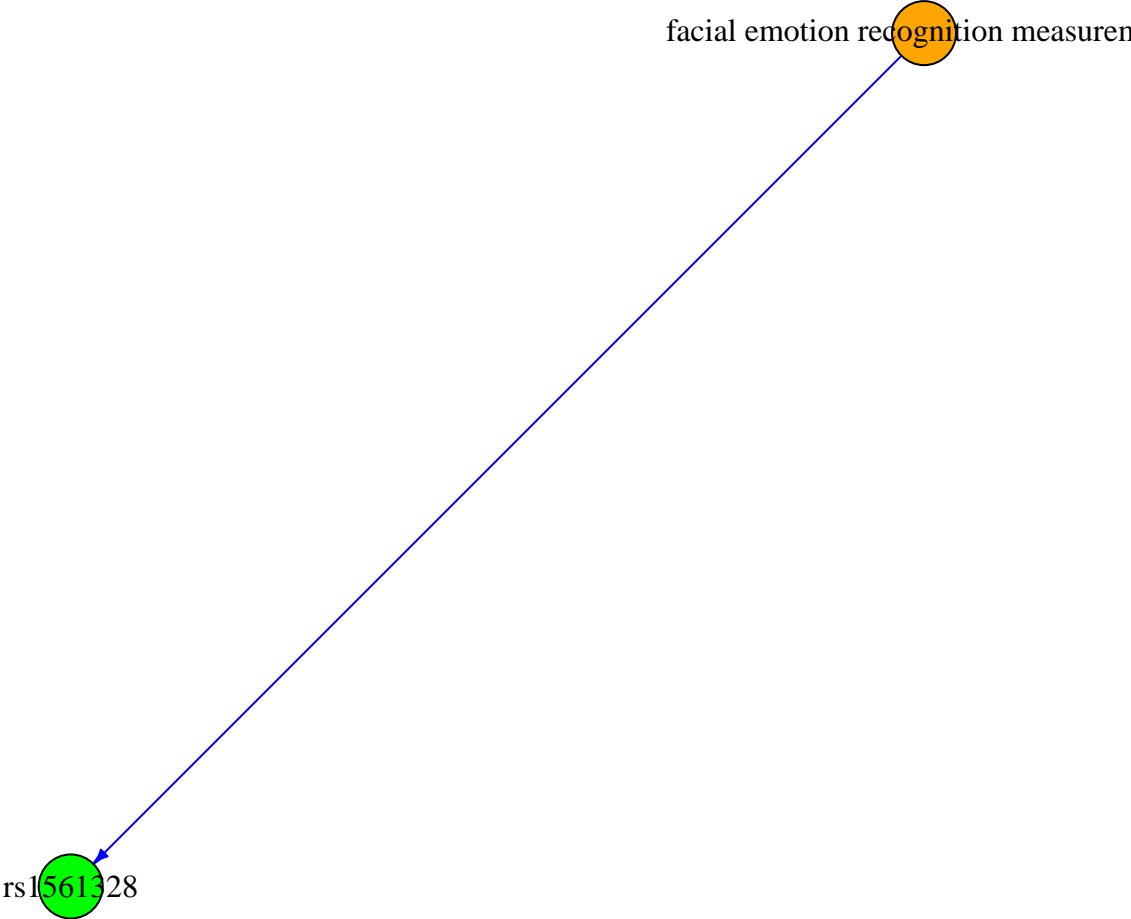

# Variant–Disease Network (response to methylphenidate)

response to methylphenidate

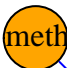

rs1561328

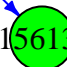

## Variant–Disease Network (parkinsons disease)

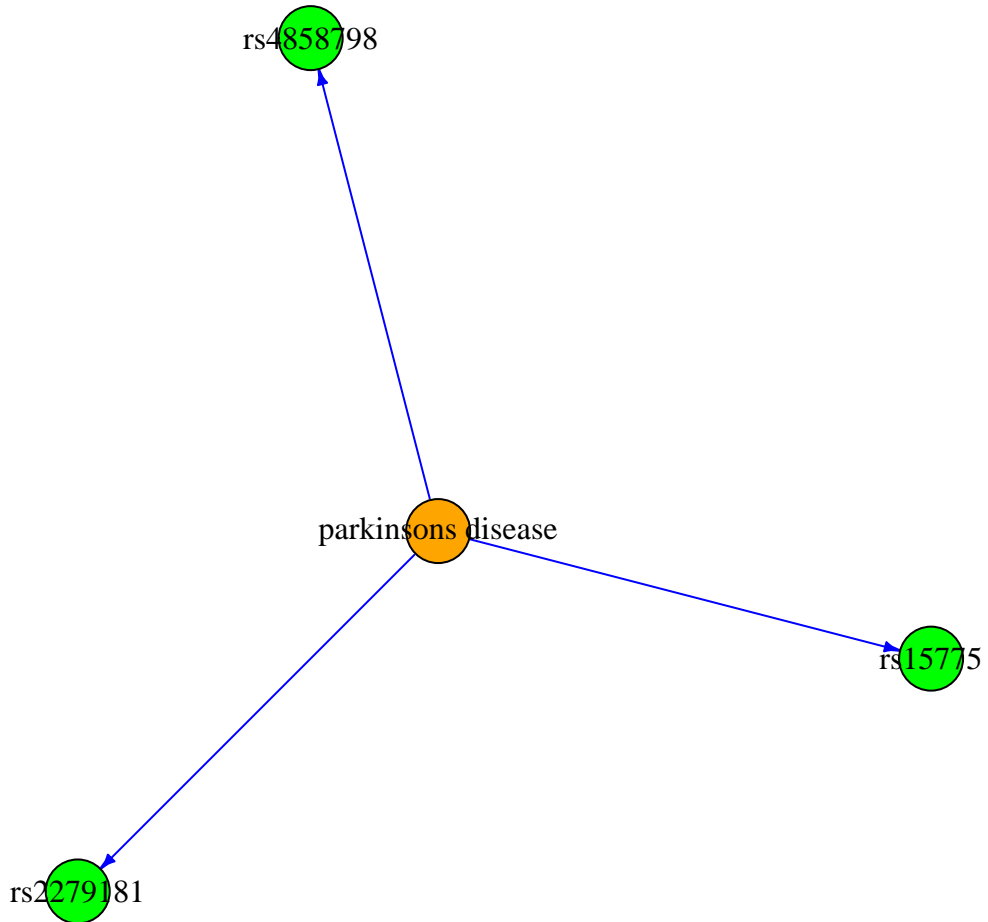

## Variant–Disease Network (late-onset Alzheimers disease)

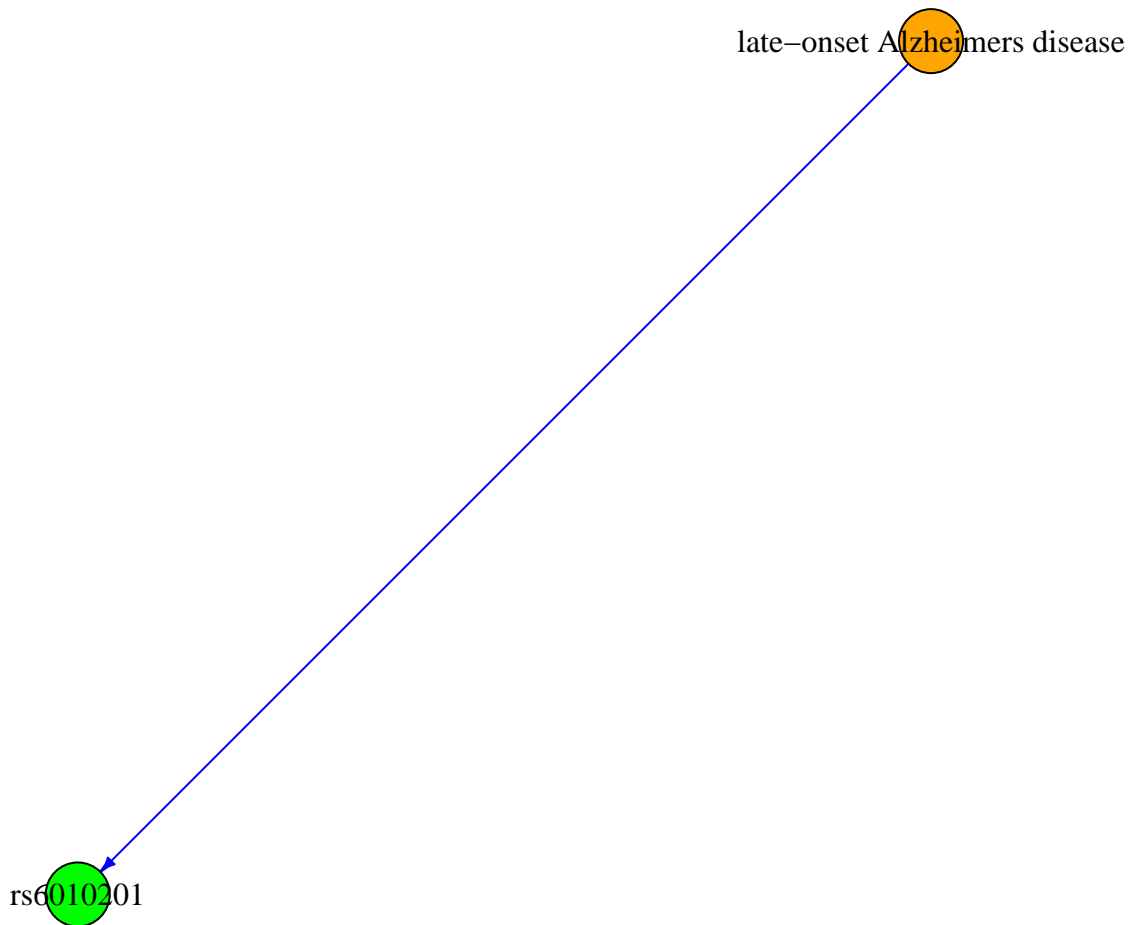

## Variant–Disease Network (uric acid measurement)

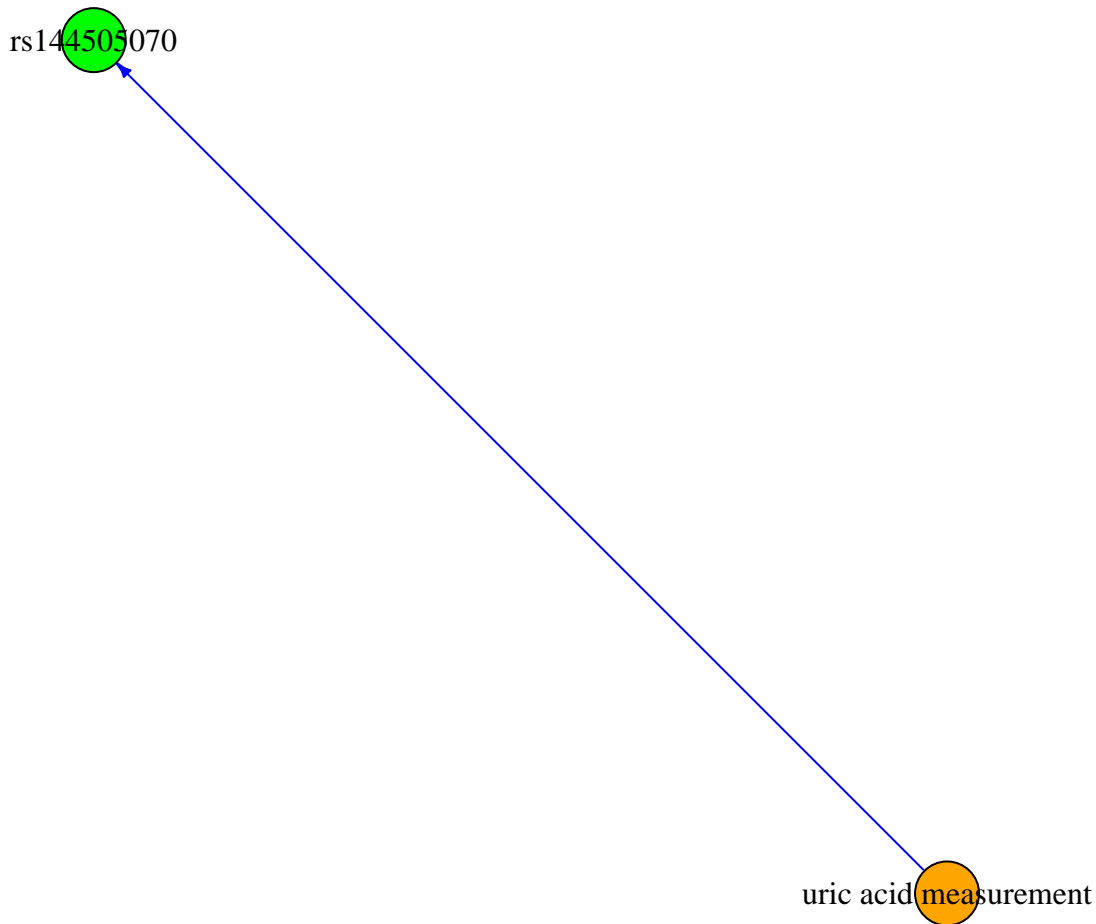



# Variant–Disease Network (functional impairment measurement)

functional impairment measurement

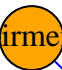

rs7207986

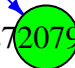

## Variant–Disease Network (neuroticism measurement)

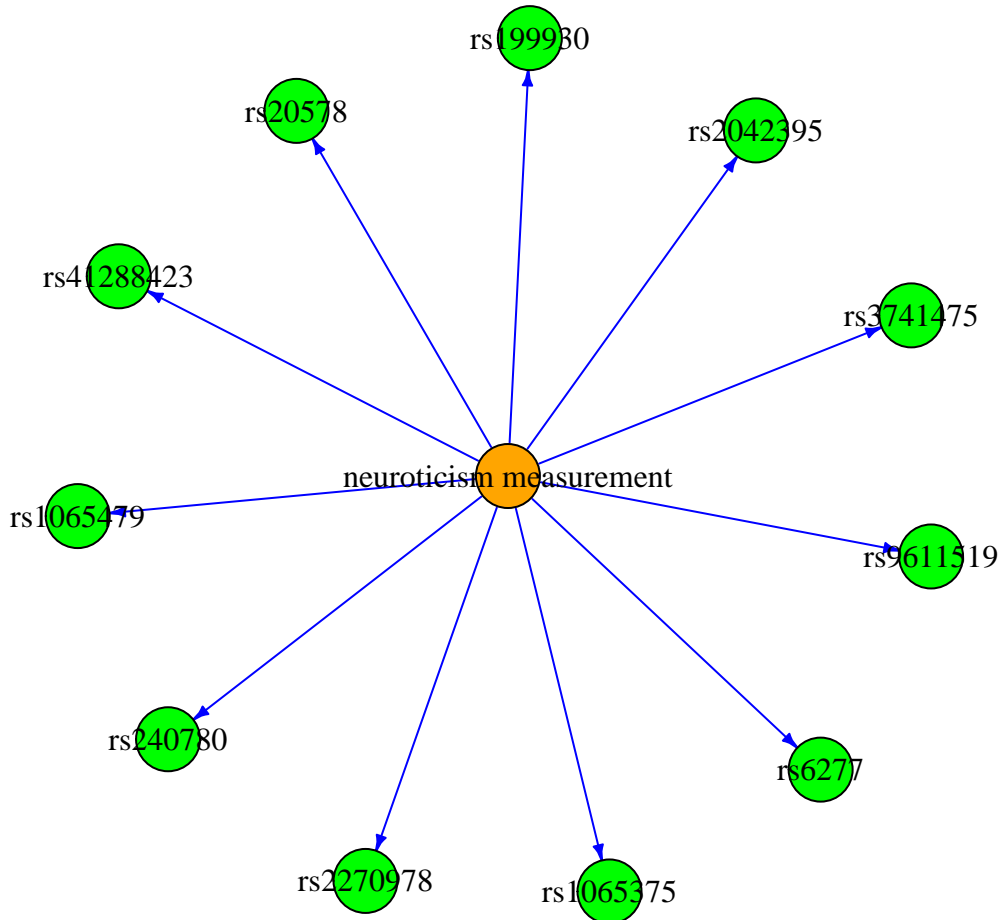

## Variant–Disease Network (age at onset)

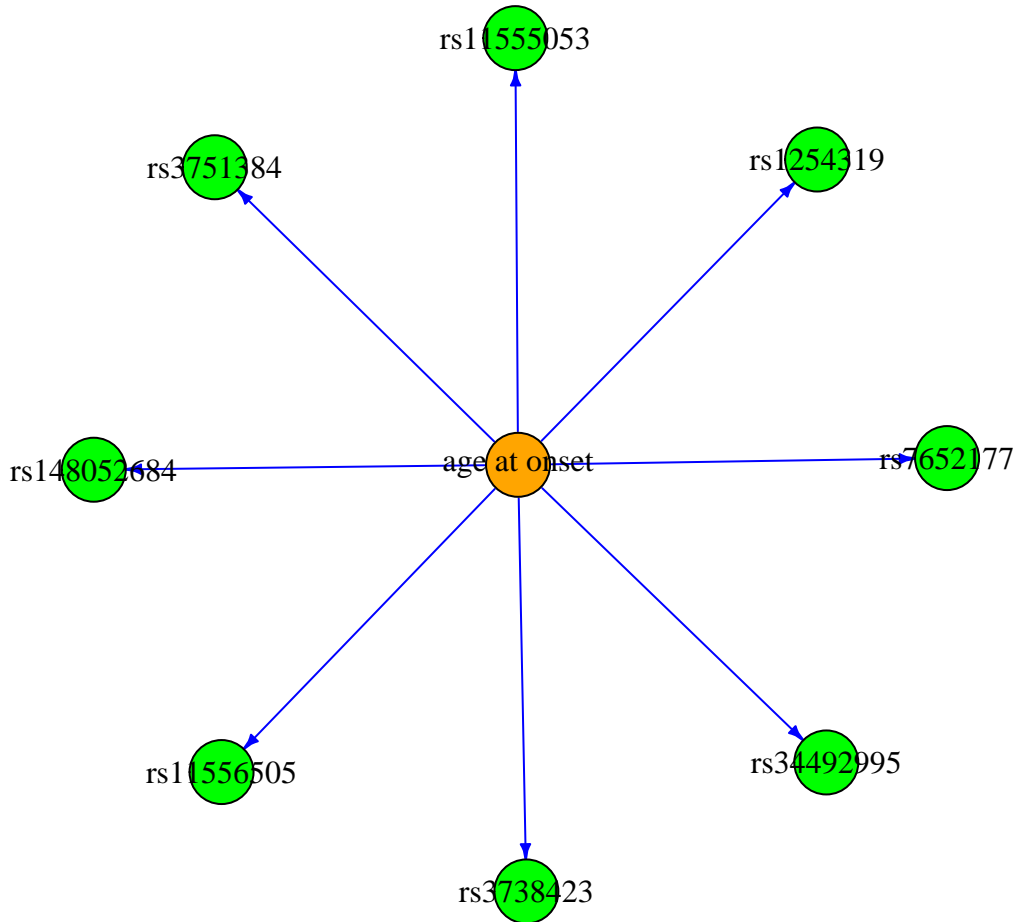

Variant–Disease Network (BMI-adjusted waist circumference)

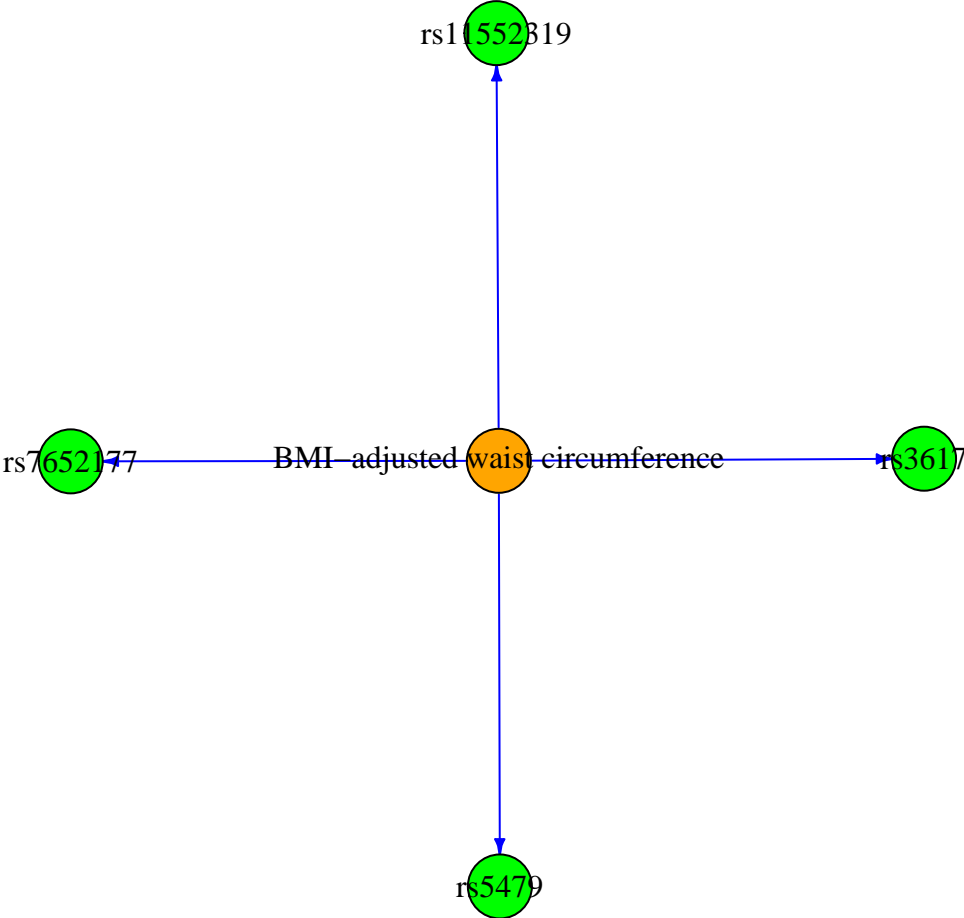

## Variant–Disease Network (physical activity measurement)

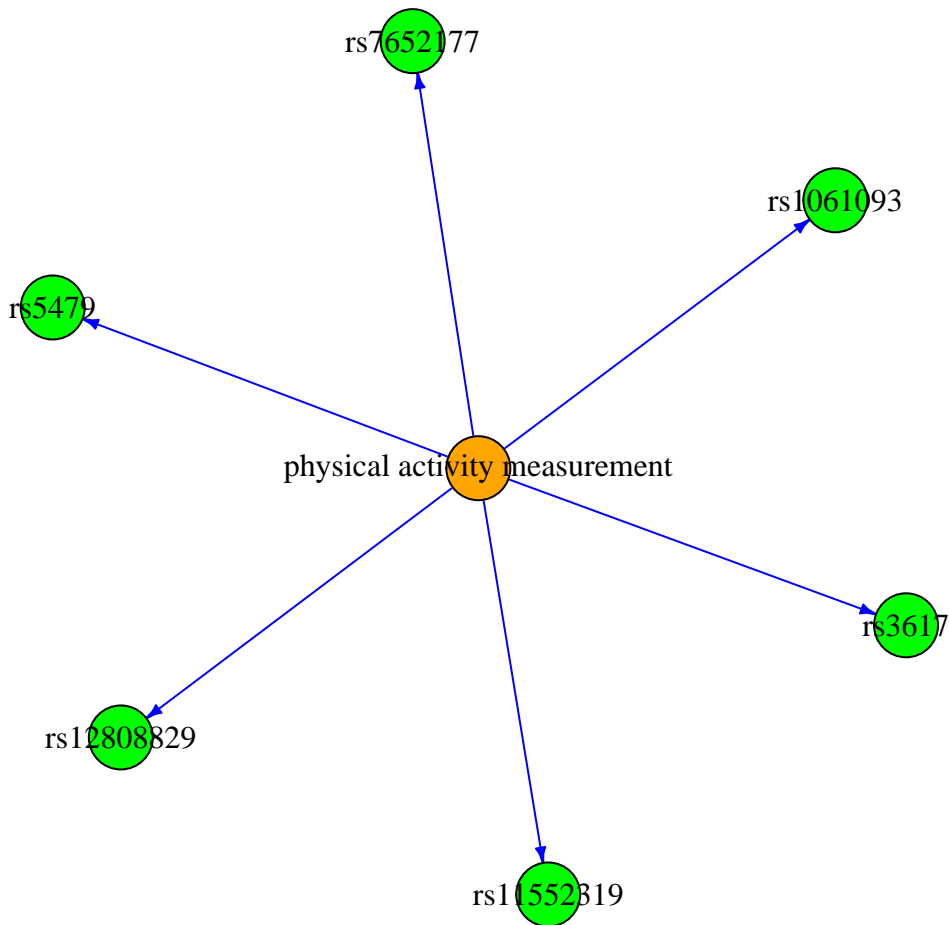

# Variant–Disease Network (refractive error measurement)

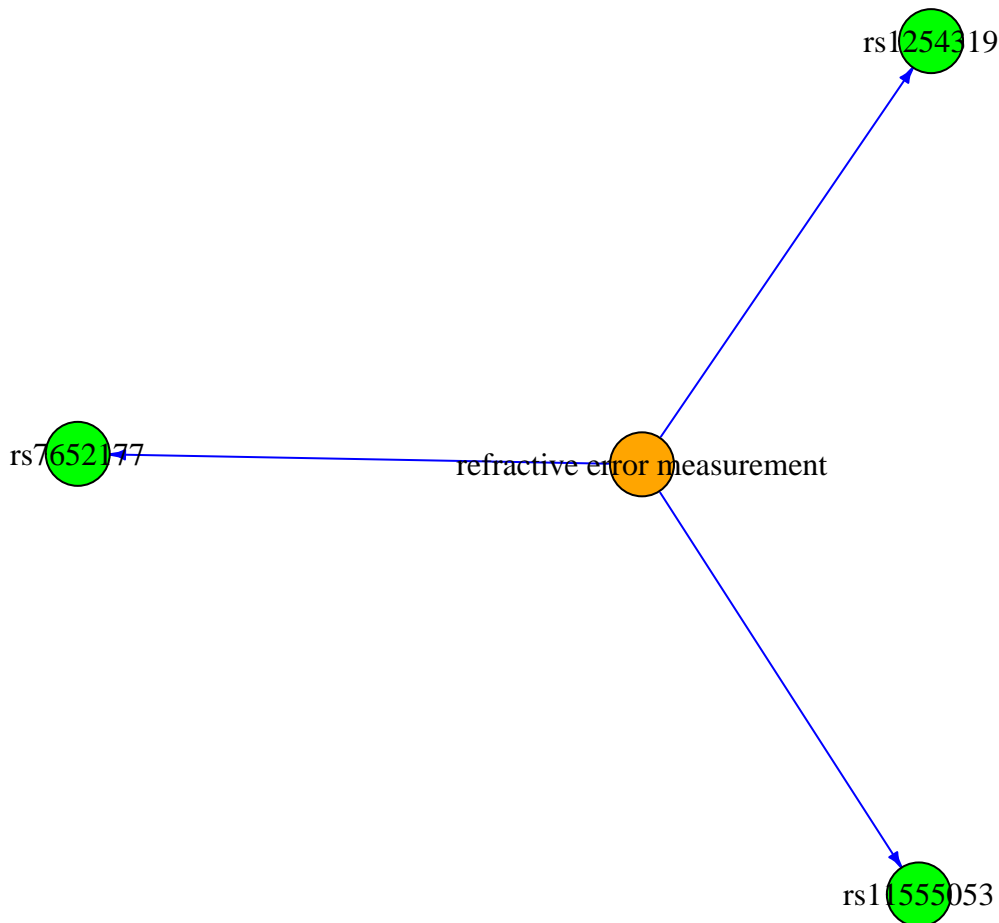

## Variant–Disease Network (waist circumference)

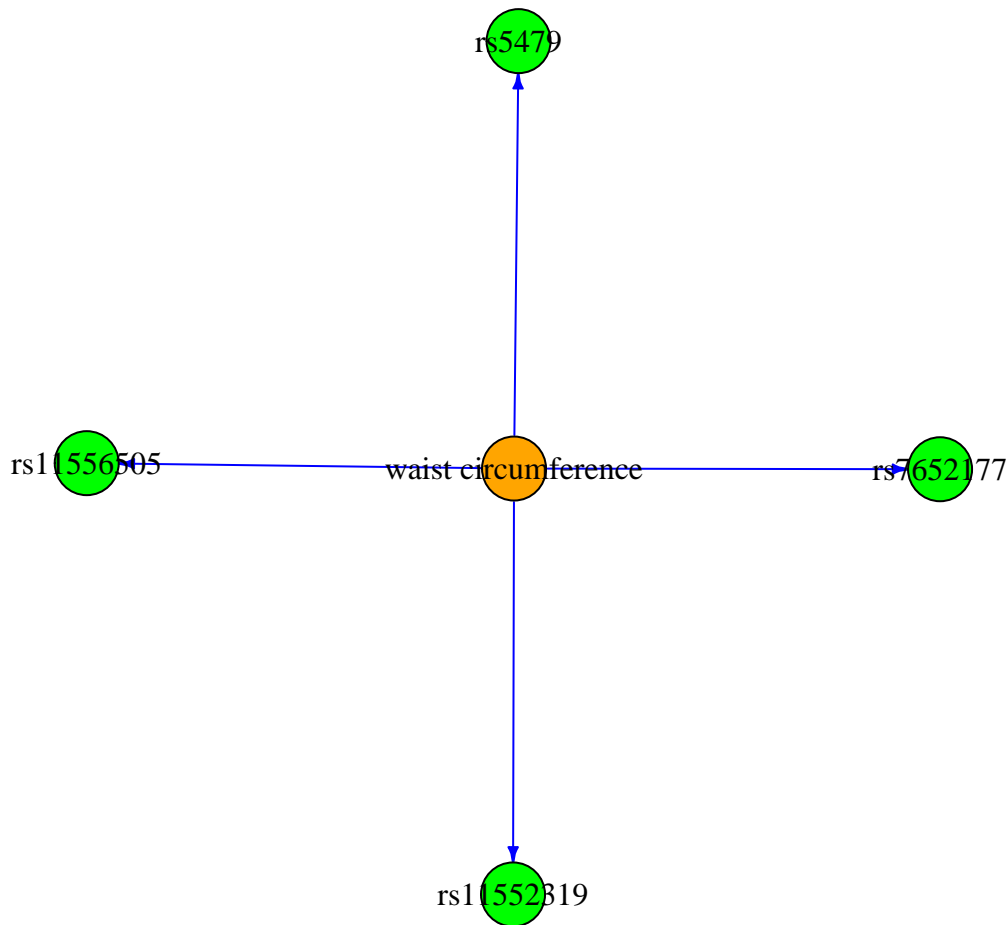

**Variant–Disease Network (testosterone measurement)**

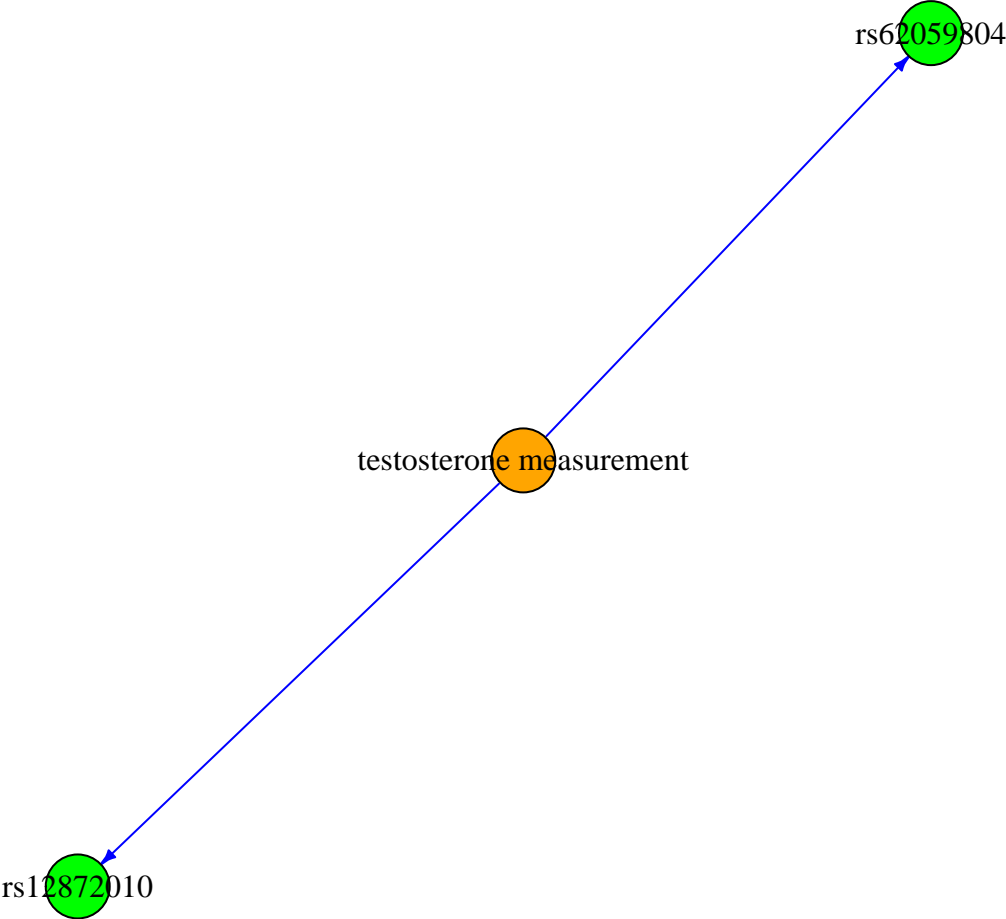



## Variant–Disease Network (dental caries)

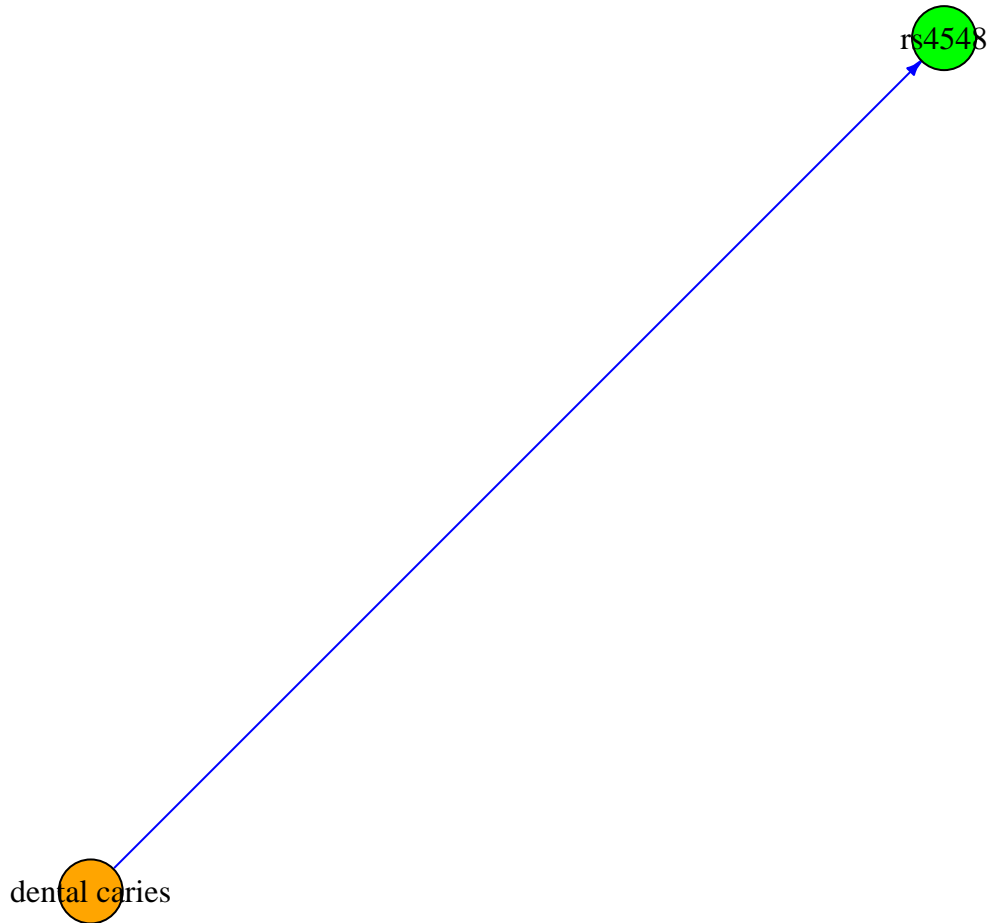

**Variant–Disease Network (fatty acid measurement)**

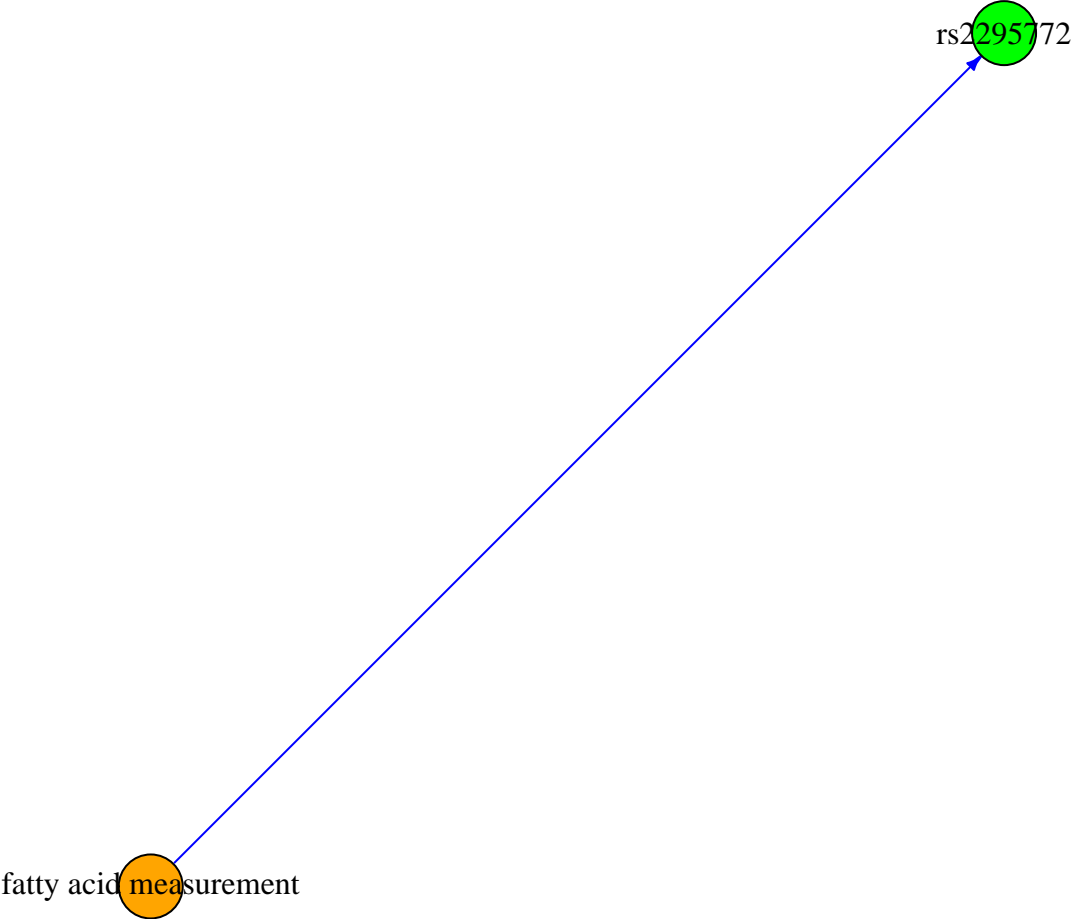

**Variant–Disease Network (palmitoleic acid measurement)**

palmitoleic acid measurement

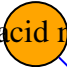

rs2295772

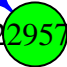

## Variant–Disease Network (erythrocyte count)

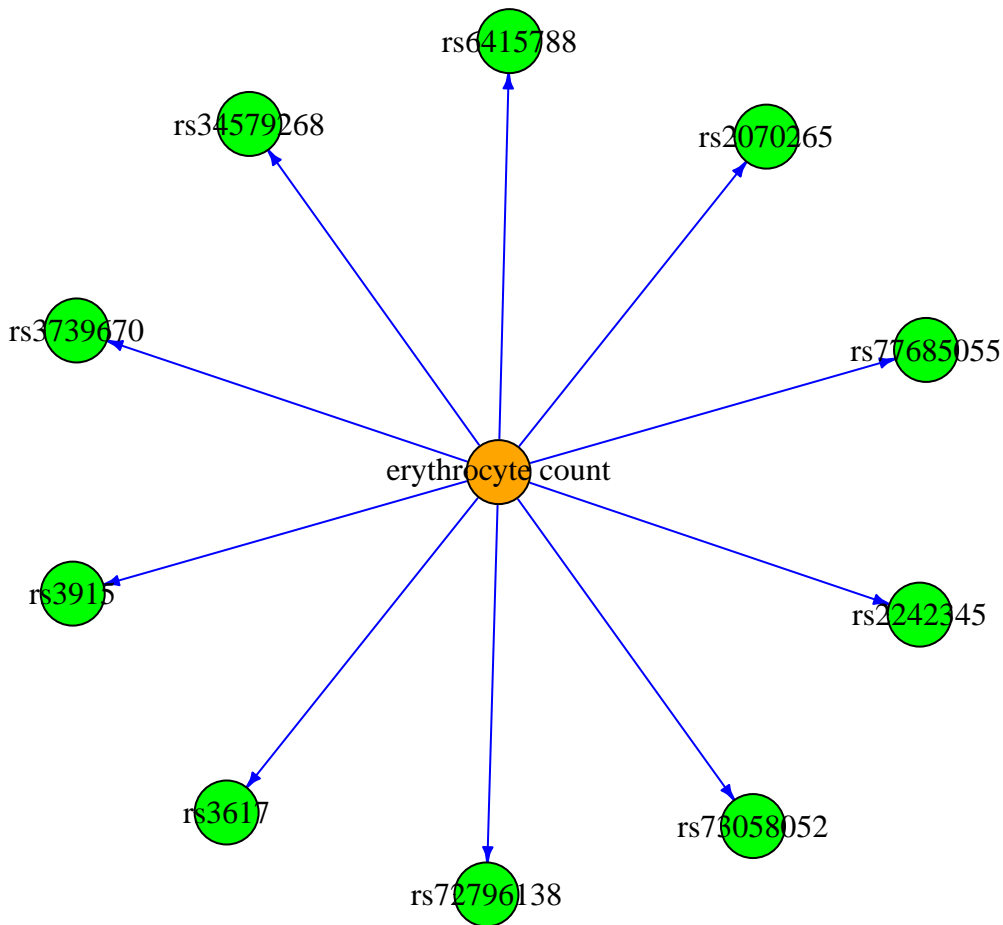

## Variant–Disease Network (red blood cell distribution width)

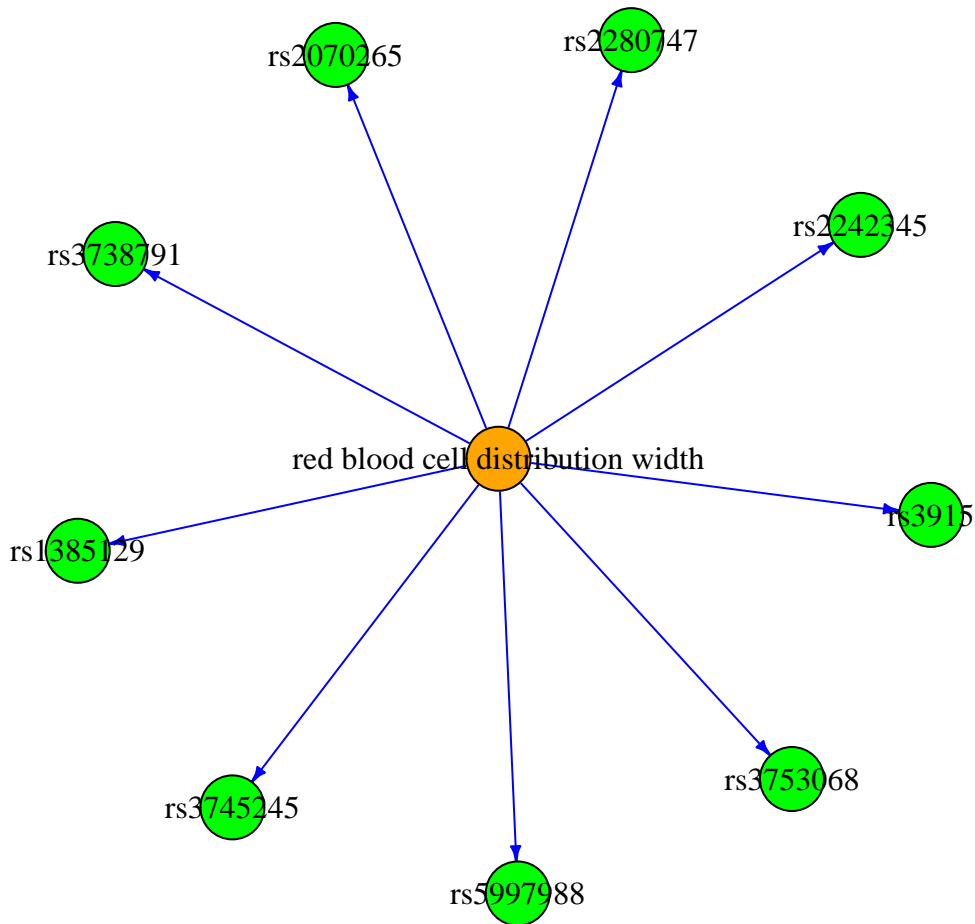

## Variant–Disease Network (anxiety)

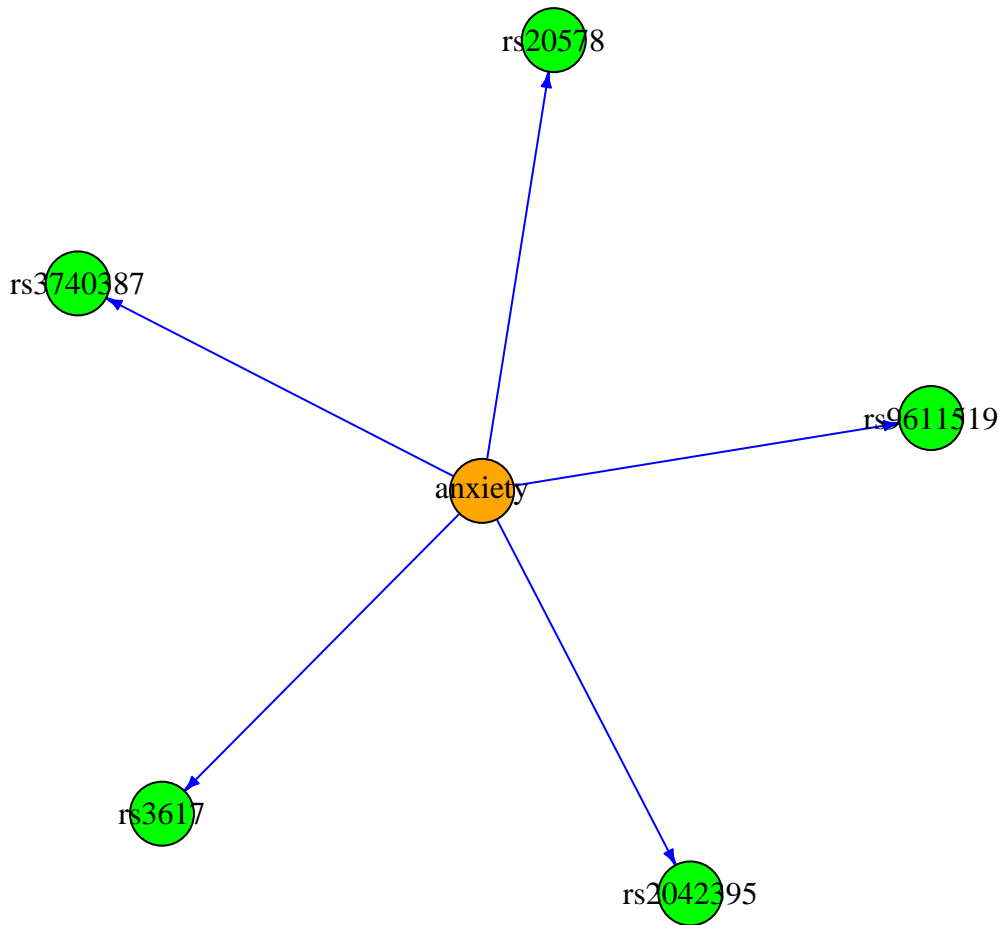

## Variant–Disease Network (migraine disorder)

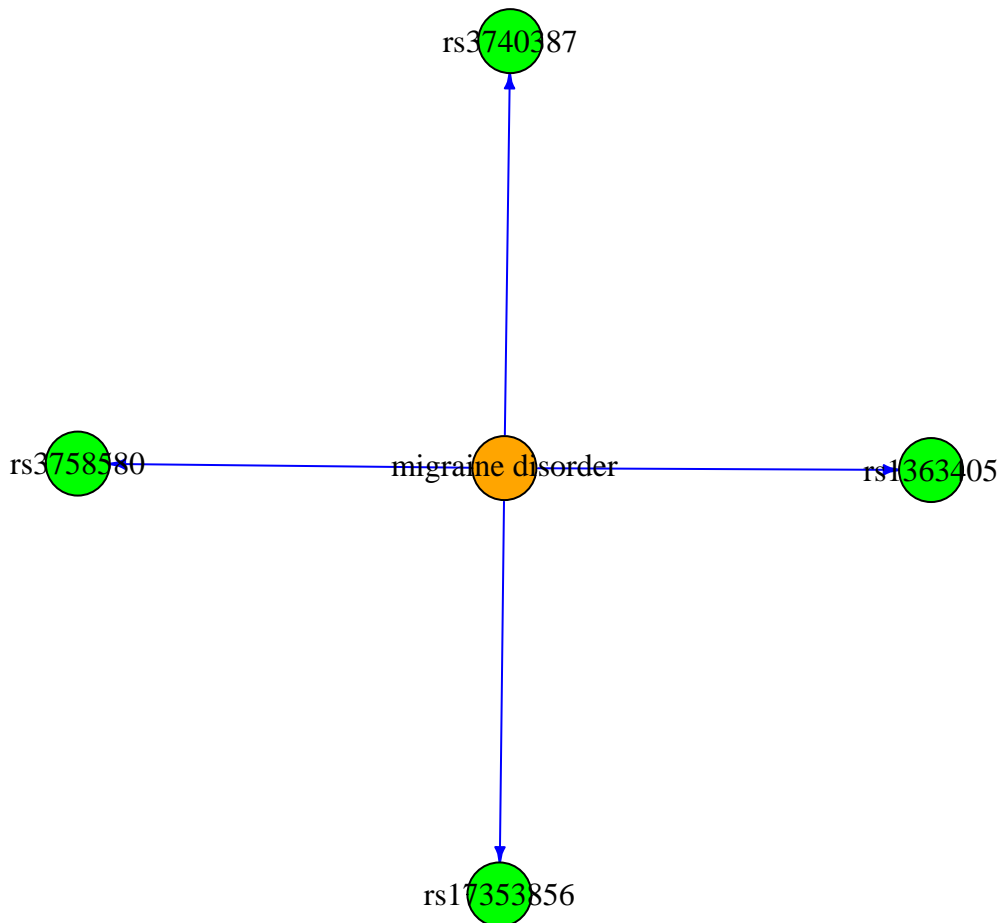

**Variant–Disease Network (white matter lesion progression measurement)**

white matter lesion progression measurement

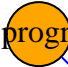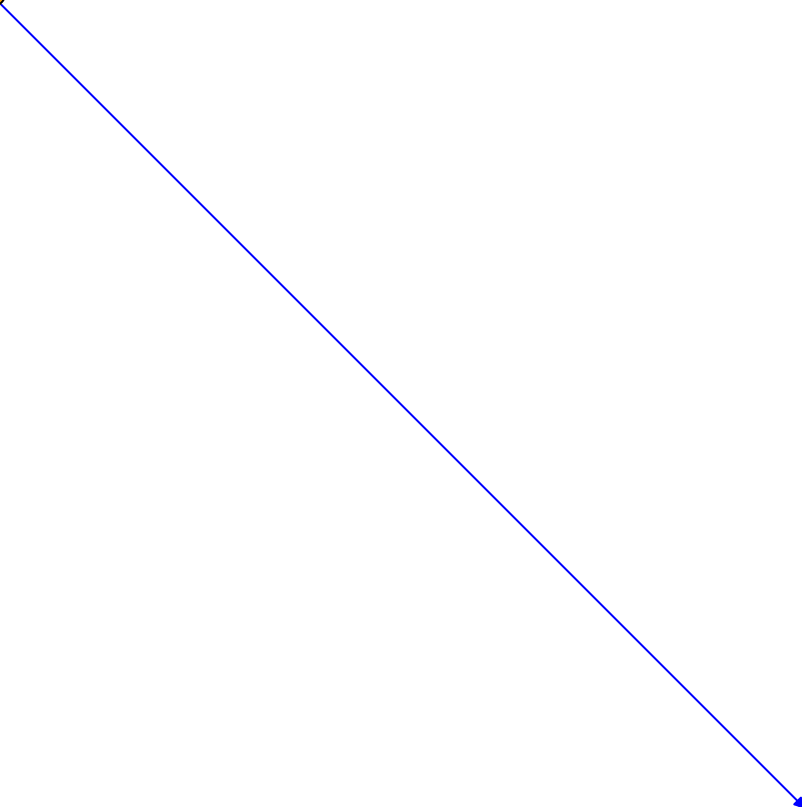

rs3740387

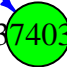



# Variant-Disease Network (head and neck malignant neoplasia)

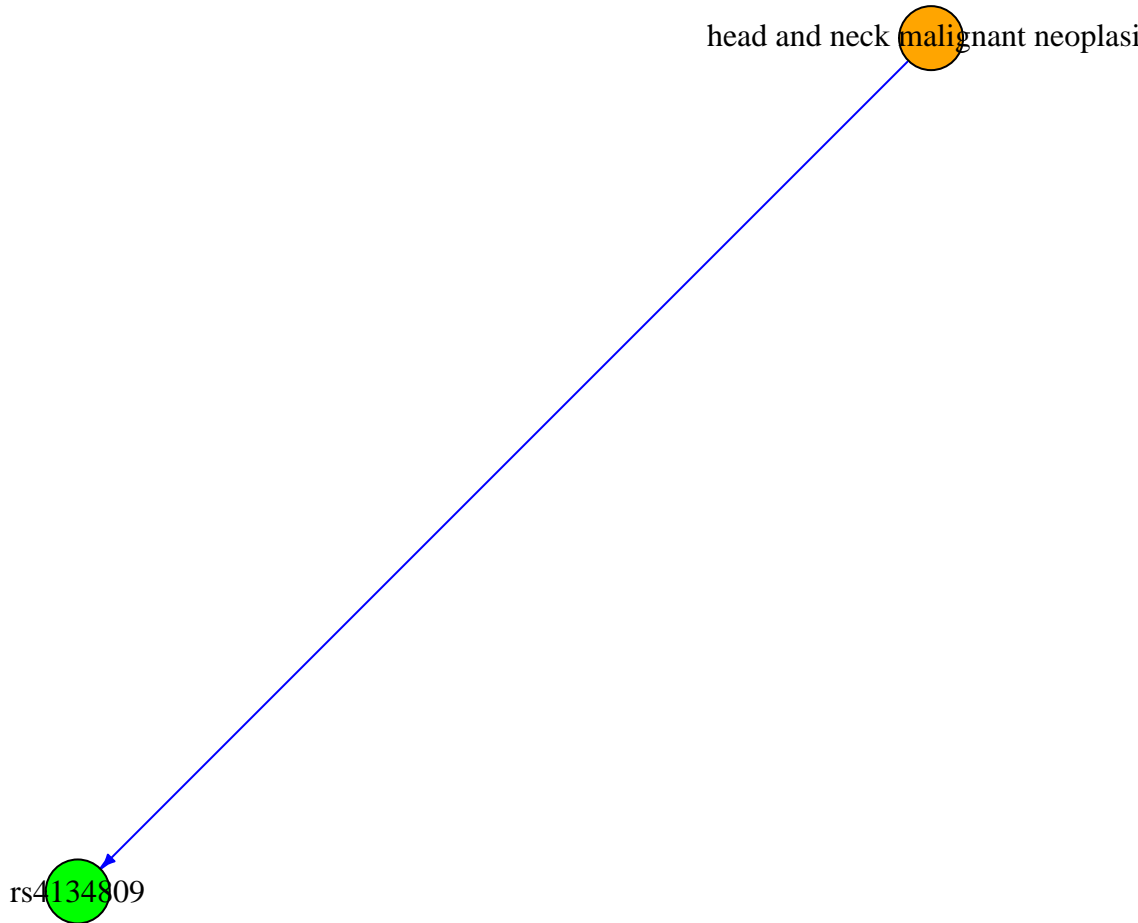

## Variant–Disease Network (neuropathic pain)

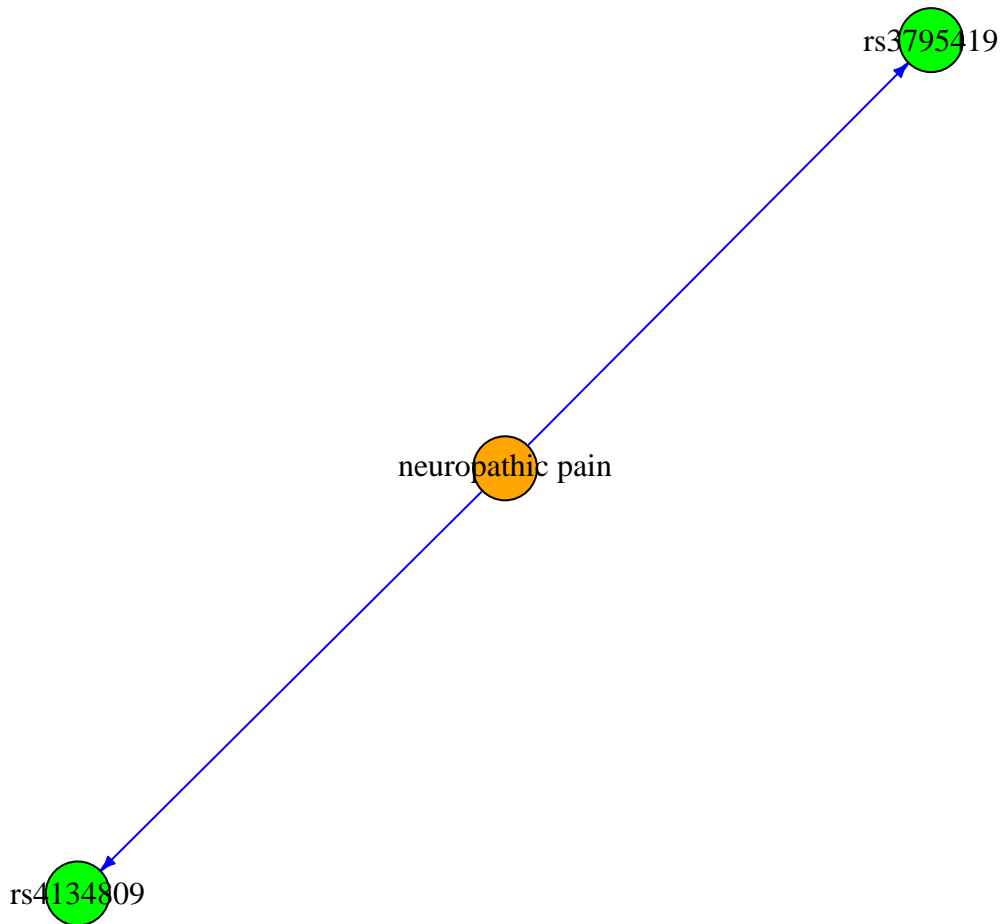

**Variant–Disease Network (adolescent idiopathic scoliosis)**

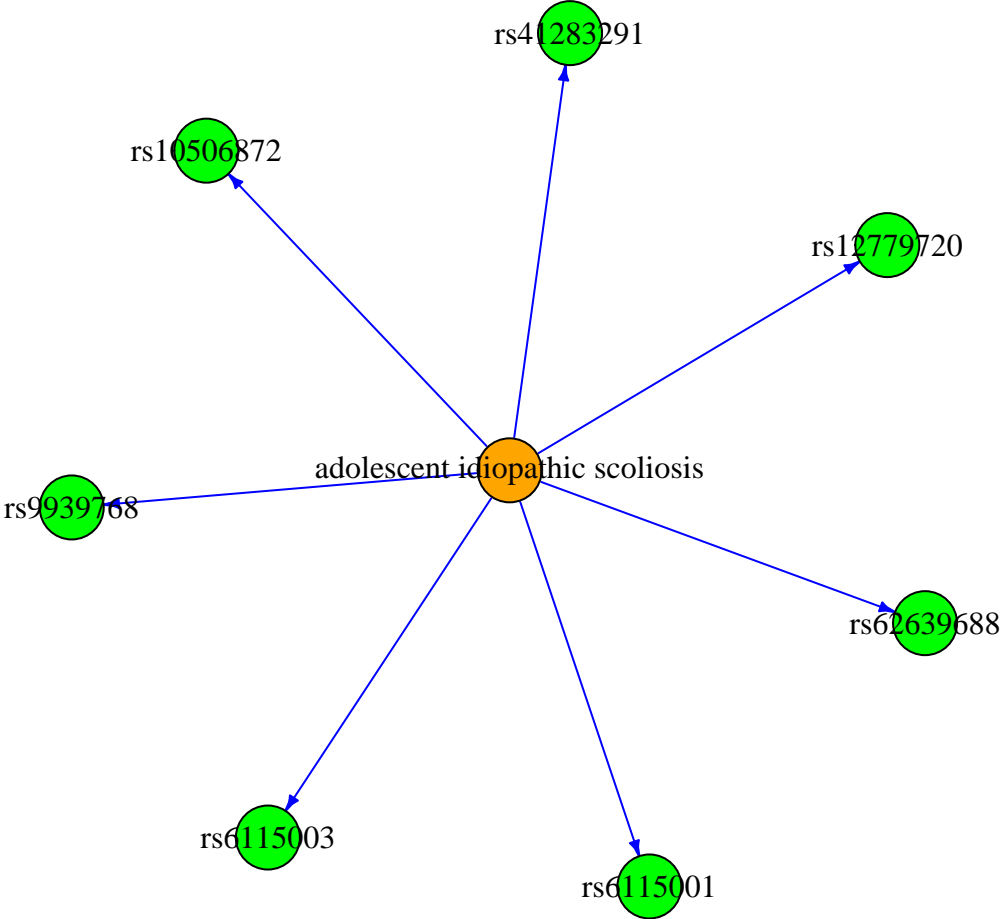

# Variant–Disease Network (parental genotype effect measurement)

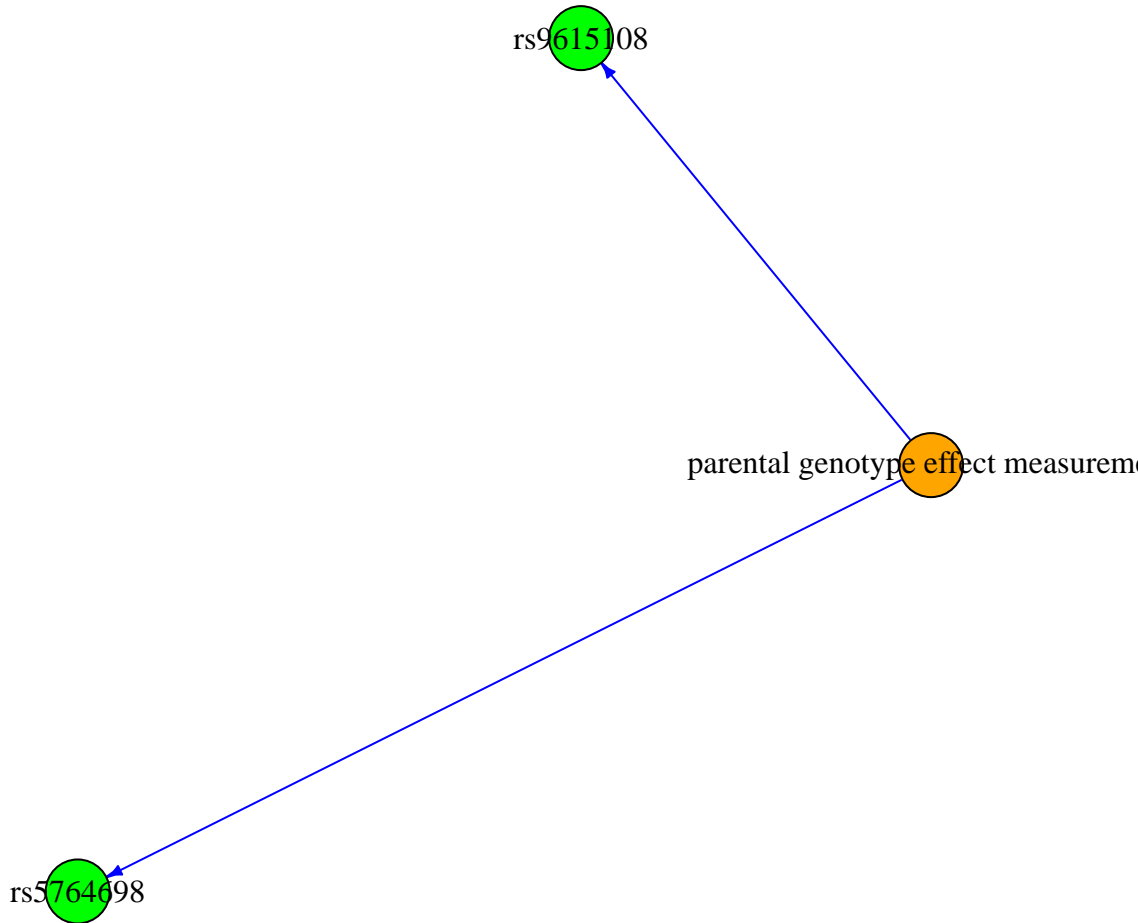

## Variant–Disease Network (peanut allergy measurement)

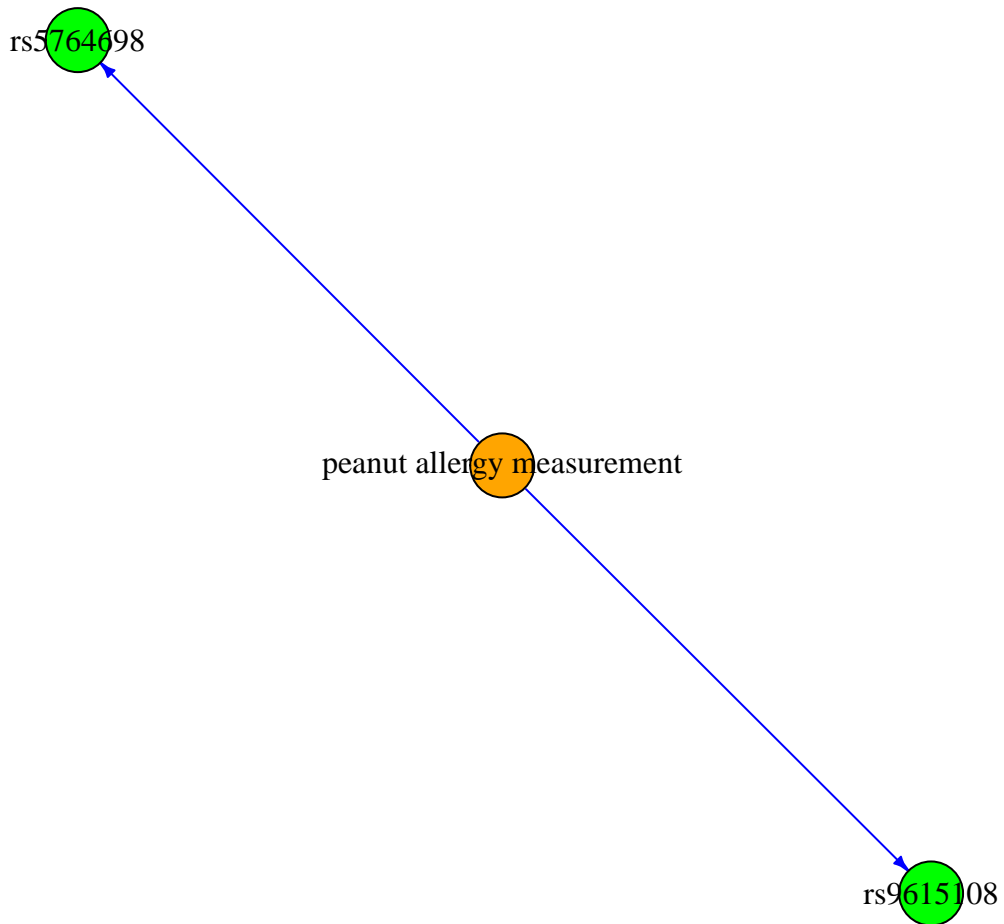

Variant–Disease Network (age-related macular degeneration)

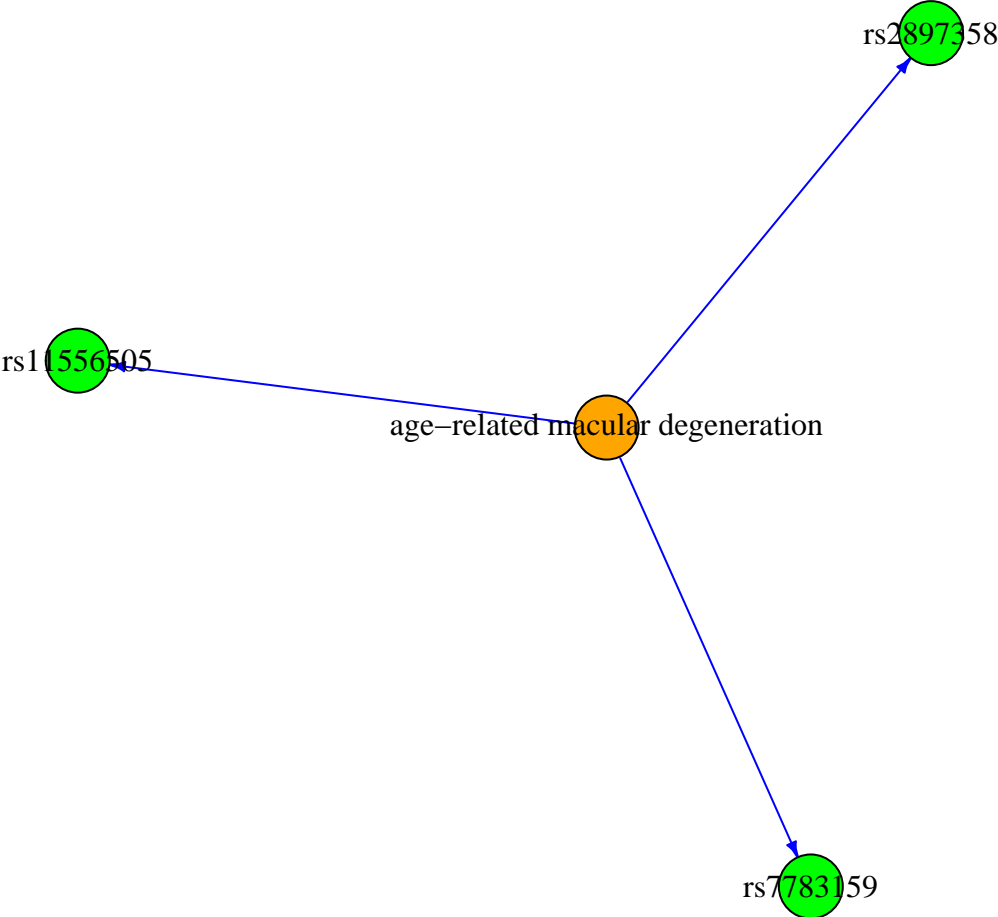

## Variant–Disease Network (atrophic macular degeneration)

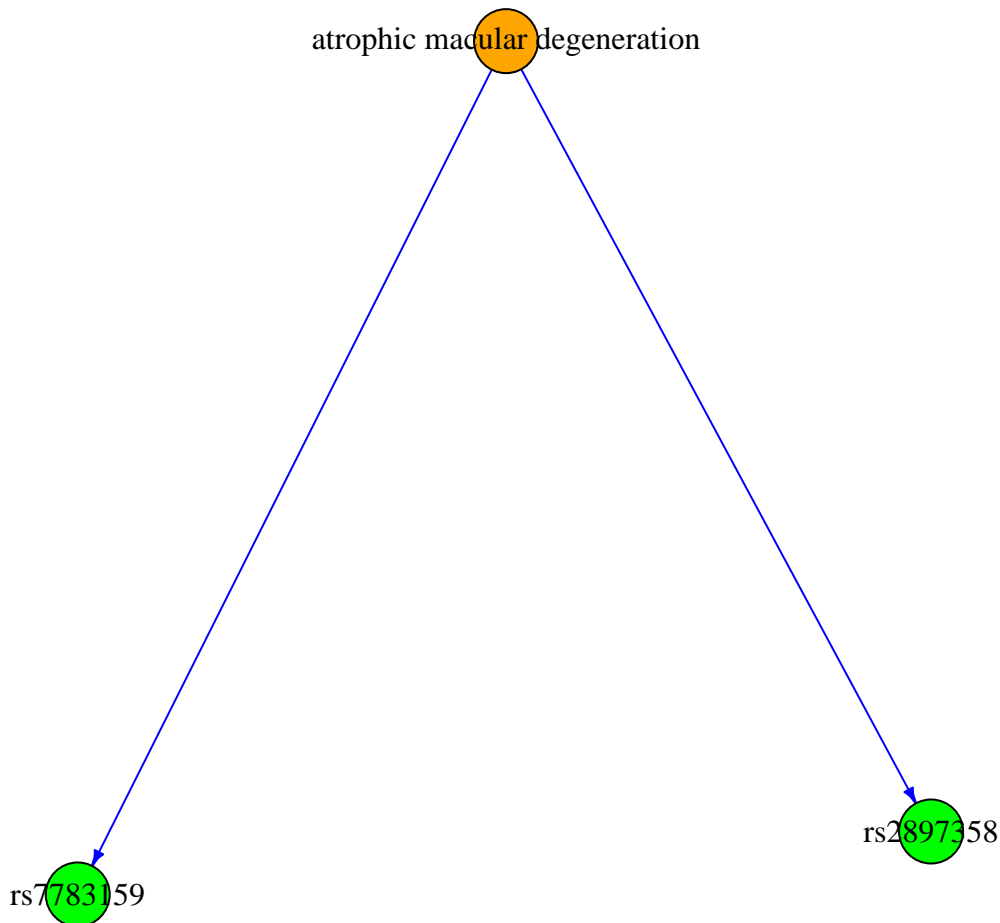

## Variant–Disease Network (platelet distribution width)

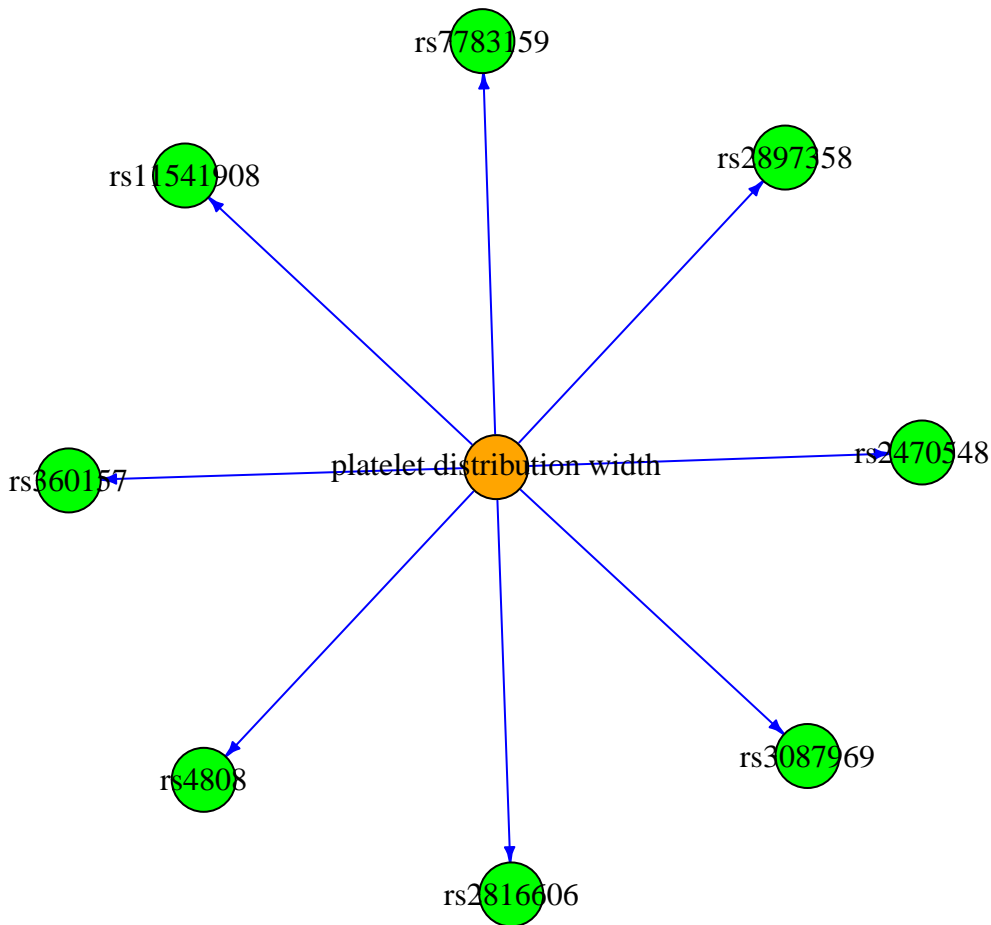



## Variant–Disease Network (wet macular degeneration)

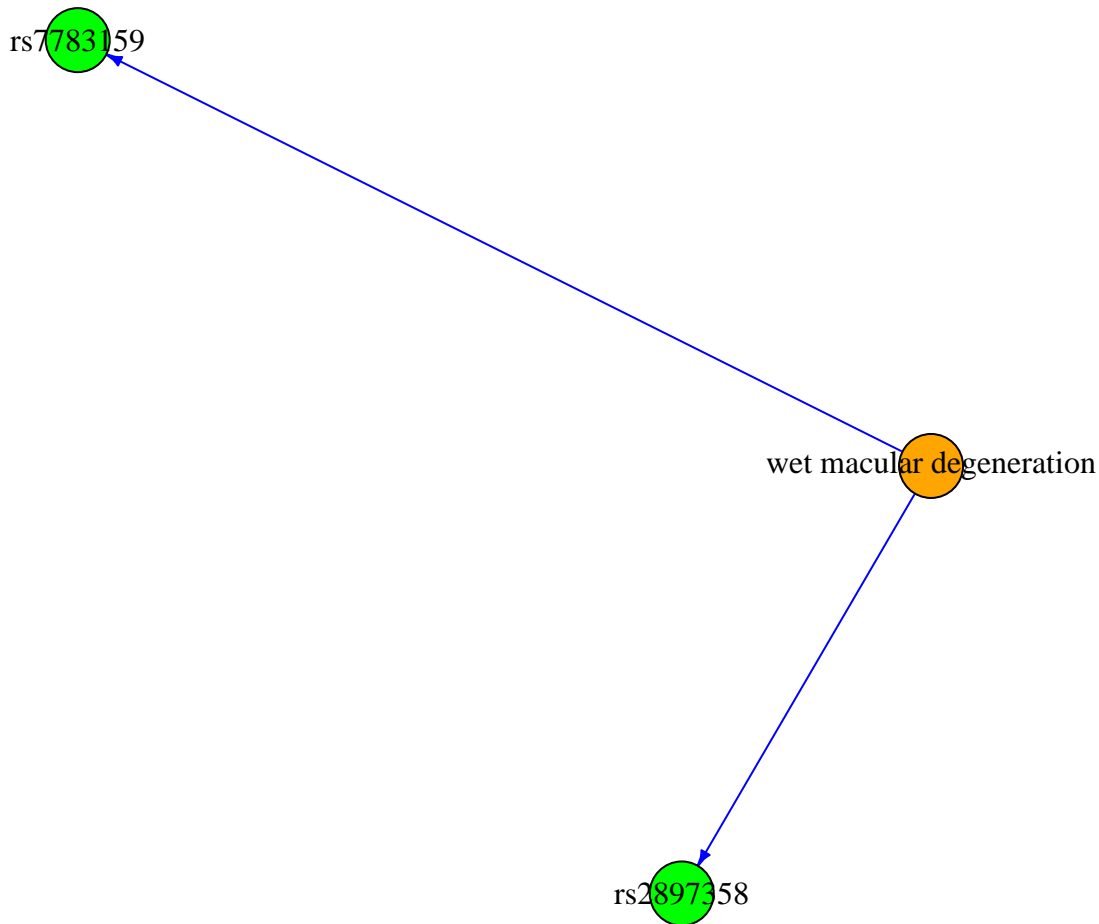

## Variant–Disease Network (D dimer measurement)

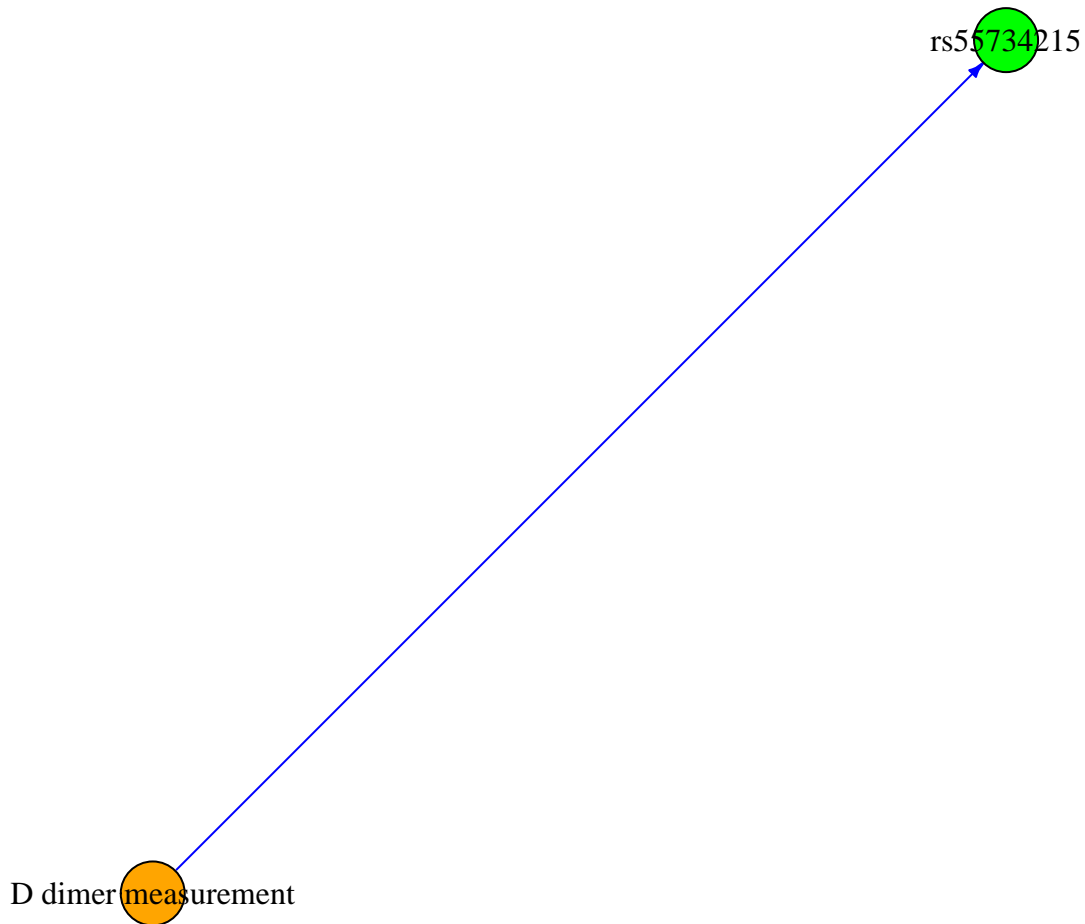

# Variant–Disease Network (factor VII measurement)

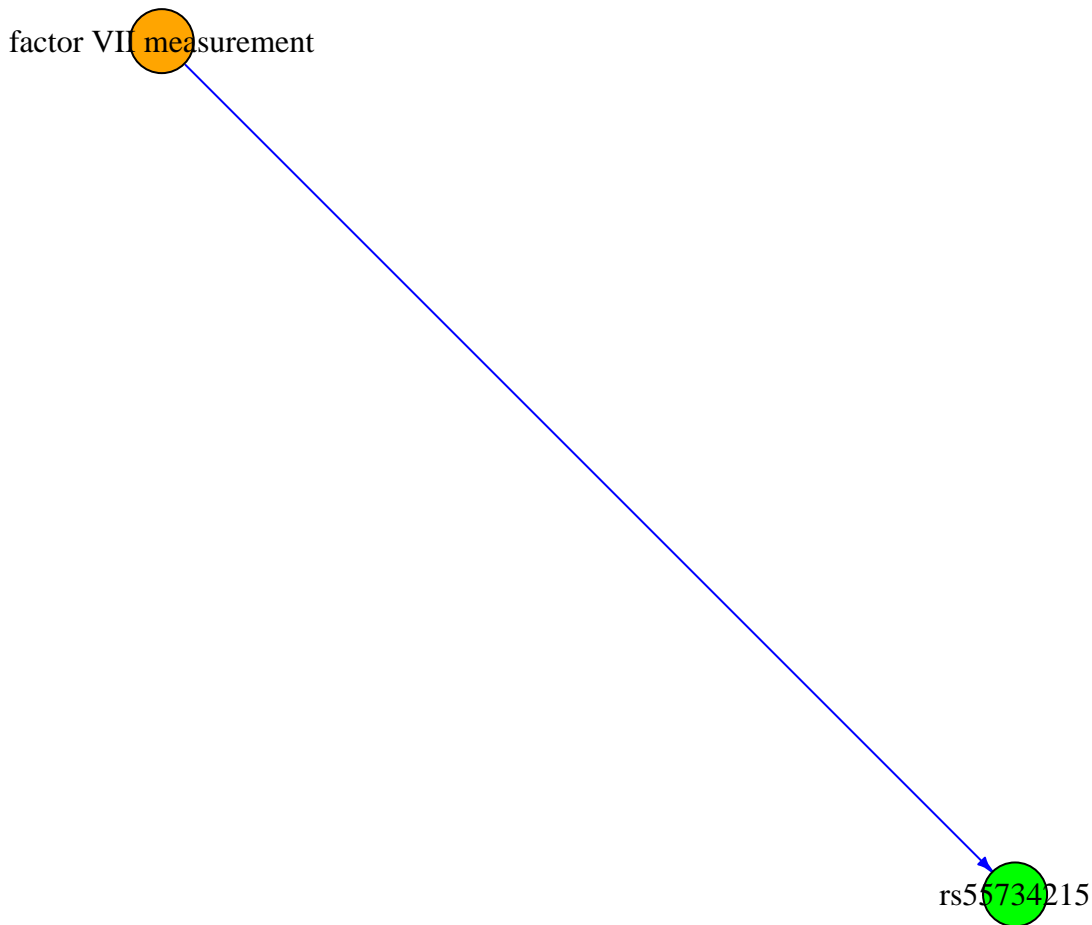

## Variant-Disease Network (hematological measurement)

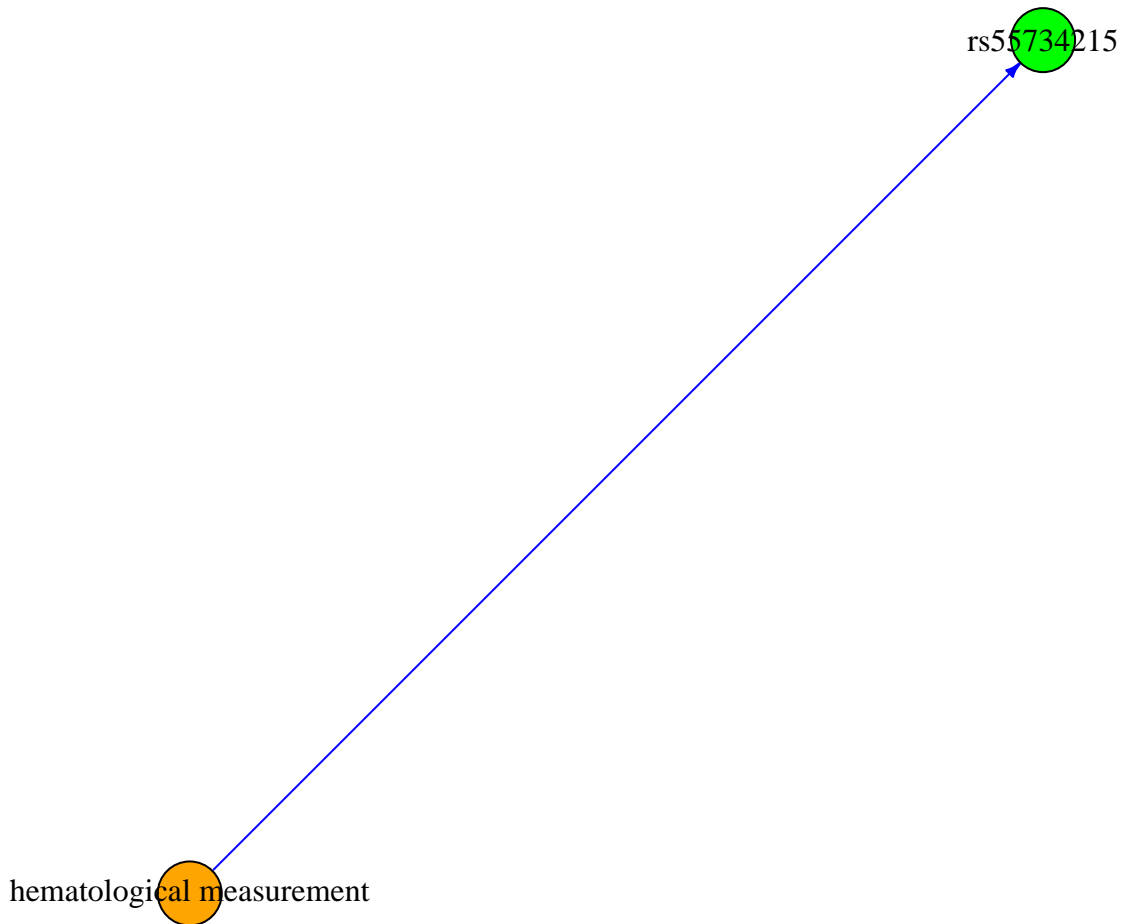

## Variant–Disease Network (protein c measurement)

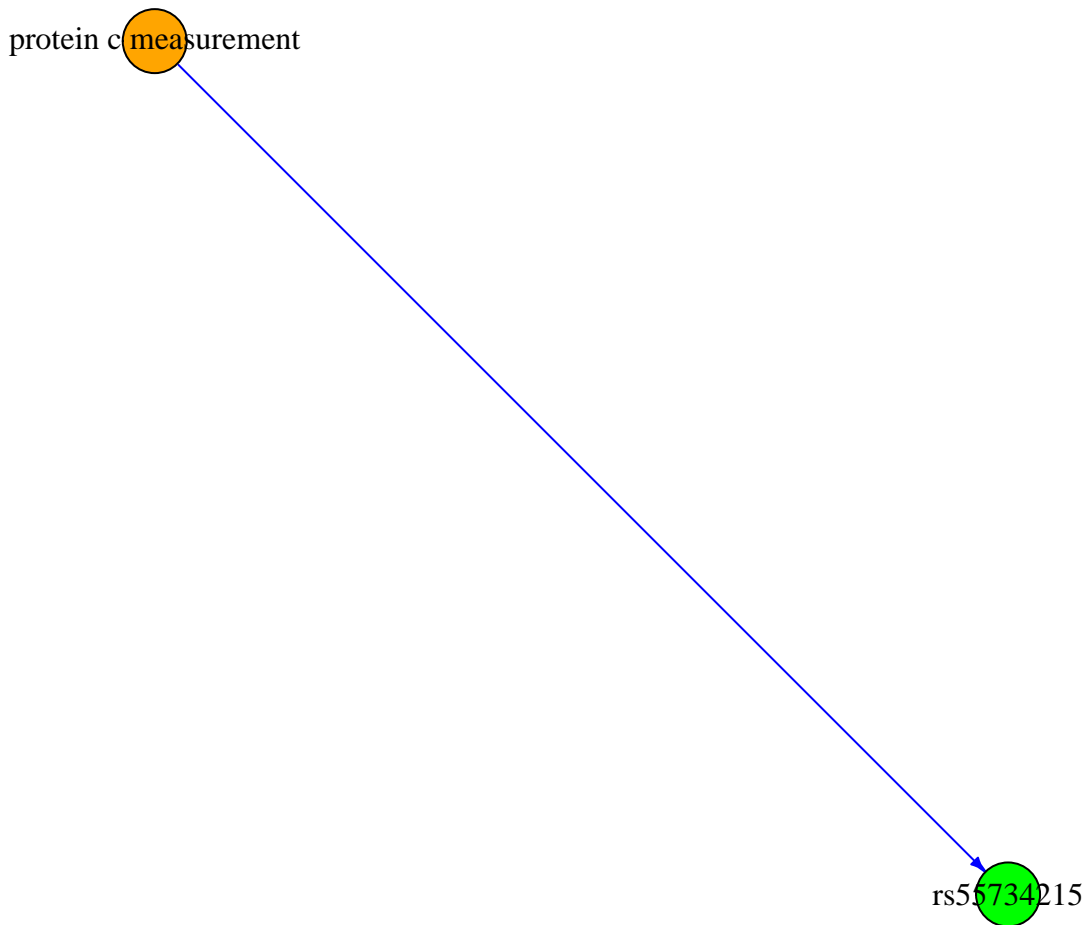

## Variant–Disease Network (prothrombin time measurement)

prothrombin time measurement

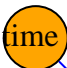

rs55734215

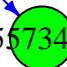

## Variant–Disease Network (sporadic amyotrophic lateral sclerosis)

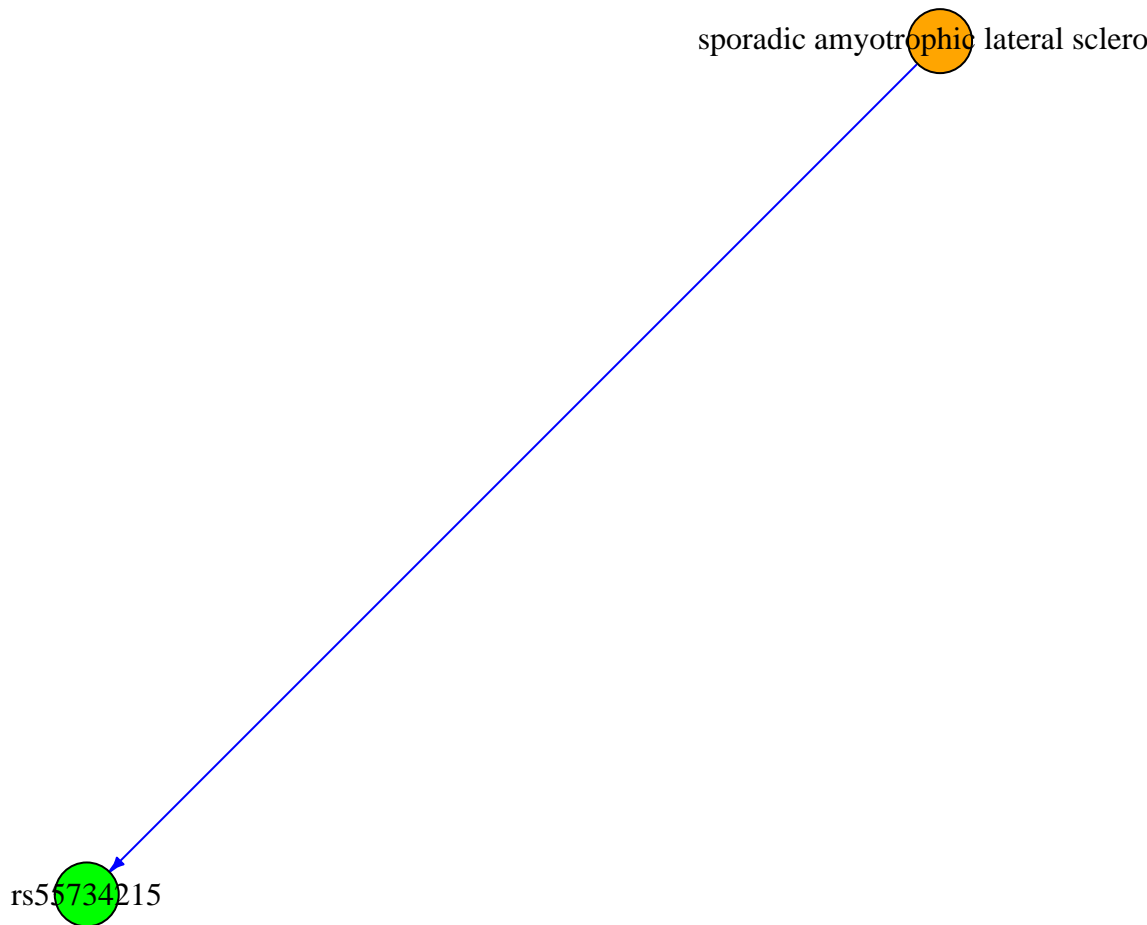

**Variant–Disease Network (vitamin K–dependent protein C measurement)**

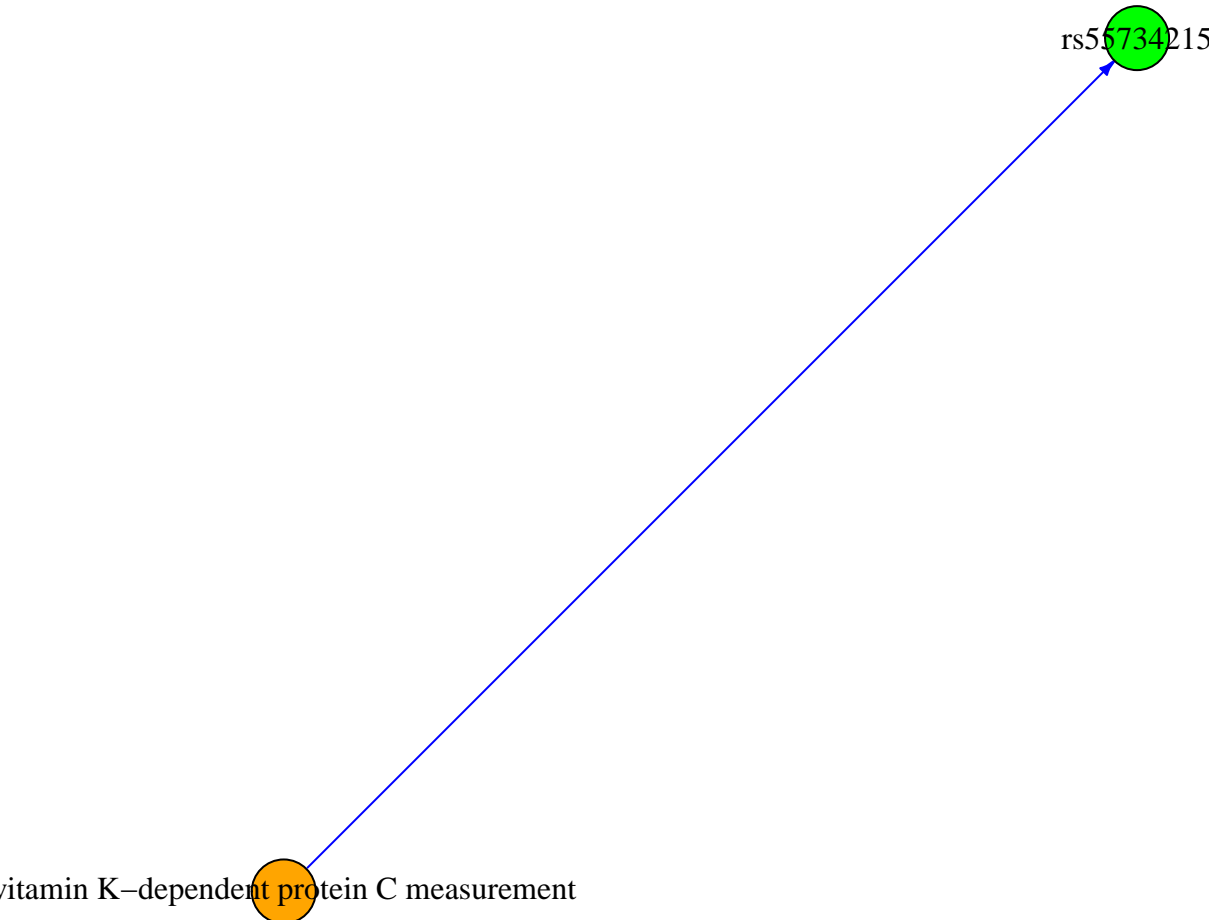



**Variant–Disease Network (smoking status measurement)**

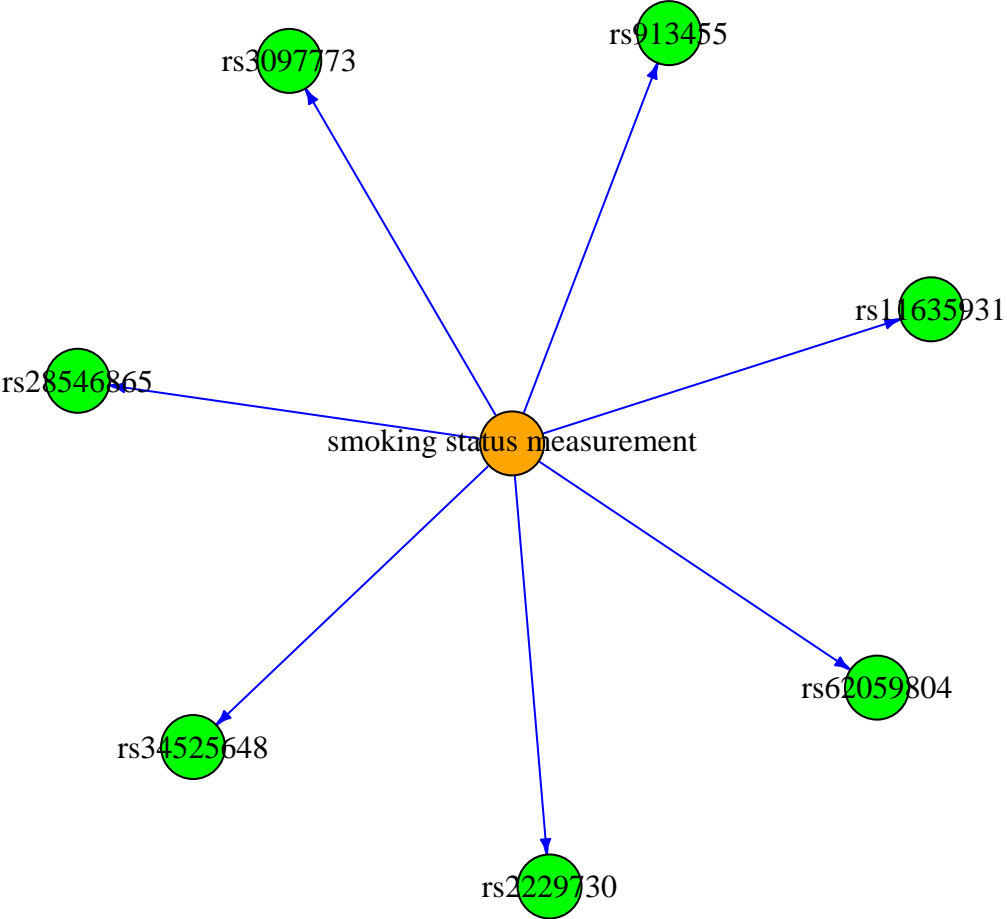

## Variant–Disease Network (squamous cell lung carcinoma)

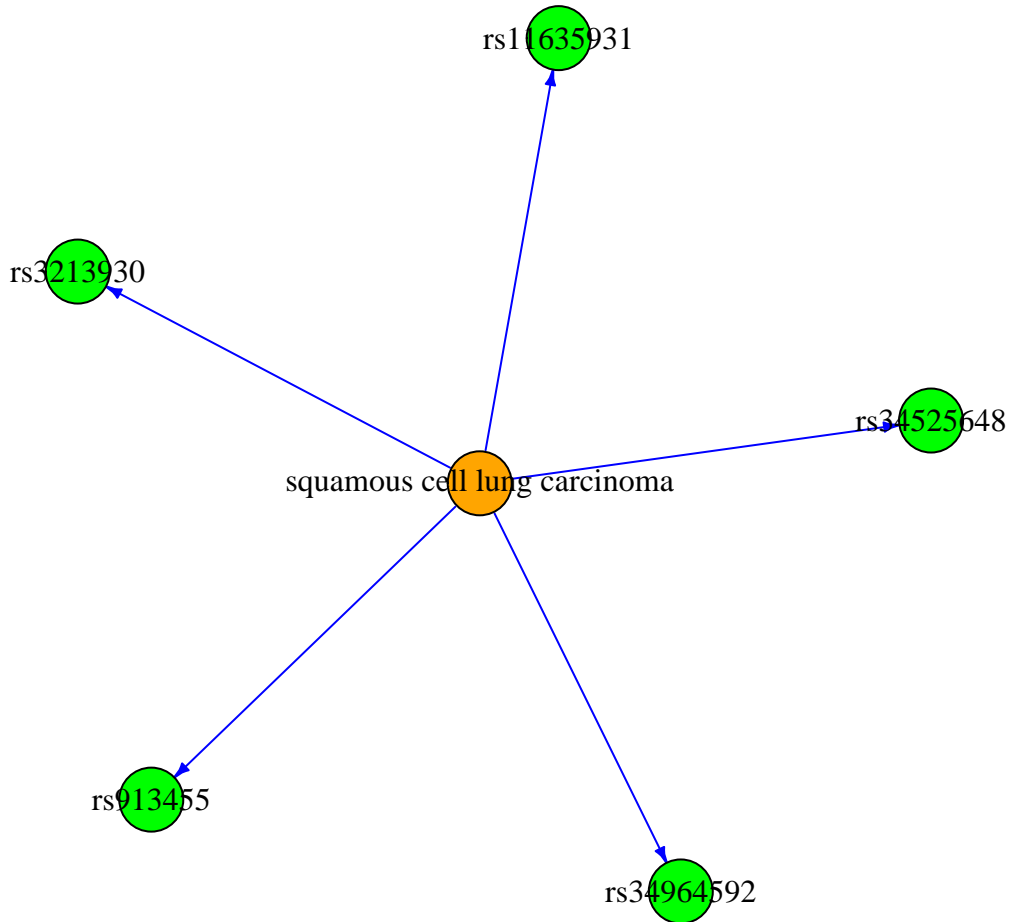

## Variant–Disease Network (asthma)

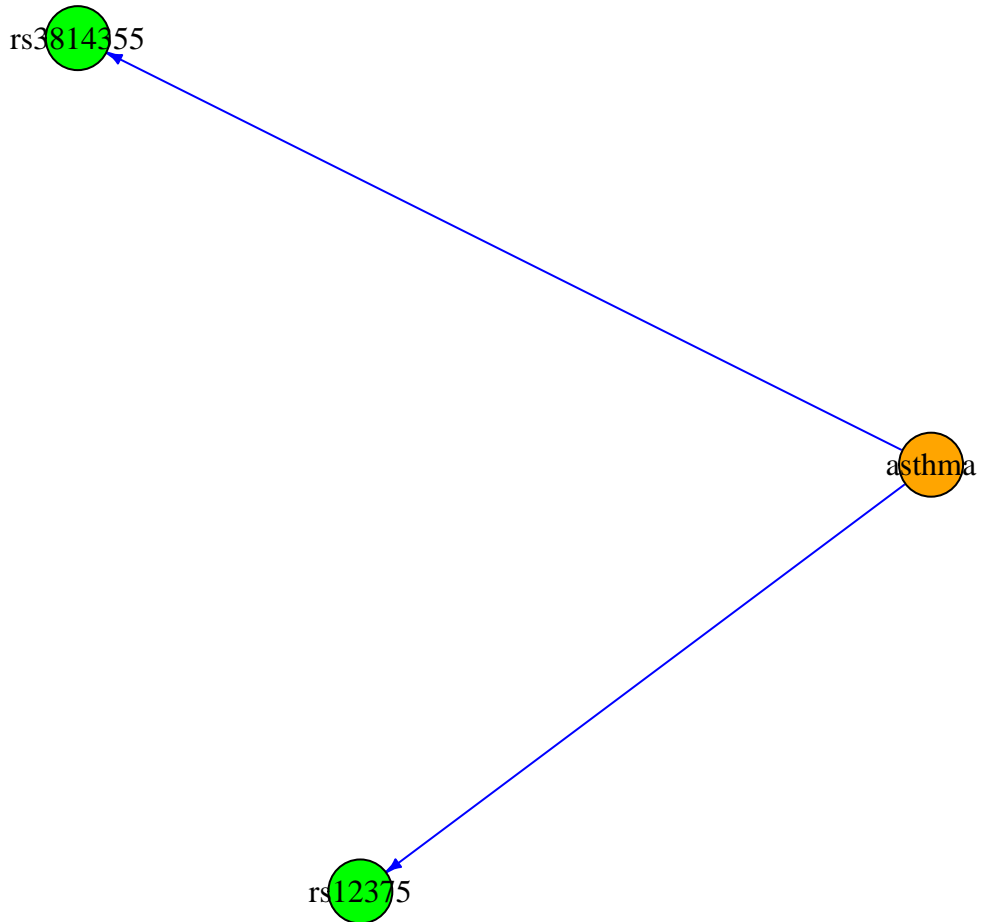

**Variant–Disease Network (response to diisocyanate)**

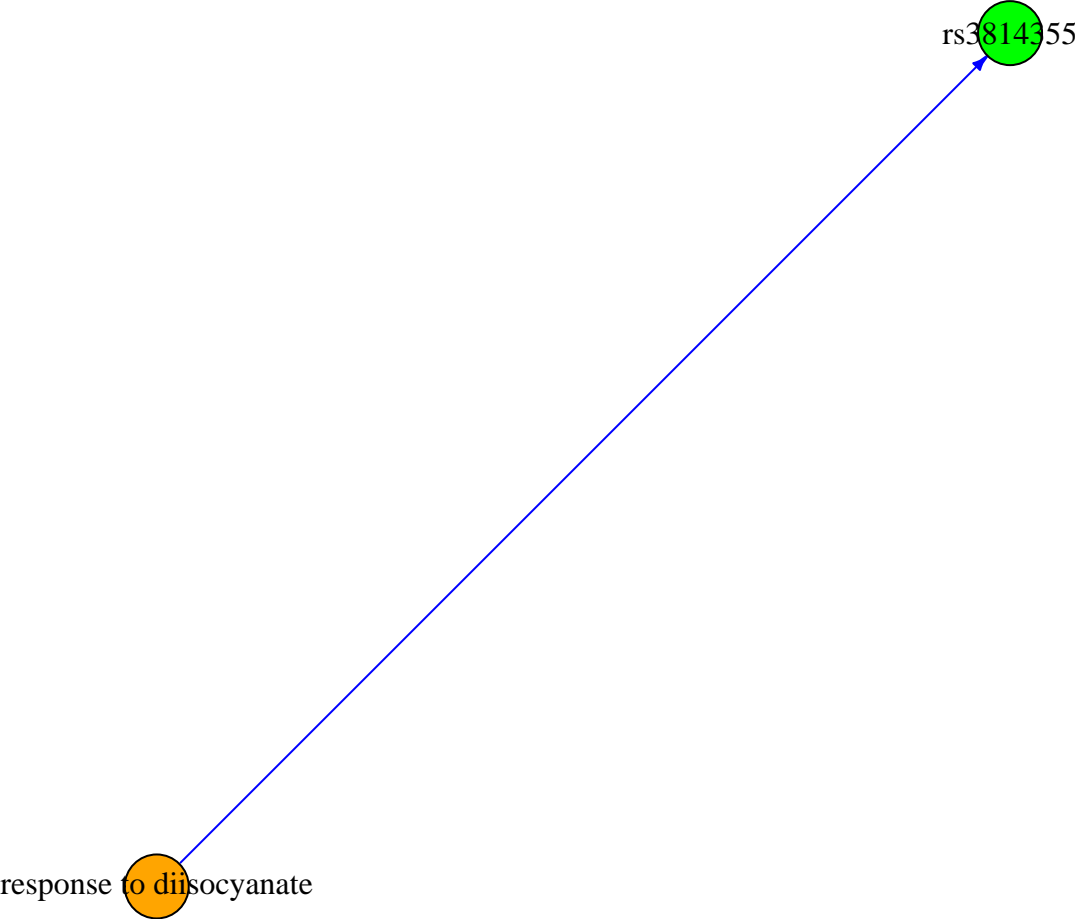

## Variant–Disease Network (reaction time measurement)

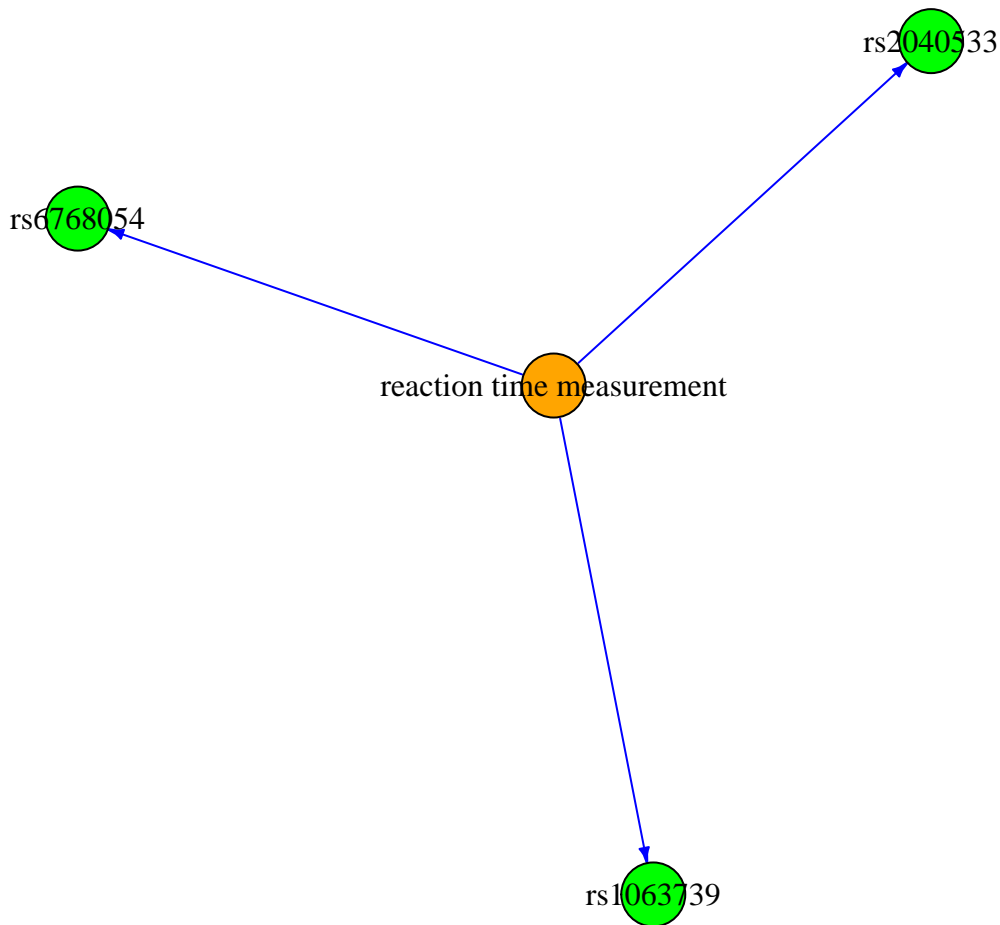

## Variant–Disease Network (small cell lung carcinoma)

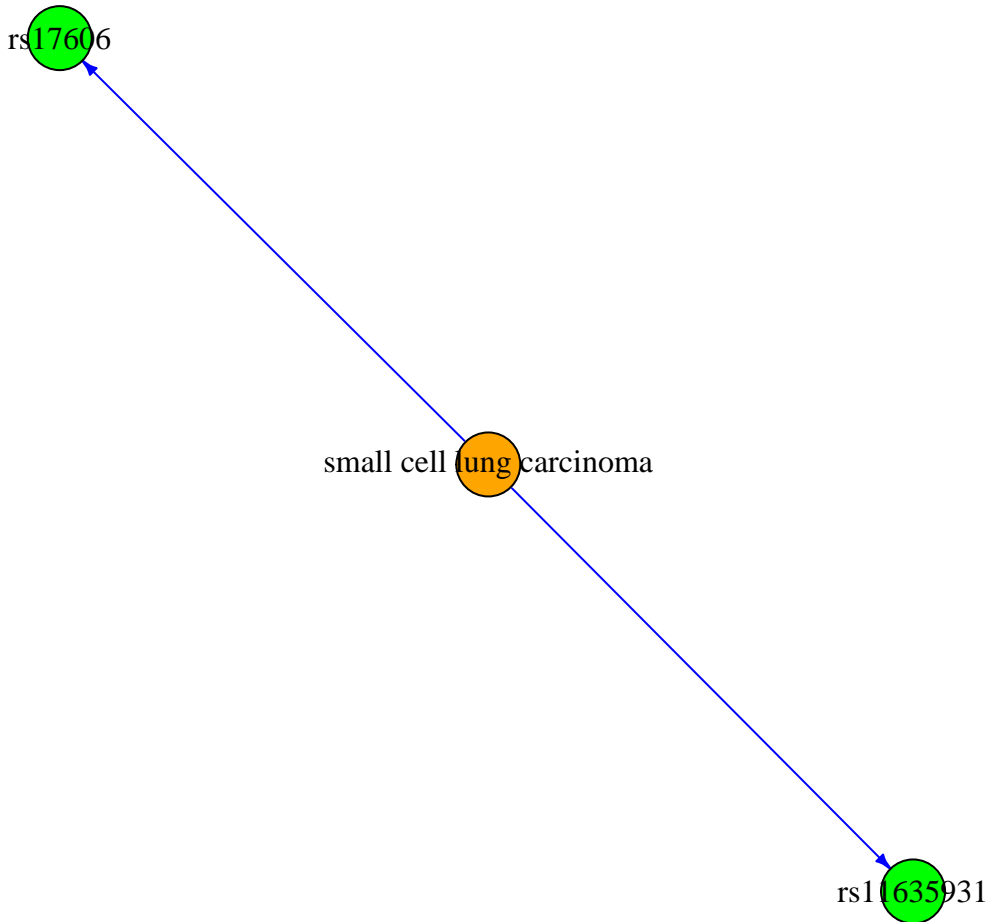

**Variant–Disease Network (lipoprotein measurement)**

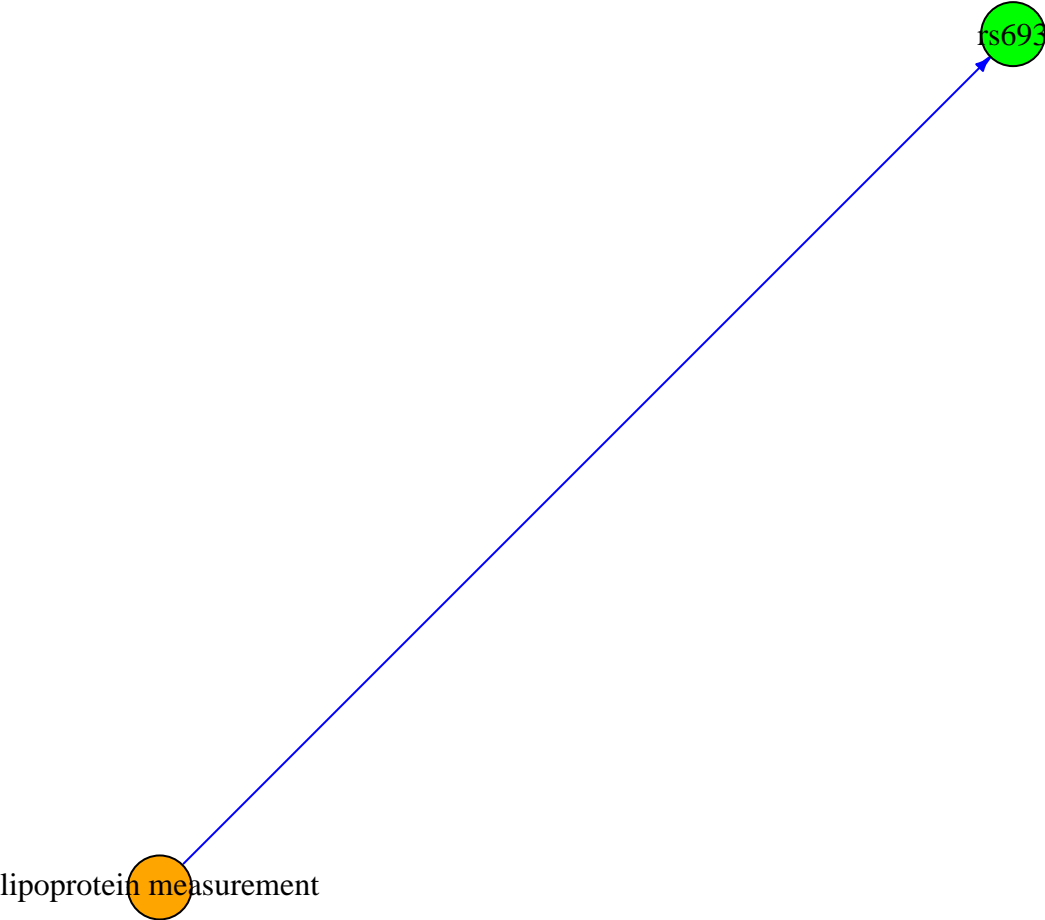

## Variant-Disease Network (homocysteine measurement)

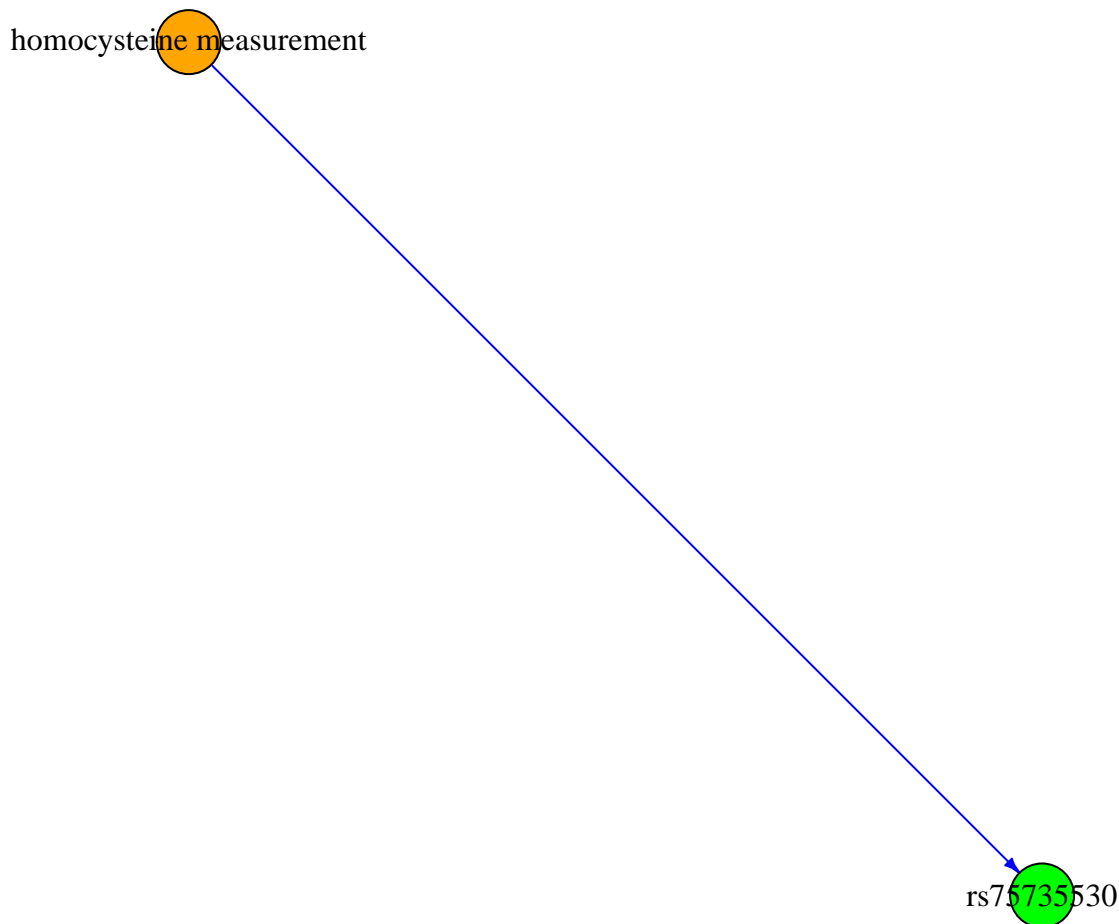



## Variant–Disease Network (age at menopause)

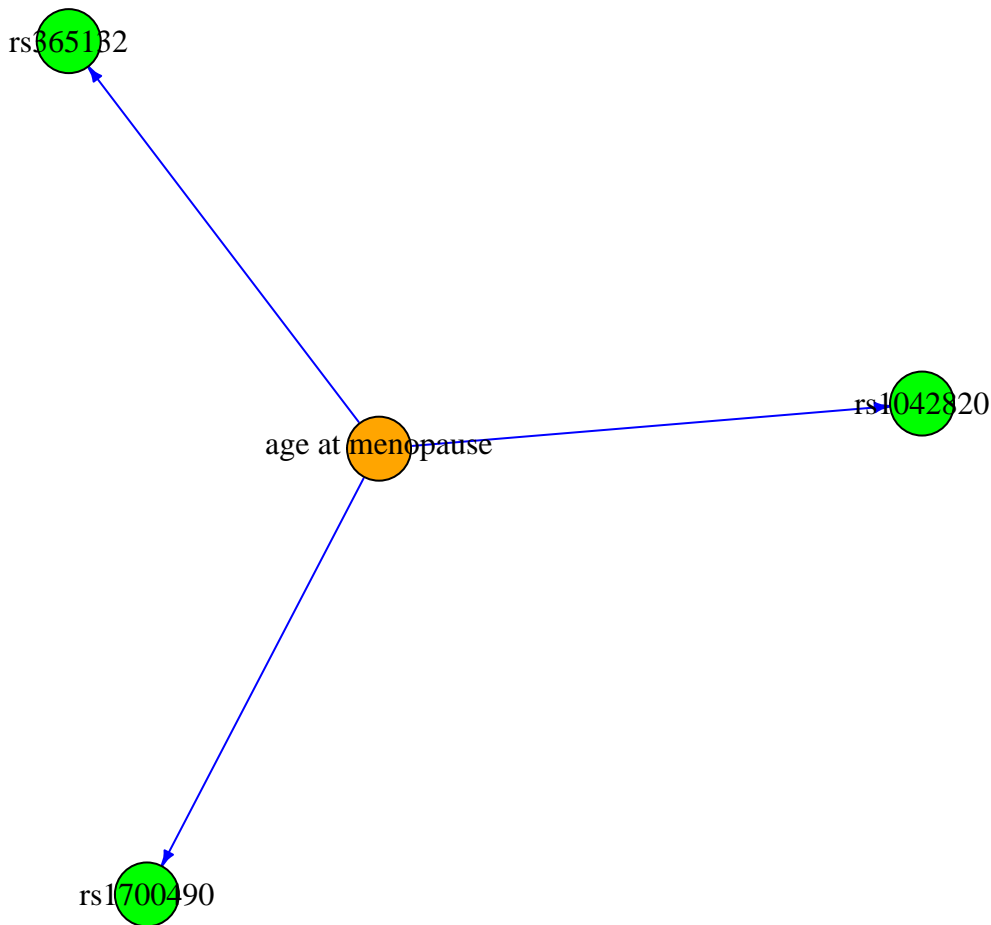

## Variant–Disease Network (uterine fibroid)

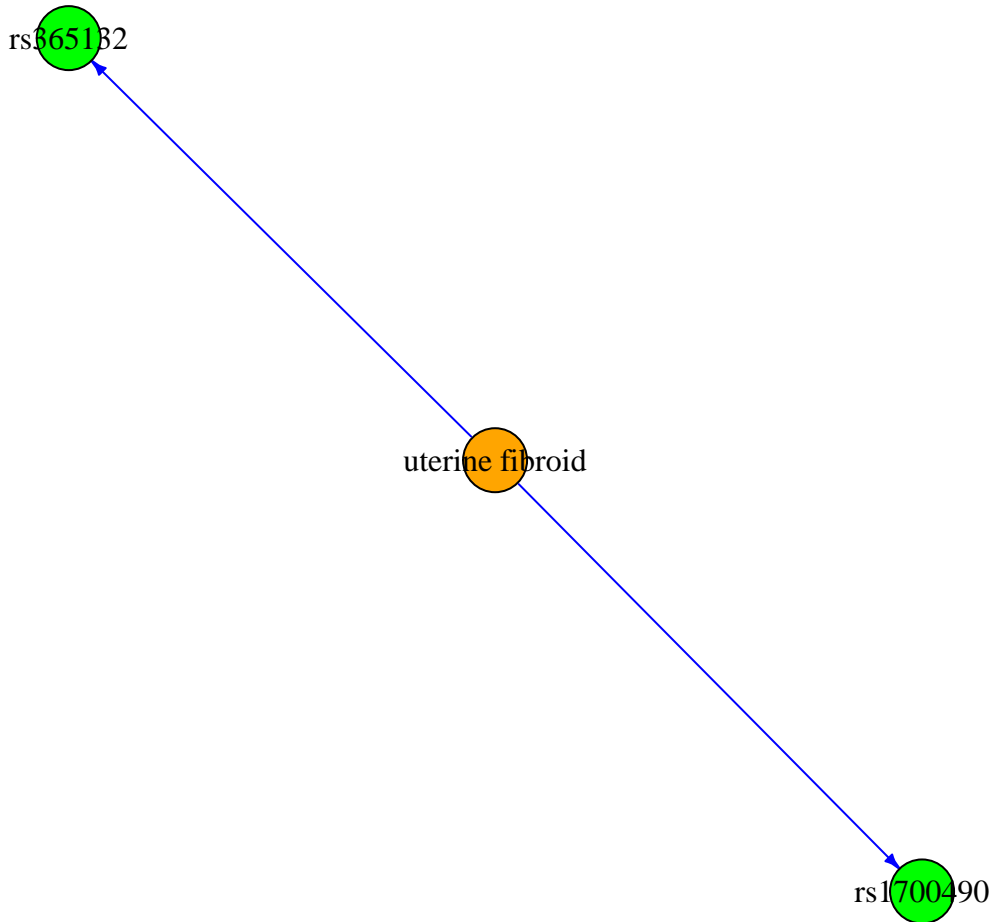

## Variant-Disease Network (circadian rhythm)

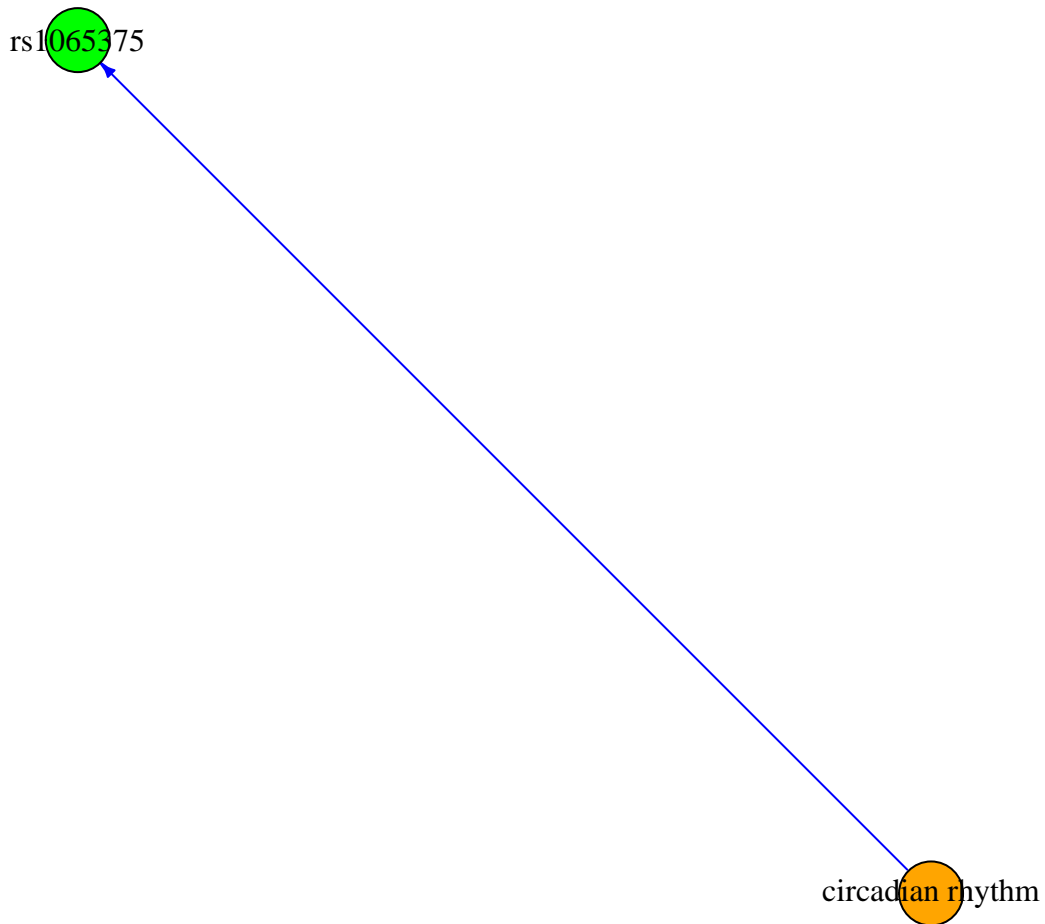

## Variant–Disease Network (depressive symptom measurement)

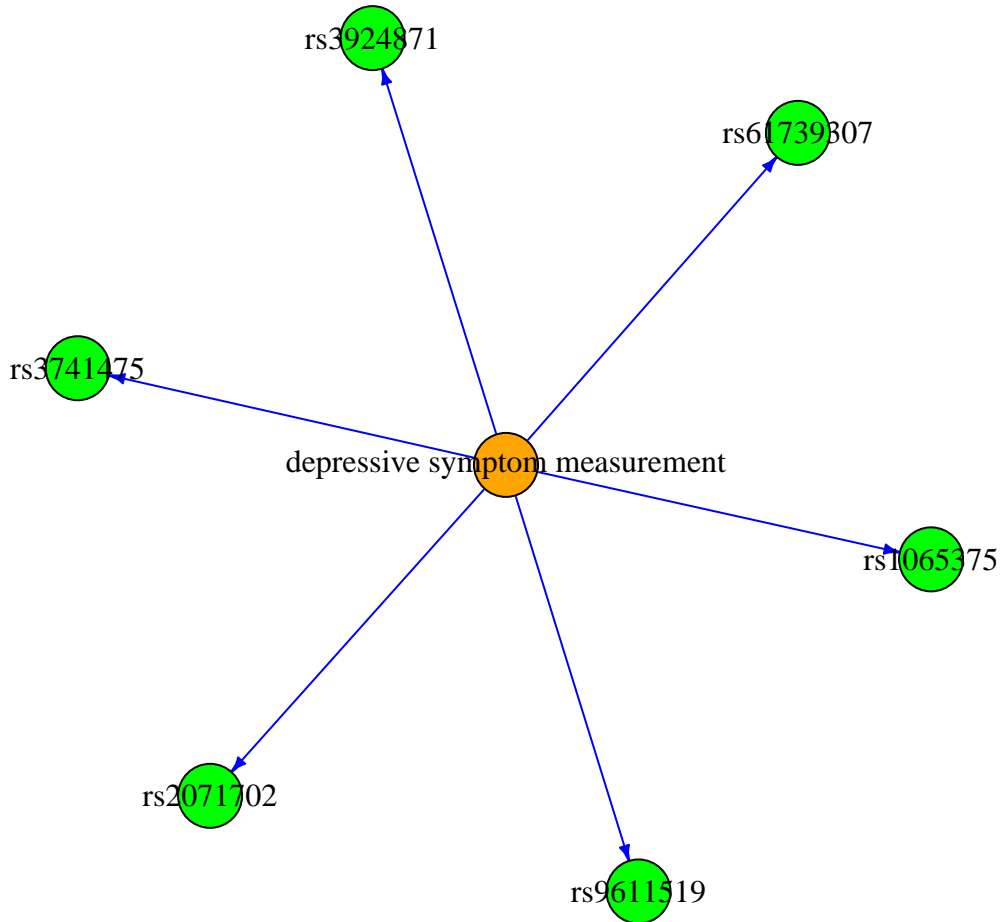

## Variant–Disease Network (wellbeing measurement)

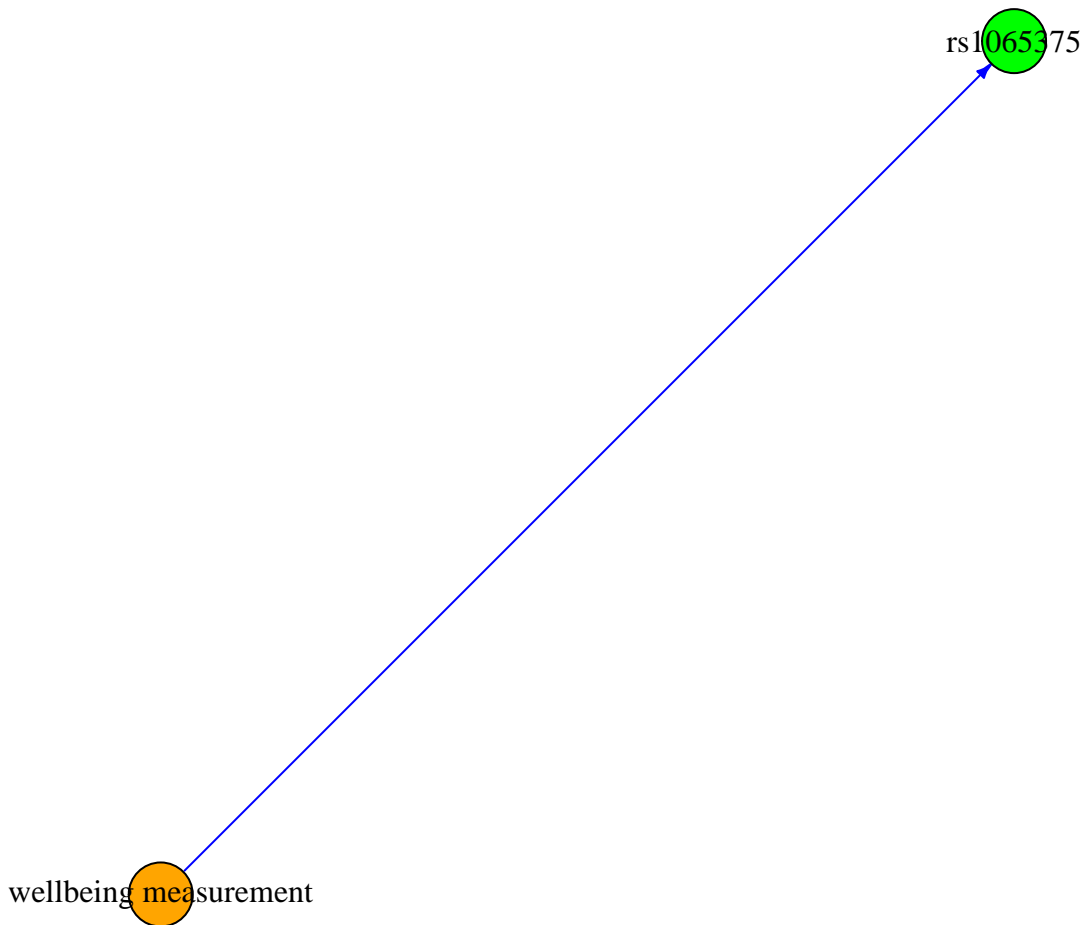

Variant–Disease Network (chronic lymphocytic leukemia)

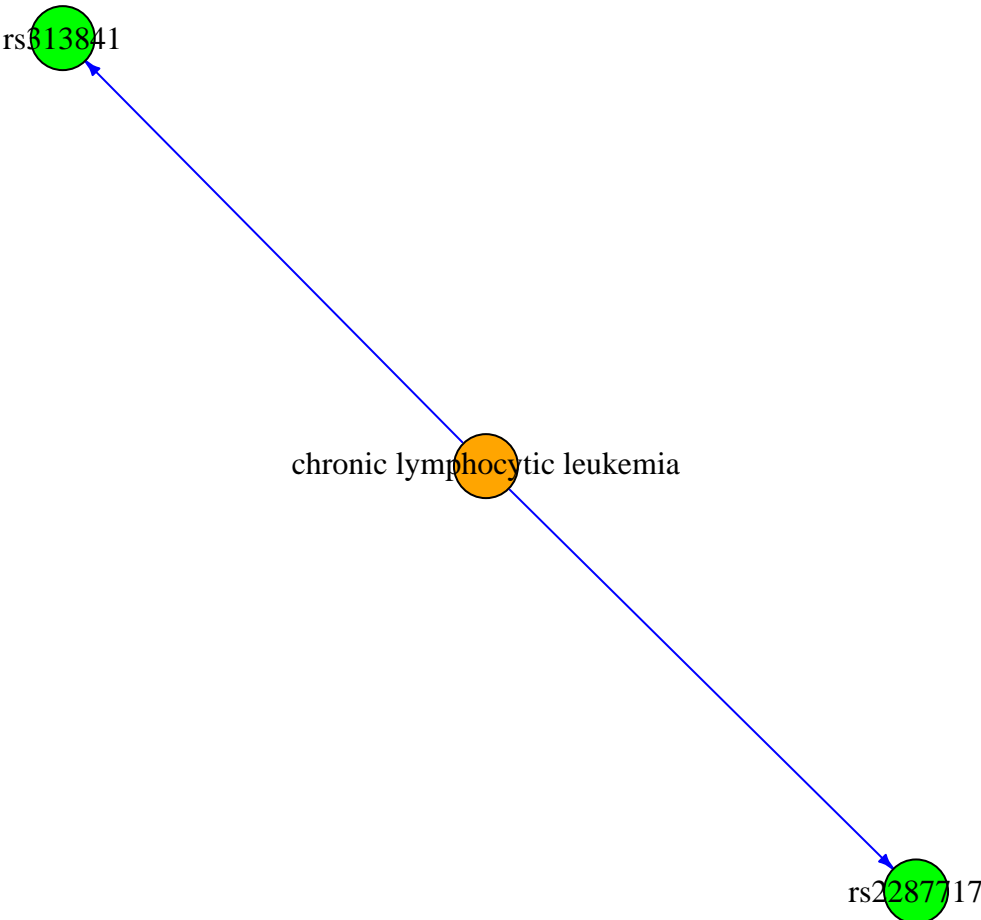

## Variant–Disease Network (sclerosing cholangitis)

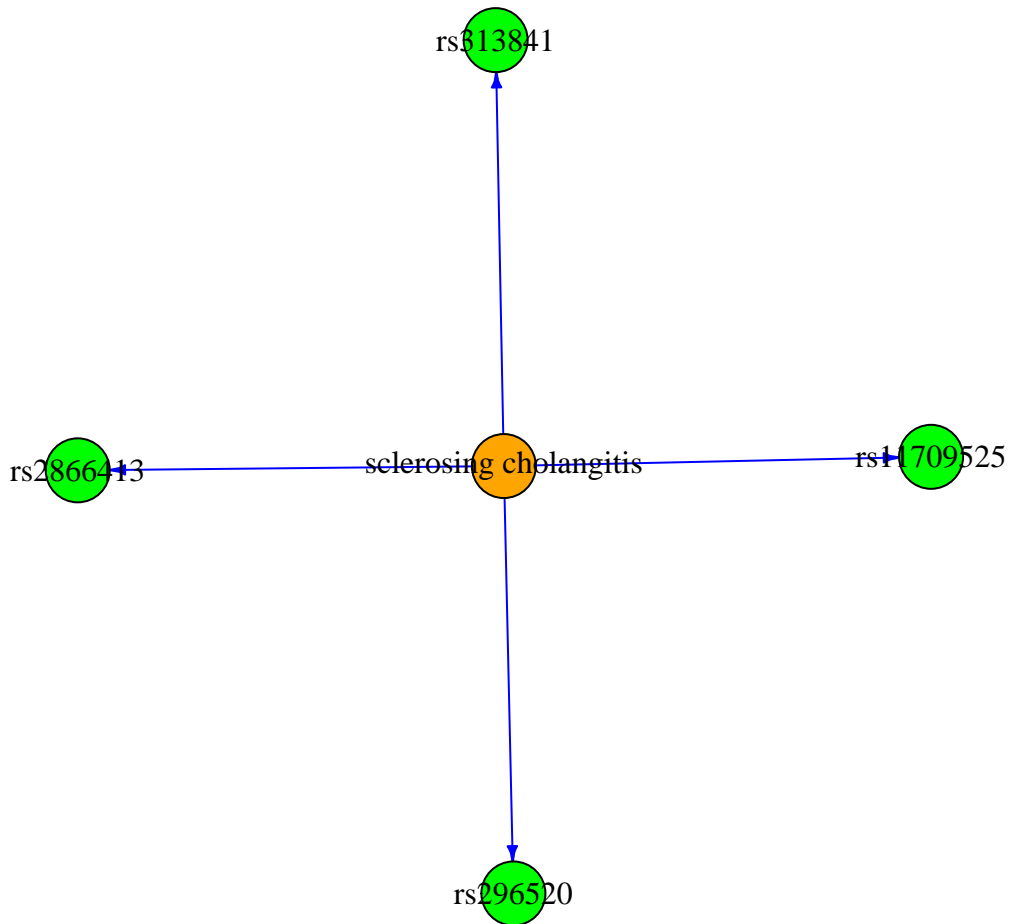

## Variant–Disease Network (1,5 anhydroglucitol measurement)

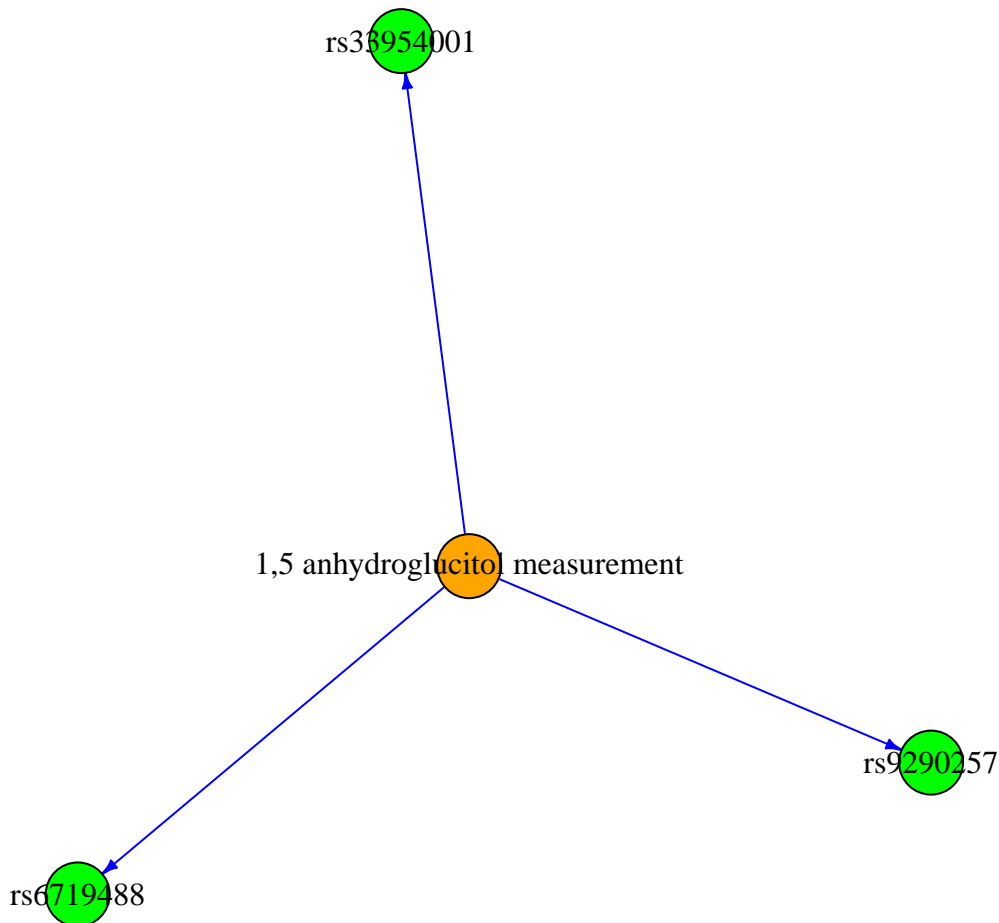



## Variant–Disease Network (age at assessment)

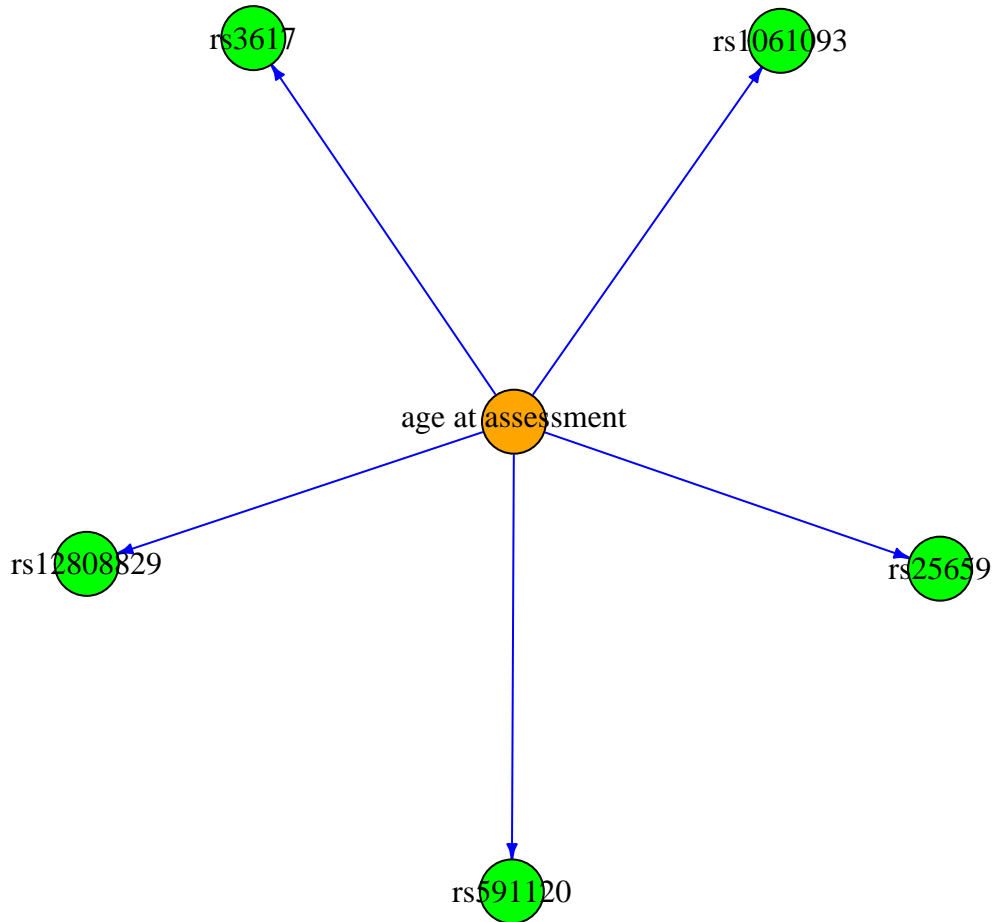

# Variant–Disease Network (BMI-adjusted waist–hip ratio)

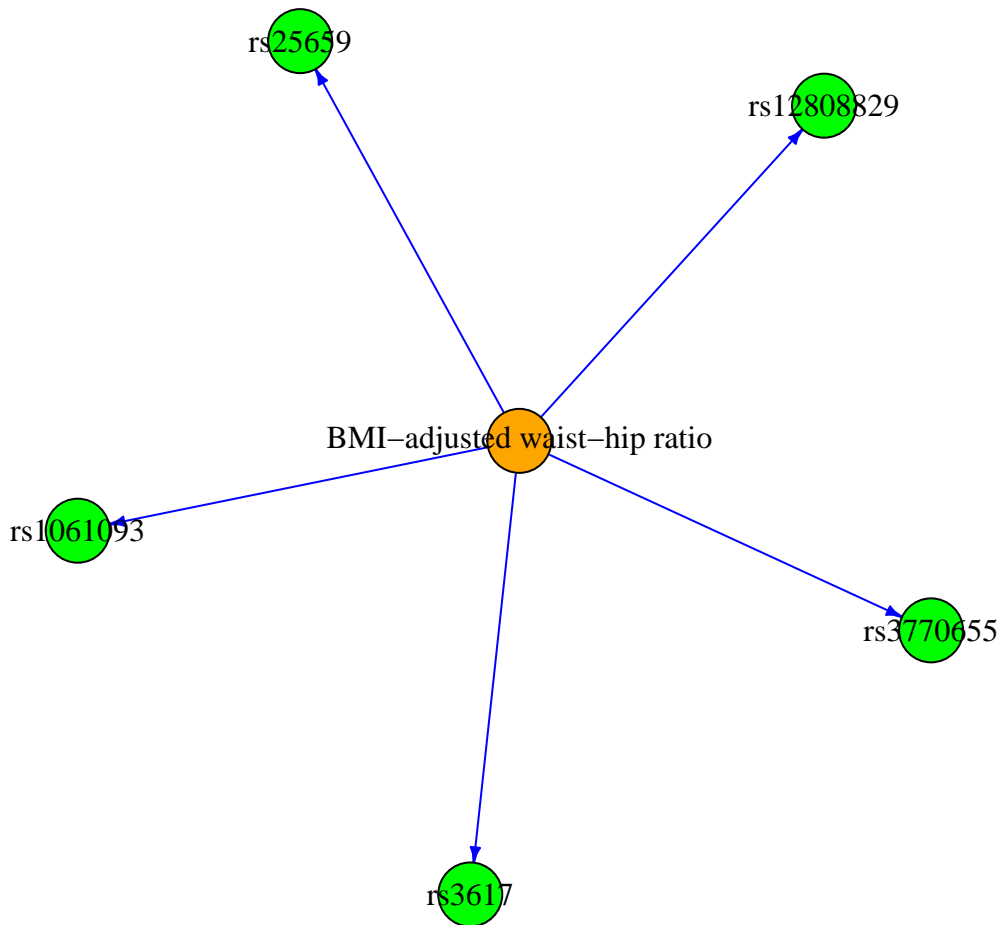

# Variant–Disease Network (sex interaction measurement)

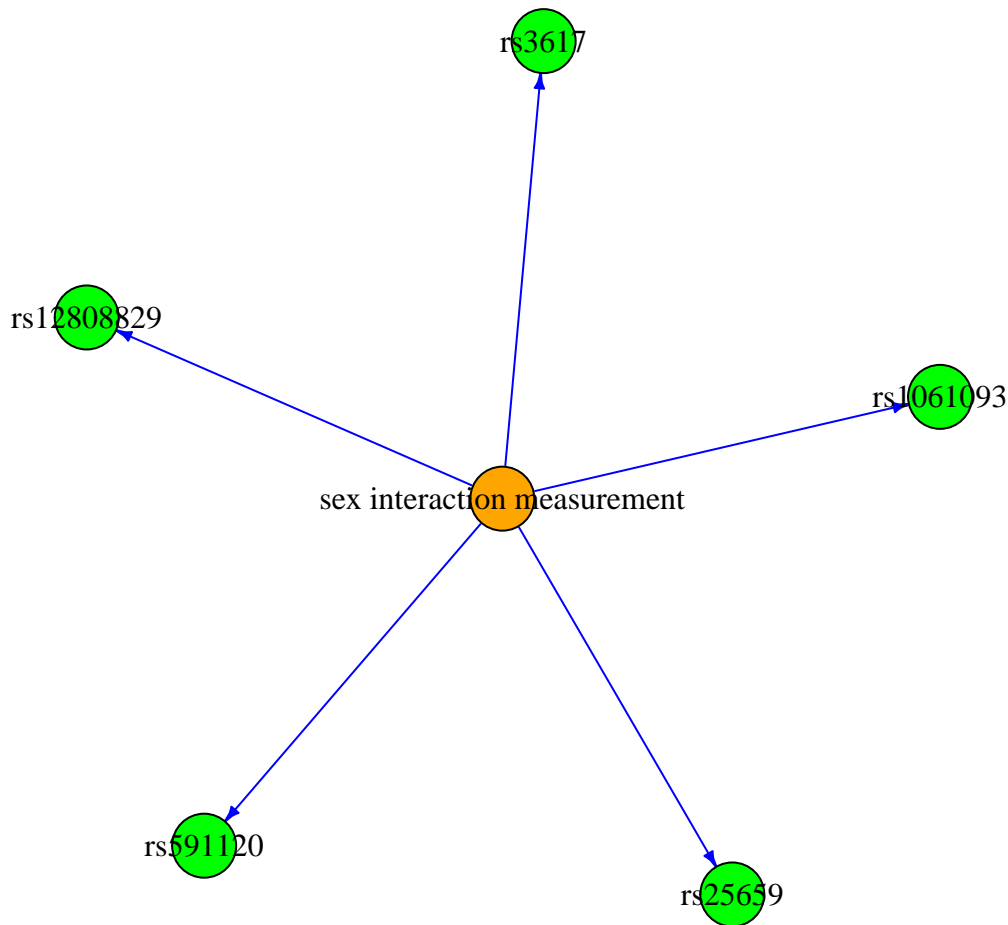

## Variant–Disease Network (age-related hearing impairment)

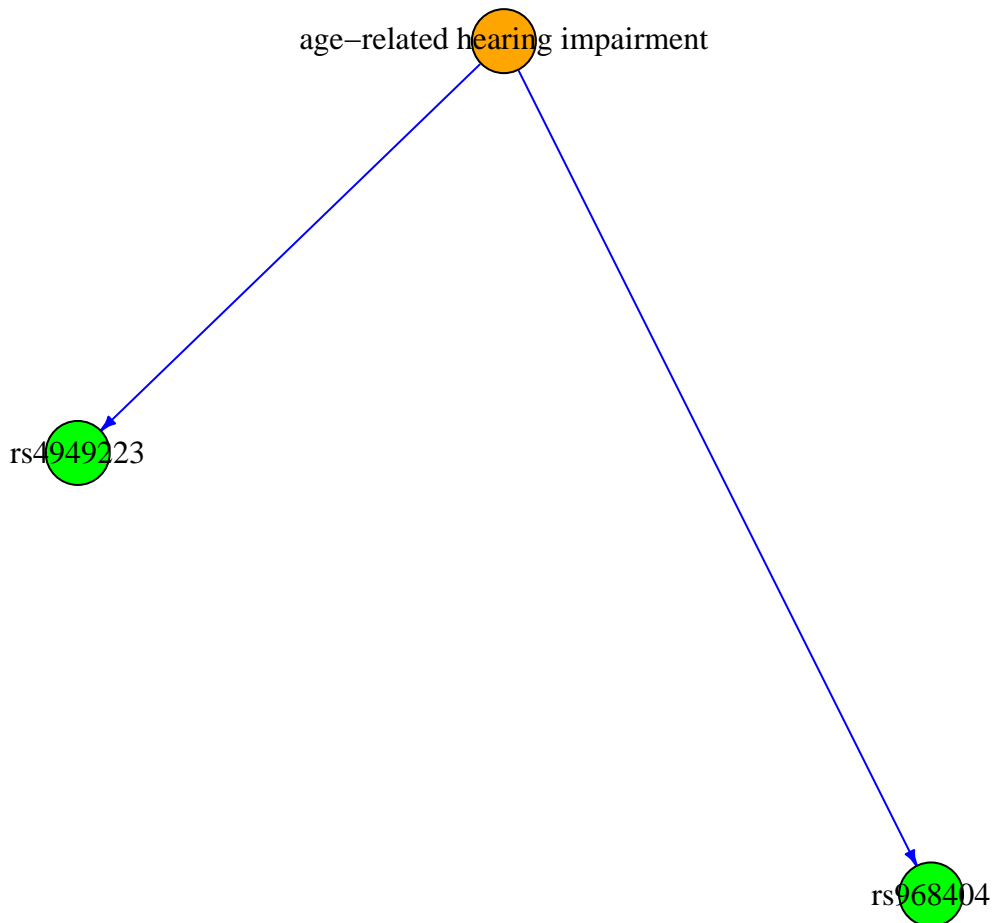

## Variant–Disease Network (coronary heart disease)

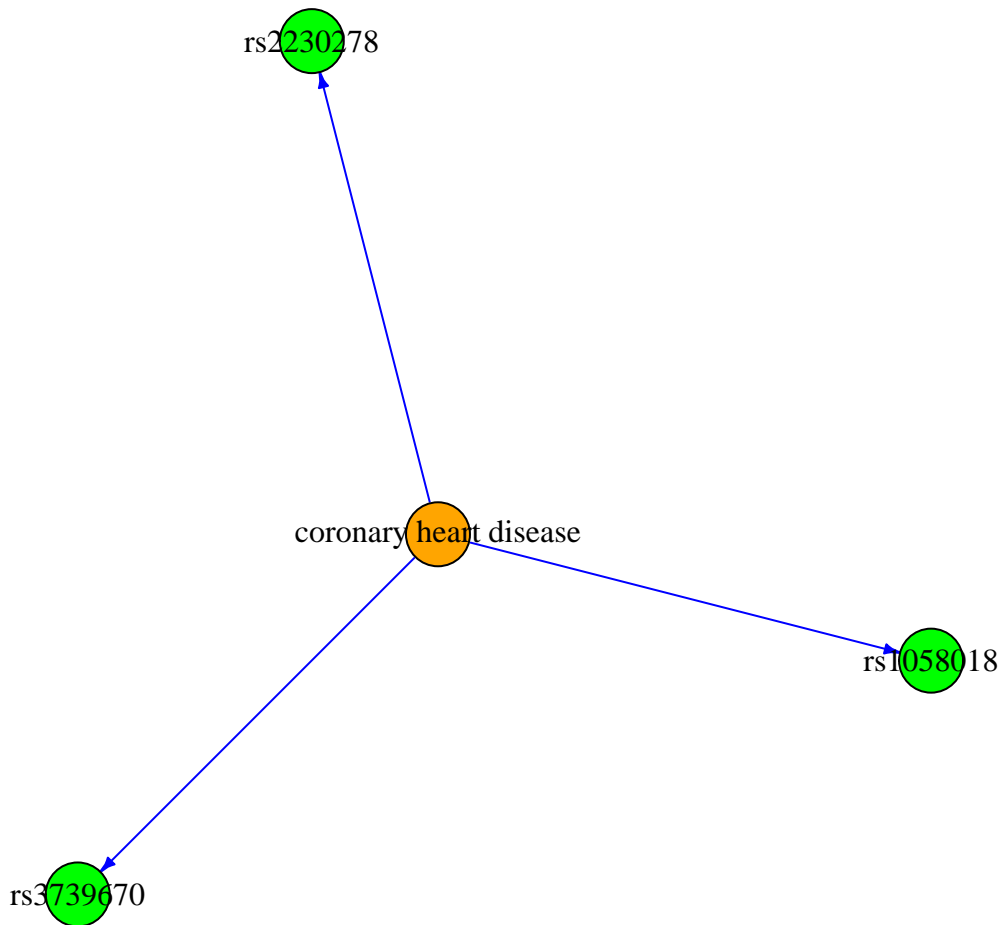

## Variant–Disease Network (interleukin–6 measurement)

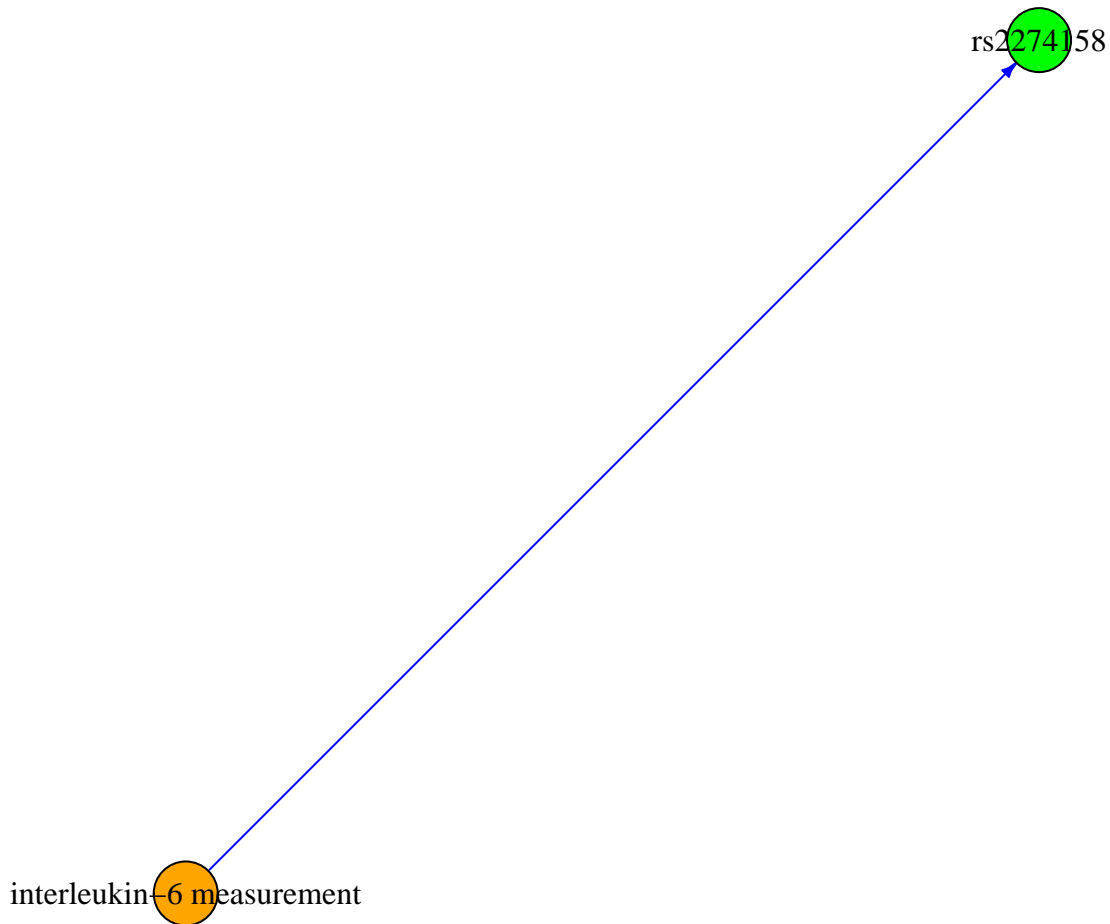

**Variant–Disease Network (creatinine clearance measurement)**

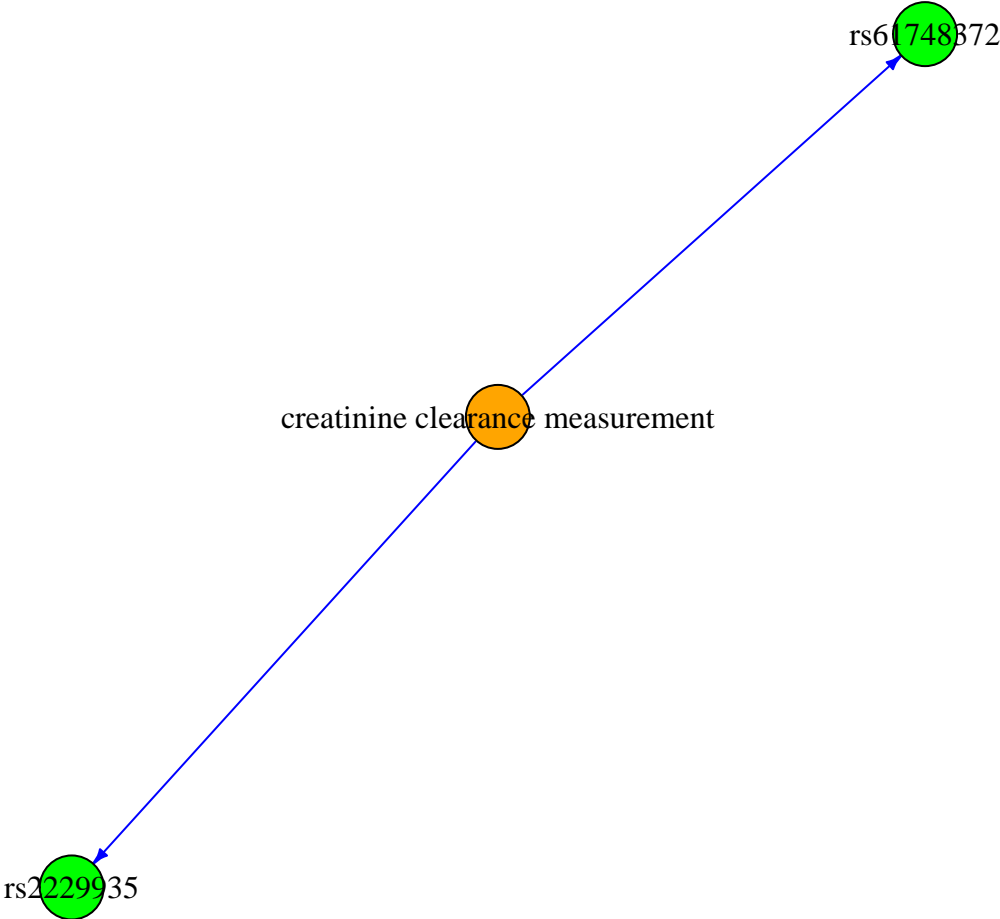

Variant–Disease Network (HIV infection)

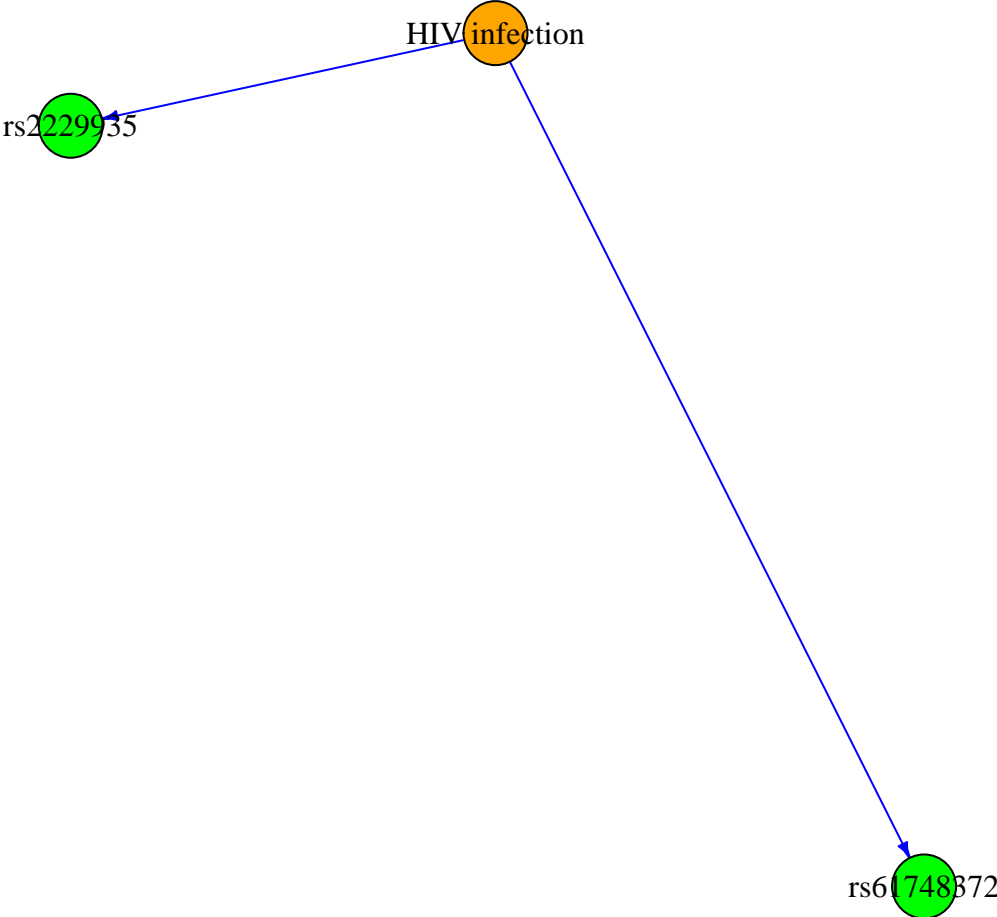



## Variant–Disease Network (response to tenofovir)

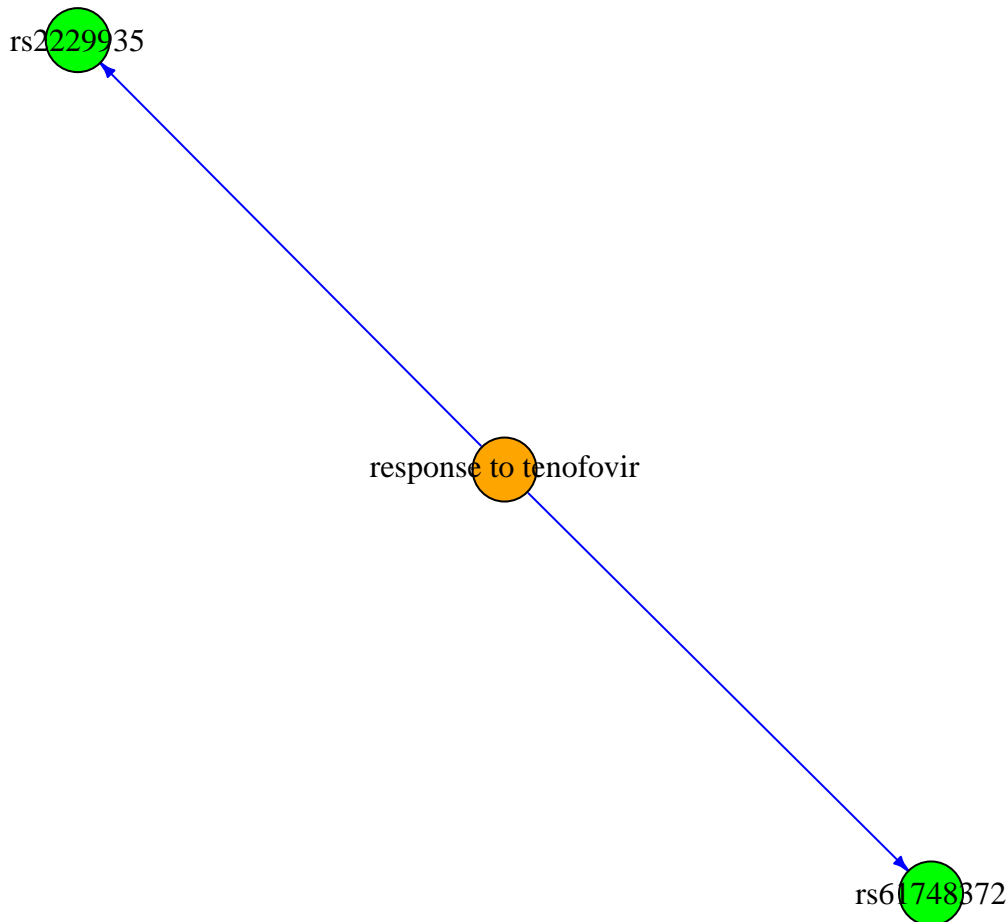

**Variant–Disease Network (brain serotonin transporter measurement)**

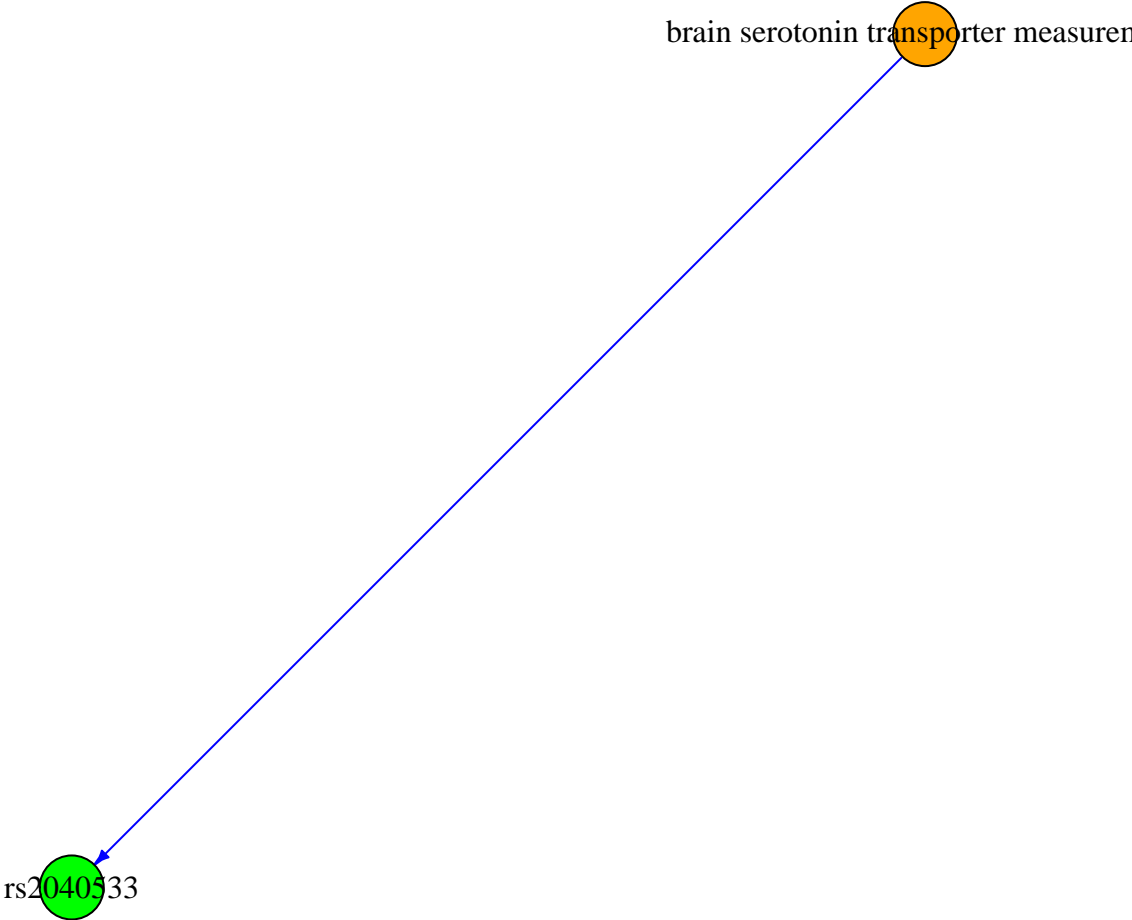

## Variant–Disease Network (diabetic nephropathy)

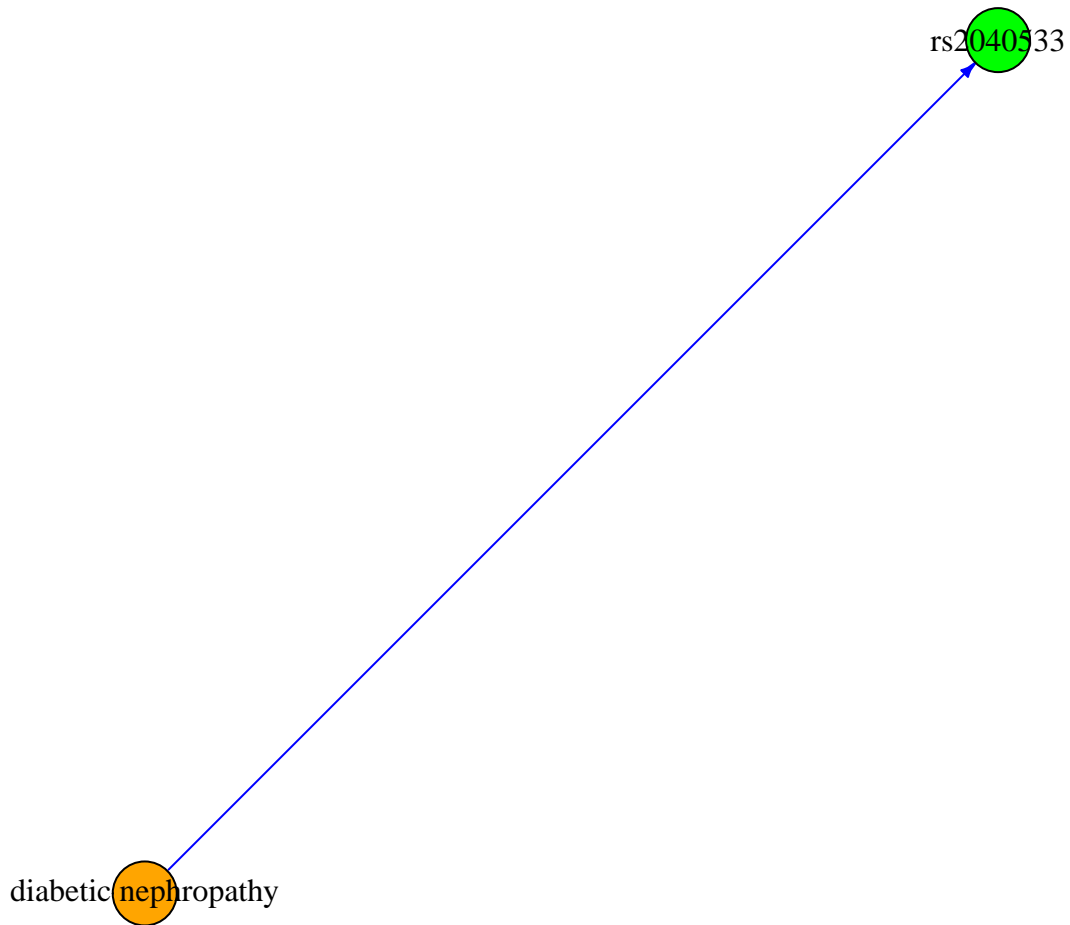

## Variant–Disease Network (response to paclitaxel)

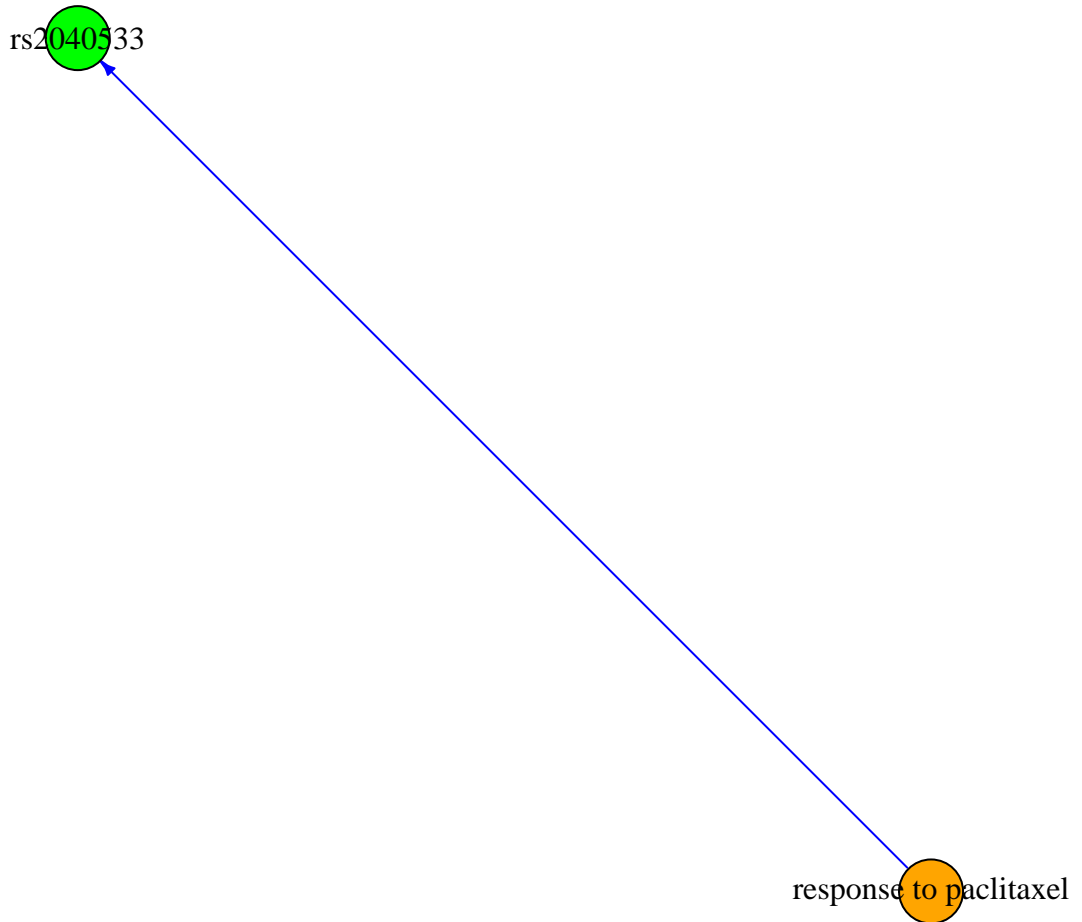

**Variant–Disease Network (glucagon–like peptide–1 measurement)**

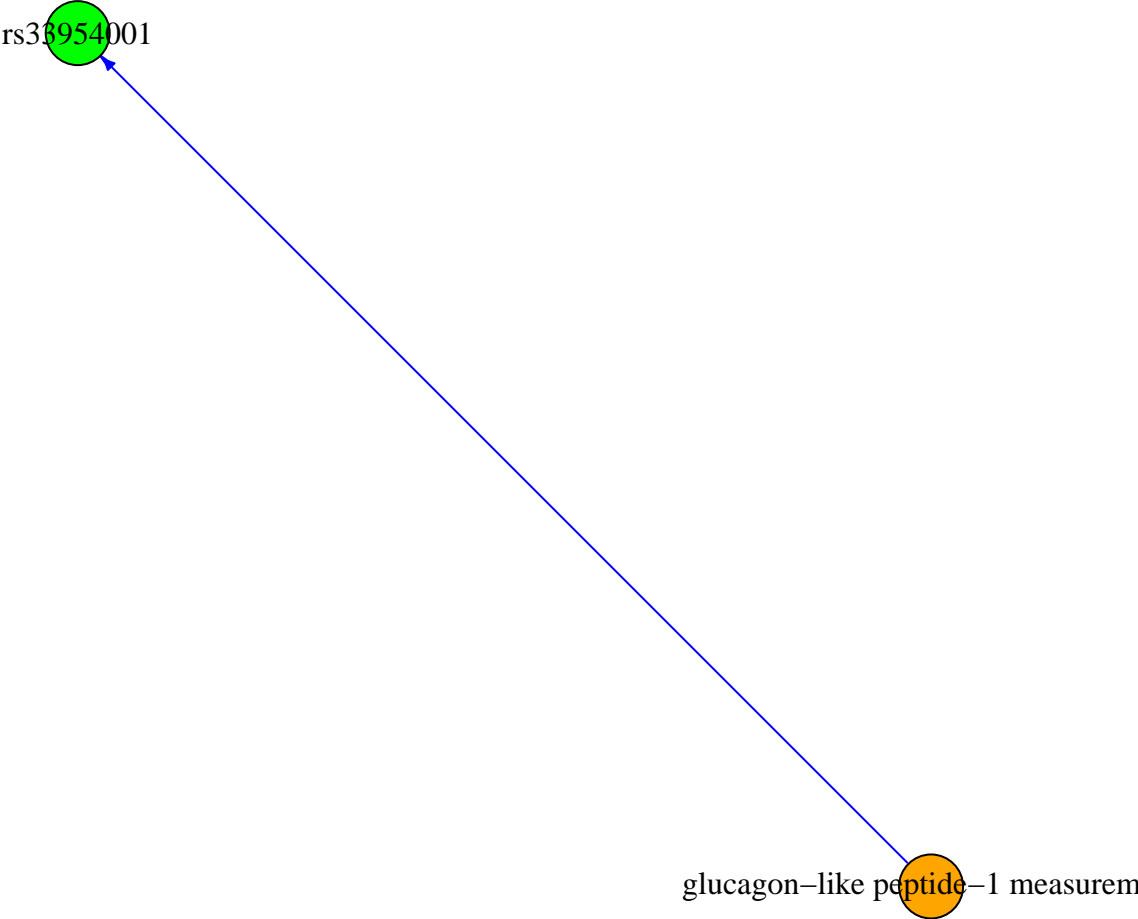

# ant-Disease Network (glucose-dependent insulintropic peptide (GIP) meas

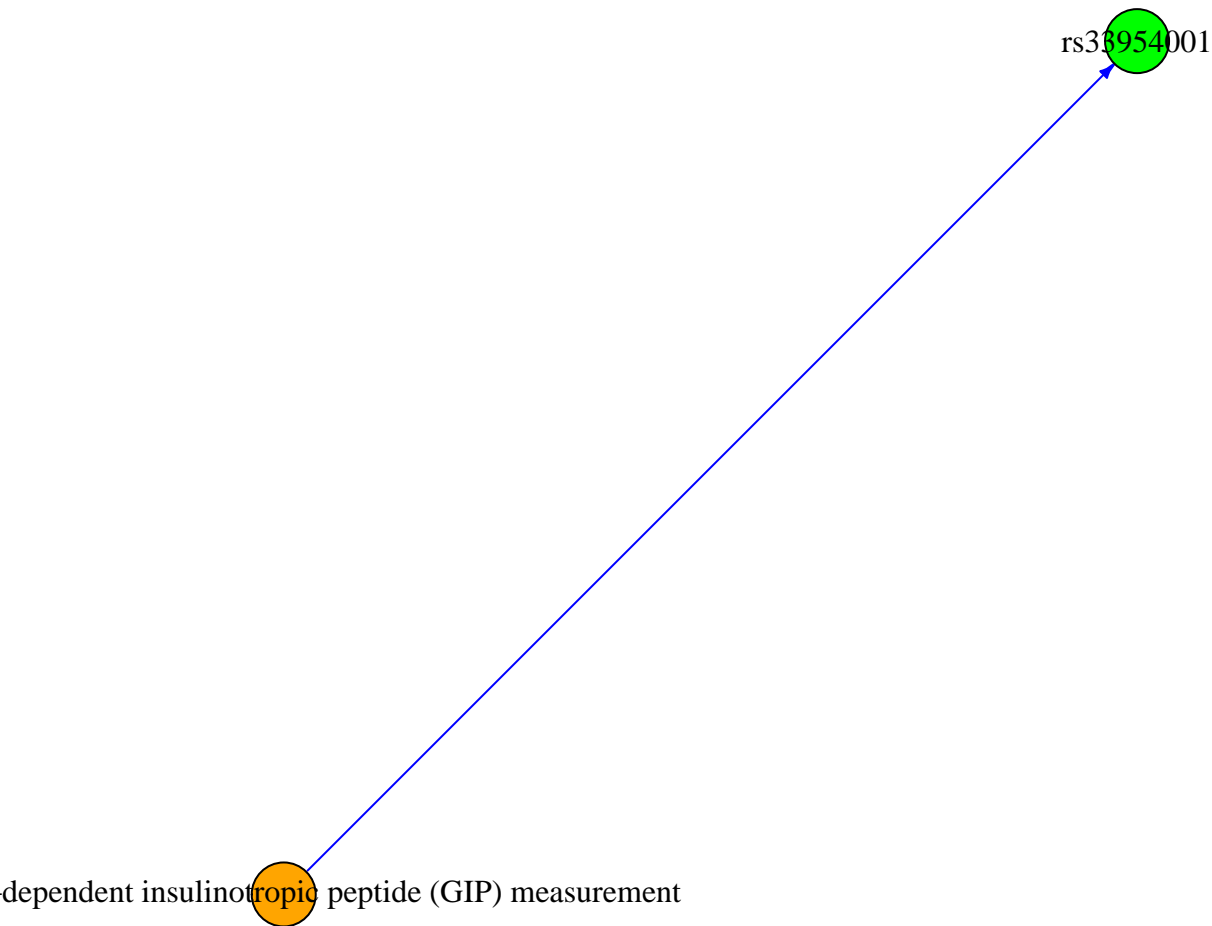

## Variant–Disease Network (glucose tolerance test)

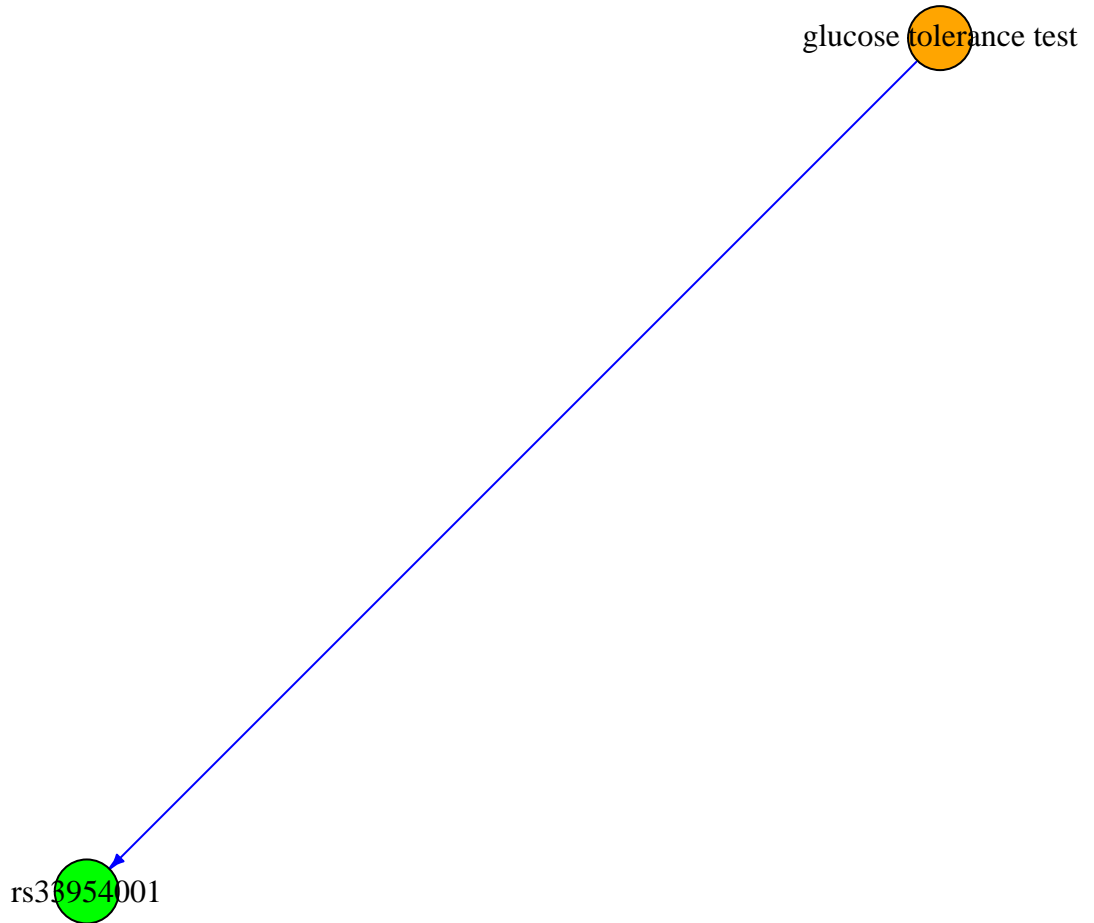

# Variant–Disease Network (non–alcoholic fatty liver disease)

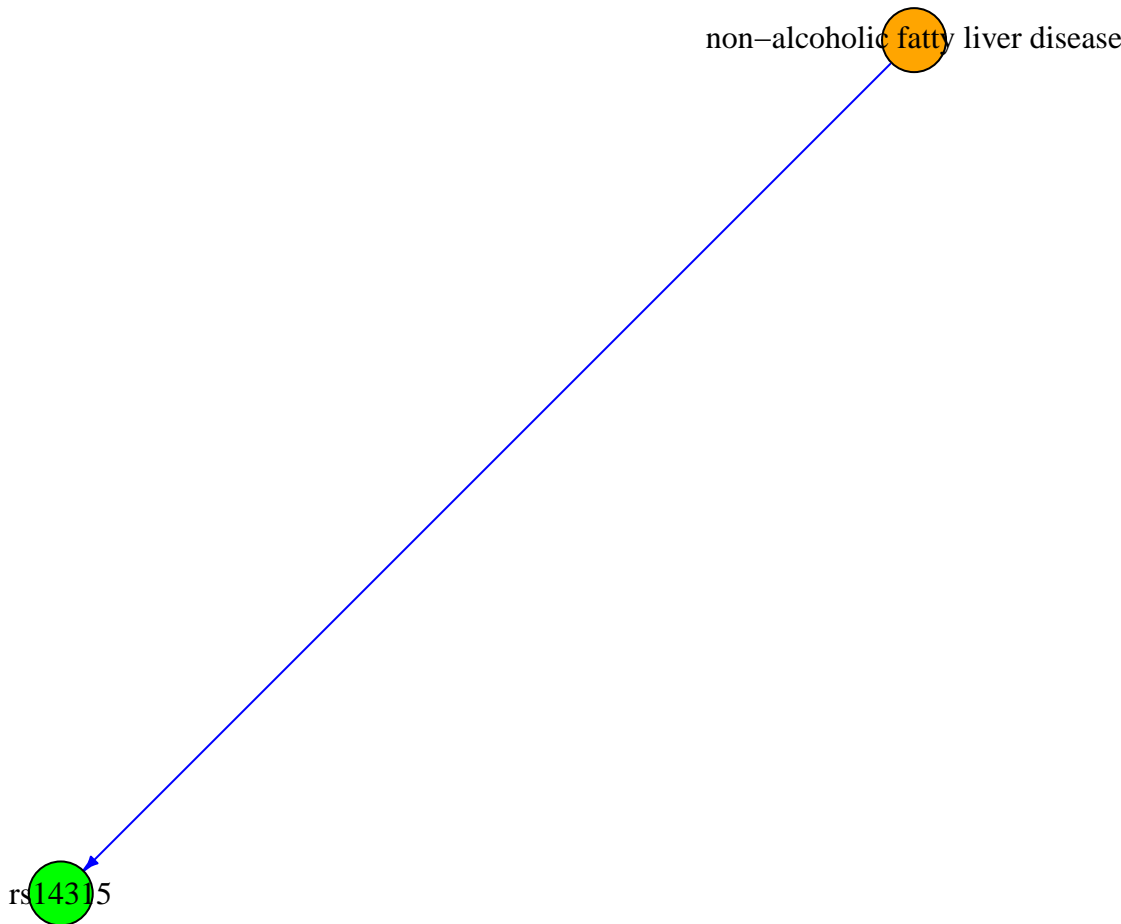



## Variant–Disease Network (vitamin D measurement)

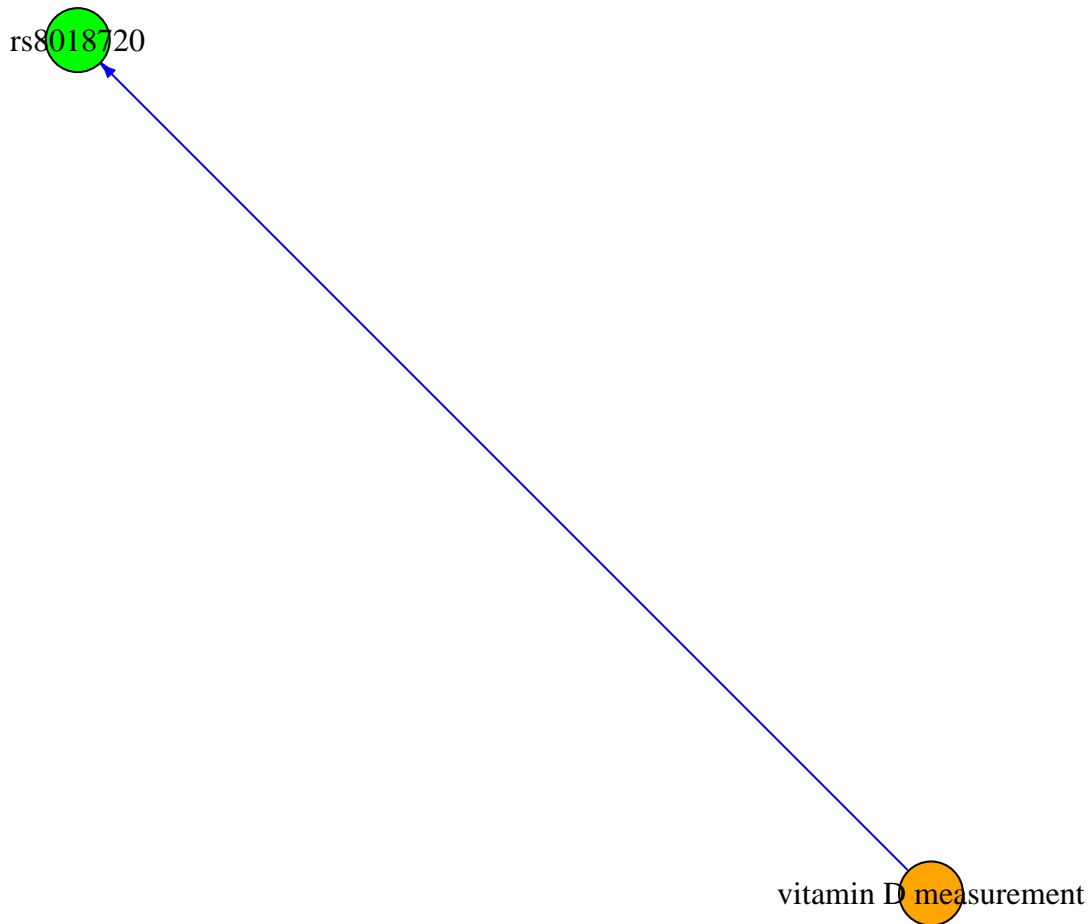

## Variant–Disease Network (telomere length)

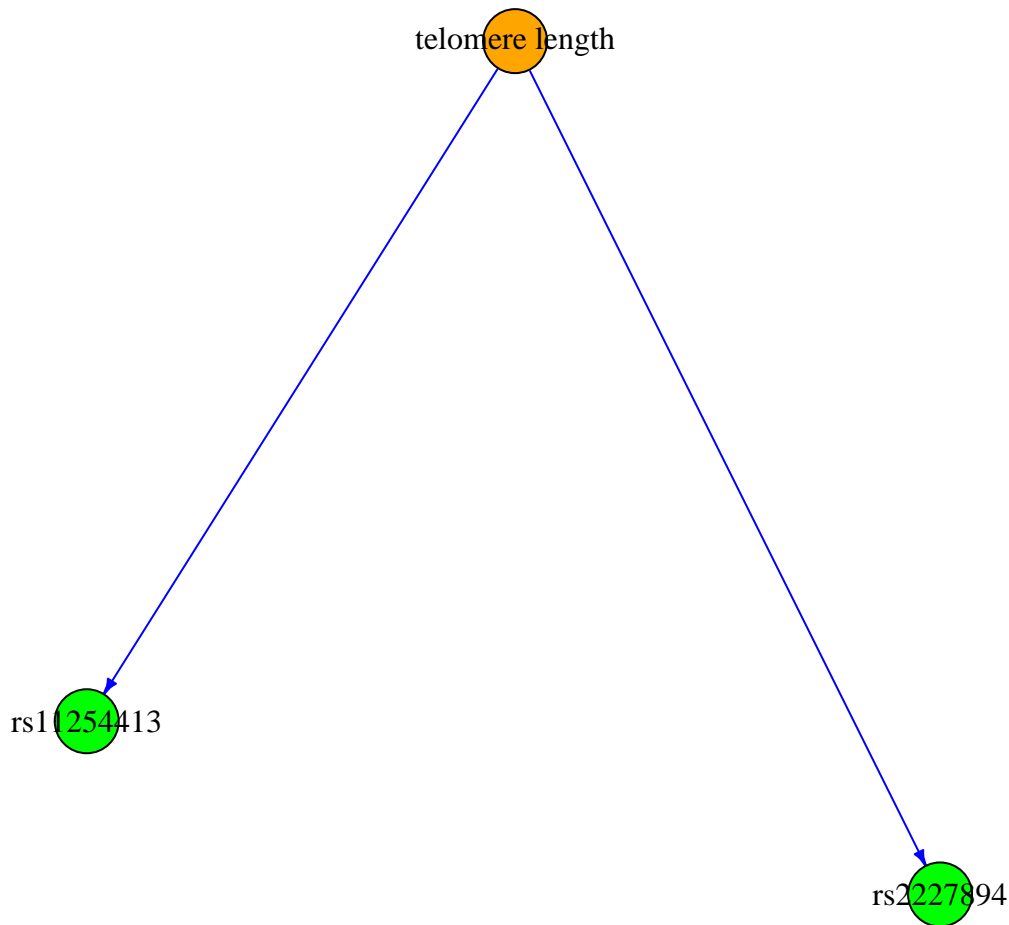

## Variant–Disease Network (alkaline phosphatase measurement)

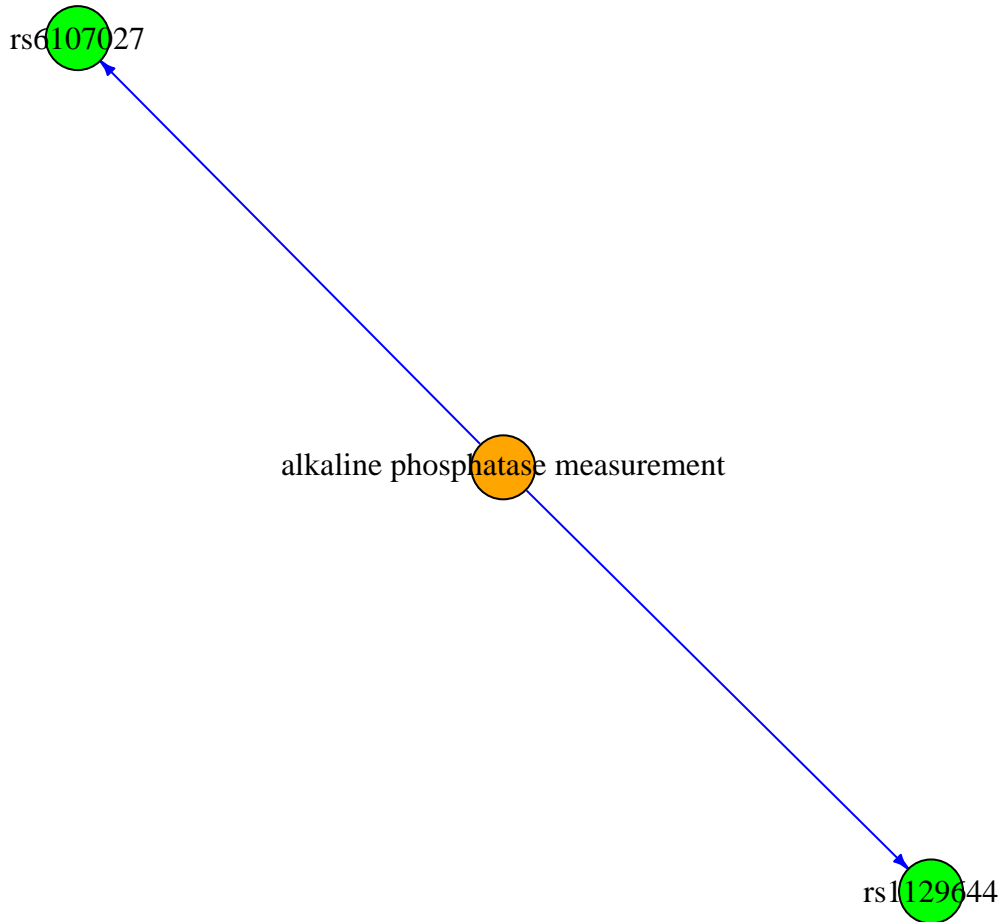

Variant–Disease Network (anti–neutrophil antibody associated vasculitis

rs9525984

anti–neutrophil antibody associated vas

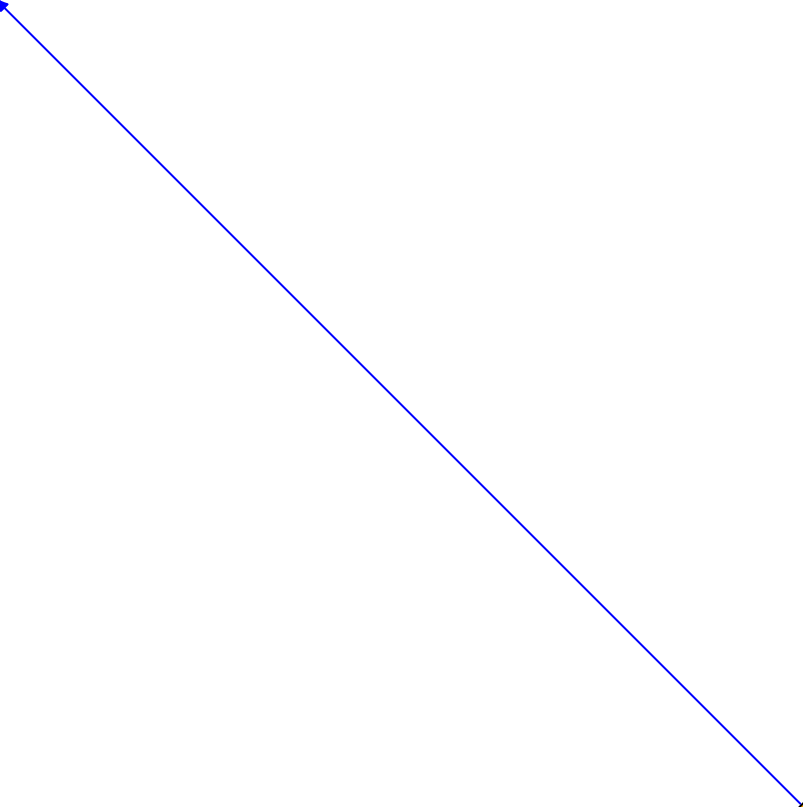

## Variant–Disease Network (disease progression measurement)

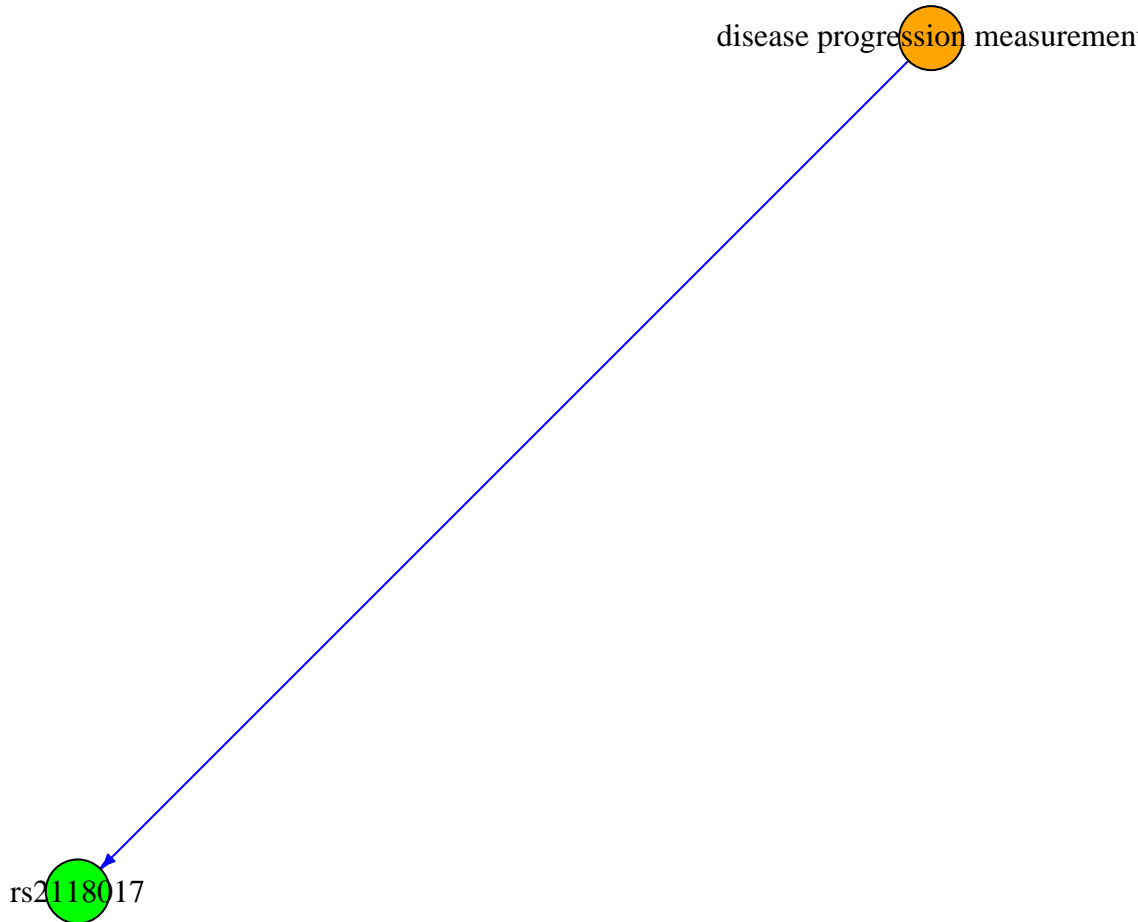

## Variant–Disease Network (egg allergy measurement)

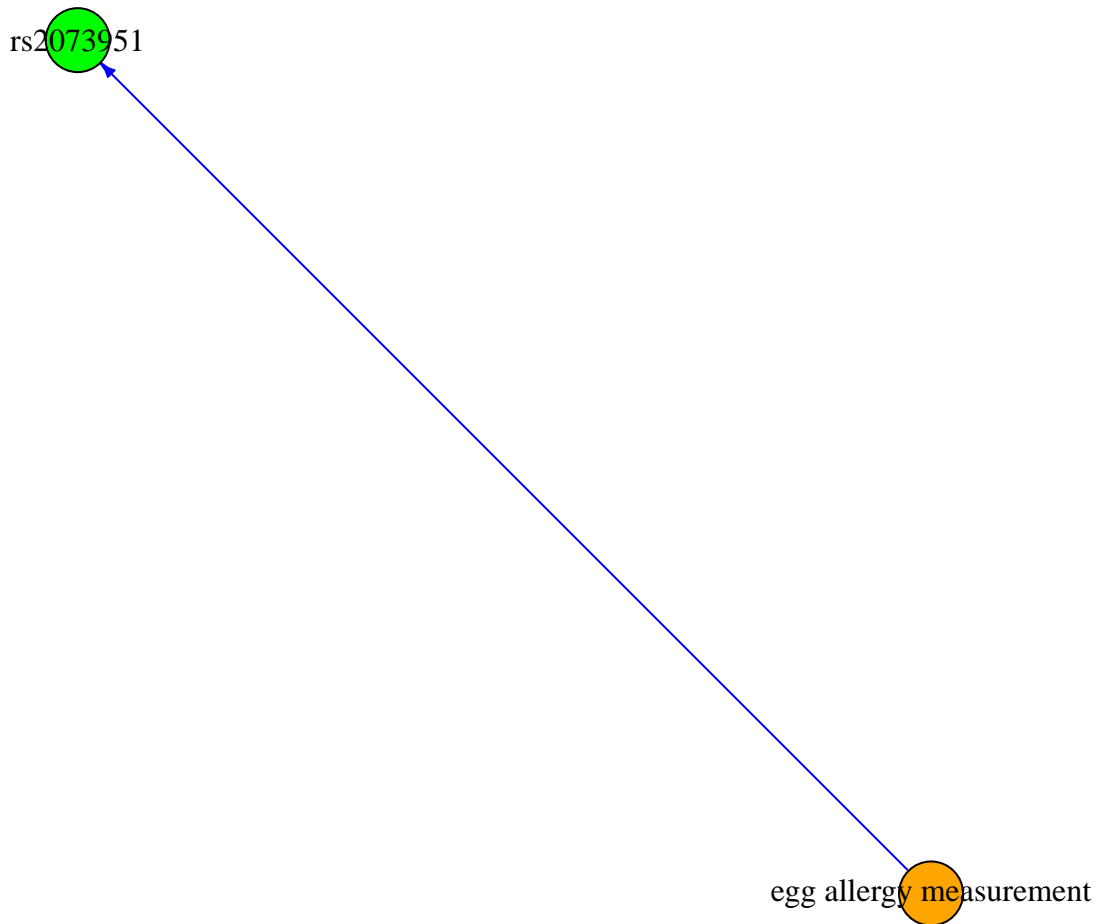

## Variant–Disease Network (eosinophilic esophagitis)

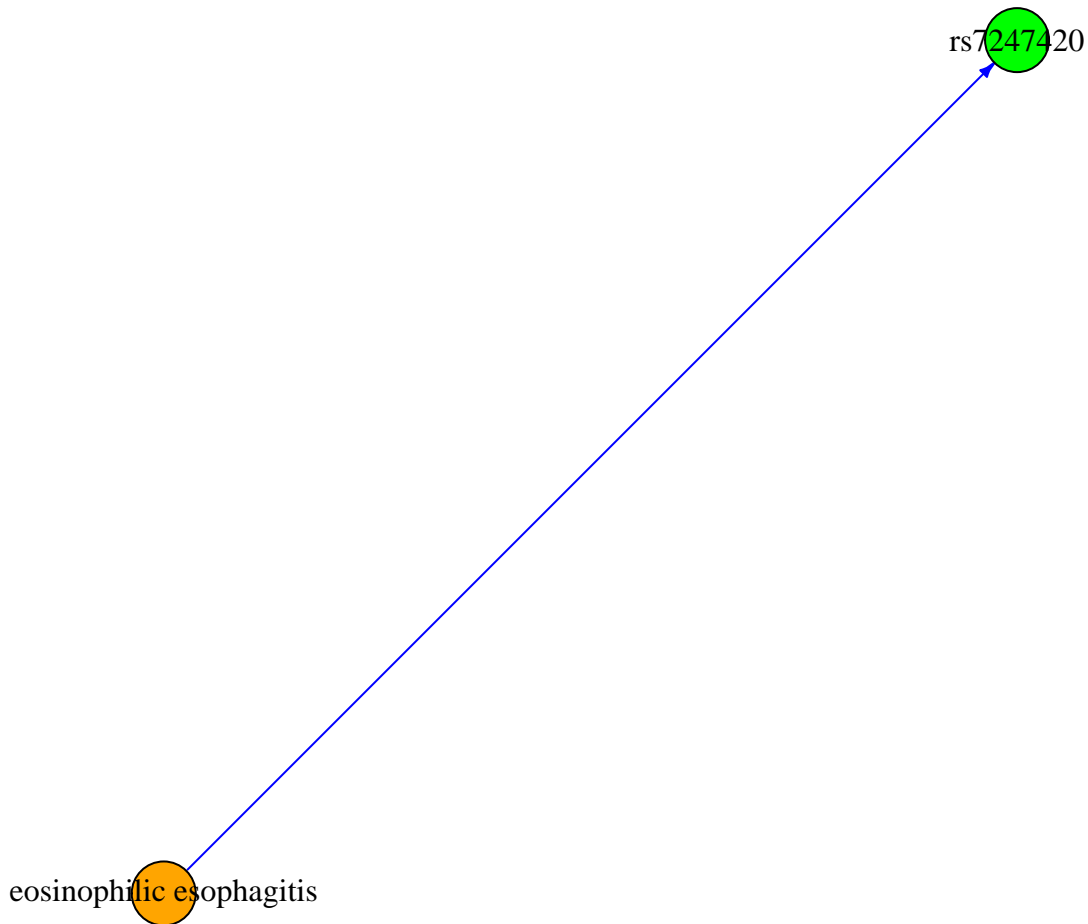

# Variant–Disease Network (serum albumin measurement)

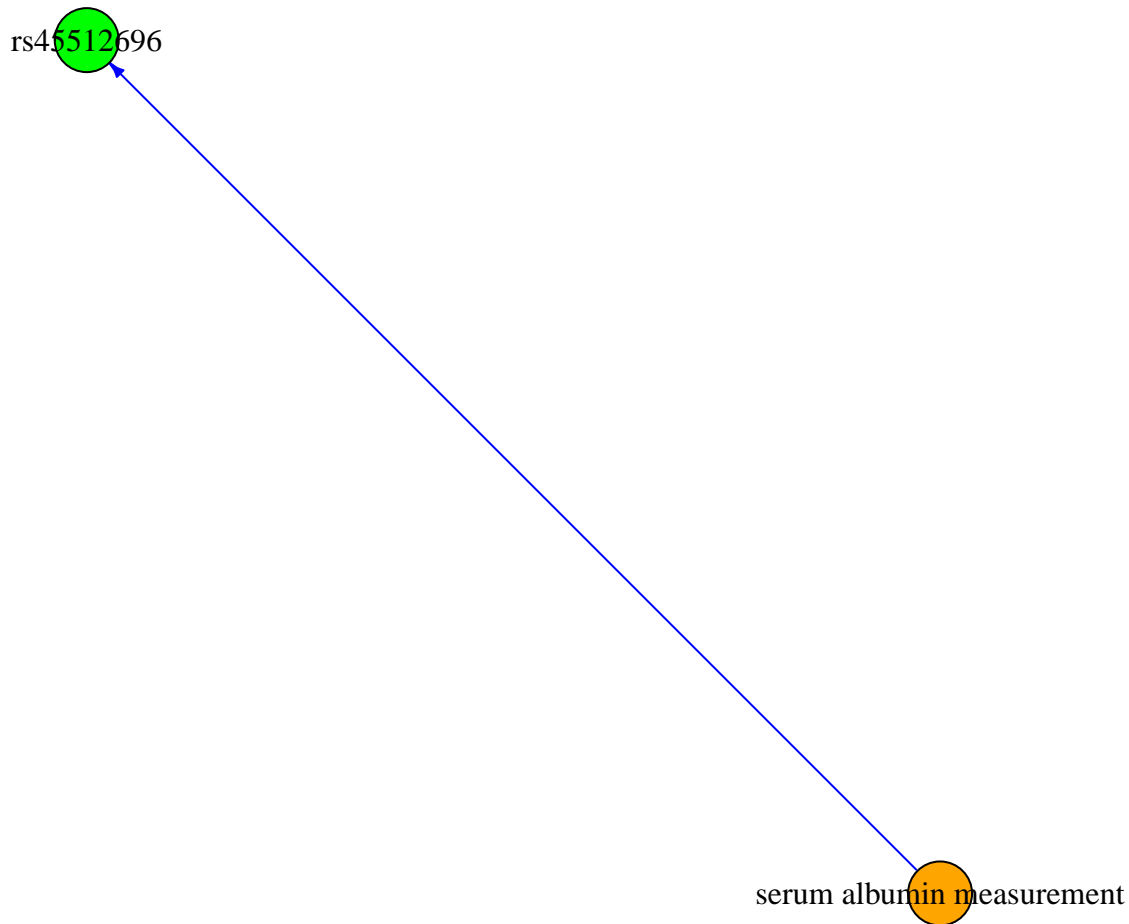



## Variant–Disease Network (clostridium difficile infection)

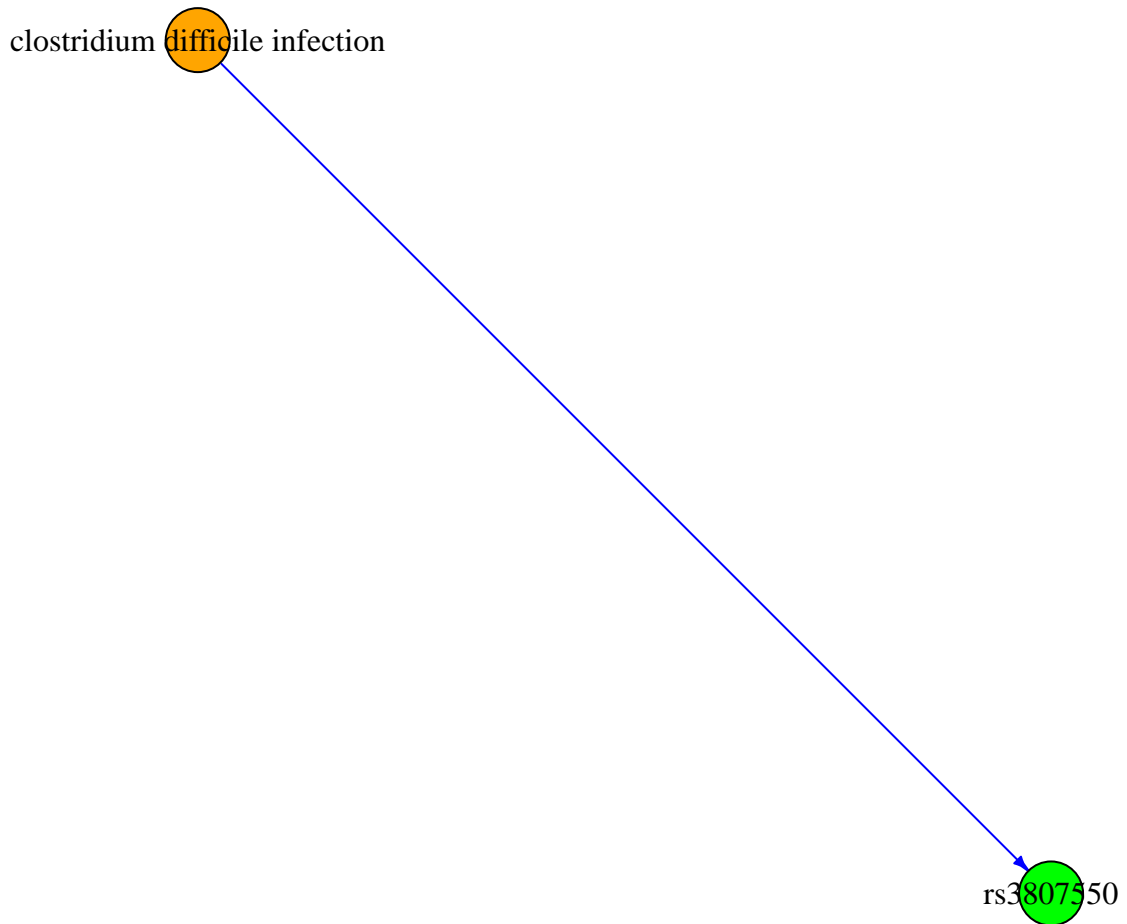

## Variant-Disease Network (multiple myeloma)

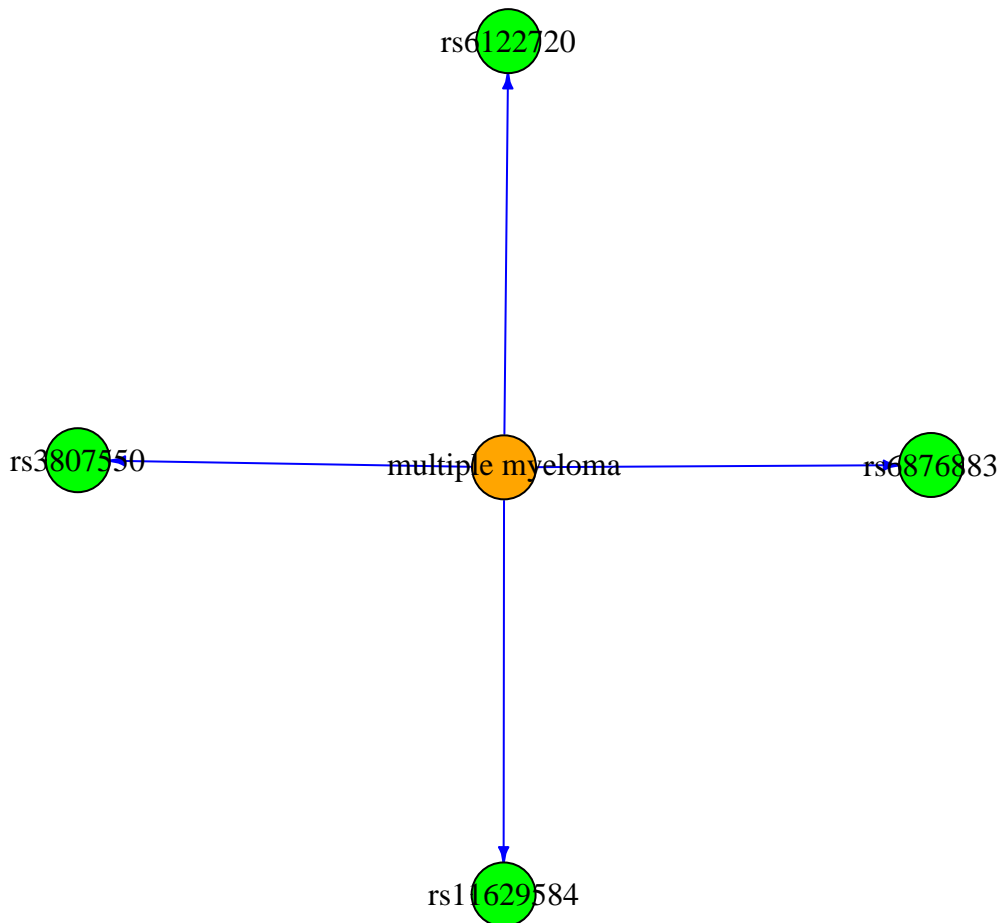

## Variant–Disease Network (serum metabolite measurement)

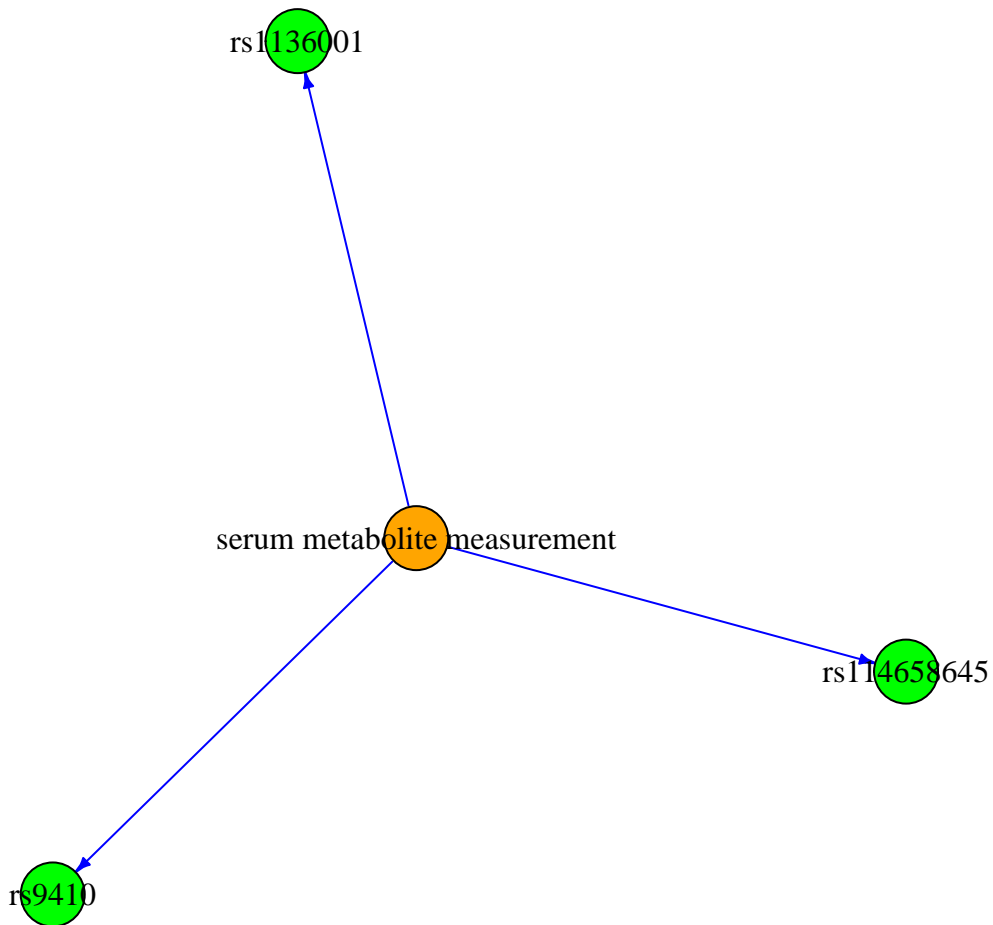

# Variant–Disease Network (seasonal gut microbiome composition measurement)

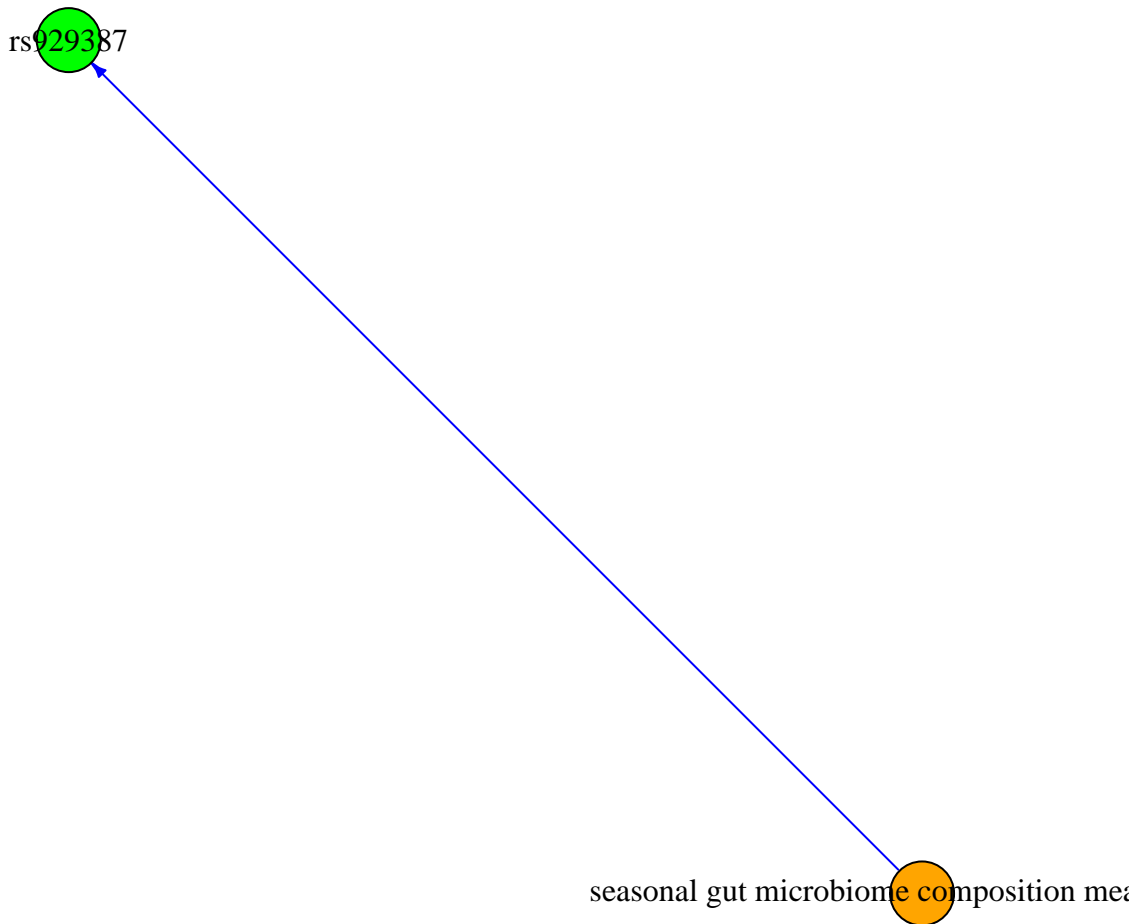

## Variant–Disease Network (hemoglobin measurement)

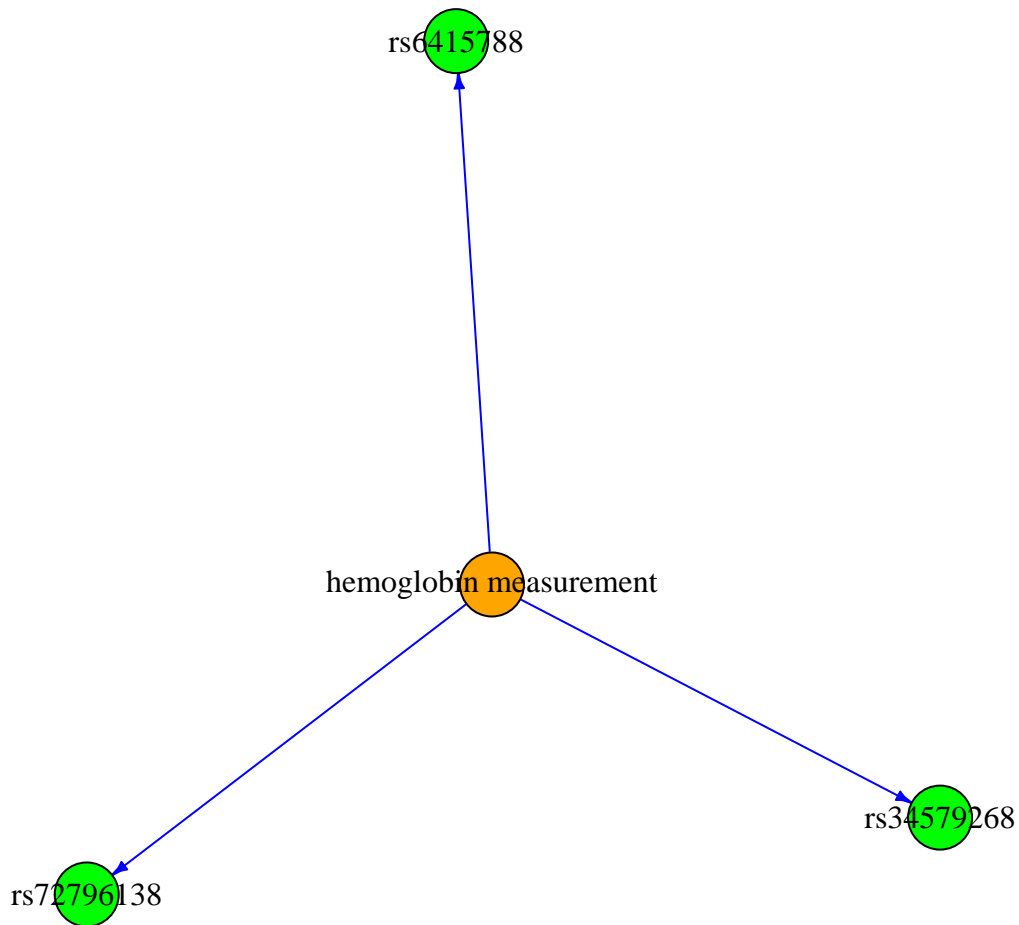

## Variant–Disease Network (cutaneous melanoma)

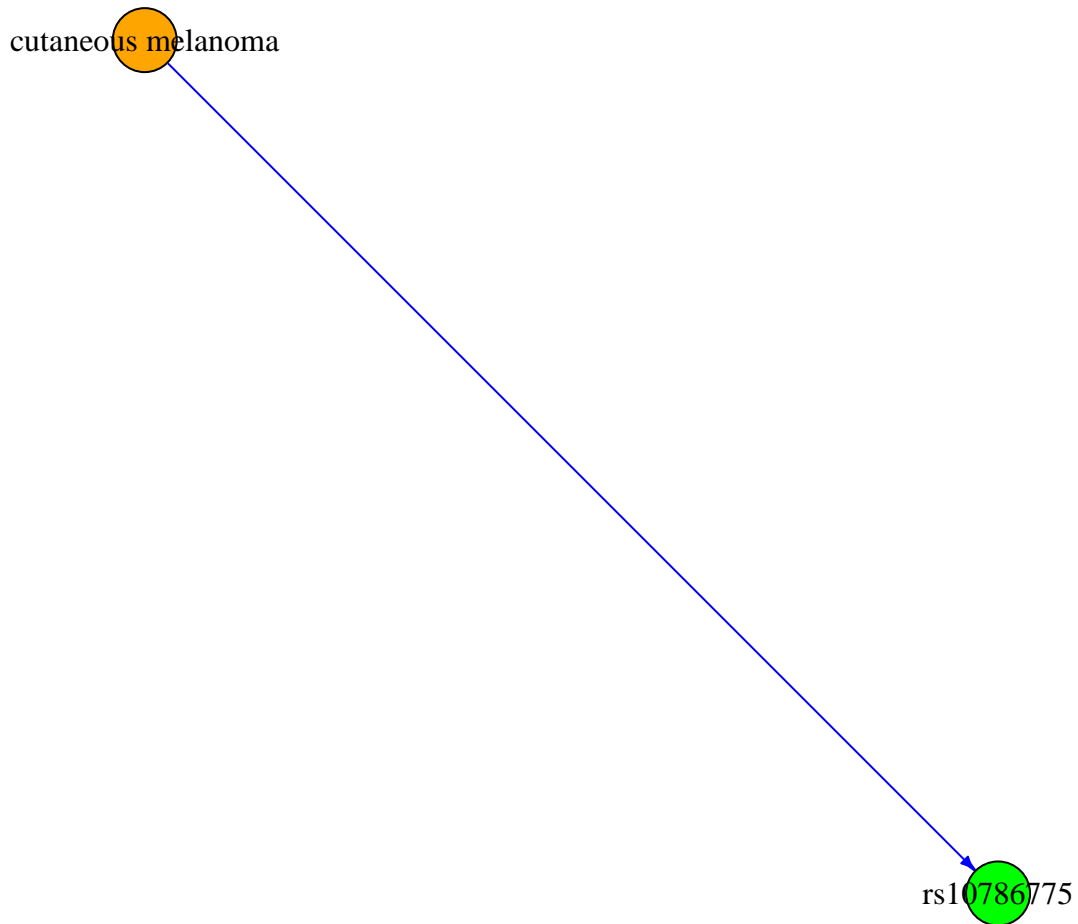

**Variant–Disease Network (lip morphology measurement)**

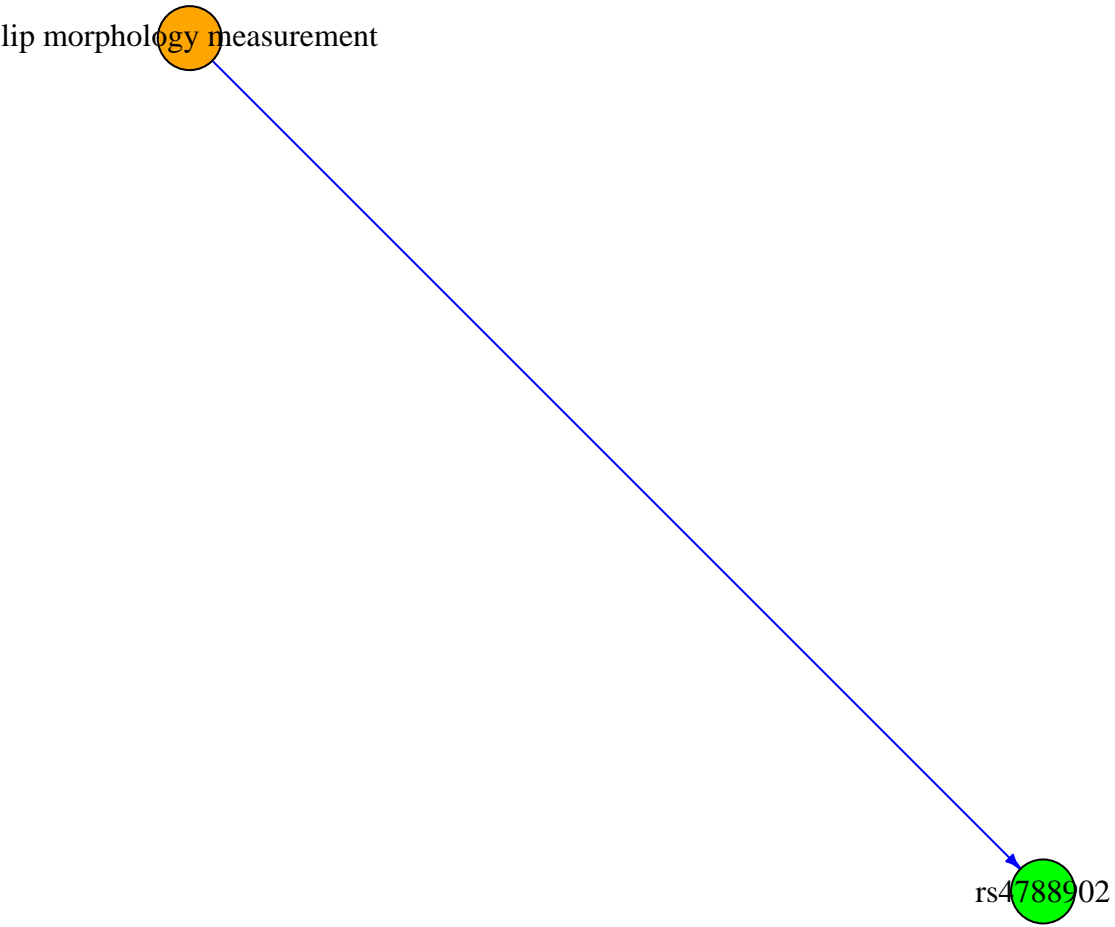

## Variant-Disease Network (rotator cuff tear)

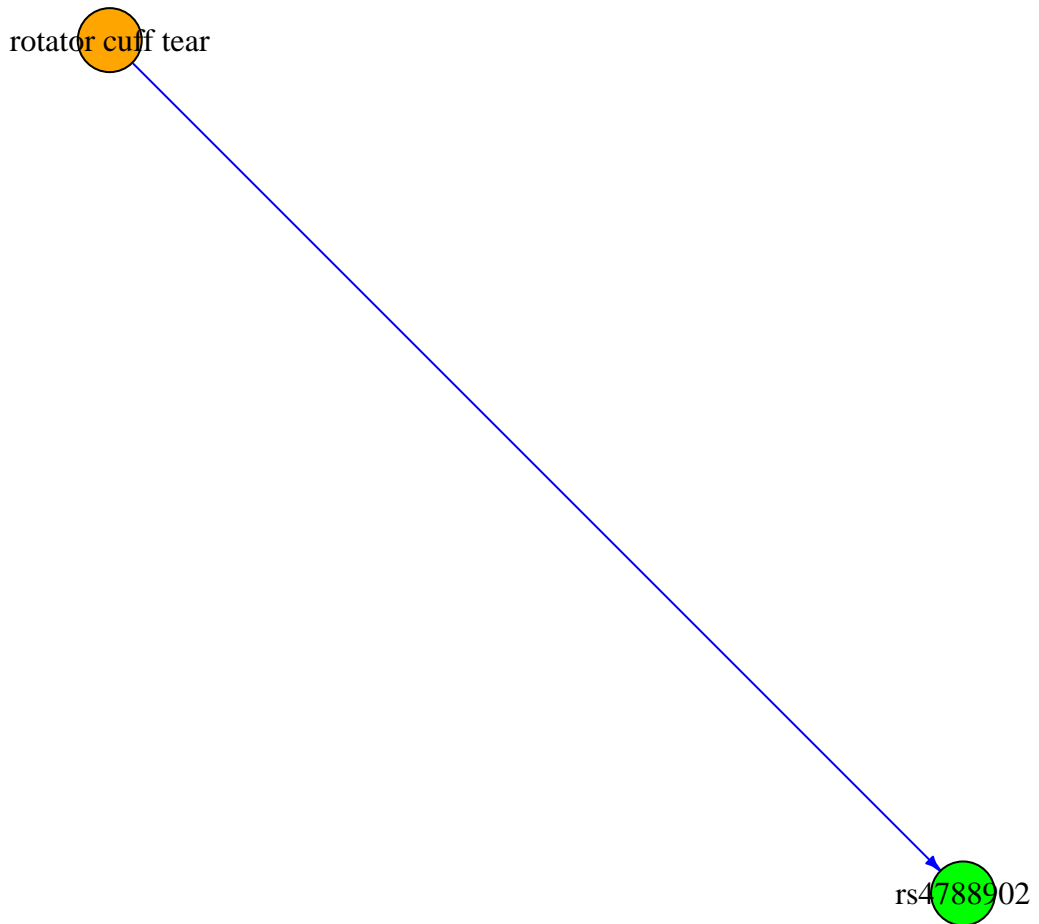



## Variant–Disease Network (diet measurement)

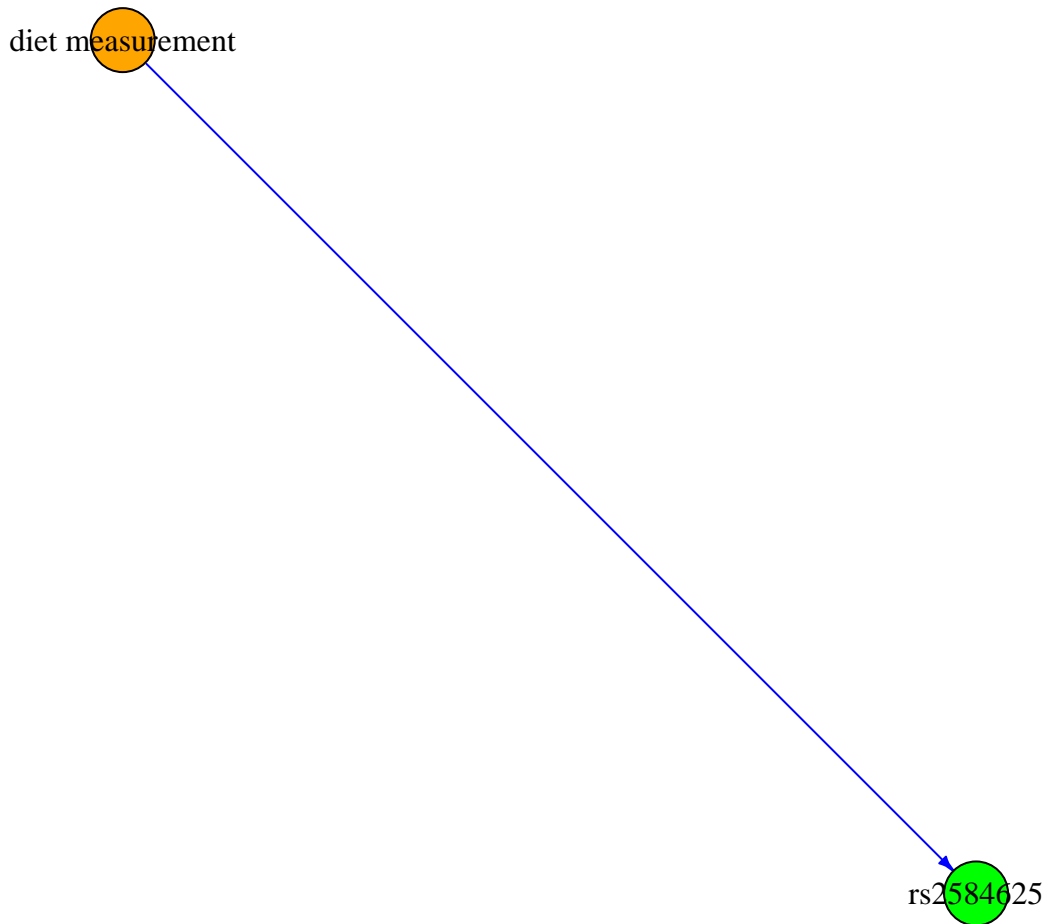

## Variant–Disease Network (fibrinogen measurement)

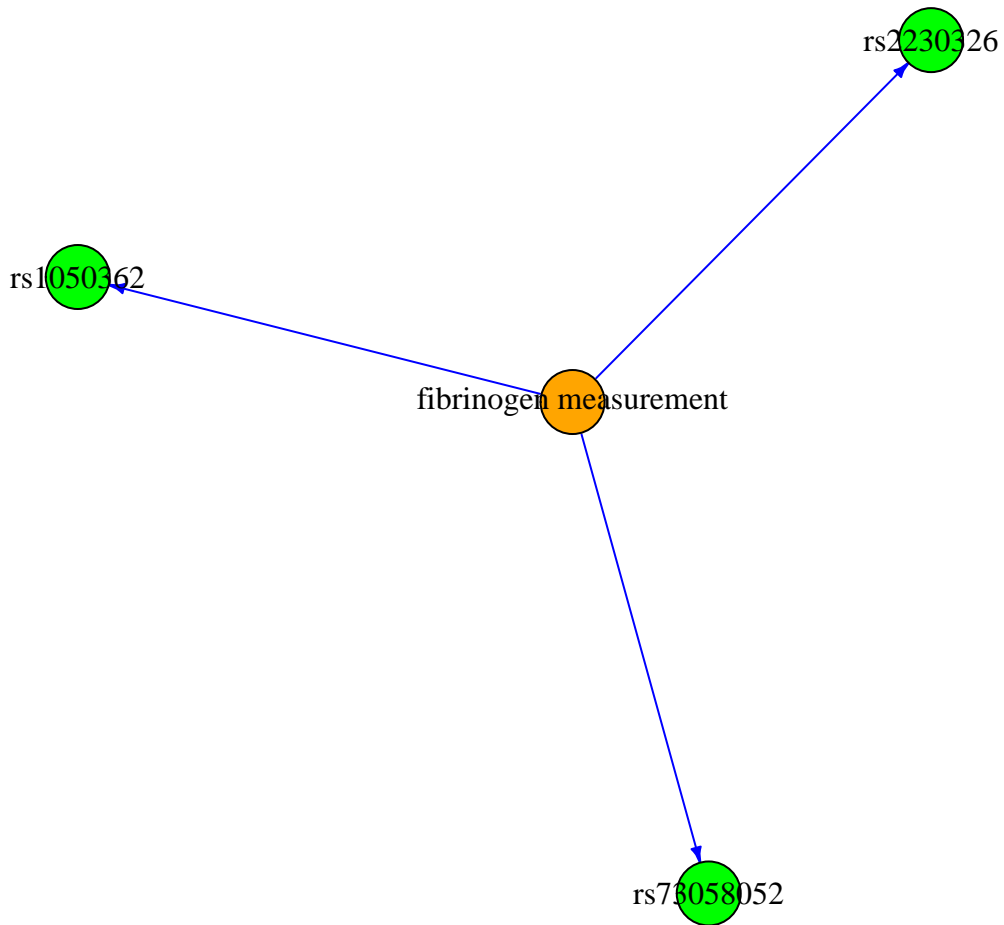

# Variant-Disease Network (vitiligo)

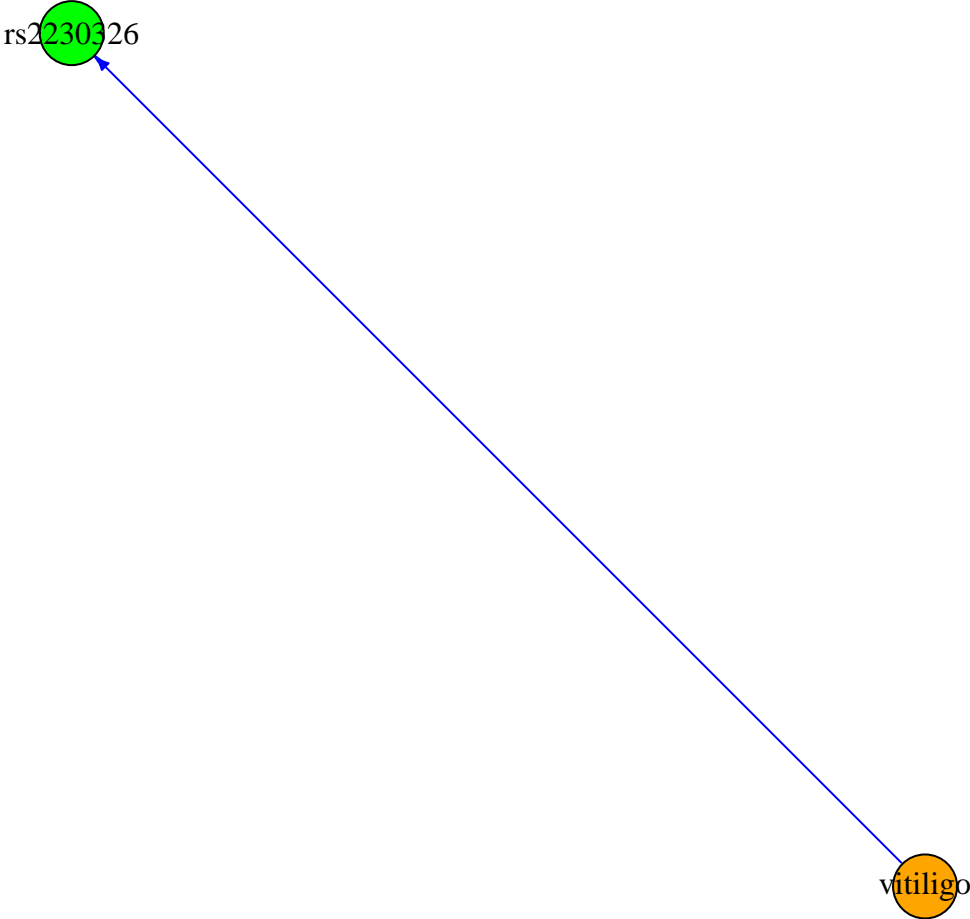

## Variant–Disease Network (biliary liver cirrhosis)

biliary liver cirrhosis

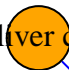

rs2866413

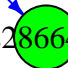

## Variant–Disease Network (primary biliary cirrhosis)

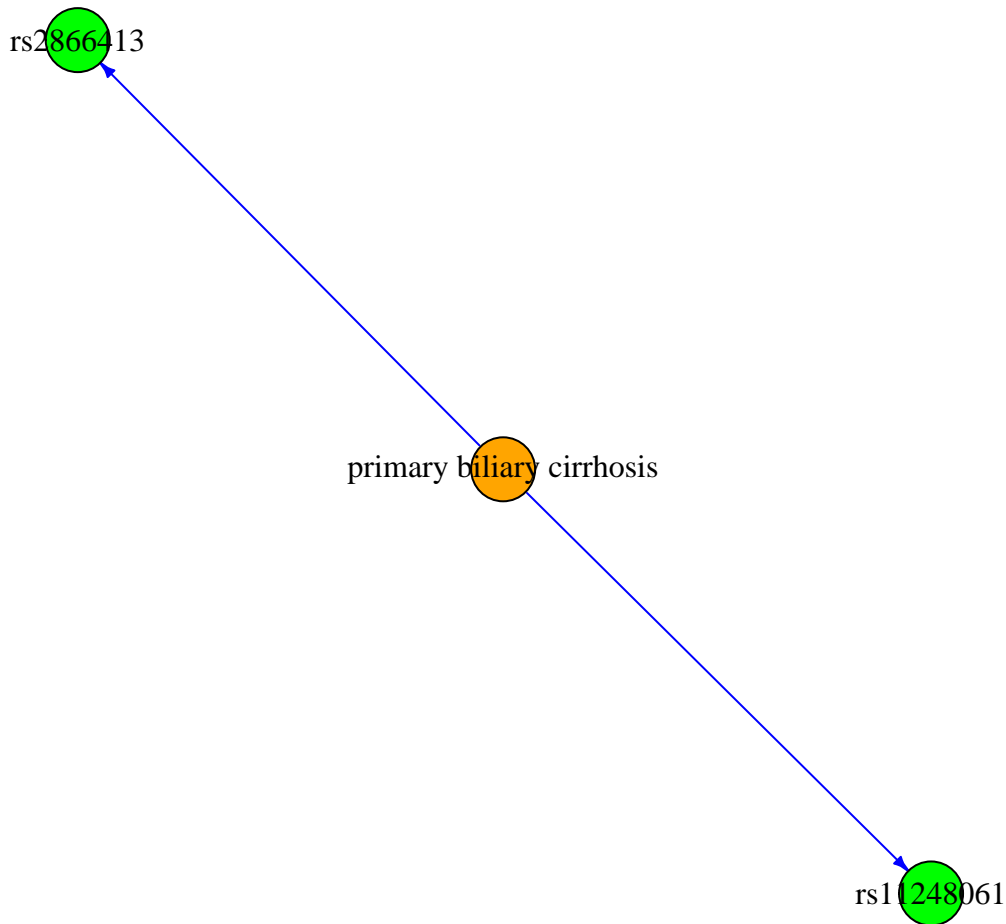

## Variant–Disease Network (autoantibody measurement)

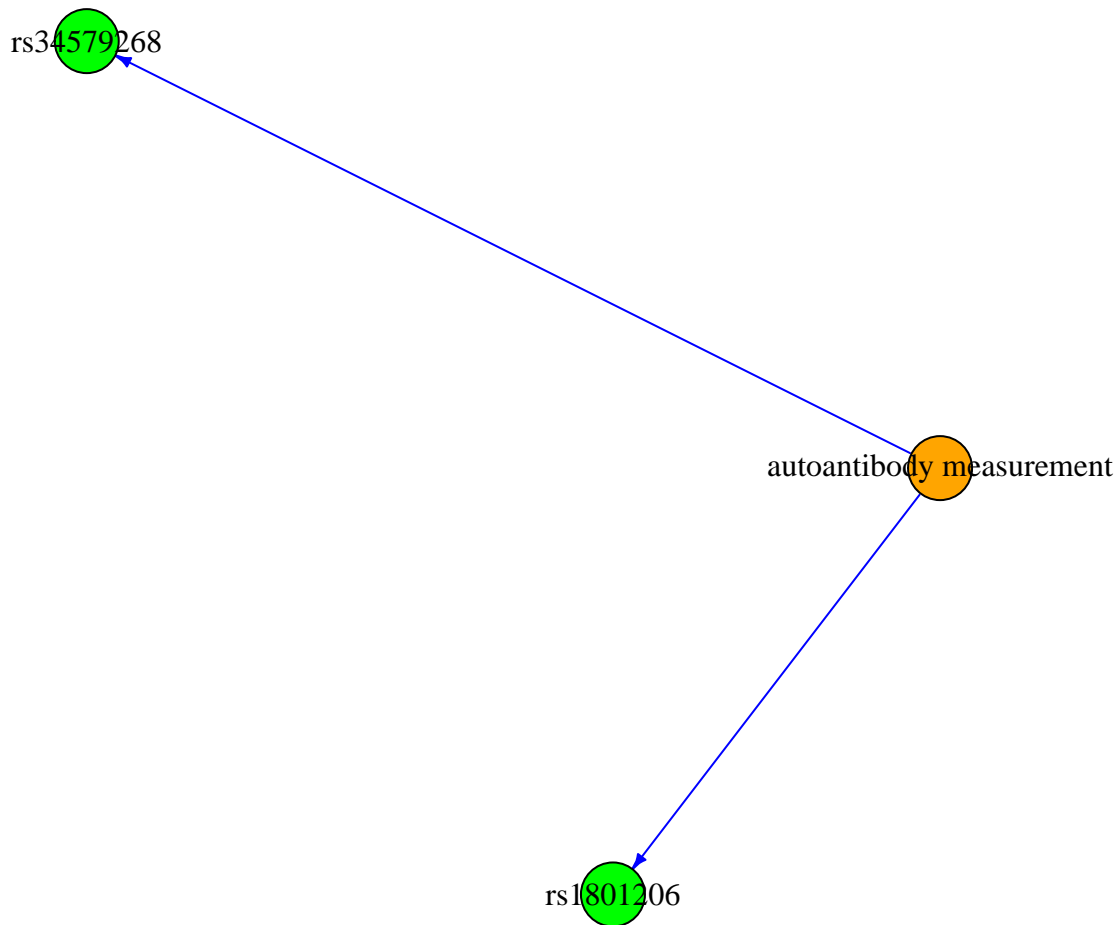

## Variant–Disease Network (optic disc area measurement)

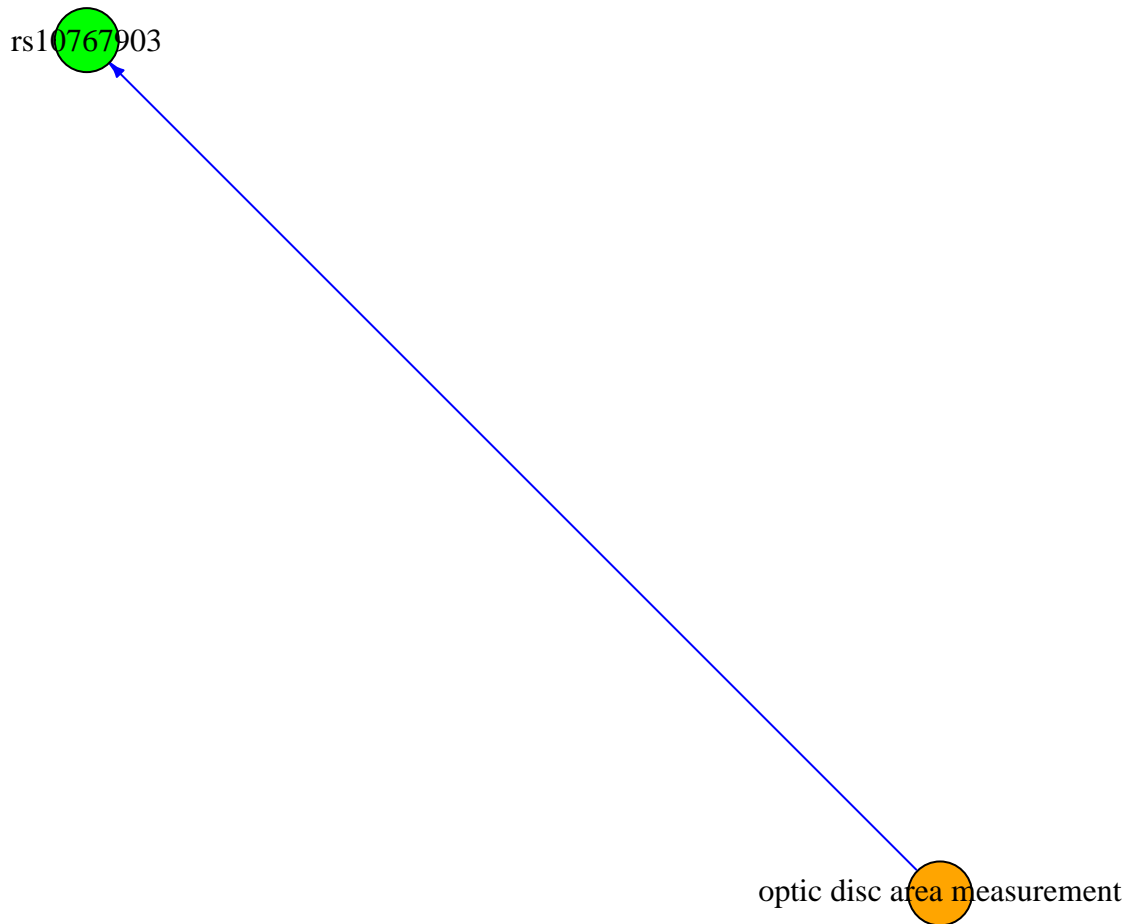

## Variant–Disease Network (attempted suicide)

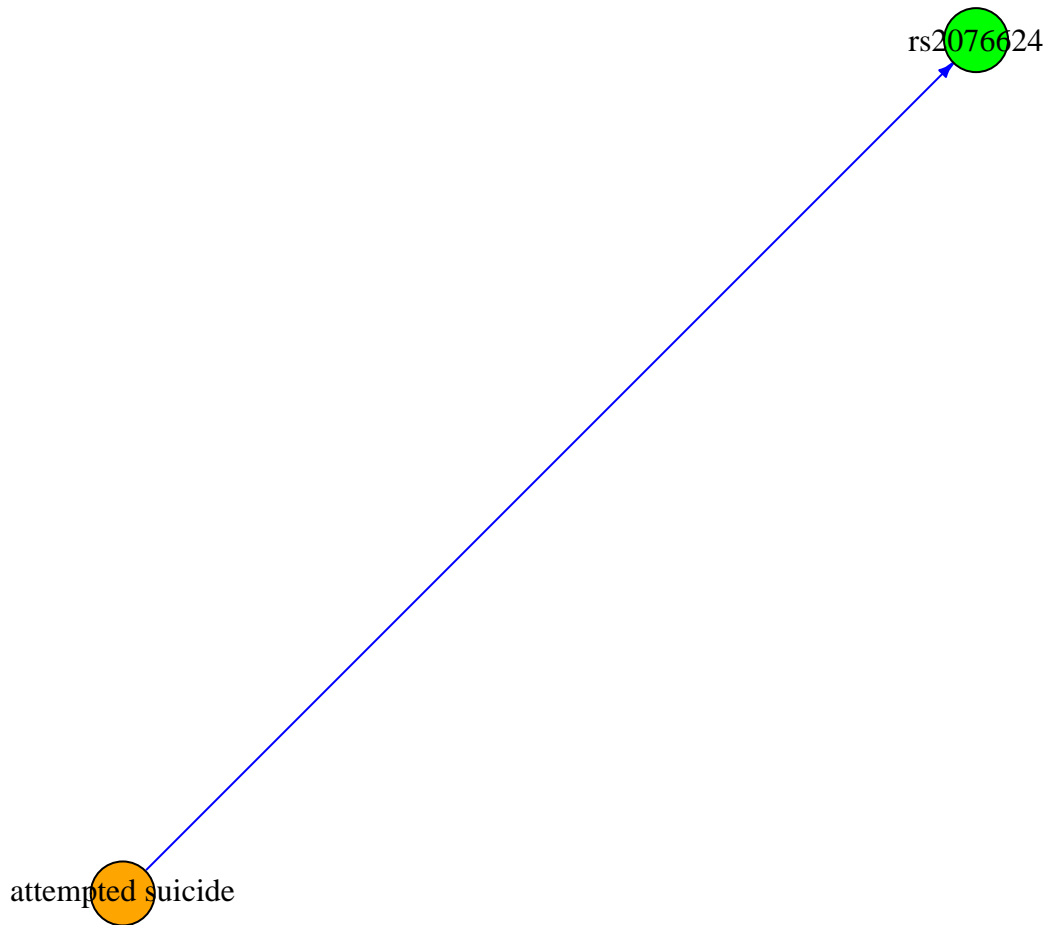



## Variant–Disease Network (cirrhosis of liver)

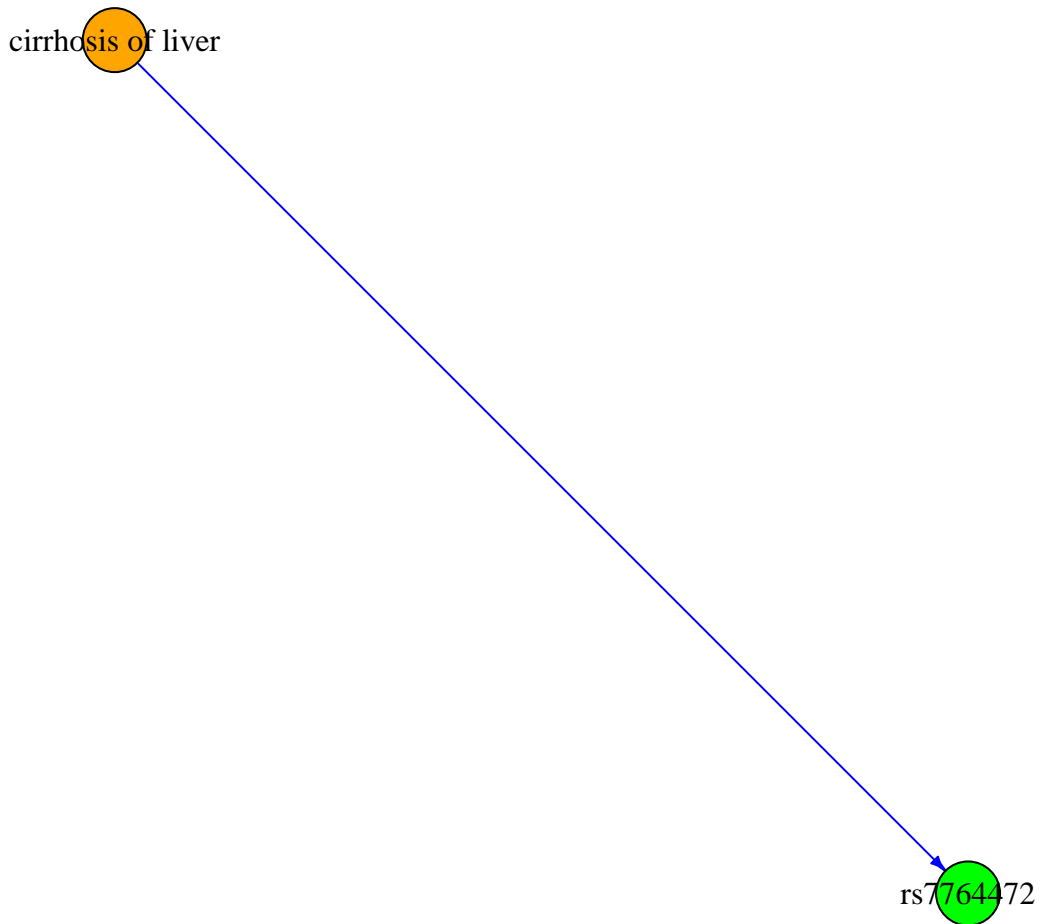

## Variant–Disease Network (hepatitis C infection)

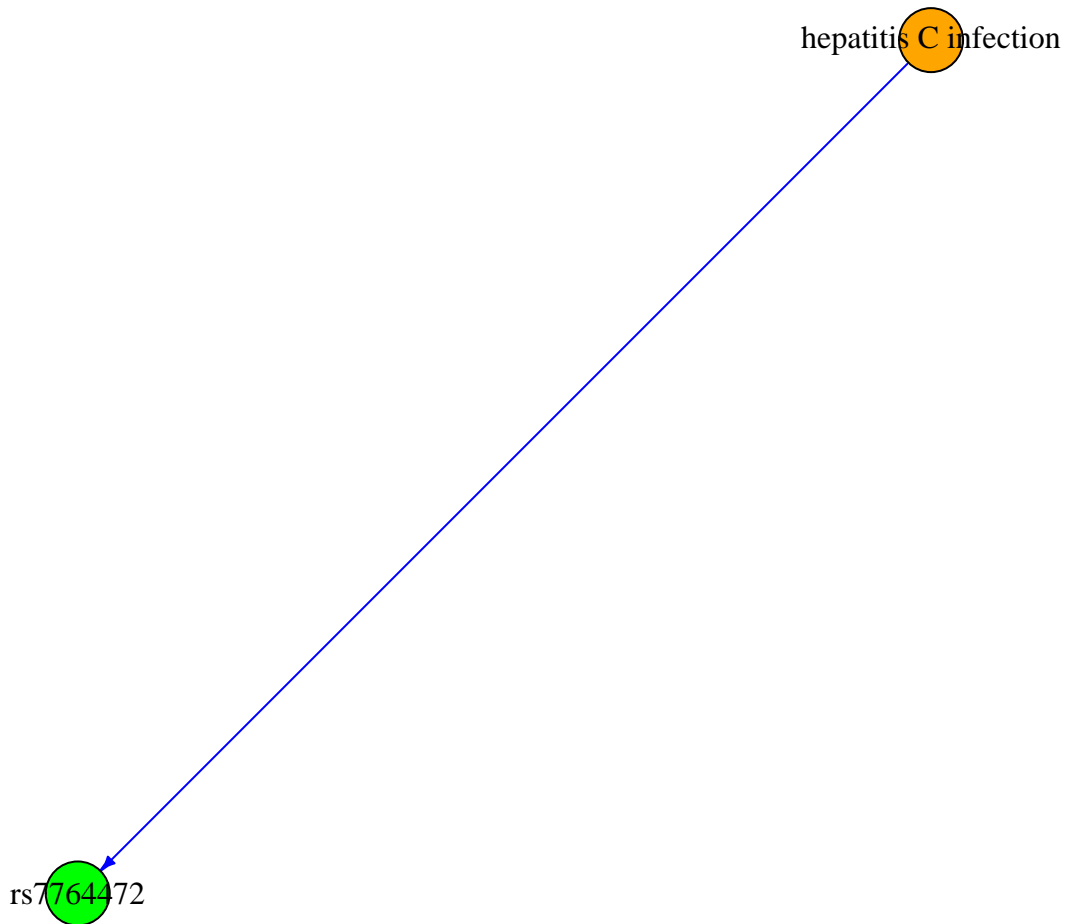

# Variant–Disease Network (response to sulfonylurea)

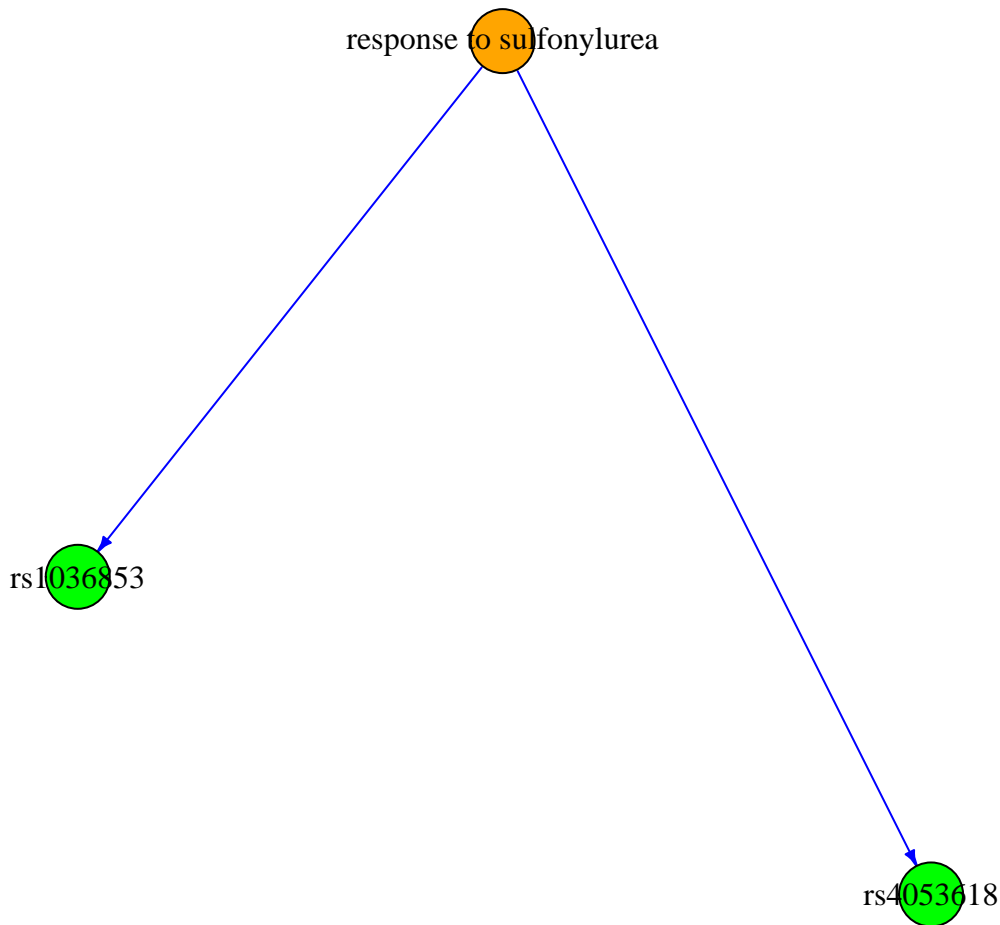

# Variant–Disease Network (susceptibility to urinary tract infection measurement)

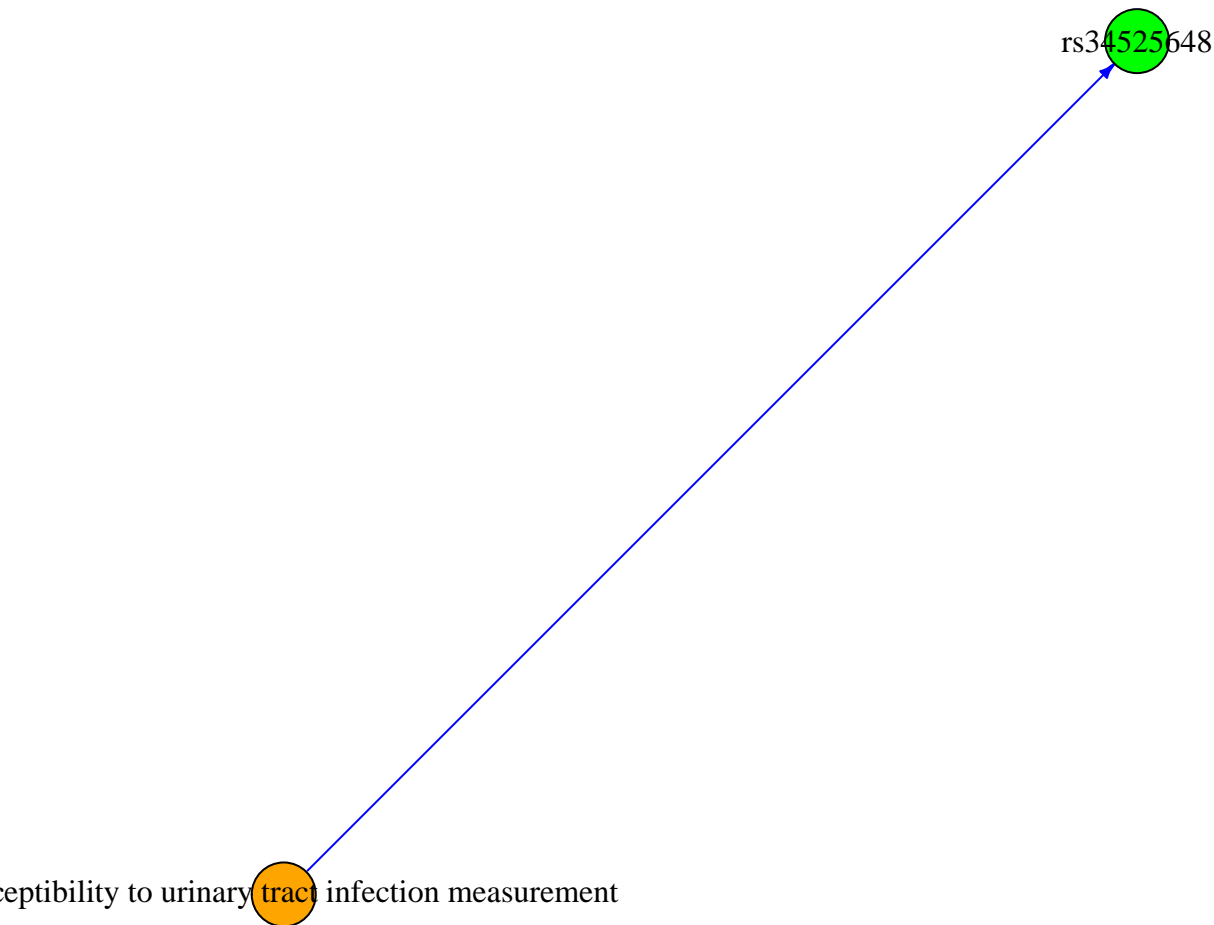

## Variant–Disease Network (functional laterality)

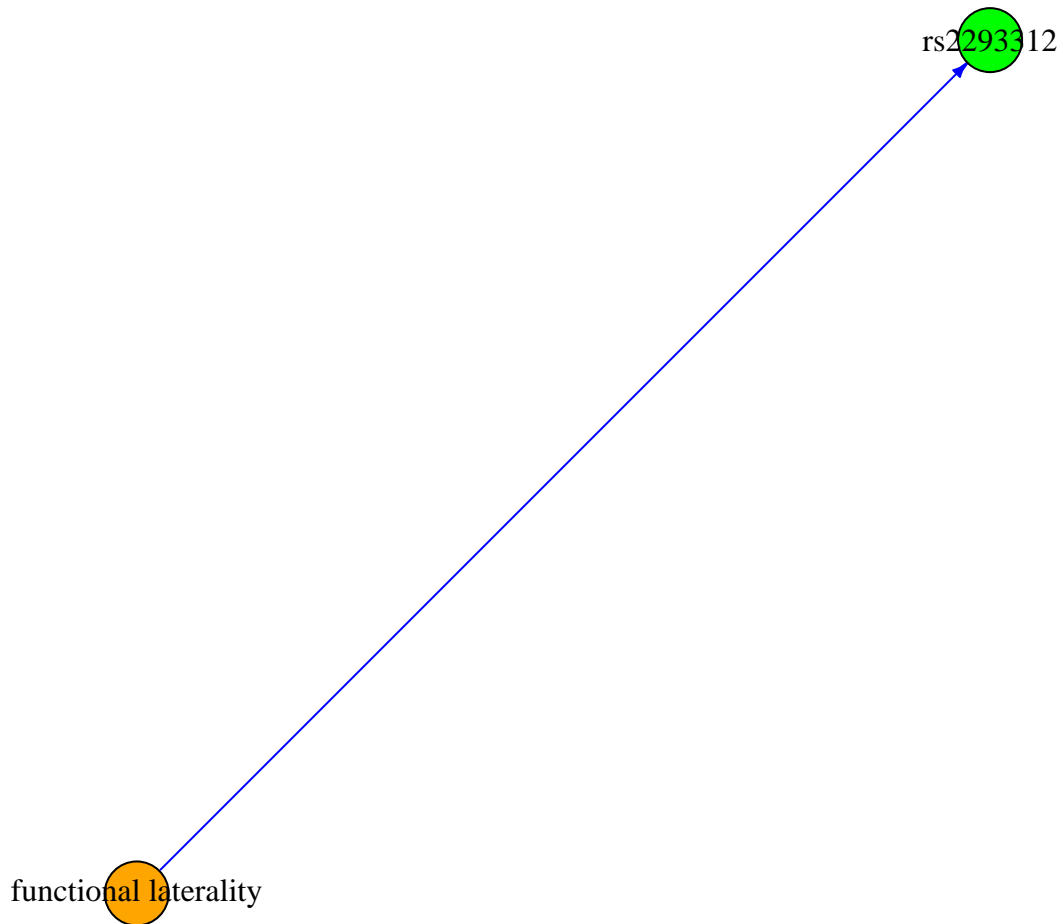

**Variant–Disease Network (serum IgG glycosylation measurement)**

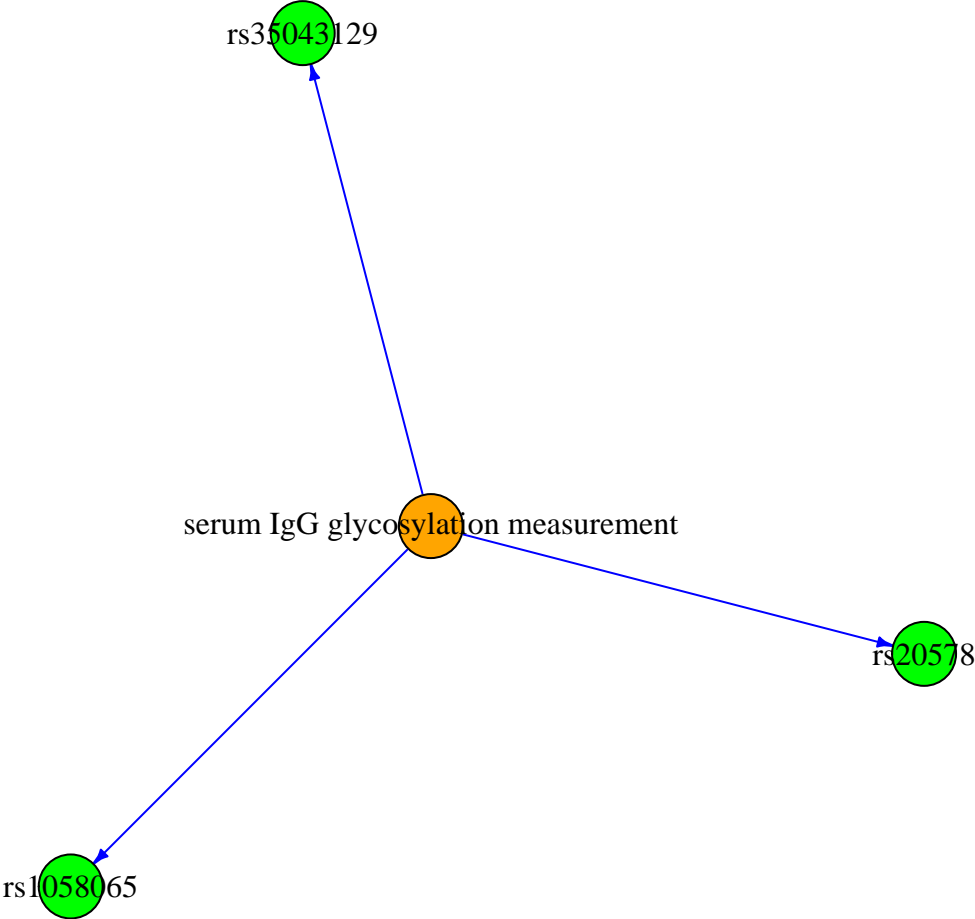

## Variant–Disease Network (neuropsychological test)

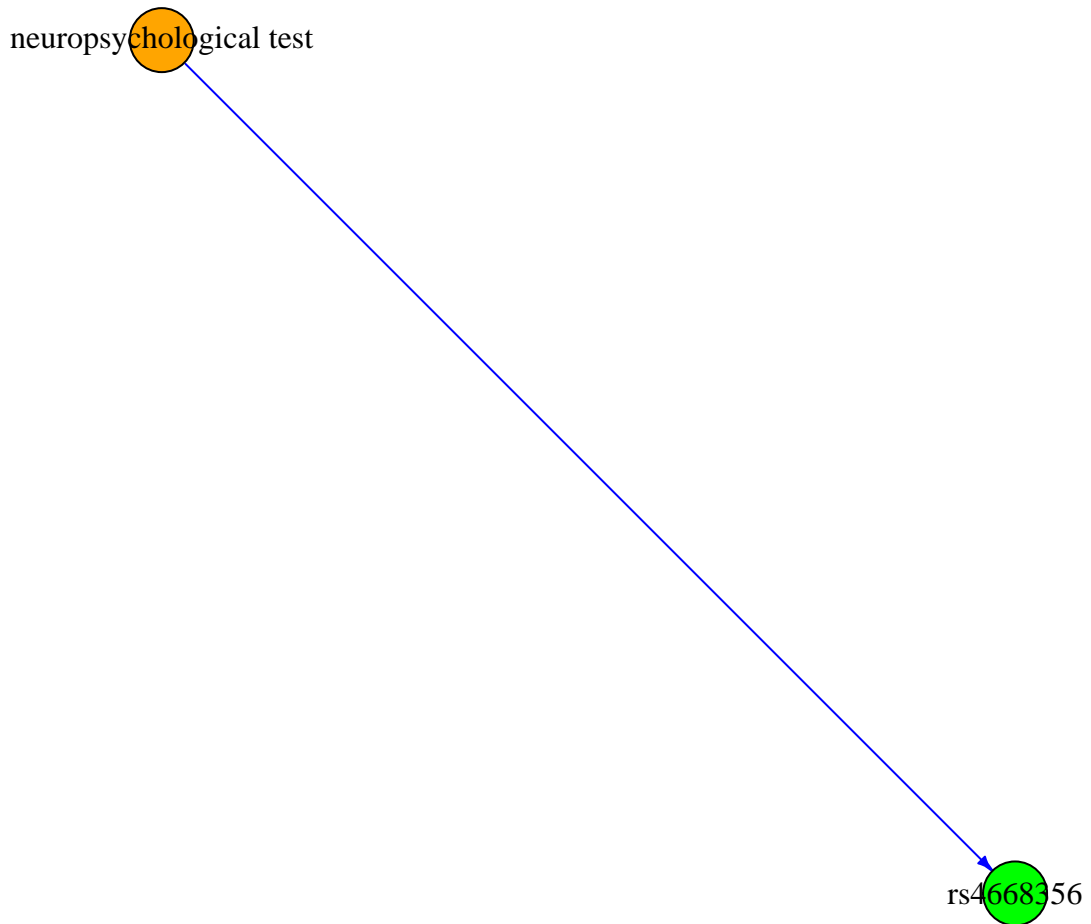

## Variant–Disease Network (alpha linolenic acid measurement)

alpha linolenic acid measurement

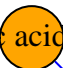

rs3816088

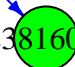



## Variant-Disease Network (osteoarthritis)

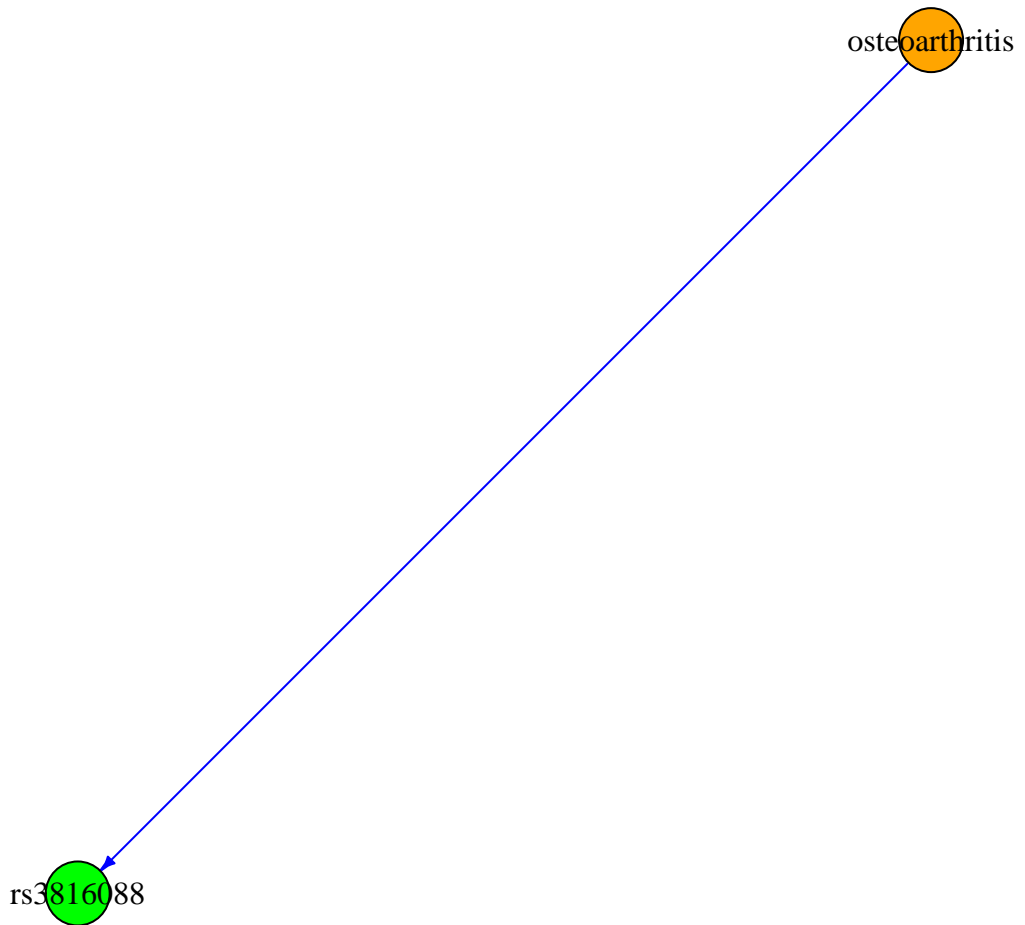

## Variant–Disease Network (cytotoxicity measurement)

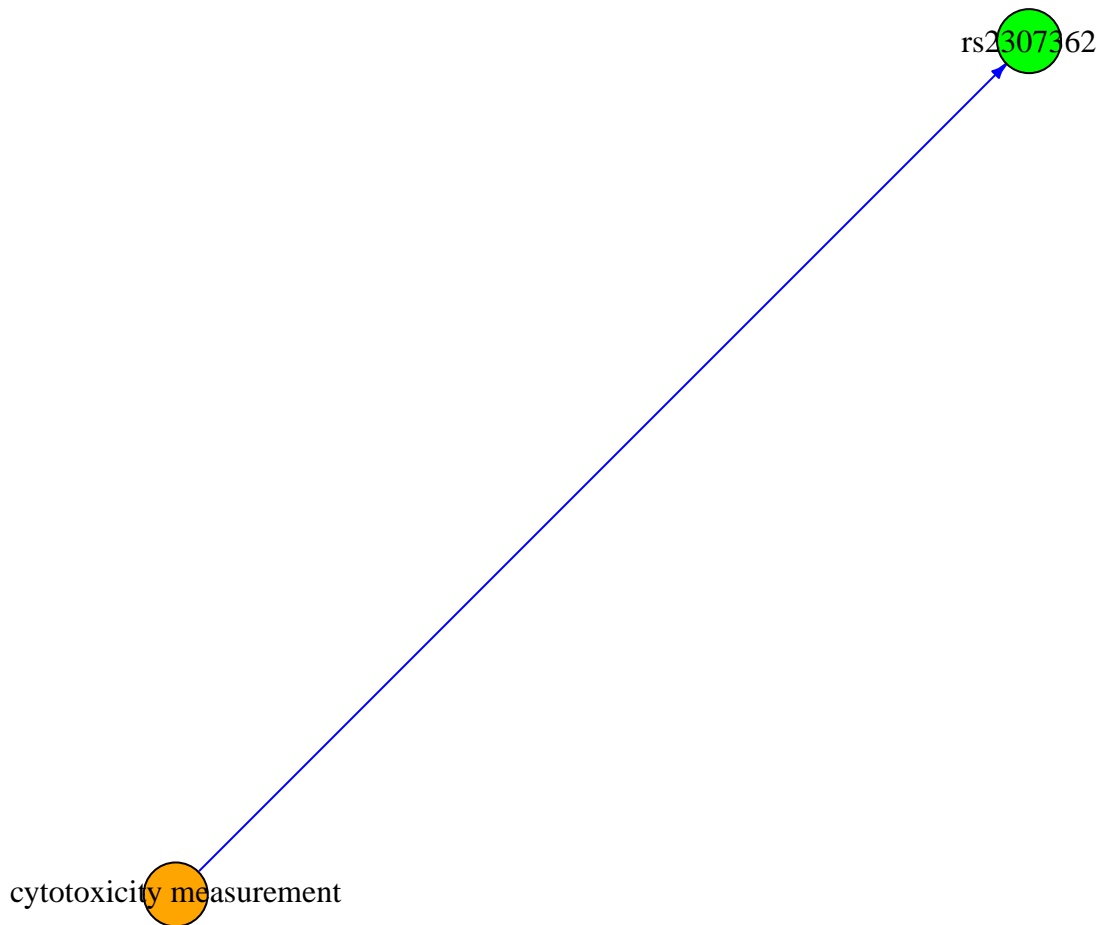

# Variant–Disease Network (outer ear morphology trait)

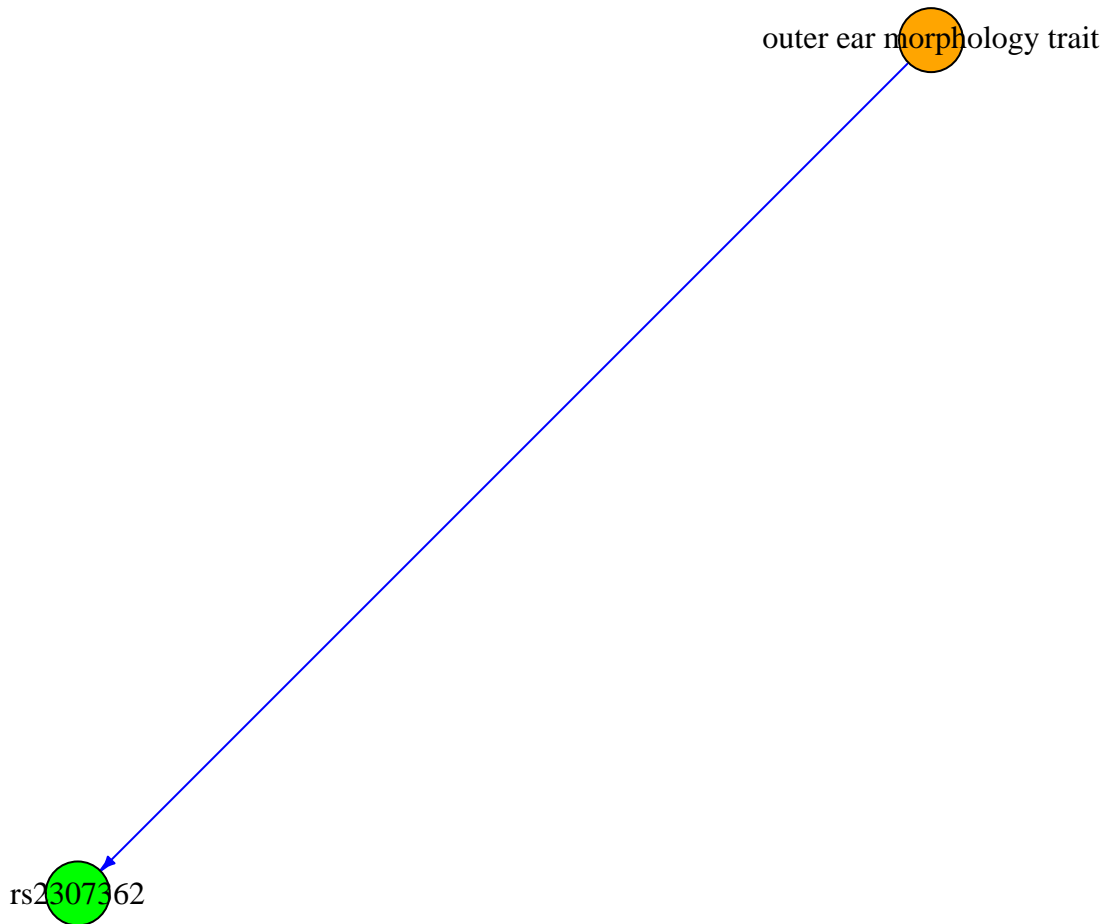

## Variant–Disease Network (QT interval)

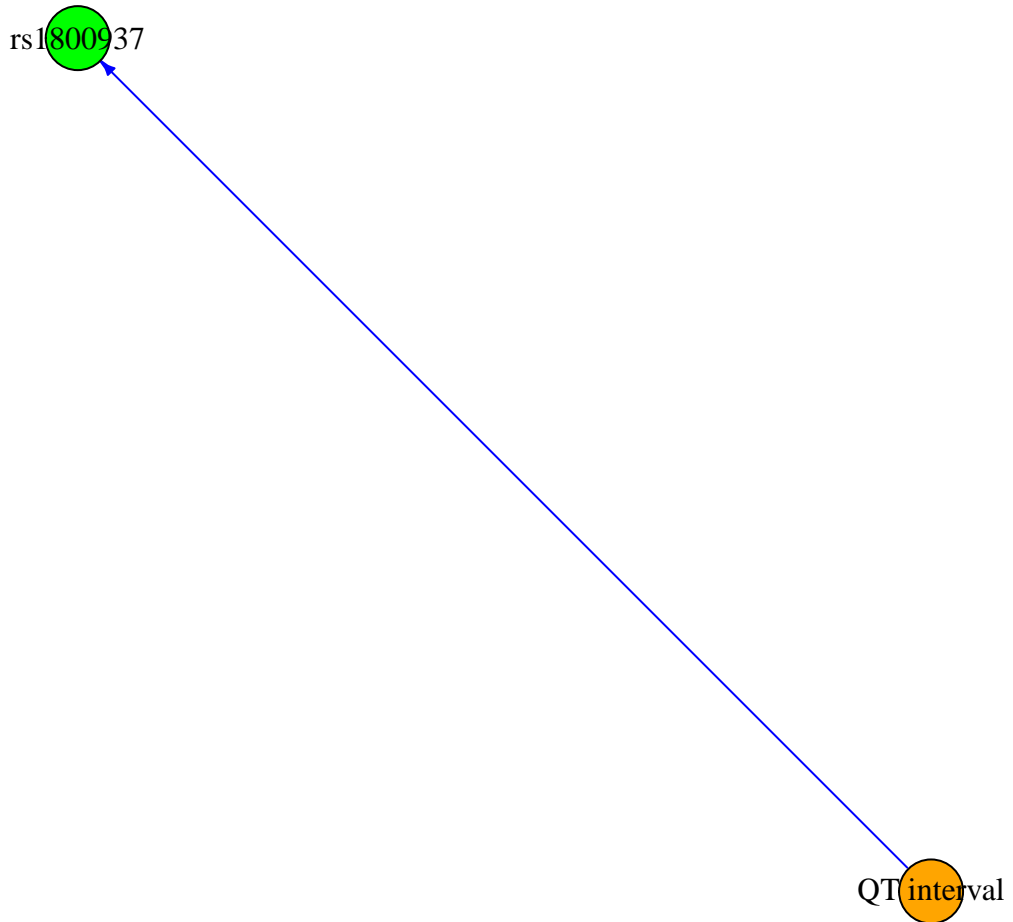

# Variant–Disease Network (Trypanosoma cruzi seropositivity)

Trypanosoma **cruzi** seropositivity

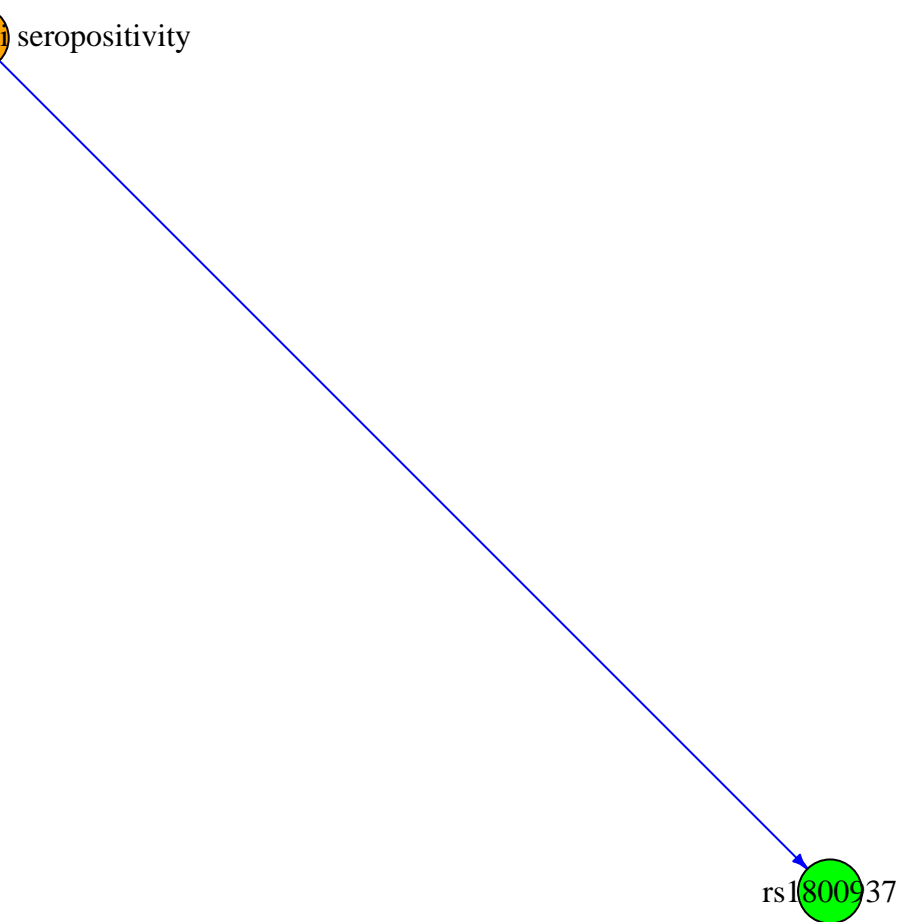

# Variant–Disease Network (body composition measurement)

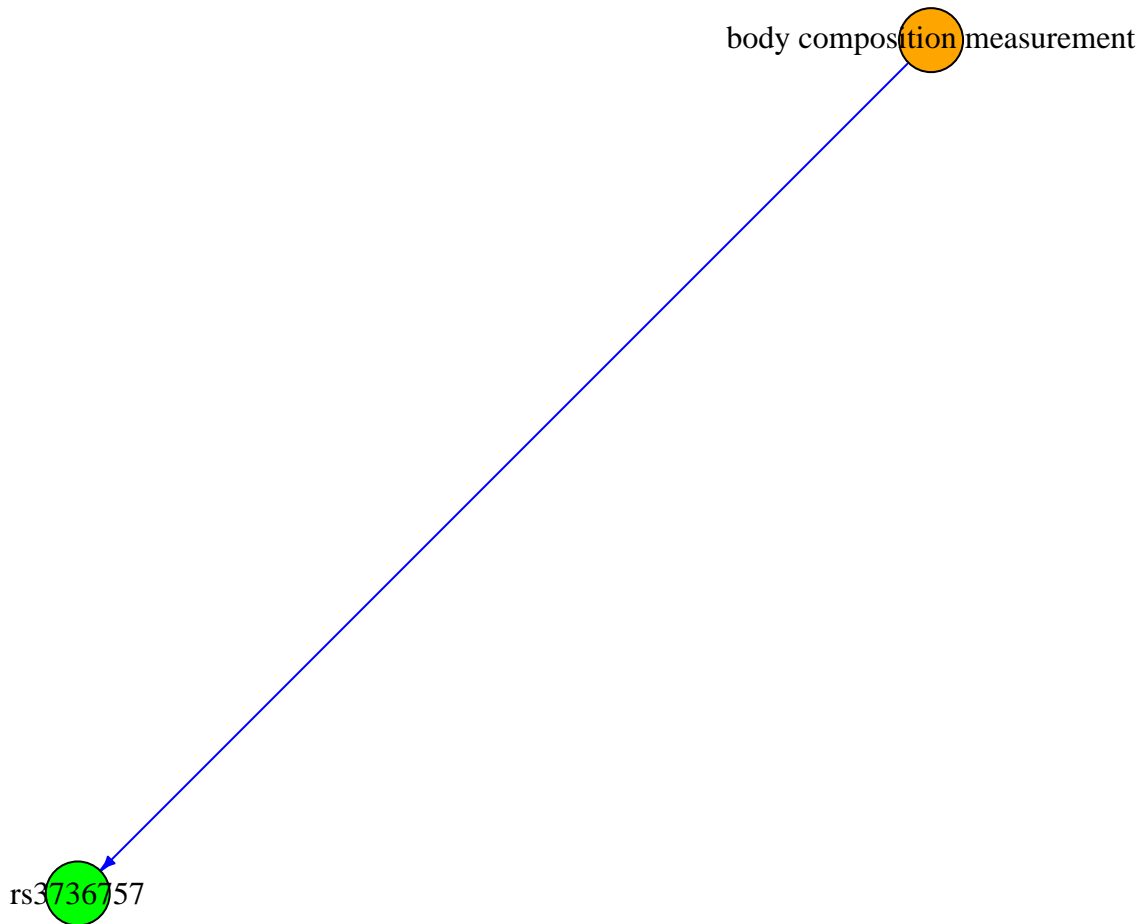

# Variant–Disease Network (haptoglobin measurement)

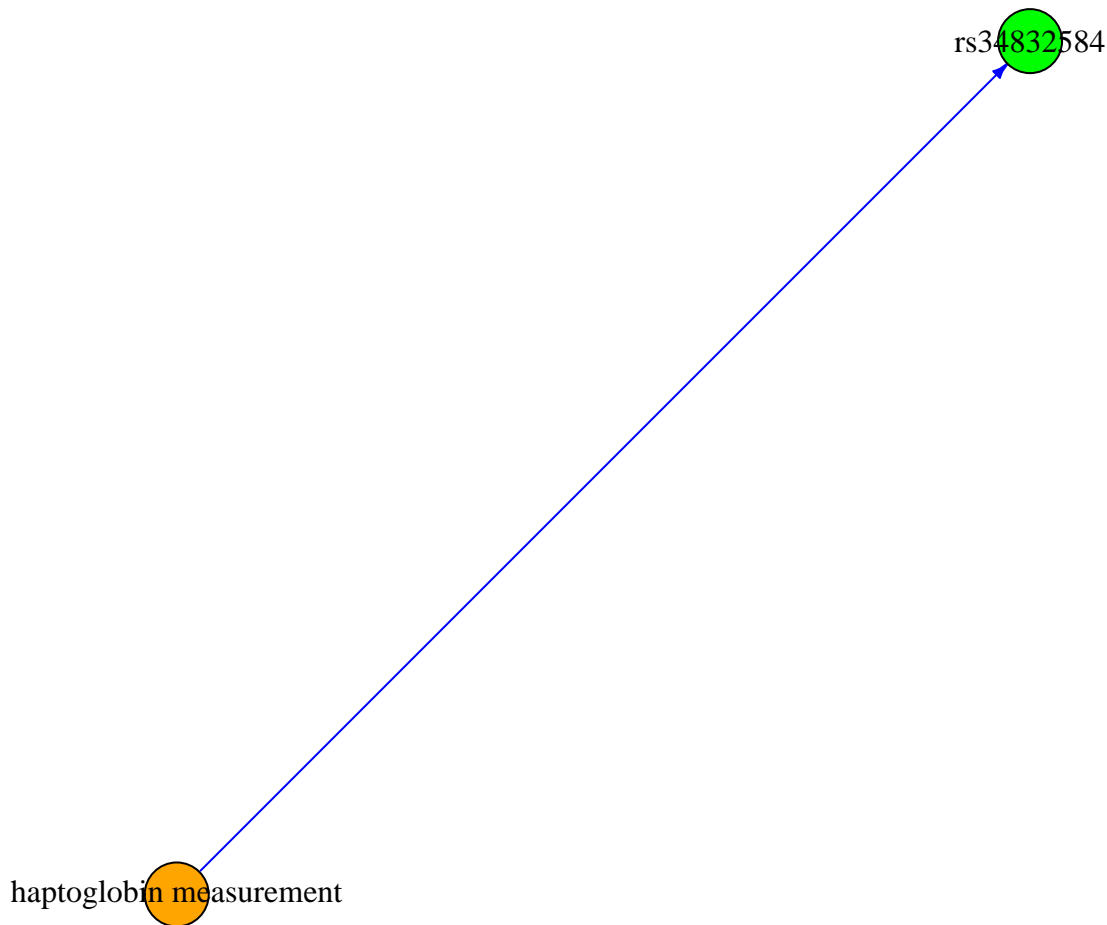

## Variant-Disease Network (sleep quality)

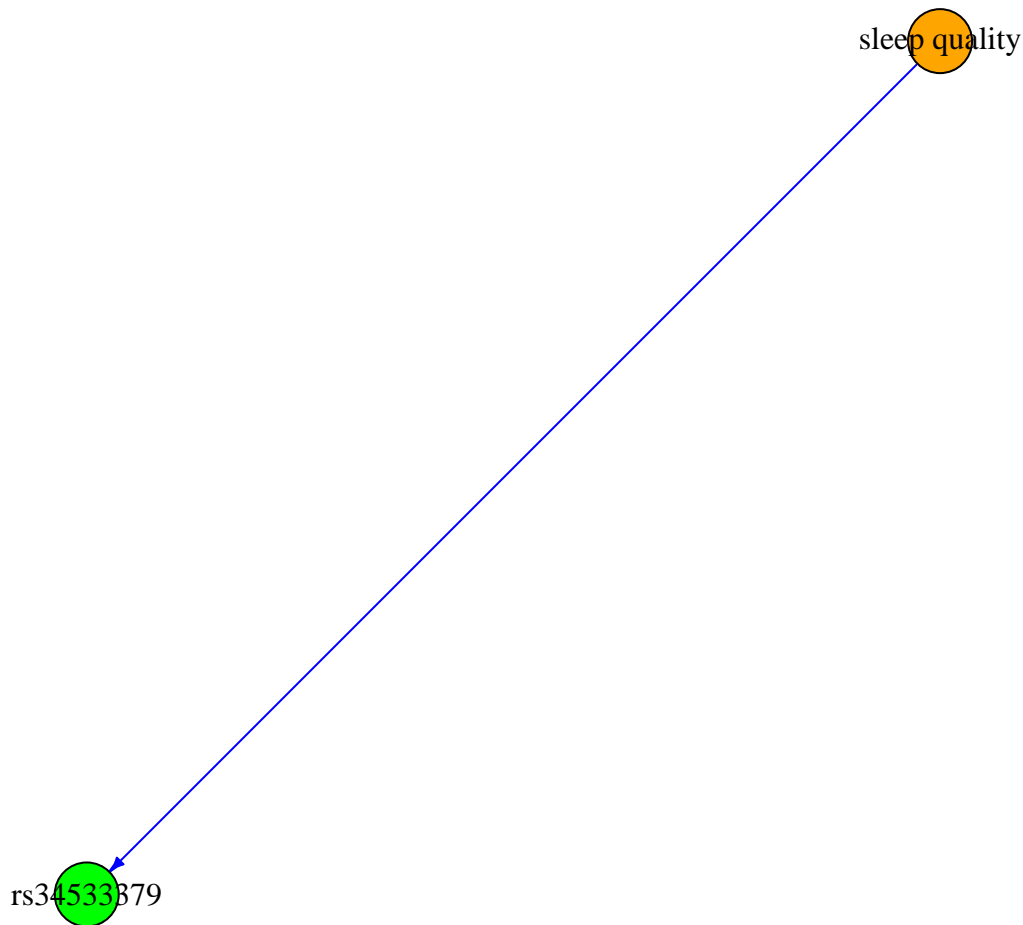



Variant–Disease Network (mood disorder)

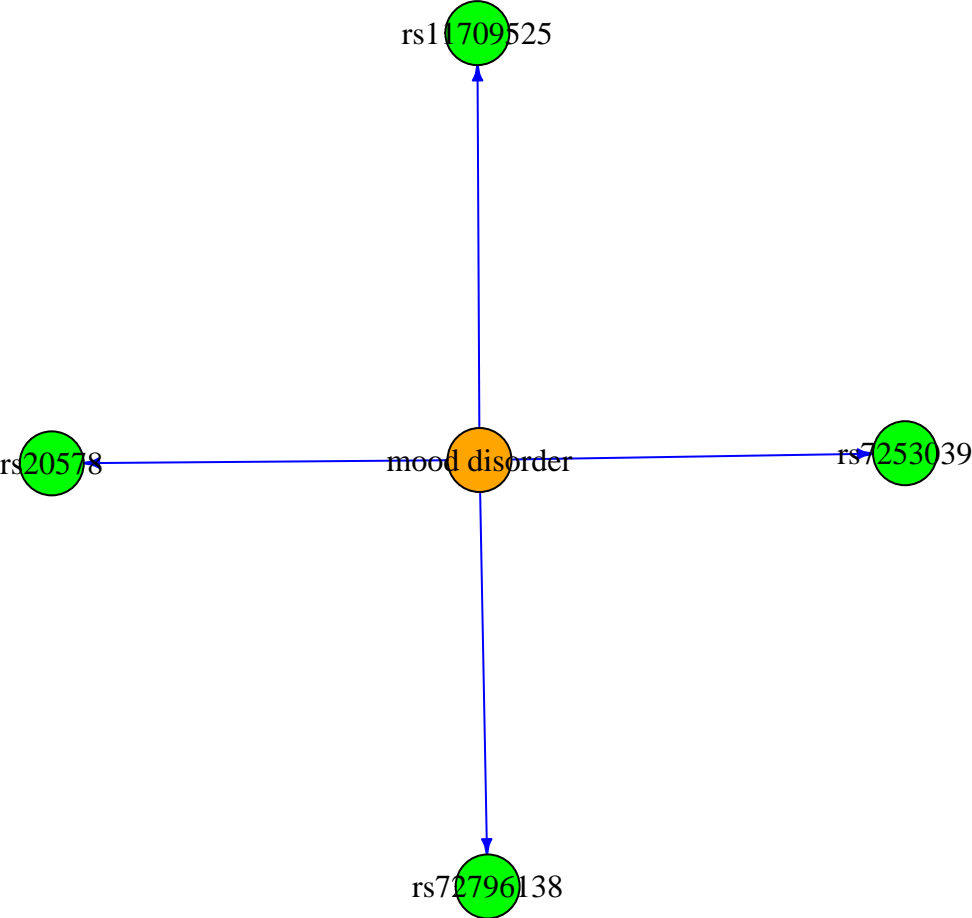

## Variant–Disease Network (parental longevity)

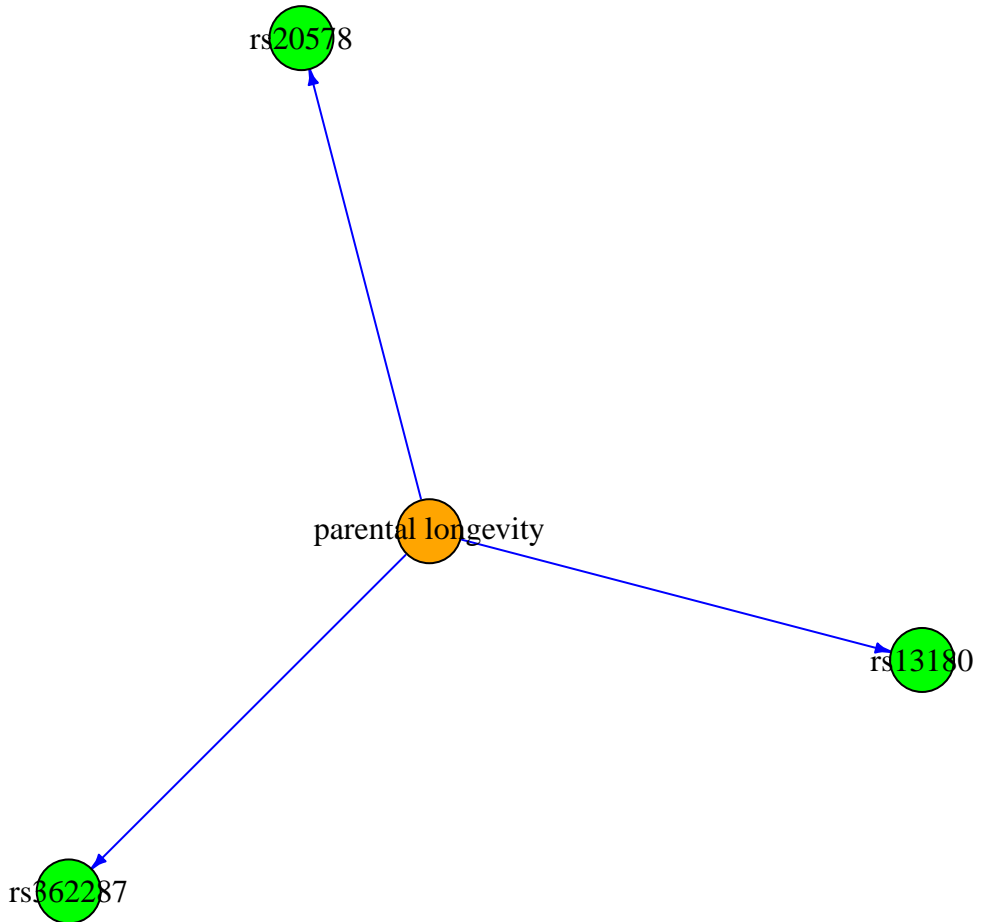

# Variant–Disease Network (hormone measurement)

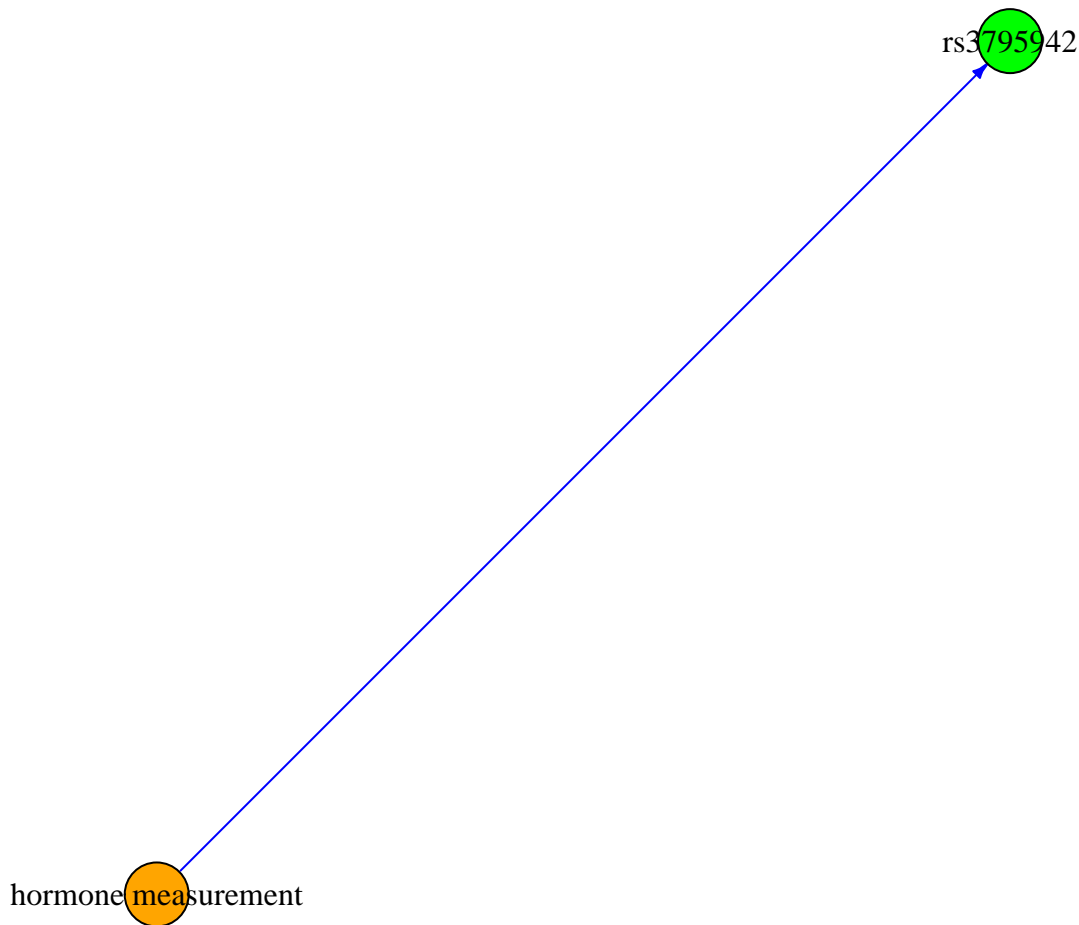

## Variant–Disease Network (brain measurement)

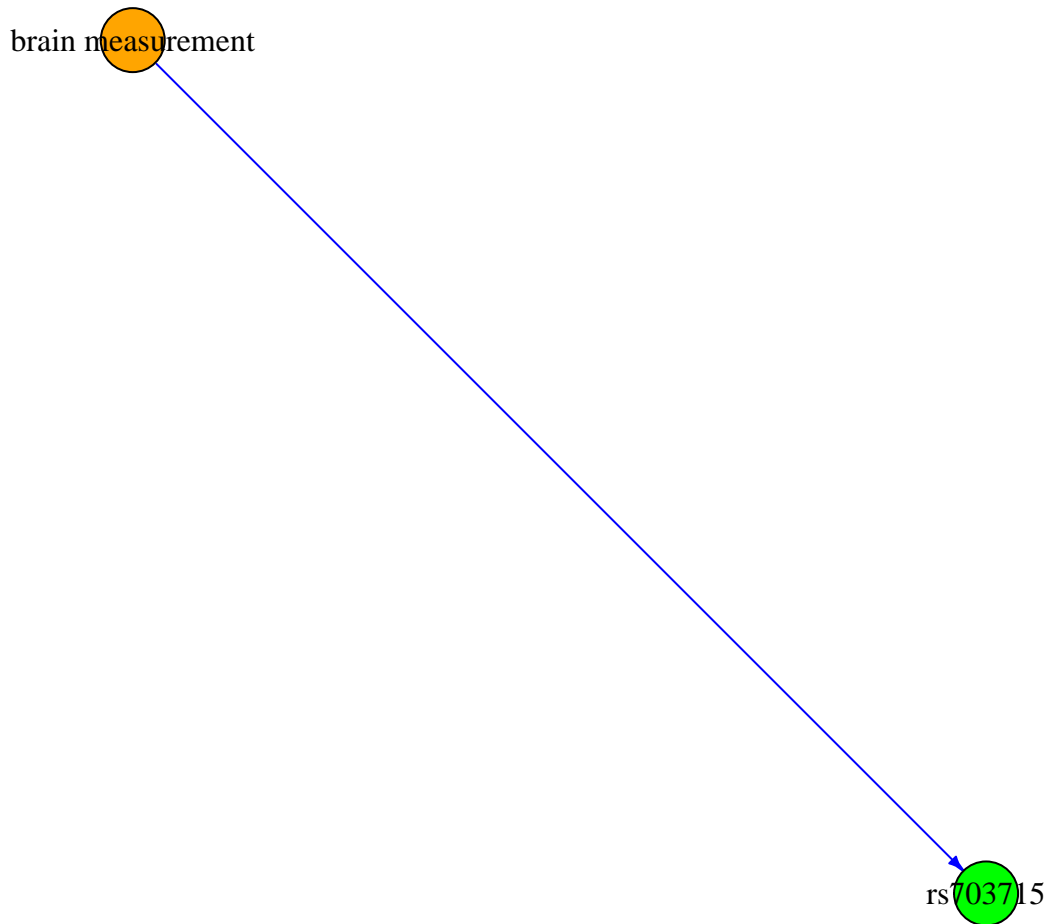

## Variant–Disease Network (hippocampal volume)

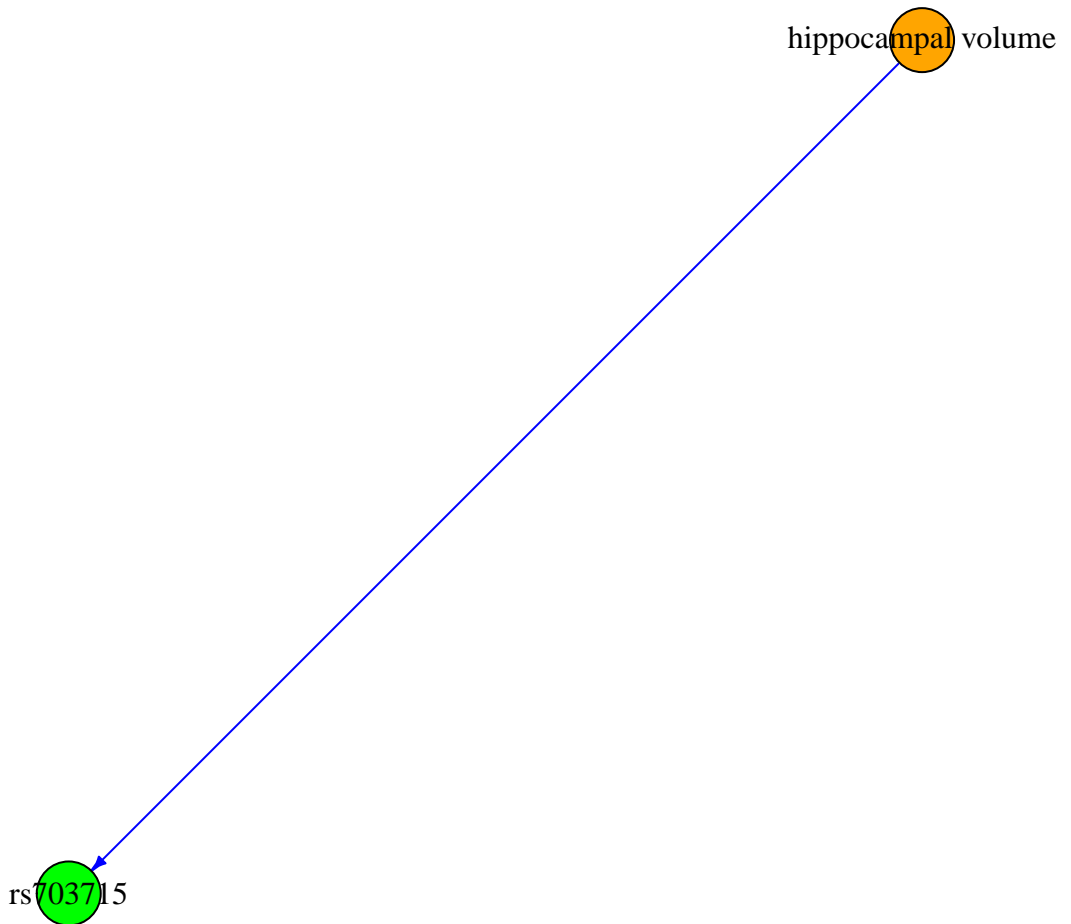

## Variant-Disease Network (catalase measurement)

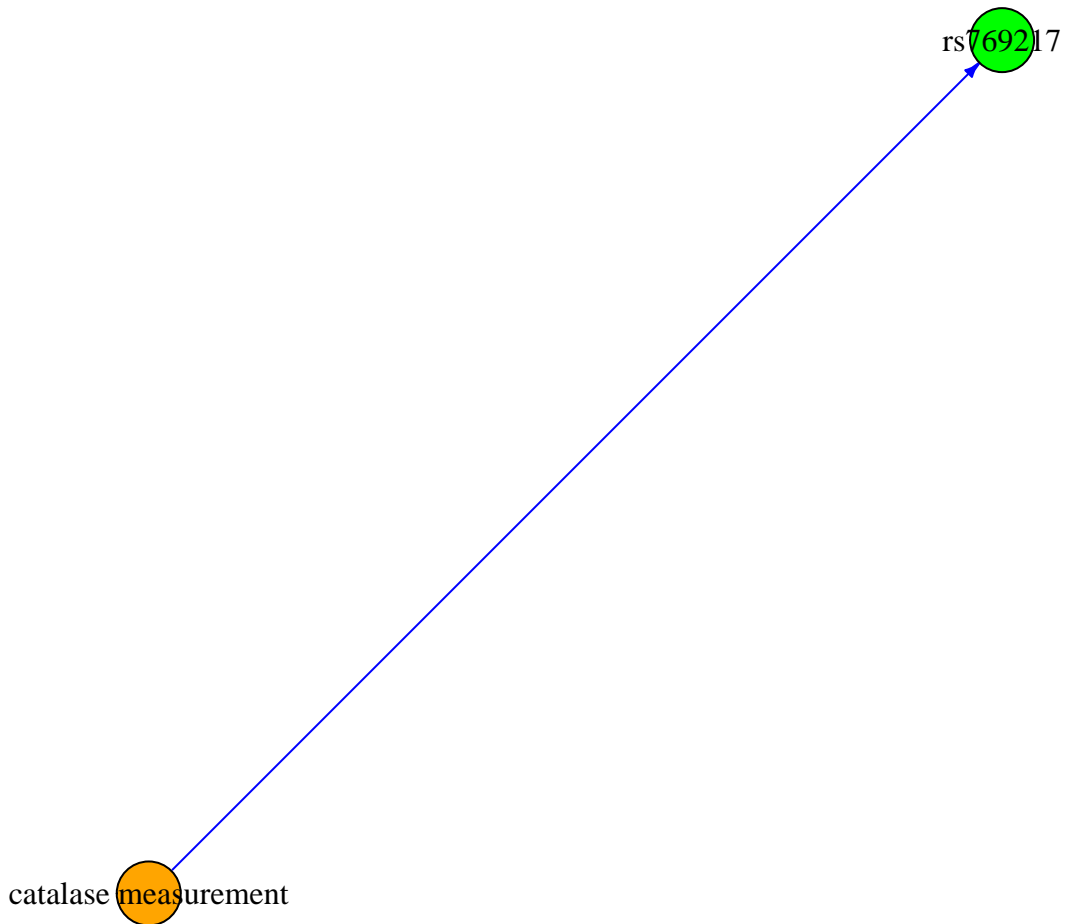

## Variant–Disease Network (estradiol measurement)

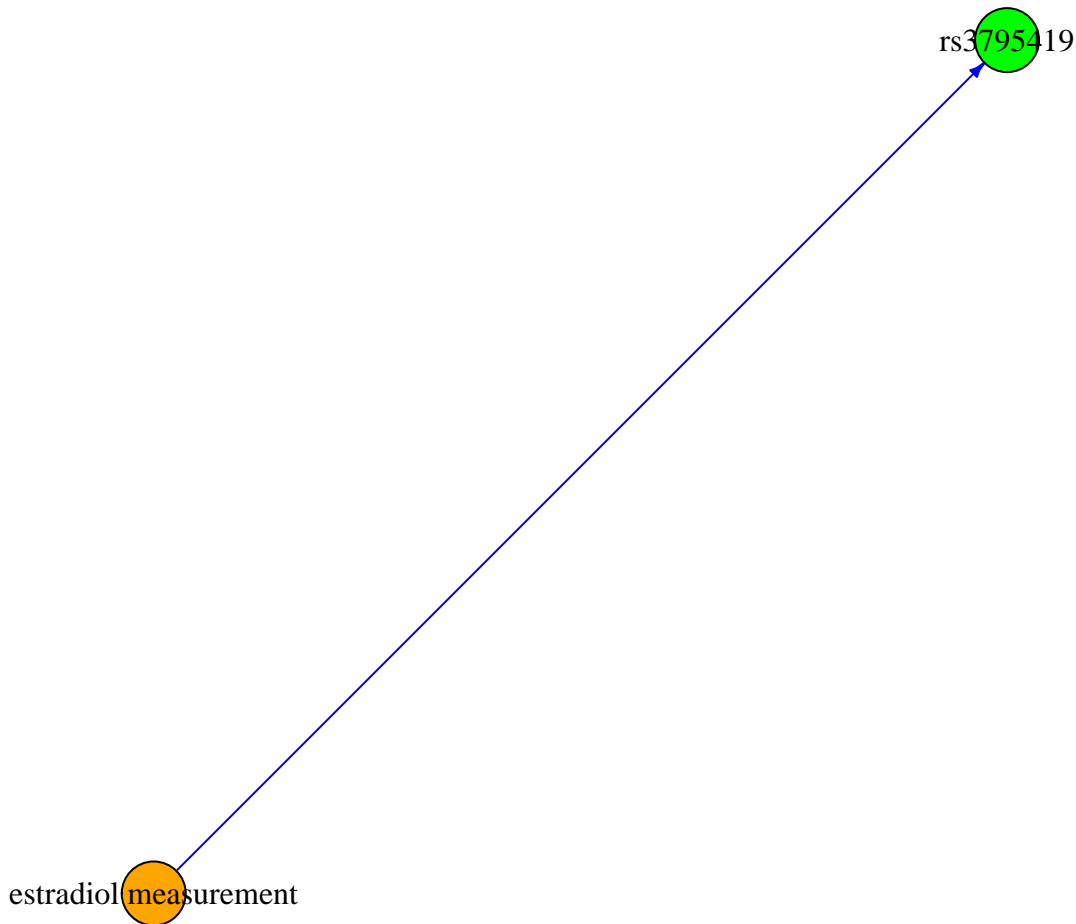

## Variant-Disease Network (response to tnf antagonist)

response to tnf antagonist

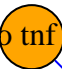

rs3795419

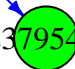



Variant–Disease Network (transmembrane glycoprotein NMB measurement

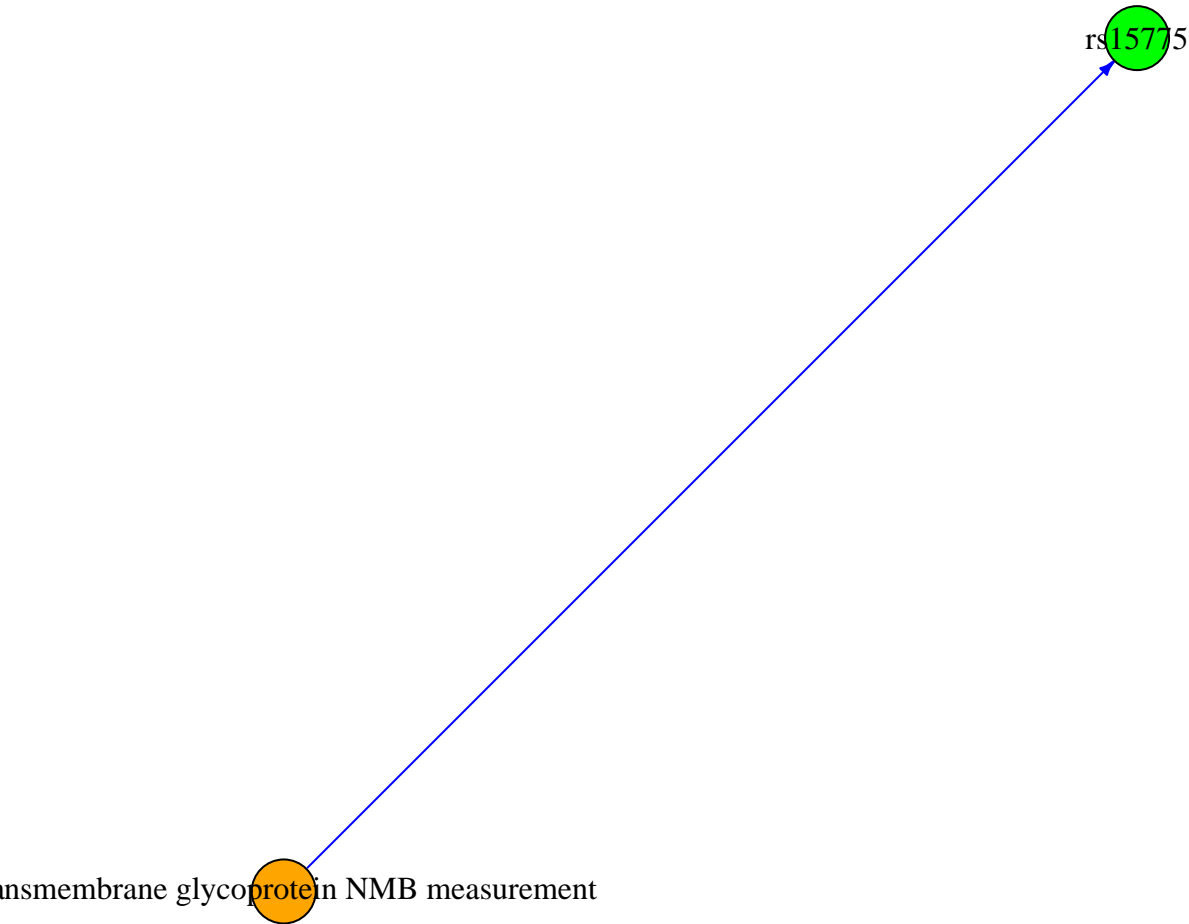

**Variant–Disease Network (beta–amyloid 1–42 measurement)**

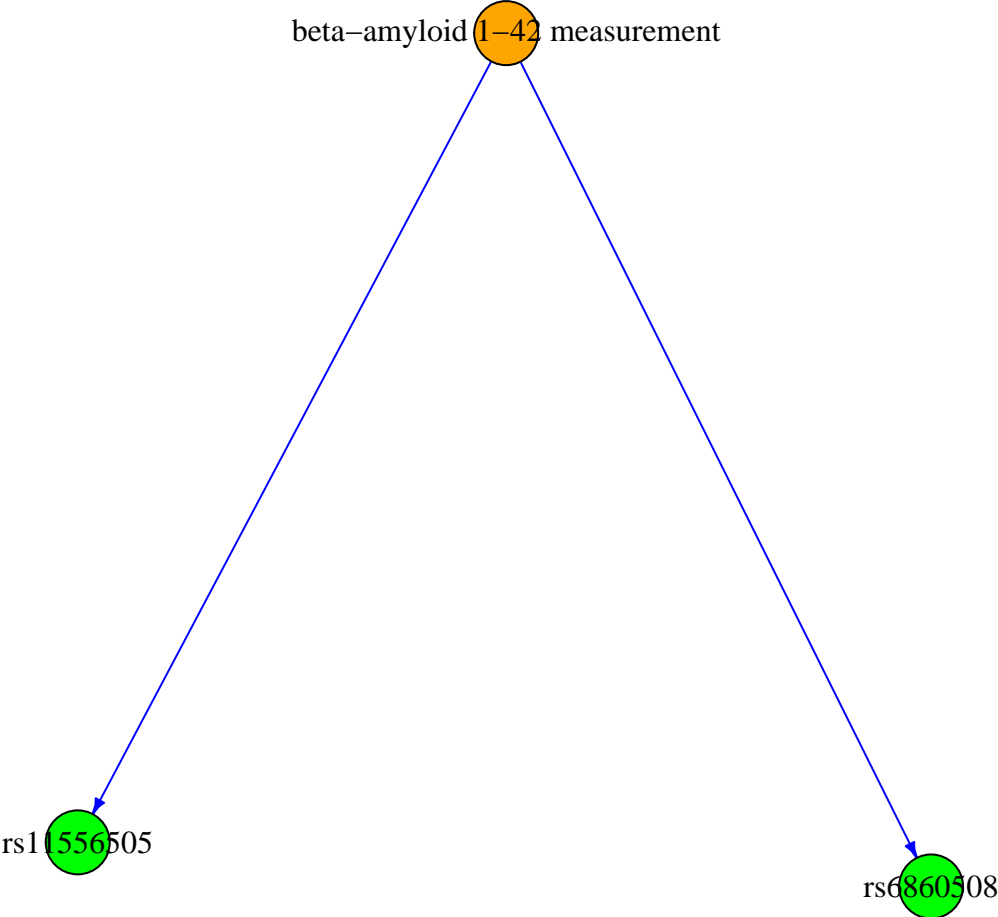

**Variant–Disease Network (left ventricular structural measurement)**

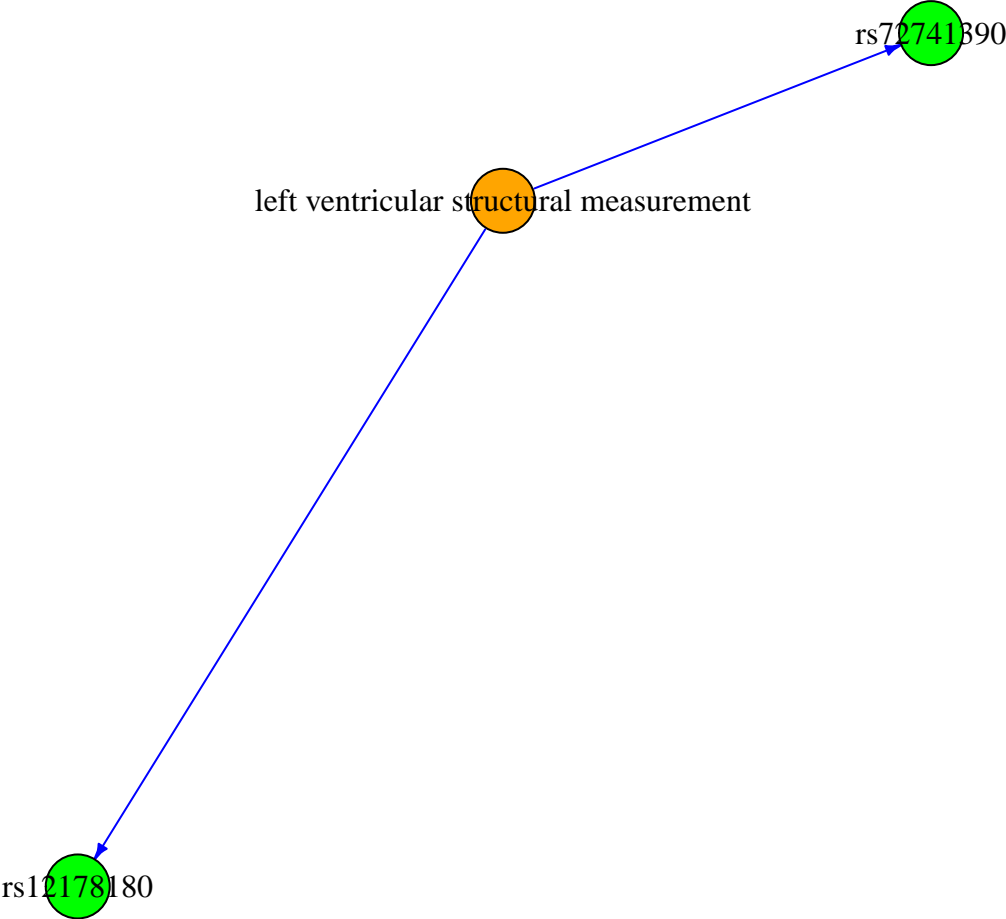

# Variant–Disease Network (mosquito bite reaction size measurement)

mosquito bite reaction size measurement

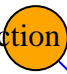

rs11541311

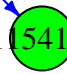

## Variant–Disease Network (gastric carcinoma)

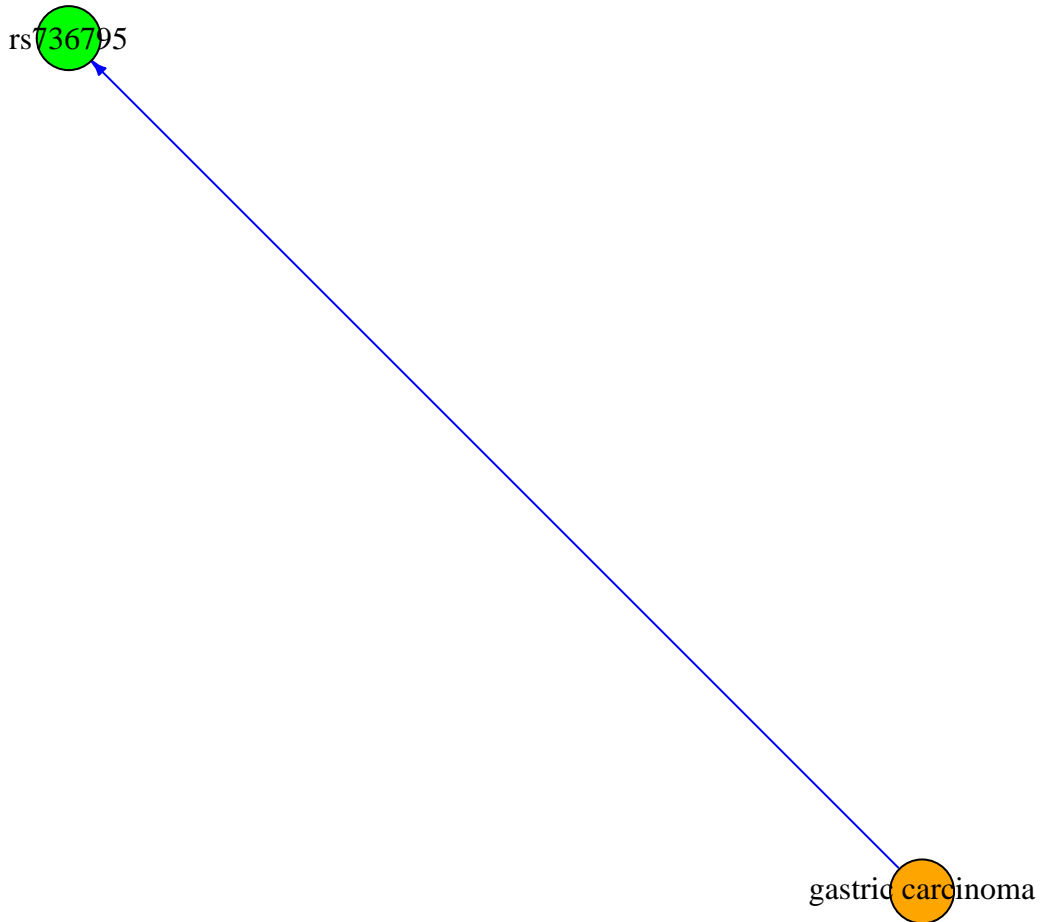

# Variant–Disease Network (hair shape measurement)

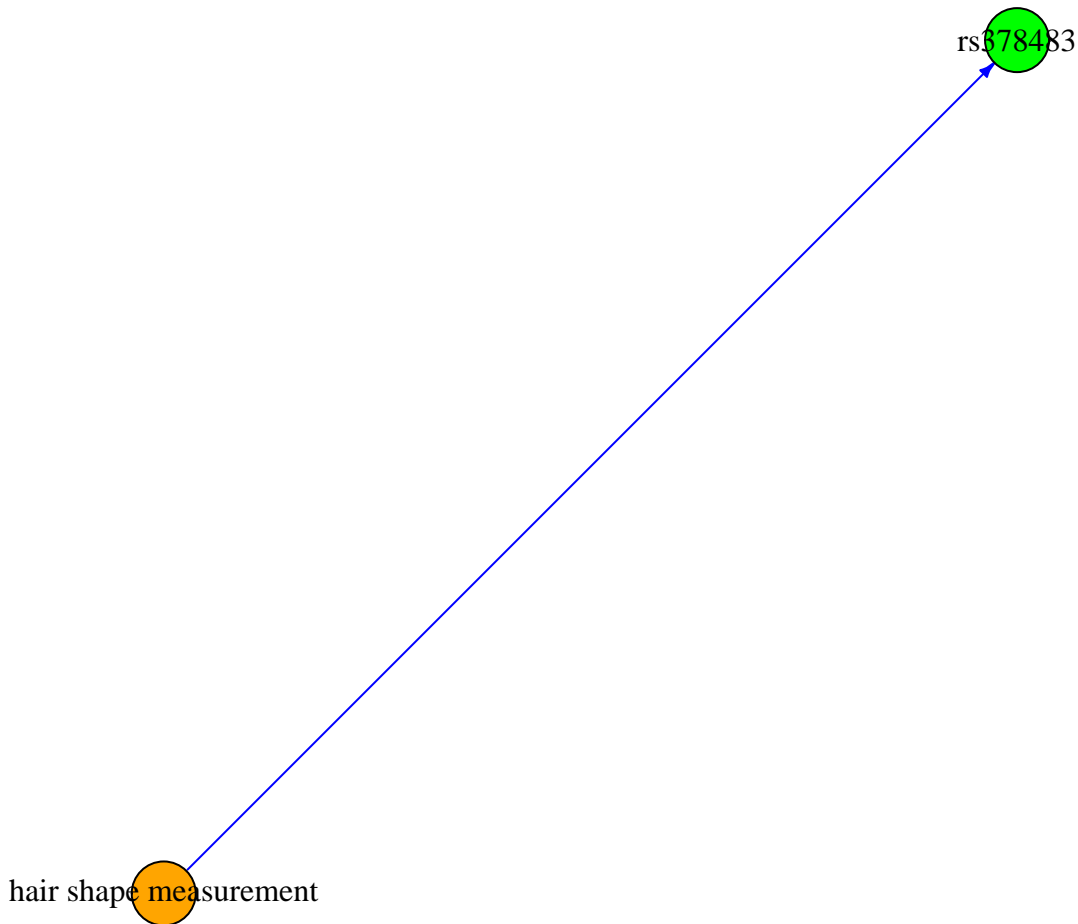

## Variant-Disease Network (non-melanoma skin carcinoma)

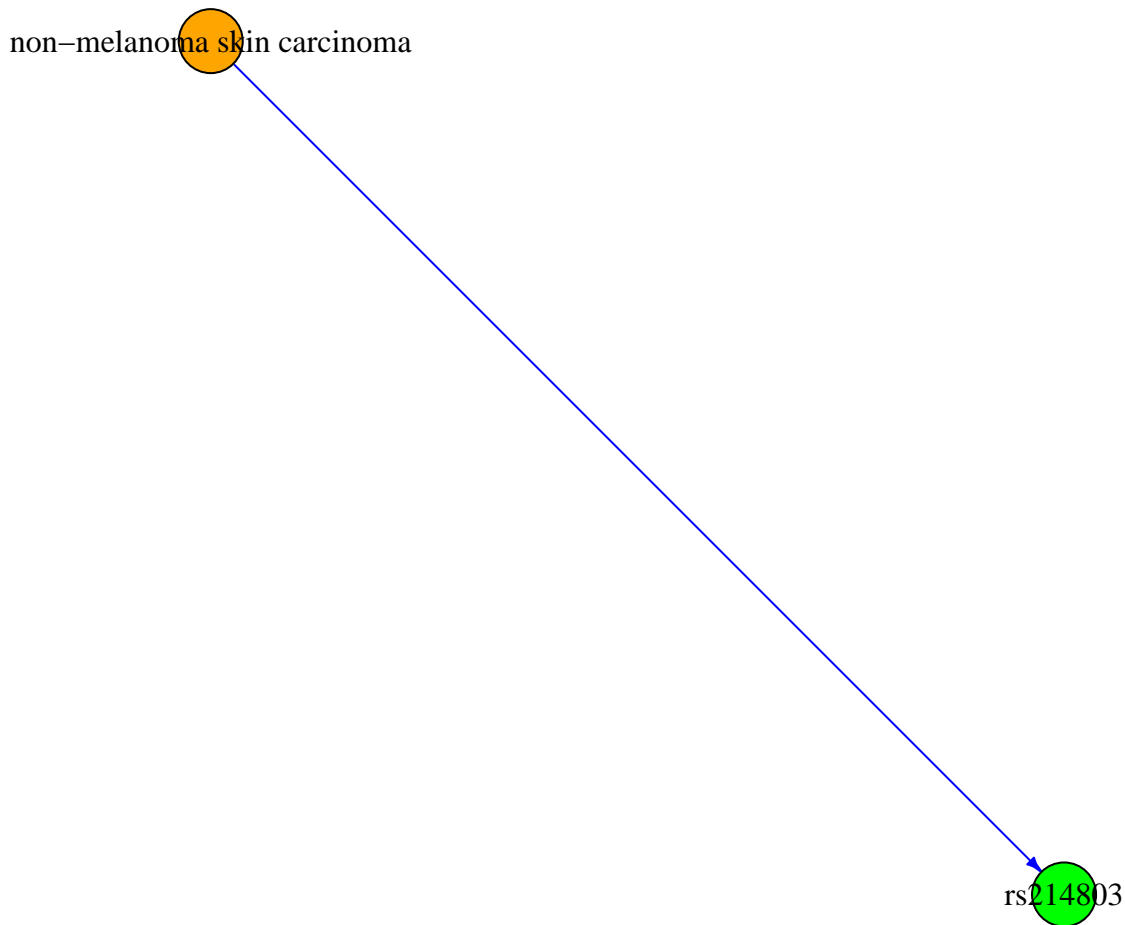

## Variant–Disease Network (DNA methylation)

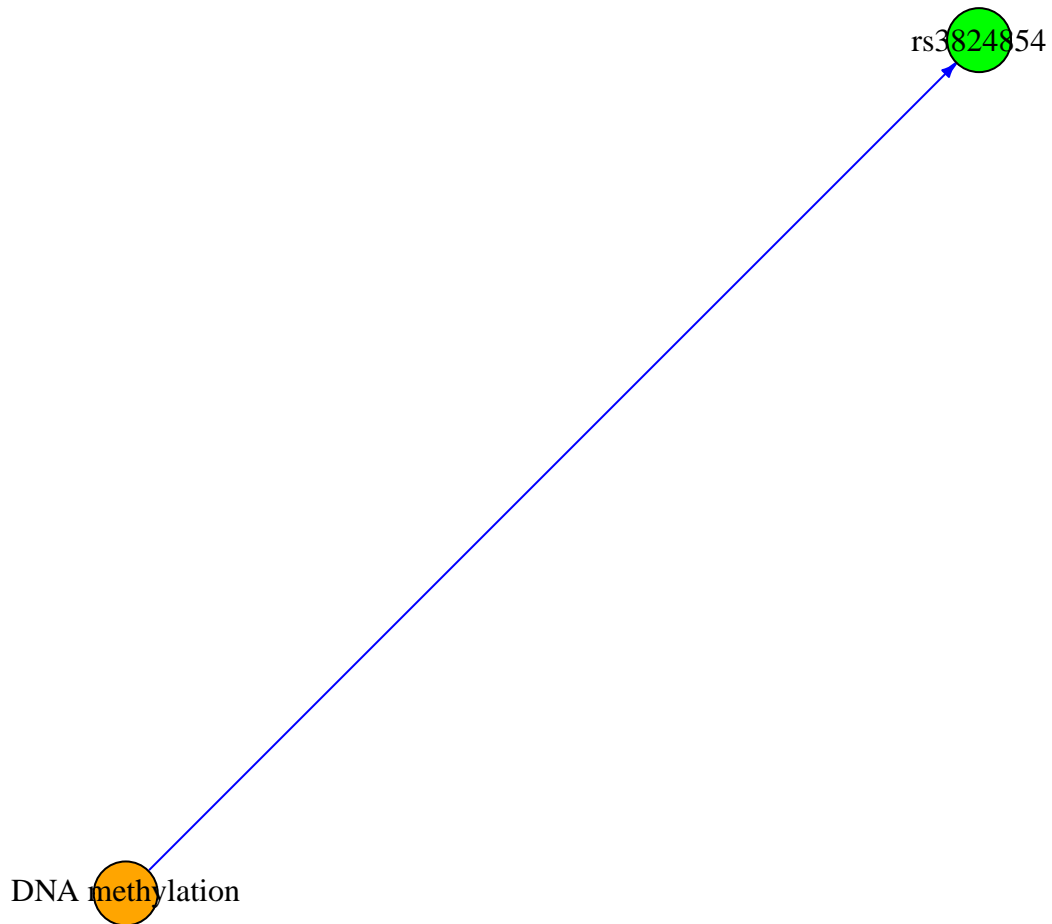



## Variant–Disease Network (limited scleroderma)

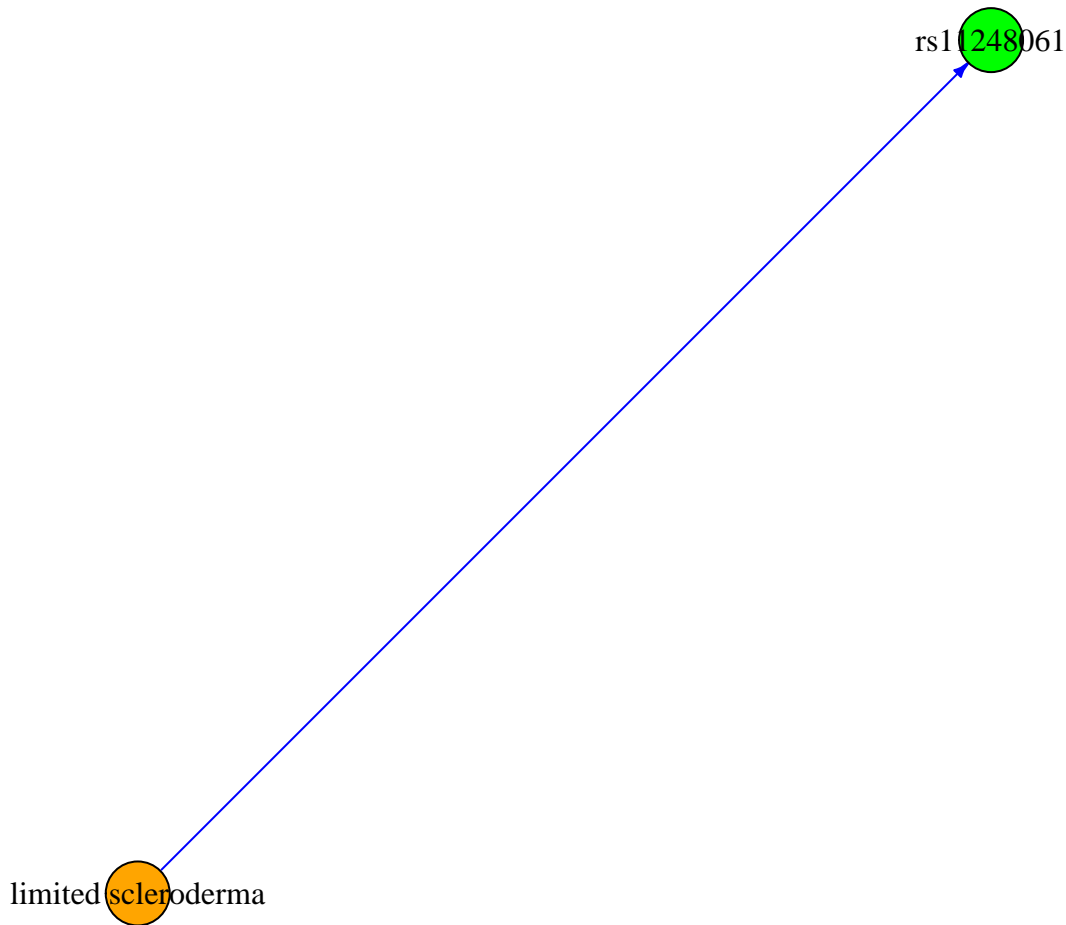

## Variant–Disease Network (polymyositis)

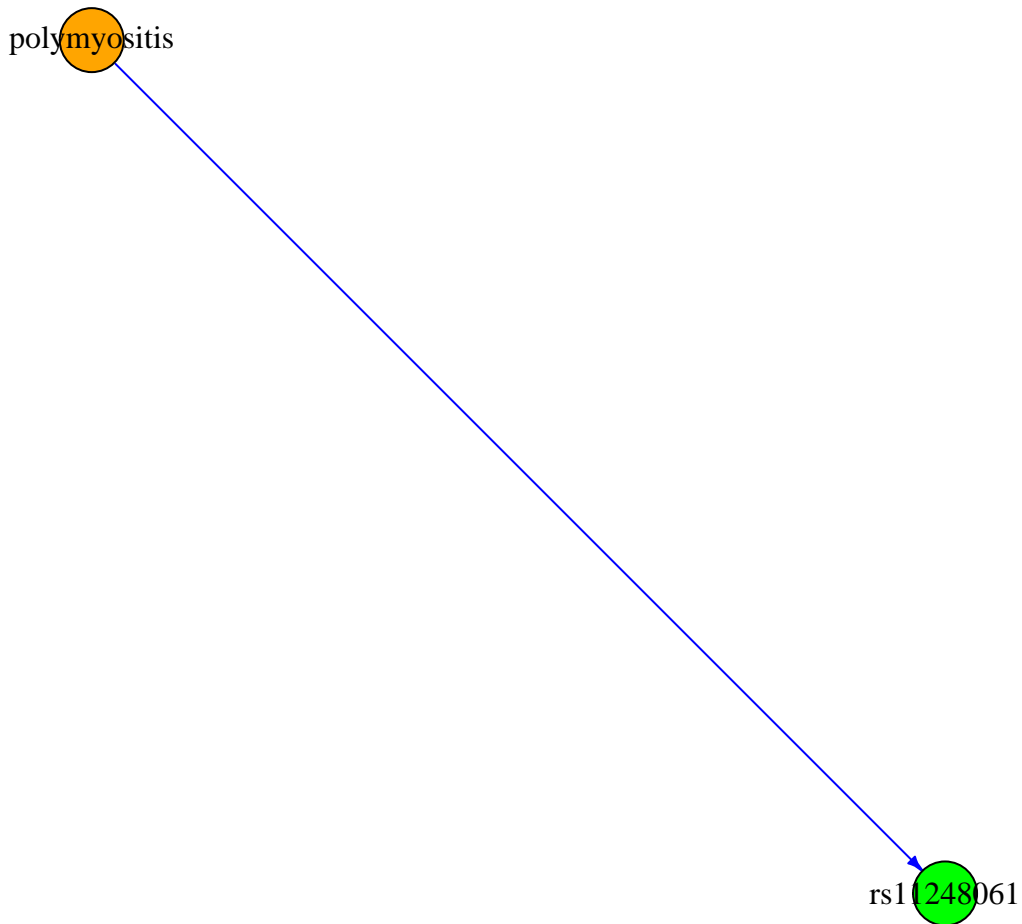

## Variant–Disease Network (Sjogren syndrome)

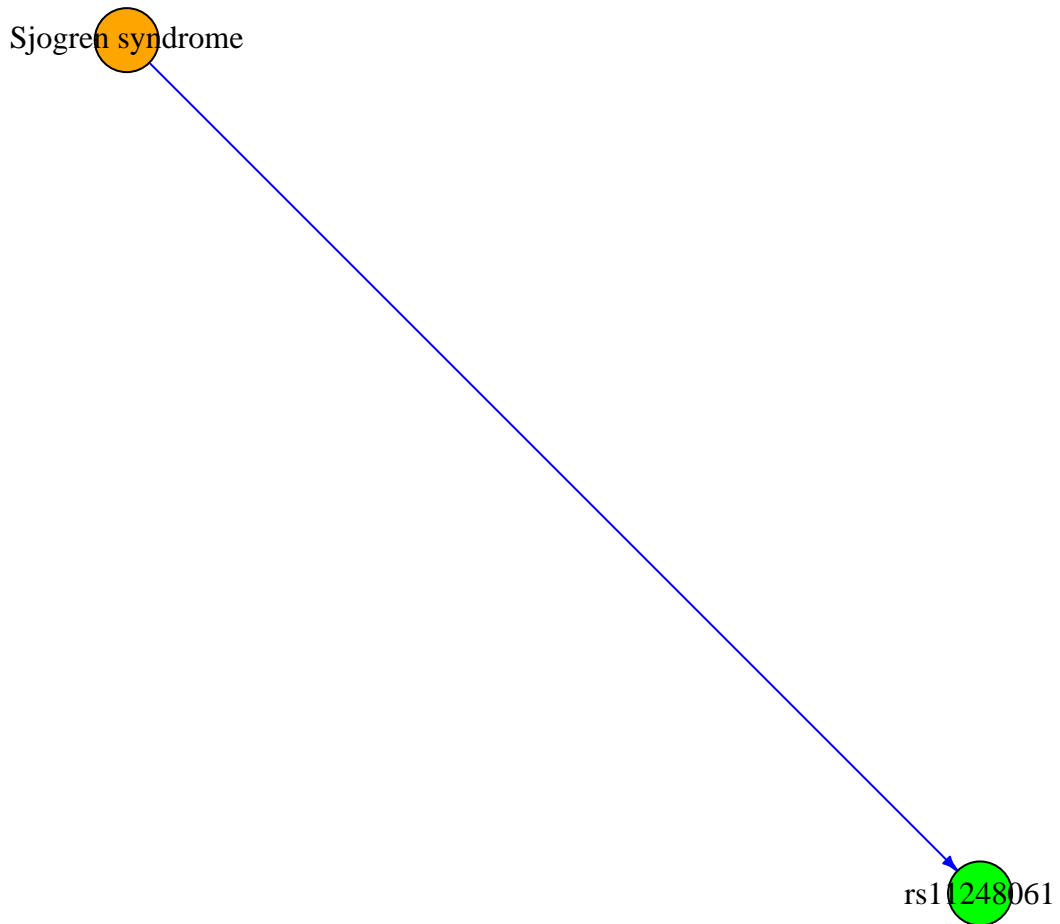

## Variant–Disease Network (bone density)

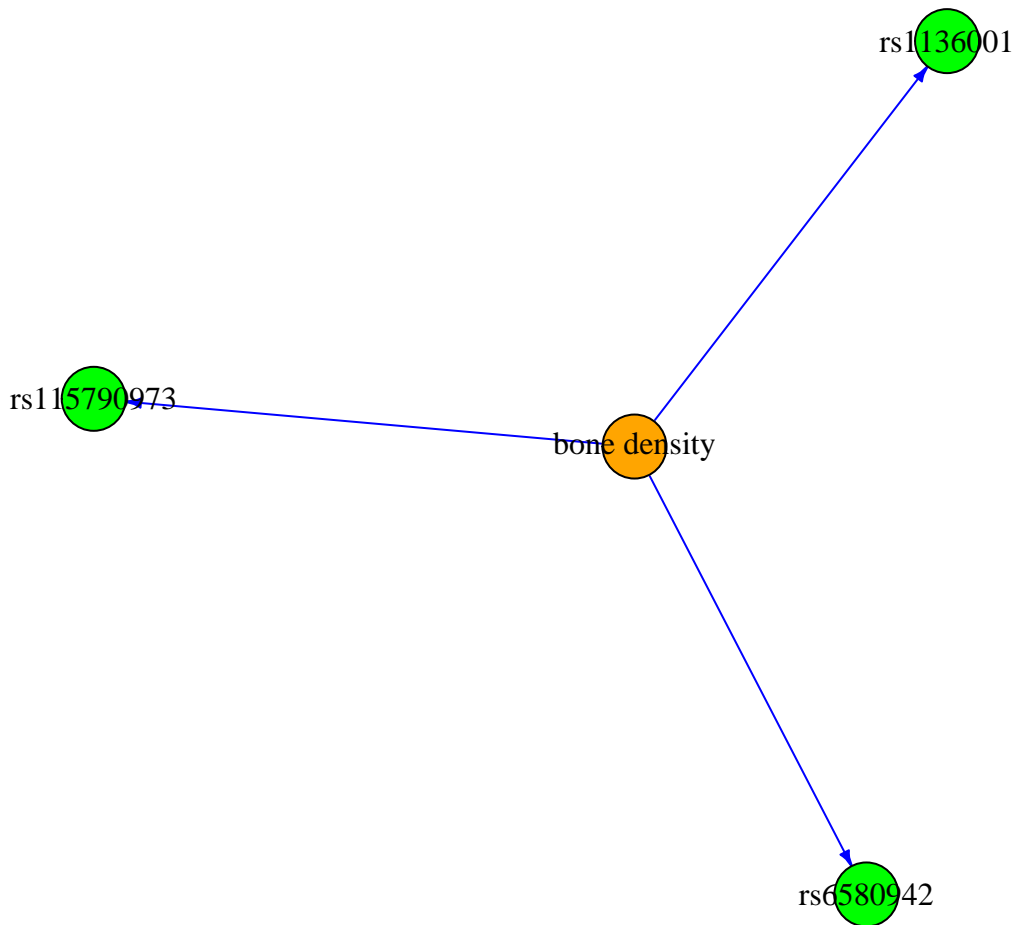

# Variant–Disease Network (mental or behavioural disorder)

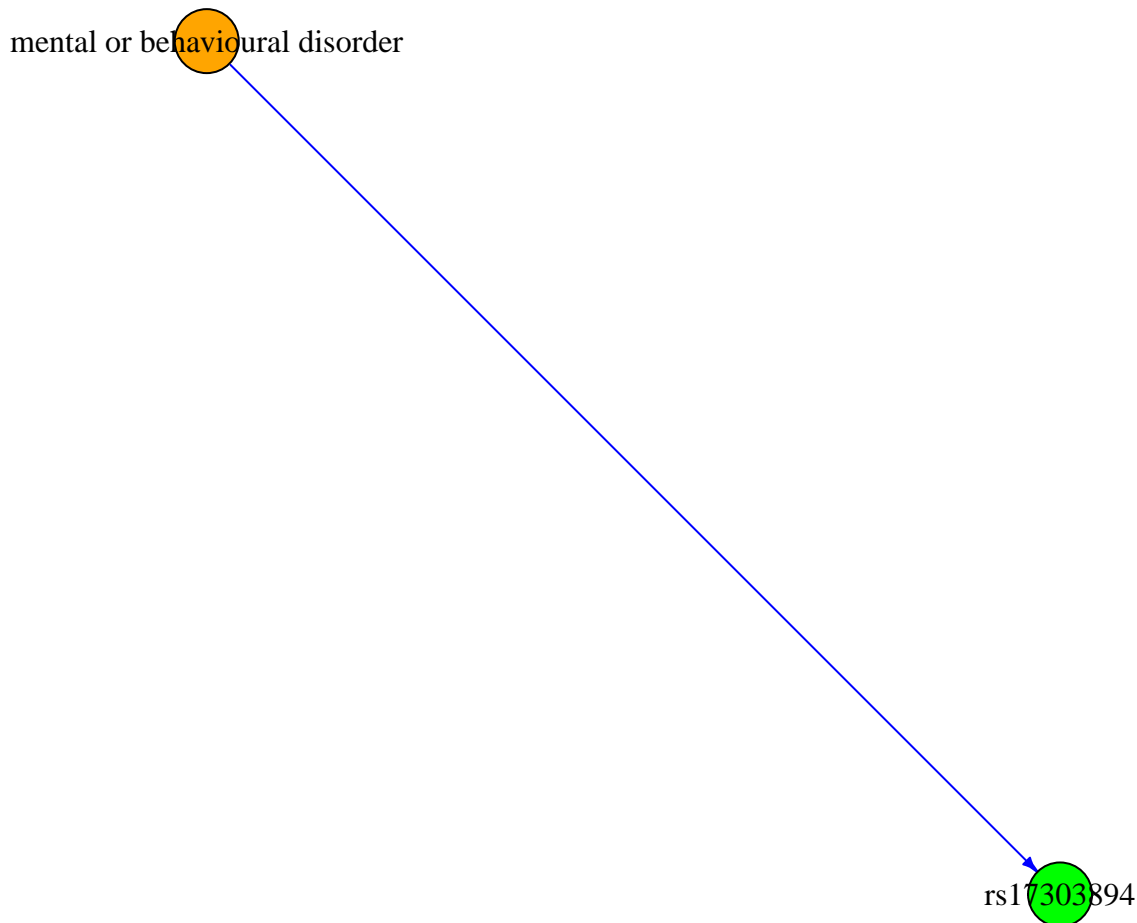

## **Variant–Disease Network (family history of Alzheimer’s disease)**

## Variant–Disease Network (abnormal thrombosis)

abnormal thrombosis

rs3087969

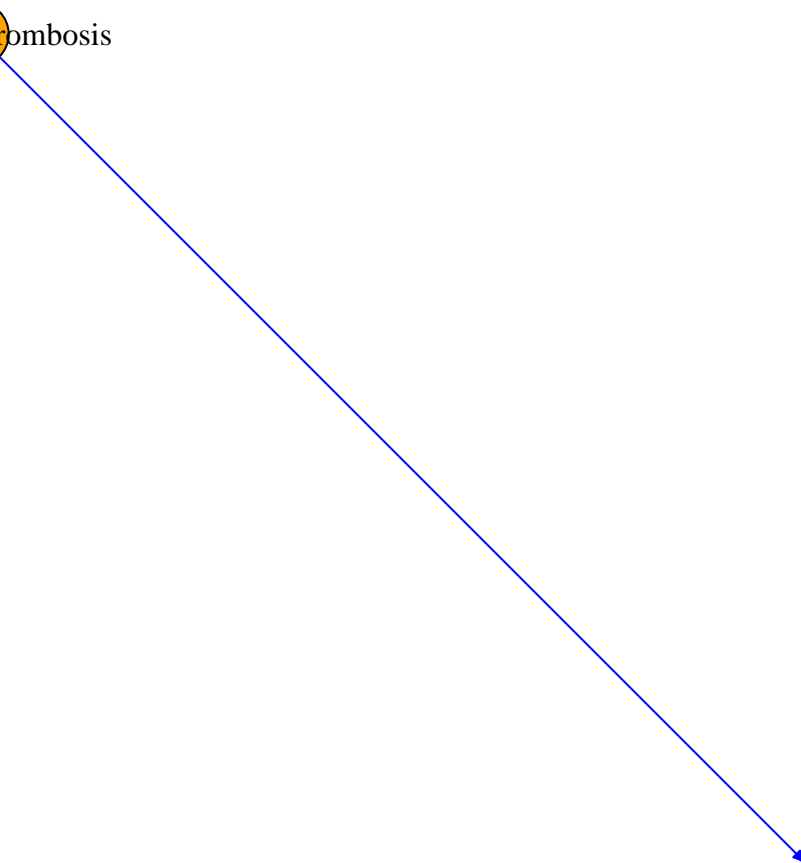

## Variant–Disease Network (deep vein thrombosis)

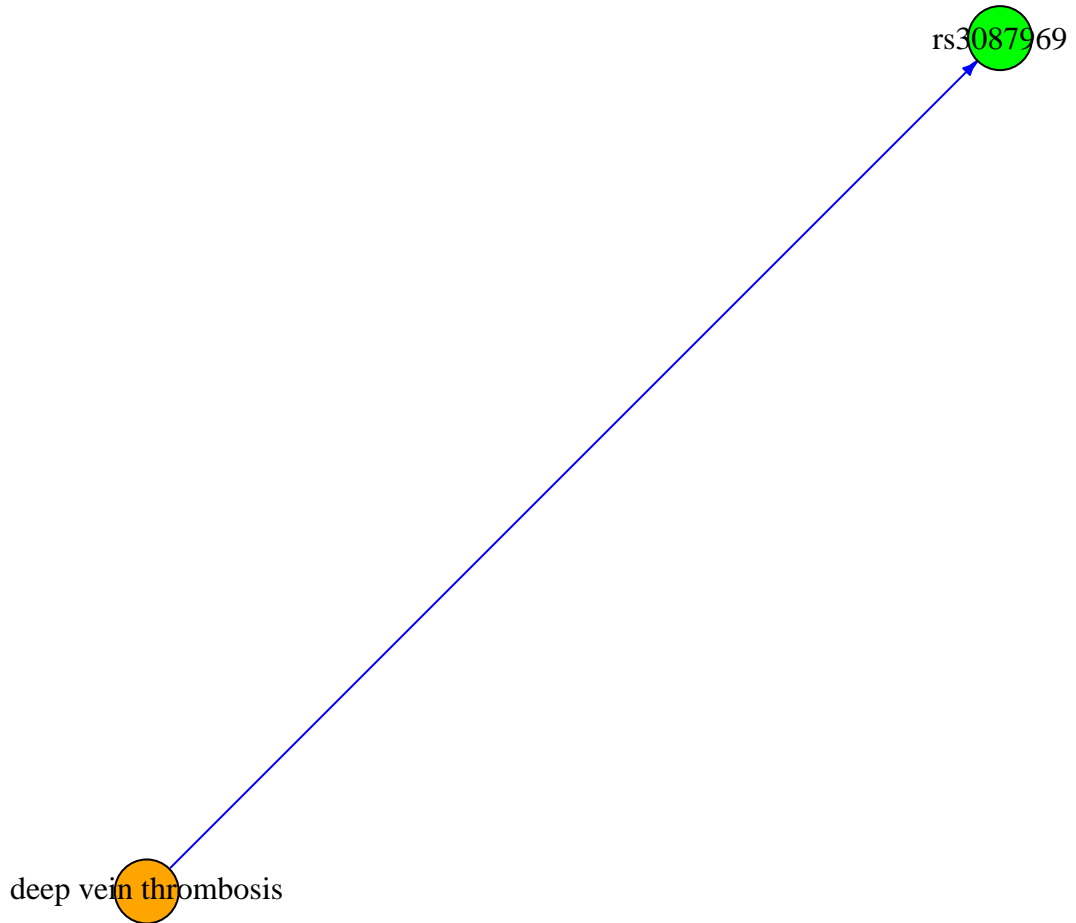



Variant–Disease Network (Ischemic stroke)

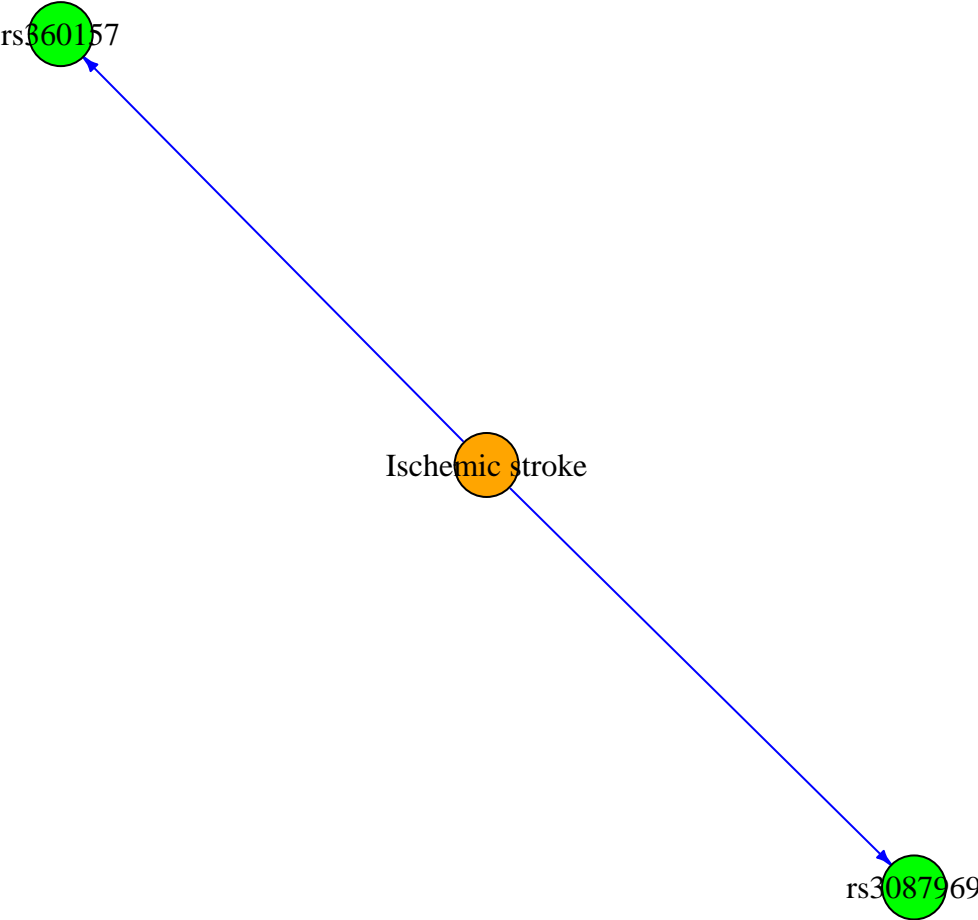

## Variant-Disease Network (pulmonary embolism)

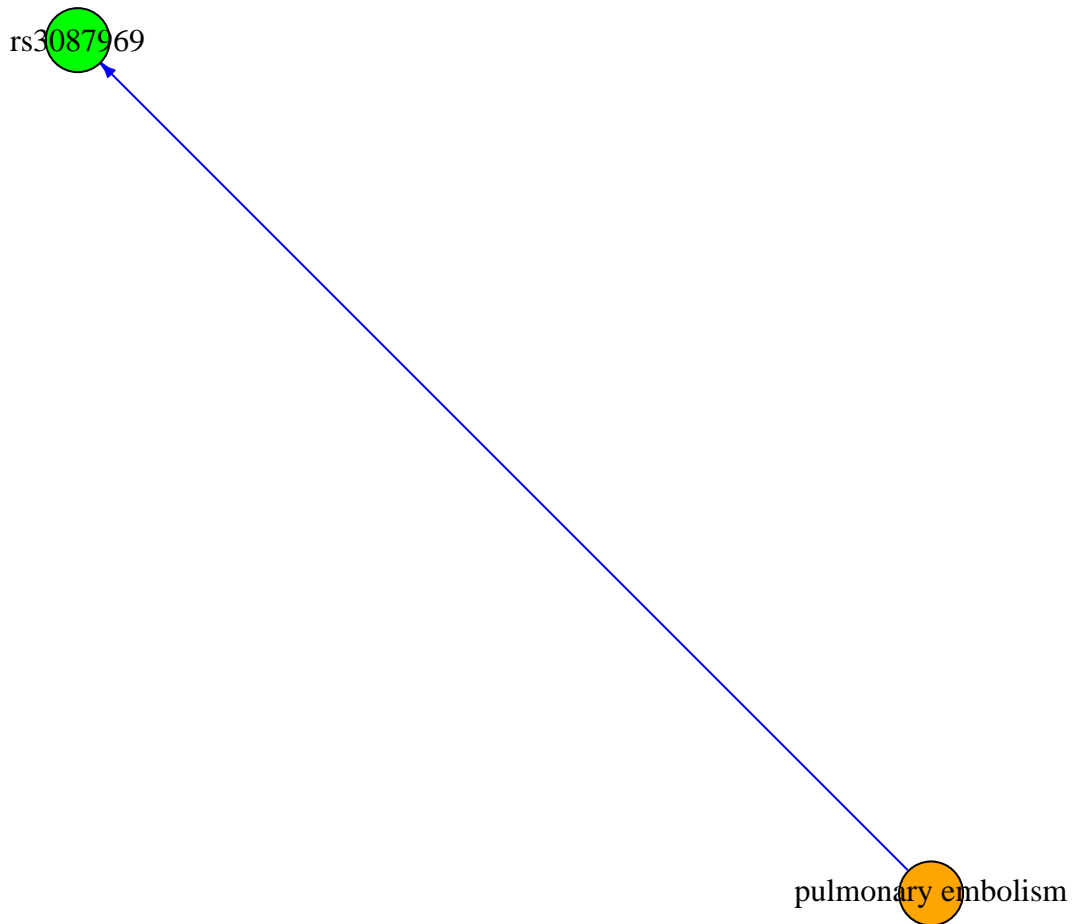

## Variant-Disease Network (stroke)

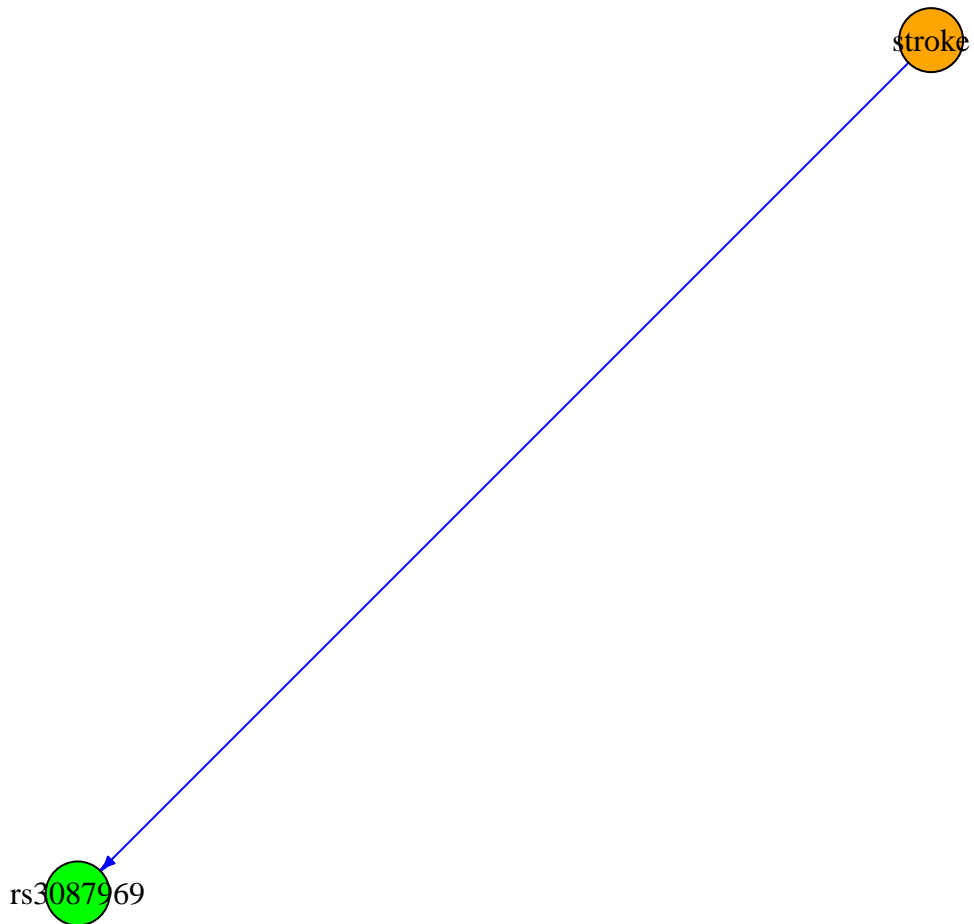

# Variant-Disease Network (venous thromboembolism)

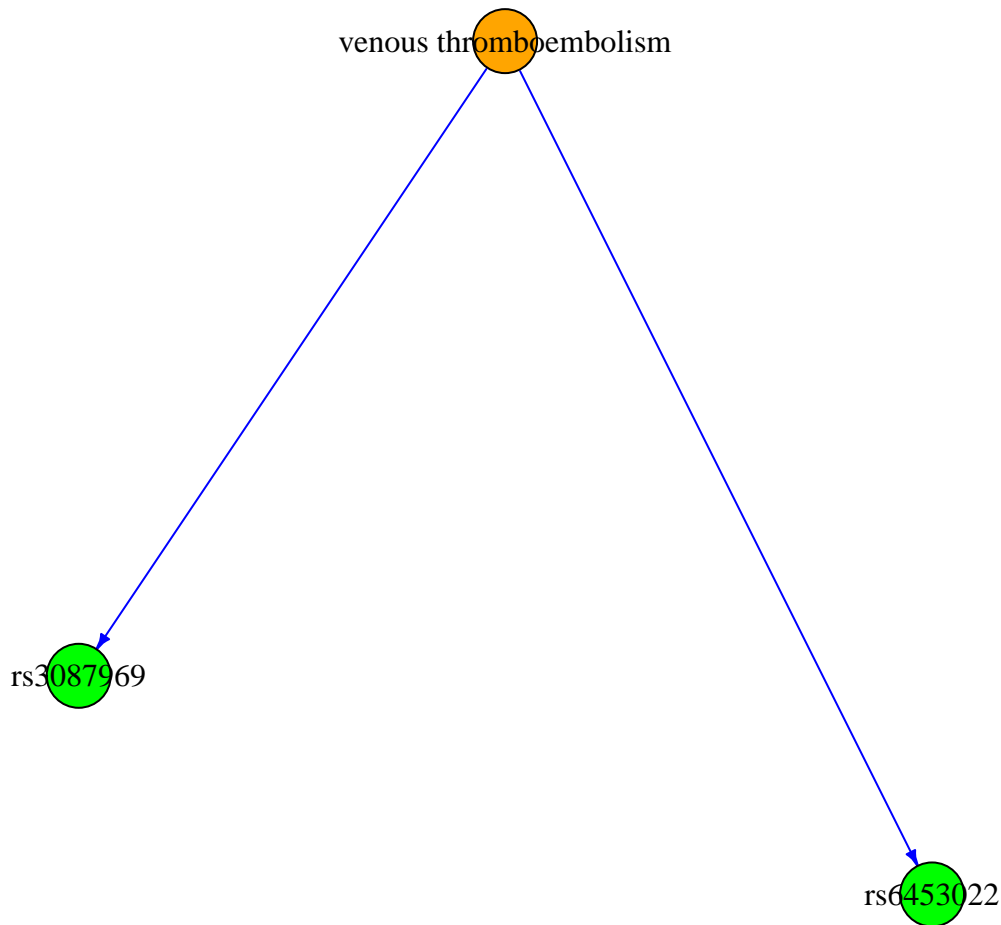

**Variant–Disease Network (Alzheimers disease neuropathologic change)**

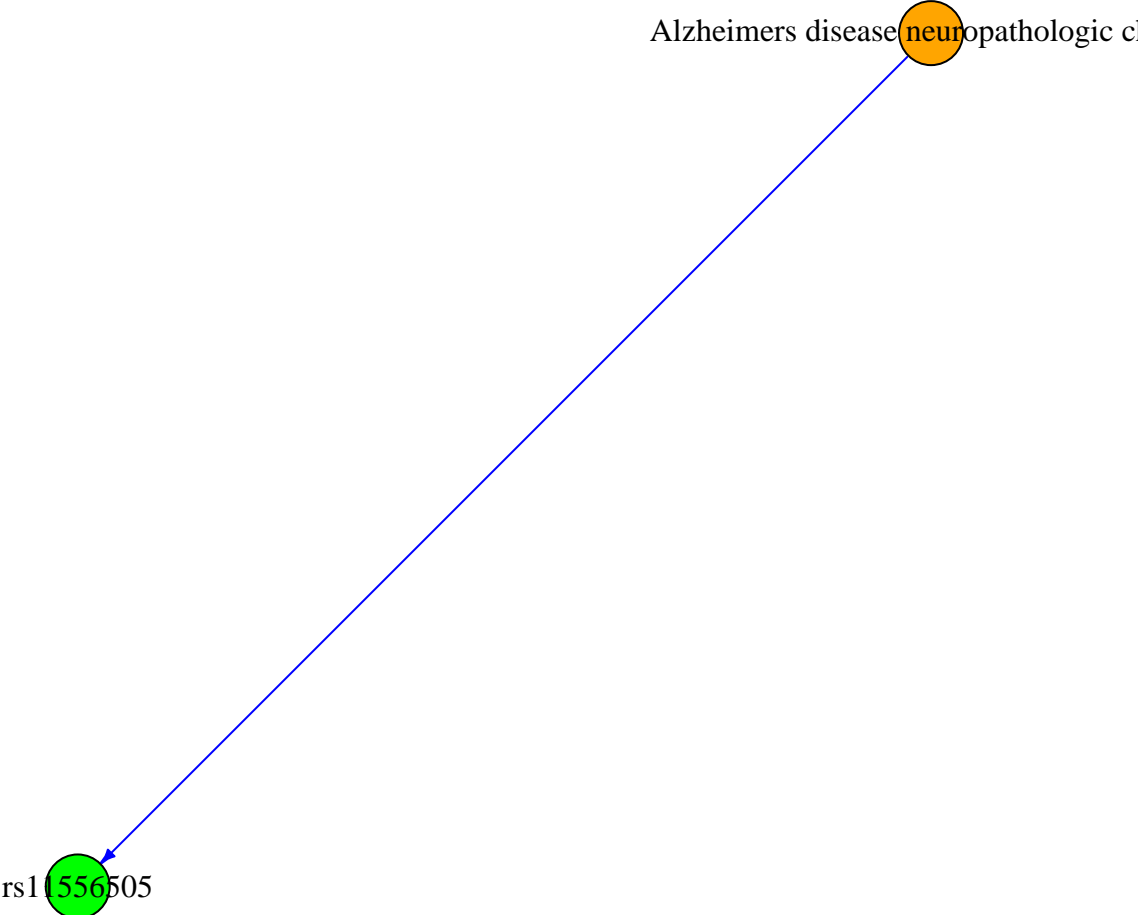

## Variant–Disease Network (amyloid–beta measurement)

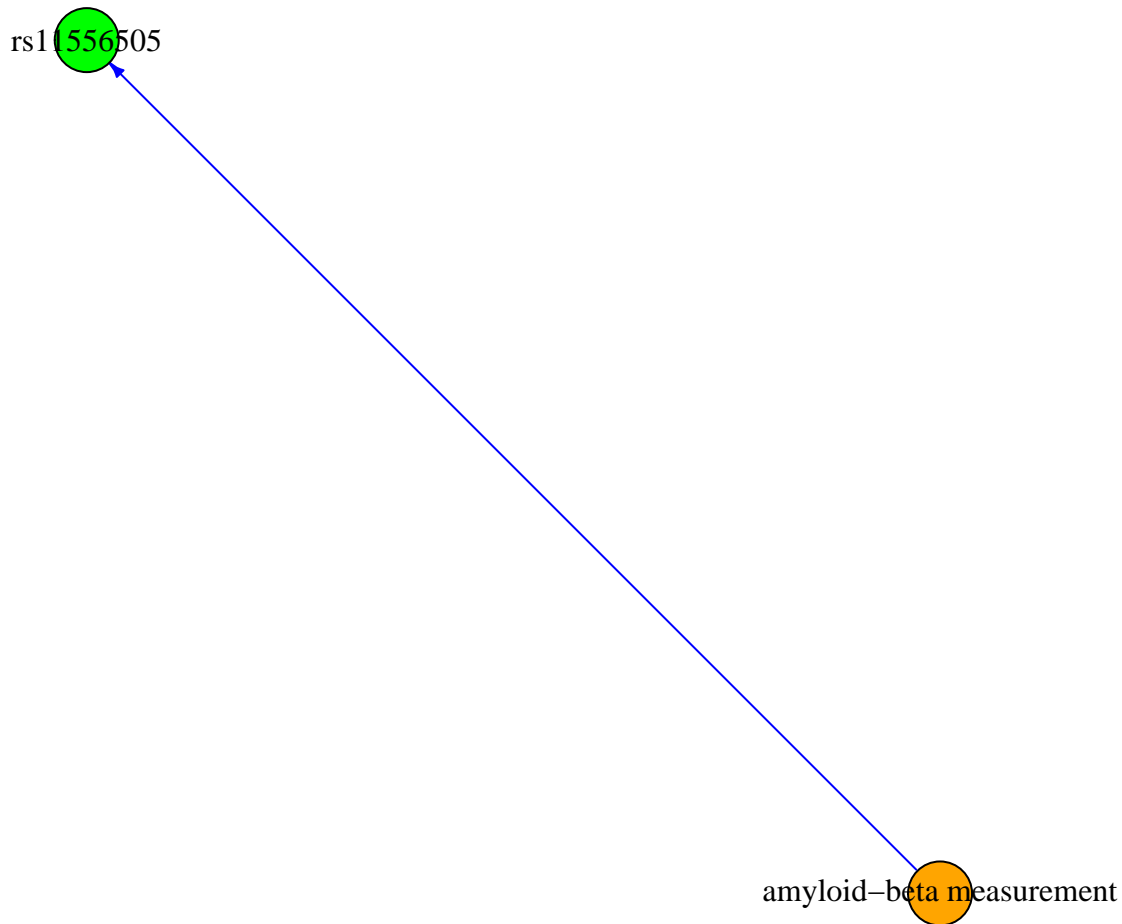

**Variant–Disease Network (cerebral amyloid angiopathy)**

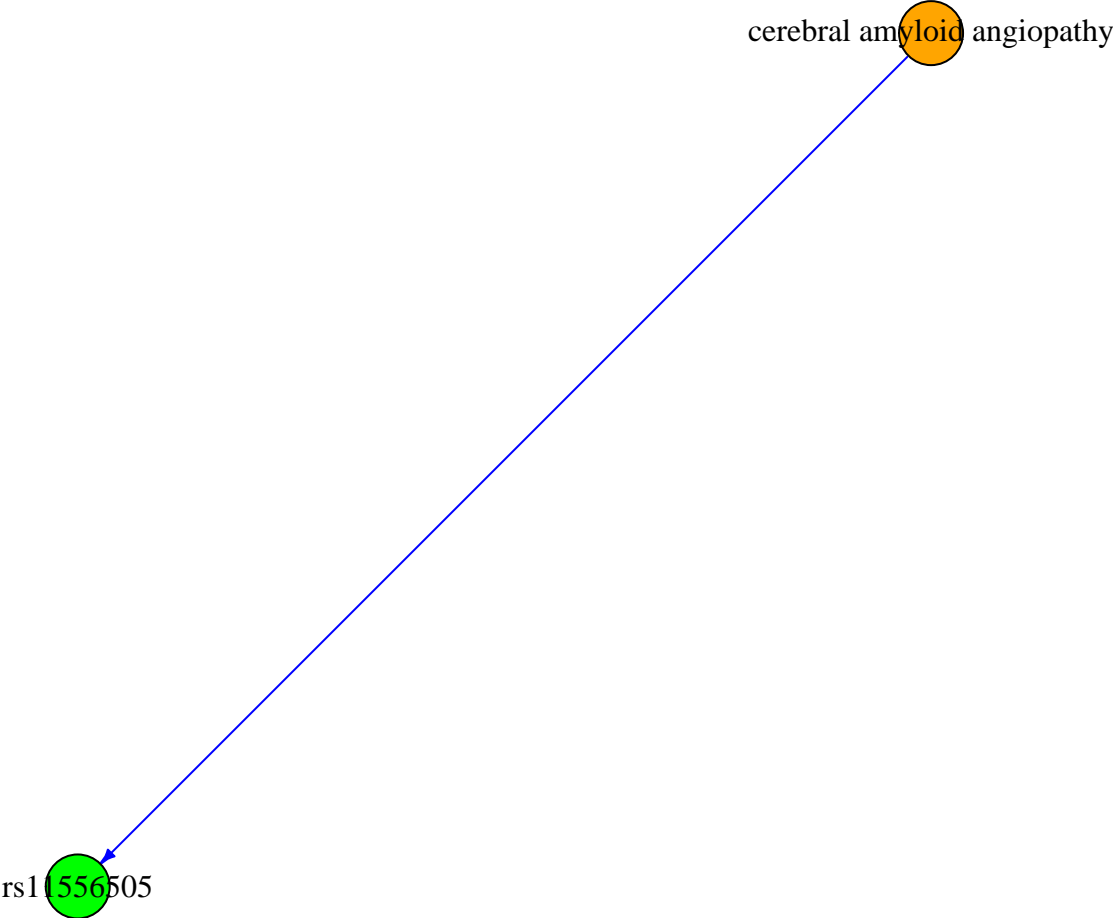

## Variant–Disease Network (cognitive decline)

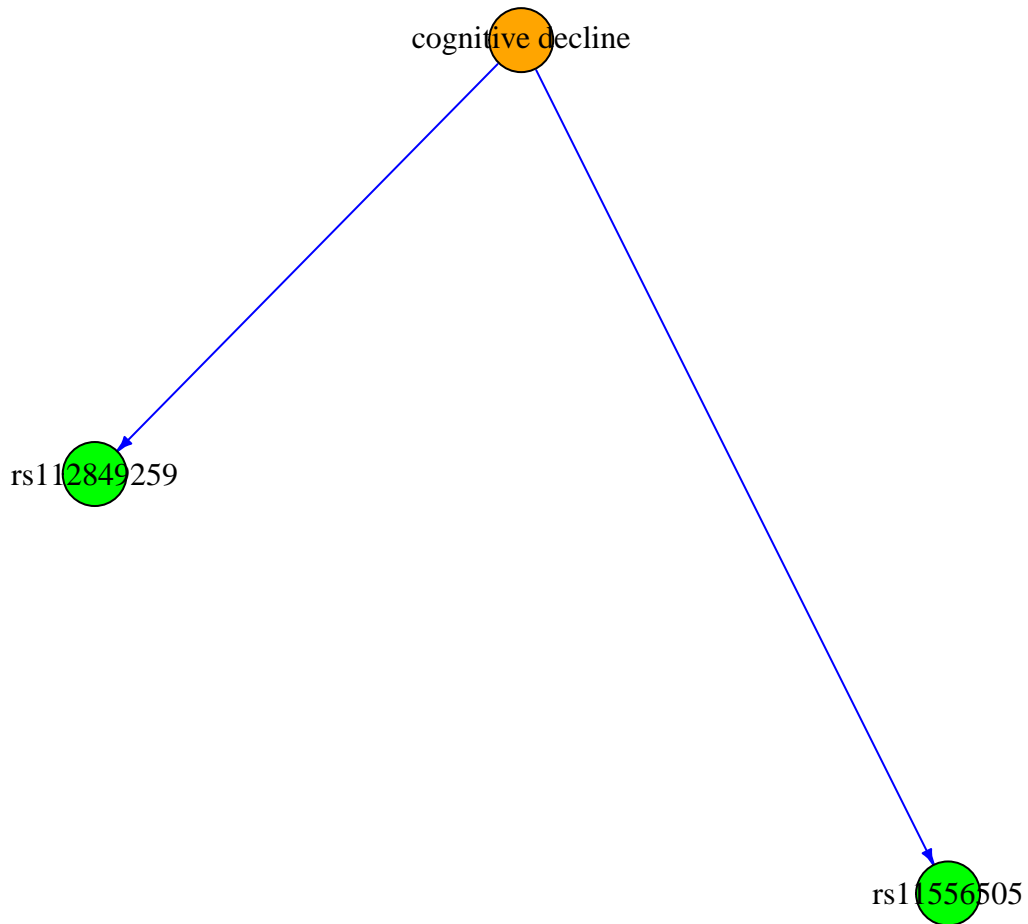



# Variant–Disease Network (c–reactive protein measurement)

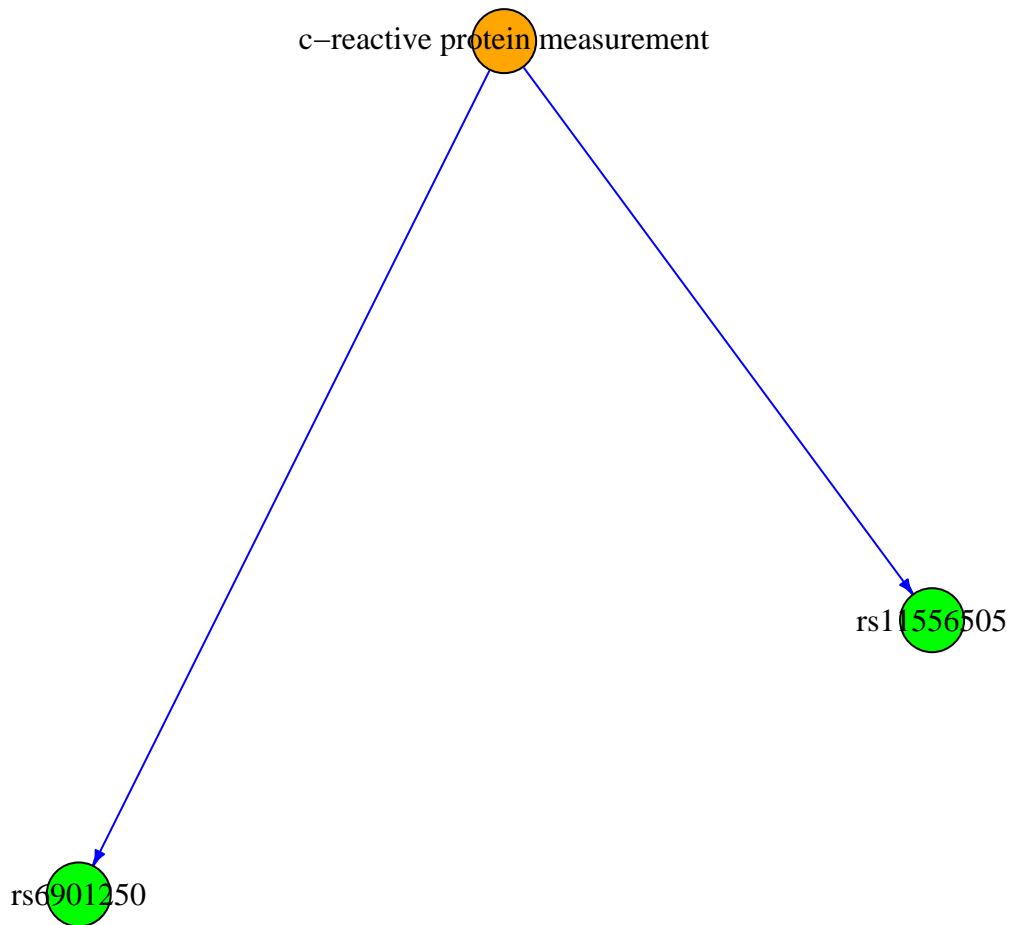

## Variant-Disease Network (longevity)

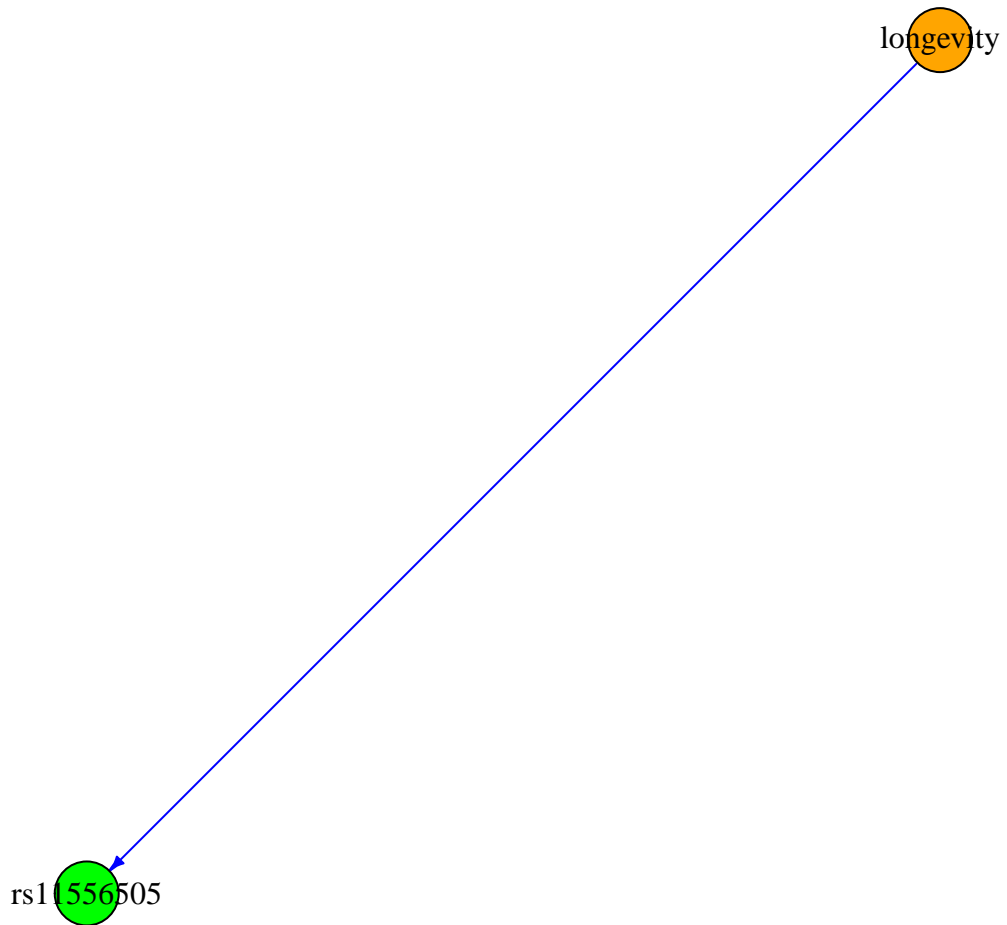

## Variant–Disease Network (memory performance)

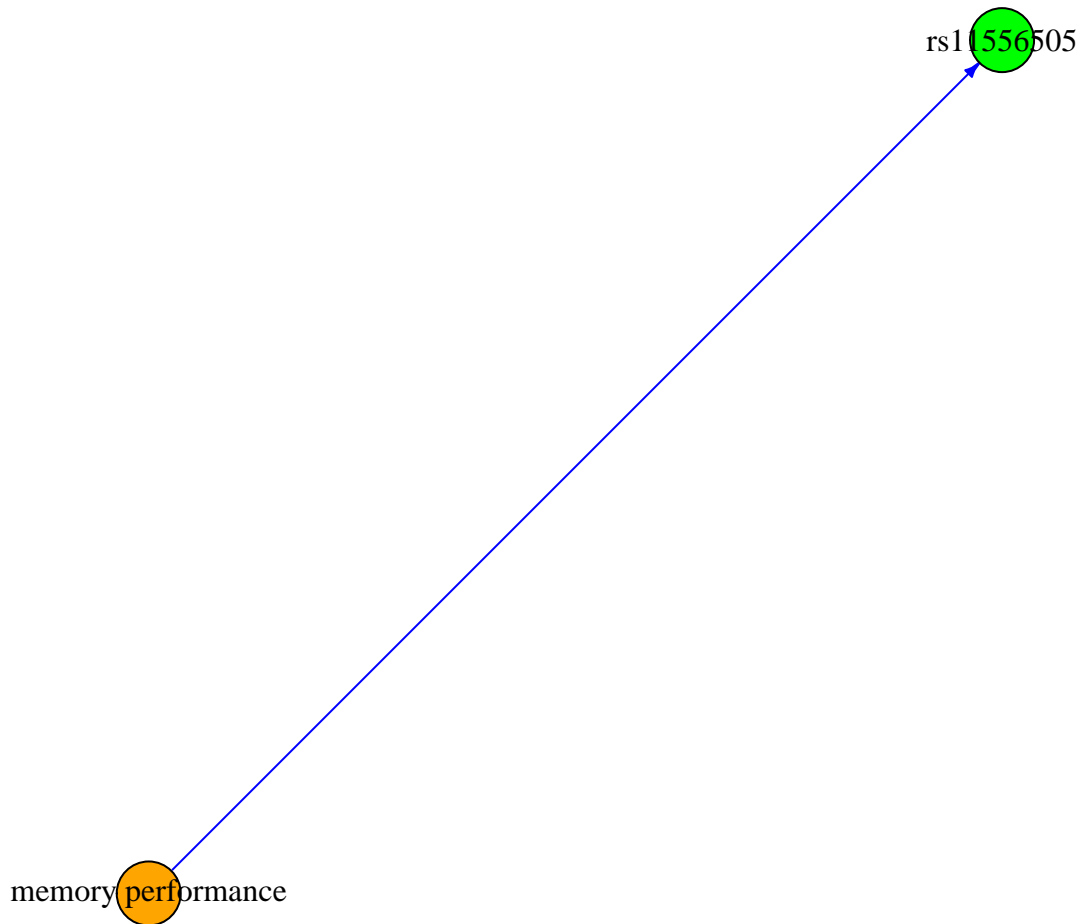

# Variant–Disease Network (neuritic plaque measurement)

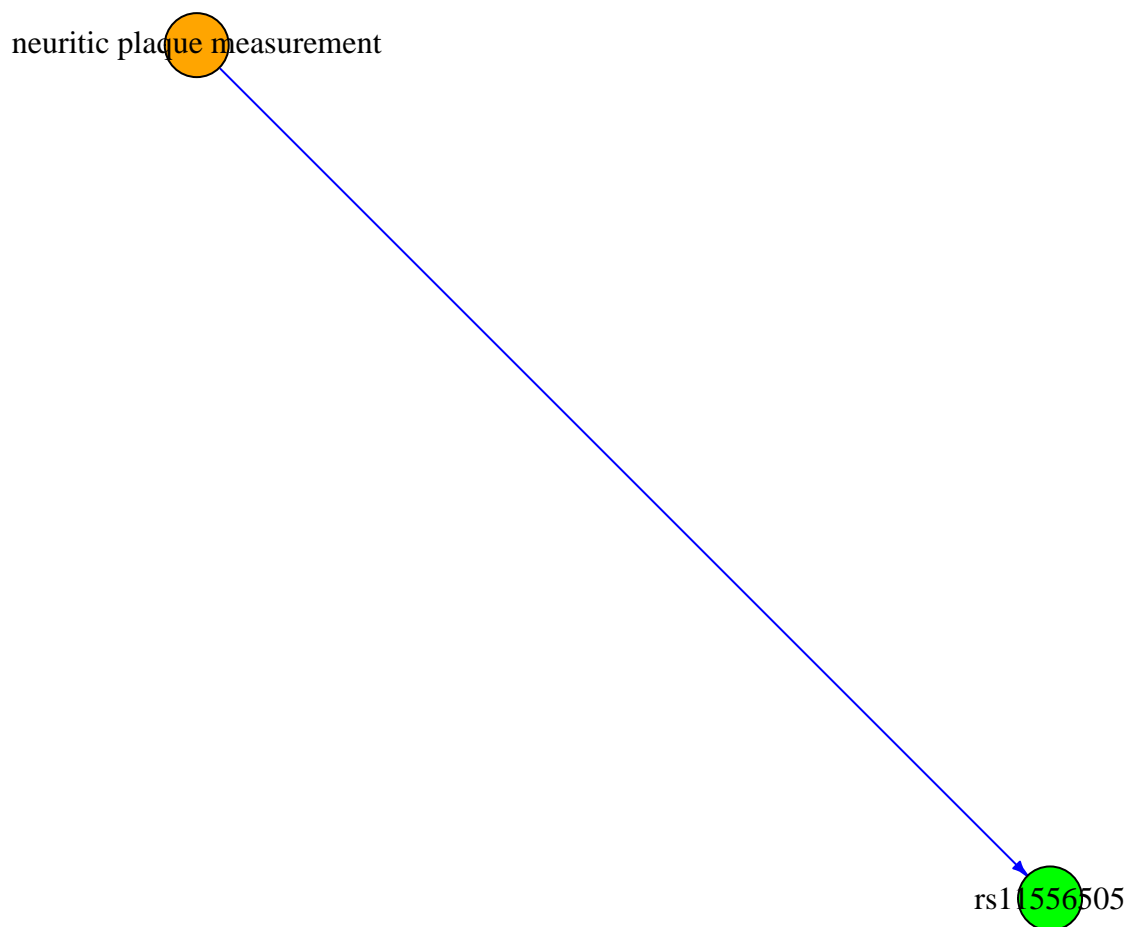

# Variant–Disease Network (neurofibrillary tangles measurement)

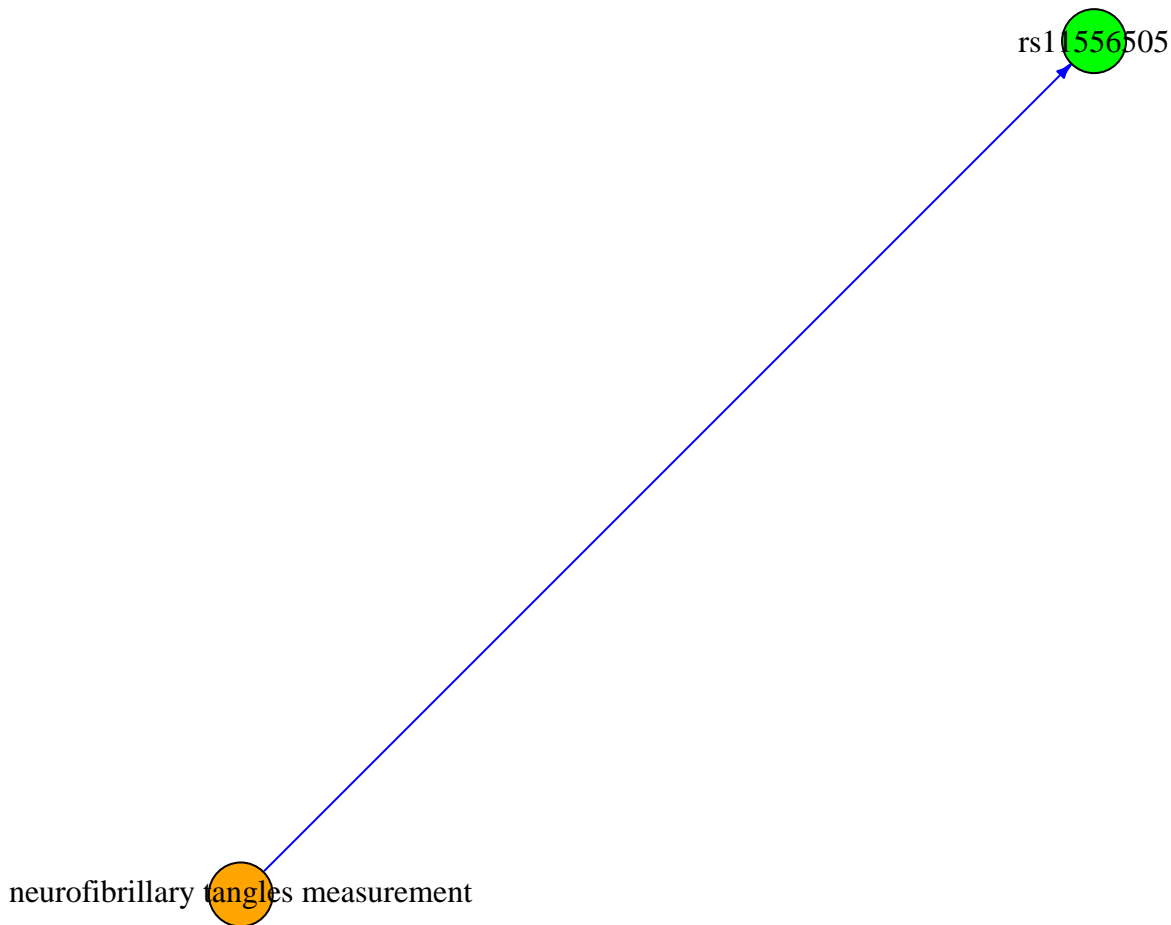

Variant–Disease Network (neuroimaging measurement)

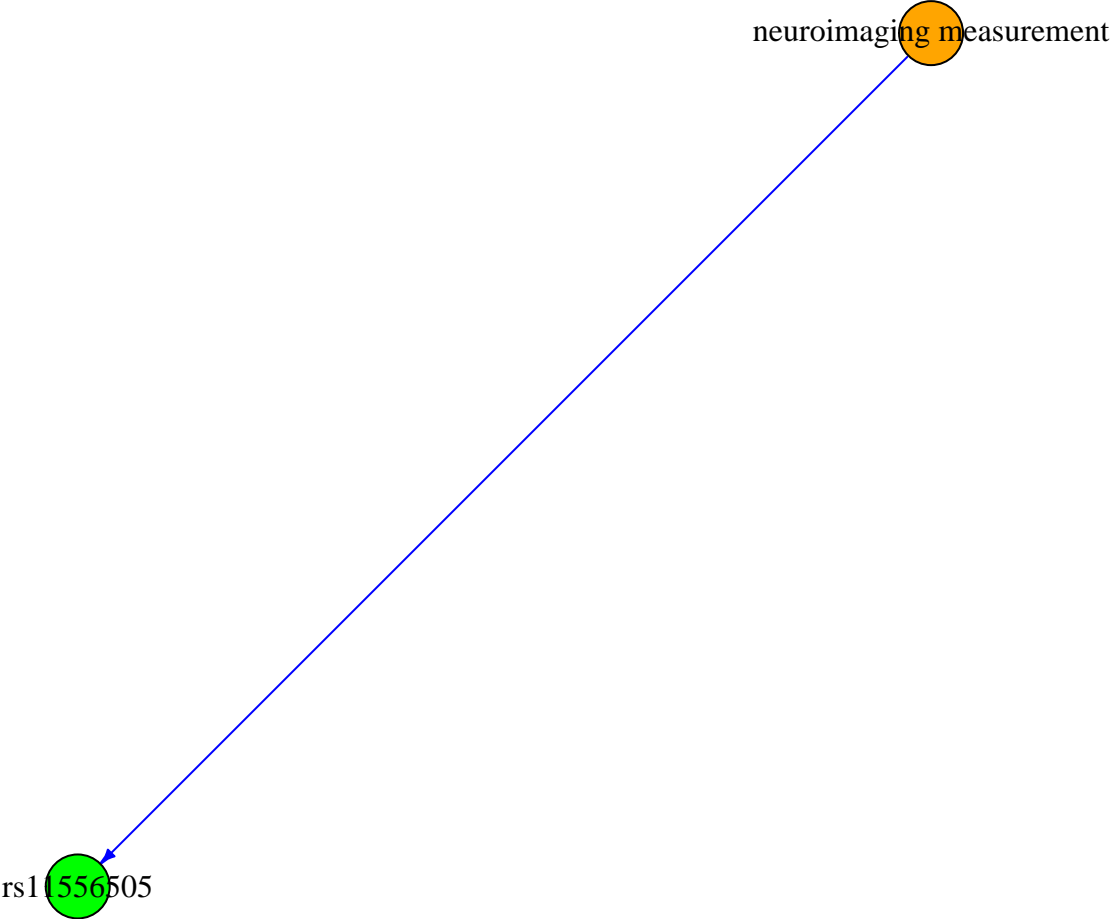

**Variant–Disease Network (paragraph delayed recall measurement)**

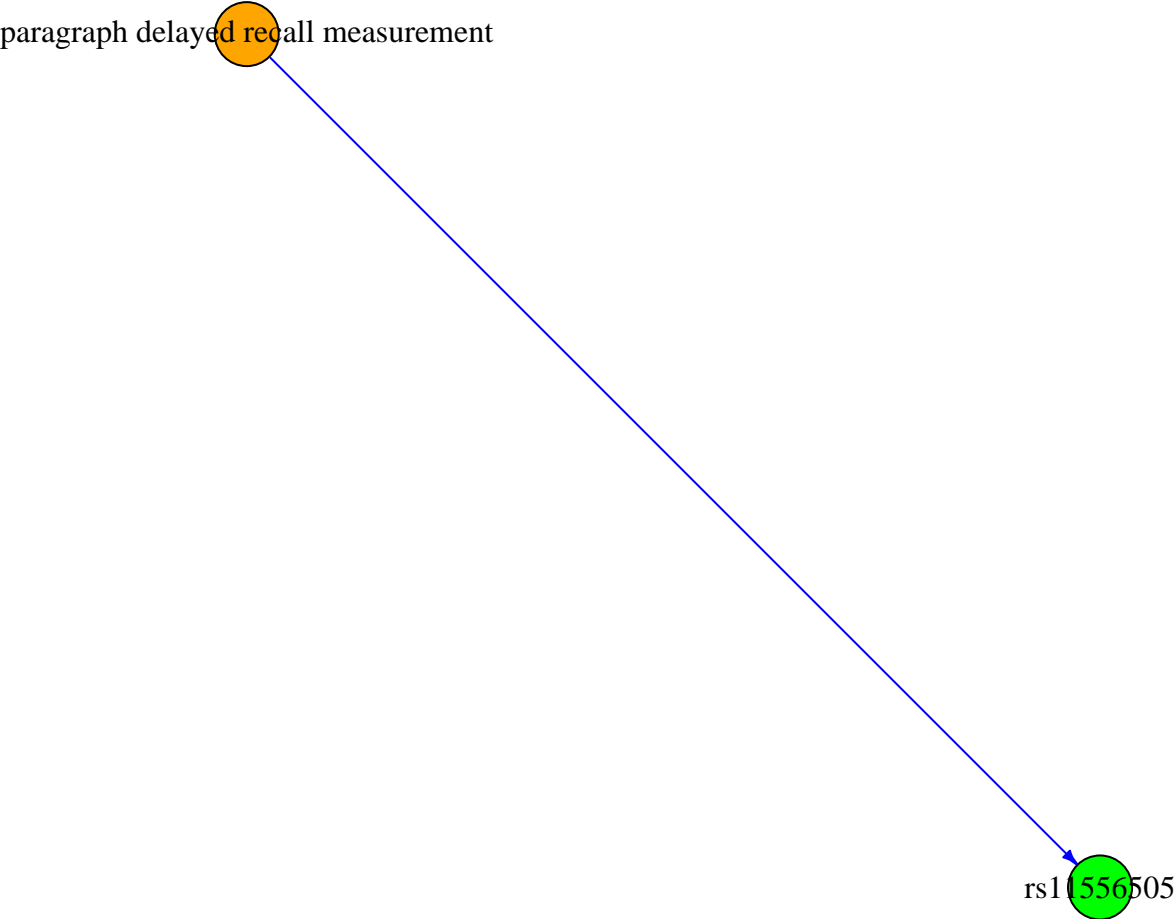

## Variant–Disease Network (posterior cortical atrophy)

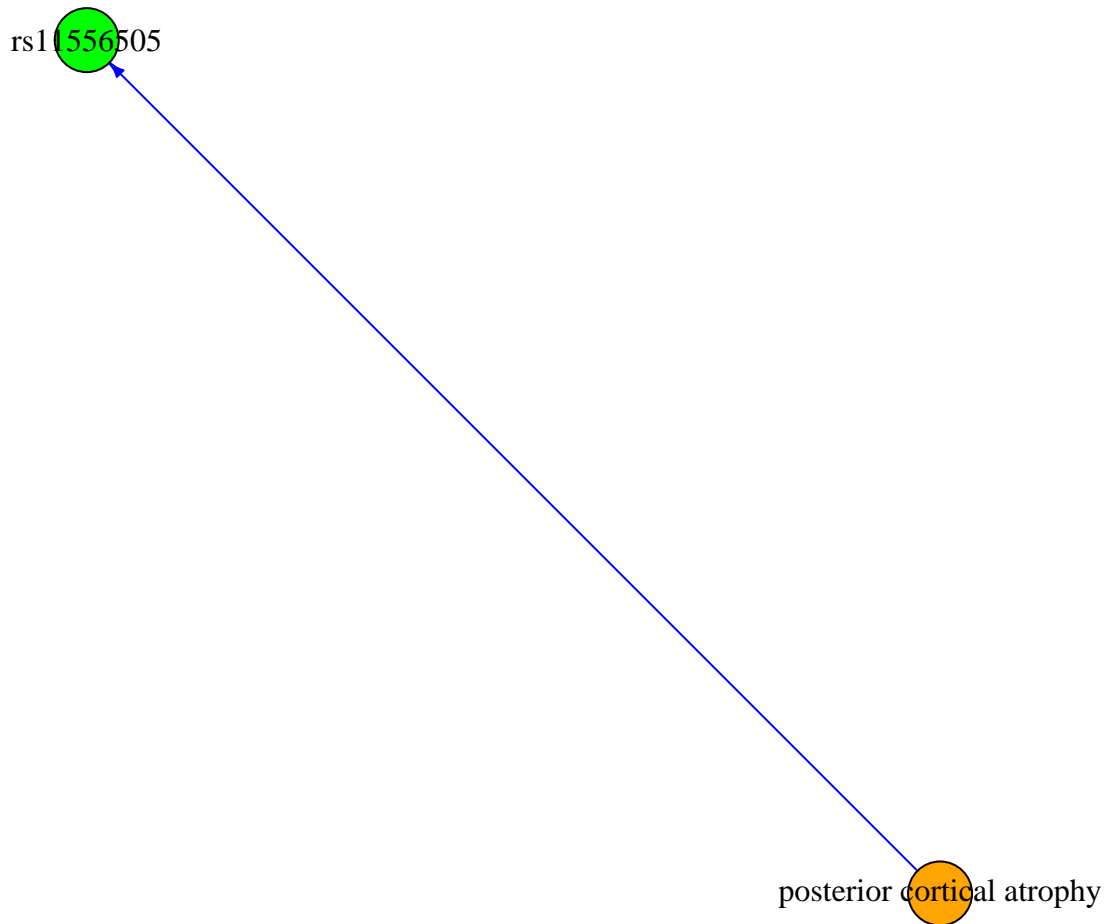



## Variant-Disease Network (p-tau measurement)

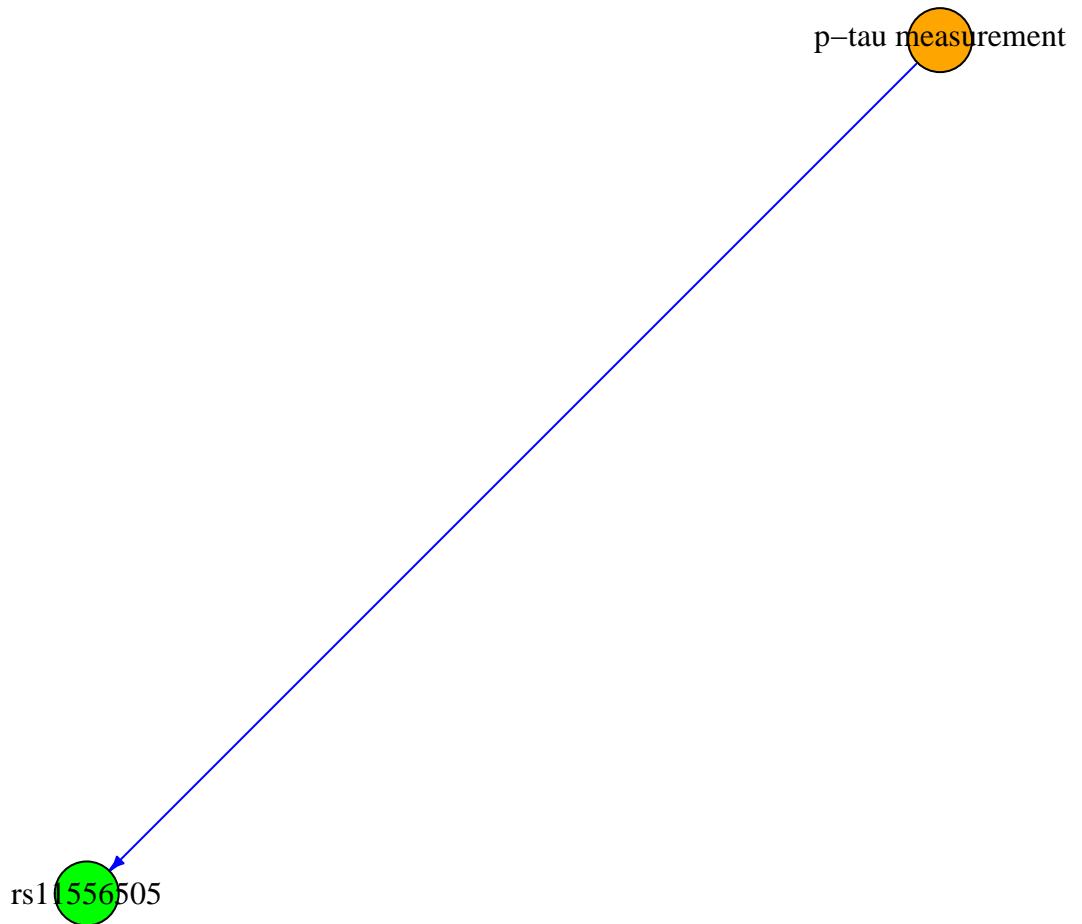

Variant–Disease Network (sensory perception of smell)

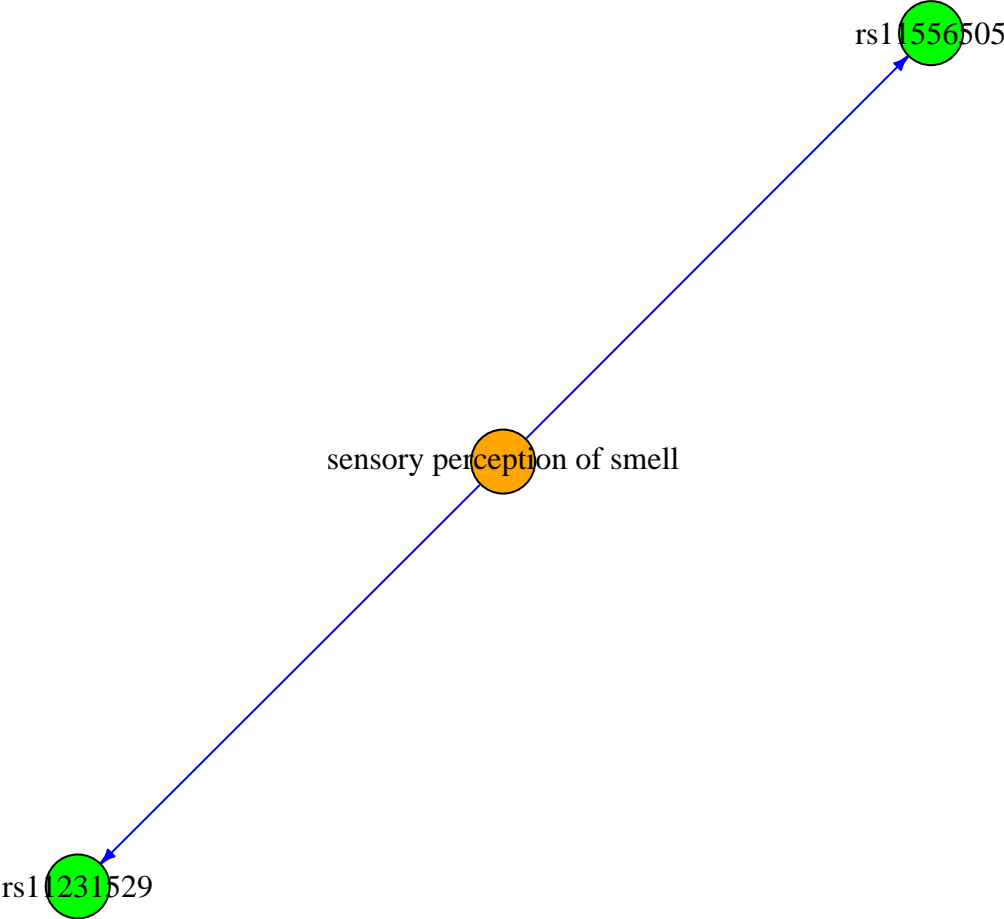

## Variant–Disease Network (t-tau:Ab1:42 ratio)

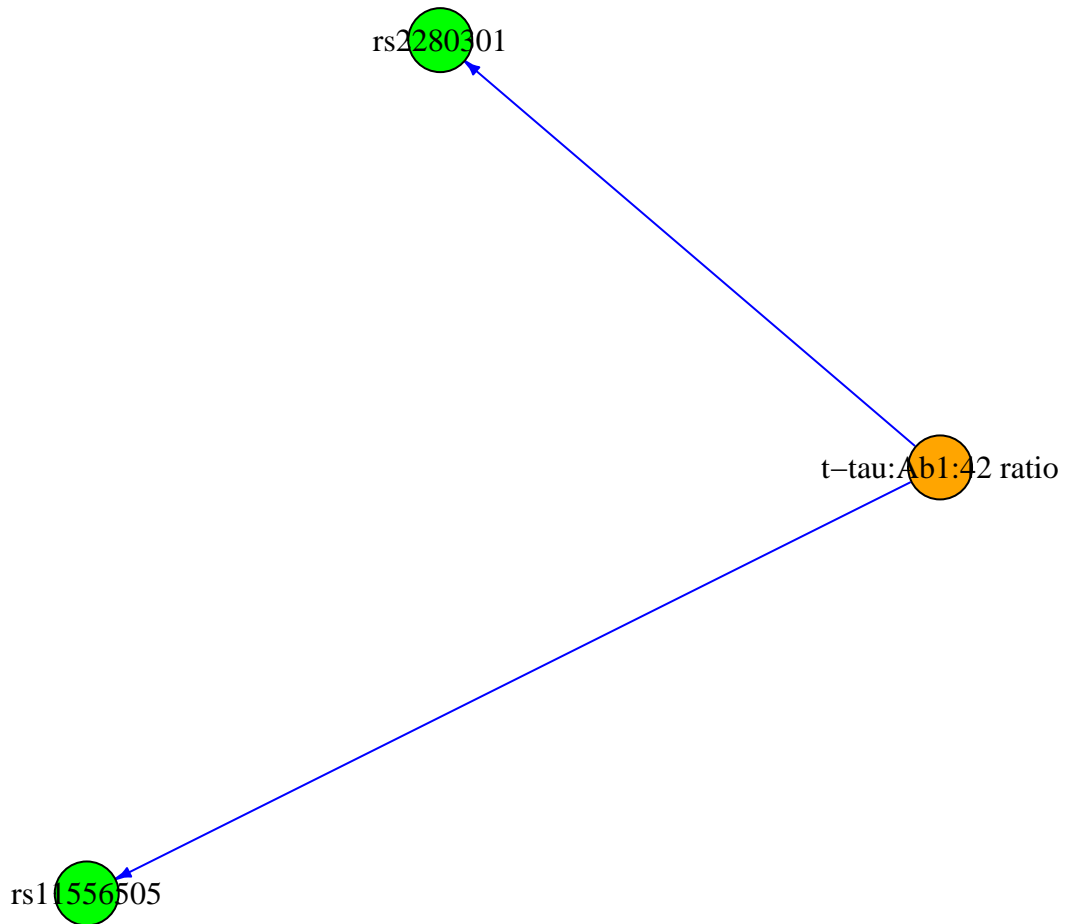

## Variant-Disease Network (t-tau measurement)

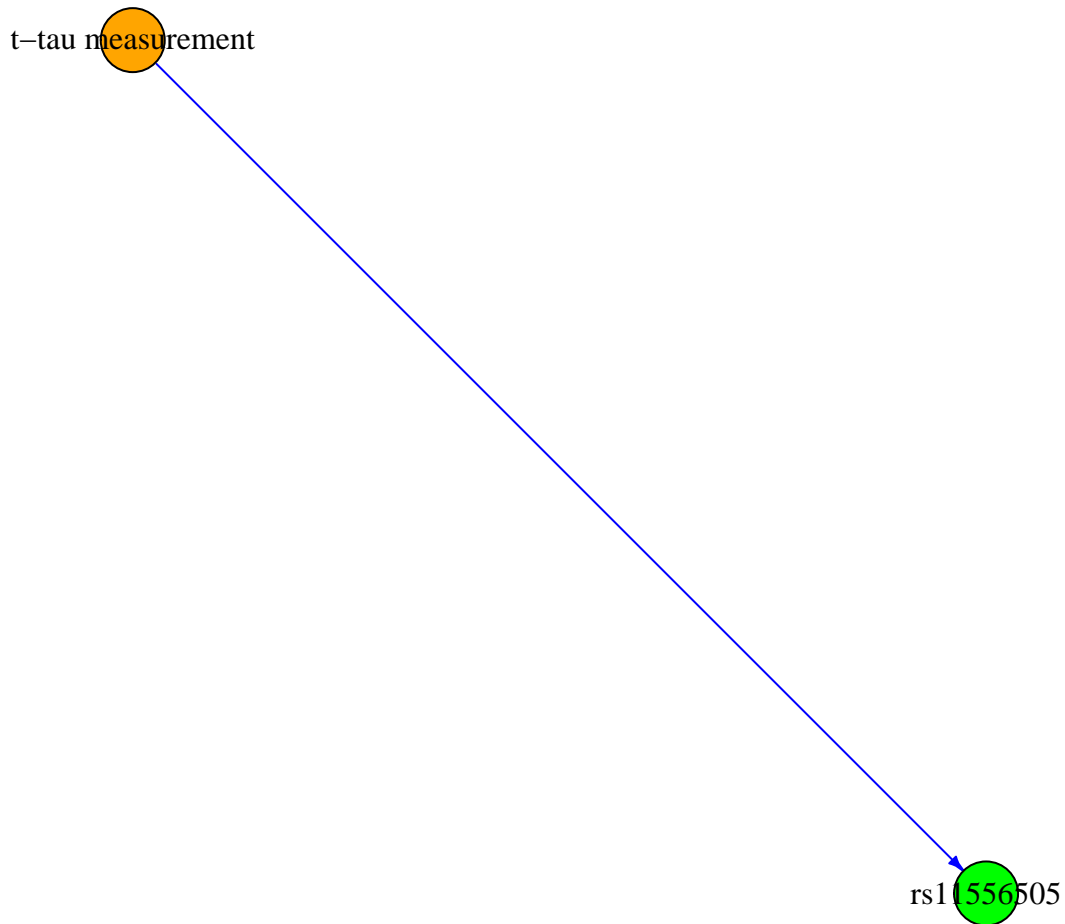

## Variant–Disease Network (bladder carcinoma)

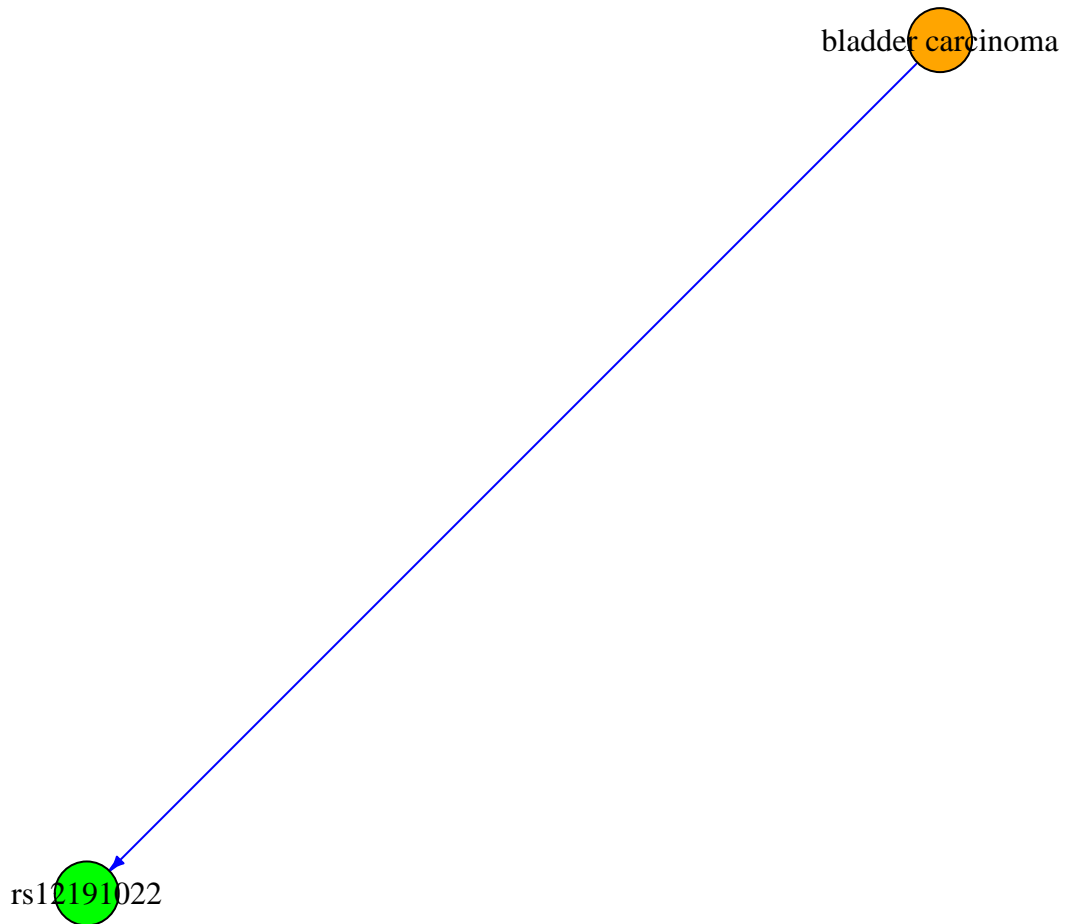

Variant–Disease Network (nicotine dependence symptom count)

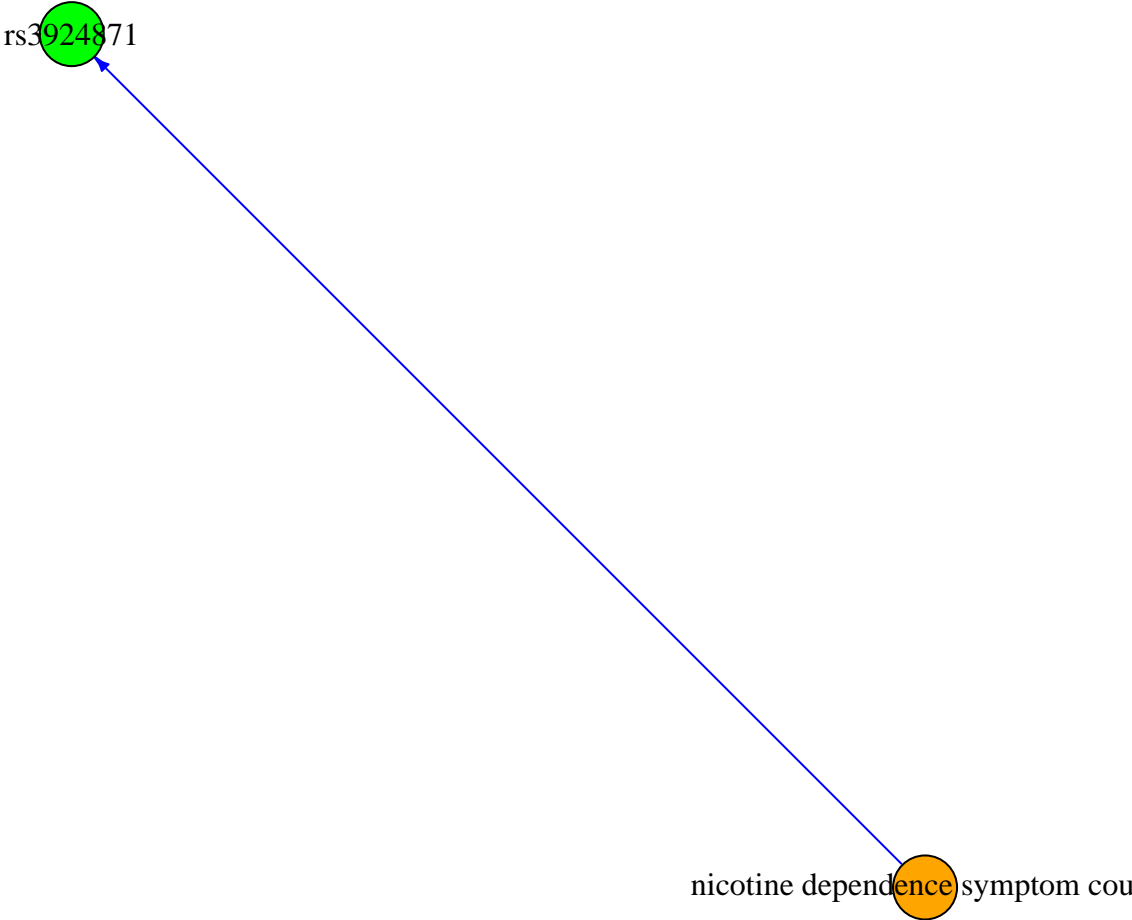

## Variant–Disease Network (endometrial neoplasm)

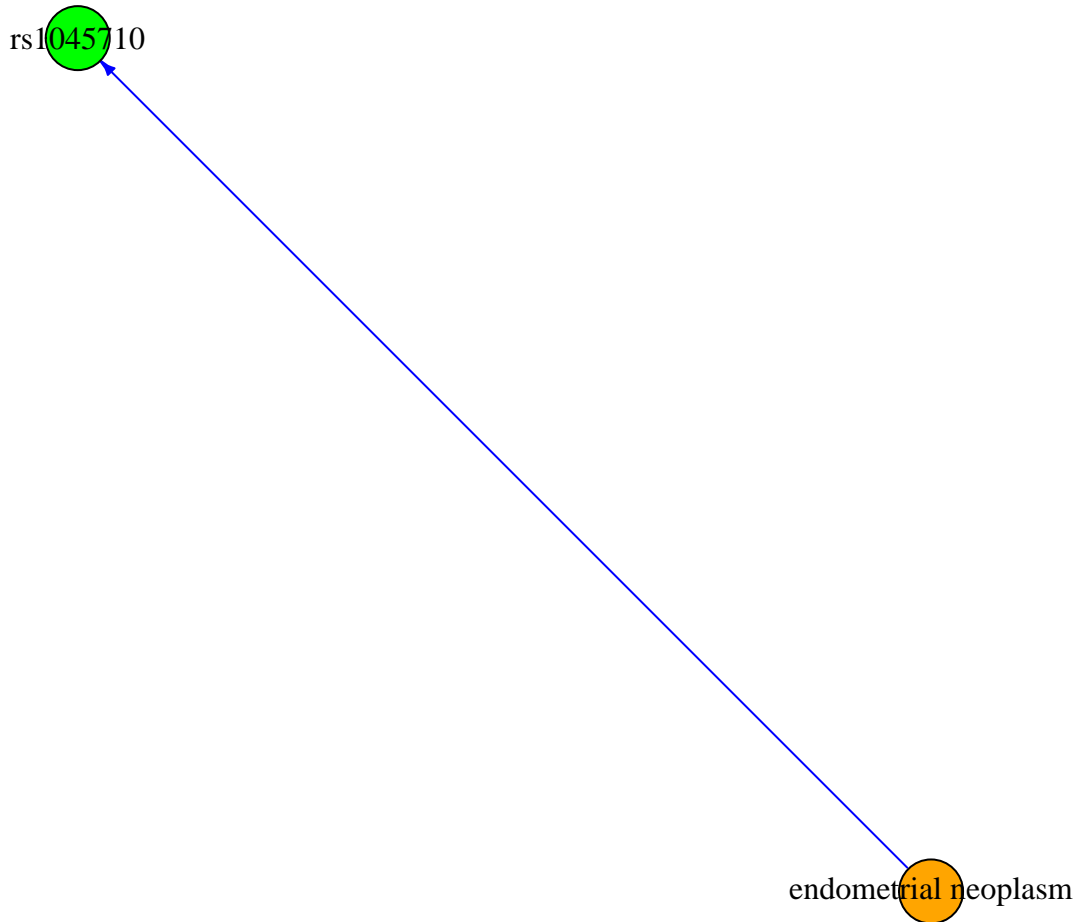

## Variant–Disease Network (Astigmatism)

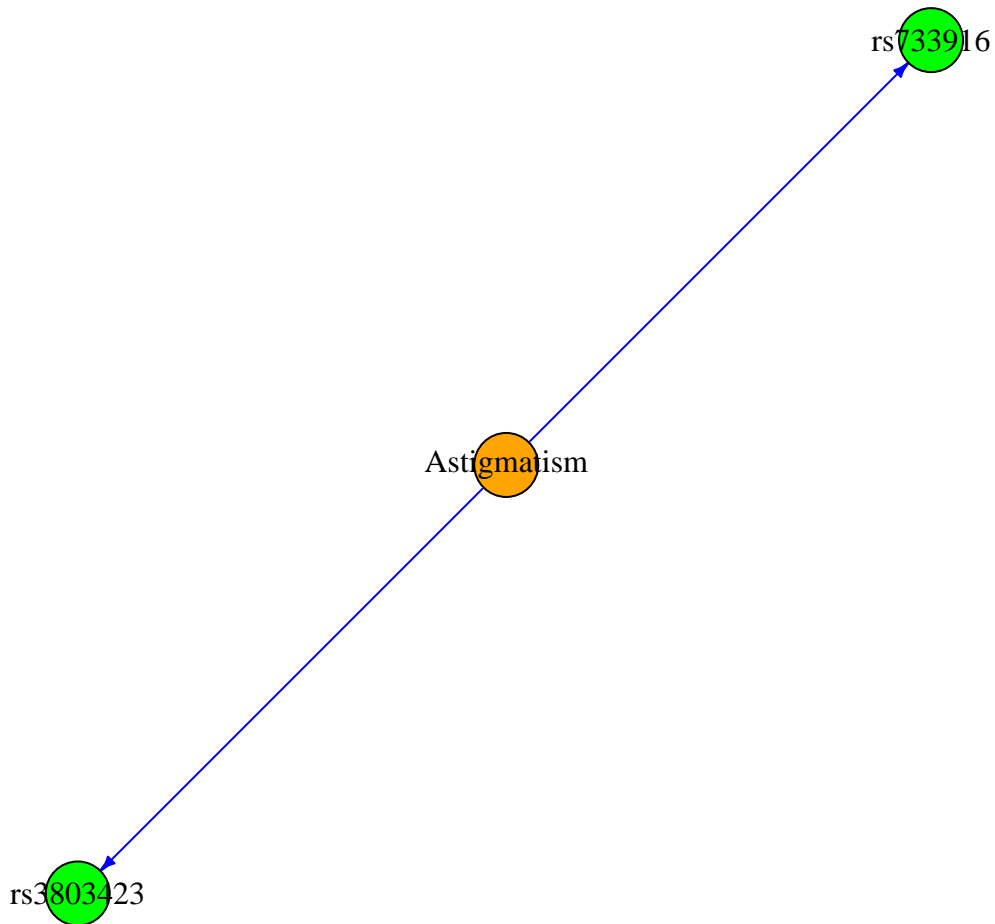



Variant–Disease Network (3–hydroxypropylmercapturic acid measurement)

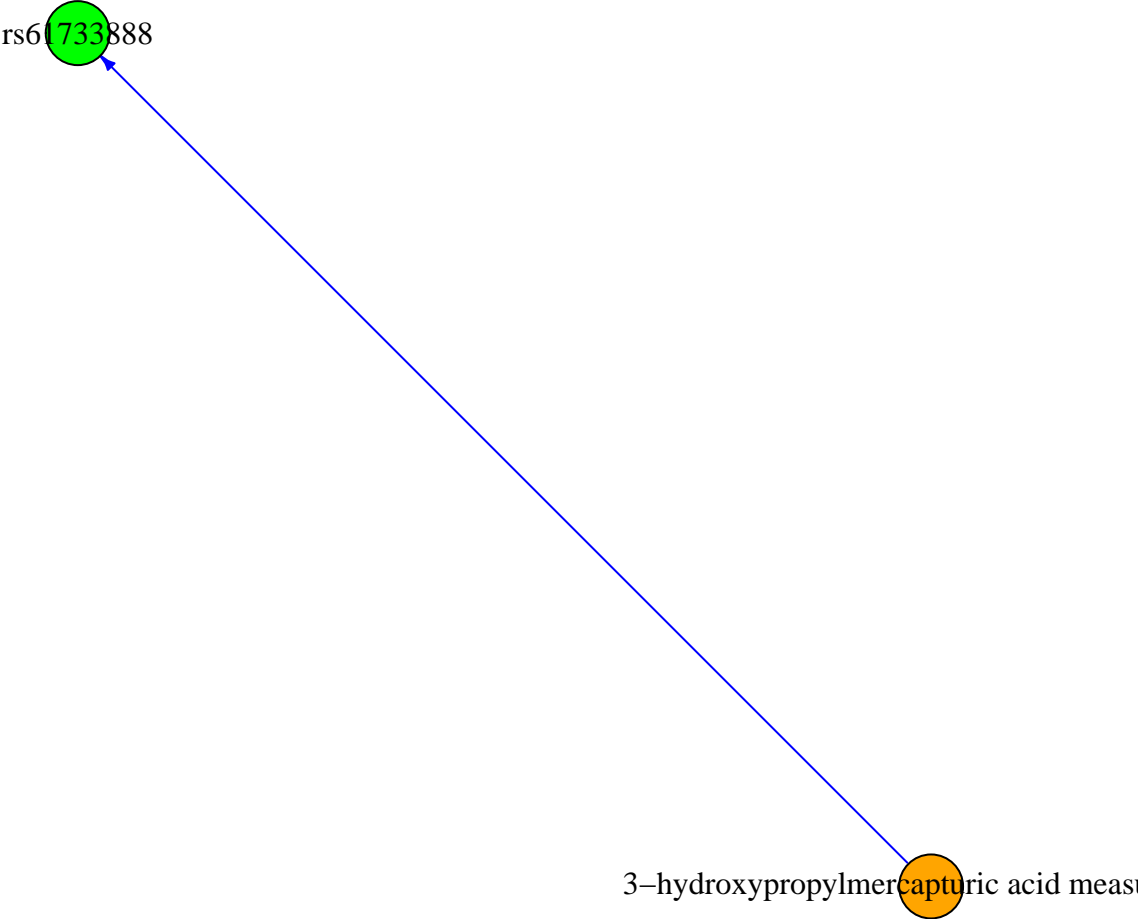

Variant–Disease Network (selenium measurement)

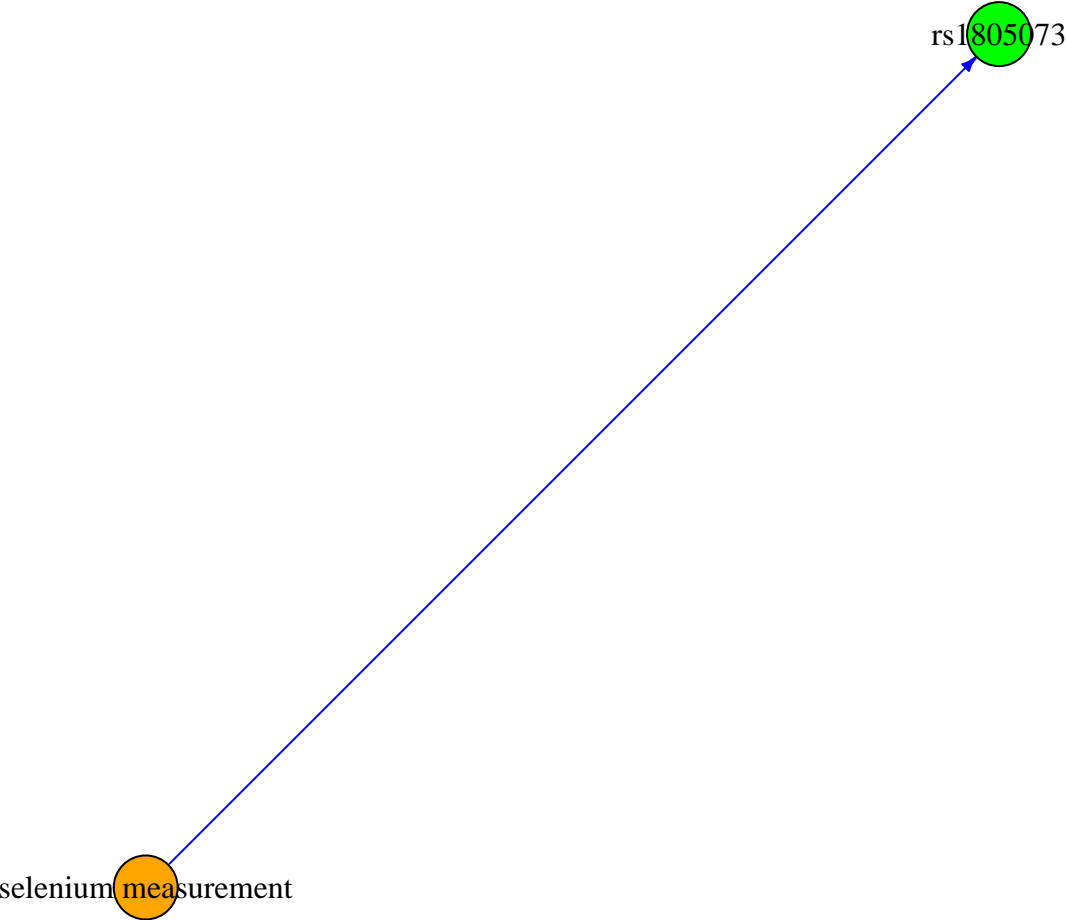

## Variant–Disease Network (serum selenium measurement)

serum selenium measurement

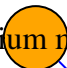

rs1805073

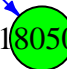

## Variant–Disease Network (basophil count)

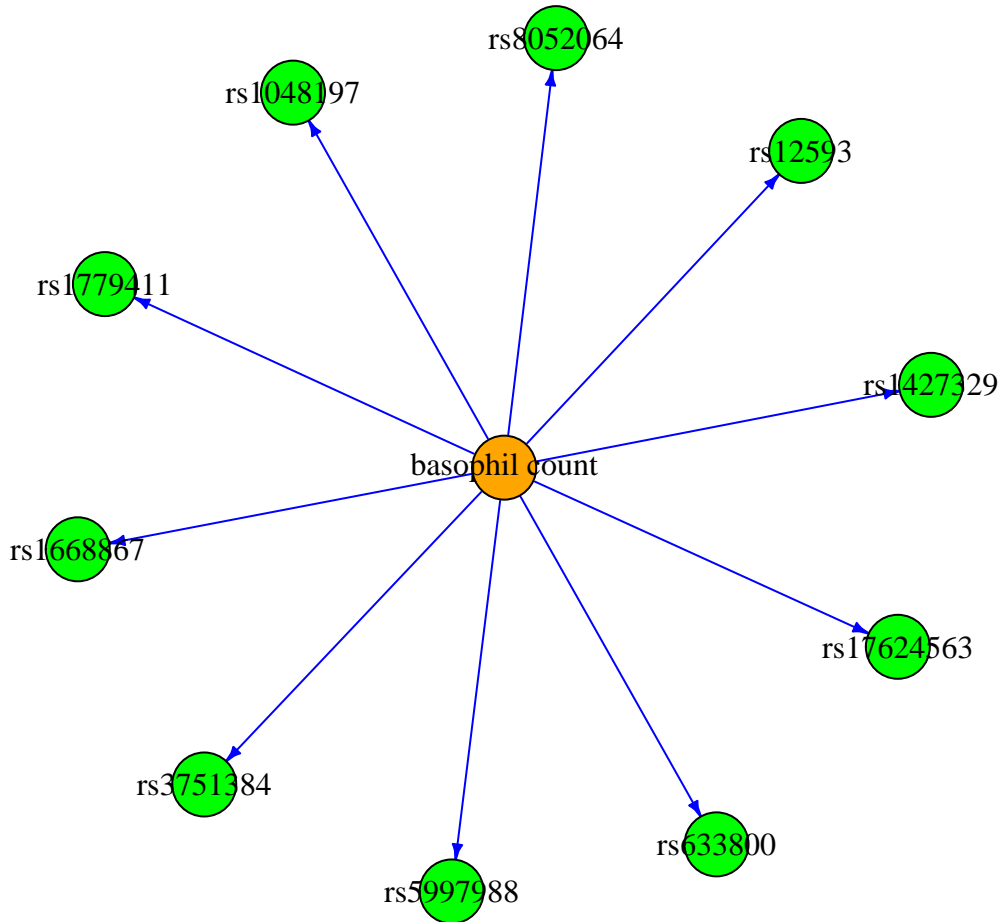

**Variant–Disease Network (basophil percentage of white cells)**

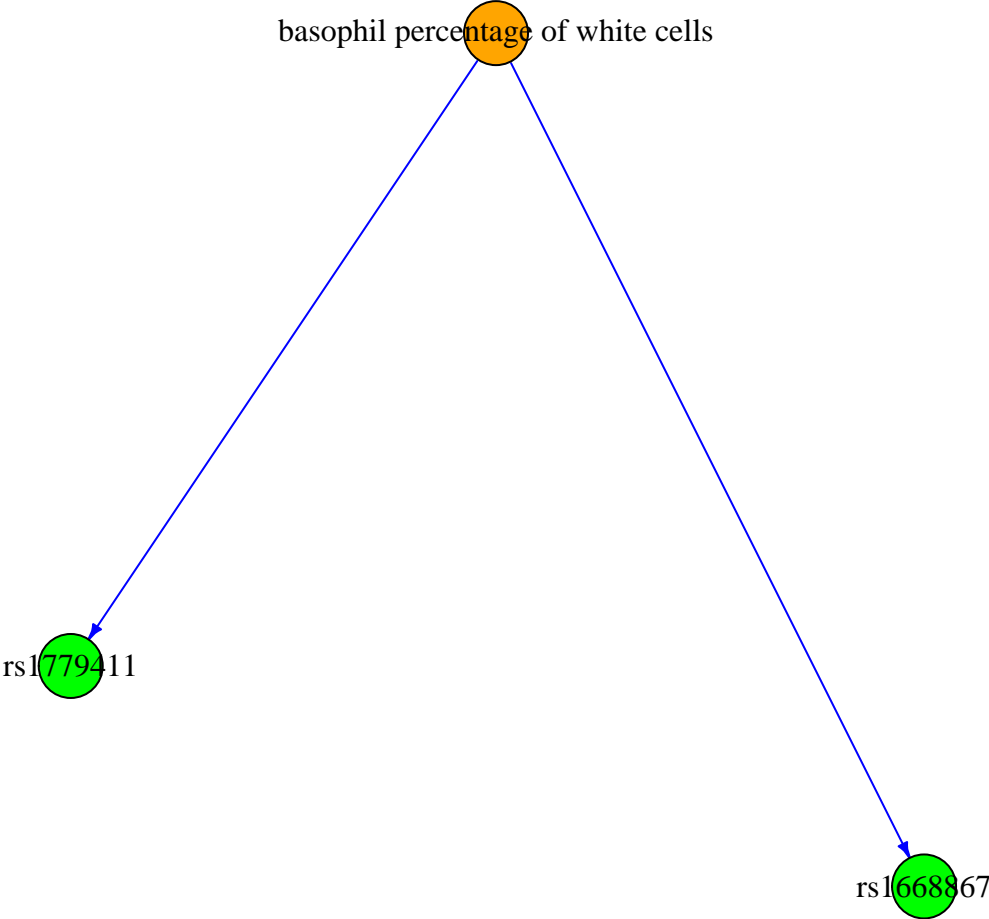

## Variant–Disease Network (alcoholic pancreatitis)

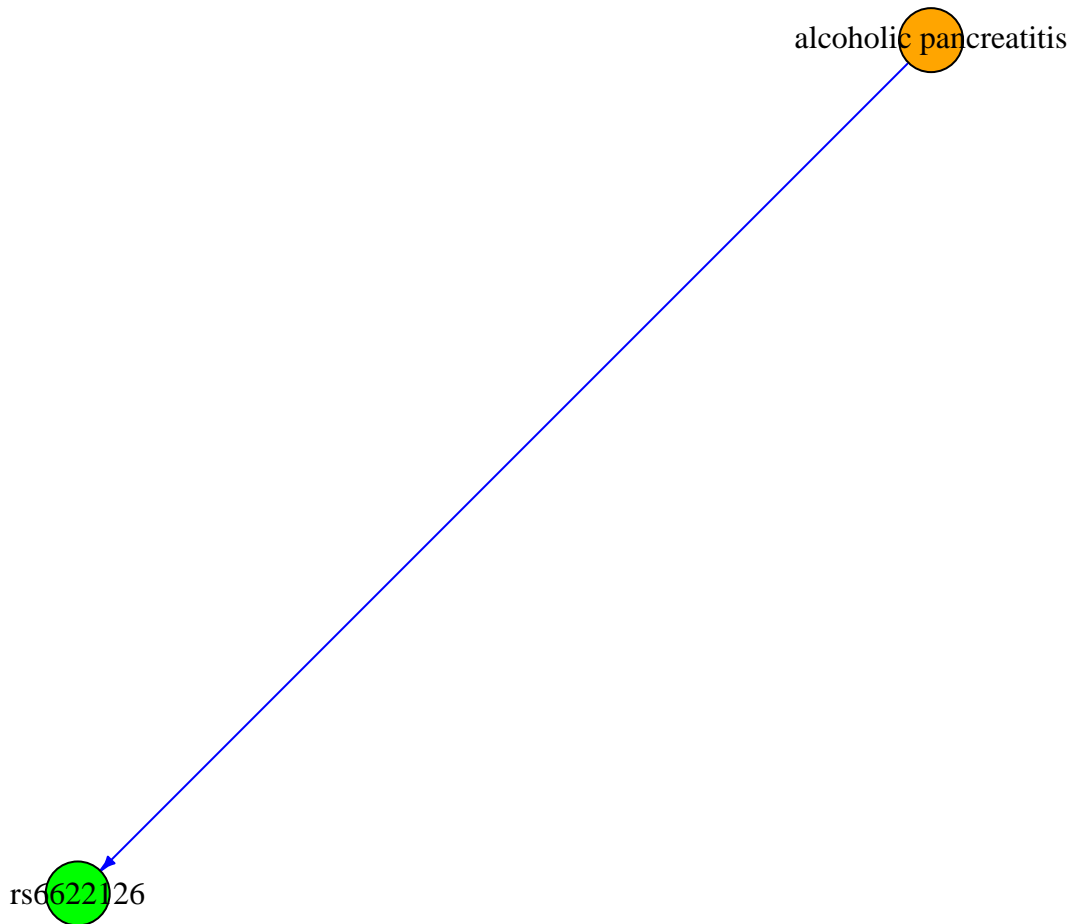

Variant–Disease Network (interleukin 6 receptor subunit beta measurement

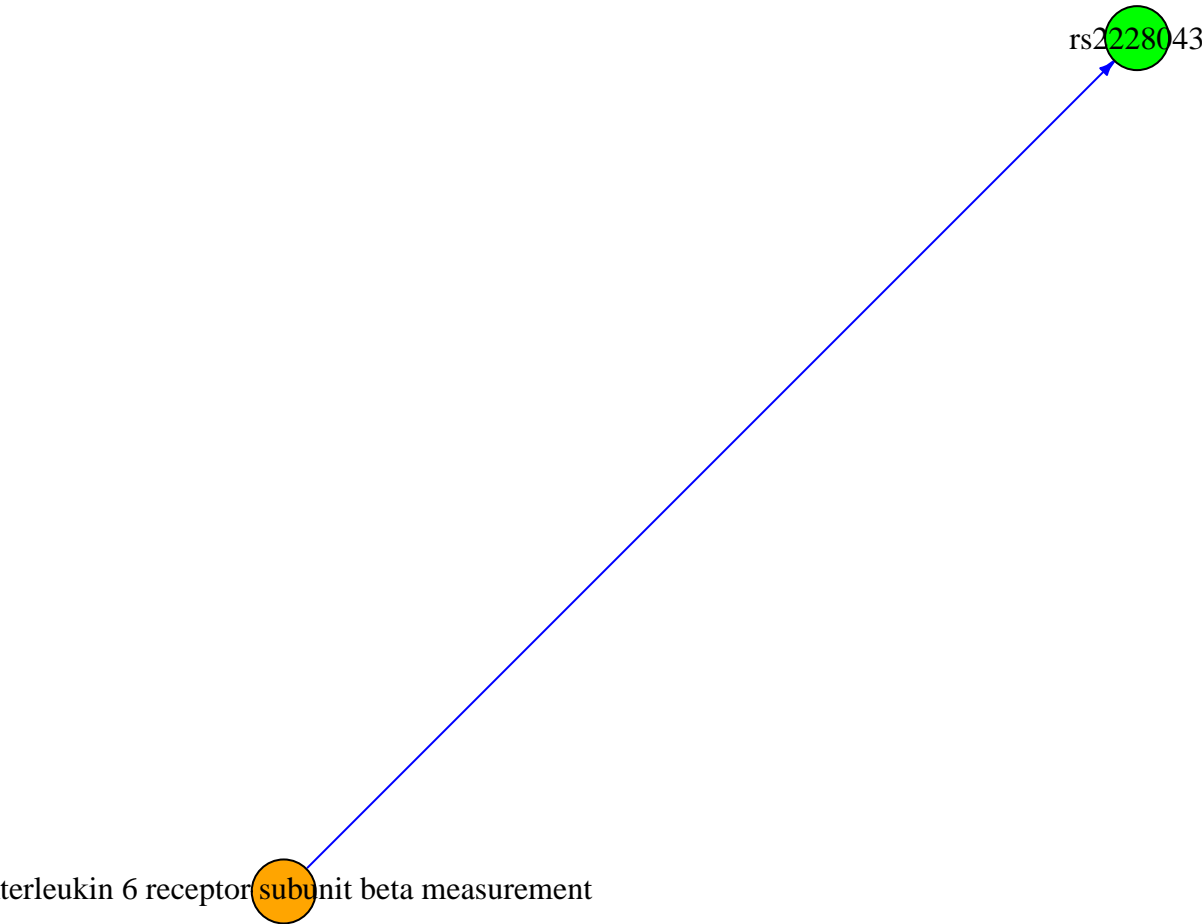

## Variant–Disease Network (eosinophil count)

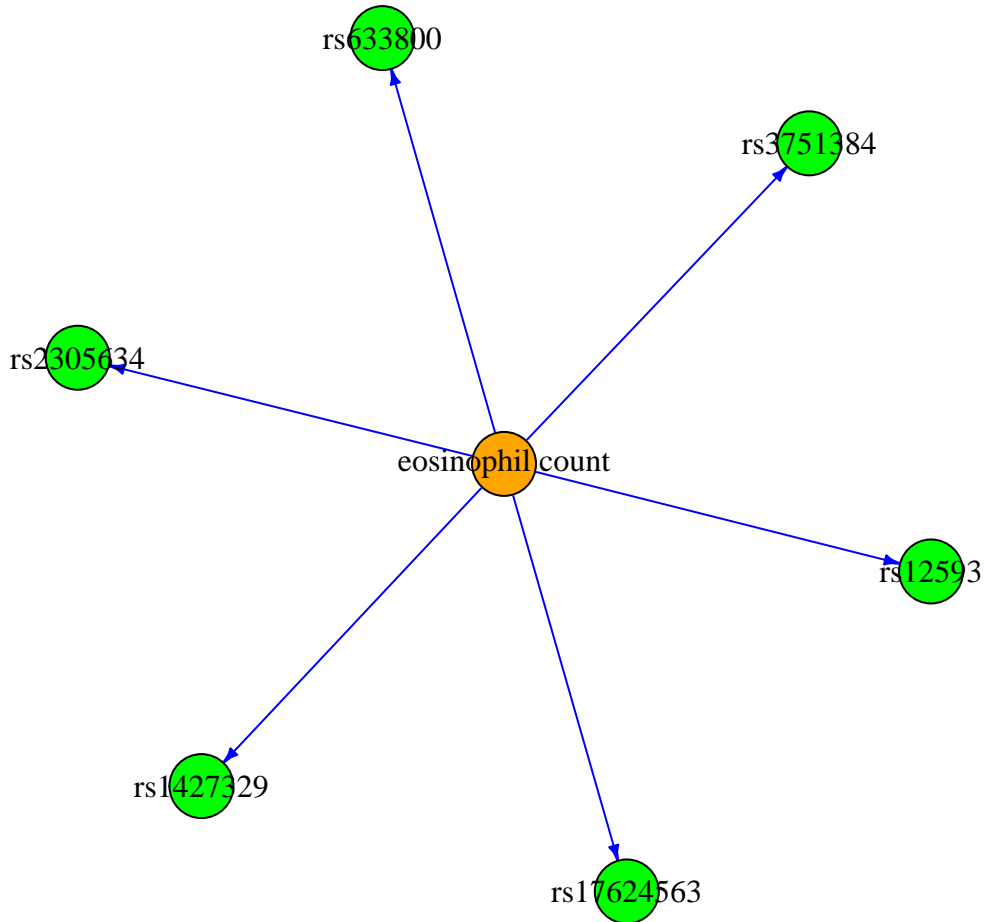



# Variant–Disease Network (eosinophil percentage of granulocytes)

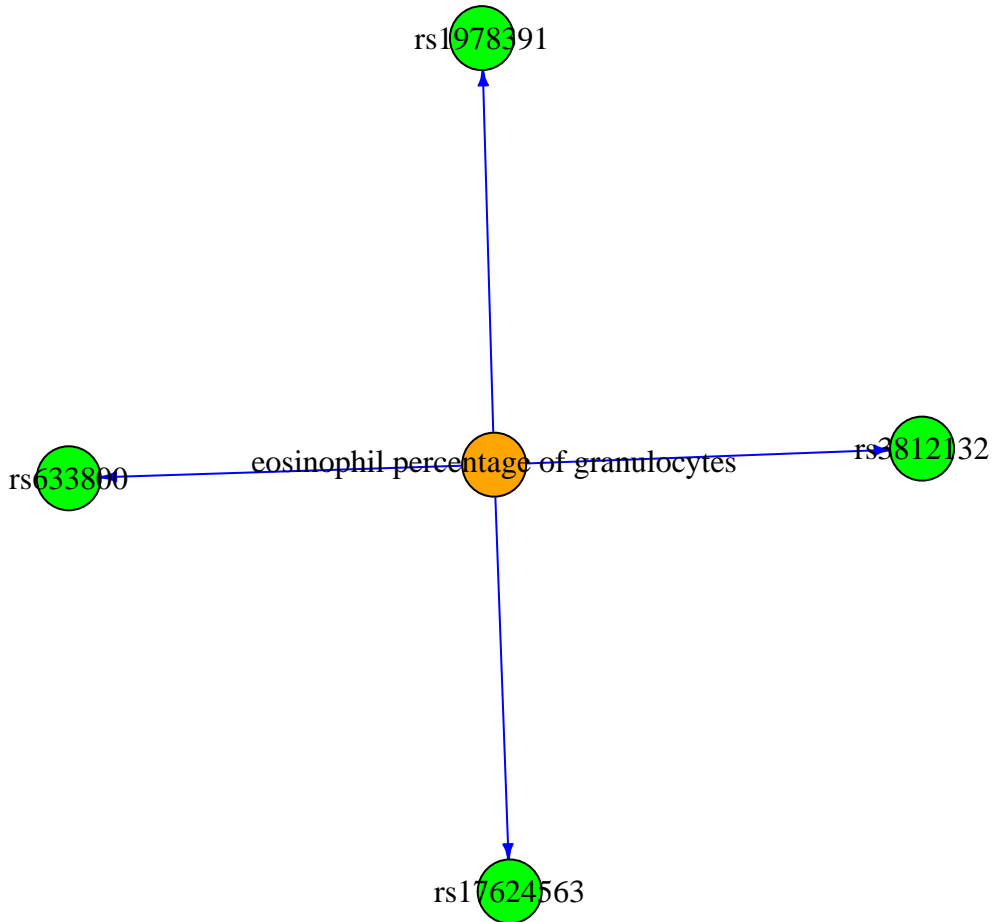

Variant–Disease Network (eosinophil percentage of white cells)

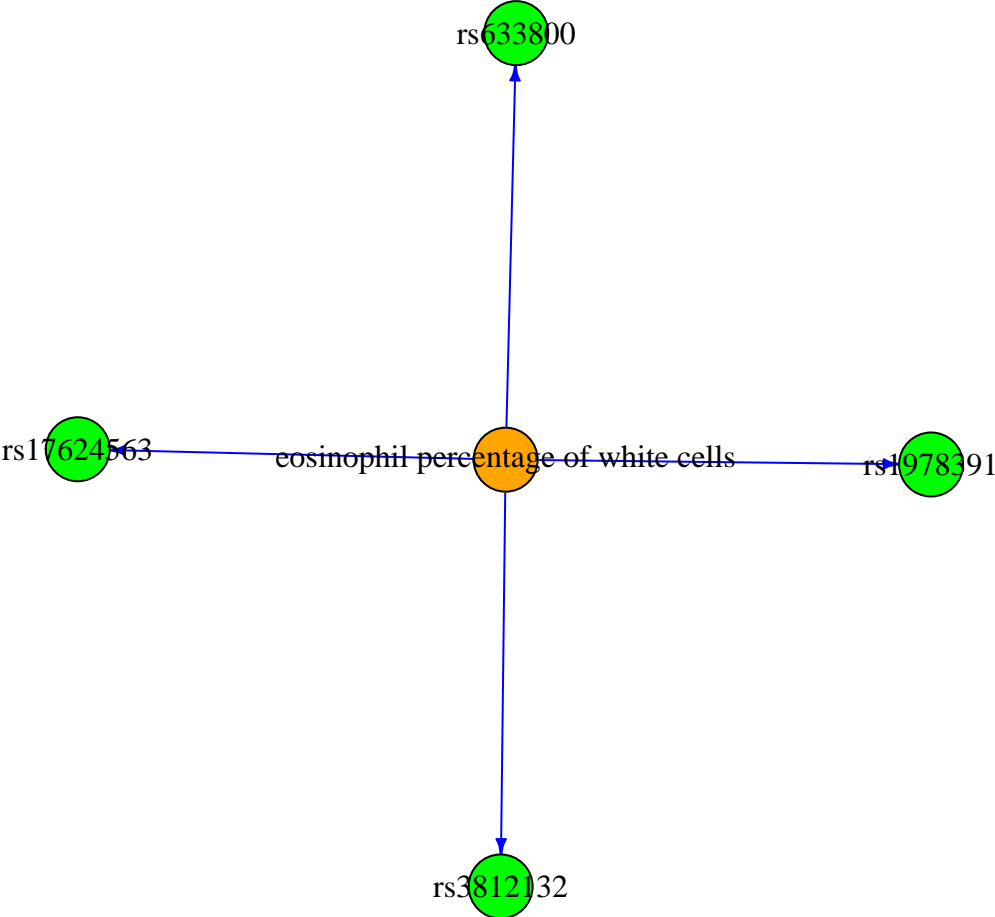

## Variant–Disease Network (neutrophil percentage of granulocytes)

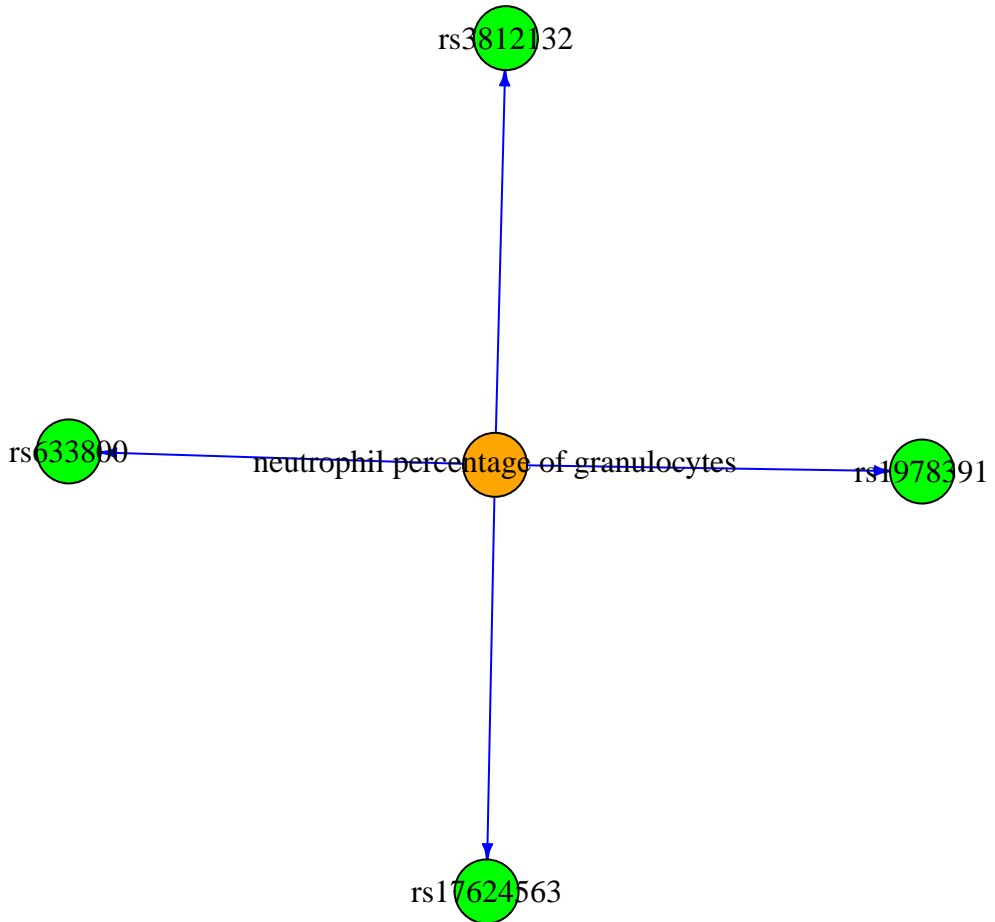

## Variant–Disease Network (chronic kidney disease)

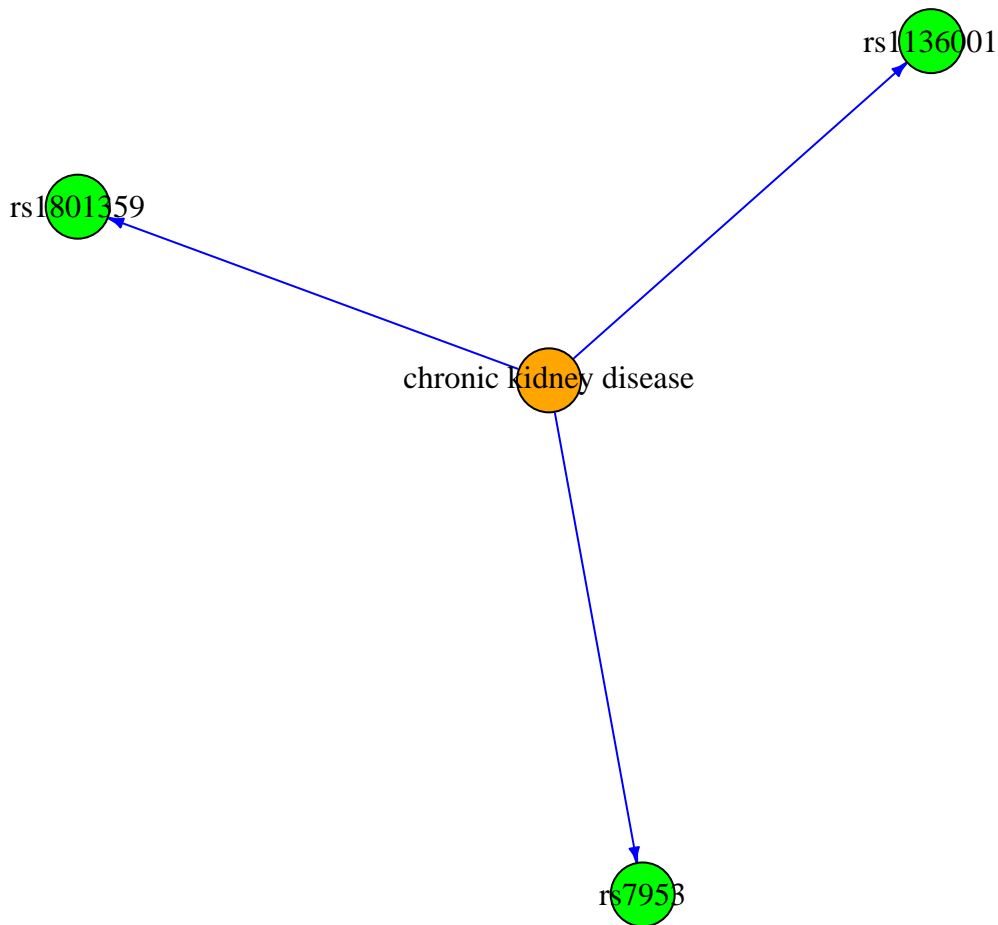

## Variant–Disease Network (colorectal health)

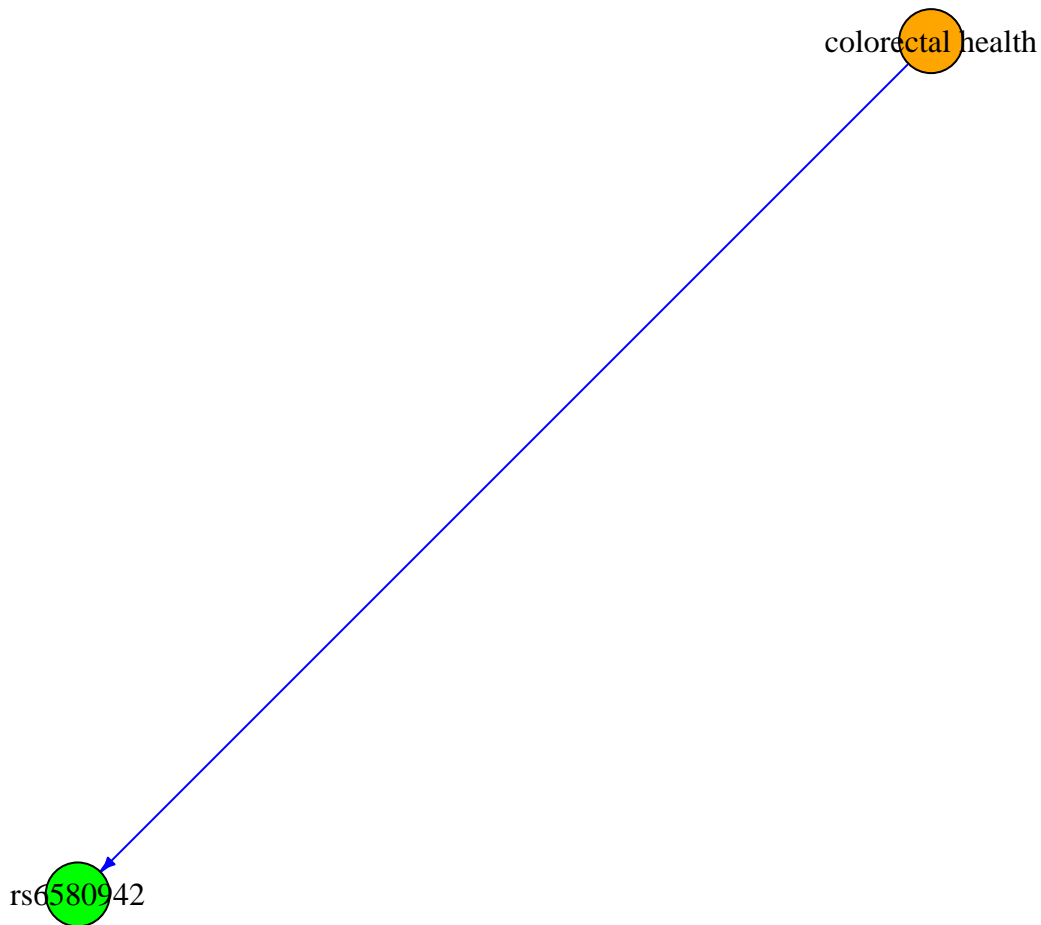

**Variant–Disease Network (femoral neck bone mineral density)**

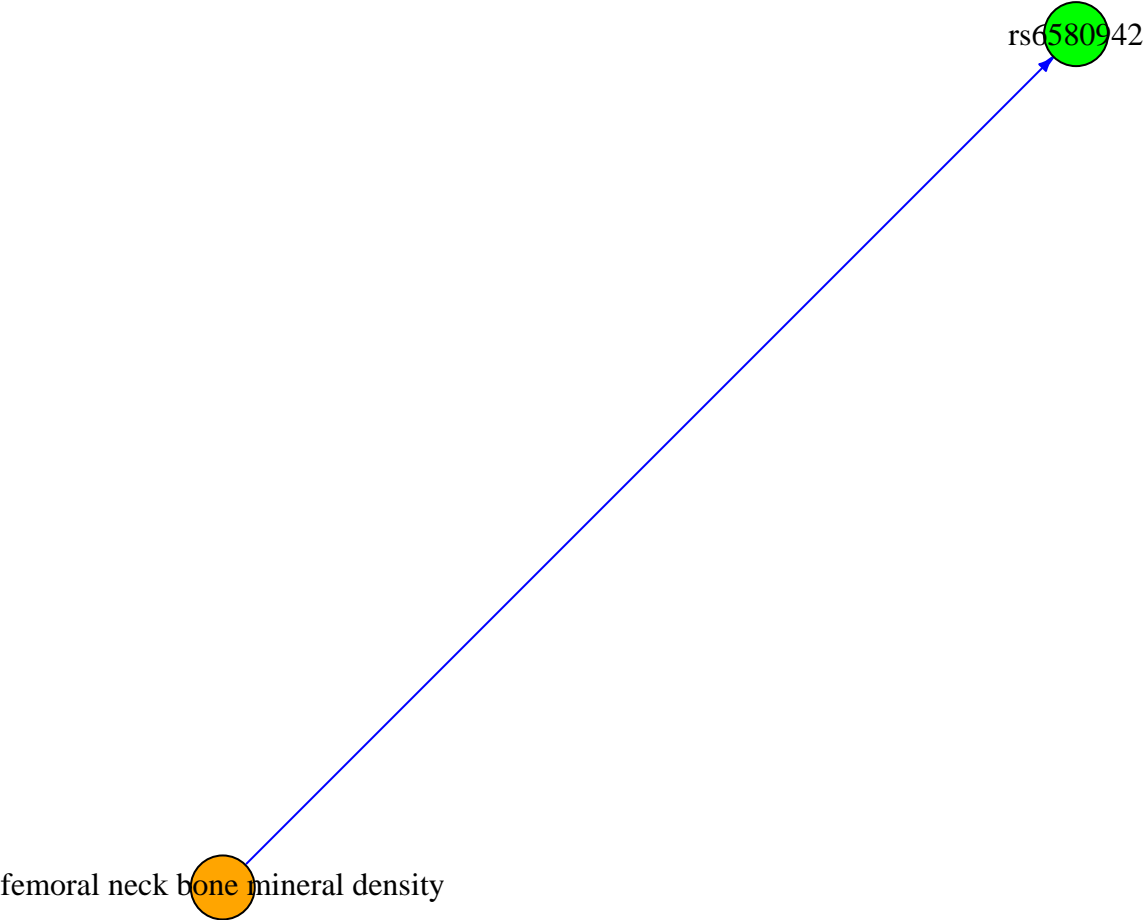

## Variant–Disease Network (spine bone mineral density)

spine bone mineral density

rs6580942



Variant–Disease Network (response to selective serotonin reuptake inhibitor)

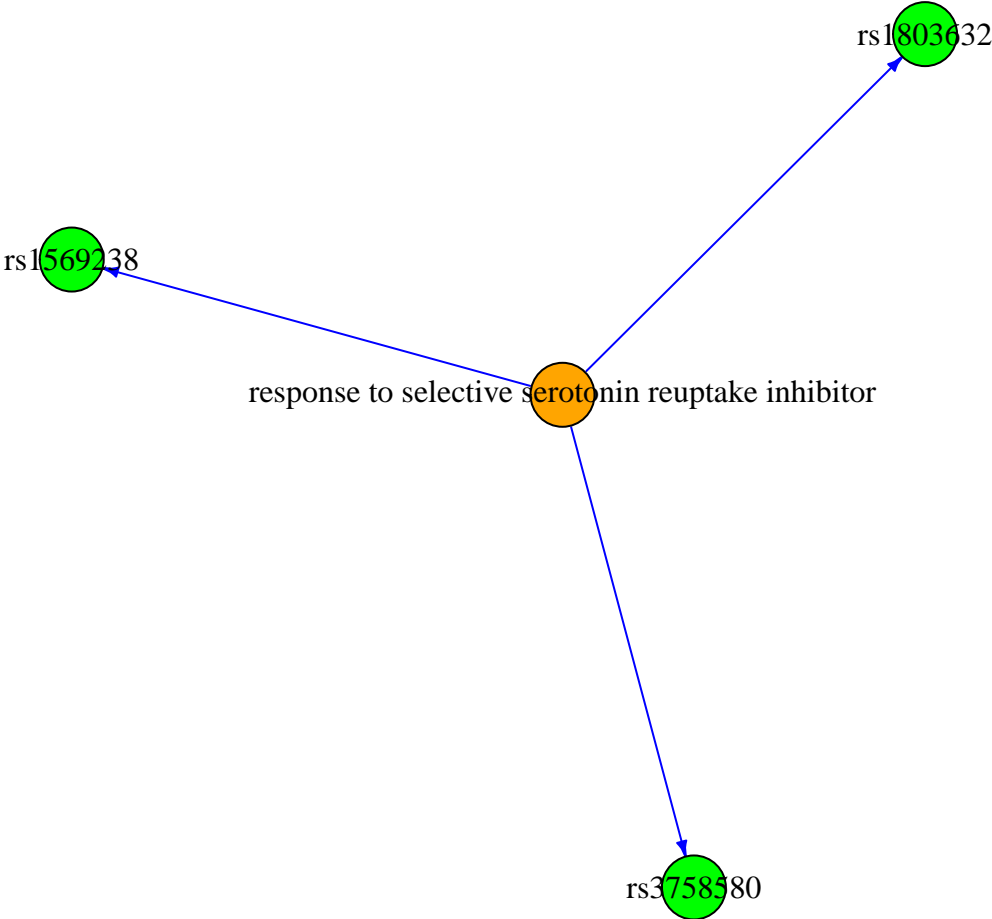



**Variant–Disease Network (serum non–albumin protein measurement)**

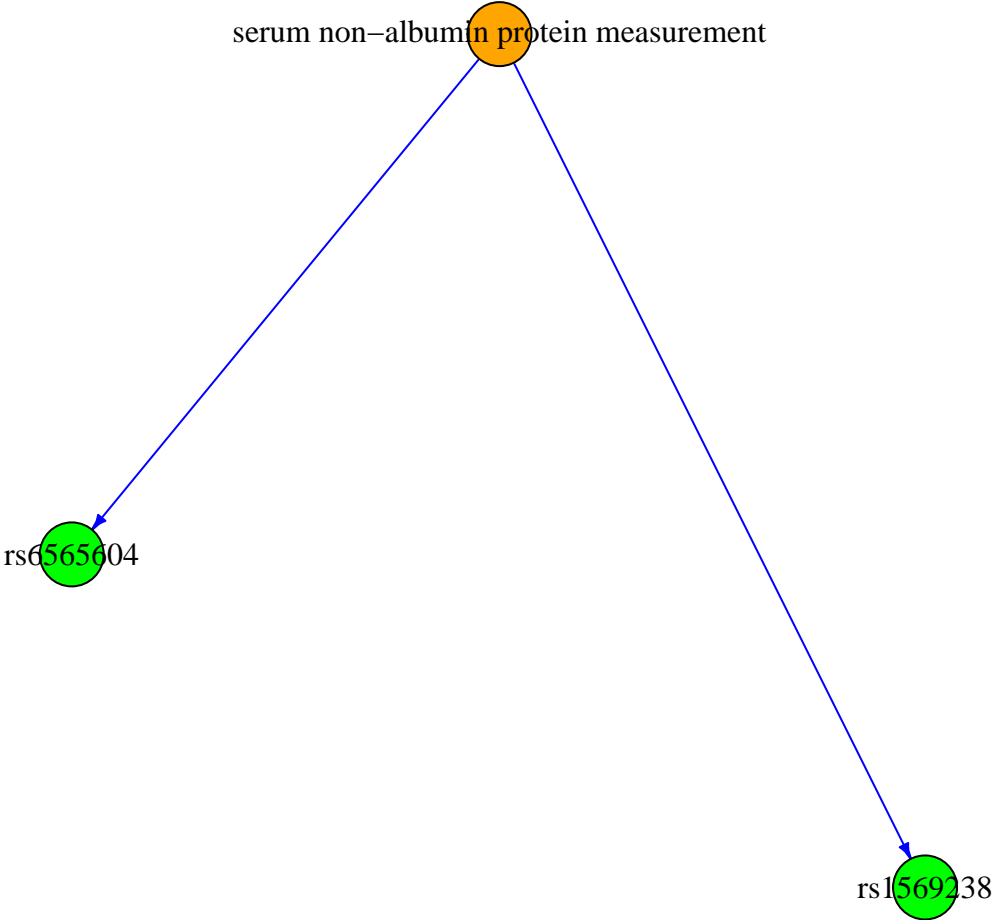

## Variant–Disease Network (granulocyte count)

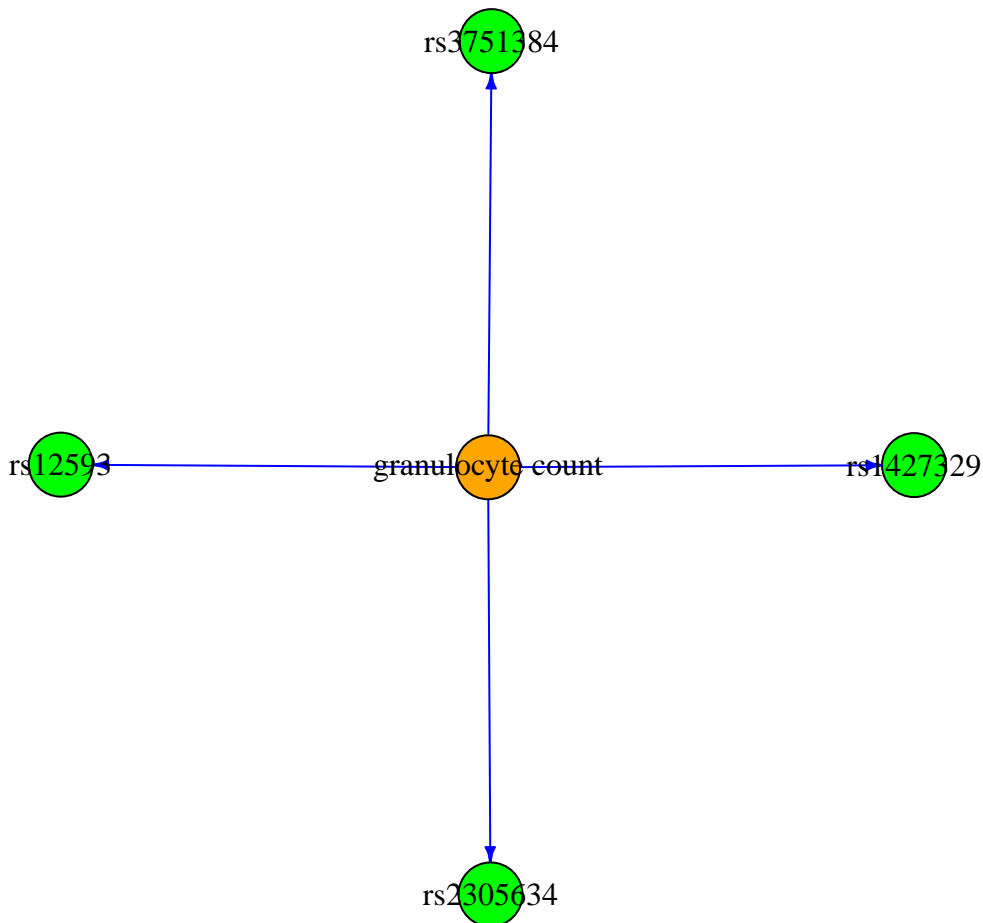

## Variant–Disease Network (myeloid white cell count)

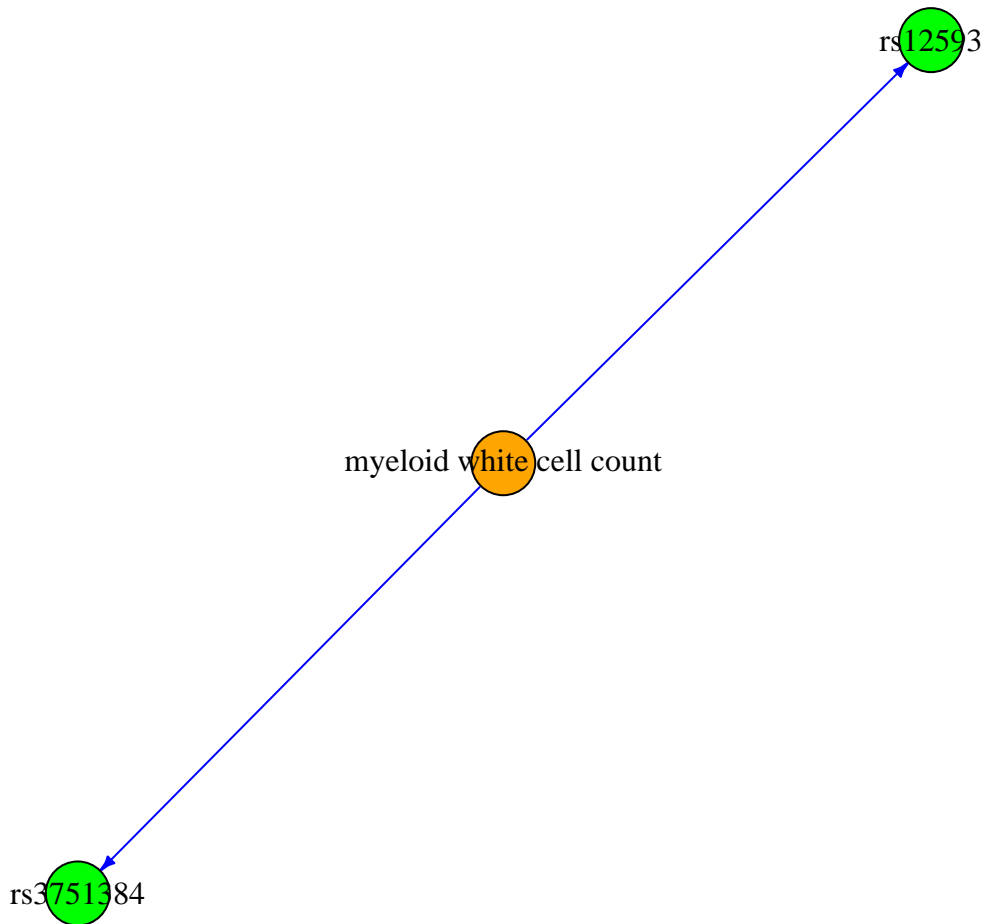

## Variant–Disease Network (neutrophil count)

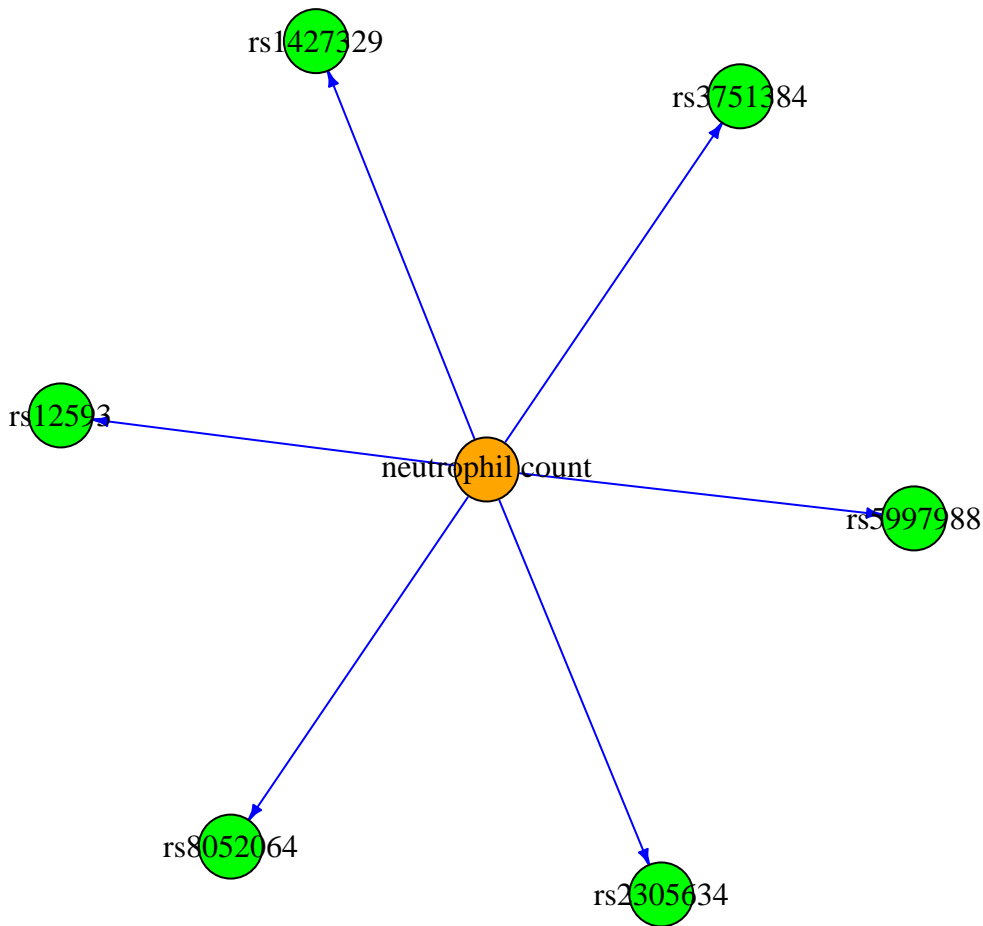

# Variant–Disease Network (forced expiratory volume)

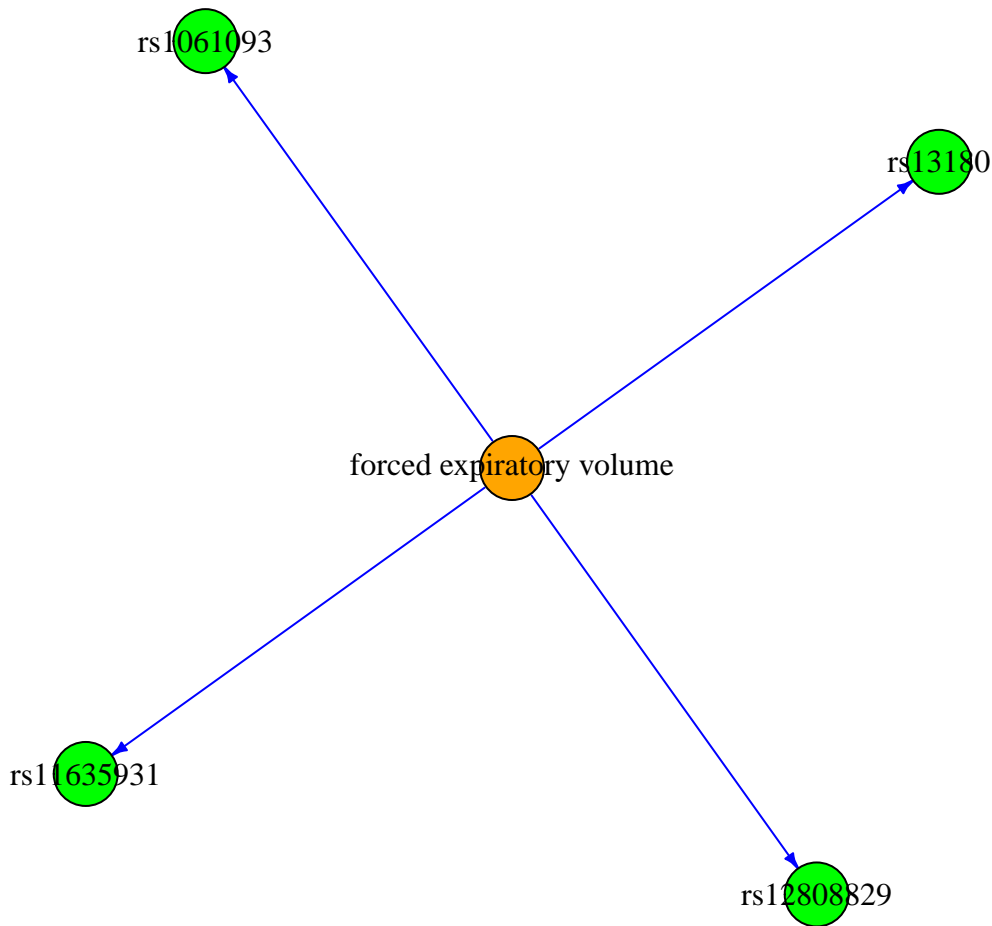

## Variant–Disease Network (lung adenocarcinoma)

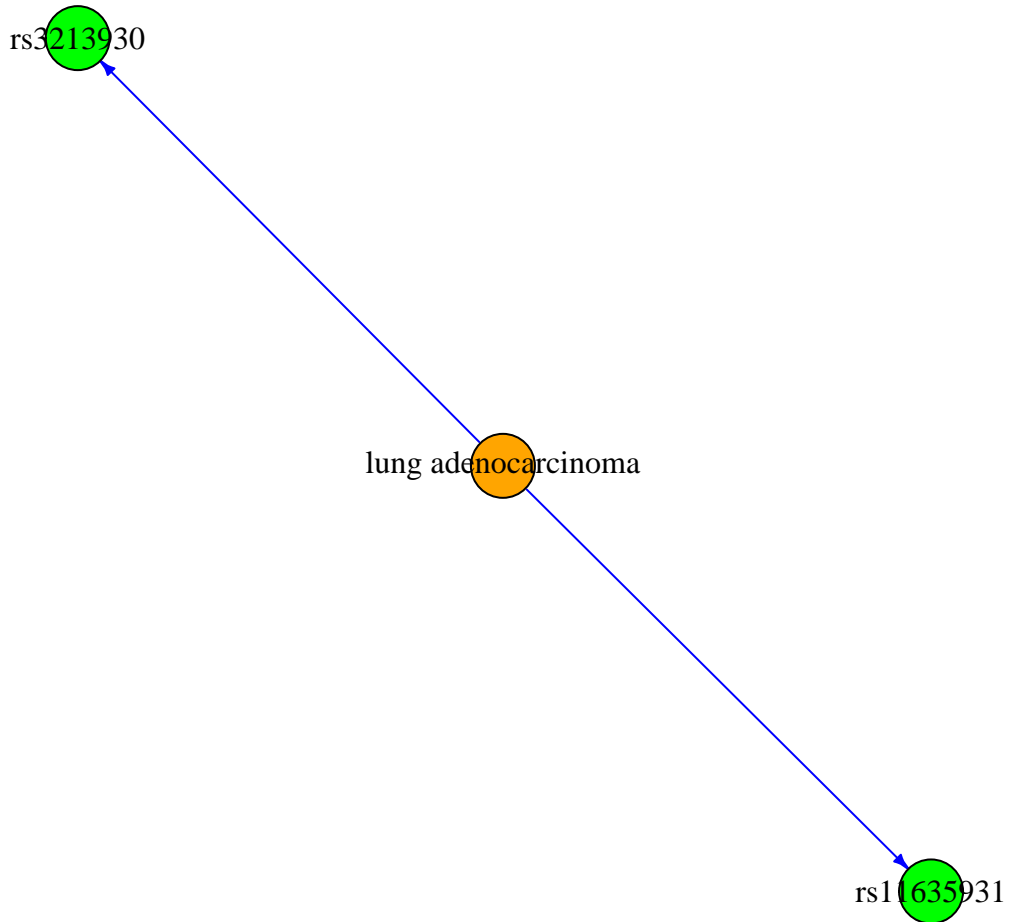

Variant–Disease Network (neutrophil percentage of white cells)

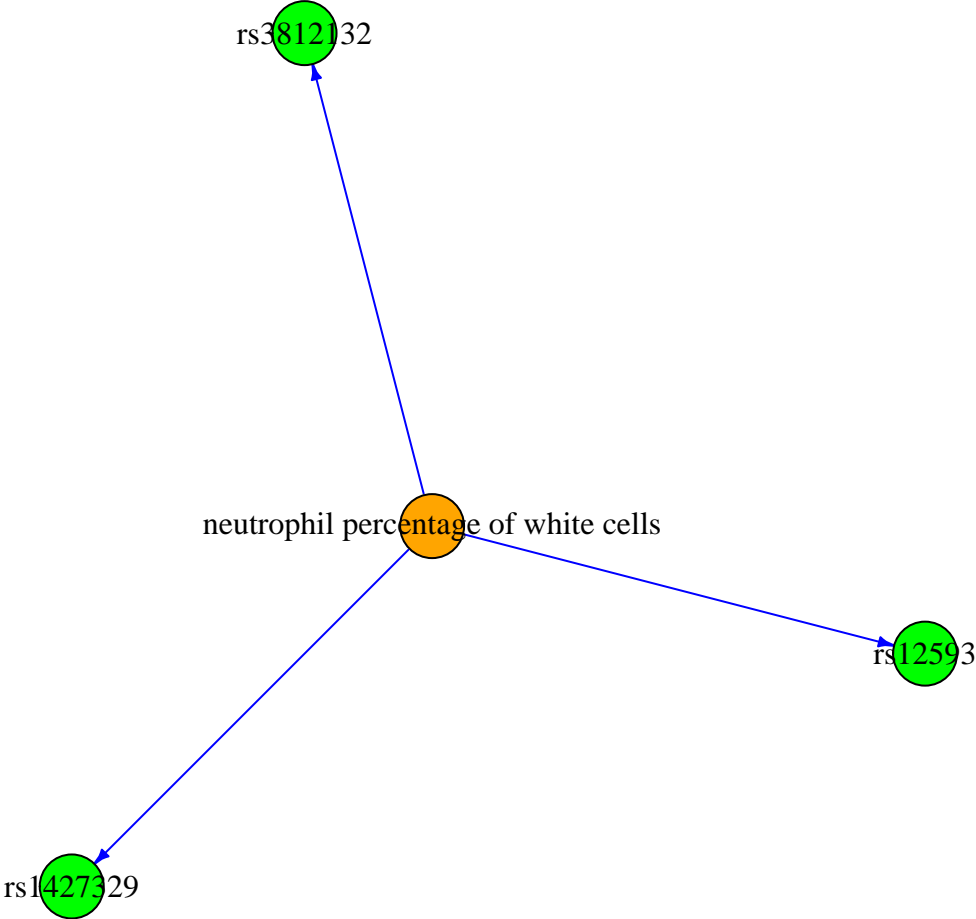

## Variant-Disease Network (suntan)

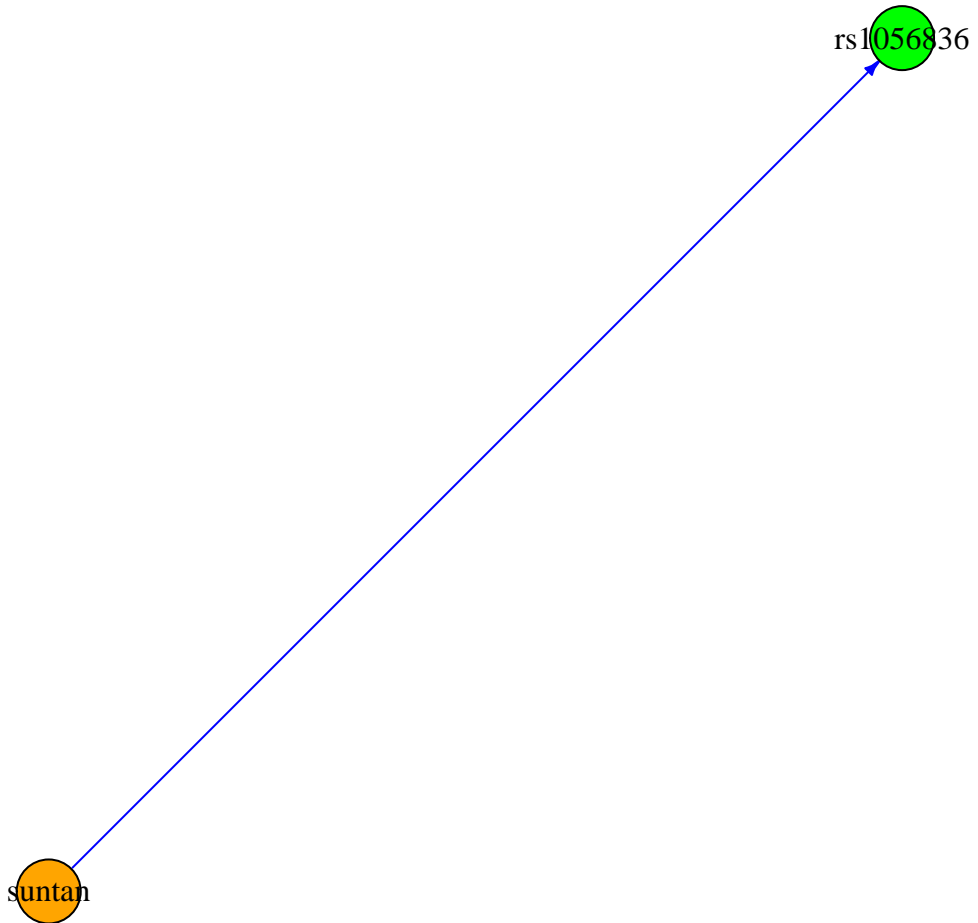



## Variant–Disease Network (suicide behaviour)

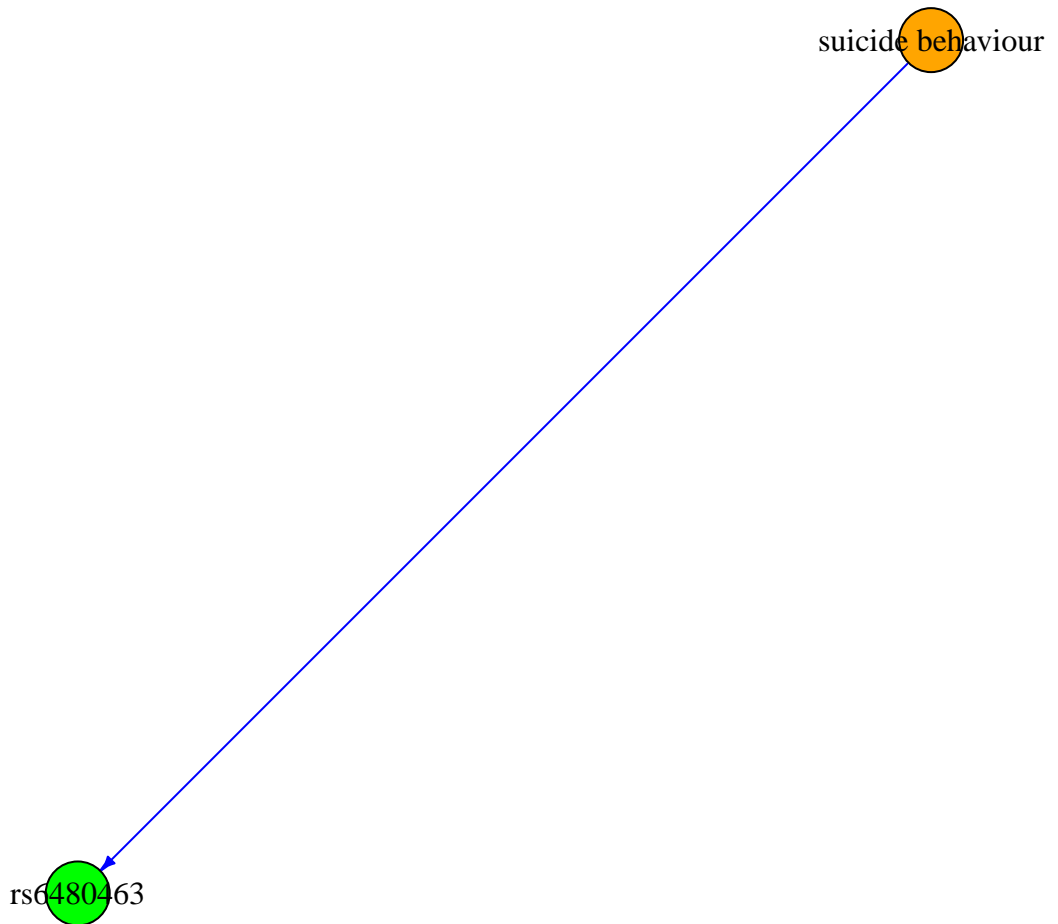

Variant–Disease Network (progressive supranuclear palsy)

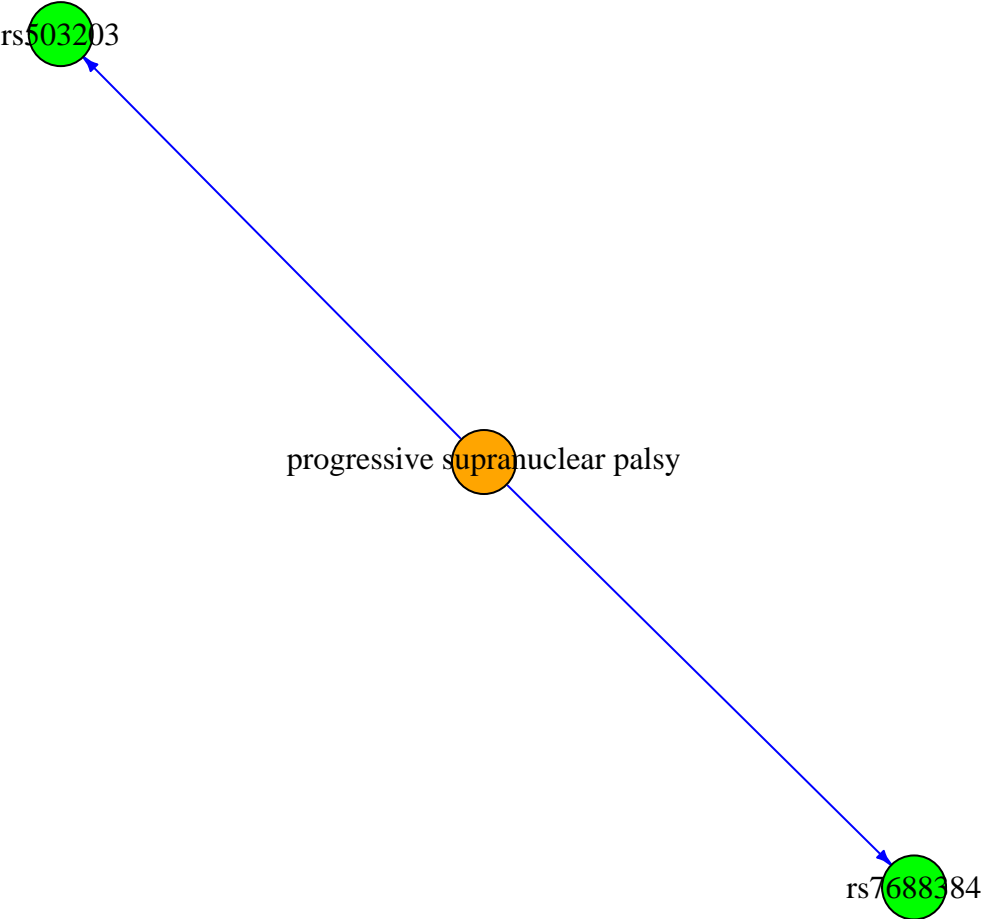

## Variant–Disease Network (psoriasis vulgaris)

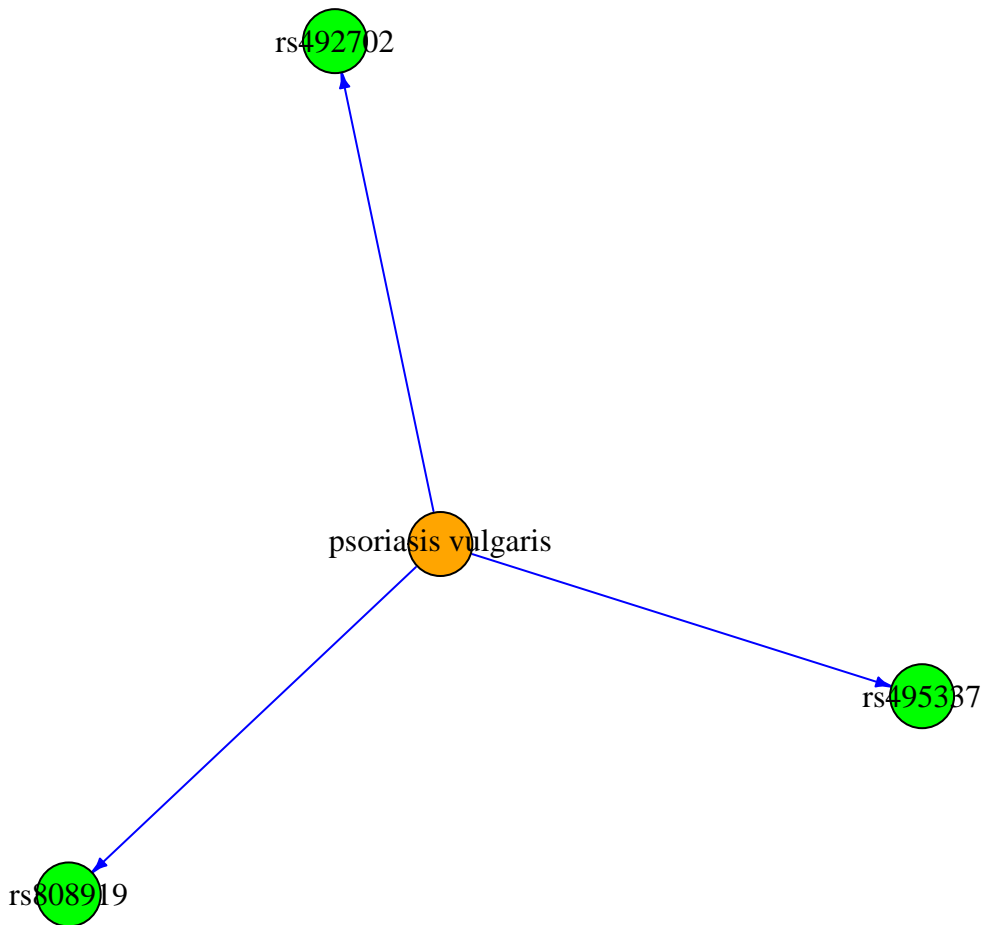

## Variant–Disease Network (psoriatic arthritis)

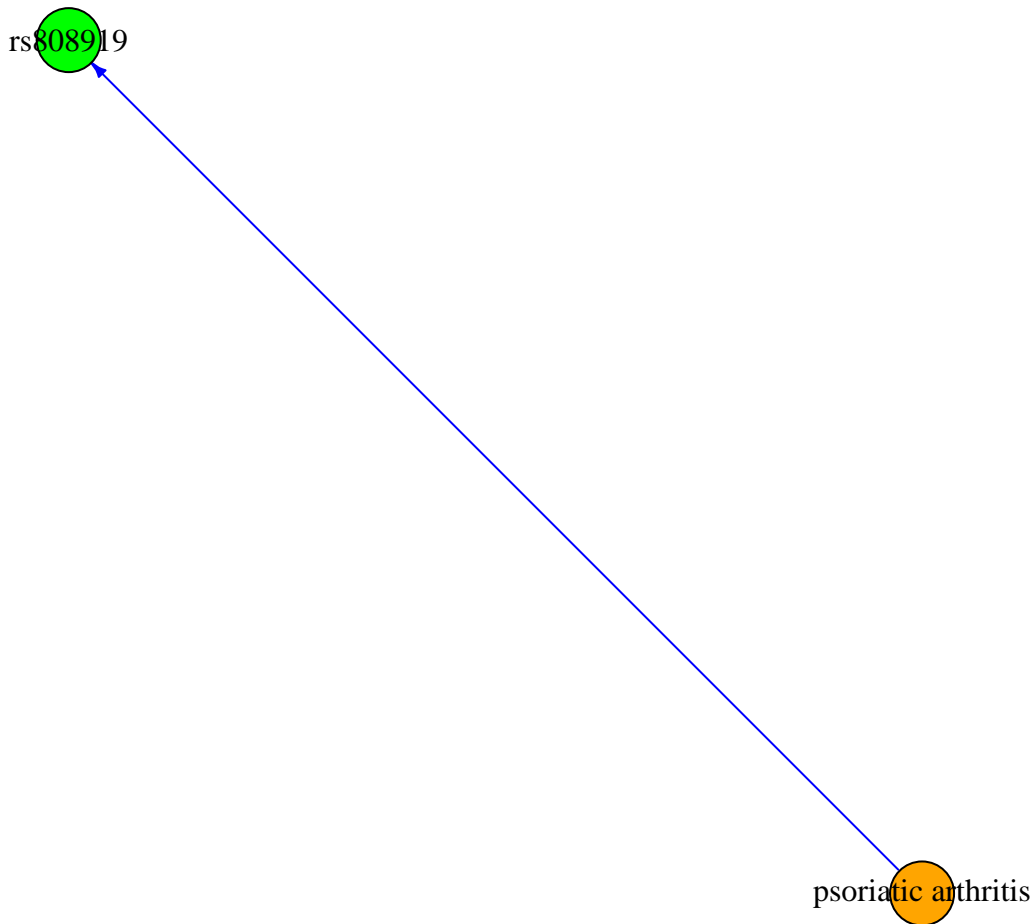

## Variant–Disease Network (lupus nephritis)

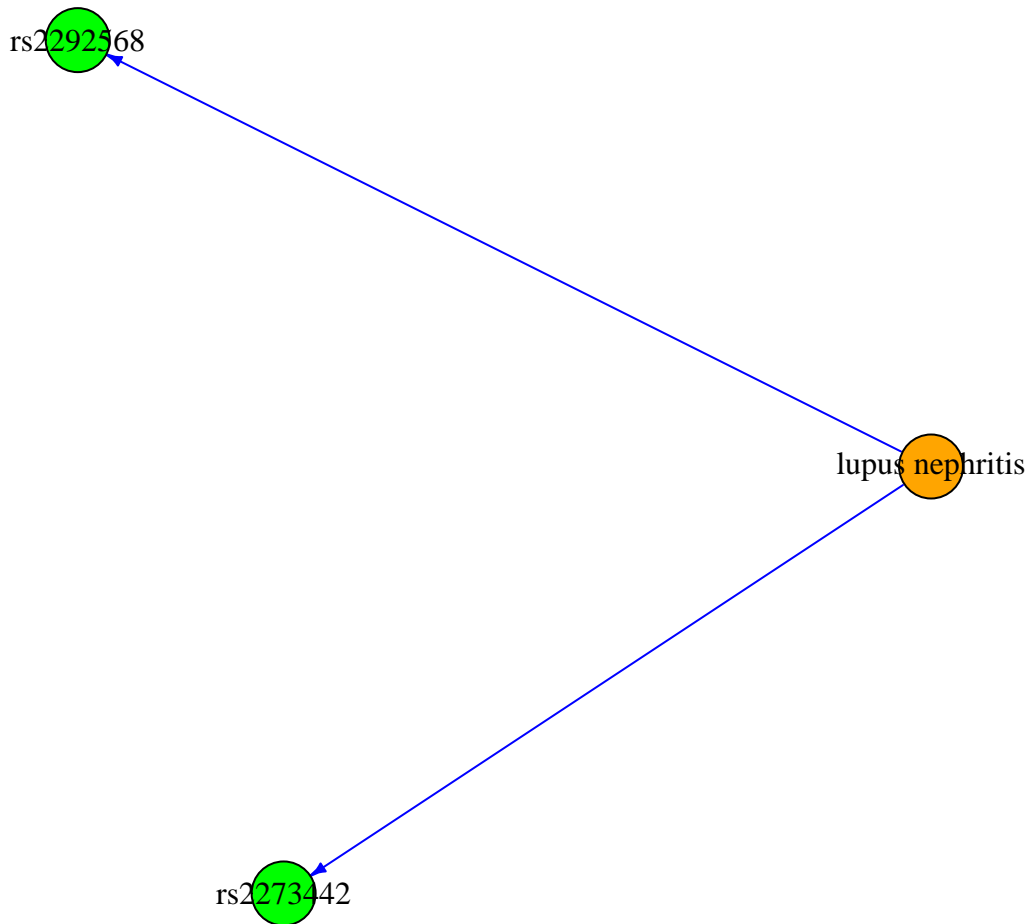

## Variant–Disease Network (IgF–1 measurement)

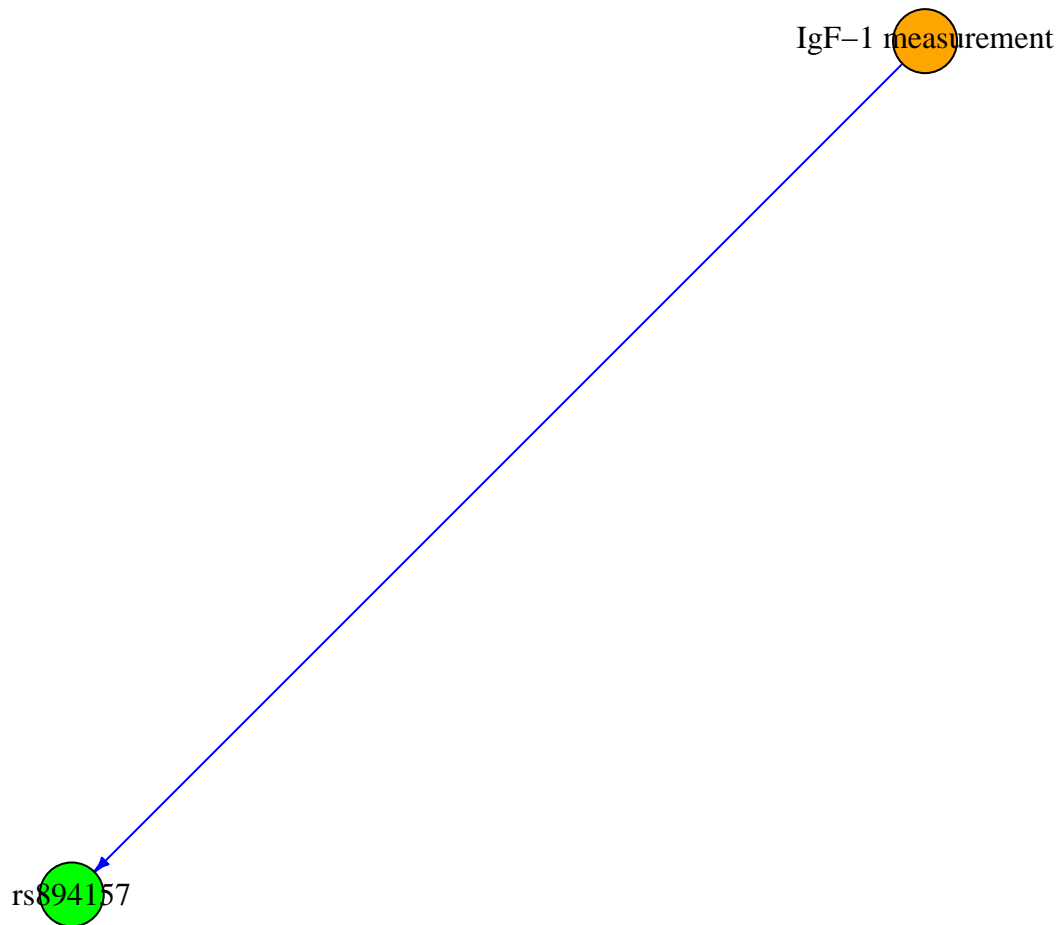

## Variant-Disease Network (esophageal carcinoma)

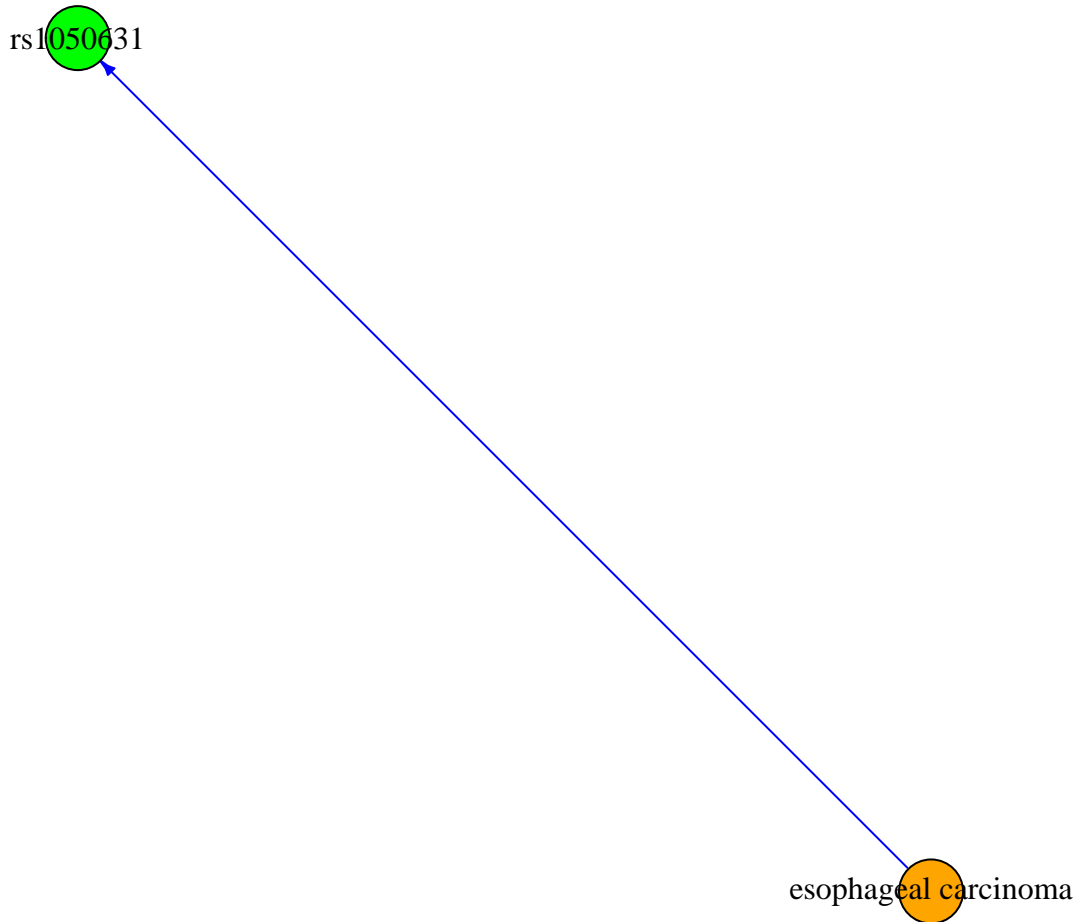

## Variant–Disease Network (squamous cell carcinoma)

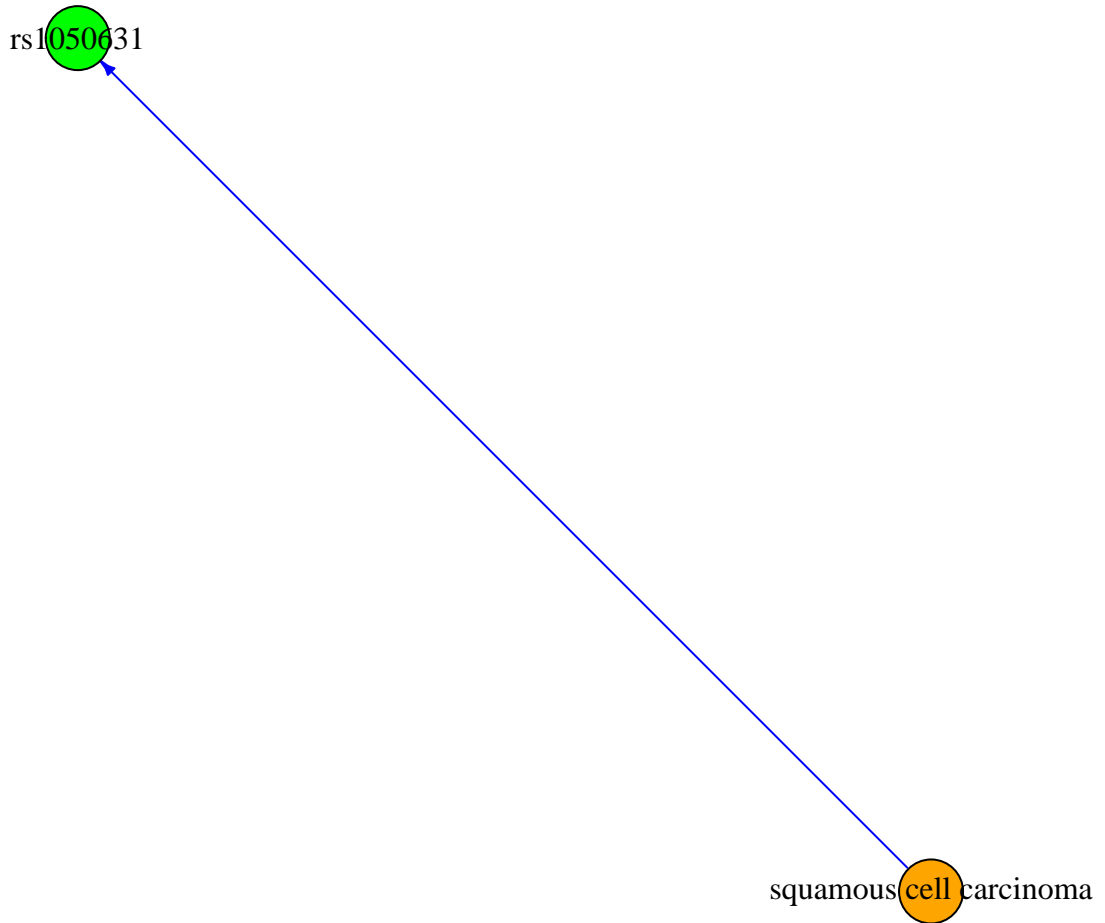



## Variant–Disease Network (fructosamine measurement)

fructosamine measurement

rs1129459

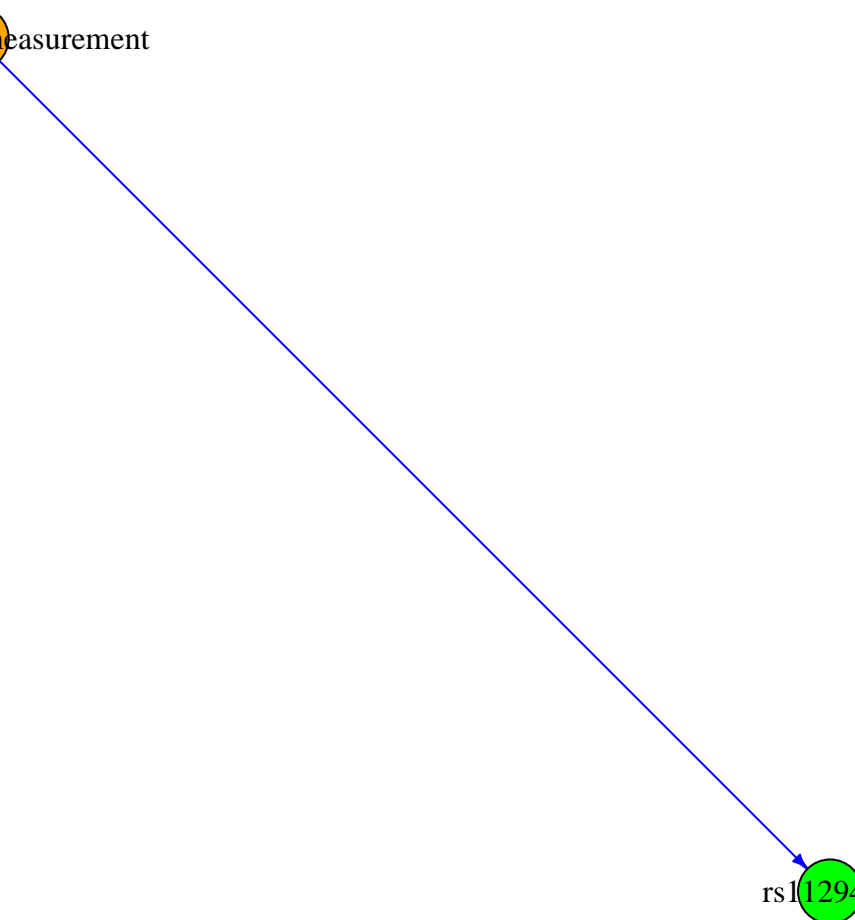

## Variant–Disease Network (total glycated albumin)

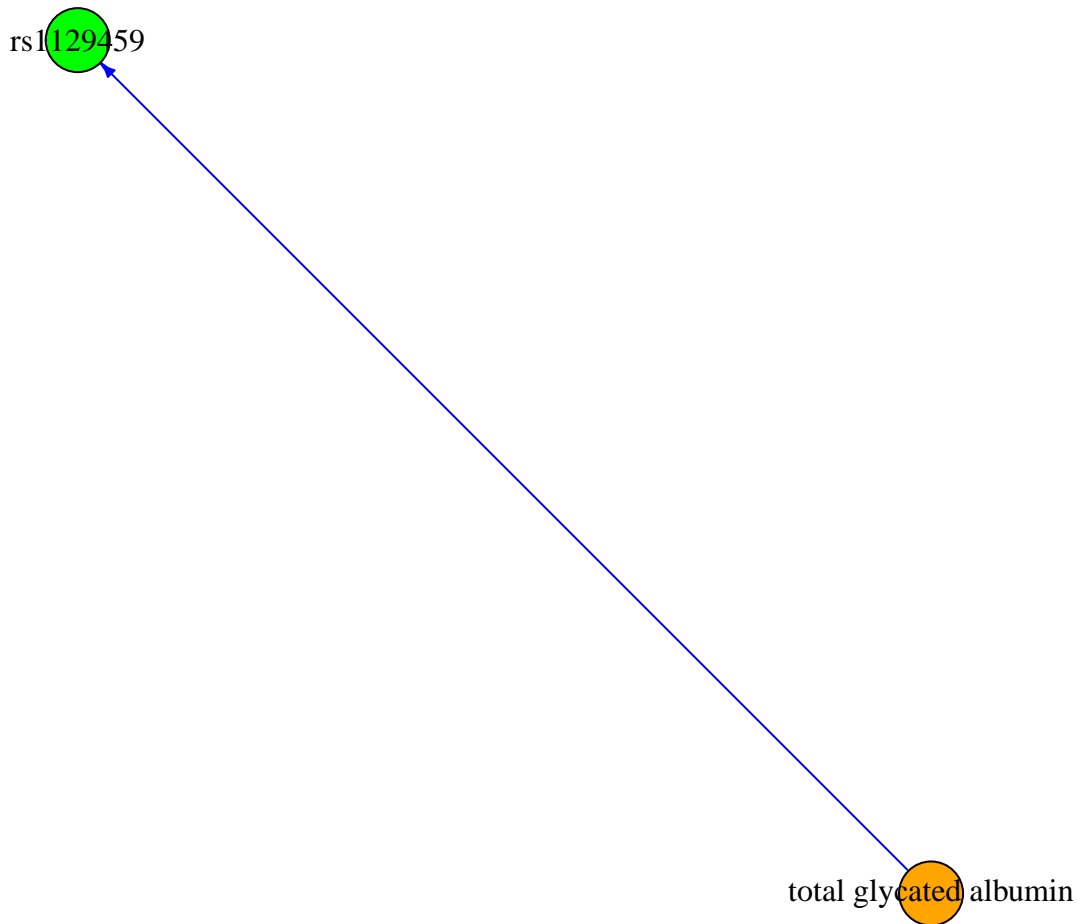

## Variant-Disease Network (breast size)

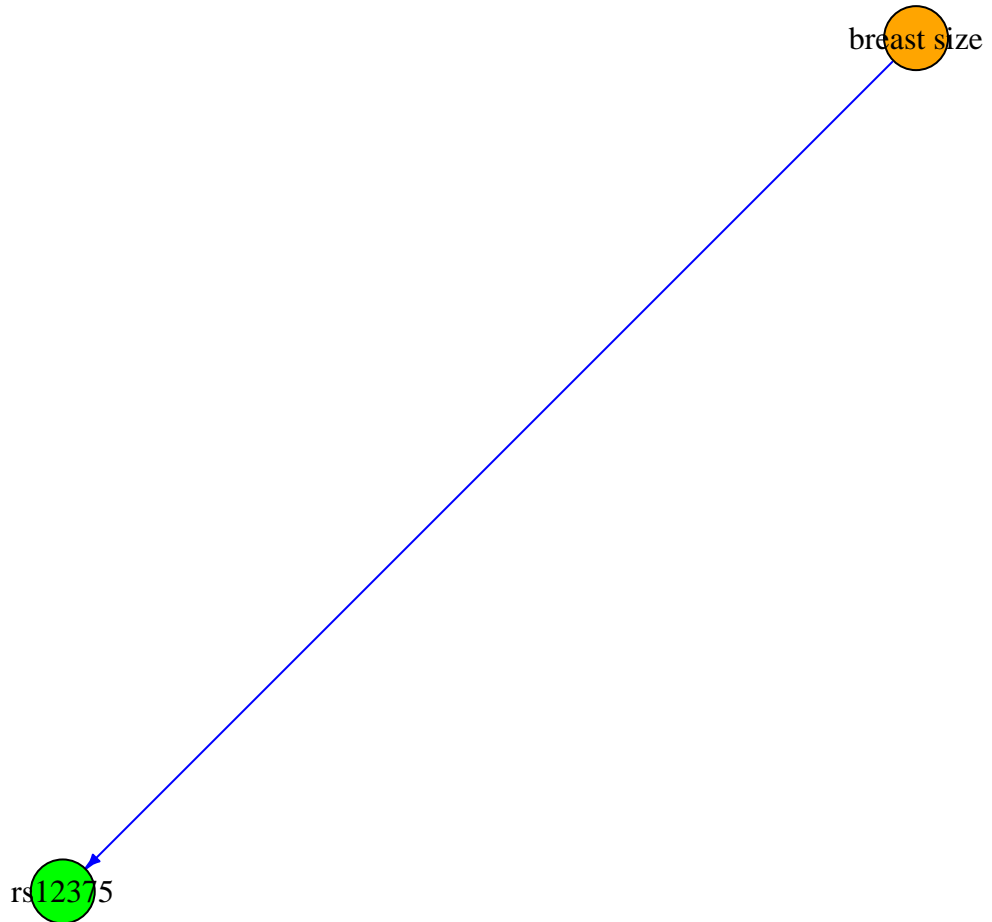

**Variant–Disease Network (estrogen receptor negative breast cancer)**

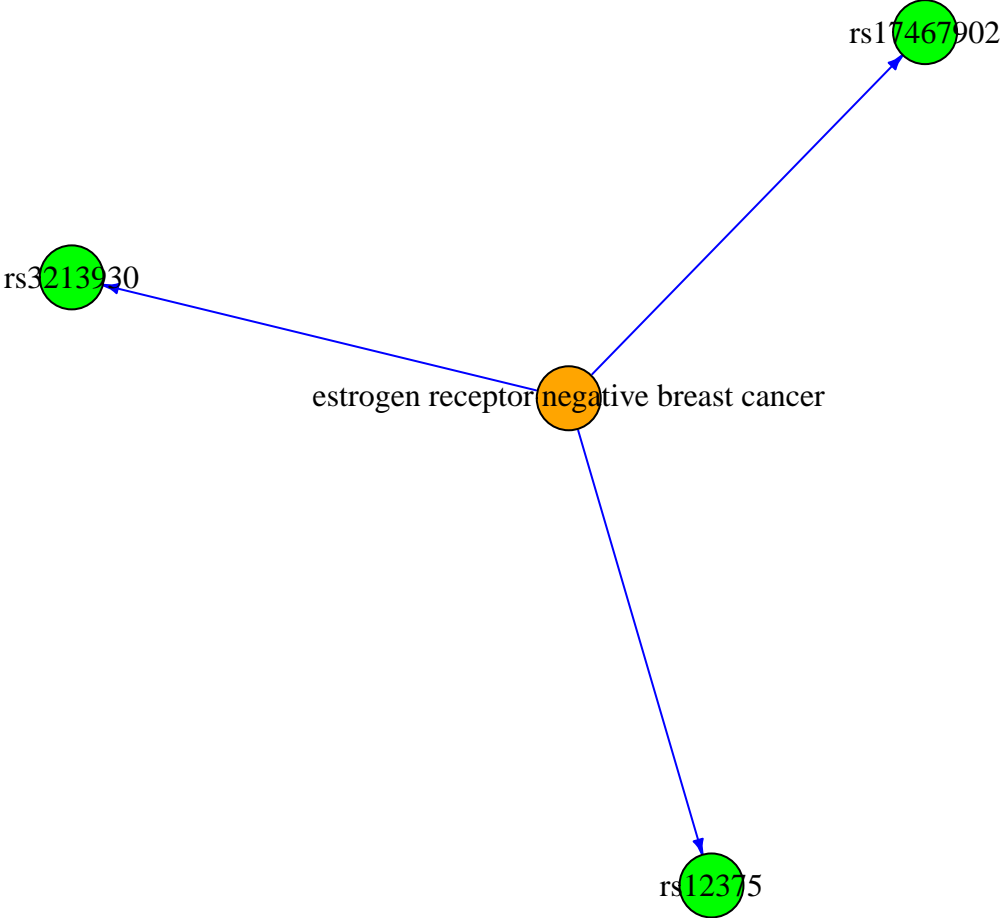

## Variant–Disease Network (Alopecia)

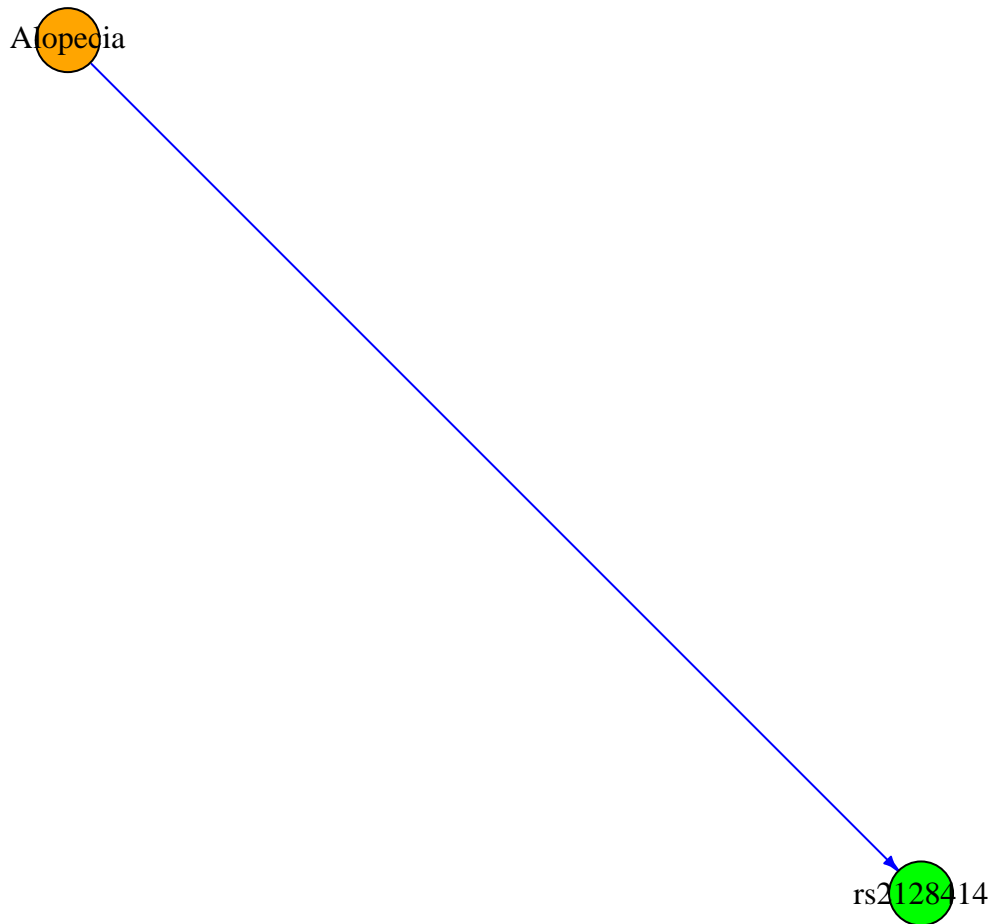

# Variant–Disease Network (response to cyclophosphamide)

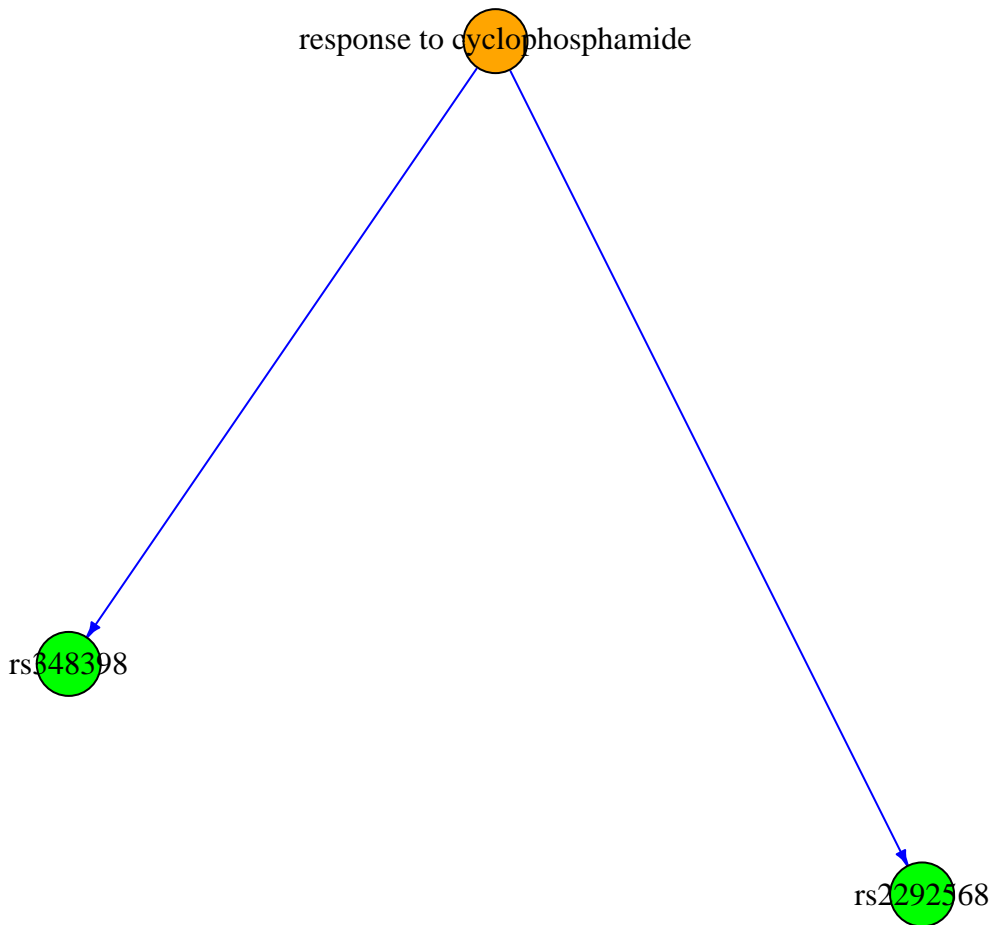

## Variant–Disease Network (pancreatic carcinoma)

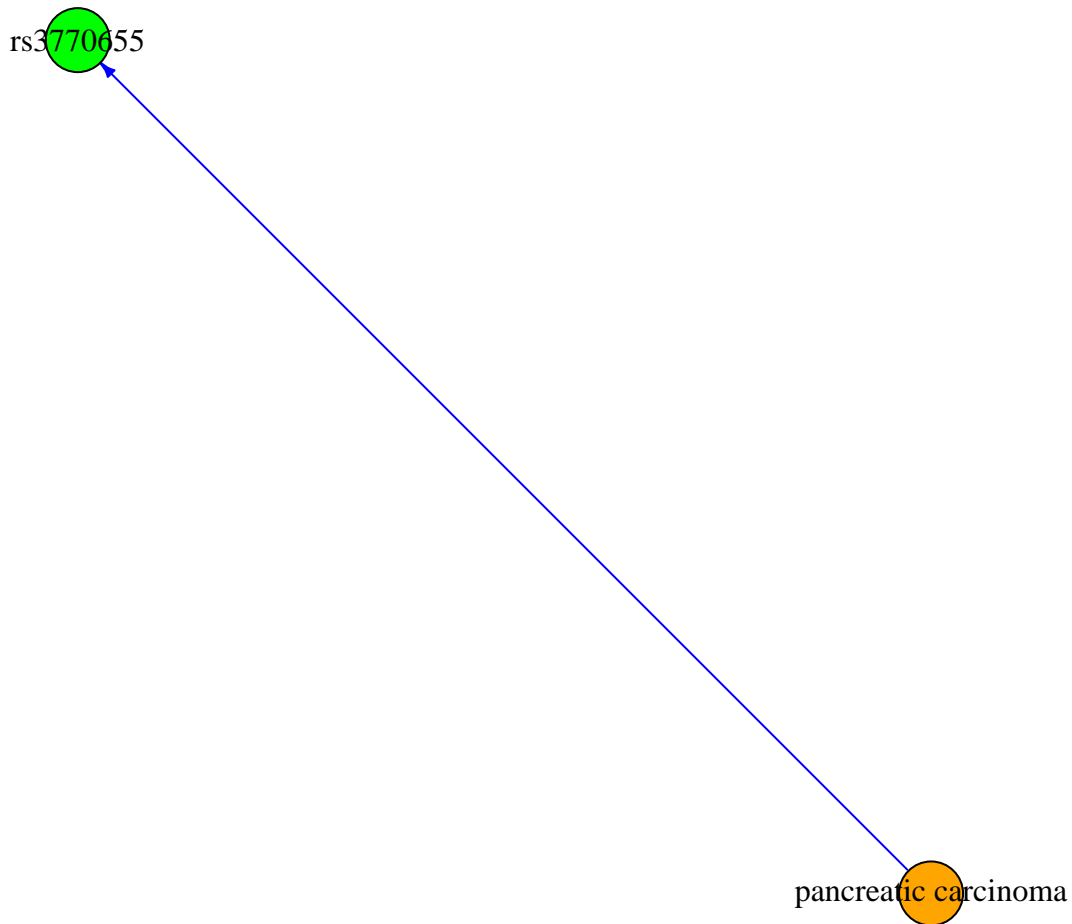

**Variant–Disease Network (amyloid plaque accumulation rate)**

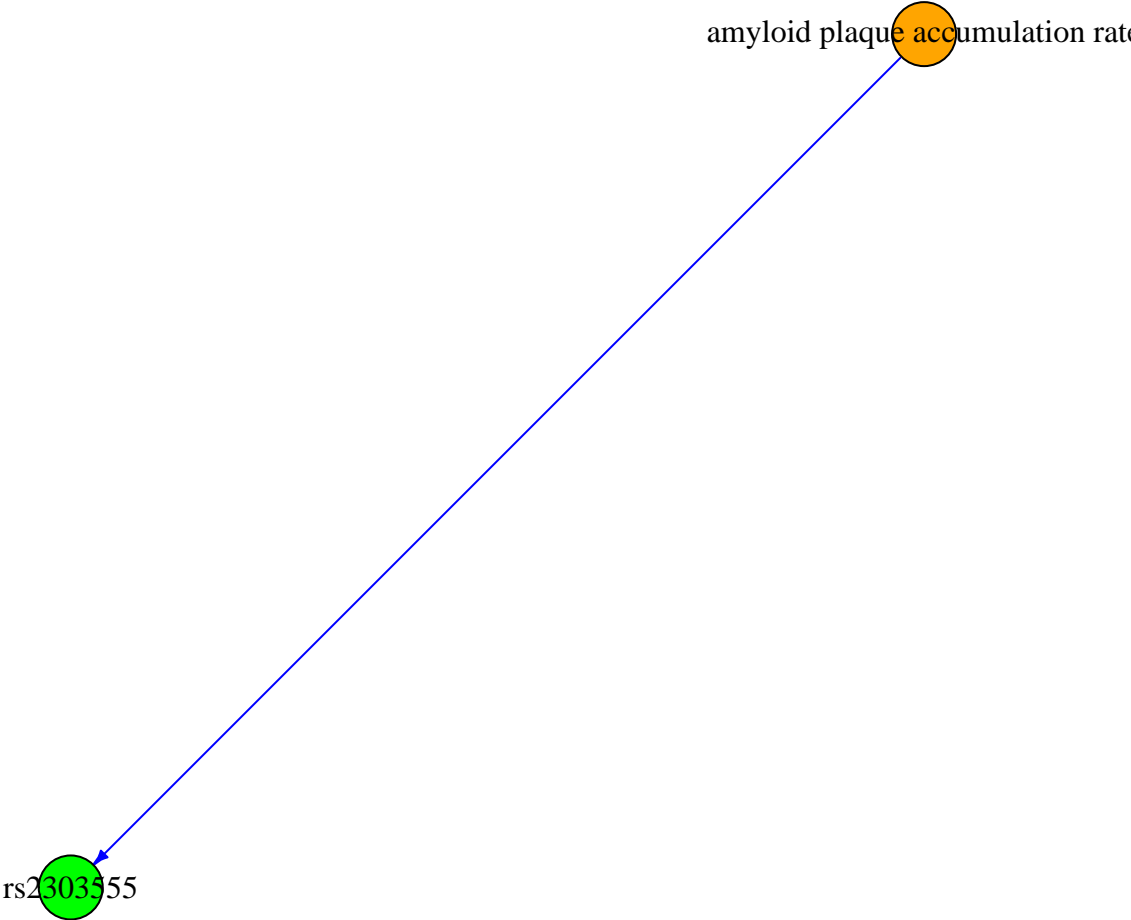



## Variant-Disease Network (microalbuminuria)

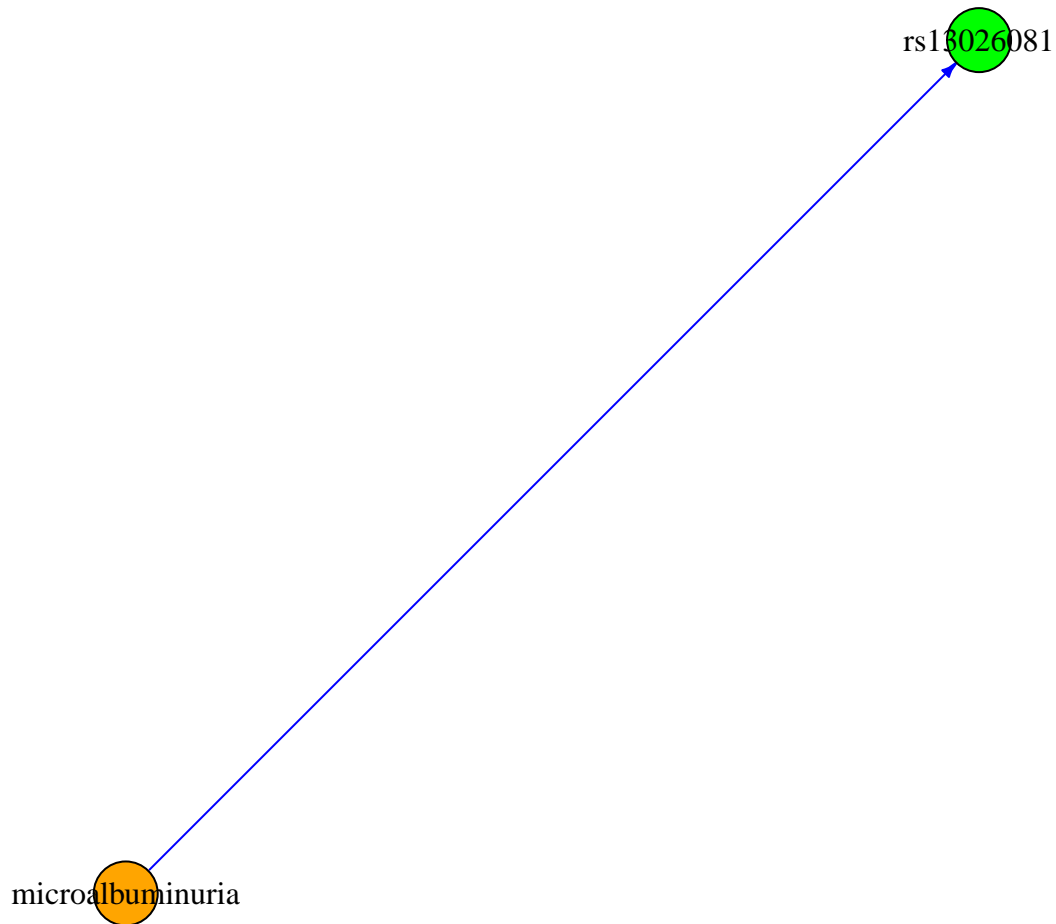

# Variant–Disease Network (urinary albumin to creatinine ratio)

urinary albumin to creatinine ratio

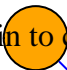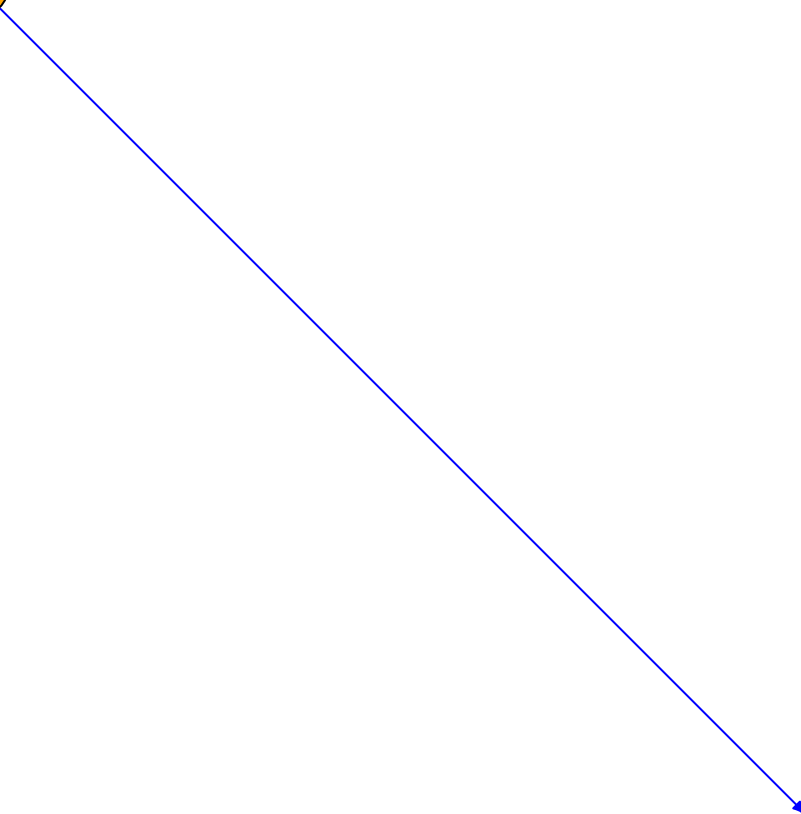

rs13026081

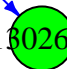

# Variant–Disease Network (maximal midexpiratory flow rate)

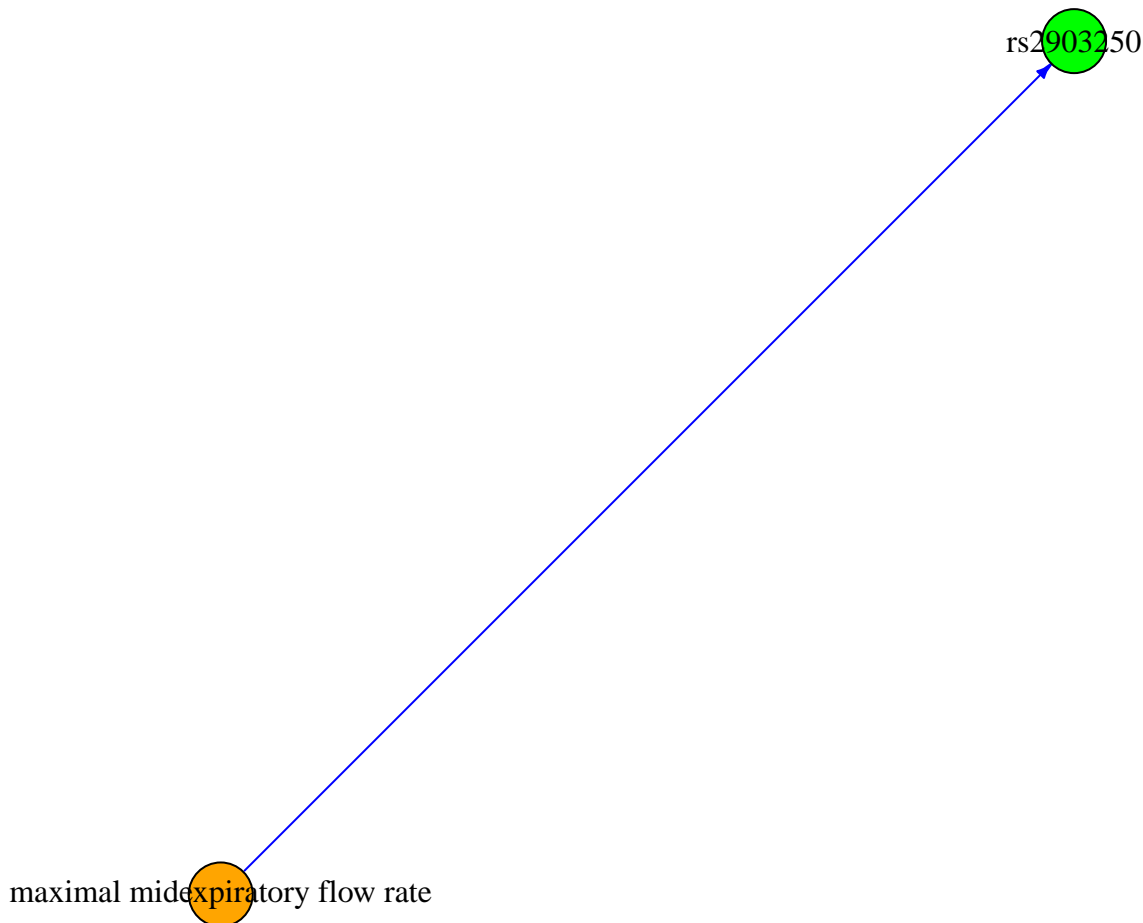

Variant–Disease Network (congenital left–sided heart lesions)

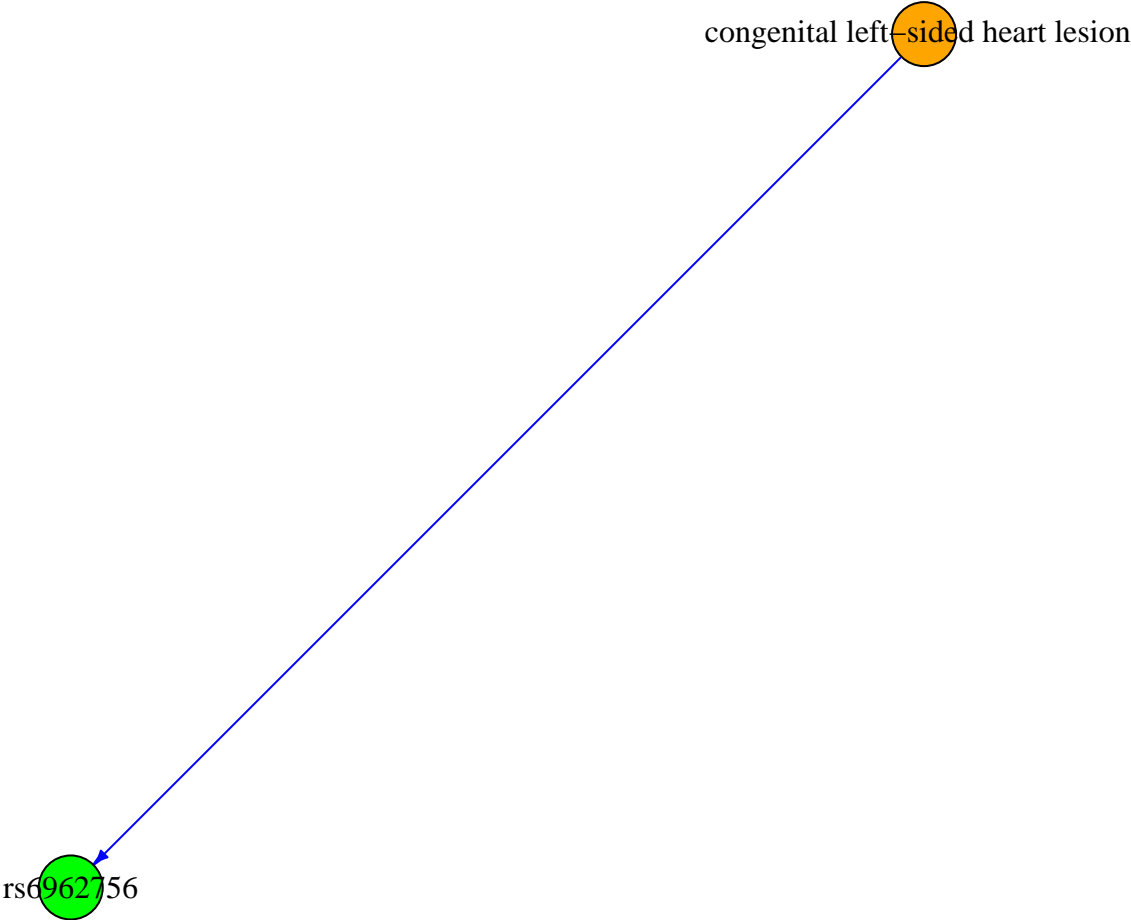

Variant–Disease Network (menstrual cycle measurement)

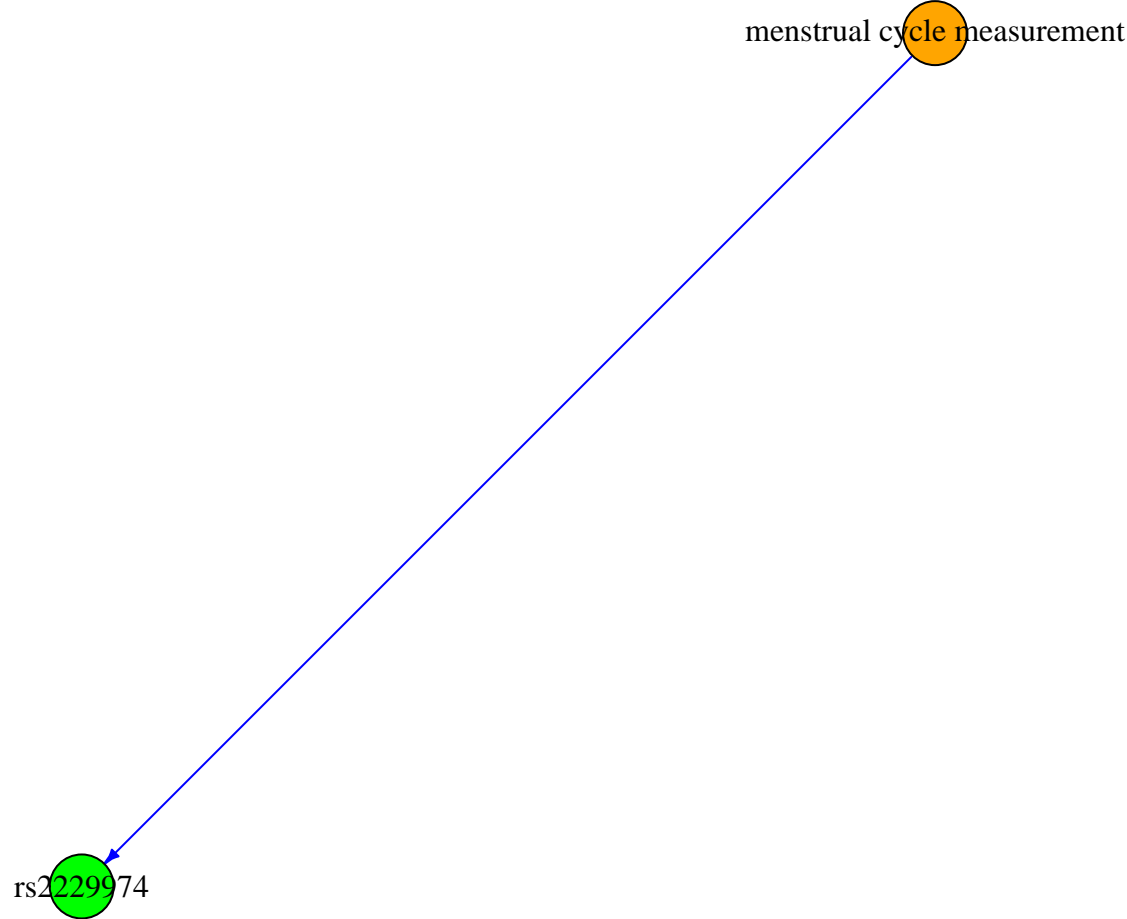

Variant–Disease Network (information processing speed)

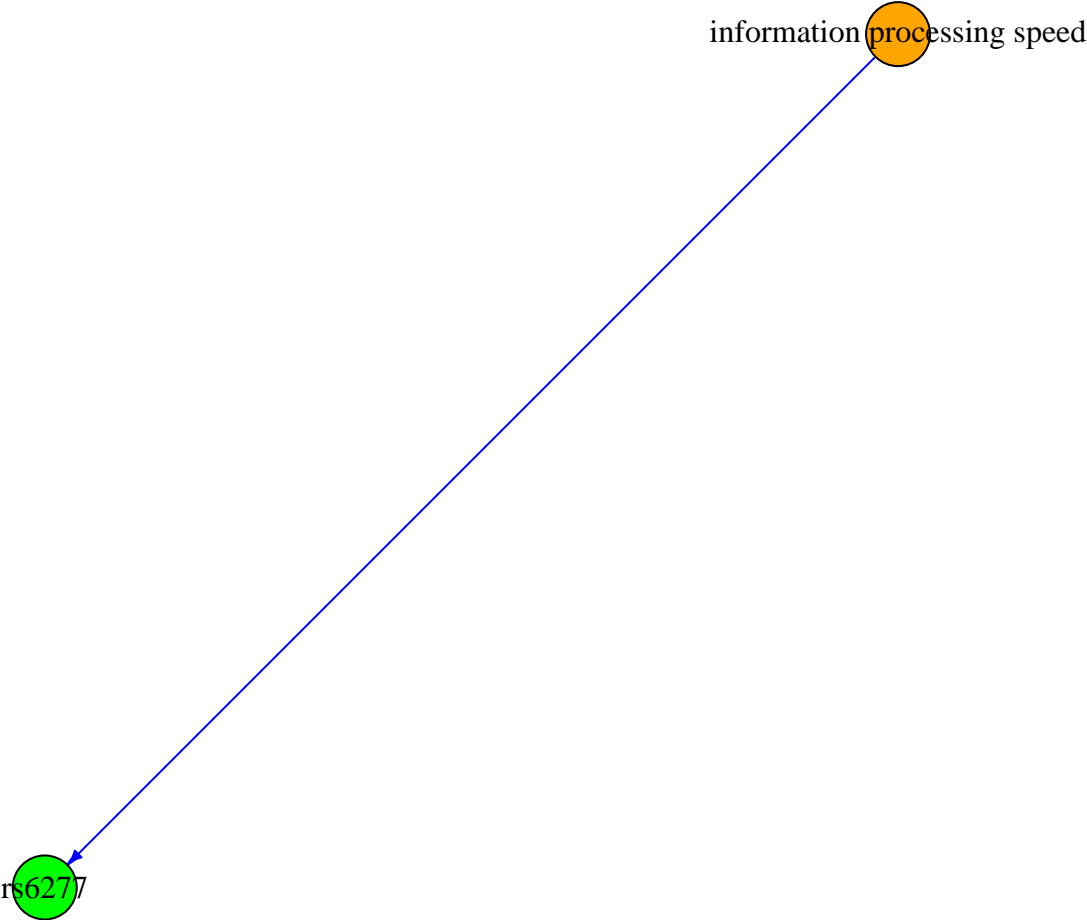

## Variant-Disease Network (birth measurement)

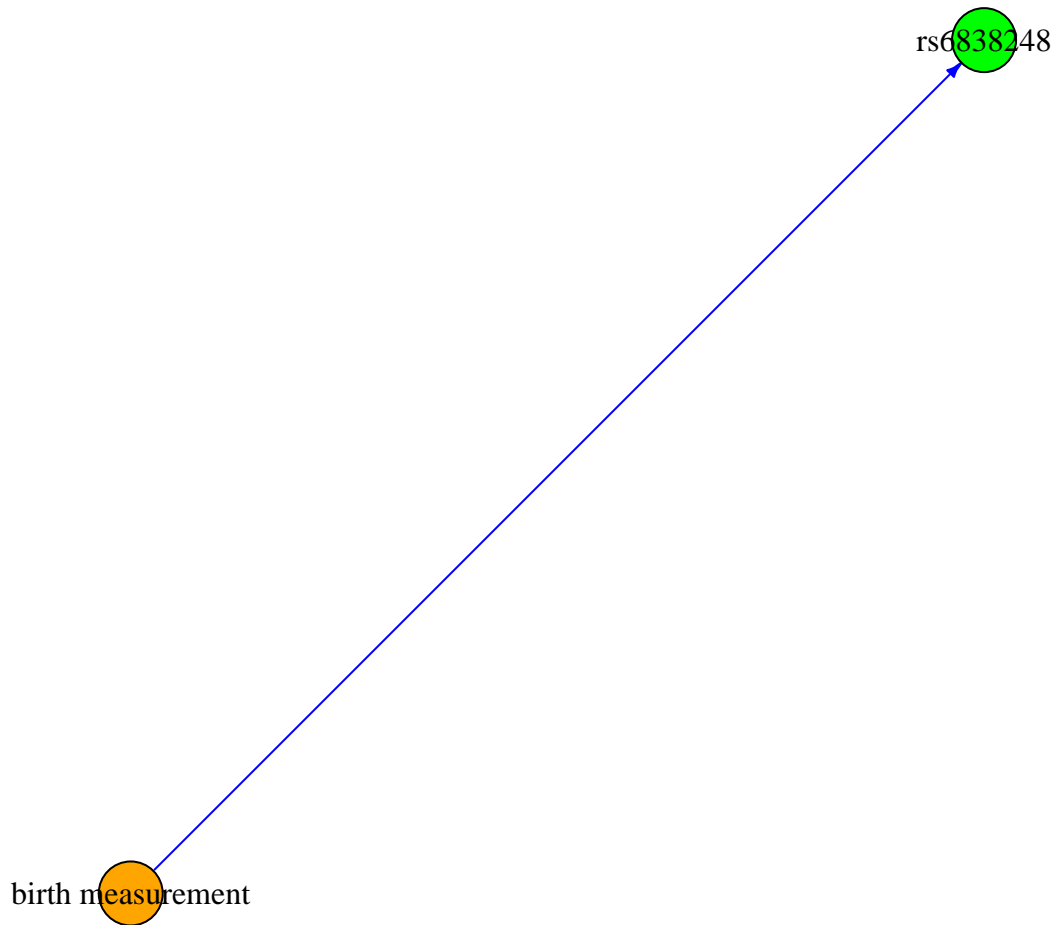

## Variant-Disease Network (gestational age)

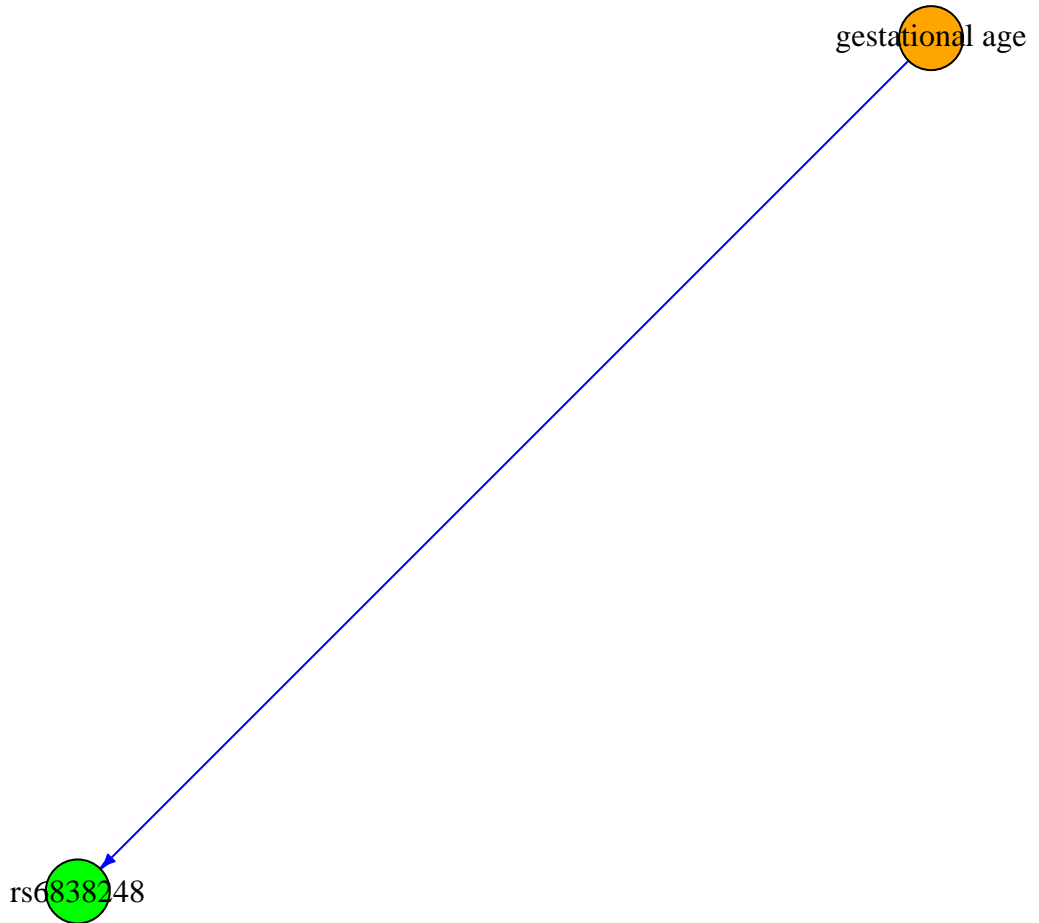



**Variant–Disease Network (acute lymphoblastic leukemia)**

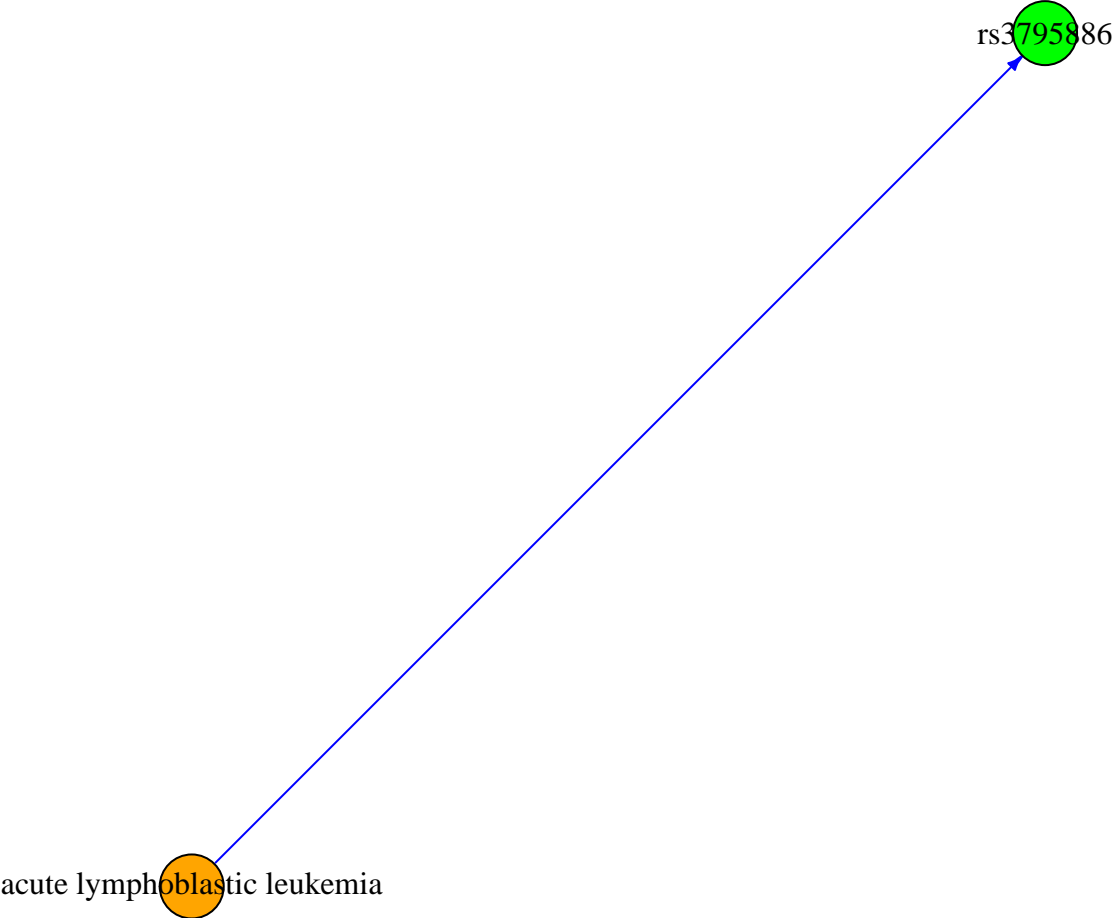

## Variant–Disease Network (calcium measurement)

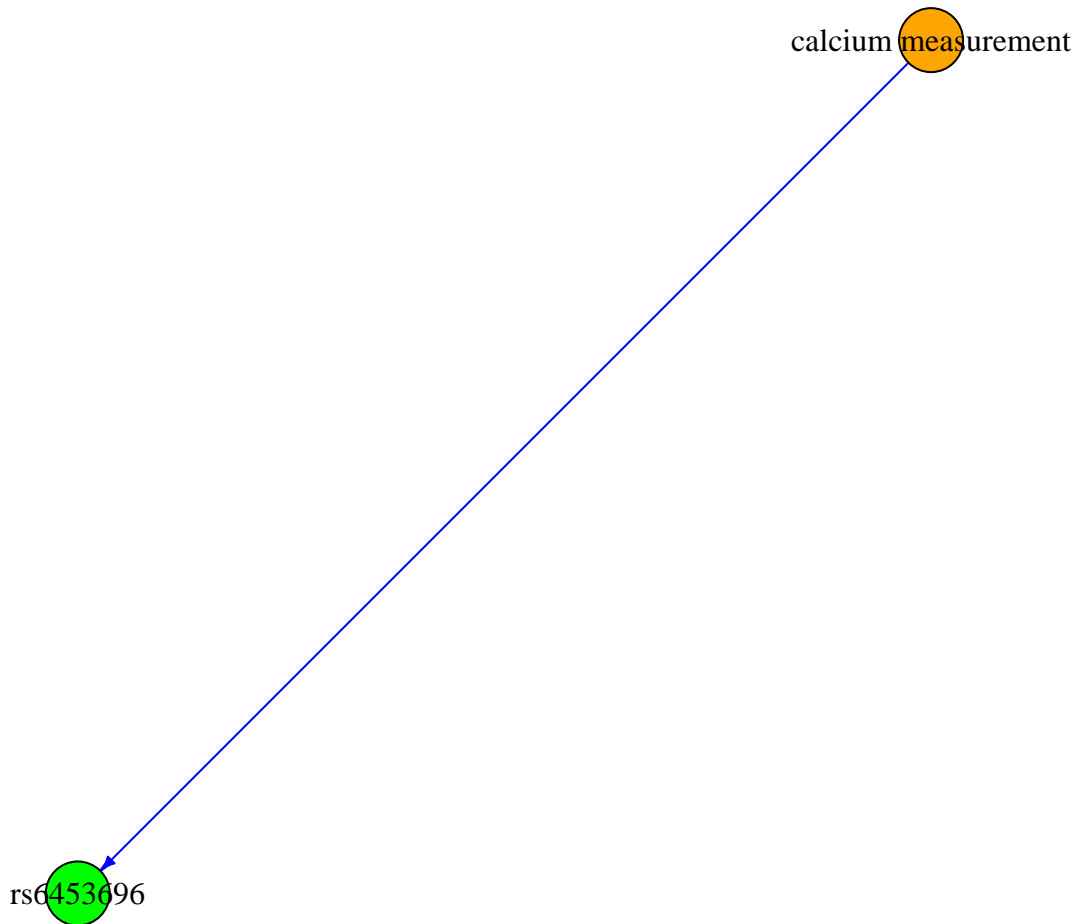

Variant–Disease Network (CD109 antigen measurement)

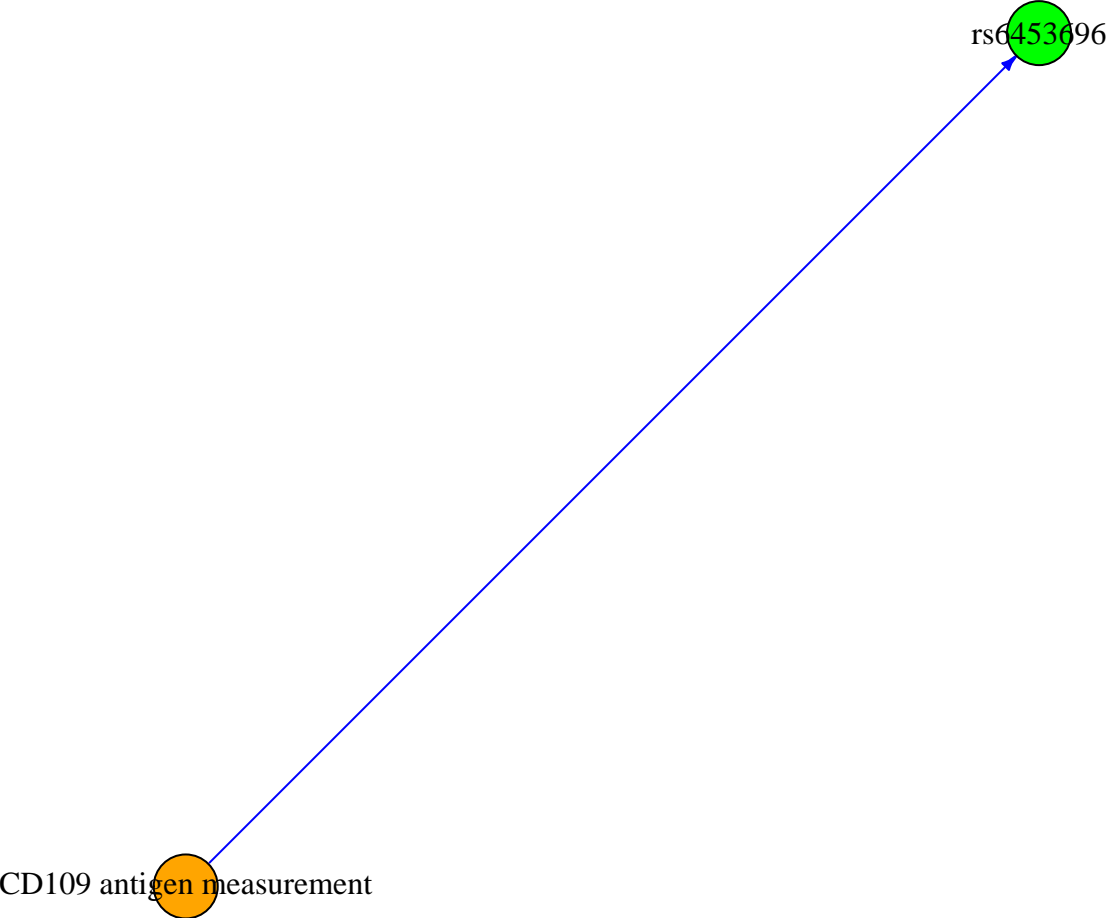

## Variant–Disease Network (glycerophospholipid measurement)

glycerophospholipid measurement

rs1136001

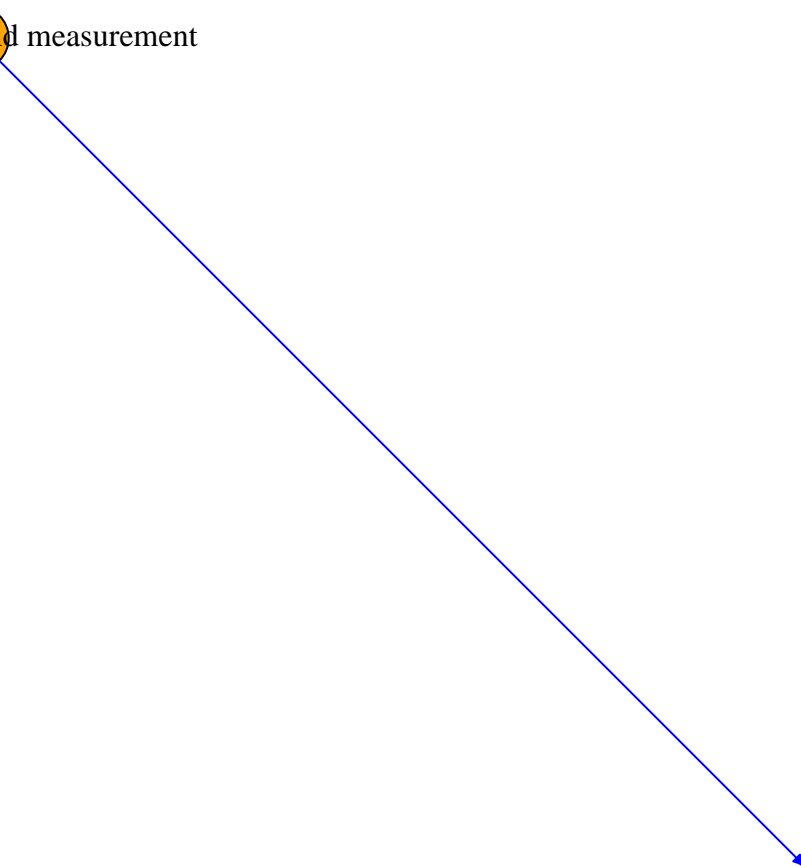

# Variant–Disease Network (metabolite measurement)

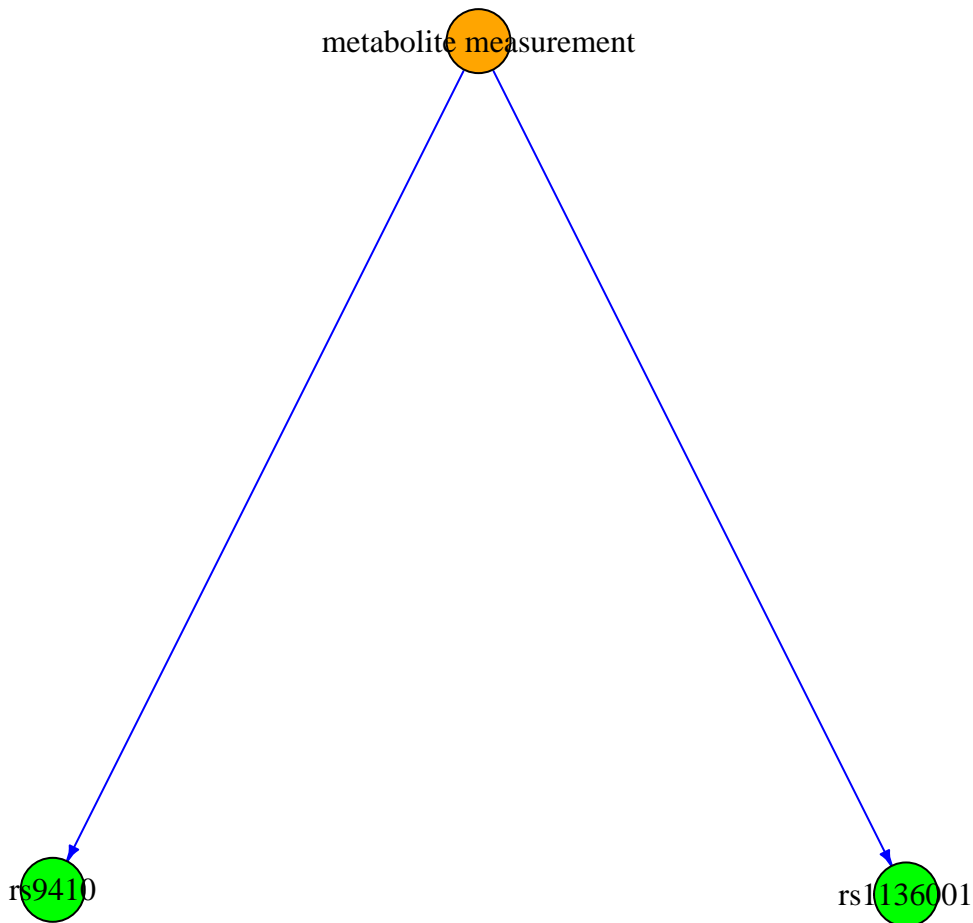

Variant–Disease Network (omega–6 polyunsaturated fatty acid measurement

omega–6 polyunsaturated fatty acid measurement

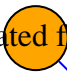

rs1136001



## Variant–Disease Network (phospholipid measurement)

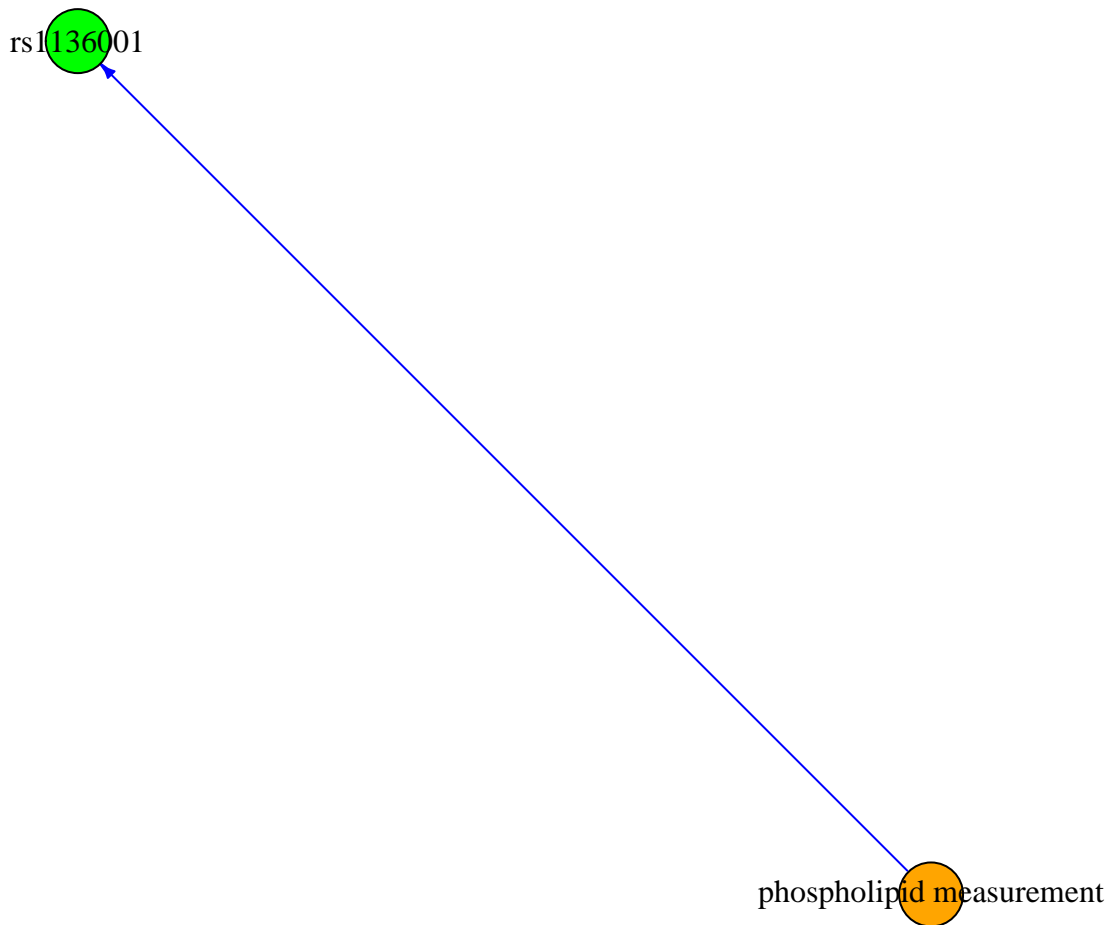

**Variant–Disease Network (coronary artery calcification)**

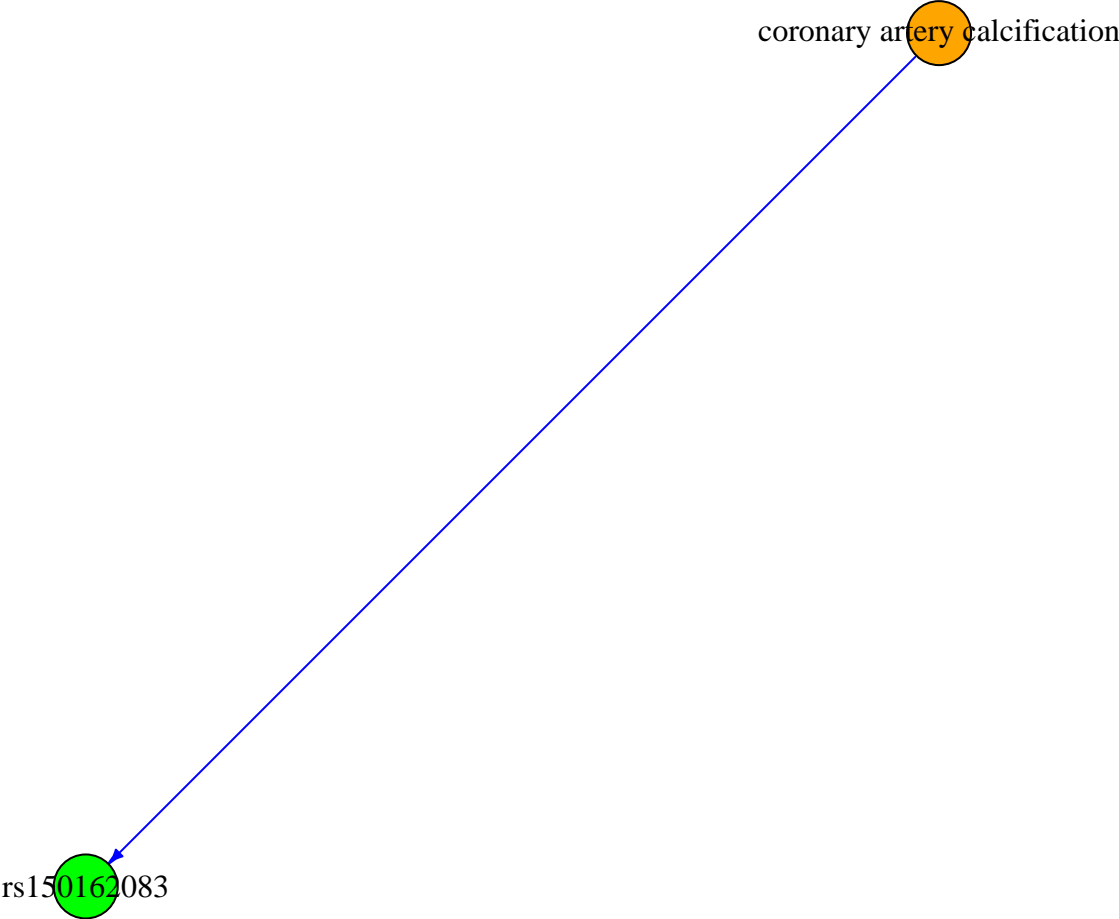



# Variant–Disease Network (urinary metabolite measurement)

urinary metabolite measurement

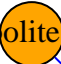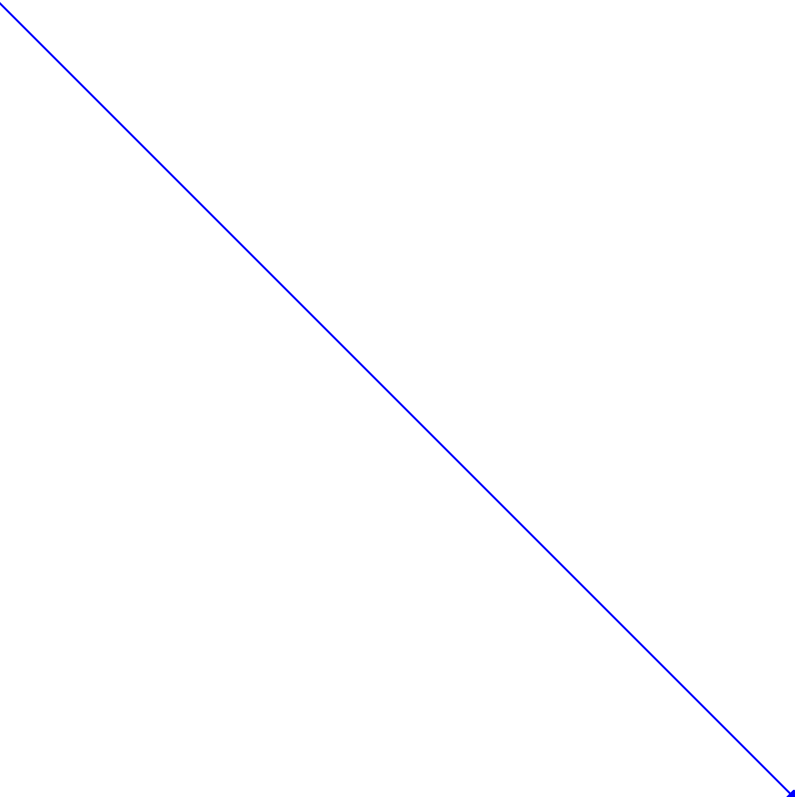

rs2295475

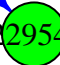

Variant–Disease Network (Agouti–related protein measurement)

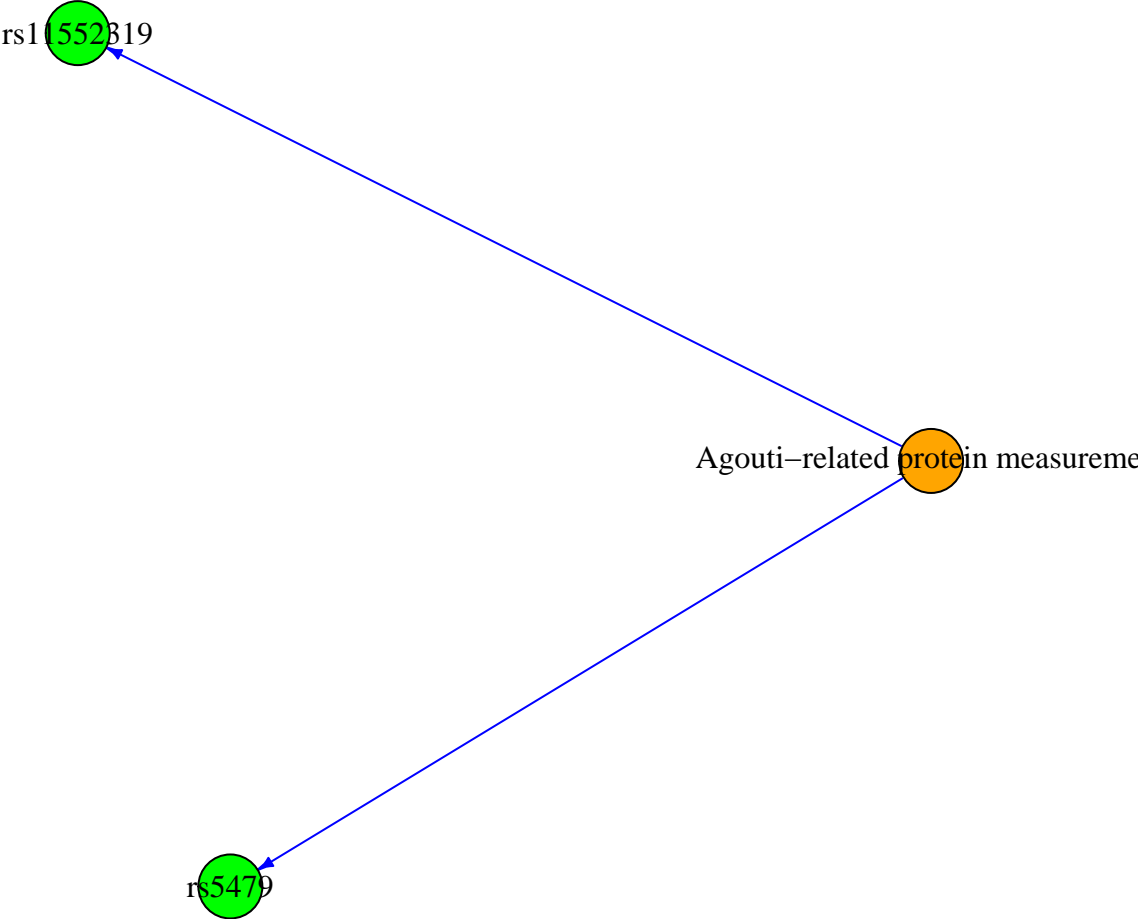

## Variant-Disease Network (resting heart rate)

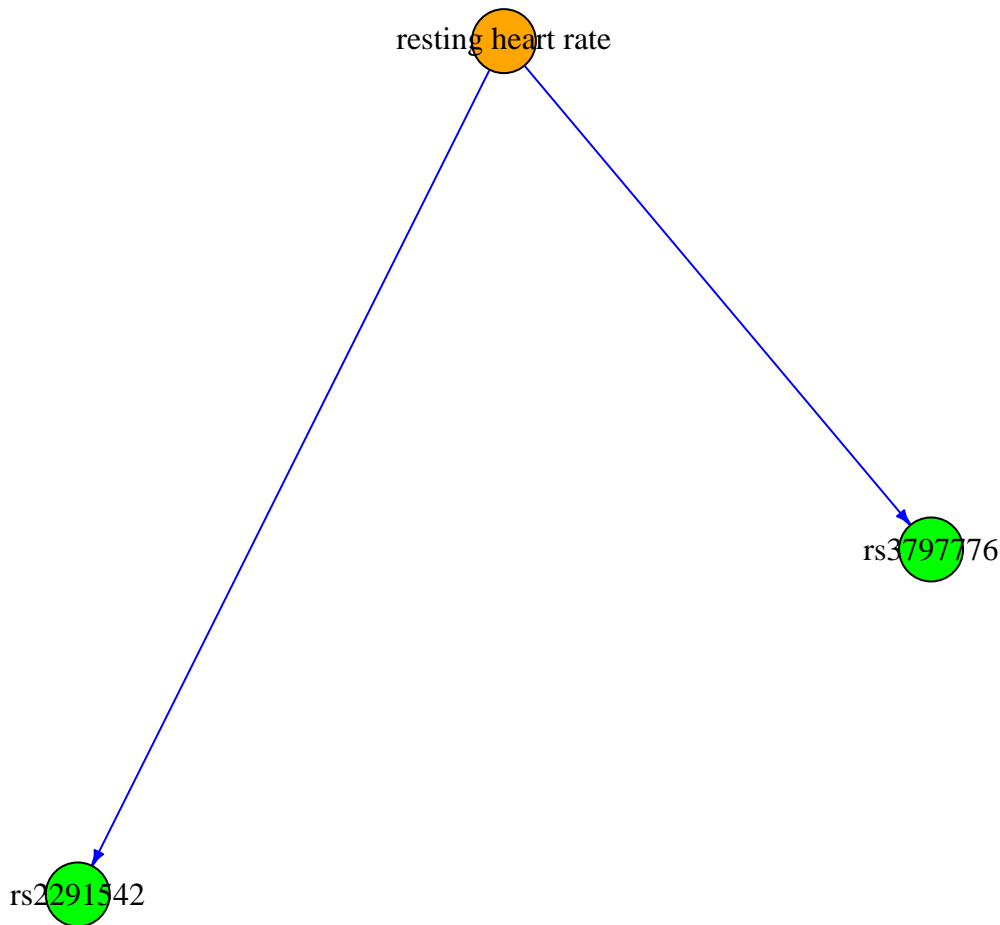

## Variant-Disease Network (serum IgM measurement)

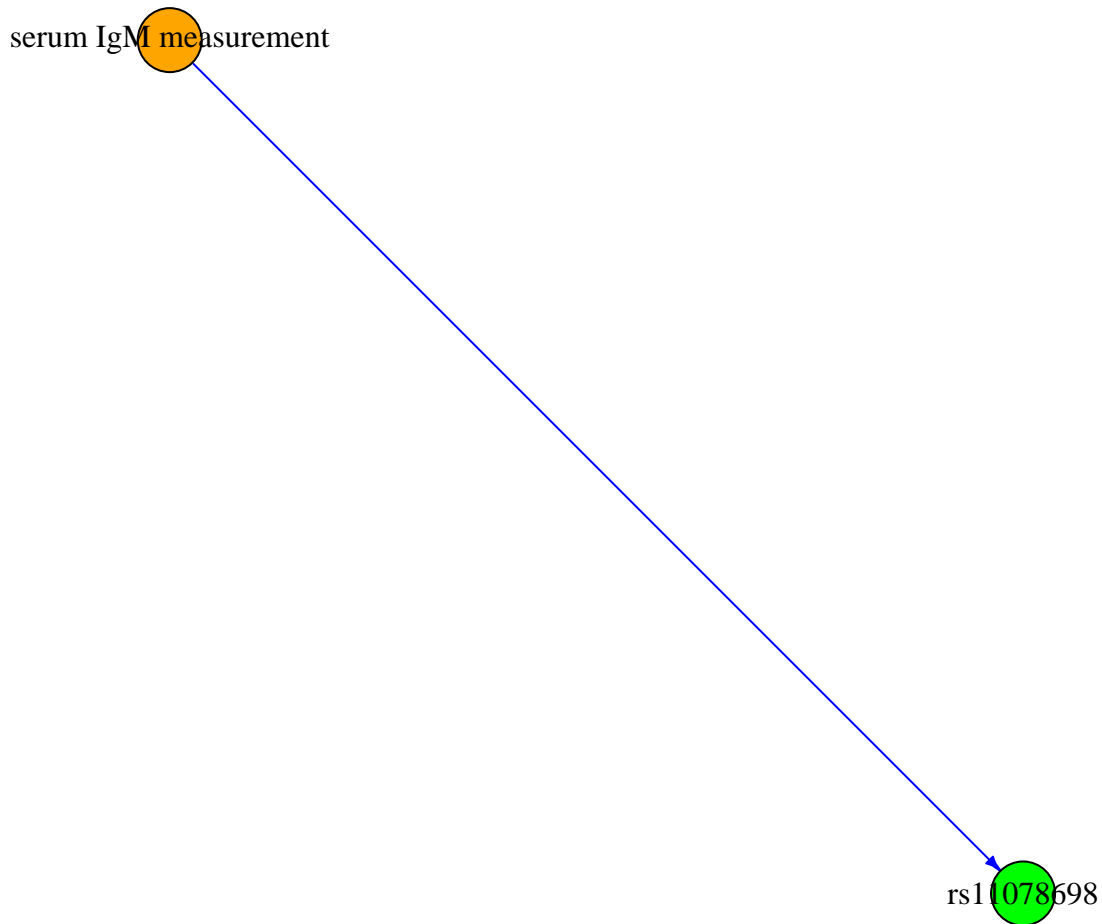

## Variant-Disease Network (cytokine measurement)

cytokine measurement

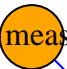

rs2240921

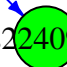

## Variant–Disease Network (response to vaccine)

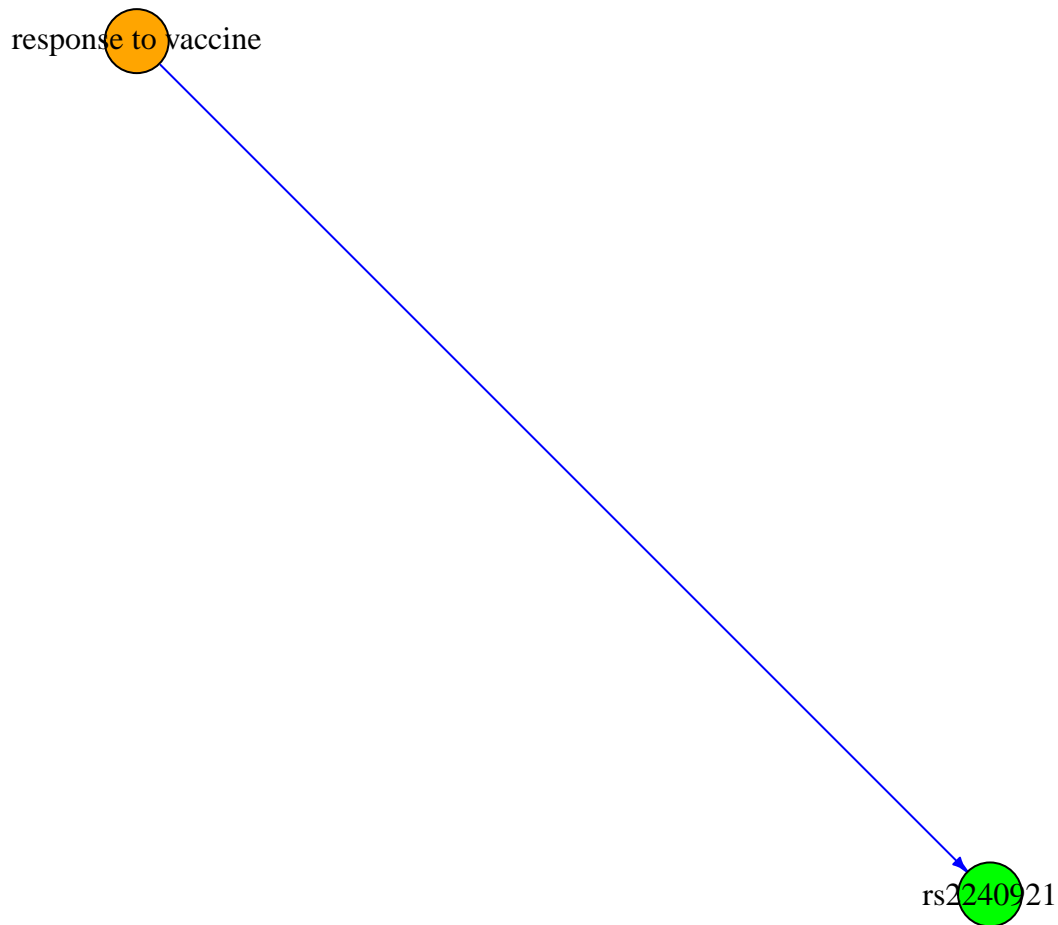

## Variant–Disease Network (adiponectin measurement)

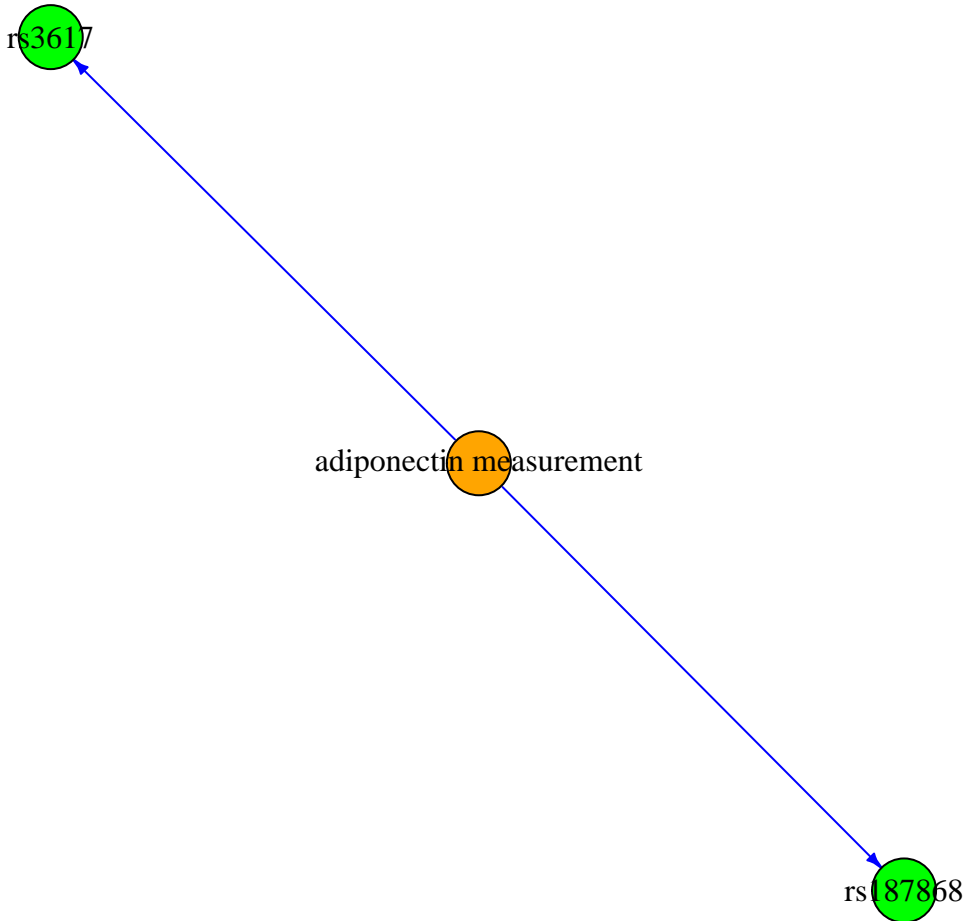

## Variant–Disease Network (open–angle glaucoma)

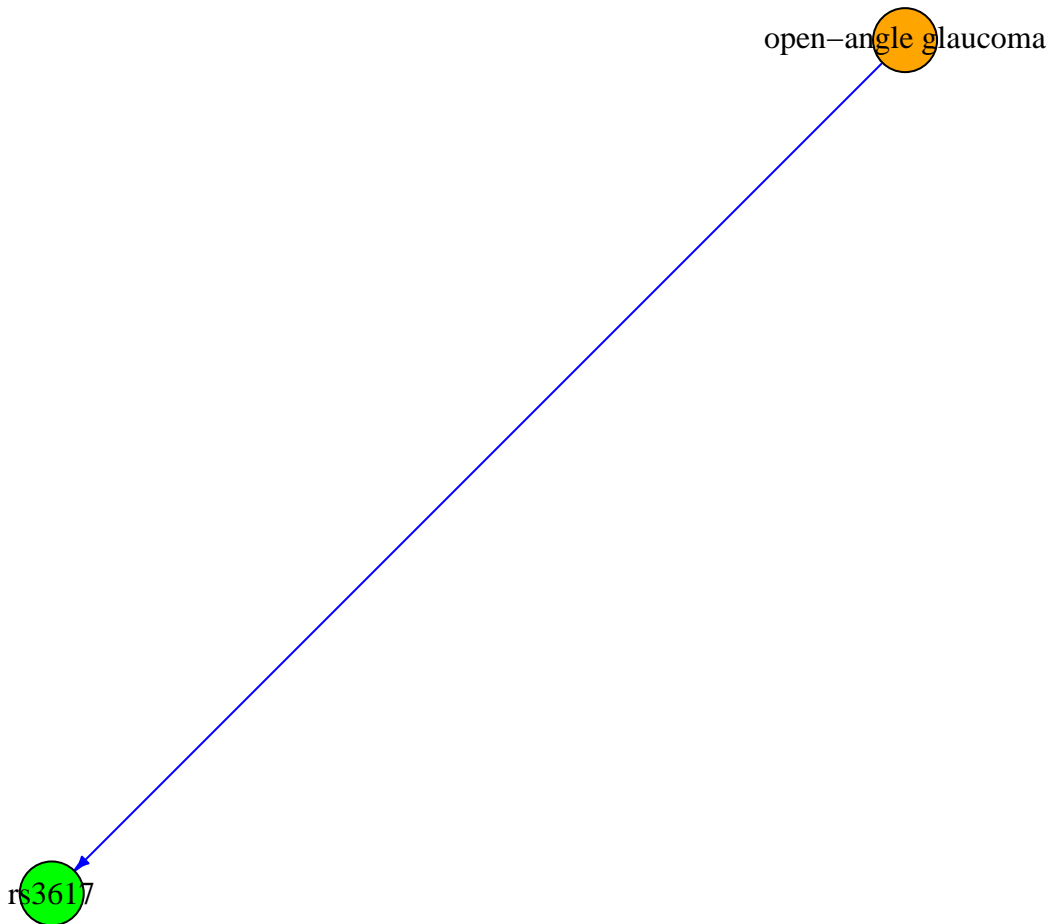



## Variant–Disease Network (schizoaffective disorder)

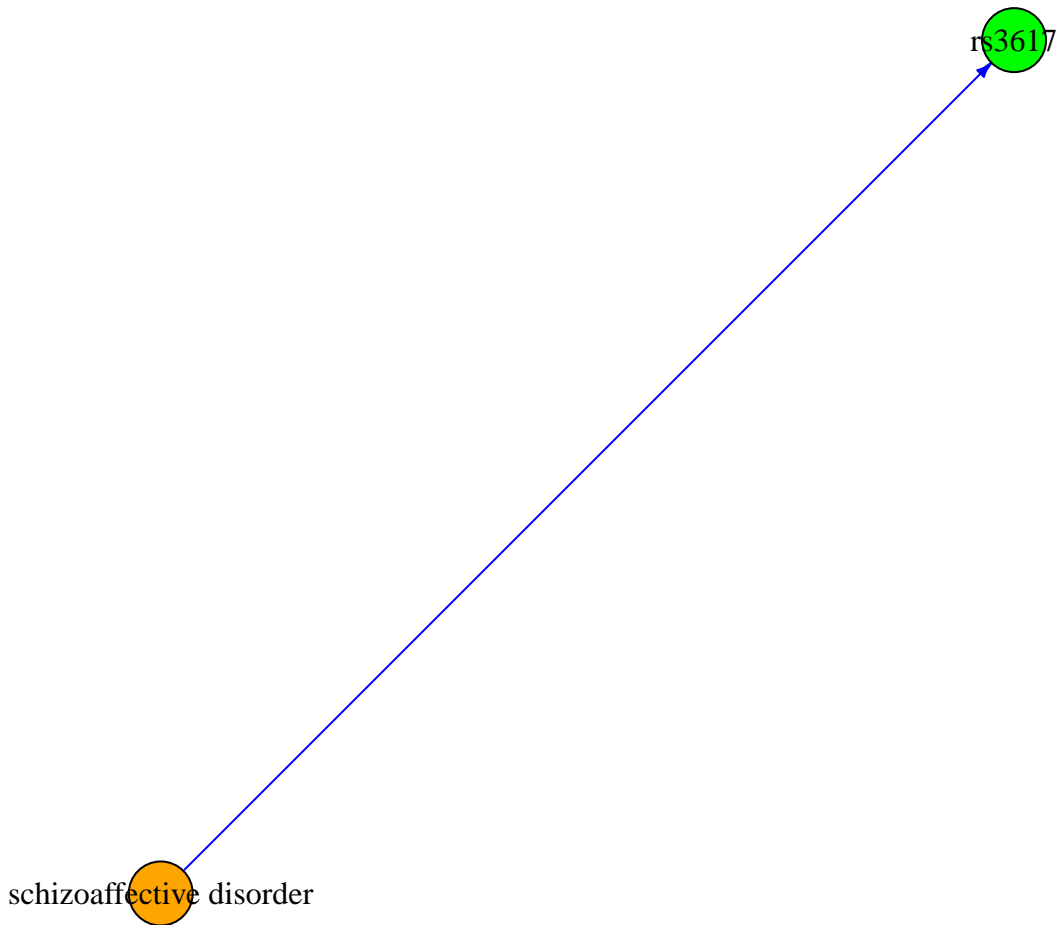

## Variant–Disease Network (openness measurement)

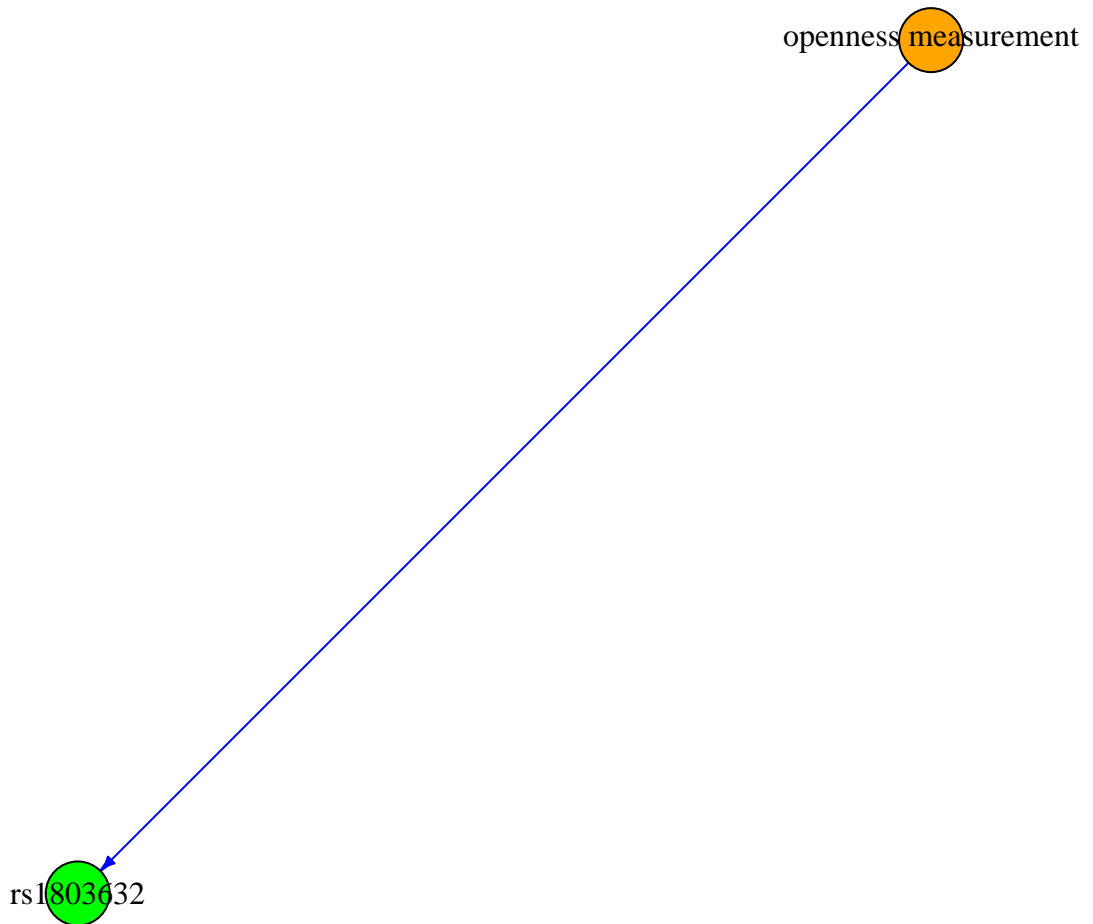

**Variant–Disease Network (psychosocial stress measurement)**

psychosocial stress measurement

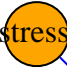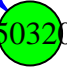

rs503203

## Variant–Disease Network (alcohol dependence)

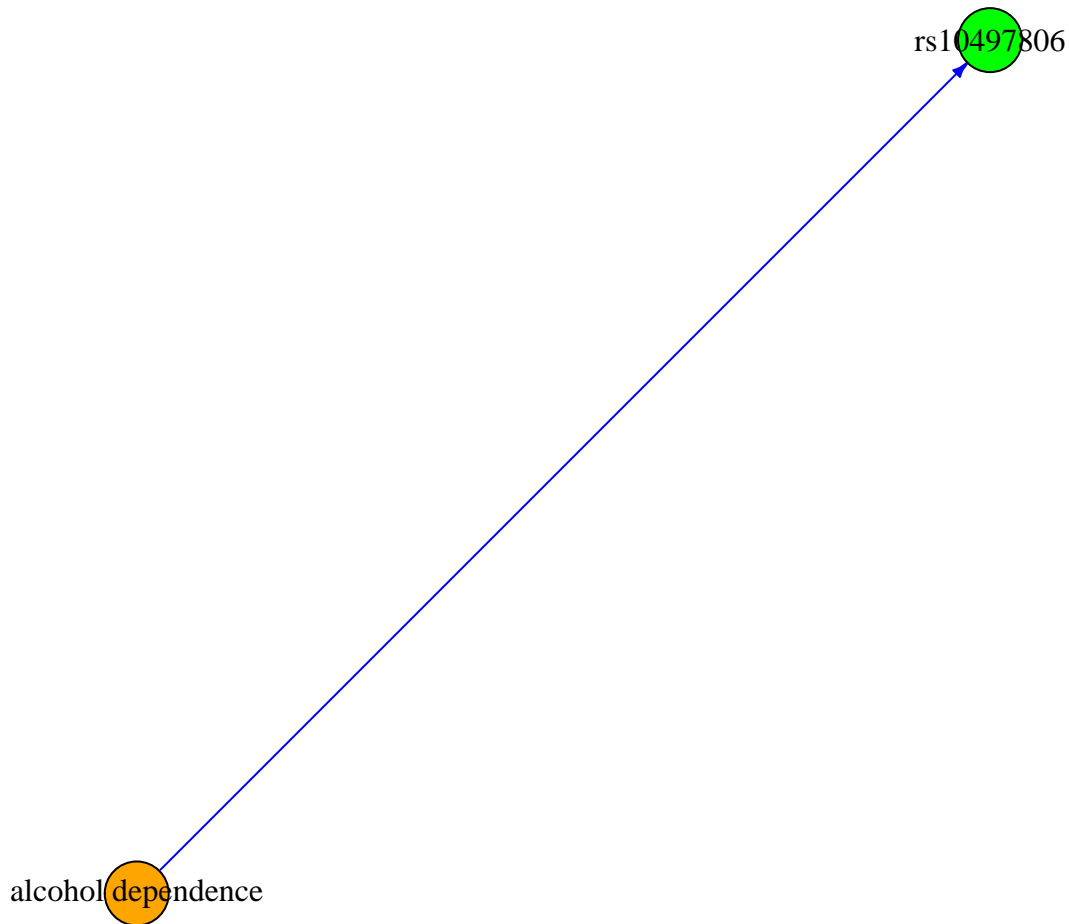

## Variant-Disease Network (brain aneurysm)

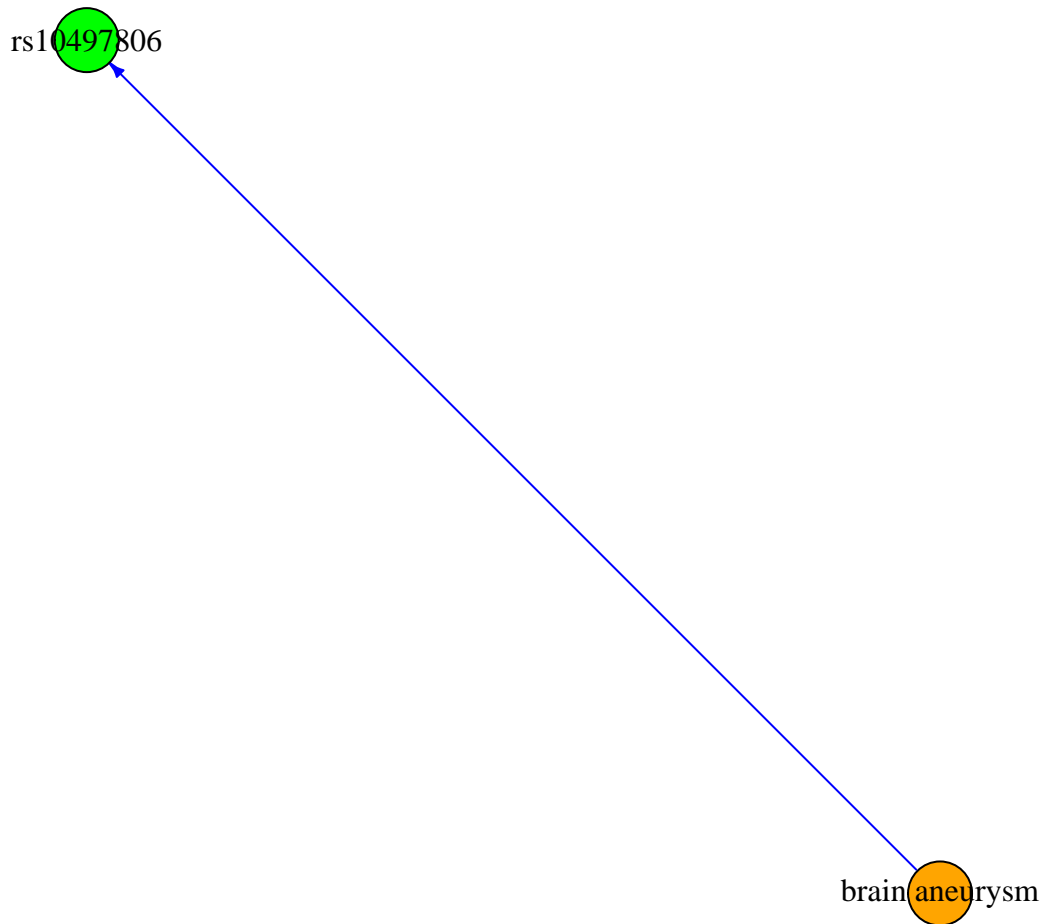

## Variant–Disease Network (ankylosing spondylitis)

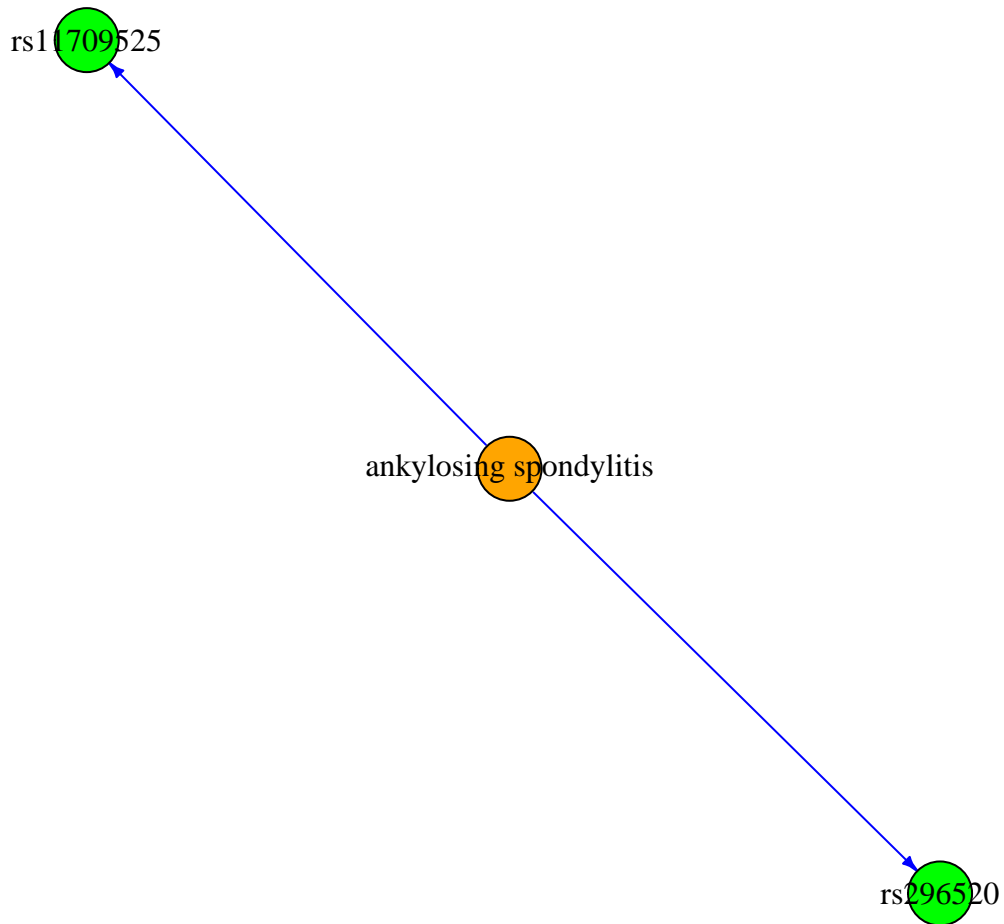

## Variant–Disease Network (celiac disease)

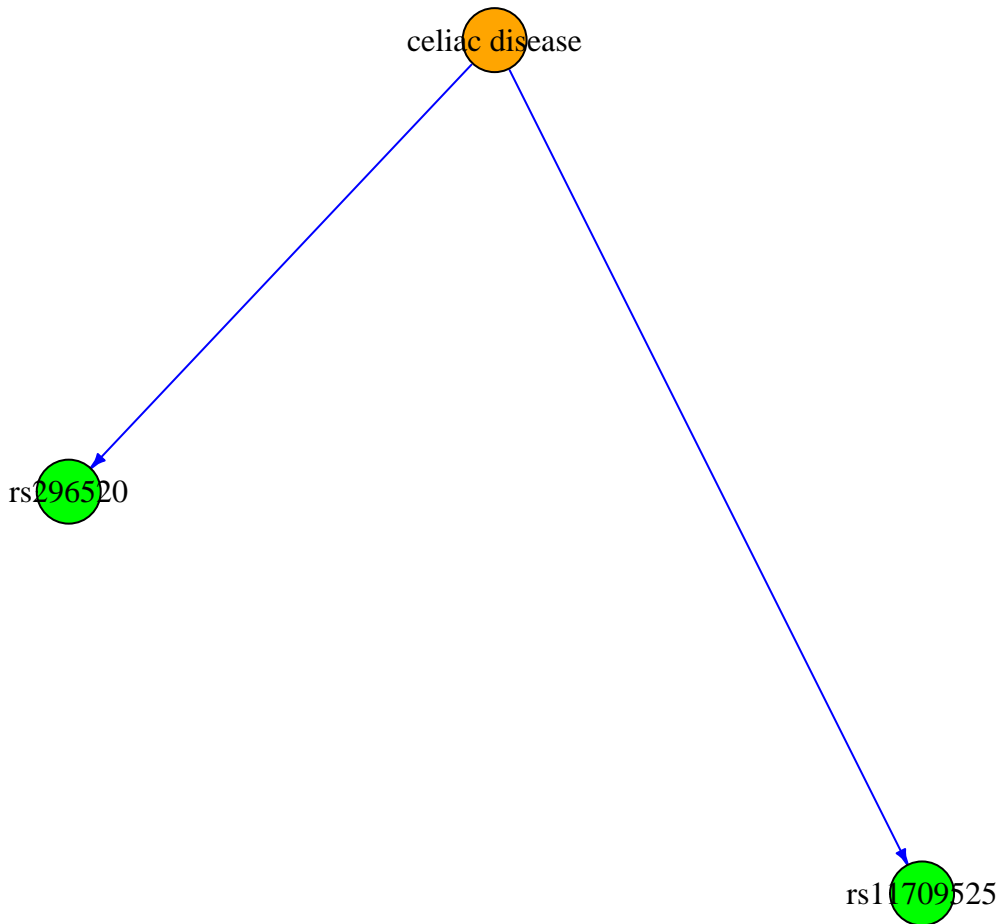

# Variant–Disease Network (blood urea nitrogen measurement)

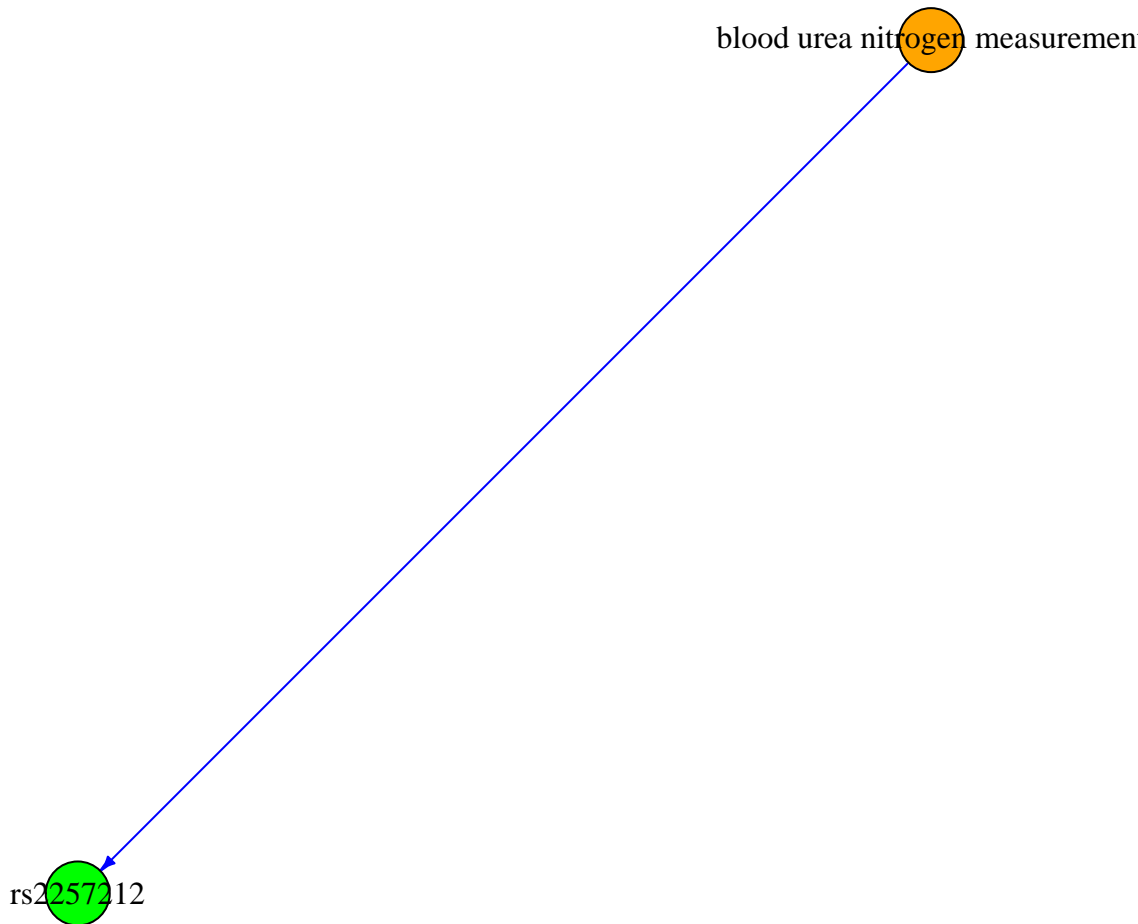



# Variant–Disease Network (ovarian endometrioid carcinoma)

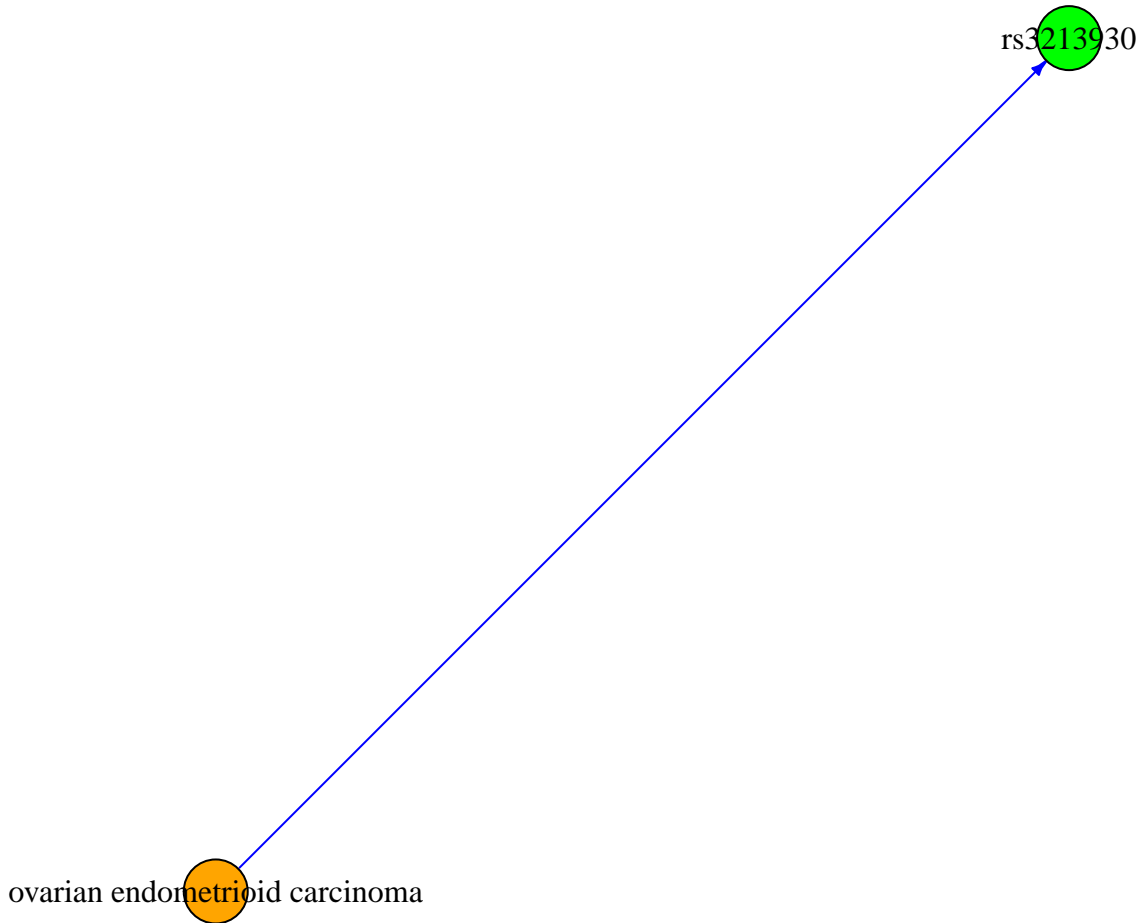

Variant–Disease Network (fasting blood glucose measurement)

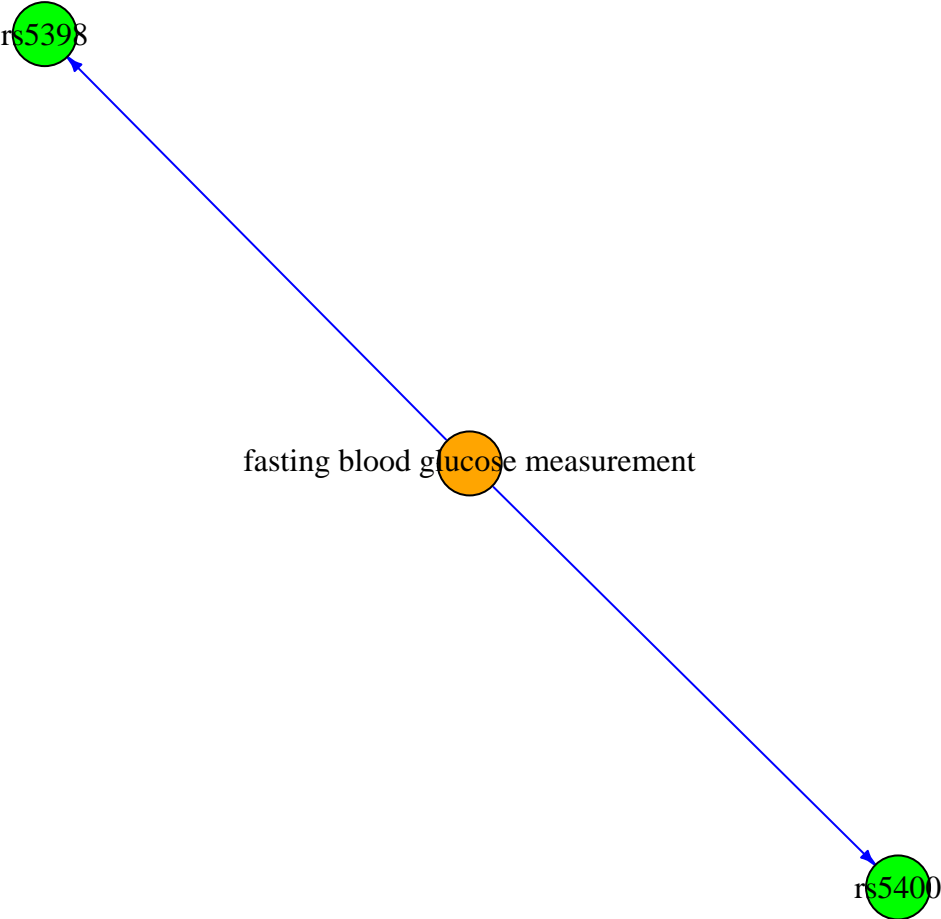

## Variant-Disease Network (HOMA-B)

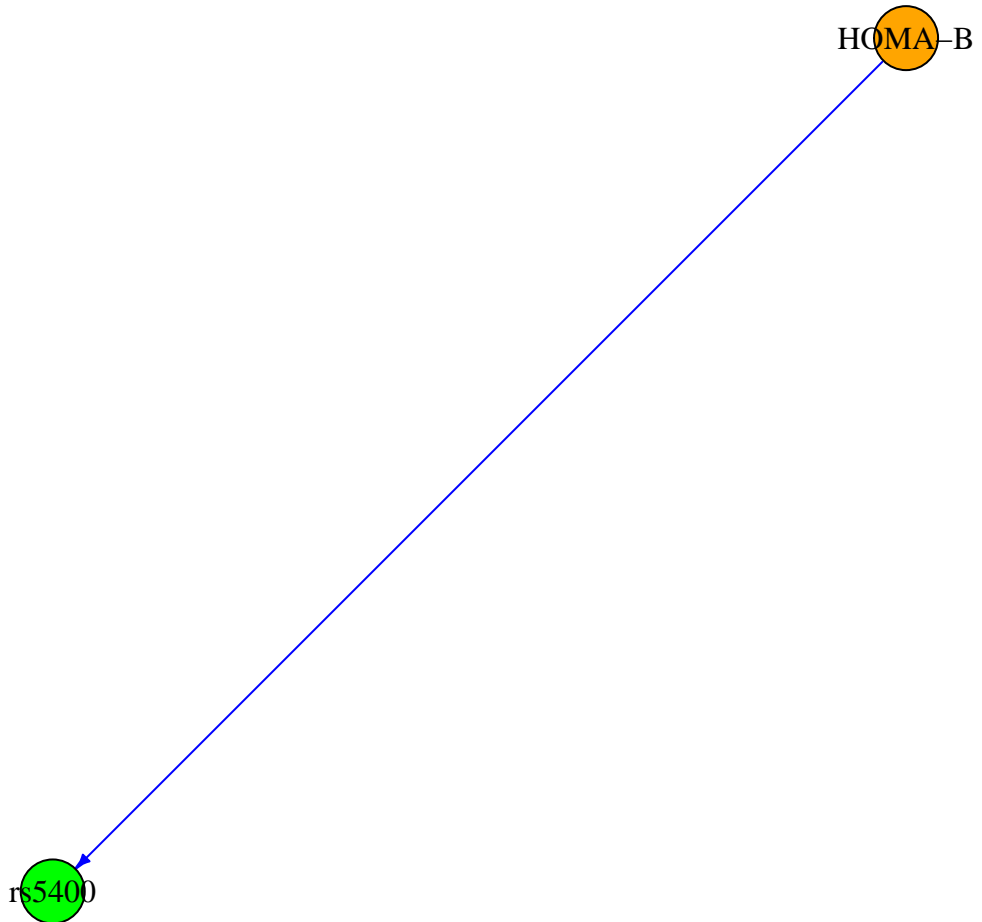

Variant–Disease Network (serum gamma–glutamyl transferase measurement)

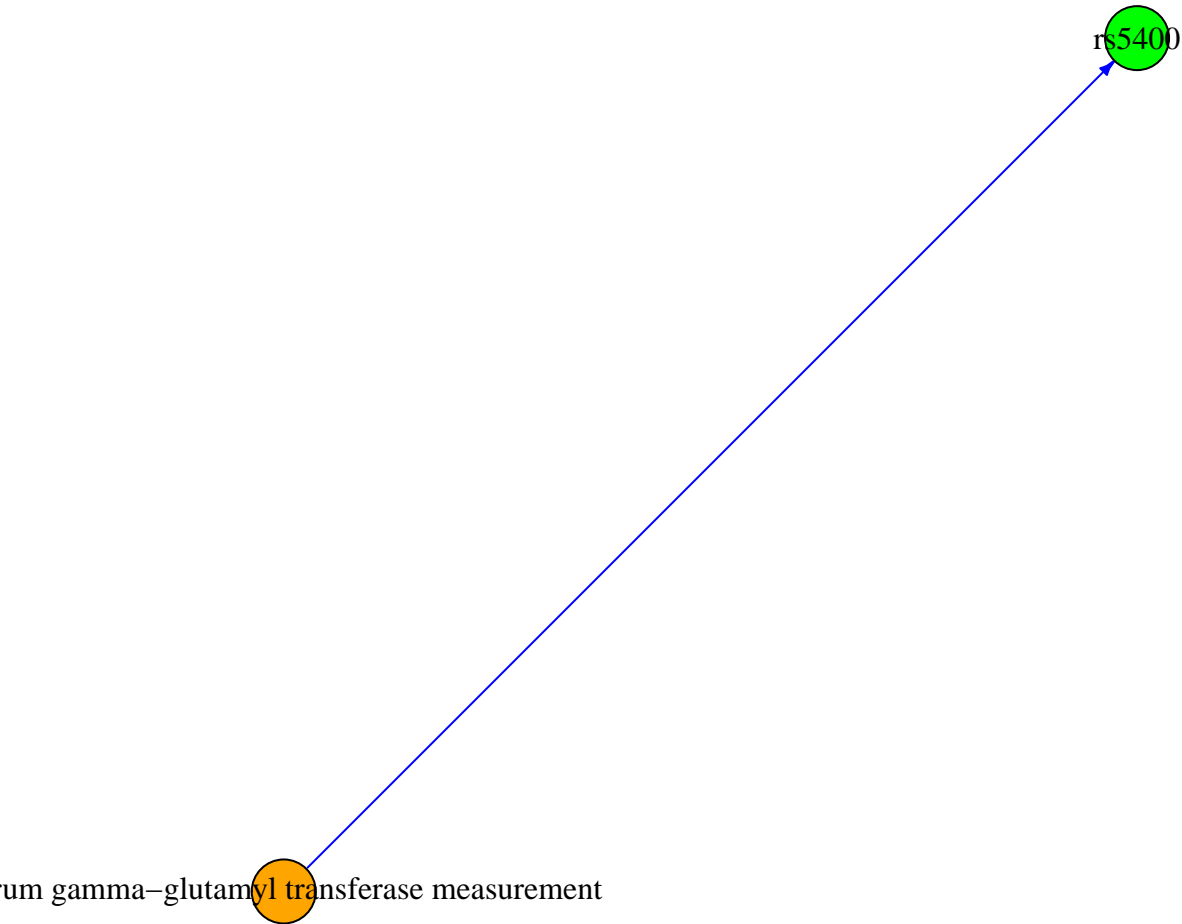

## Variant–Disease Network (glucose measurement)

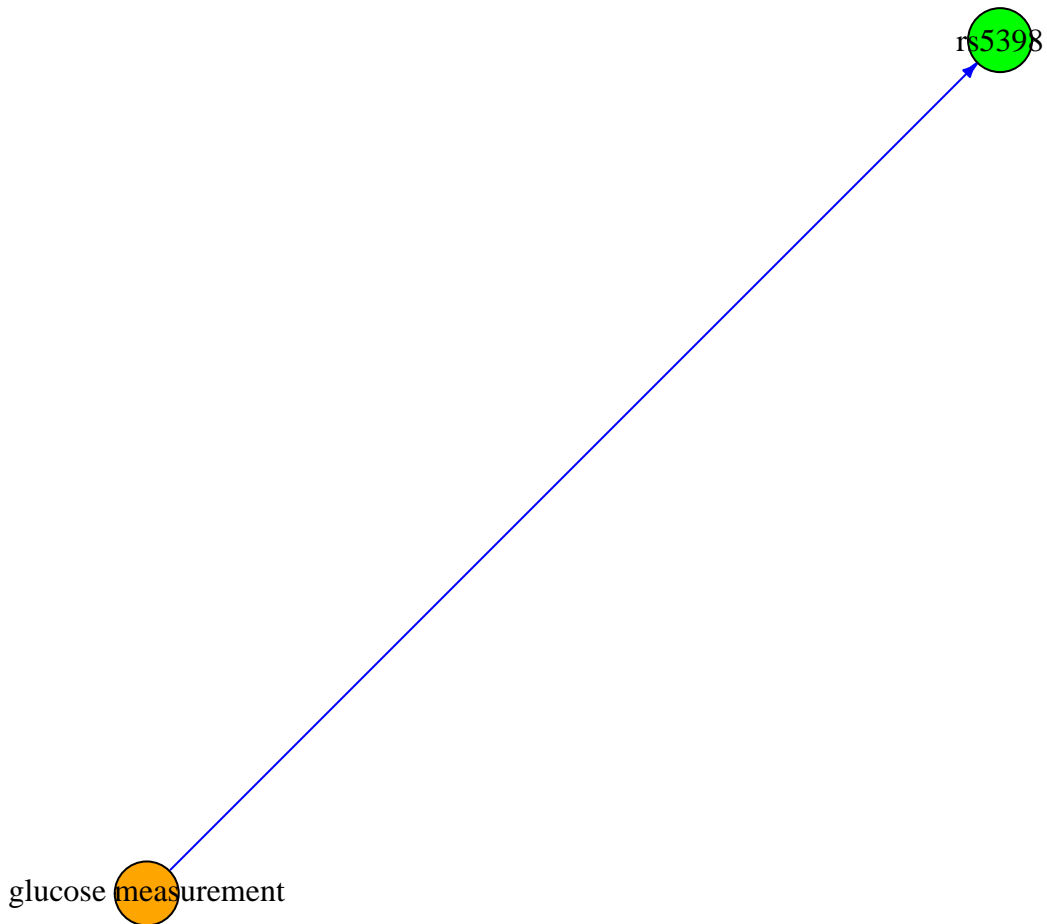

## Variant-Disease Network (response to metformin)

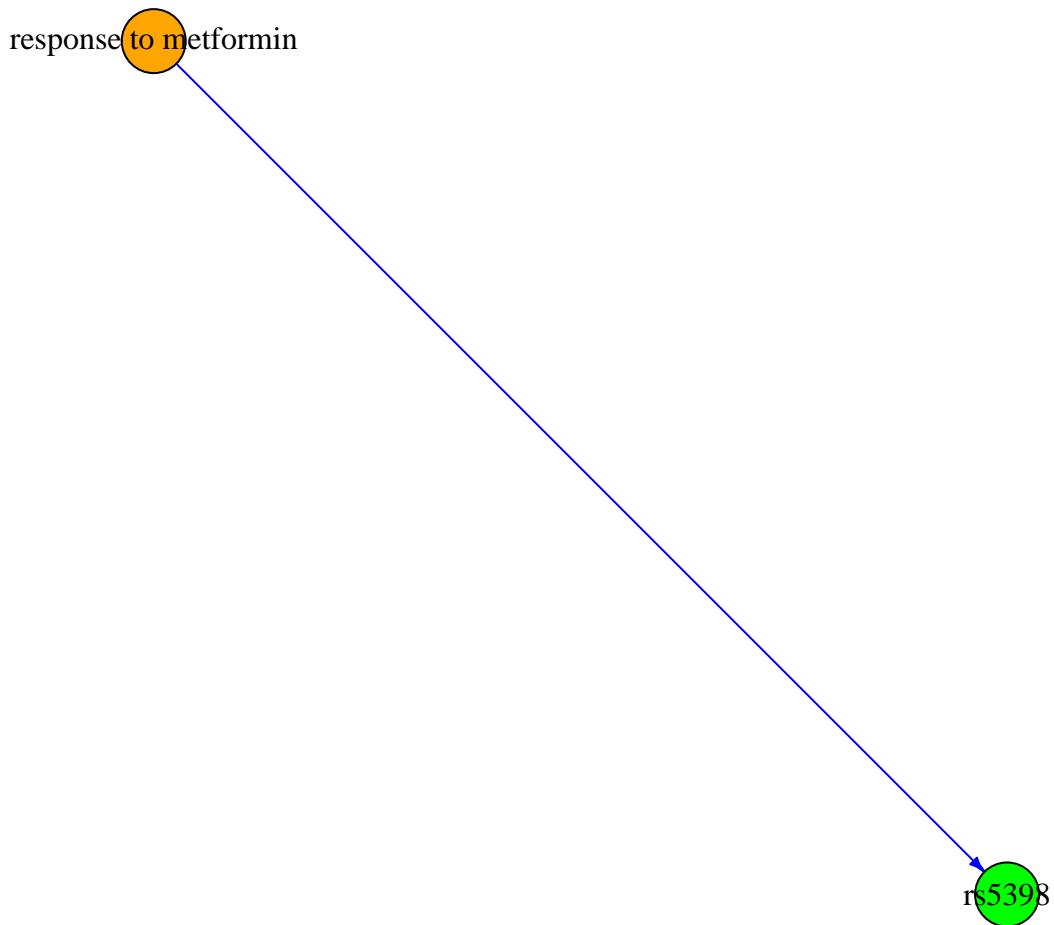

## Variant–Disease Network (seborrheic dermatitis)

seborrheic dermatitis

rs6762208

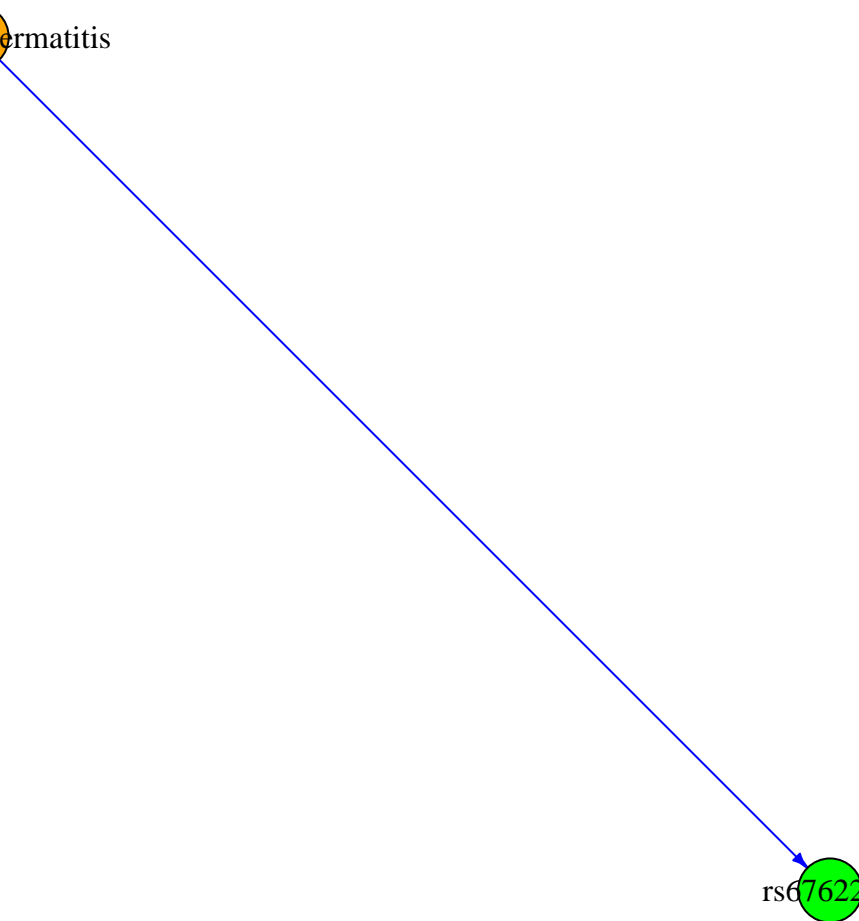

## Variant-Disease Network (autoimmune disease)

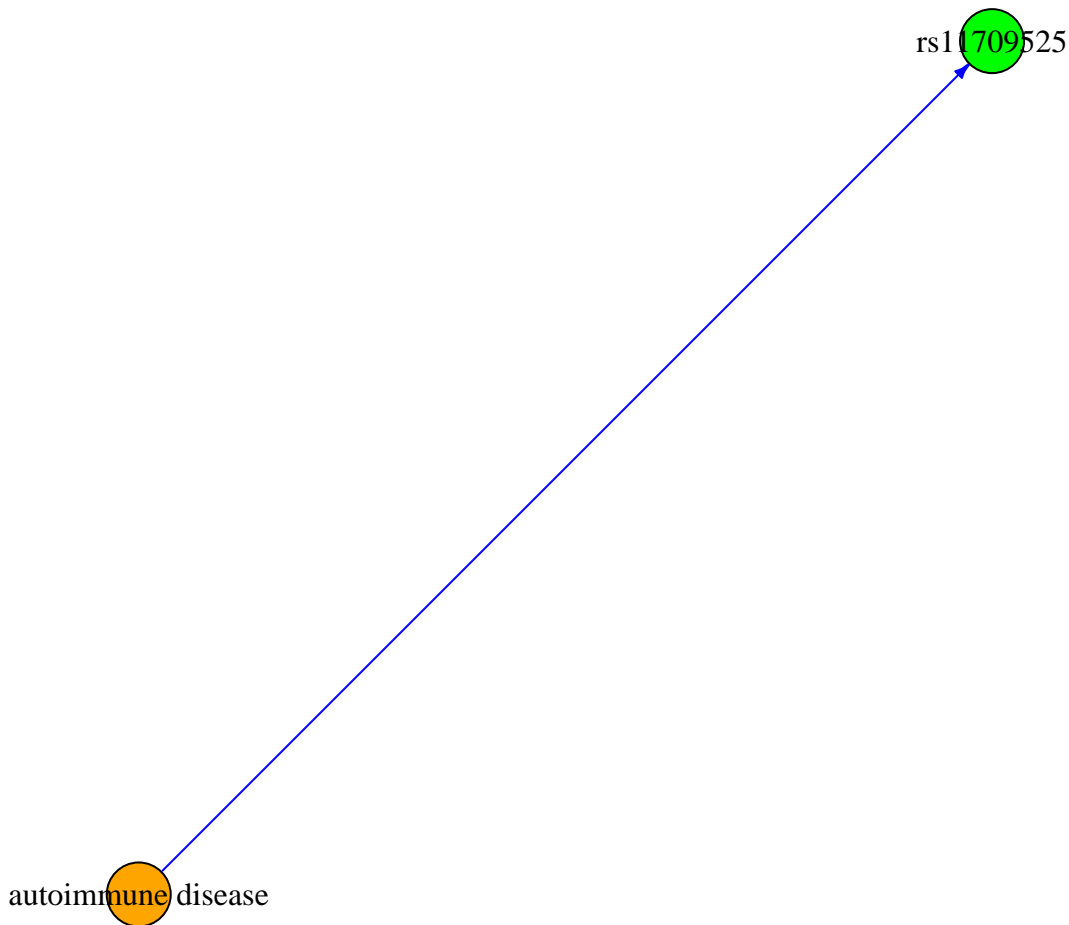



## Variant–Disease Network (autoimmune thyroid disease)

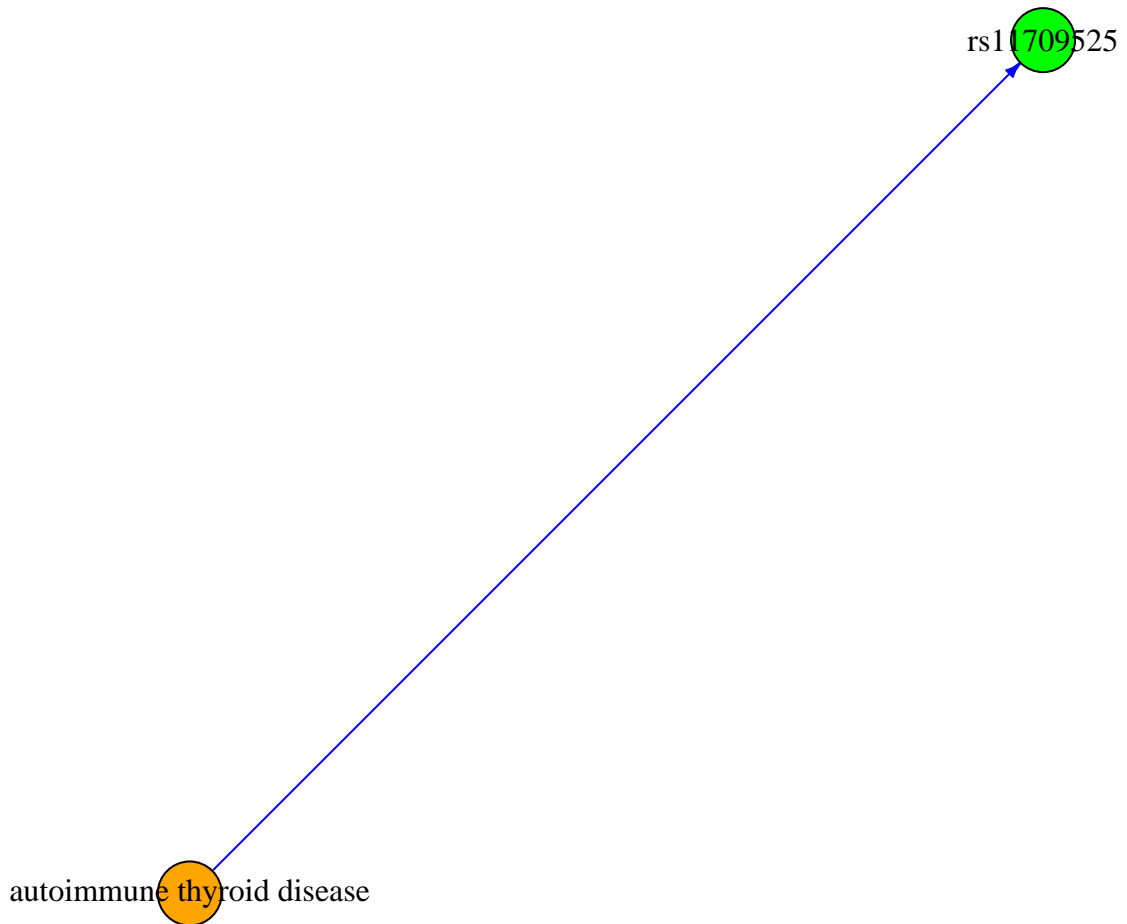

**Variant–Disease Network (chronic childhood arthritis)**

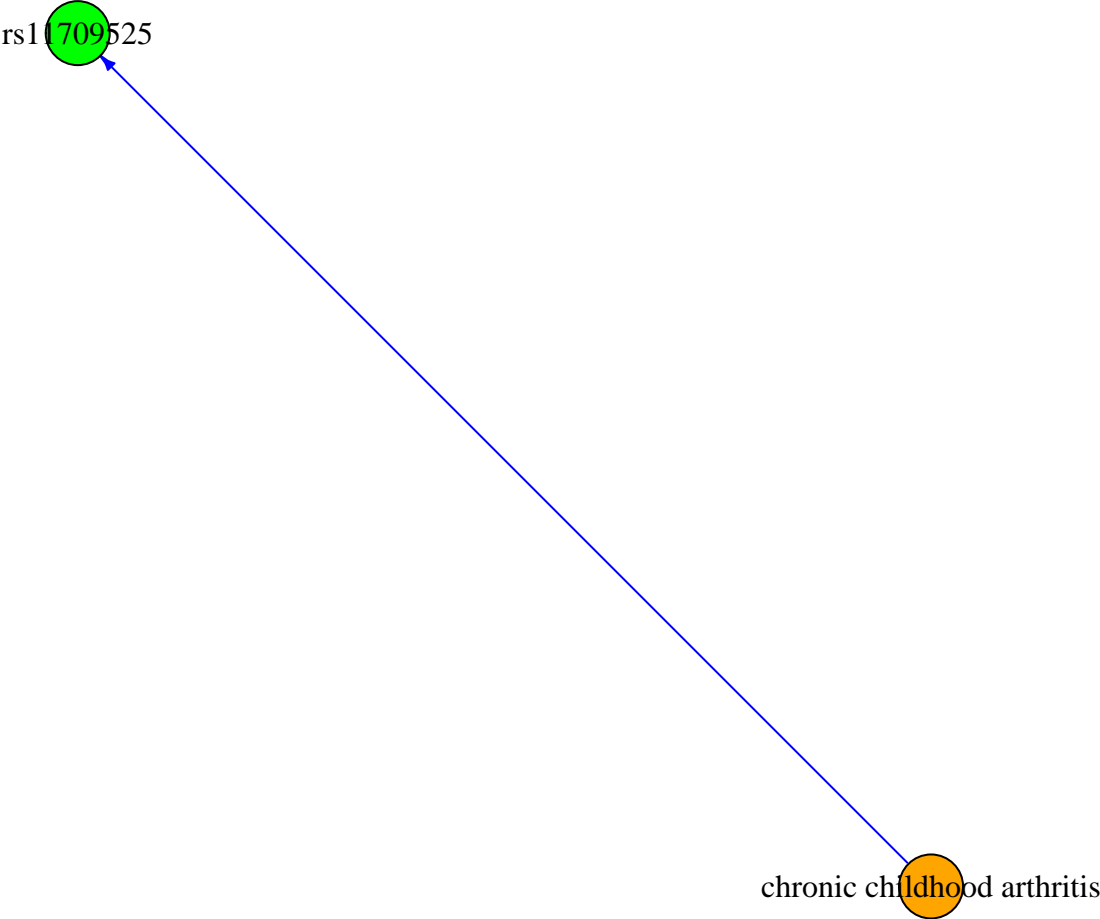

**Variant–Disease Network (common variable immunodeficiency)**

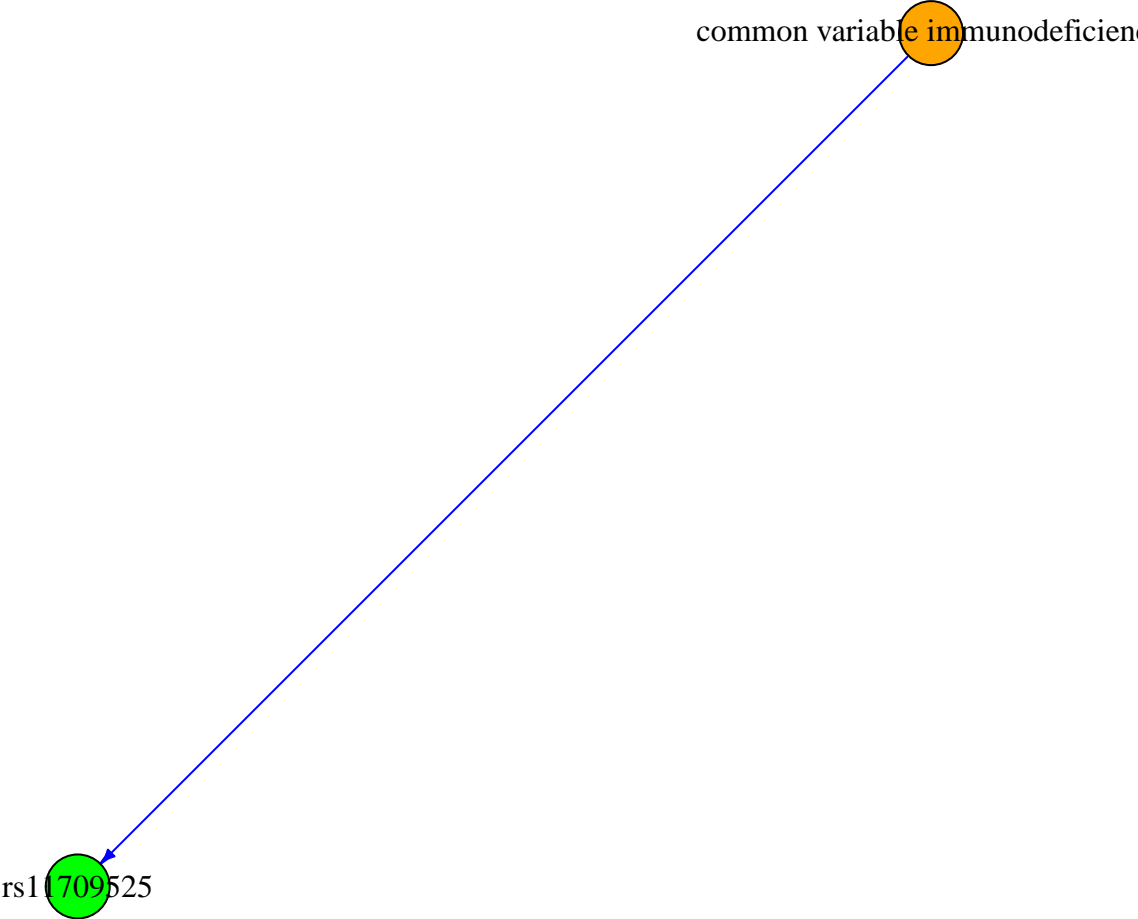

Variant–Disease Network (gut microbiome measurement)

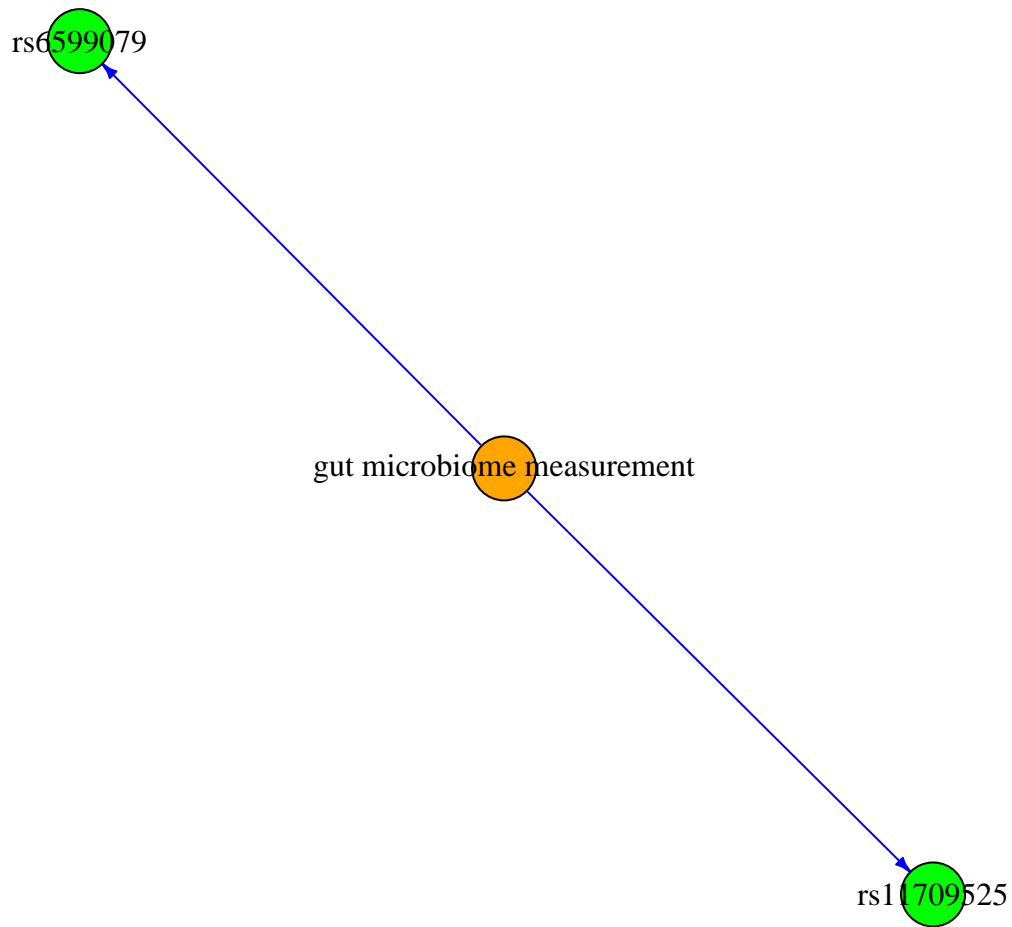

Variant–Disease Network (hepatocyte growth factor–like protein measurement)

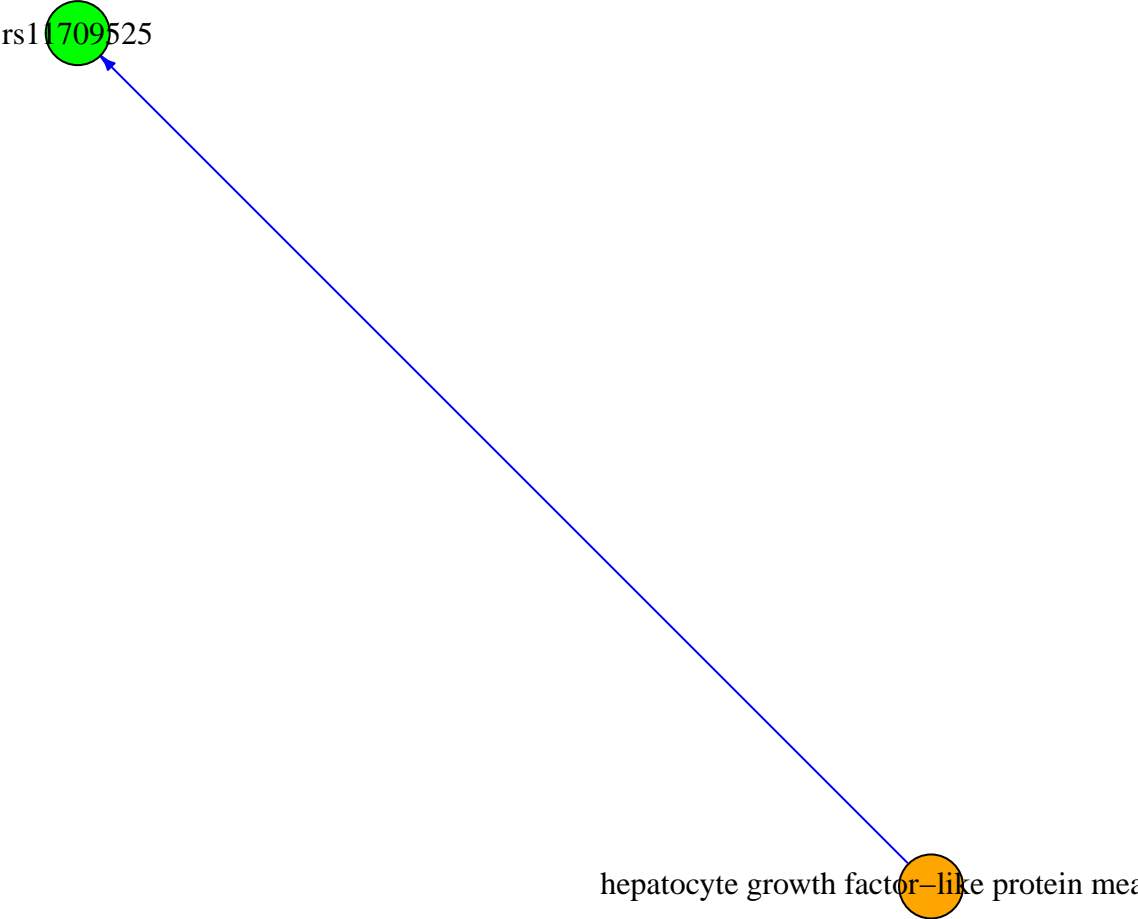

## Variant–Disease Network (self rated health)

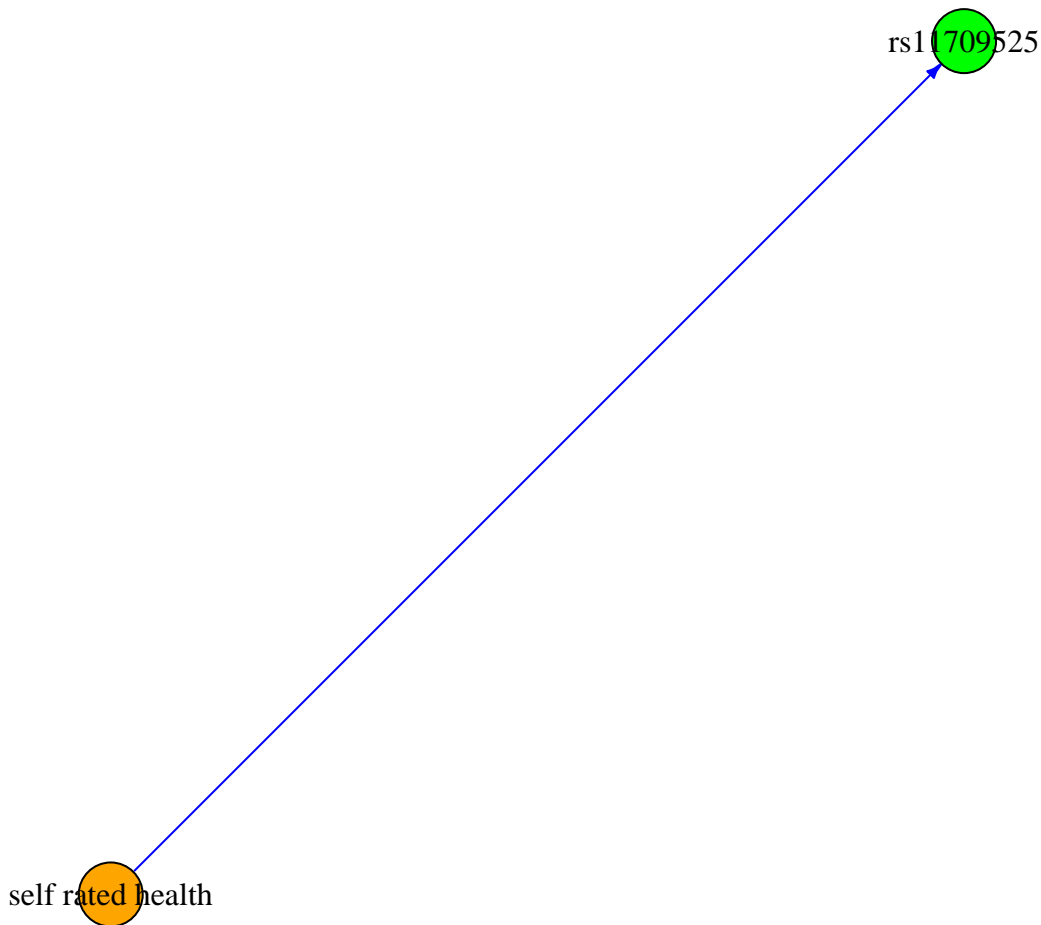

## Variant–Disease Network (age at first birth measurement)

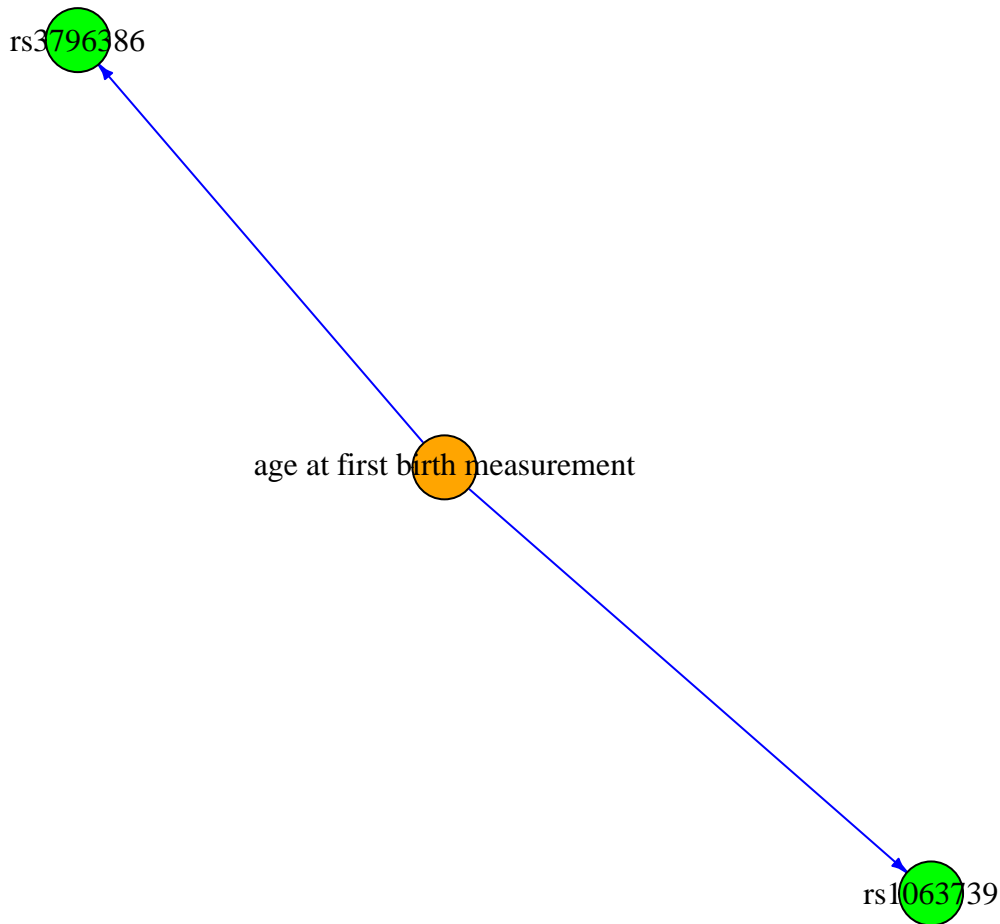

## Variant–Disease Network (physical activity)

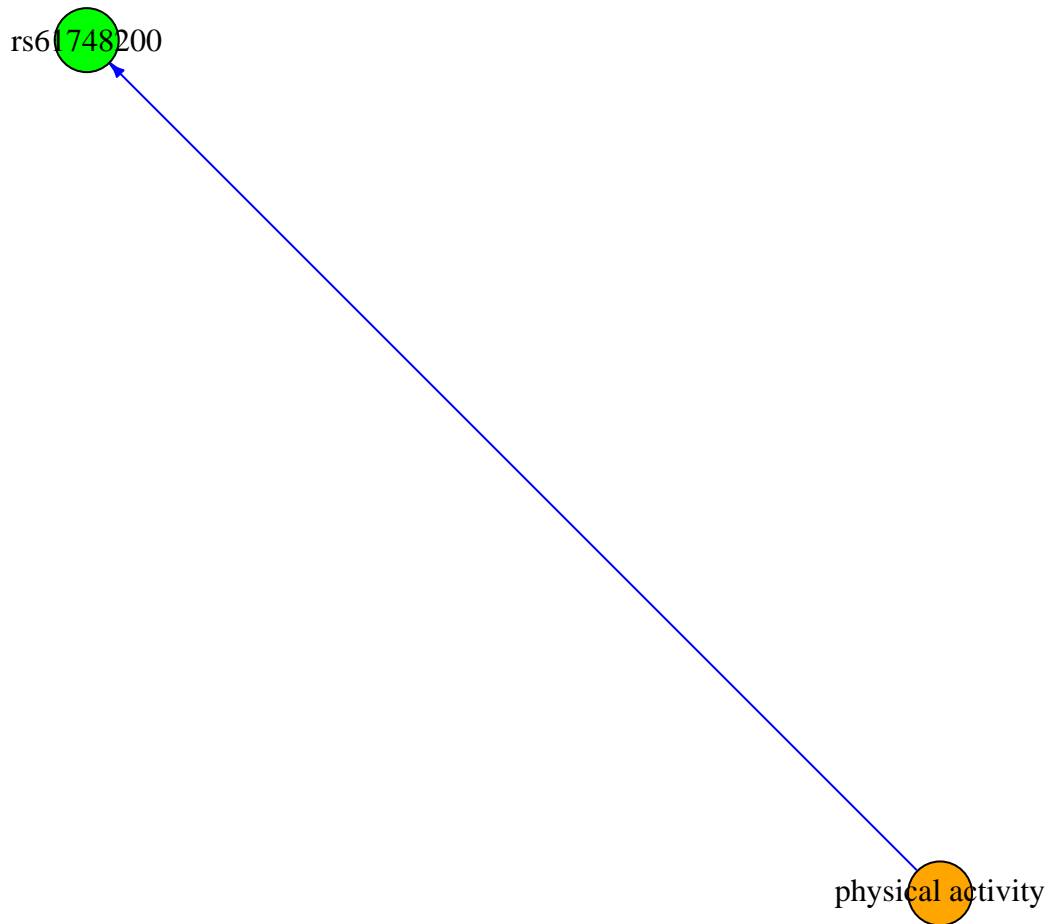



**Variant–Disease Network (abdominal aortic artery calcification)**

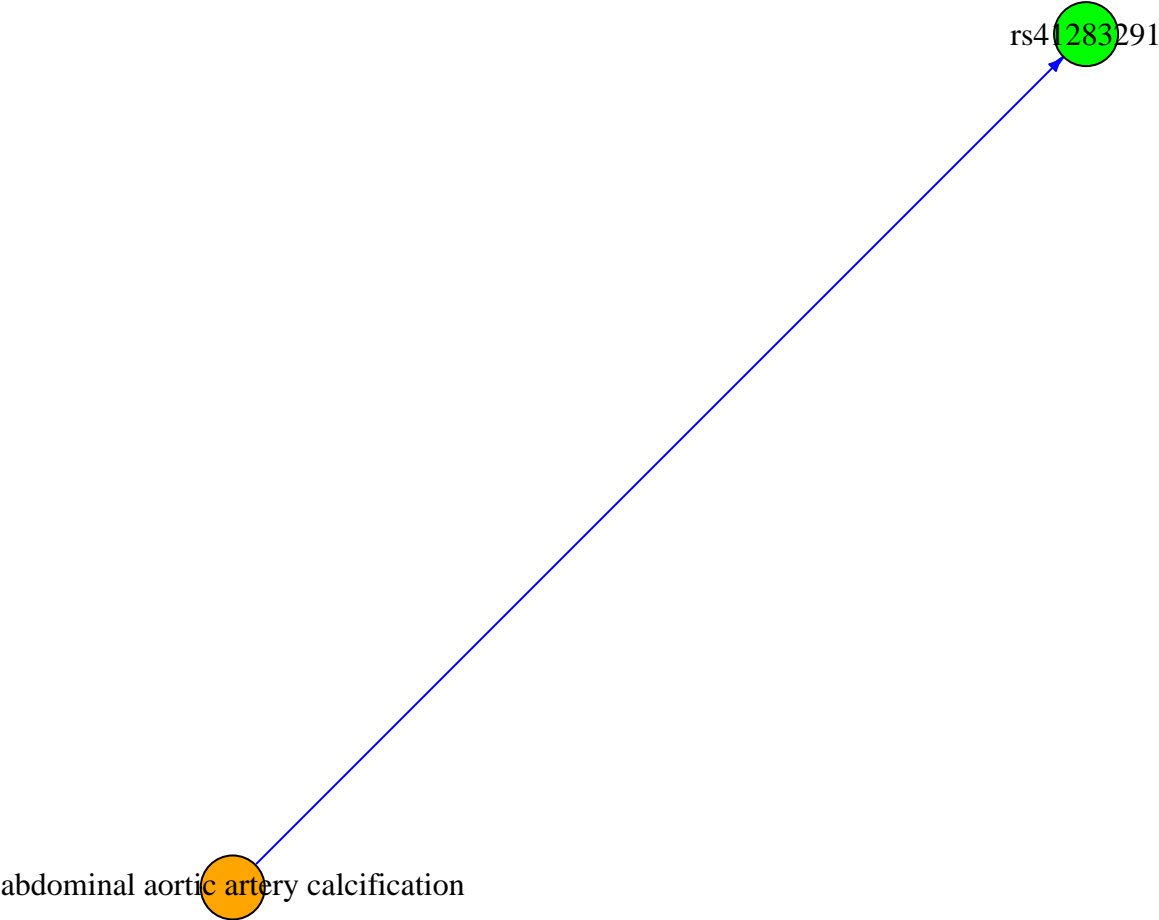

Variant–Disease Network (amino acid measurement)

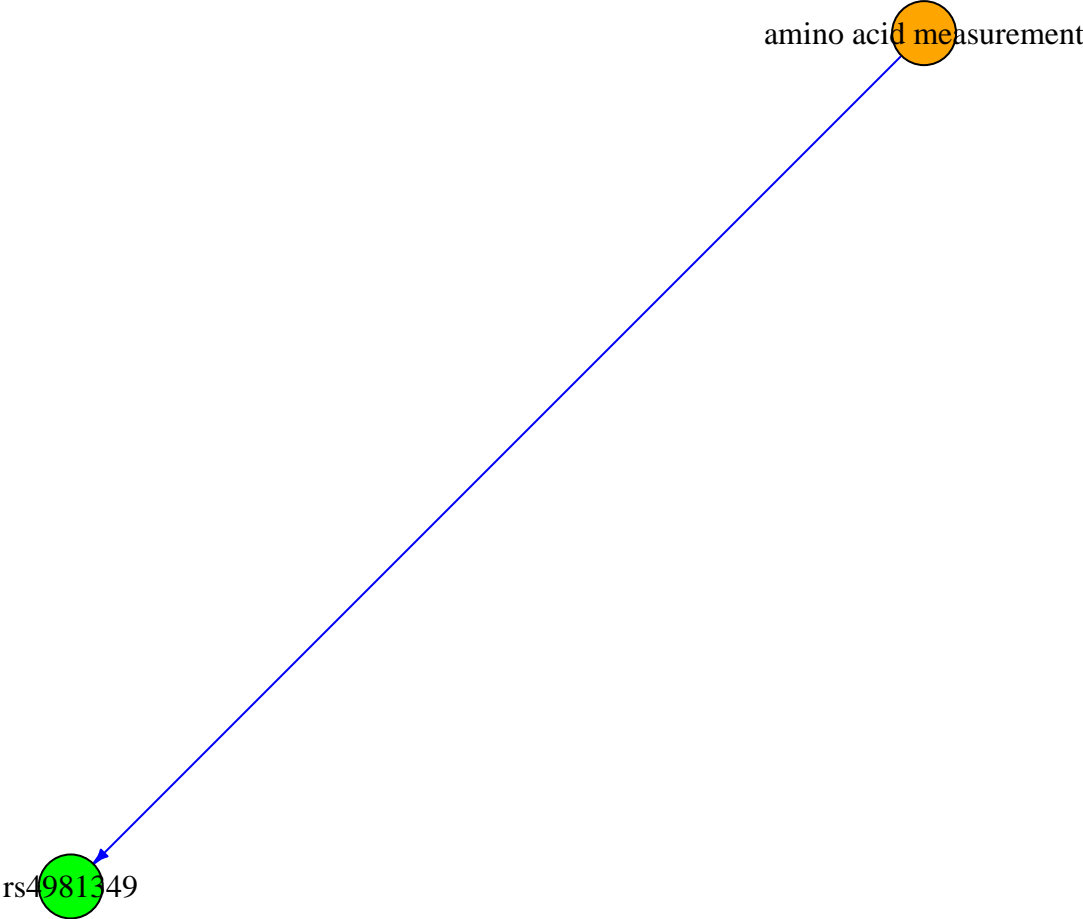

## Variant–Disease Network (protein measurement)

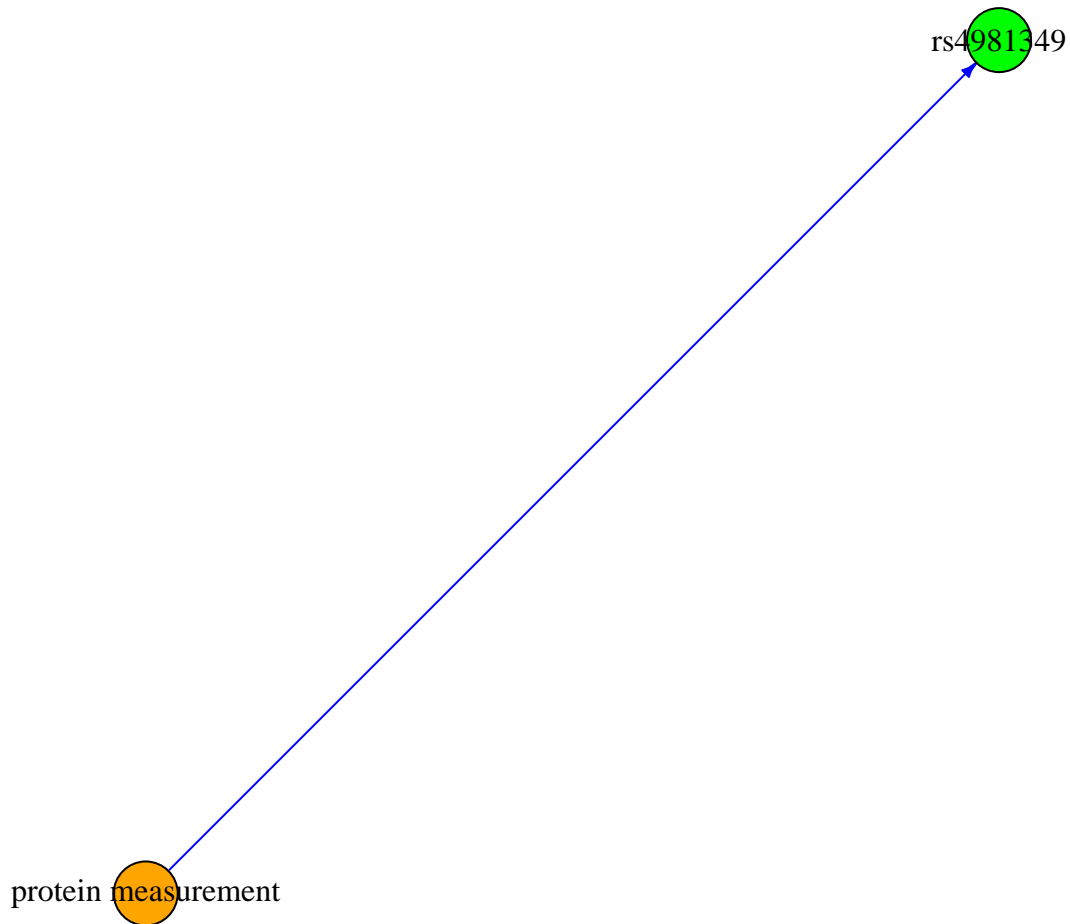

## Variant–Disease Network (response to anticoagulant)

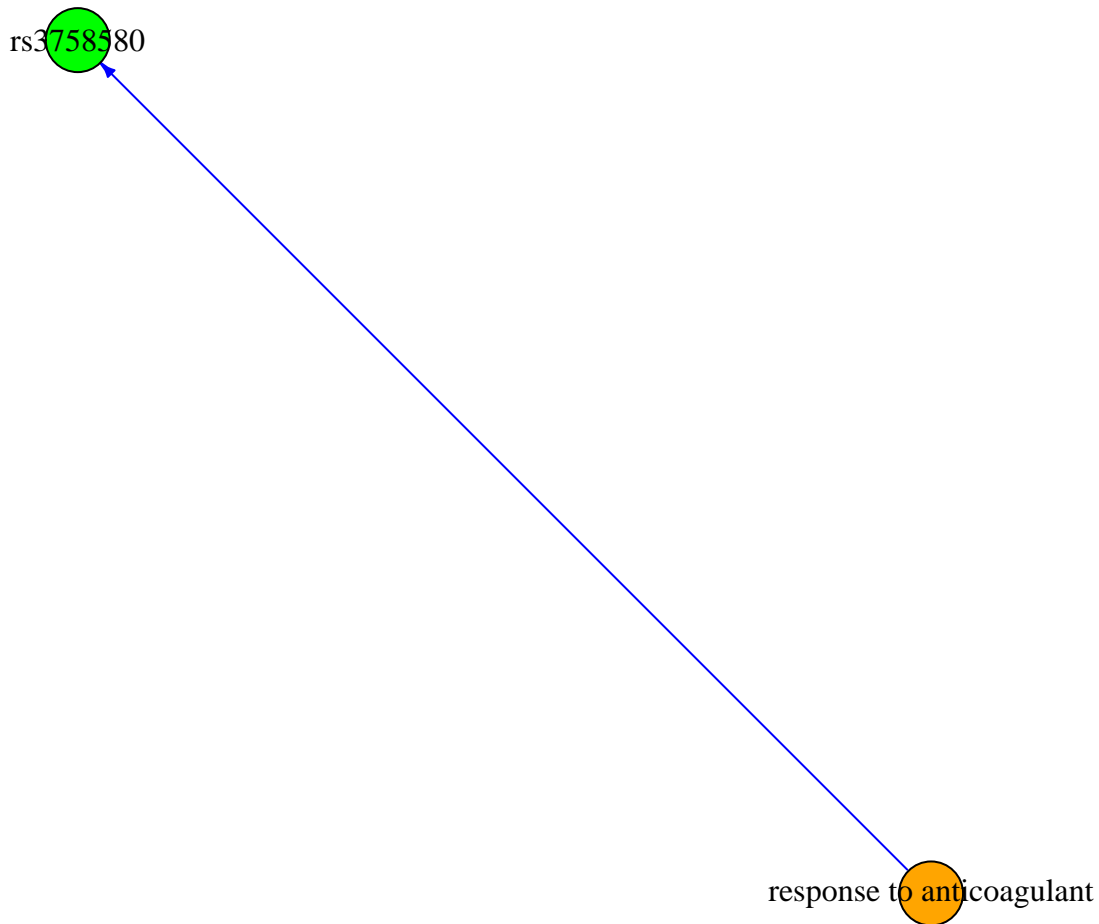

# Variant–Disease Network (response to platelet aggregation inhibitor)

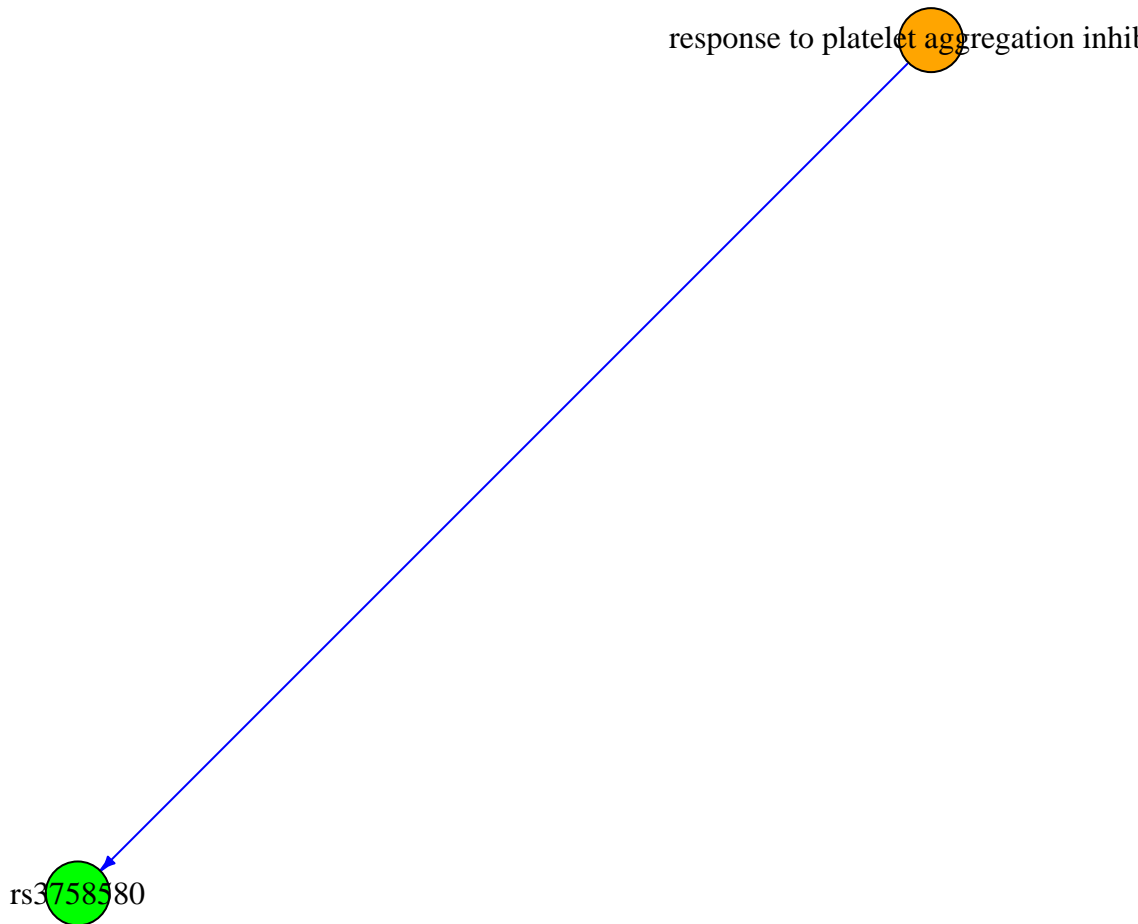

## Variant-Disease Network (coronary aneurysm)

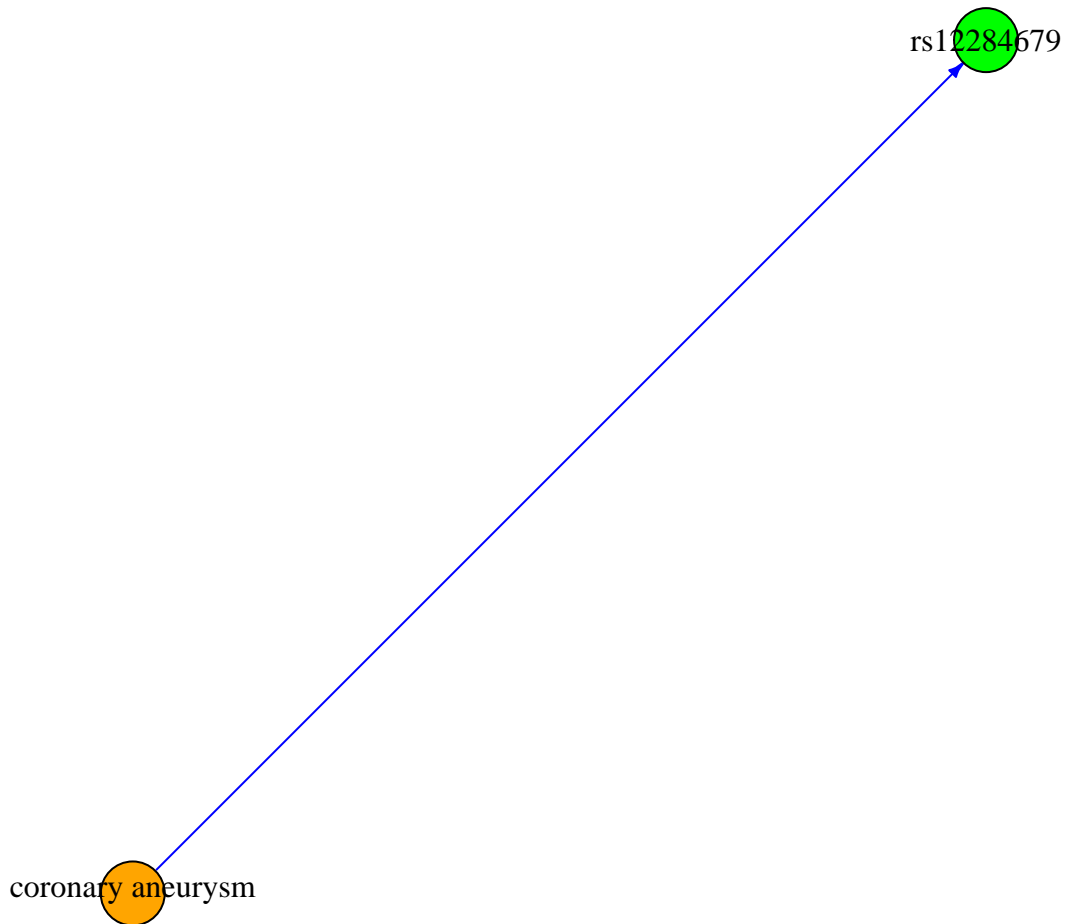

**Variant–Disease Network (mucocutaneous lymph node syndrome)**

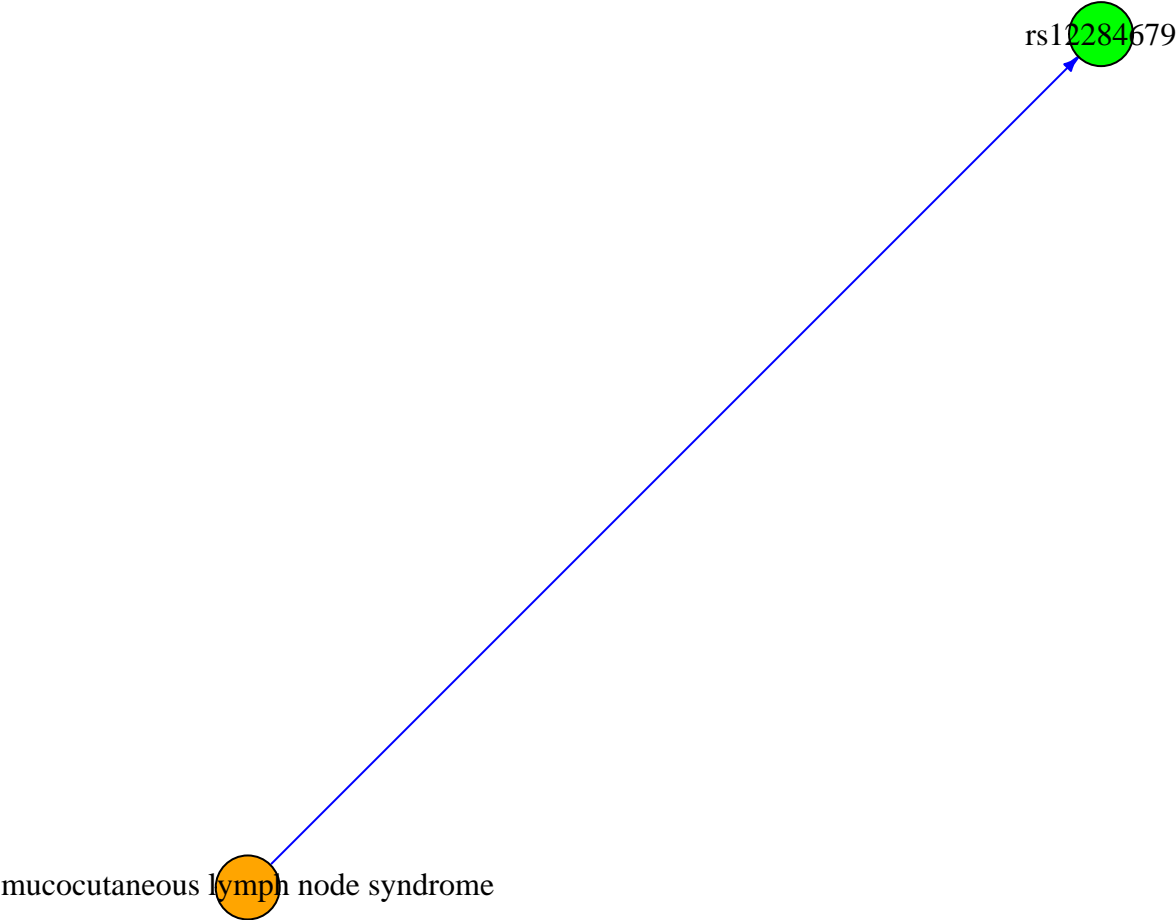

# Variant–Disease Network (response to tetracyclic antidepressant)

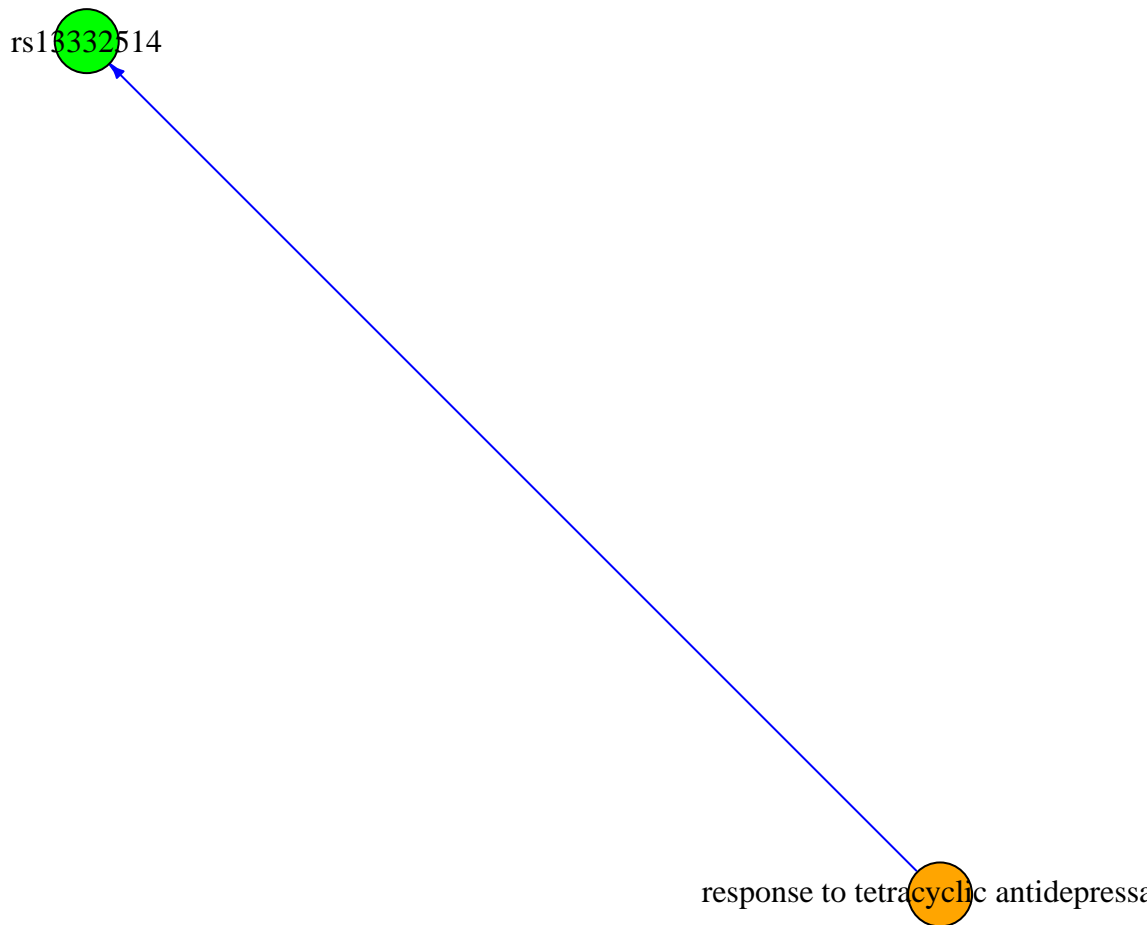



Variant–Disease Network (response to tricyclic antidepressant)

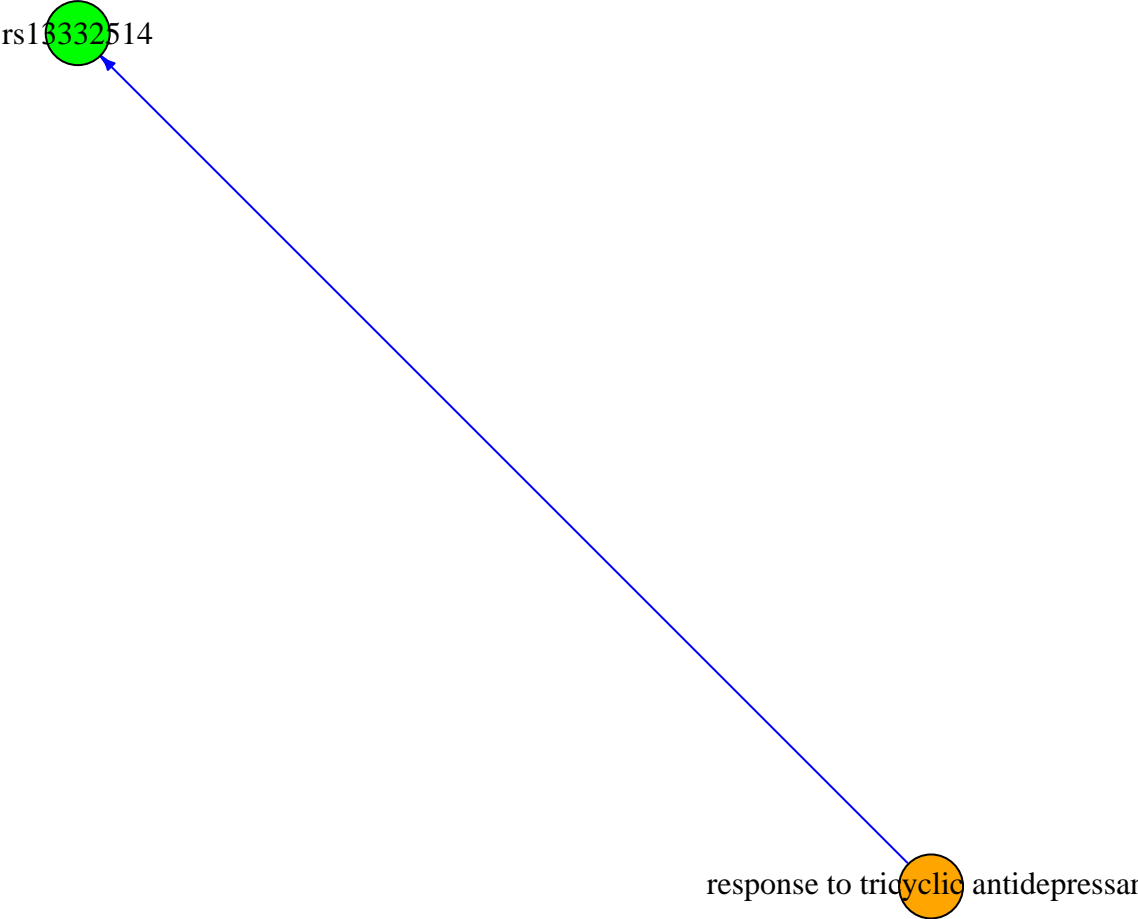

## Variant–Disease Network (RR interval)

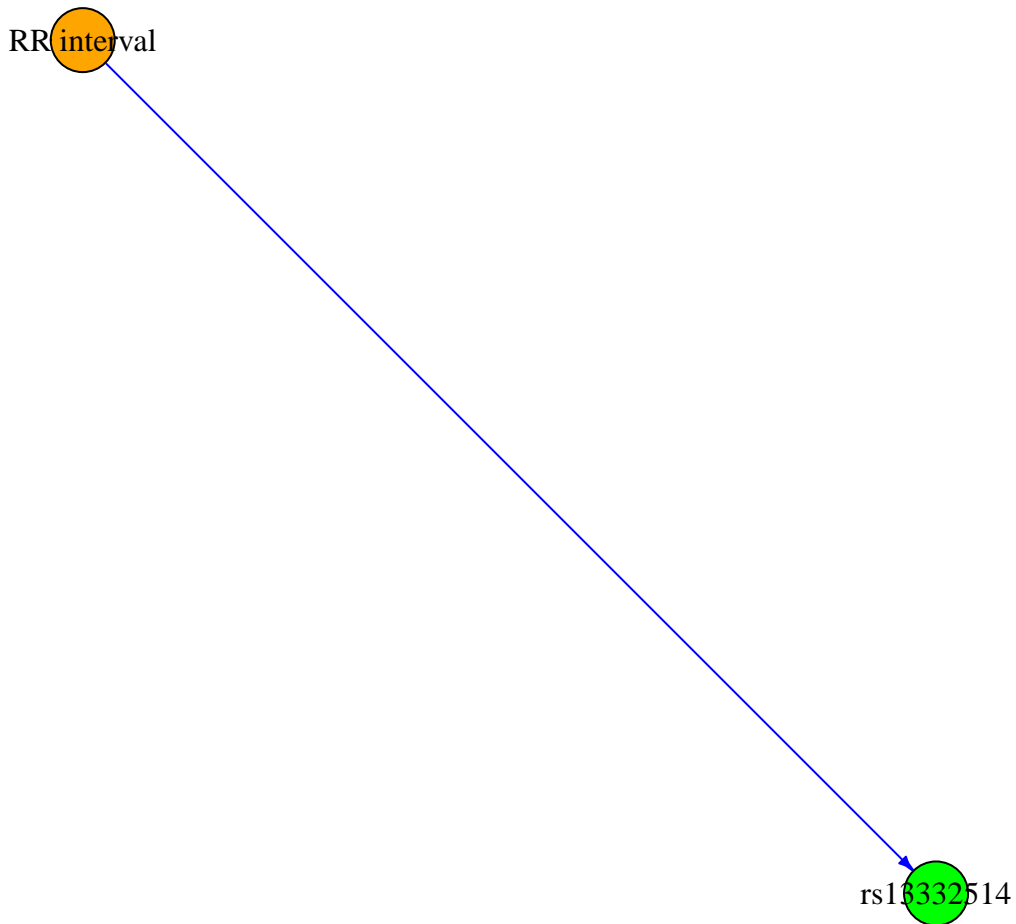

## Variant-Disease Network (carrier status)

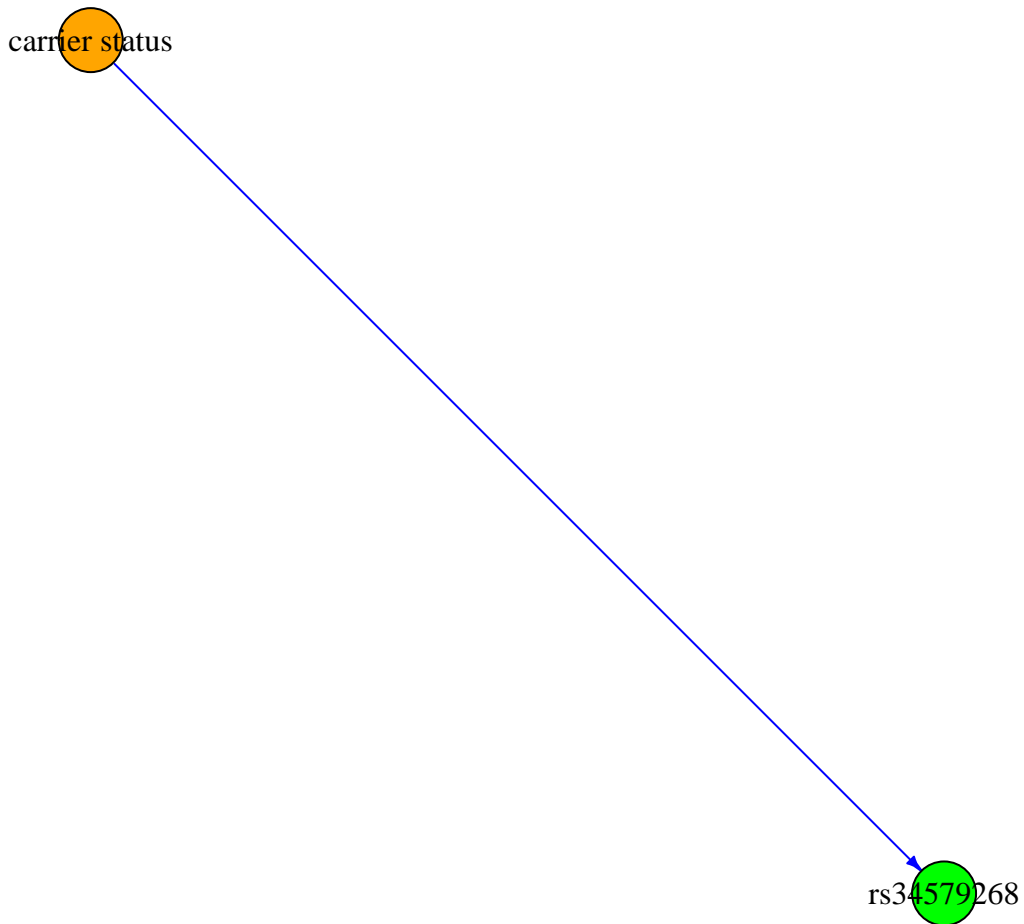

# Variant–Disease Network (event free survival time)

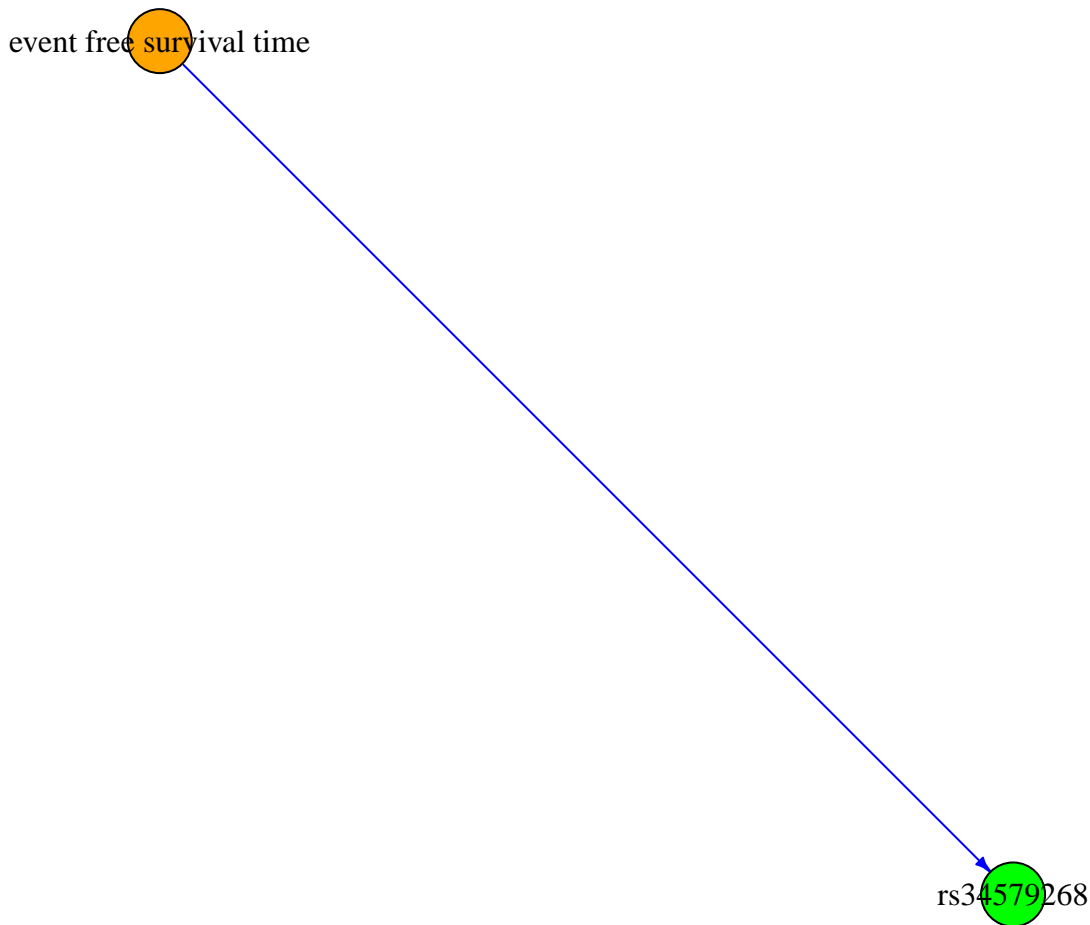

## Variant–Disease Network (body weight)

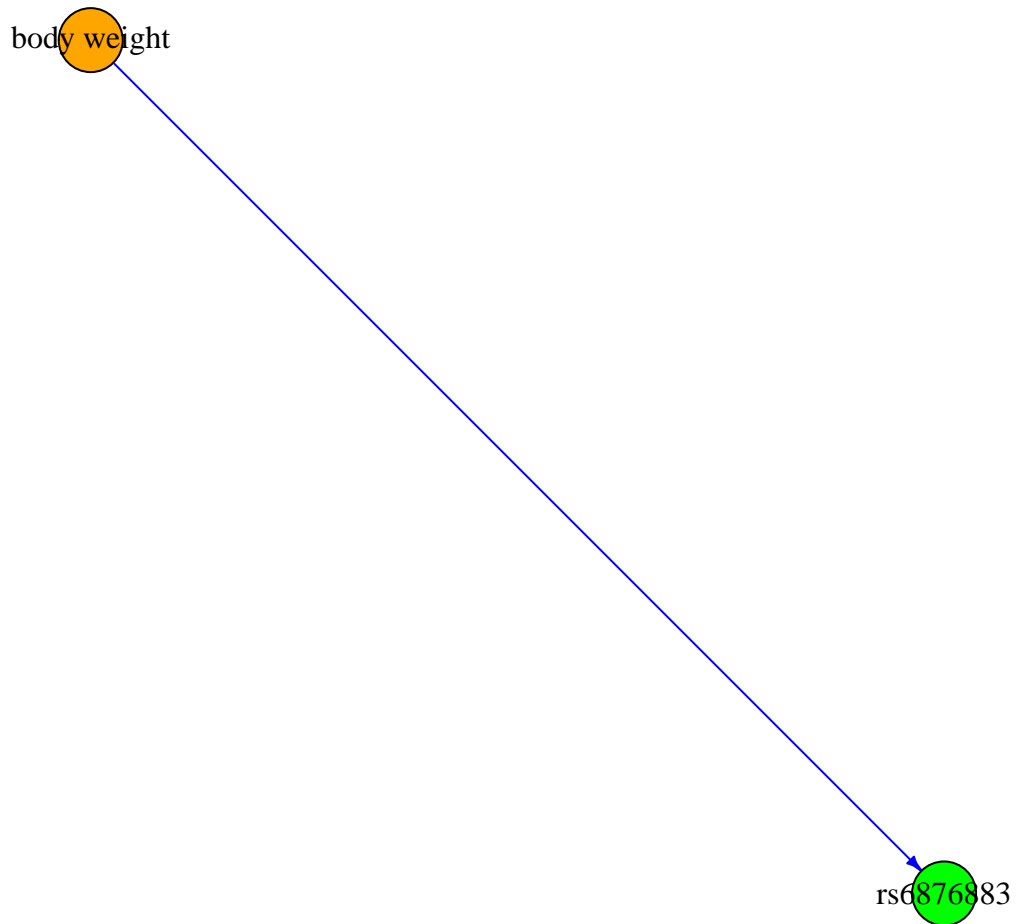

## Variant-Disease Network (beta wave measurement)

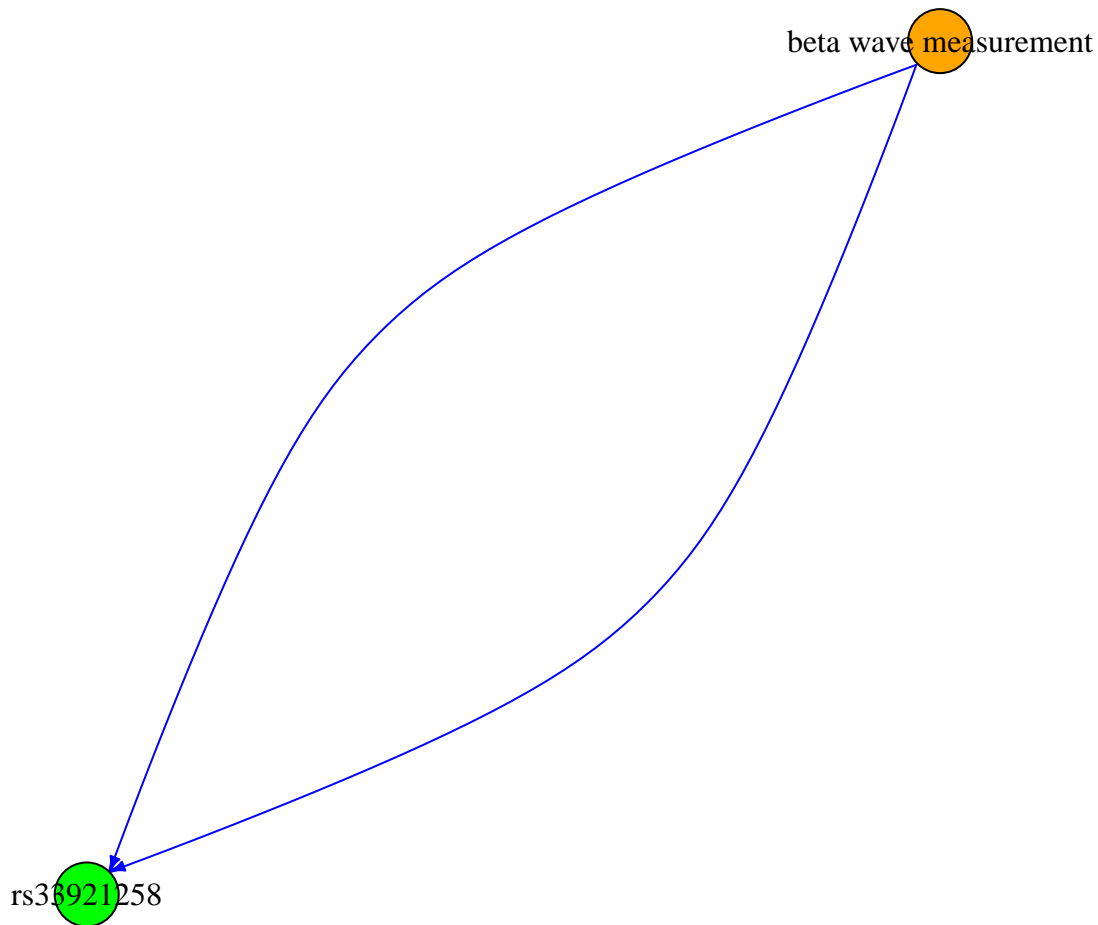

# Variant–Disease Network (electroencephalogram measurement)

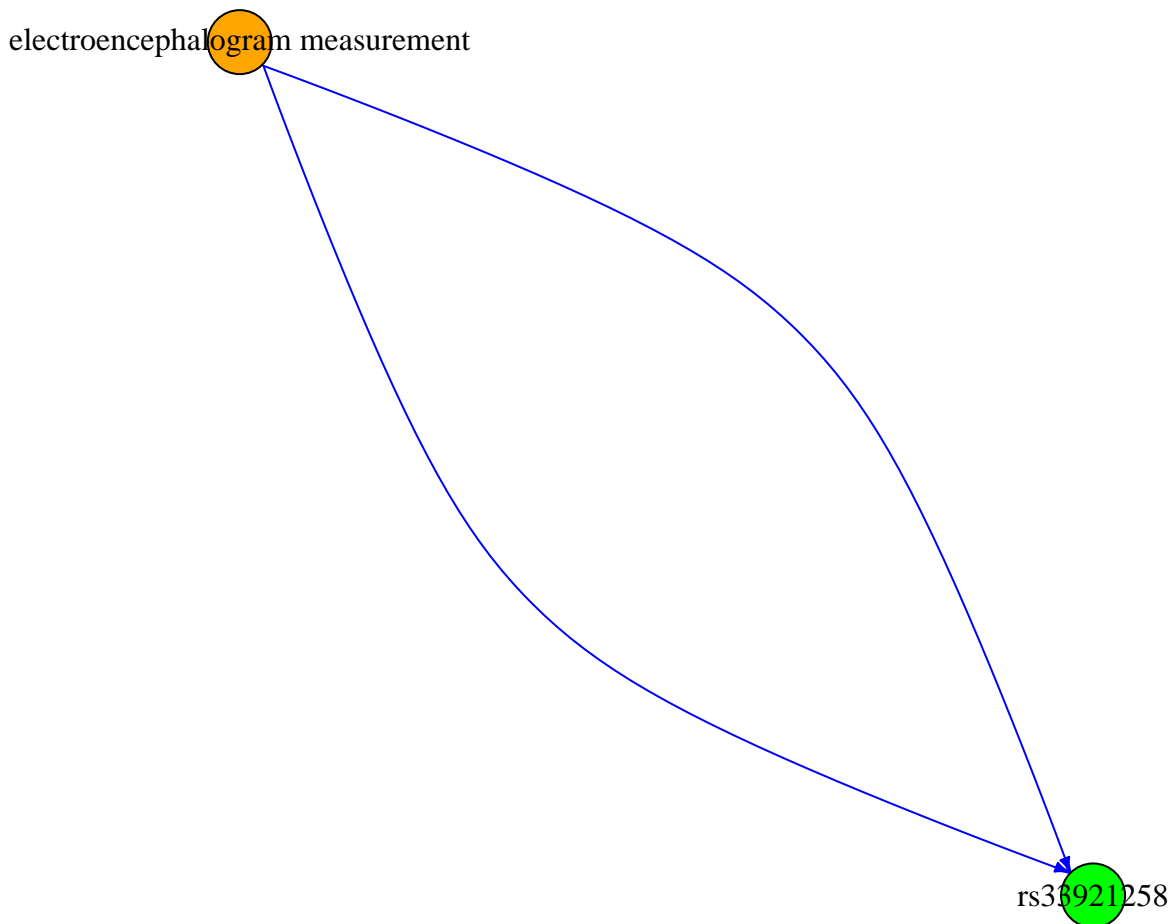

**Variant–Disease Network (sex hormone–binding globulin measurement)**

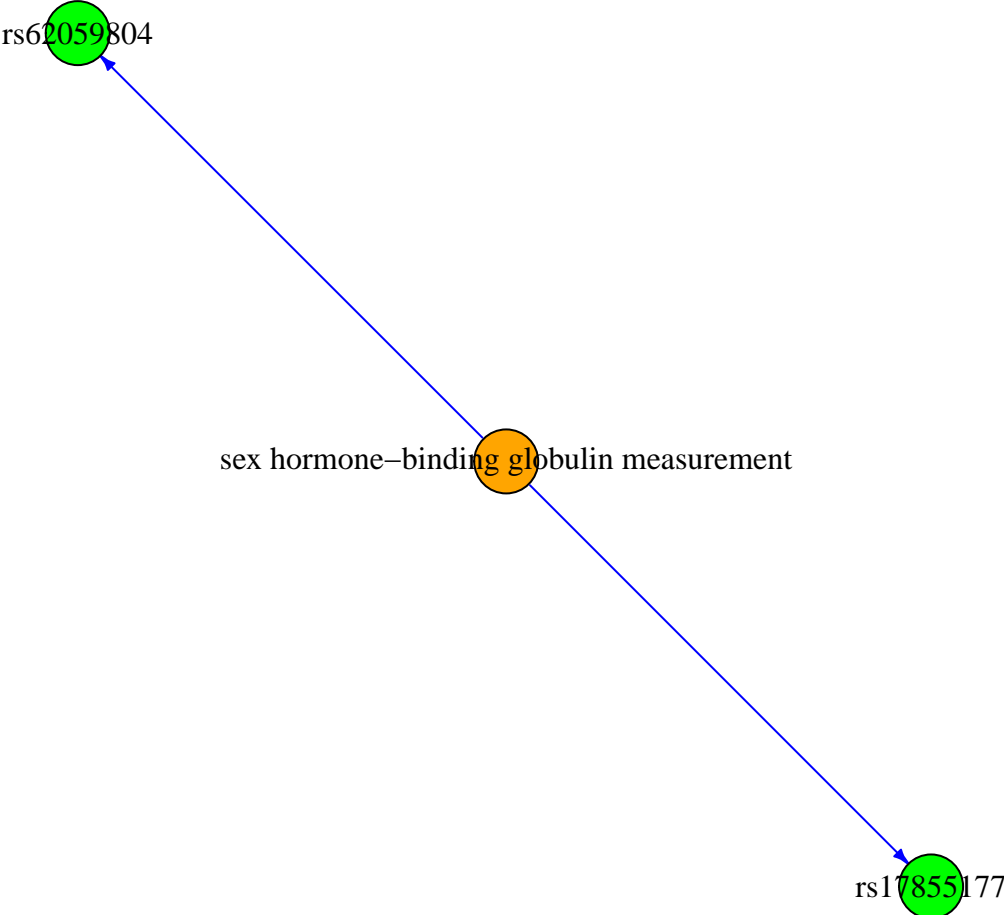



# Variant–Disease Network (nose morphology measurement)

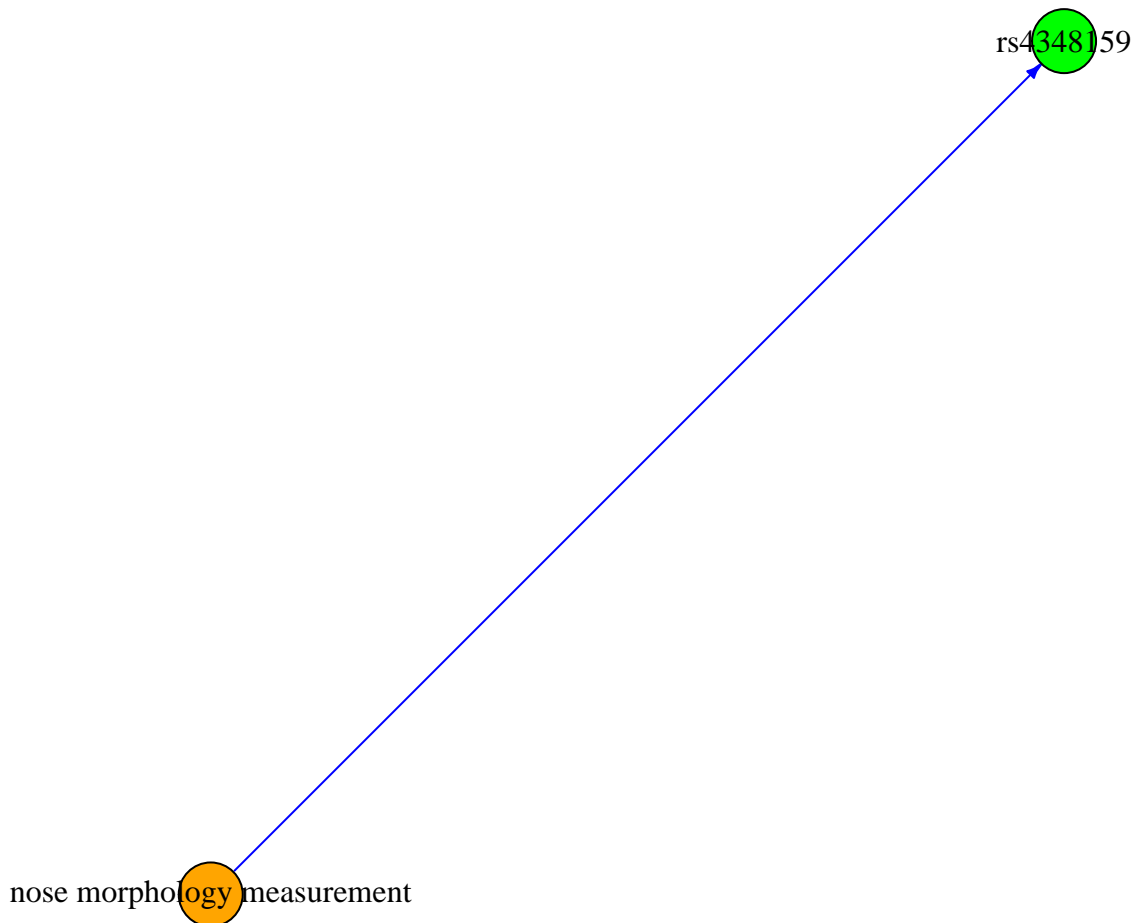

## Variant–Disease Network (acylcarnitine measurement)

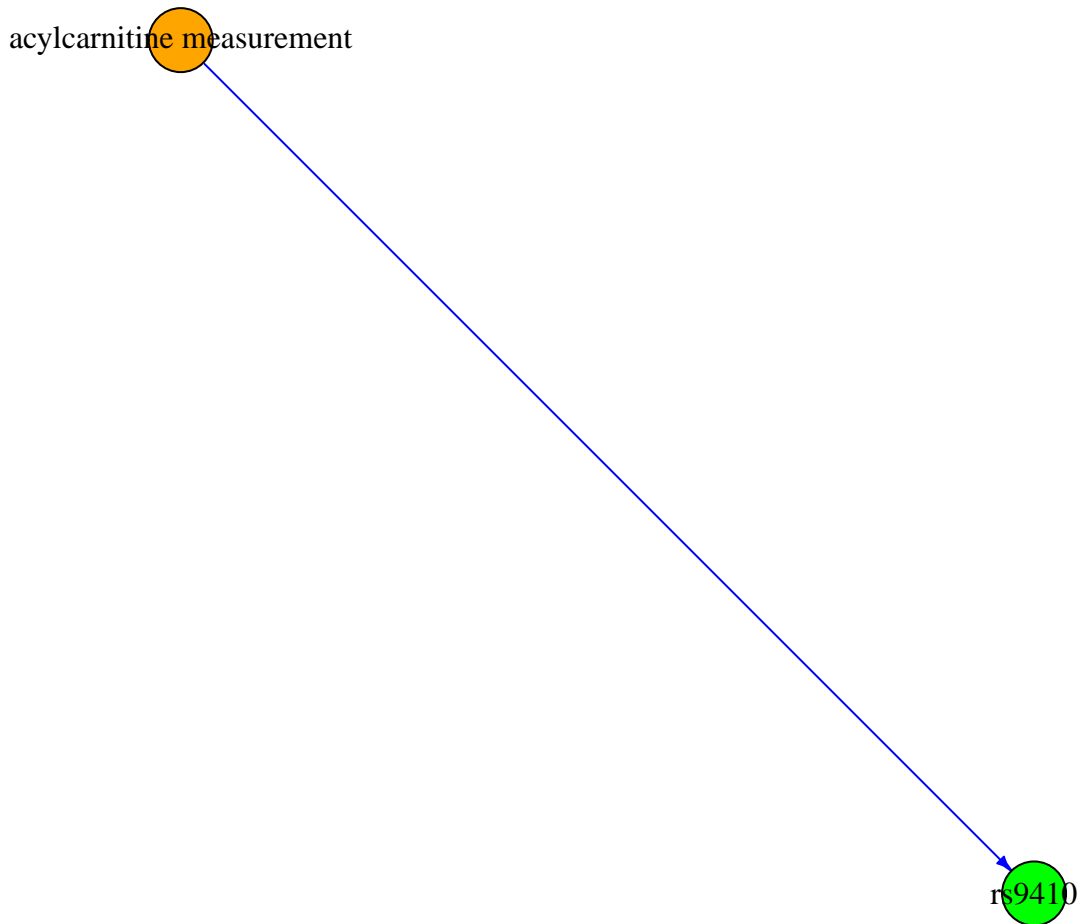

# Variant–Disease Network (peptidyl–prolyl cis–trans isomerase D measurement

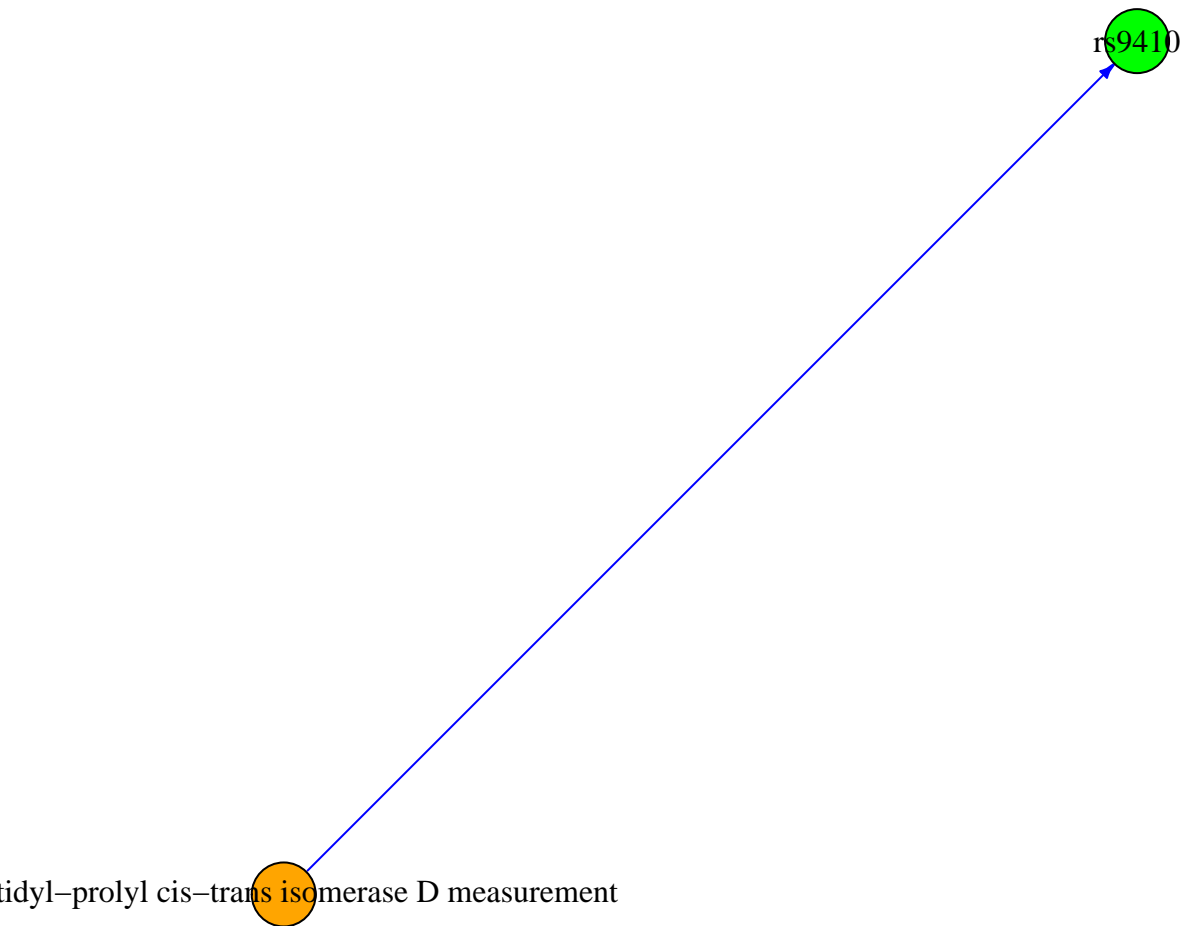

**Variant–Disease Network (chronic hepatitis C infection)**

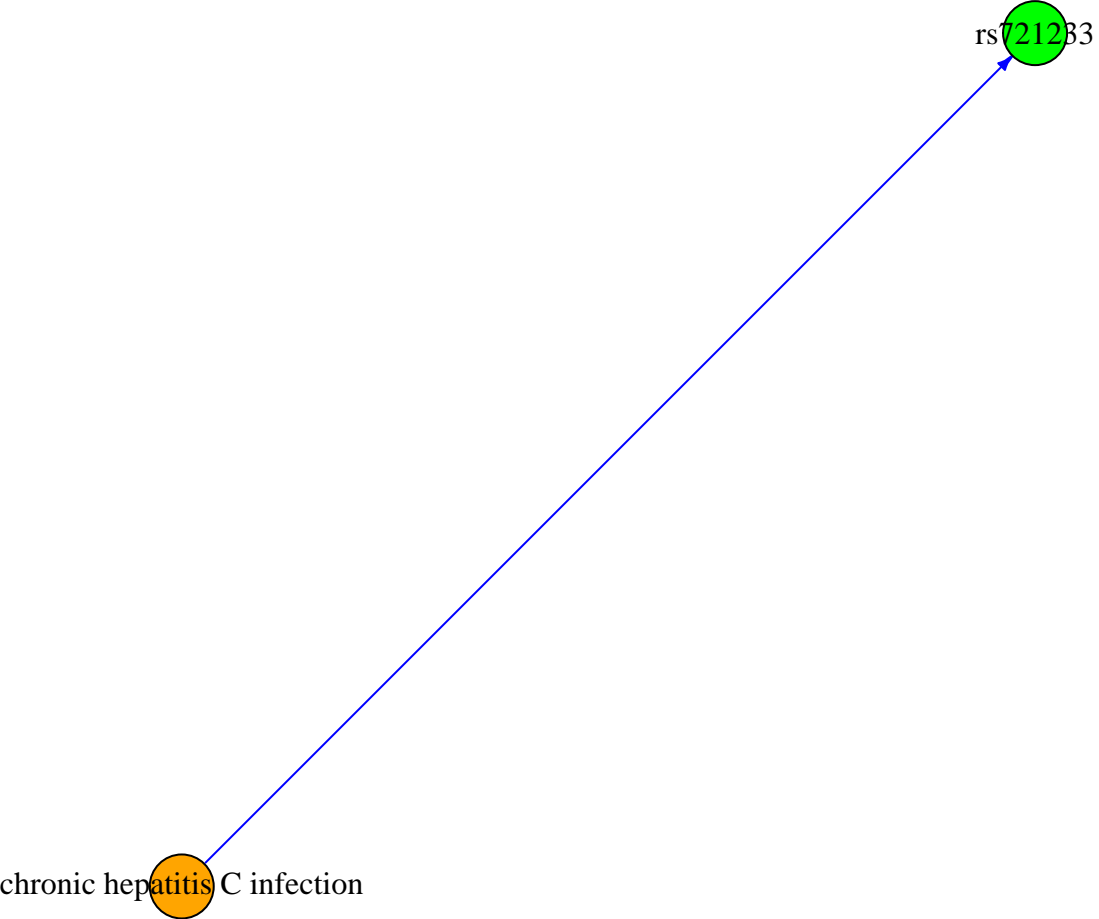

## Variant–Disease Network (necrotizing enterocolitis)

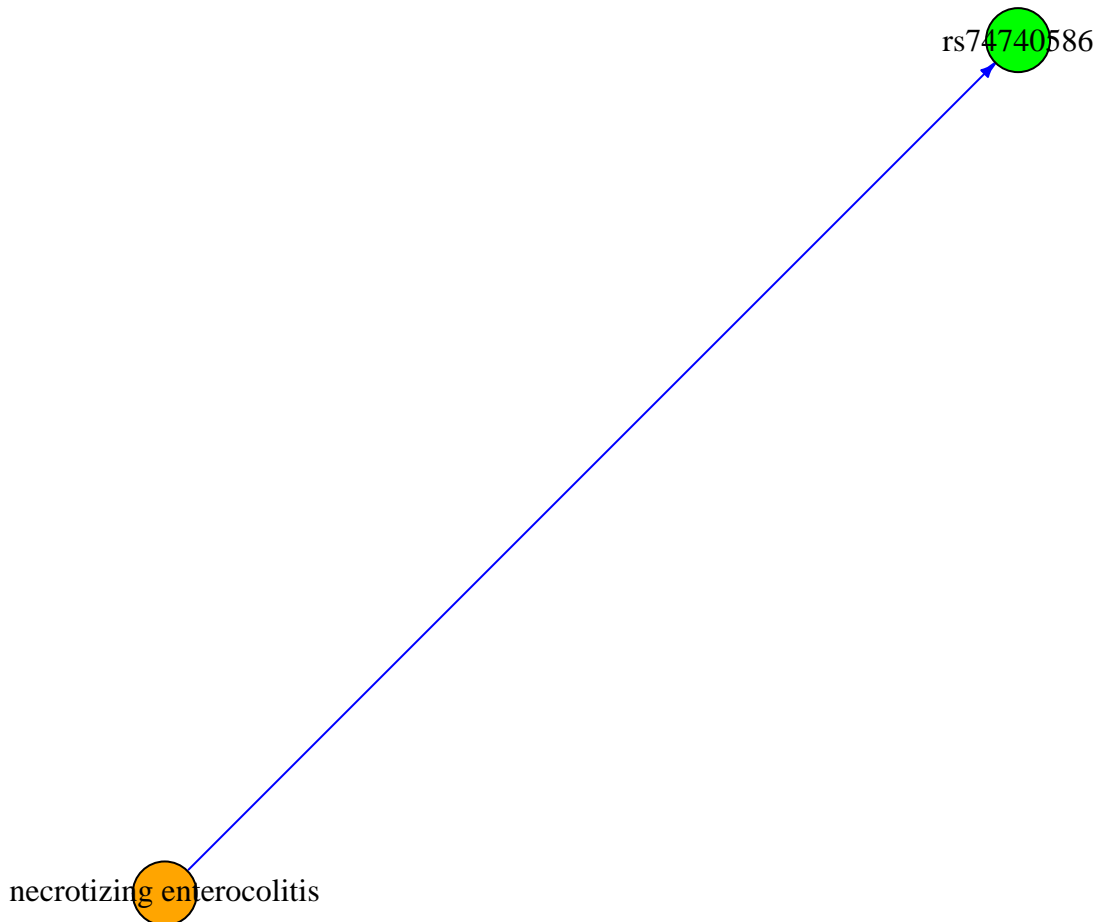

## Variant–Disease Network (premature birth)

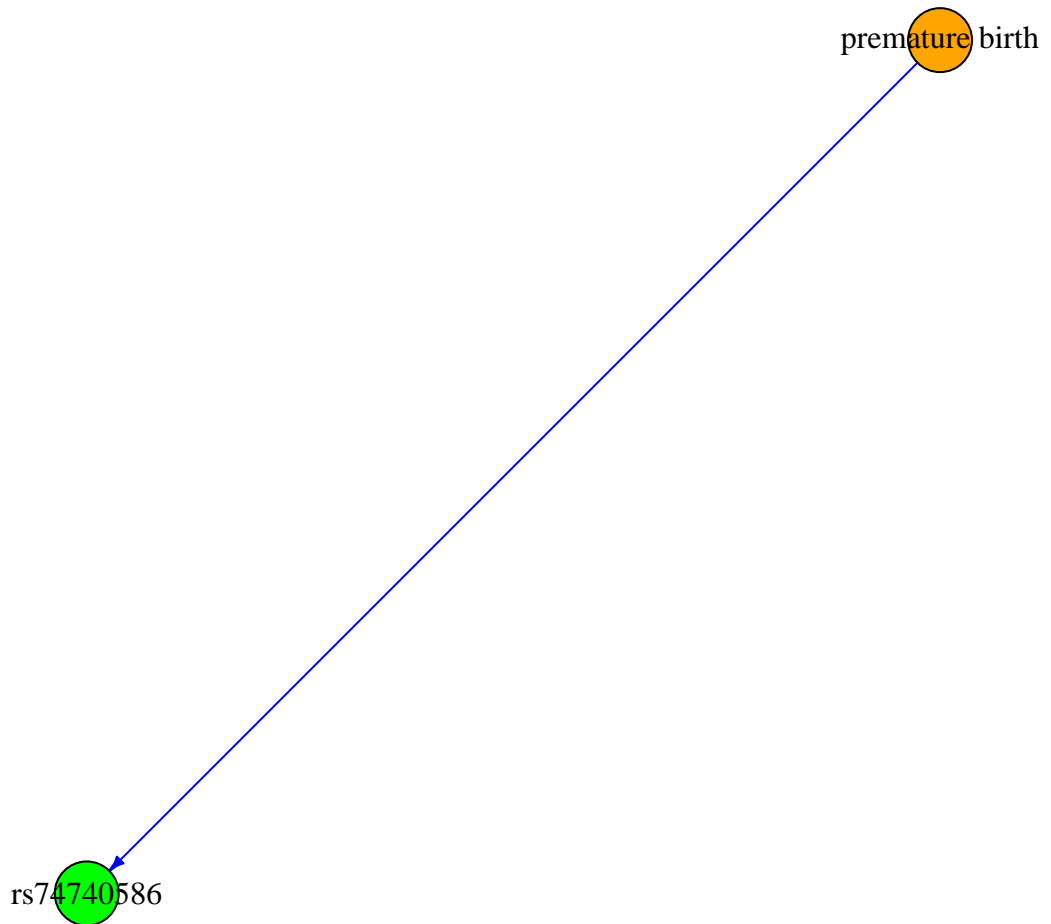

# Variant–Disease Network (allergic sensitization measurement)

allergic sensitization measurement

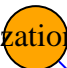

rs633800

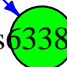

Variant–Disease Network (taxonomic microbiome measurement)

taxonomic microbiome measurement

rs6599079

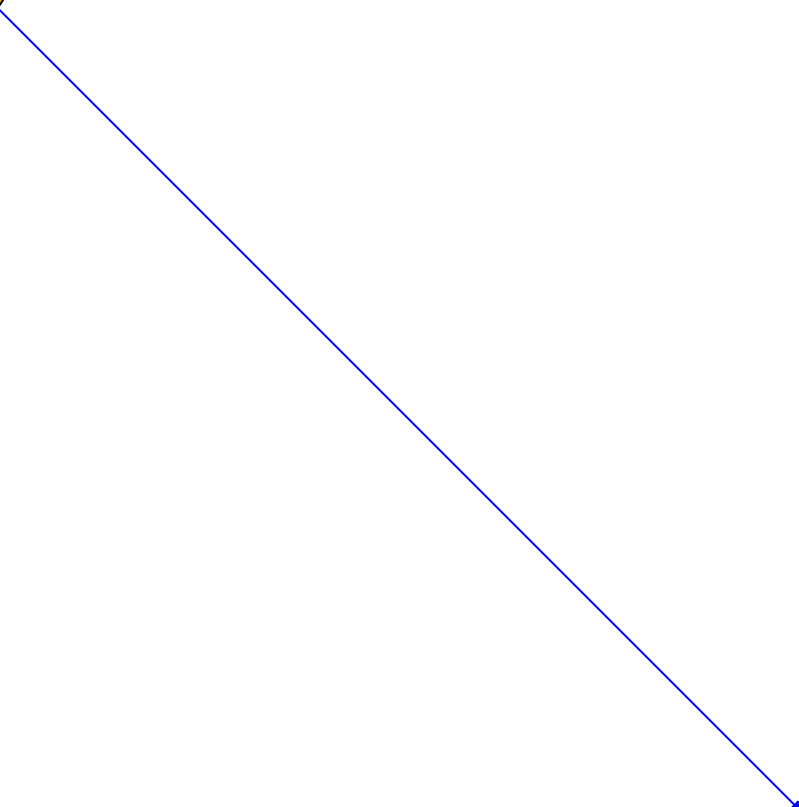



**Variant–Disease Network (fibroblast growth factor basic measurement)**

fibroblast growth factor basic measurement

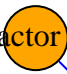

rs2004649

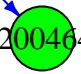

# Variant–Disease Network (cerebrospinal fluid biomarker measurement)

rs9675120

cerebrospinal fluid biomarker measurement

rs7037849

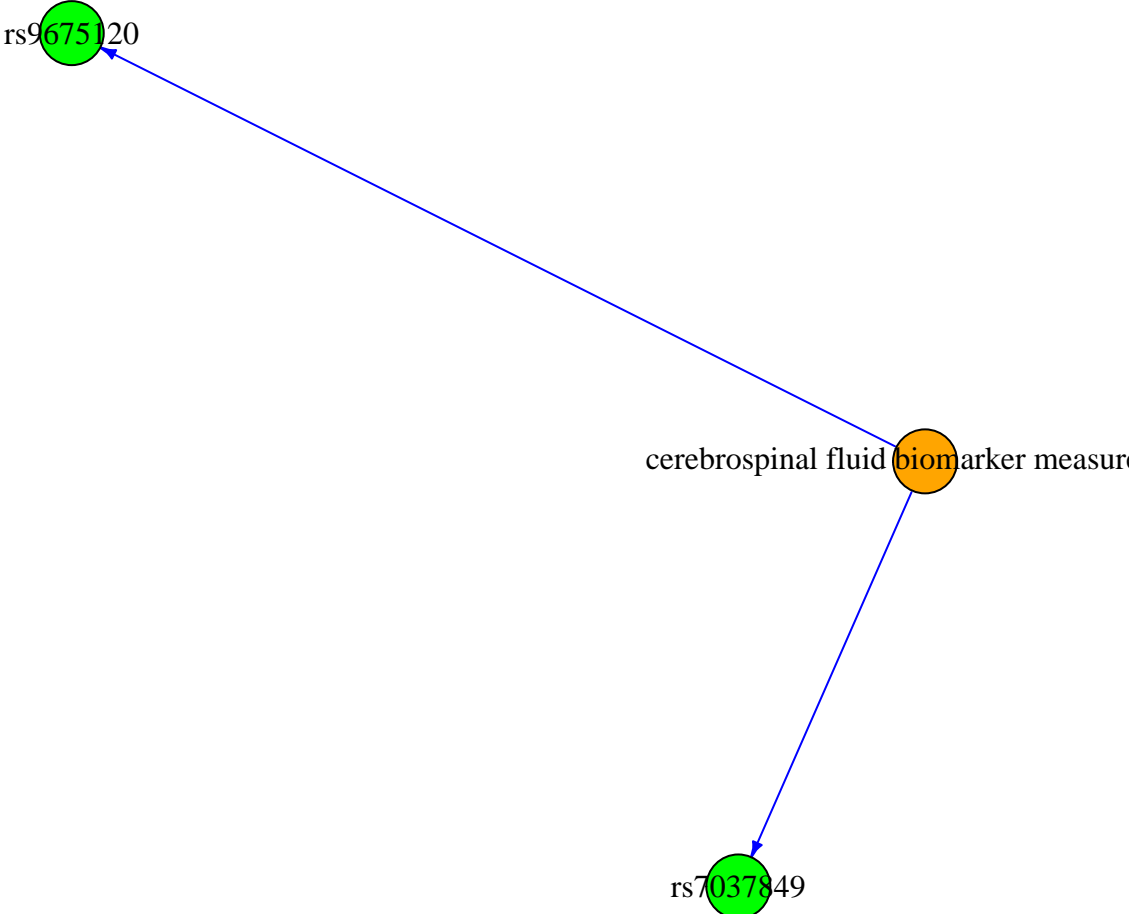

network (WAP, Kazal, immunoglobulin, Kunitz and NTR domain-containing p

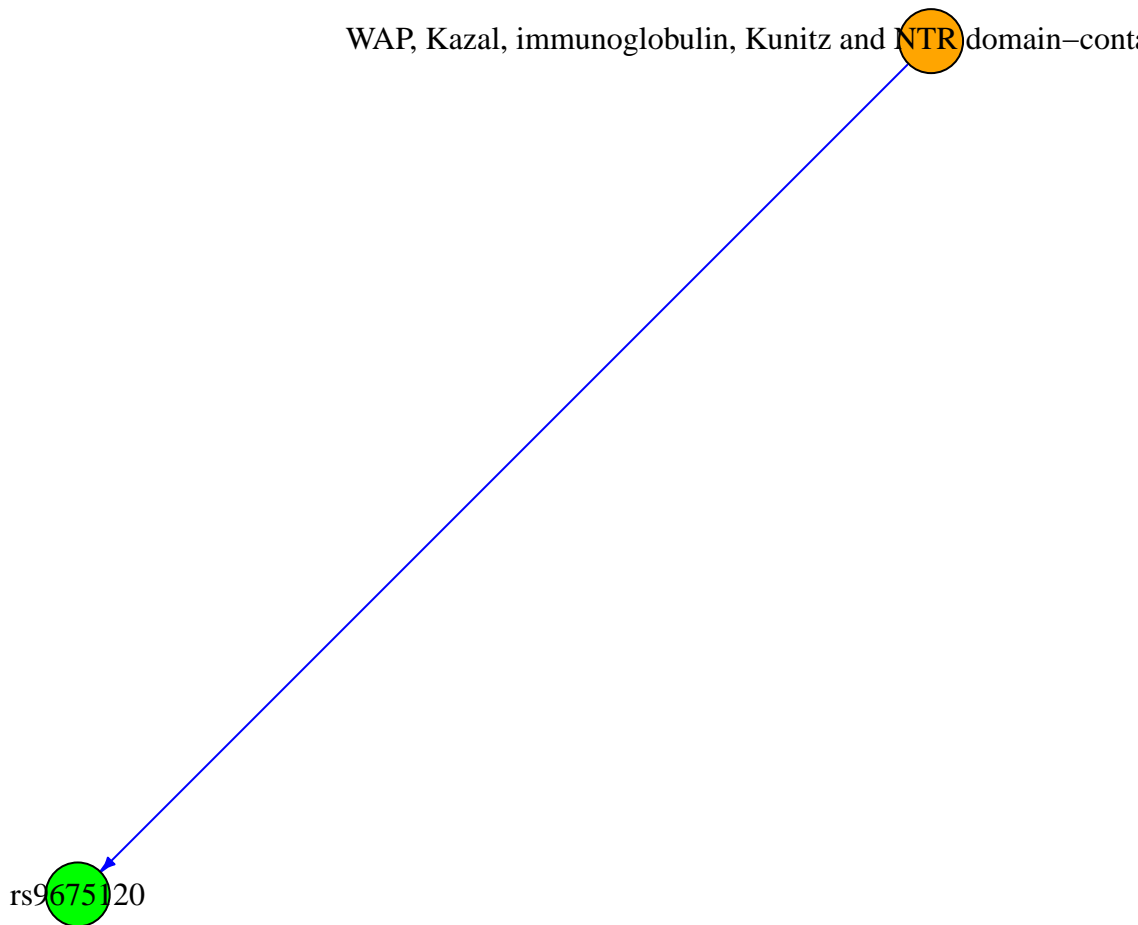

# Variant–Disease Network (beta–nerve growth factor measurement)

beta–nerve growth factor measurement

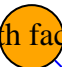

rs3749348

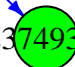

## Variant–Disease Network (alcohol consumption measurement)

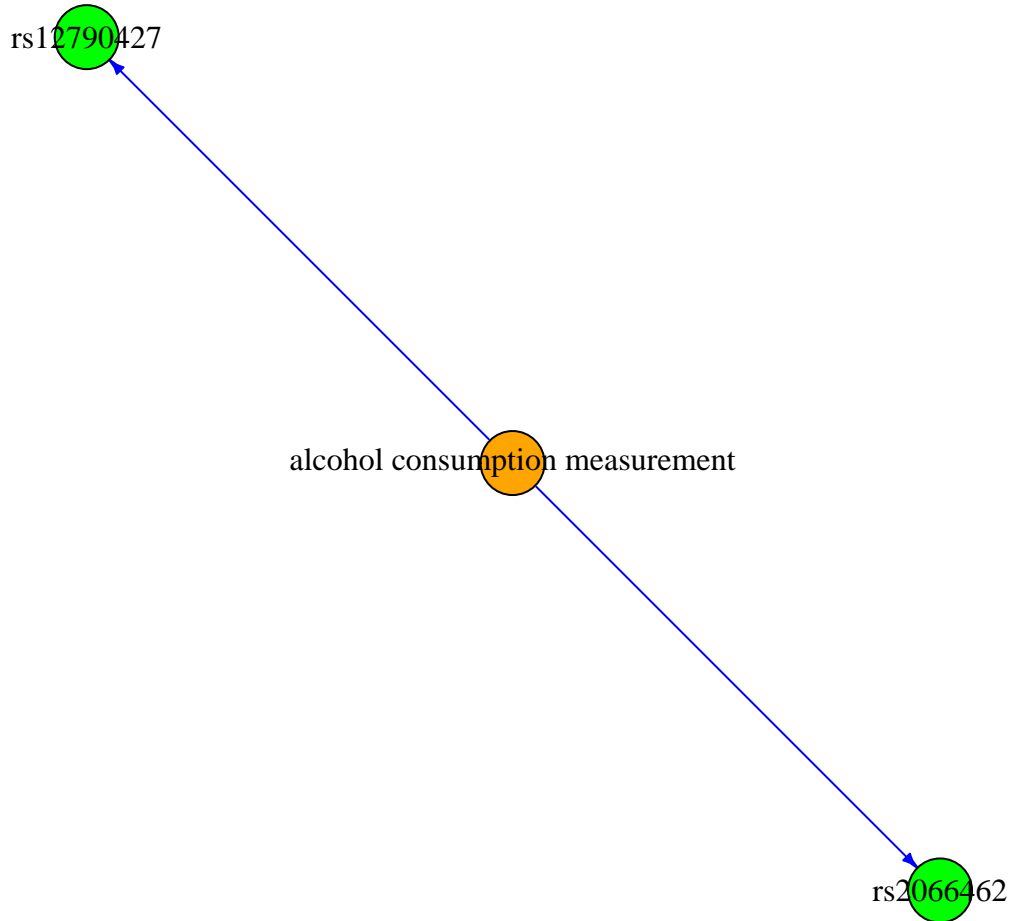

## Variant–Disease Network (alcohol drinking)

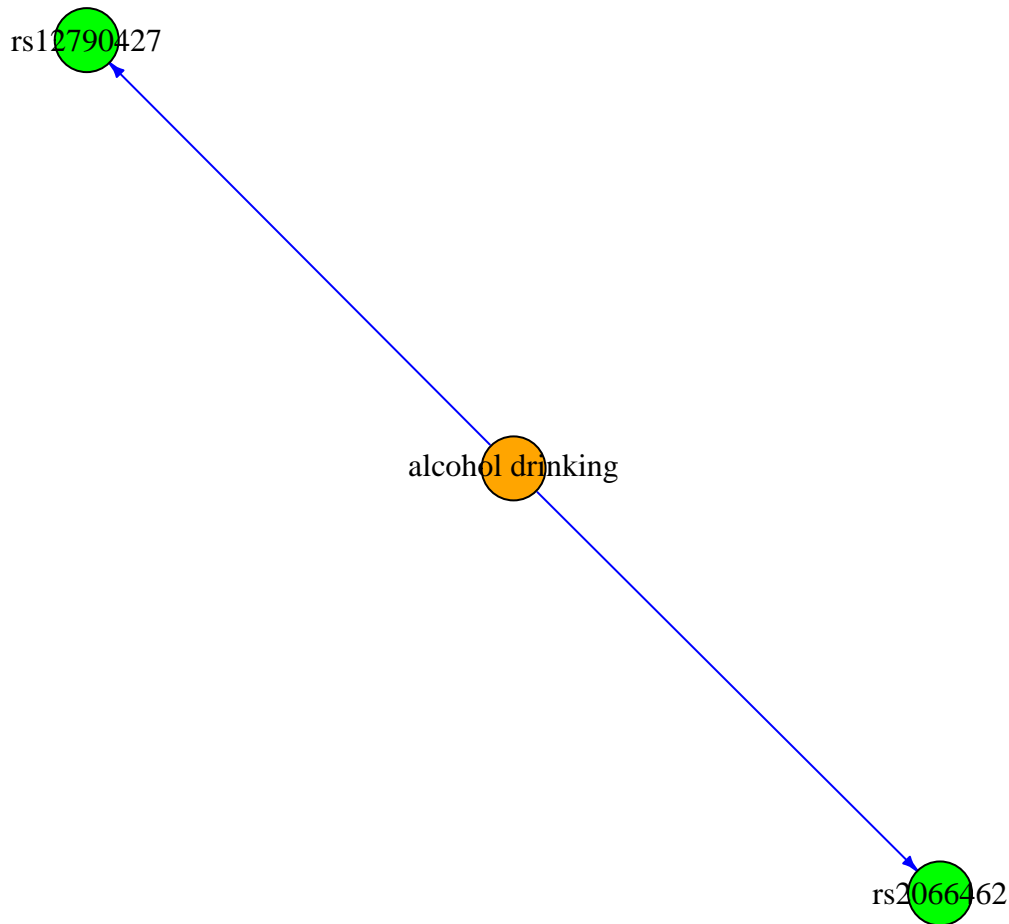

# Variant–Disease Network (coagulation factor measurement)

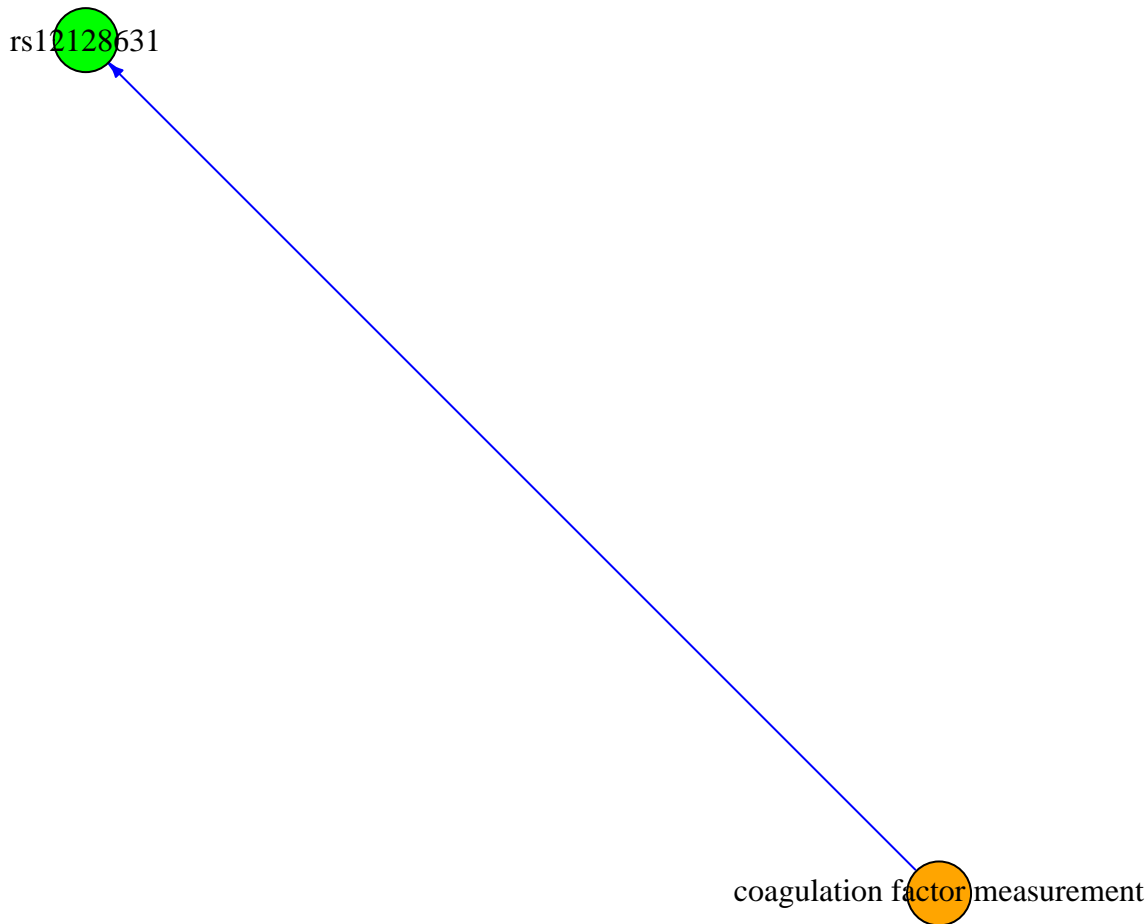

## Variant-Disease Network (response to drug)

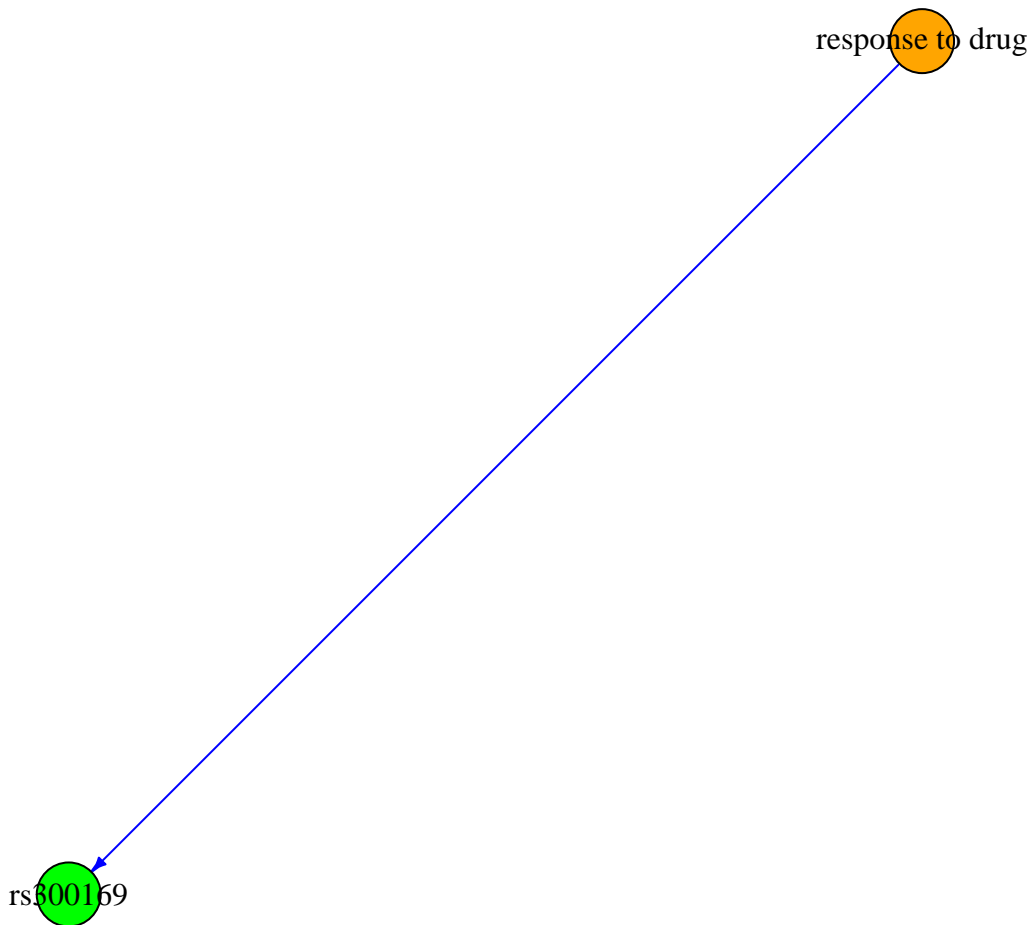



## Variant–Disease Network (Abnormality of refraction)

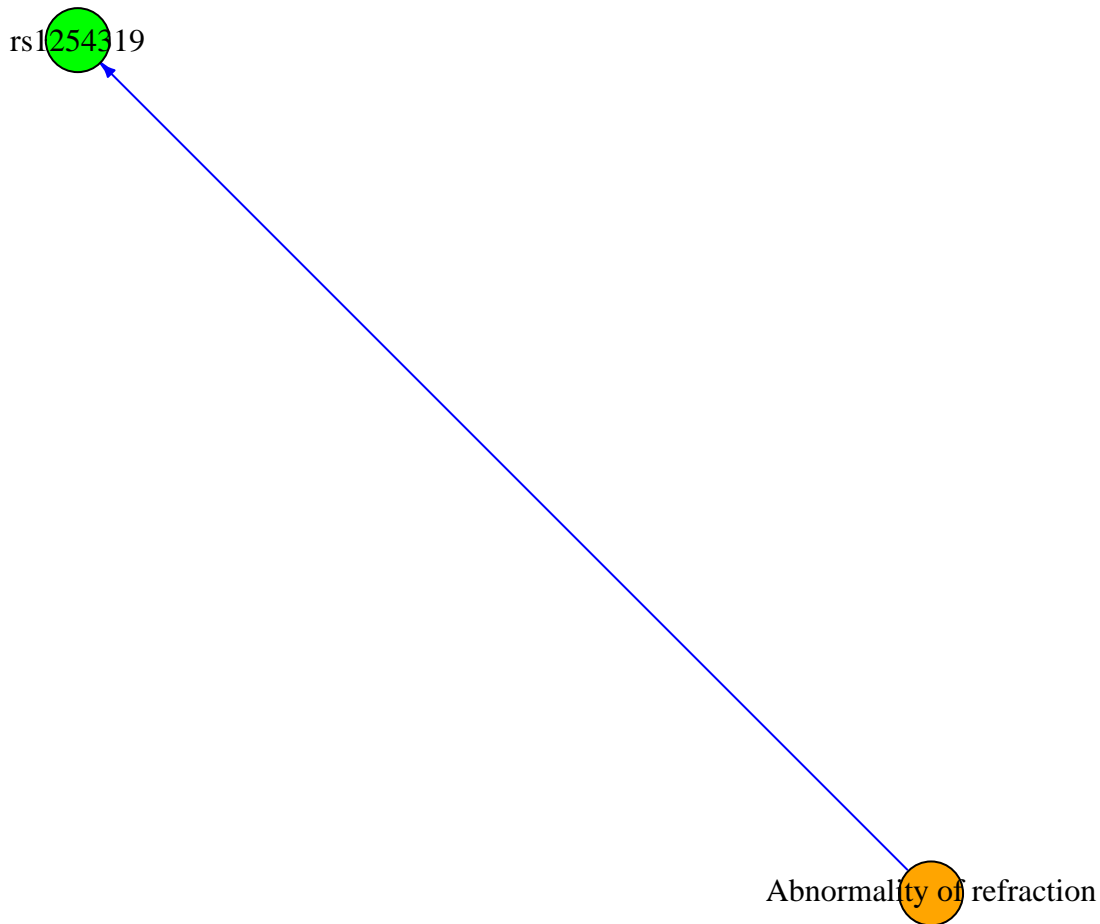

## Variant–Disease Network (estrone measurement)

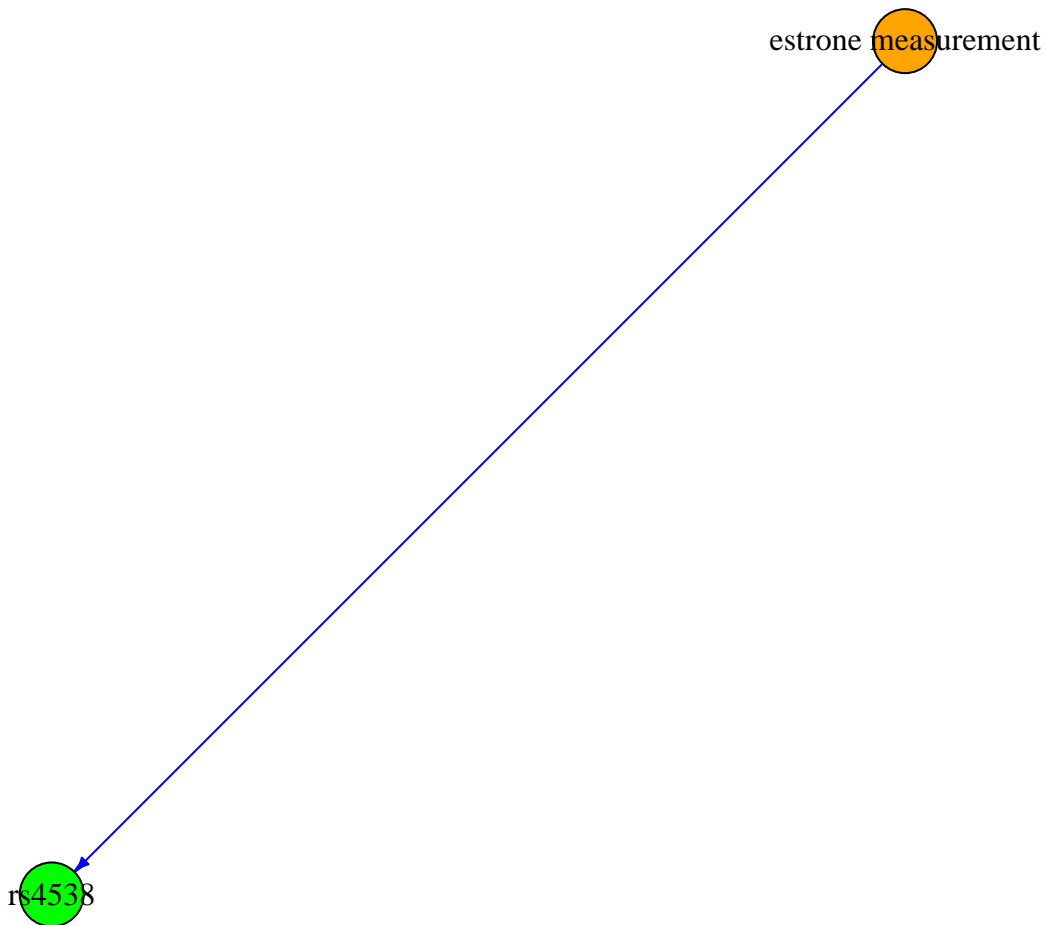

## Variant-Disease Network (diverticulitis)

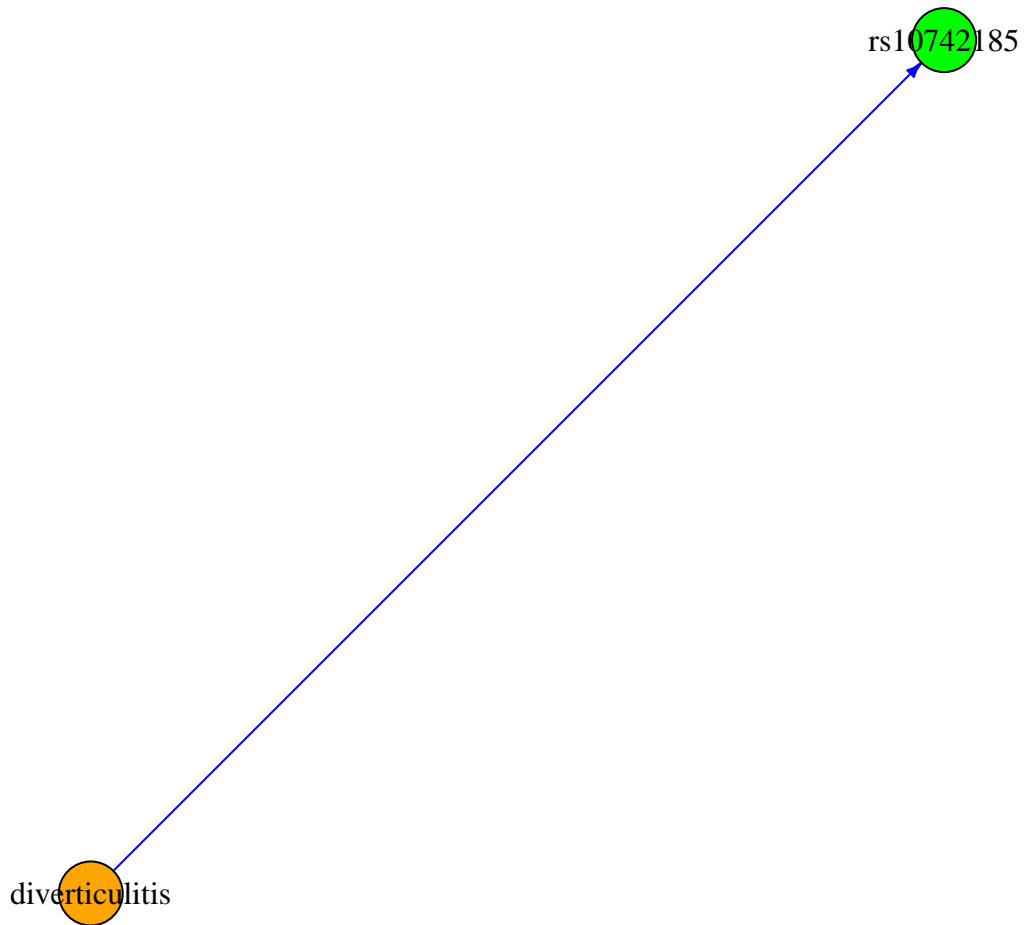

## Variant–Disease Network (eye color)

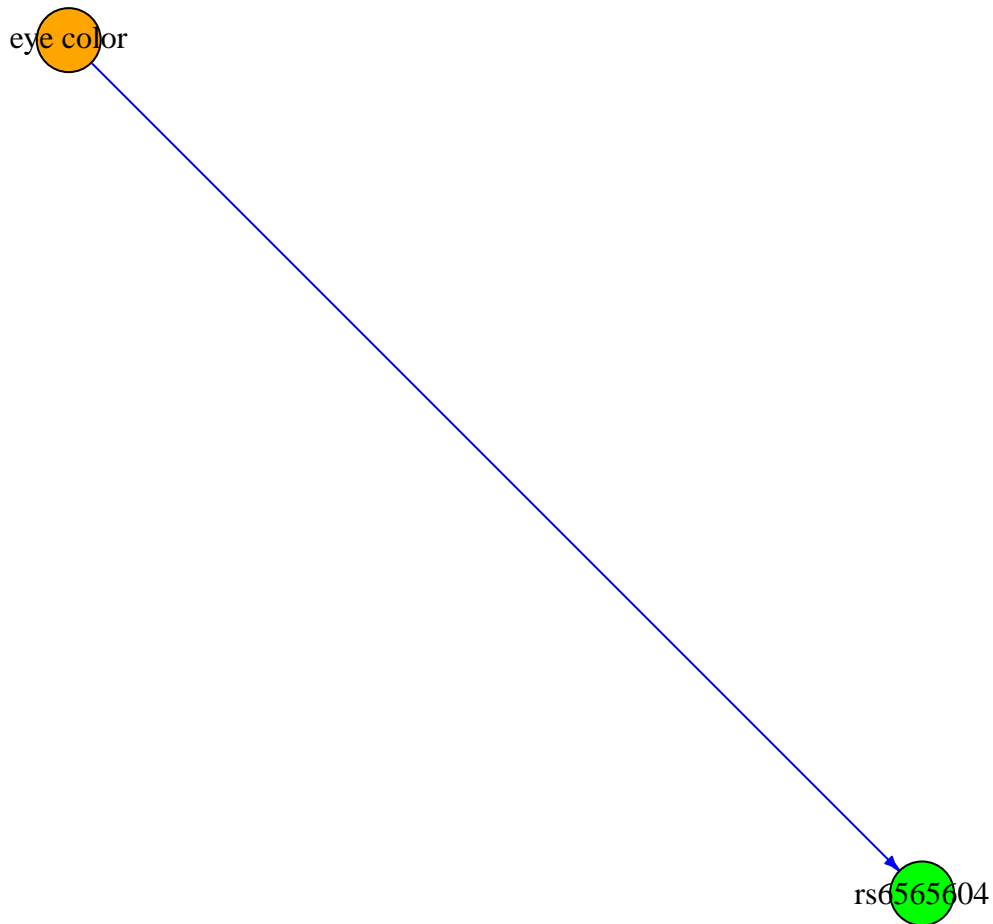

## Variant-Disease Network (bilirubin measurement)

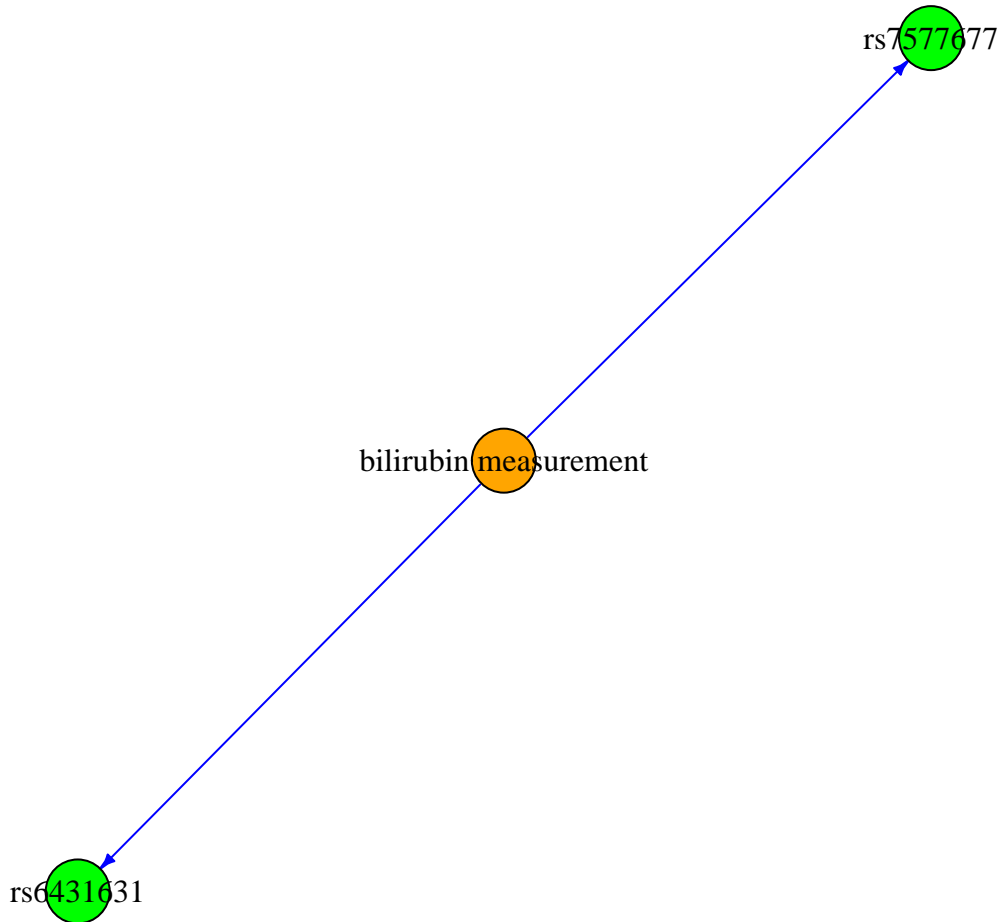

## Variant–Disease Network (CCL2 measurement)

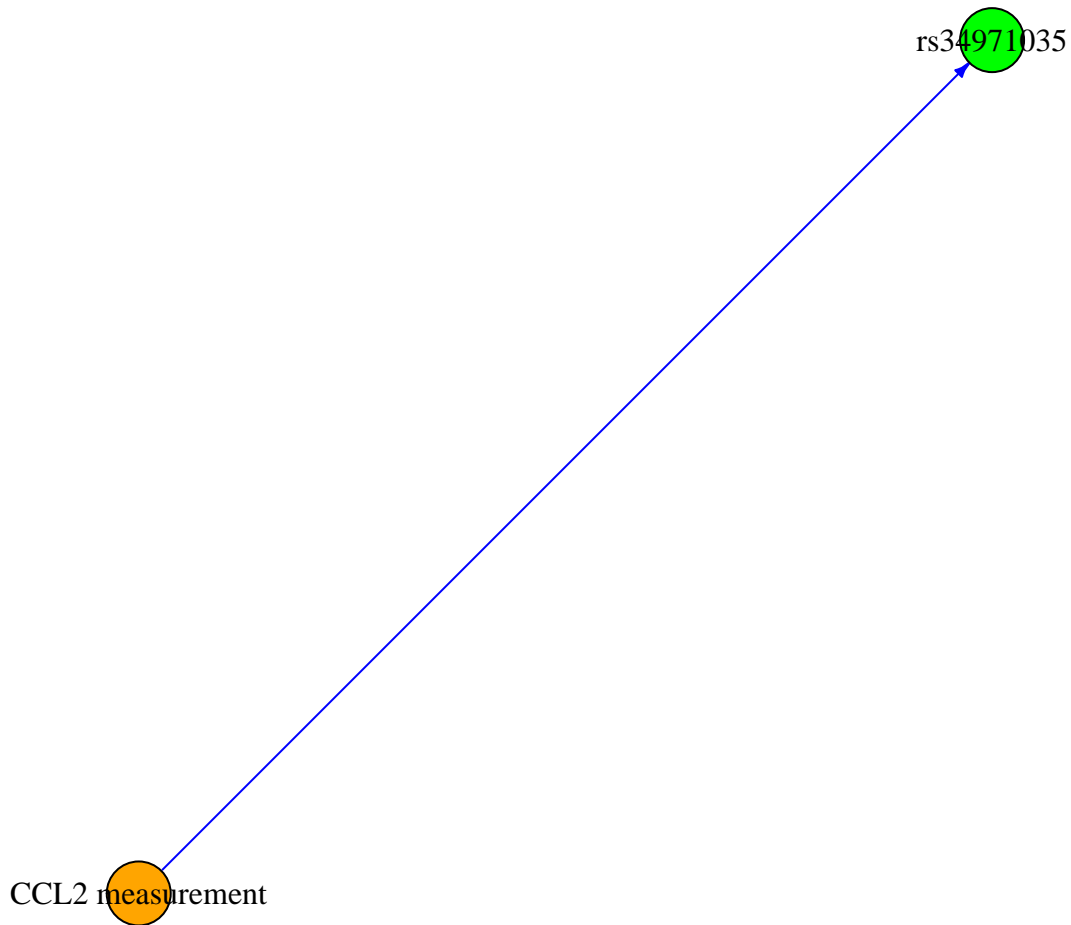

## Variant–Disease Network (lipoprotein A measurement)

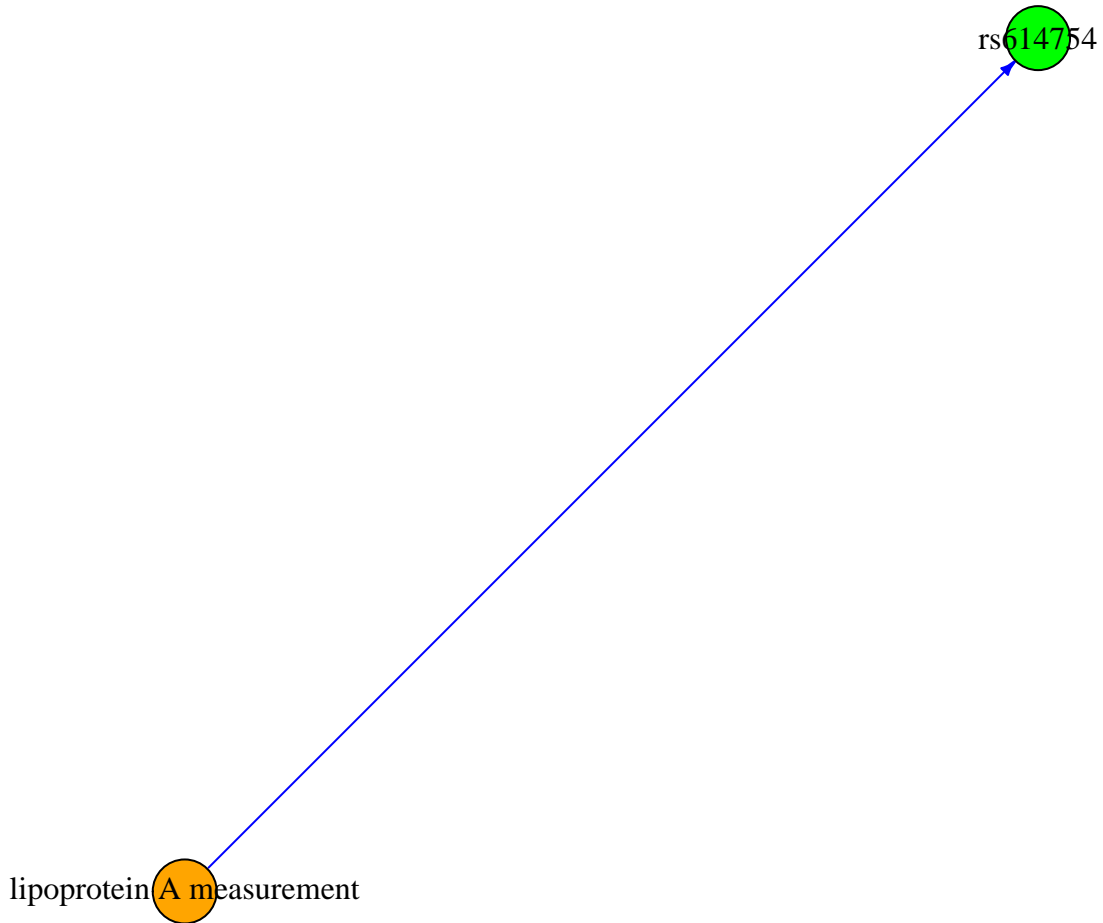

## Variant–Disease Network (response to alcohol)

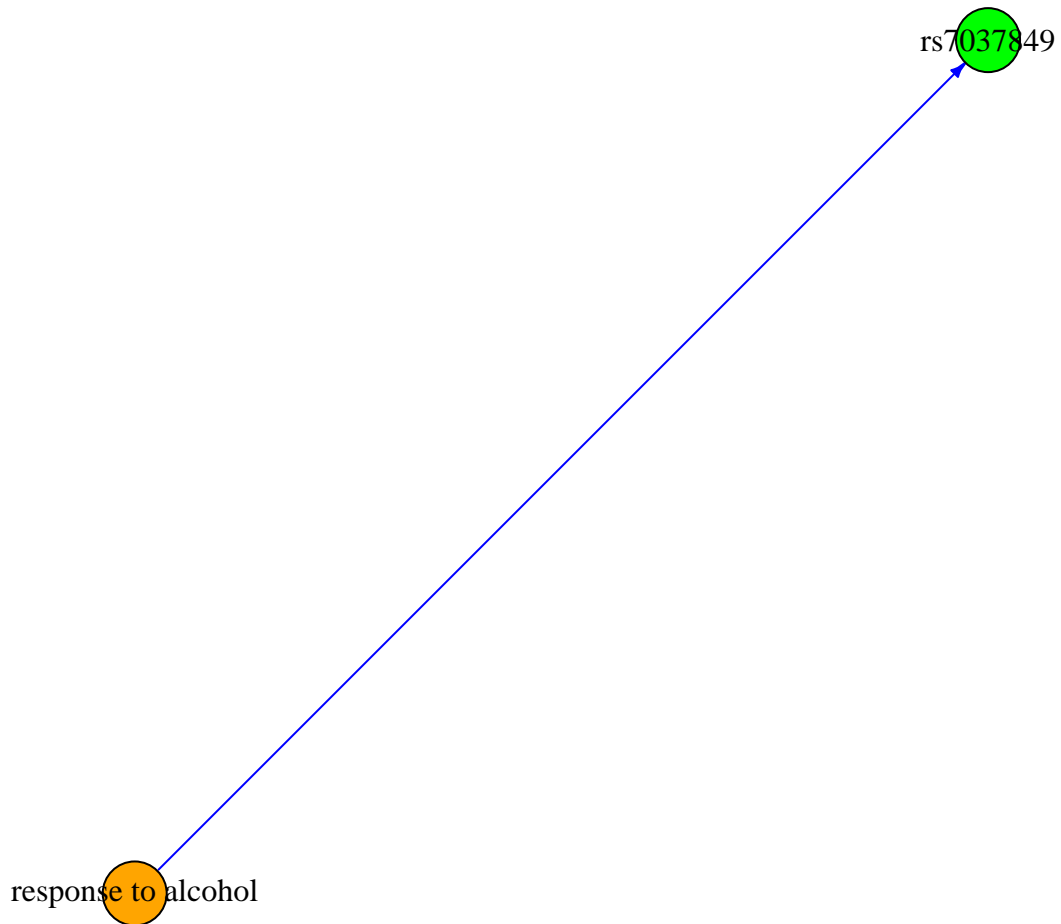



# Variant–Disease Network (synophrys measurement)

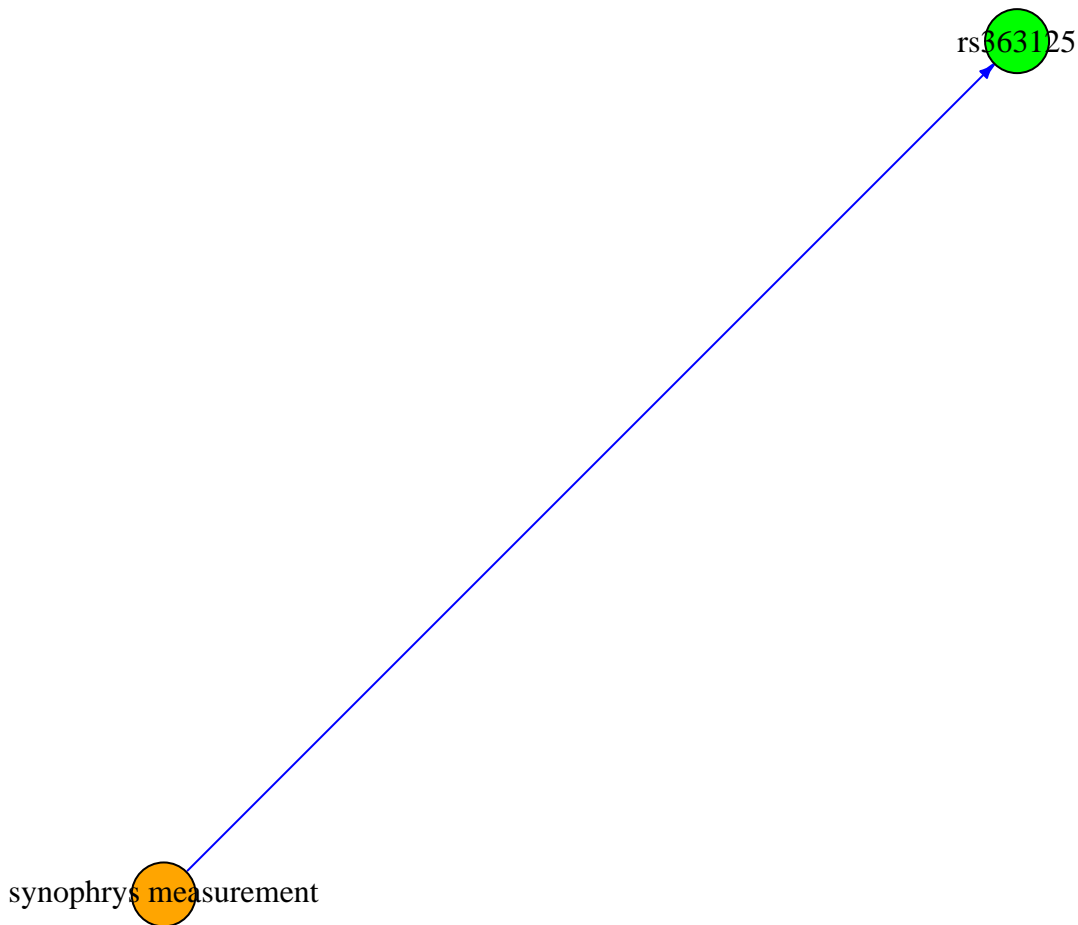

**Variant–Disease Network (response to antineoplastic agent)**

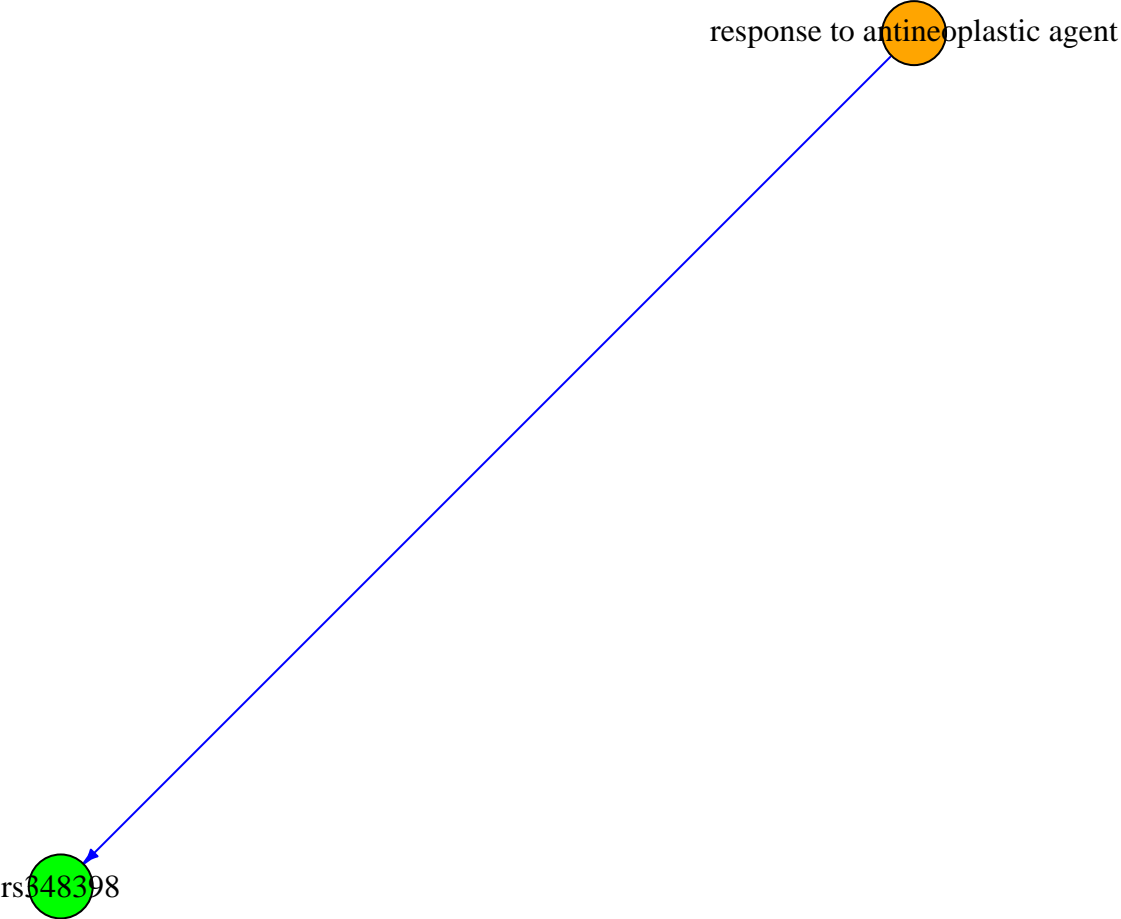

**Variant–Disease Network (chin morphology measurement)**

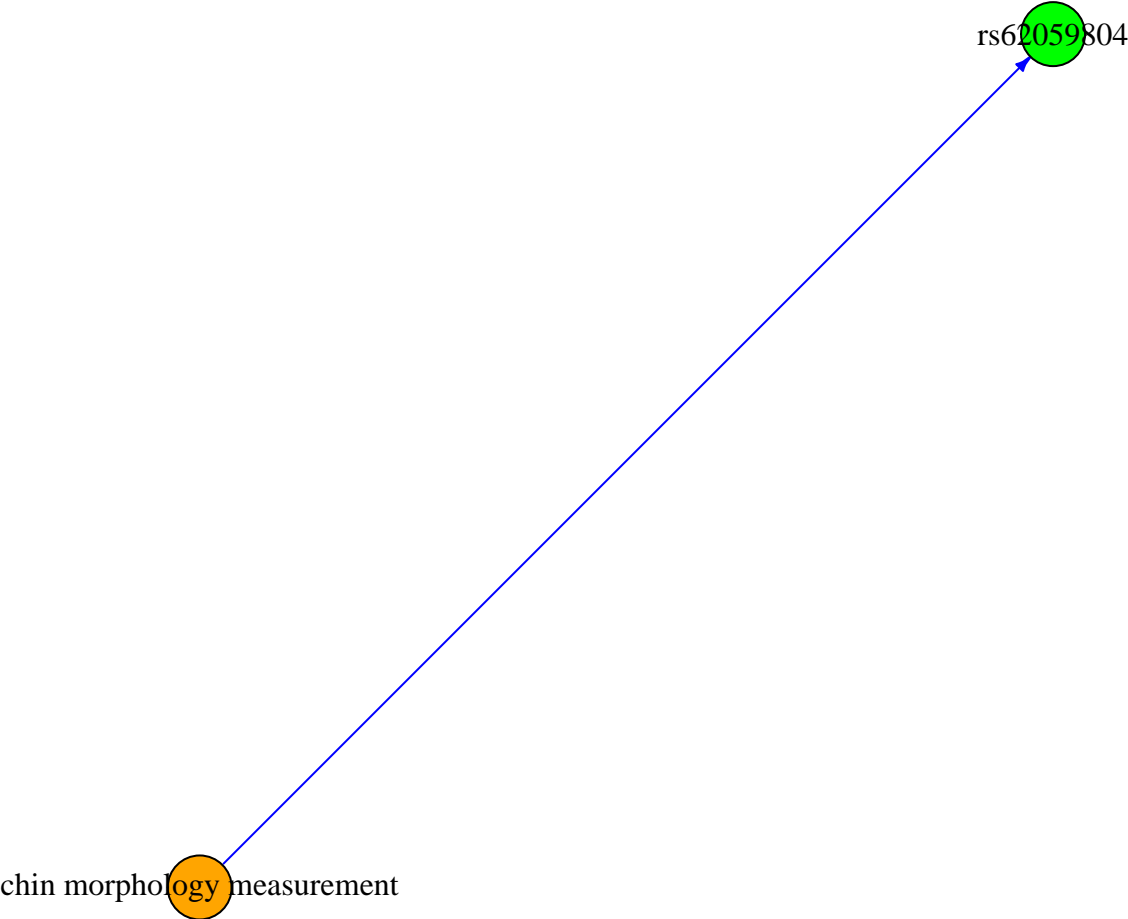

# Variant-Disease Network (cancer biomarker measurement)

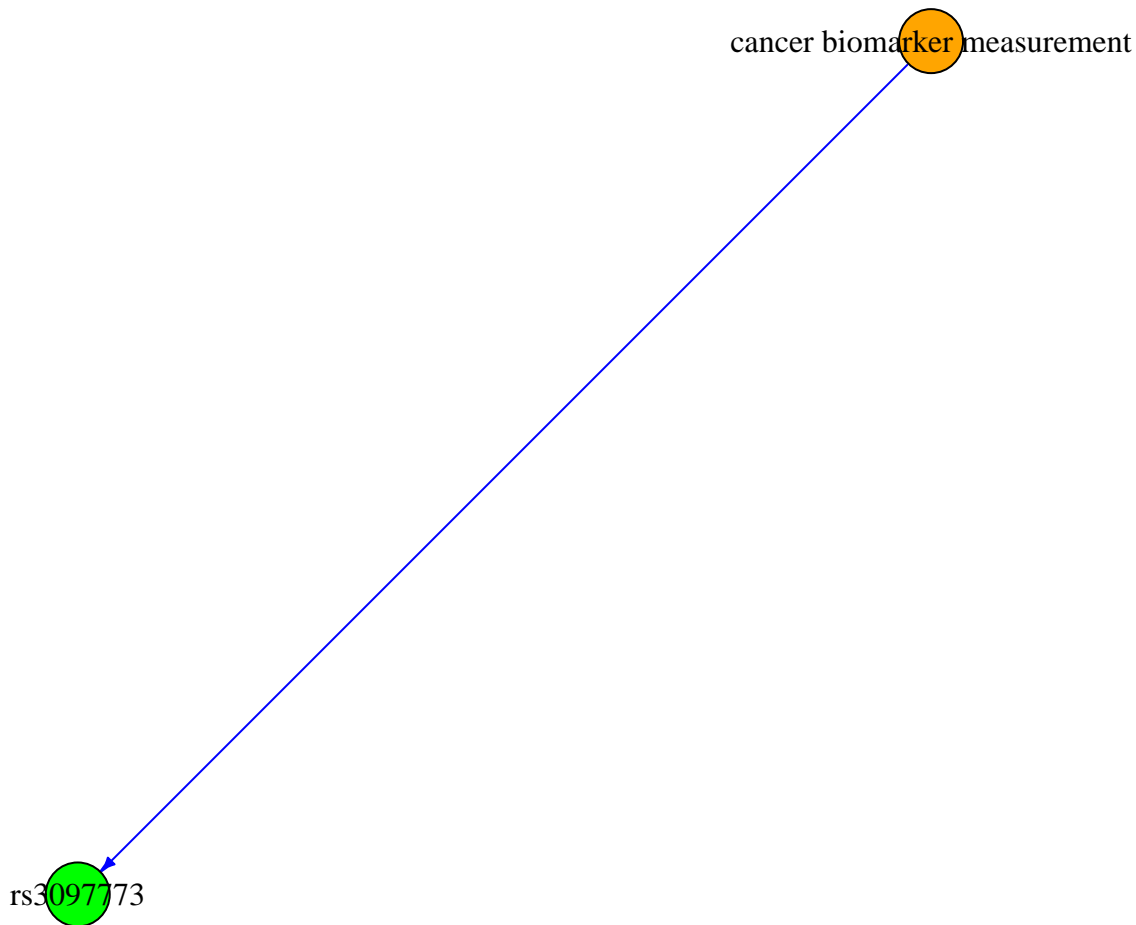

## Variant–Disease Network (oral cavity cancer)

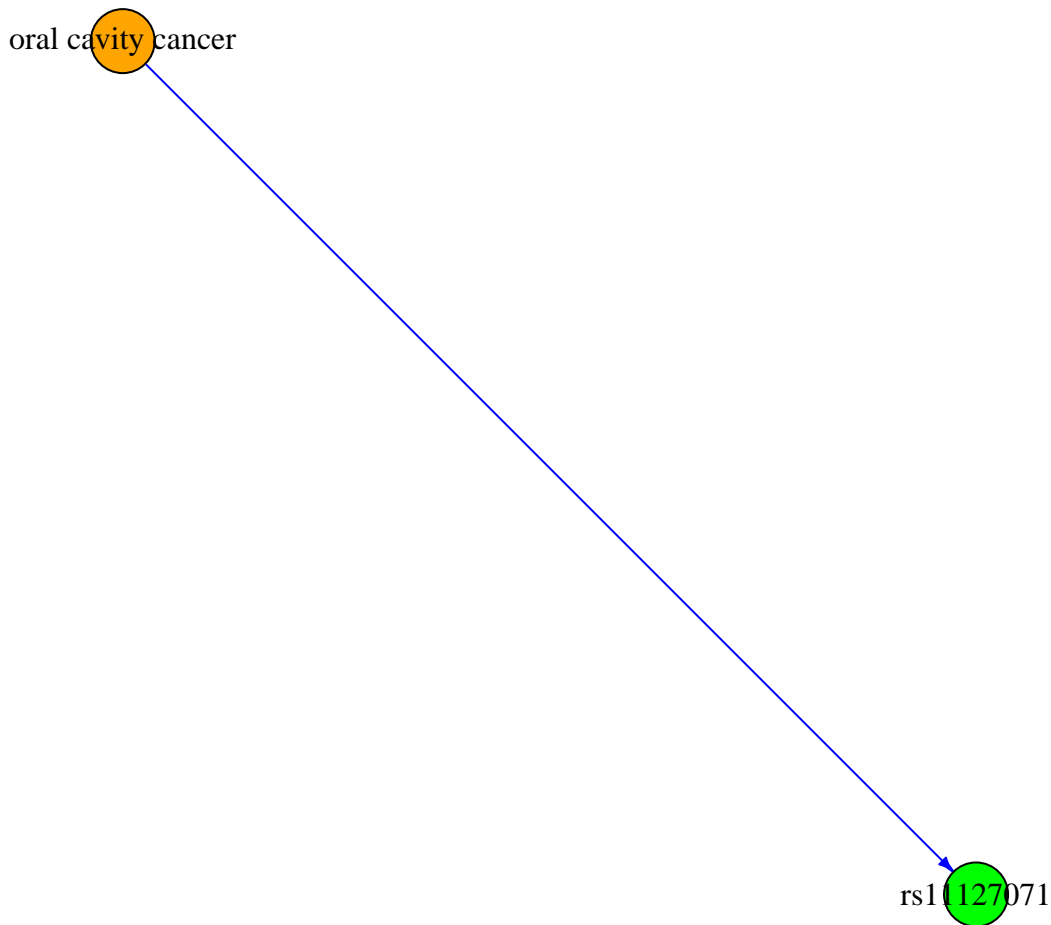

# Variant-Disease Network (melanoma-derived growth regulatory protein measu

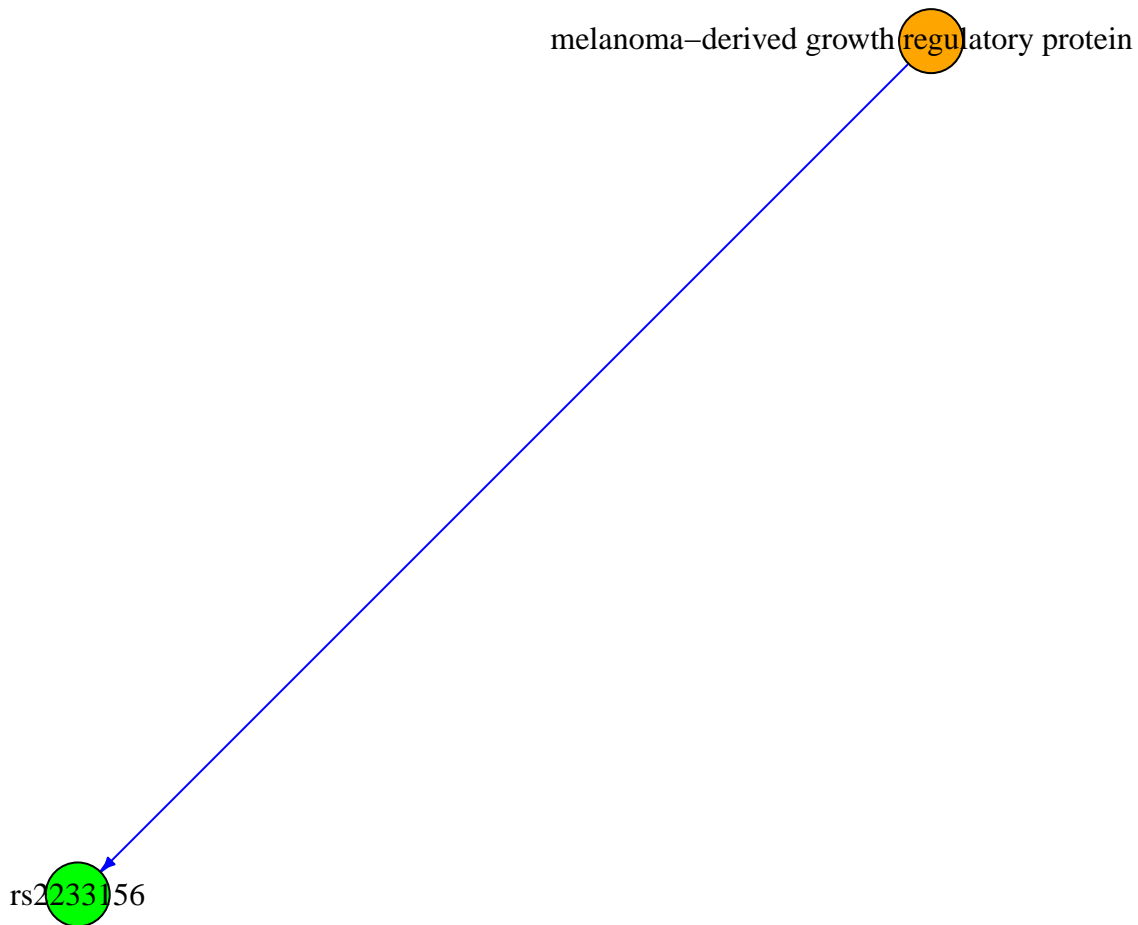

Supplement: Supplementary file 7 [file Supplementary_Fig_S5.pdf › Supplementary files/Supplementary_Fig_S5.pdf]
