# Supplementary material for: Evaluation of Five Mammalian Models for Human Disease Research Using Genomic and Bioinformatic Approaches
Source: Preprints.org preprint supplement (doi:10.20944/preprints202305.1816.v1), 2023-05-26

## Variant–Disease Network (adenoma malignum)

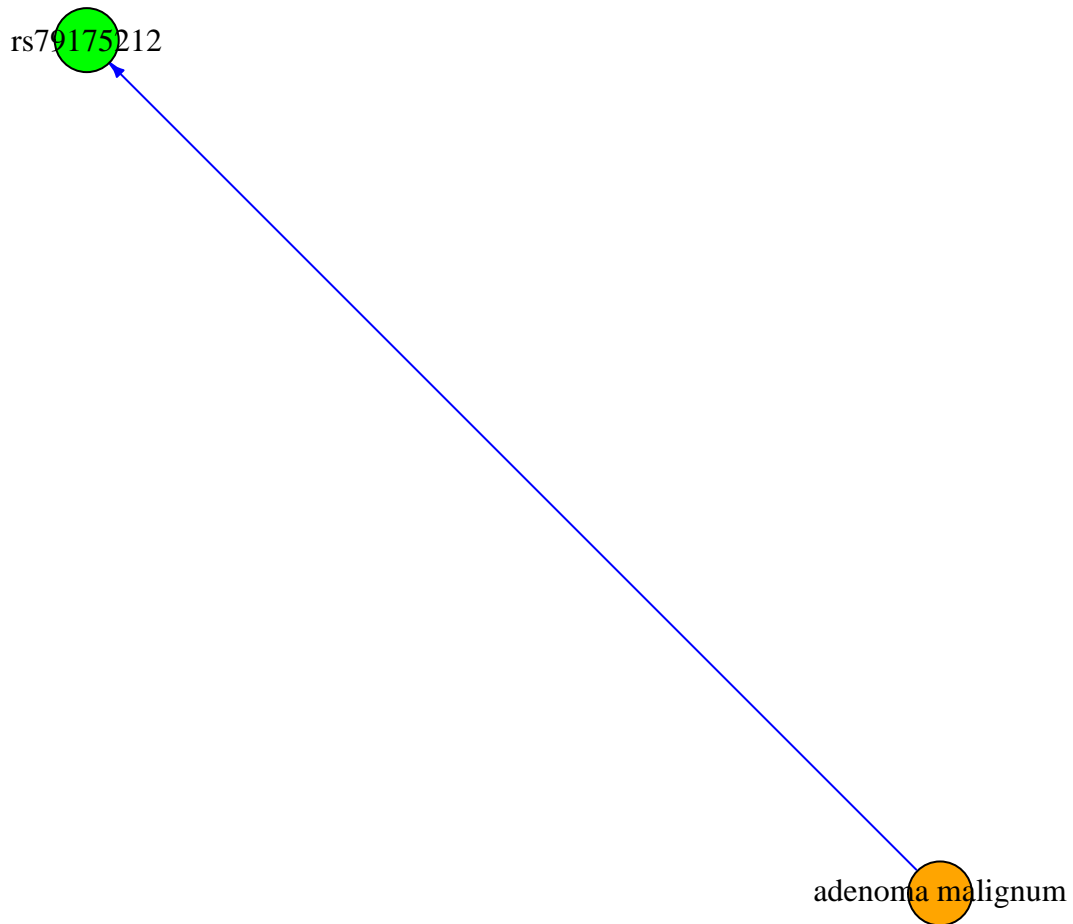

**Variant–Disease Network (carcinoid–endocrine tumour)**

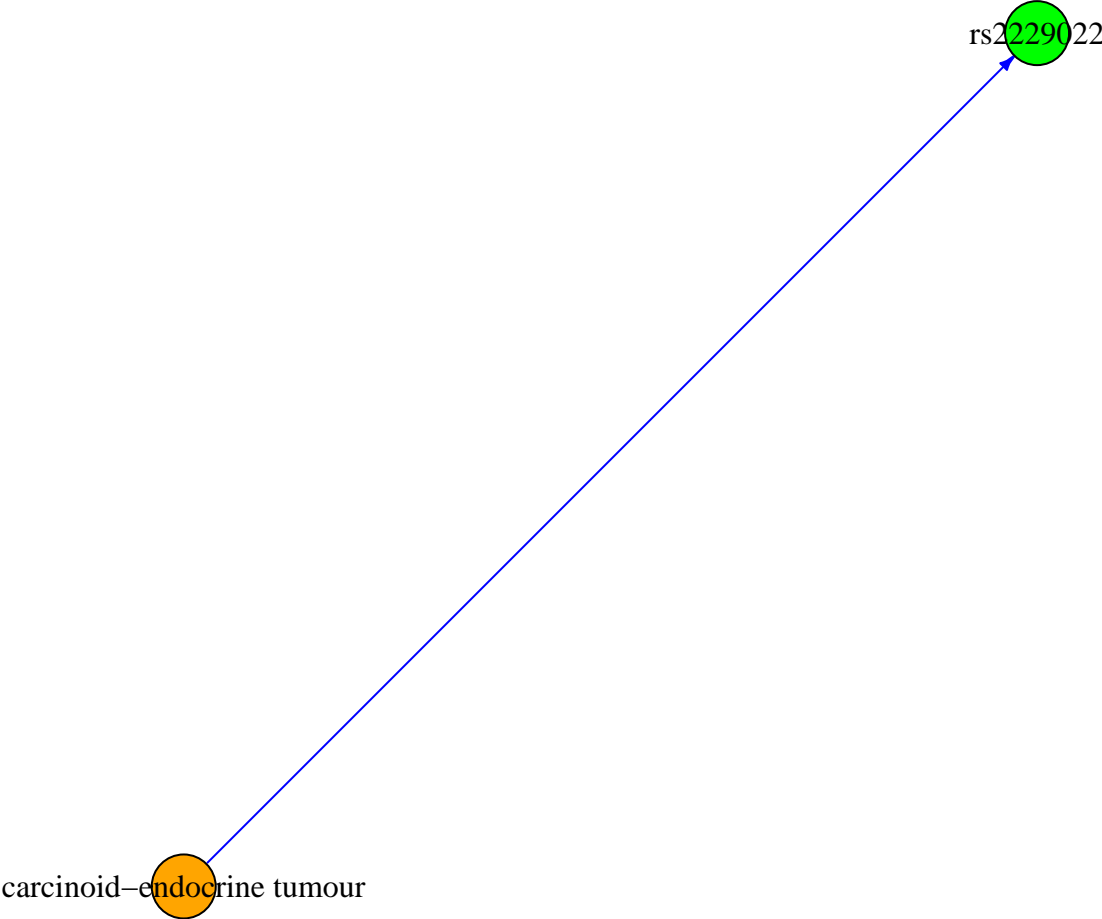

## Variant–Disease Network (breast carcinoma)

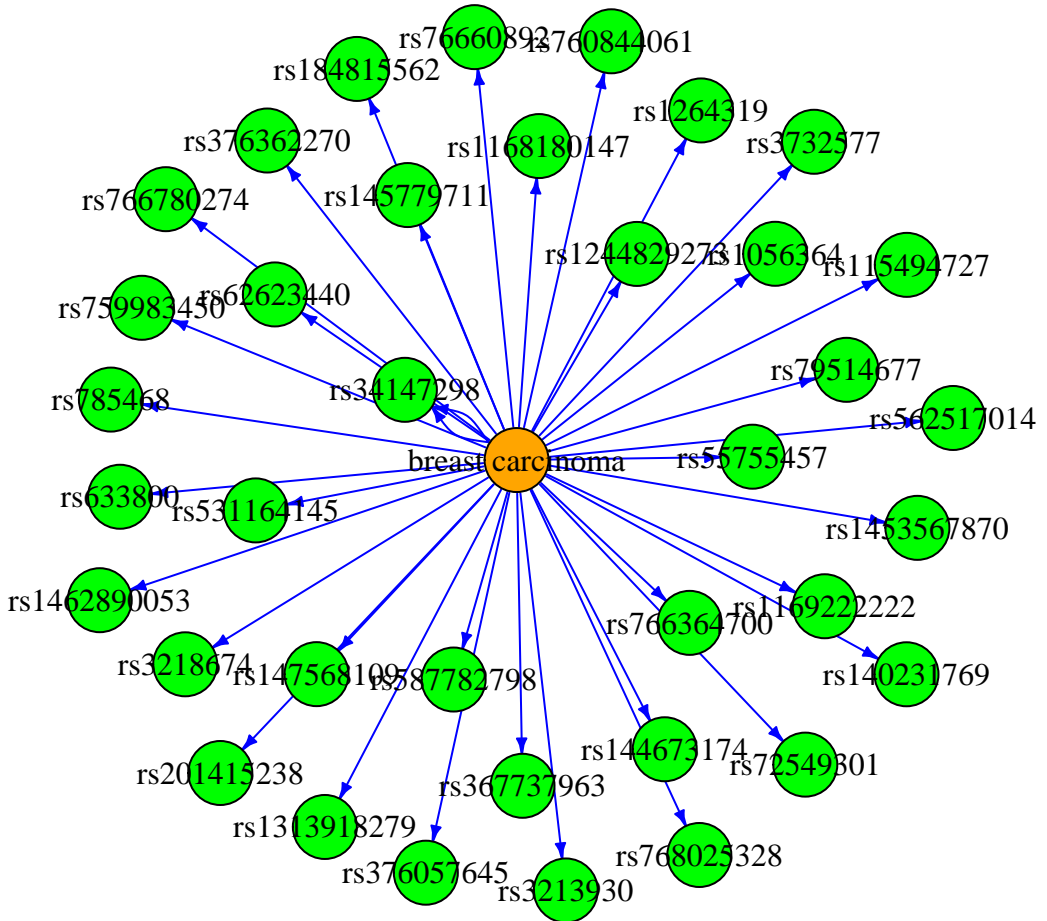

## Variant-Disease Network (liver carcinoma)

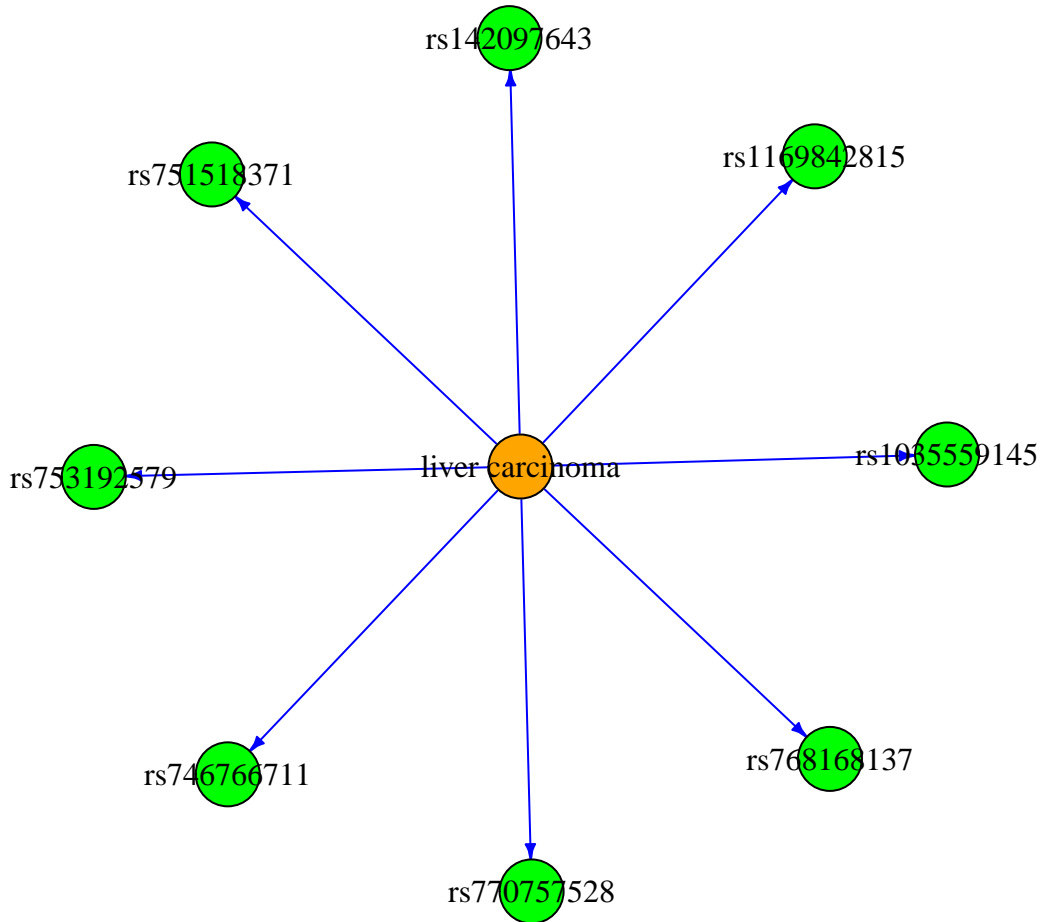

## Variant–Disease Network (lung carcinoma)

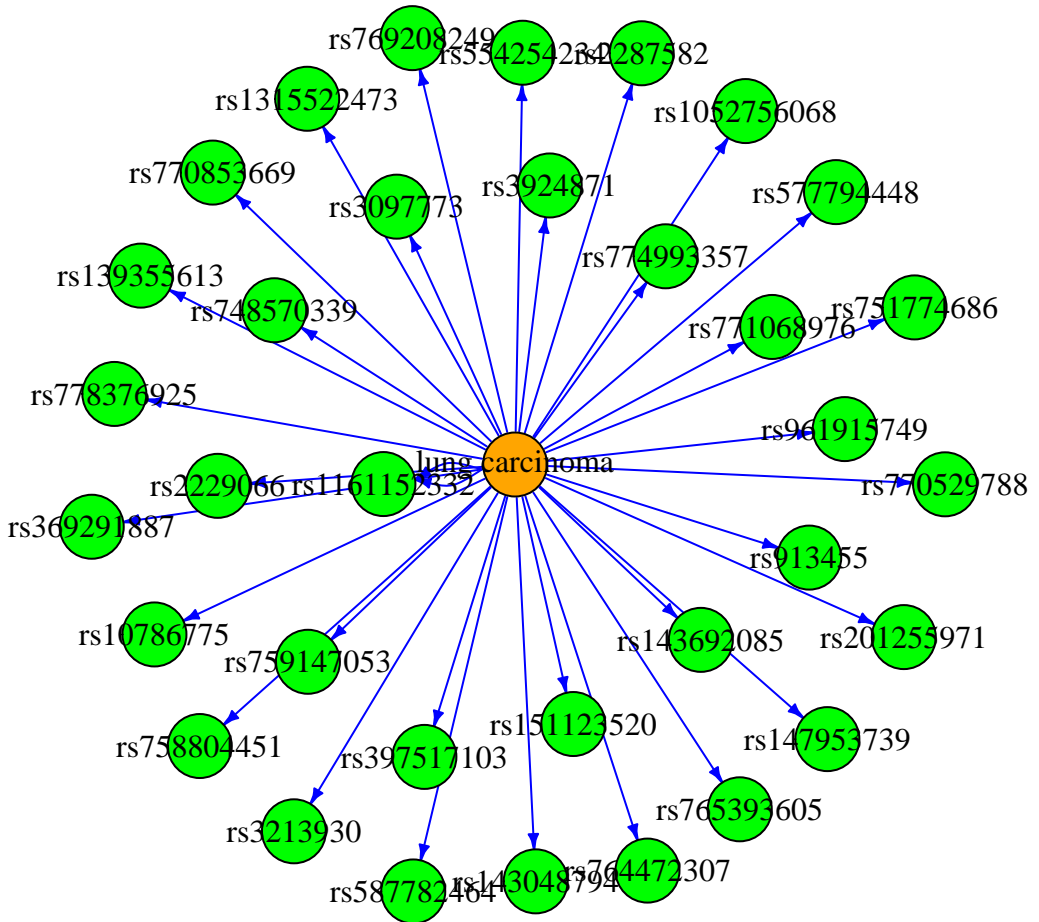

## Variant-Disease Network (skin carcinoma)

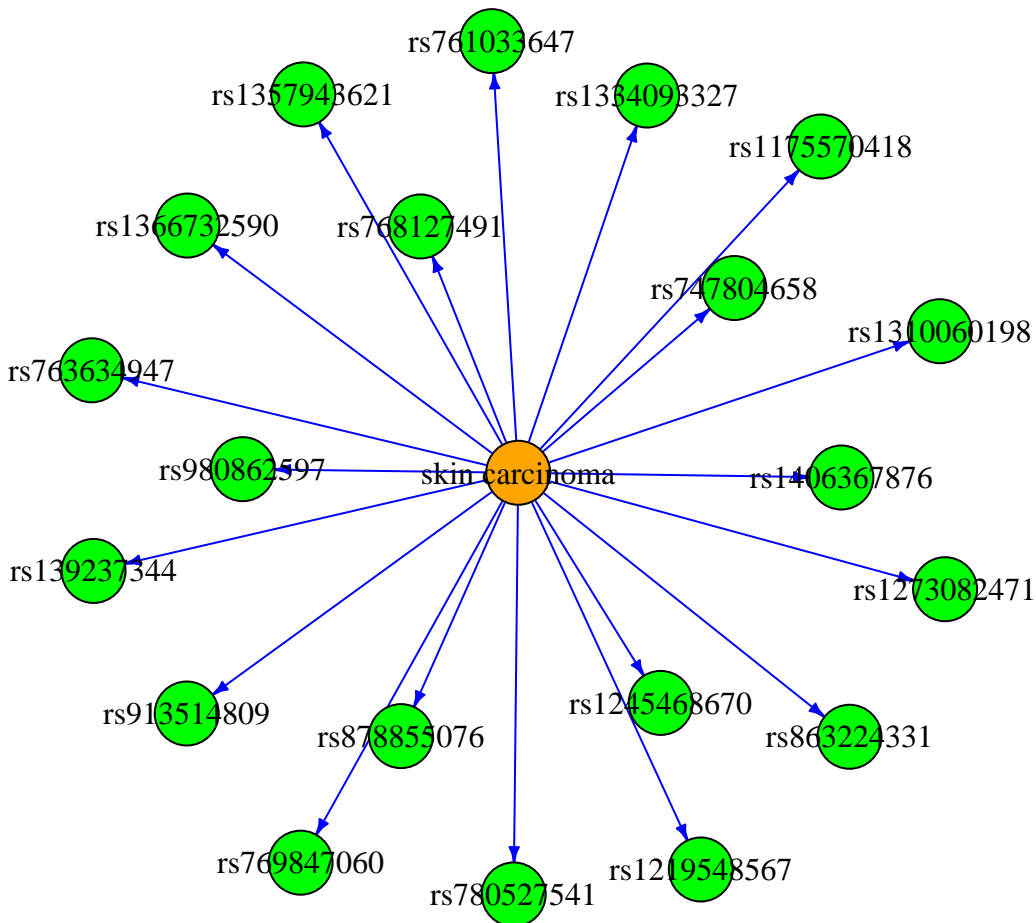

## Variant–Disease Network (large intestine carcinoma)

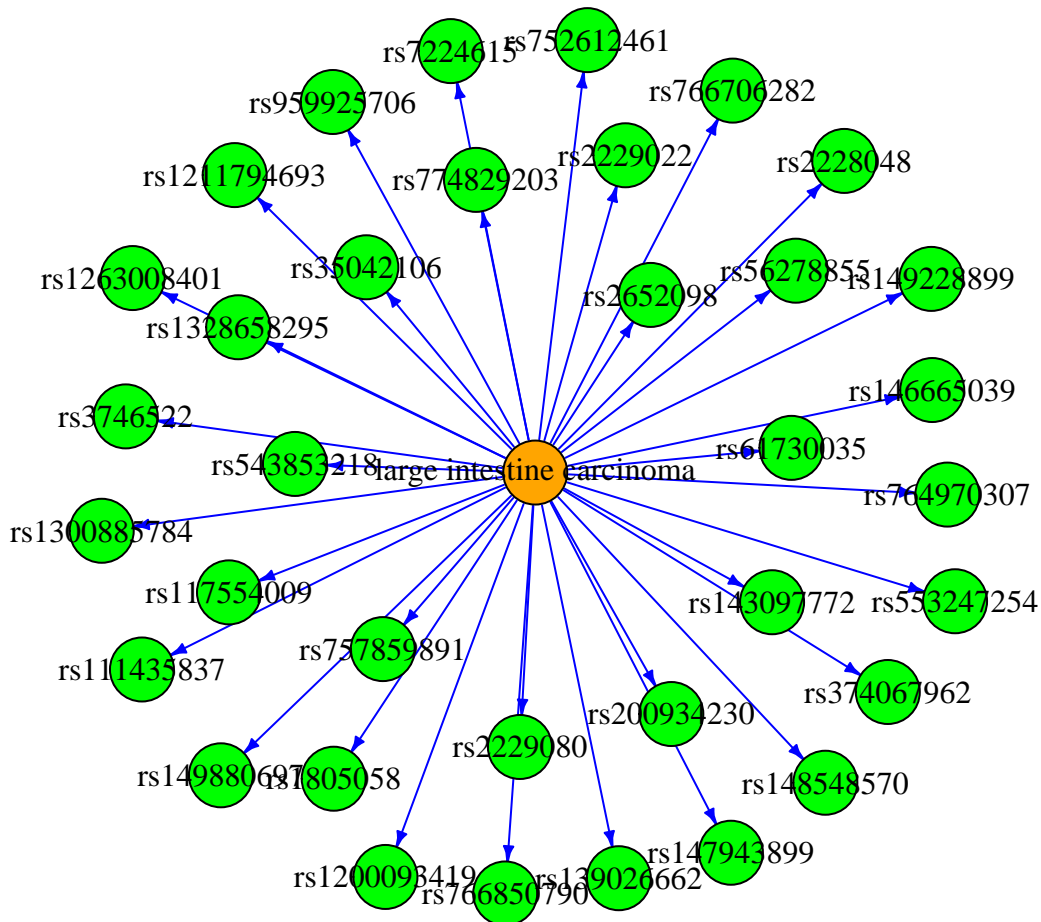

## Variant–Disease Network (prostate carcinoma)

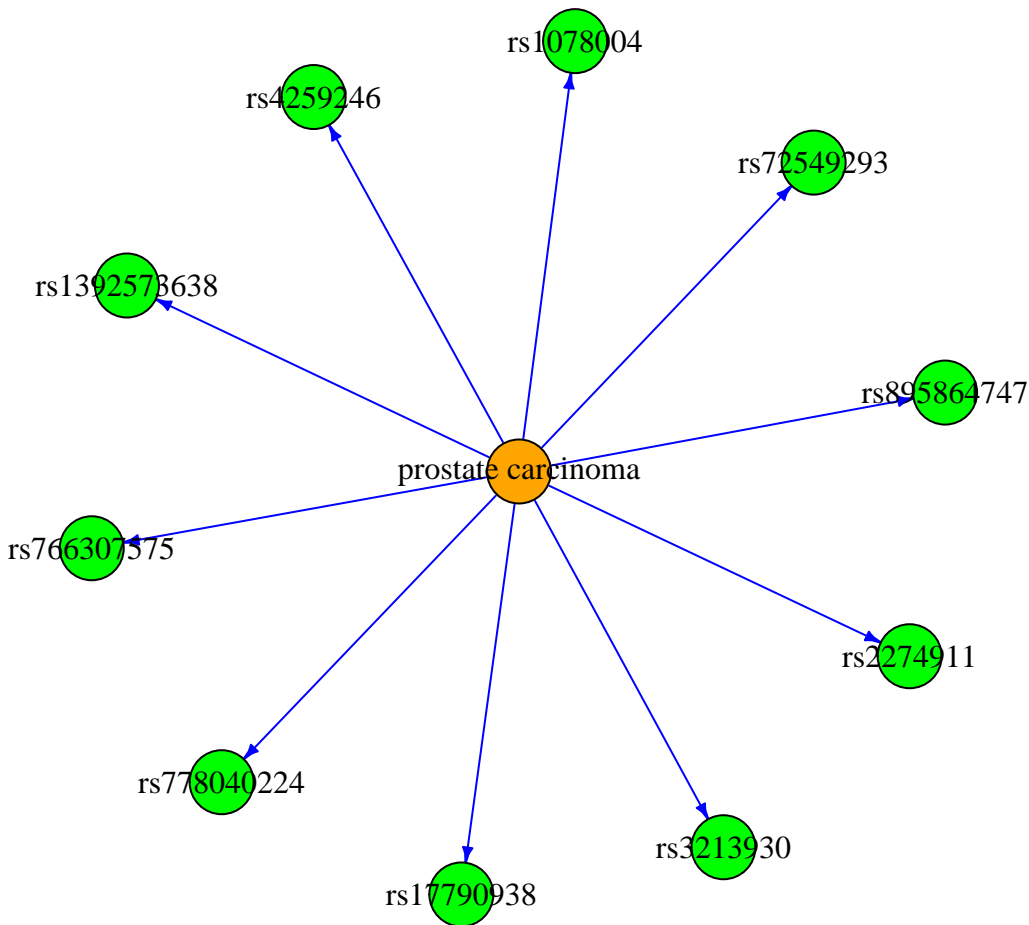



## Variant–Disease Network (urinary tract carcinoma)

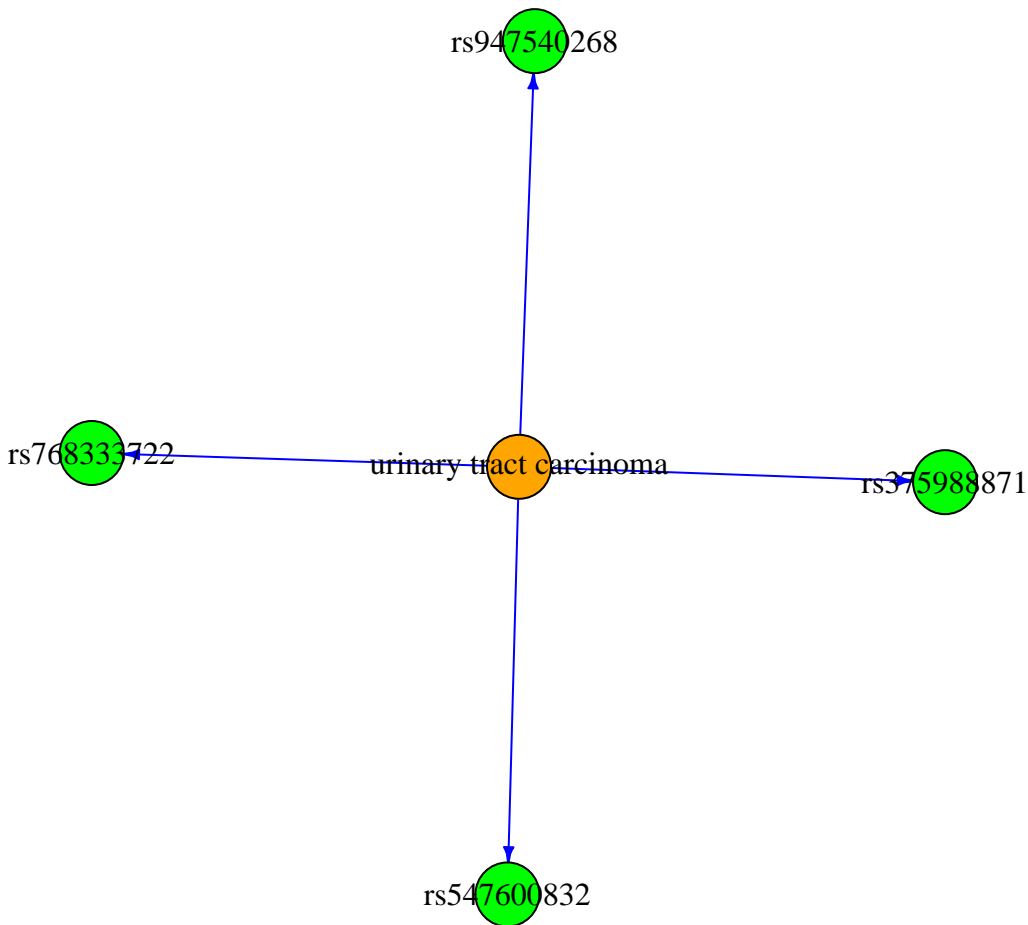

## Variant-Disease Network (endometrium carcinoma)

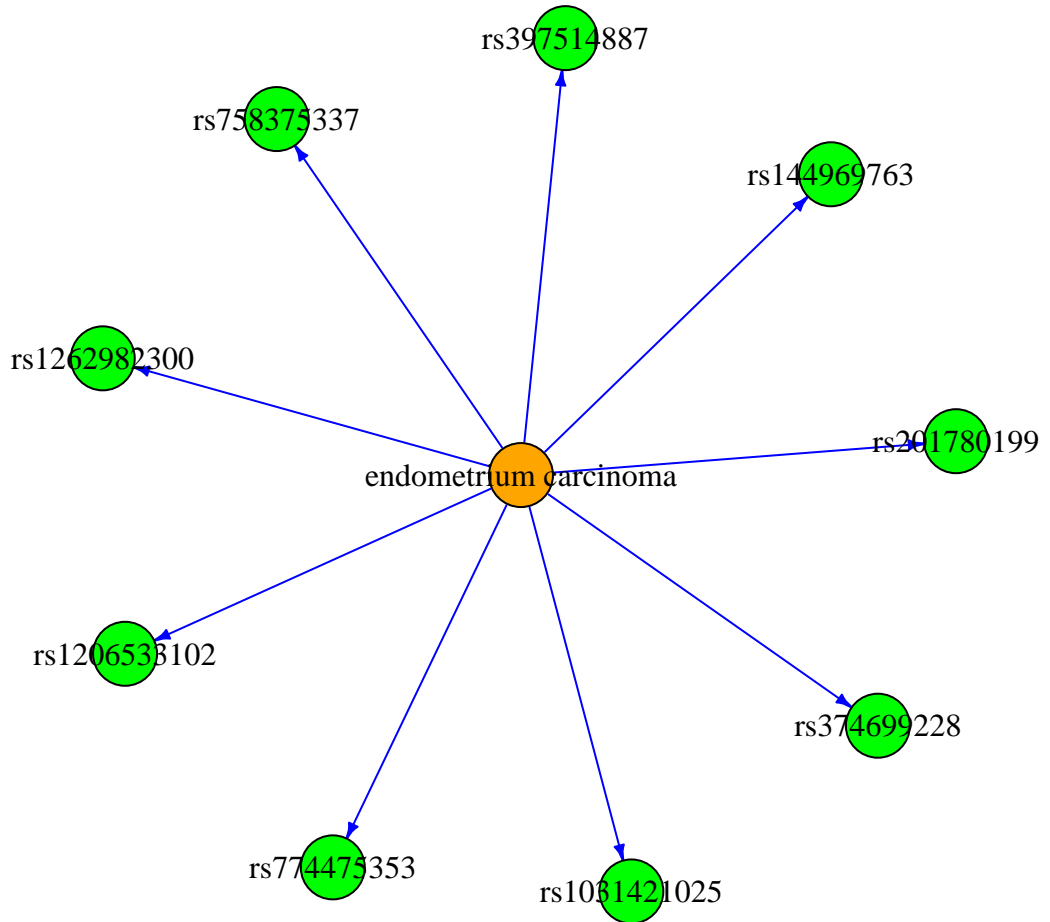

Variant–Disease Network (oesophagus carcinoma)

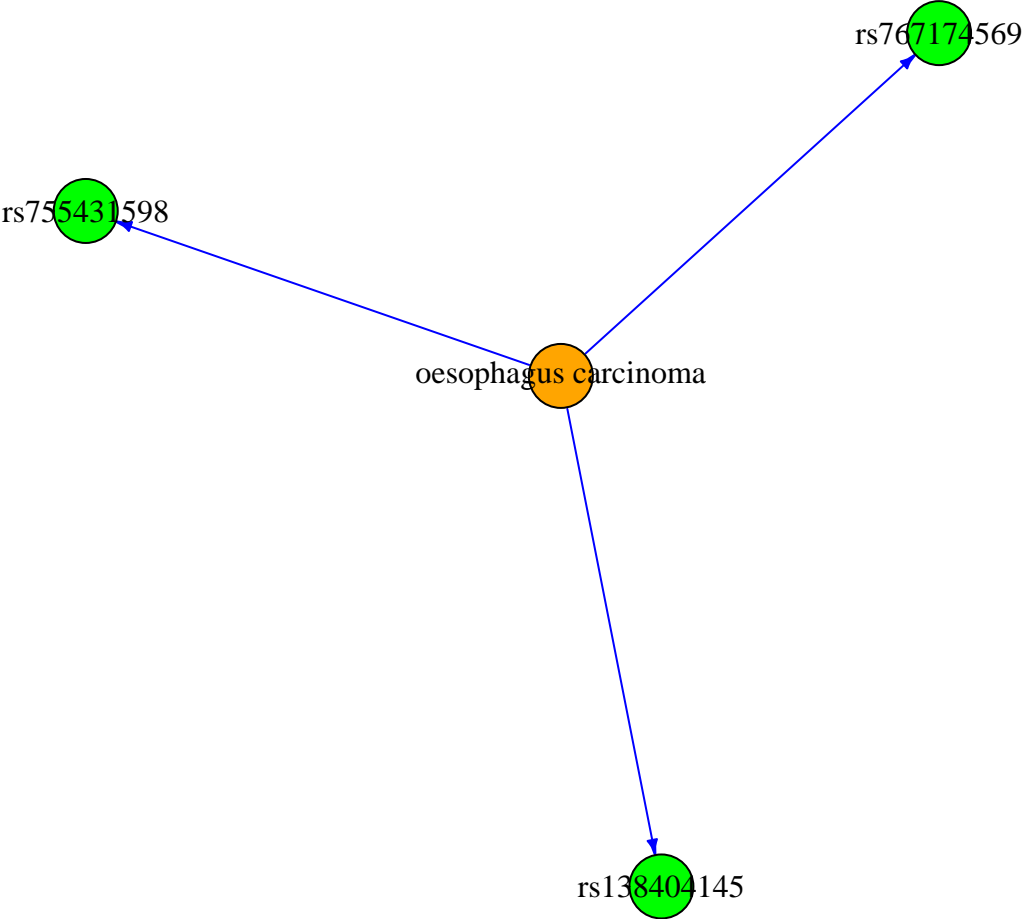

## Variant–Disease Network (stomach carcinoma)

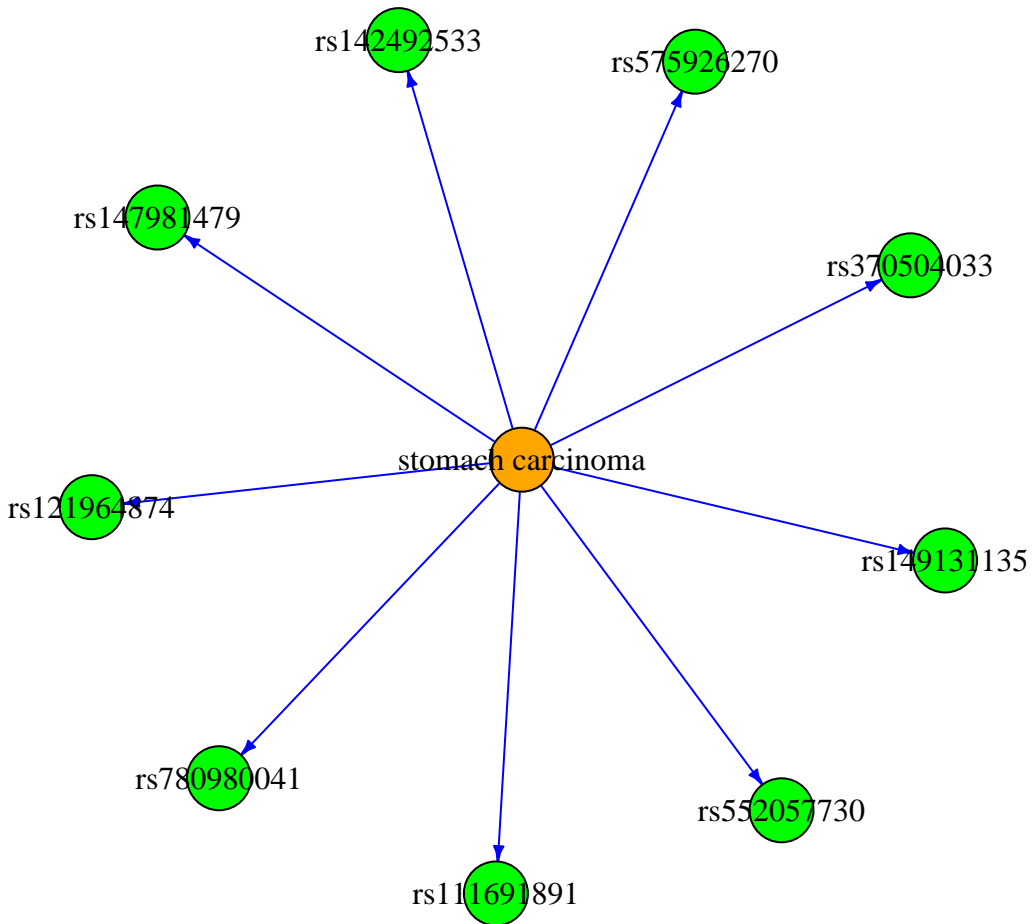

## Variant–Disease Network (small intestine carcinoma)

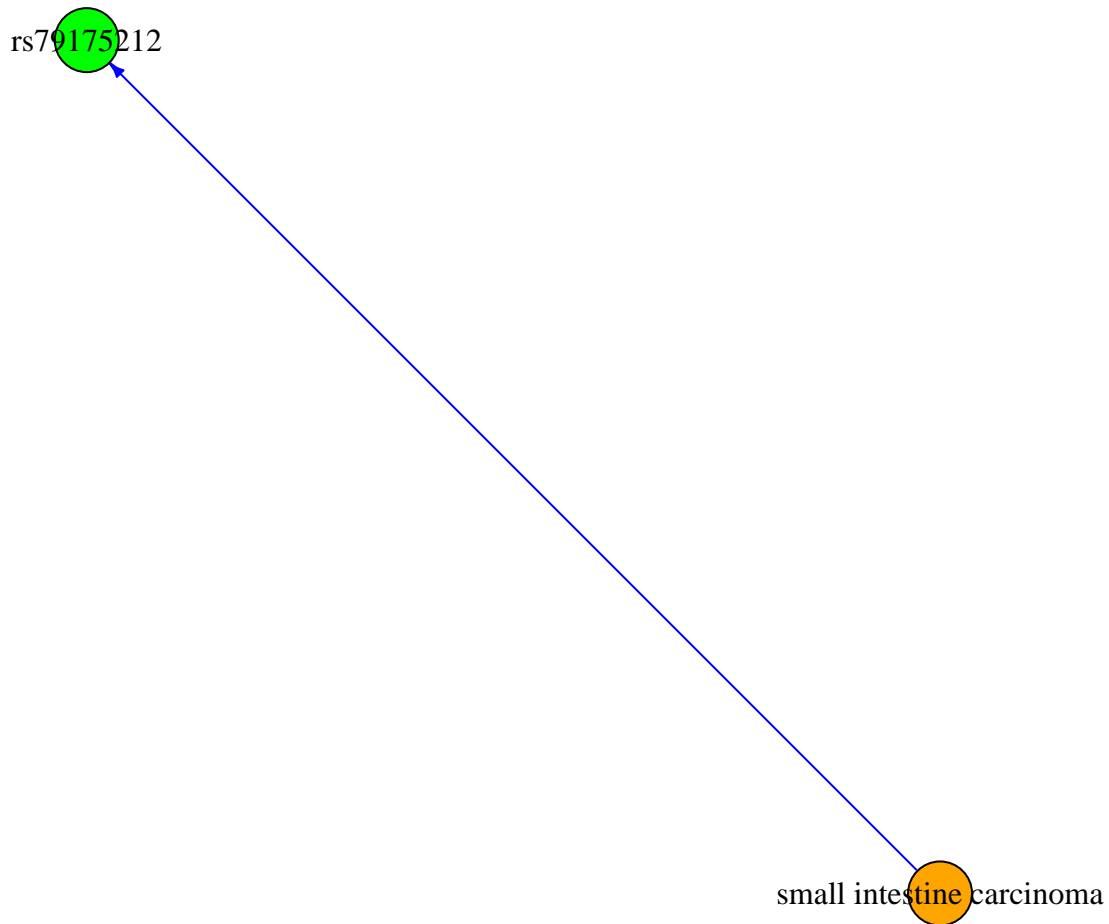

Variant–Disease Network (upper aerodigestive tract carcinoma)

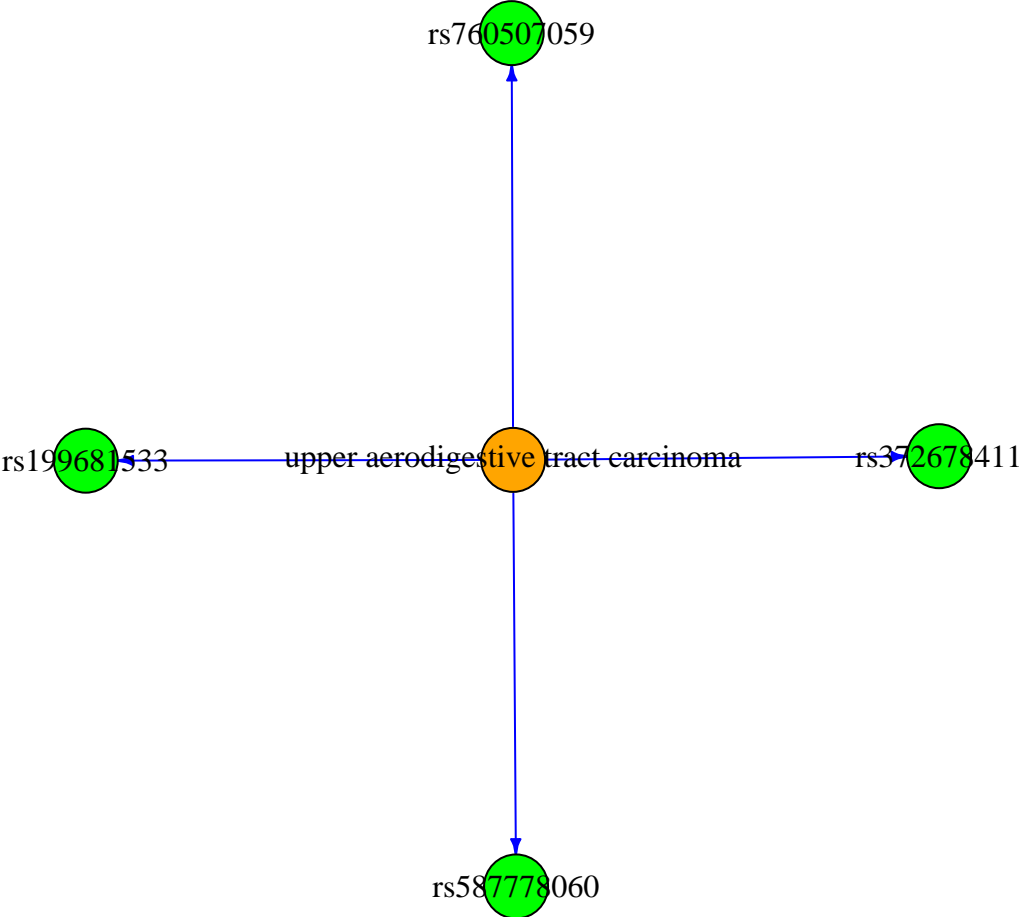

## Variant–Disease Network (pancreas carcinoma)

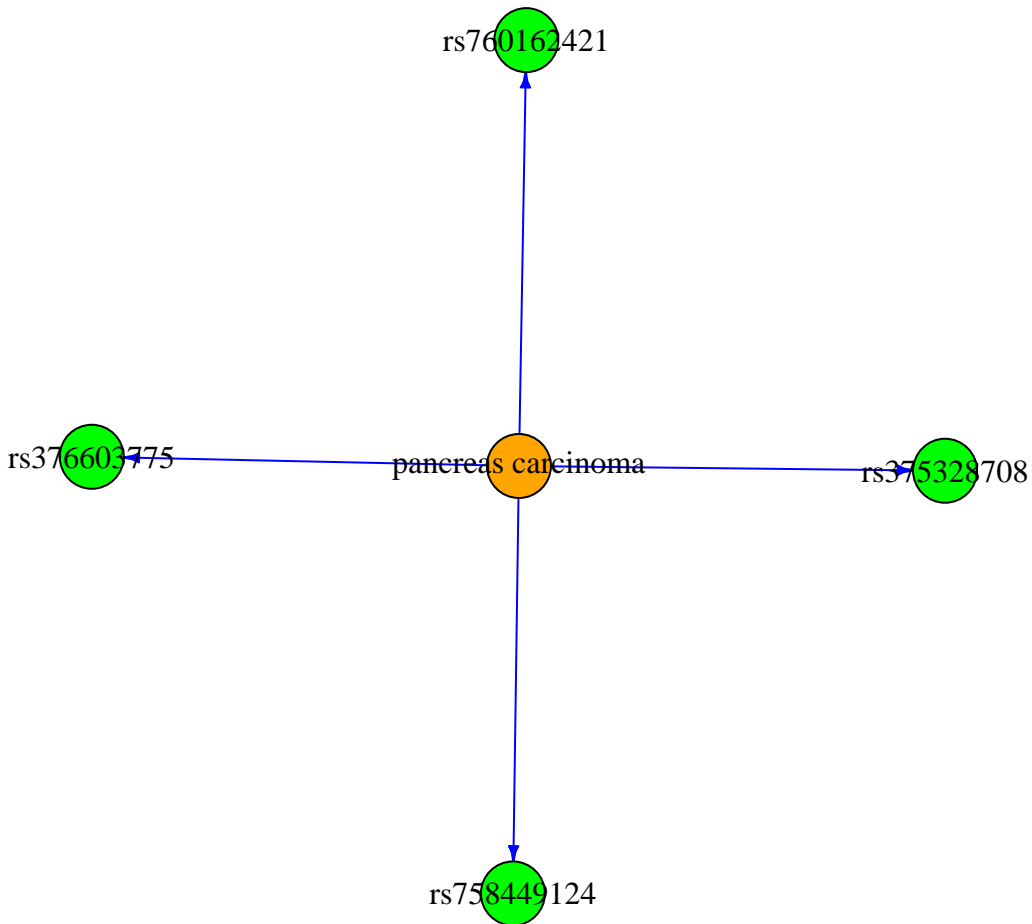

## Variant–Disease Network (thyroid carcinoma)

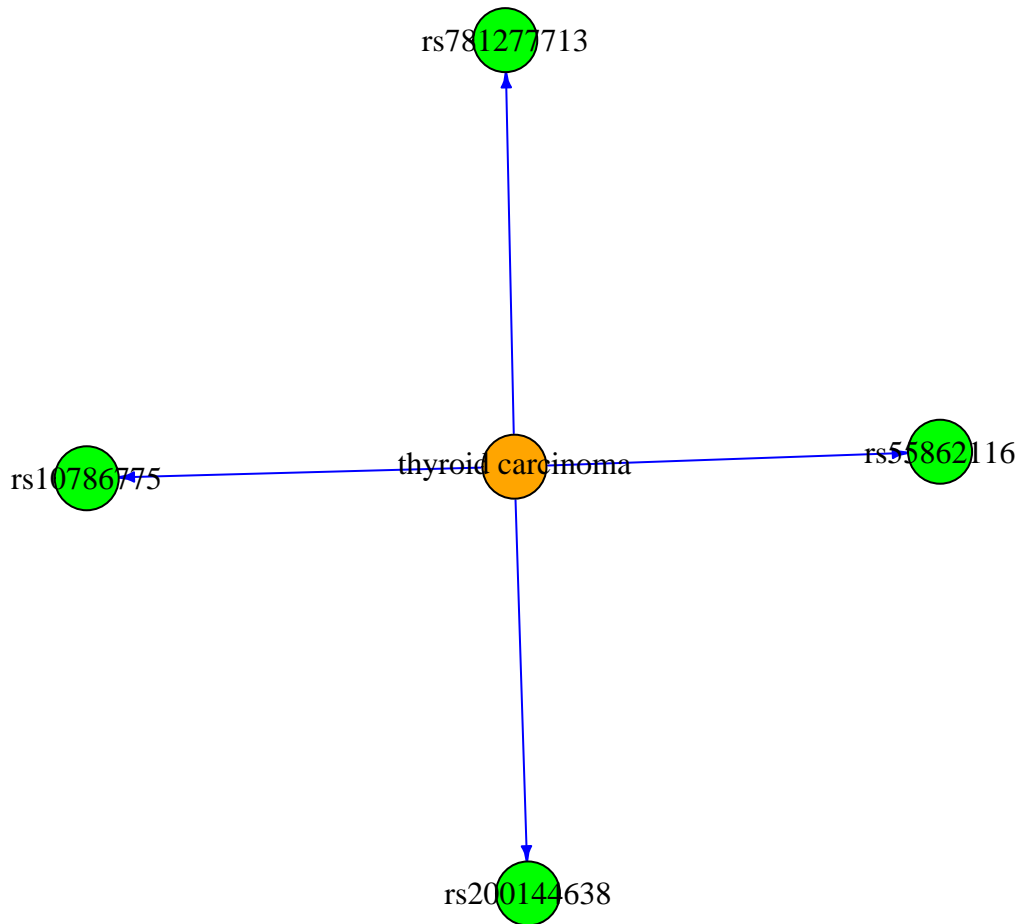



## Variant-Disease Network (kidney carcinoma)

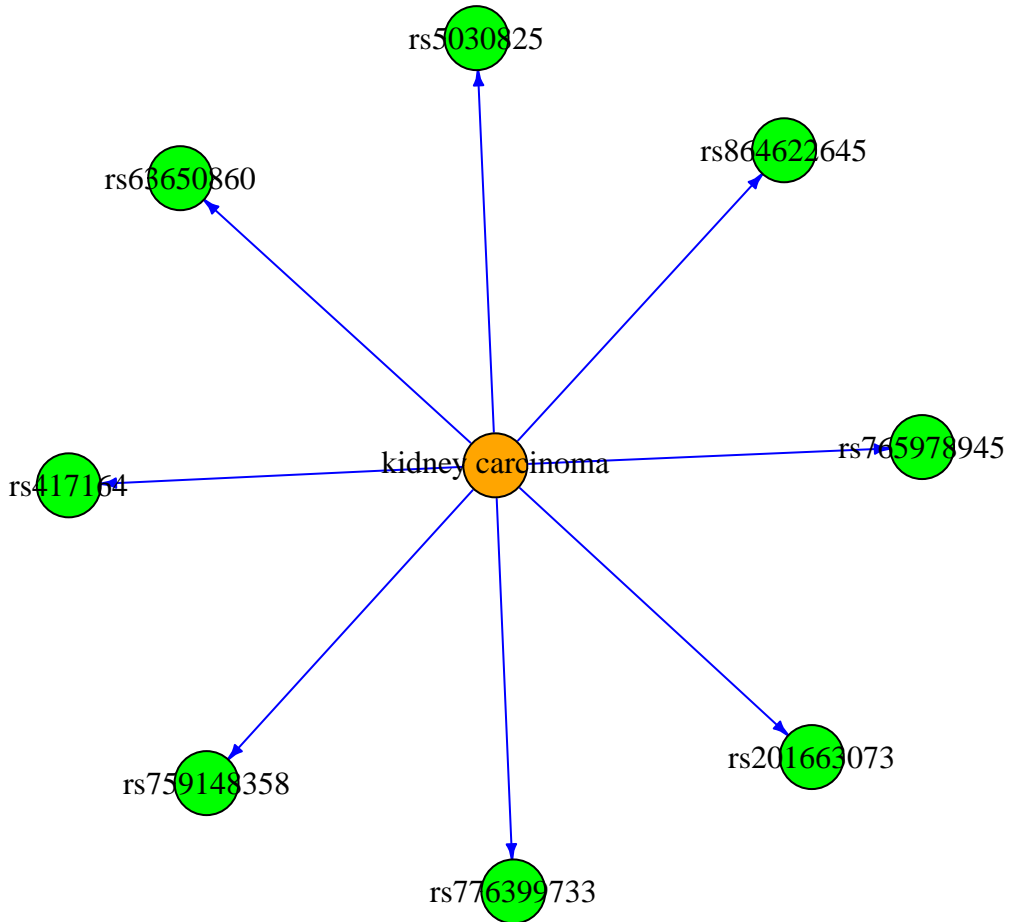

## Variant–Disease Network (biliary tract carcinoma)

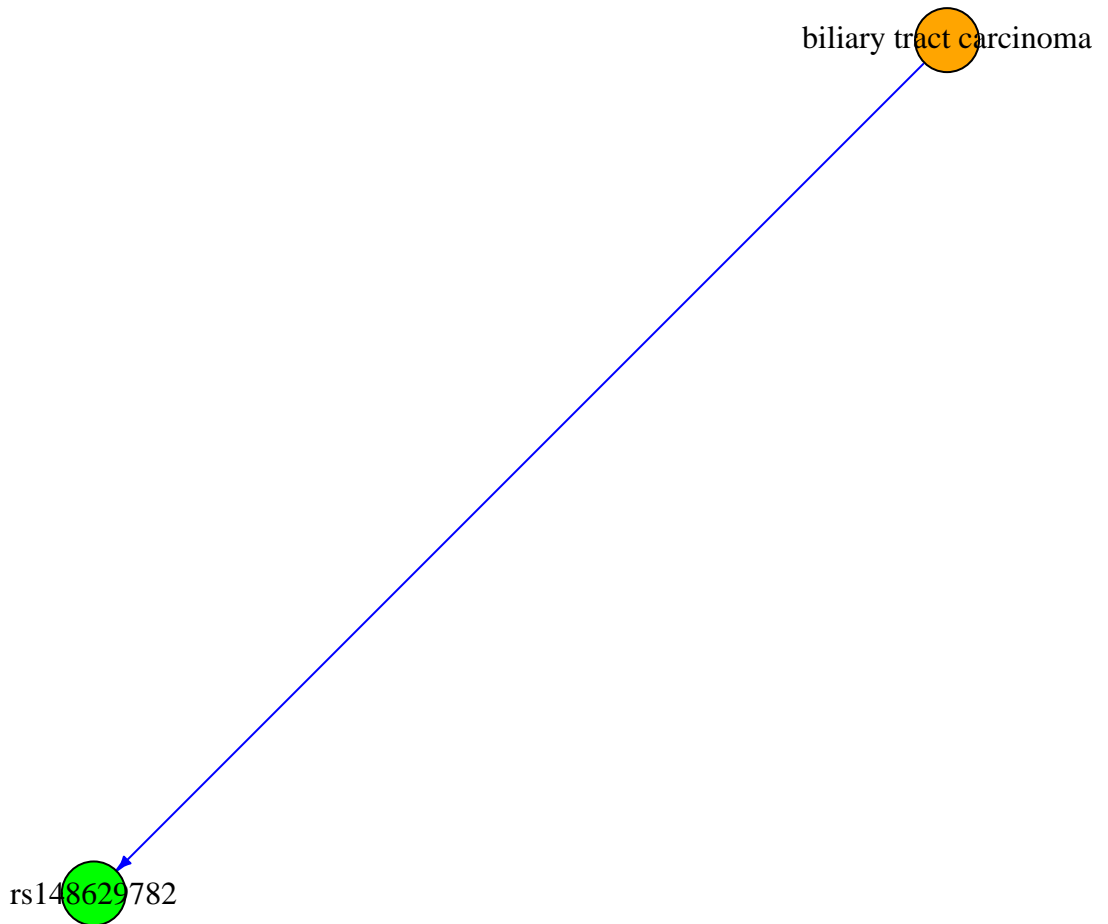

**Variant–Disease Network (salivary gland carcinoma)**

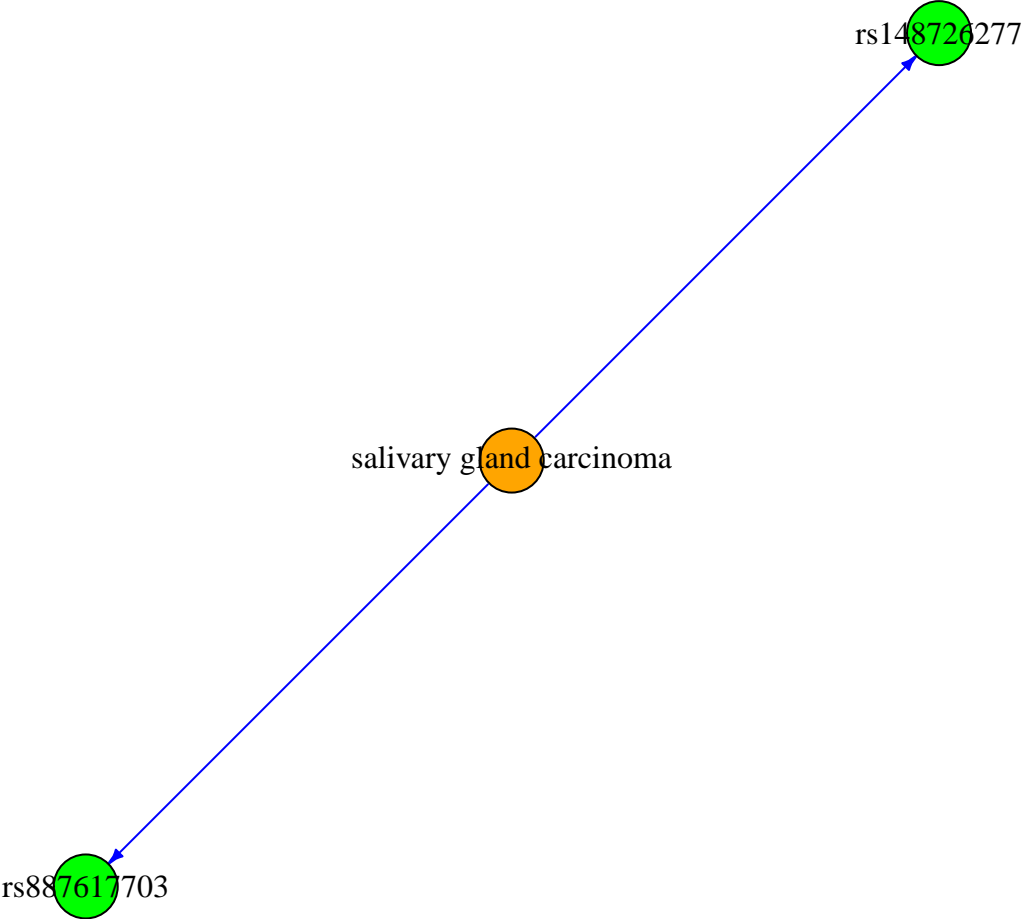

## Variant-Disease Network (ovary carcinoma)

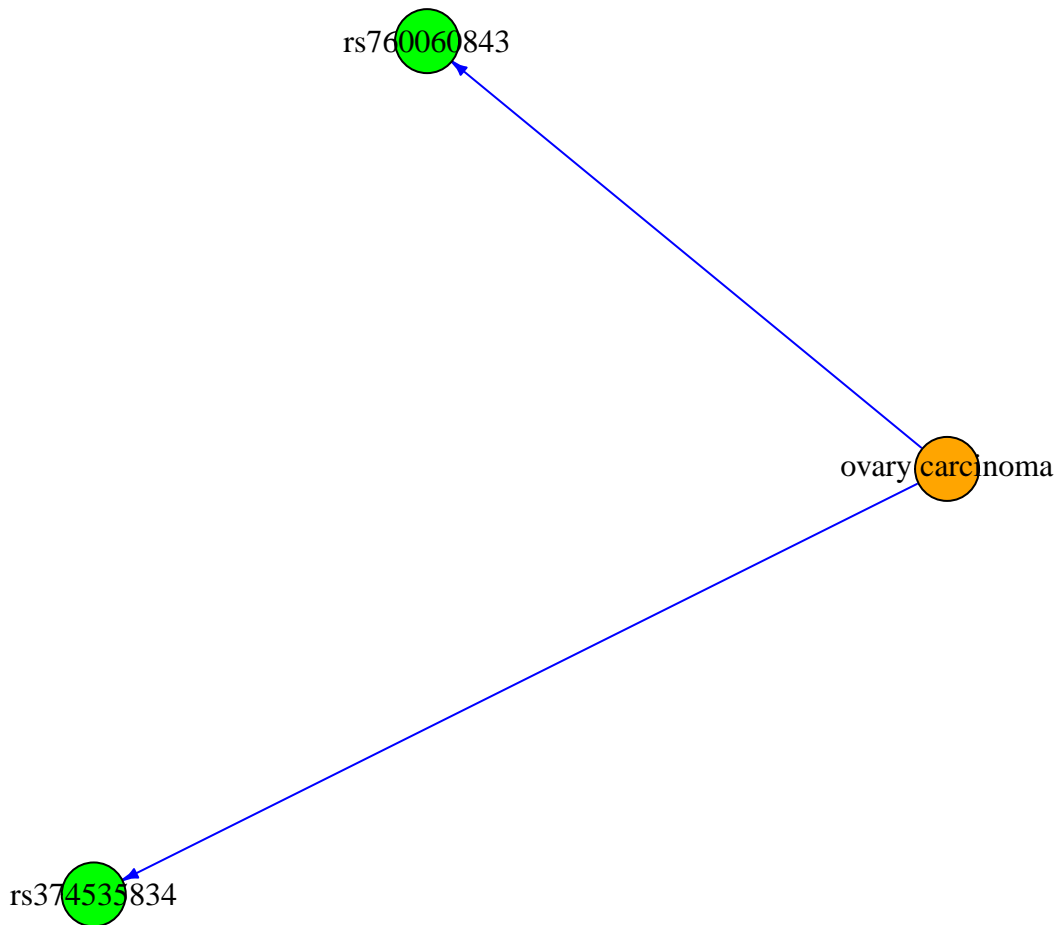

## Variant-Disease Network (cervix carcinoma)

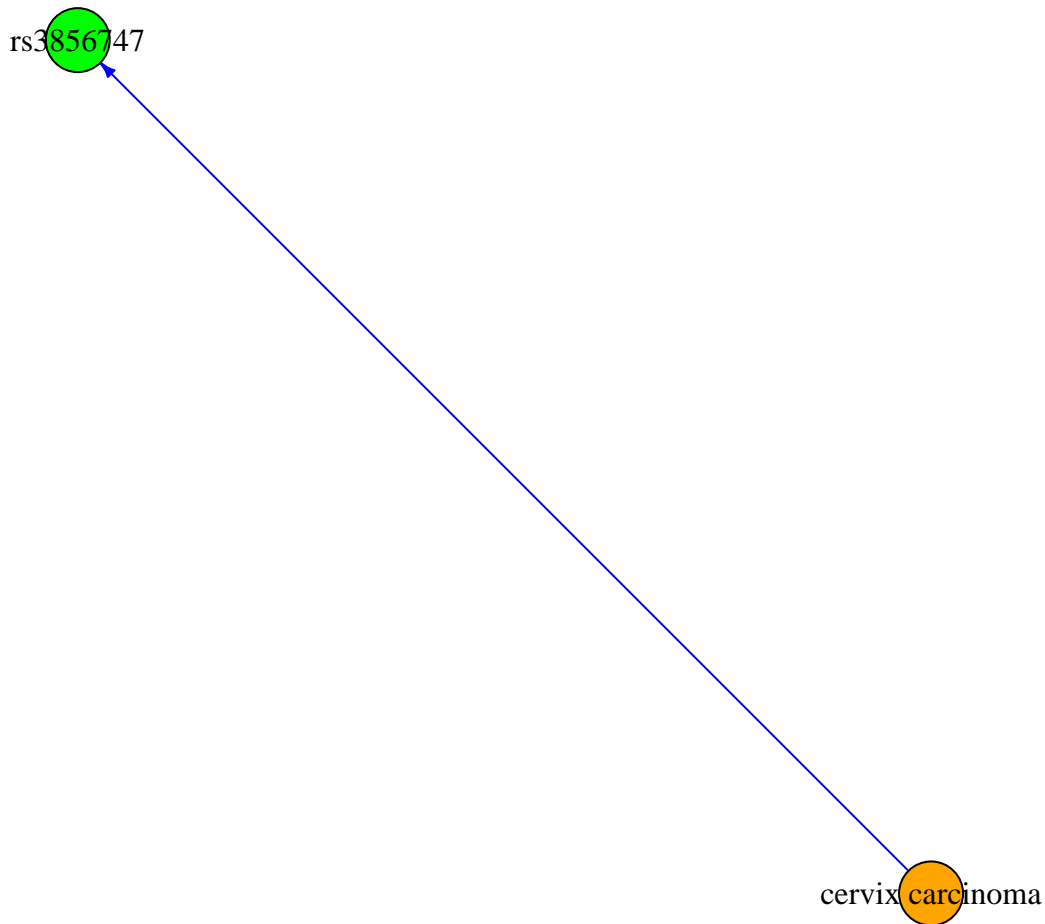

## Variant-Disease Network (fibroepithelial neoplasm)

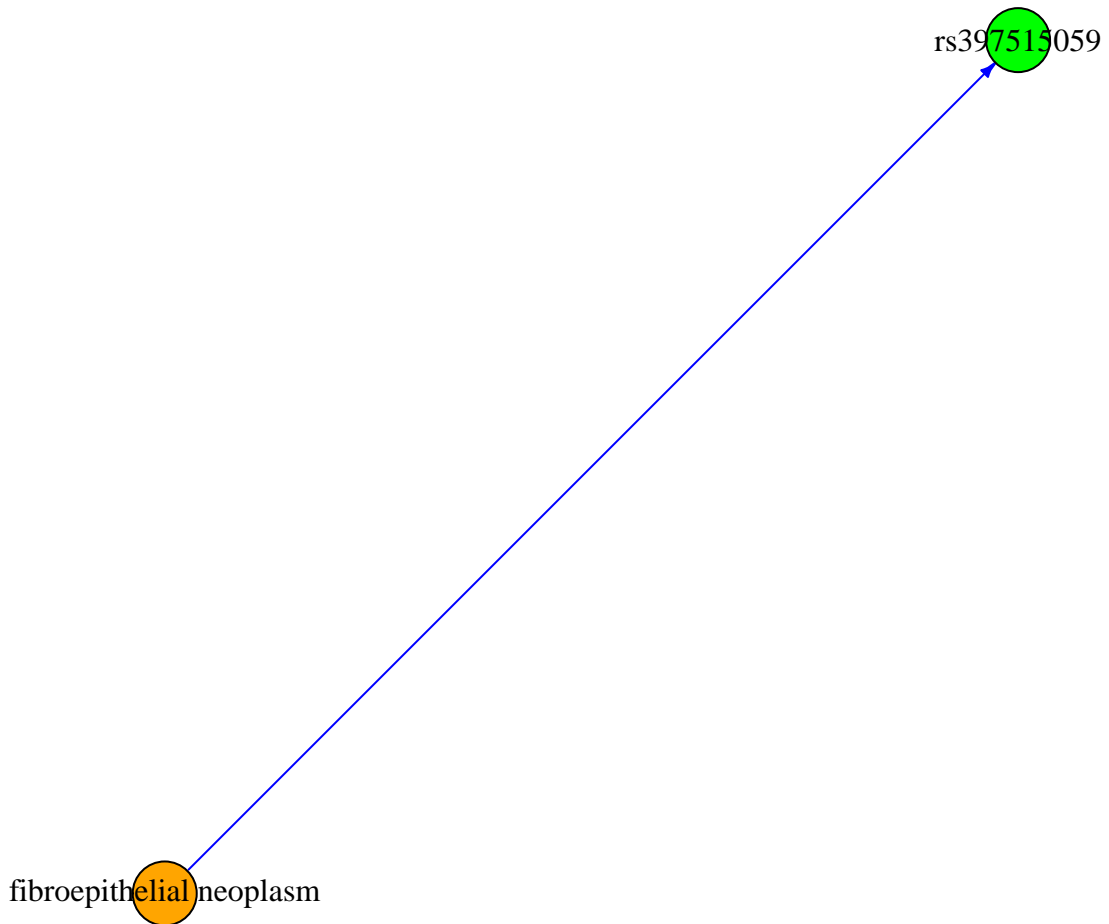

## Variant-Disease Network (fibrosarcoma)

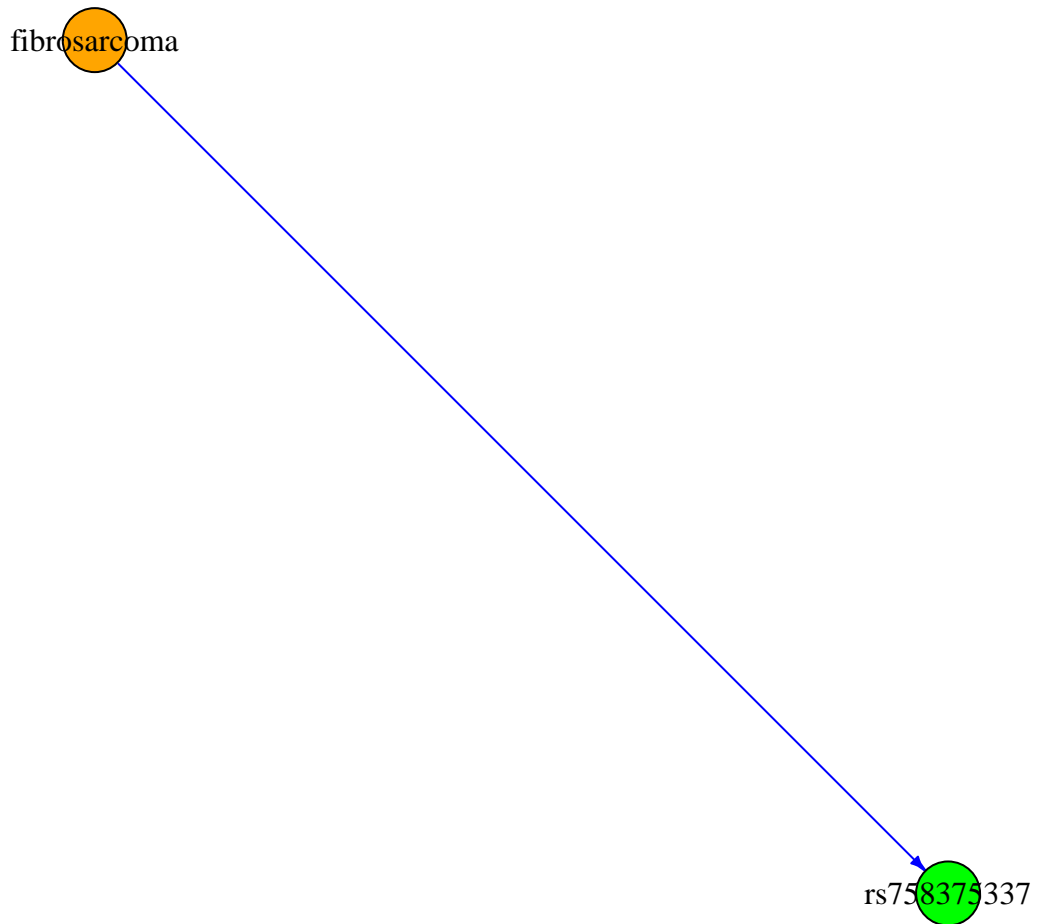

## Variant-Disease Network (germ cell tumour)

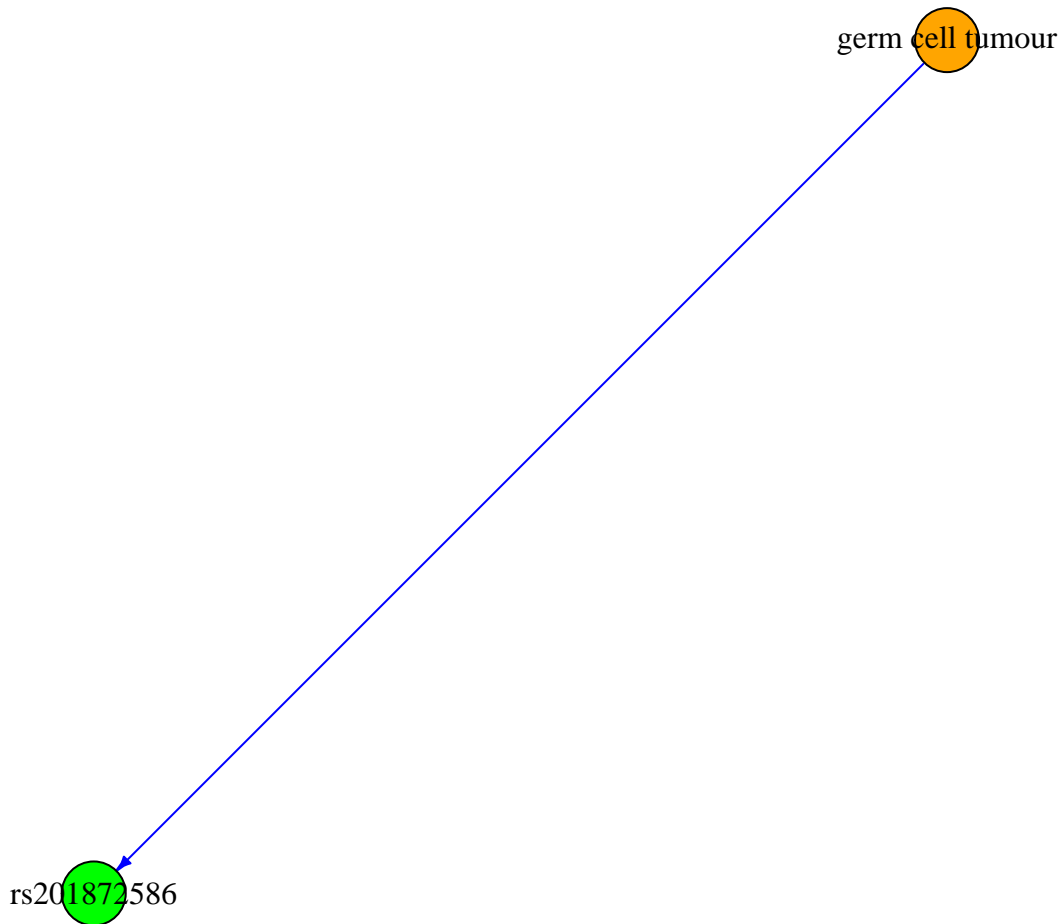



## Variant-Disease Network (glioma)

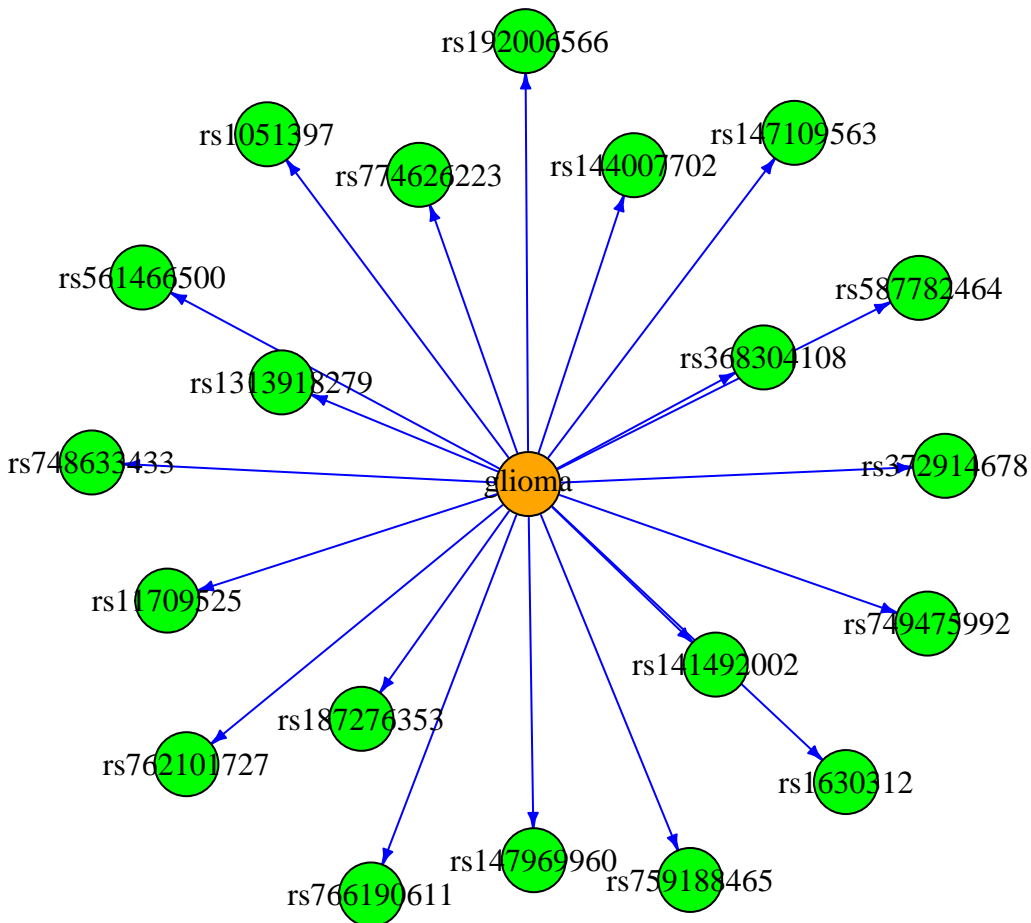

## Variant–Disease Network (haemangioblastoma)

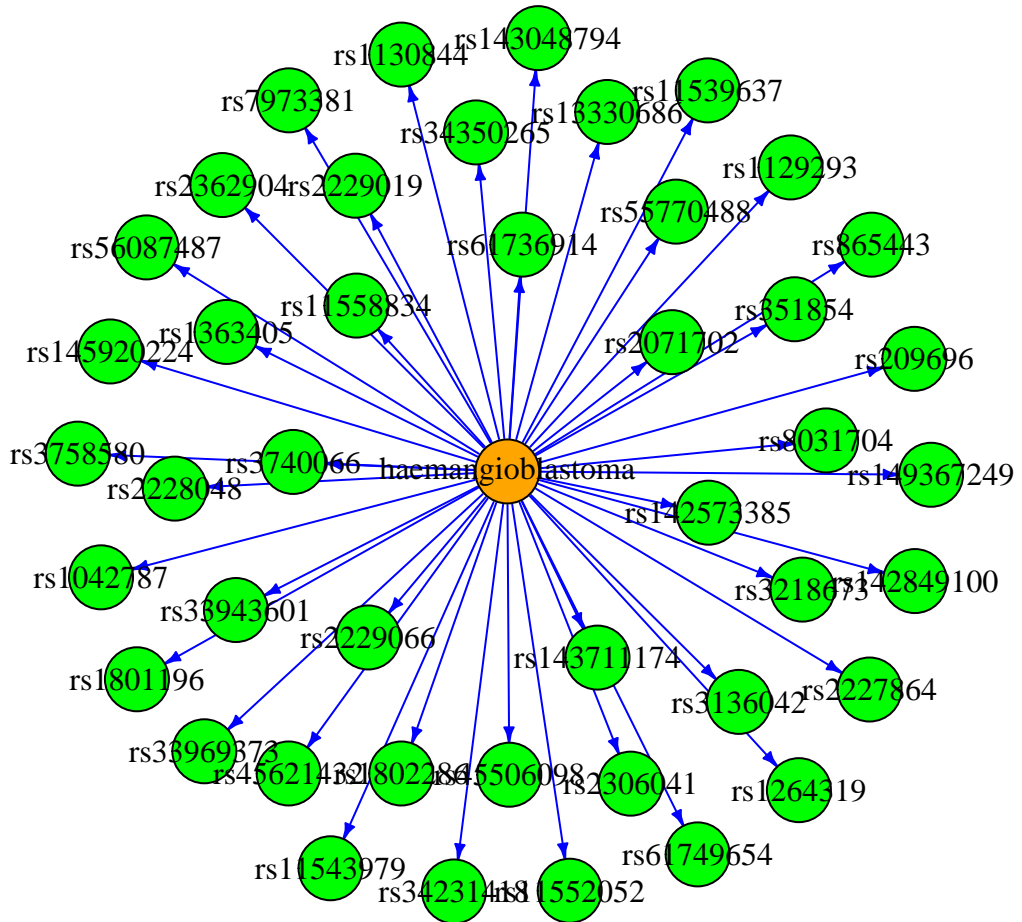

## Variant–Disease Network (haematopoietic neoplasm)

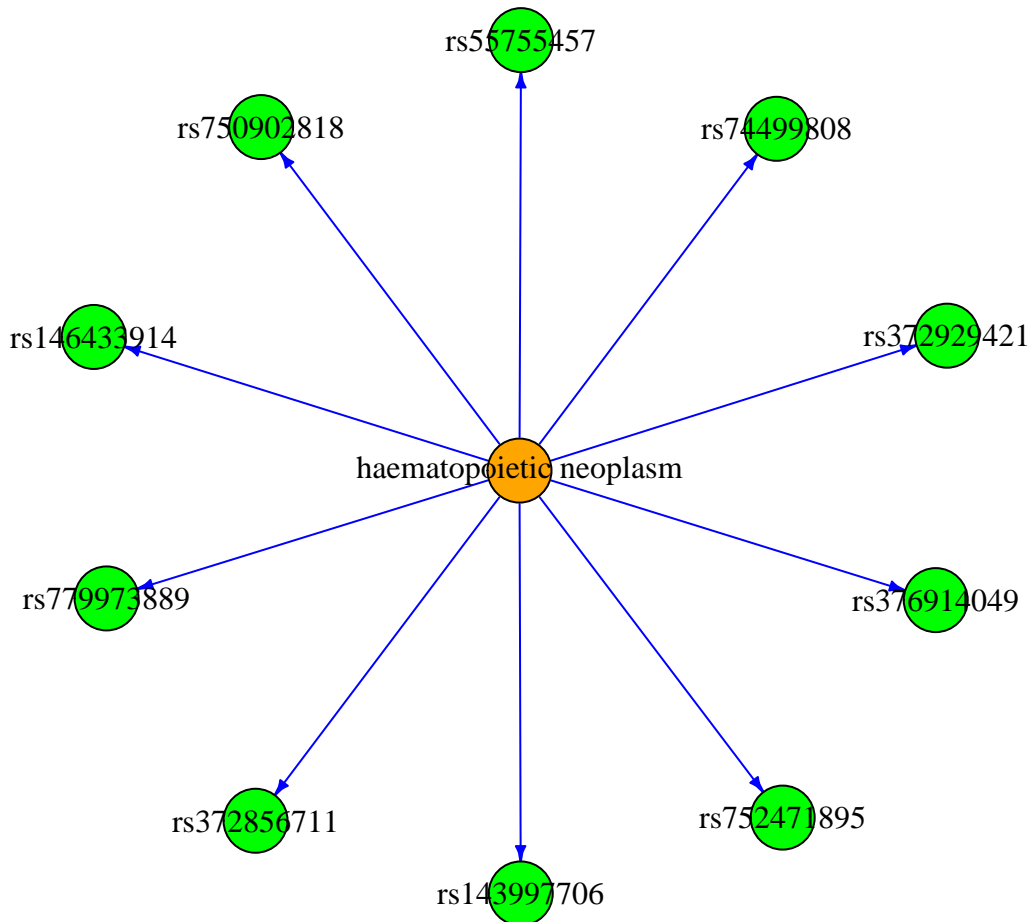

## Variant–Disease Network (leiomyosarcoma)

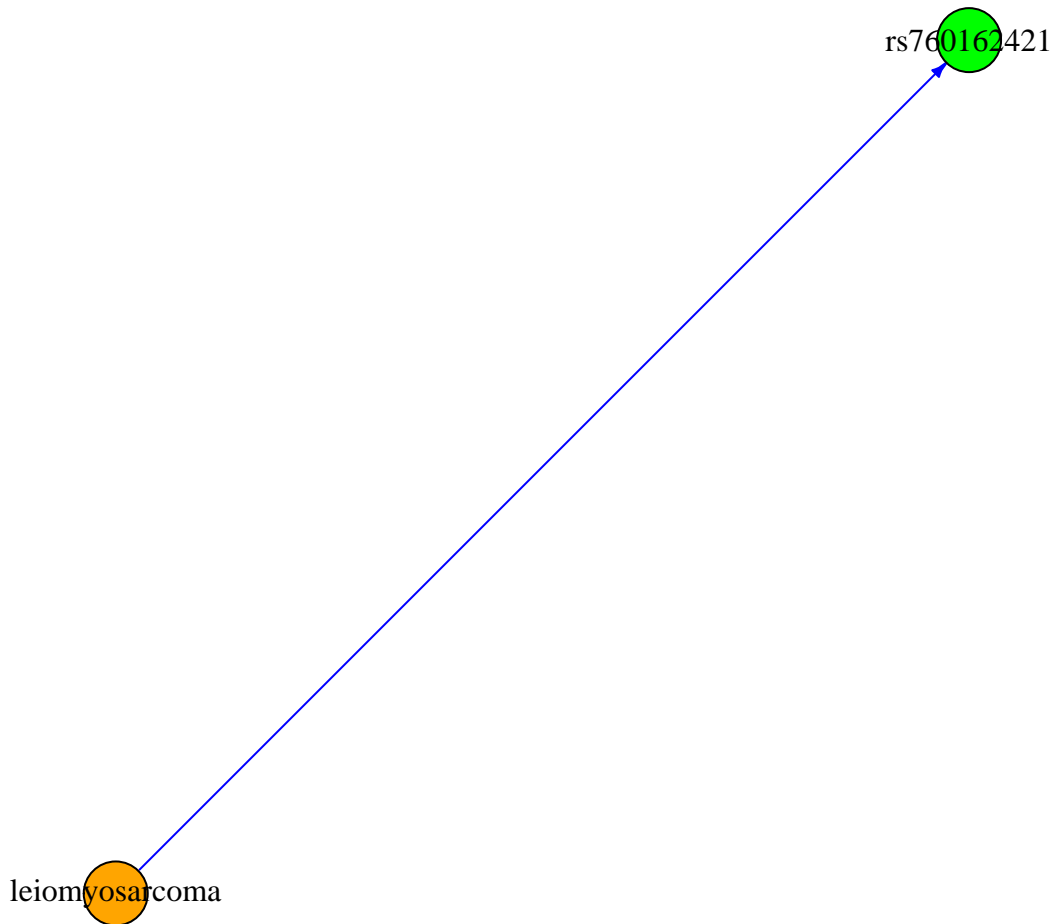

## Variant–Disease Network (lymphoid neoplasm)

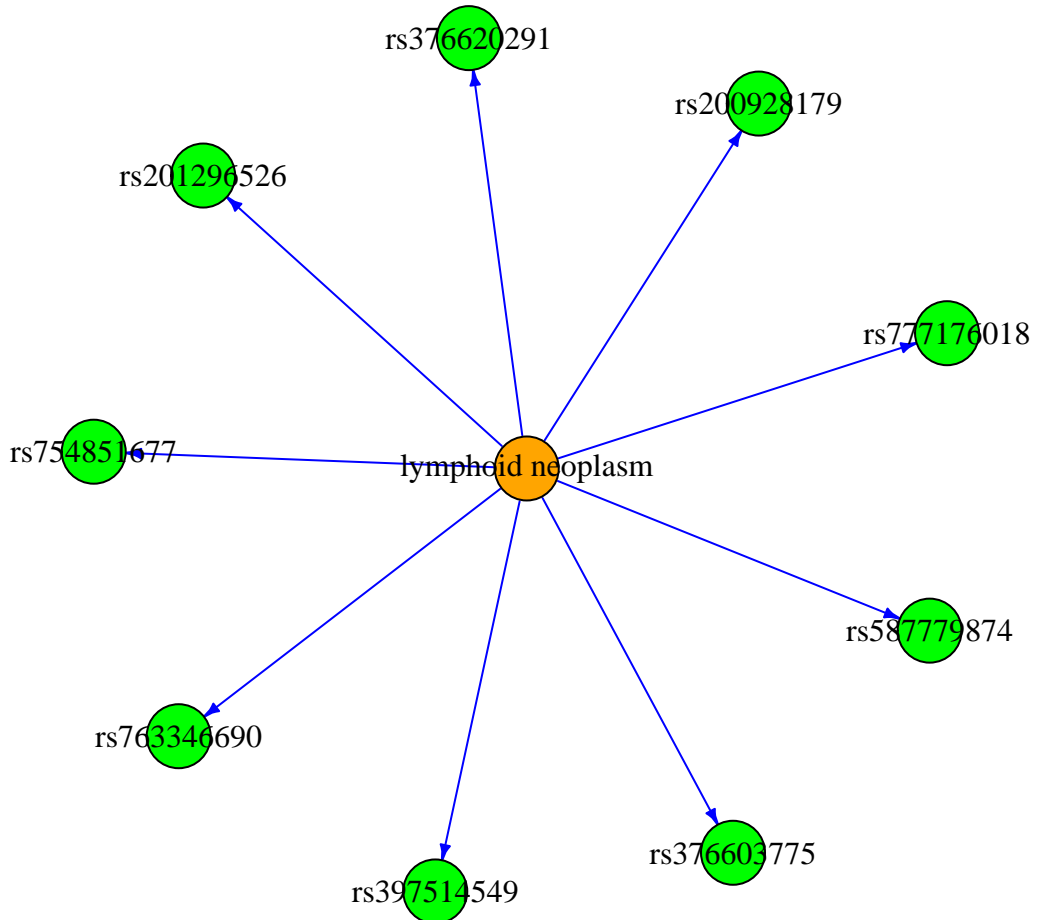

## Variant-Disease Network (malignant melanoma)

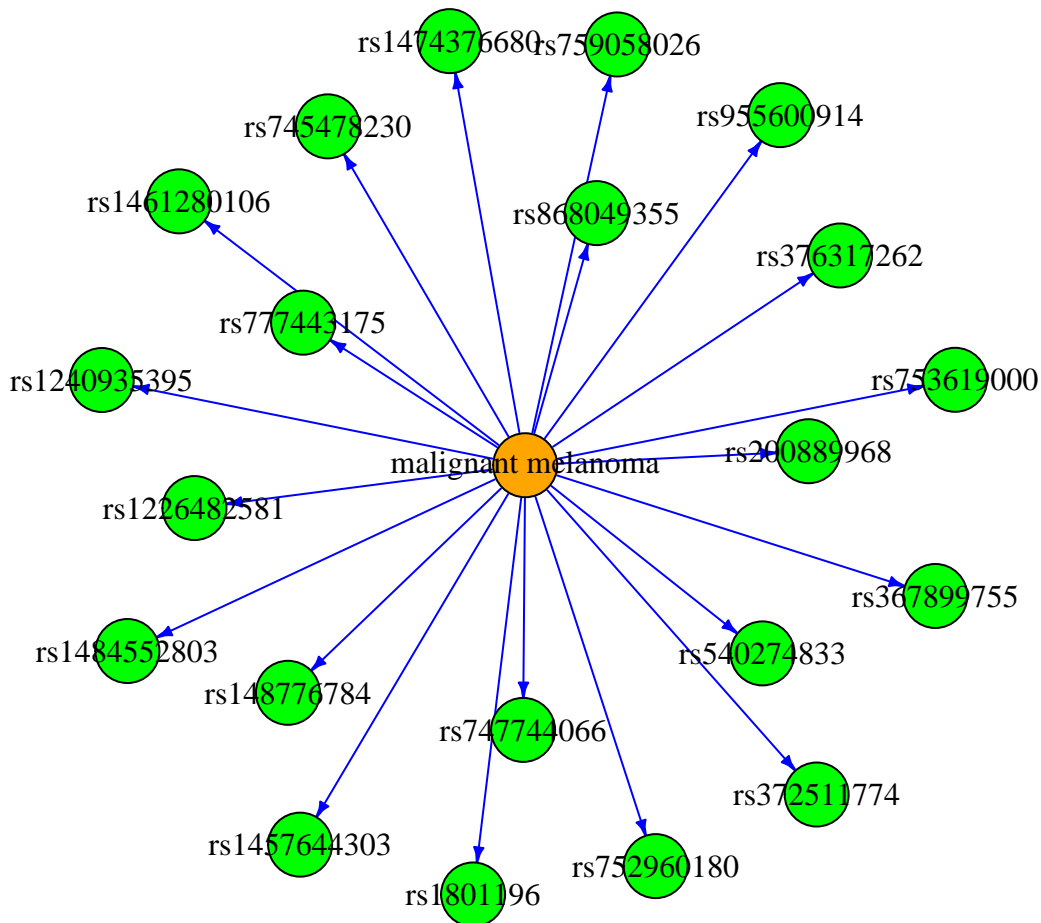

## Variant-Disease Network (mesothelioma)

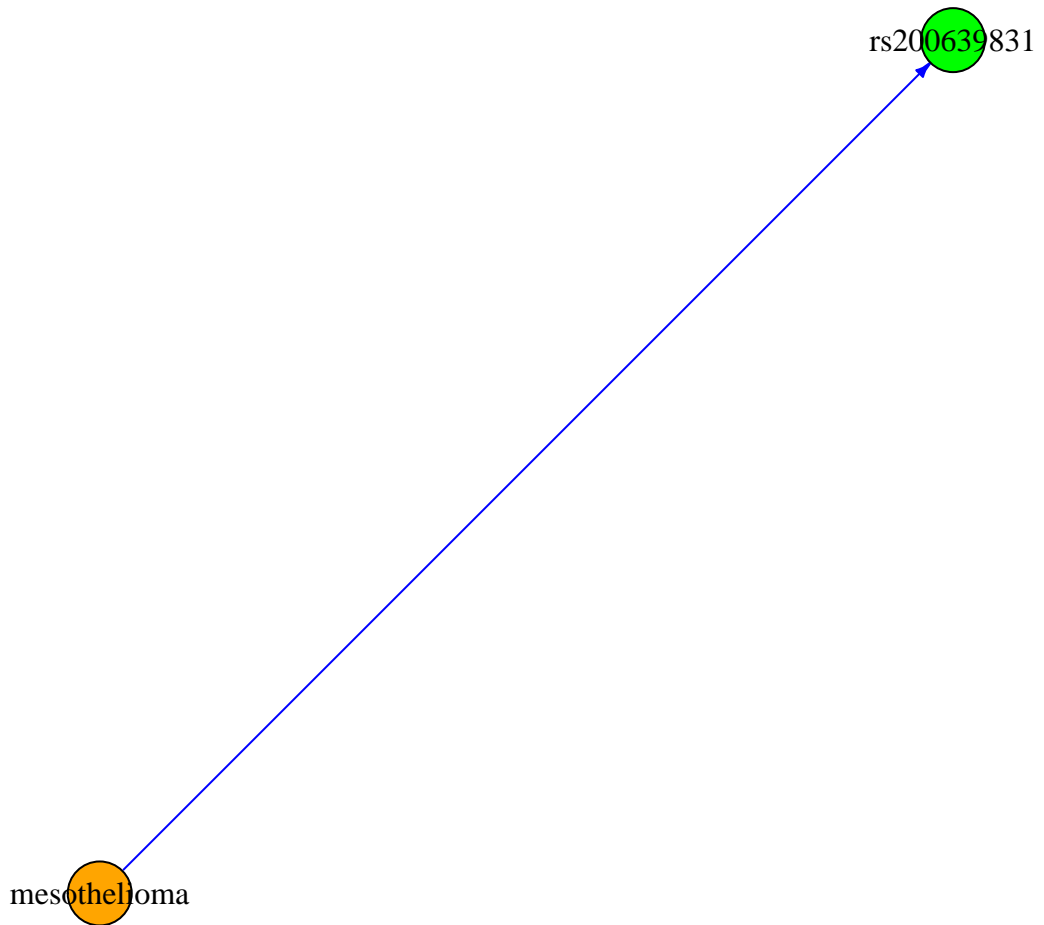

# Variant–Disease Network (primitive neuroectodermal tumour–medulloblastoma)

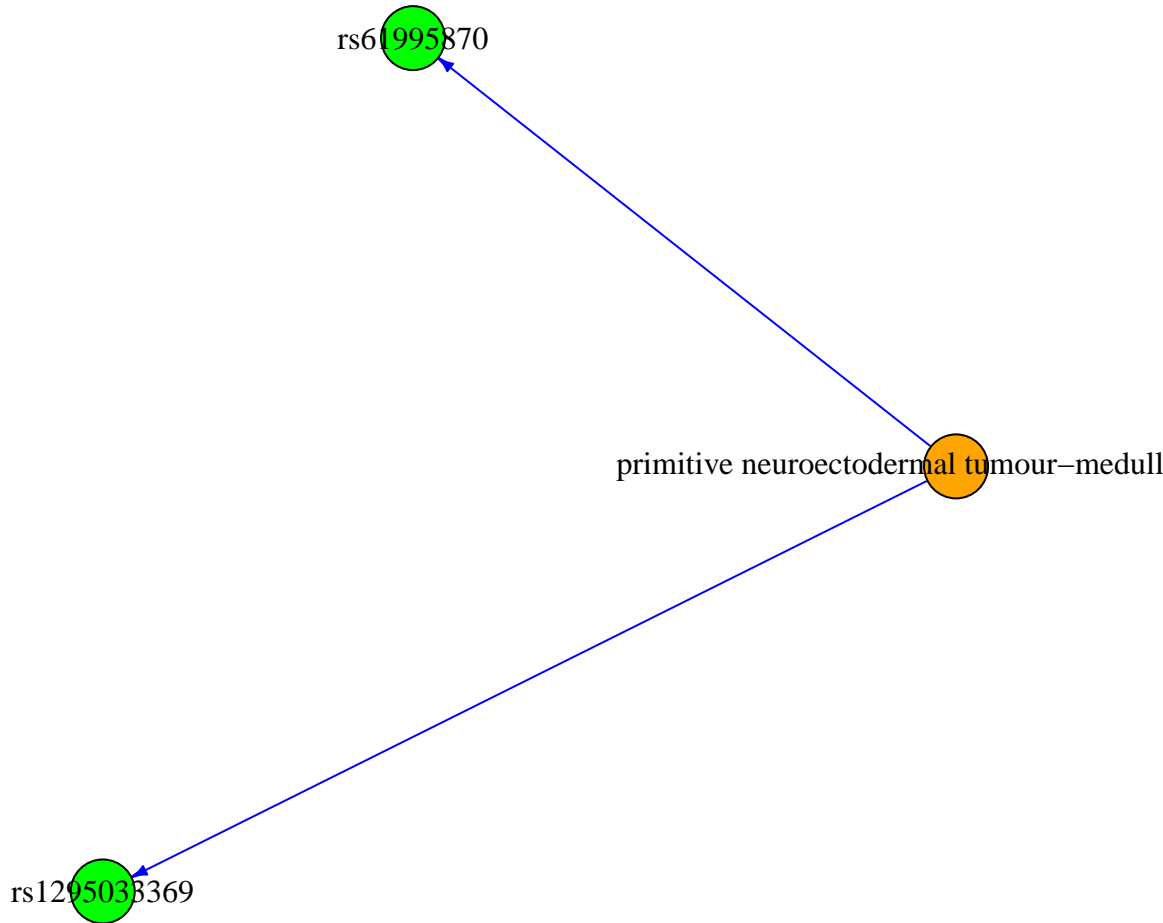



## Variant-Disease Network (synovial sarcoma)

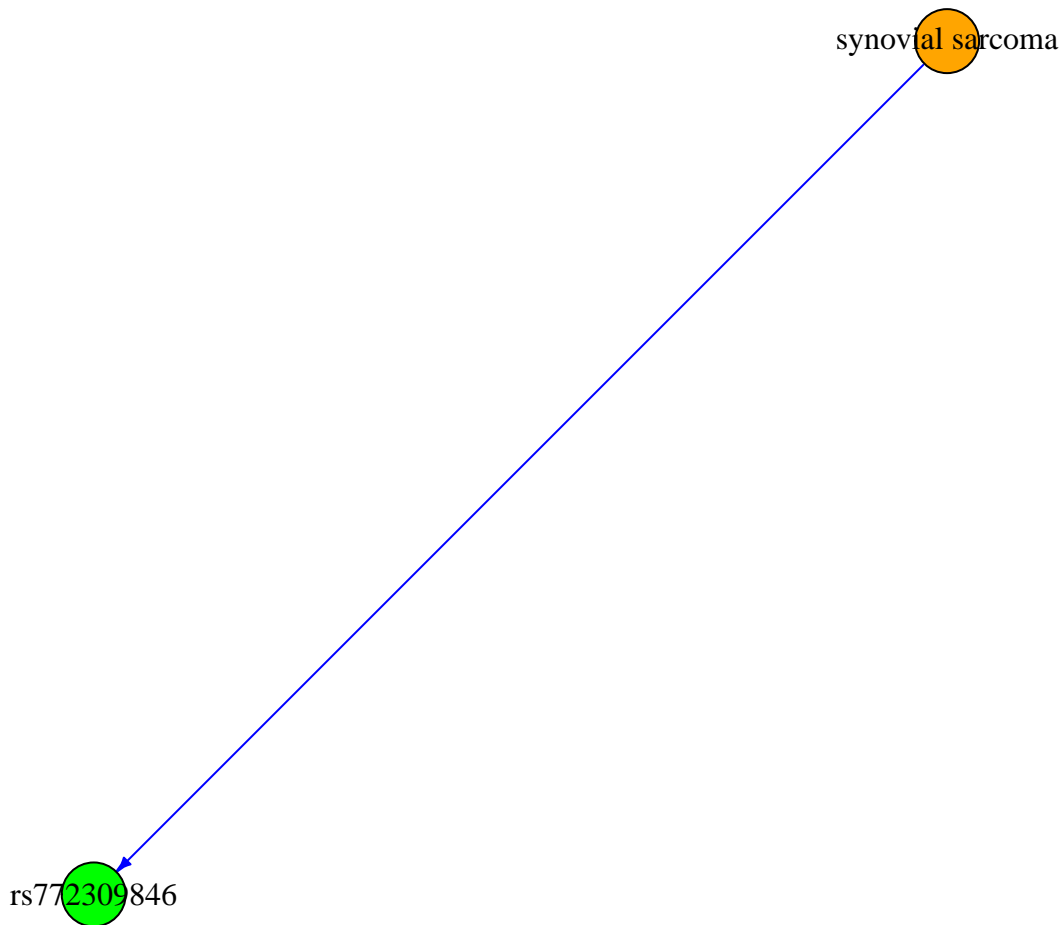

## Variant–Disease Network ( Autosomal Dominant)

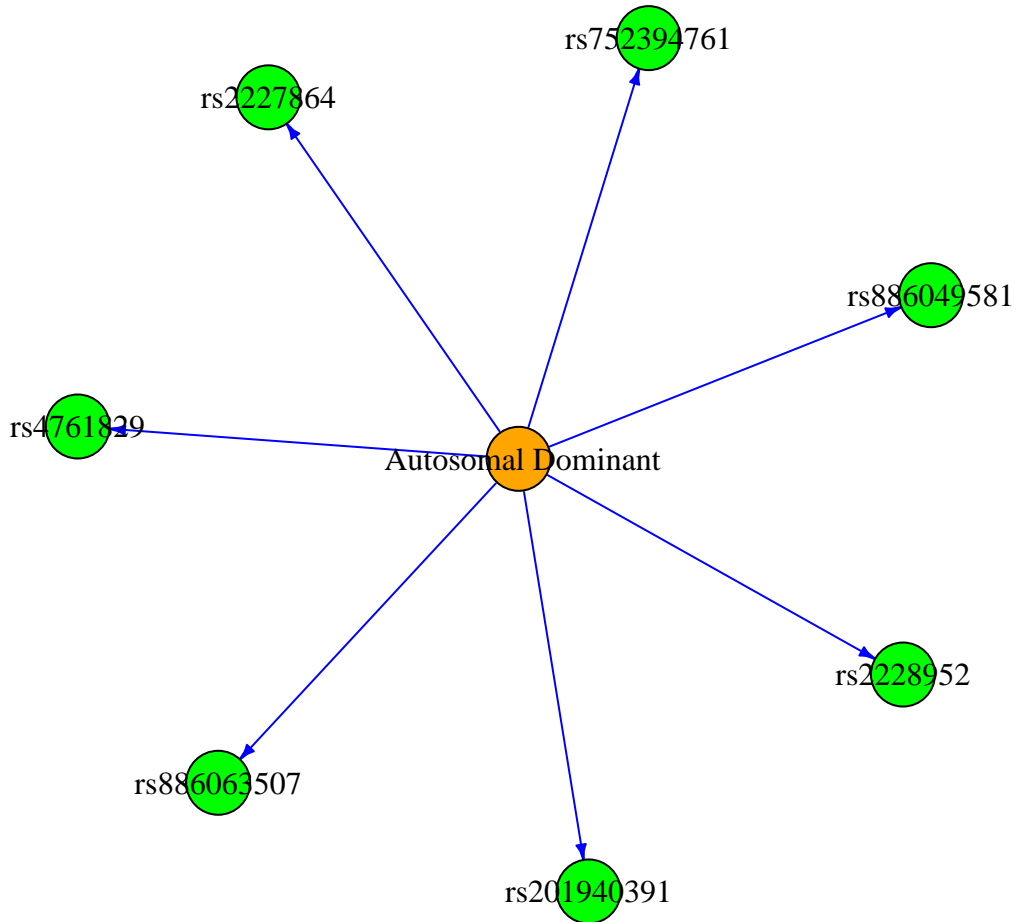

## Variant–Disease Network ( Autosomal Recessive)

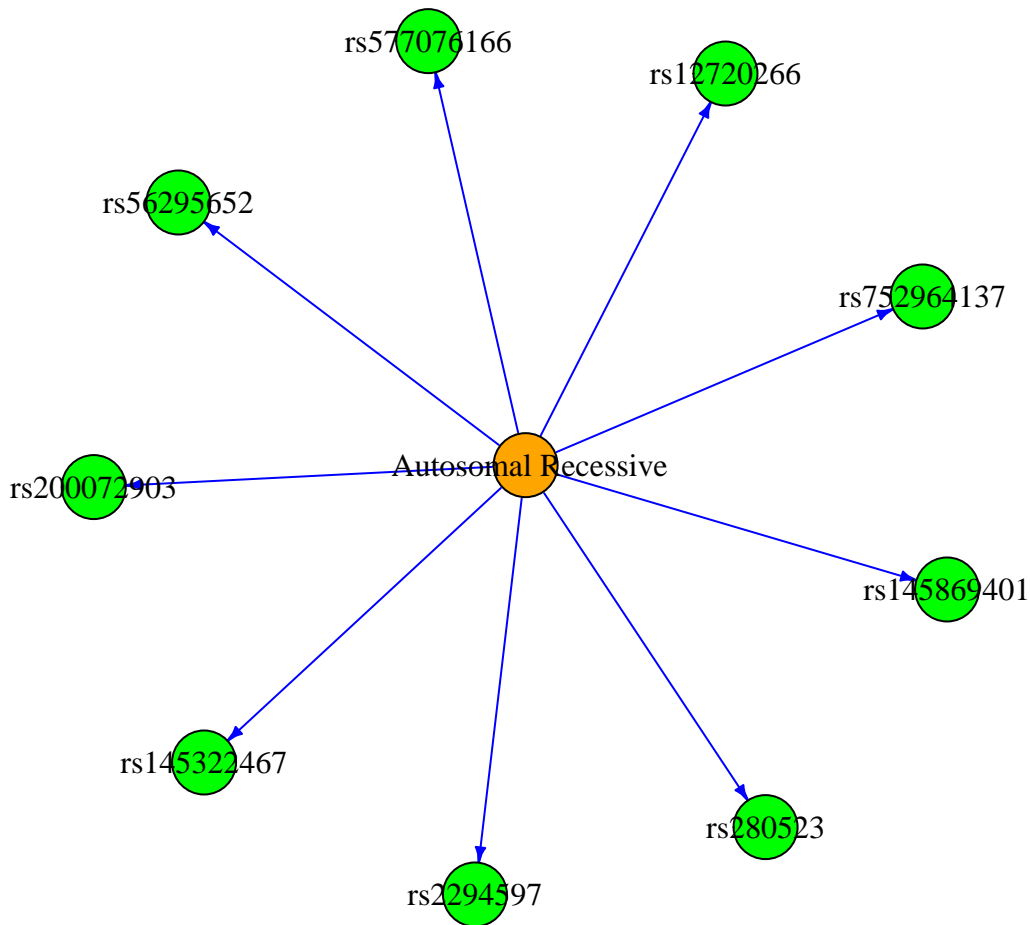

## Variant-Disease Network ( Deafness)

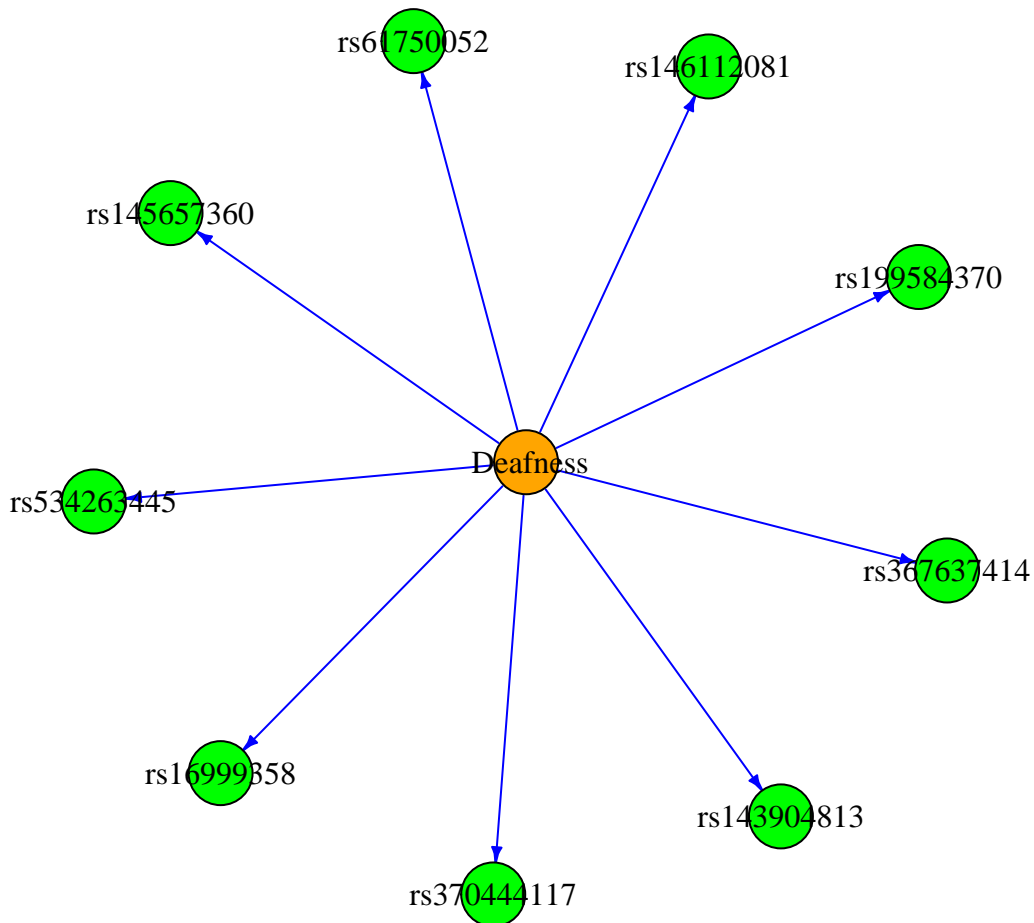

## Variant–Disease Network ( Noninsulin–Dependent)

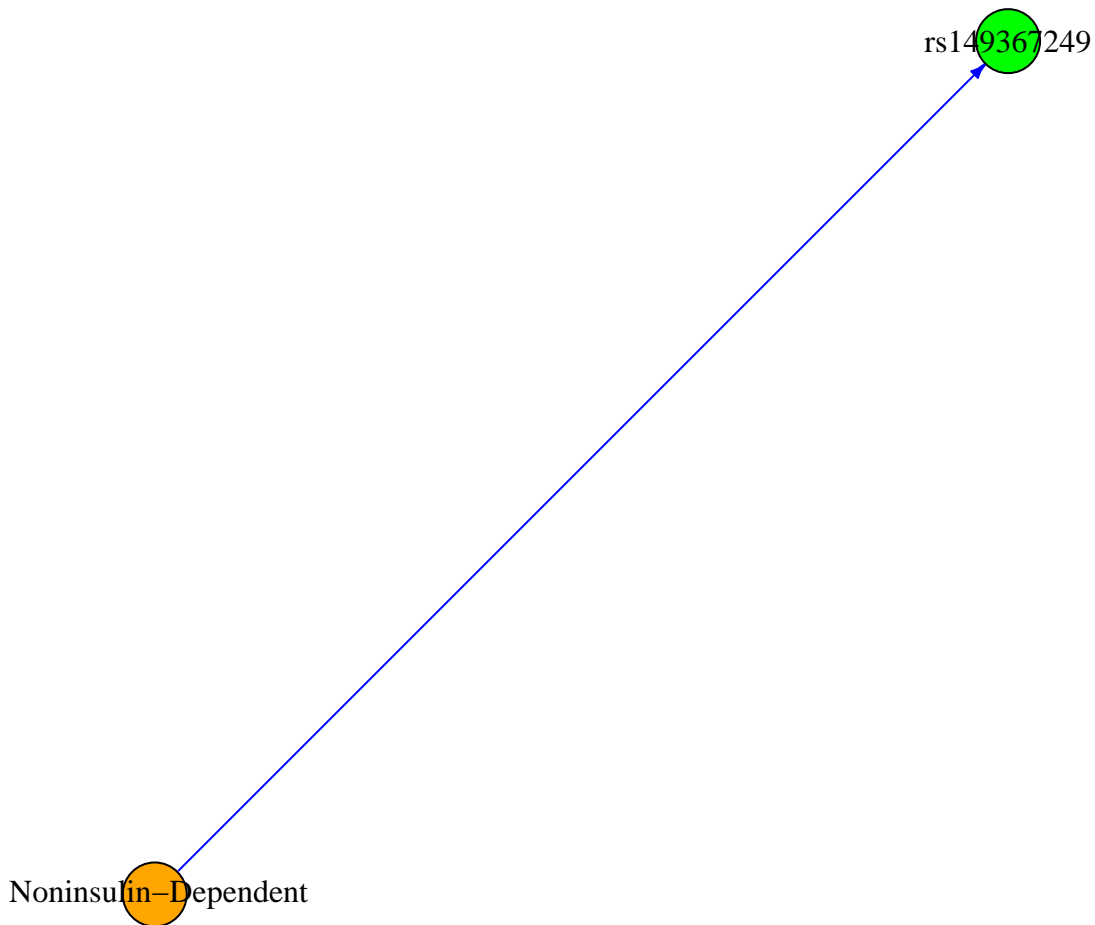

## Variant-Disease Network (Abetalipoproteinaemia)

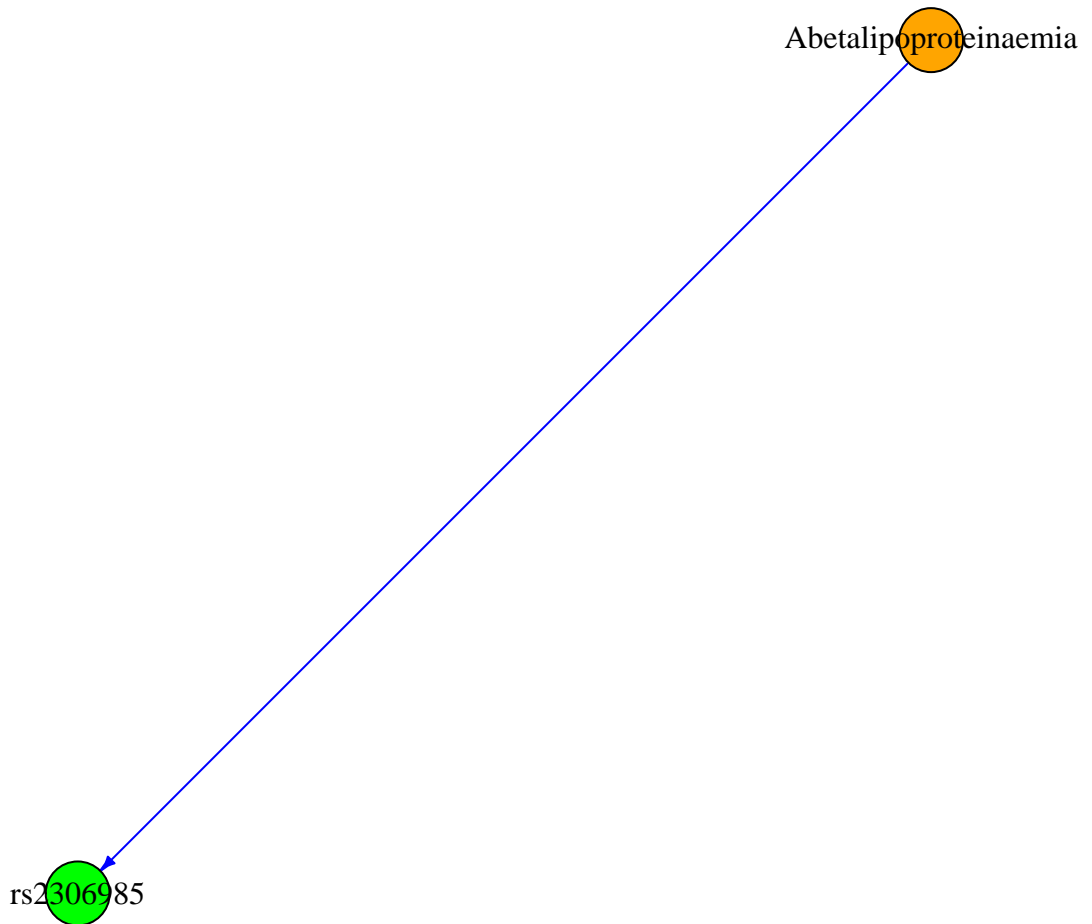

## Variant–Disease Network (Abnormal aggressive)

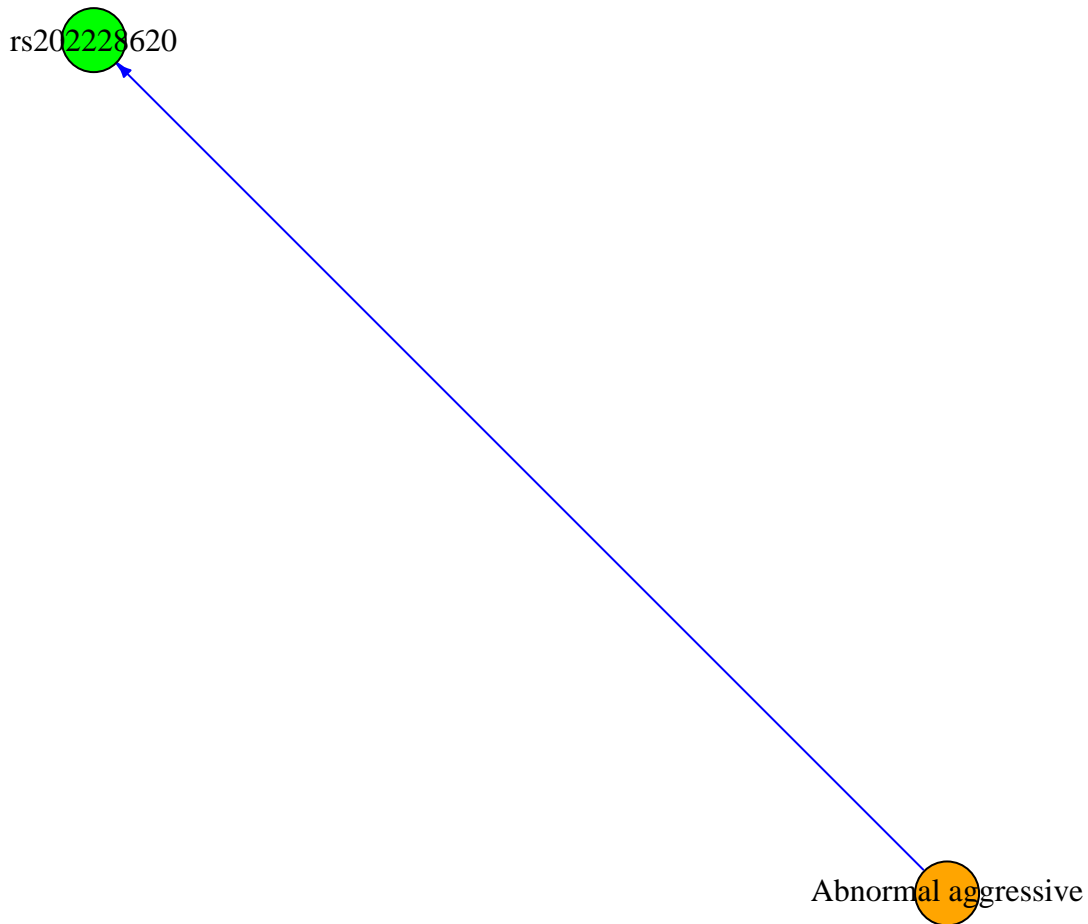

## Variant-Disease Network (Achondrogenesis)

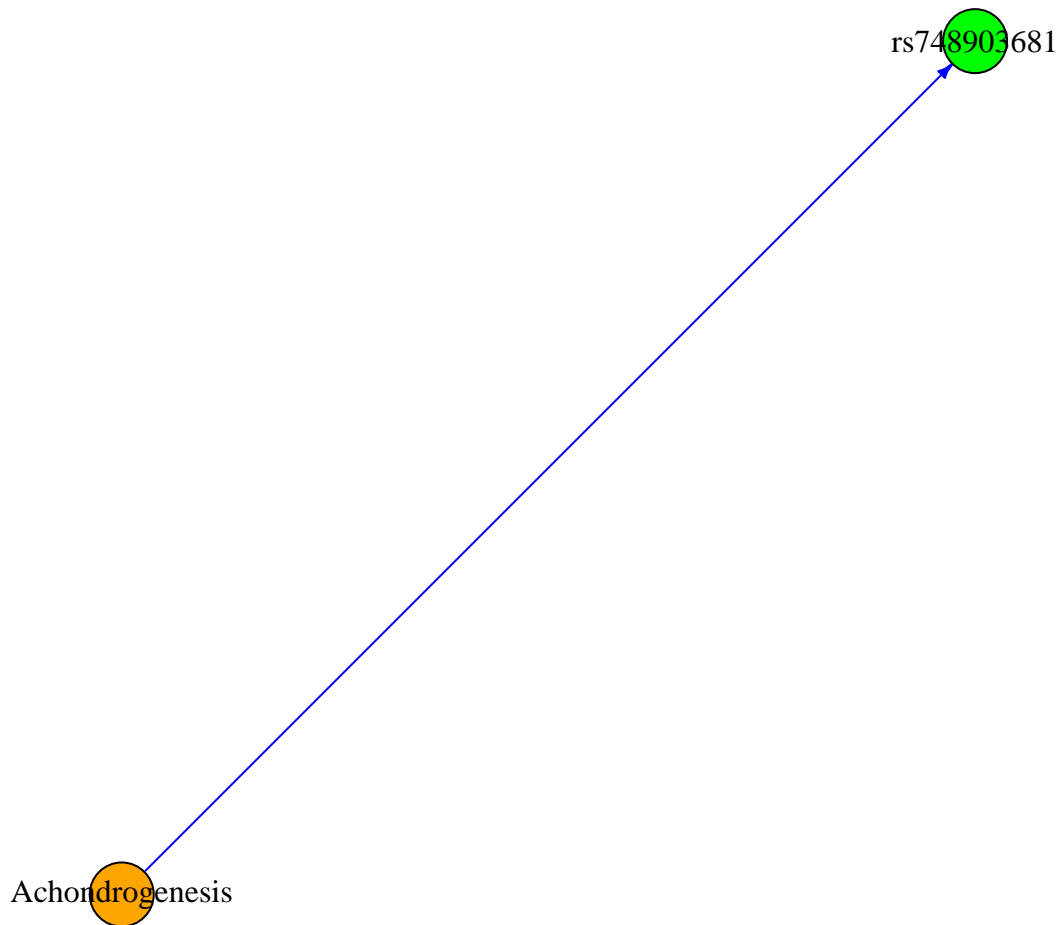



## Variant-Disease Network (Achromatopsia)

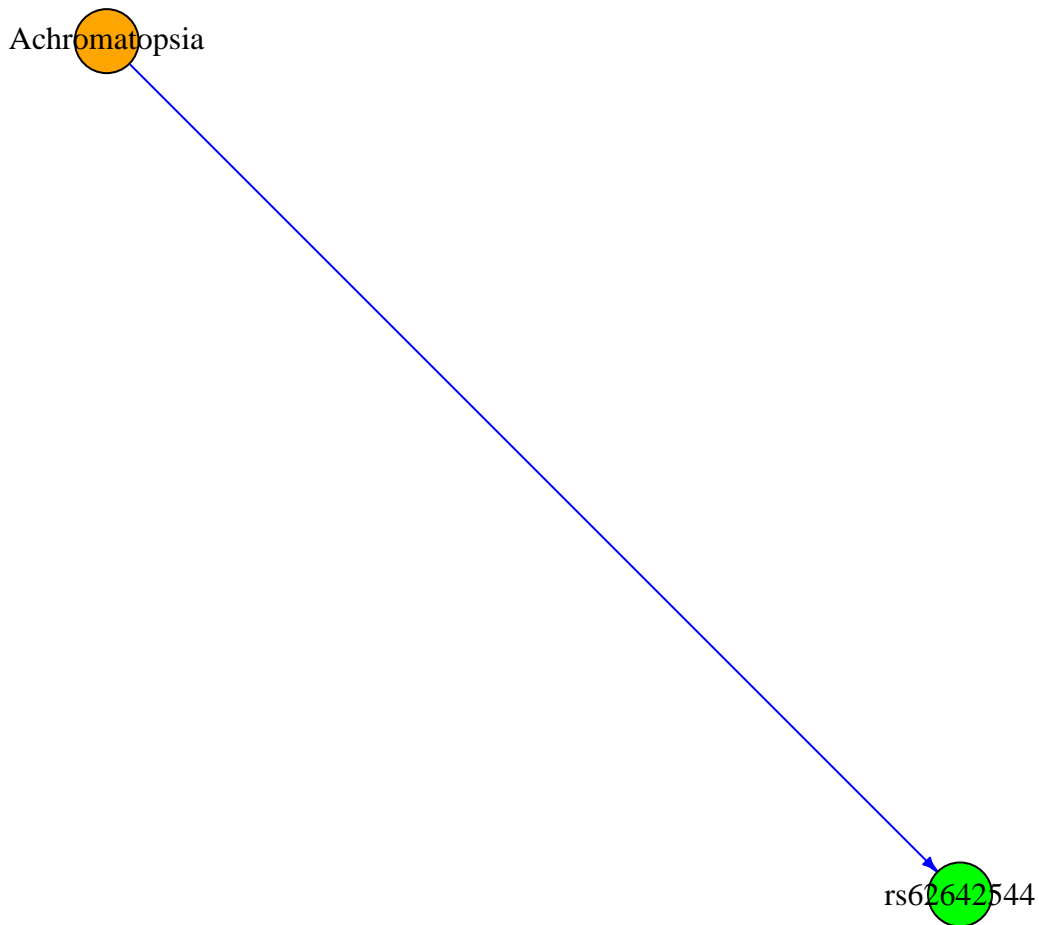

**Variant–Disease Network (Acrocephalosyndactyly type I)**

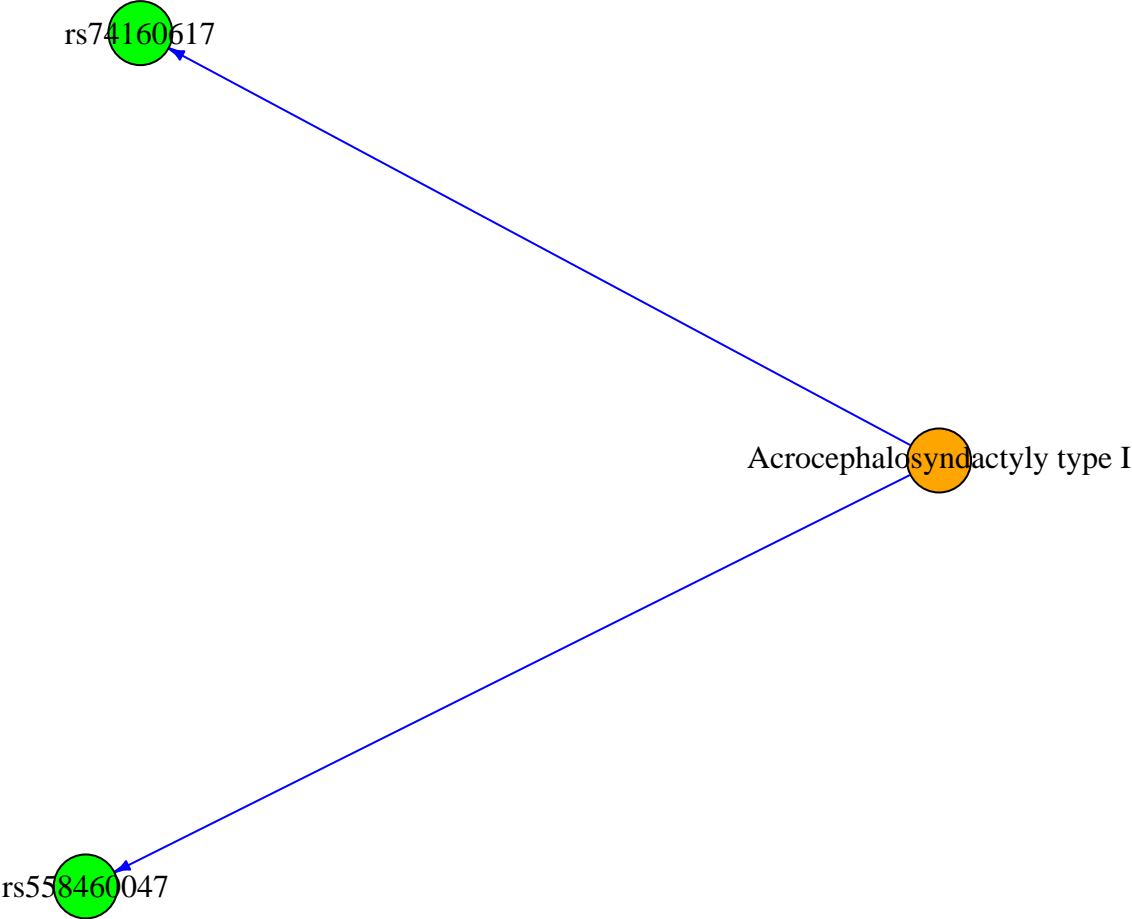

## Variant-Disease Network (Acrodysostosis)

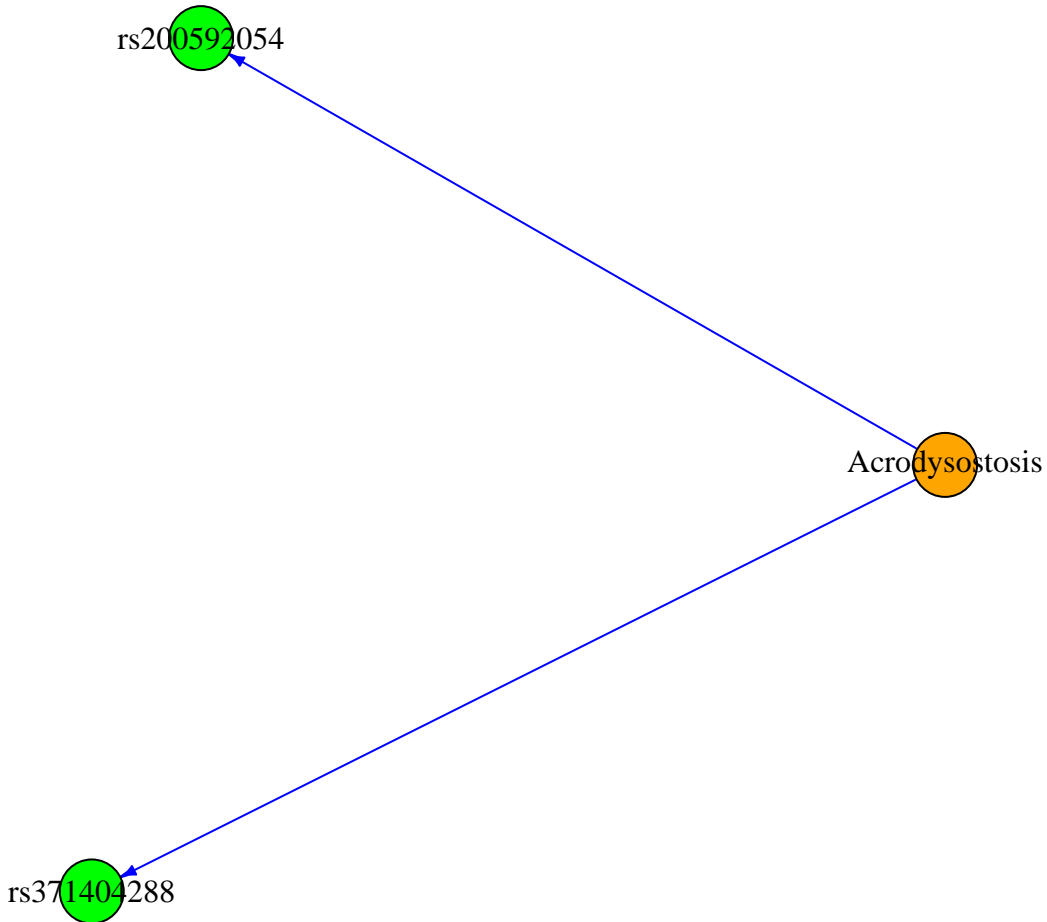

## Variant–Disease Network (Acromesomelic Dysplasia)

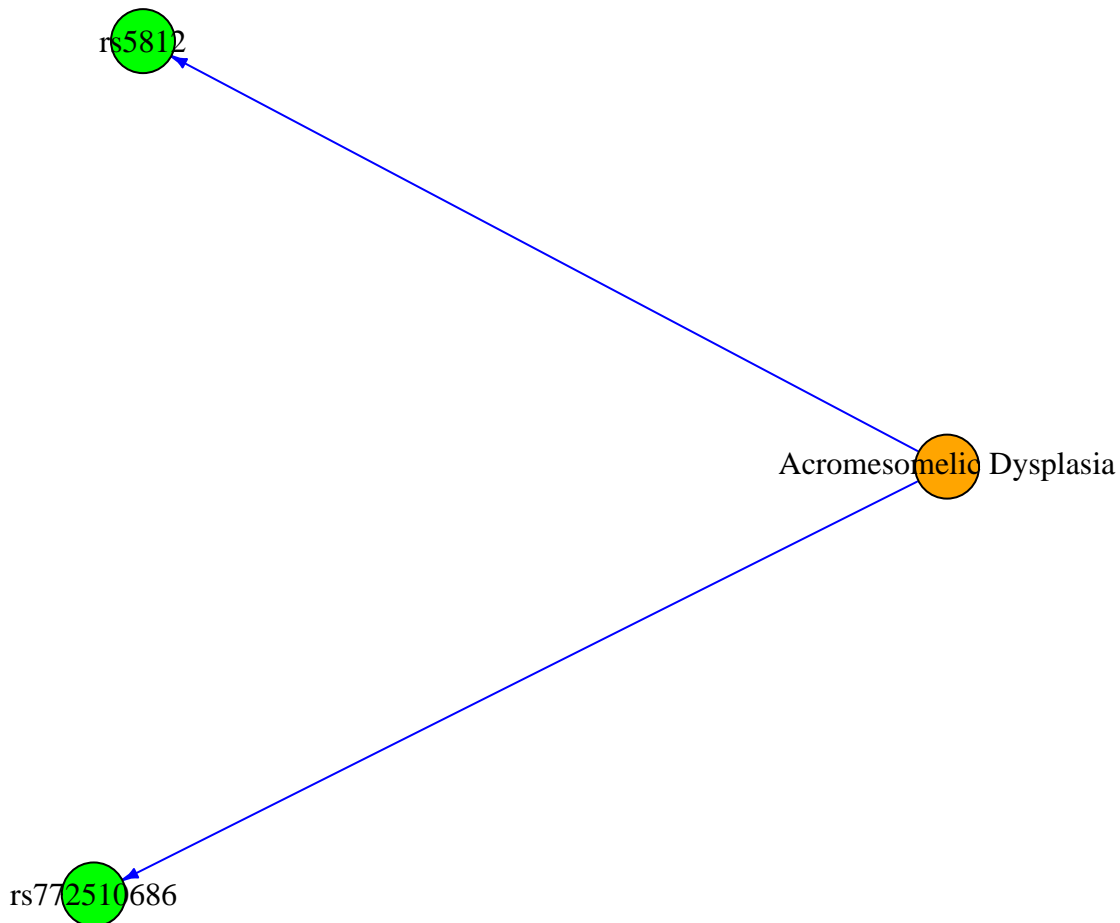

**Variant–Disease Network (Acromesomelic dysplasia Maroteaux type)**

Acromesomelic dysplasia Maroteaux type

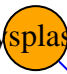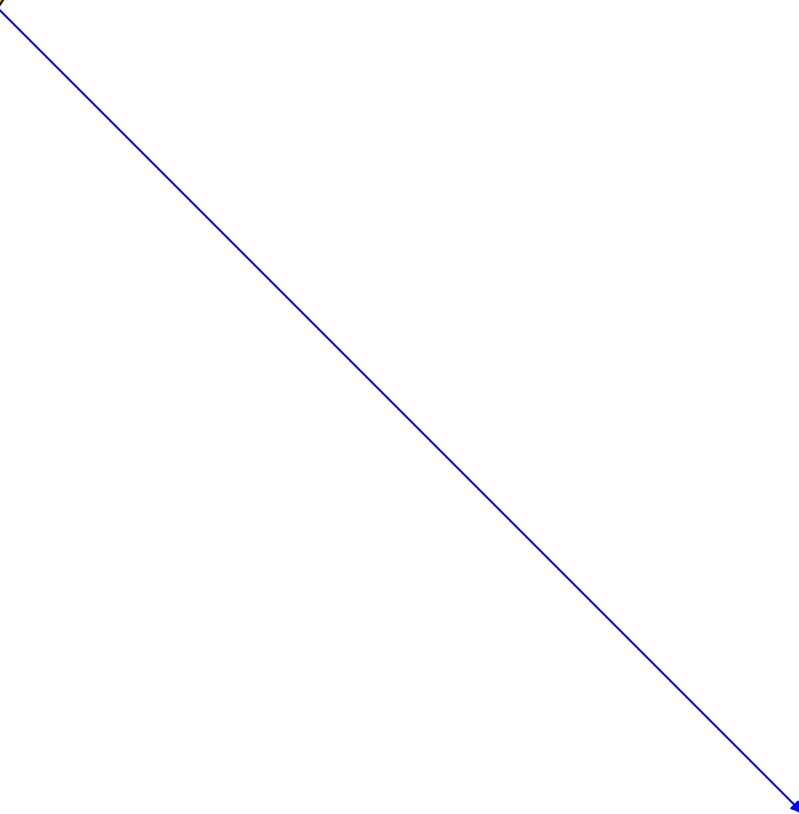

rs772856710

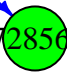

## Variant–Disease Network (Acromicric dysplasia)

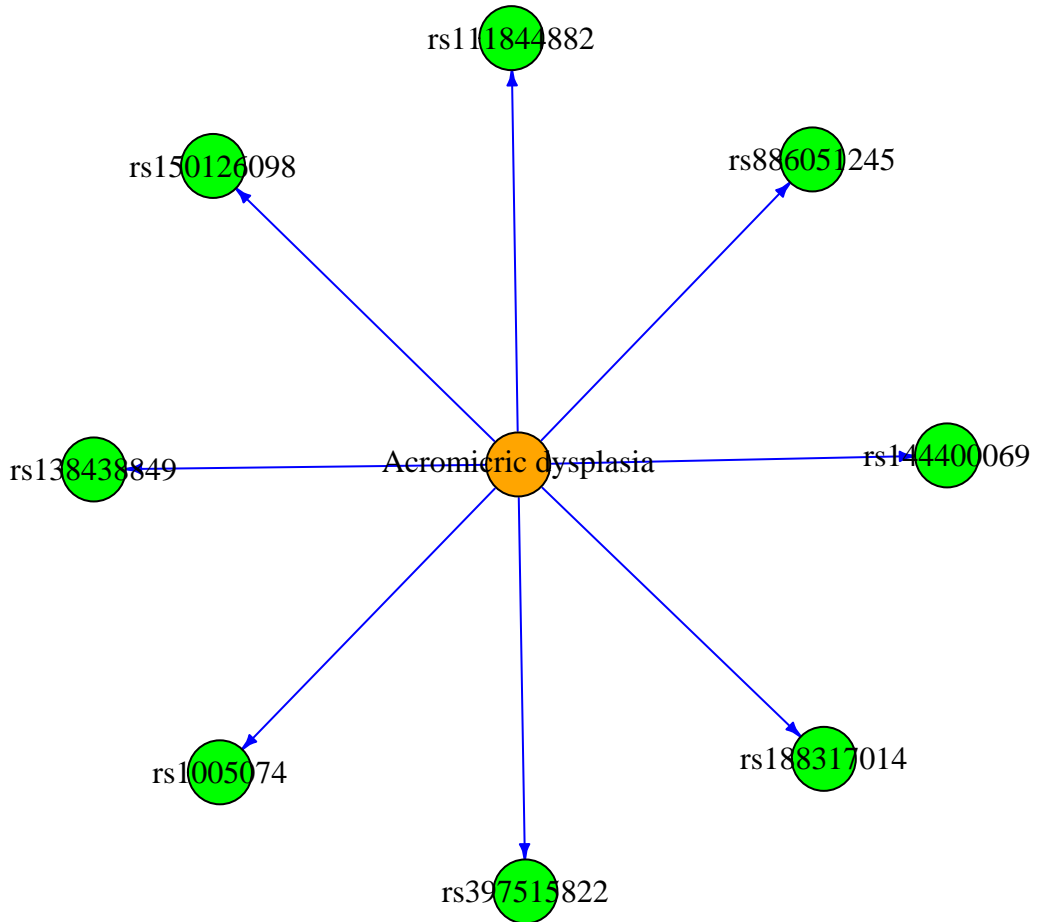

Variant–Disease Network (Acute intermittent porphyria)

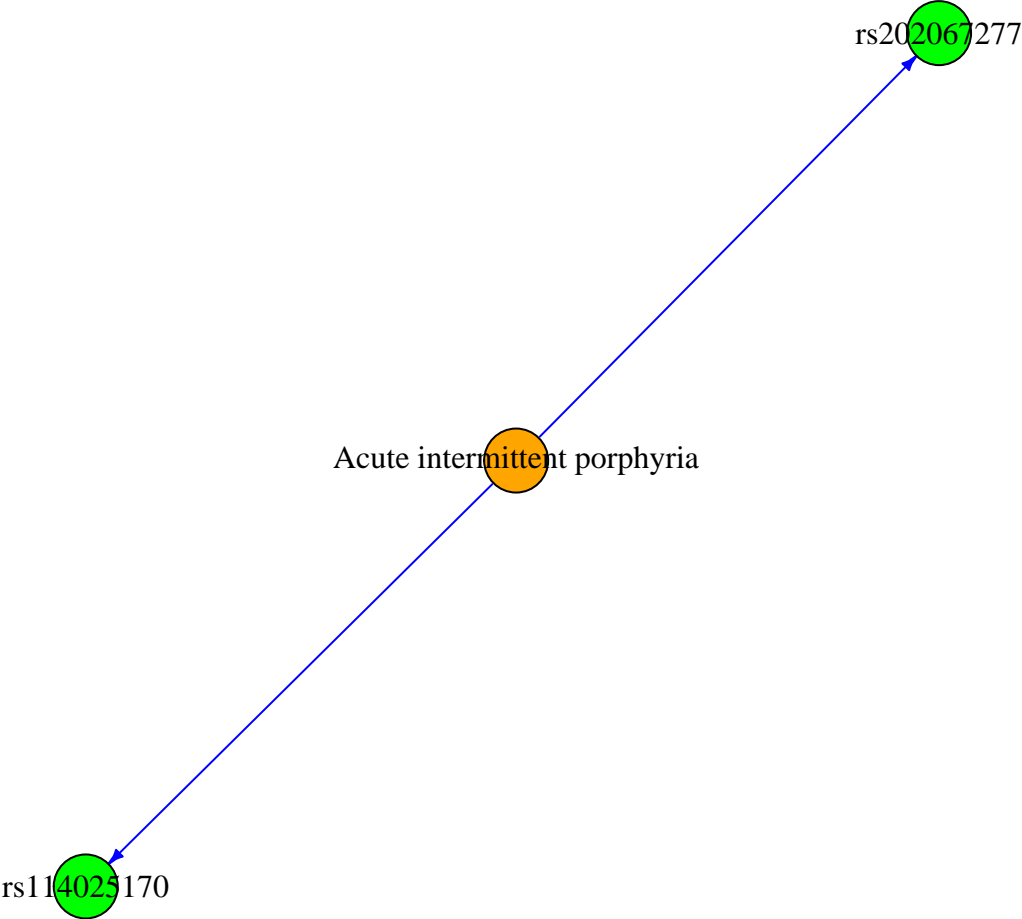

Variant–Disease Network (Acute myeloid leukemia)

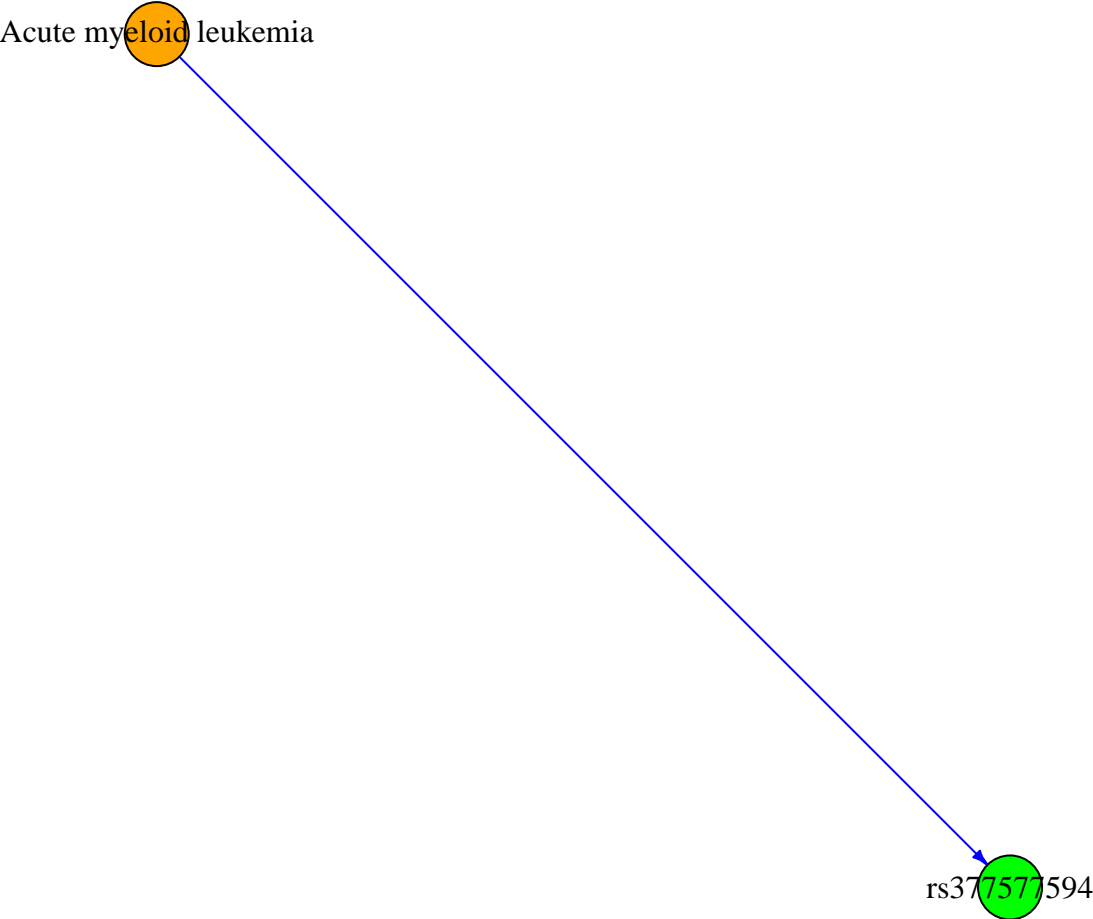



**Variant–Disease Network (Adams–Oliver syndrome 5)**

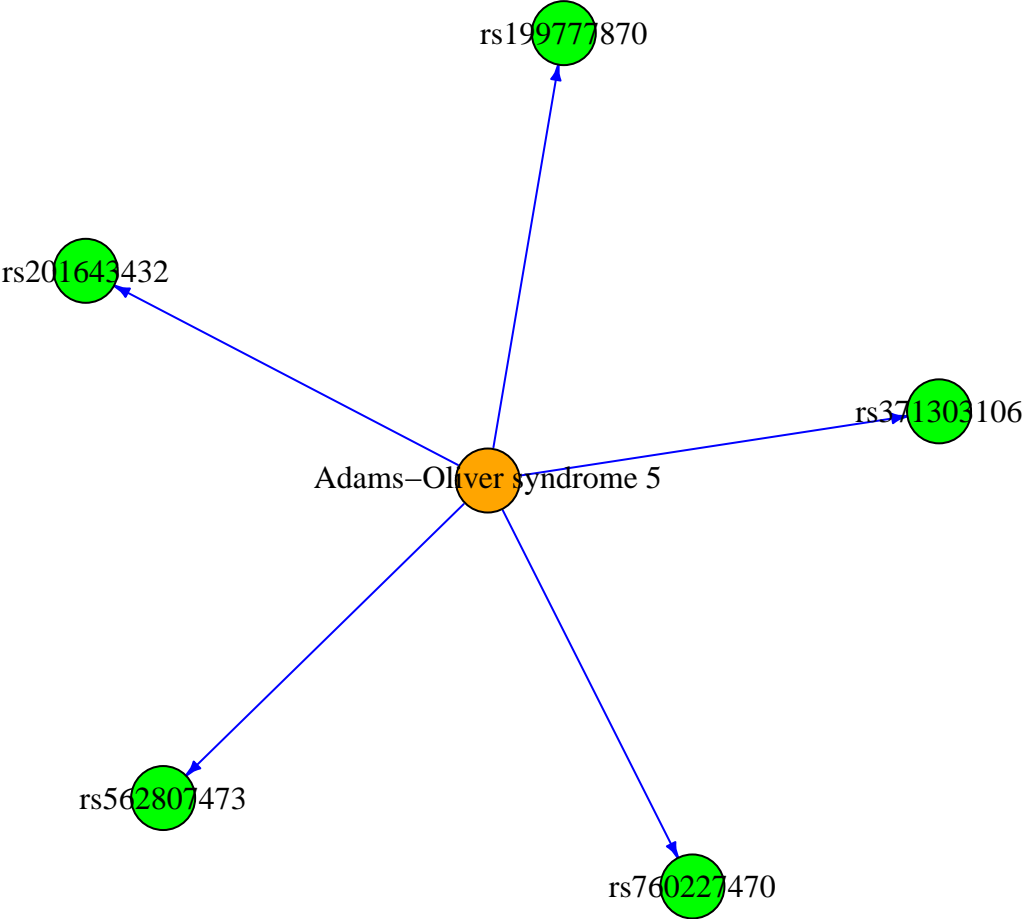

**Variant–Disease Network (Adenylosuccinate lyase deficiency)**

Adenylosuccinate lyase deficiency

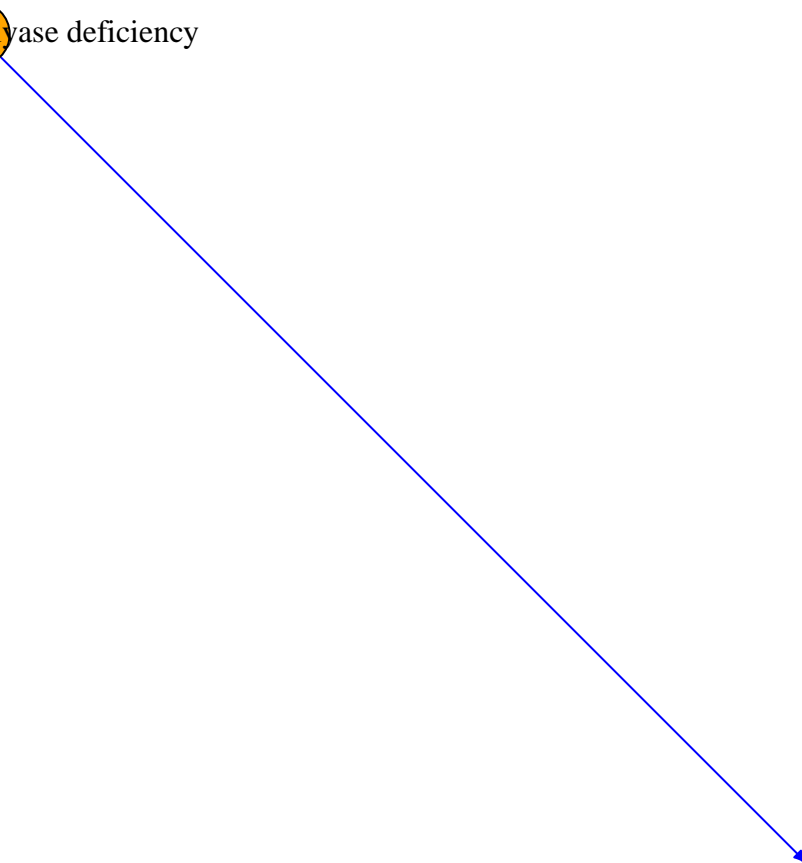

rs369069575

## Variant–Disease Network (Age-related cortical cataract)

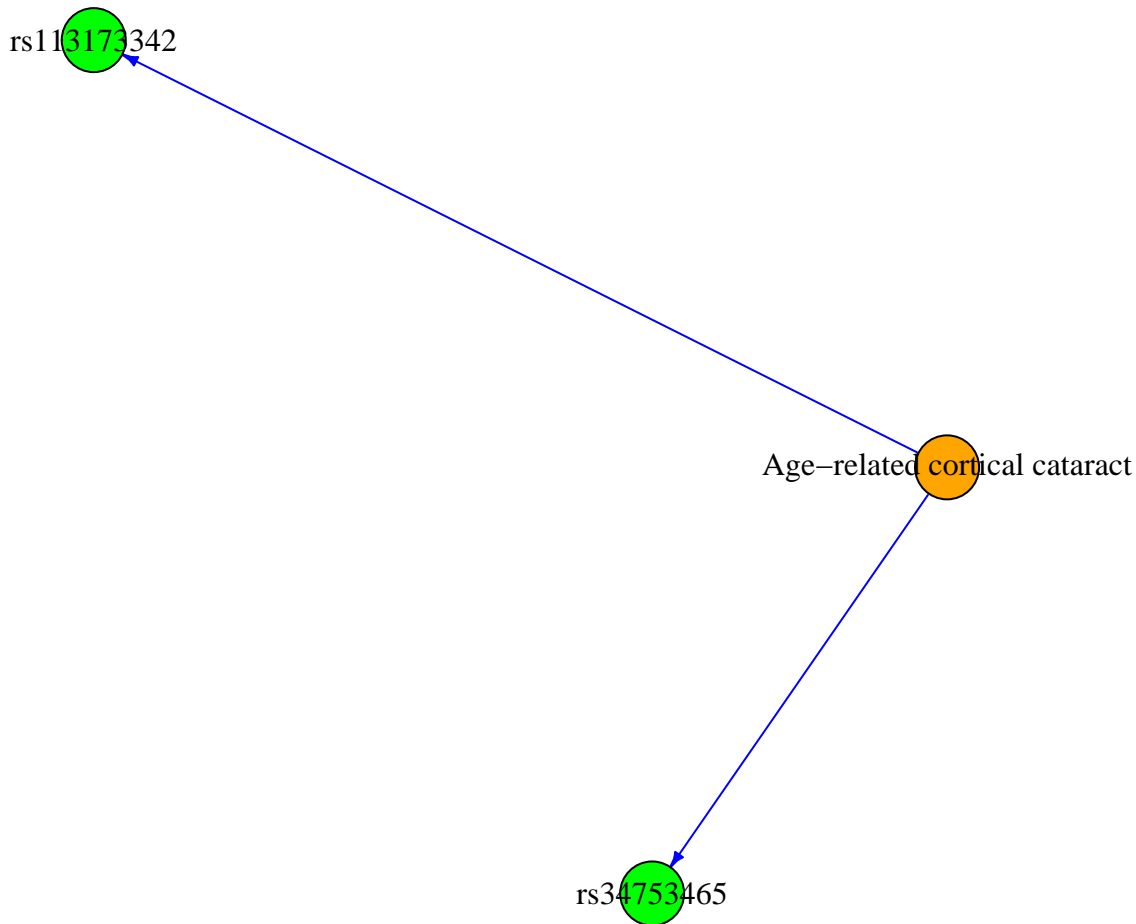

**Variant–Disease Network (Aggressive behavior)**

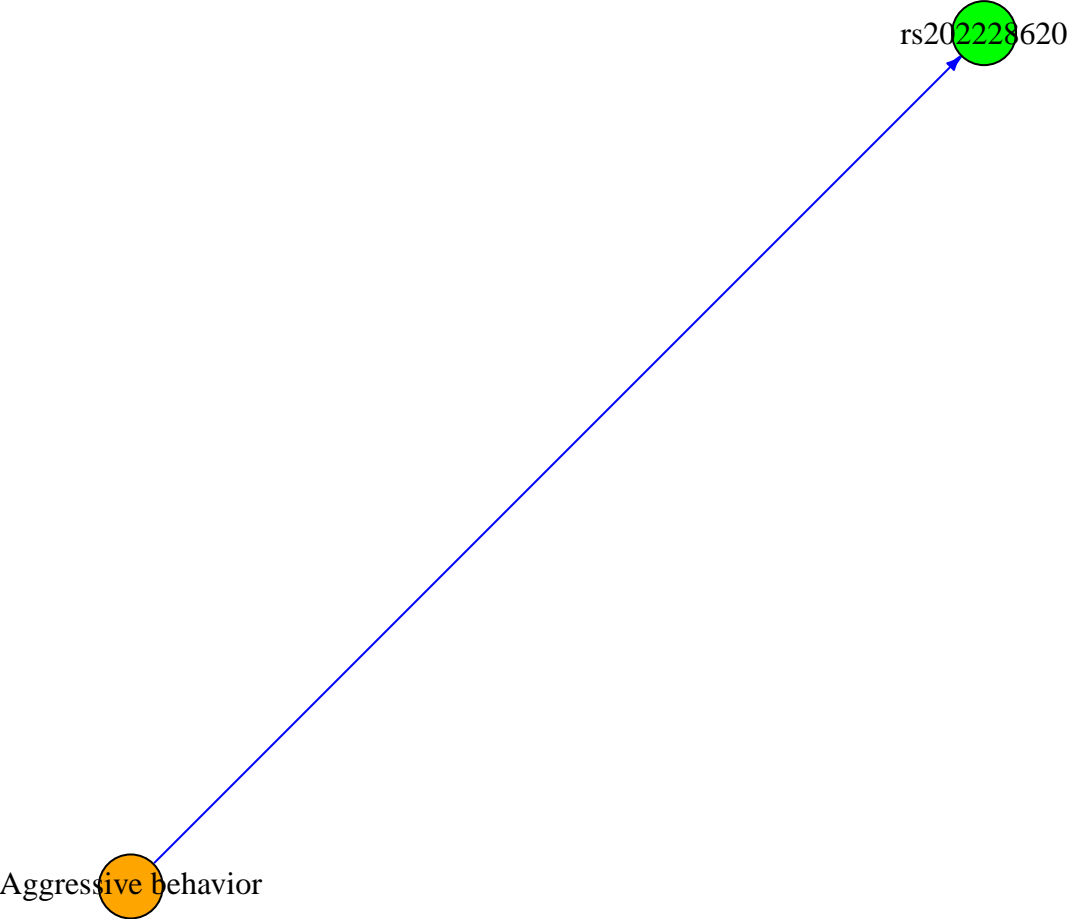

**Variant–Disease Network (Aicardi–Goutieres syndrome 6)**

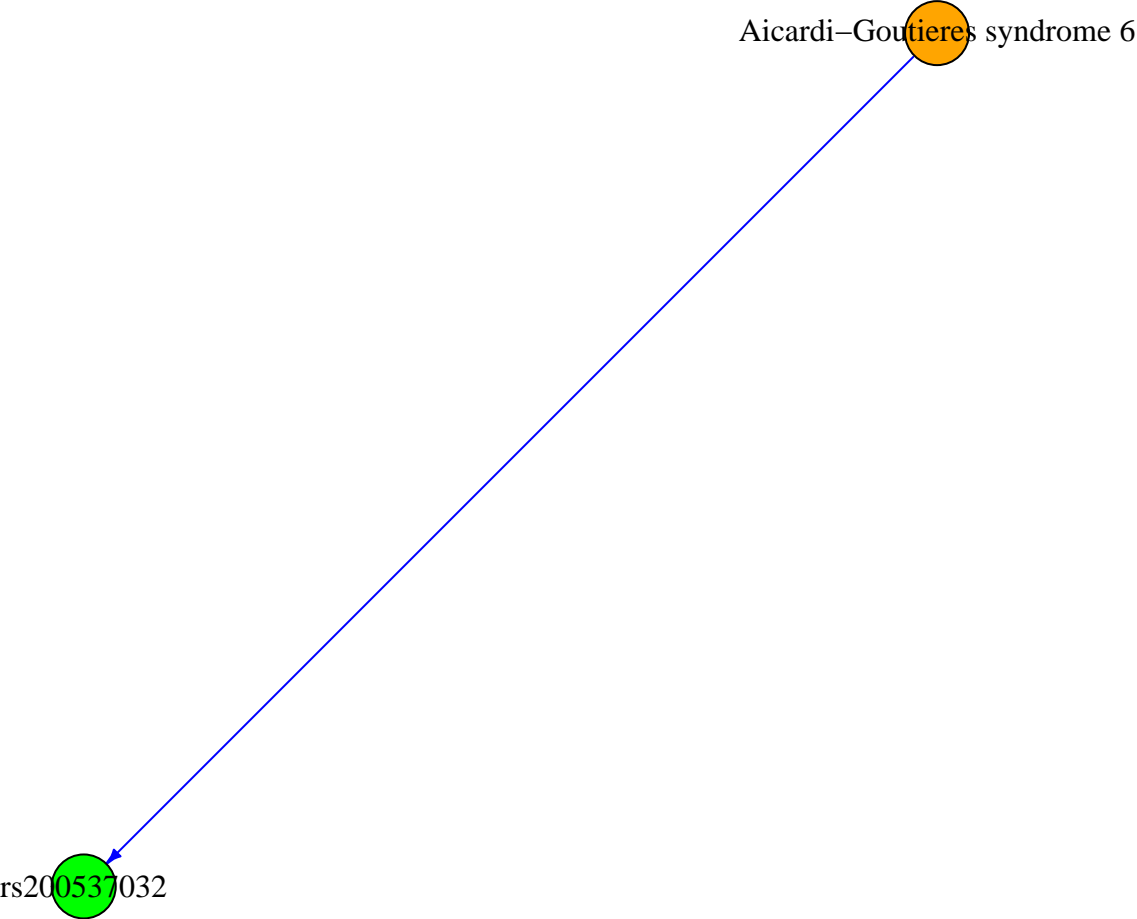

Variant–Disease Network (AIPL1–Related Disorders)

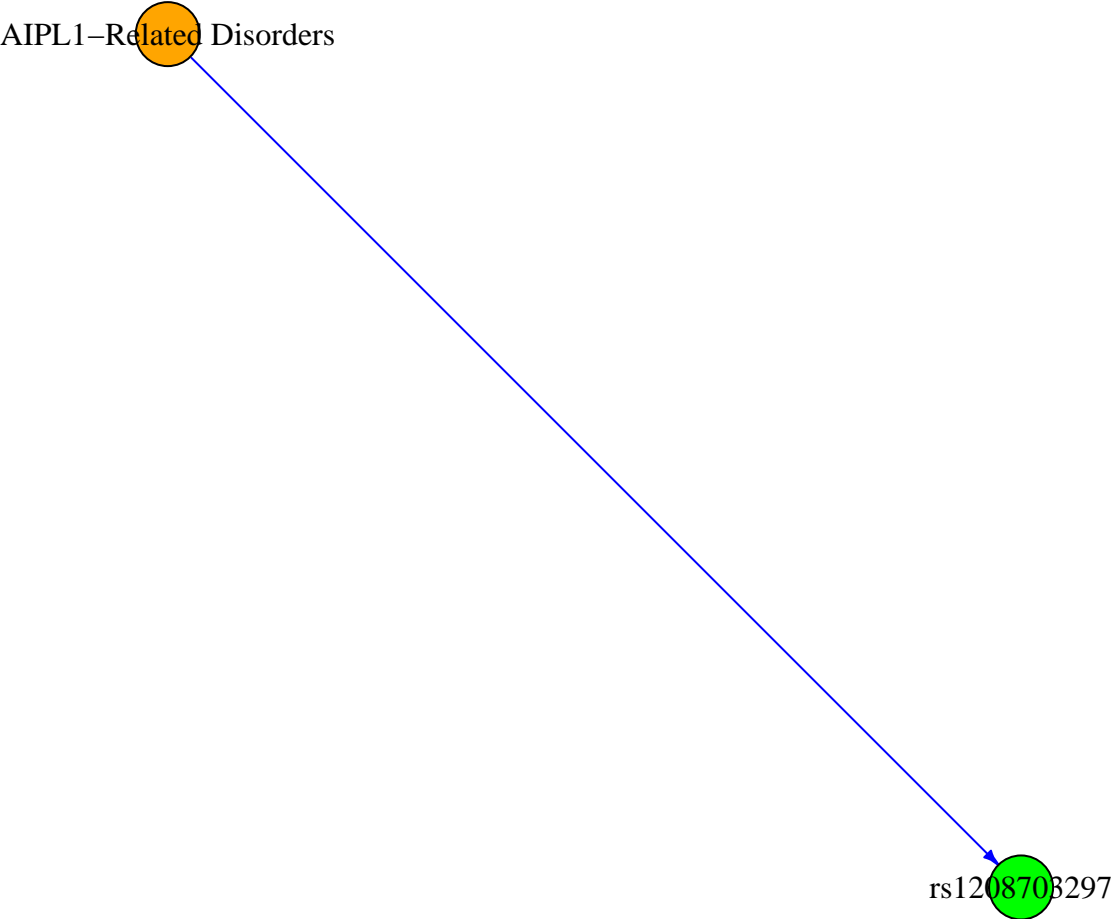

## Variant–Disease Network (Alagille syndrome 1)

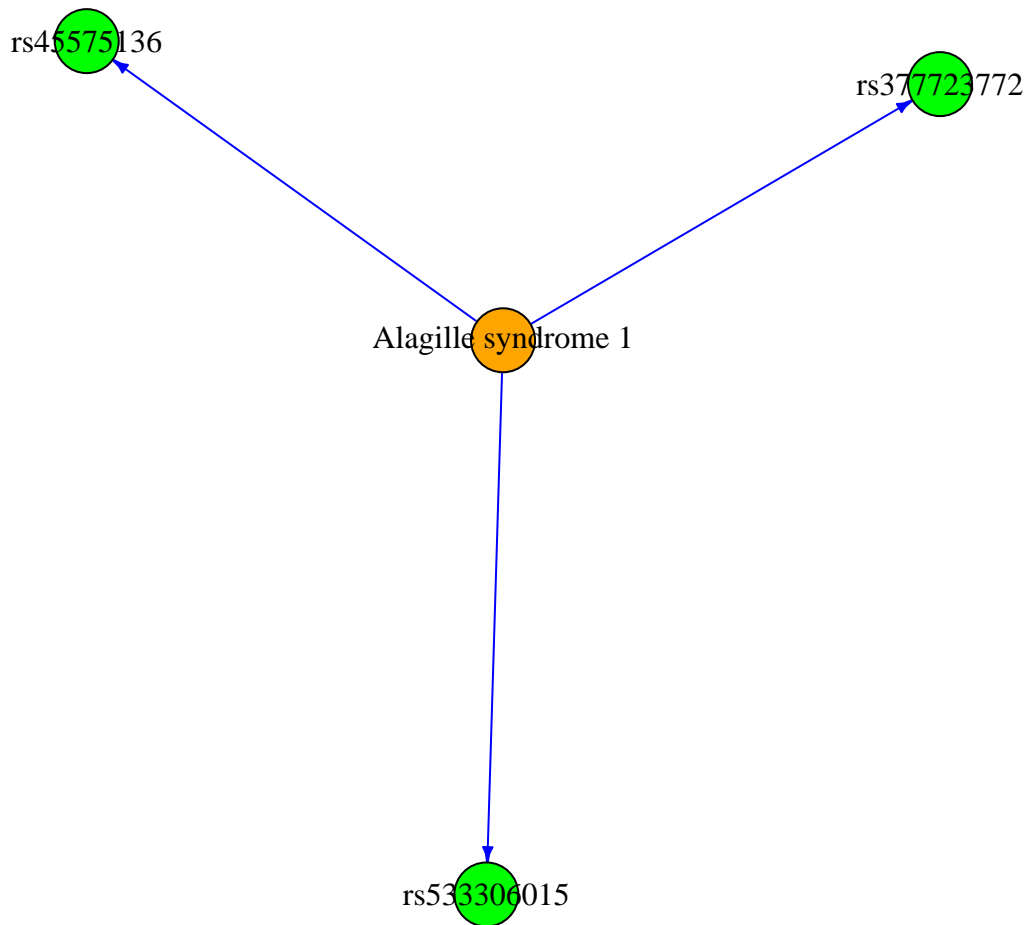

## Variant–Disease Network (Albinism)

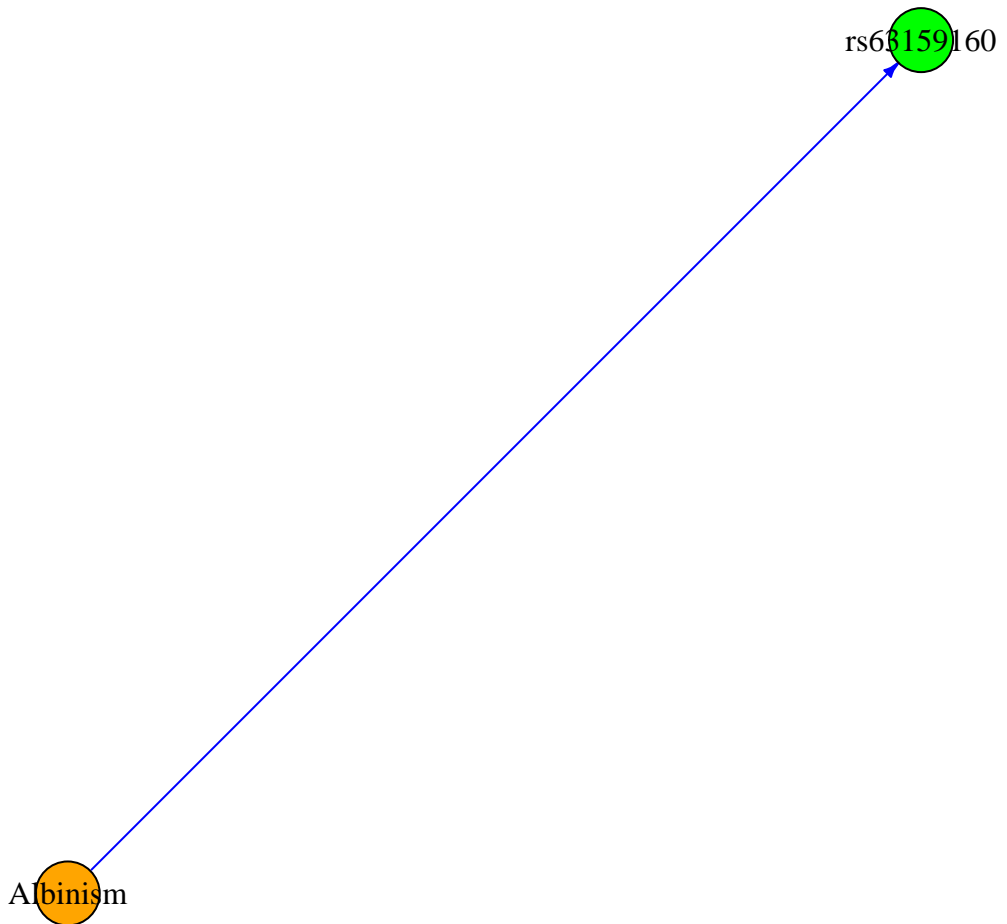



Variant–Disease Network (Alkaptonuria)

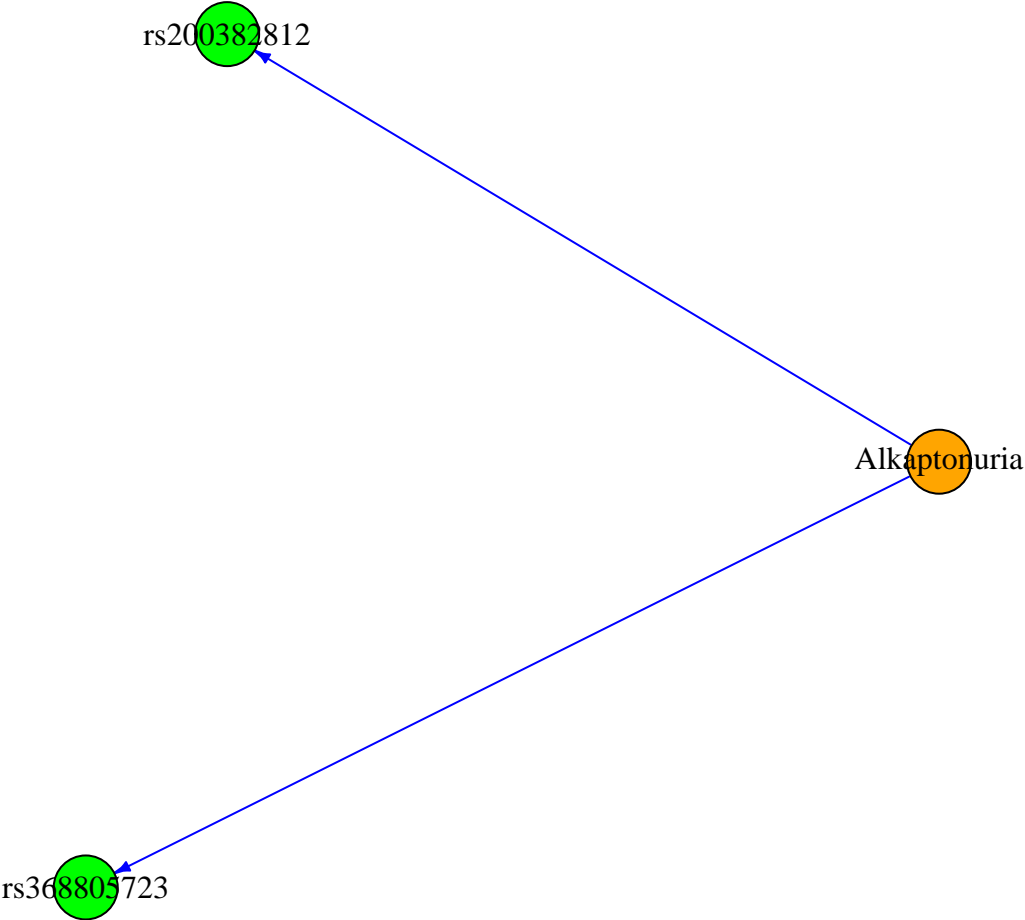

# Variant-Disease Network (Allan-Herndon-Dudley syndrome)

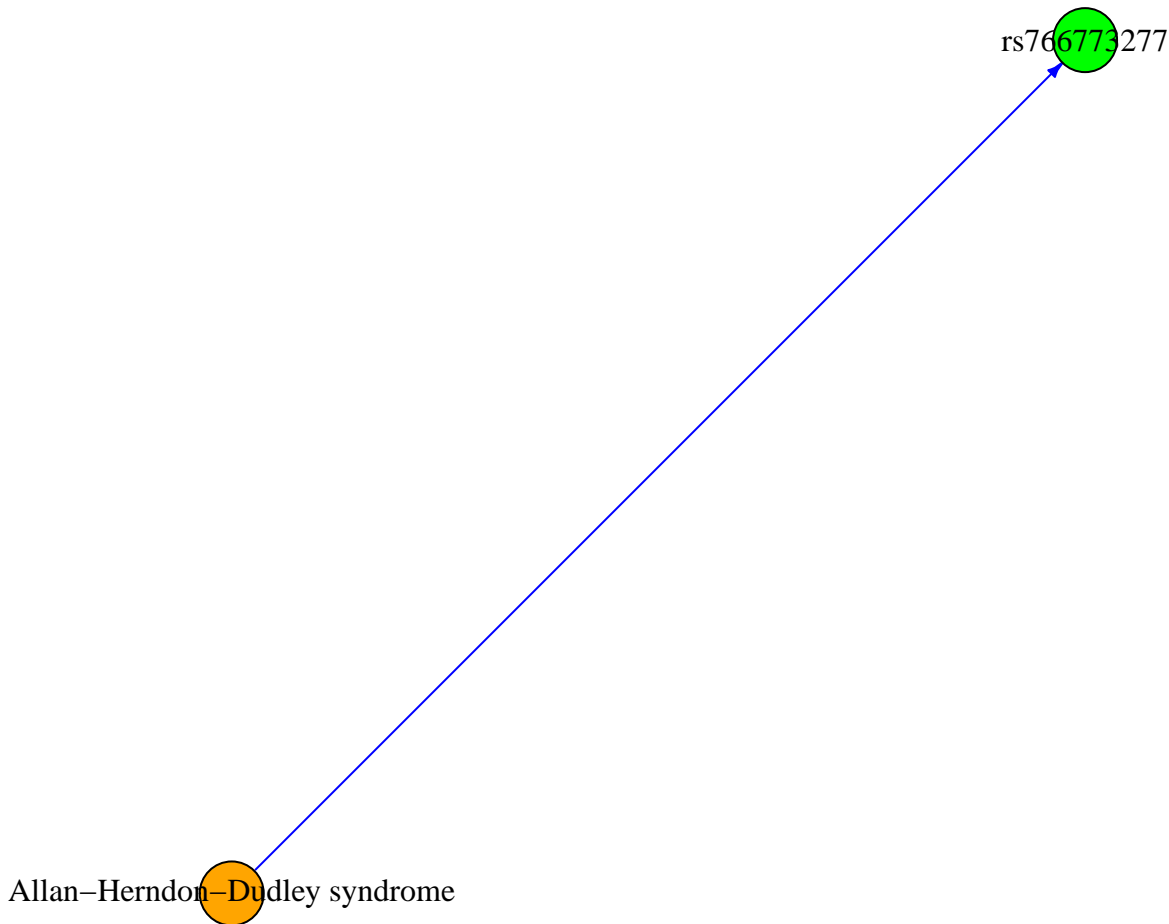

## Variant–Disease Network (Alopecia universalis)

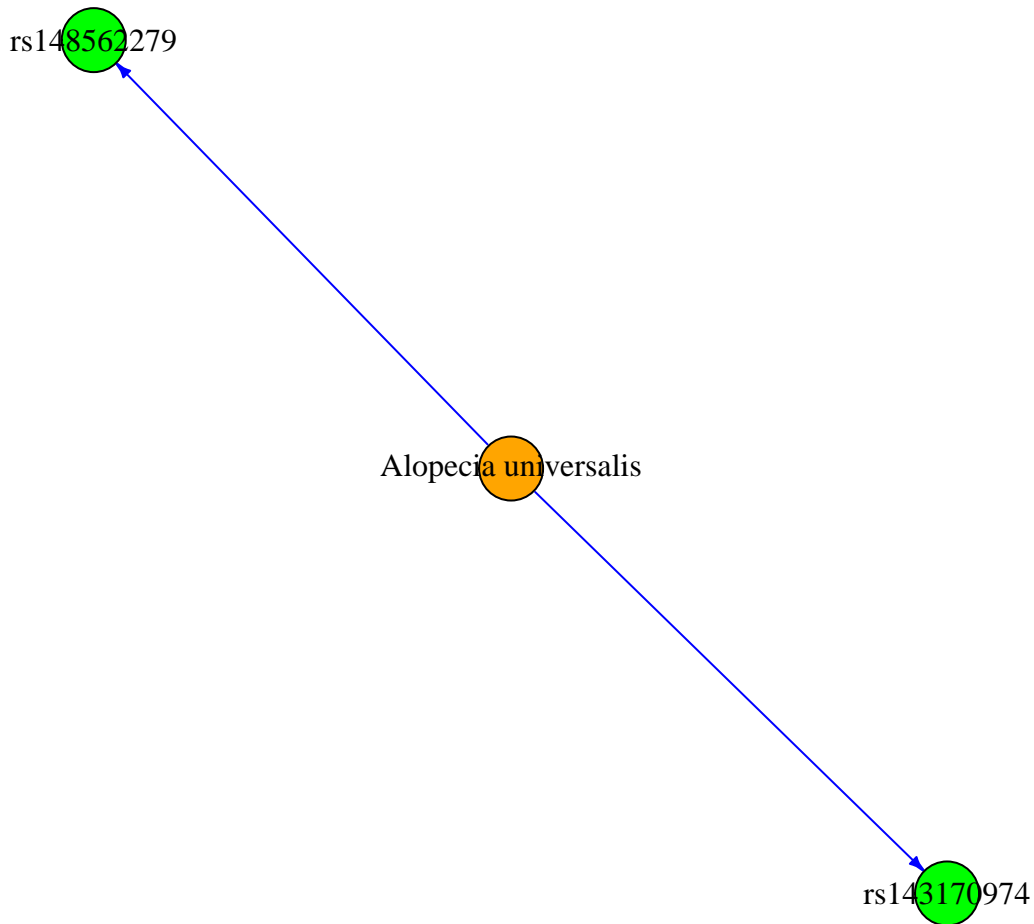

Variant–Disease Network (ALS2–Related Disorders)

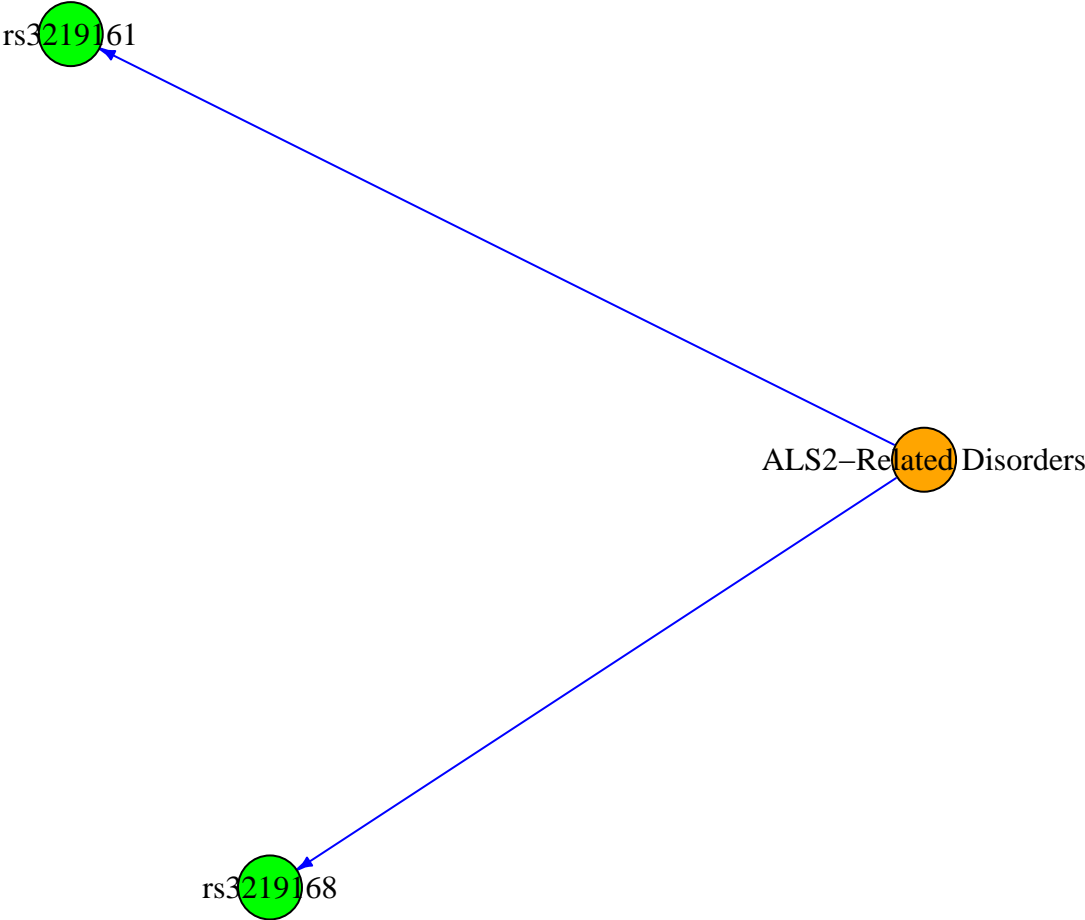

## Variant–Disease Network (Amelogenesis Imperfecta)

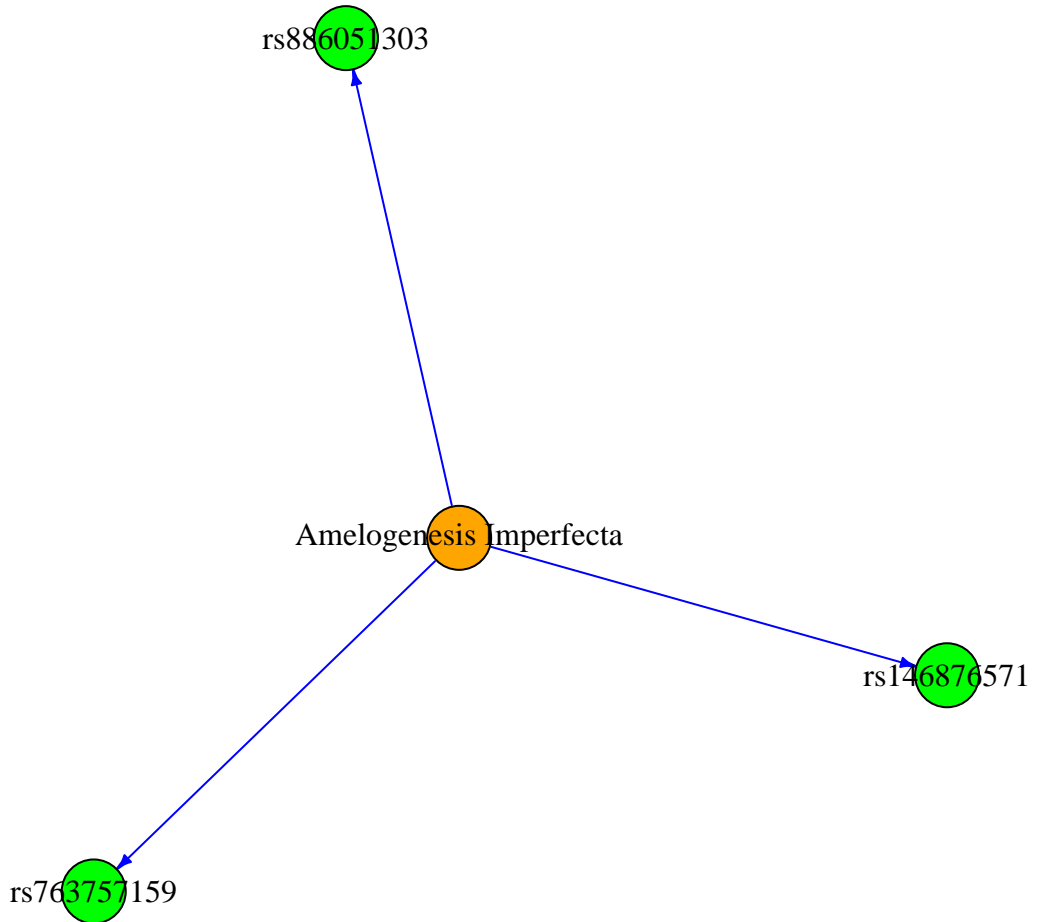

## Variant–Disease Network (Amyloidosis)

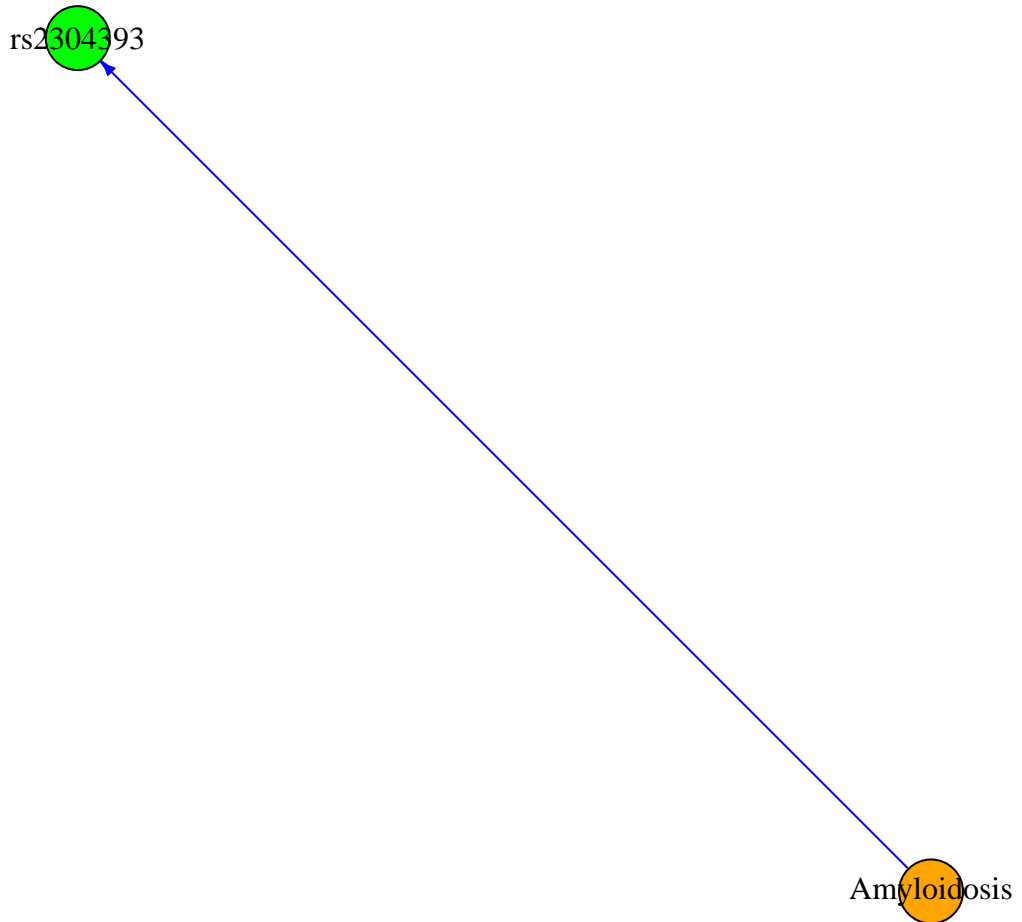

Variant–Disease Network (Amyotrophic Lateral Sclerosis)

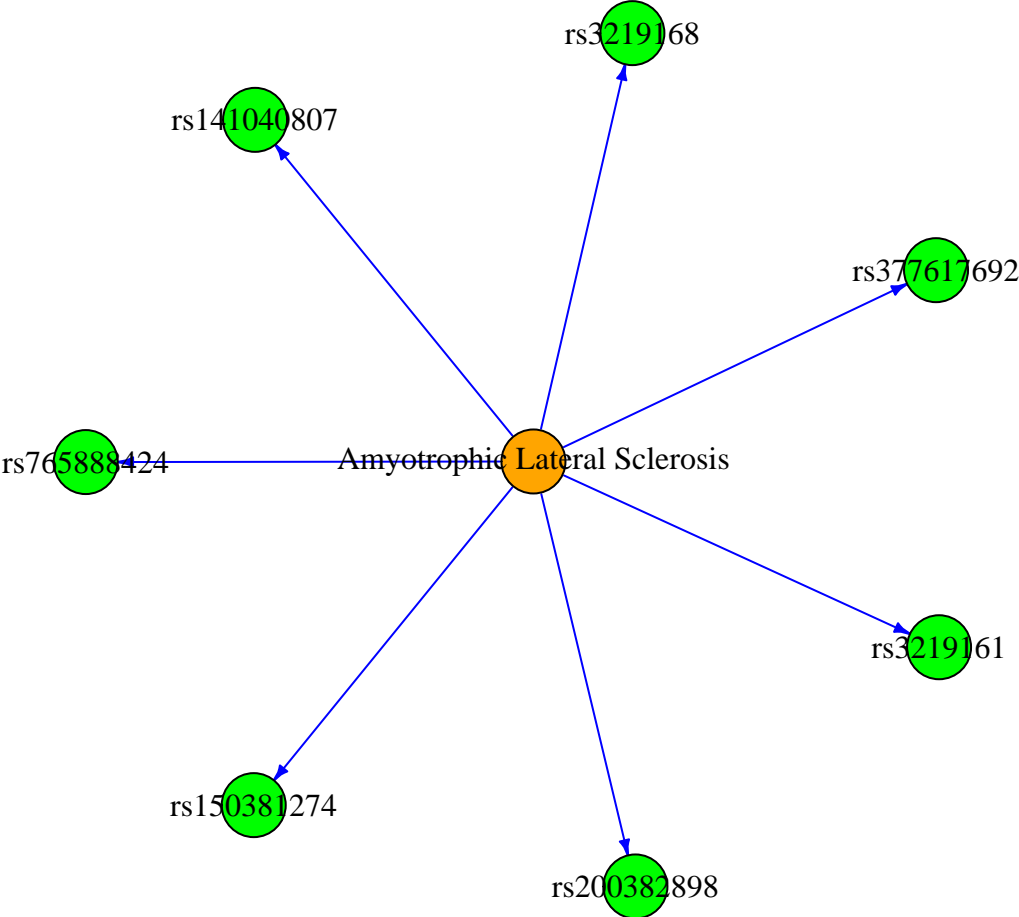

# Variant–Disease Network (Amyotrophic lateral sclerosis 14)

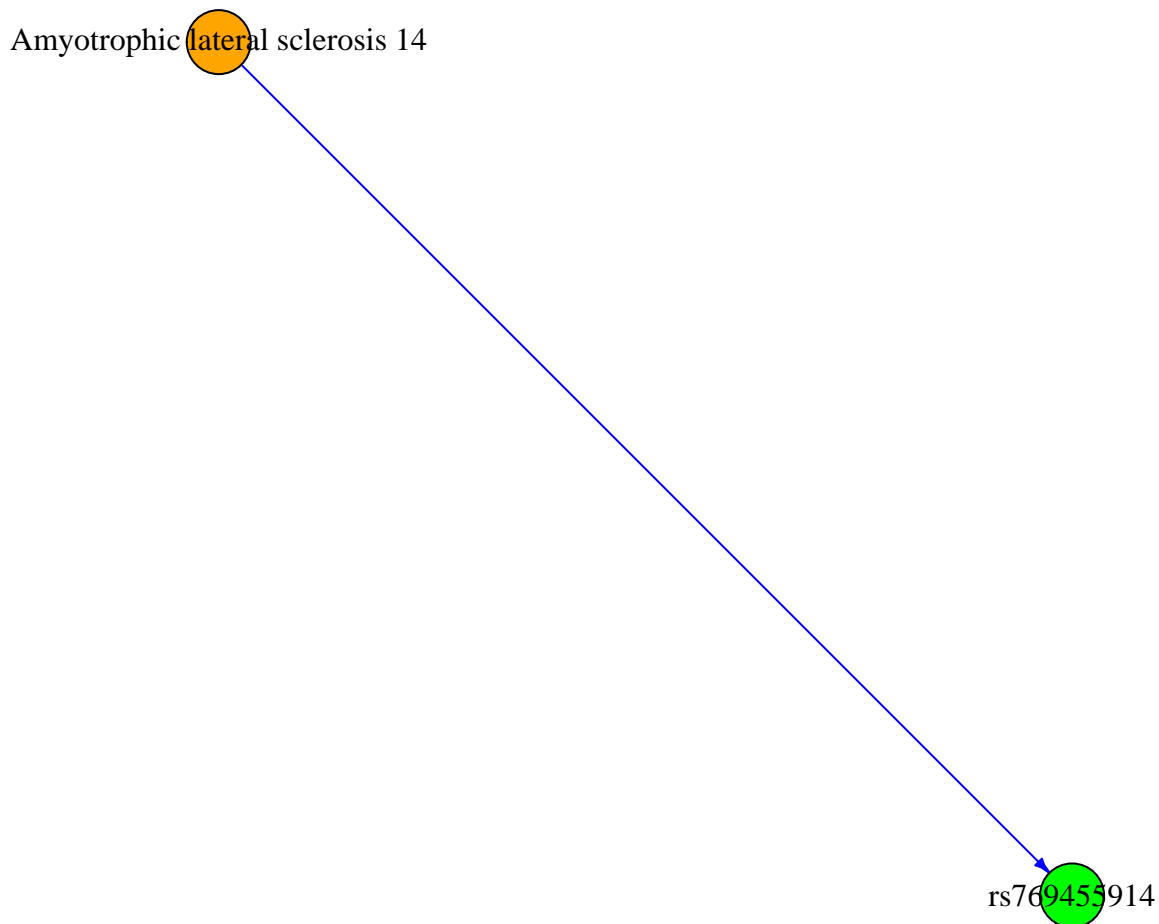



Variant–Disease Network (Amyotrophic lateral sclerosis type 1)

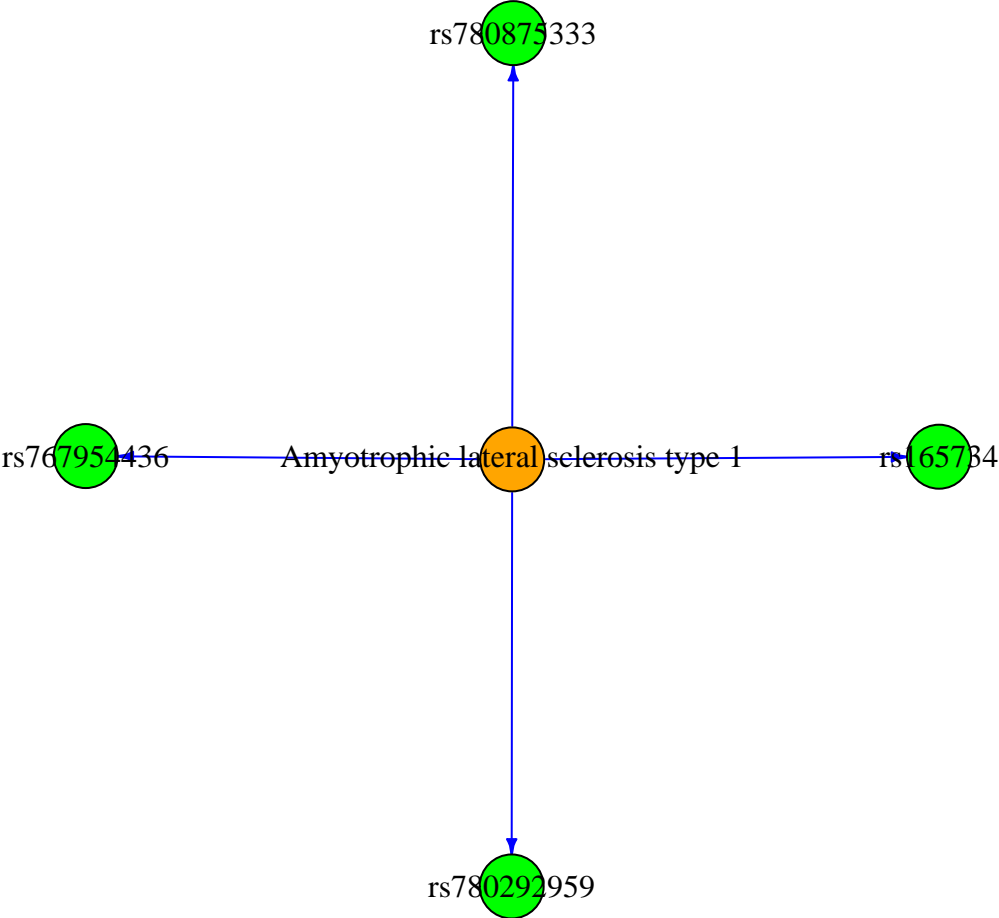

# Variant–Disease Network (Amyotrophic lateral sclerosis type 12)

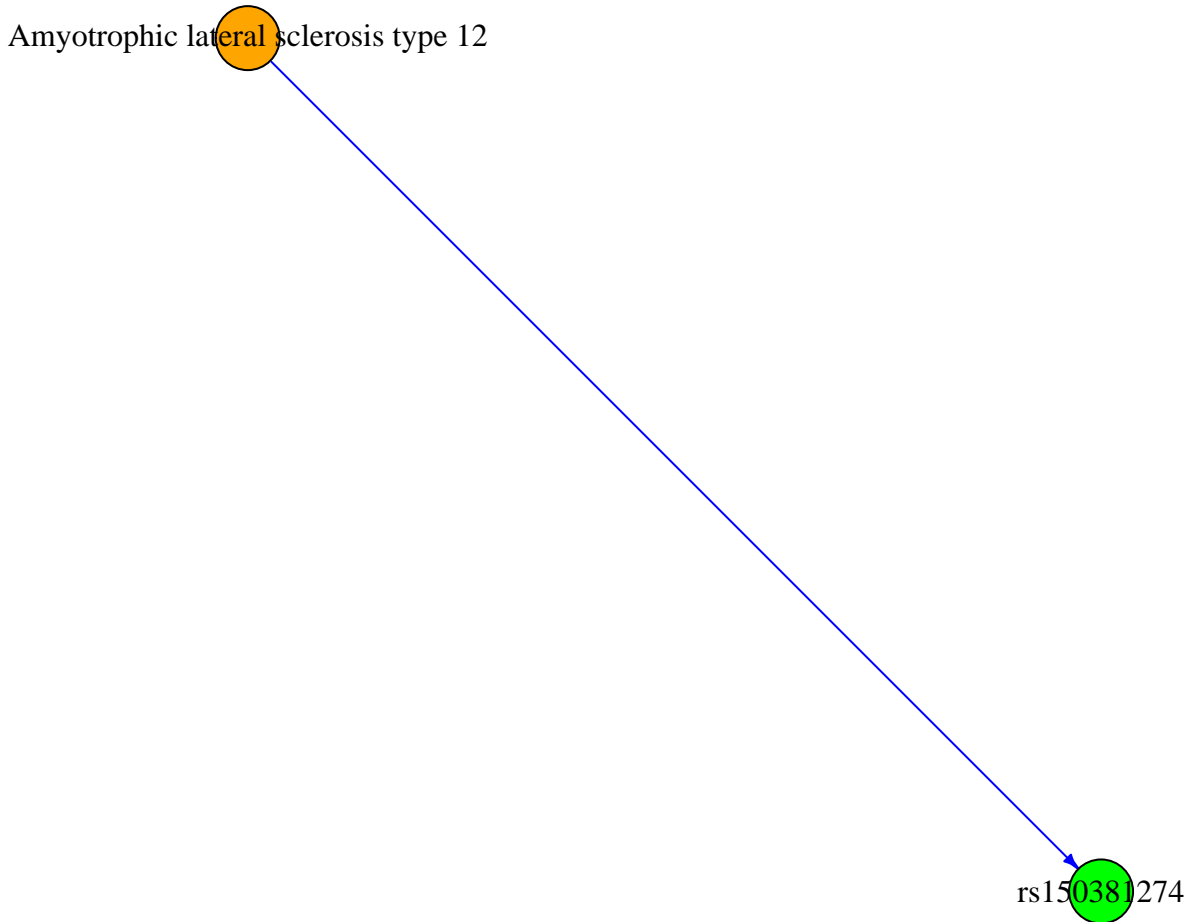

Variant–Disease Network (Amyotrophic lateral sclerosis type 4)

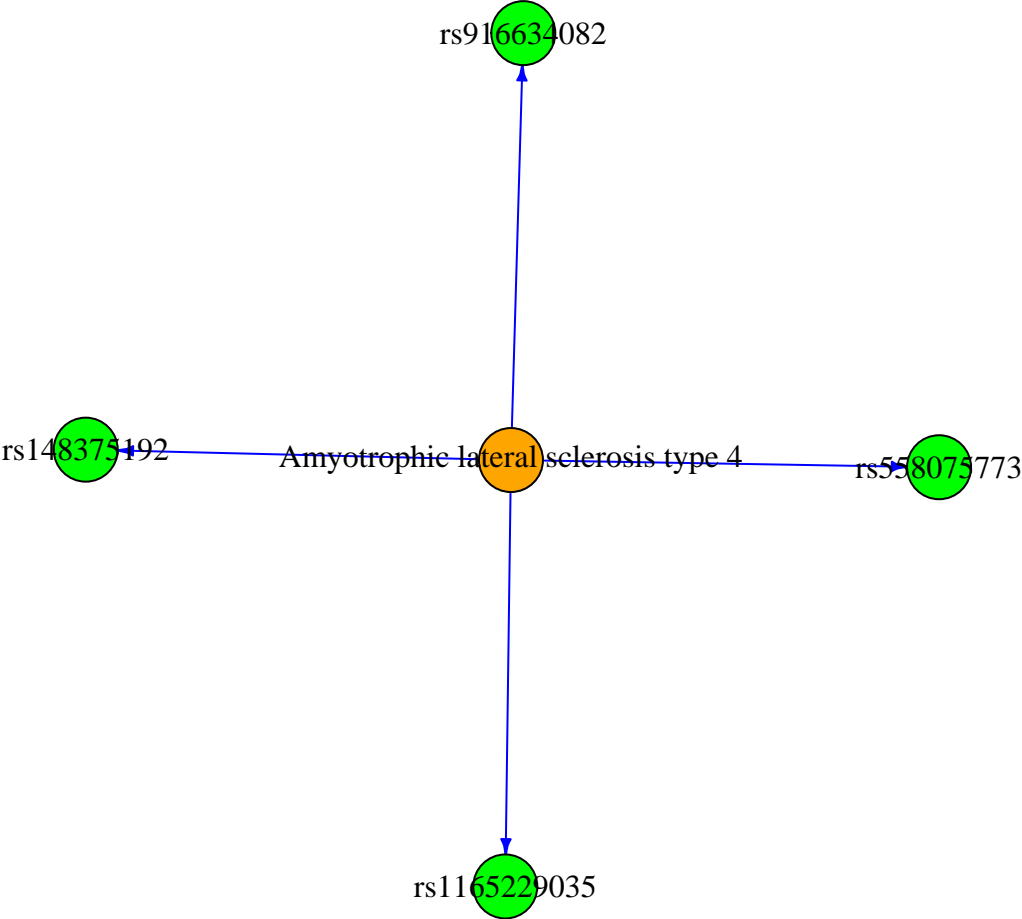

## Variant–Disease Network (Andermann syndrome)

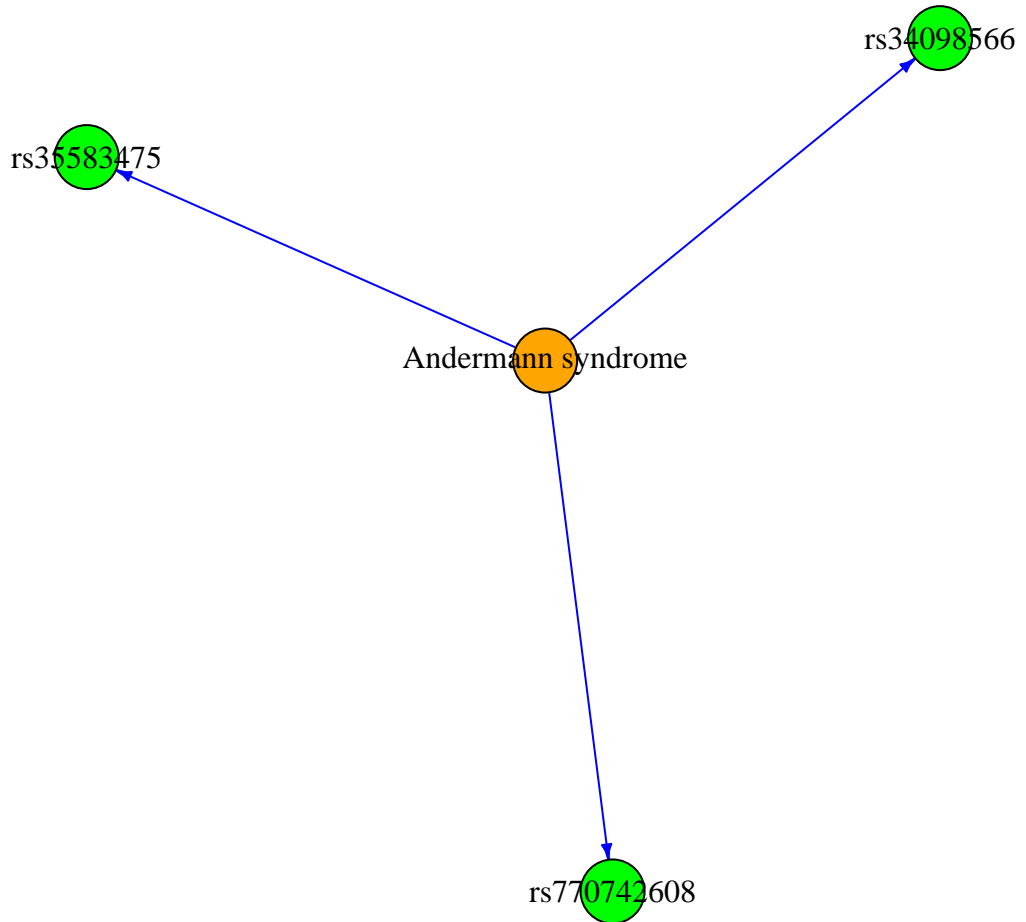

Variant–Disease Network (Angelman syndrome)

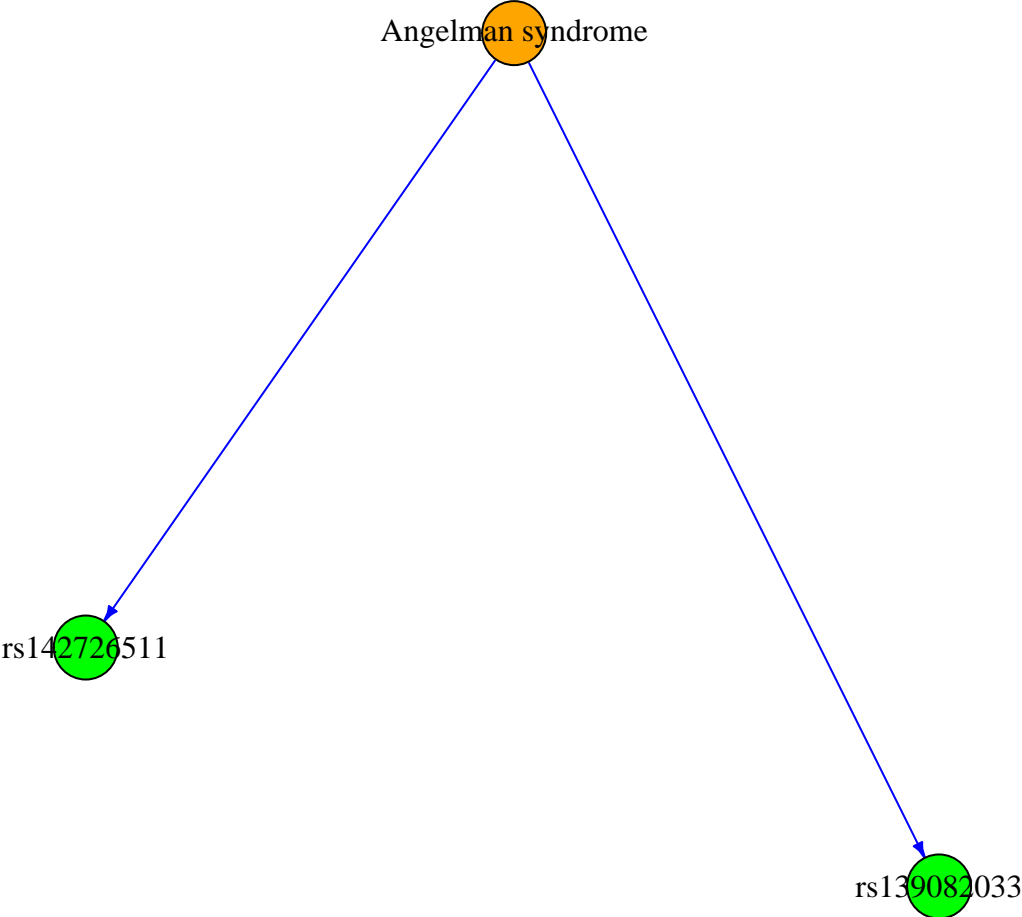

# ant-Disease Network (Angiokeratoma corporis diffusum with arteriovenous

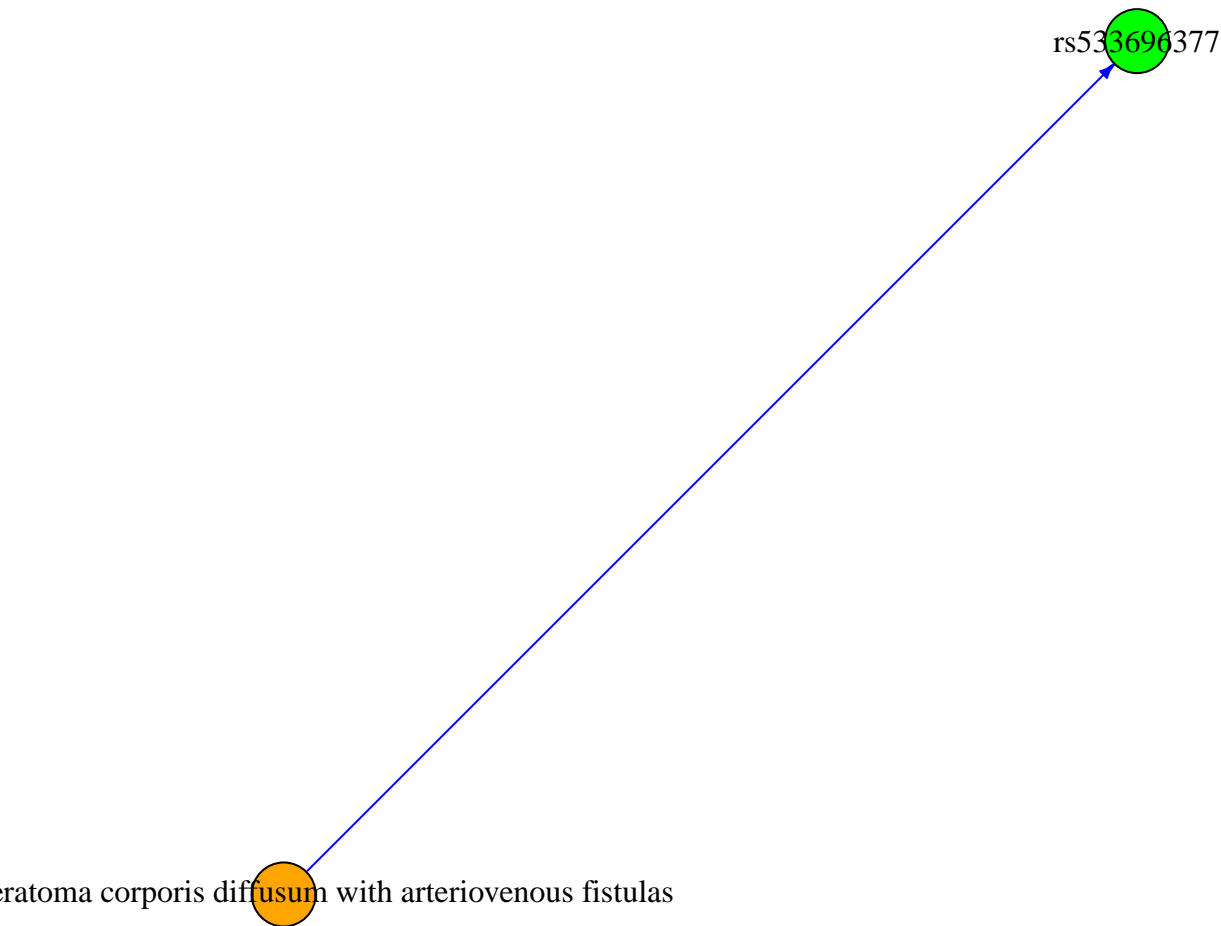

## Variant–Disease Network (Aniridia 1)

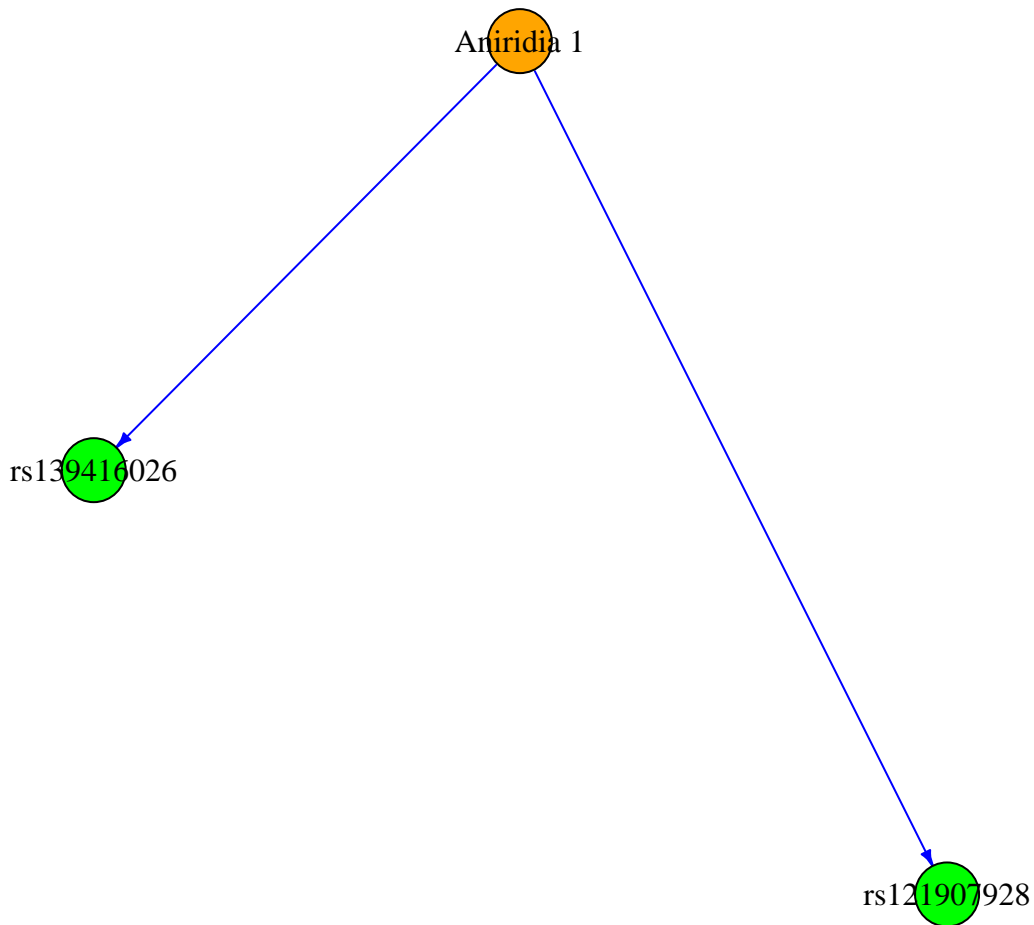

Variant–Disease Network (Antenatal Bartter Syndrome)

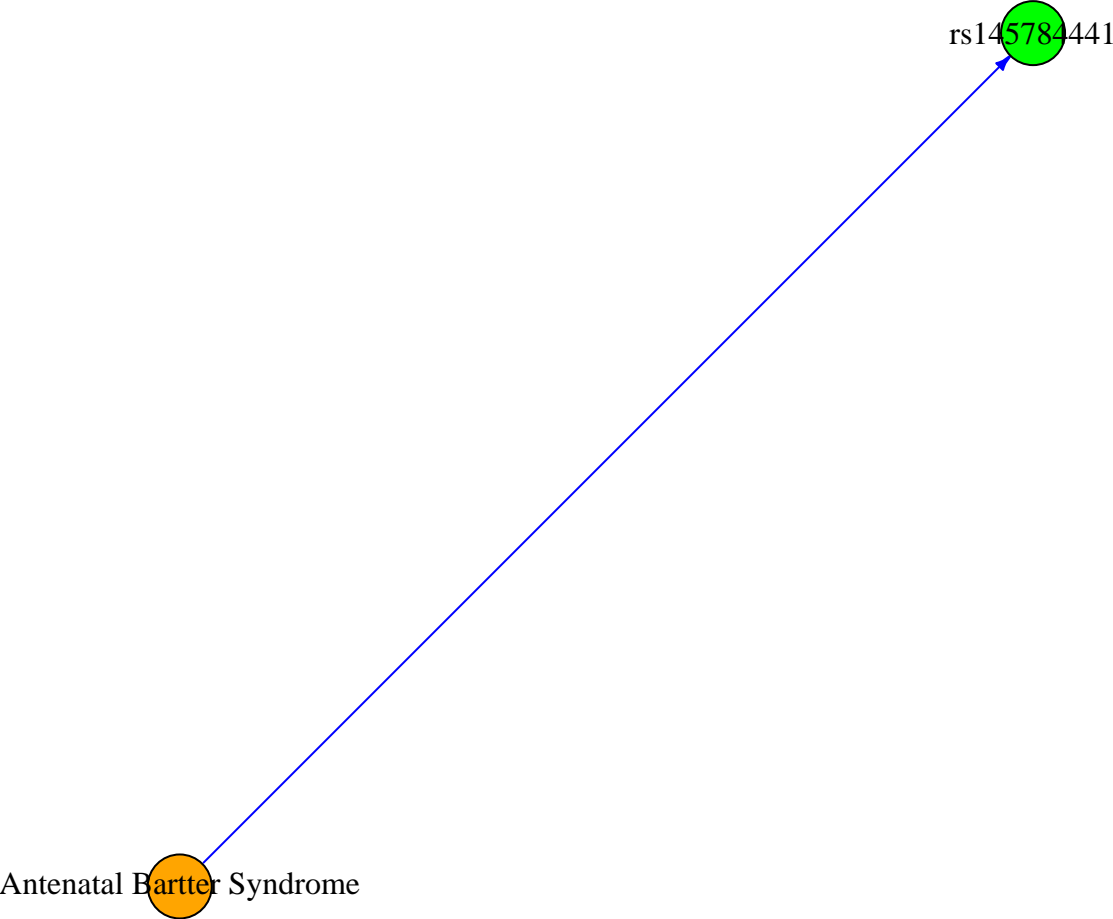



# nt-Disease Network (anthracyclines and related substances response – Toxi

rs7853758



anthracyclines and related substances response –



## Variant–Disease Network (Aortic aneurysm)

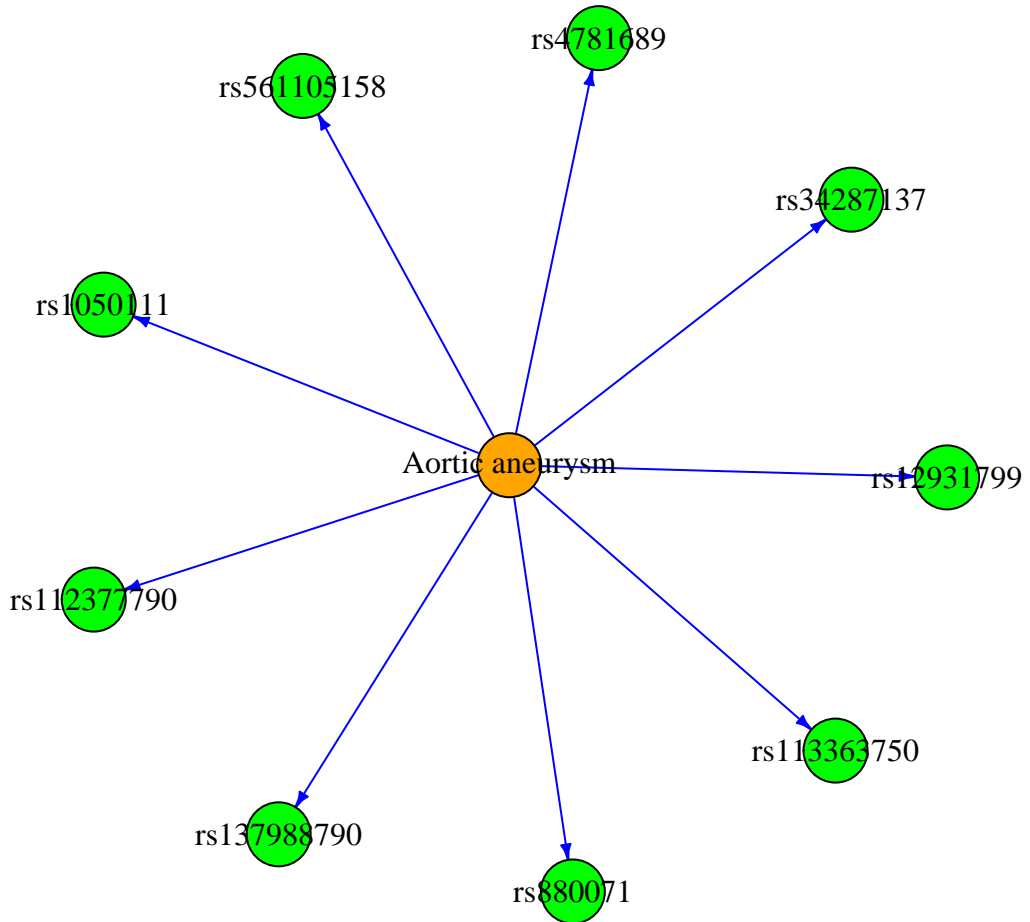

## Variant–Disease Network (Aortic valve disorder)

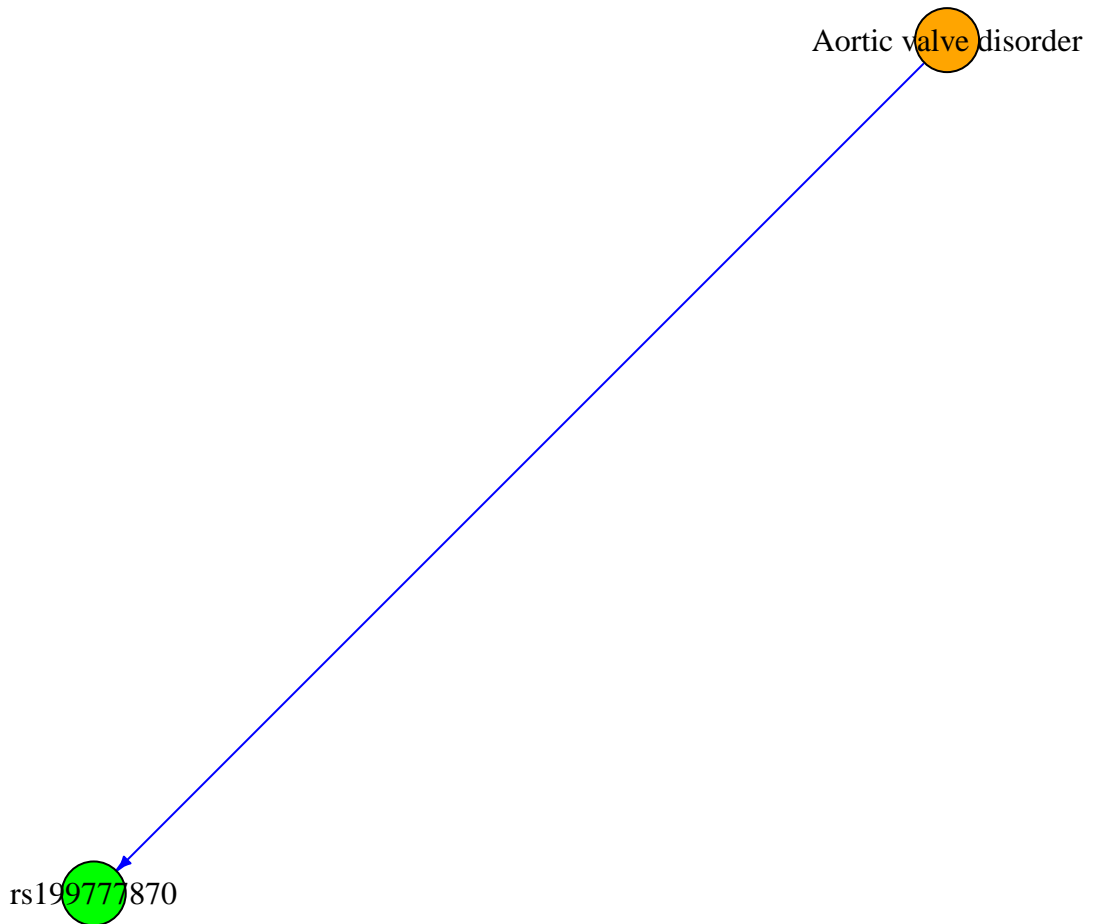

Variant–Disease Network (APP POLYMORPHISM)

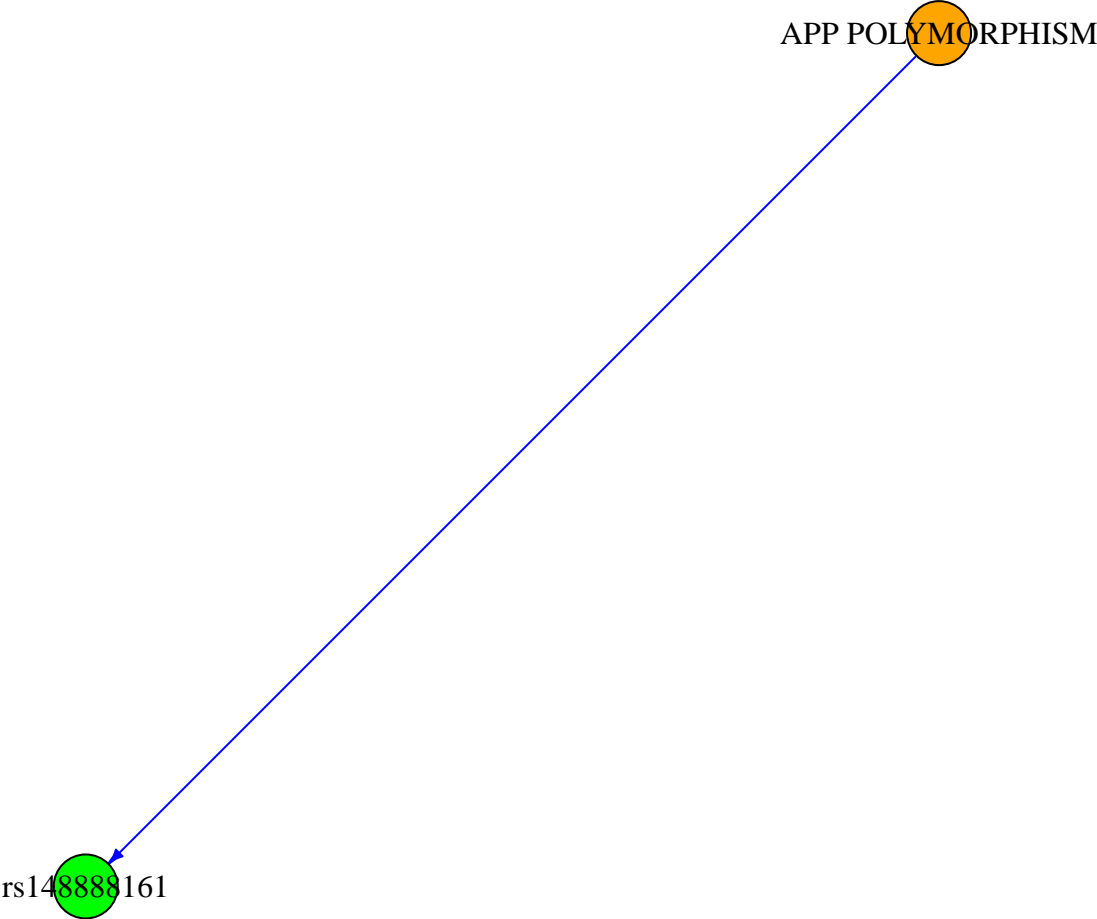

Variant–Disease Network (Arginine:glycine amidinotransferase deficiency)

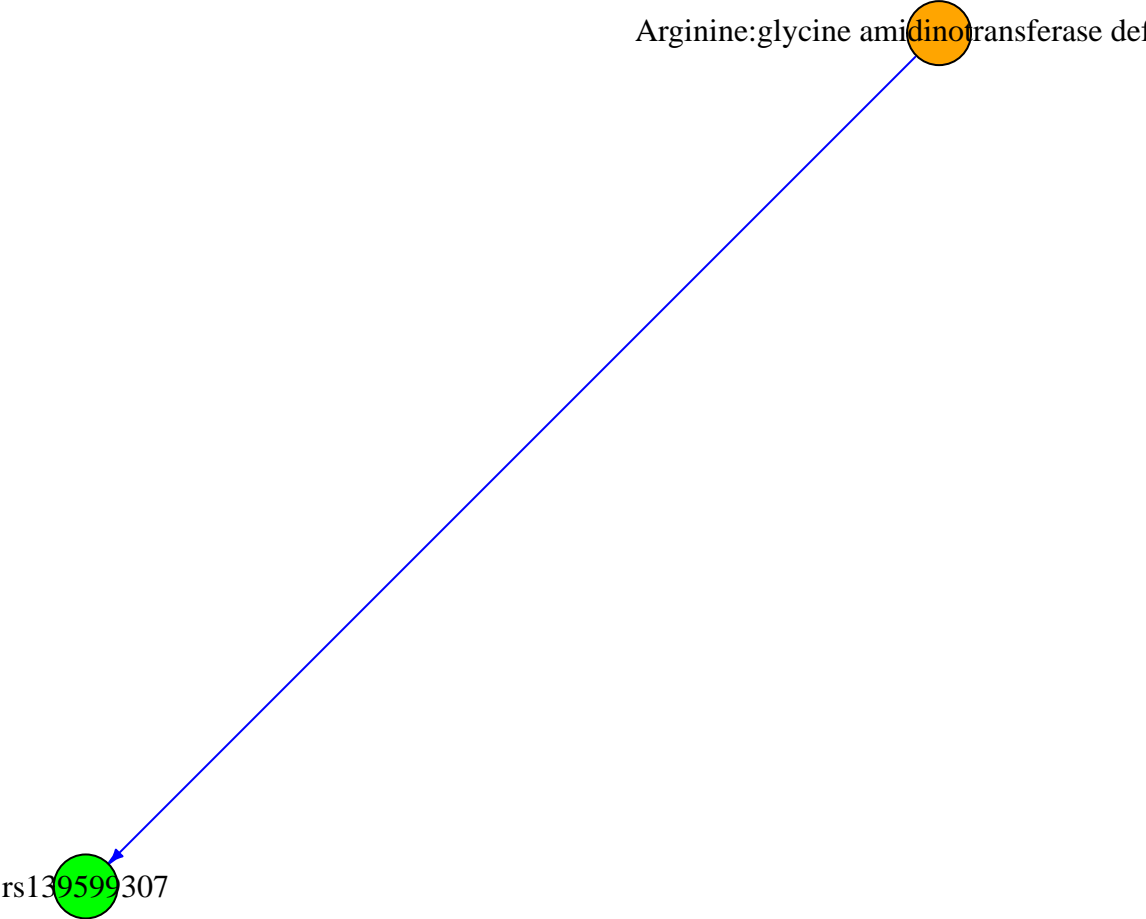

## Variant-Disease Network (Argininosuccinate lyase deficiency)

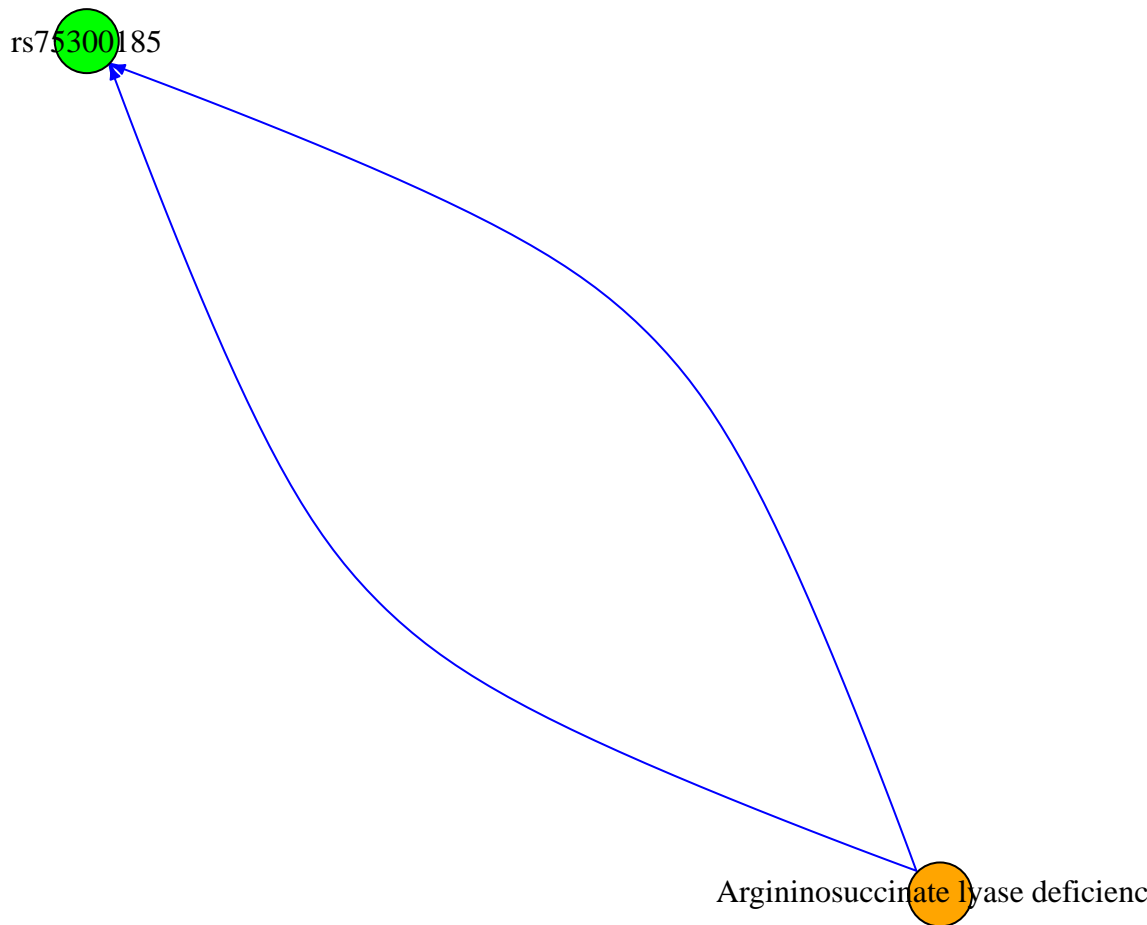

## Variant–Disease Network (Aromatase deficiency)

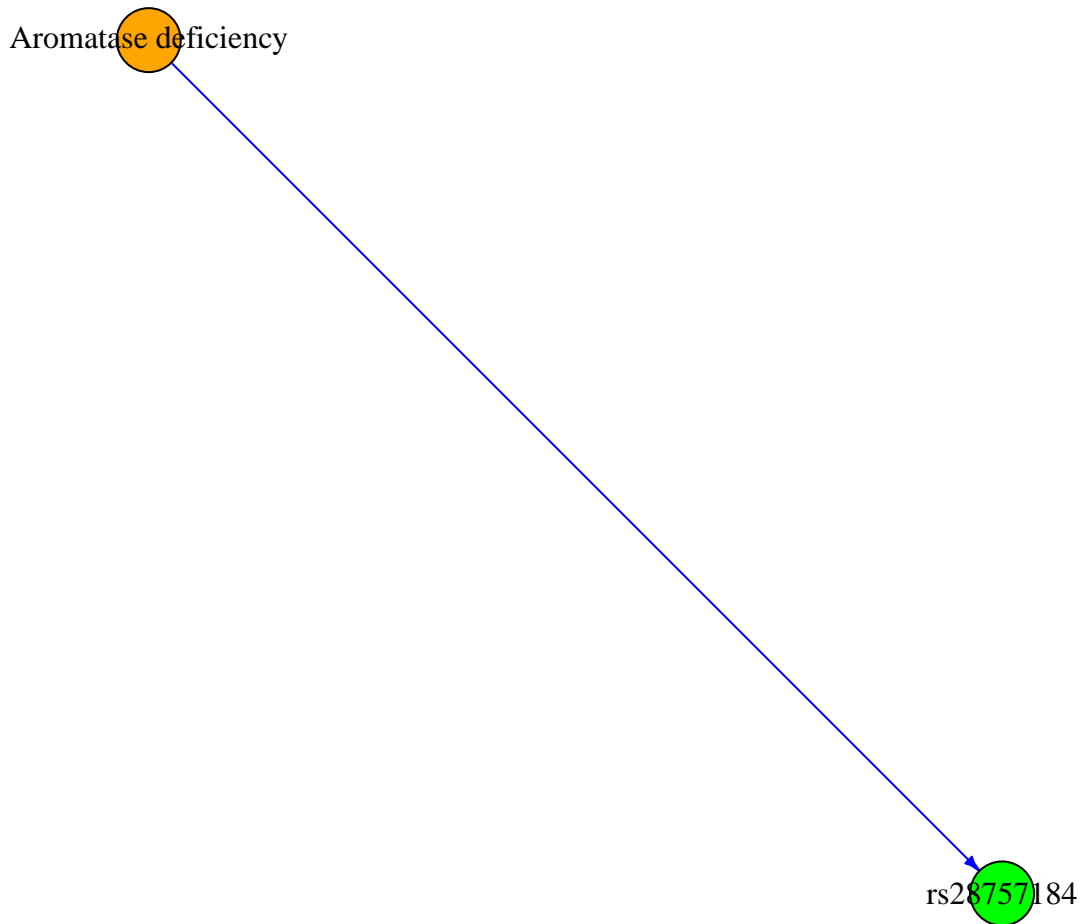

## Variant–Disease Network (Arrhythmia)

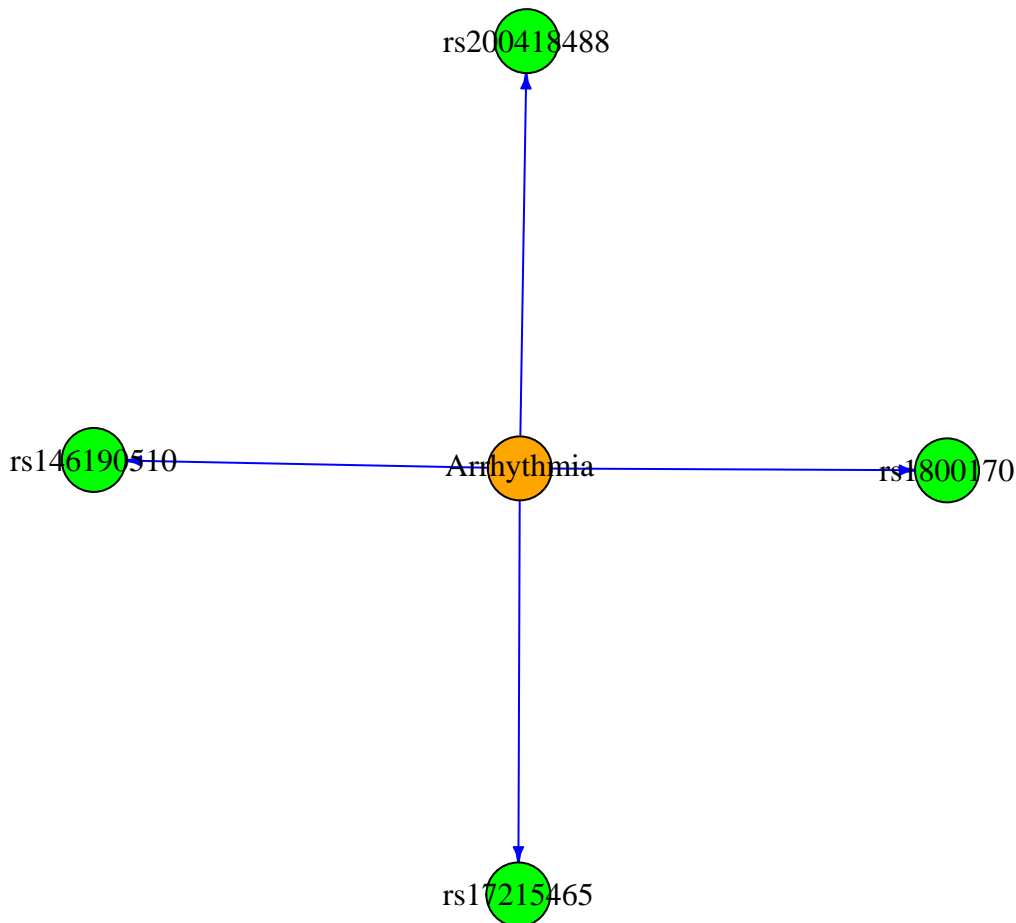



Variant–Disease Network (Arrhythmogenic right ventricular cardiomyopathy)

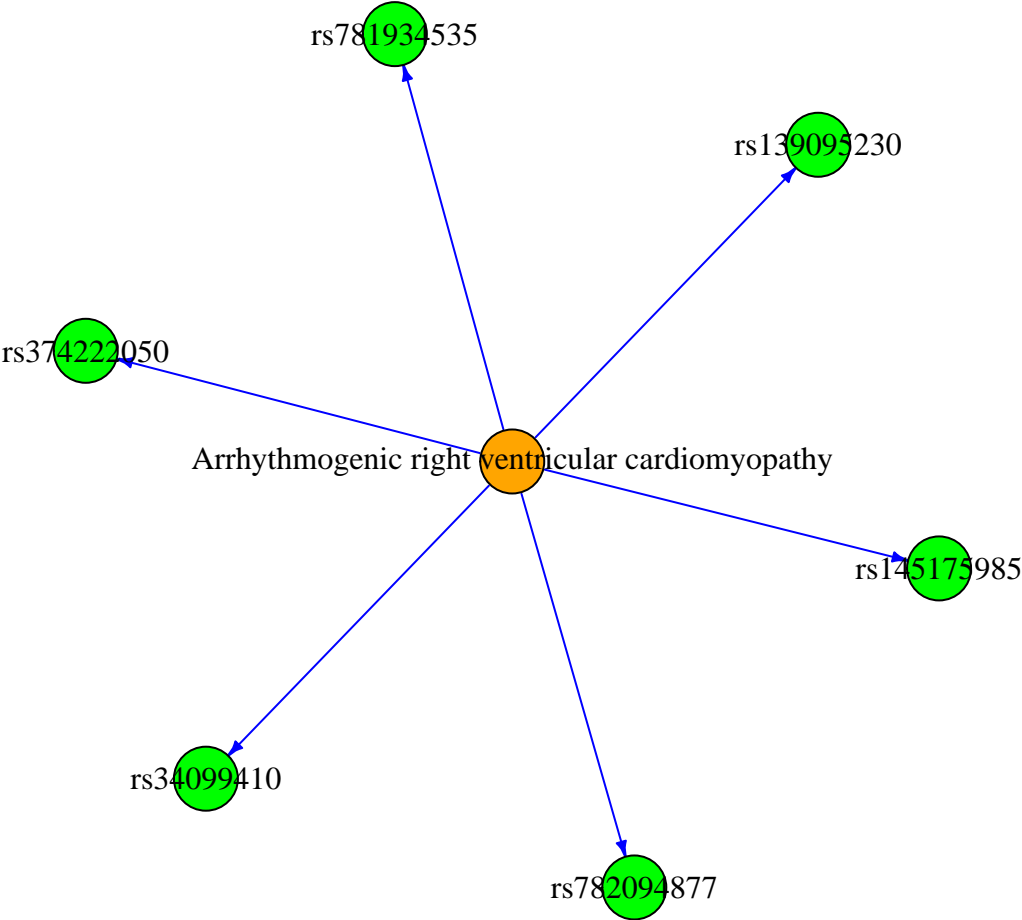

## Variant–Disease Network (Arrhythmogenic right ventricular dysplasia)

rs146754105

Arrhythmogenic right ventricular dysplasia

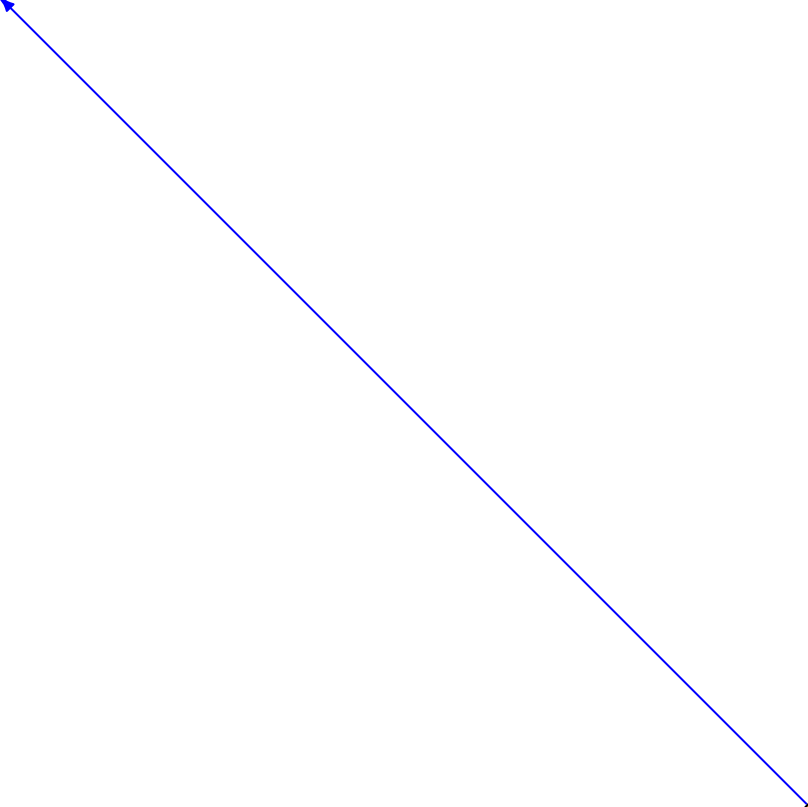

## Variant–Disease Network (Arterial calcification)

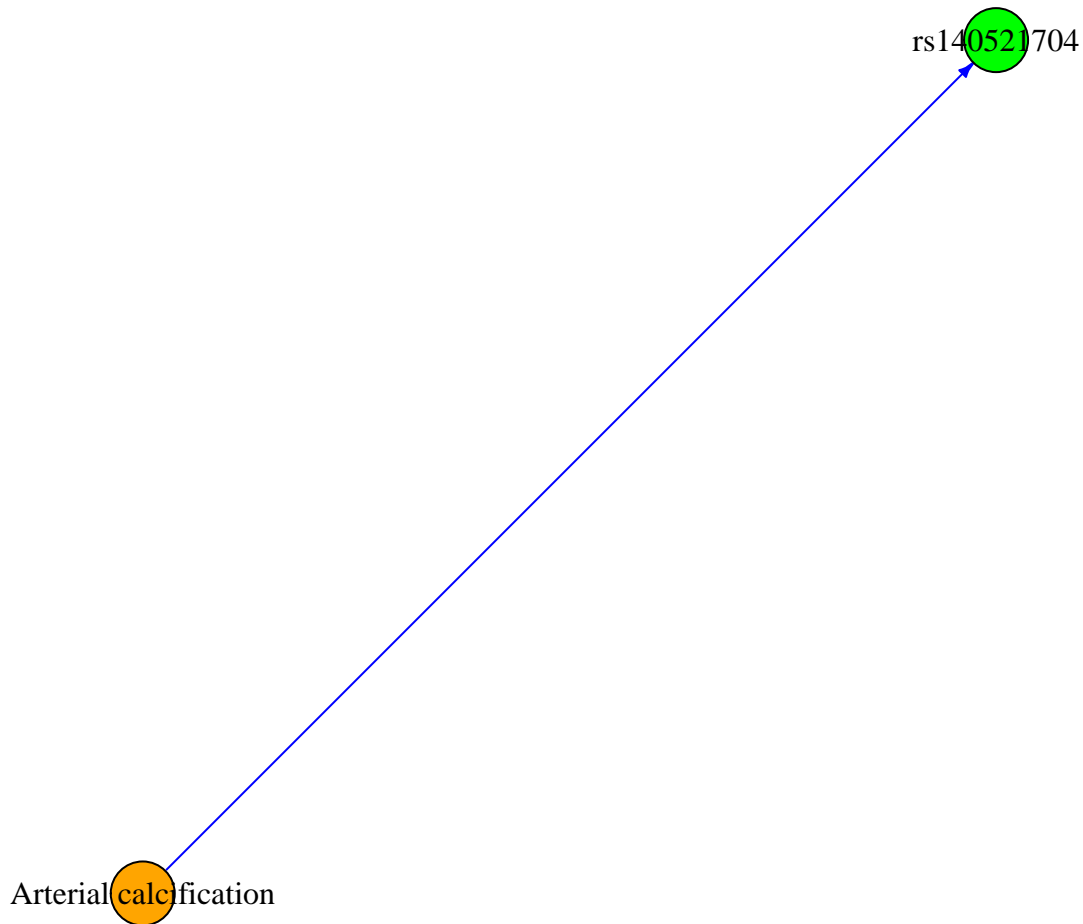

Variant–Disease Network (Arterial tortuosity syndrome)

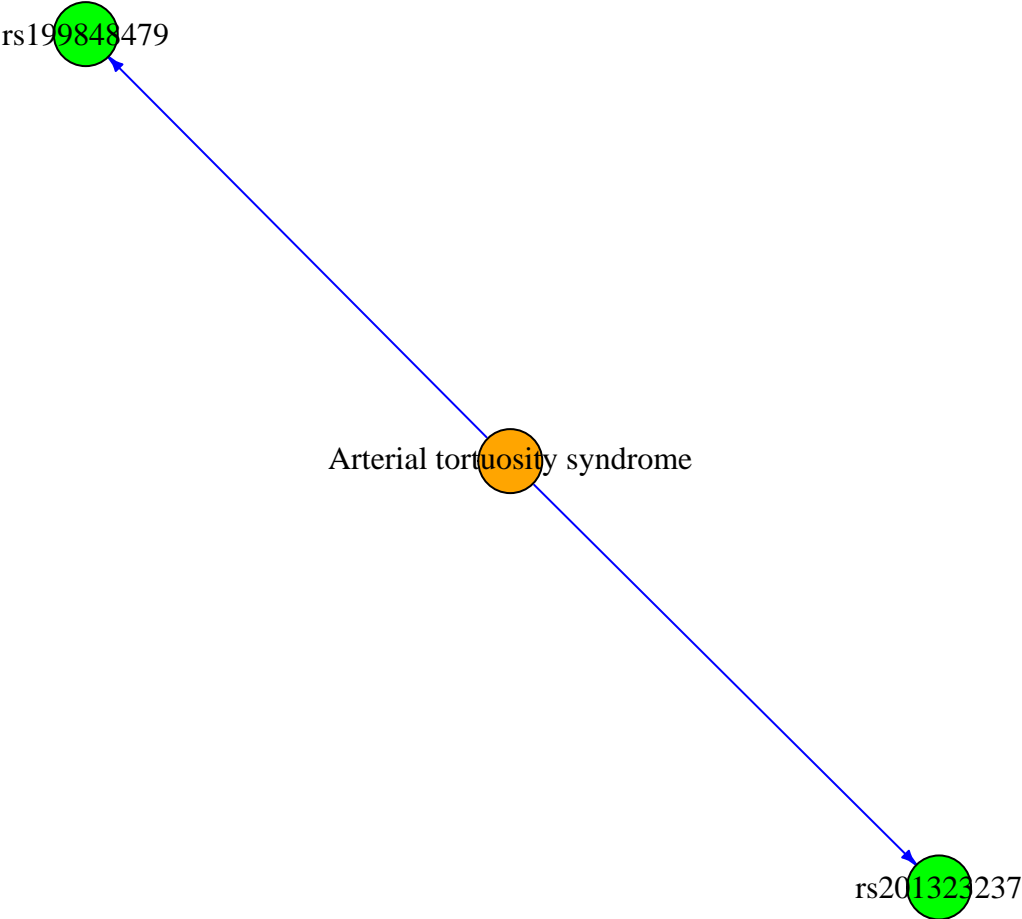

## Variant-Disease Network (Arteriohepatic dysplasia)

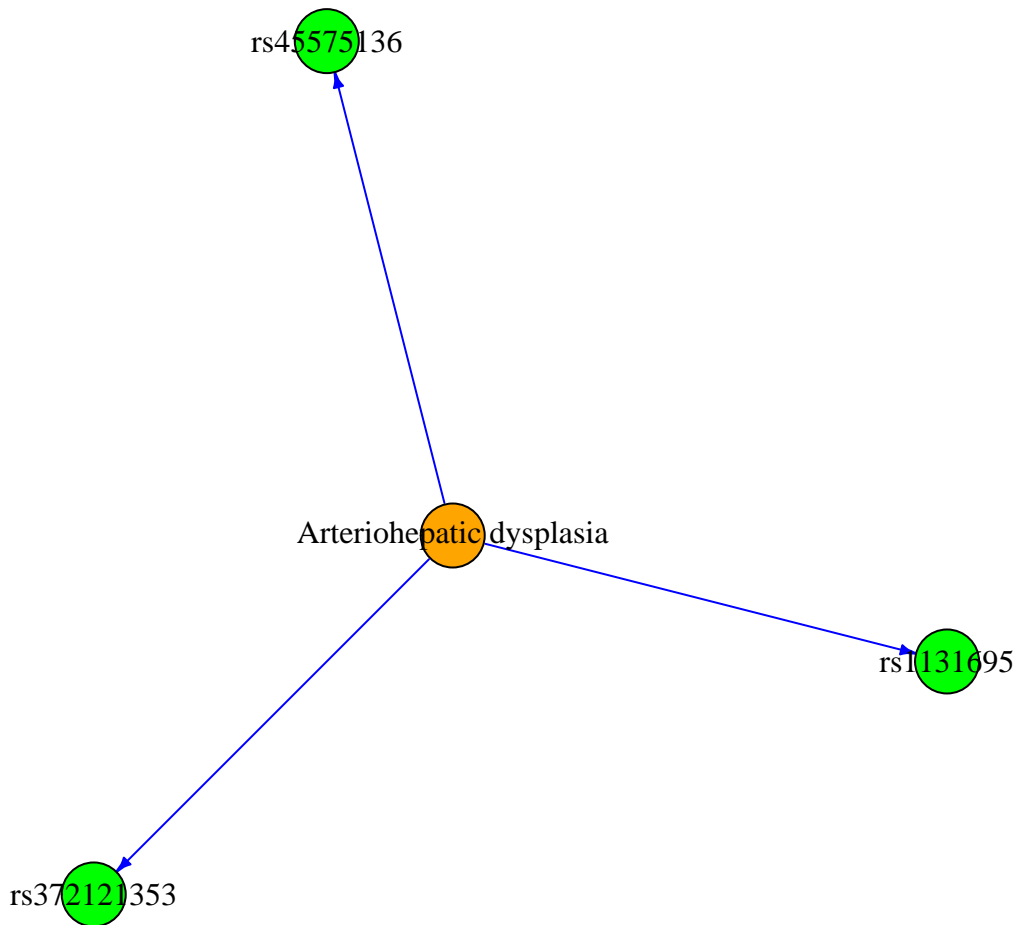

Variant–Disease Network (Arthrogryposis multiplex congenita)

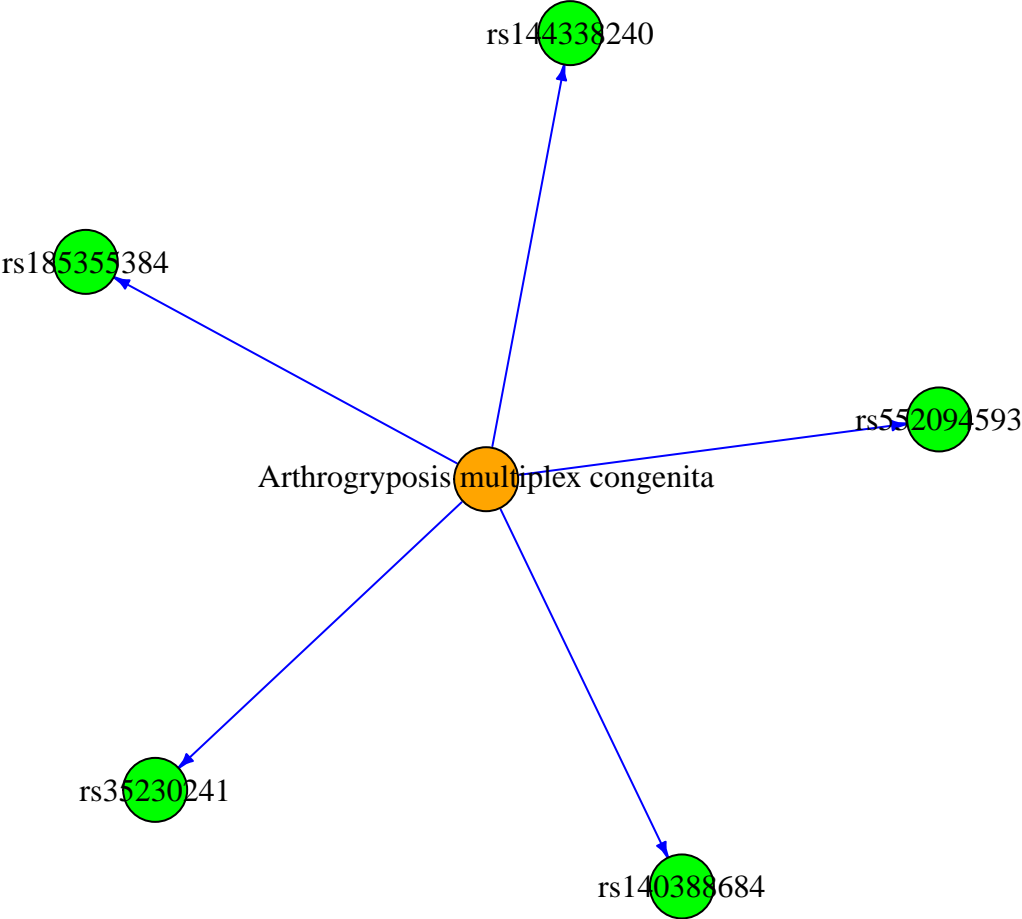

# Variant–Disease Network (Arthrogryposis multiplex congenita distal)

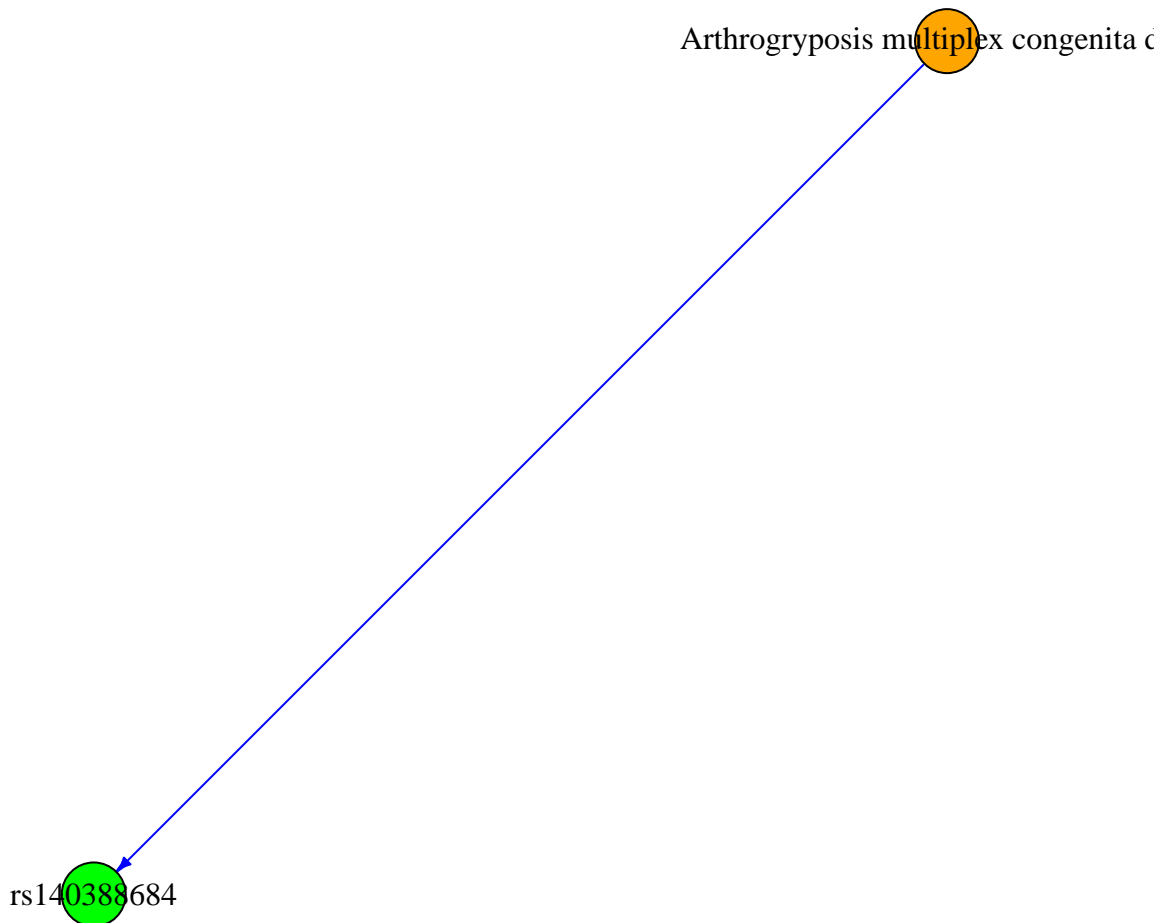

Variant–Disease Network (Aspartylglucosaminuria)

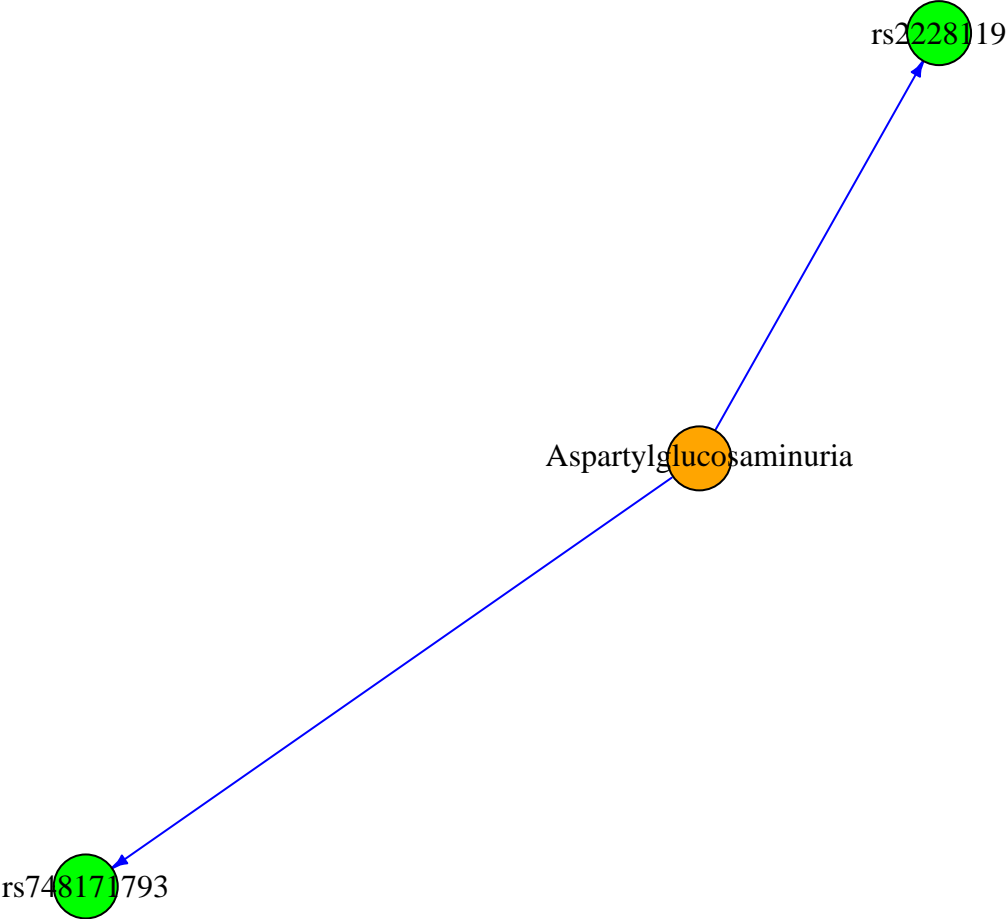



Variant–Disease Network (Ataxia Neuropathy Spectrum Disorders)

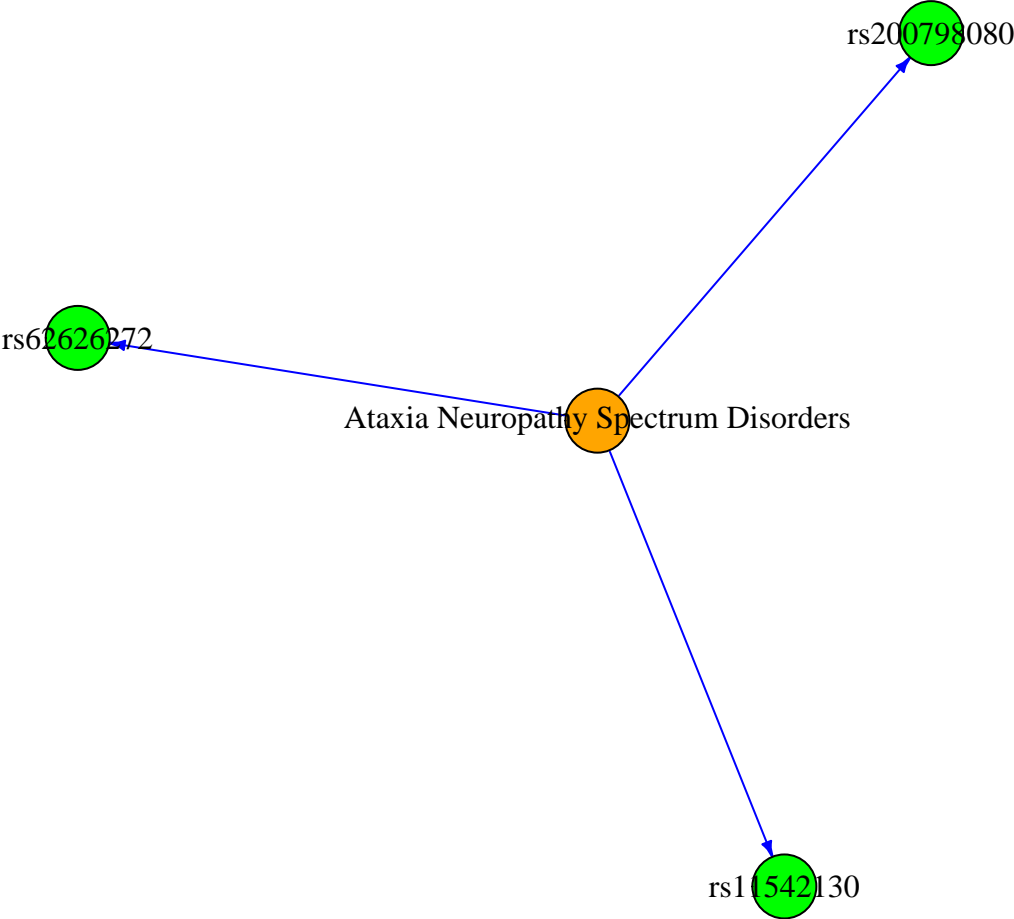

# Variant–Disease Network (Ataxia with Oculomotor Apraxia)

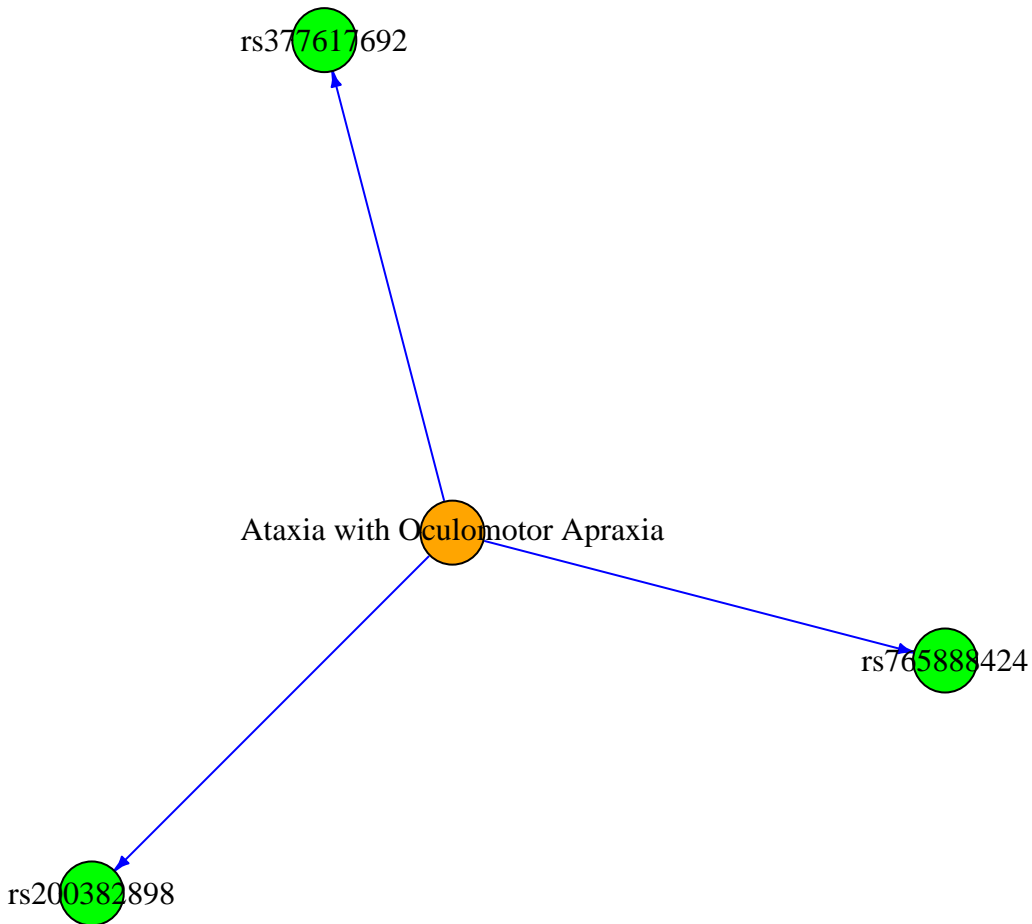

## Variant-Disease Network (Ataxia-telangiectasia syndrome)

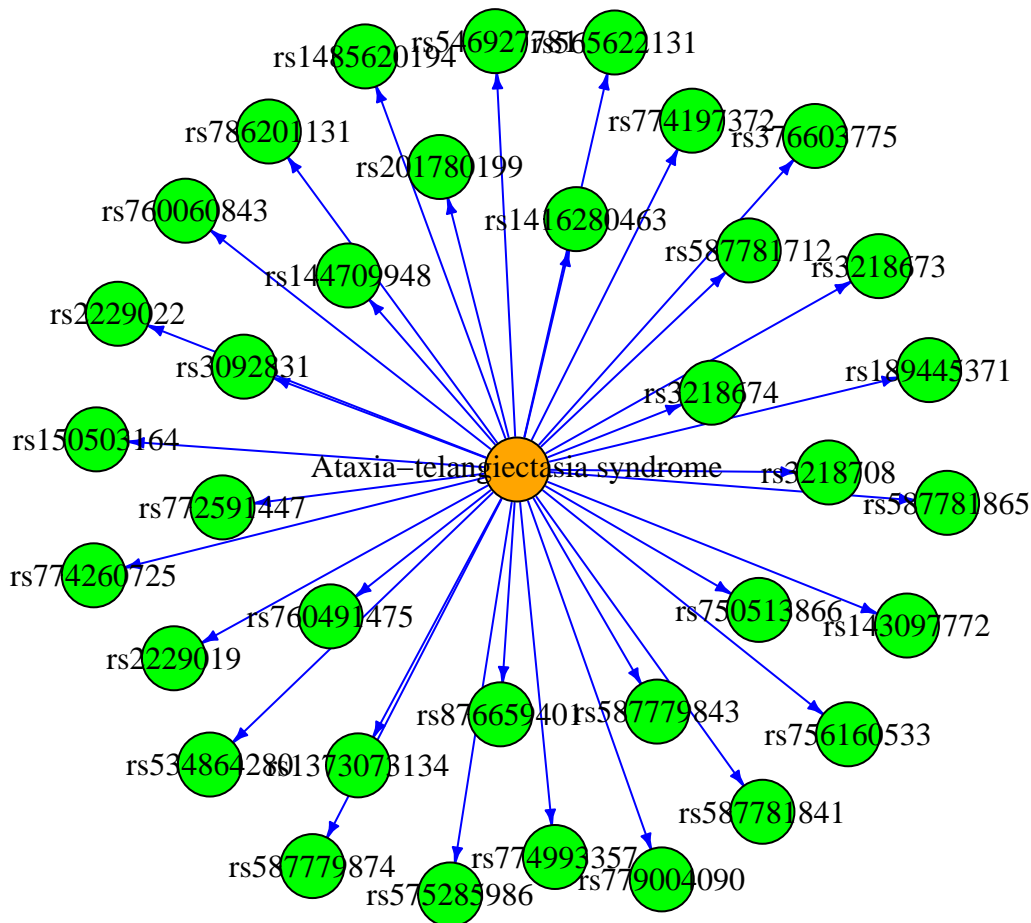

Variant–Disease Network (Ataxia–telangiectasia–like disorder 1)

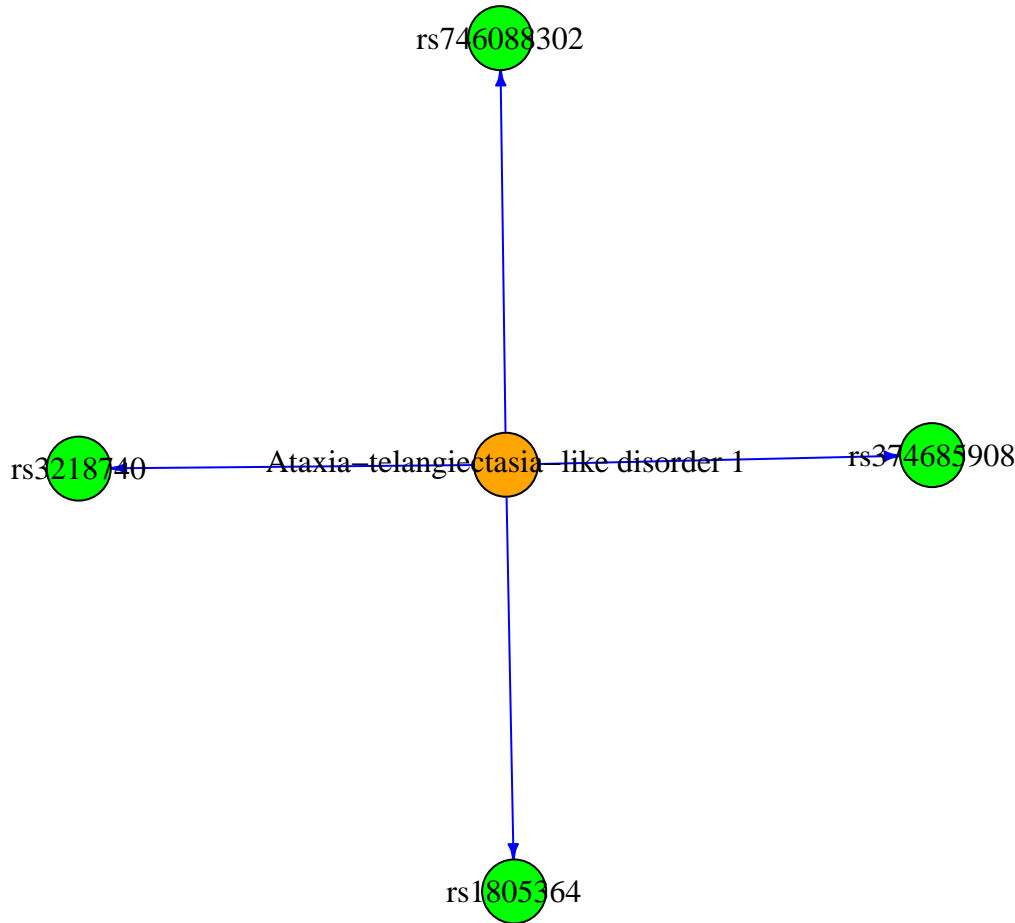

## Variant–Disease Network (Atrichia with papular lesions)

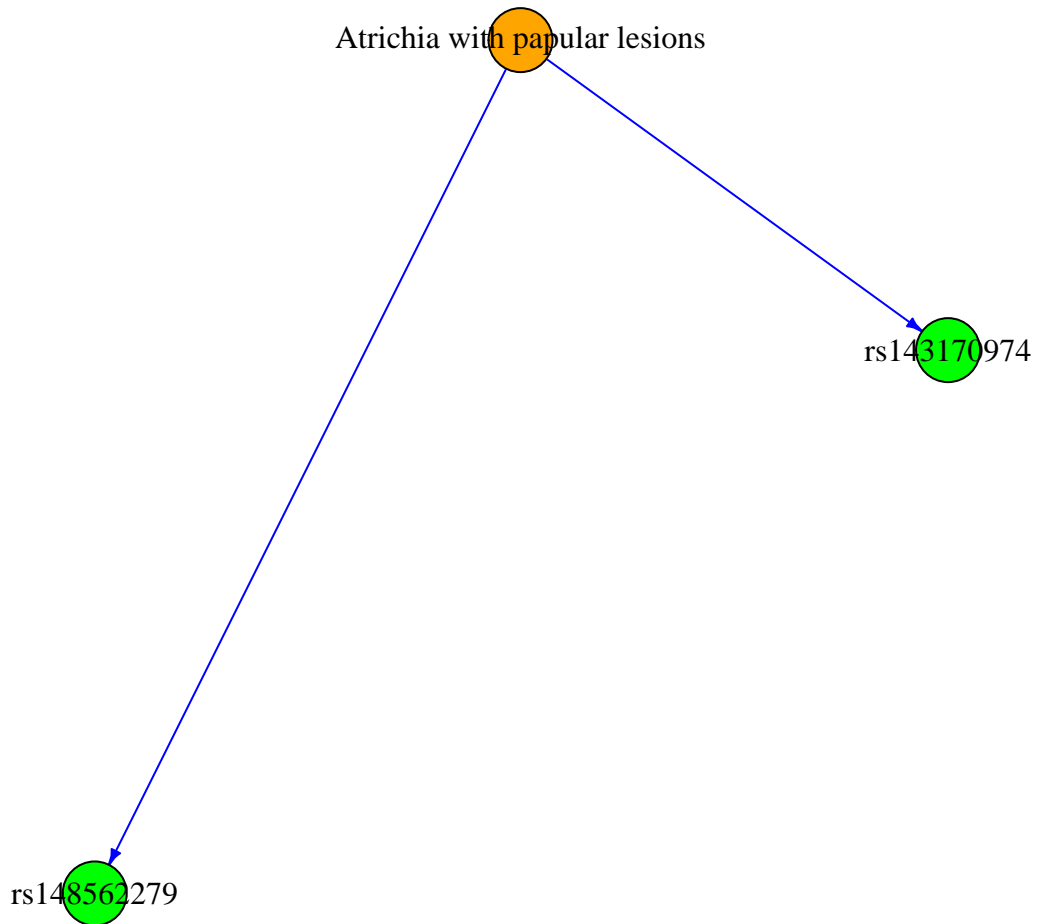

## Variant–Disease Network (Atrioventricular septal defect 4)

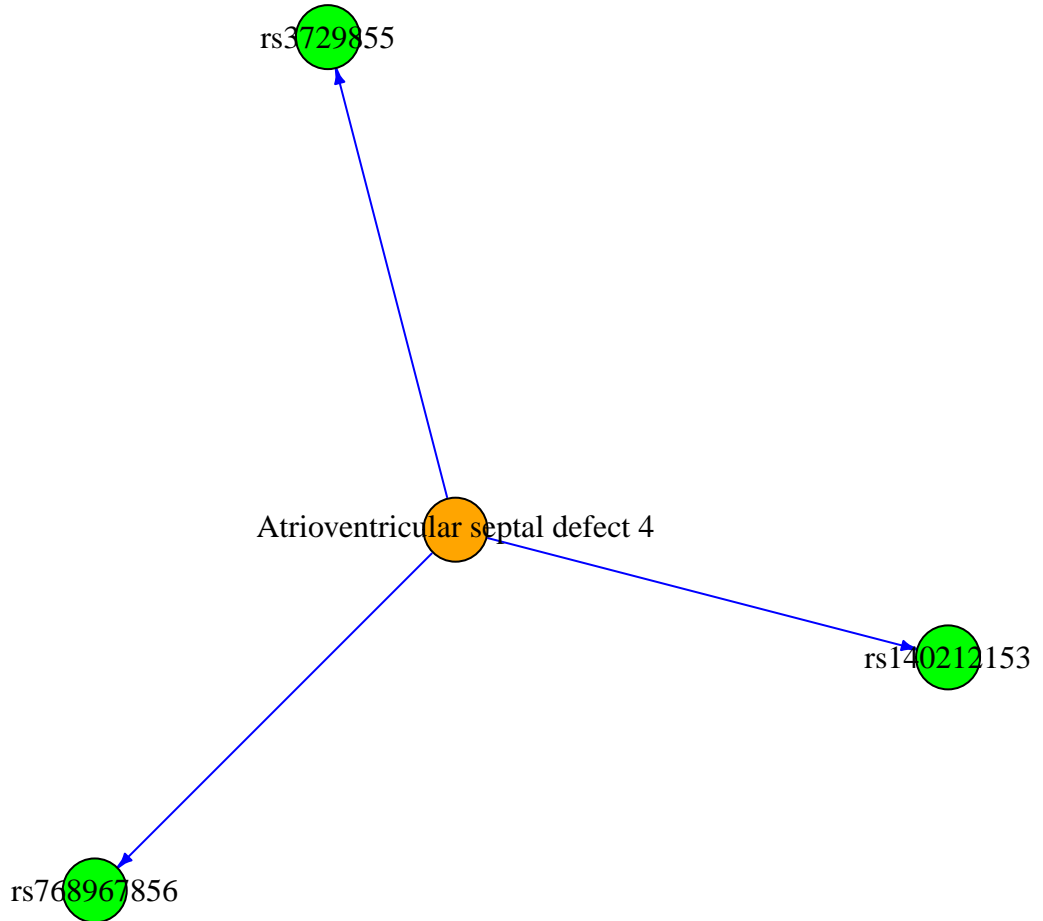

Variant–Disease Network (Atrophia bulborum hereditaria)

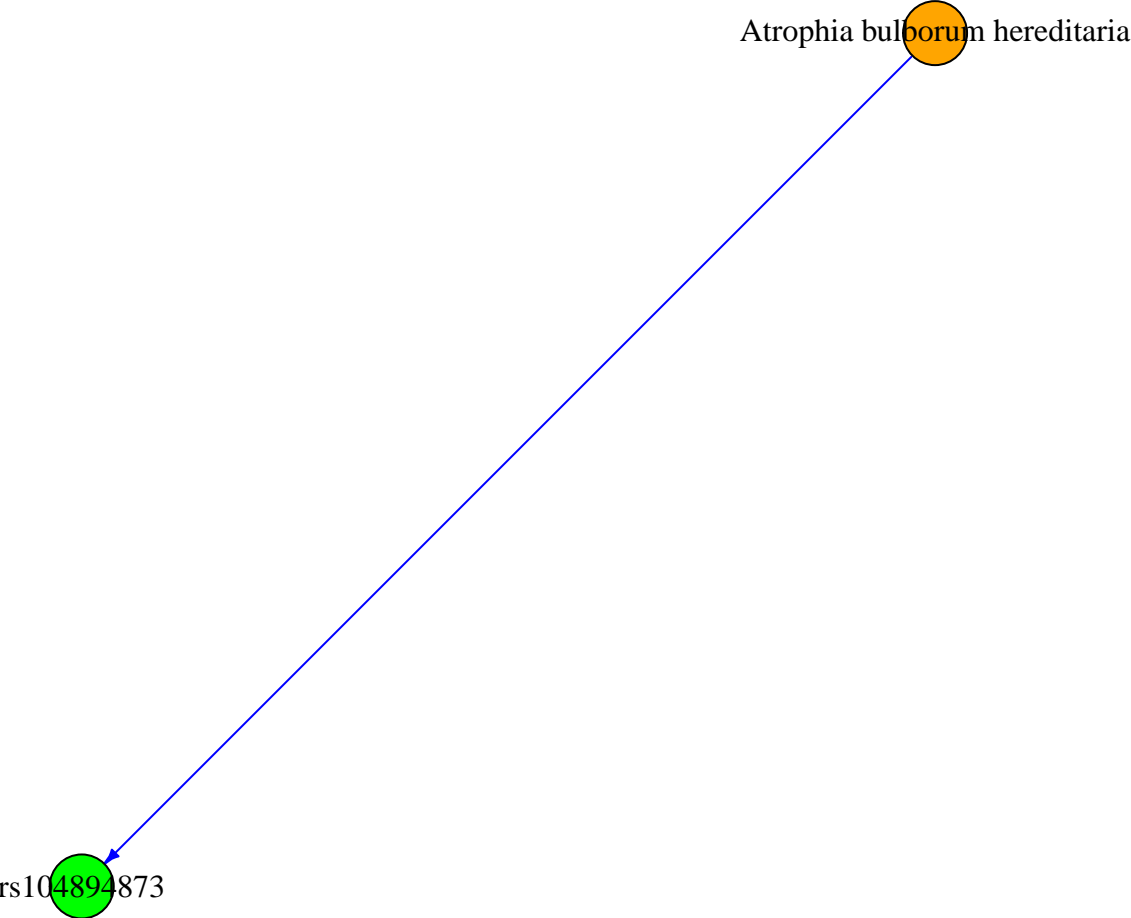

Variant–Disease Network (Atypical hemolytic uremic syndrome)

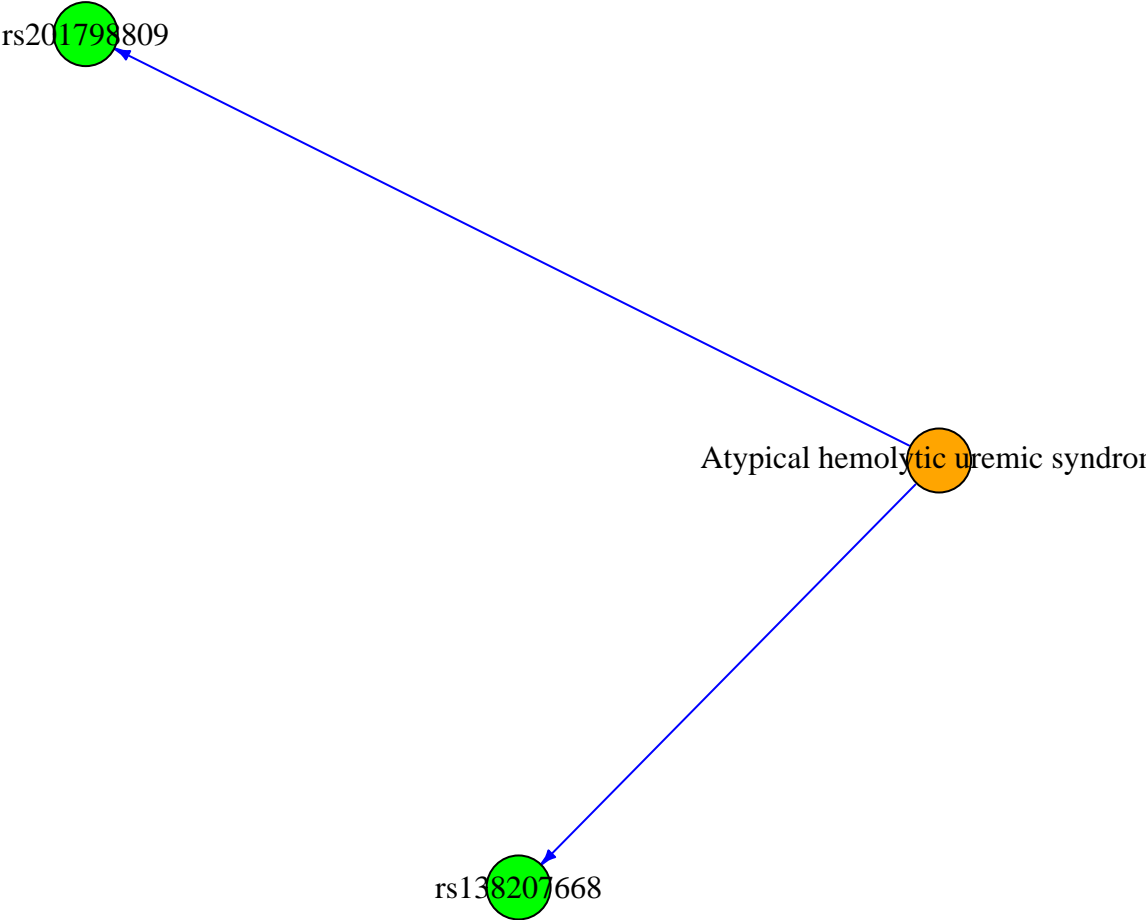



**Variant–Disease Network (Atypical hemolytic–uremic syndrome 4)**

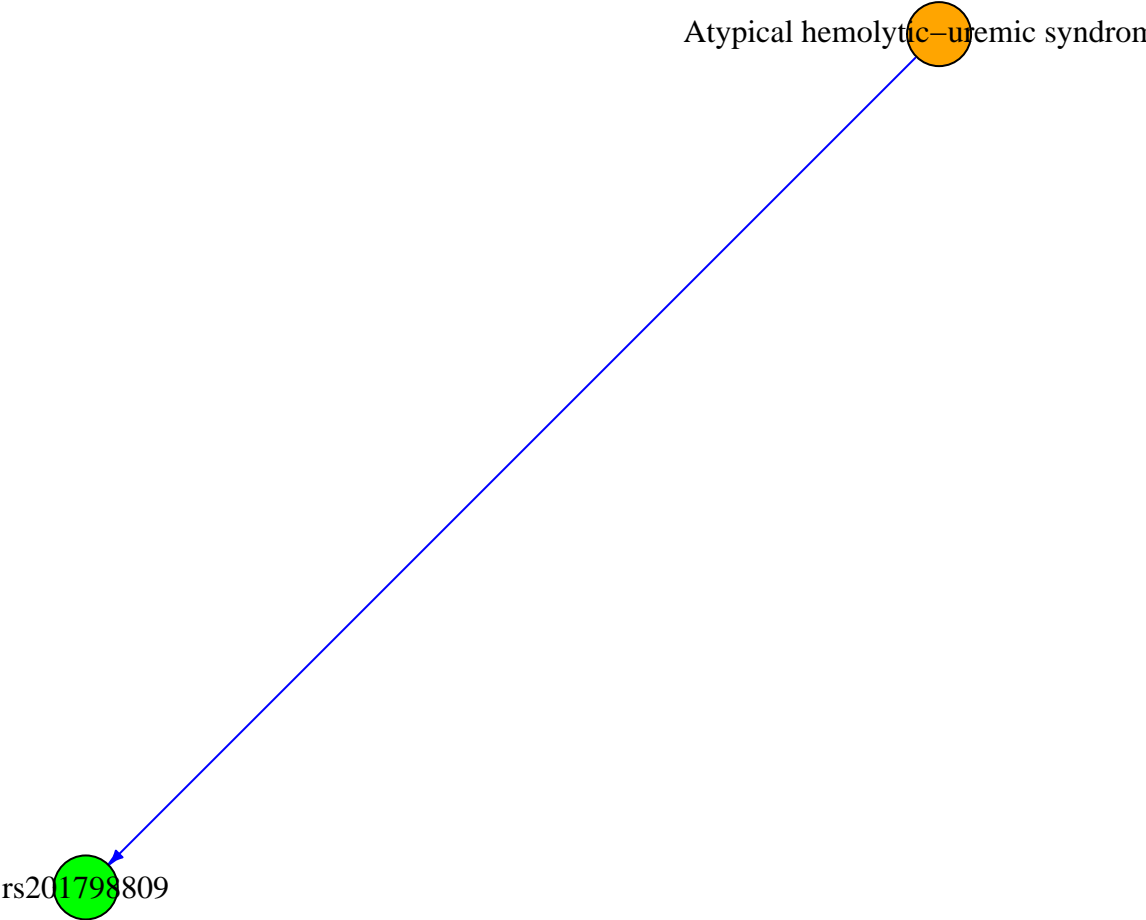

## Variant–Disease Network (Aural atresia)

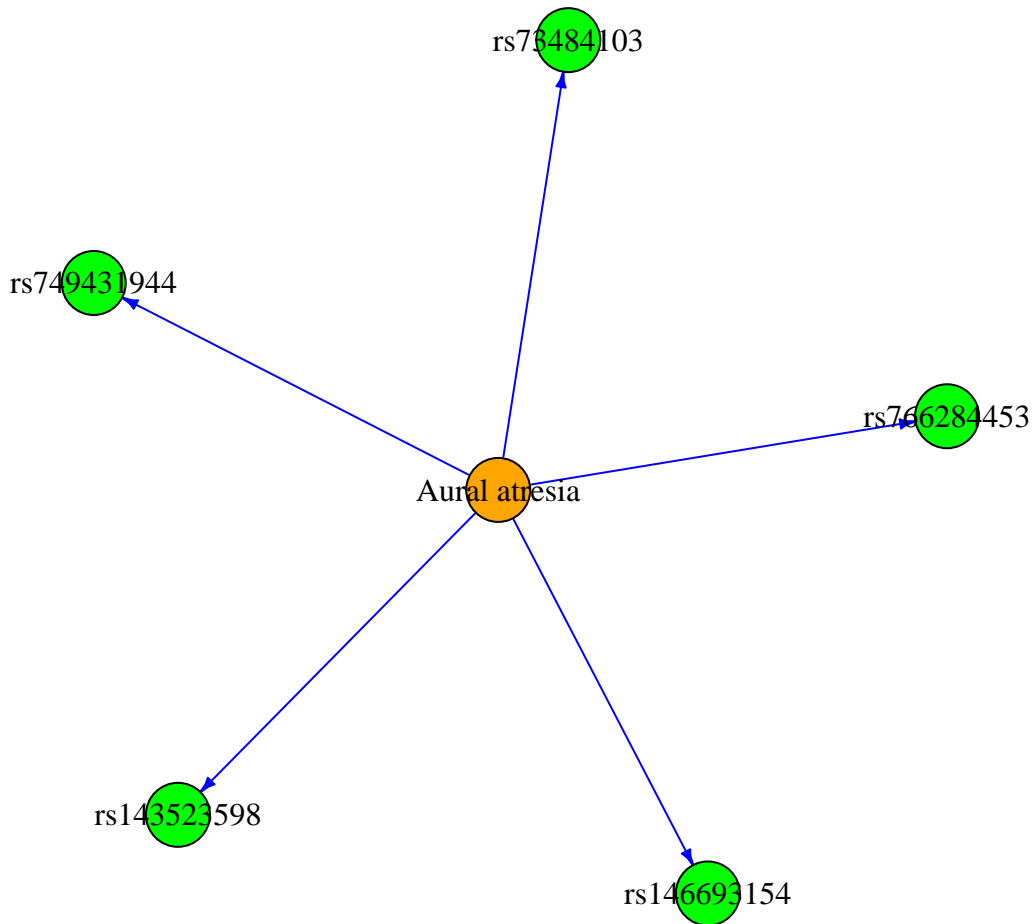

# Variant–Disease Network (Auriculocondylar syndrome)

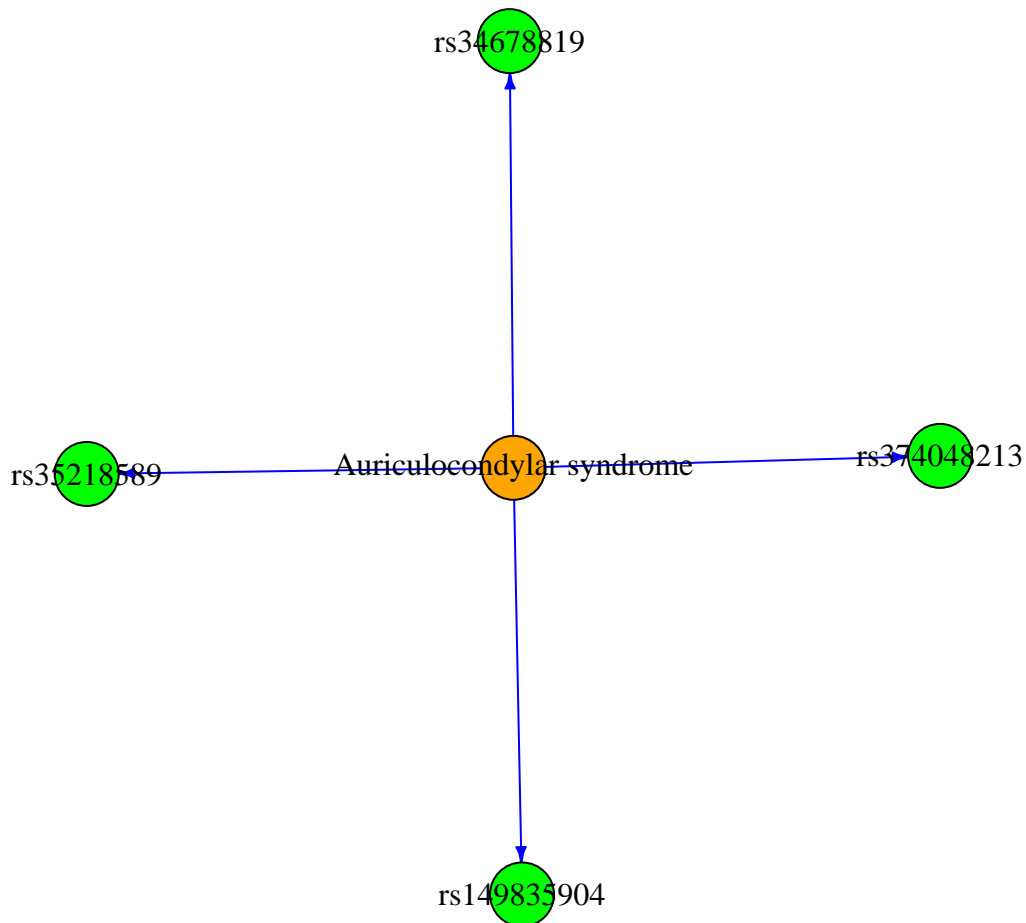

# Variant–Disease Network (Autism spectrum disorder)

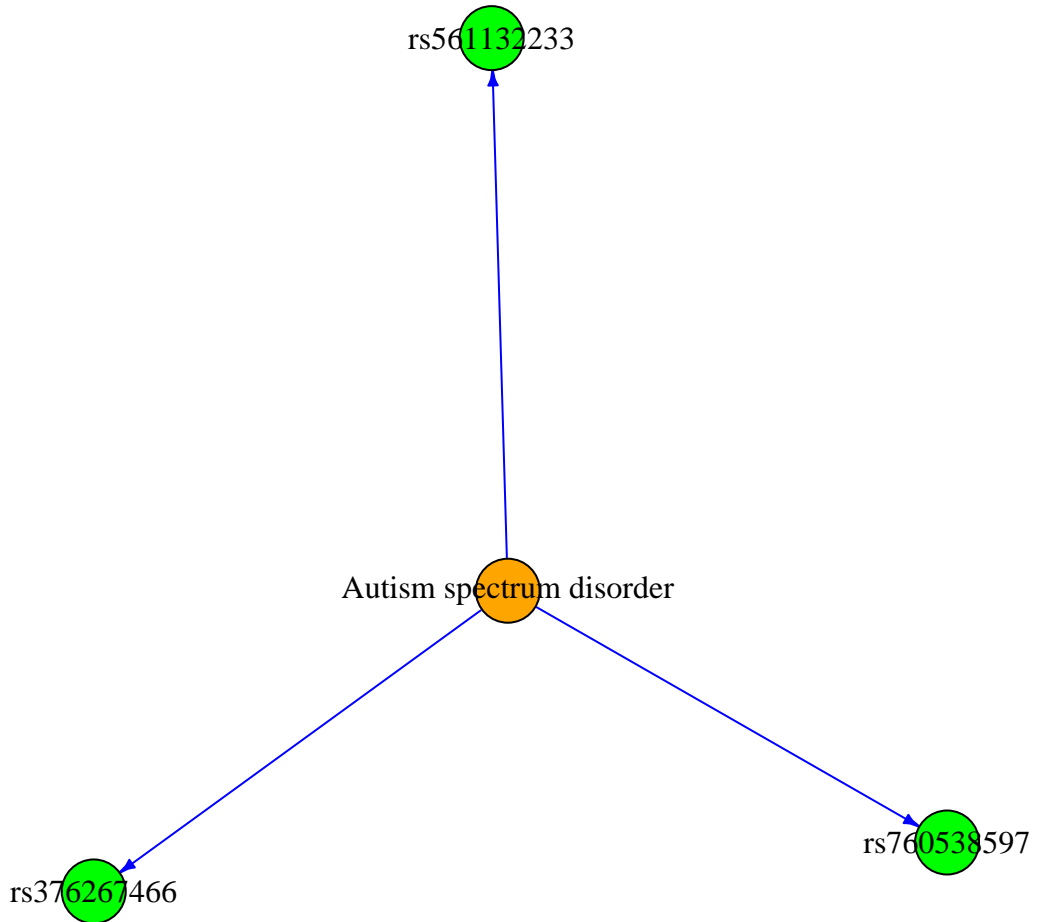

**Variant–Disease Network (Autistic disorder of childhood onset)**

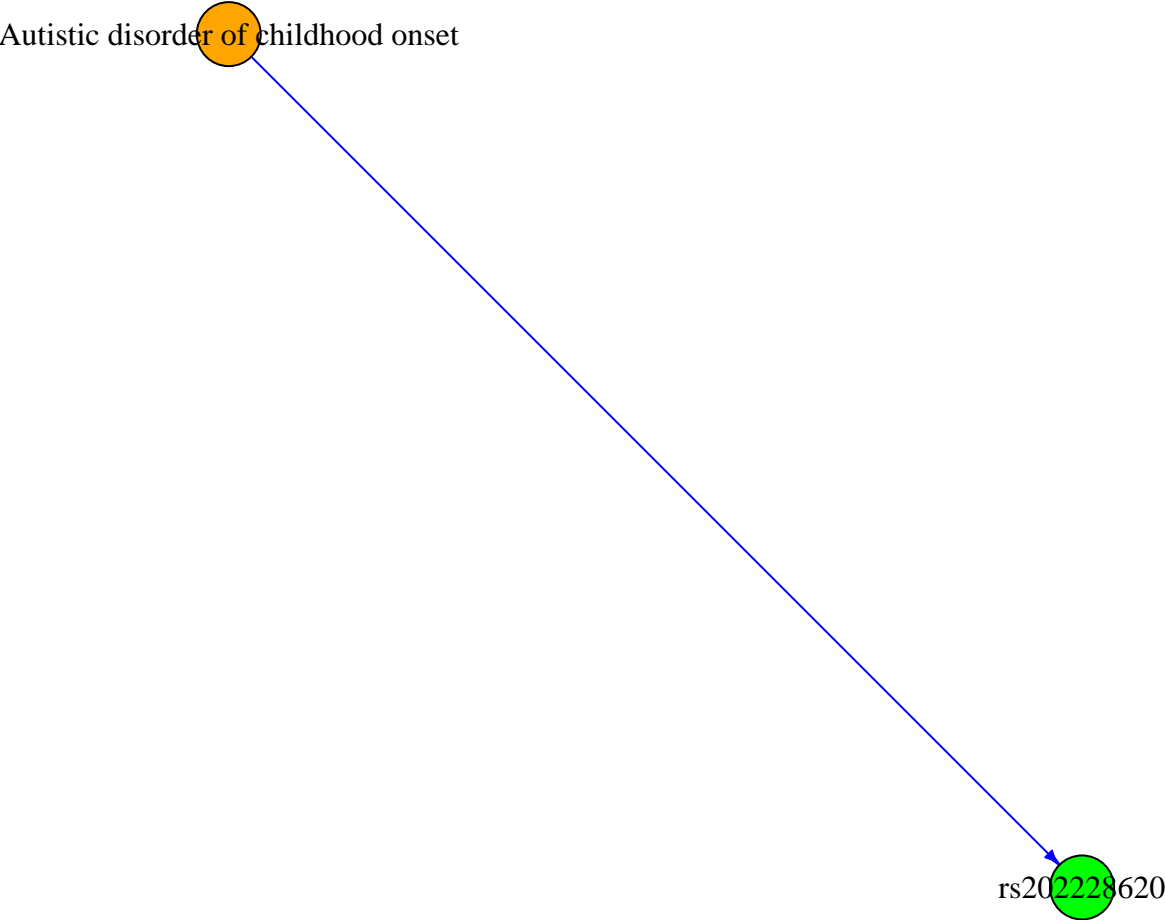

## Variant–Disease Network (Autoinflammation)

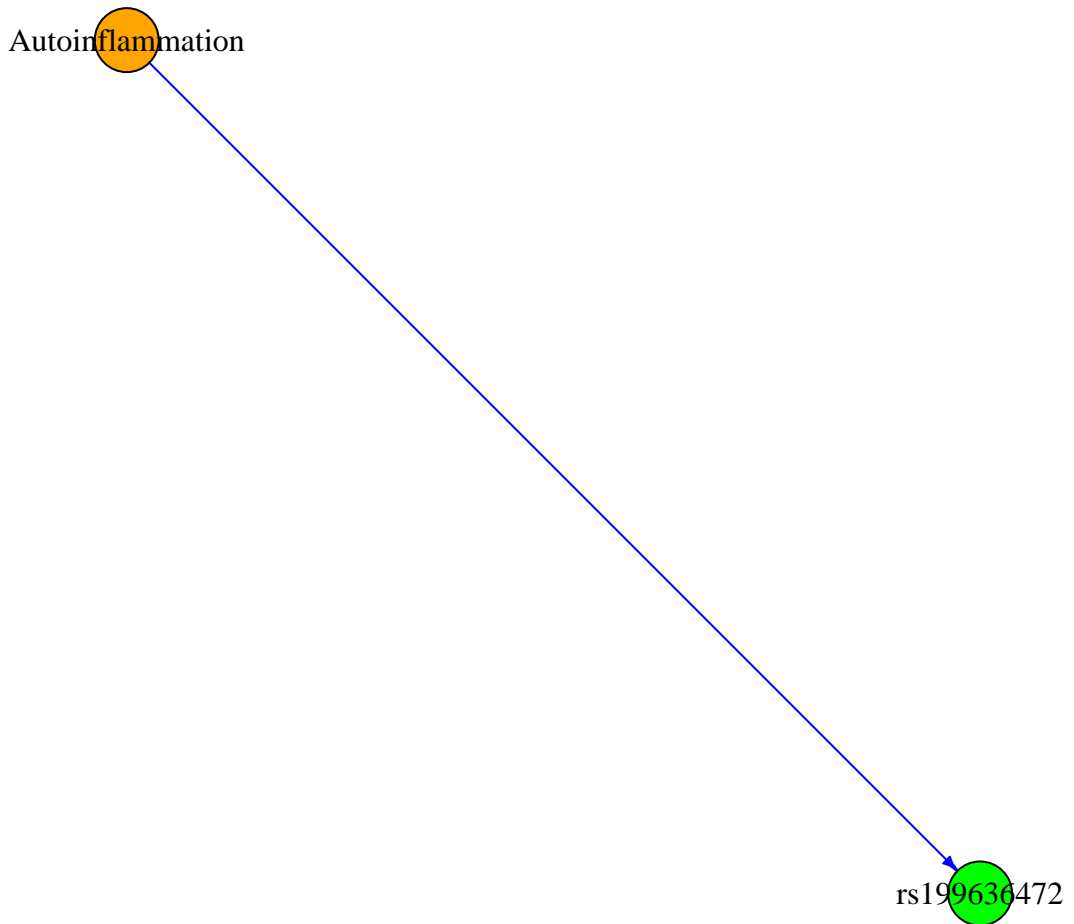

Variant–Disease Network (Autosomal recessive centronuclear myopathy)

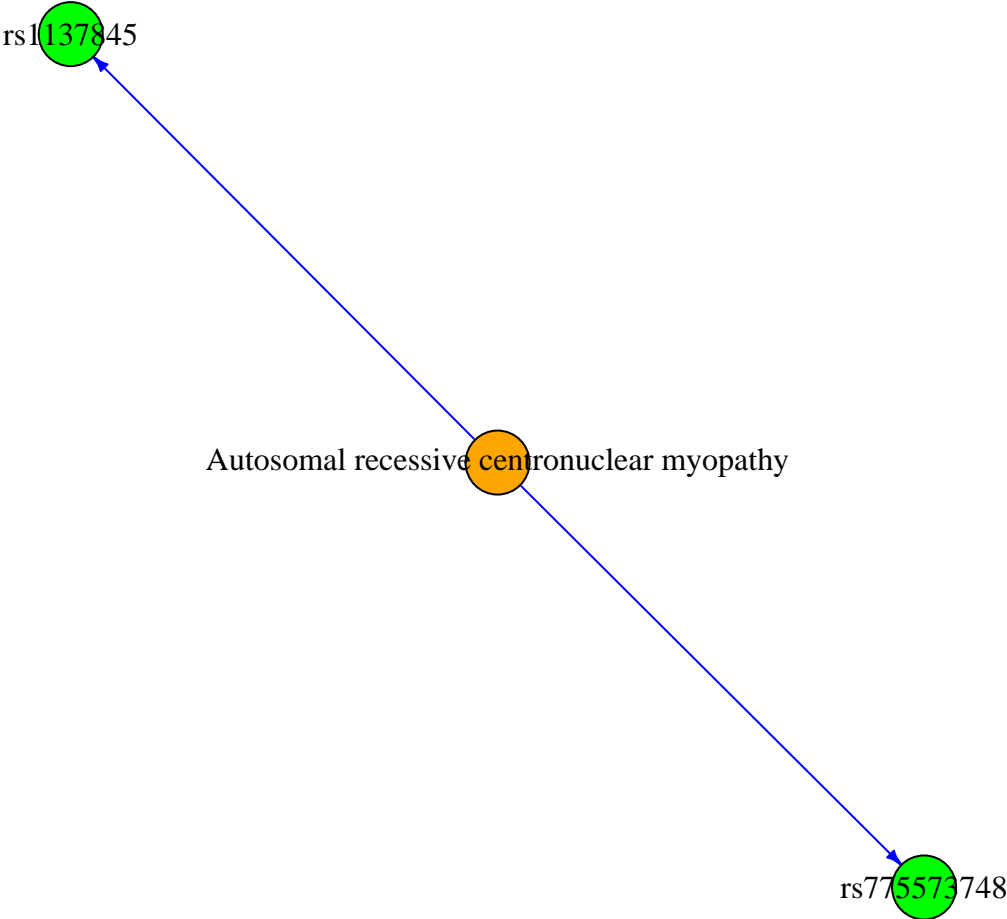

**Variant–Disease Network (Autosomal recessive cerebellar ataxia)**

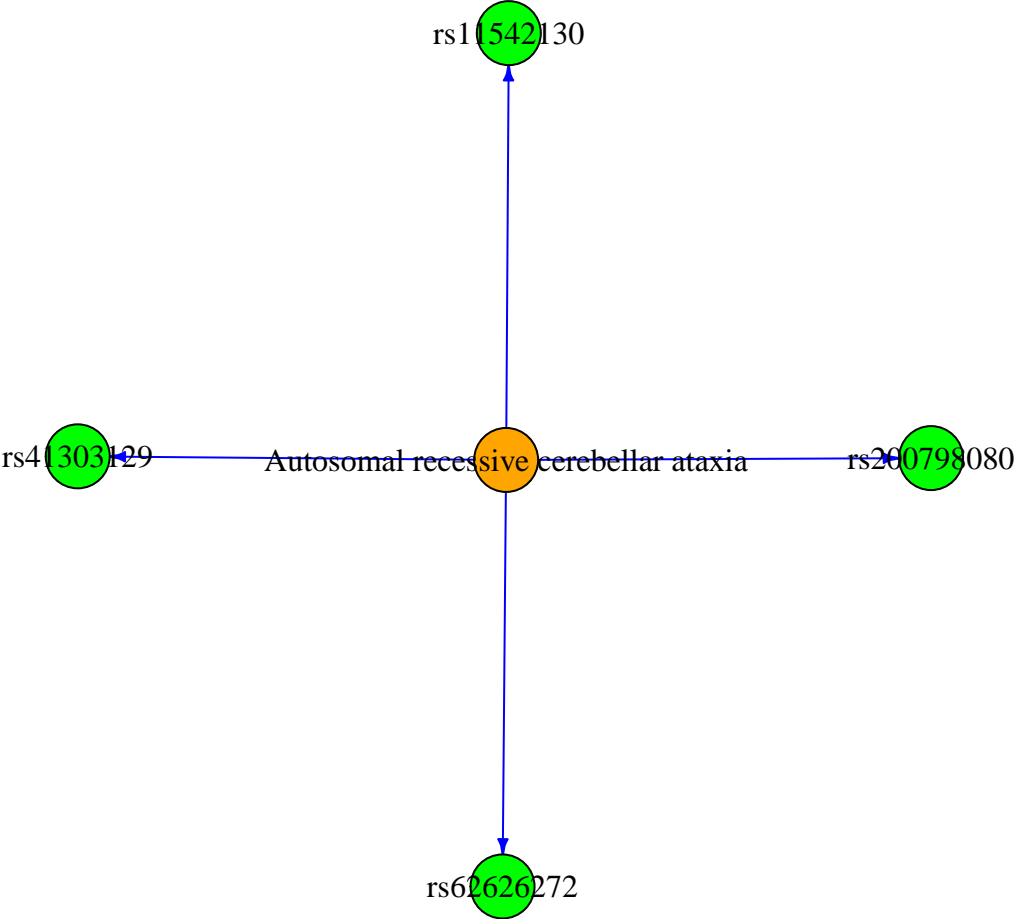



# Variant–Disease Network (Autosomal recessive cutis laxa type 1B)

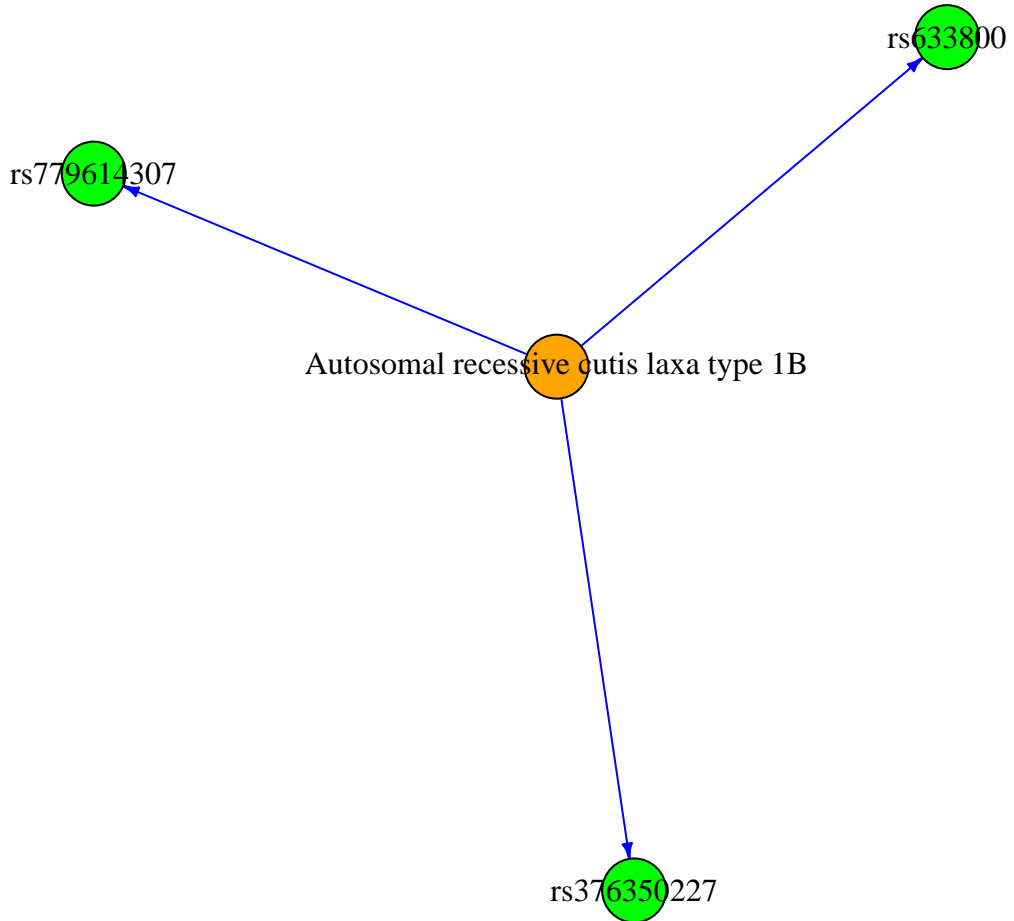

**Variant–Disease Network (Bardet–Biedl syndrome)**

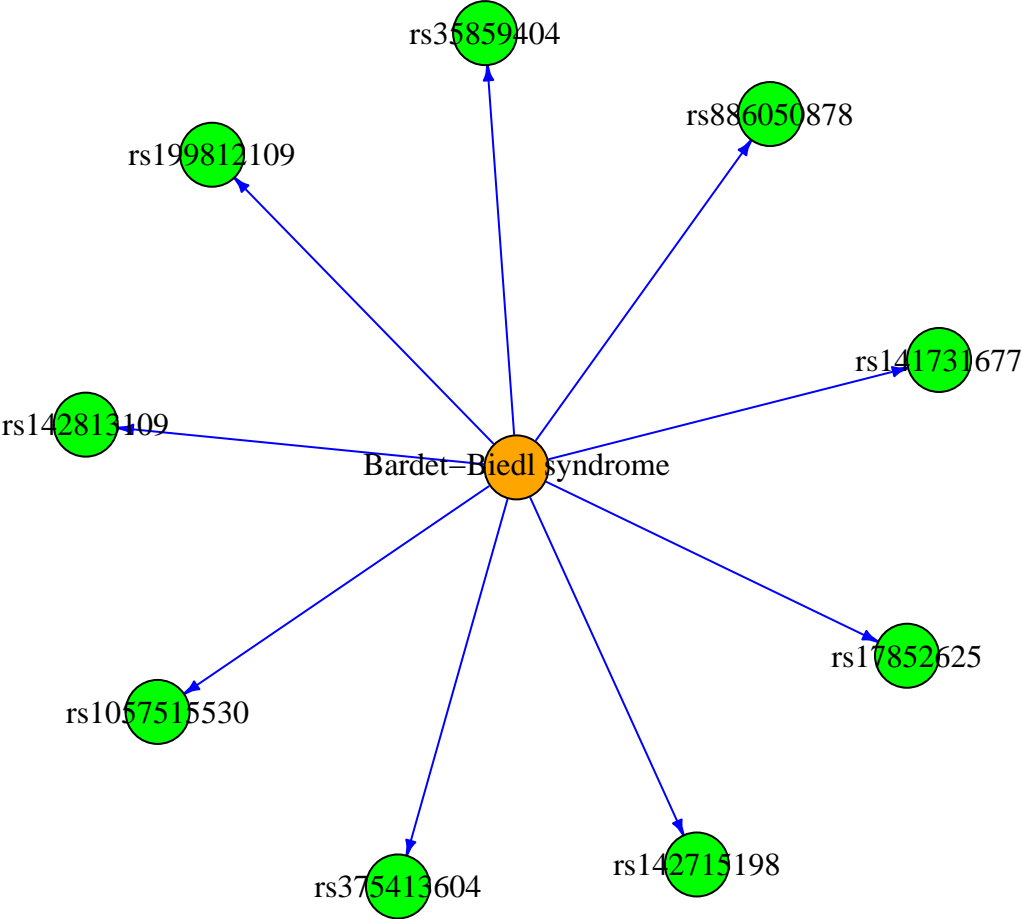

## Variant–Disease Network (Bardet–Biedl syndrome 1)

rs35194418

Bardet–Biedl syndrome 1

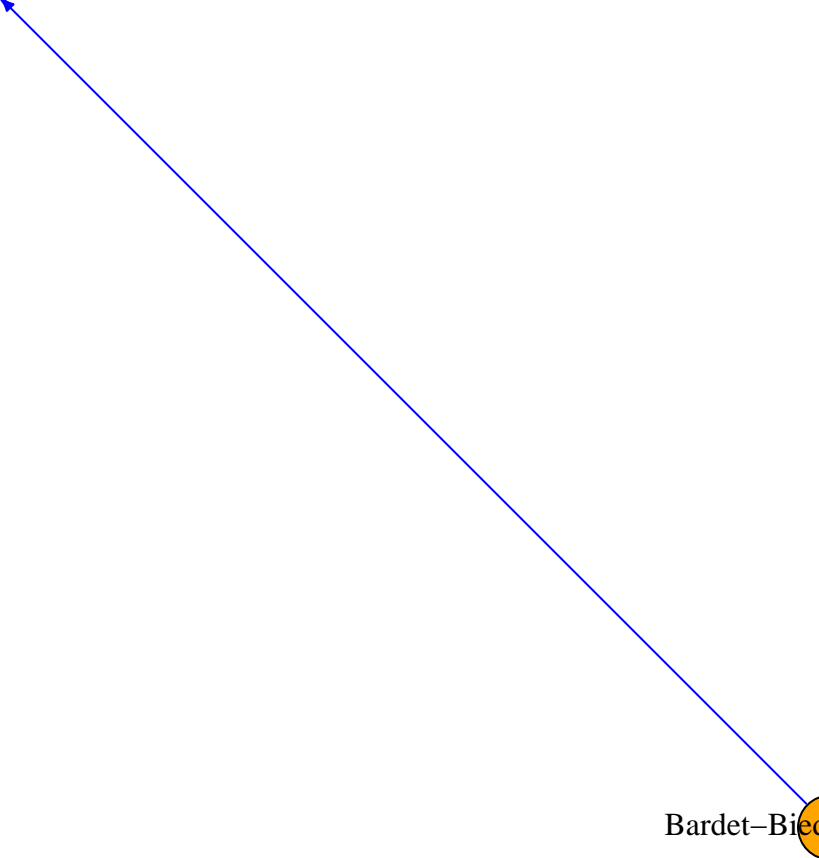

# Variant–Disease Network (Bardet–Biedl syndrome 10)

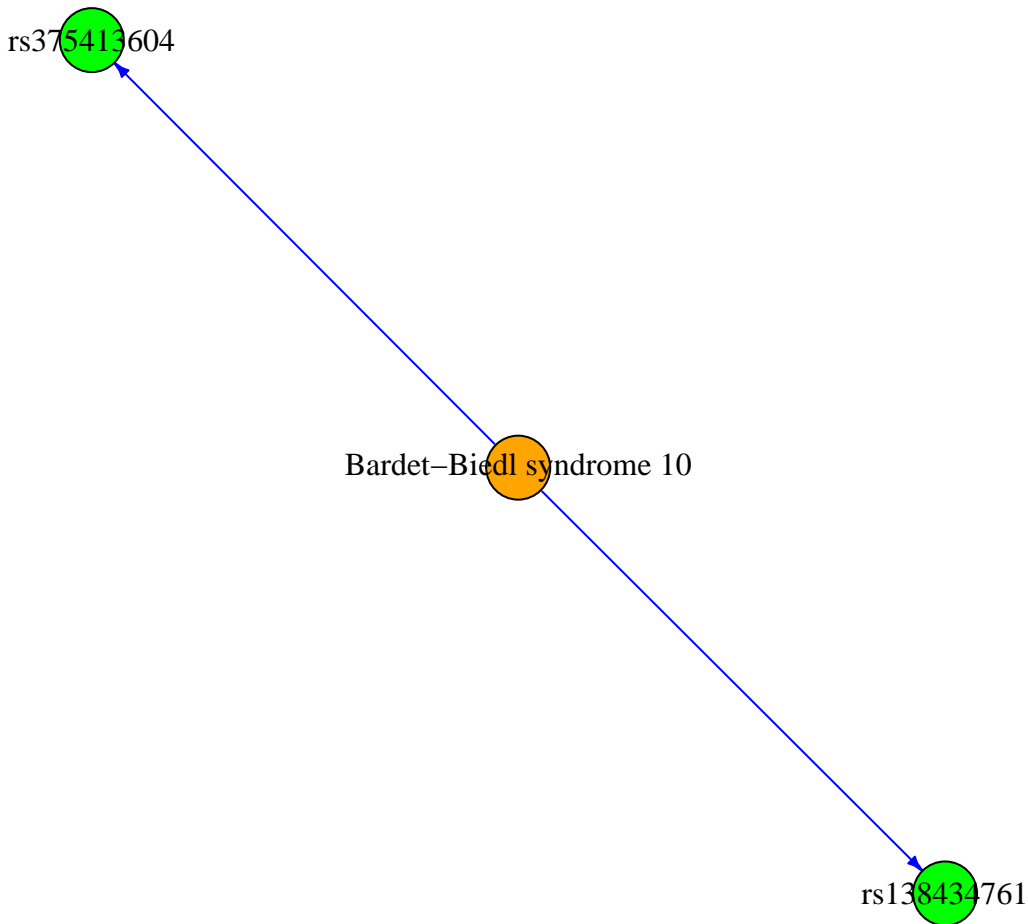

Variant–Disease Network (Bardet–Biedl syndrome 2)

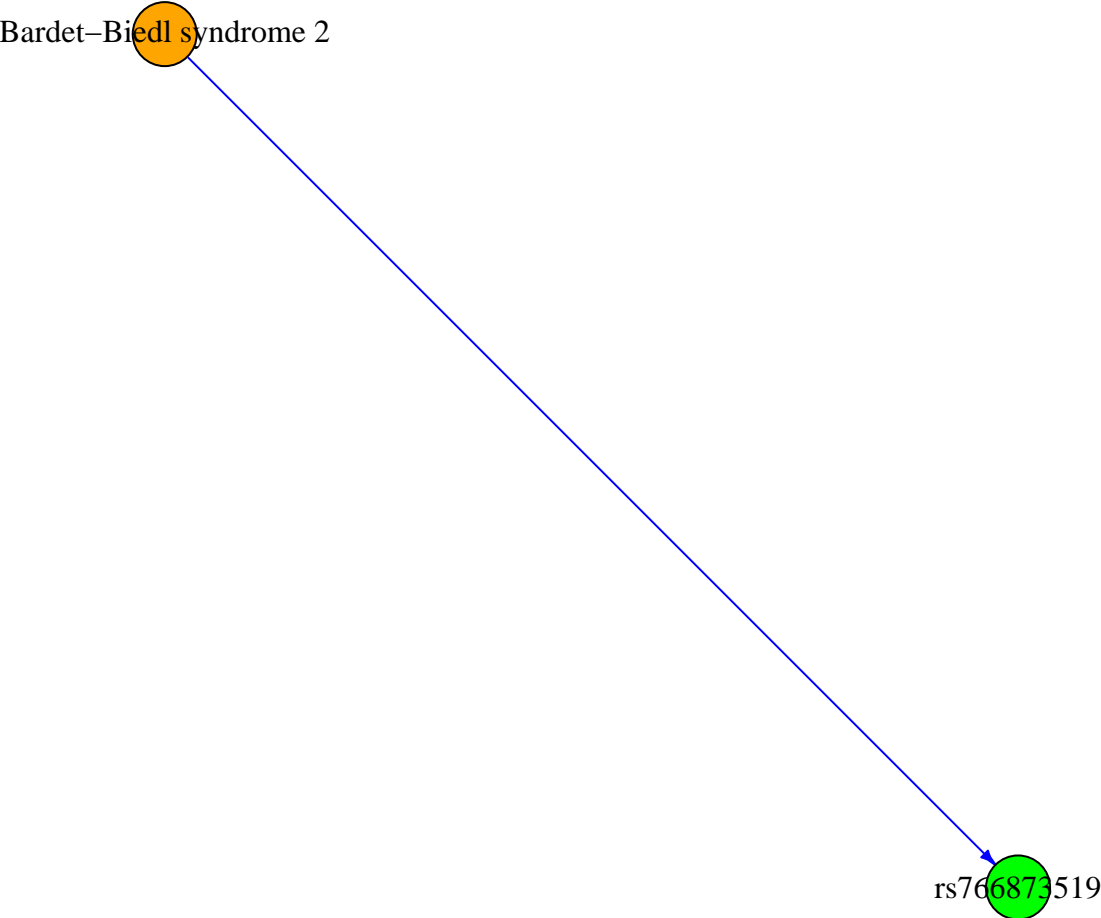

## Variant–Disease Network (Bare lymphocyte syndrome 2)

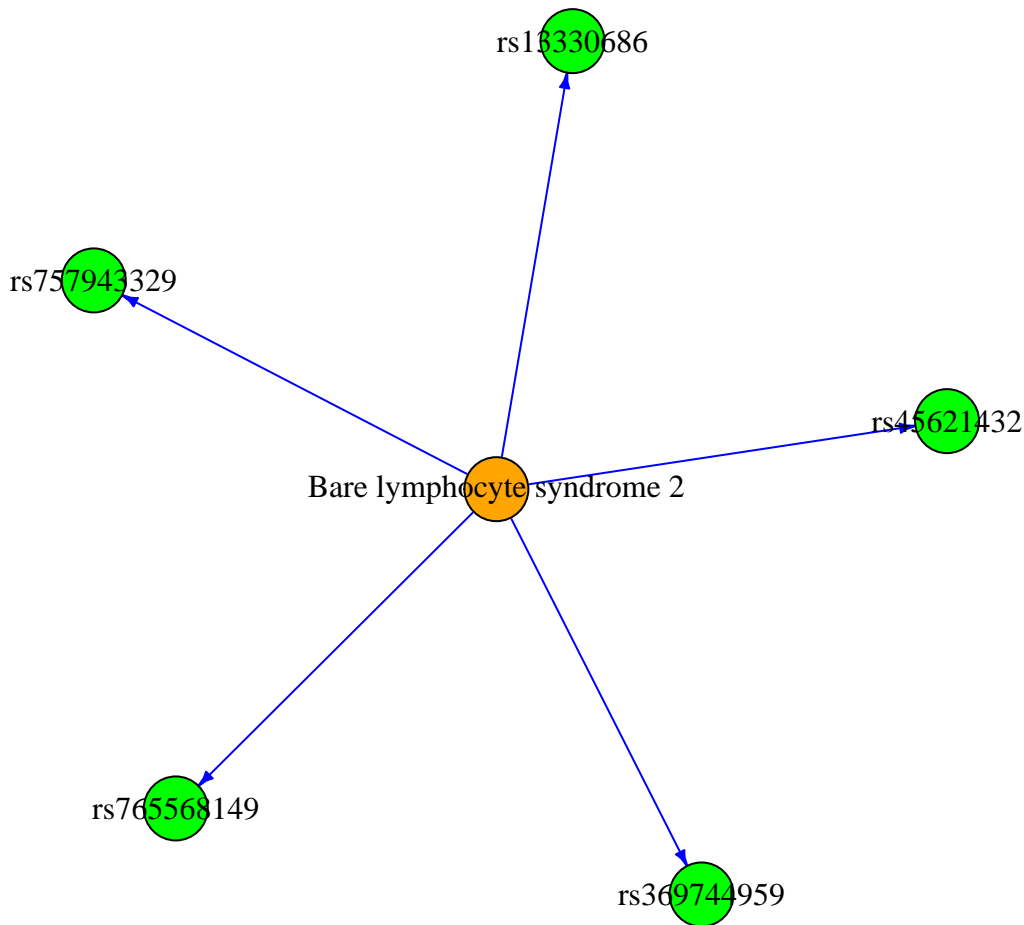

**Variant–Disease Network (Bare lymphocyte syndrome type 1)**

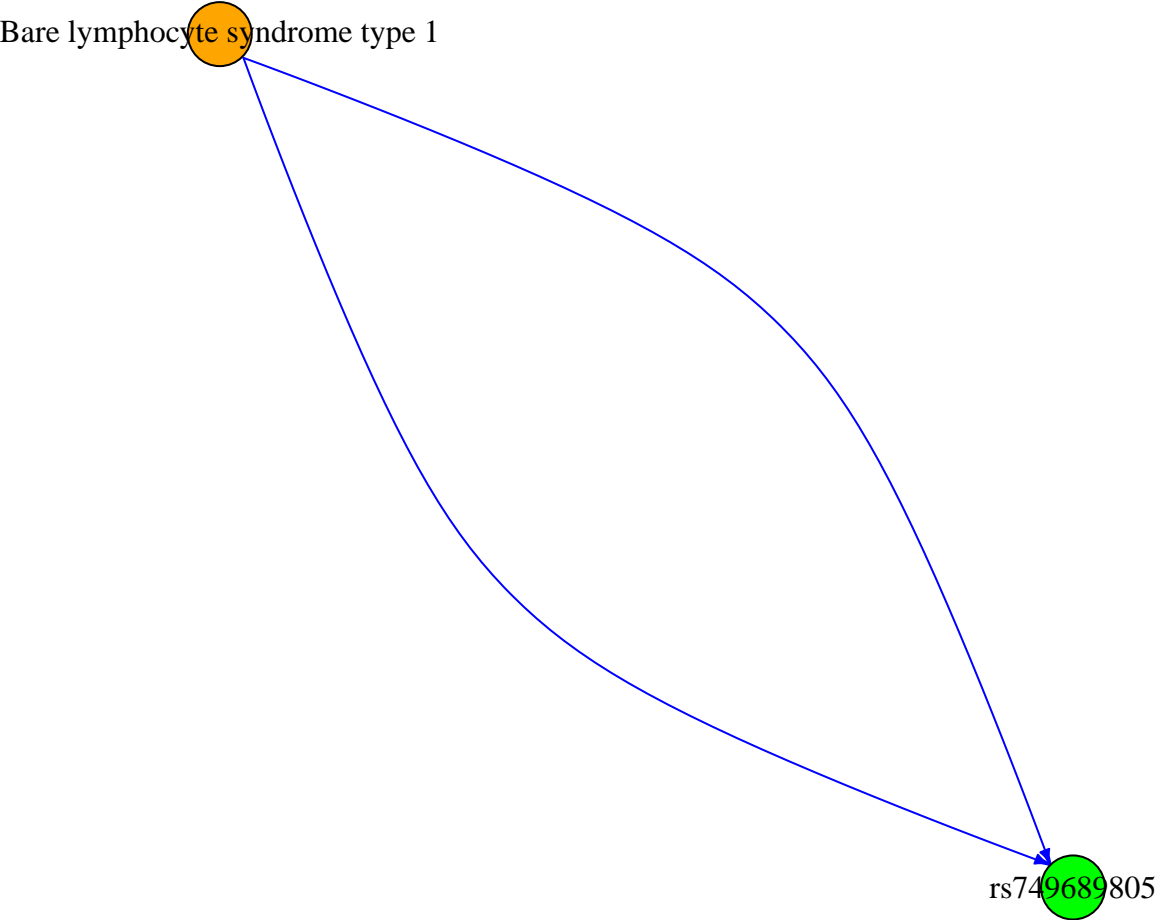

## Variant-Disease Network (Basal cell carcinoma)

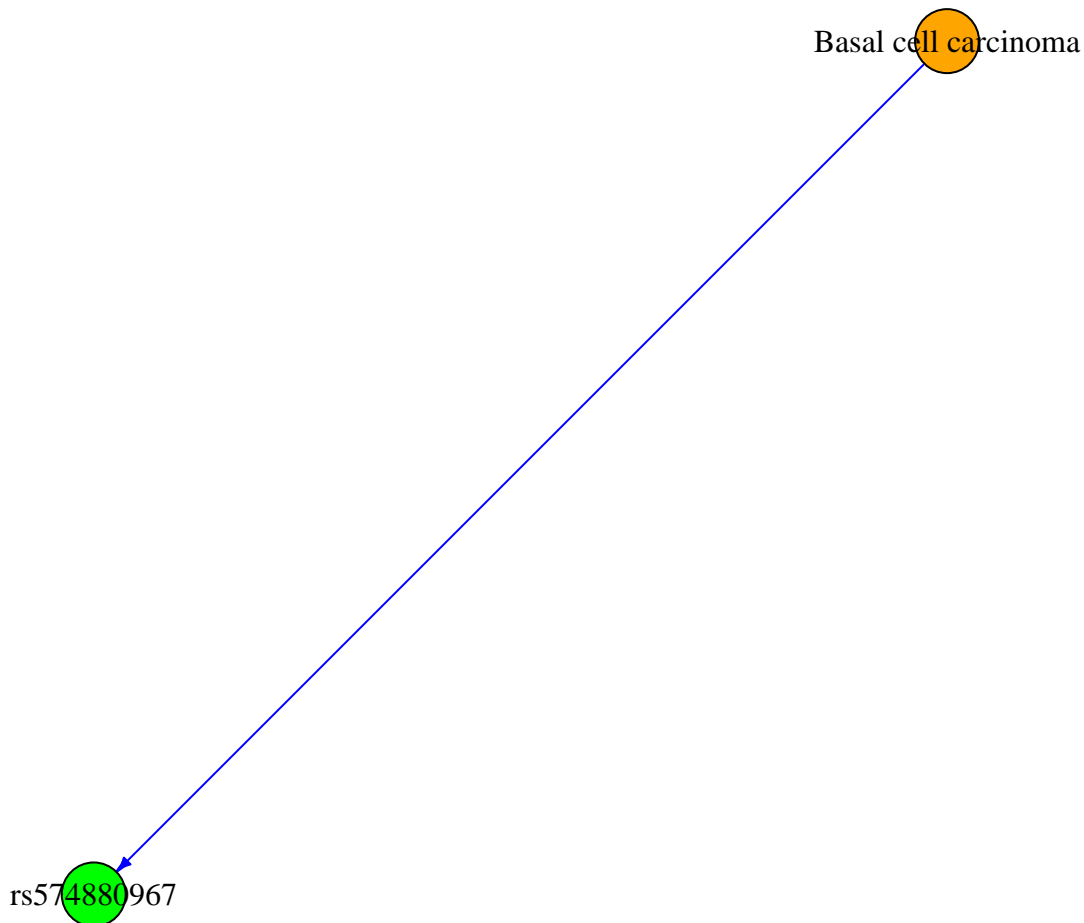



# Variant–Disease Network (Beaulieu–Boycott–Innes syndrome)

Beaulieu–Boycott–Innes syndrome

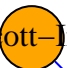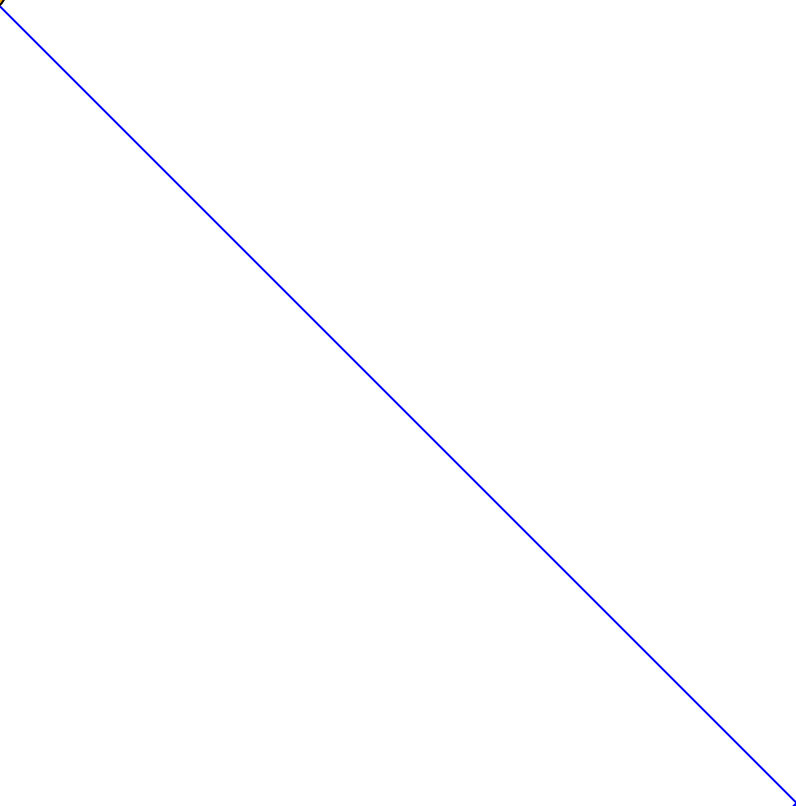

rs772533643

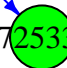

## Variant–Disease Network (Behavior disorder)

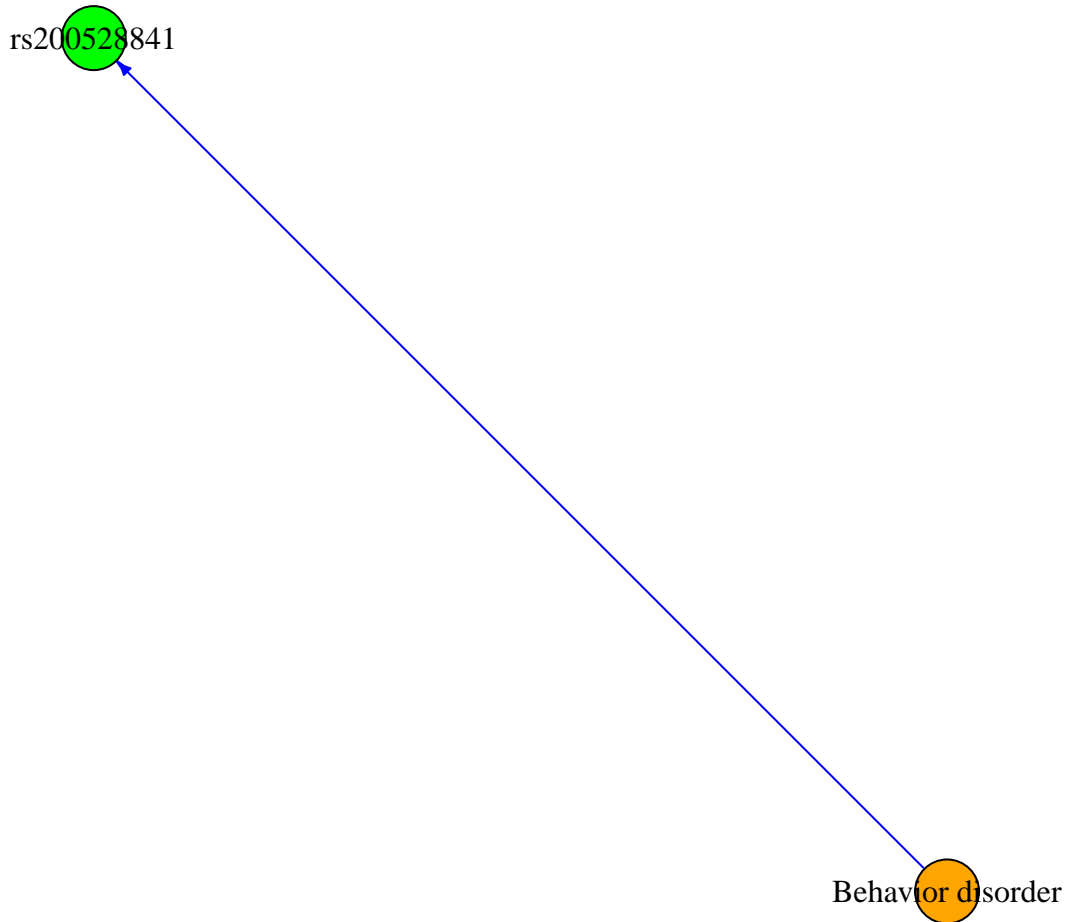

## Variant–Disease Network (Benign familial neonatal seizures)

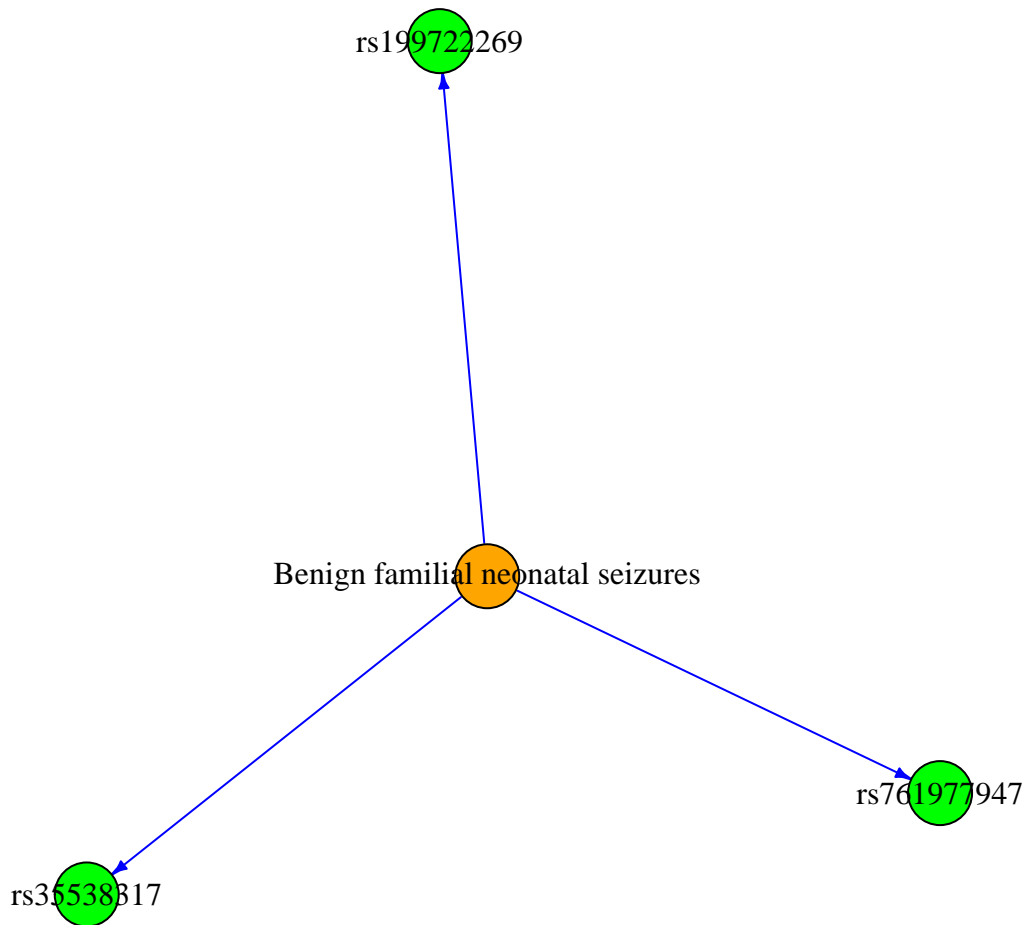

## Variant–Disease Network (Benign familial neonatal seizures 2)

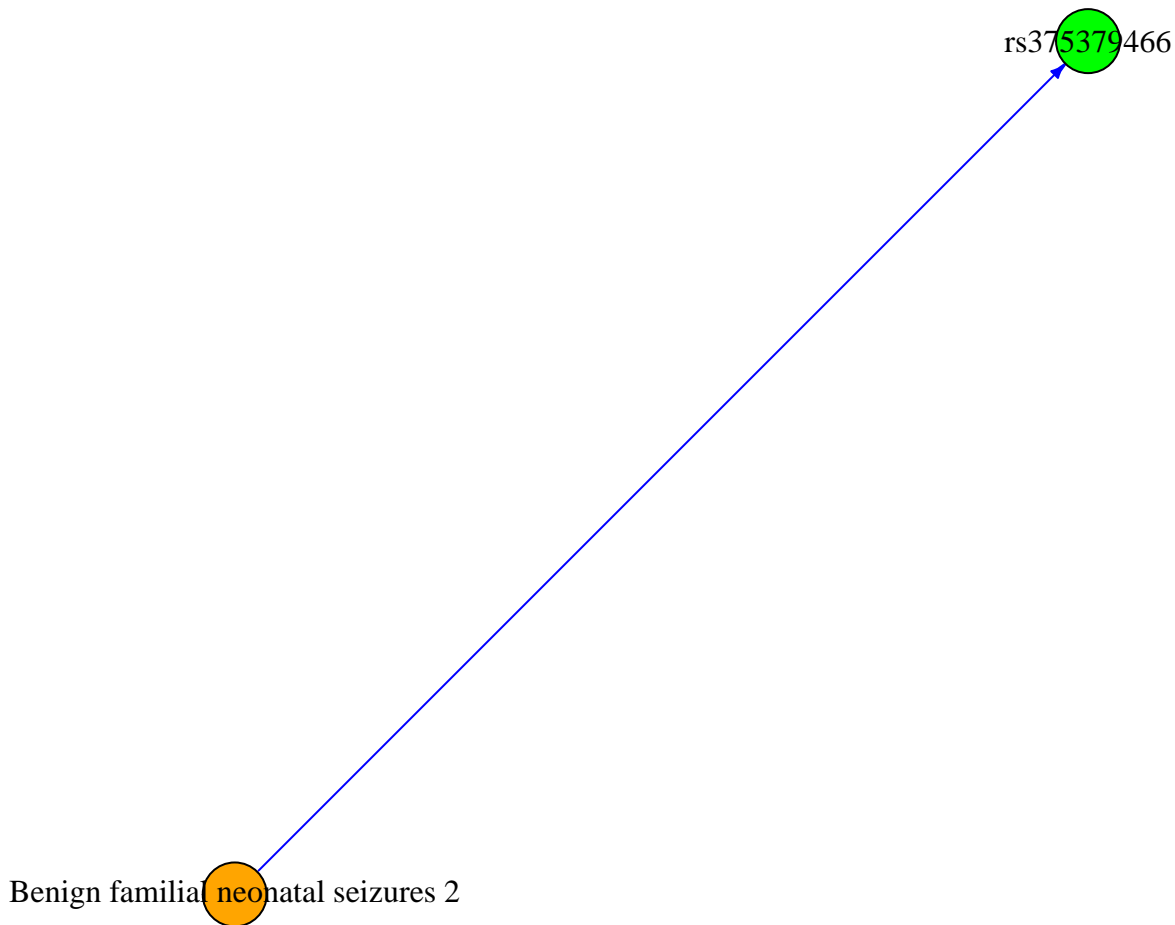

# Variant–Disease Network (Benign Neonatal Epilepsy)

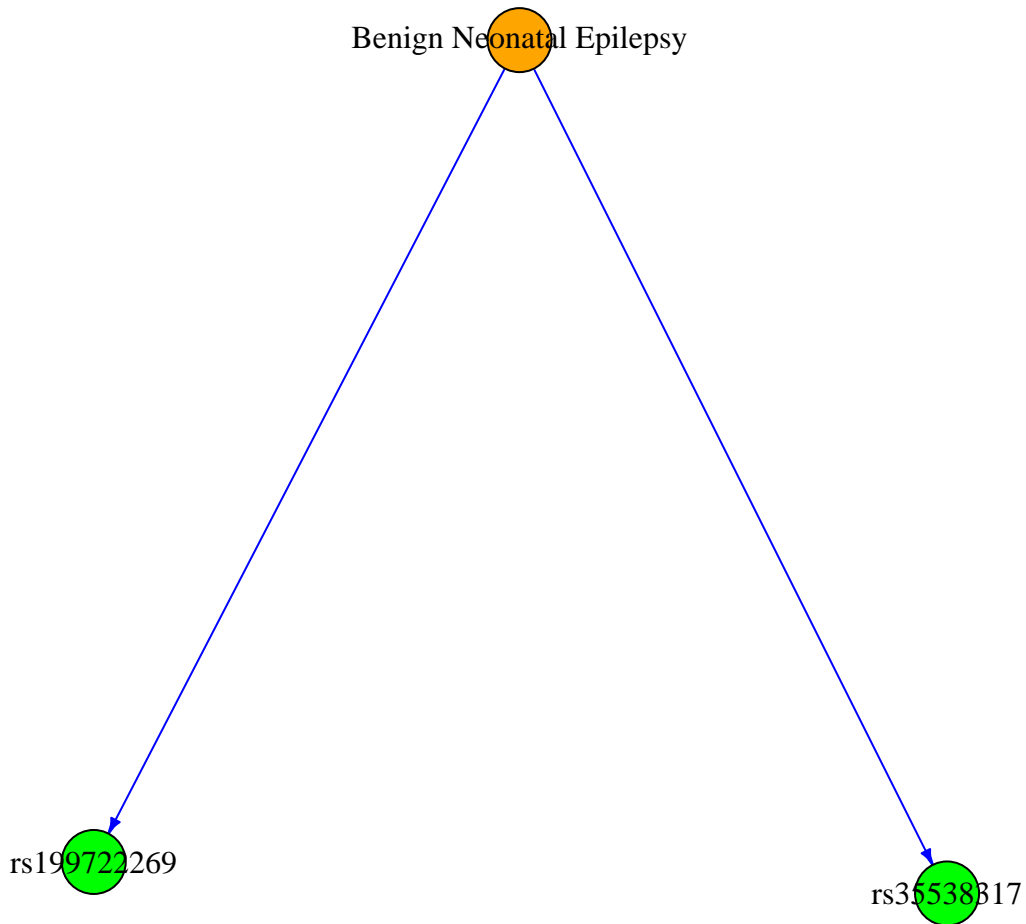

# Variant-Disease Network (Beta-2-adrenoreceptor agonist)

Beta-2-adrenoreceptor agonist

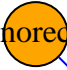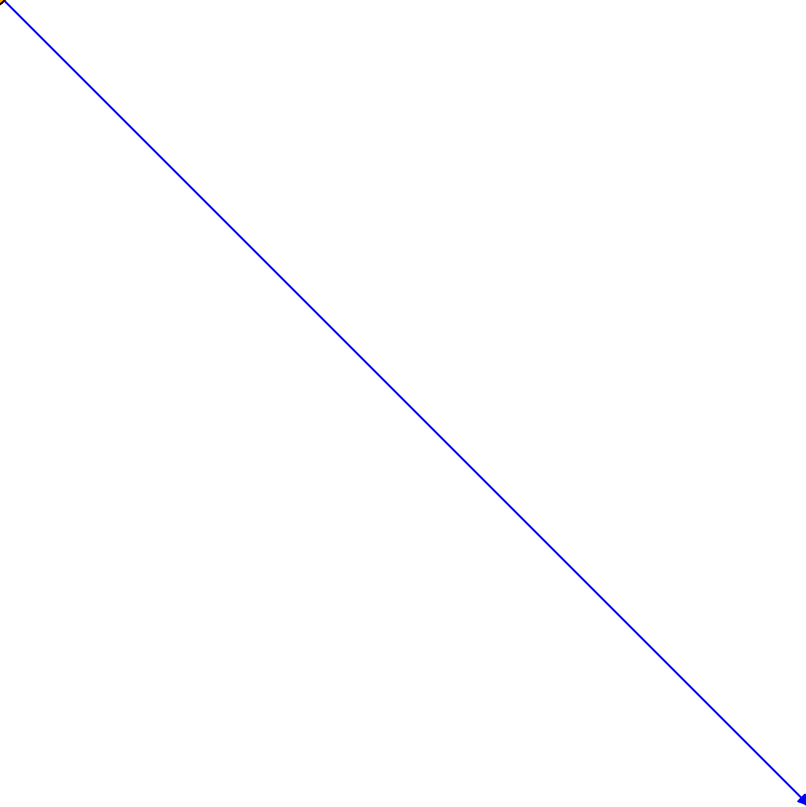

rs1800888

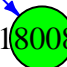

## Variant-Disease Network (Beta-D-mannosidosis)

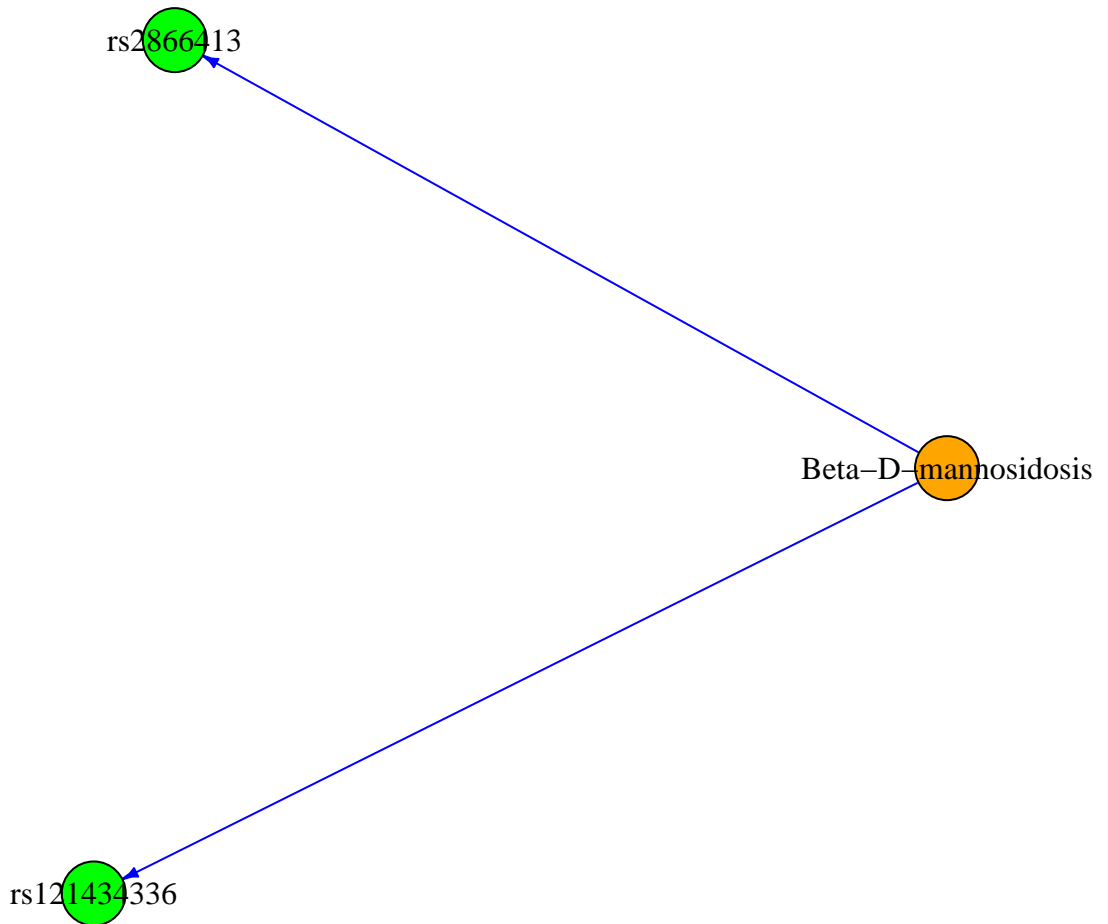

**Variant–Disease Network (Bethlem myopathy 1)**

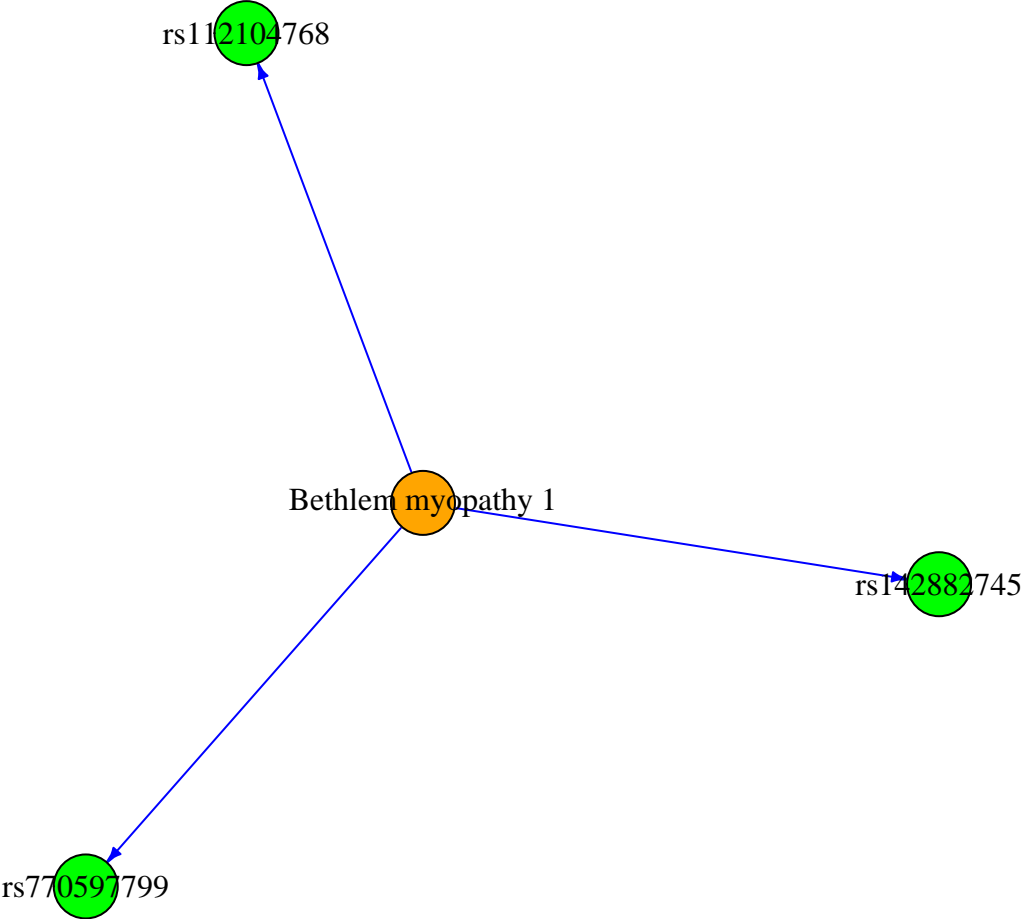



**Variant–Disease Network (Bethlem myopathy 2)**

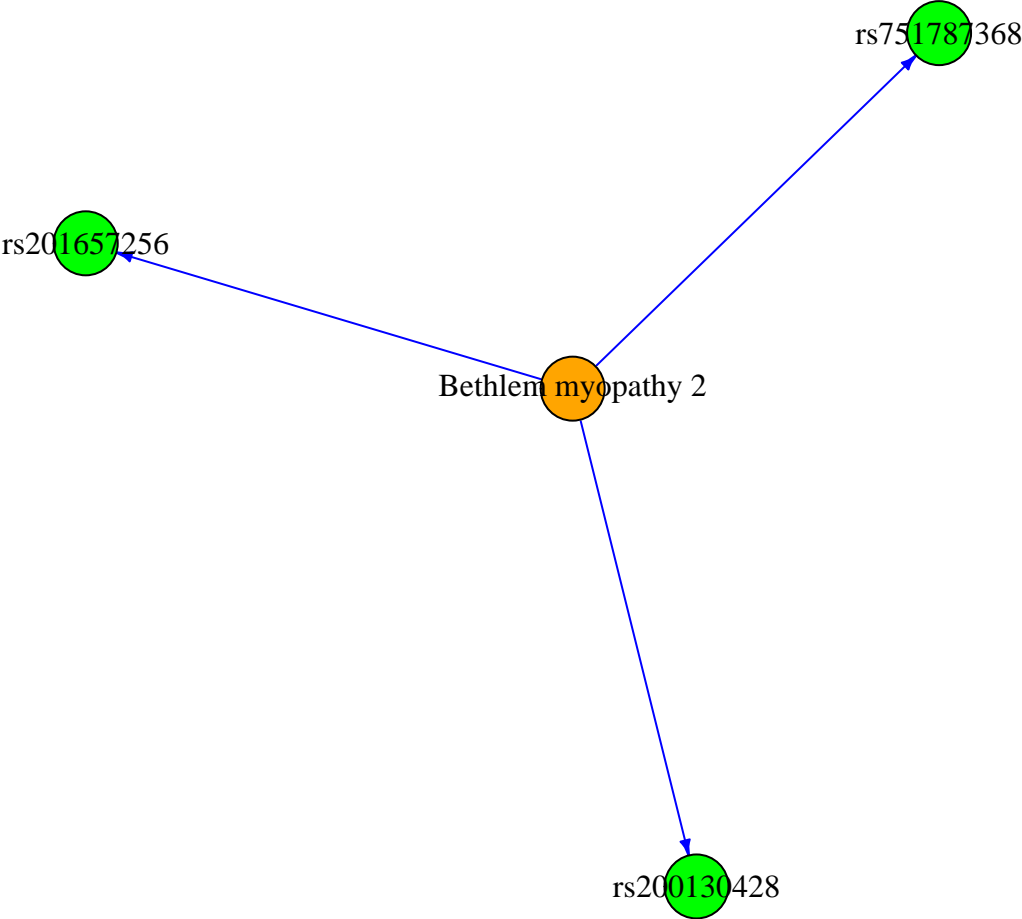

# Variant–Disease Network (BH4–Deficient Hyperphenylalaninemia)

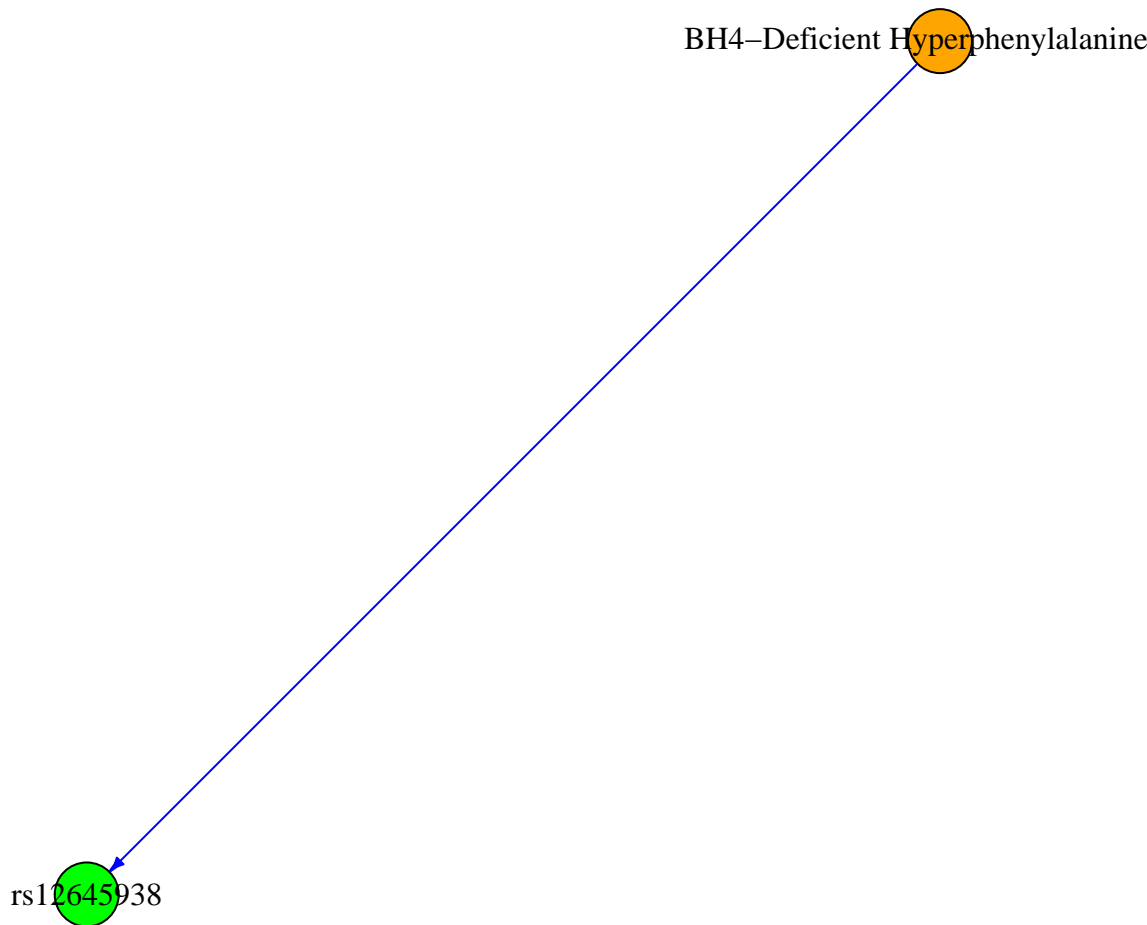

# Variant–Disease Network (Bifunctional peroxisomal enzyme deficiency)

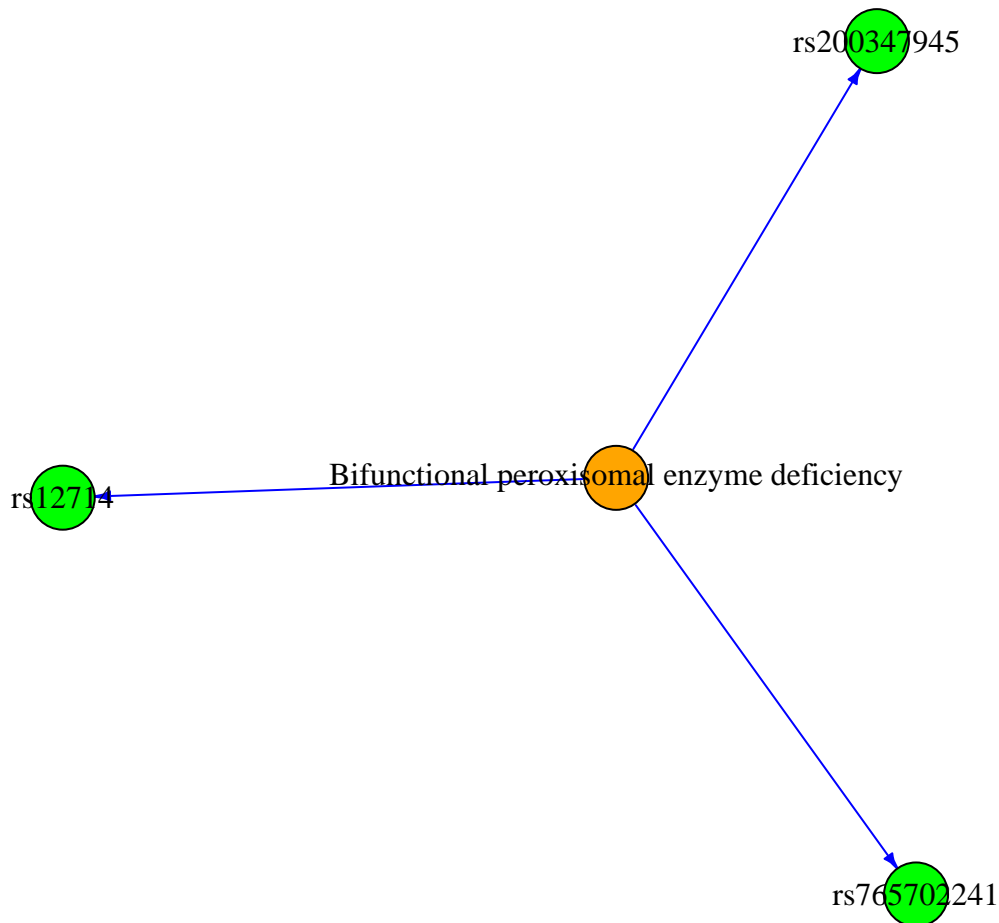

## Variant–Disease Network (Biotinidase deficiency)

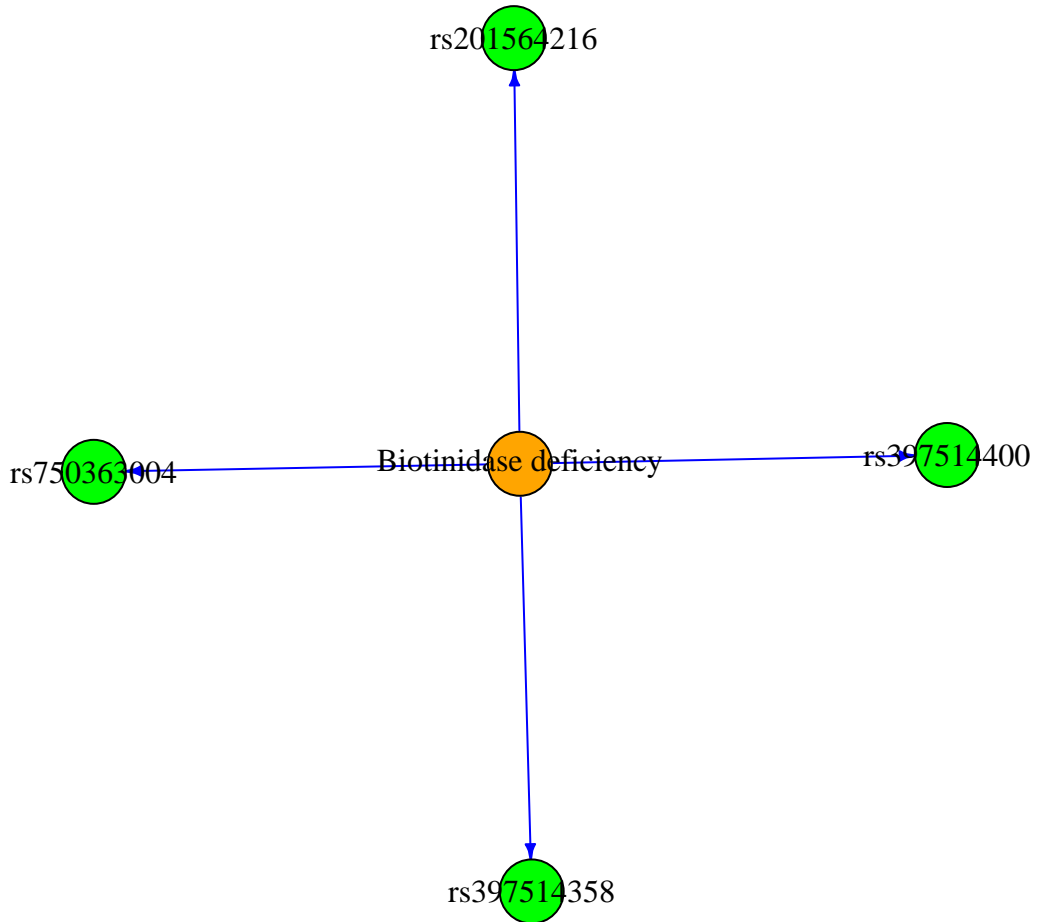

## Variant–Disease Network (Birbeck granule deficiency)

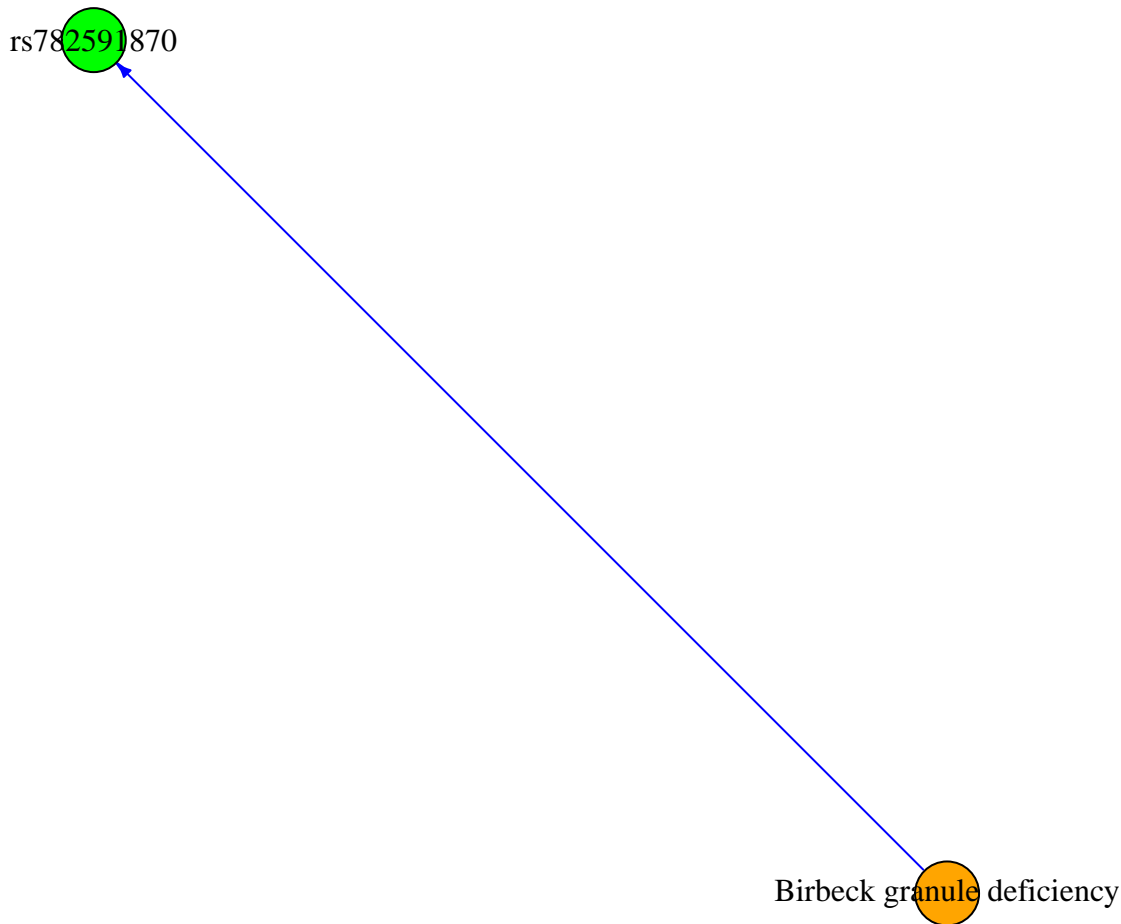

## Variant-Disease Network (Bladder cancer)

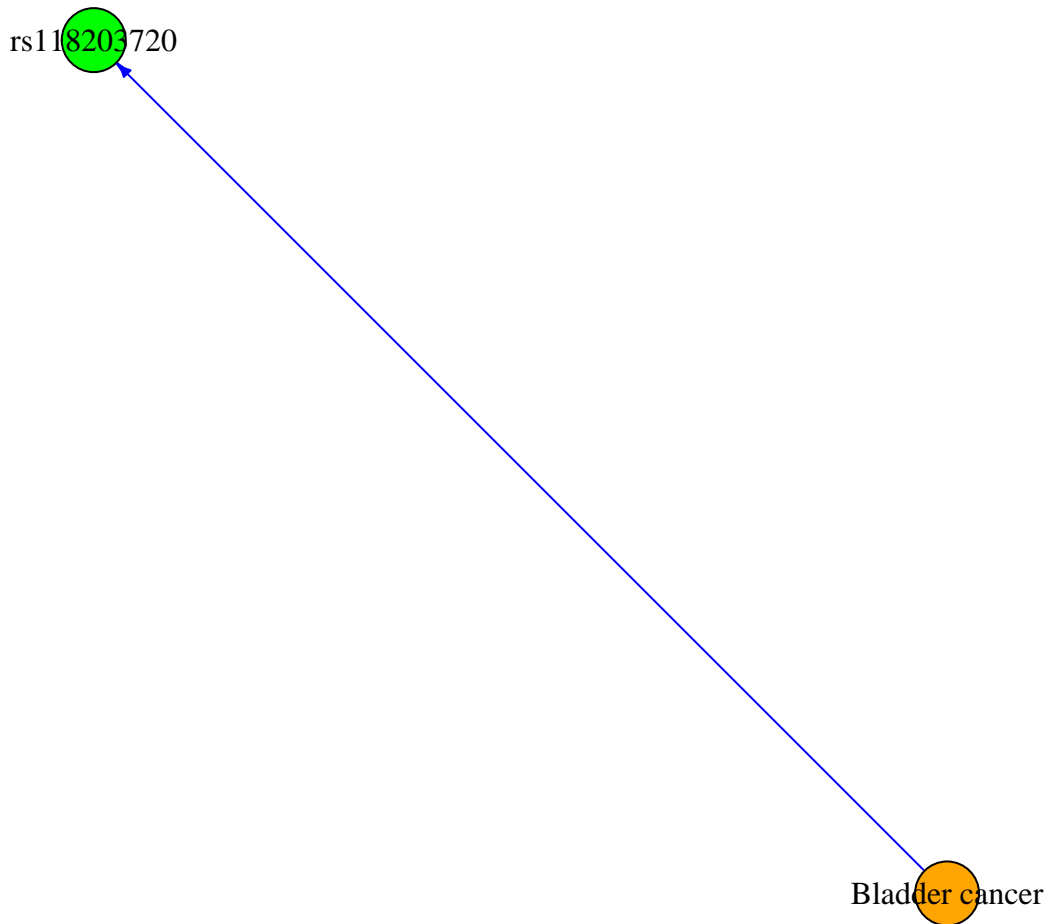

## Variant–Disease Network (Blau syndrome)

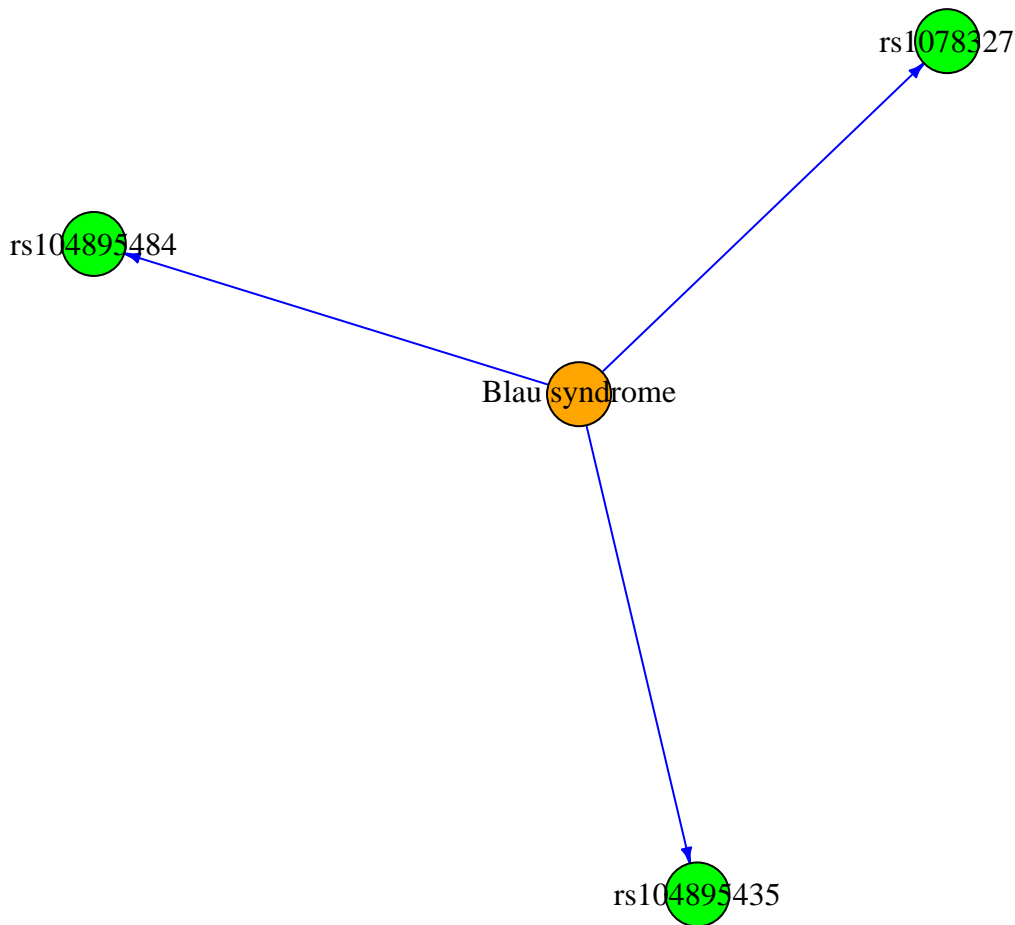

# Variant–Disease Network (Blepharocheilodontic syndrome 1)

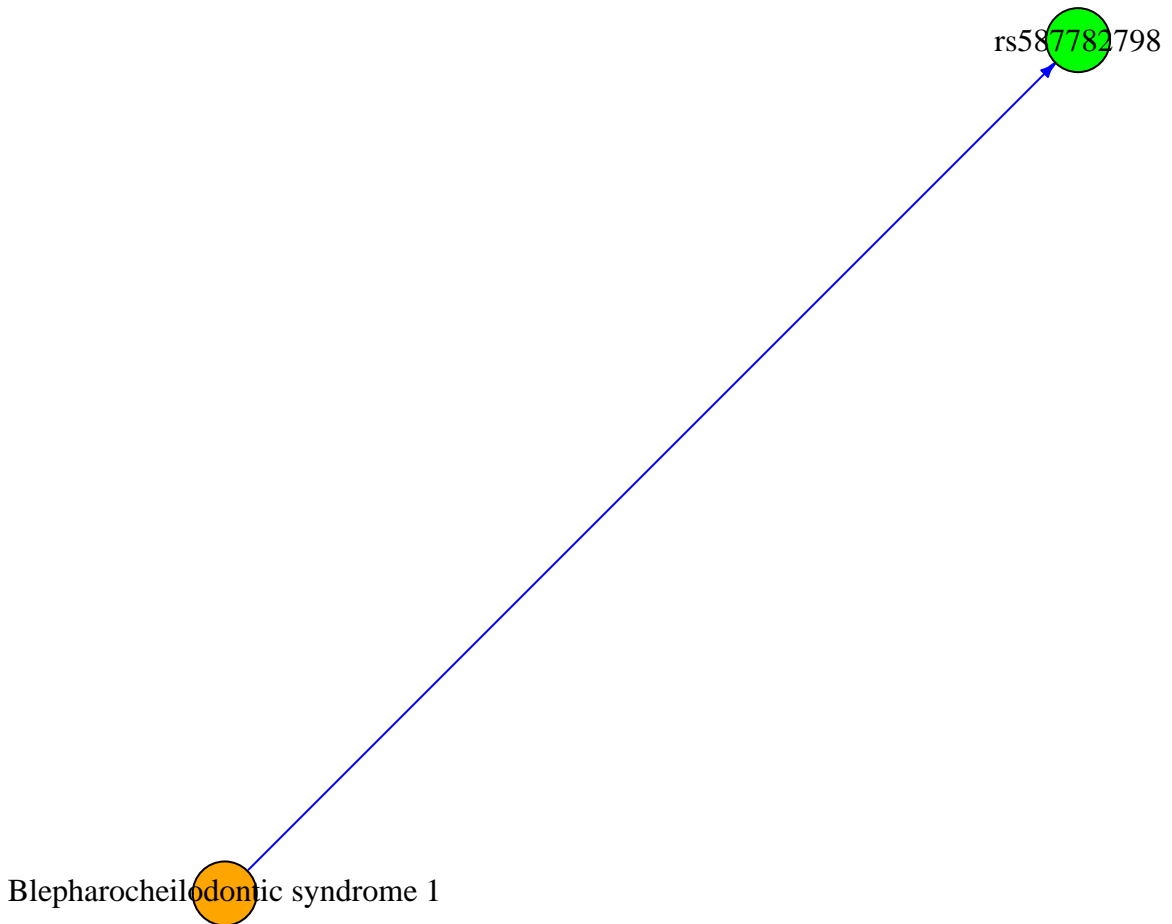



## Variant–Disease Network (Blepharophimosis)

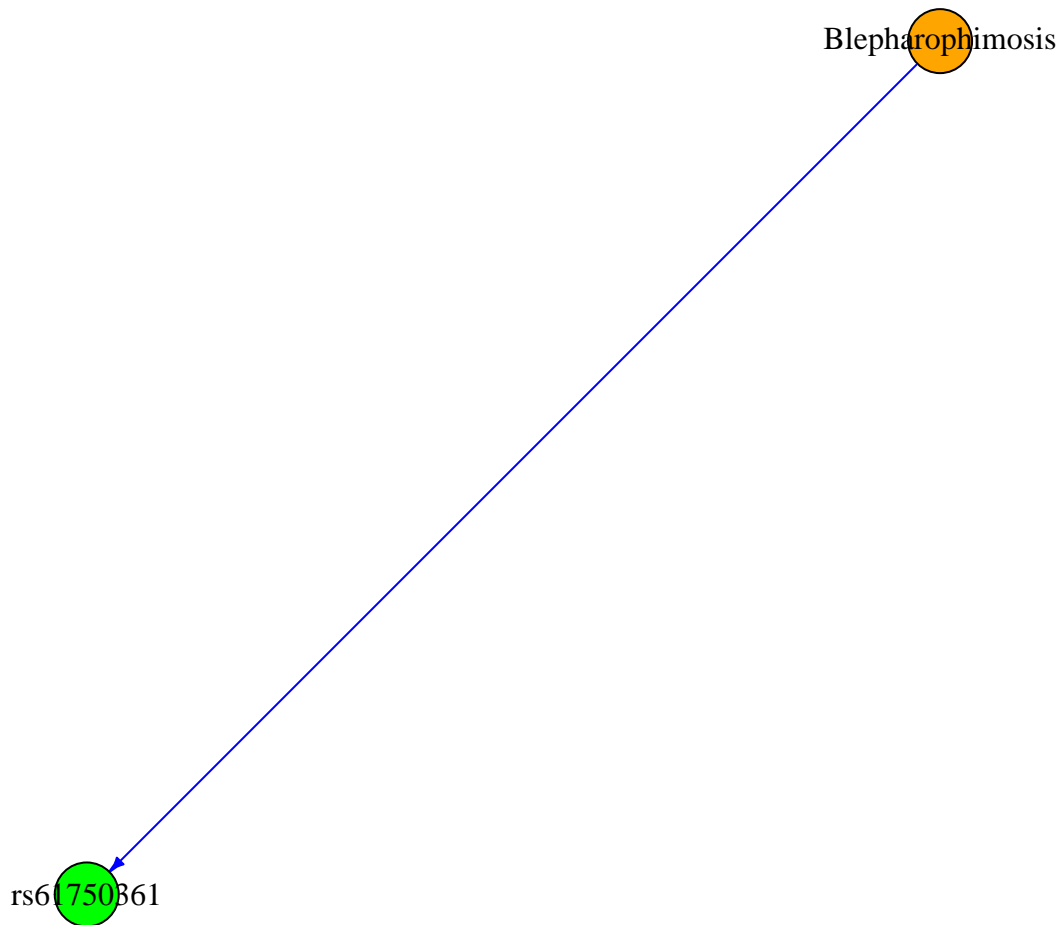

## Variant-Disease Network (Bloom syndrome)

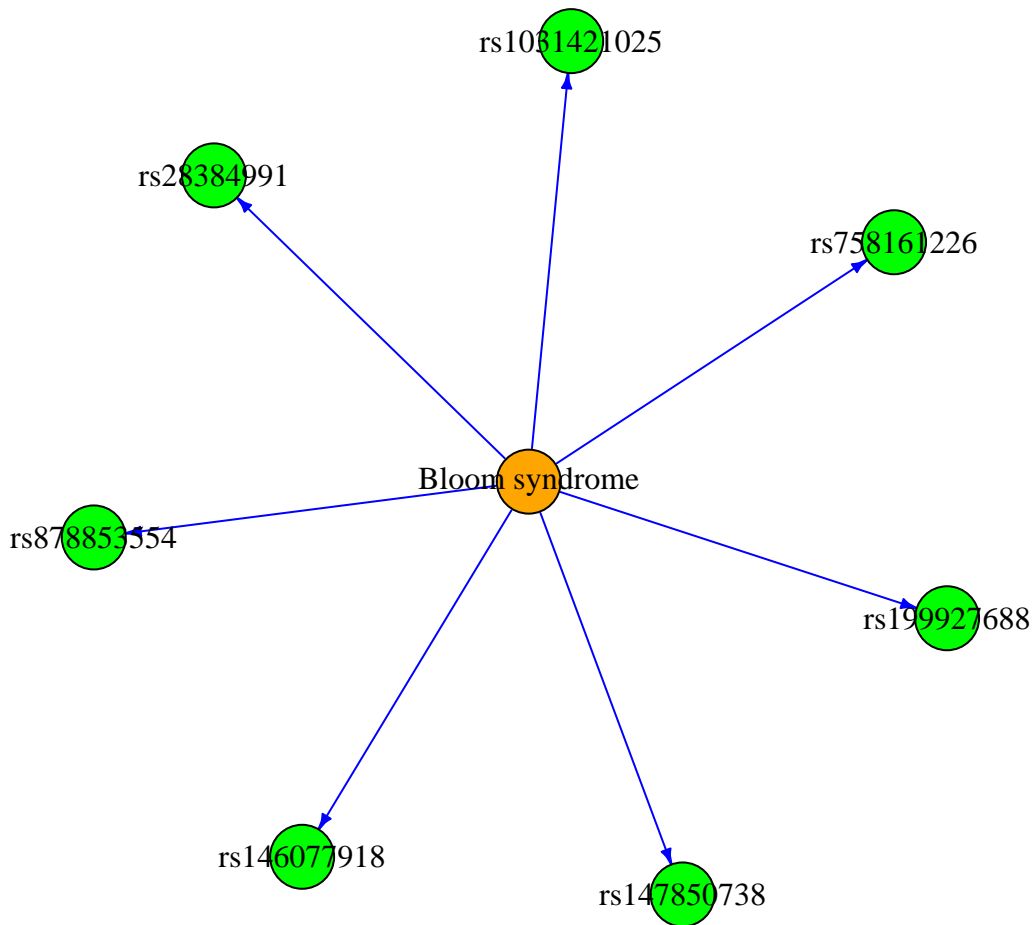

**Variant–Disease Network (Bone fragility with contractures)**

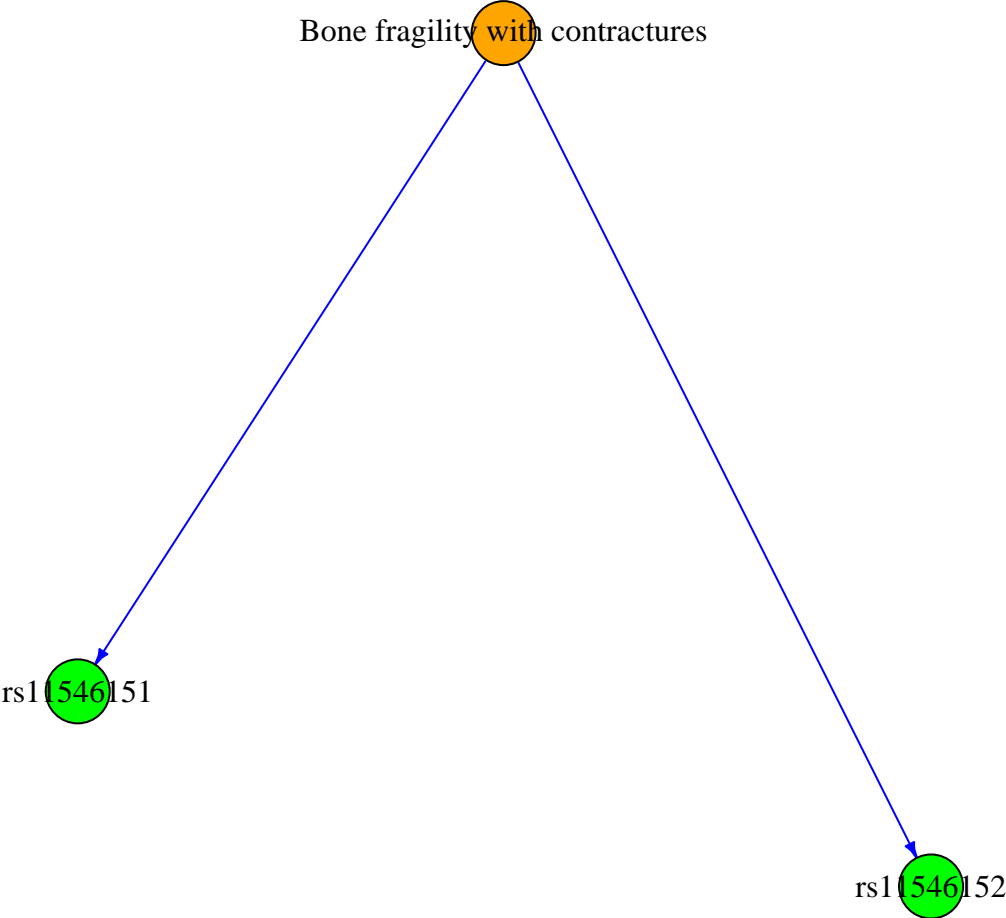

## Variant–Disease Network (Brachydactyly)

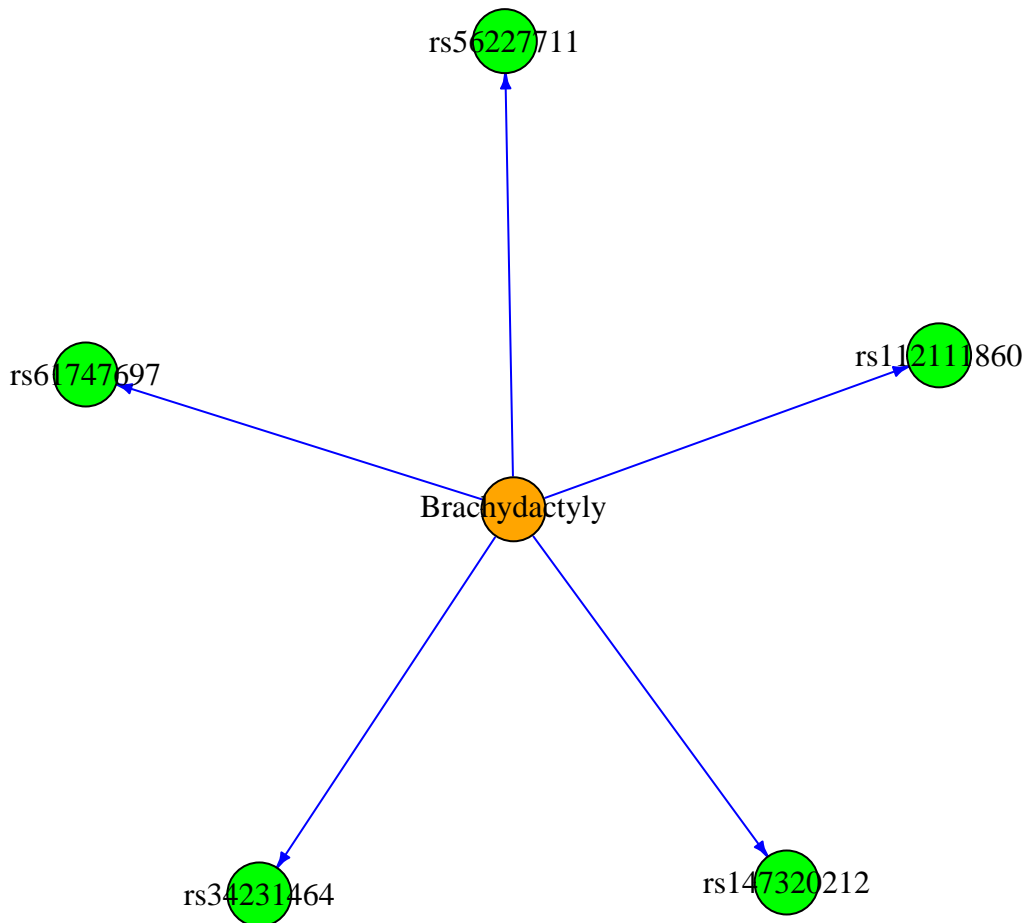

# Variant-Disease Network (BRAIN ABNORMALITIES)

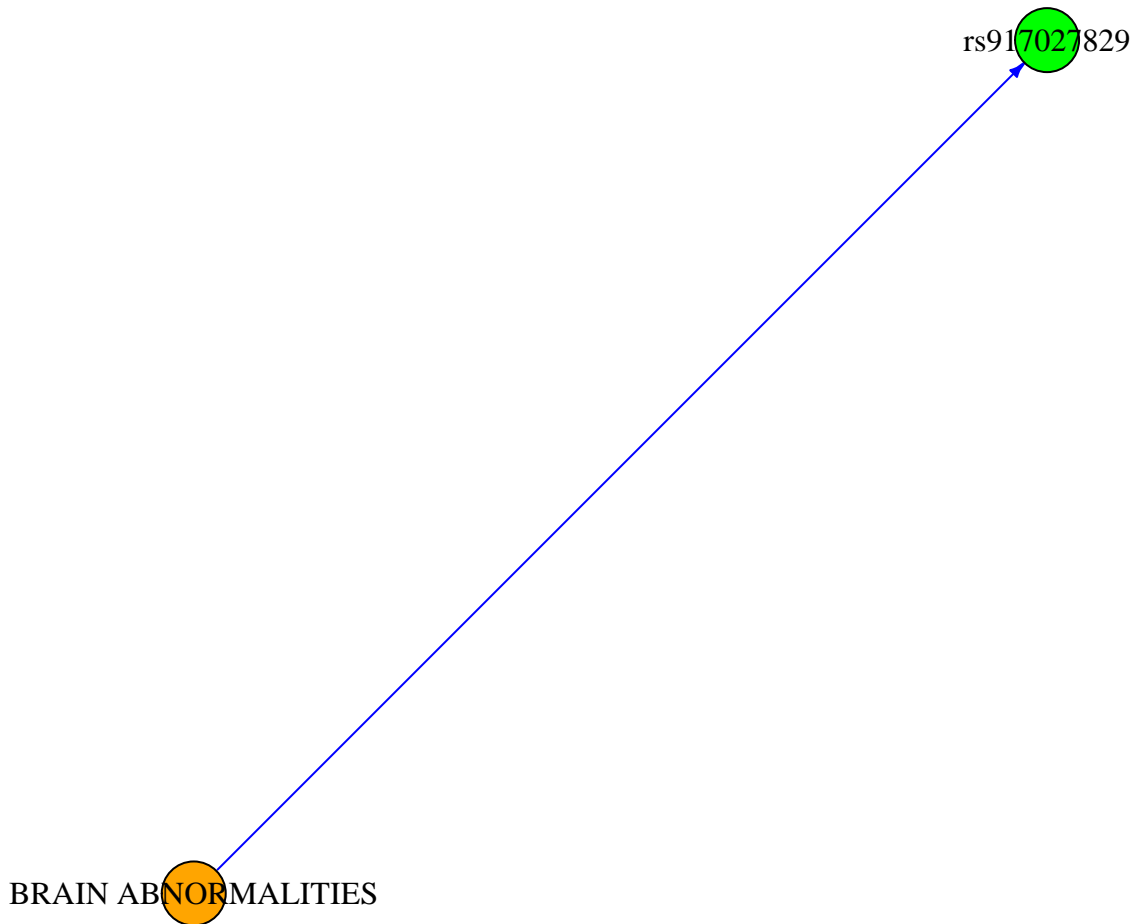

## Variant-Disease Network (breast cancer)

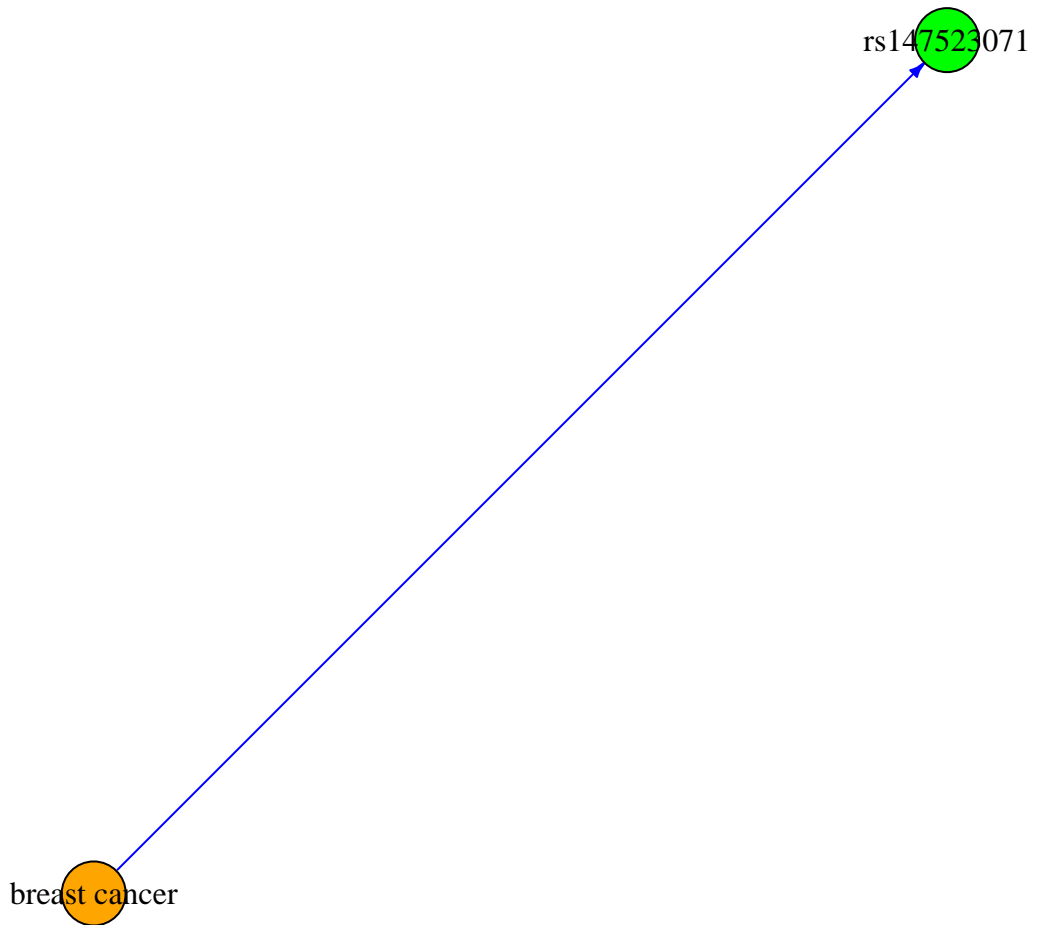

## Variant–Disease Network (Breast–ovarian cancer)

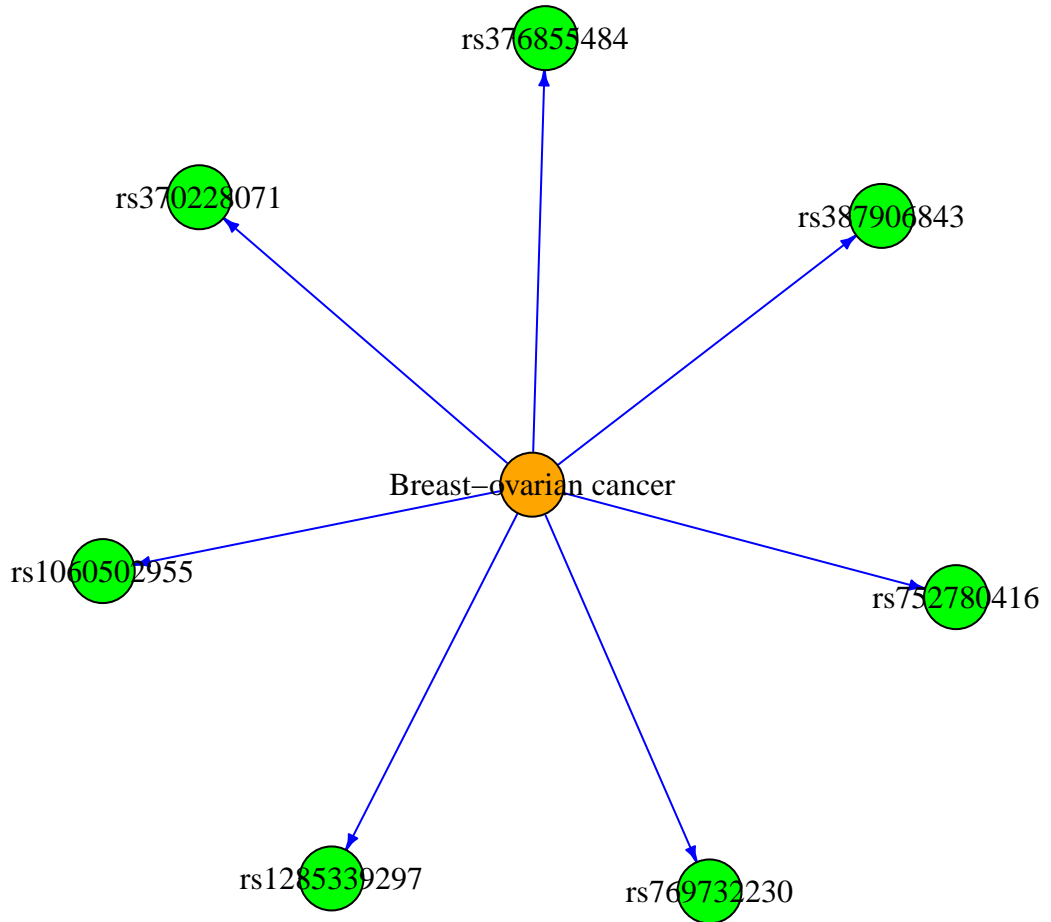

# Variant–Disease Network (Bronchiectasis with or without elevated sweat chloride 1)

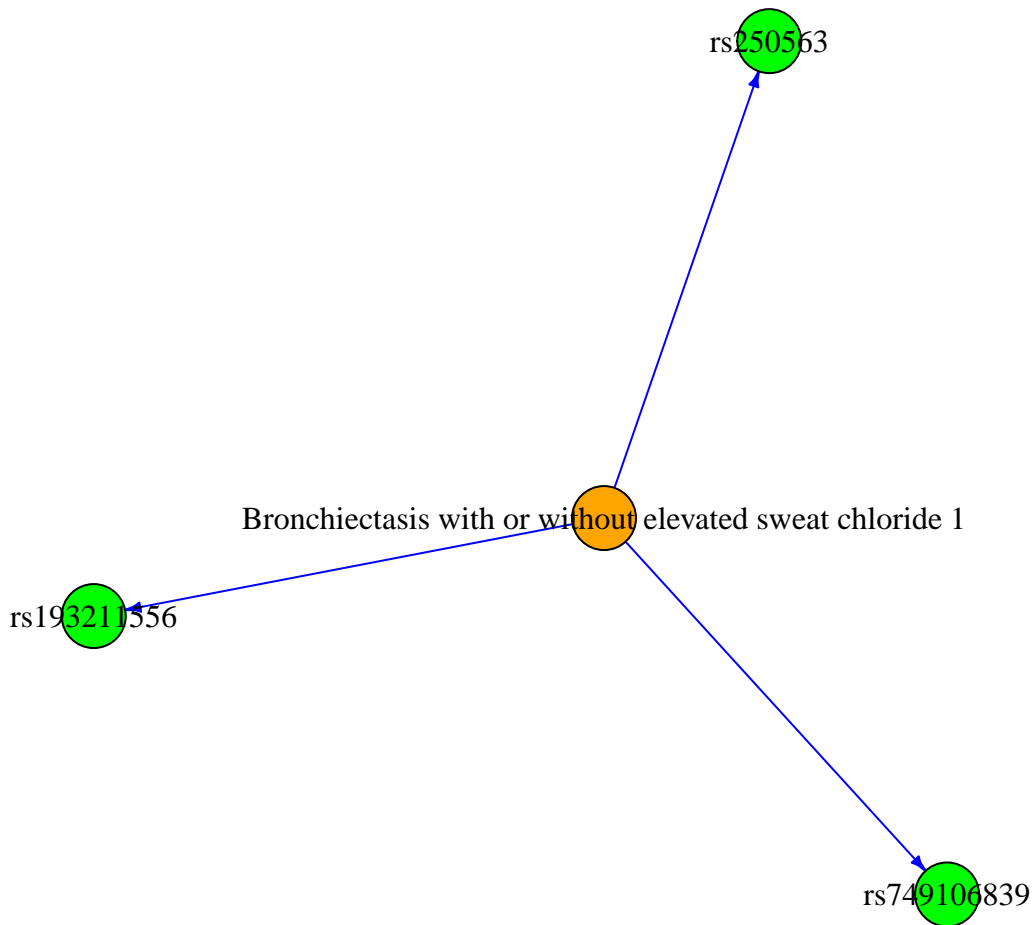



Variant–Disease Network (Brown–Violetto–Van Laere syndrome 1)

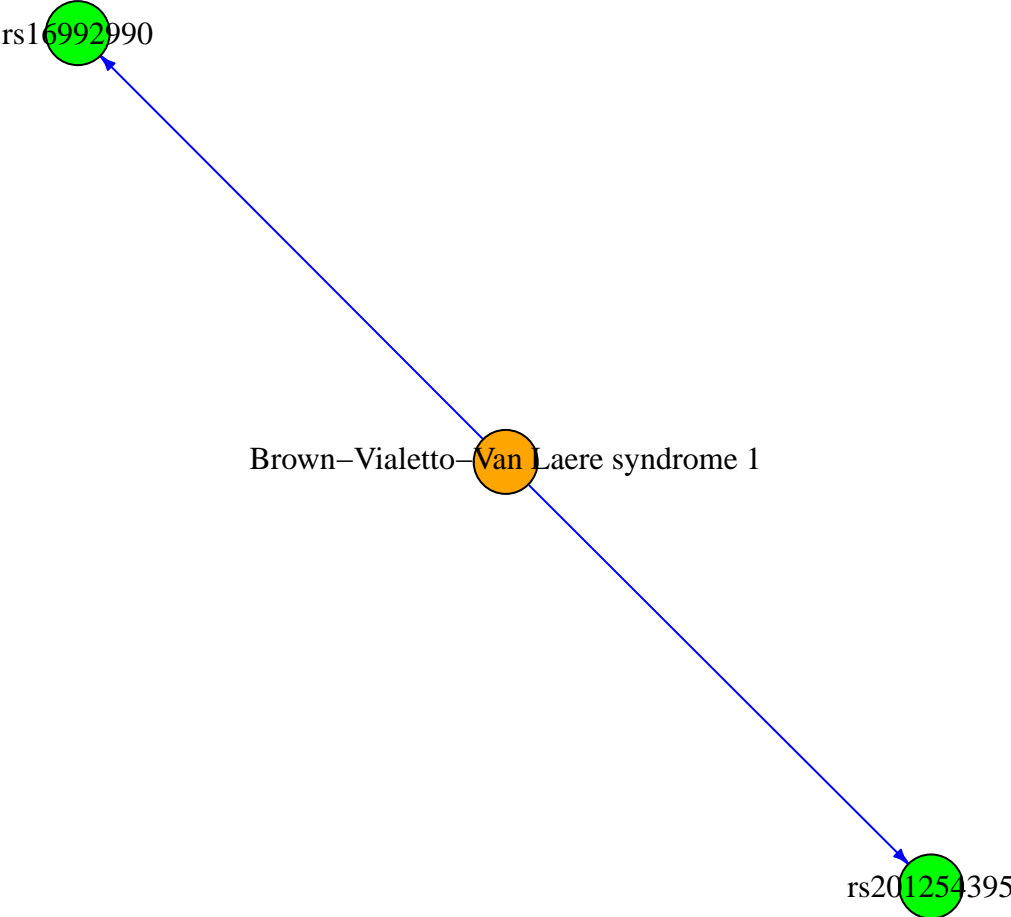

## Variant–Disease Network (Brugada syndrome)

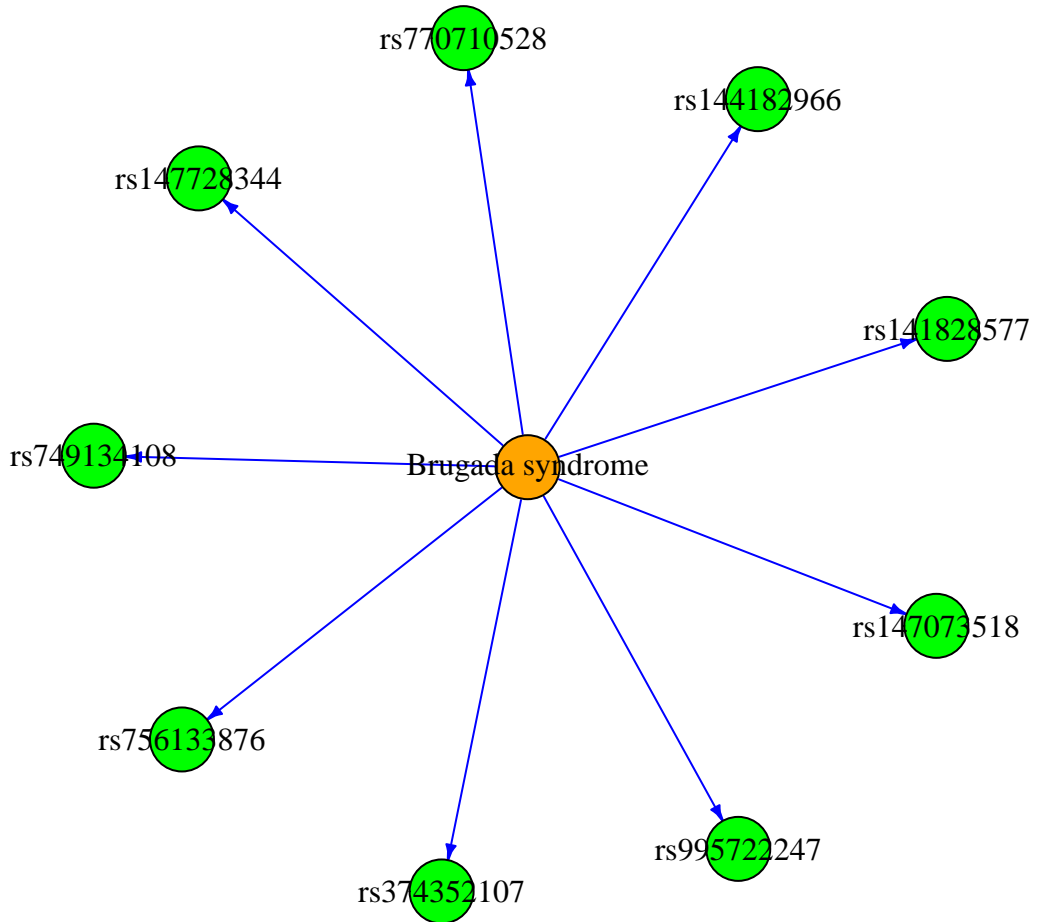

## Variant-Disease Network (Brugada syndrome 4)

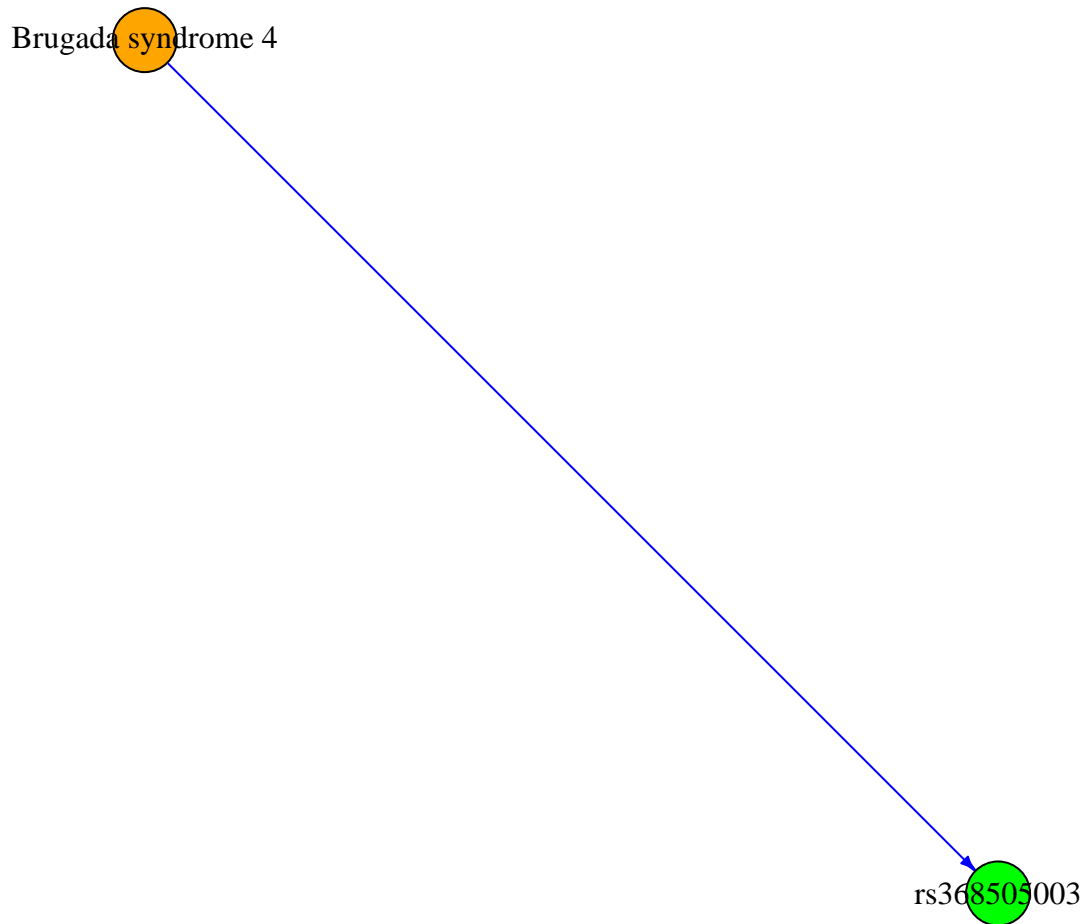

Variant–Disease Network (Brugada syndrome 5)

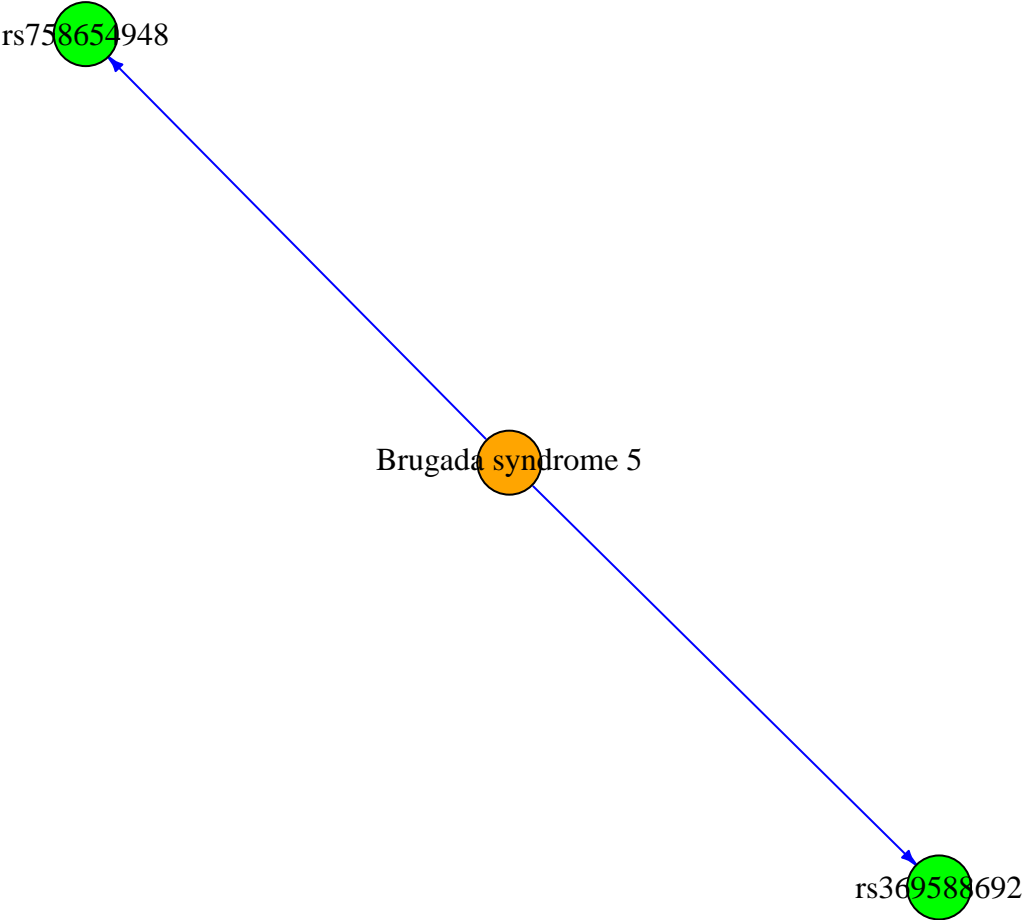

## Variant–Disease Network (Brugada syndrome 8)

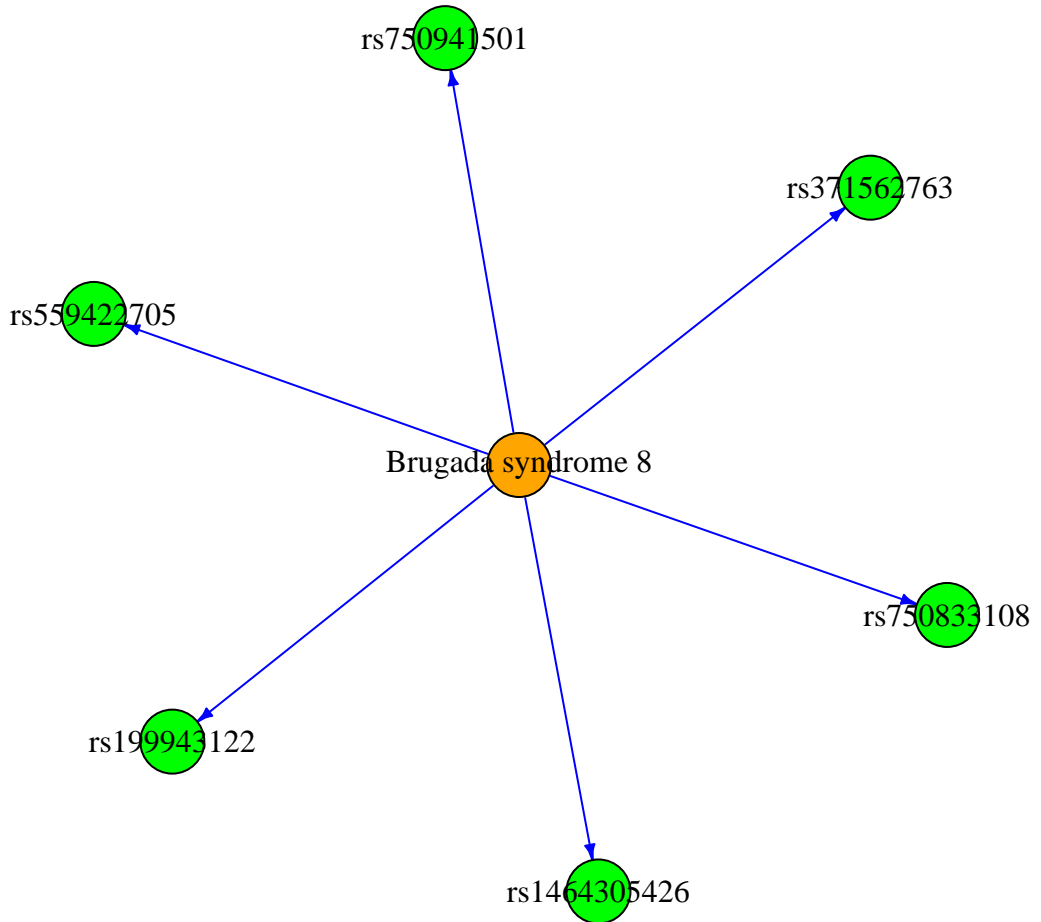

Variant–Disease Network (Brugada syndrome 9)

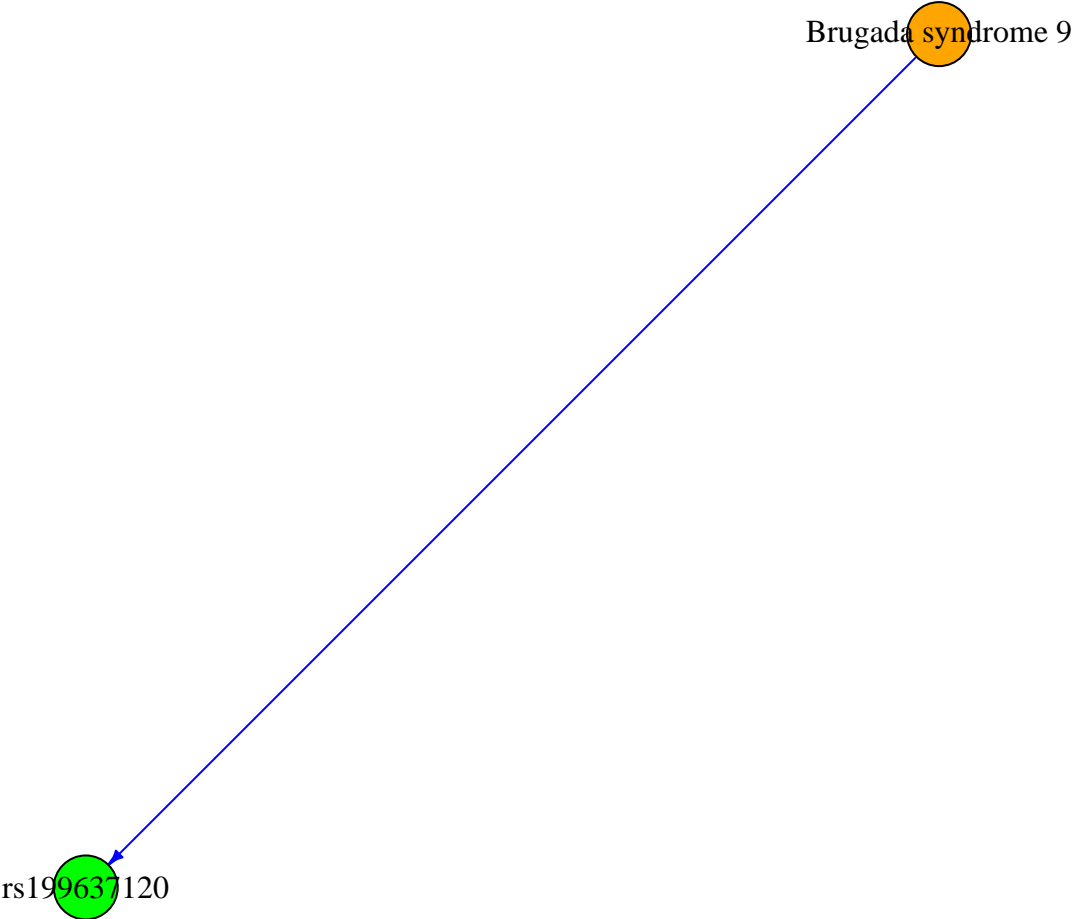

## Variant–Disease Network (Budd–Chiari syndrome)

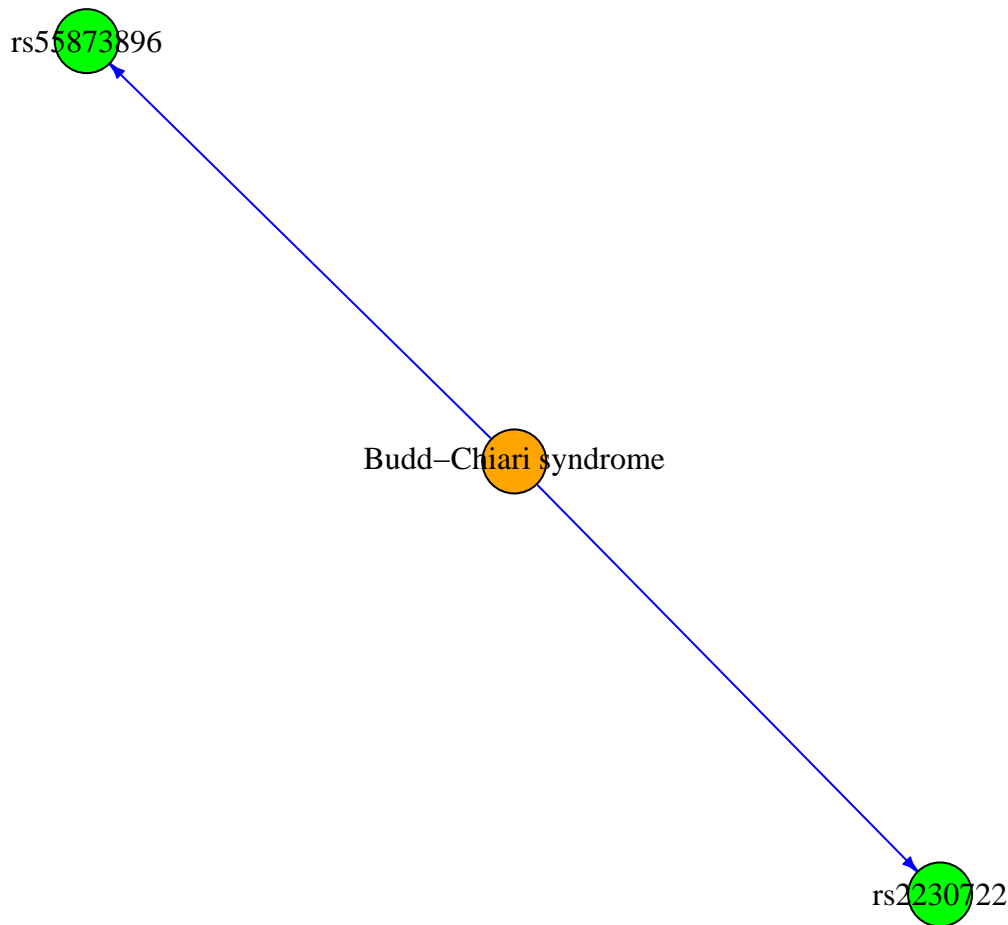

## Variant-Disease Network (Bulbous nose)

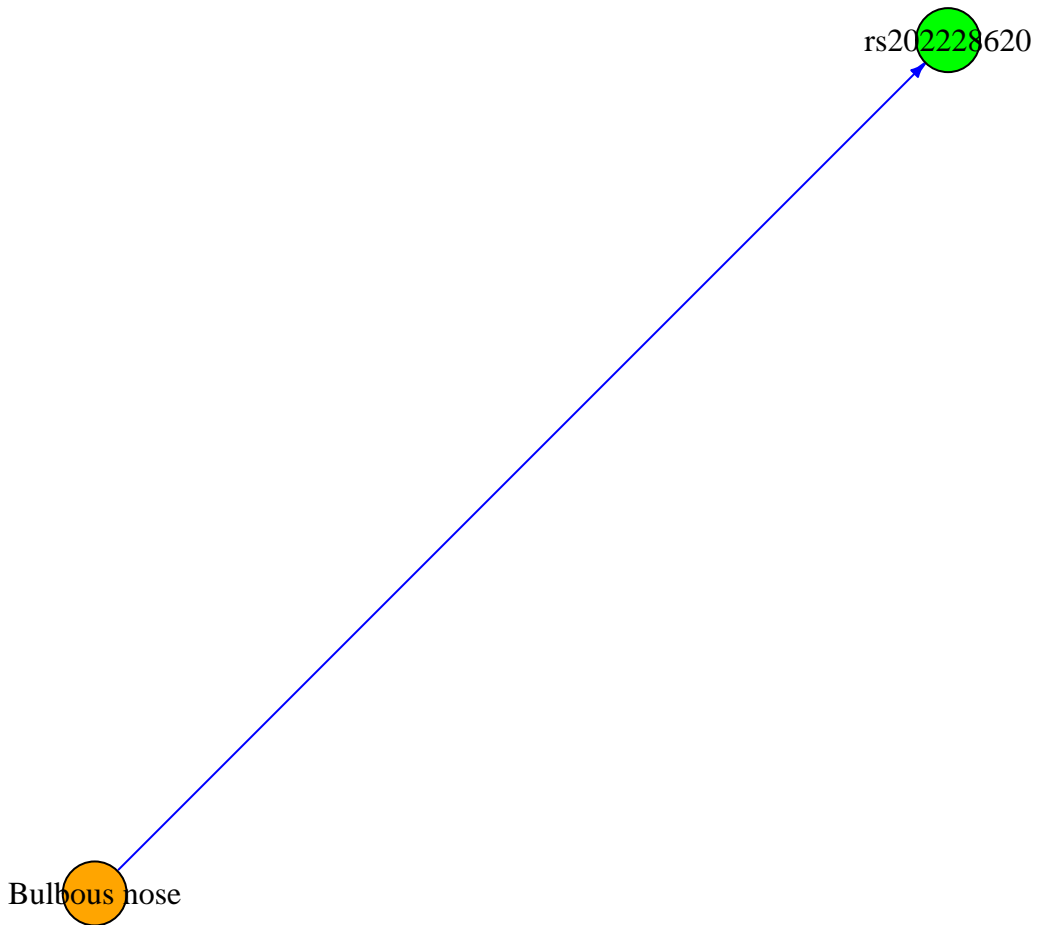



**Variant–Disease Network (Bullous ichthyosiform erythroderma)**

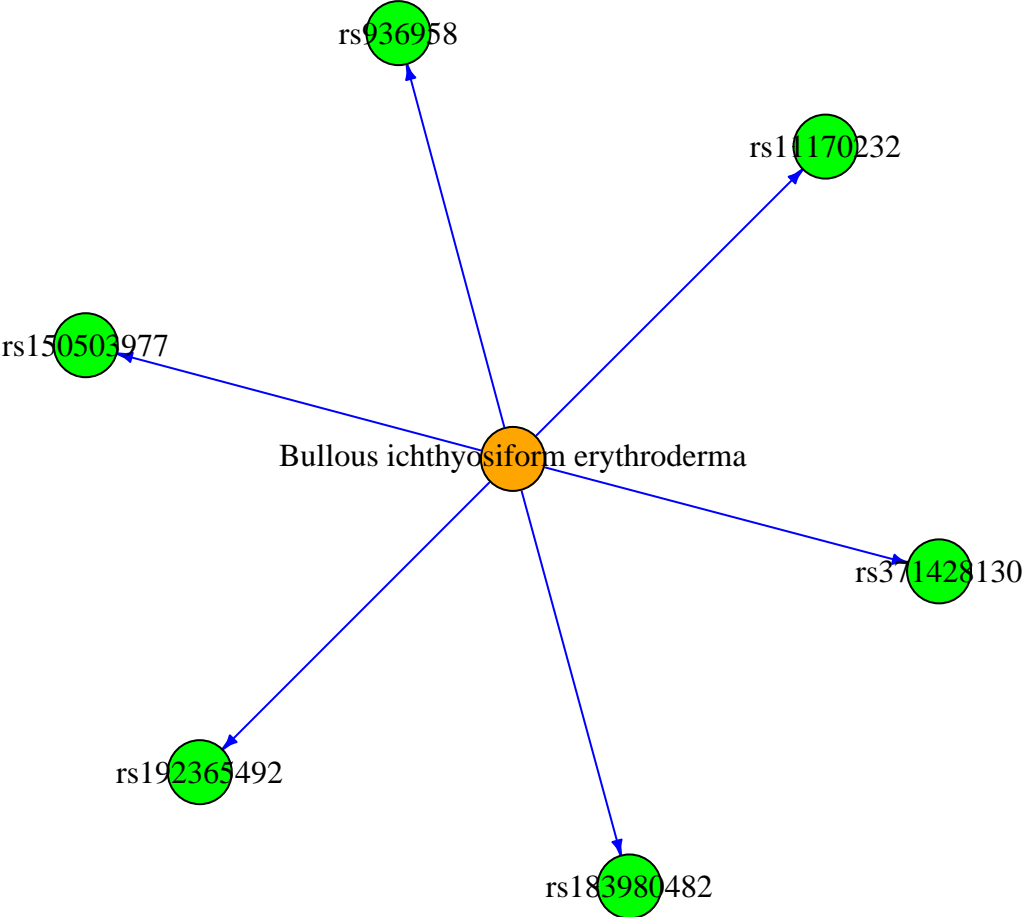

## Variant-Disease Network (Canavan Disease)

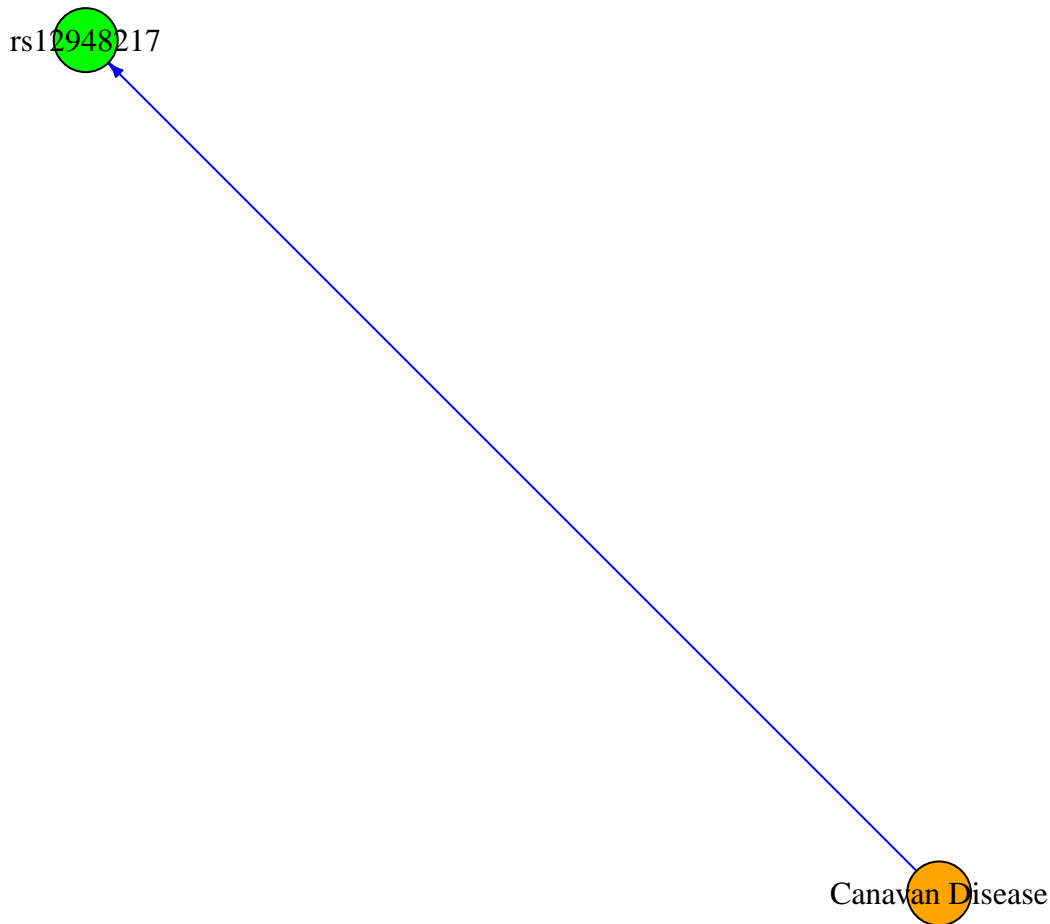

## Variant-Disease Network (Candidiasis)

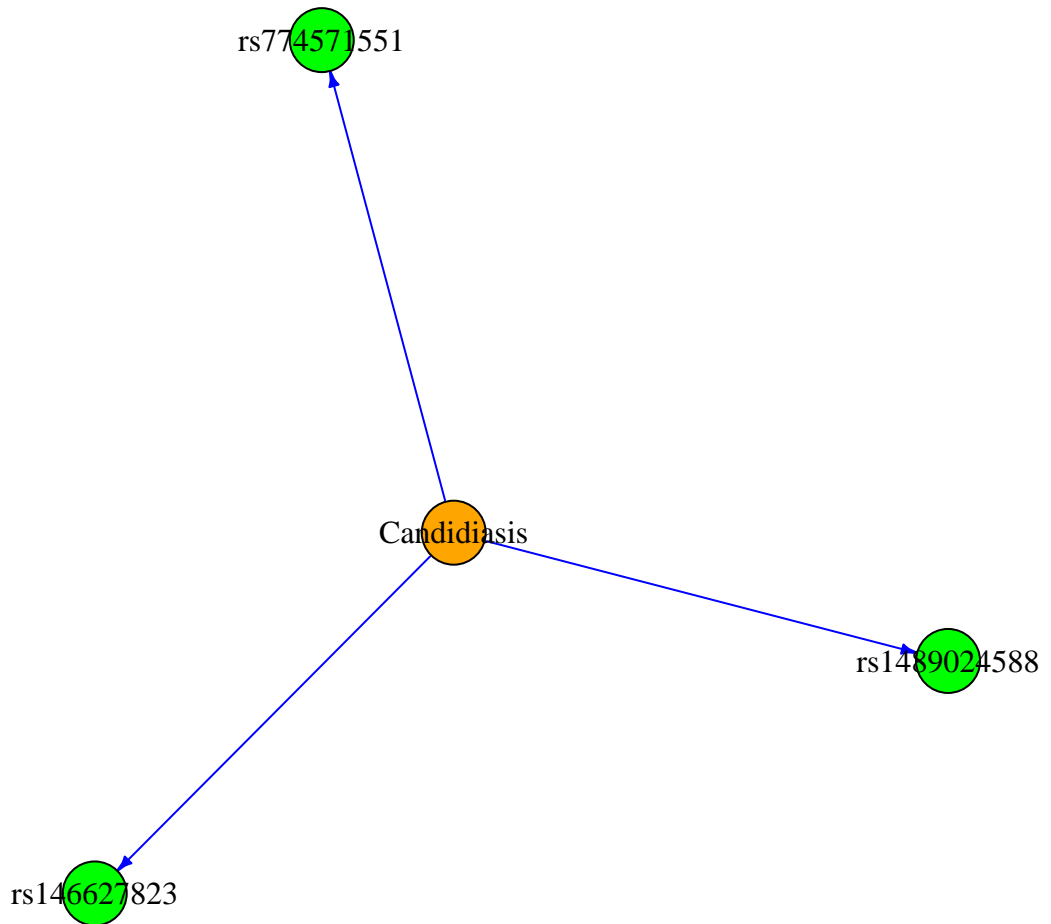

## Variant–Disease Network (Carcinoma of colon)

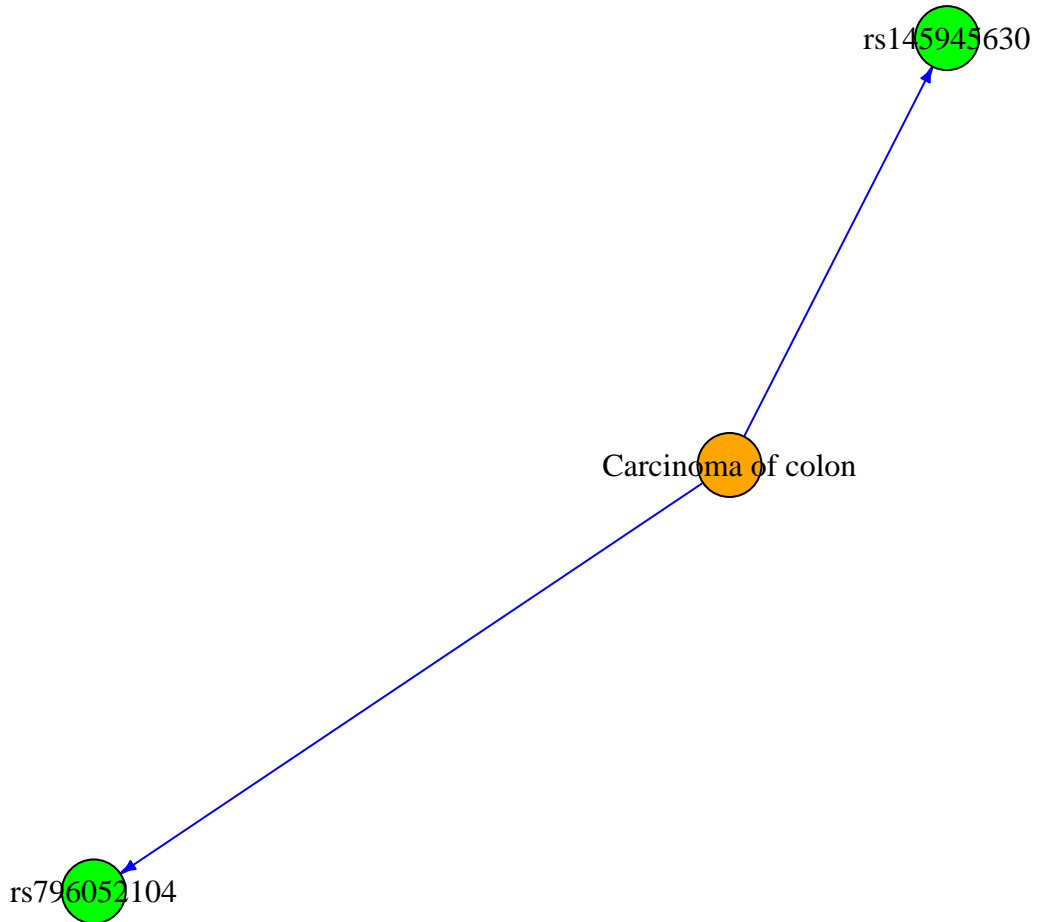

# Variant–Disease Network (Cardiac conduction defect)

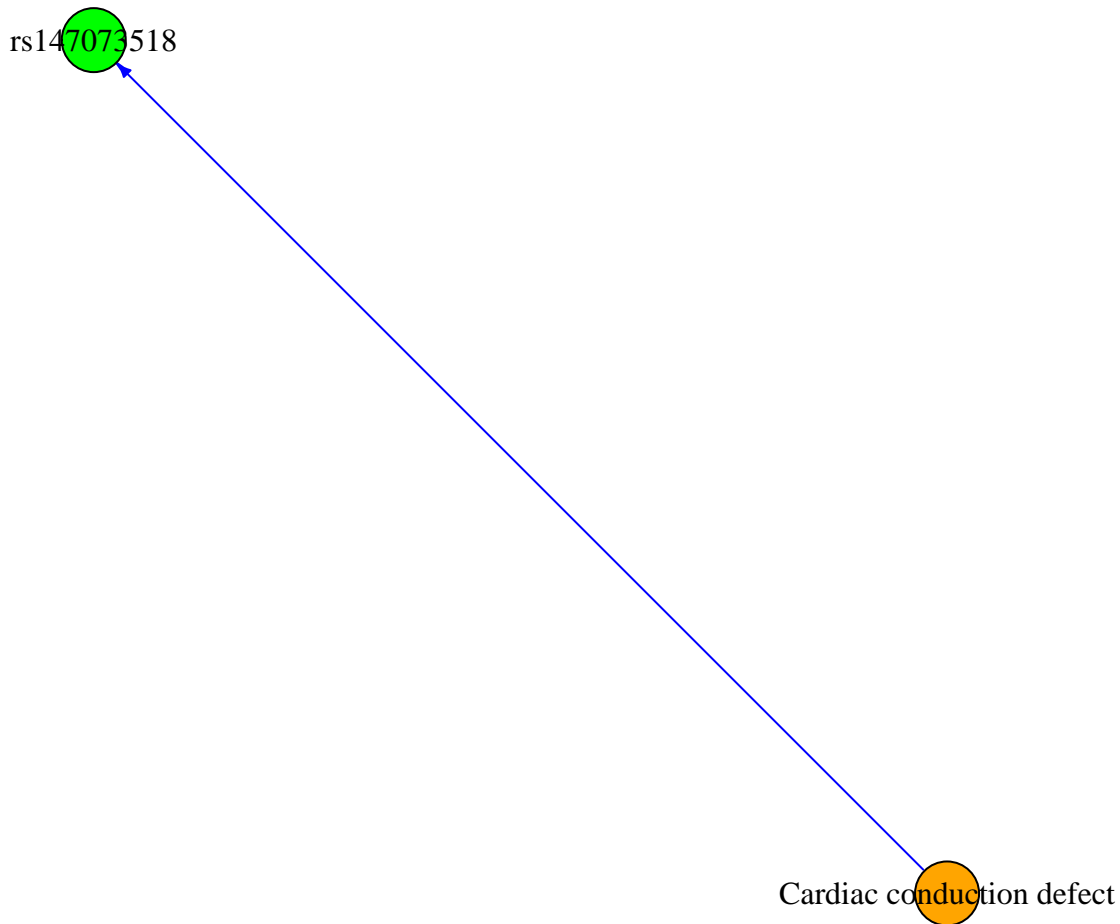

**Variant–Disease Network (Cardiofaciocutaneous syndrome 4)**

Cardiofaciocutaneous syndrome 4

rs17851657

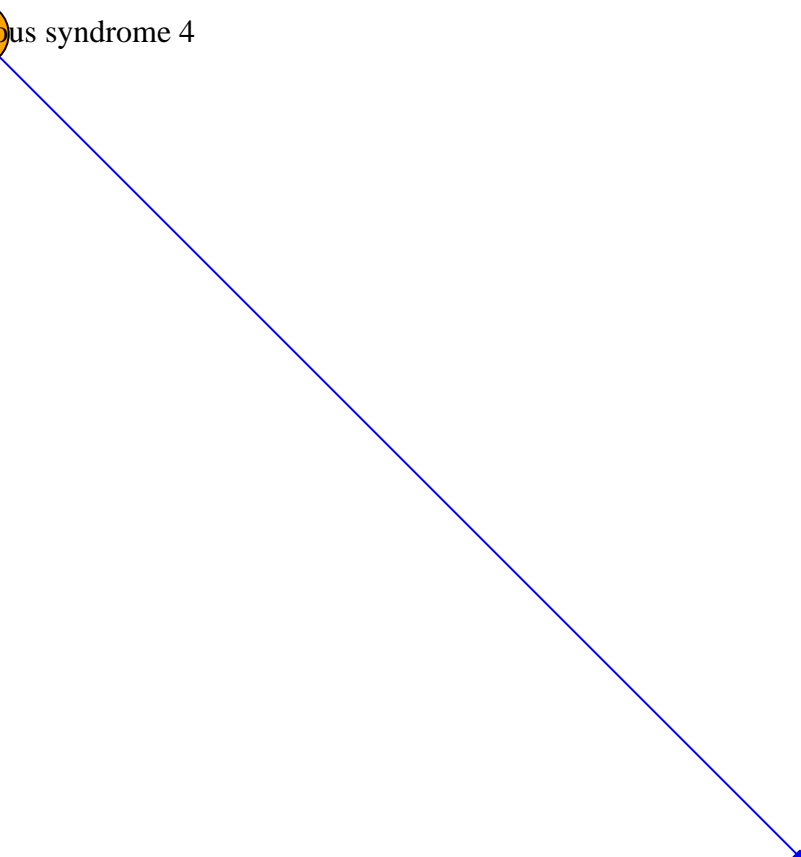

Variant–Disease Network (Cardiomyopathy)

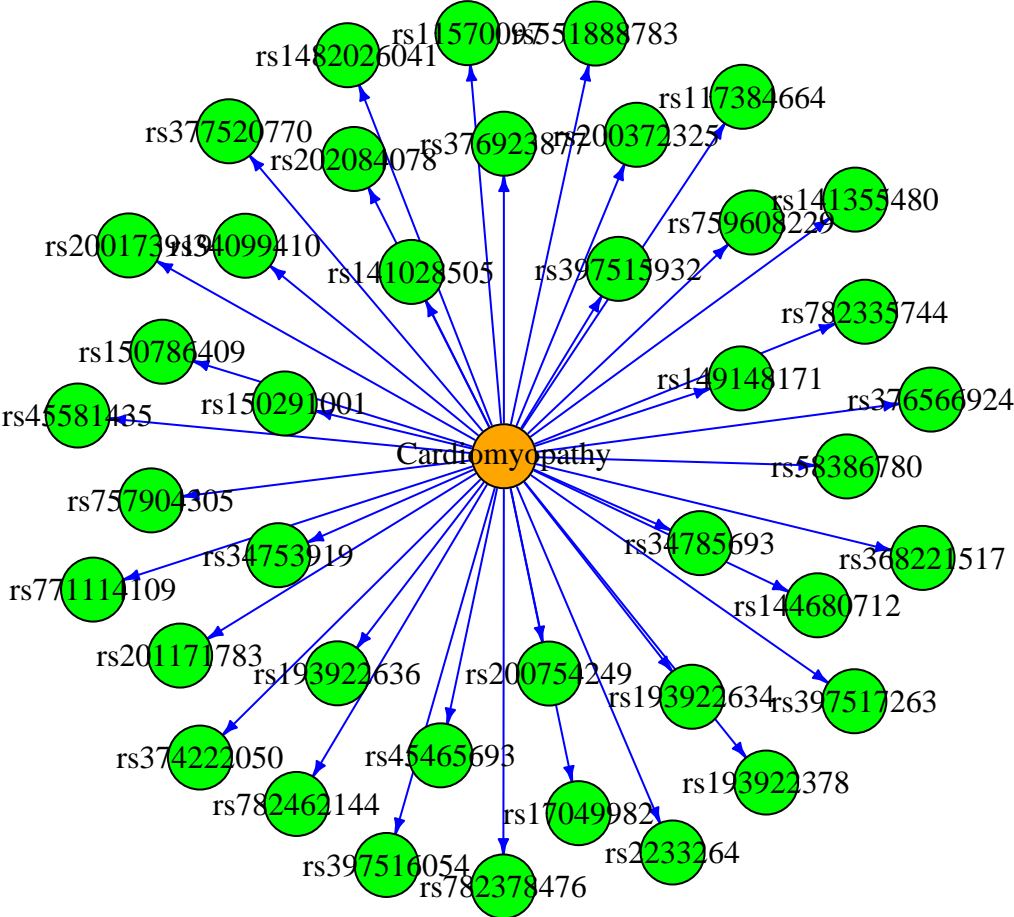

Variant–Disease Network (Cardiovascular phenotype)

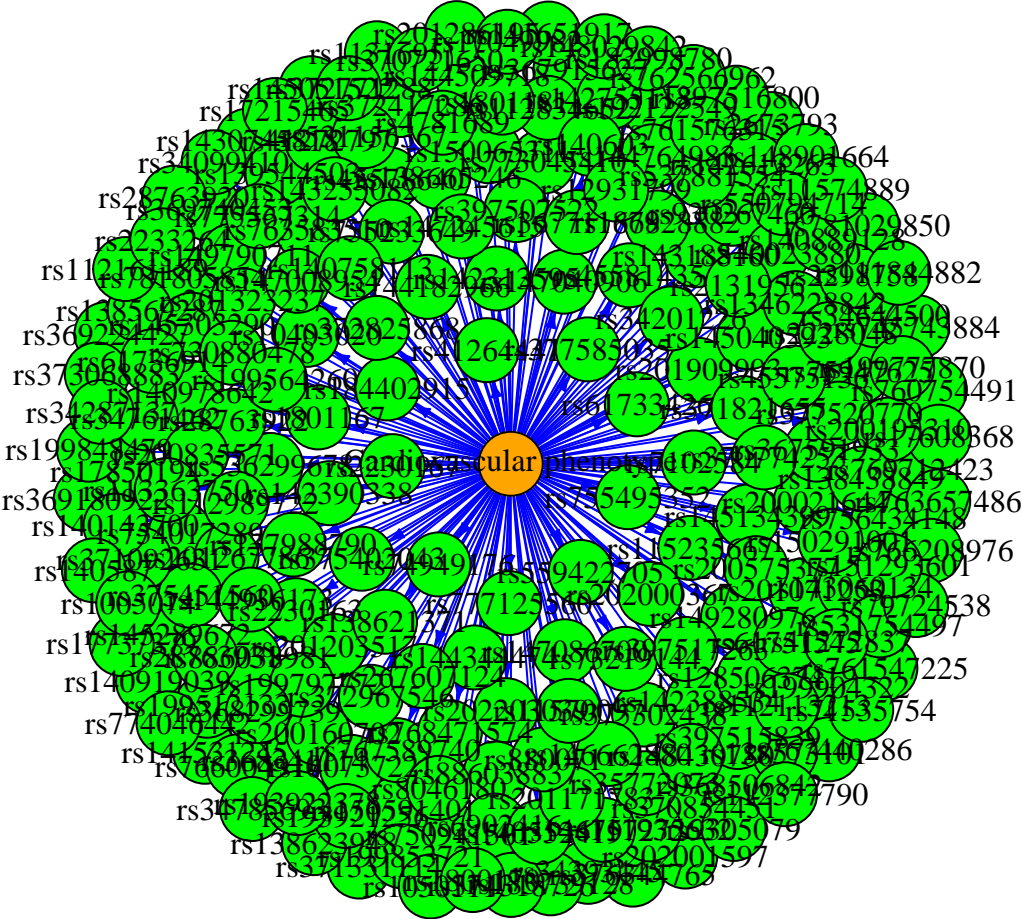



## Variant–Disease Network (Carney complex)

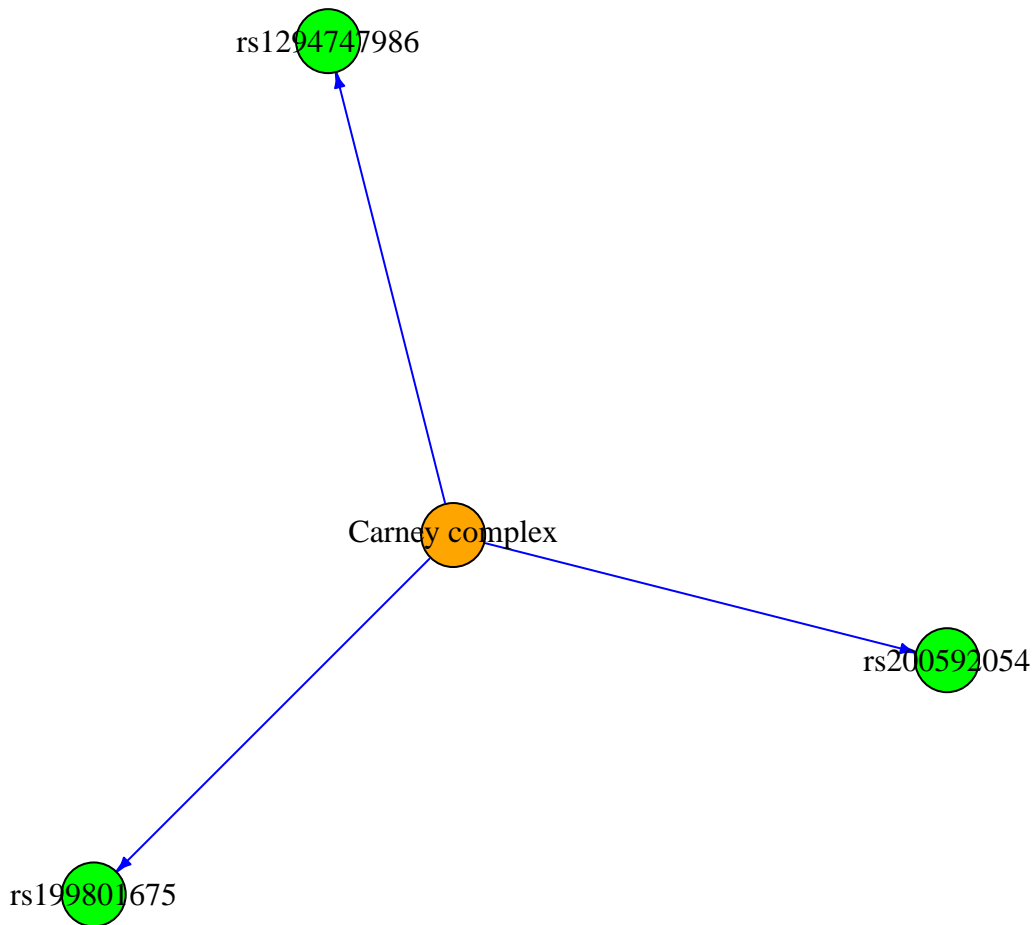

## Variant–Disease Network (Carnitine palmitoyltransferase II deficiency)

rs229292

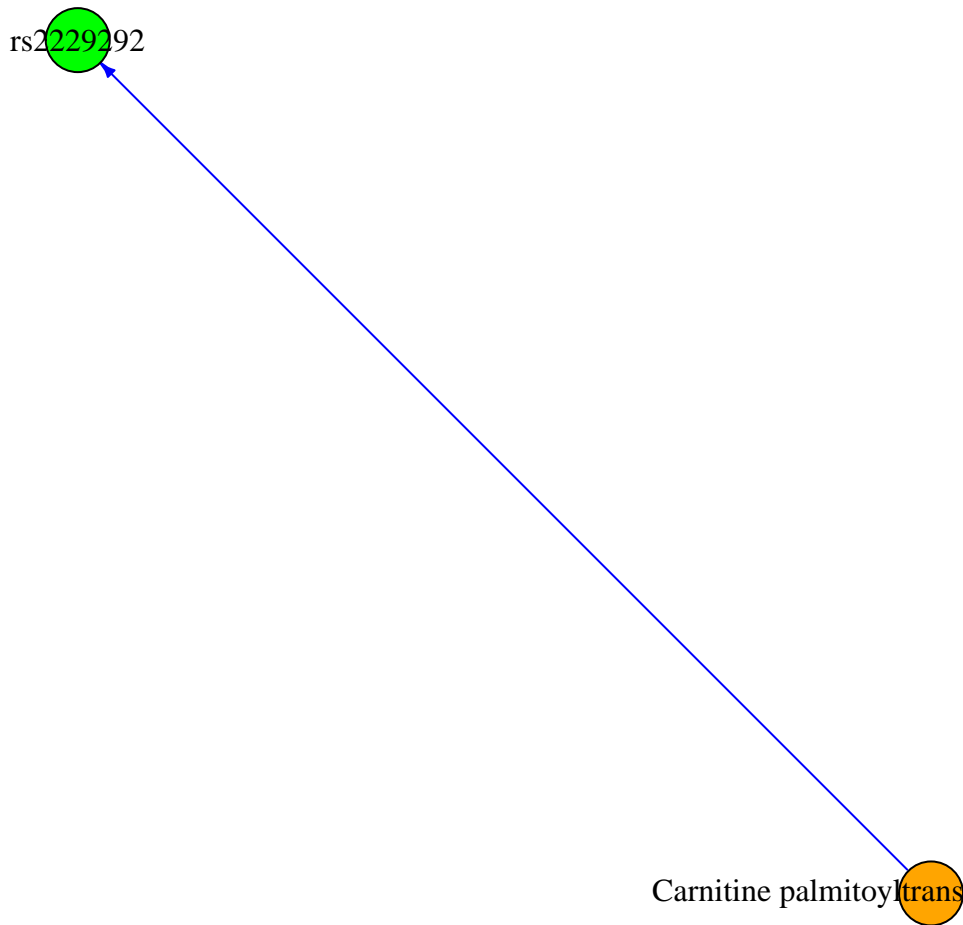

```
graph LR; A((rs229292)) <--> B((Carnitine palmitoyltransferase II deficiency))
```

Carnitine palmitoyltransferase II deficiency

## Variant–Disease Network (Carpenter syndrome 2)

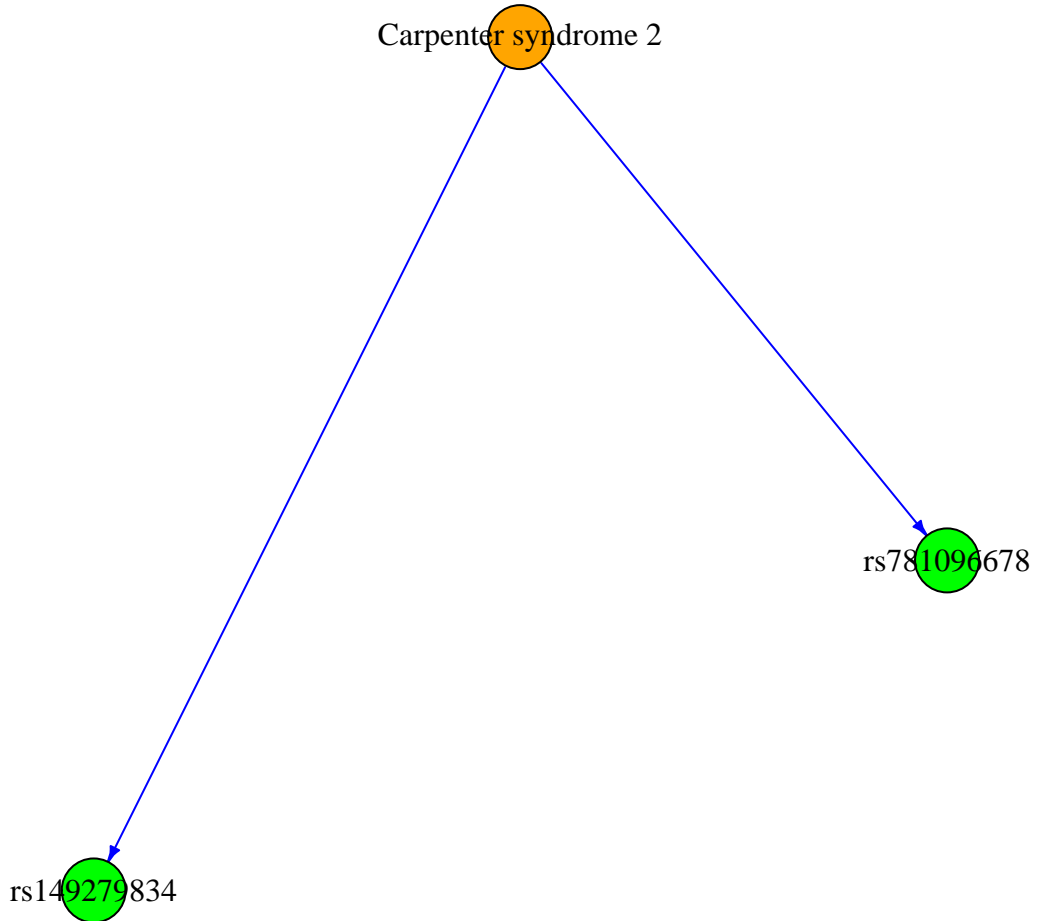

## Variant-Disease Network (Cataract)

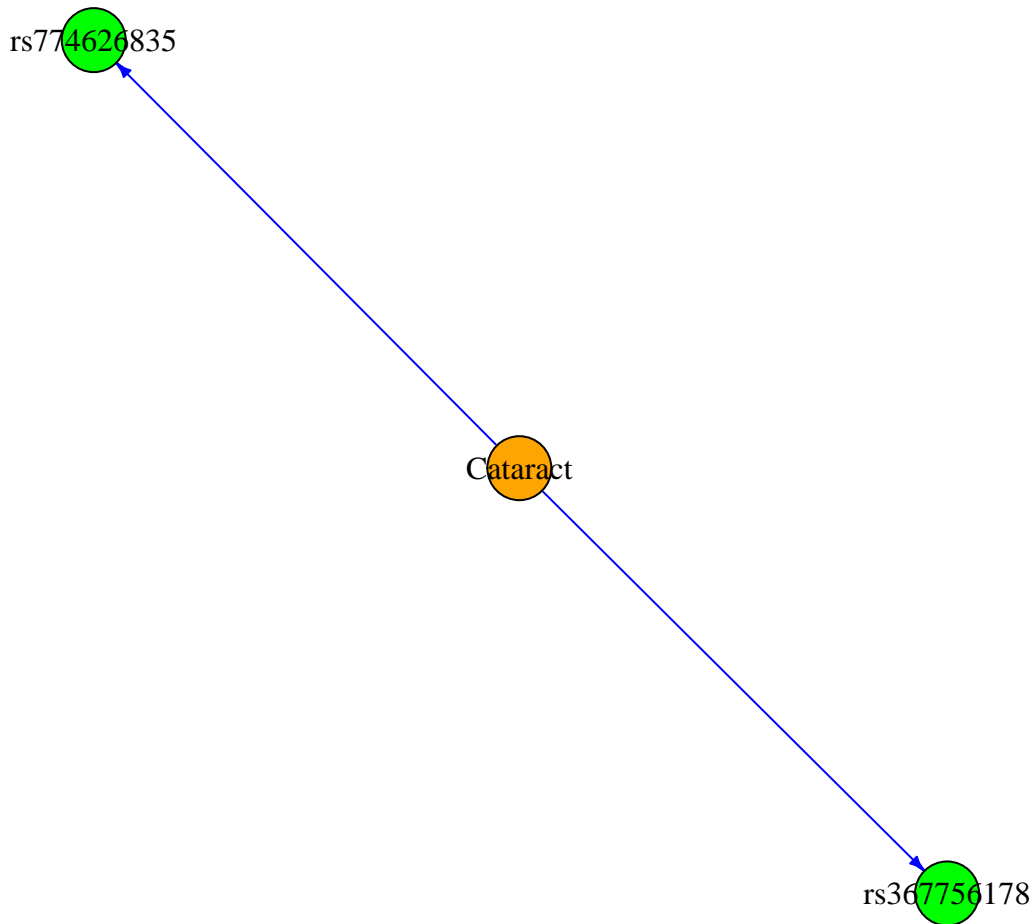

Variant–Disease Network (Cataract 33)

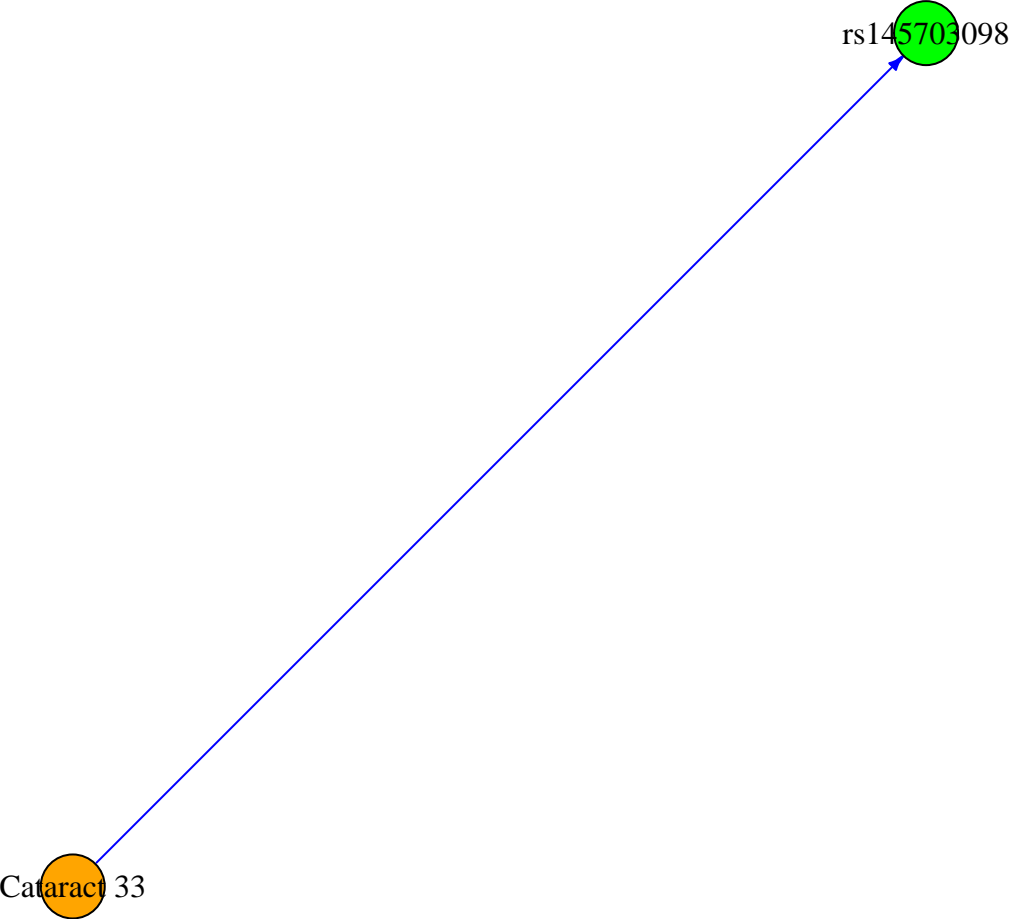

Variant–Disease Network (Cataract 4)

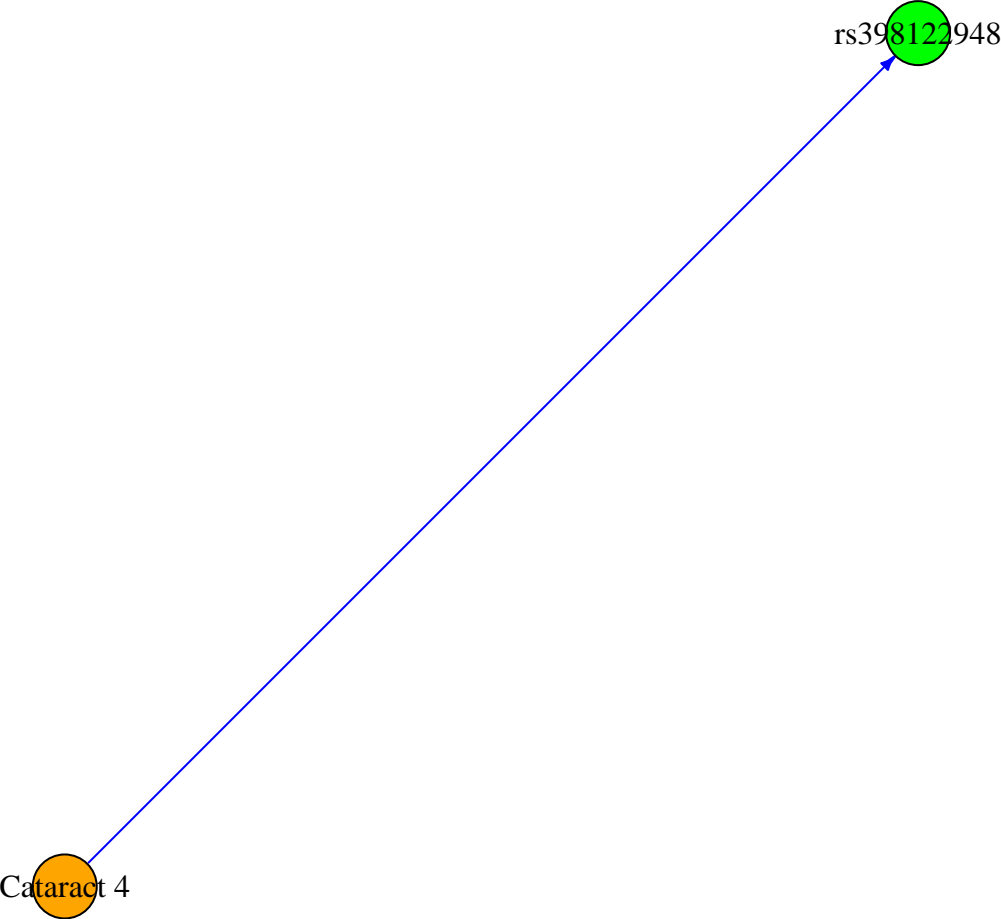

## Variant-Disease Network (Cataract 6)

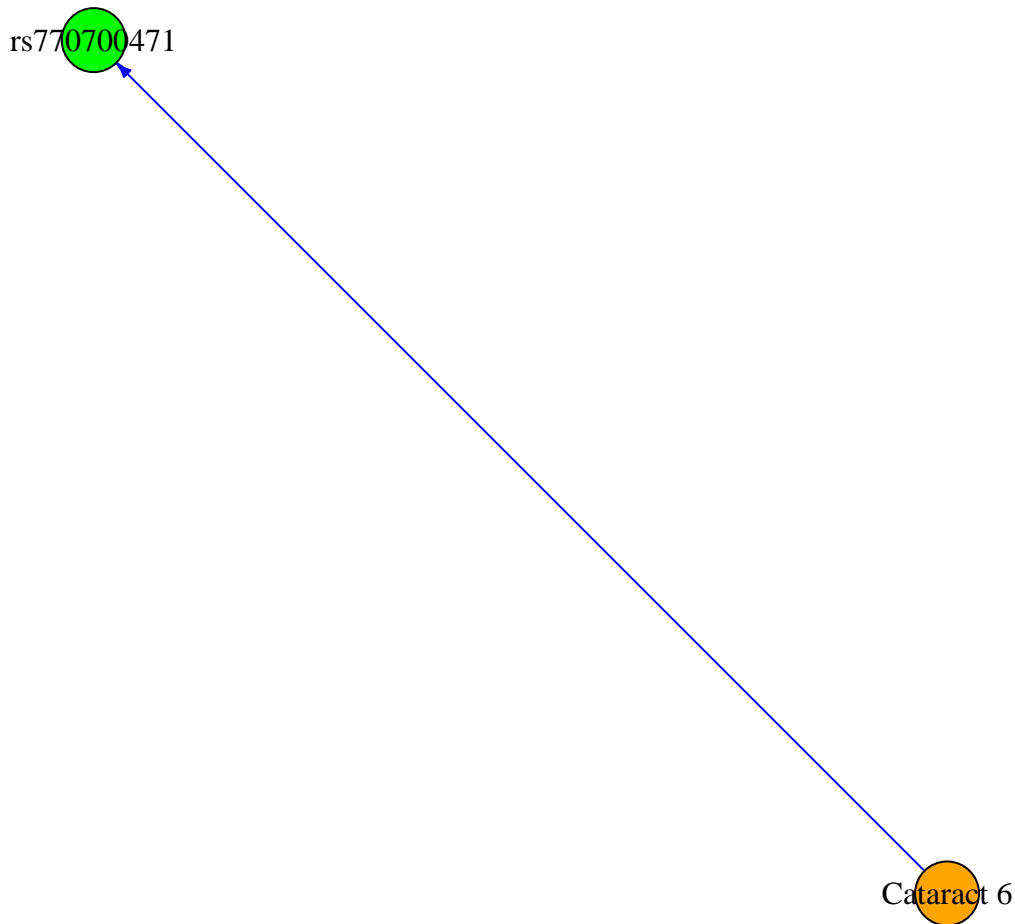

# Variant-Disease Network (Catecholaminergic polymorphic ventricular tachycardia)

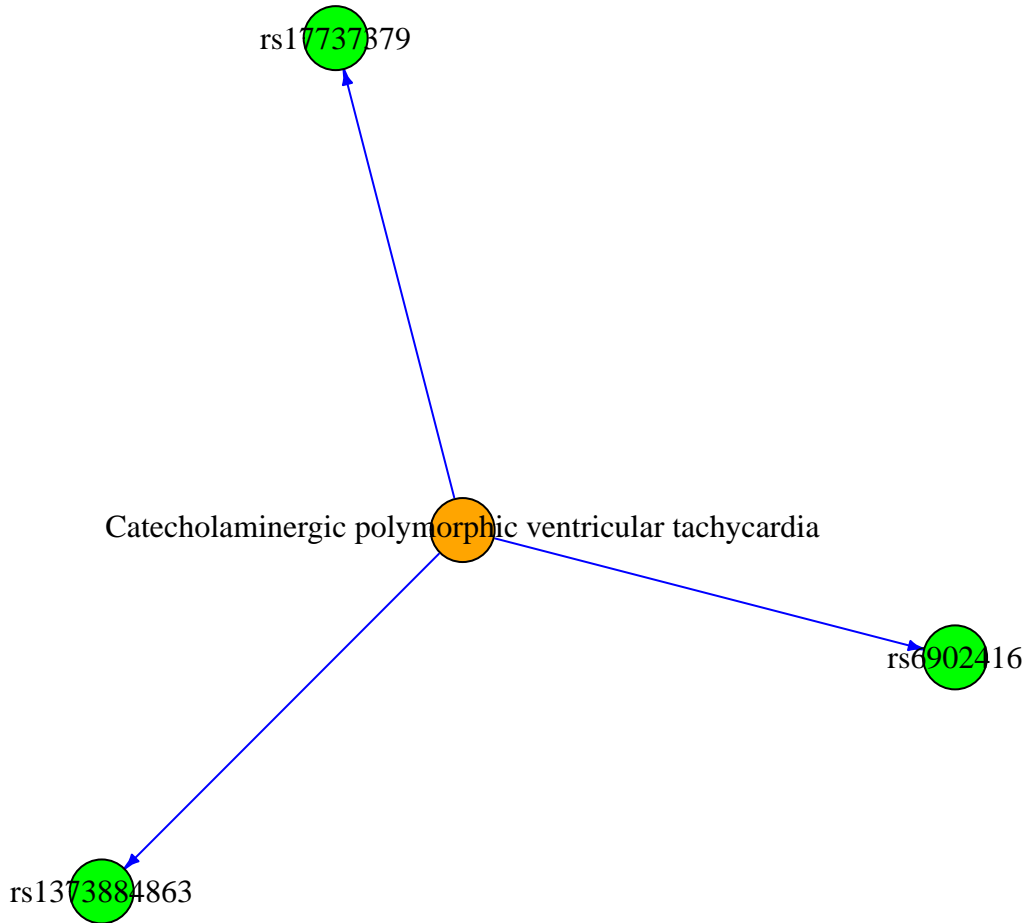



**Variant–Disease Network (Caudal dysgenesis syndrome)**

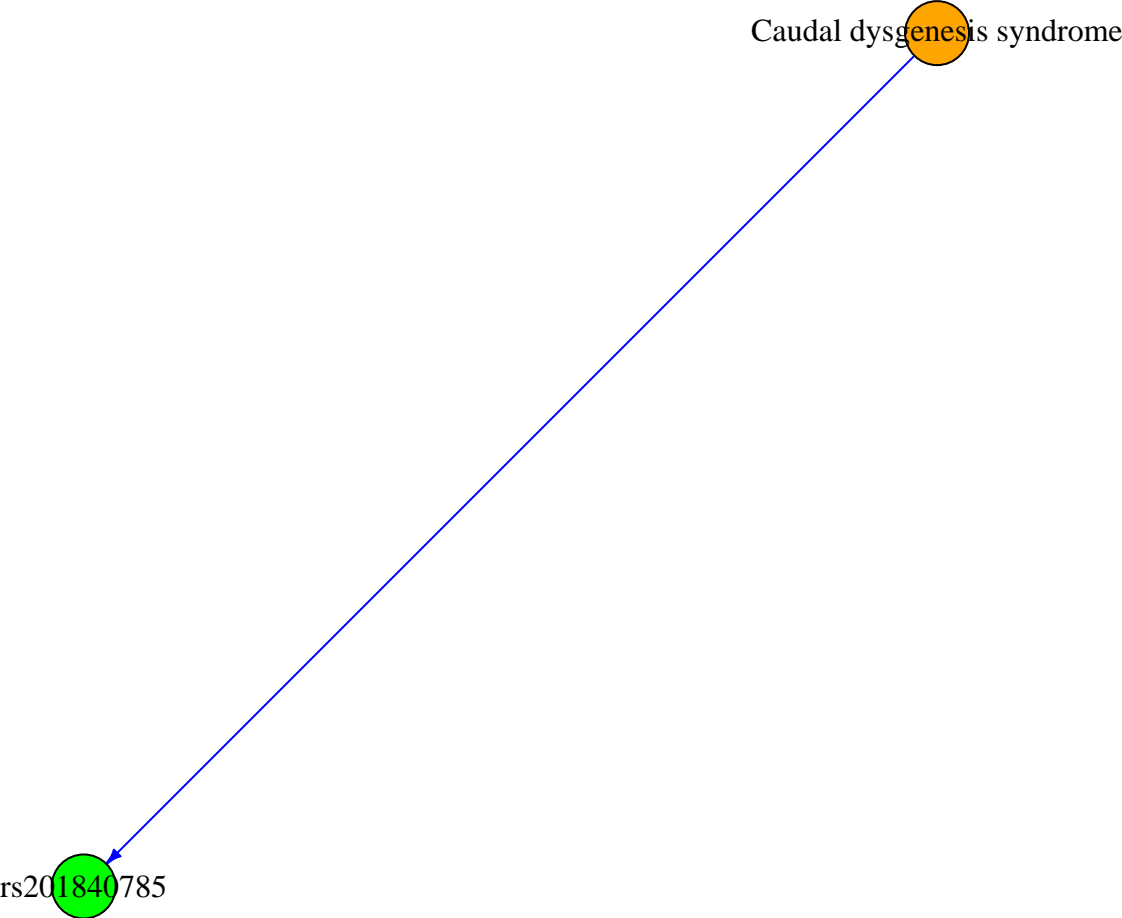

# Variant–Disease Network (Caused by mutation in the TBC1 domain family)

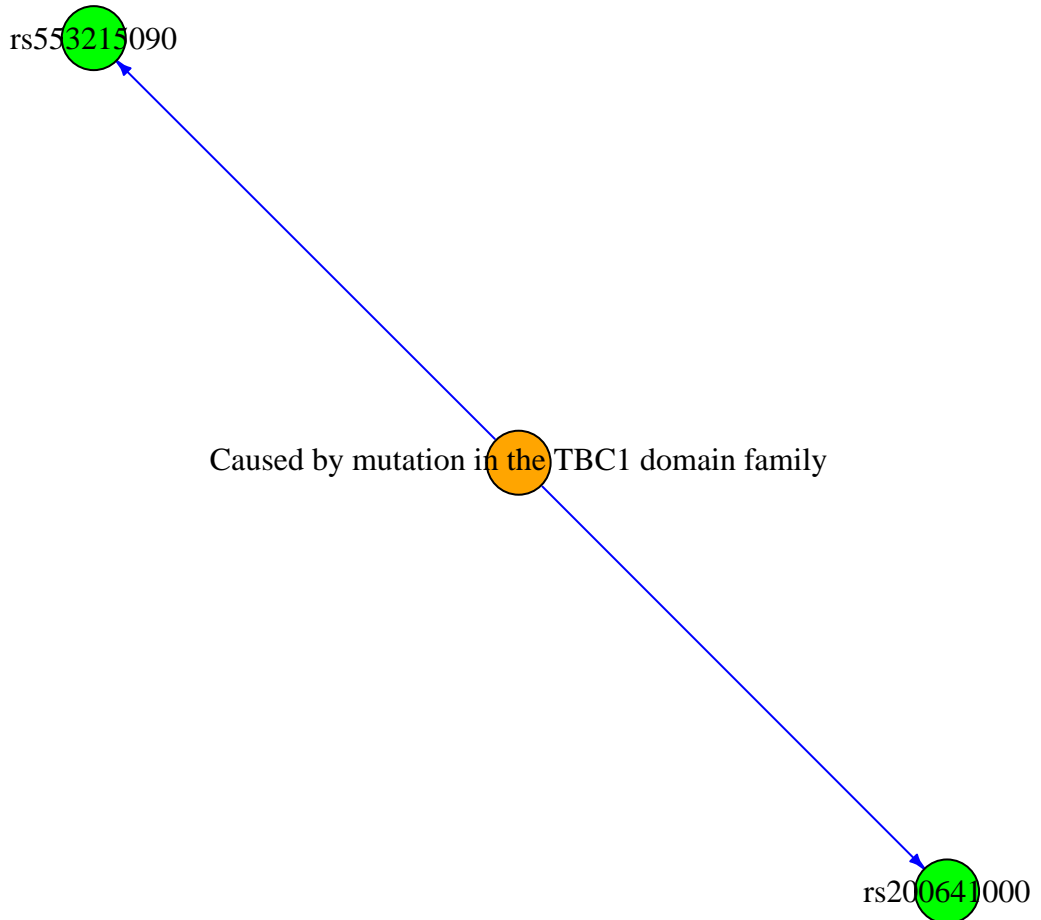

# Variant–Disease Network (CC2D2A–Related Disorders)

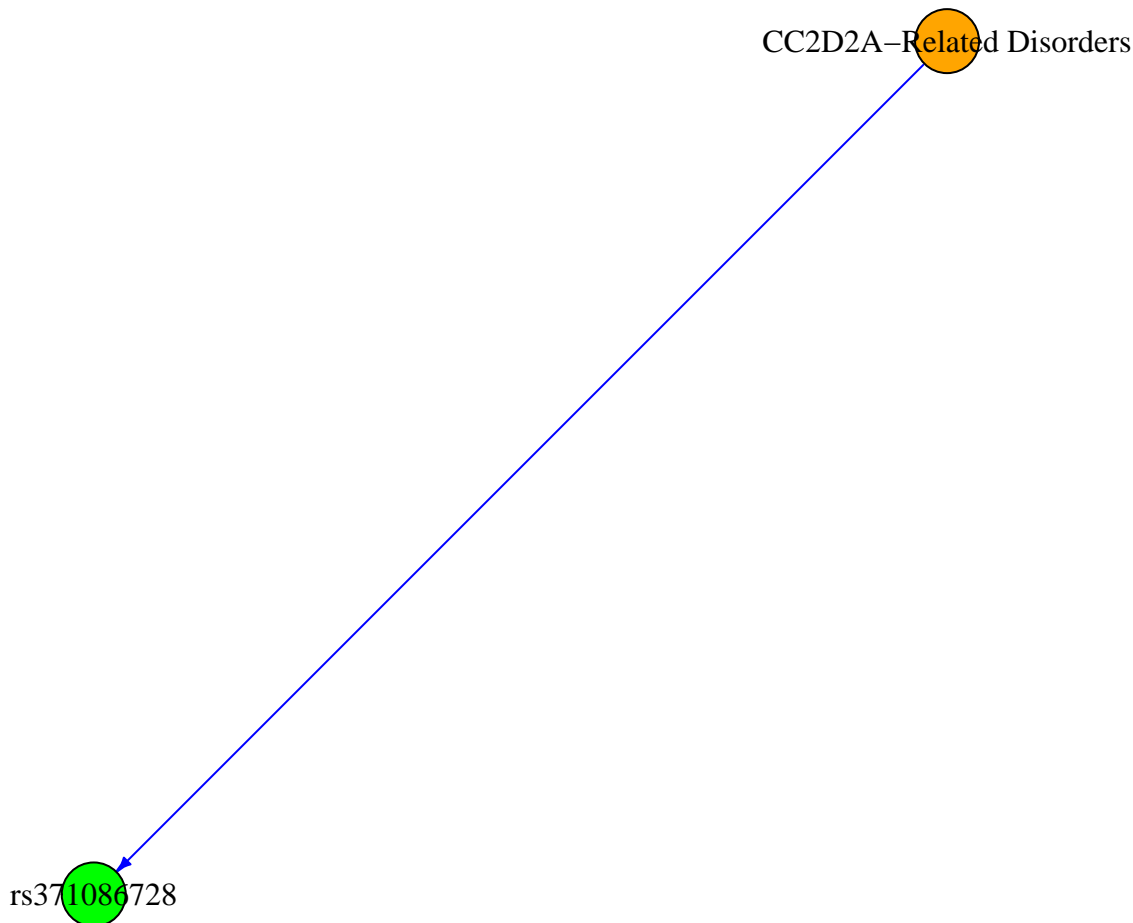

**Variant–Disease Network (CCR5 POLYMORPHISM)**

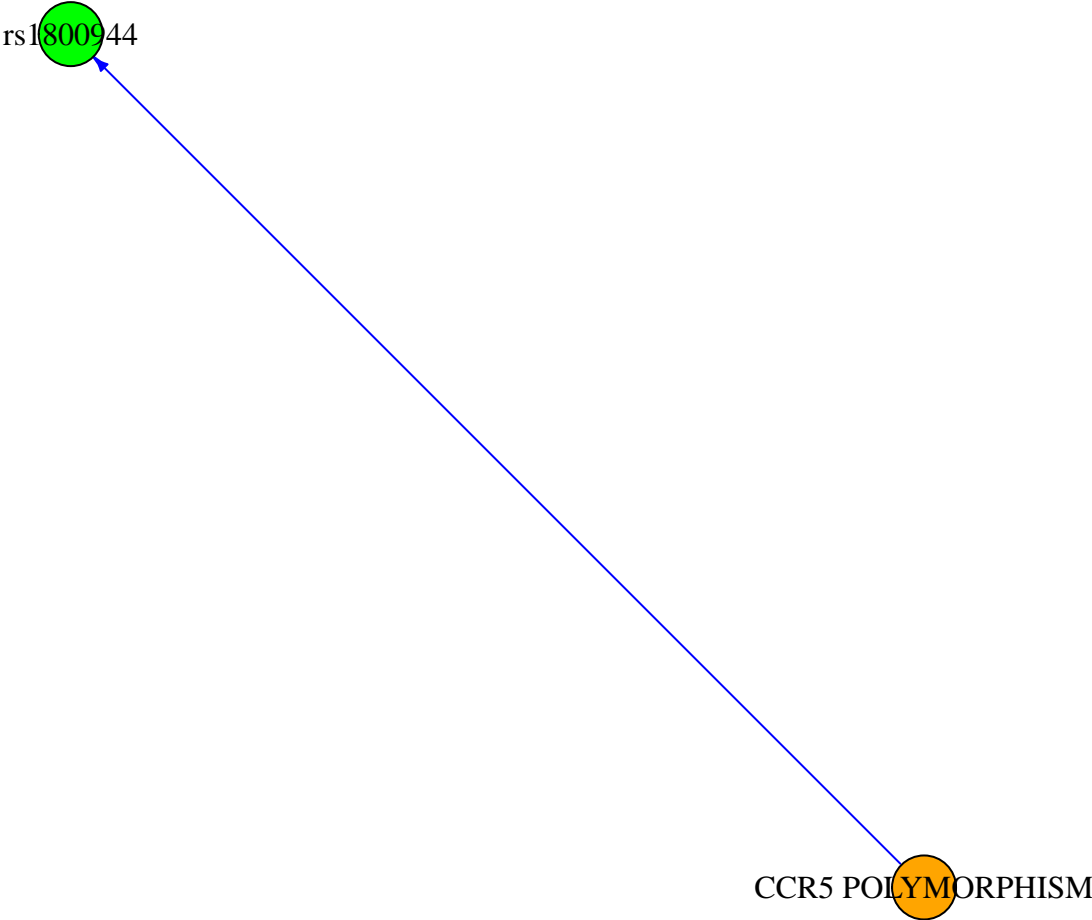

# Variant-Disease Network (Centronuclear Myopathy)

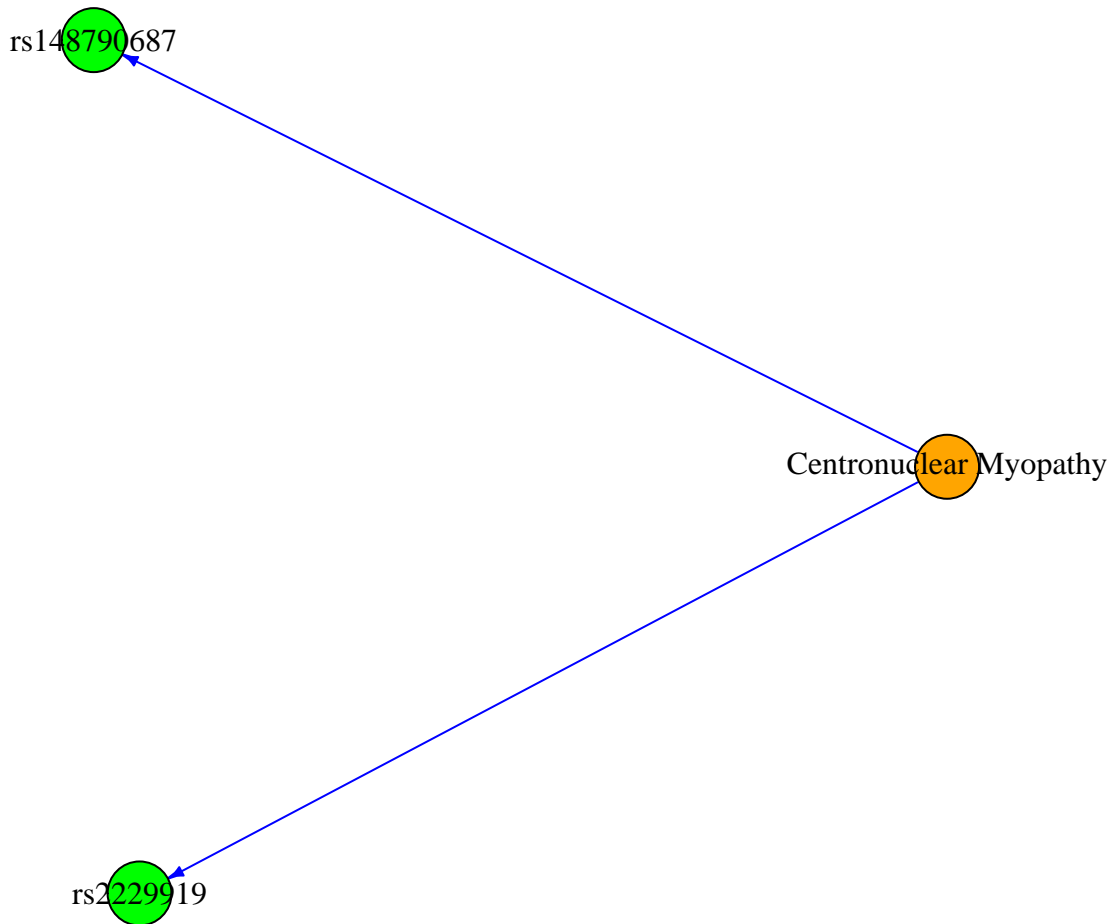

## Variant–Disease Network (Cerebellar ataxia)

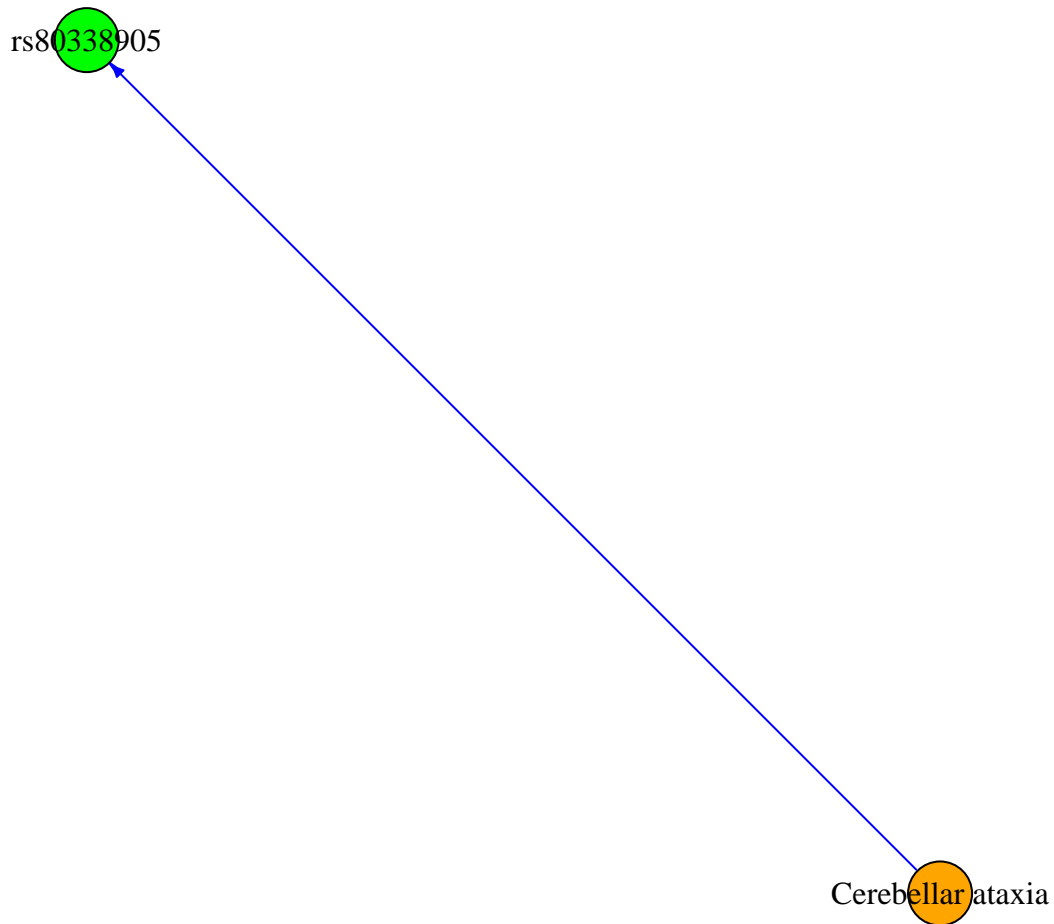

# rs114887570 (Cerebral autosomal dominant arteriopathy with subcortical infarcts and leukoencephalopathy type 1)

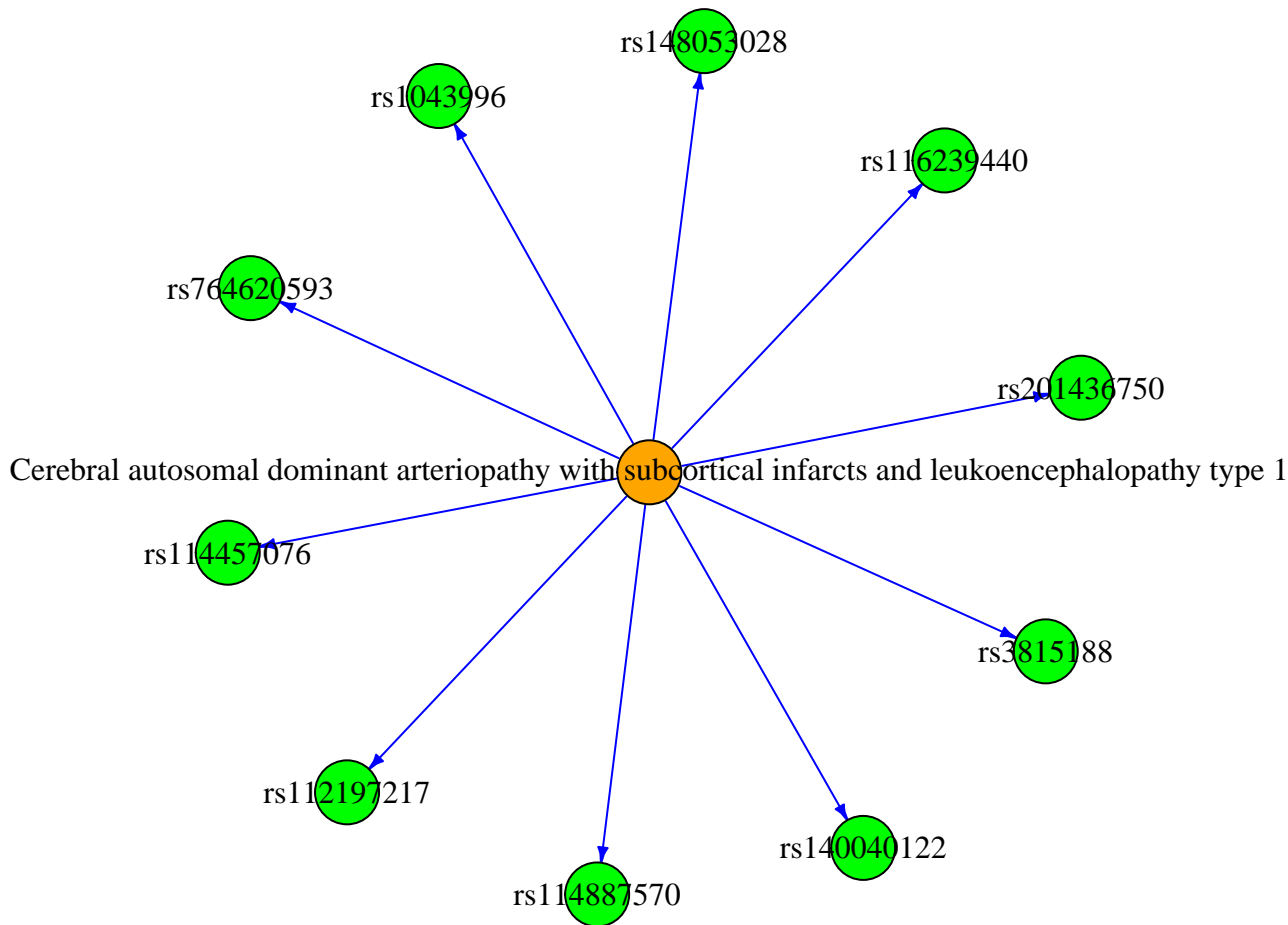

## Variant-Disease Network (Cerebral cavernous malformation)

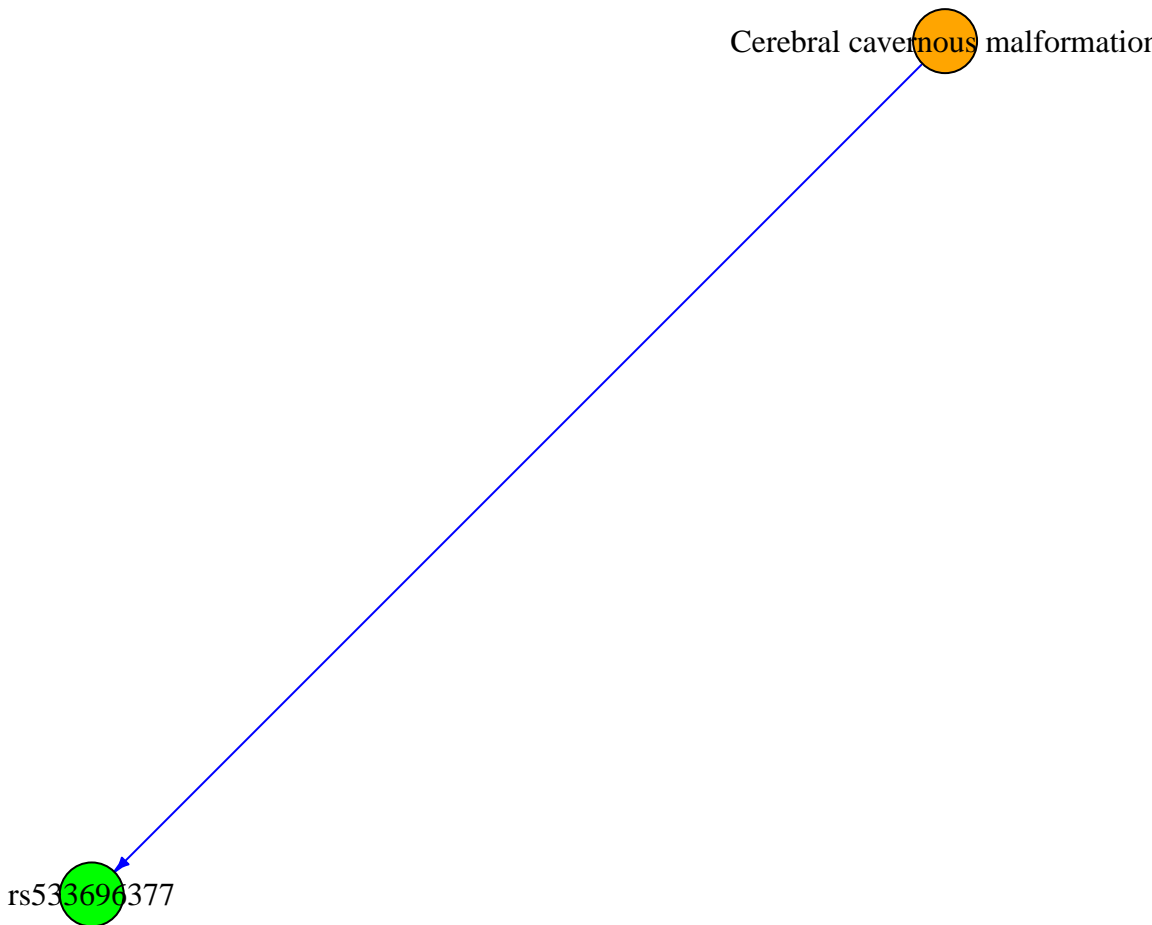



# Variant–Disease Network (Cerebral palsy spastic quadriplegic)

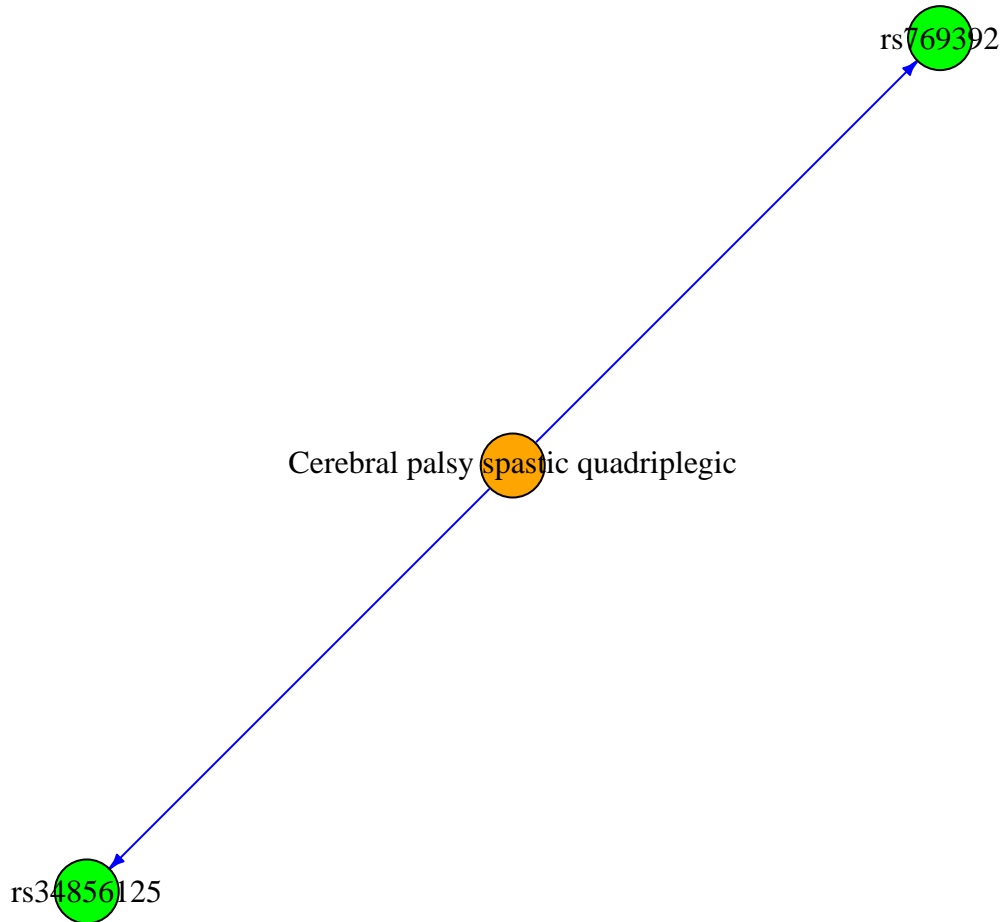

Variant–Disease Network (Ceroid lipofuscinosis neuronal 1)

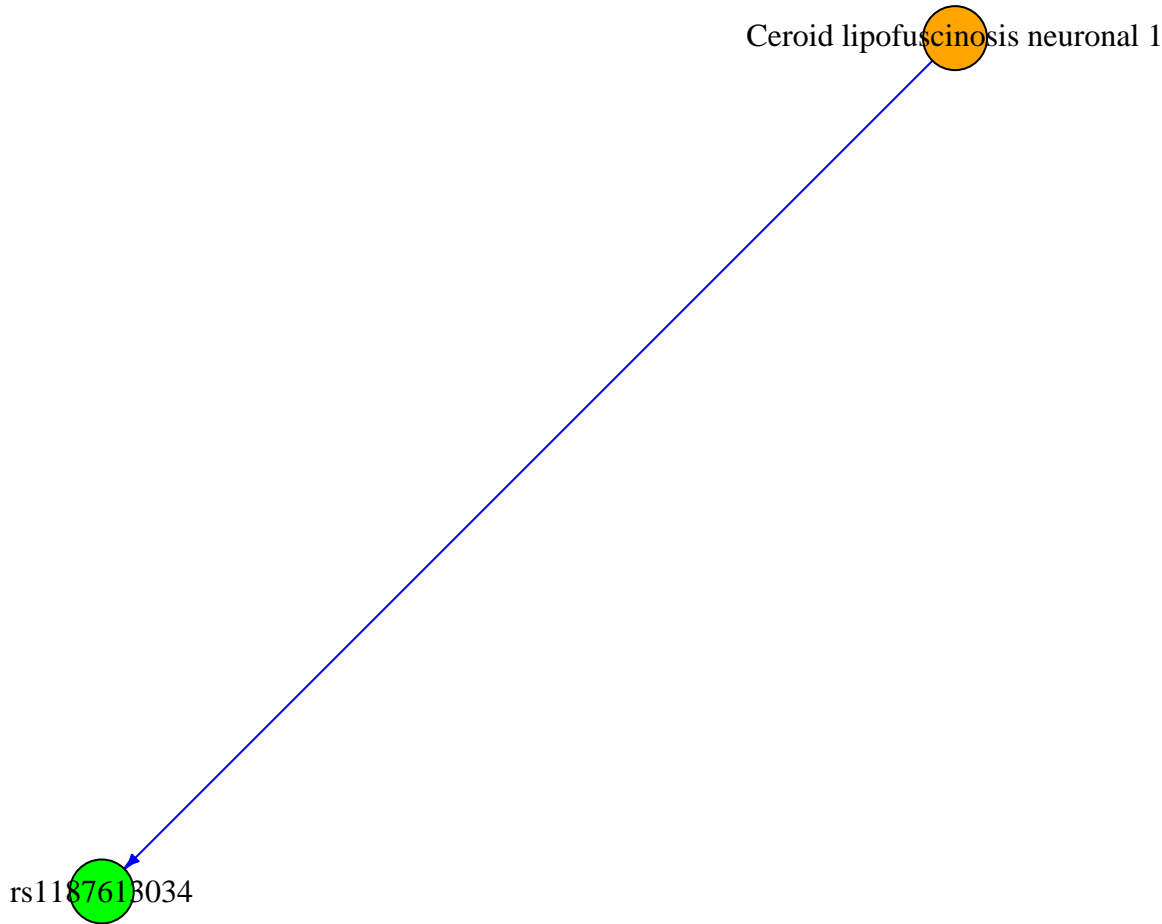

Variant–Disease Network (Ceroid lipofuscinosis neuronal 2)

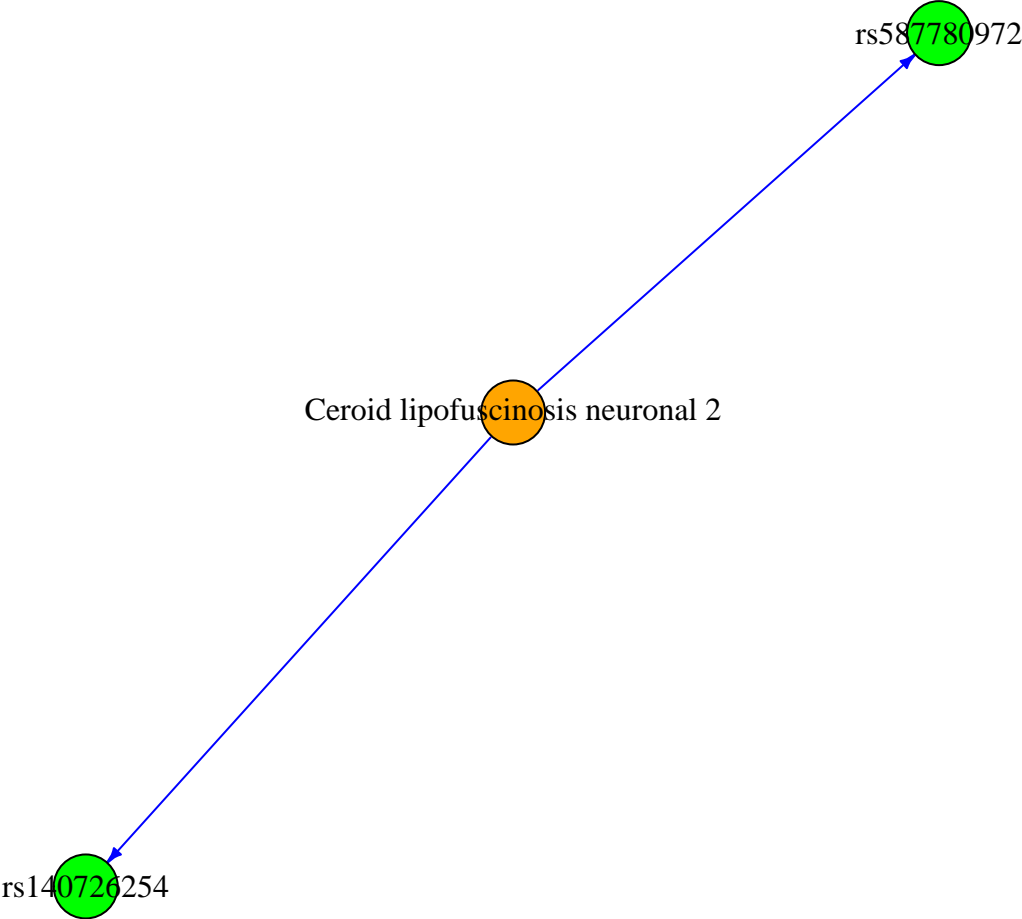

**Variant–Disease Network (Ceroid lipofuscinosis neuronal 7)**

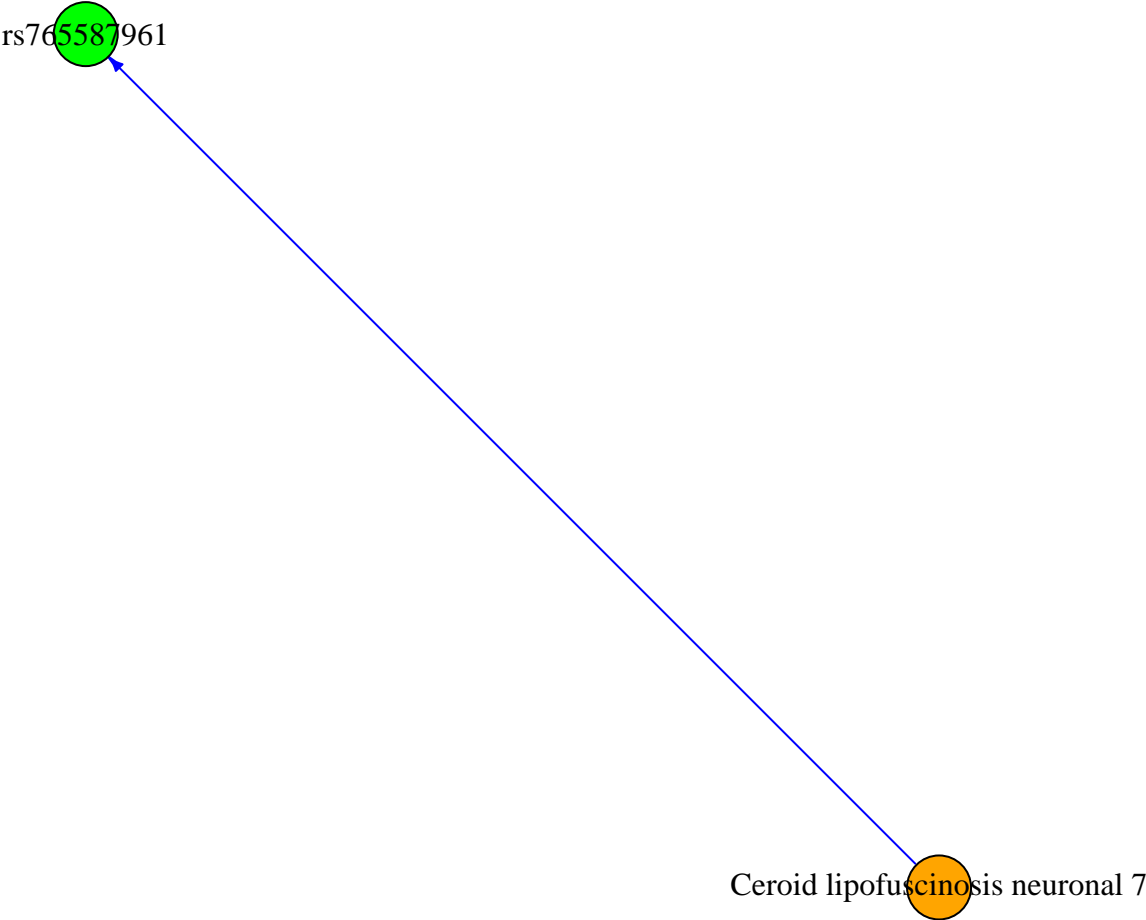

## Variant–Disease Network (Charcot–Marie–Tooth)

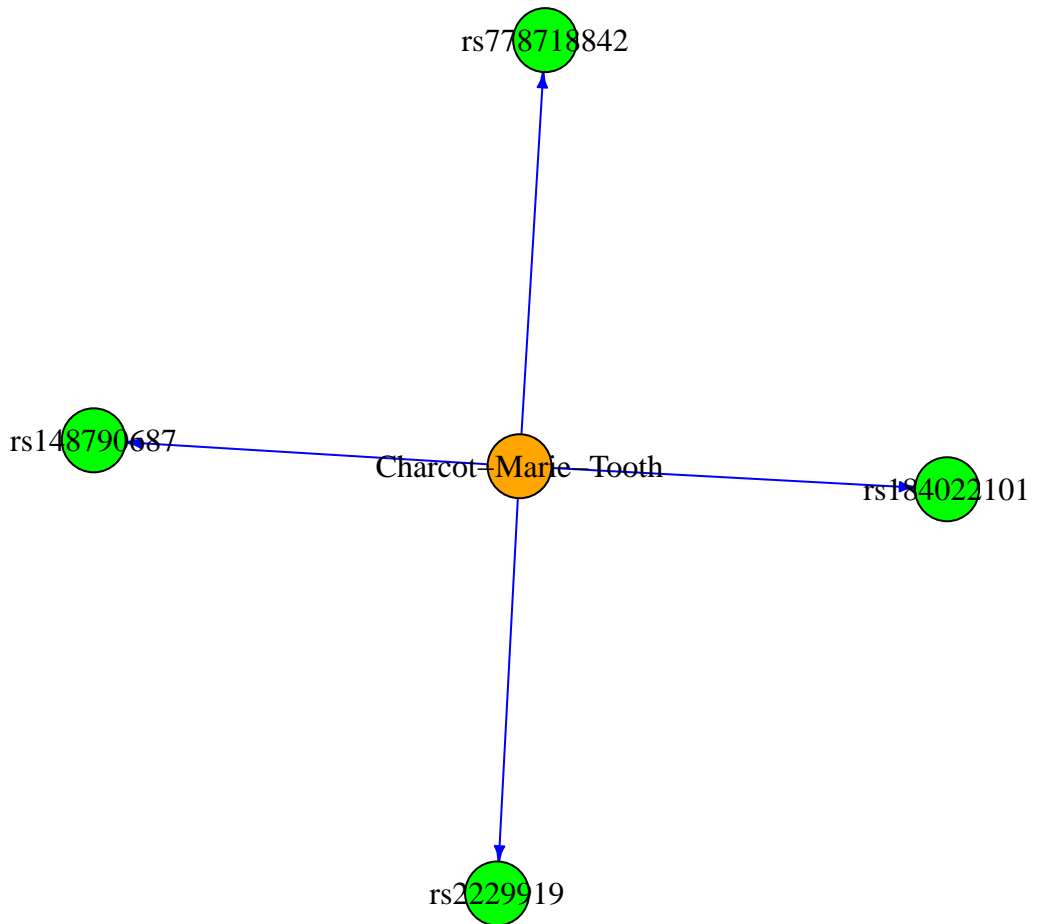

Variant–Disease Network (Charcot–Marie–Tooth disease)

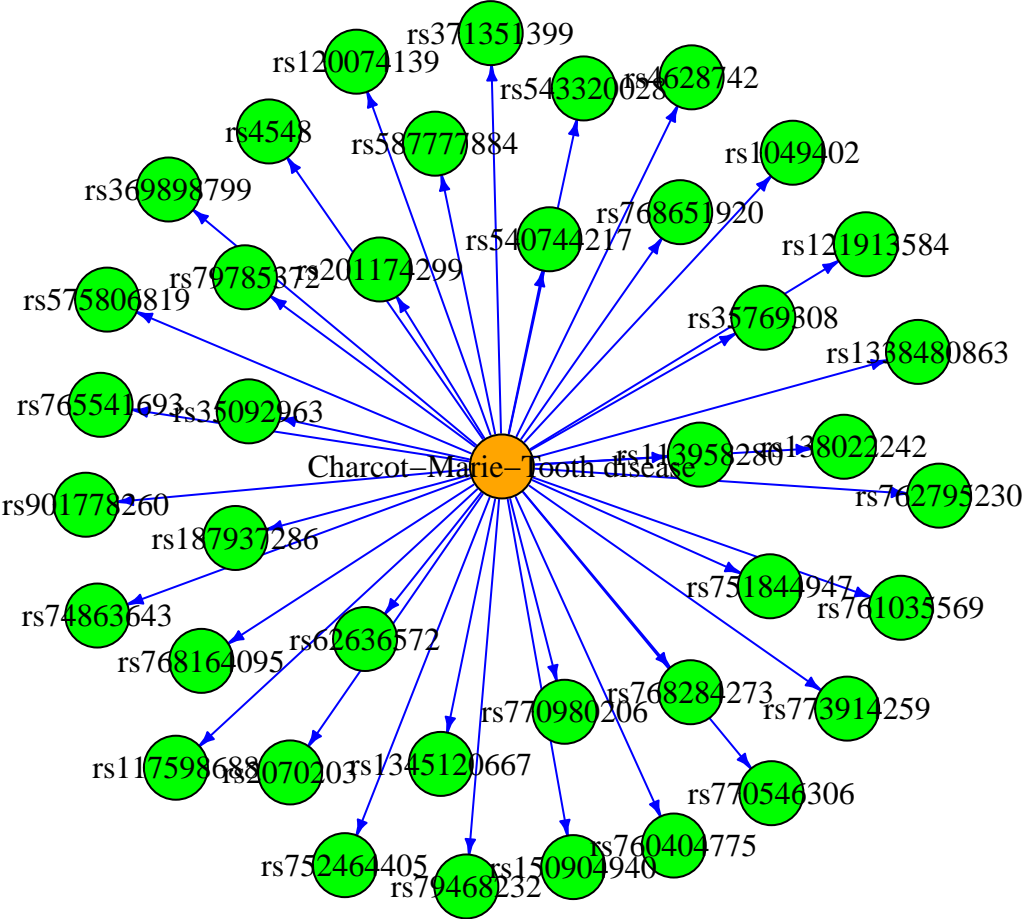

## Variant–Disease Network (Charcot–Marie–Tooth disease type 2D)

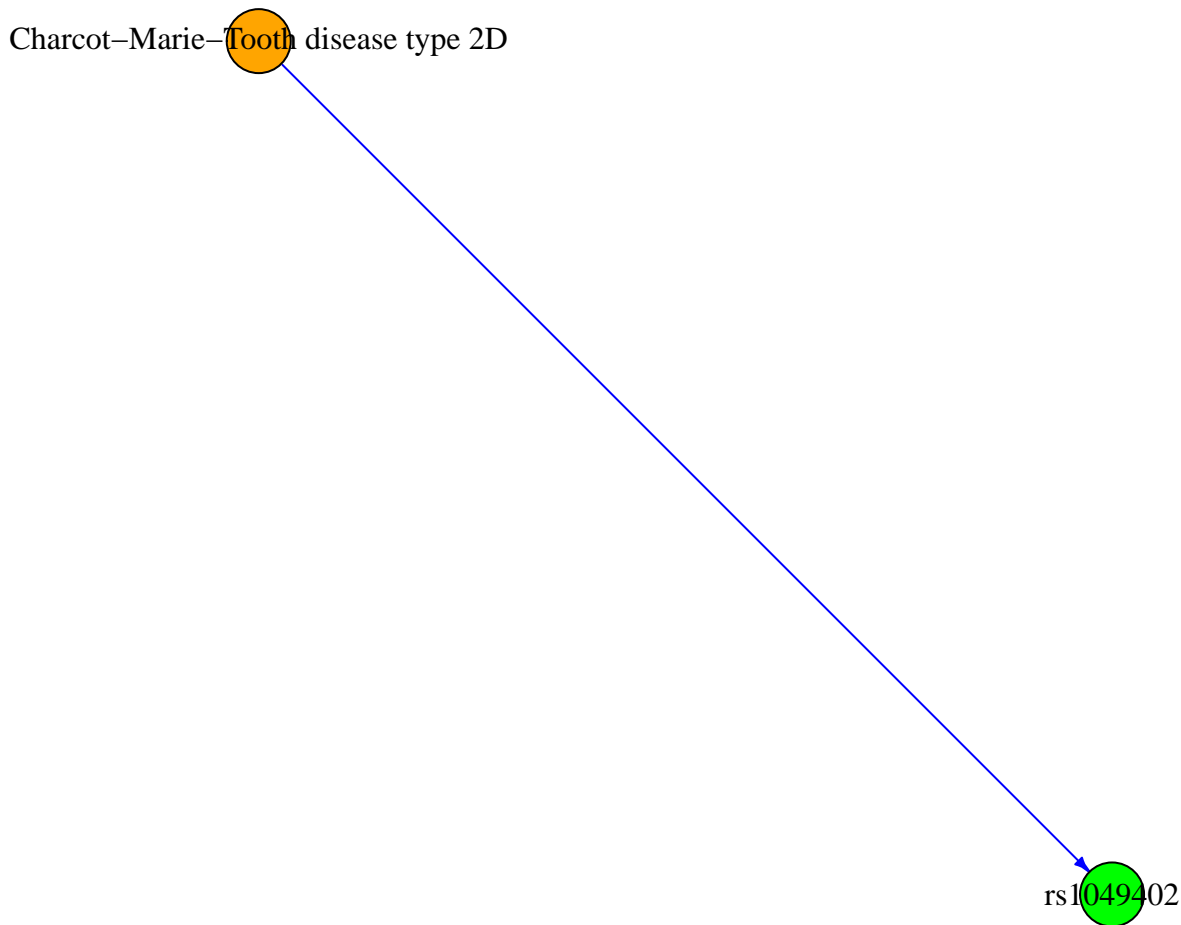

# Variant–Disease Network (Charcot–Marie–Tooth disease type 2E)

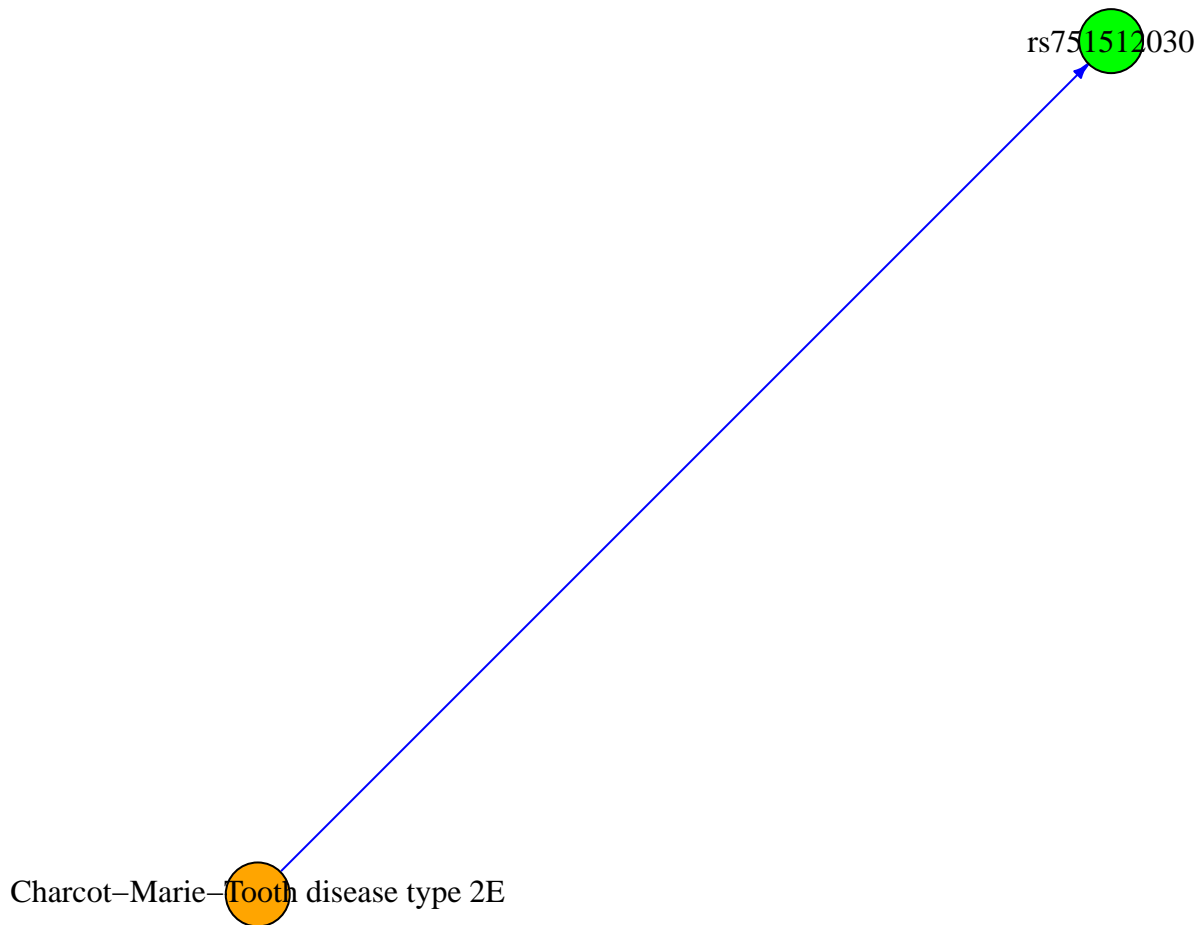



# Variant–Disease Network (Charcot–Marie–Tooth disease type 4)

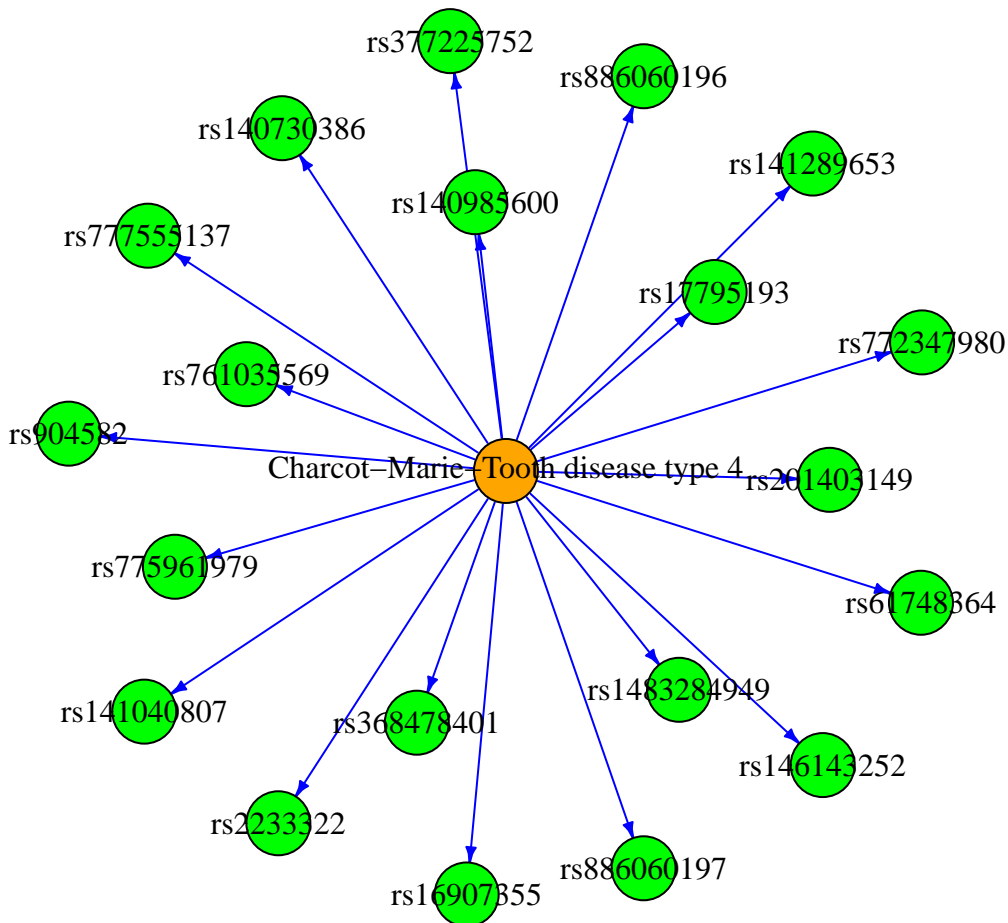

# -Disease Network (Charcot-Marie-Tooth disease type 4B2 with early-onset)

rs120074139

Charcot-Marie-Tooth disease type 4B2 with early



## Variant–Disease Network (CHARGE association)

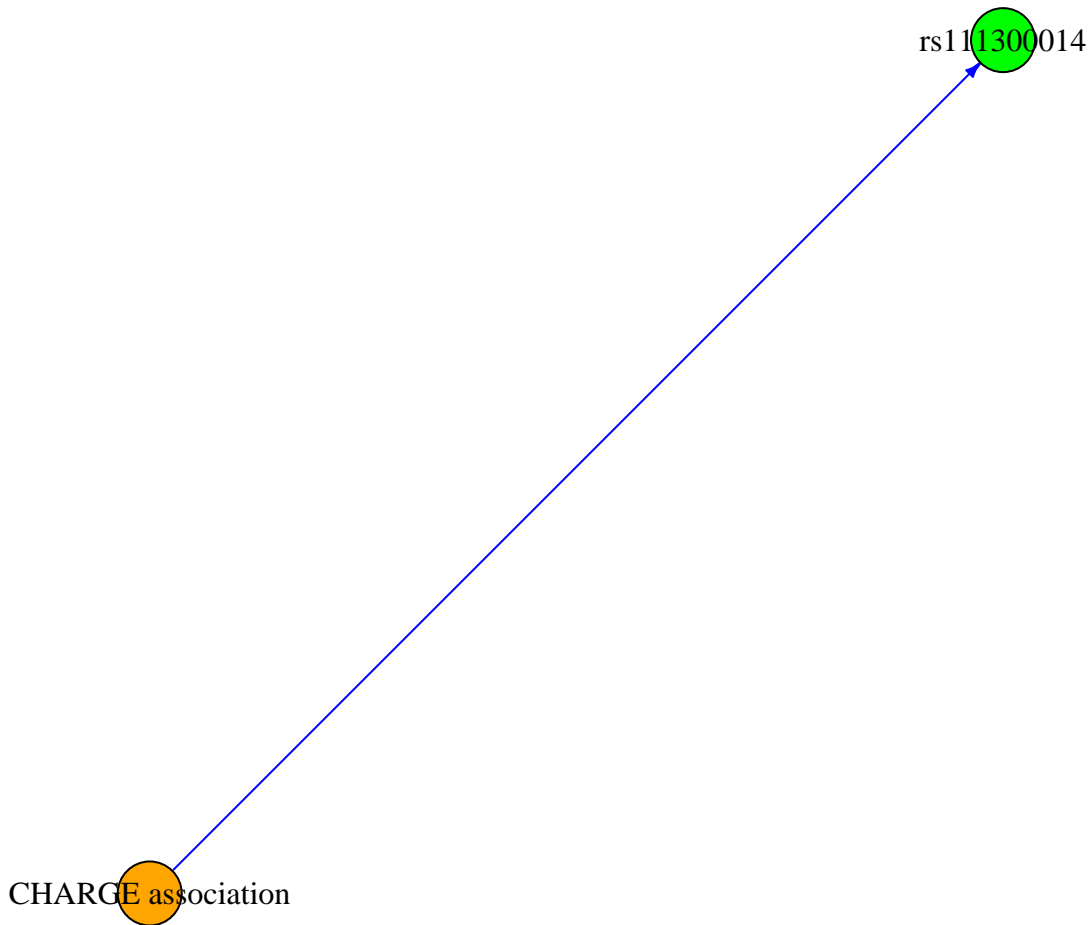

## Variant-Disease Network (Chitotriosidase deficiency)

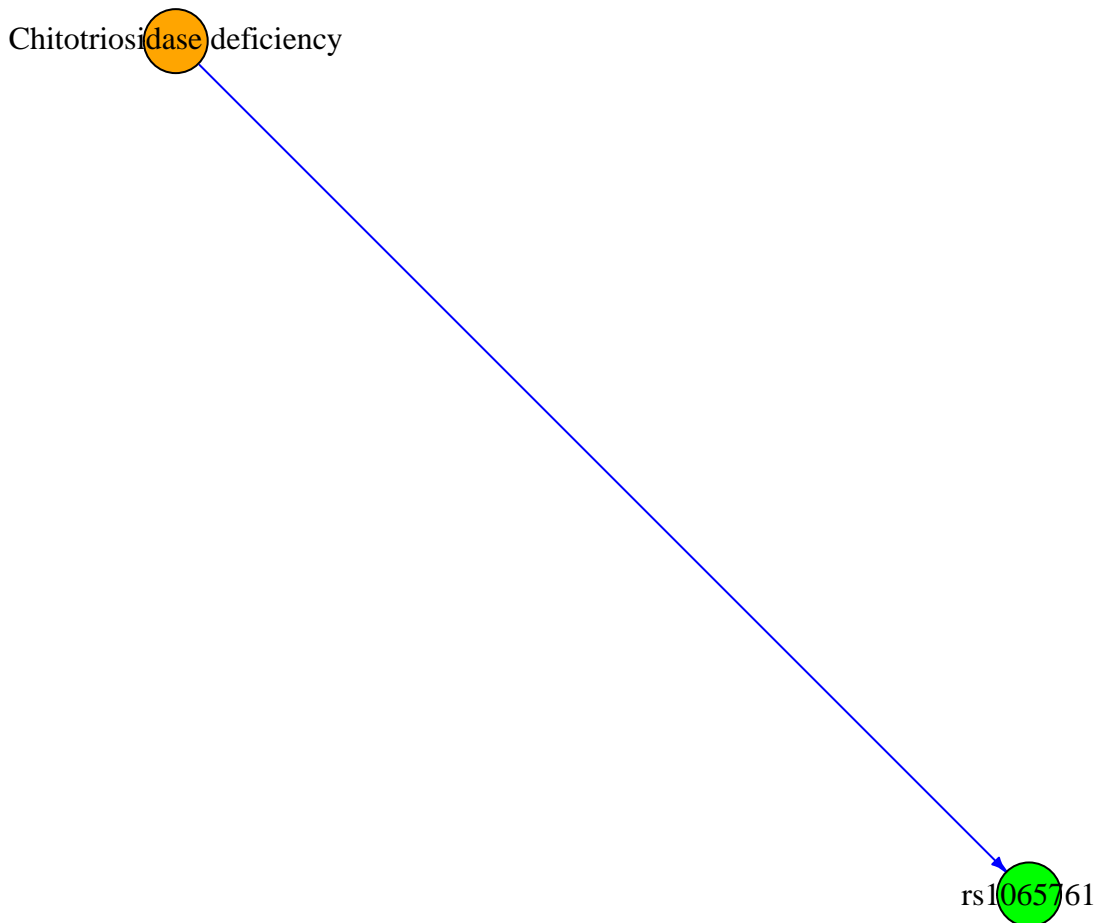

## Variant-Disease Network (Cholestanol storage disease)

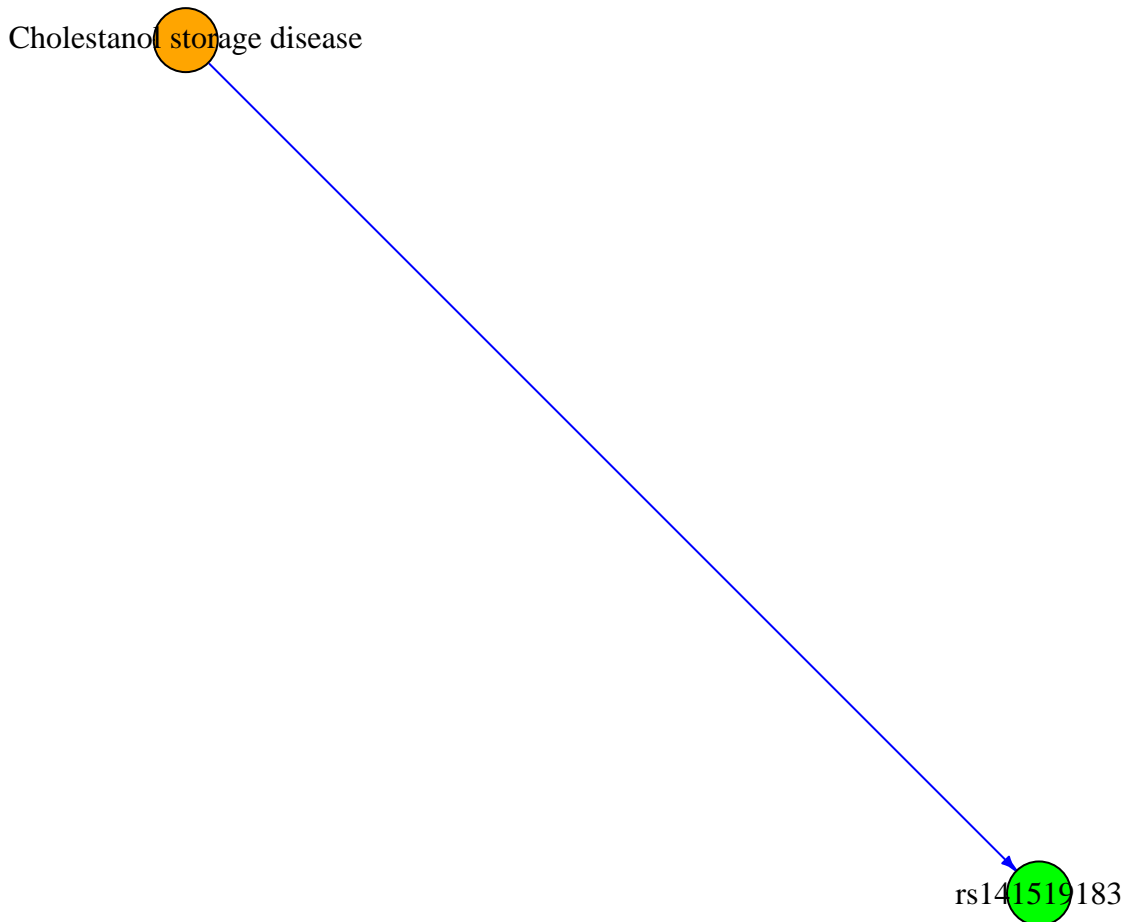

## Variant-Disease Network (Cholestasis)

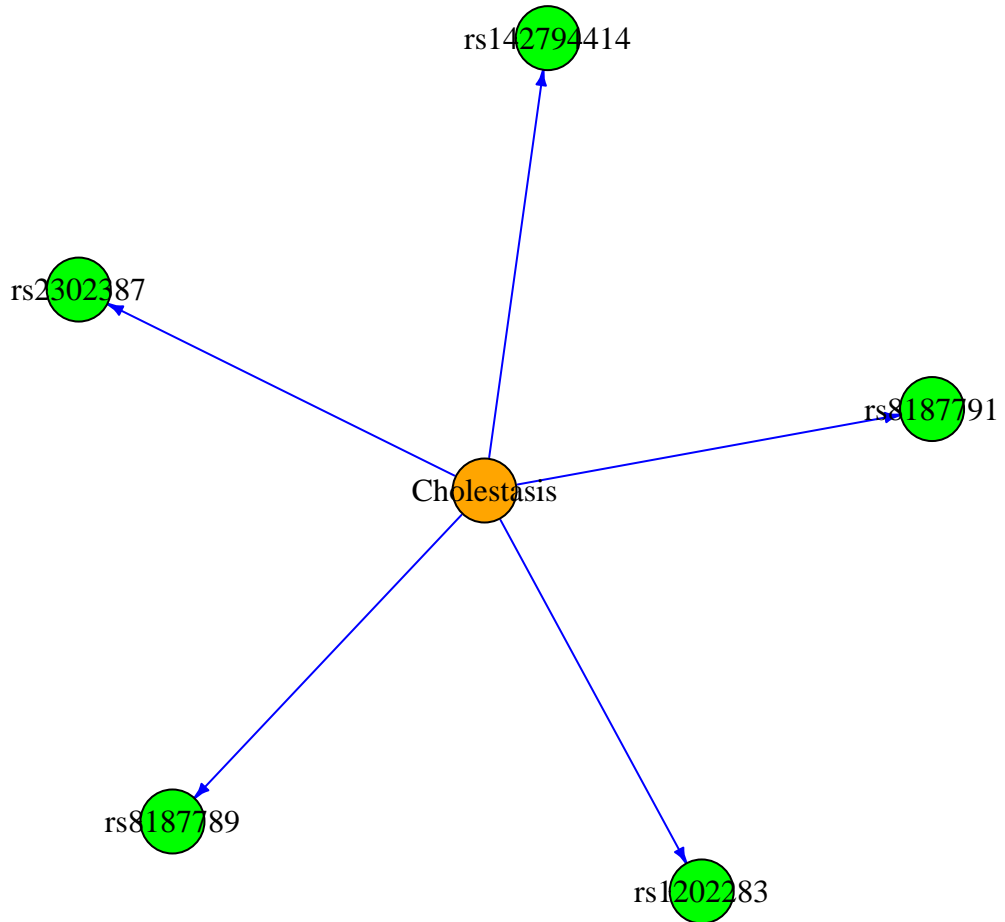

Variant–Disease Network (Chondrocalcinosis)

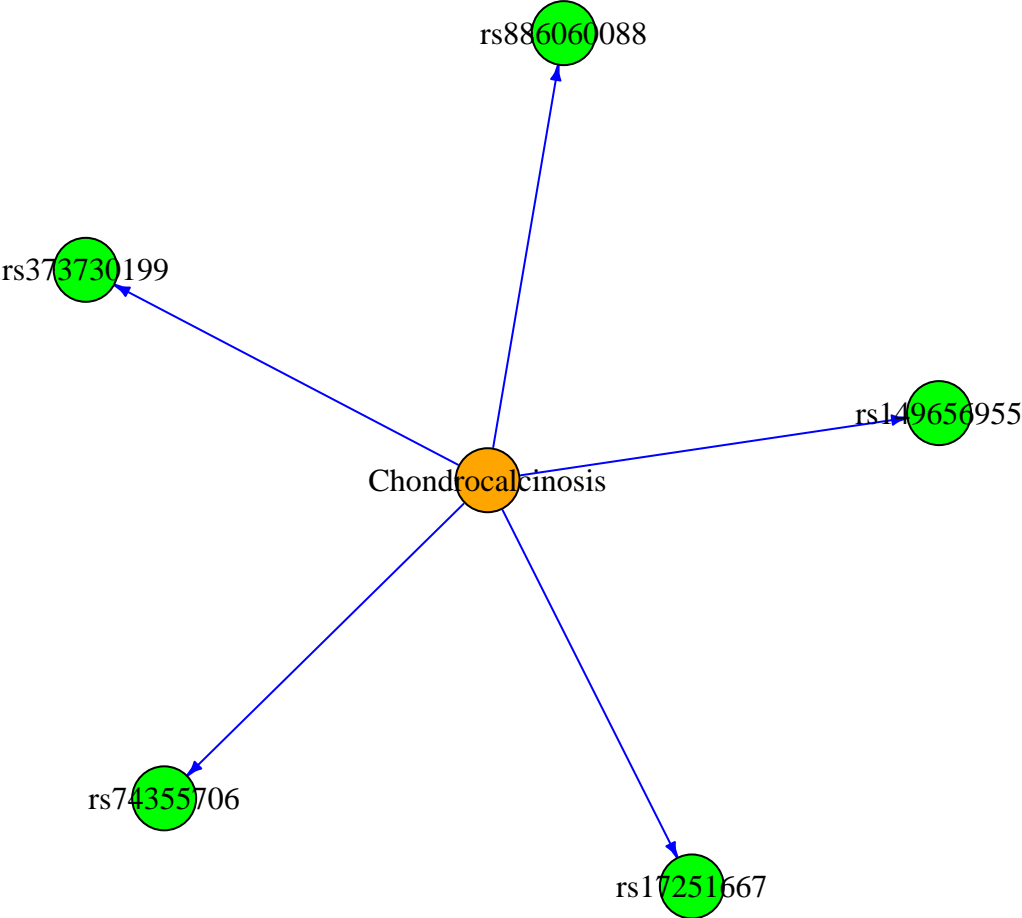

## Variant–Disease Network (Chondrodysplasia)

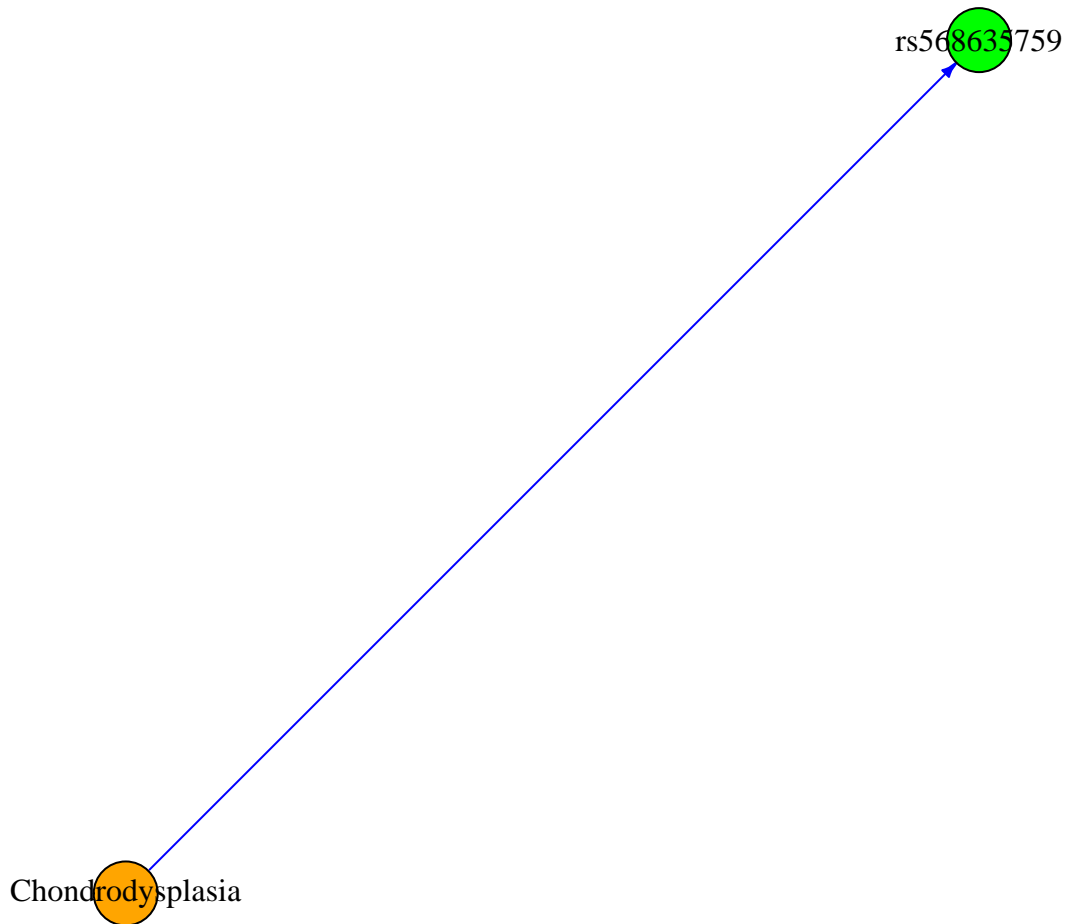



## Variant-Disease Network (Choreoacanthocytosis)

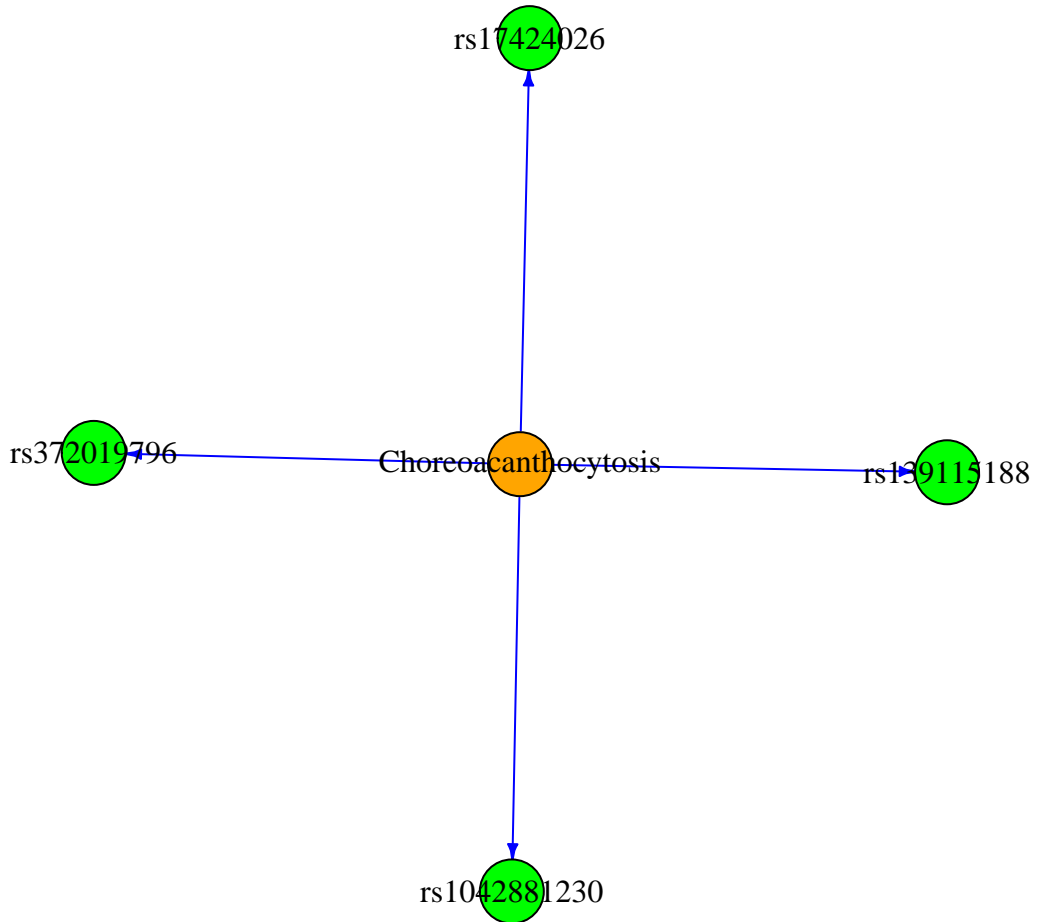

Variant–Disease Network (Christianson syndrome)

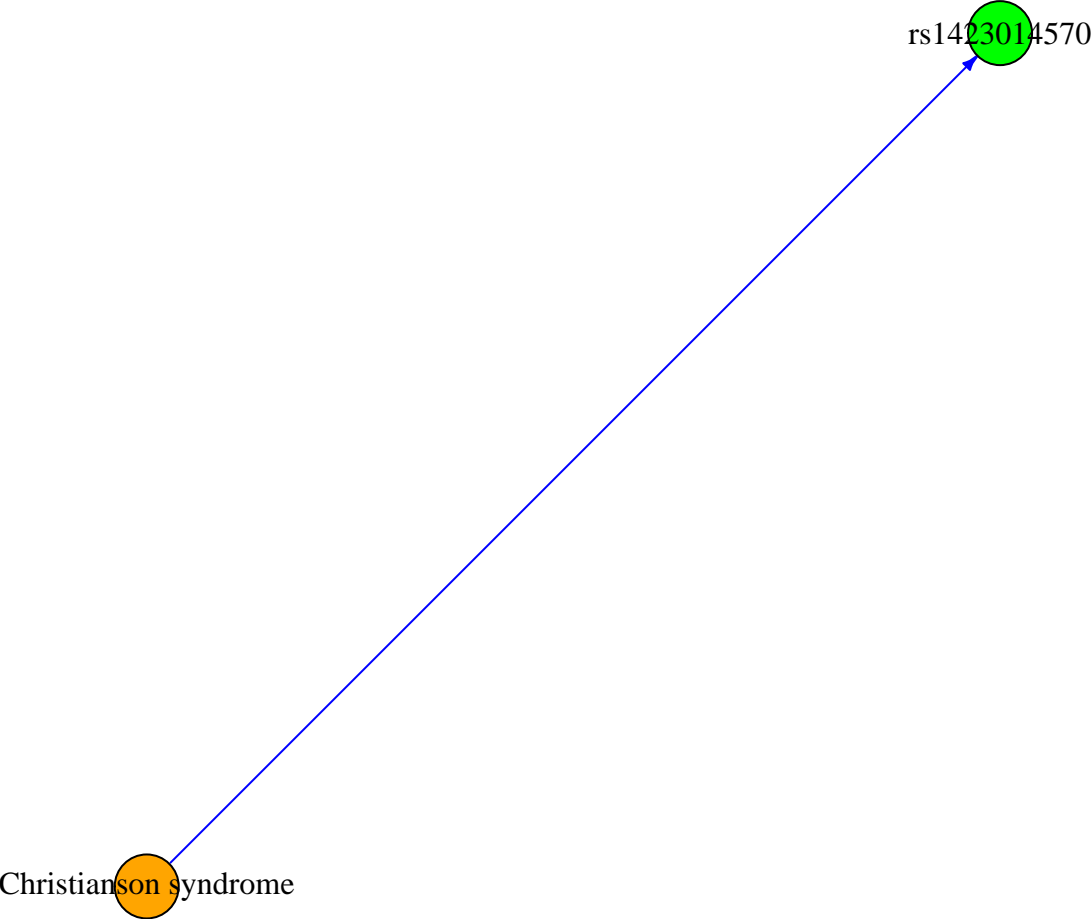

**Variant–Disease Network (Chronic infantile neurological)**

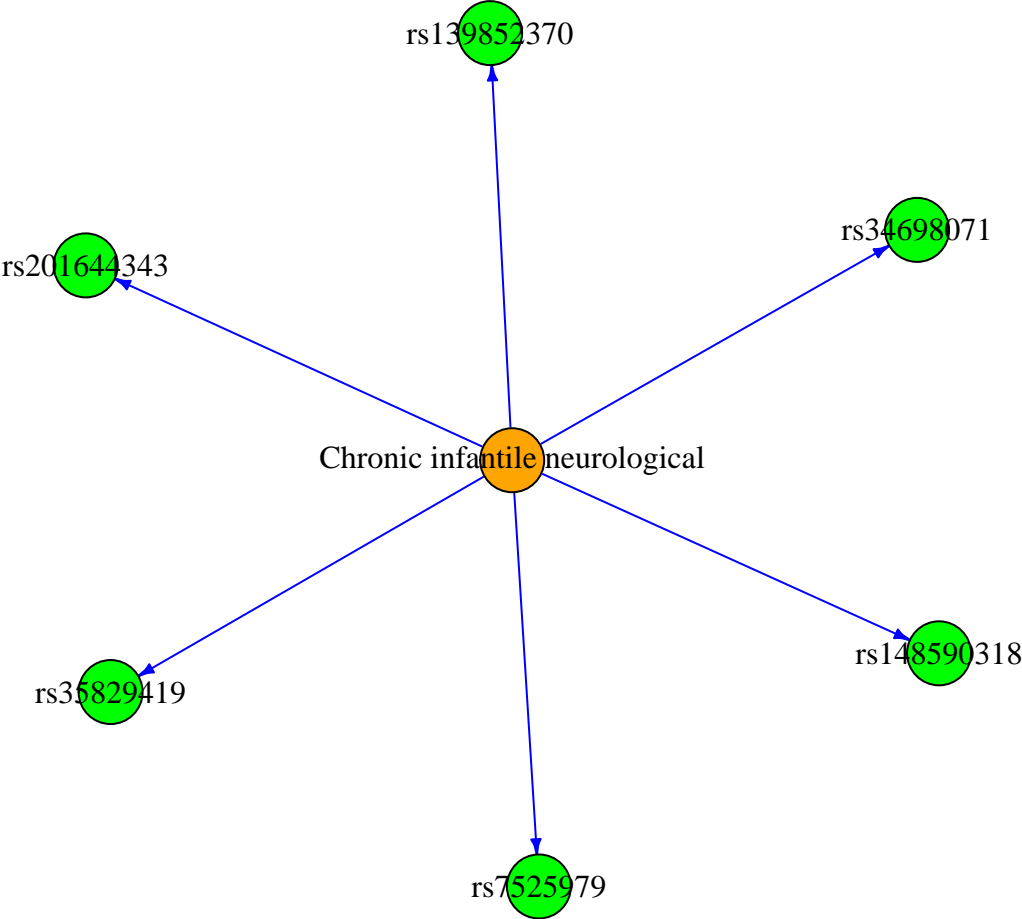

## Variant–Disease Network (Ciliary dyskinesia)

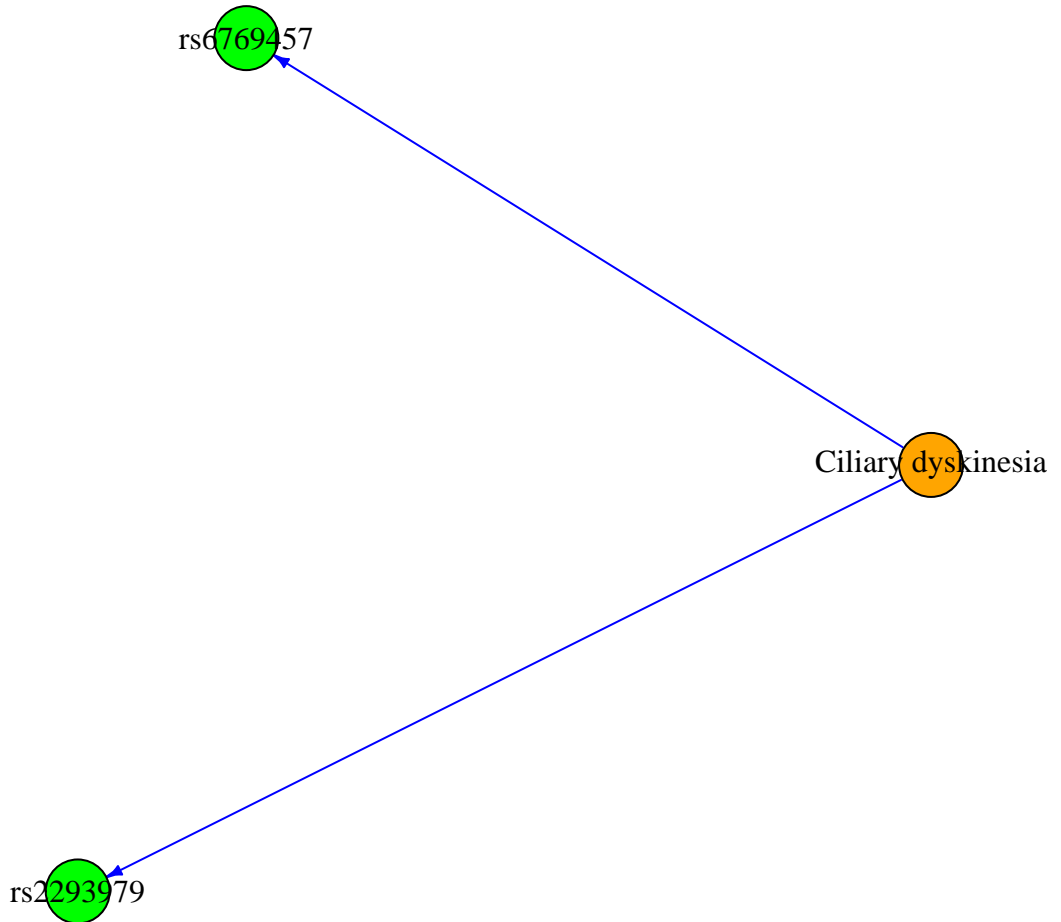

## Variant–Disease Network (Citrullinemia type I)

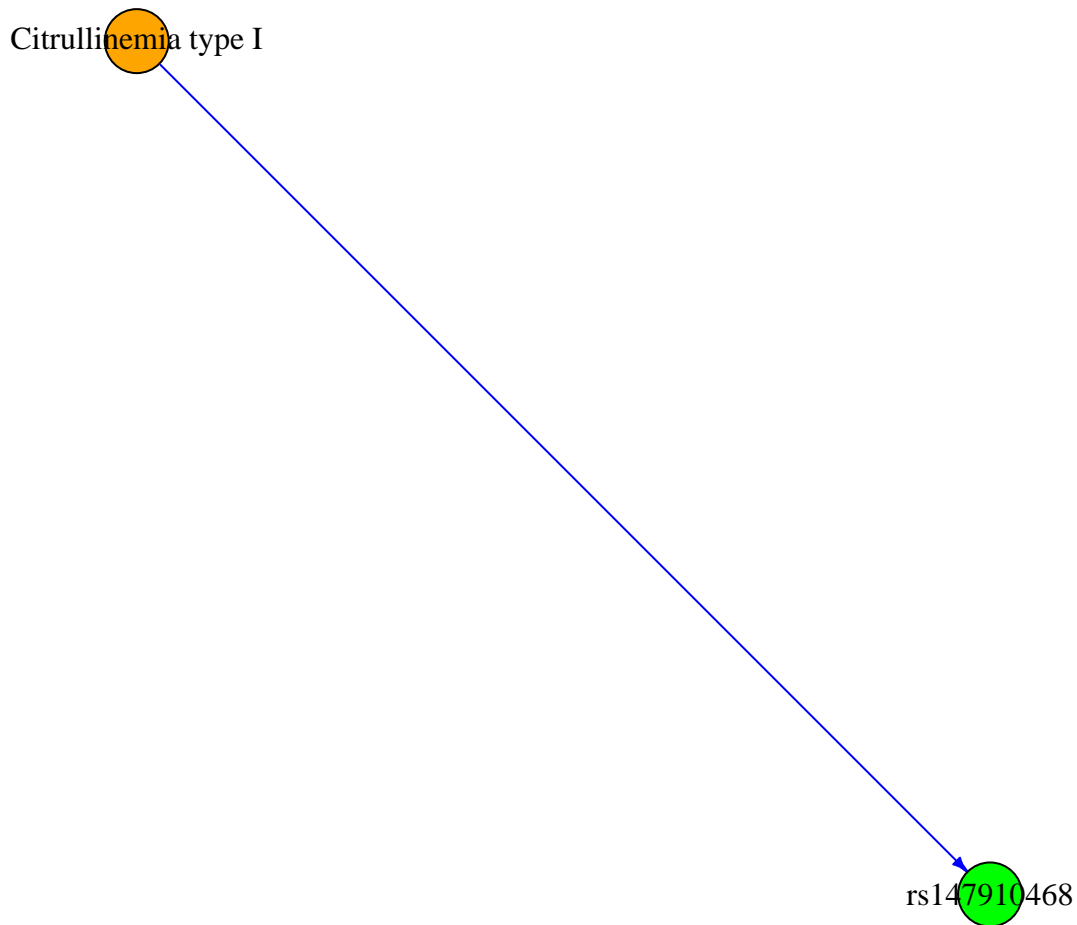

## Variant–Disease Network (Cleft Lip +/- Cleft Palate)

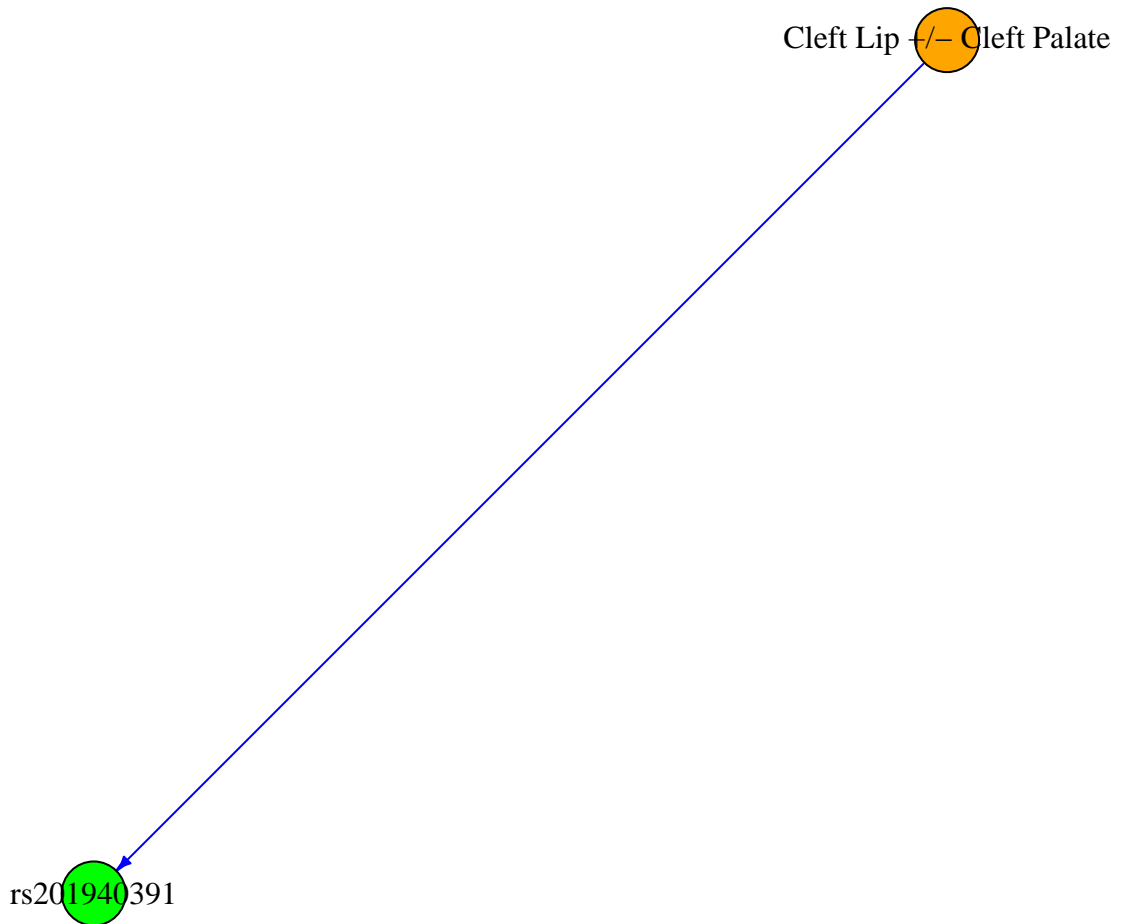

**Variant–Disease Network (Cleft palate)**

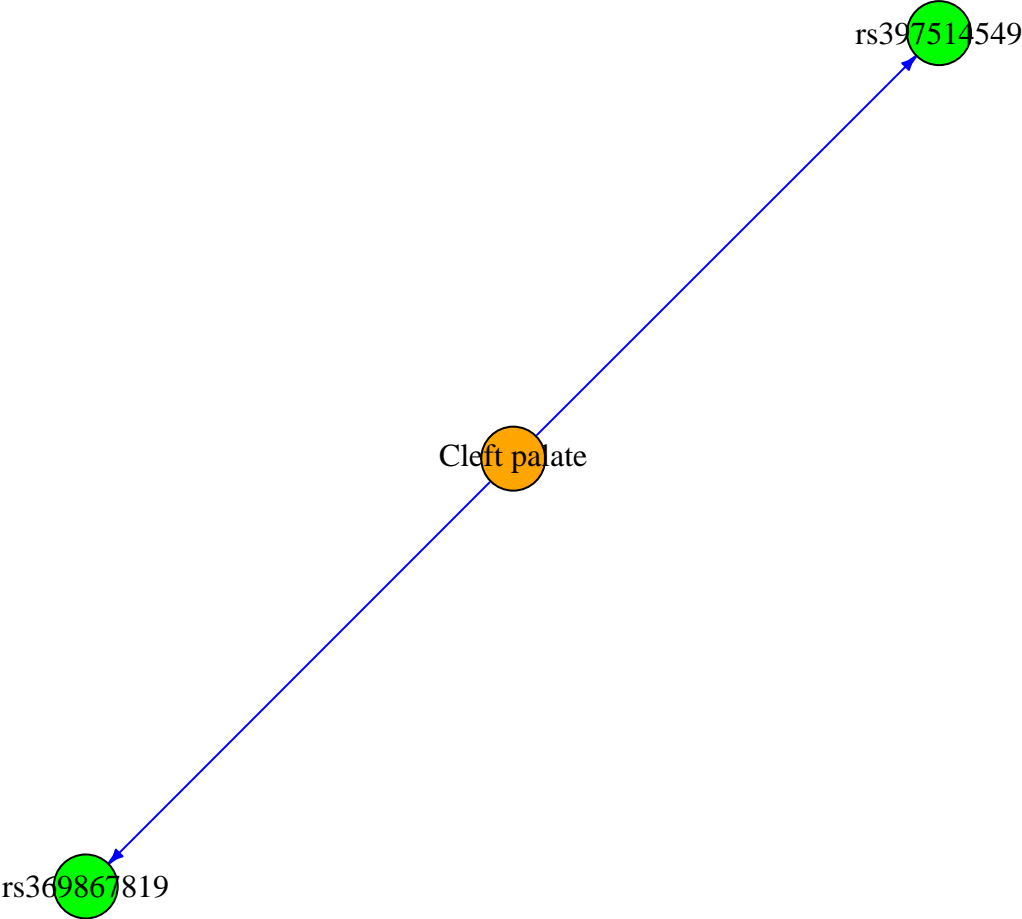

## Variant-Disease Network (C-like syndrome)

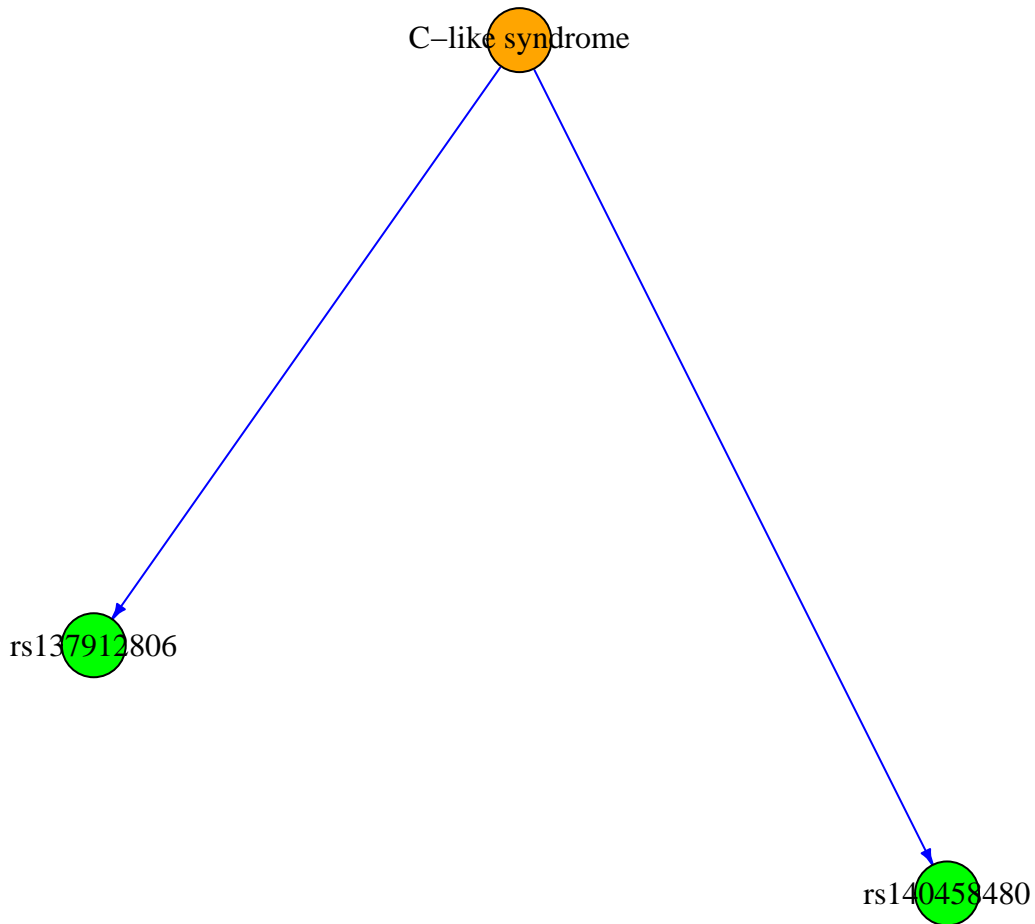



# Variant-Disease Network (Clinodactyly of the 5th toe)

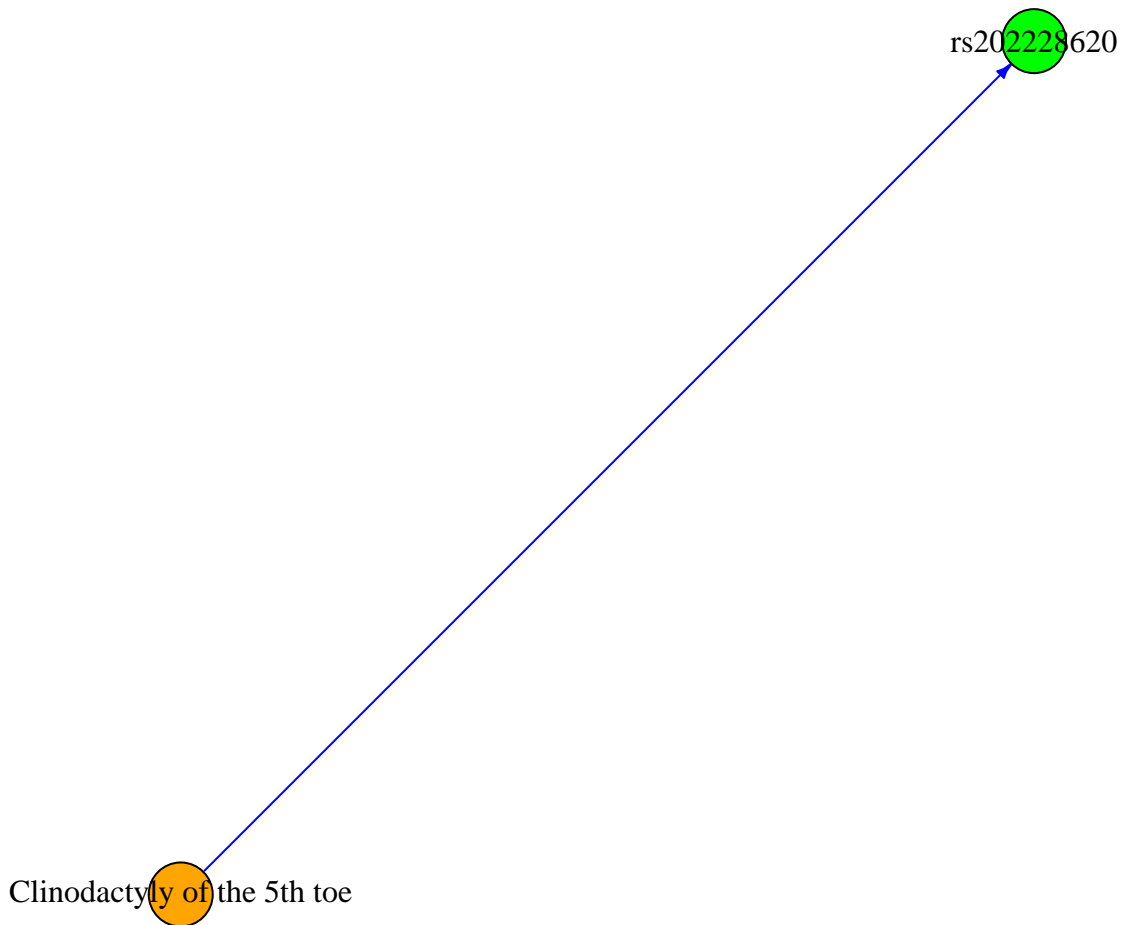

## Variant–Disease Network (Coarse facial features)

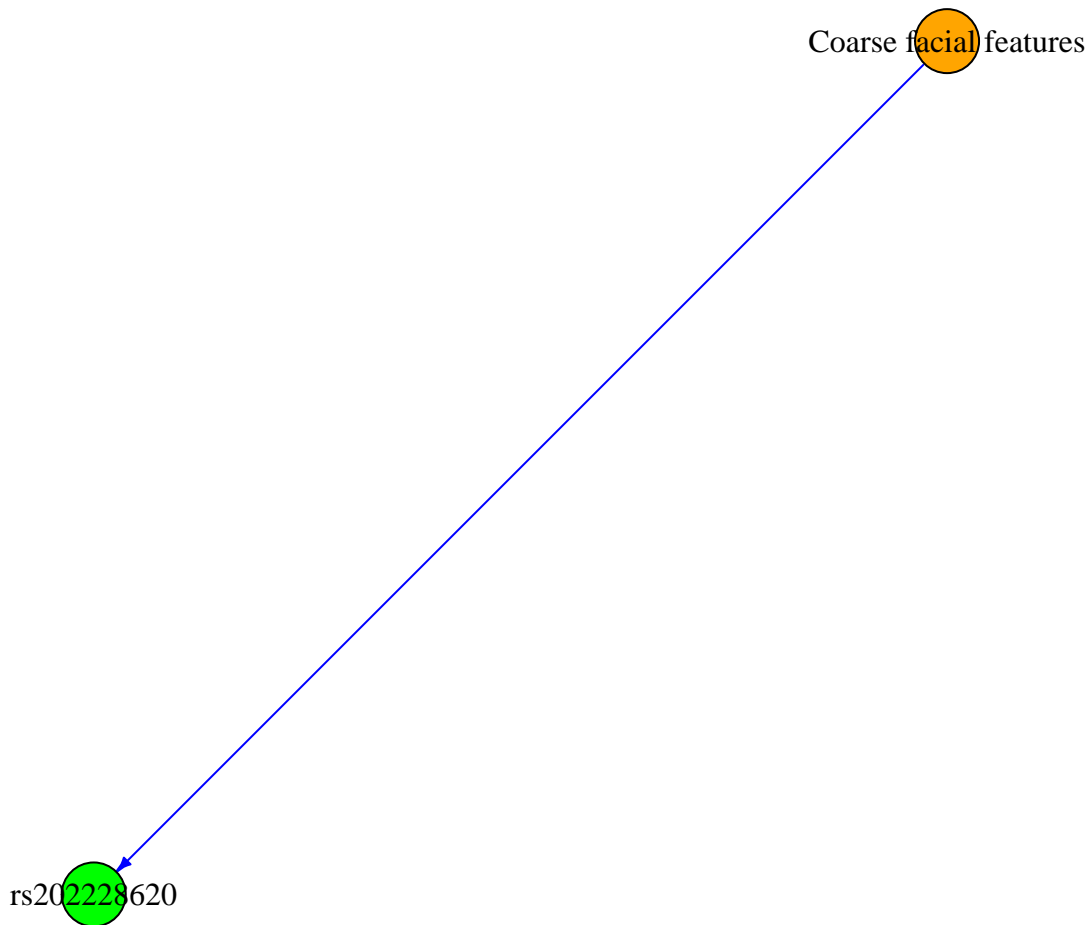

**Variant–Disease Network (Cockayne syndrome)**

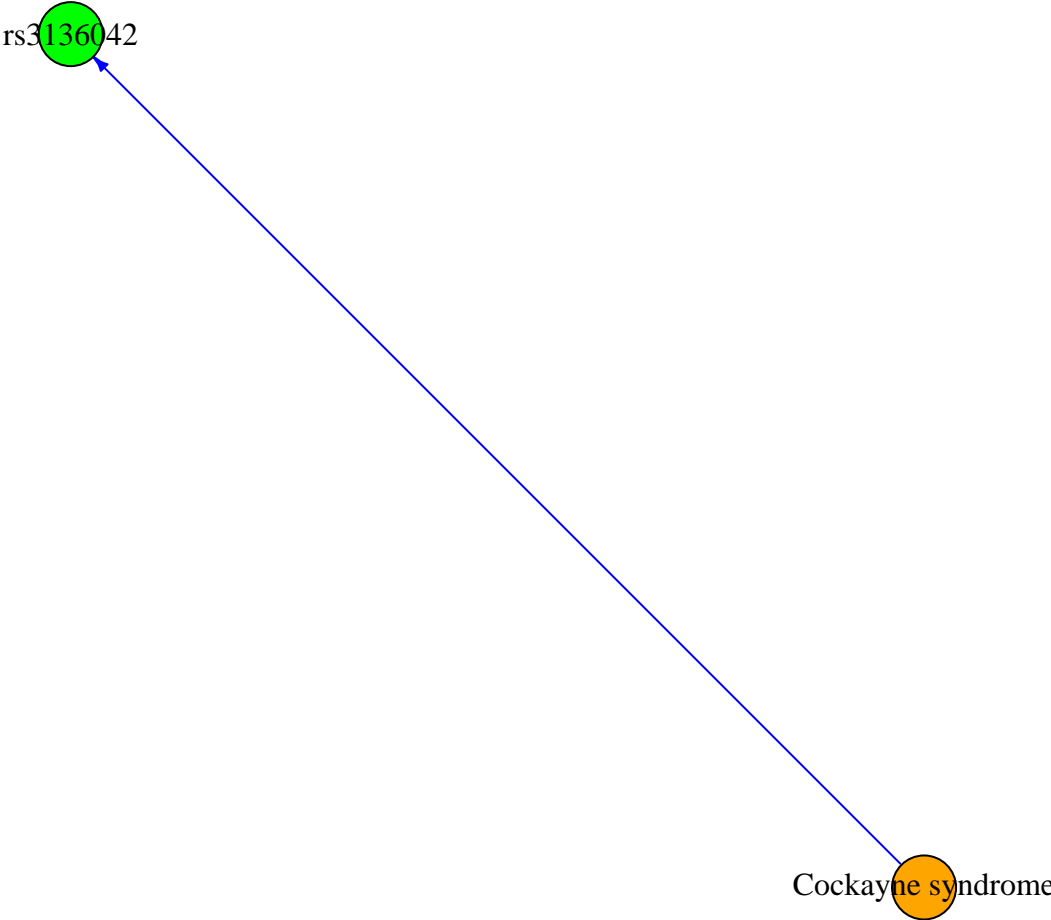

## Variant–Disease Network (Coenzyme Q10 deficiency)

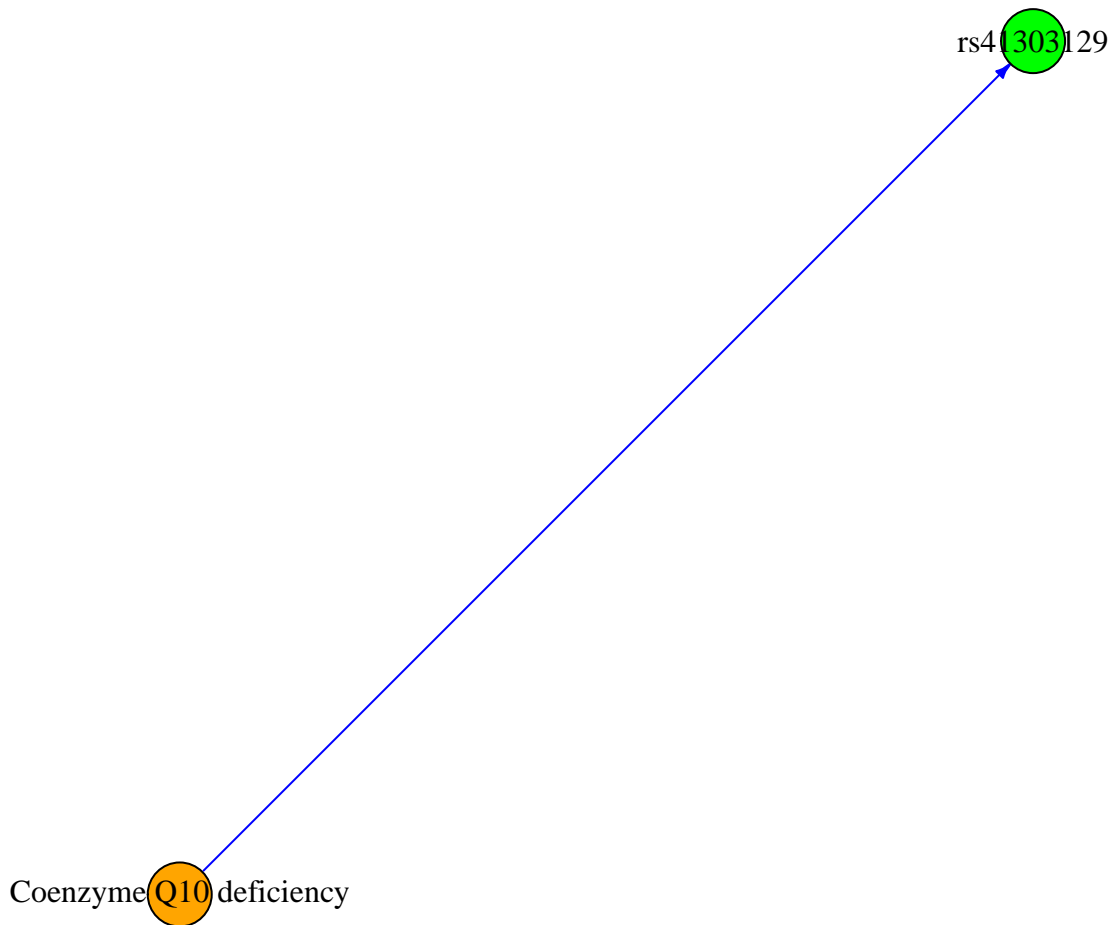

## Variant–Disease Network (COG7 congenital disorder of glycosylation)

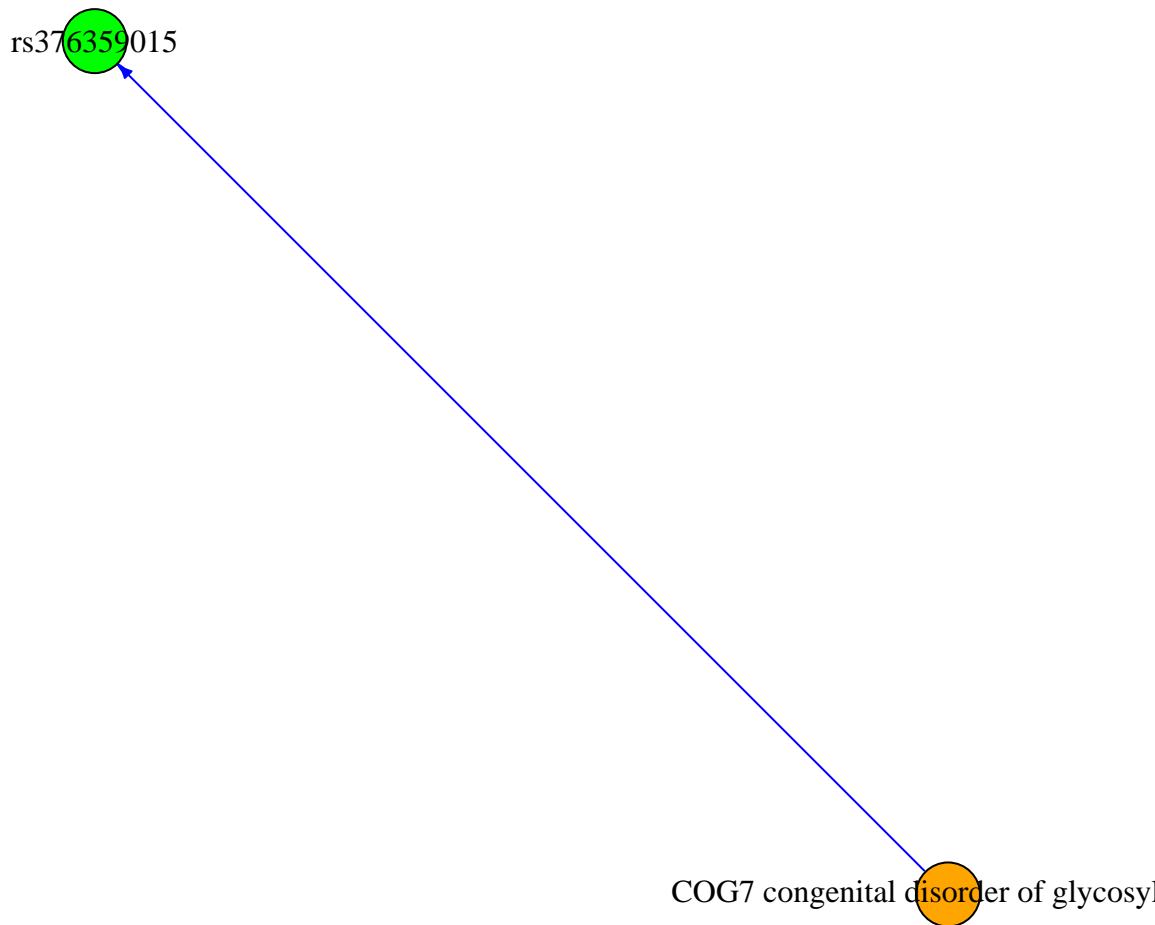

## Variant–Disease Network (Cognitive impairment)

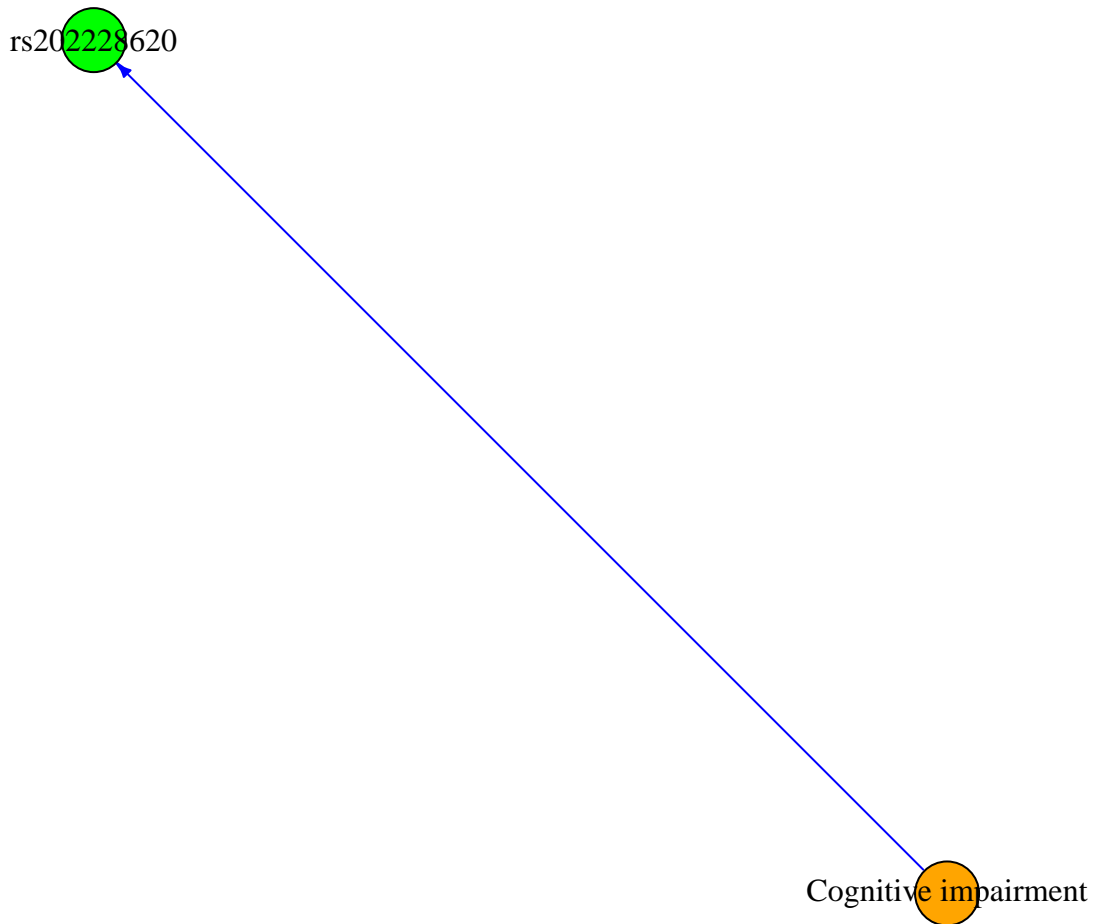

Variant–Disease Network (Collagen VI–related myopathy)

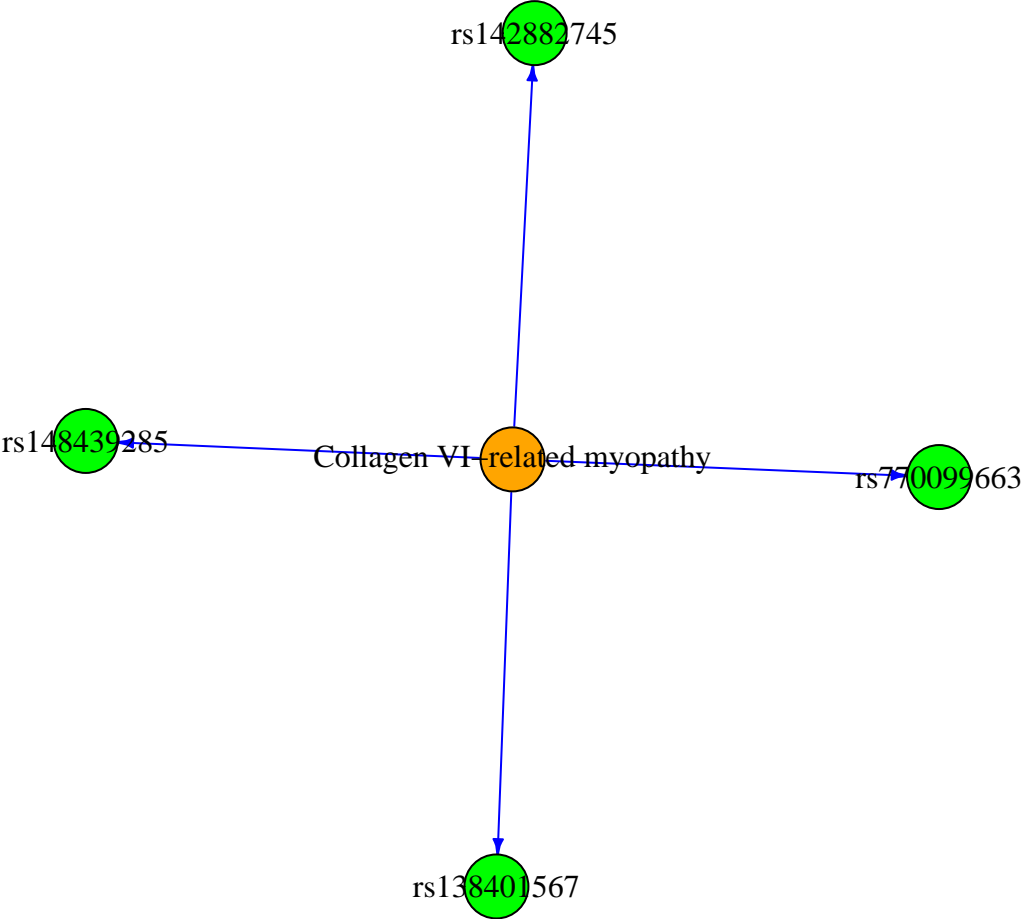

## Variant-Disease Network (Colorectal cancer)

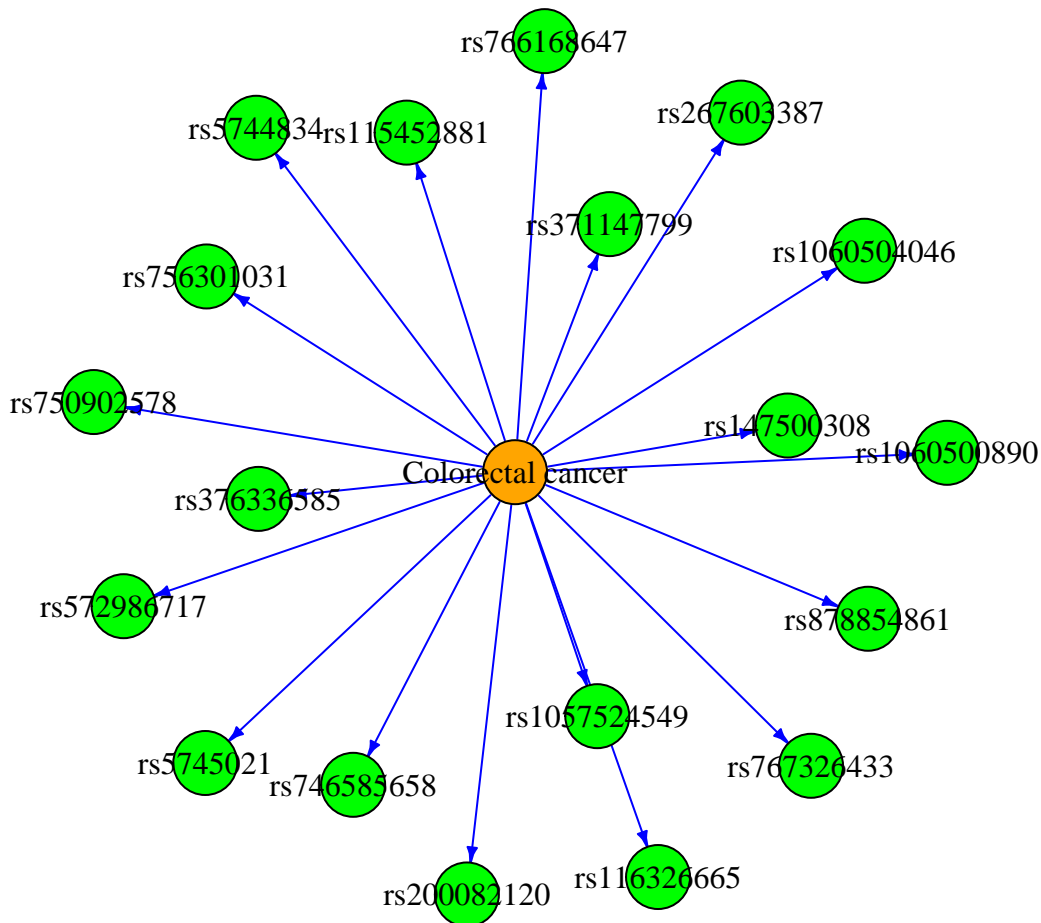



Variant–Disease Network (Combined oxidative phosphory deficiency)

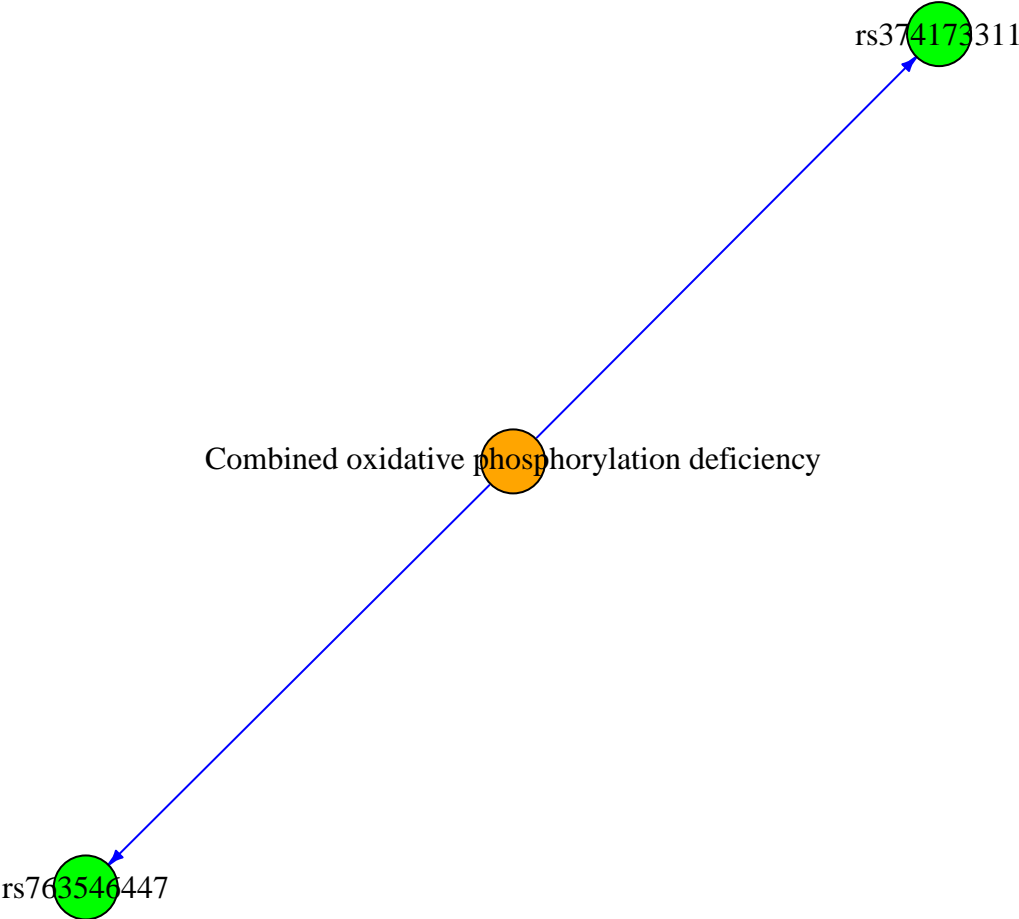

Variant–Disease Network (Combined oxidative phosphorylation deficiency

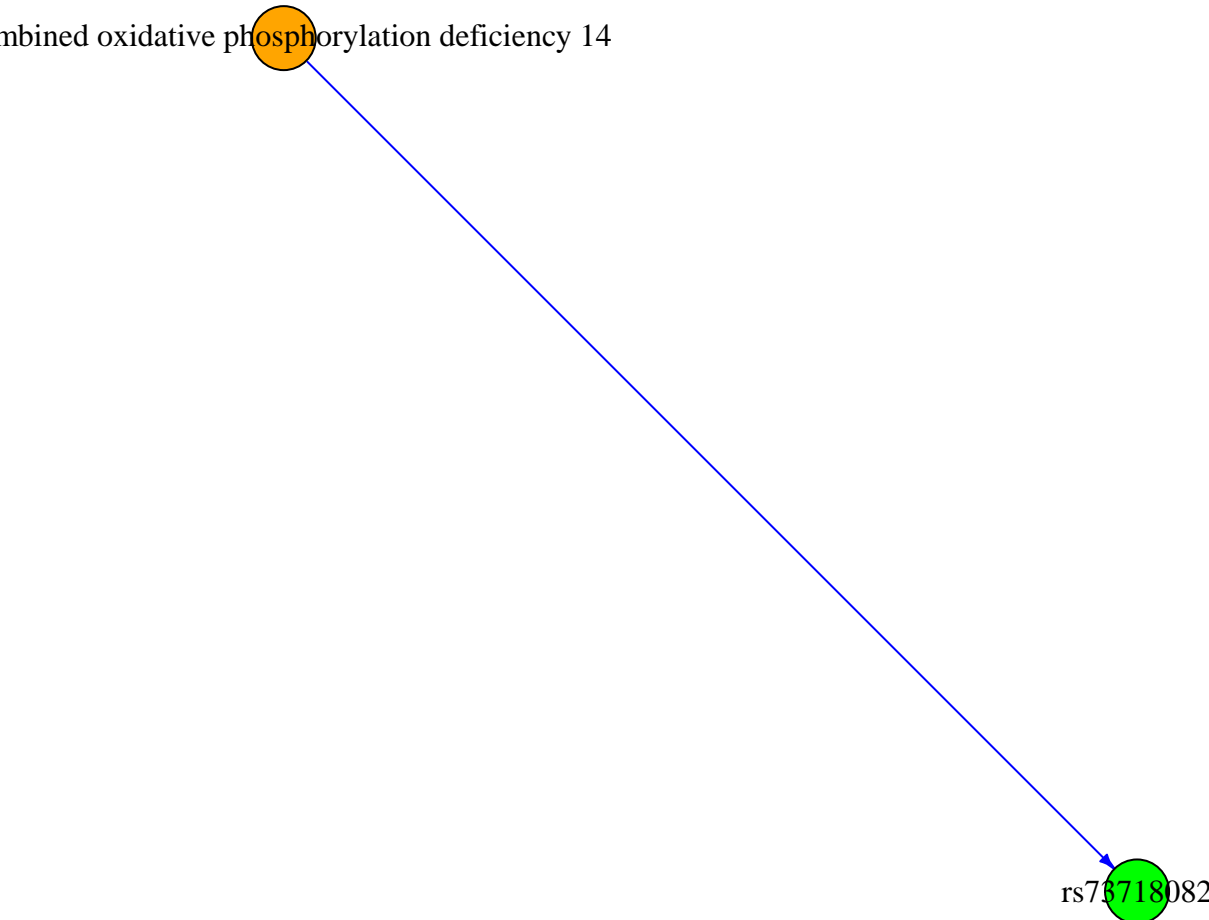

**Variant–Disease Network (Combined oxidative phosphorylation deficiency**

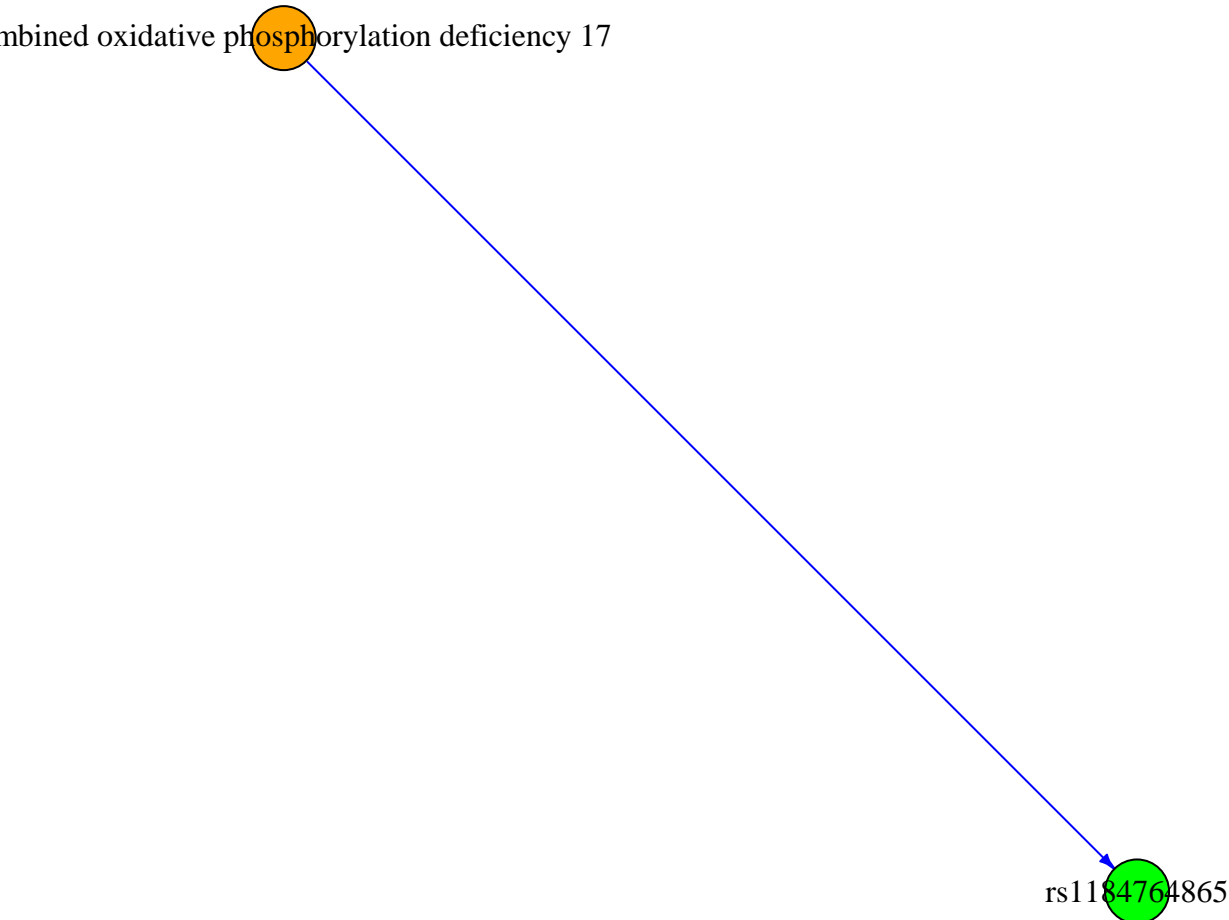

**Variant–Disease Network (Combined Pituitary Hormone Deficiency)**

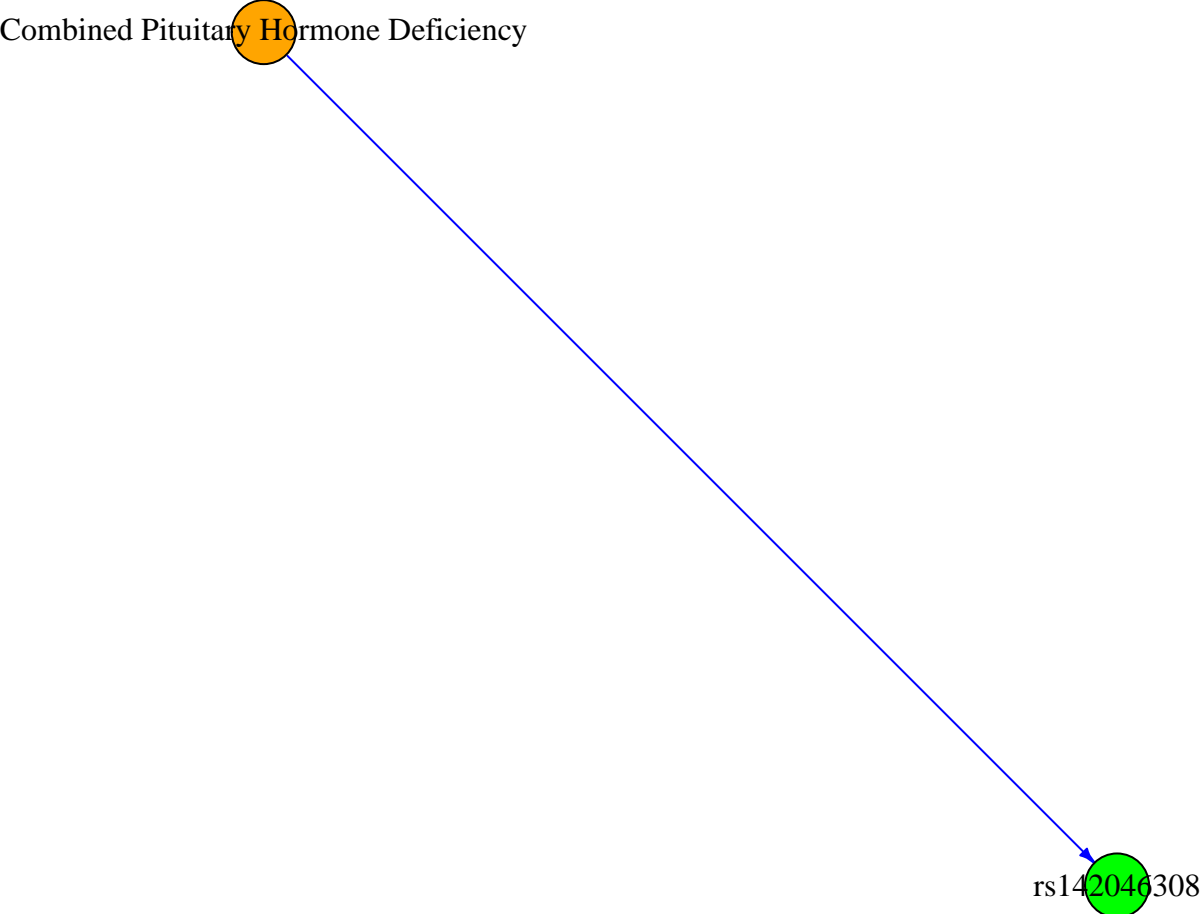

# Variant–Disease Network (Common variable immunodeficiency 7)

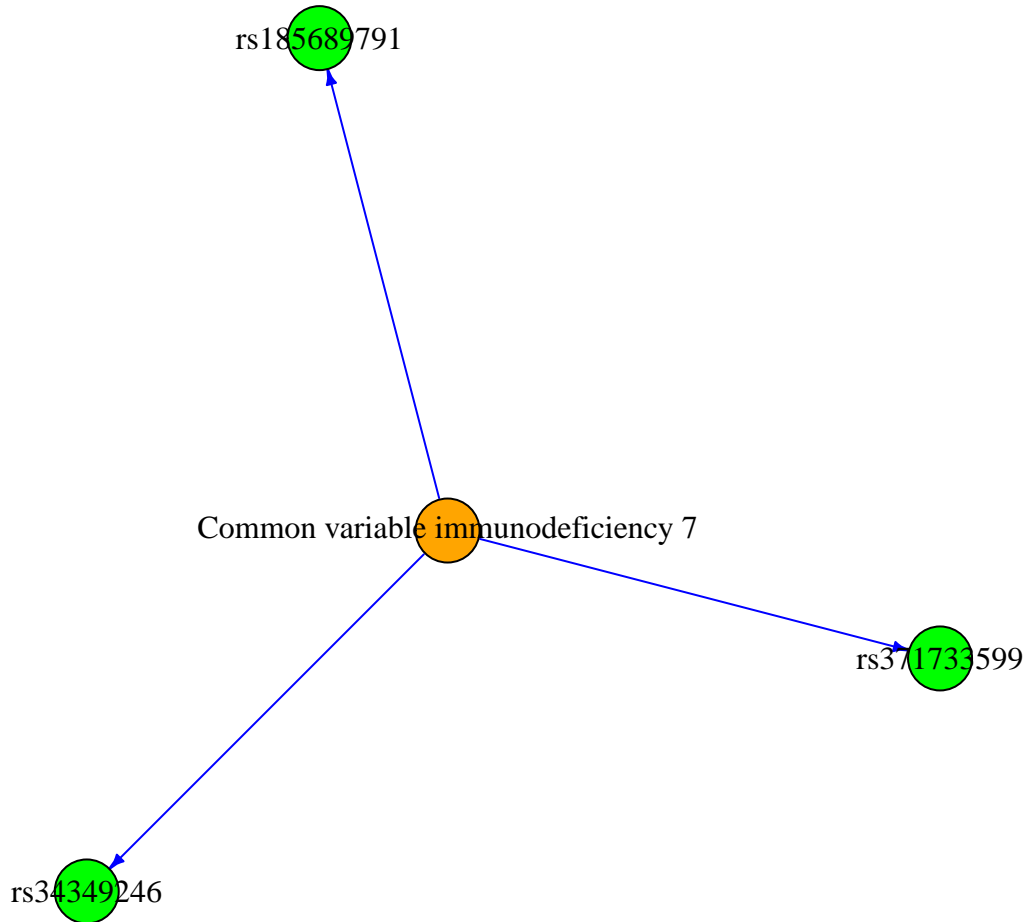

Variant–Disease Network (Complement component 2 deficiency)

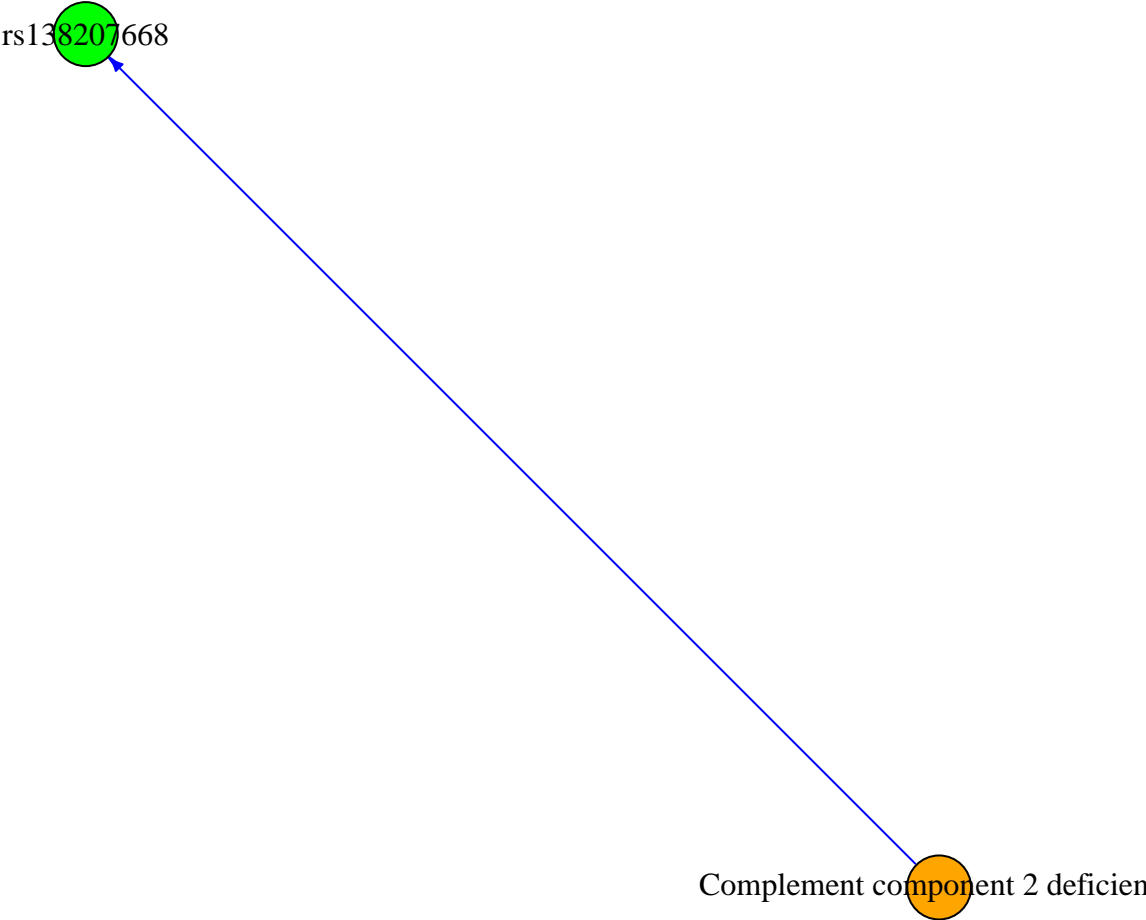

# Variant–Disease Network (Complement component 8 deficiency type 2)

Complement component 8 deficiency type 2

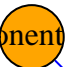

rs140813121

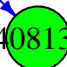

## Variant–Disease Network (Cone dystrophy 3)

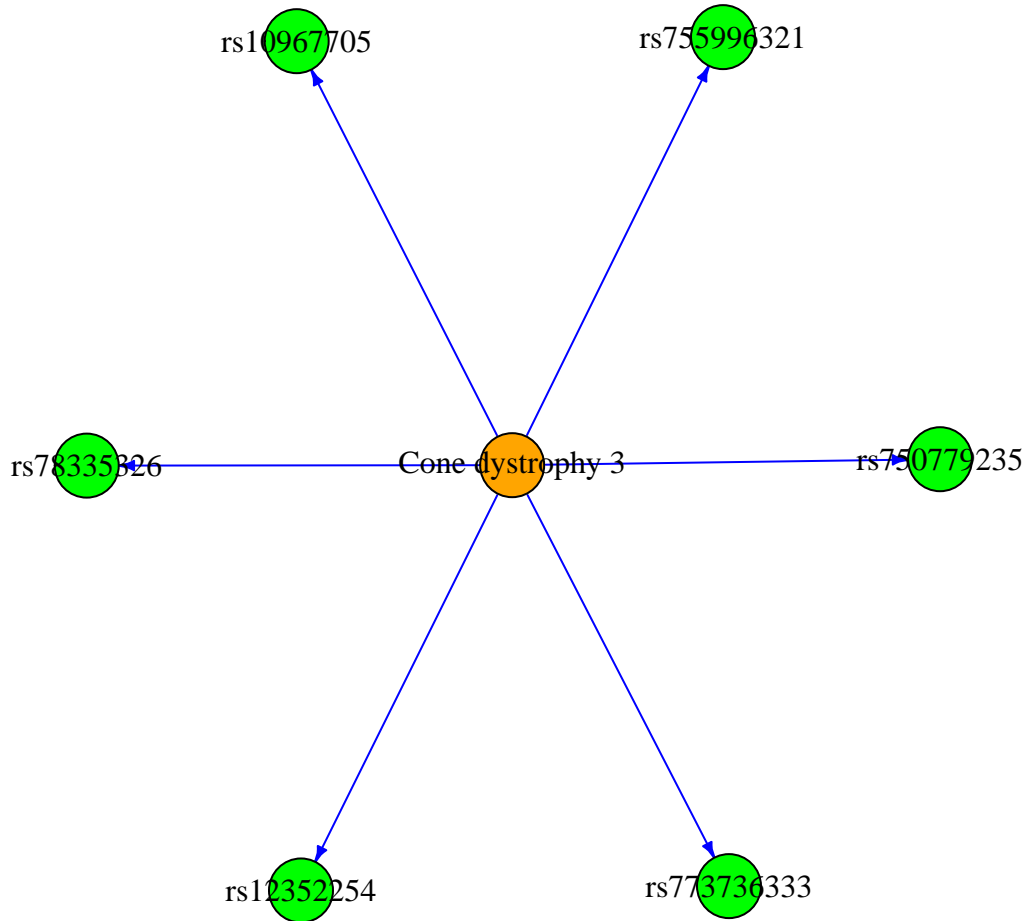



## Variant-Disease Network (Cone-Rod Dystrophy)

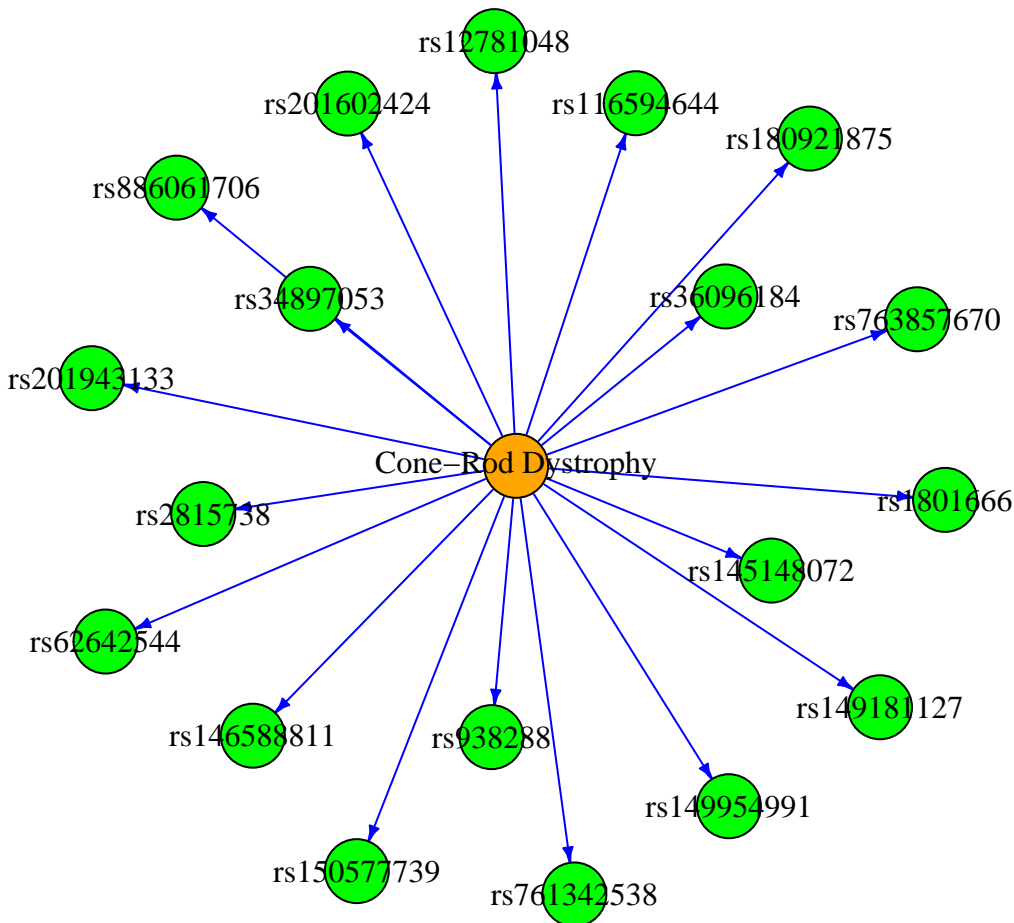

**Variant–Disease Network (Cone–rod dystrophy 15)**

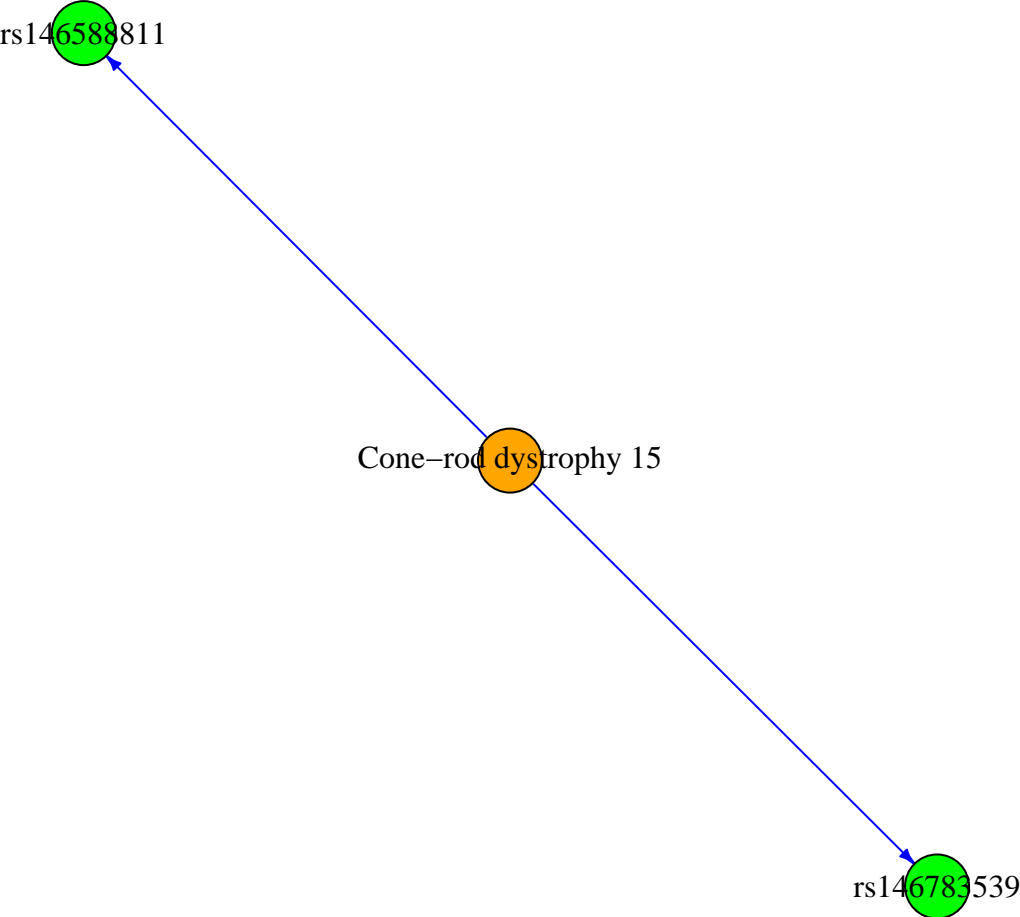

Variant–Disease Network (Cone-rod dystrophy amelogenesis imperfecta

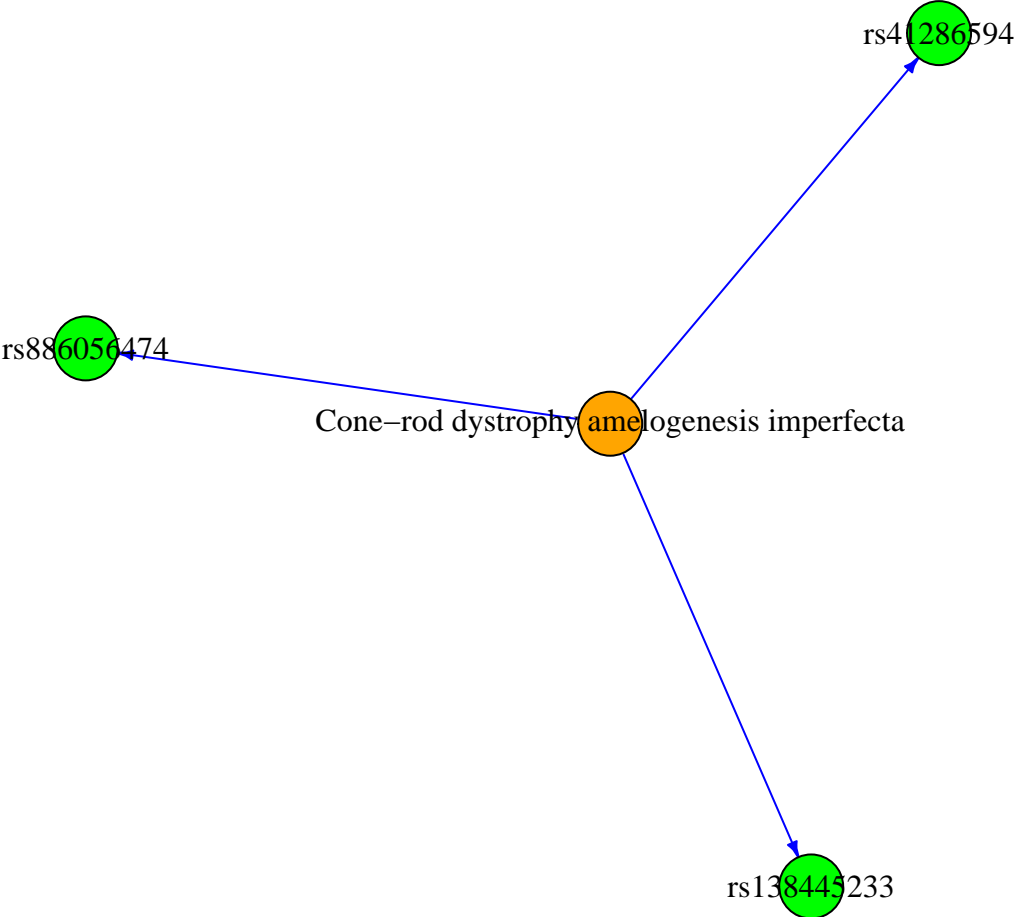

# Variant–Disease Network (Congenital absence of salivary gland)

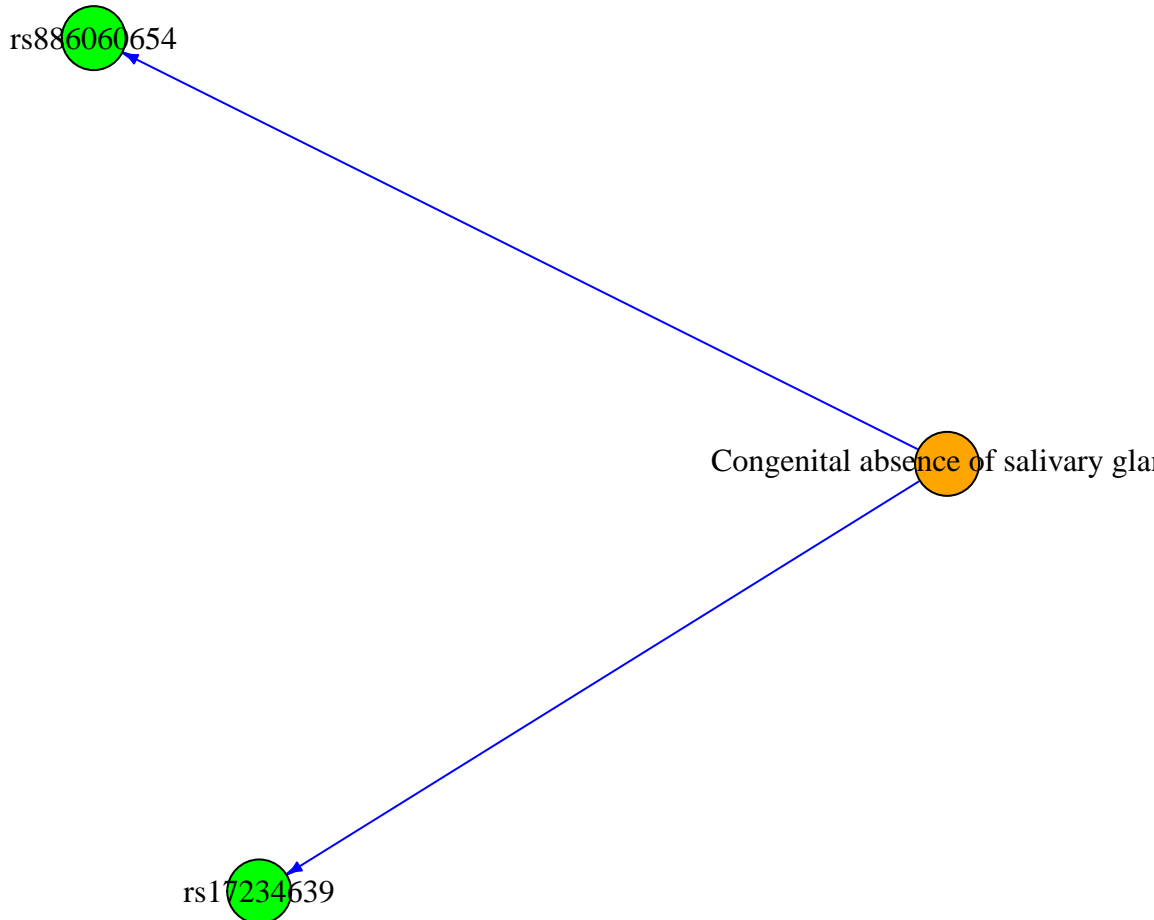

## Variant–Disease Network (Congenital cataract)

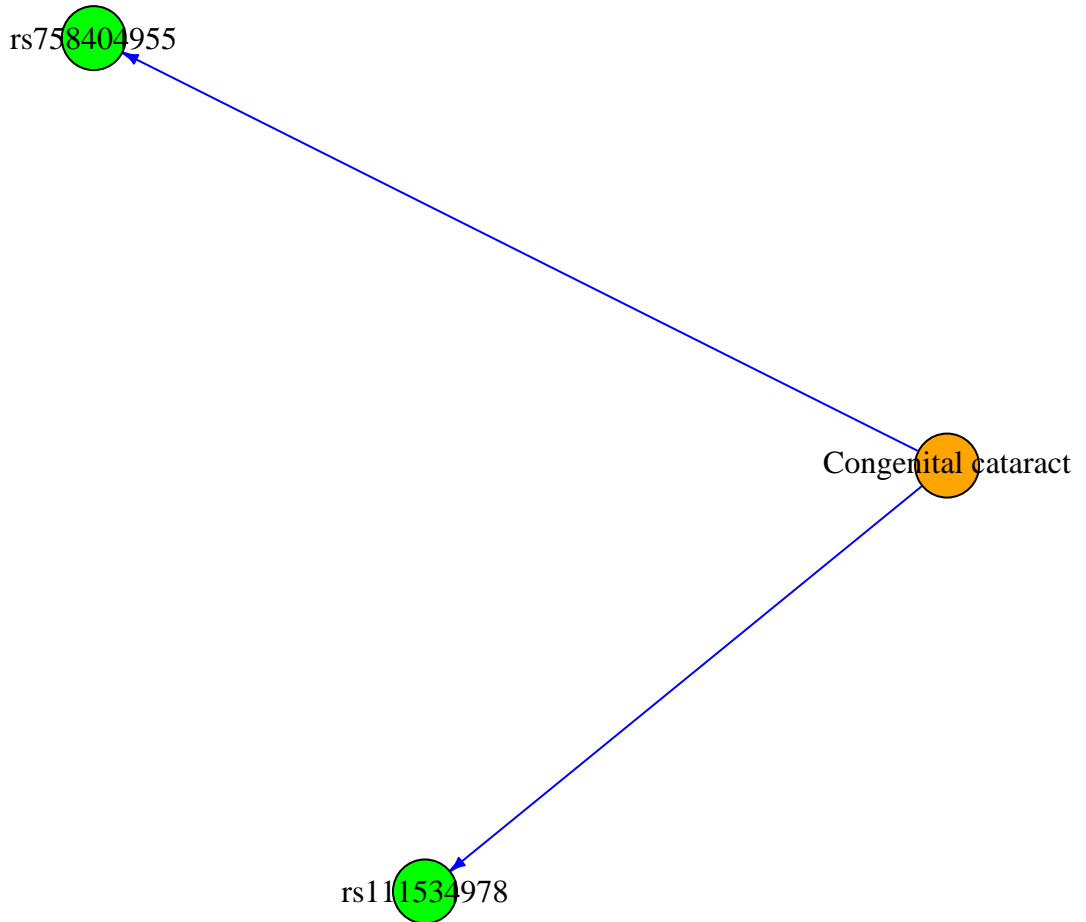

**Variant–Disease Network (Congenital cerebellar hypoplasia)**

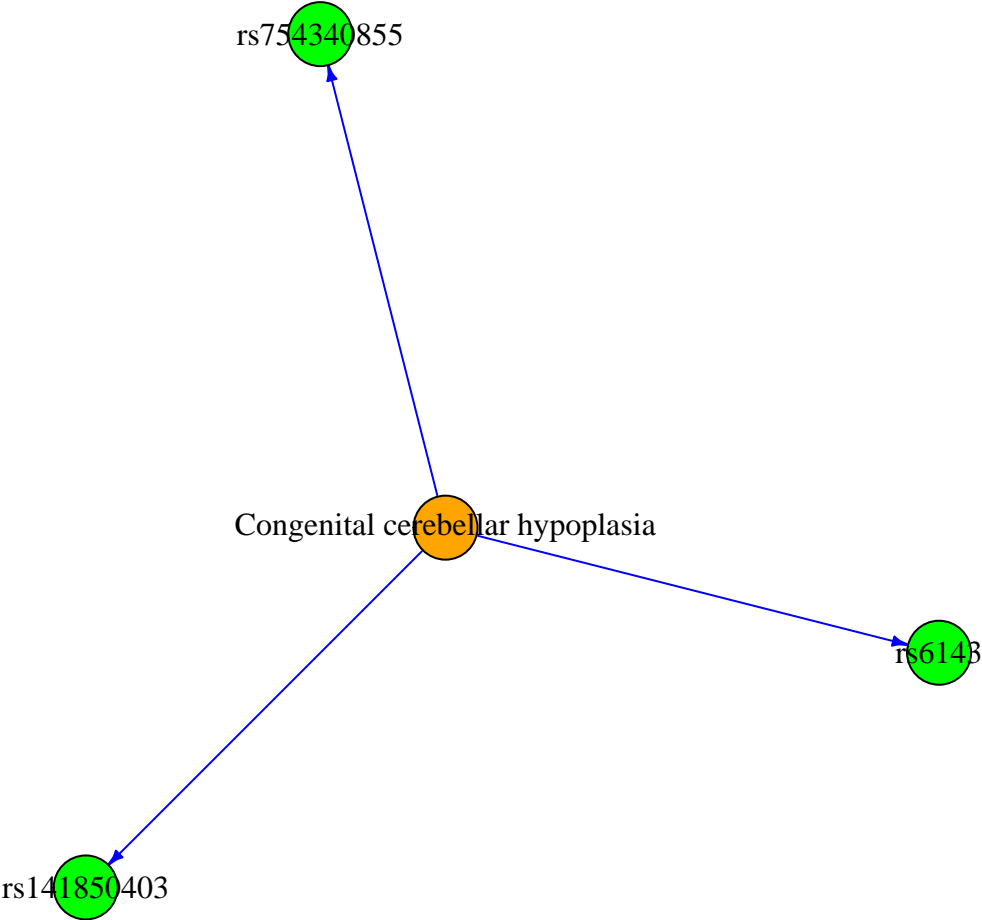

**Variant–Disease Network (Congenital contractural arachnodactyly)**

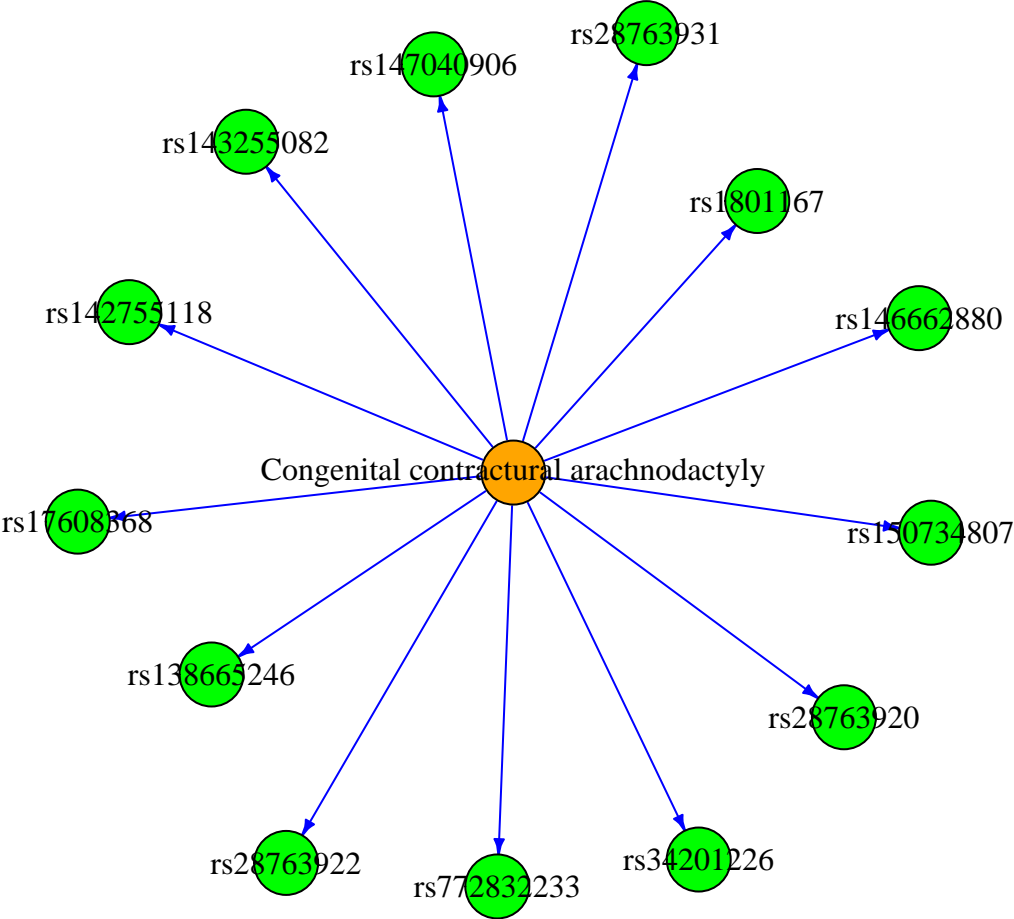

Variant–Disease Network (Congenital disorder of deglycosylation)

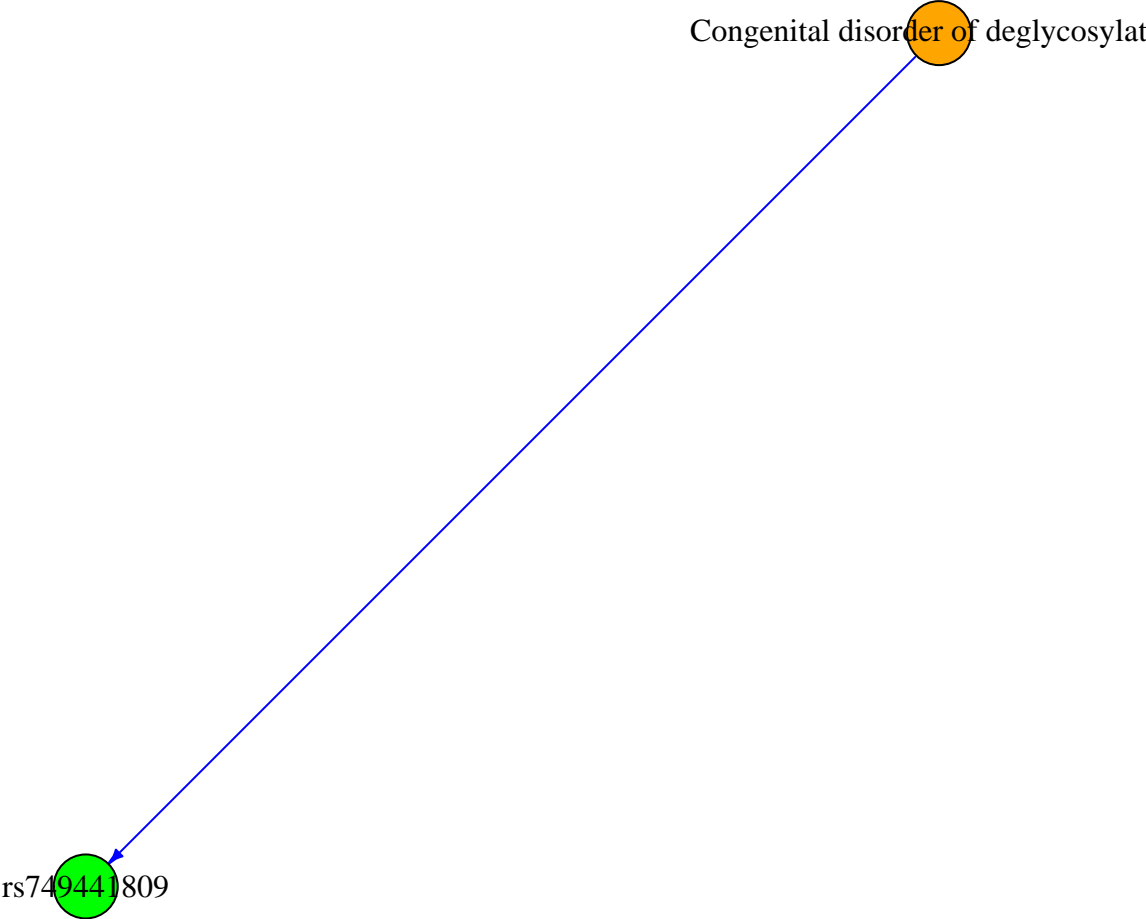



# Variant–Disease Network (Congenital disorder of glycosylation)

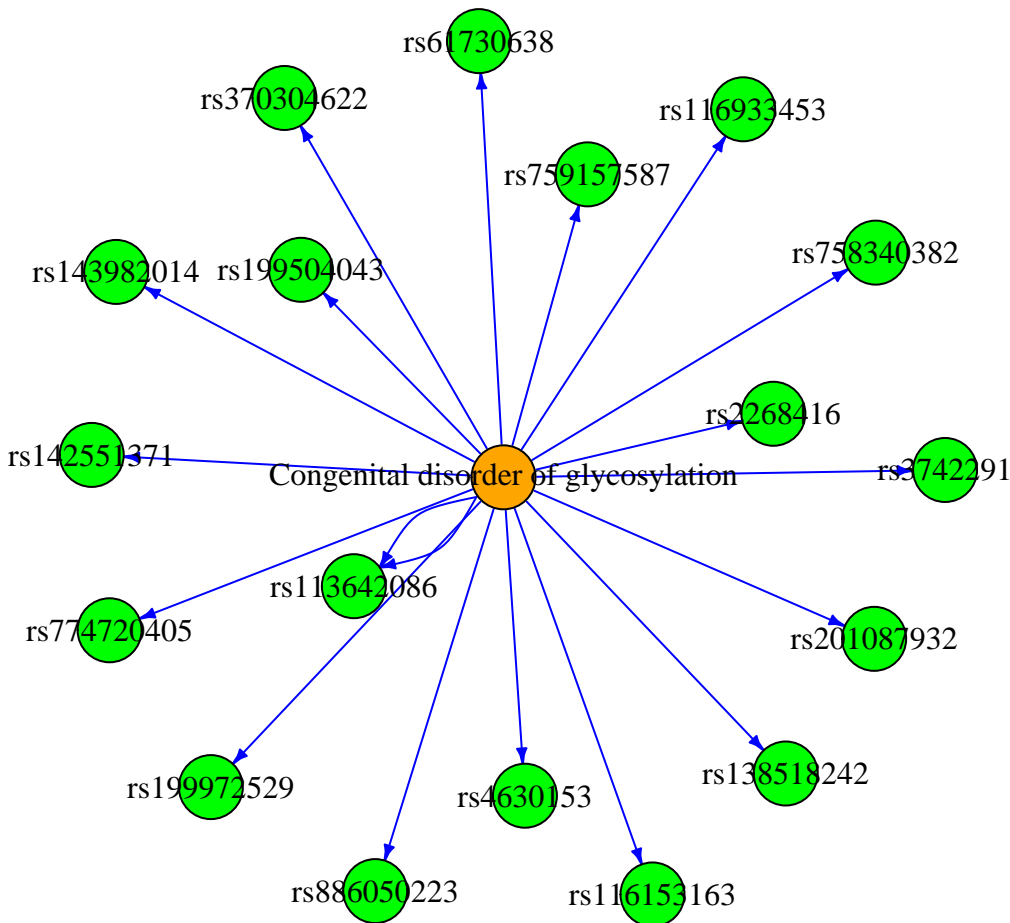

**Variant–Disease Network (Congenital disorder of glycosylation type 1B)**

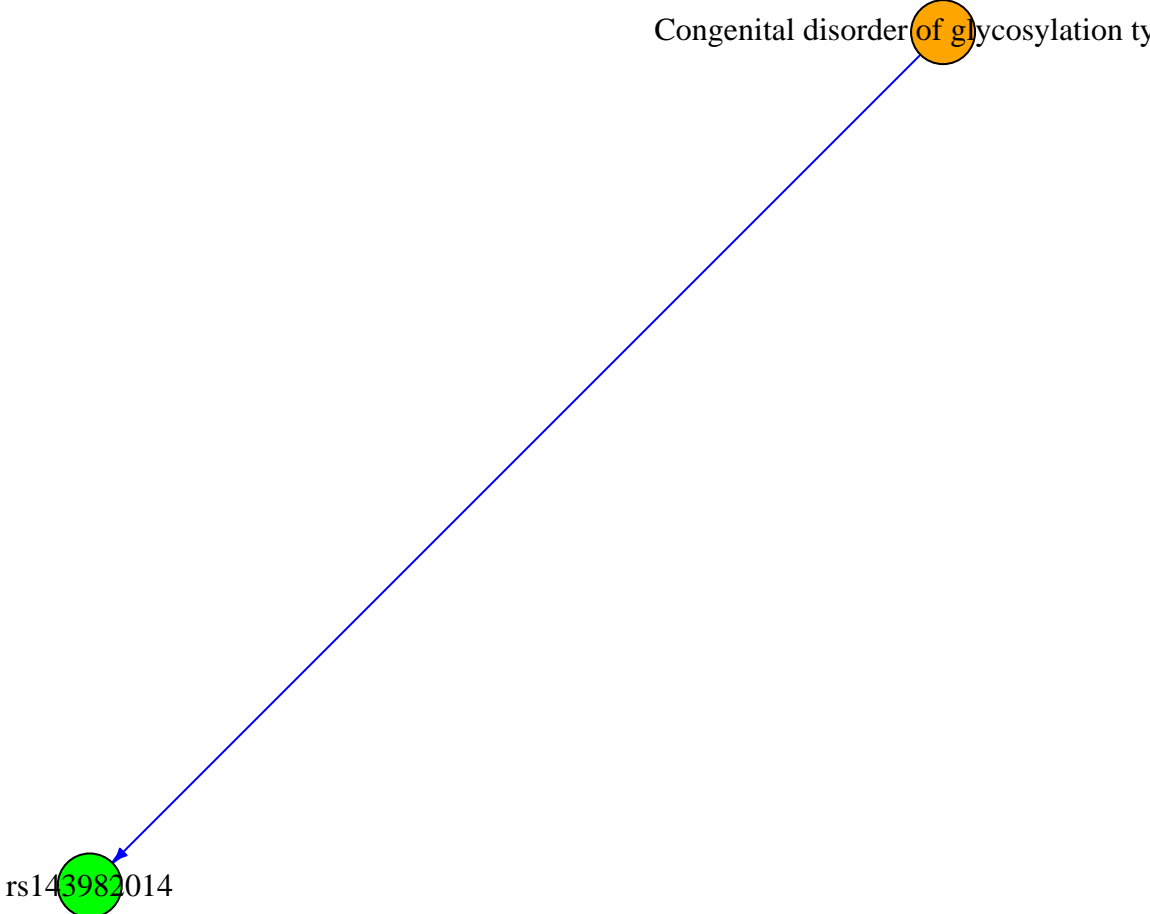

**Variant–Disease Network (Congenital disorder of glycosylation type 2B)**

Congenital disorder of glycosylation type 2B

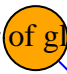

rs371586378

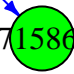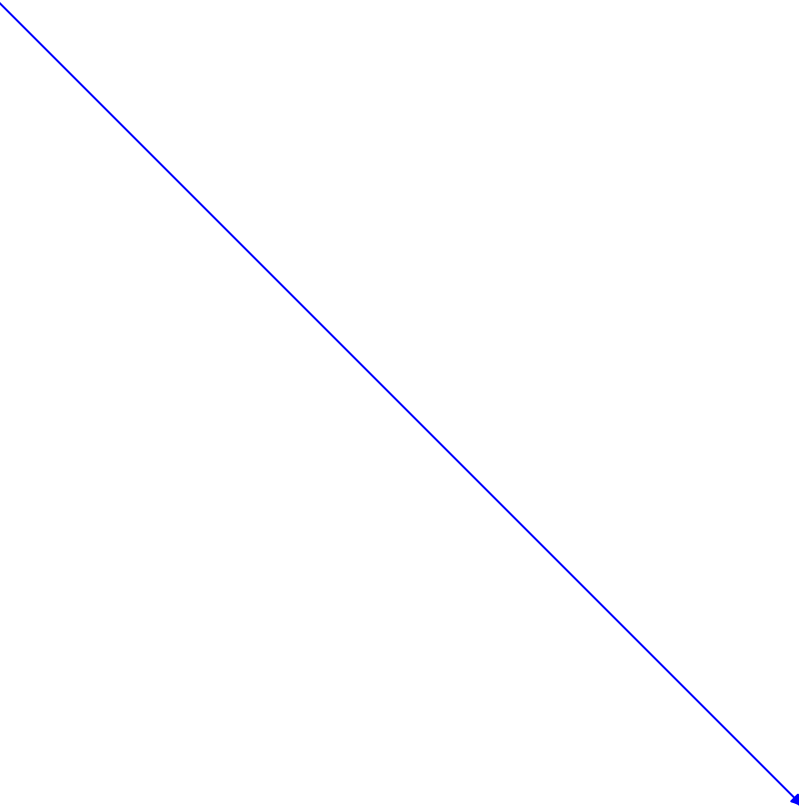

**Variant–Disease Network (Congenital disorder of glycosylation type 2C)**

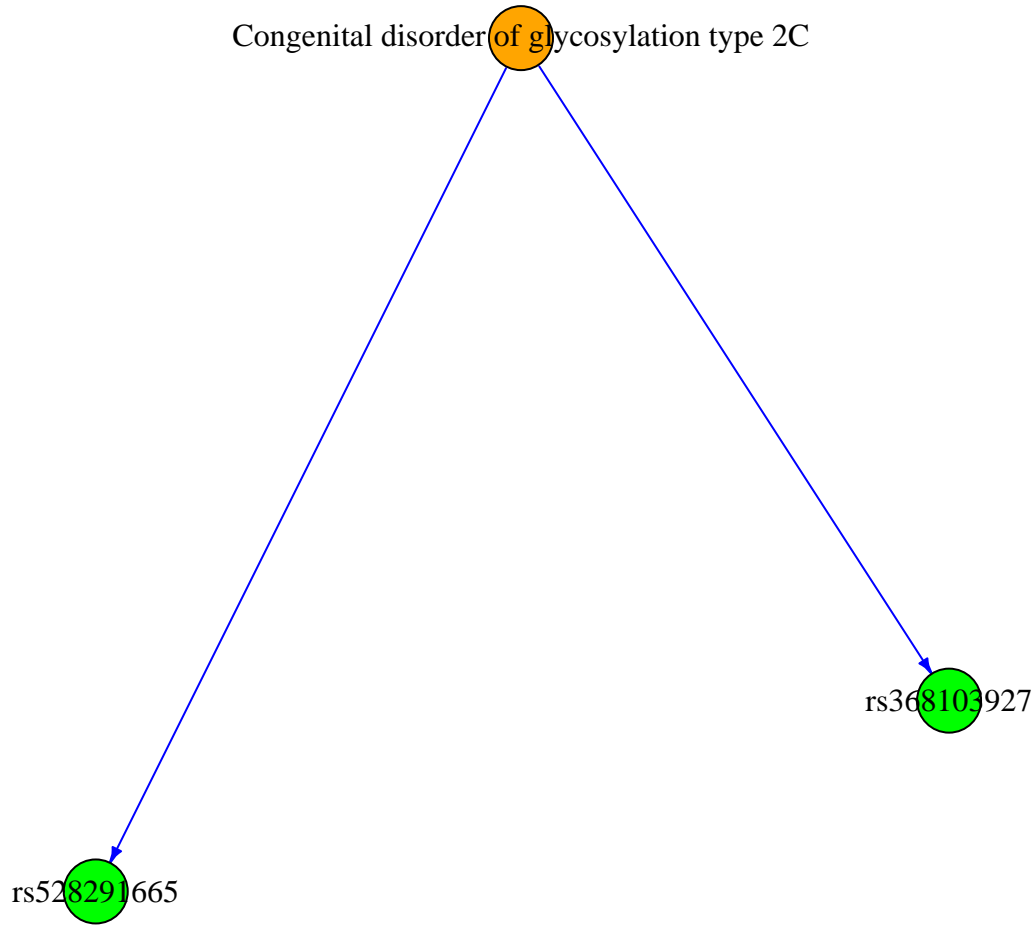

# Variant-Disease Network (Congenital disorder of glycosylation type 2F)

Congenital disorder of glycosylation type 2F

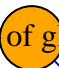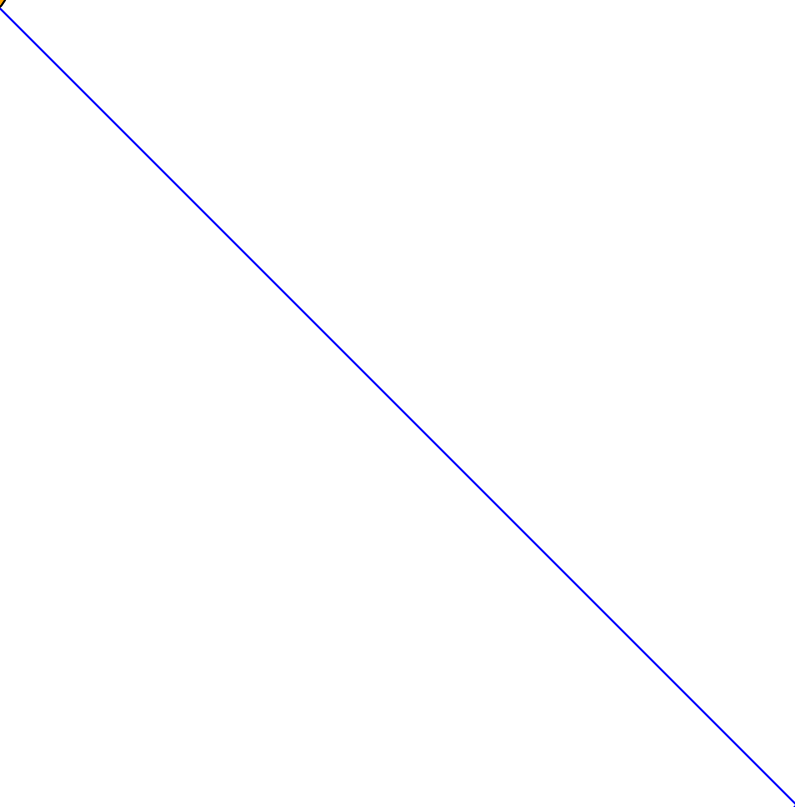

rs578205635

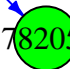

**Variant–Disease Network (Congenital disorder of glycosylation type 2H)**

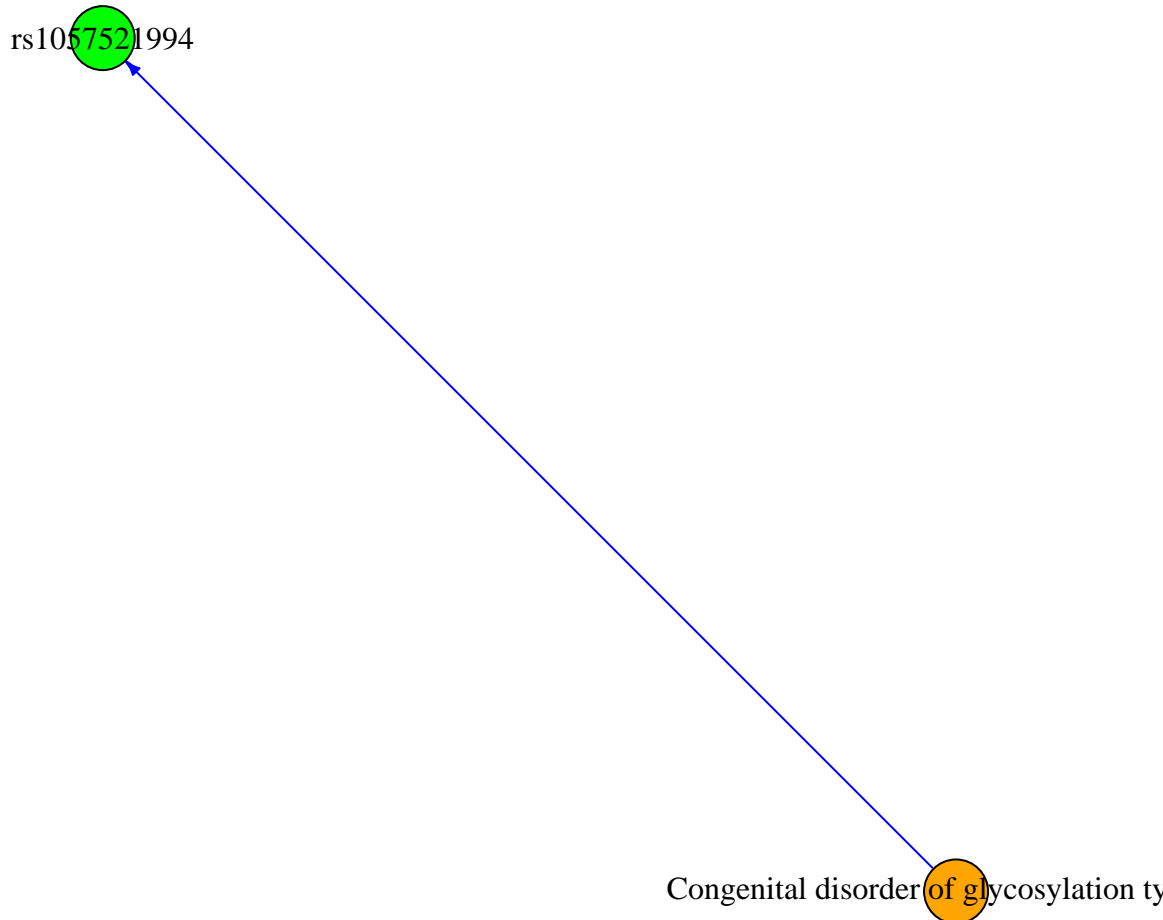

# Variant–Disease Network (Congenital disorder of glycosylation type 2L)

Congenital disorder of glycosylation type 2L

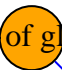

rs747232819

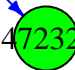

Variant–Disease Network (Congenital generalized lipodystrophy)

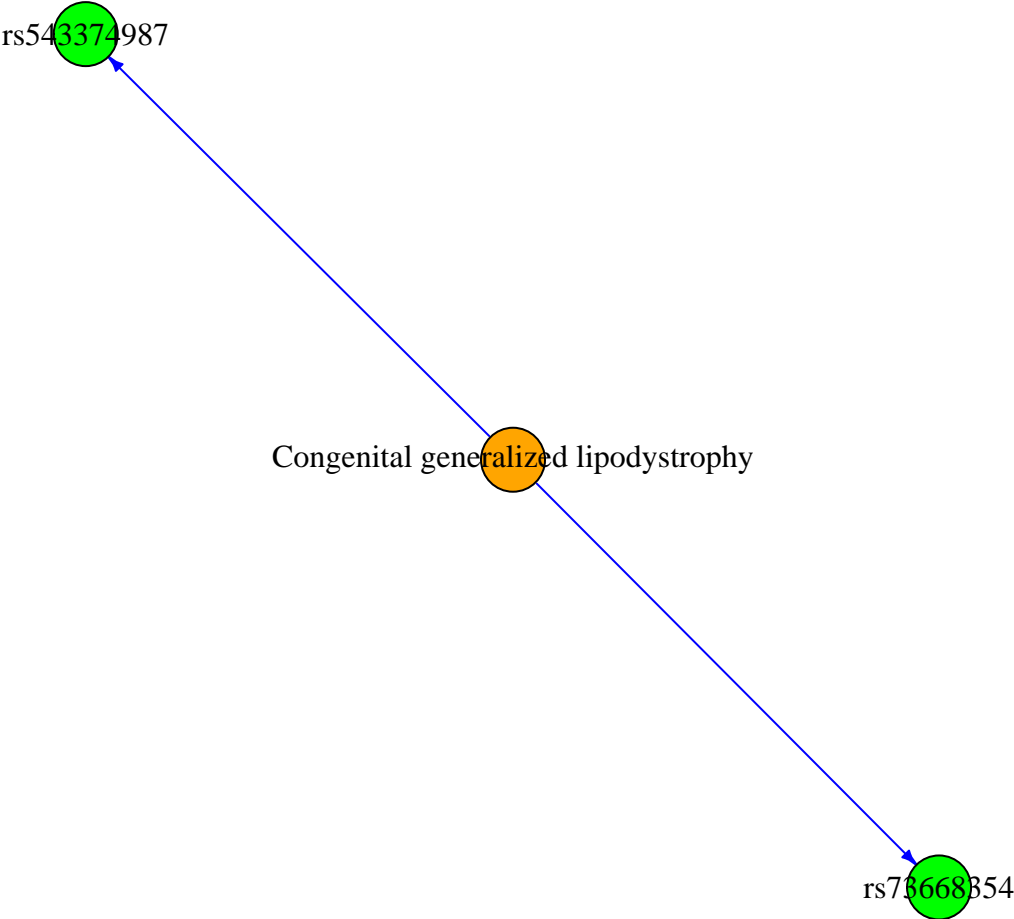



# Variant–Disease Network (Congenital generalized lipodystrophy type 1)

rs200656731

Congenital generalized lipodystrophy

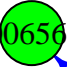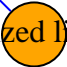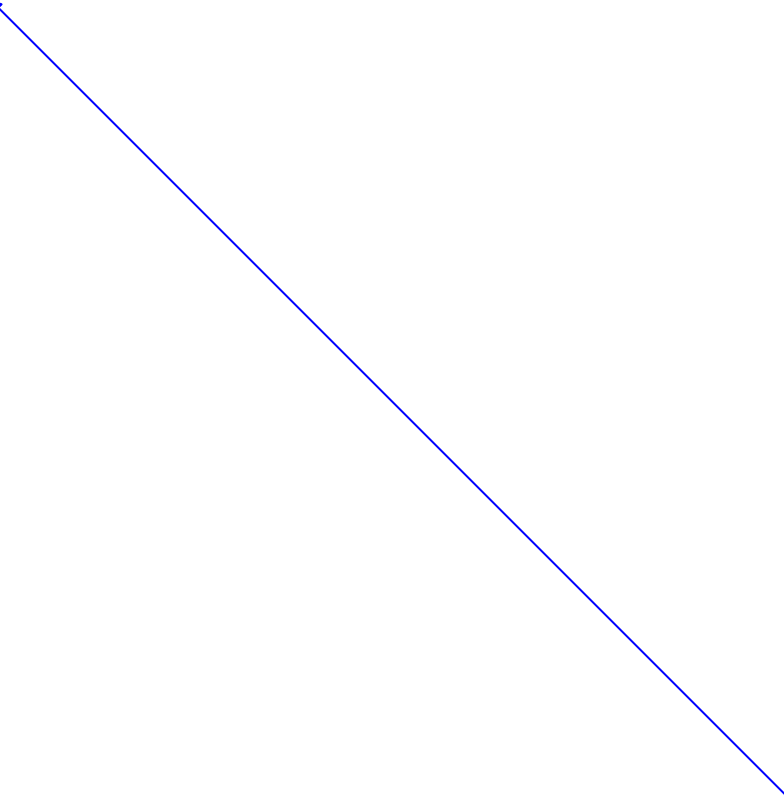

Variant–Disease Network (Congenital glucose–galactose malabsorption)

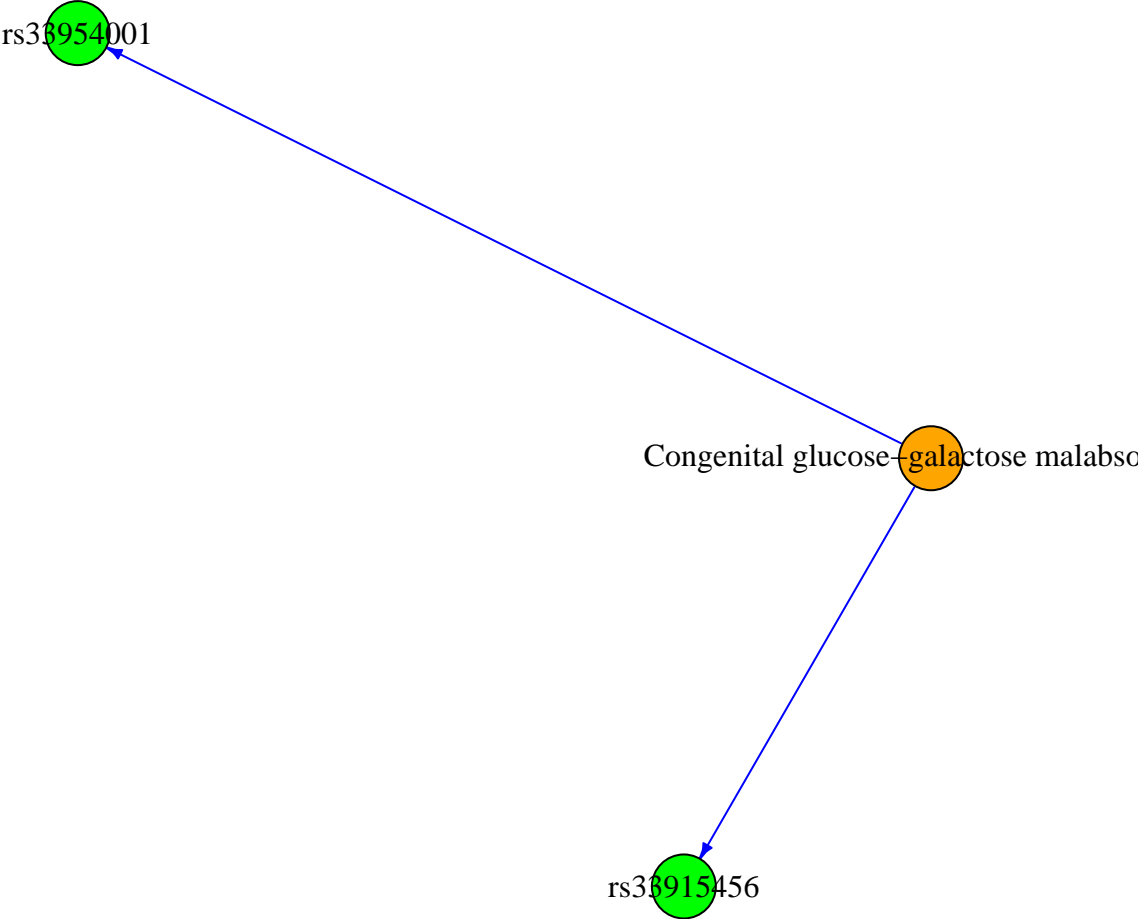

Variant–Disease Network (Congenital hyperammonemia)

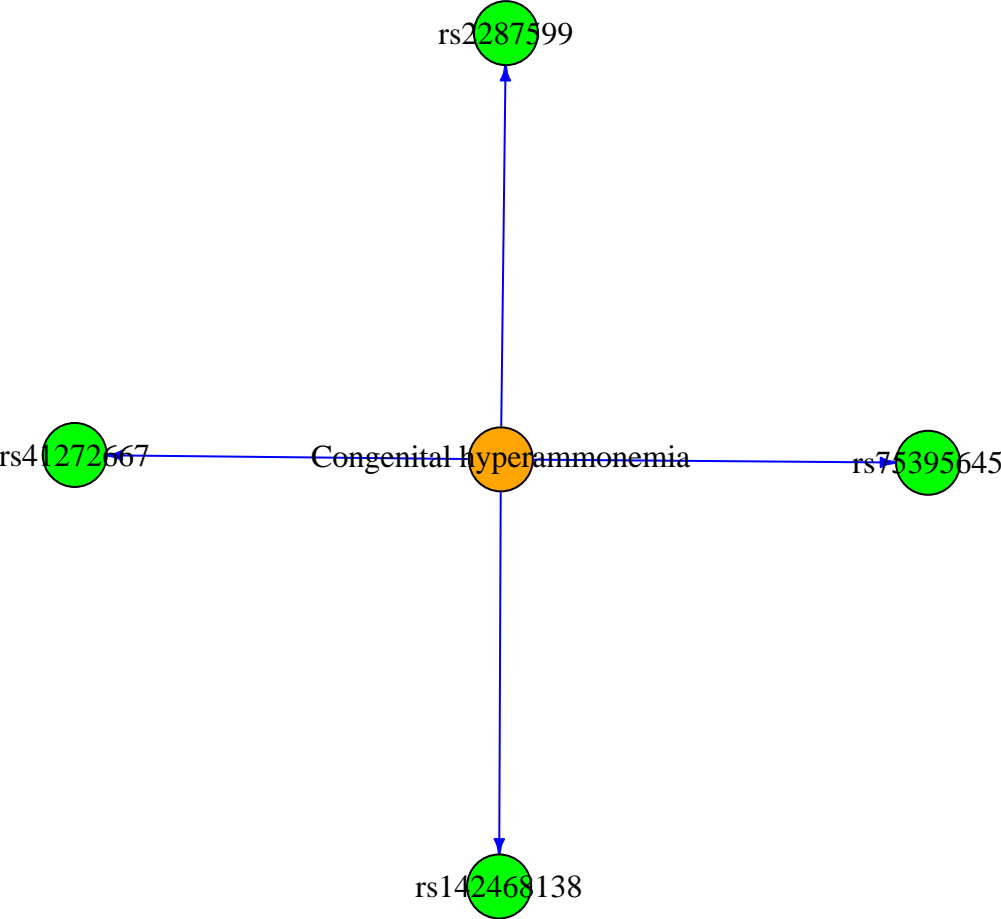

## Variant–Disease Network (Congenital hypothyroidism)

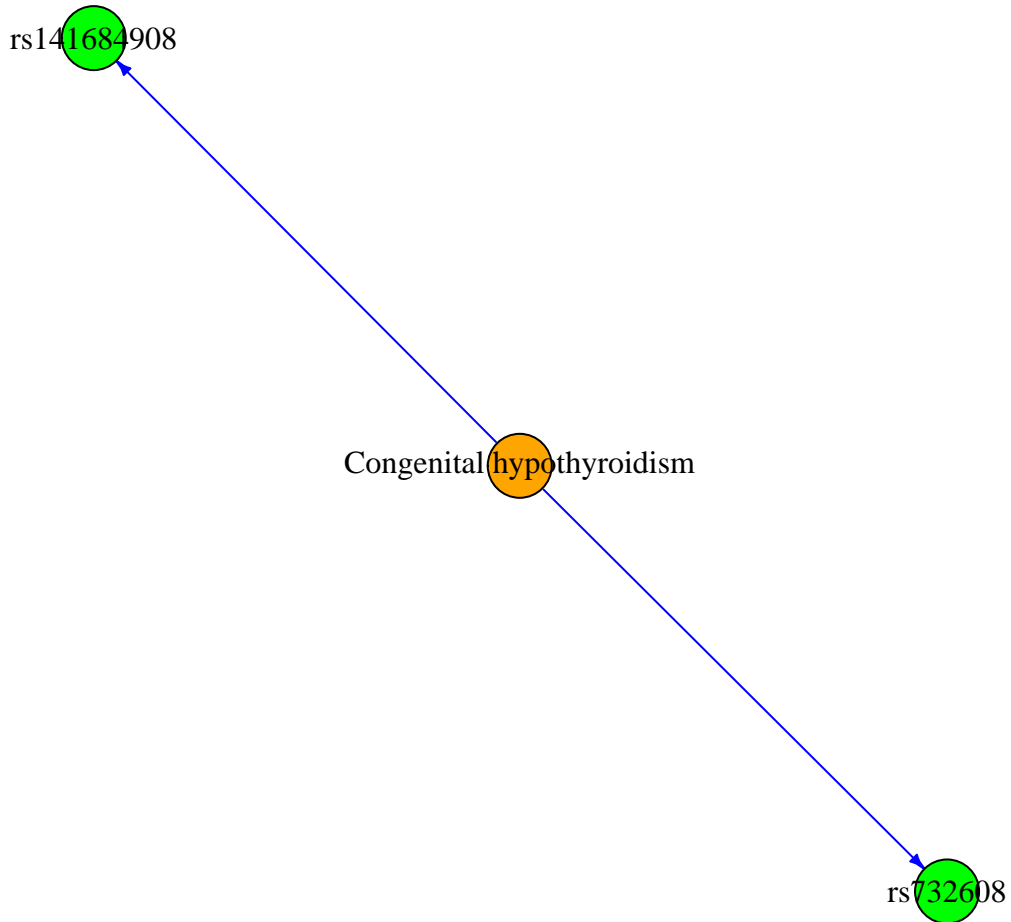

# Variant–Disease Network (Congenital ichthyosiform erythroderma)

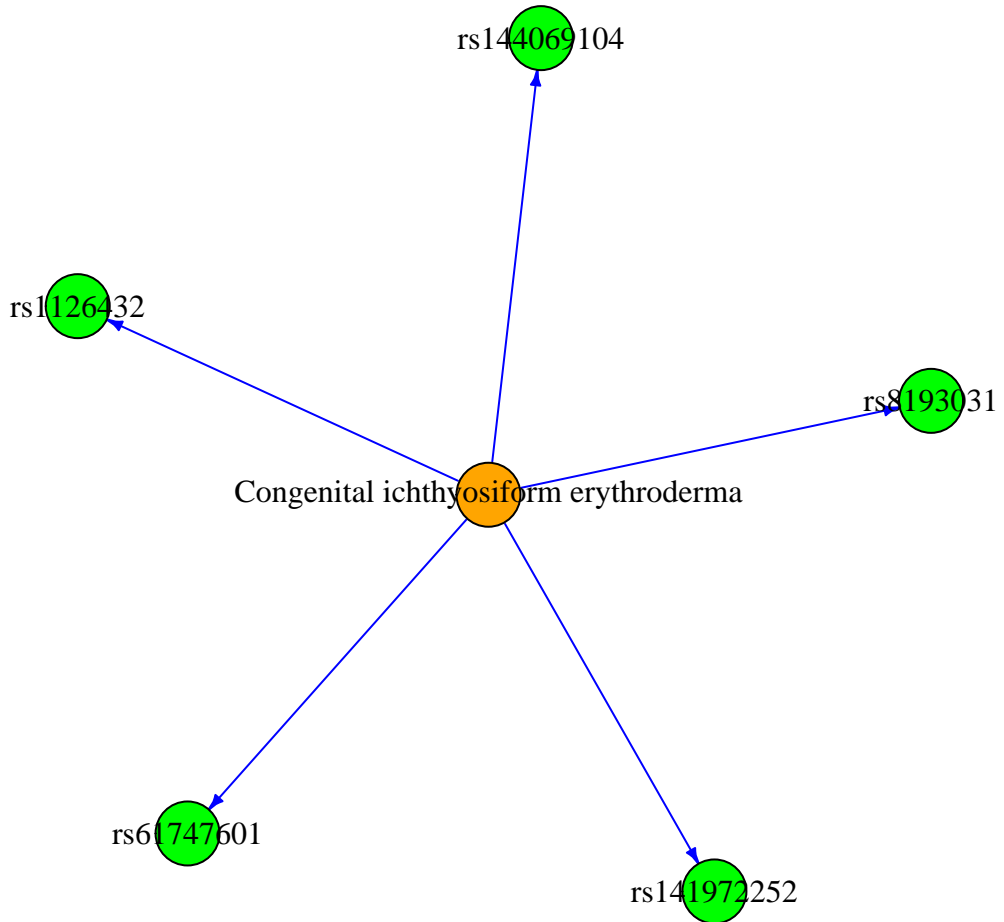

**Variant–Disease Network (Congenital lactase deficiency)**

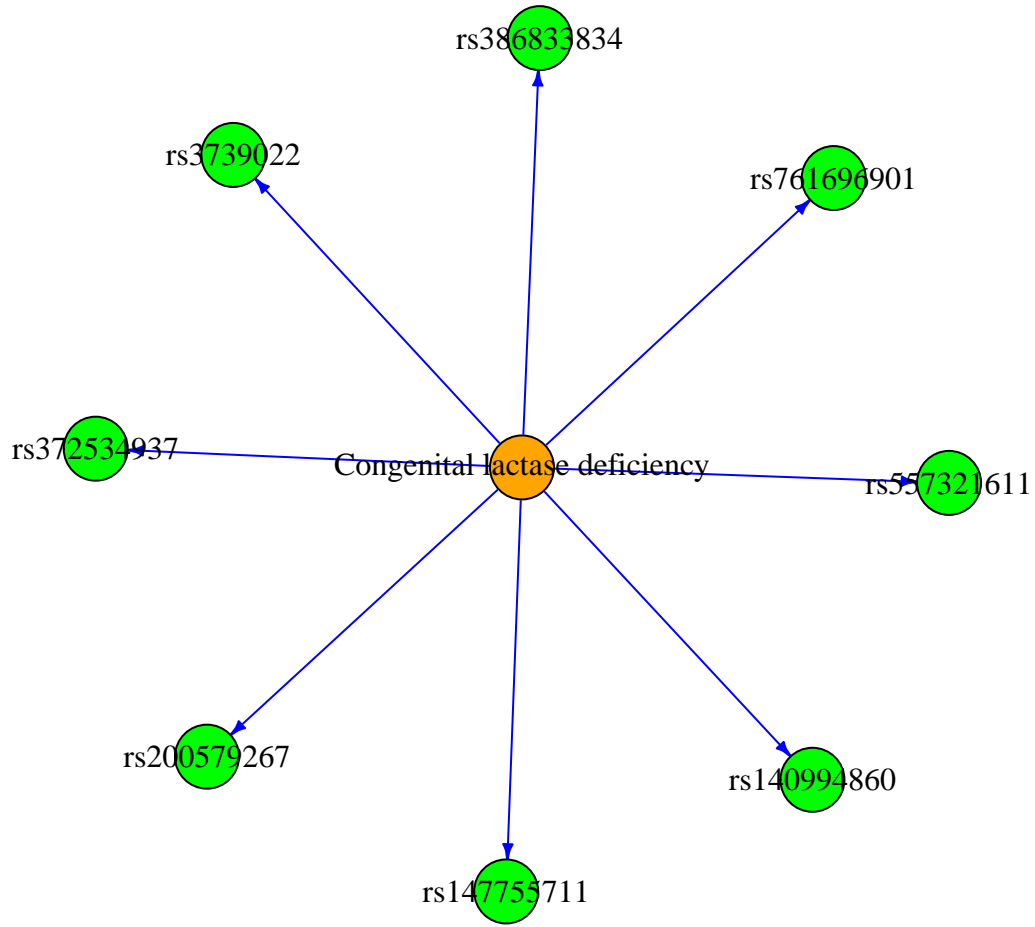

Variant–Disease Network (Congenital long QT syndrome)

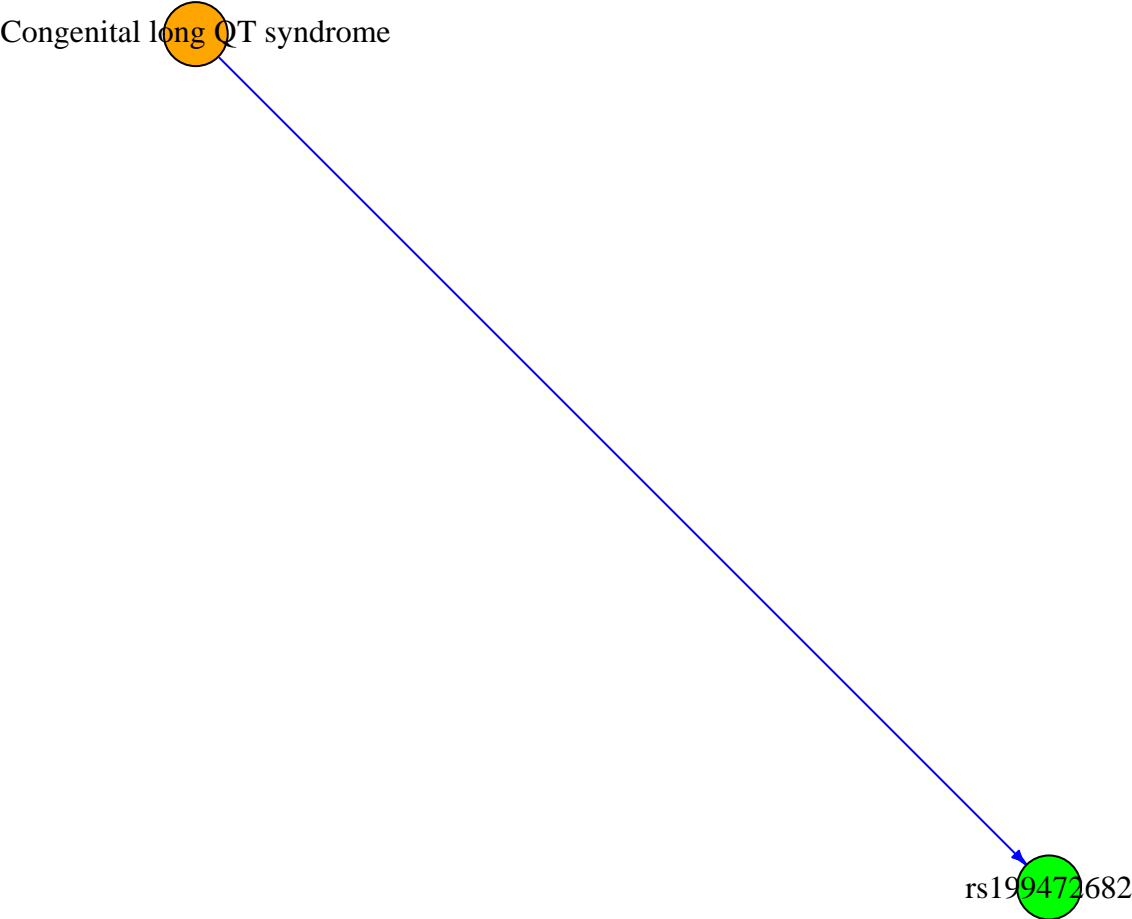

Variant–Disease Network (Congenital Muscular Dystrophy)

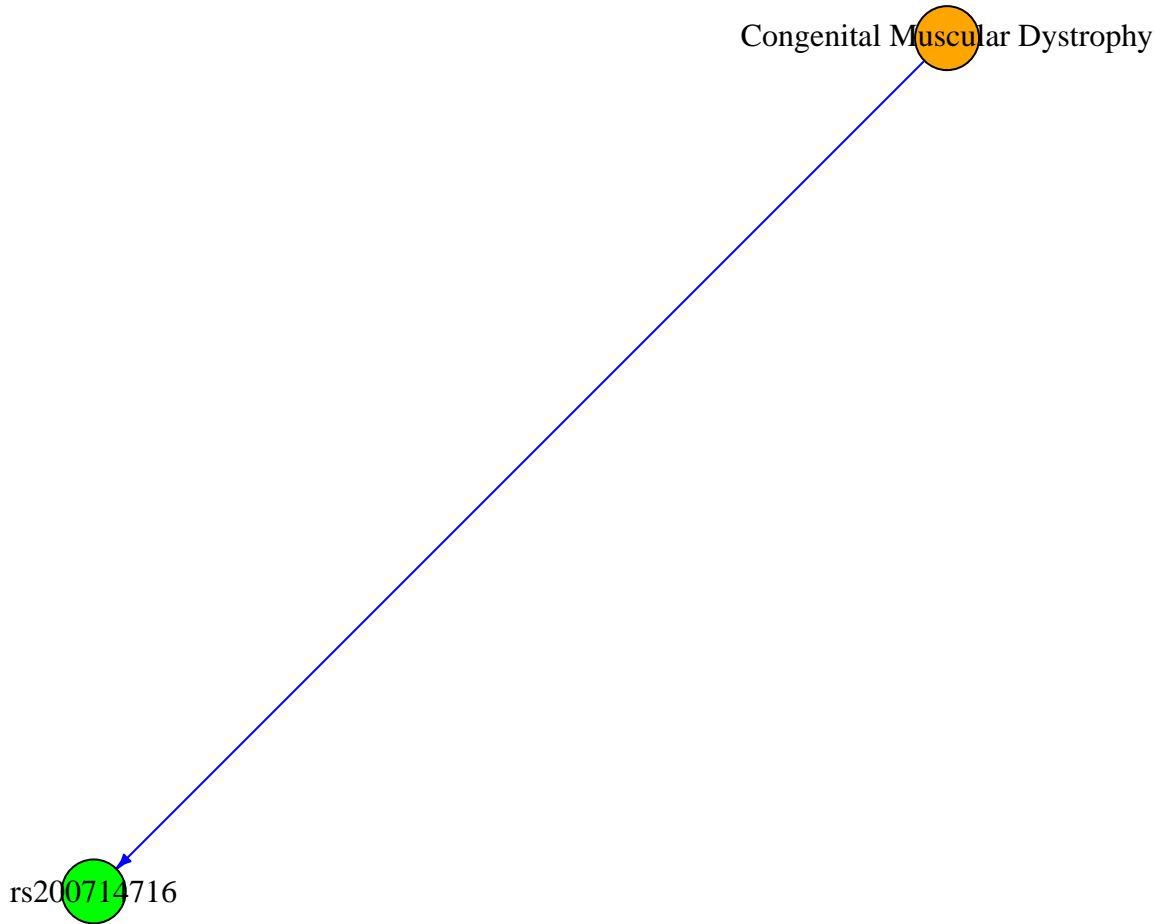



# se Network (Congenital muscular dystrophy–dystroglycanopathy with brain a

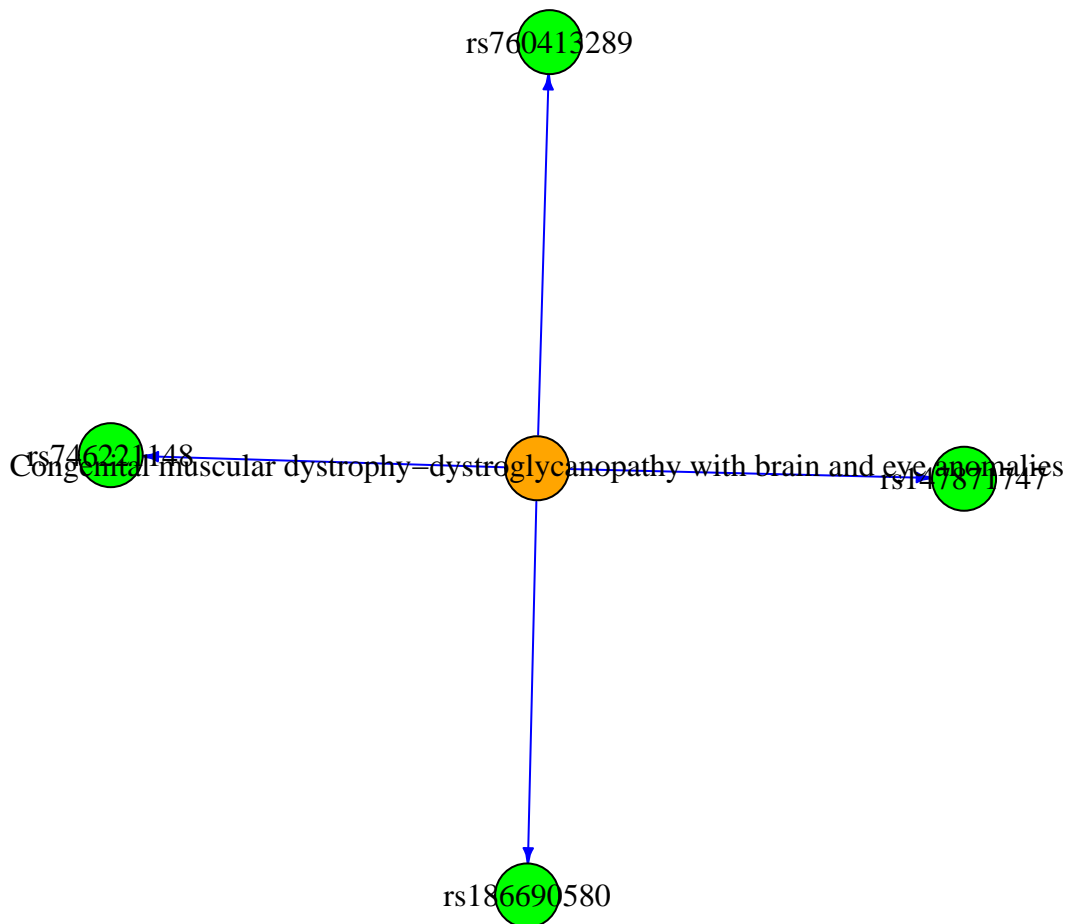

# Disease Network (Congenital muscular dystrophy–dystroglycanopathy with me

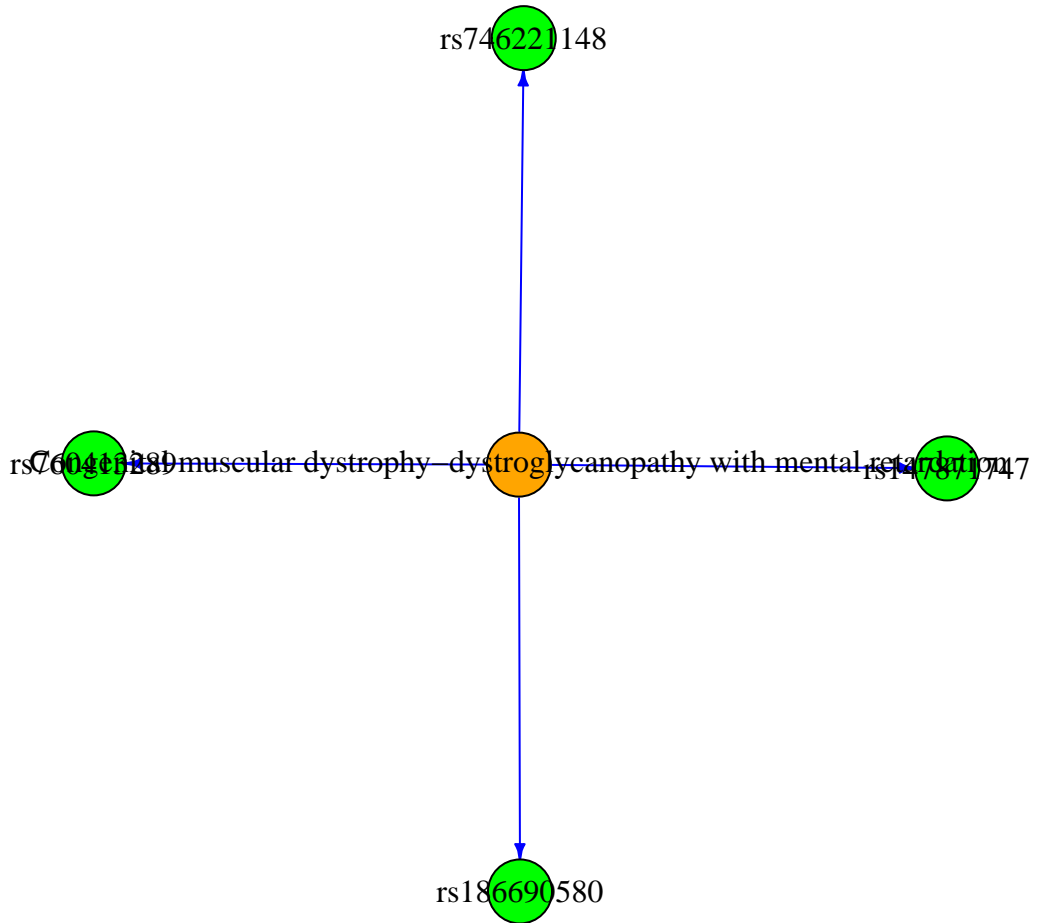

# Variant–Disease Network (Congenital muscular hypertrophy–cerebral syndrome)

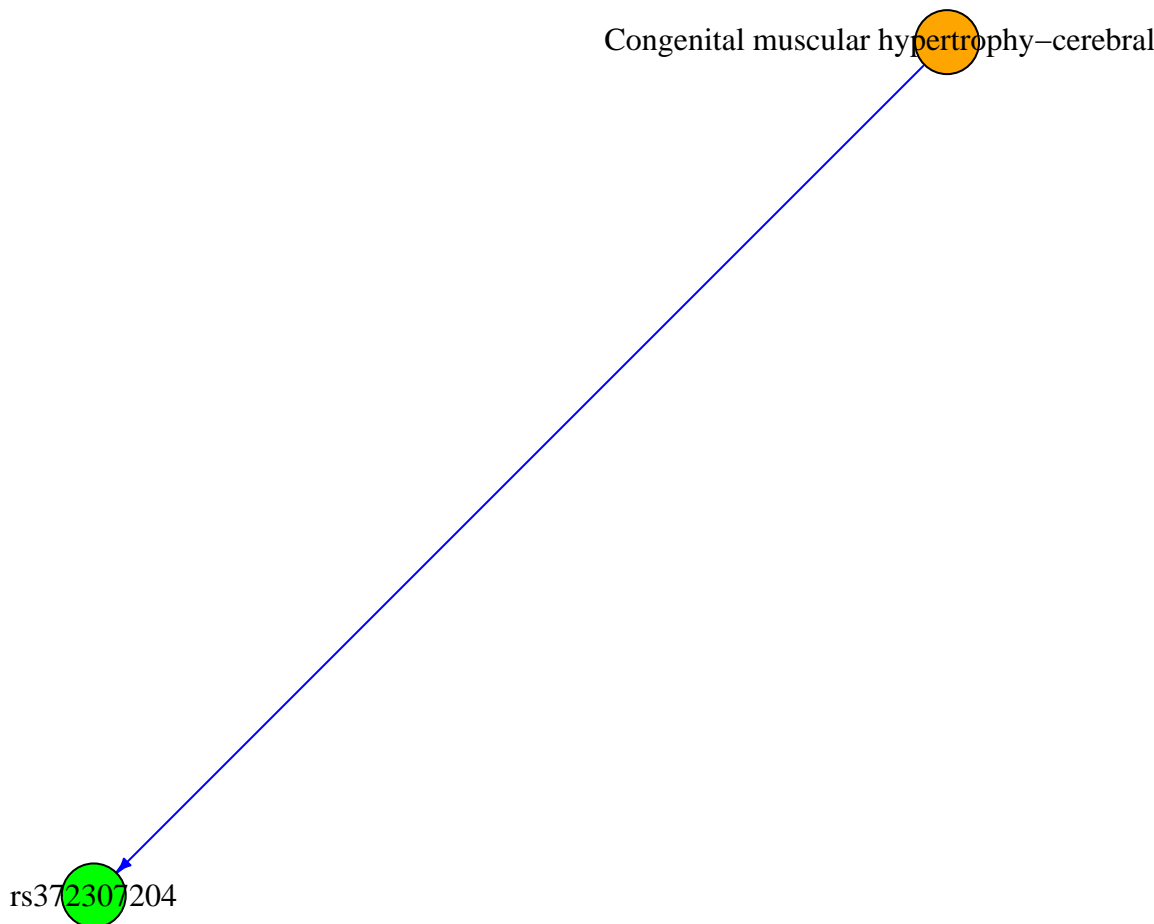

**Variant–Disease Network (Congenital myasthenic syndrome)**

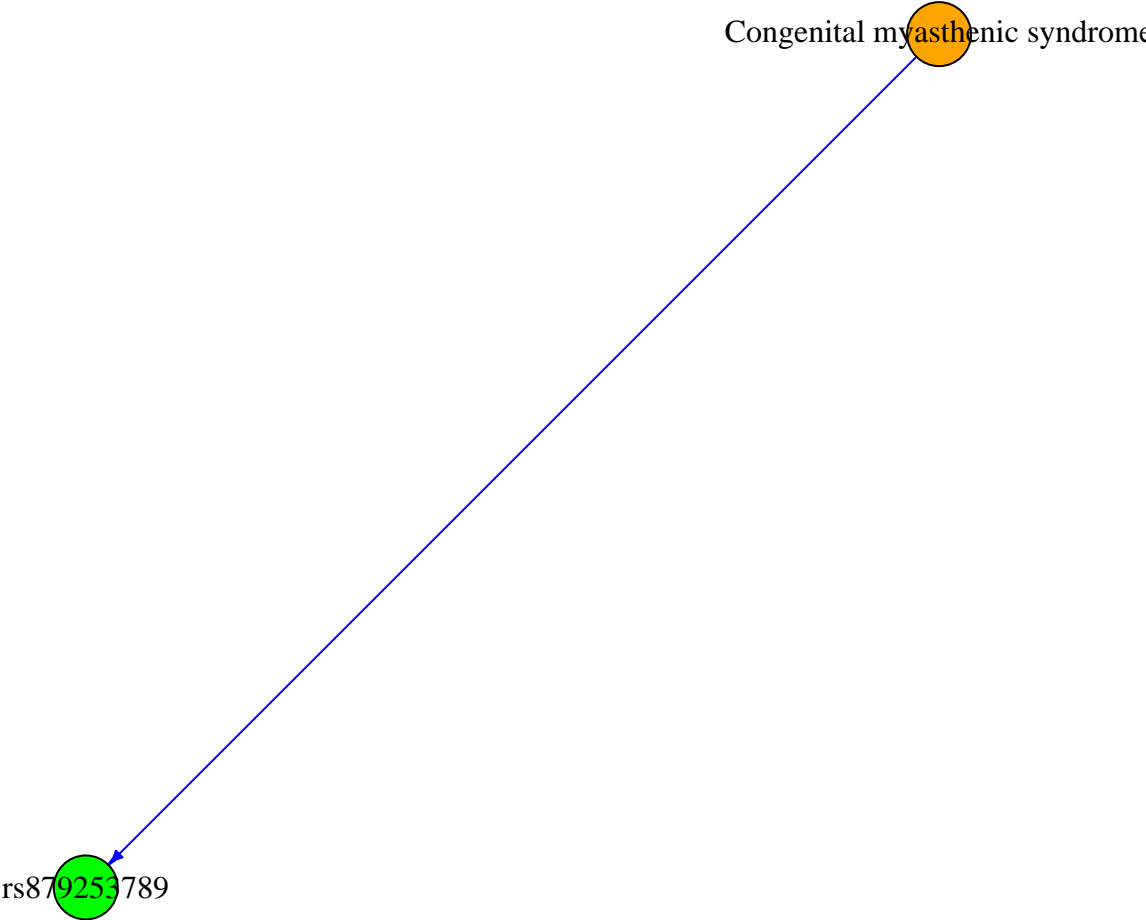

**Variant–Disease Network (Congenital myotonia)**

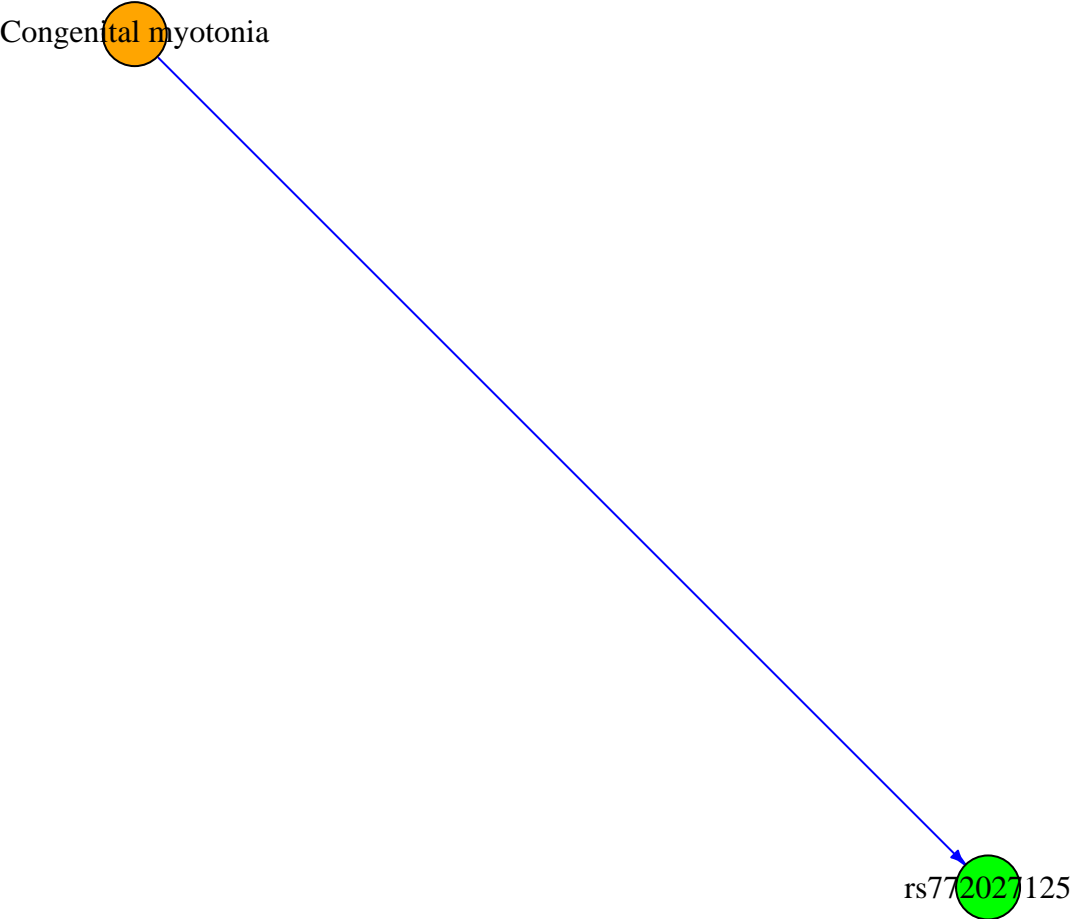

Variant–Disease Network (Congenital secretory diarrhea)

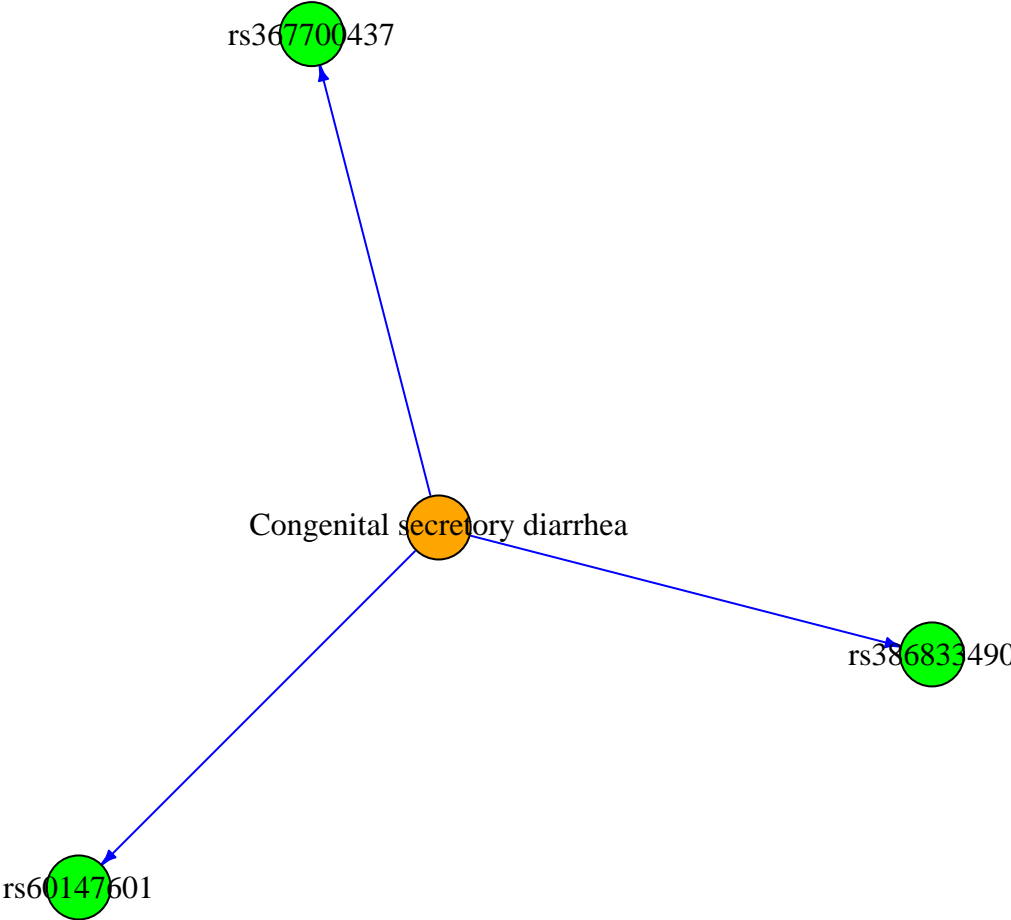

# Disease Network (Congenital sensory neuropathy with selective loss of small m

rs755243469

Congenital sensory neuropathy with selective loss of s



# Variant–Disease Network (Congenital Stationary Night Blindness)

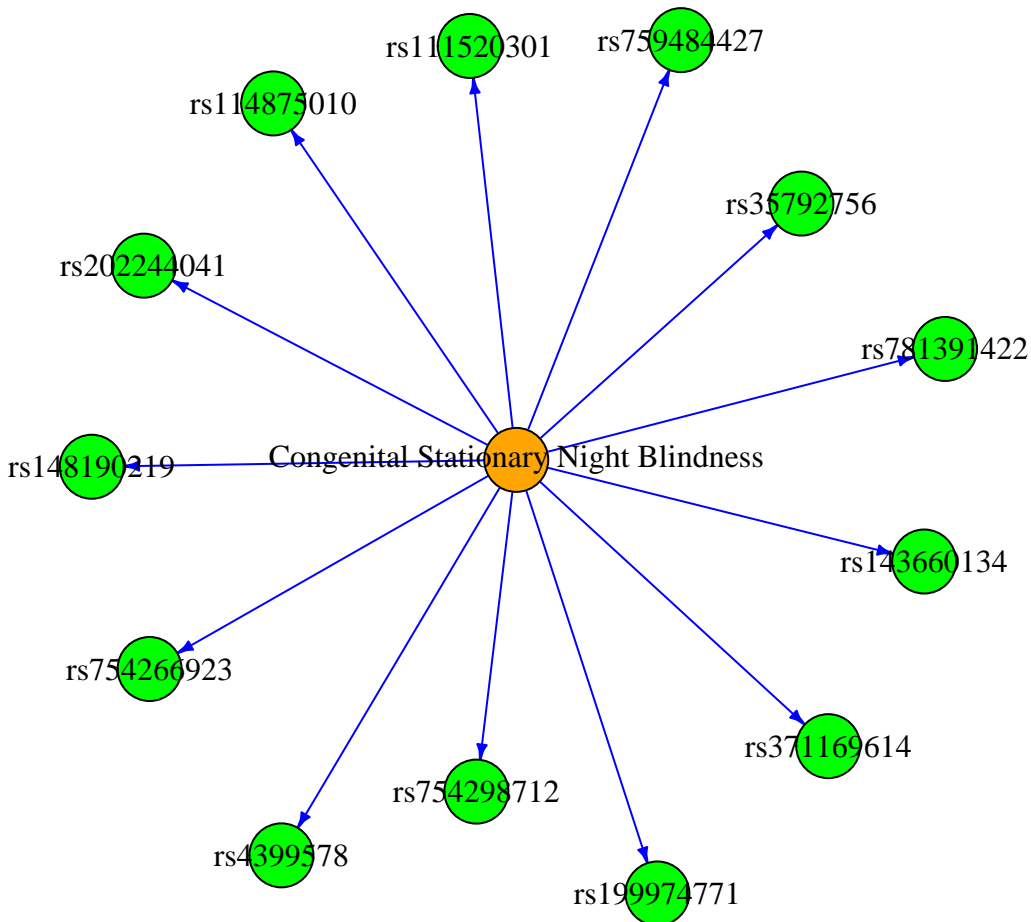



## Variant–Disease Network (Connective tissue disorder)

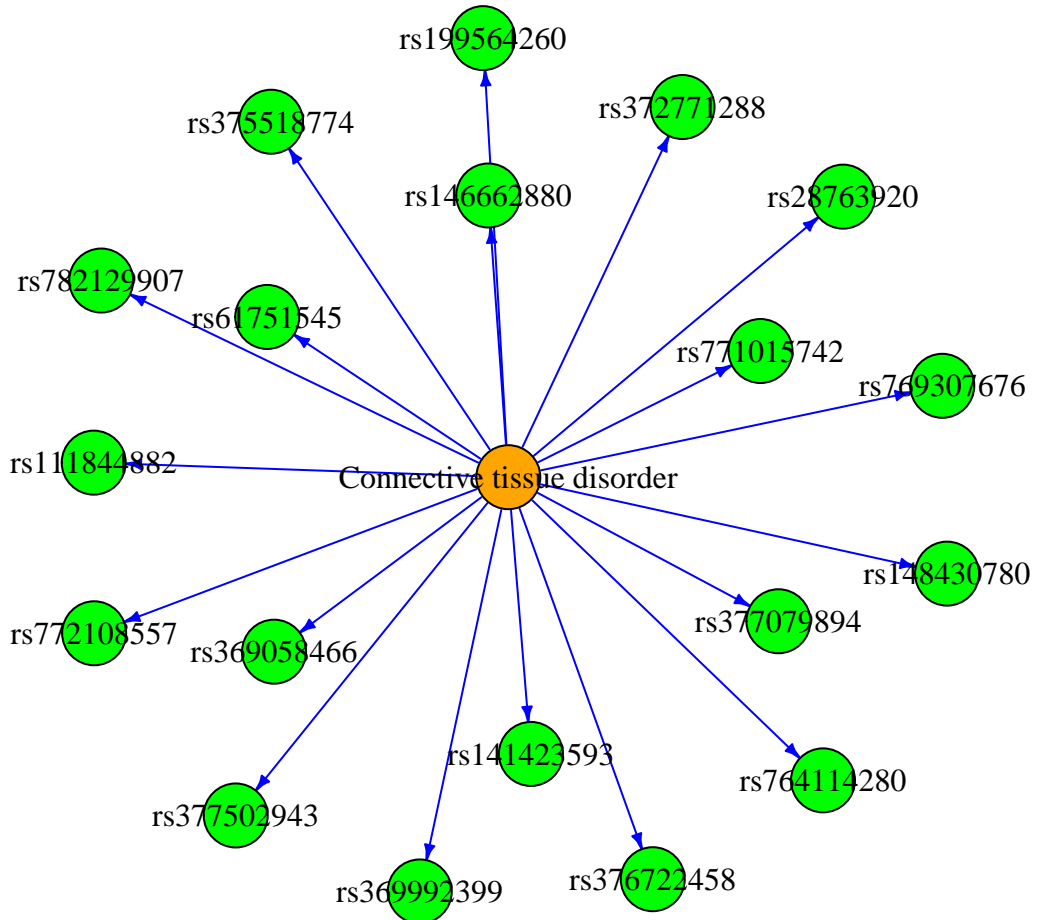

## Variant–Disease Network (Corneal Dystrophy)

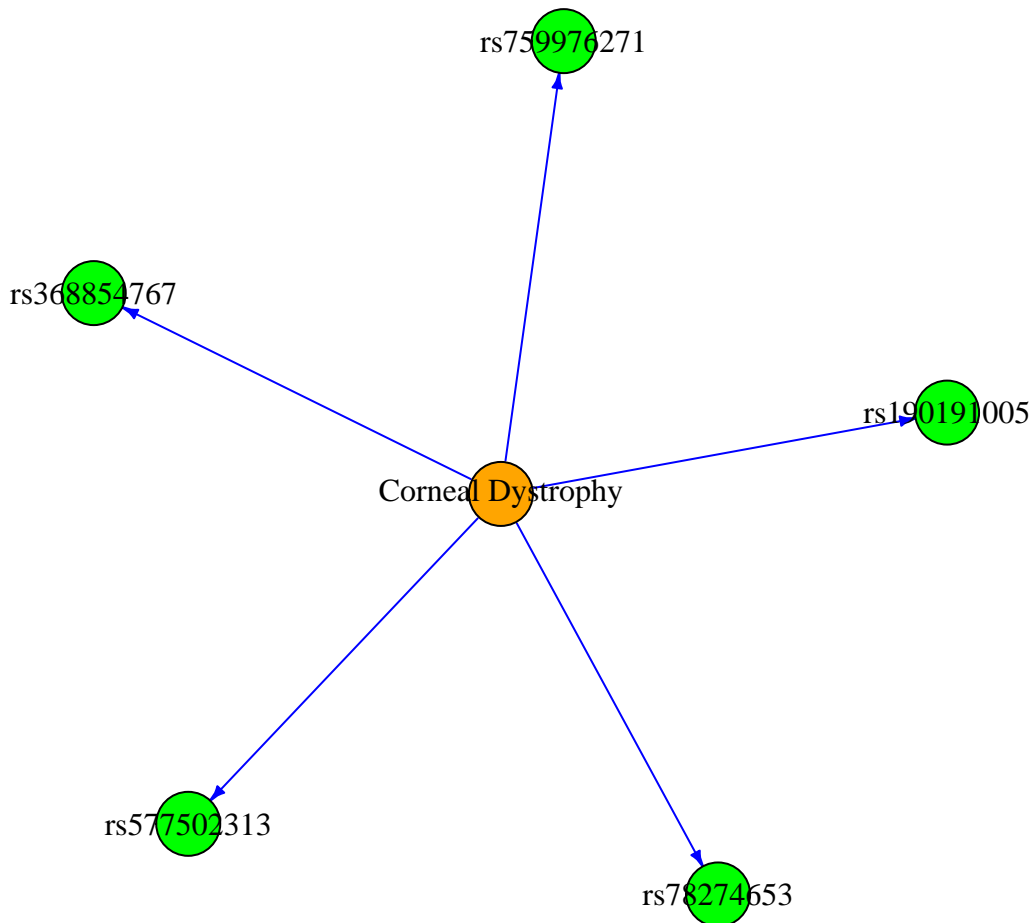

## Variant–Disease Network (Cornelia de Lange Syndrome)

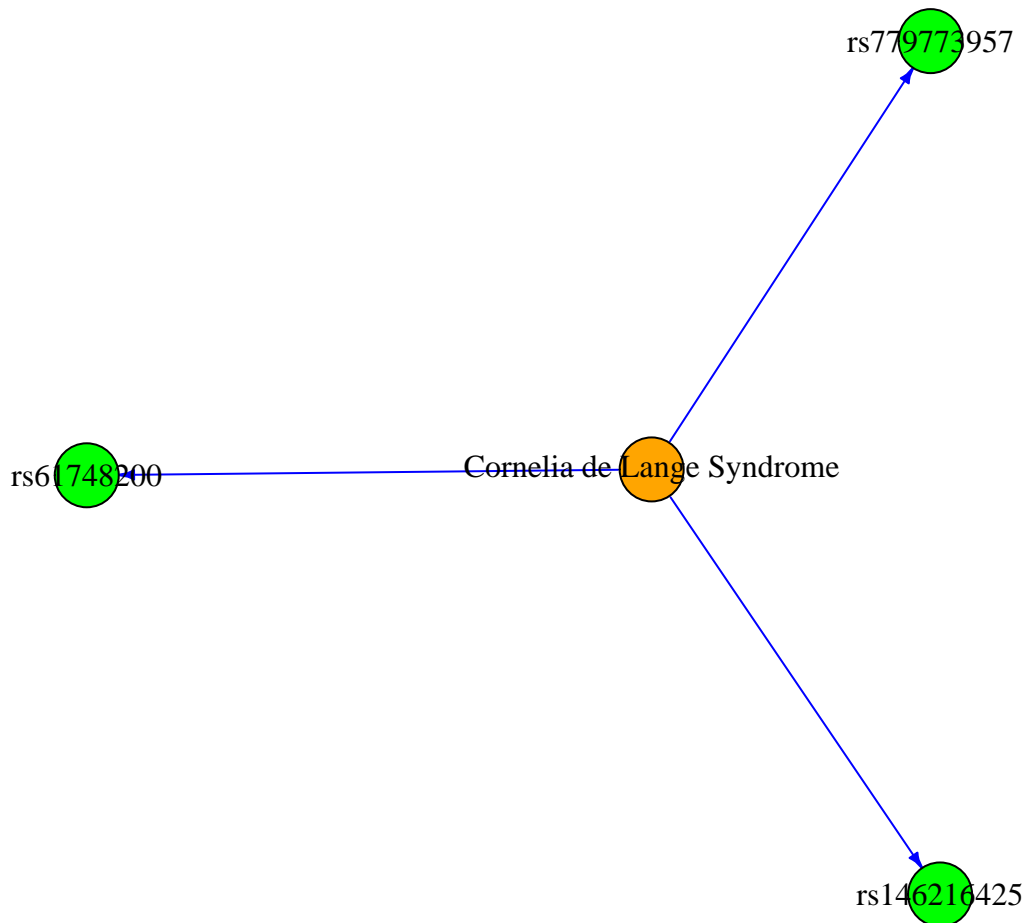

**Variant–Disease Network (Cornelia de Lange syndrome 1)**

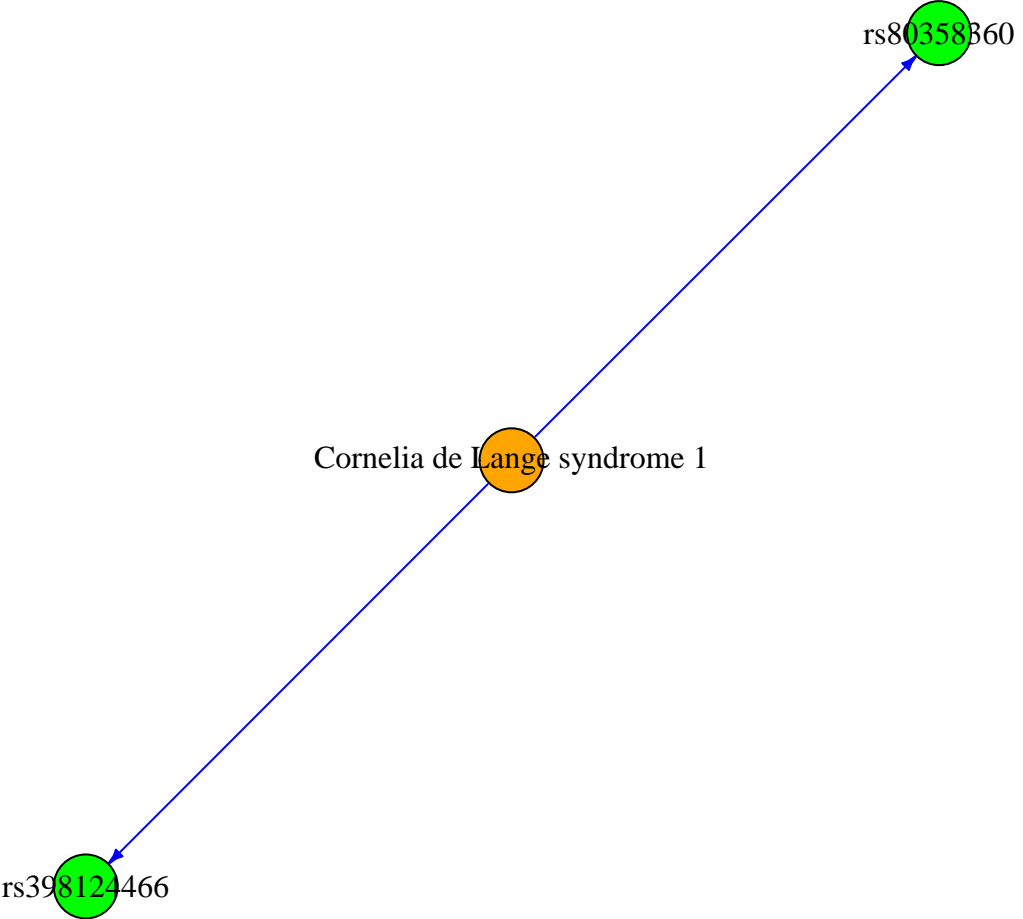

## Variant–Disease Network (Cornelia de Lange syndrome 3)

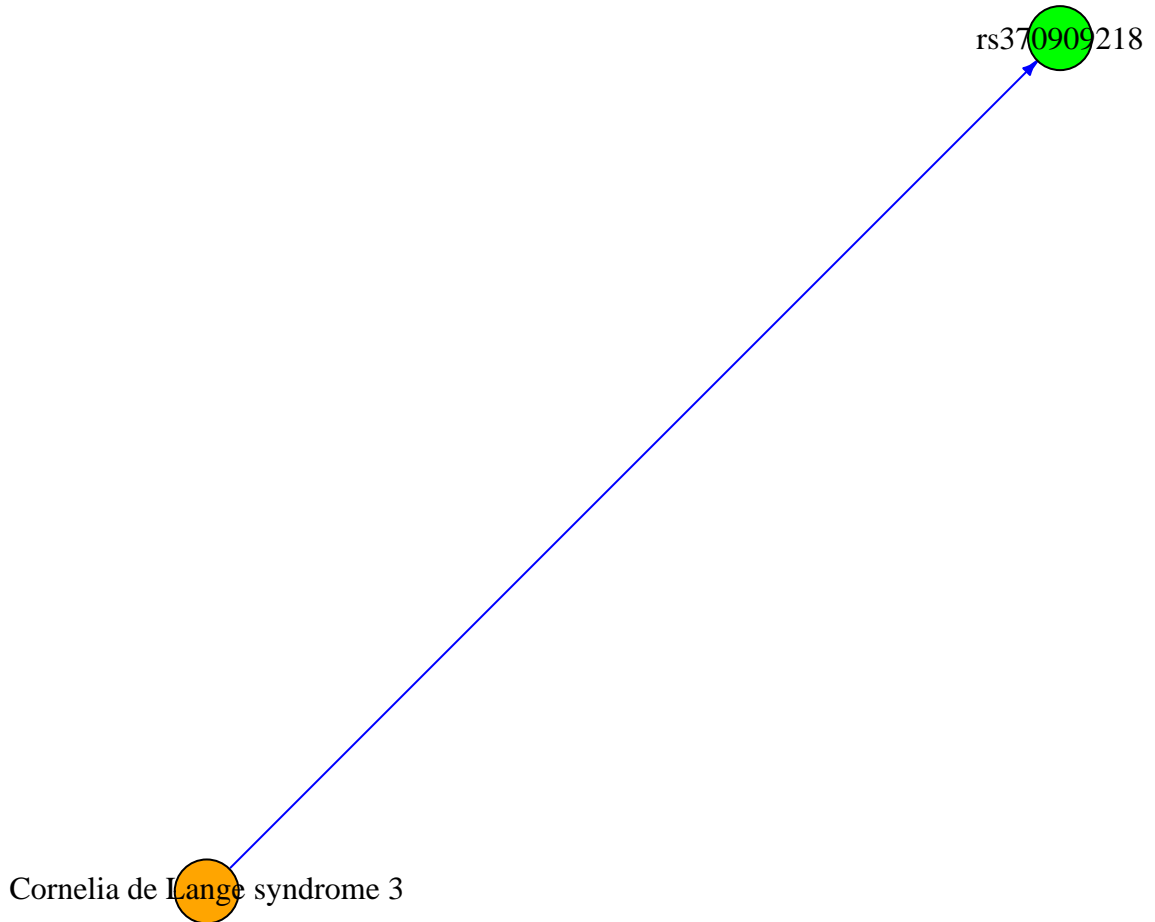

## Variant-Disease Network (Cortical malformations)

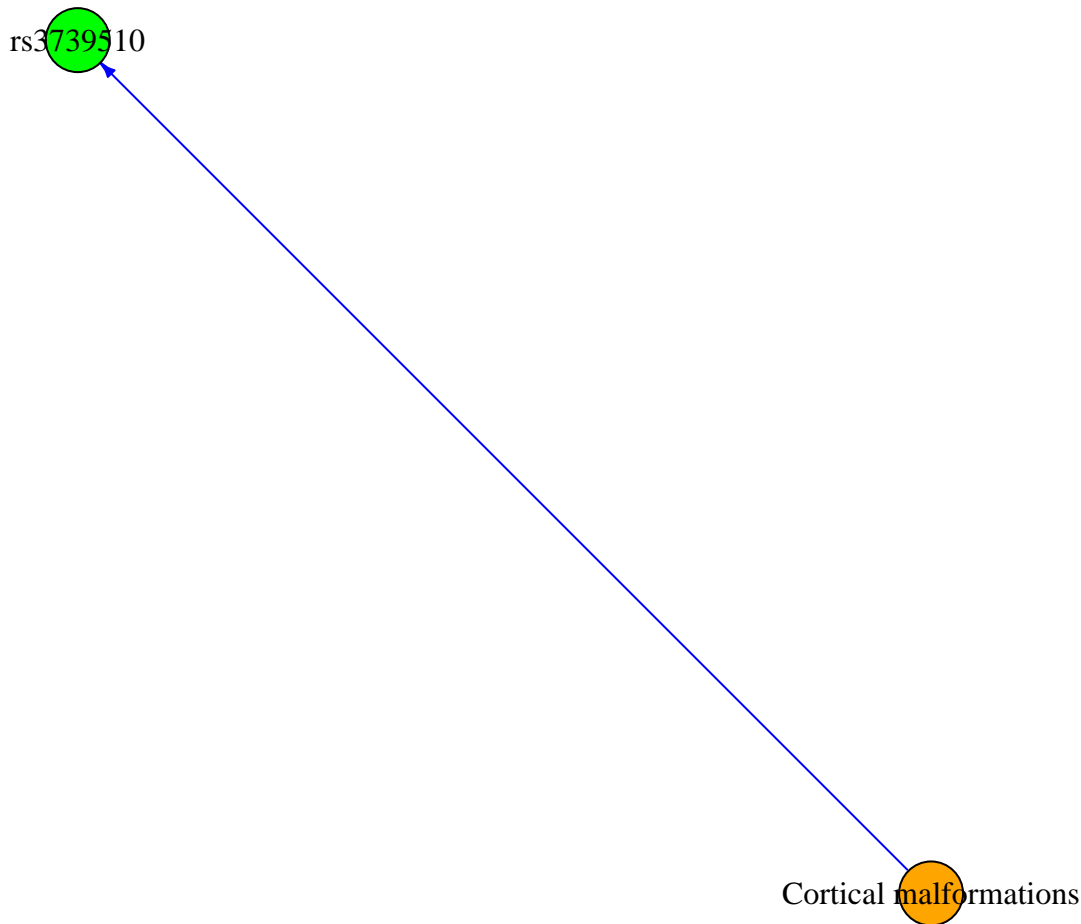

Variant–Disease Network (Corticosterone methyloxidase type 1 deficiency)

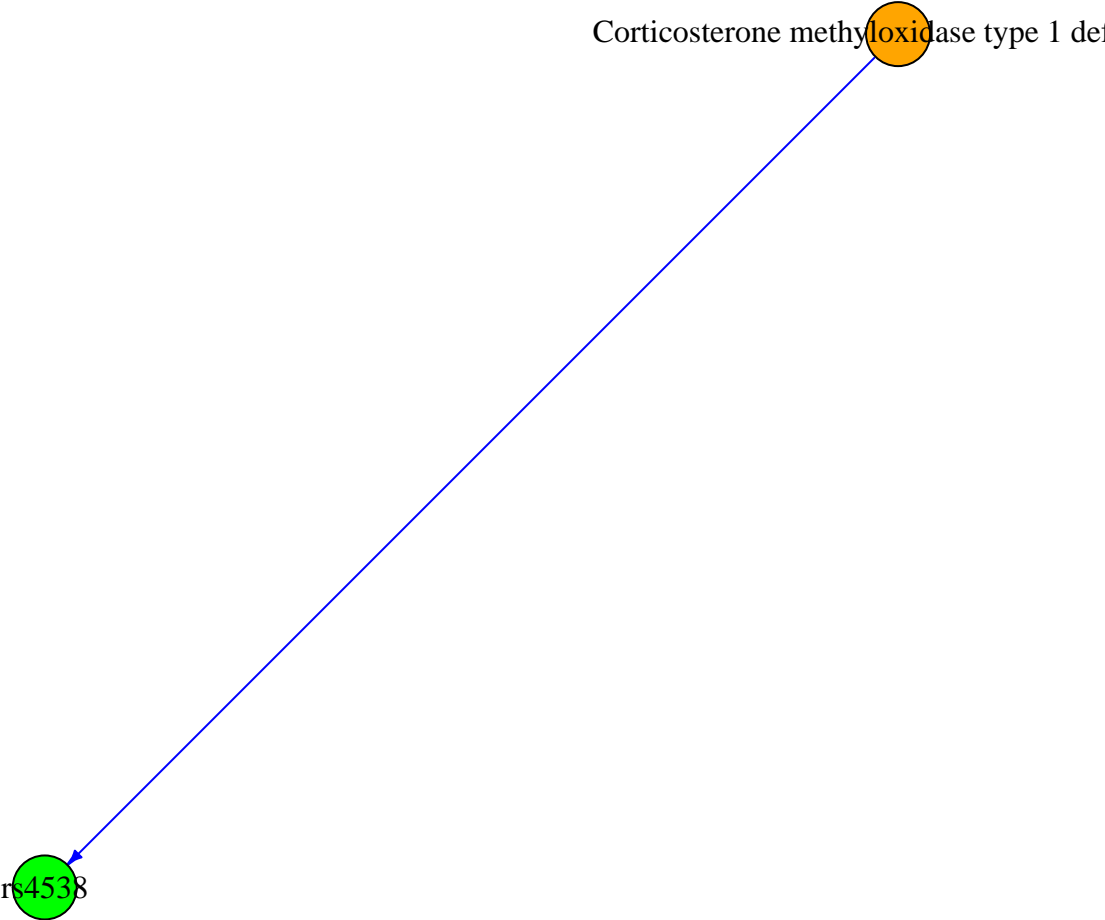

Variant–Disease Network (Corticosterone methyloxidase type 2 deficiency)

Corticosterone methyloxidase type 2 deficiency

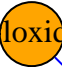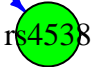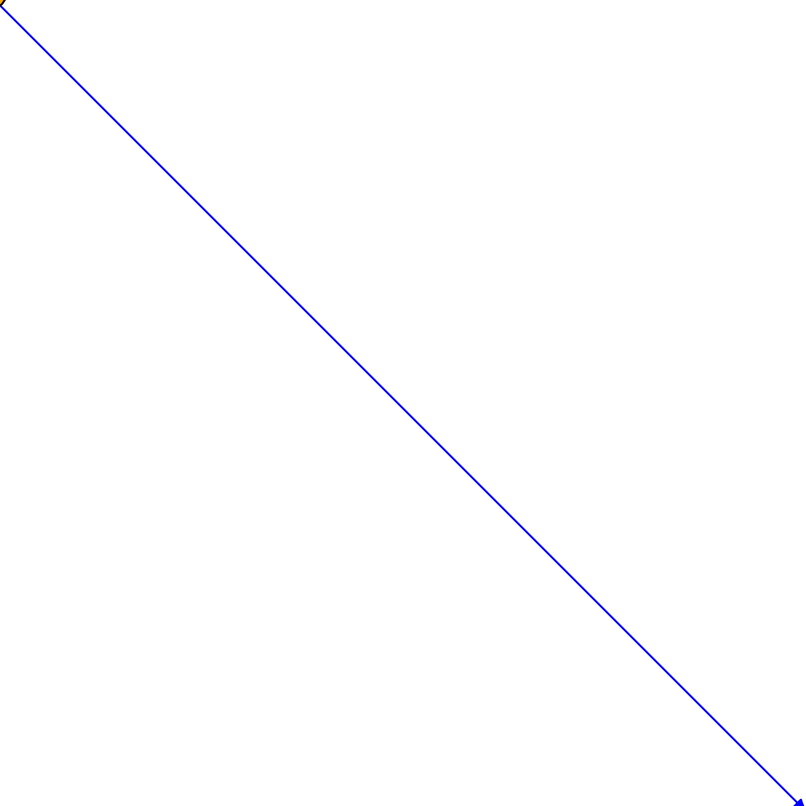



## Variant–Disease Network (Cowden syndrome)

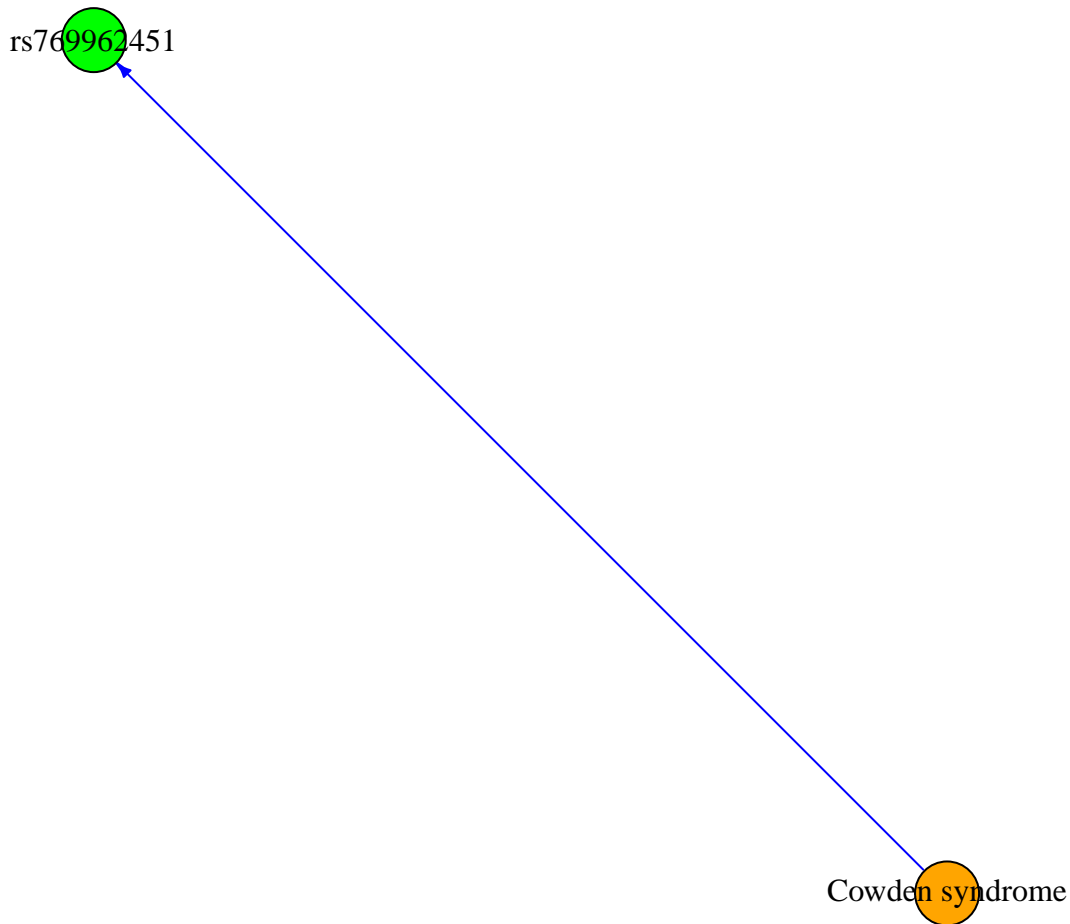

**Variant–Disease Network (Cowden syndrome 6)**

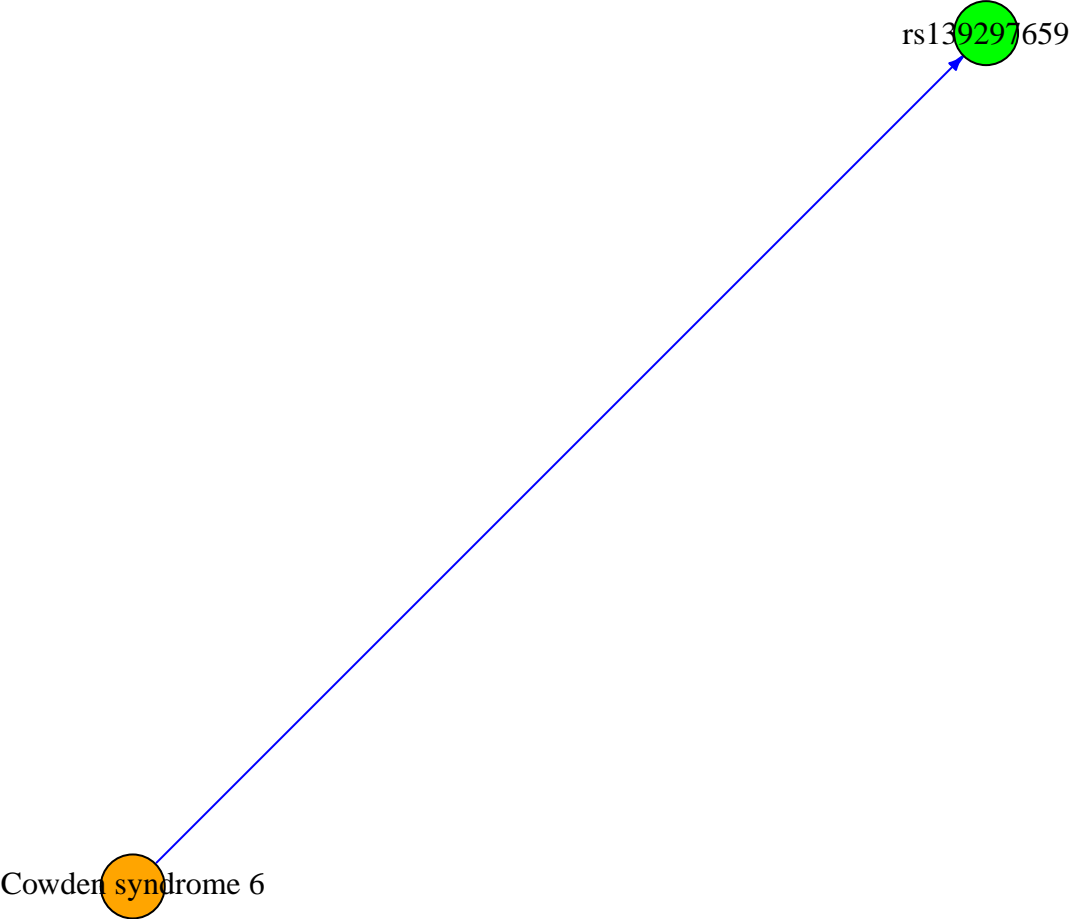

**Variant–Disease Network (Cranioectodermal dysplasia)**

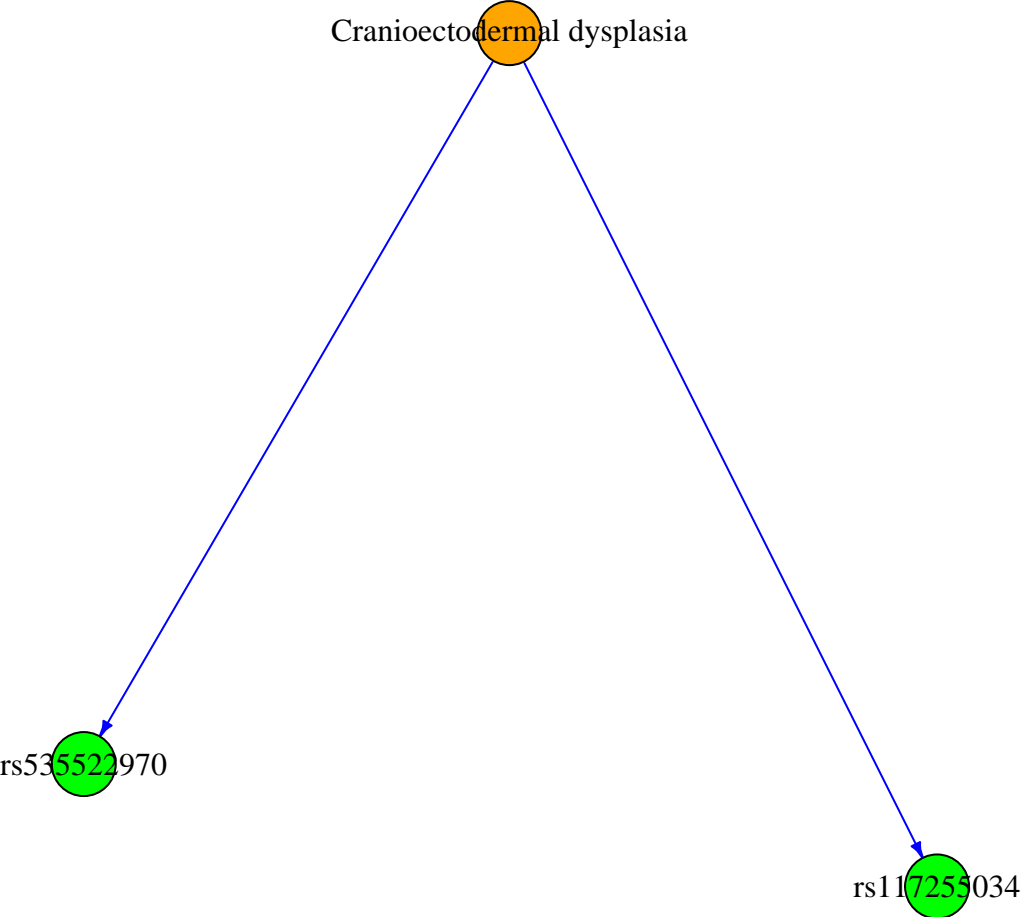

# Variant–Disease Network (Craniofacial deafness hand syndrome)

rs369680052

Craniofacial deafness hand syndrome

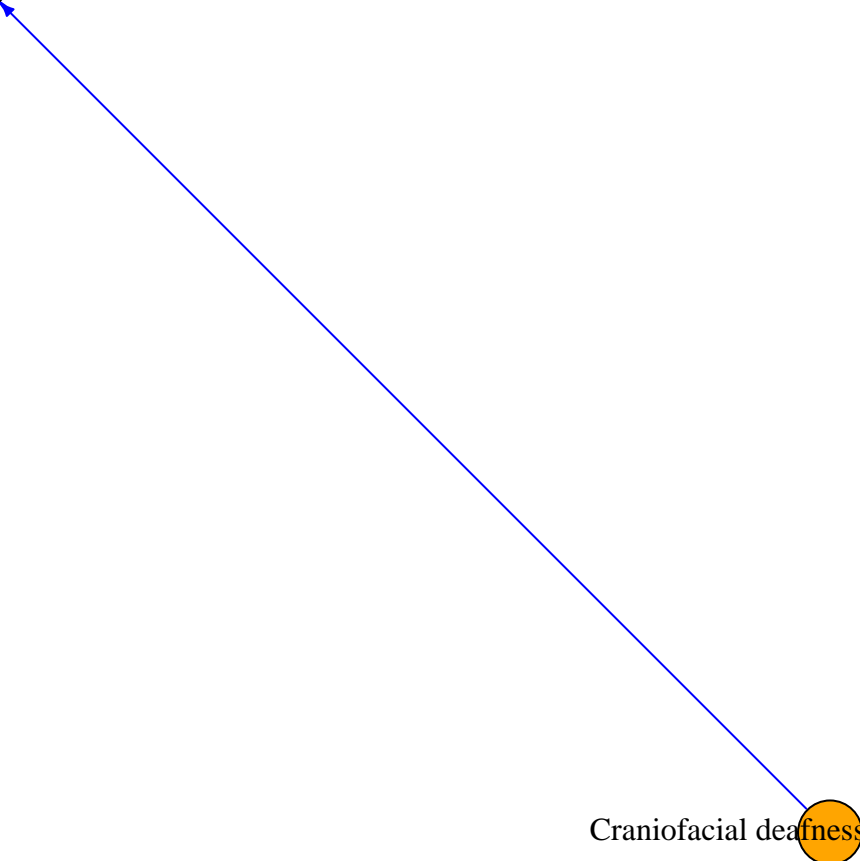

**Variant–Disease Network (Cranio metaphyseal dysplasia)**

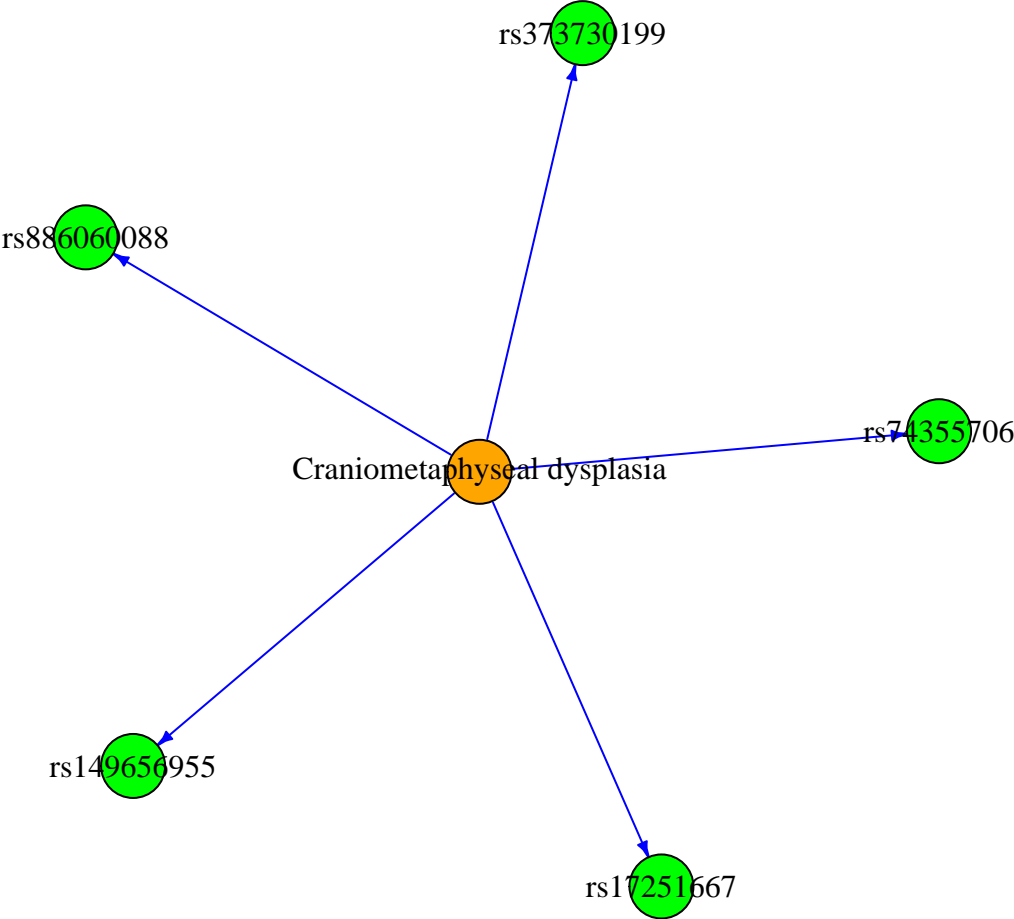

## Variant-Disease Network (Craniopharyngioma)

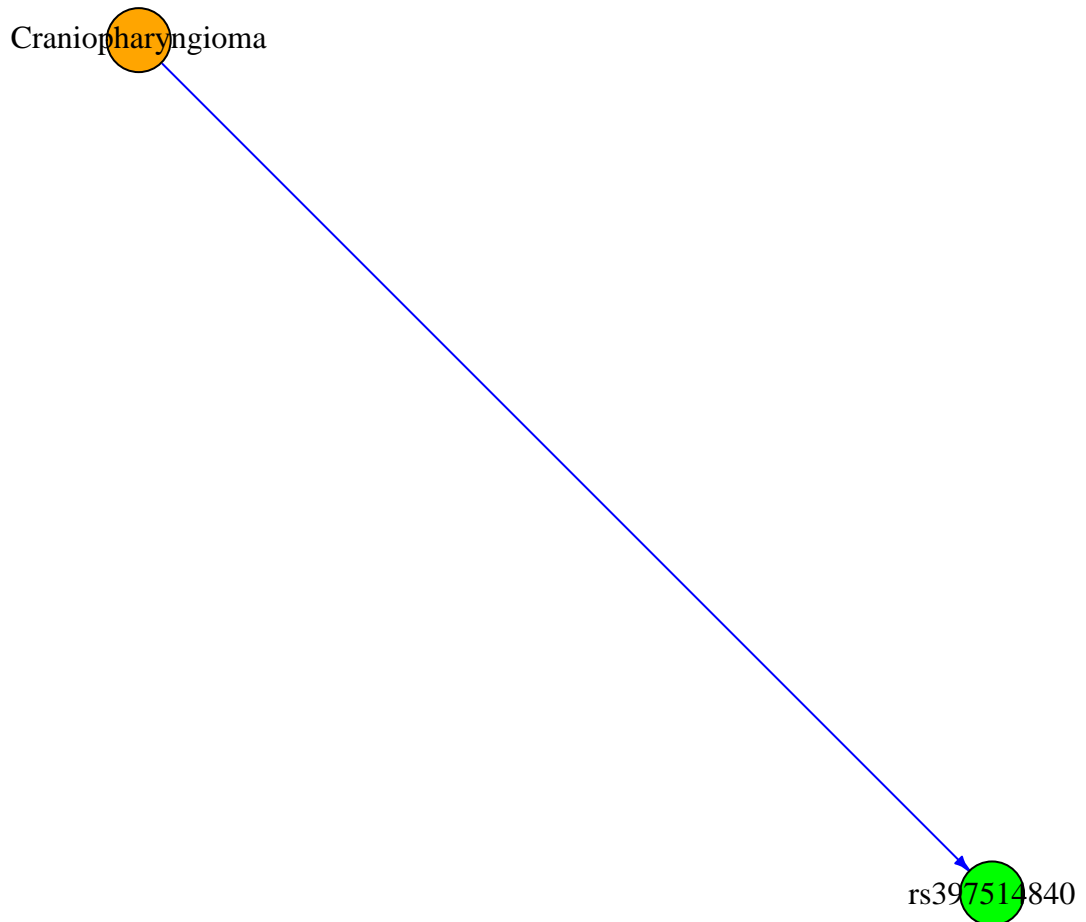

## Variant-Disease Network (Craniosynostosis)

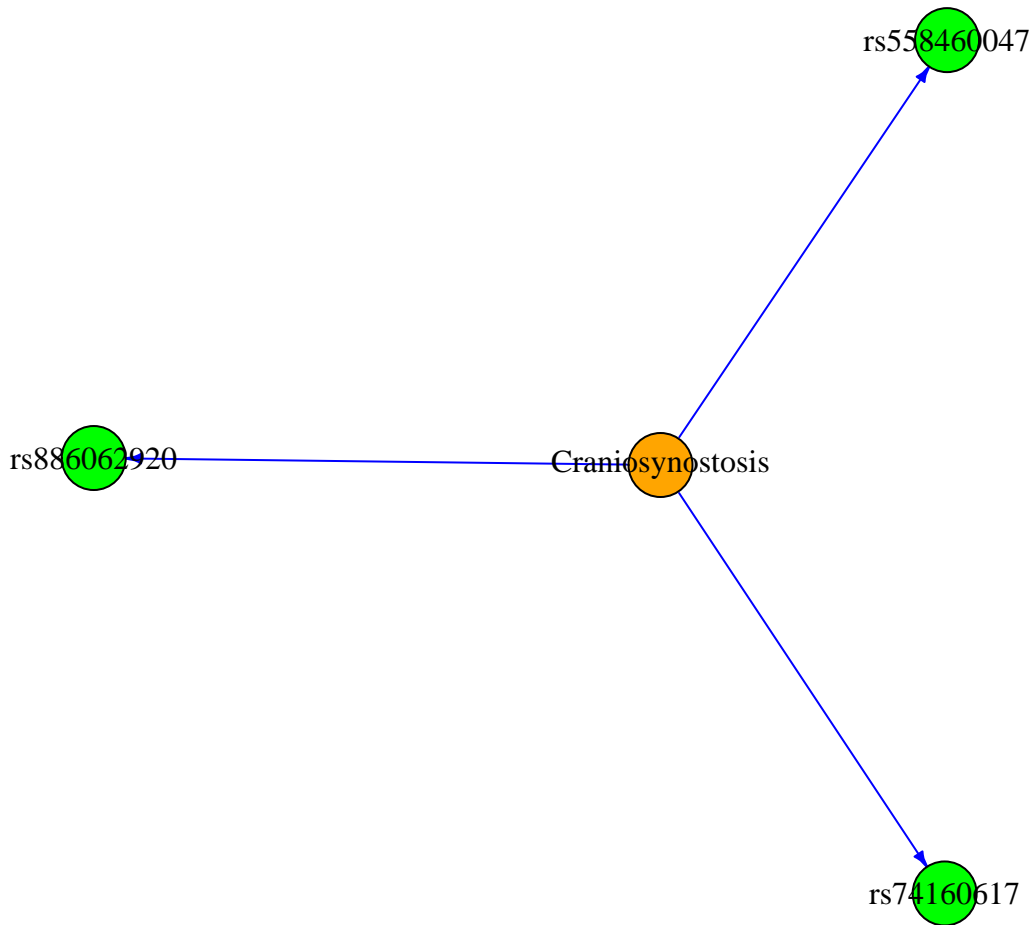

Variant–Disease Network (Crigler Najjar syndrome)

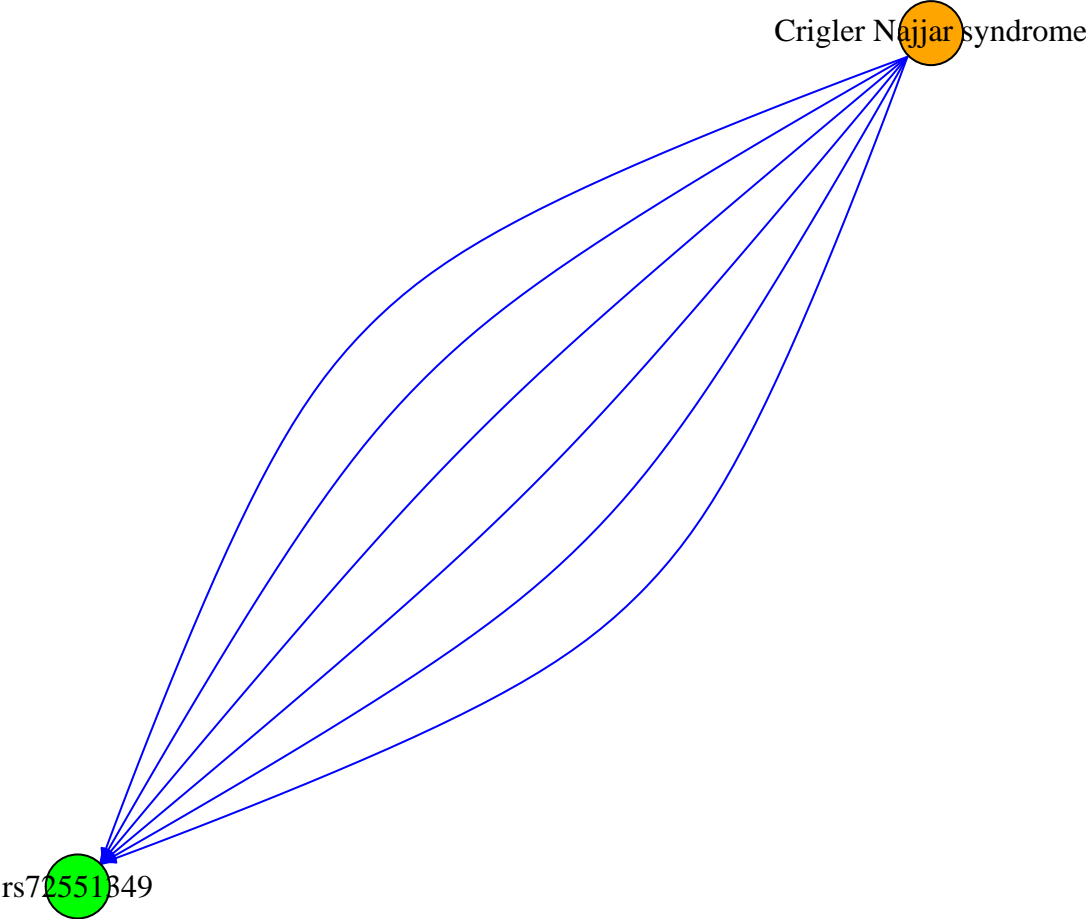



**Variant–Disease Network (Crohn disease)**

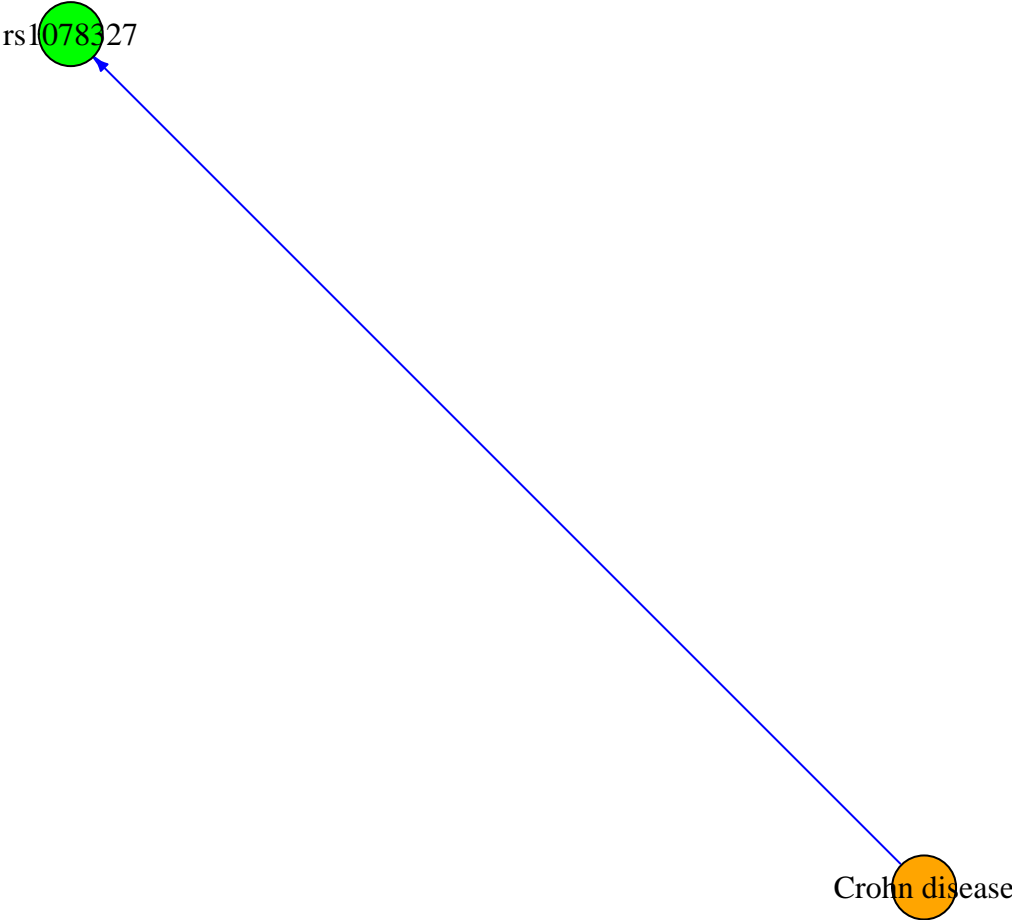

## Variant–Disease Network (Crouzon syndrome)

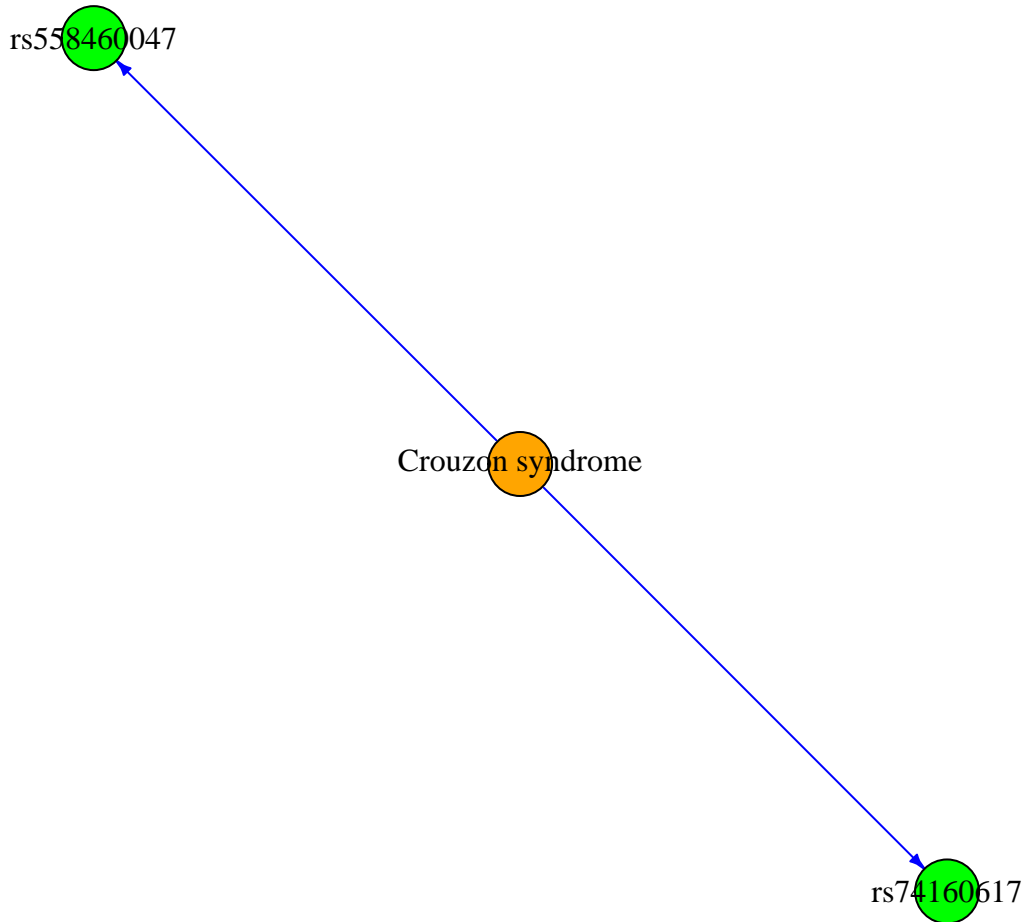

**Variant–Disease Network (Cryopyrin associated periodic syndrome)**

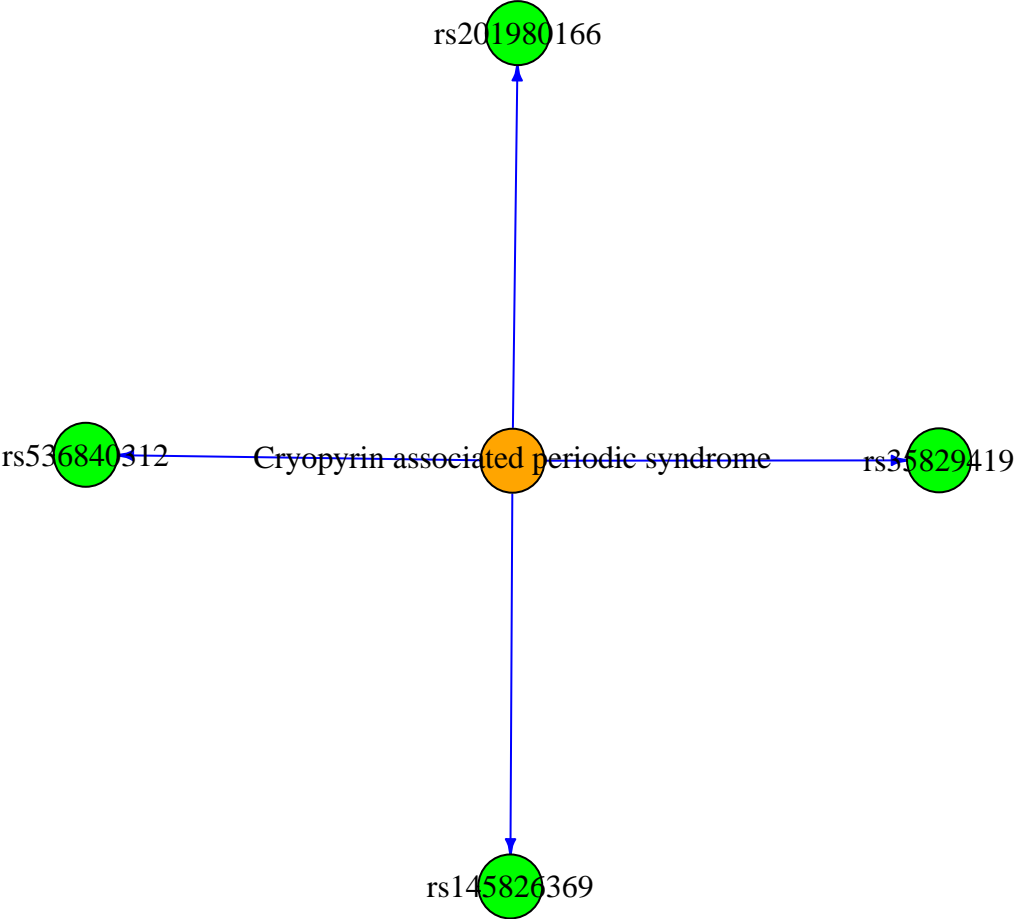

**Variant–Disease Network (Cutaneous malignant melanoma 3)**

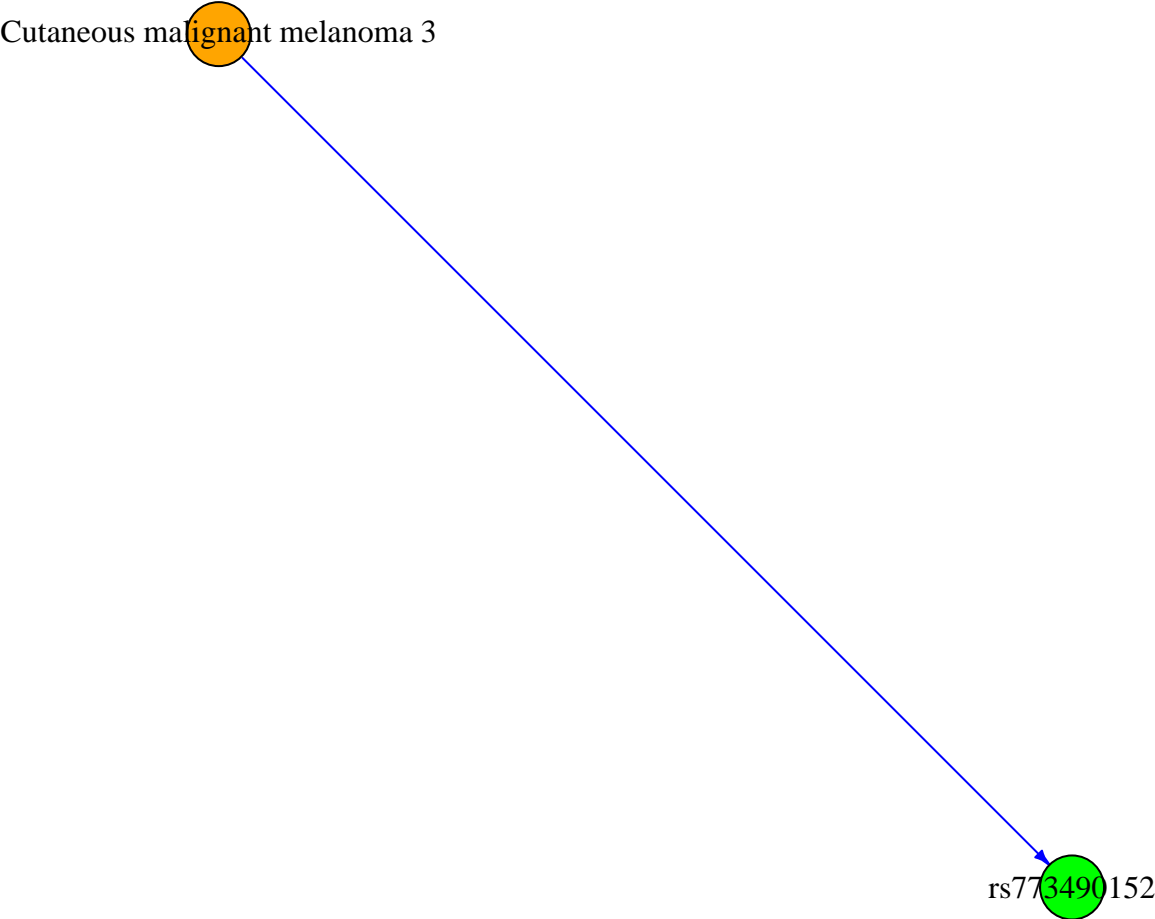

Variant–Disease Network (Cutis Gyrata syndrome of Beare and Stevenson)

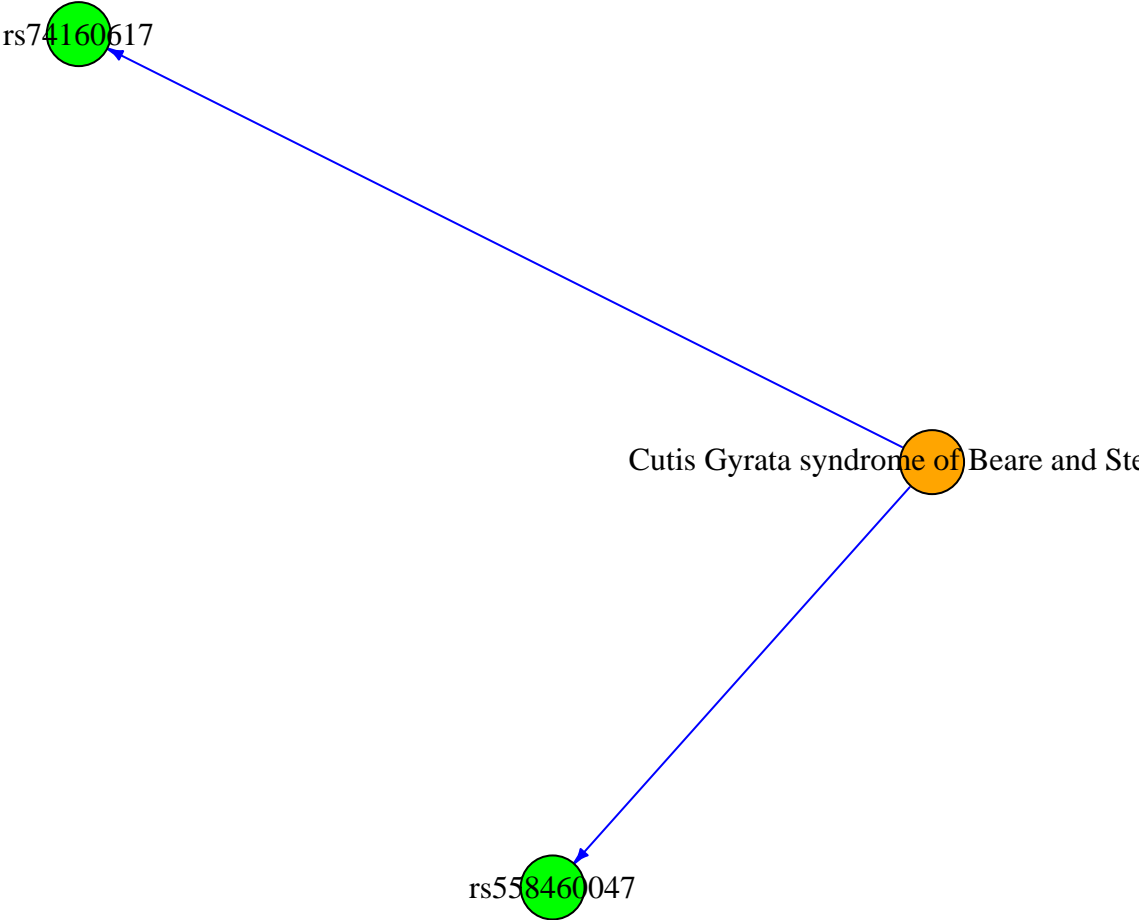

## Variant-Disease Network (Cutis laxa)

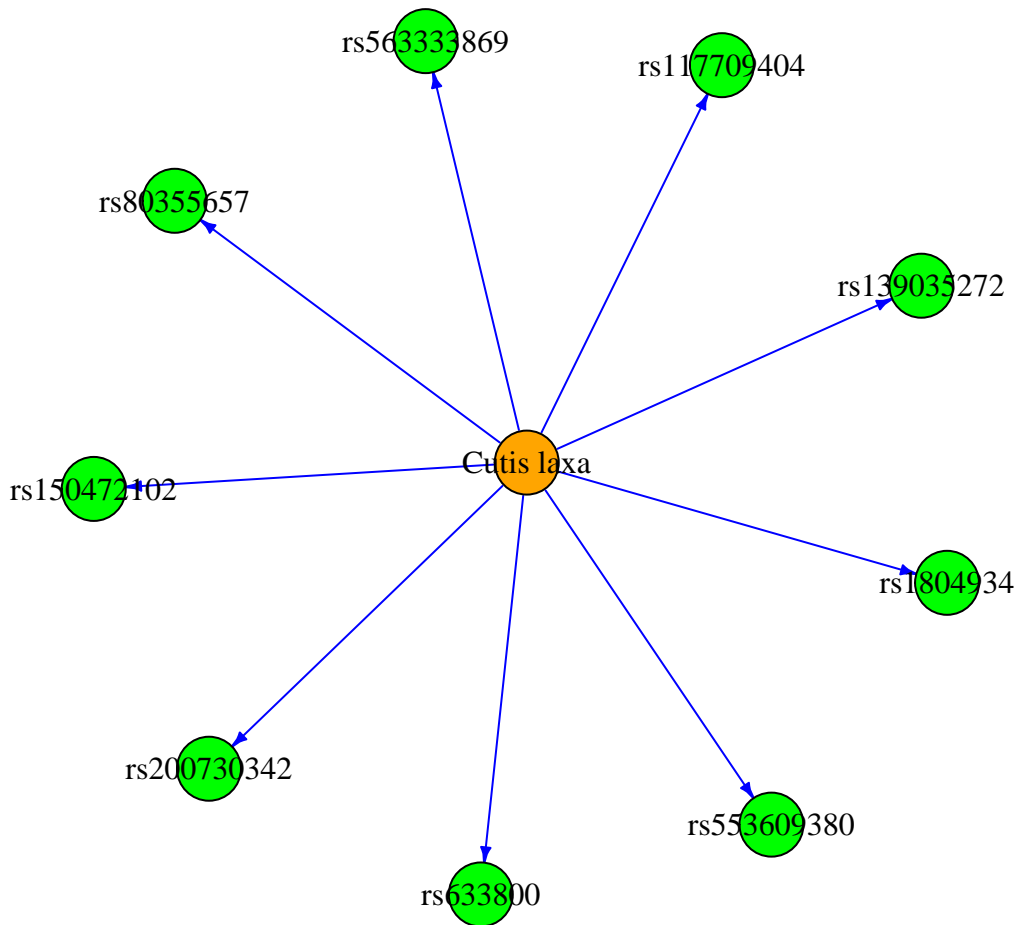

## Variant–Disease Network (Cutis laxa with severe pulmonary)

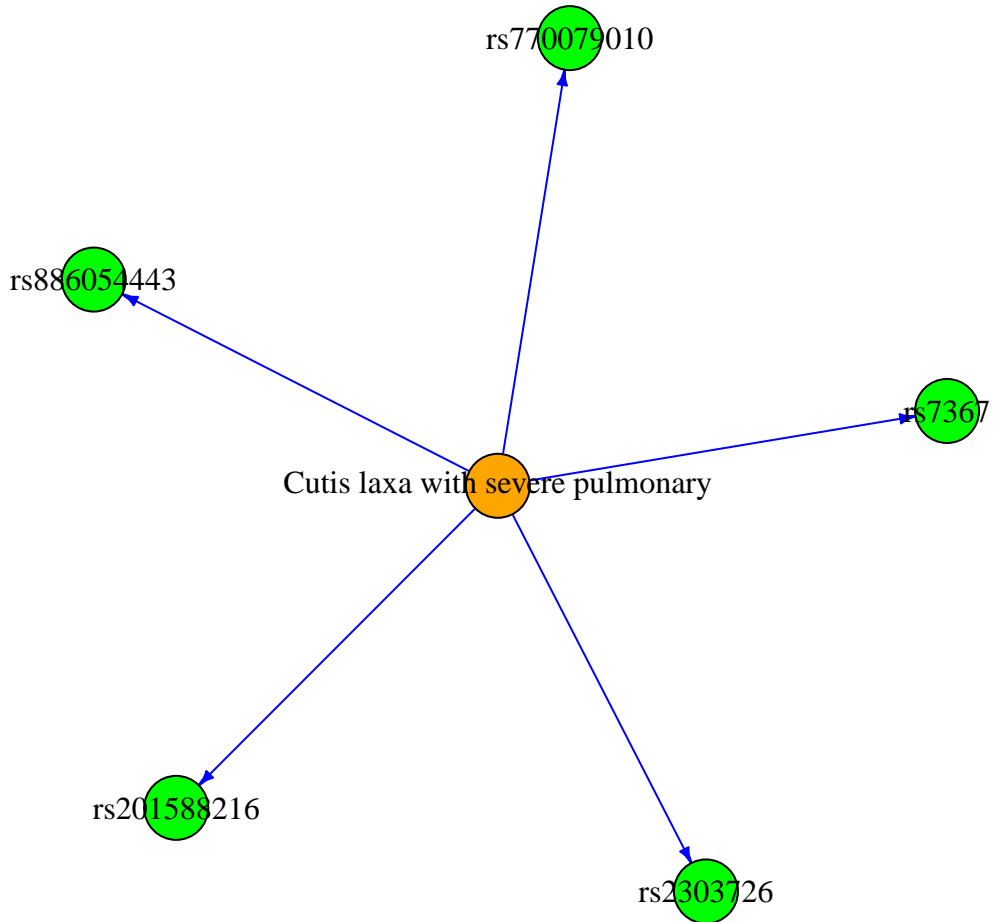

# Variant–Disease Network (Cutis laxa–corneal clouding–oligophrenia syndrome)

cutis laxa–corneal clouding–oligophrenia syndrome

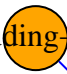

rs1804934

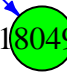



Variant–Disease Network (Cylindromatosis)

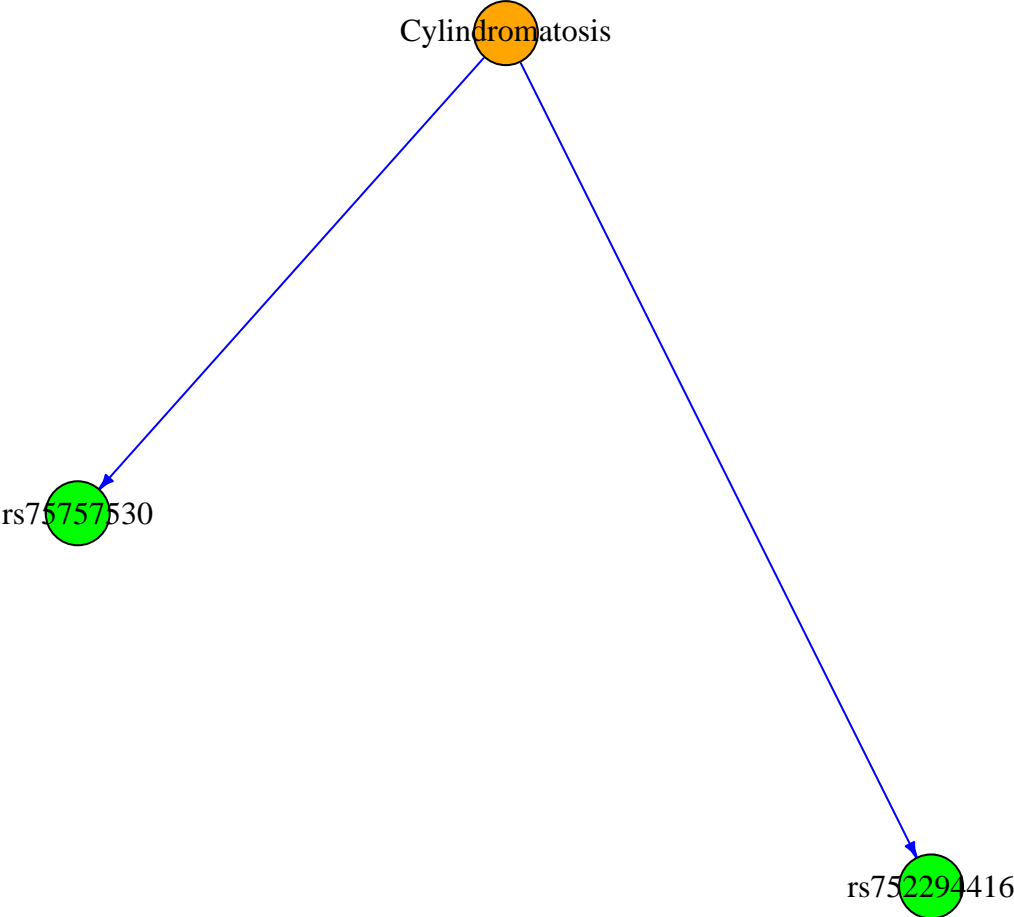

## Variant–Disease Network (CYP2C8 POLYMORPHISM)

CYP2C8 POLYMORPHISM

rs1058930

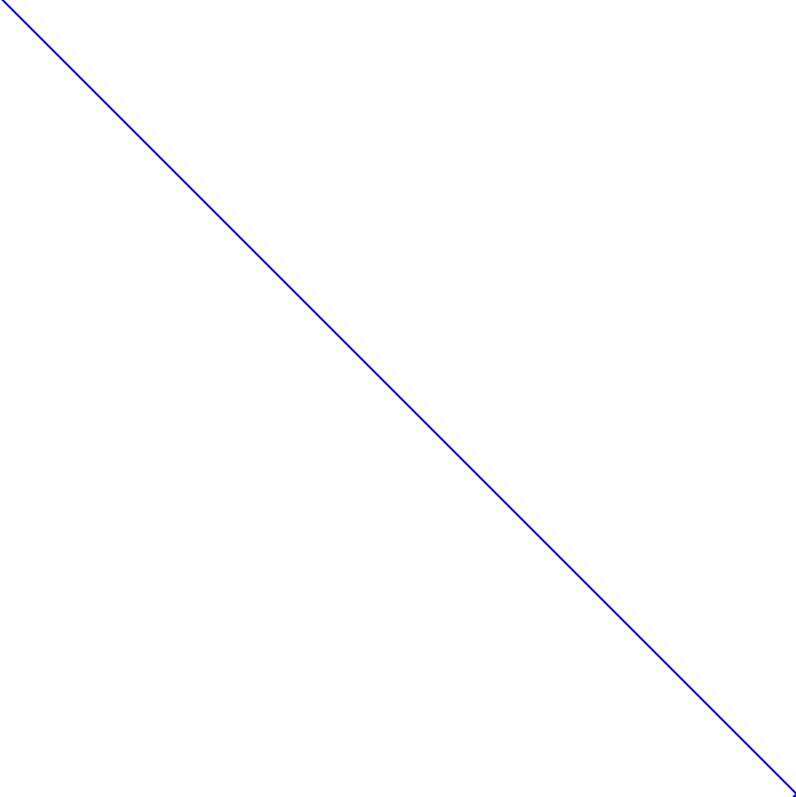

Variant–Disease Network (Cystic fibrosis)

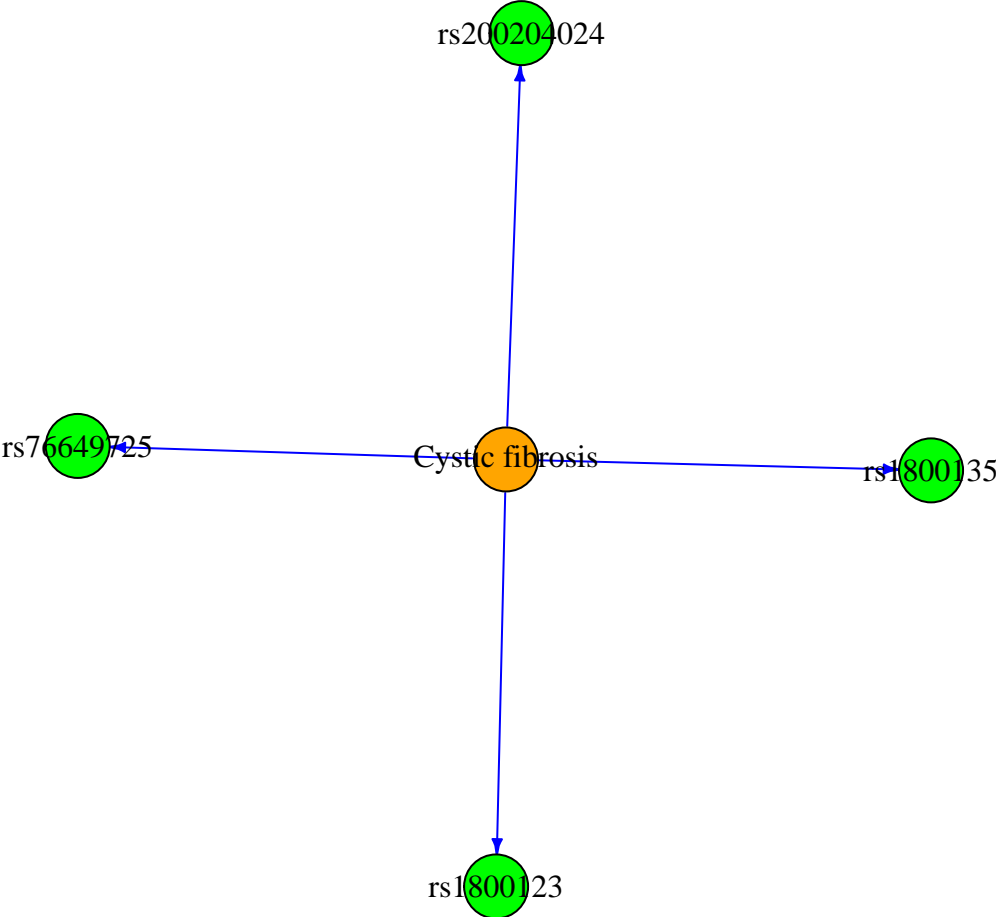

Variant–Disease Network (Cystic Fibrosis–Like Syndrome)

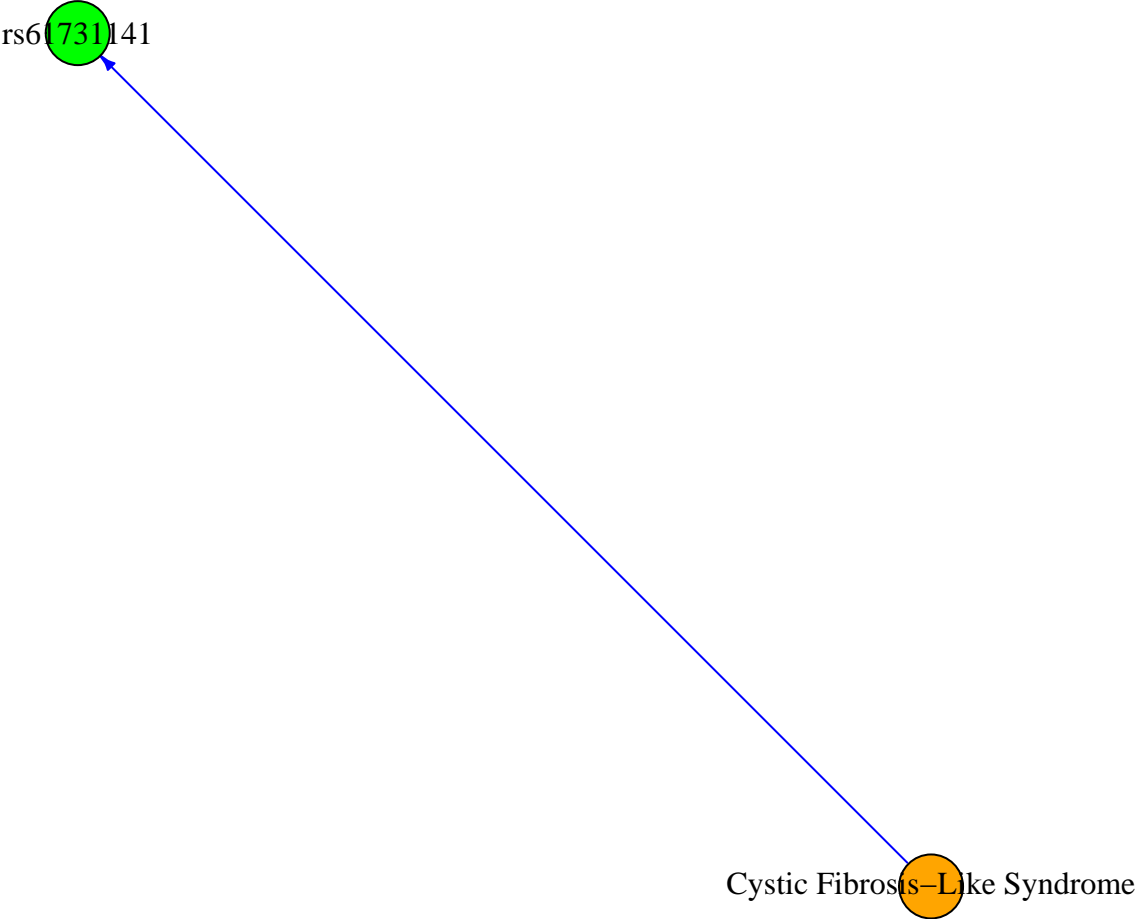

## Variant–Disease Network (Cystinosis)

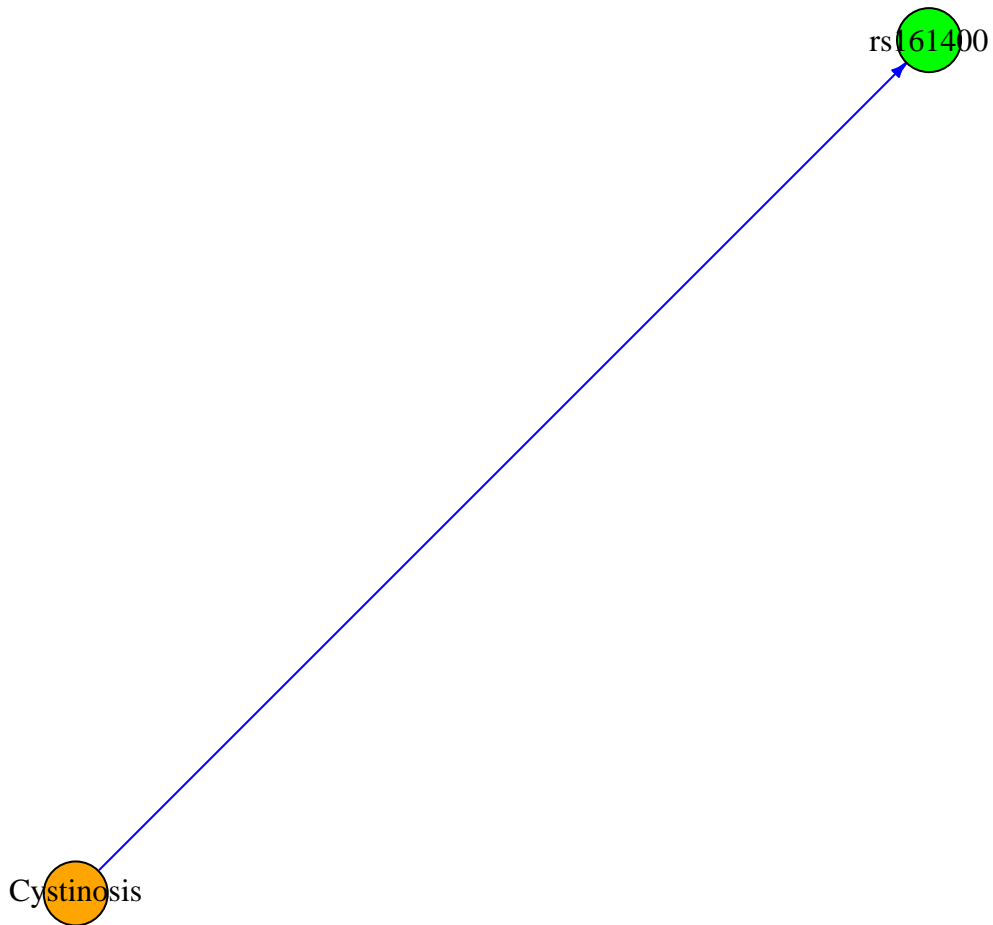

## Variant-Disease Network (Cystinuria)

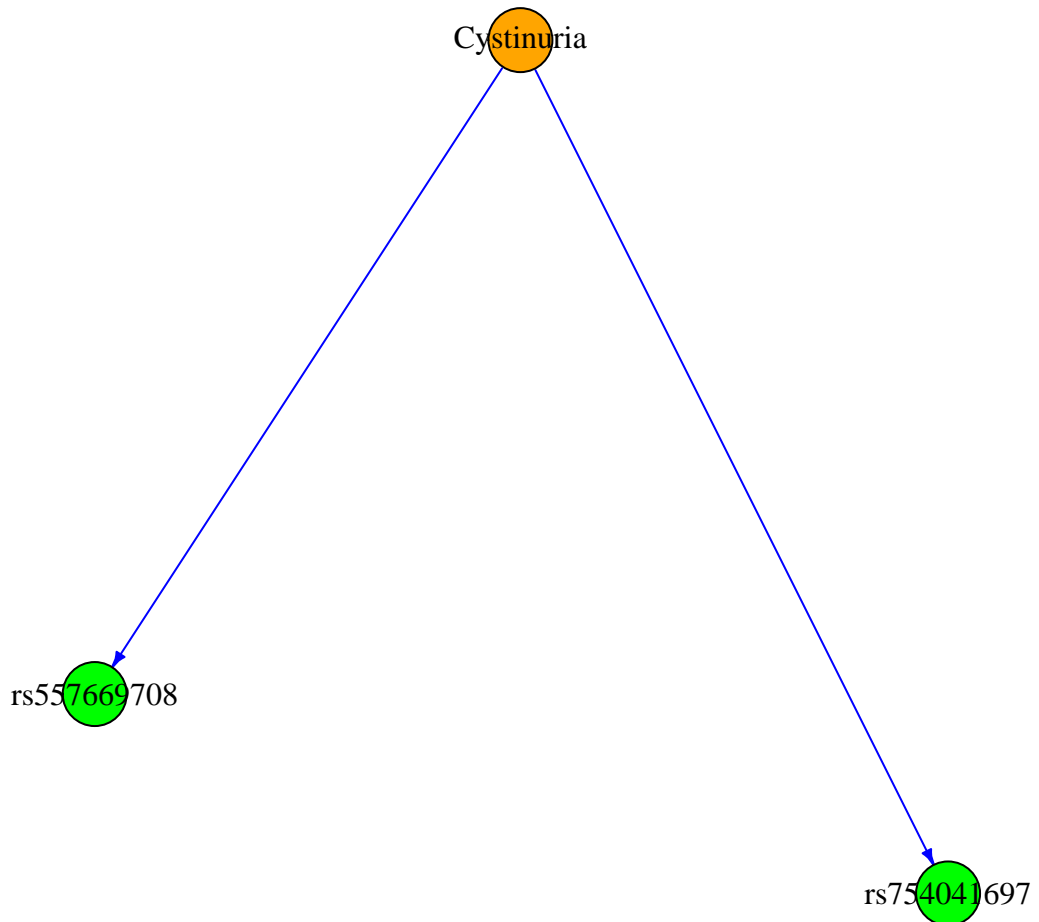

**Variant–Disease Network (D–2–hydroxyglutaric aciduria 2)**

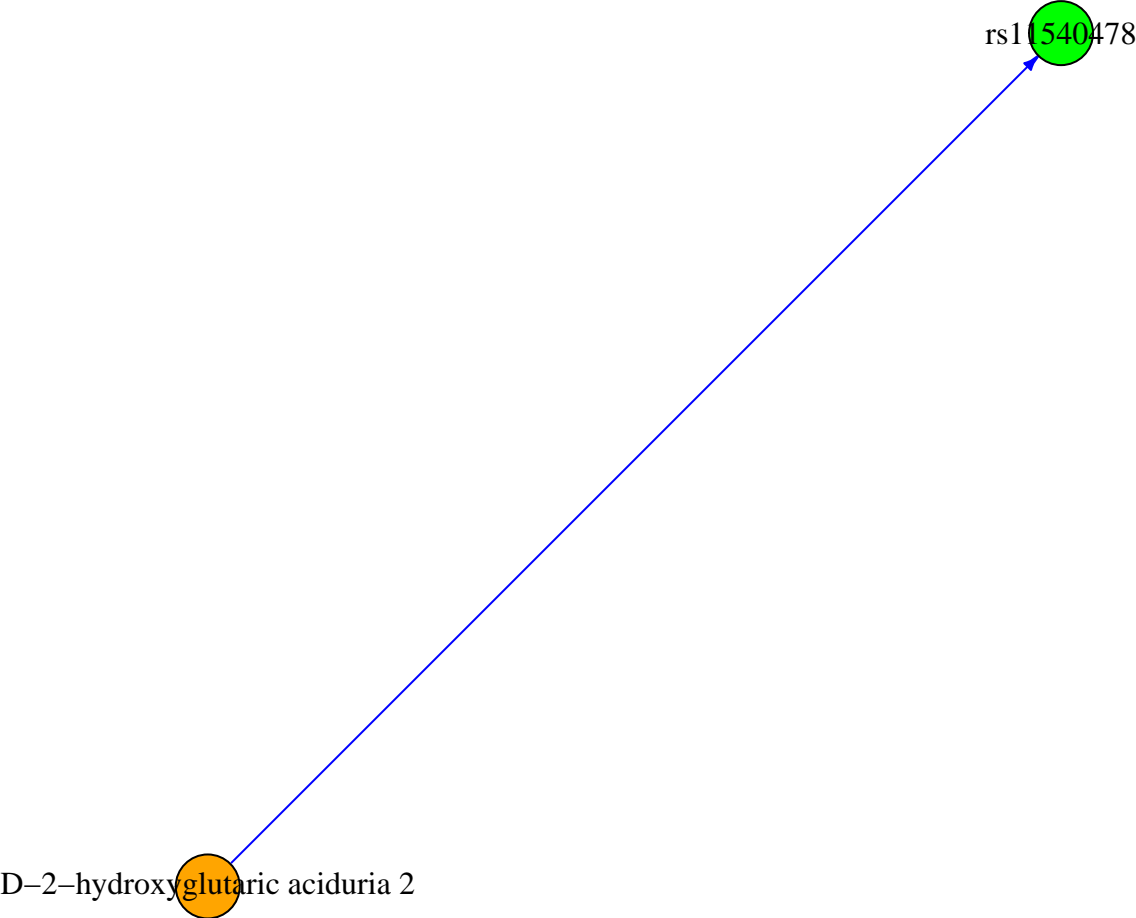

Variant–Disease Network (Danon disease)

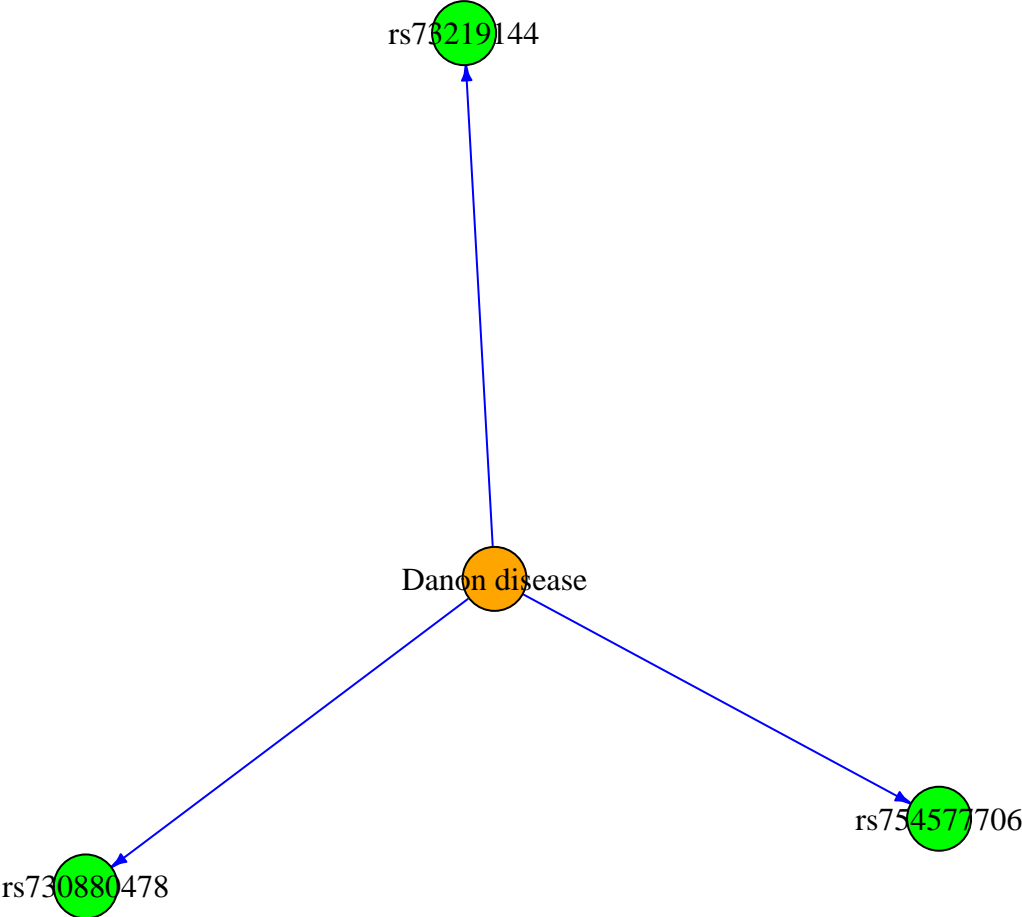



## Variant-Disease Network (Deafness)

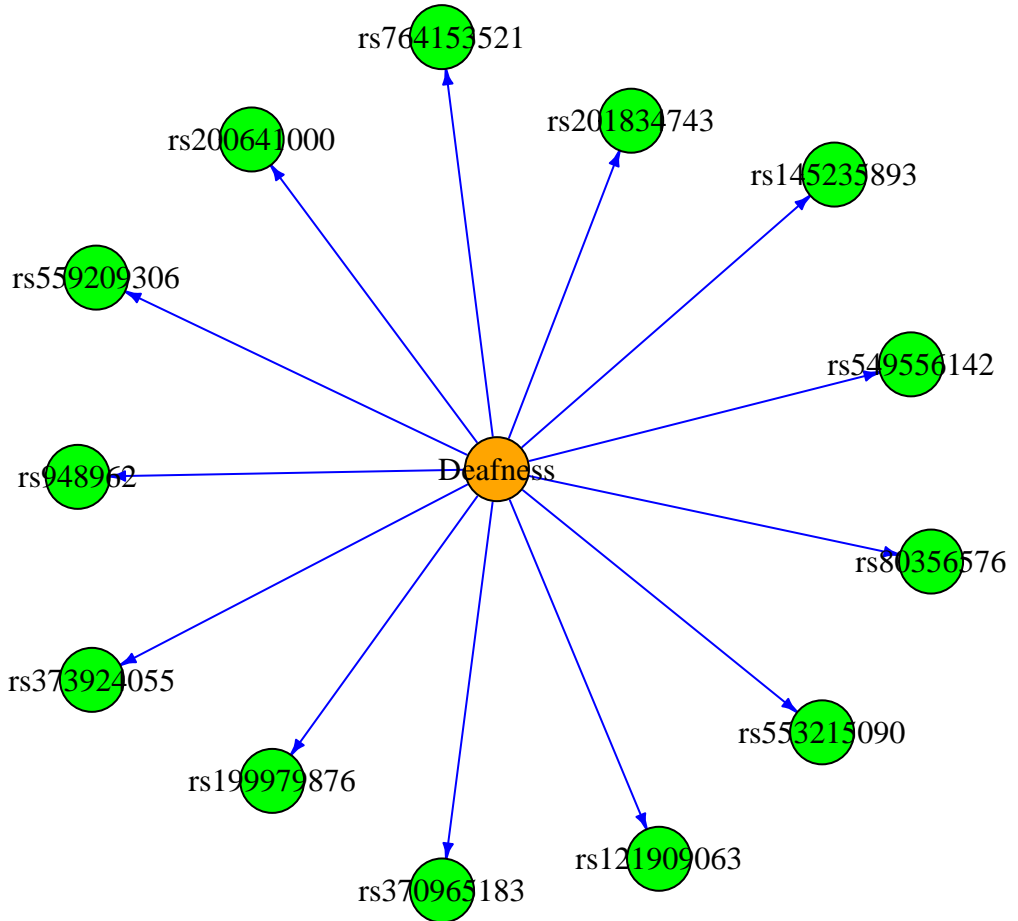

Variant–Disease Network (Deficiency of 2-methylbutyryl-CoA dehydrogenase)

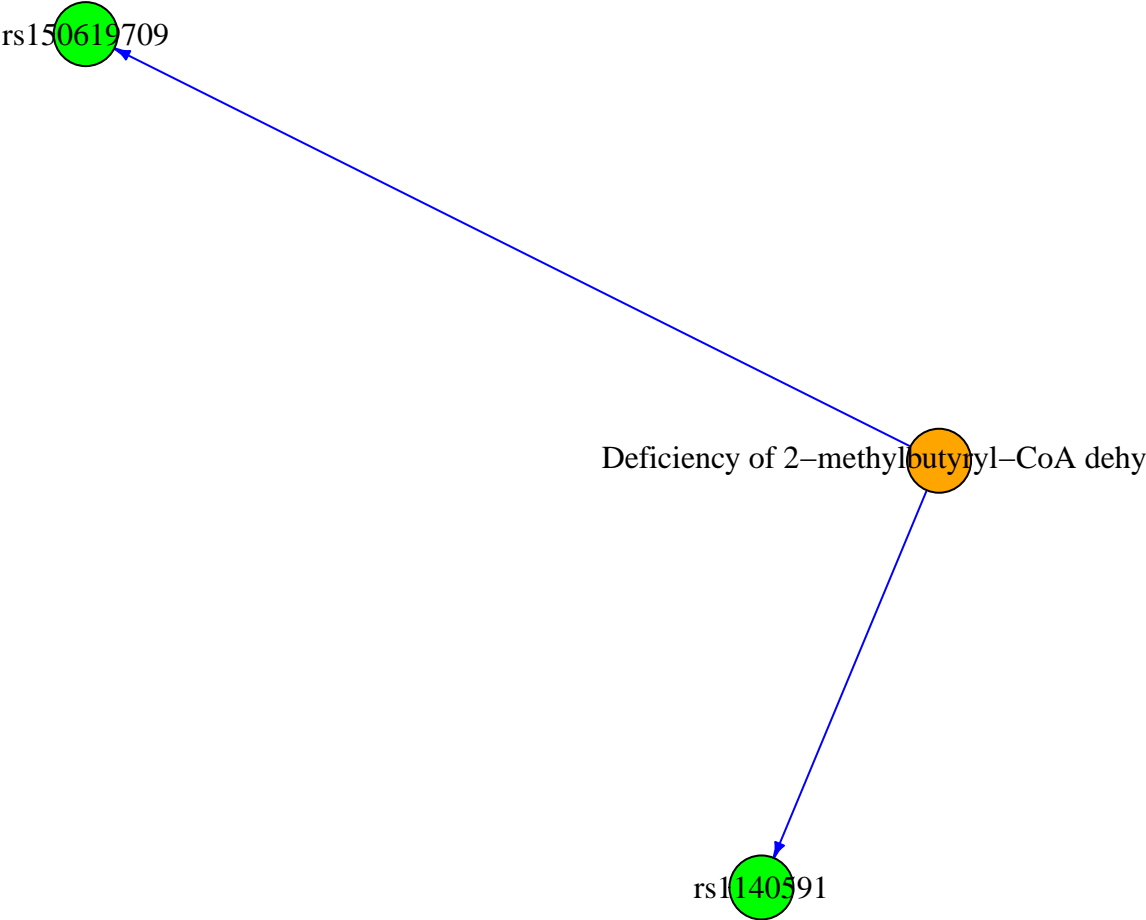

Variant–Disease Network (Deficiency of 3–hydroxyacyl–CoA dehydrogenase)

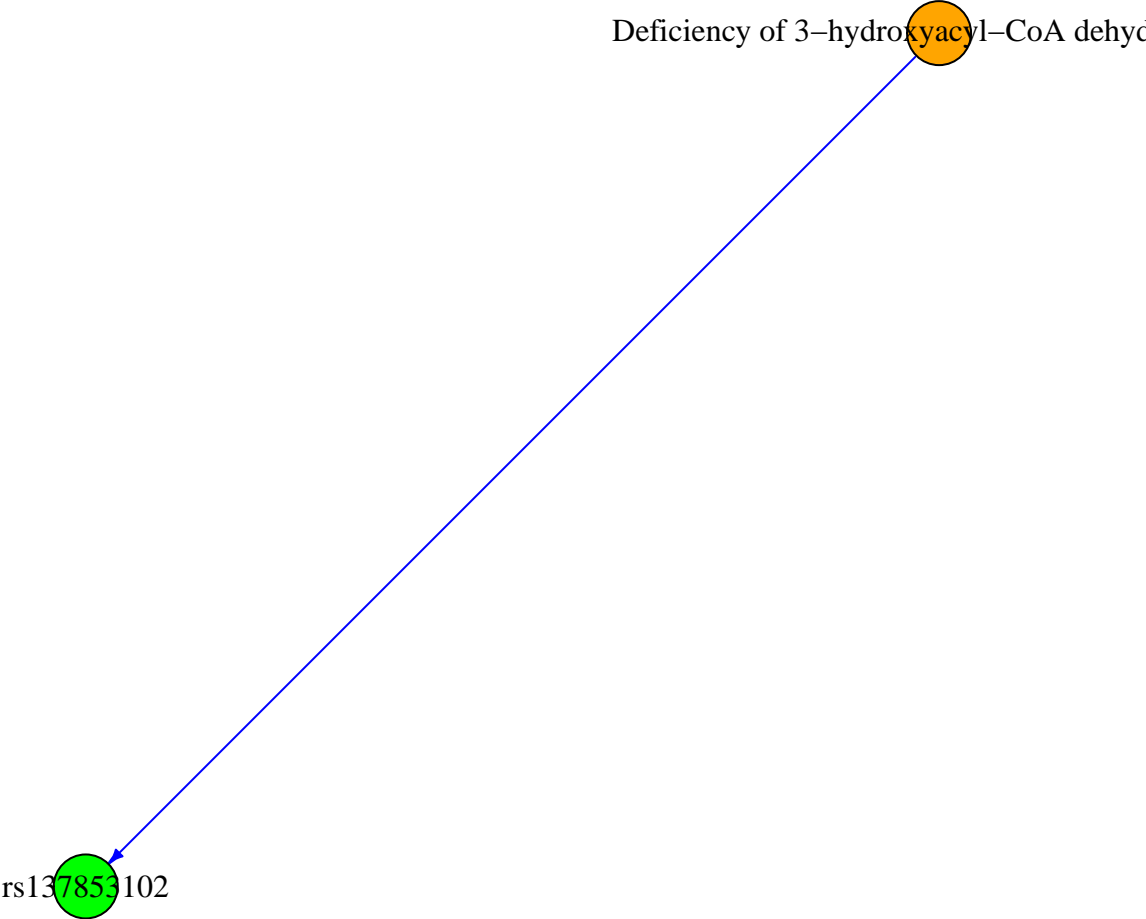

# Variant–Disease Network (Deficiency of acetyl–CoA acetyltransferase)

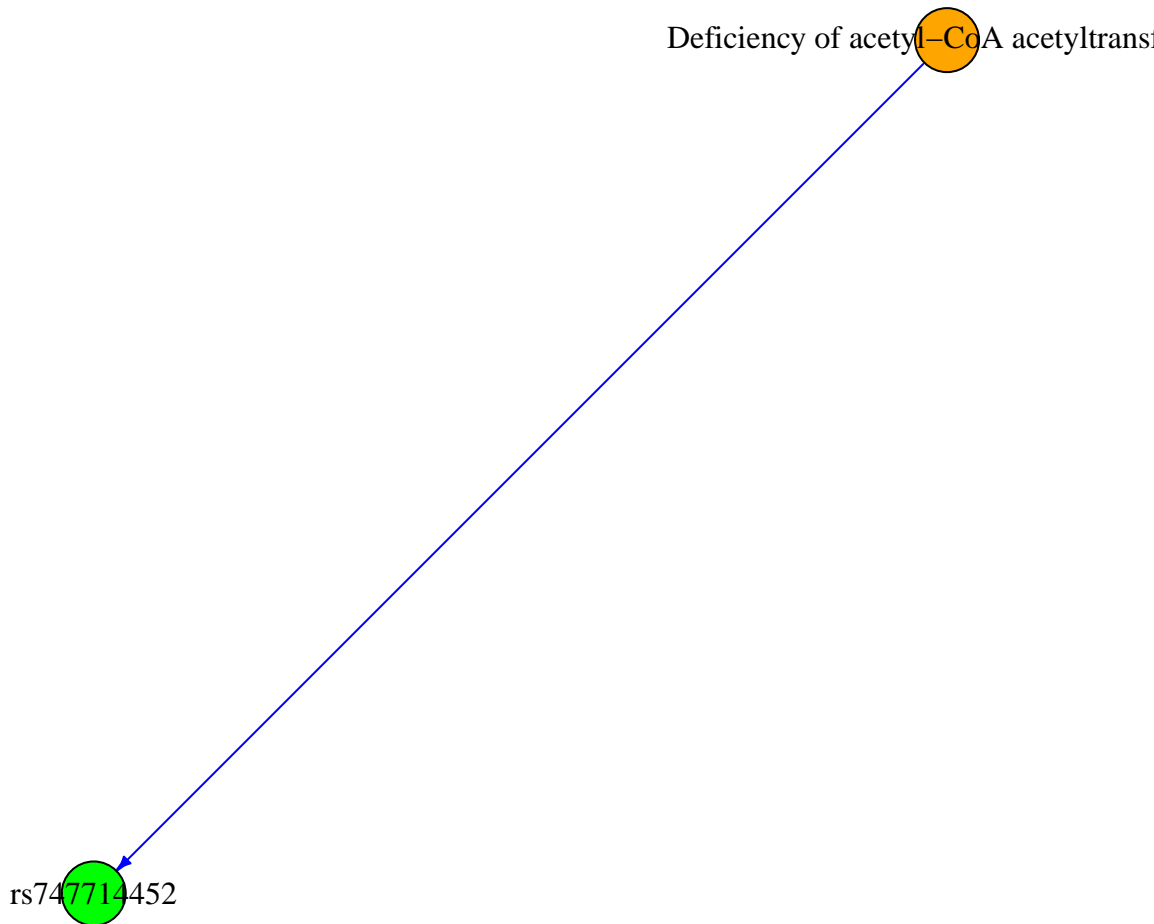

# Variant-Disease Network (Deficiency of alpha-mannosidase)

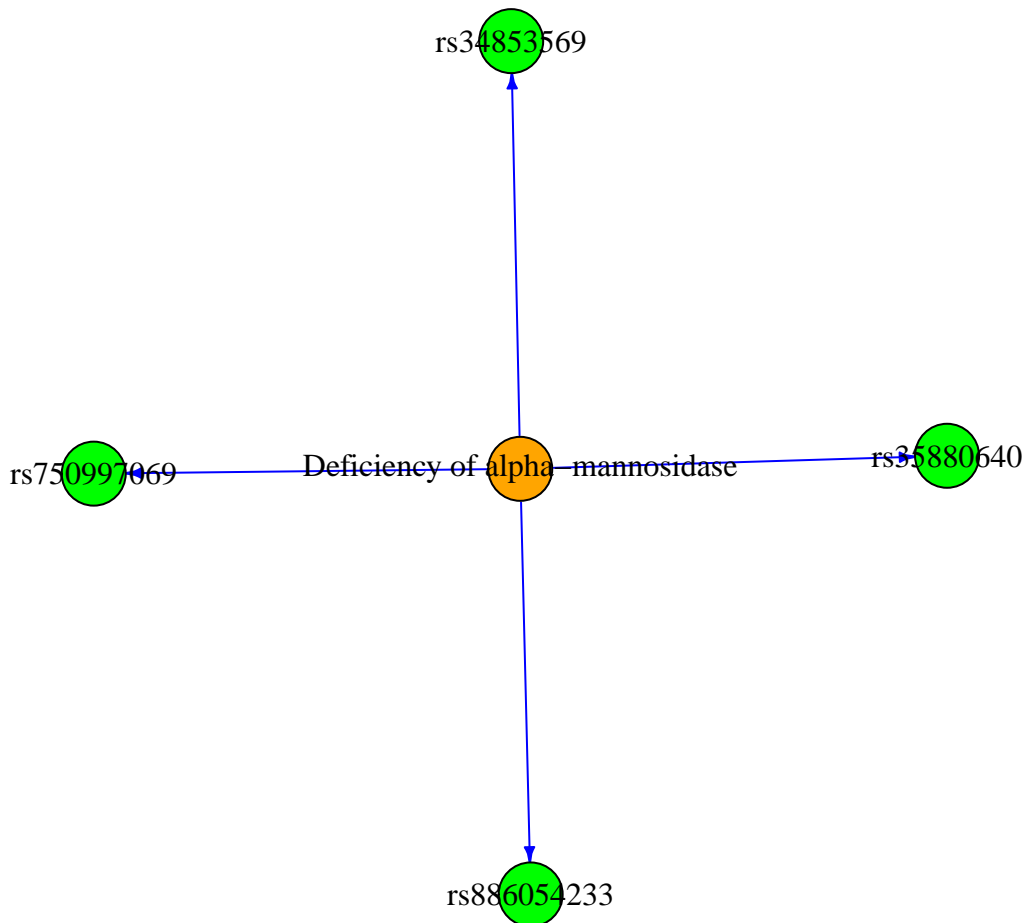

# Variant-Disease Network (Deficiency of aromatic-L-amino-acid decarboxylase)

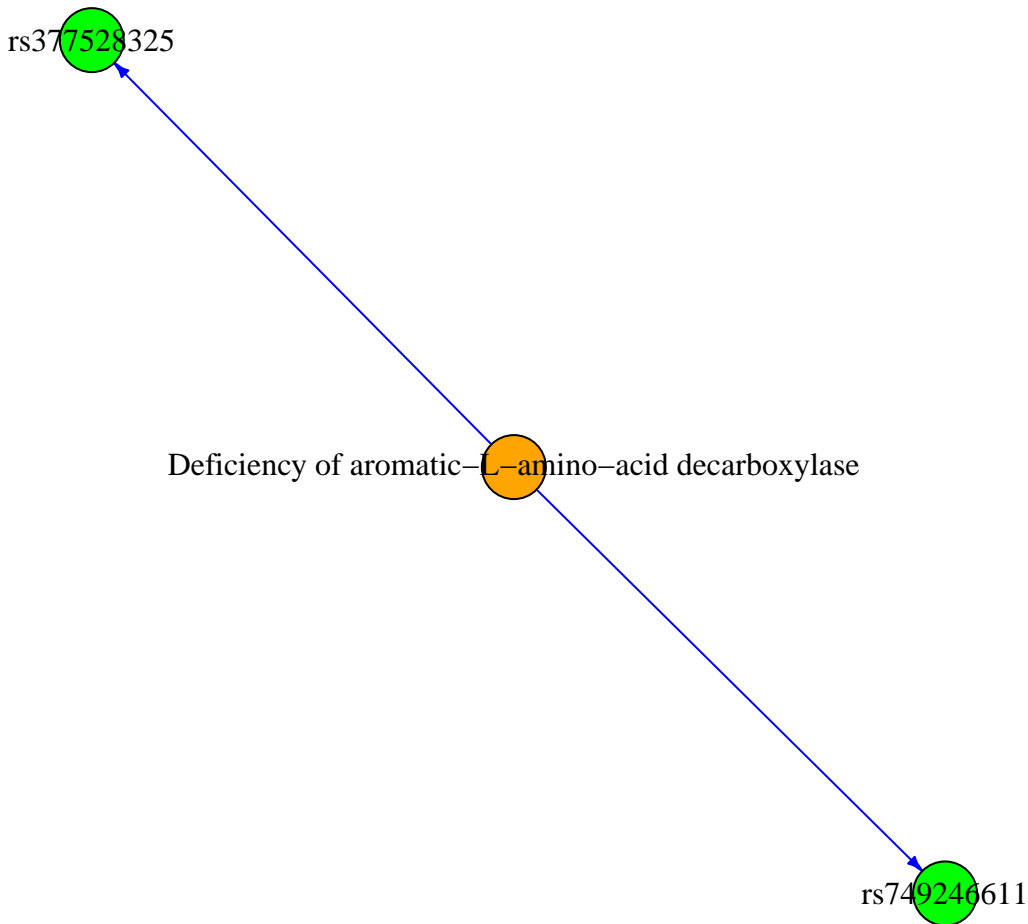

**Variant–Disease Network (Deficiency of butyryl–CoA dehydrogenase)**

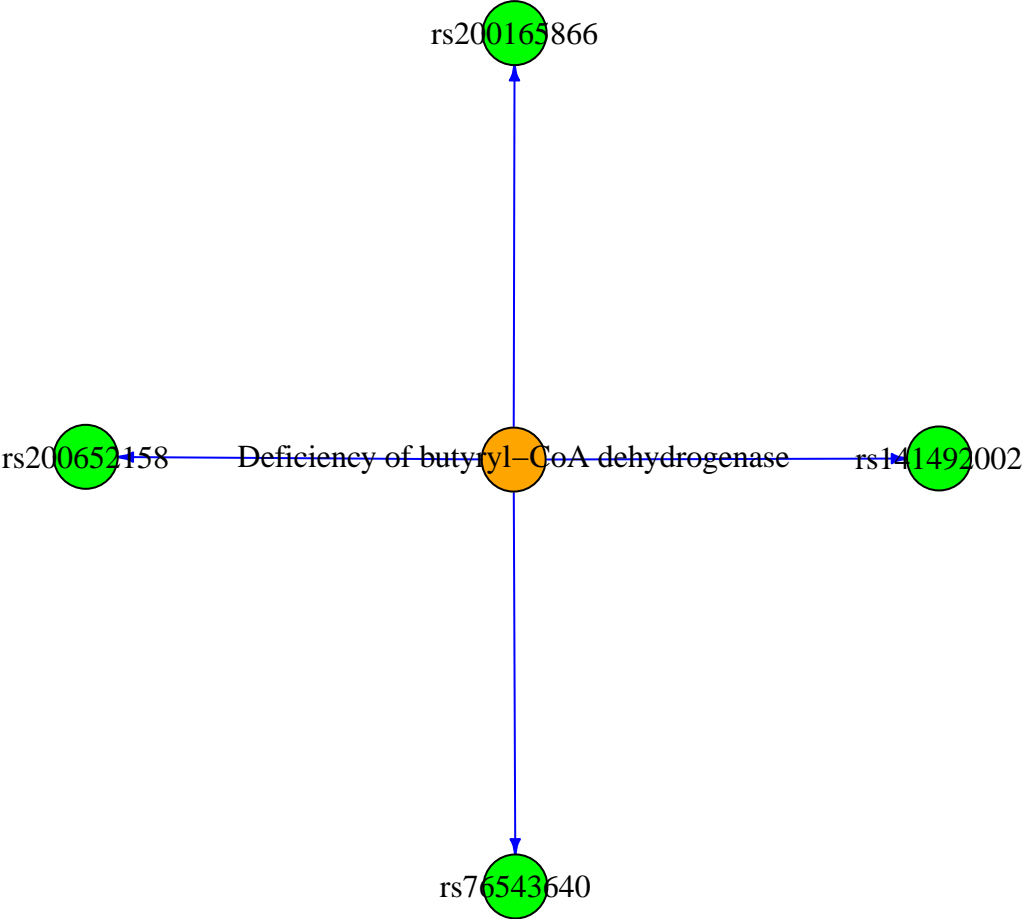

## Variant–Disease Network (Deficiency of ferroxidase)

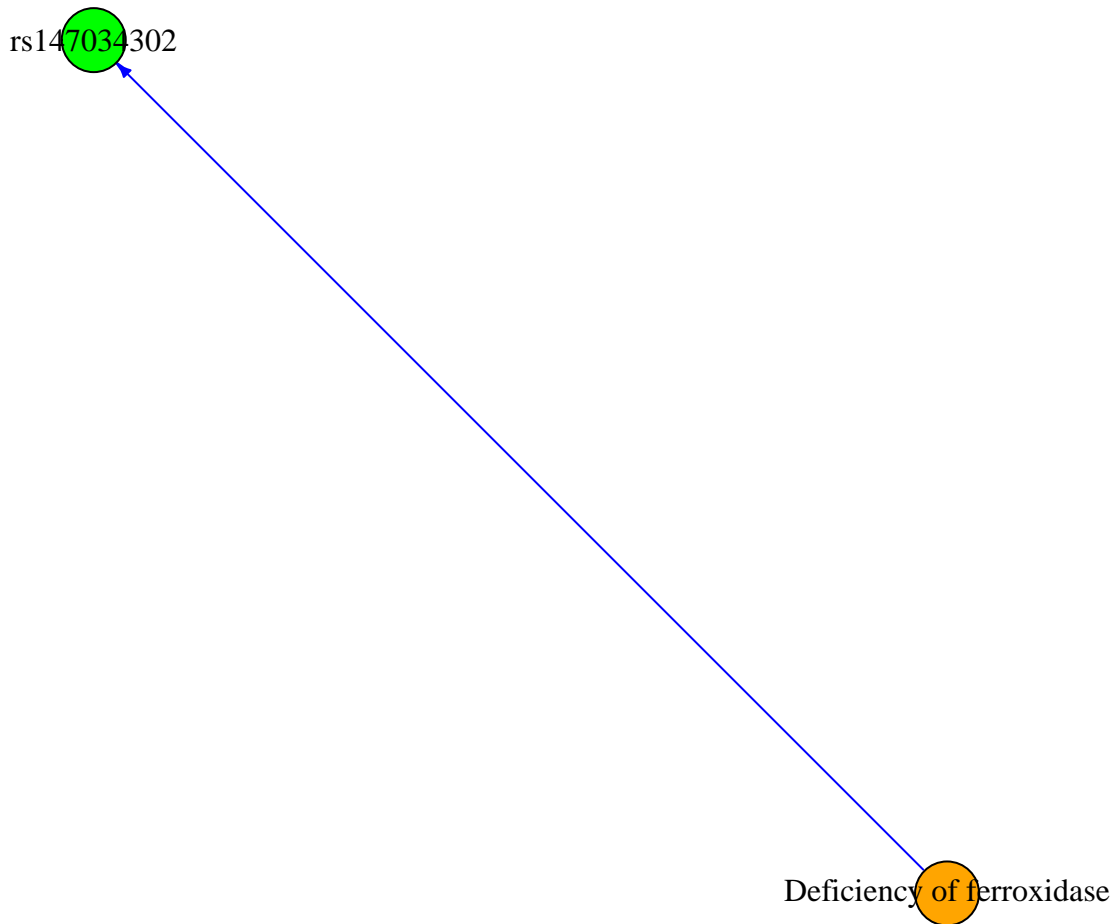



## Variant–Disease Network (Deficiency of galactokinase)

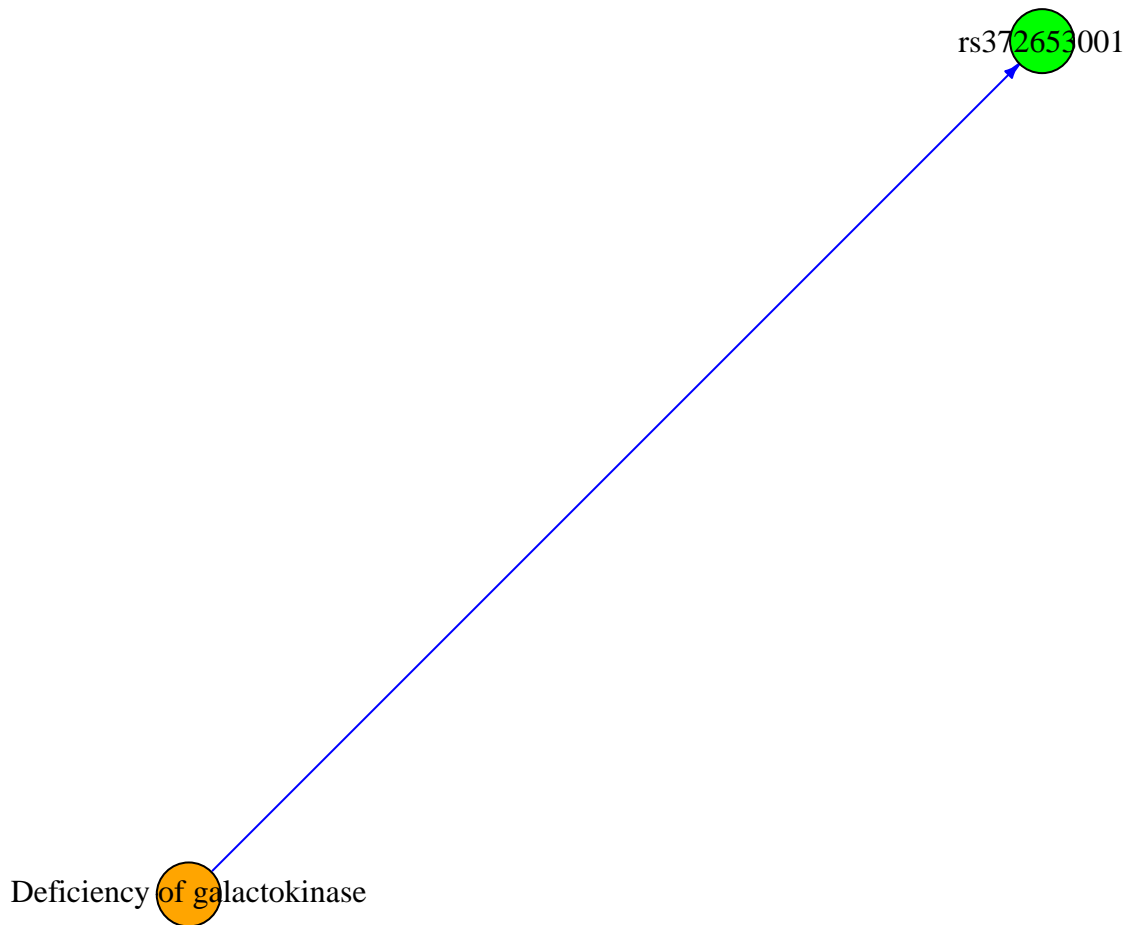

**Variant–Disease Network (Deficiency of hyaluronoglucosaminidase)**

Deficiency of hyaluronoglucosaminidase

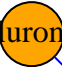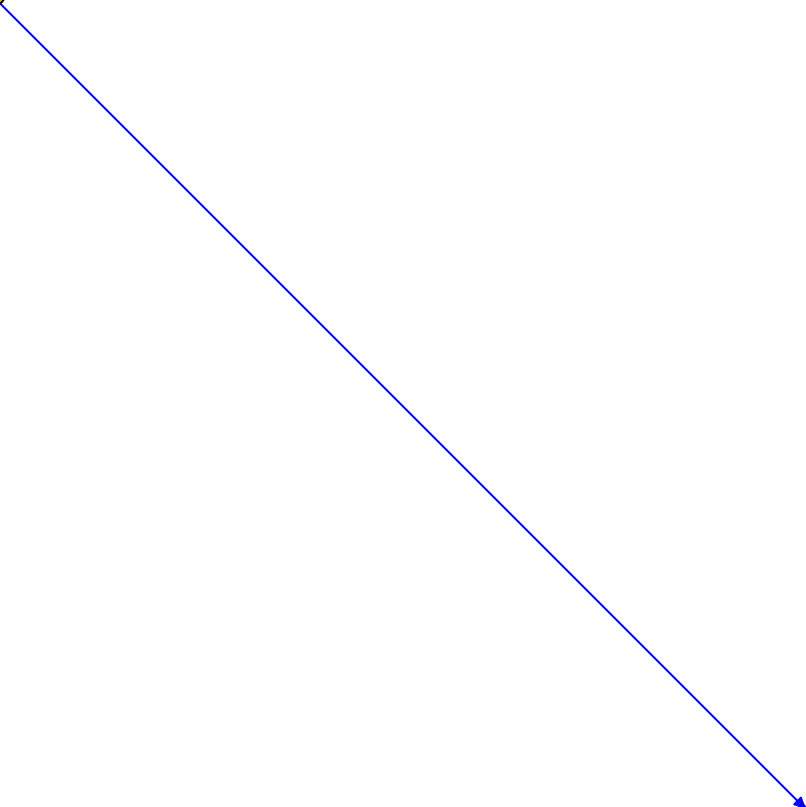

rs116097974

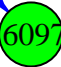

Variant–Disease Network (Deficiency of hydroxymethylglutaryl–CoA lyase)

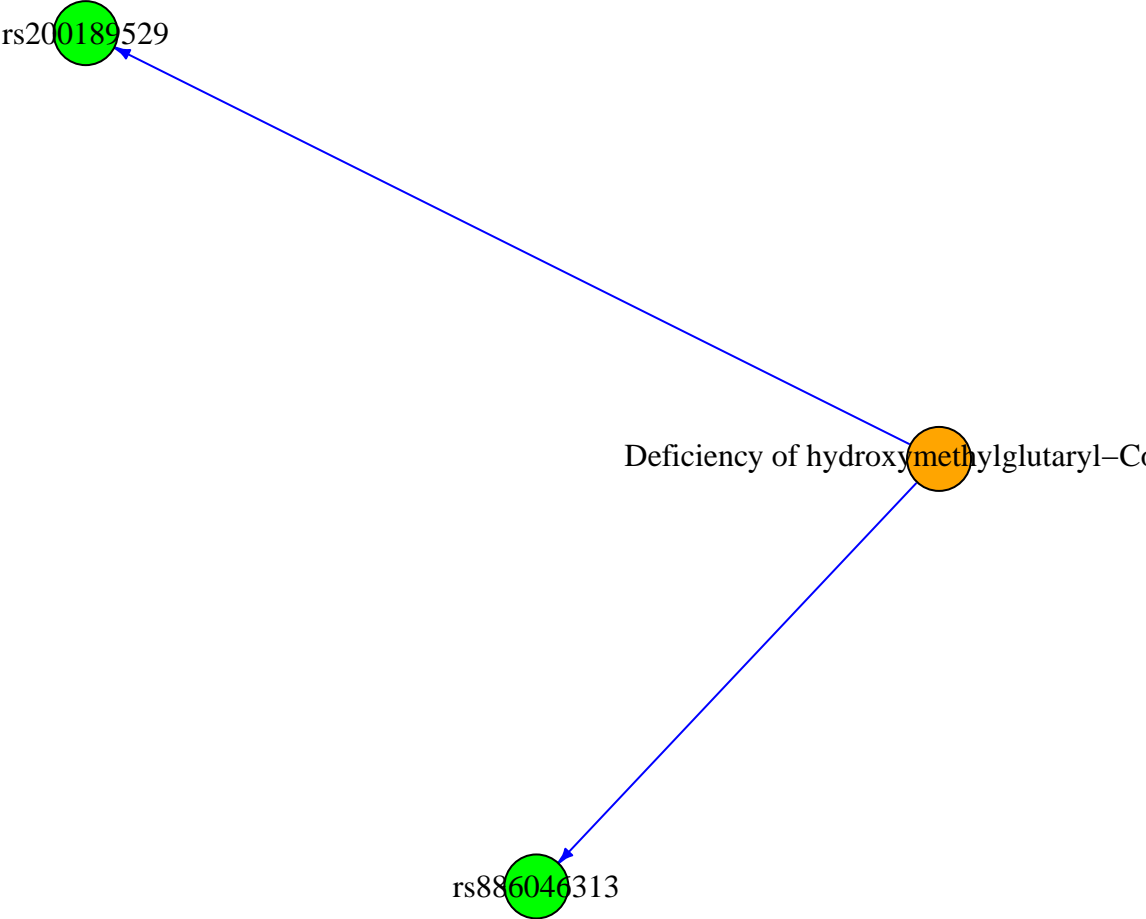

Variant–Disease Network (Deficiency of iodide peroxidase)

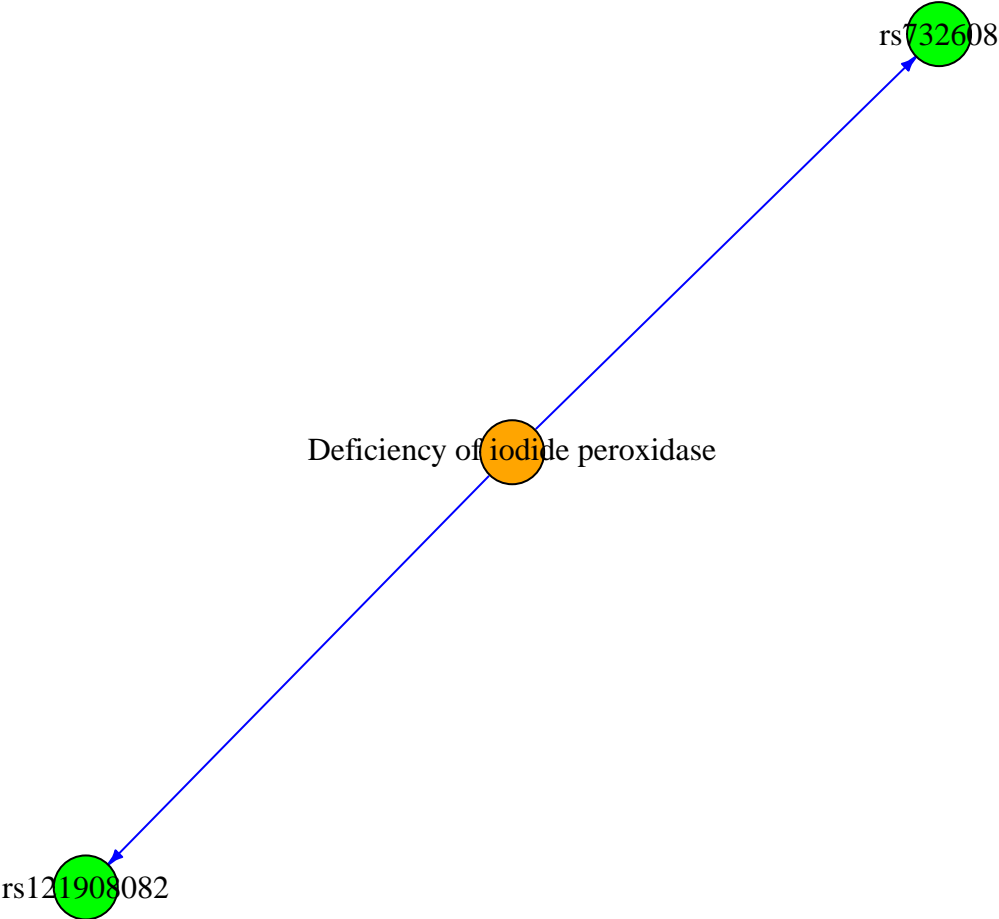

# -Disease Network (Deficiency of UDPglucose–hexose–1–phosphate uridylyltransferase)

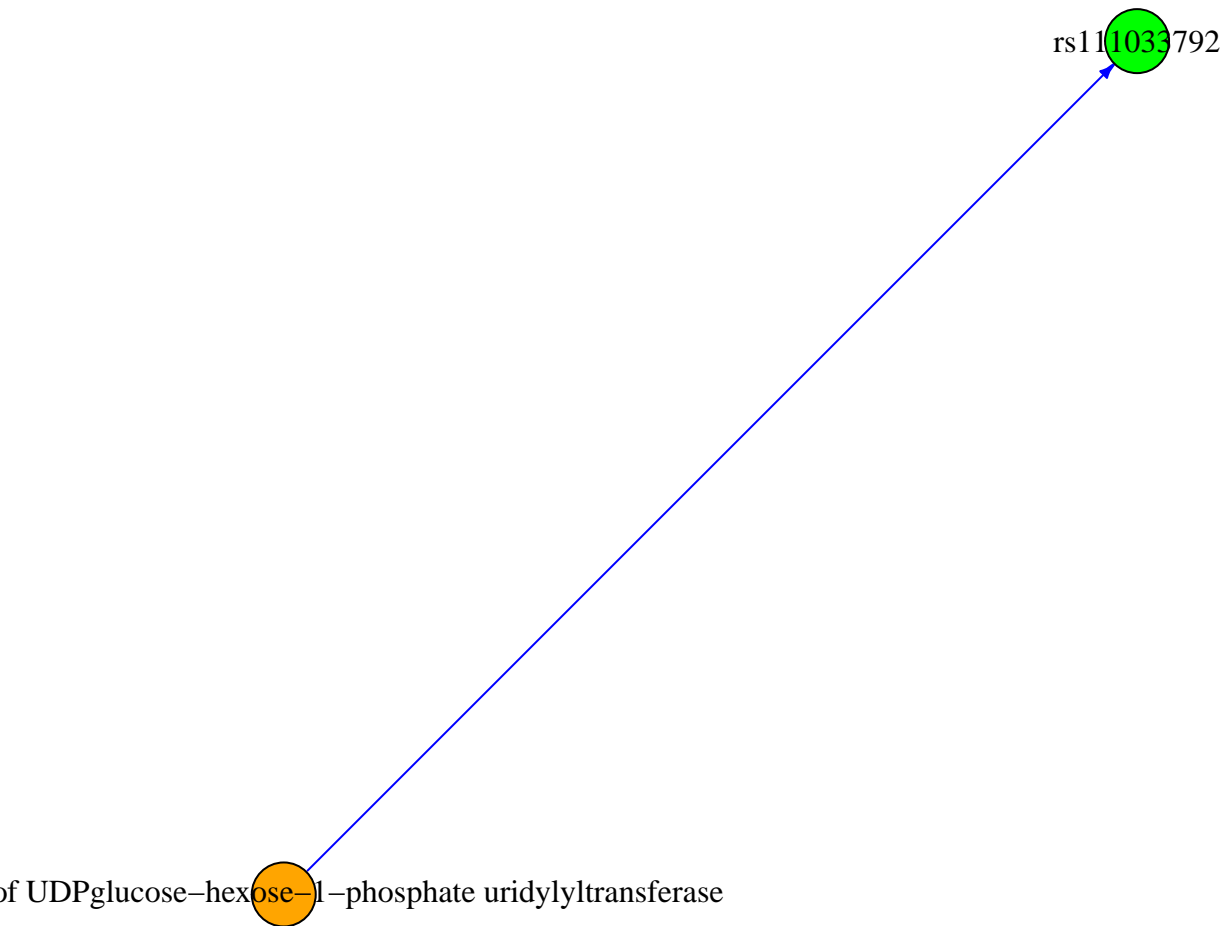

## Variant-Disease Network (Dementia)

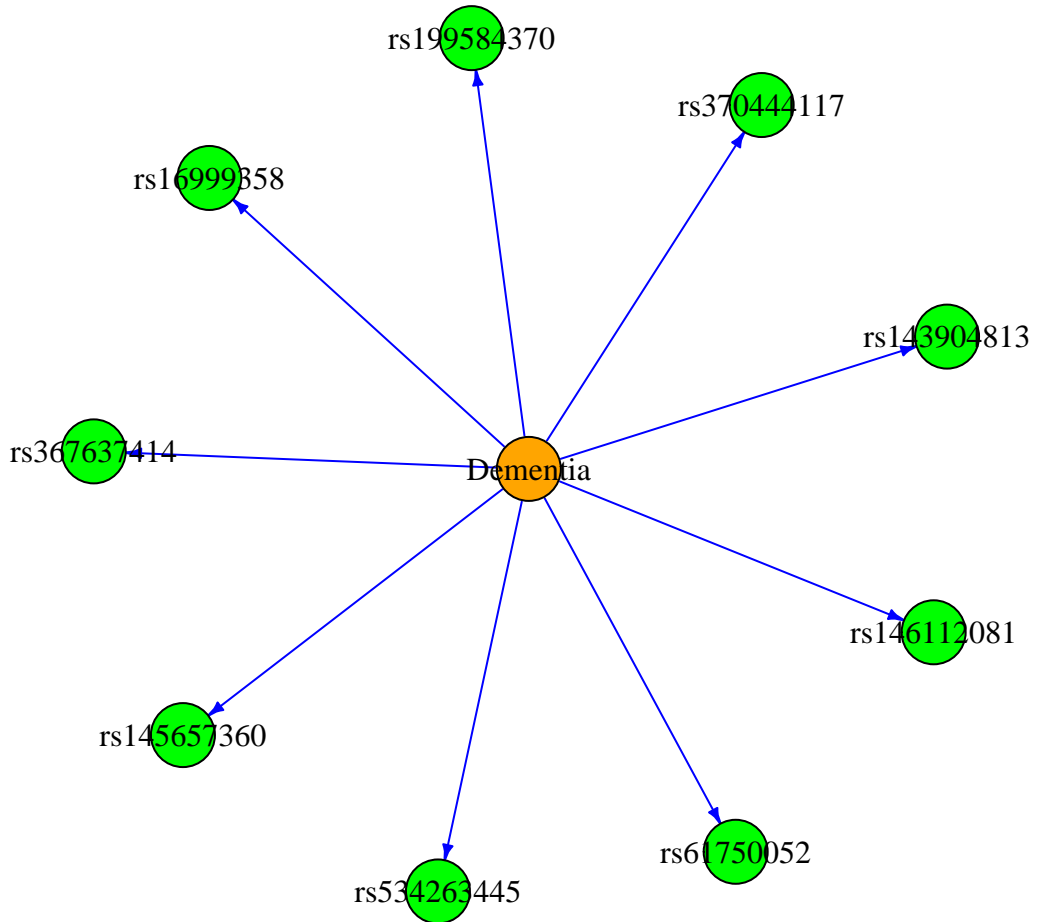

## Variant–Disease Network (Dents disease)

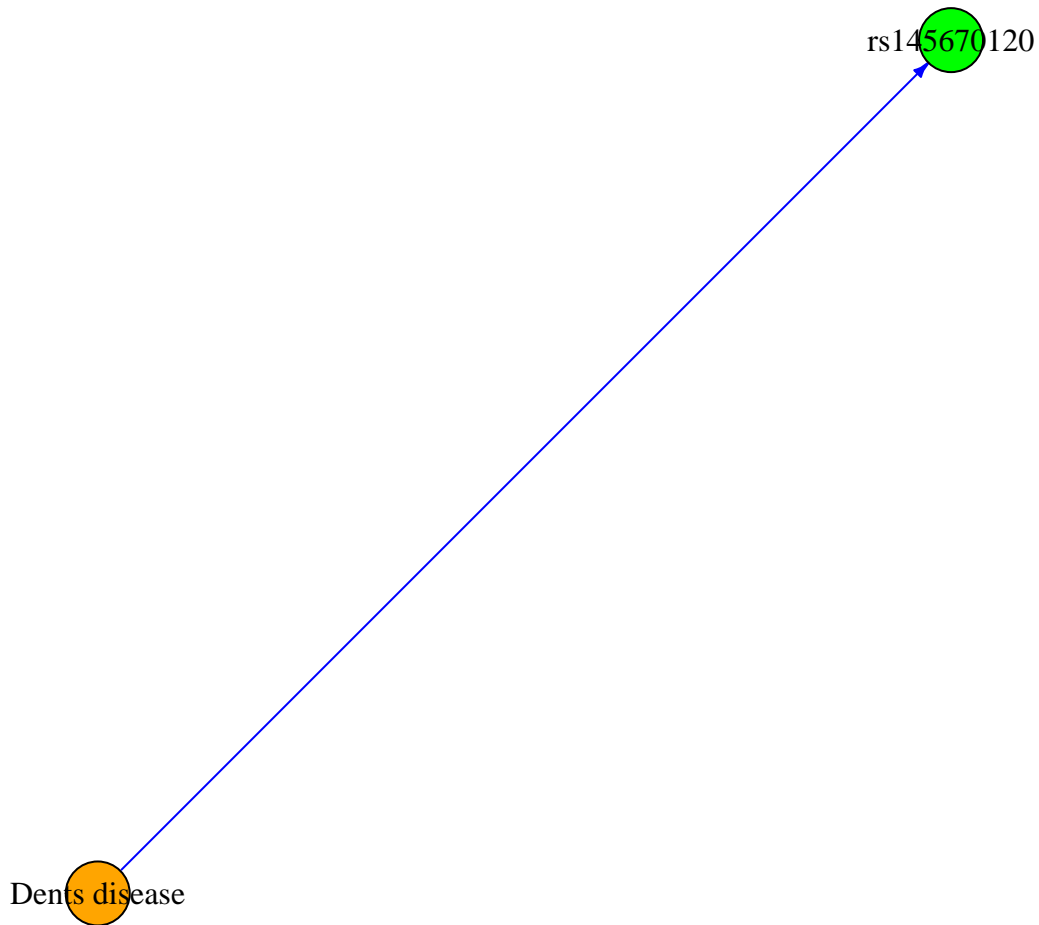

Variant–Disease Network (Dermatofibrosis lenticularis disseminata)

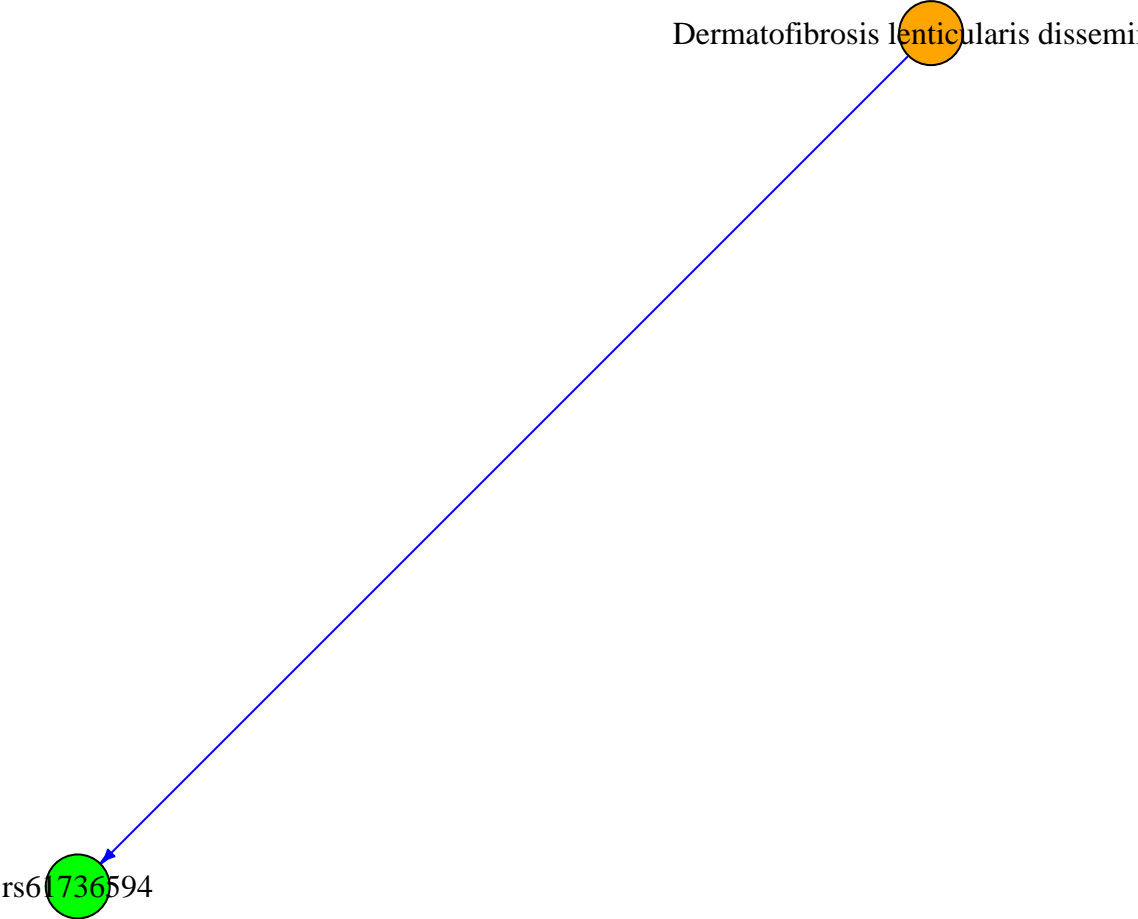



# Variant-Disease Network (Desmoid disease)

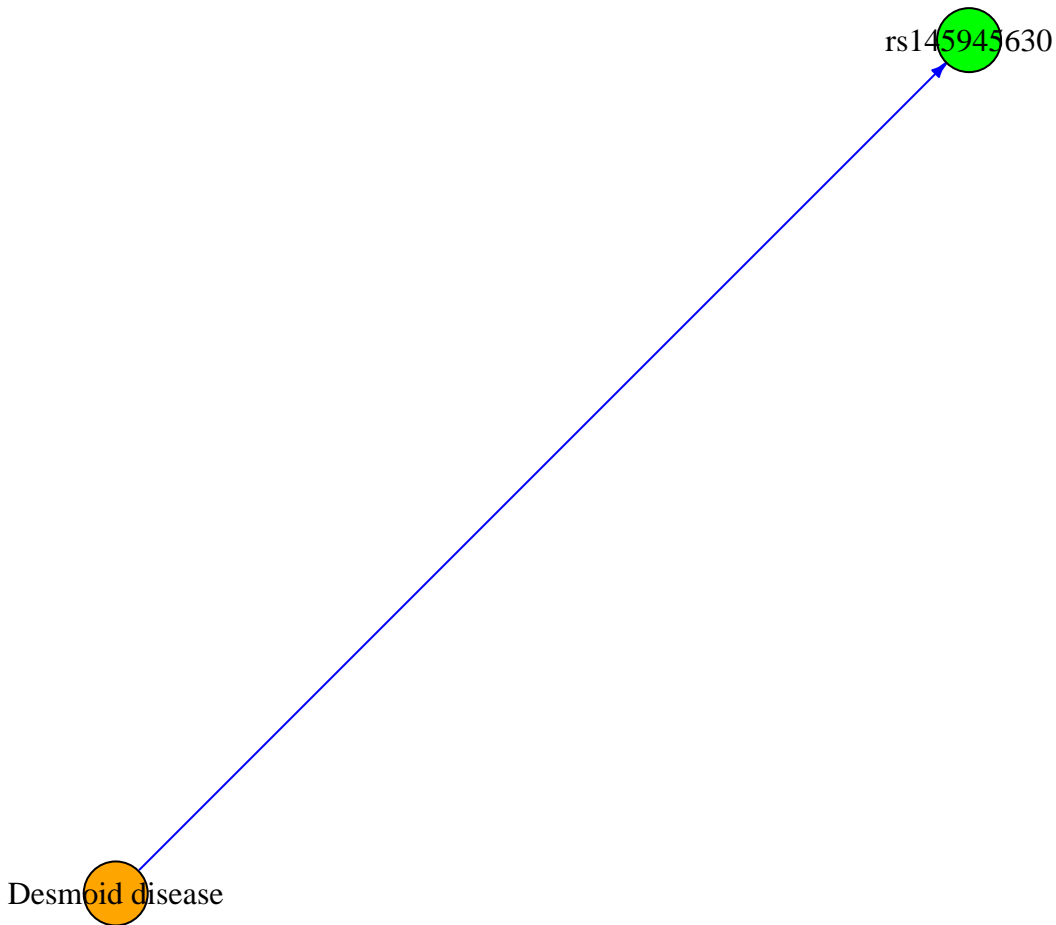

Variant–Disease Network (Diabetes mellitus)

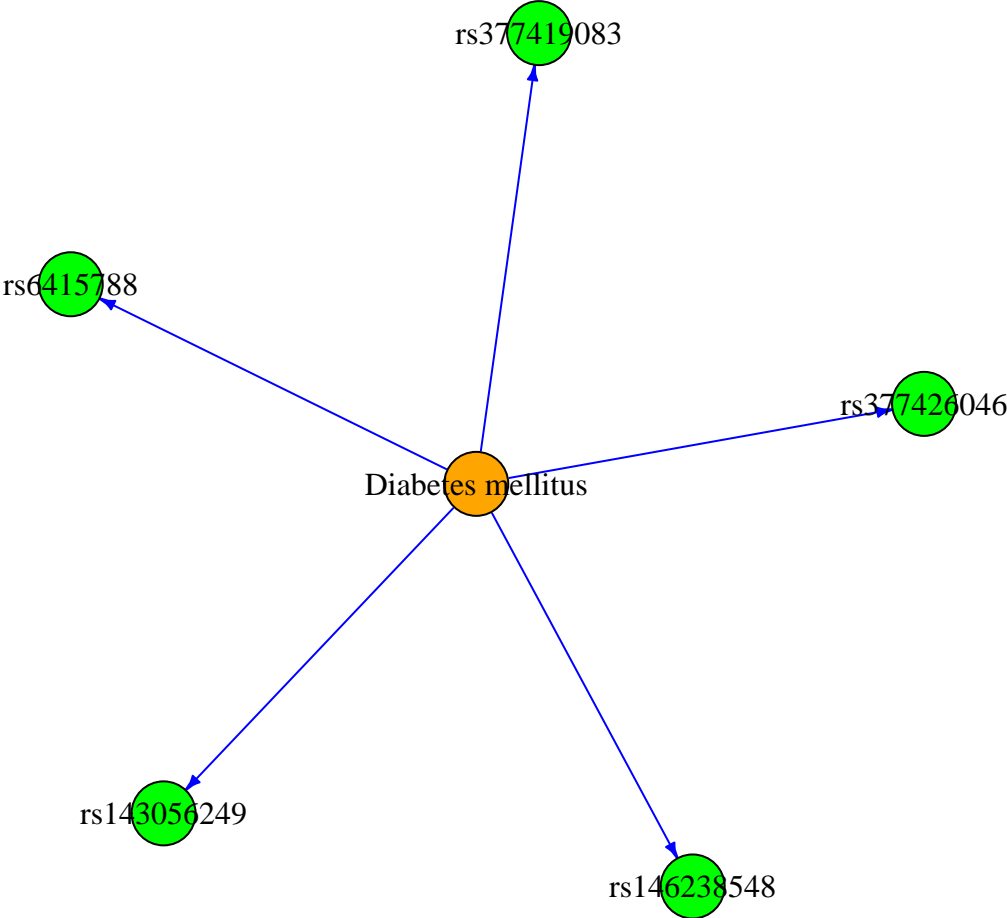

**Variant–Disease Network (Diamond–Blackfan anemia)**

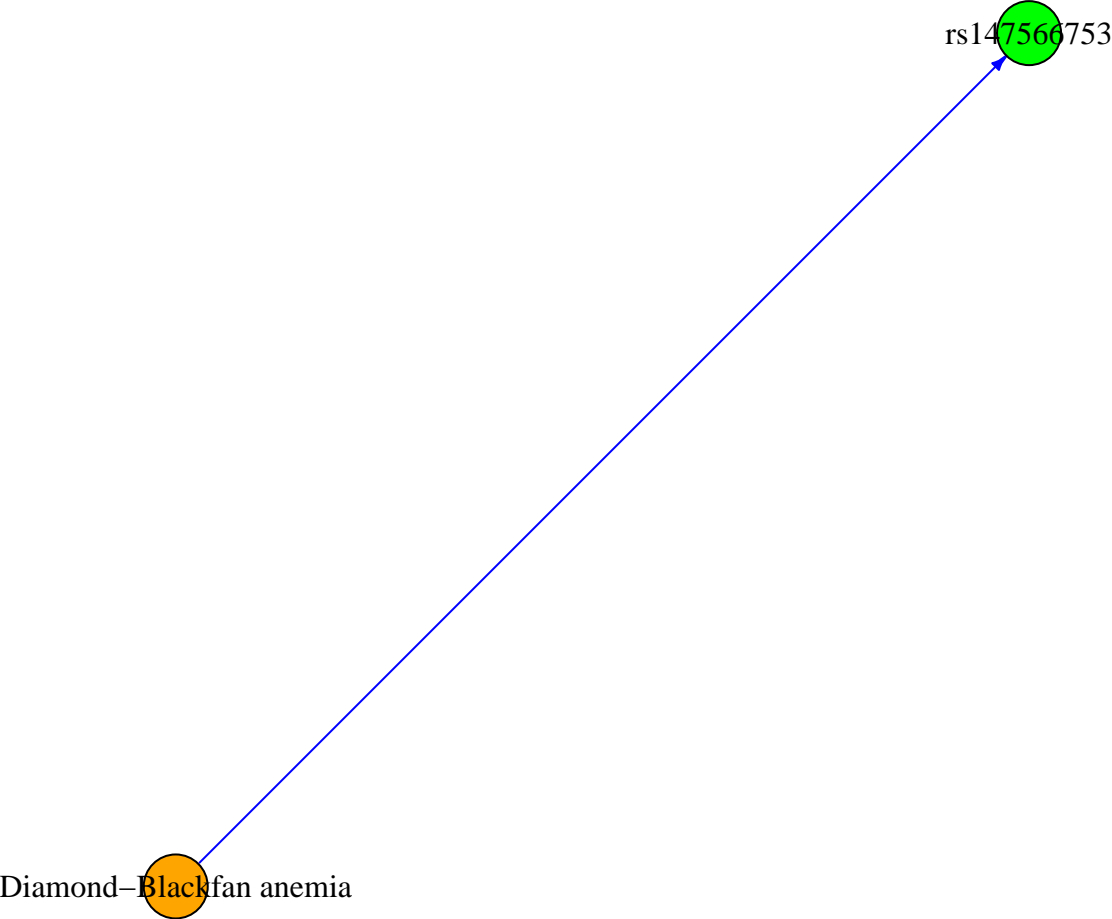

## Variant–Disease Network (Diamond–Blackfan anemia 1)

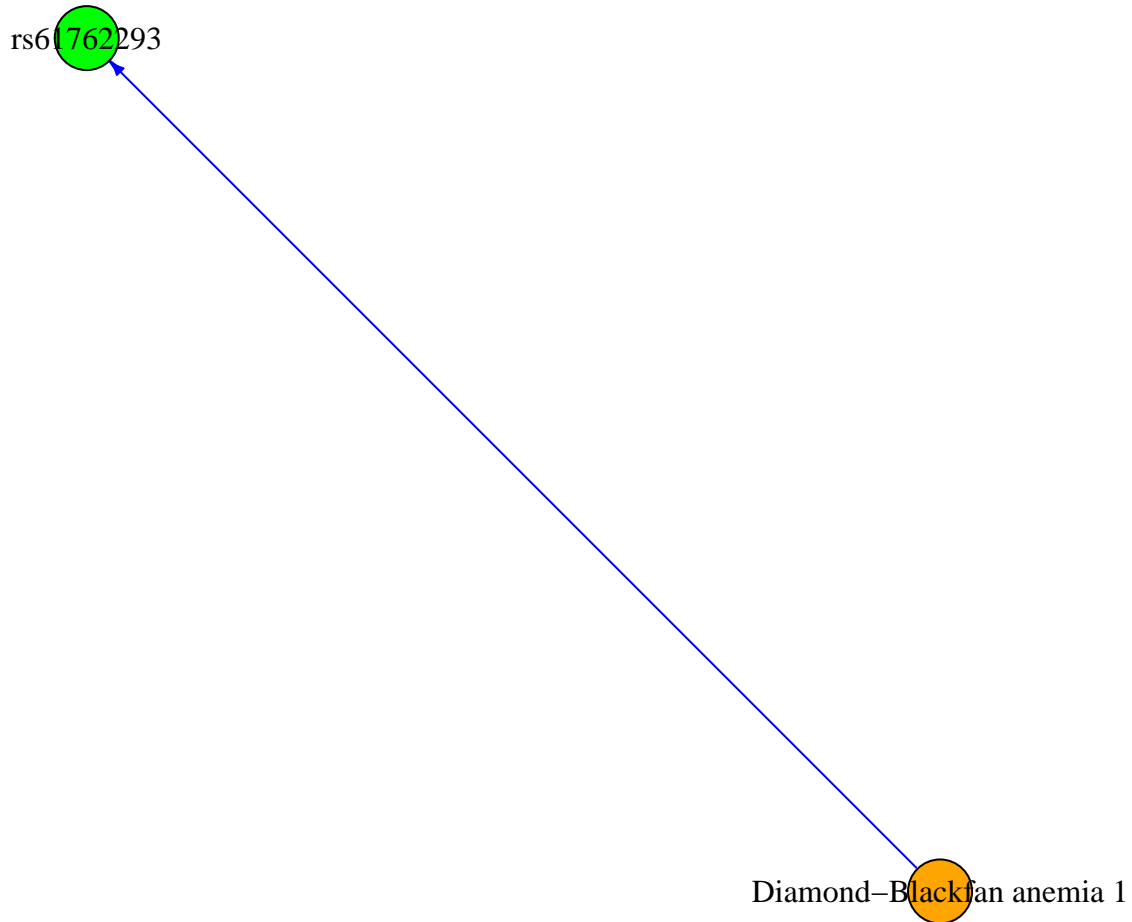

Variant–Disease Network (Diaphanospondylodysostosis)

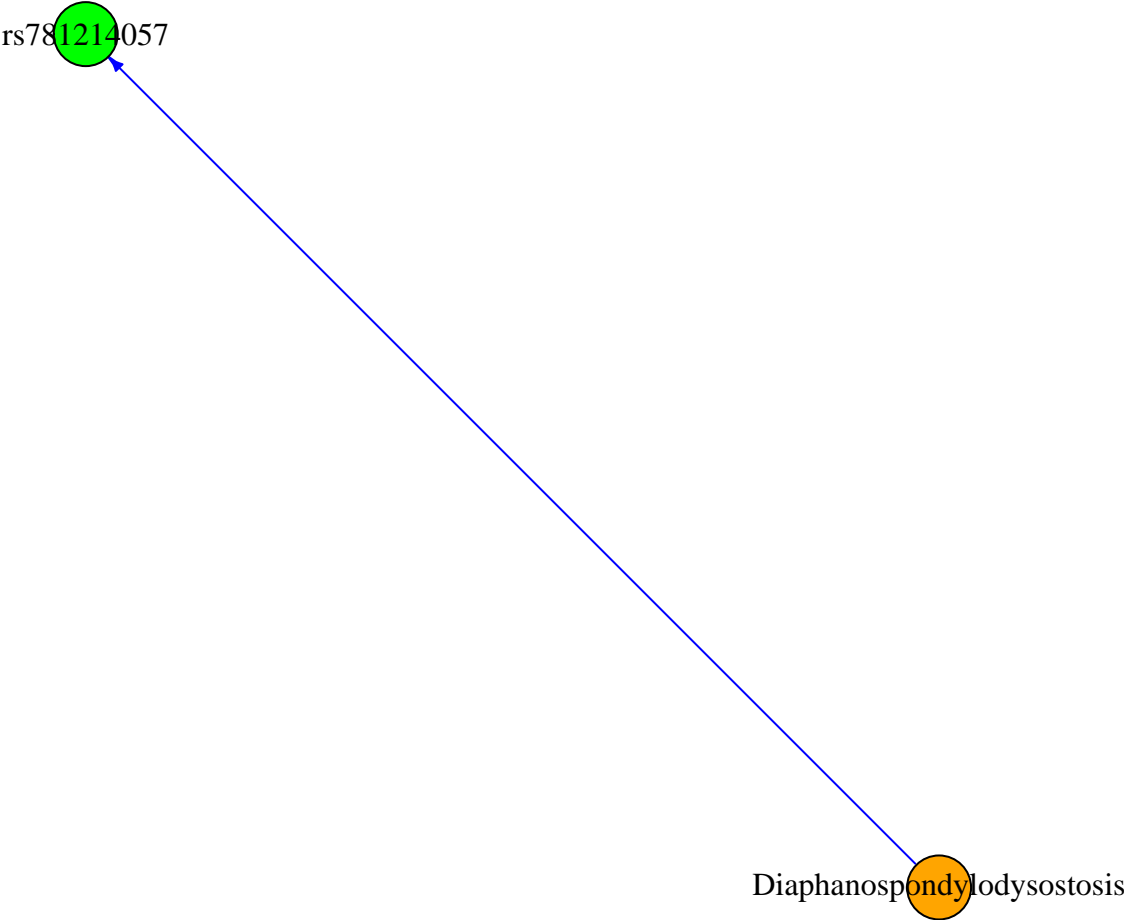

# Variant–Disease Network (Diarrhea with Microvillus Atrophy)

rs2969930

Diarrhea with Microvillus Atrophy

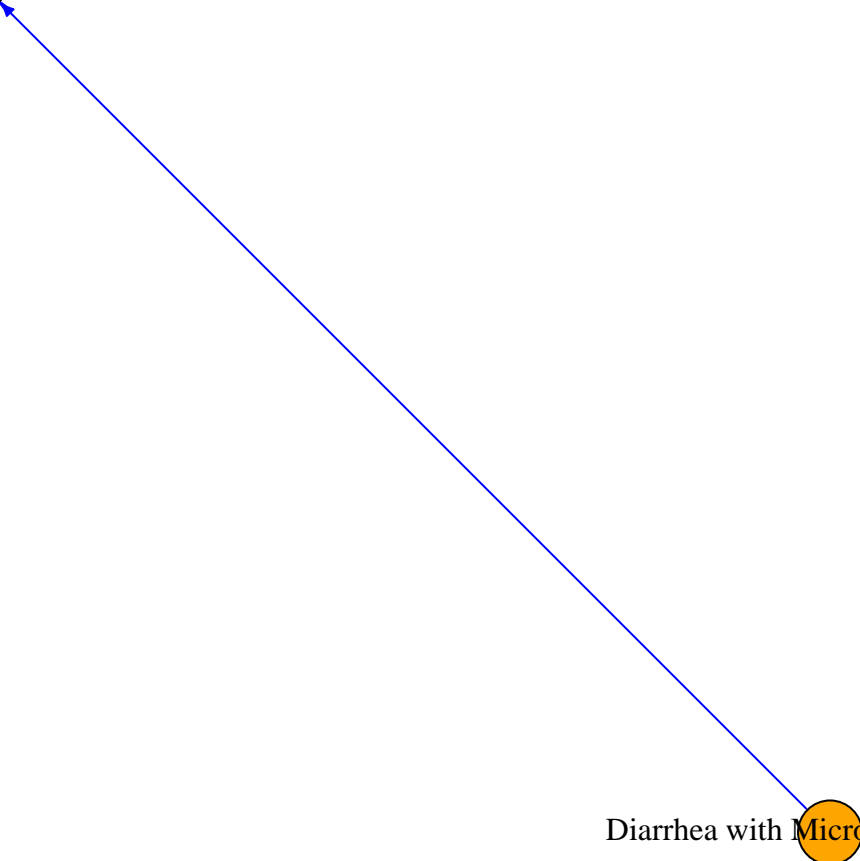

## Variant–Disease Network (Dicarboxylic aminoaciduria)

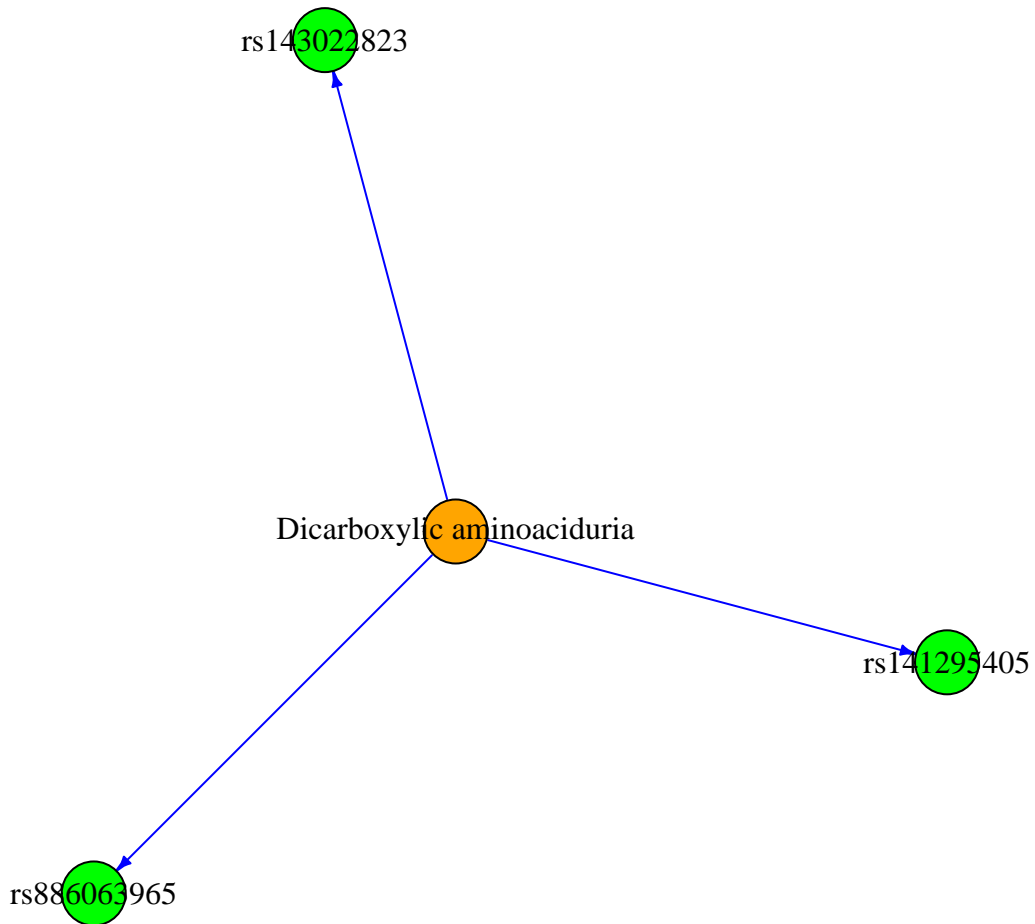

# Disease Network (DICER1-related pleuropulmonary blastoma cancer predispos

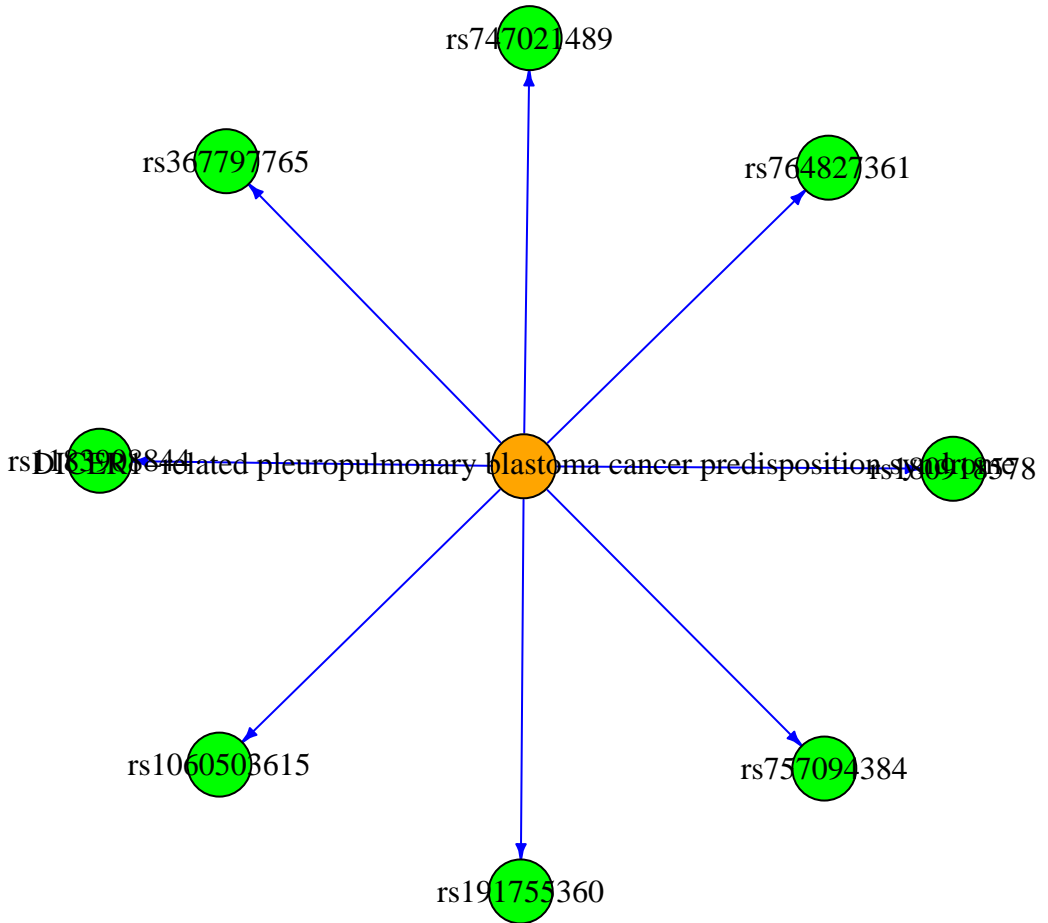



## Variant–Disease Network (Diffuse mesangial sclerosis)

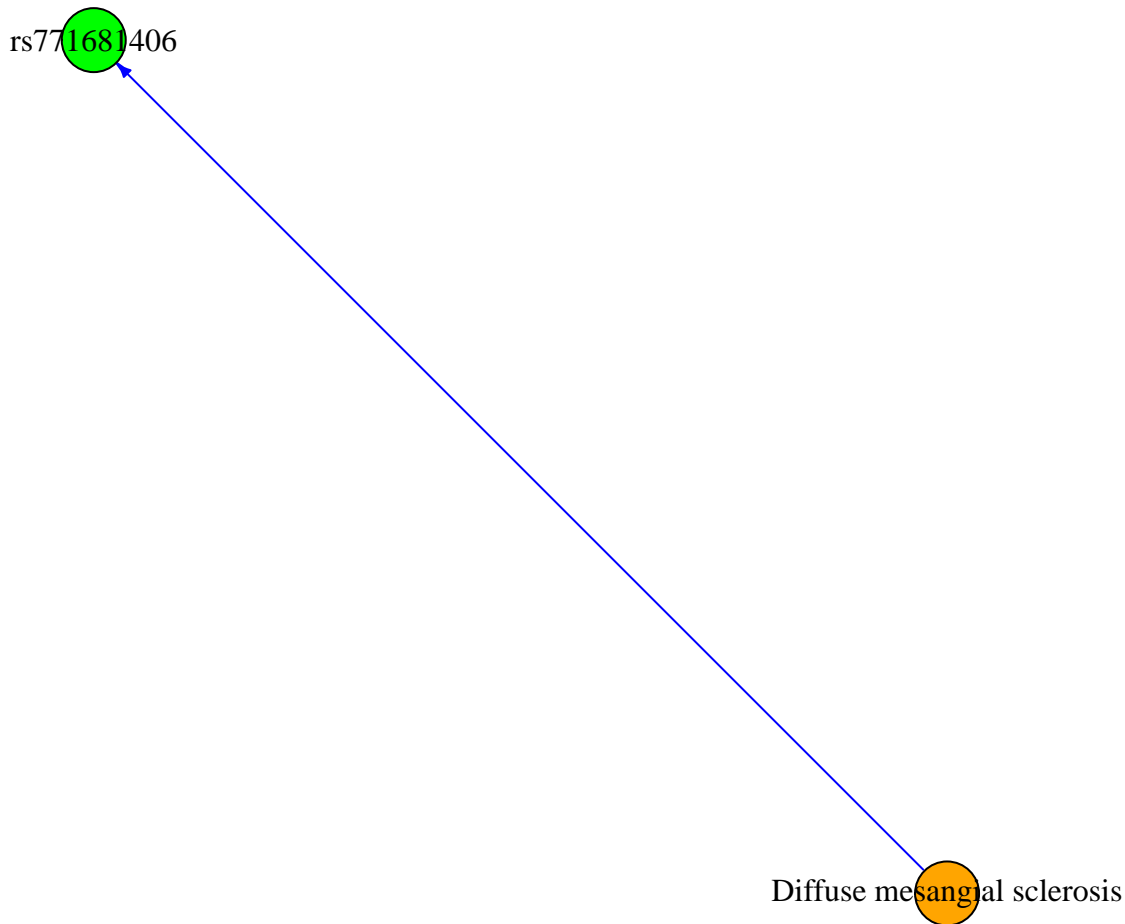

# Variant–Disease Network (Dihydropteridine reductase deficiency)

rs12645938

Dihydropteridine reductase deficiency

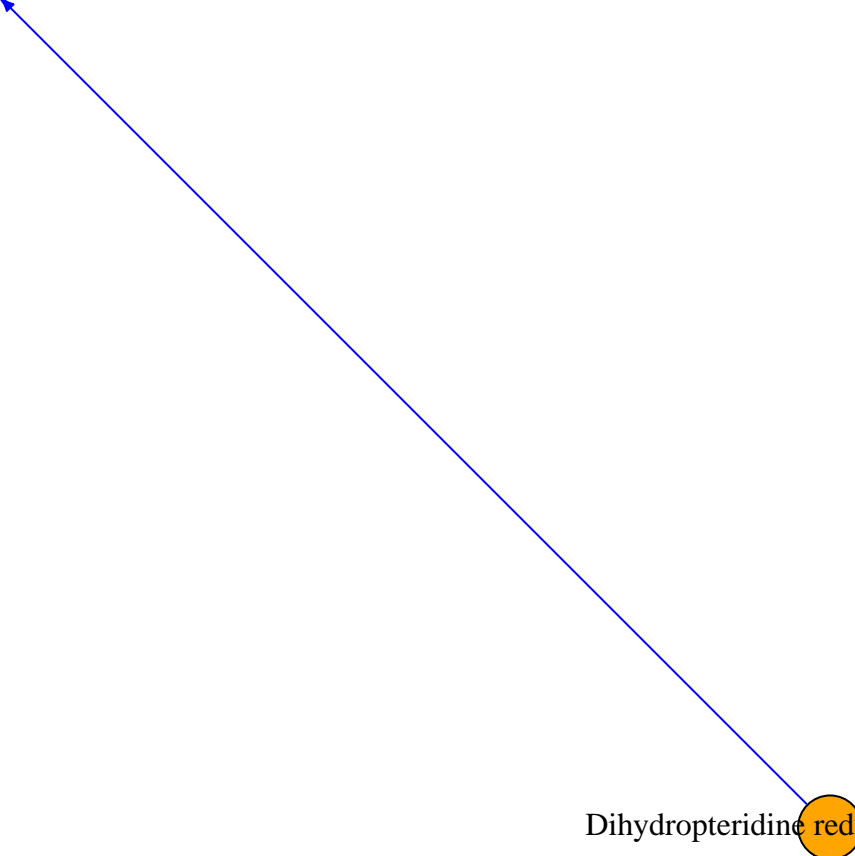

Variant–Disease Network (Dihydropyrimidinase deficiency)

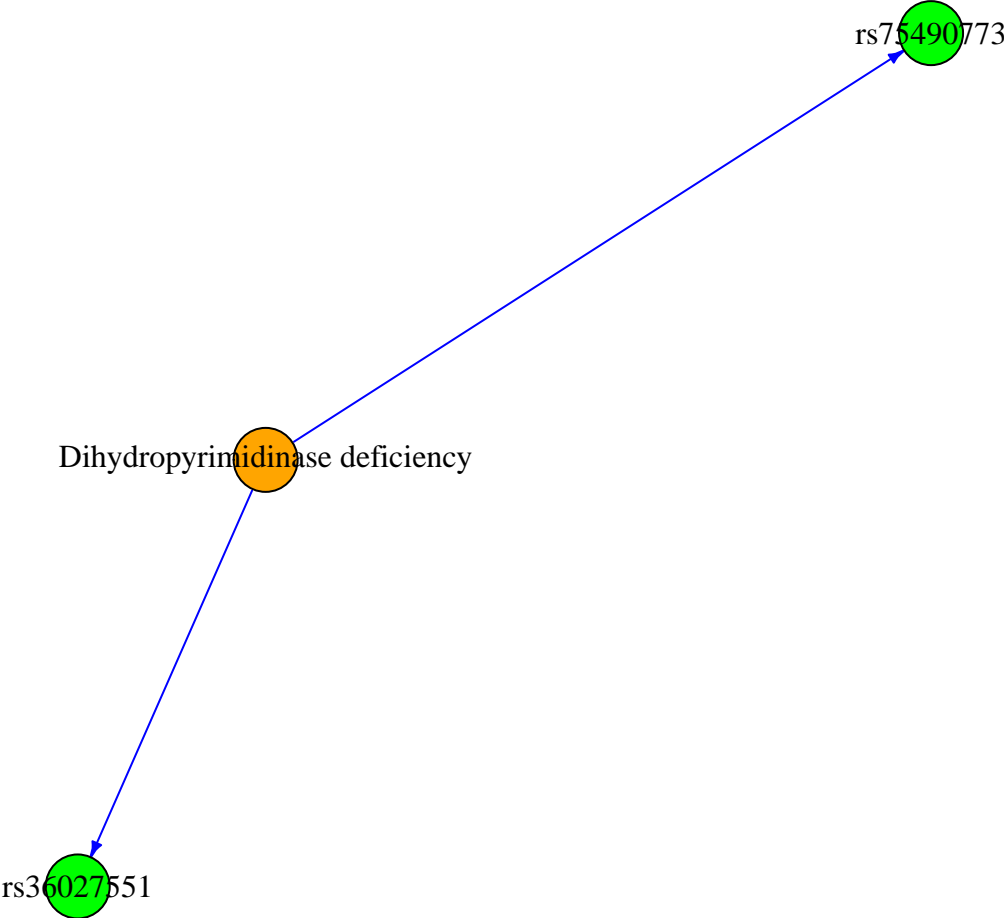

Variant–Disease Network (Dihydropyrimidine dehydrogenase deficiency)

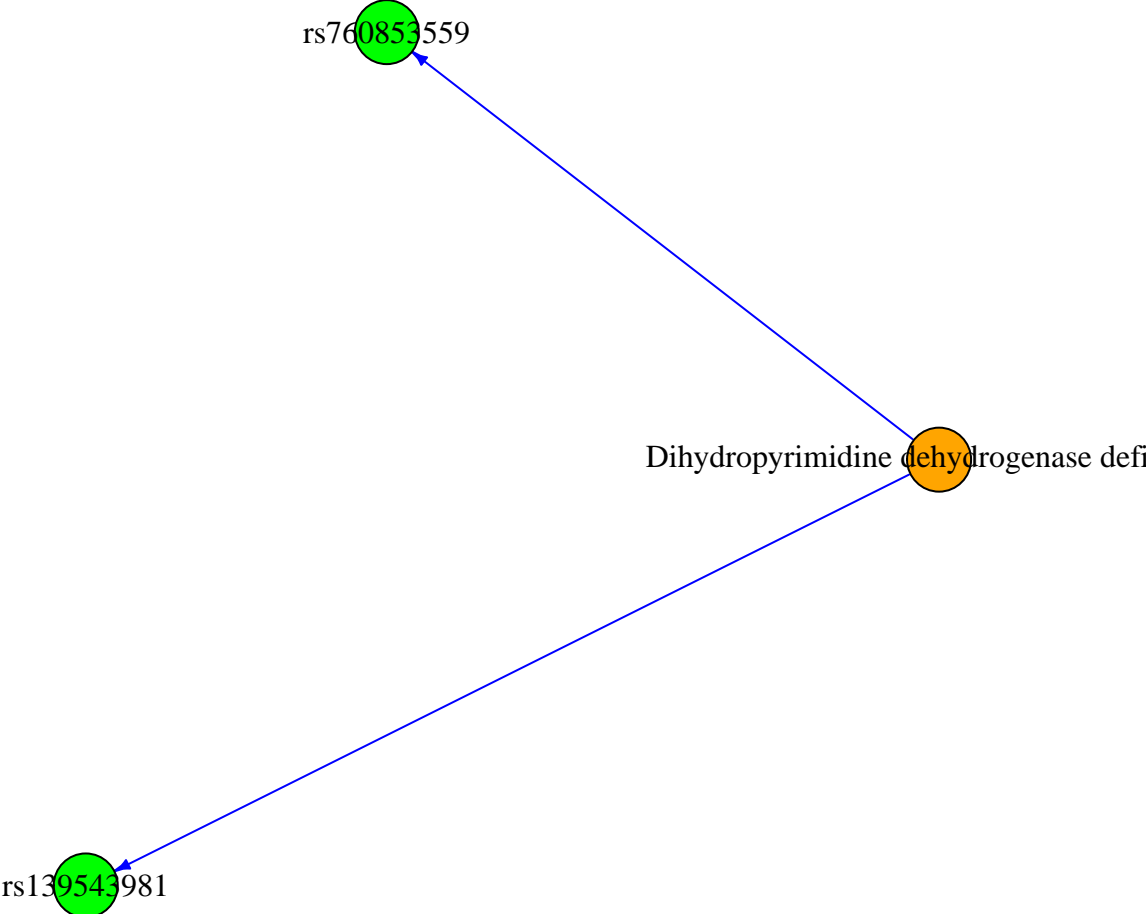

## Variant–Disease Network (Dilated Cardiomyopathy)

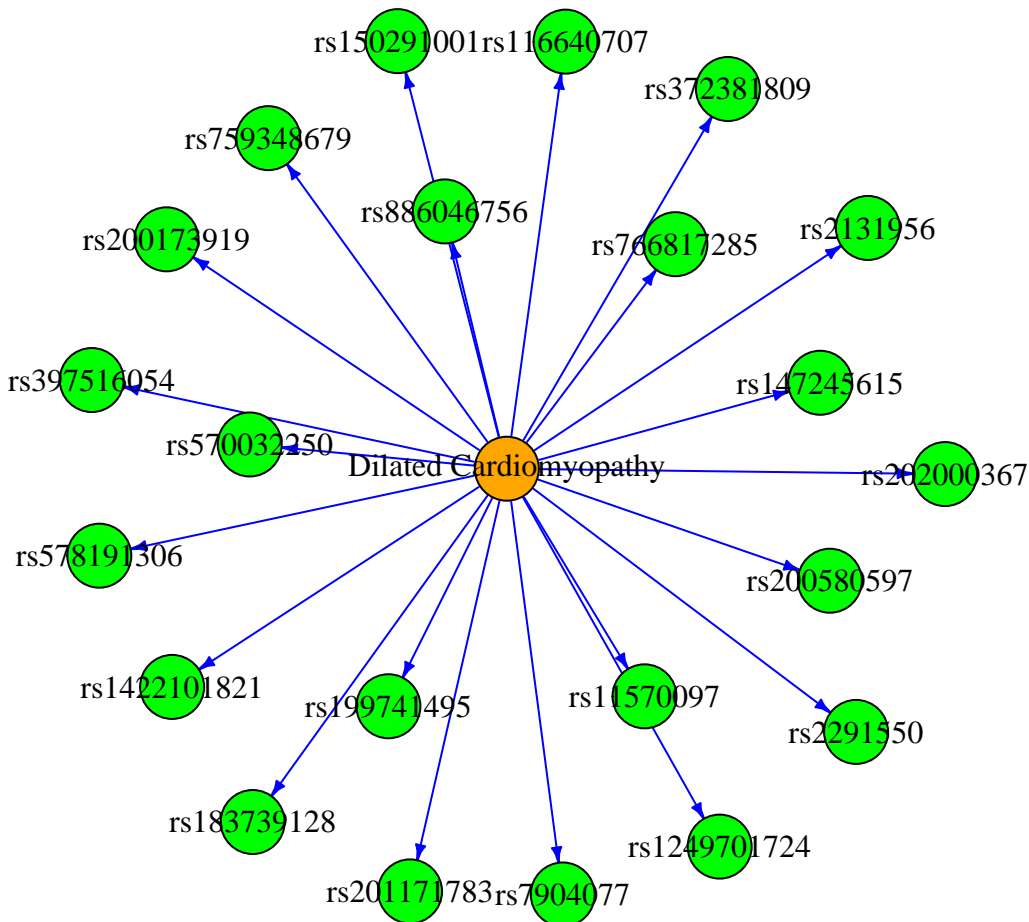

**Variant–Disease Network (Dilated cardiomyopathy 1AA)**

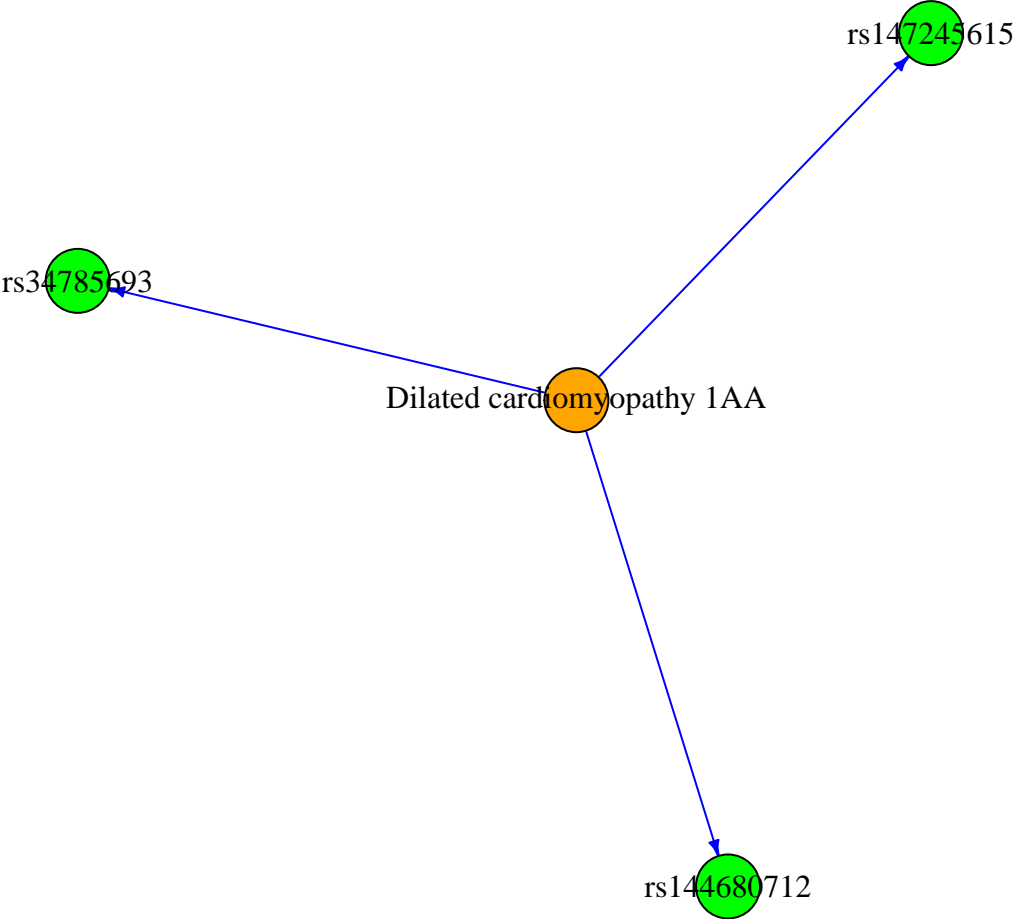

## Variant-Disease Network (Dilated cardiomyopathy 1CC)

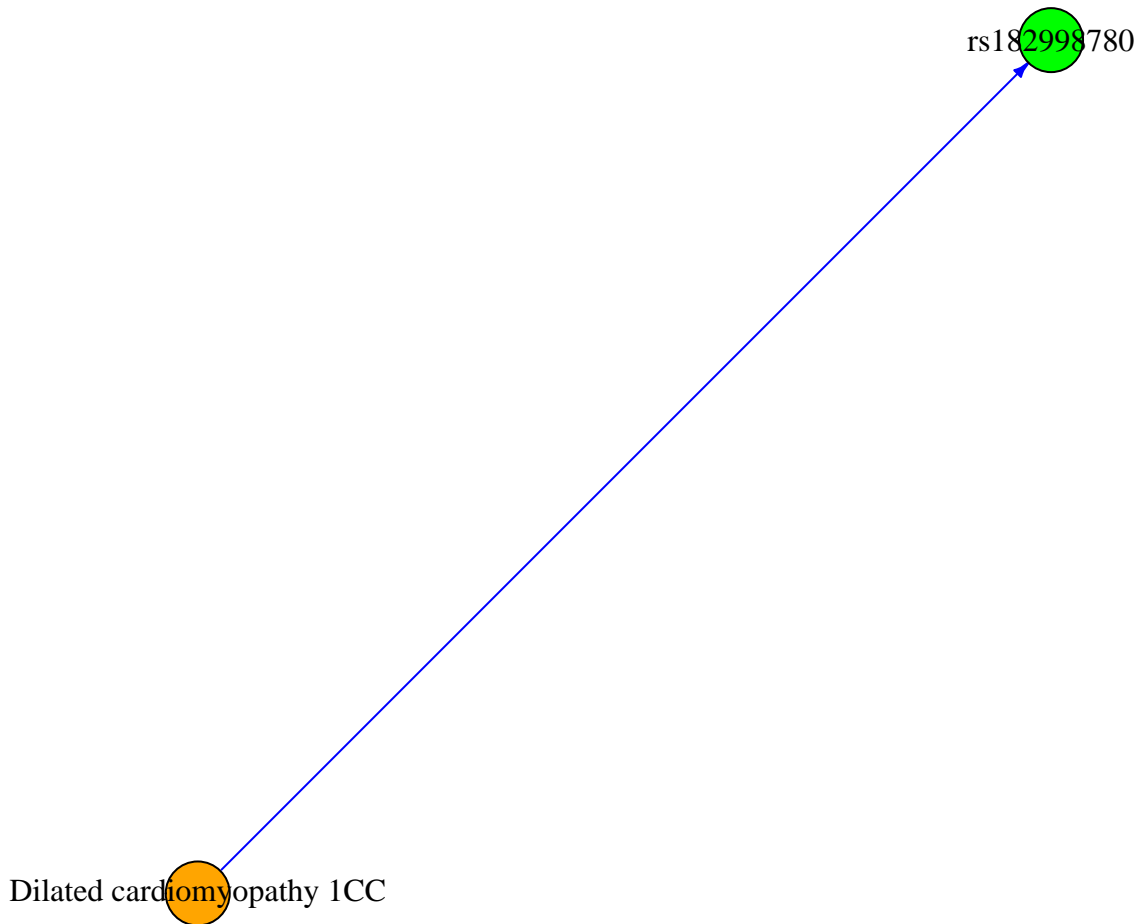

## Variant–Disease Network (Dilated cardiomyopathy 1HH)

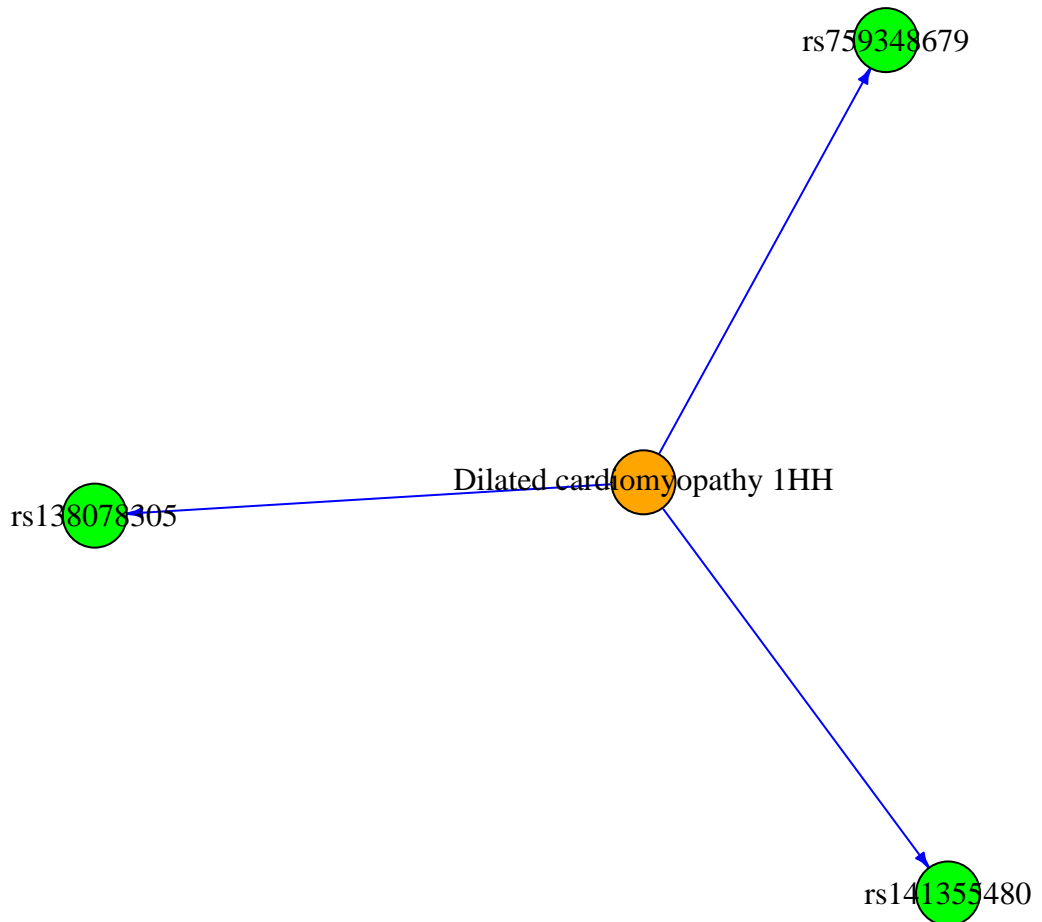



**Variant–Disease Network (Dilated cardiomyopathy 1II)**

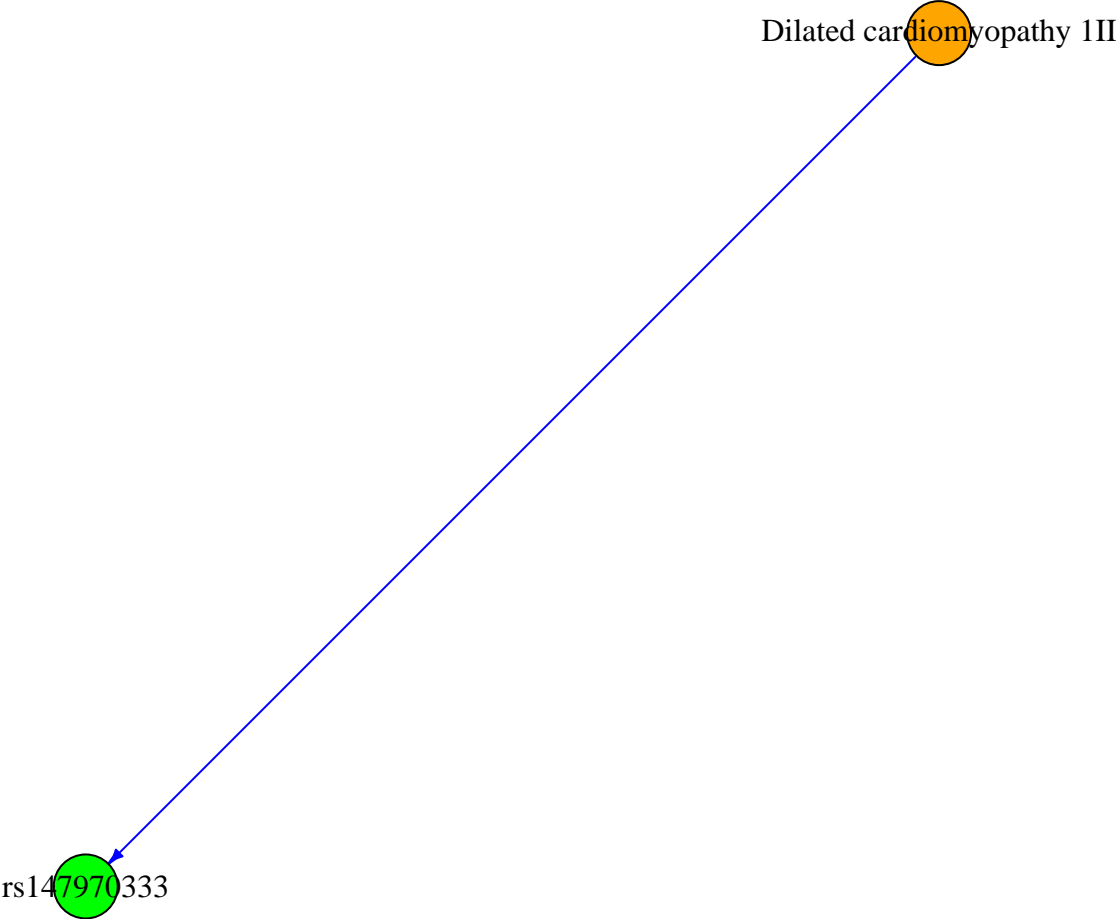

**Variant–Disease Network (Dilated cardiomyopathy 1J)**

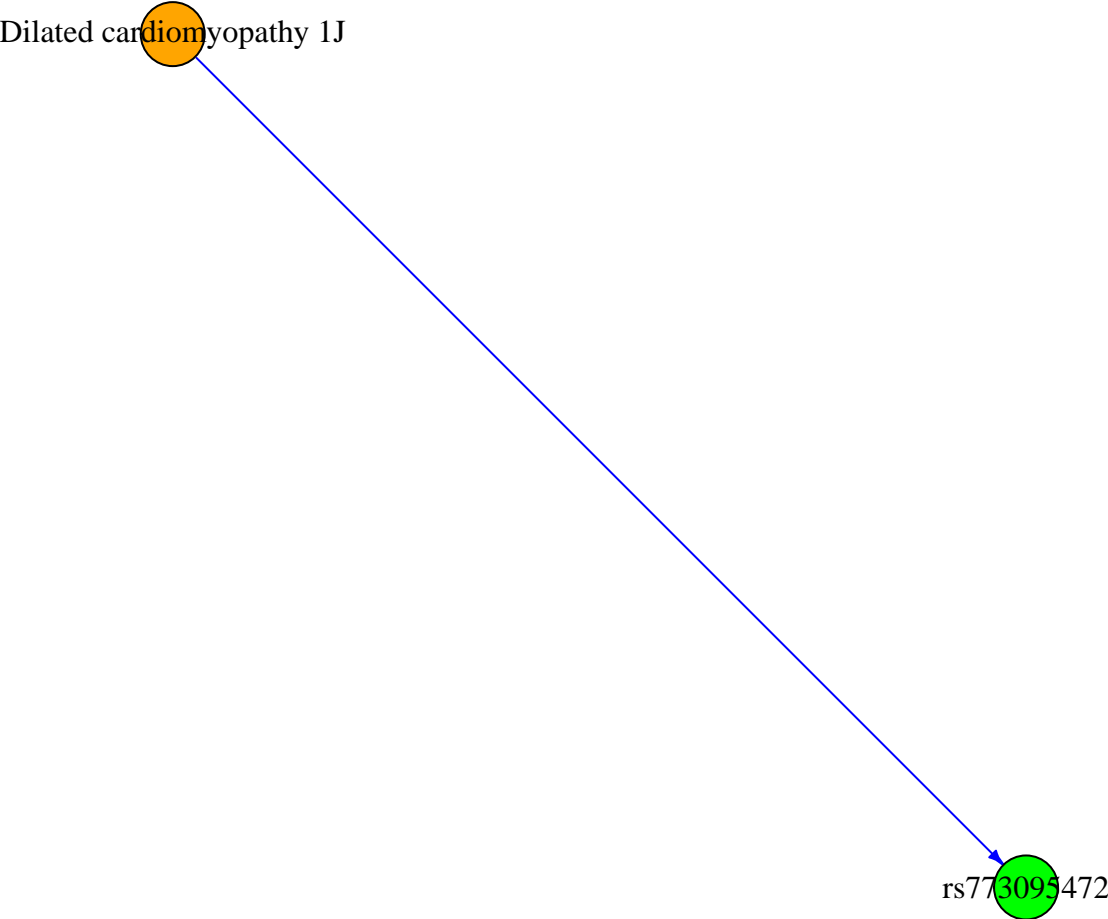

## Variant–Disease Network (Dilated cardiomyopathy 1JJ)

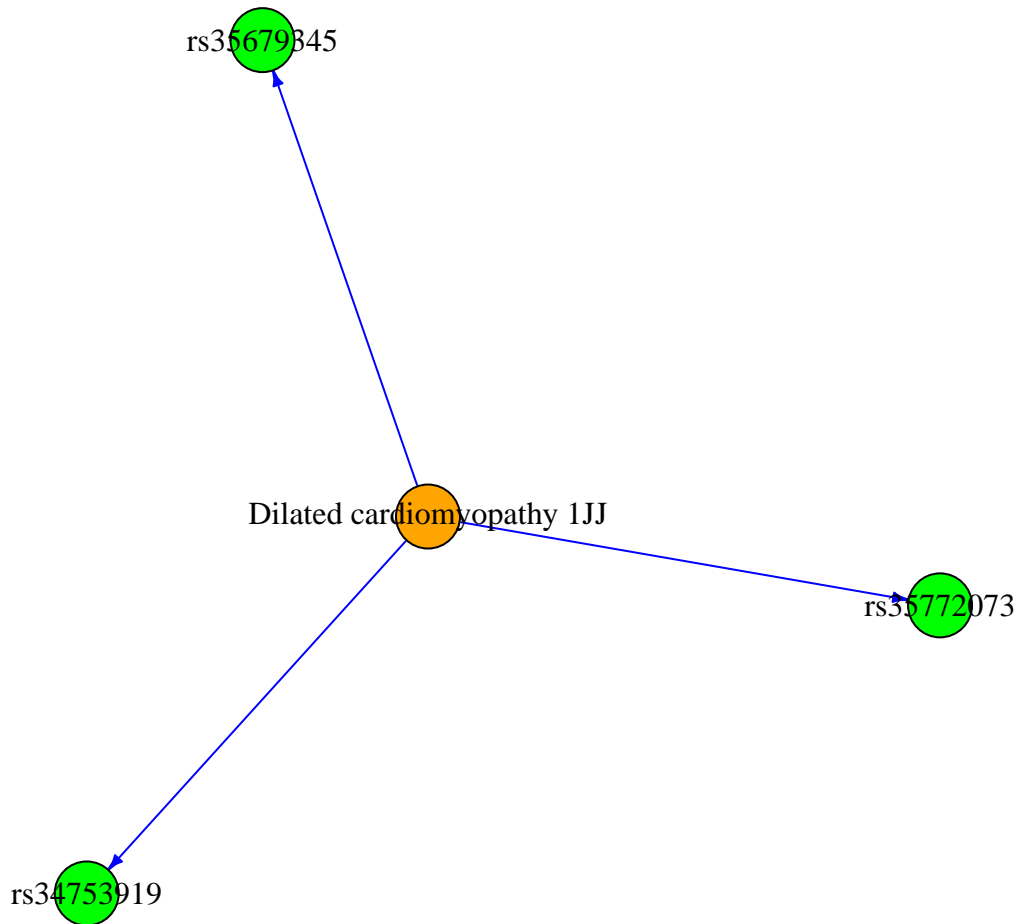

Variant–Disease Network (Dilated cardiomyopathy 1KK)

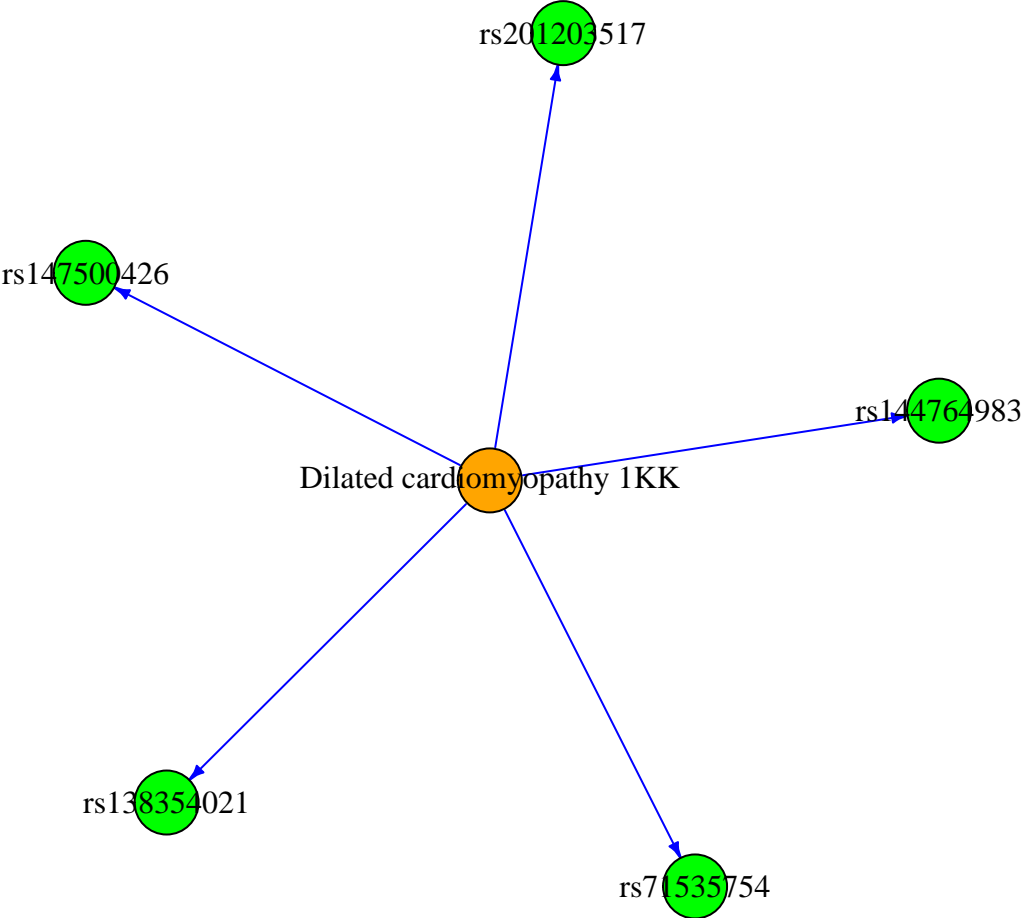

## Variant–Disease Network (Dilated cardiomyopathy 10)

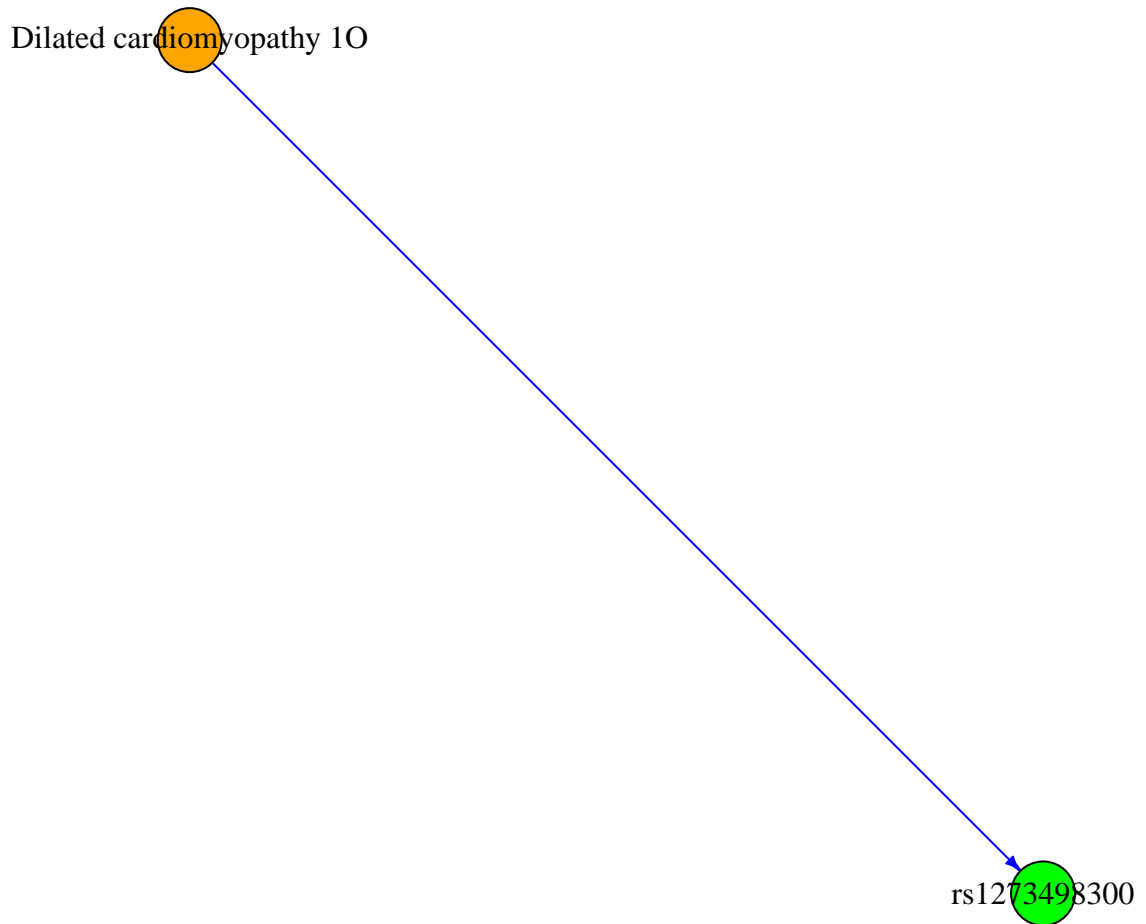

**Variant–Disease Network (Dilated cardiomyopathy 1S)**

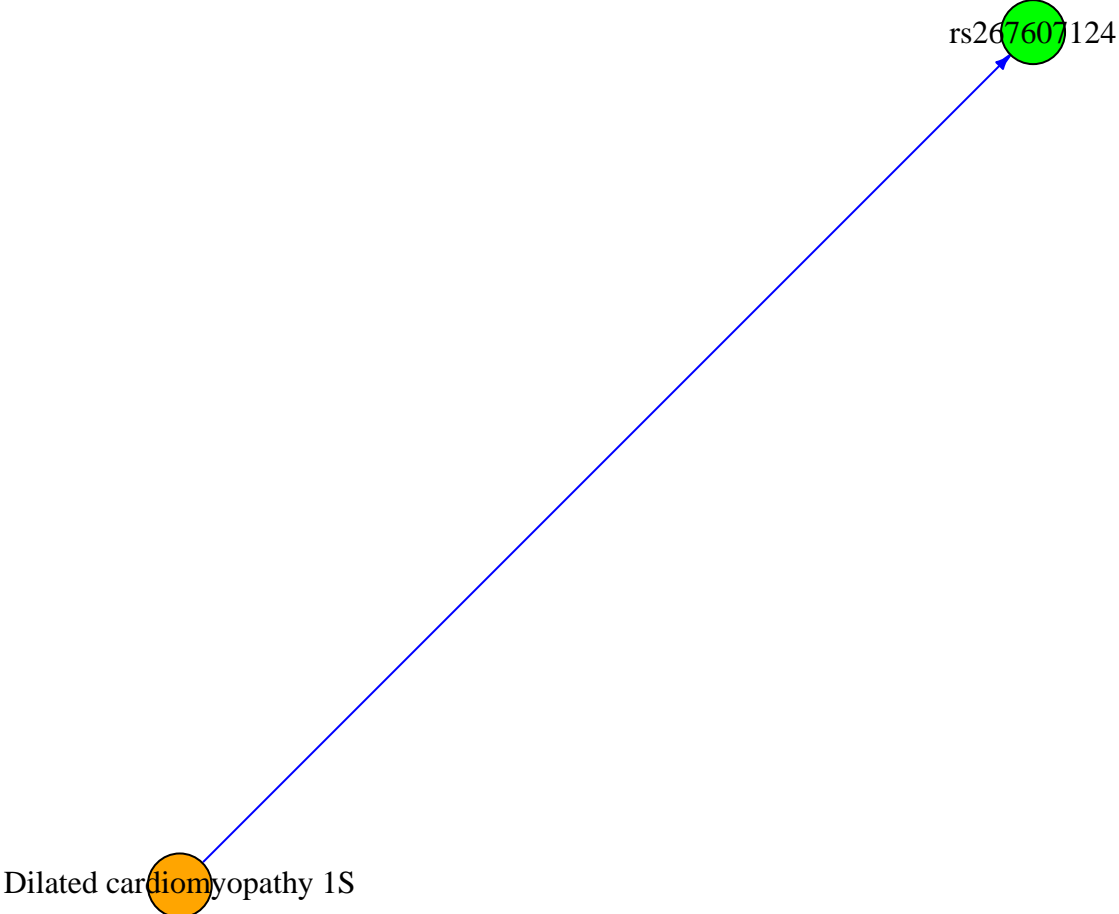

## Variant–Disease Network (Dilated cardiomyopathy 1W)

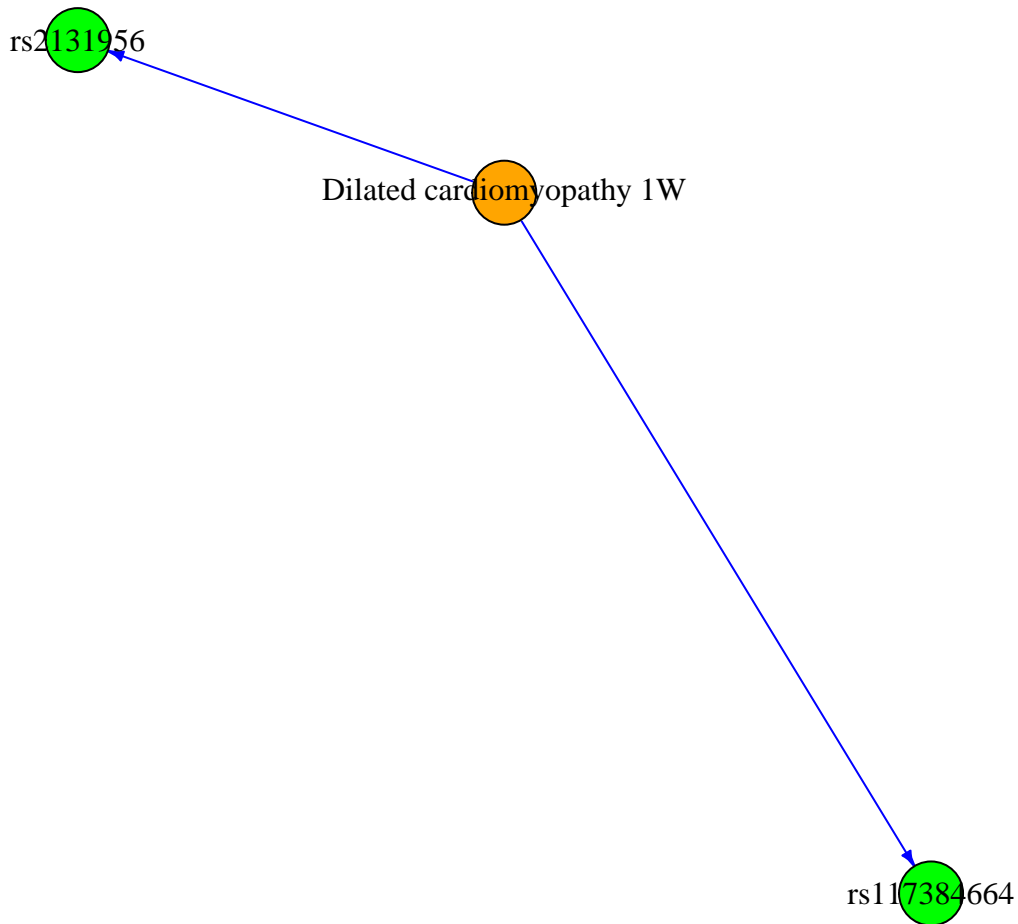

**Variant–Disease Network (Dilated cardiomyopathy 1Z)**

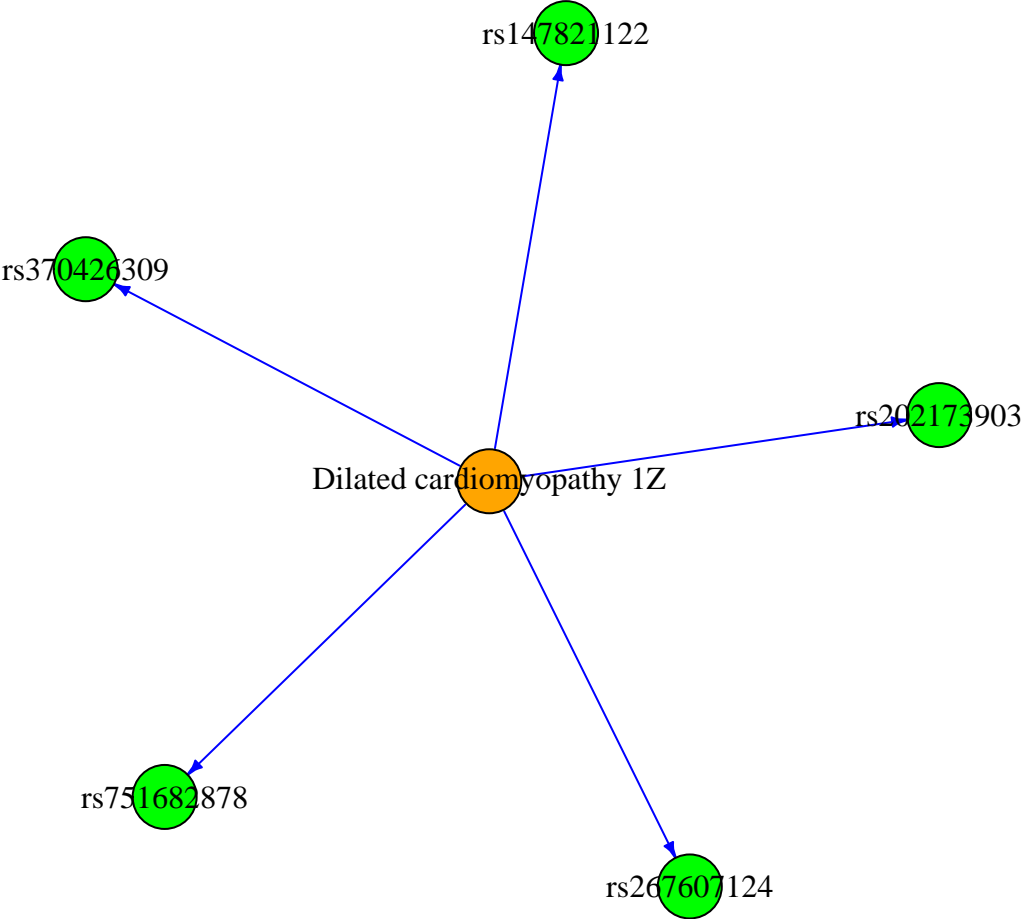



Variant–Disease Network (Disorders of Intracellular Cobalamin Metabolism)

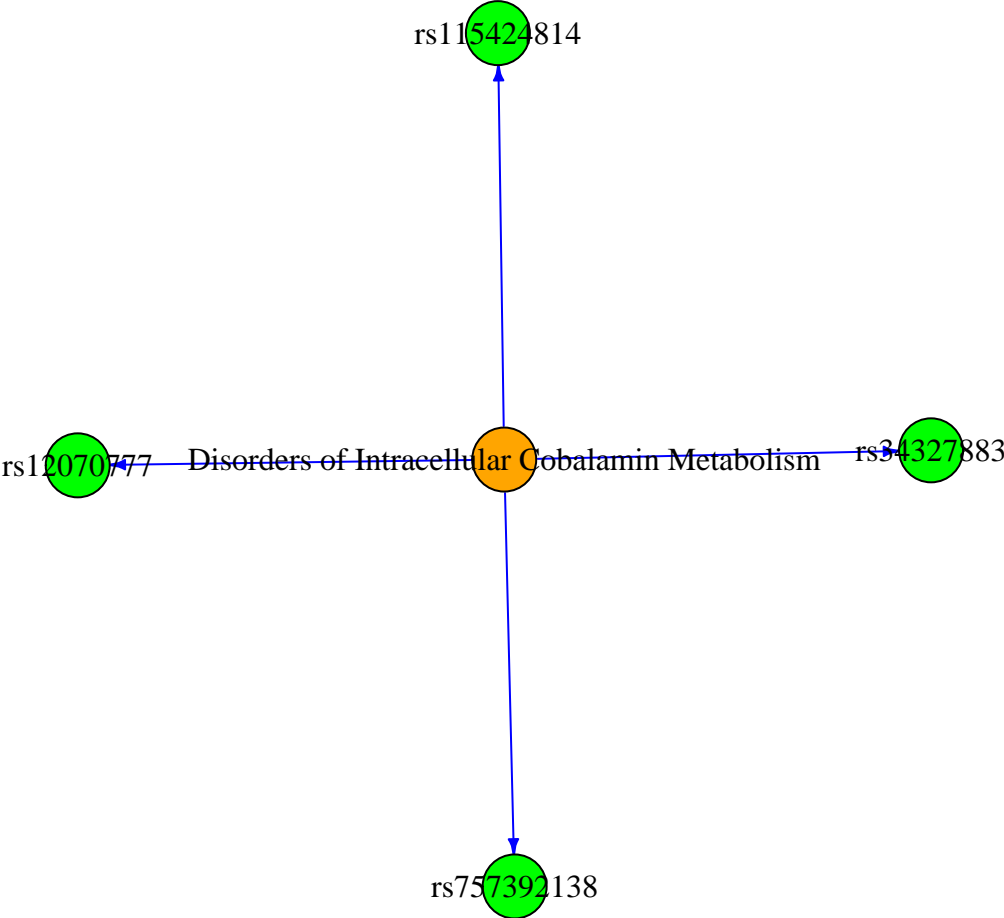

## Variant-Disease Network (Distal arthrogryposis)

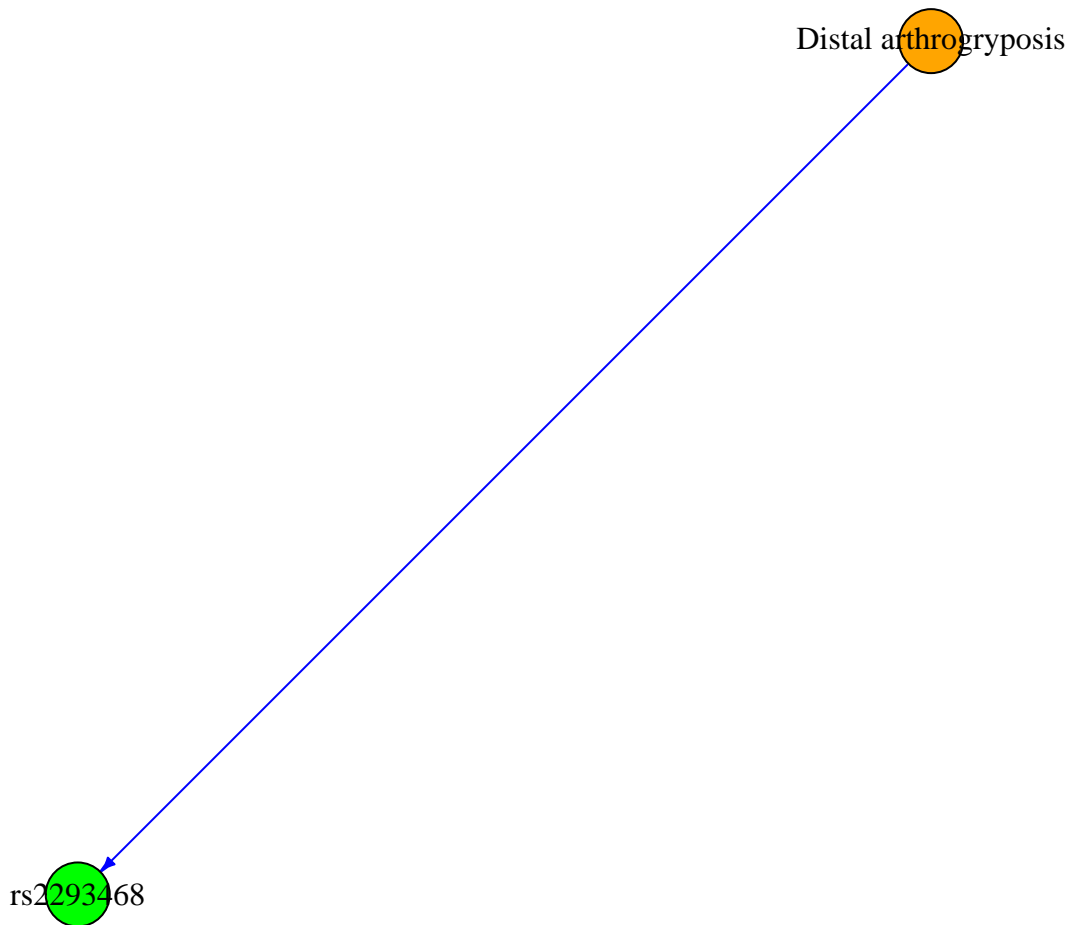

Variant–Disease Network (Distal hereditary motor neuropathy)

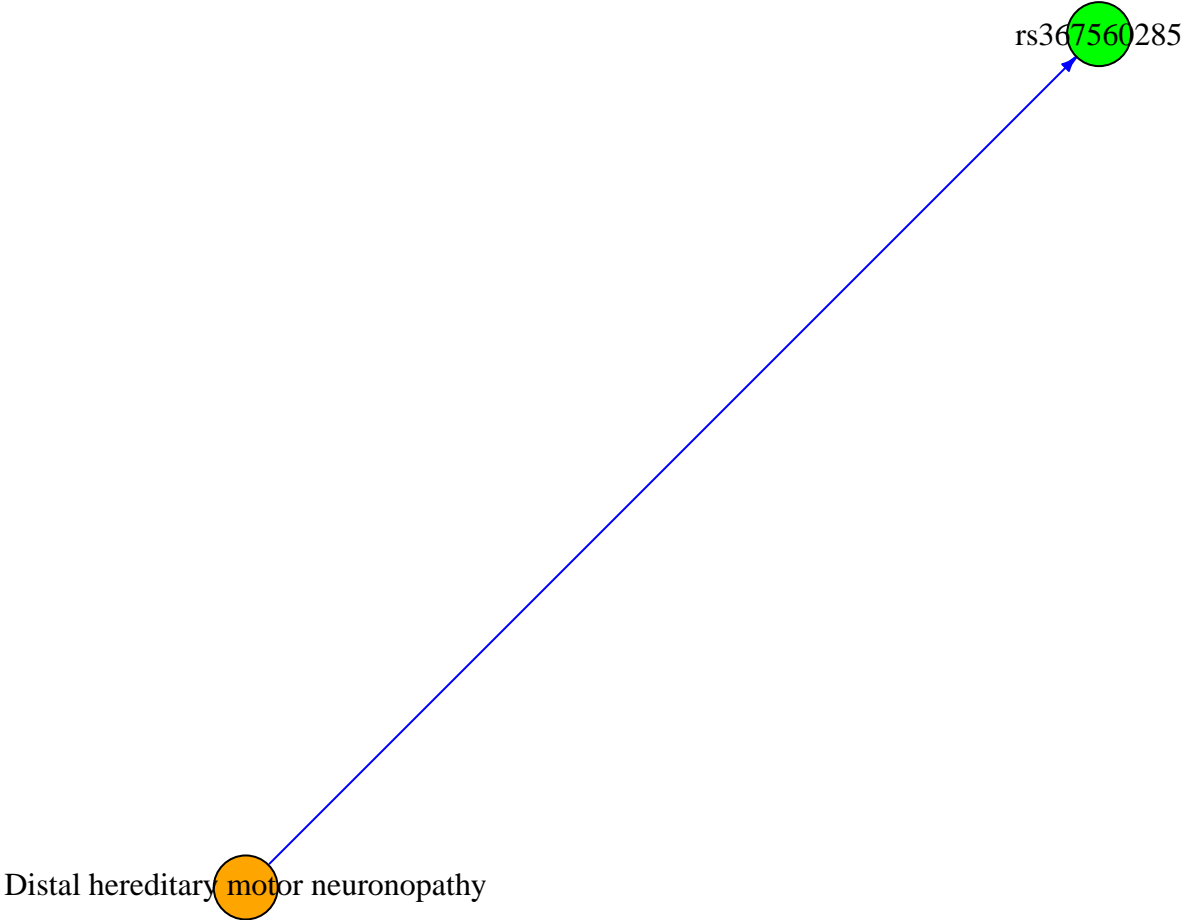

**Variant–Disease Network (Distal hereditary motor neuropathy type 5)**

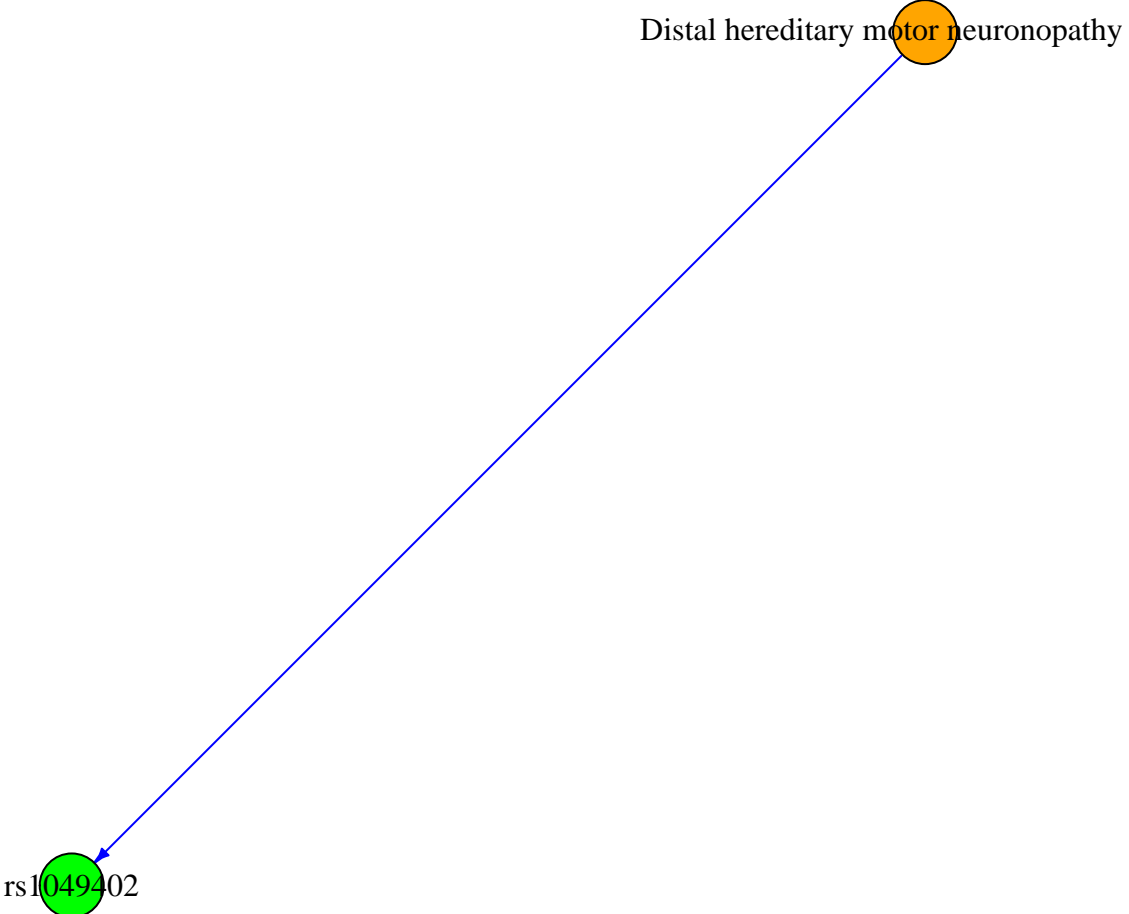

Variant–Disease Network (Distal hereditary motor neuropathy type 7B)

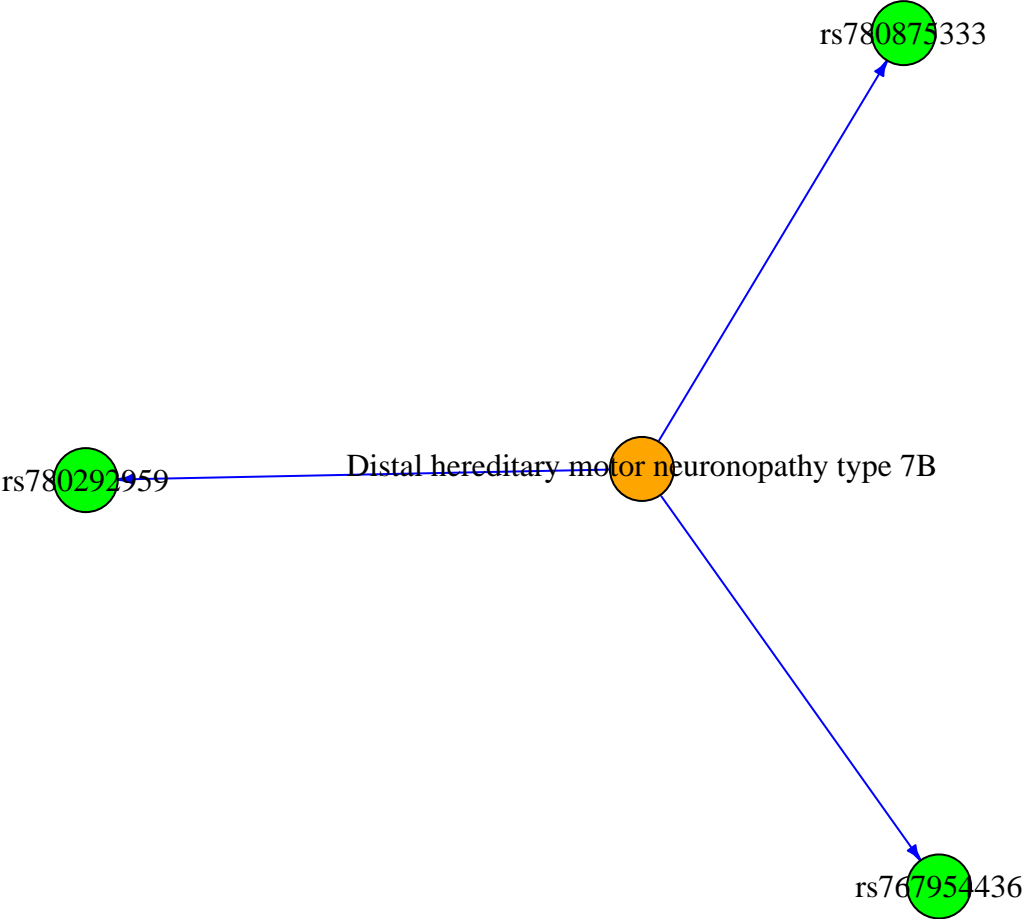

## Variant–Disease Network (Distal myopathy)

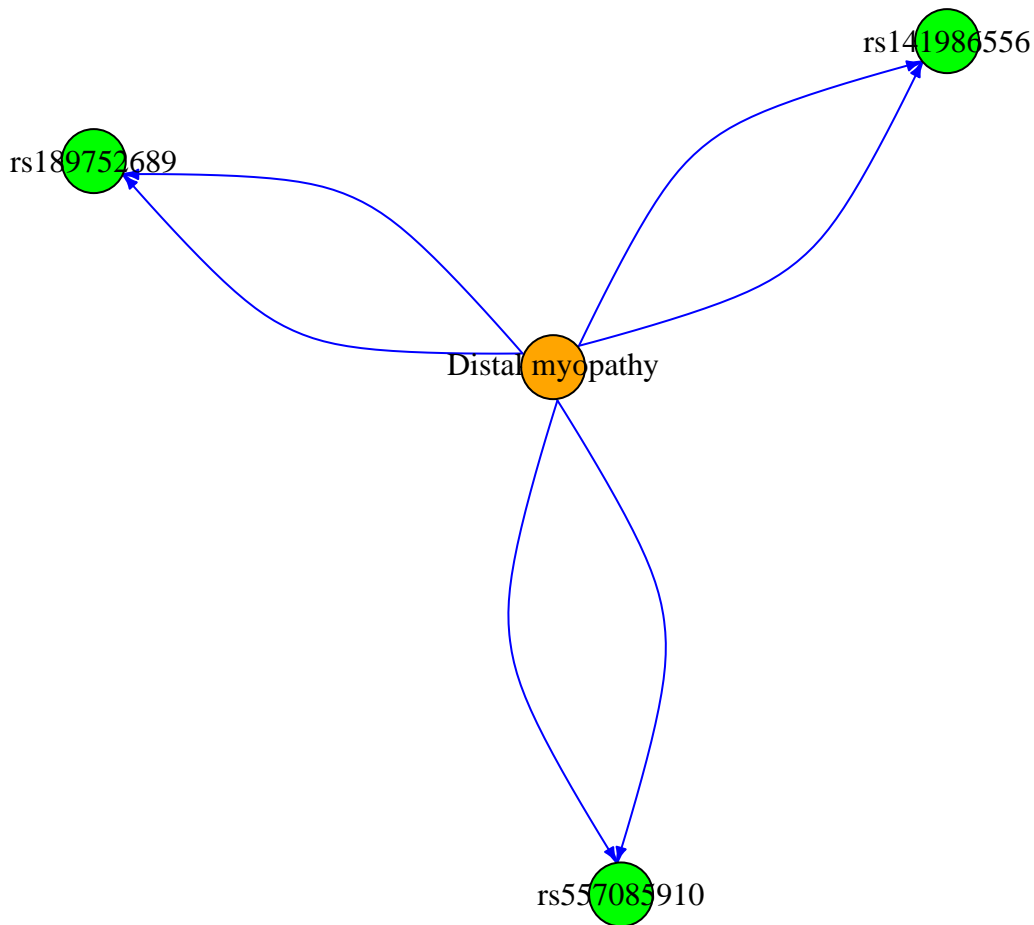

**Variant–Disease Network (Distal Renal Tubular Acidosis)**

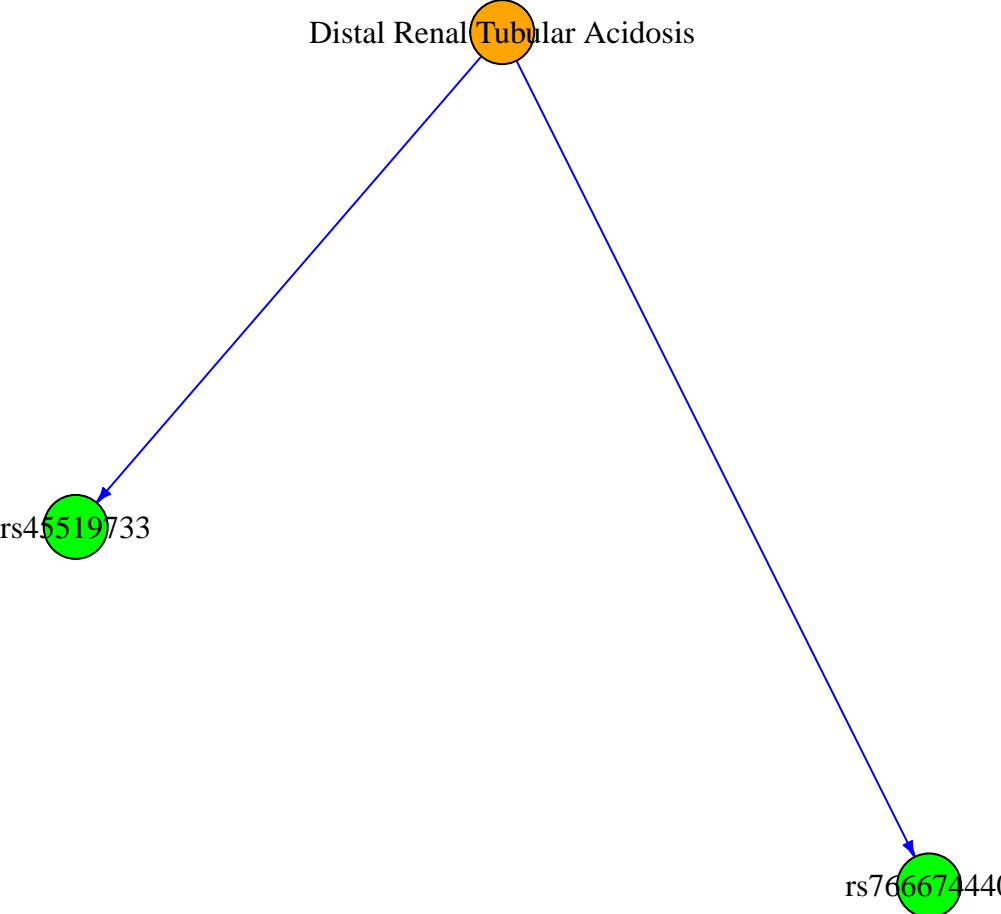

**Variant–Disease Network (Distal spinal muscular atrophy)**

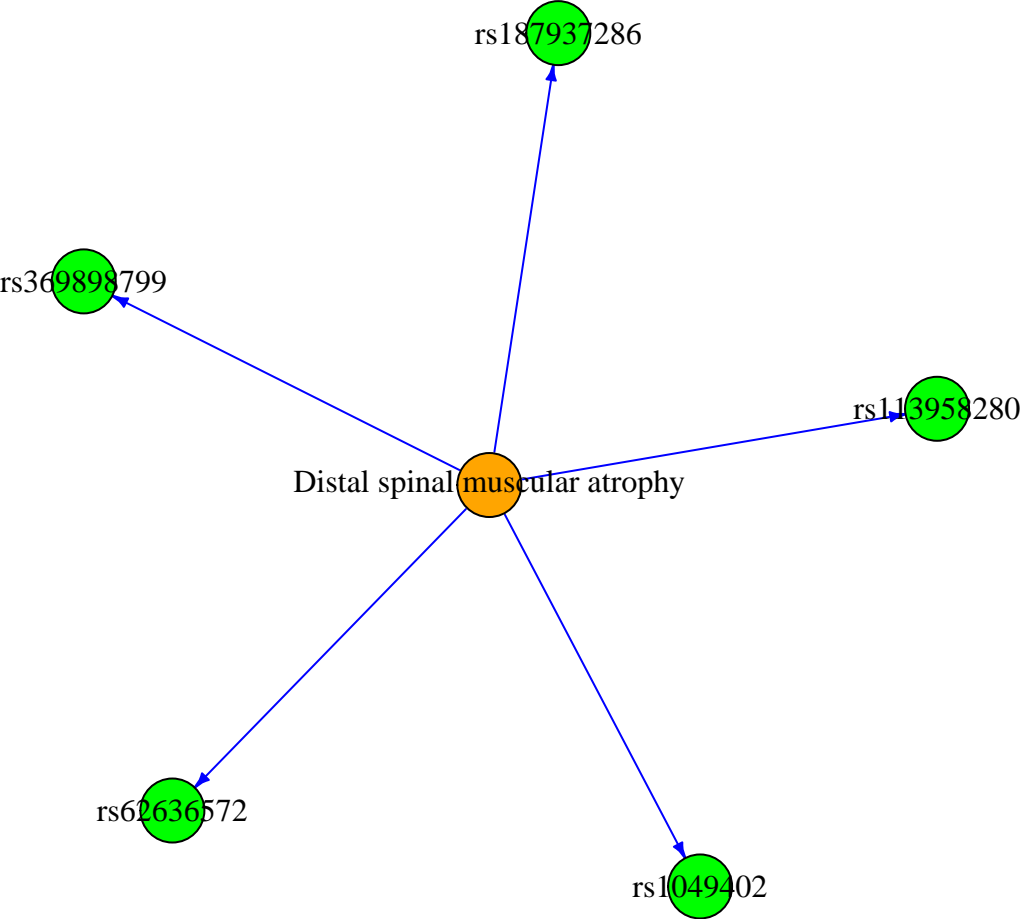



## Variant–Disease Network (Donnai Barrow syndrome)

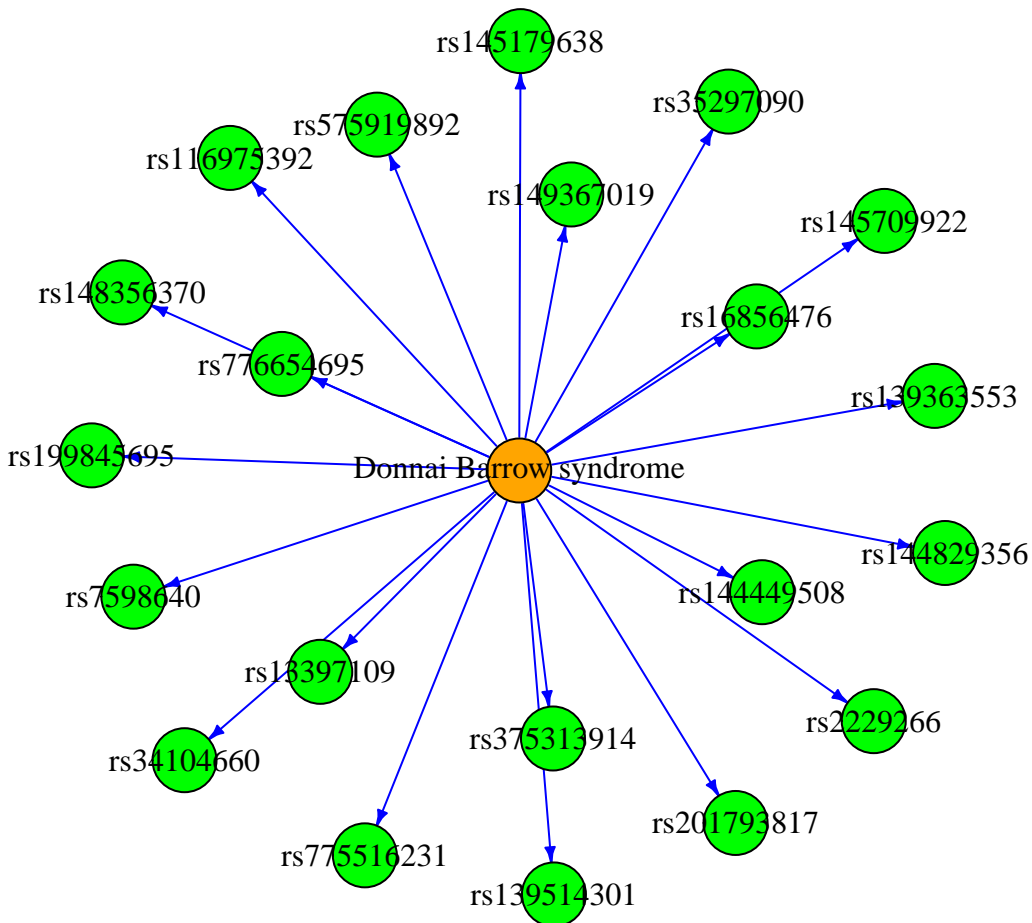

Variant–Disease Network (Doyme honeycomb retinal dystrophy)

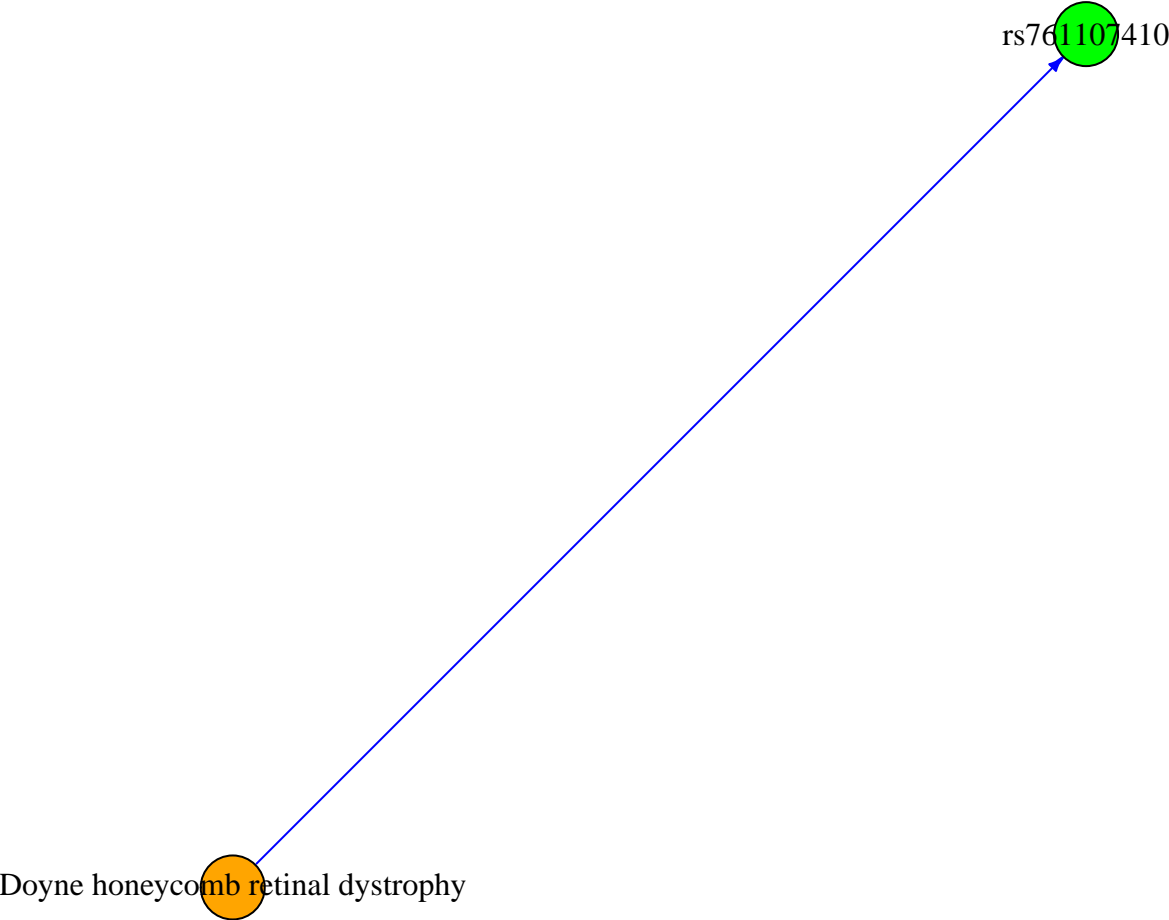

## Variant–Disease Network (Drash syndrome)

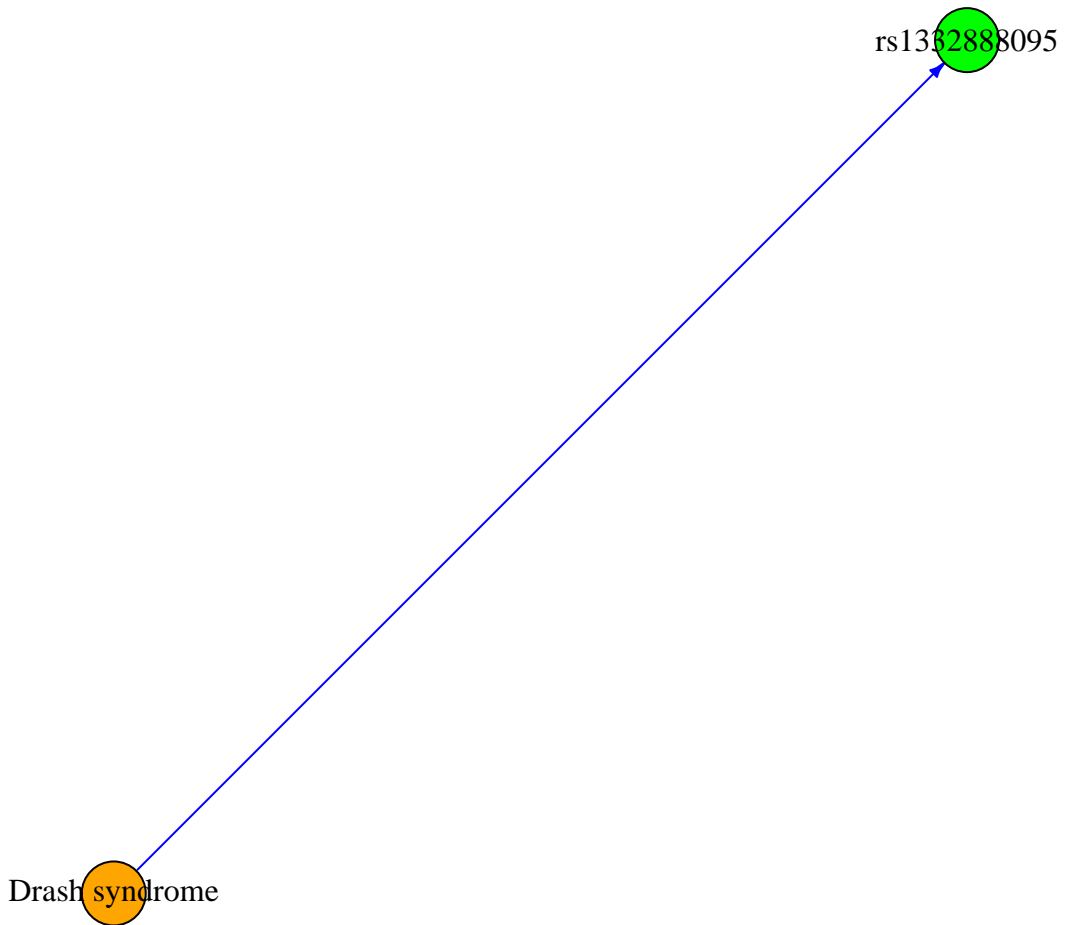

**Variant–Disease Network (Dubin–Johnson syndrome)**

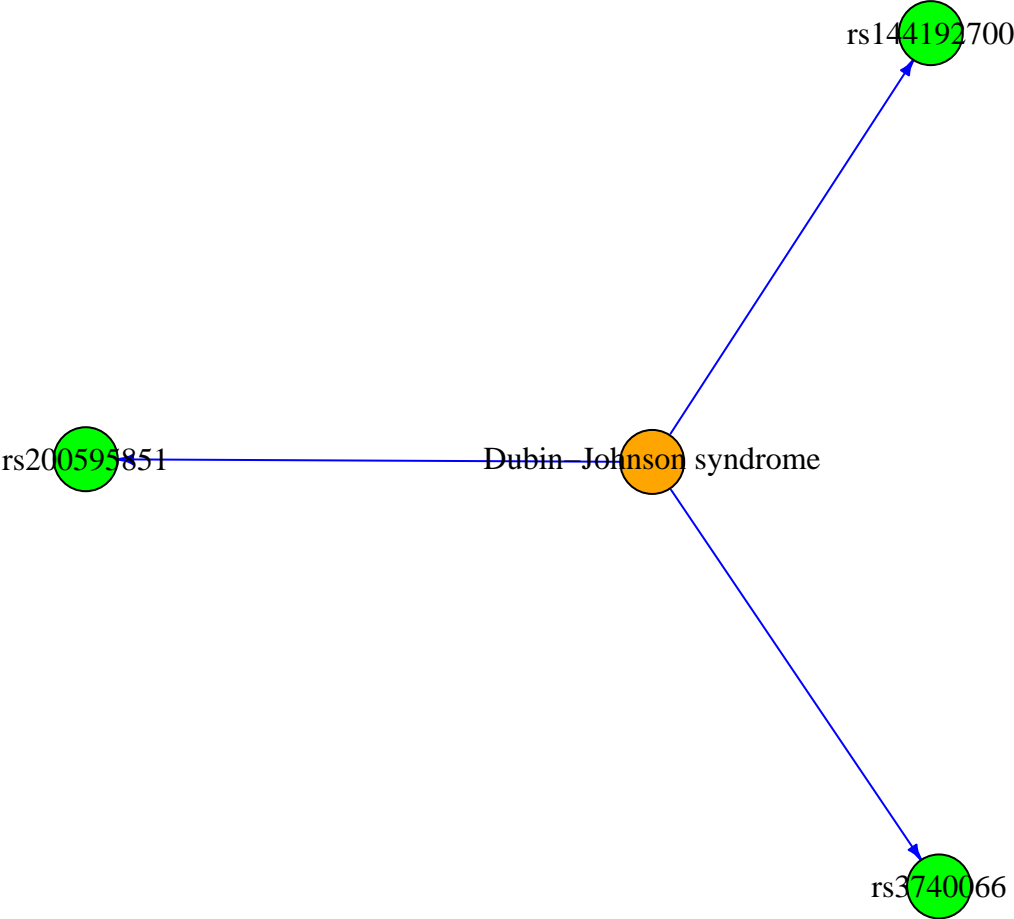

**Variant–Disease Network (Duchenne muscular dystrophy)**

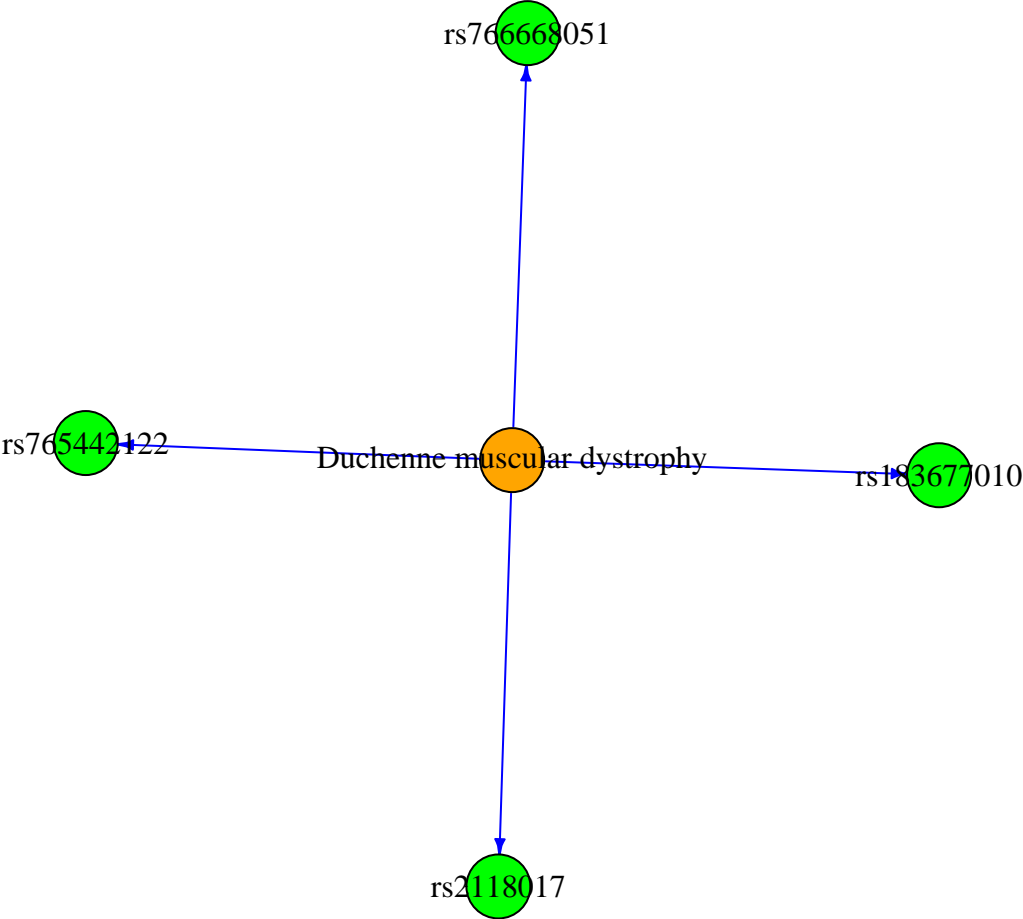

Variant–Disease Network (Dyggve–Melchior–Clausen syndrome)

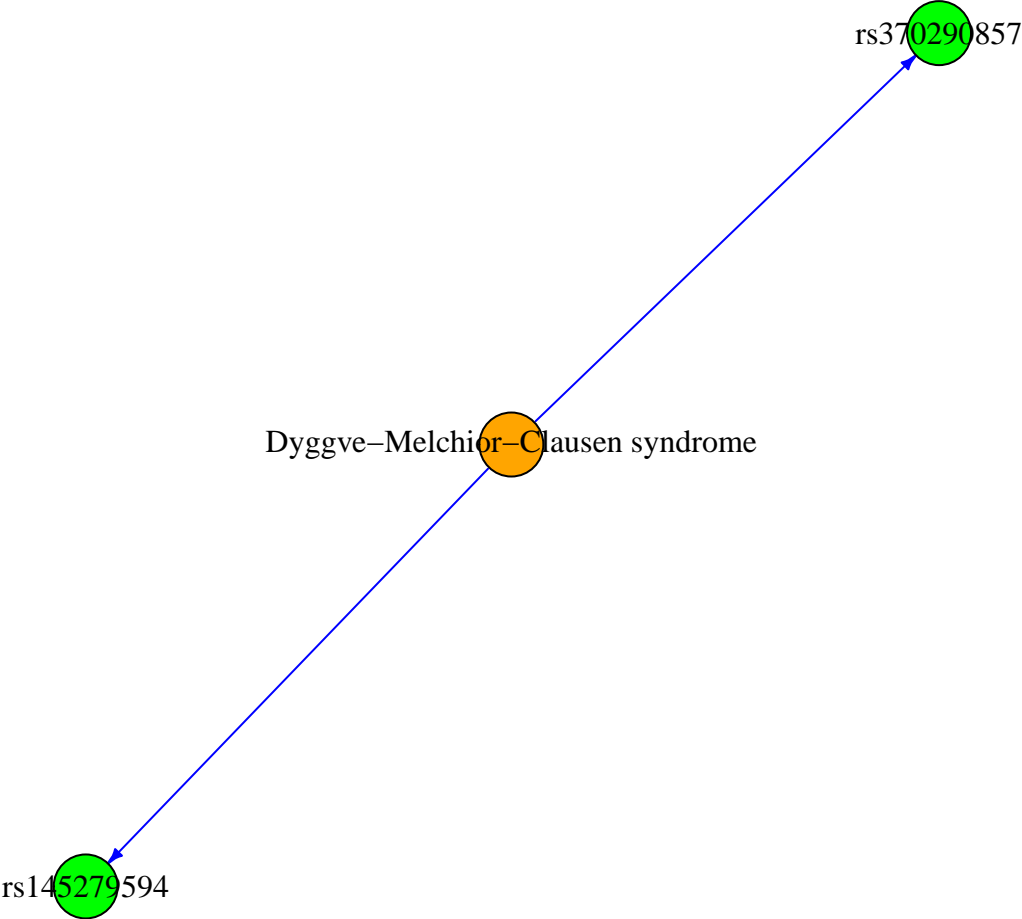

Variant–Disease Network (Dysgnathia complex)

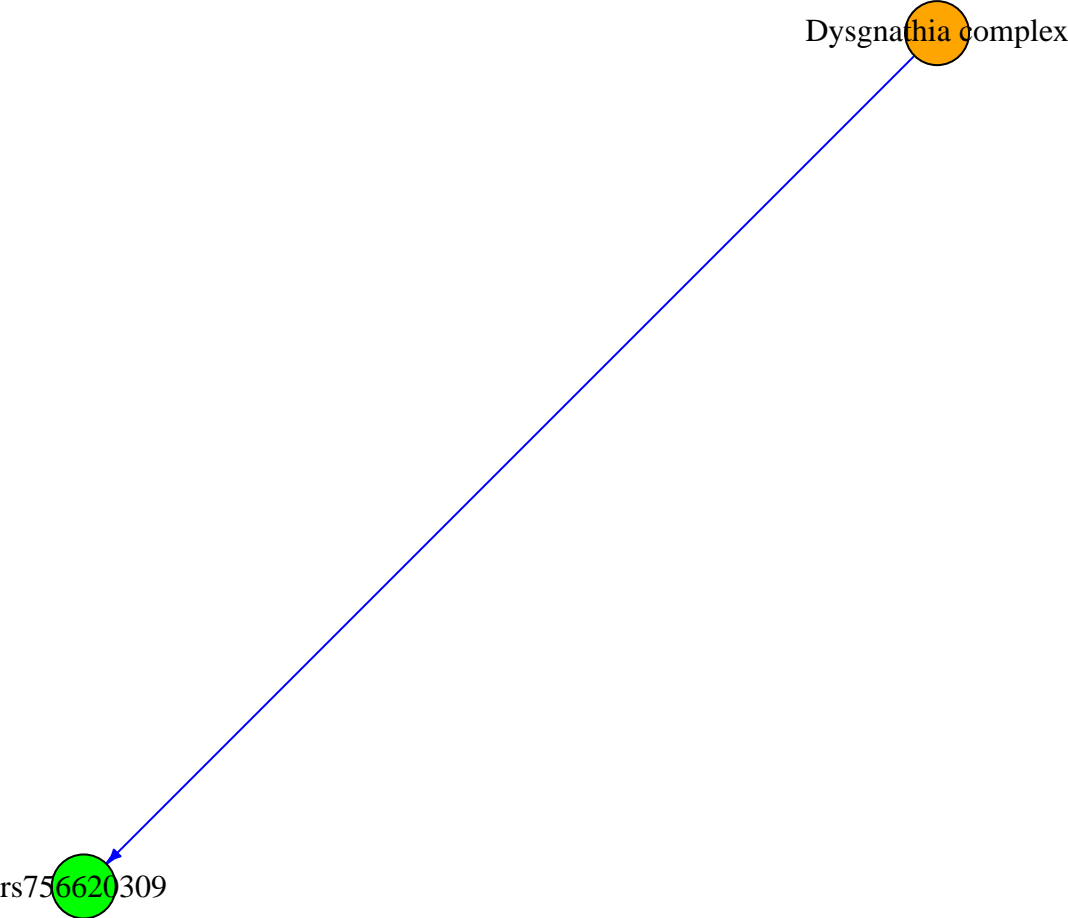

**Variant–Disease Network (Dyskeratosis congenita)**

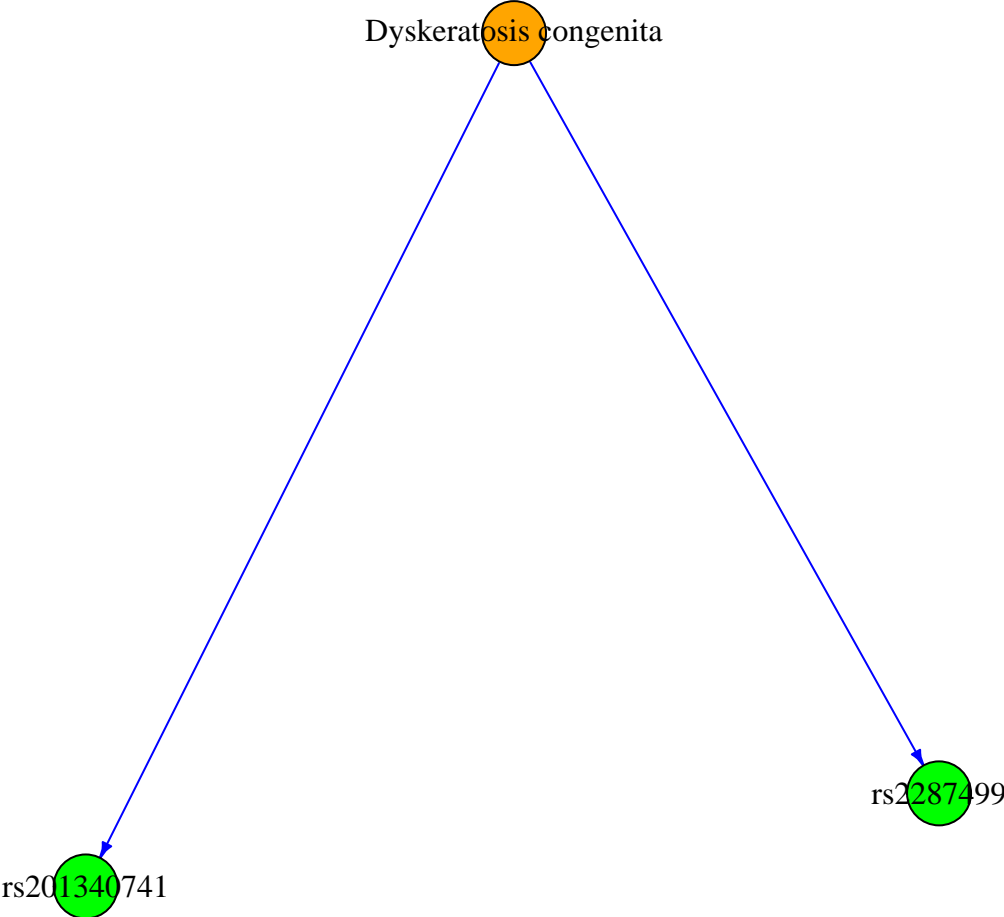



## Variant-Disease Network (Dyssegmental Dysplasia)

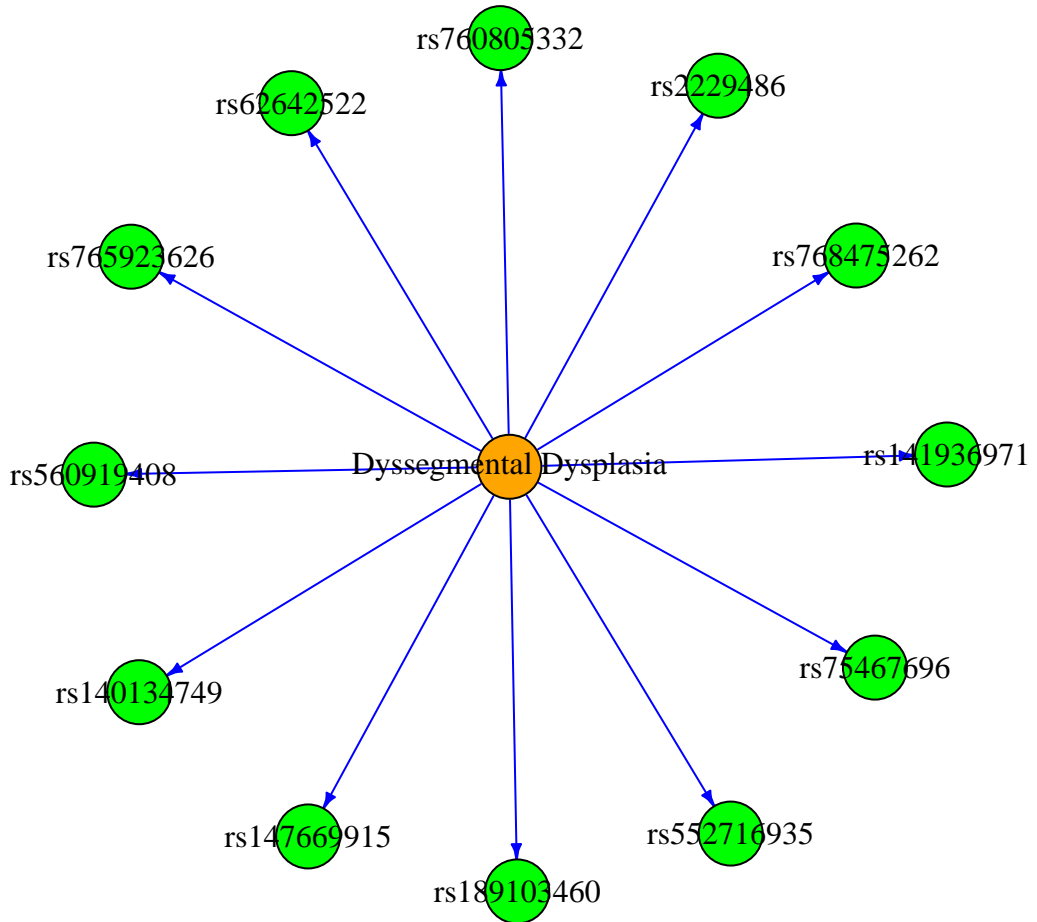

## Variant–Disease Network (Dystonia)

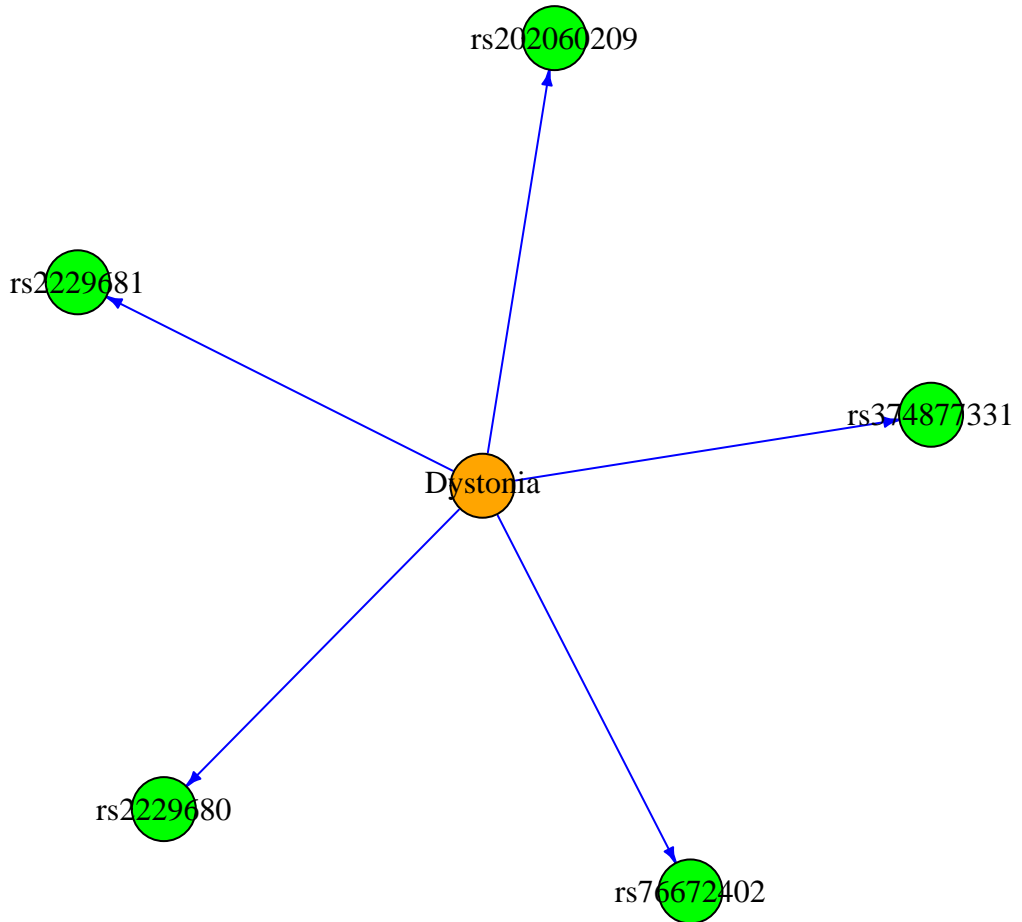

## Variant-Disease Network (Dystonia 10)

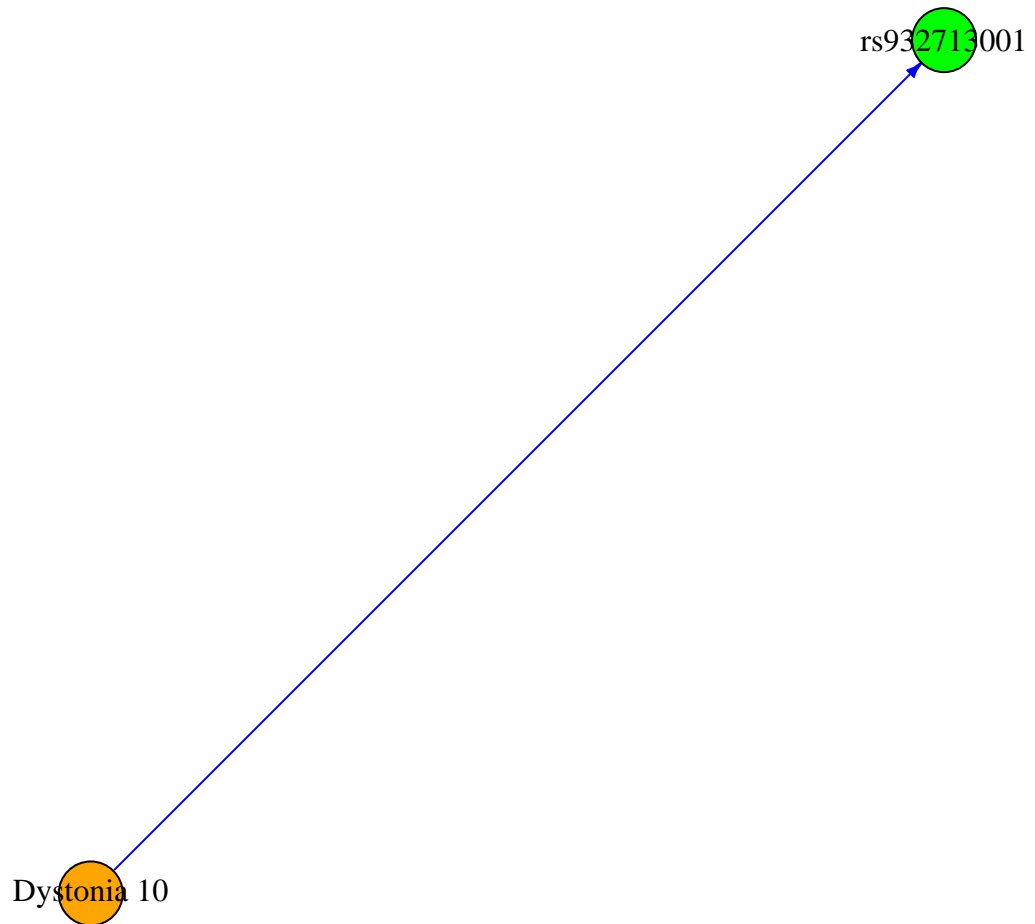

## Variant-Disease Network (Dystonia 16)

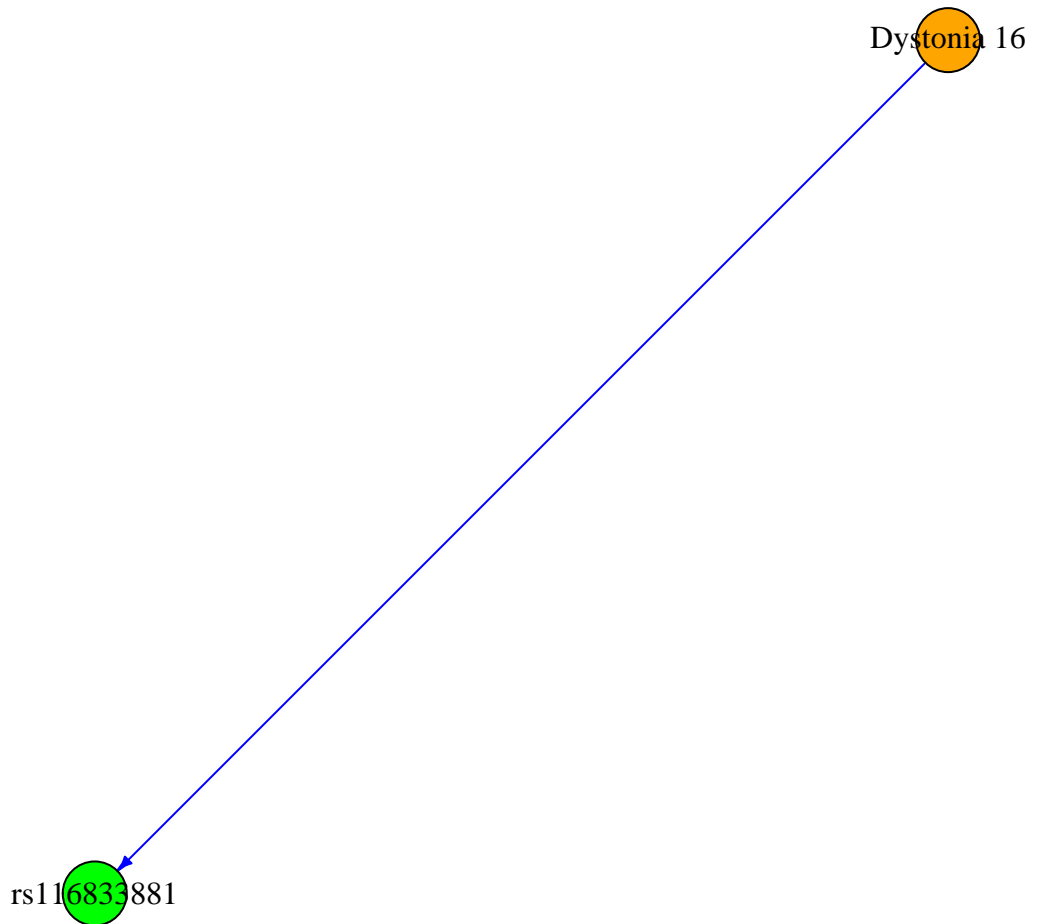

## Variant-Disease Network (Dystonia 24)

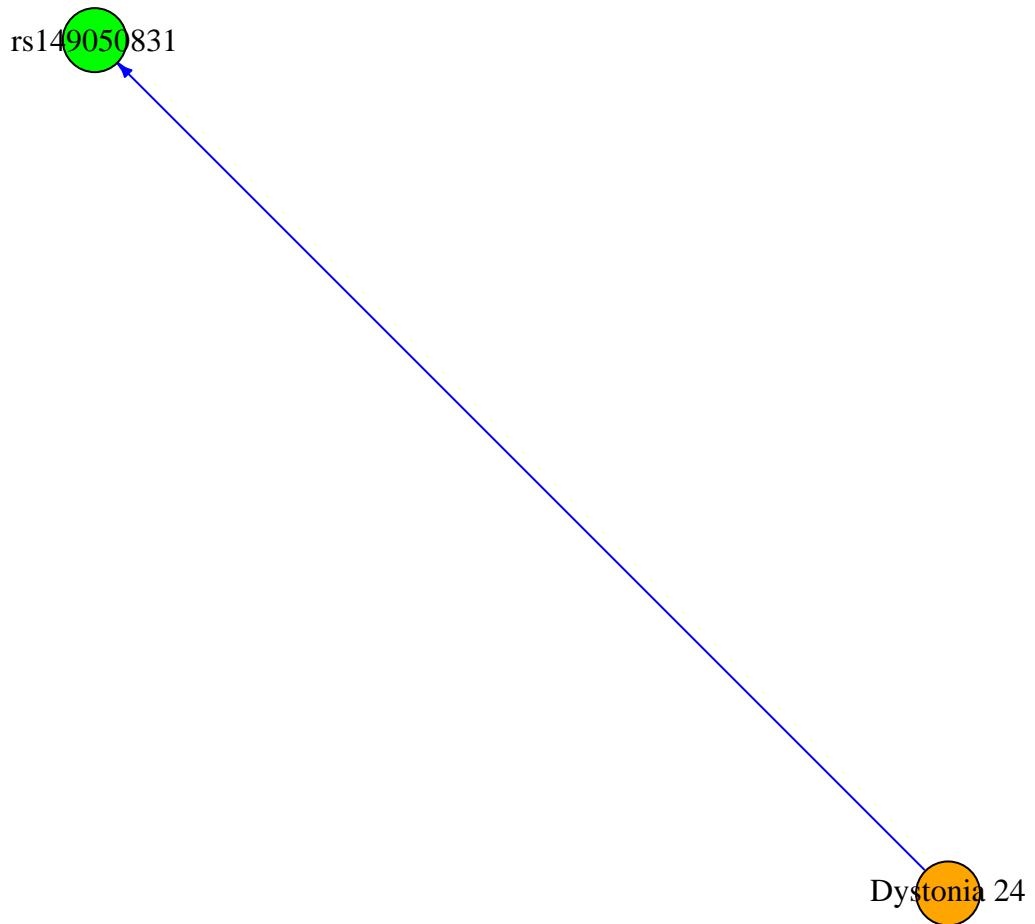

# Variant–Disease Network (Early infantile epileptic encephalopathy)

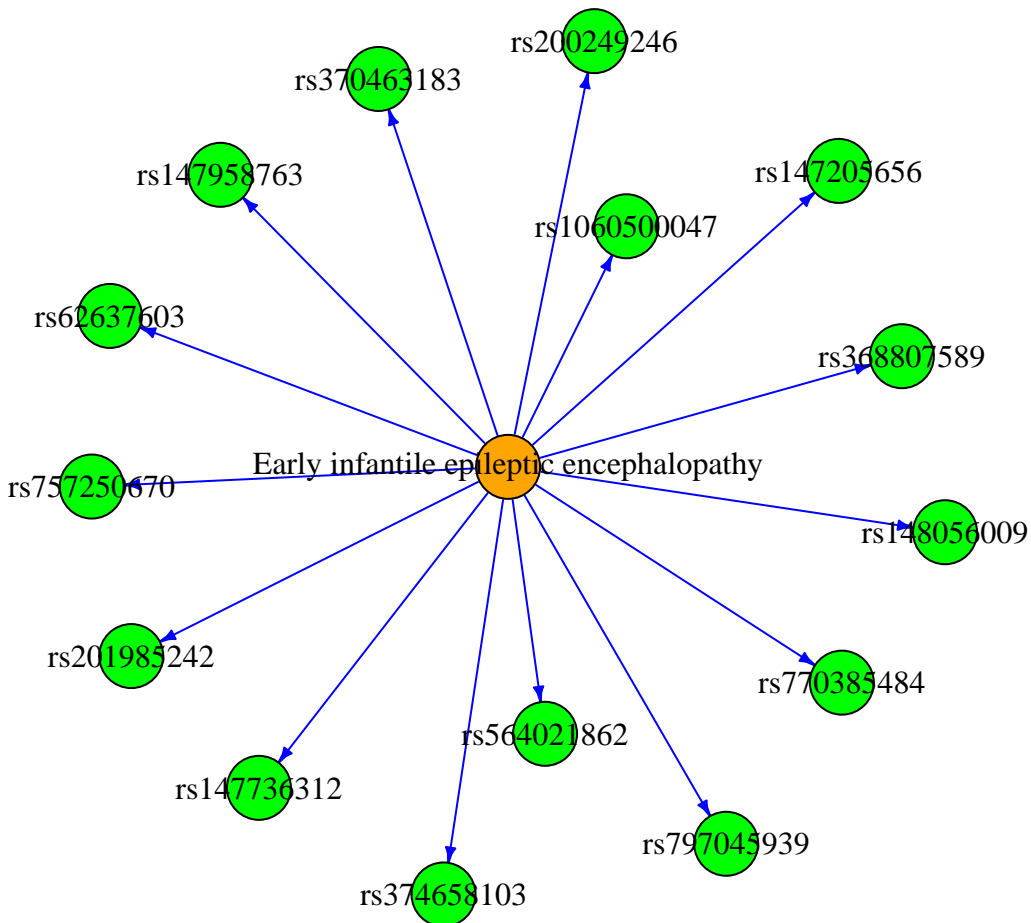

## Variant–Disease Network (Early infantile epileptic encephalopathy 10)

Early infantile epileptic encephalopathy 10

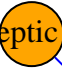

rs587784369

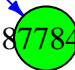

**Variant–Disease Network (Early infantile epileptic encephalopathy 12)**

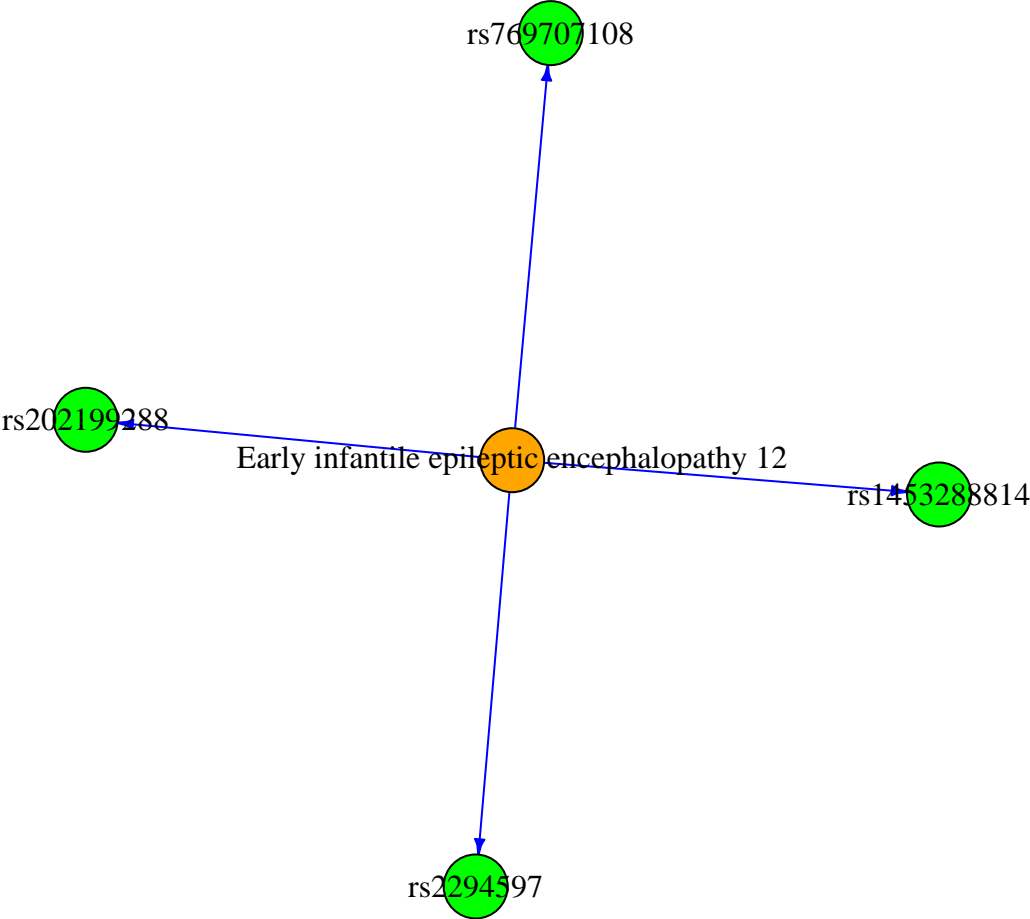



**Variant–Disease Network (Early infantile epileptic encephalopathy 14)**

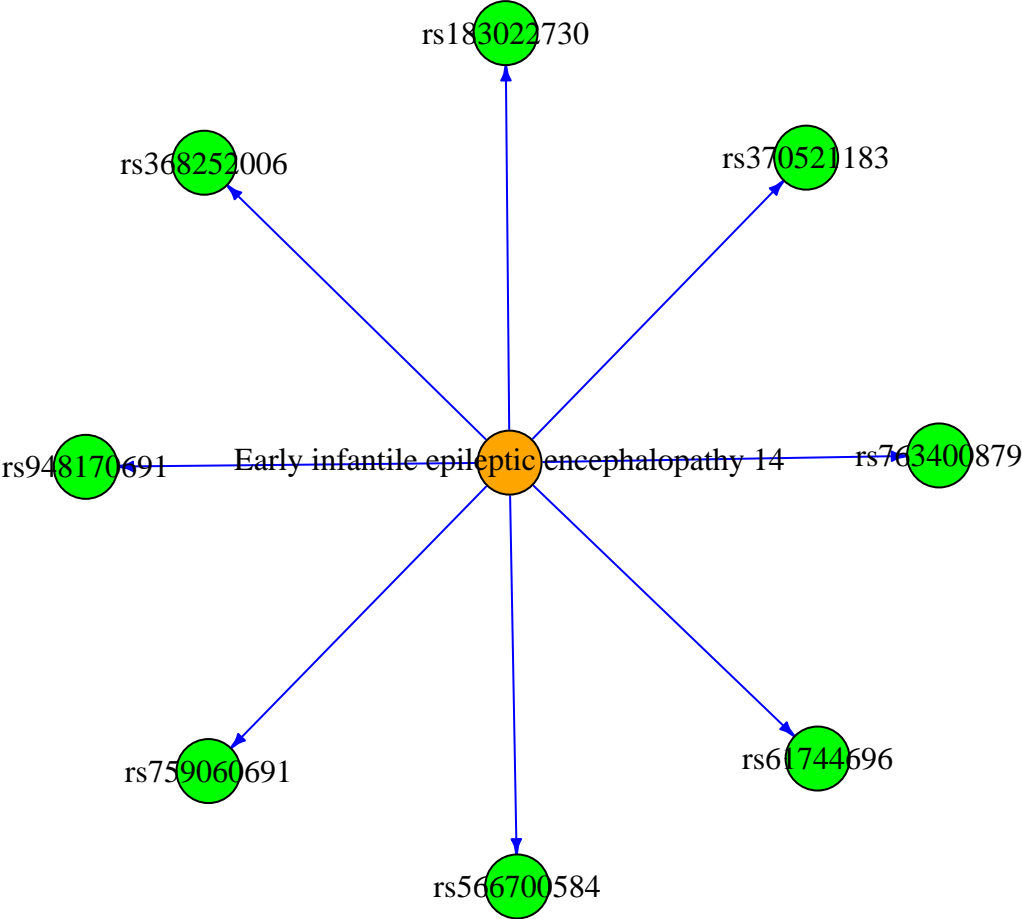

**Variant–Disease Network (Early infantile epileptic encephalopathy 2)**

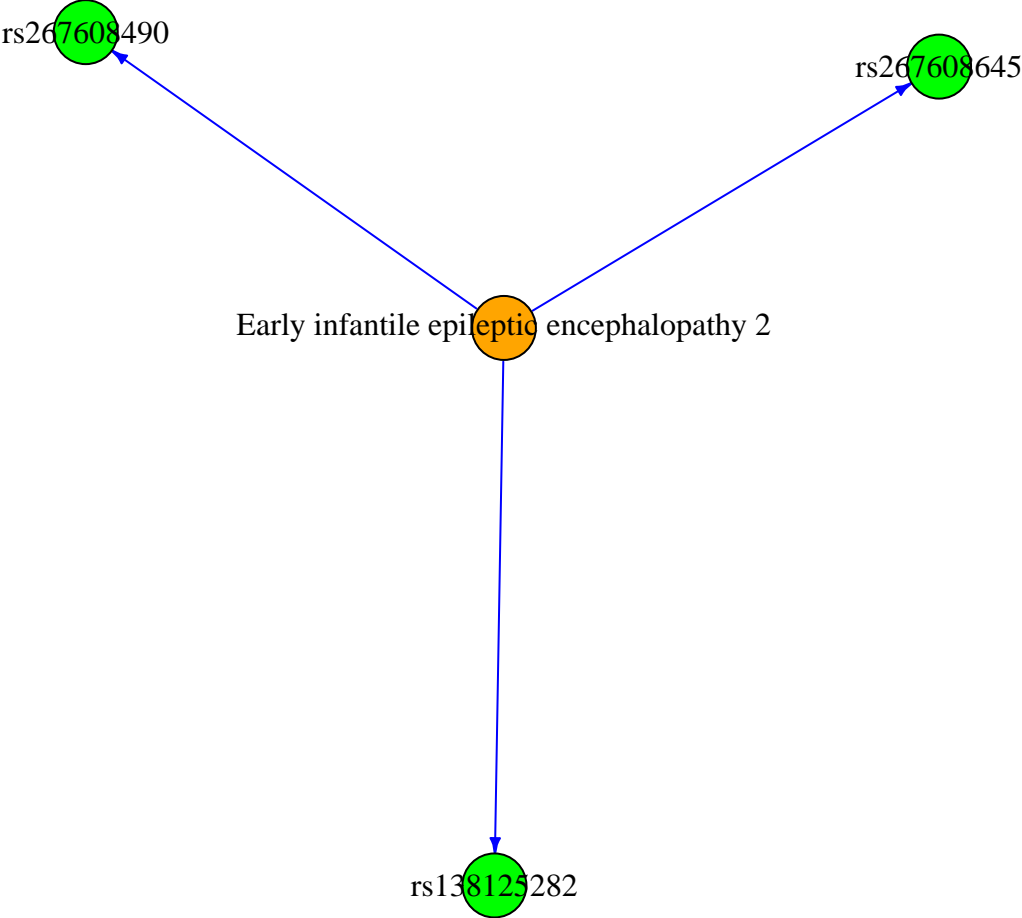

## Variant–Disease Network (Early infantile epileptic encephalopathy 34)

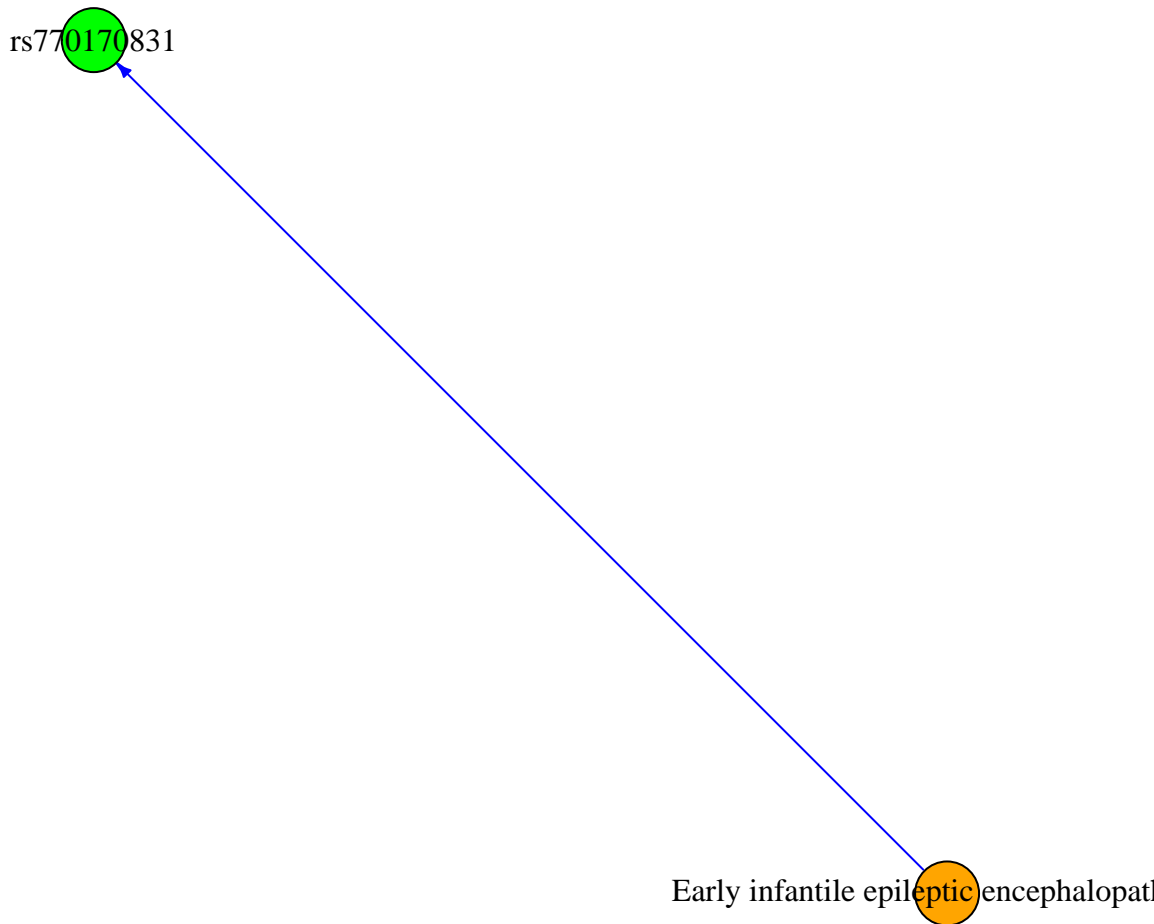

**Variant–Disease Network (Early infantile epileptic encephalopathy 9)**

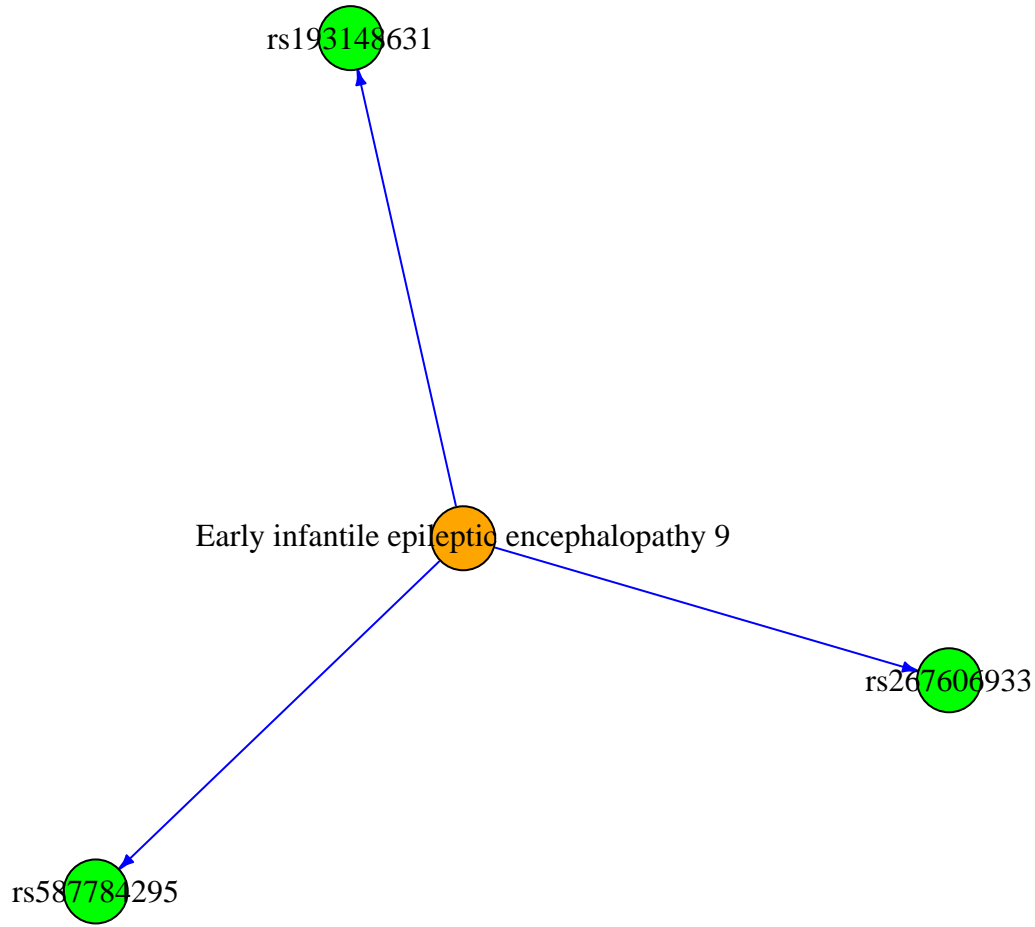

**Variant–Disease Network (Early–Onset Familial Alzheimer Disease)**

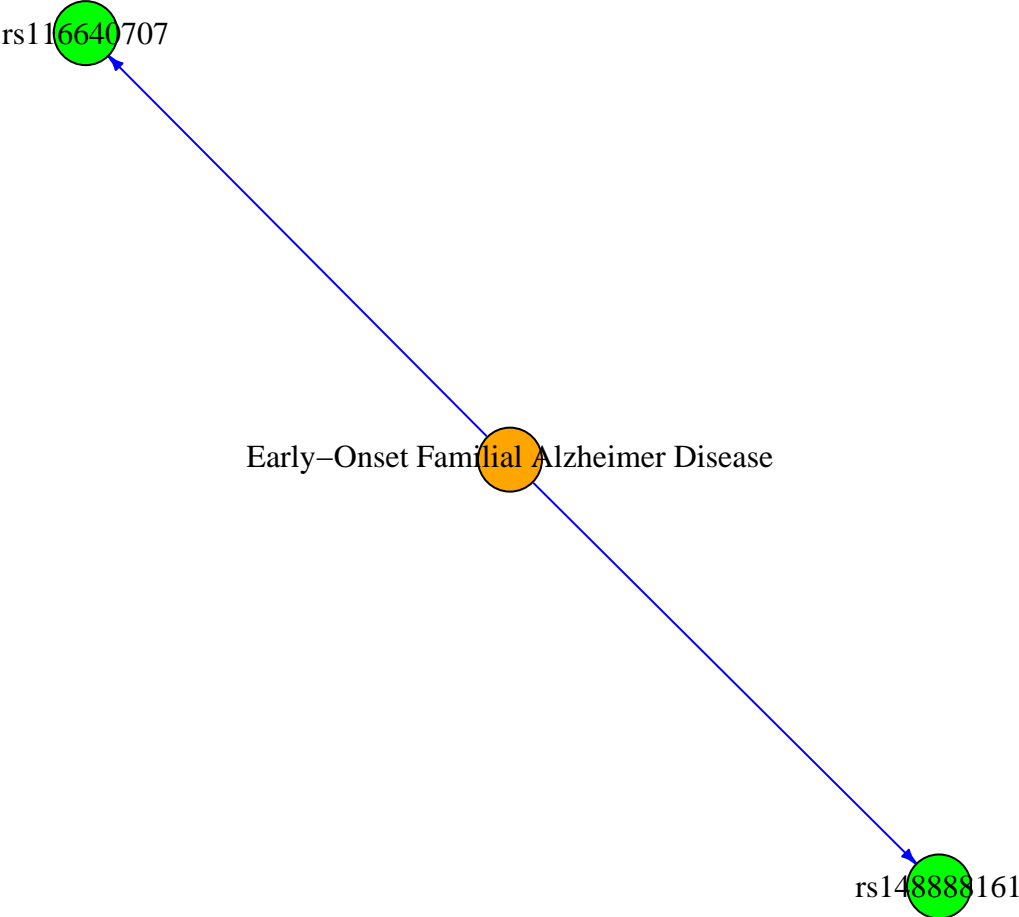

Variant–Disease Network (Ectodermal dysplasia and immunodeficiency 2

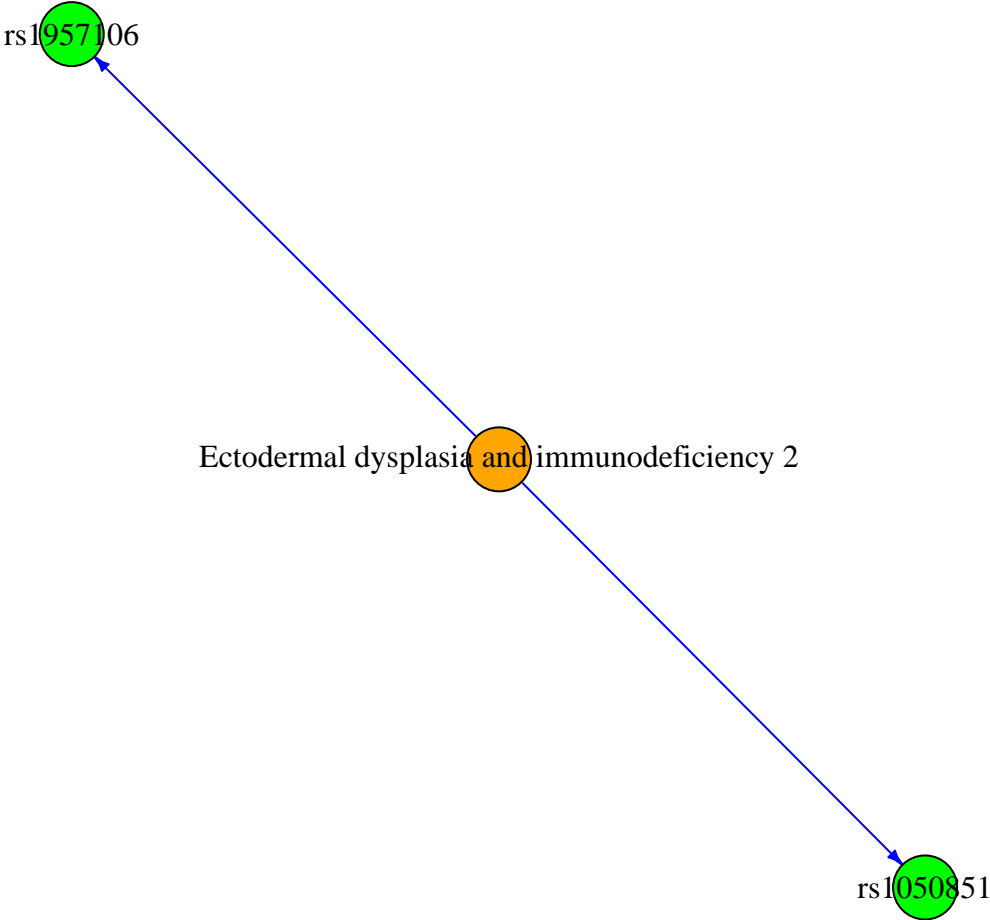

**Variant–Disease Network (Ectodermal dysplasia skin fragility syndrome)**

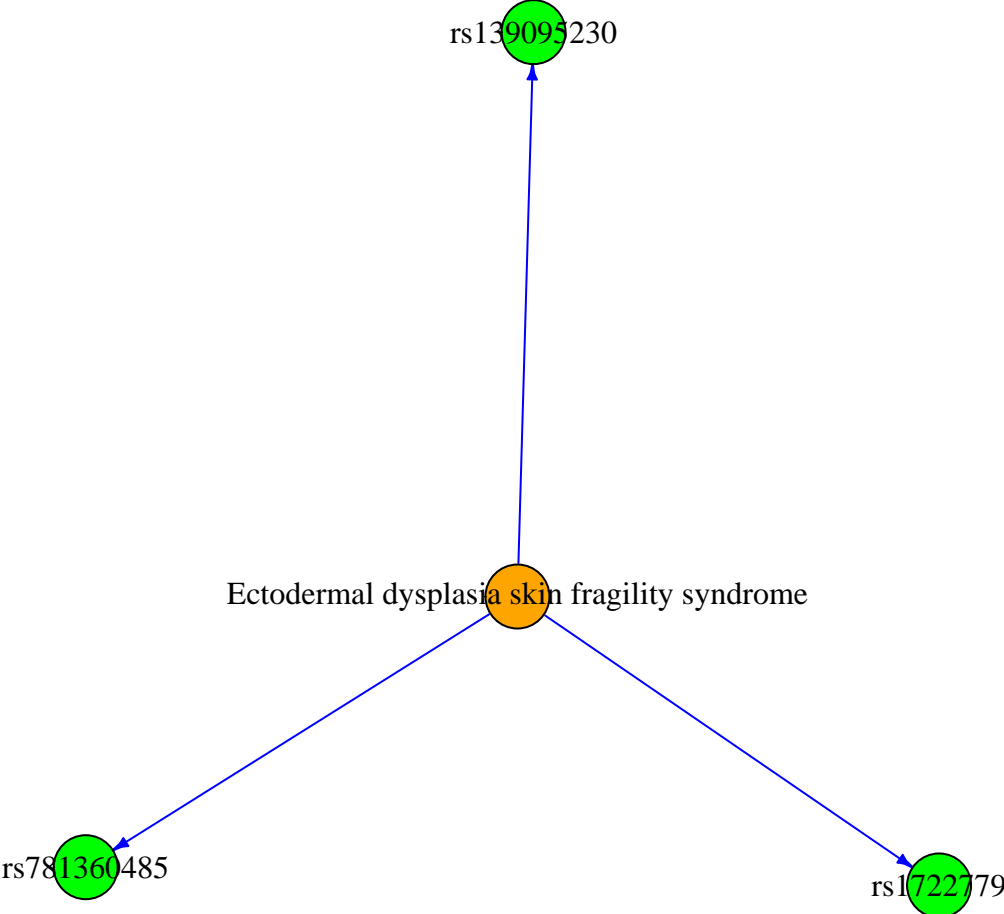

## Variant-Disease Network (Ectopia lentis)

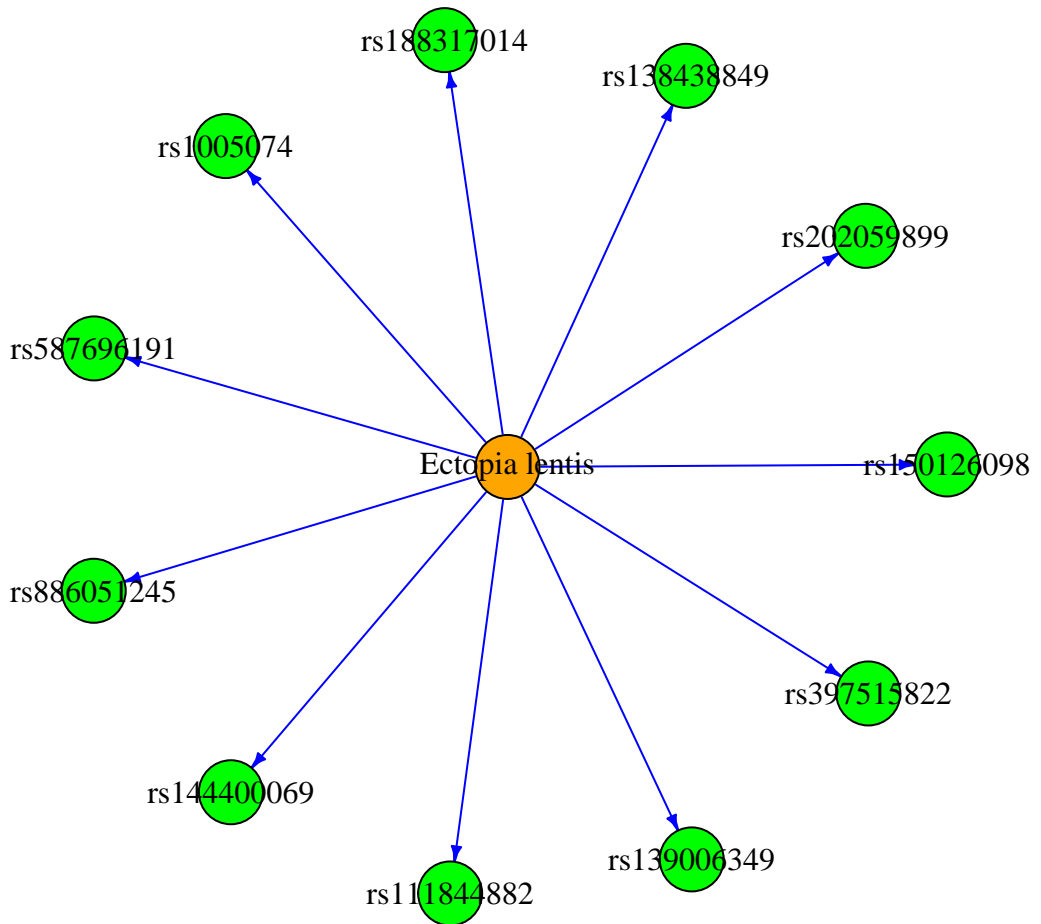



Variant–Disease Network (Ehlers–Danlos syndrome)

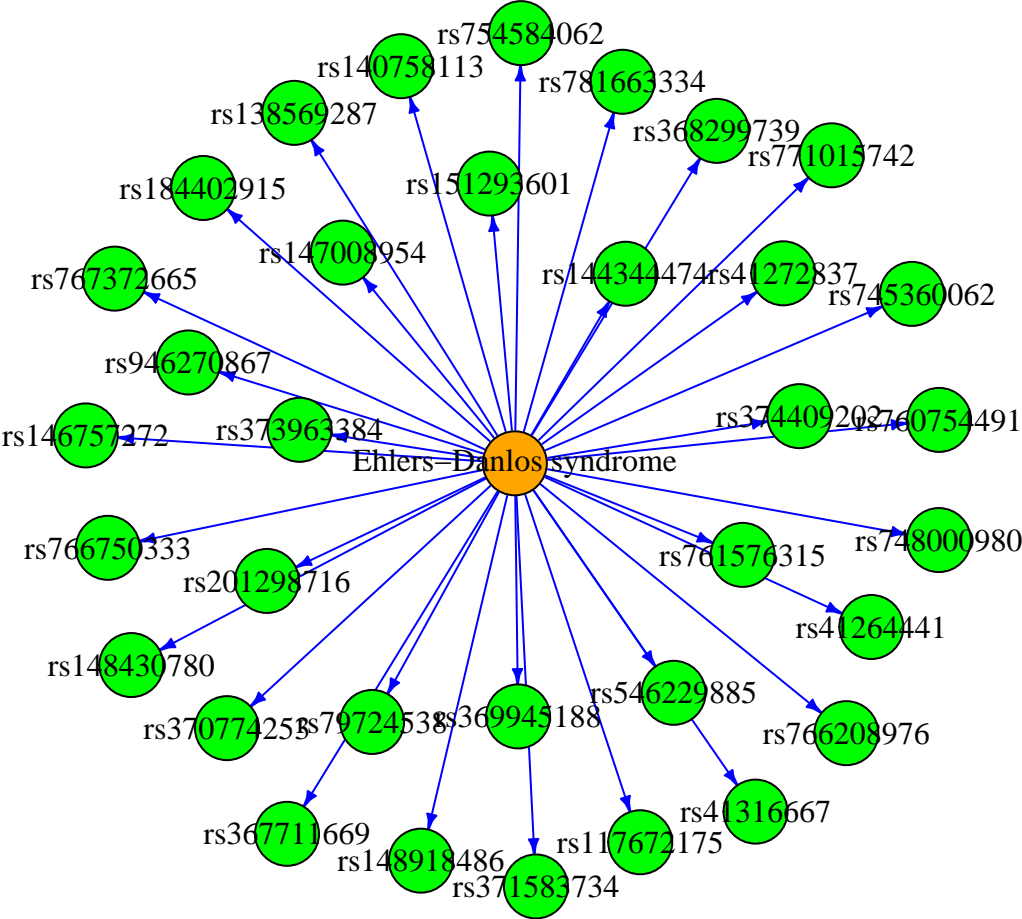

## Variant–Disease Network (Ehlers–Danlos syndrome classic type 2)

Ehlers–Danlos syndrome classic type 2

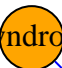

rs148430780

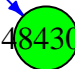

Variant–Disease Network (Ehlers–Danlos syndrome dermatosparaxis type)

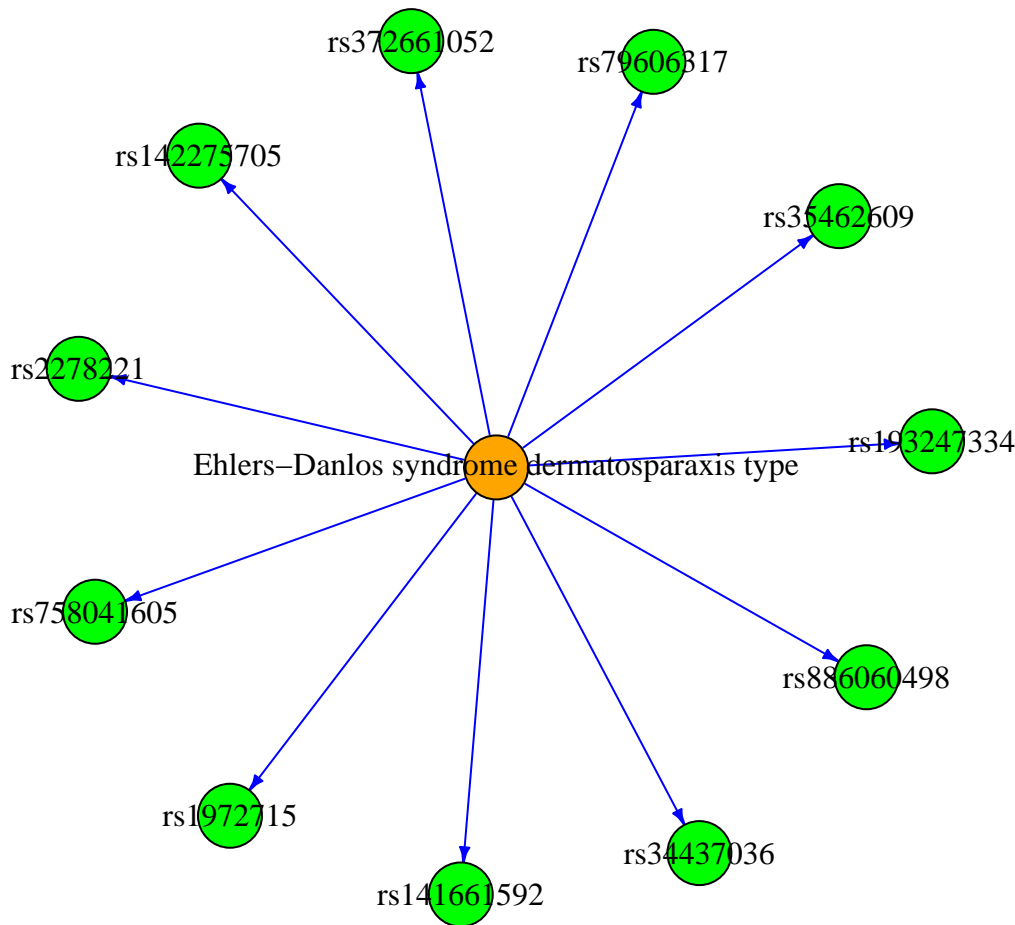

**Variant–Disease Network (Ehlers–Danlos syndrome progeroid type)**

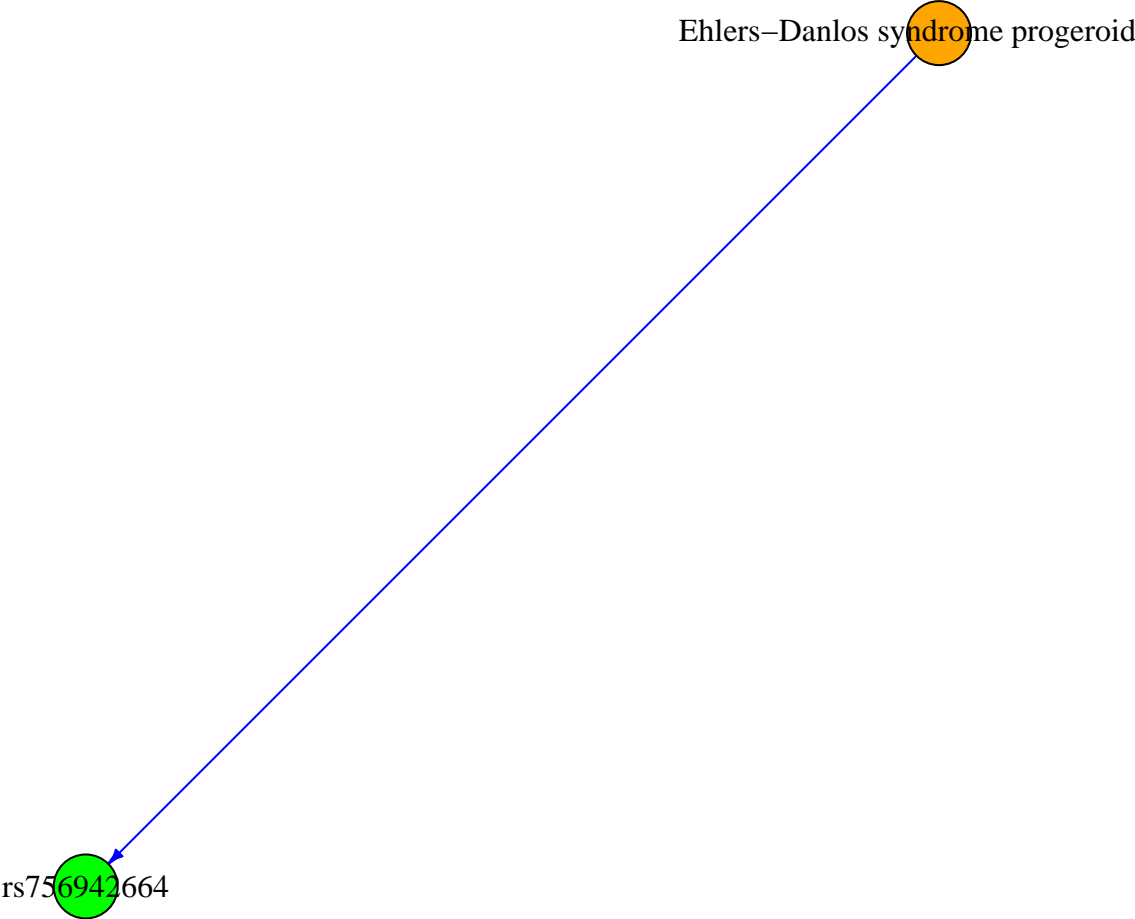

## Variant-Disease Network (Elliptocytosis)

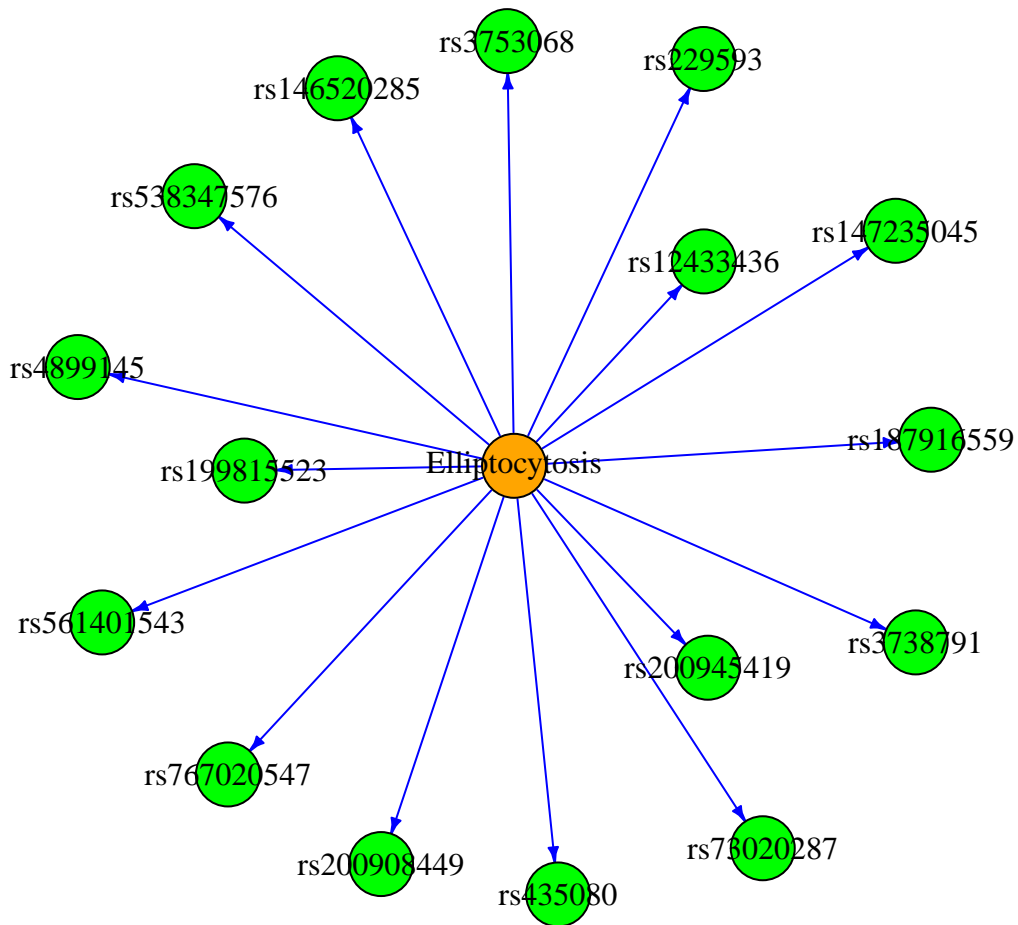

**Variant–Disease Network (Emery–Dreifuss muscular dystrophy)**

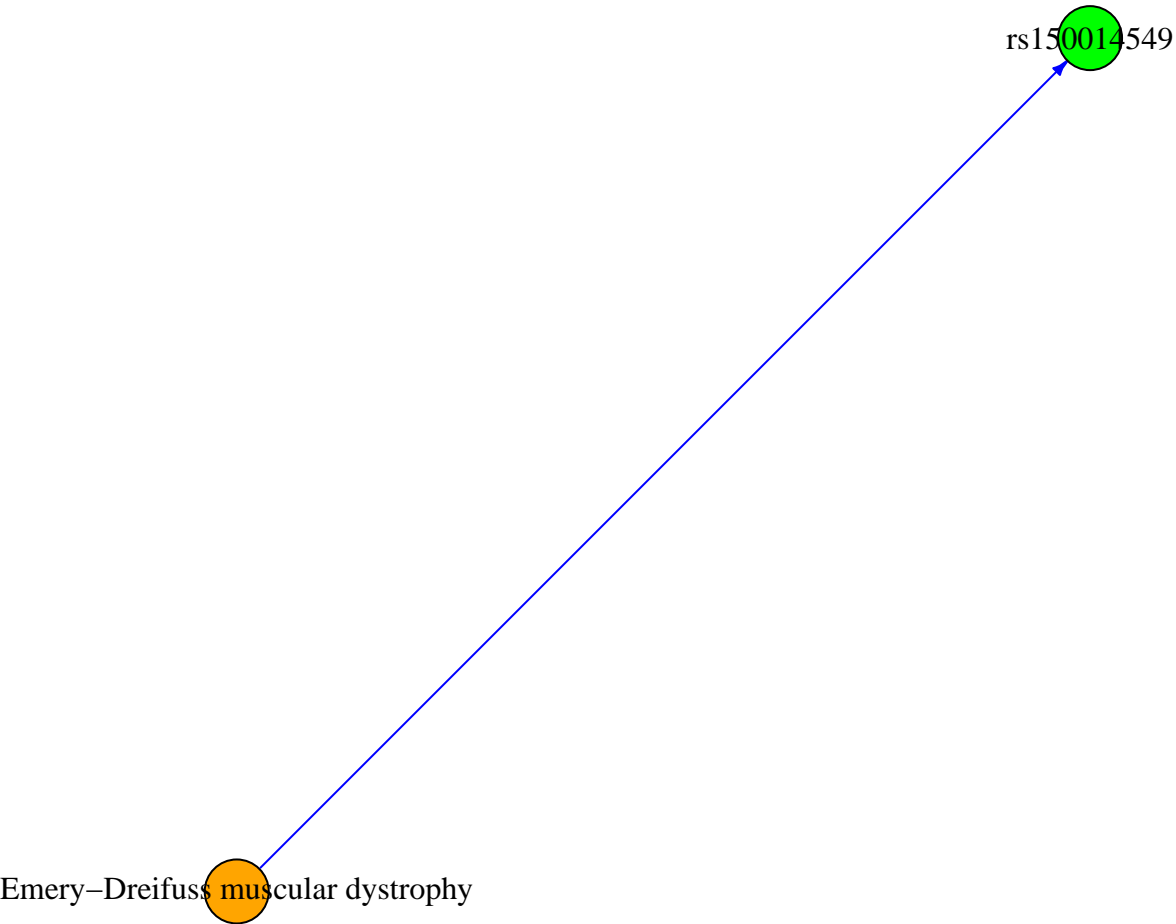

Variant–Disease Network (Encephalopathy)

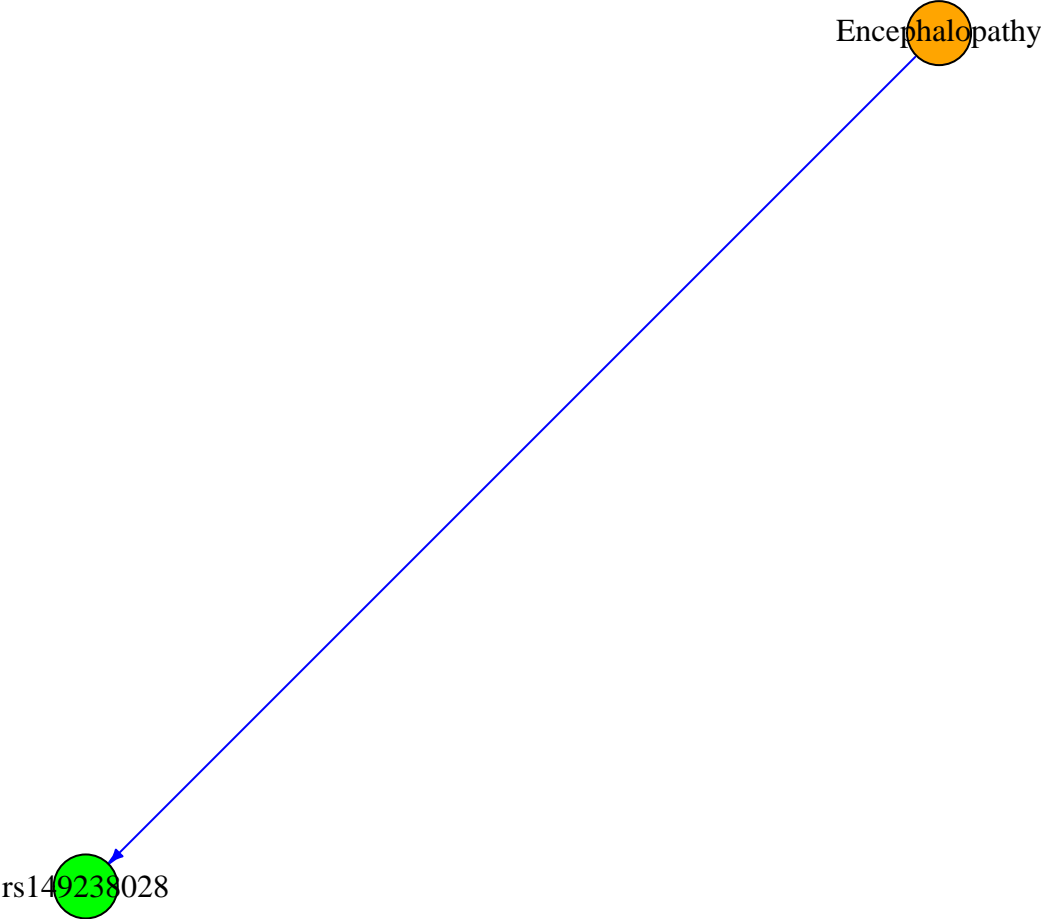

## Variant–Disease Network (Endometrial carcinoma)

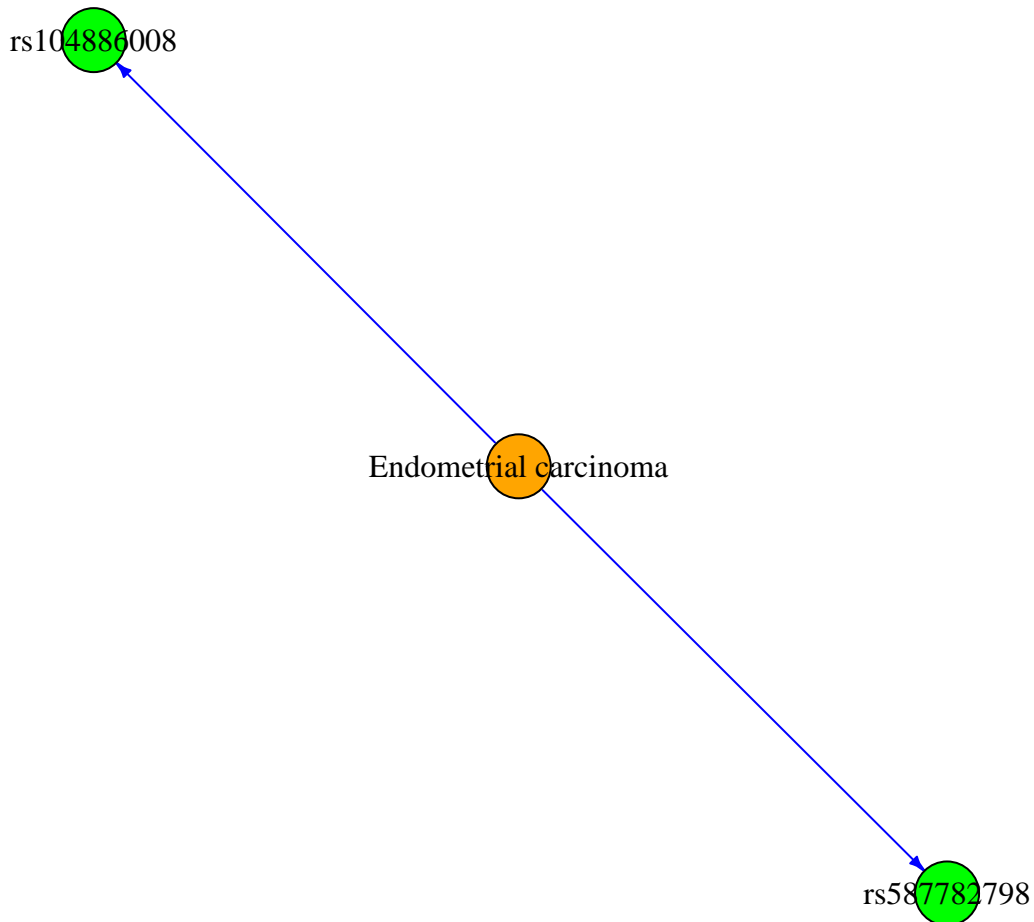



**Variant–Disease Network (Enhanced s–cone syndrome)**

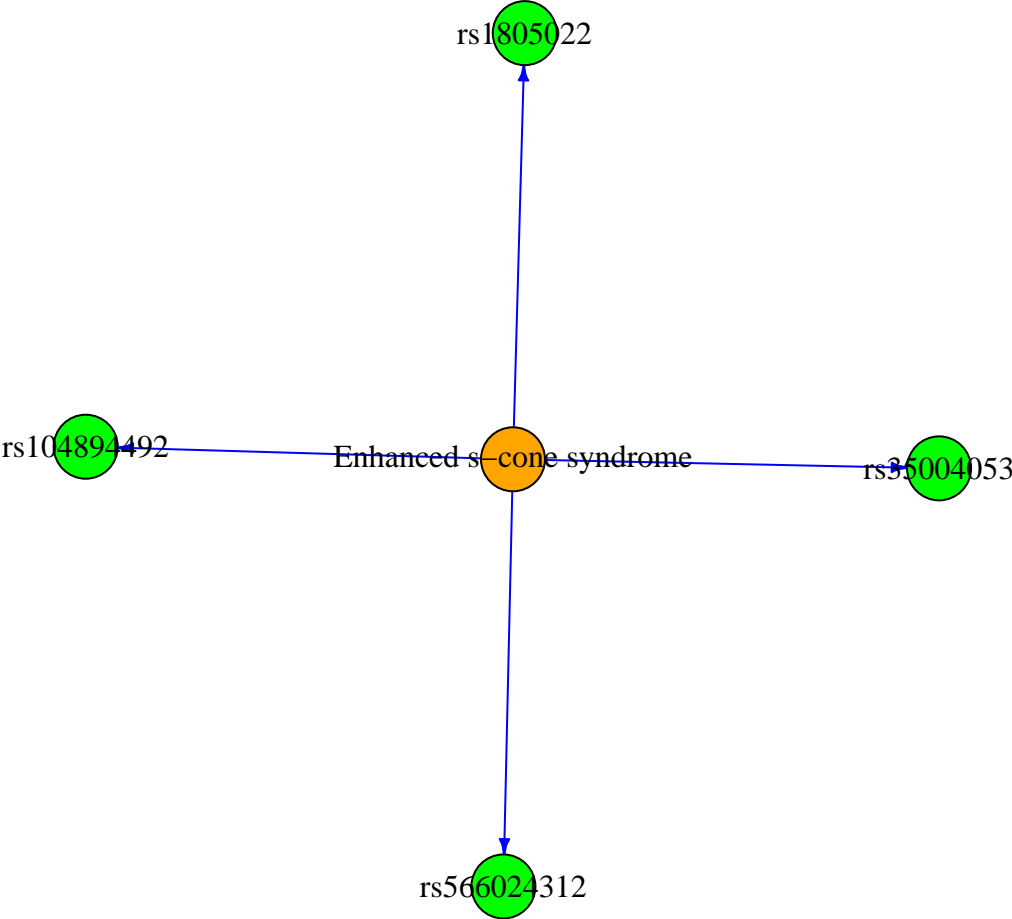

# Variant–Disease Network (Enlarged vestibular aqueduct)

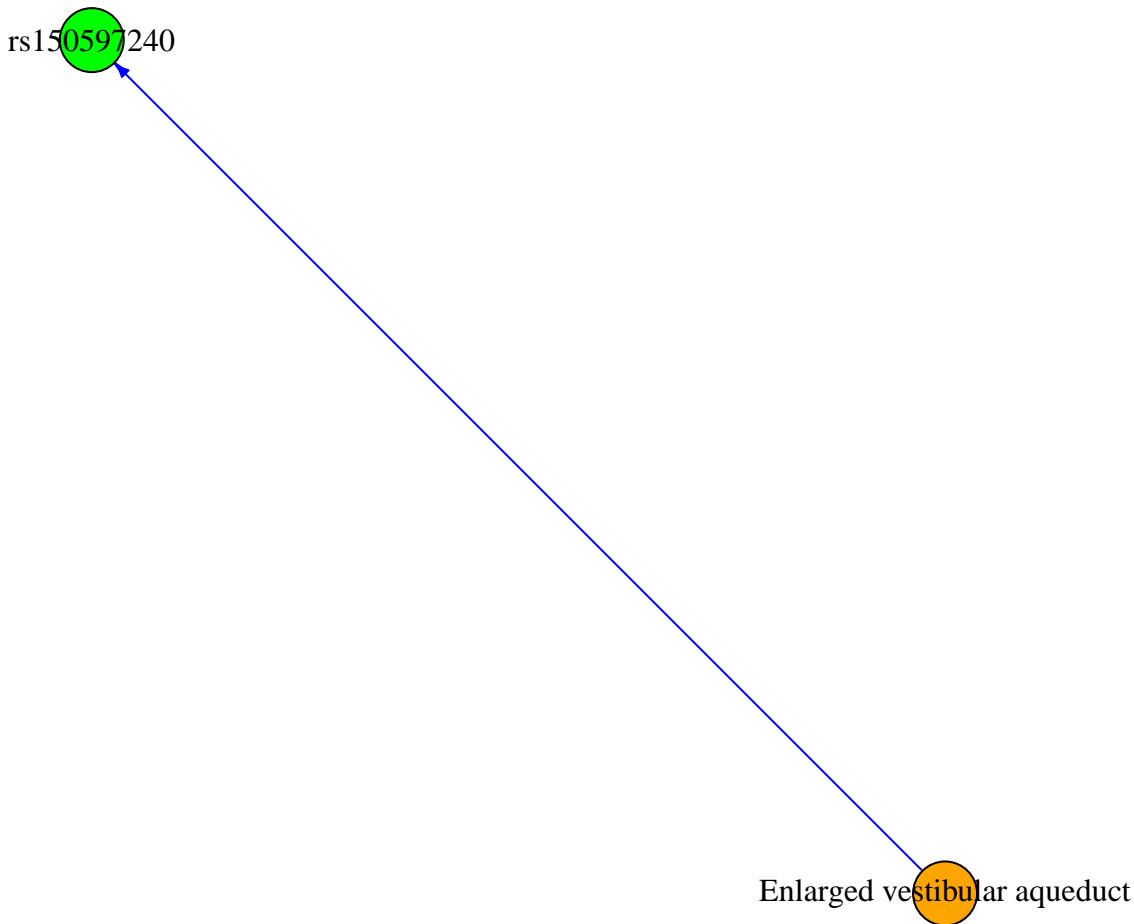

**Variant–Disease Network (EPIDERMODYSPLASIA VERRUCIFORMIS)**

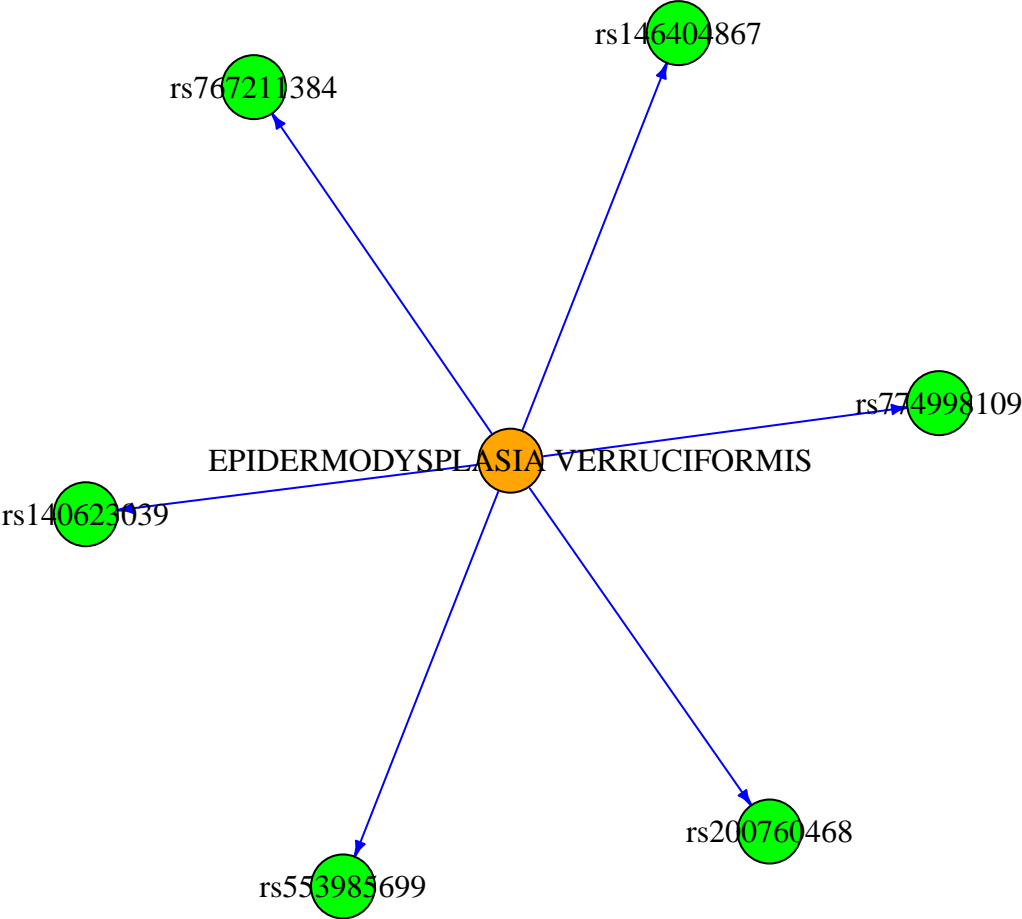

## Variant–Disease Network (Epidermolysis bullosa)

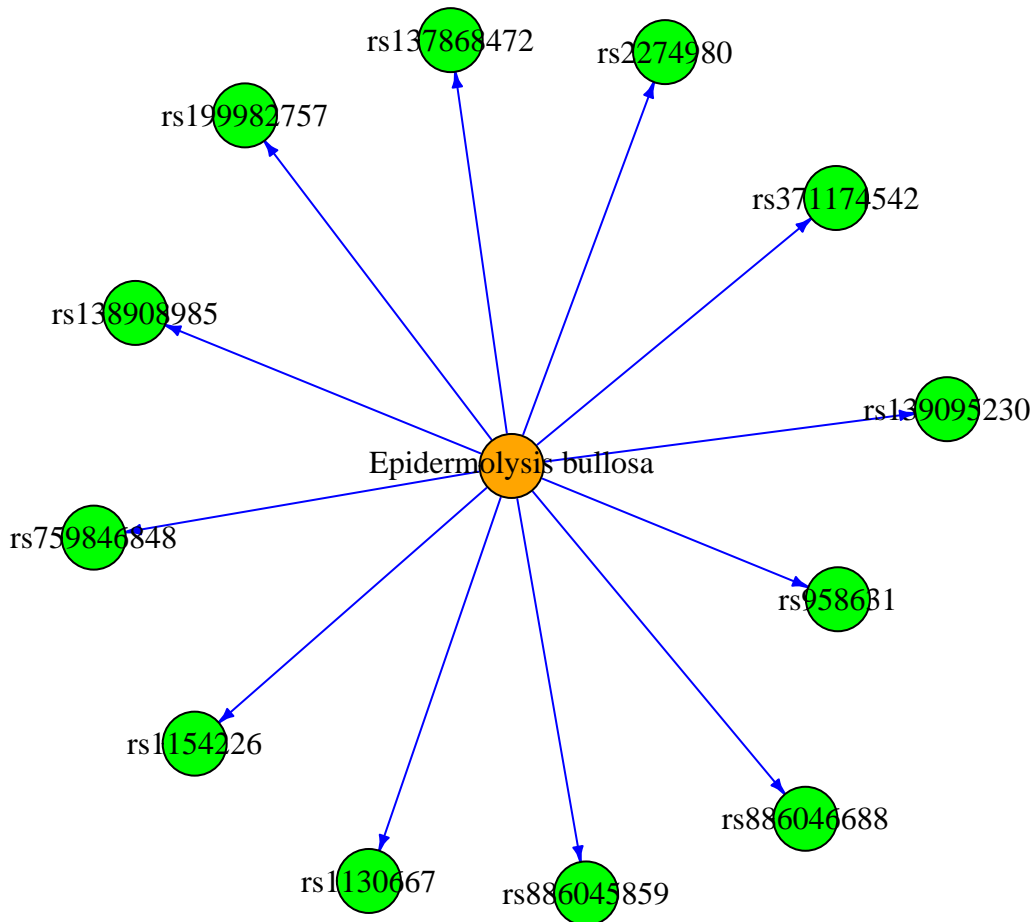

# Variant–Disease Network (Epidermolysis bullosa junctionalis with pyloric atresia)

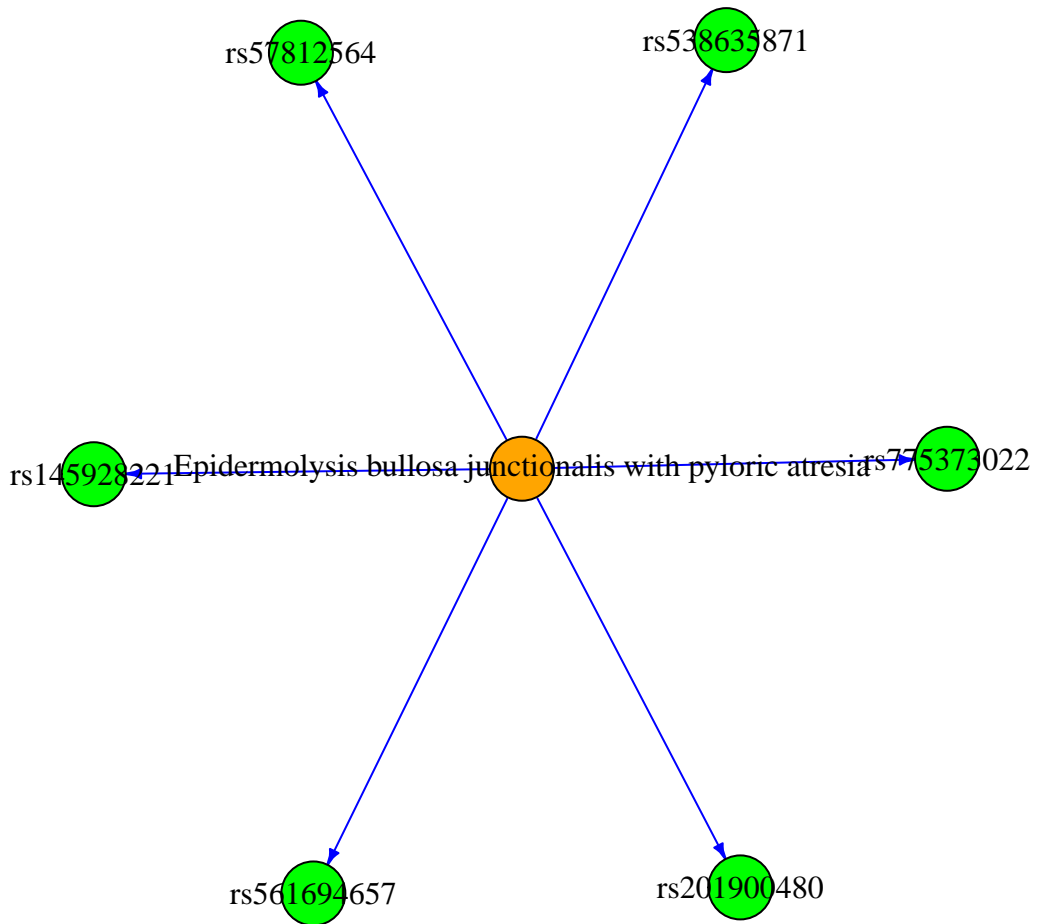

**Variant–Disease Network (Epidermolysis bullosa simplex)**

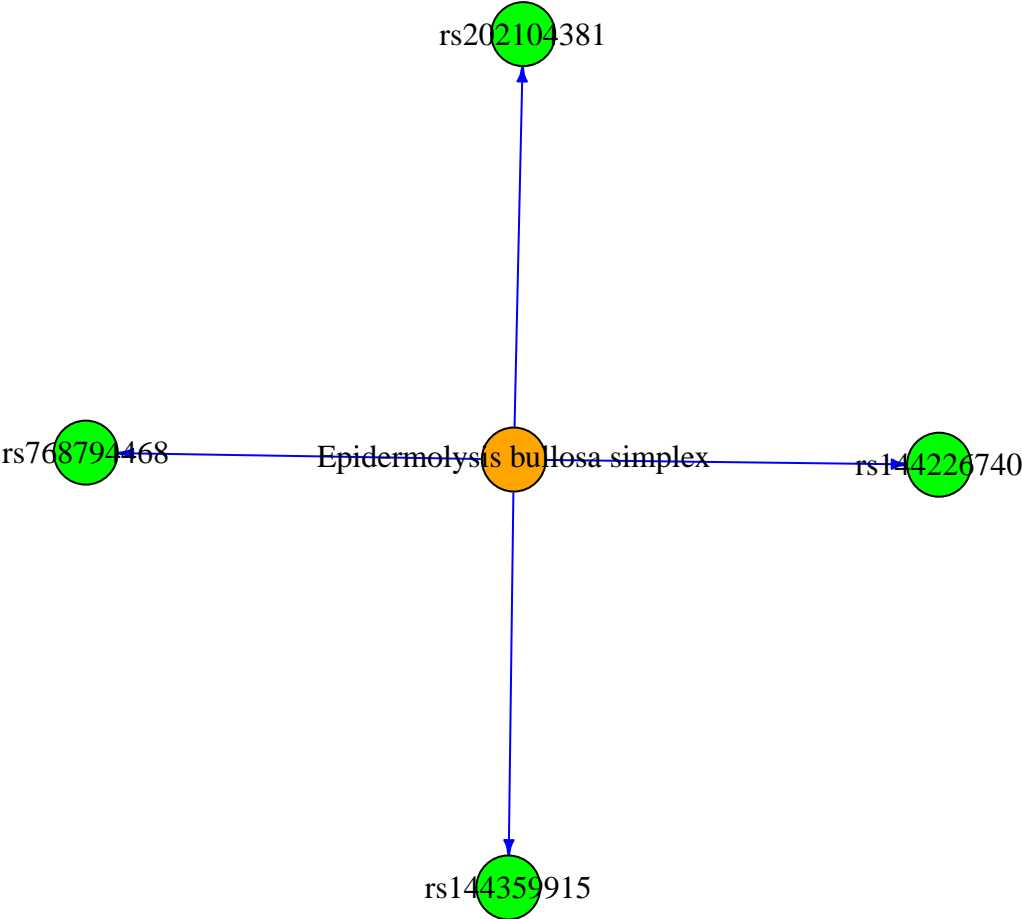

## Variant–Disease Network (Epilepsy)

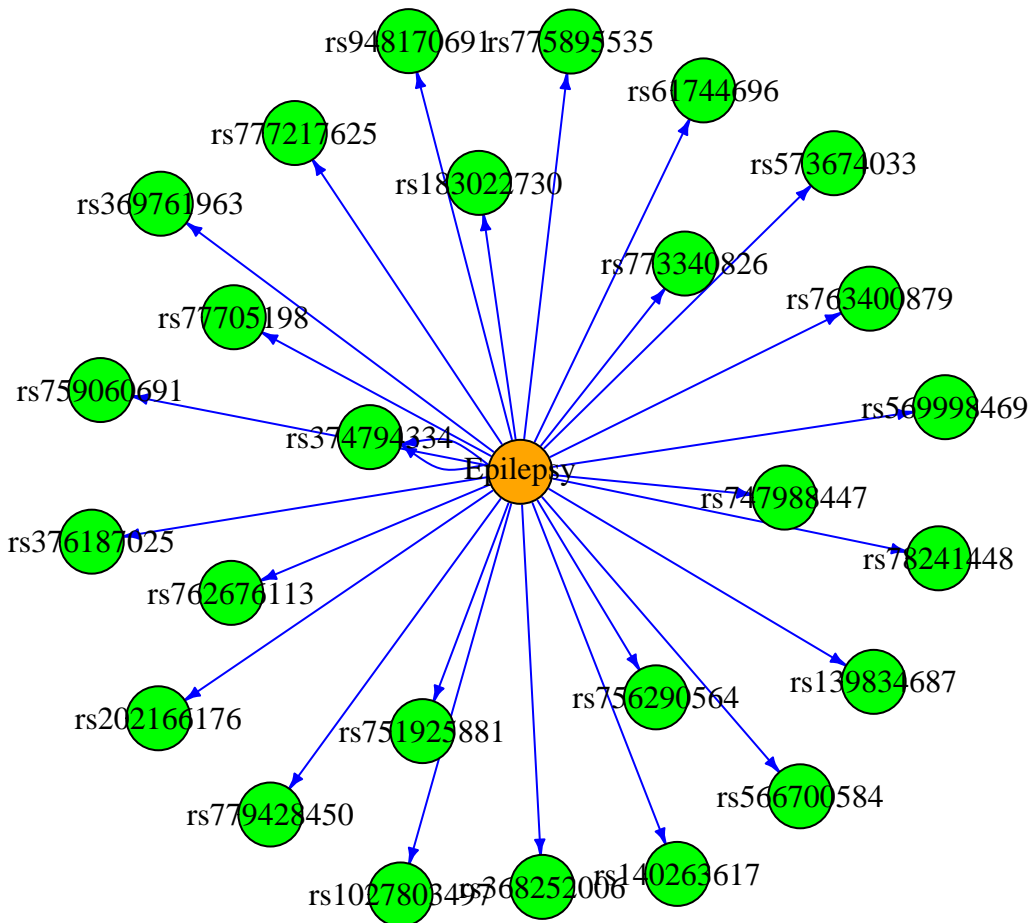

Variant–Disease Network (Epileptic encephalopathy)

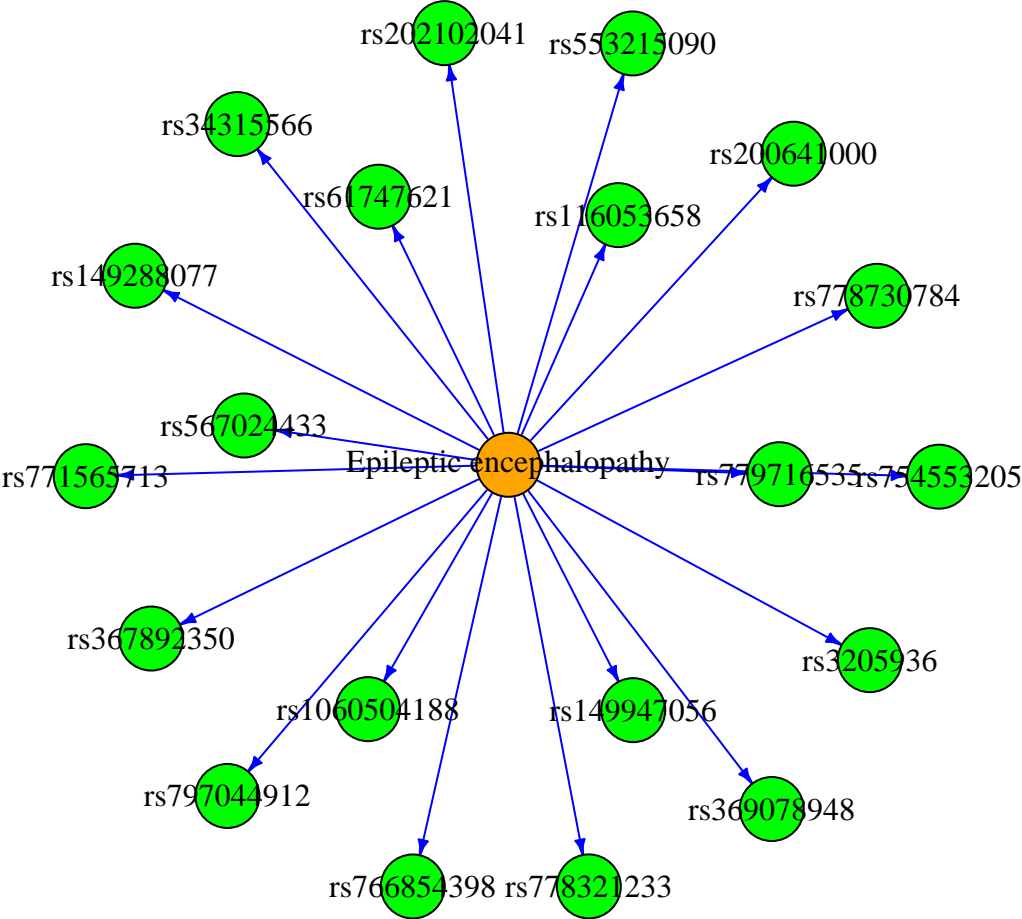



**Variant–Disease Network (Epiphyseal chondrodysplasia)**

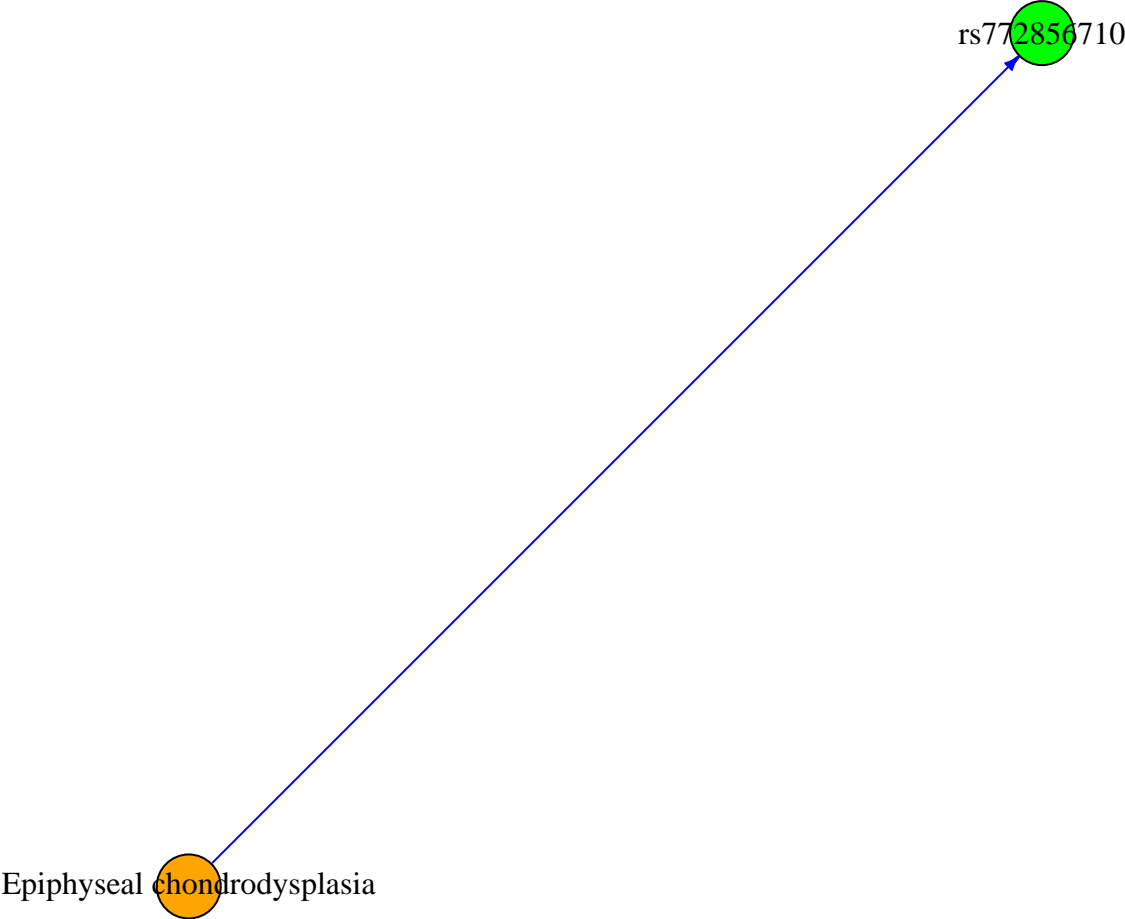

## Variant–Disease Network (Episodic pain syndrome)

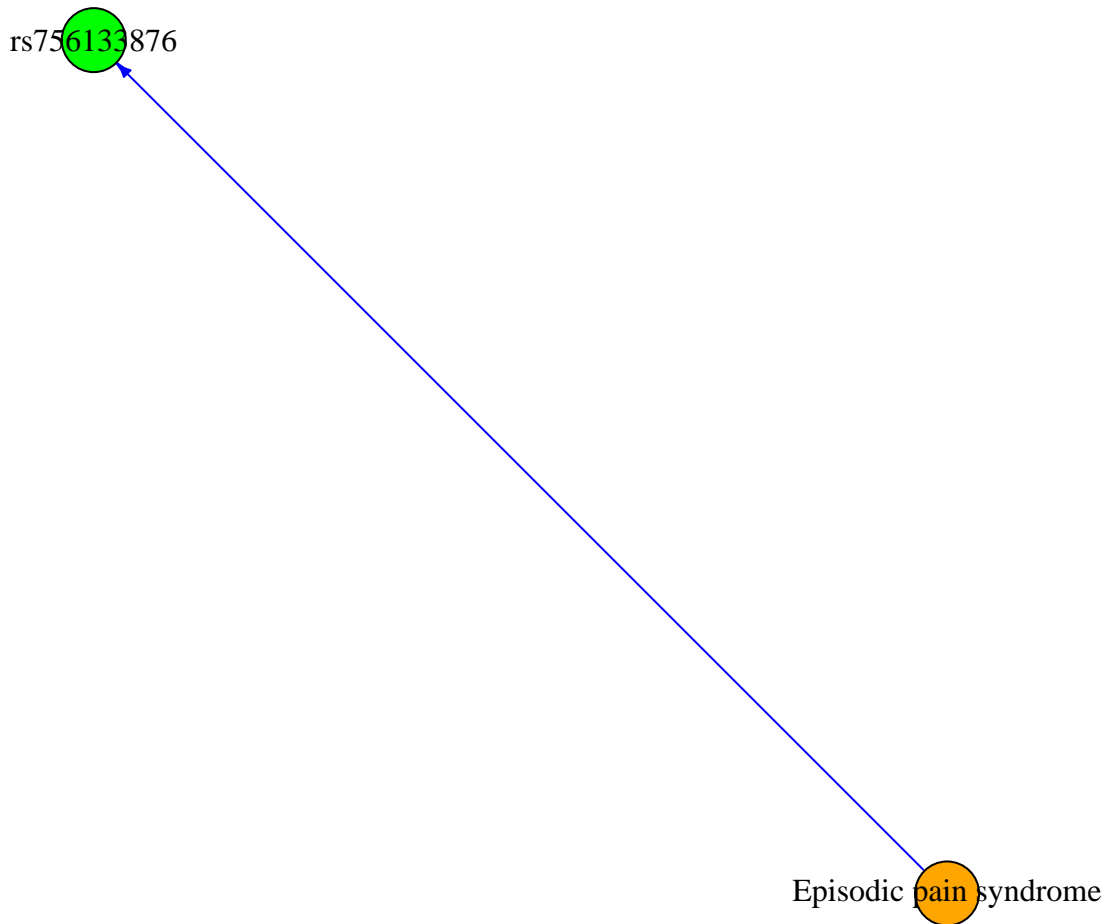

# Variant–Disease Network (Epithelial recurrent erosion dystrophy)

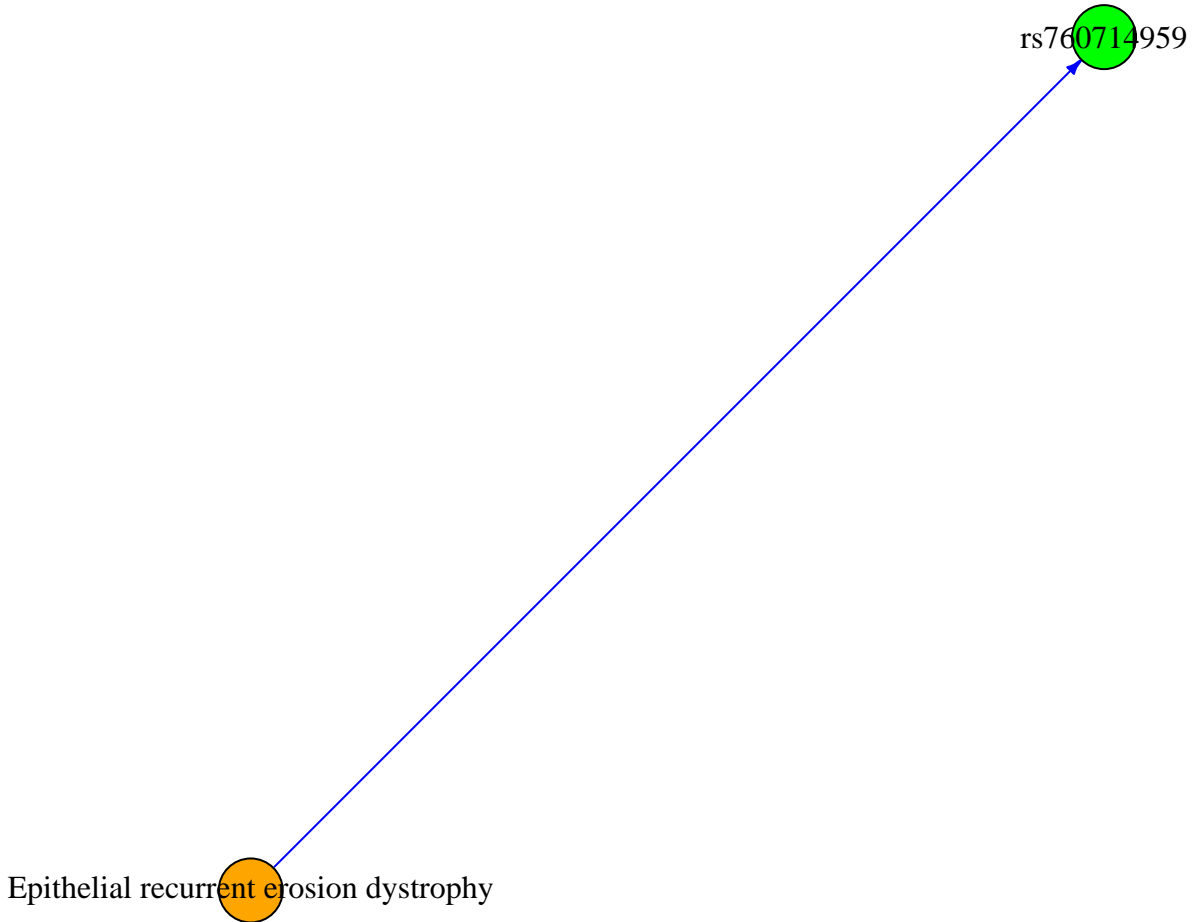

Variant–Disease Network (Erythrocyte AMP deaminase deficiency)

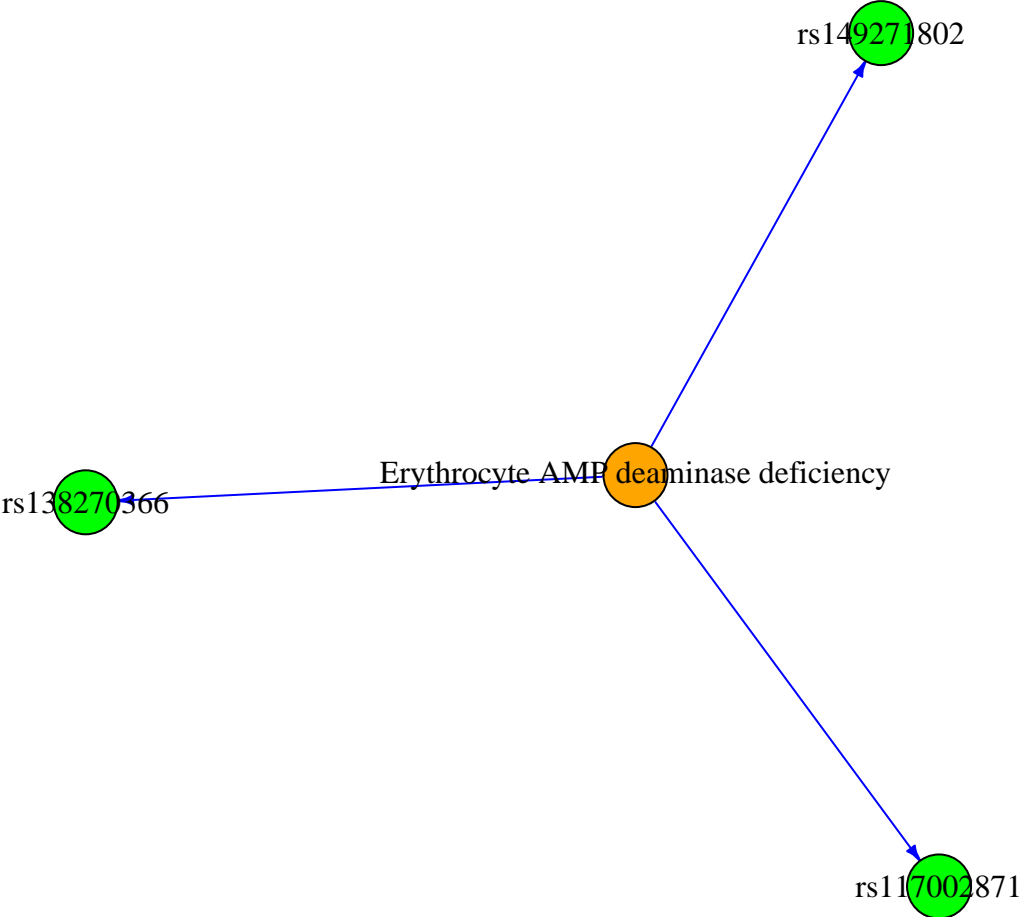

Variant–Disease Network (Erythrocytosis)

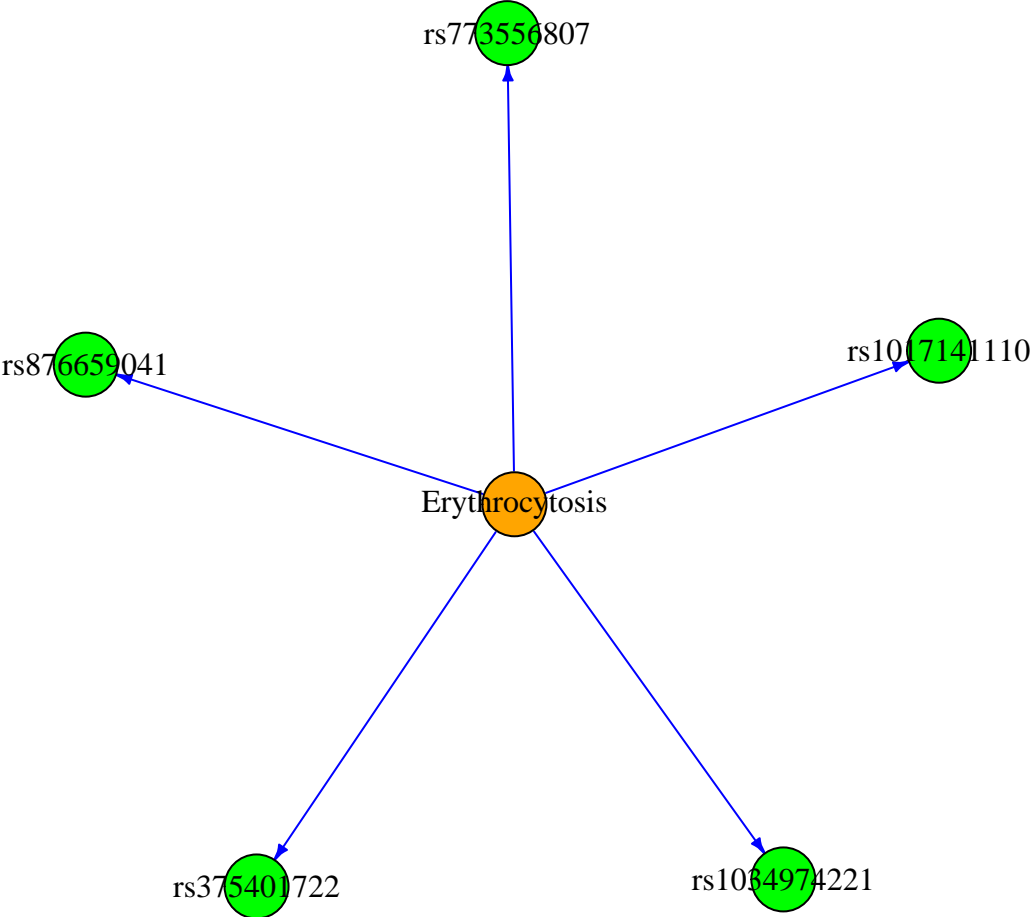

## Variant-Disease Network (Esophageal atresia)

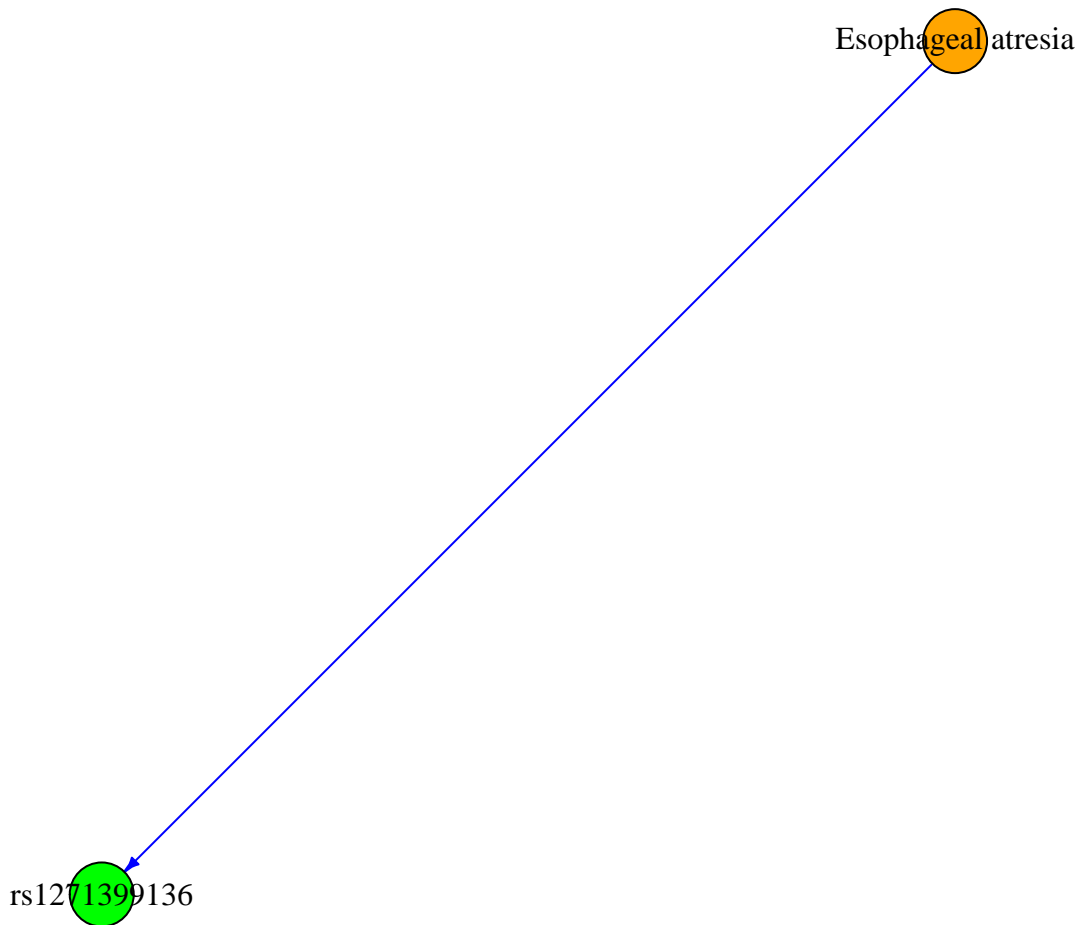

## Variant–Disease Network (Evans syndrome)

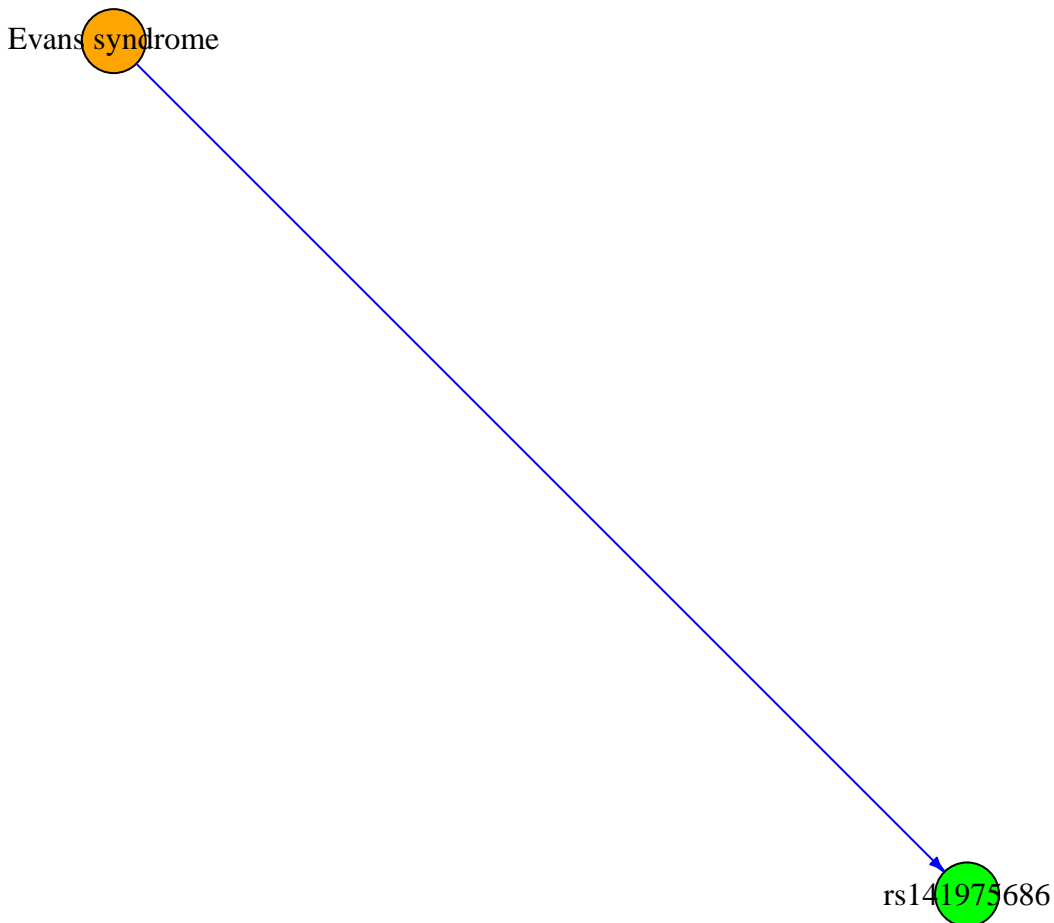

## Variant-Disease Network (Fabry disease)

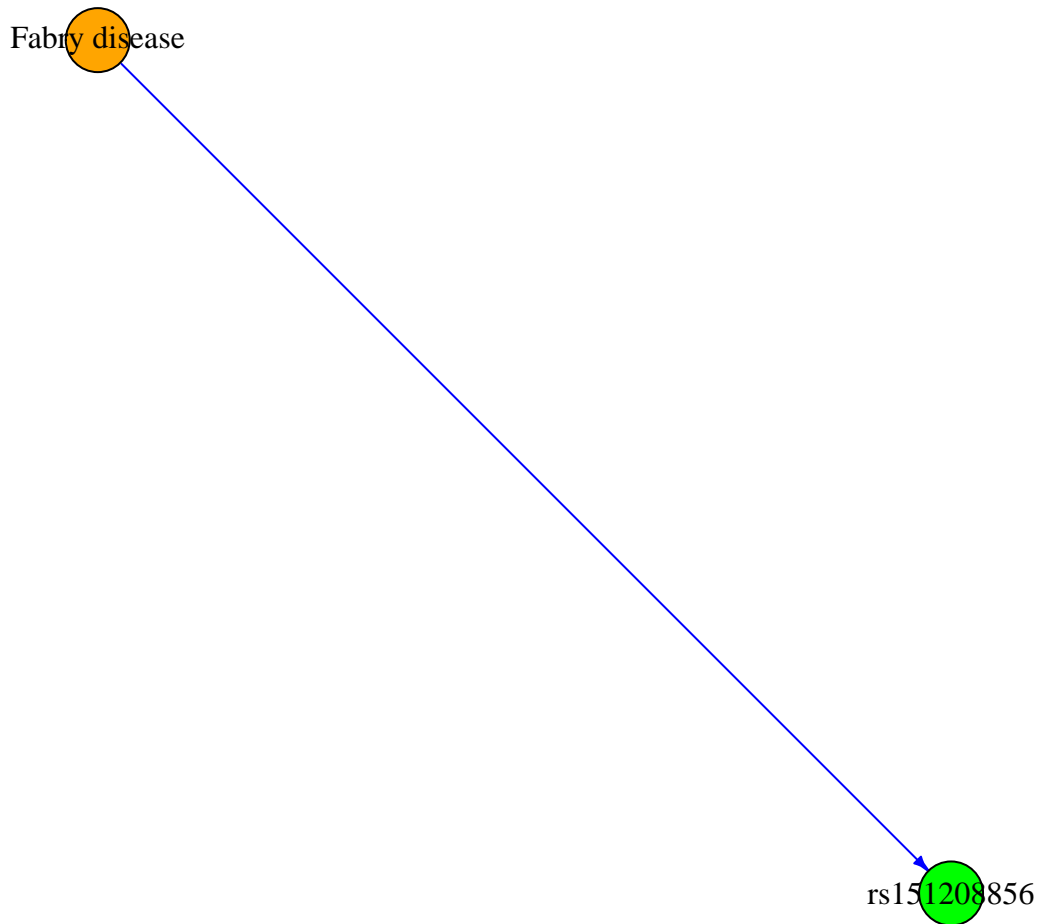



## Variant–Disease Network (Facial dysmorphism)

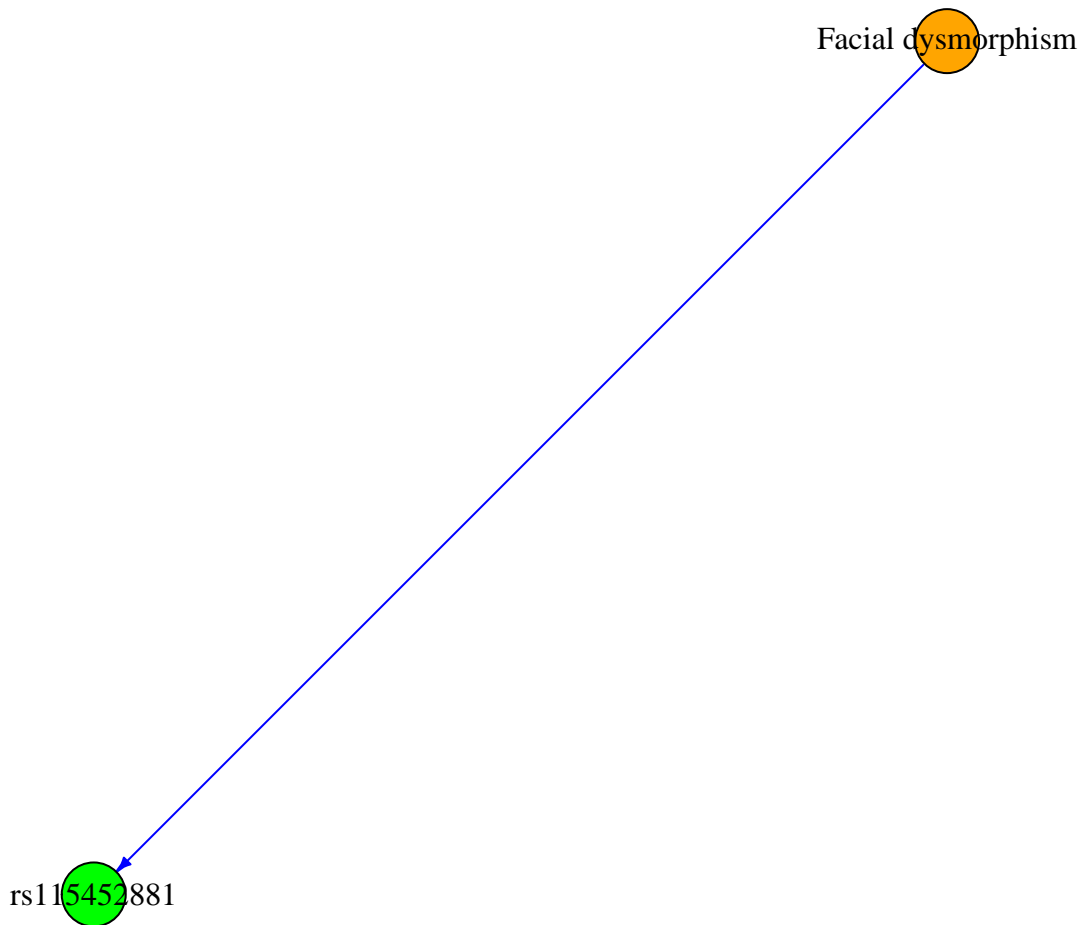

Variant–Disease Network (Factor XIII subunit B deficiency)

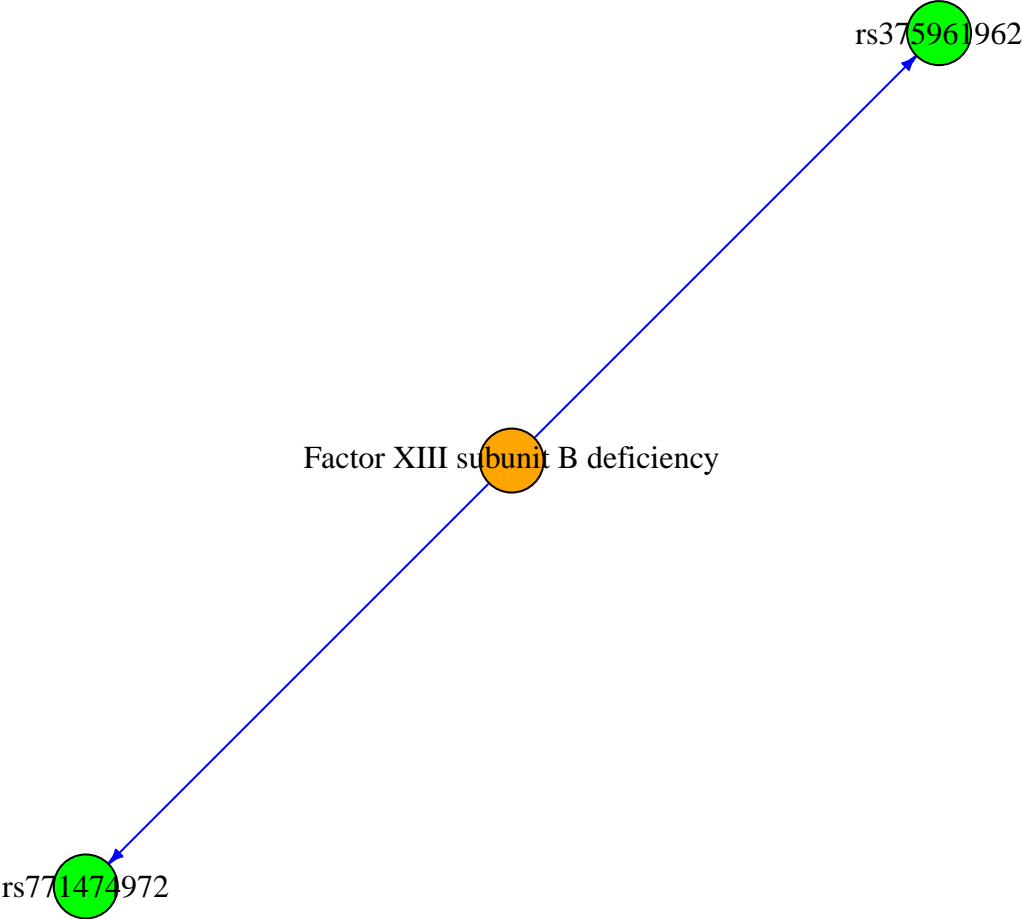

# Variant–Disease Network (Familial adenomatous polyposis)

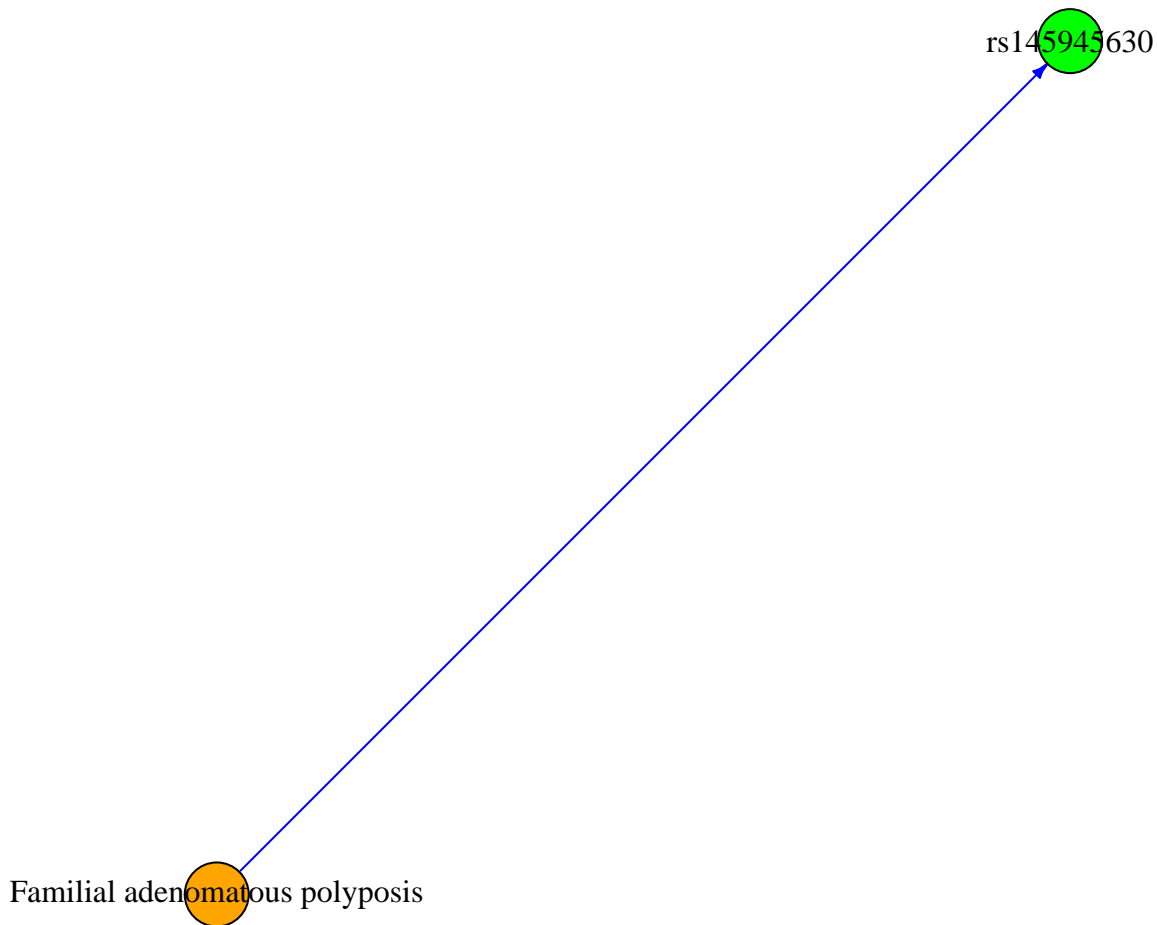

**Variant–Disease Network (Familial adenomatous polyposis 1)**

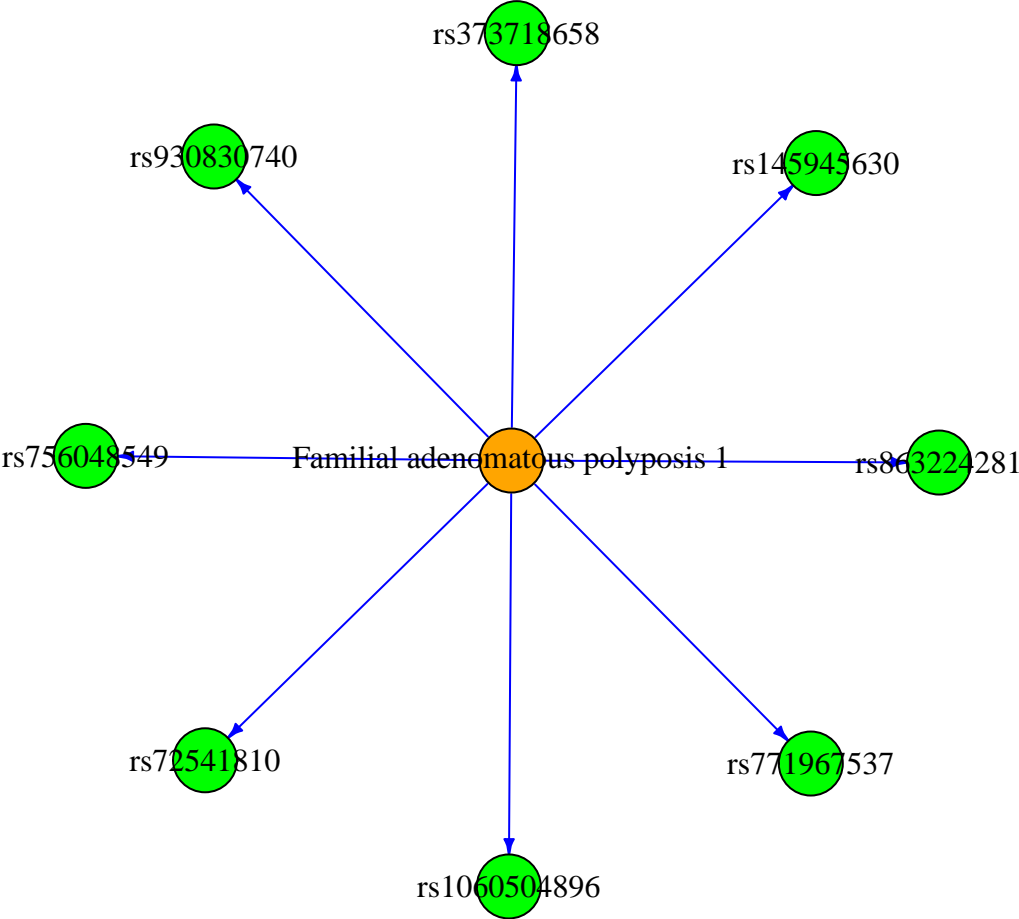

# Variant-Disease Network (Familial amyloid nephropathy with urticaria AND deafness)

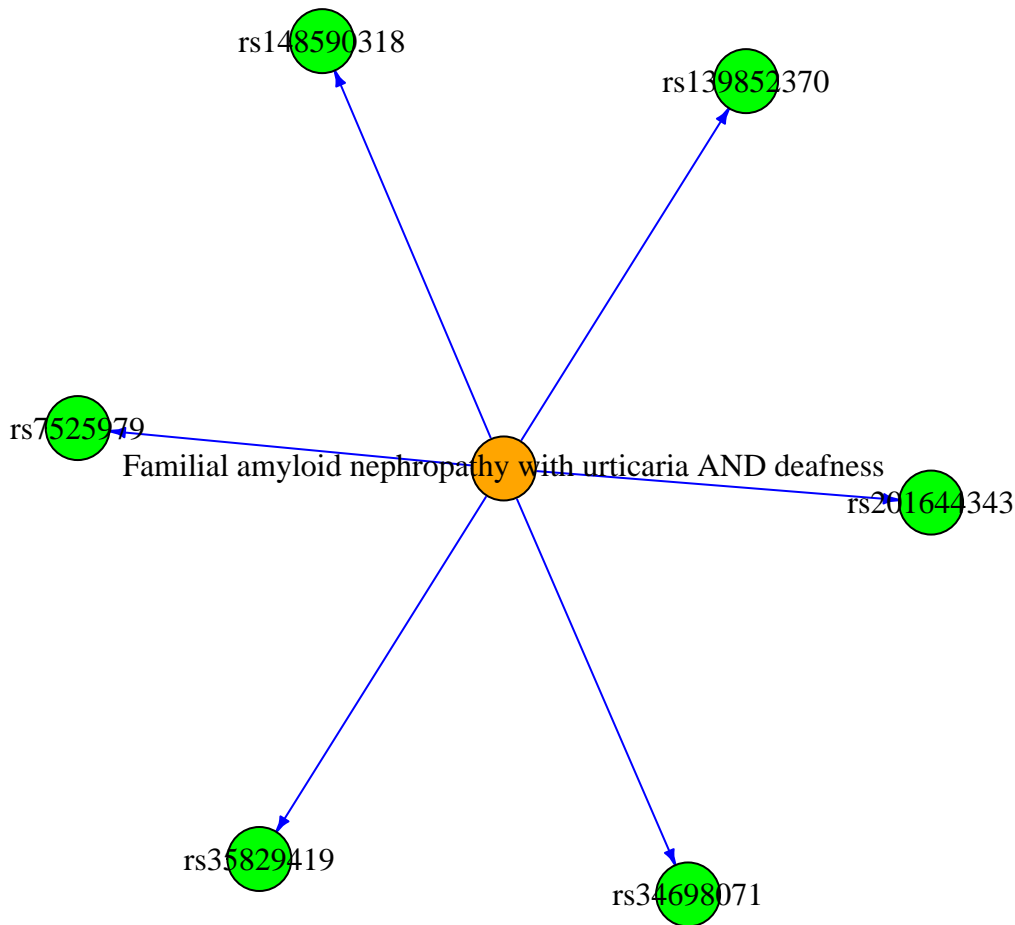

## Variant–Disease Network (Familial aortopathy)

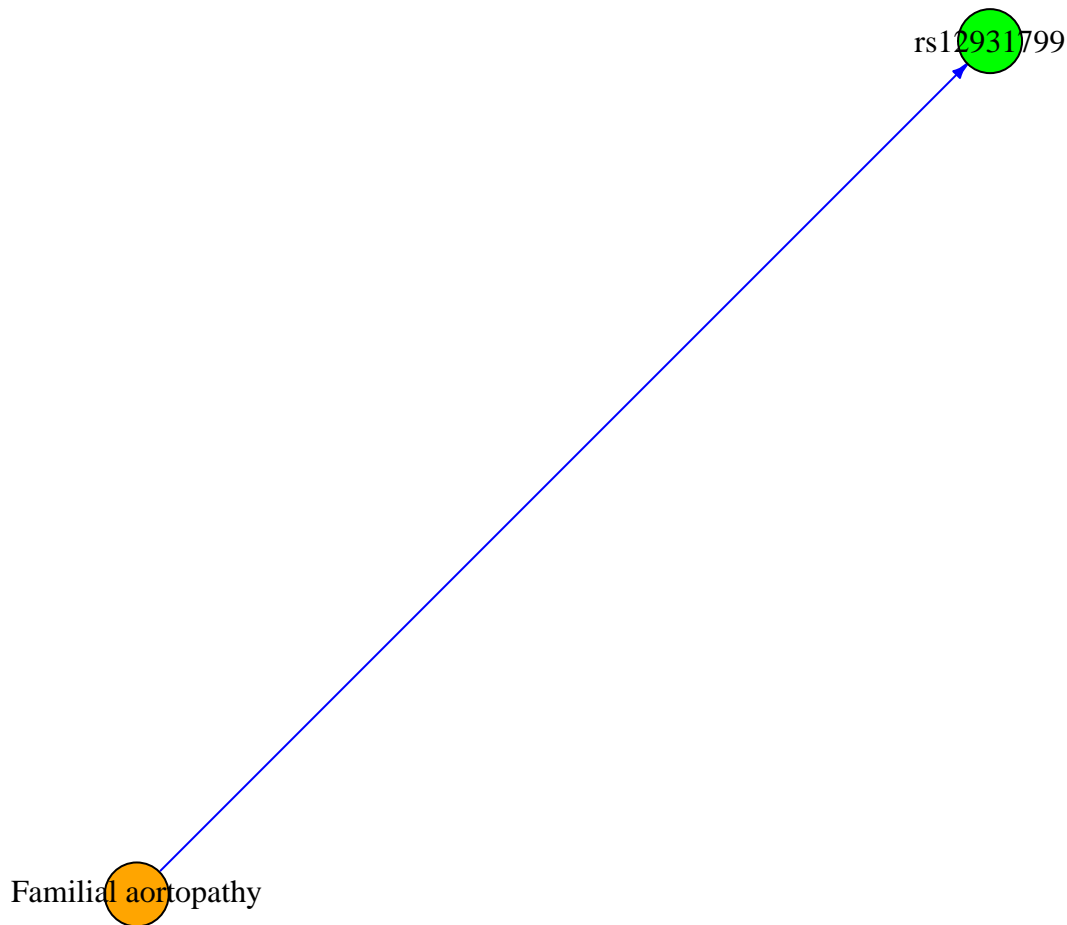

## Variant–Disease Network (Familial atrial fibrillation)

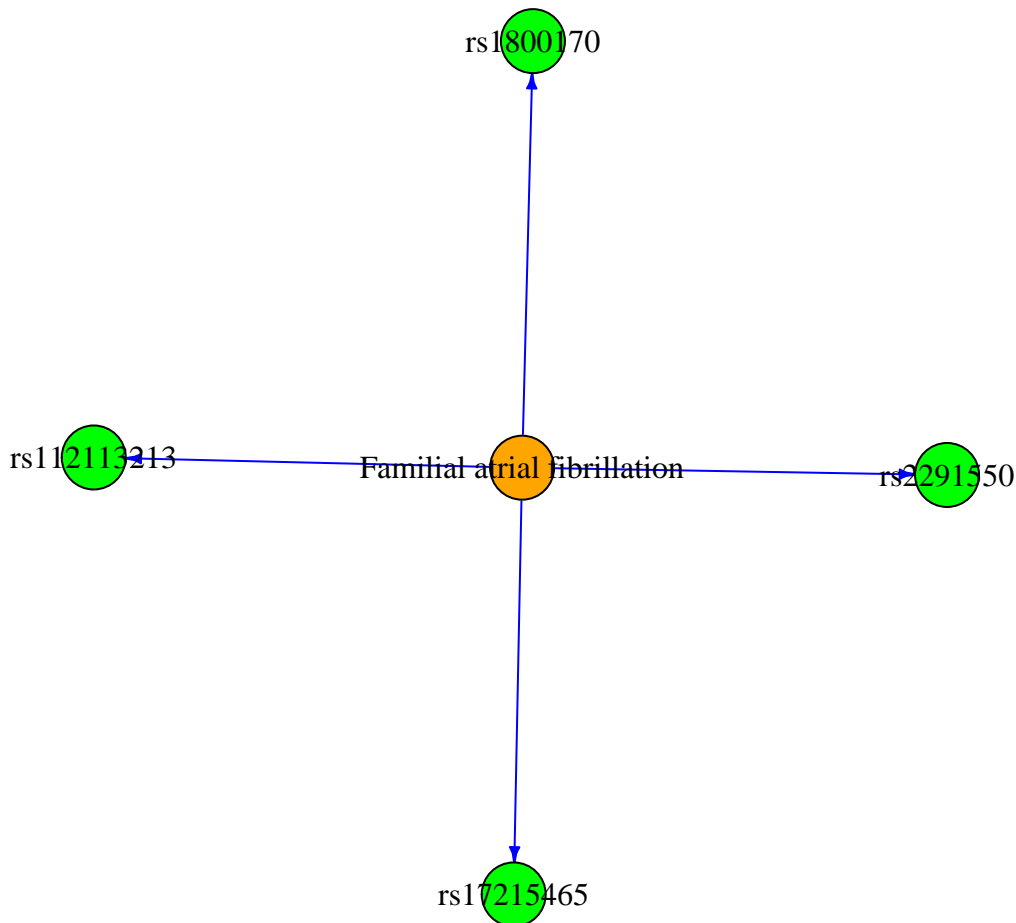

Variant–Disease Network (Familial Atypical Mycobacteriosis)

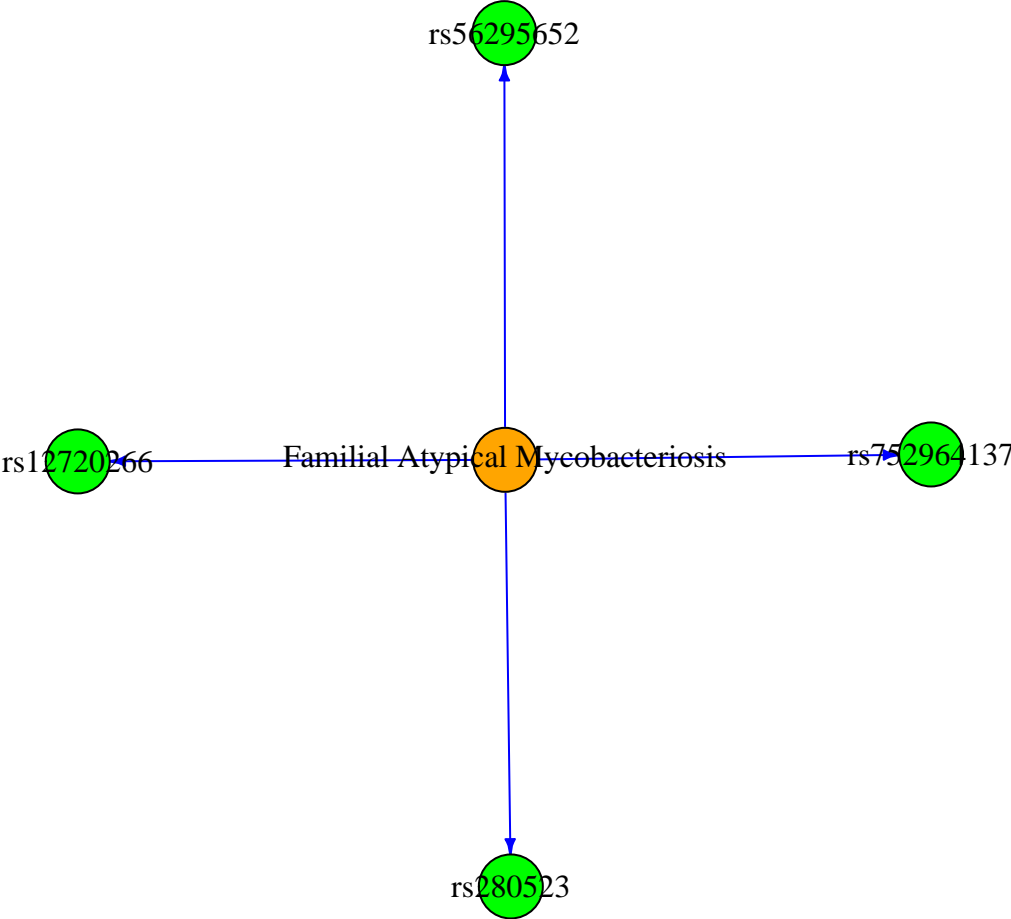



**Variant–Disease Network (Familial cancer of breast)**

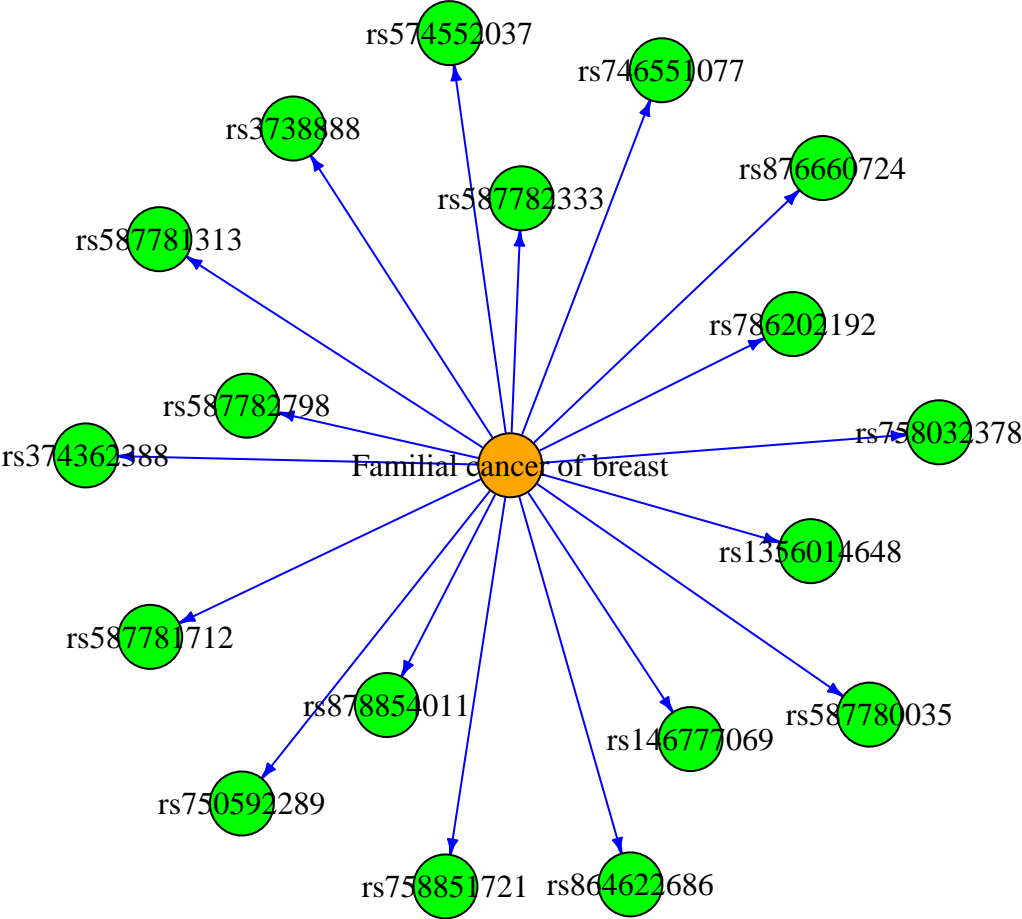

## Variant–Disease Network (Familial Candidiasis)

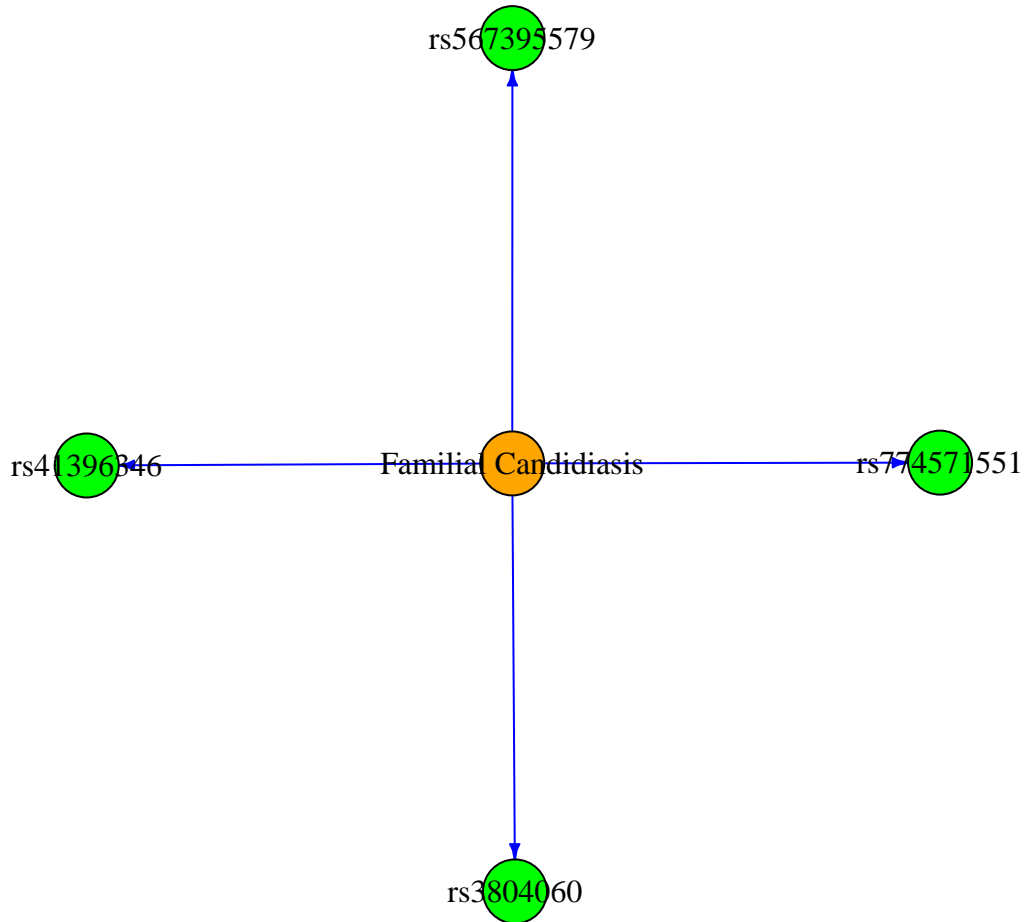

# Variant–Disease Network (Familial cold autoinflammatory syndrome)

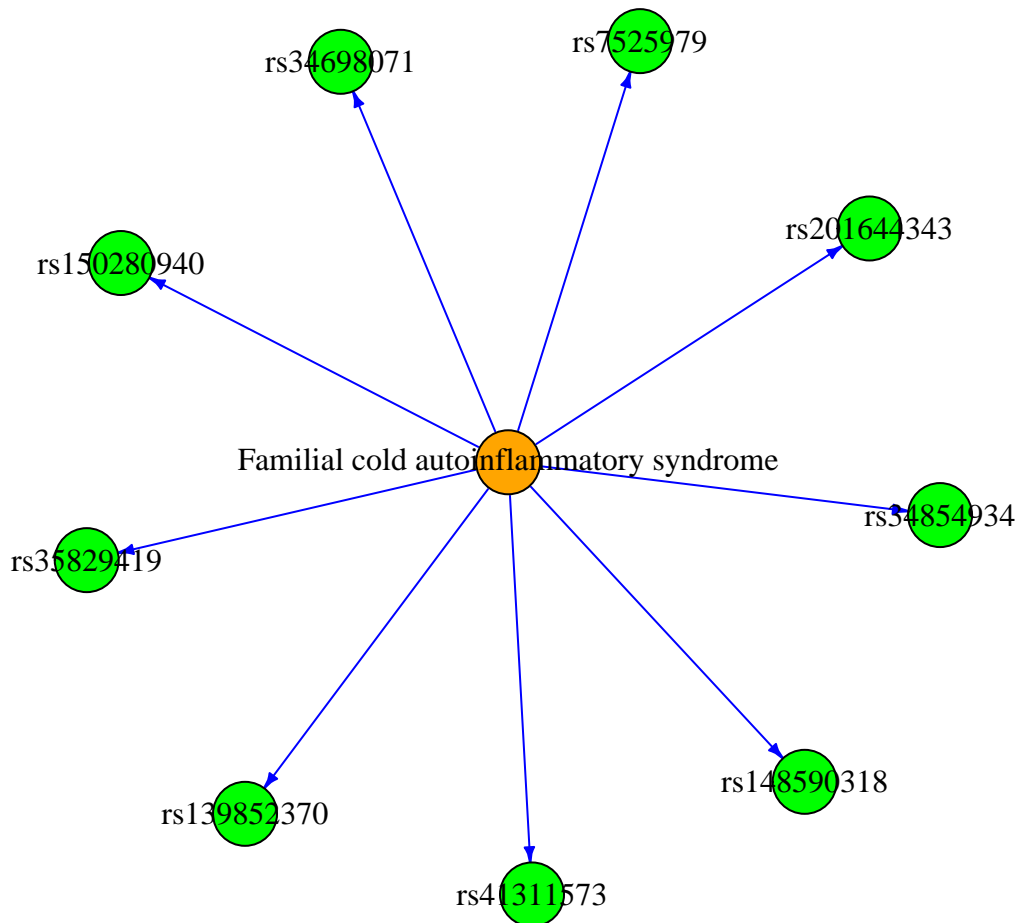

**Variant–Disease Network (Familial cold autoinflammatory syndrome 2)**

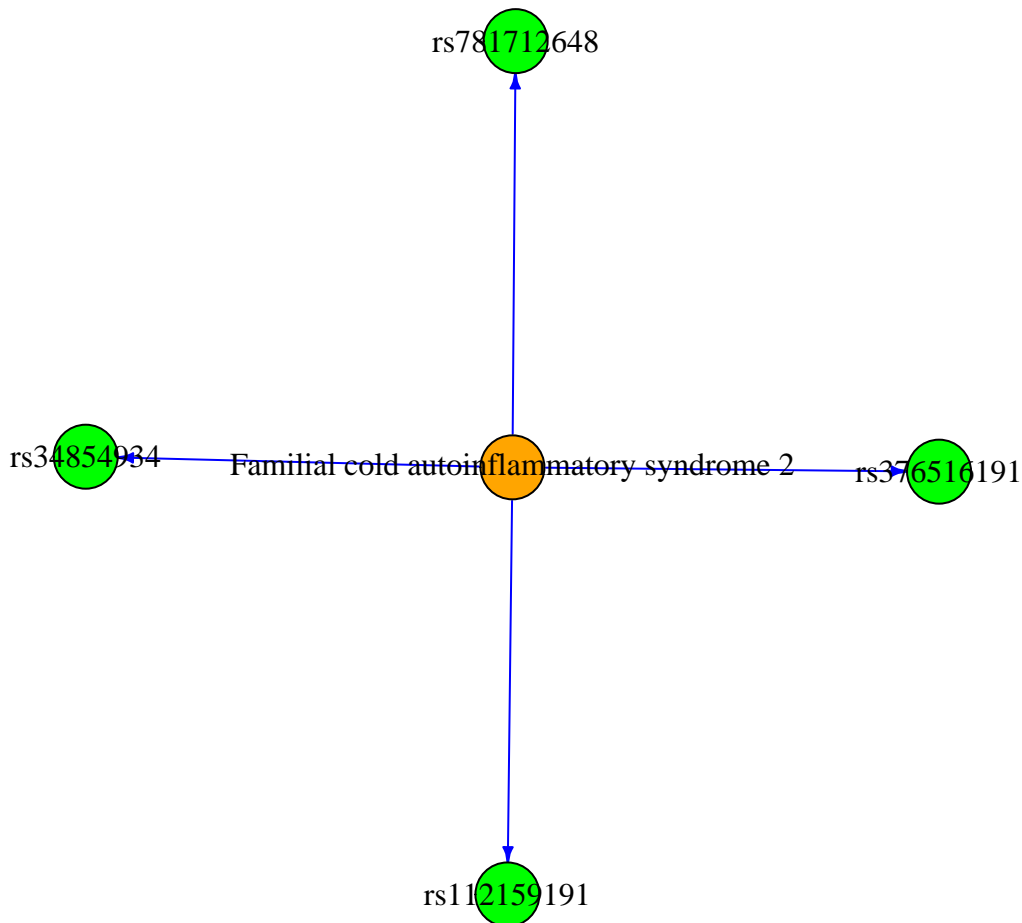

**Variant–Disease Network (Familial cold autoinflammatory syndrome 3)**

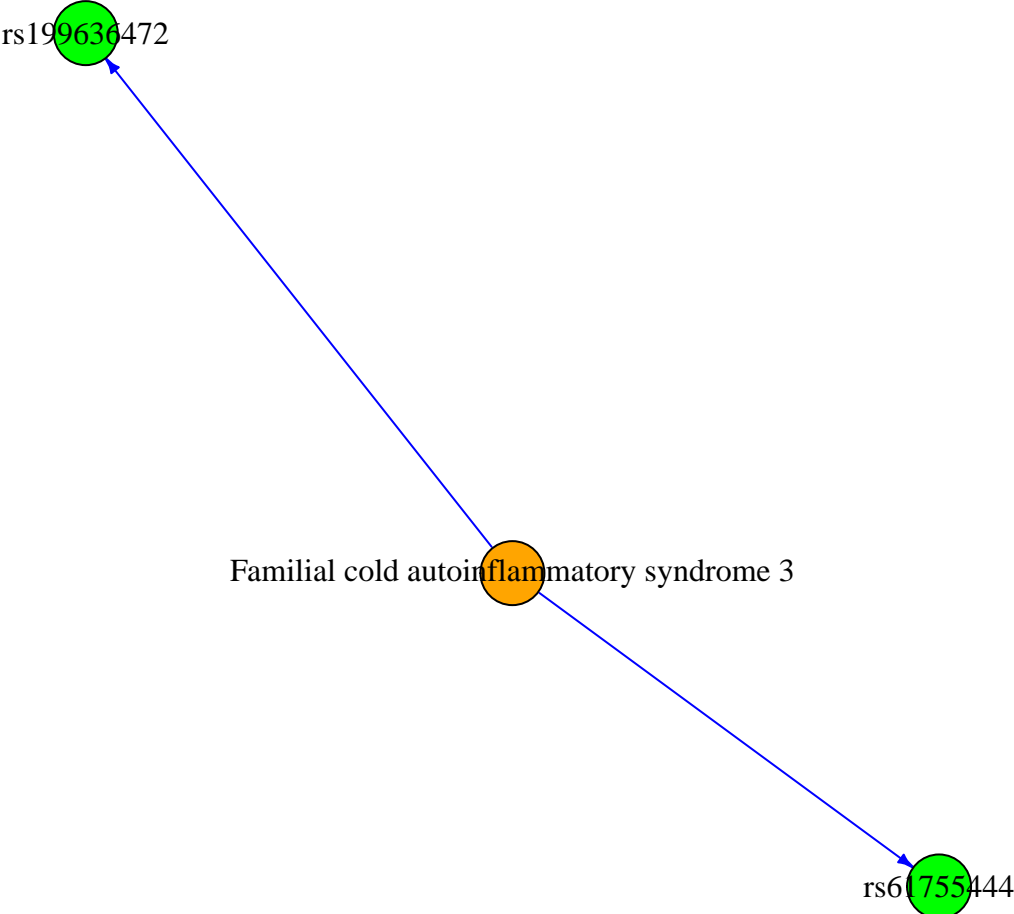

## Variant–Disease Network (Familial cold urticaria)

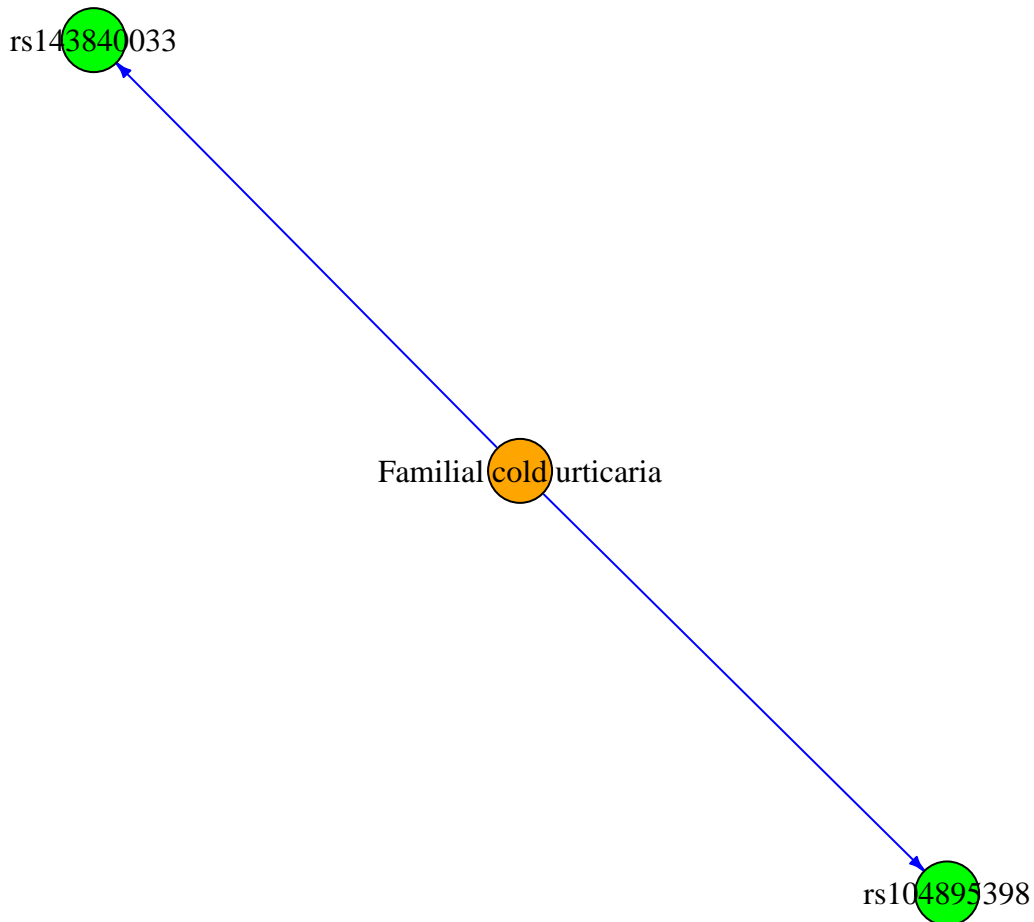

## Variant–Disease Network (Familial colorectal cancer)

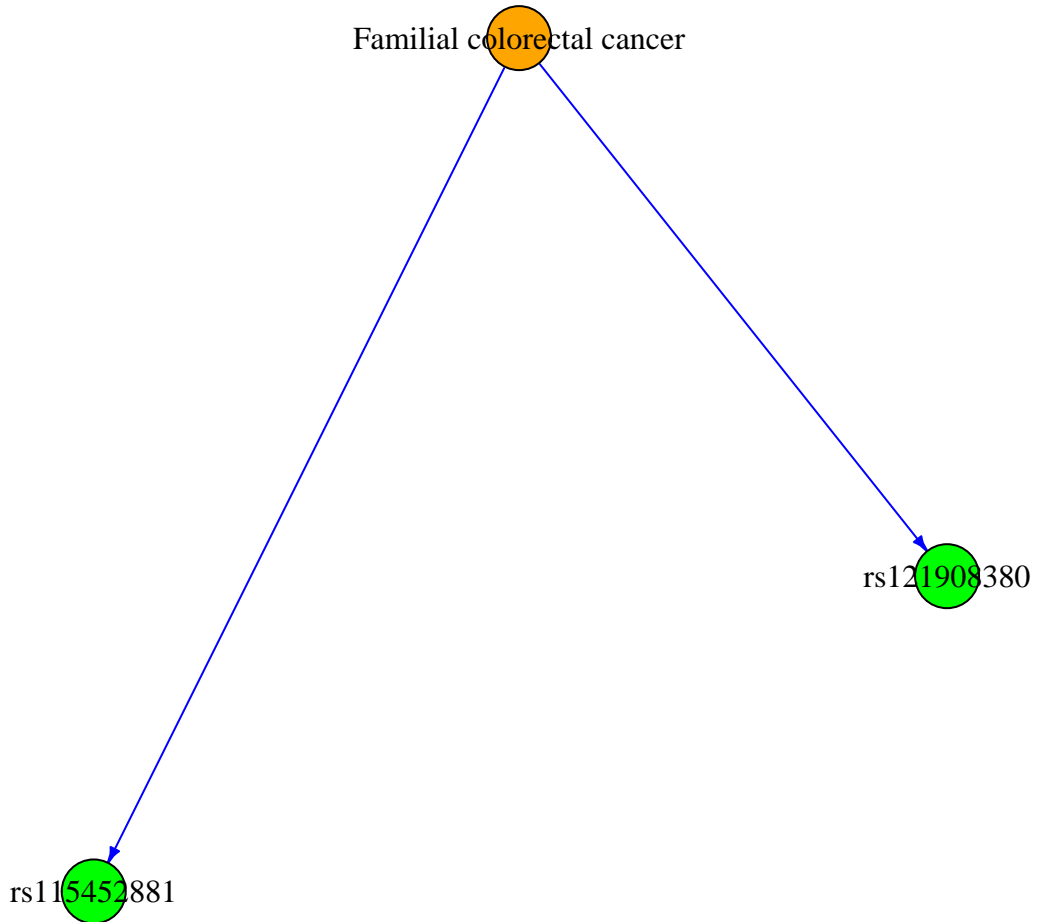

## Variant–Disease Network (Familial dilated cardiomyopathy)

rs551888783

Familial dilated cardiomyopathy

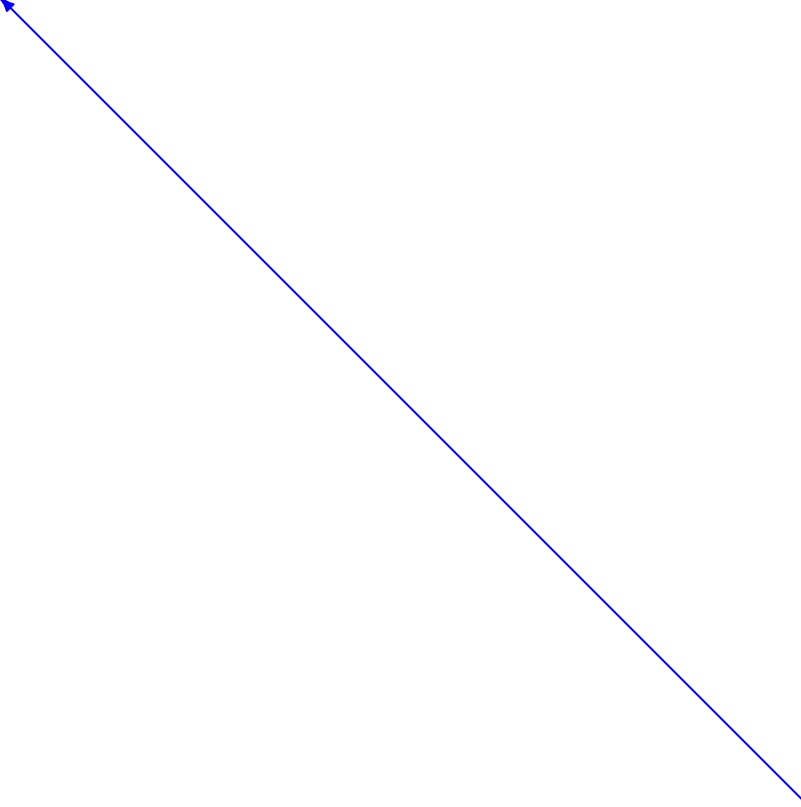



## Variant–Disease Network (Familial erythrocytosis)

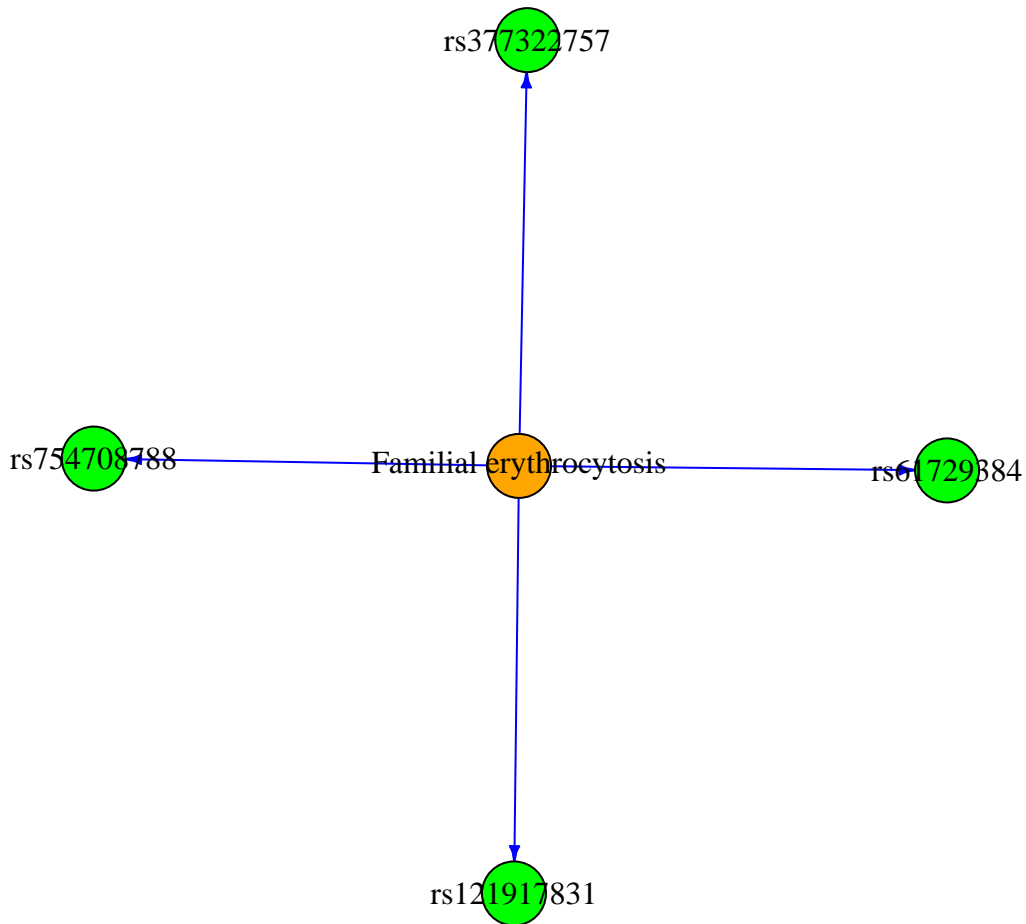

**Variant–Disease Network (Familial febrile seizures 8)**

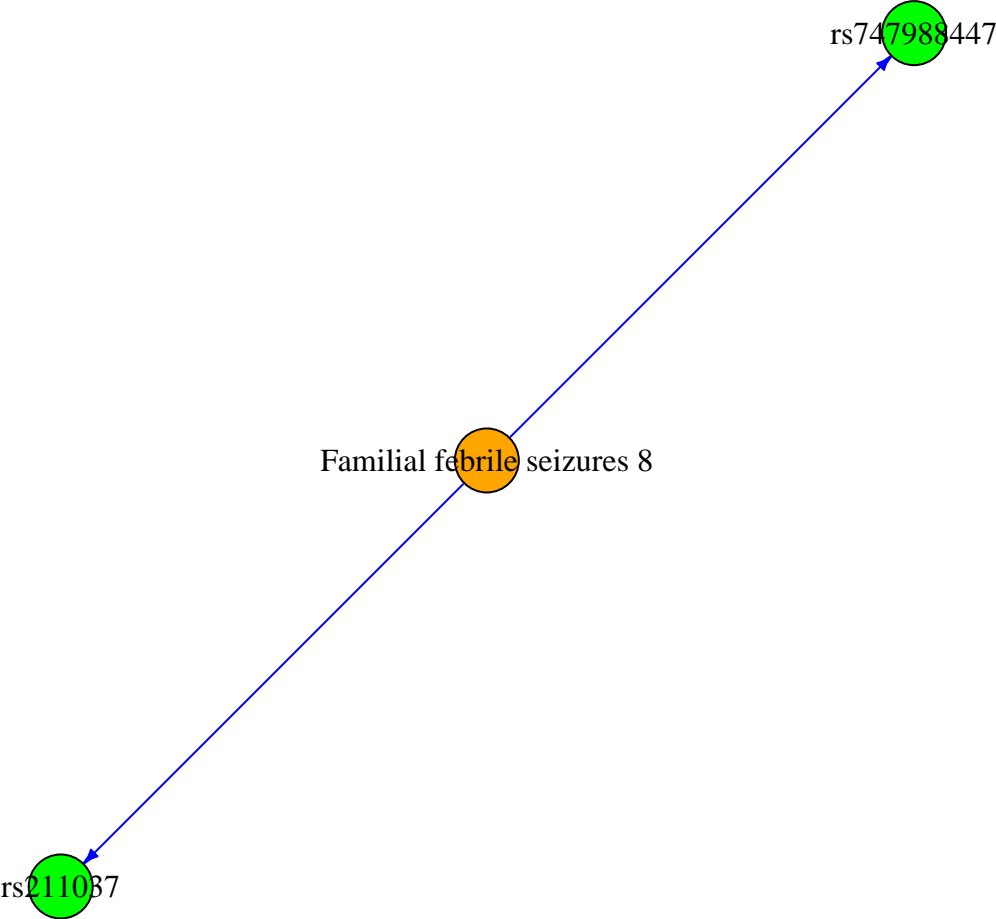

# Variant–Disease Network (Familial hemiplegic migraine type 3)

rs149315236

Familial hemiplegic migraine type

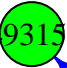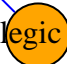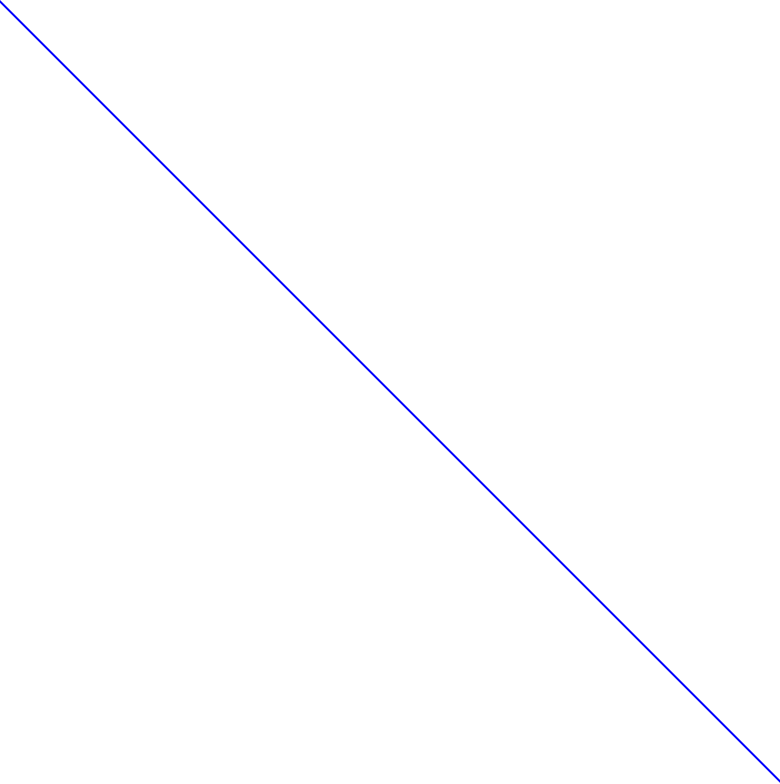

Variant–Disease Network (Familial hemophagocytic lymphohistiocytosis)

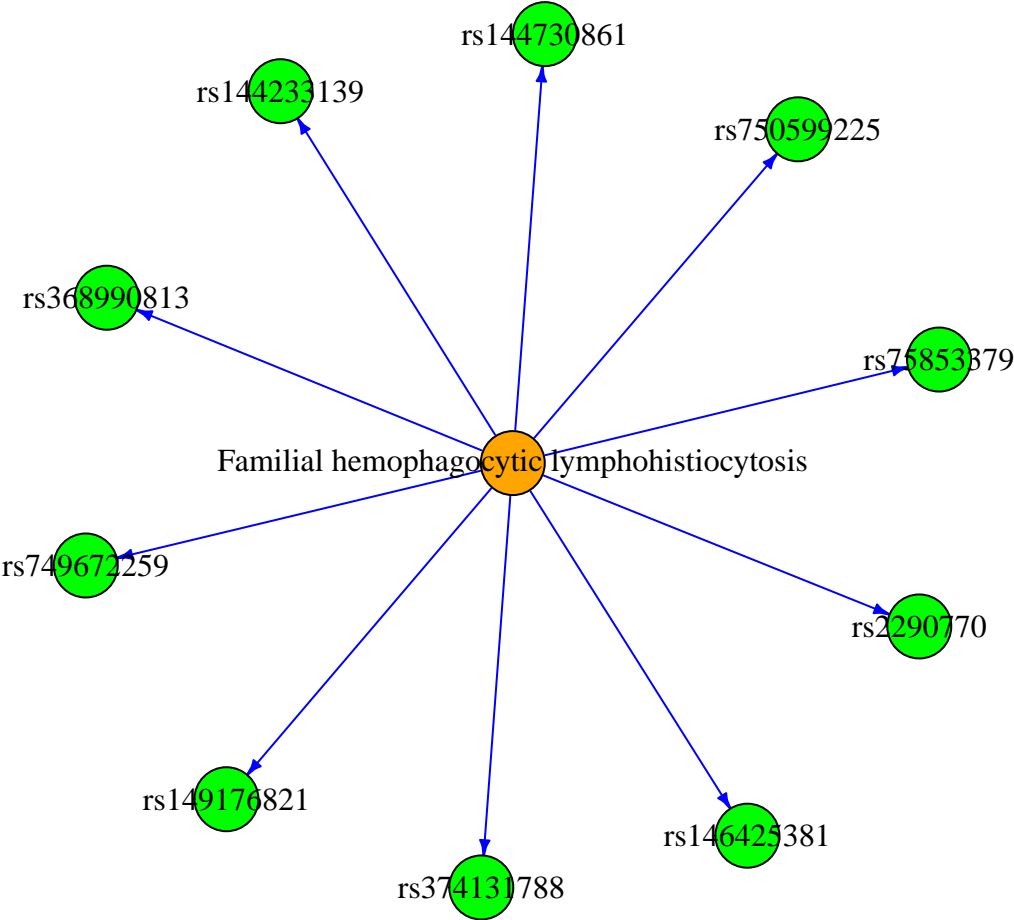

# Variant–Disease Network (Familial High Density Lipoprotein Deficiency)

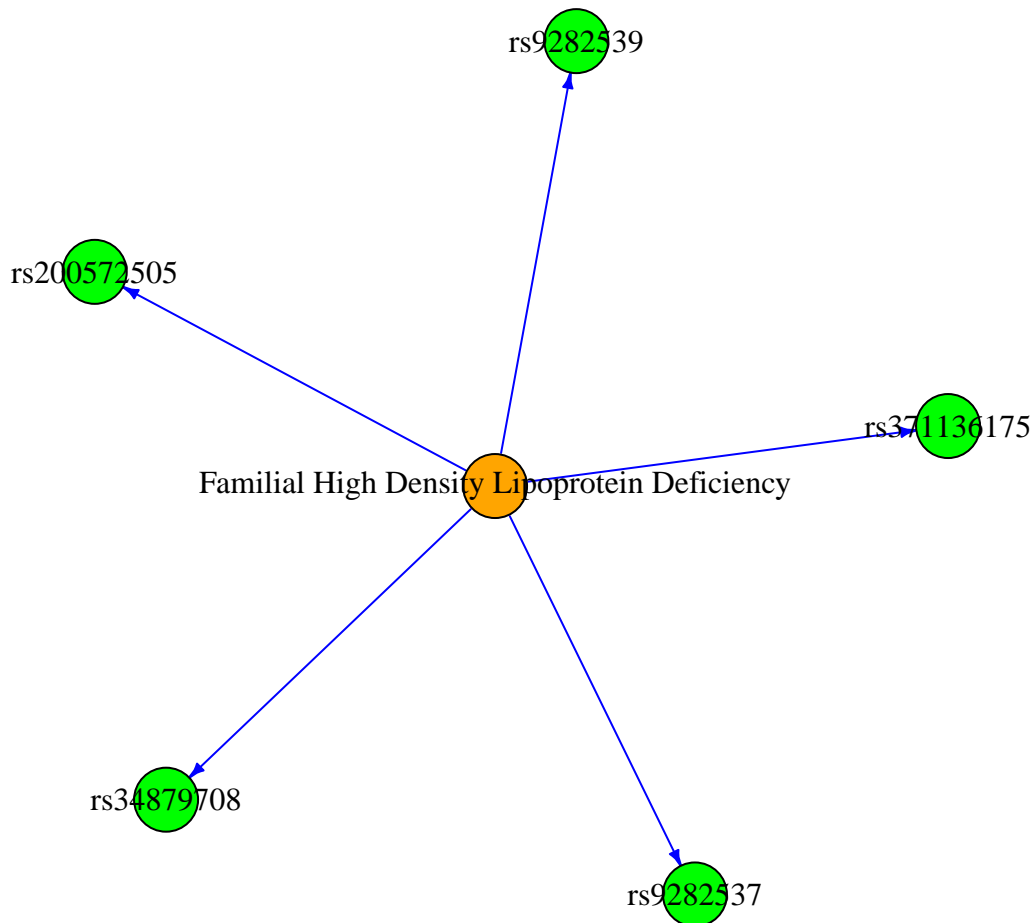

Variant–Disease Network (Familial hyperaldosteronism)

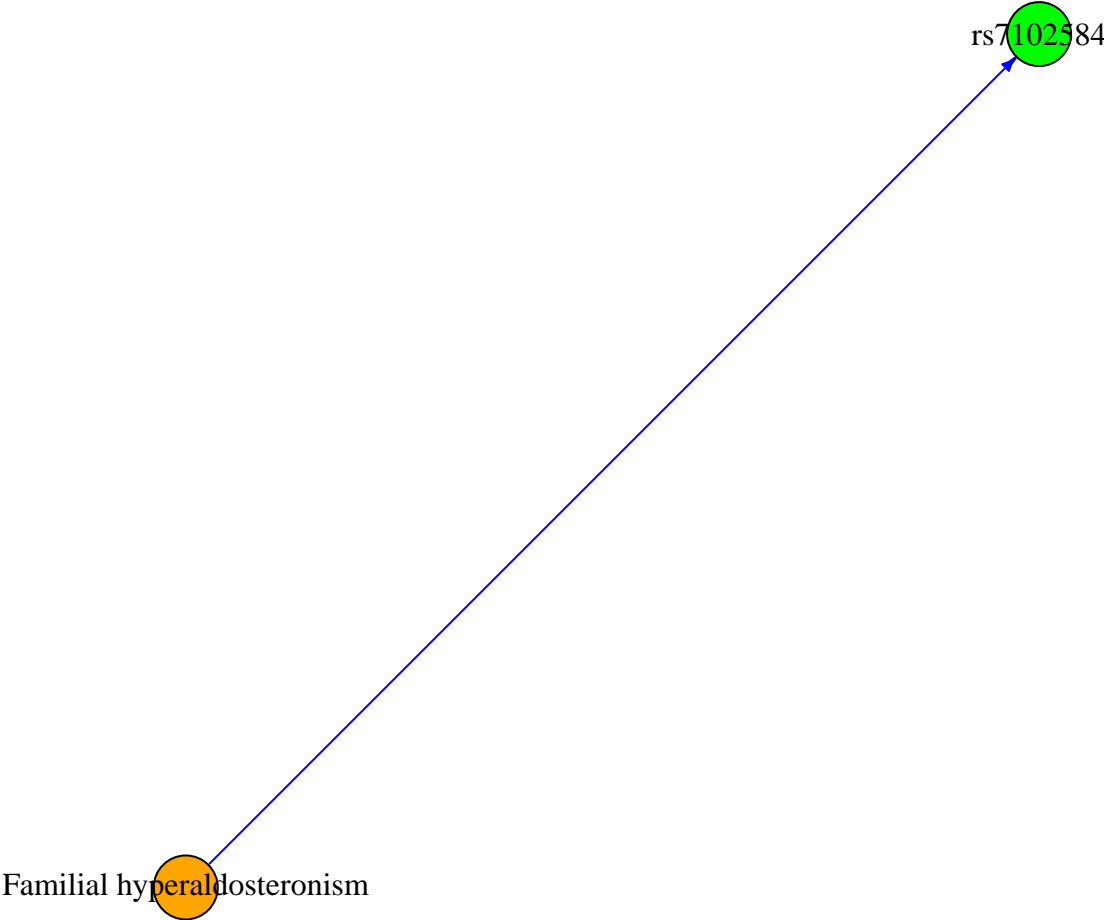

**Variant–Disease Network (Familial hypercholesterolemia)**

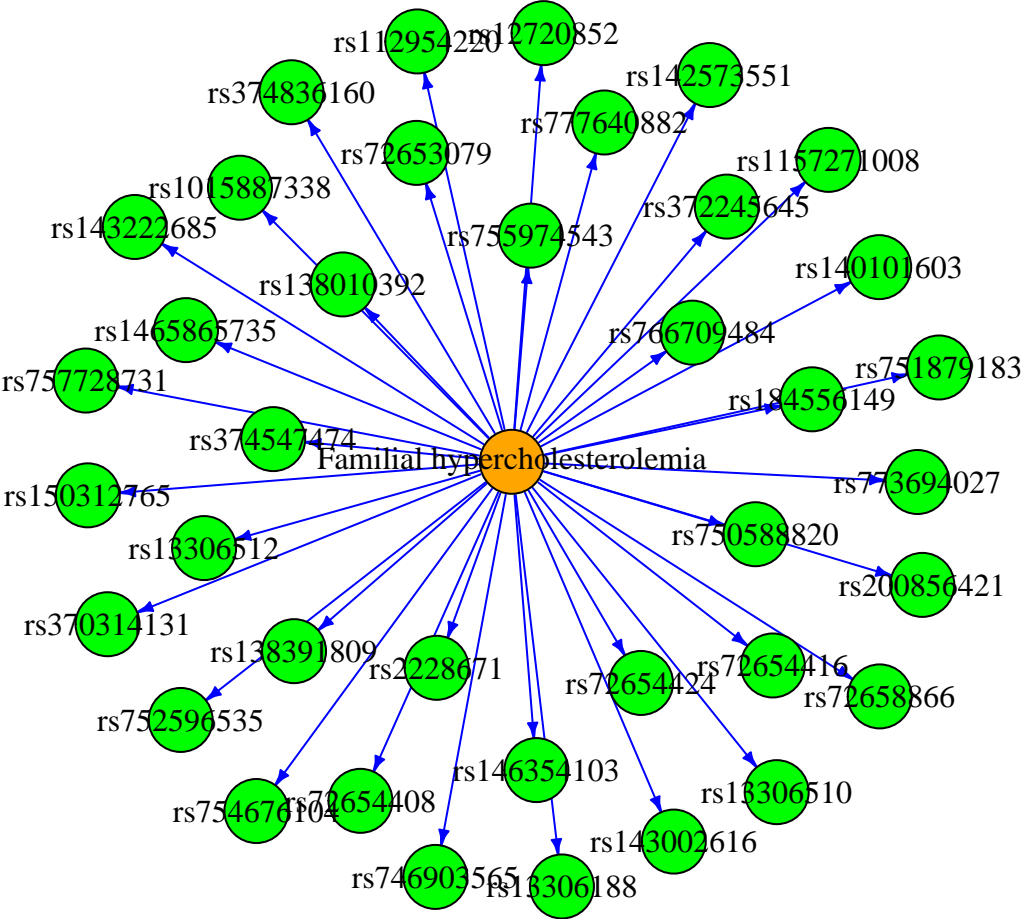

Variant–Disease Network (Familial hypercholesterolemia – homozygous)

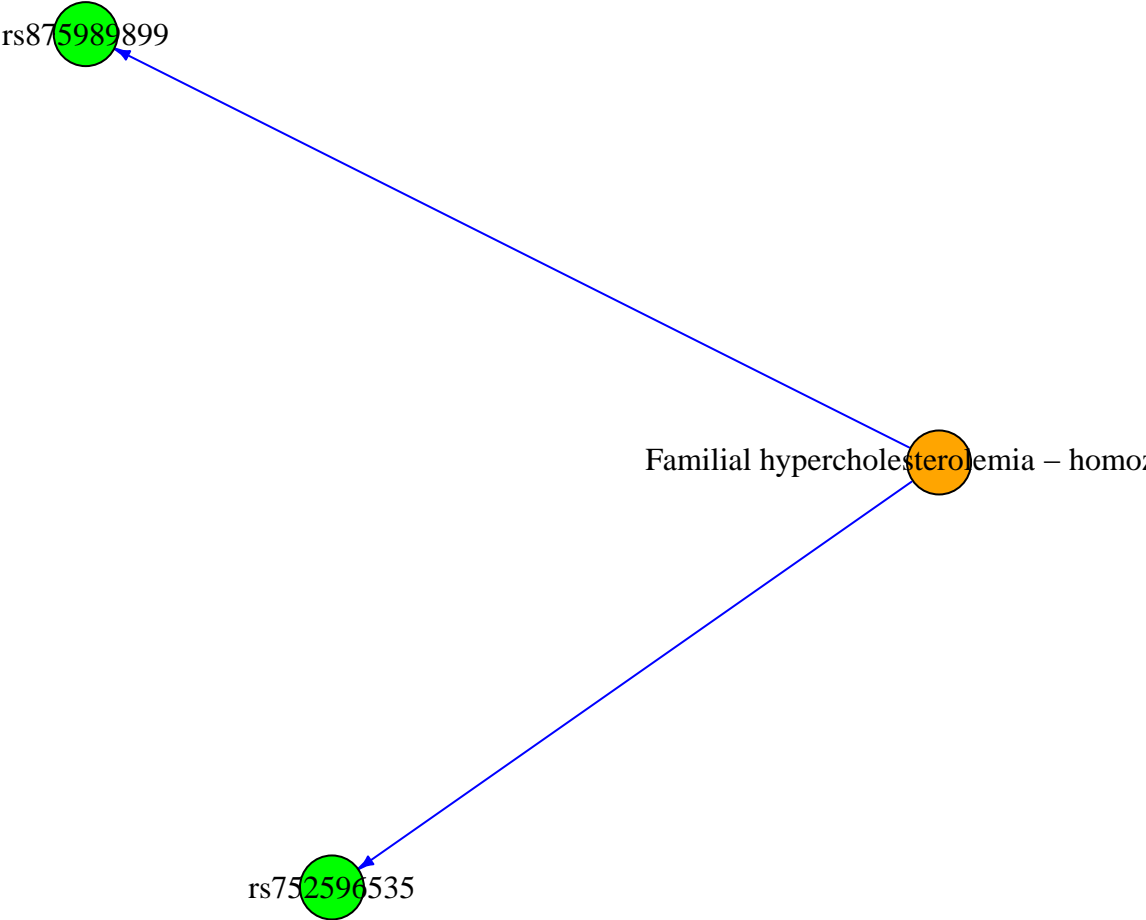



**Variant–Disease Network (Familial hypercholesterolemia 1)**

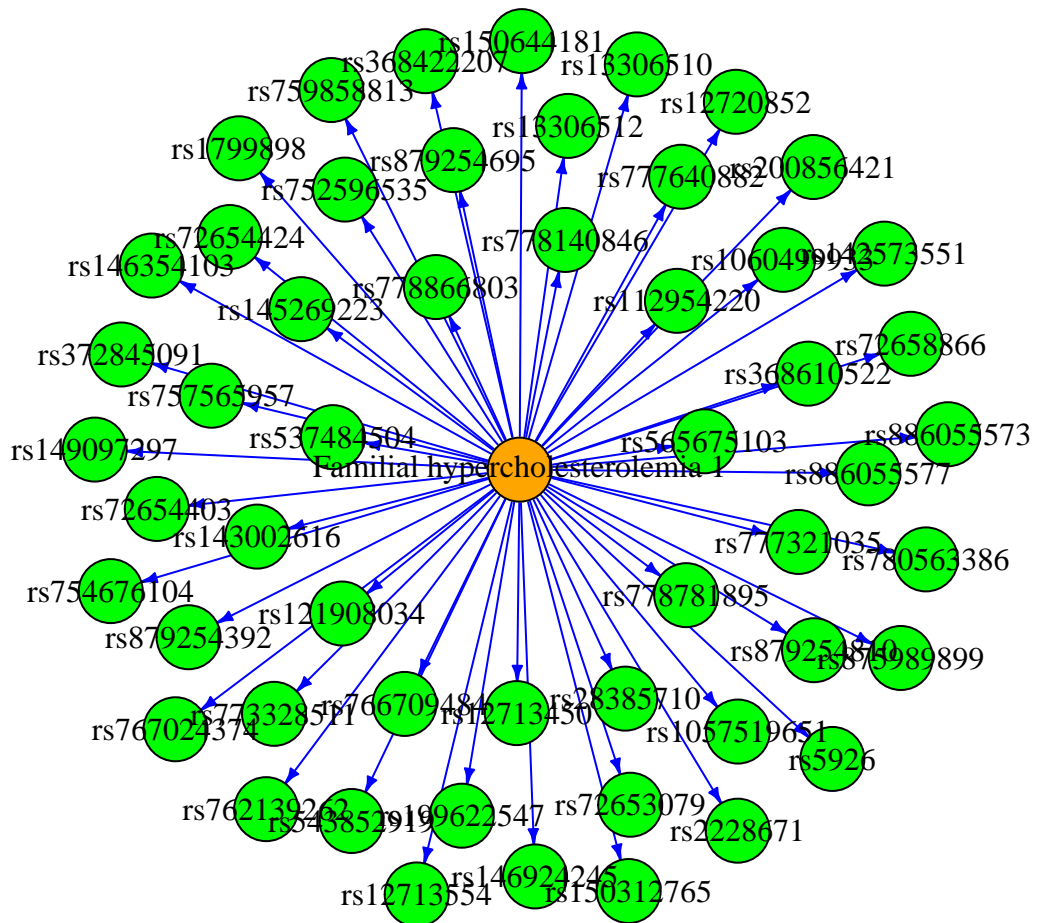

## Variant–Disease Network (Familial hypercholesterolemia 2)

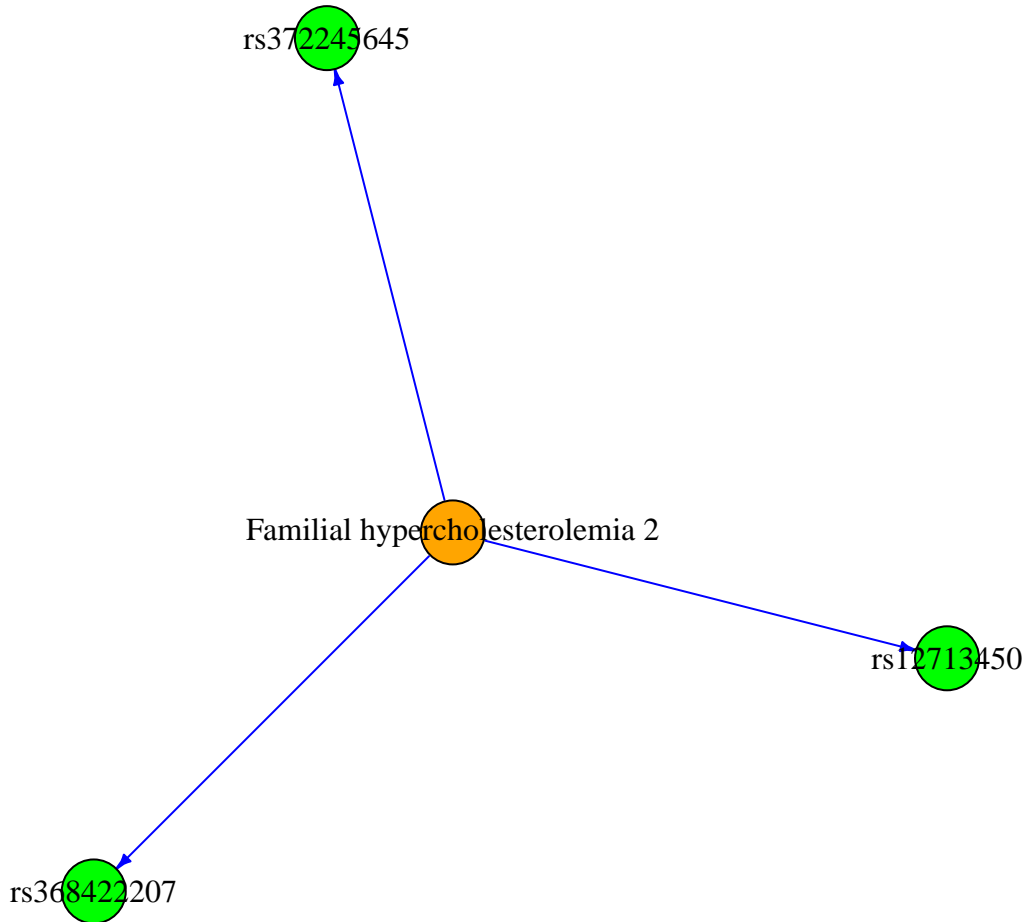

## Variant–Disease Network (Familial hypercholesterolemia 3)

Familial hypercholesterolemia 3

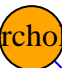

rs28385710

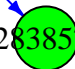

**Variant–Disease Network (Familial hypertrophic cardiomyopathy 1)**

Familial hypertrophic cardiomyopathy 1

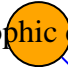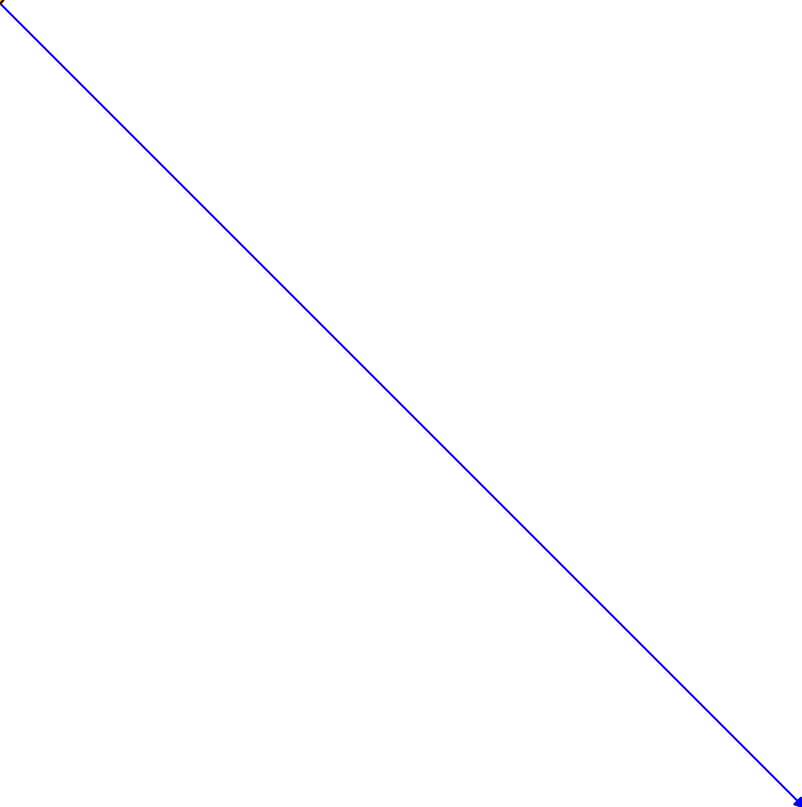

rs374538348

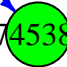

**Variant–Disease Network (Familial hypertrophic cardiomyopathy 13)**

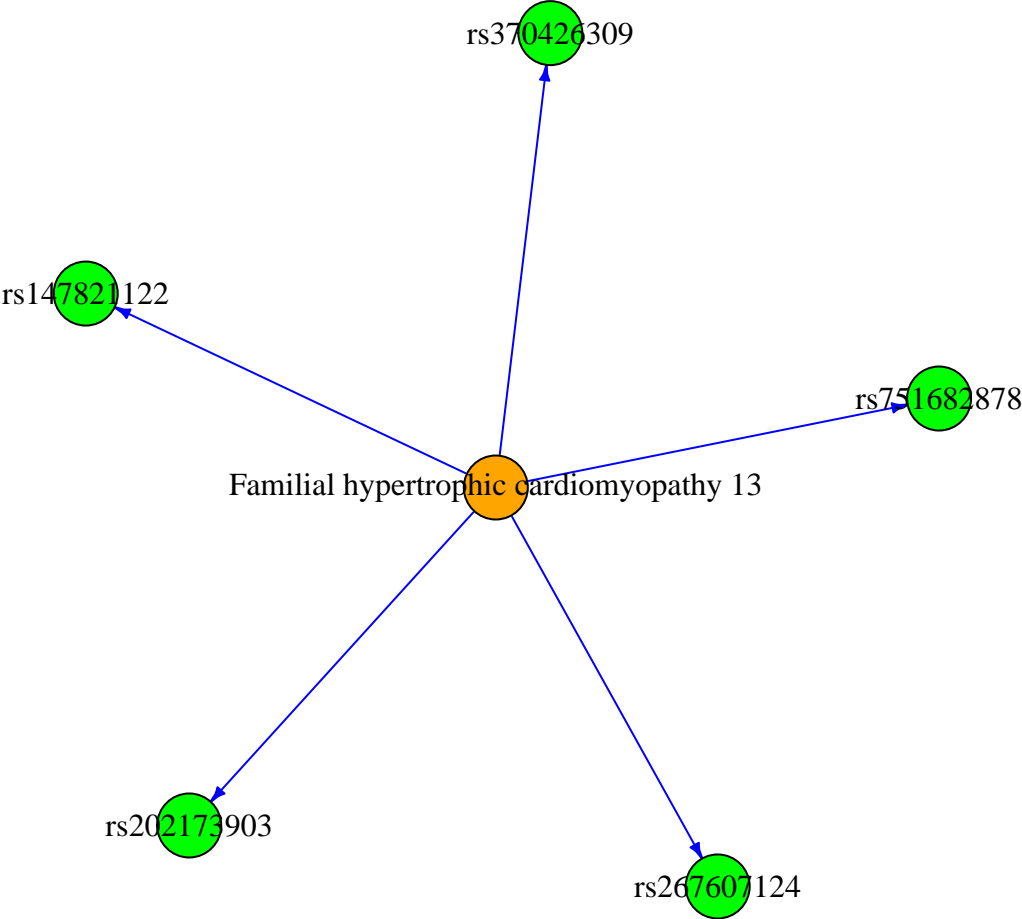

**Variant–Disease Network (Familial hypertrophic cardiomyopathy 16)**

Familial hypertrophic cardiomyopathy 16

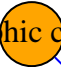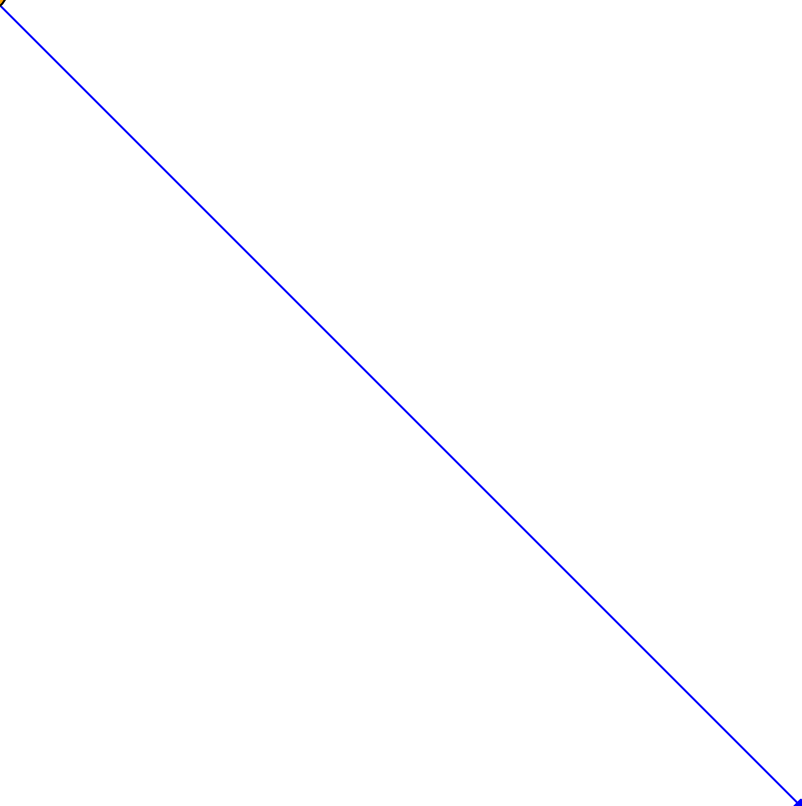

rs17049982

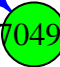

**Variant–Disease Network (Familial hypertrophic cardiomyopathy 19)**

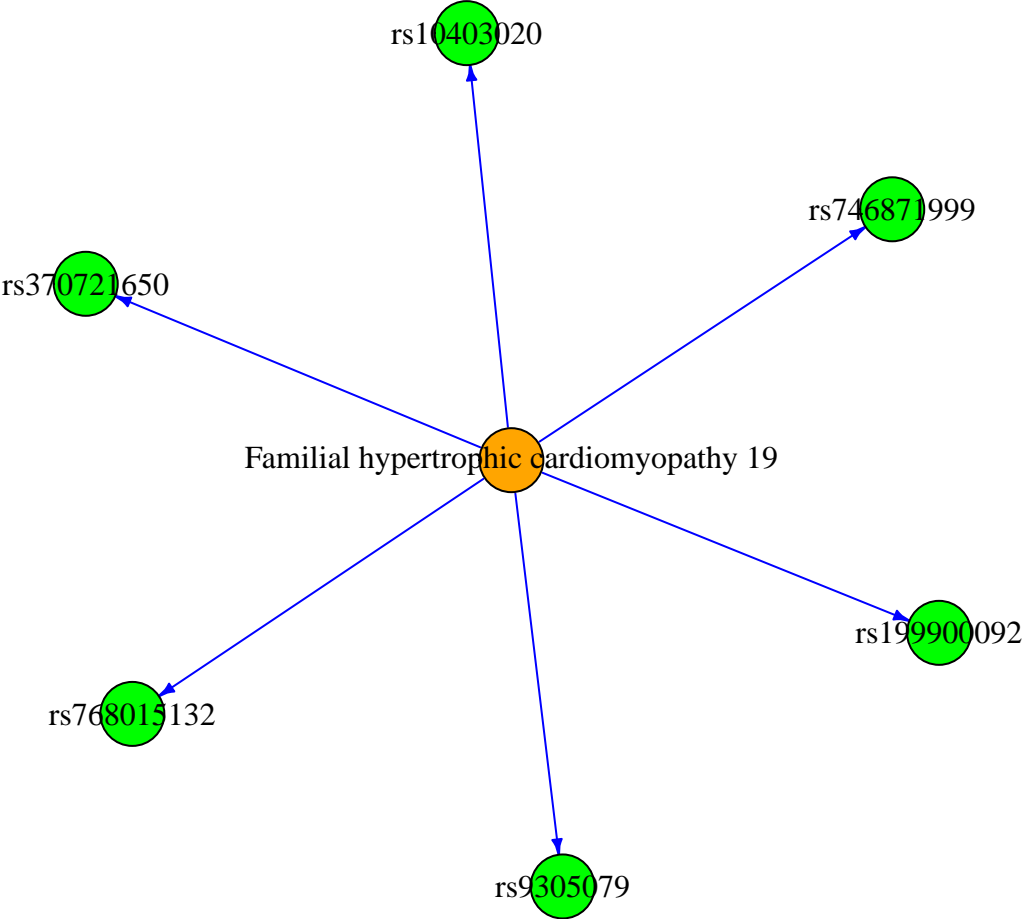

**Variant–Disease Network (Familial hypertrophic cardiomyopathy 2)**

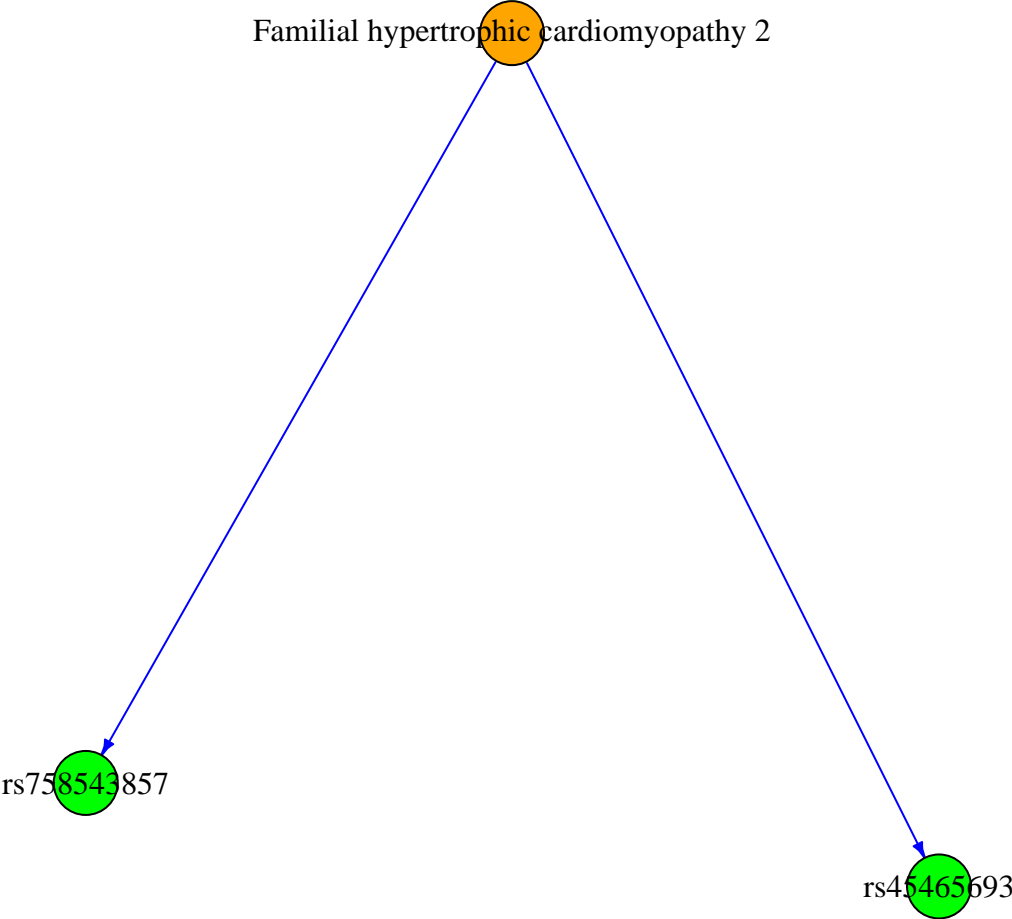



Variant–Disease Network (Familial hypertrophic cardiomyopathy 20)

Familial hypertrophic cardiomyopathy 20

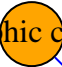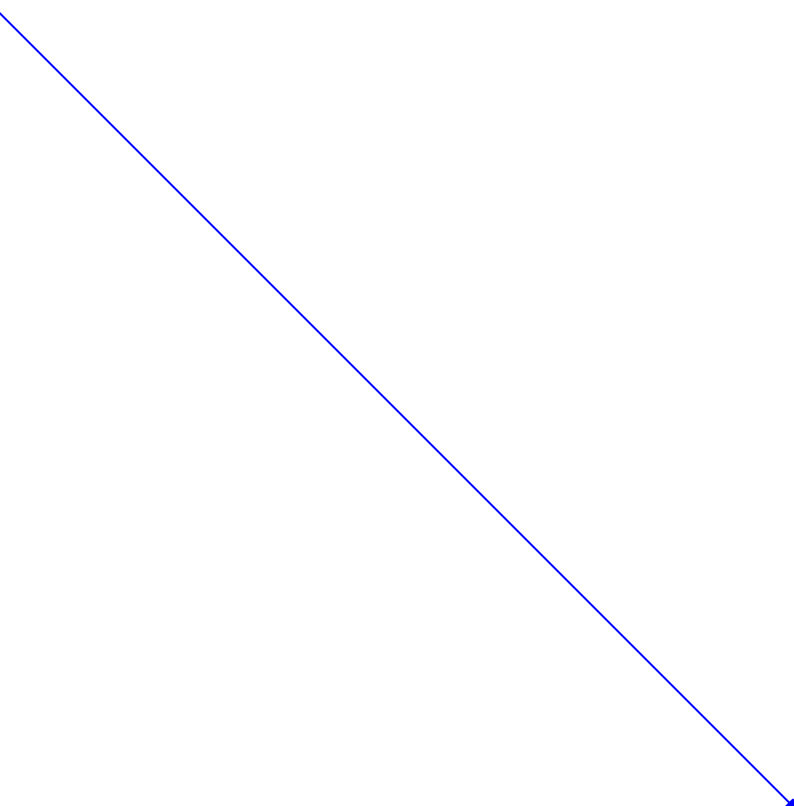

rs182998780

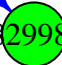

**Variant–Disease Network (Familial hypertrophic cardiomyopathy 4)**

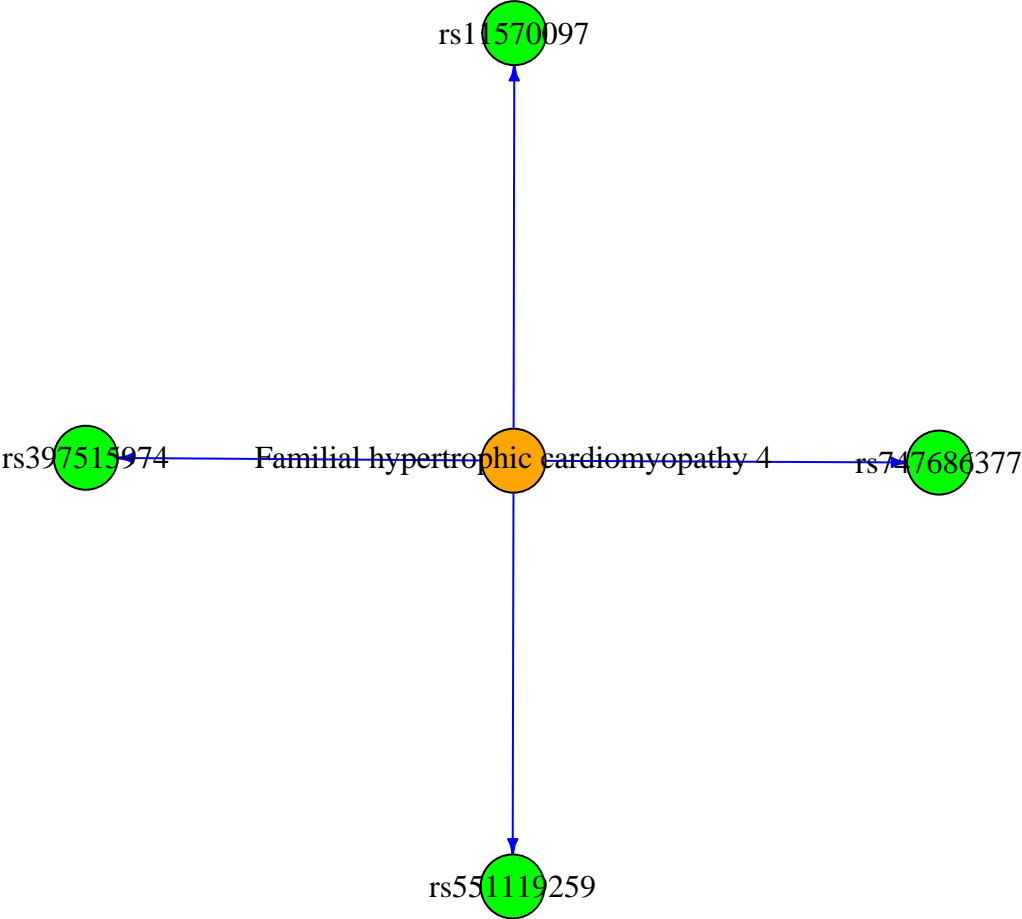

**Variant–Disease Network (Familial hypertrophic cardiomyopathy 8)**

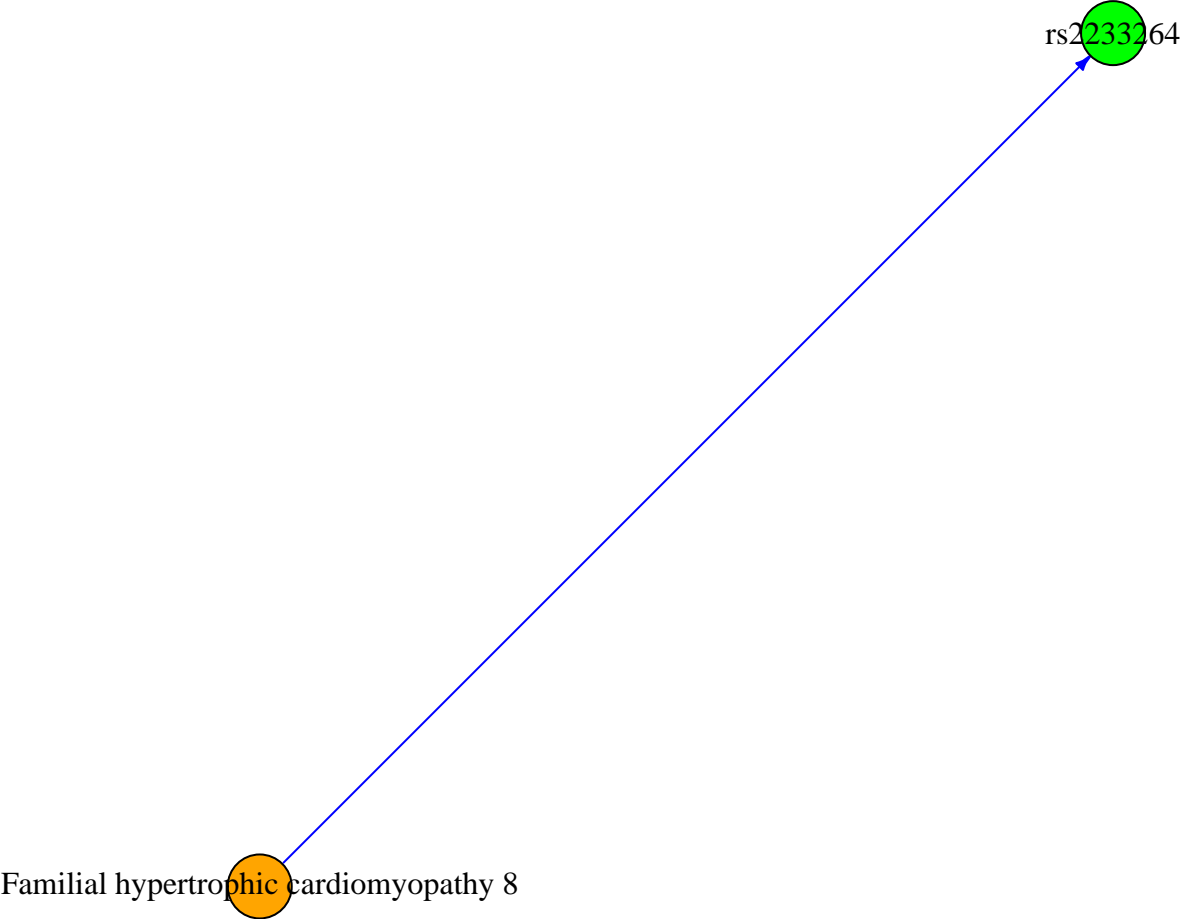

# Case Network (Familial Hypertrophic Cardiomyopathy with Wolff–Parkinson–V

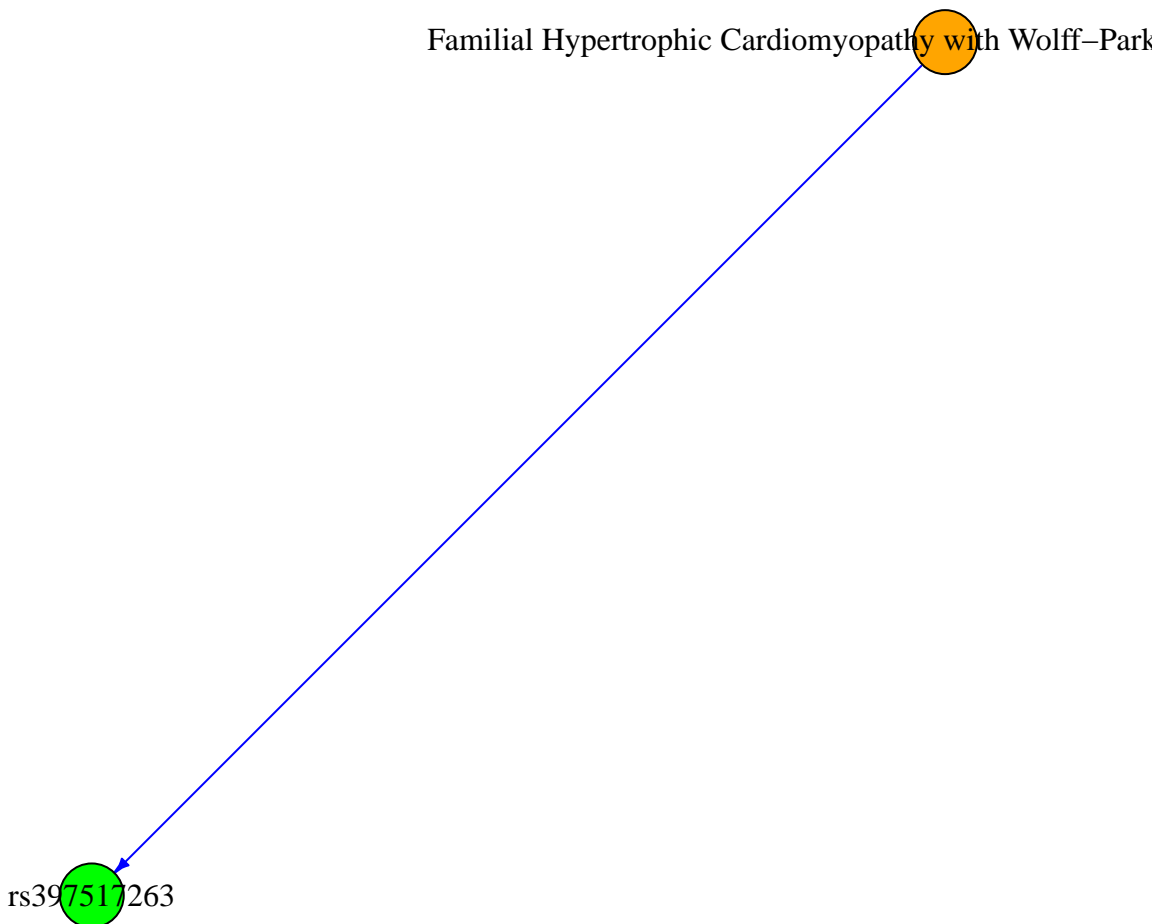

# Variant–Disease Network (Familial hypobetalipoproteinemia)

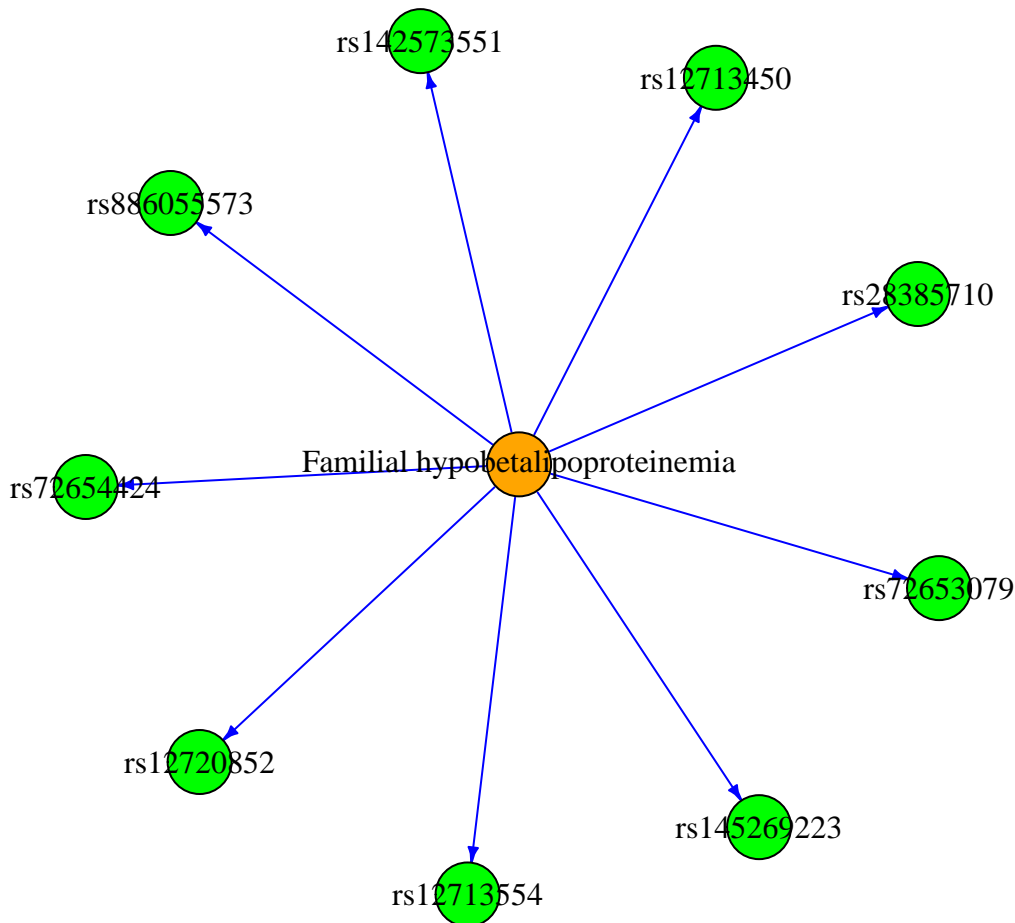

# Variant–Disease Network (Familial hypokalemia–hypomagnesemia)

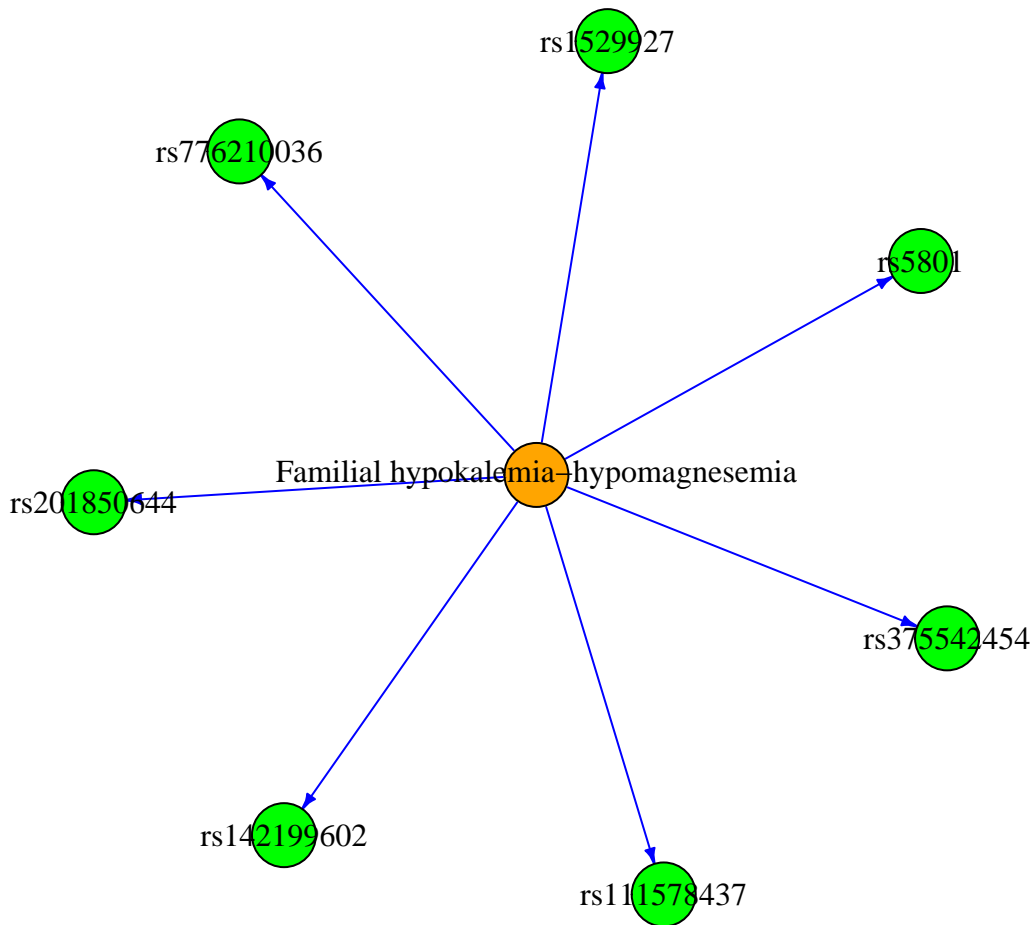

Variant–Disease Network (Familial infantile myasthenia)

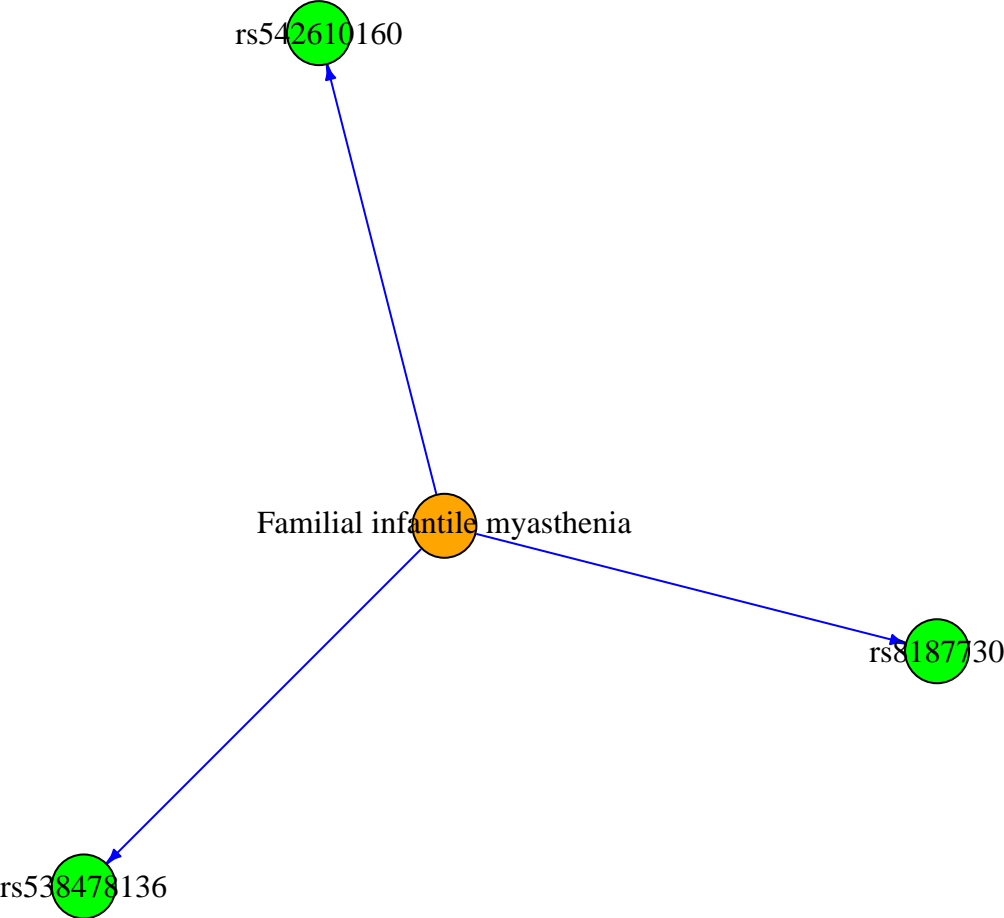

# Variant–Disease Network (Familial medullary thyroid carcinoma)

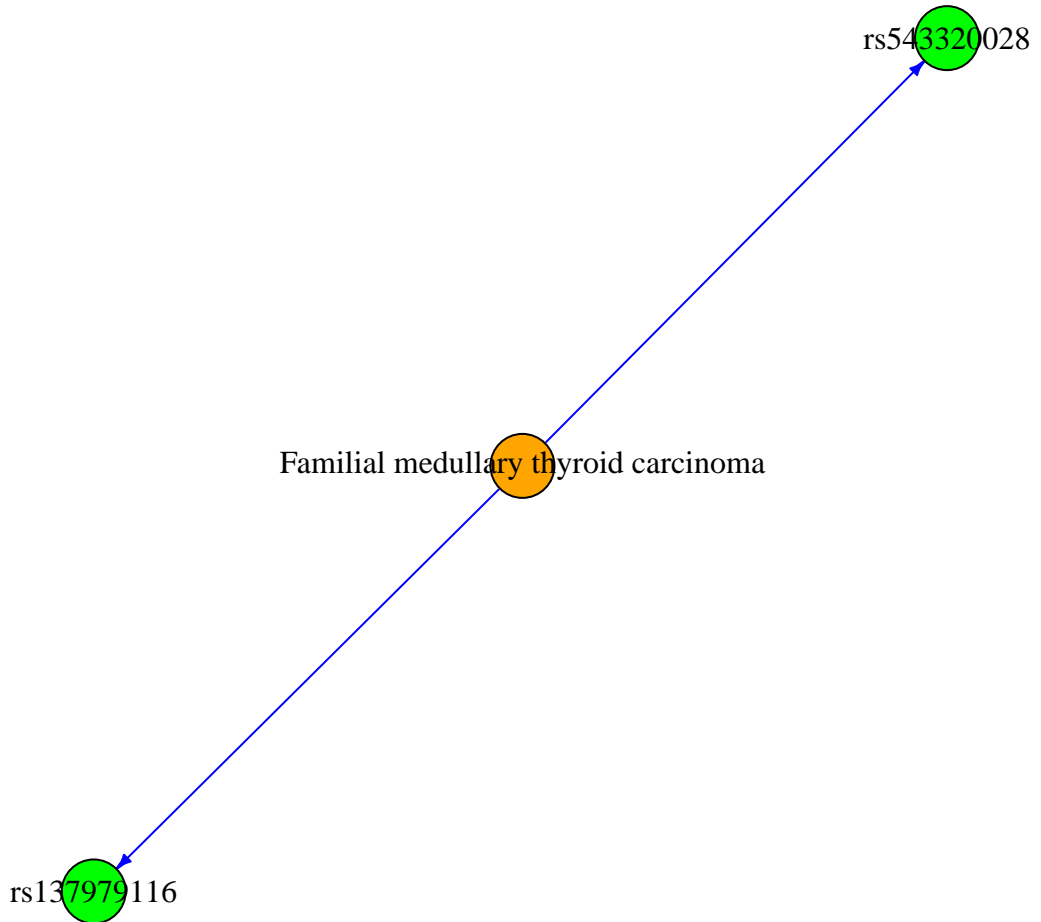



Variant–Disease Network (Familial multiple polyposis syndrome)

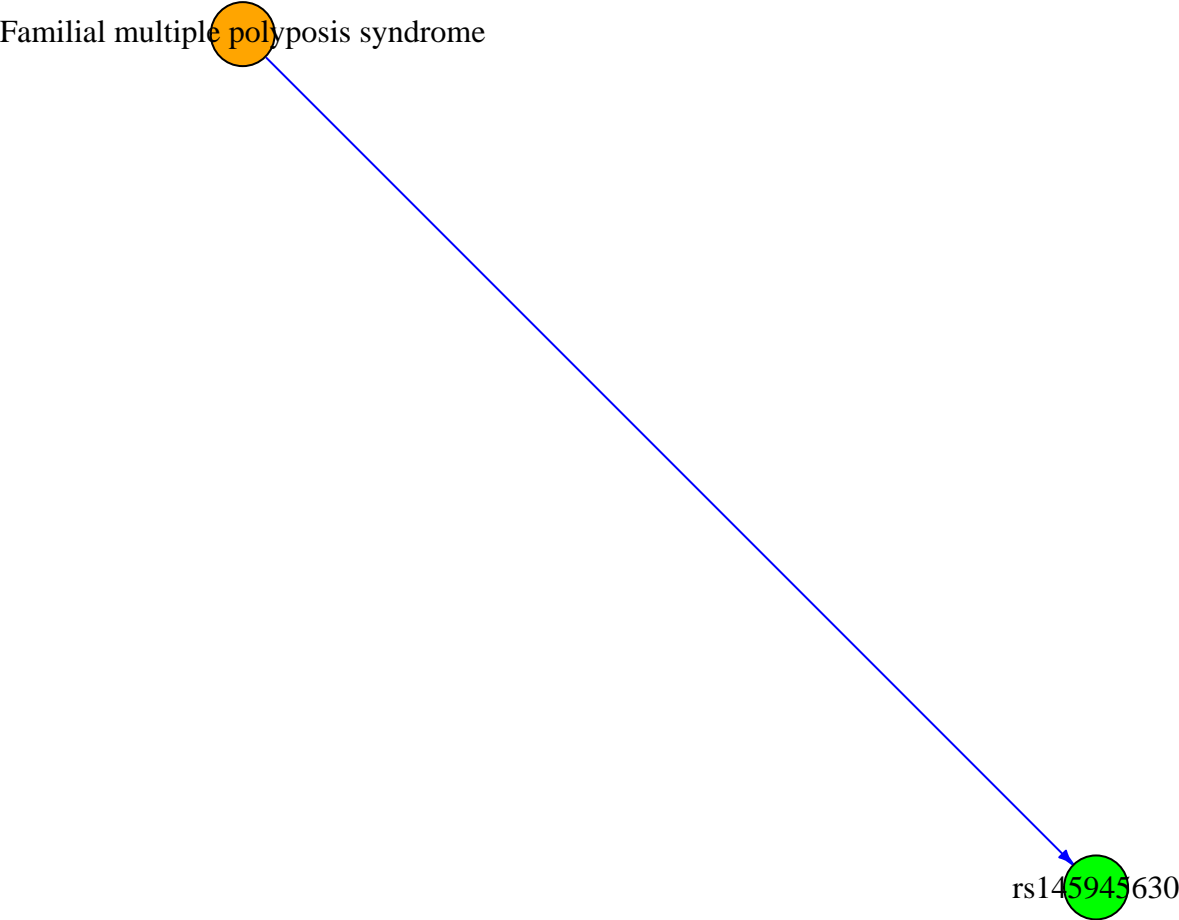

## Variant–Disease Network (Familial partial lipodystrophy)

rs149367249

Familial partial lipodystrophy

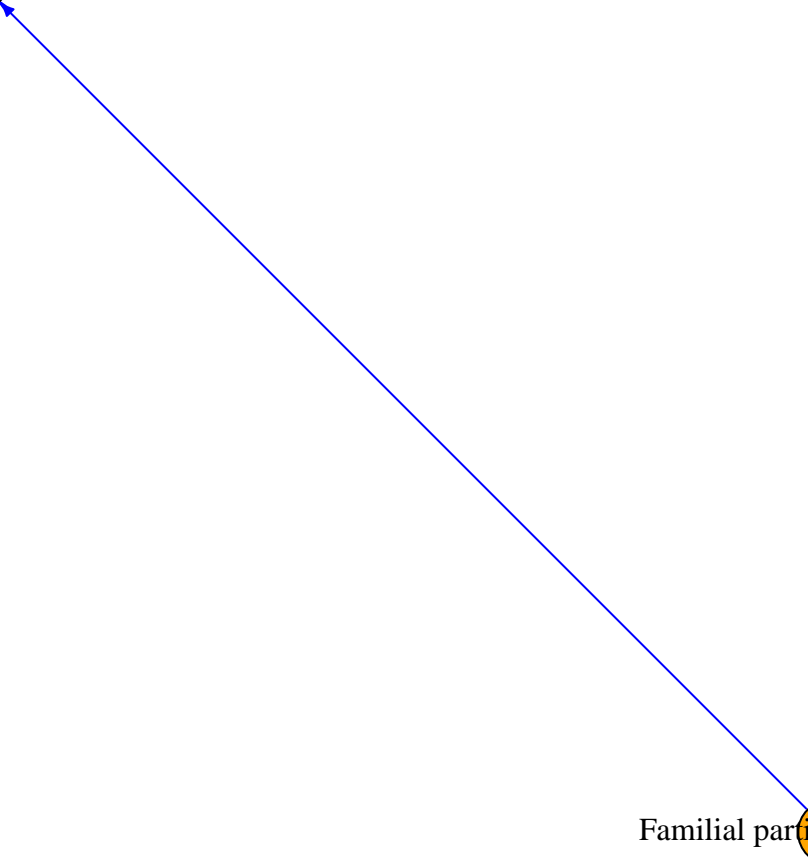

# ant-Disease Network (Familial platelet disorder with associated myeloid mal

platelet disorder with associated myeloid malignancy

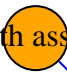

rs773689002

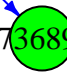

## Variant–Disease Network (Familial renal glucosuria)

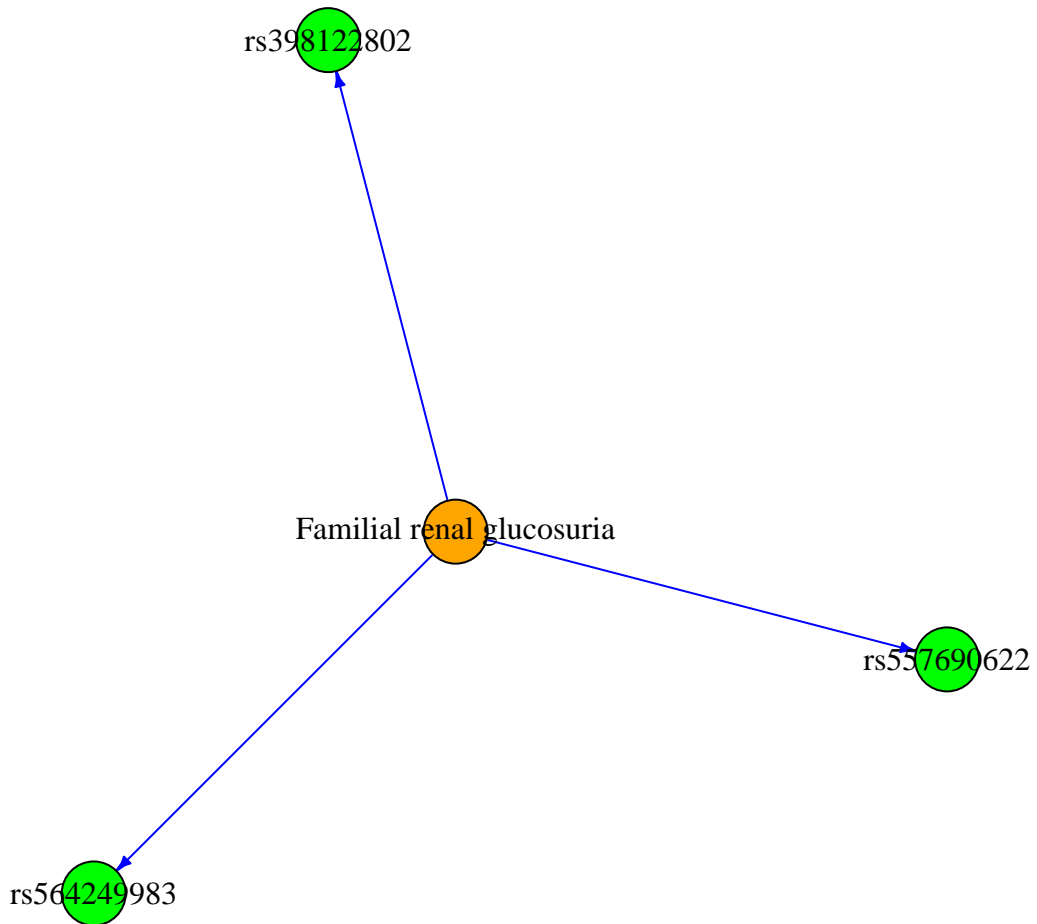

Variant–Disease Network (Familial restrictive cardiomyopathy 3)

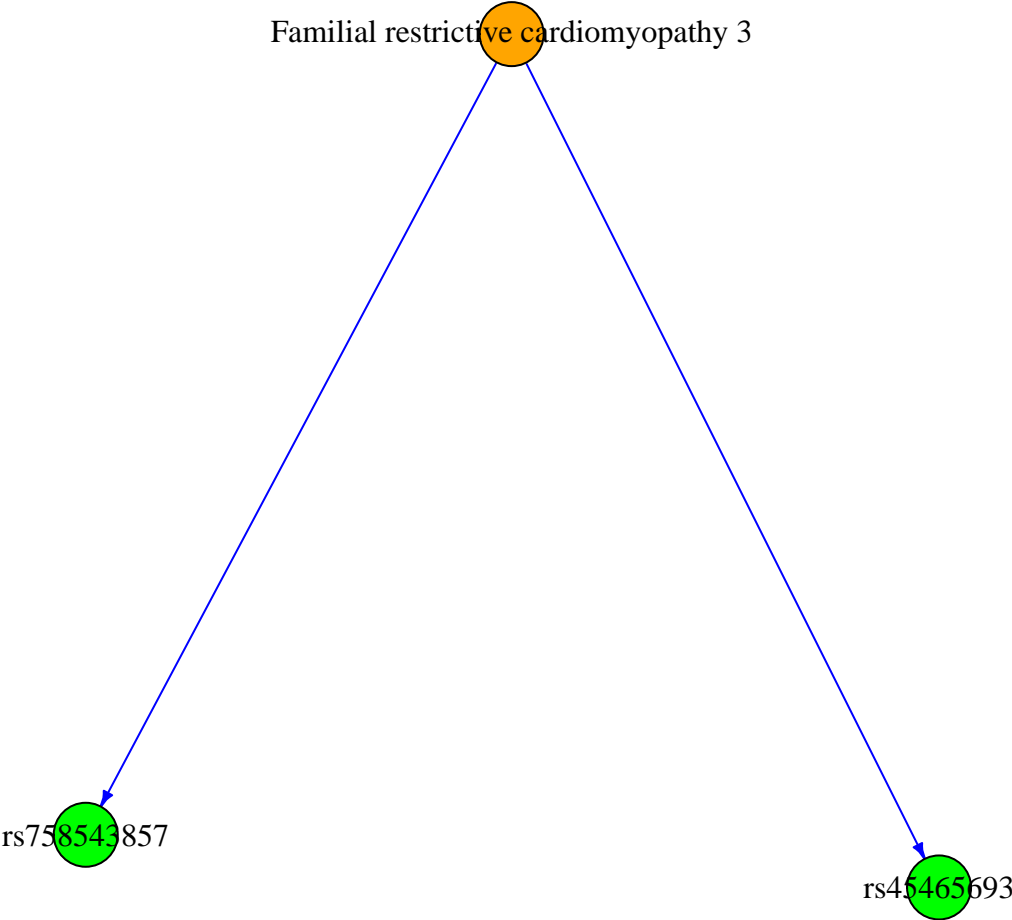

**Variant–Disease Network (Familial temporal lobe epilepsy 1)**

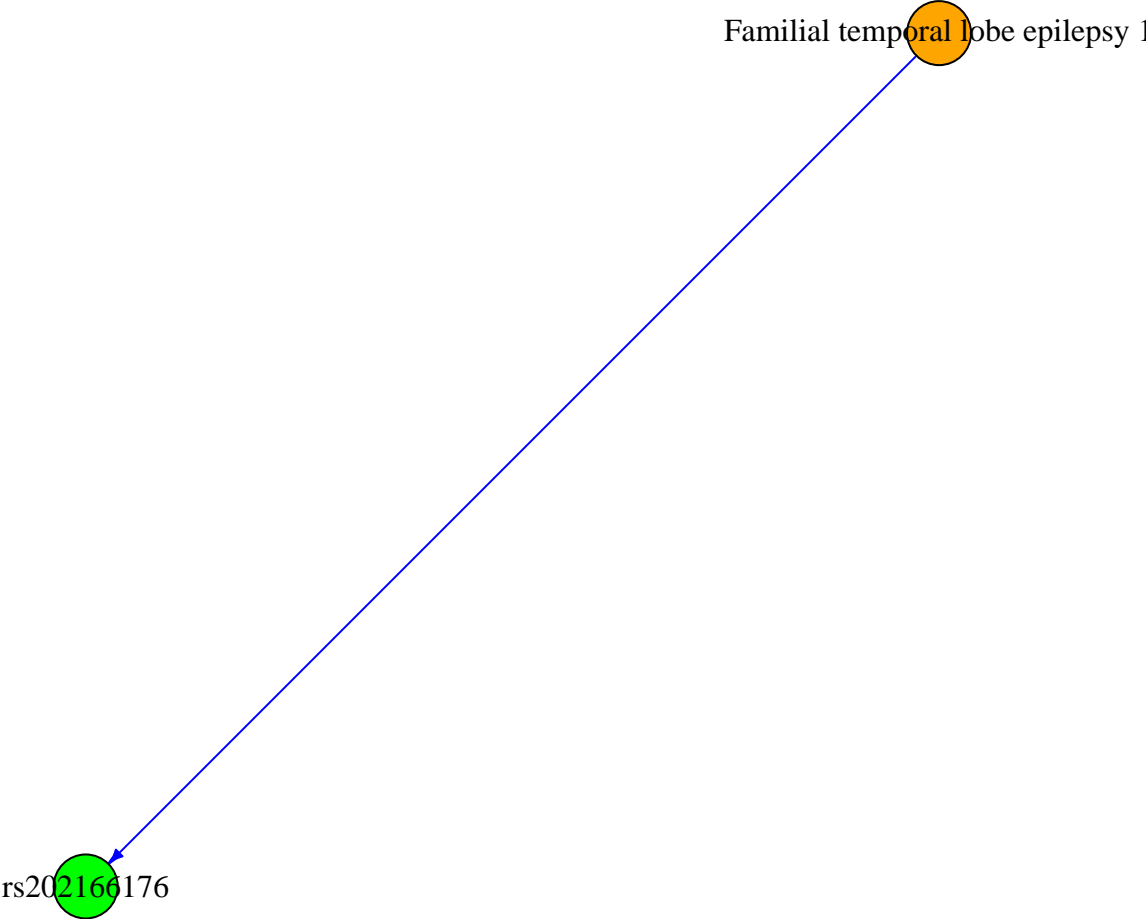

# nt-Disease Network (Familial X-linked hypophosphatemic vitamin D refracto

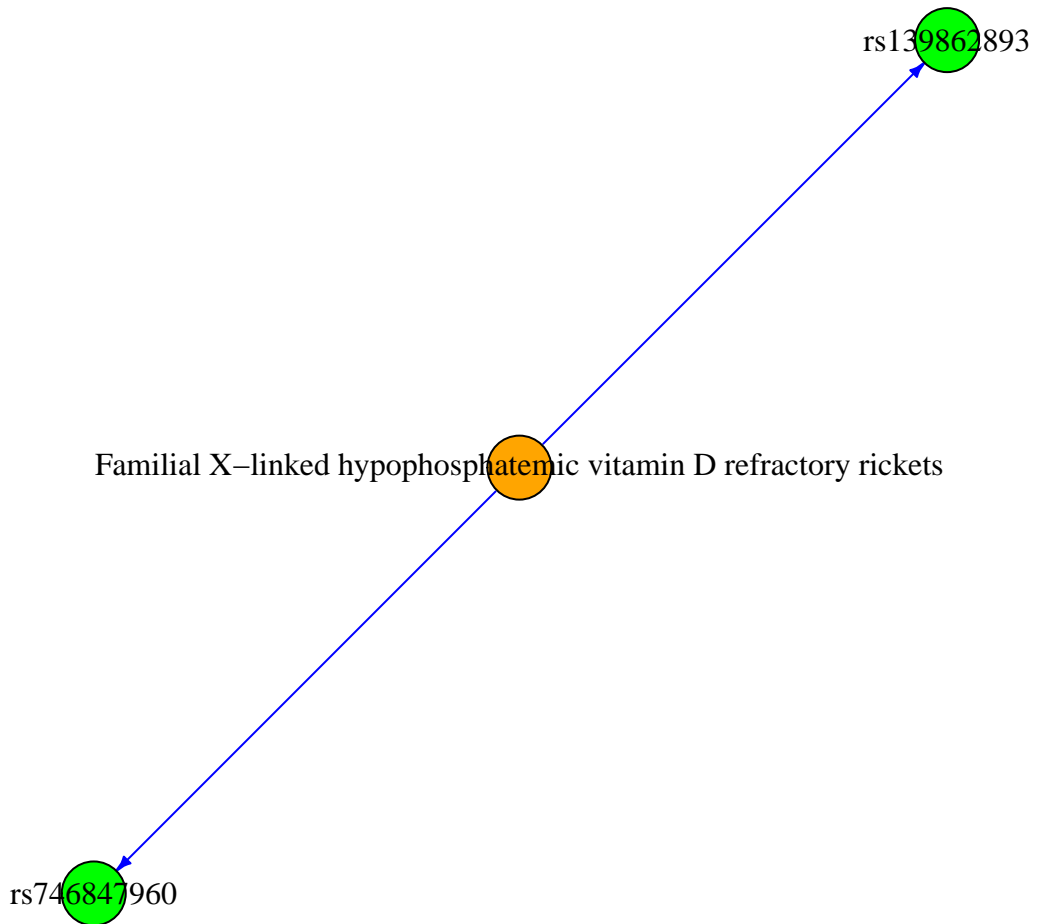

Variant–Disease Network (Fanconi anemia)

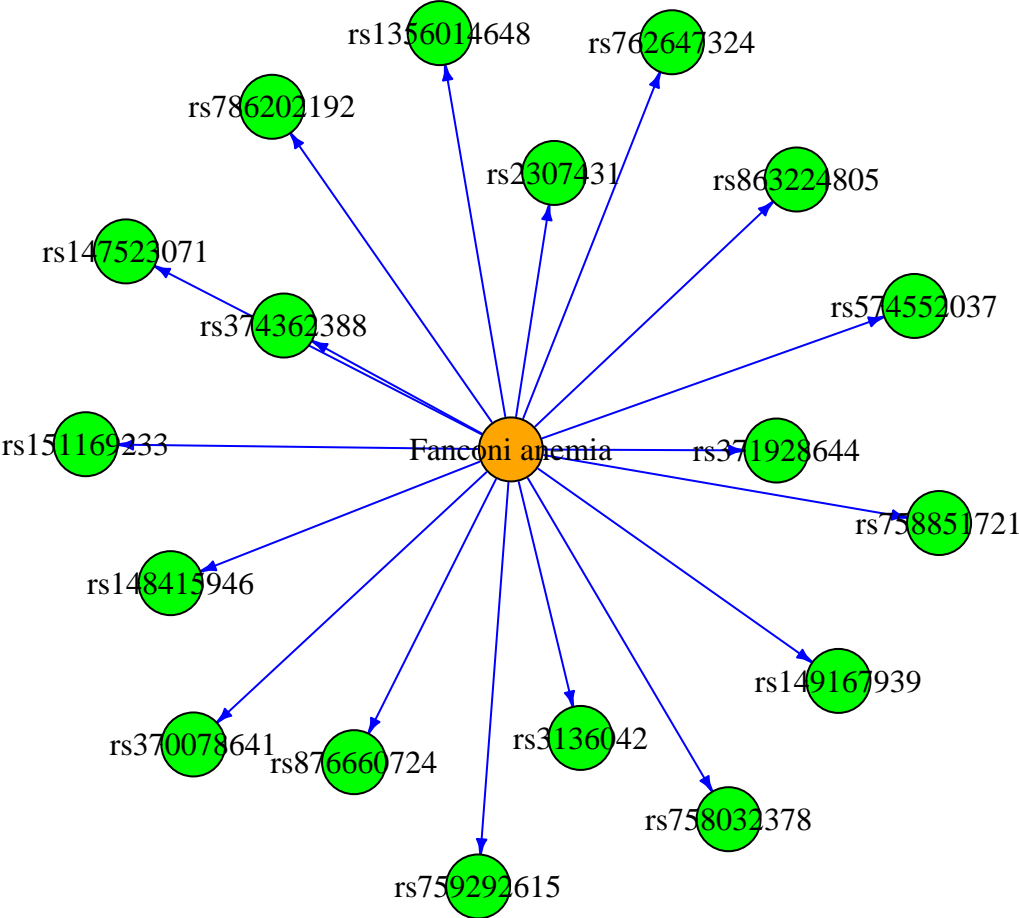



## Variant–Disease Network (Fanconi–Bickel syndrome)

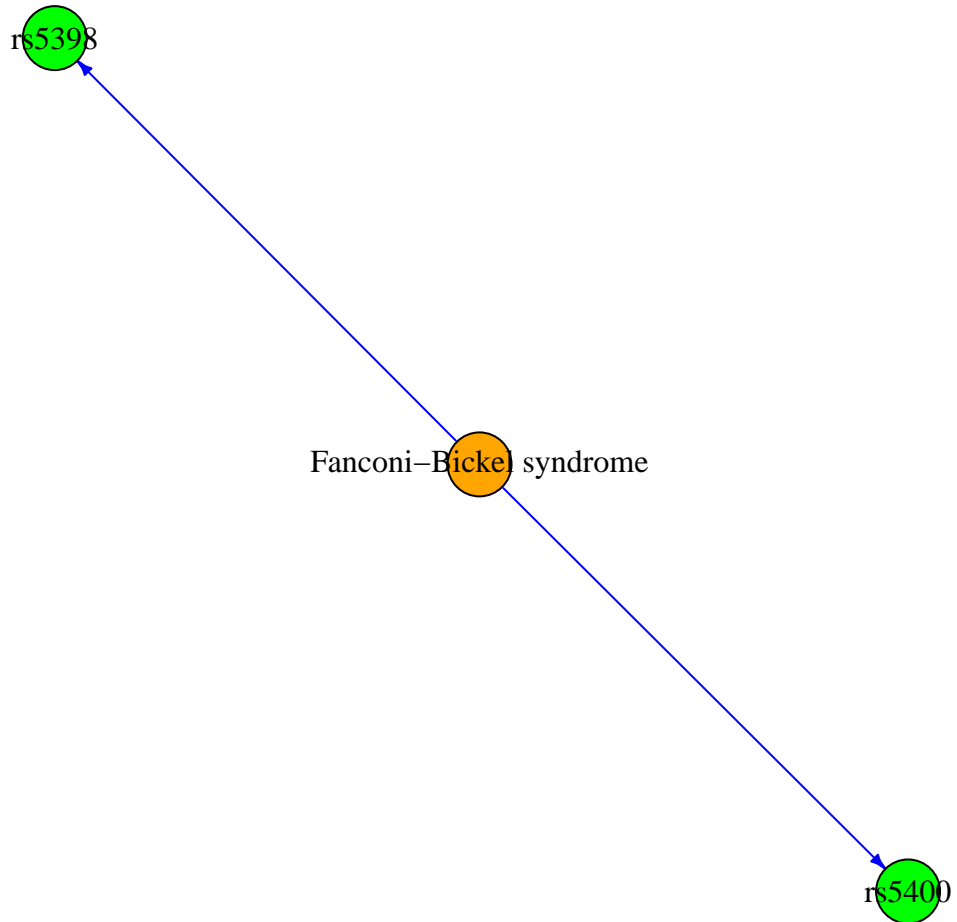

## Variant–Disease Network (Fetal akinesia sequence)

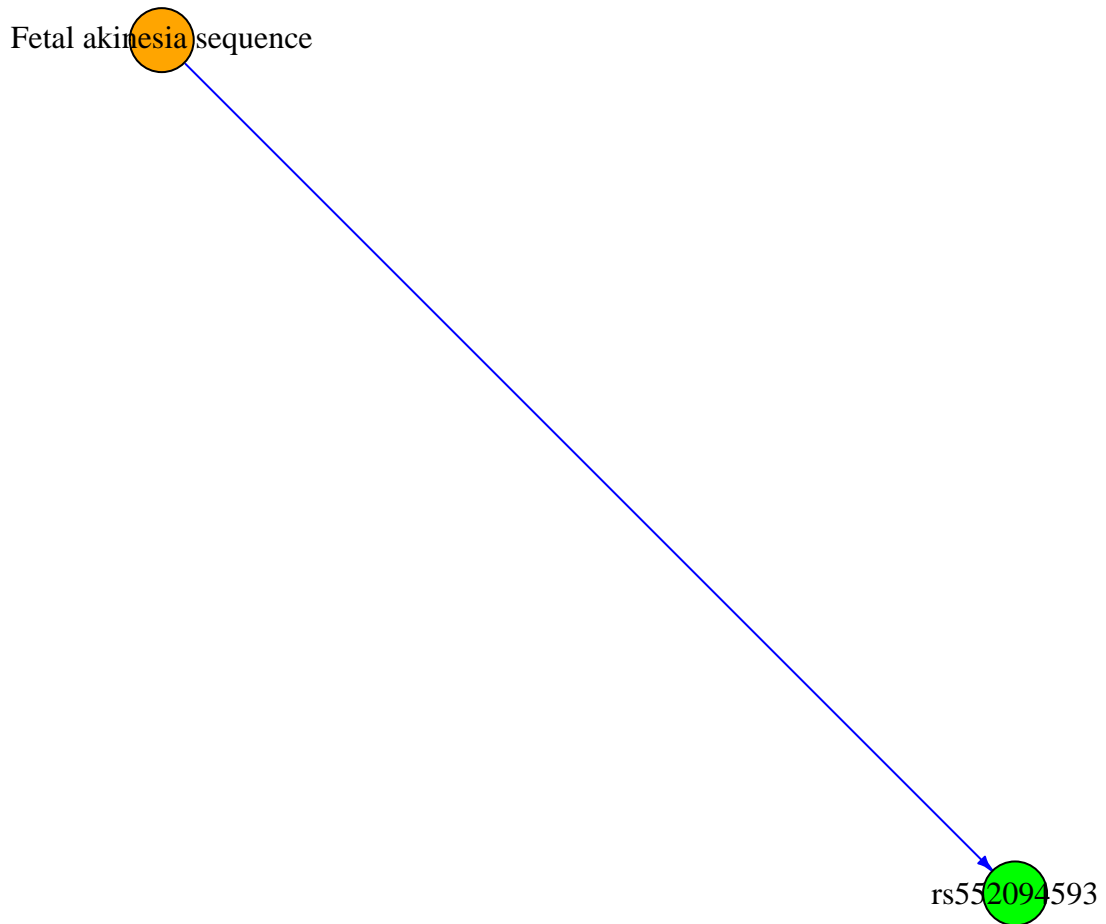

# Variant–Disease Network (Fibrochondrogenesis 1)

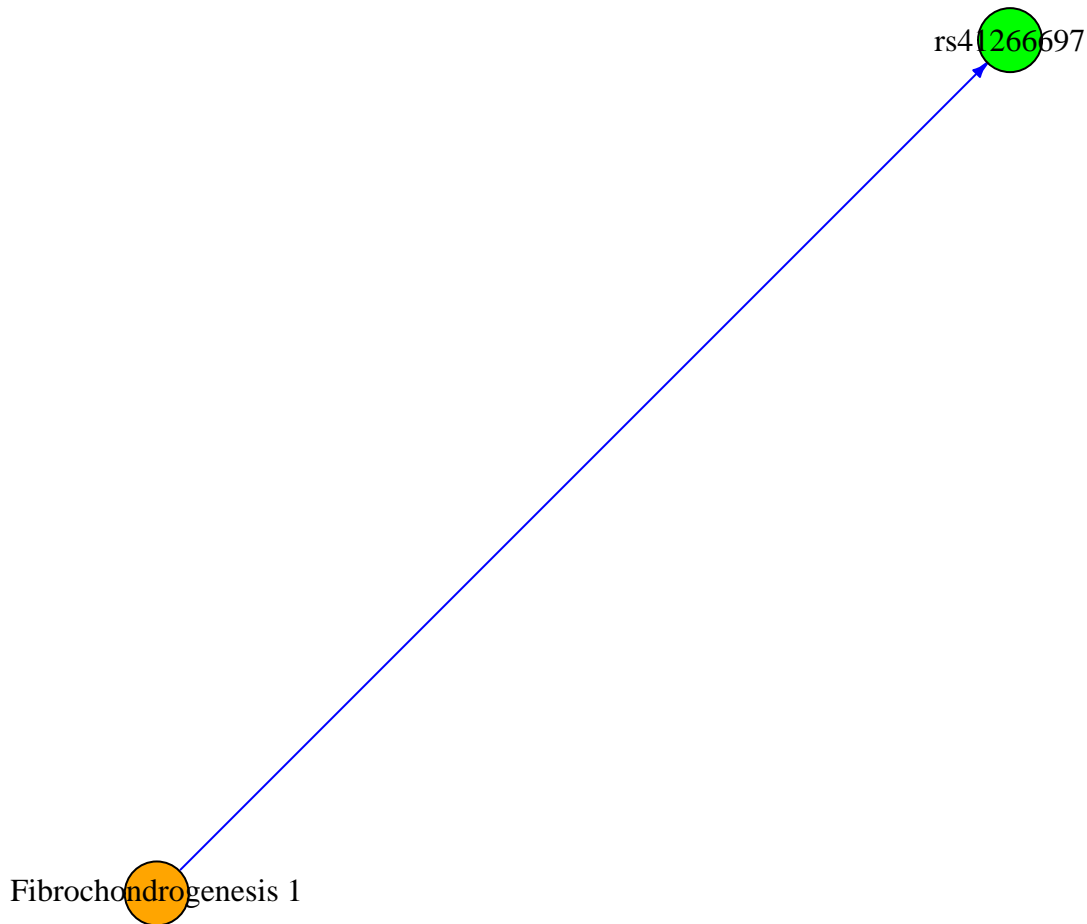

# Variant–Disease Network (Finnish congenital nephrotic syndrome)

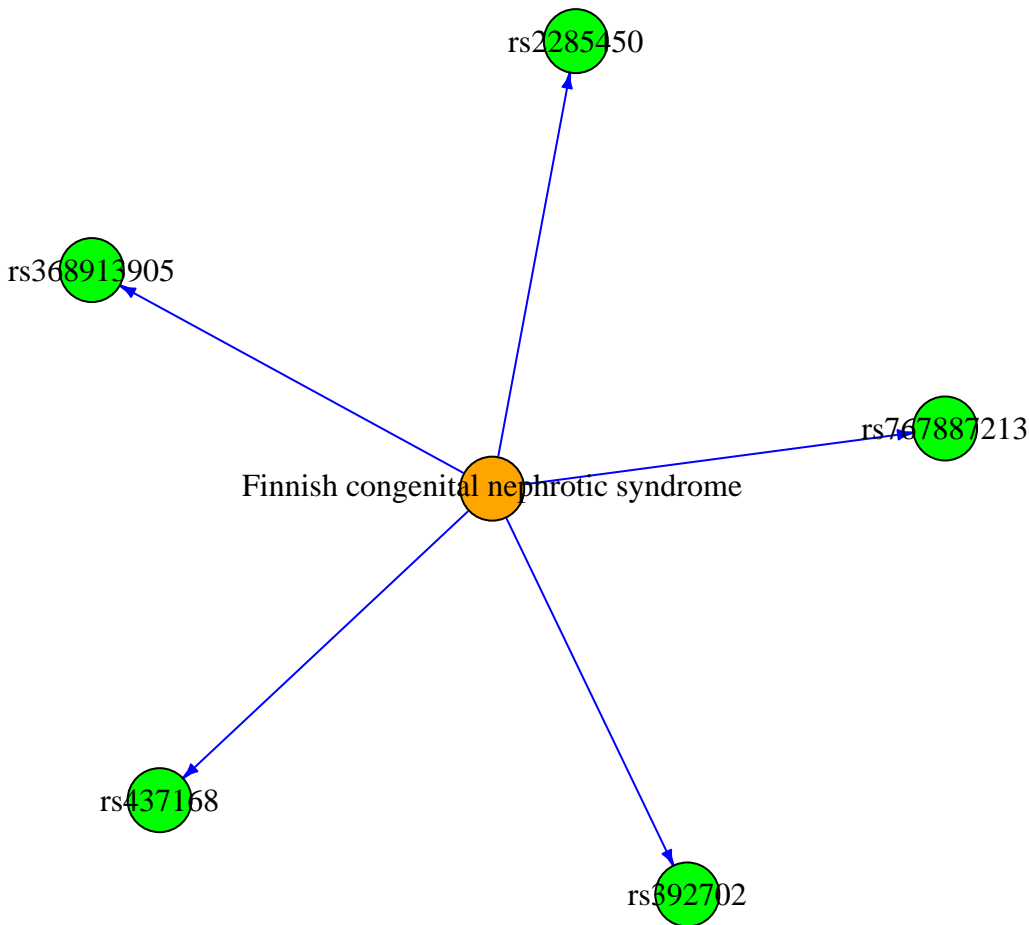

## Variant–Disease Network (Fleck corneal dystrophy)

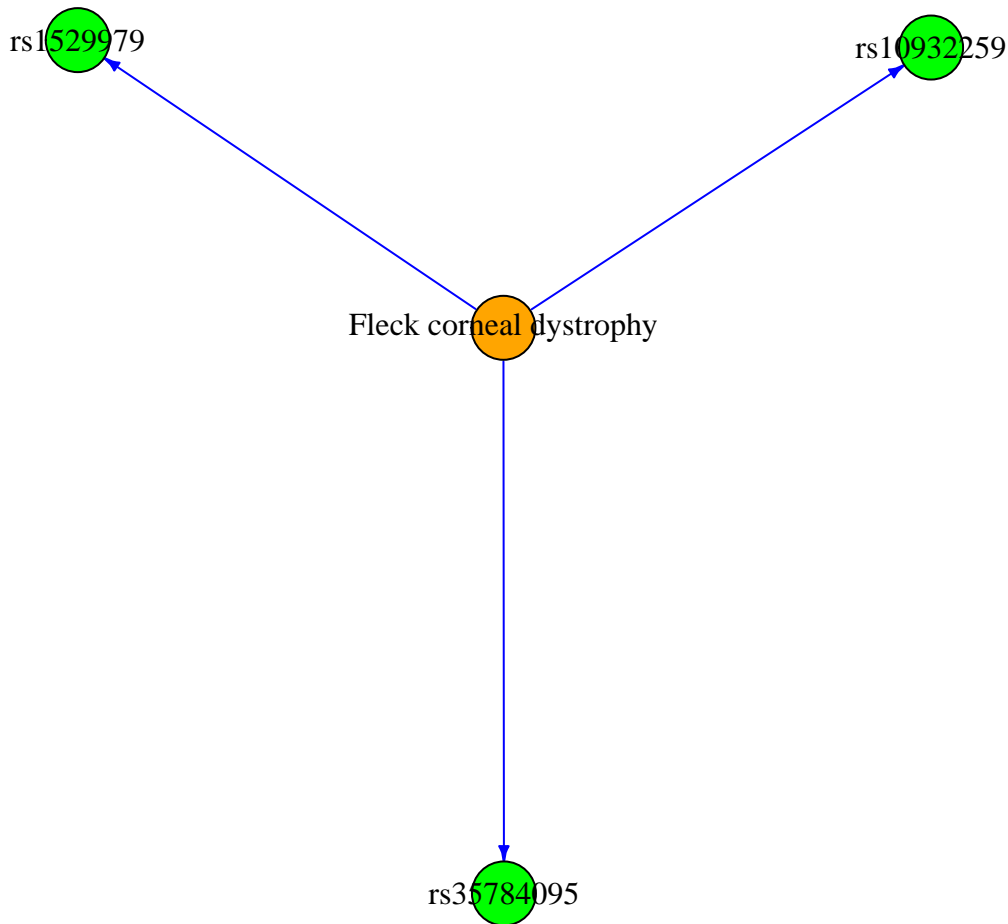

# Variant–Disease Network (FLNB–Related Spectrum Disorders)

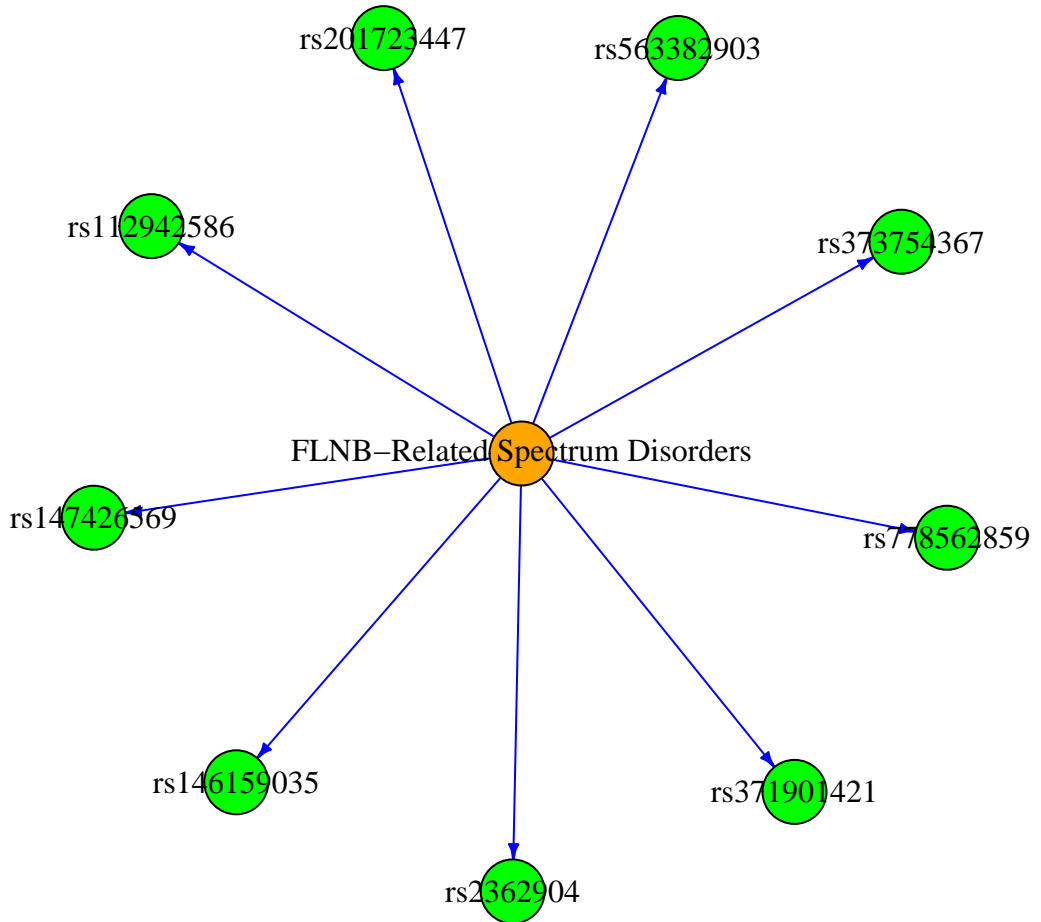

**Variant–Disease Network (Focal cortical dysplasia type II)**

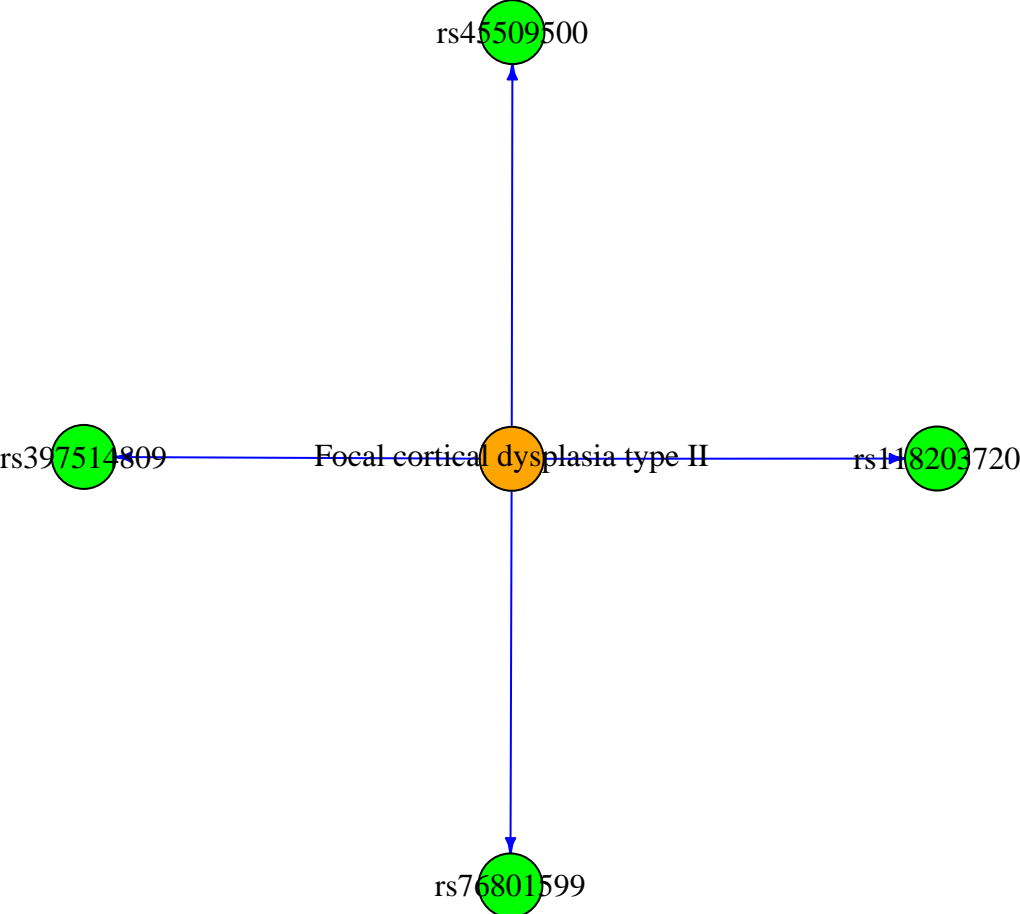

Variant–Disease Network (Focal segmental glomerulosclerosis)

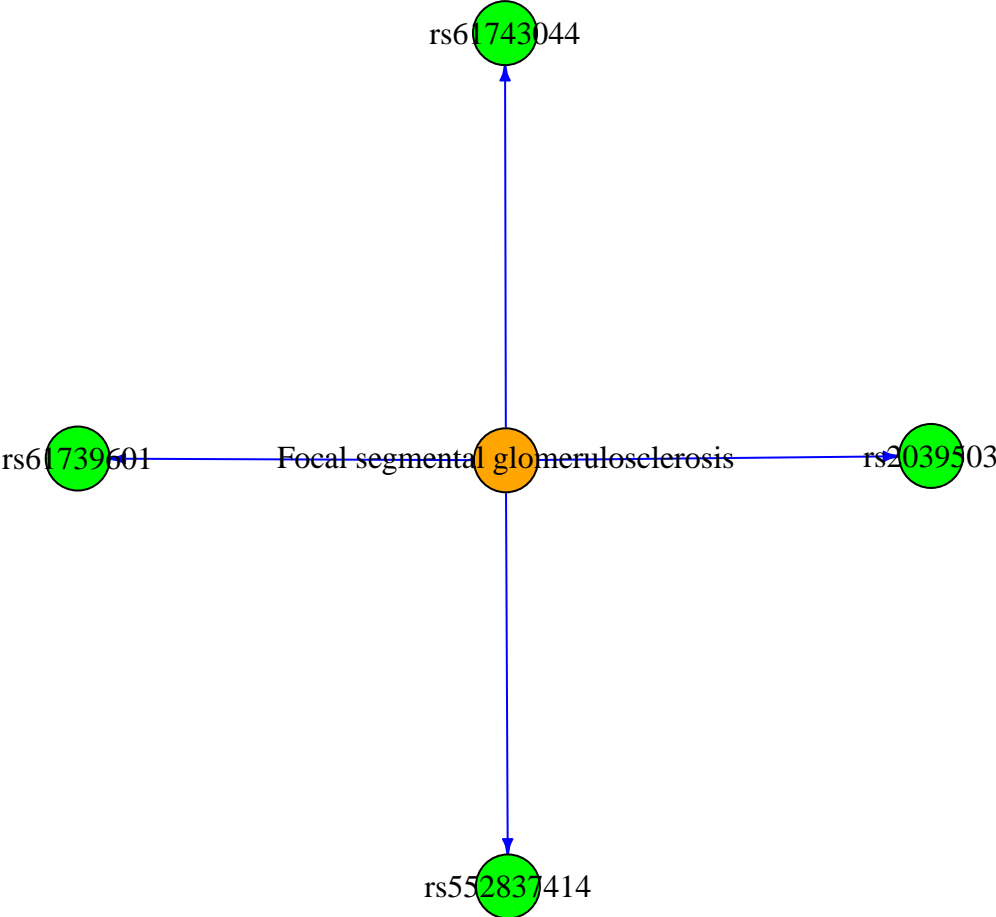



## Variant–Disease Network (Focal segmental glomerulosclerosis 2)

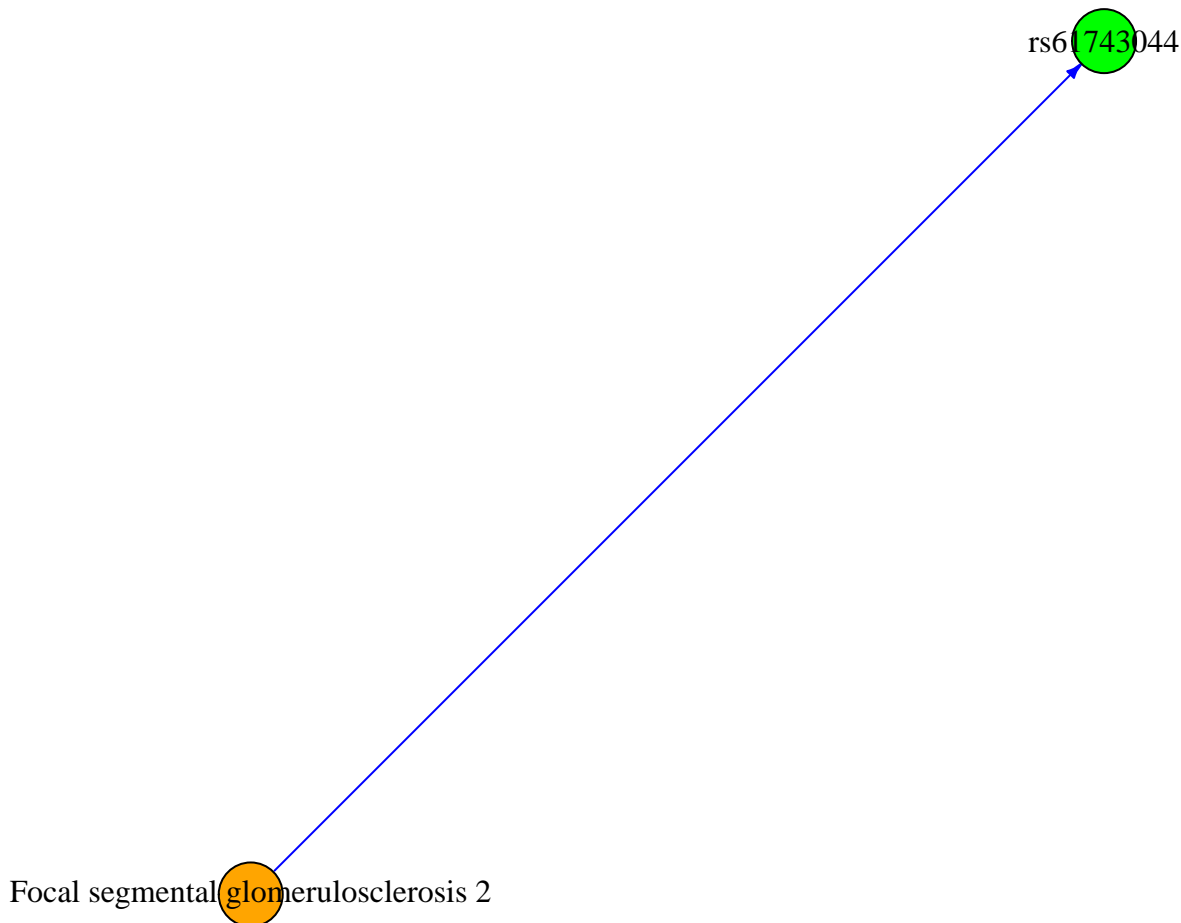

## Variant–Disease Network (Focal segmental glomerulosclerosis 3)

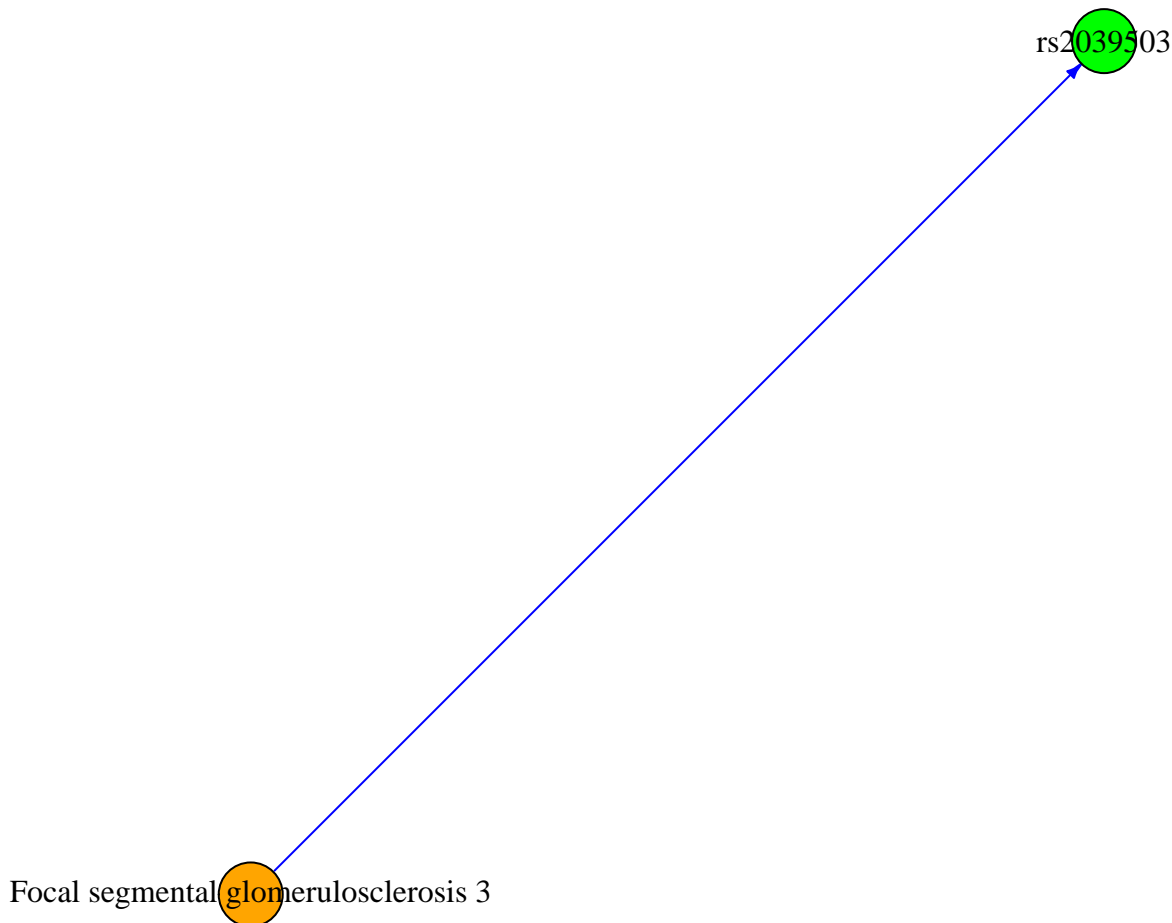

# Variant–Disease Network (Follicle–stimulating hormone deficiency)

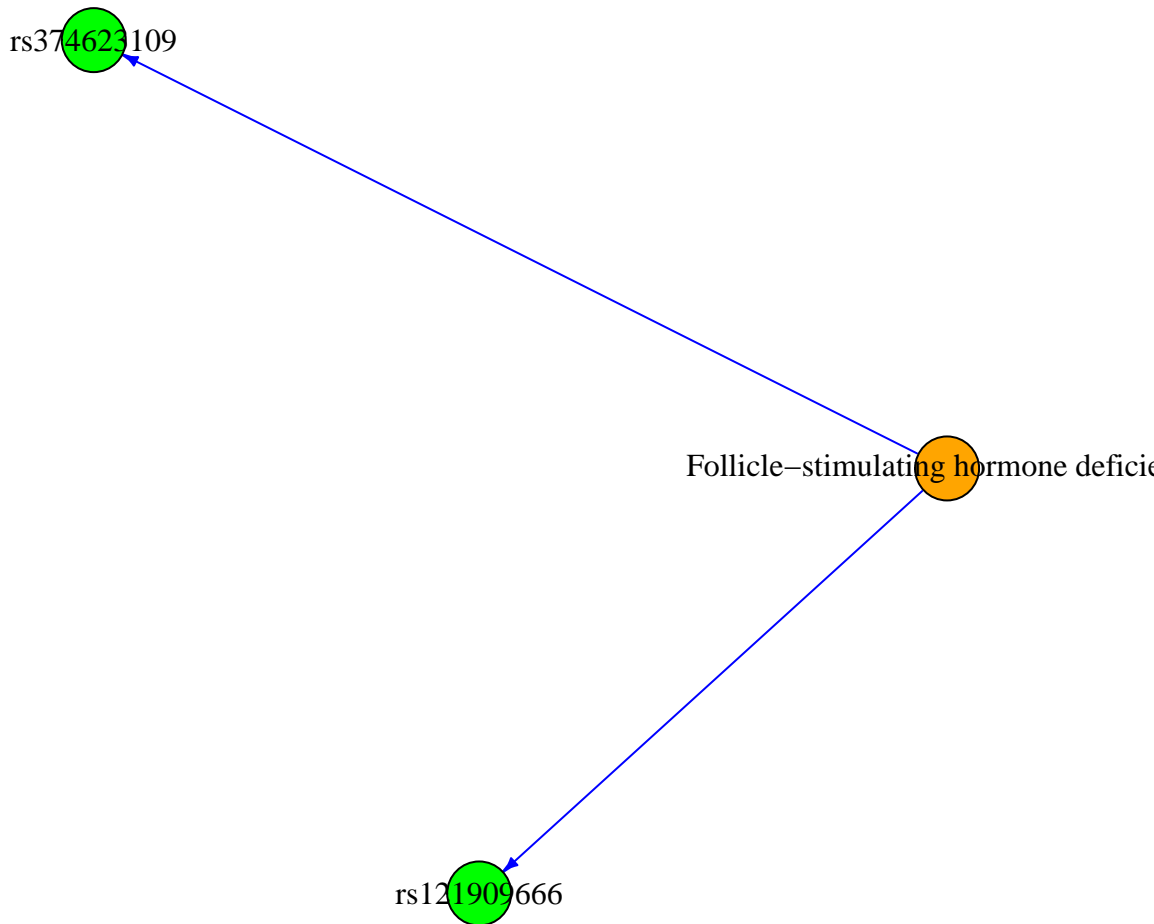

## Variant-Disease Network (Fraser syndrome 1)

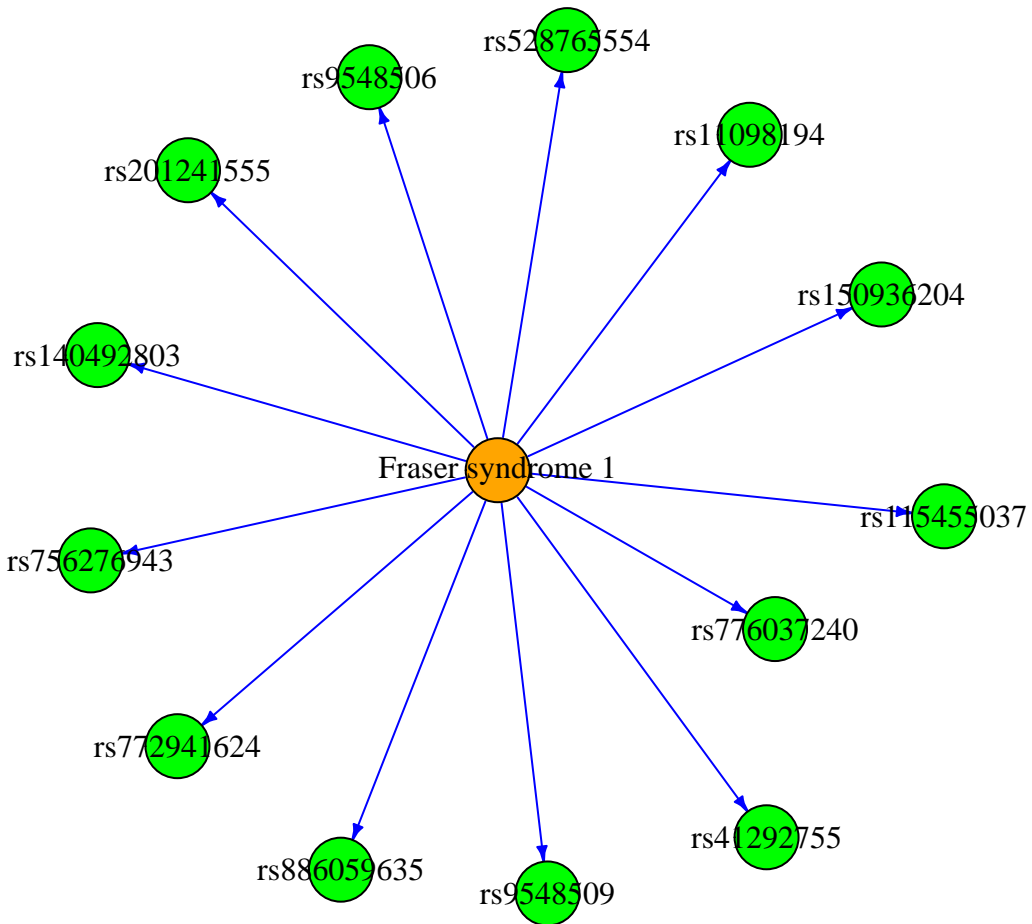

## Variant-Disease Network (Frasier syndrome)

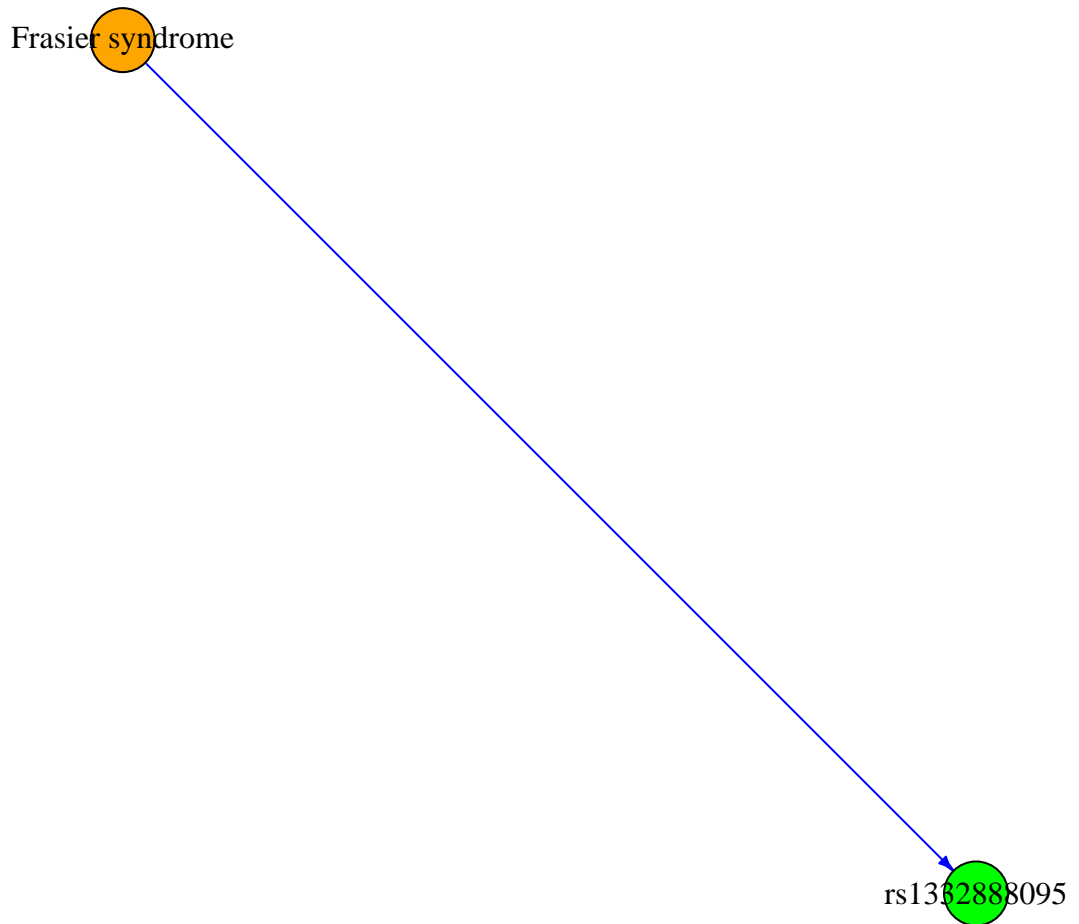

# Variant–Disease Network (Freeman–Sheldon syndrome)

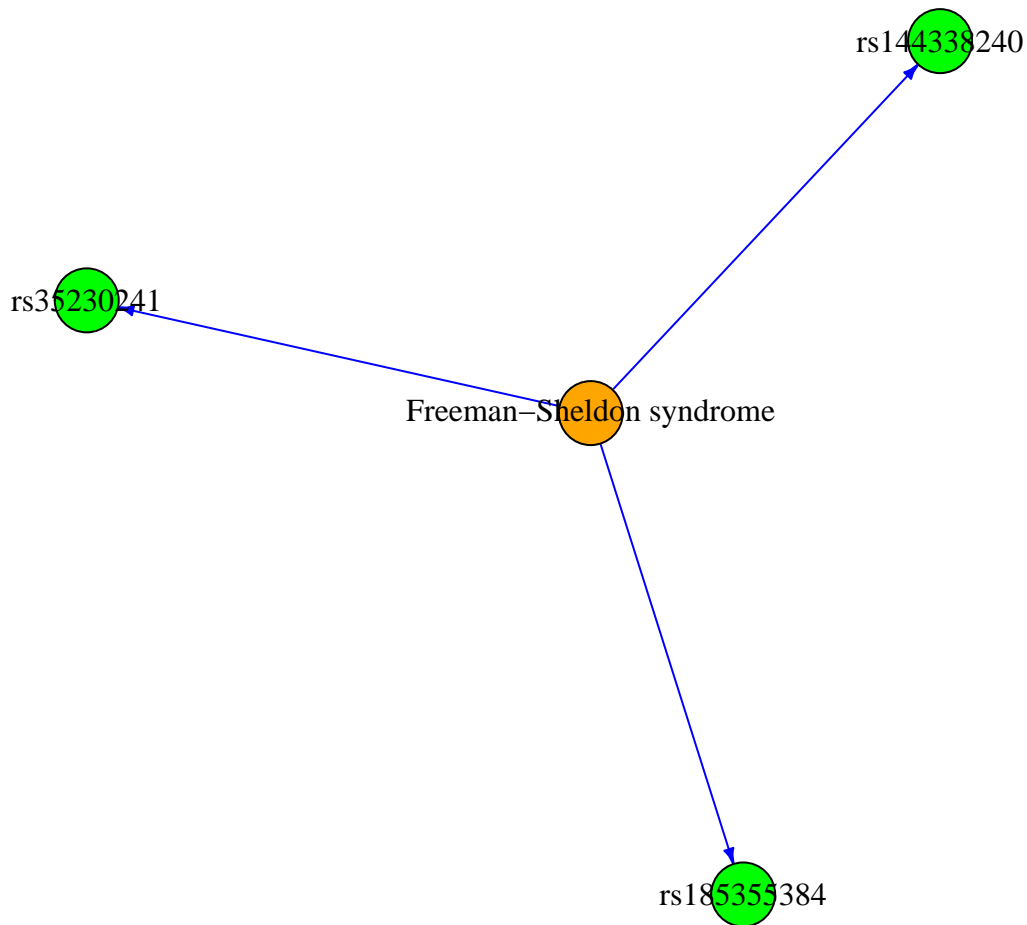

## Variant-Disease Network (Frontal bossing)

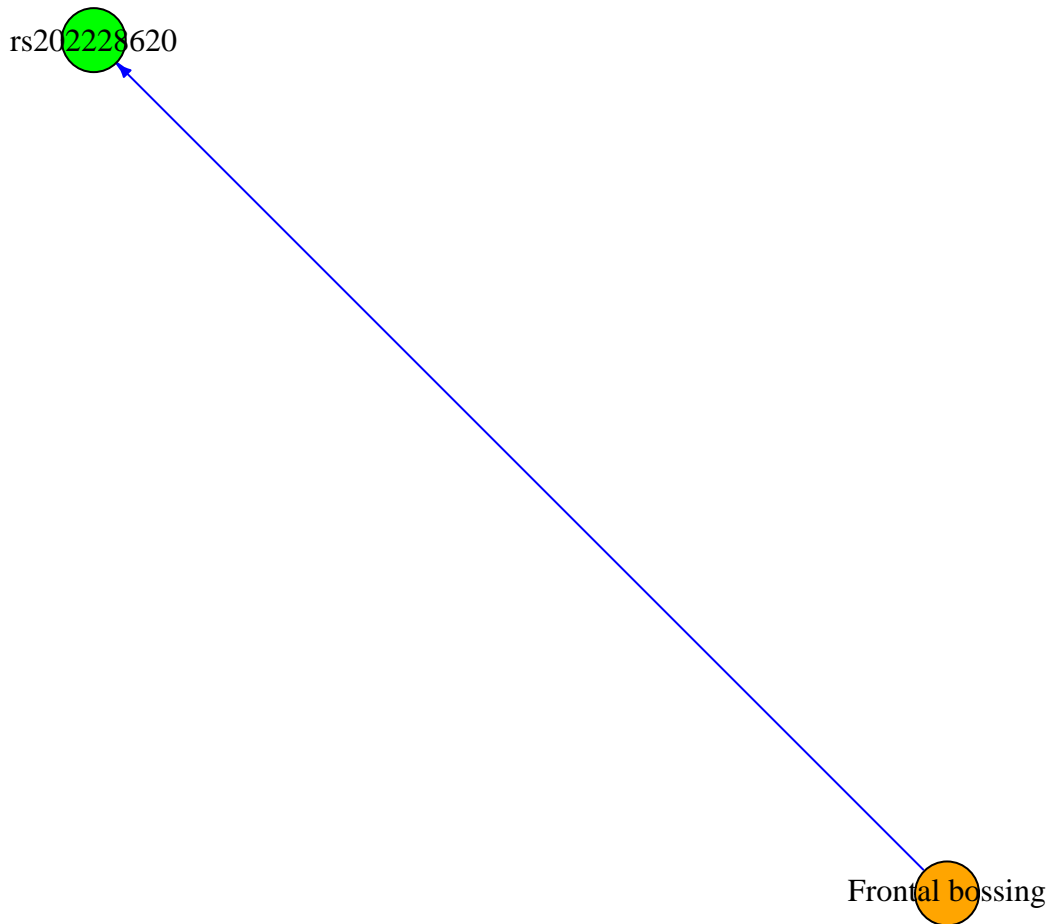

Variant–Disease Network (Frontometaphyseal dysplasia 1)

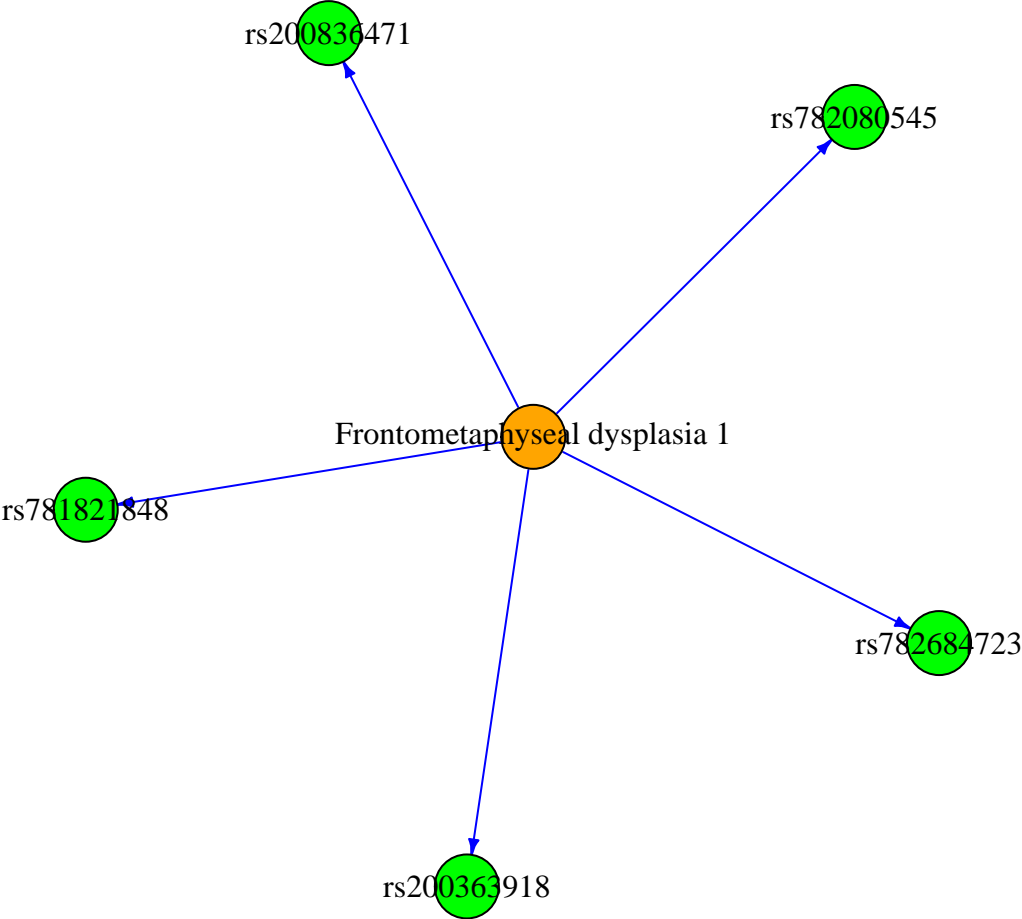



## Variant–Disease Network (Fucosidosis)

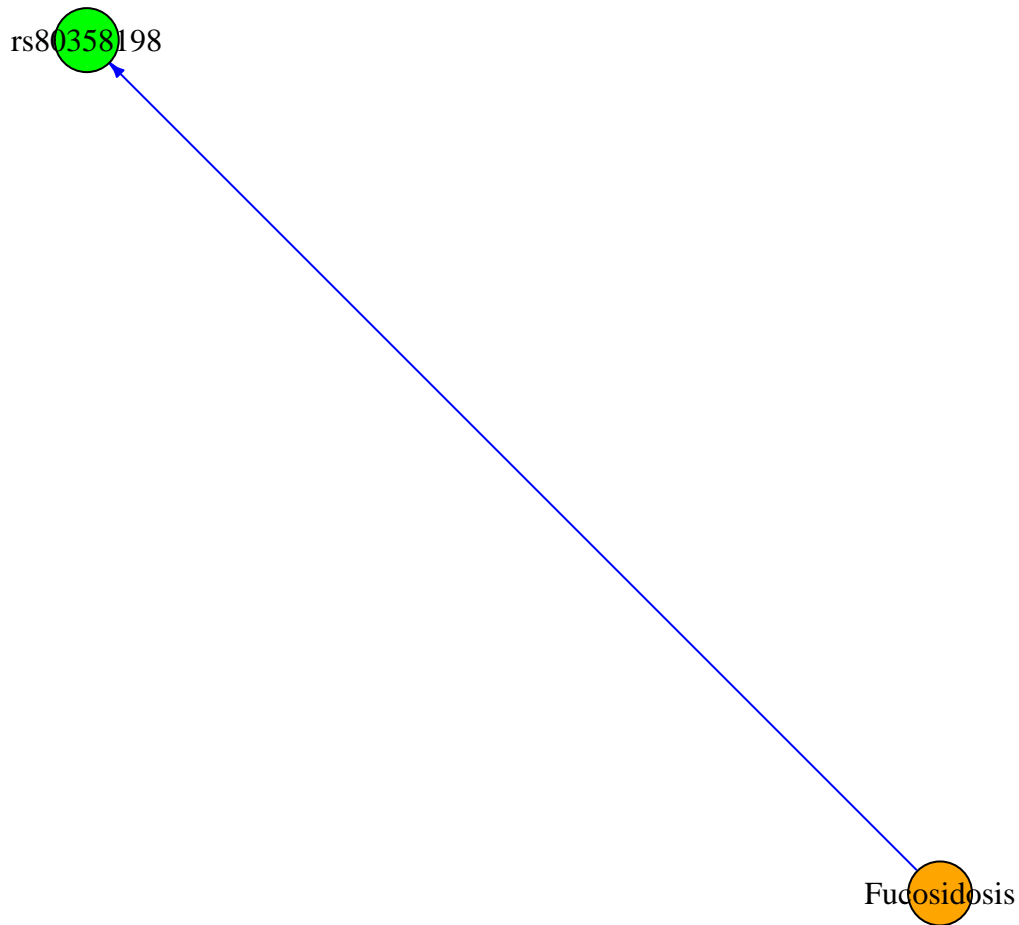

## Variant-Disease Network (Fumarase deficiency)

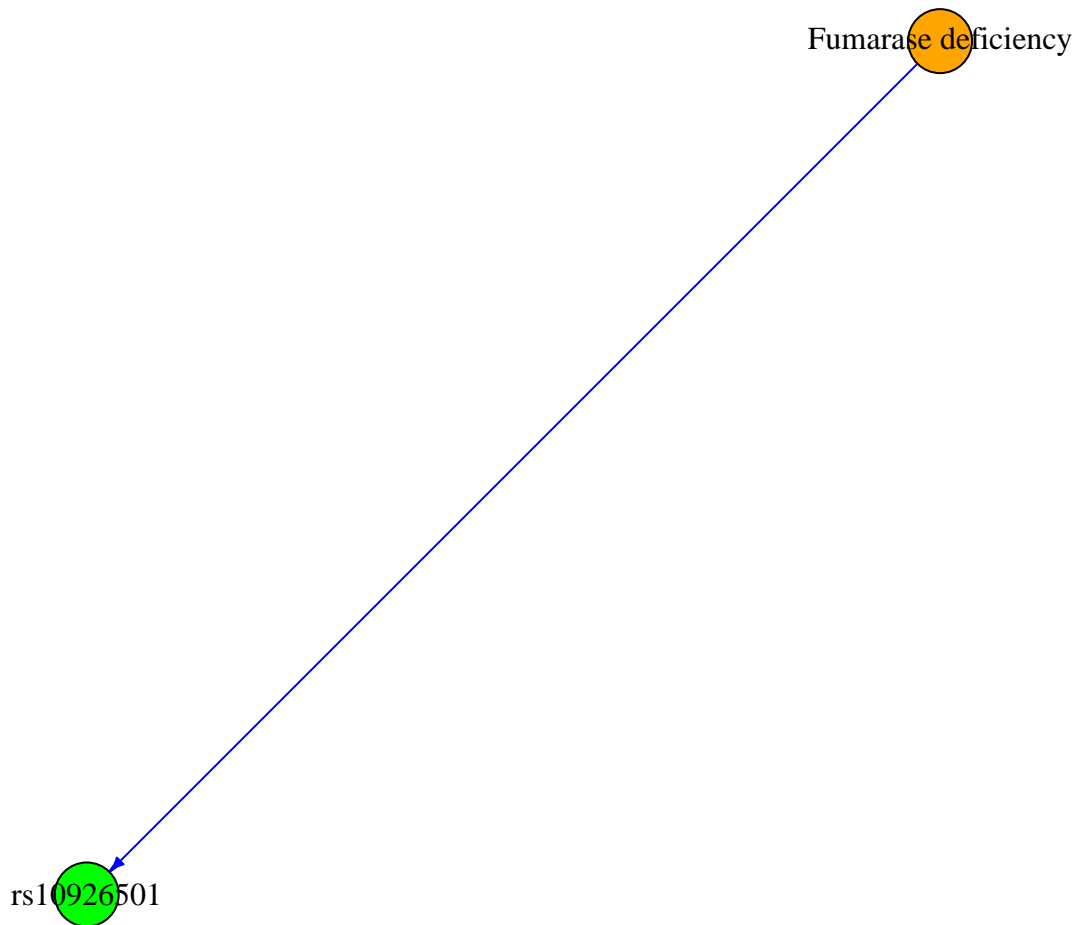

**Variant–Disease Network (Galactosylceramide beta–galactosidase deficiency)**

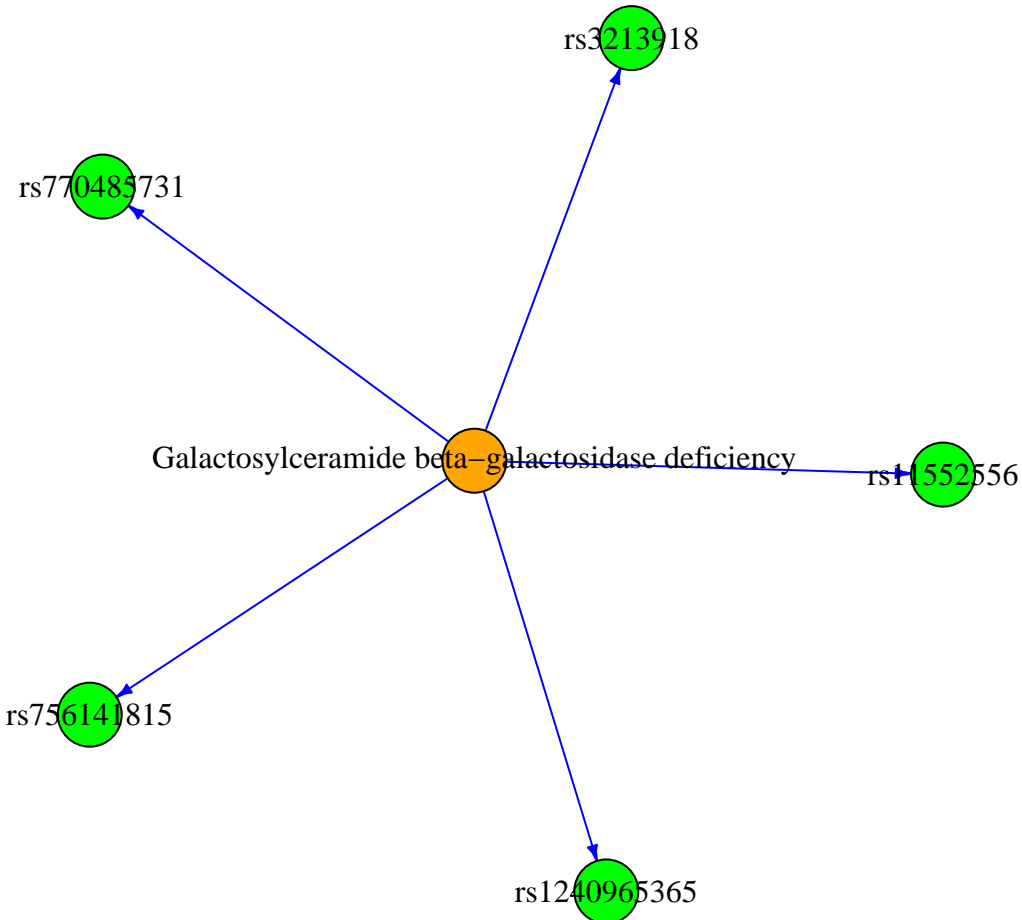

## Variant–Disease Network (Gallbladder disease 1)

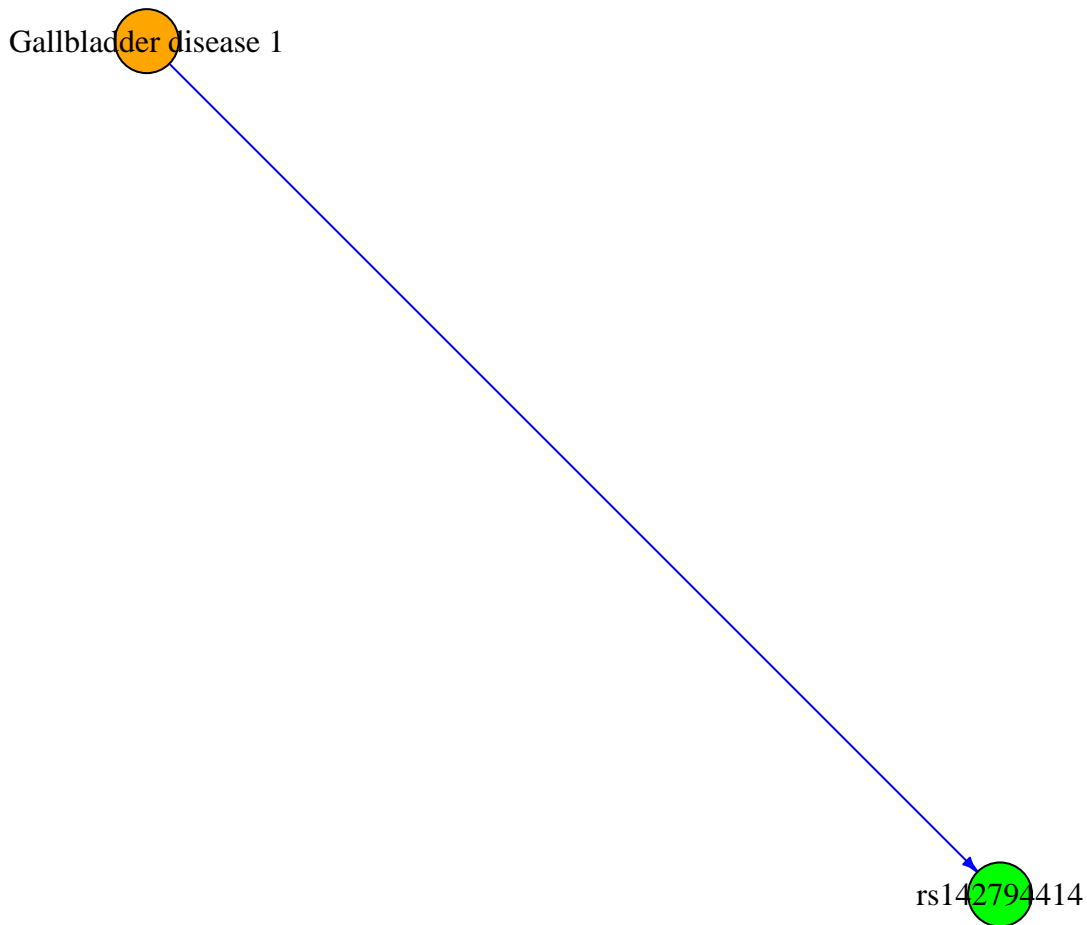

Variant–Disease Network (Gamma–aminobutyric acid transaminase deficiency)

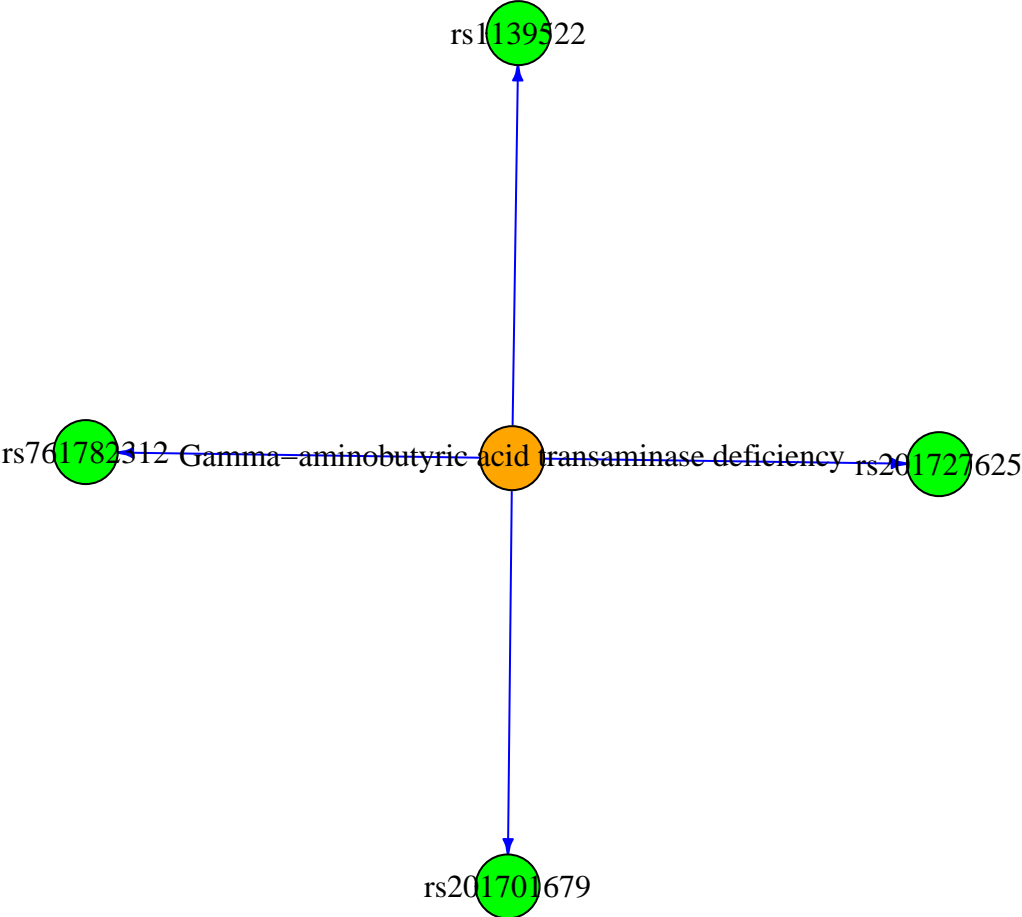

**Variant–Disease Network (Gangliosidosis GM1 type 3)**

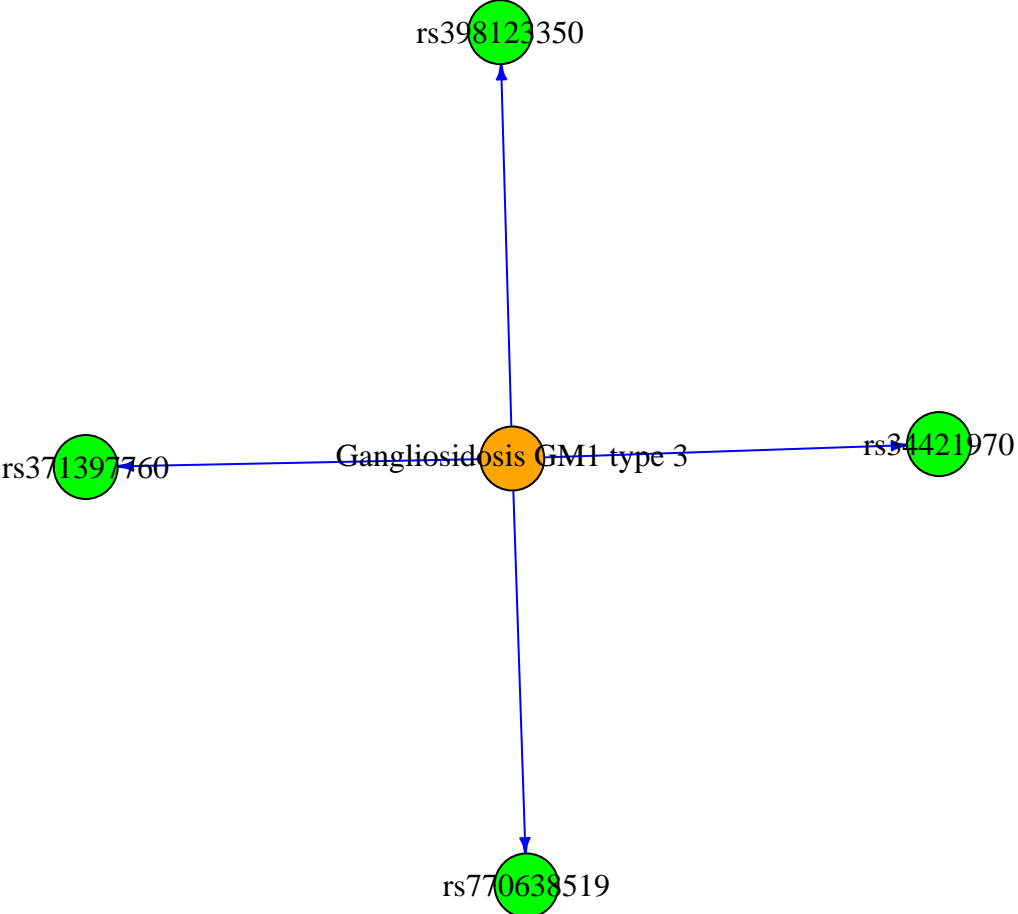

**Variant–Disease Network (Gastrointestinal stroma tumor)**

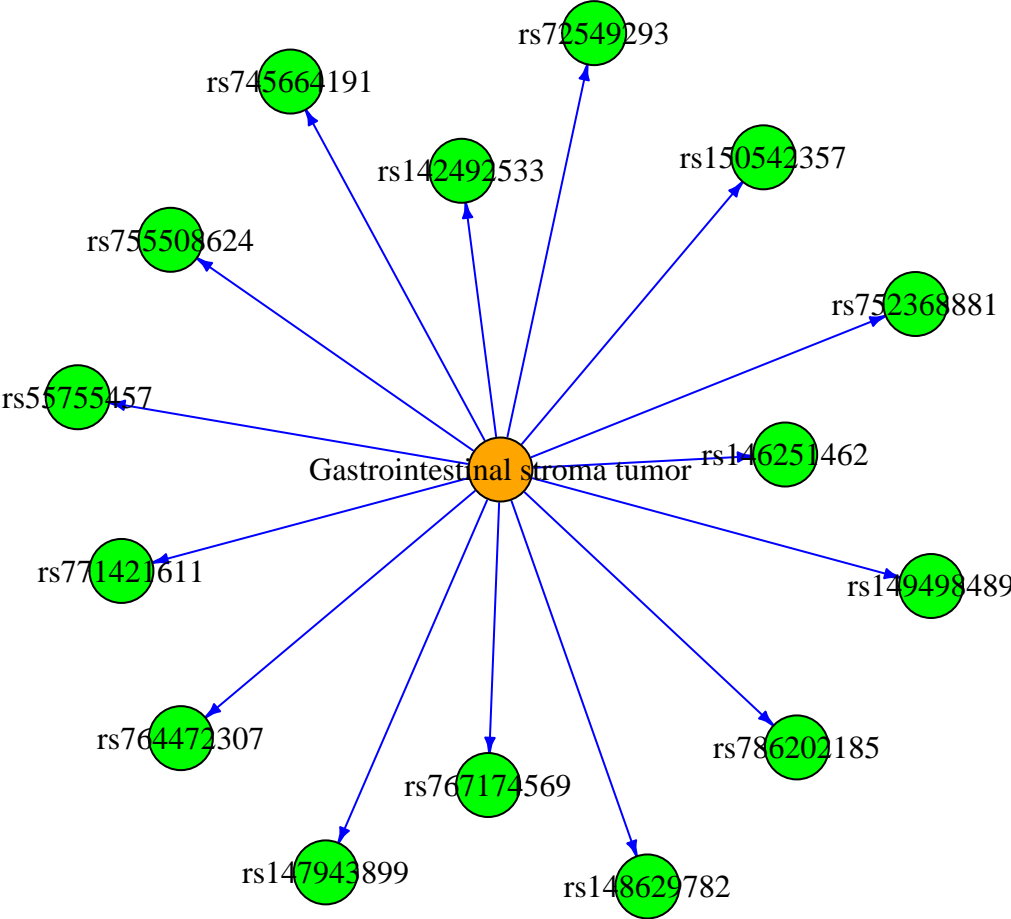

## Variant–Disease Network (Gaze palsy)

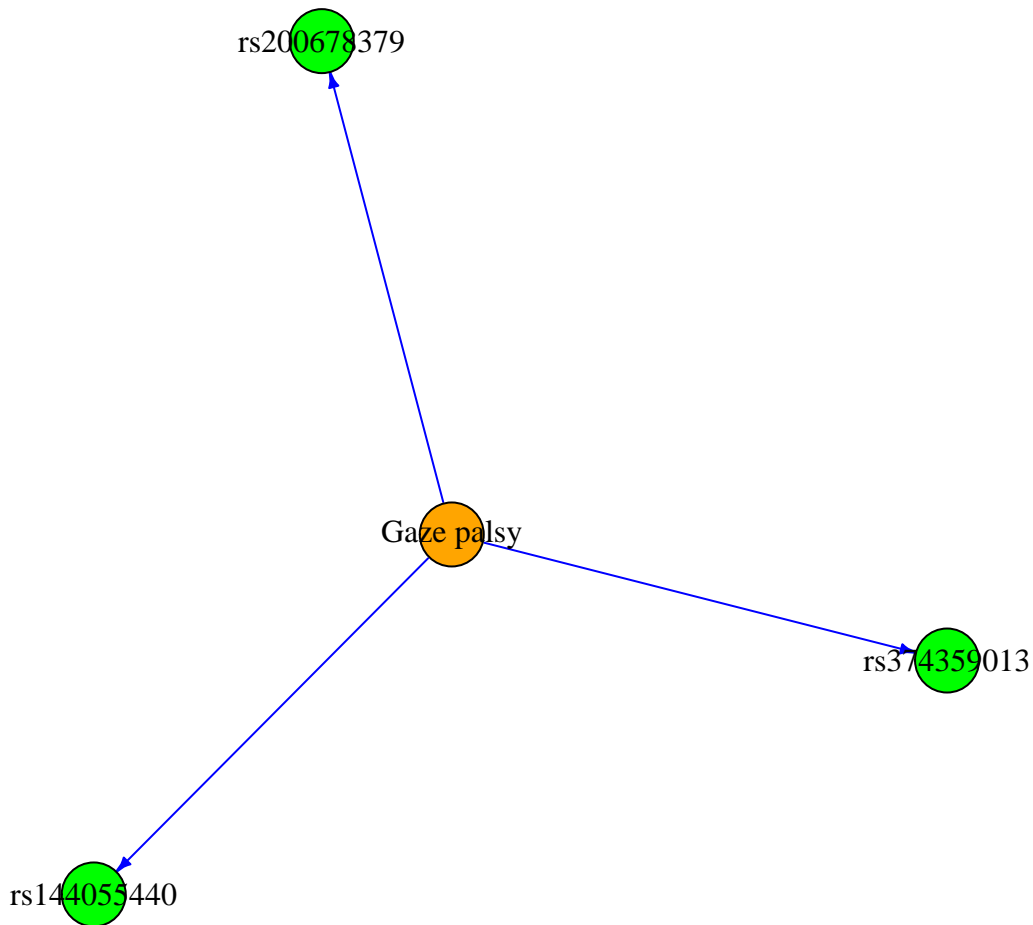



## Variant–Disease Network (Geleophysic dysplasia)

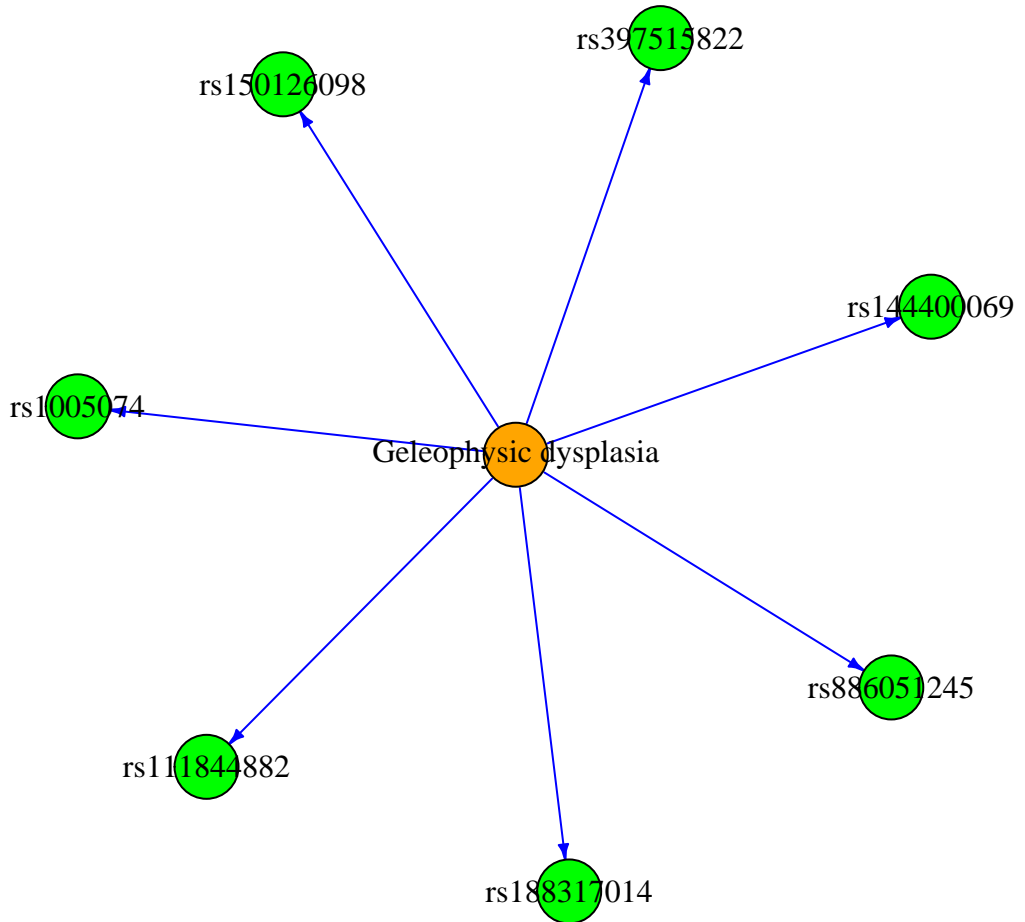

## Variant-Disease Network (Geleophysic dysplasia 2)

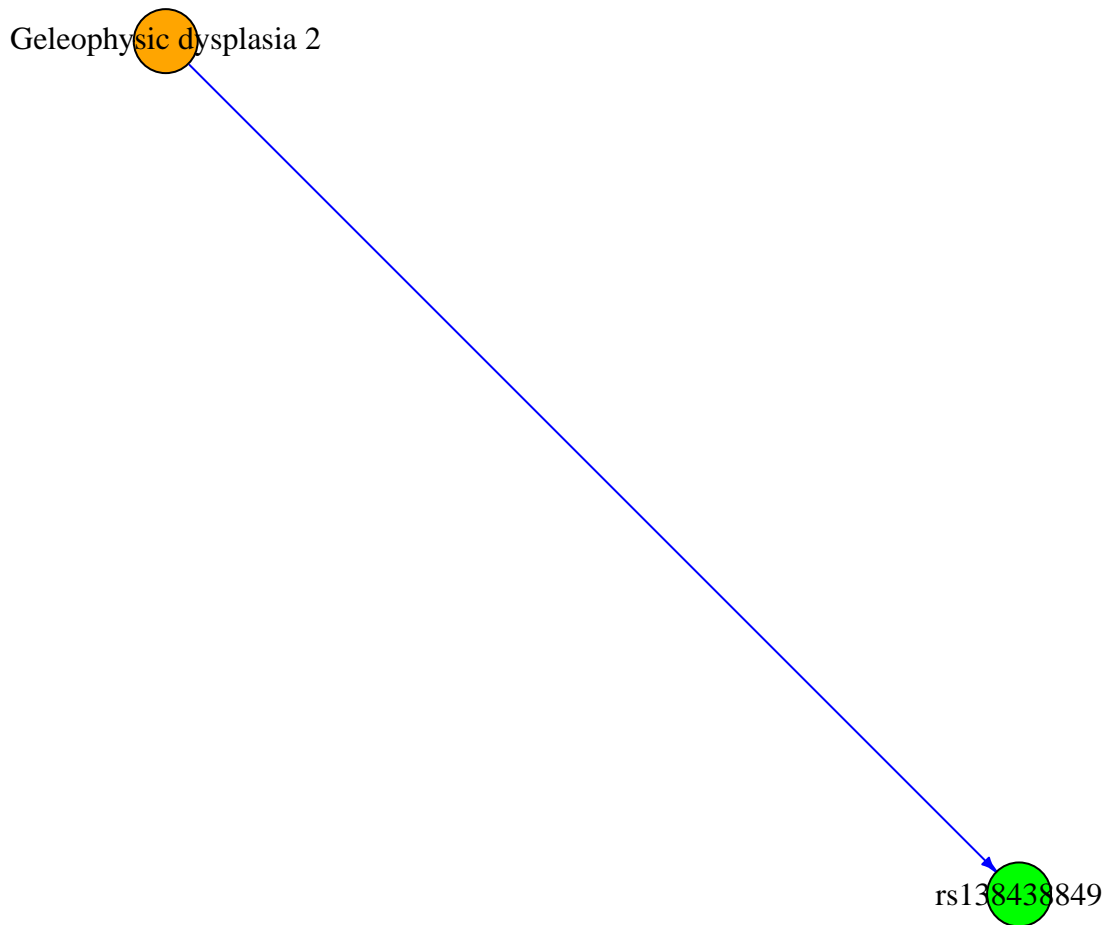

Variant–Disease Network (Generalized epilepsy and paroxysmal dyskinesia)

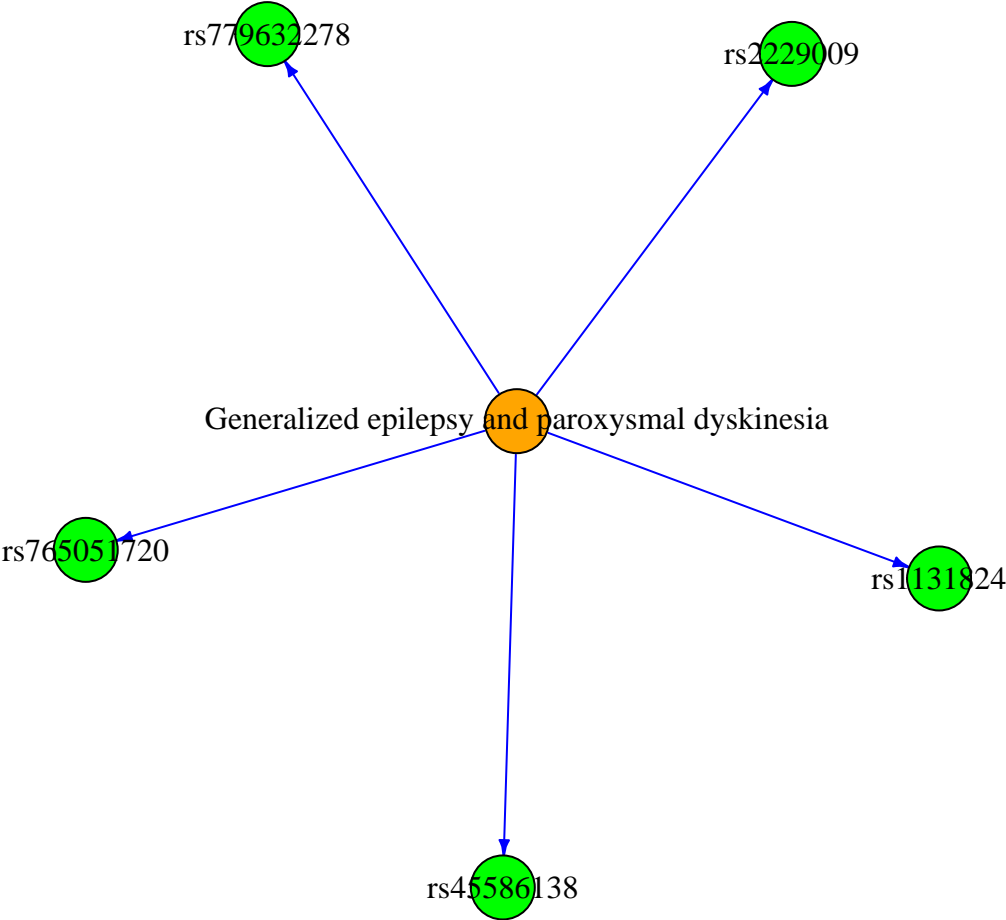

Variant–Disease Network (Generalized epilepsy with febrile seizures plus

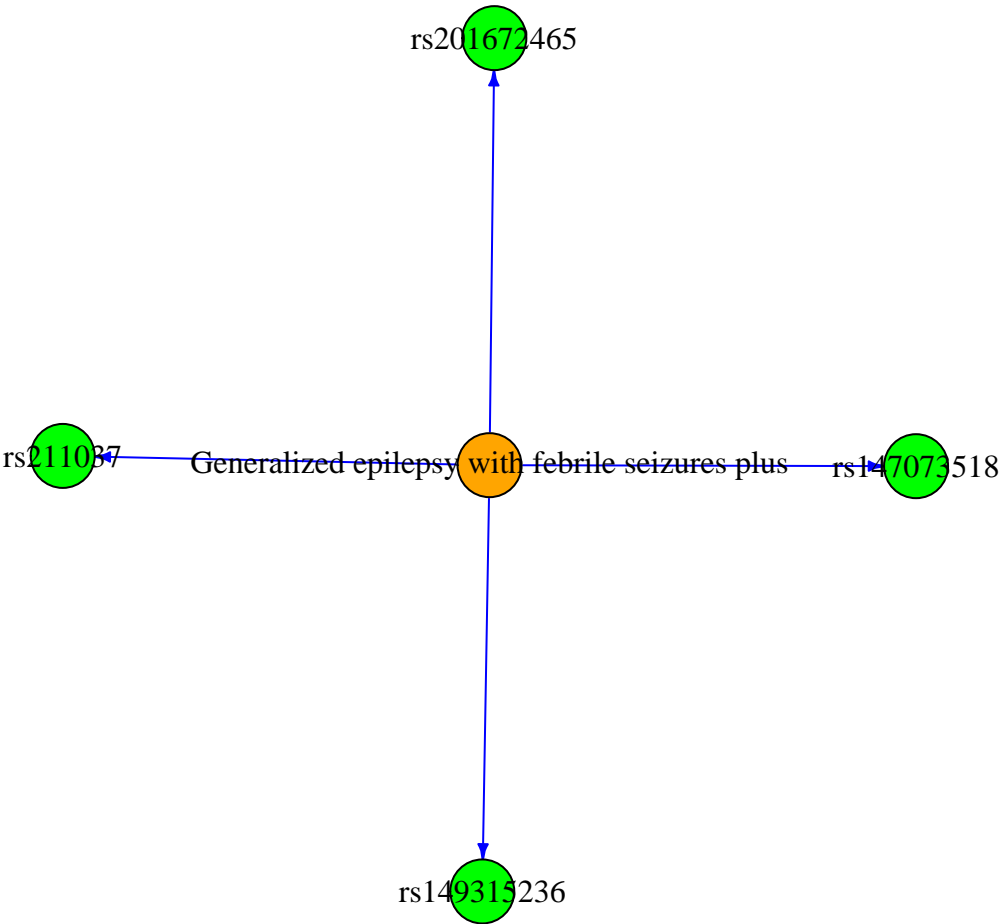

# Variant–Disease Network (Geroderma osteodysplastica)

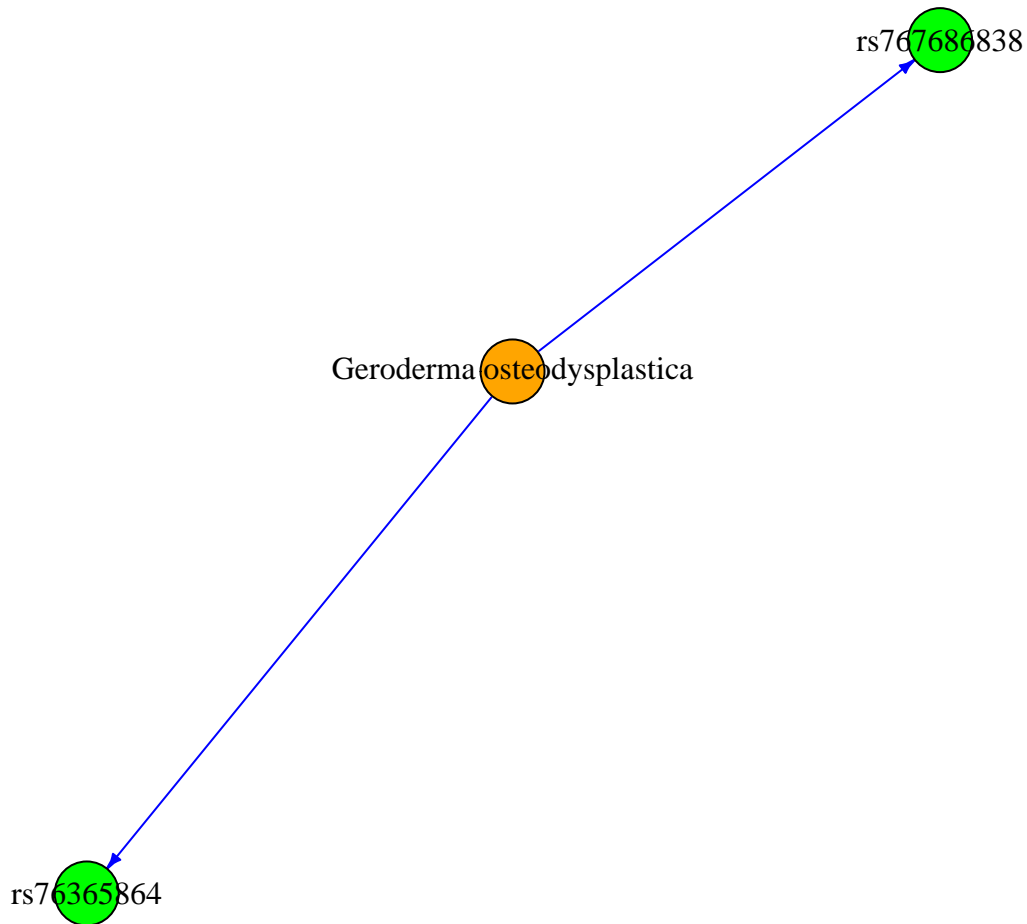

## Variant–Disease Network (Giant axonal neuropathy 1)

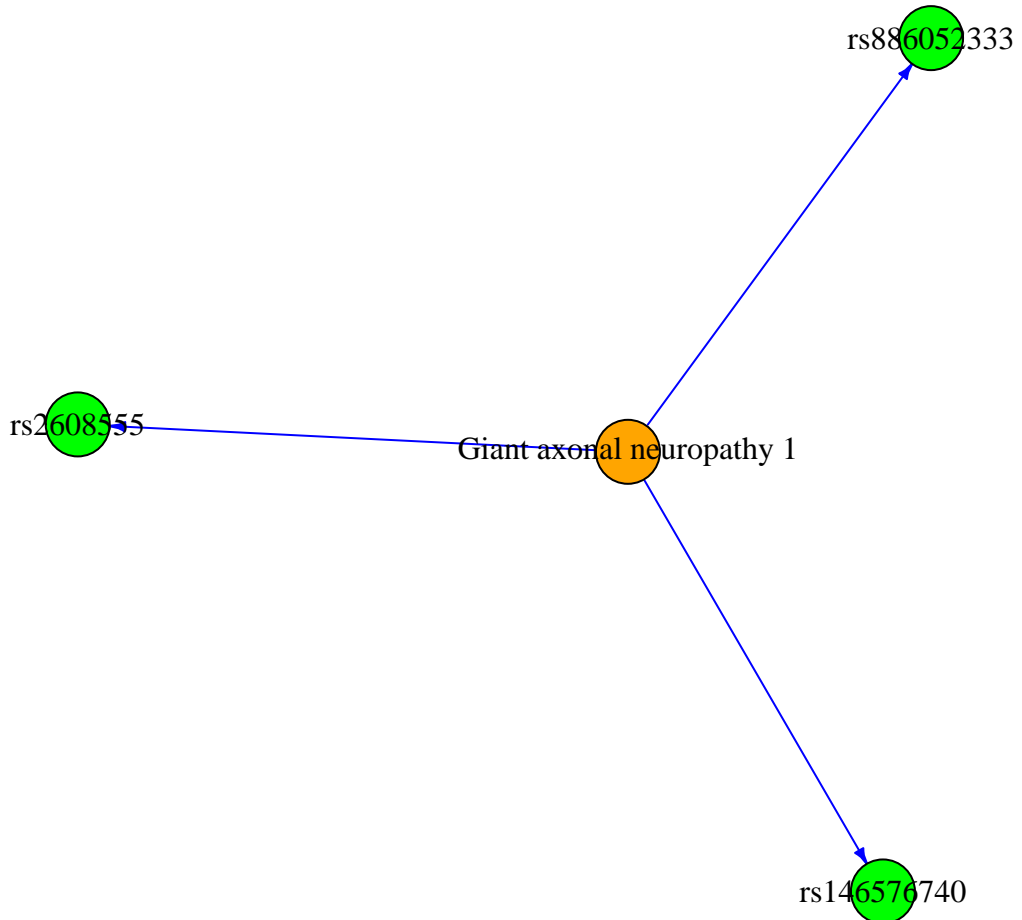

## Variant–Disease Network (Gilberts syndrome)

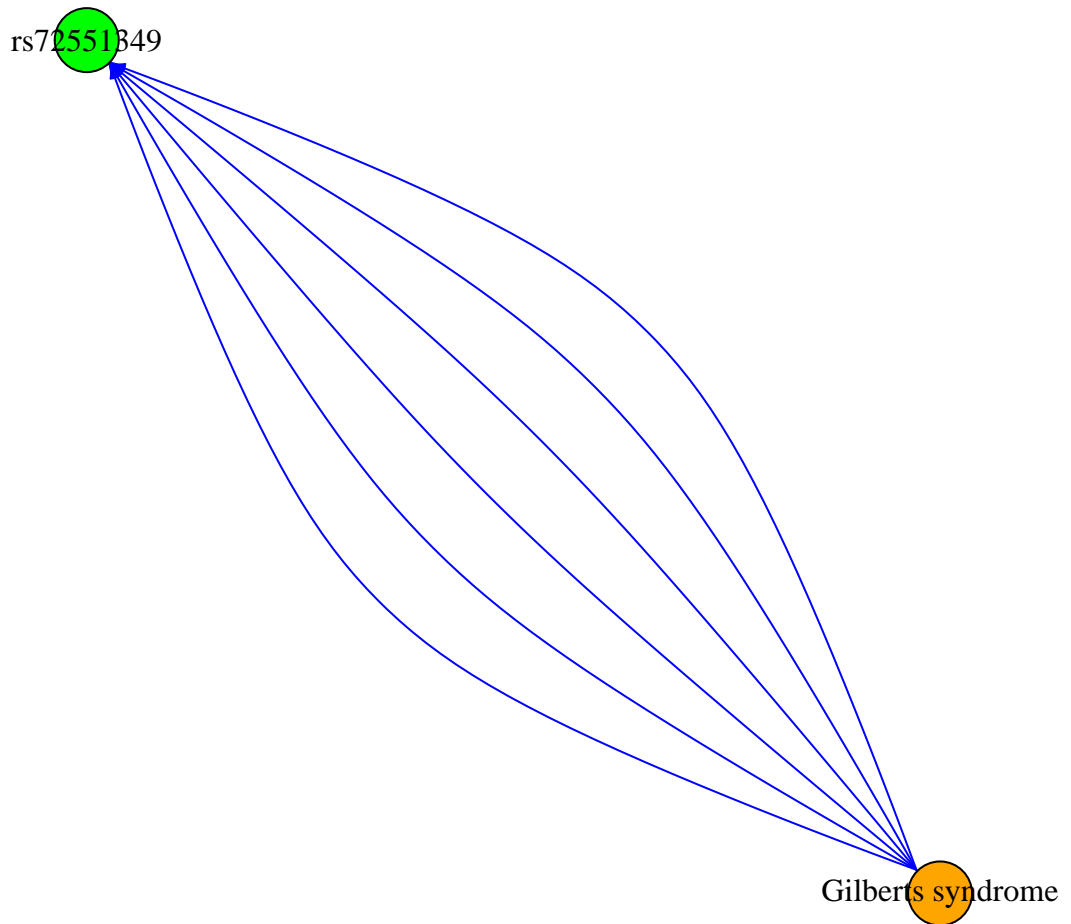

## Variant–Disease Network (Gingival fibromatosis)

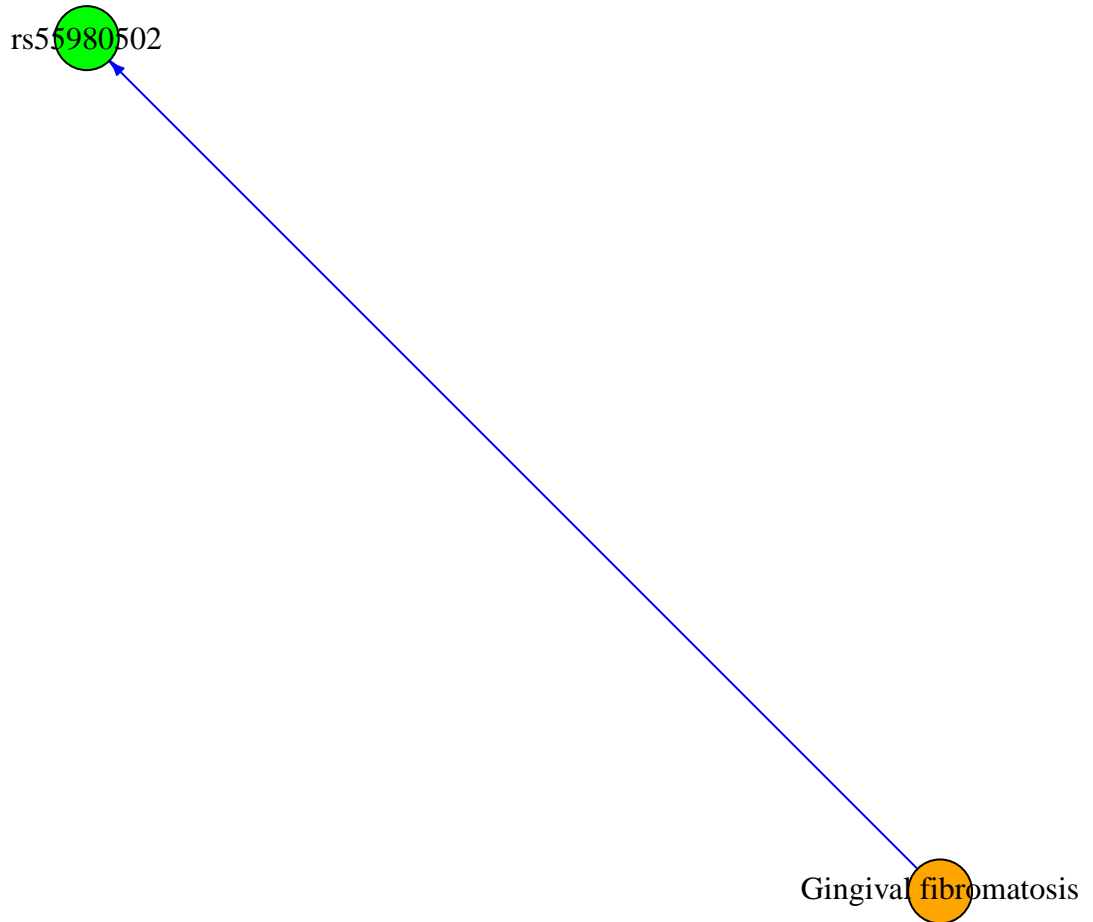



Variant–Disease Network (Glanzmann thrombasthenia)

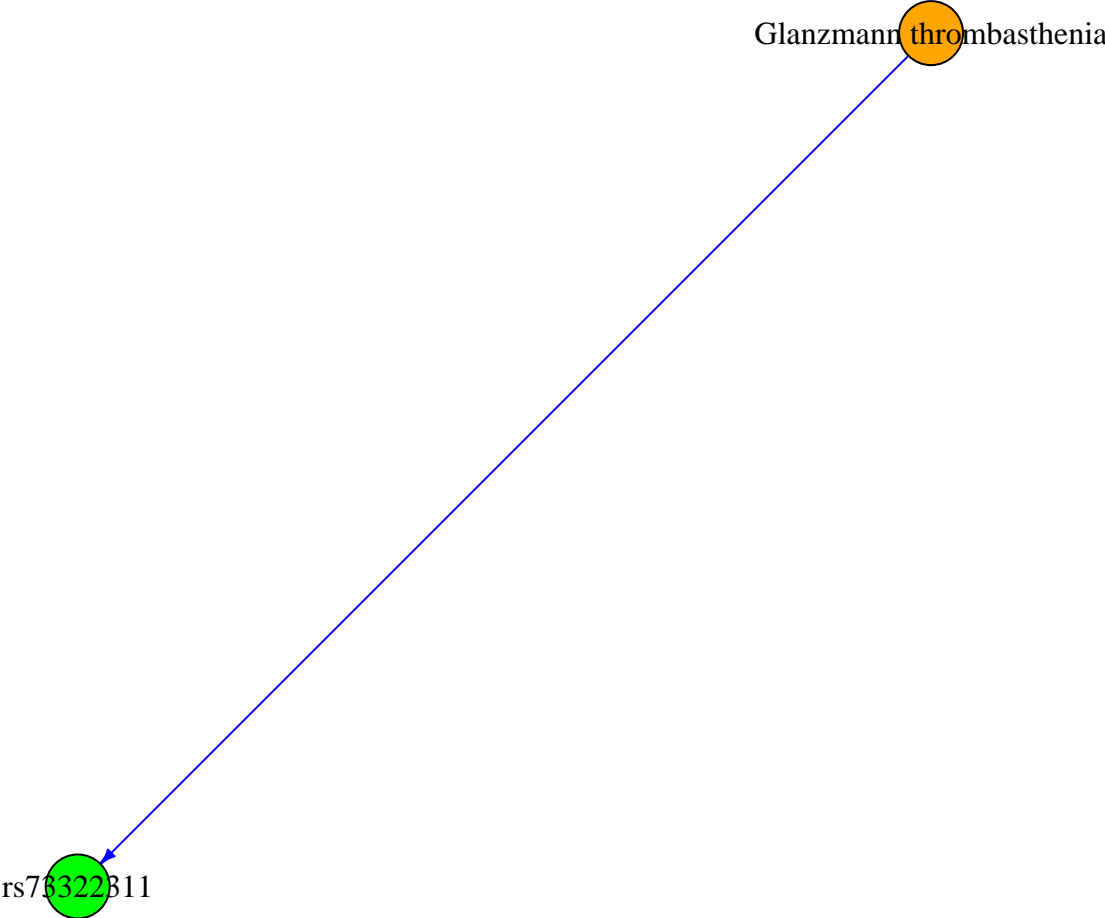

## Variant–Disease Network (Glaucoma 1)

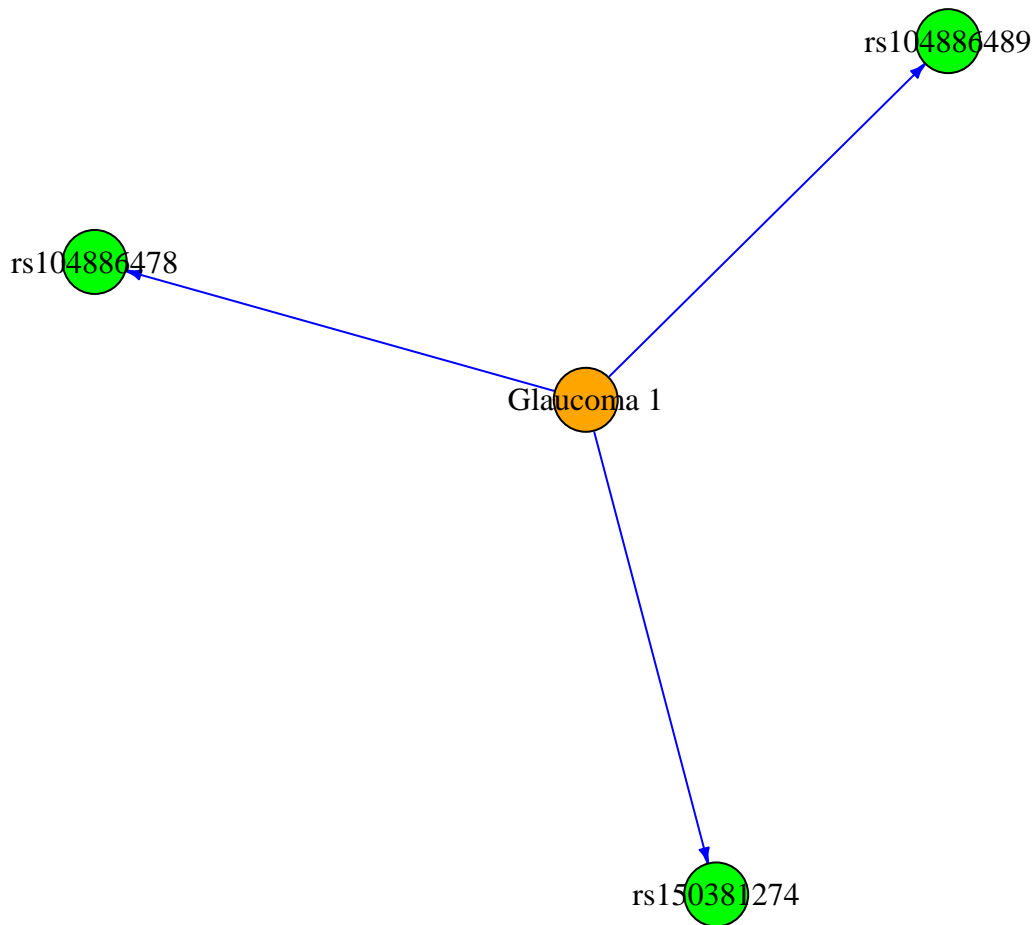

## Variant-Disease Network (Glaucoma 3)

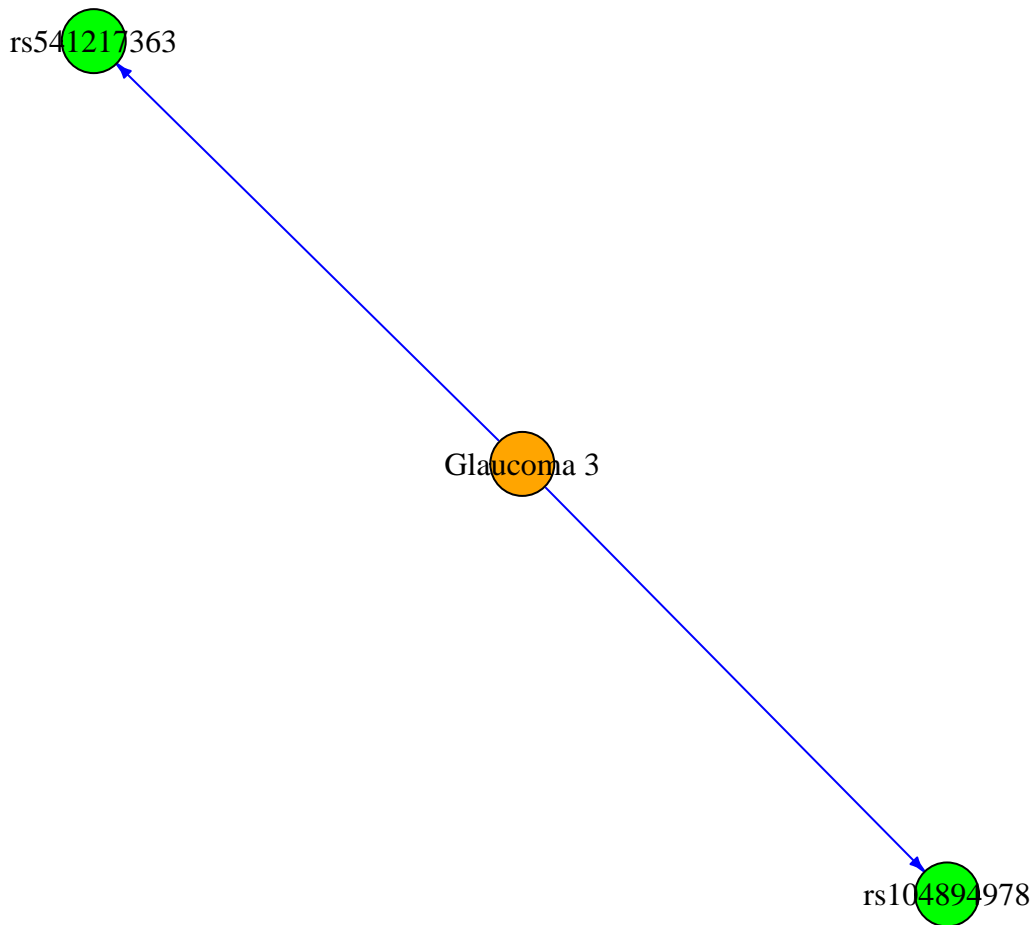

# Variant–Disease Network (Global developmental delay)

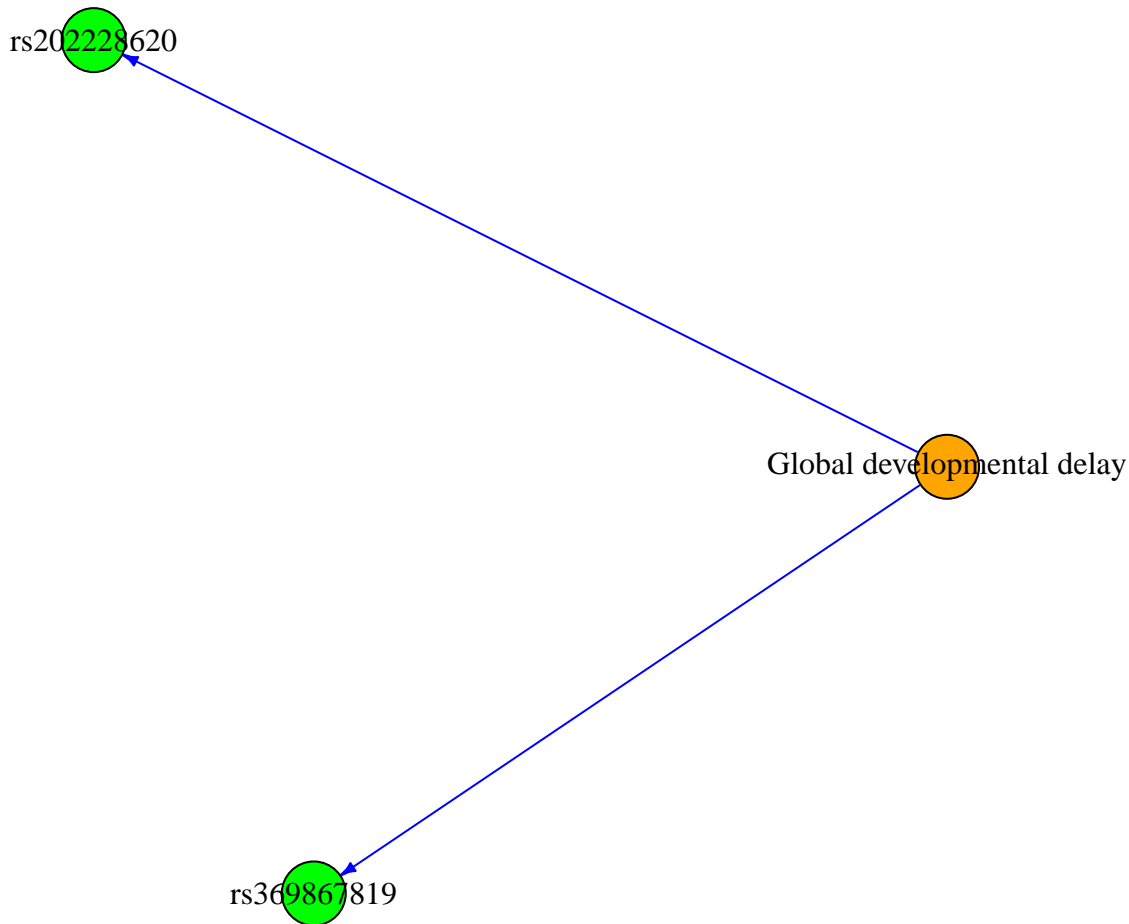

**Variant–Disease Network (Glucocorticoid deficiency with achalasia)**

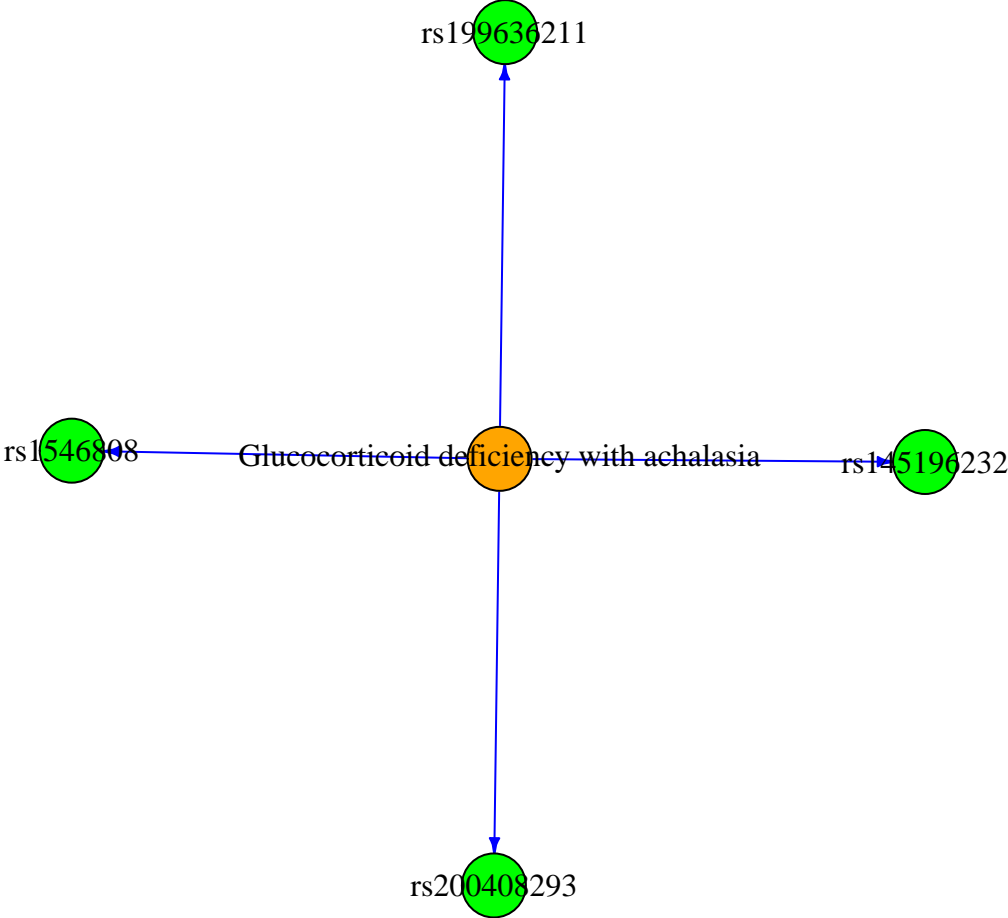

Variant–Disease Network (Glucose transporter type 1 deficiency syndrome)

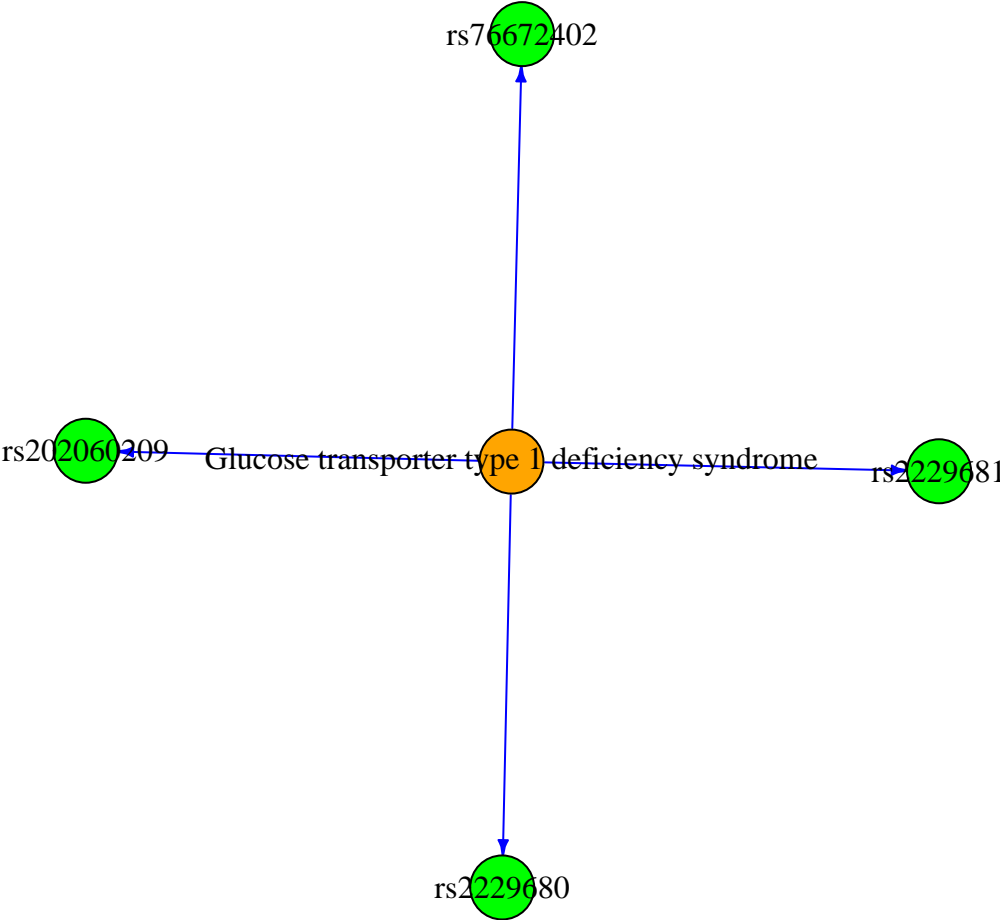

Variant–Disease Network (Glucose–6–phosphate transport defect)

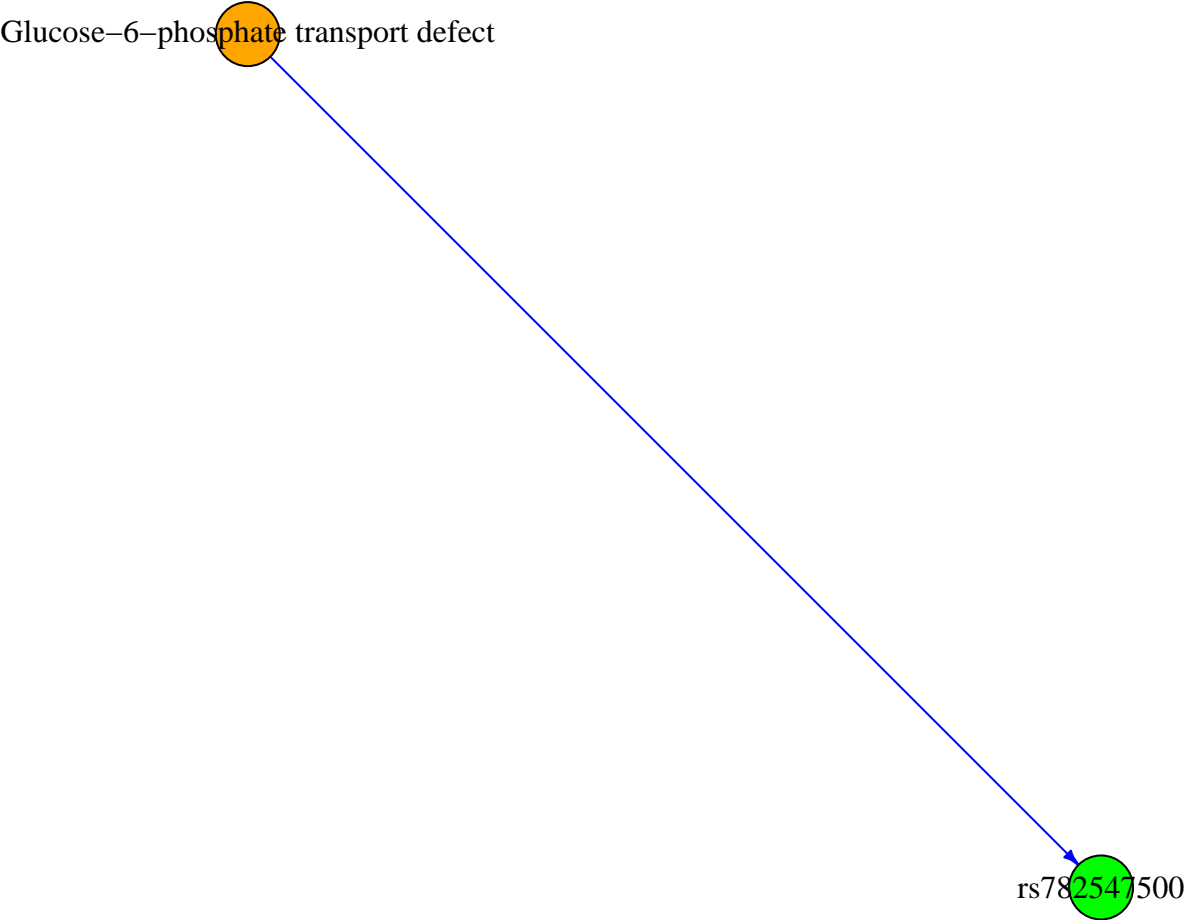

Variant–Disease Network (GLUT1 deficiency syndrome 1)

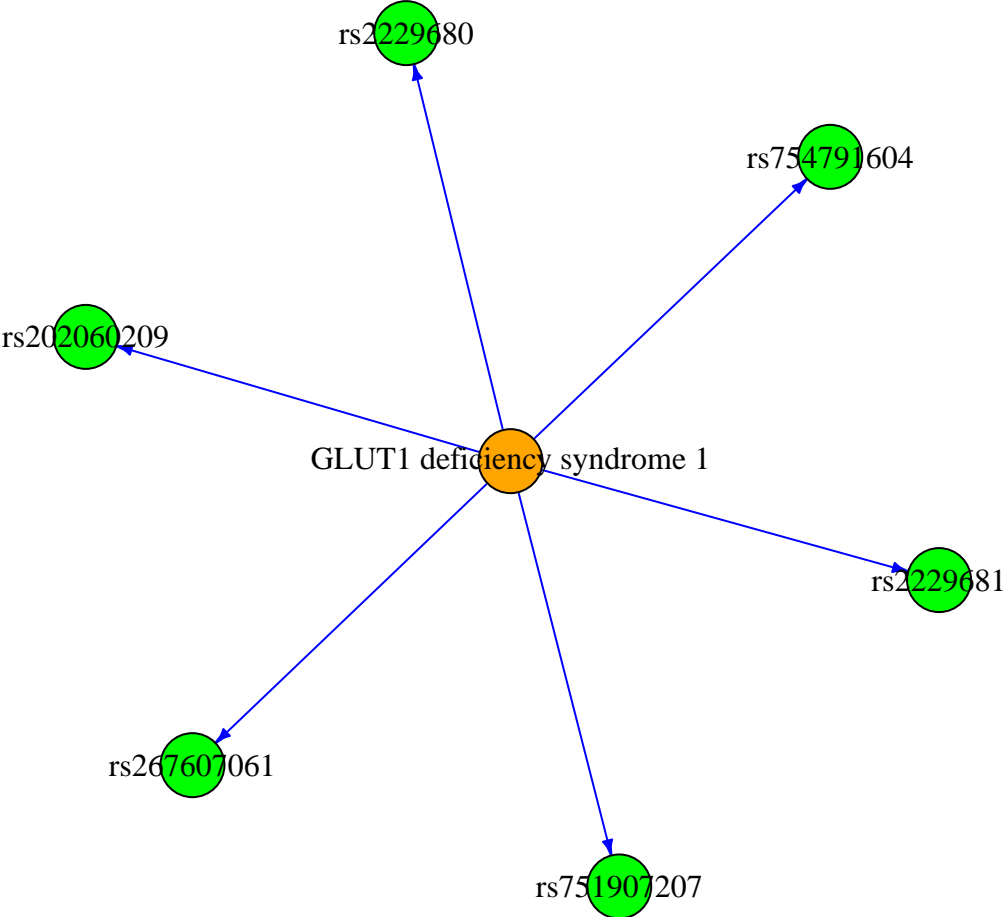



Variant–Disease Network (GLUT1 deficiency syndrome 2)

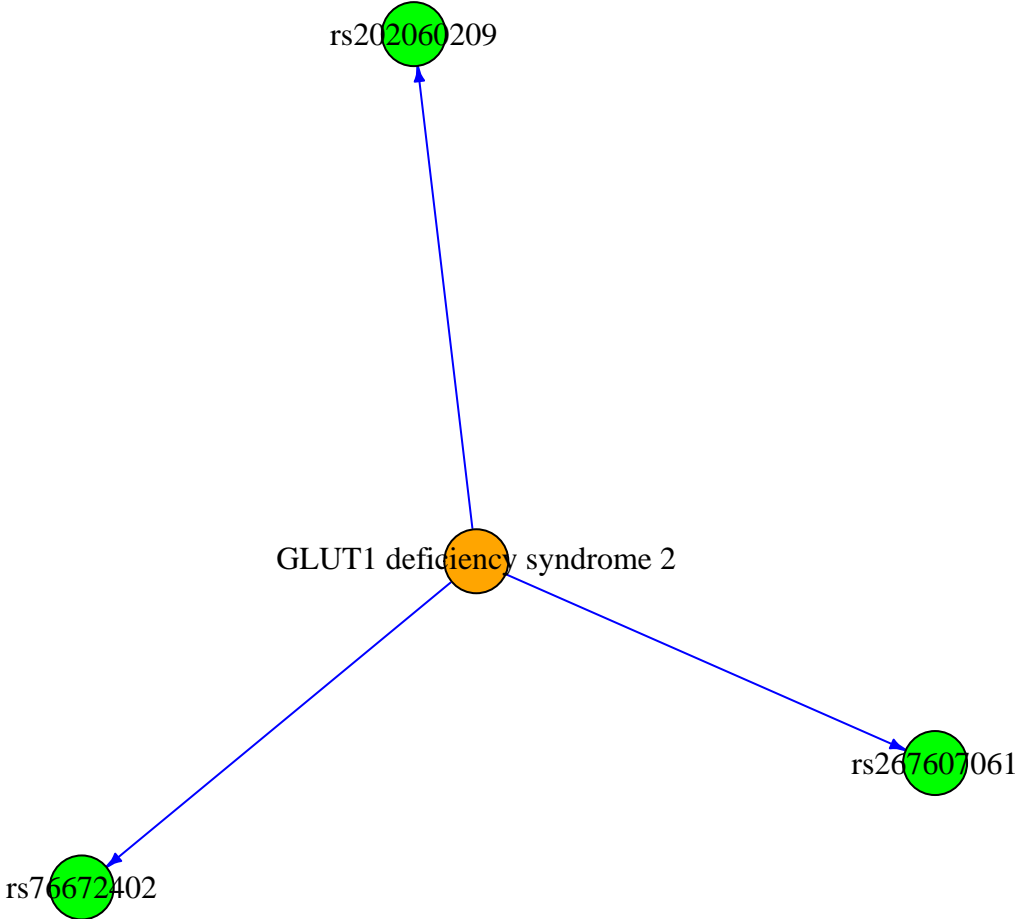

# Variant-Disease Network (GLUTAMIC PYRUVATE TRANSAMINASE POLYMORPHISM)

GLUTAMIC PYRUVATE TRANSAMINASE POLYMORPHISM

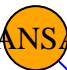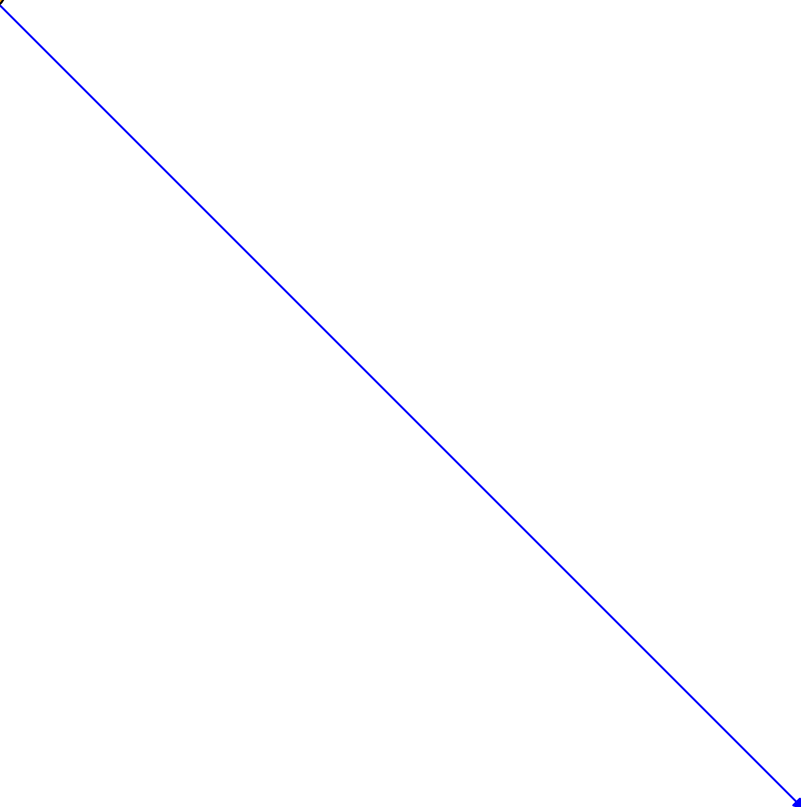

rs1063739

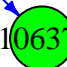

## Variant-Disease Network (Glutamine deficiency)

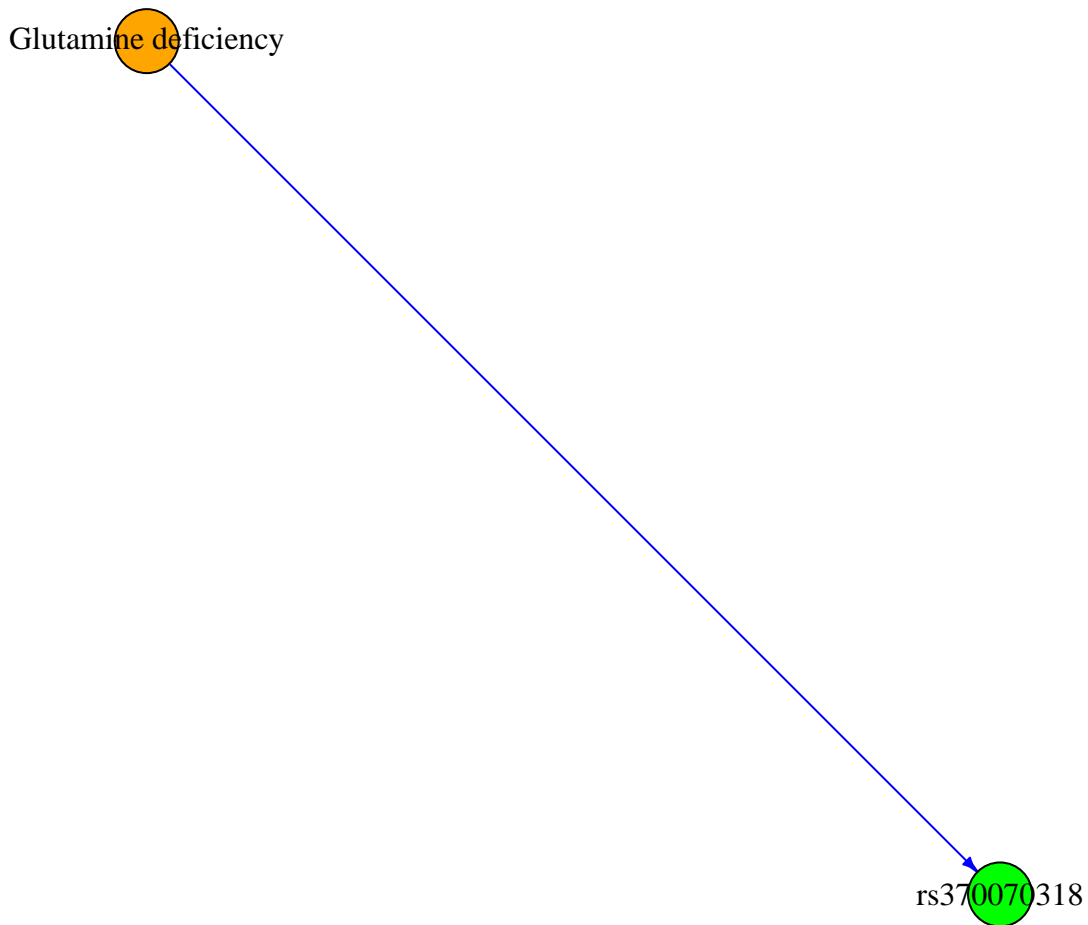

# Variant-Disease Network (Gluthathione synthetase deficiency)

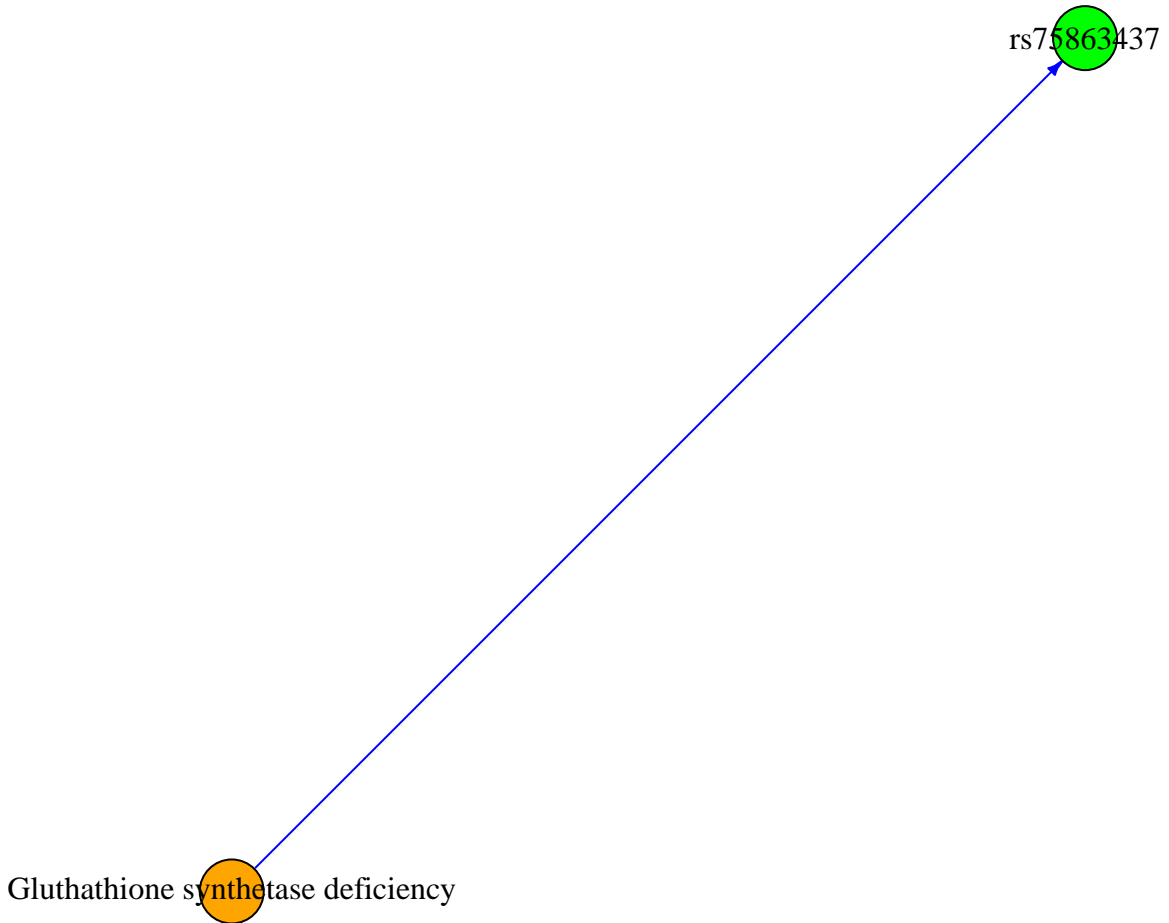

# Variant–Disease Network (Glycogen phosphorylase kinase deficiency)

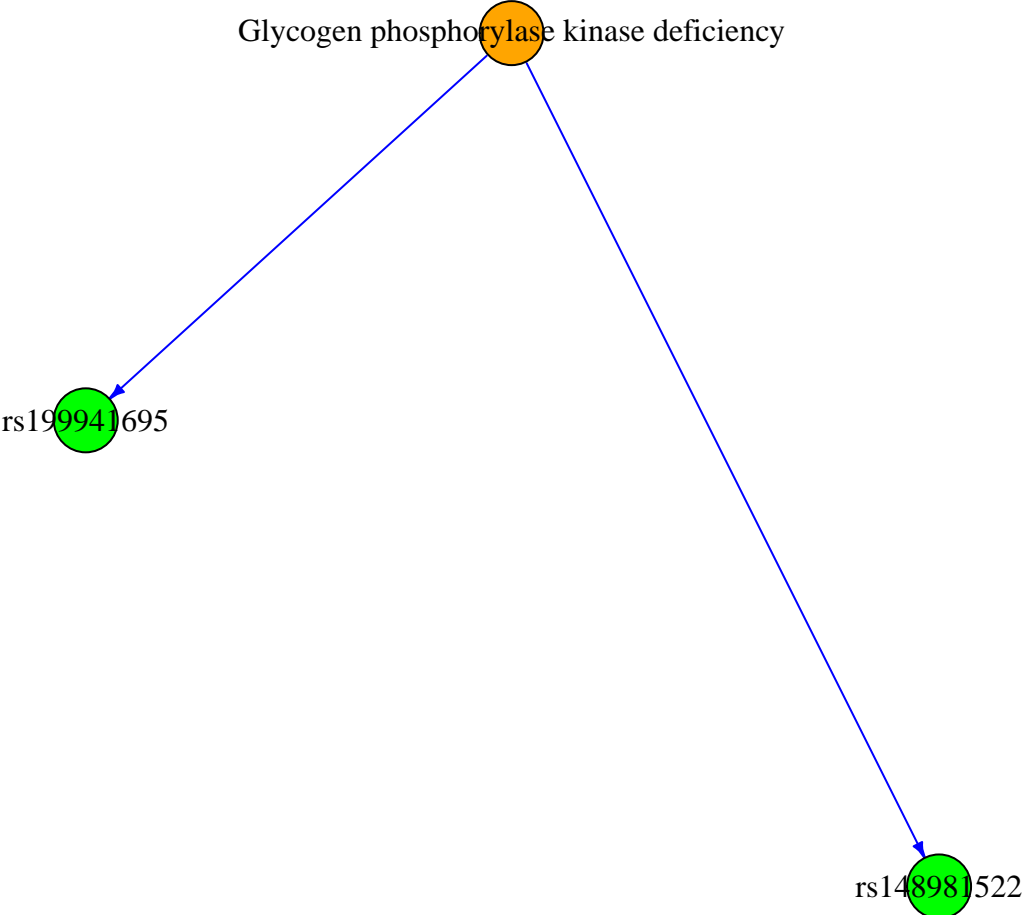

## Variant-Disease Network (Glycogen storage disease)

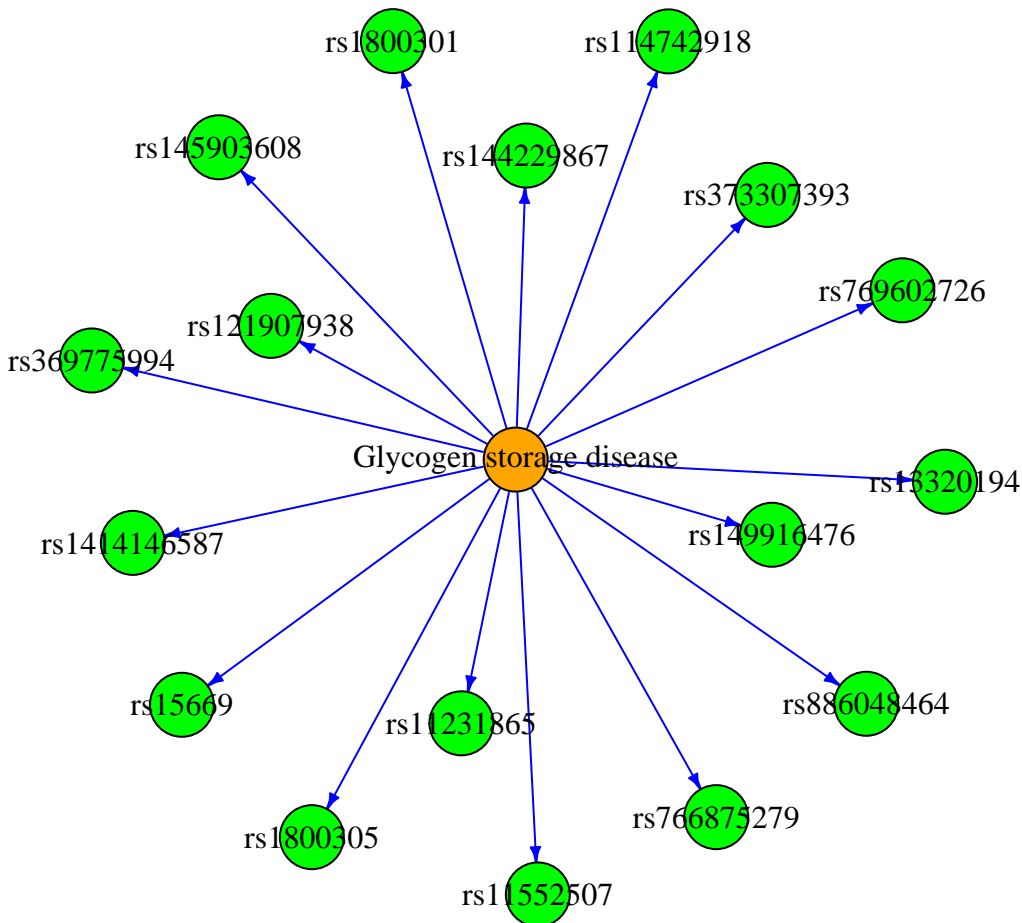

## Variant–Disease Network (Glycogen storage disease II)

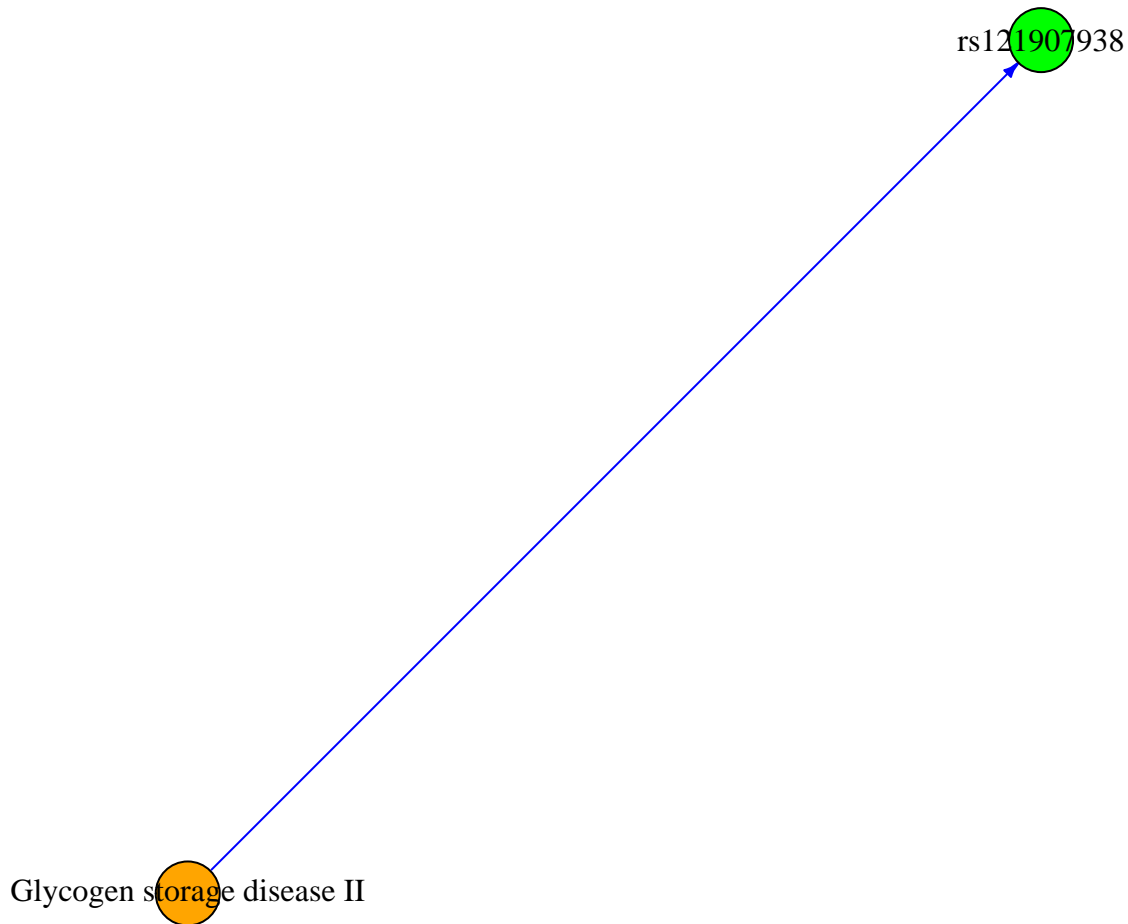

Variant–Disease Network (Glycogen storage disease of heart)

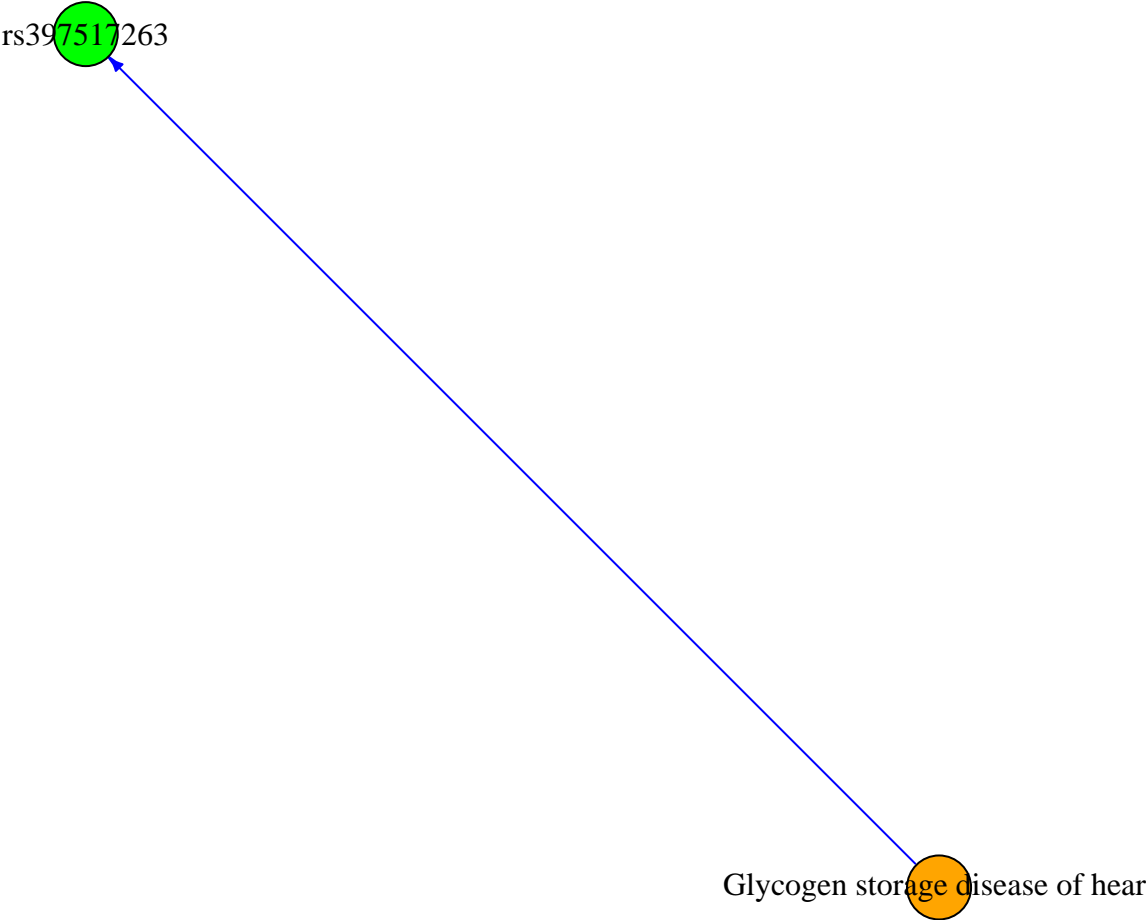



## Variant–Disease Network (Glycogen storage disease type 13)

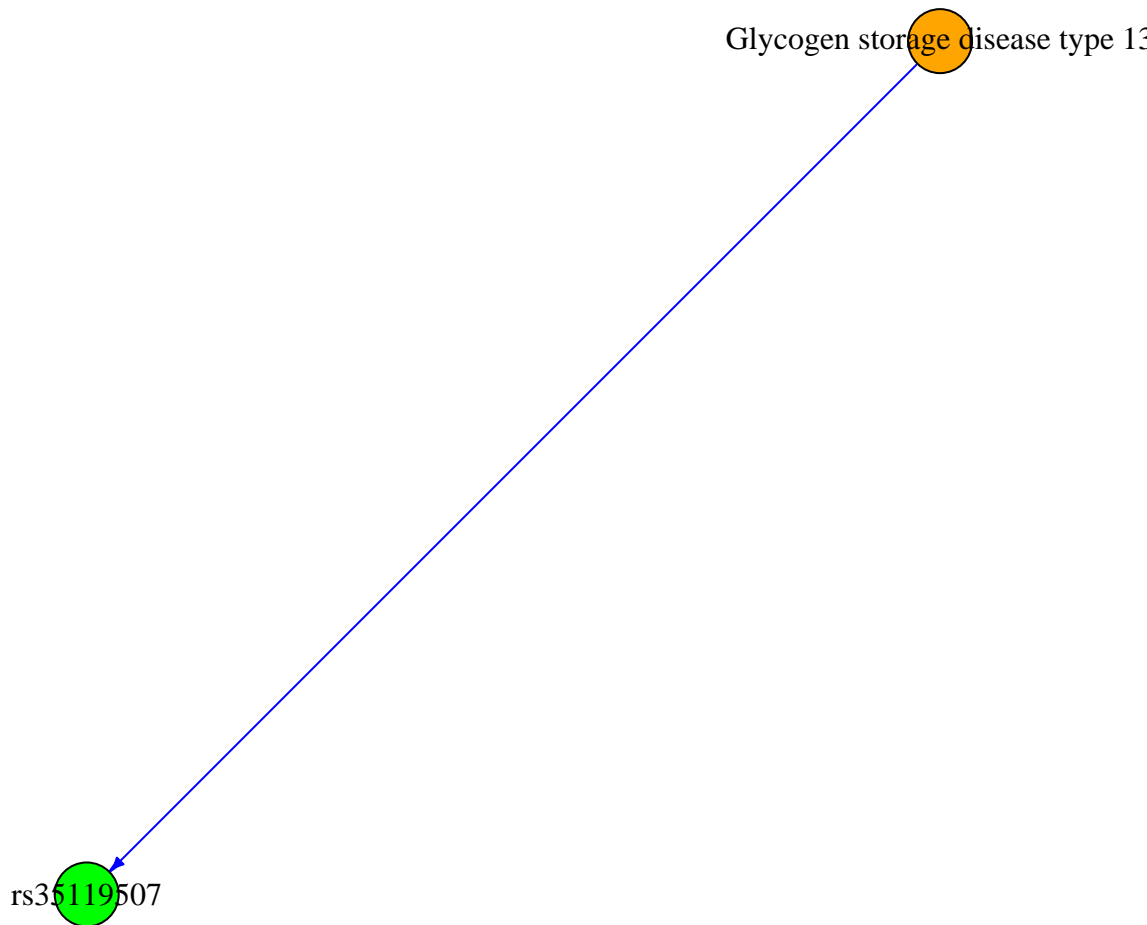

## Variant–Disease Network (Glycogen storage disease type III)

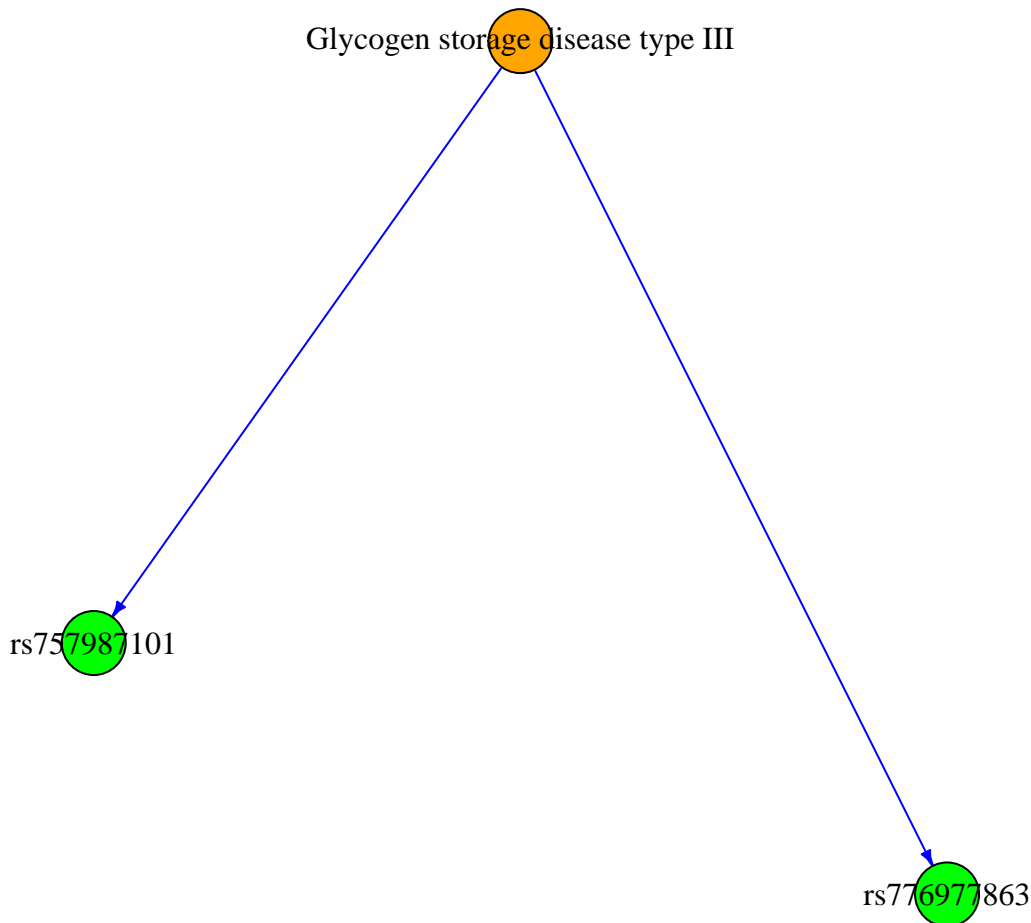

## Variant–Disease Network (Glycogen storage disease XI)

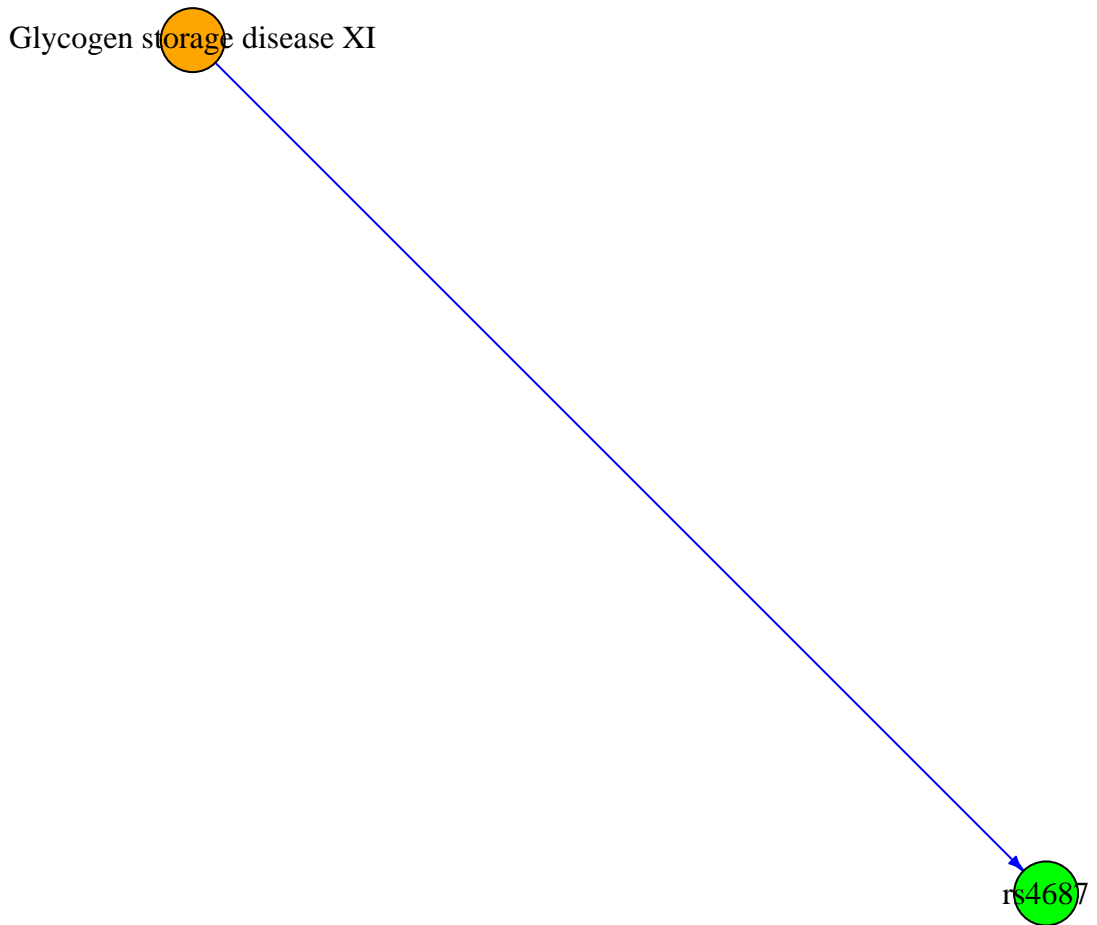

## Variant–Disease Network (GM1 gangliosidosis)

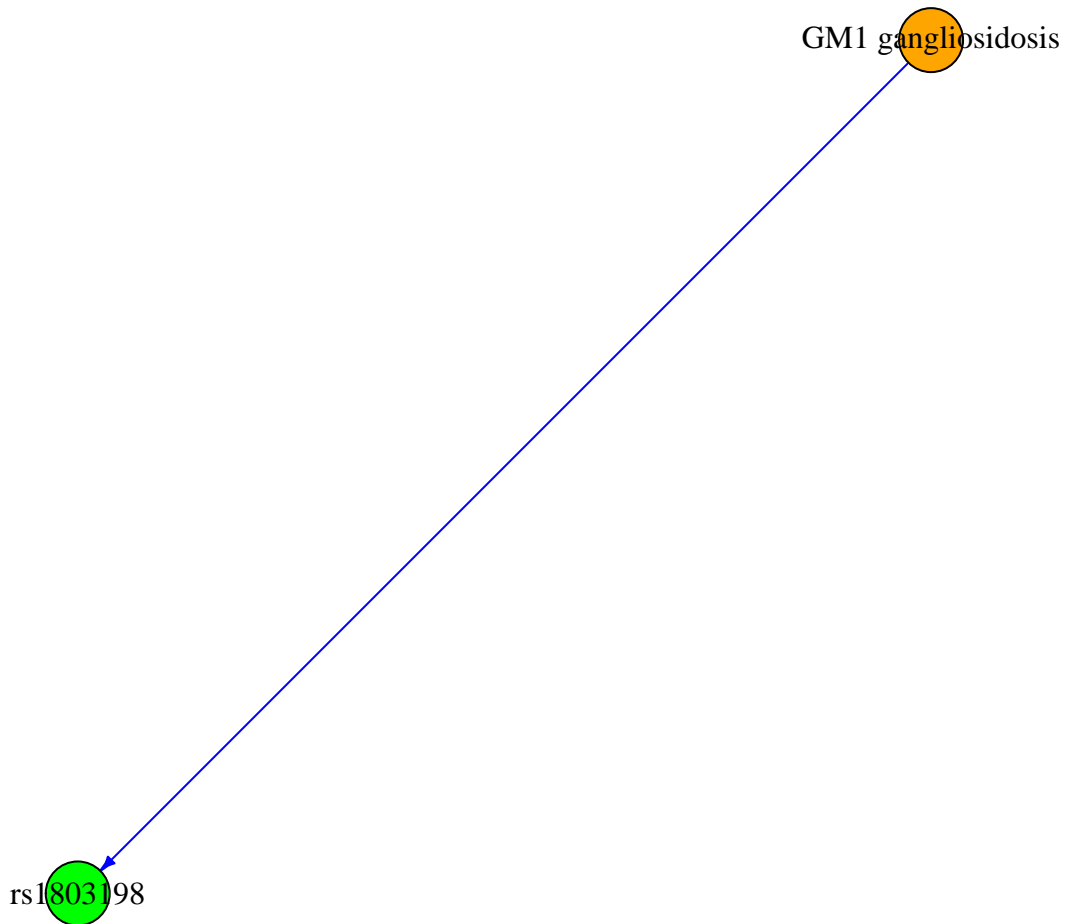

# Variant–Disease Network (GM1 gangliosidosis type 2)

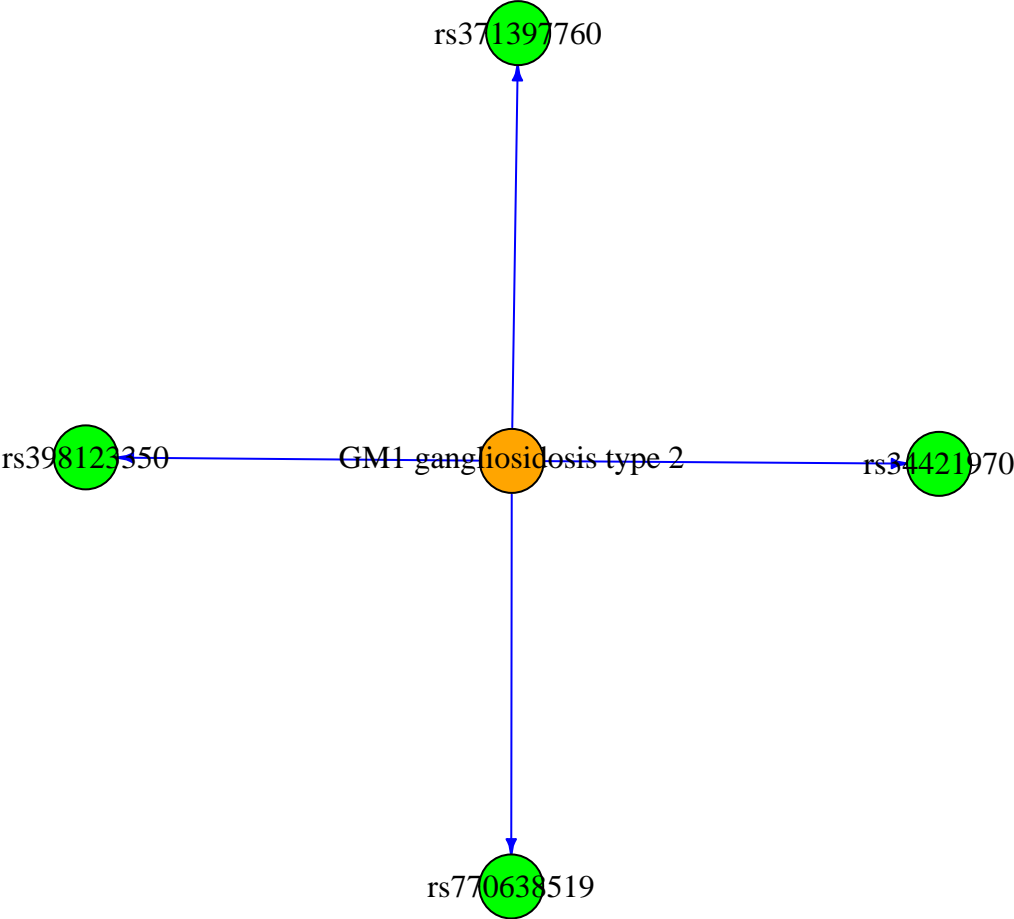

Variant–Disease Network (GNE myopathy)

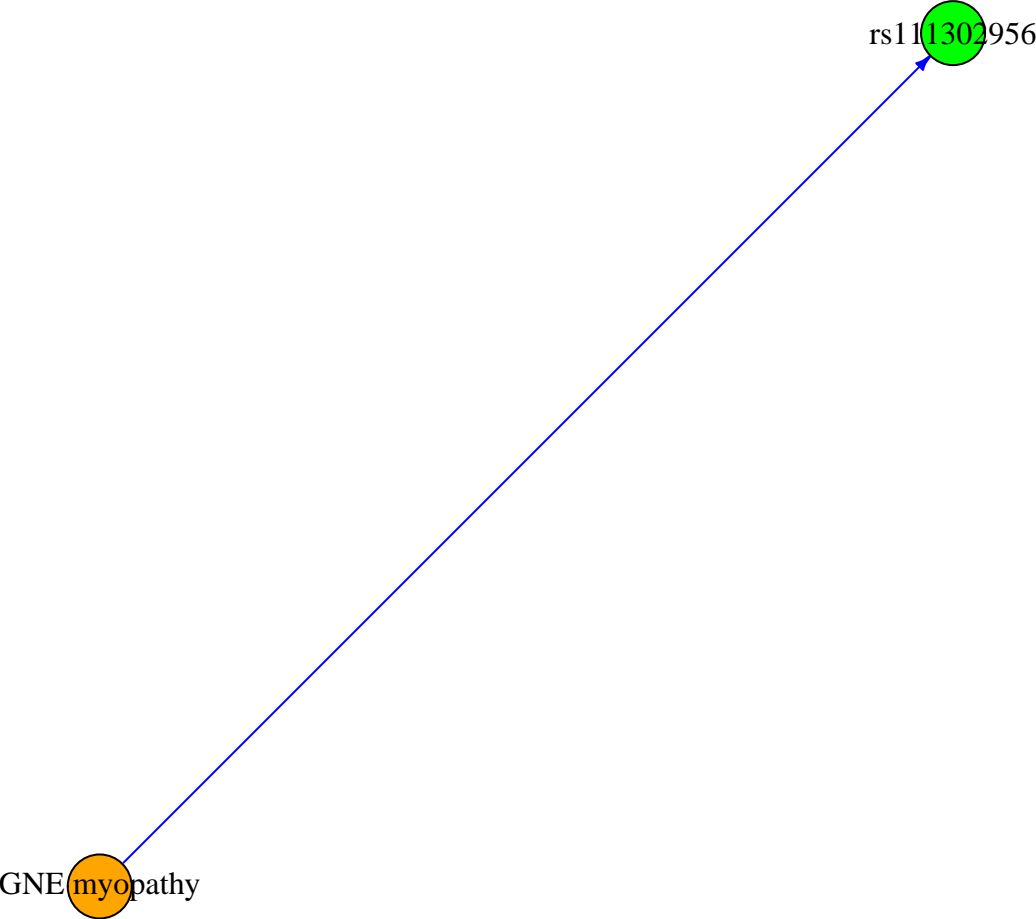

## Variant-Disease Network (Gorlin syndrome)

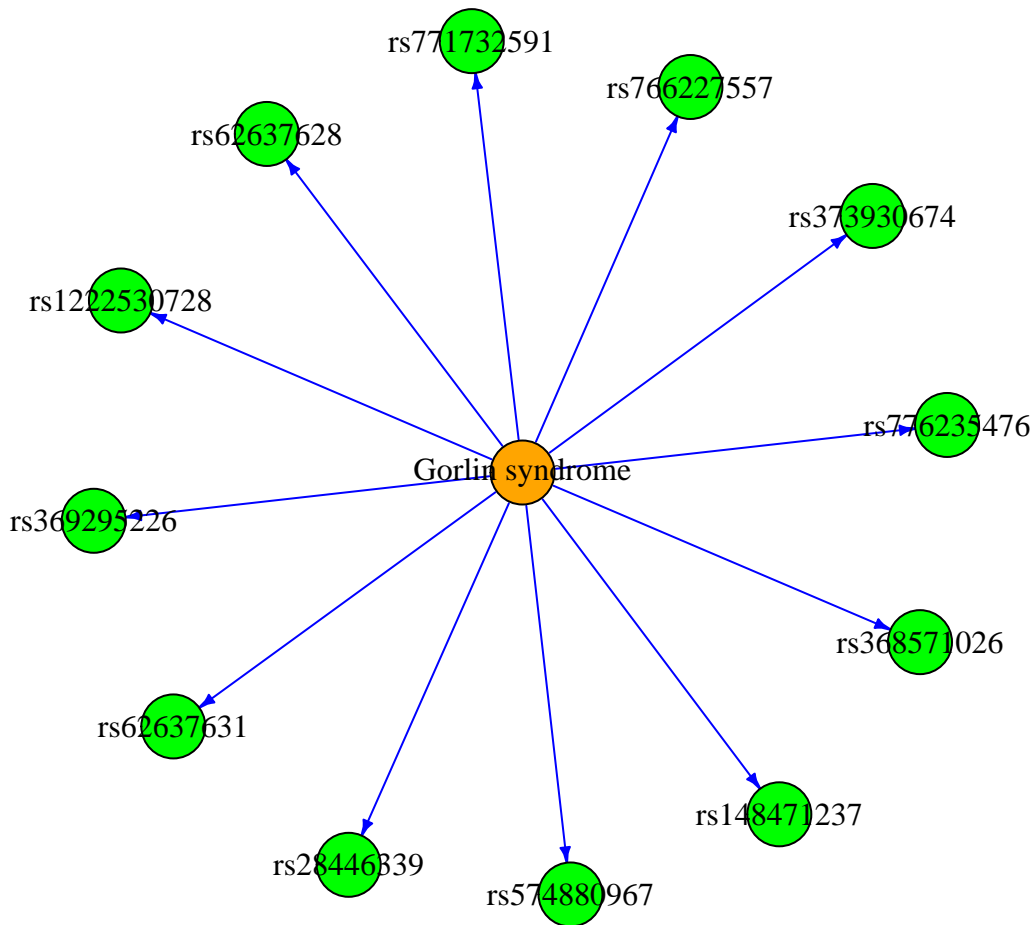

## Variant–Disease Network (Gray platelet syndrome)

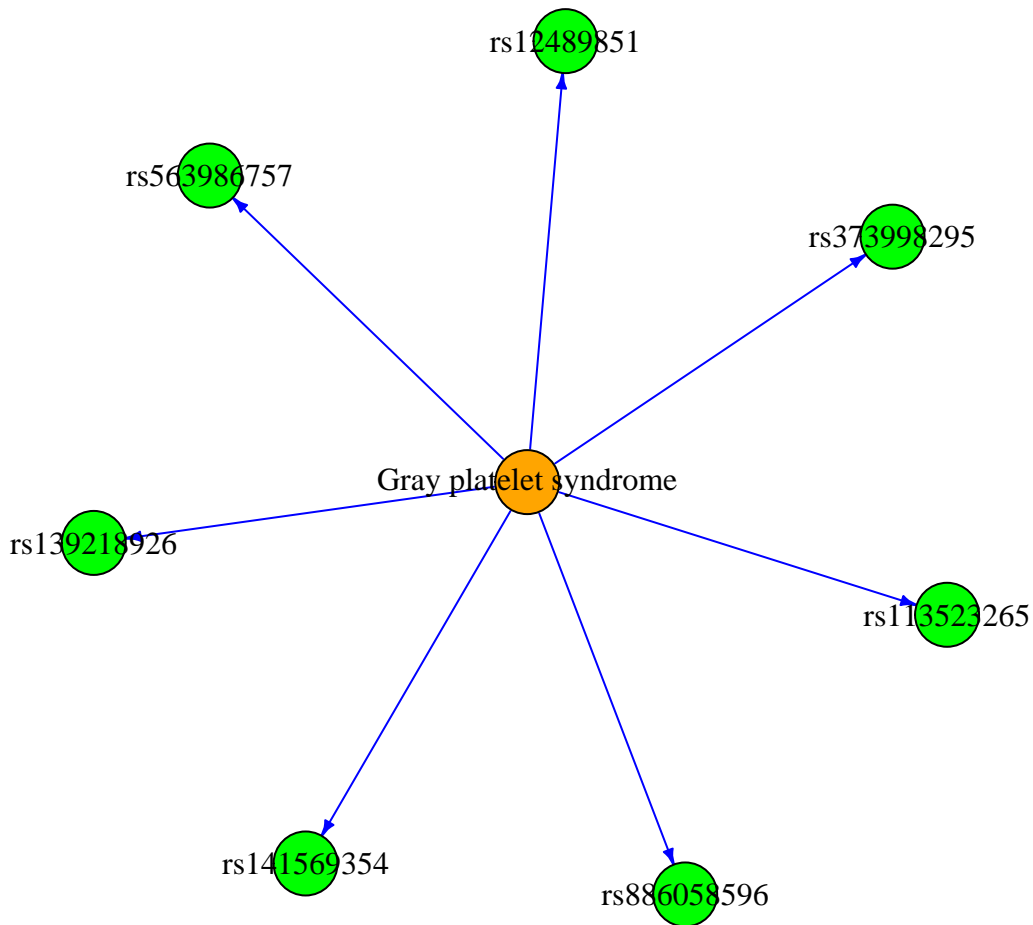



## Variant-Disease Network (Greenberg dysplasia)

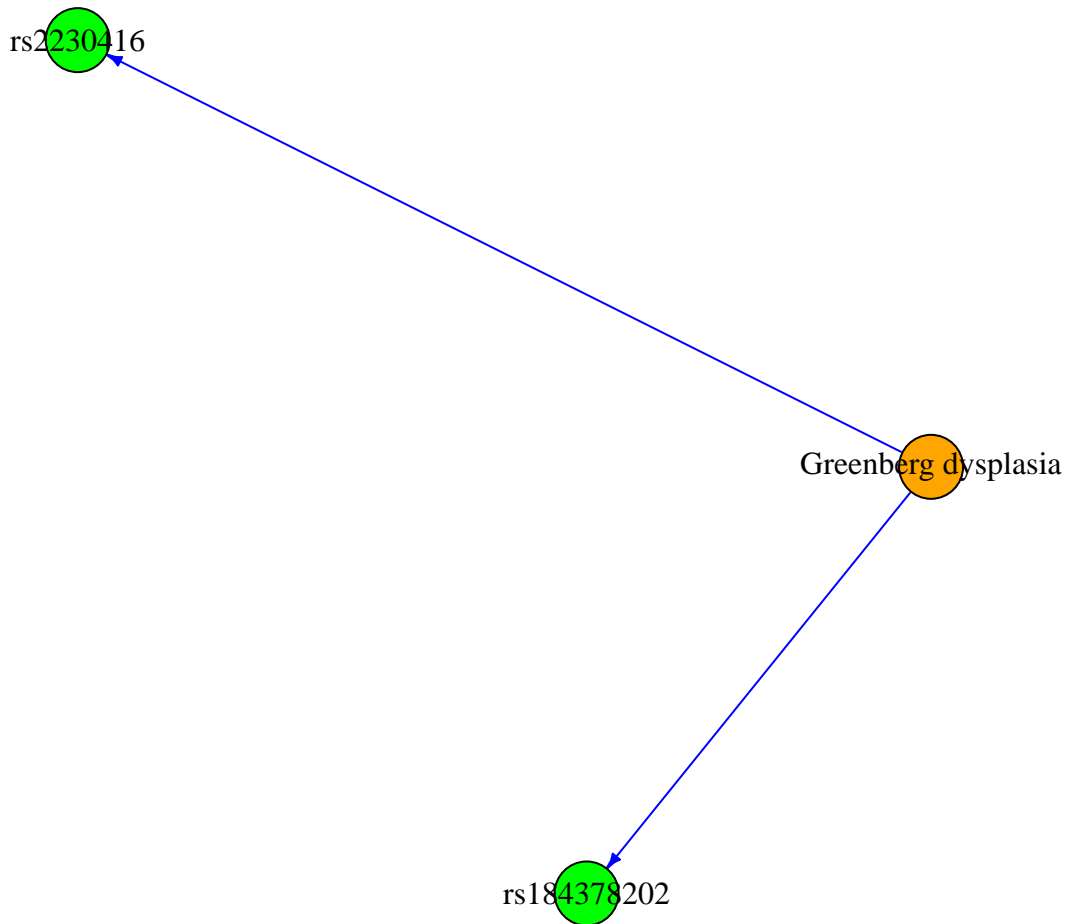

**Variant–Disease Network (Greig cephalopolysyndactyly syndrome)**

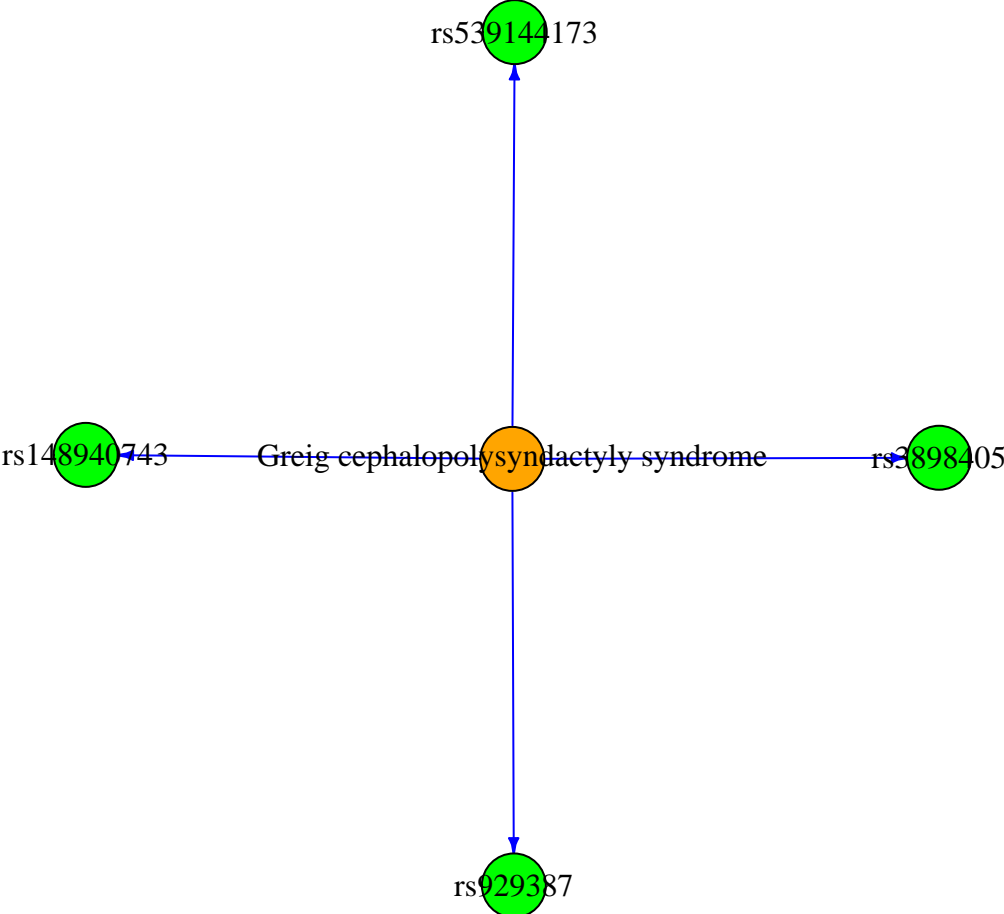

# Variant-Disease Network (Growth hormone insensitivity with immunodeficiency)

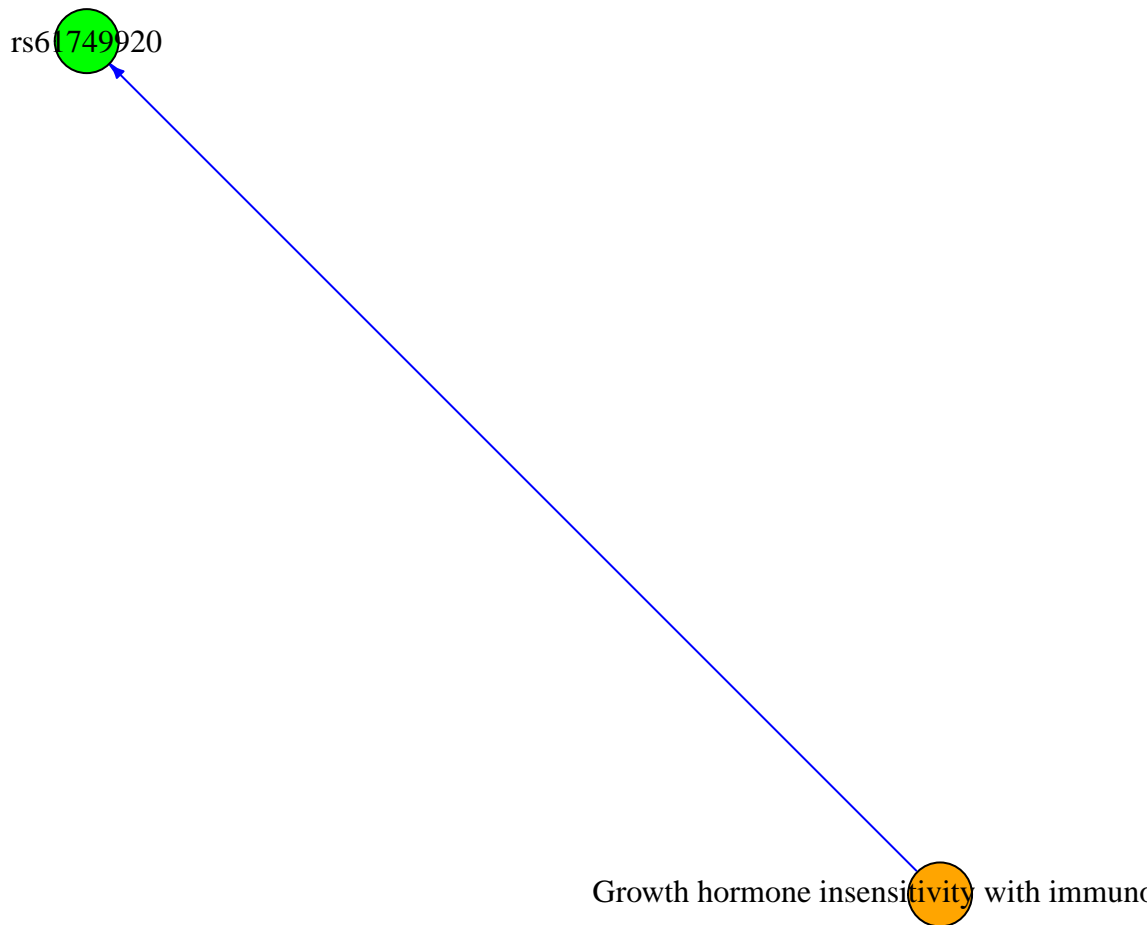

## Variant–Disease Network (Haemorrhagic telangiectasia 1)

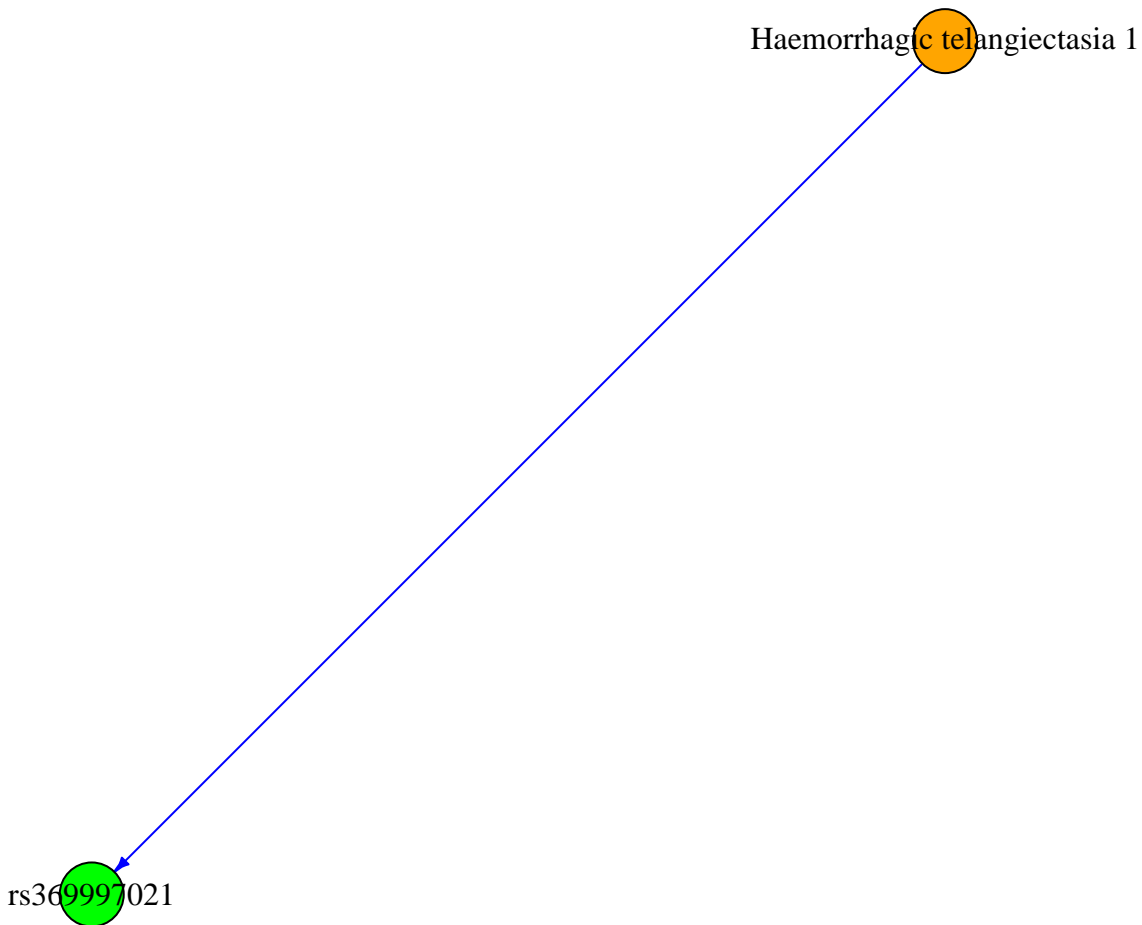

**Variant–Disease Network (Hajdu–Cheney syndrome)**

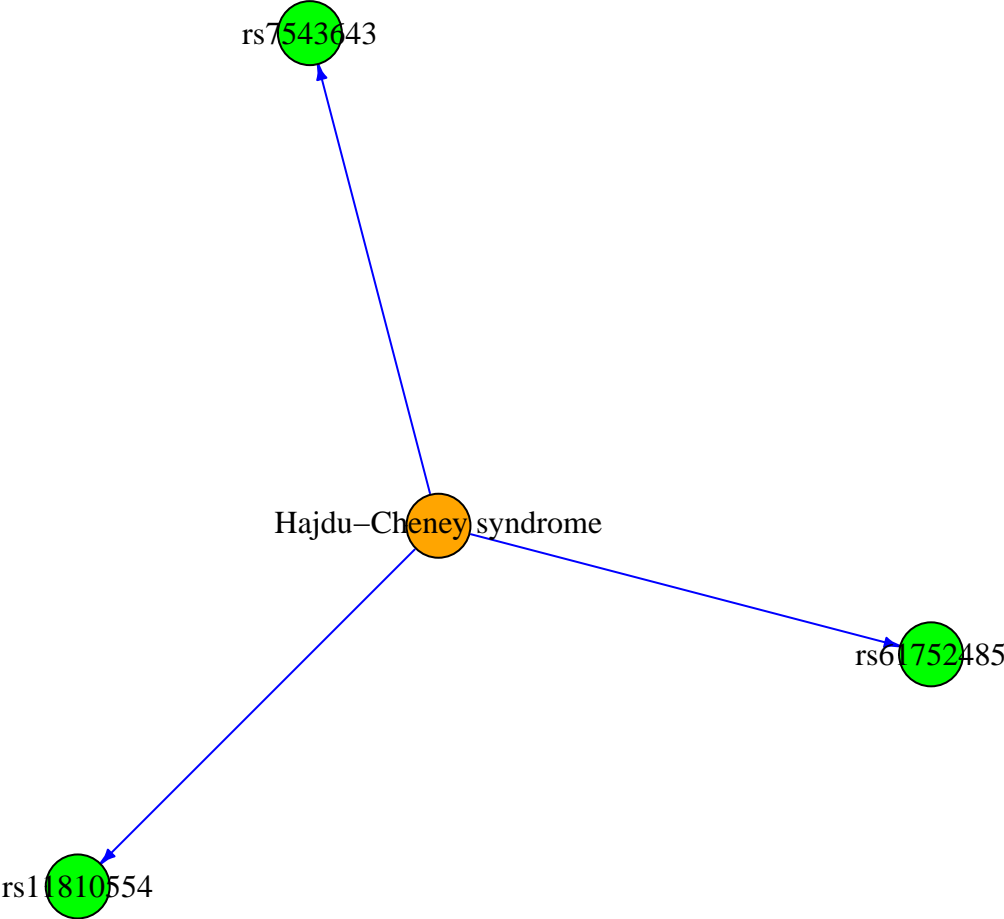

## Variant-Disease Network (Hallux valgus)

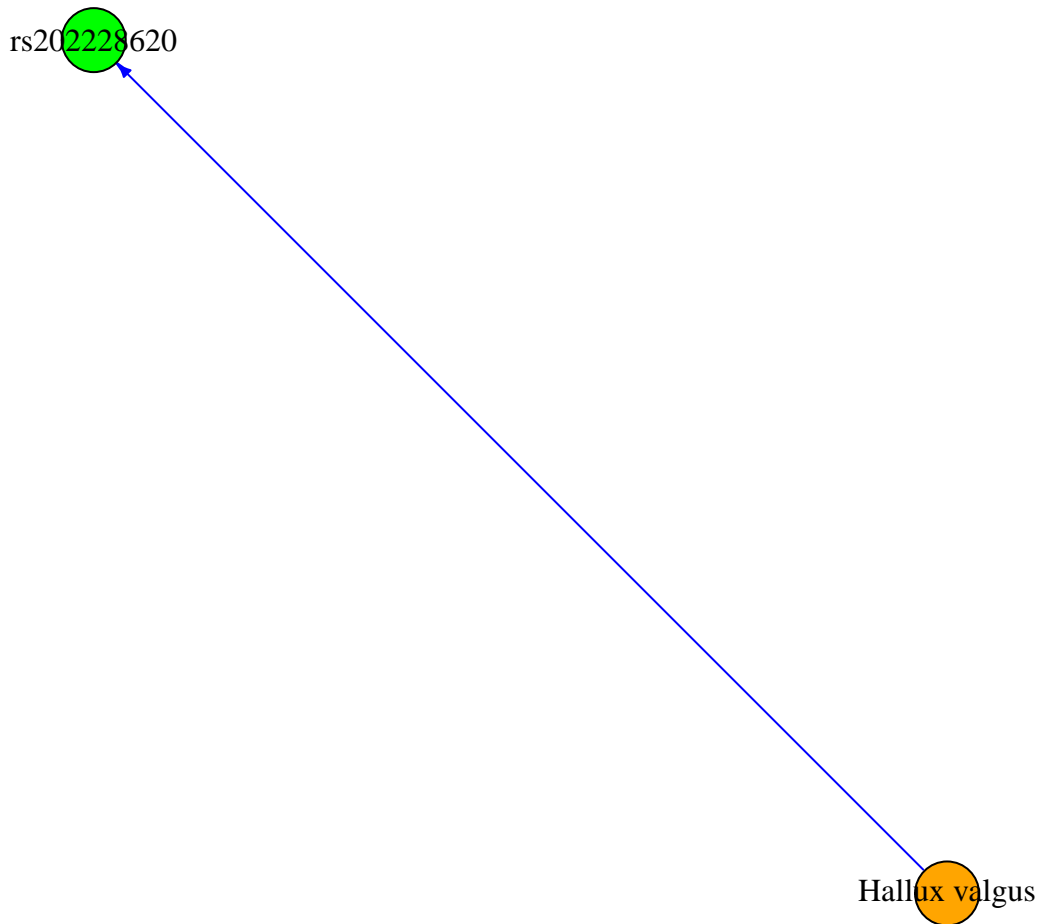

## Variant–Disease Network (Hecht syndrome)

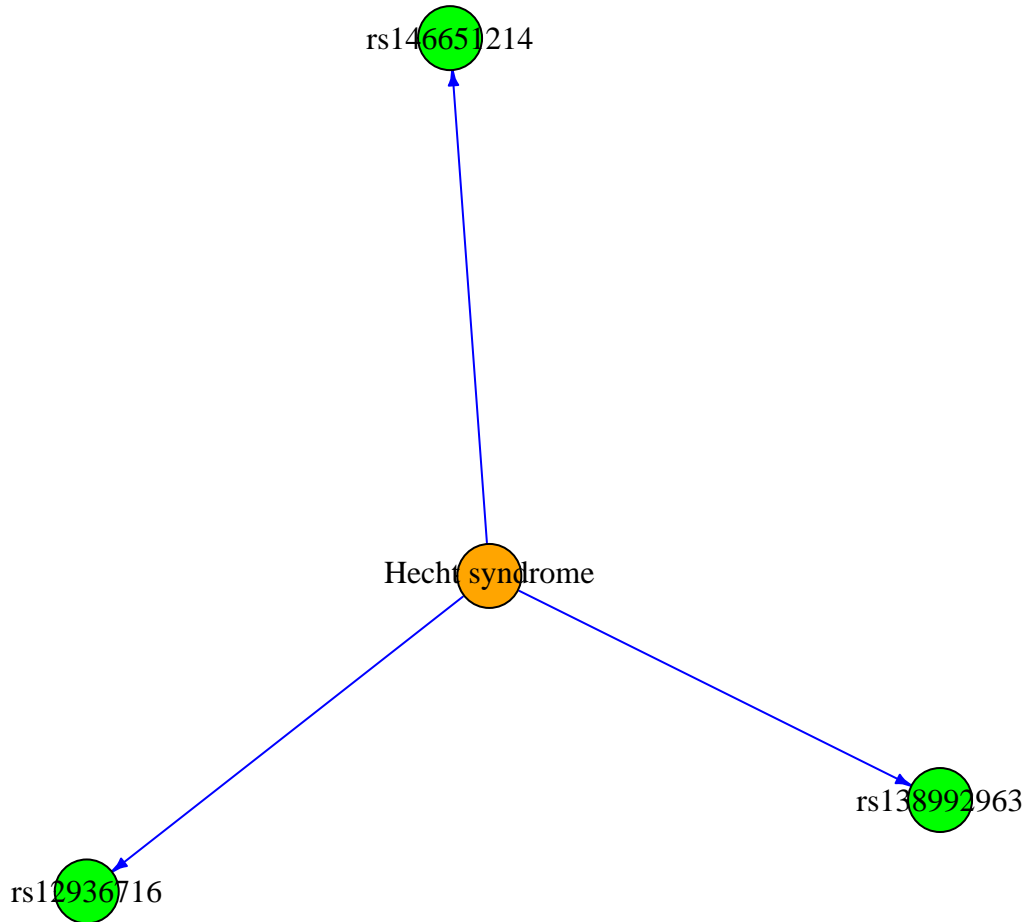

# Variant–Disease Network (Helsmoortel–Van der Aa Syndrome)

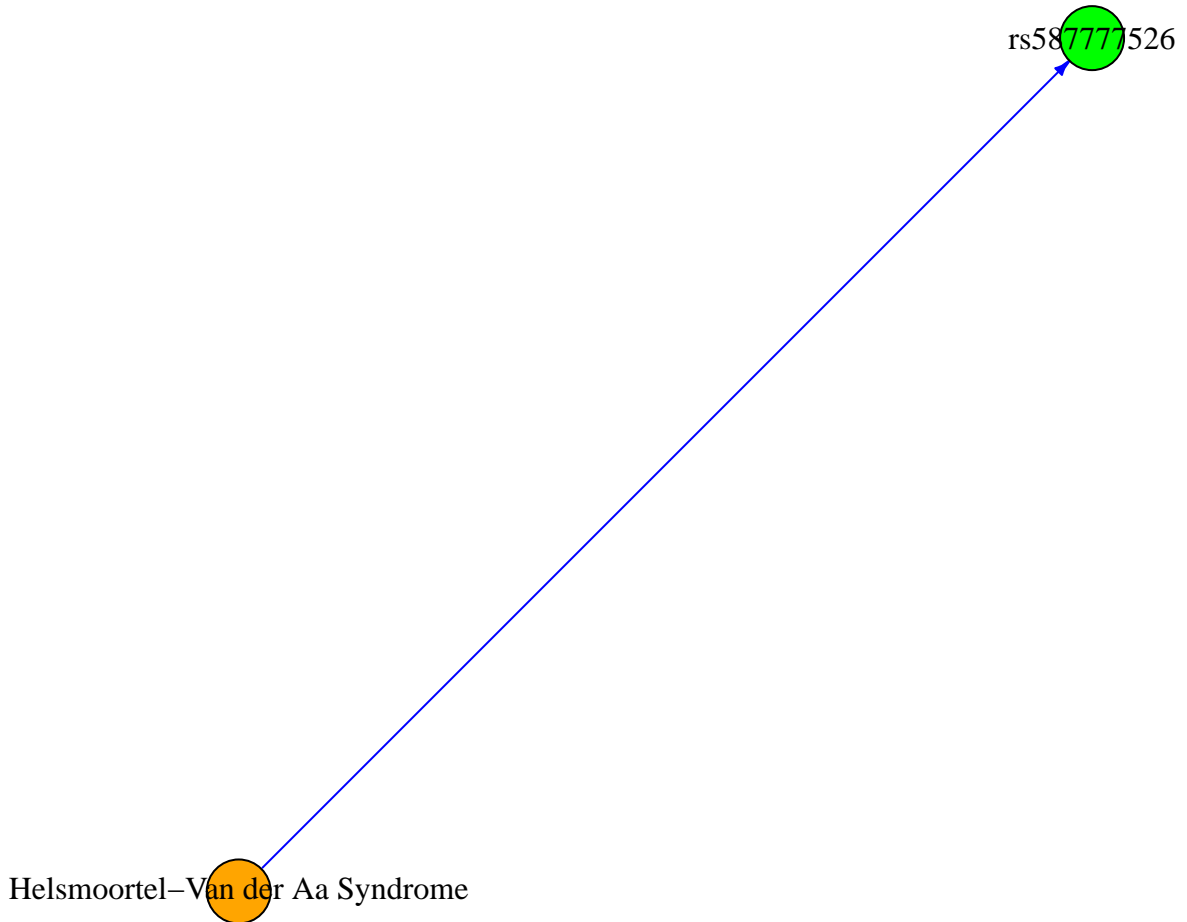



Variant–Disease Network (Hemochromatosis type 3)

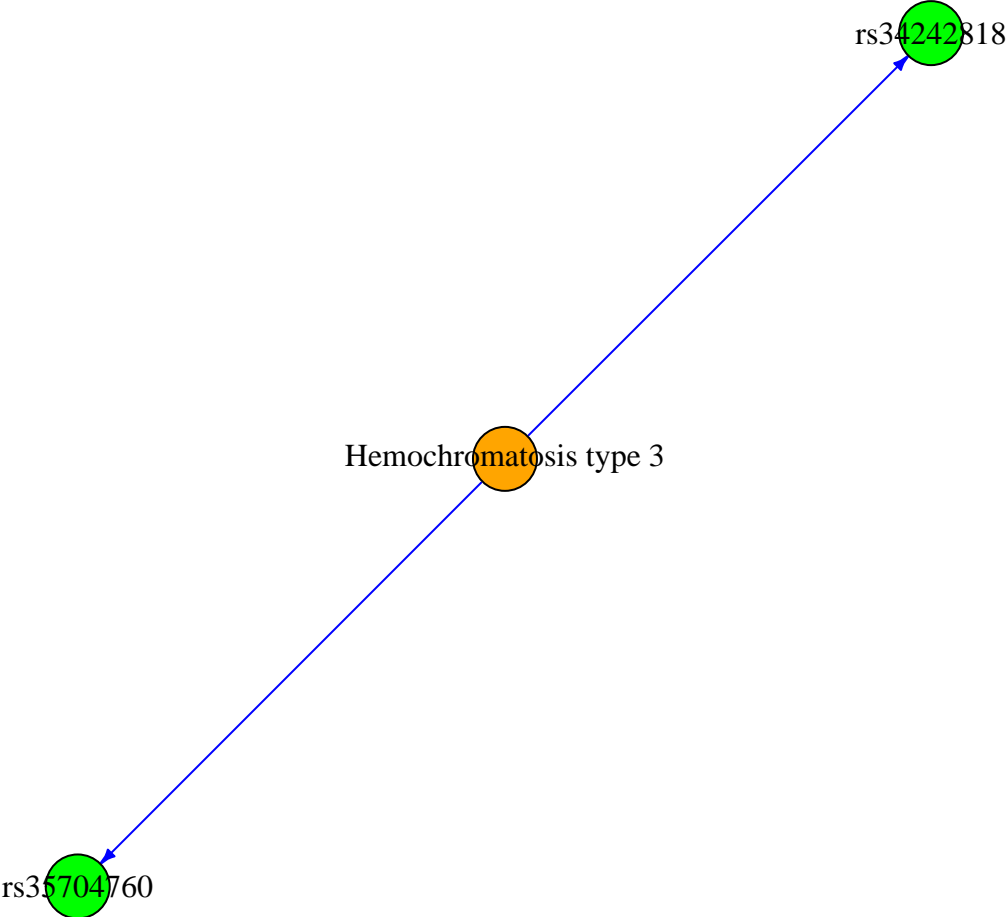

## Variant–Disease Network (Hemochromatosis type 4)

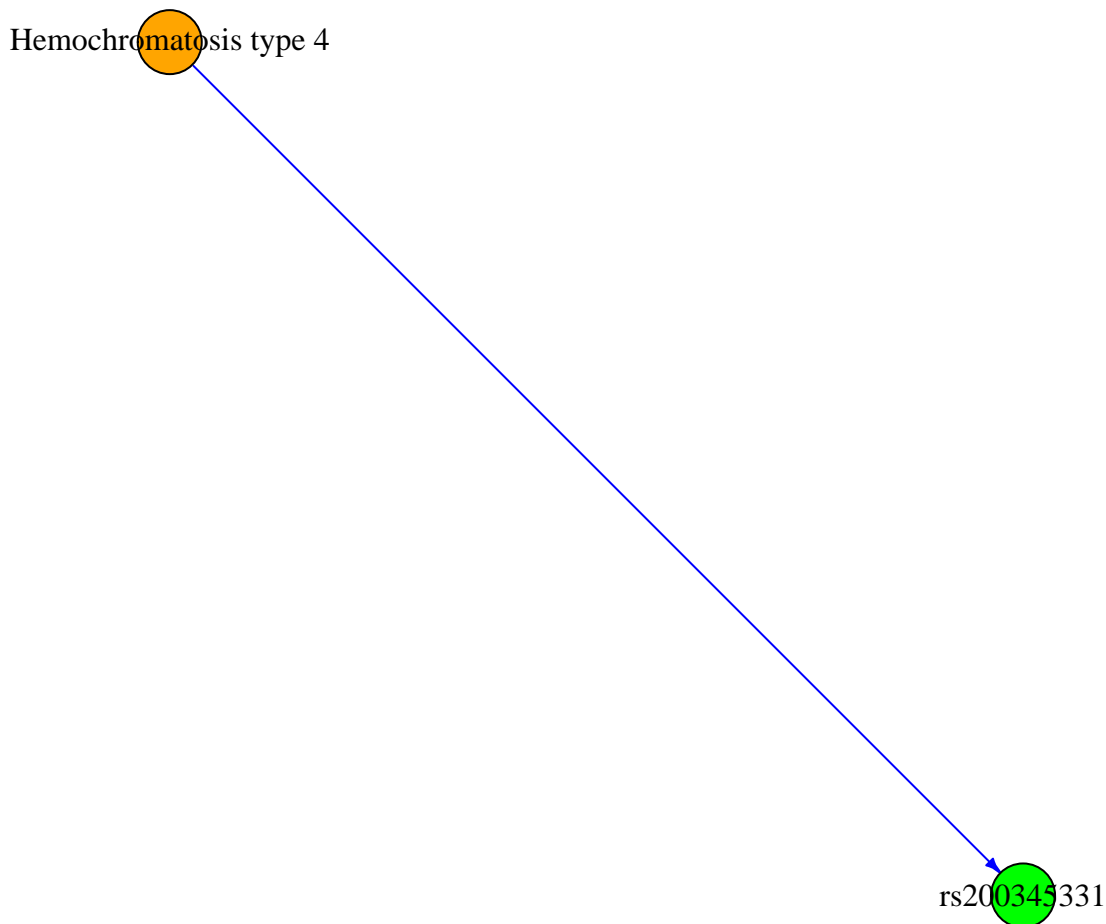

Variant–Disease Network (HEMOGLOBIN BREM–SUR–MER)

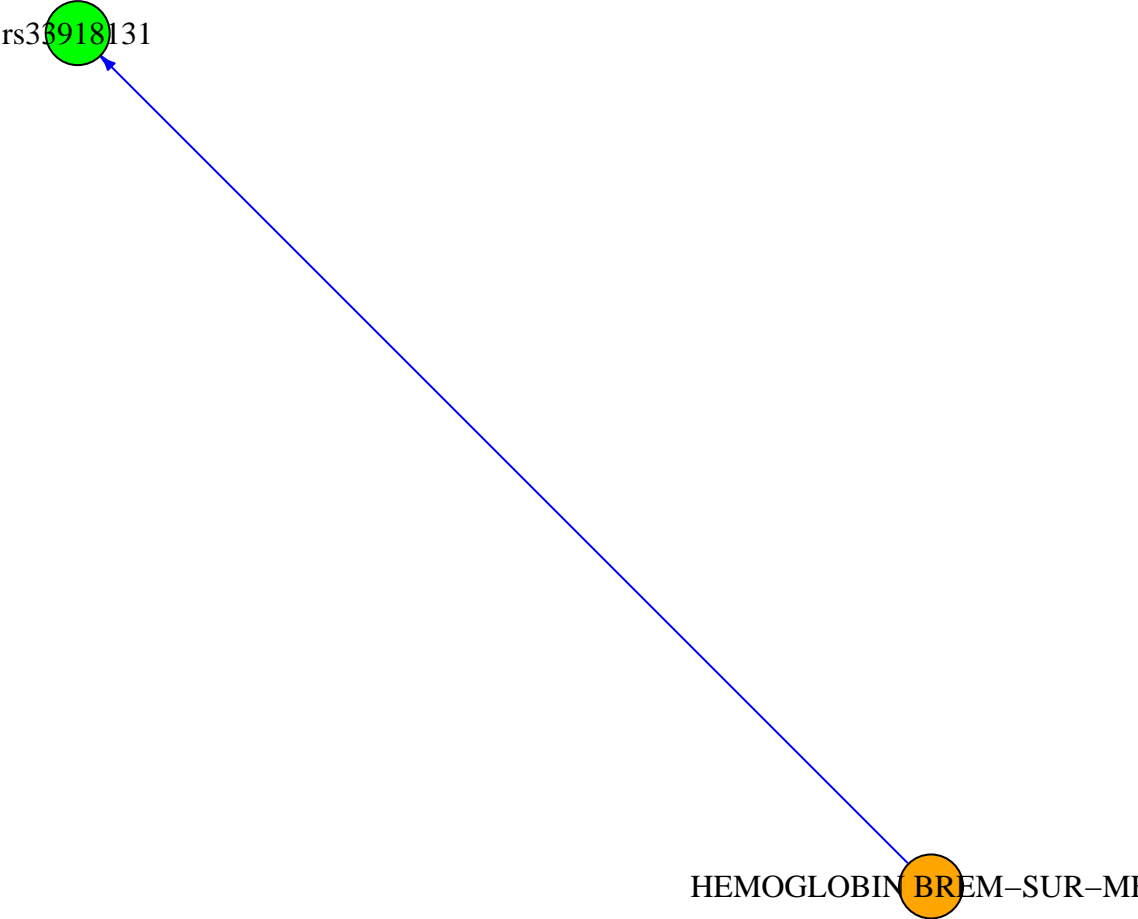

**Variant–Disease Network (HEMOGLOBIN D (IBADAN))**

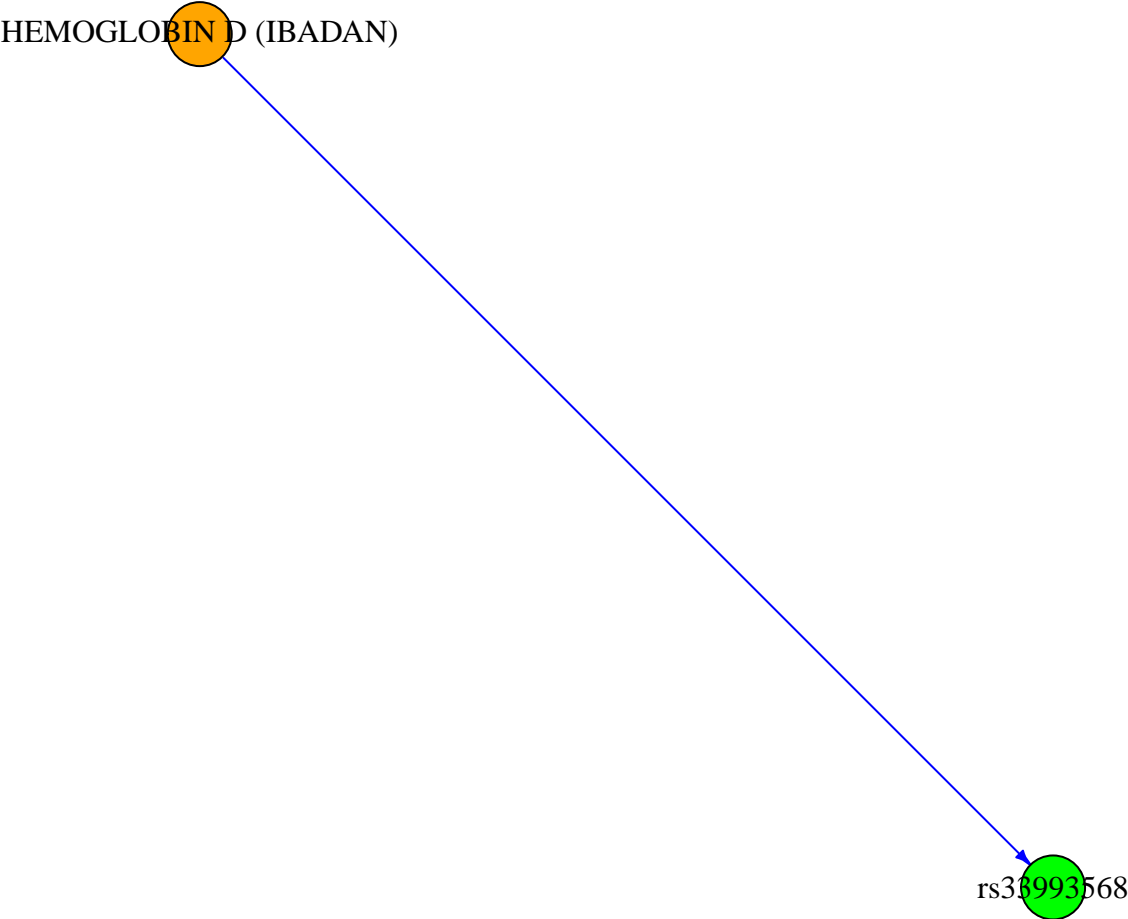

**Variant–Disease Network (HEMOGLOBIN D (OULED RABAH))**

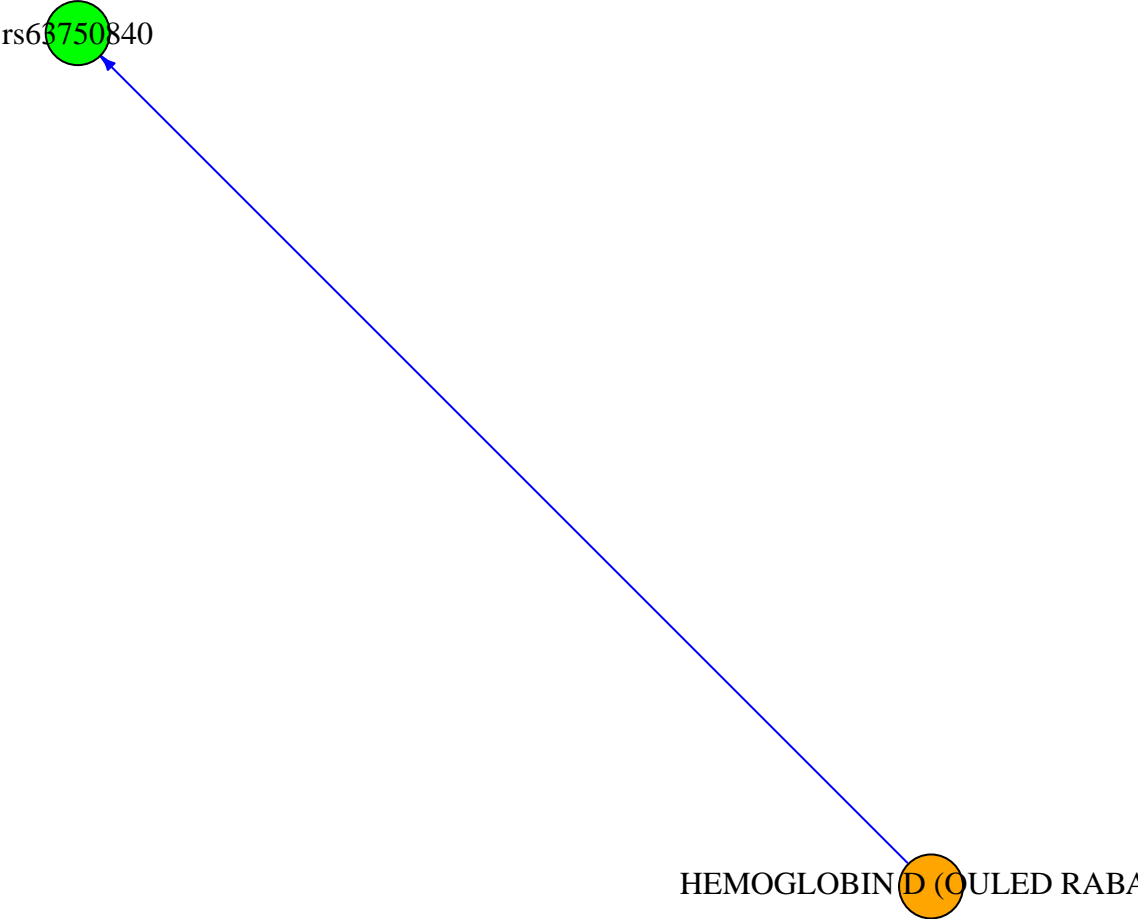

Variant–Disease Network (HEMOGLOBIN ERNZ)

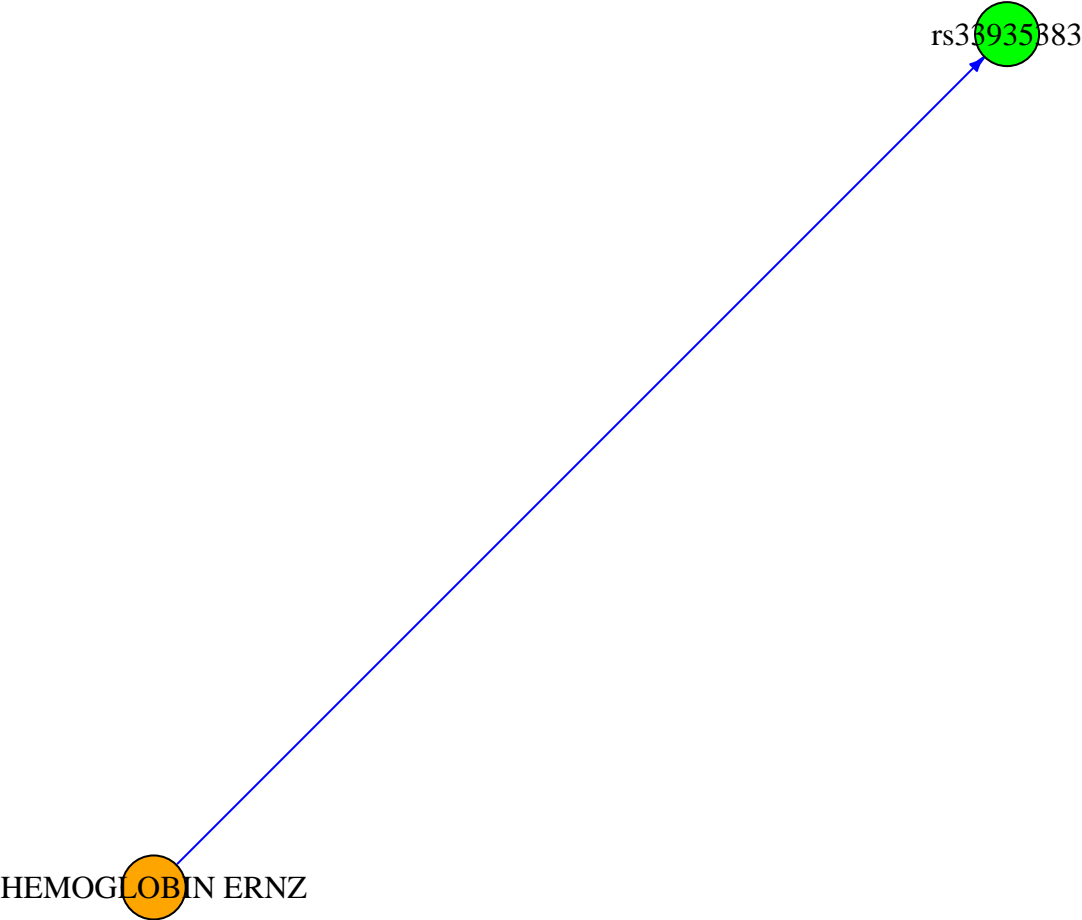

# Variant–Disease Network (HEMOGLOBIN G (FERRARA))

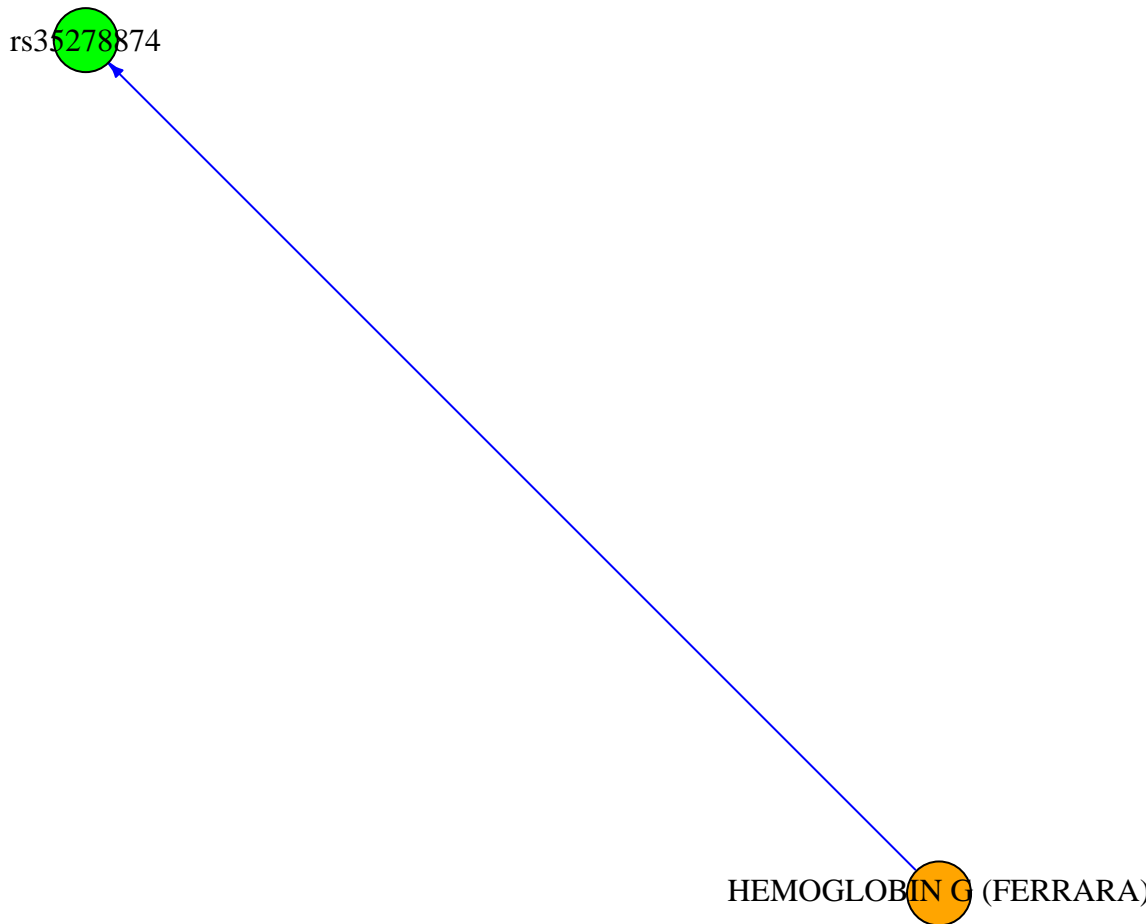

**Variant–Disease Network (HEMOGLOBIN J (CHICAGO))**

rs31985847

HEMOGLOBIN J (CHICAGO)

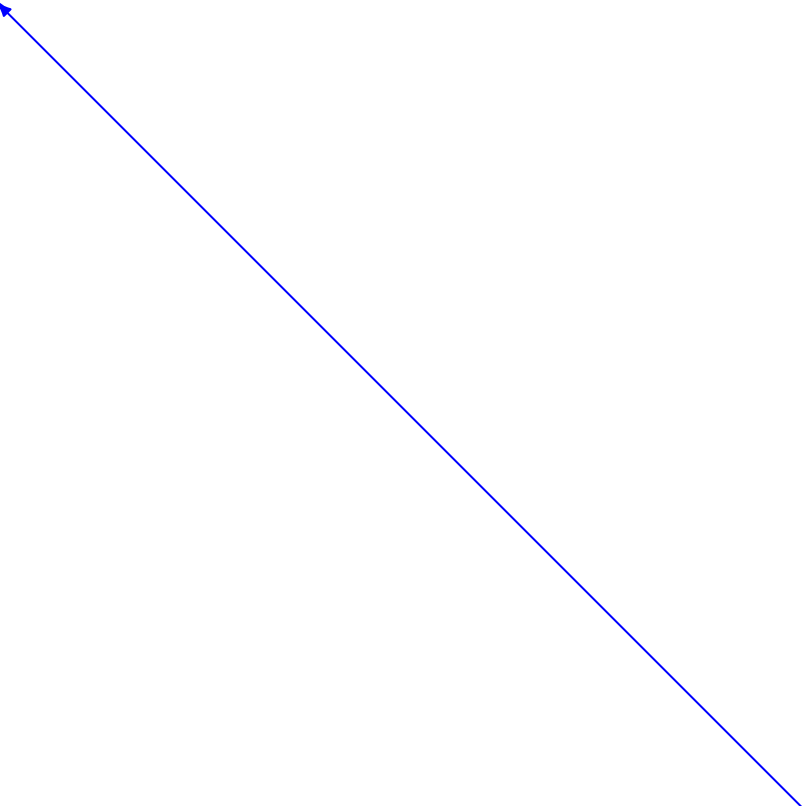



Variant–Disease Network (HEMOGLOBIN J (LENS))

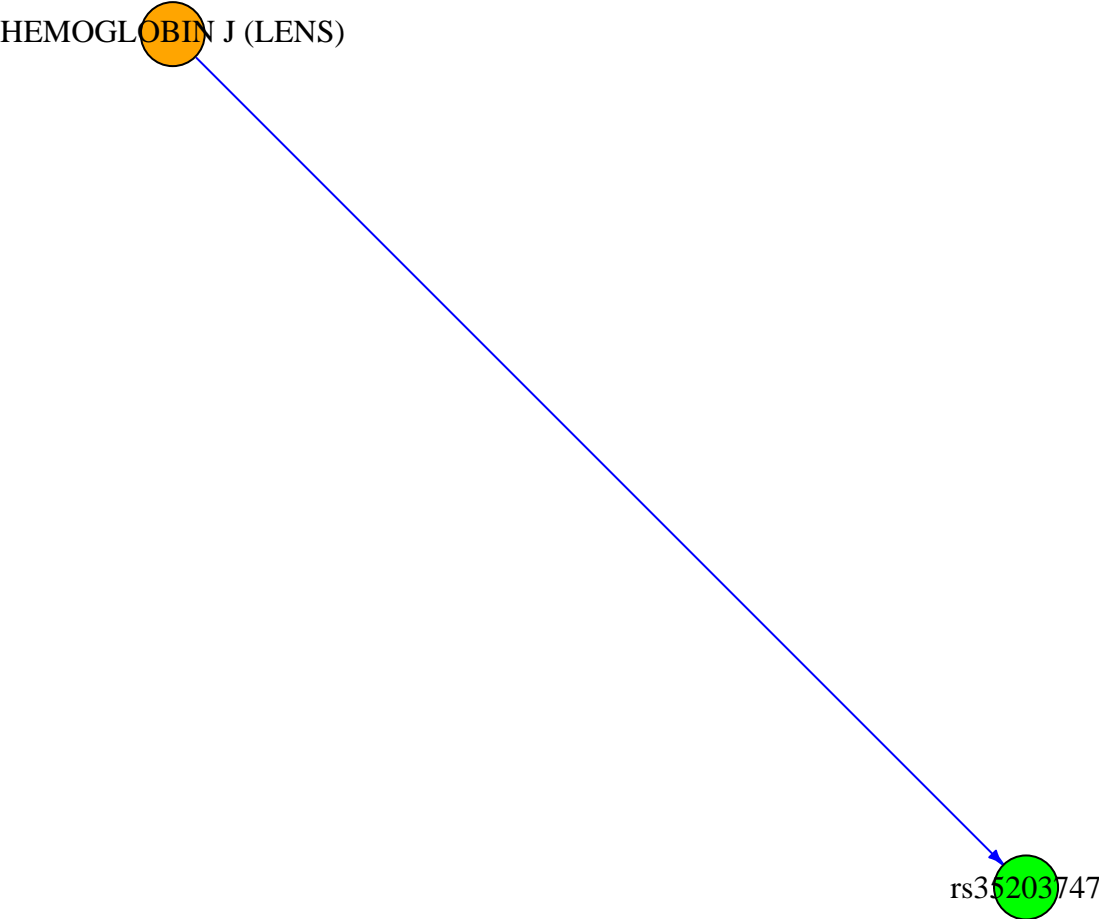

# Variant-Disease Network (HEMOGLOBIN PORTO ALEGRE)

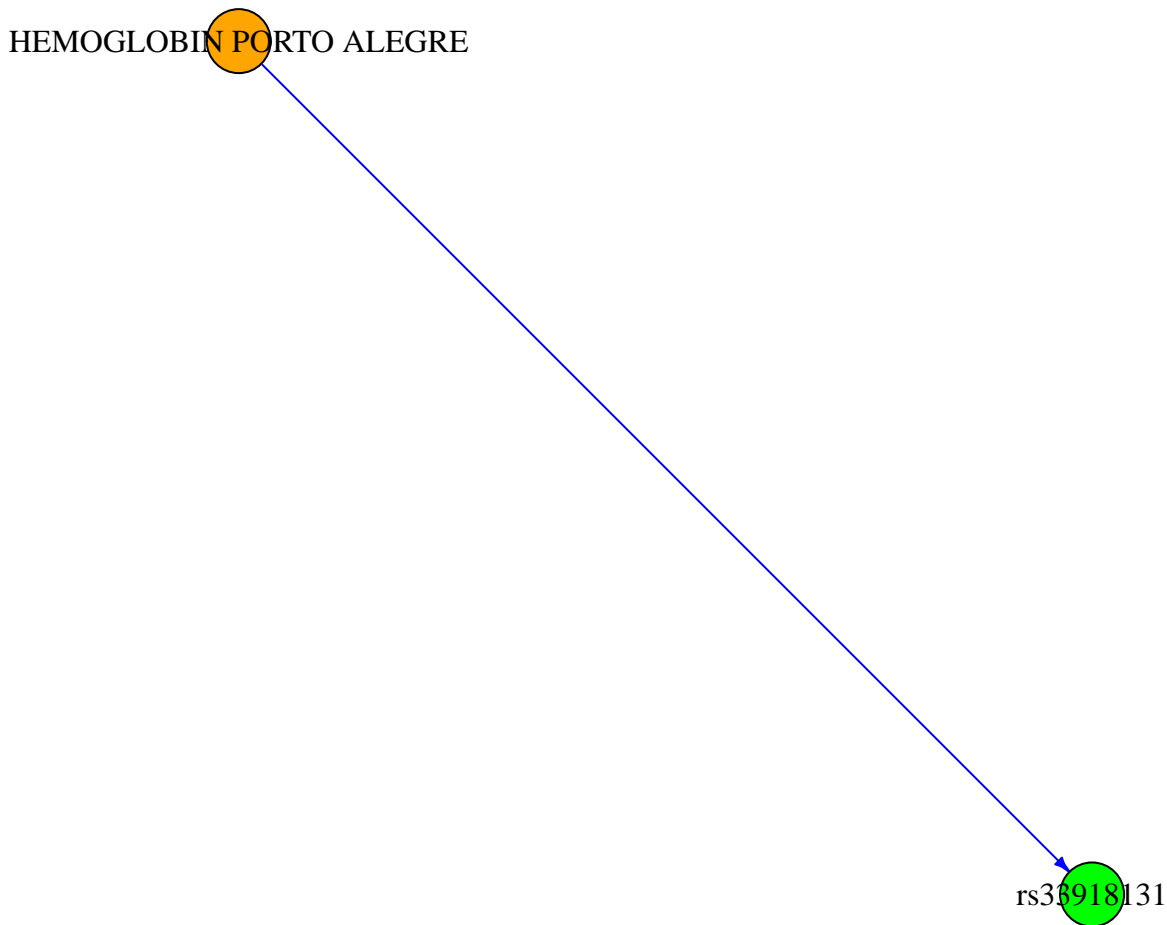

Variant–Disease Network (HEMOGLOBIN TYNE)

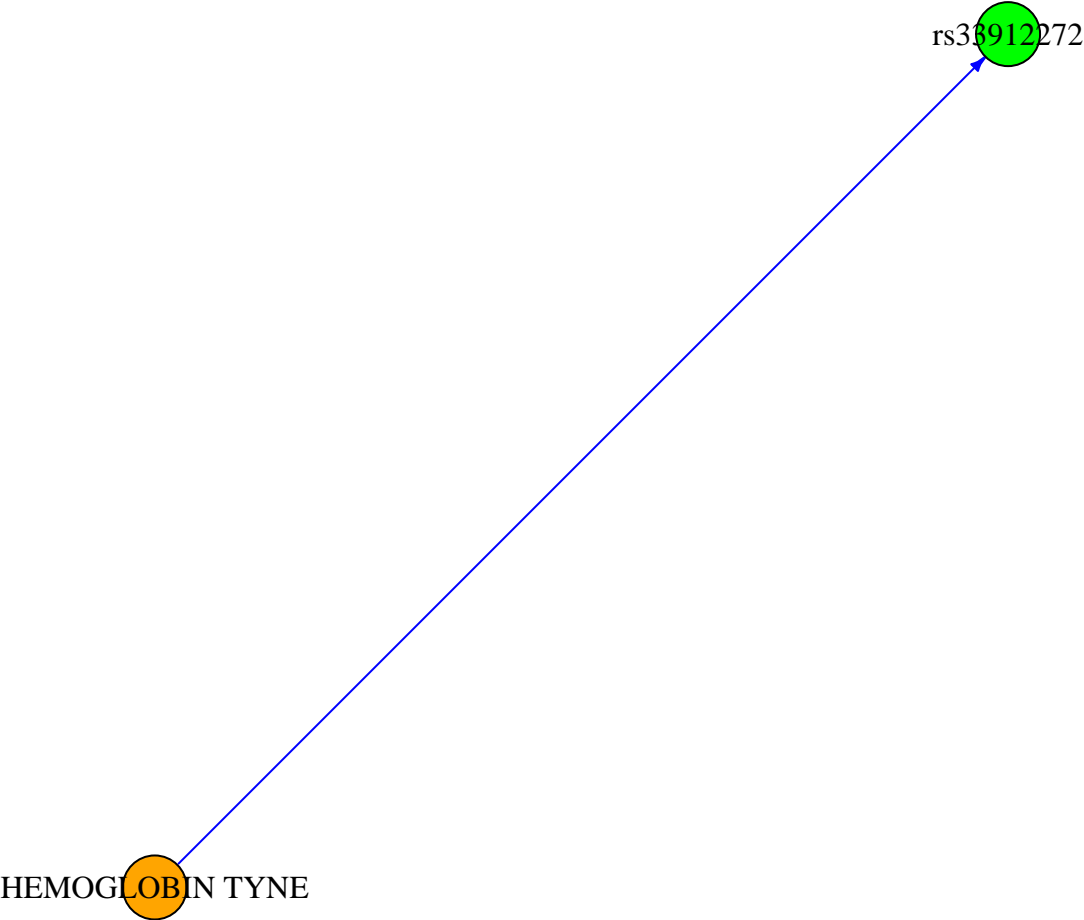

# Variant–Disease Network (HEMOGLOBIN VILLEJUIF)

rs31935883

HEMOGLOBIN VILLEJUIF

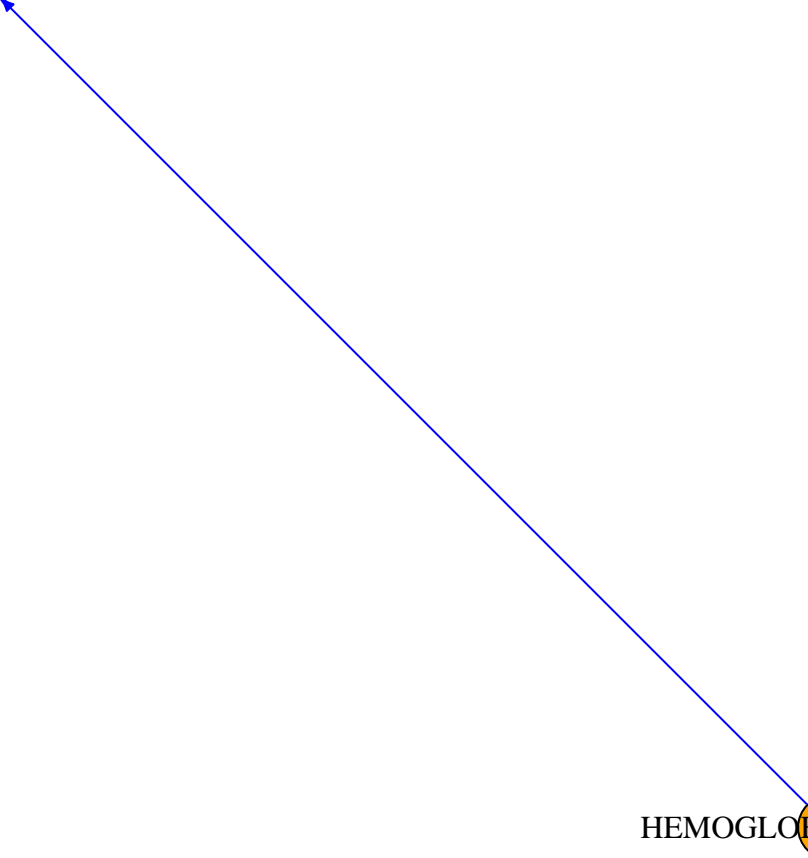

## Variant–Disease Network (Hemolytic anemia)

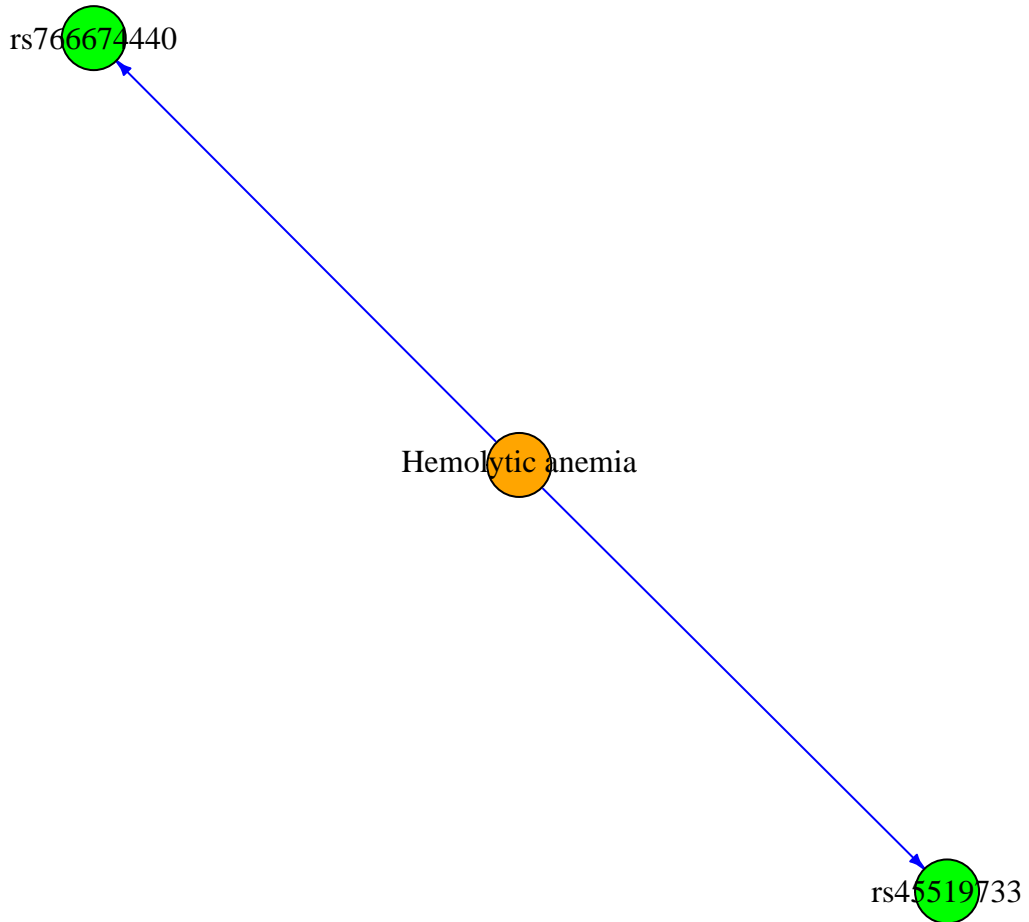

Variant–Disease Network (Hemophagocytic lymphohistiocytosis)

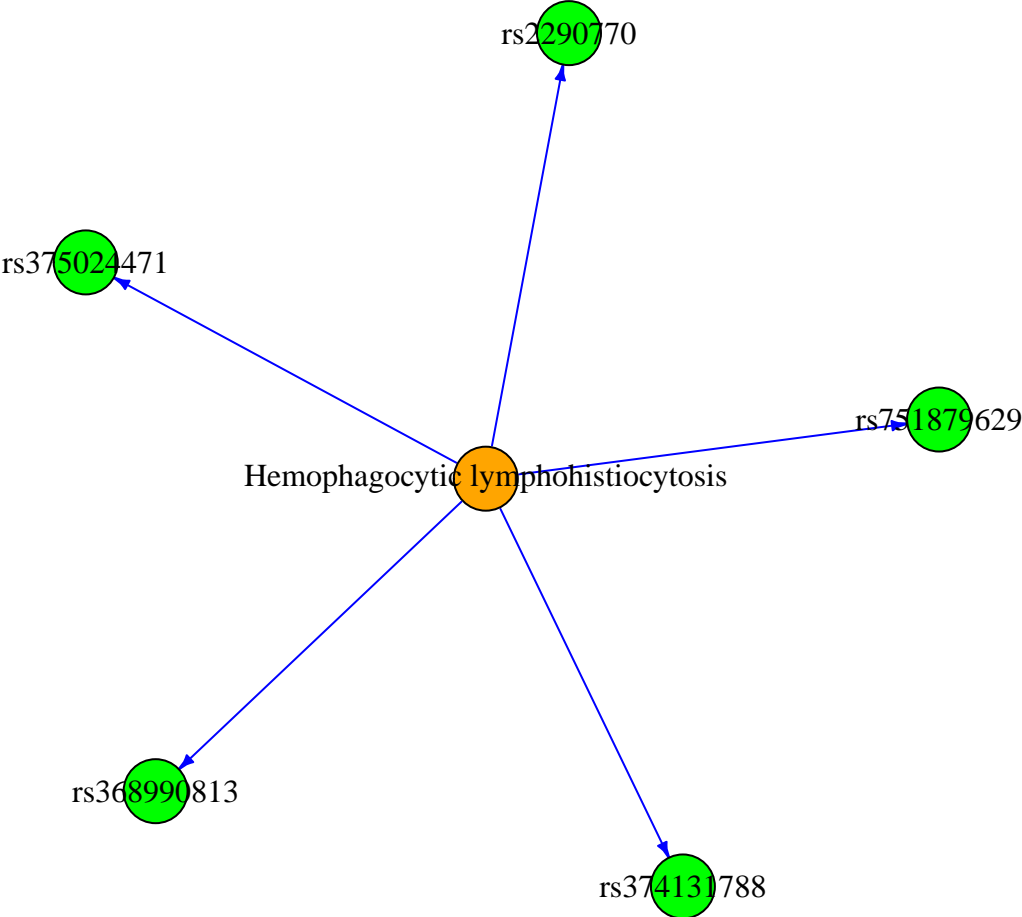

## Variant-Disease Network (Hemophilia B)

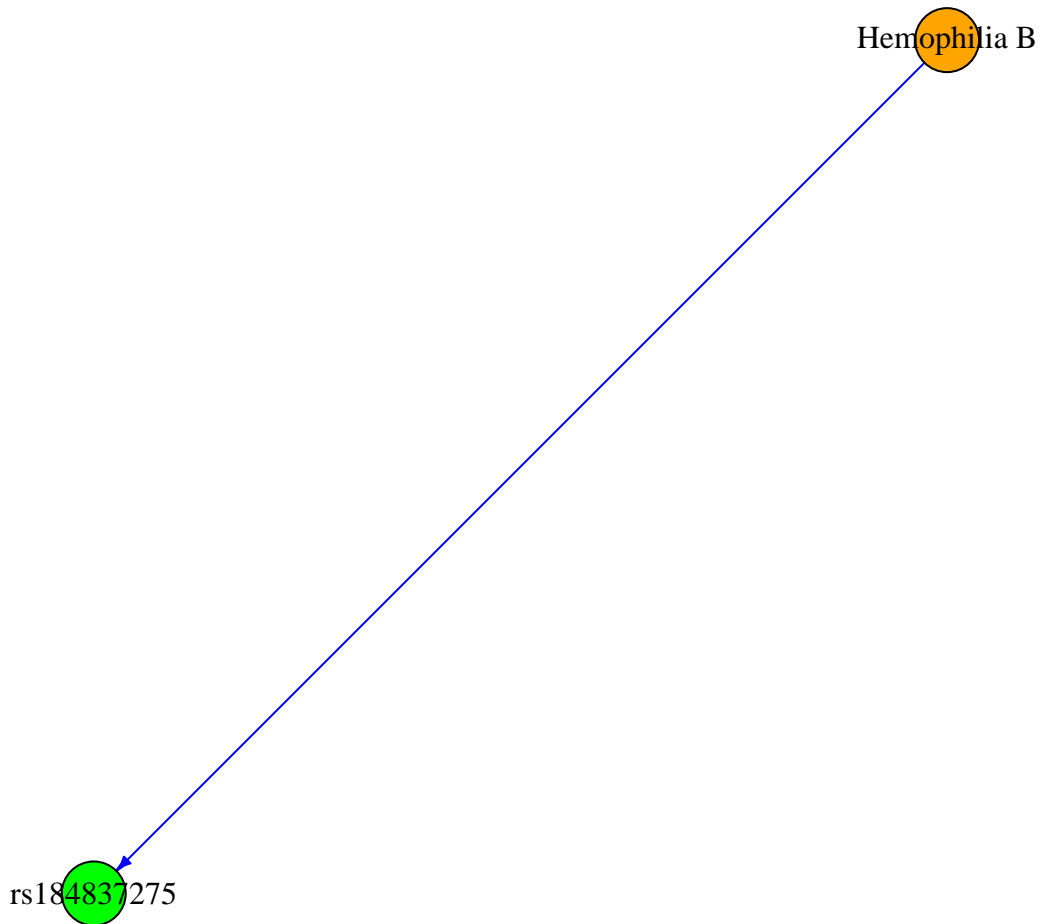

**Variant–Disease Network (Hepatic failure)**

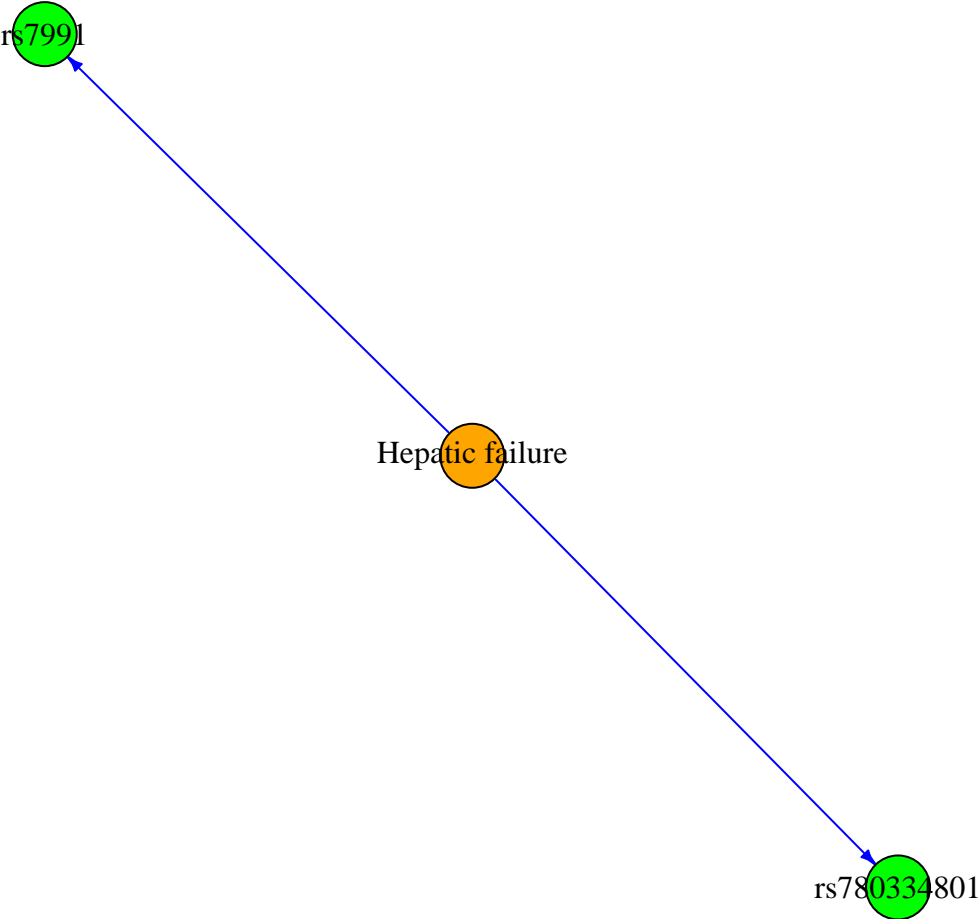



**Variant–Disease Network (Hepatic lipase deficiency)**

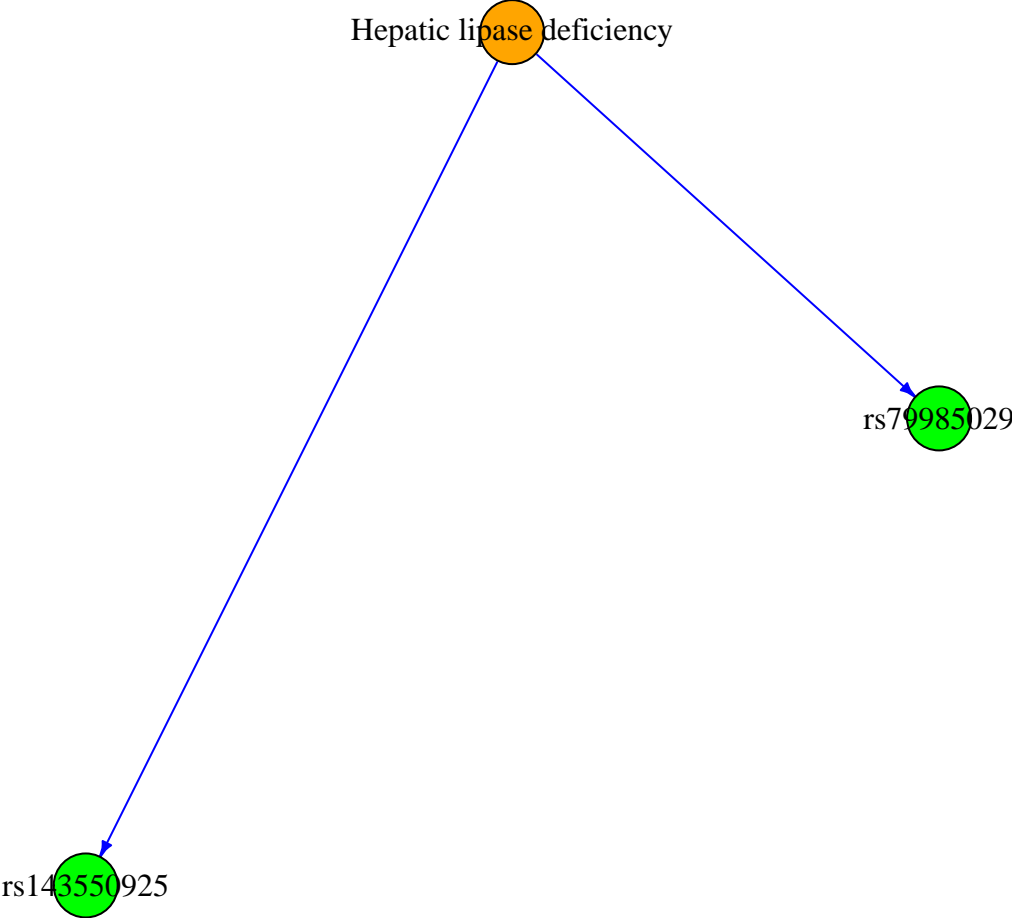

Variant–Disease Network (Hepatic methionine adenosyltransferase deficiency)

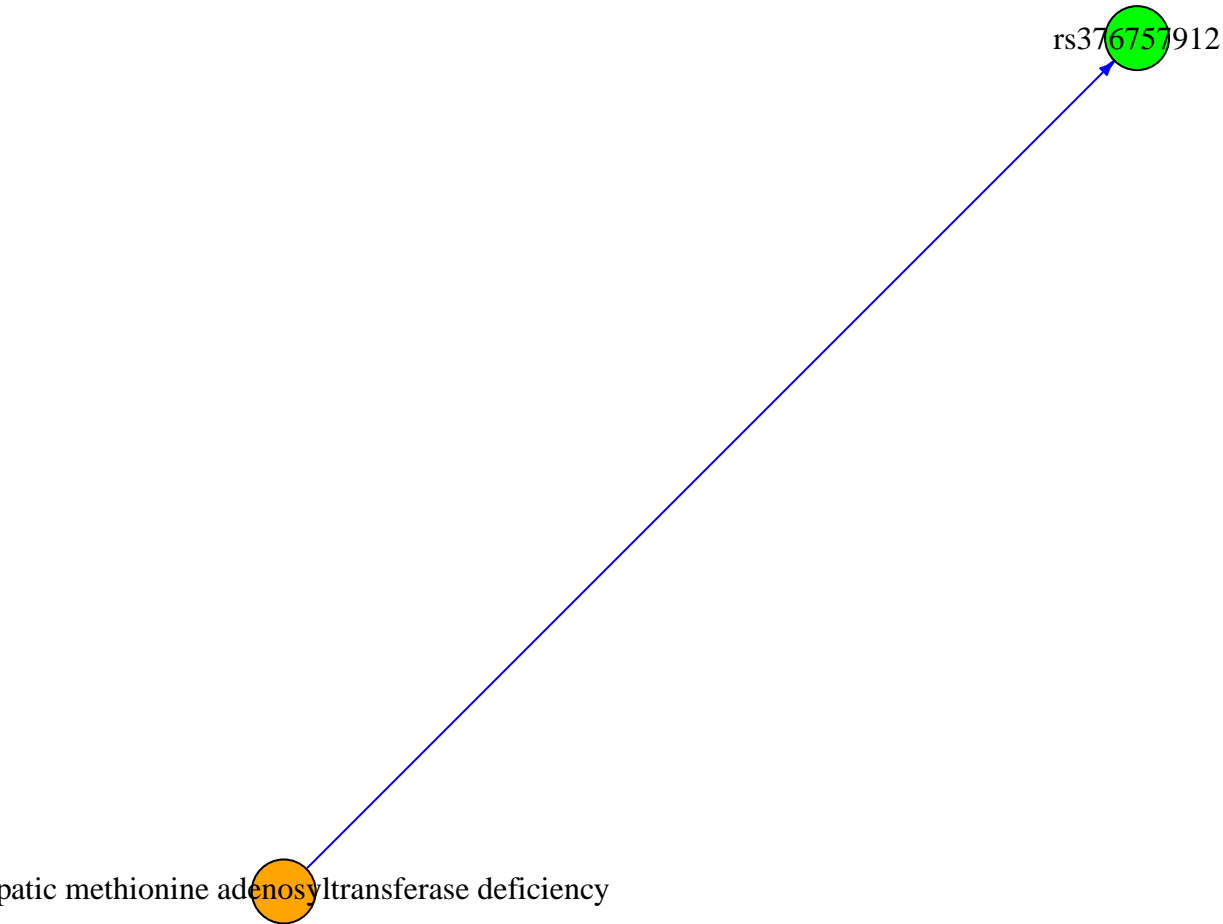

Variant–Disease Network (Hepatoblastoma)

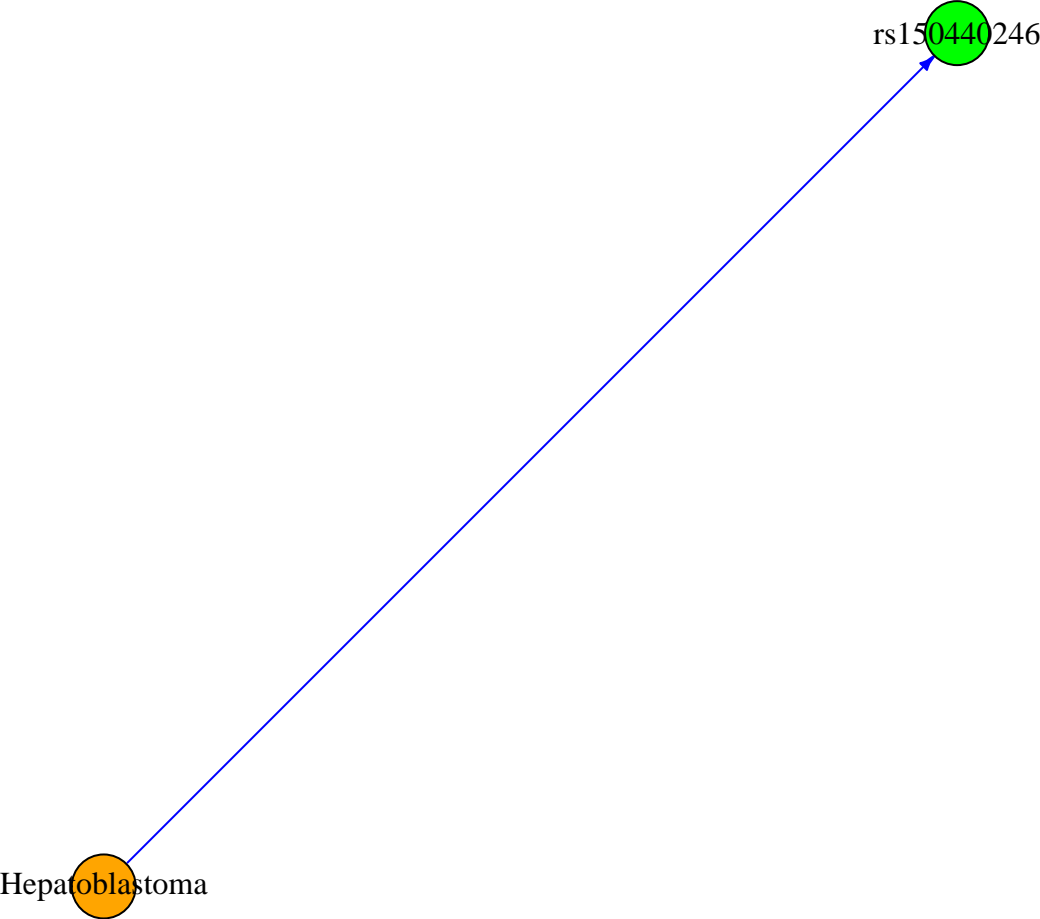

## Variant–Disease Network (Hepatocellular carcinoma)

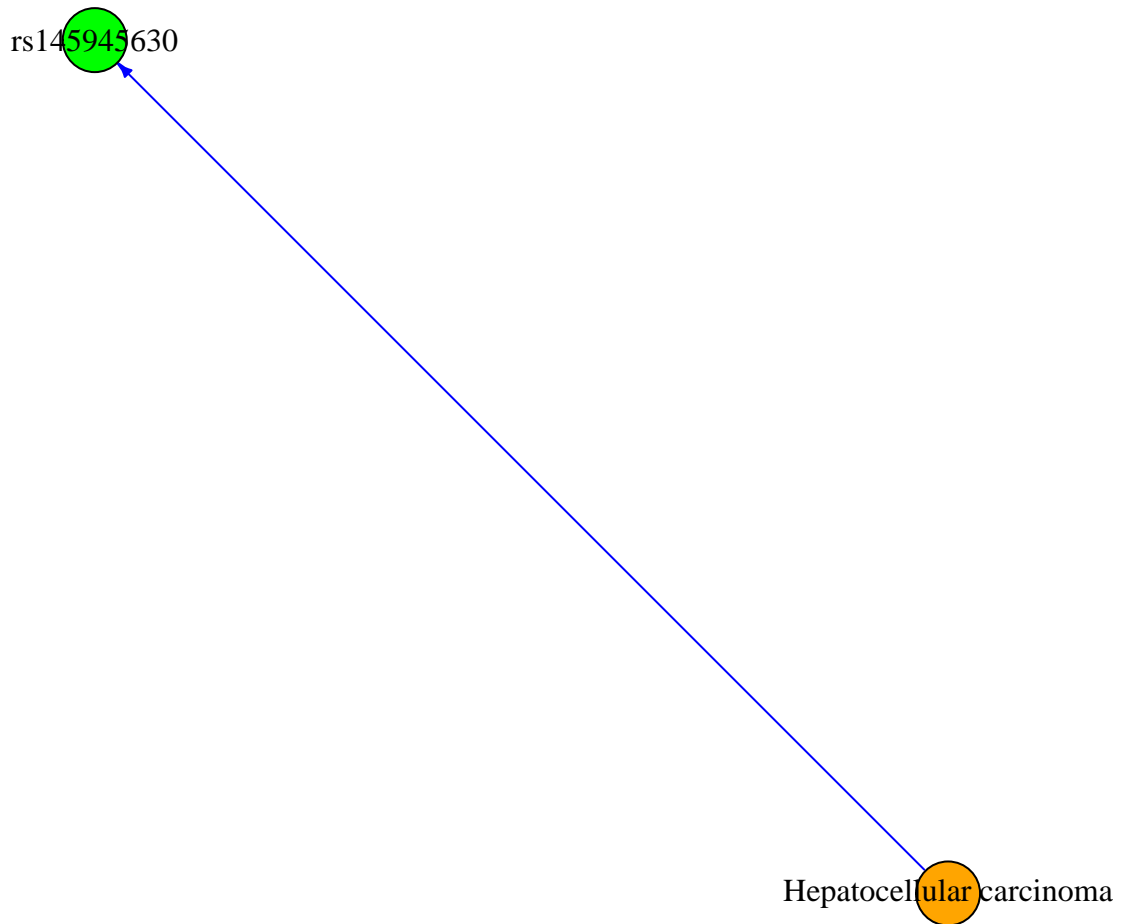

Variant–Disease Network (Hereditary breast and ovarian cancer syndrome)

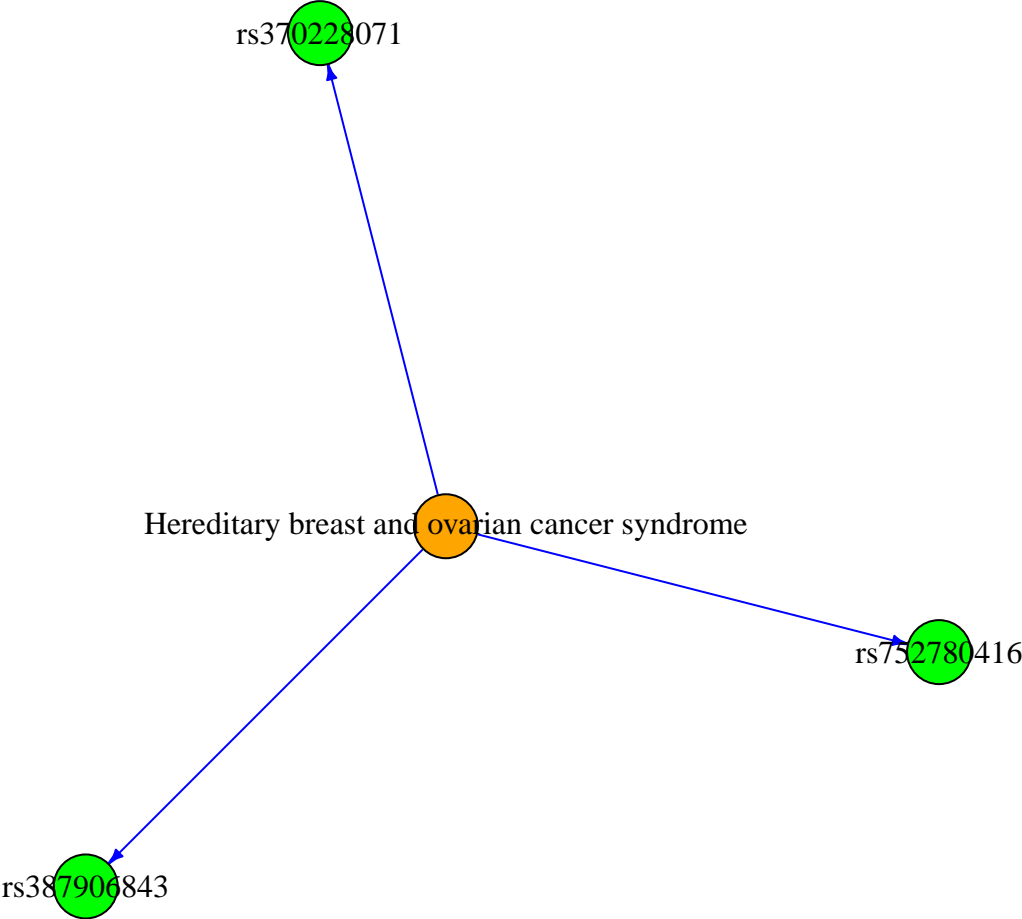

# Variant-Disease Network (Hereditary cancer-predisposing syndrome)

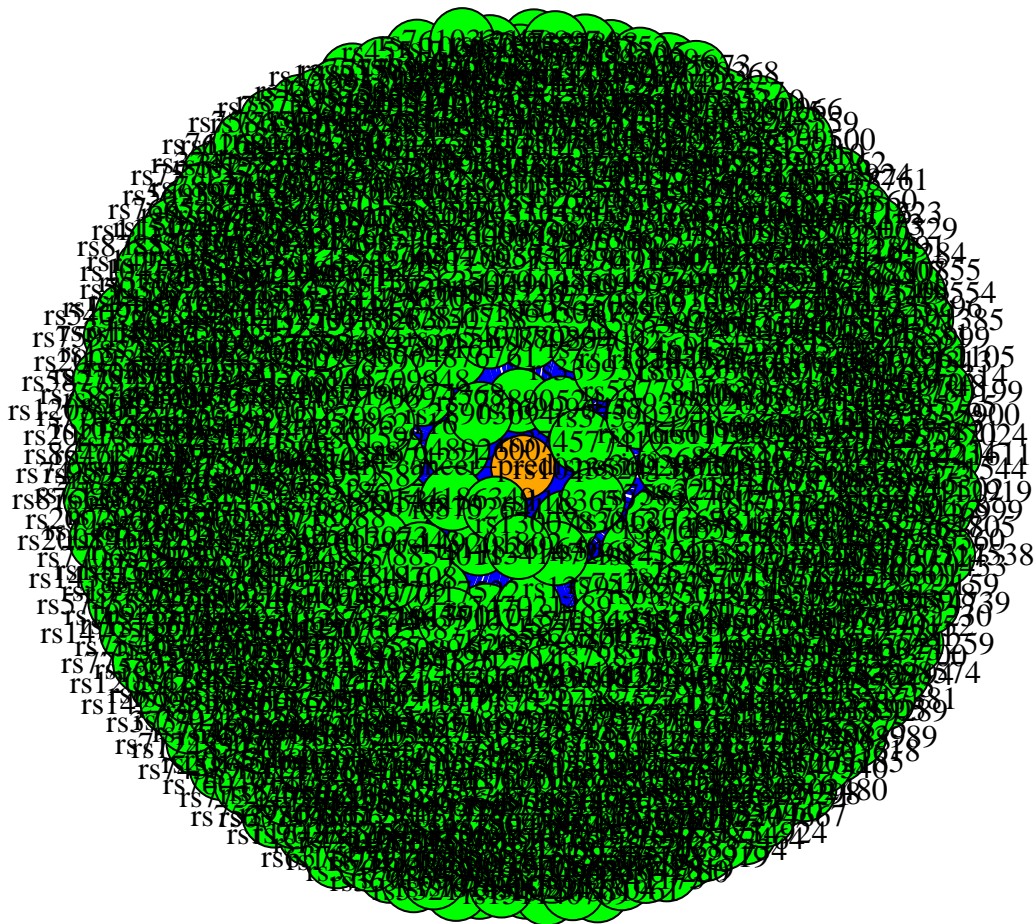

**Variant–Disease Network (Hereditary cutaneous melanoma)**

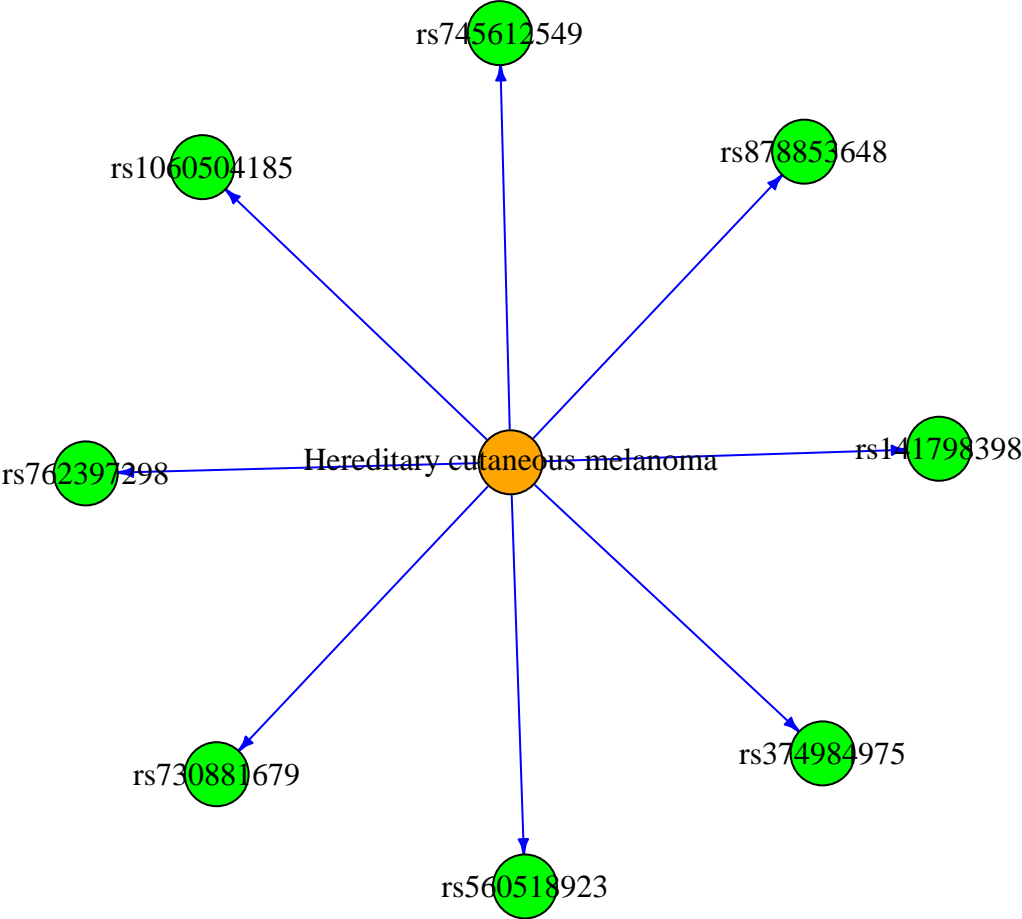

**Variant–Disease Network (Hereditary diffuse gastric cancer)**

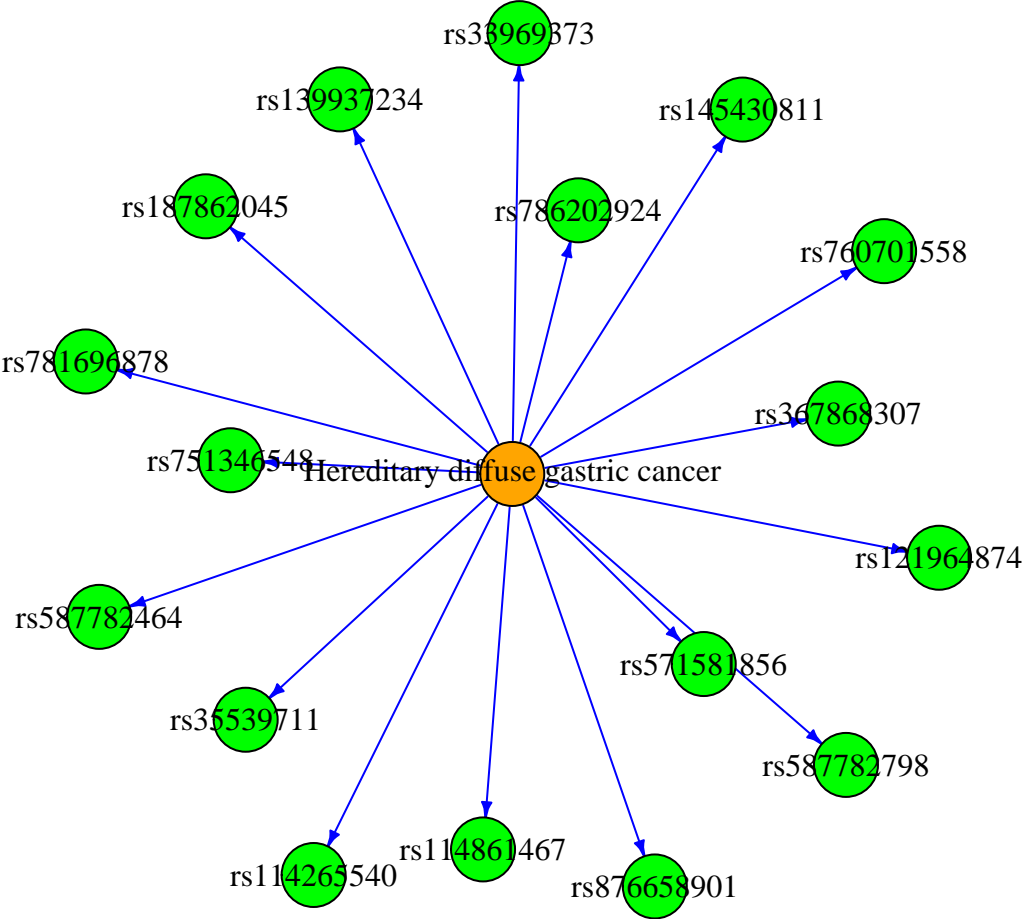



# Variant-Disease Network (Hereditary diffuse leukoencephalopathy with spheroids)

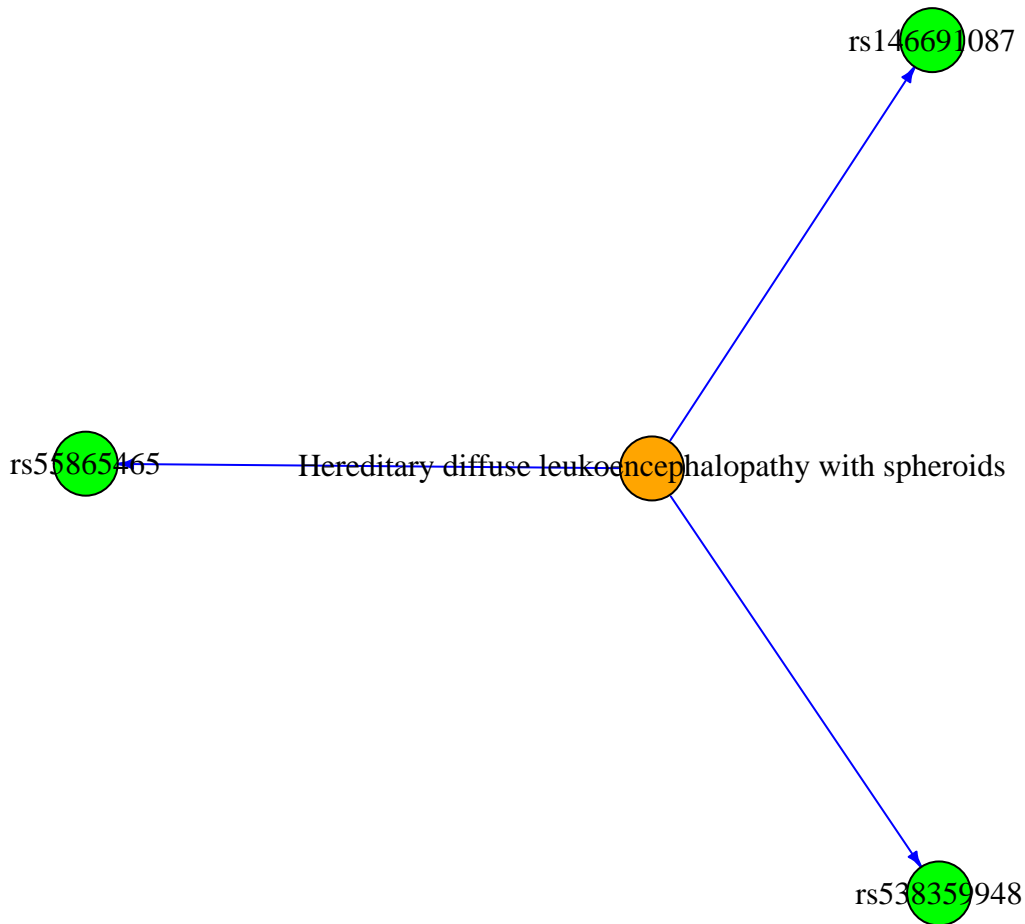

# Variant–Disease Network (Hereditary factor XI deficiency disease)

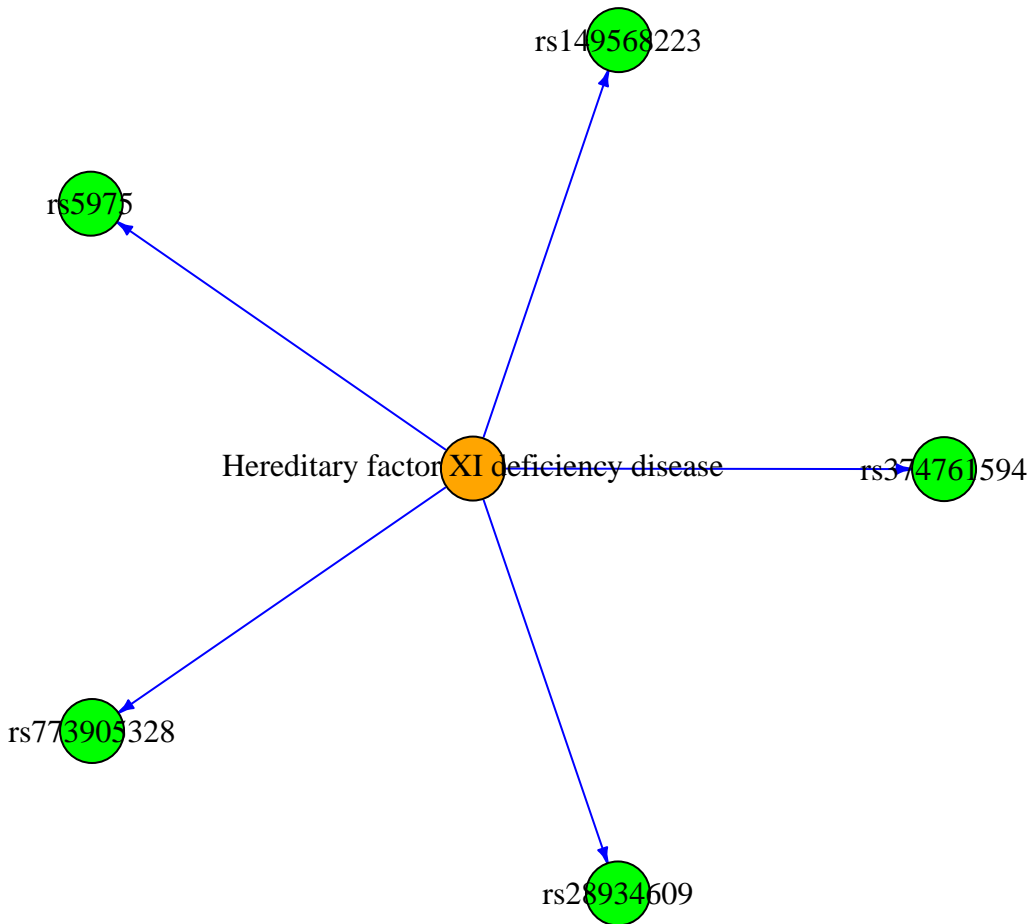

# Variant–Disease Network (Hereditary hemochromatosis)

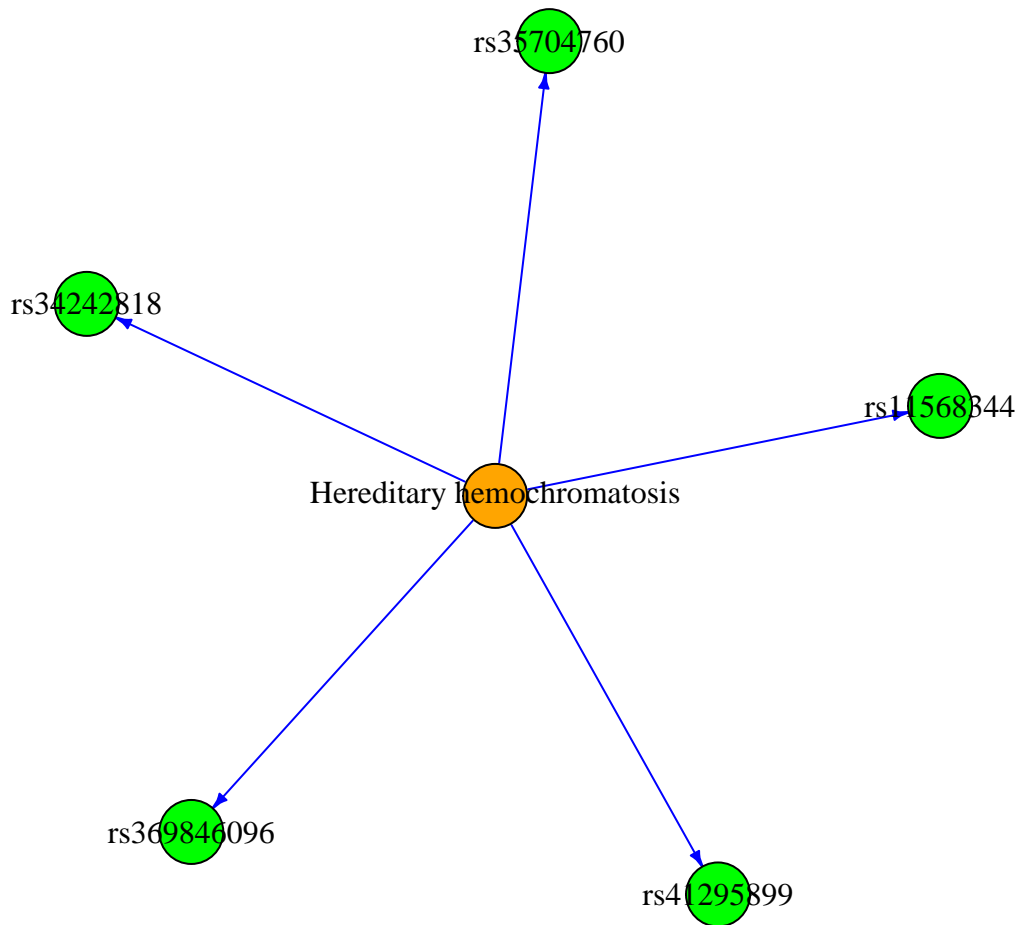

# Variant–Disease Network (Hereditary hemorrhagic telangiectasia)

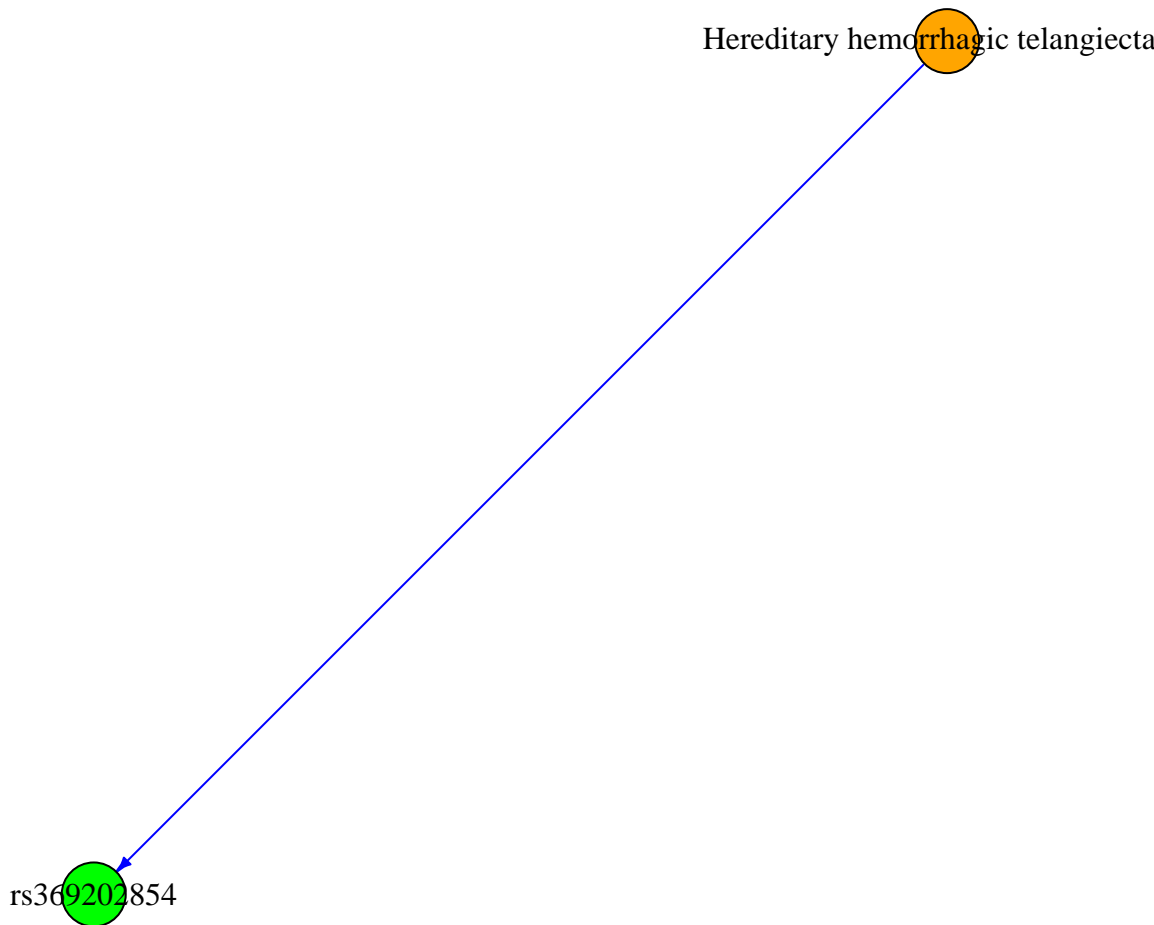

**Variant–Disease Network (Hereditary hemorrhagic telangiectasia type 1)**

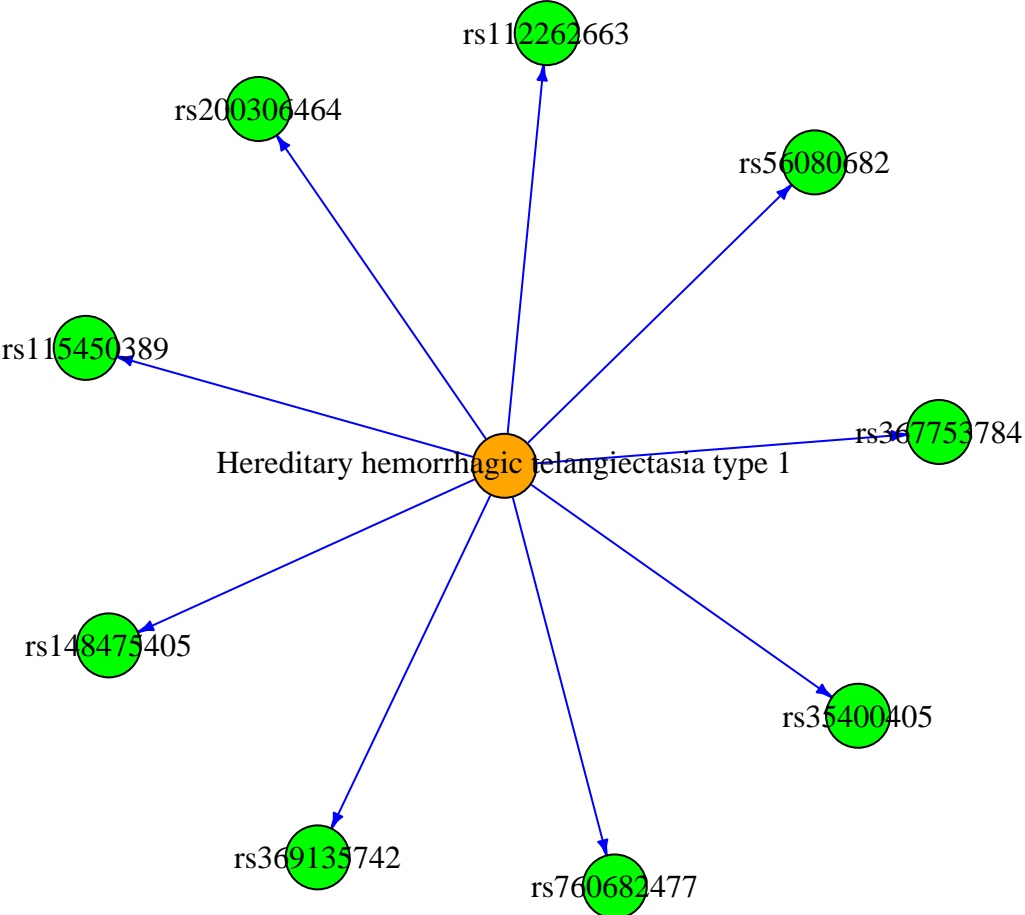

**Variant–Disease Network (Hereditary hemorrhagic telangiectasia type 2)**

Hereditary hemorrhagic telangiectasia type 2

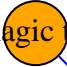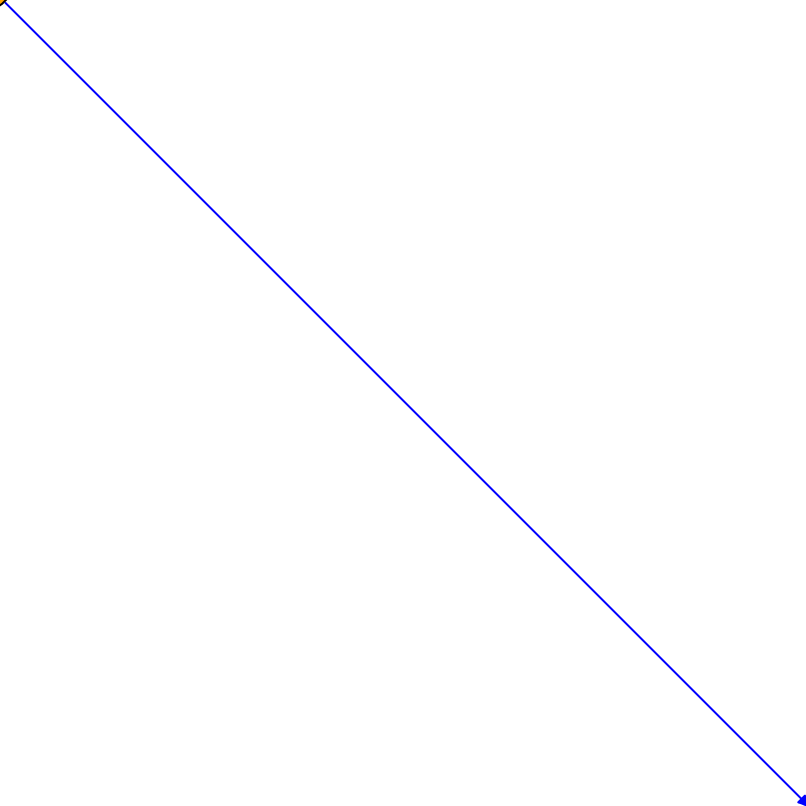

rs56080682

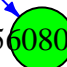

Variant–Disease Network (Hereditary insensitivity to pain with anhidrosis)

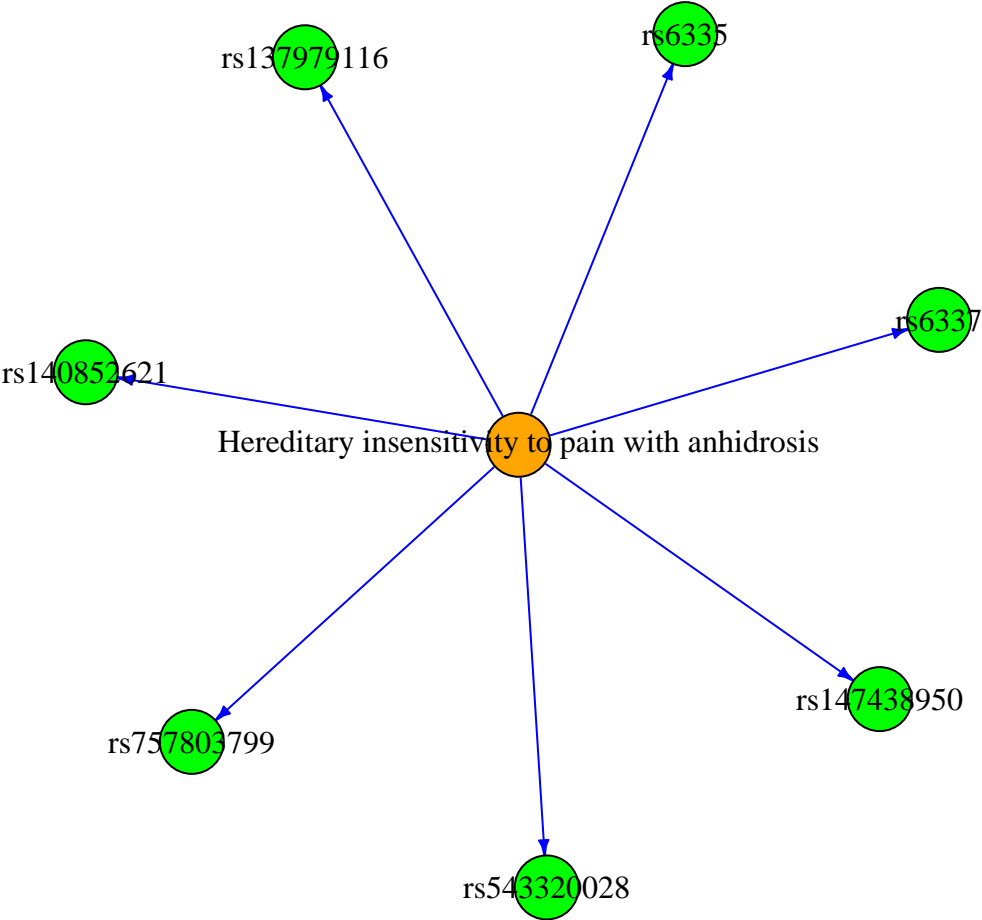

**Variant–Disease Network (Hereditary Multiple Osteochondromatosis)**

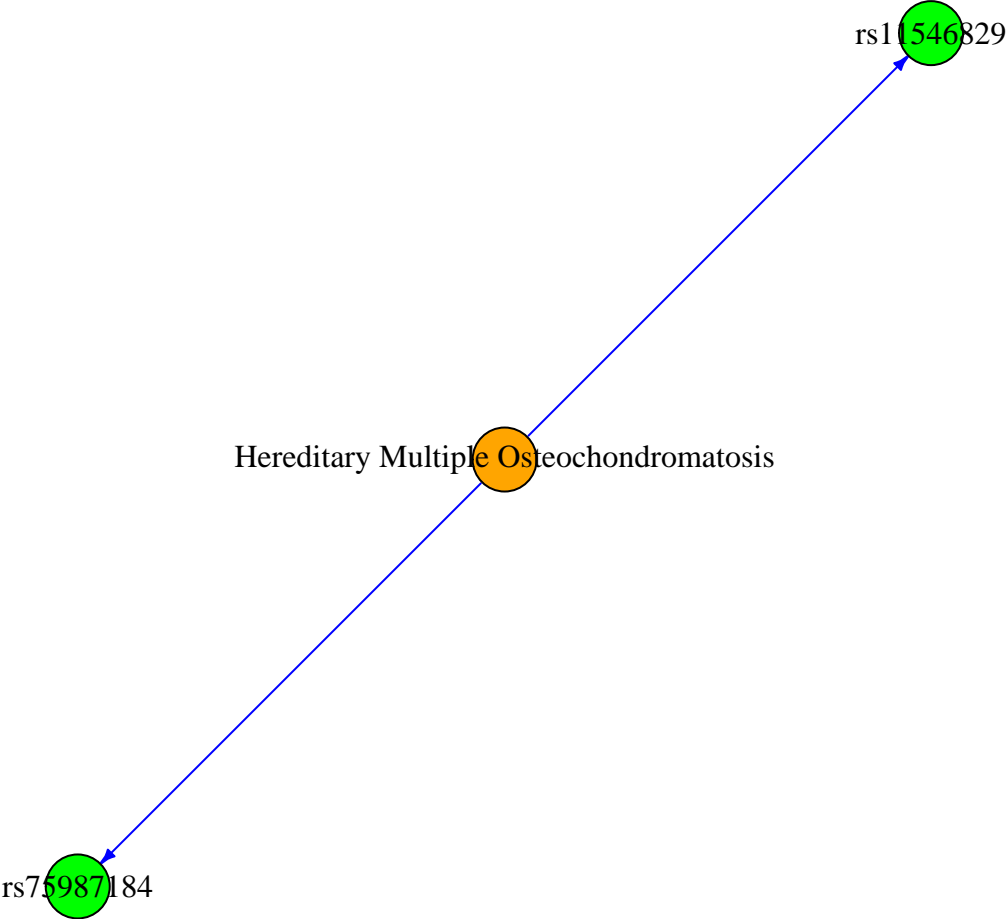



# Variant–Disease Network (Hereditary Neuralgic Amyotrophy (HNA))

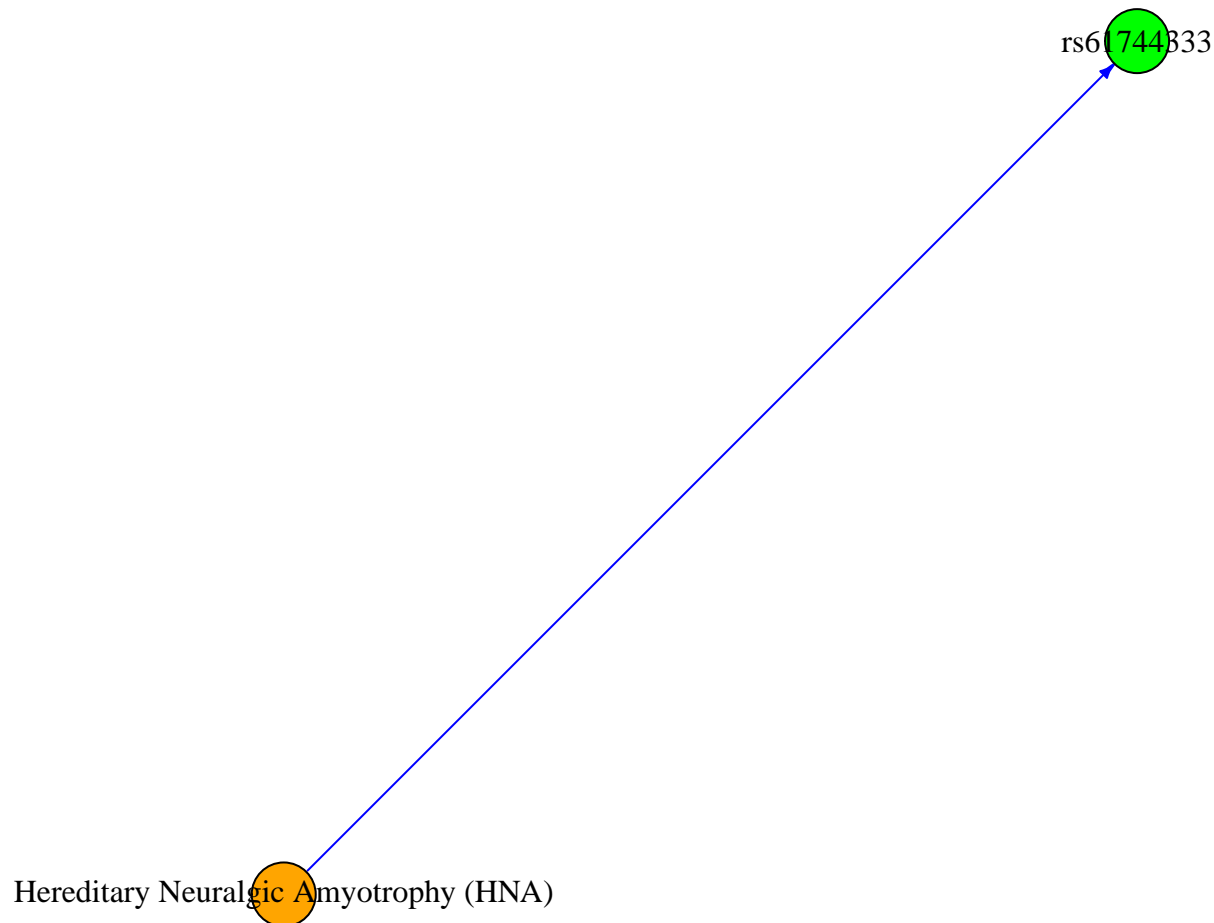

# Variant–Disease Network (Hereditary nonpolyposis colon cancer)

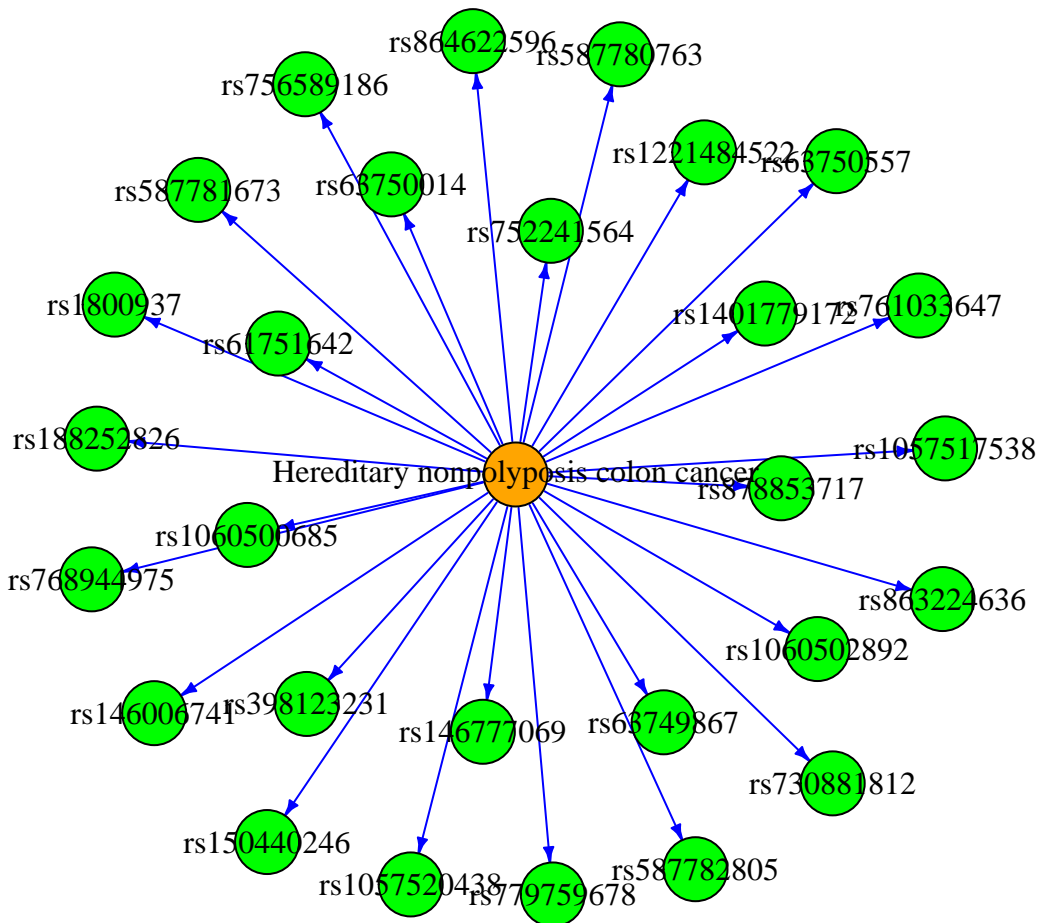

Variant–Disease Network (Hereditary nonpolyposis colorectal cancer type

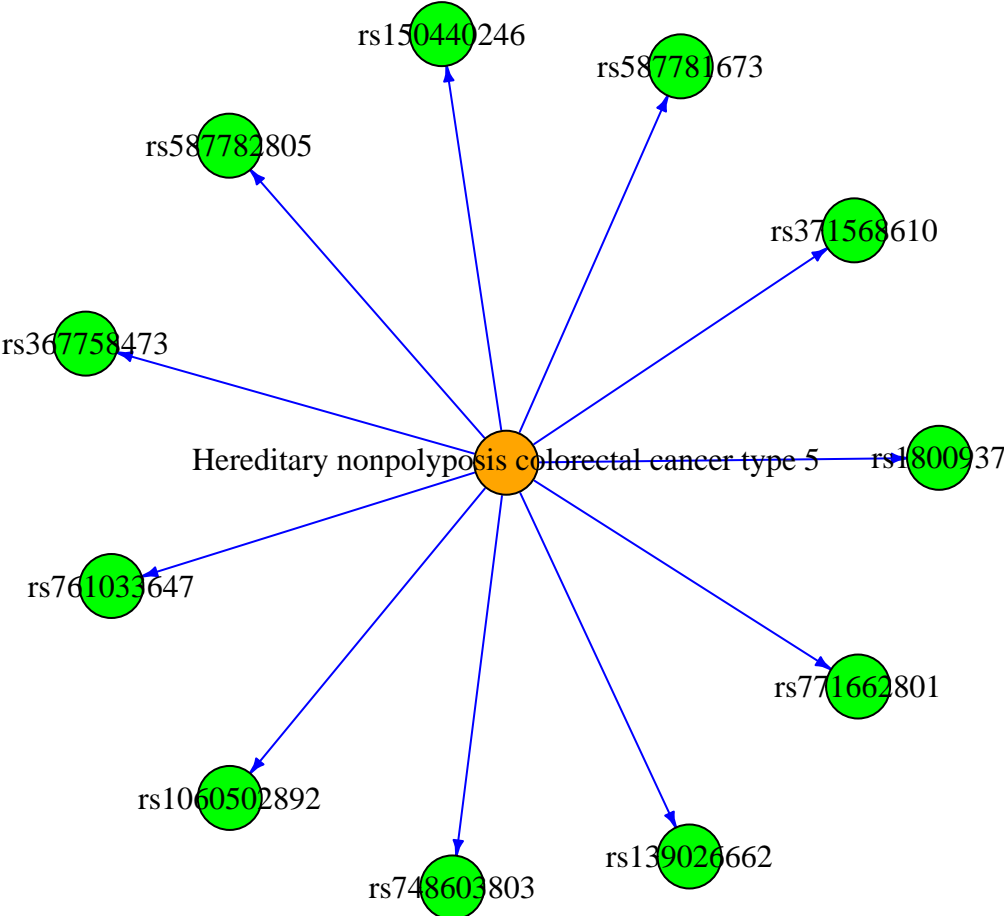

# Variant-Disease Network (Hereditary Paraganglioma-Pheochromocytoma Syndromes)

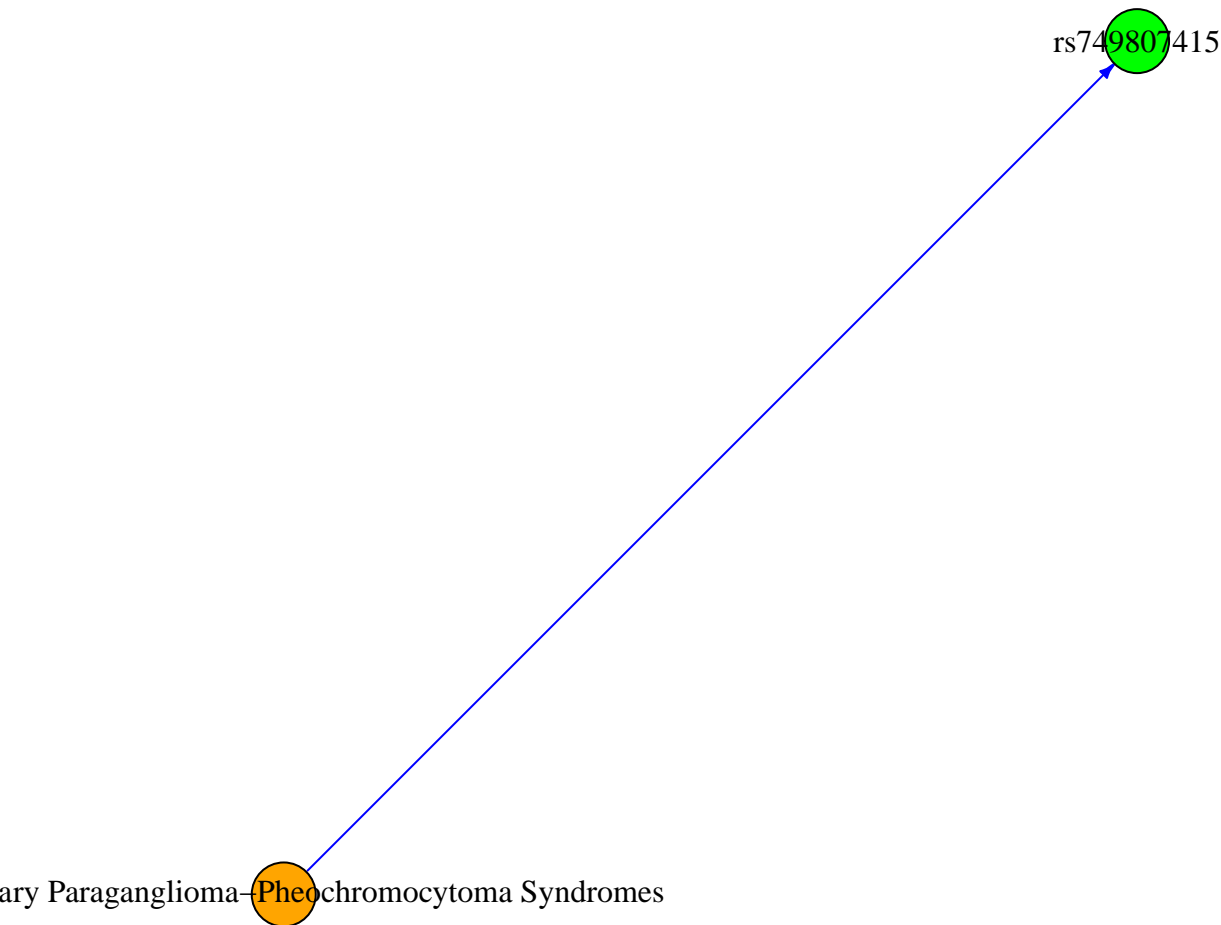

**Variant–Disease Network (Hereditary pyropoikilocytosis)**

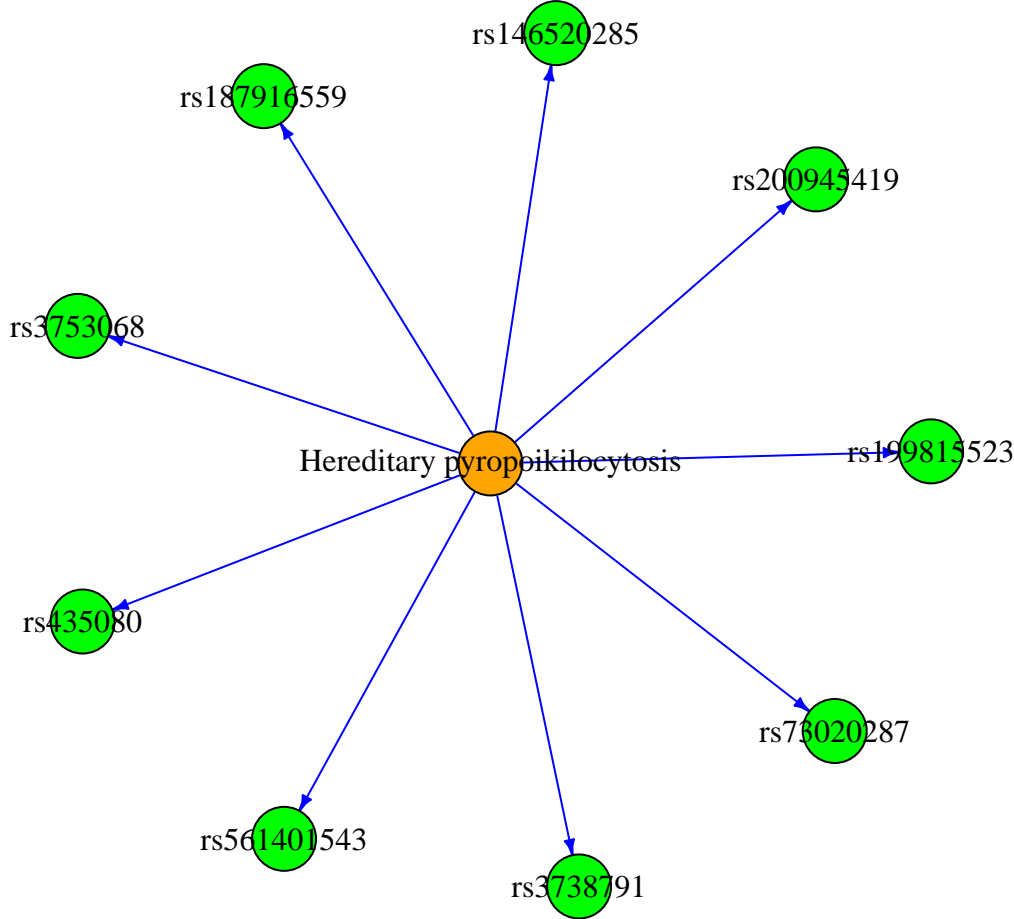

# Variant-Disease Network (Hereditary sensory and autonomic neuropathy type 1)

rs162848

Hereditary sensory and autonomic neuropathy type 1

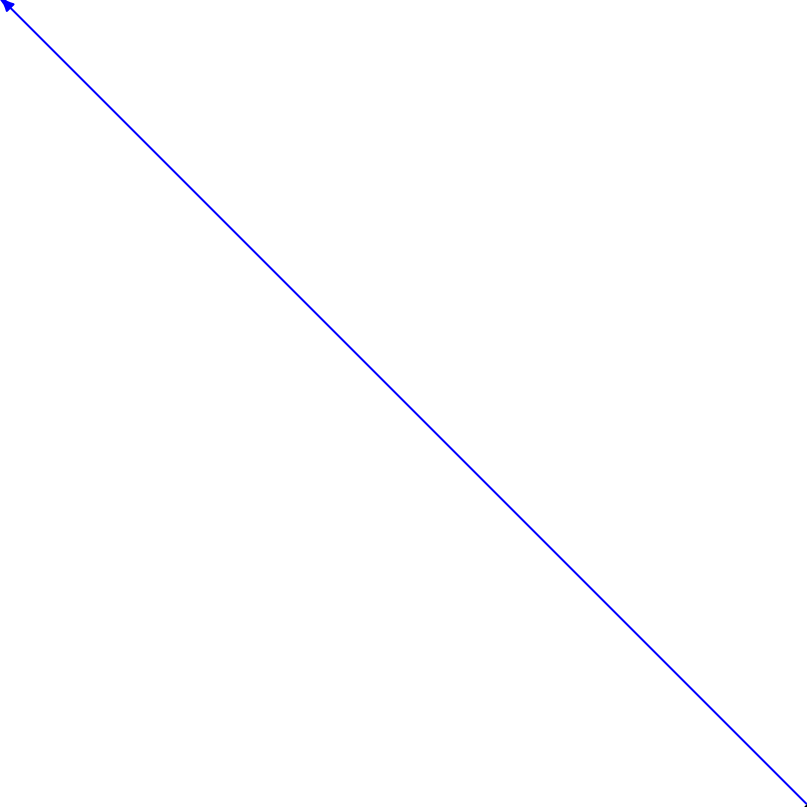

# Variant-Disease Network (Hereditary sensory and autonomic neuropathy type IIB)

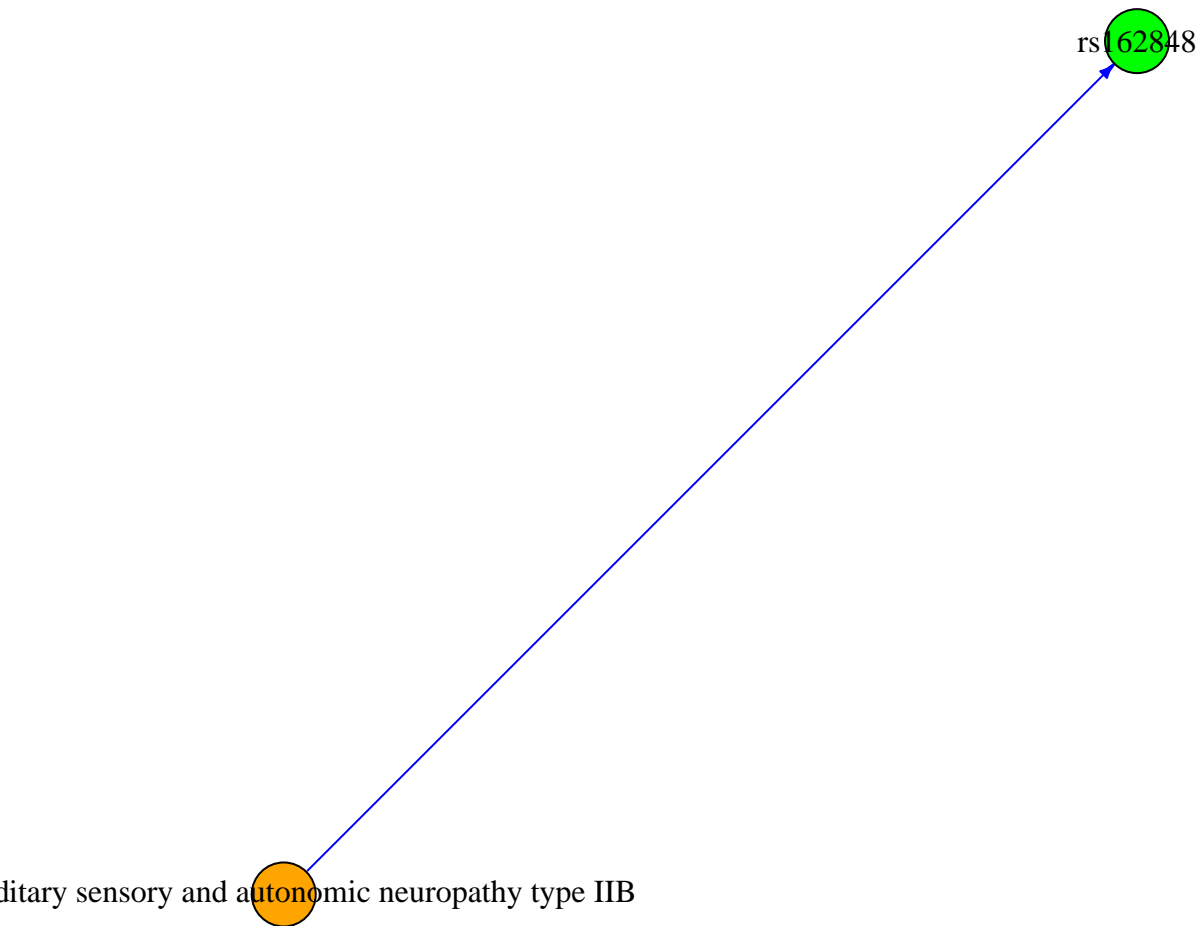

# Variant–Disease Network (Hereditary sensory neuropathy type IE)

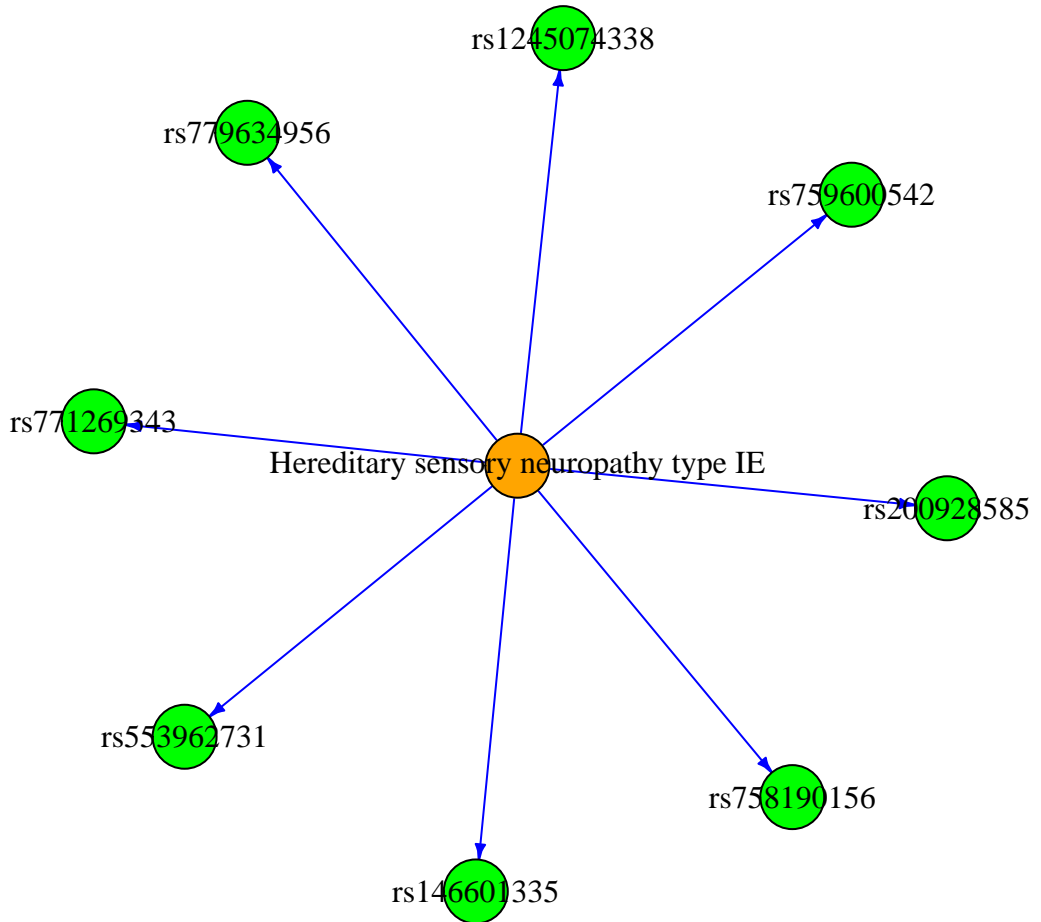



# -Disease Network (Hereditary Sideroblastic Anemia with Myopathy and Lact

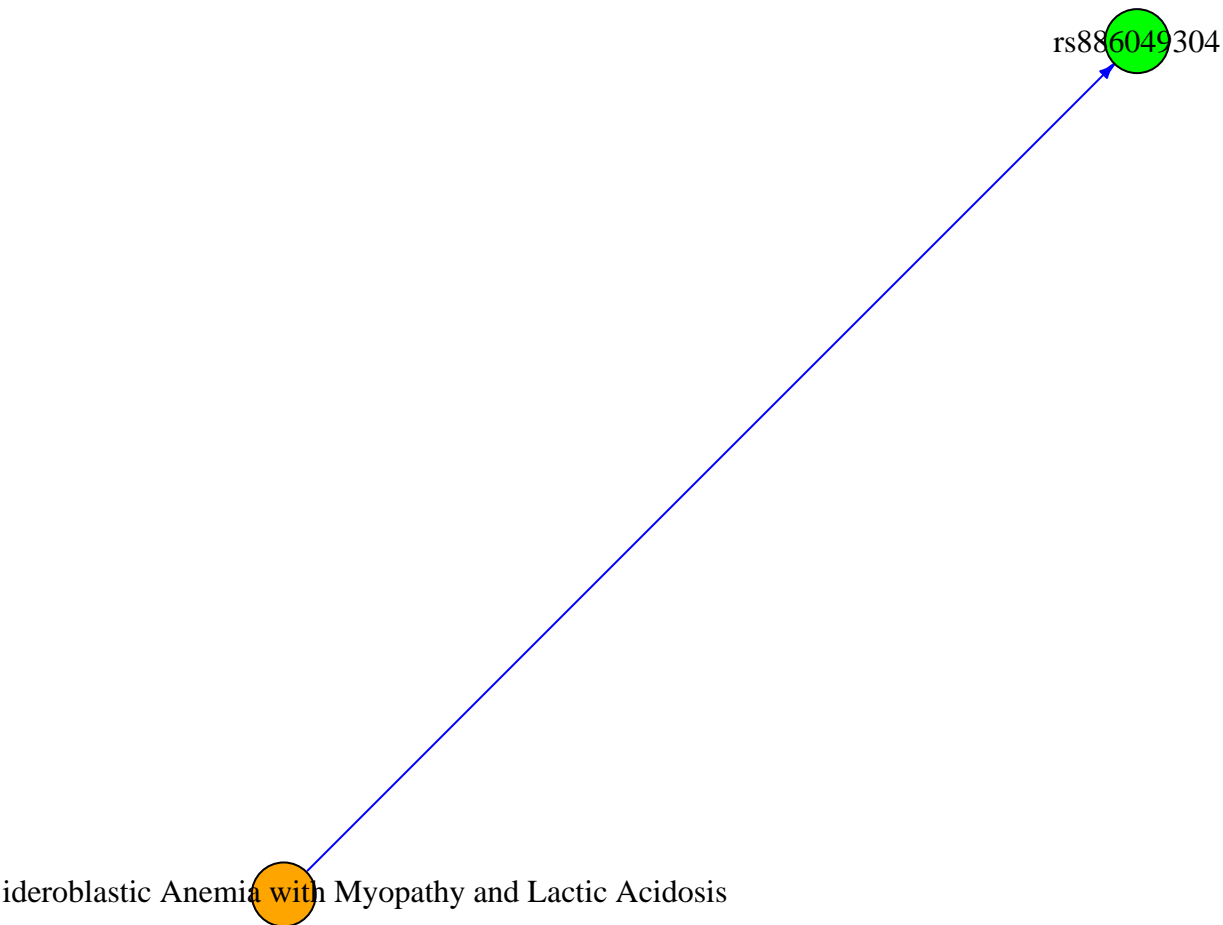

**Variant–Disease Network (Hermansky Pudlak syndrome 2)**

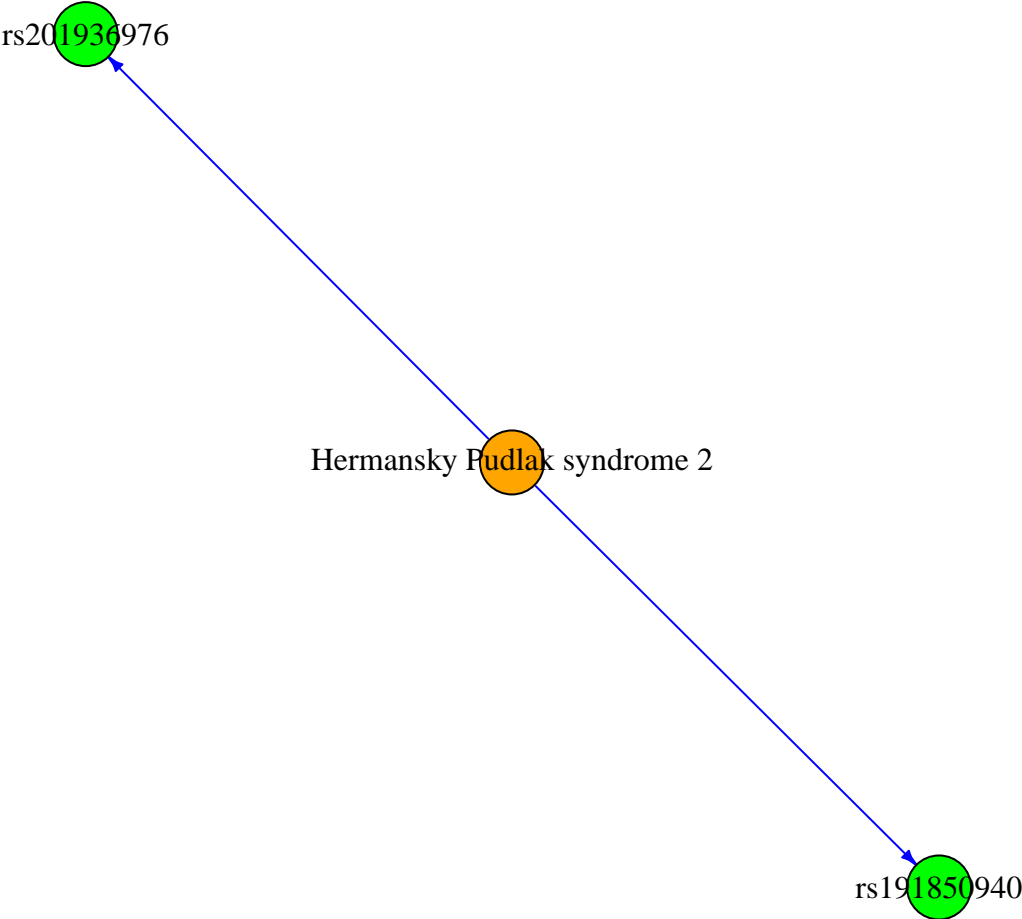

Variant–Disease Network (Hermansky–Pudlak syndrome)

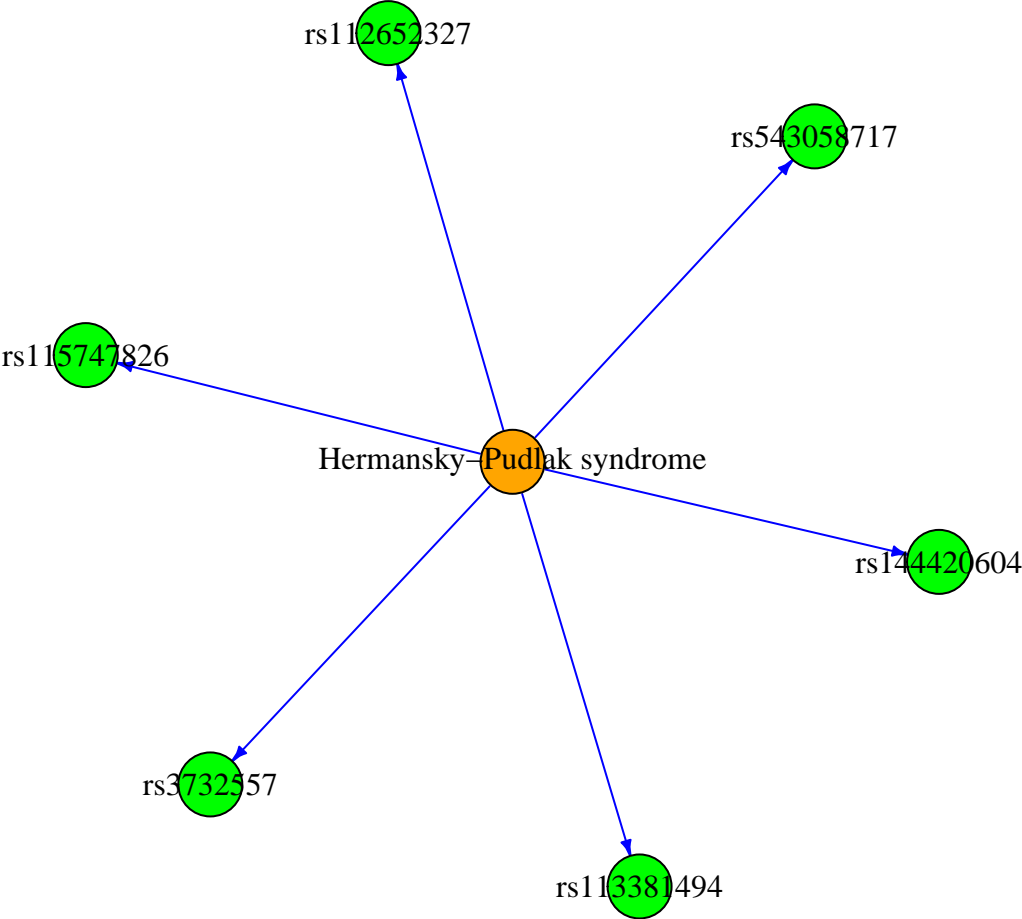

**Variant–Disease Network (Herpes simplex encephalitis 1)**

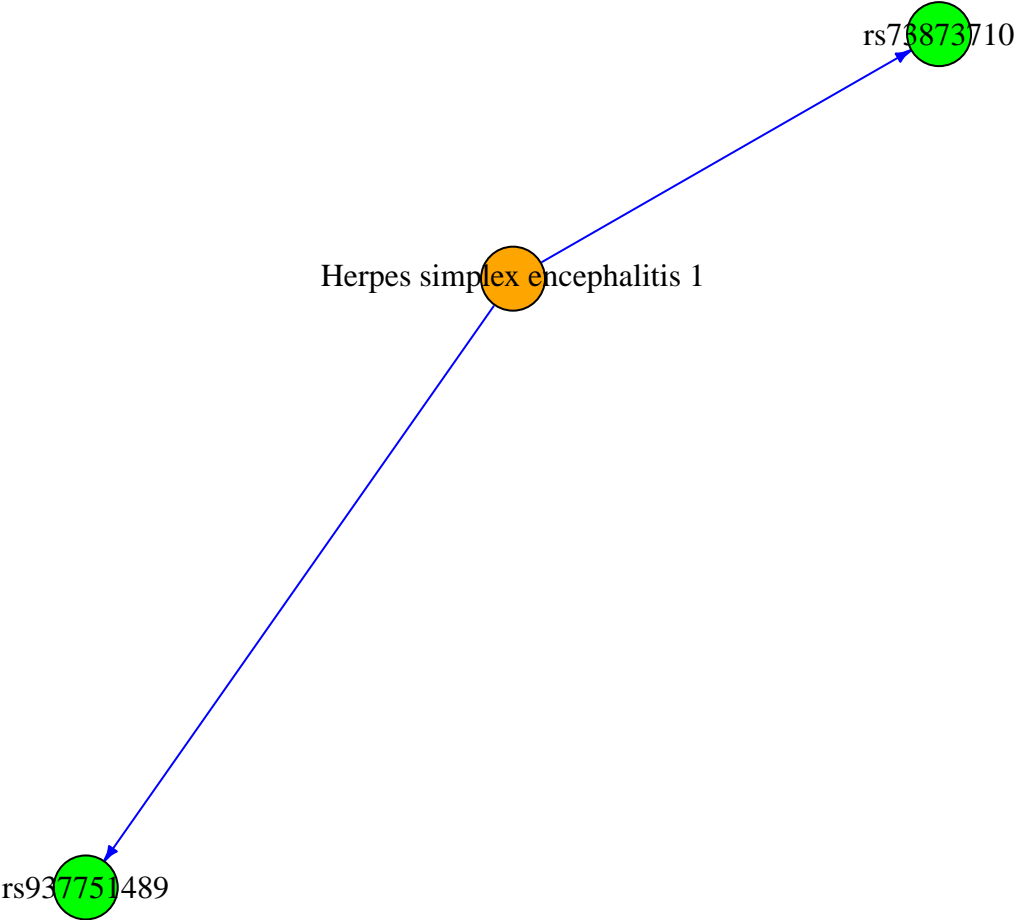

**Variant–Disease Network (heterogeneous nuclear ribonucleoprotein G)**

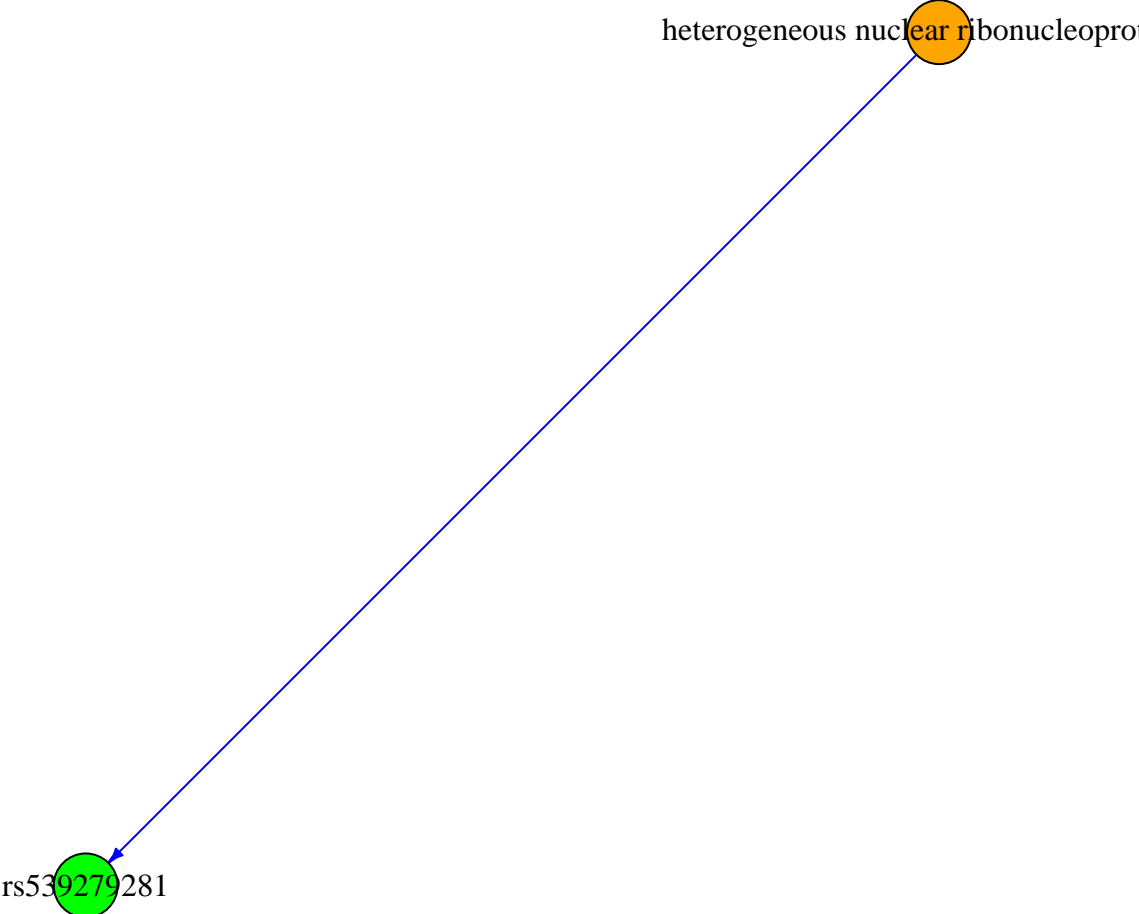

Variant–Disease Network (Heterotaxia)

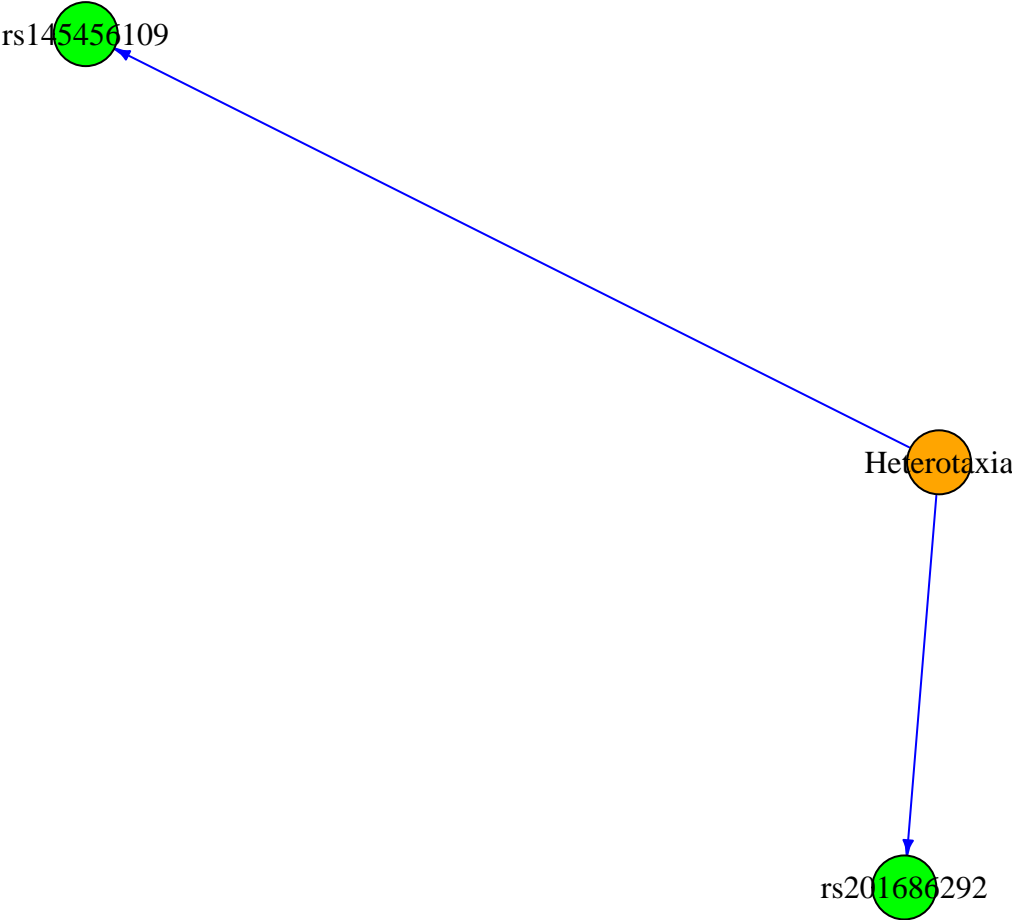

## Variant–Disease Network (Hirschsprung disease)

Hirschsprung disease

rs2295933

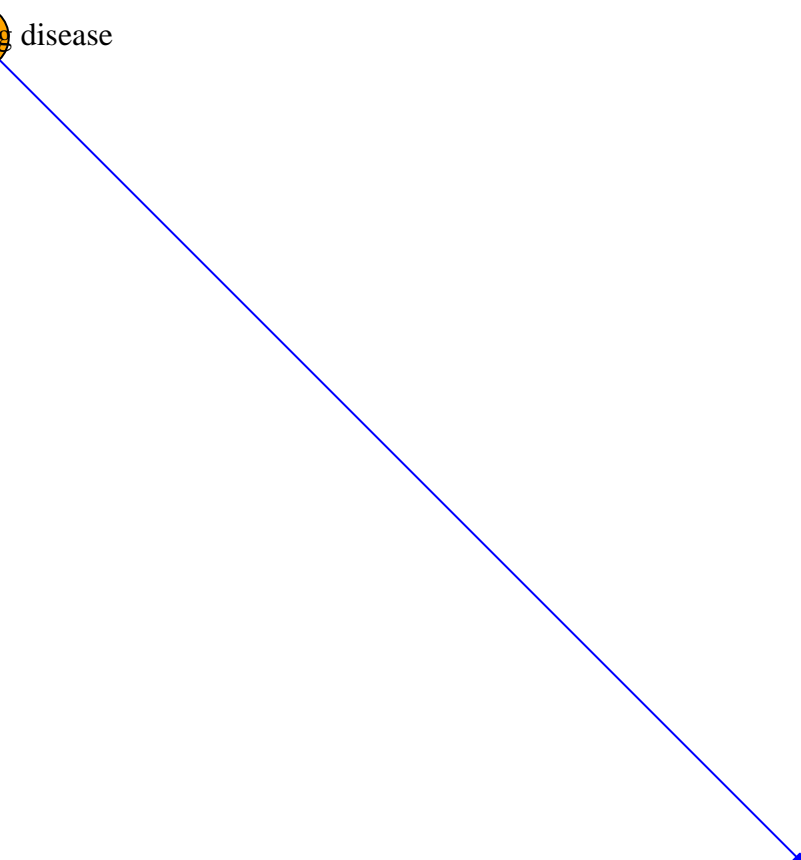

## Variant–Disease Network (Hirschsprung disease 1)

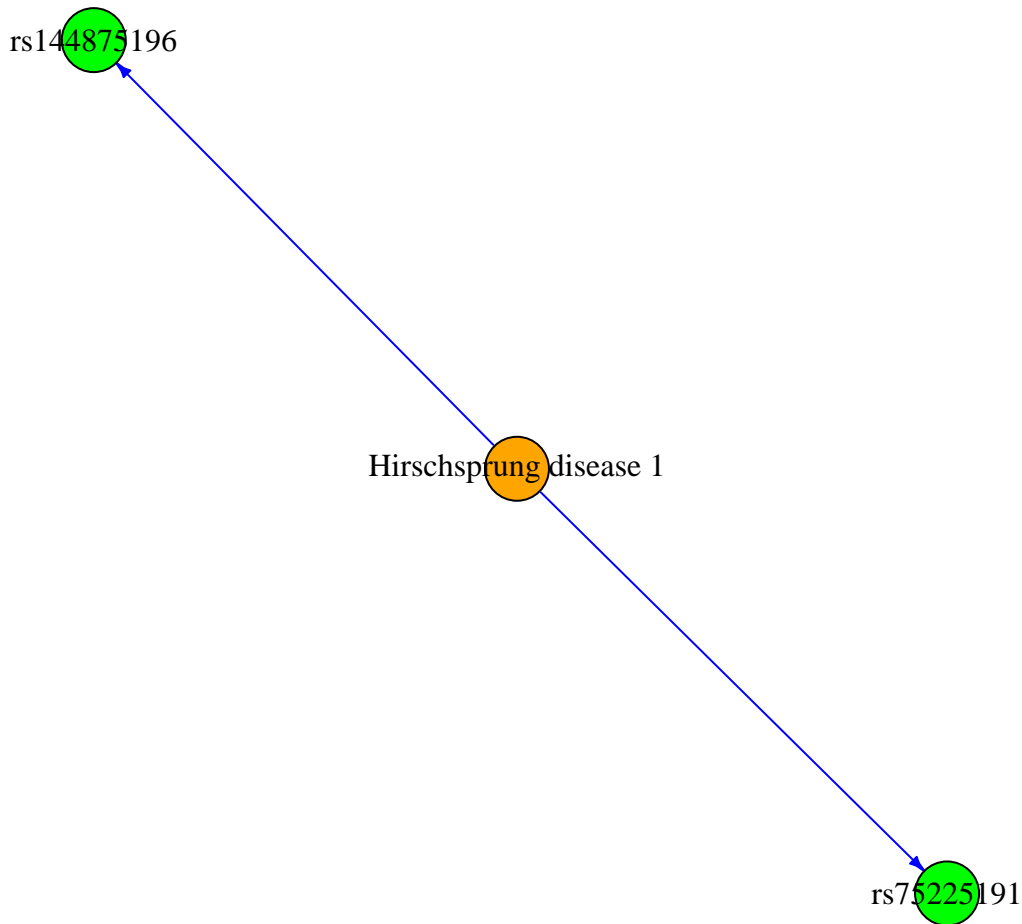



## Variant–Disease Network (Histiocytic medullary reticulosis)

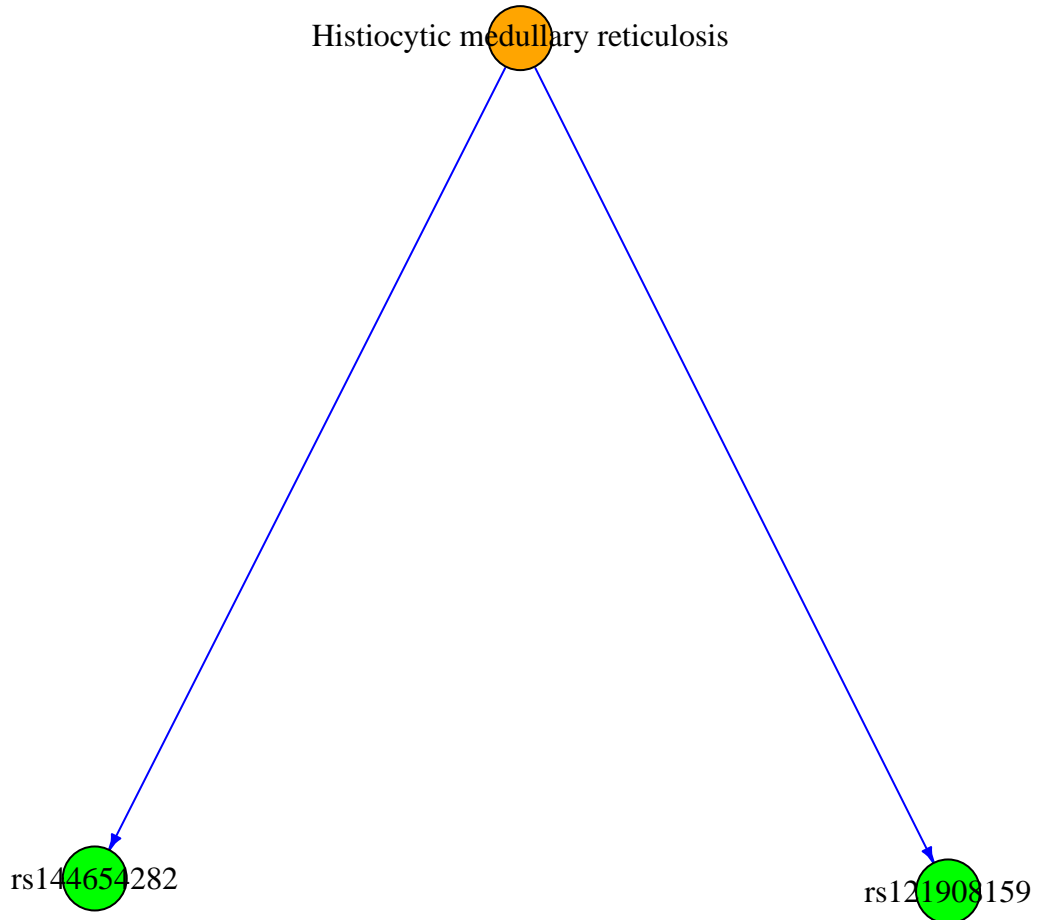

Variant–Disease Network (Histiocytosis–lymphadenopathy plus syndrome)

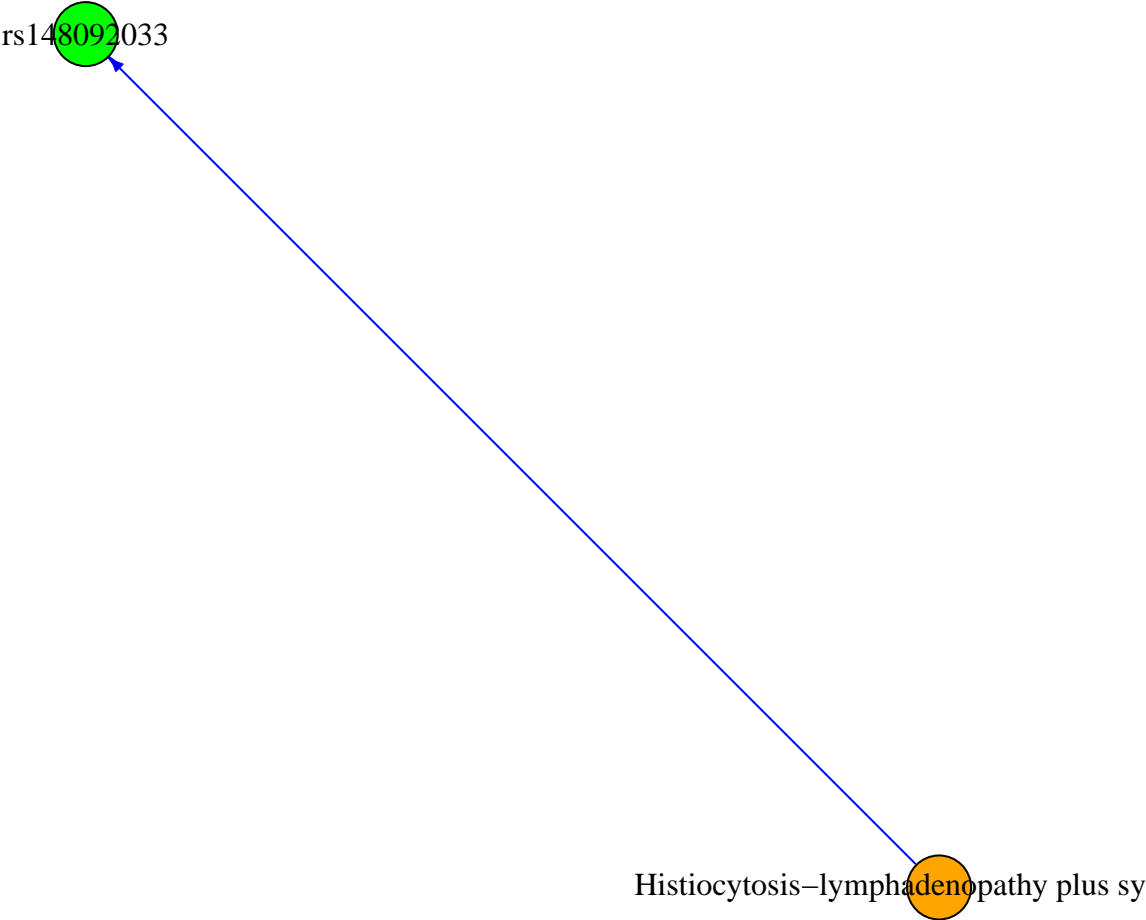

## Variant–Disease Network (History of neurodevelopmental disorder)

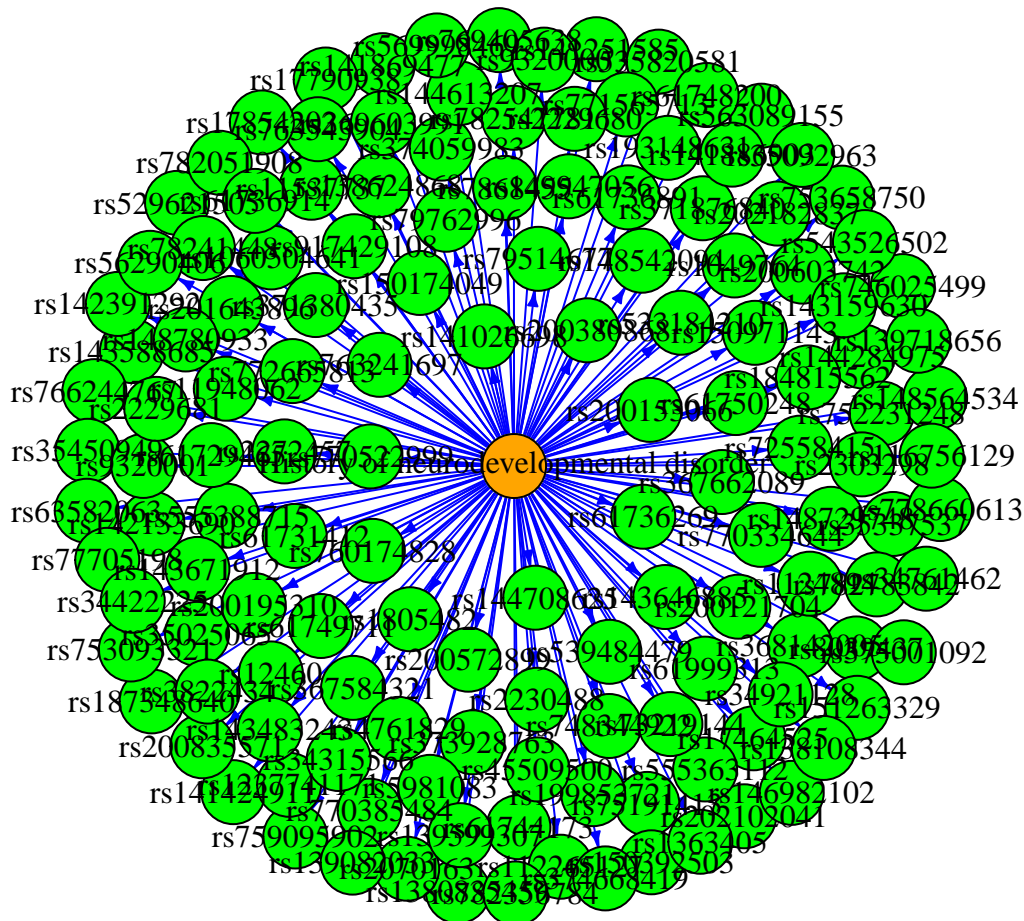

# Variant–Disease Network (HNSHA due to aldolase A deficiency)

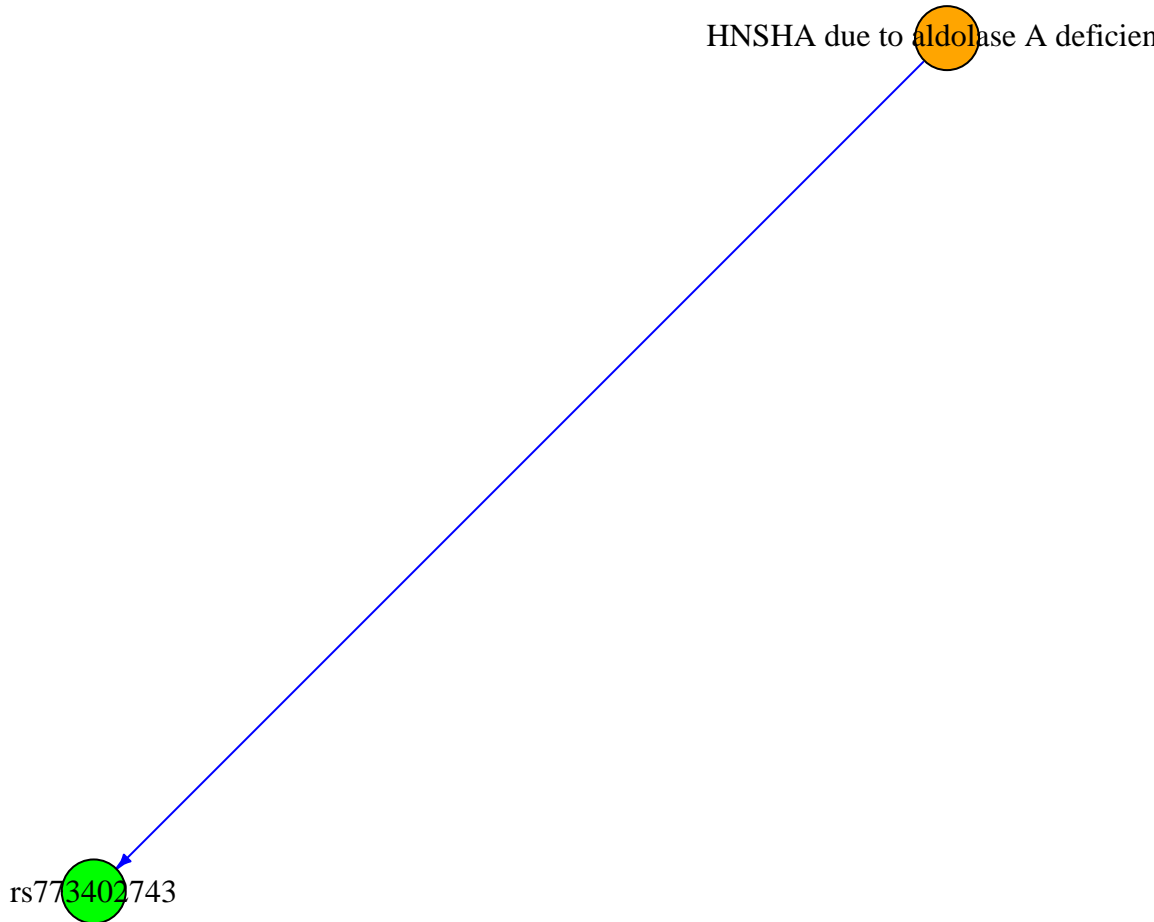

Variant–Disease Network (Holocarboxylase synthetase deficiency)

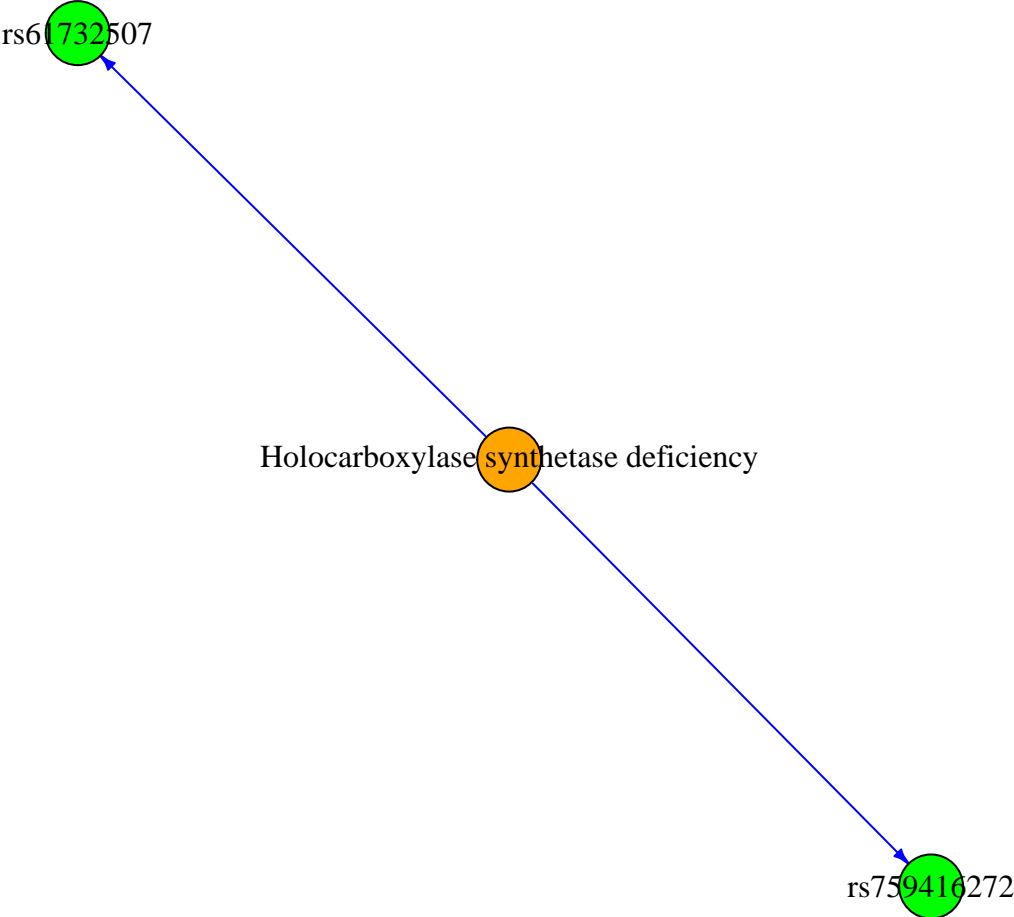

## Variant-Disease Network (Holoprosencephaly 3)

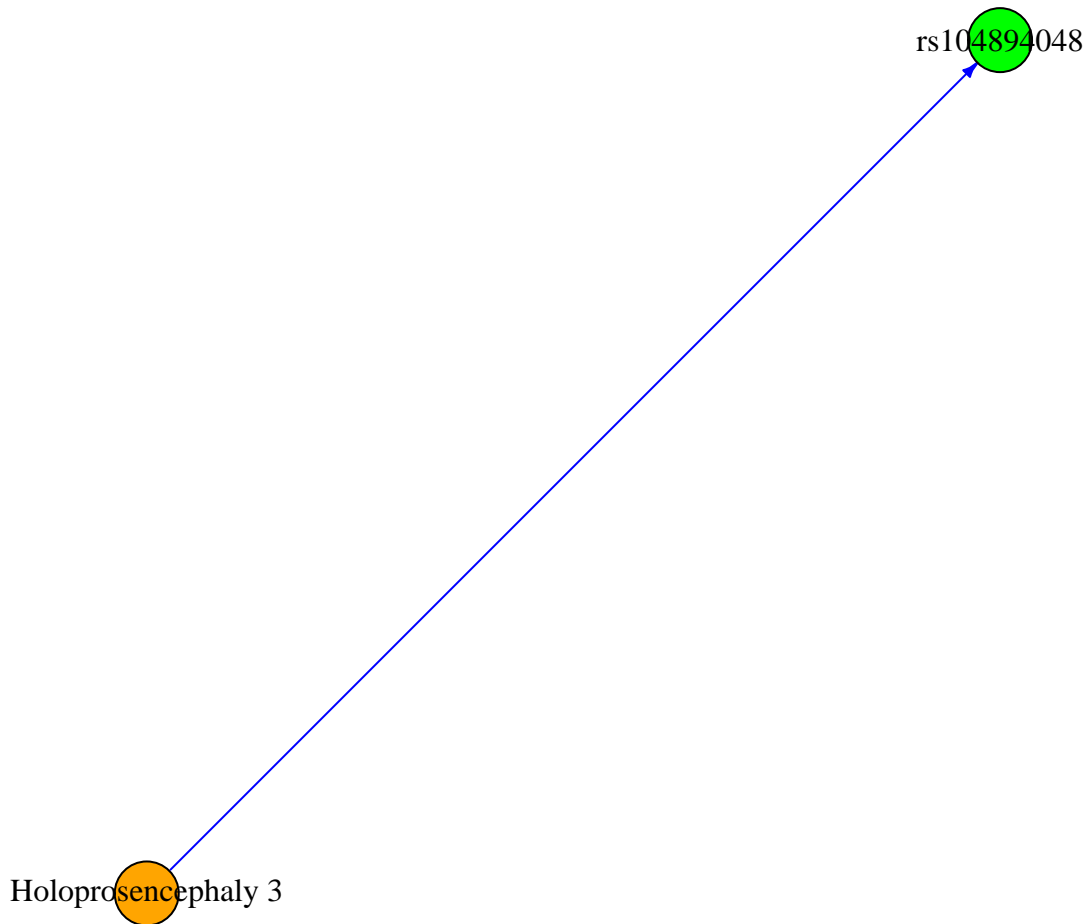

## Variant–Disease Network (Holoprosencephaly 4)

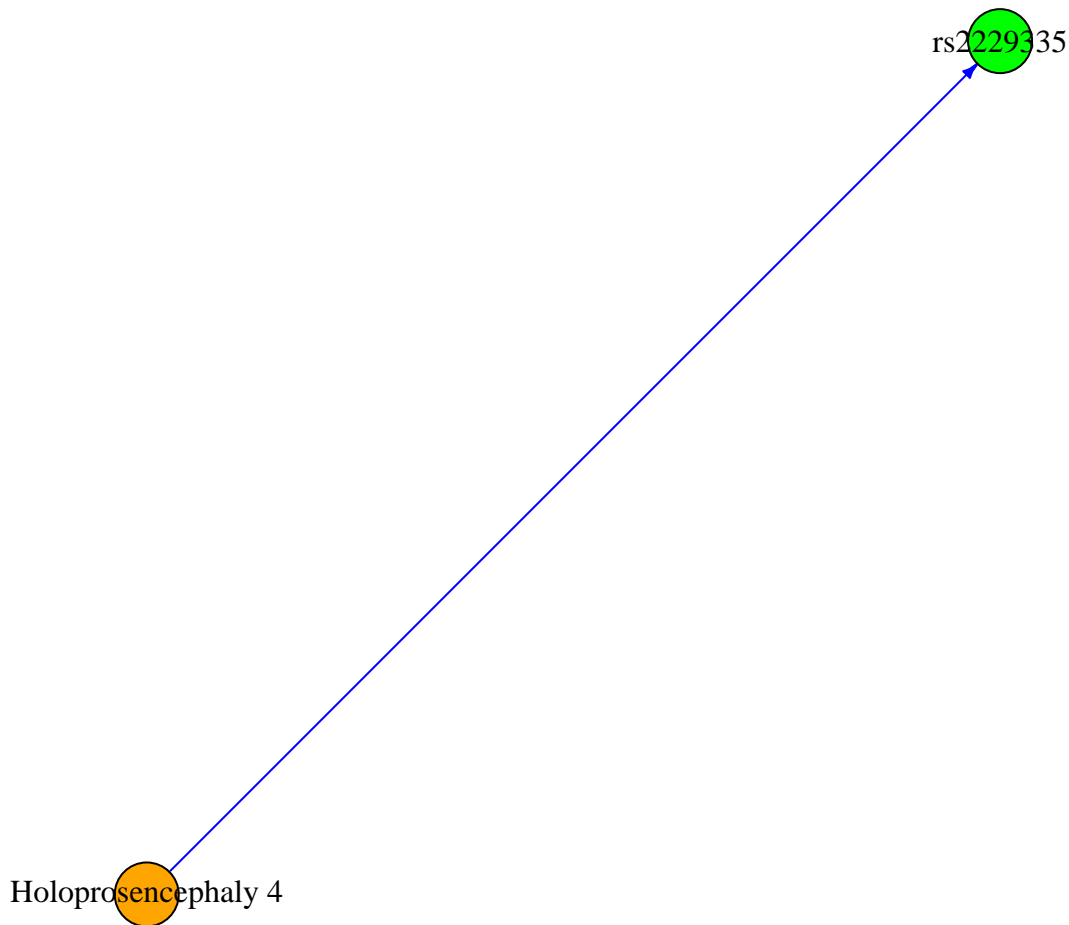

## Variant-Disease Network (Holoprosencephaly 7)

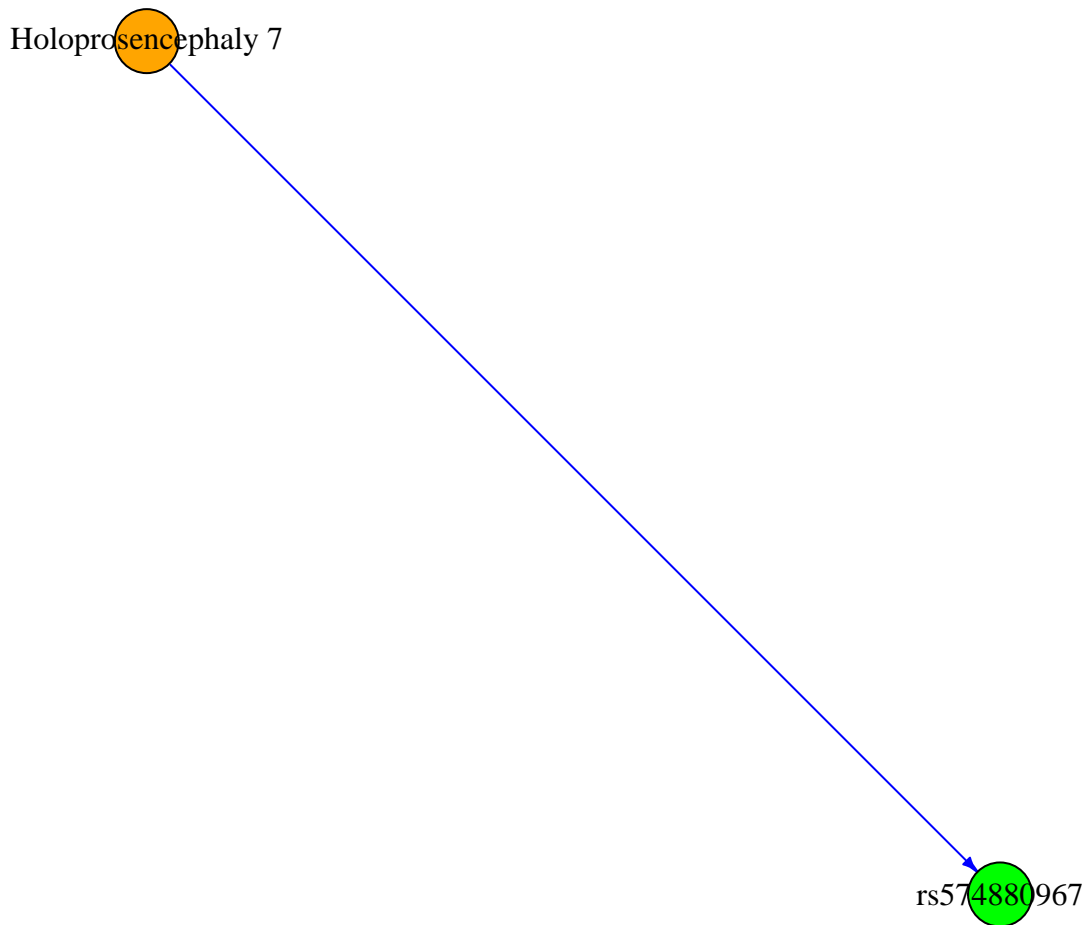



**Variant–Disease Network (Holoprosencephaly sequence)**

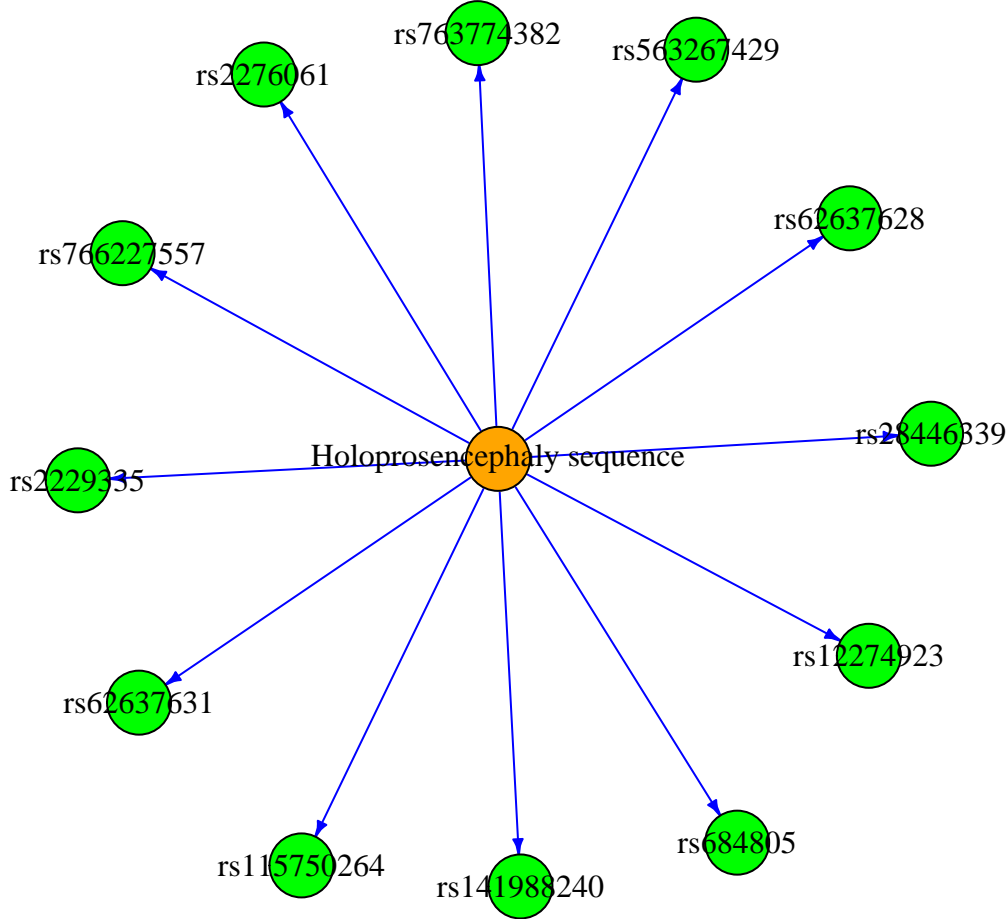

Variant–Disease Network (Homocystinuria)

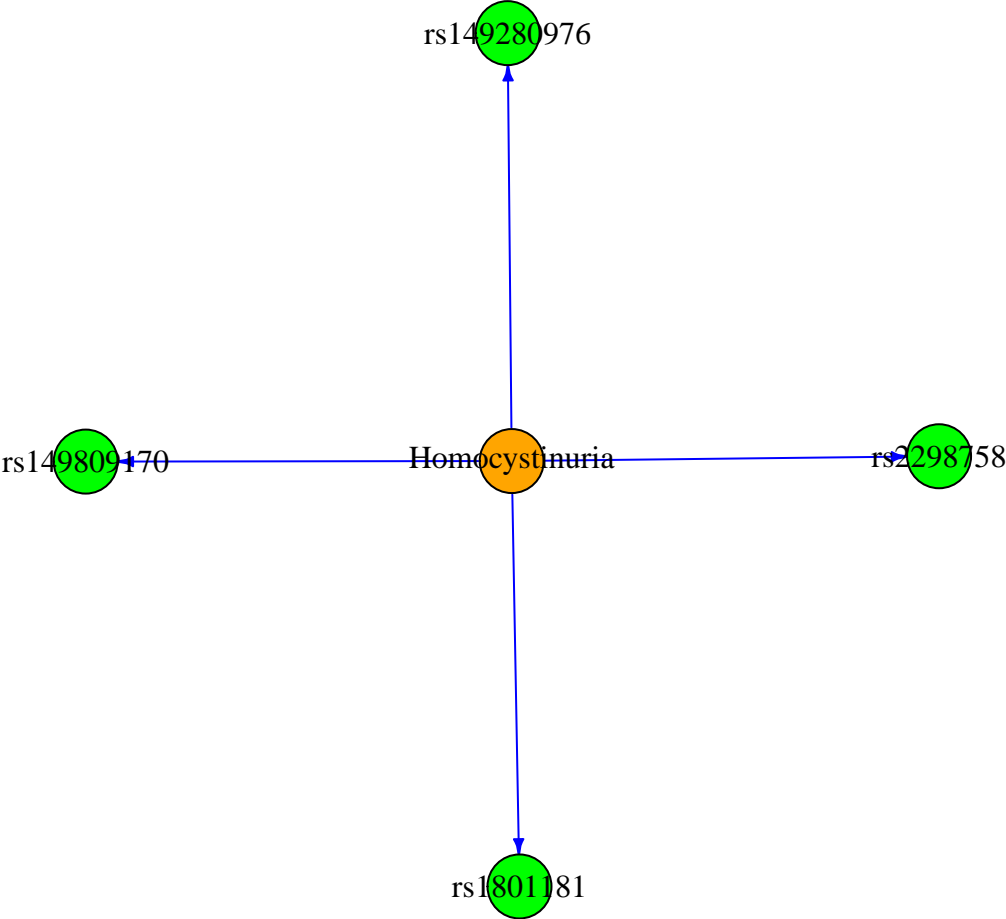

**Variant–Disease Network (Homocystinuria due to CBS deficiency)**

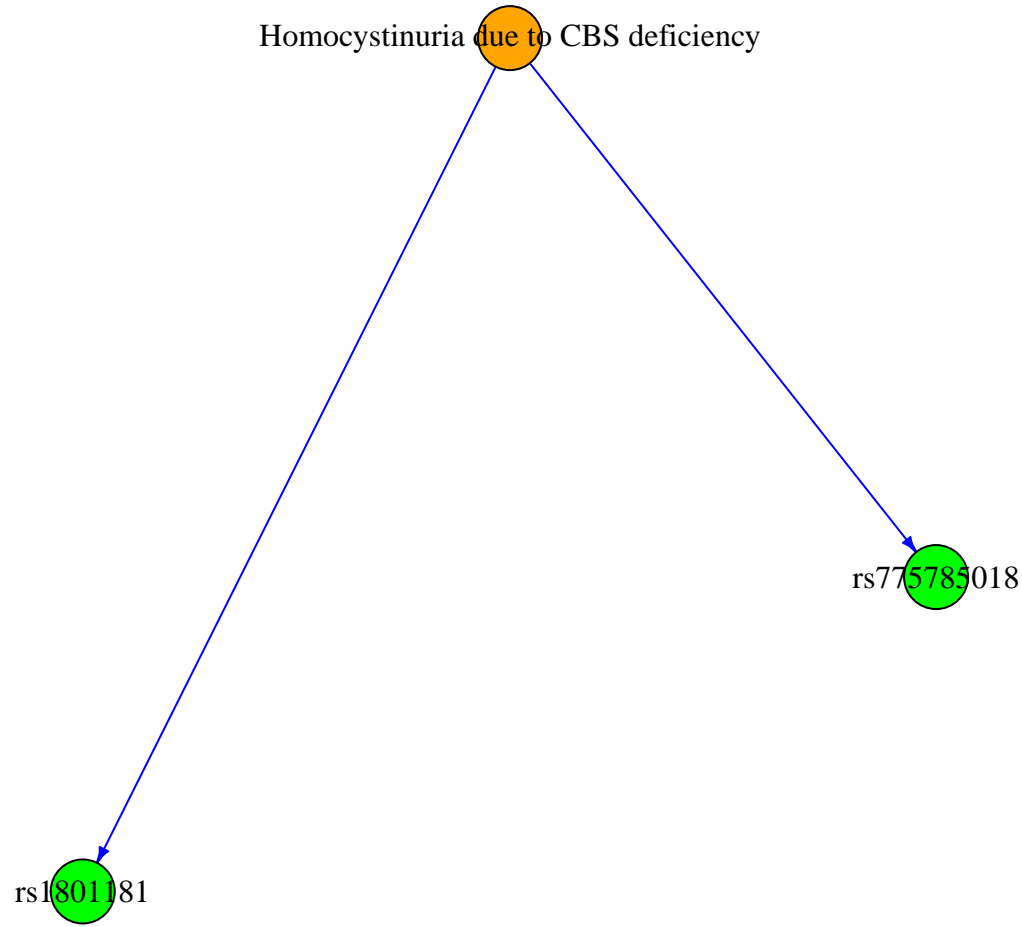

# Variant–Disease Network (Howel–Evans syndrome)

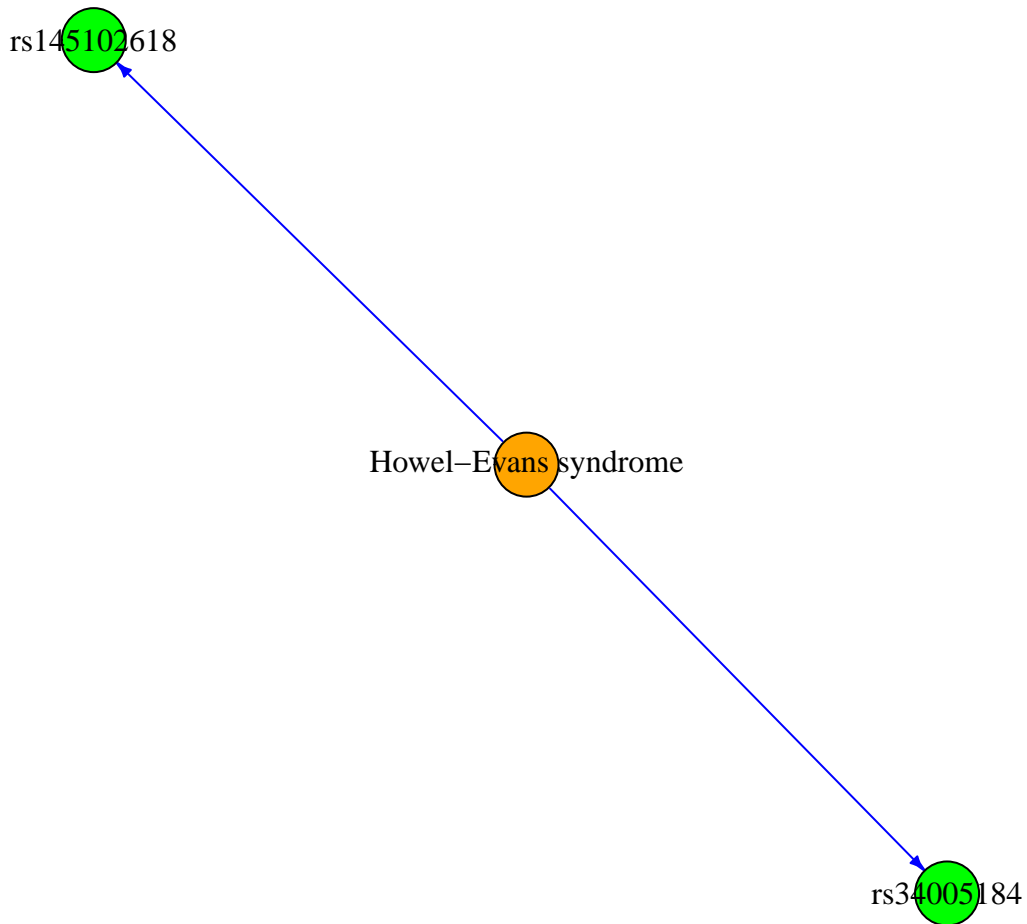

## Variant–Disease Network (Hurler syndrome)

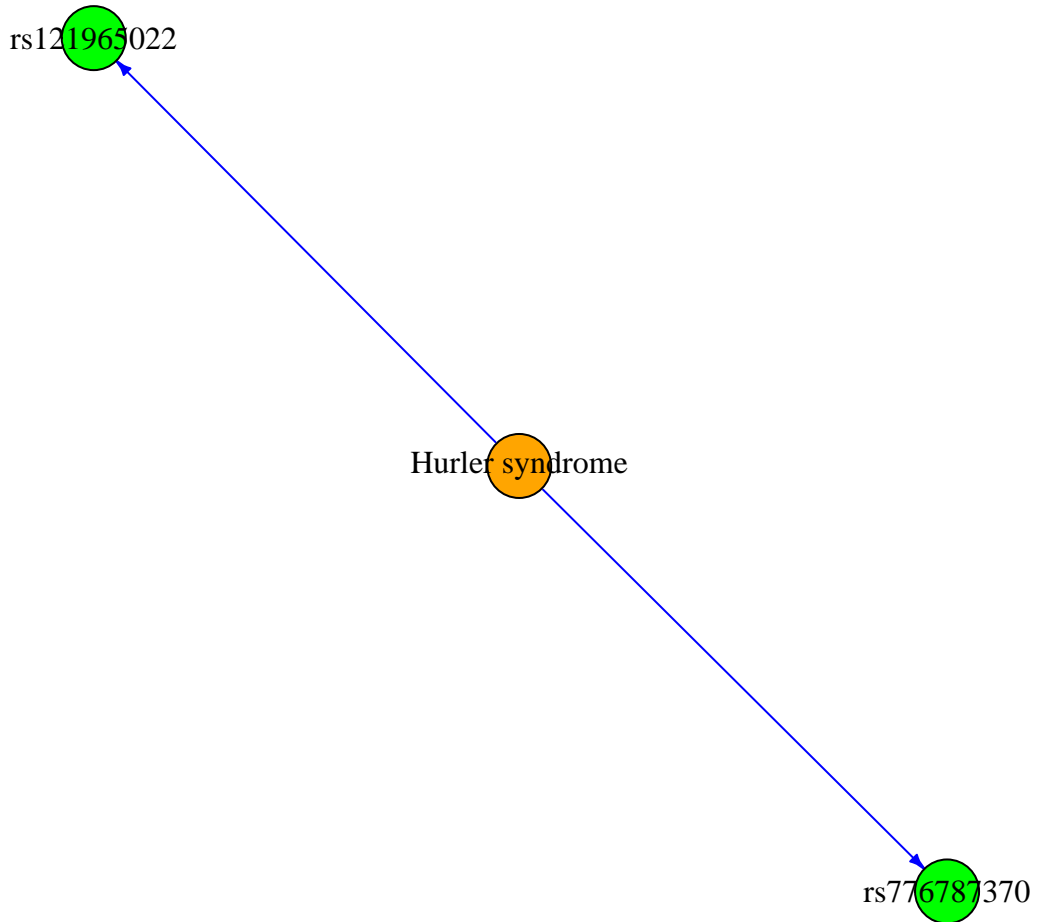

## Variant–Disease Network (Hyperaldosteronism)

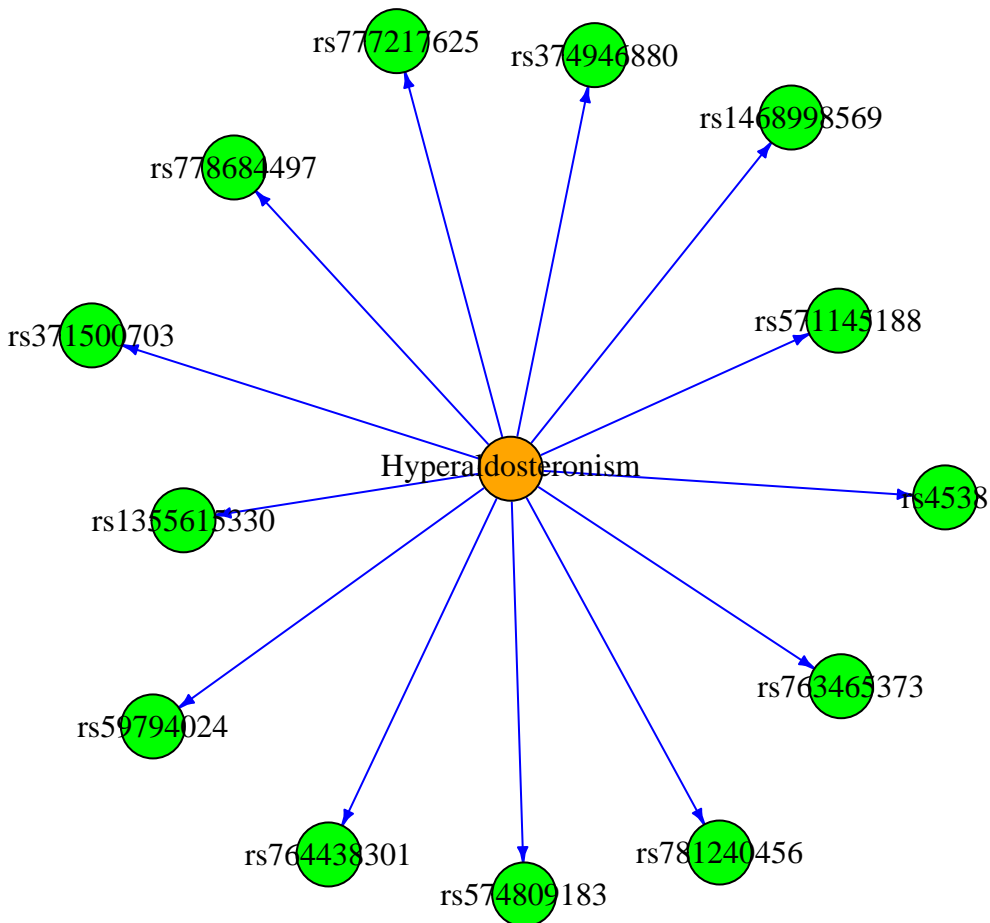

## Variant–Disease Network (Hyperammonemia)

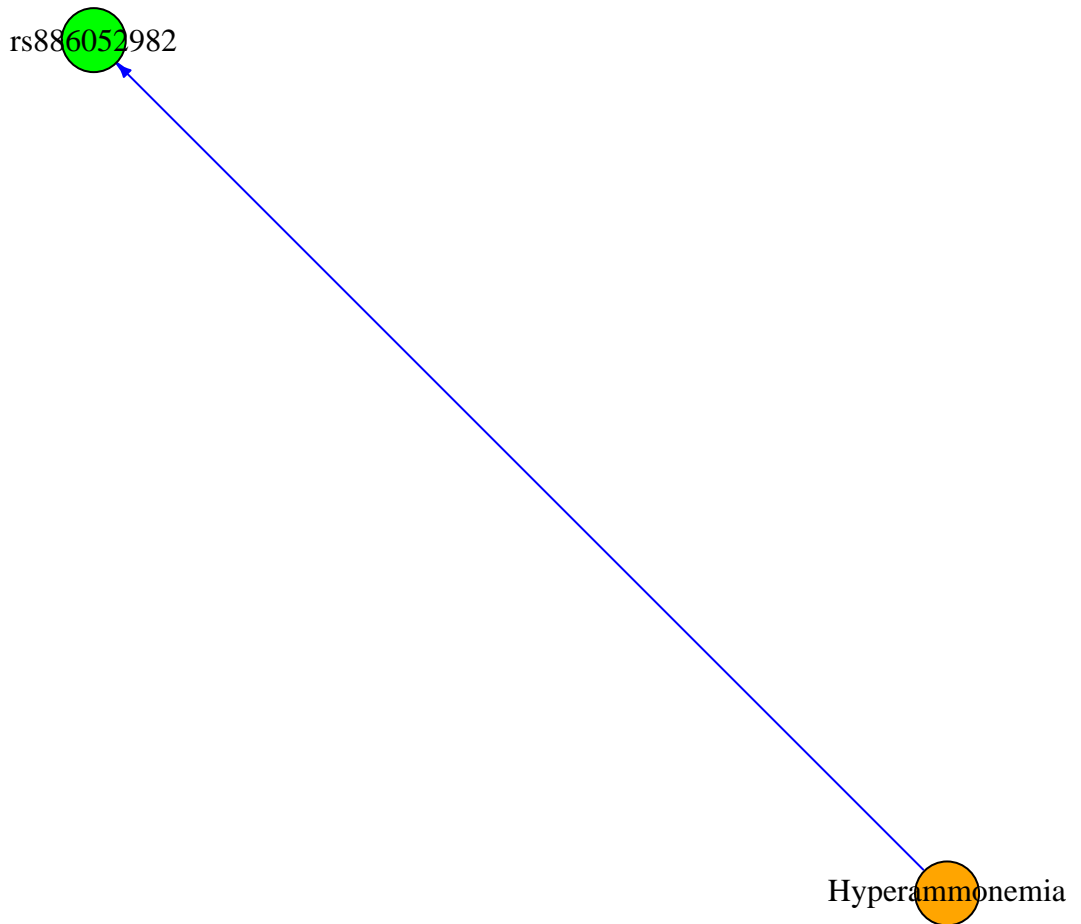

## Variant–Disease Network (Hyperekplexia)

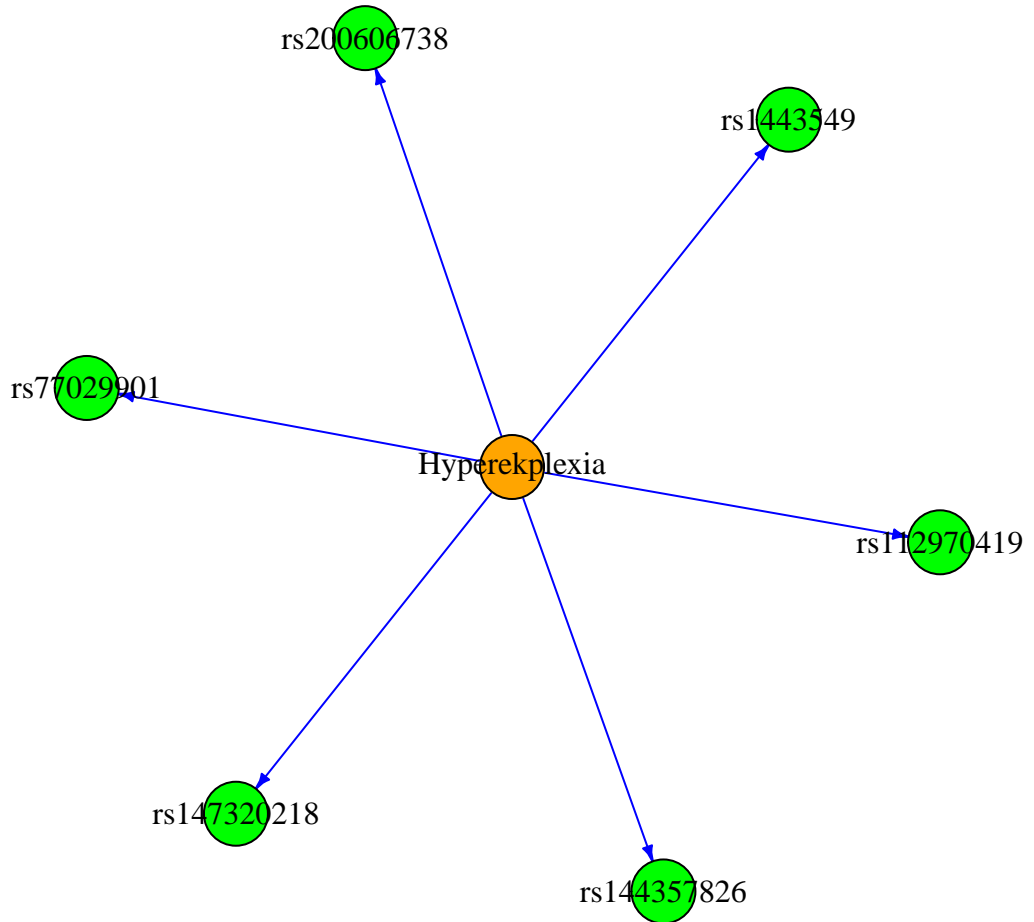



Variant–Disease Network (Hyperekplexia 1)

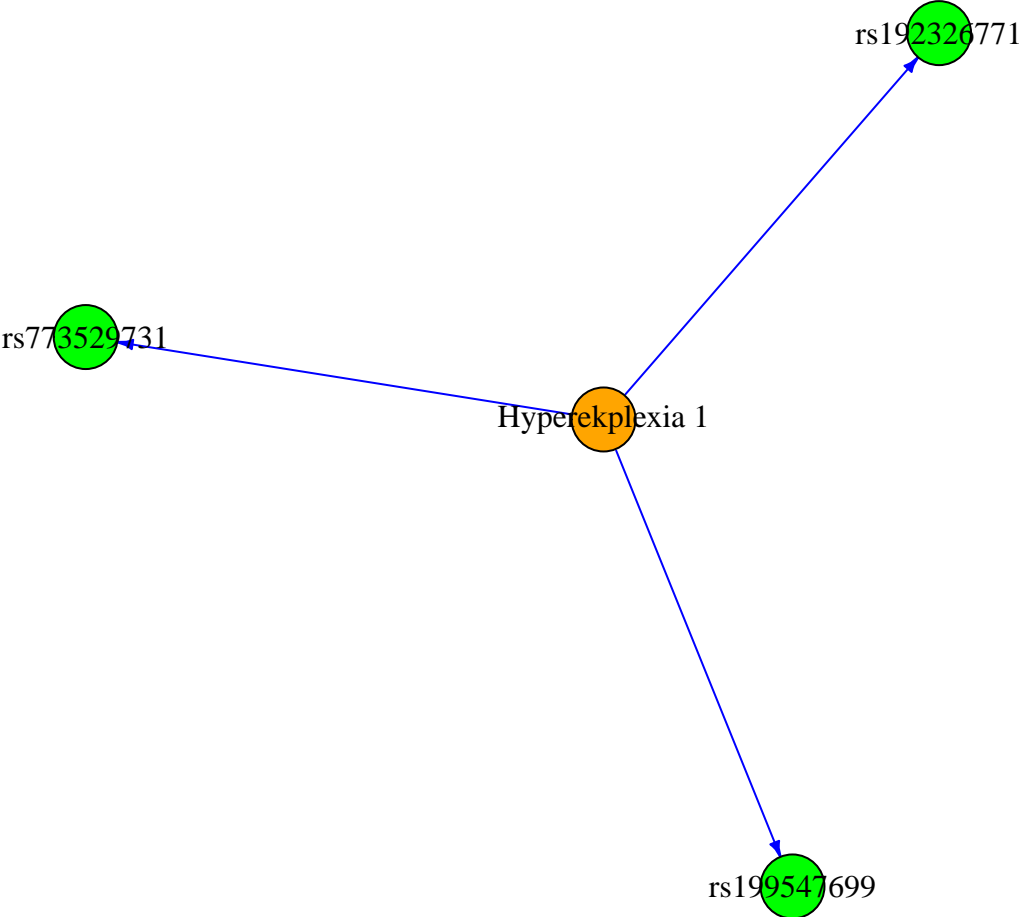

Variant–Disease Network (Hyperekplexia 3)

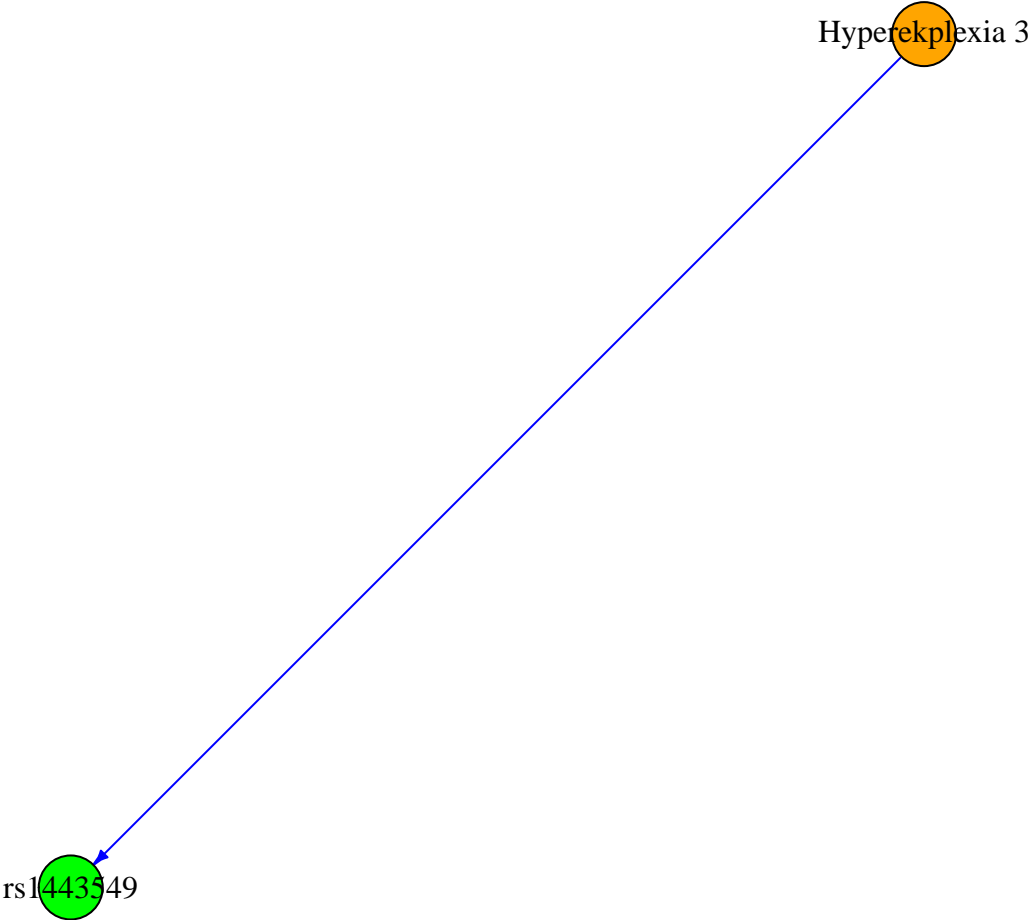

Variant–Disease Network (Hyperferritinemia cataract syndrome)

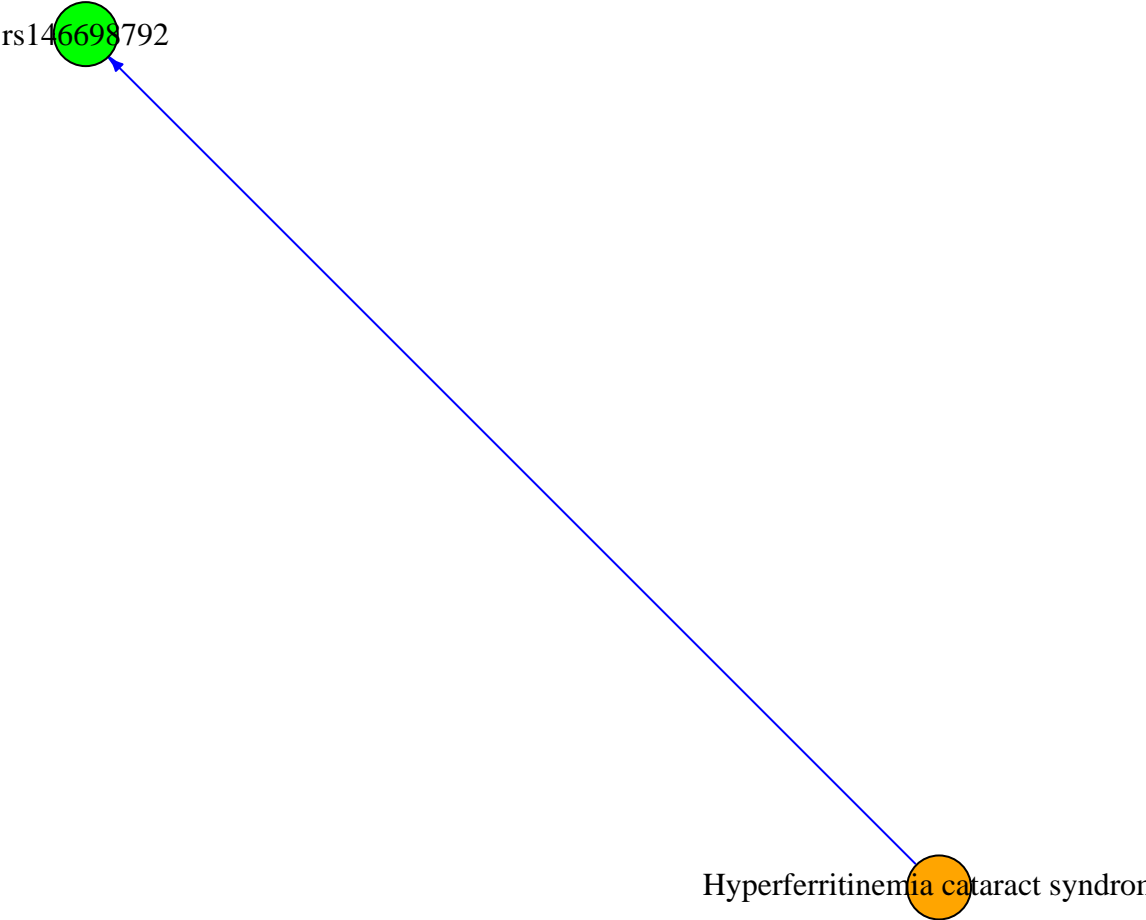

Variant–Disease Network (Hyperglycinuria)

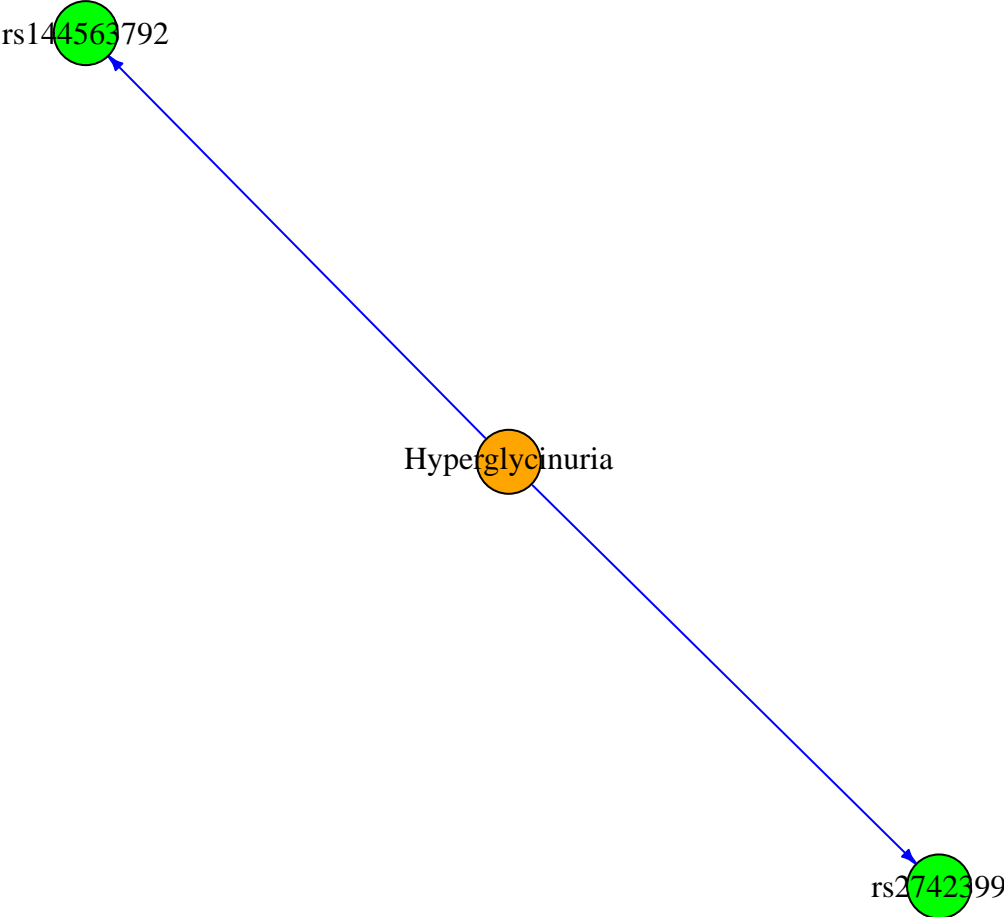

**Variant–Disease Network (Hyper–IgE recurrent infection syndrome 1)**

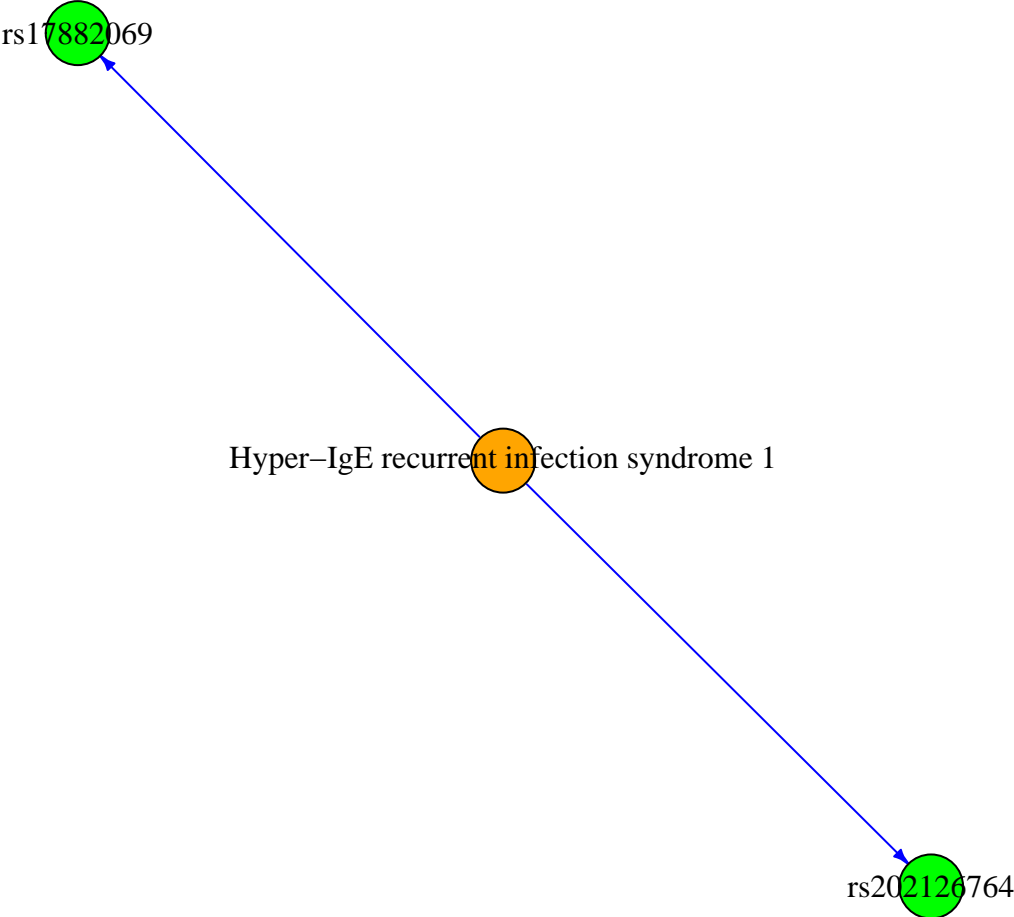

## Variant-Disease Network (Hyper-IgE syndrome)

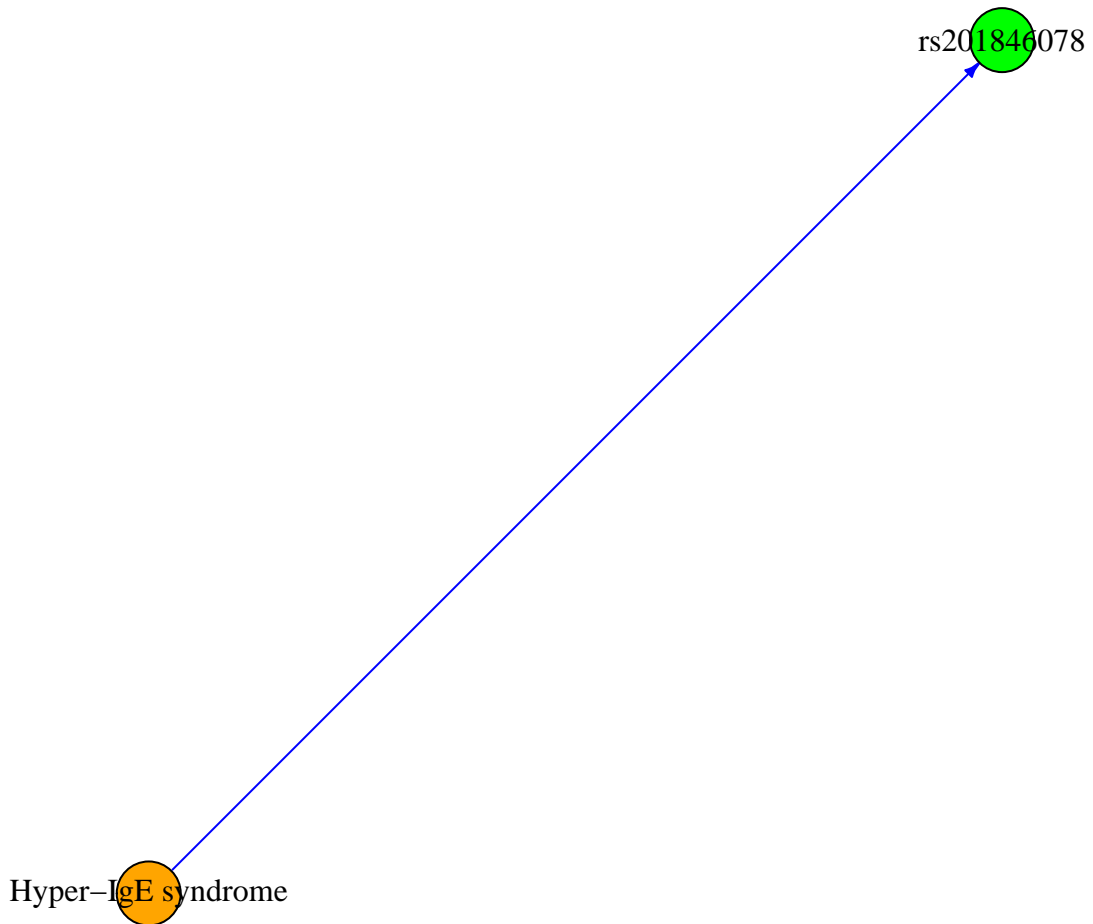

## Variant–Disease Network (Hyperinsulinemic hypoglycemia)

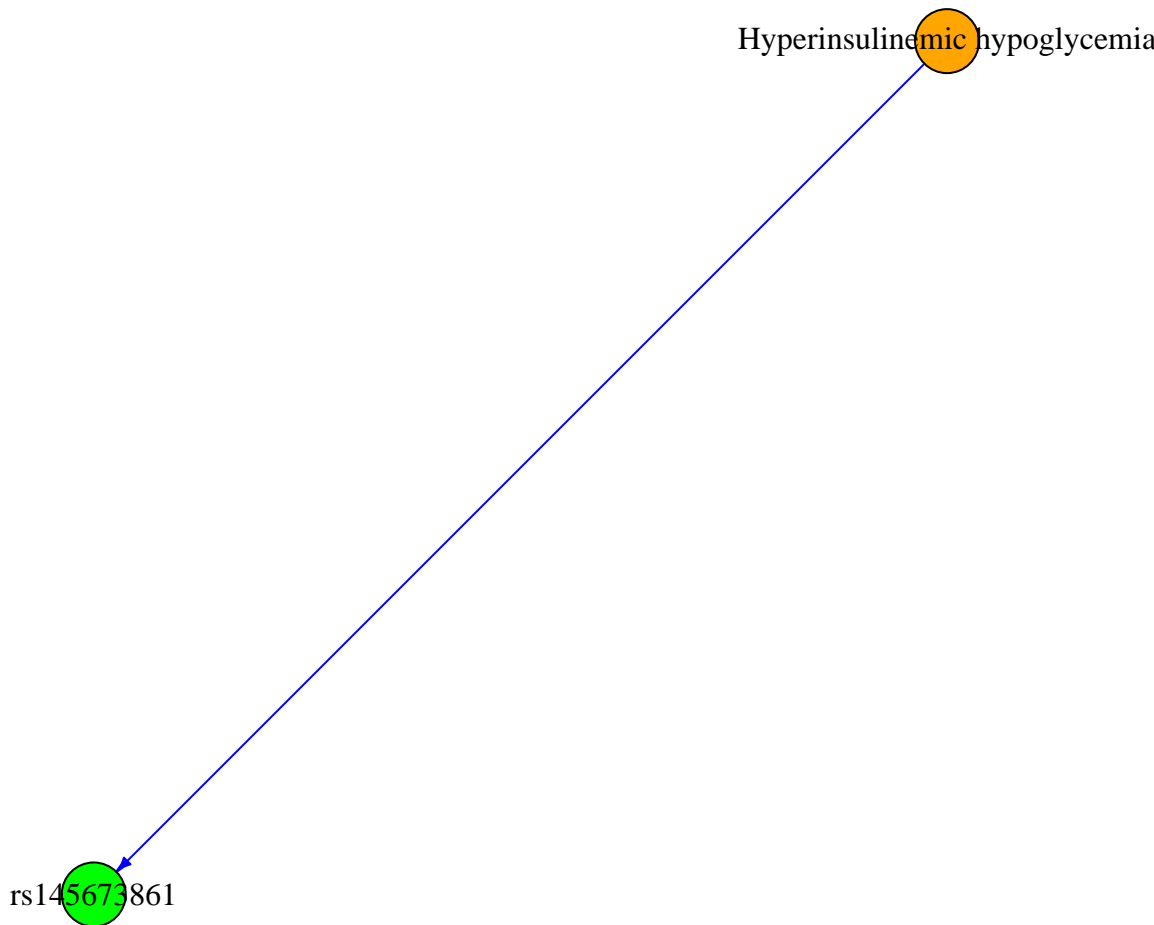

Variant–Disease Network (Hyperinsulinism)

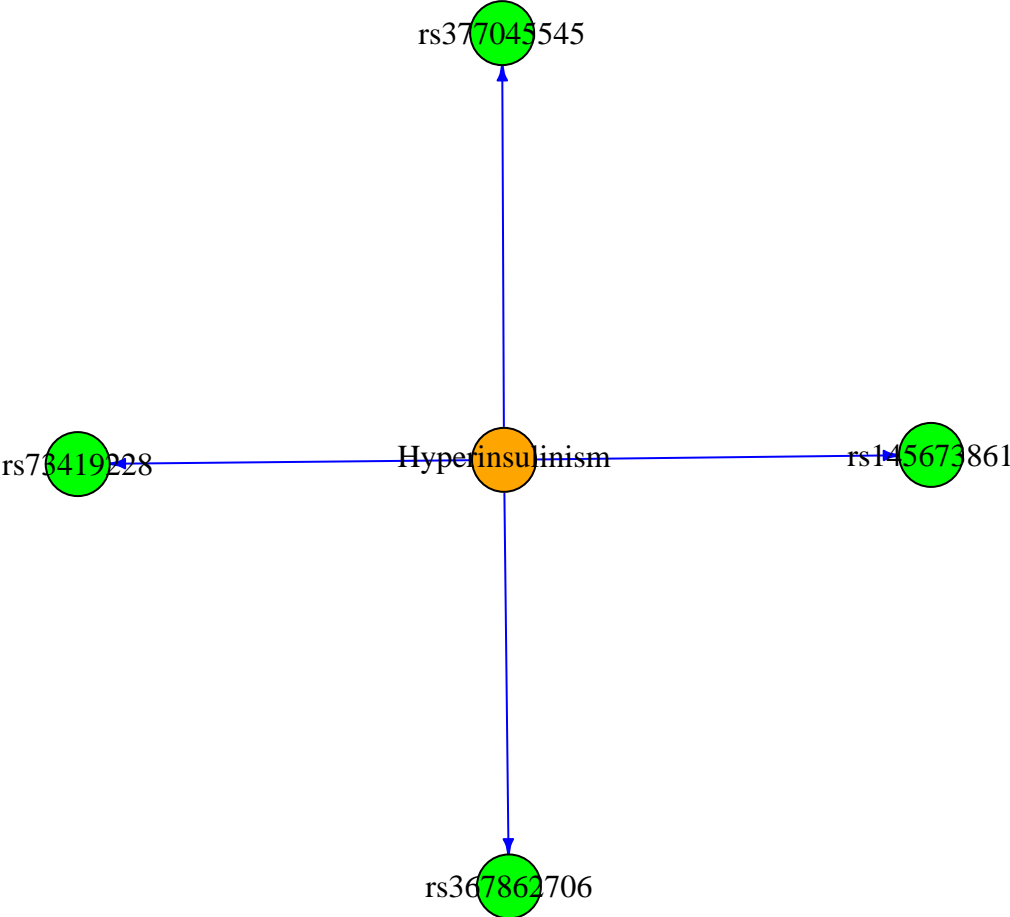



# Variant–Disease Network (Hyperkalemic Periodic Paralysis)

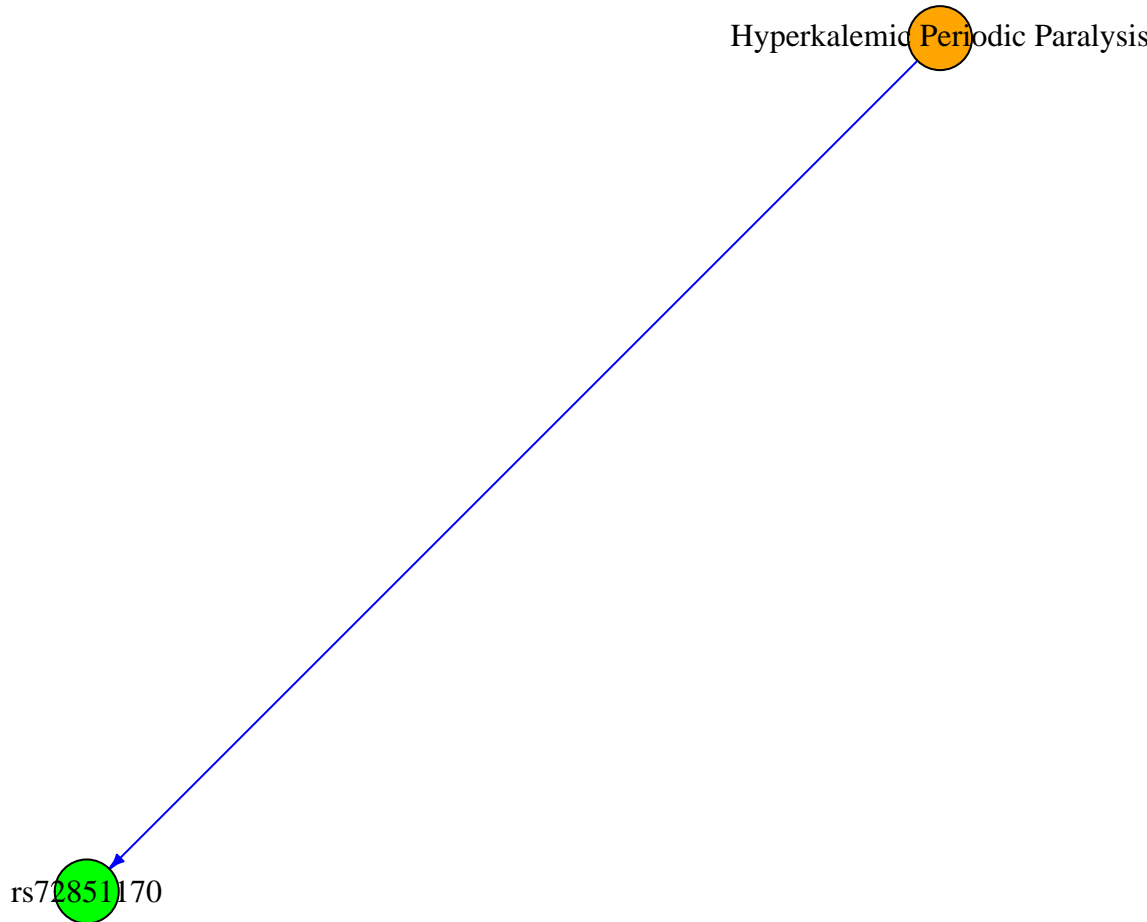

# Variant–Disease Network (Hyperkalemic Periodic Paralysis Type 1)

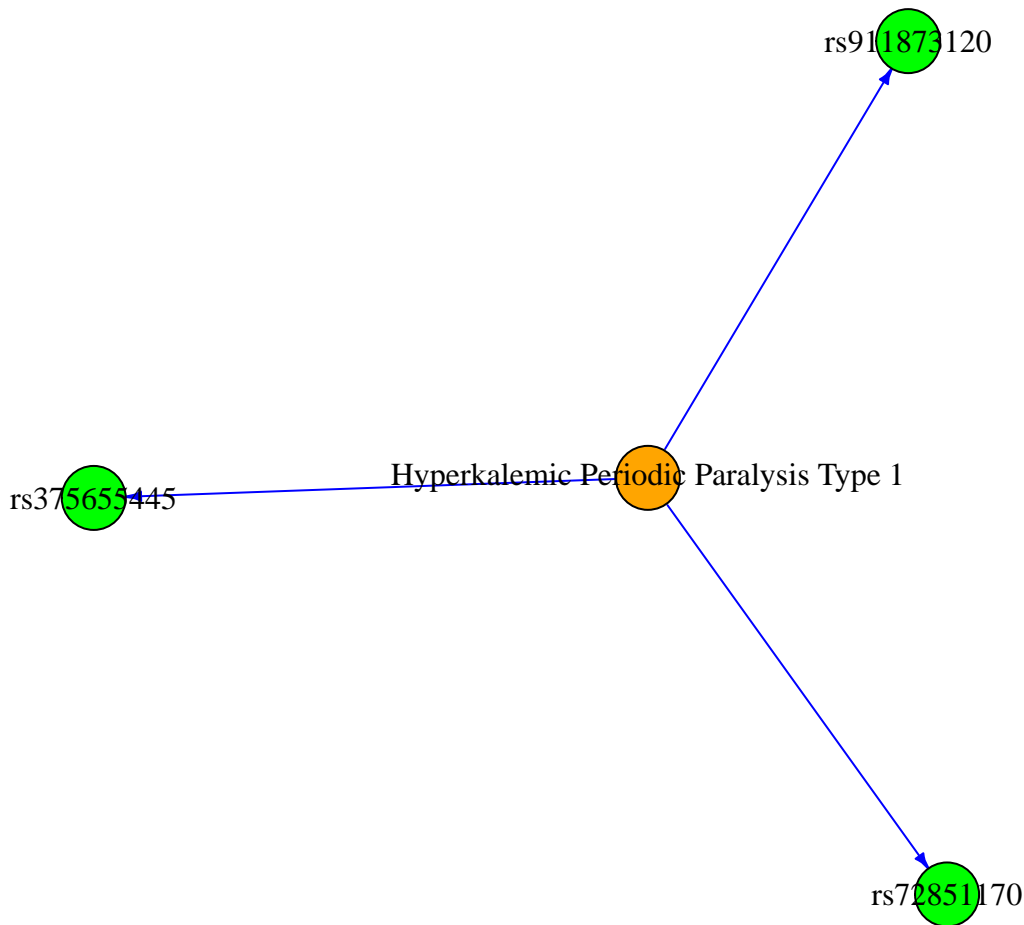

## Variant–Disease Network (Hyperlipoproteinemia)

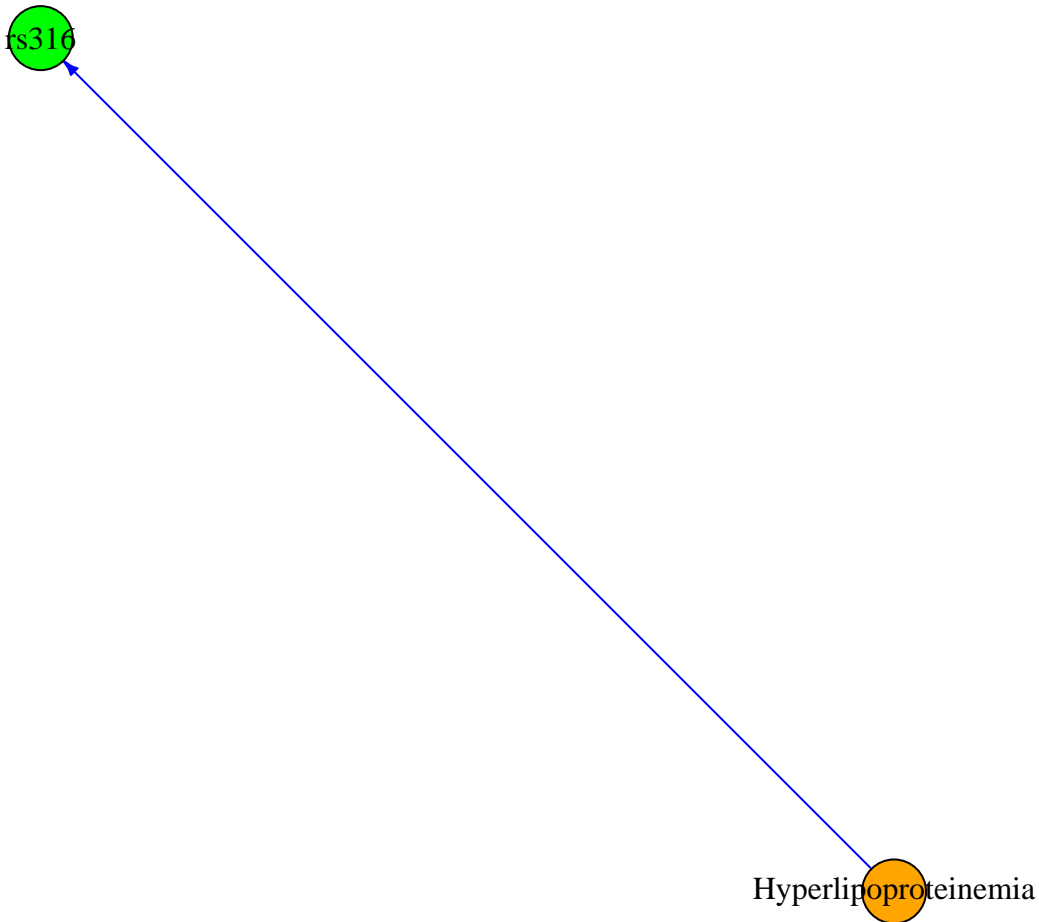

# Disease Network (Hypermethioninemia with s-adenosylhomocysteine hydrolase deficiency)

rs13043752

Hypermethioninemia with s-adenosylhomocysteine hydrolase deficiency

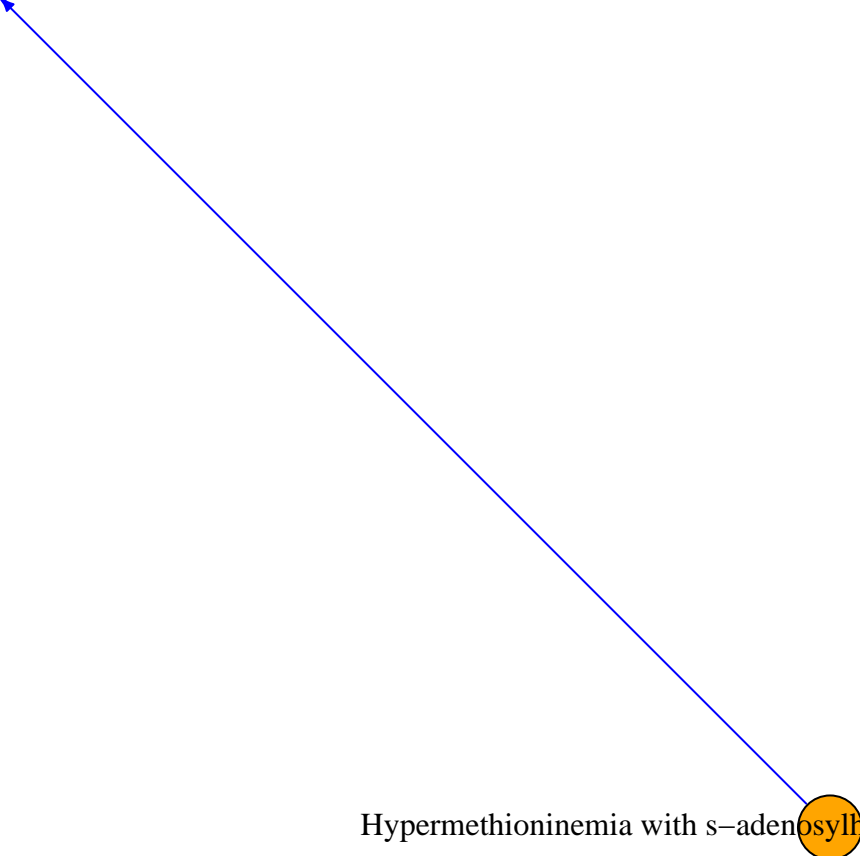

# rs9577152-Disease Network (Hyperornithinemia–hyperammonemia–homocitrullinuria)

Hyperornithinemia–hyperammonemia–homocitrullinuria syndrome

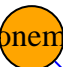

rs9577152

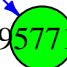

## Variant-Disease Network (Hyperparathyroidism)

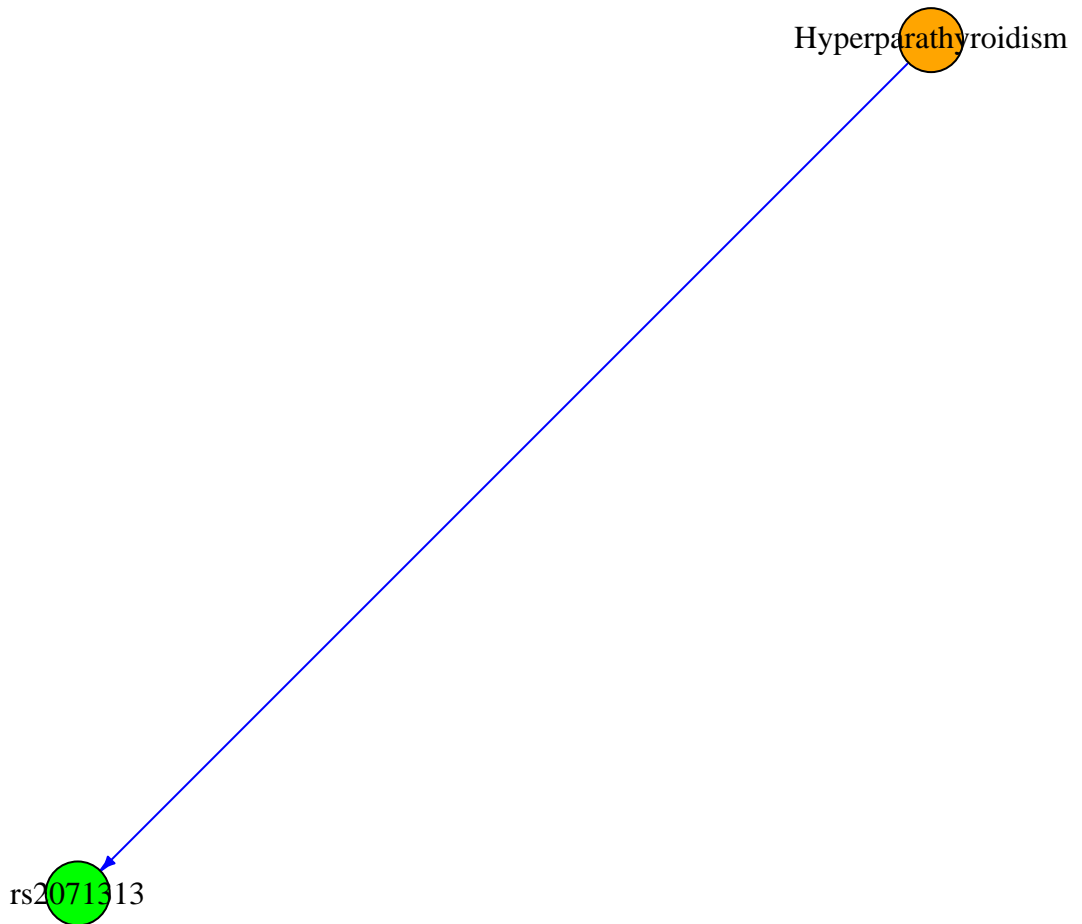

# Variant-Disease Network (Hyperphosphatasia with mental retardation syndrome)

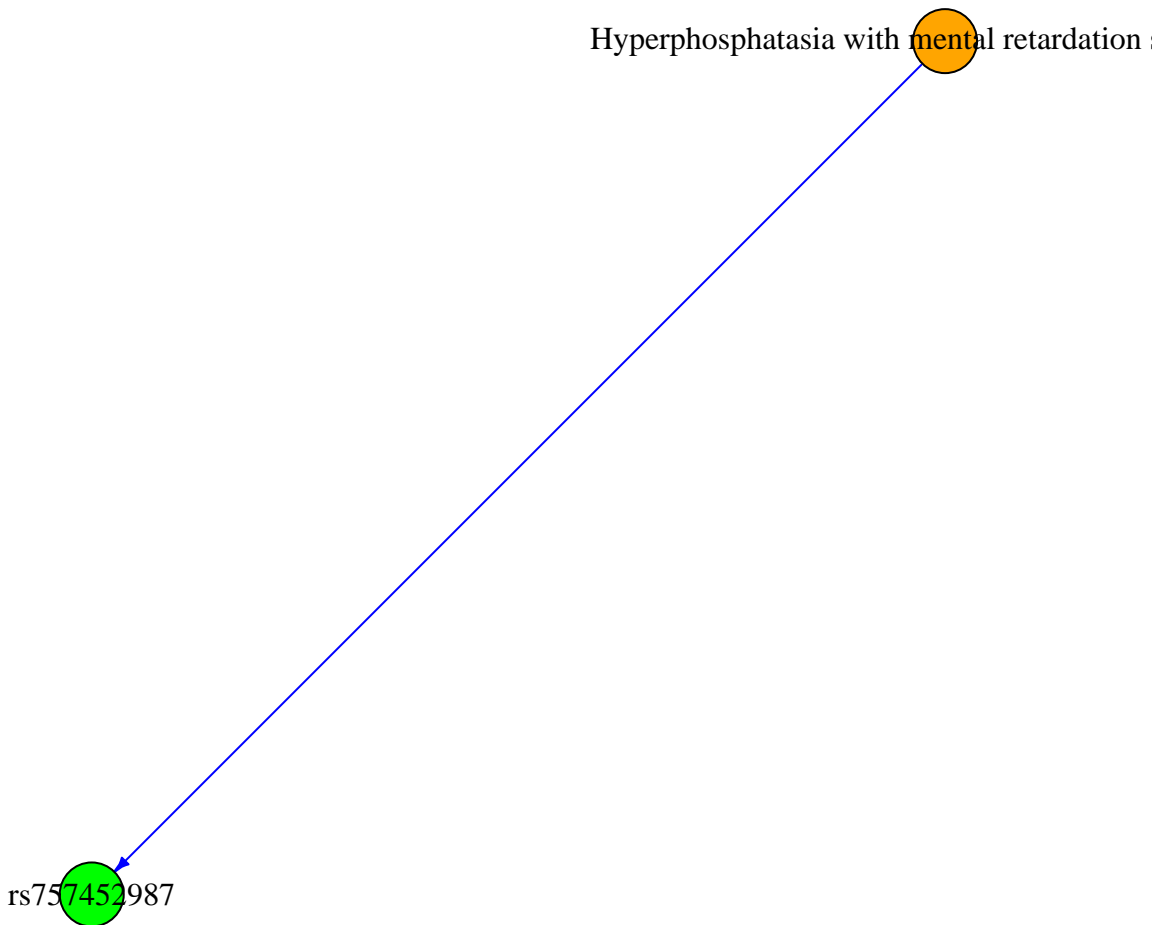

# Variant–Disease Network (Hyperphosphatasia–intellectual disability syndrome)

Hyperphosphatasia–intellectual disability syndrome

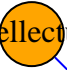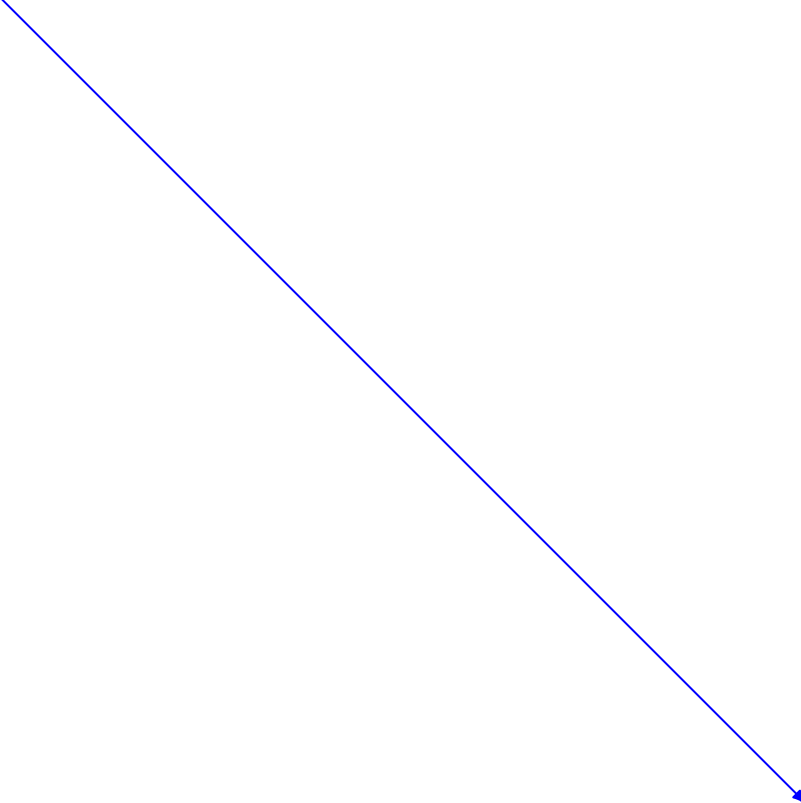

rs374876329

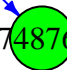



## Variant–Disease Network (Hyperprolinemia)

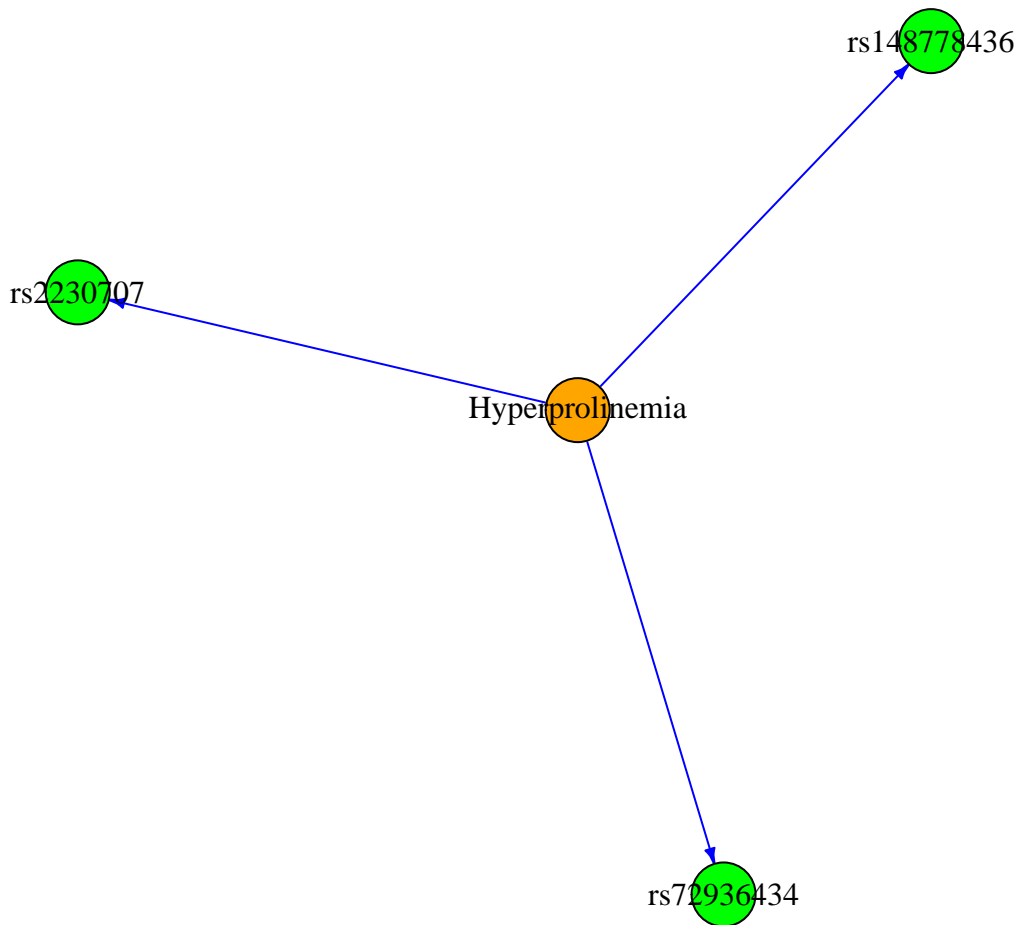

# Variant–Disease Network (Hypertrichotic osteochondrodysplasia)

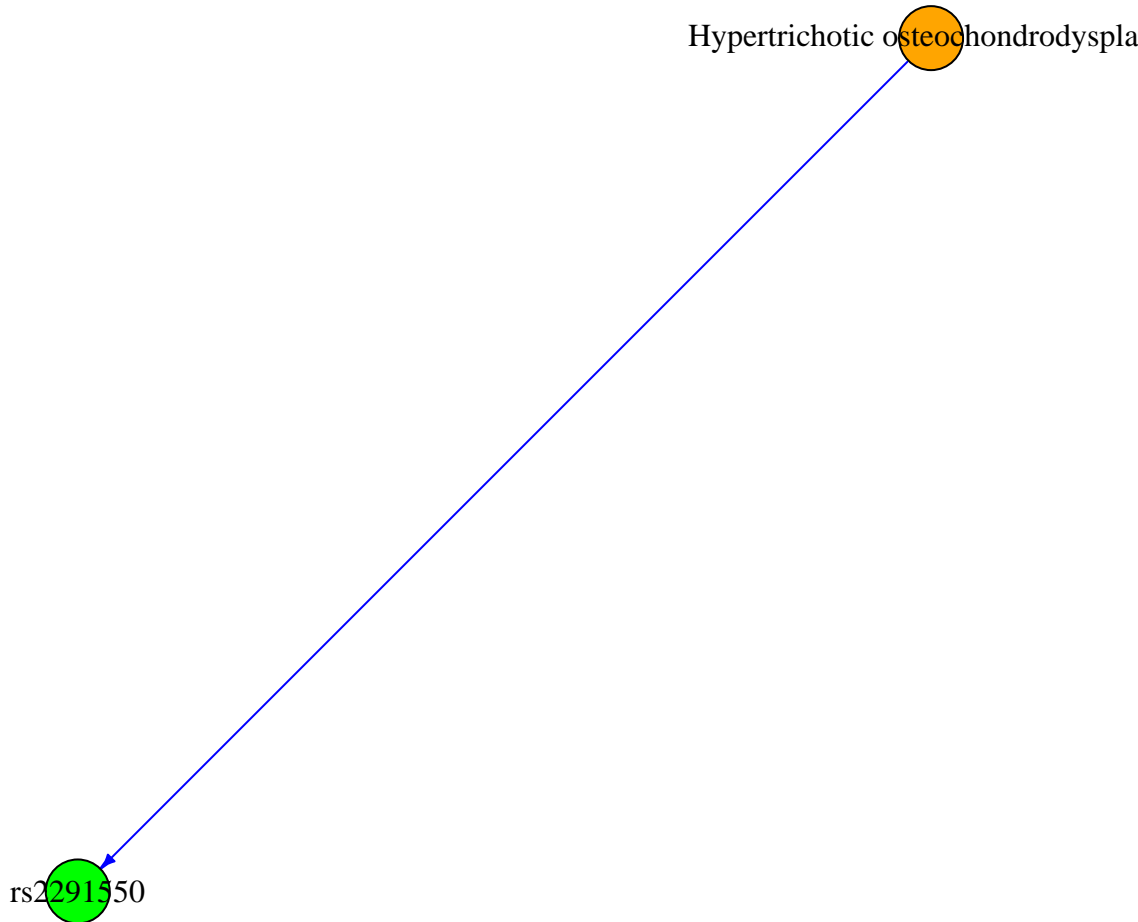

**Variant–Disease Network (Hypertrophic cardiomyopathy)**

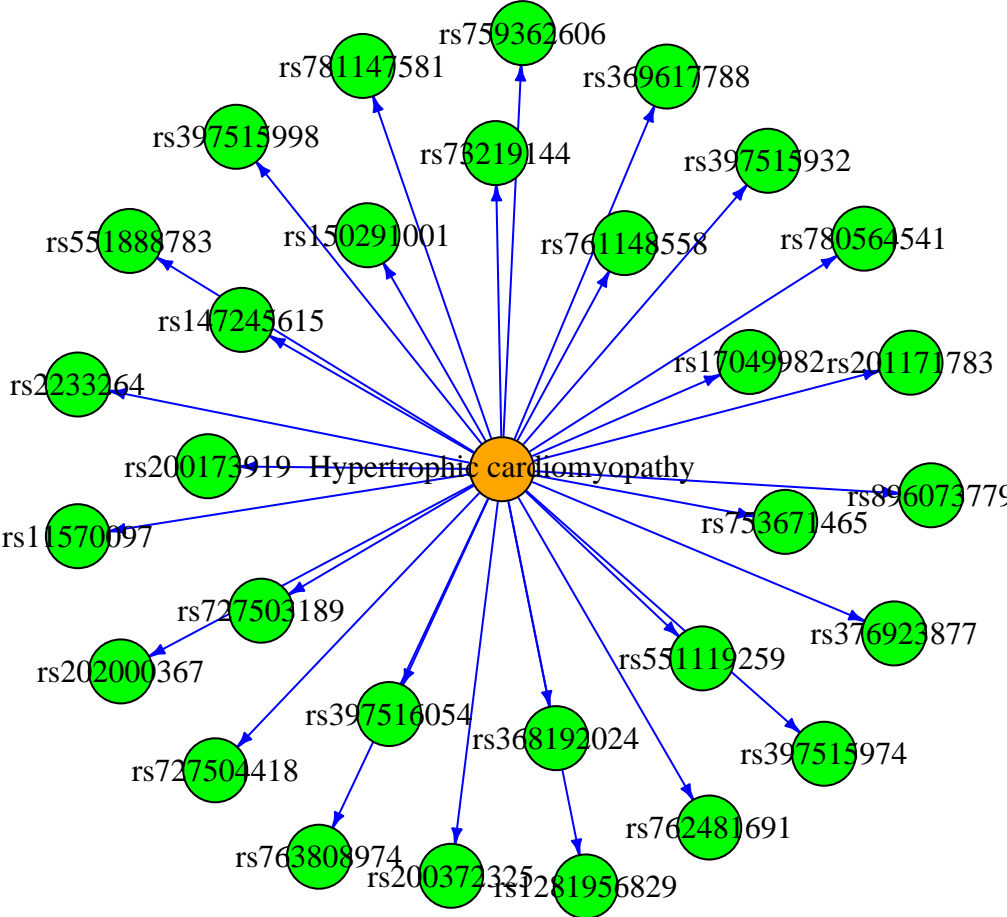

Variant–Disease Network (Hypobetalipoproteinemia)

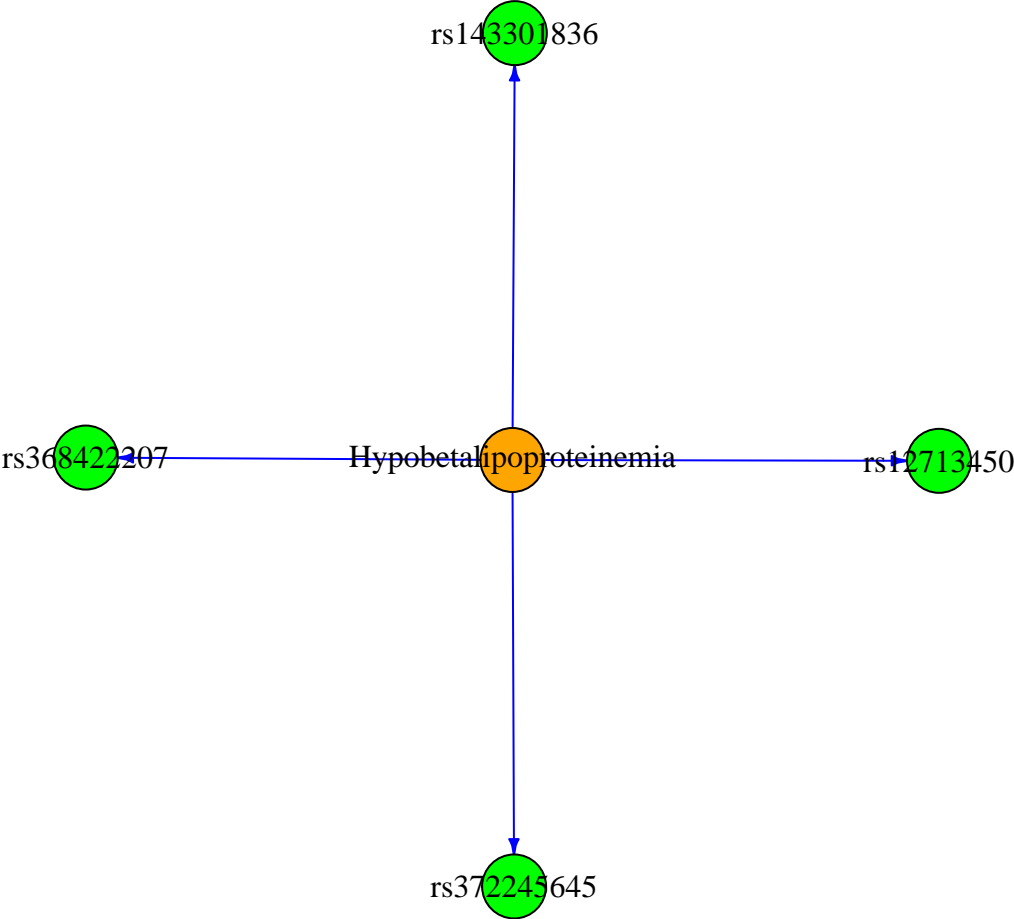

# Genetic-Disease Network (Hypoglycemia with deficiency of glycogen synthetase in

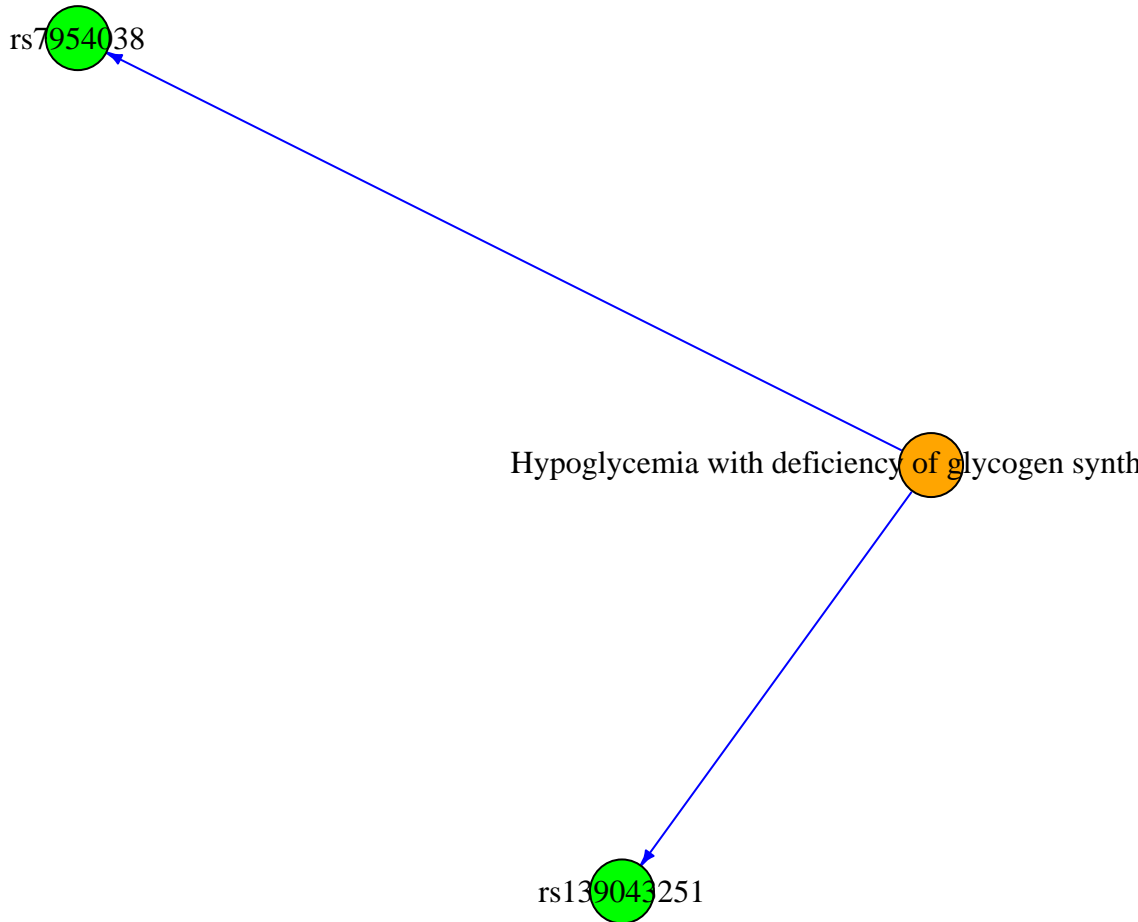

## Variant–Disease Network (Hypogonadism)

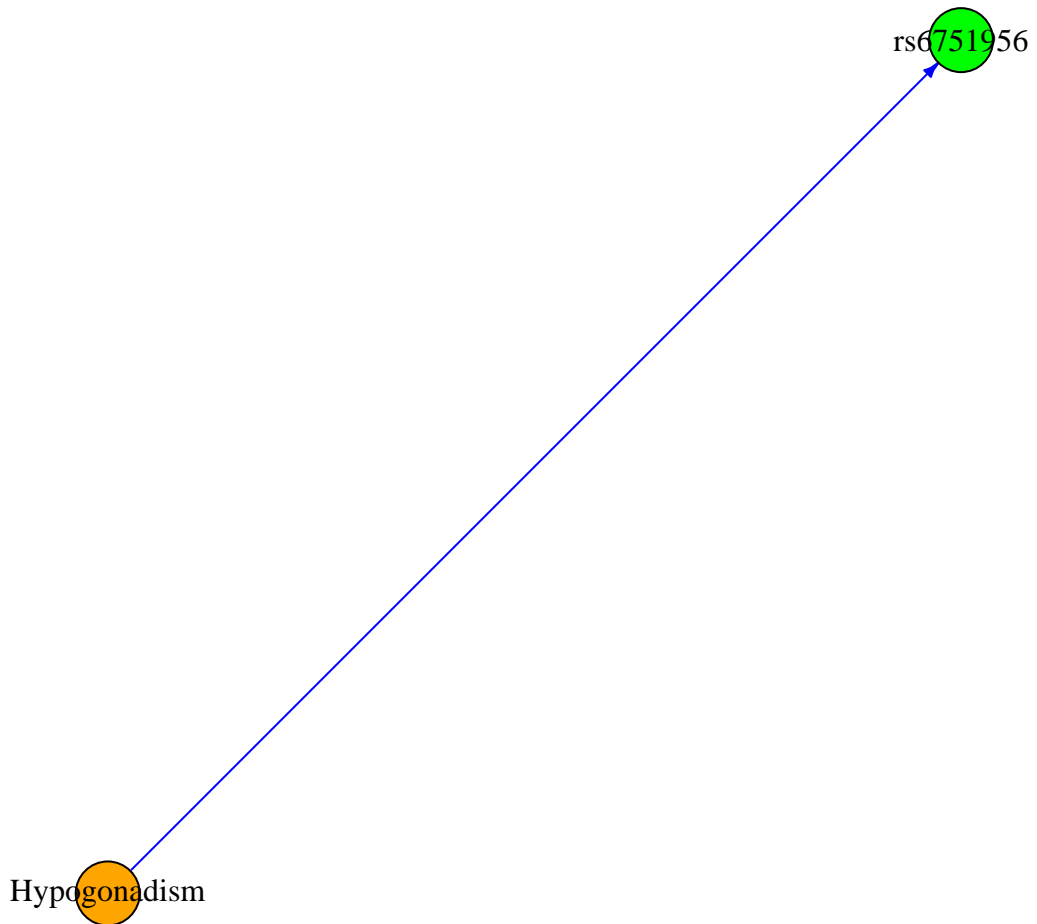

## Variant–Disease Network (Hypogonadism with anosmia)

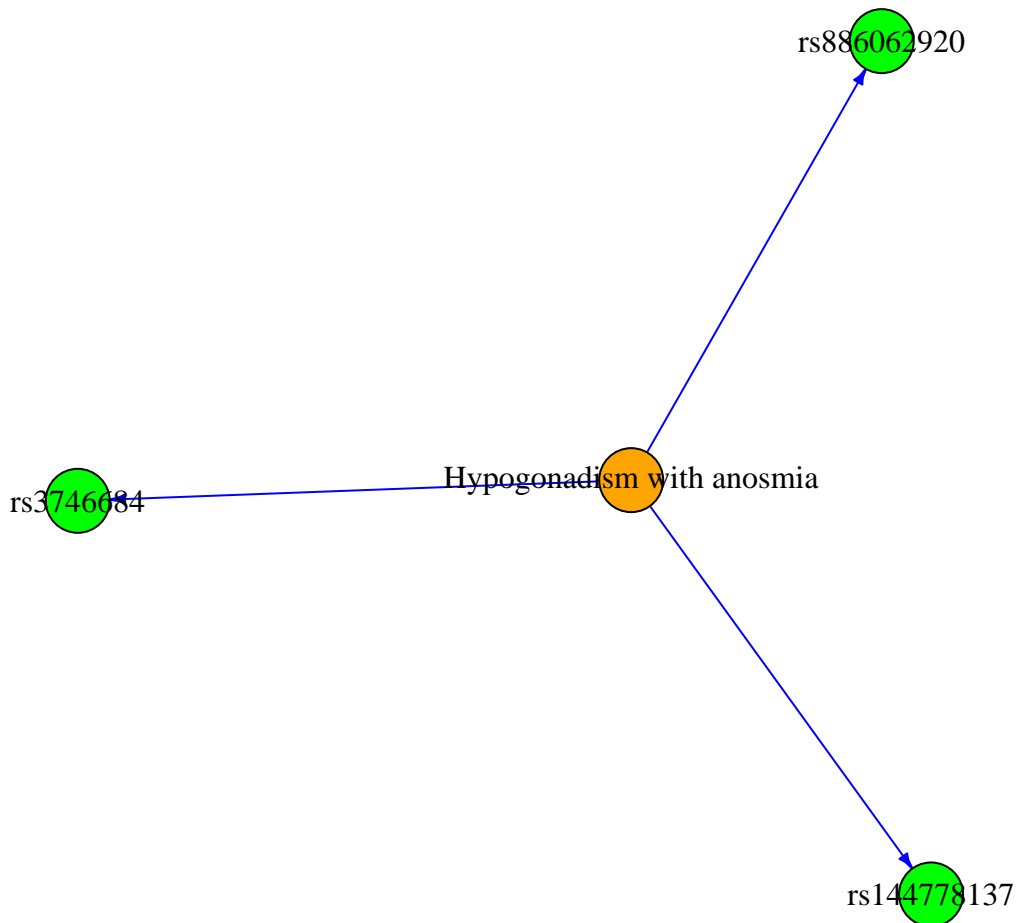

**Variant–Disease Network (Hypokalemic periodic paralysis)**

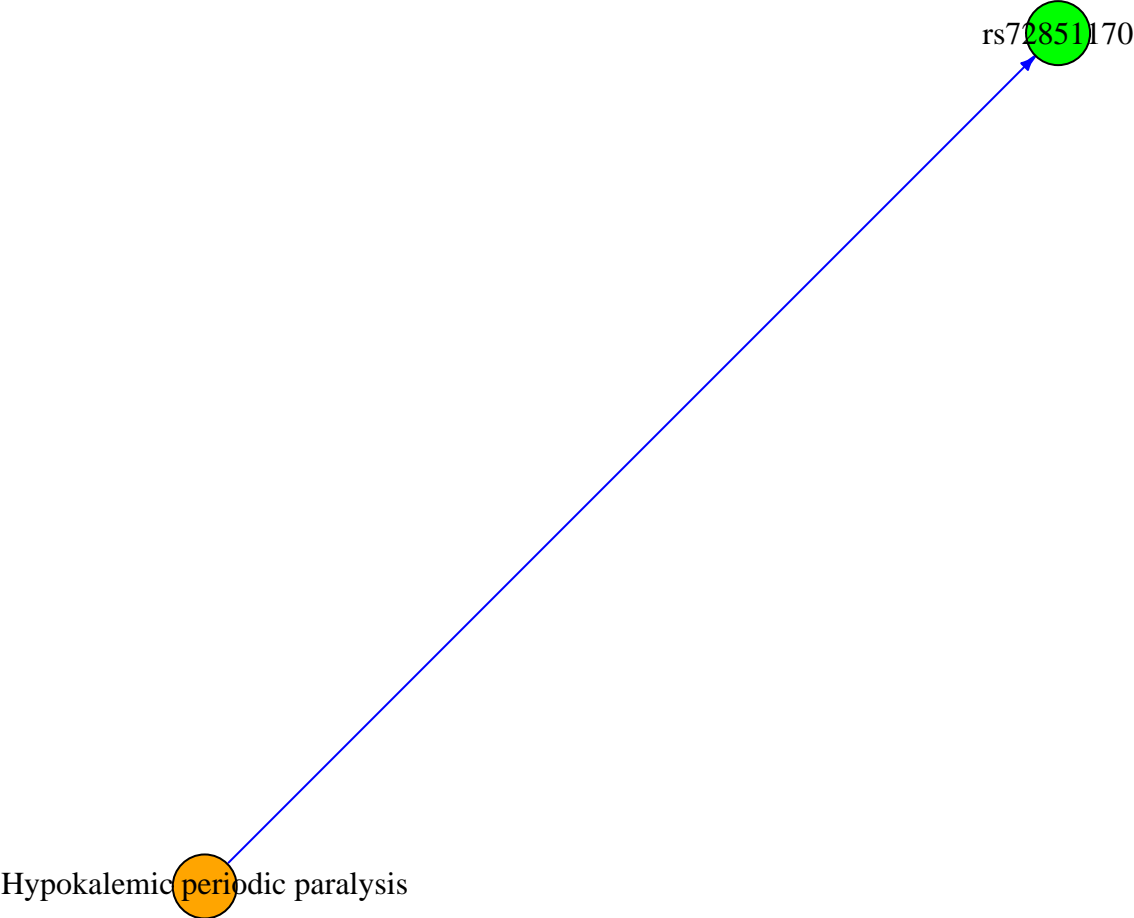



# Variant-Disease Network (Hypoparathyroidism retardation dysmorphism syndrome)

rs762683460

Hypoparathyroidism retardation dysmorphism



# Variant–Disease Network (Hypophosphatemic Rickets)

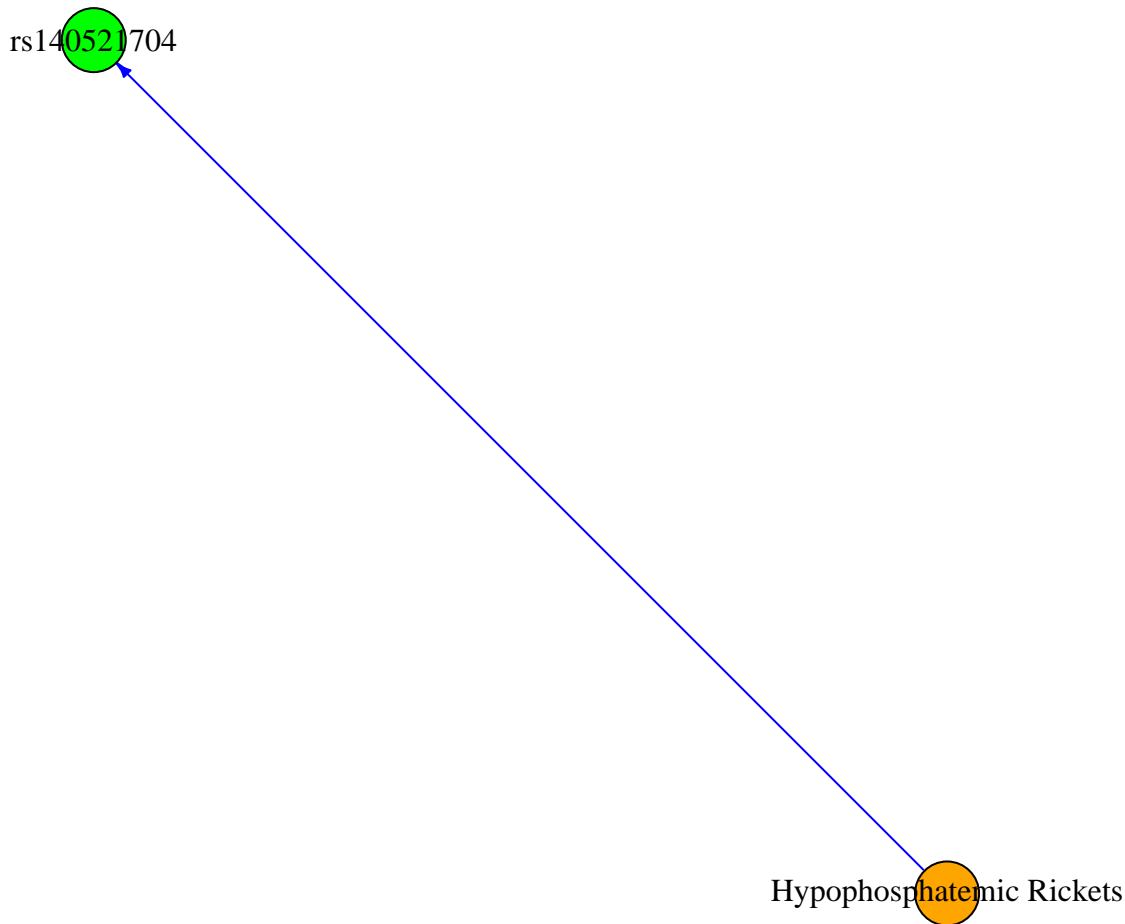

Variant–Disease Network (Hypotension)

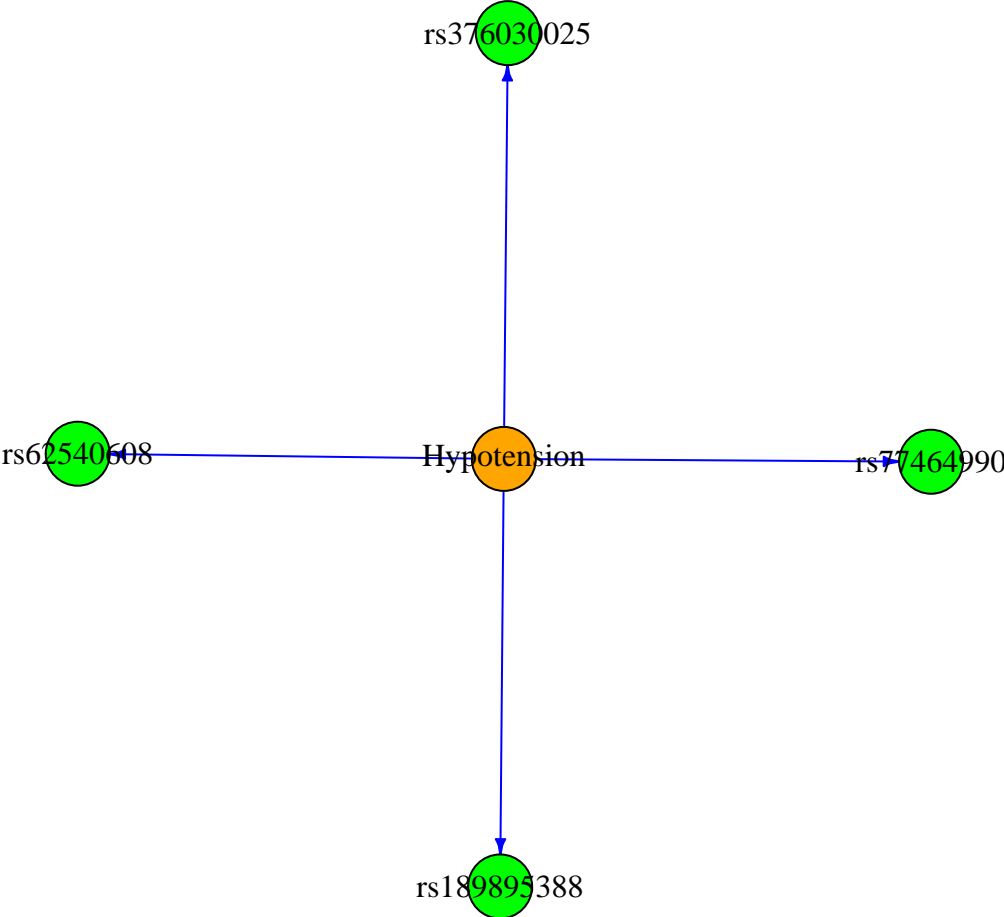

## Variant-Disease Network (Hypotonia)

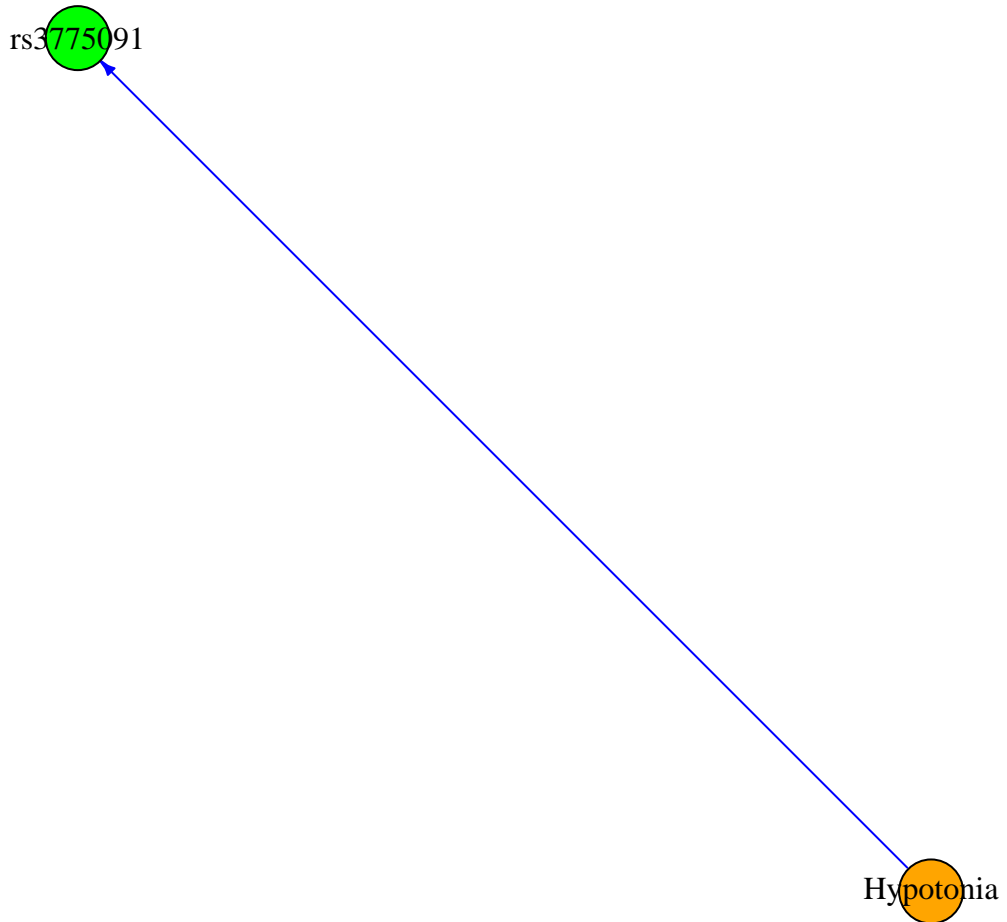

# Variant–Disease Network (Idiopathic basal ganglia calcification 1)

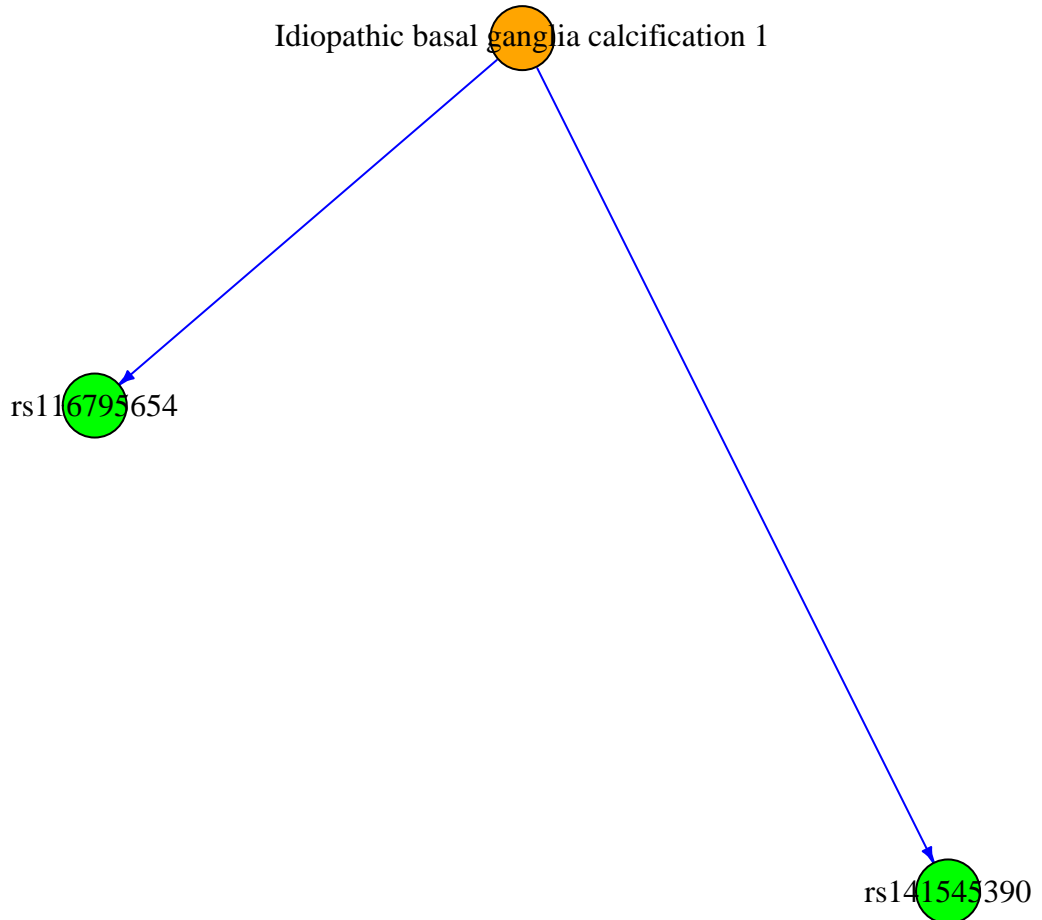

**Variant–Disease Network (Idiopathic generalized epilepsy)**

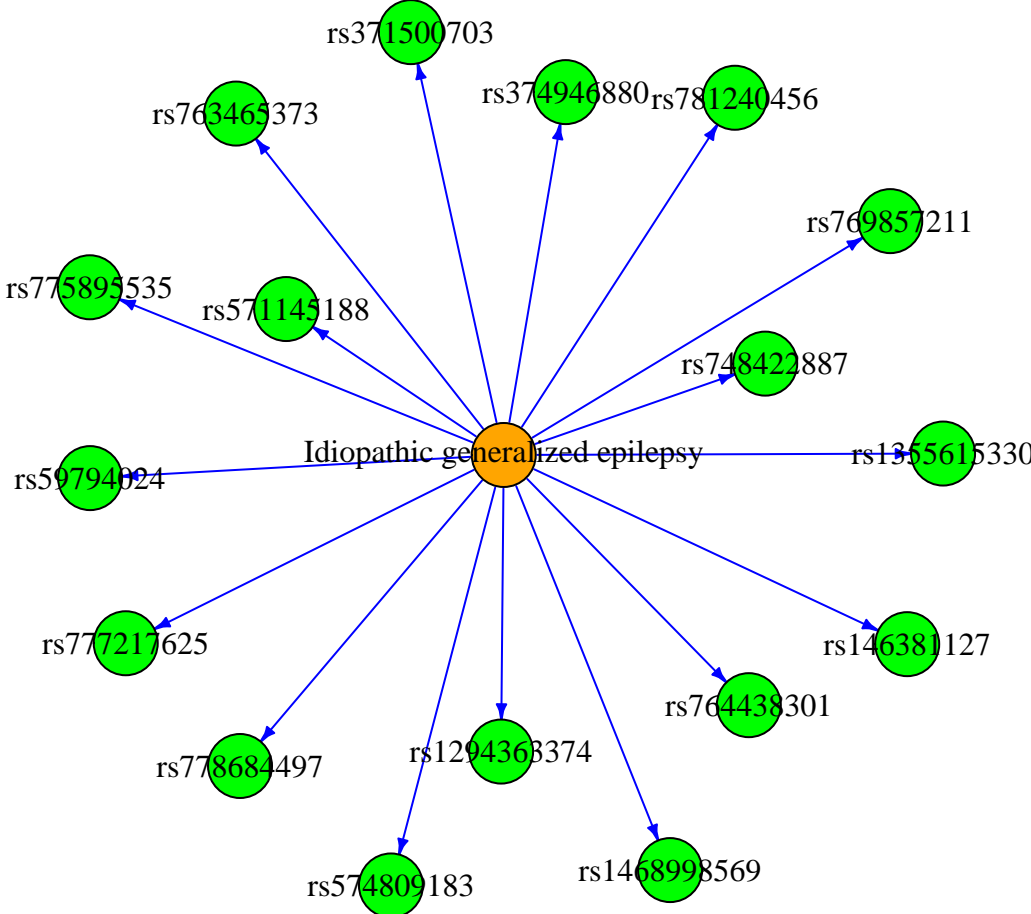

Variant–Disease Network (Idiopathic hypereosinophilic syndrome)

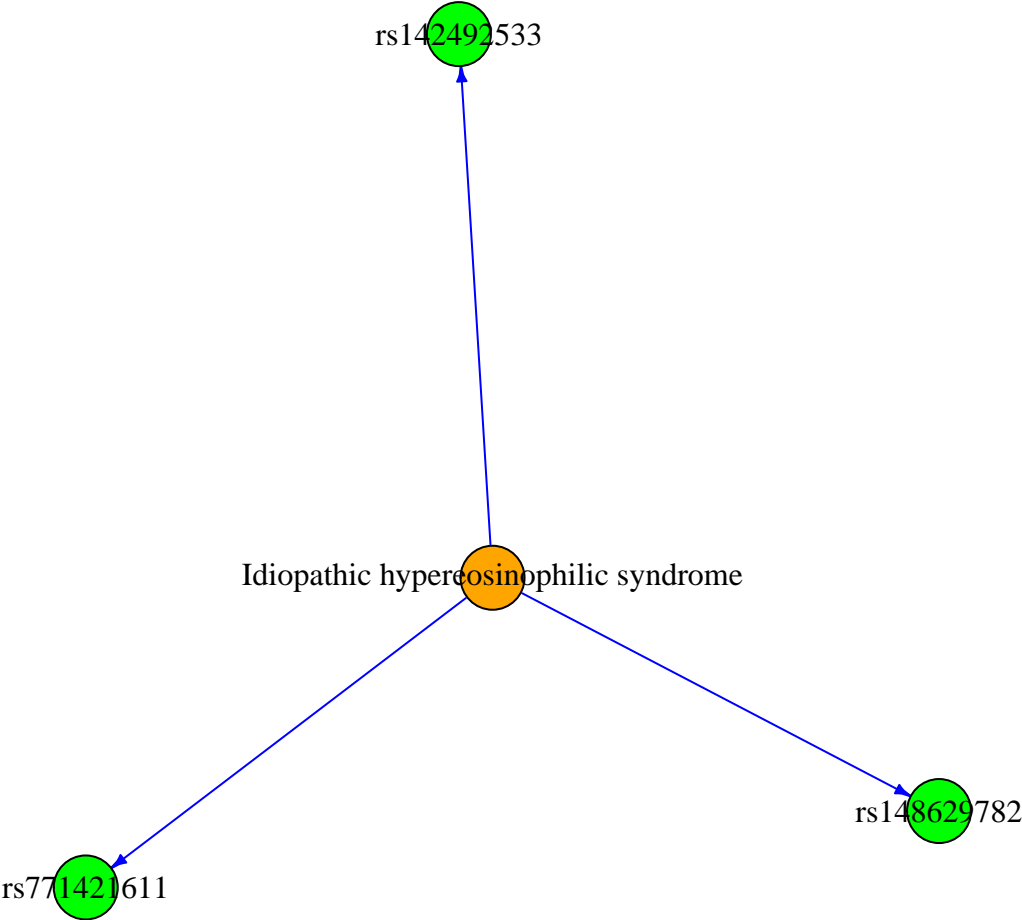

## Variant–Disease Network (Immunodeficiency)

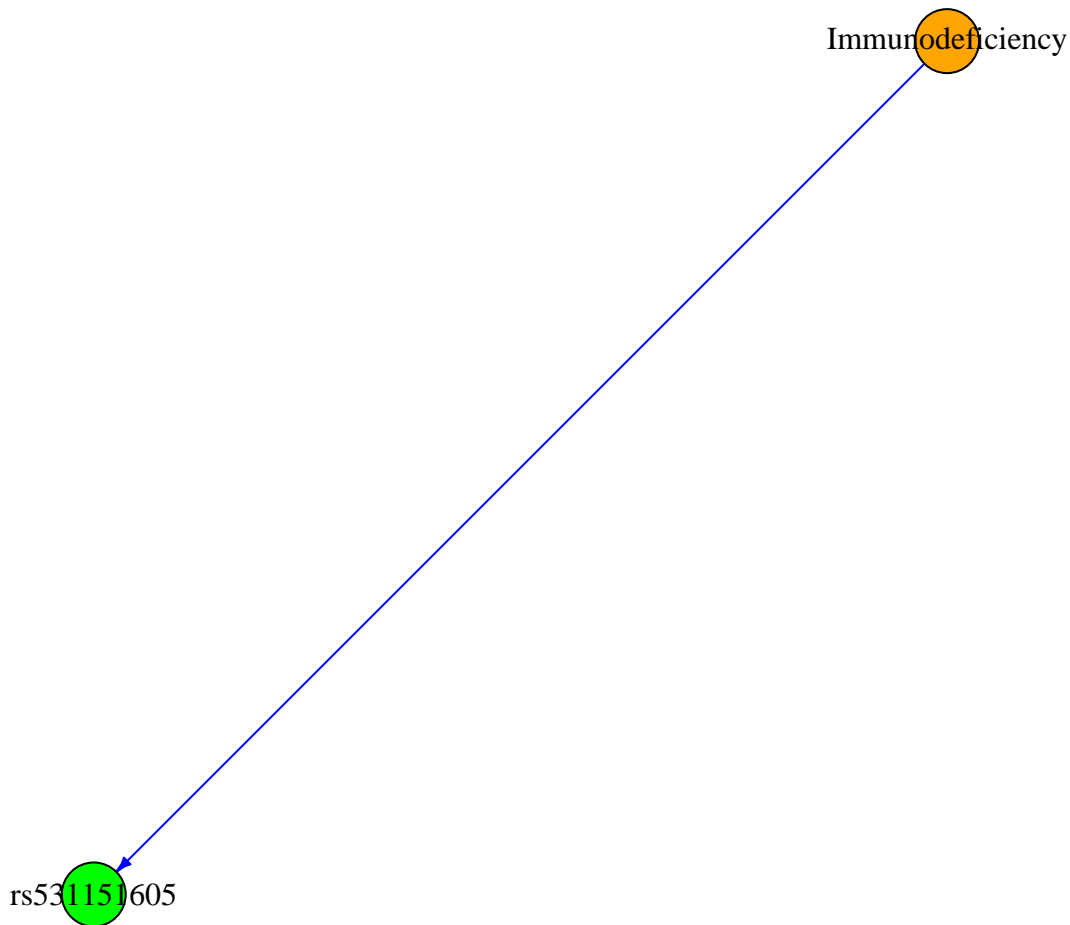



## Variant–Disease Network (Immunodeficiency 24)

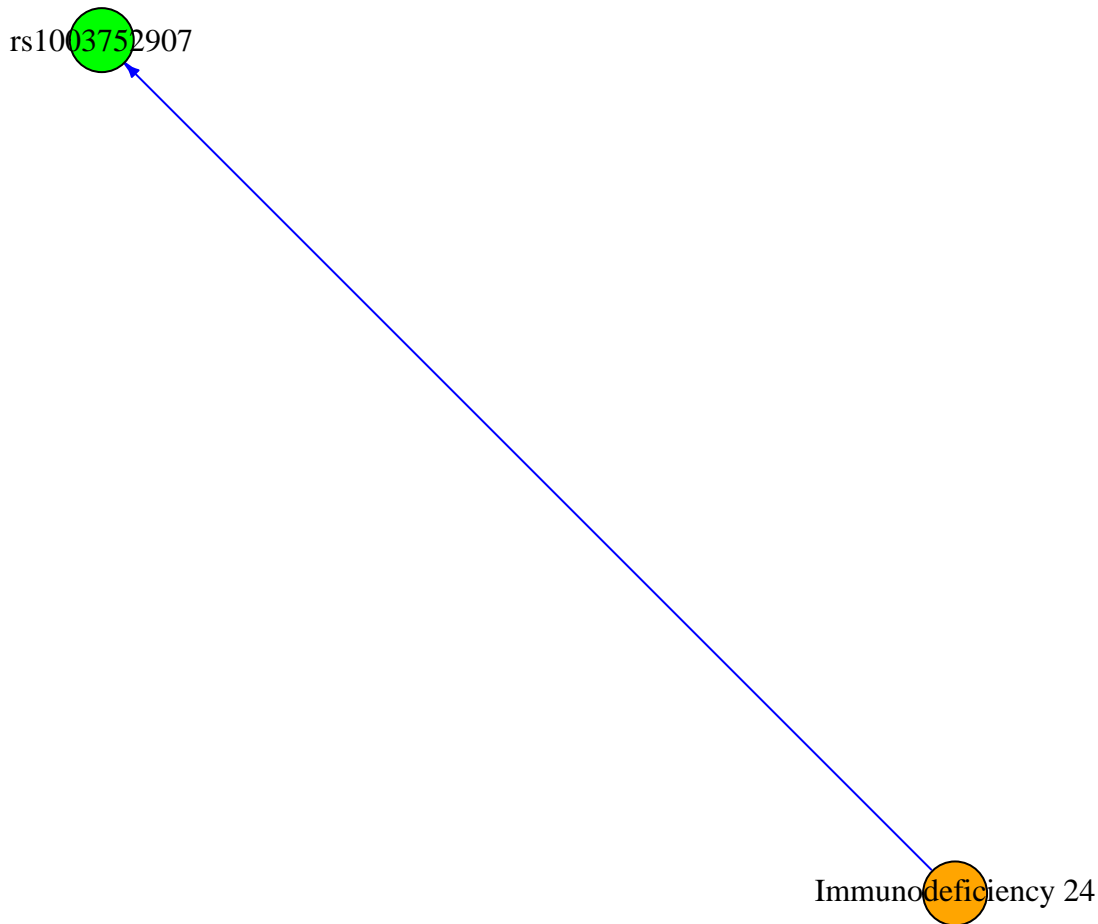

# Ant-Disease Network (Immunodeficiency 26 with or without neurologic abnormalities)

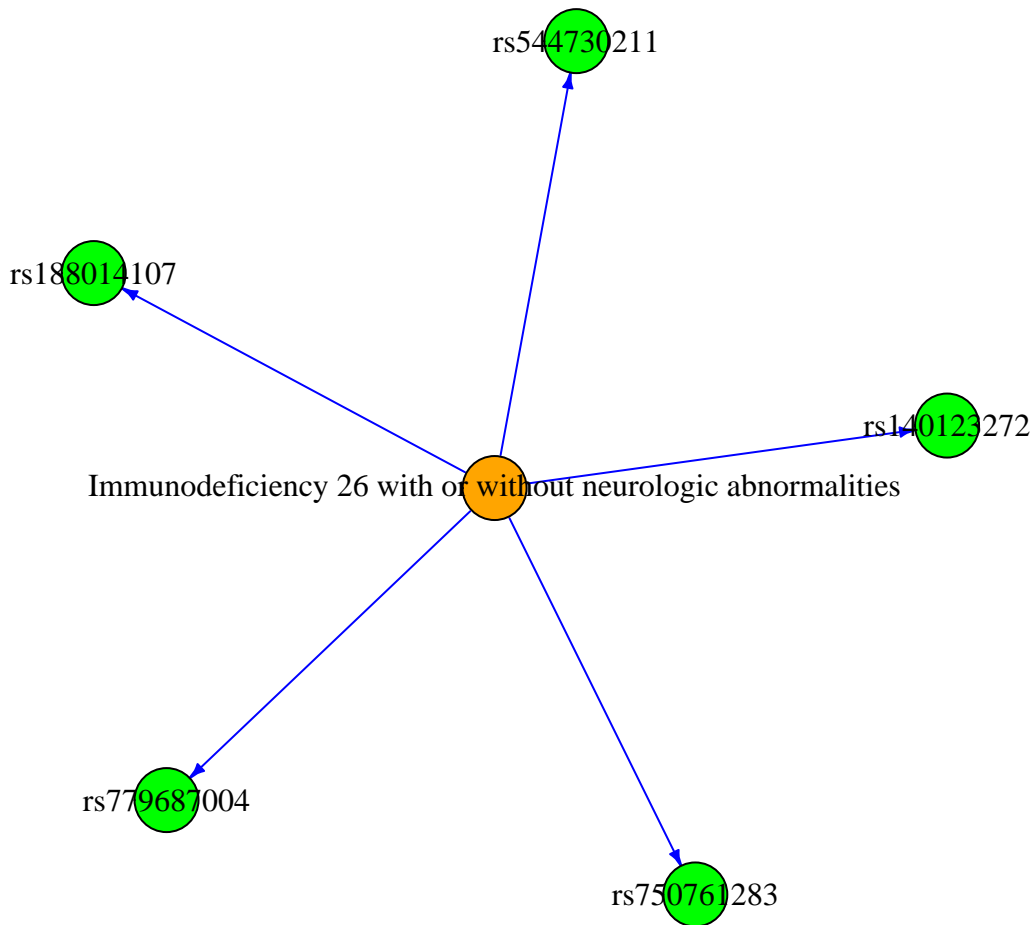

## Variant–Disease Network (Immunodeficiency 51)

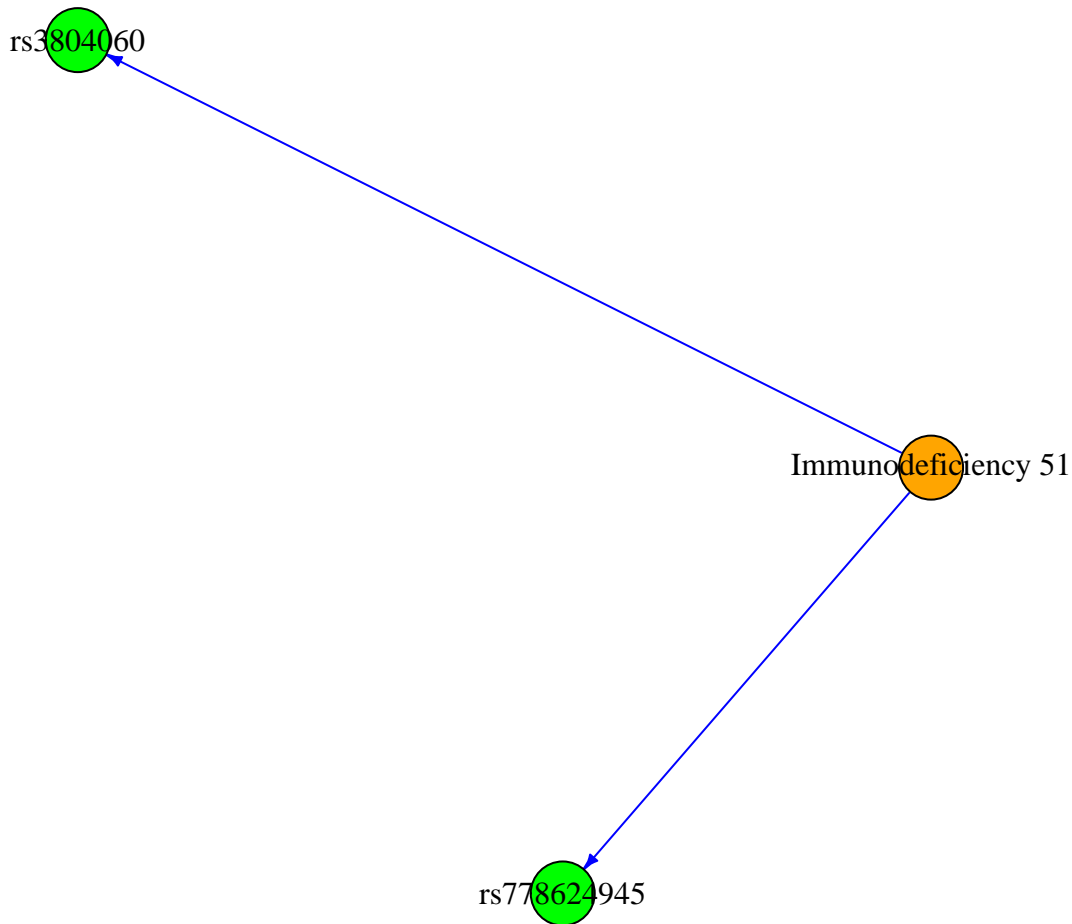

# Disease Network (Immunodeficiency–centromeric instability–facial anomalies

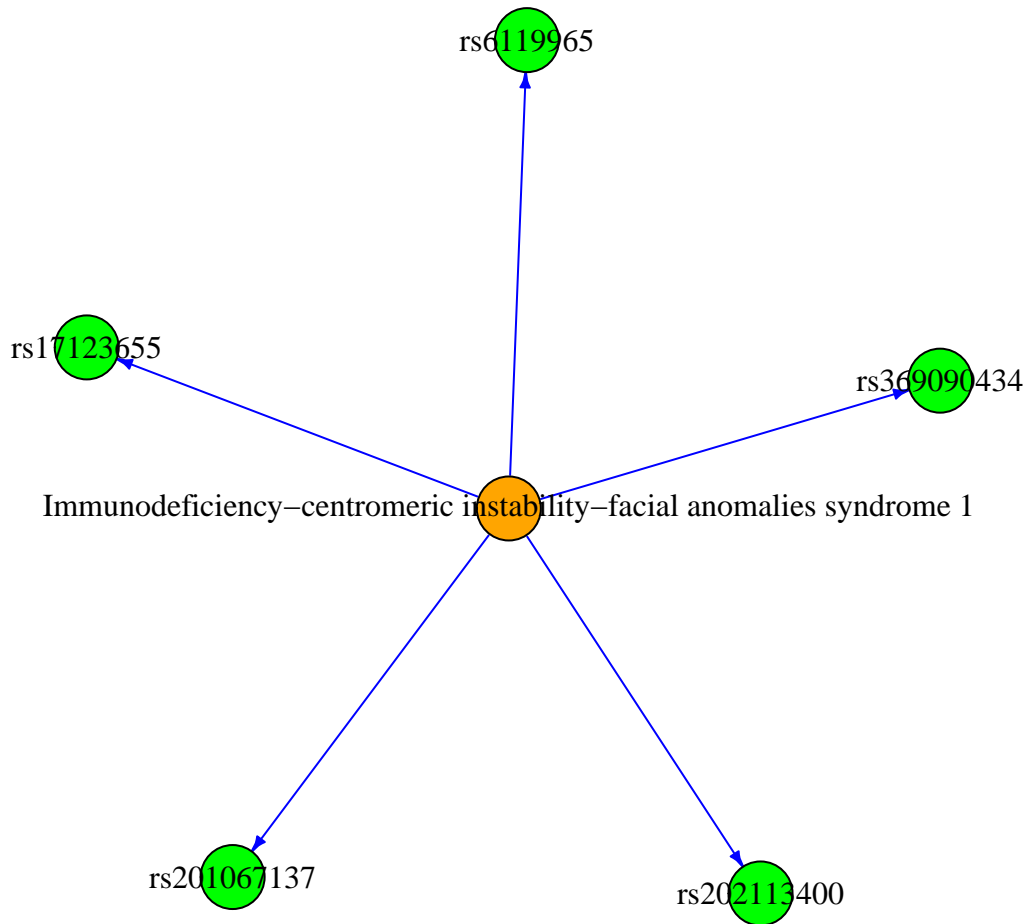

# Disease Network (Immunodeficiency–centromeric instability–facial anomalies

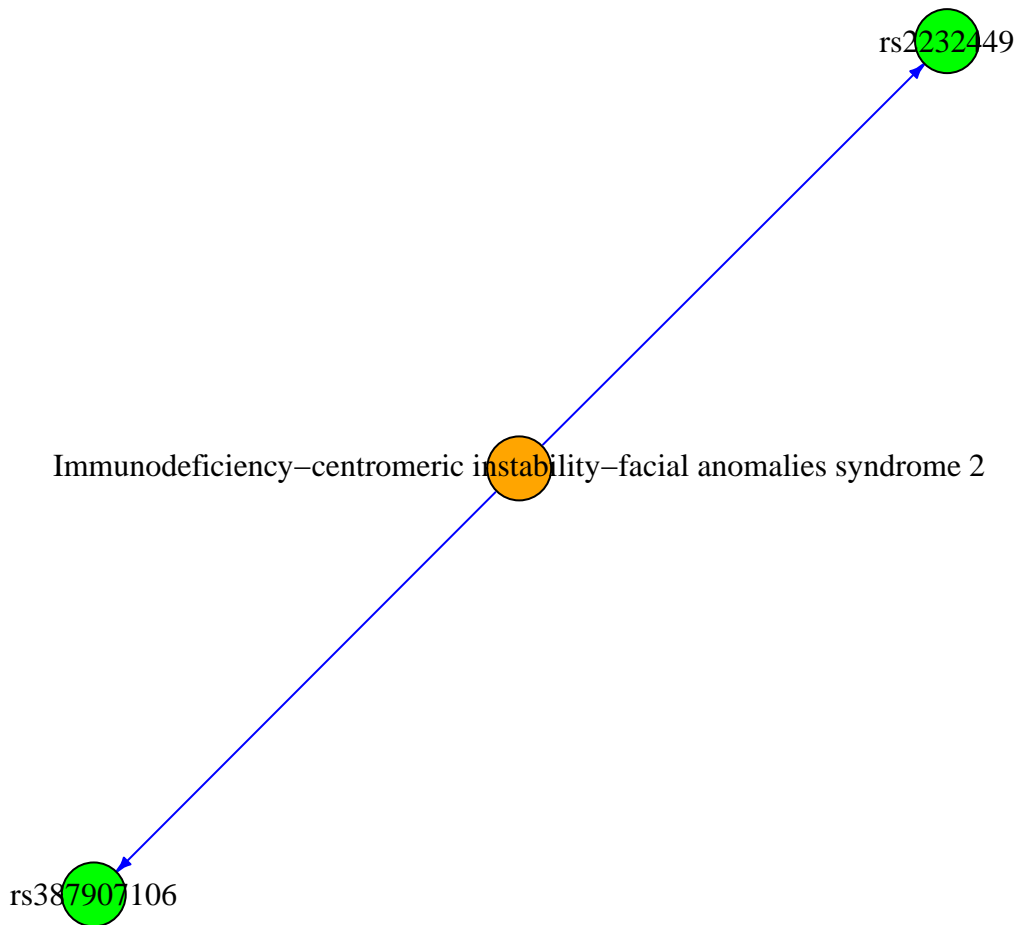

## Variant–Disease Network (Inborn genetic diseases)

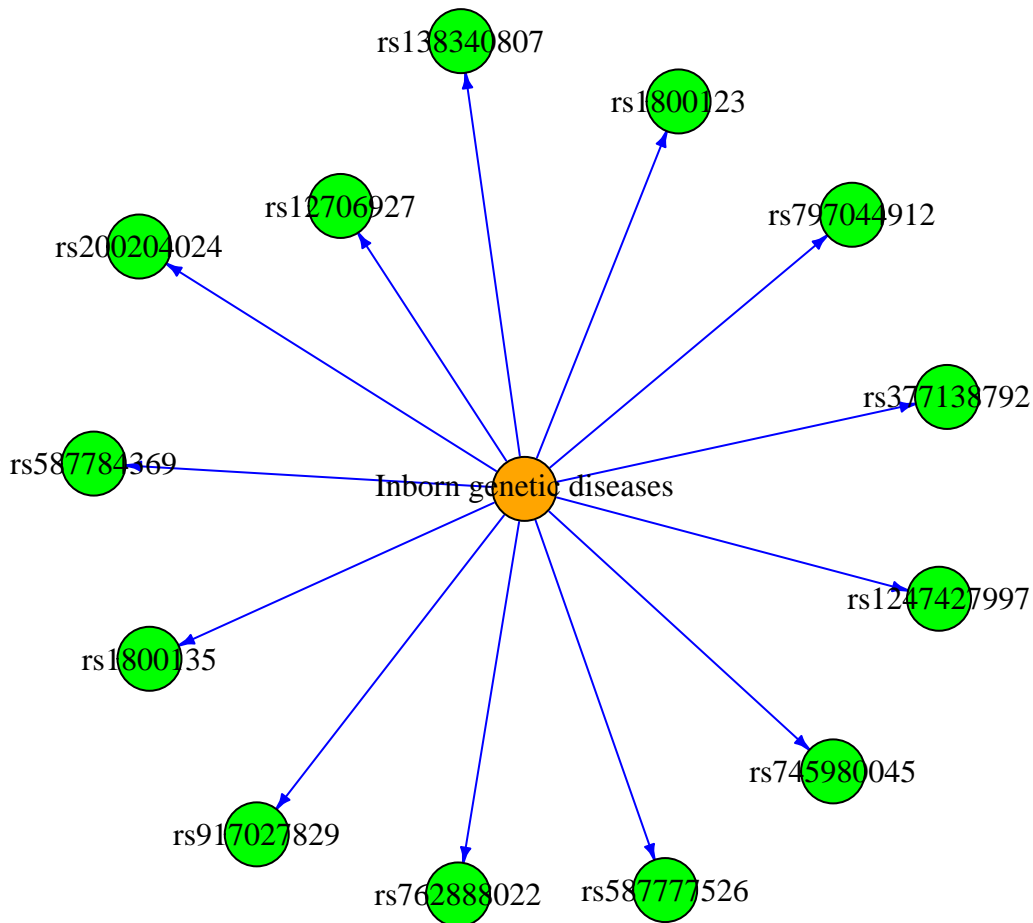

Variant–Disease Network (Inclusion Body Myopathy)

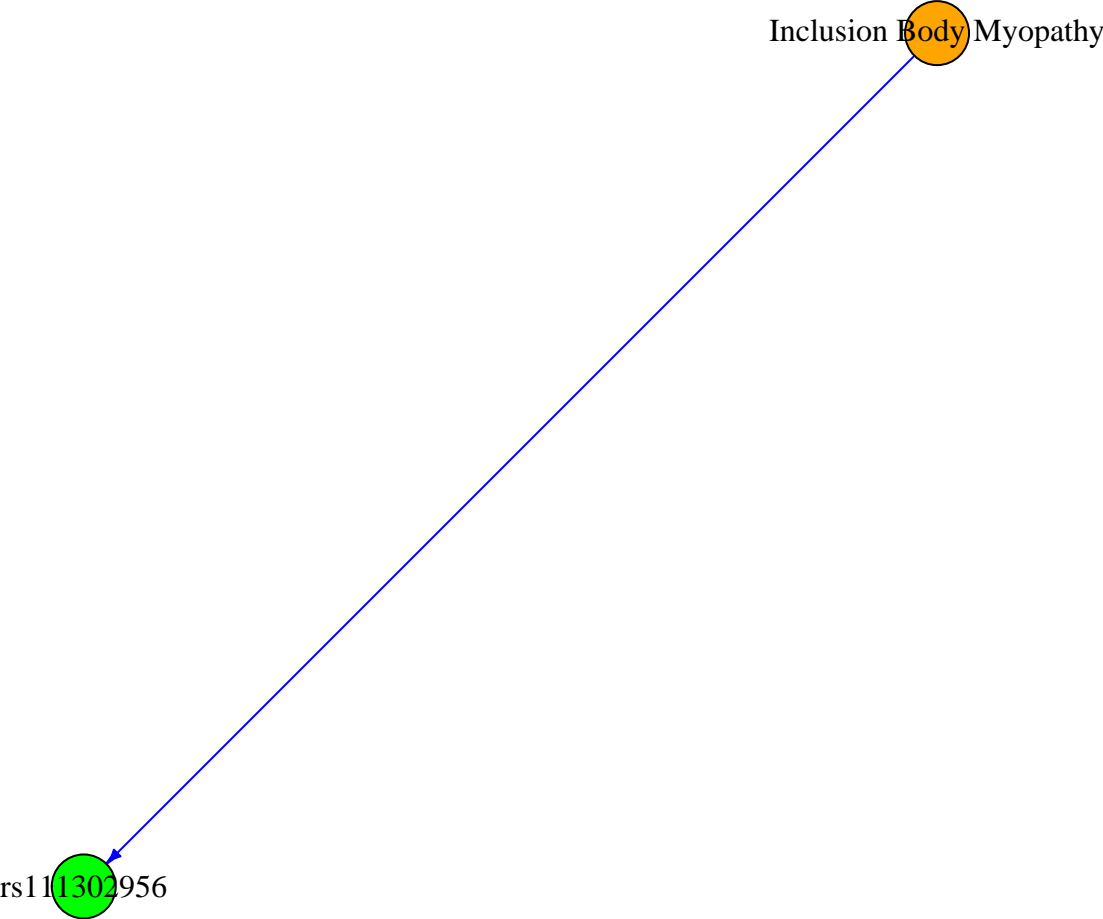

**Variant–Disease Network (Inclusion body myopathy 3)**

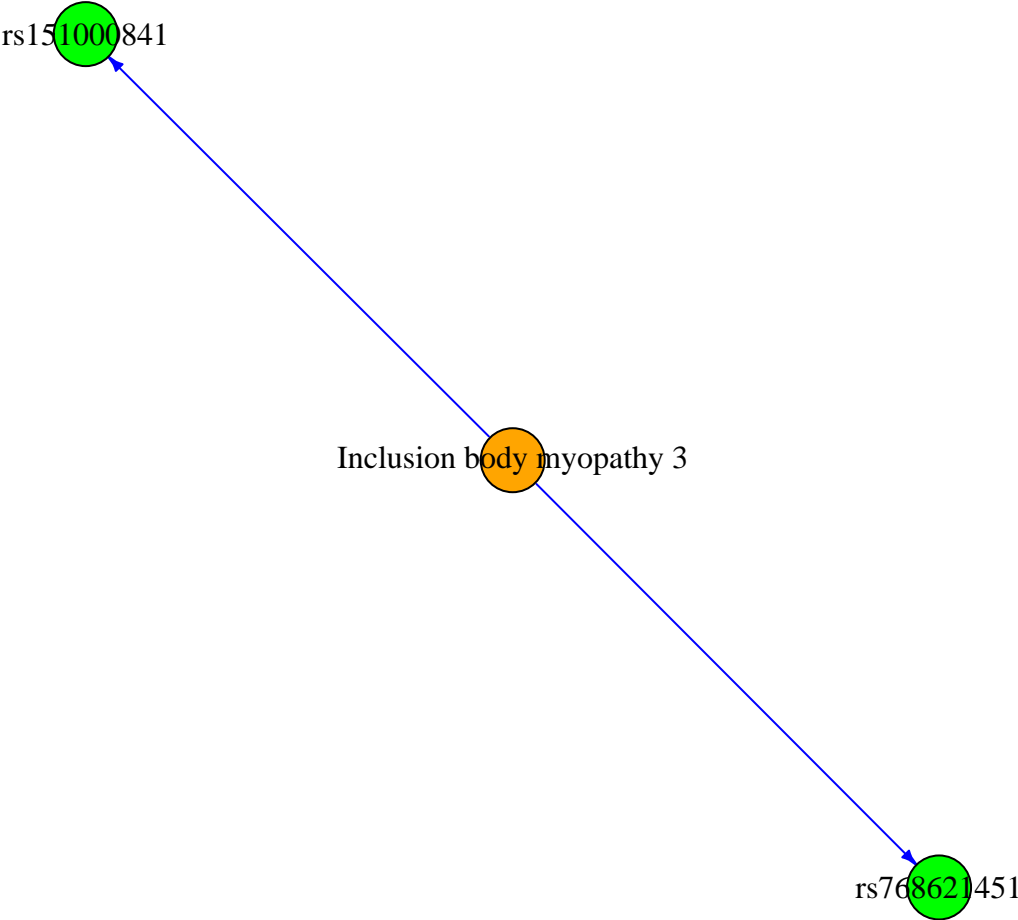



rk (Inclusion body myopathy with early-onset Paget disease with or without

with early-onset Paget disease with or without frontotemporal dementia 1

rs769455914

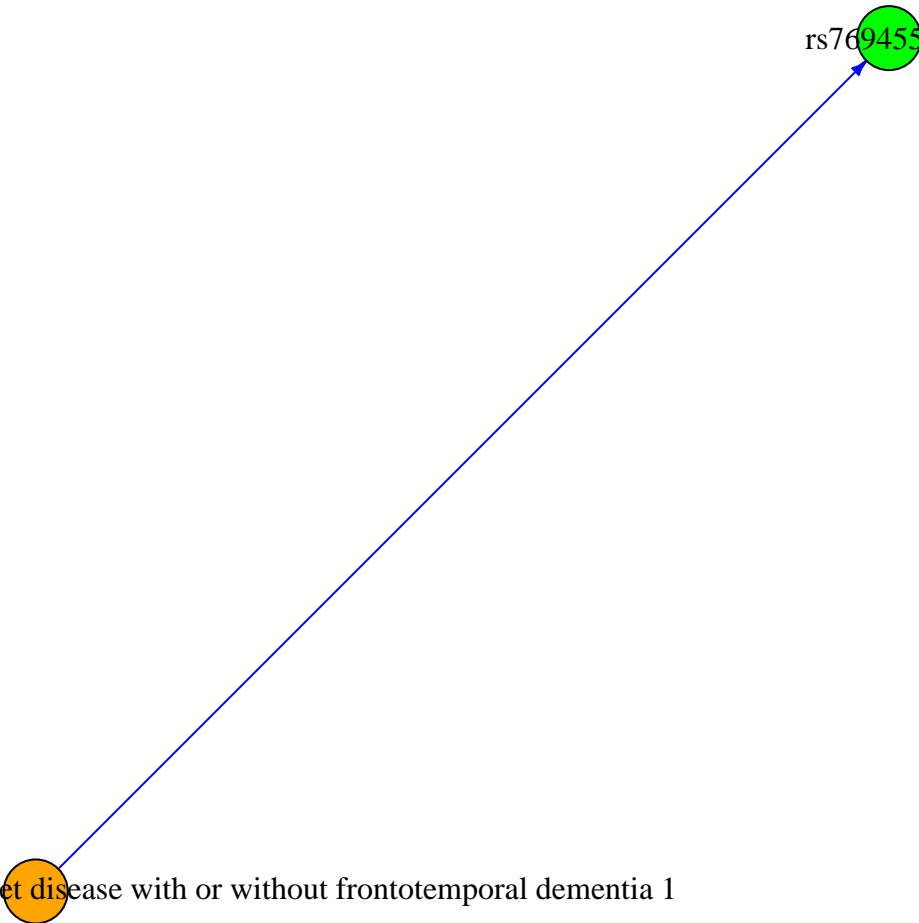

## Variant–Disease Network (Increased left ventricular wall thickness)

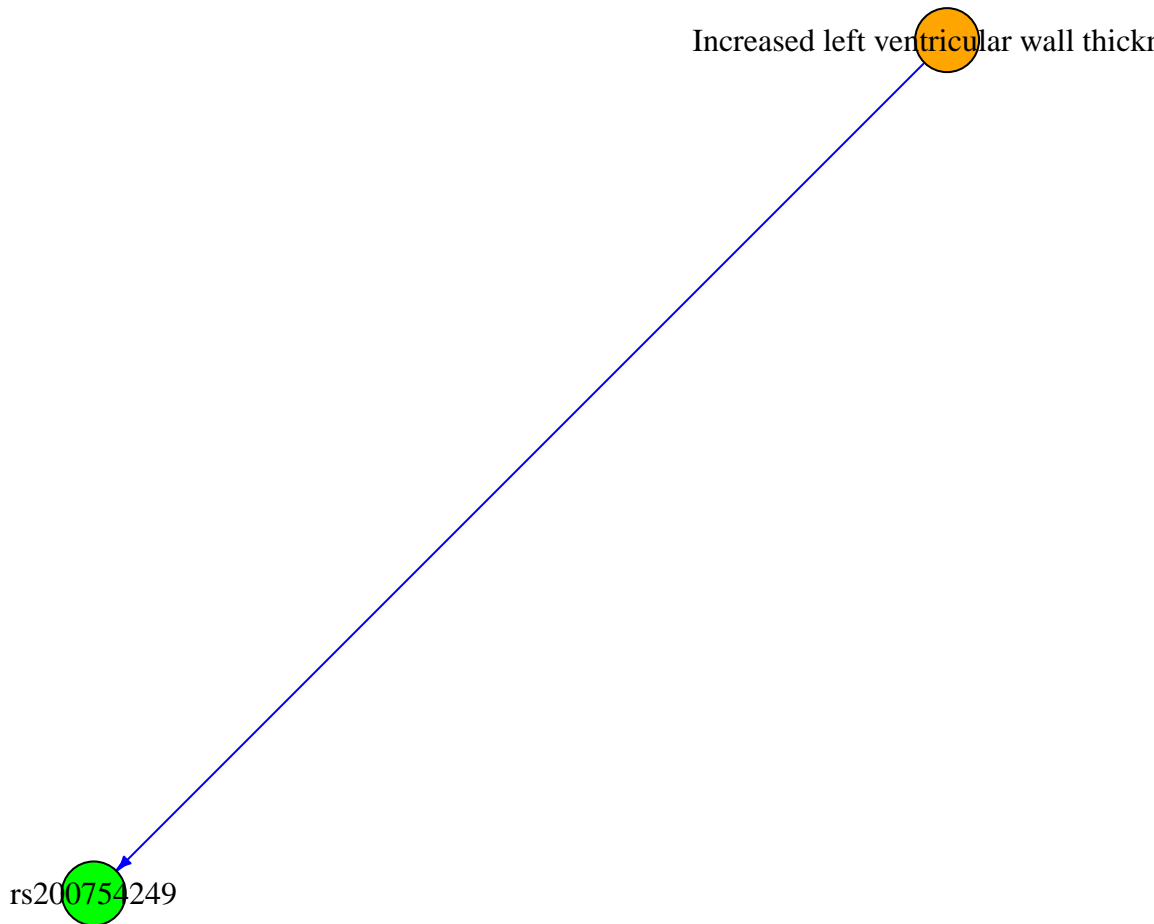

Variant–Disease Network (Infantile cortical hyperostosis)

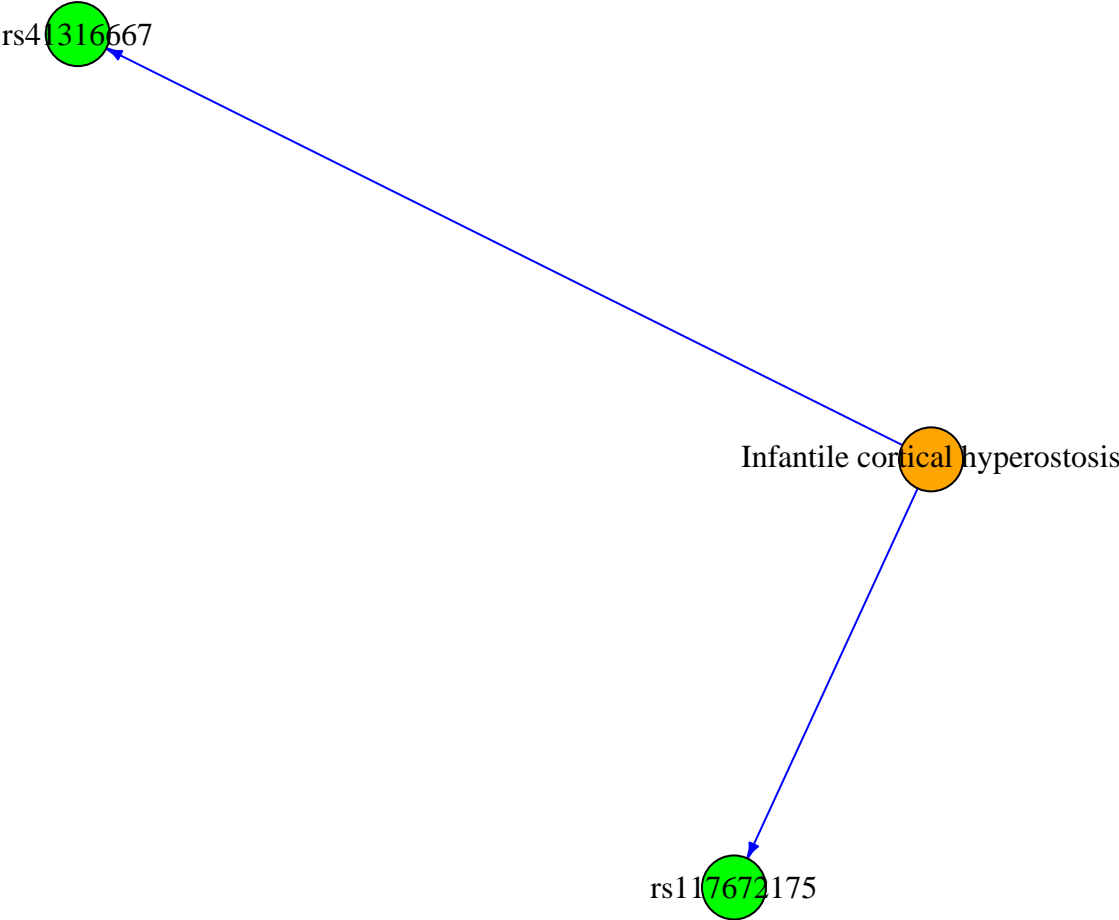

## Variant–Disease Network (Infantile GM1 gangliosidosis)

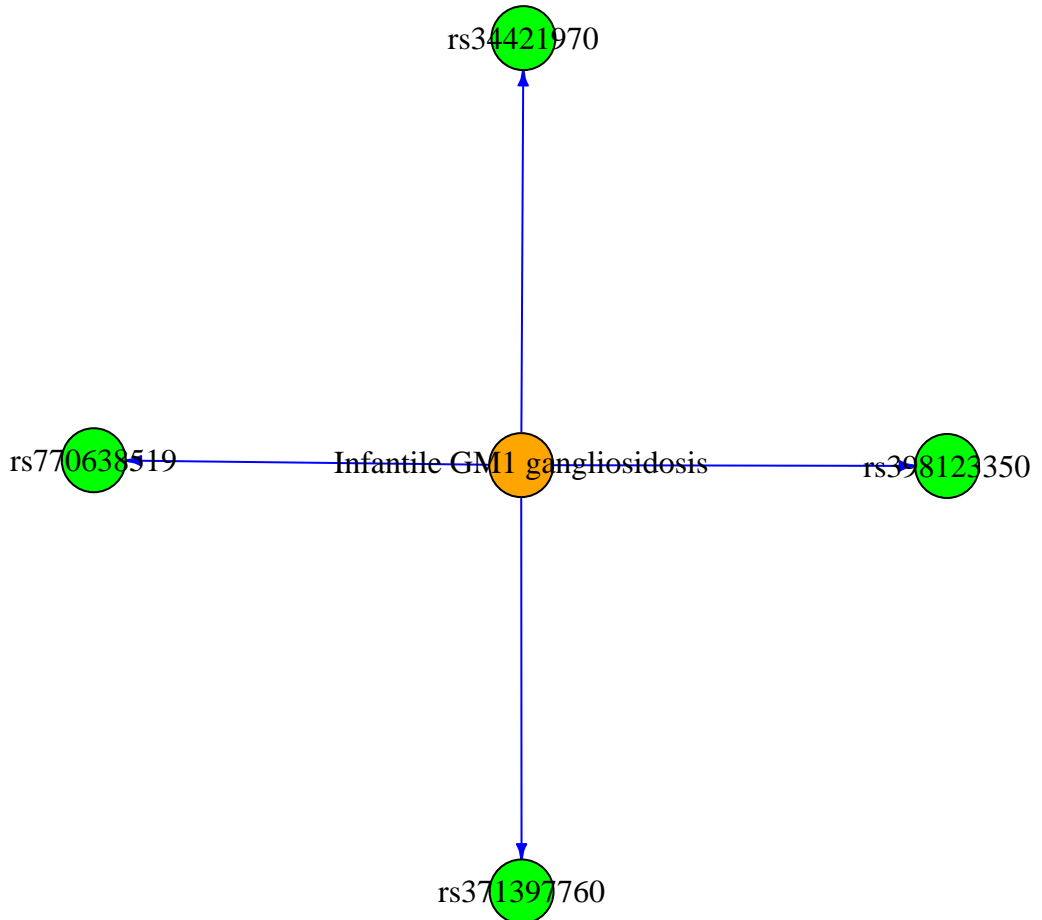

## Variant-Disease Network (Infantile nephronophthisis)

Infantile nephronophthisis

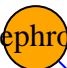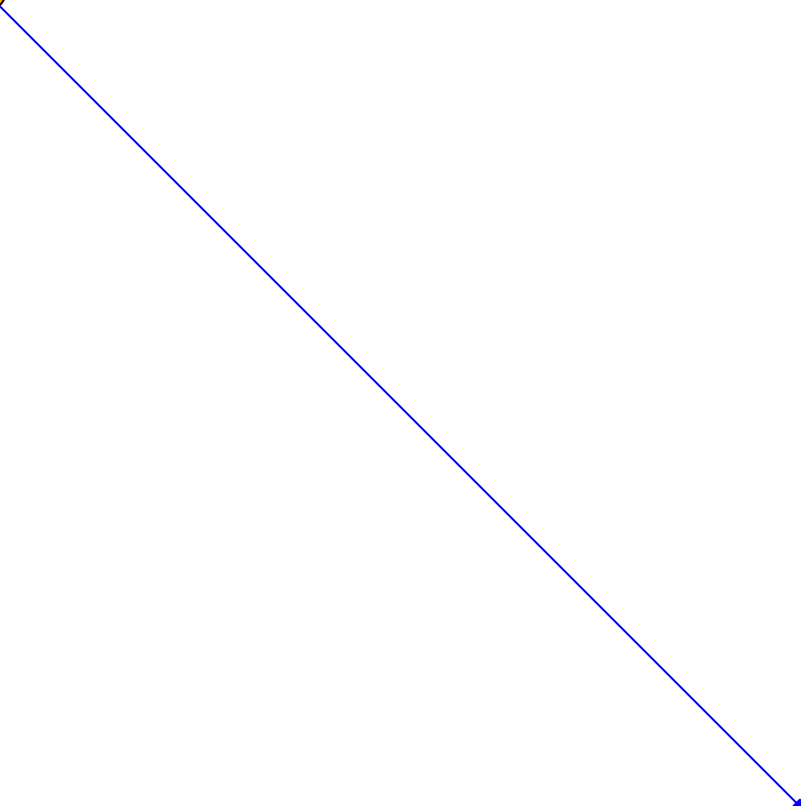

rs376879175

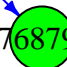

## Variant–Disease Network (Infantile spasms)

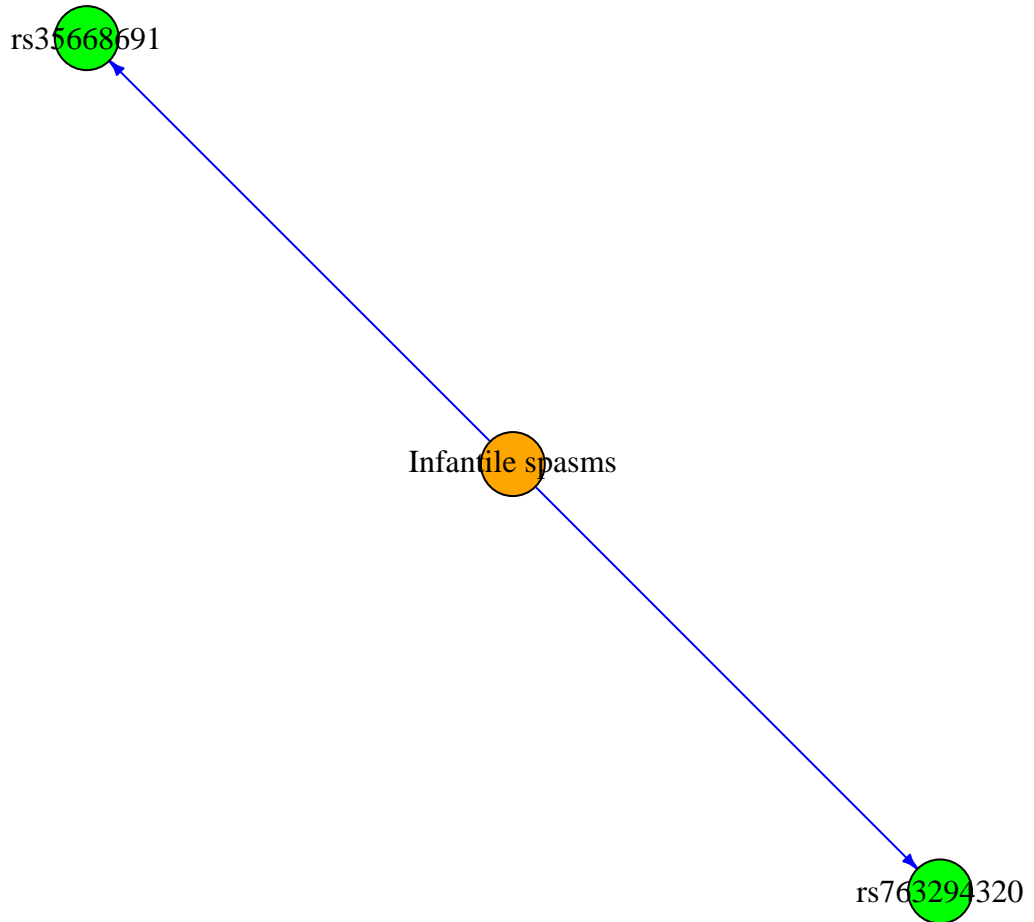

**Variant–Disease Network (Inflammatory bowel disease 1)**

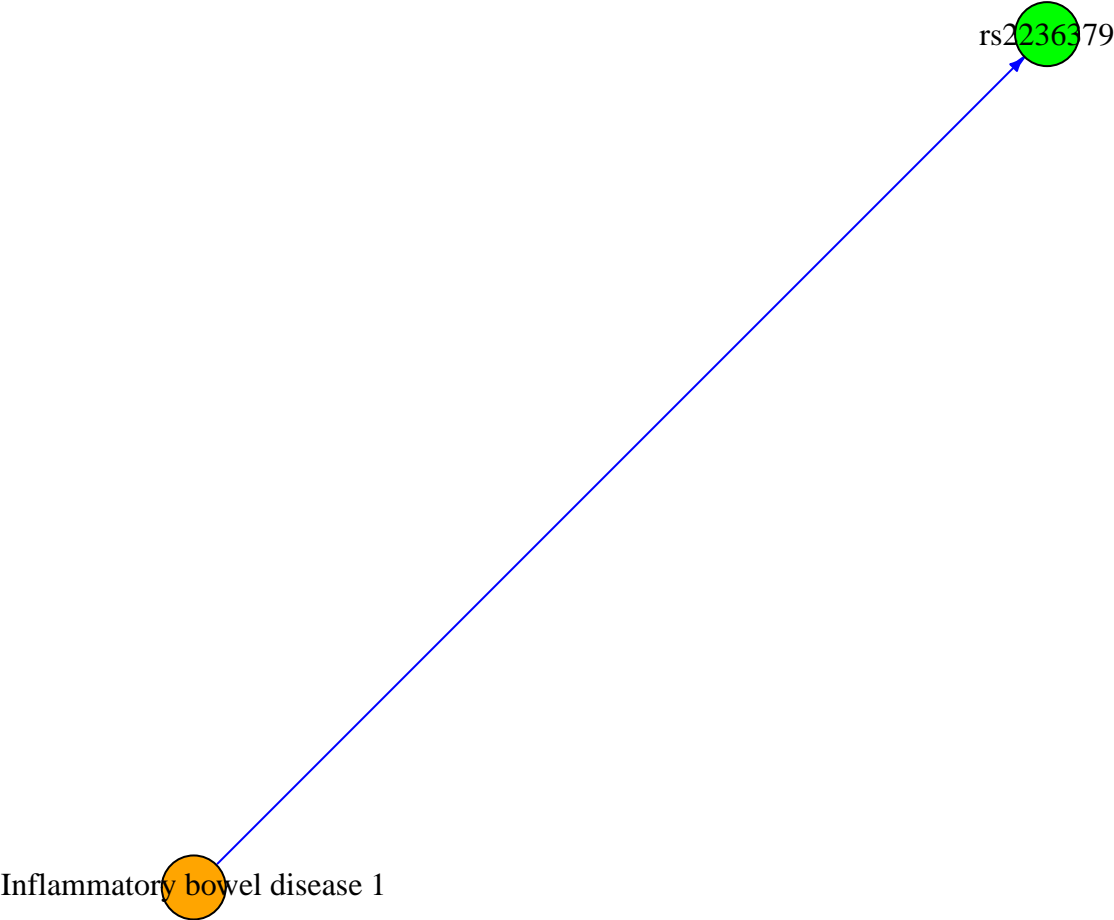

## Variant–Disease Network (Insulin–like growth factor 1 resistance to)

rs55770488

Insulin–like growth factor 1 resistance

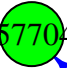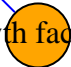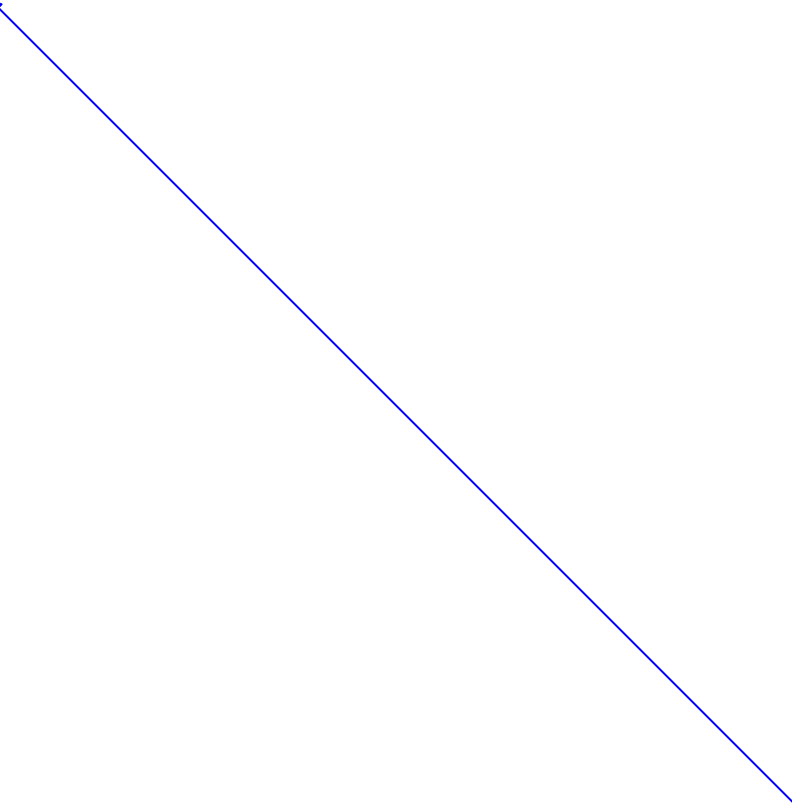



## Variant-Disease Network (Intellectual Disability)

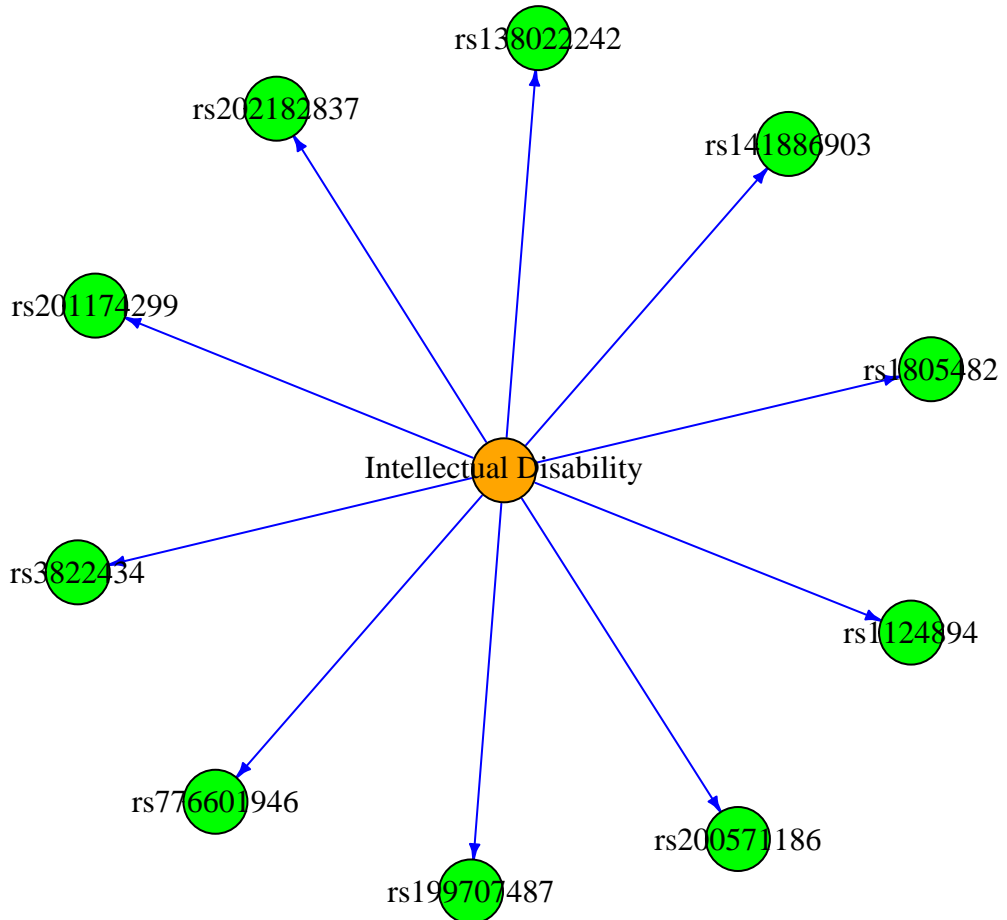

**Variant–Disease Network (Interstitial lung and liver disease)**

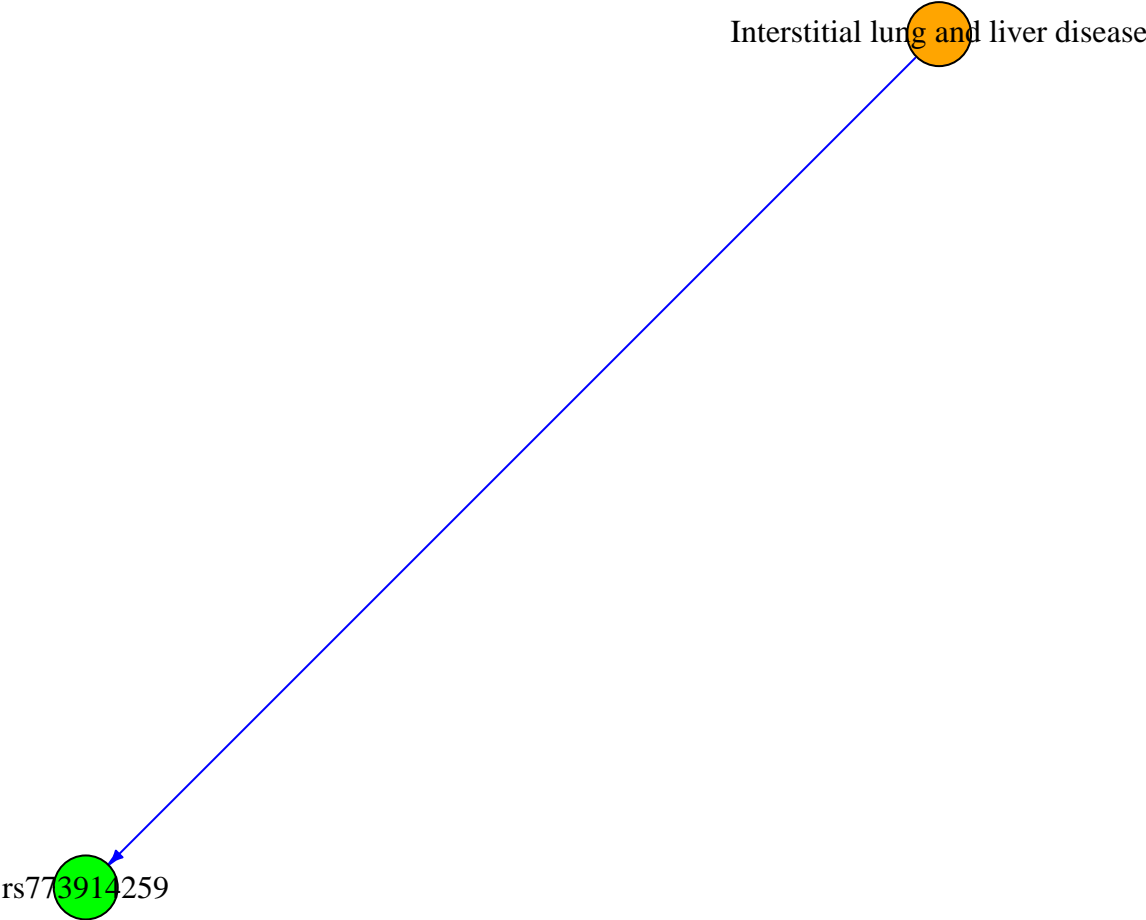

## Variant–Disease Network (Intrinsic factor deficiency)

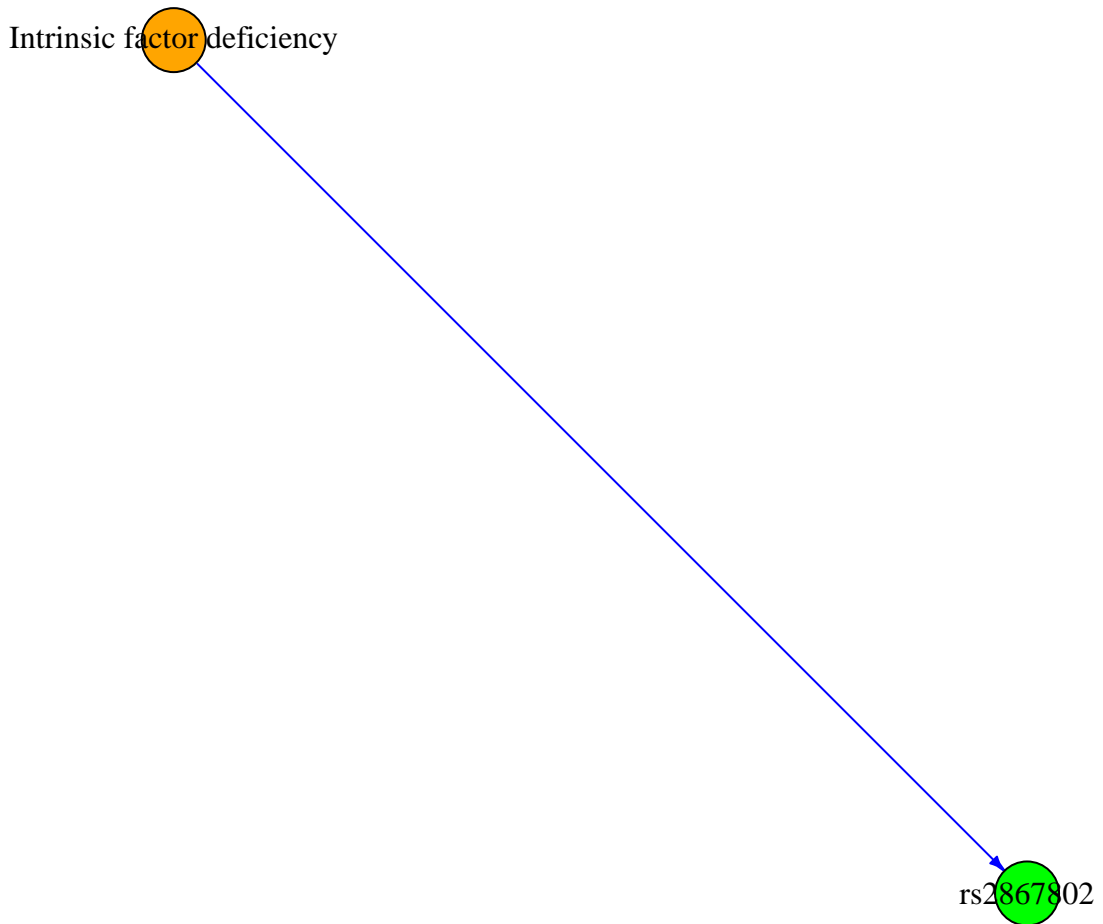

## Variant–Disease Network (Iodotyrosyl coupling defect)

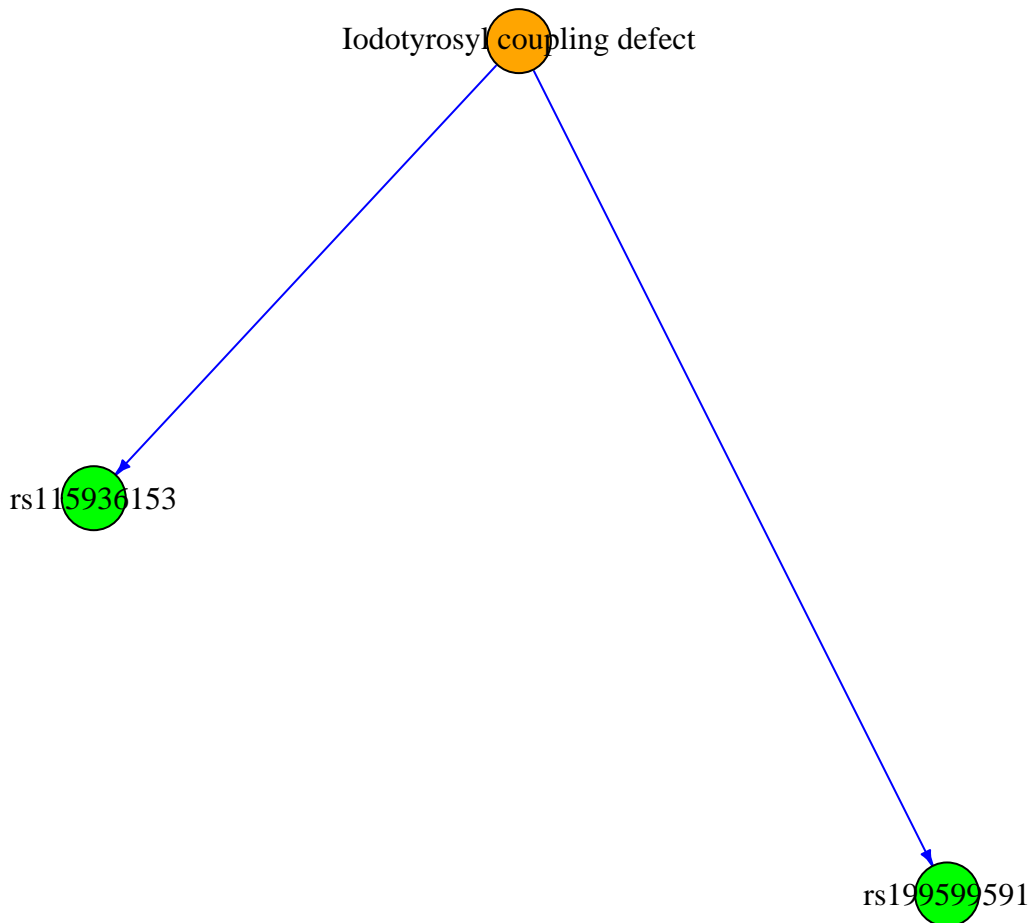

Variant–Disease Network (Irido–corneo–trabecular dysgenesis)

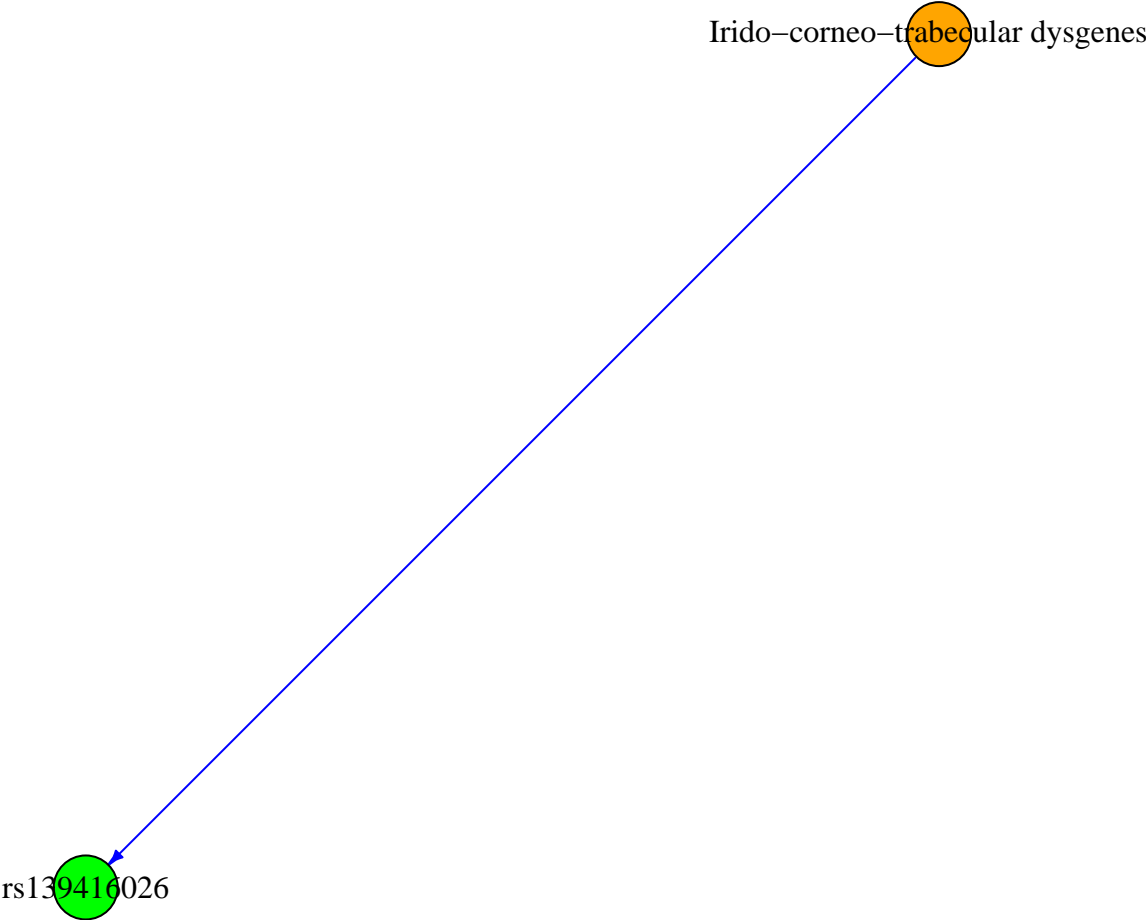

Variant–Disease Network (Ischiopatellar dysplasia)

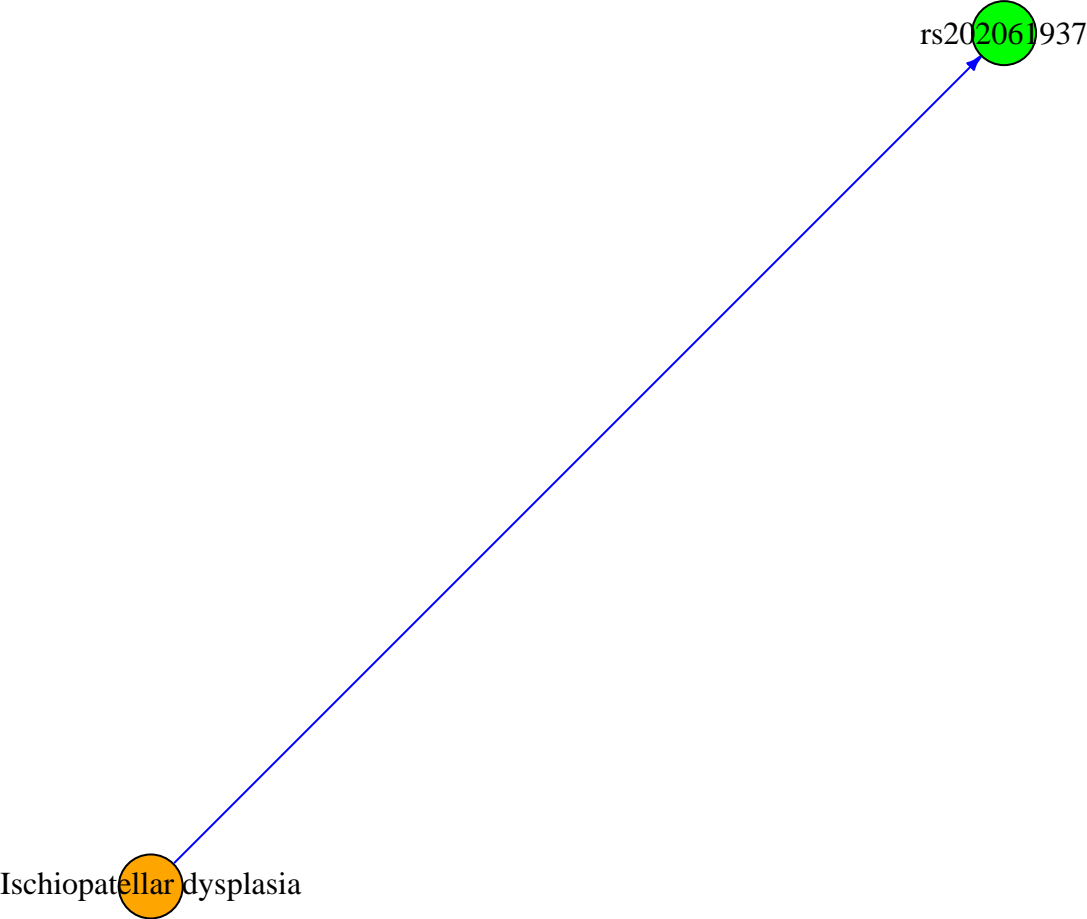

# Variant–Disease Network (Isolated coronal synostosis)

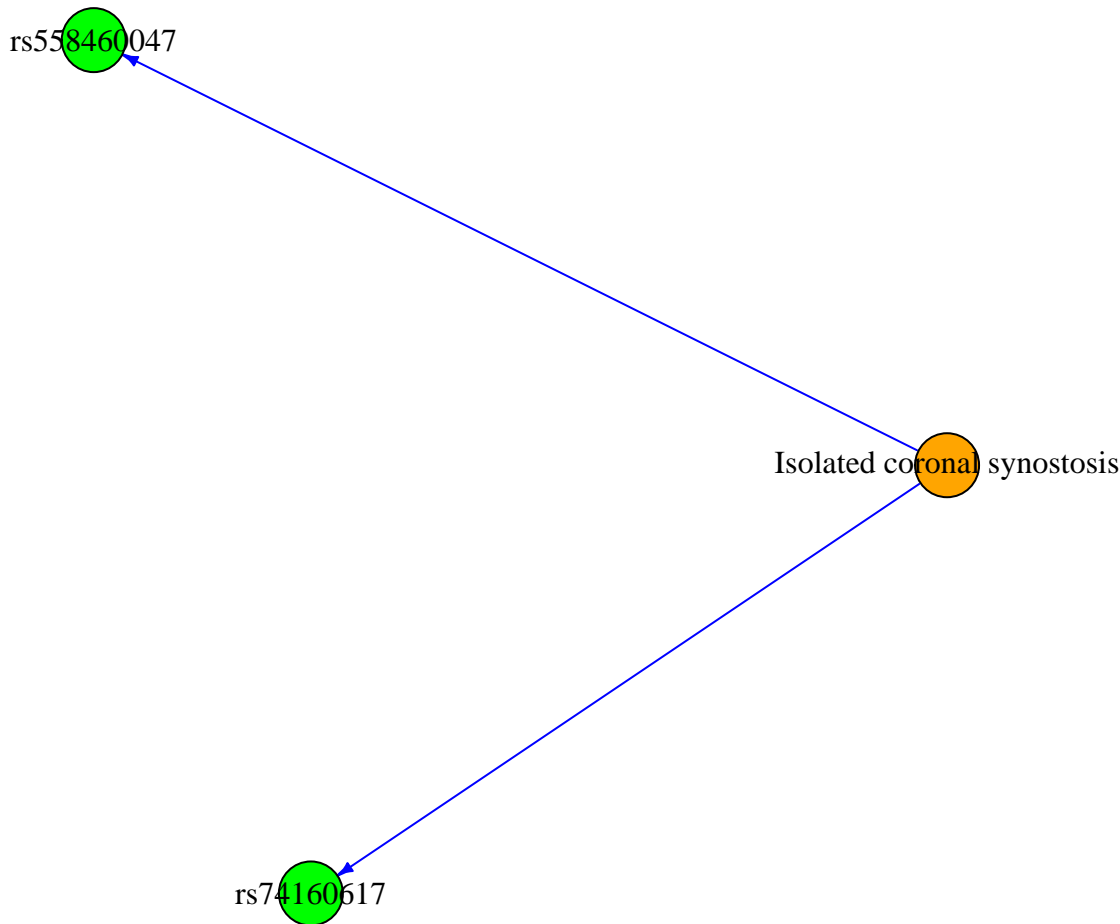

## Variant–Disease Network (Isolated GnRH Deficiency)

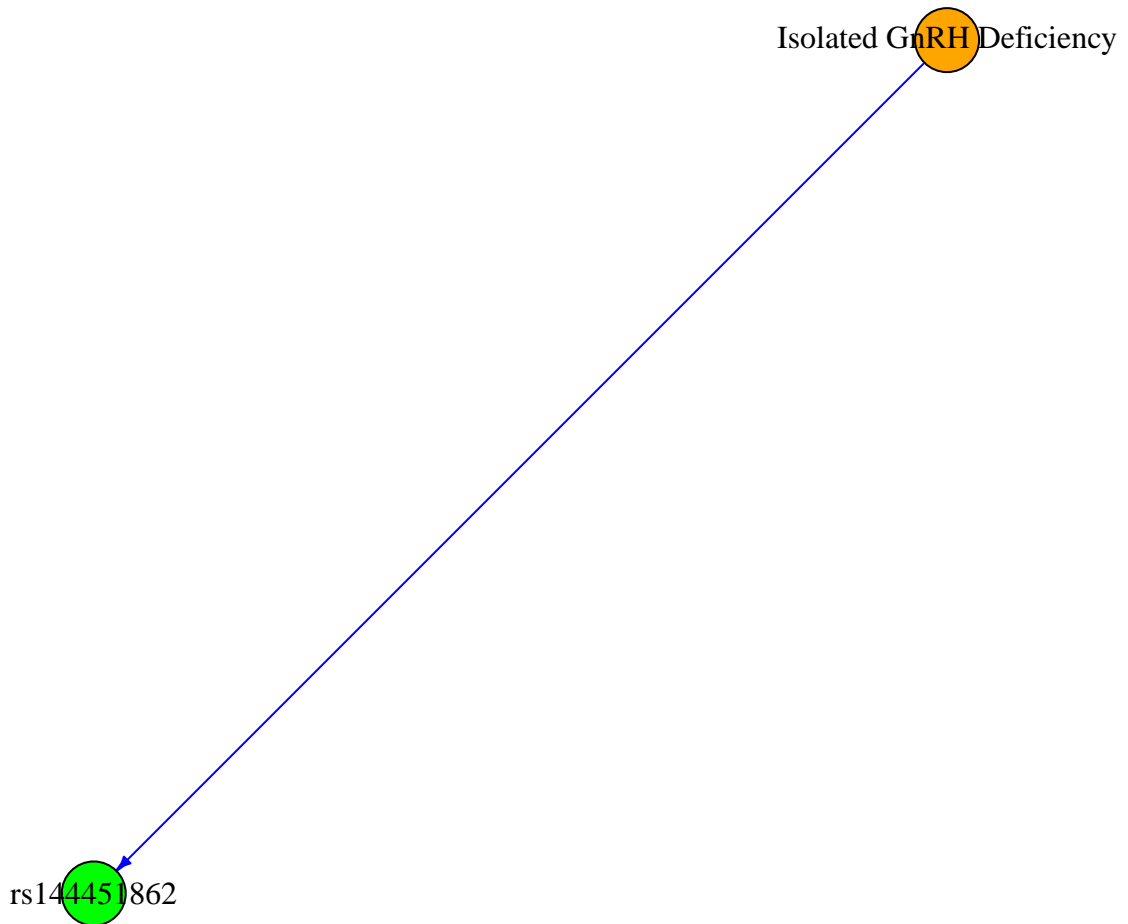



Variant–Disease Network (Isolated Nonsyndromic Congenital Heart Diseases)

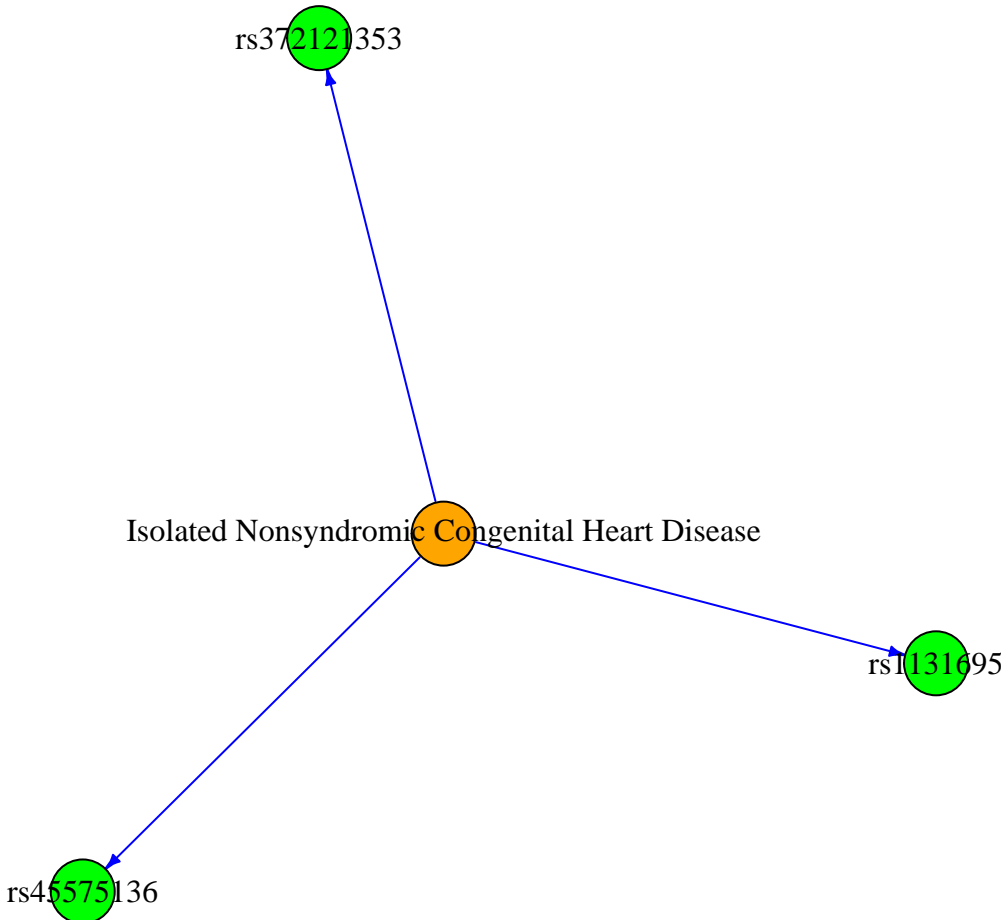

**Variant–Disease Network (Isovaleryl–CoA dehydrogenase deficiency)**

Isovaleryl–CoA dehydrogenase deficiency

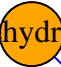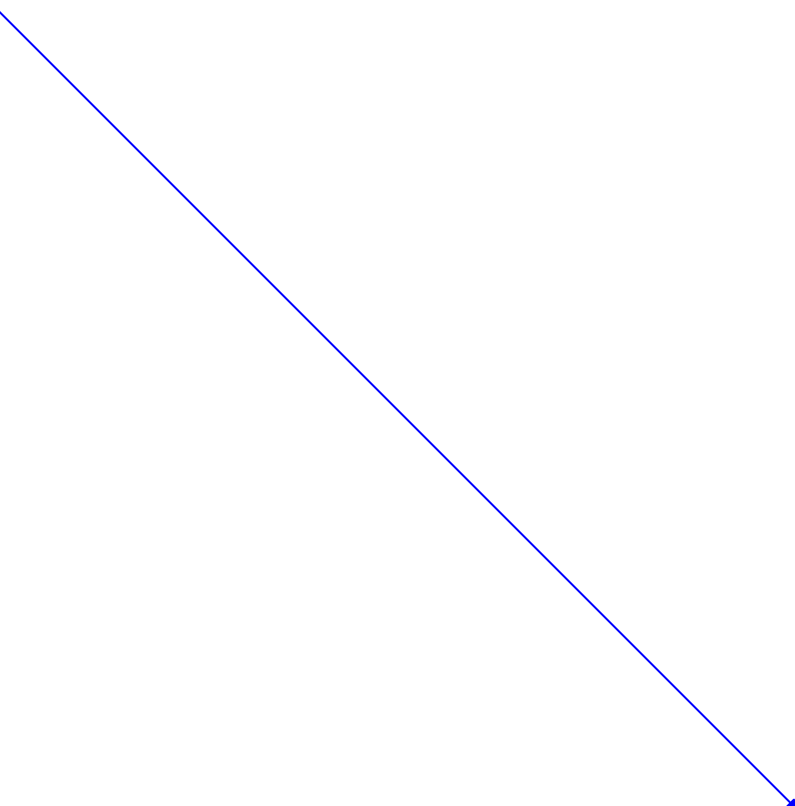

rs75383128

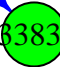

# Variant-Disease Network (Jackson-Weiss syndrome)

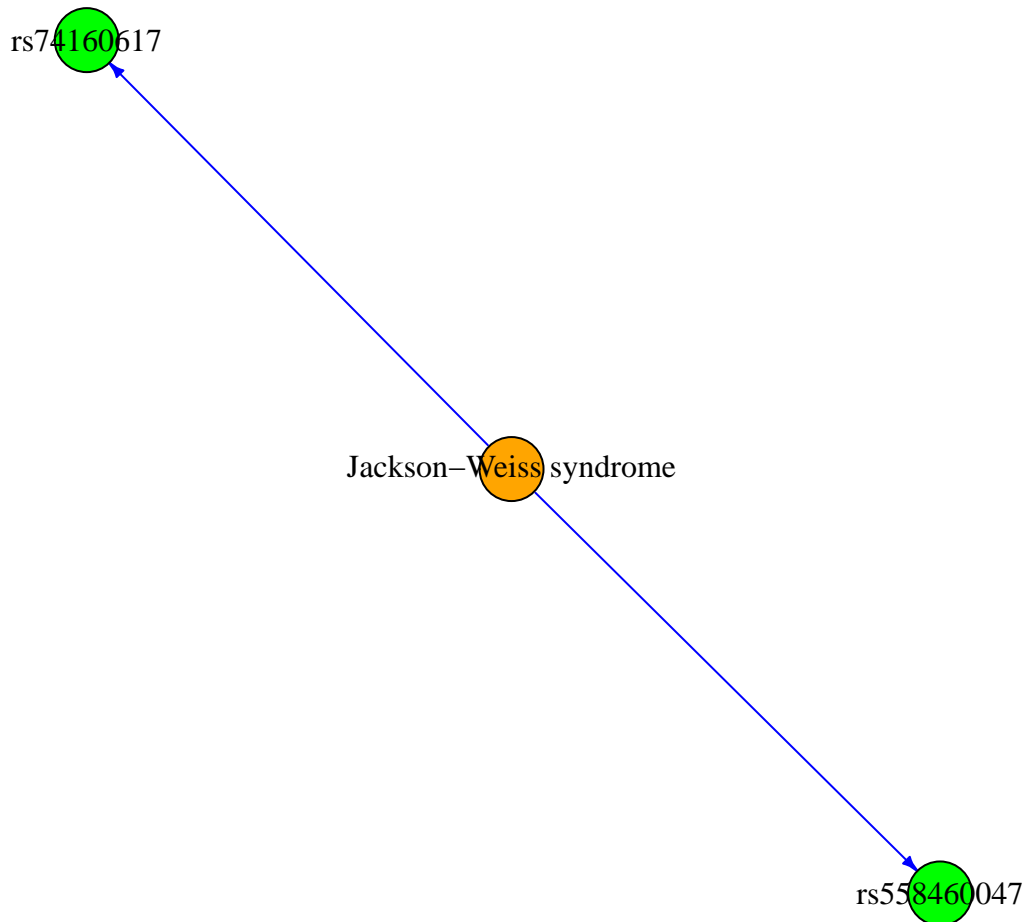

## Variant–Disease Network (Jarcho–Levin syndrome)

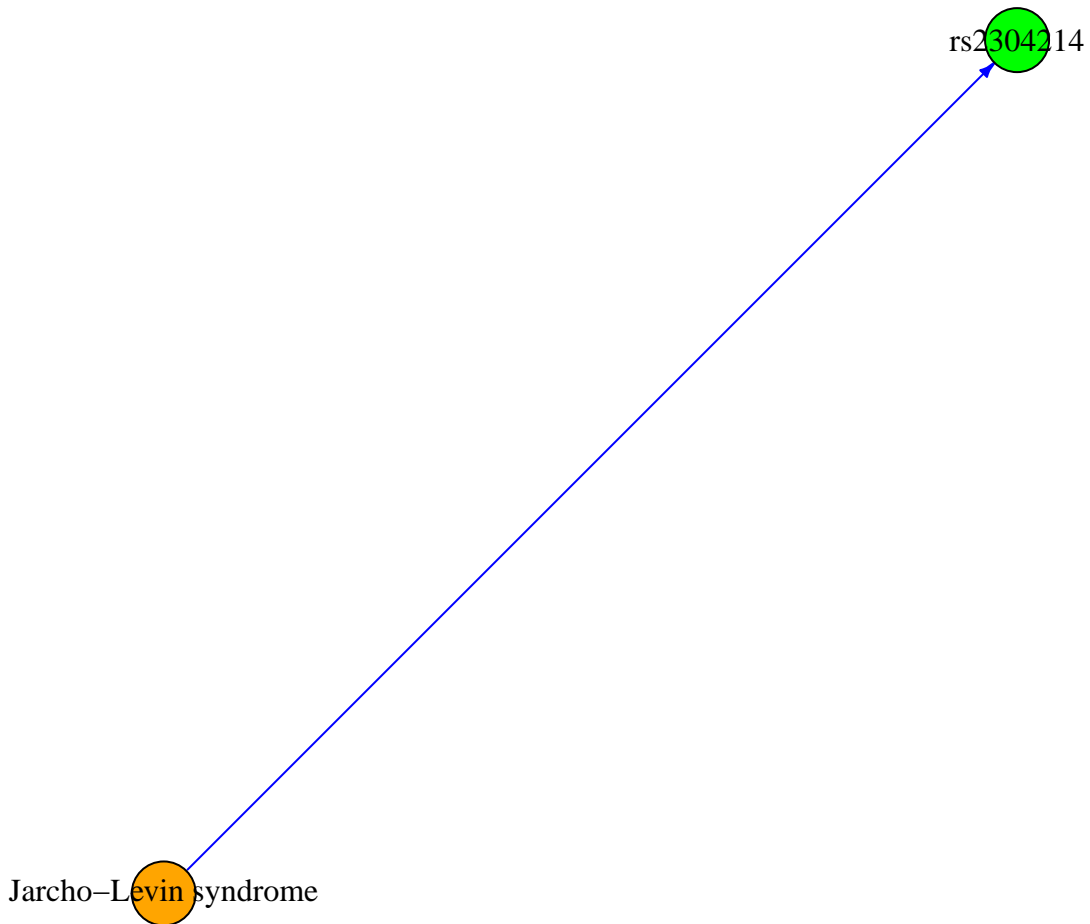

Variant–Disease Network (Jervell and Lange–Nielsen syndrome)

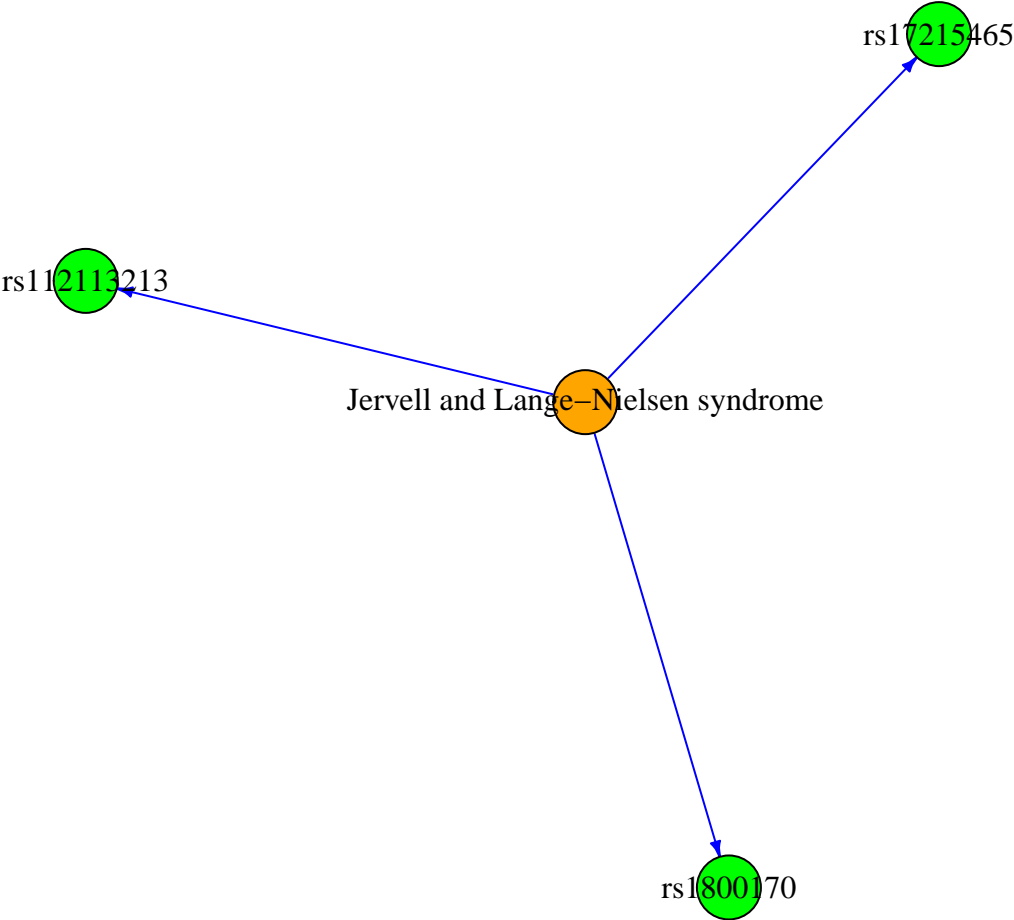

## Variant–Disease Network (Jeune thoracic dystrophy)

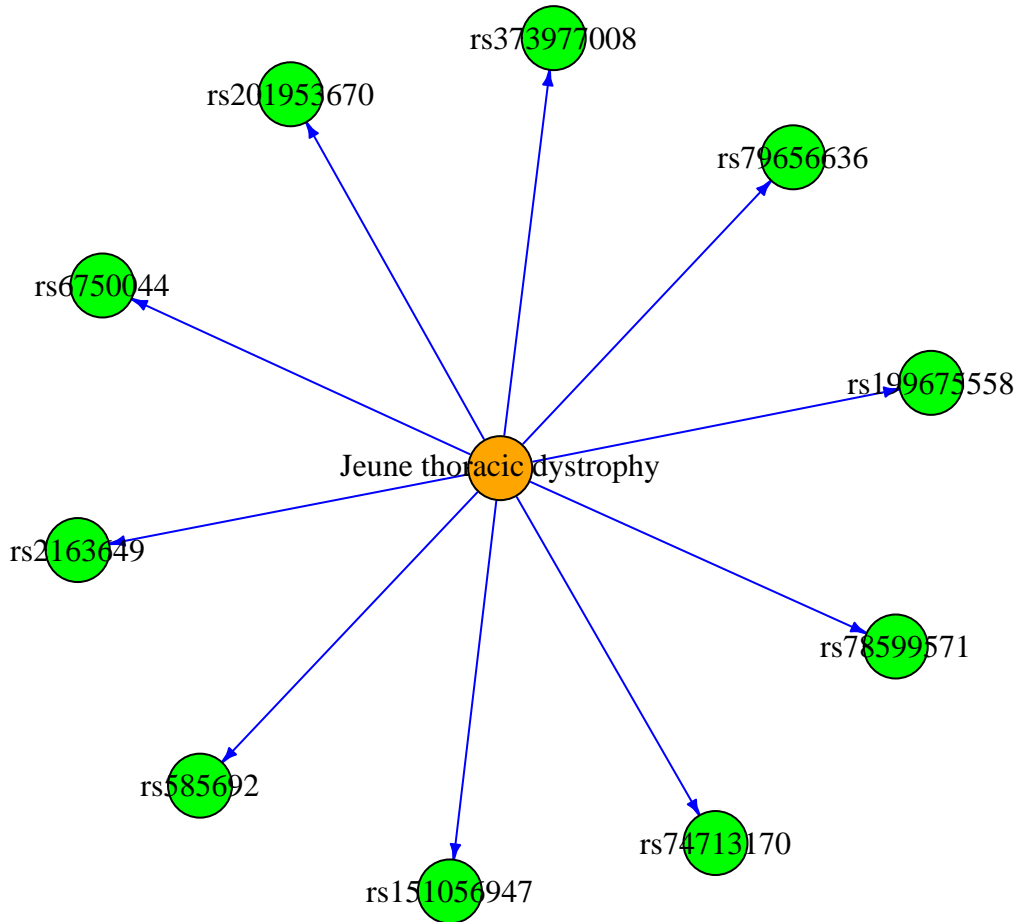

## Variant–Disease Network (Joubert syndrome)

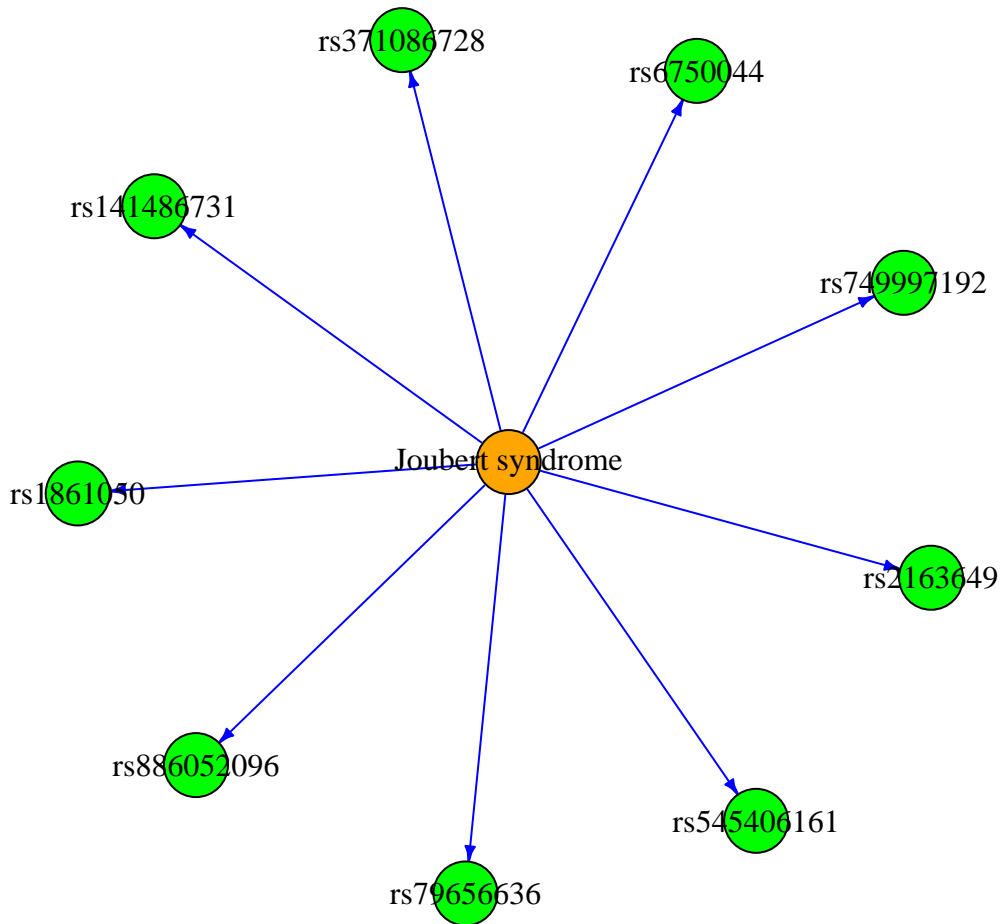

## Variant–Disease Network (Joubert syndrome 1)

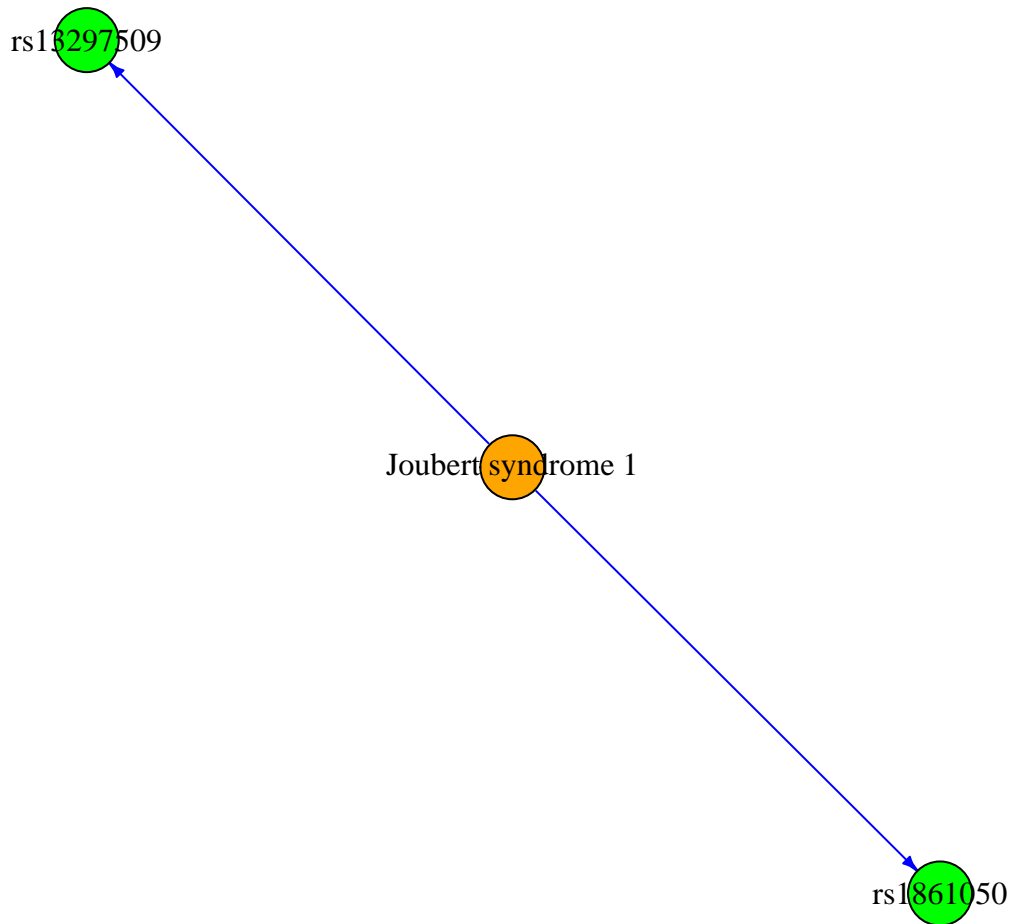



## Variant–Disease Network (Joubert syndrome 17)

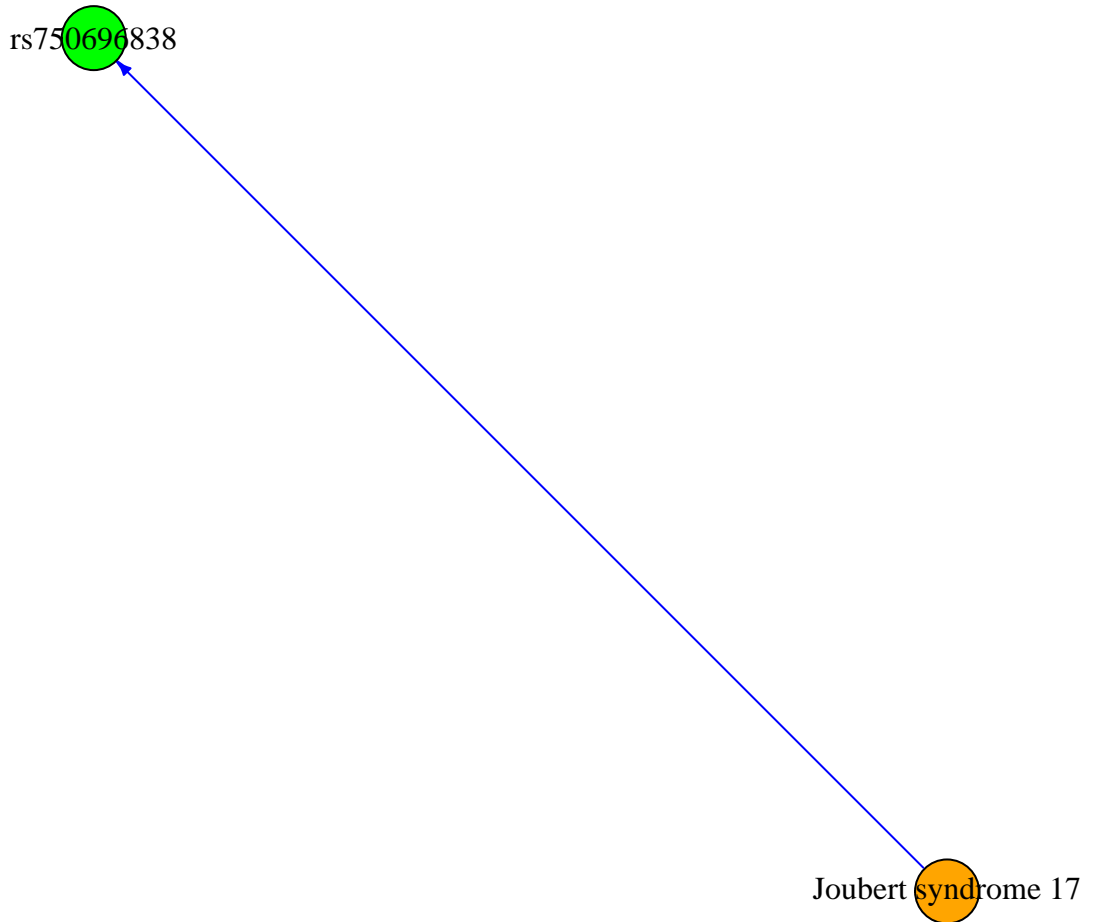

## Variant–Disease Network (Joubert syndrome 5)

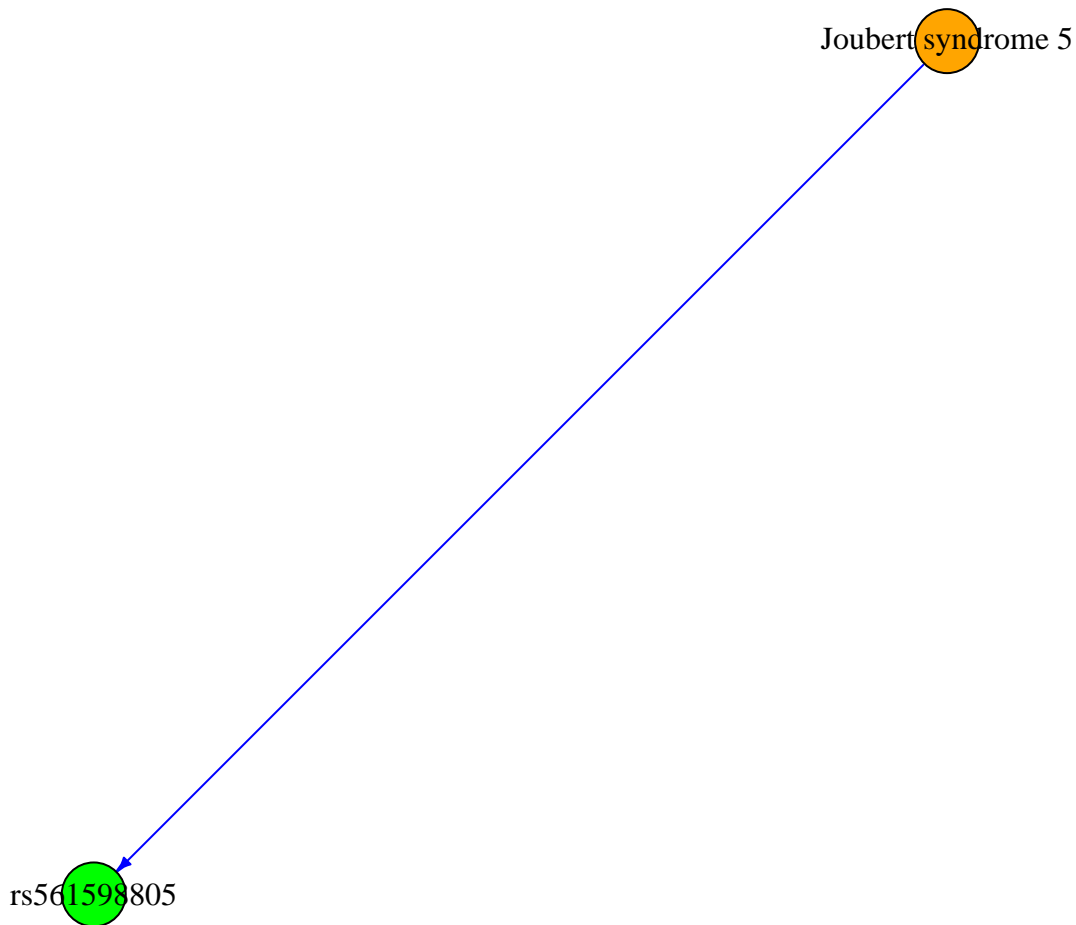

Variant–Disease Network (Junctional epidermolysis bullosa gravis of Herli

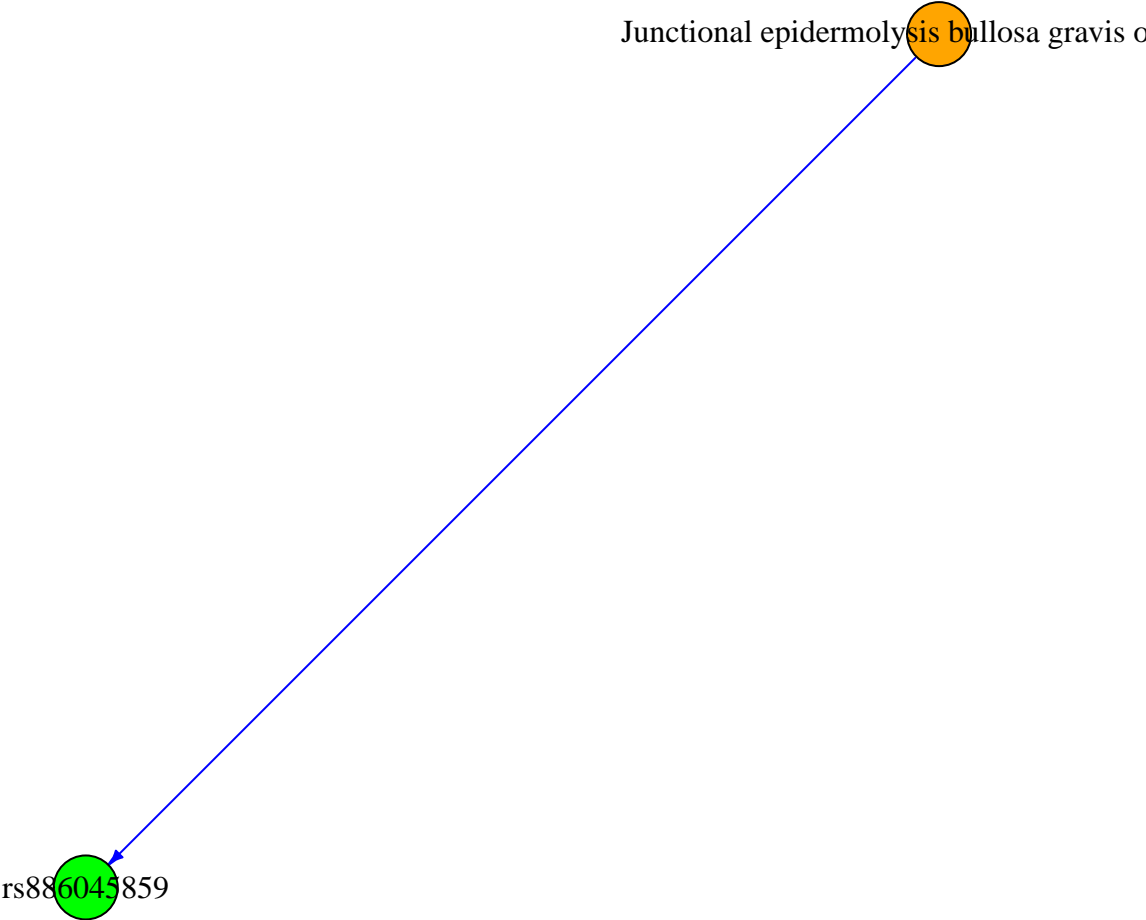

## Variant–Disease Network (Juvenile hemochromatosis)

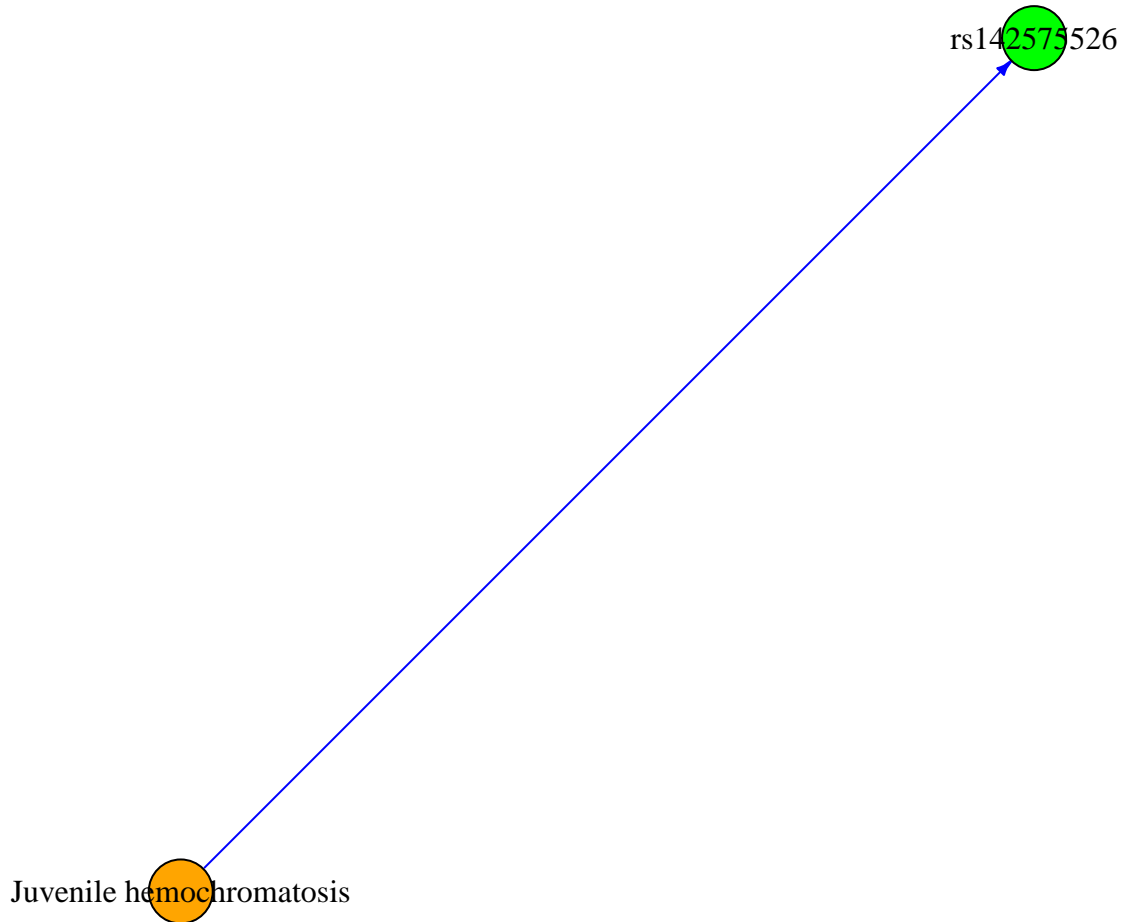

## Variant–Disease Network (Juvenile Polyposis)

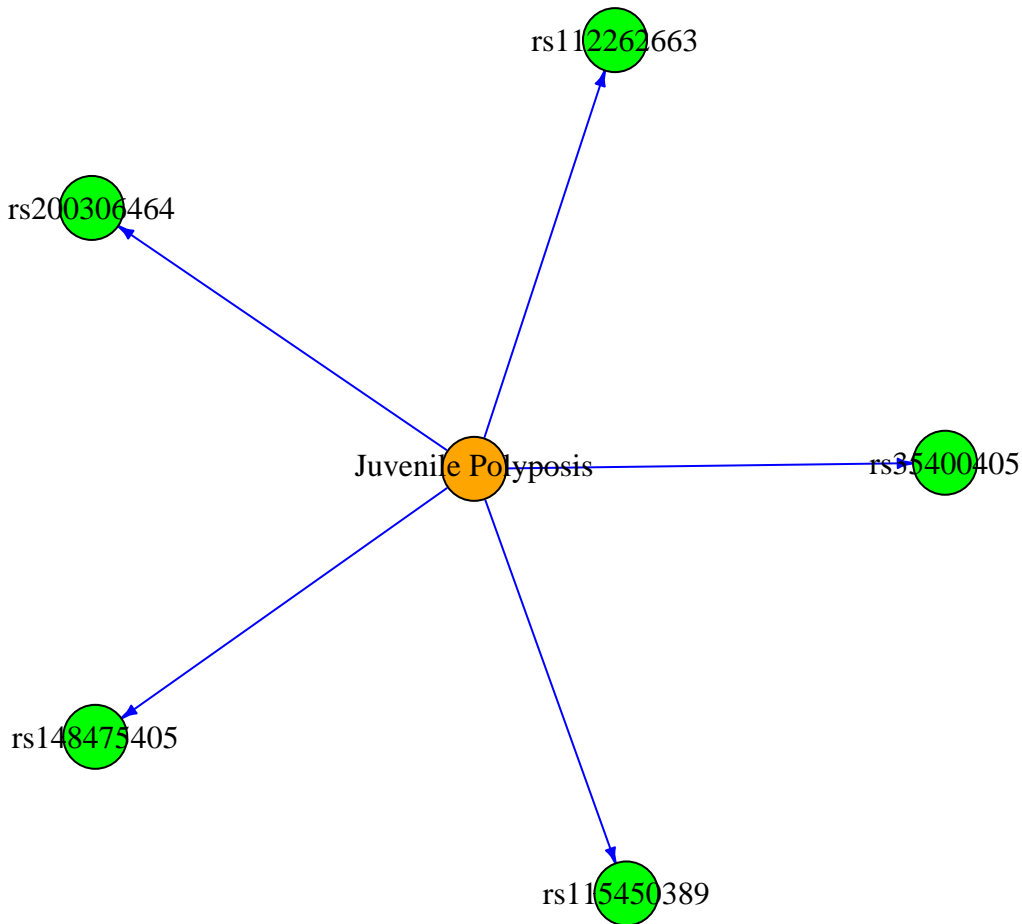

## Variant–Disease Network (Kallmann syndrome 2)

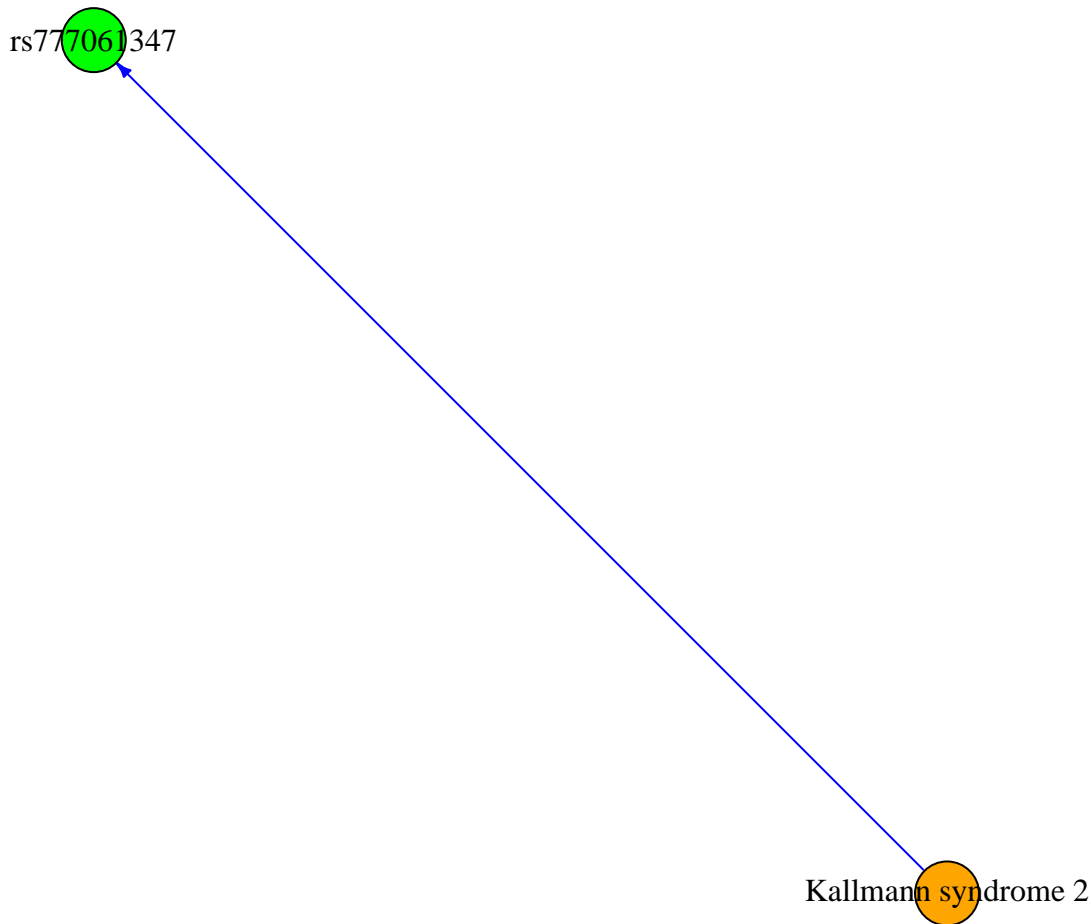

## Variant–Disease Network (Kallmann syndrome 3)

Kallmann syndrome 3

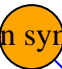

rs3746684

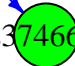

Variant–Disease Network (Keratosis follicularis)

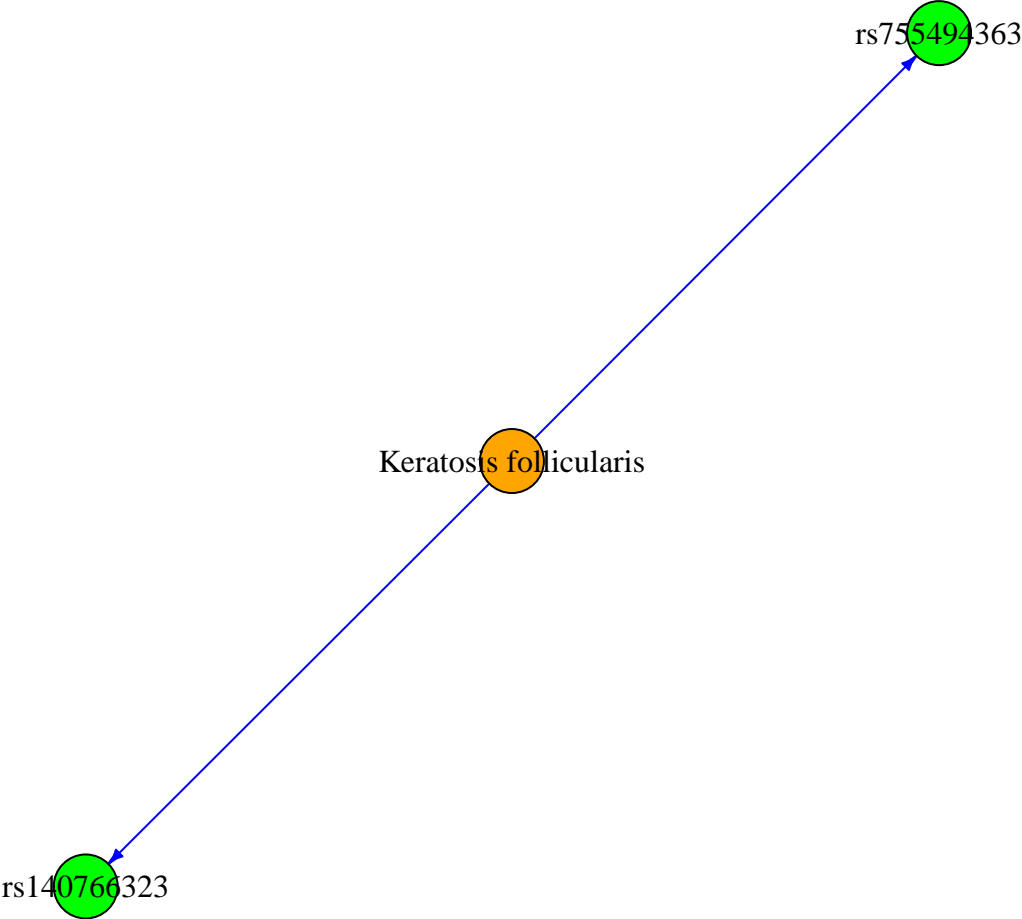



## Variant–Disease Network (Kindlers syndrome)

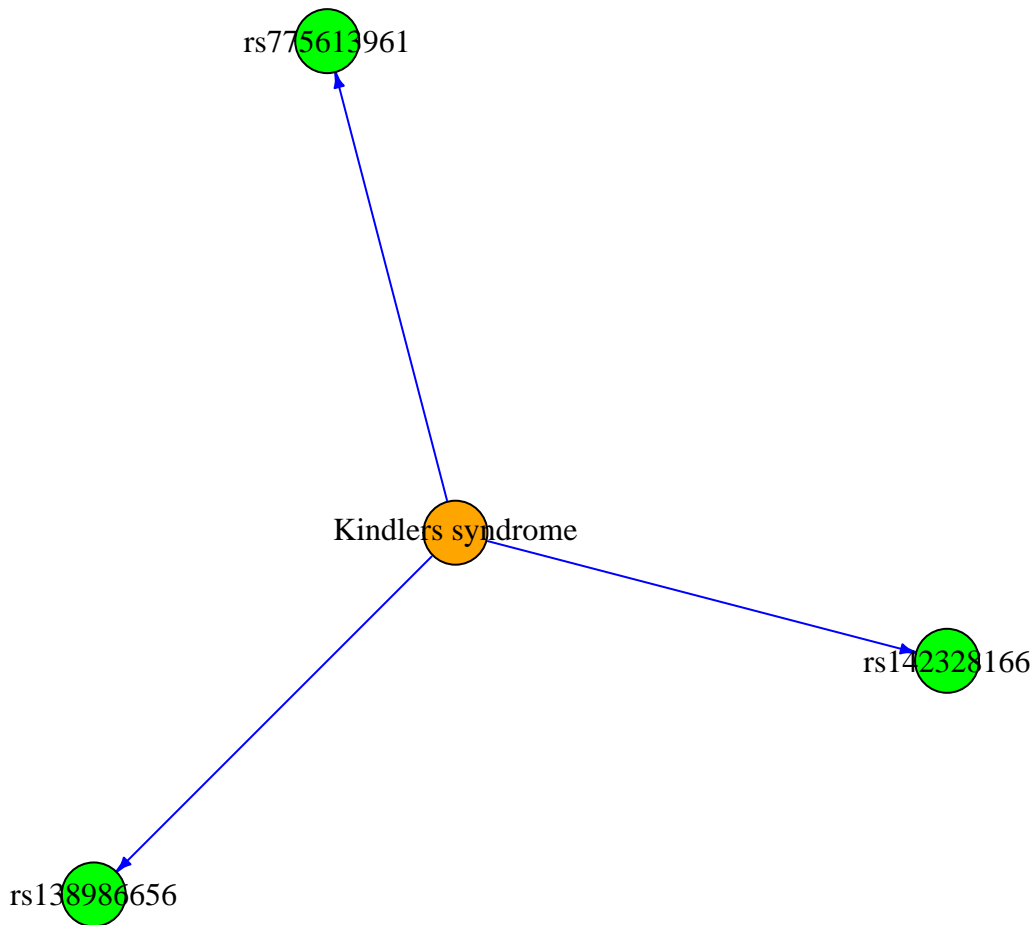

## Variant–Disease Network (Kleefstra syndrome 1)

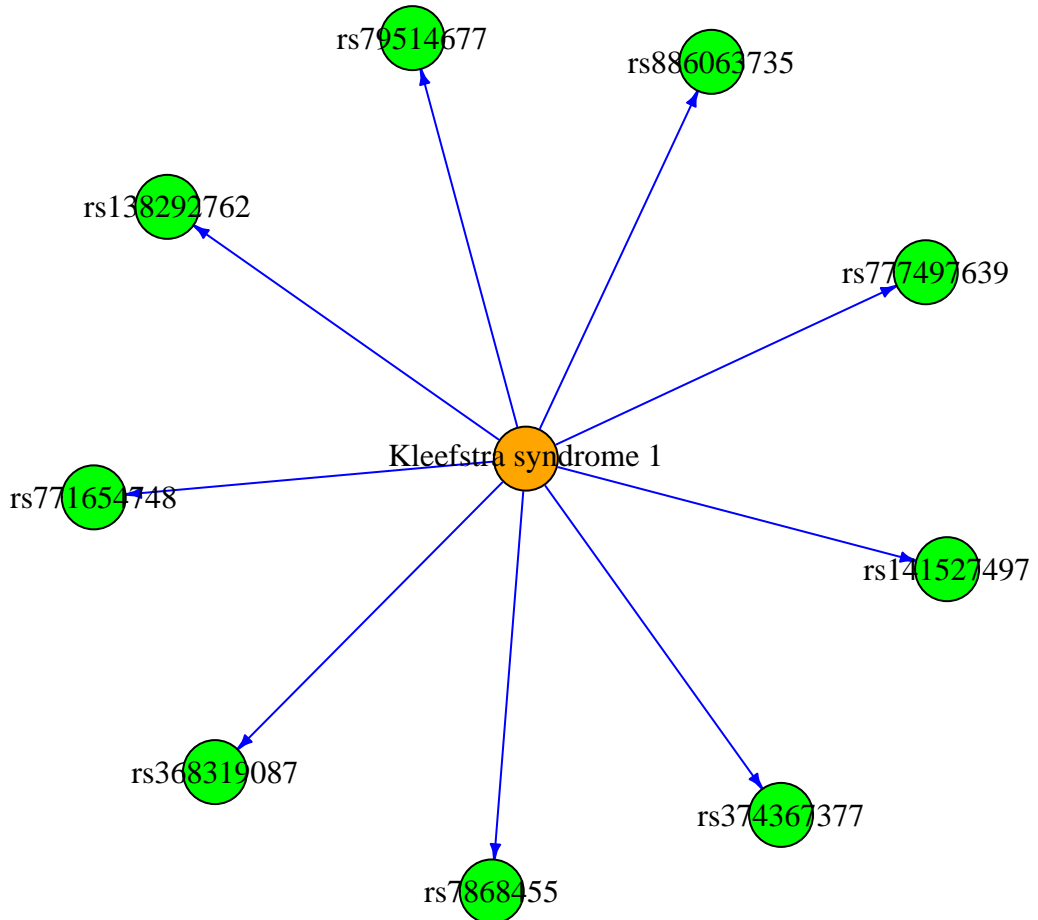

## Variant-Disease Network (Kohlschutters syndrome)

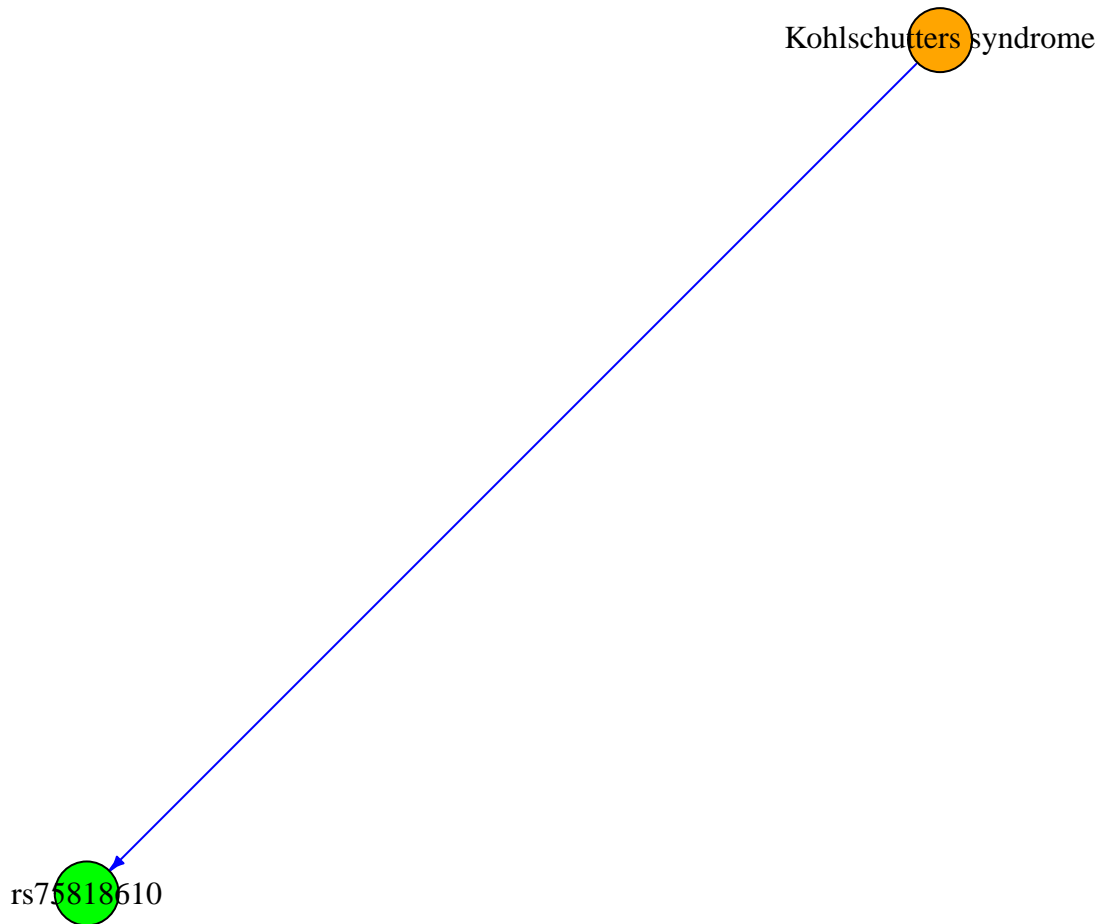

## Variant–Disease Network (Koolen–de Vries syndrome)

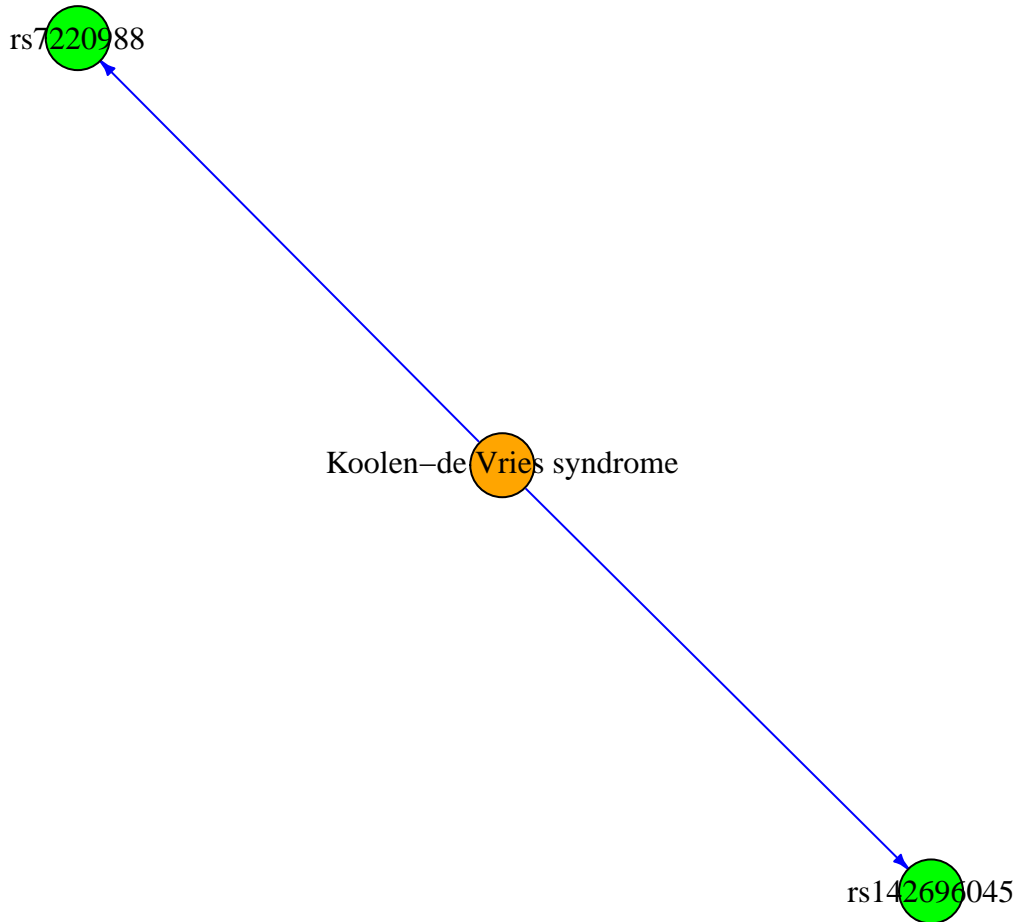

# Variant–Disease Network (Lactate dehydrogenase B deficiency)

rs141707607

Lactate dehydrogenase B deficiency



## Variant–Disease Network (Lactose intolerance)

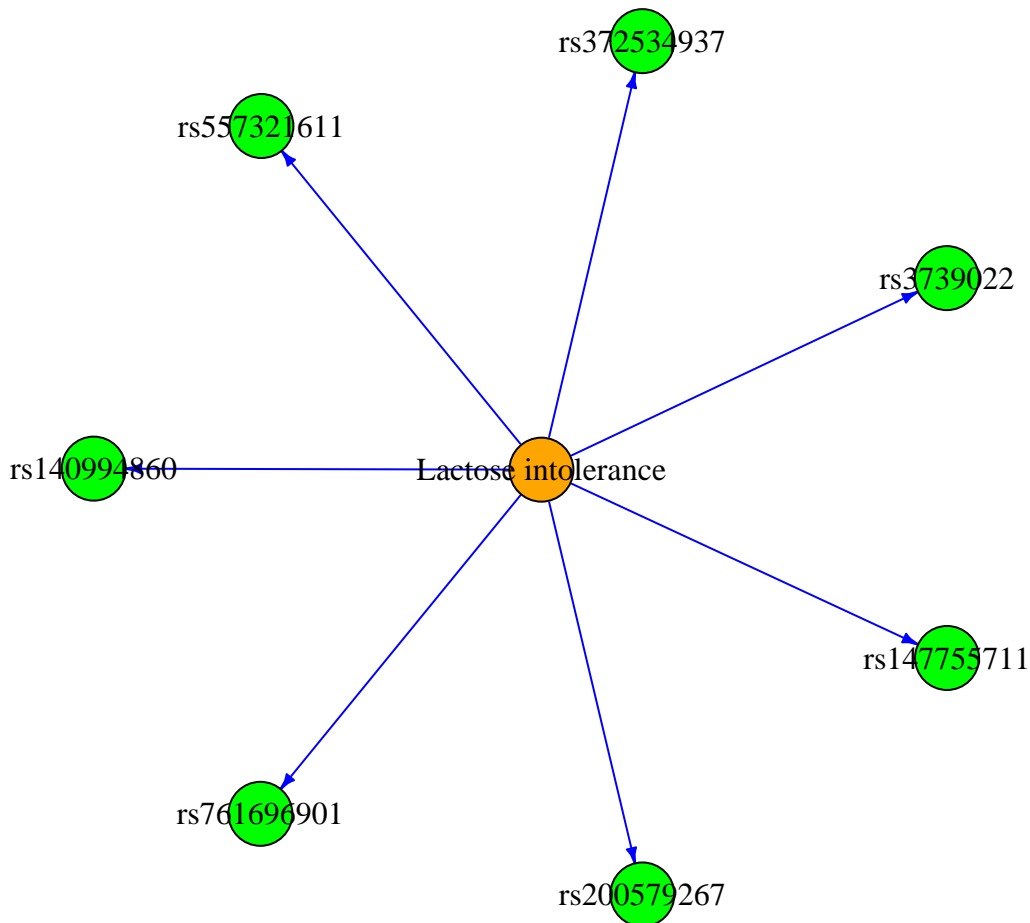

Variant–Disease Network (Lafora disease)

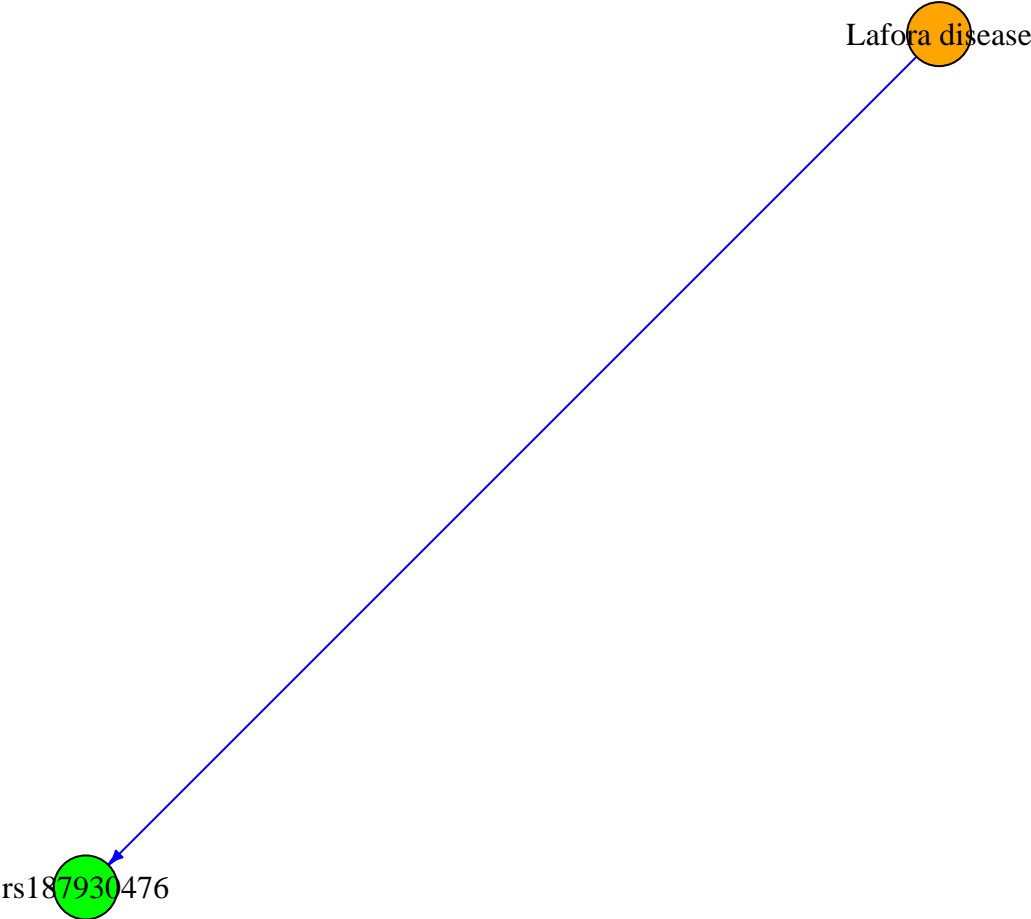

Variant–Disease Network (Lamellar cataract)

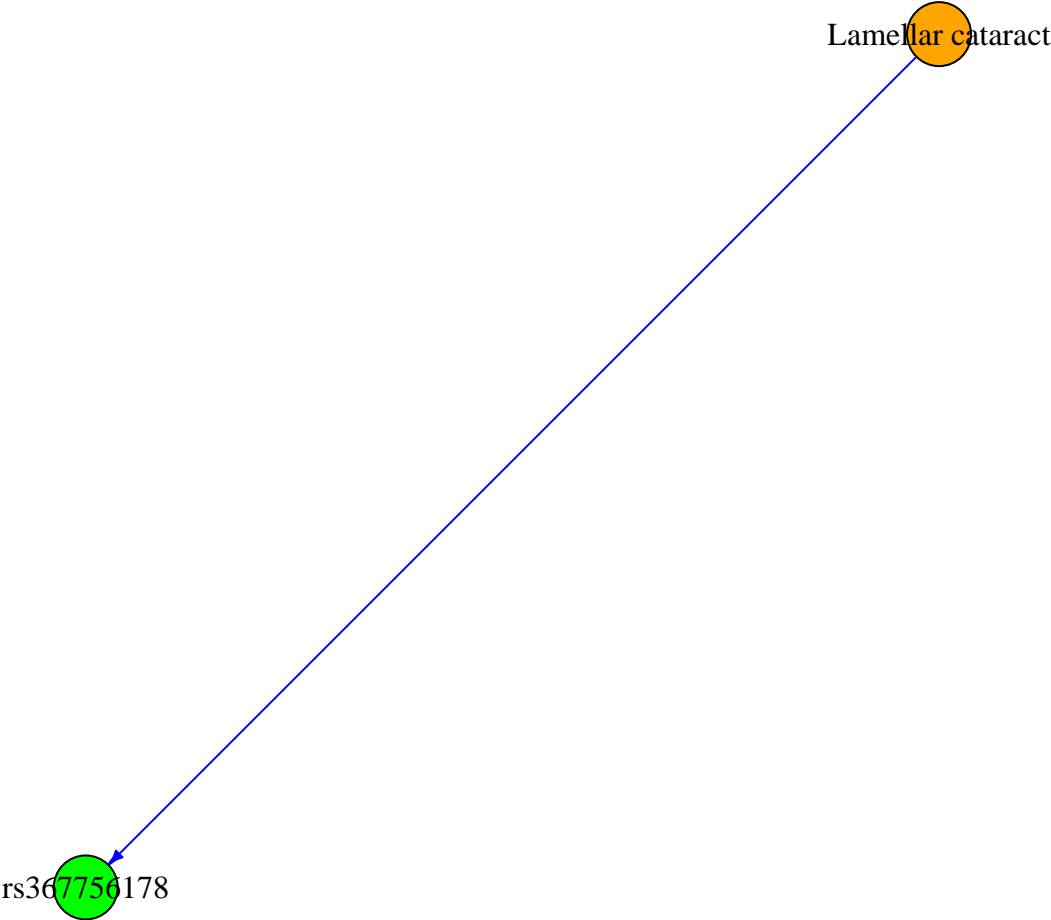



Variant–Disease Network (Langer–Giedion syndrome)

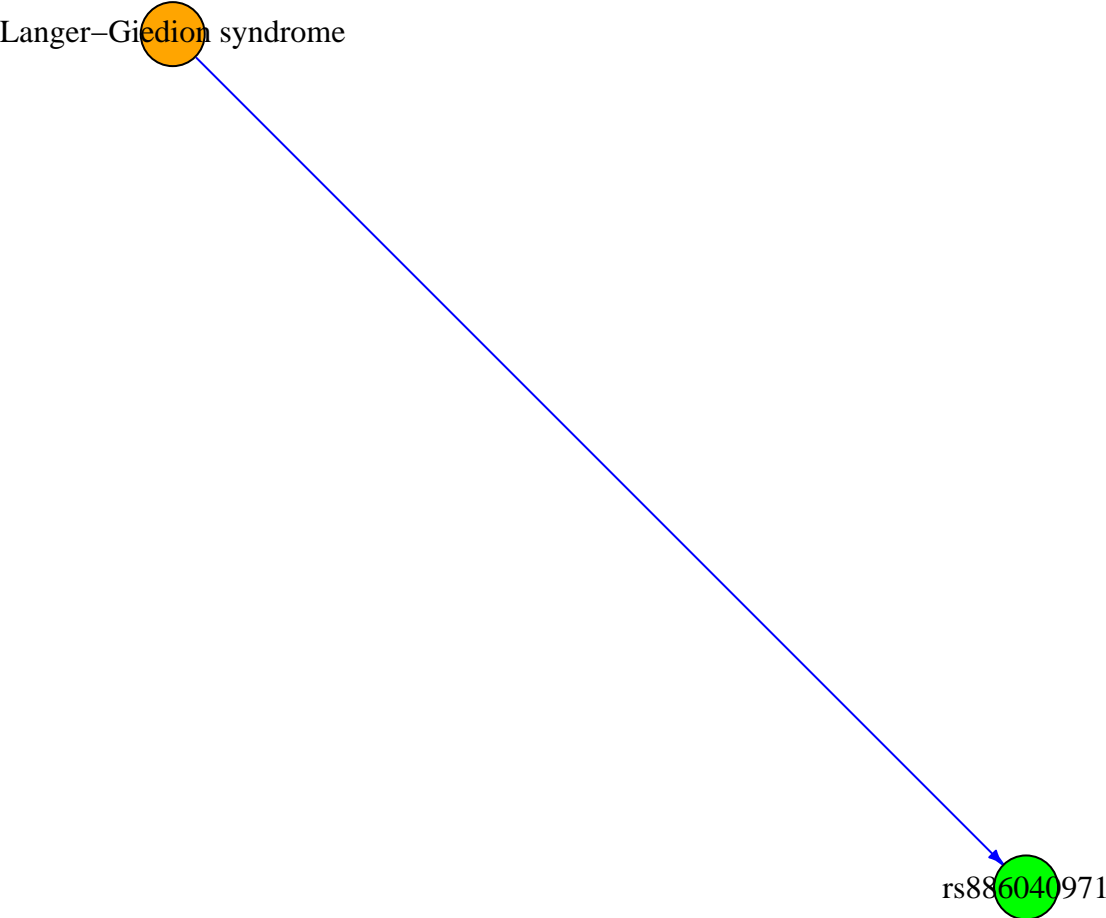

Variant–Disease Network (Larsen syndrome)

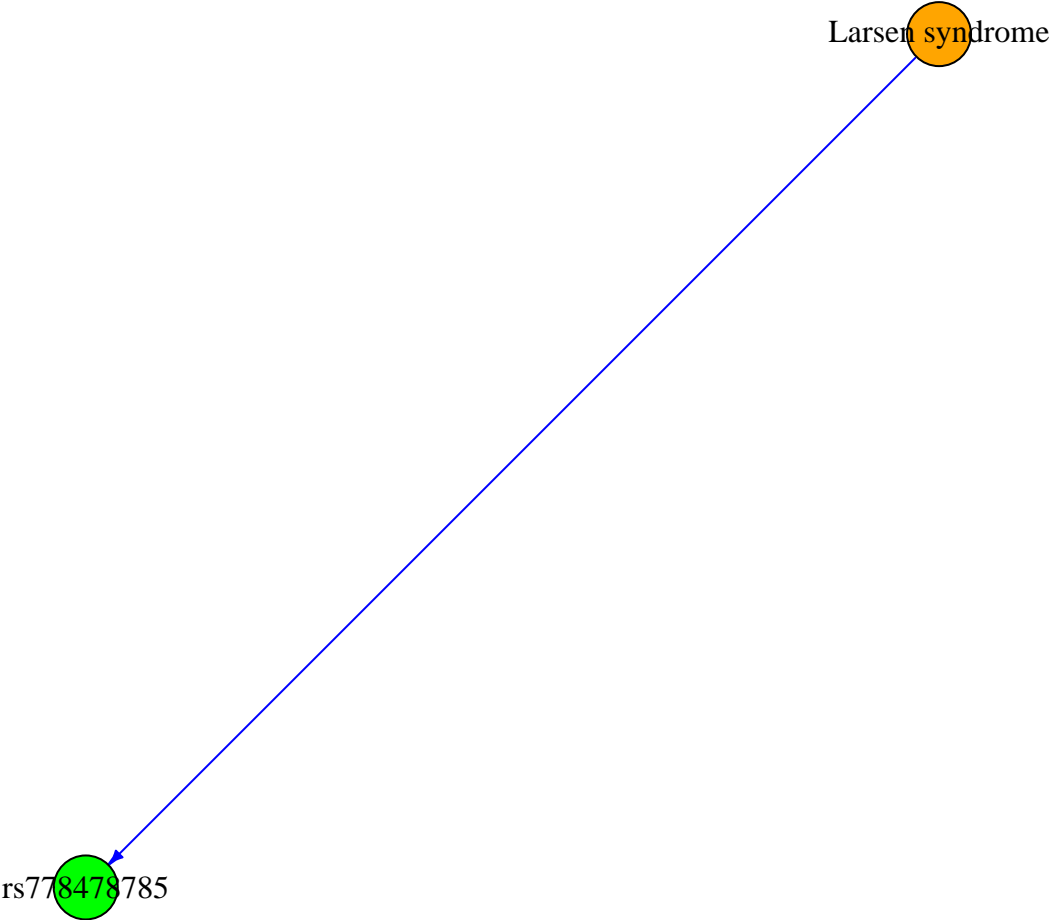

Variant–Disease Network (Laryngoonychocutaneous syndrome)

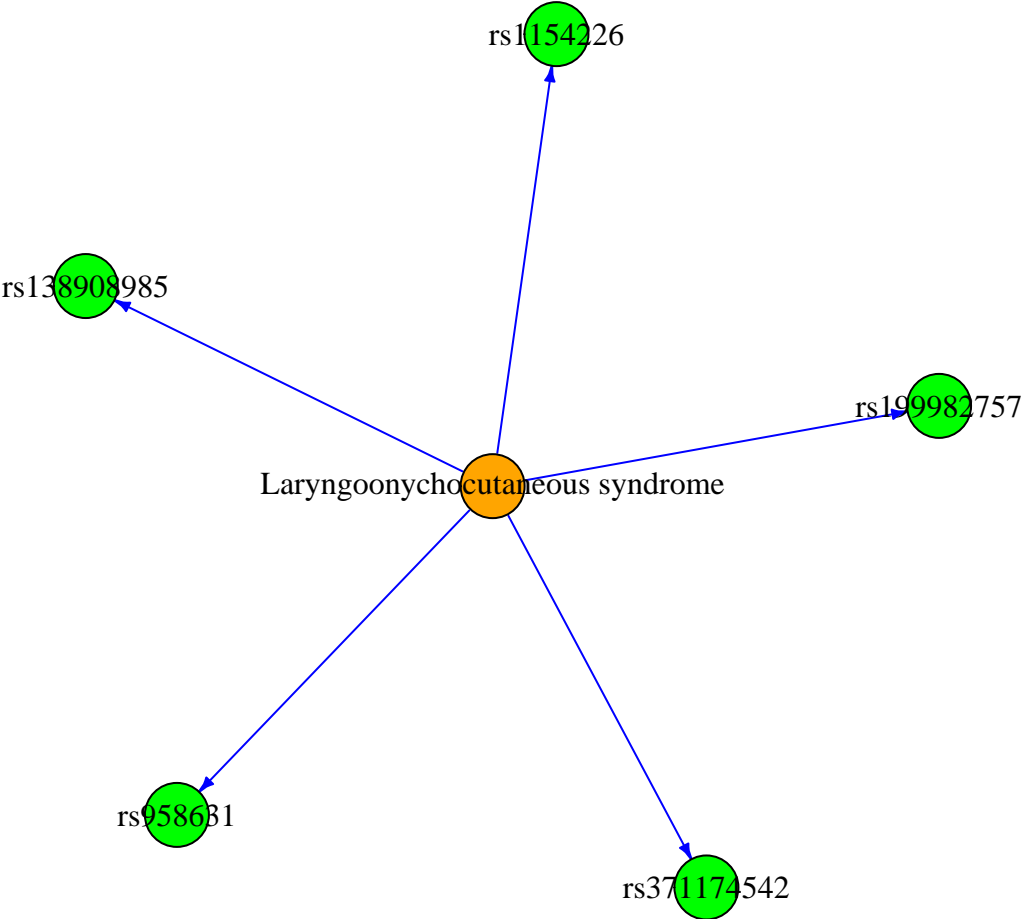

## Variant–Disease Network (LCHAD Deficiency)

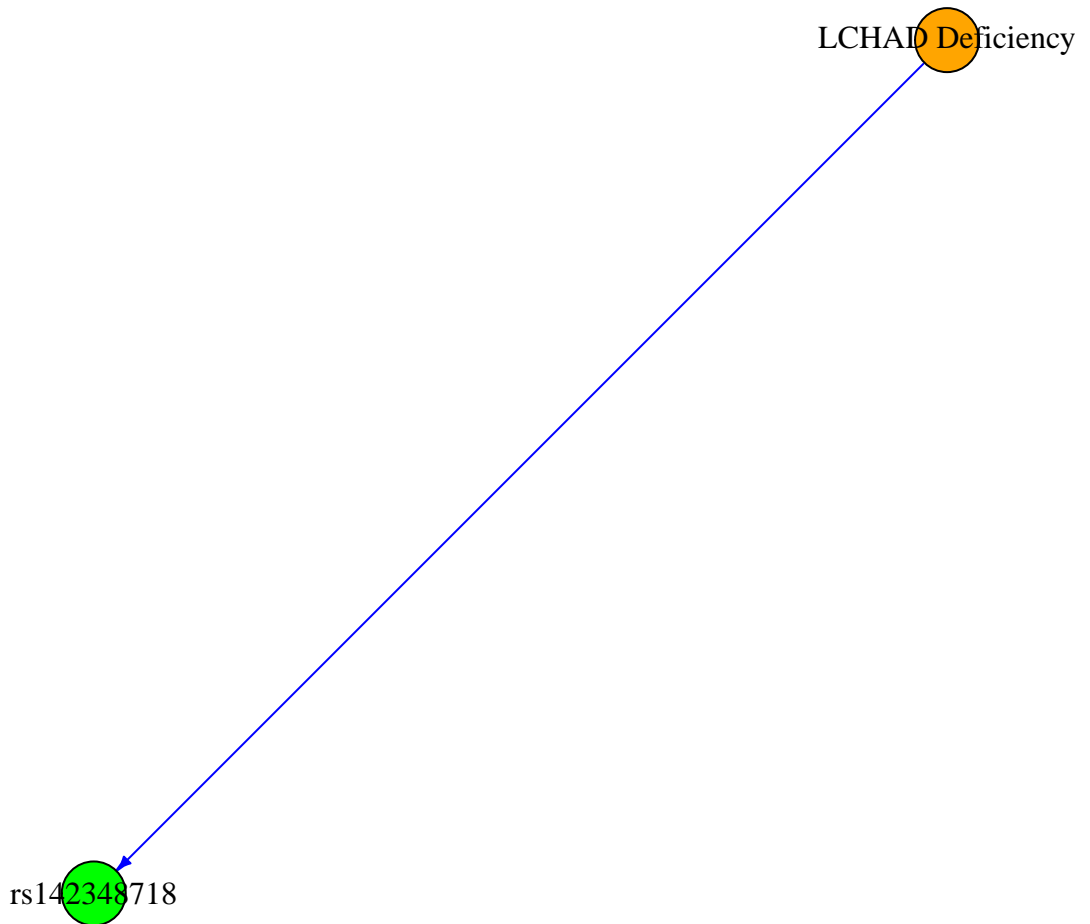

Variant–Disease Network (Leber congenital amaurosis)

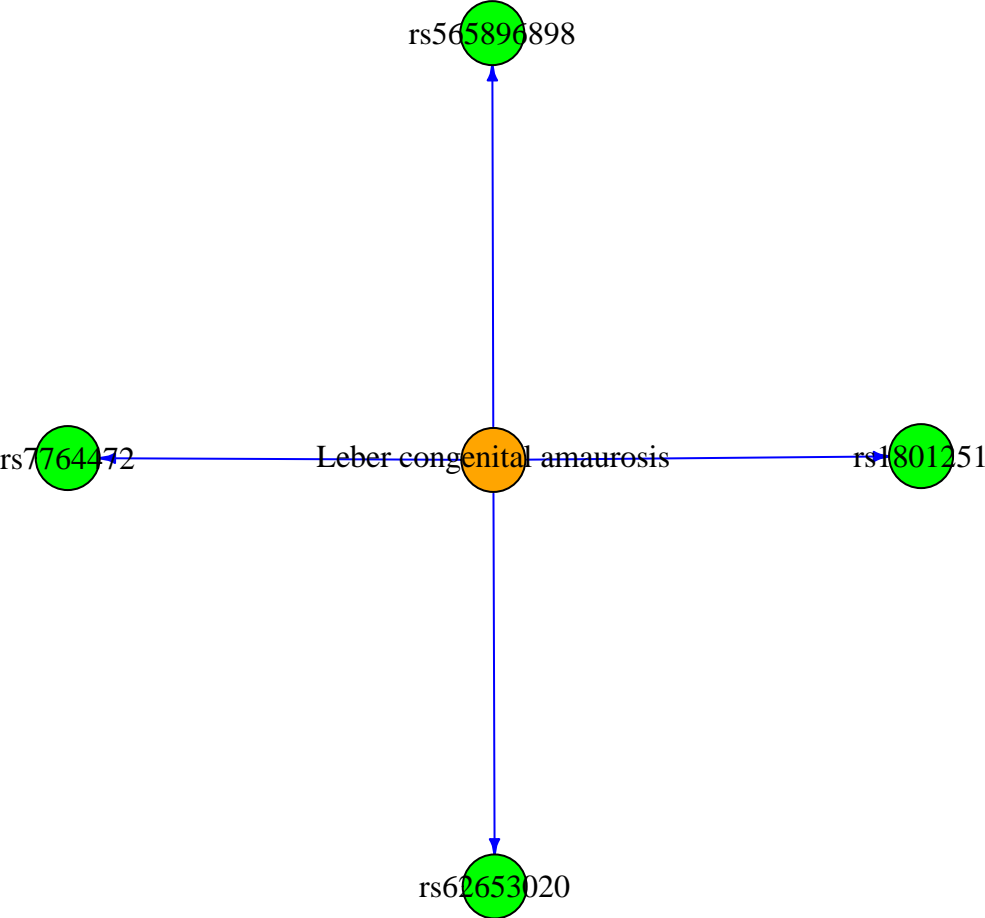

**Variant–Disease Network (Left ventricular noncompaction 6)**

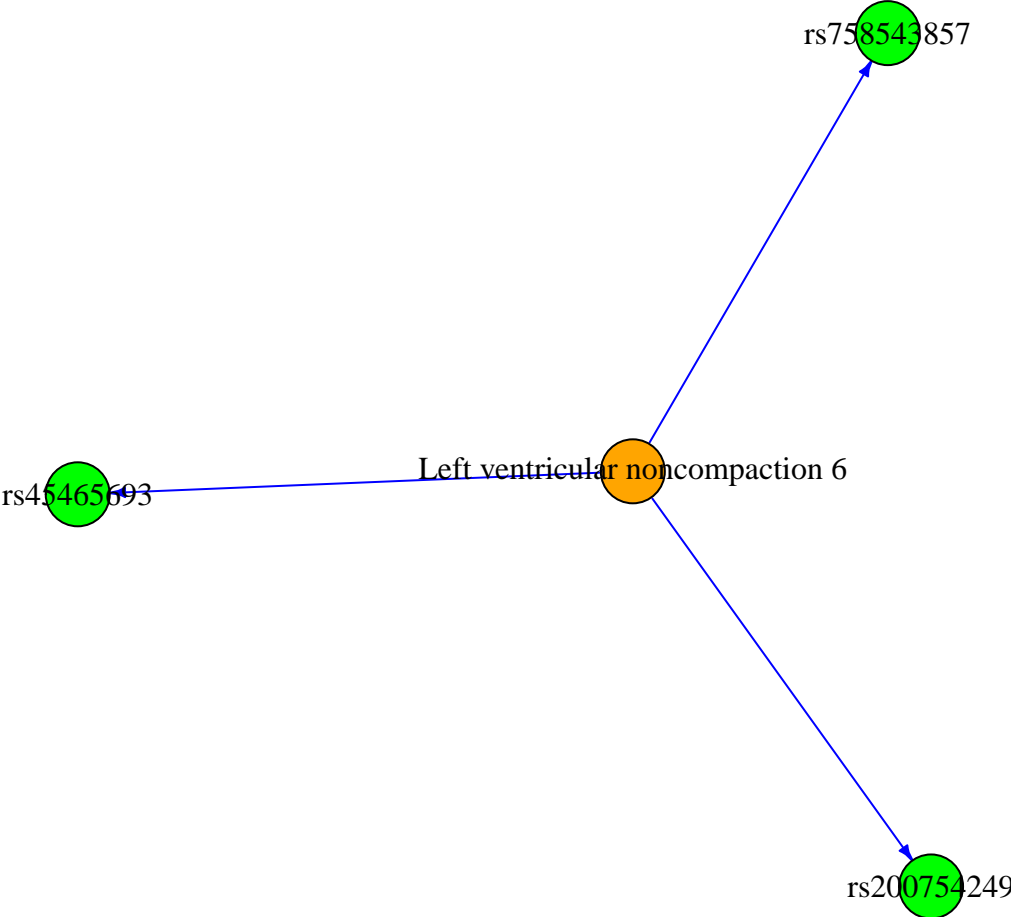

Variant–Disease Network (Left ventricular noncompaction 8)

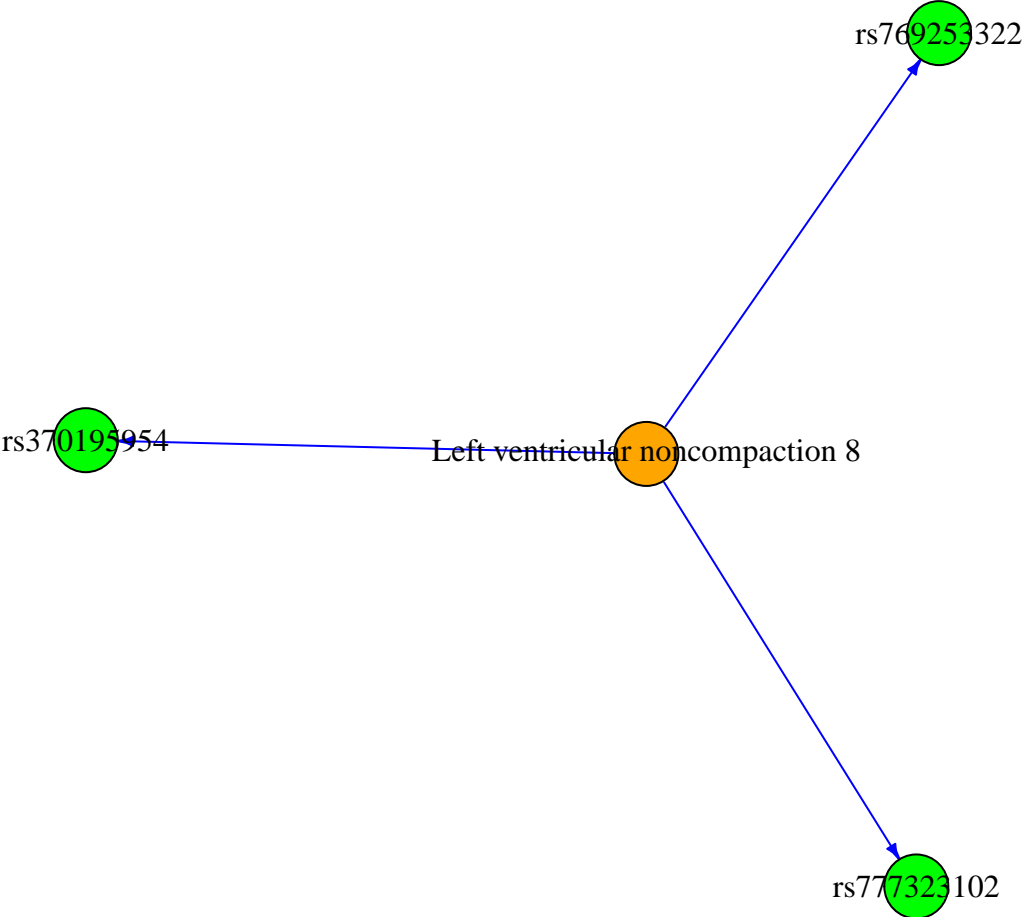

Variant–Disease Network (Left ventricular noncompaction cardiomyopath

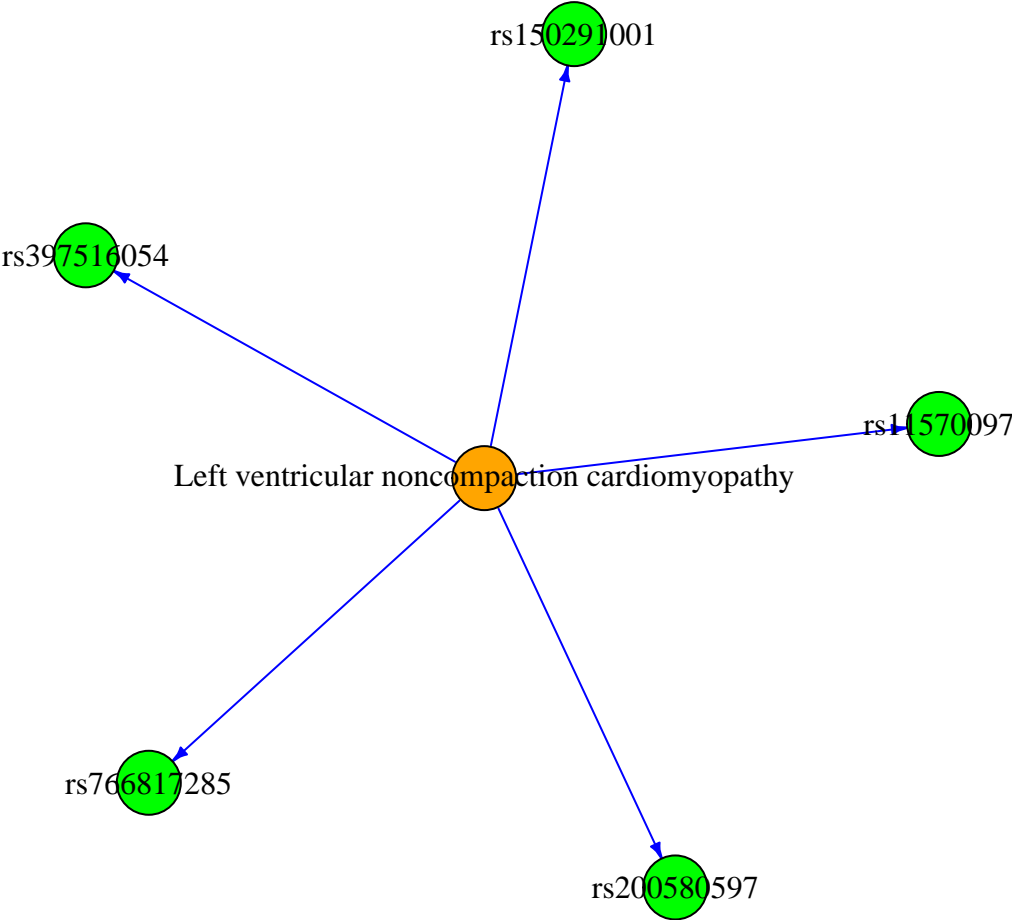



Variant–Disease Network (Legius syndrome)

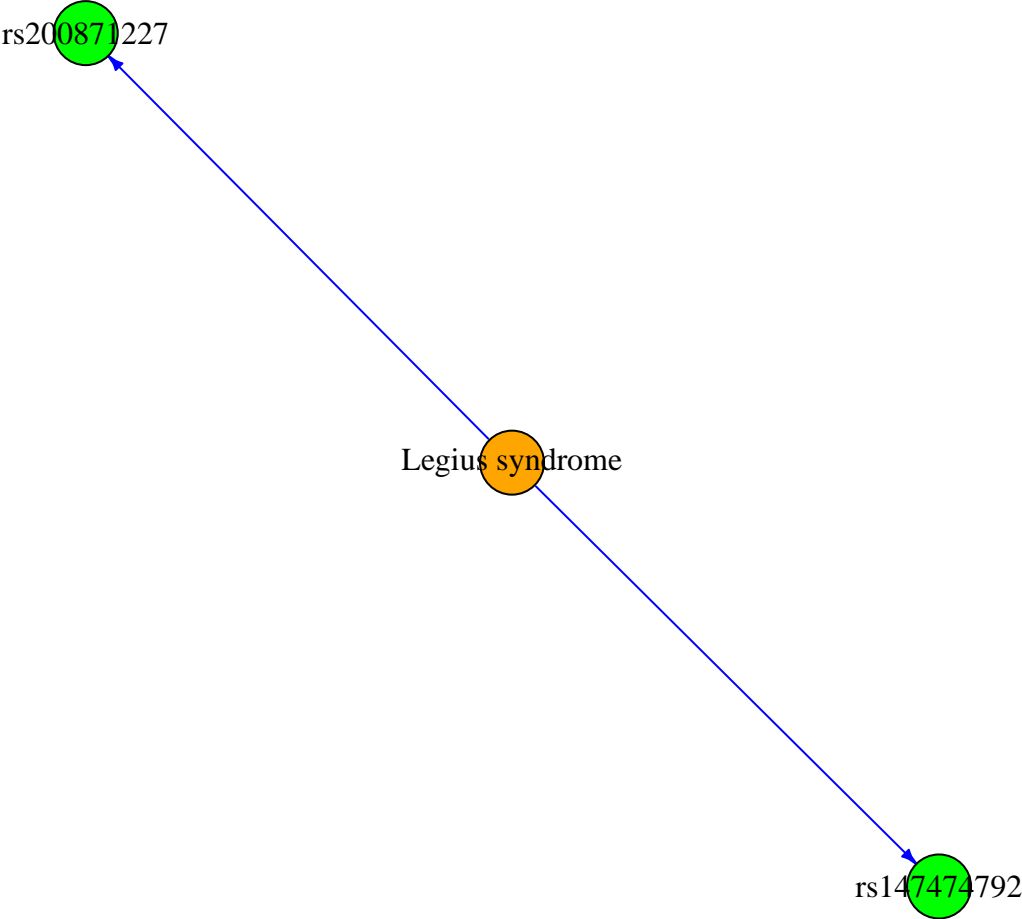

Variant–Disease Network (Leigh syndrome)

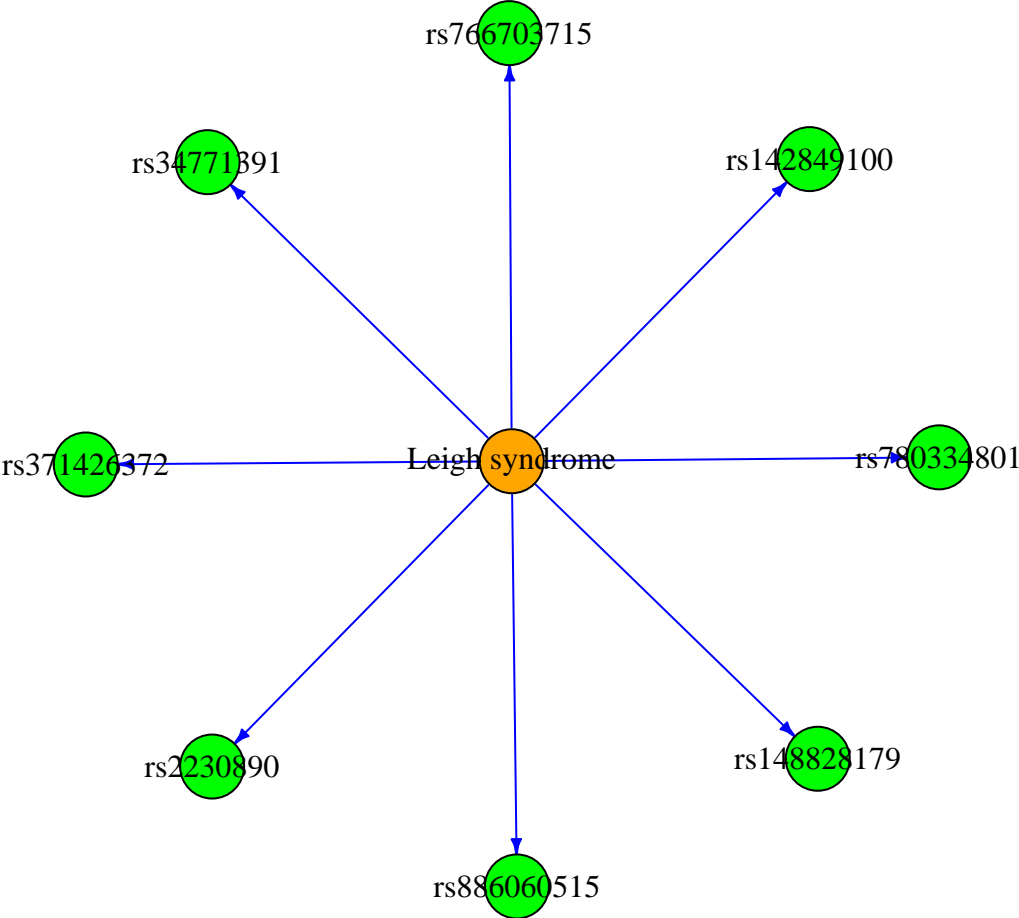

## Variant-Disease Network (Lethal Encephalopathy)

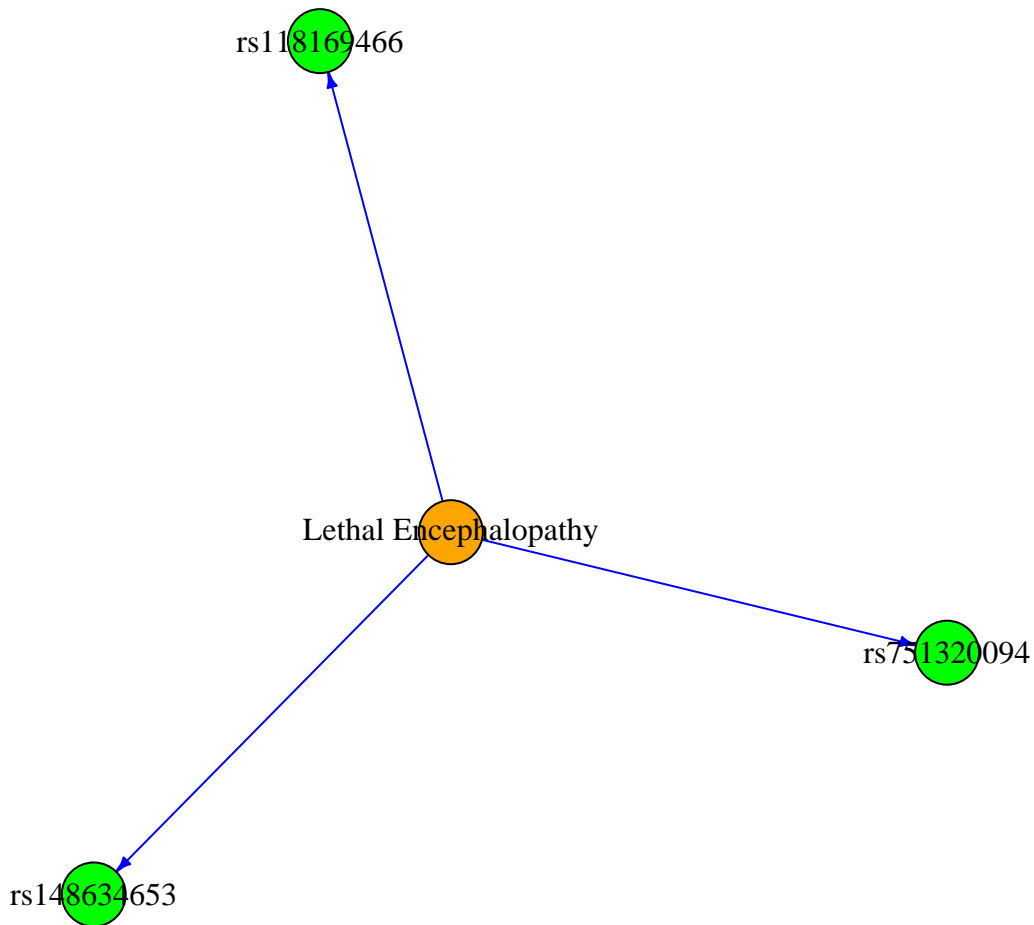

Variant–Disease Network (Lethal multiple pterygium syndrome)

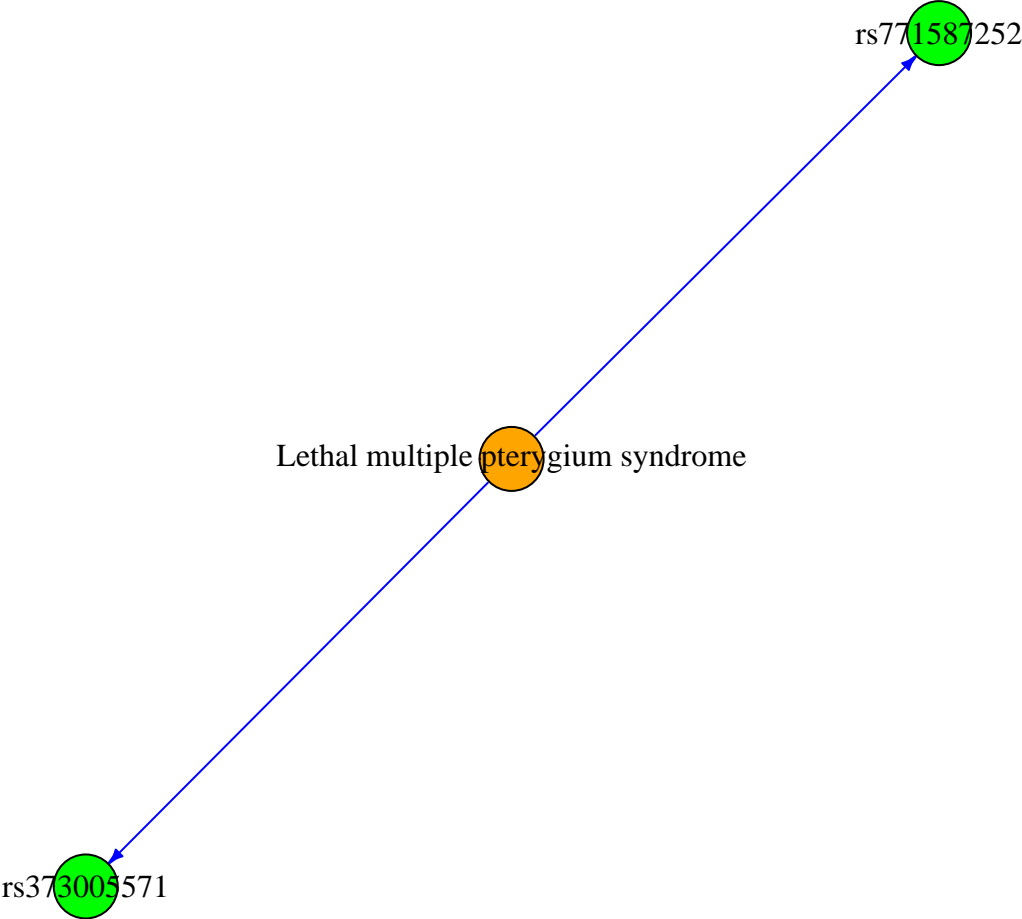

# Variant–Disease Network (Leukoencephalopathy with ataxia)

Leukoencephalopathy with ataxia

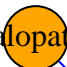

rs9820367

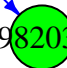

Variant–Disease Network (Levy–Hollister syndrome)

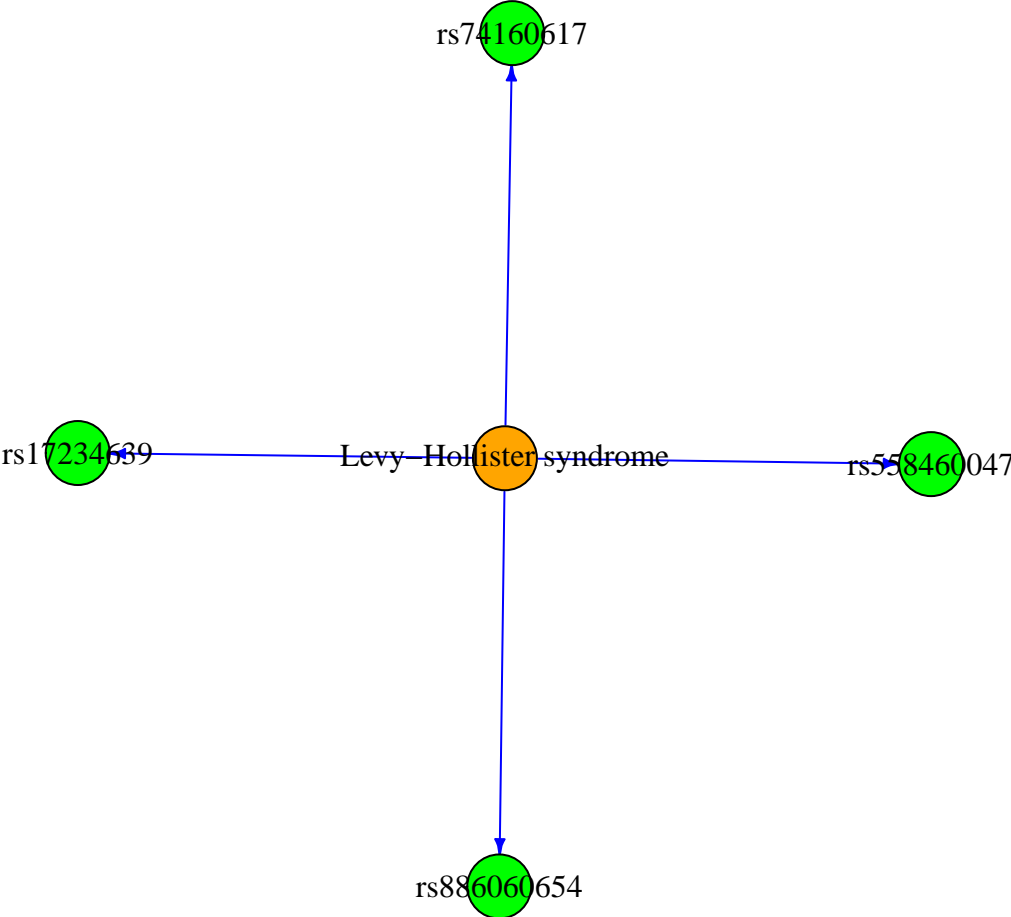

## Variant–Disease Network (Liddle syndrome 1)

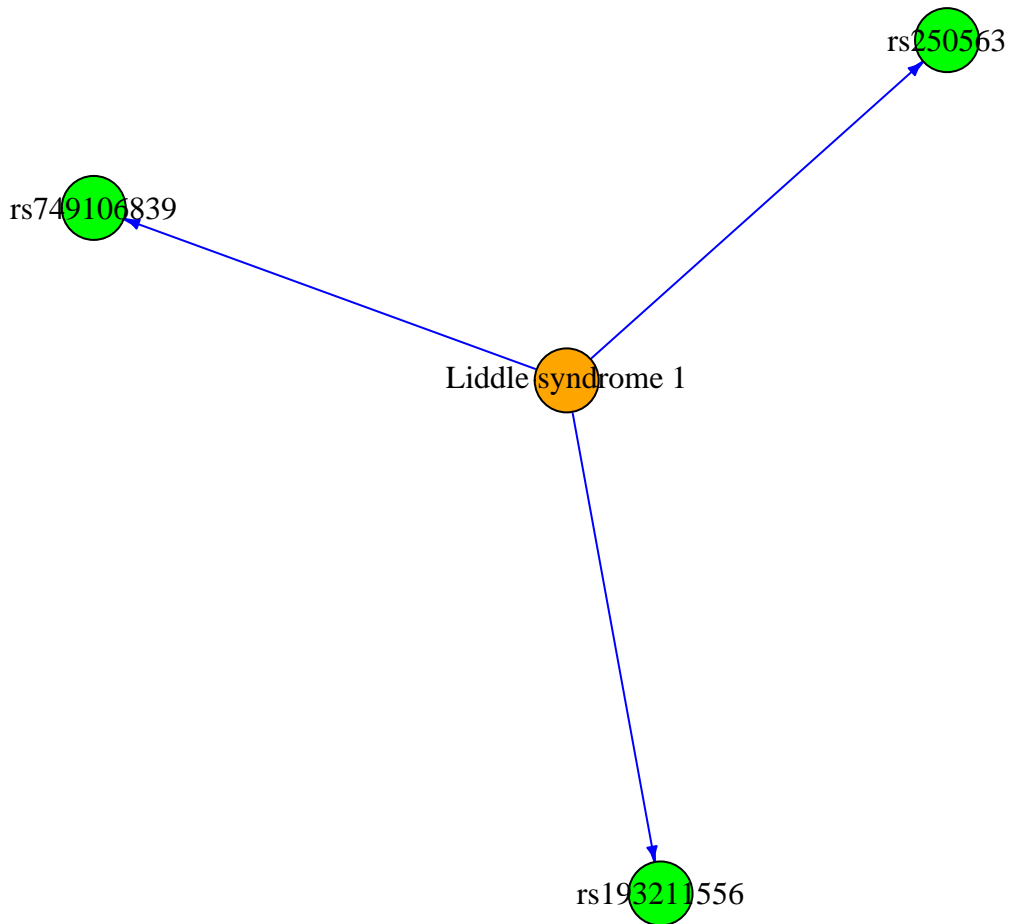

## Variant–Disease Network (Li–Fraumeni syndrome)

rs2287499

Li–Fraumeni syndrome





Variant–Disease Network (Lig4 syndrome)

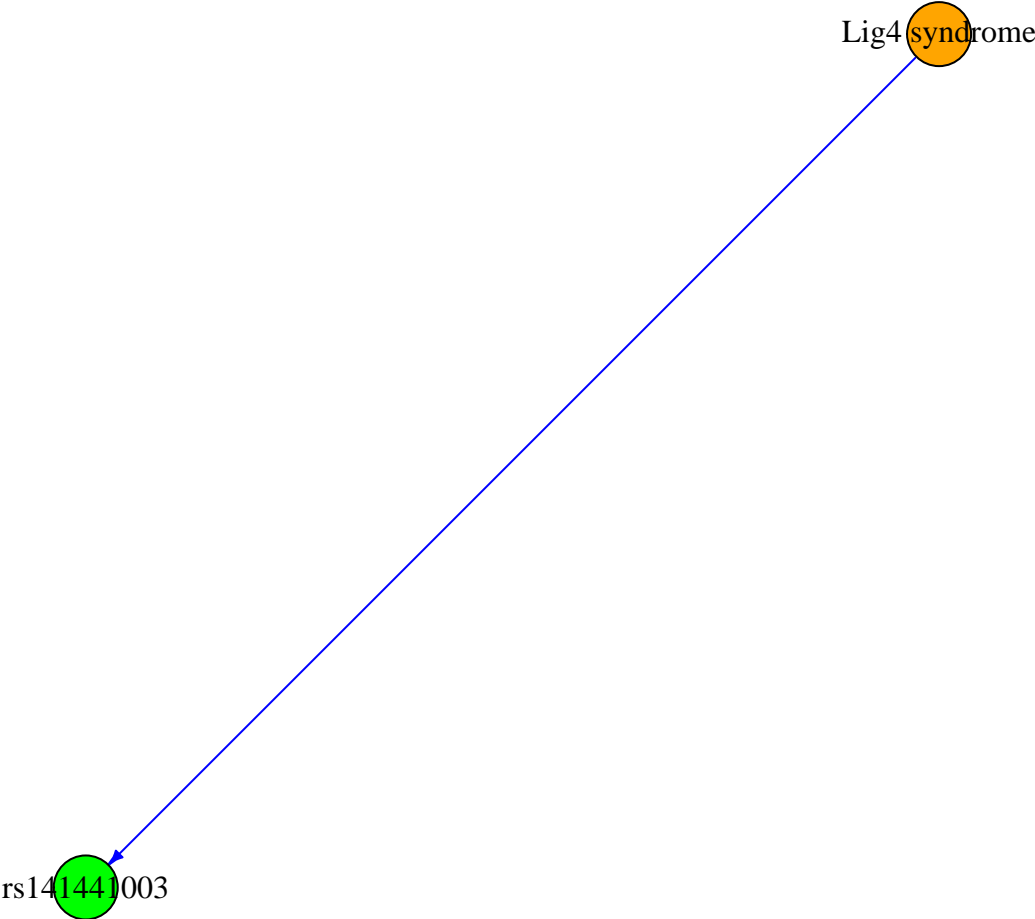

Variant–Disease Network (Limb–Girdle Muscular Dystrophy)

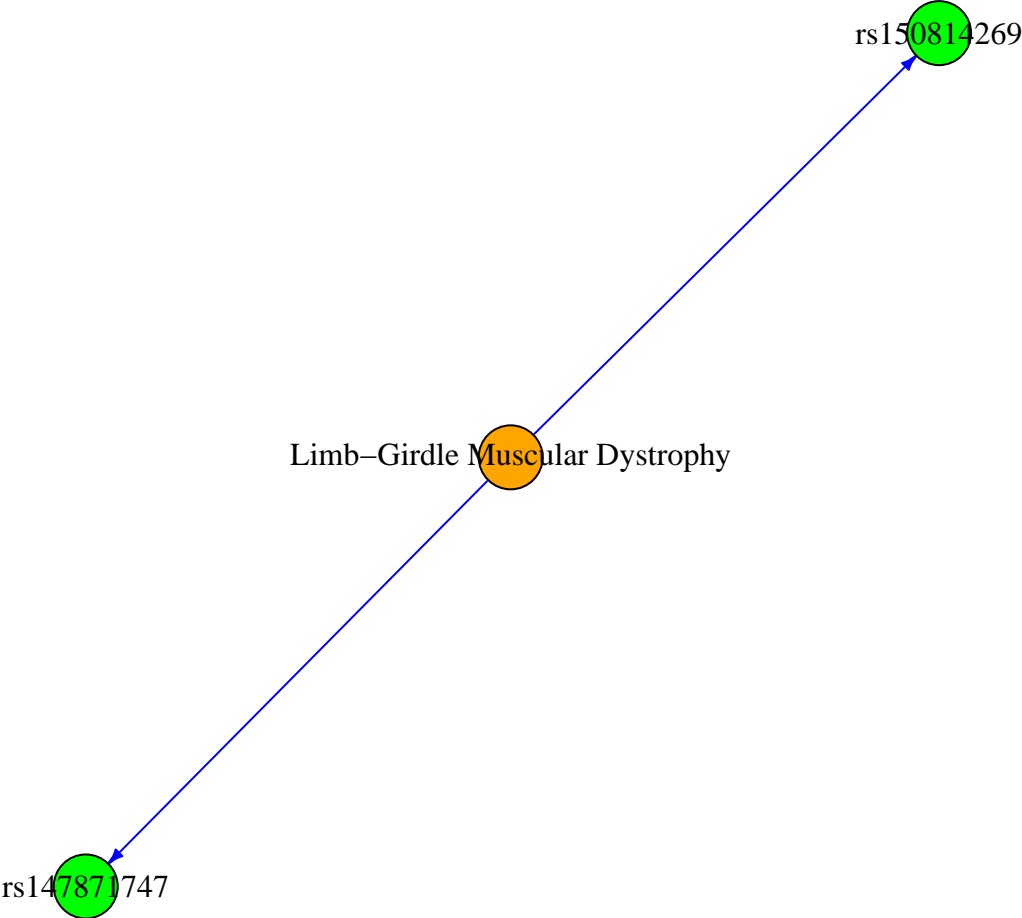

# Variant-Disease Network (Limb-girdle muscular dystrophy-dystroglycanopathy)

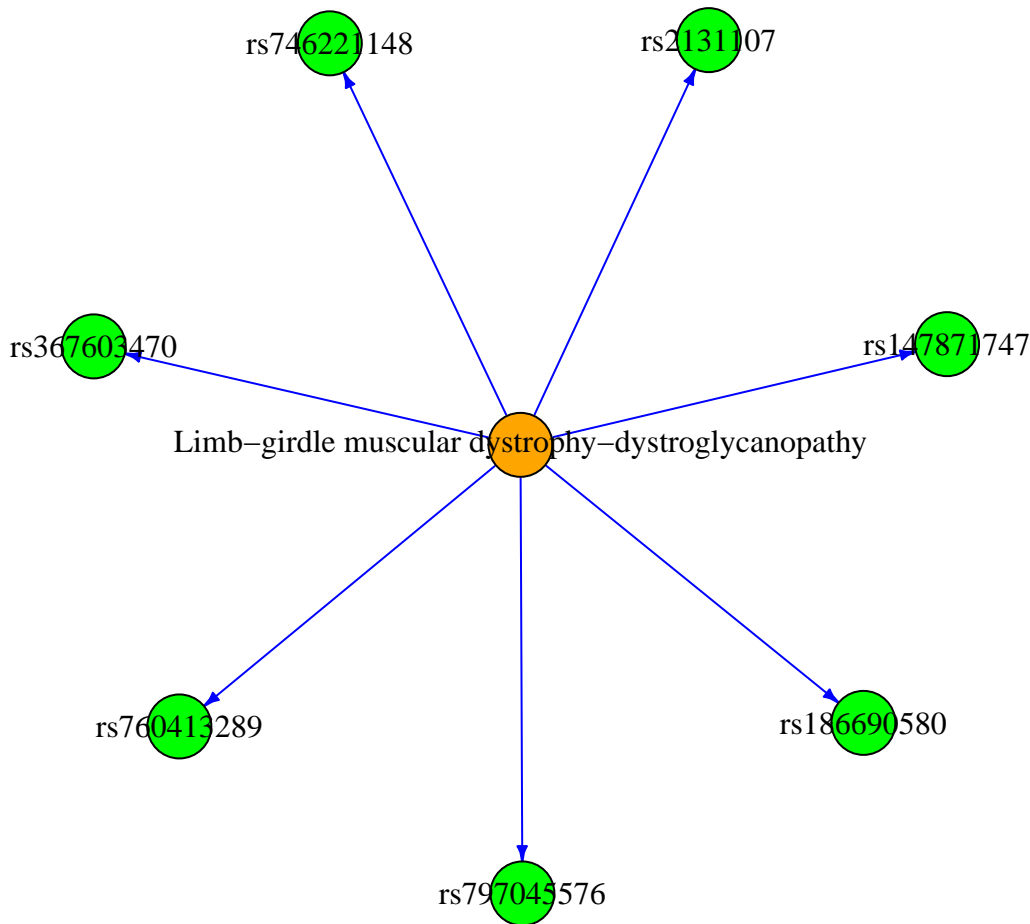

**Variant–Disease Network (Lissencephaly)**

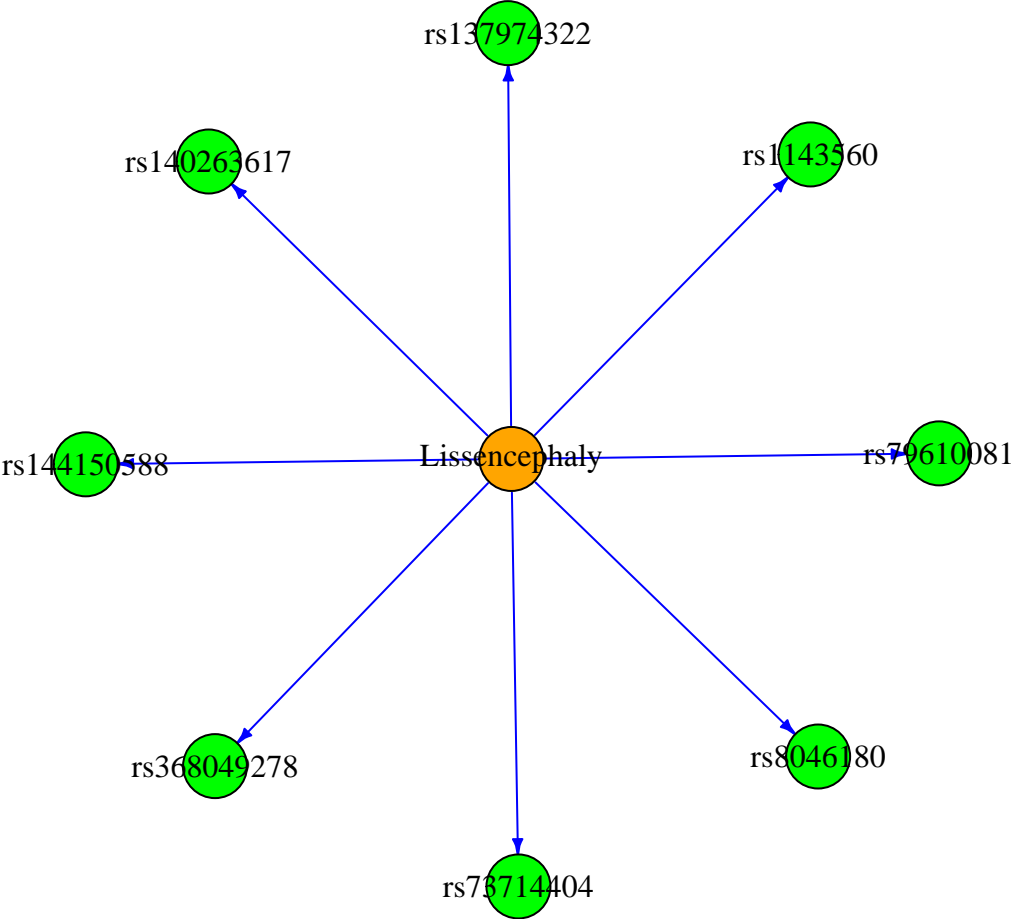

Variant–Disease Network (Lissencephaly 1)

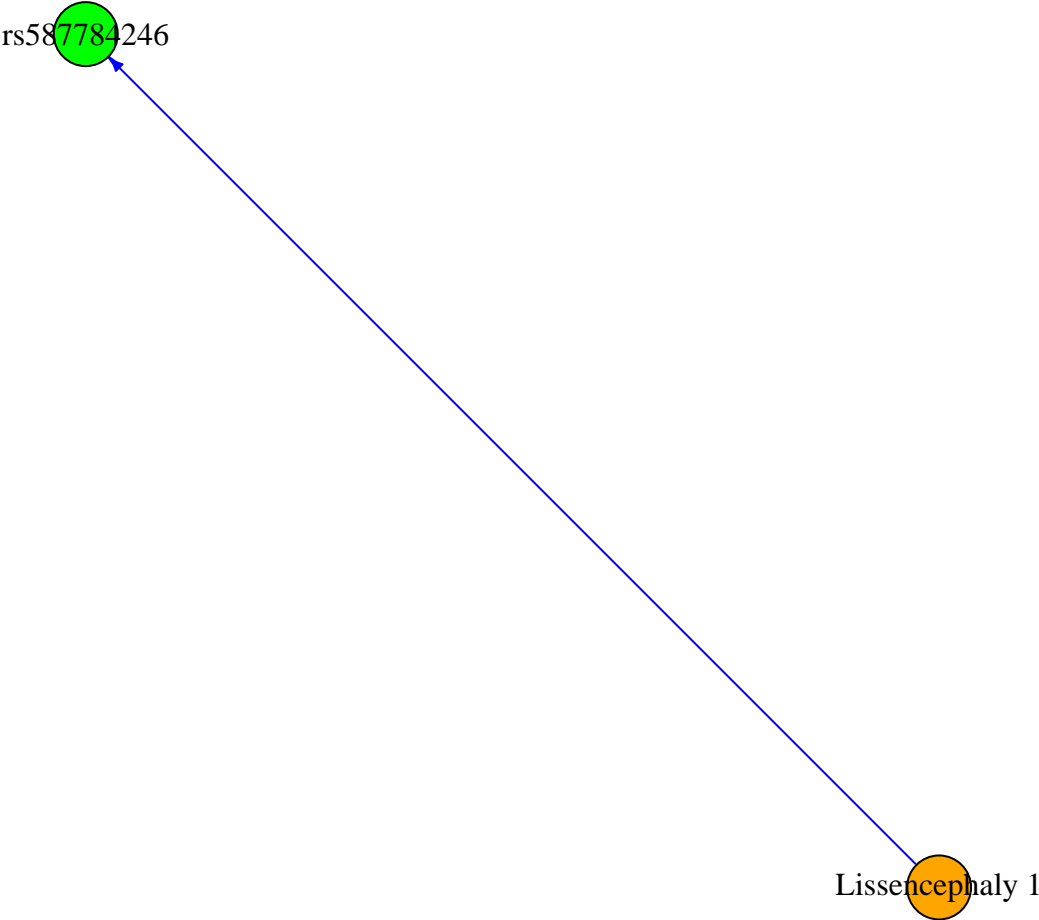

Variant–Disease Network (Lissencephaly 2)

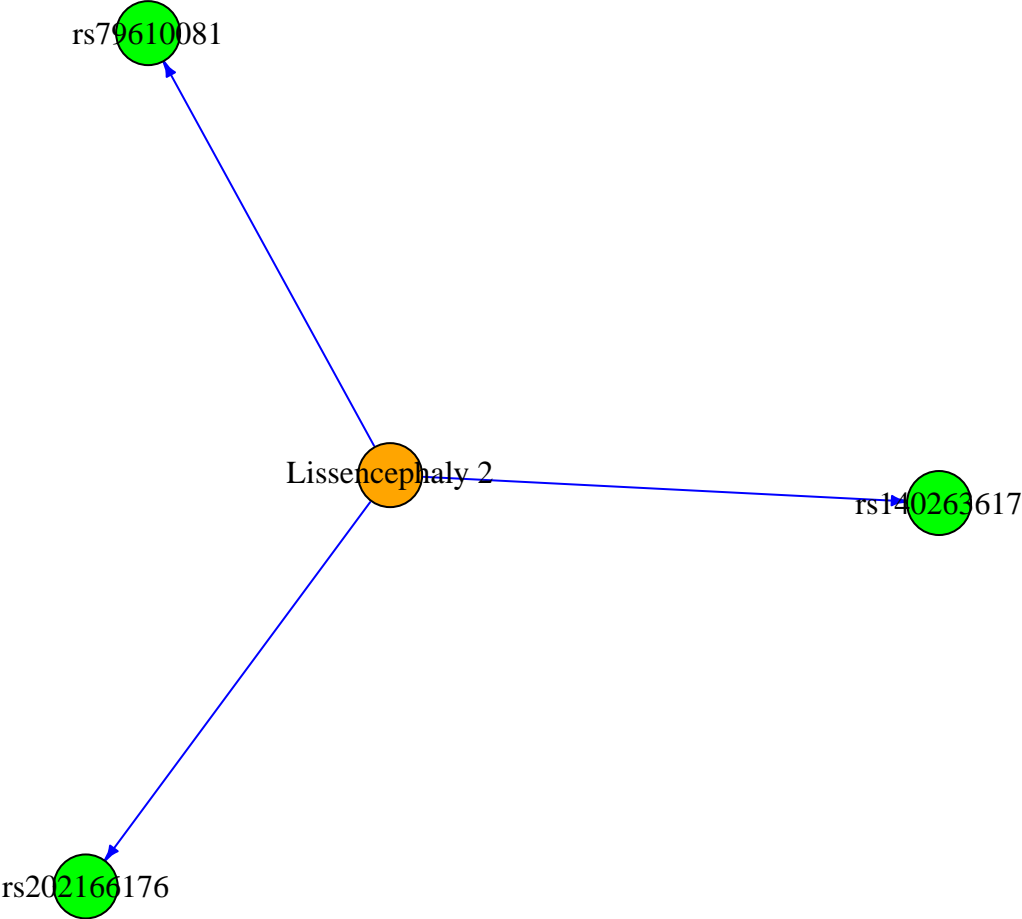

**Variant–Disease Network (Lissencephaly/Subcortical Band Heterotopia)**

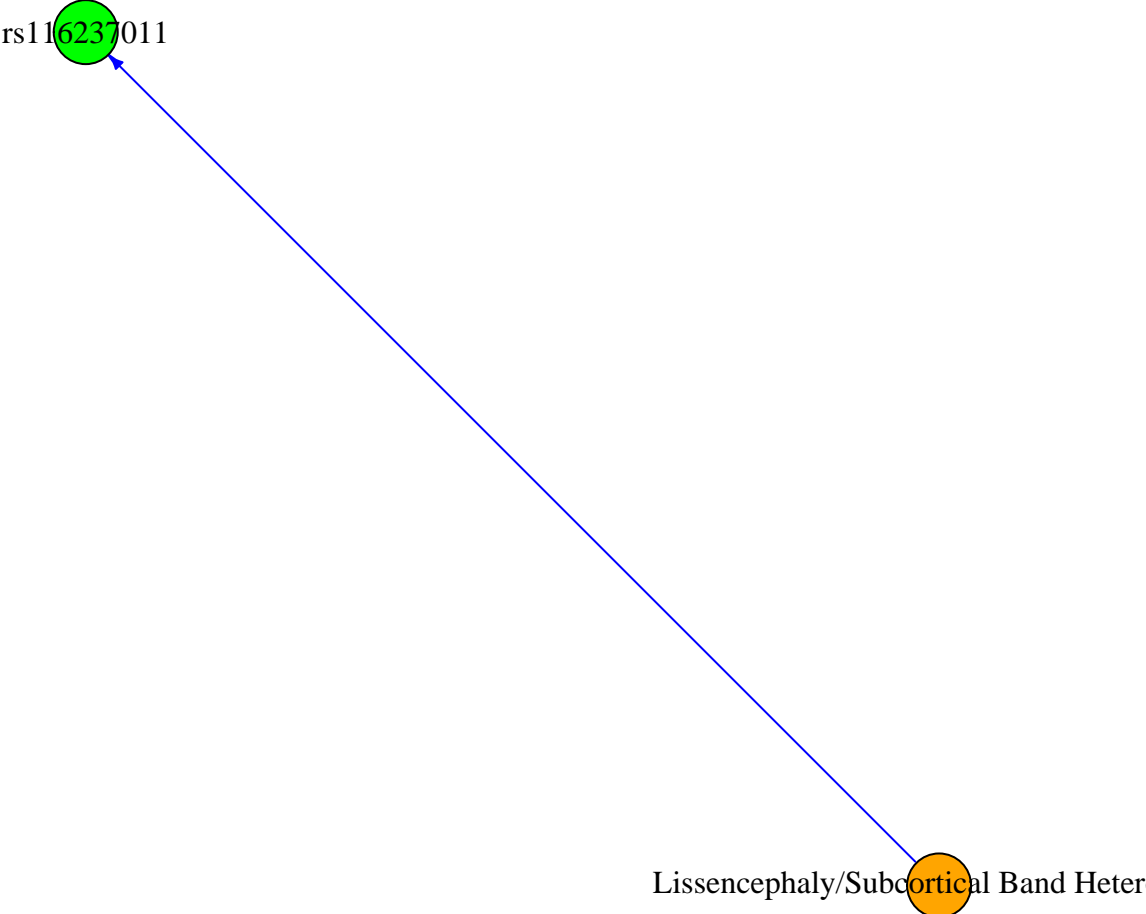

**Variant–Disease Network (Liver failure acute infantile)**

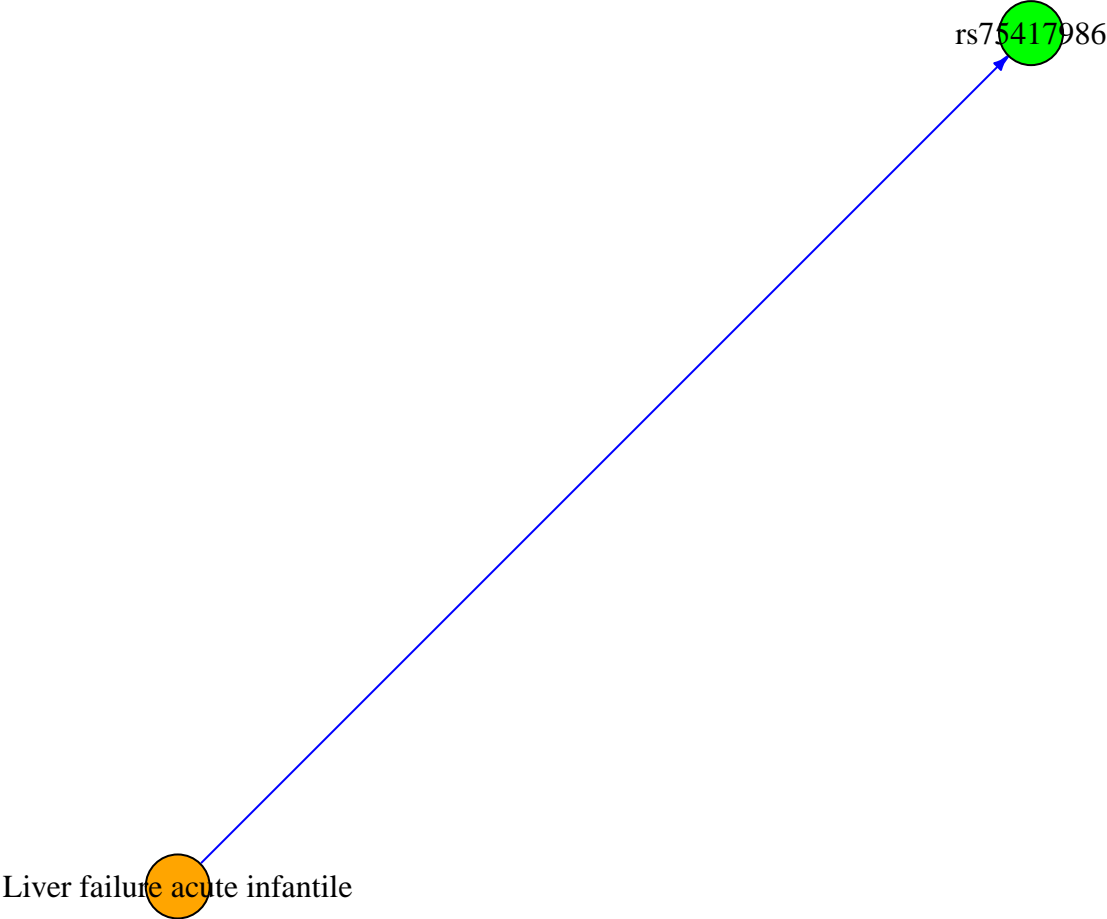



Variant–Disease Network (Localized AR Hypotrichosis)

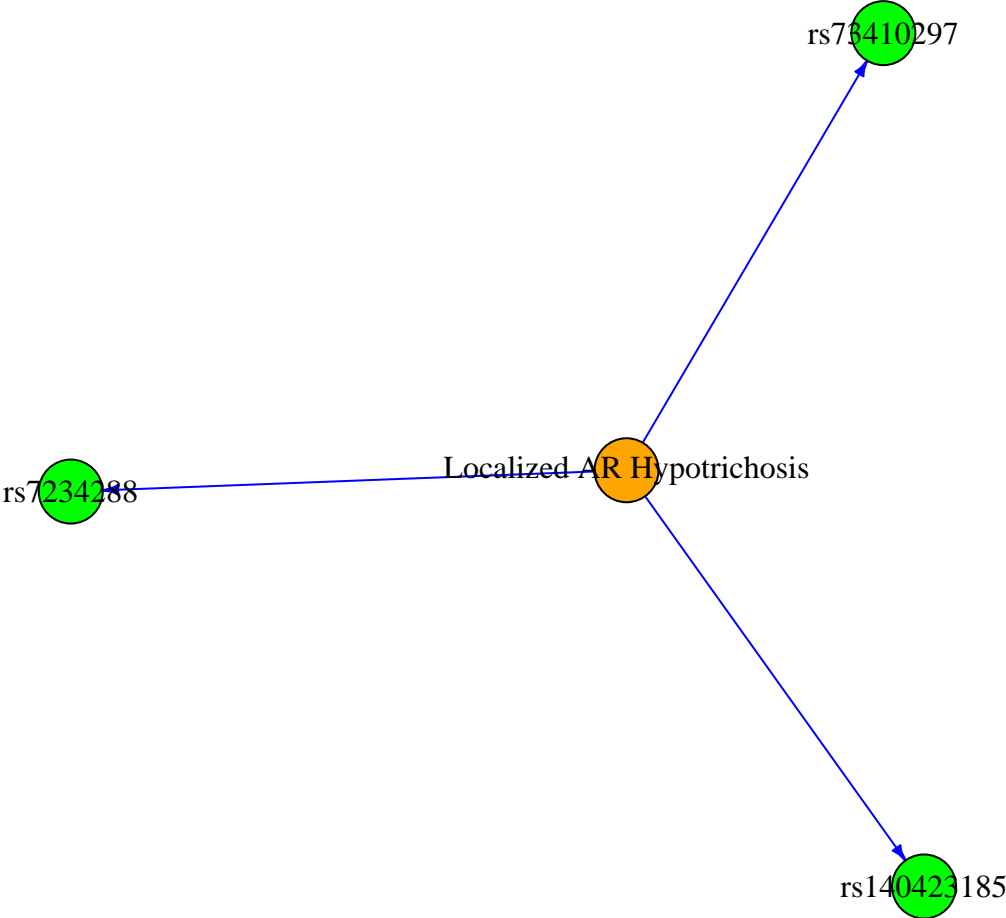

## Variant-Disease Network (Loeys-Dietz syndrome)

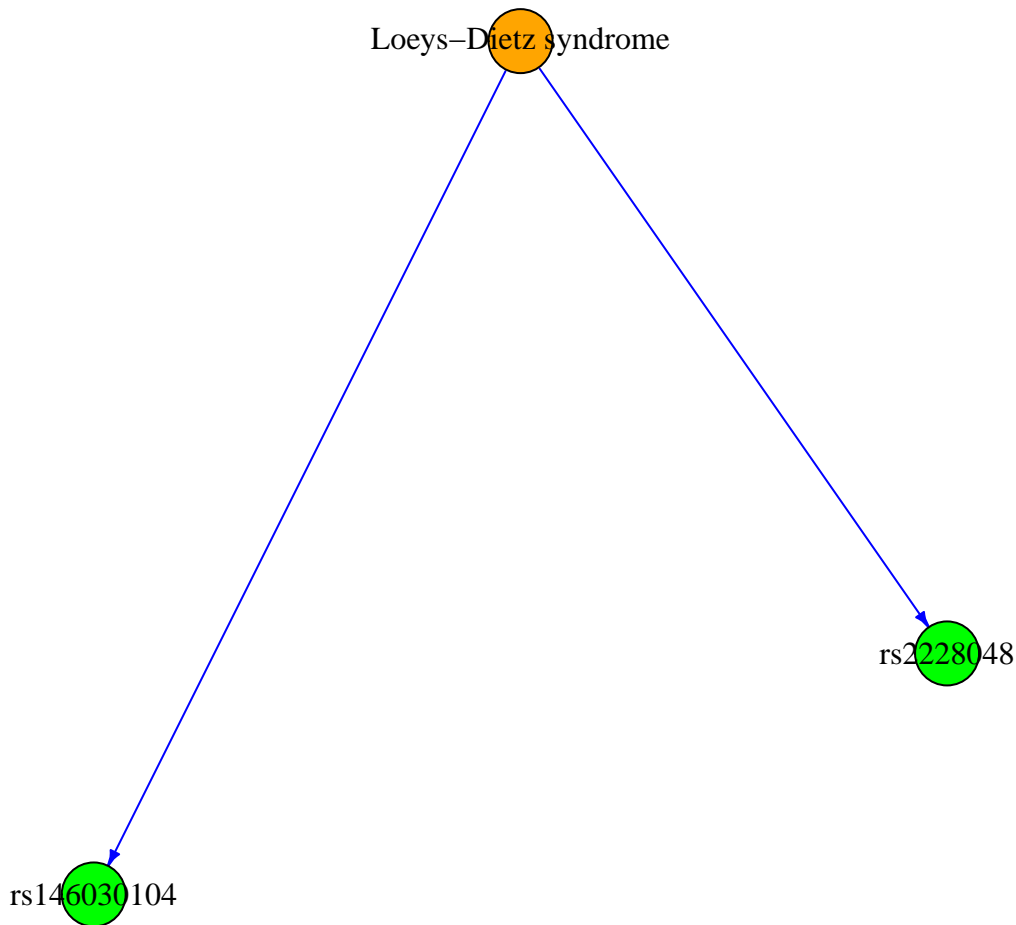

# Variant-Disease Network (Loeys-Dietz syndrome 3)

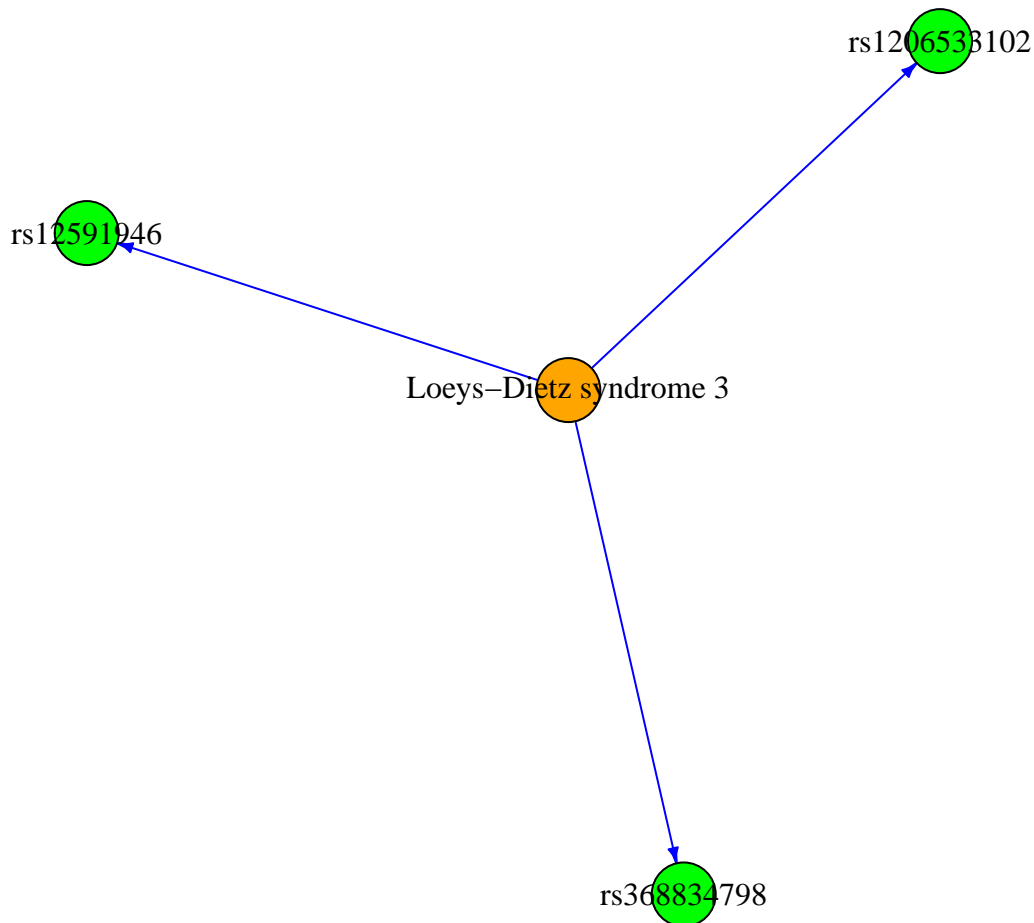

## Variant–Disease Network (Loeys–Dietz syndrome 4)

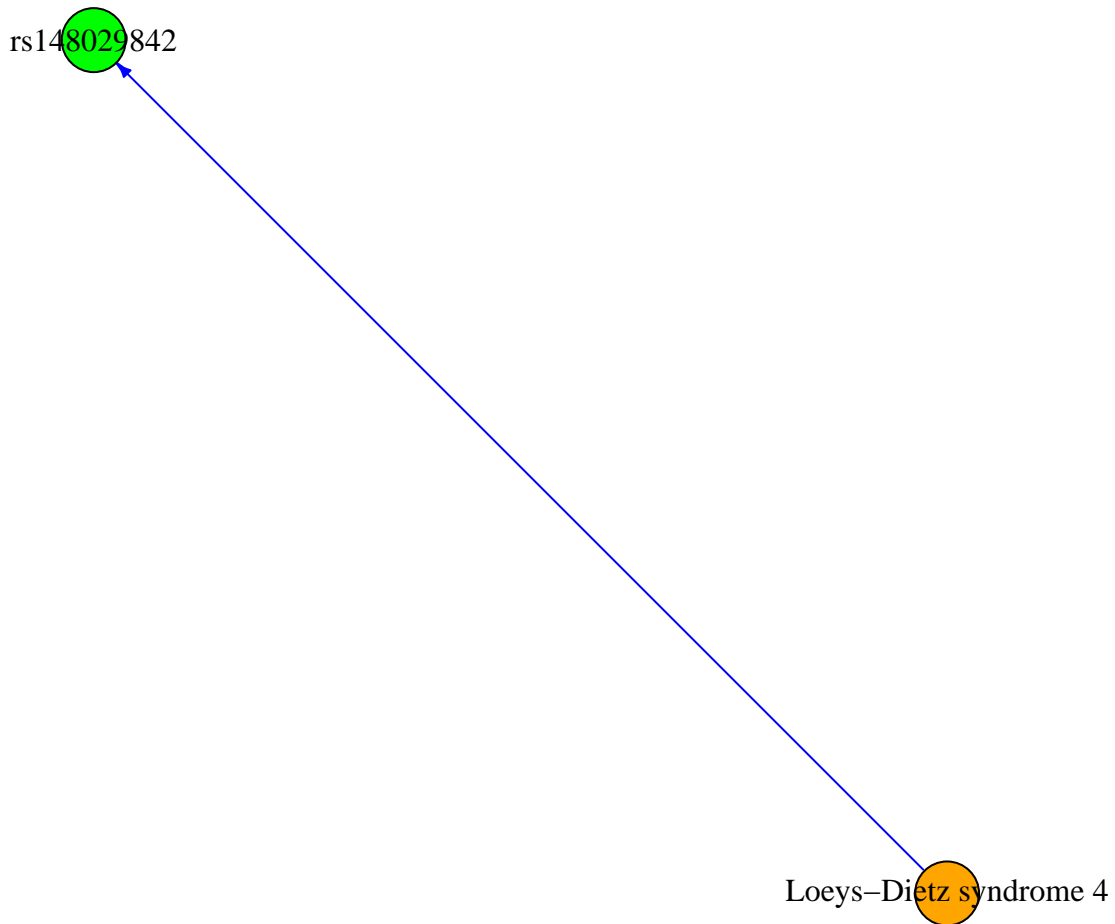

## Variant–Disease Network (Long QT syndrome)

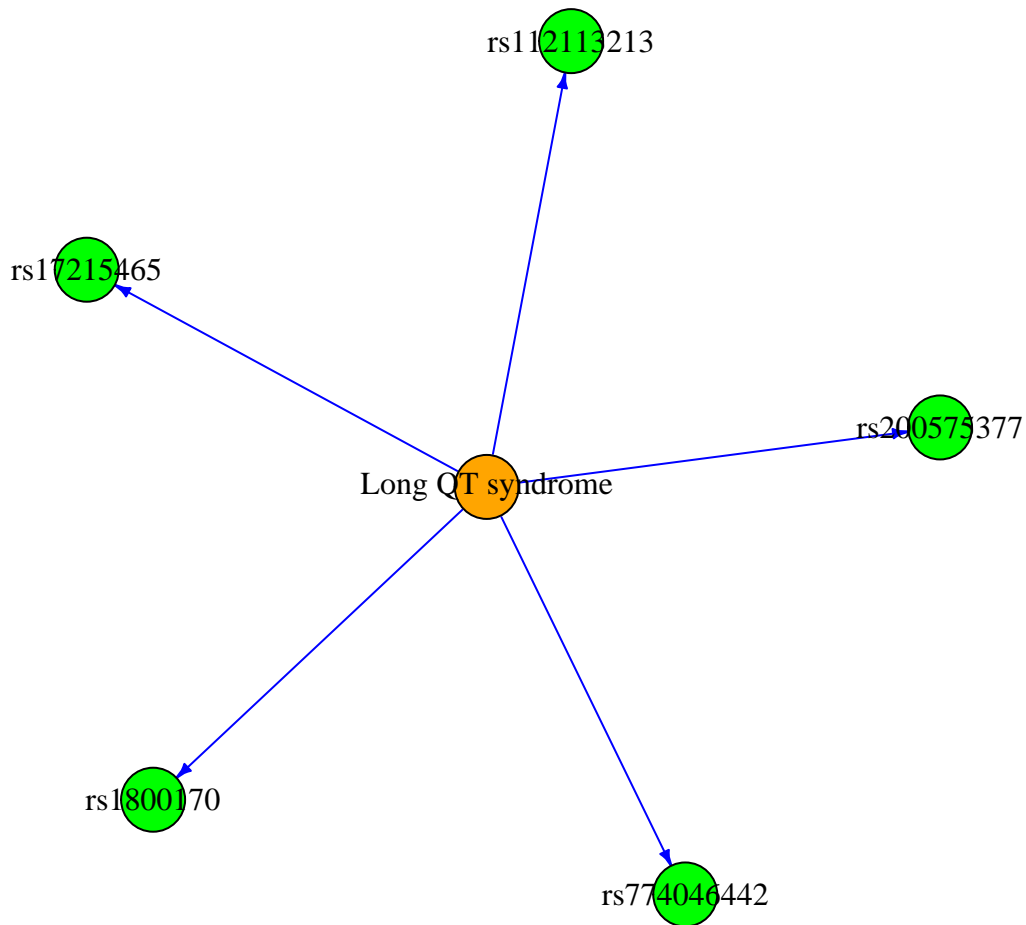

## Variant–Disease Network (Long QT syndrome 14)

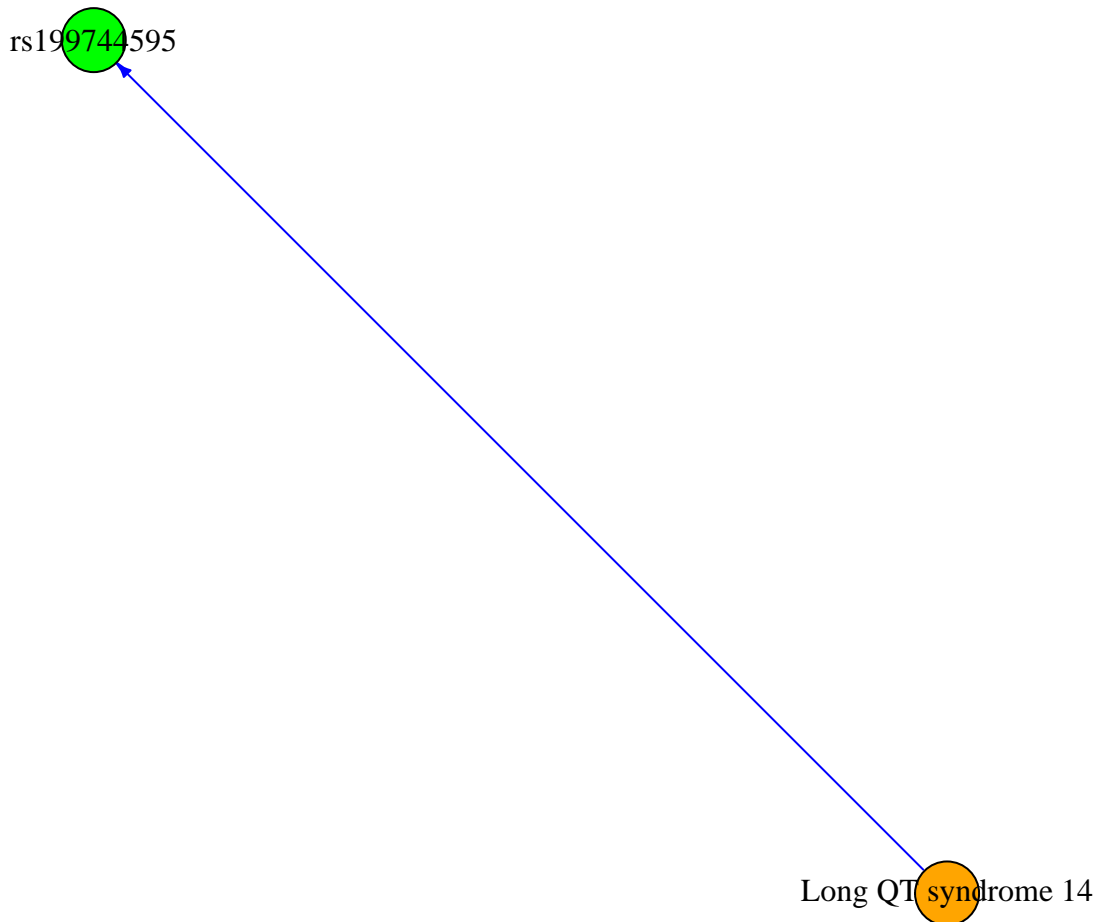

# Variant-Disease Network (Long-chain 3-hydroxyacyl-CoA dehydrogenase defi

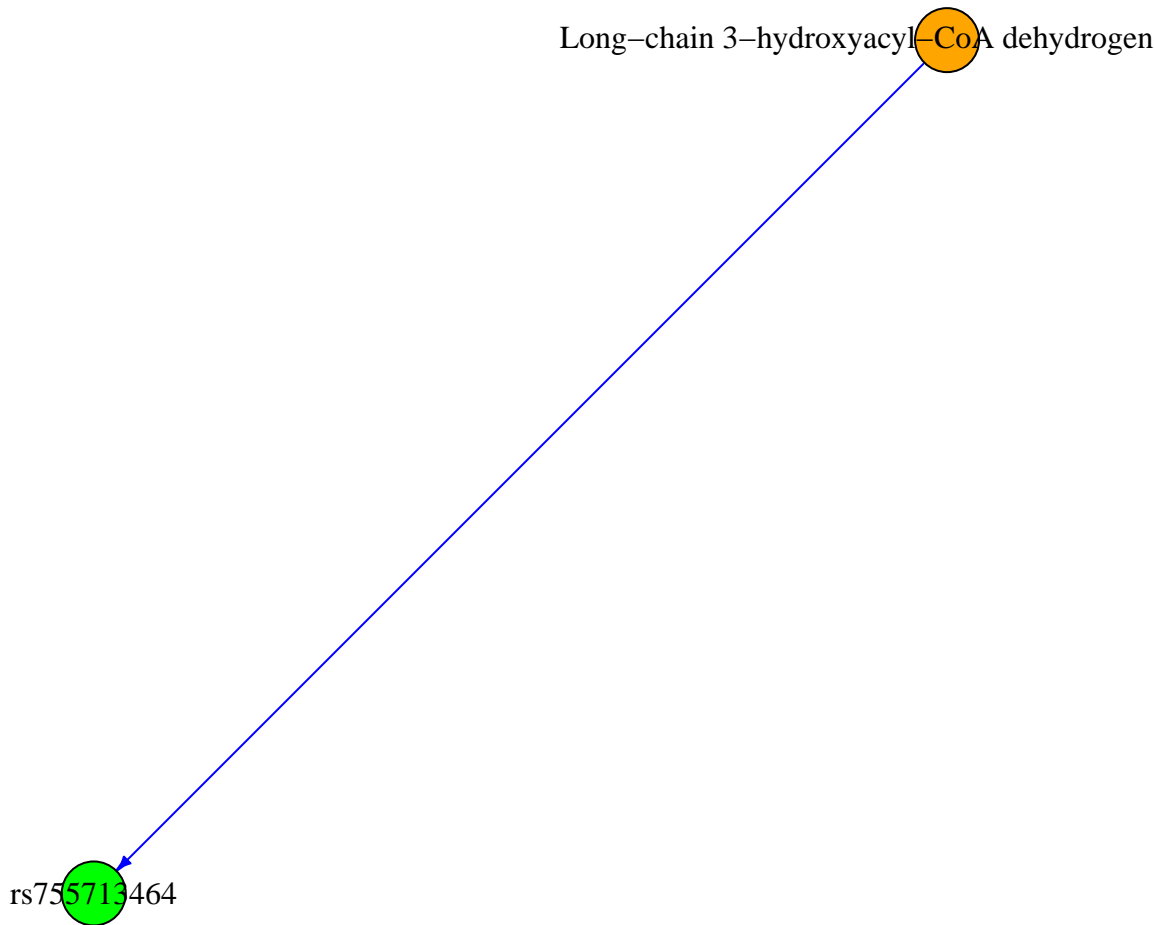

## Variant–Disease Network (Lowe syndrome)

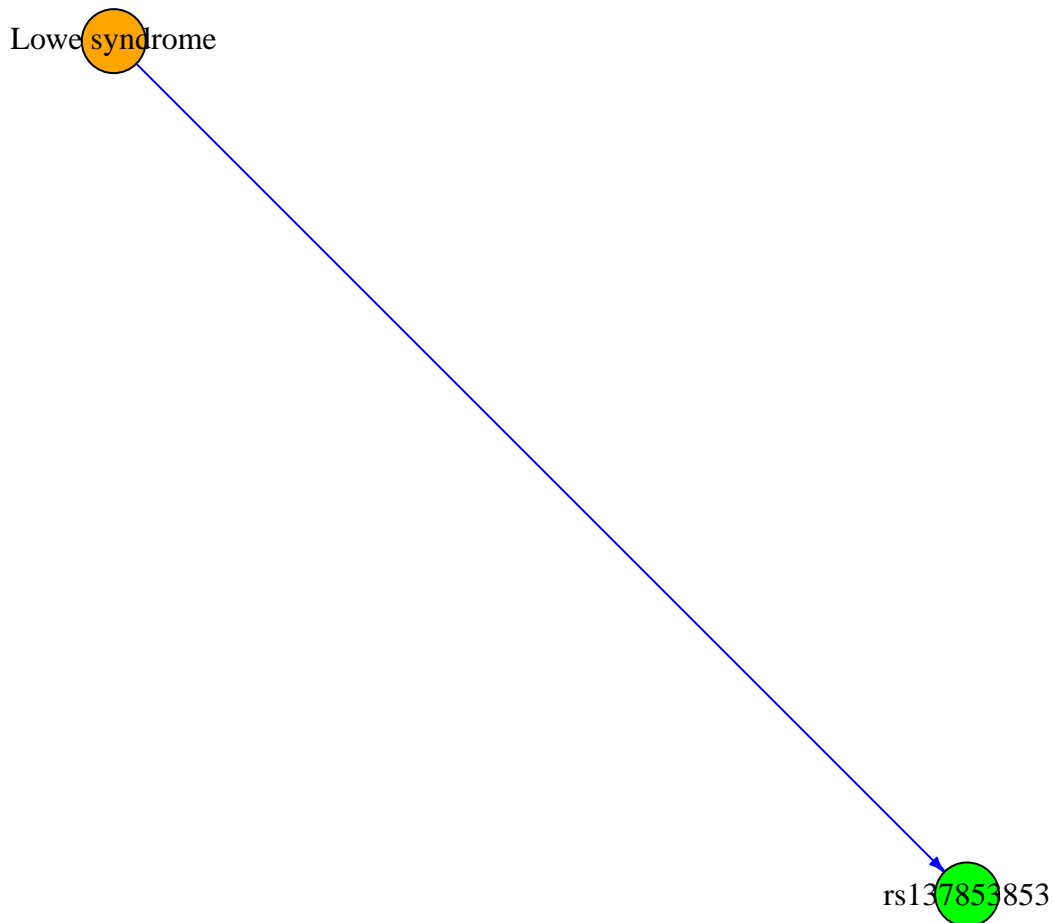



## Variant–Disease Network (Lung adenocarcinoma)

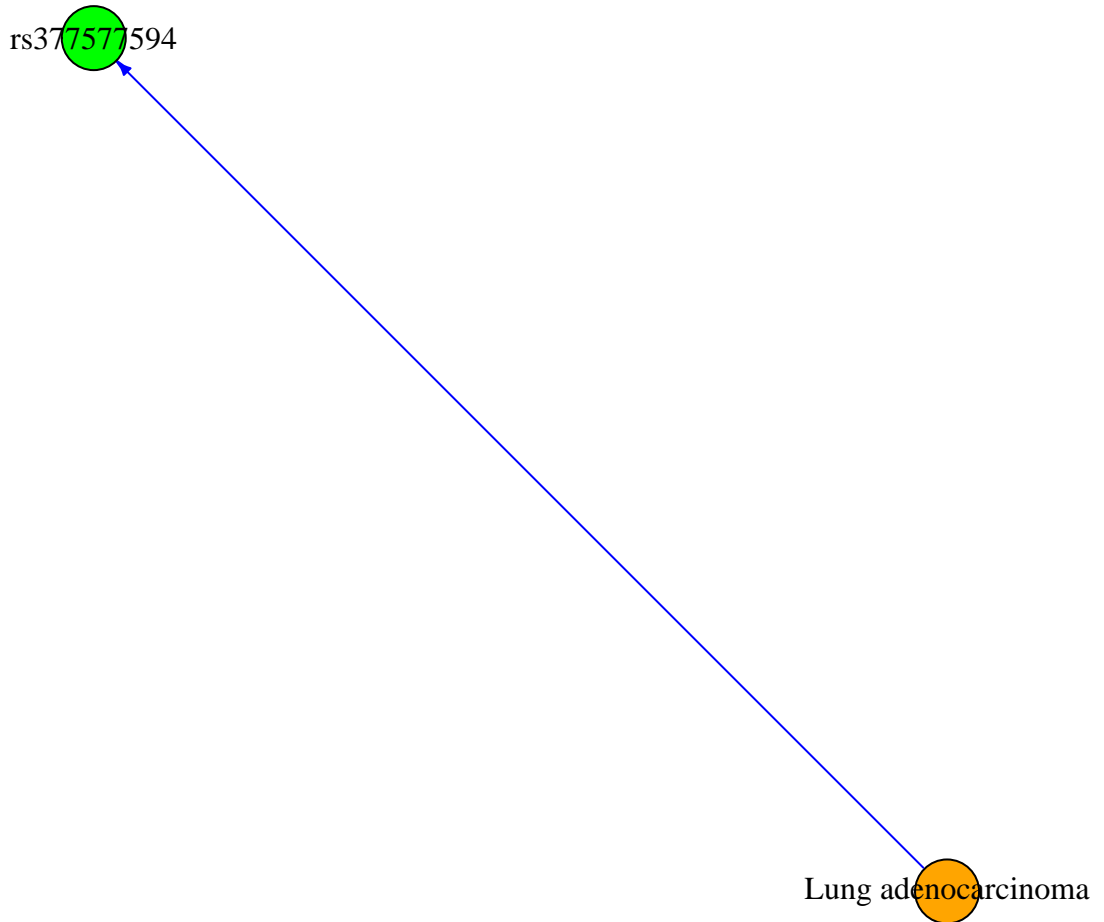

## Variant–Disease Network (Lung cancer)

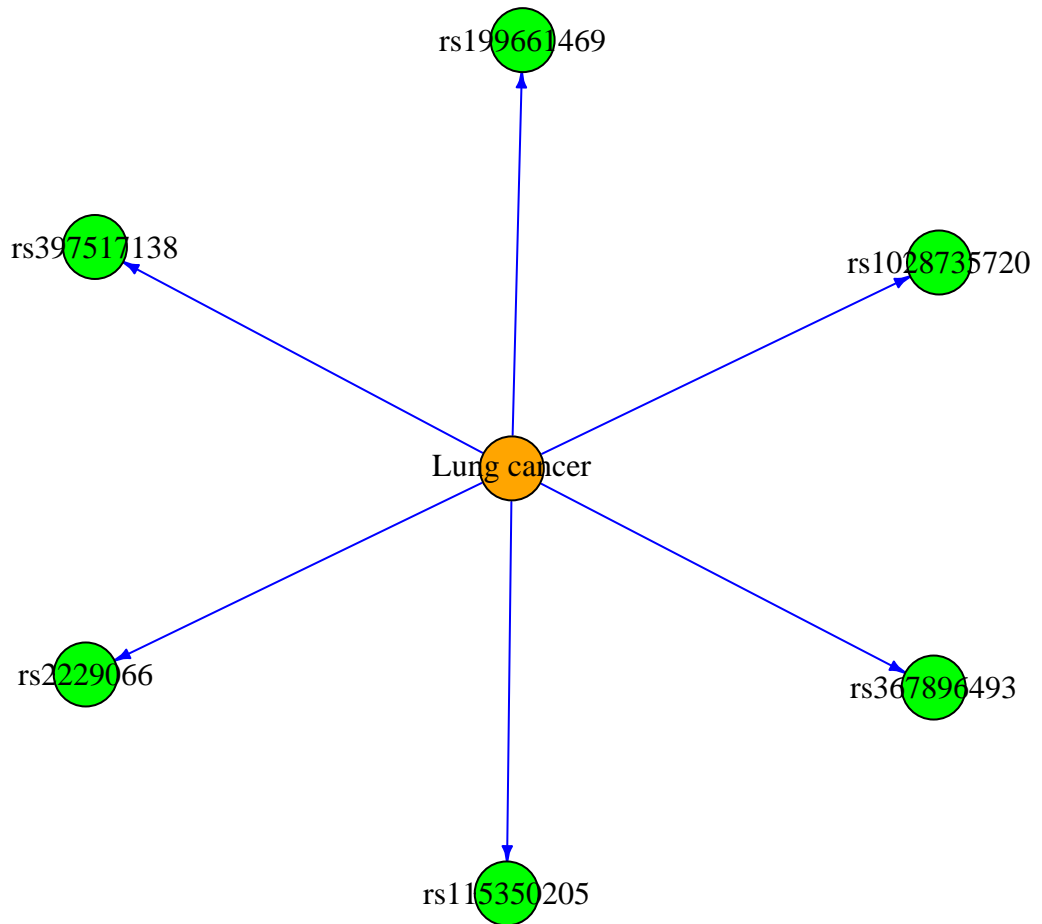

## Variant–Disease Network (Luscan–lumish syndrome)

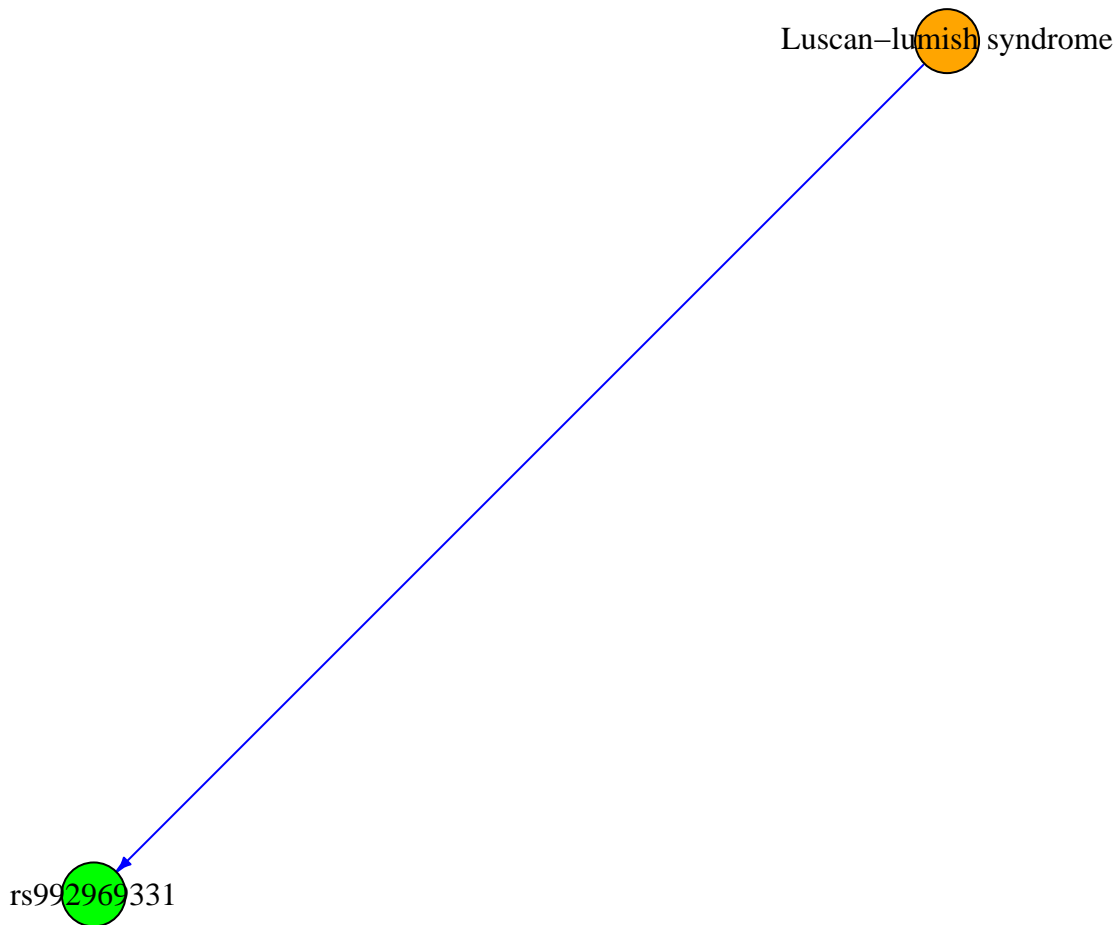

## Variant-Disease Network (Lymphangiomyomatosis)

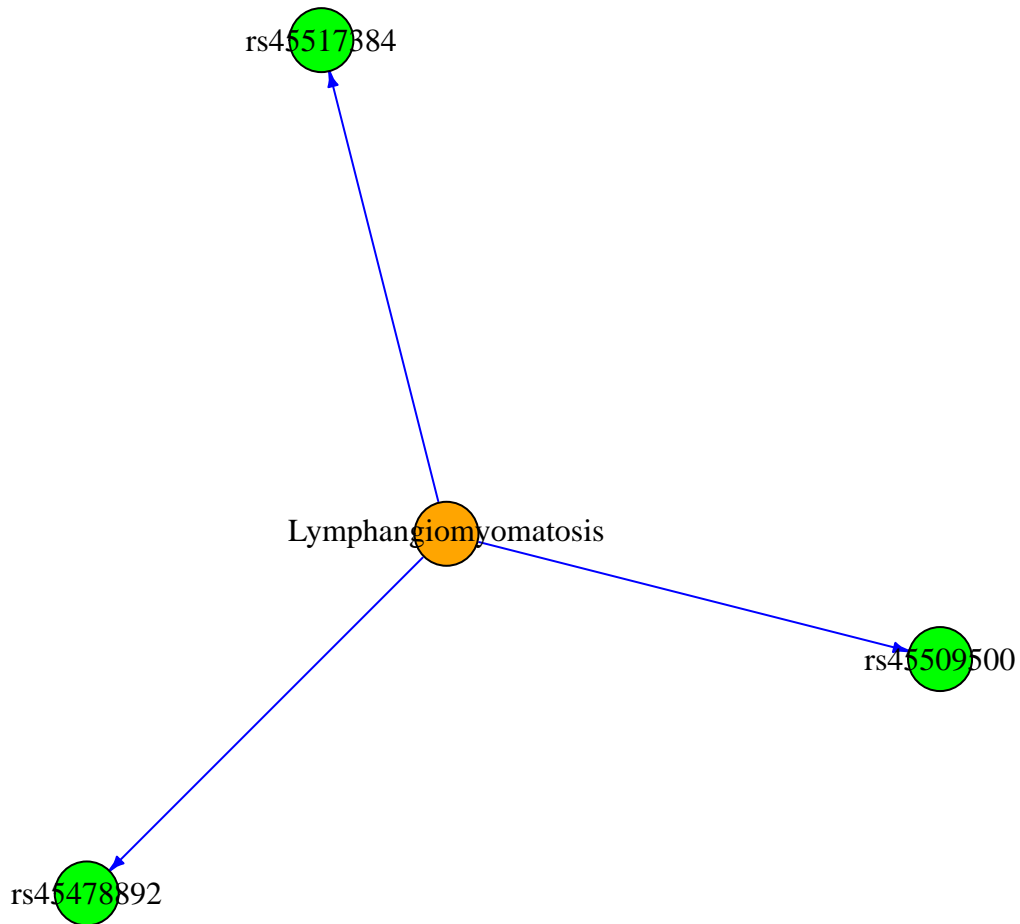

# Variant–Disease Network (Lymphoproliferative syndrome 1)

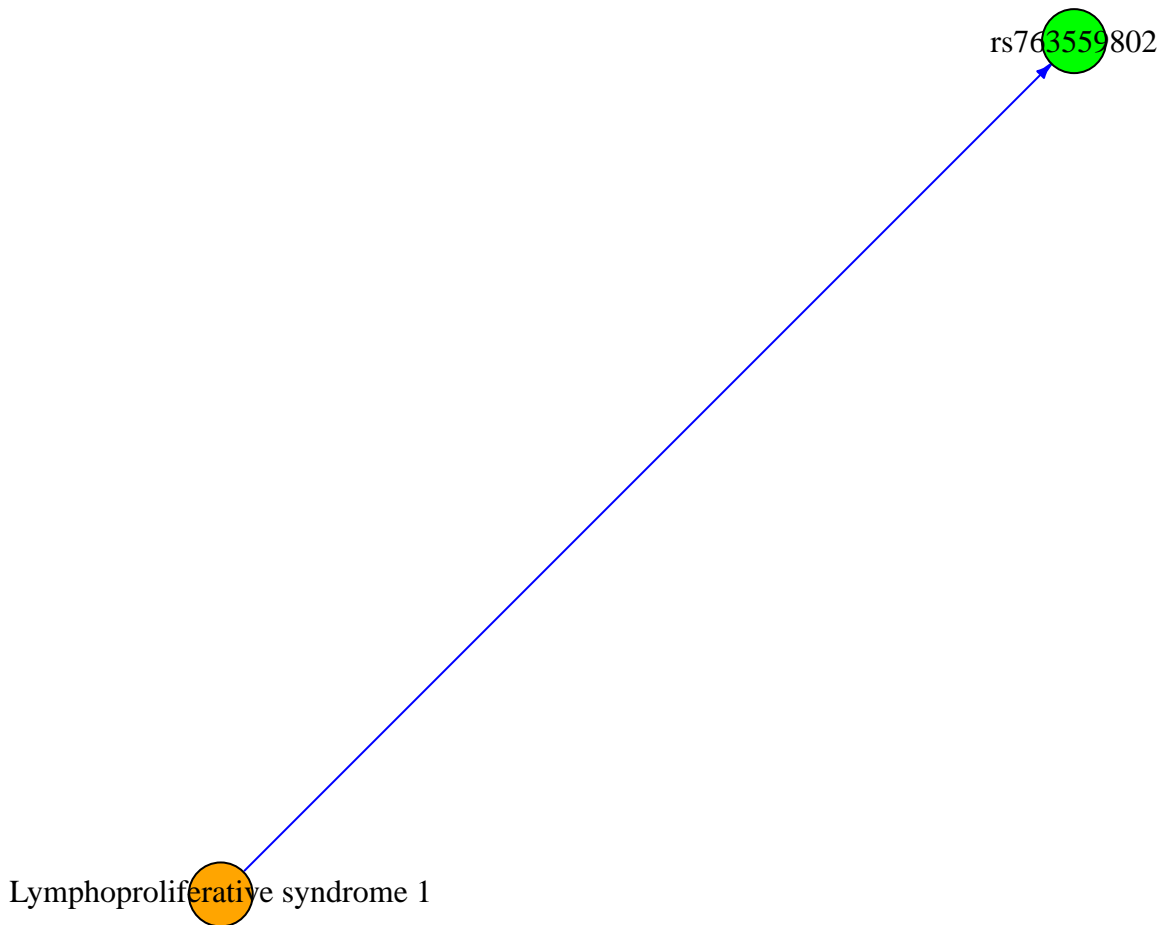

## Variant–Disease Network (Lynch syndrome)

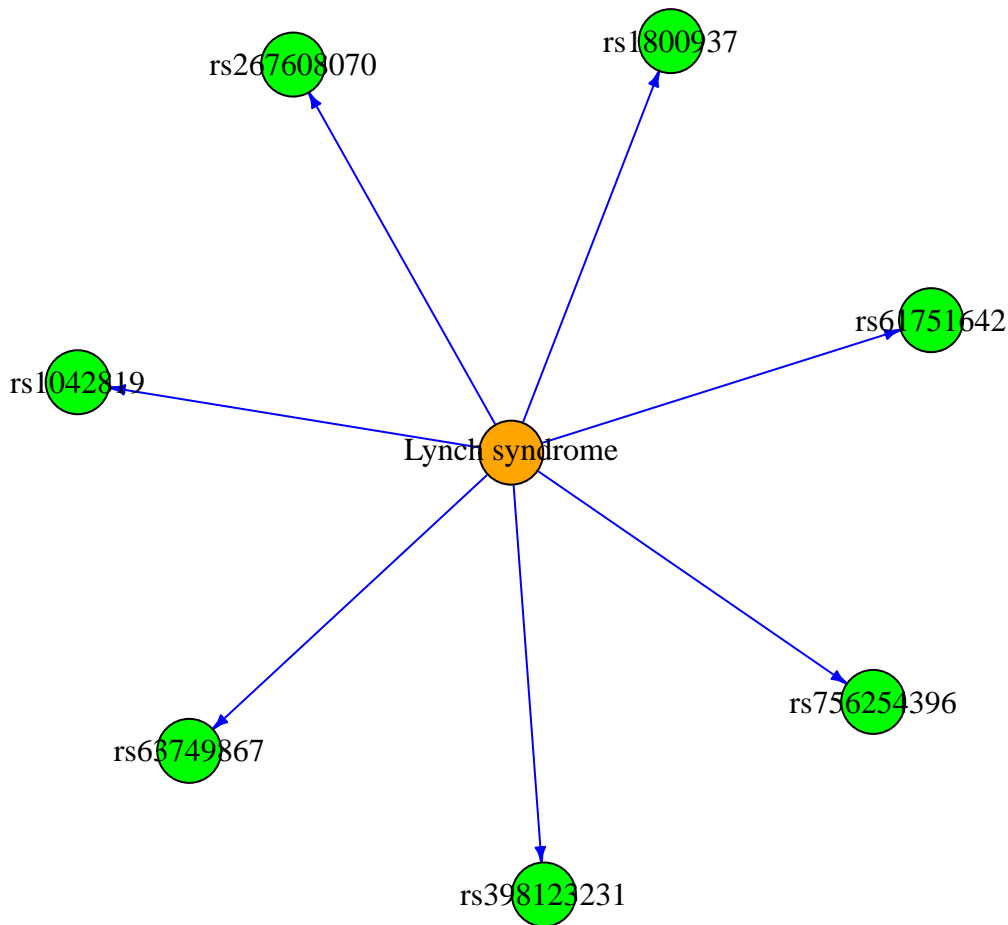

## Variant–Disease Network (Lynch syndrome II)

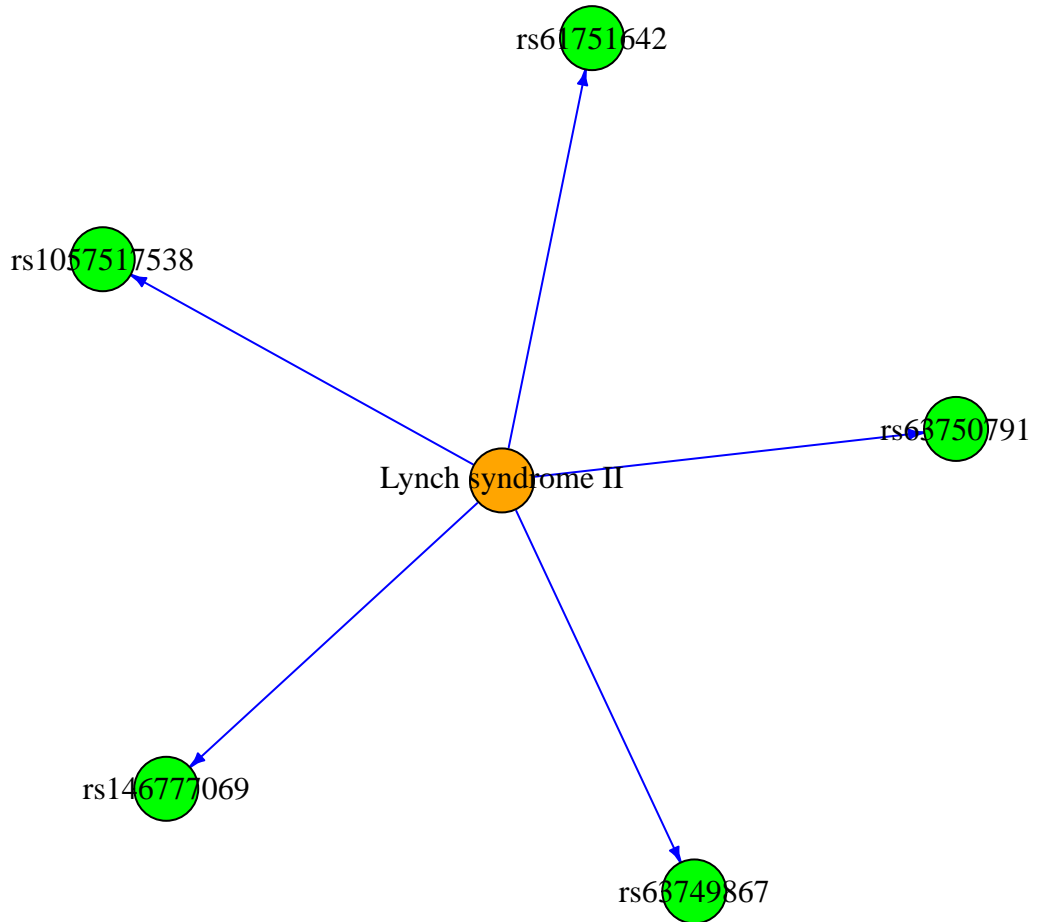

## Variant–Disease Network (Lysinuric protein intolerance)

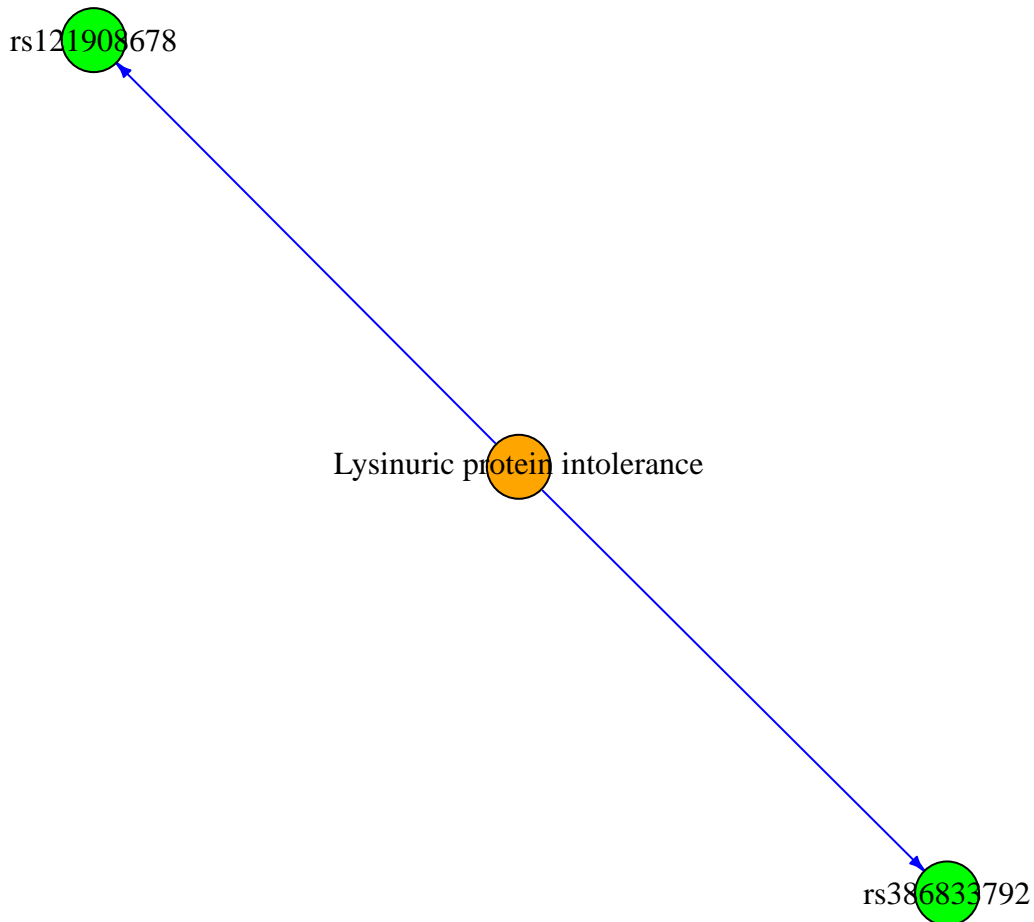



## Variant-Disease Network (Macroglossia)

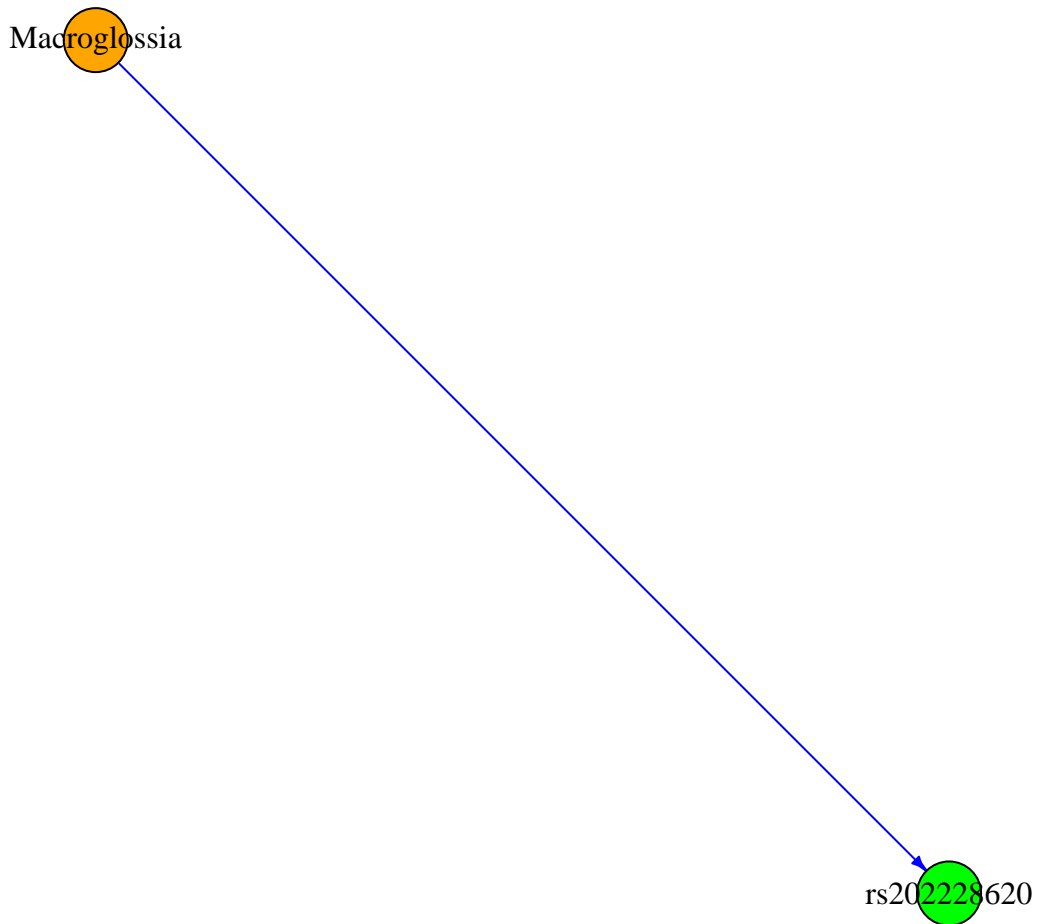

## Variant–Disease Network (Macular degeneration)

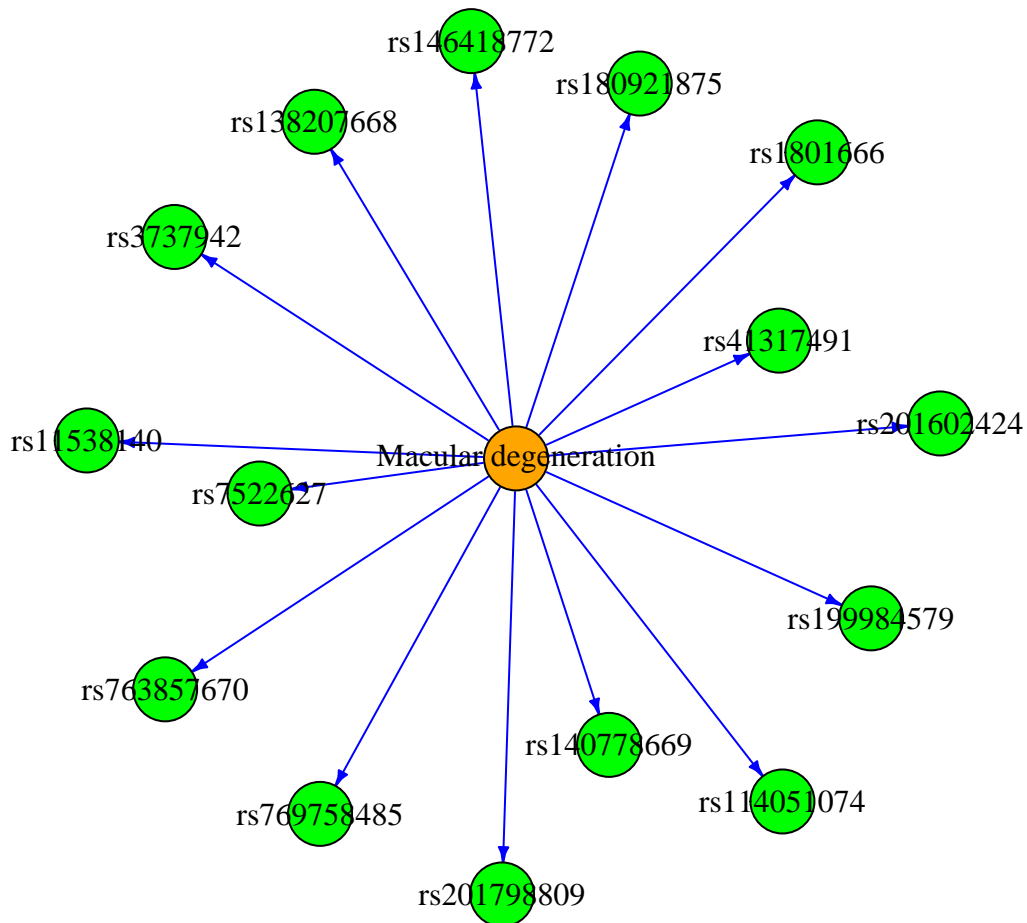

## Variant–Disease Network (Macular dystrophy)

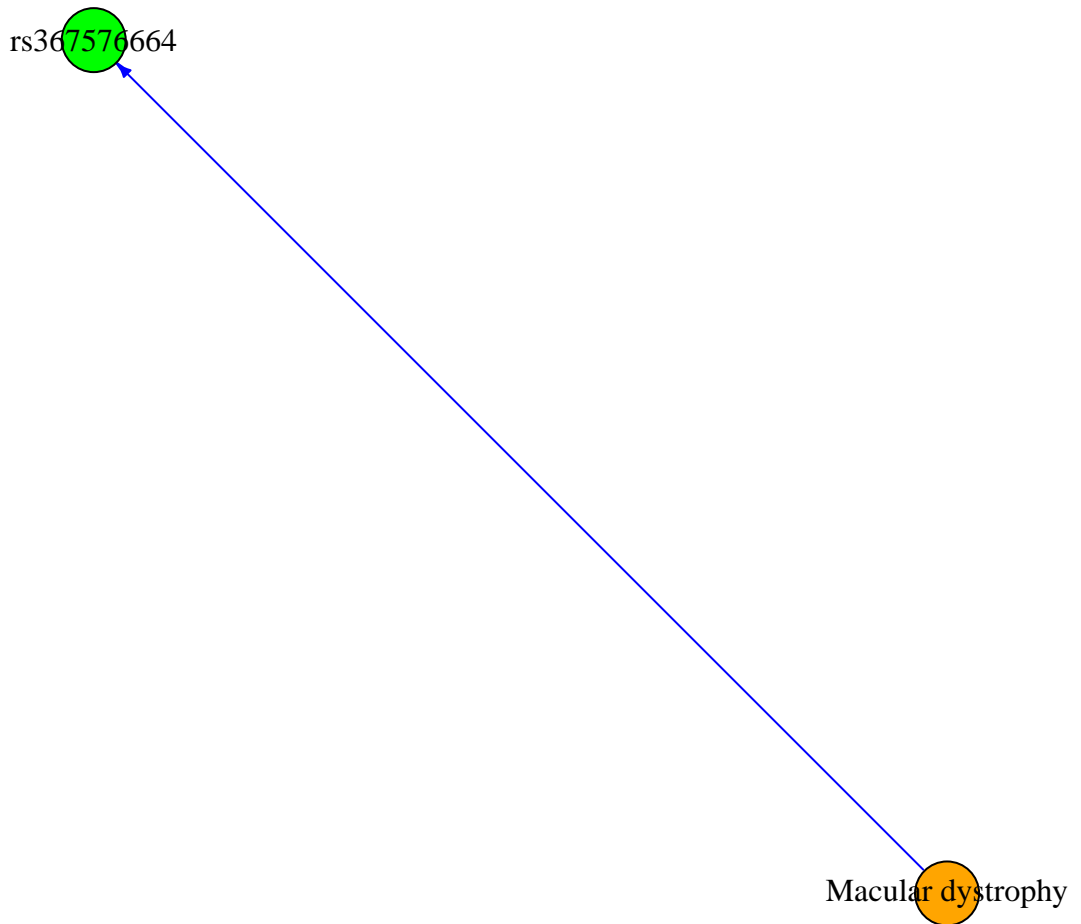

## Variant–Disease Network (Majeed syndrome)

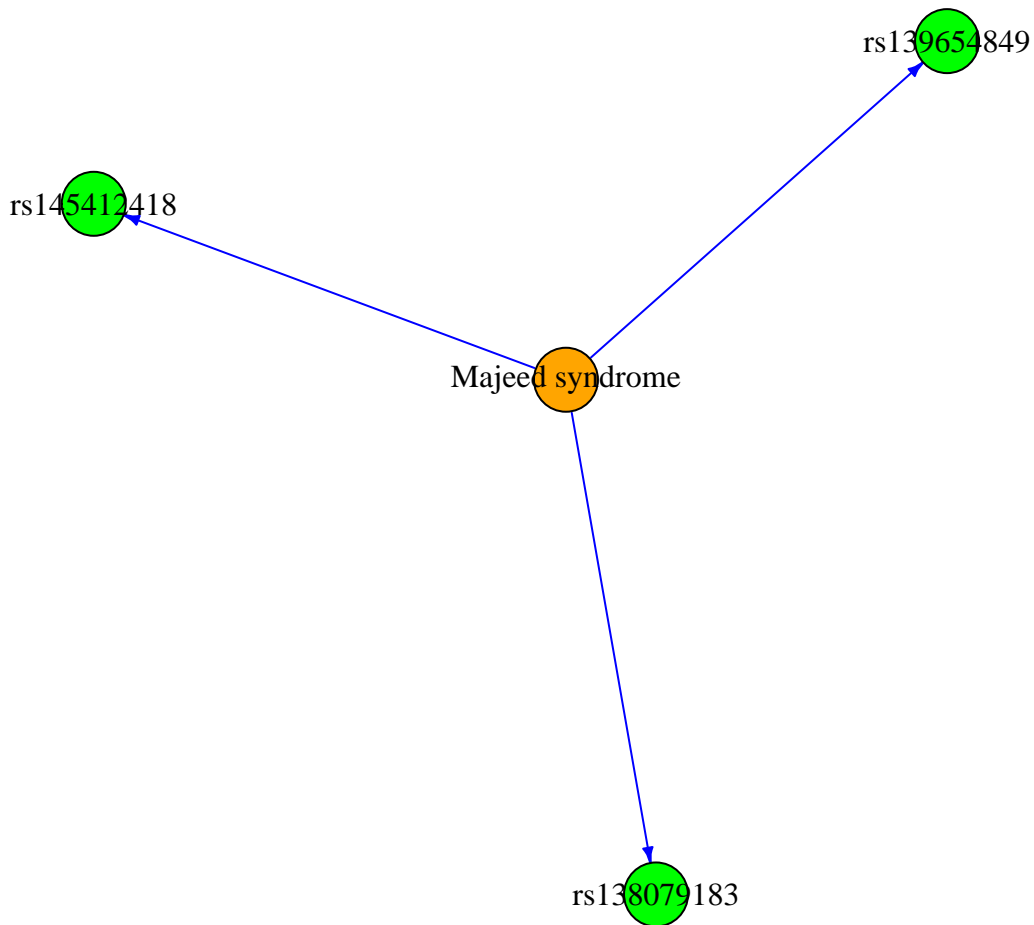

# Variant–Disease Network (Malignant tumor of prostate)

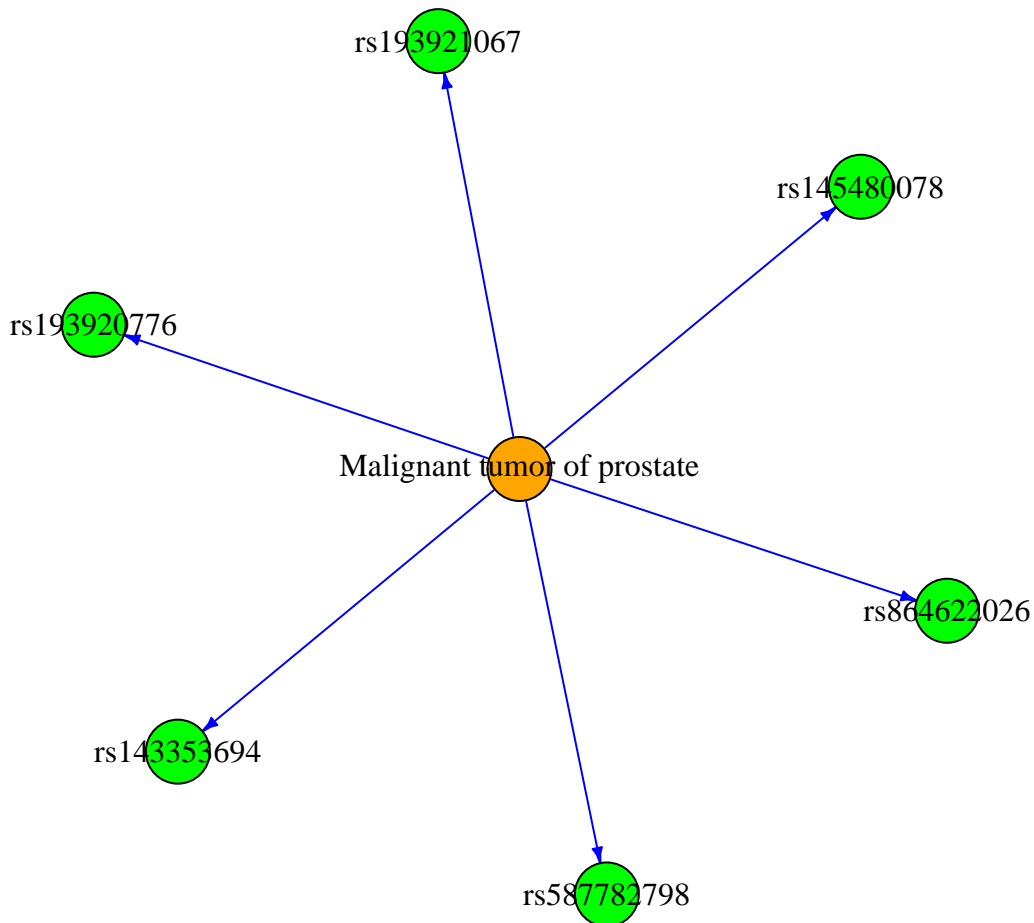

## Variant–Disease Network (Mandibular prognathia)

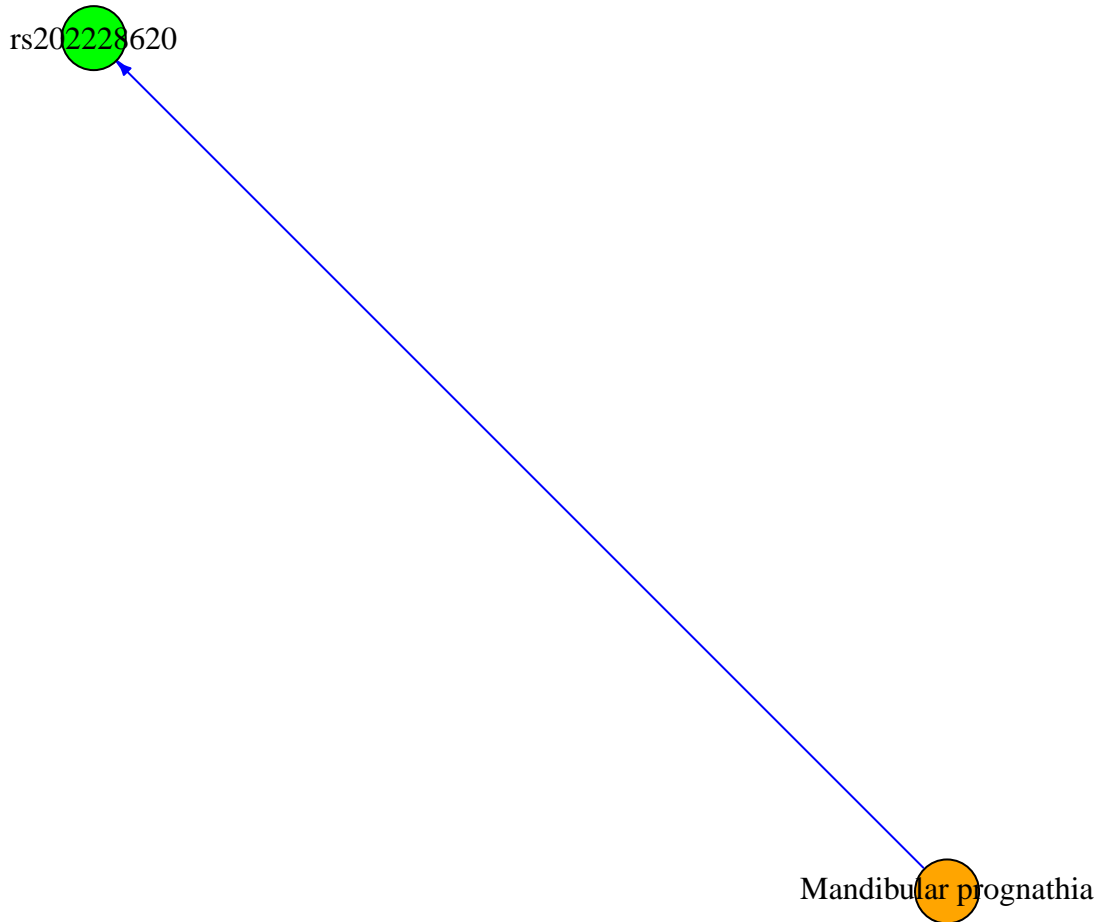

# Variant–Disease Network (Maple syrup urine disease)

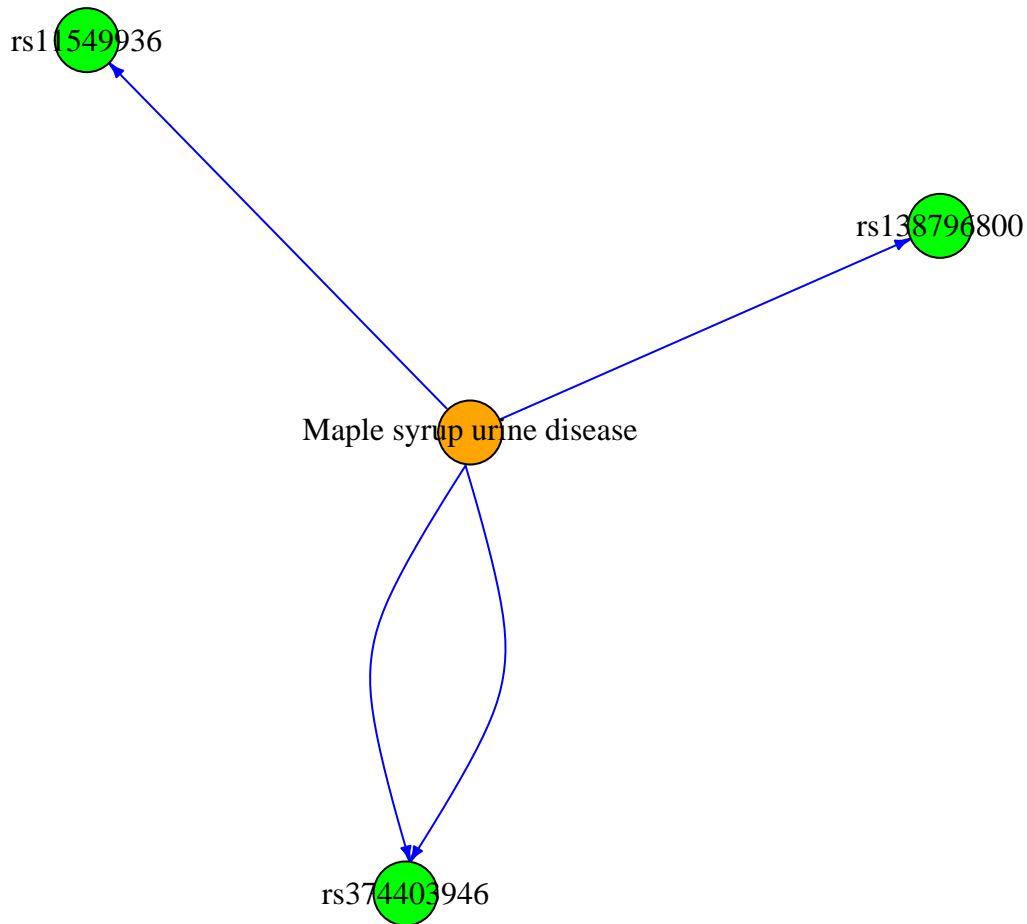

Variant–Disease Network (MAPT–Related Spectrum Disorders)

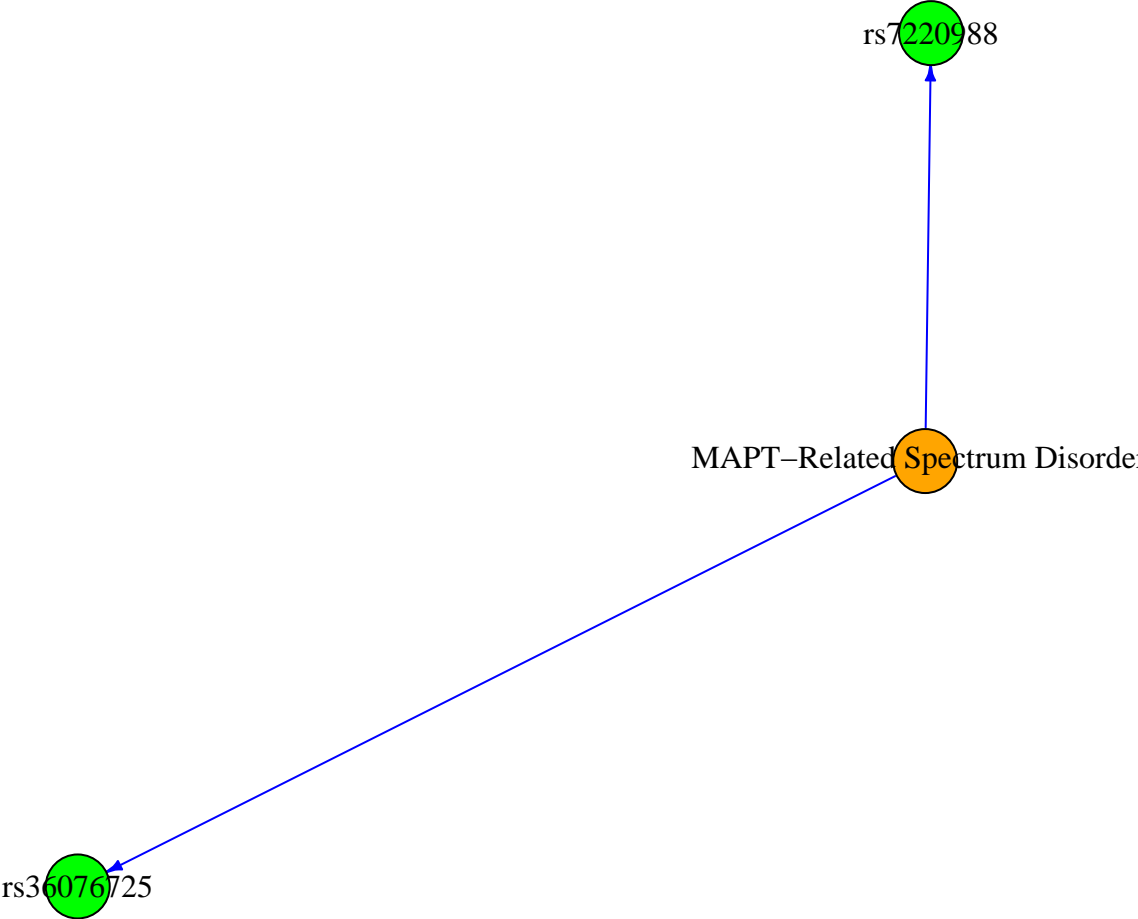



**Variant–Disease Network (Marden Walker like syndrome)**

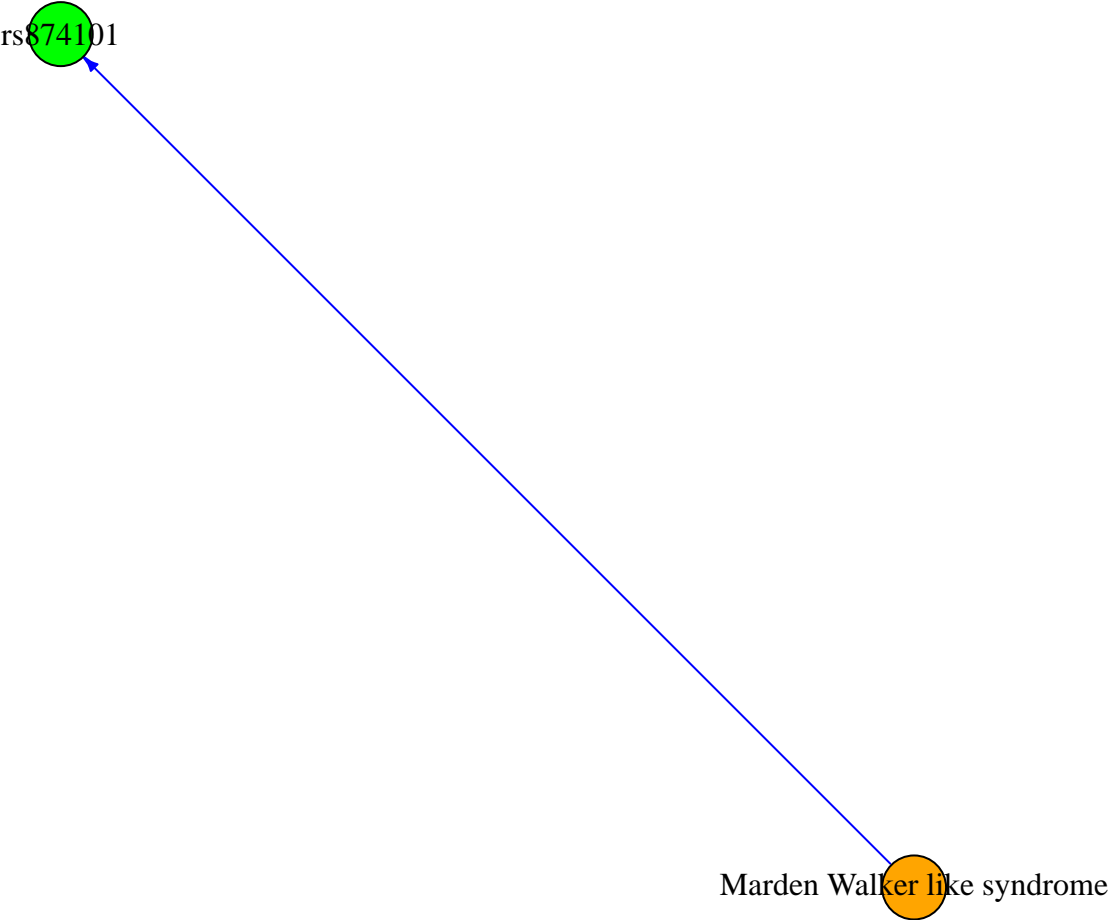

## Variant–Disease Network (Marfan lipodystrophy syndrome)

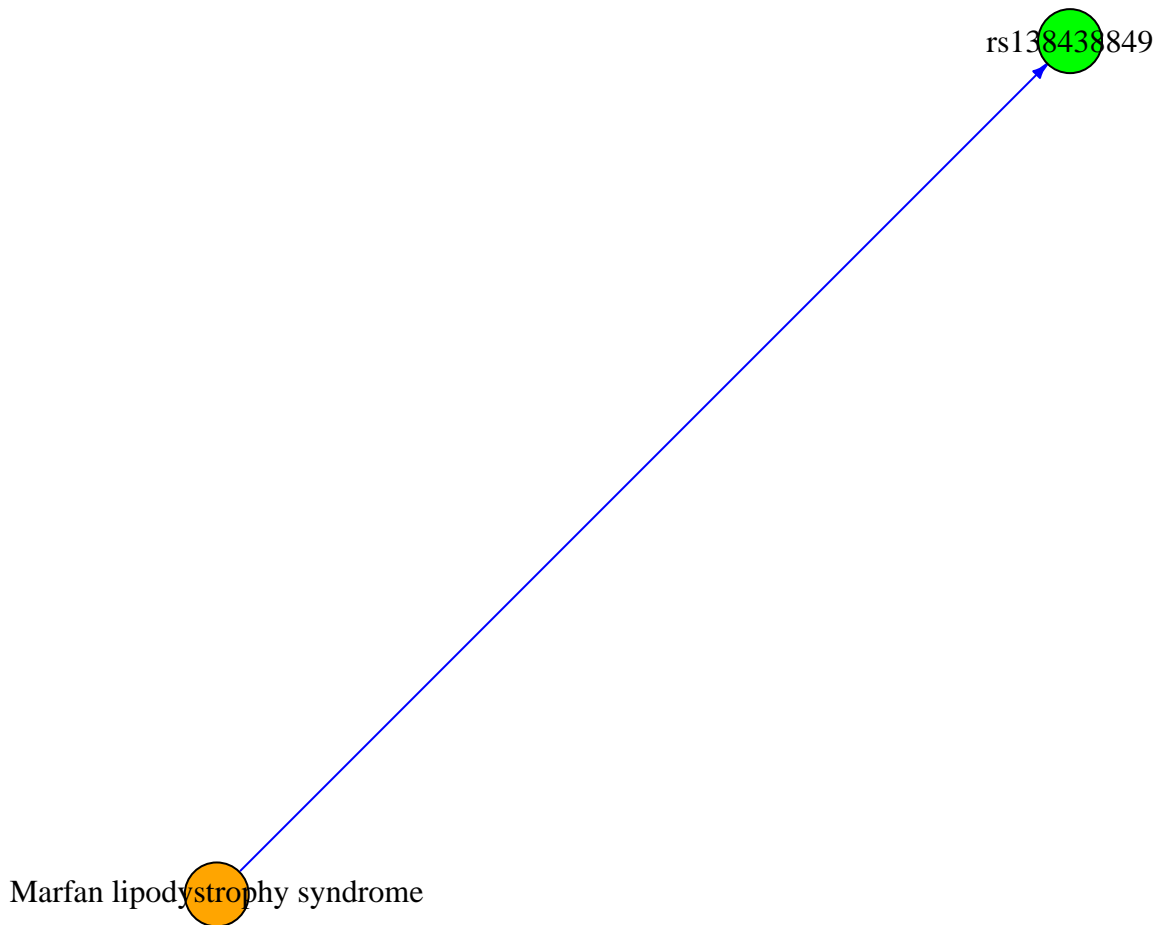

## Variant–Disease Network (Marfan syndrome)

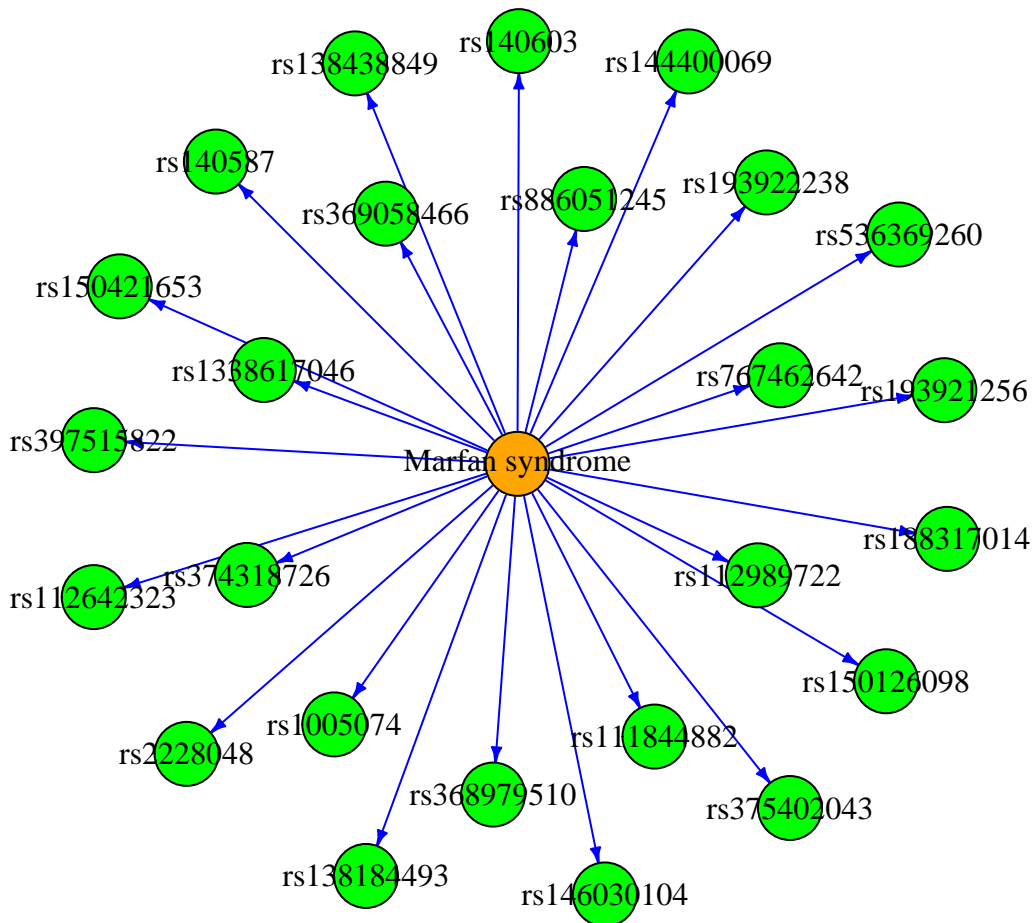

work (Marfan Syndrome/Loeys–Dietz Syndrome/Familial Thoracic Aortic Aneurysms and Dissections)

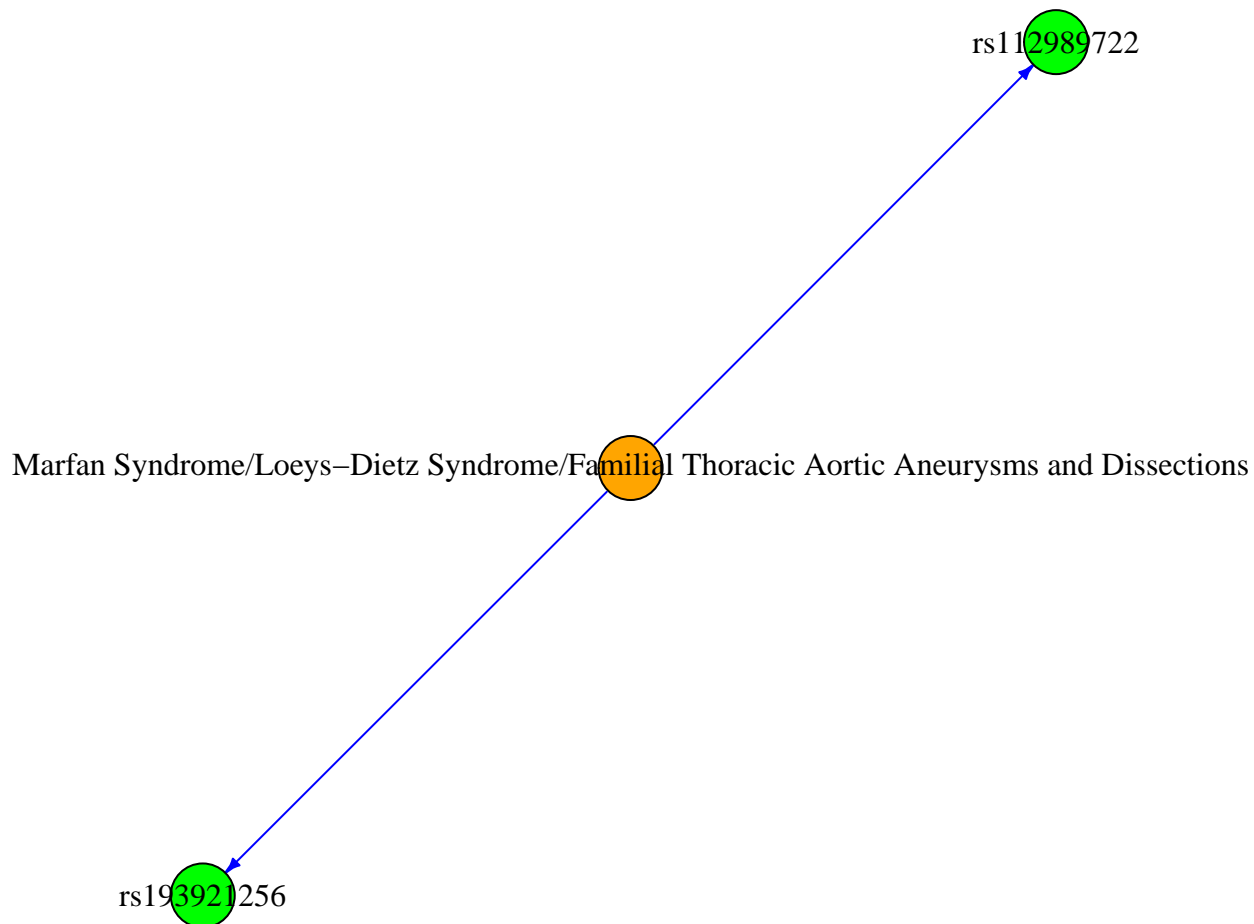

## Variant–Disease Network (Marinesco–Sjögren syndrome)

## Variant–Disease Network (Martsolf syndrome)

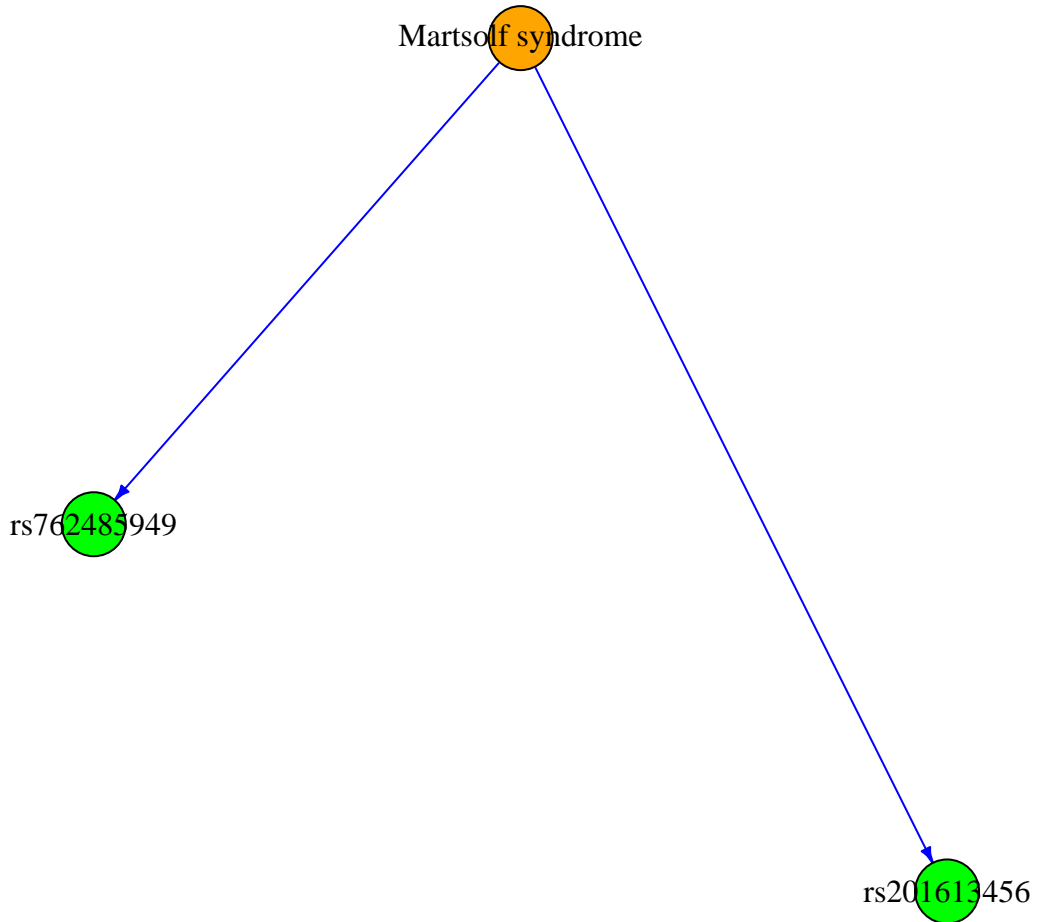

## Variant–Disease Network (MASP2 deficiency)

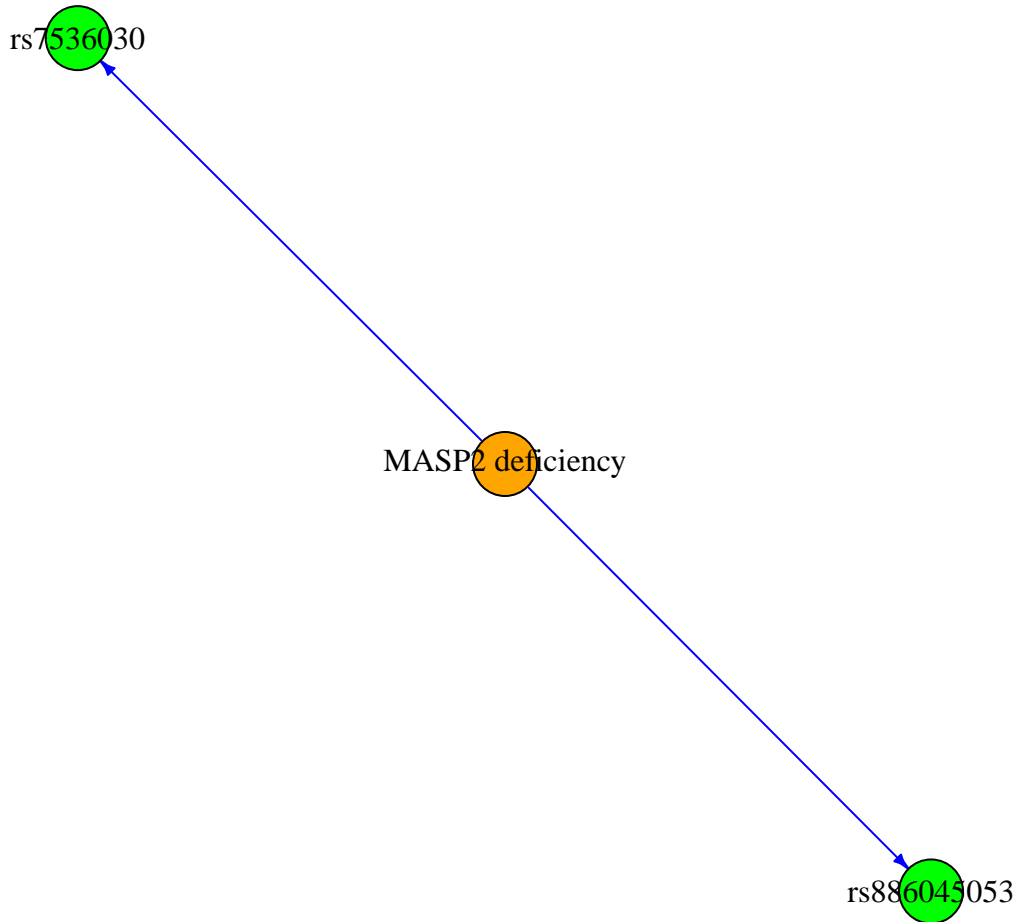

## Variant–Disease Network (MASS syndrome)

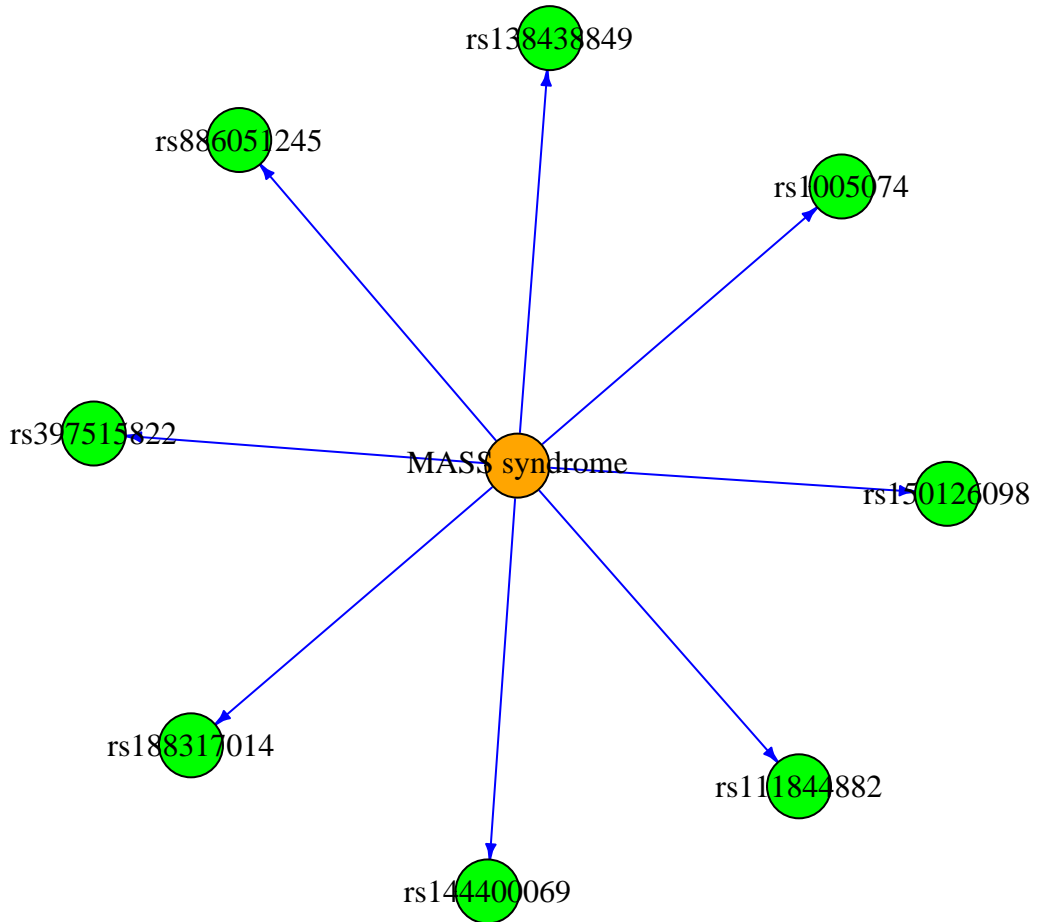



## Variant-Disease Network (Mastocytosis)

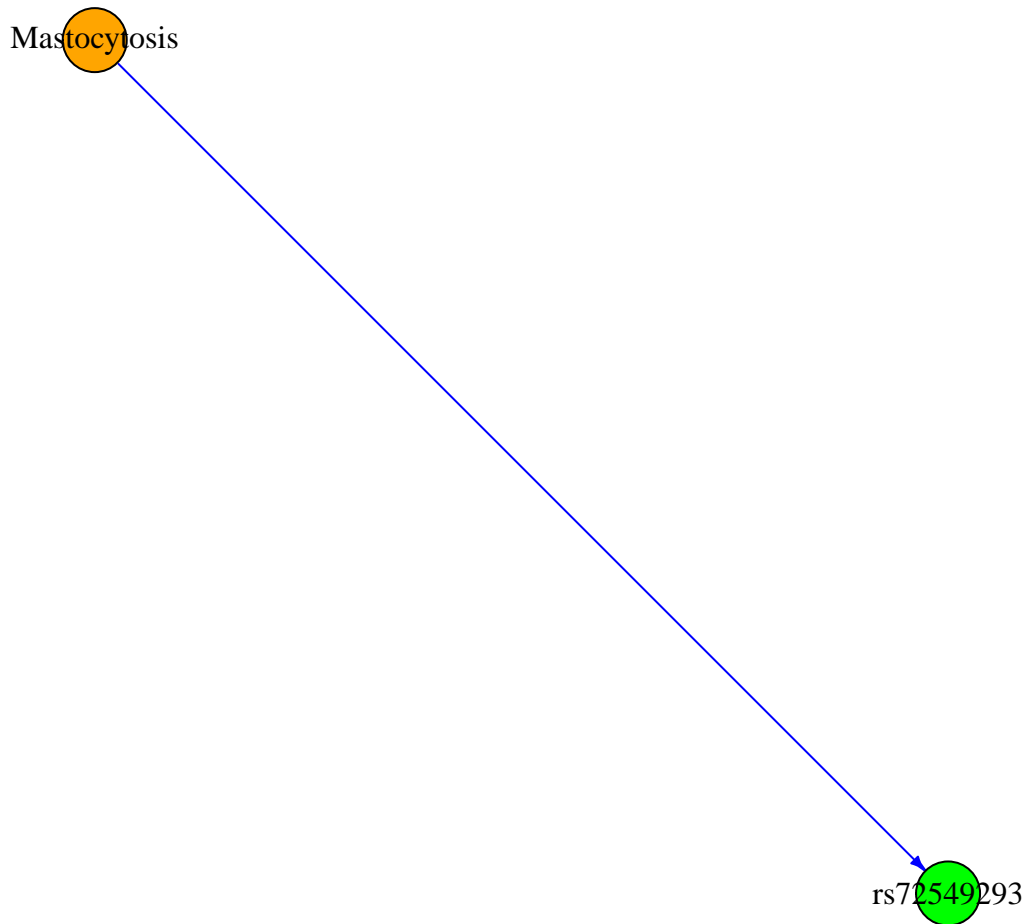

# Variant–Disease Network (Maturity onset diabetes mellitus in young)

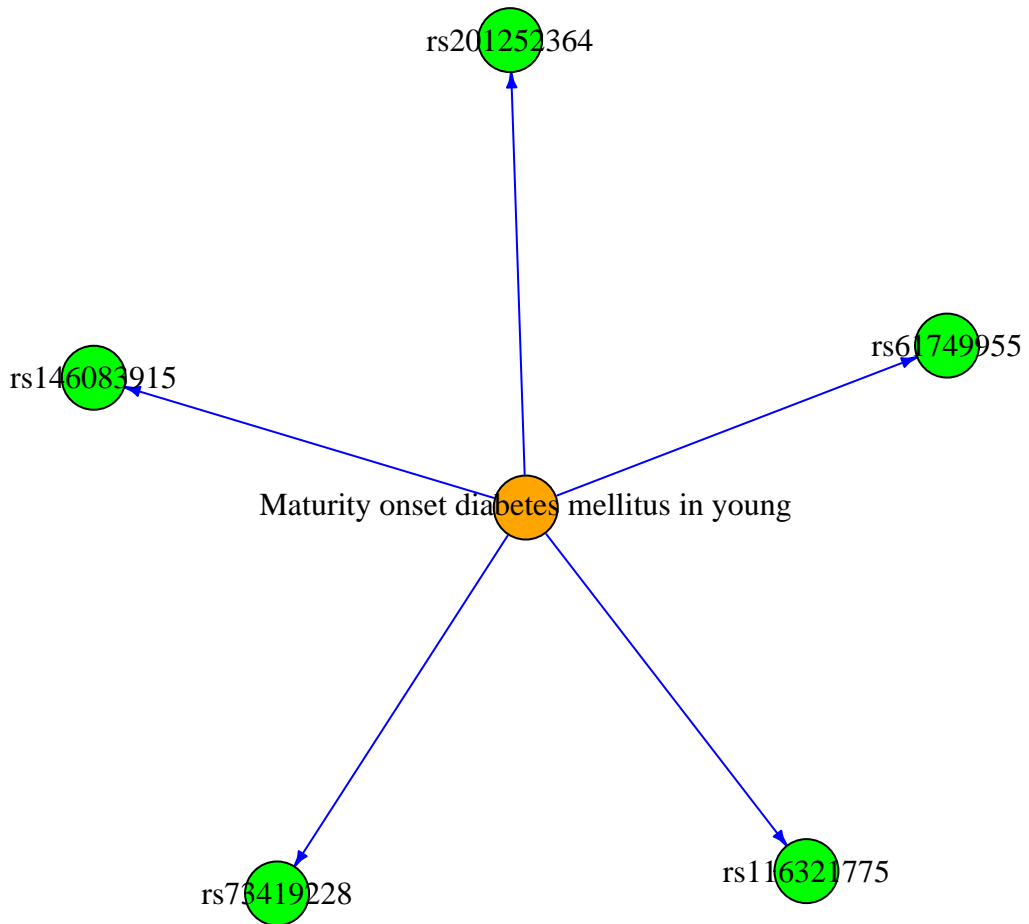

Variant–Disease Network (Maturity–onset diabetes of the young)

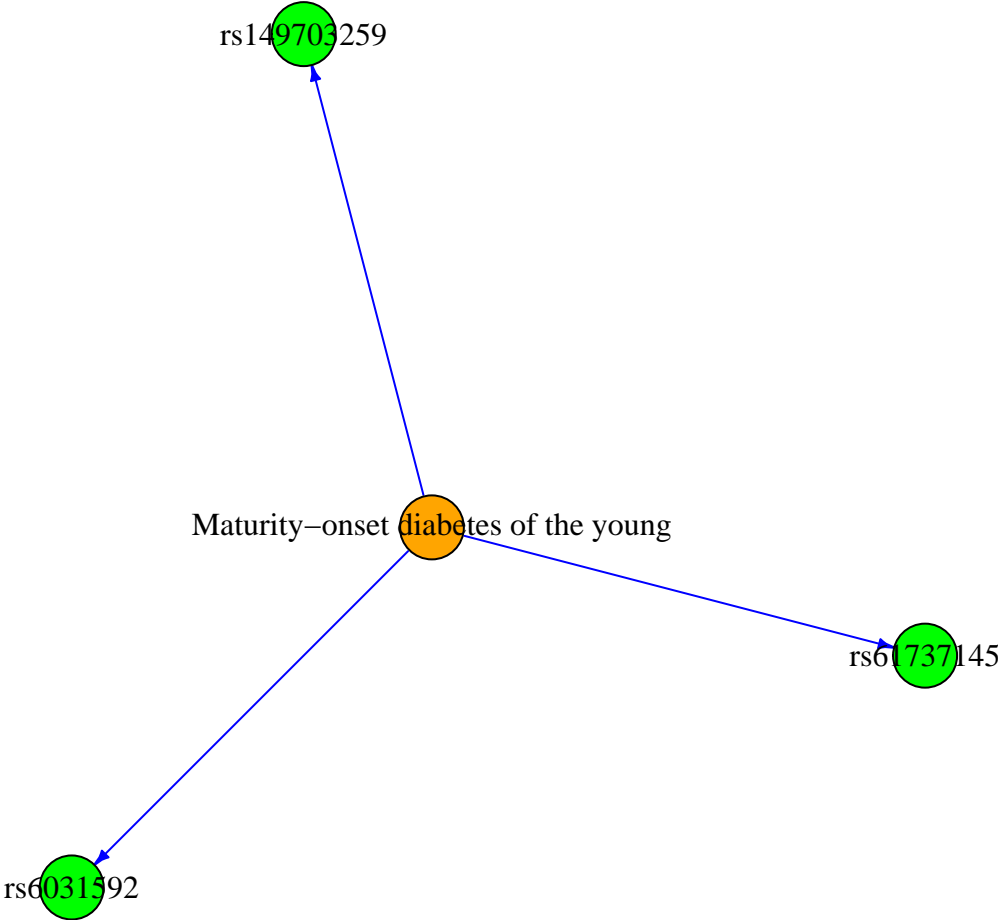

Variant–Disease Network (McKusick Kaufman syndrome)

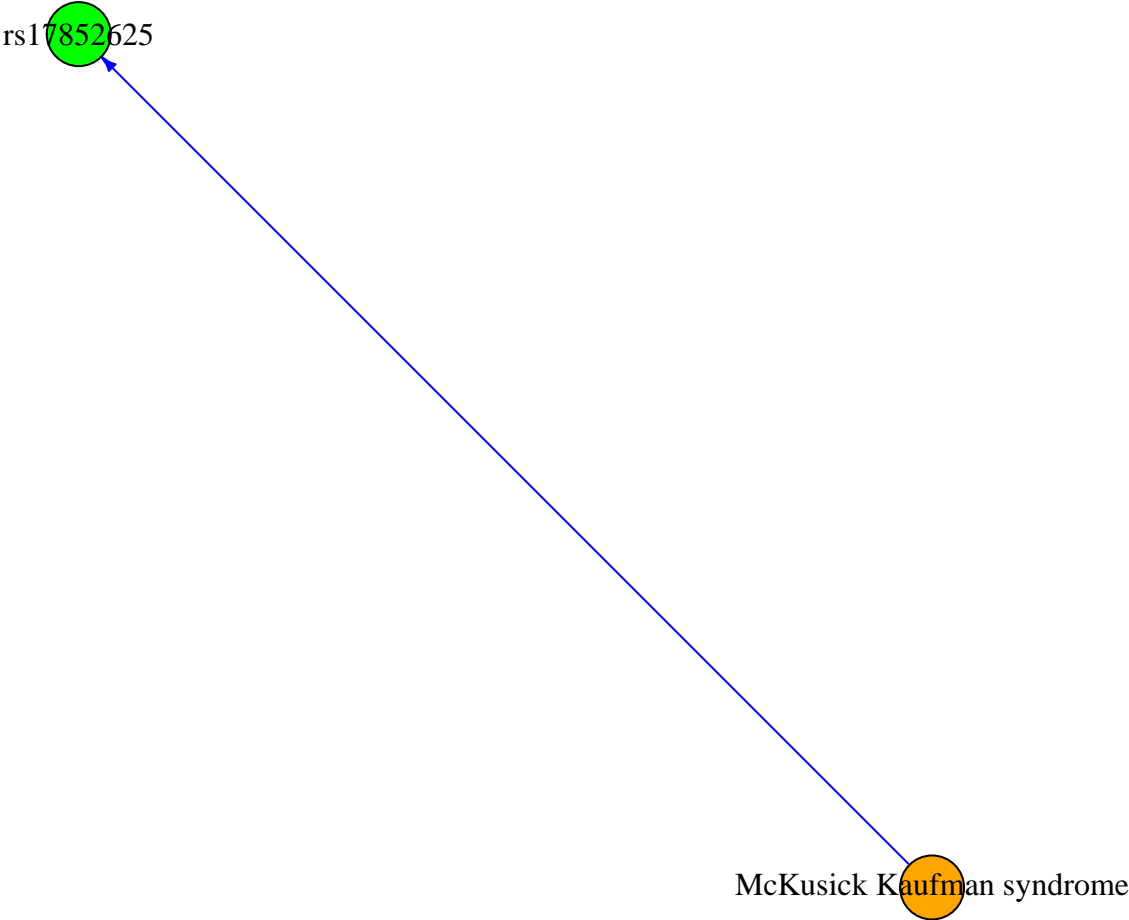

## Variant–Disease Network (Meacham syndrome)

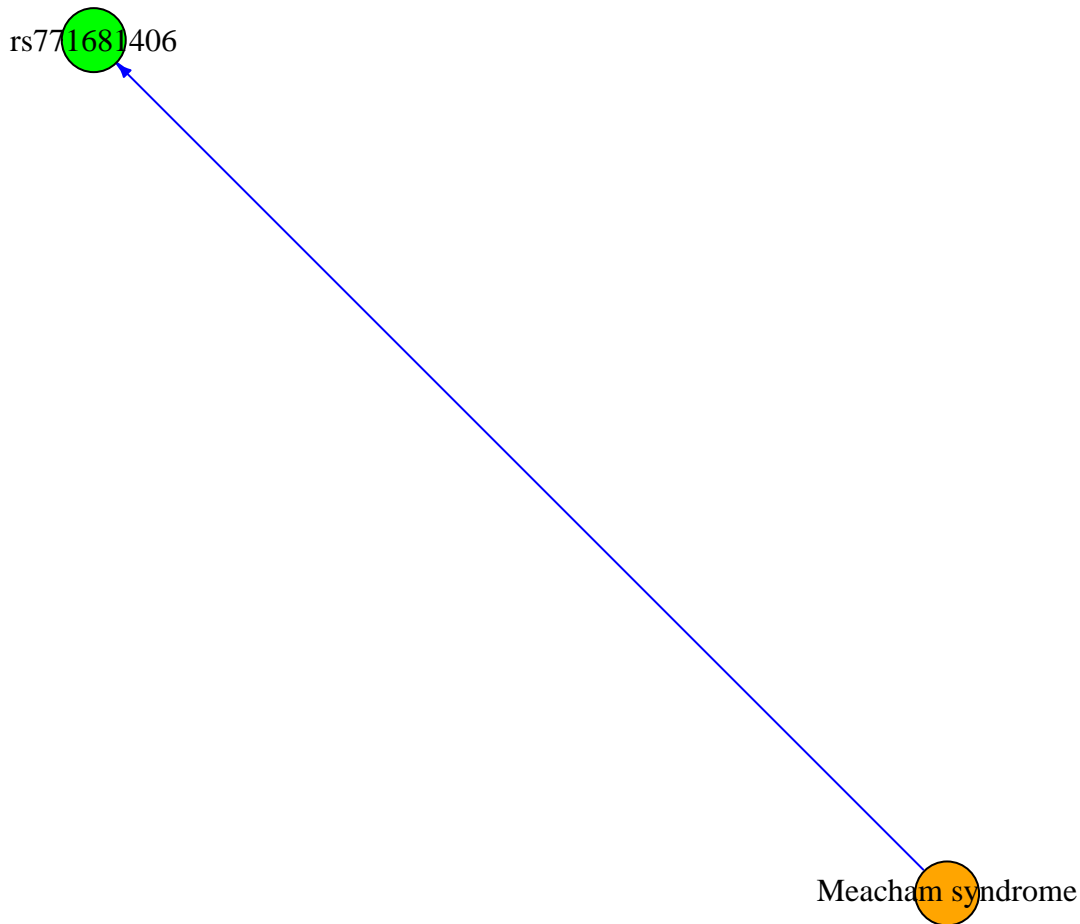

## Variant–Disease Network (Meckel–Gruber syndrome)

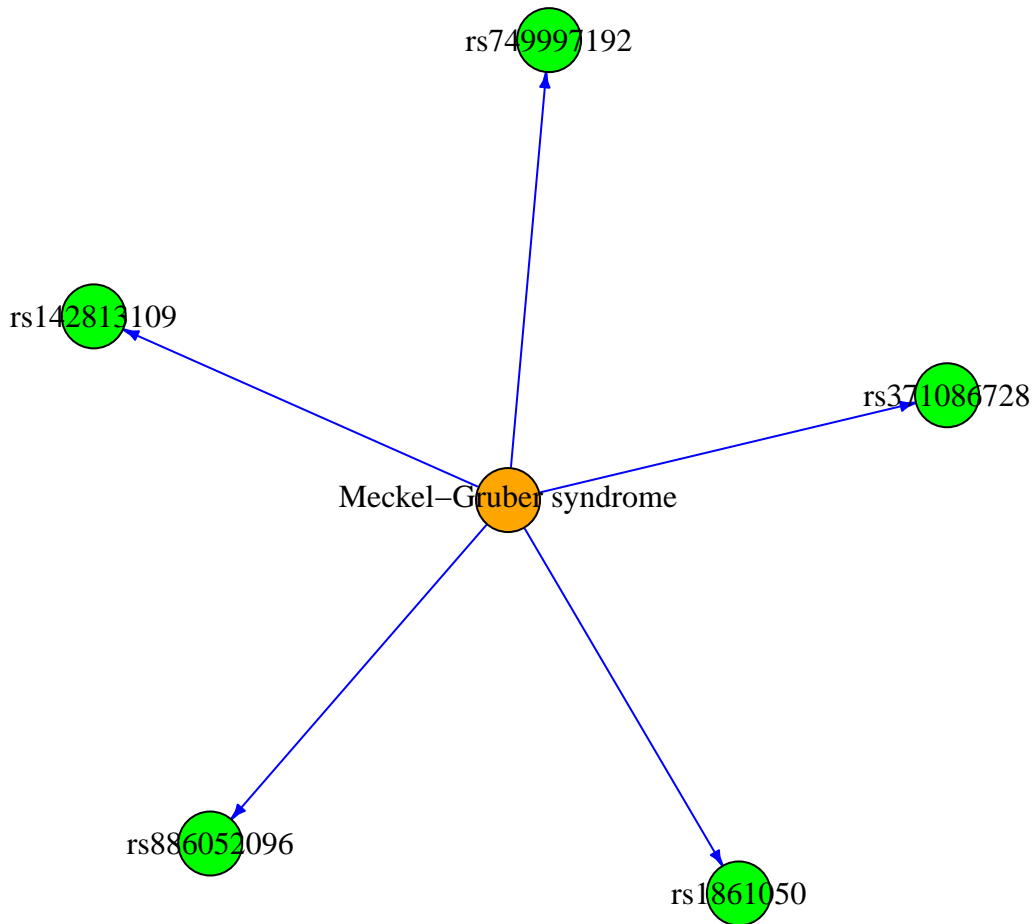

# ant-Disease Network (Megalencephalic leukoencephalopathy with subcortic

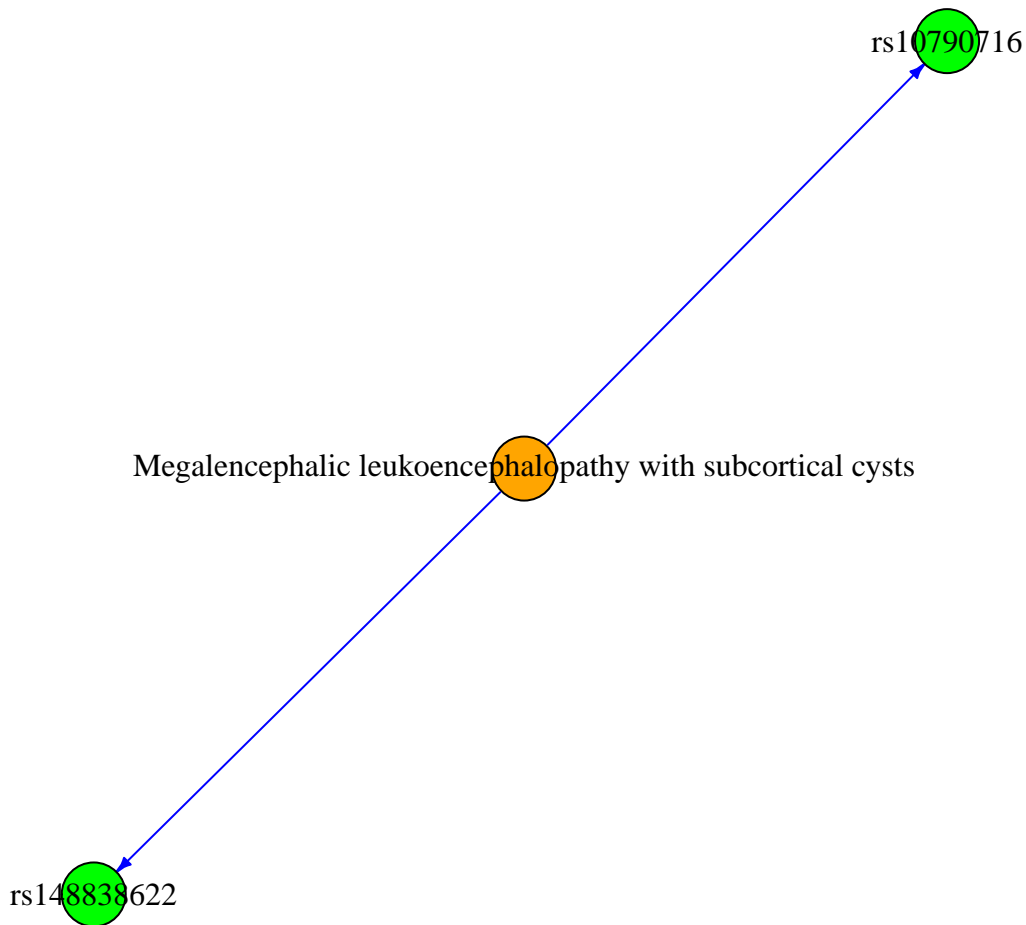

# sease Network (Megalencephaly–polymicrogyria–polydactyly–hydrocephalus)

rs147625988

Megalencephaly–polymicrogyria–polydactyly–hydrocephalus





# sease Network (Megalencephaly-polymicrogyria-polydactyly-hydrocephalus syndrome 2)

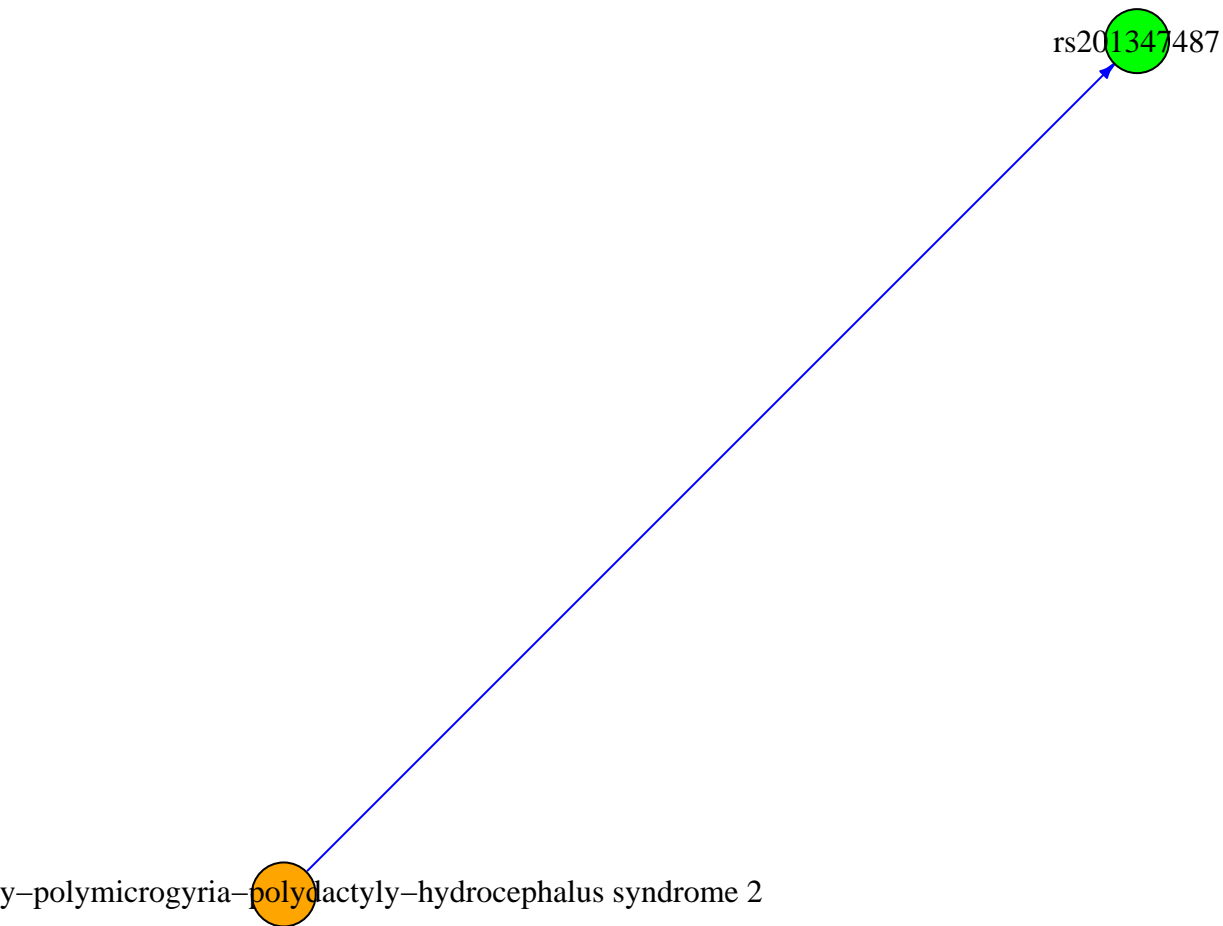

## Variant–Disease Network (Megaloblastic anemia)

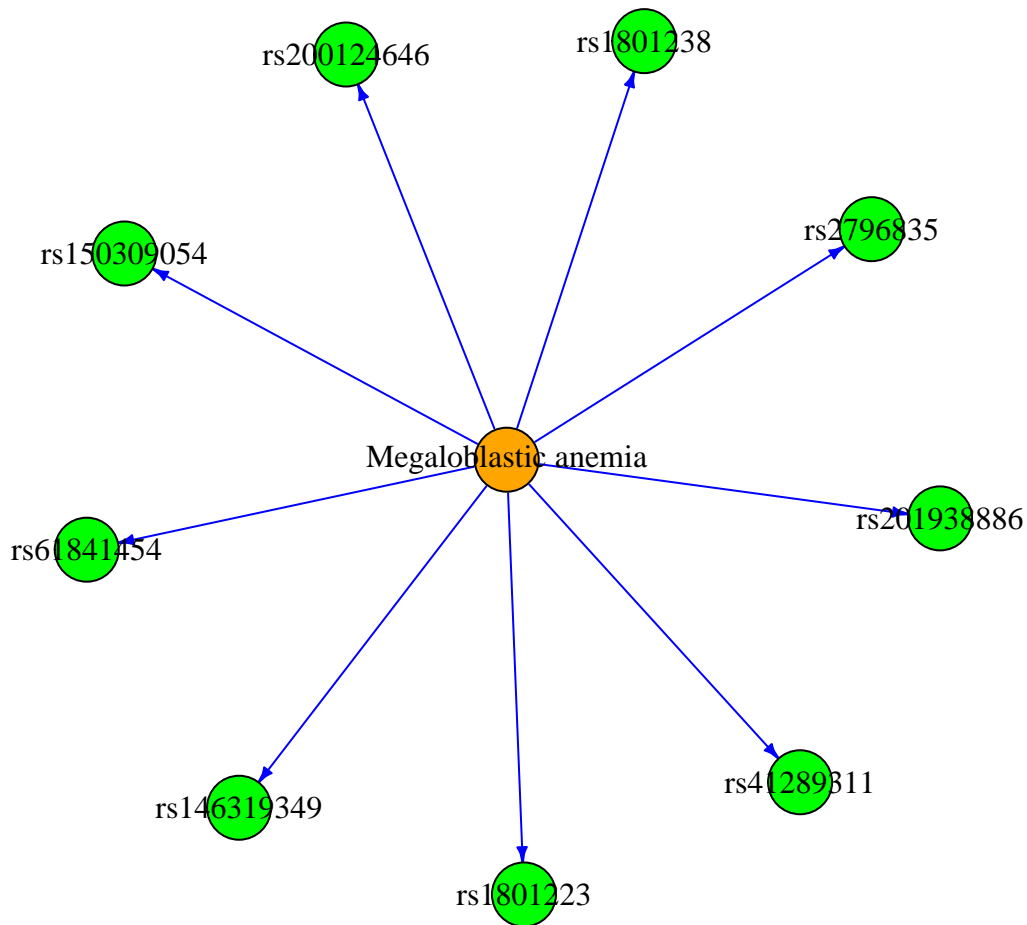

# Variant-Disease Network (Megaloblastic anemia due to inborn errors of metab

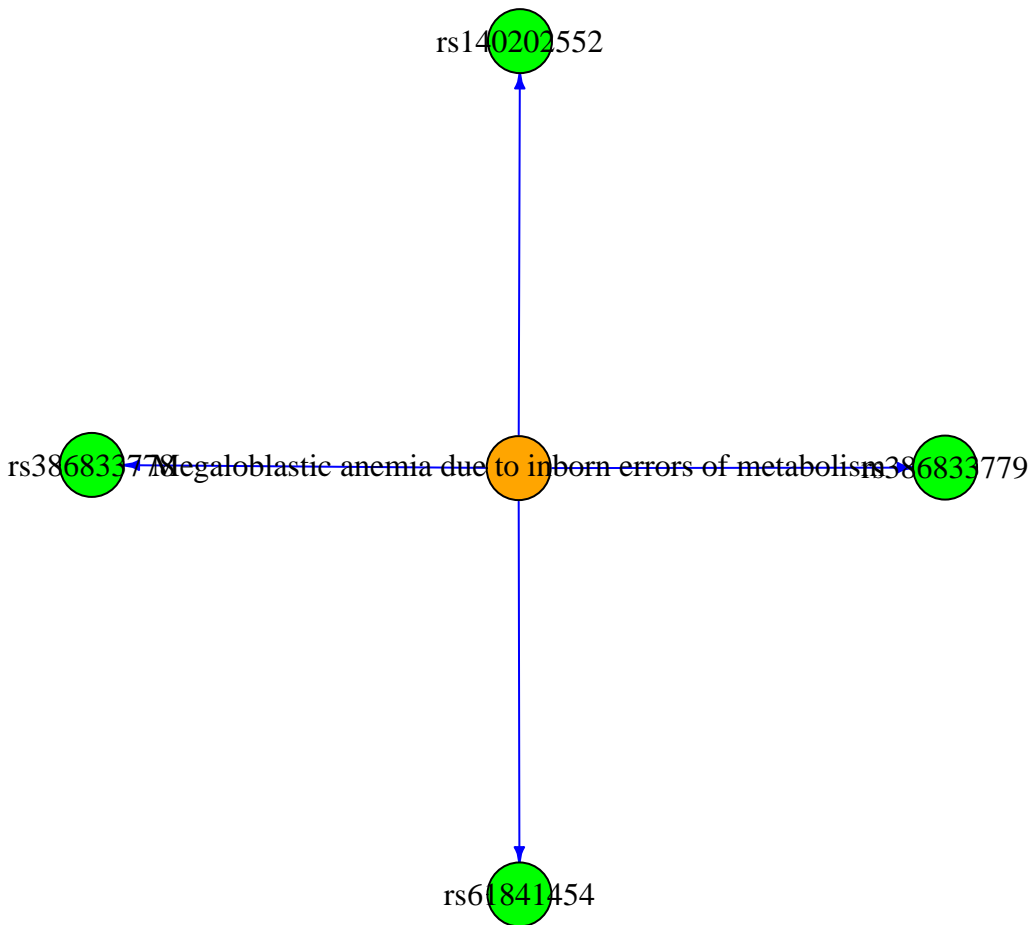

# Variant-Disease Network (Meier-gorlin syndrome 7)

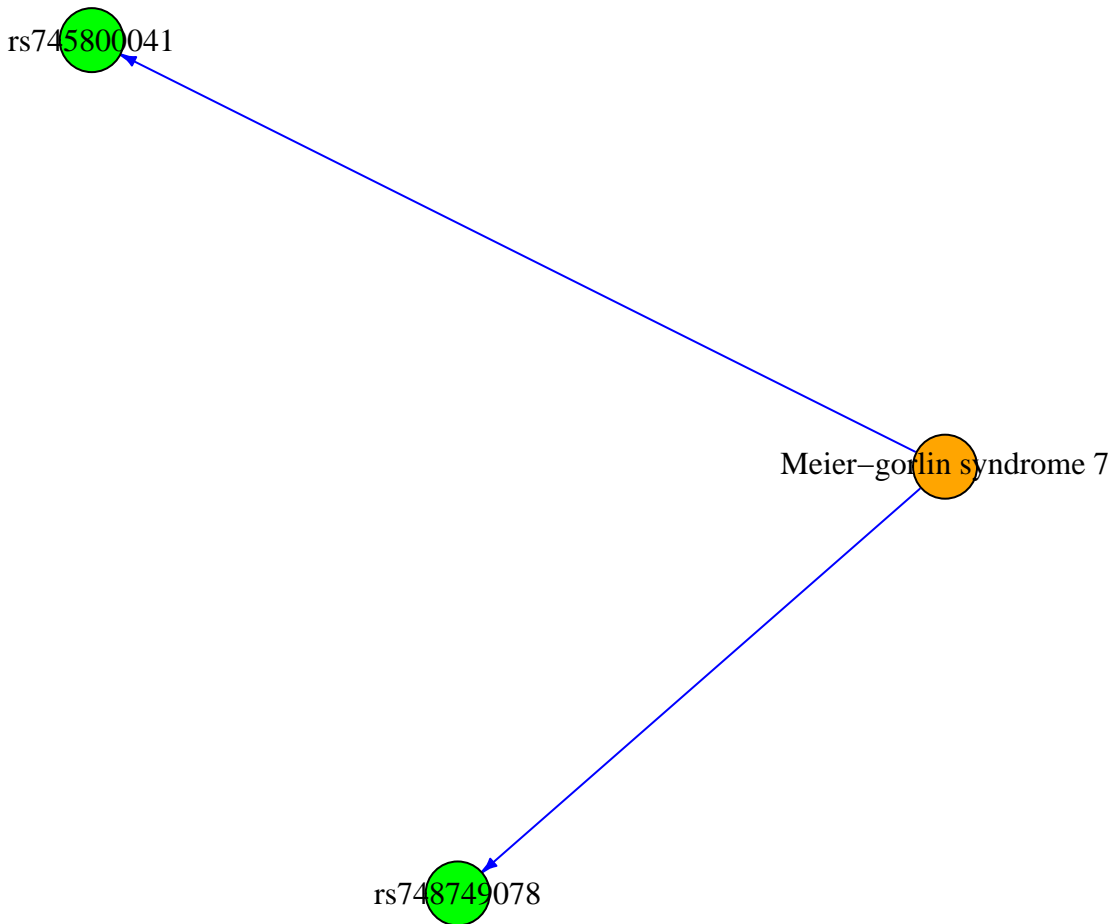

## Variant-Disease Network (Melanoma)

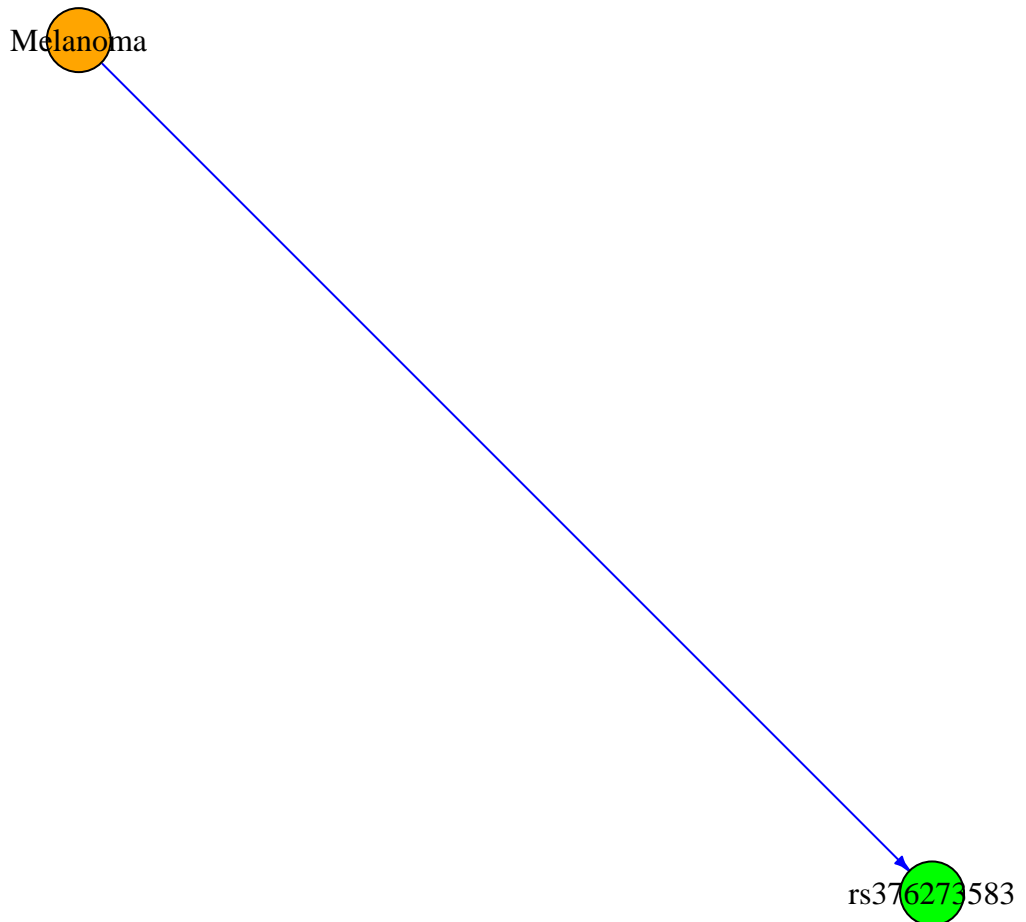

## Variant–Disease Network (Melnick–Needles syndrome)

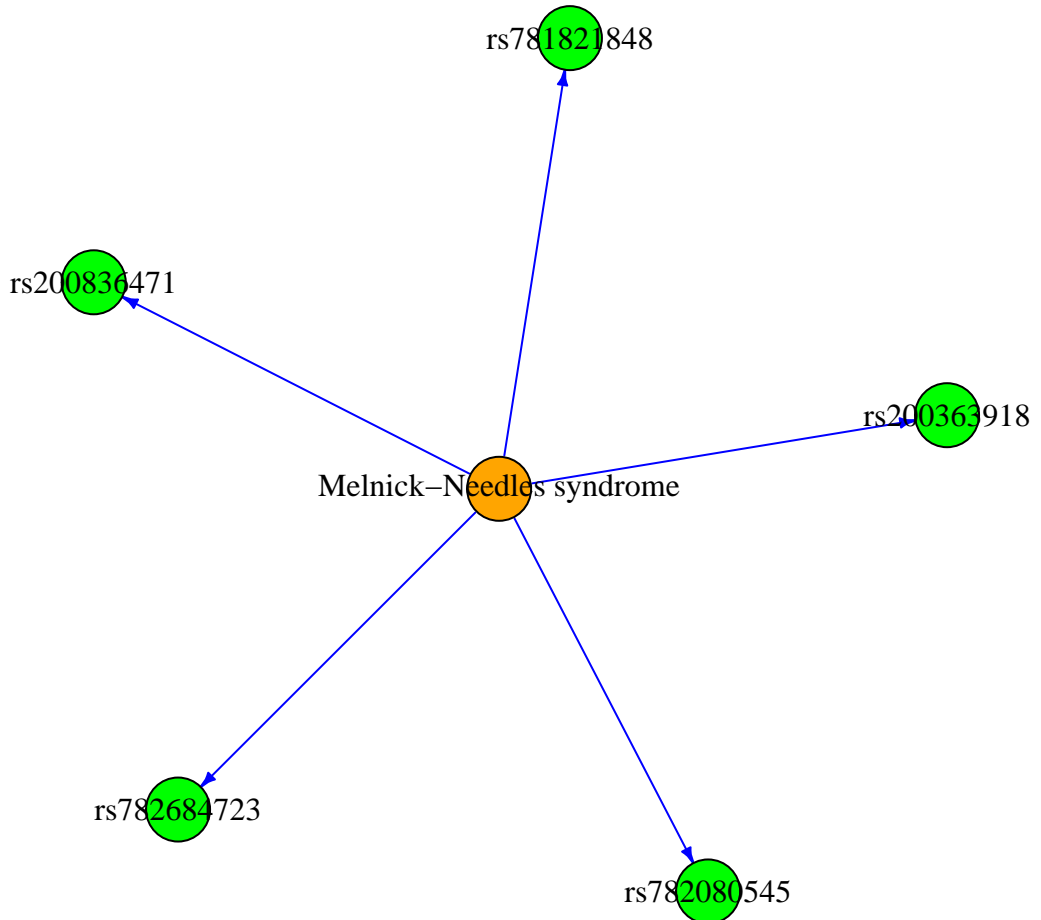

## Variant–Disease Network (Mental retardation)

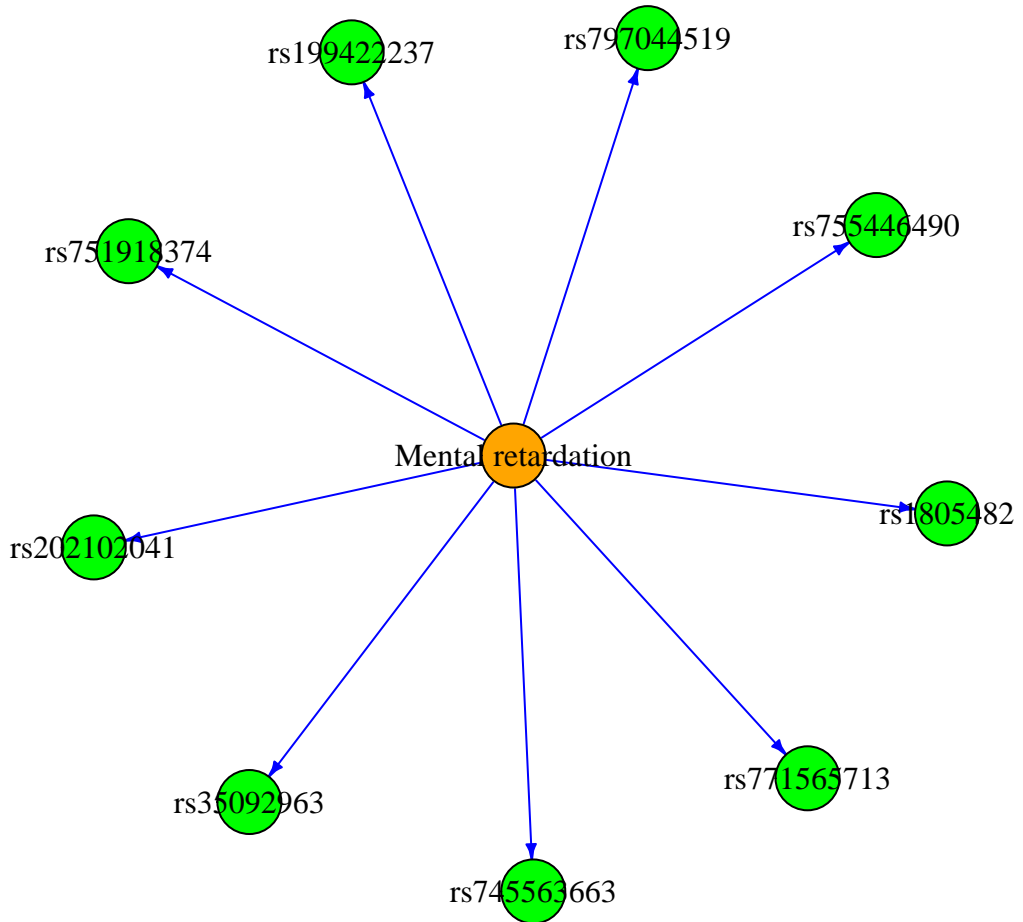

# Network (Mental retardation X-linked with cerebellar hypoplasia and distinct

rs138108344



Mental retardation X-linked with cerebellar hypoplasia and





## Variant-Disease Network (Metachondromatosis)

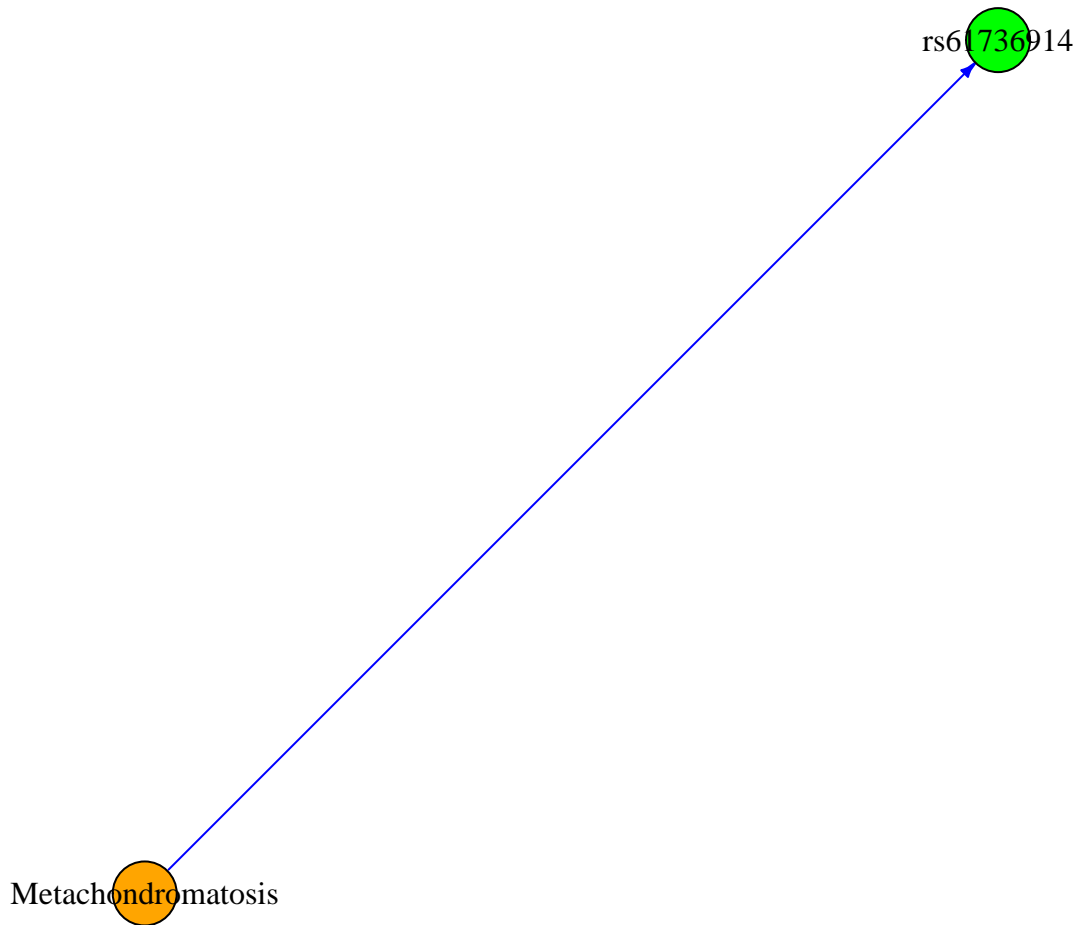

# Variant–Disease Network (Metaphyseal anadysplasia)

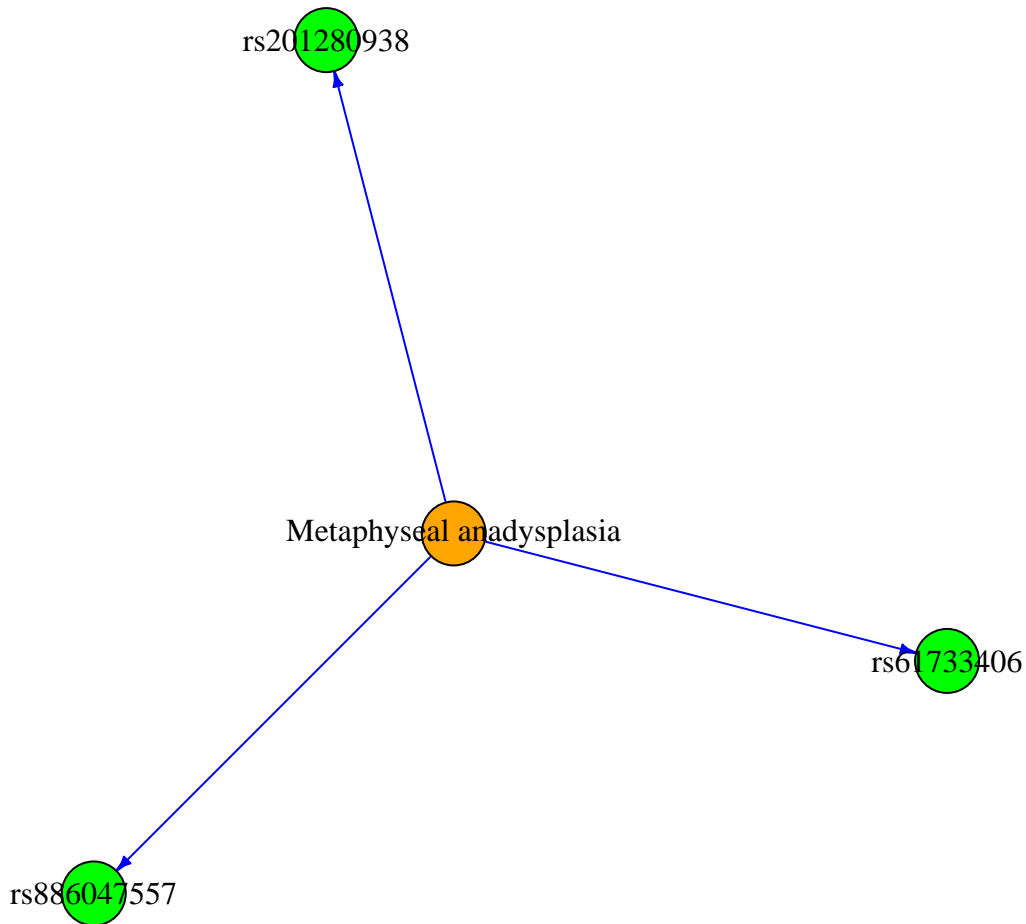

Variant–Disease Network (Metaphyseal chondrodysplasia)

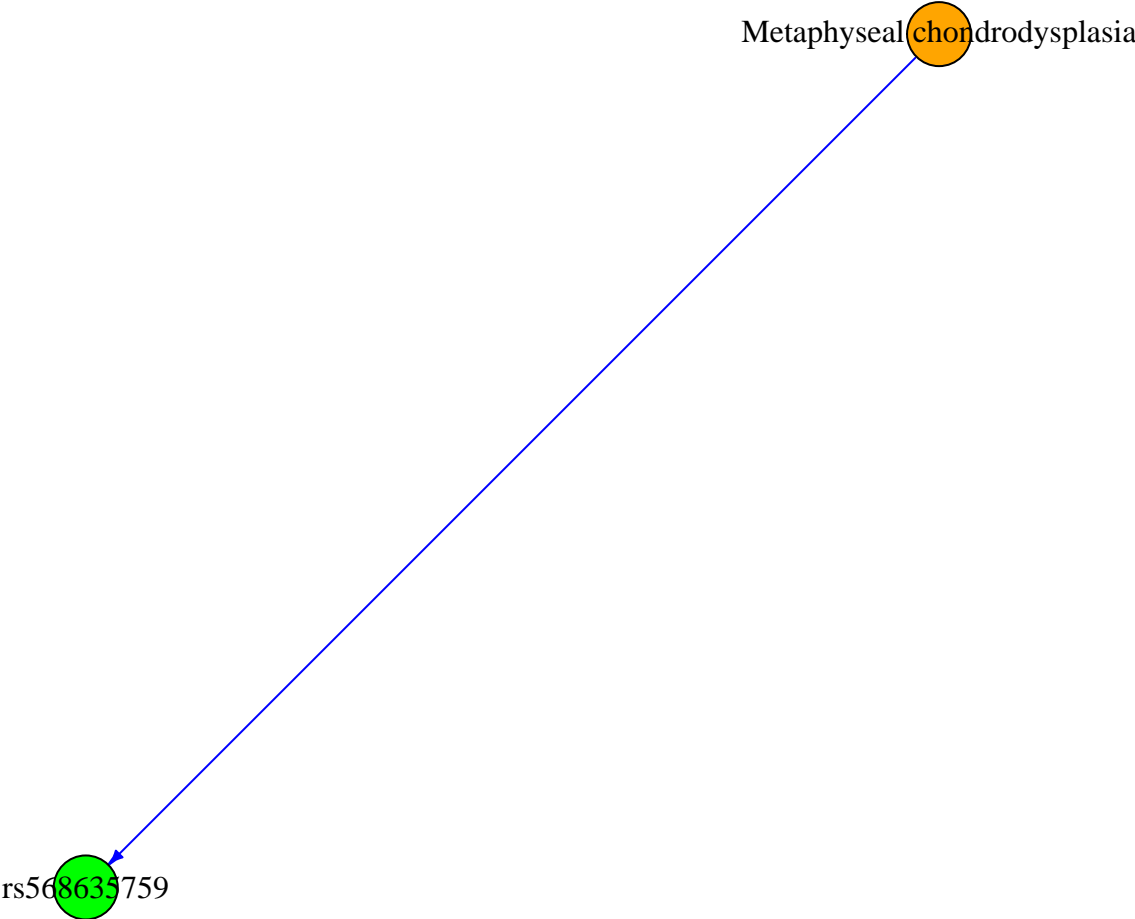

## Variant–Disease Network (Methylmalonic acidemia)

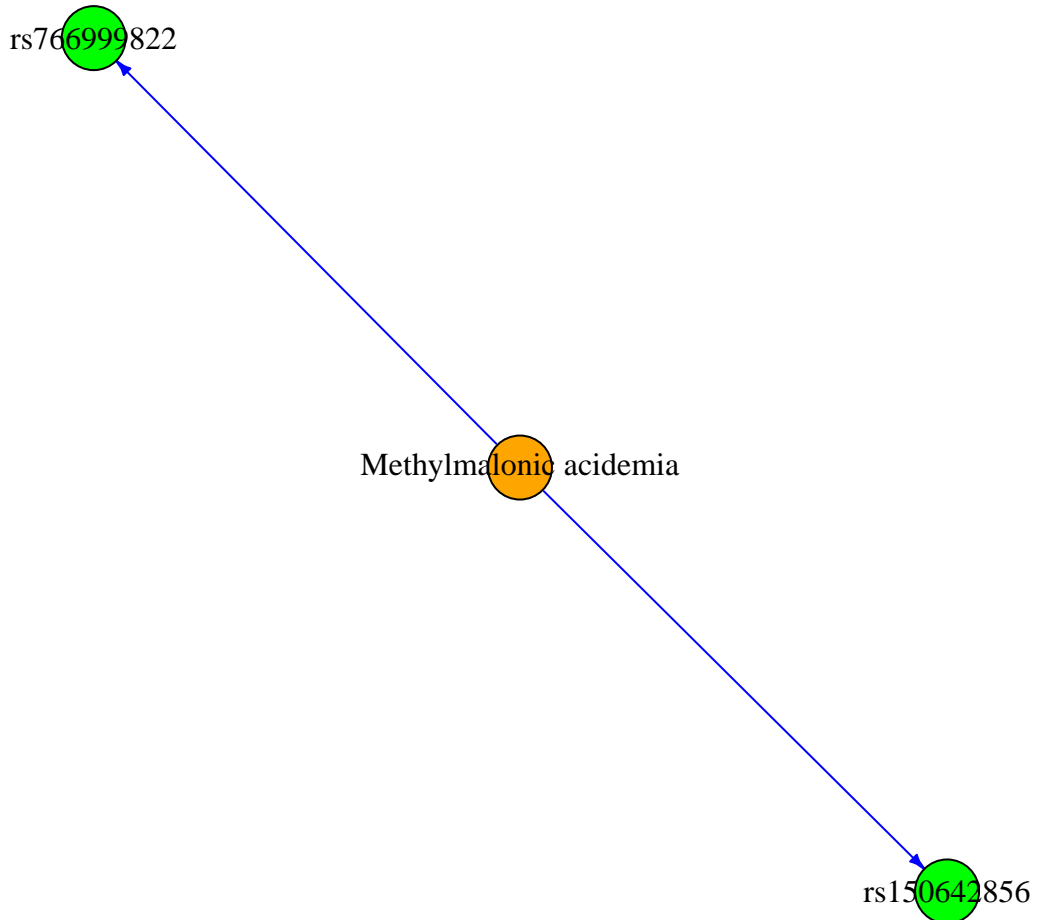

# Disease Network (Methylmalonic aciduria due to methylmalonyl-CoA mutase

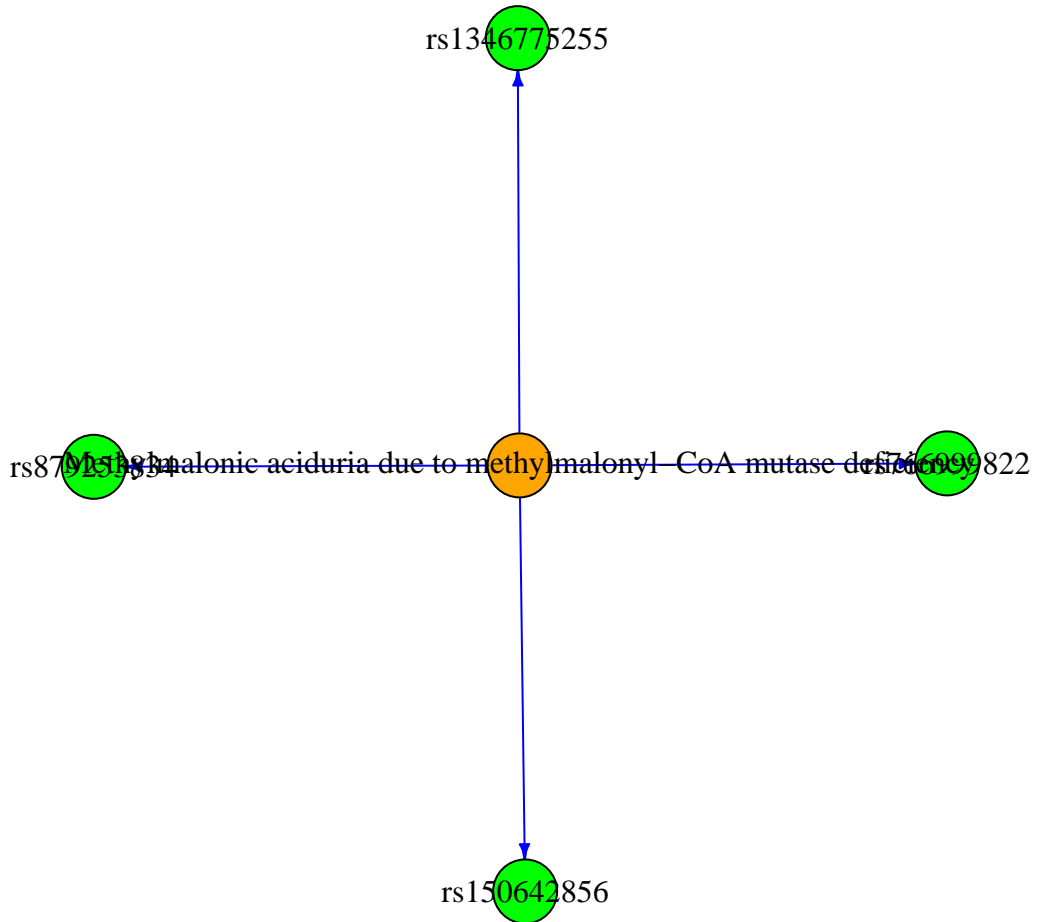

## Variant-Disease Network (Microcephaly)

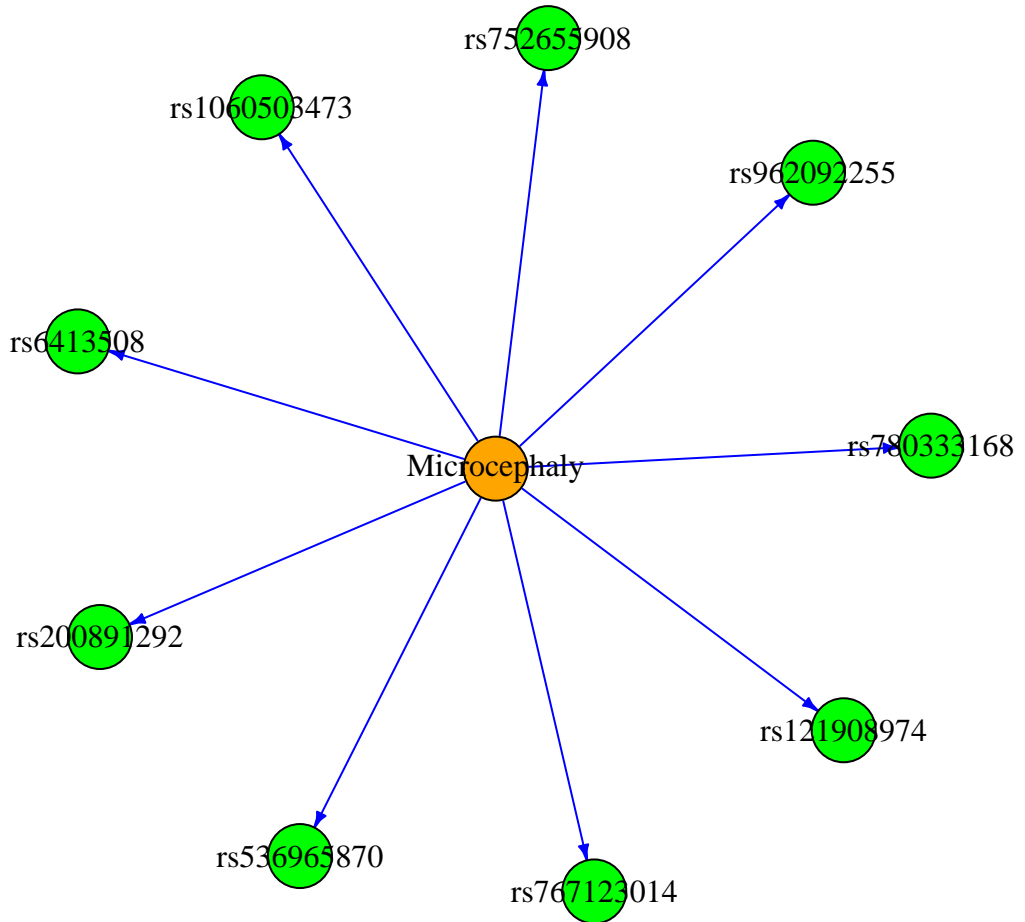

Variant–Disease Network (Microcephaly–capillary malformation syndrome)

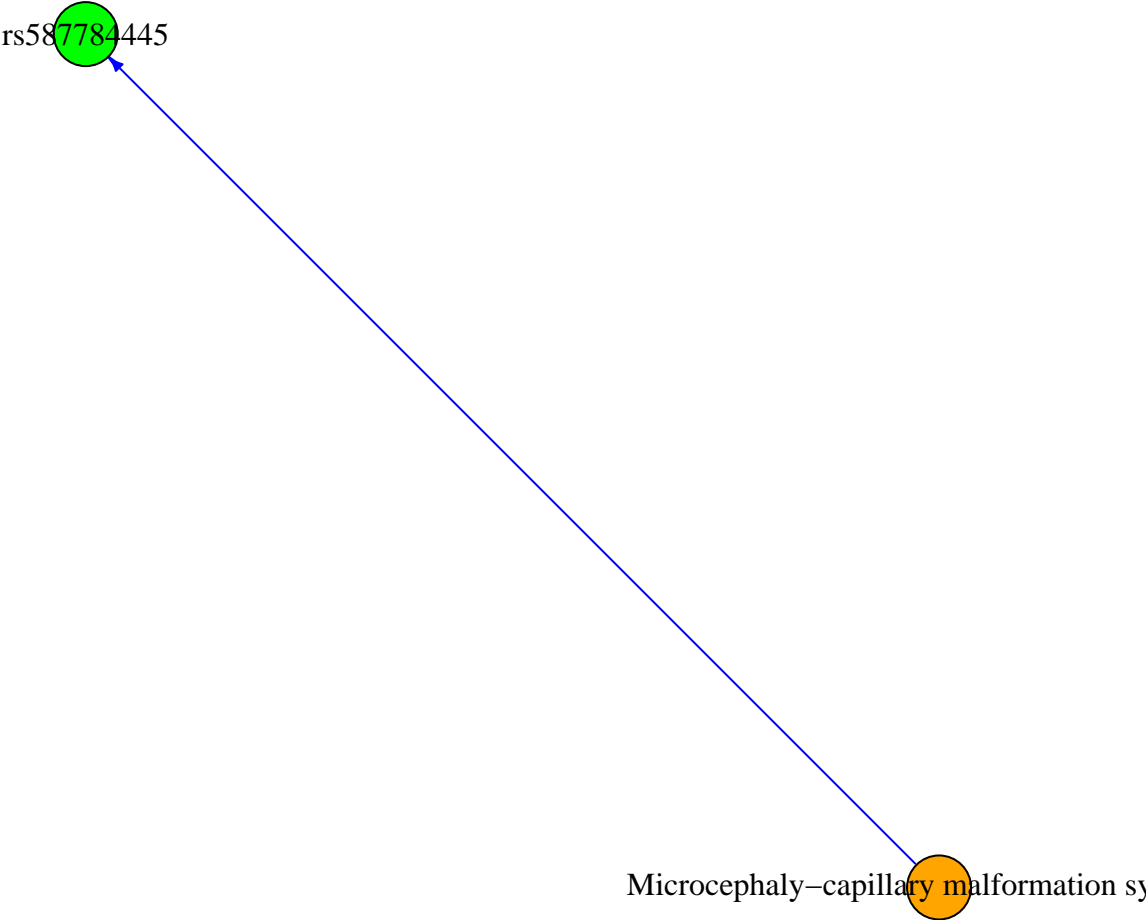

## Variant–Disease Network (Microcytic anemia)

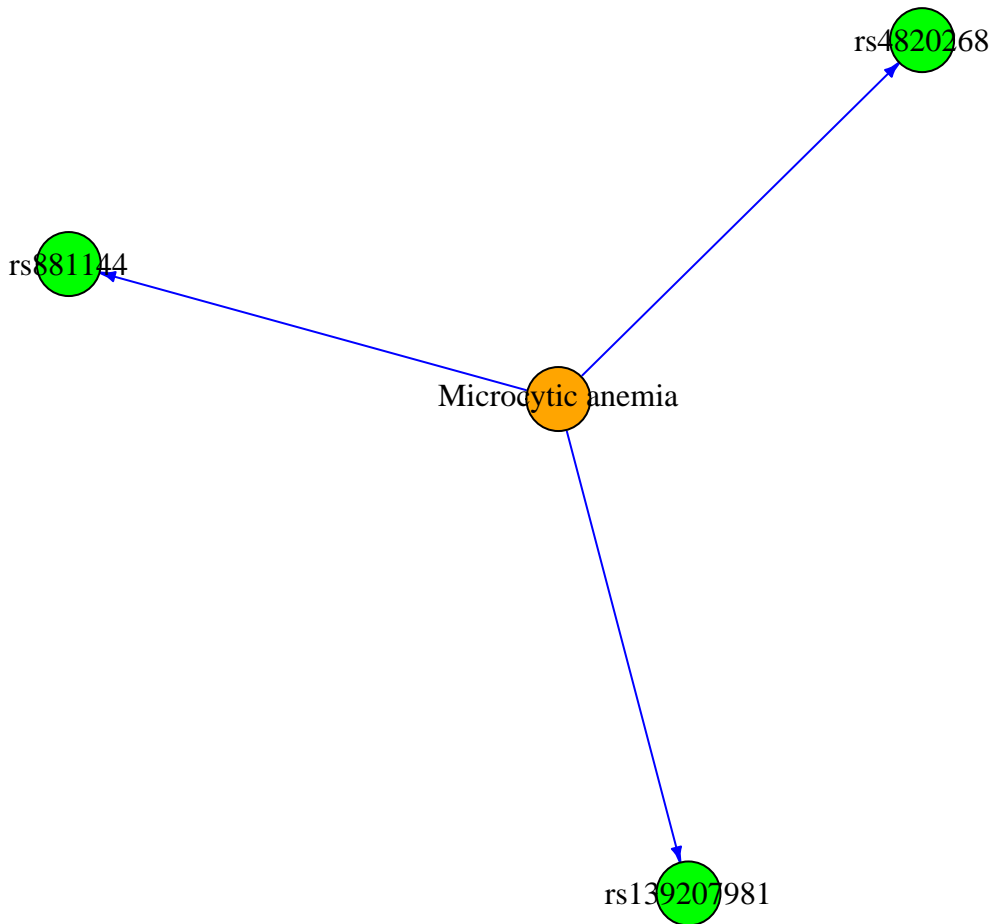



Variant–Disease Network (Miller syndrome)

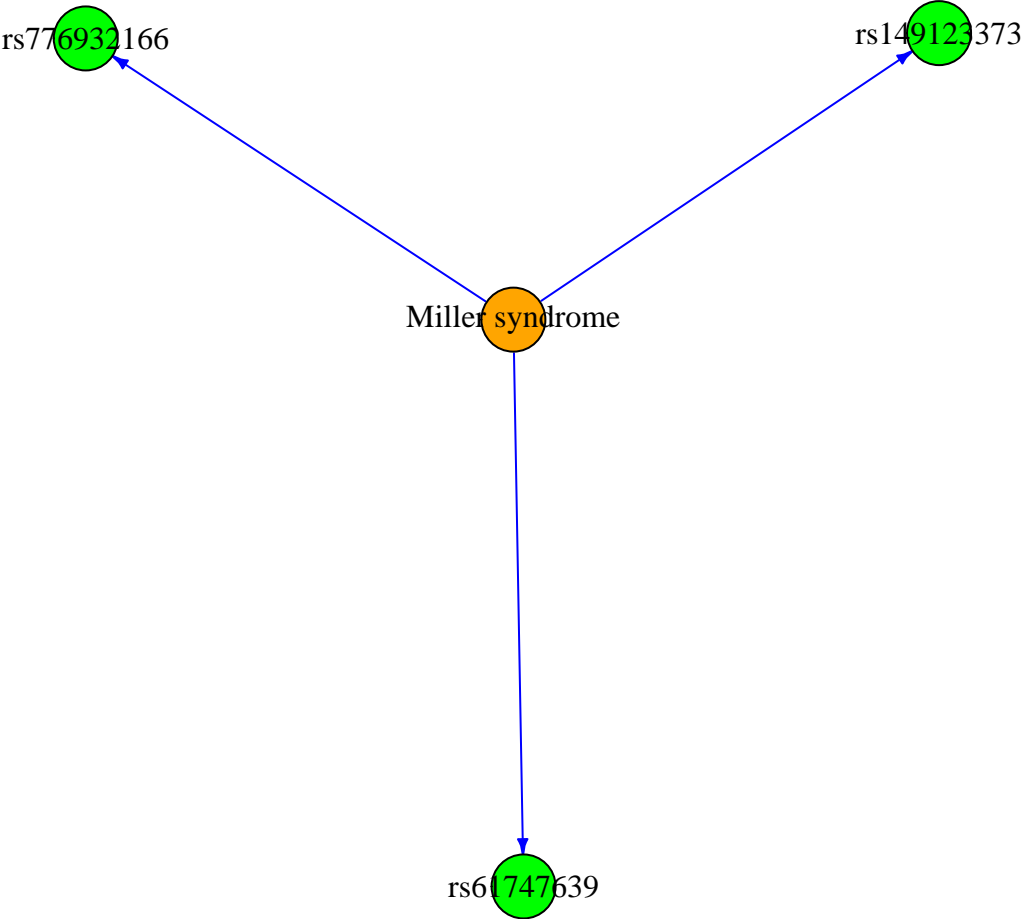

## Variant–Disease Network (Mirror movements 1)

Mirror movements 1

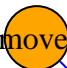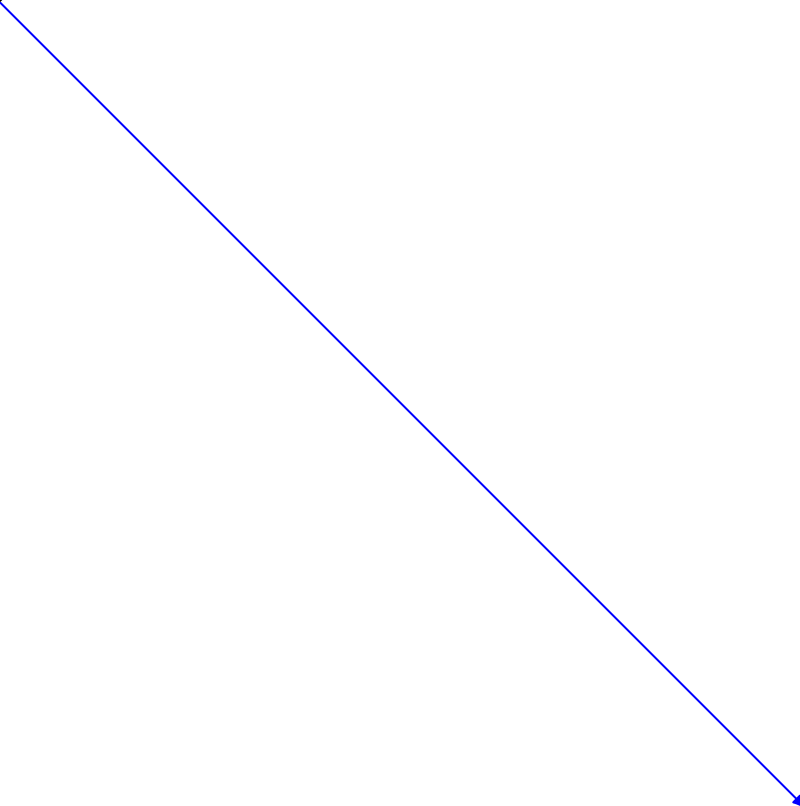

rs2229080

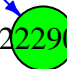

# Disease Network (mitochondrial 3-hydroxy-3-methylglutaryl-CoA synthase

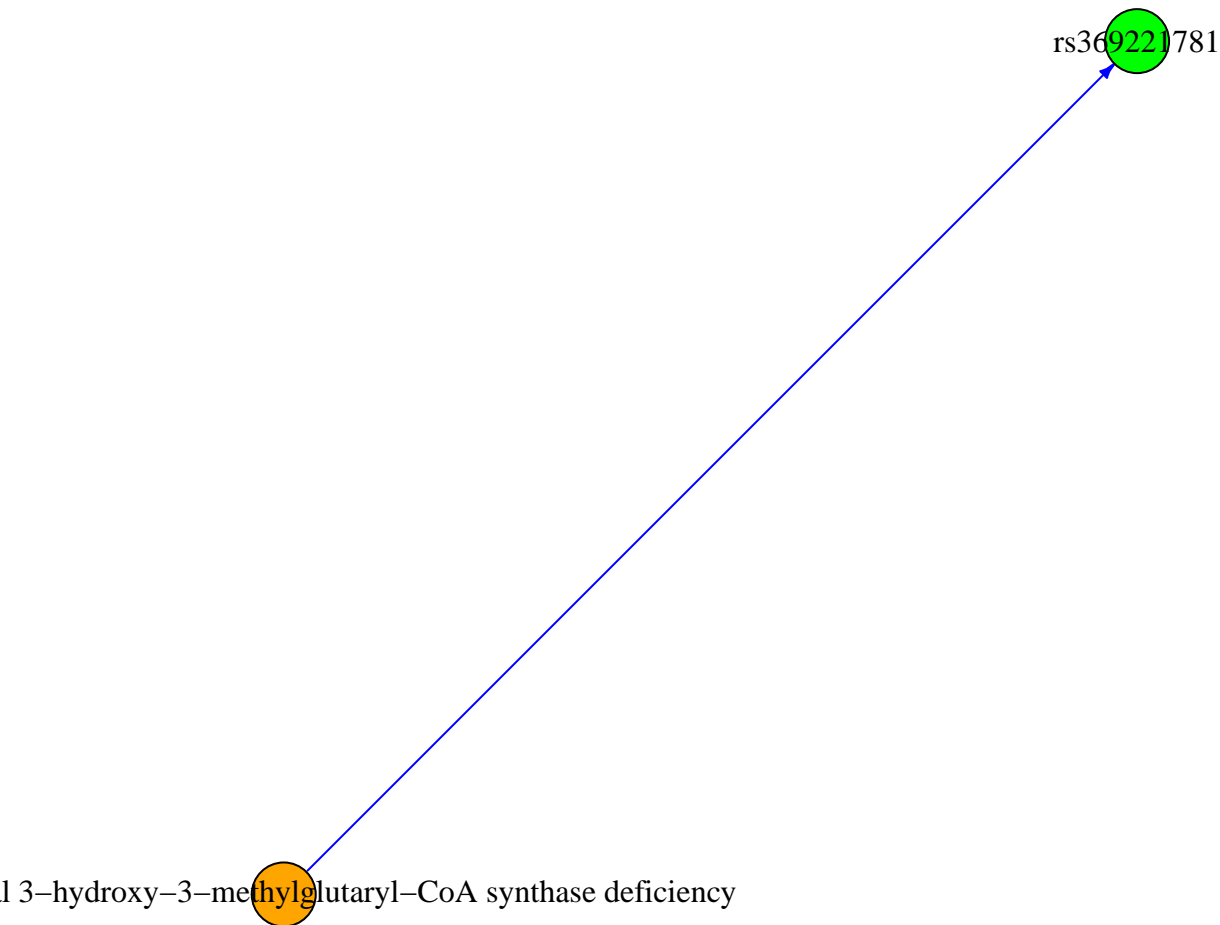

# Variant–Disease Network (Mitochondrial complex I deficiency)

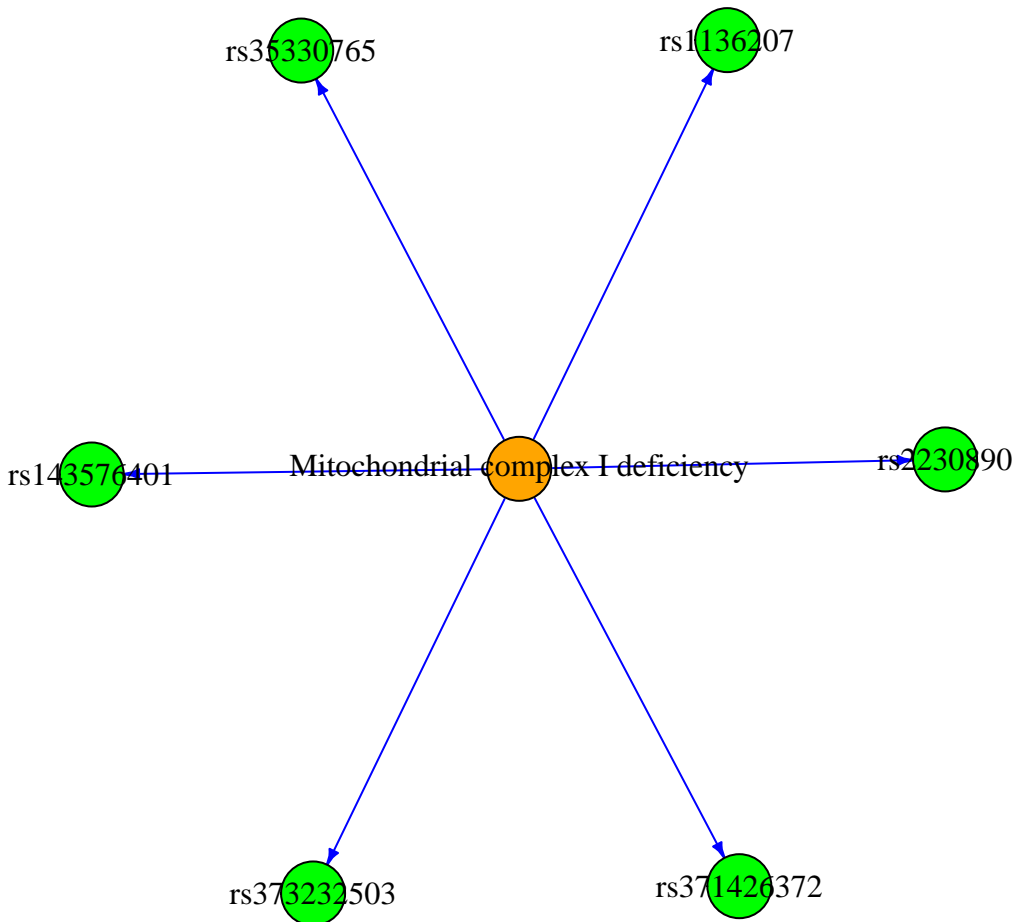

# Variant-Disease Network (Mitochondrial complex II deficiency)

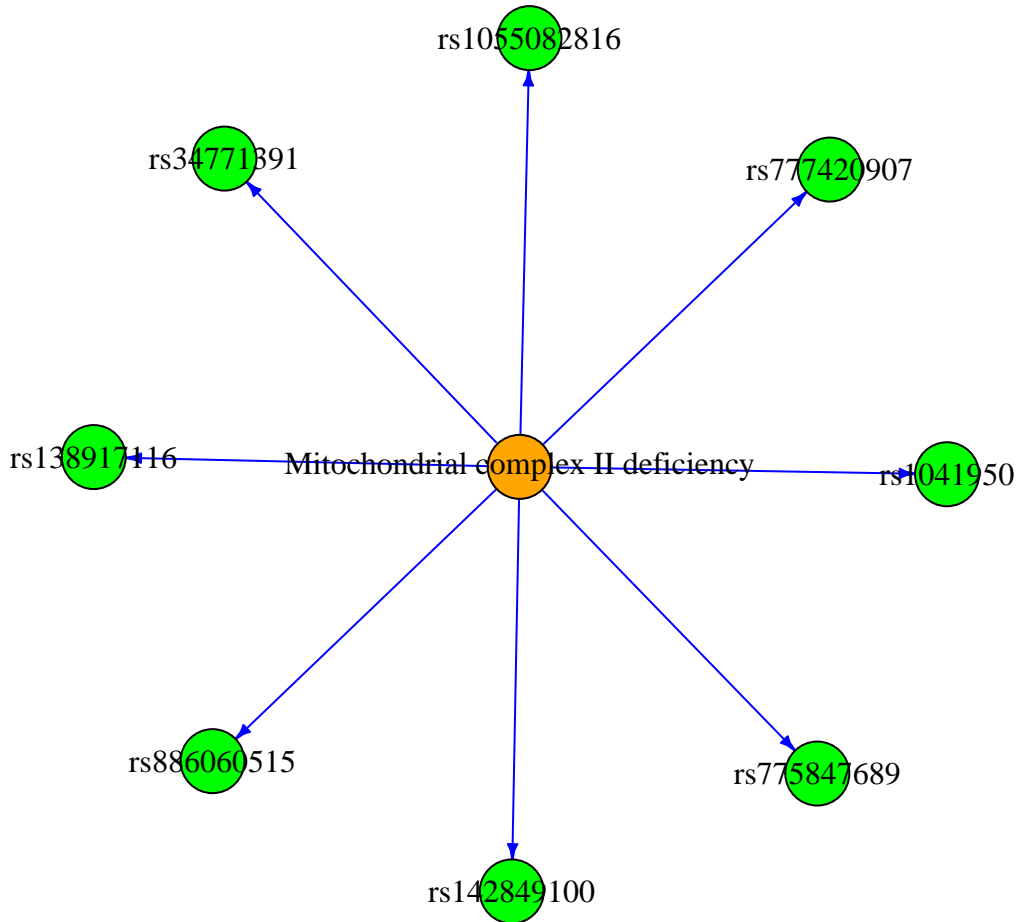

# Variant–Disease Network (Mitochondrial Complex V (ATP Synthase) Deficiency)

Mitochondrial Complex V (ATP Synthase) Deficiency

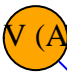

rs61732273

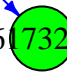

## Variant–Disease Network (Mitochondrial diseases)

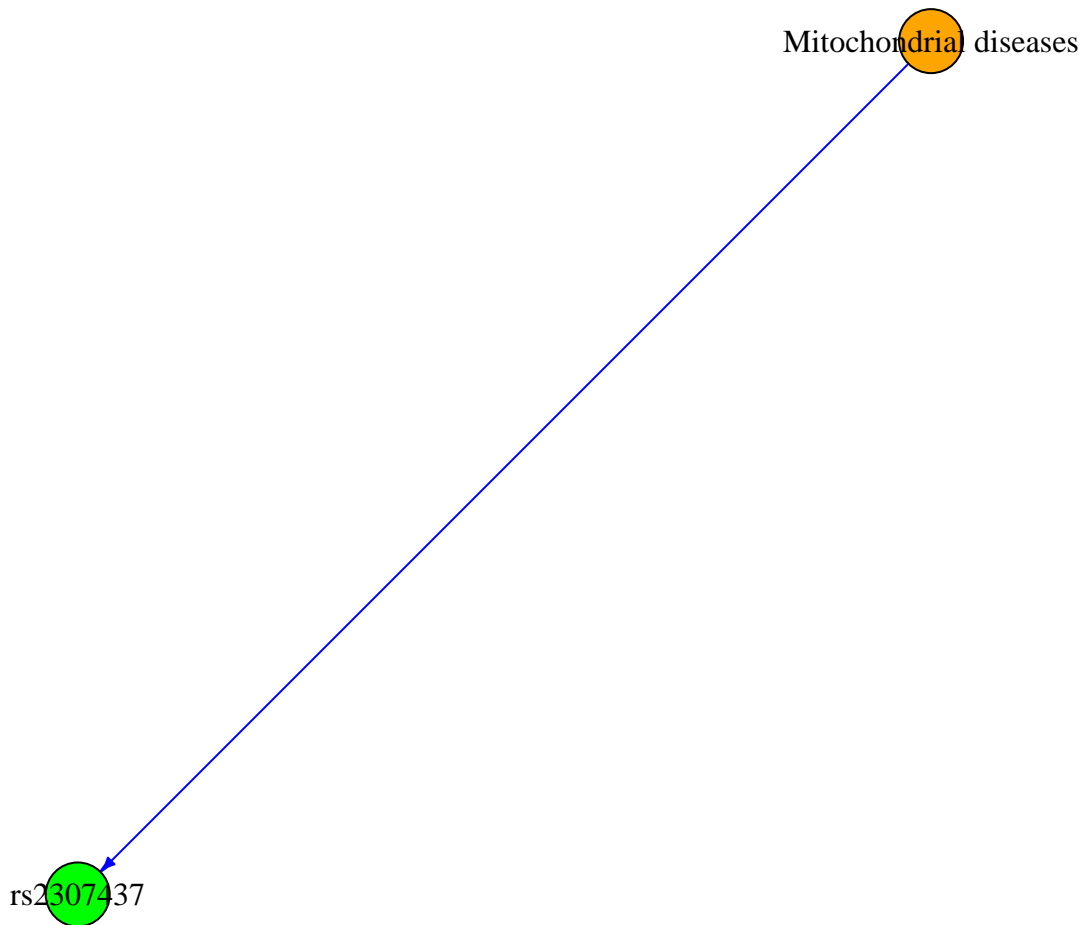

# Variant–Disease Network (Mitochondrial DNA depletion syndrome)

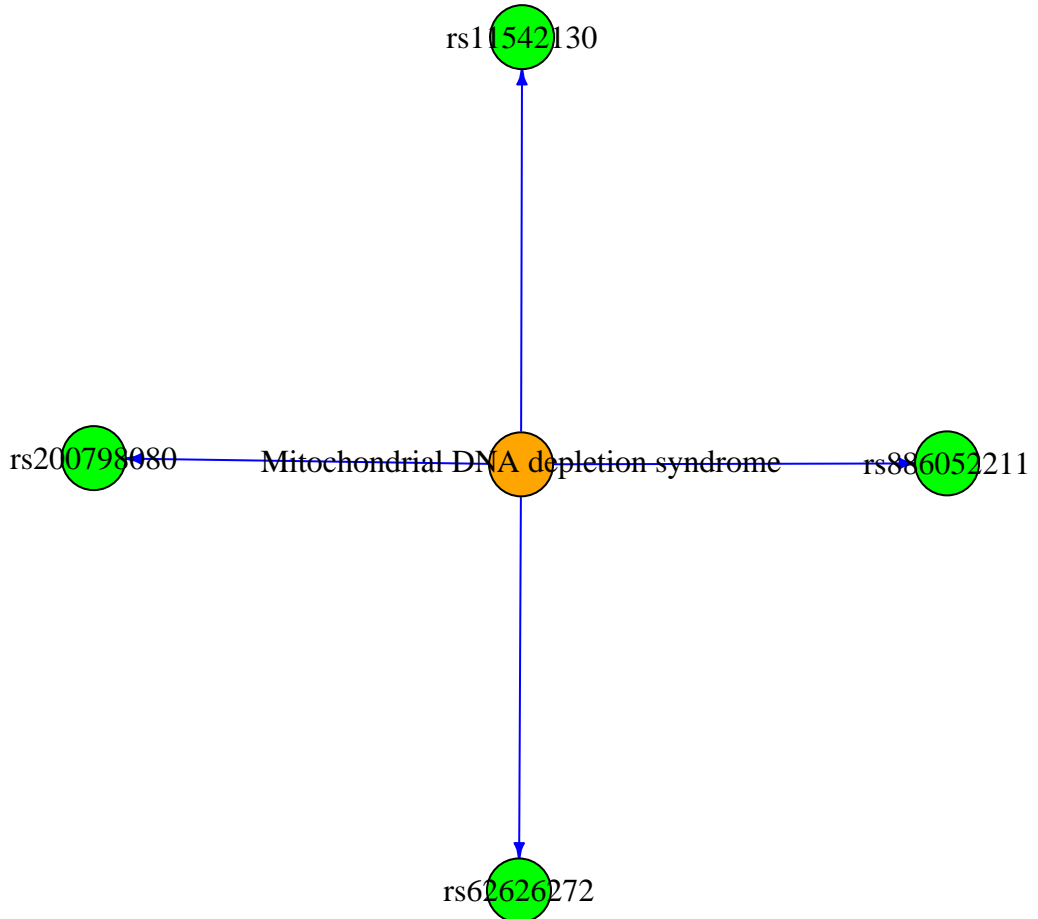



# Disease Network (Mitochondrial DNA depletion syndrome 13 (encephalomyopathy))

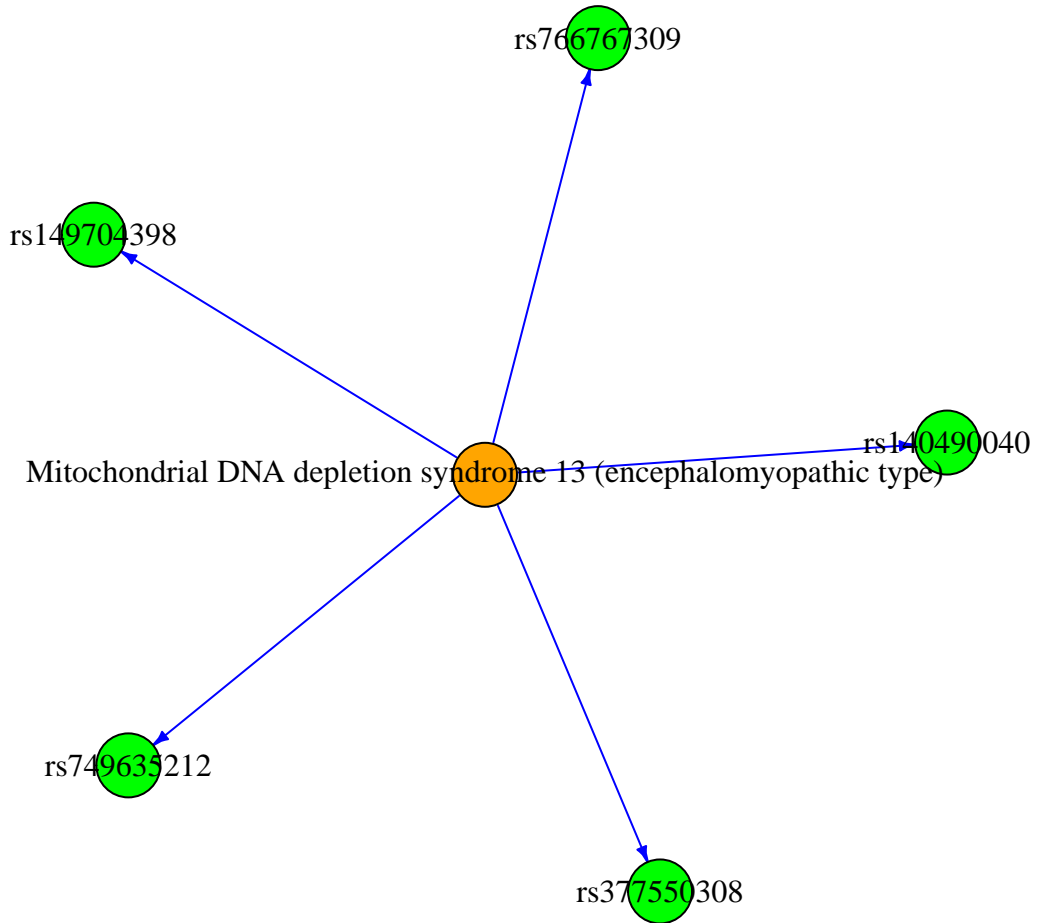

network (Mitochondrial DNA depletion syndrome 9 (encephalomyopathic with r

rs766814700



Mitochondrial DNA depletion syndrome 9 (encephalomyopathi



## Variant–Disease Network (Mitochondrial encephalopathy)

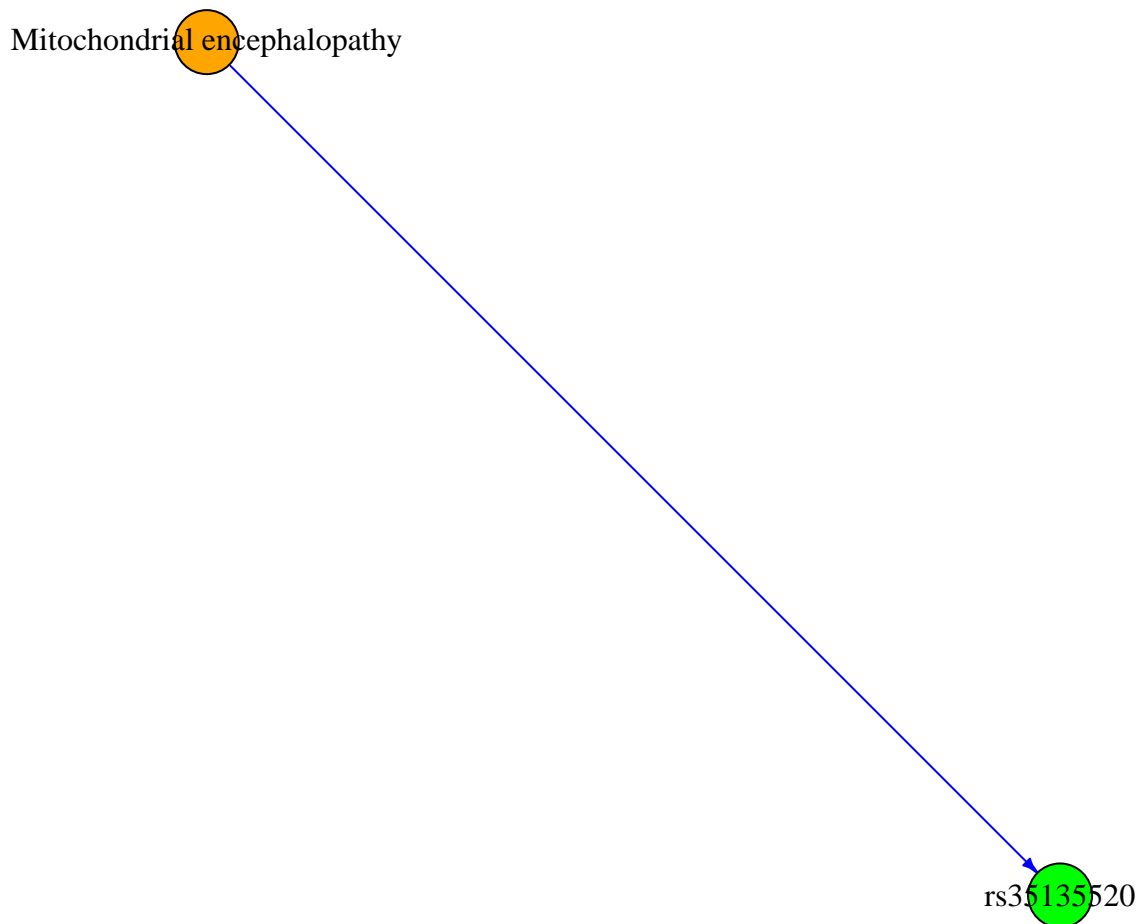

Variant–Disease Network (Mitochondrial myopathy and sideroblastic anemia)

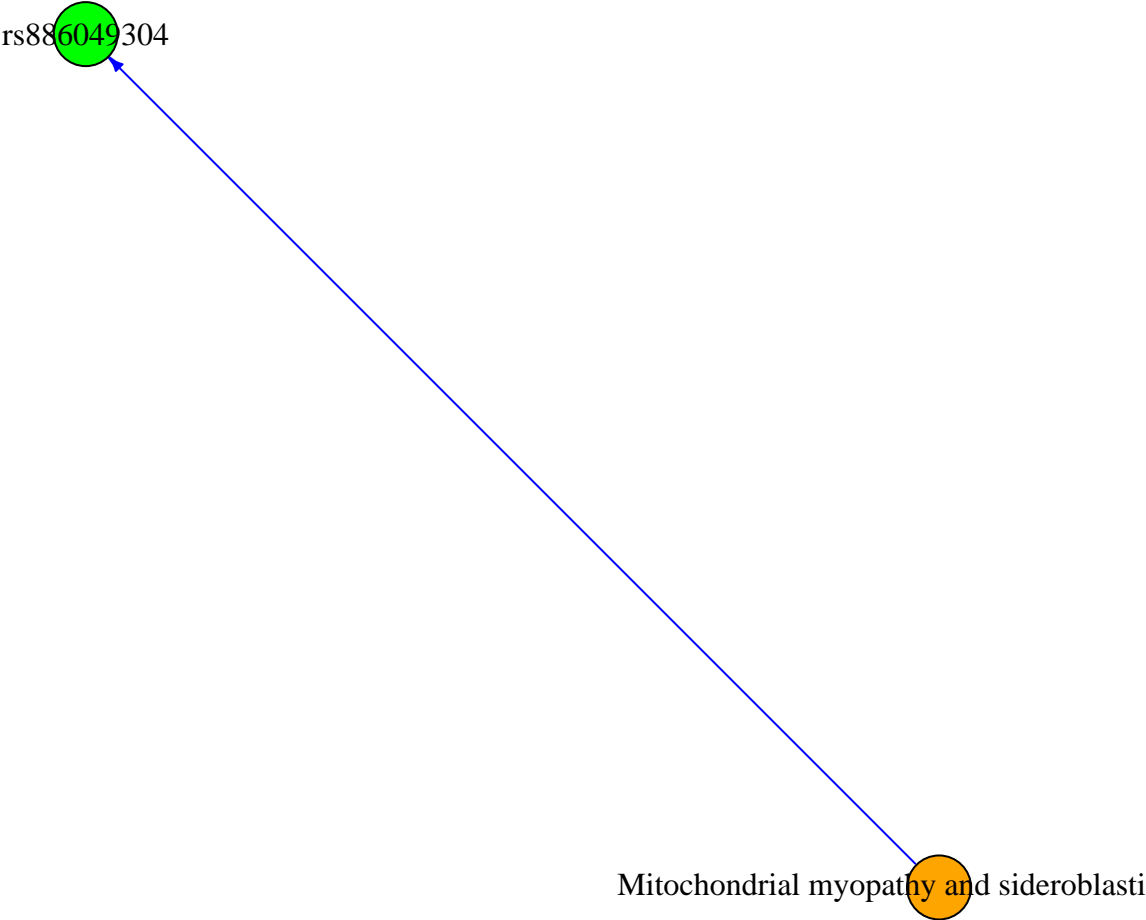

**Variant–Disease Network (Mitochondrial trifunctional protein deficiency)**

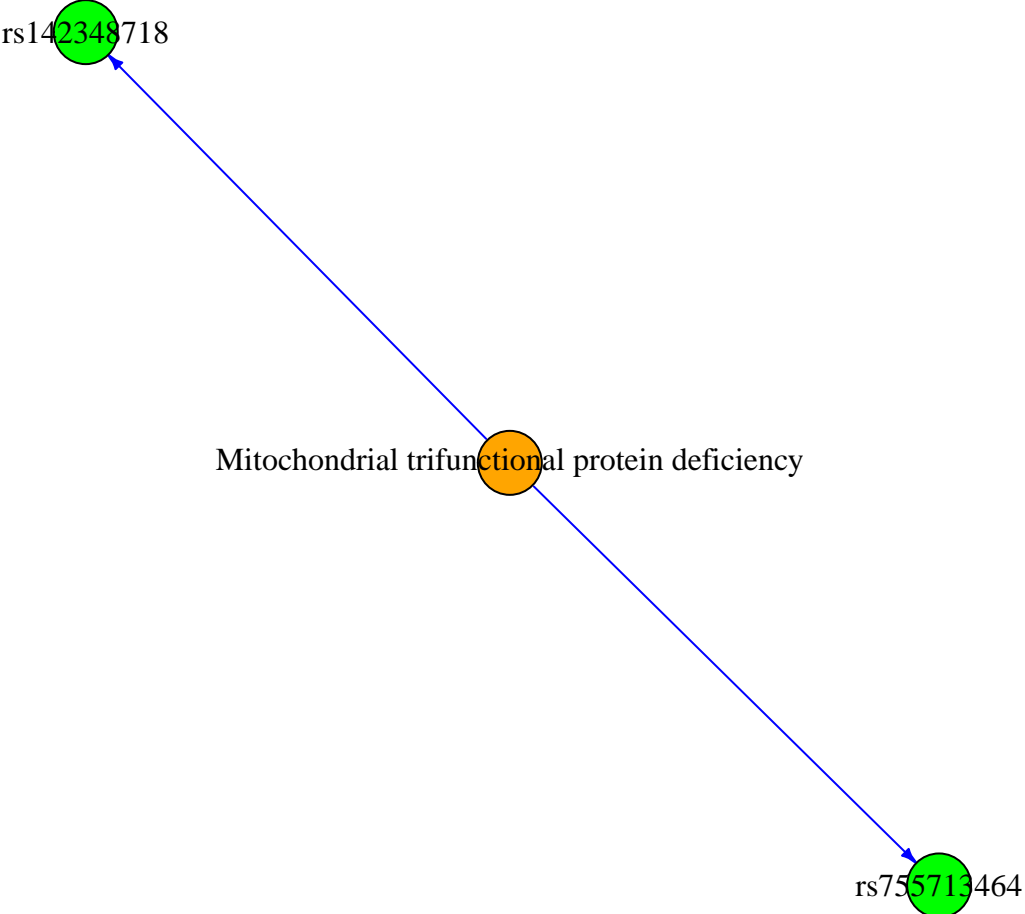

**Variant–Disease Network (Monocarboxylate transporter 1 deficiency)**

Monocarboxylate transporter 1 deficiency

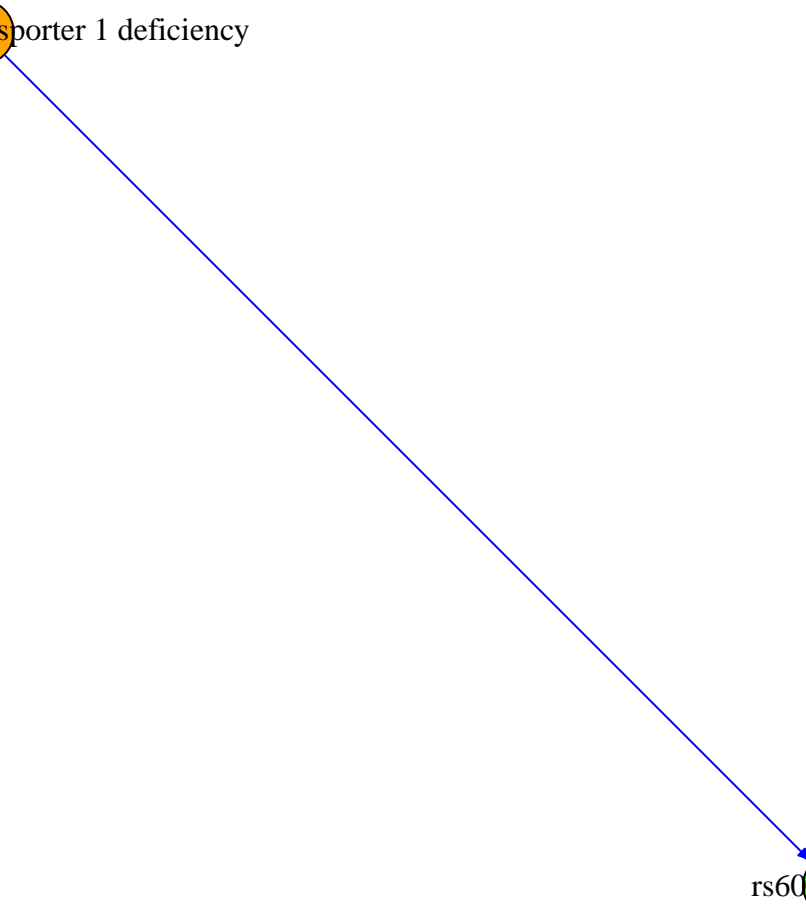

rs606231299

## Variant–Disease Network (Monogenic diabetes)

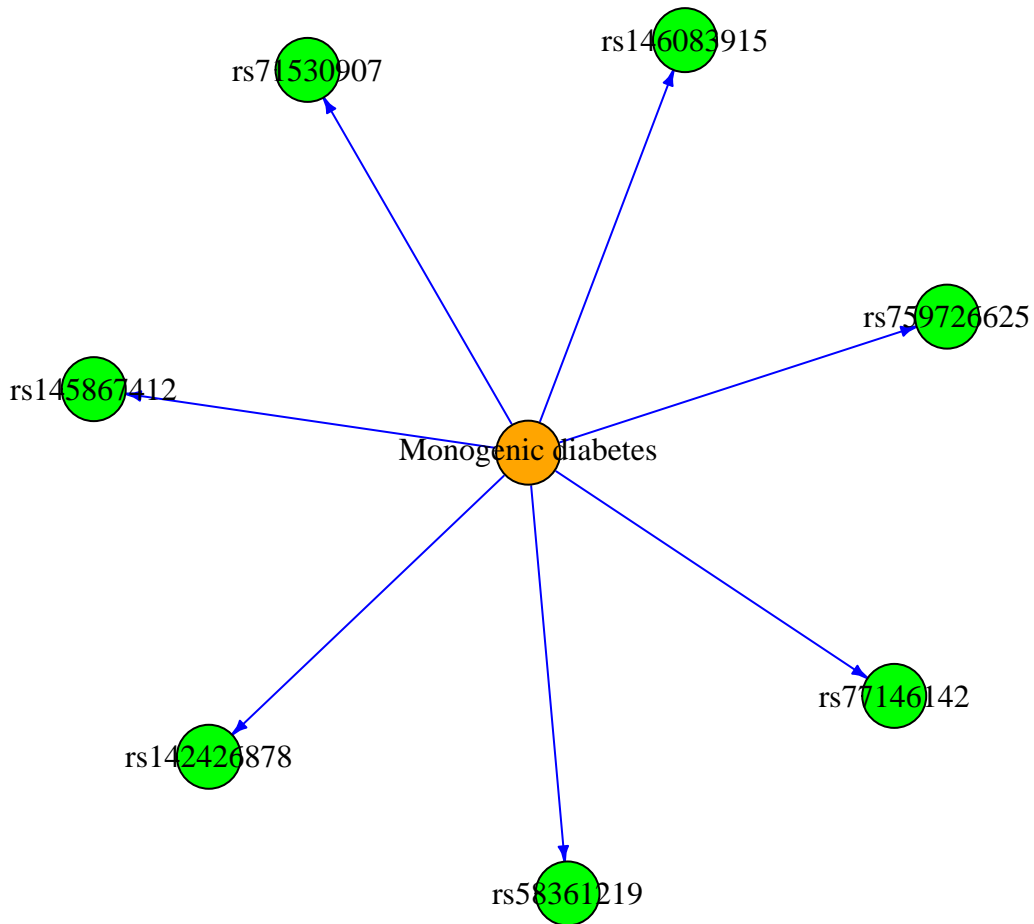

Variant–Disease Network (Monogenic Non–Syndromic Obesity)

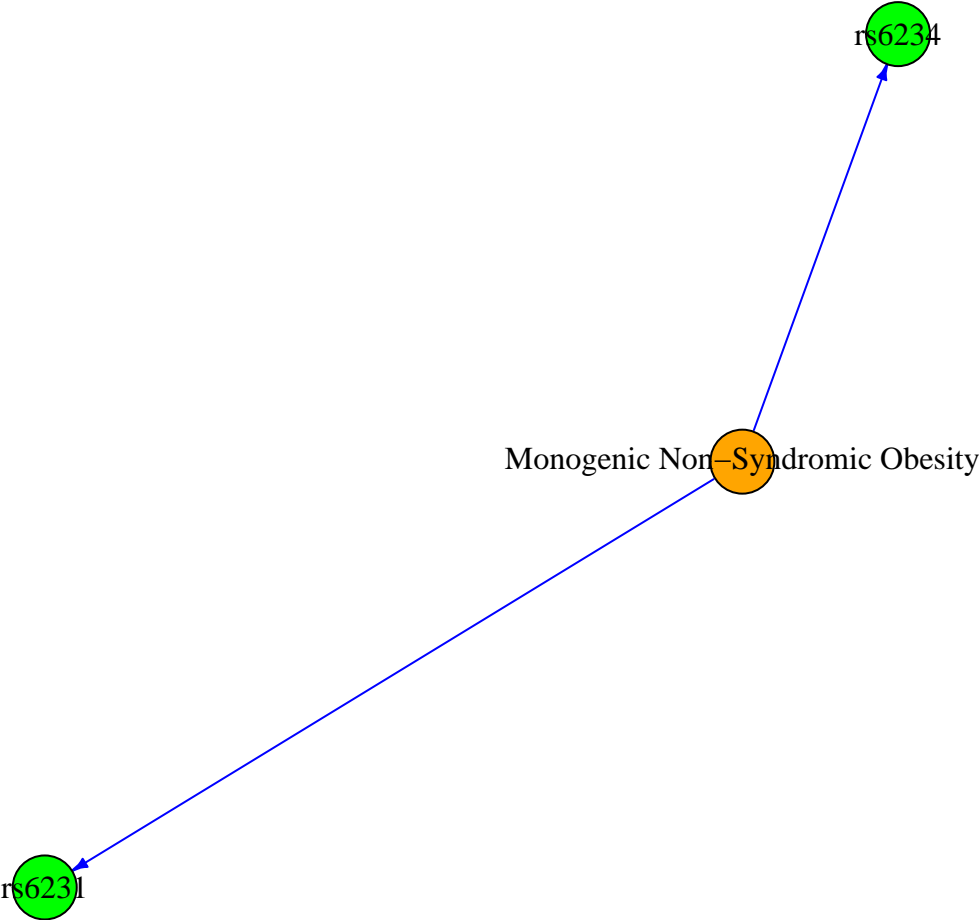



Variant–Disease Network (Mononeuropathy of the Median Nerve)

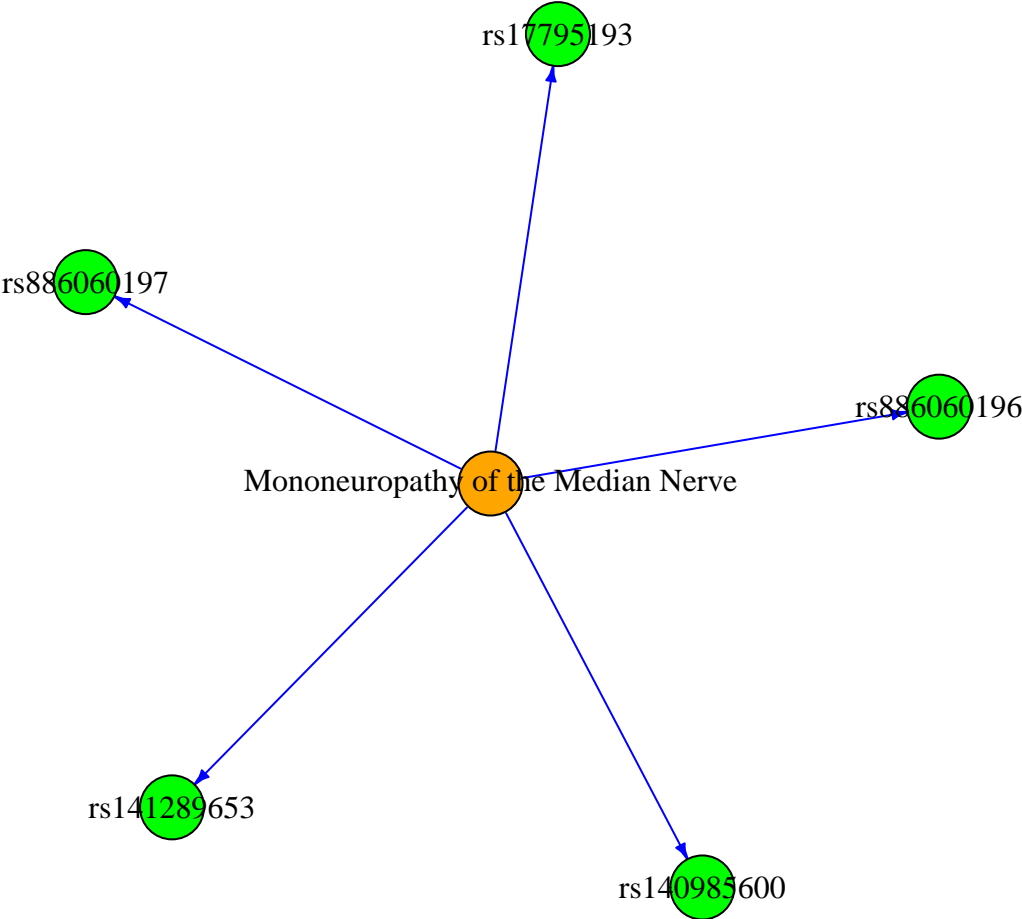

## Variant–Disease Network (Morquio syndrome)

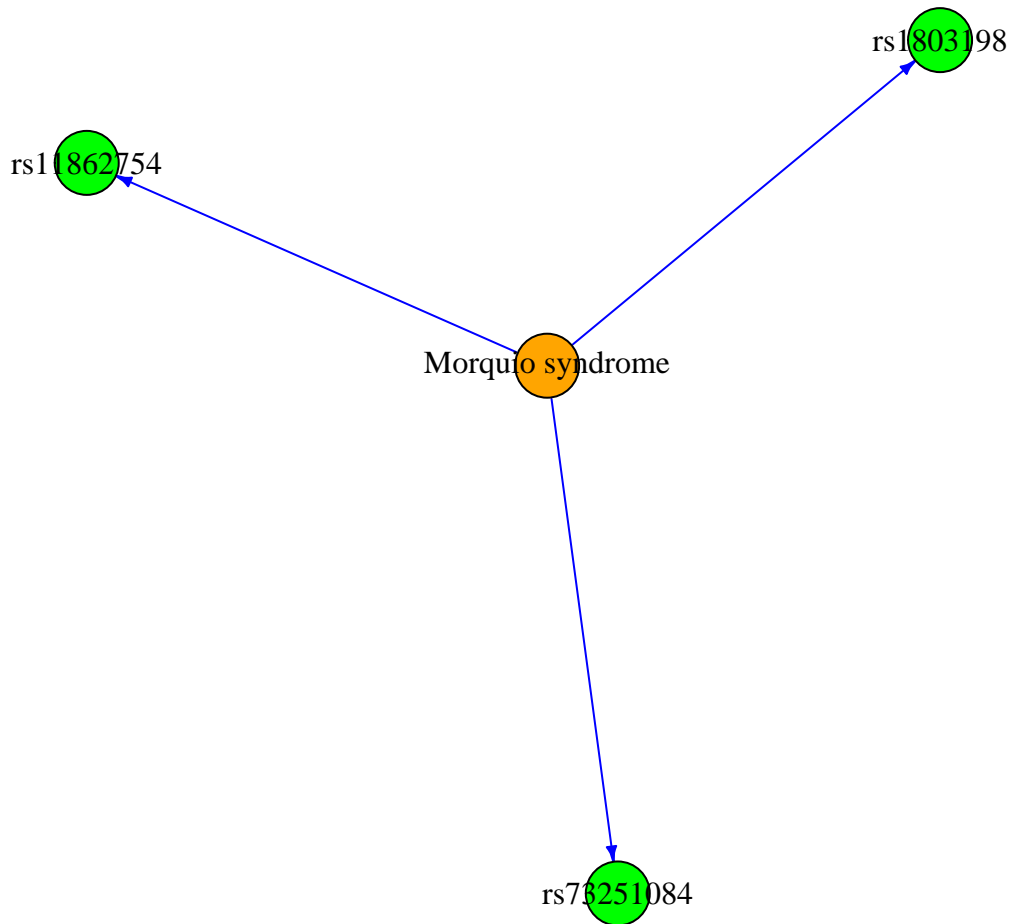

**Variant–Disease Network (Mosaic variegated aneuploidy syndrome)**

rs1802286

Mosaic variegated aneuploidy syndrome

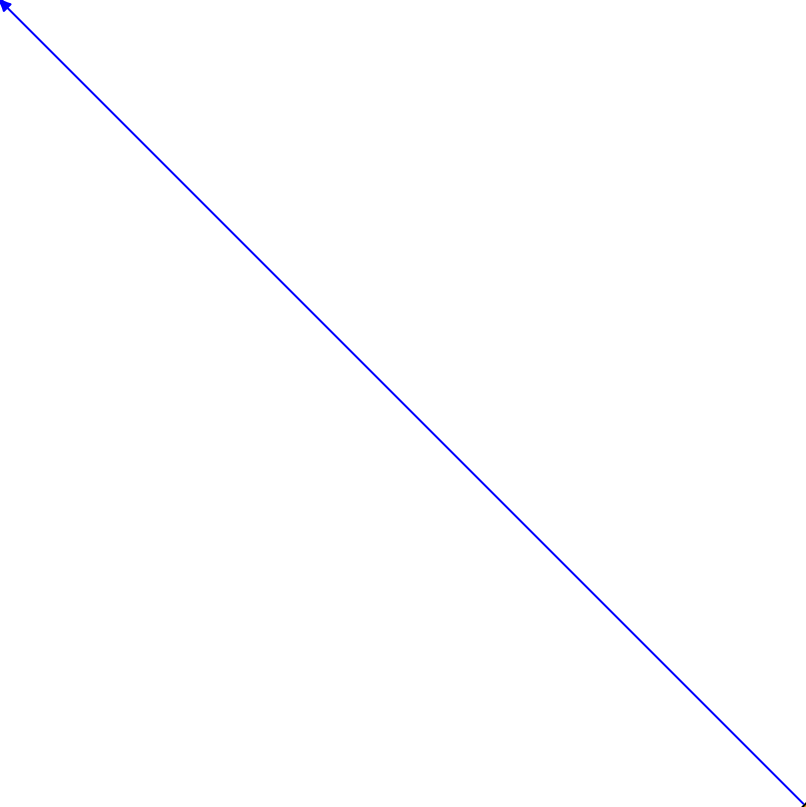

Variant–Disease Network (Mosaic variegated aneuploidy syndrome 1)

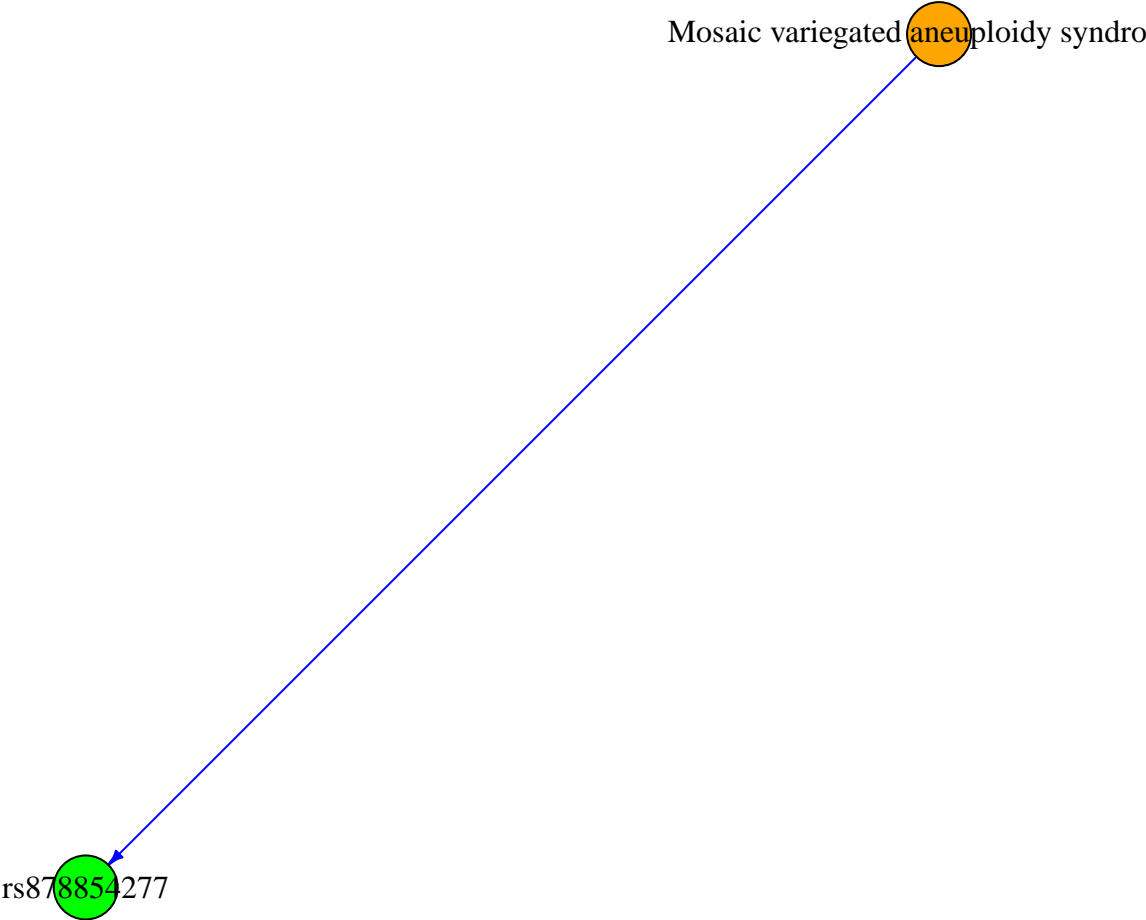

**Variant–Disease Network (Mosaic variegated aneuploidy syndrome 2)**

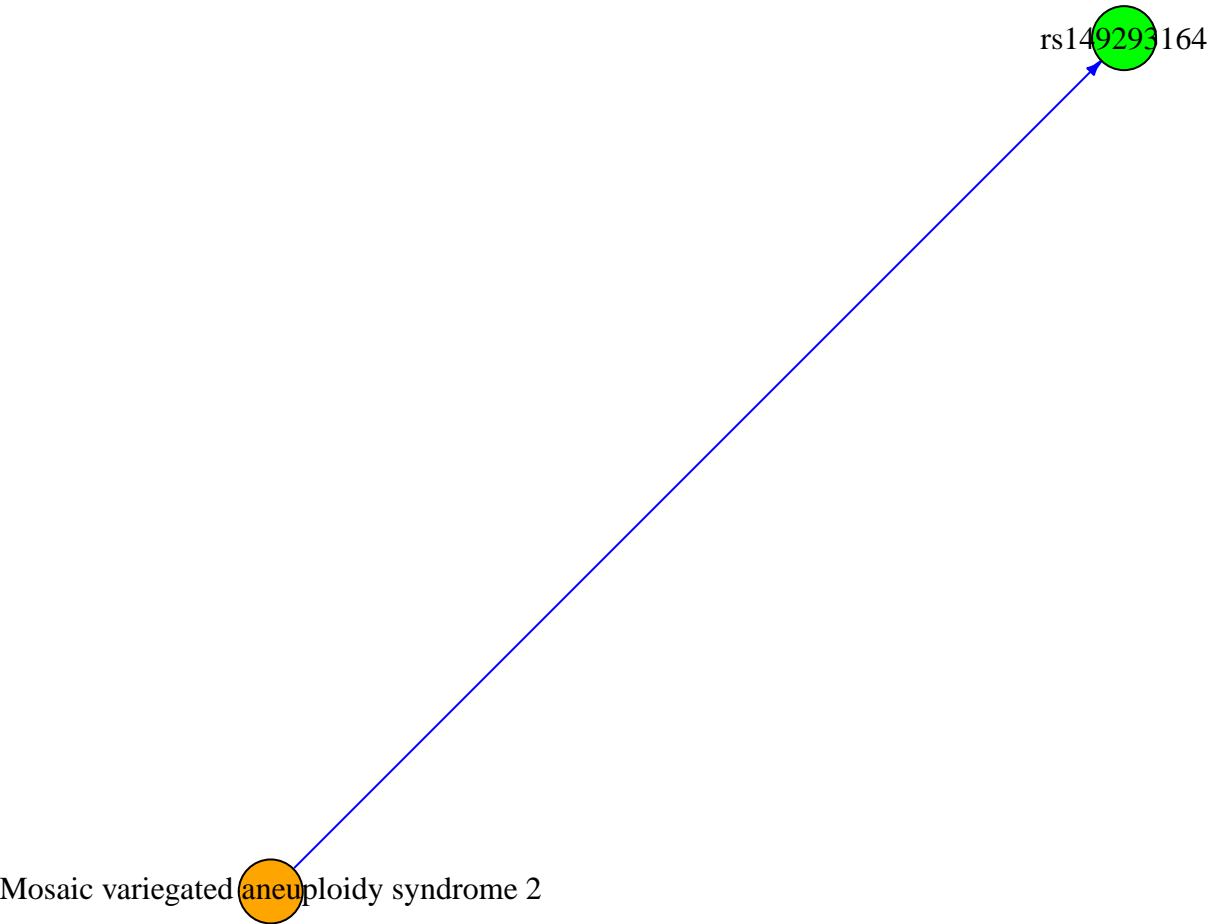

Variant–Disease Network (Mucopolipidosis III Gamma)

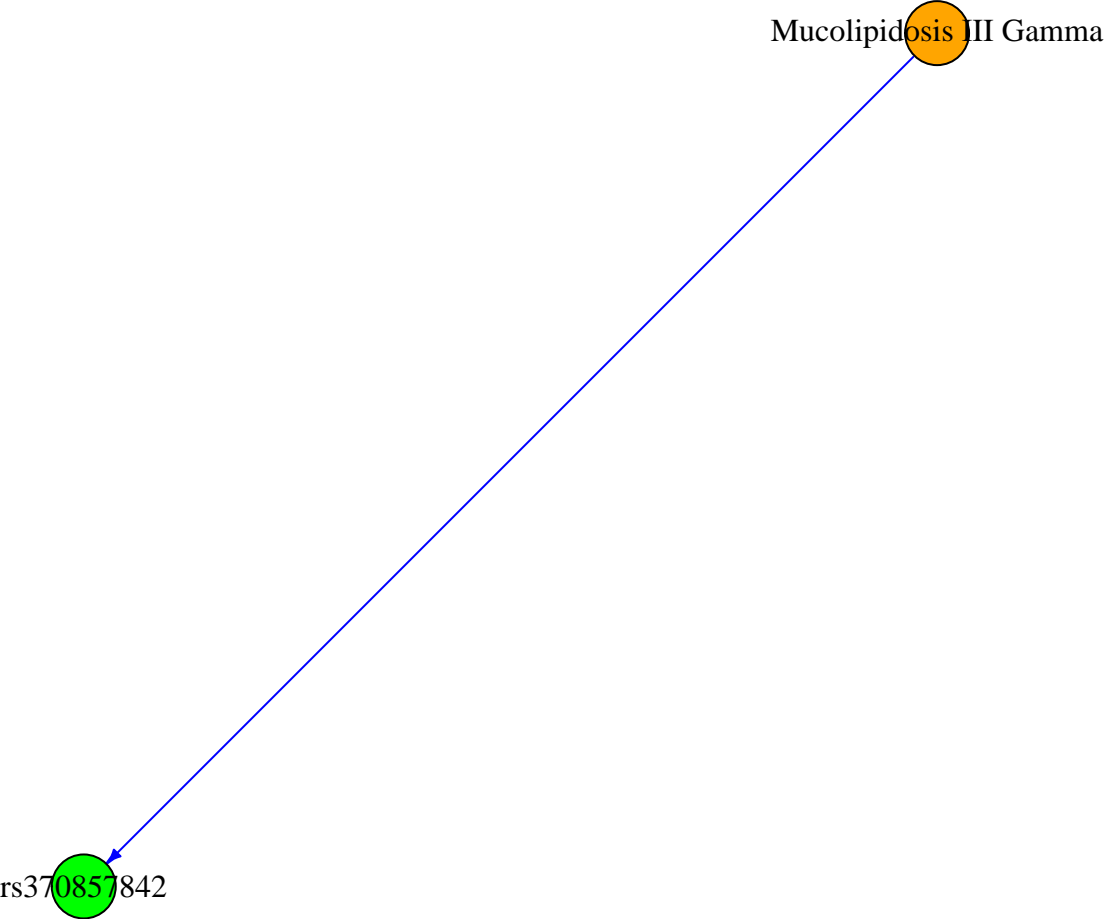

## Variant–Disease Network (Mucopolipidosis type IV)

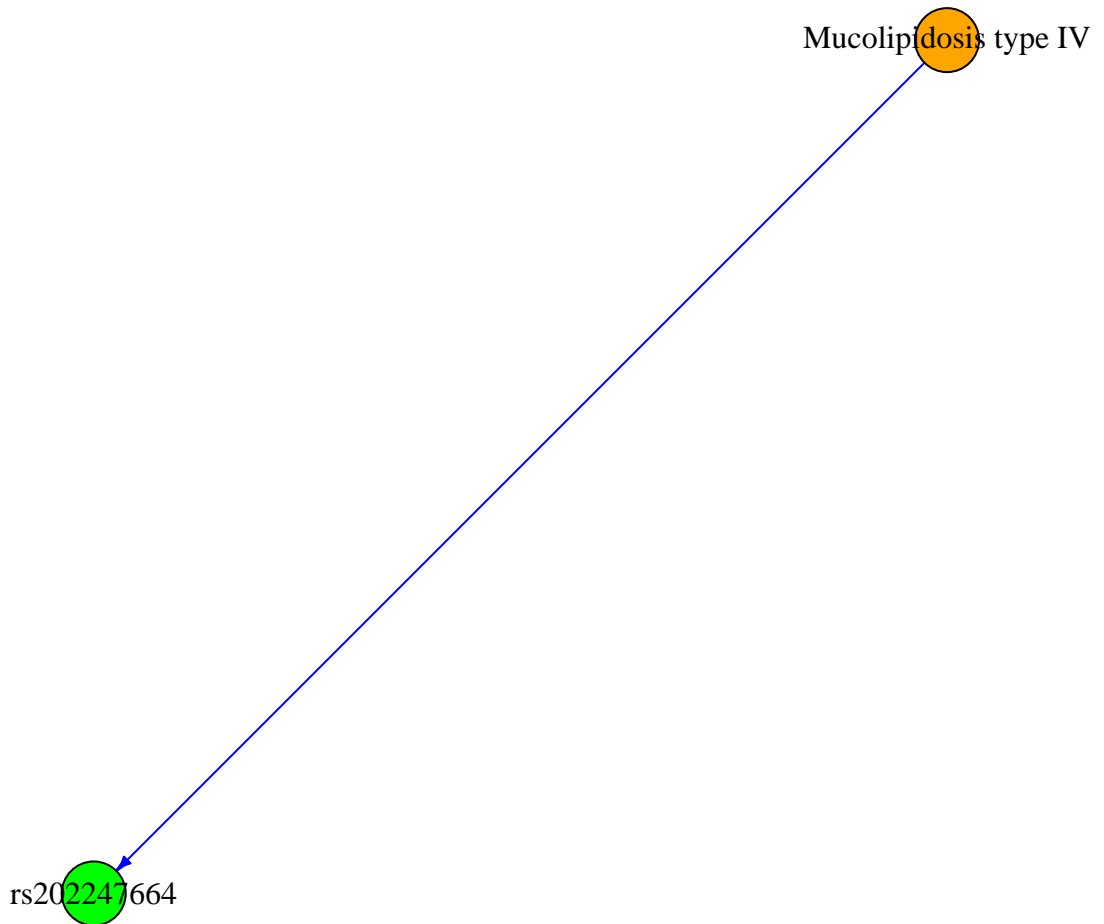

Variant–Disease Network (Mucopolysaccharidosis)

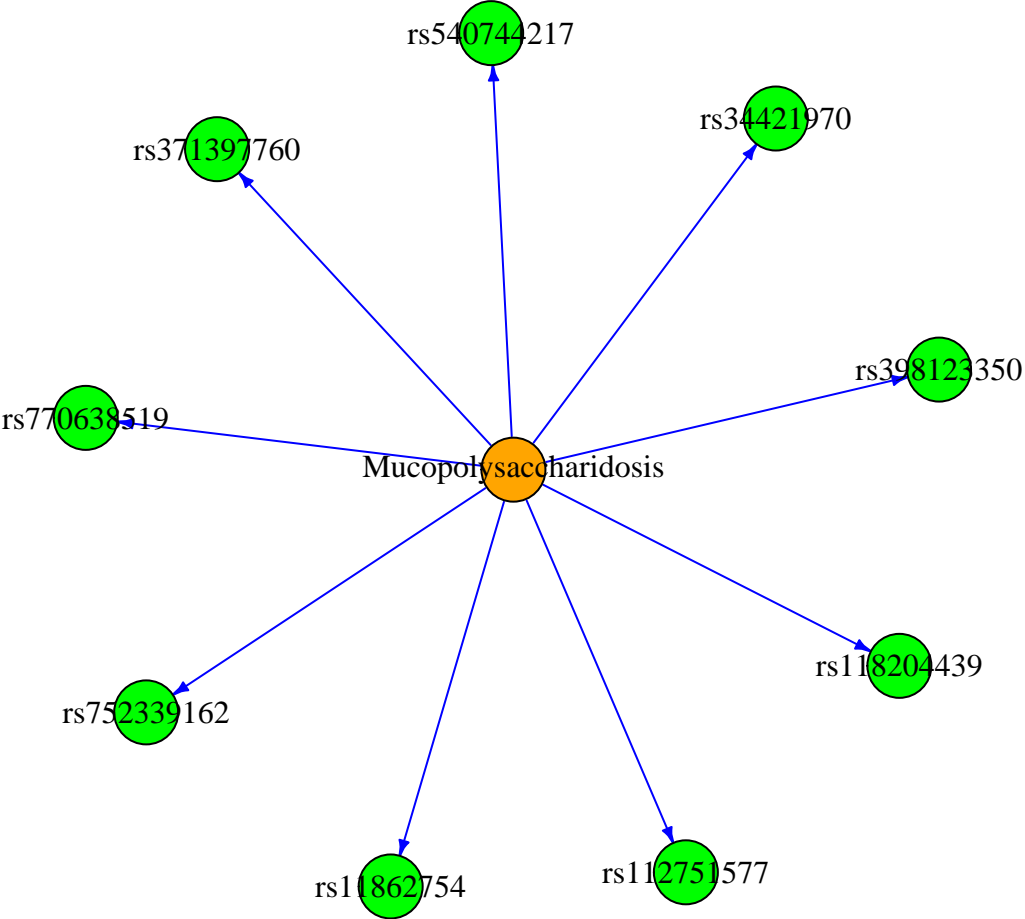



Variant–Disease Network (Mucopolysaccharidosis type I)

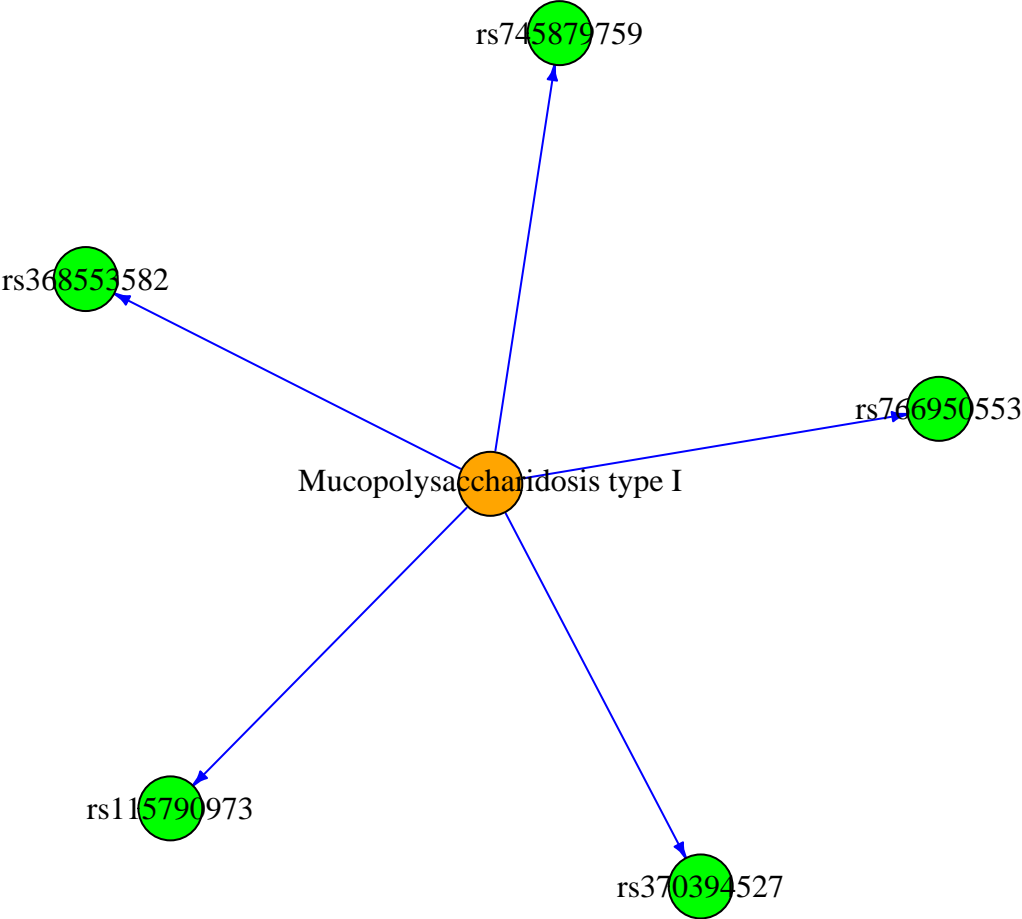

## Variant–Disease Network (Mulibrey nanism syndrome)

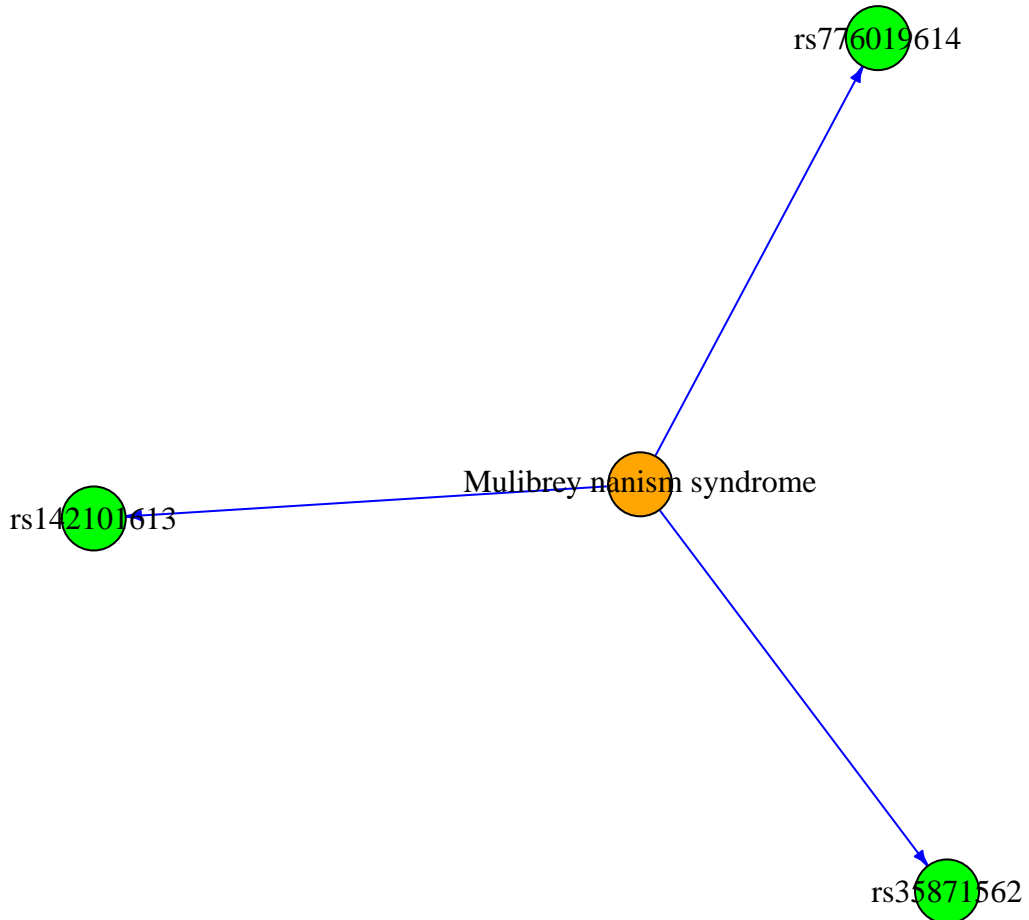

# Disease Network (Multicentric Osteolysis–Nodulosis–Arthropathy (MONA) Spectrum Disorders

olysis–Nodulosis–Arthropathy (MONA) Spectrum Disorders

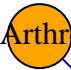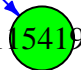

rs11541998

# nt-Disease Network (Multiple congenital anomalies–hypotonia–seizures syn

rs9320001

Multiple congenital anomalies–hypotonia–seizures syndrome 1

rs9320000

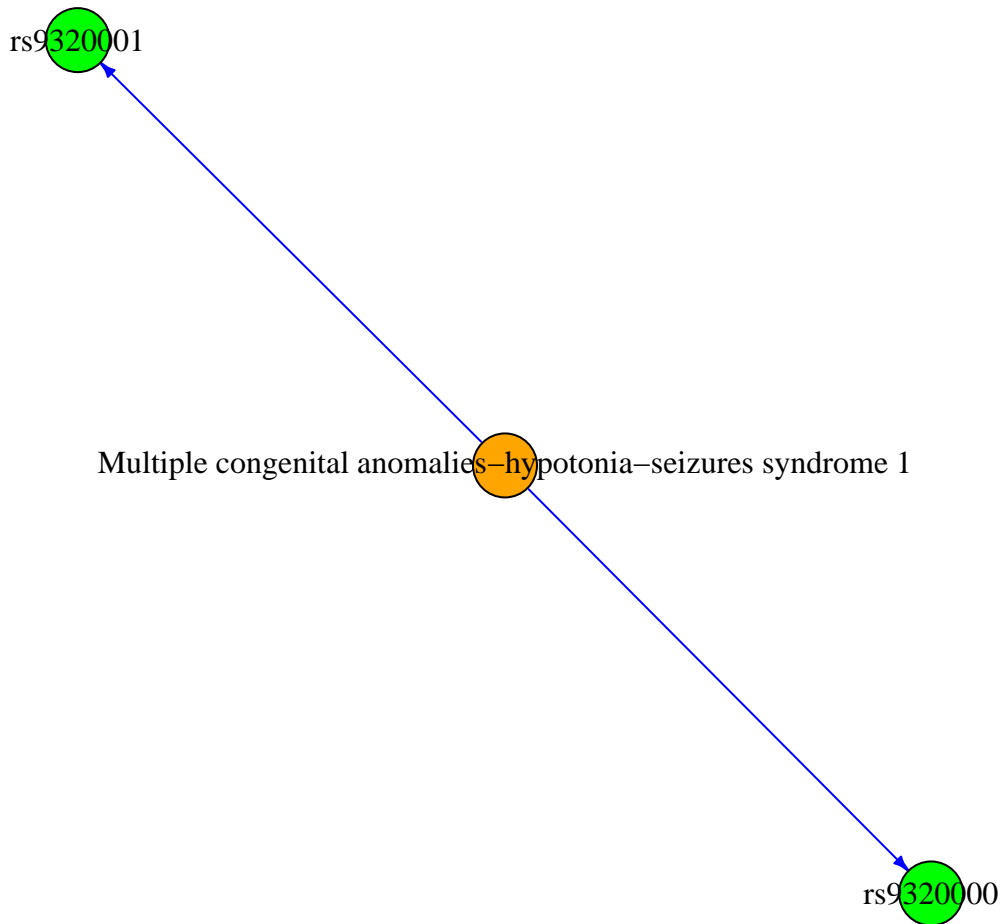

# nt-Disease Network (Multiple congenital anomalies–hypotonia–seizures syn

congenital anomalies–hypotonia–seizures syndrome 2

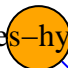

rs34422225

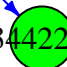

# Variant-Disease Network (Multiple Cutaneous and Mucosal Venous Malformations)

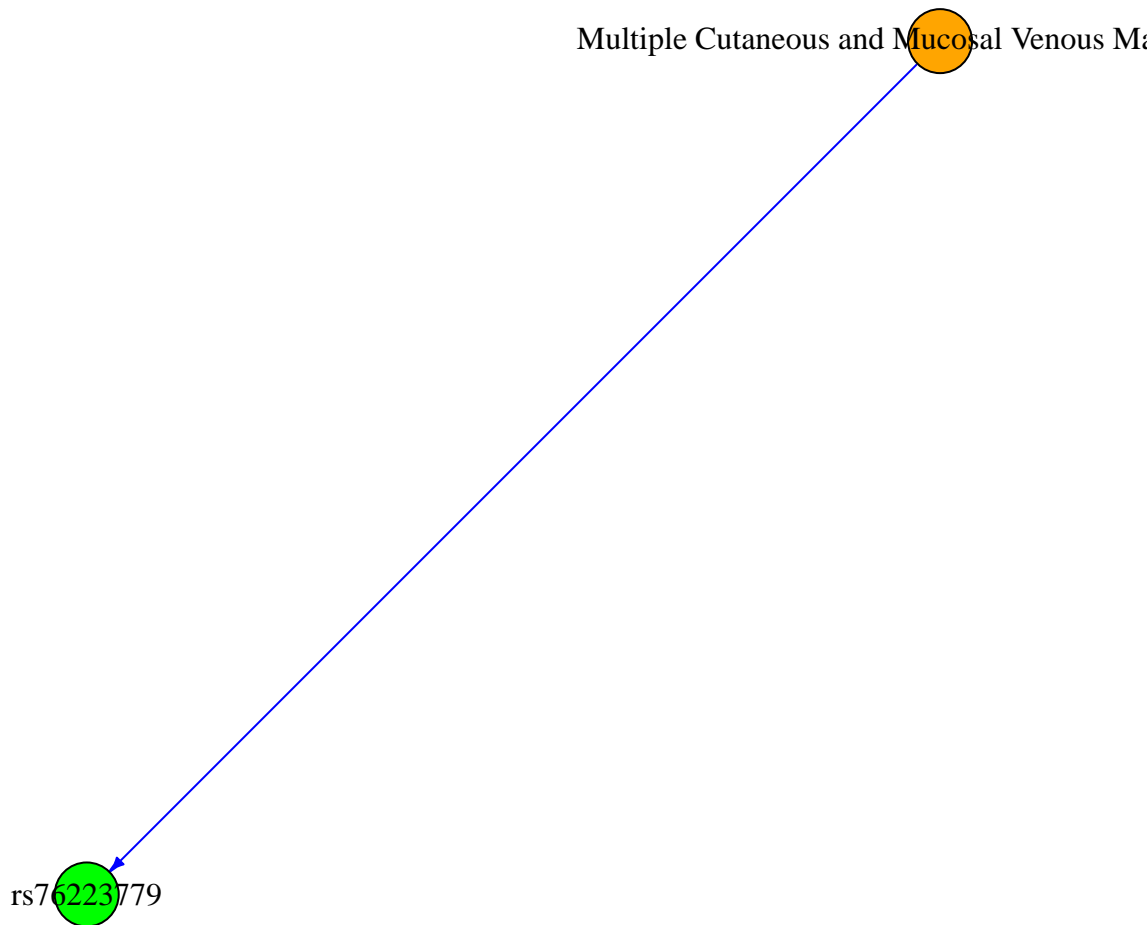

**Variant–Disease Network (Multiple Cutaneous and Uterine Leiomyomas)**

Multiple Cutaneous and Uterine Leiomyomas

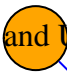

rs10926501

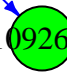

## Variant–Disease Network (Multiple cutaneous leiomyomas)

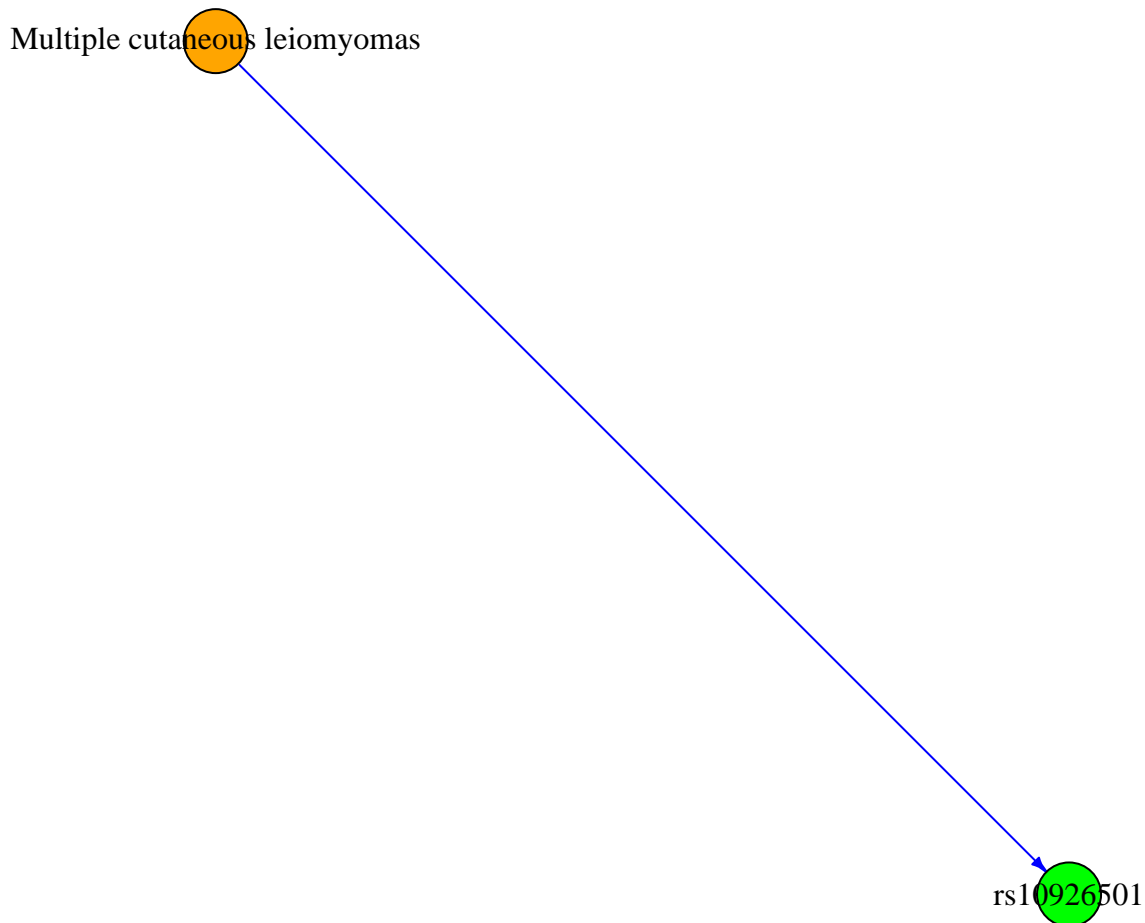



## Variant–Disease Network (Multiple endocrine neoplasia)

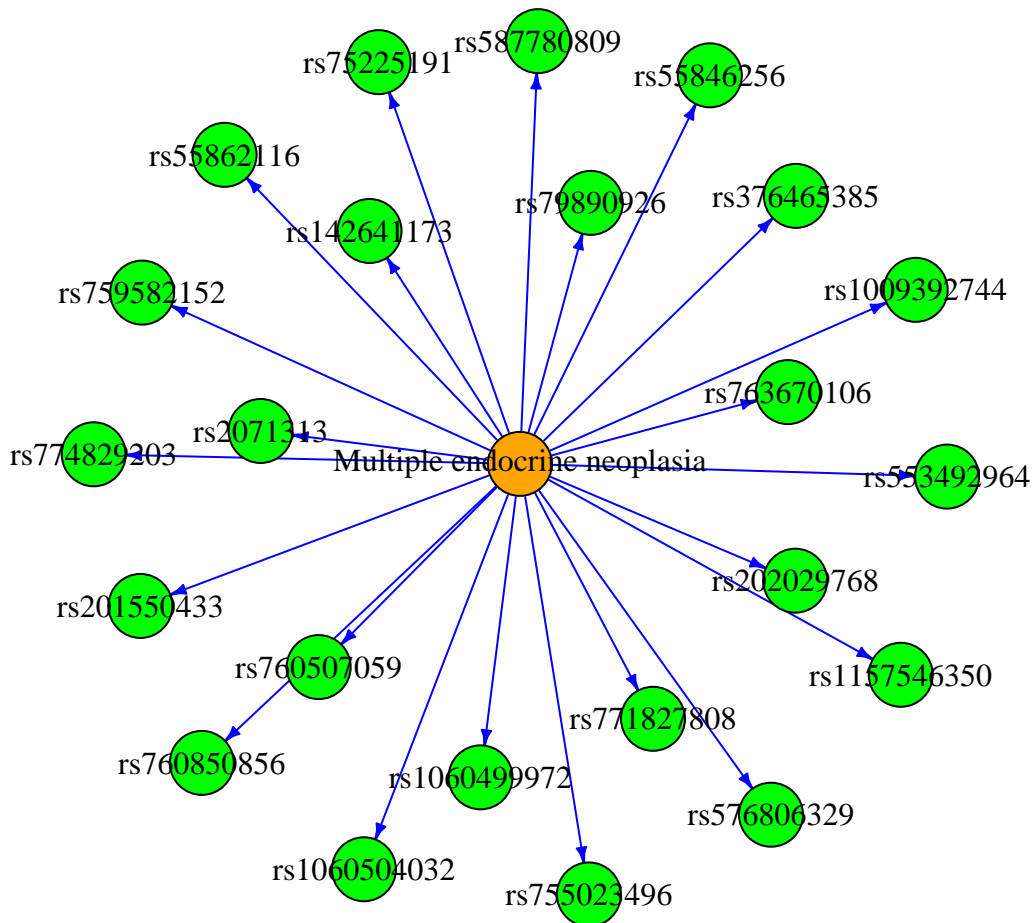

Variant–Disease Network (Multiple Epiphyseal Dysplasia)

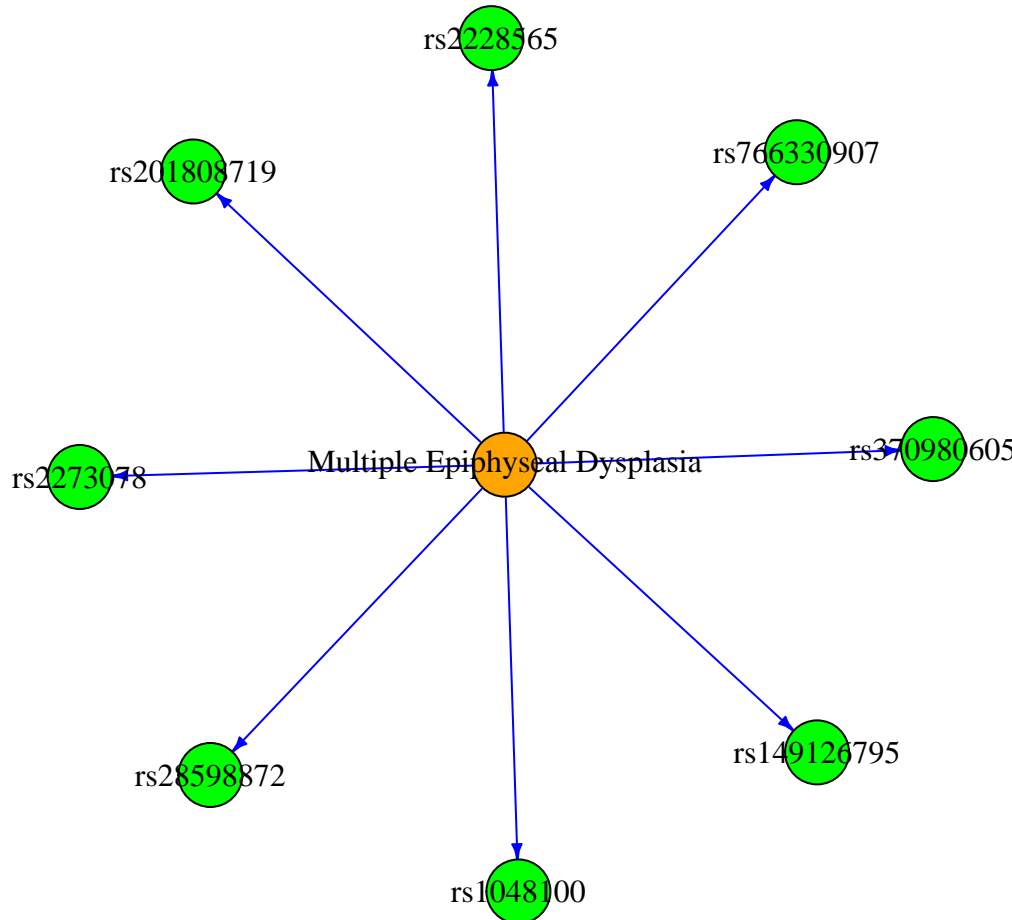

## Variant–Disease Network (Multiple exostoses type 1)

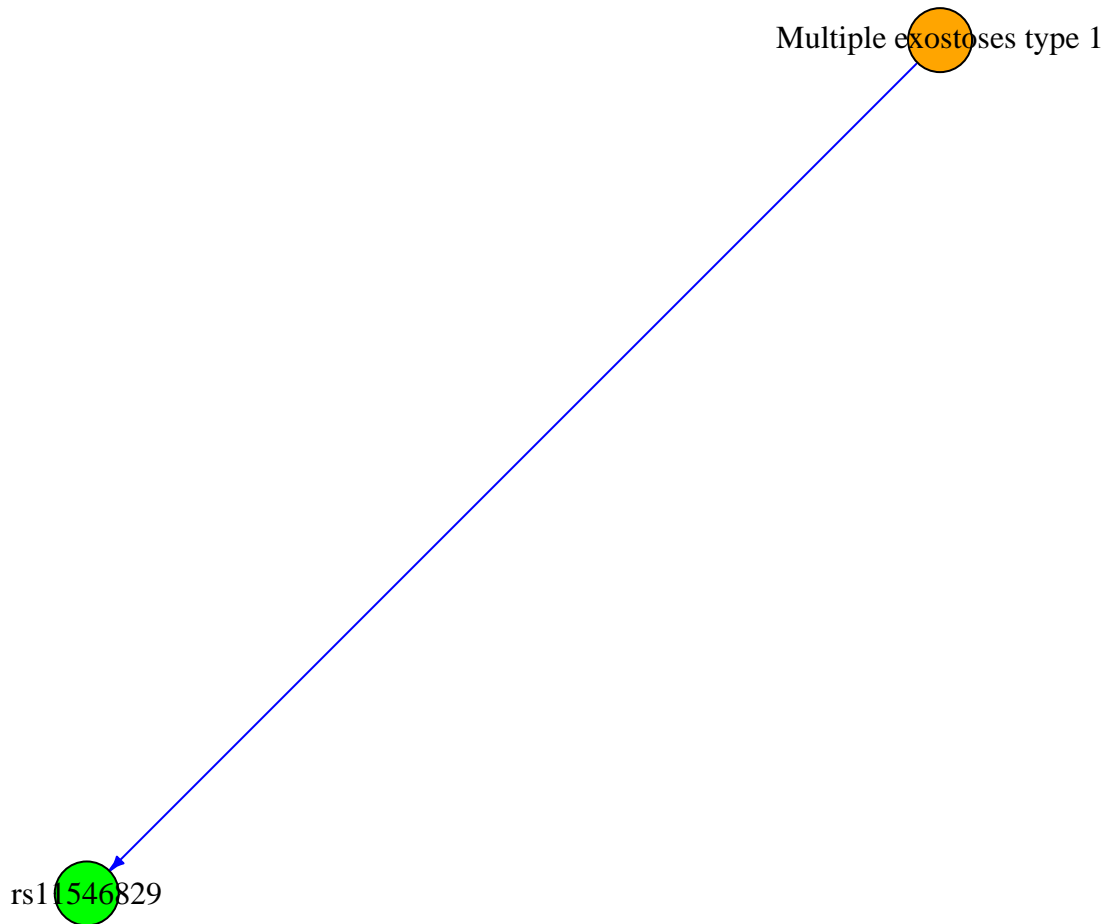

**Variant–Disease Network (Multiple gastrointestinal atresias)**

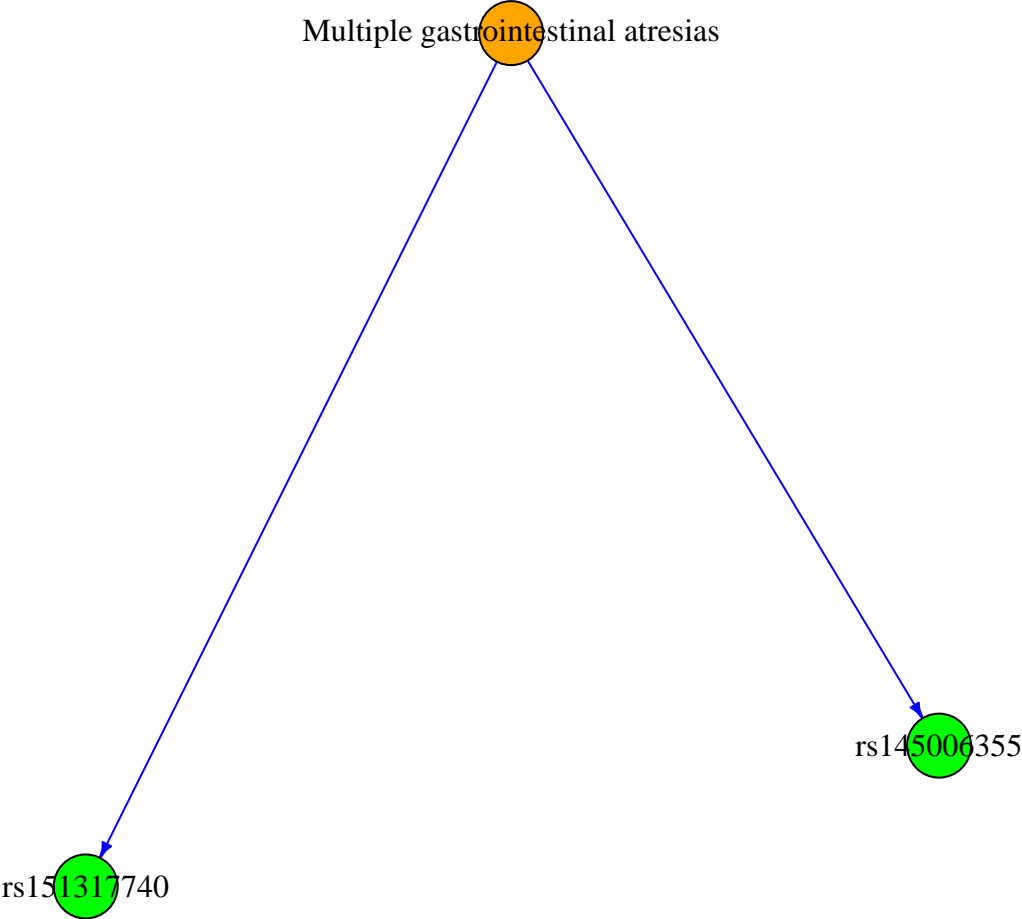

Variant–Disease Network (Multiple mitochondrial dysfunctions syndrome)

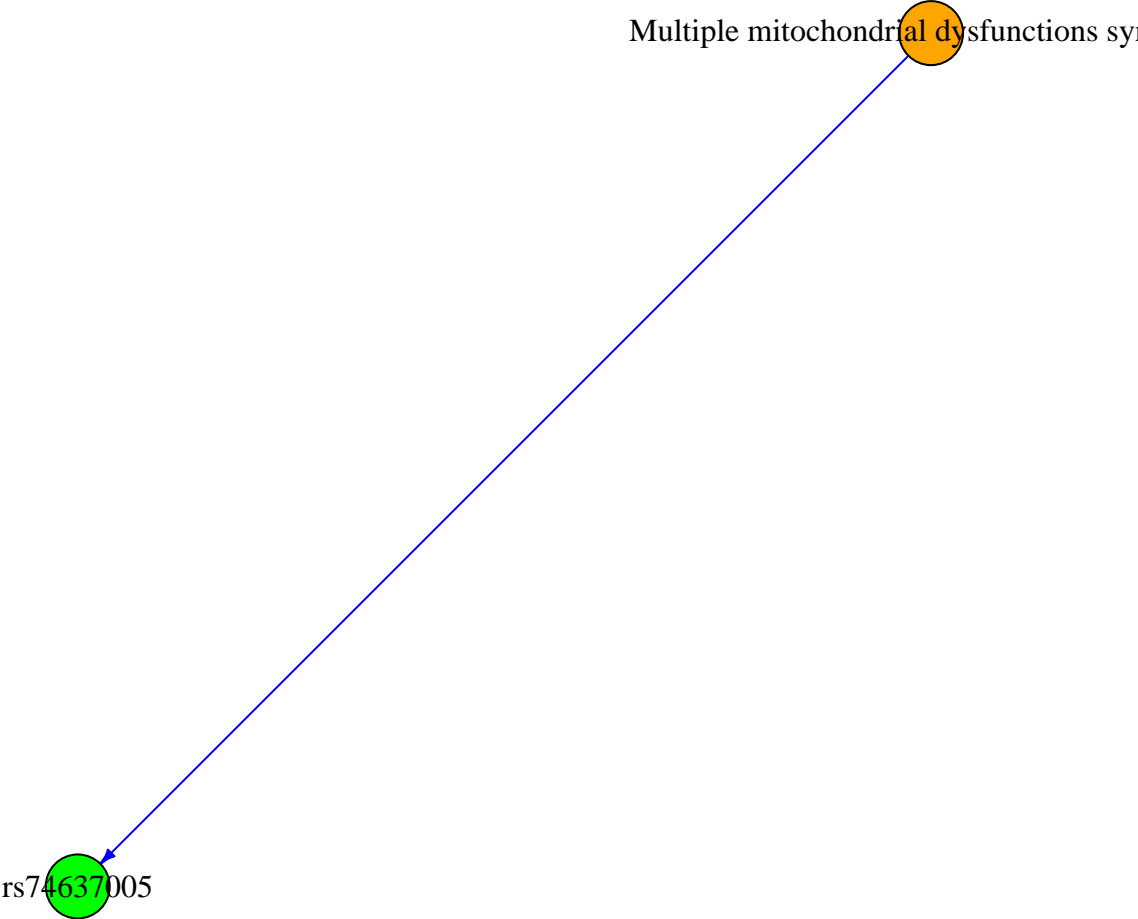

**Variant–Disease Network (Multiple pterygium syndrome Escobar type)**

rs771587252

Multiple pterygium syndrome Escobar

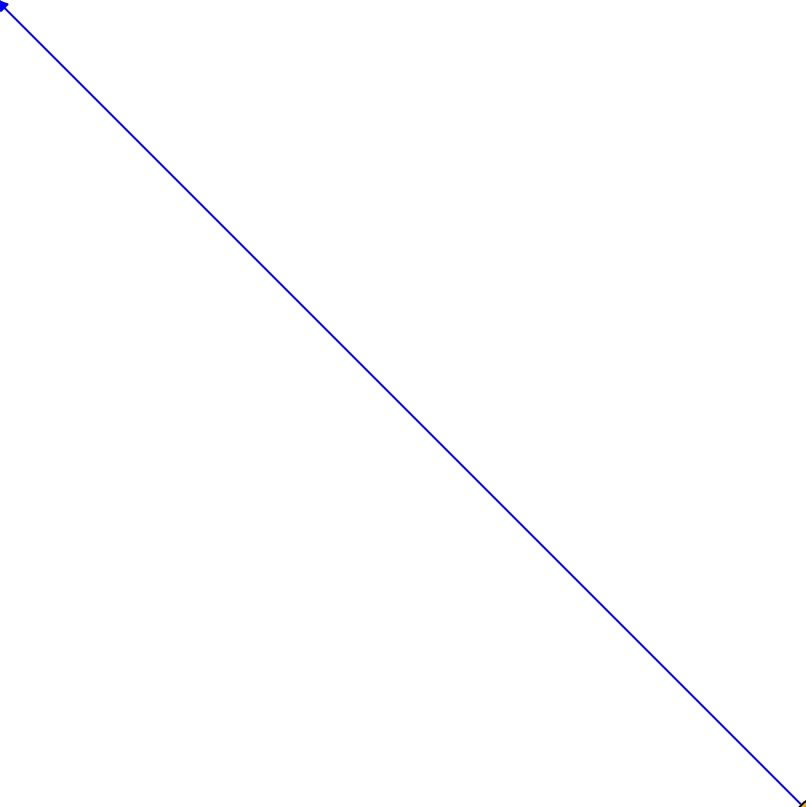

## Variant–Disease Network (Muscle AMP deaminase deficiency)

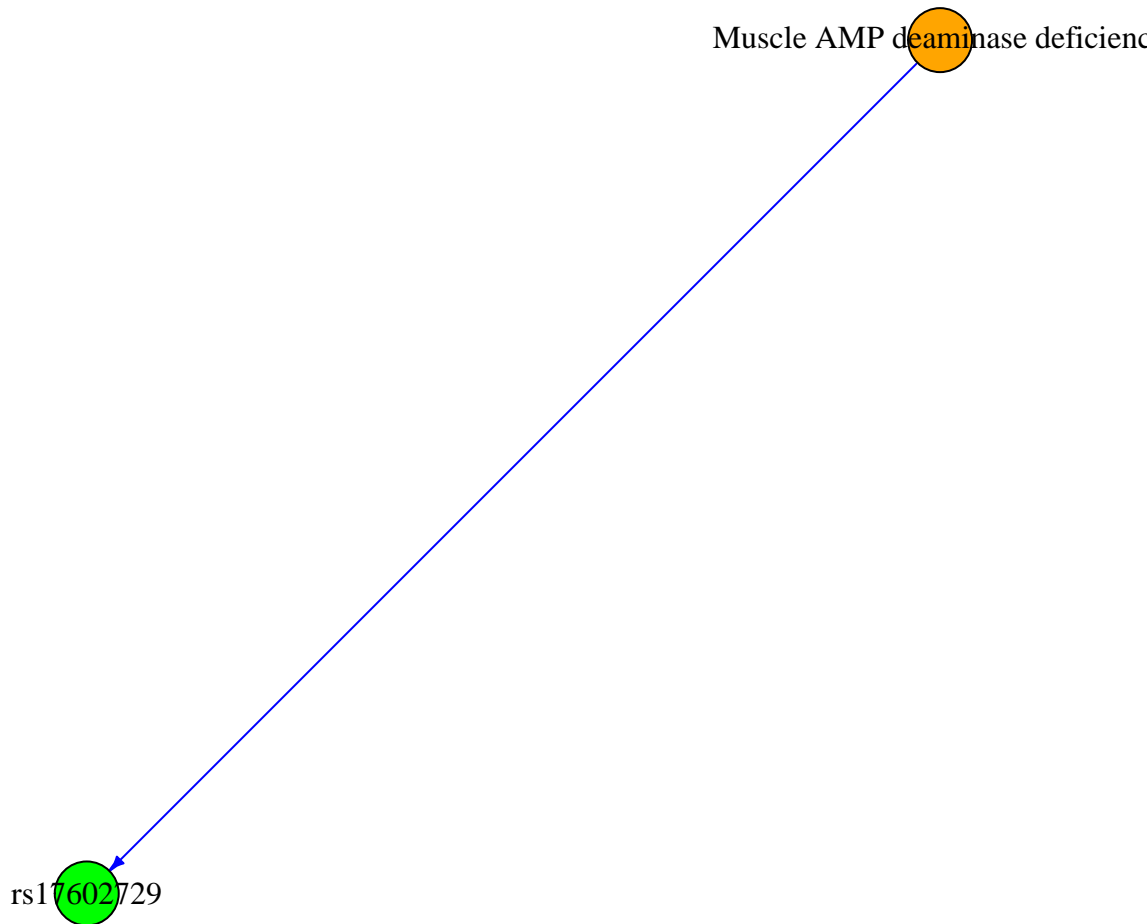

## Variant–Disease Network (Muscular dystrophy)

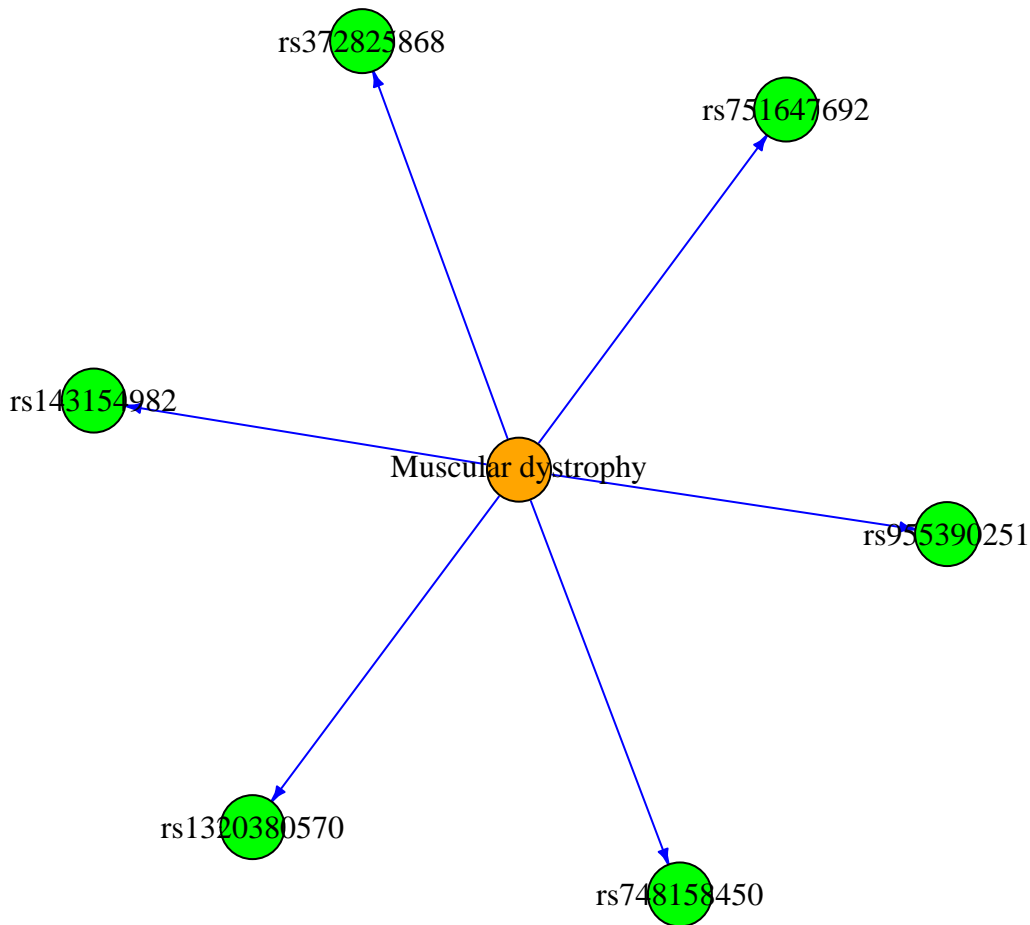



# e Network (Muscular dystrophy–dystroglycanopathy (congenital with brain a

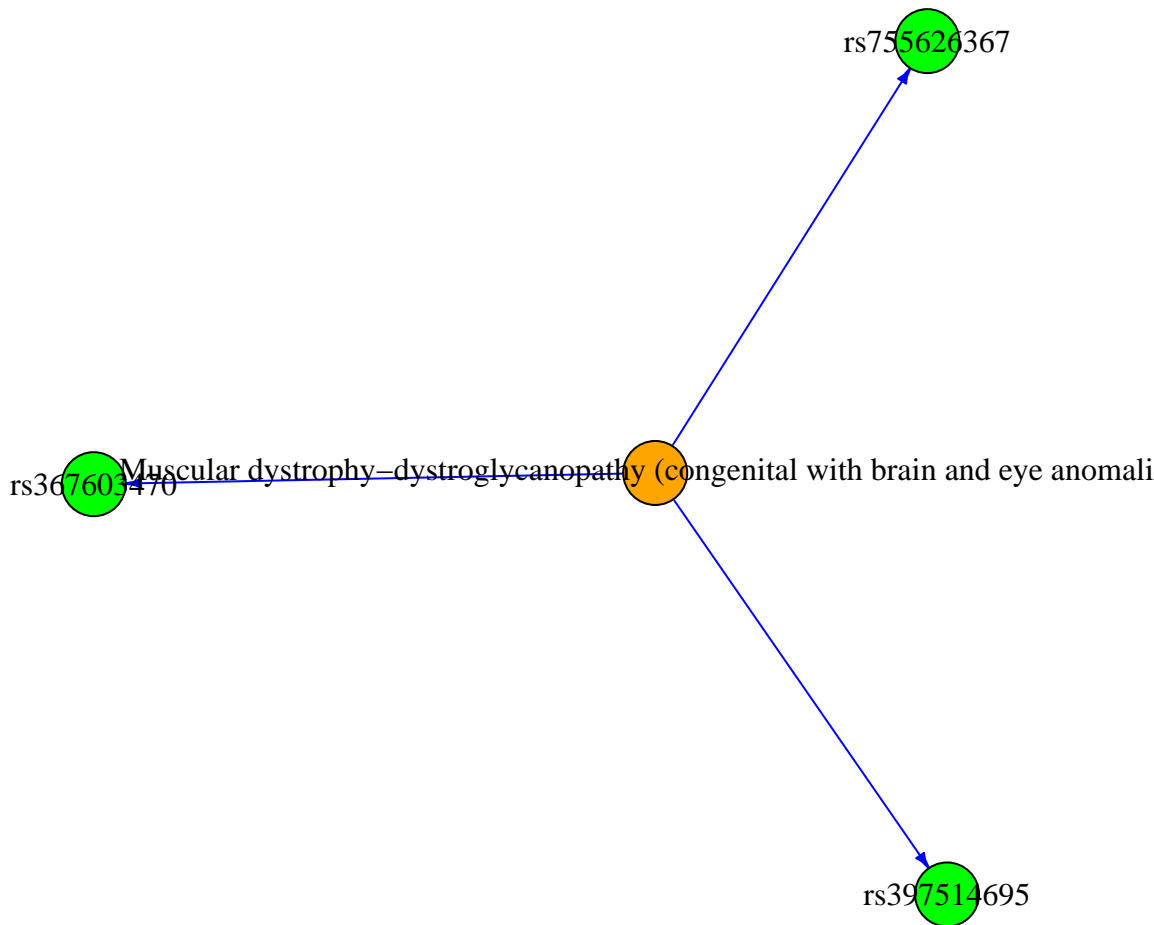

Variant–Disease Network (MUTYH–associated polyposis)

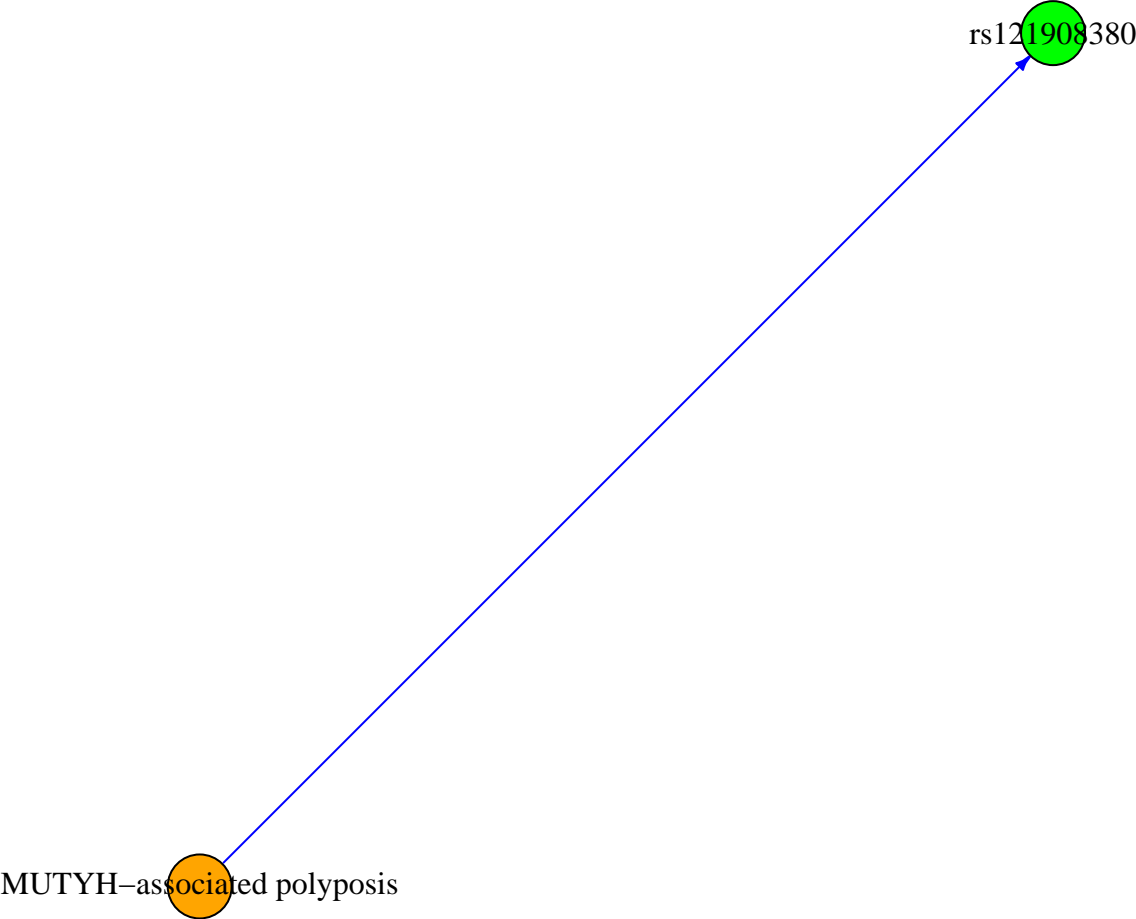

# Variant–Disease Network (Myasthenic syndrome)

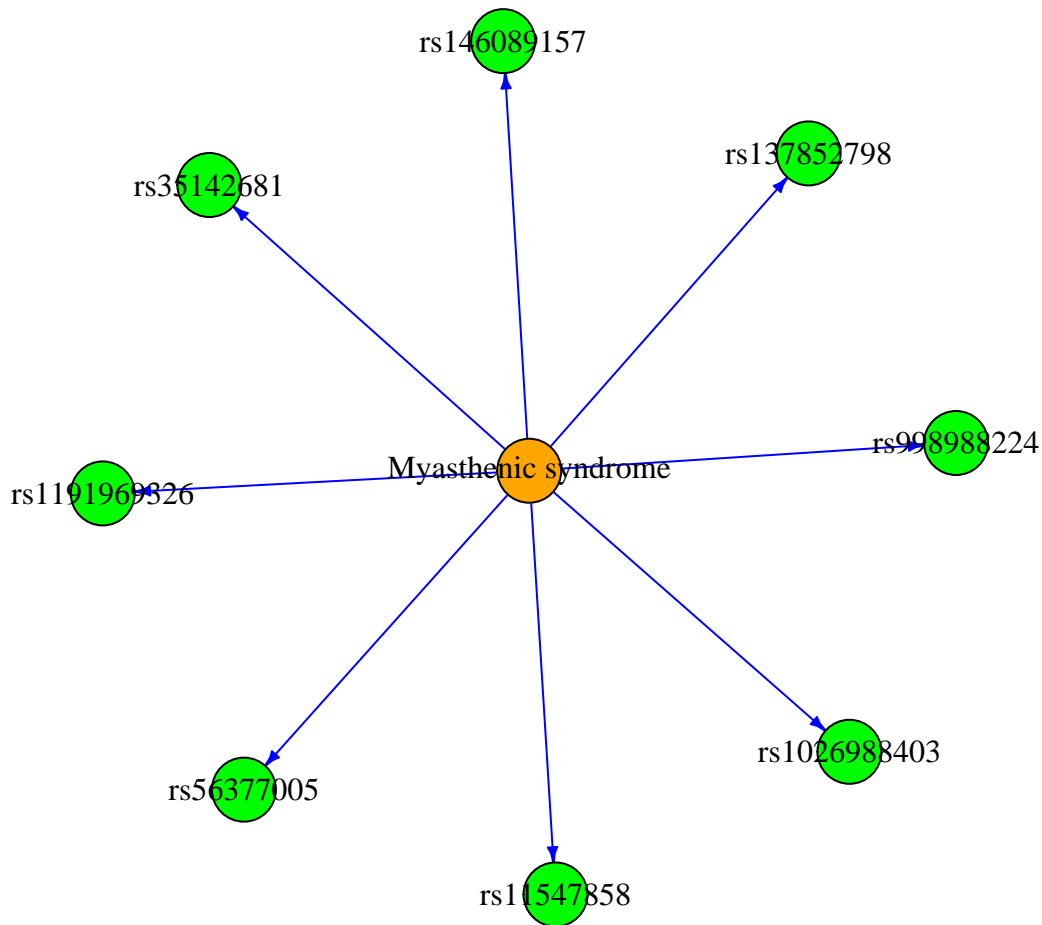

Variant–Disease Network (Myelocerebellar disorder)

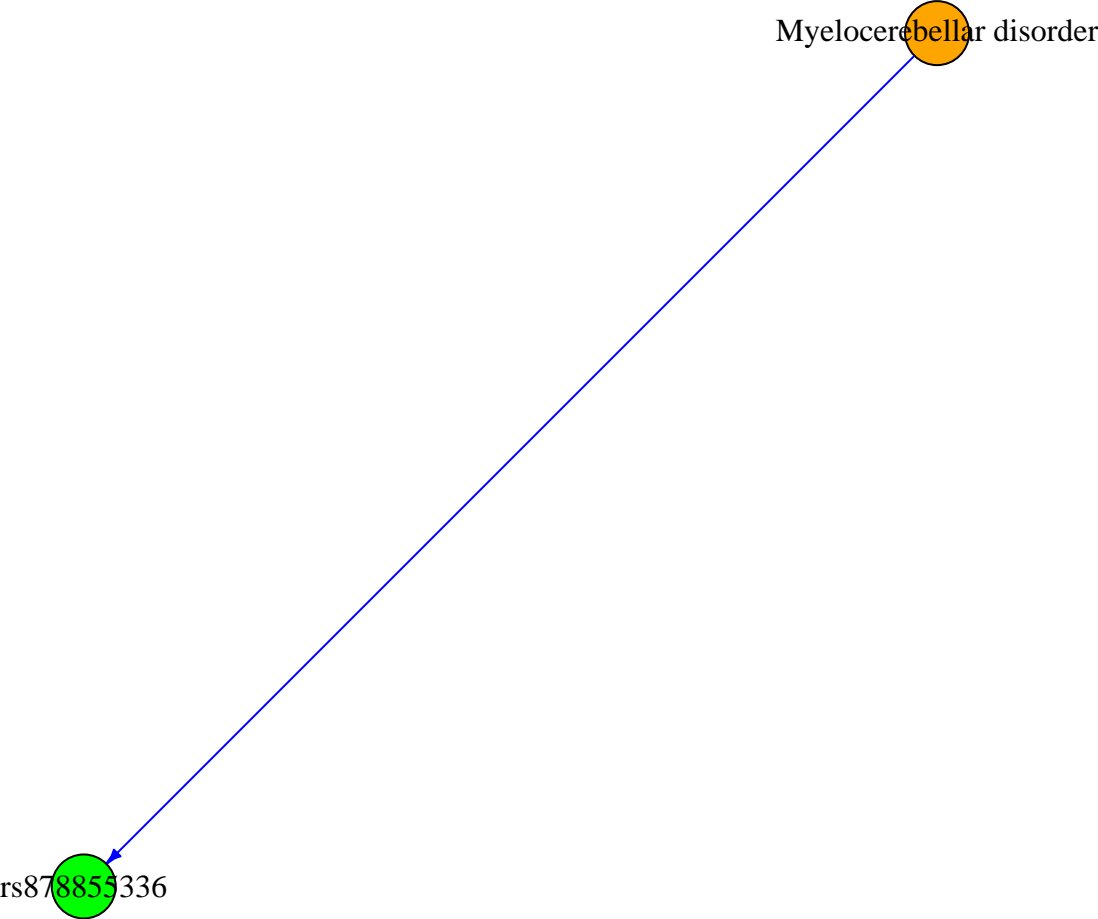

**Variant–Disease Network (Myelodysplastic syndrome)**

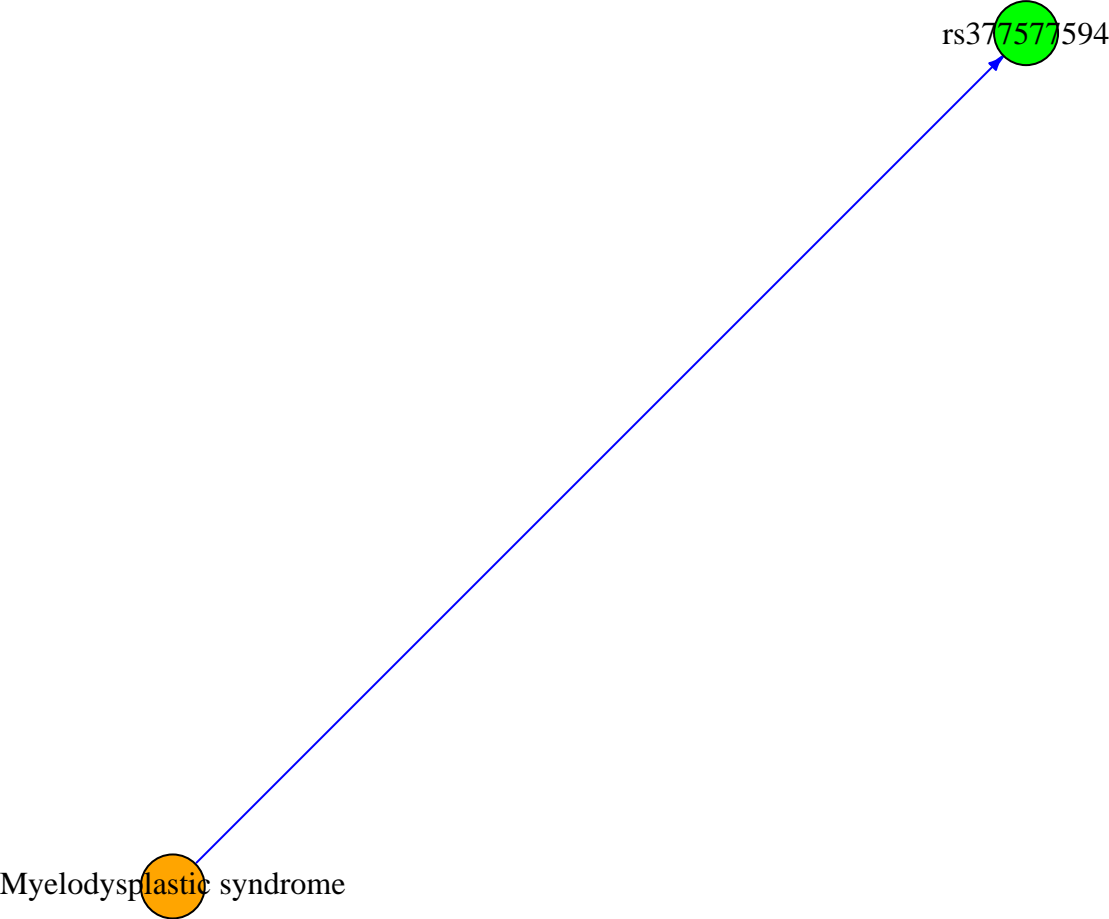

## Variant–Disease Network (MYH-associated polyposis)

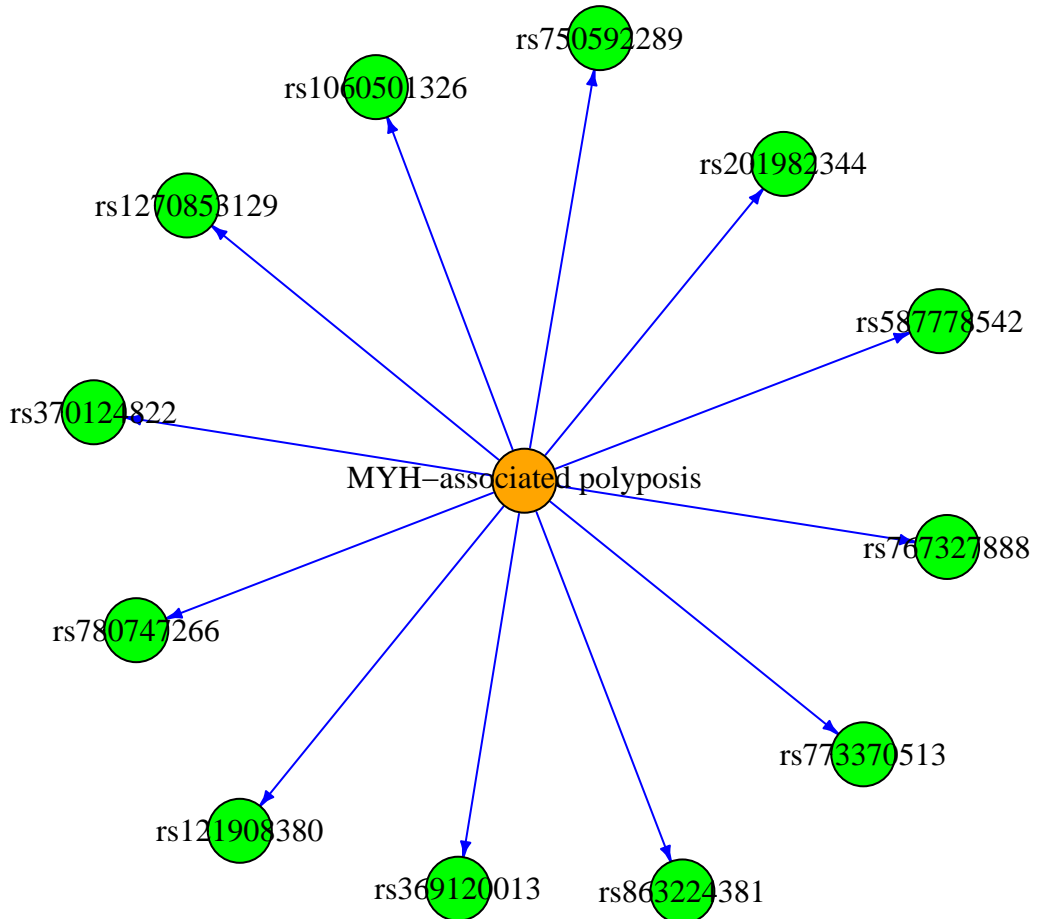

## Variant–Disease Network (Myoclonic epilepsy)

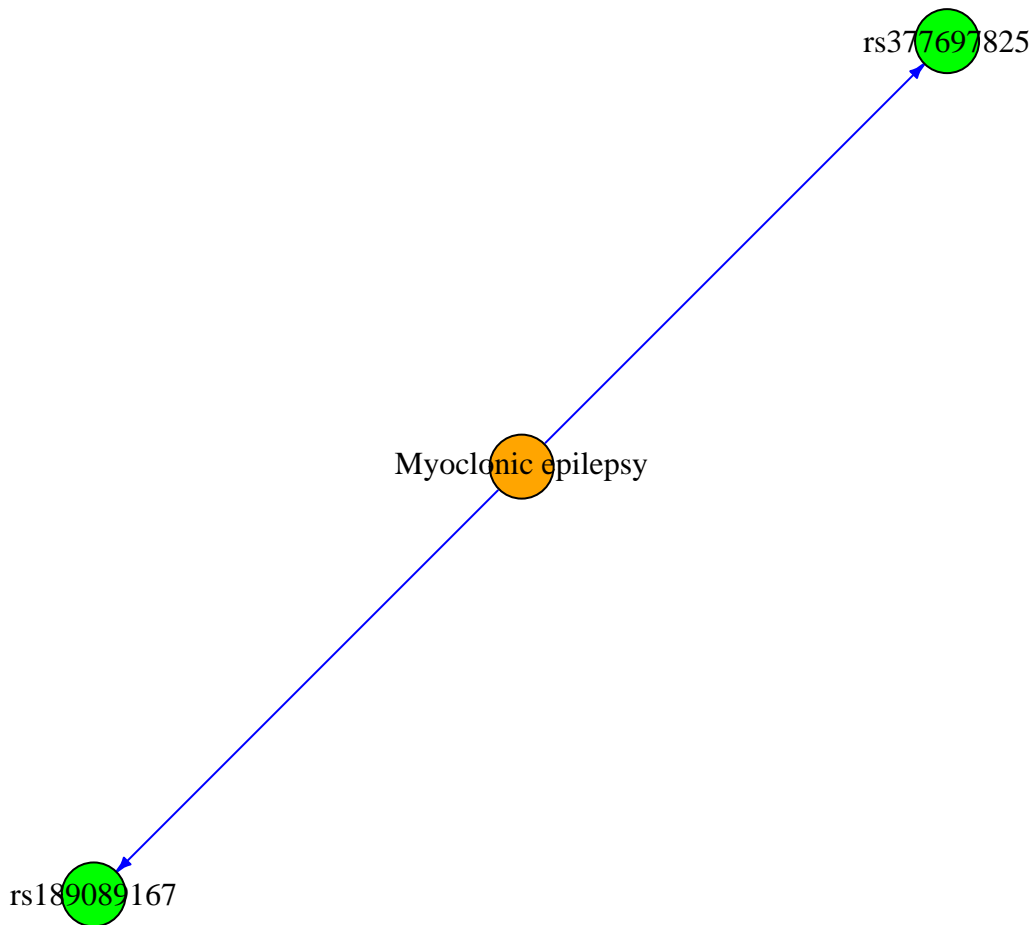

**Variant–Disease Network (Myofibrillar myopathy)**

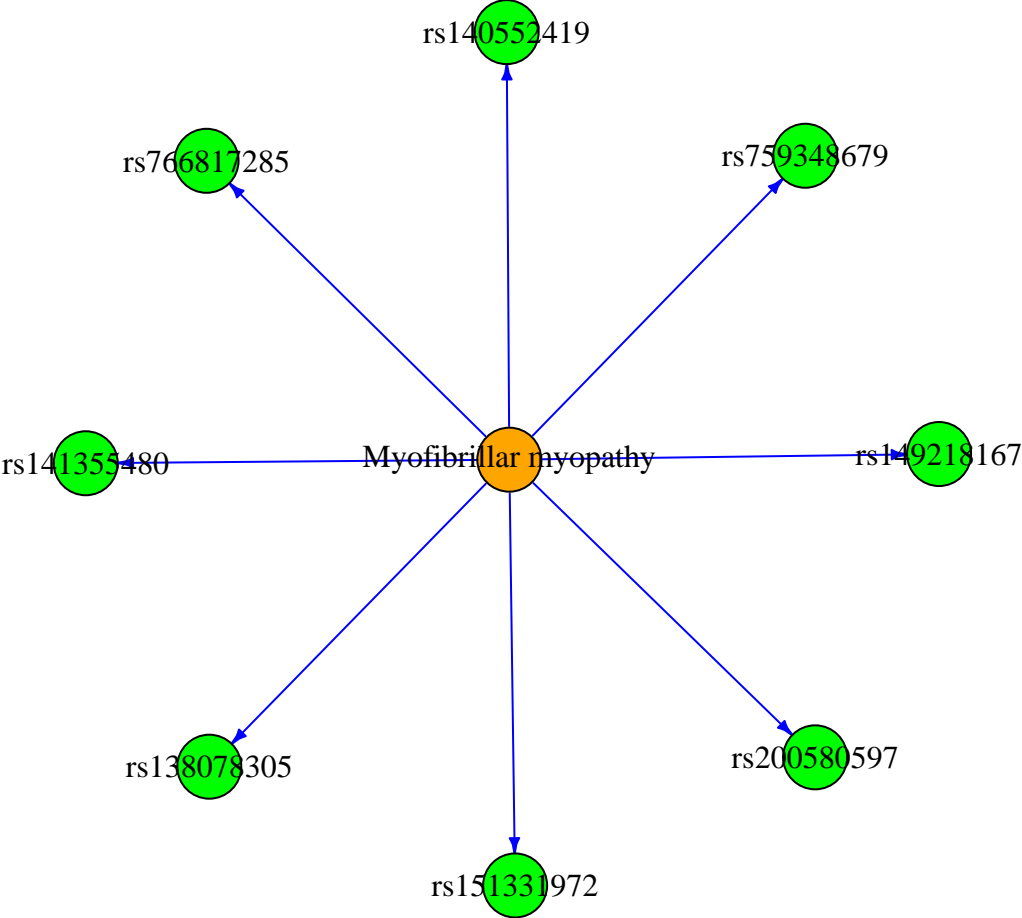



**Variant–Disease Network (Myofibrillar myopathy 1)**

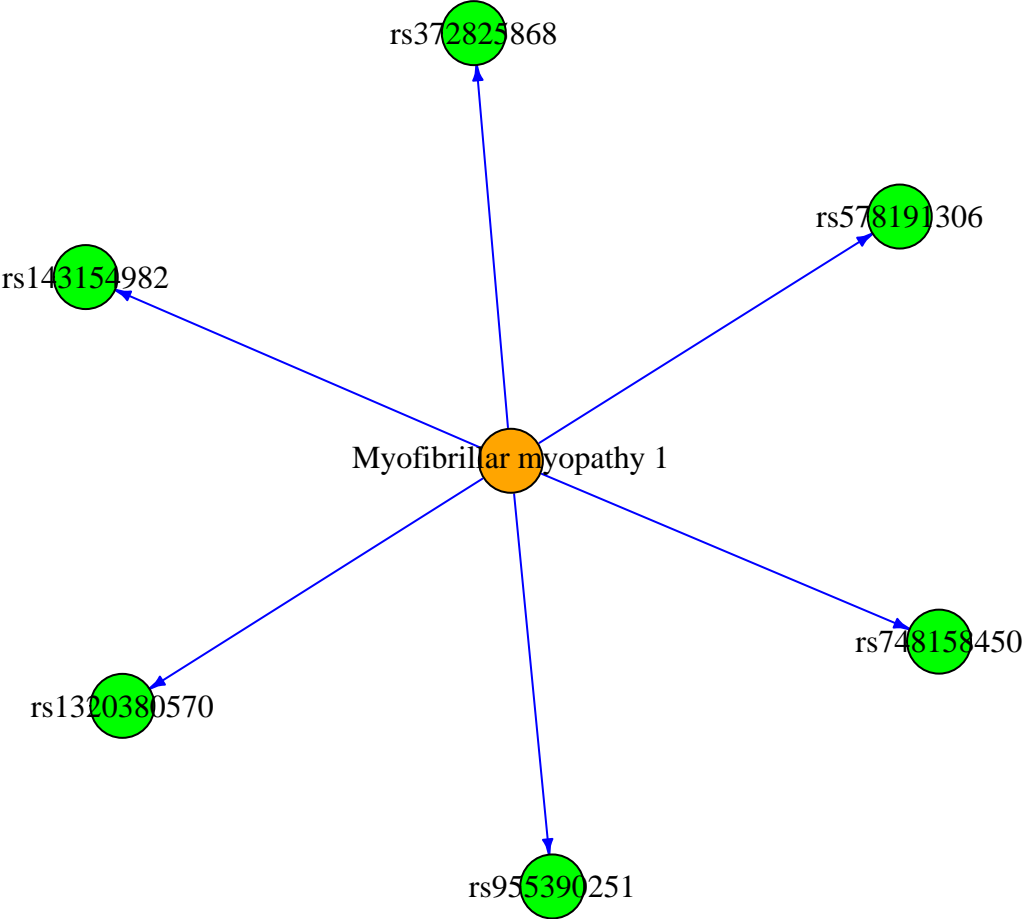

## Variant-Disease Network (Myopia 24)

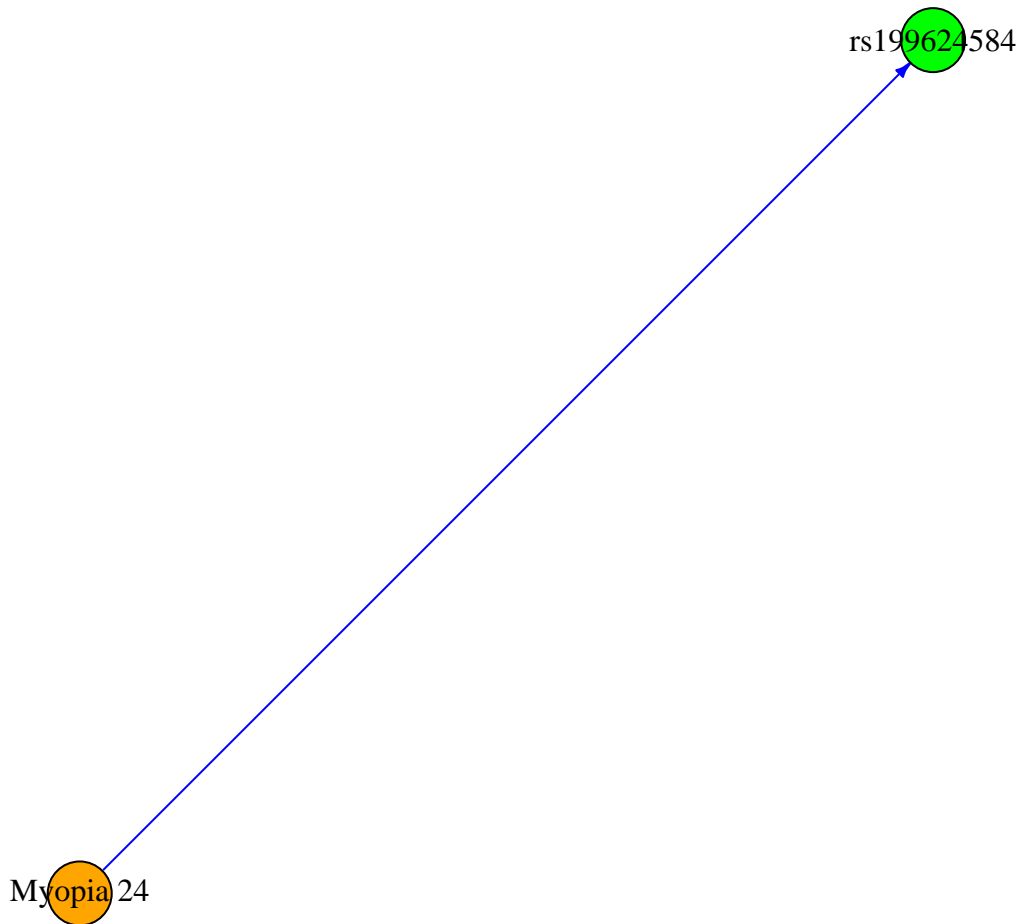

# Variant–Disease Network (Myostatin–related muscle hypertrophy)

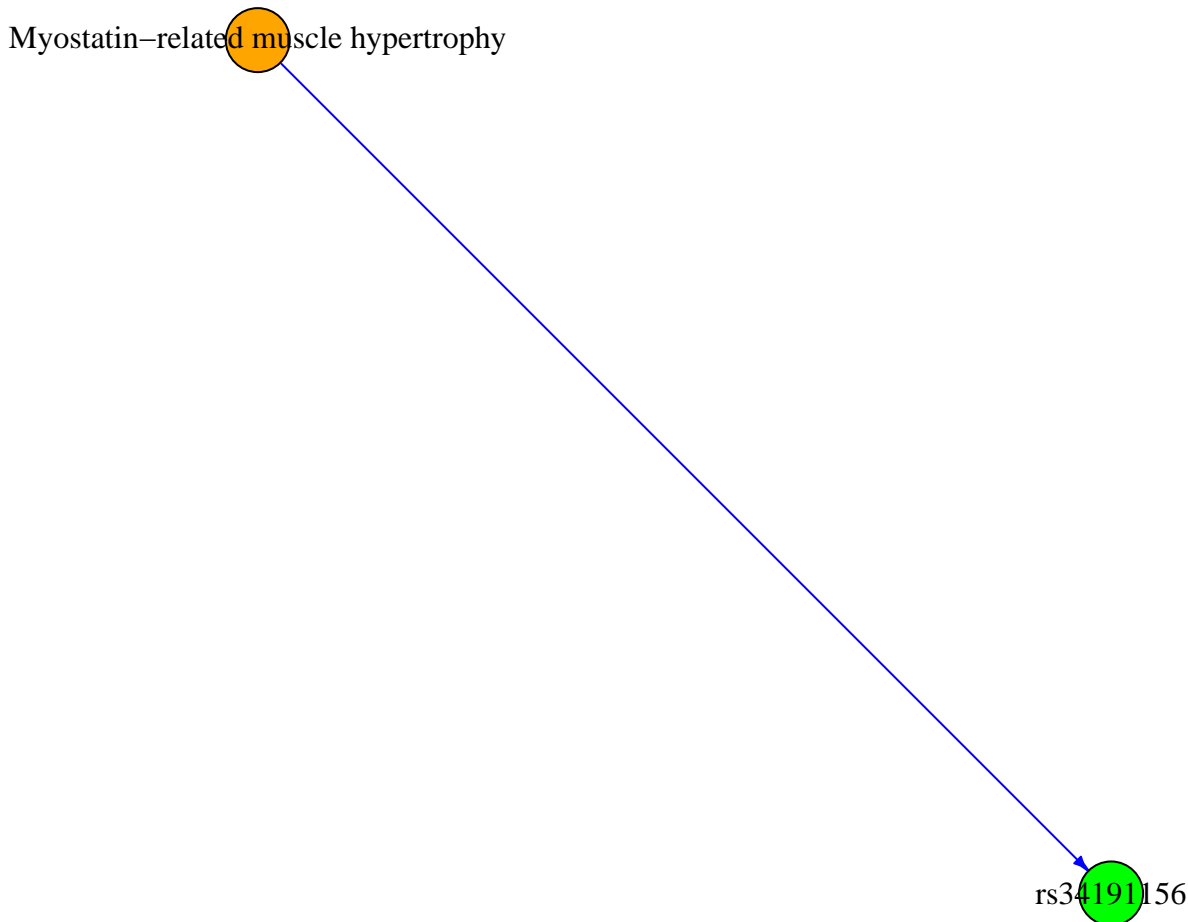

## Variant–Disease Network (Myotonia congenita)

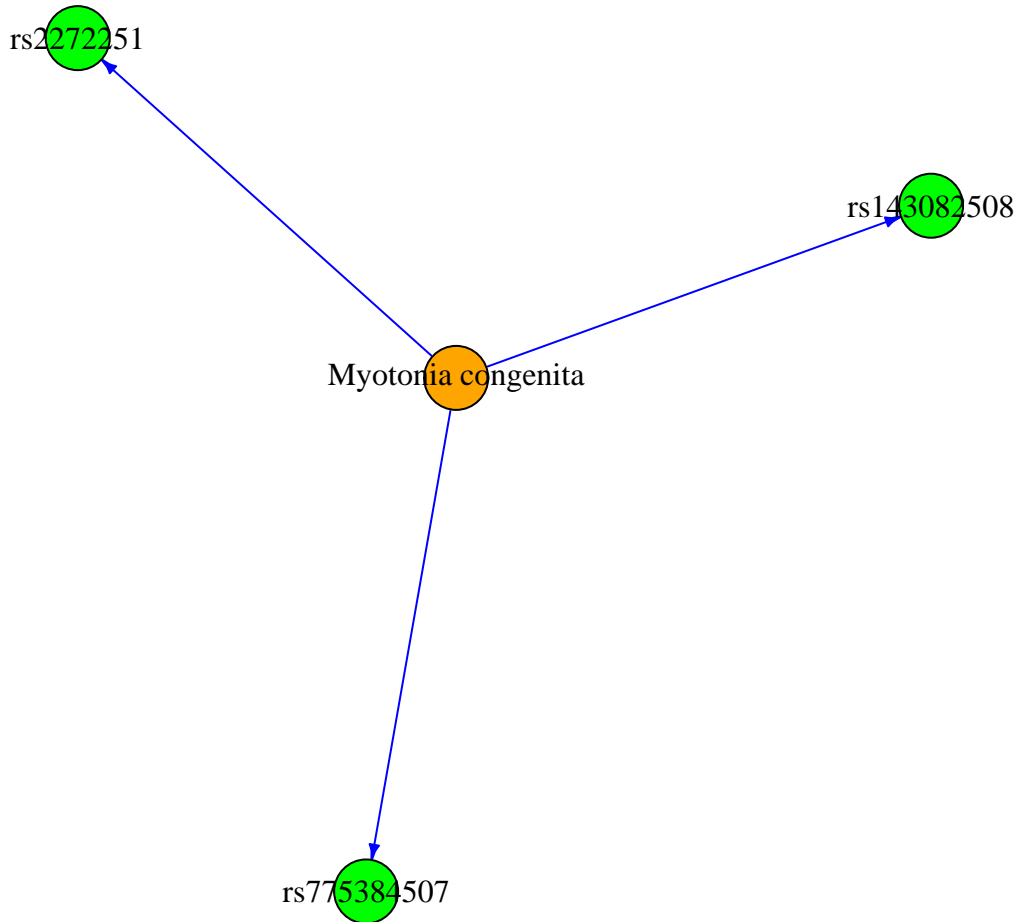

## Variant–Disease Network (Nager syndrome)

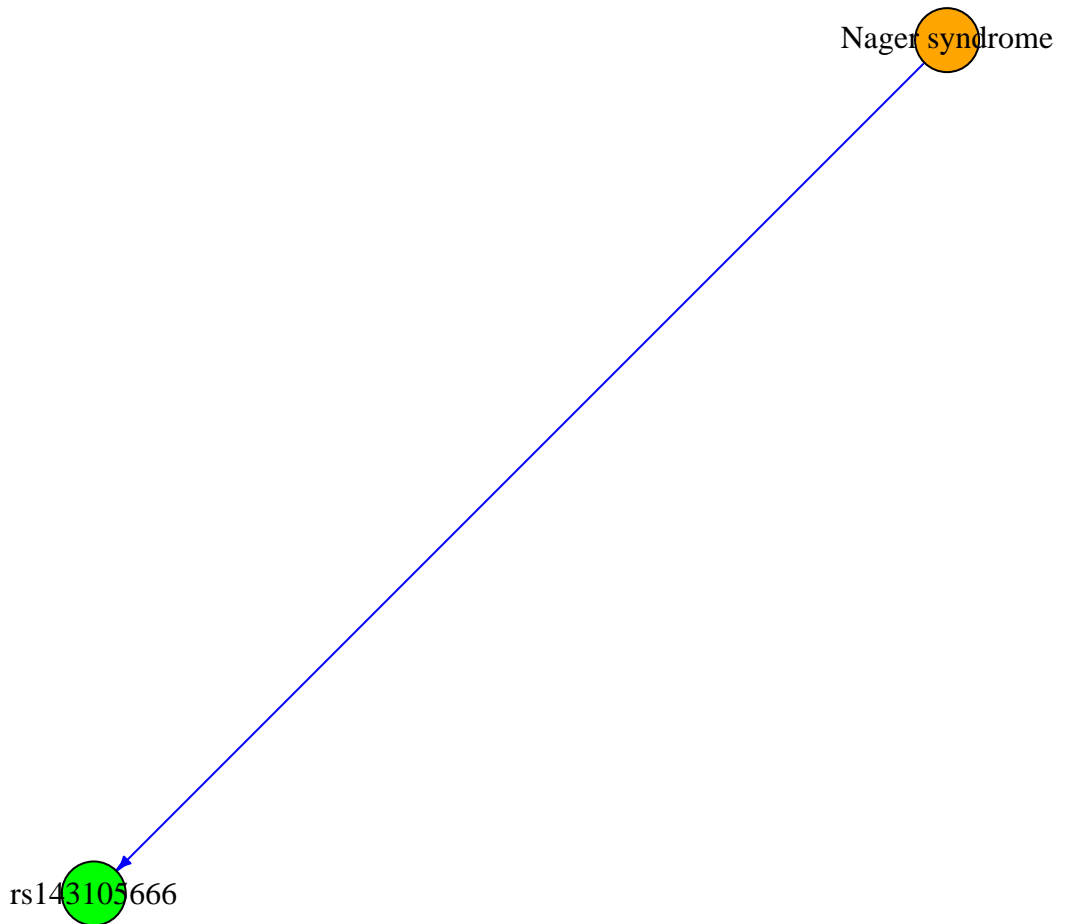

## Variant–Disease Network (Nail–patella syndrome)

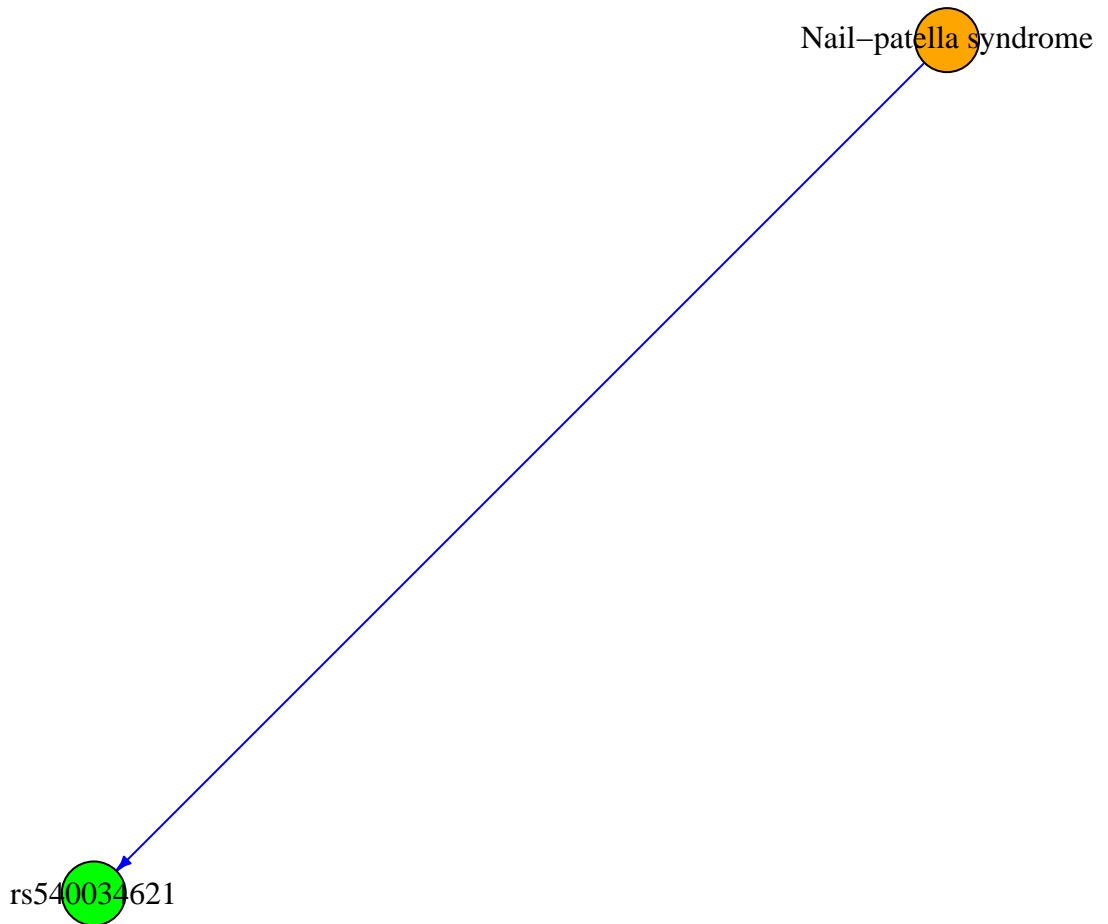

Variant–Disease Network (Naxos disease)

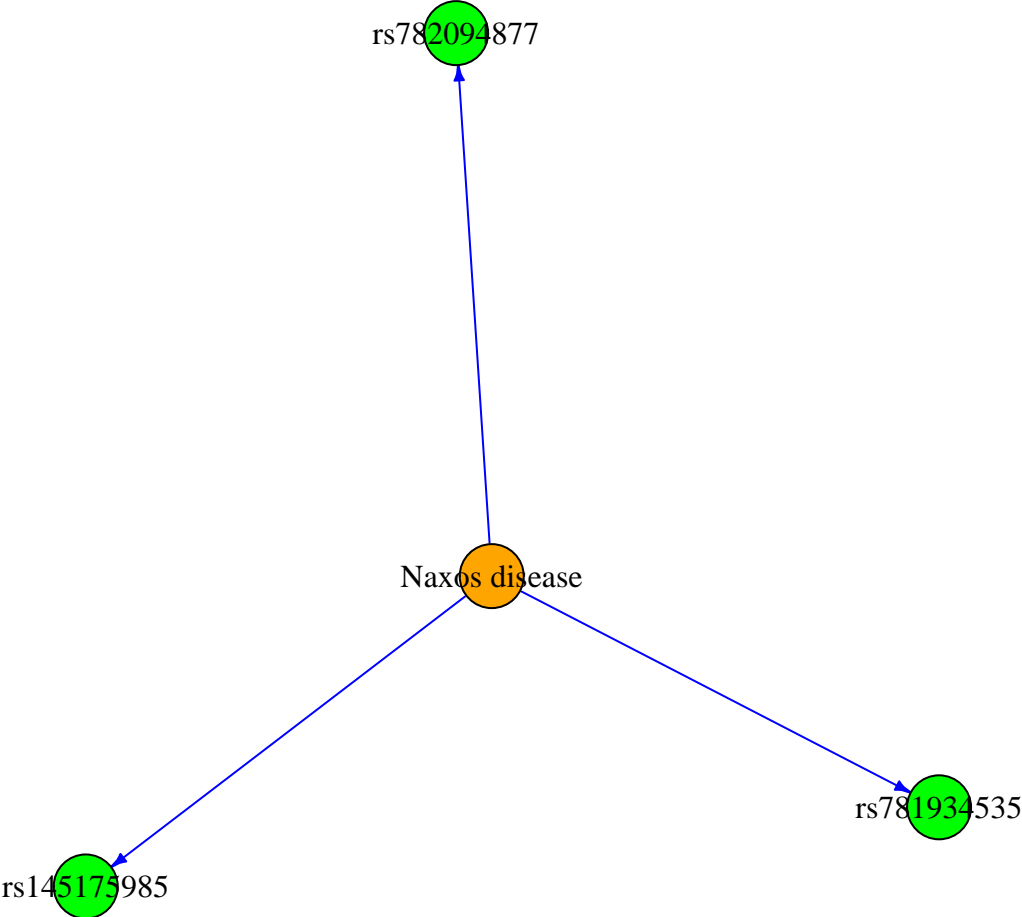

## Variant–Disease Network (Nemaline myopathy 8)

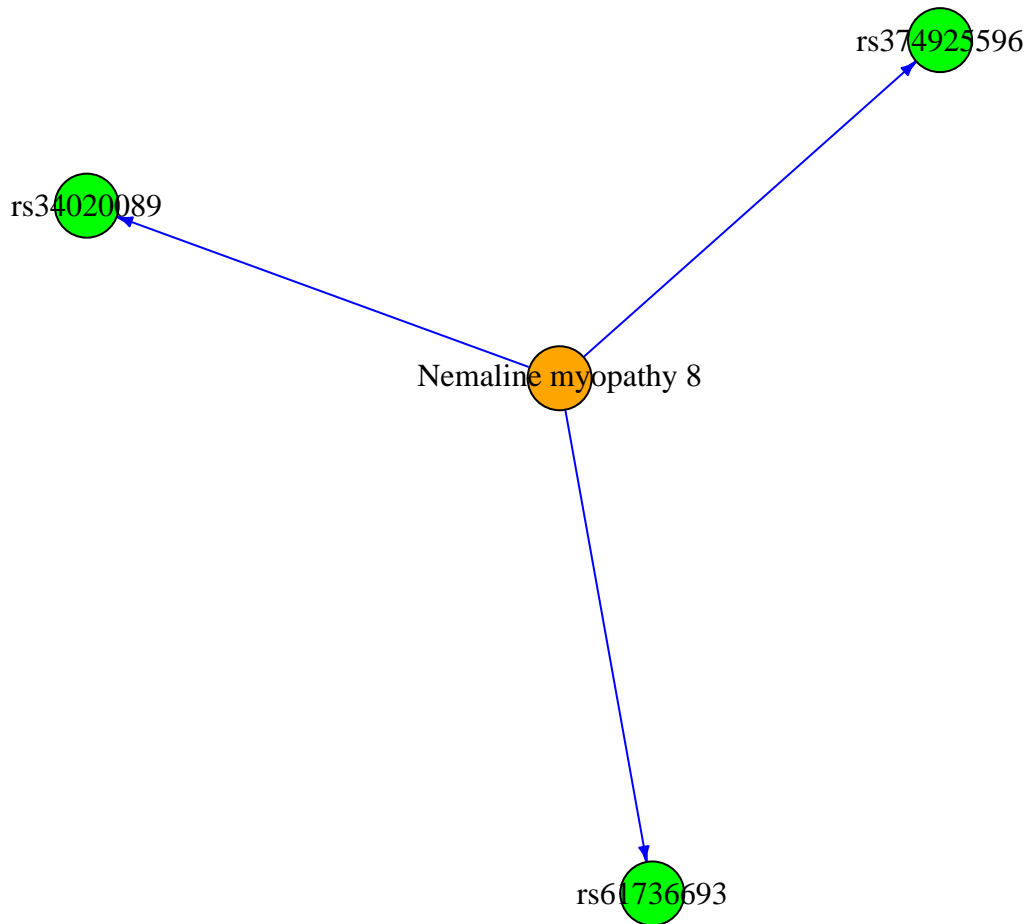



# ant-Disease Network (Neonatal intrahepatic cholestasis caused by citrin de

rs879255502

Neonatal intrahepatic cholestasis caused by cit

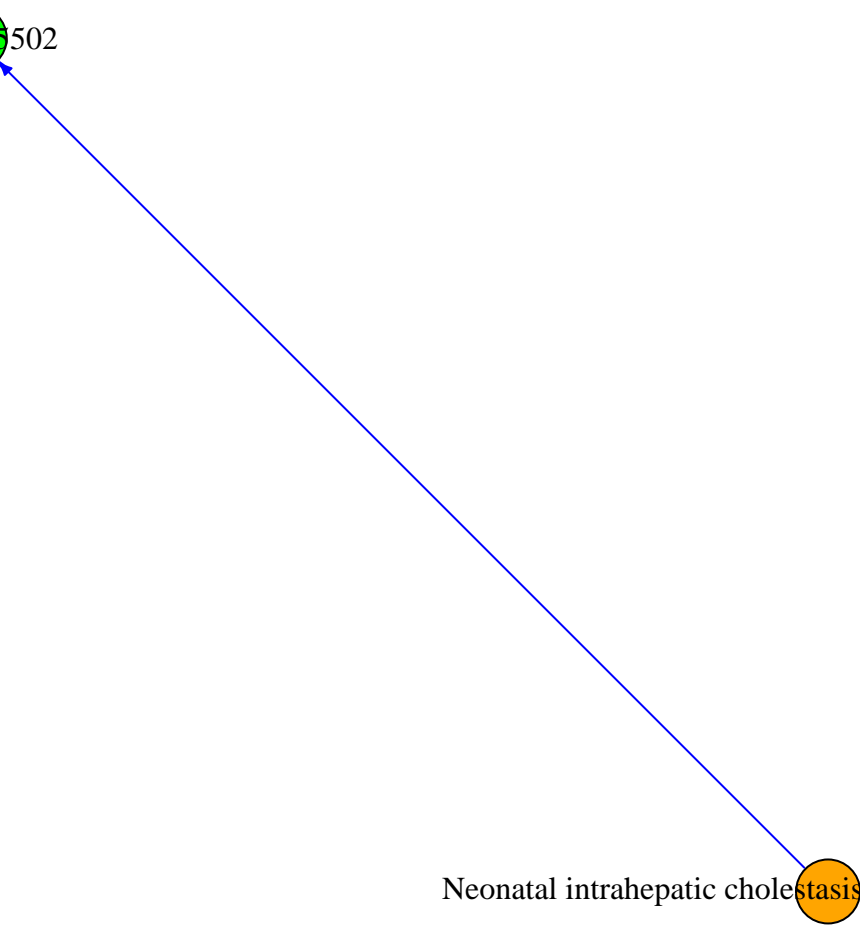

## Variant–Disease Network (Neoplasm of ovary)

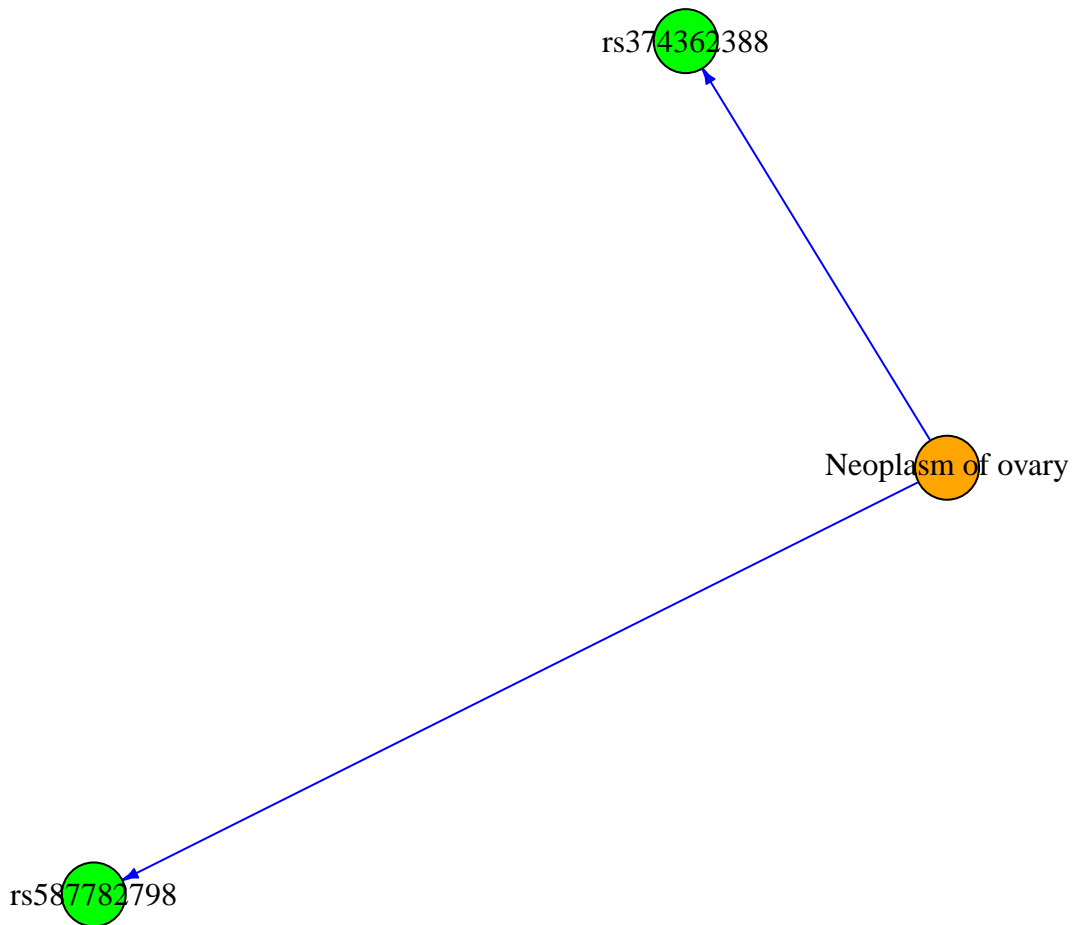

## Variant–Disease Network (Neoplasm of stomach)

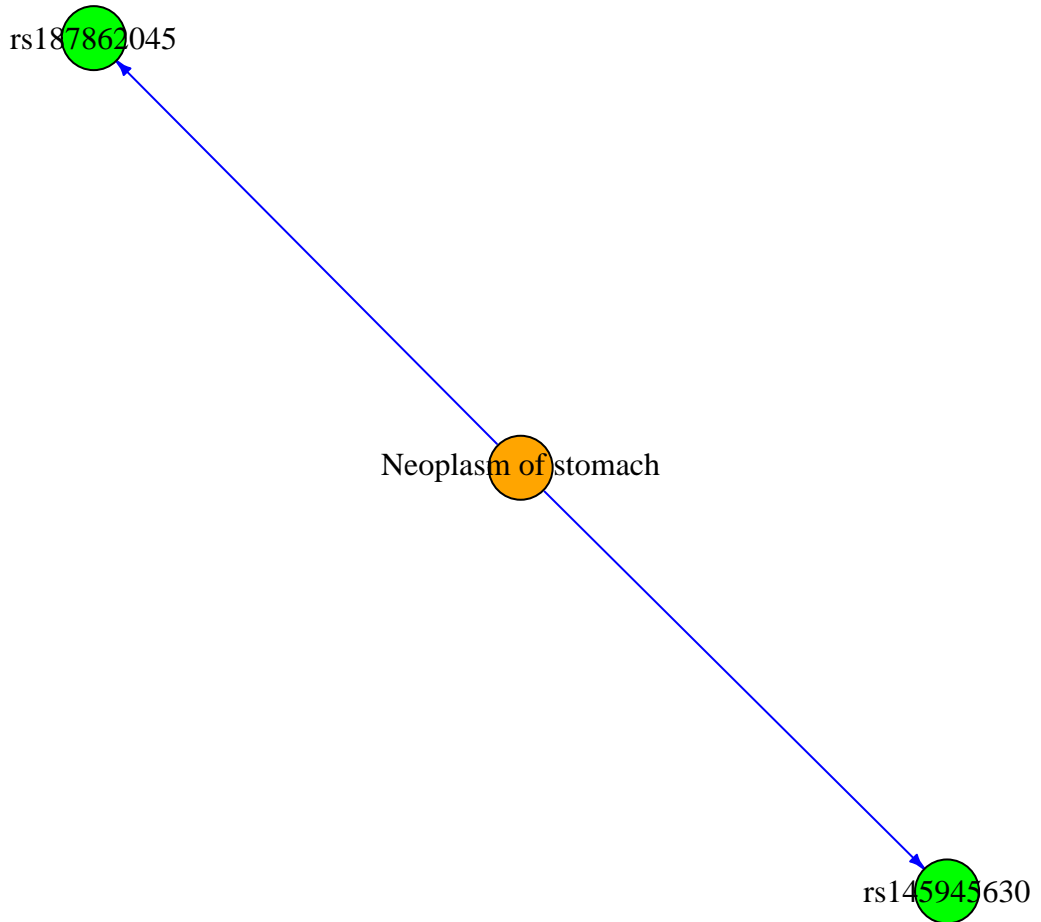

## Variant–Disease Network (Neoplasm of the breast)

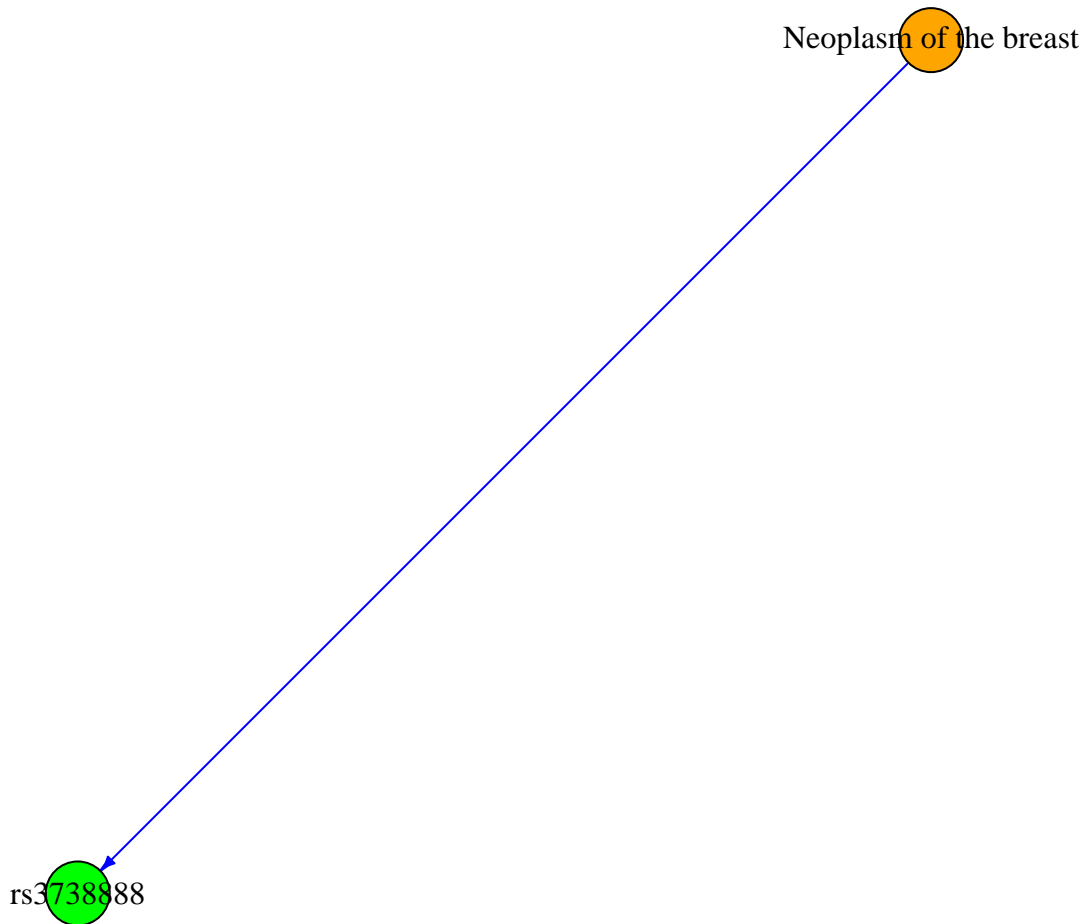

# Variant–Disease Network (Nephronophthisis)

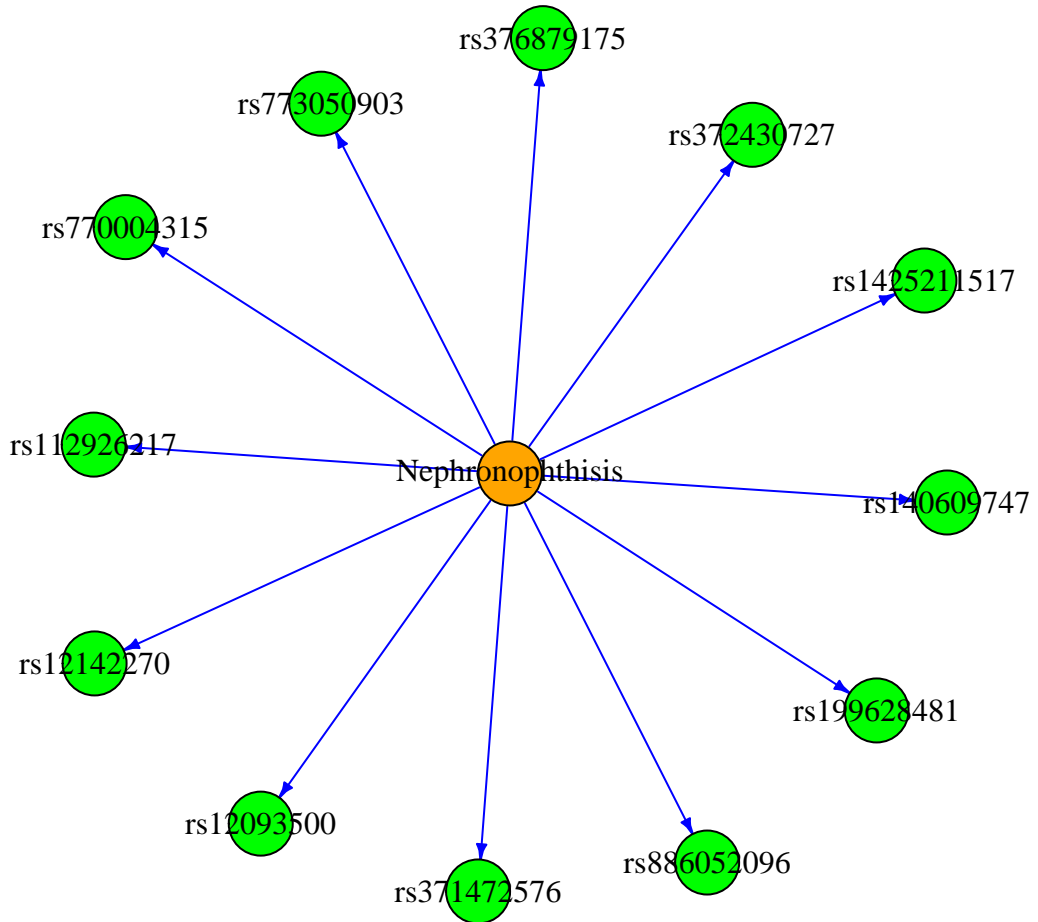

Variant–Disease Network (Nephronophthisis 16)

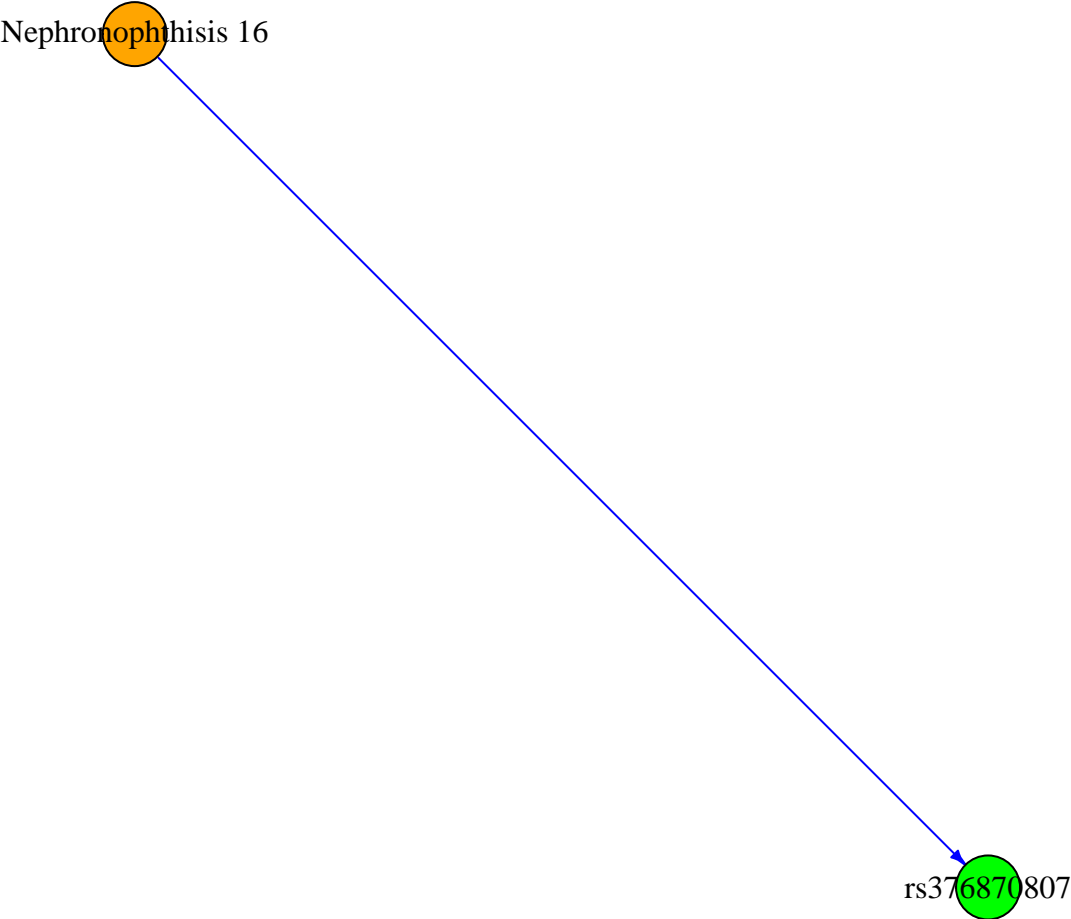

## Variant-Disease Network (Nephropathic cystinosis)

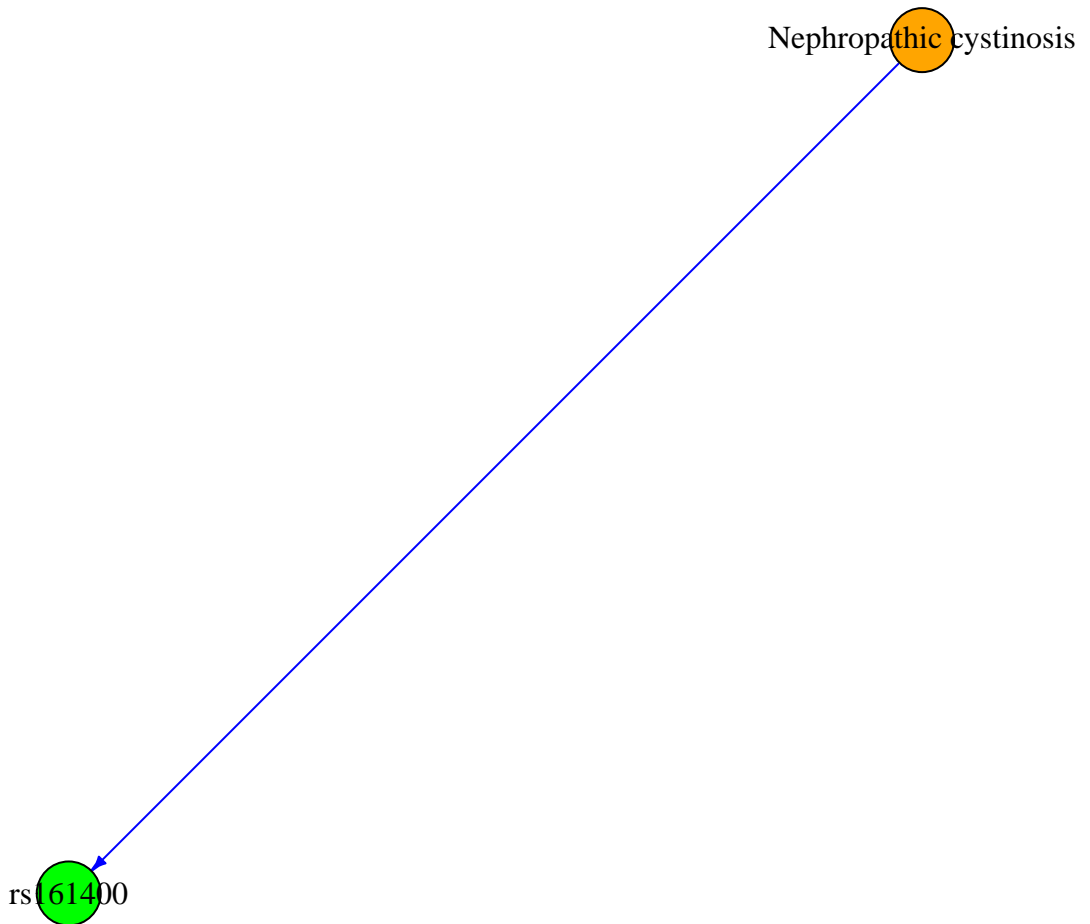

## Variant–Disease Network (Nephrotic syndrome)

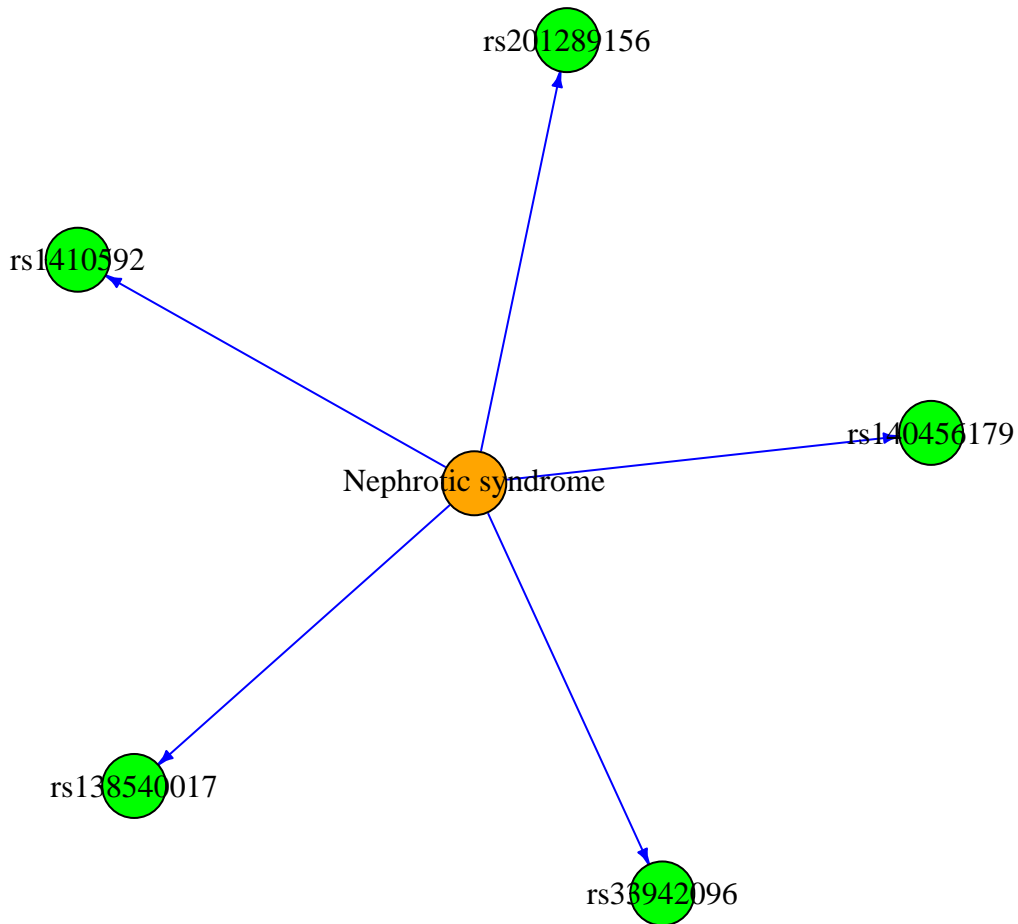



## Variant–Disease Network (Neural tube defect)

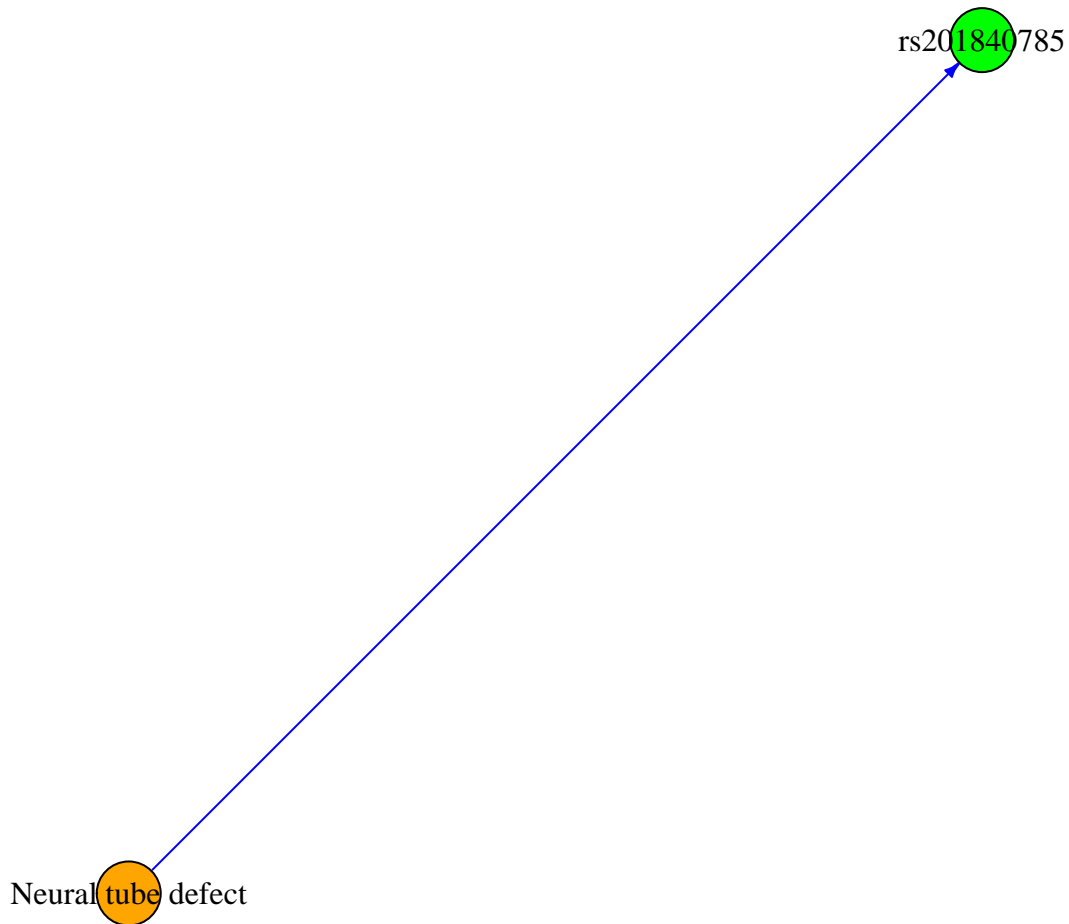

## Variant–Disease Network (Neural tube defects)

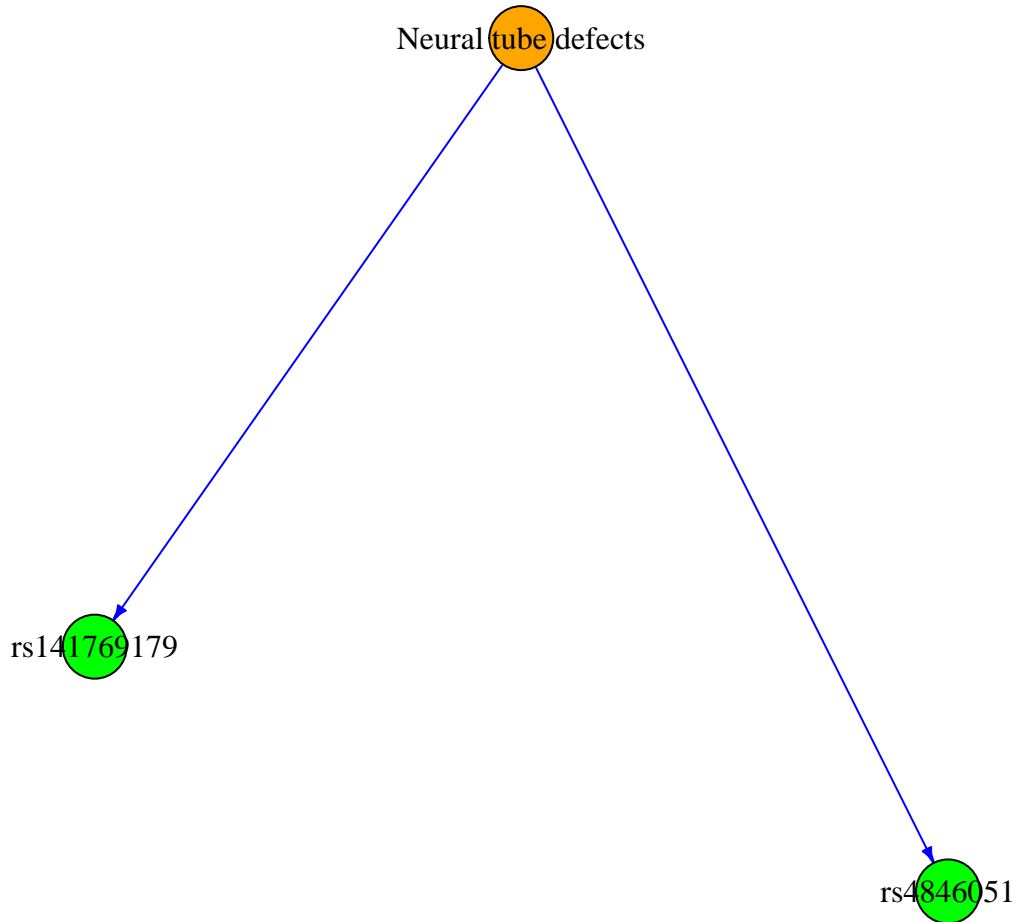

## Variant–Disease Network (Neuroblastoma)

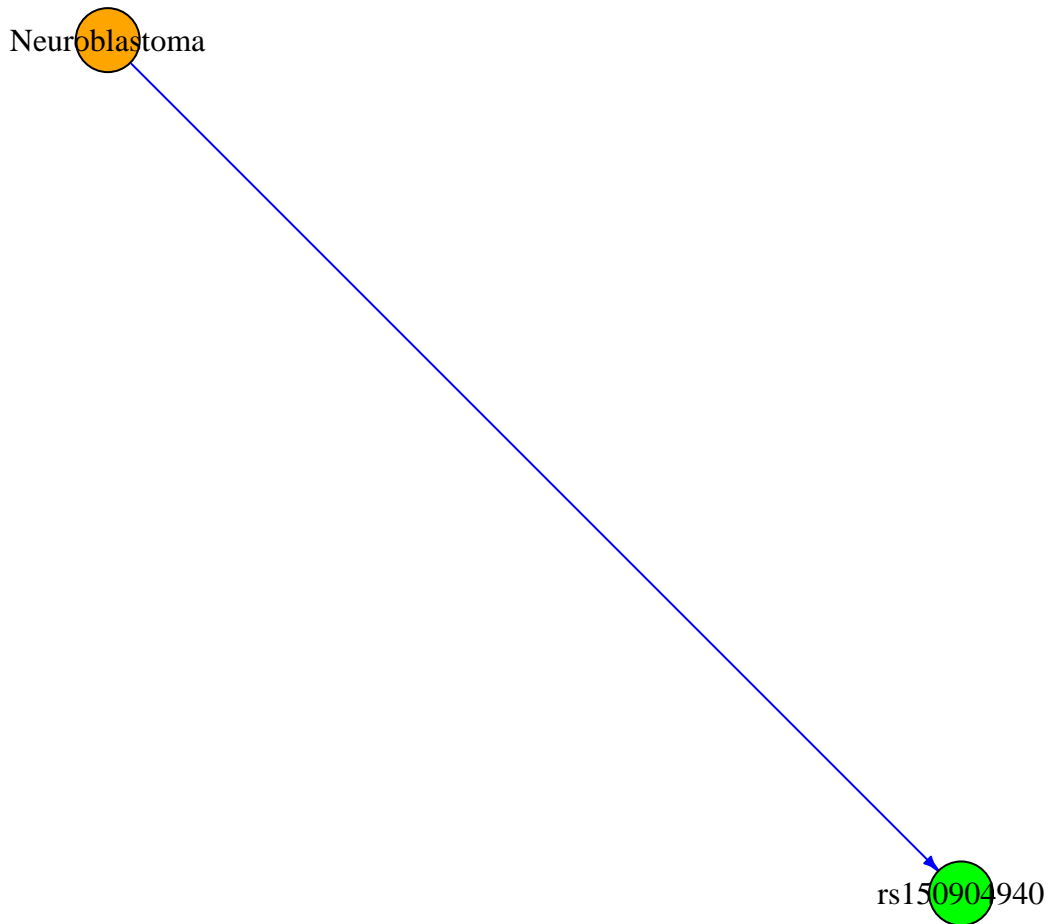

# Variant-Disease Network (Neuroblastoma 3)

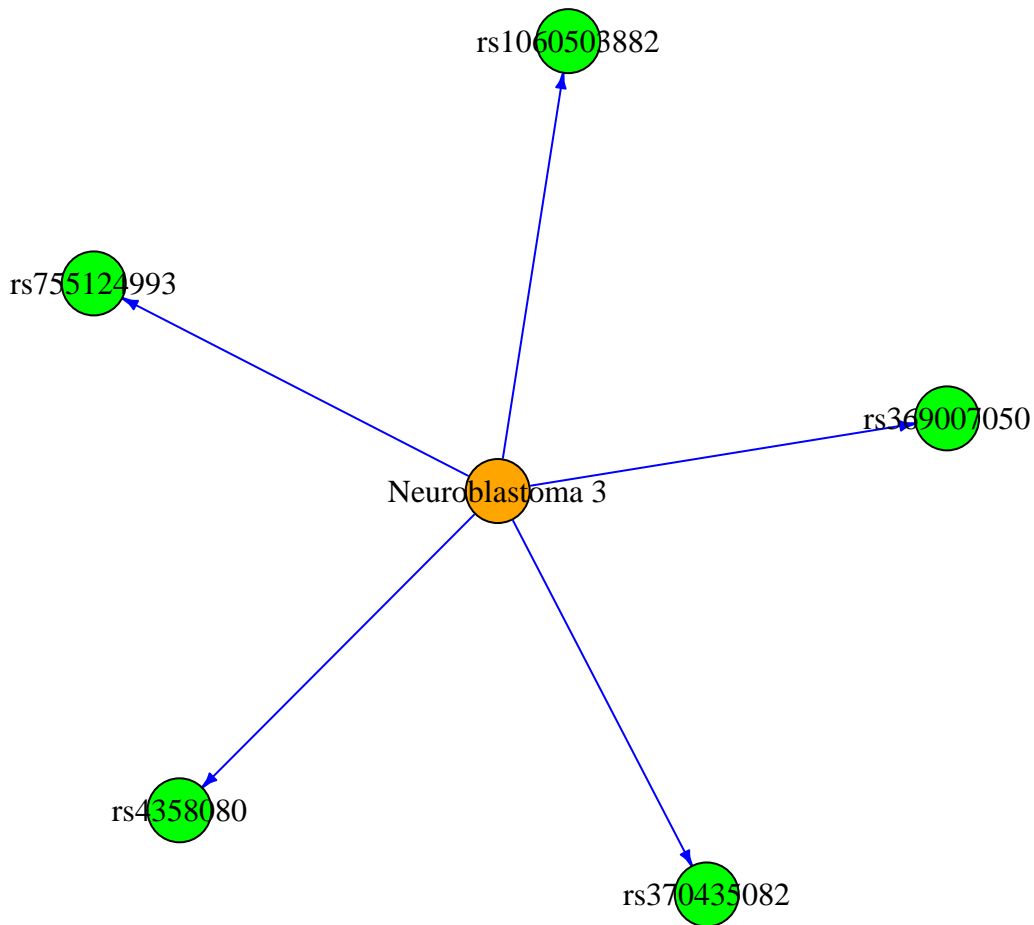

**Variant–Disease Network (Neuroblastoma Susceptibility)**

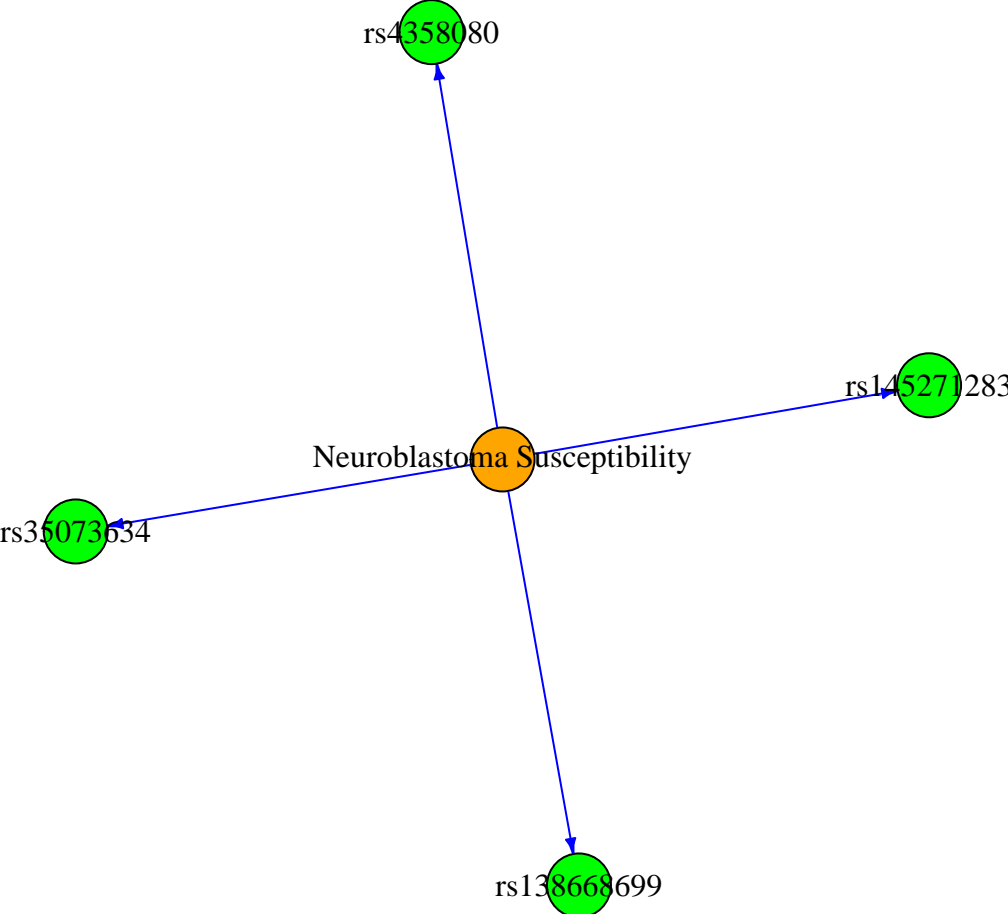

# e Network (Neurodevelopmental disorder with or without hyperkinetic movement disorder)

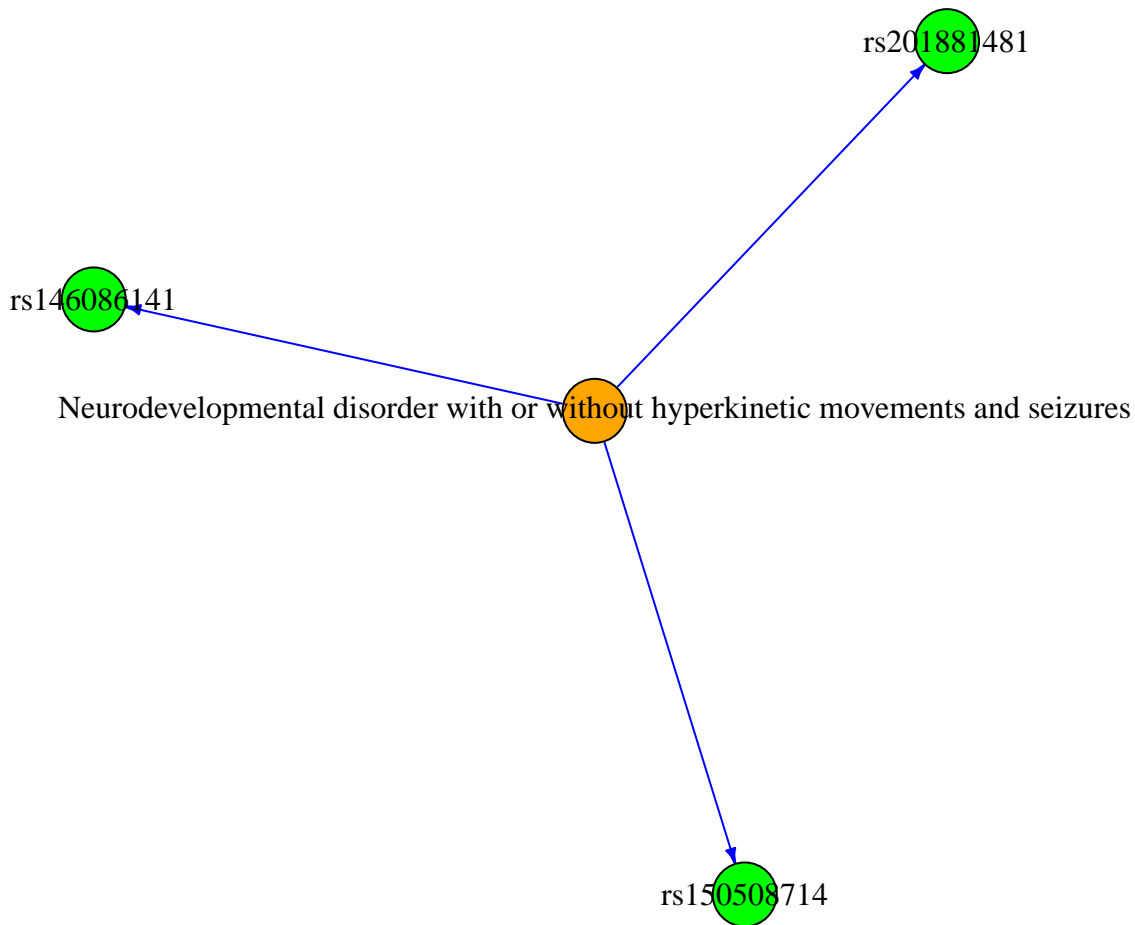

## Variant–Disease Network (Neuroferritinopathy)

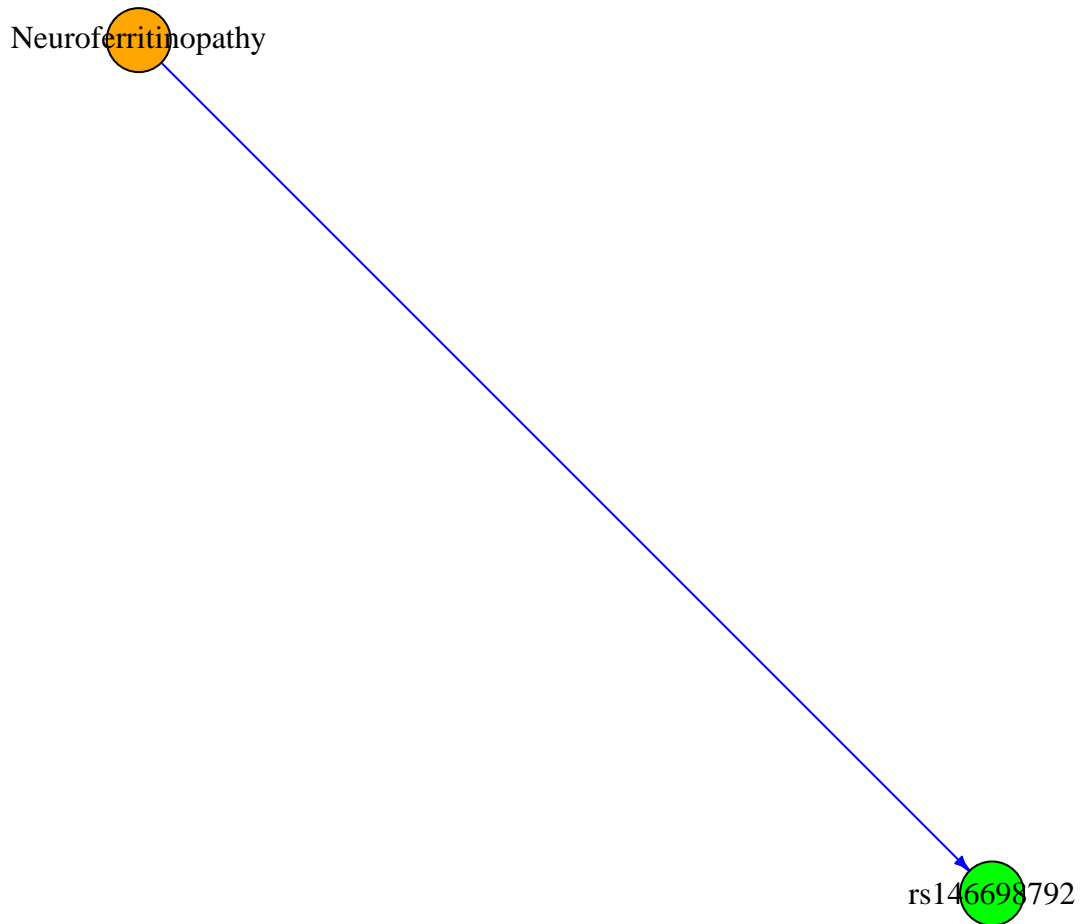

## Variant–Disease Network (Neurofibromatosis)

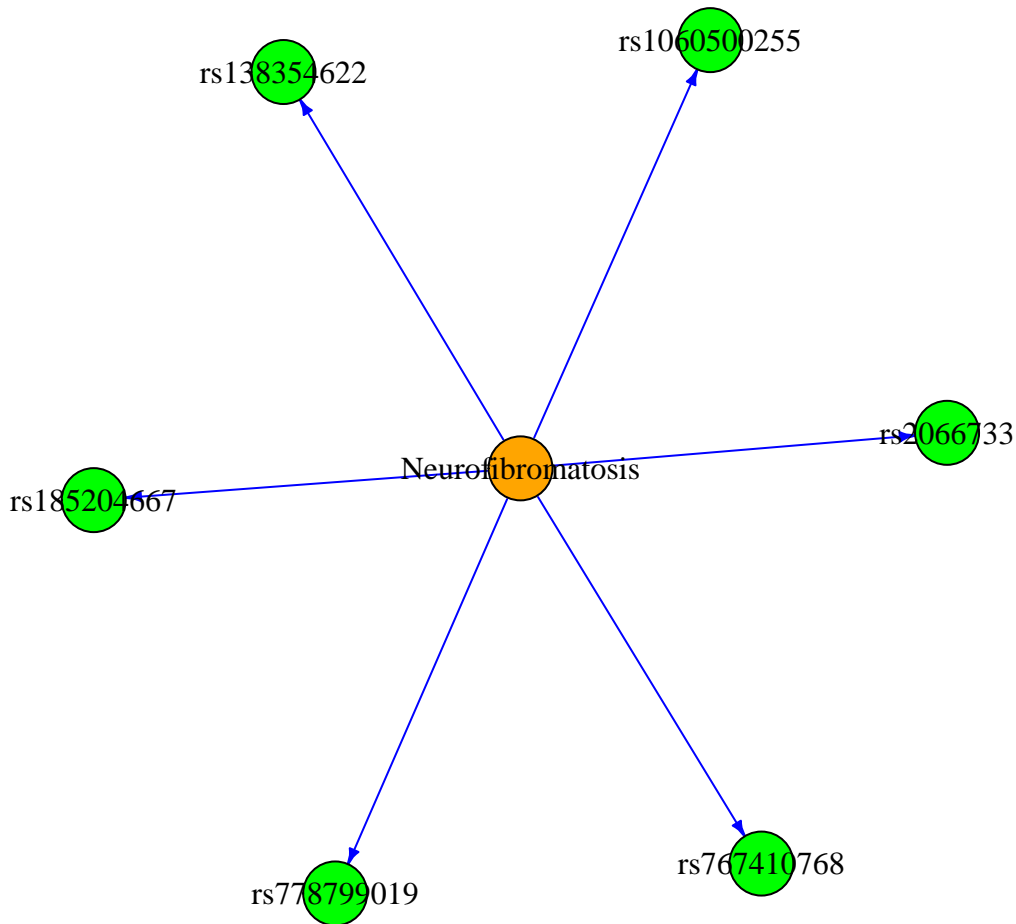



# Variant–Disease Network (Neuronal Ceroid–Lipofuscinosis)

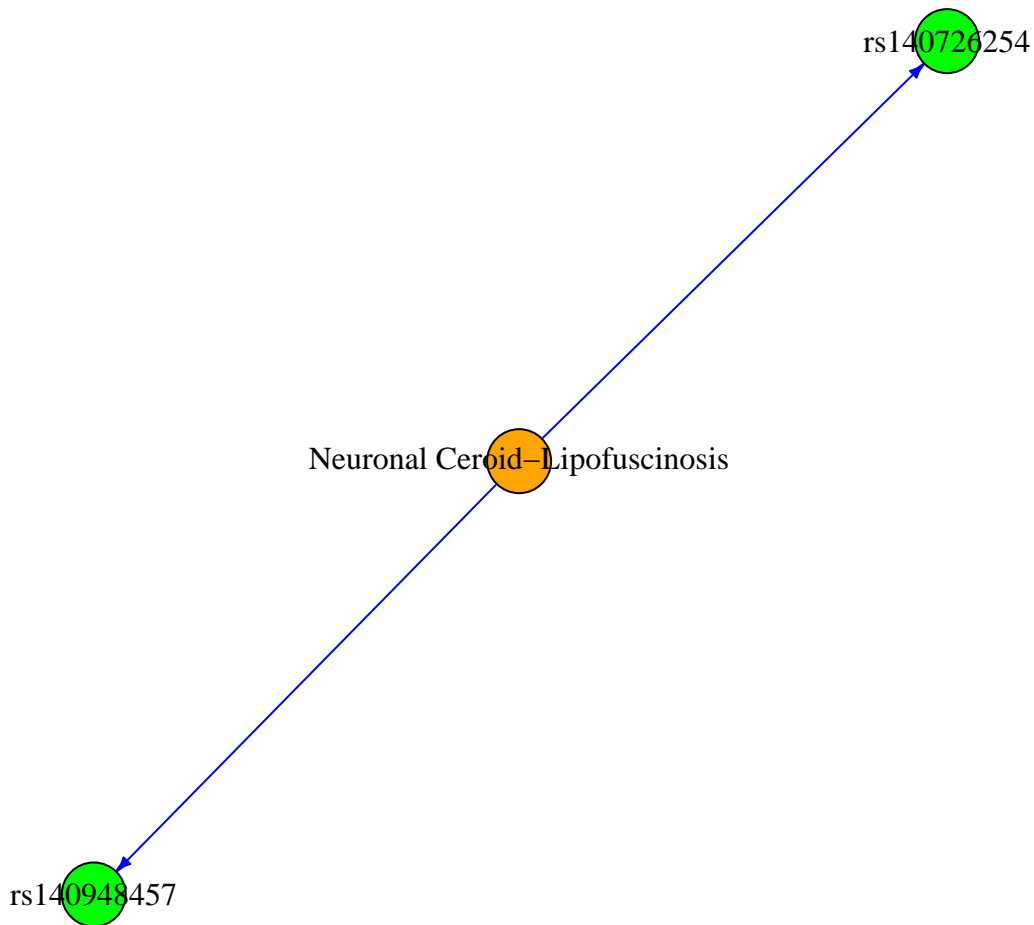

## Variant-Disease Network (Neuronopathy)

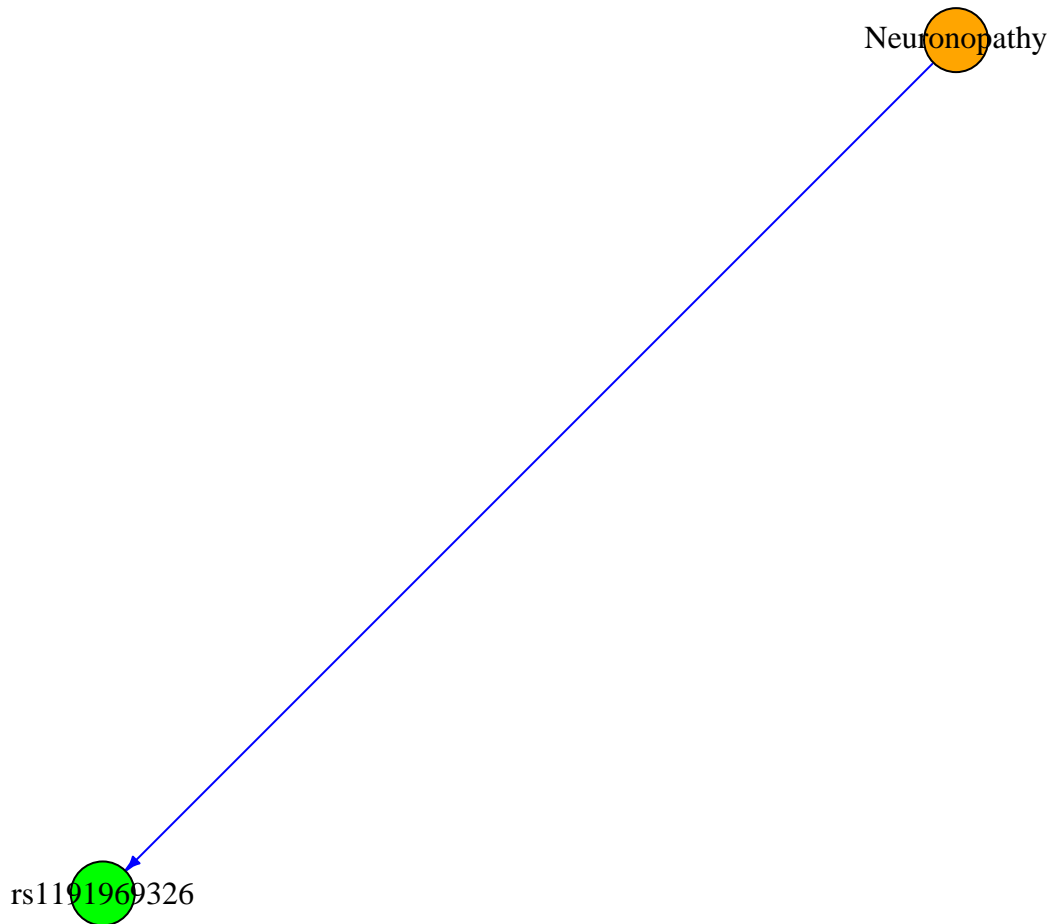

**Variant–Disease Network (Neuropathy)**

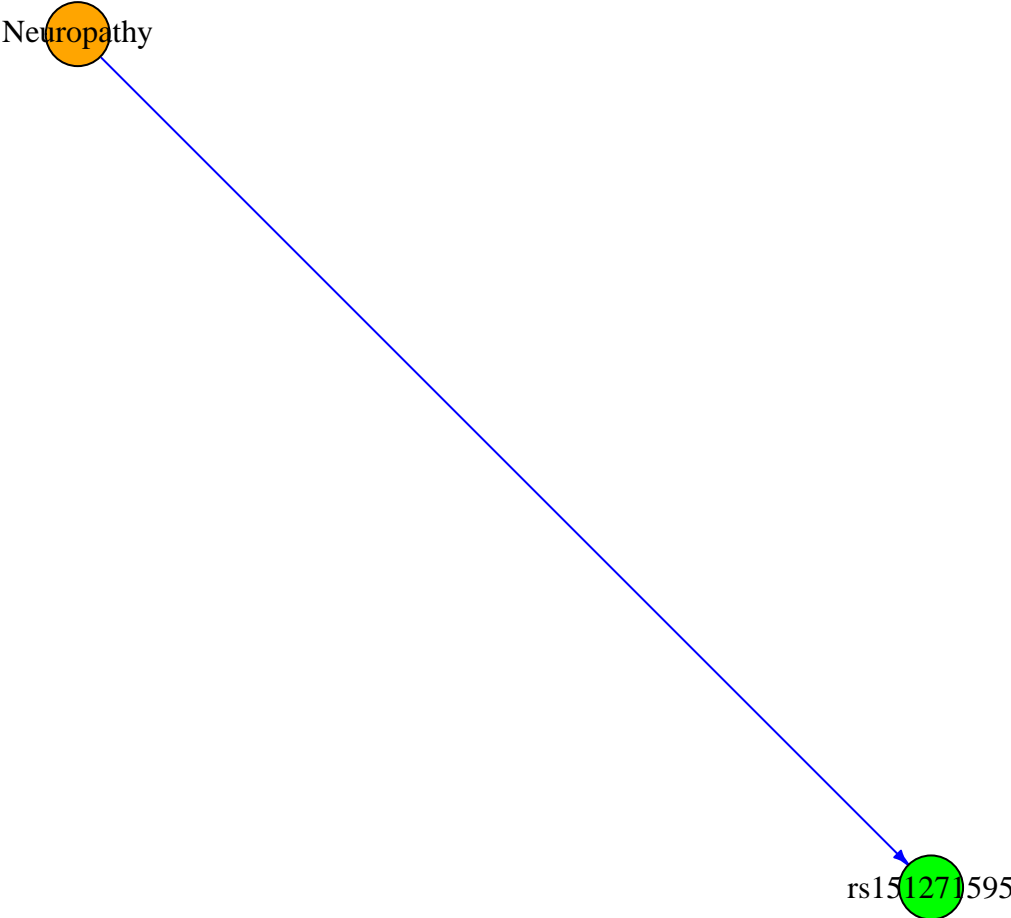

# Variant-Disease Network (Neuropathy hereditary sensory and autonomic type 1)

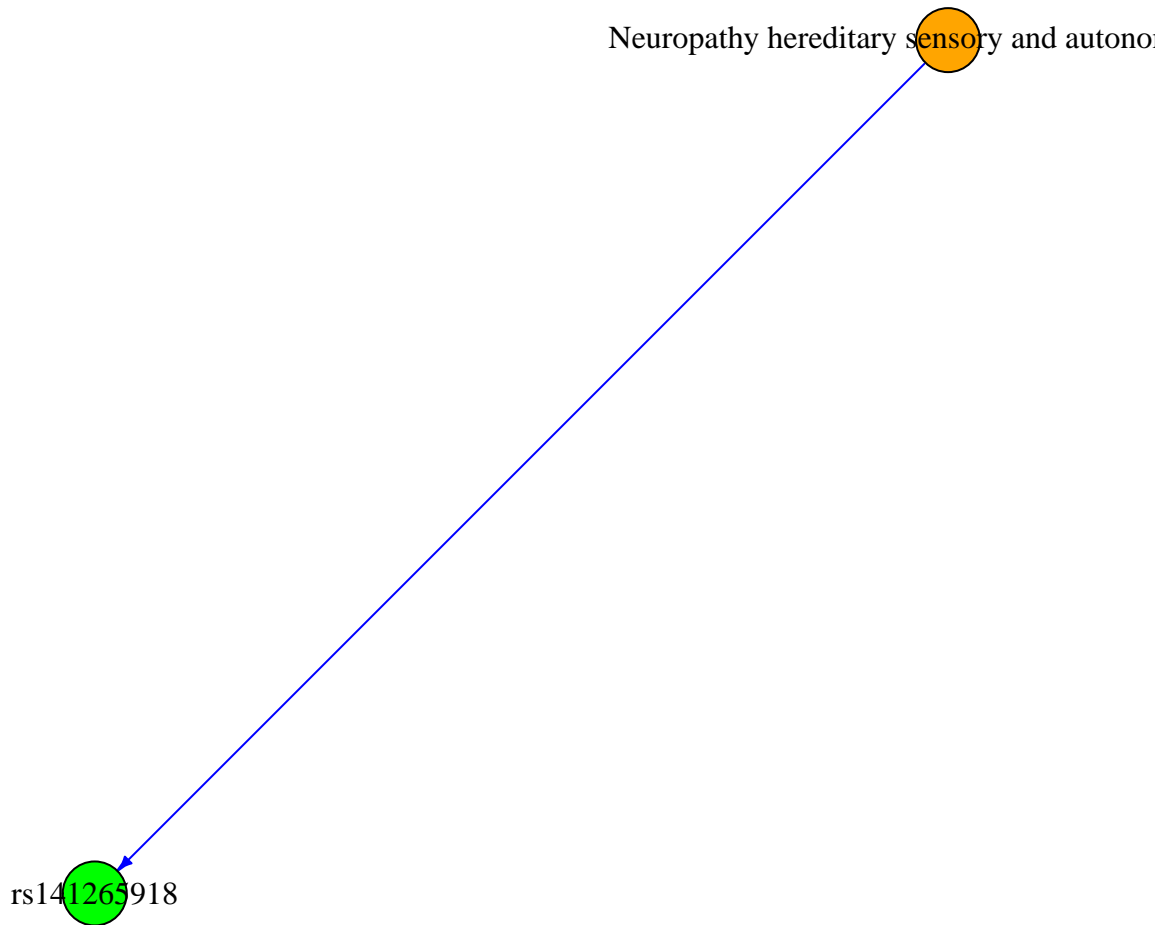

**Variant–Disease Network (Neutral lipid storage disease with myopathy)**

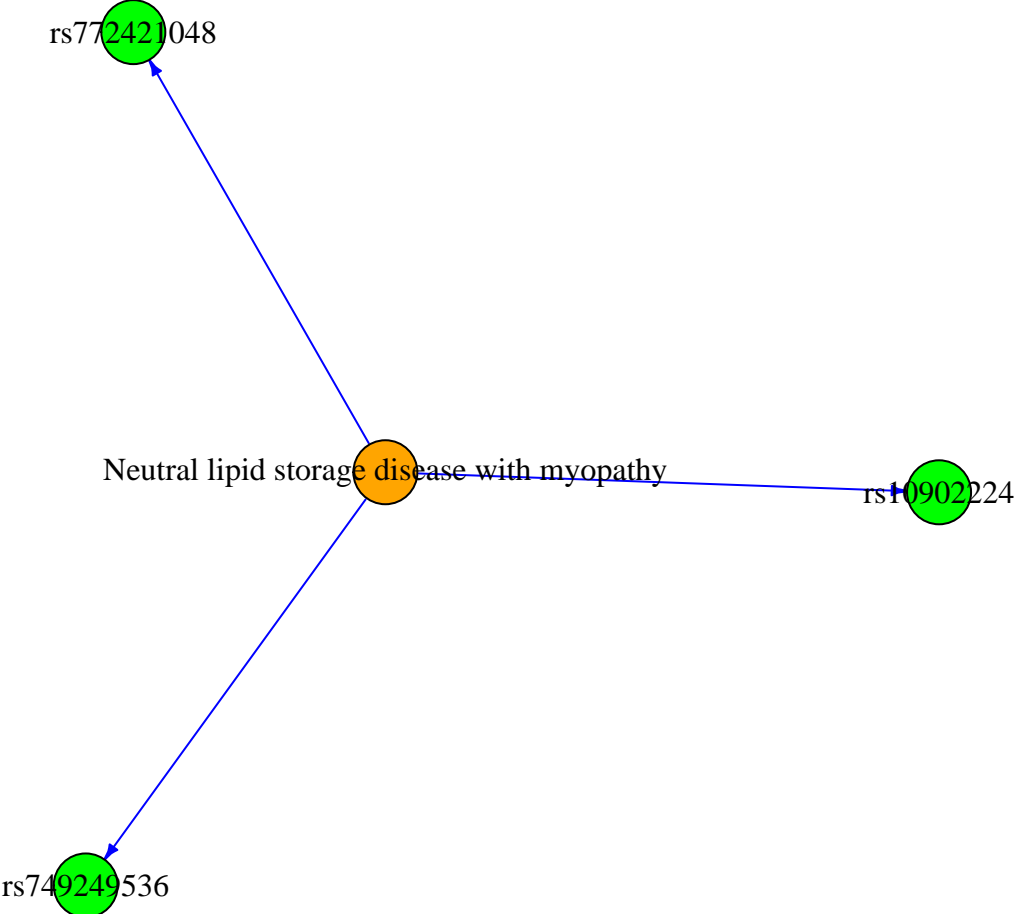

## Variant–Disease Network (Newfoundland rod–cone dystrophy)

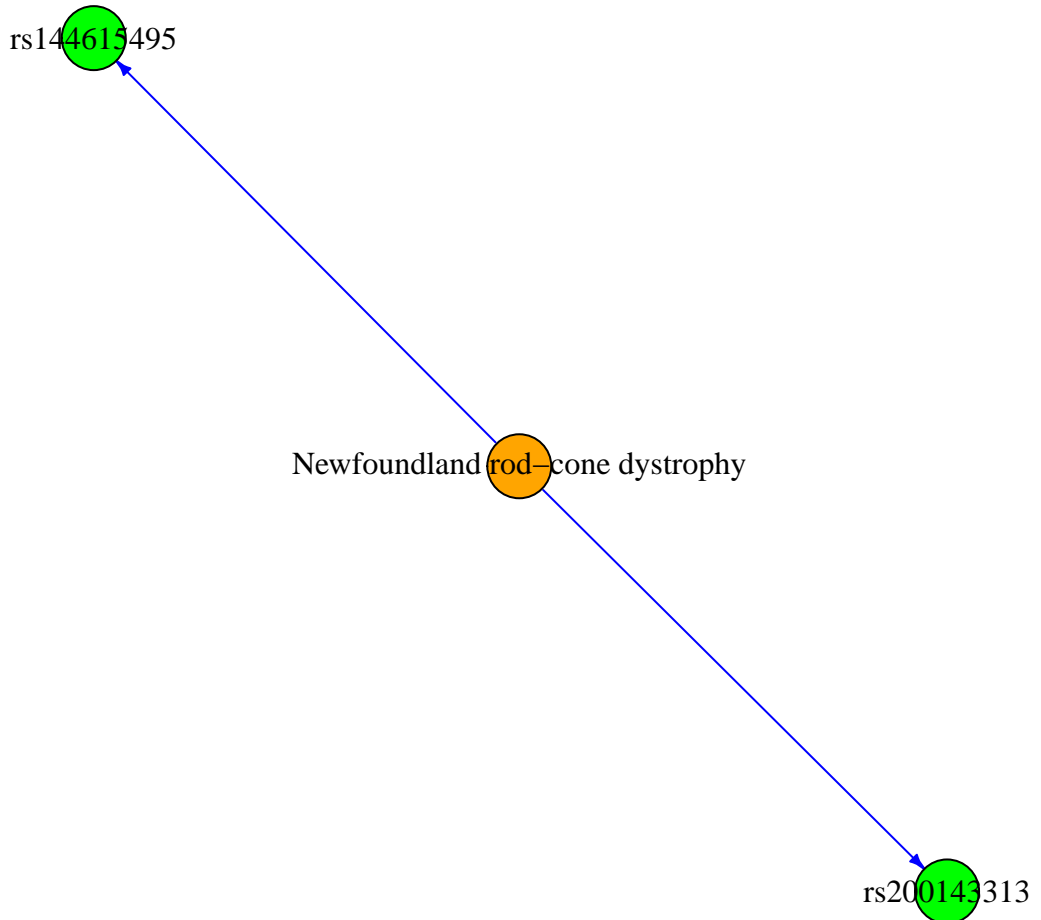

## Variant–Disease Network (Niemann–Pick disease)

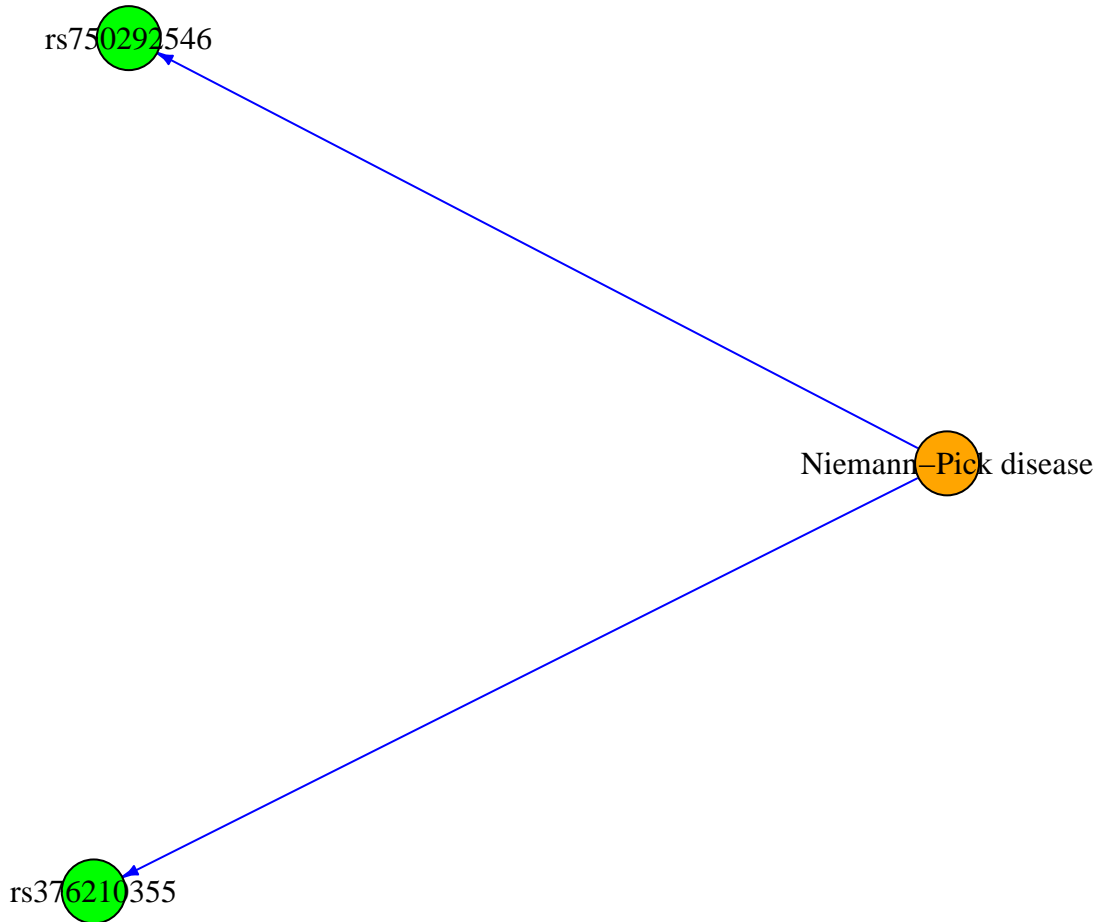

**Variant–Disease Network (Niemann–Pick disease type C1)**

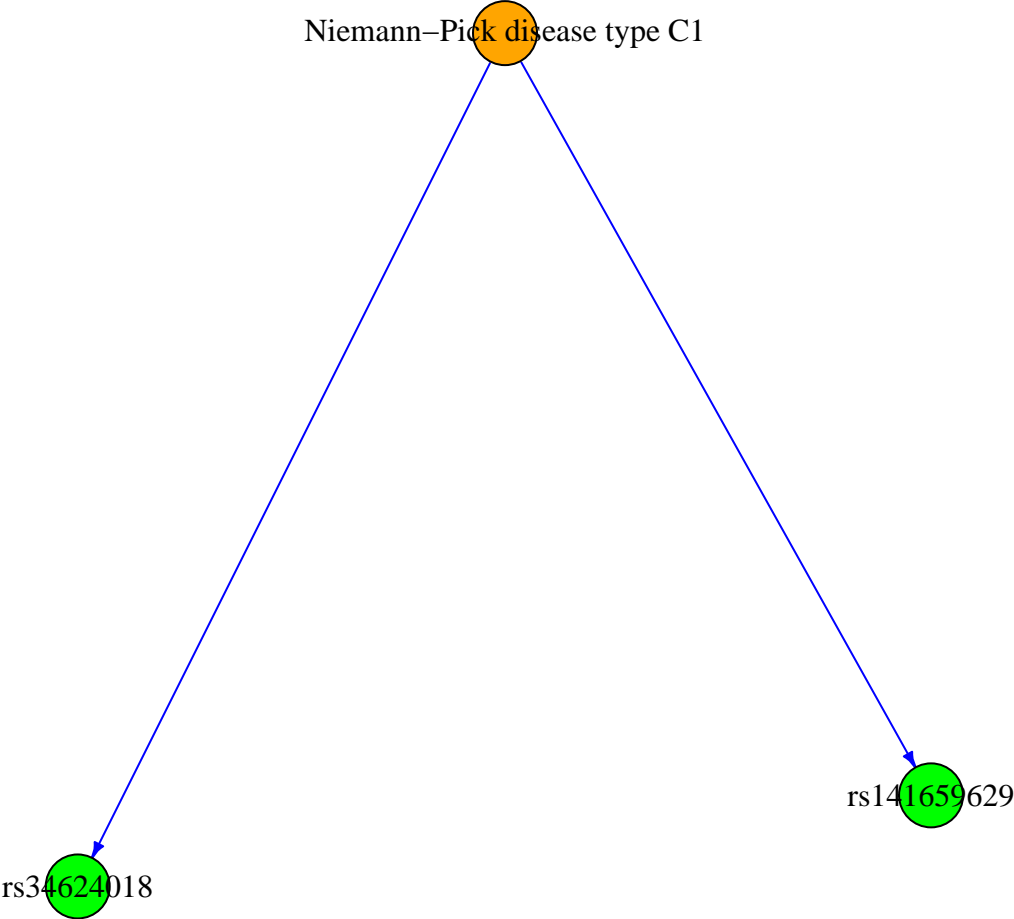



**Variant–Disease Network (Nijmegen breakage syndrome–like disorder)**

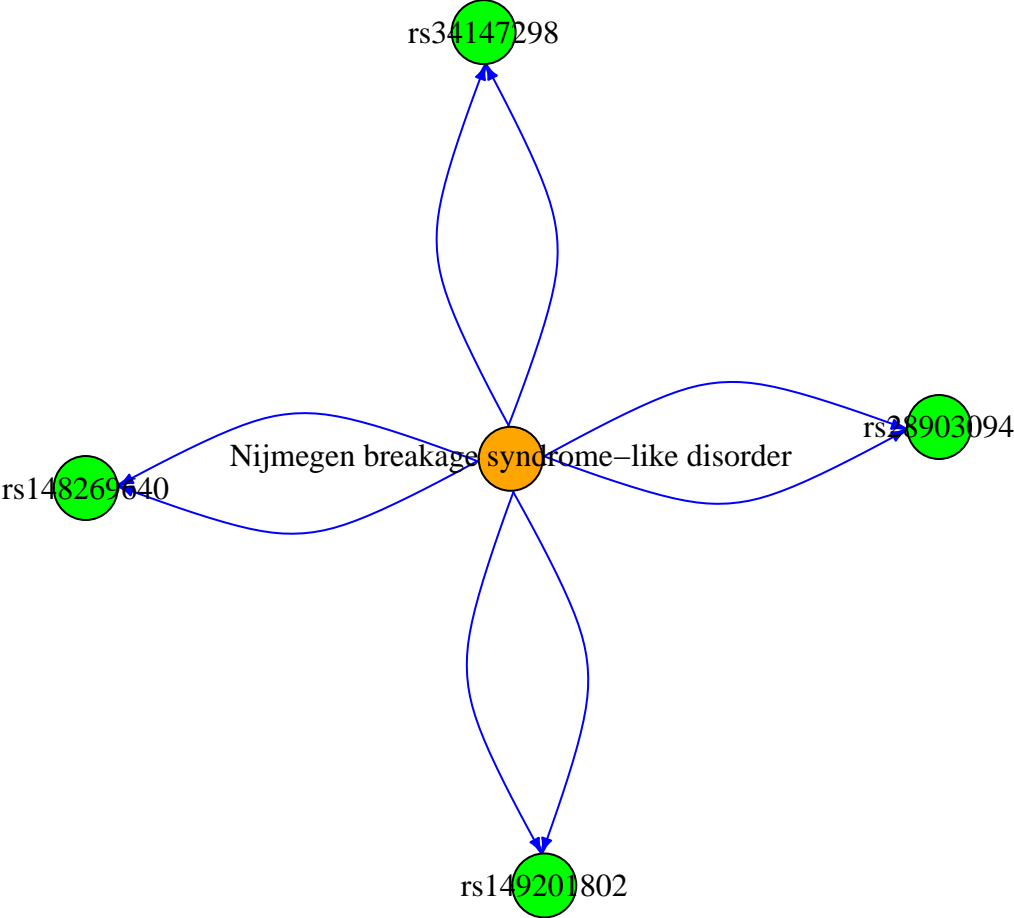

**Variant–Disease Network (Nocturnal frontal lobe epilepsy)**

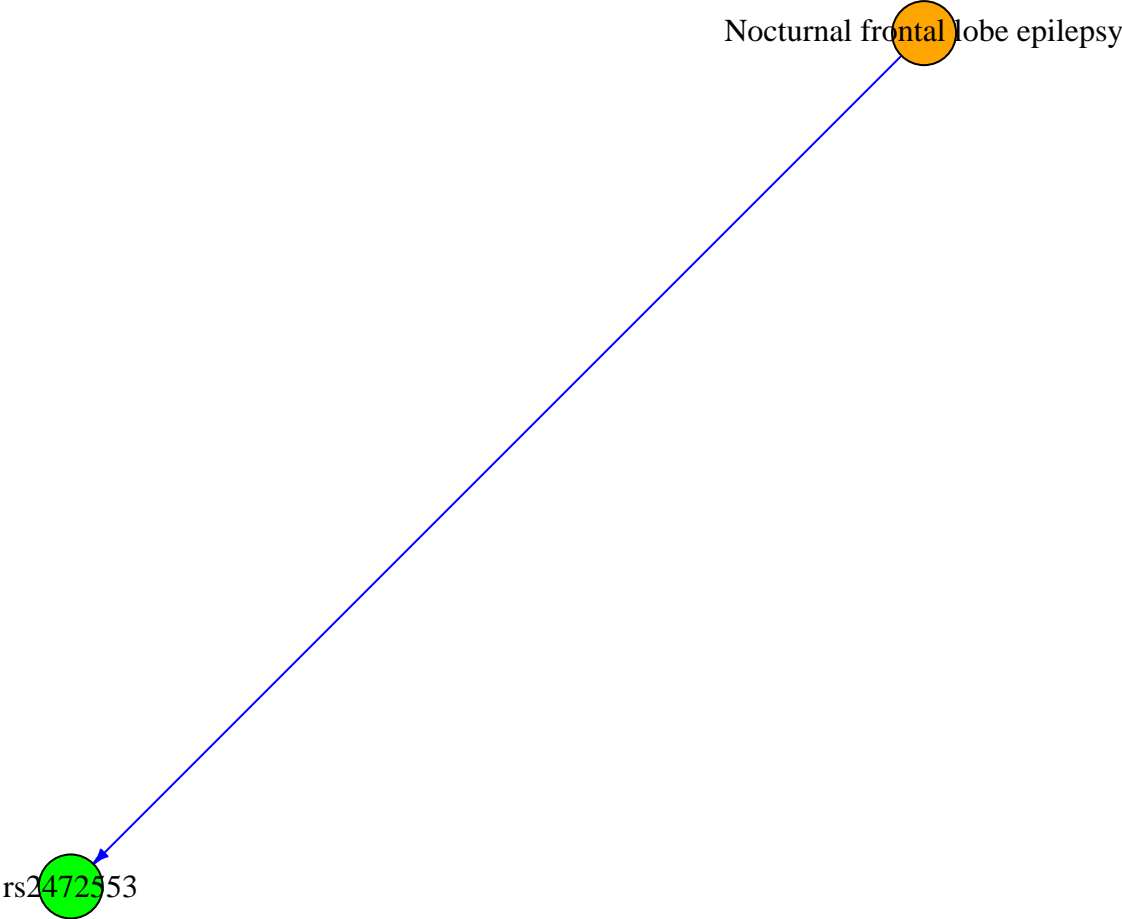

**Variant–Disease Network (Nonepidermolytic palmoplantar keratoderma)**

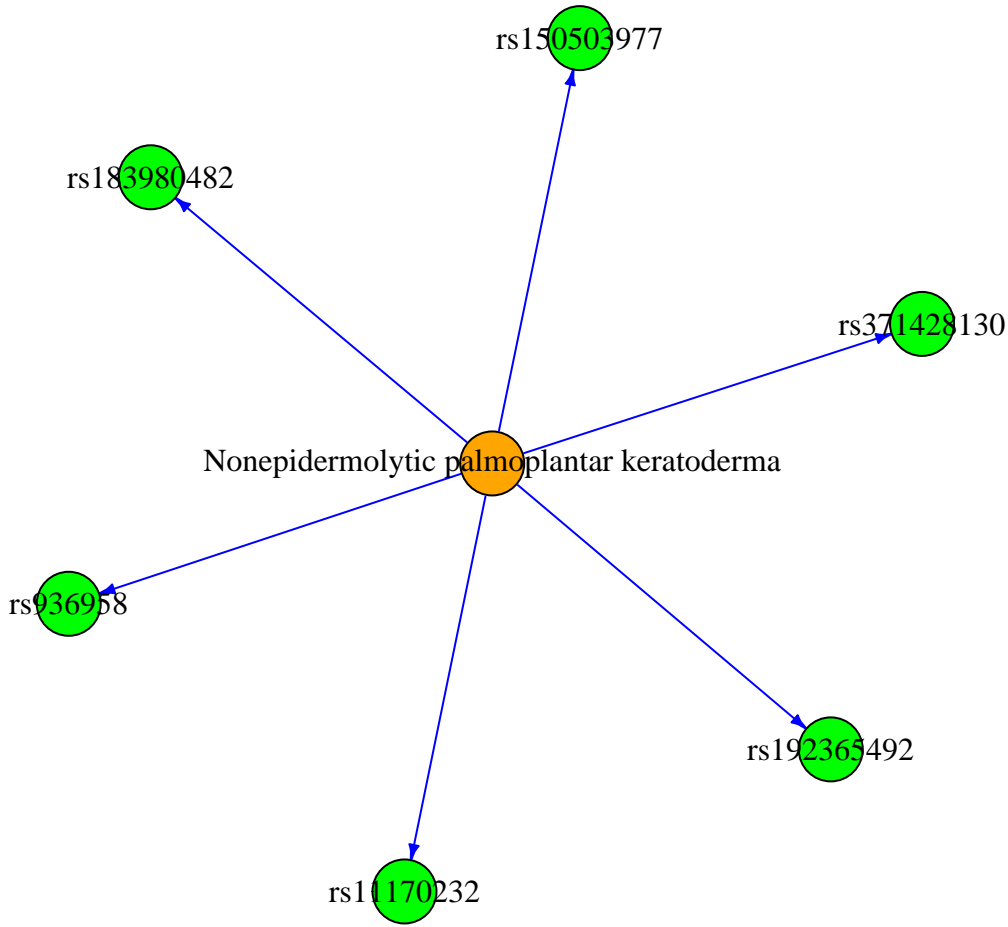

# Variant–Disease Network (Non–ketotic hyperglycinemia)

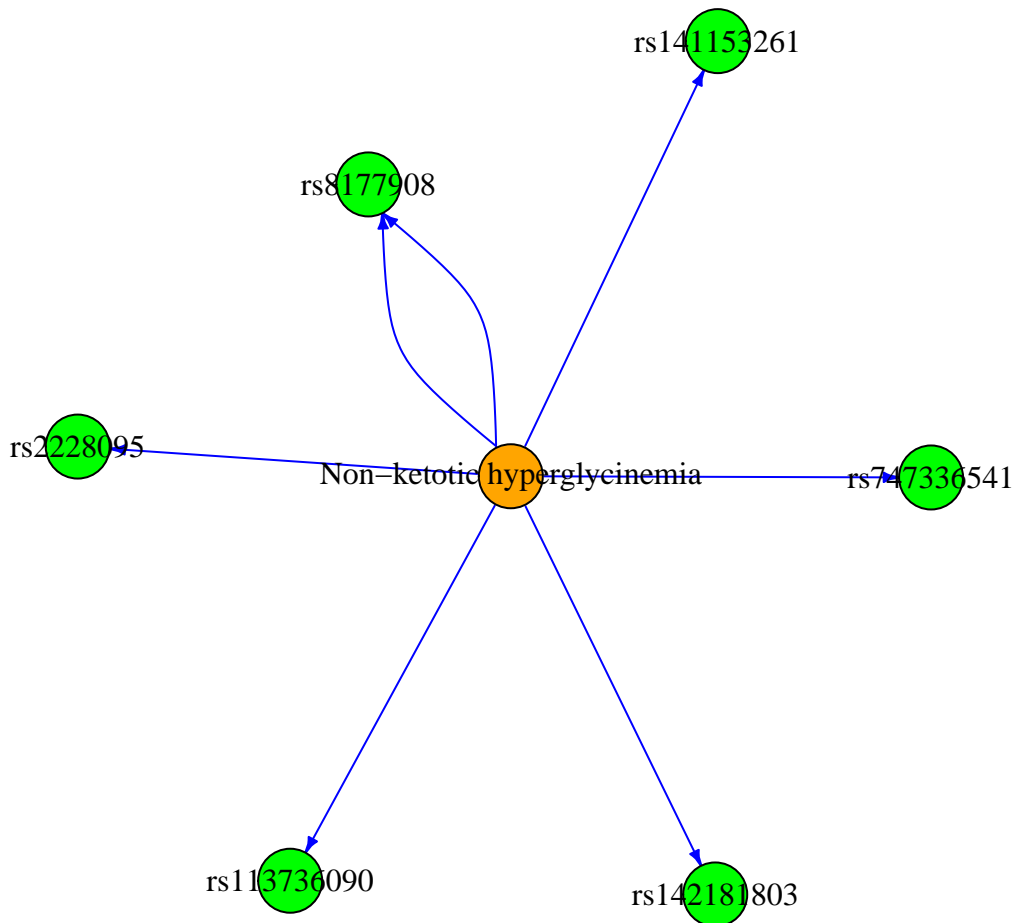

# Variant-Disease Network (Nonsyndromic Hearing Loss)

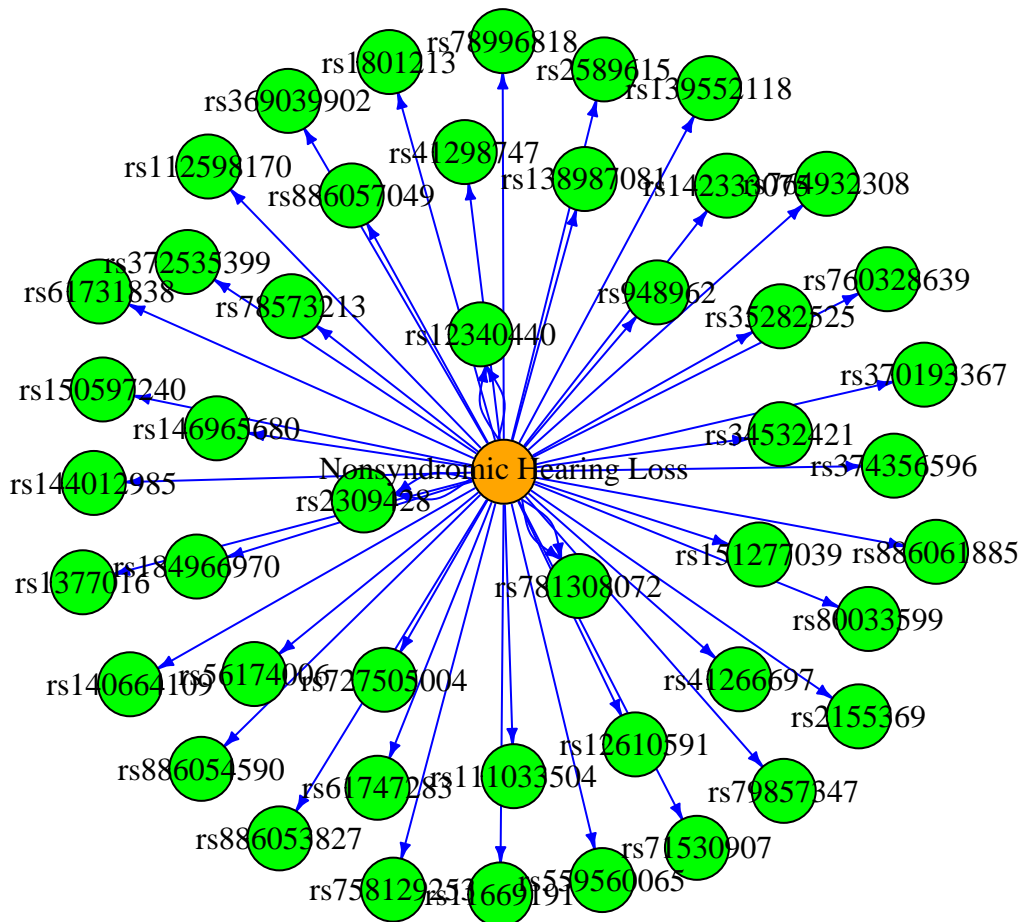

**Variant–Disease Network (Nonsyndromic hearing loss and deafness)**

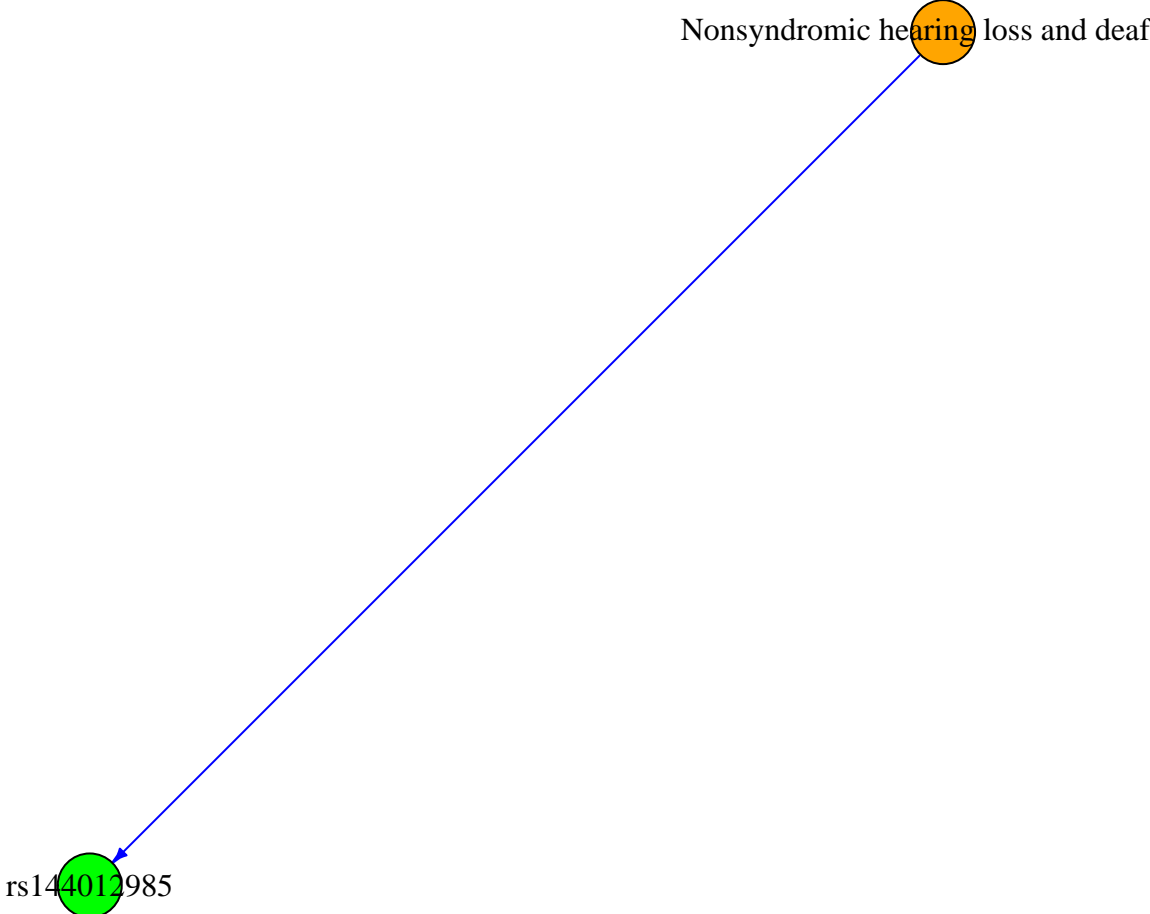

**Variant–Disease Network (Nonsyndromic Oculocutaneous Albinism)**

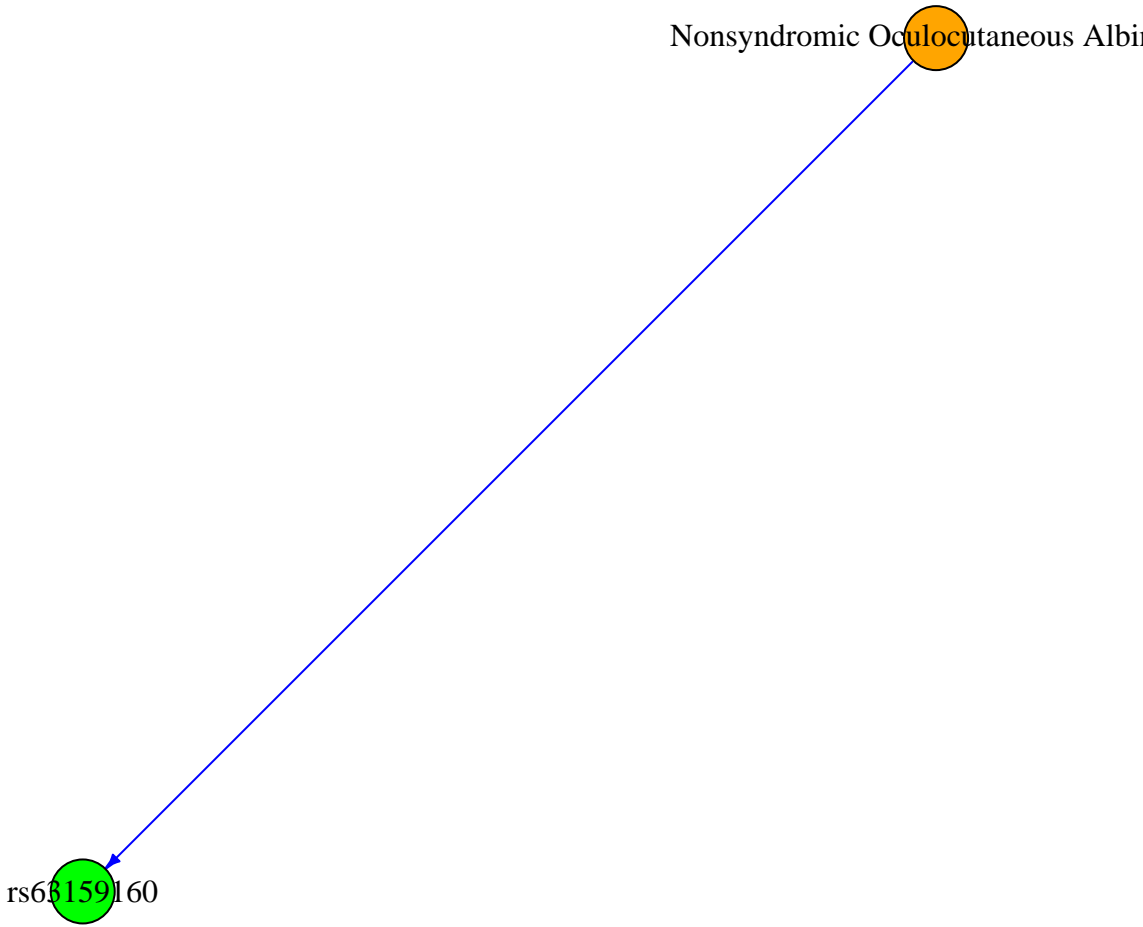

# Variant–Disease Network (Nonsyndromic Trigonocephaly)

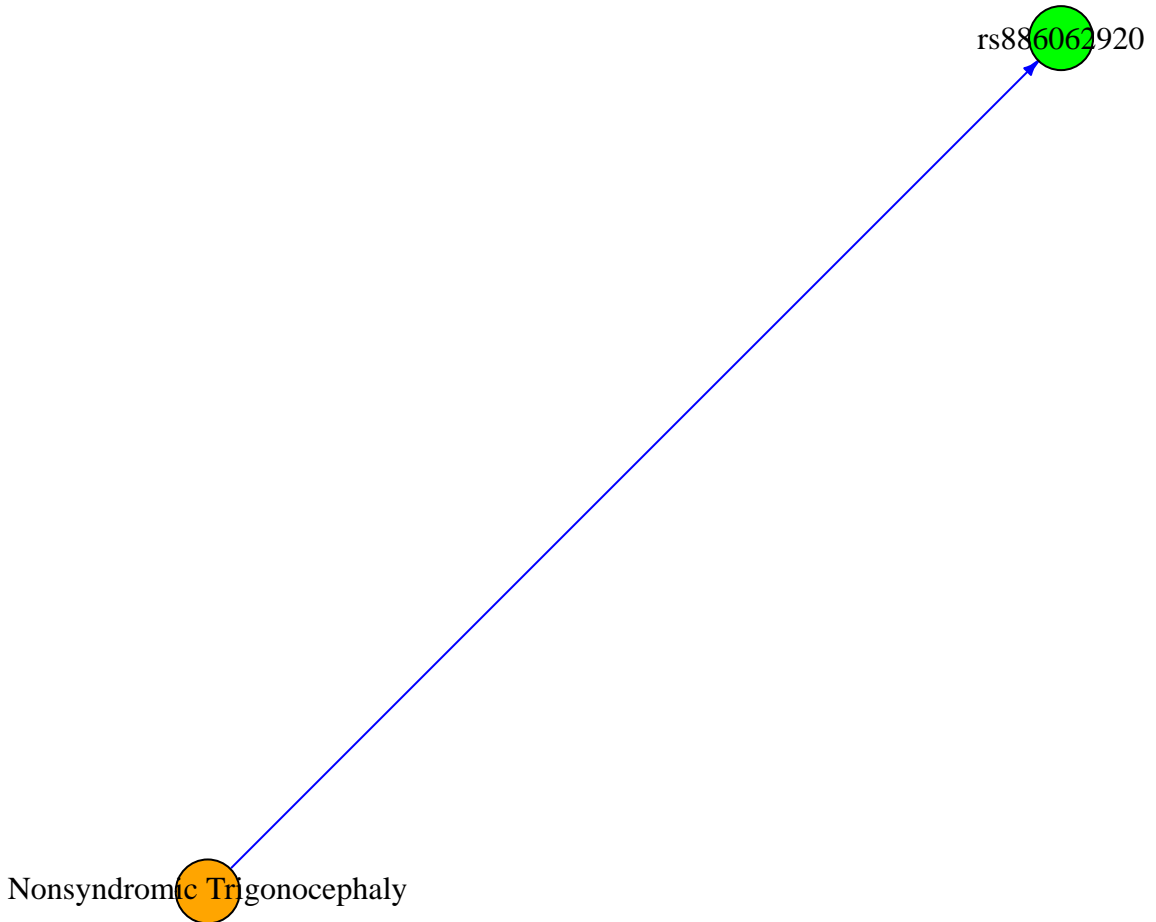



Variant–Disease Network (Non–syndromic X–linked intellectual disability)

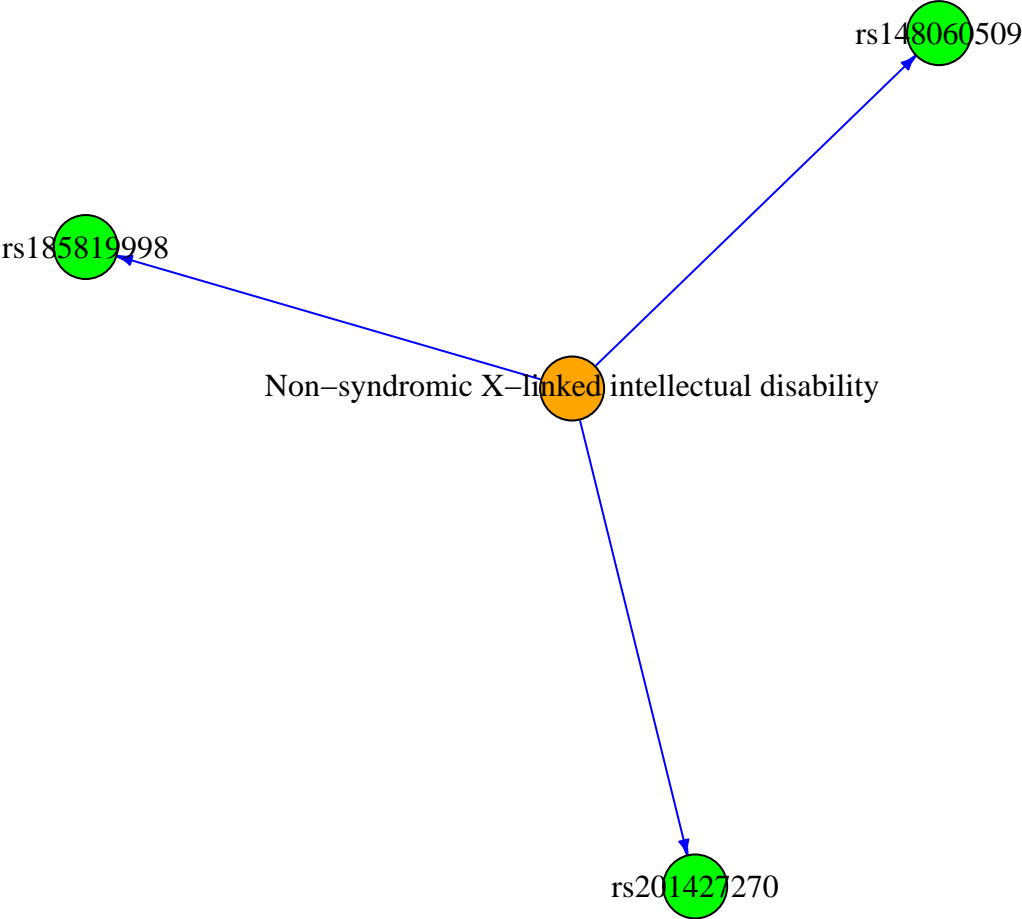

## Variant–Disease Network (Noonan syndrome)

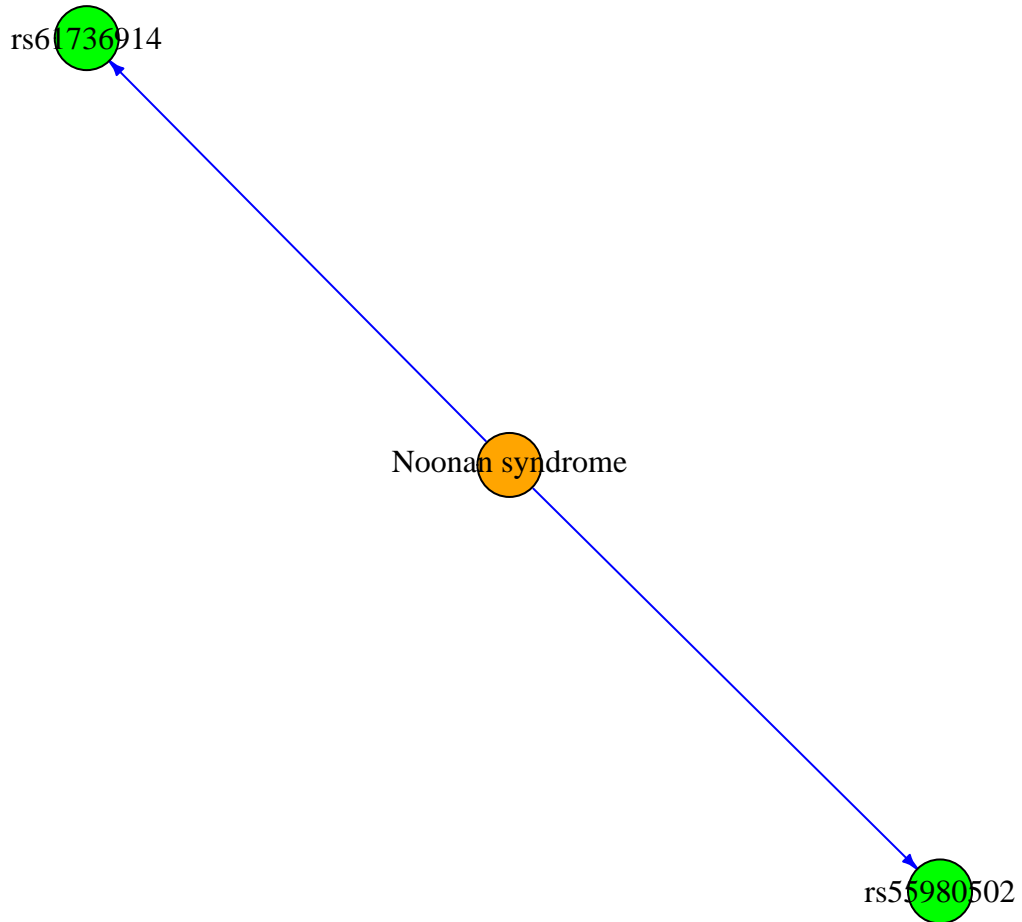

## Variant–Disease Network (Noonan syndrome 9)

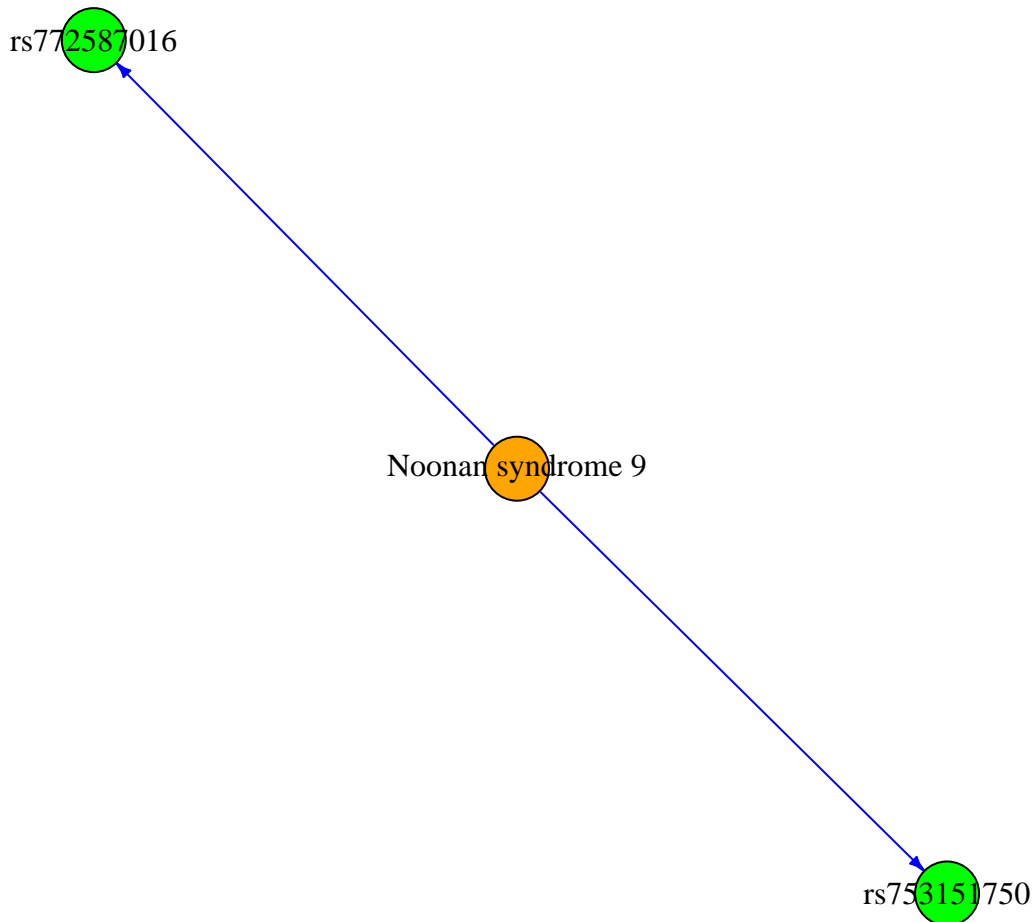

Variant–Disease Network (Noonan syndrome with multiple lentigines)

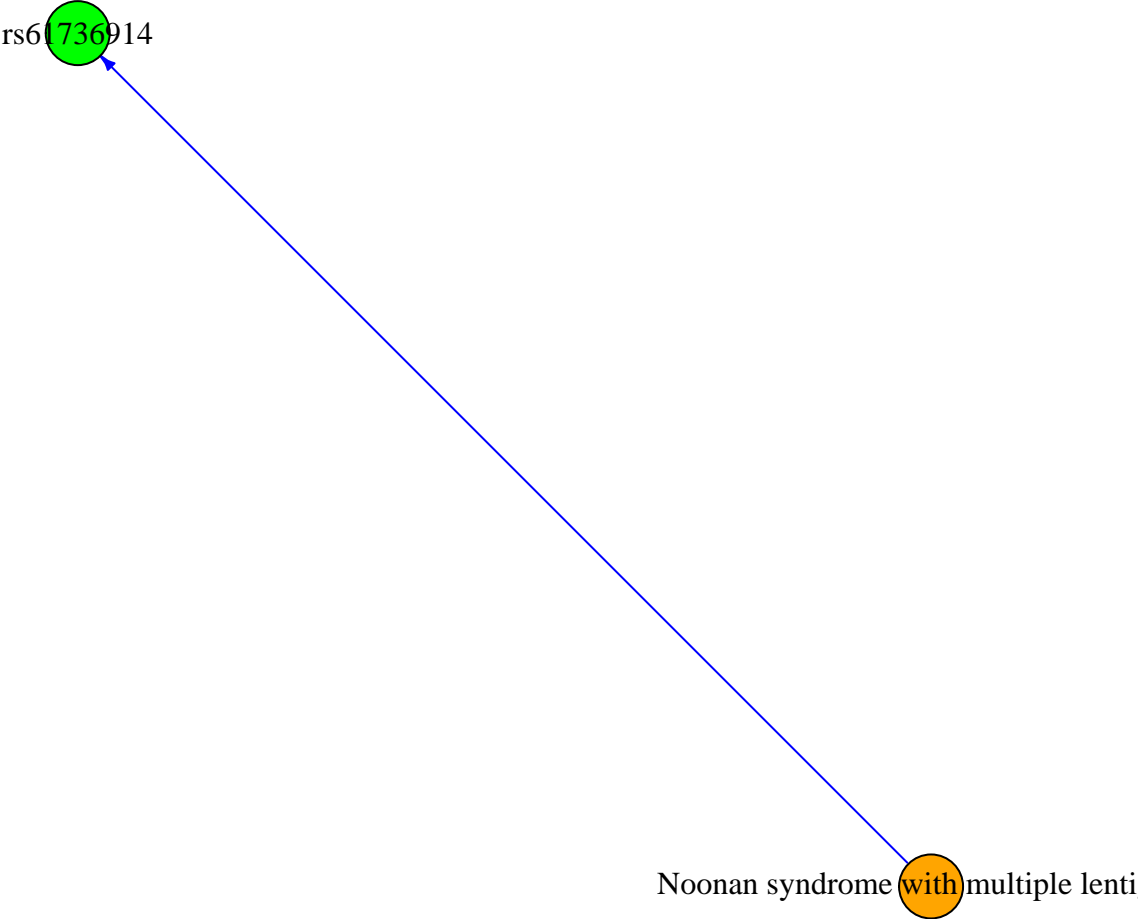

# Variant-Disease Network (Noonan syndrome-like disorder with loose anagen

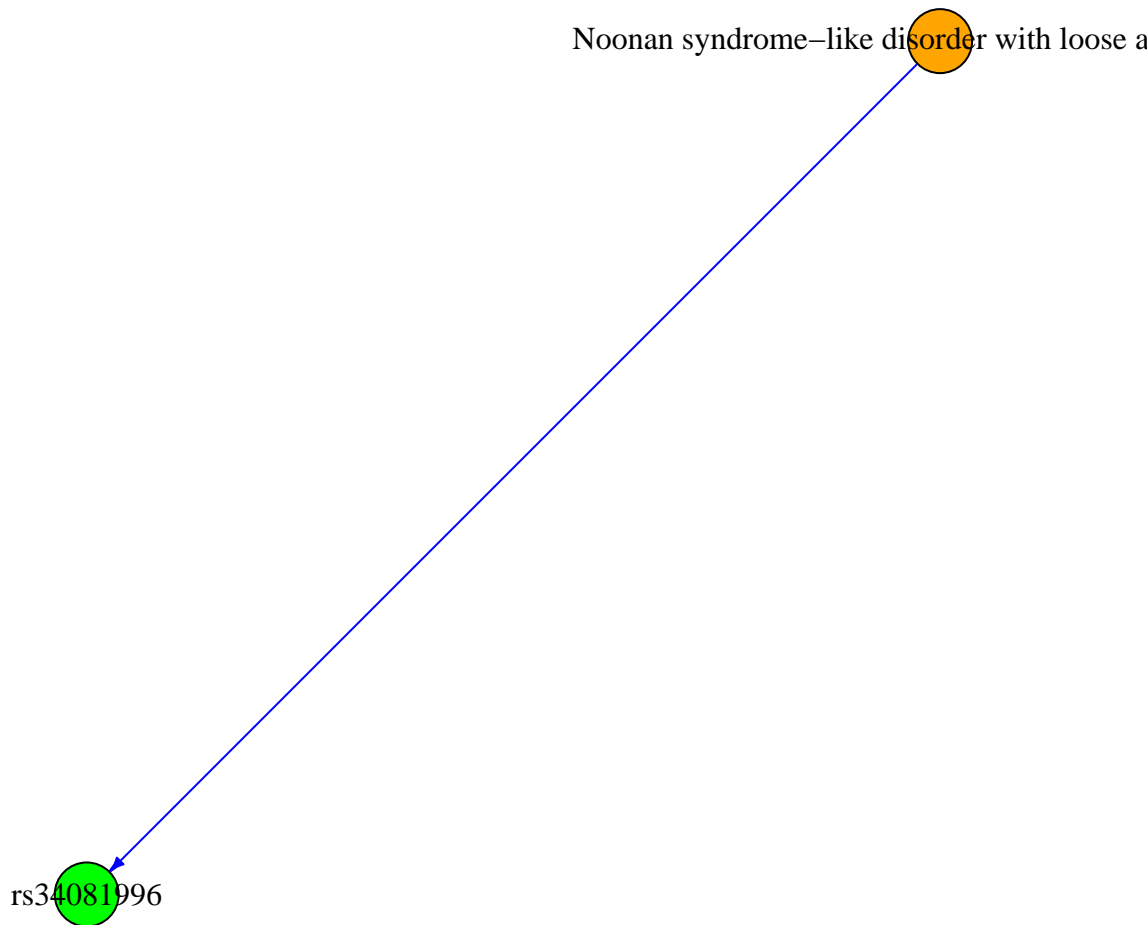

# Network (Noonan syndrome–like disorder with or without juvenile myelom)

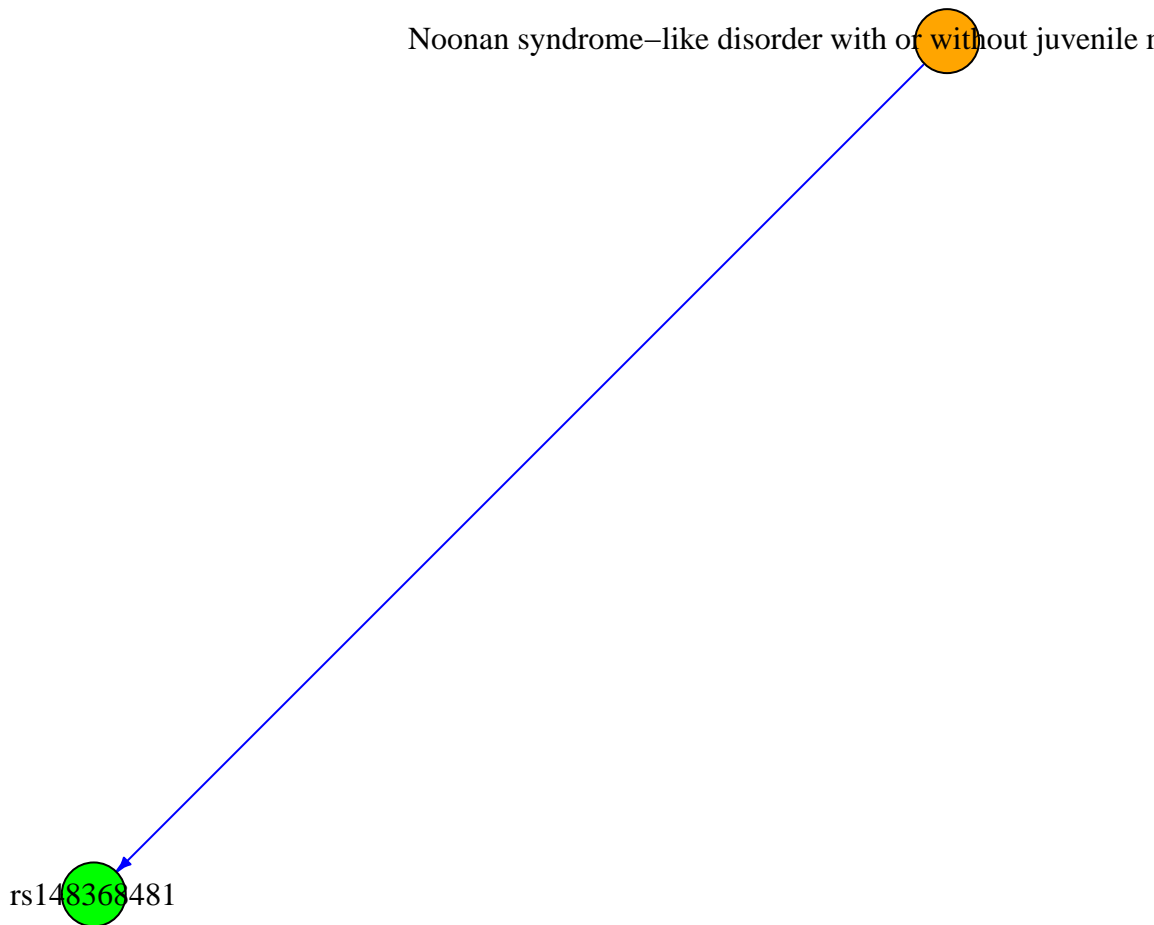

# Variant–Disease Network (Noonan–Like Syndrome Disorder)

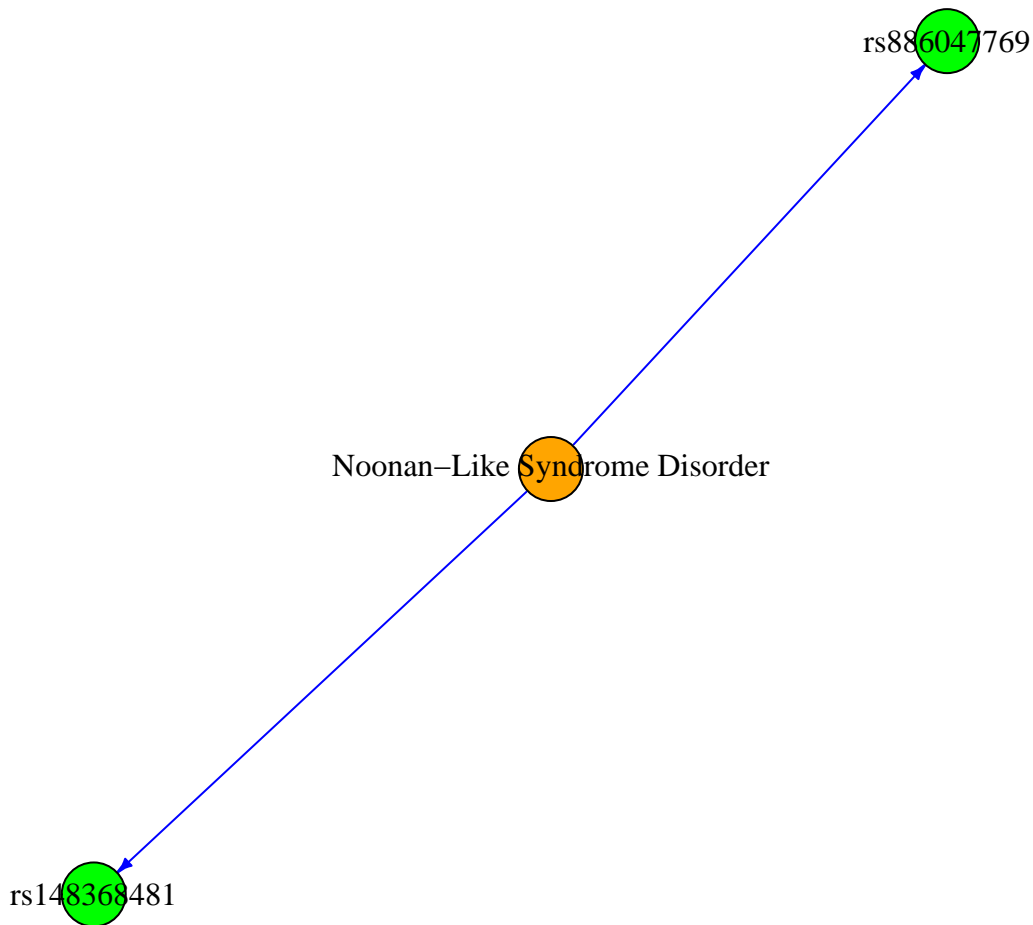

## Variant–Disease Network (Norum disease)

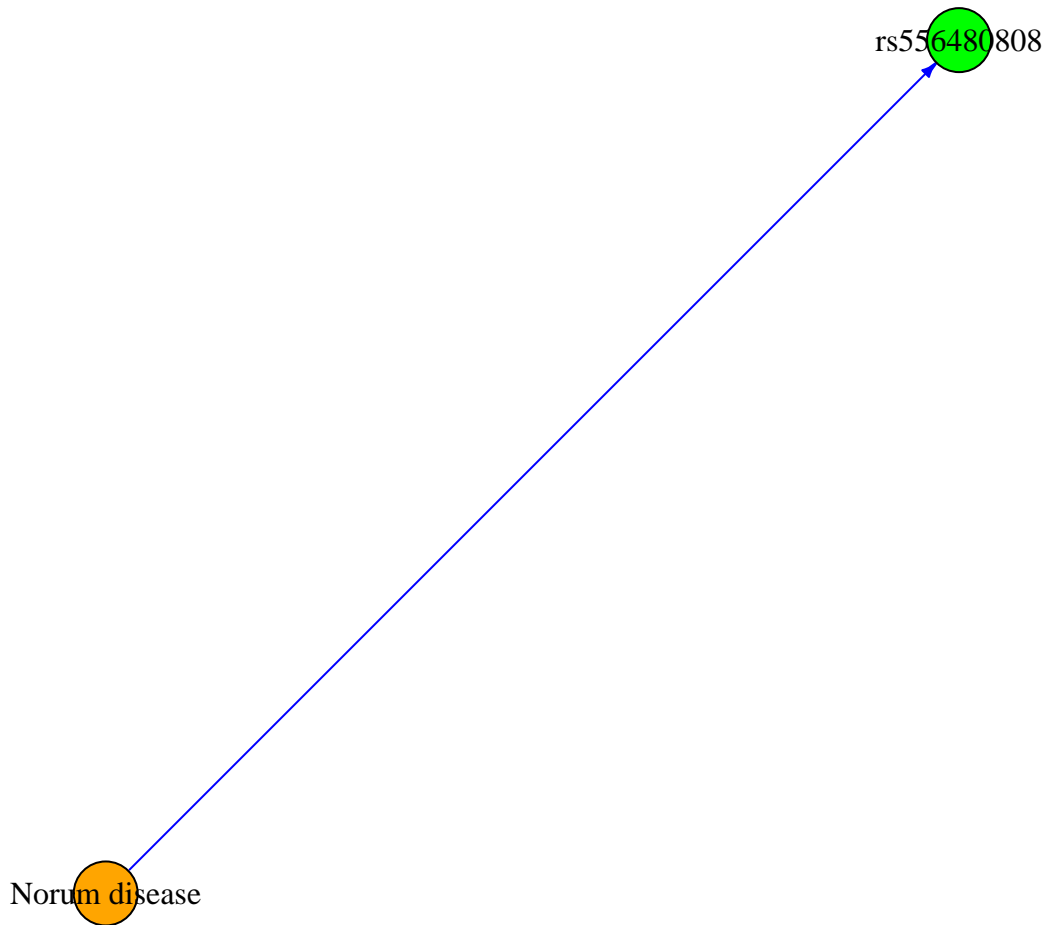



# Disease Network (Nuclearly-encoded mitochondrial complex V (ATP synthase

oded mitochondrial complex V (ATP synthase) deficiency 2

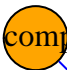

rs61732273

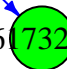

## Variant–Disease Network (Obesity)

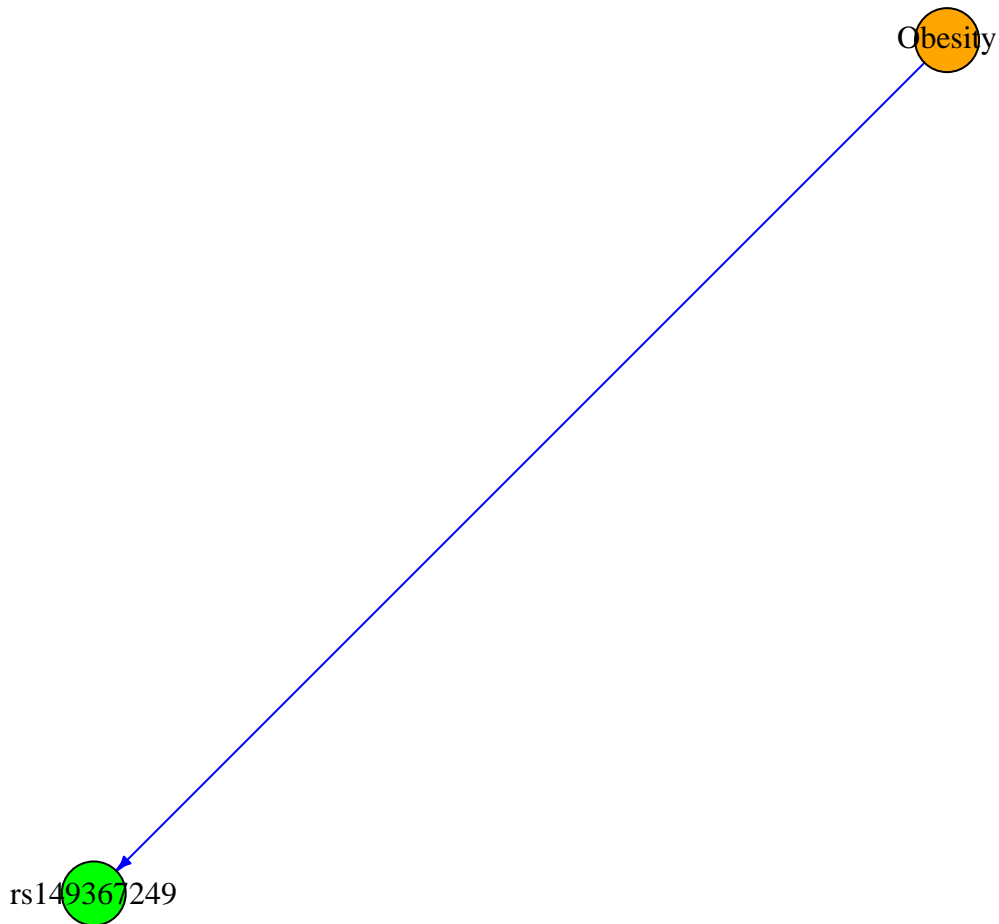

# Variant–Disease Network (Oculocutaneous albinism type 1B)

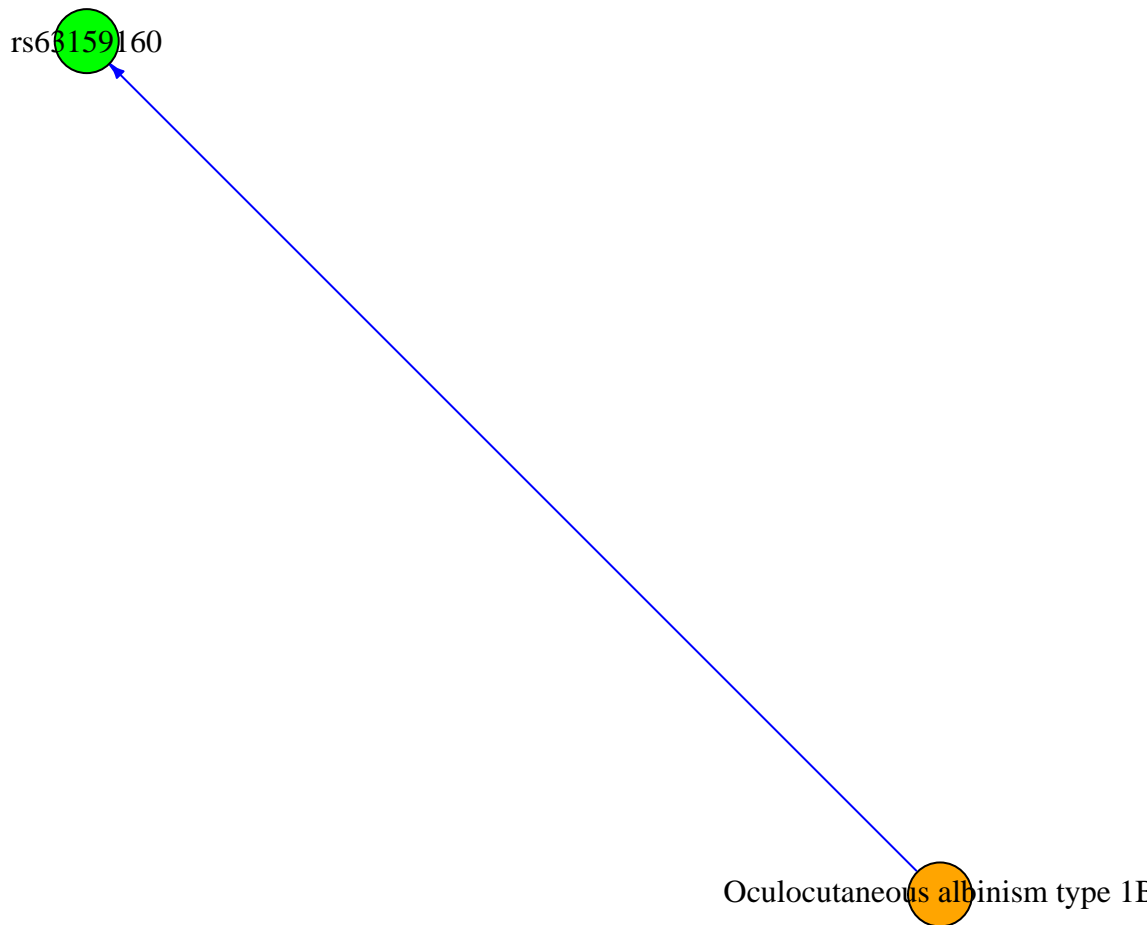

## Variant-Disease Network (Odontoonychodermal dysplasia)

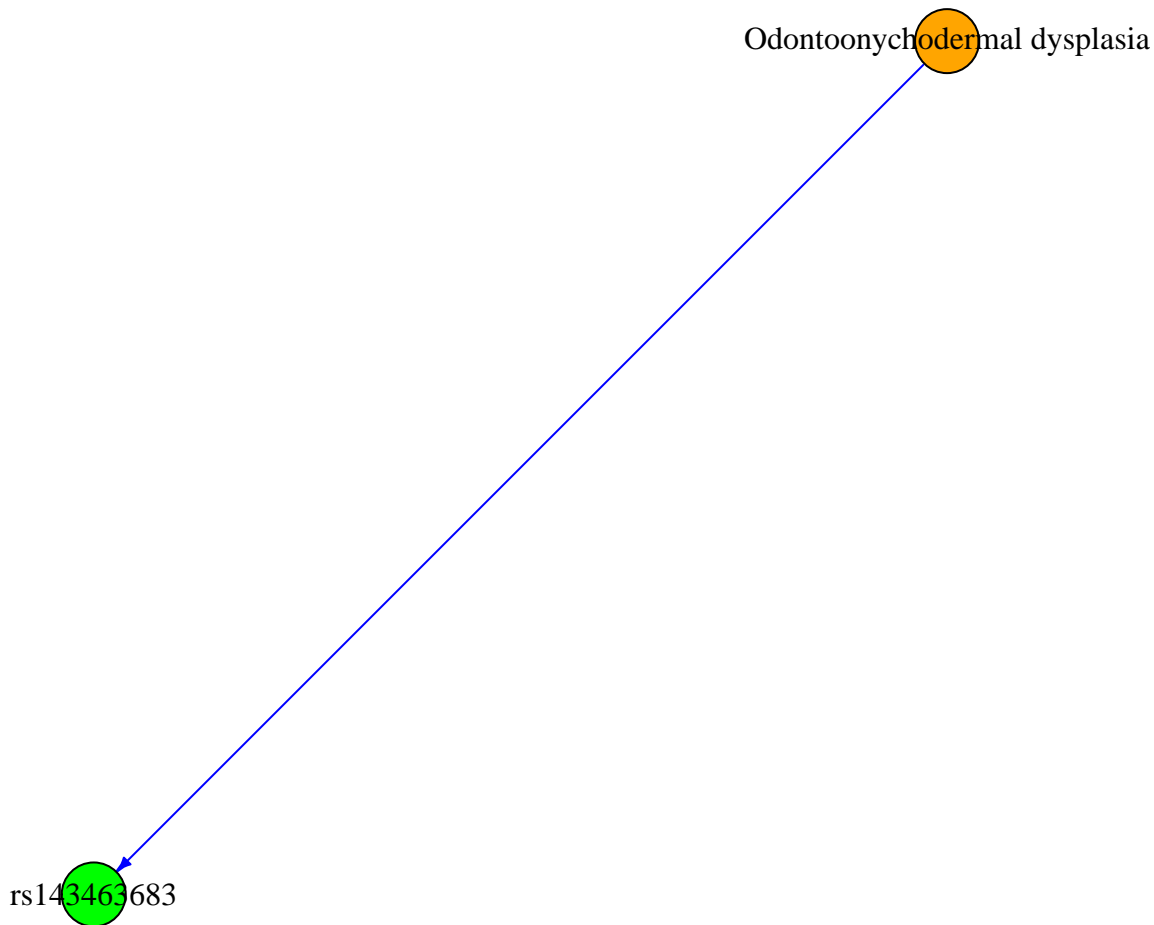

# Variant–Disease Network (Okur–chung neurodevelopmental syndrome)

rs1064796883

Okur–chung neurodevelopmental syndrome

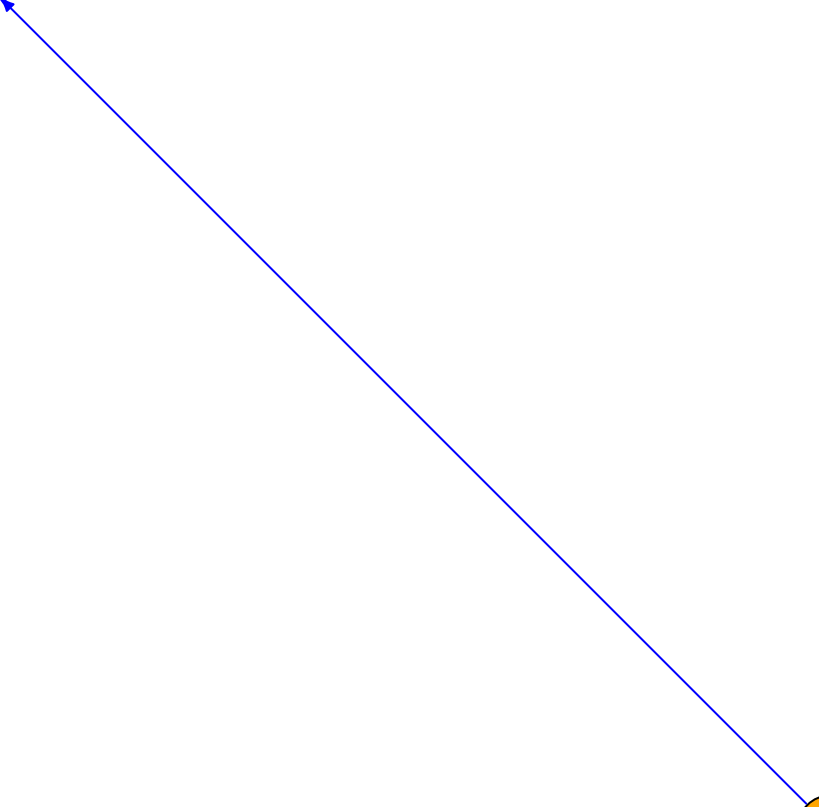

# Variant–Disease Network (Oligodontia–colorectal cancer syndrome)

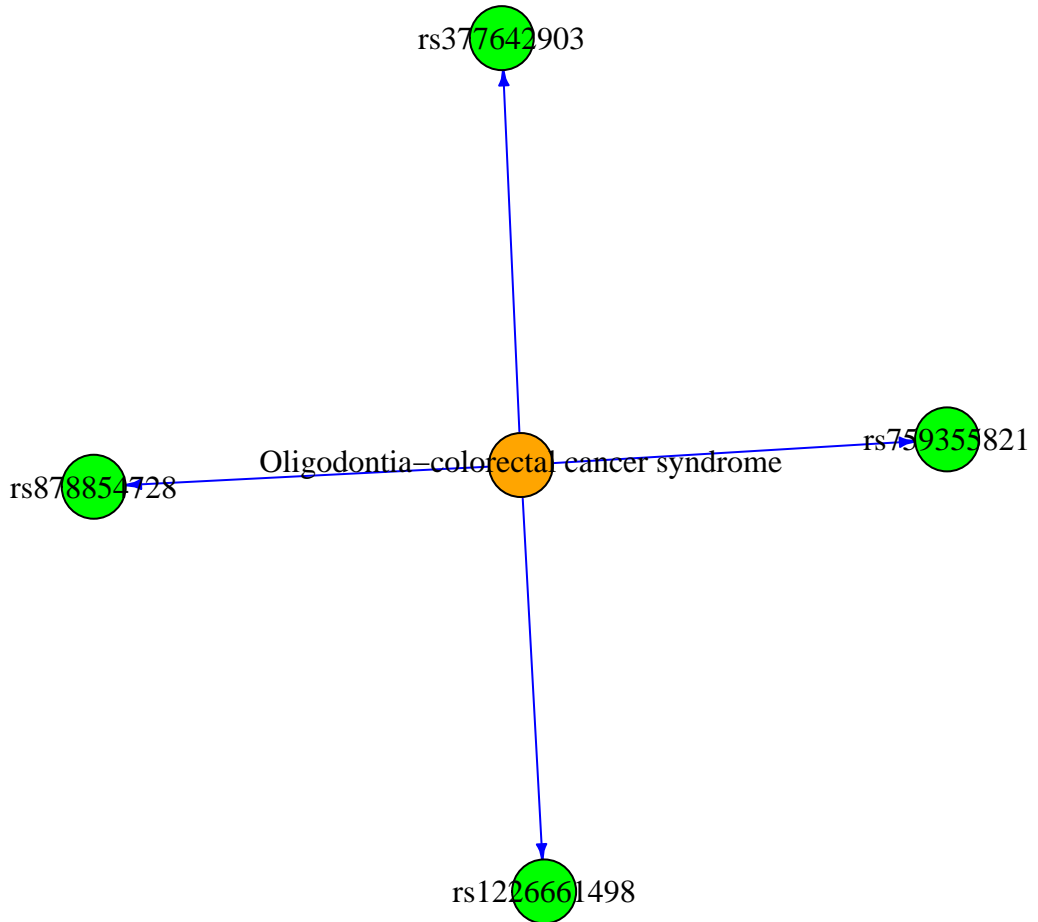

Variant–Disease Network (Omodysplasia)

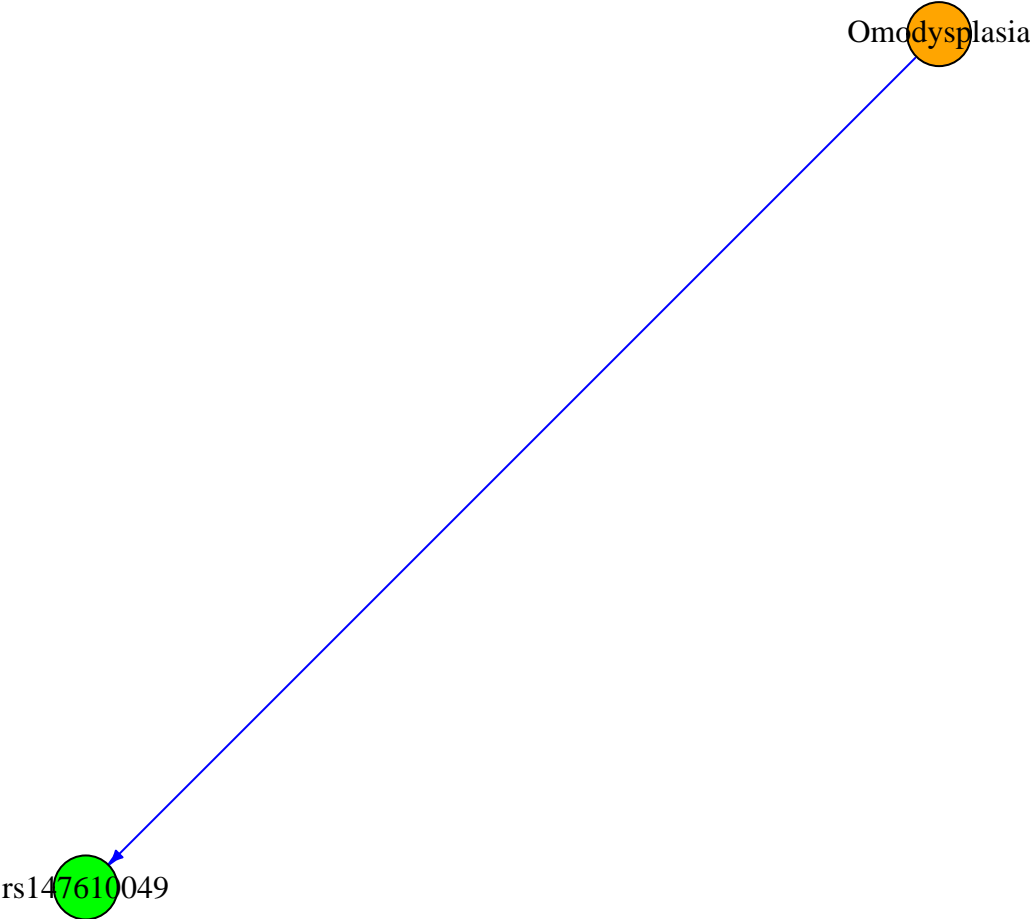

## Variant-Disease Network (Optic Atrophy)

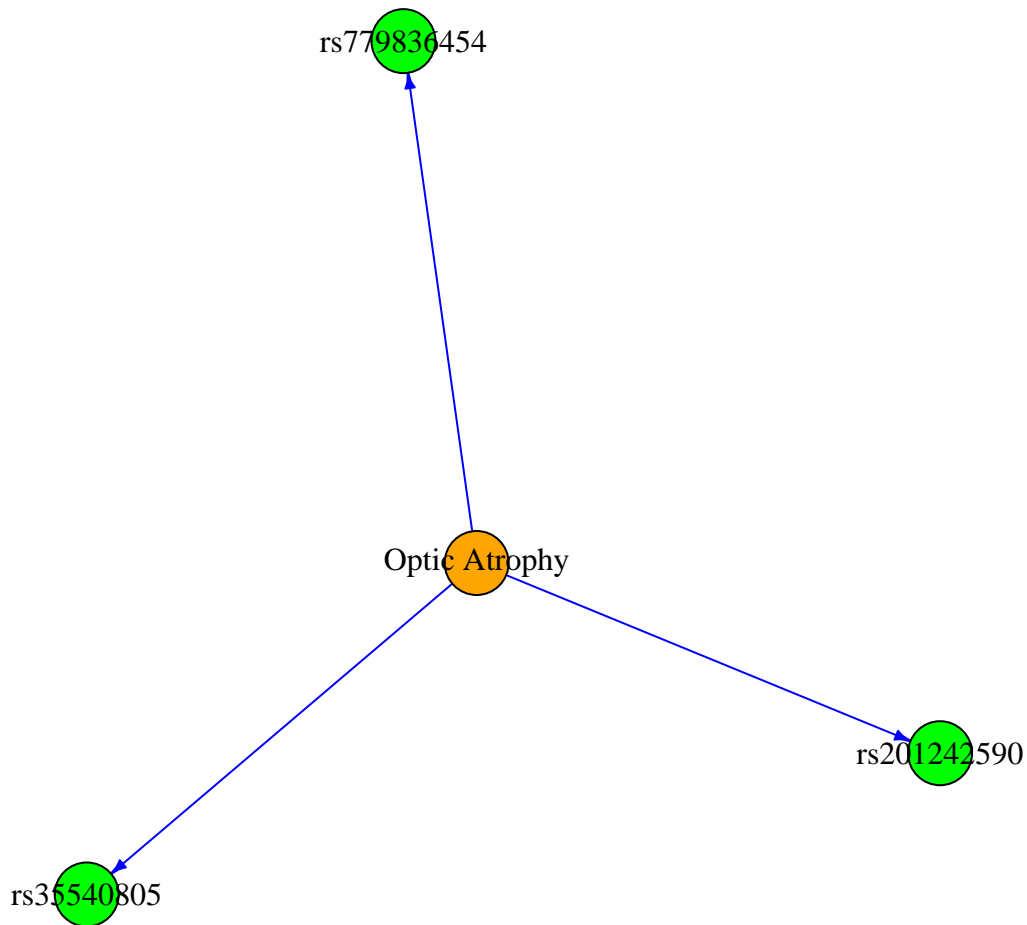



# Variant–Disease Network (Ornithine aminotransferase deficiency)

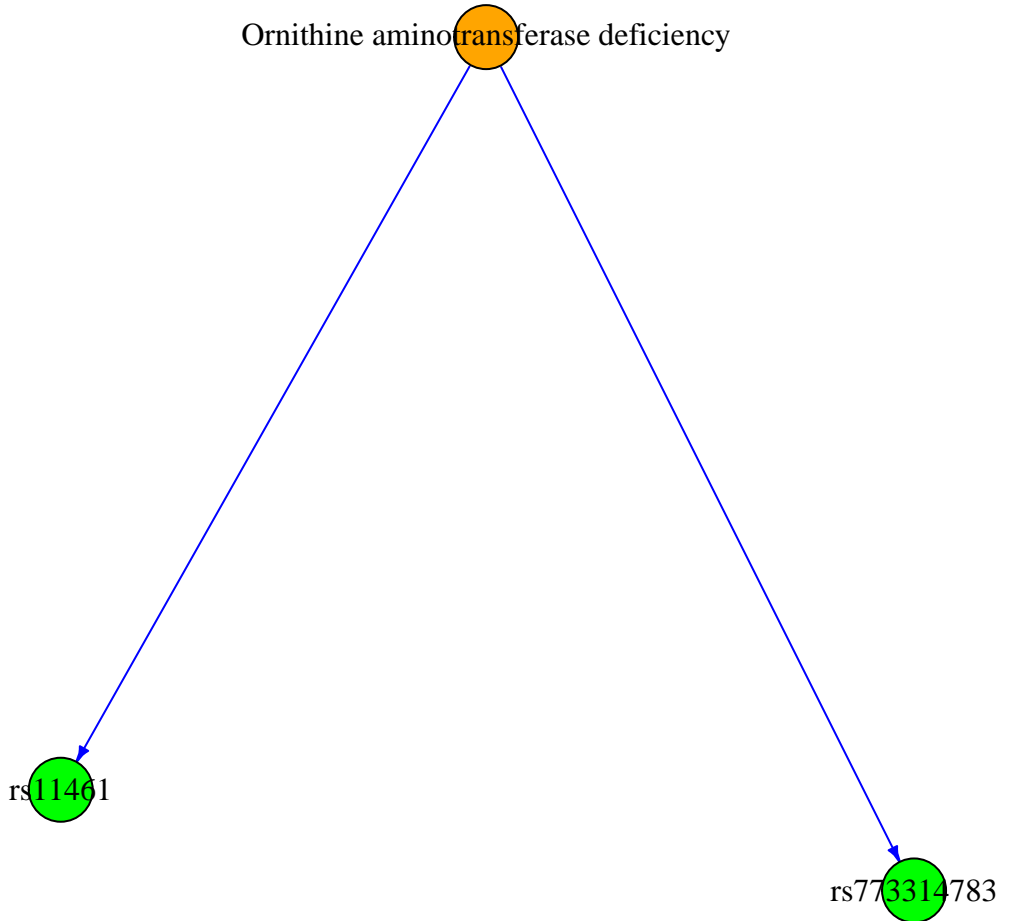

# Variant–Disease Network (Ornithine carbamoyltransferase deficiency)

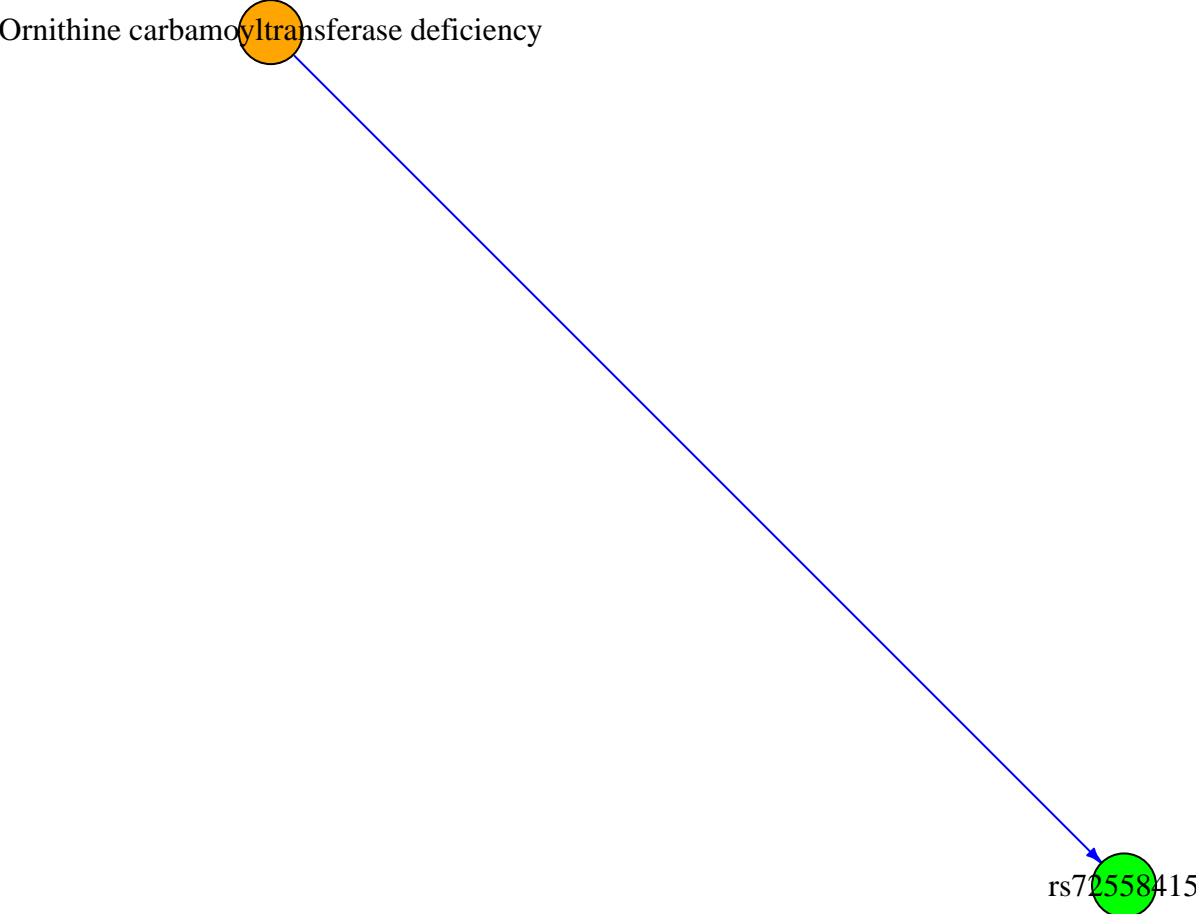

## Variant–Disease Network (Orofaciodigital syndrome 6)

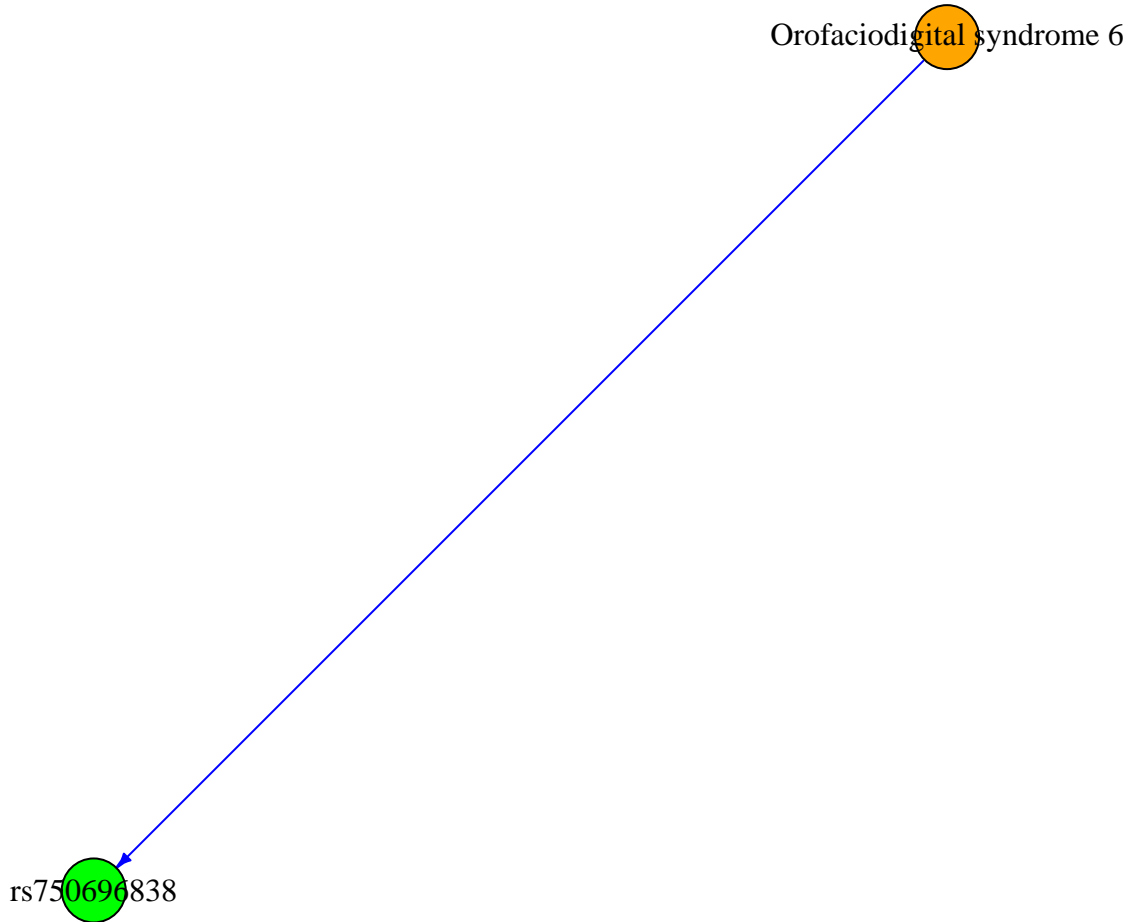

## Variant–Disease Network (Orthostatic hypotension 1)

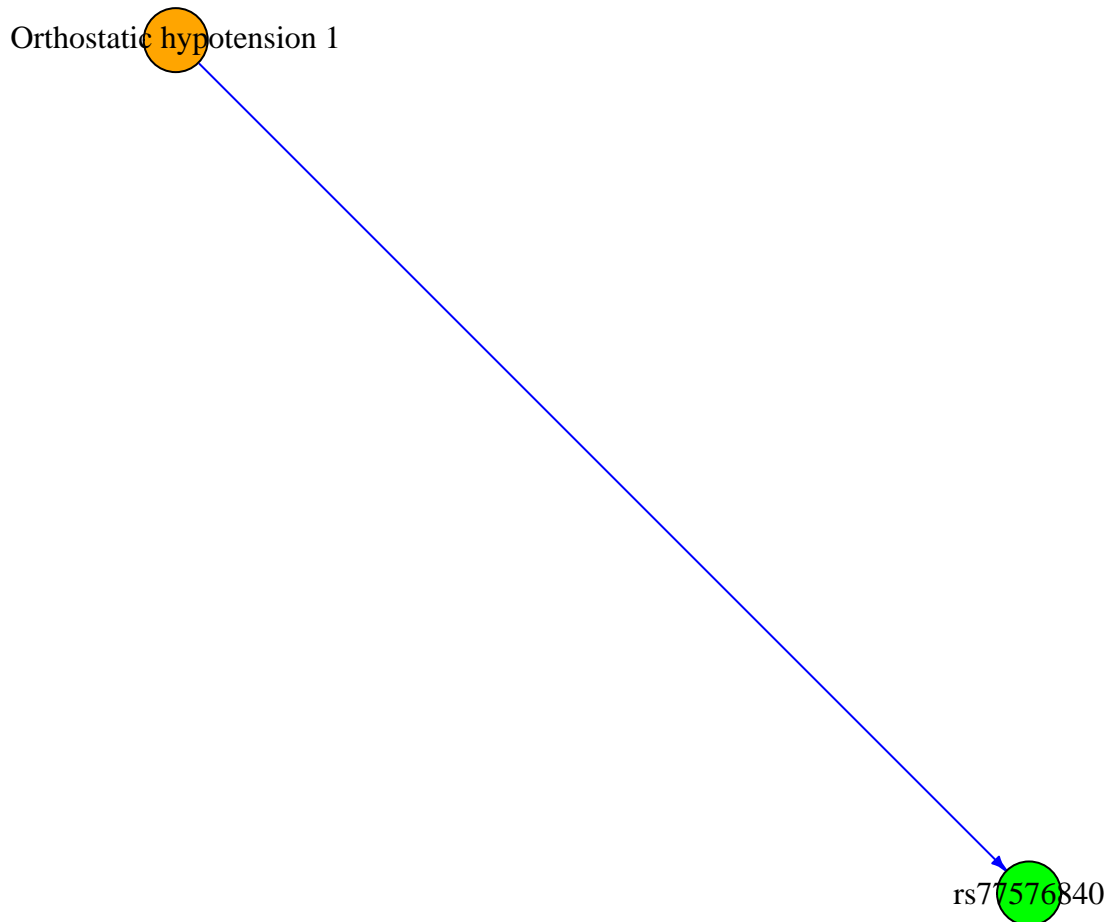

## Variant–Disease Network (Orthostatic intolerance)

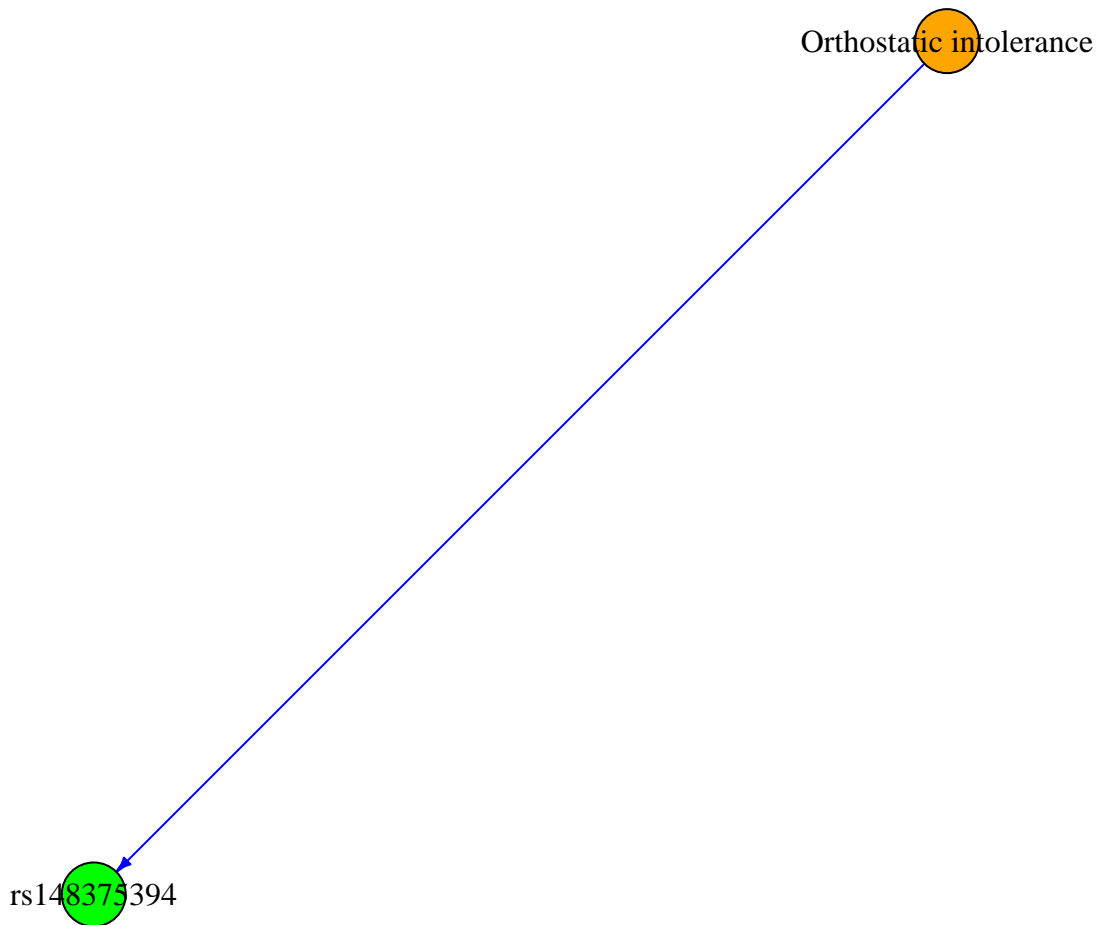

Variant–Disease Network (Osteogenesis Imperfecta)

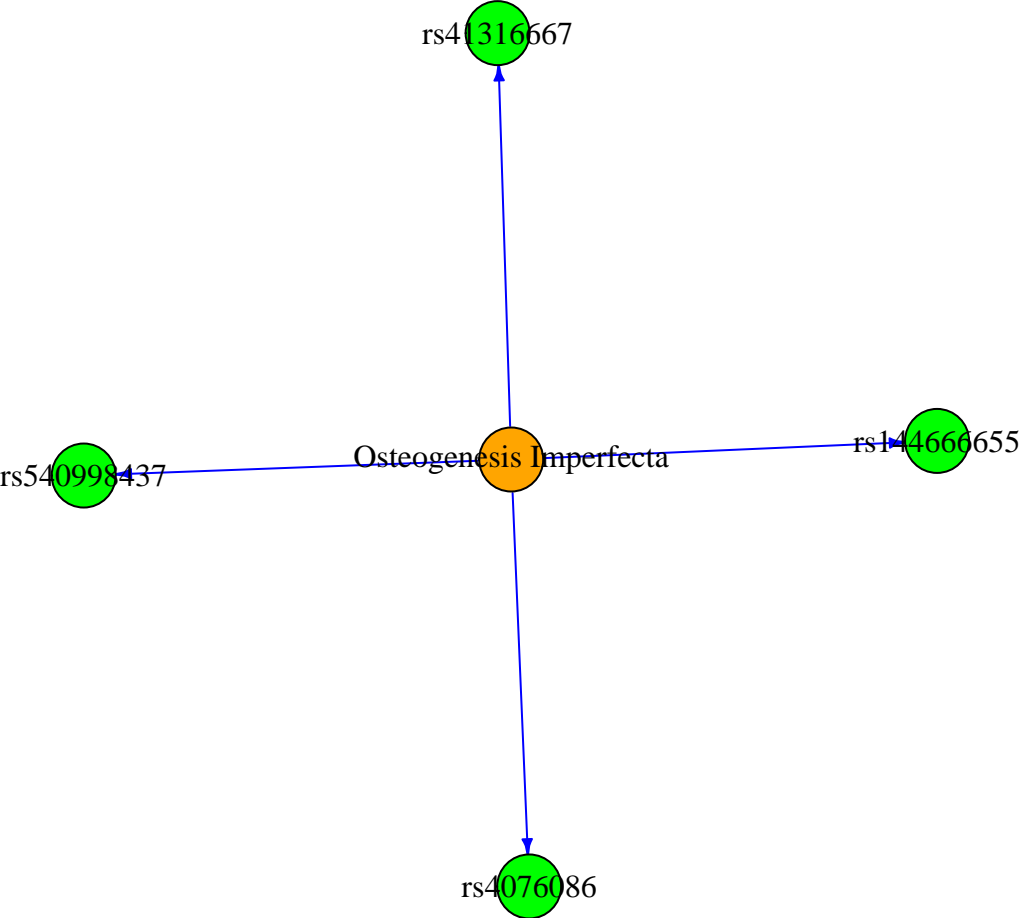

Variant–Disease Network (Osteogenesis imperfecta type 7)

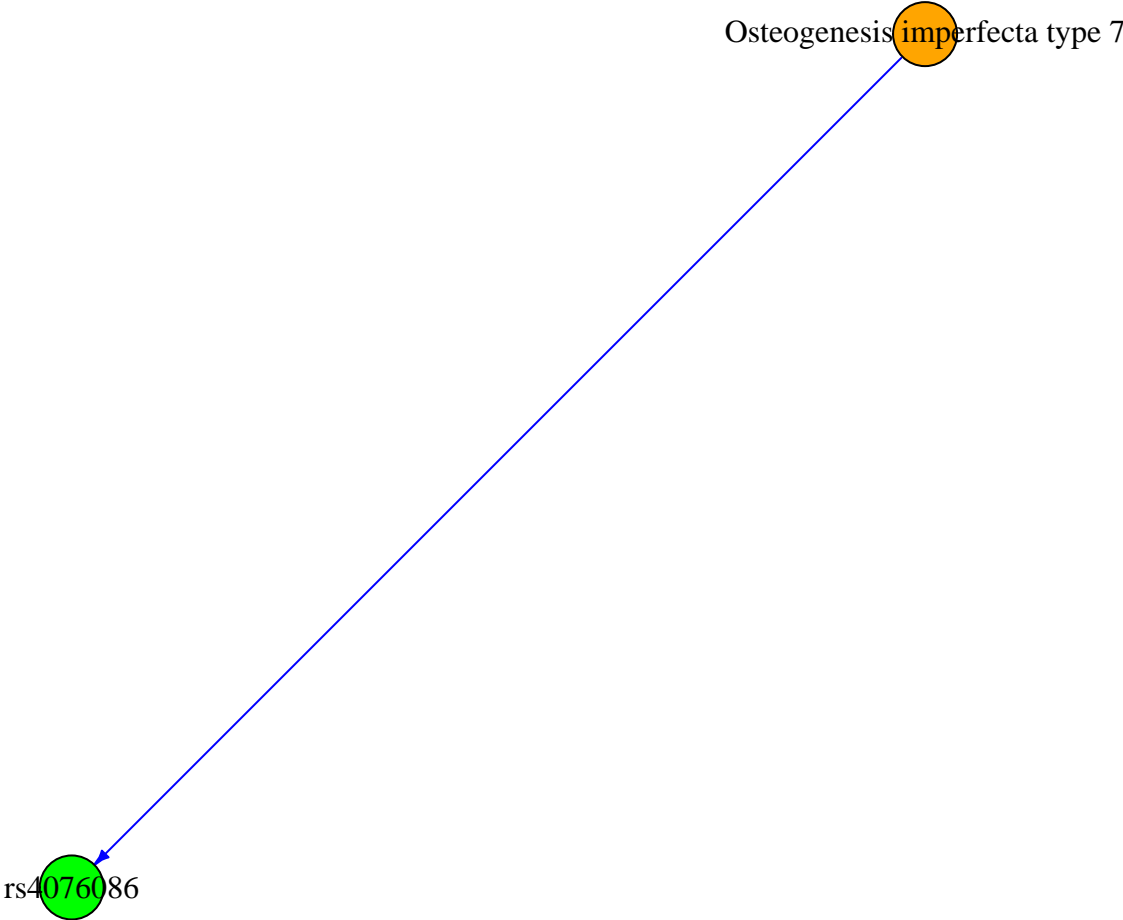

**Variant–Disease Network (Osteogenesis imperfecta type I)**

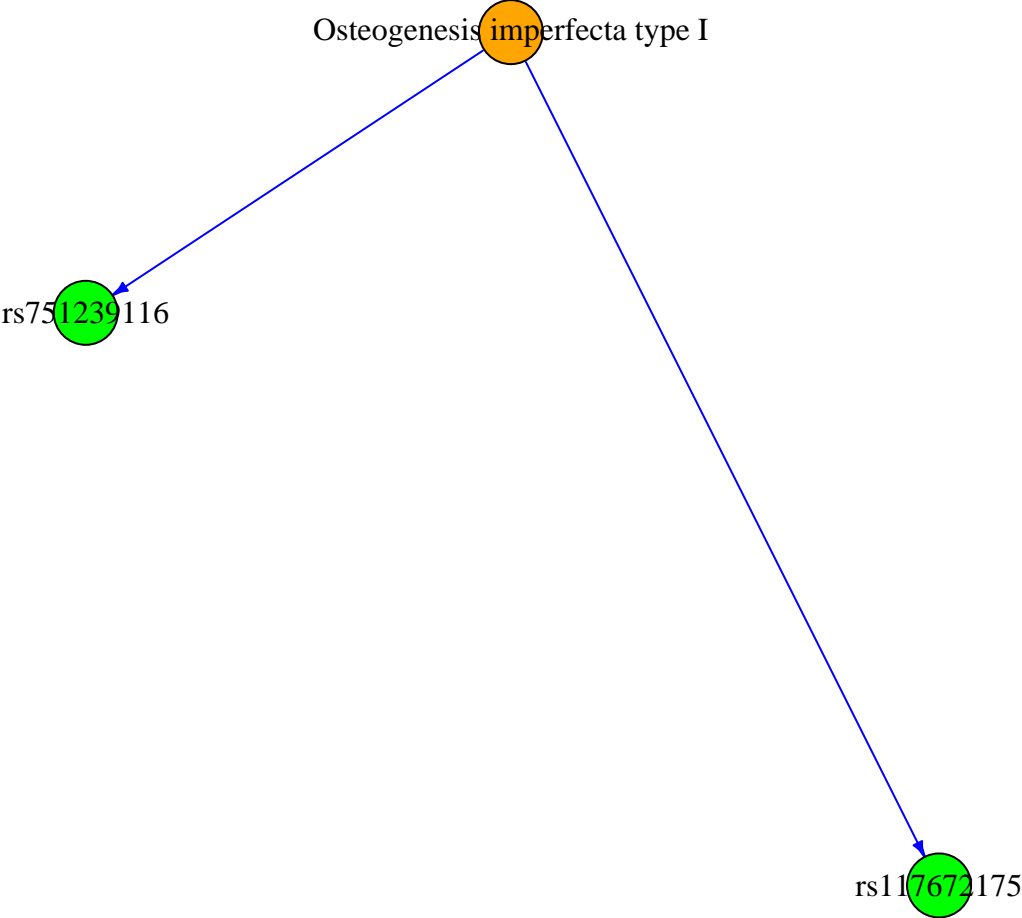



## Variant-Disease Network (Osteoglophonic dysplasia)

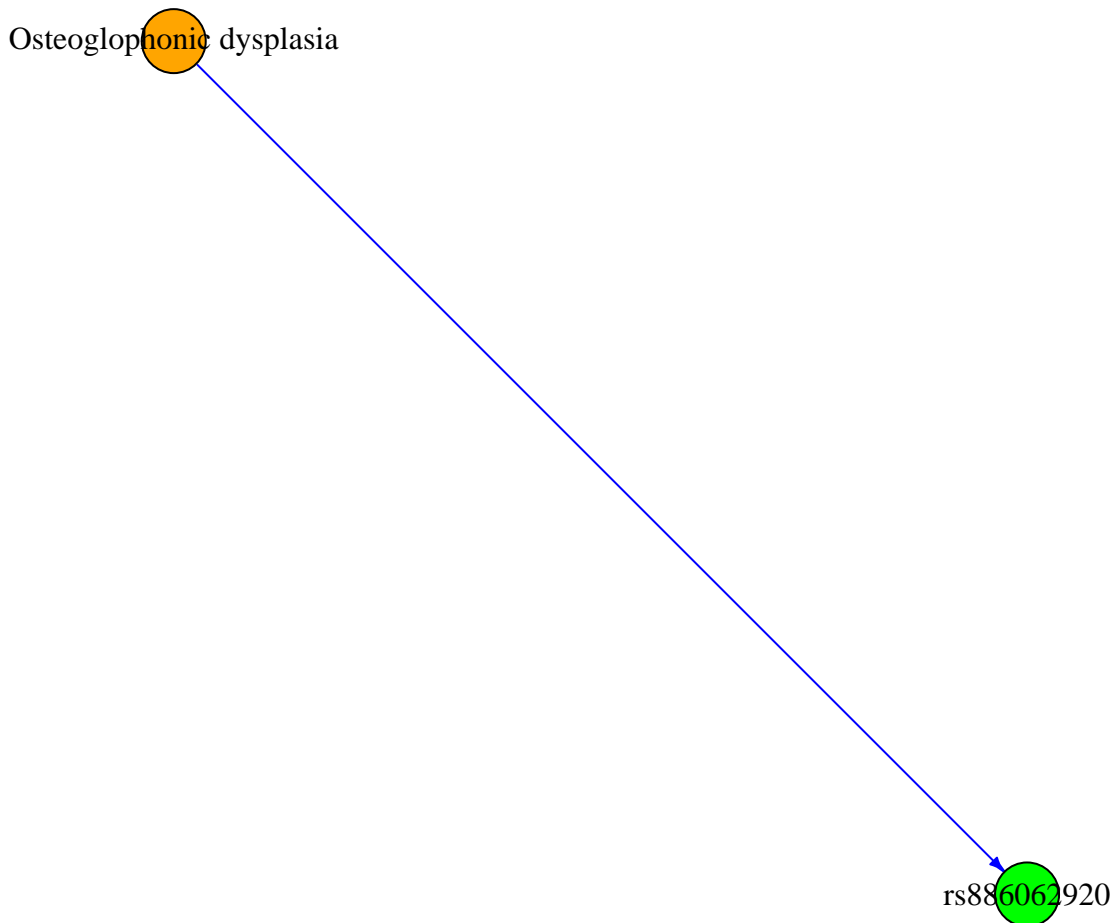

## Variant-Disease Network (Osteopetrosis)

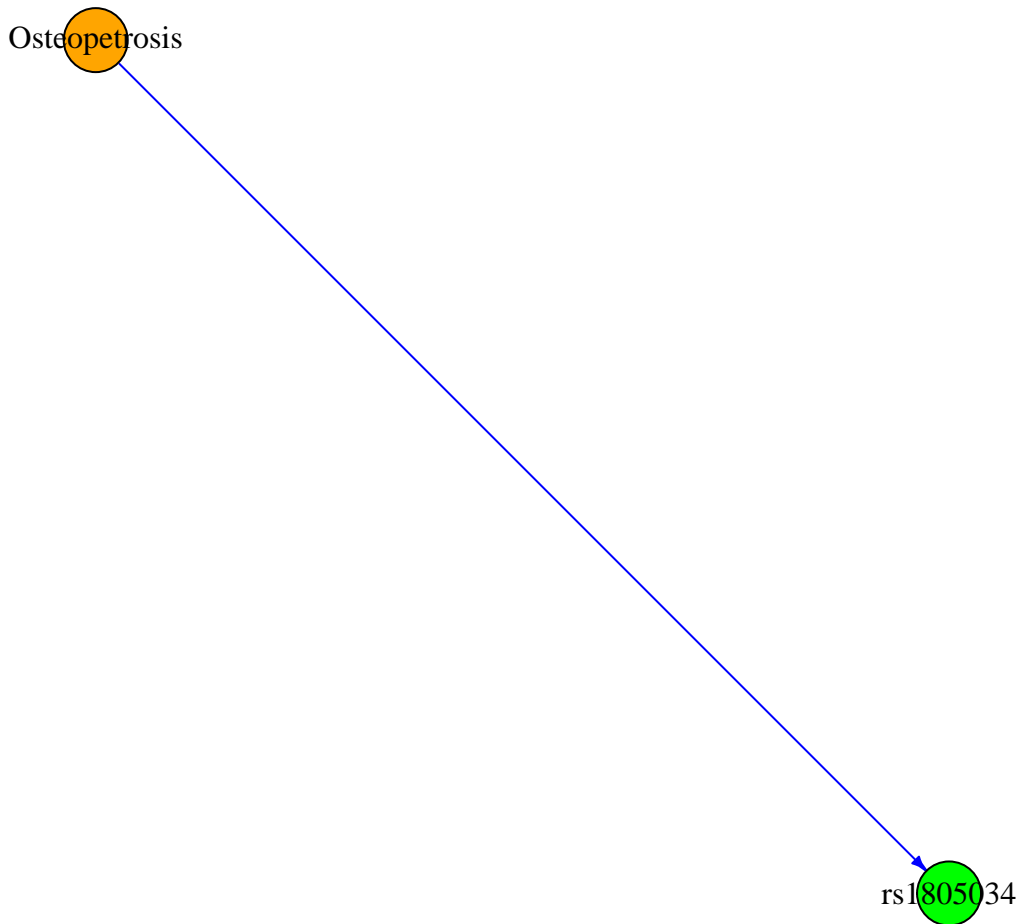

# Variant–Disease Network (Osteopetrosis with renal tubular acidosis)

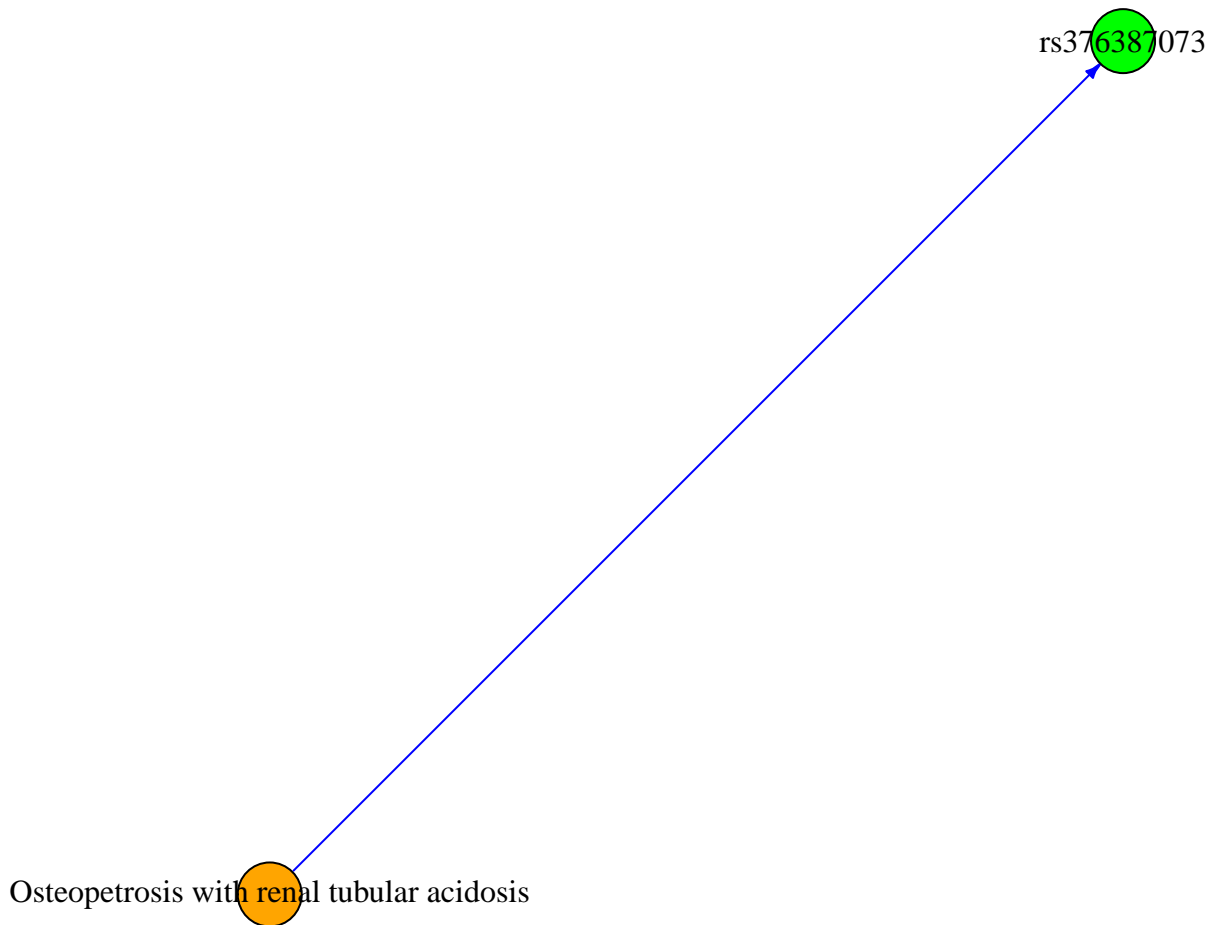

# Variant–Disease Network (Oto–palato–digital syndrome)

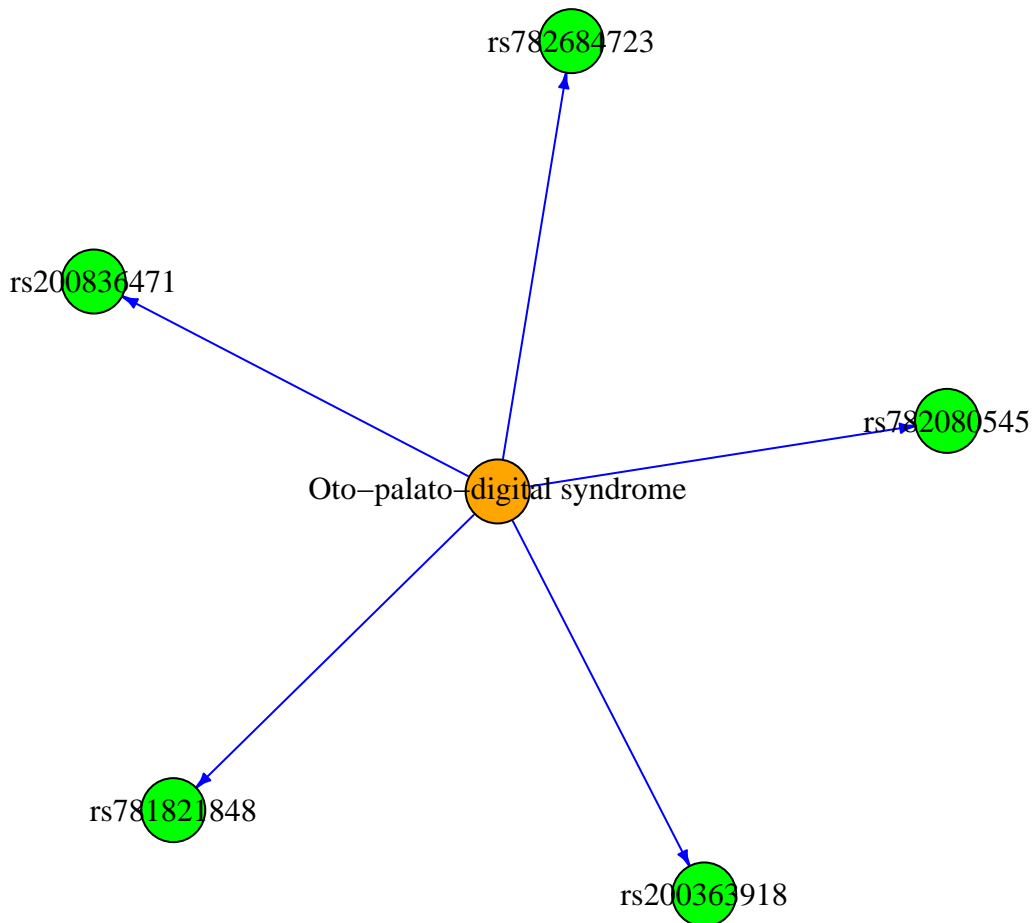

# Variant–Disease Network (Otospondylomegaepiphyseal dysplasia)

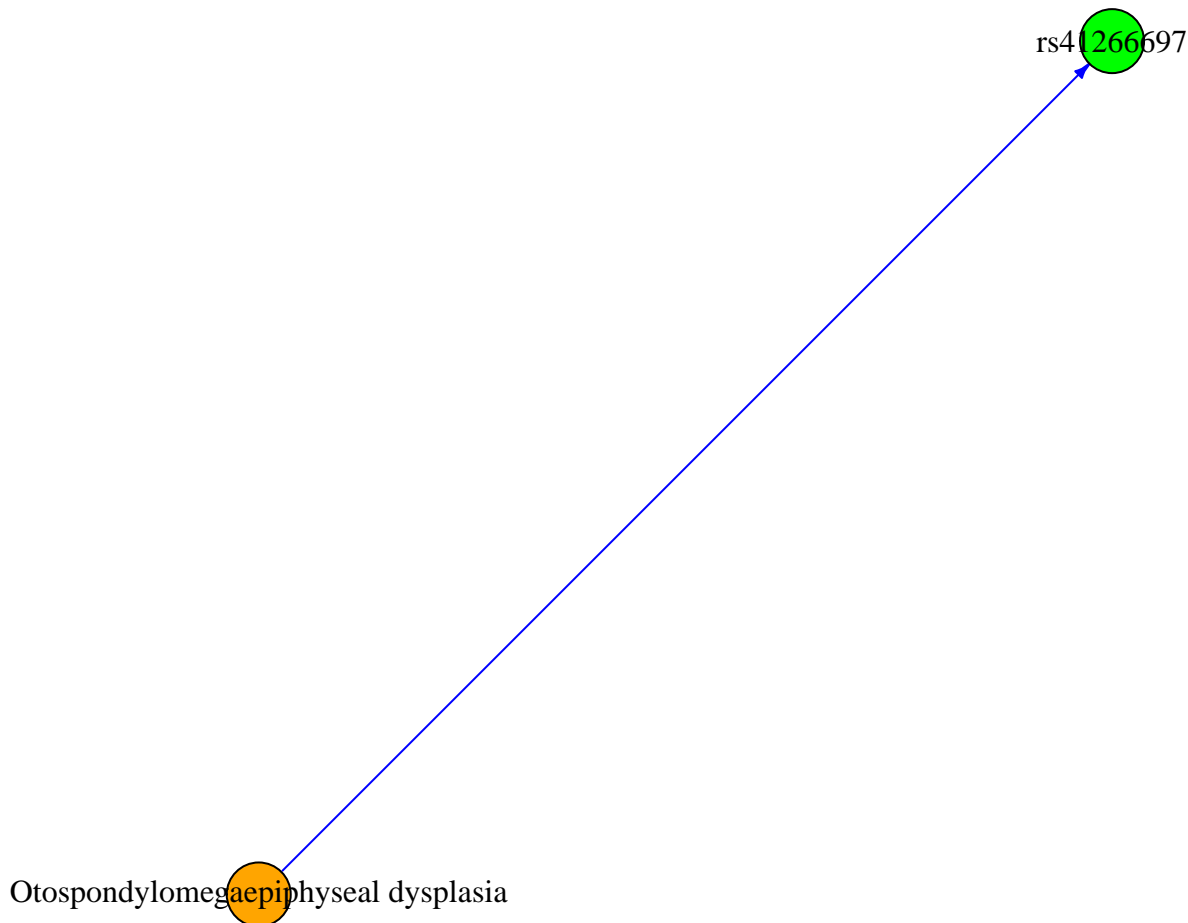

## Variant–Disease Network (Ovarian dysgenesis)

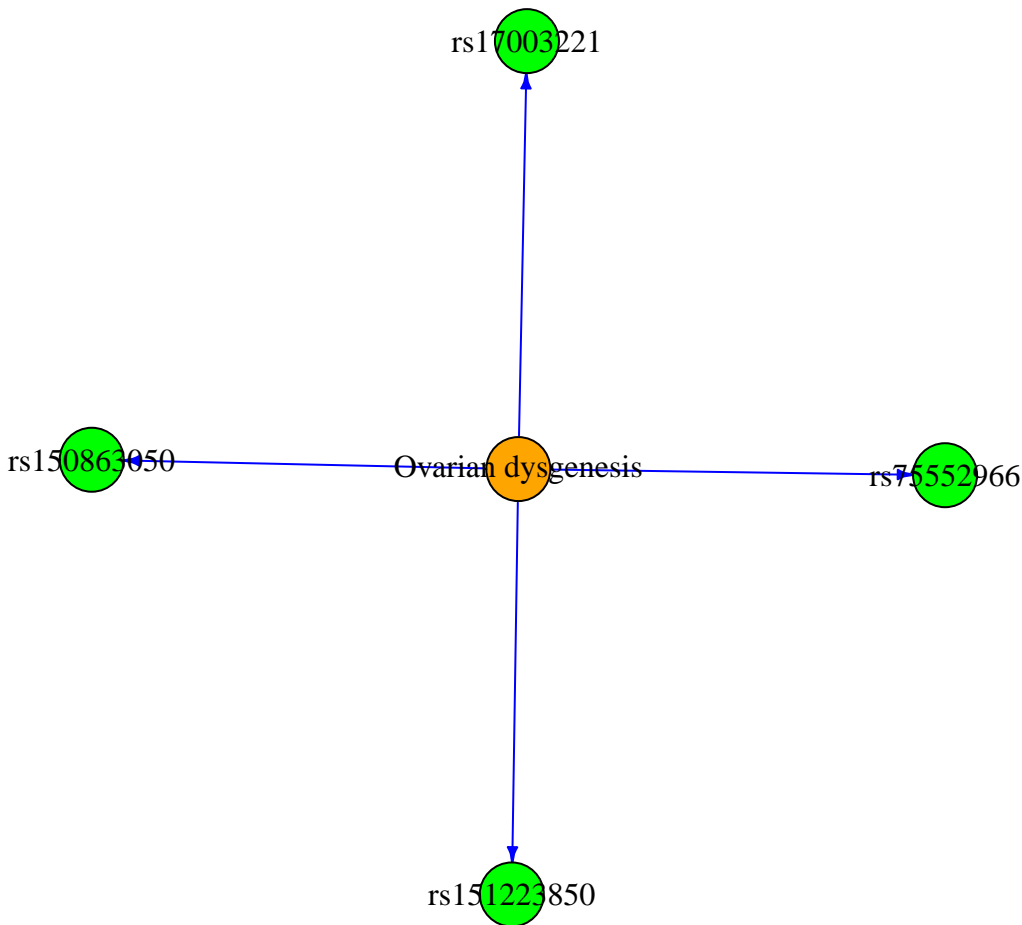

Variant–Disease Network (Ovarian hyperstimulation syndrome)

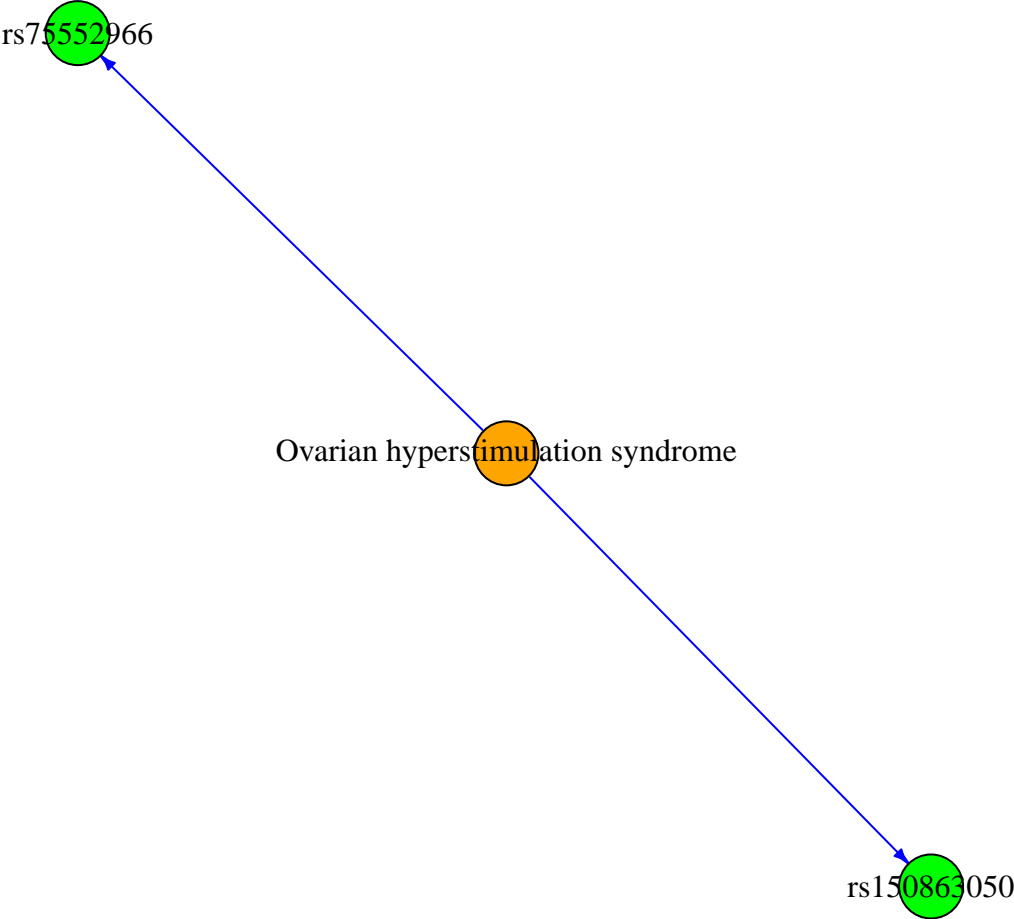

## Variant–Disease Network (Paget disease of bone)

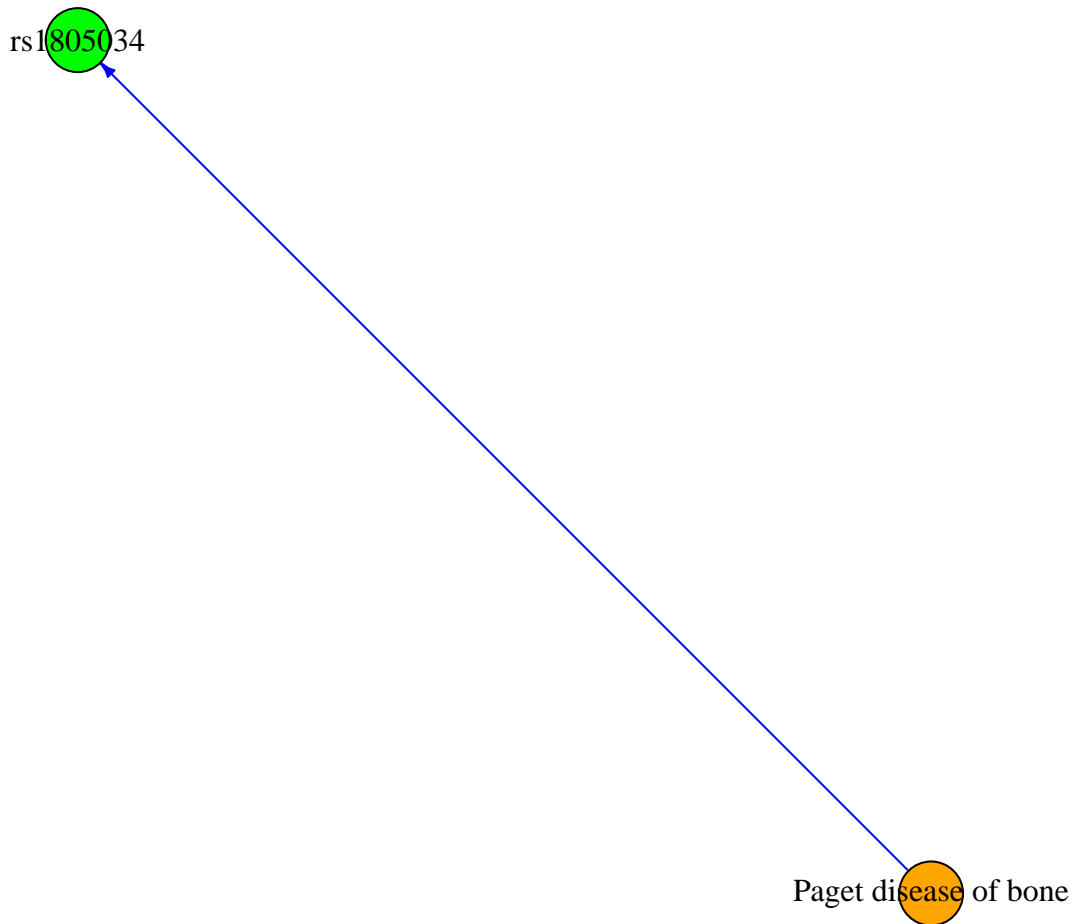



Variant–Disease Network (Pallister–Hall syndrome)

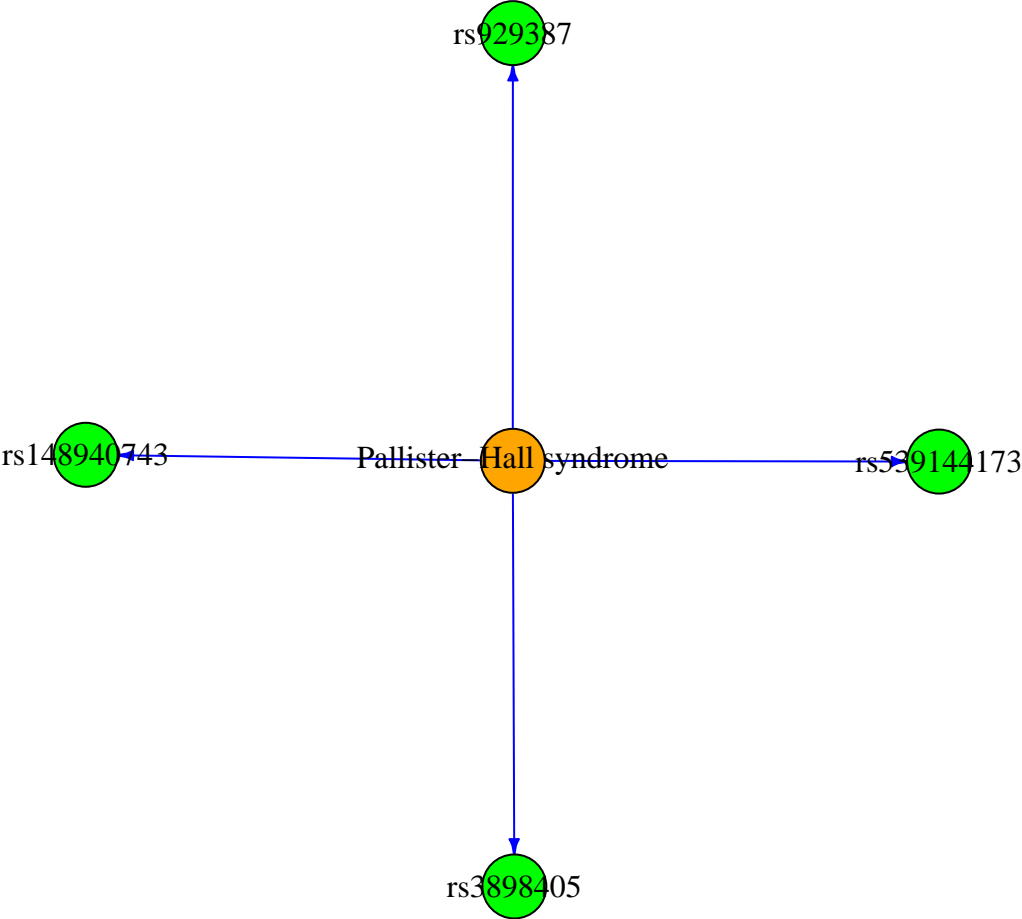

# Variant-Disease Network (Palmoplantar keratoderma)

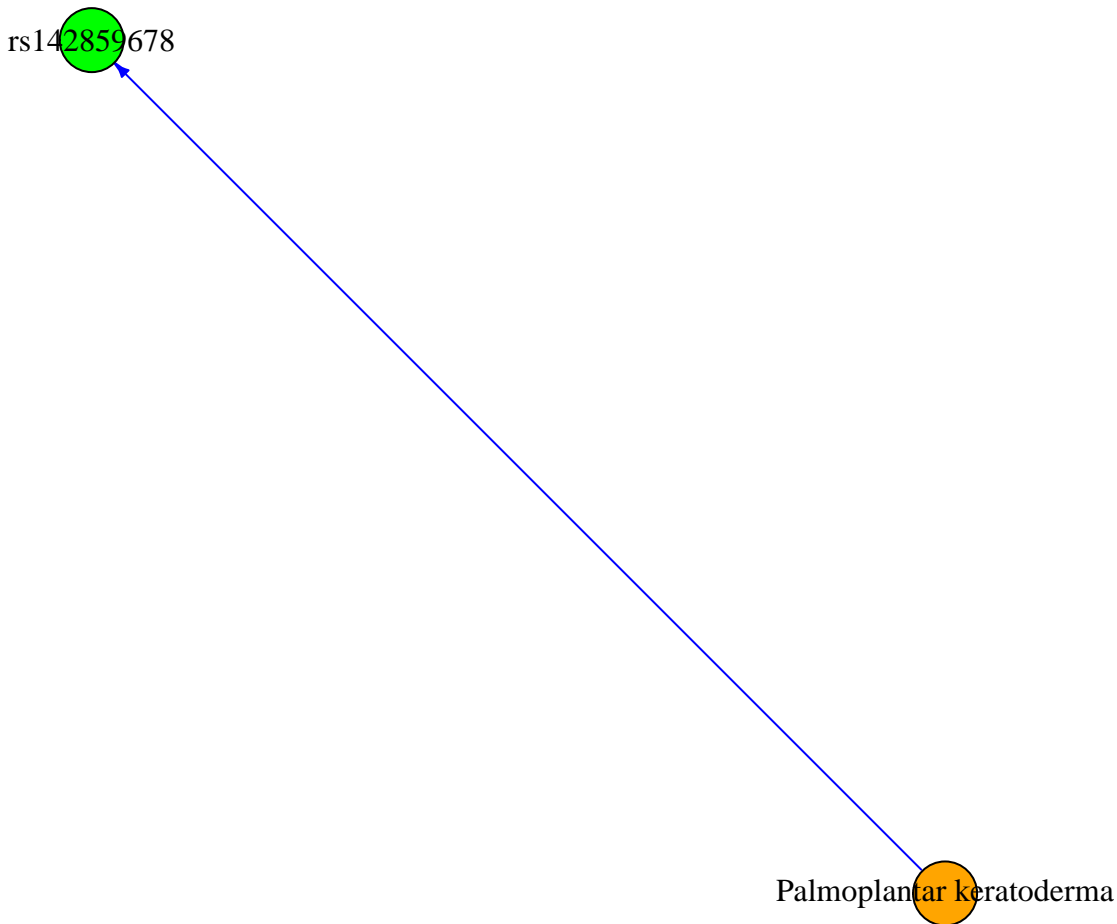

# Variant–Disease Network (Paraganglioma and gastric stromal sarcoma)

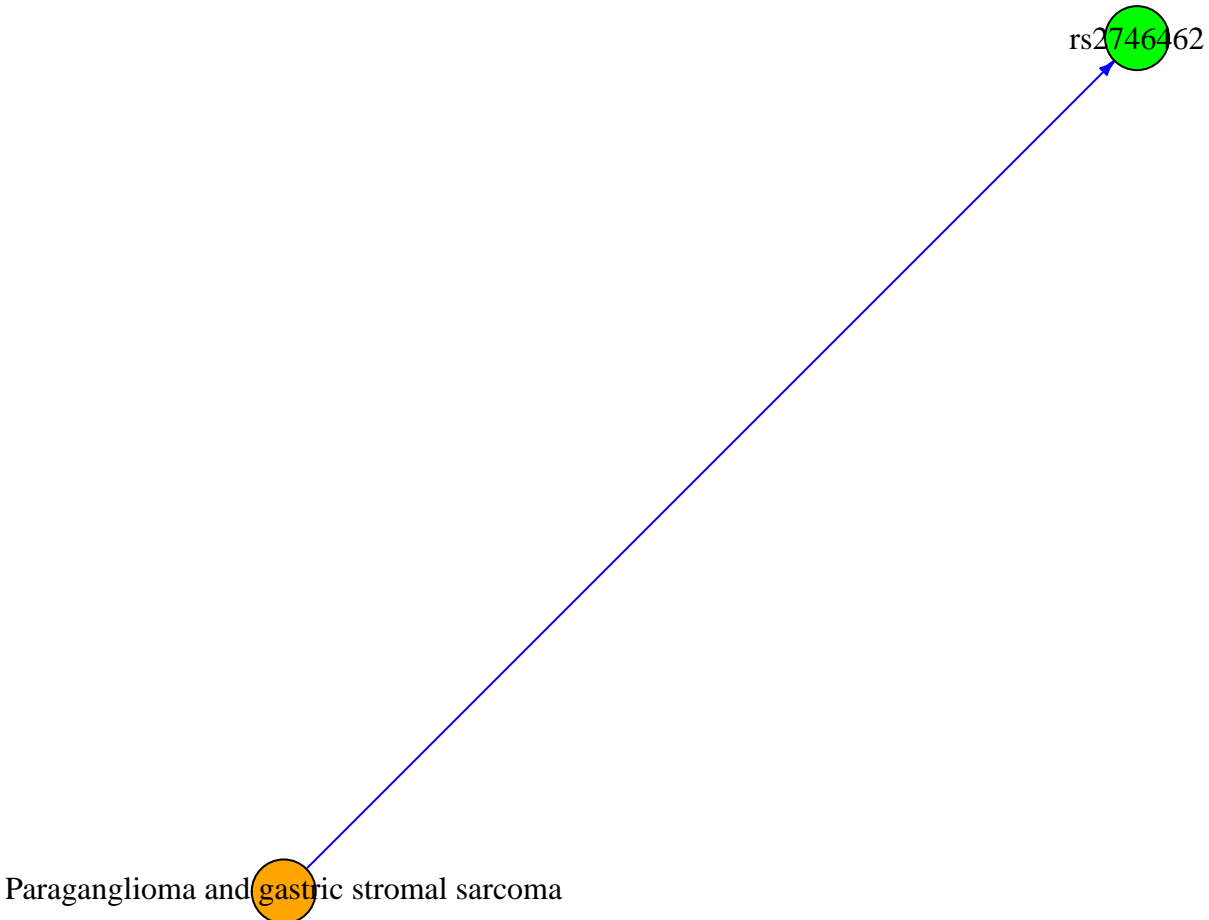

## Variant–Disease Network (Paragangliomas 4)

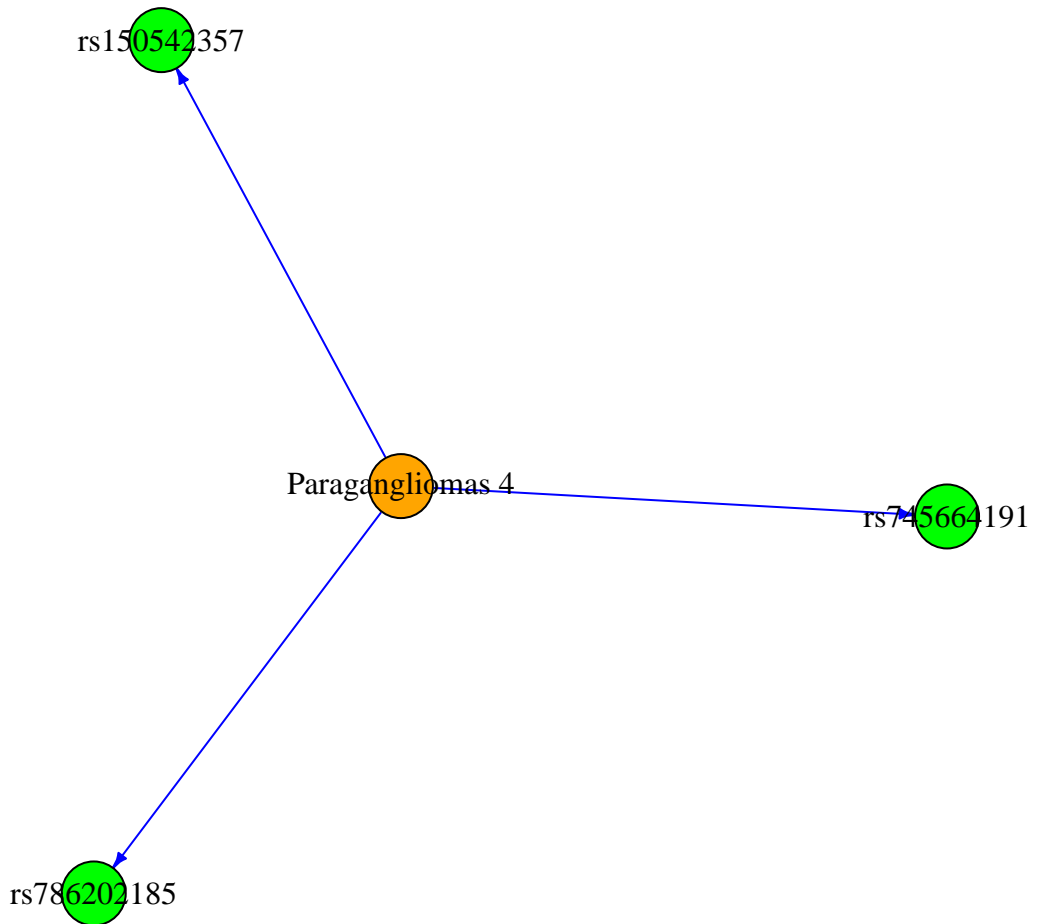

## Variant–Disease Network (Paragangliomas 5)

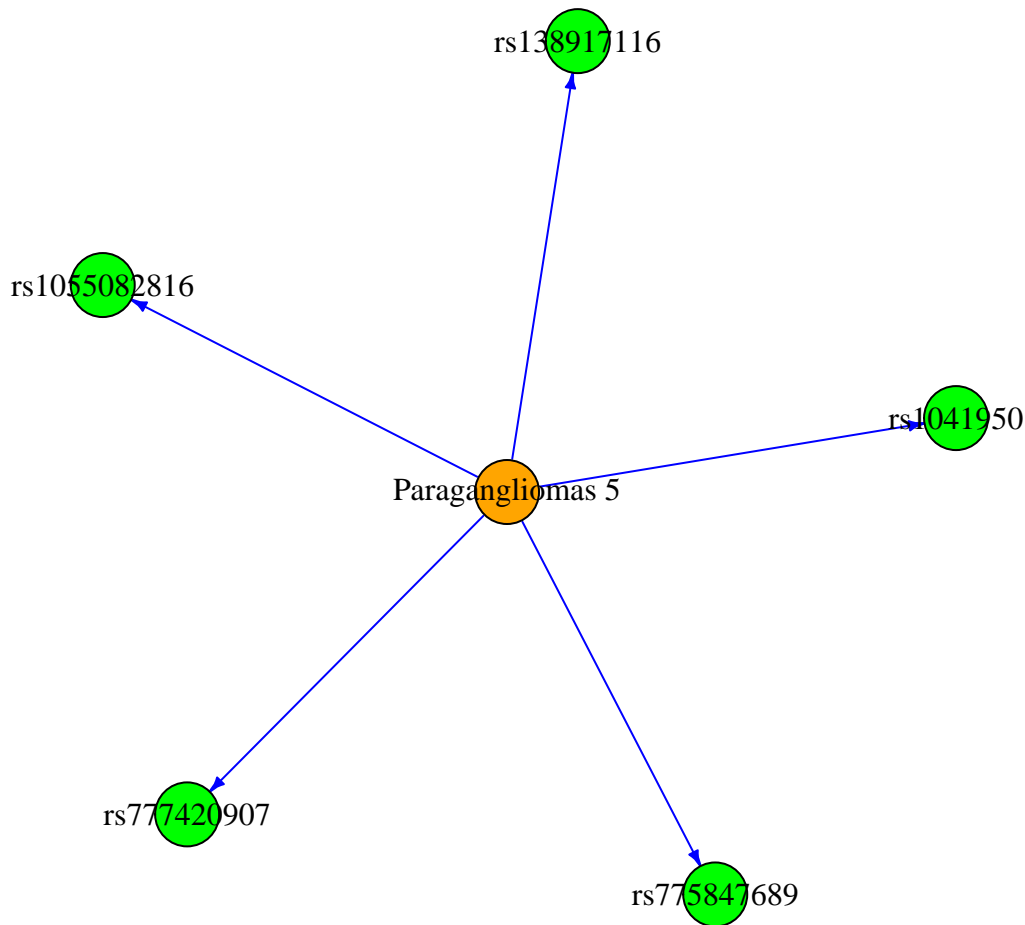

Variant–Disease Network (Paramyotonia congenita of von Eulenburg)

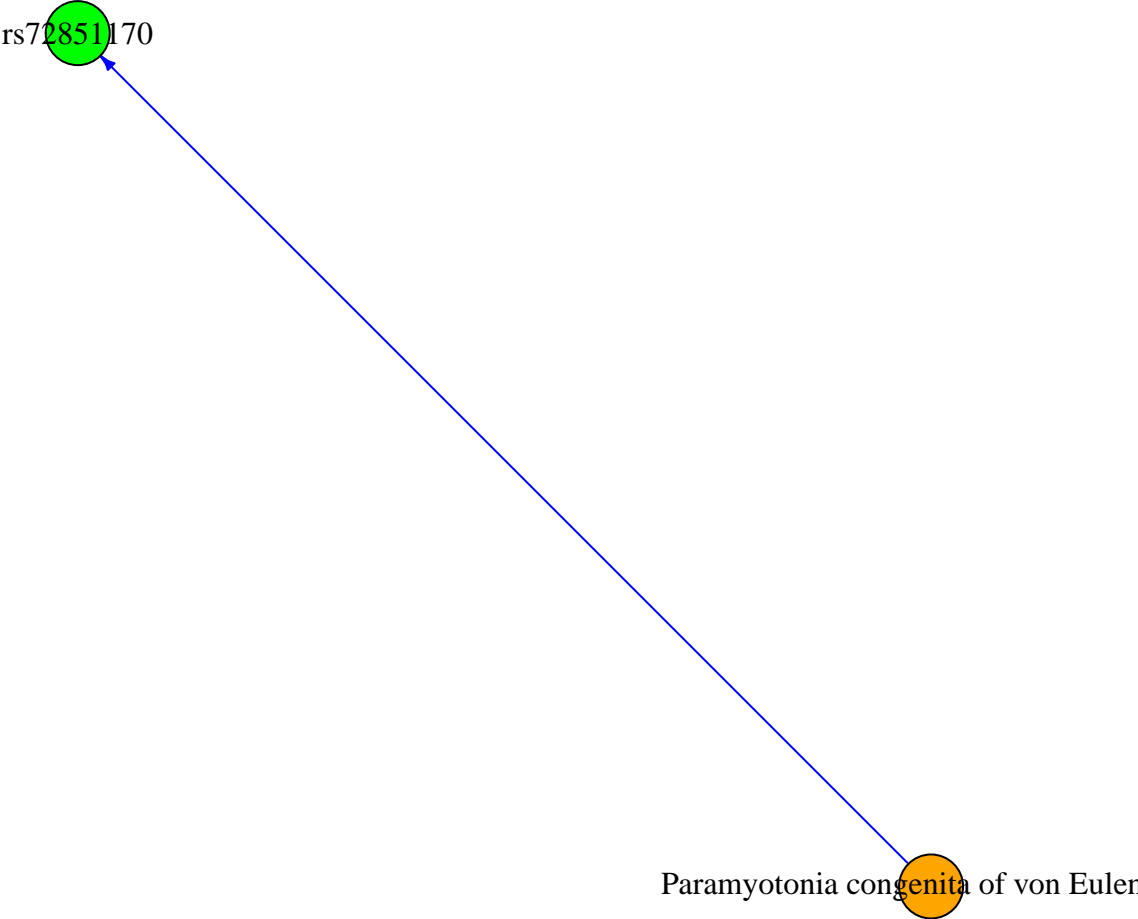

## Variant–Disease Network (Parkinson Disease)

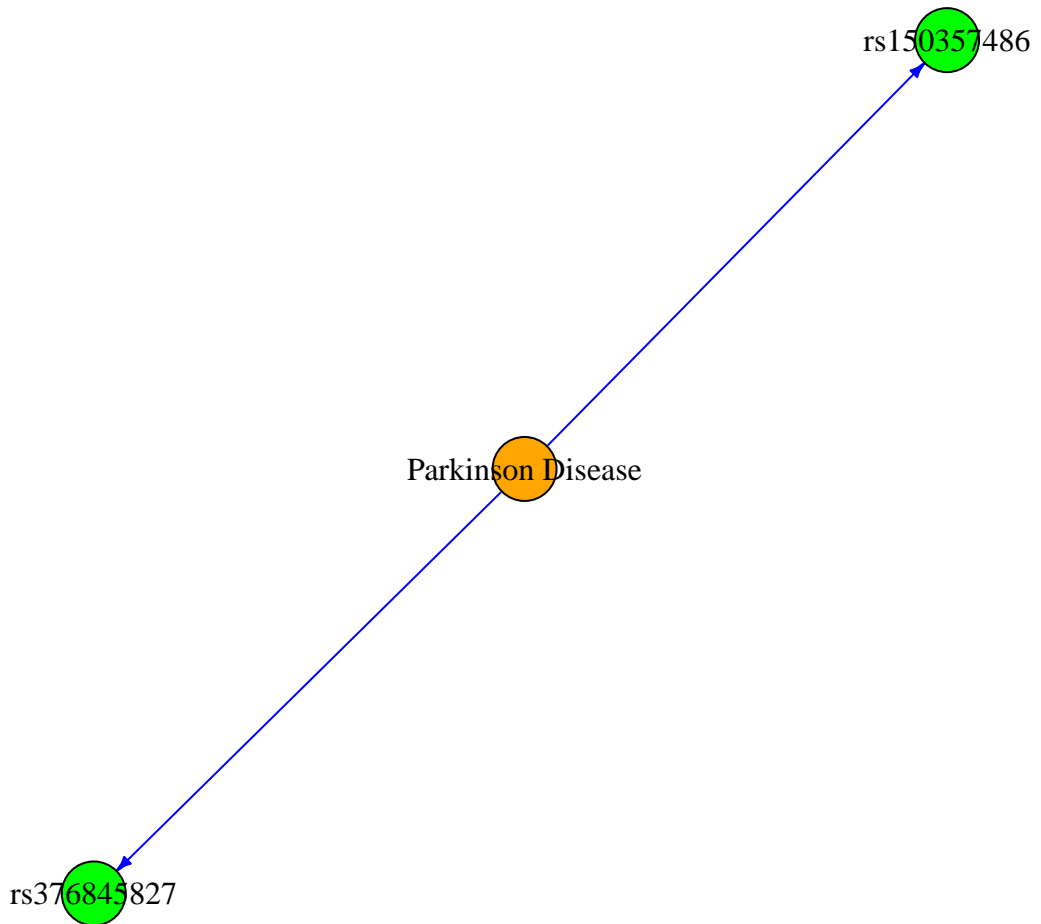

## Variant–Disease Network (Parkinson disease 19a)

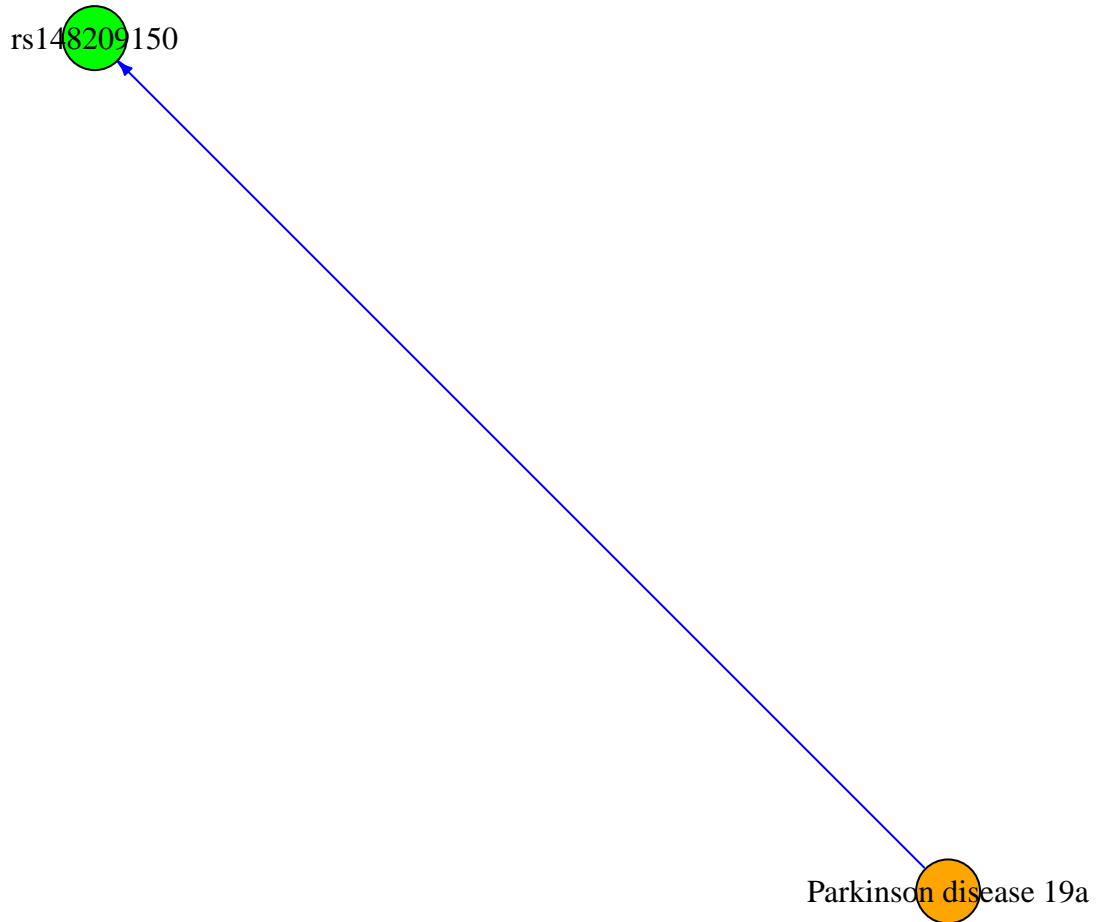



## Variant–Disease Network (Parkinson disease 2)

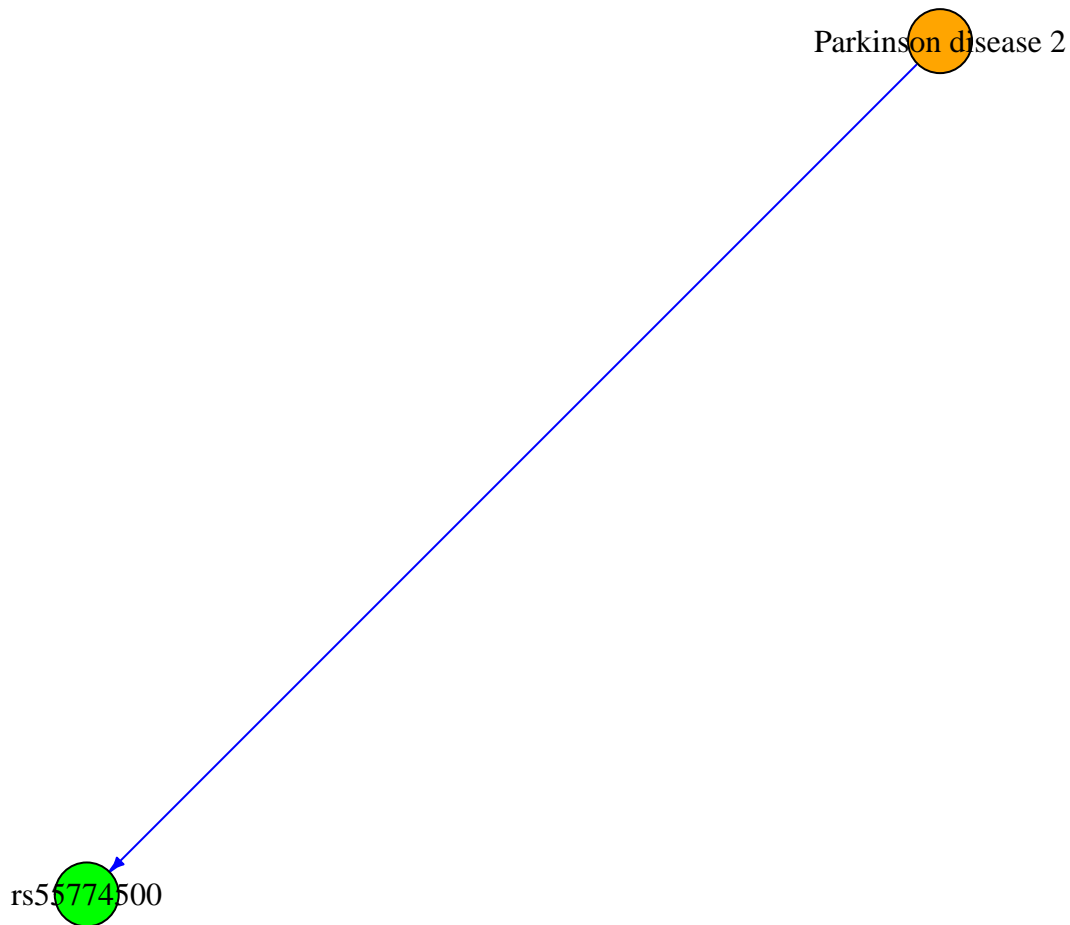

## Variant–Disease Network (Parkinson disease 20)

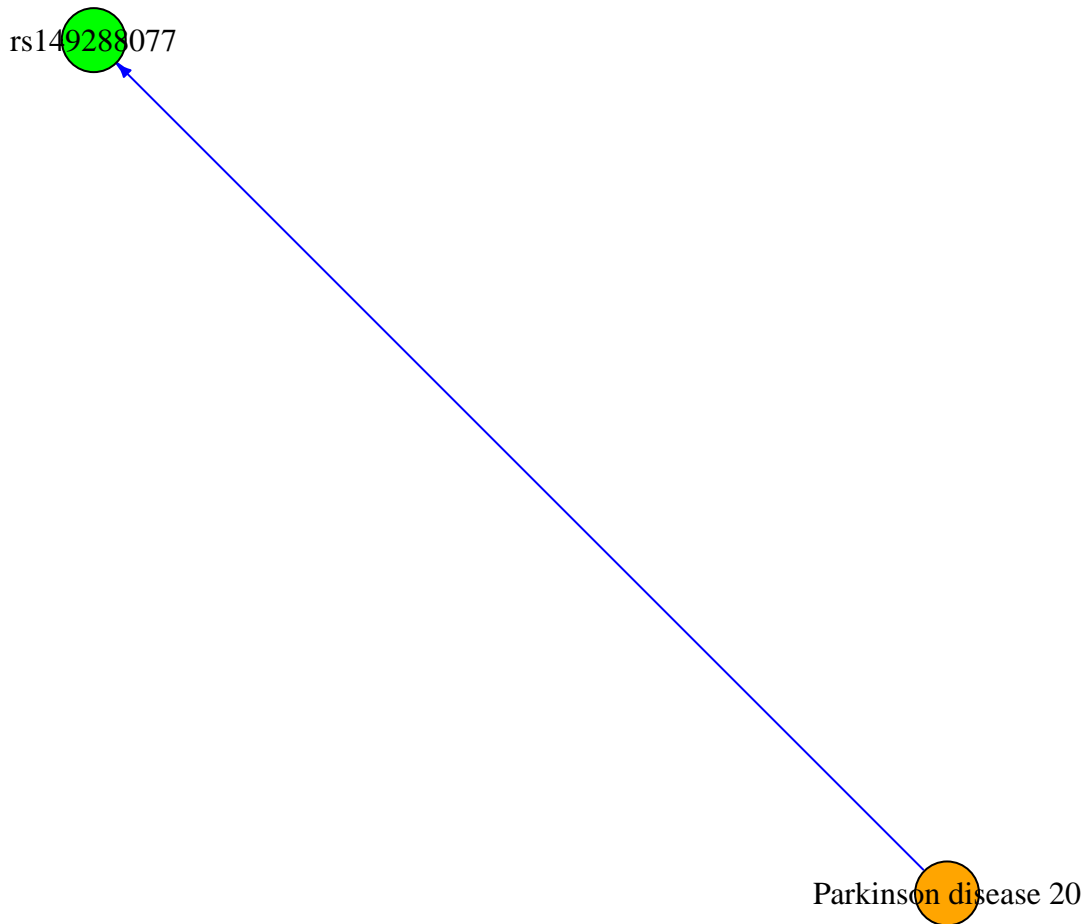

## Variant–Disease Network (Parkinson disease 8)

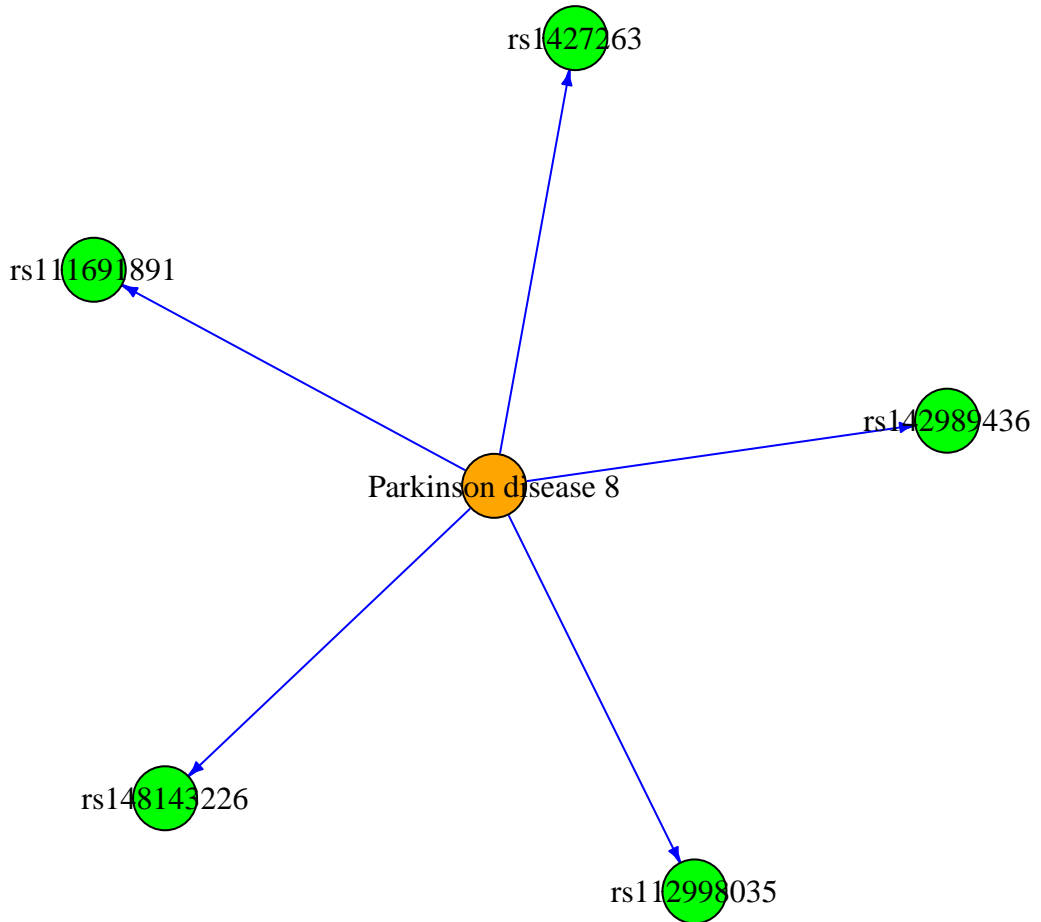

## Variant–Disease Network (Parkinson disease 9)

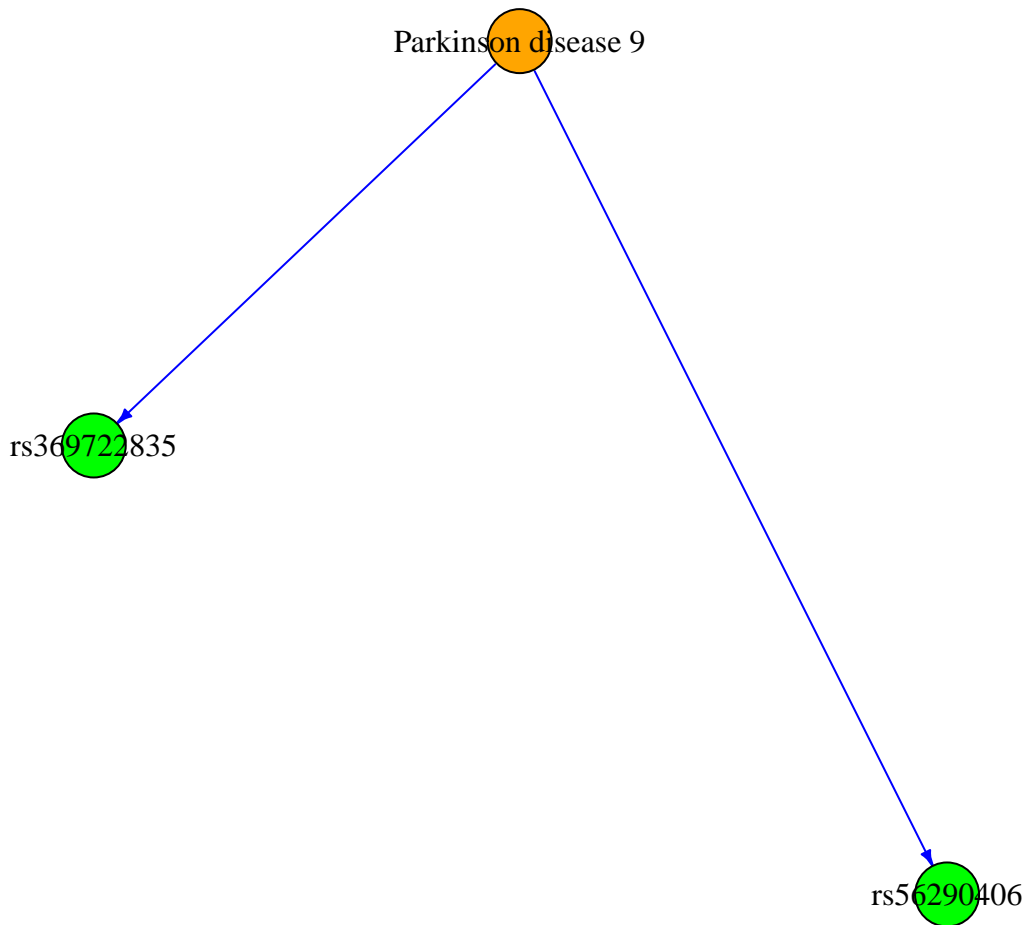

**Variant–Disease Network (Parkinsonism–dystonia)**

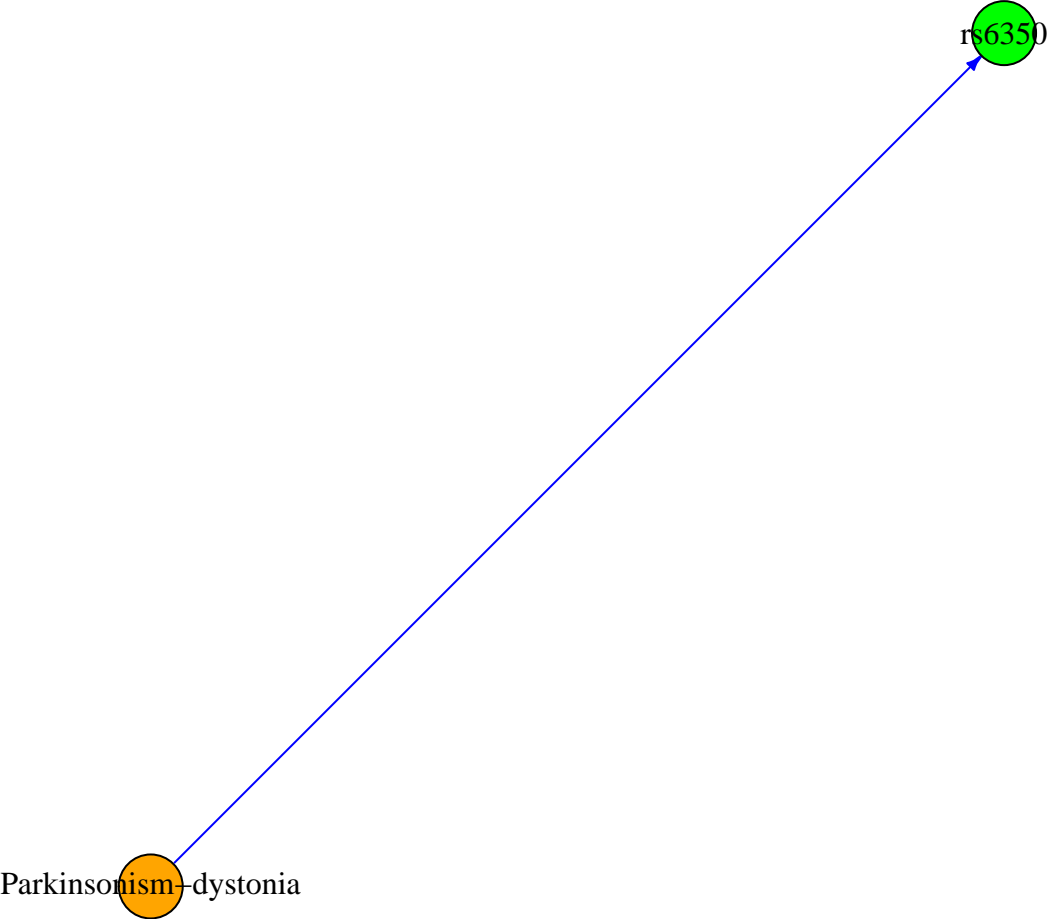

**Variant–Disease Network (Paroxysmal nonkinesigenic dyskinesia 1)**

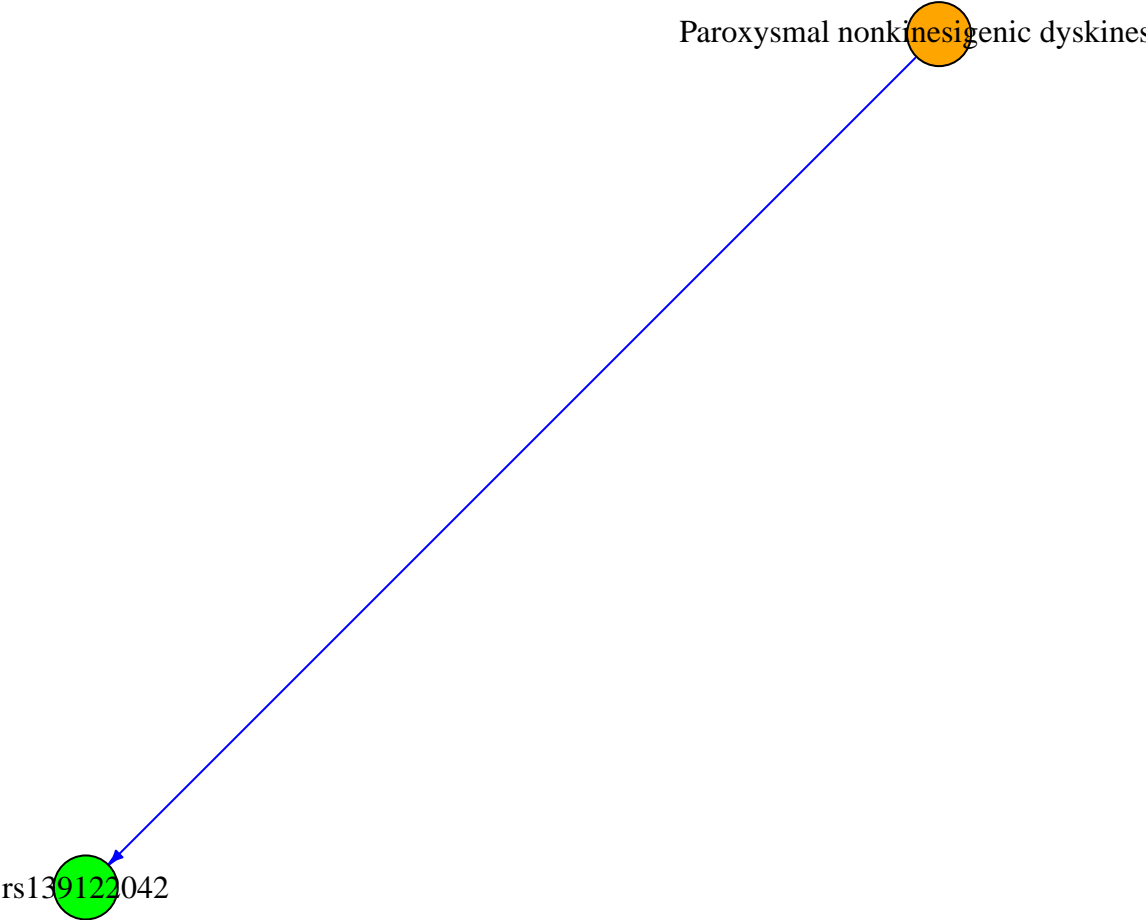

## Variant-Disease Network (Partial albinism)

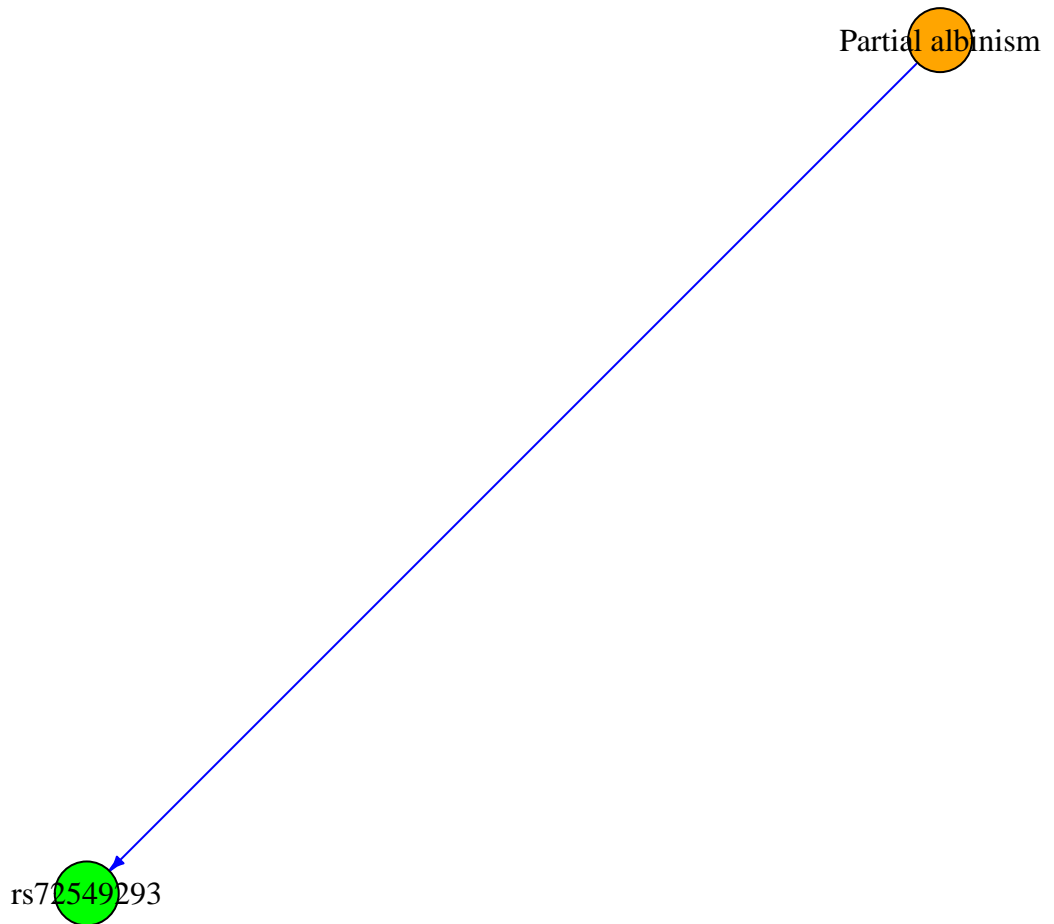

## Variant–Disease Network (Peeling skin syndrome 1)

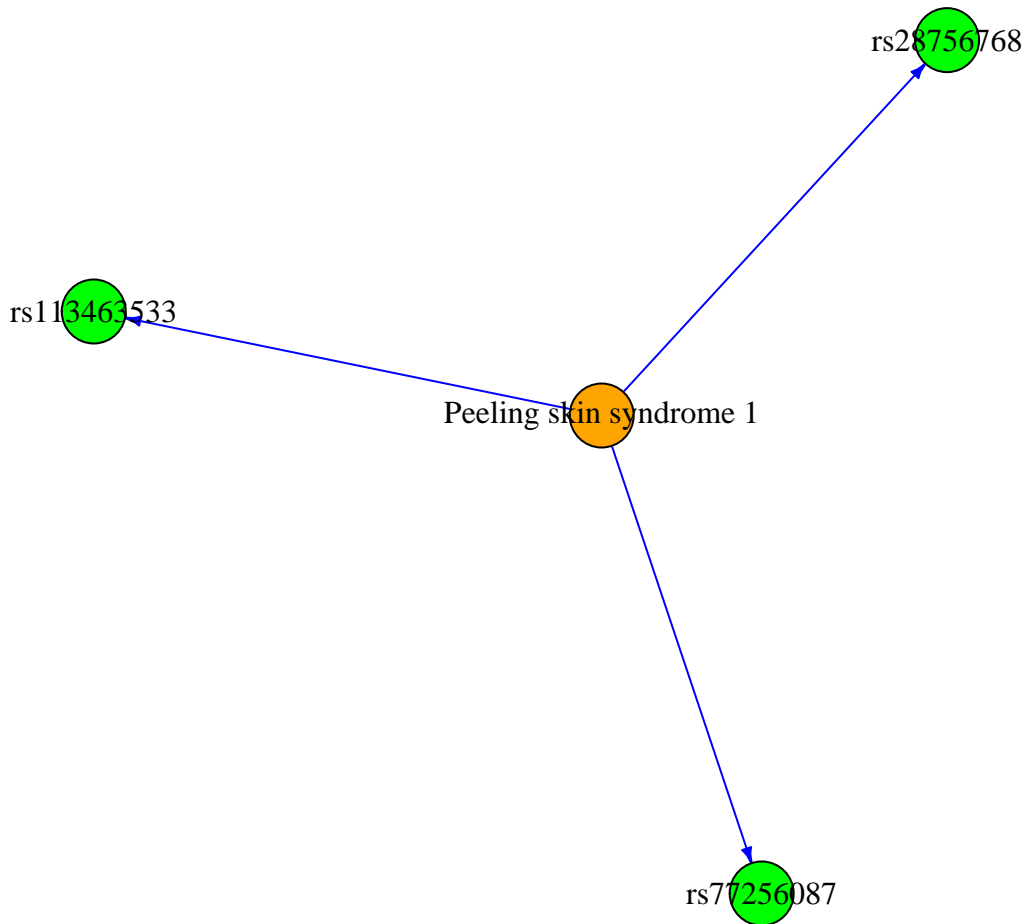



## Variant-Disease Network (Peeling skin syndrome 2)

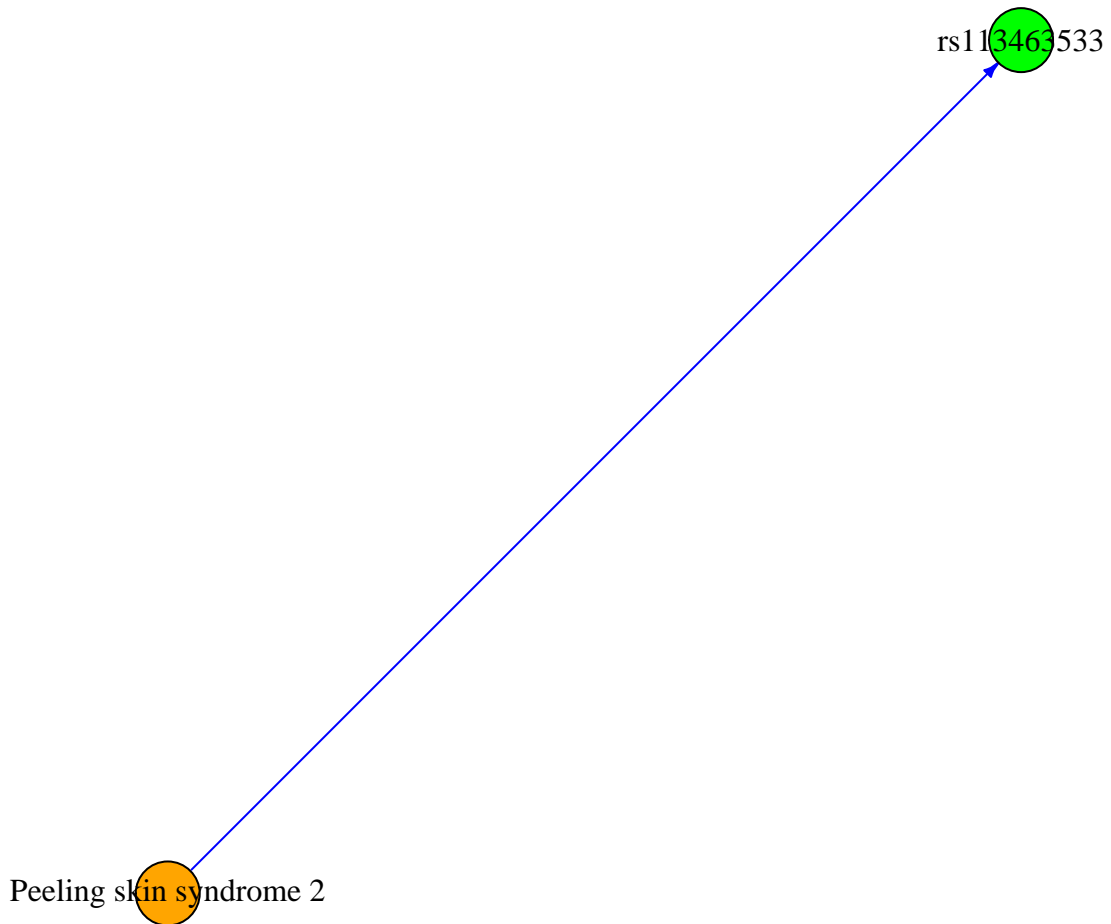

**Variant–Disease Network (Pena–Shokeir syndrome type I)**

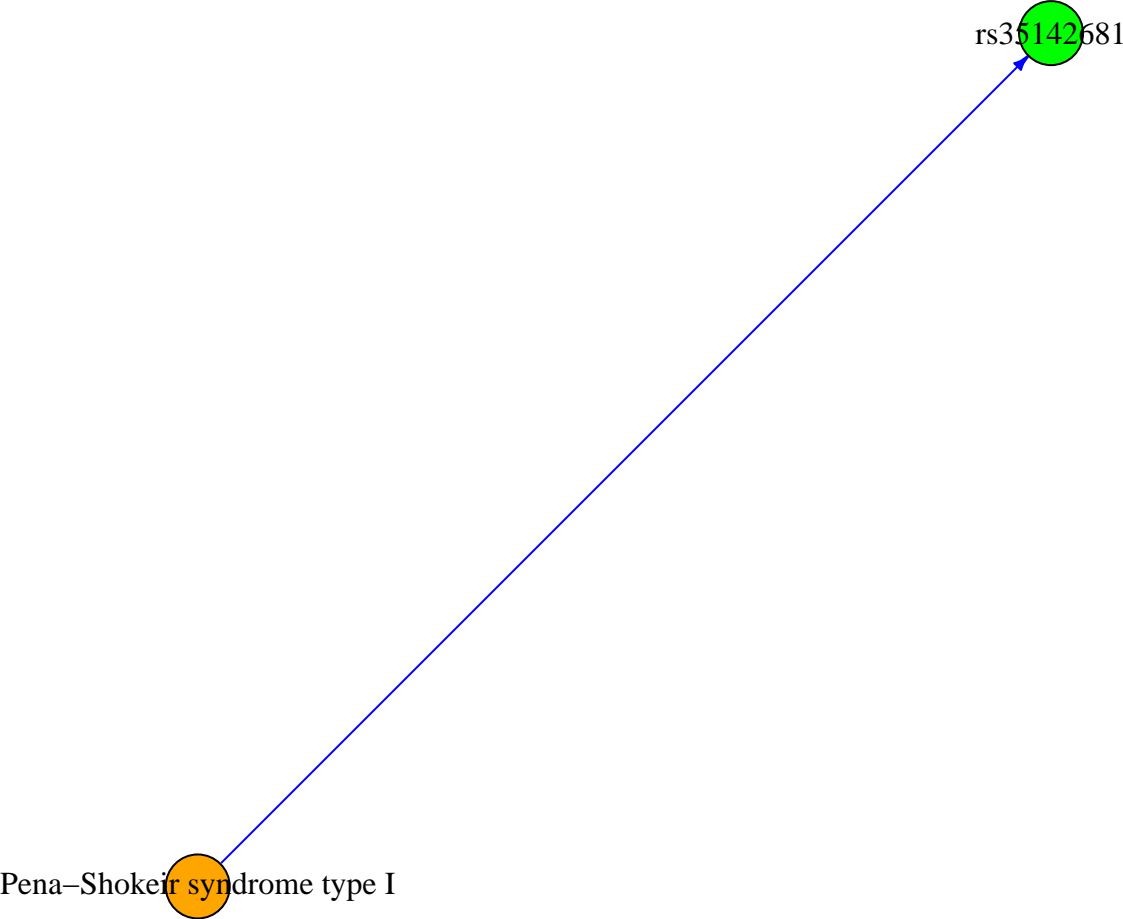

# Variant-Disease Network (Pendred syndrome)

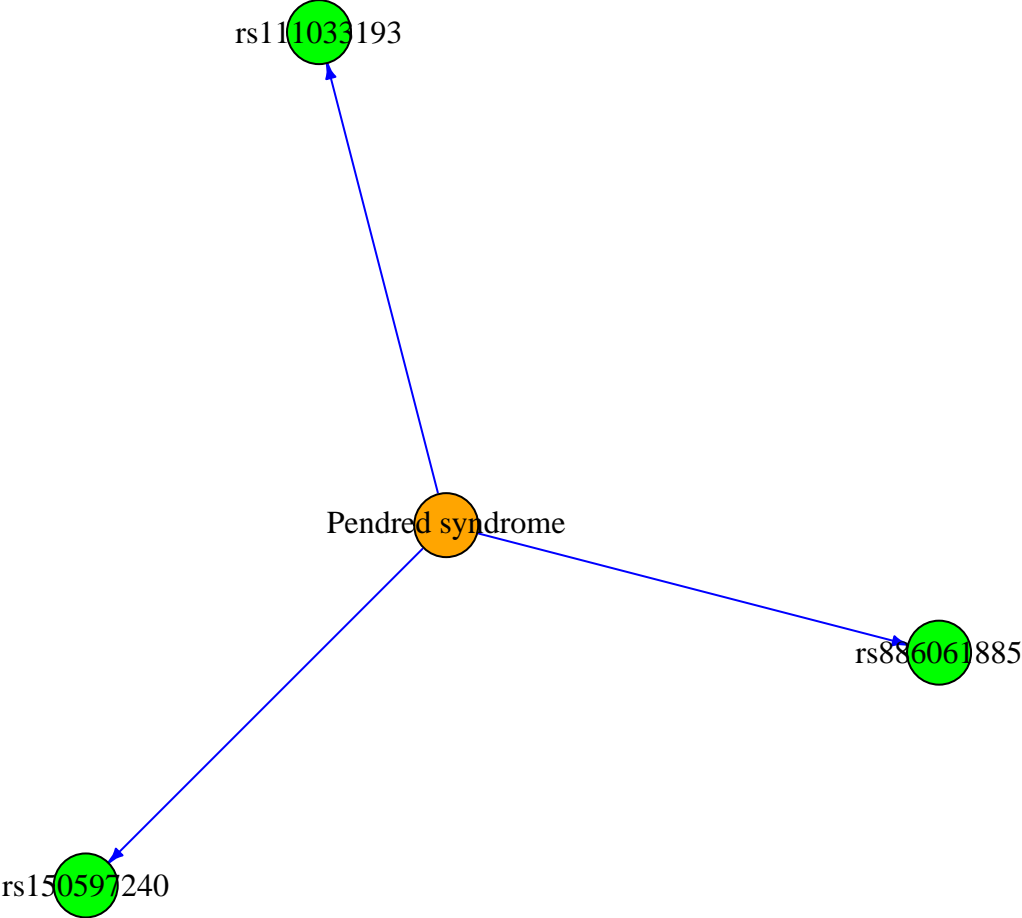

## Variant–Disease Network (PERCHING syndrome)

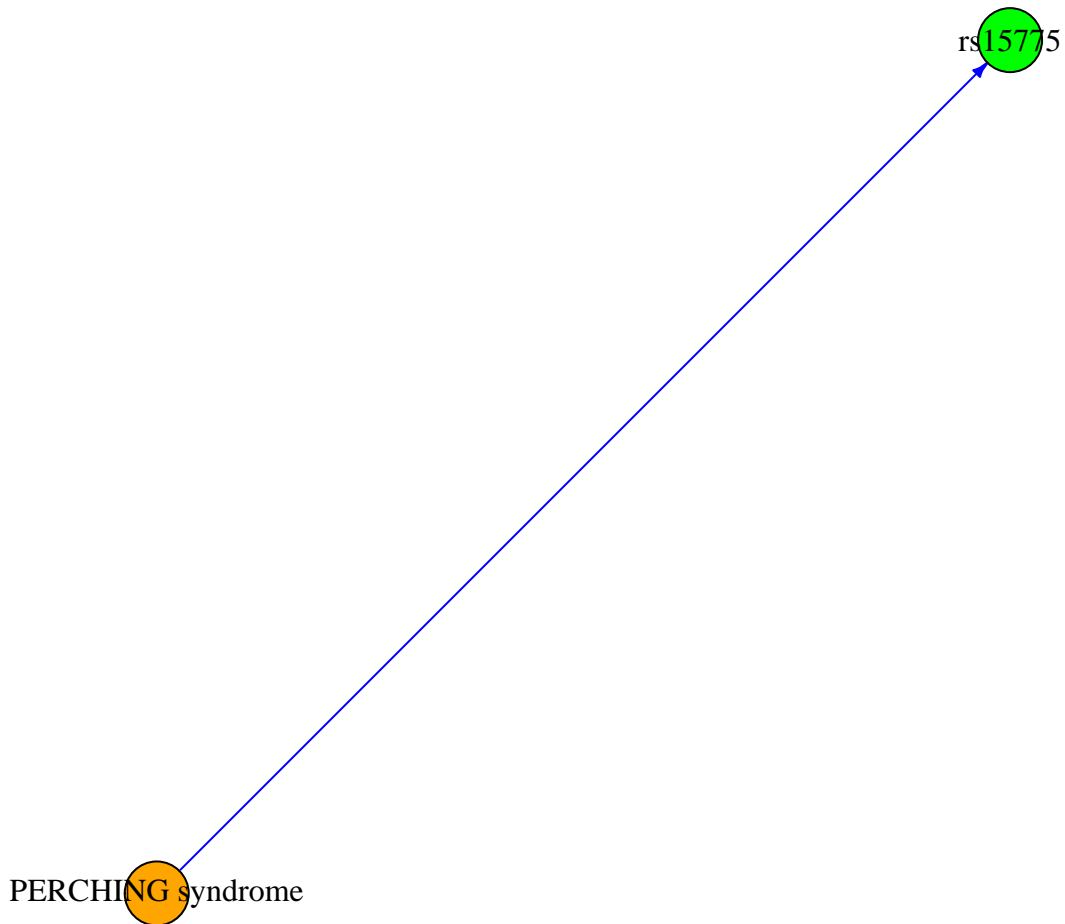

## Variant-Disease Network (Periodic fever syndrome)

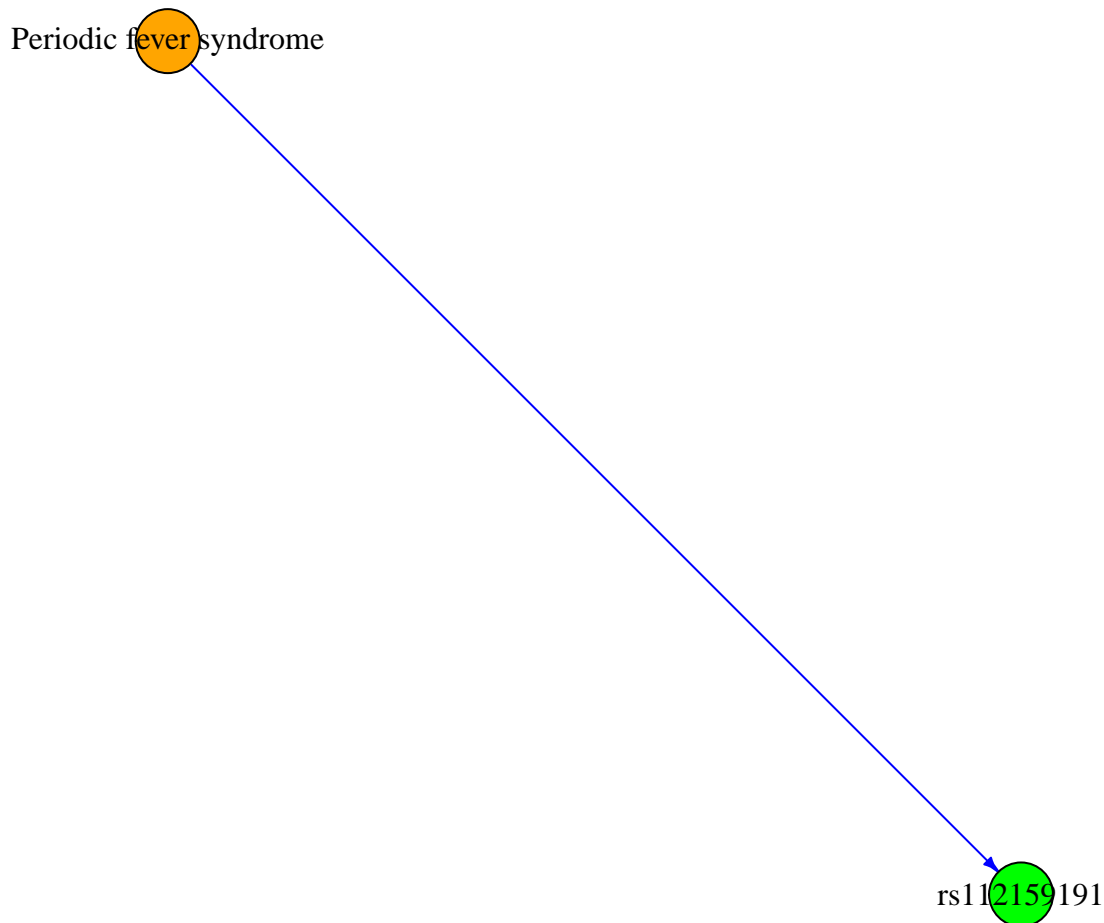

# Variant–Disease Network (Peripheral axonal neuropathy)

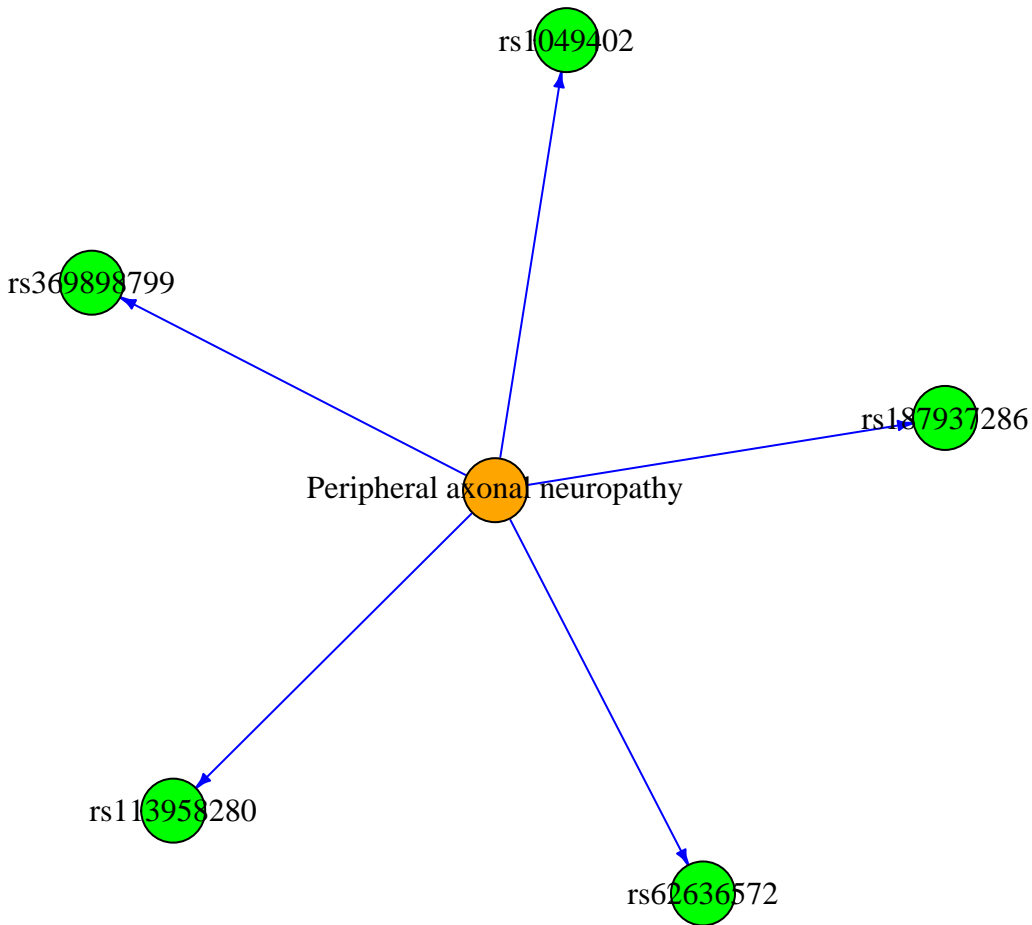

## Variant–Disease Network (Peripheral neuropathy)

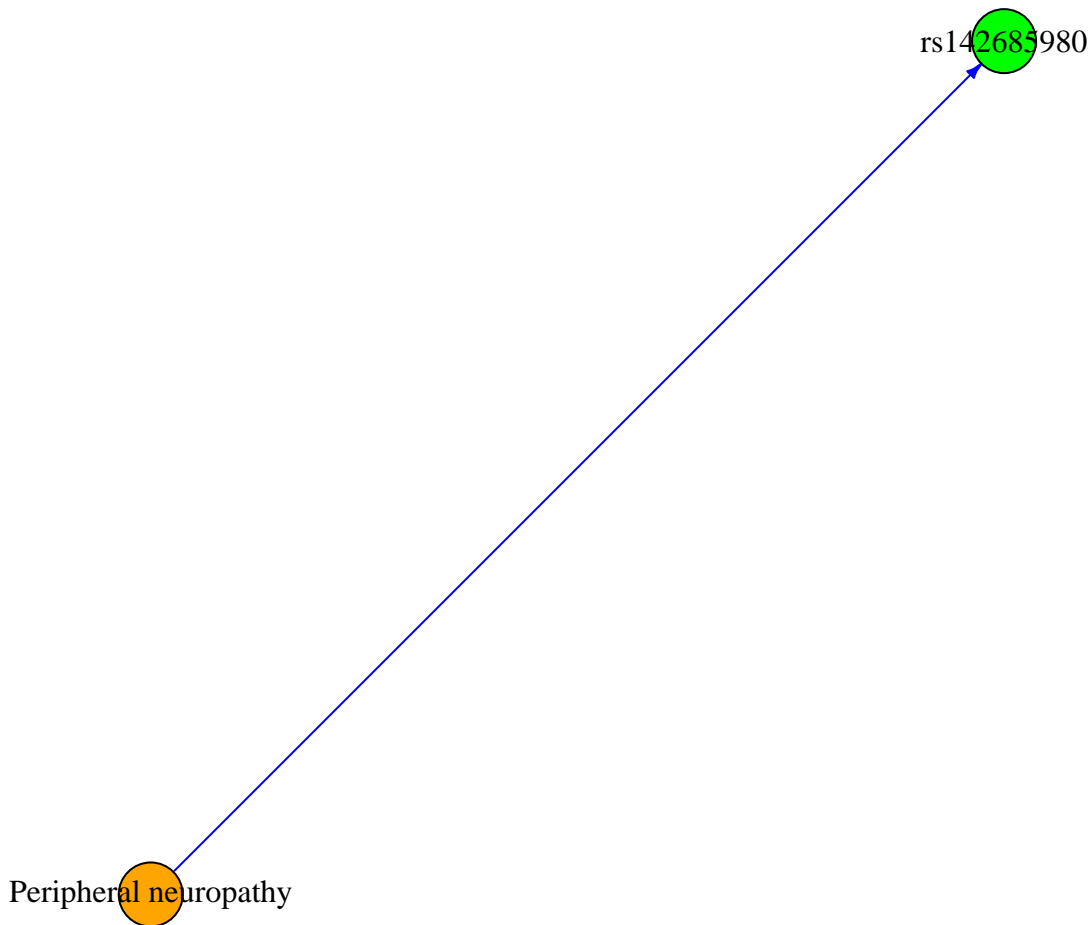

**Variant–Disease Network (Periventricular Heterotopia)**

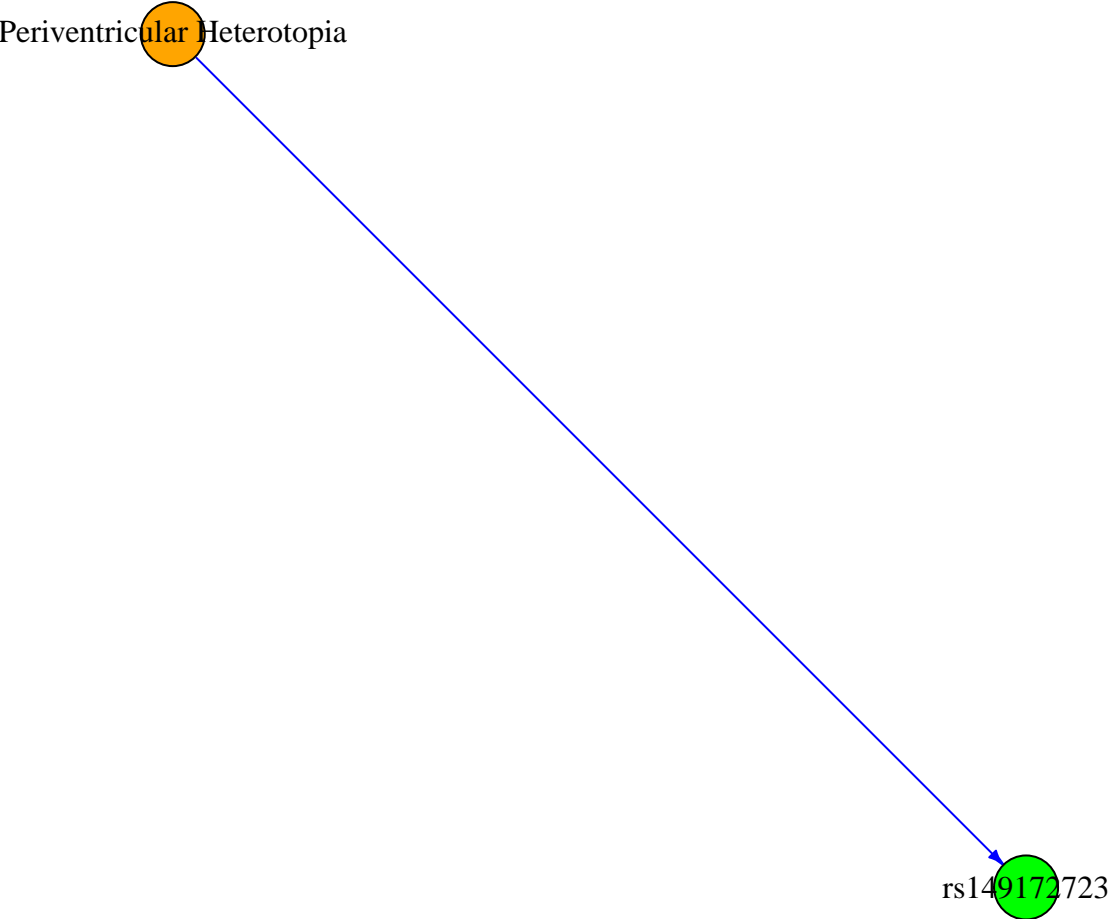



Variant–Disease Network (Periventricular nodular heterotopia 1)

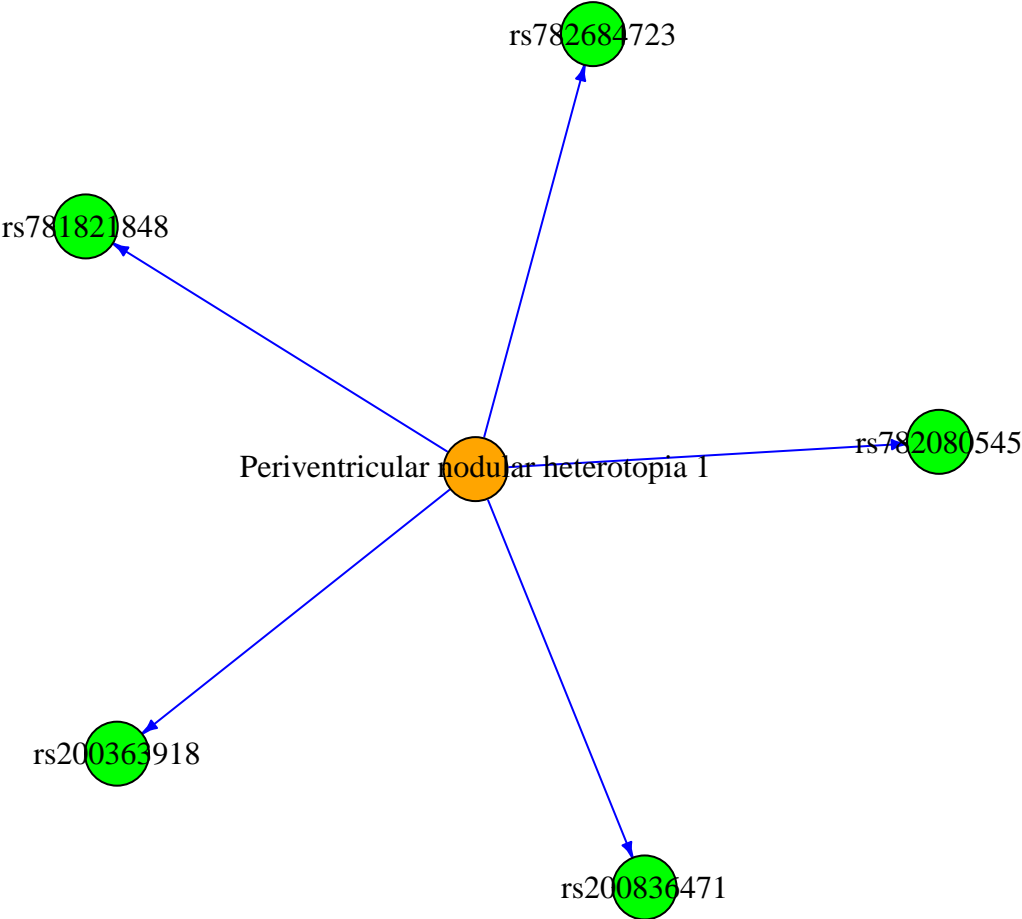

Variant–Disease Network (Permanent neonatal diabetes mellitus)

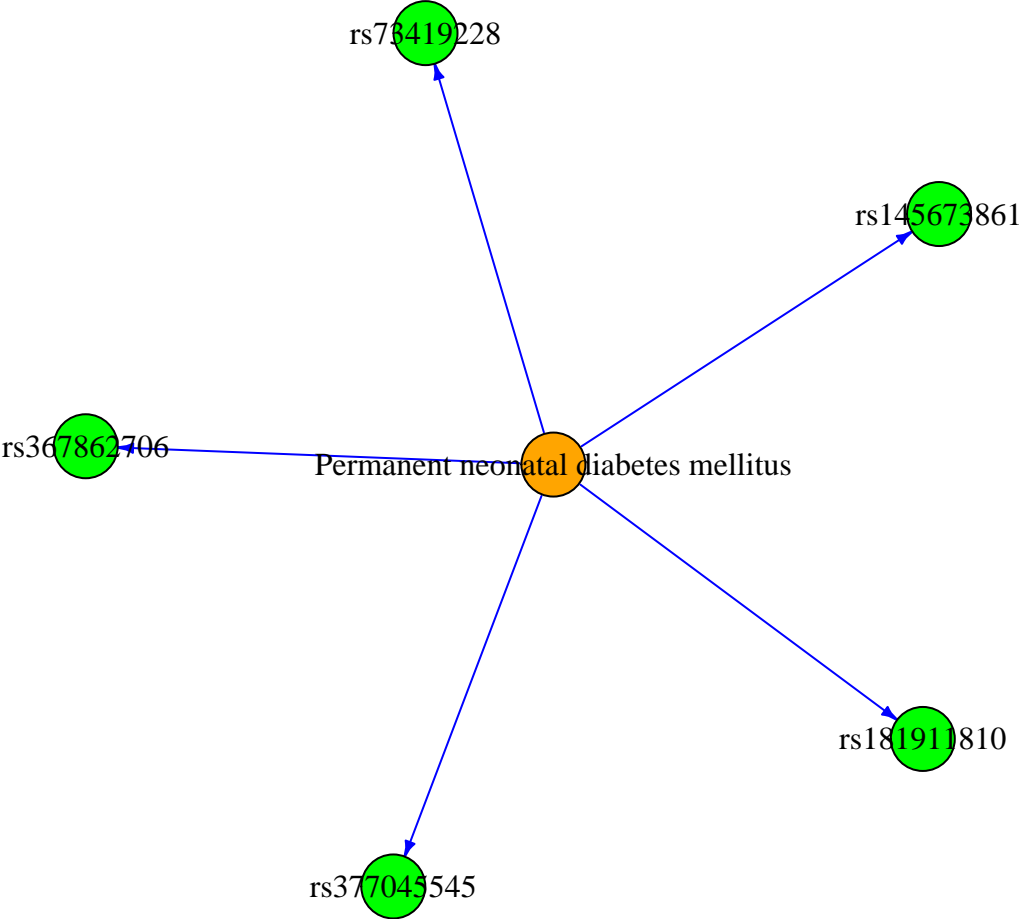

Variant–Disease Network (Peroxisome biogenesis disorder 1A (Zellweger

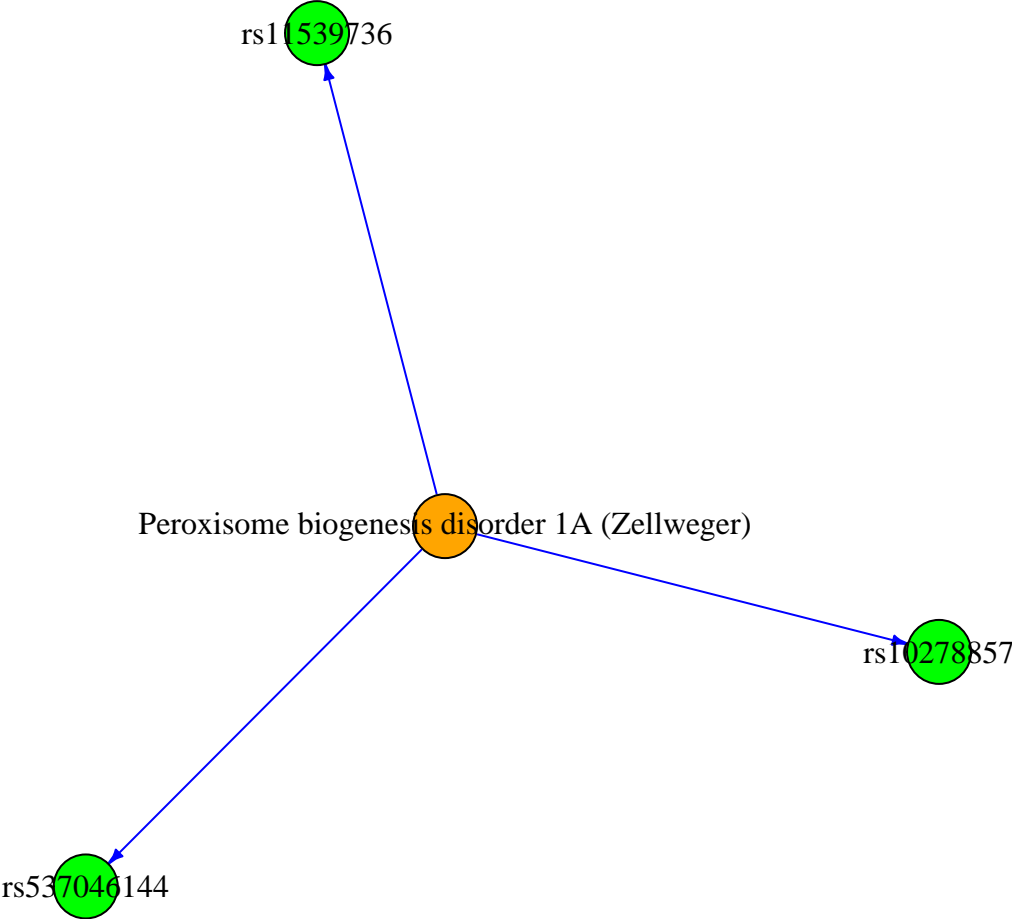

**Variant–Disease Network (Peroxisome biogenesis disorder 9B)**

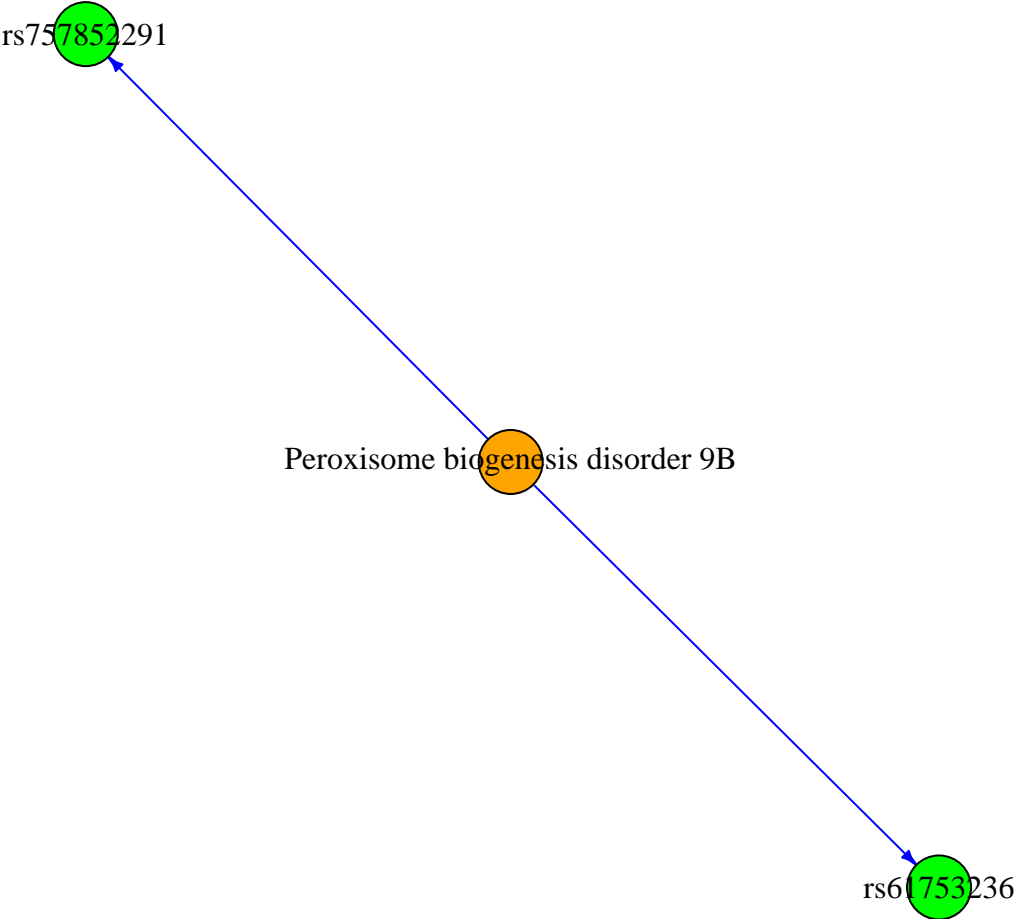

## Variant–Disease Network (Perrault syndrome)

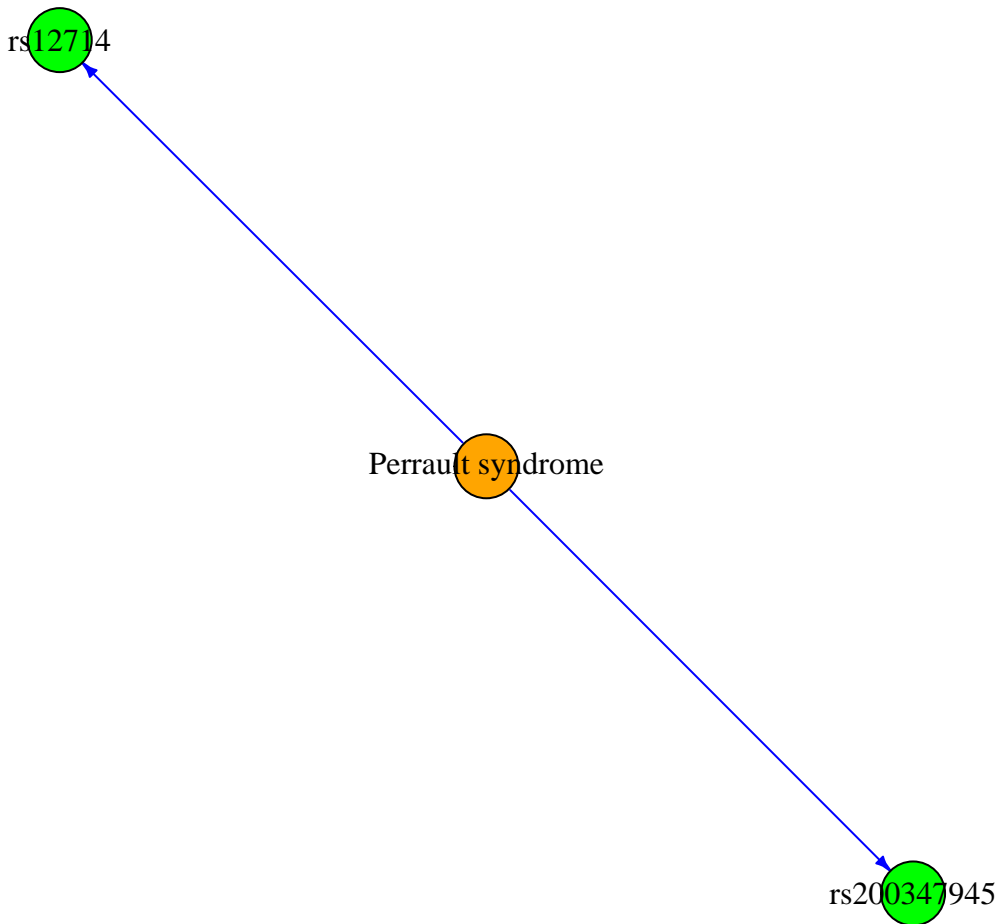

## Variant–Disease Network (Perrault syndrome 1)

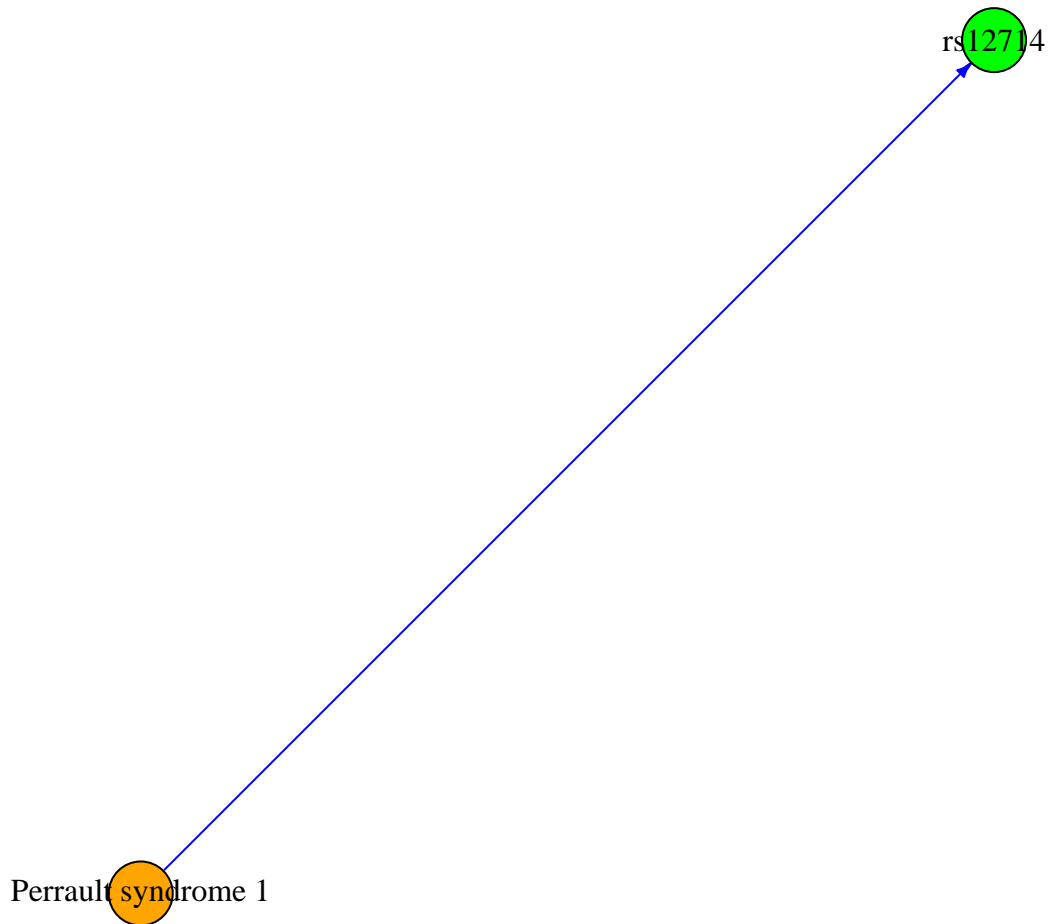

## Variant–Disease Network (Perry syndrome)

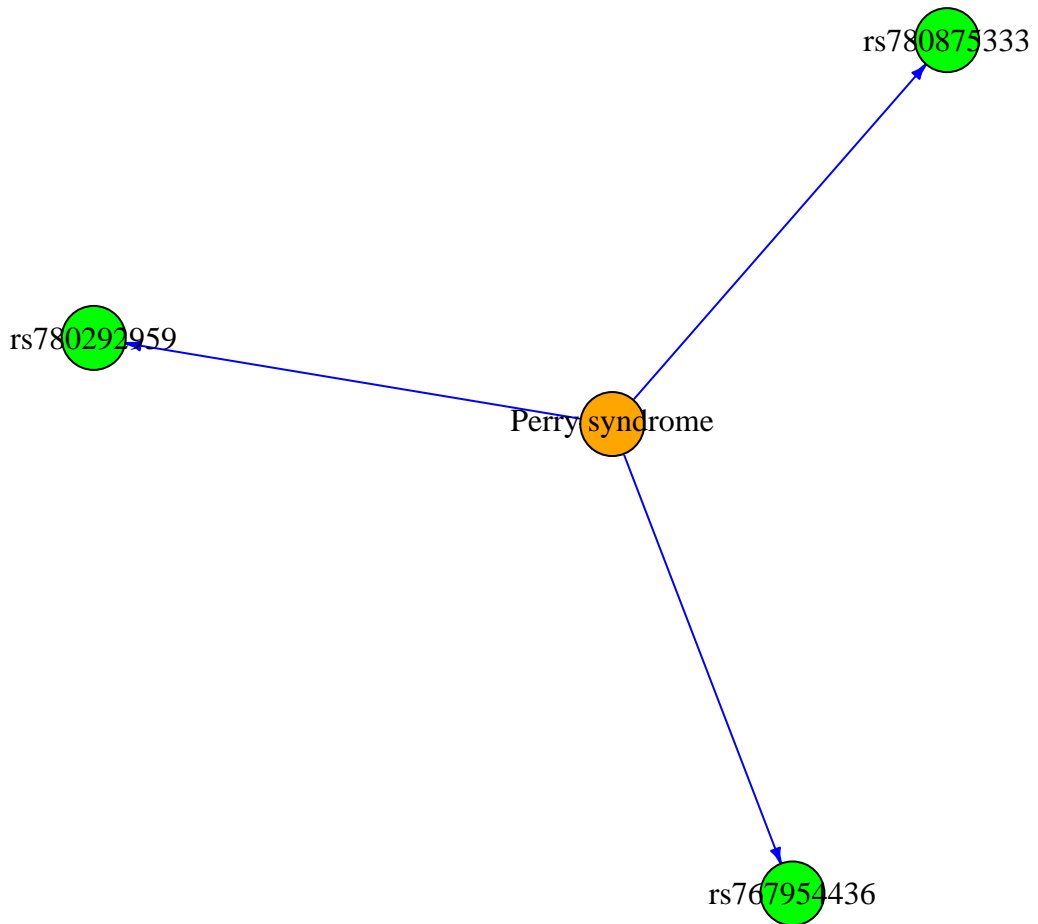

Variant–Disease Network (Peutz–Jeghers syndrome)

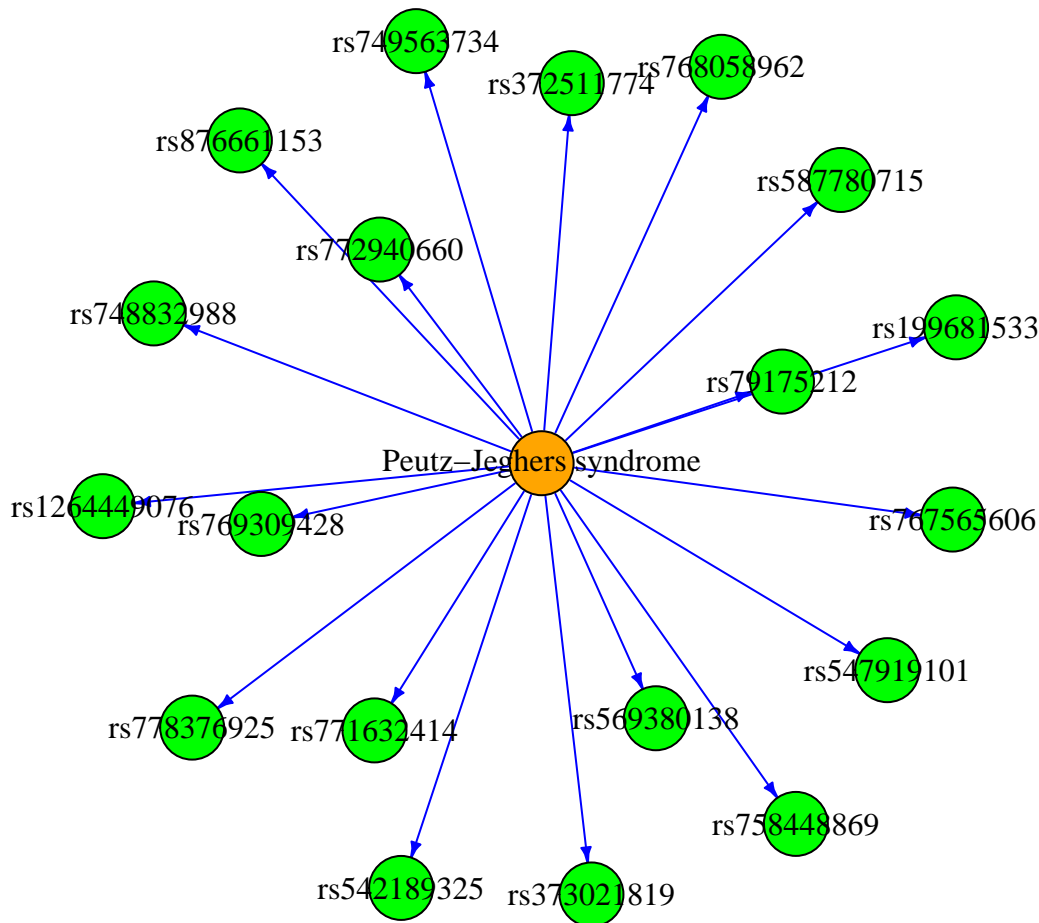



Variant–Disease Network (Pfeiffer syndrome)

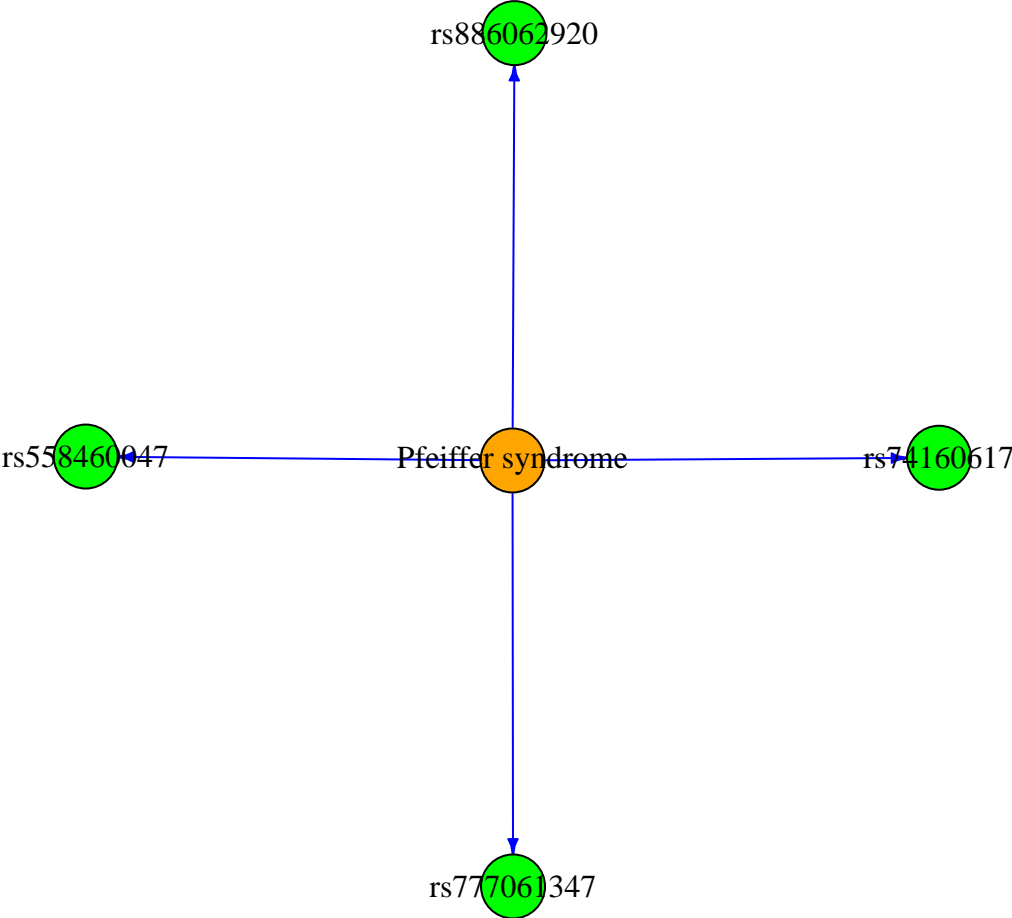

Variant–Disease Network (Phenylketonuria)

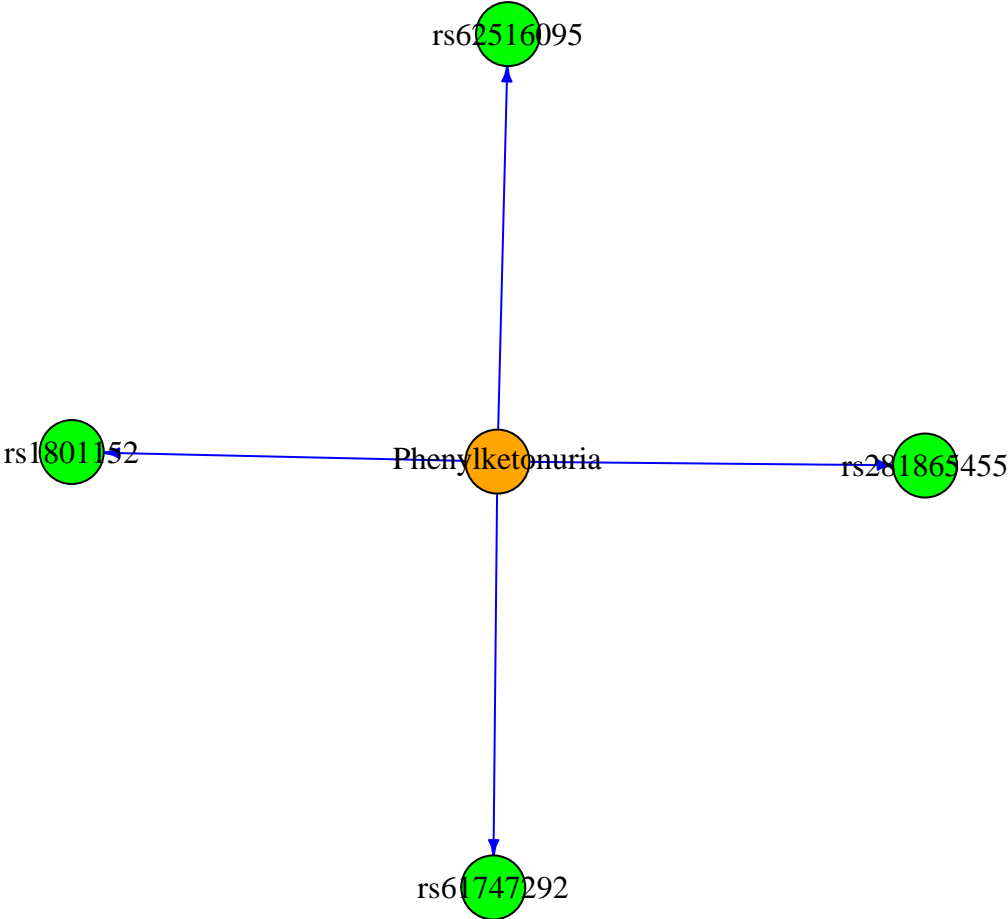

## Variant-Disease Network (Pheochromocytoma)

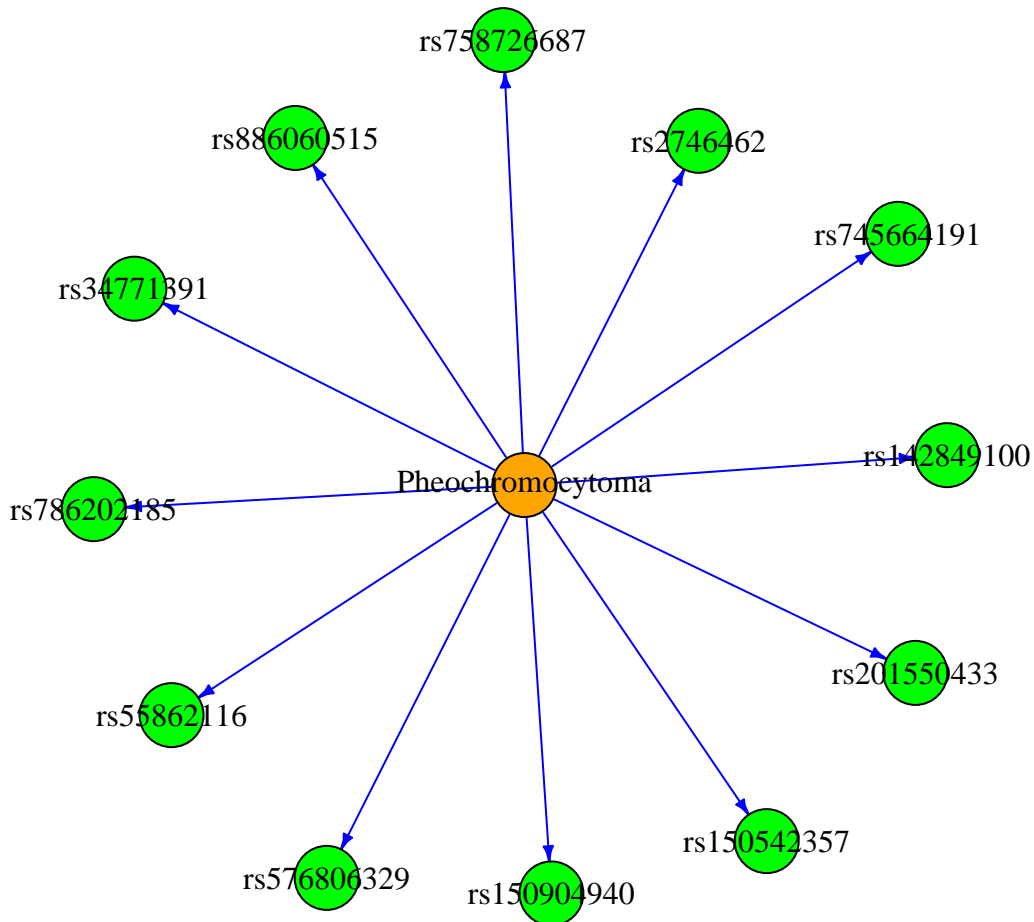

# Variant-Disease Network (Phosphoenolpyruvate carboxykinase (GTP) deficiency)

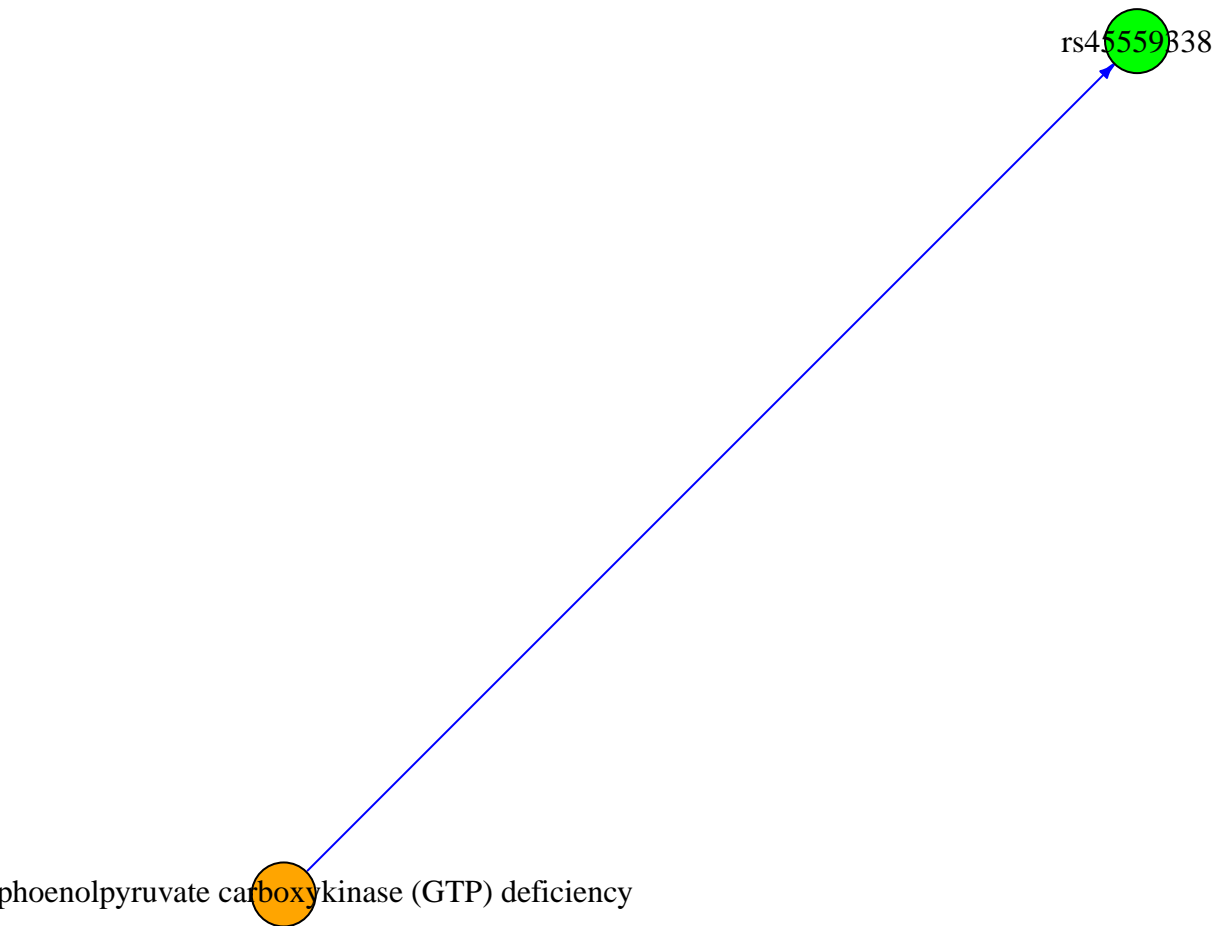

**Variant–Disease Network (Phosphoglycerate dehydrogenase deficiency)**

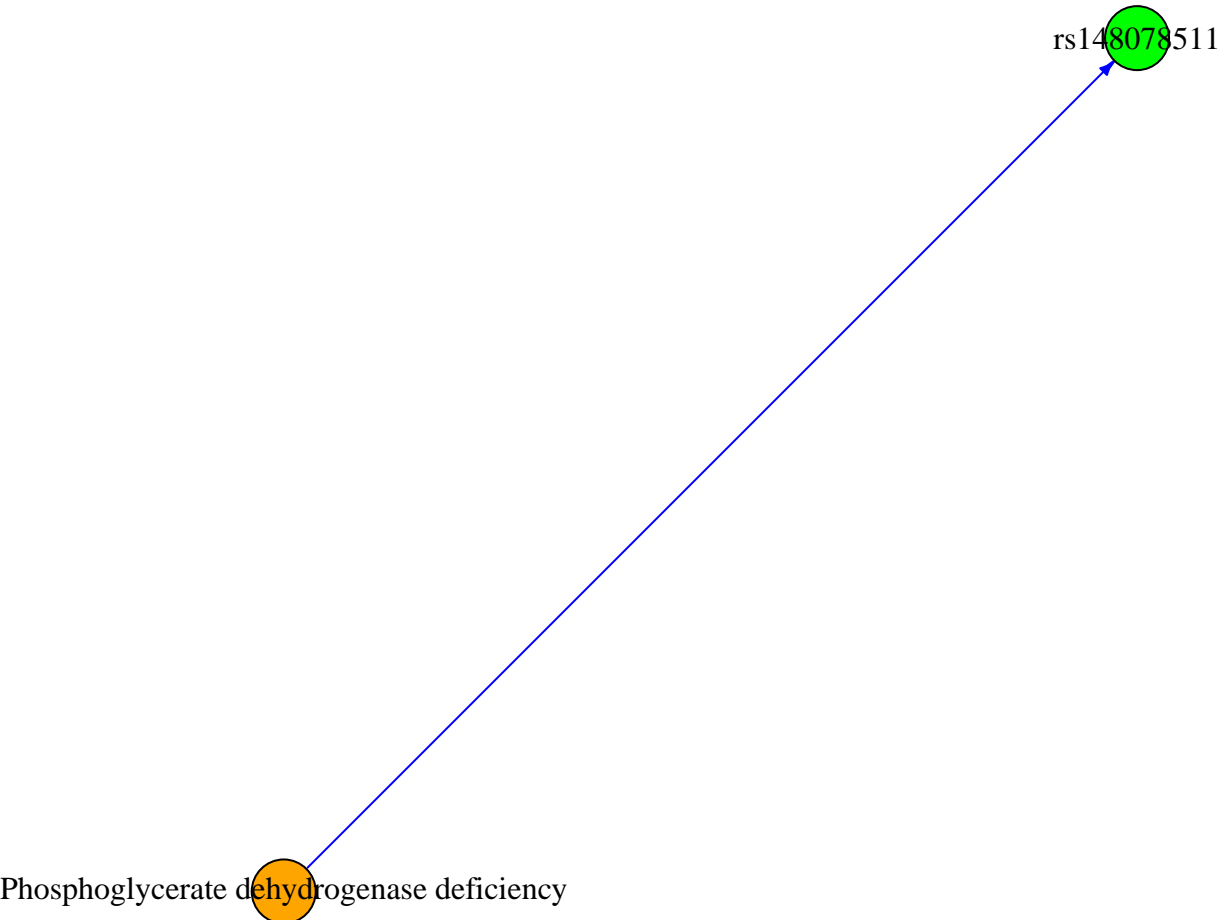

# Variant–Disease Network (Phosphoserine aminotransferase deficiency)

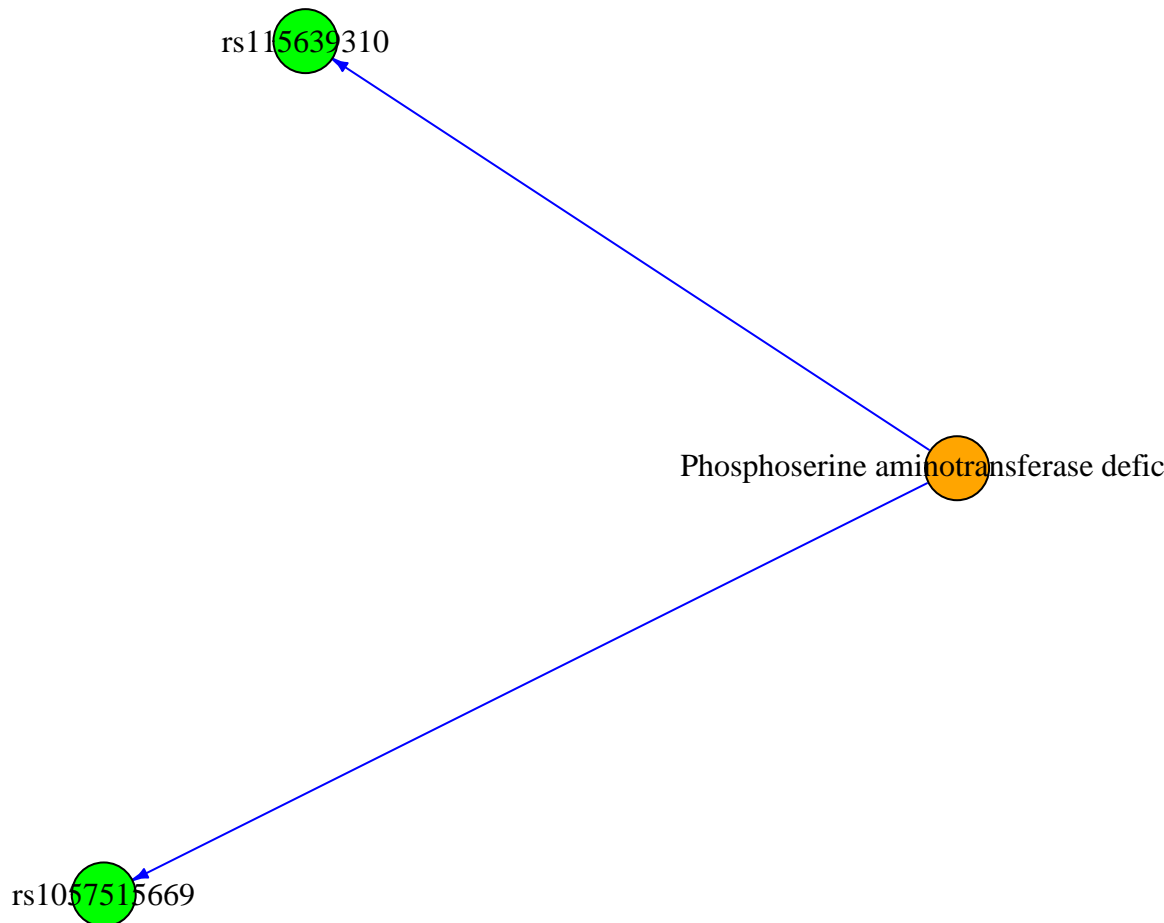

Variant–Disease Network (Phytanic acid storage disease)

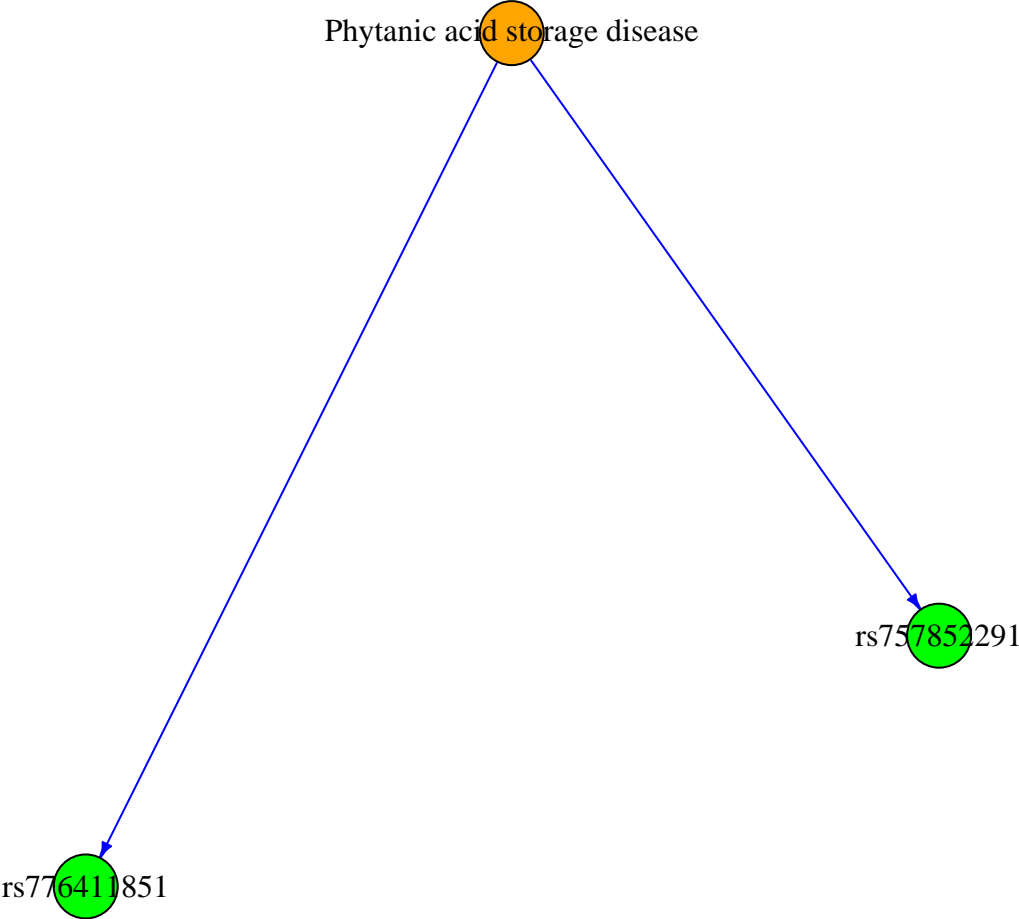

## Variant–Disease Network (Pierson syndrome)

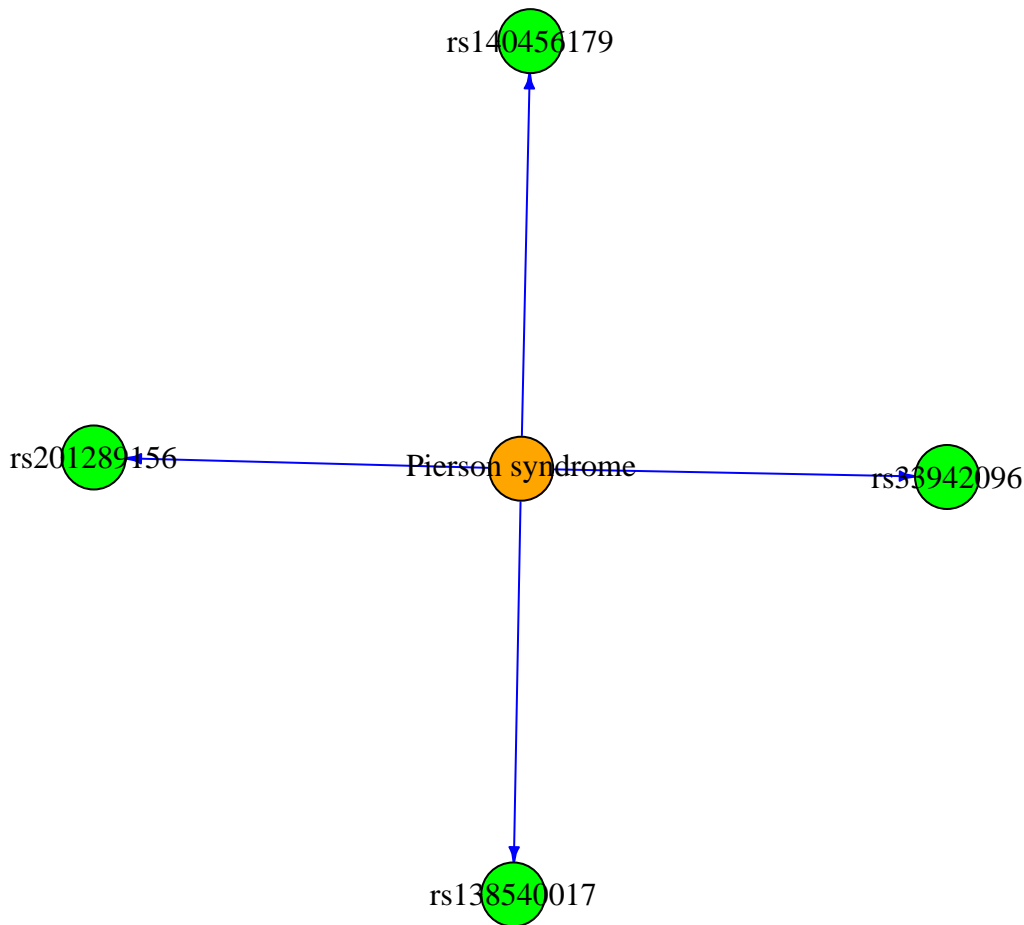



## Variant–Disease Network (Pigmentary pallidal degeneration)

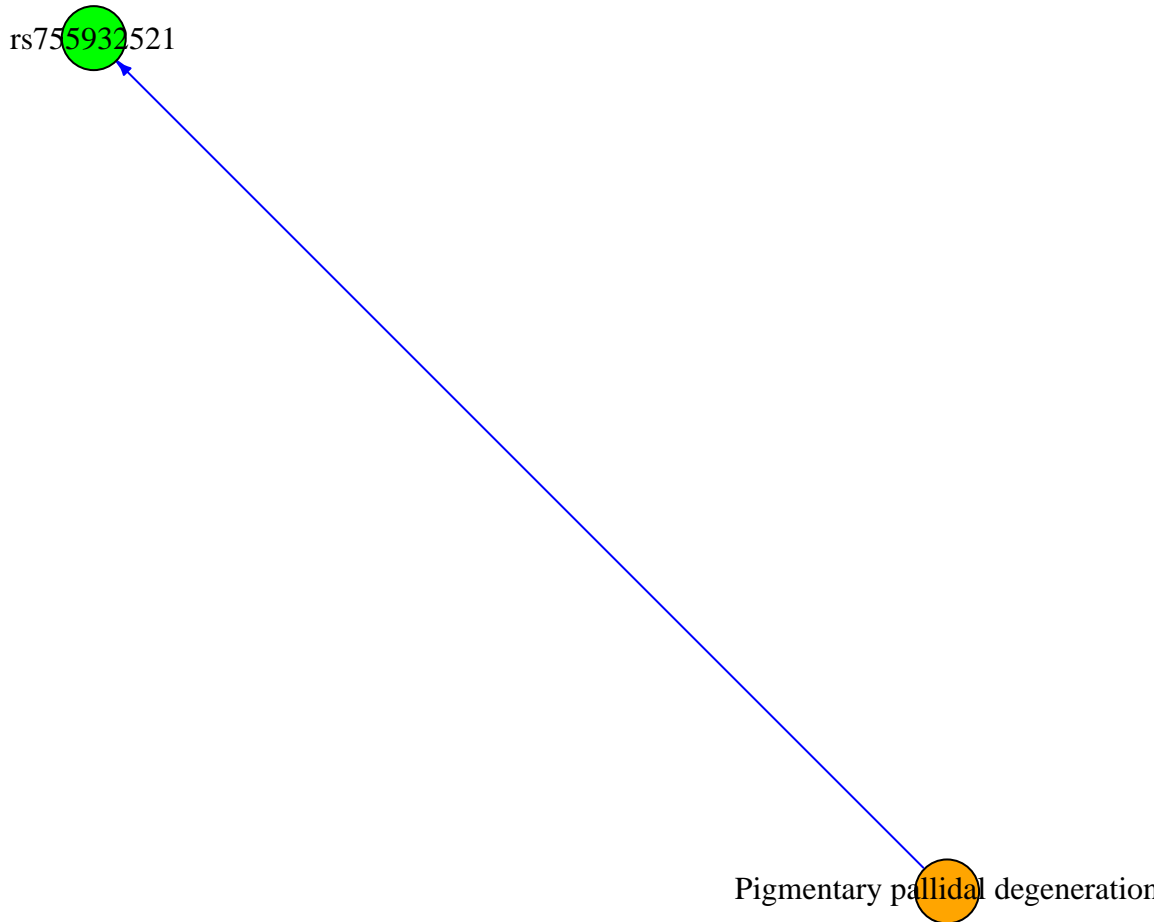

## Variant–Disease Network (Pigmentary retinal dystrophy)

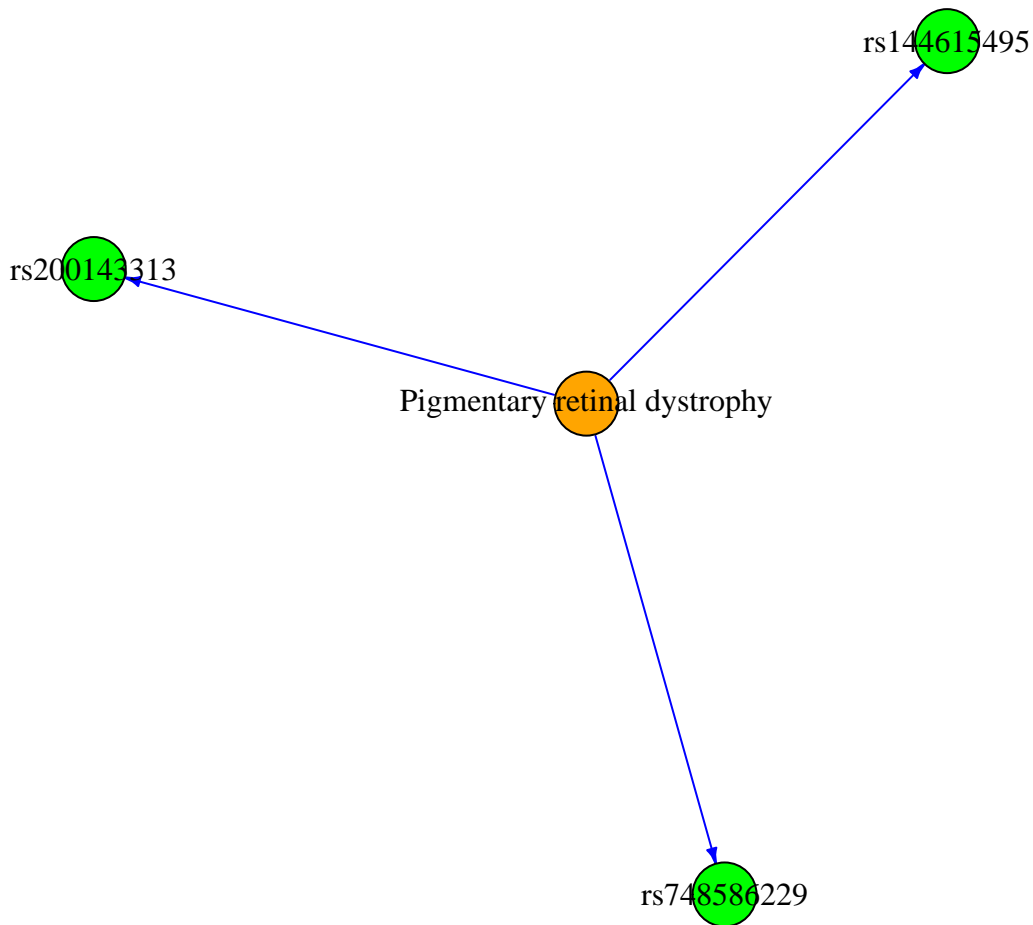

**Variant–Disease Network (Pitt–Hopkins–like syndrome)**

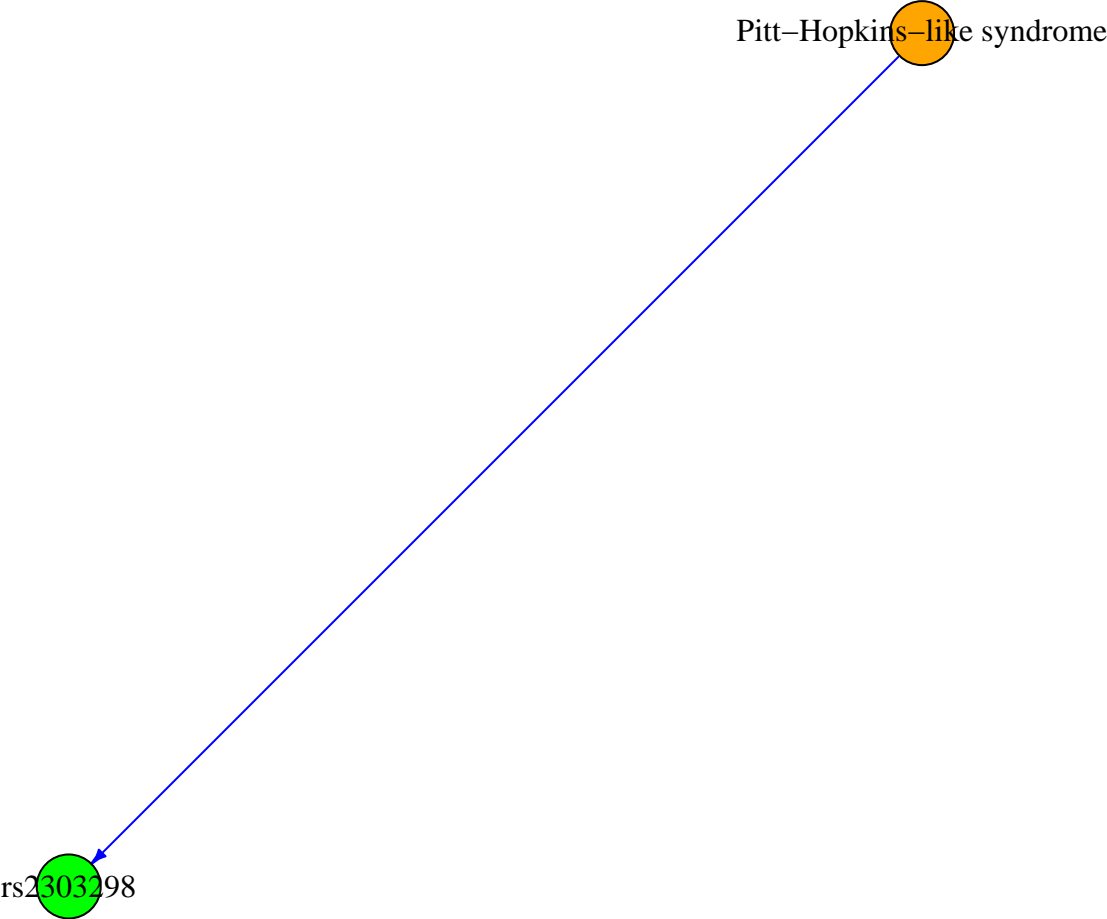

Variant–Disease Network (Pitt–Hopkins–like syndrome 2)

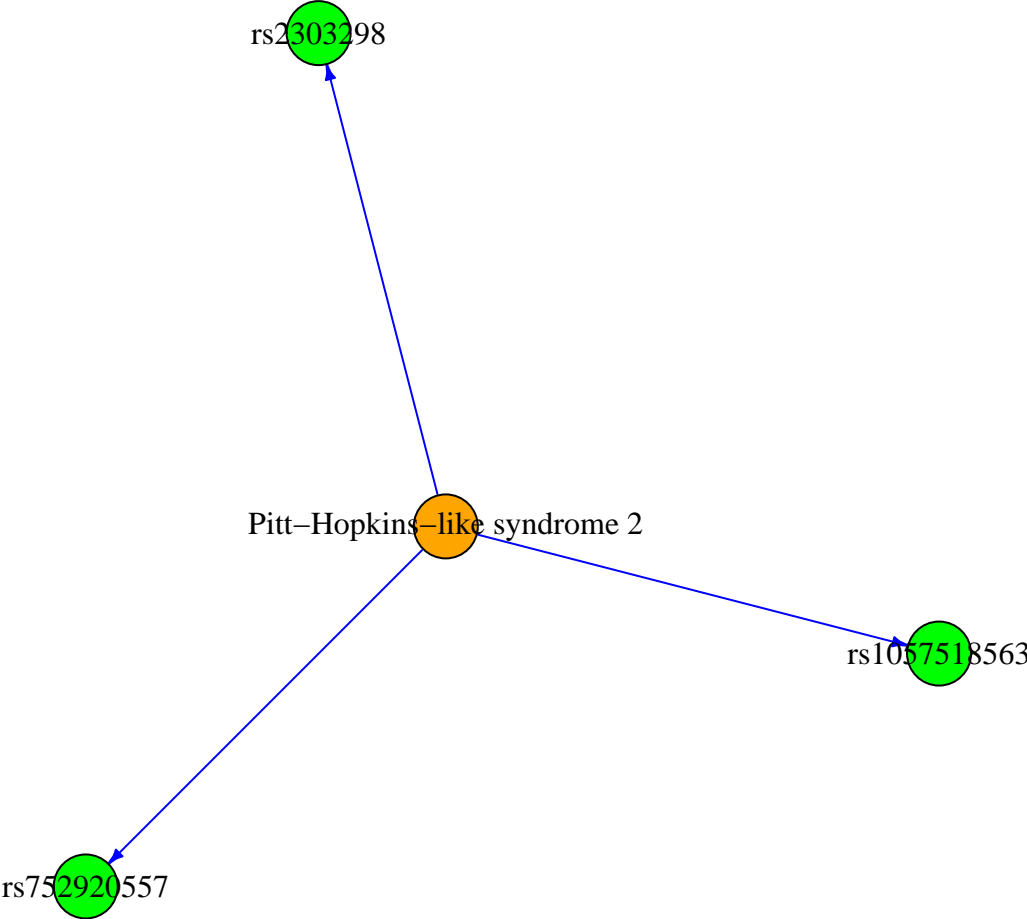

## Variant–Disease Network (Pityriasis rubra pilaris)

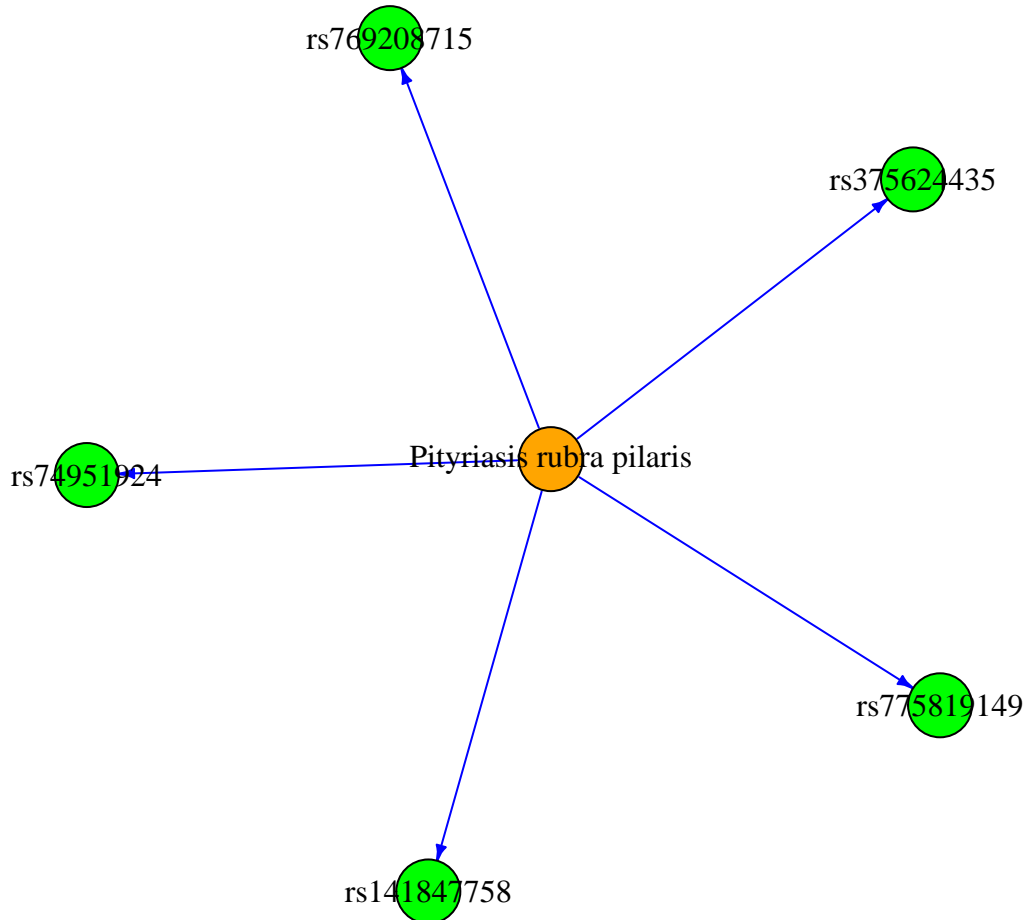

Variant–Disease Network (Plasminogen activator inhibitor type 1 deficiency)

Plasminogen activator inhibitor type 1 deficiency

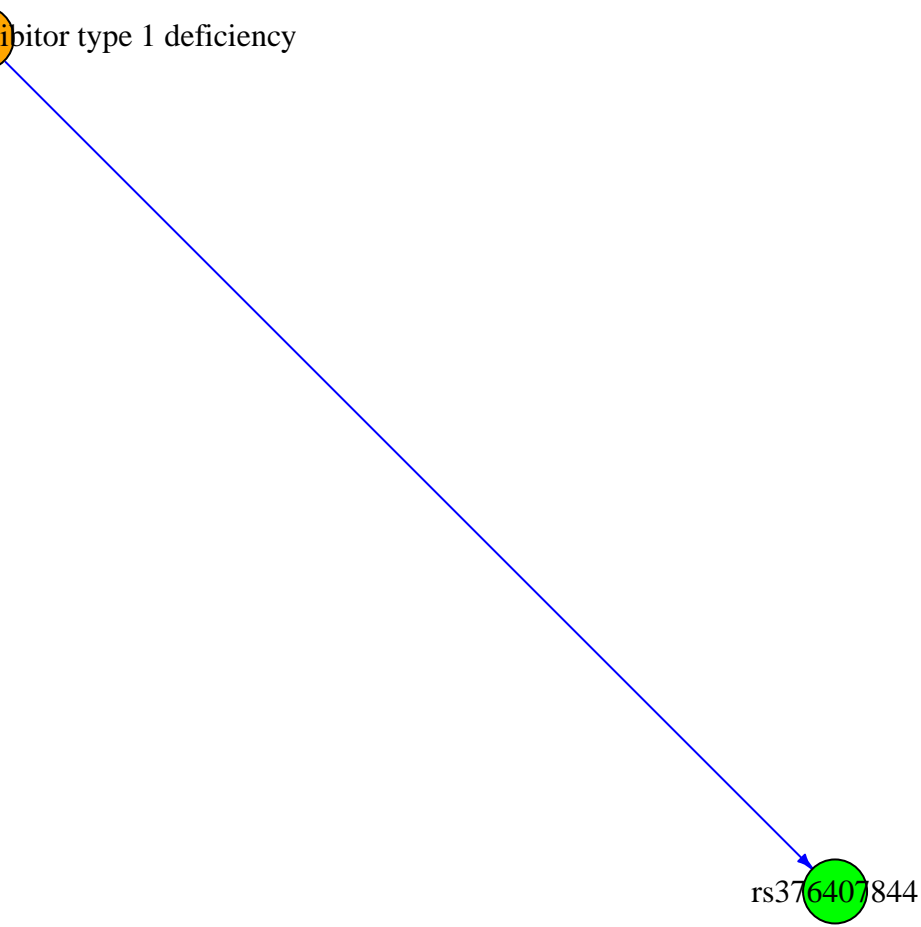

**Variant–Disease Network (Platelet–type bleeding disorder 9)**

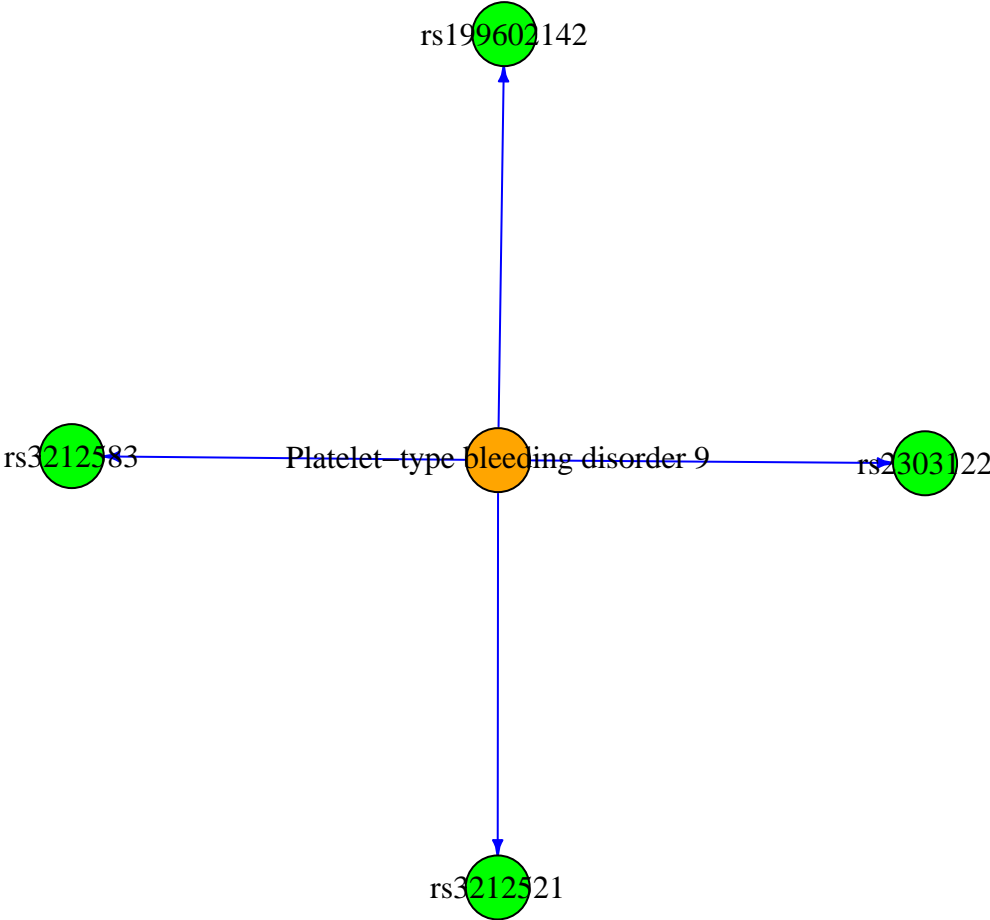

## Variant–Disease Network (Pleuropulmonary blastoma)

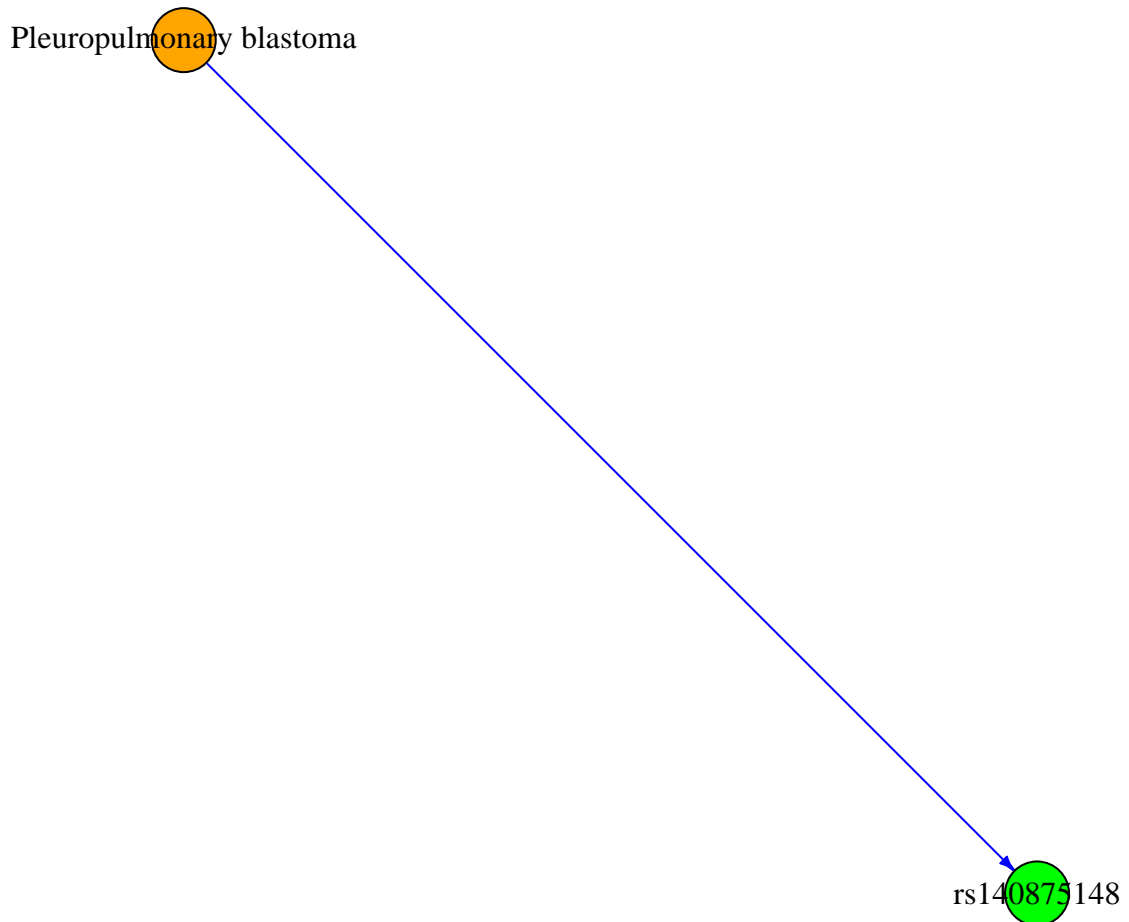



**Variant–Disease Network (Pol III–related leukodystrophy)**

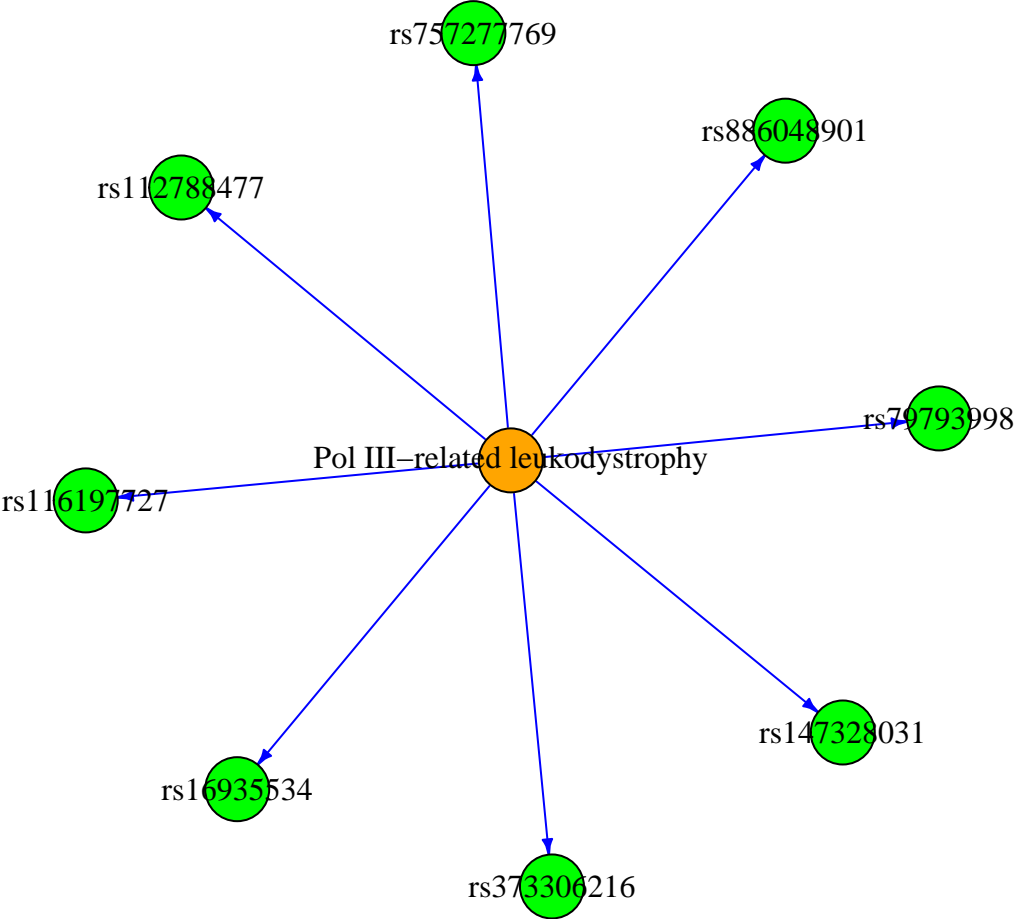

# Variant–Disease Network (POLG–Related Spectrum Disorders)

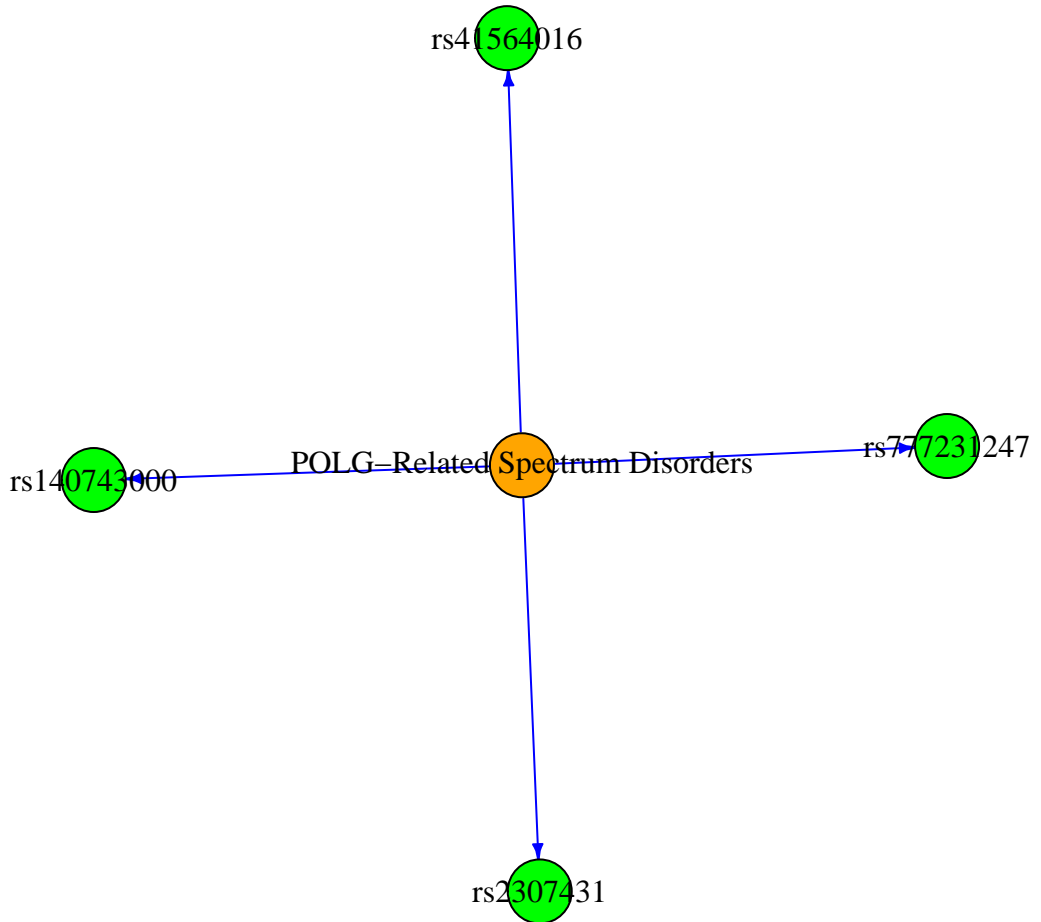

## Variant–Disease Network (Polycystic kidney disease)

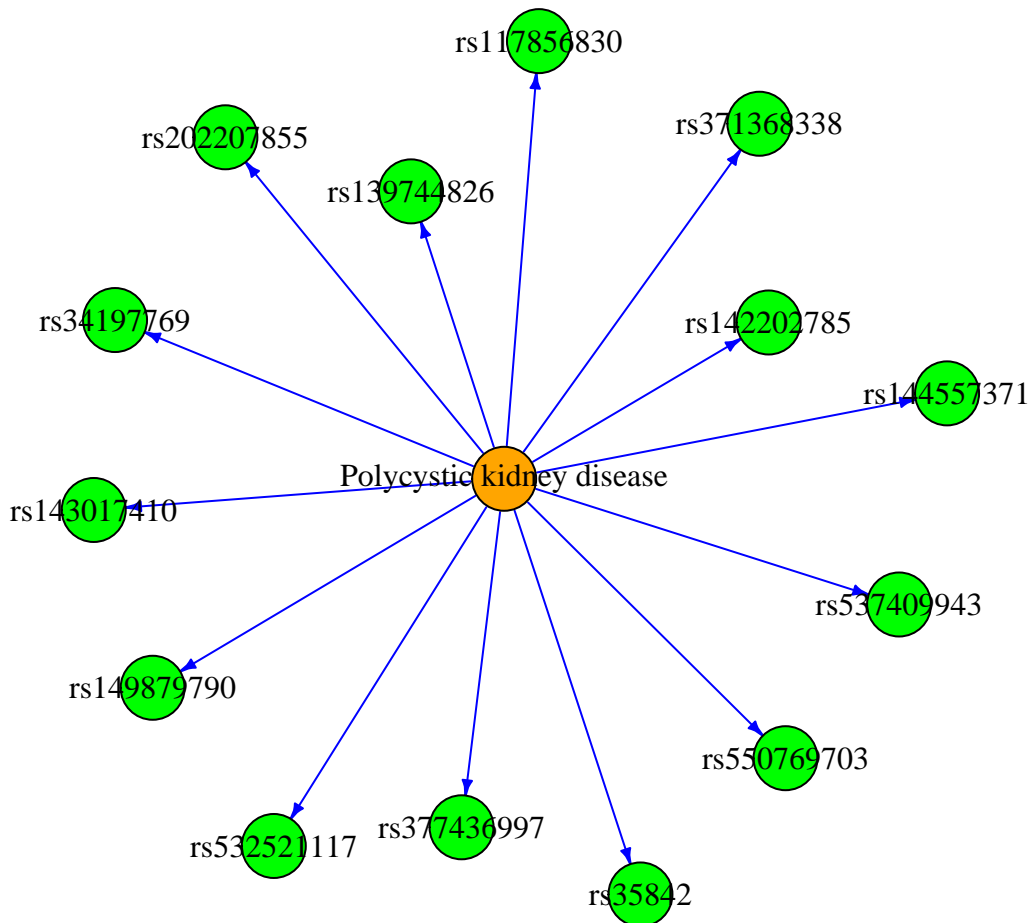

**Variant–Disease Network (Polycystic liver disease 1)**

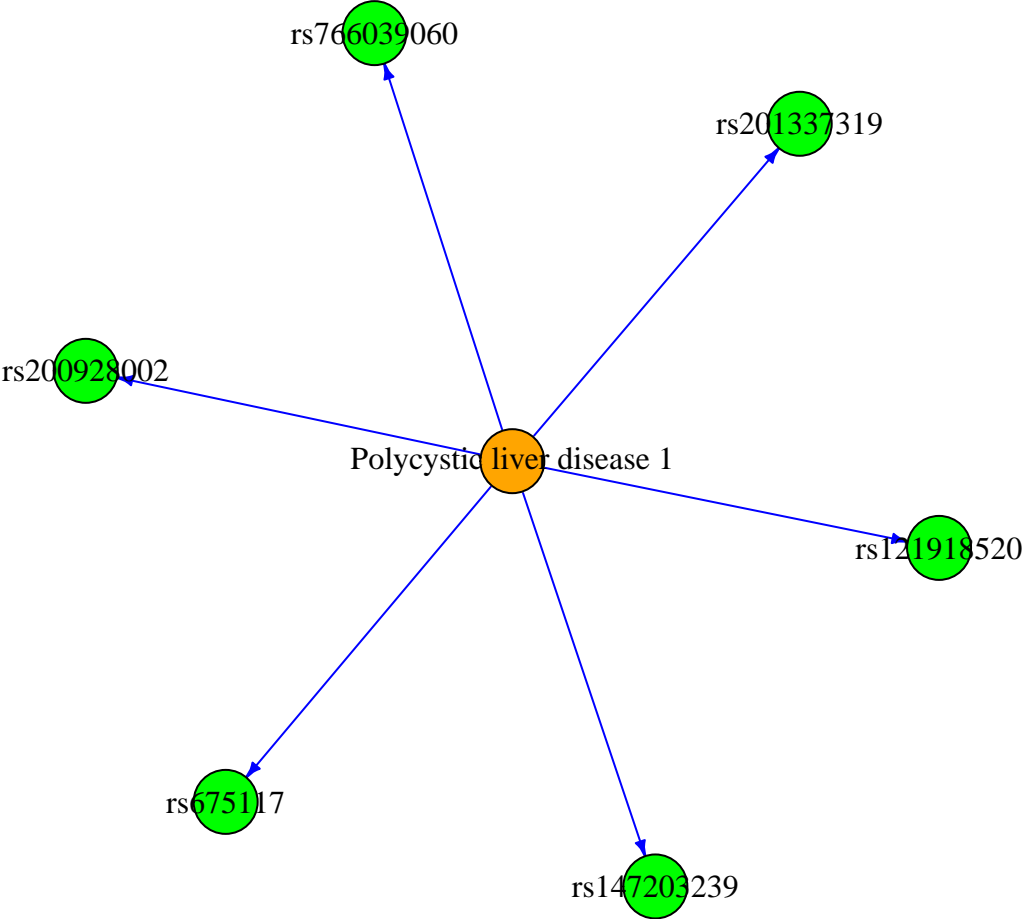

Variant–Disease Network (Polydactyly)

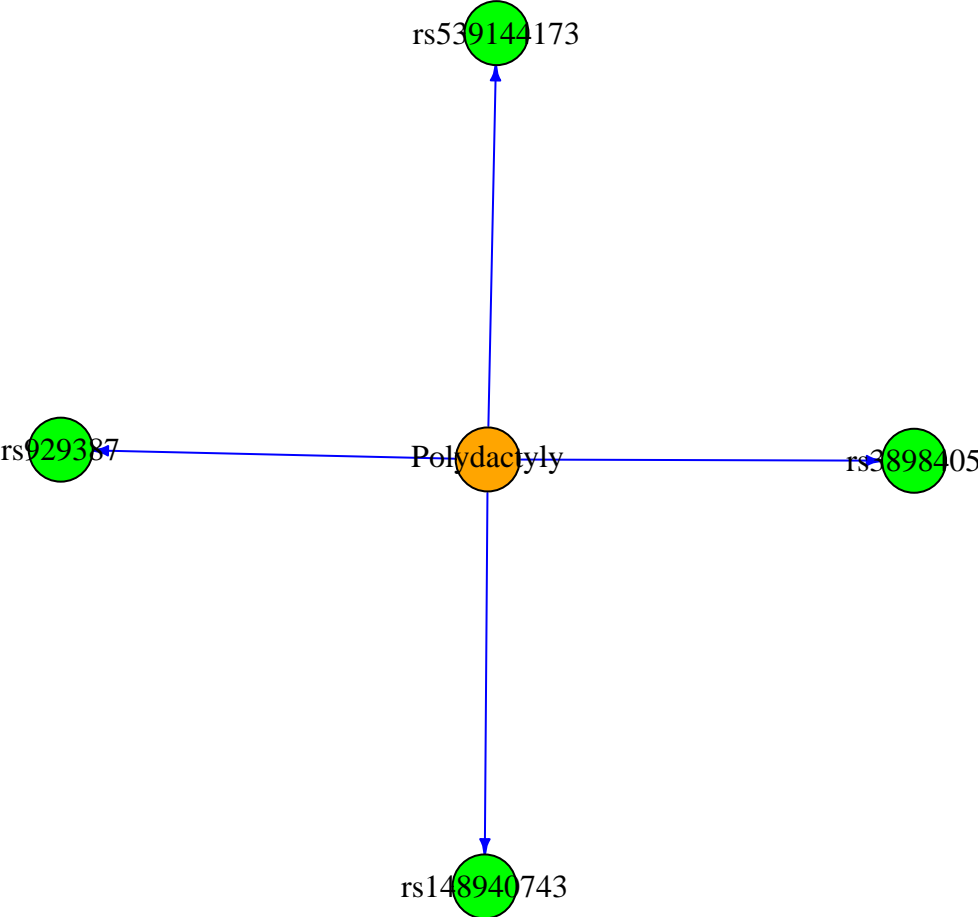

Variant–Disease Network (Polyglandular autoimmune syndrome)

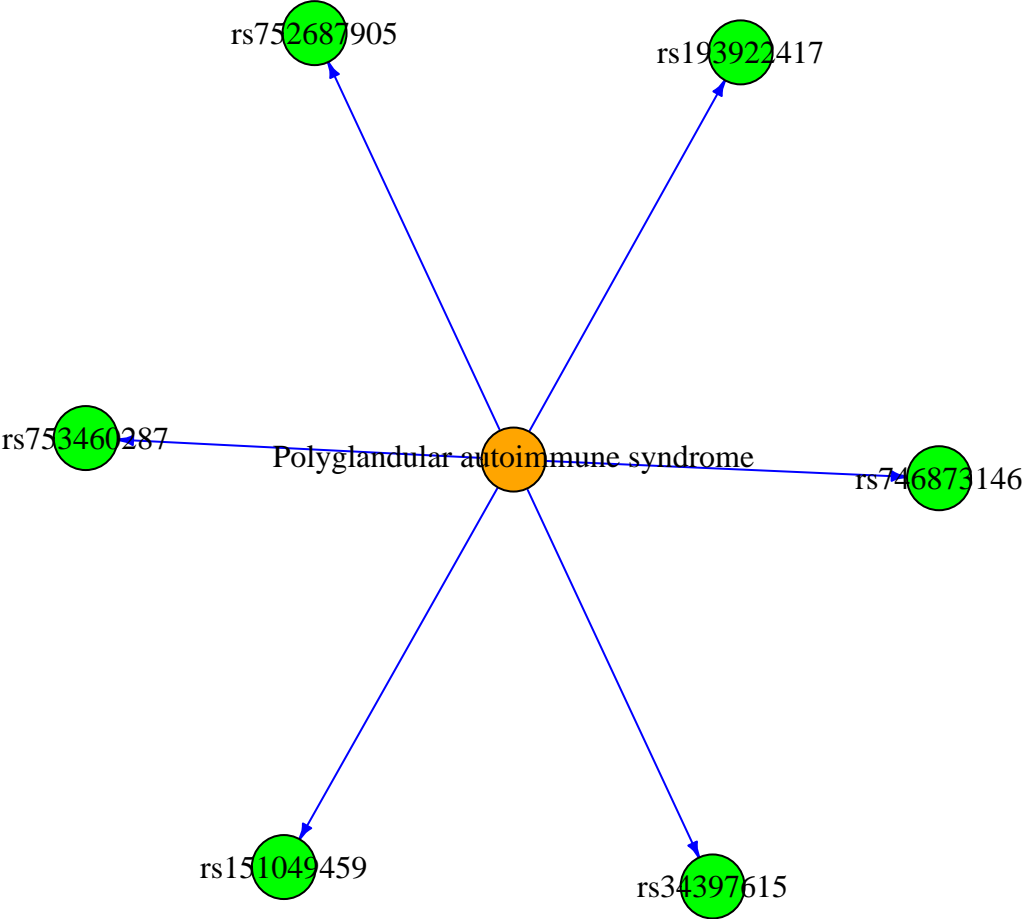

## Variant–Disease Network (Polyglucosan body disease)

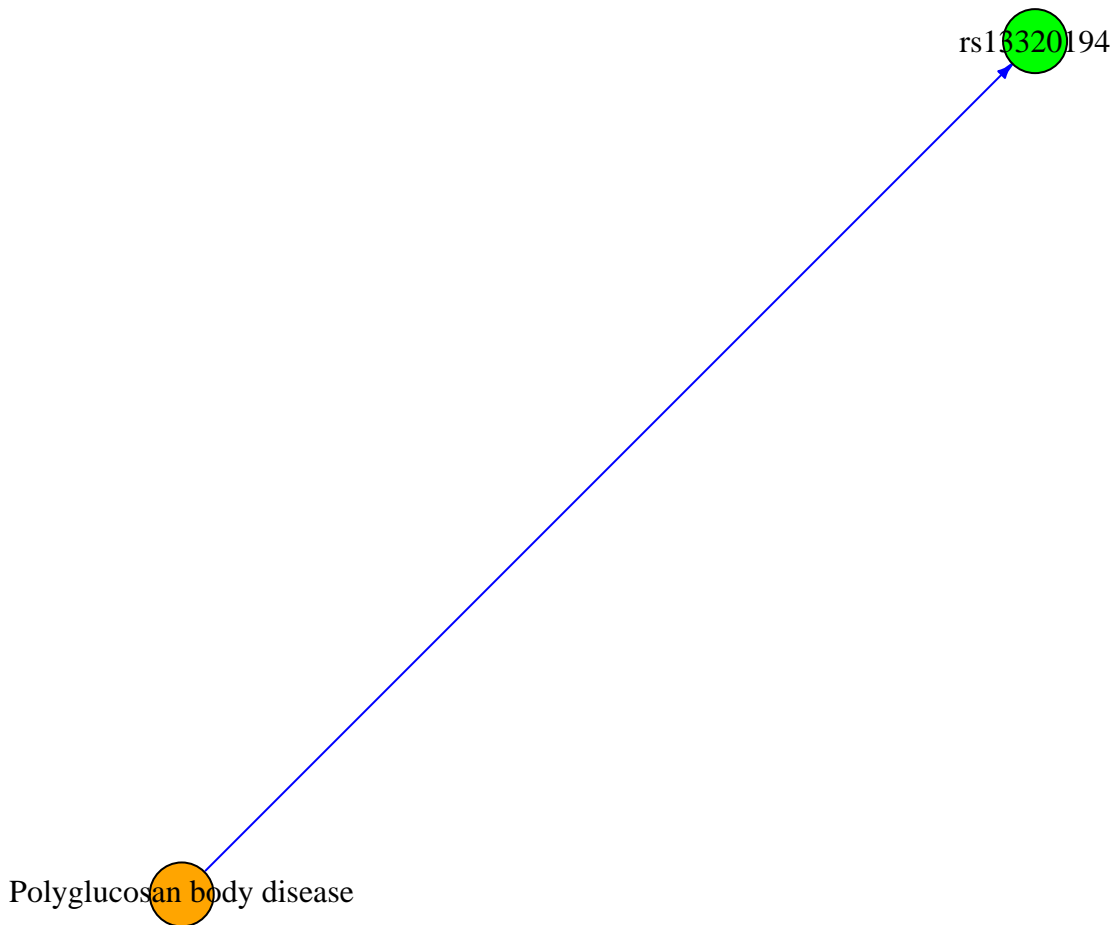

# t-Disease Network (Polyglucosan body myopathy 1 with or without immunon

rs746724862

Polyglucosan body myopathy 1 with or without in





## Variant–Disease Network (Polymicrogyria)

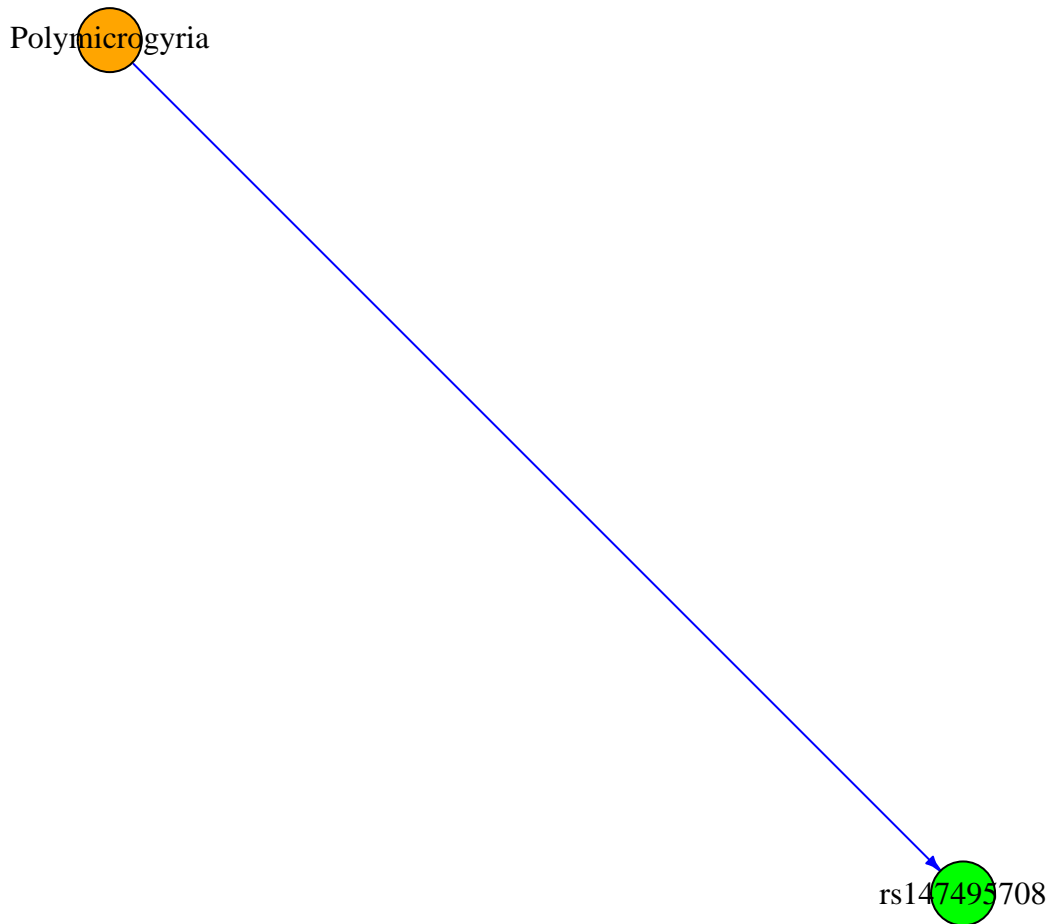

## Variant–Disease Network (Polyneuropathy)

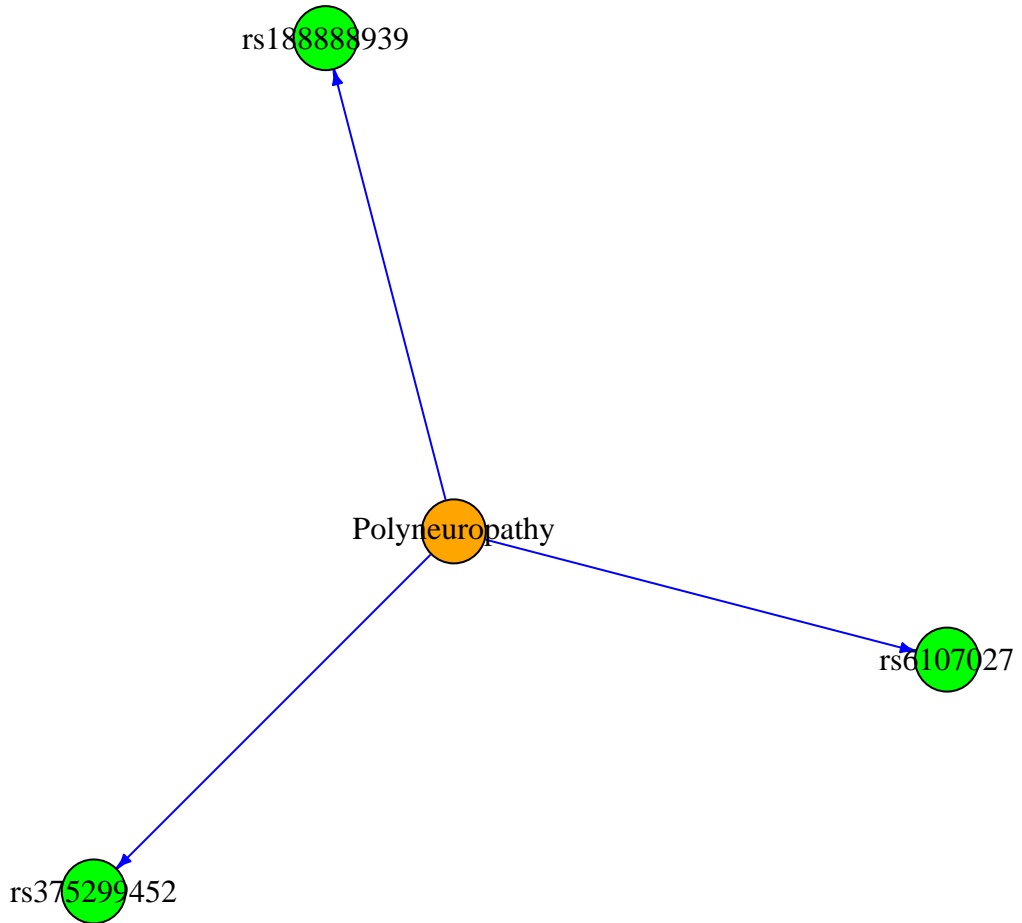

## Variant–Disease Network (Pontocerebellar hypoplasia)

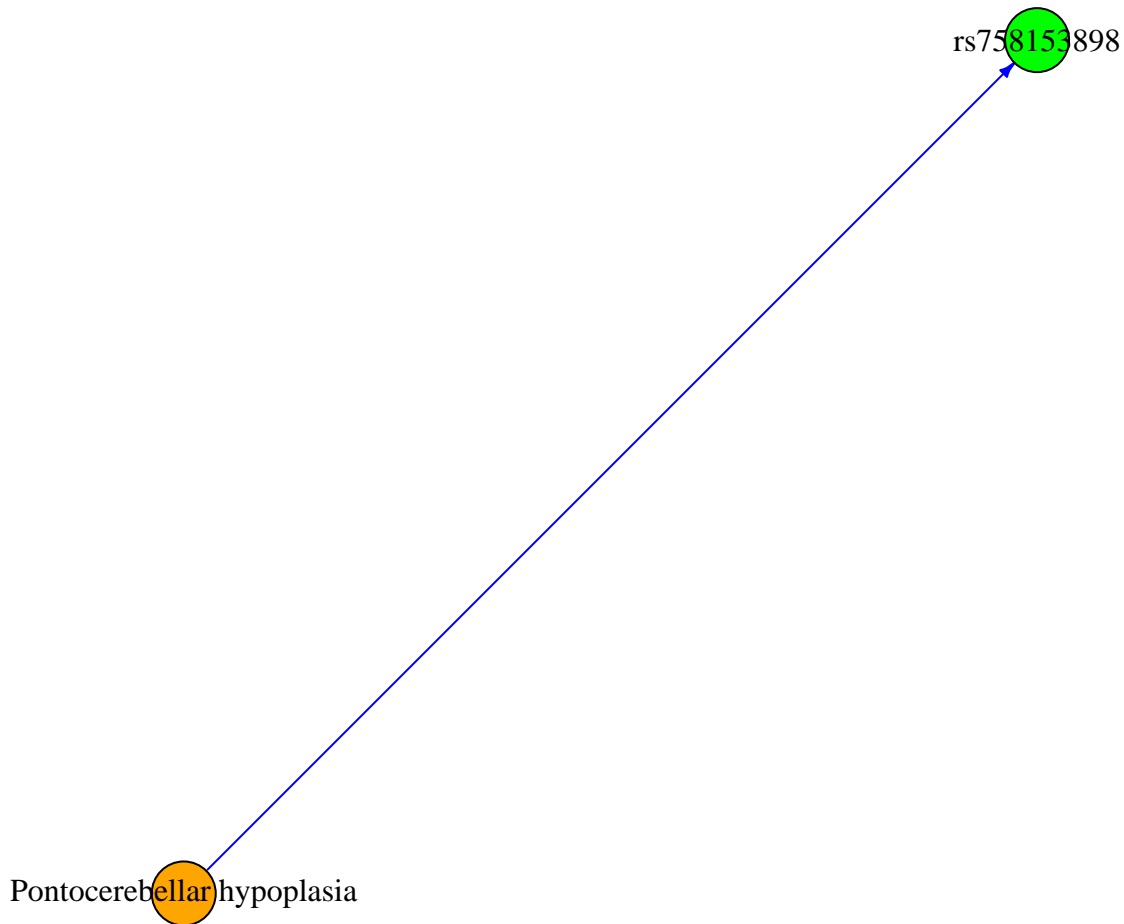

# Variant-Disease Network (Pontocerebellar hypoplasia type 1A)

rs2230532

Pontocerebellar hypoplasia type 1

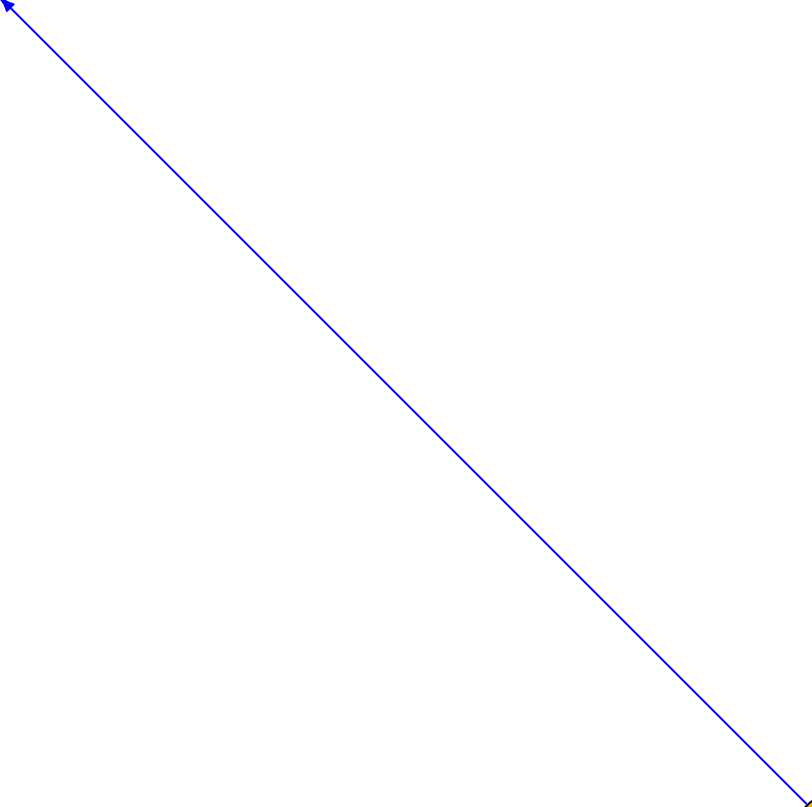

Variant–Disease Network (Pontoneocerebellar hypoplasia)

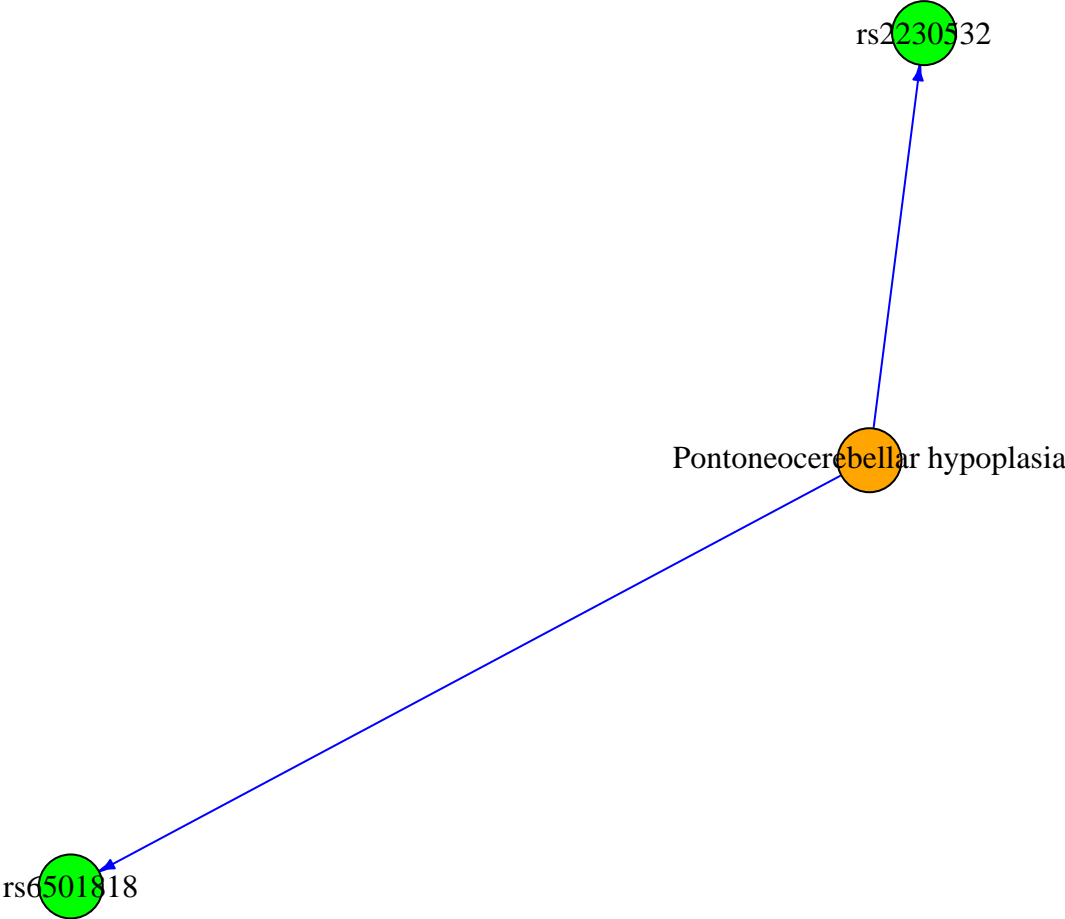

Variant–Disease Network (Popliteal pterygium syndrome)

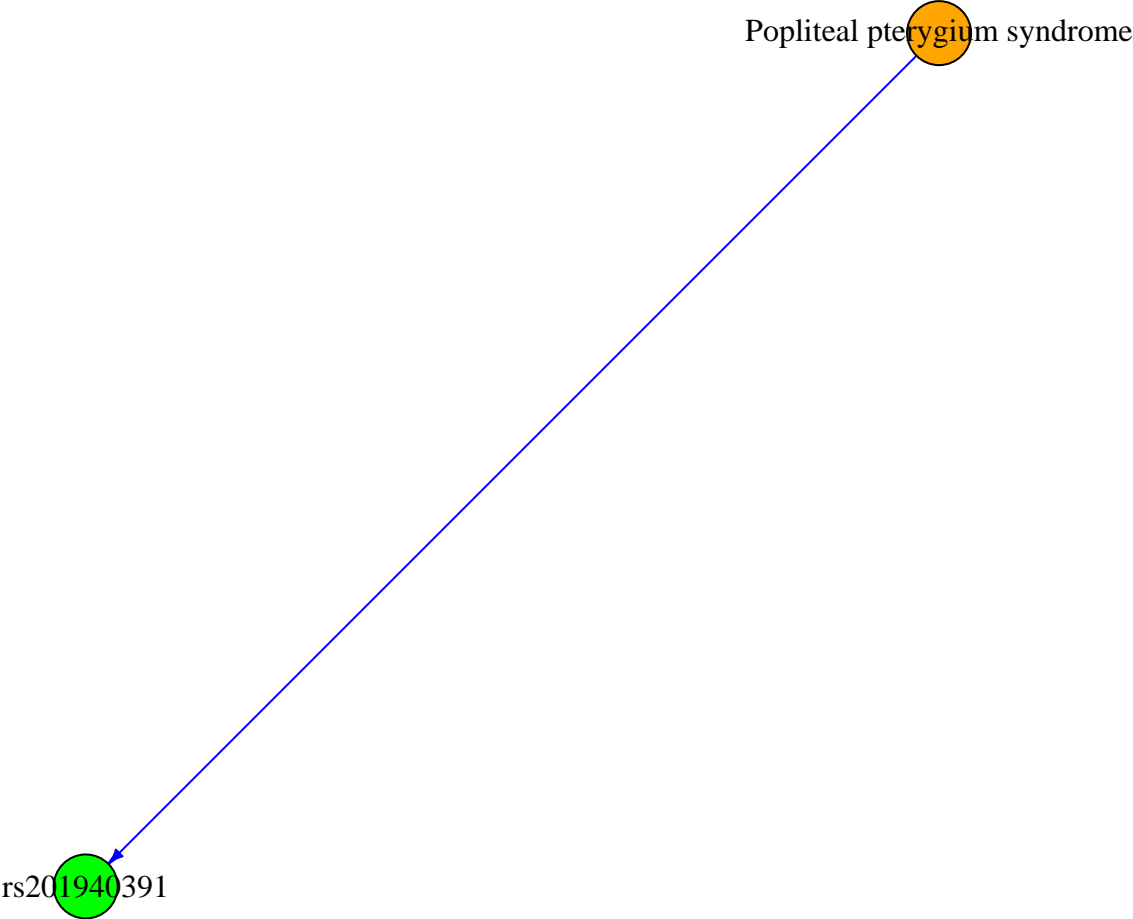

## Variant–Disease Network (Porencephalic cyst)

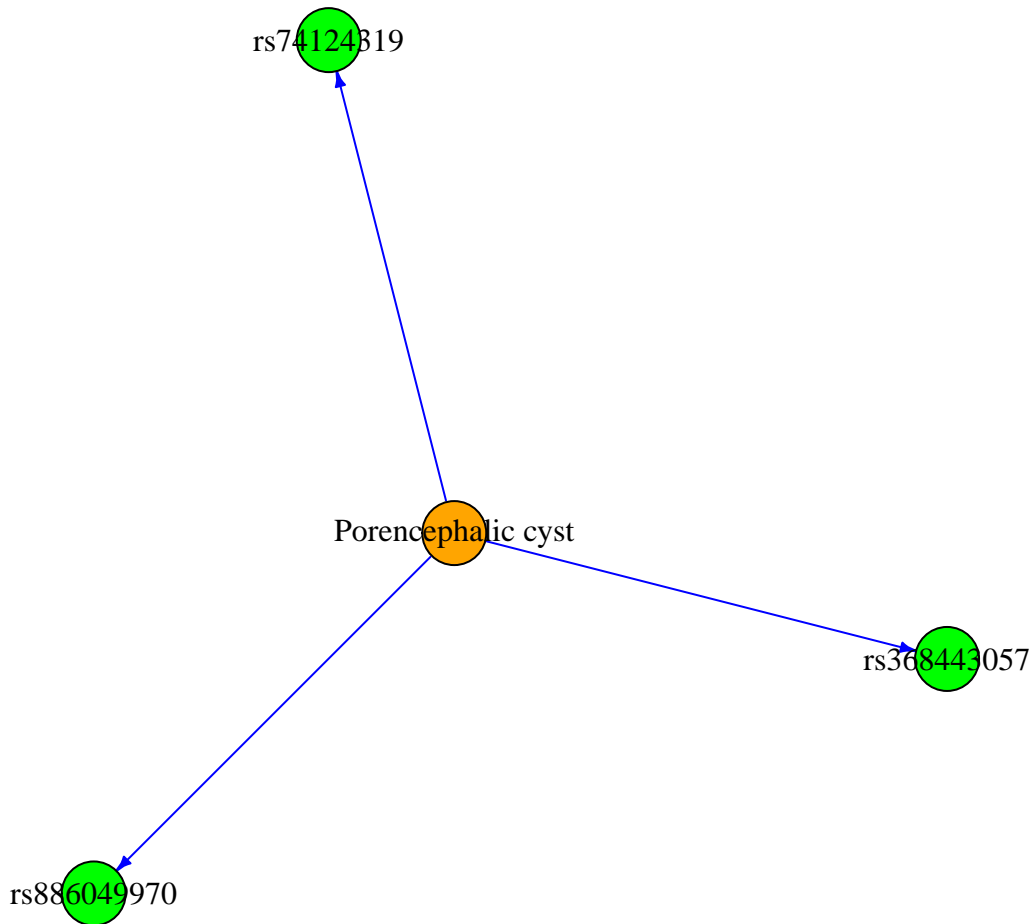

Variant–Disease Network (Porphobilinogen synthase deficiency)

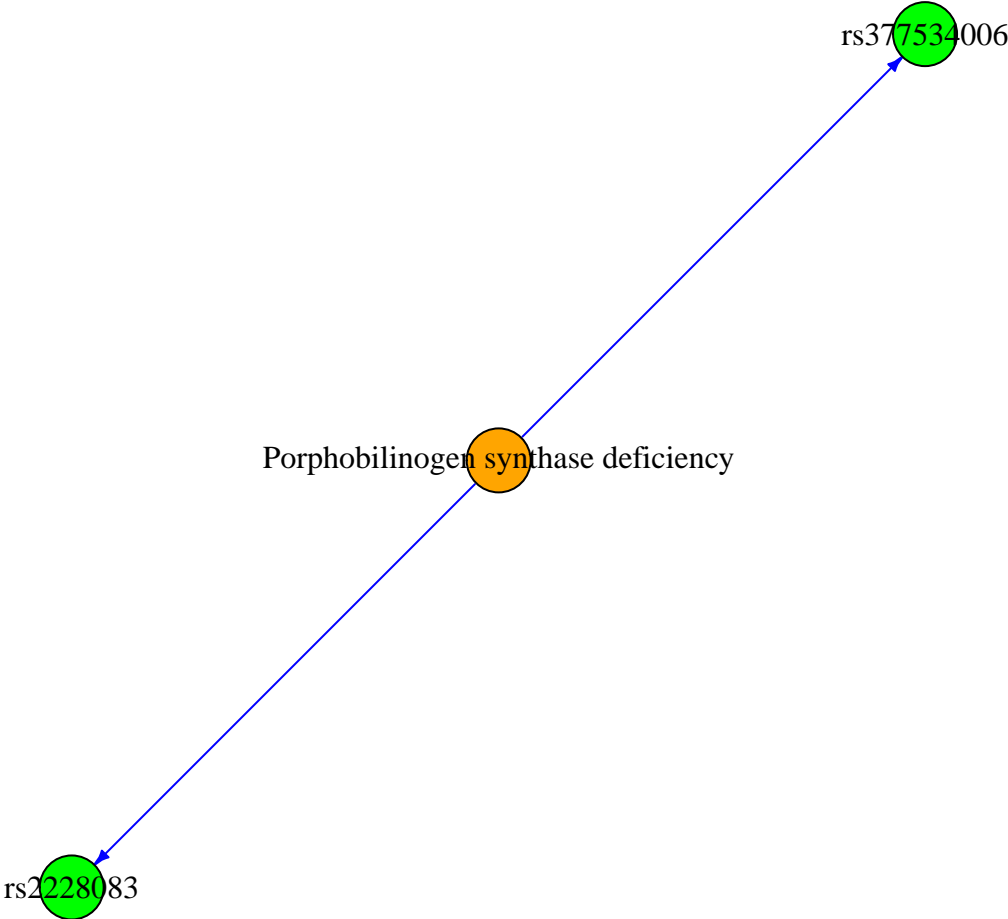



# Variant–Disease Network (Potassium aggravated myotonia)

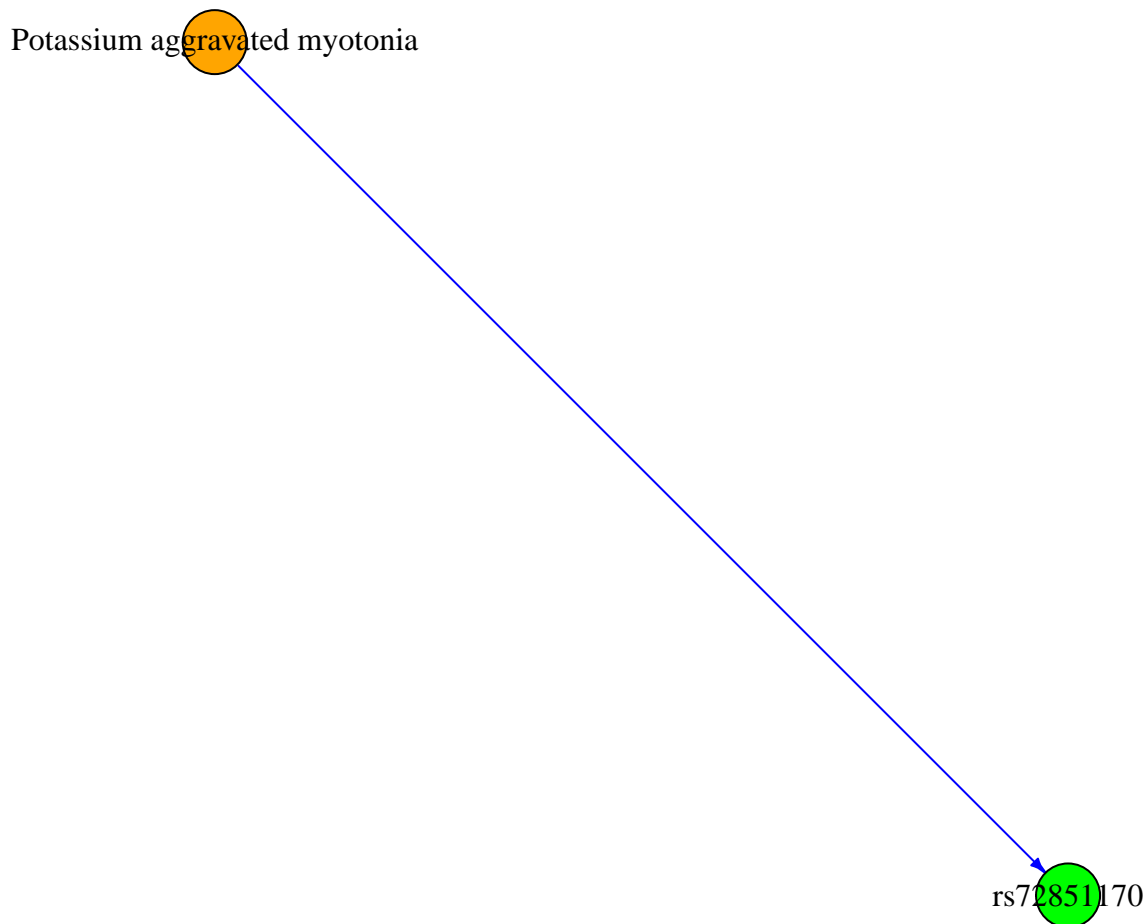

Variant–Disease Network (Premature ovarian failure 2b)

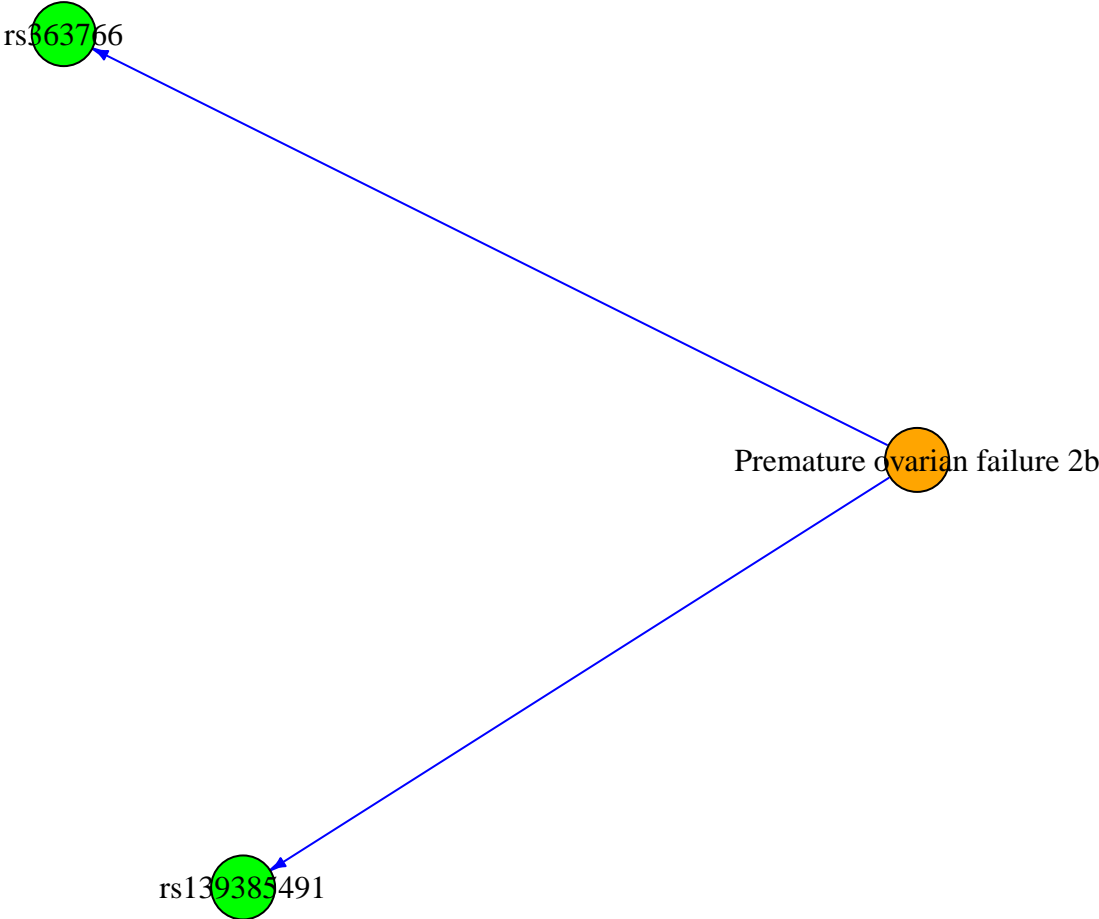

**Variant–Disease Network (Primary autosomal recessive microcephaly 2)**

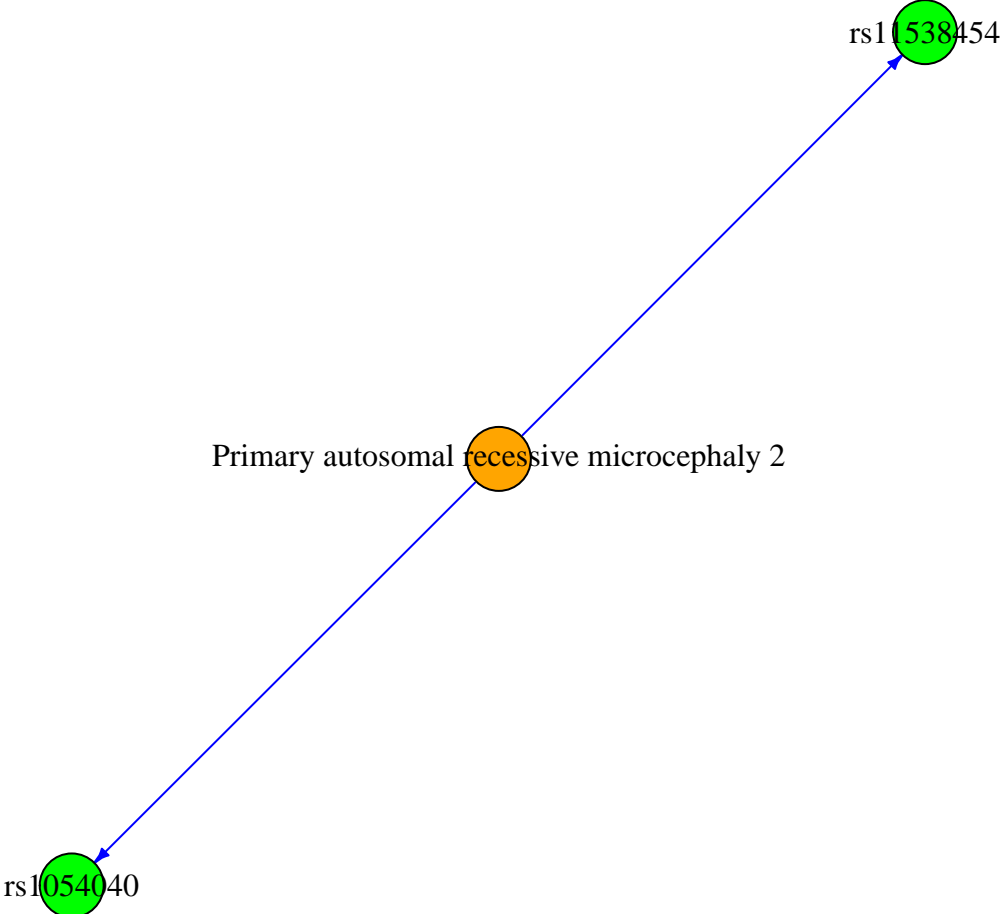

## Variant–Disease Network (Primary ciliary dyskinesia)

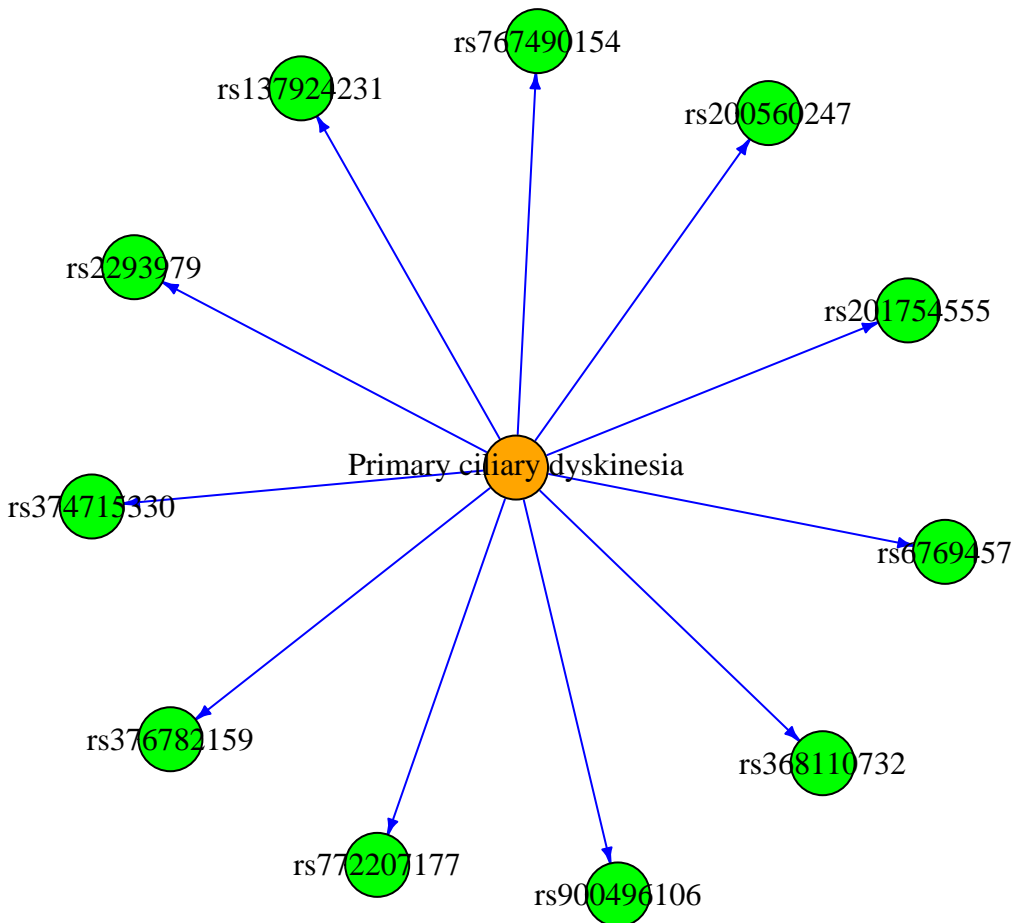

## Variant–Disease Network (Primary congenital glaucoma)

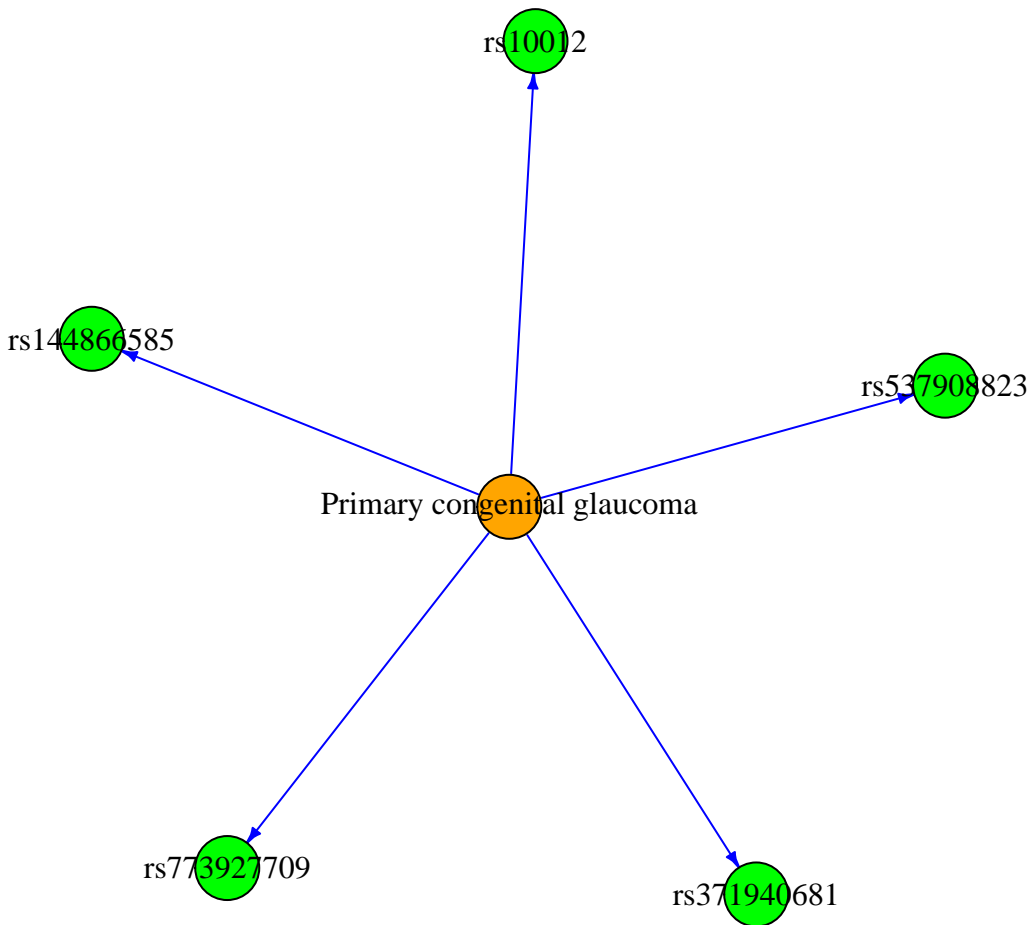

## Variant–Disease Network (Primary dilated cardiomyopathy)

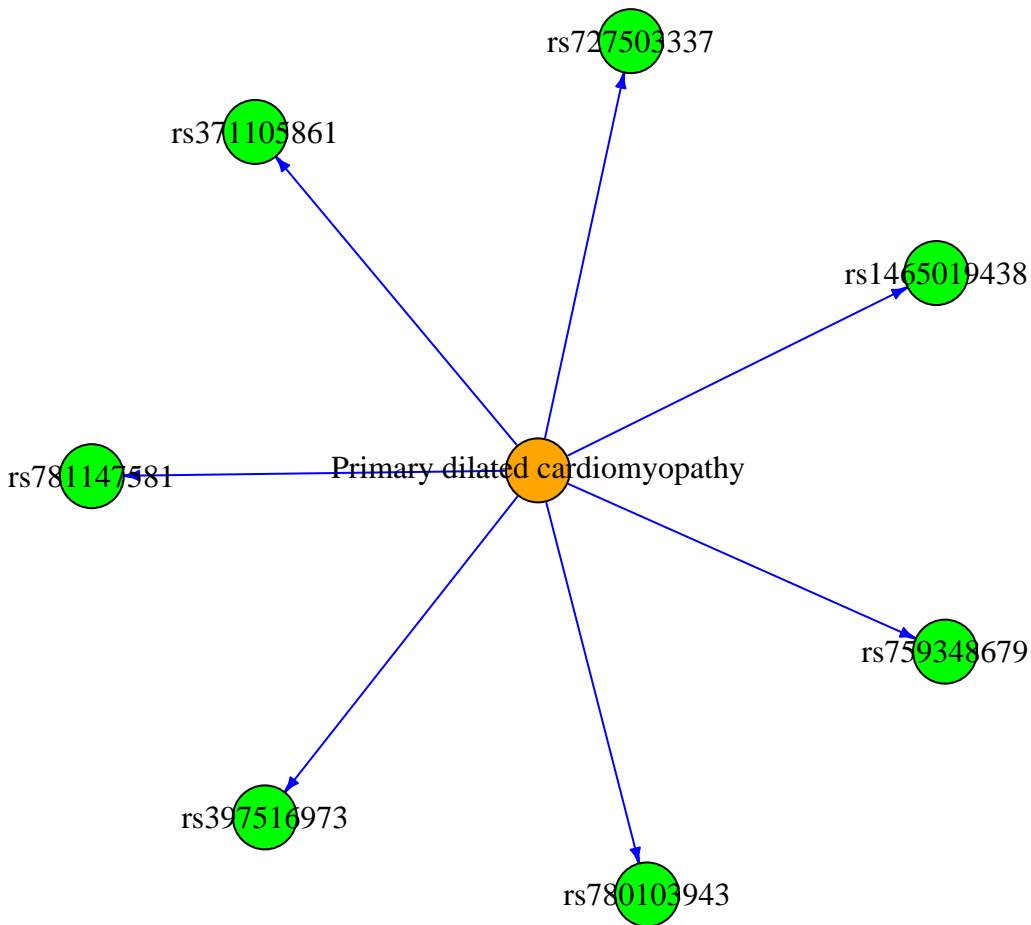

Variant–Disease Network (Primary familial hypertrophic cardiomyopathy)

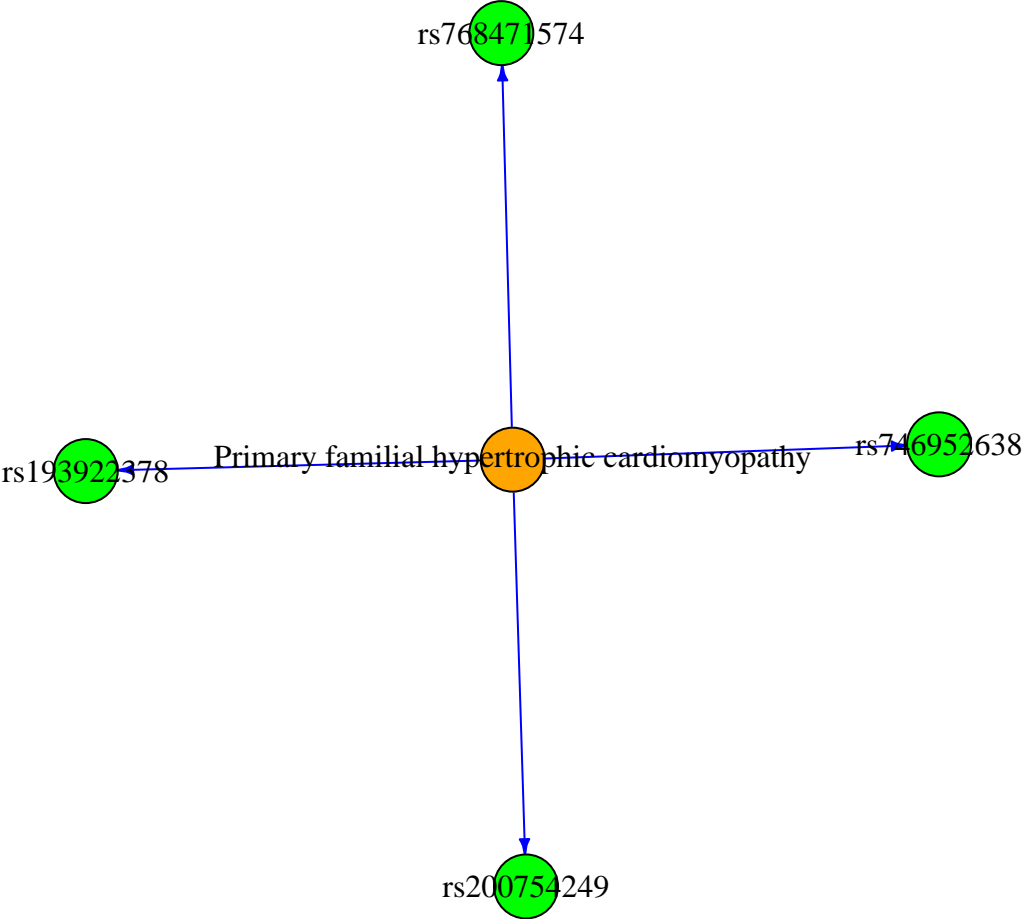

## Variant–Disease Network (Primary hyperoxaluria)

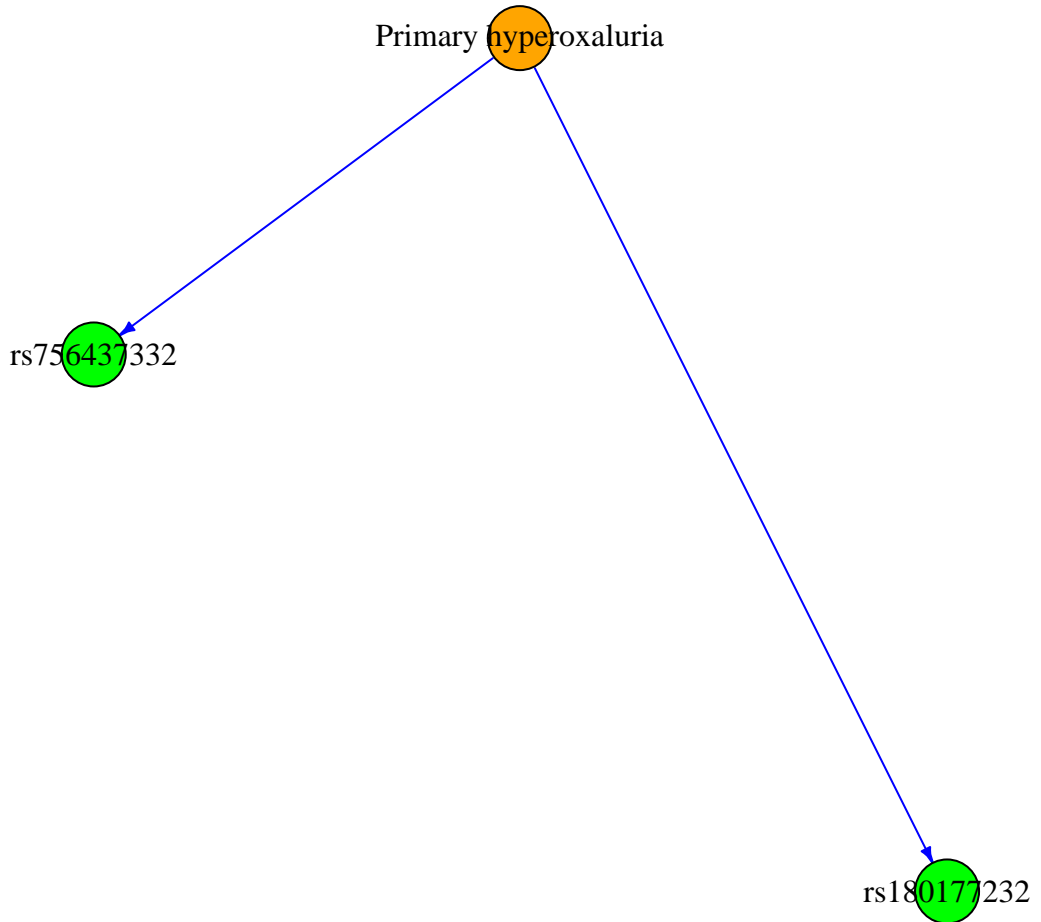



# Variant–Disease Network (Primary Microcephaly)

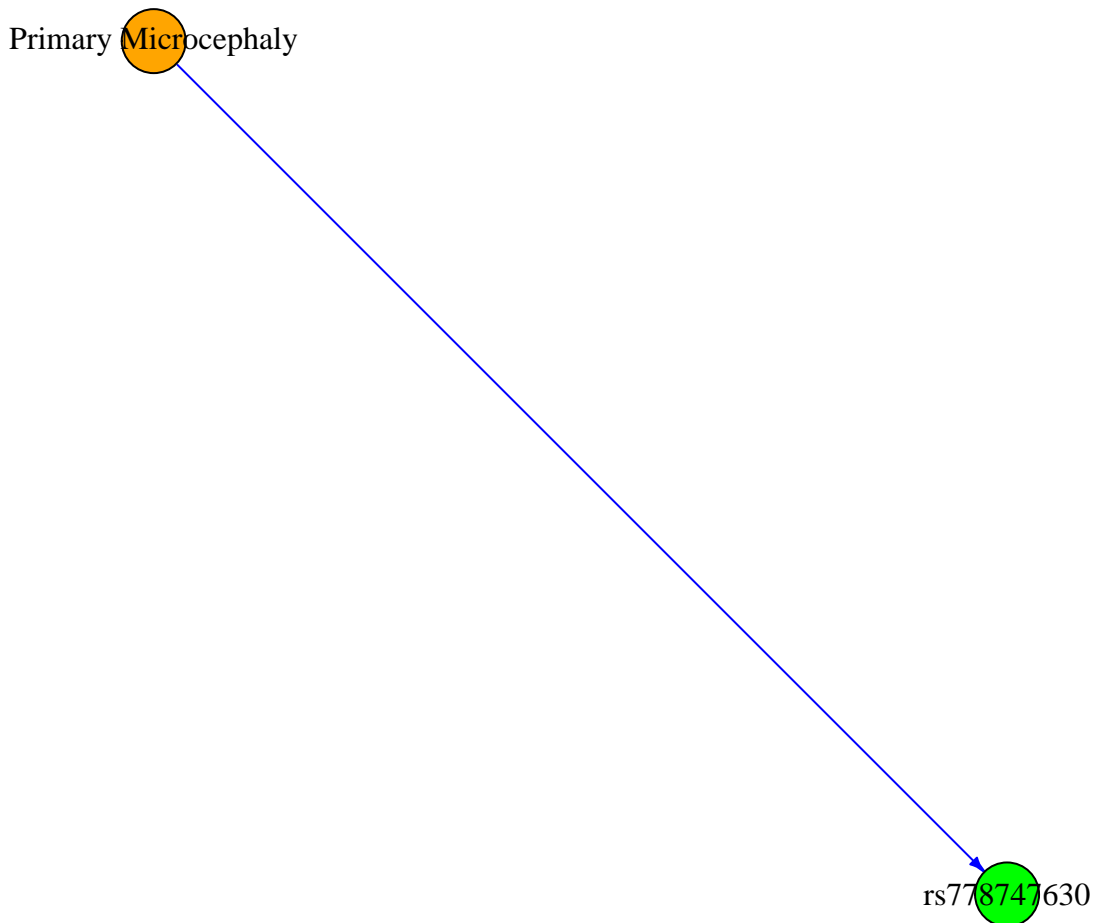

# nt-Disease Network (Primary Microcephaly 2 With or Without Cortical Malfo

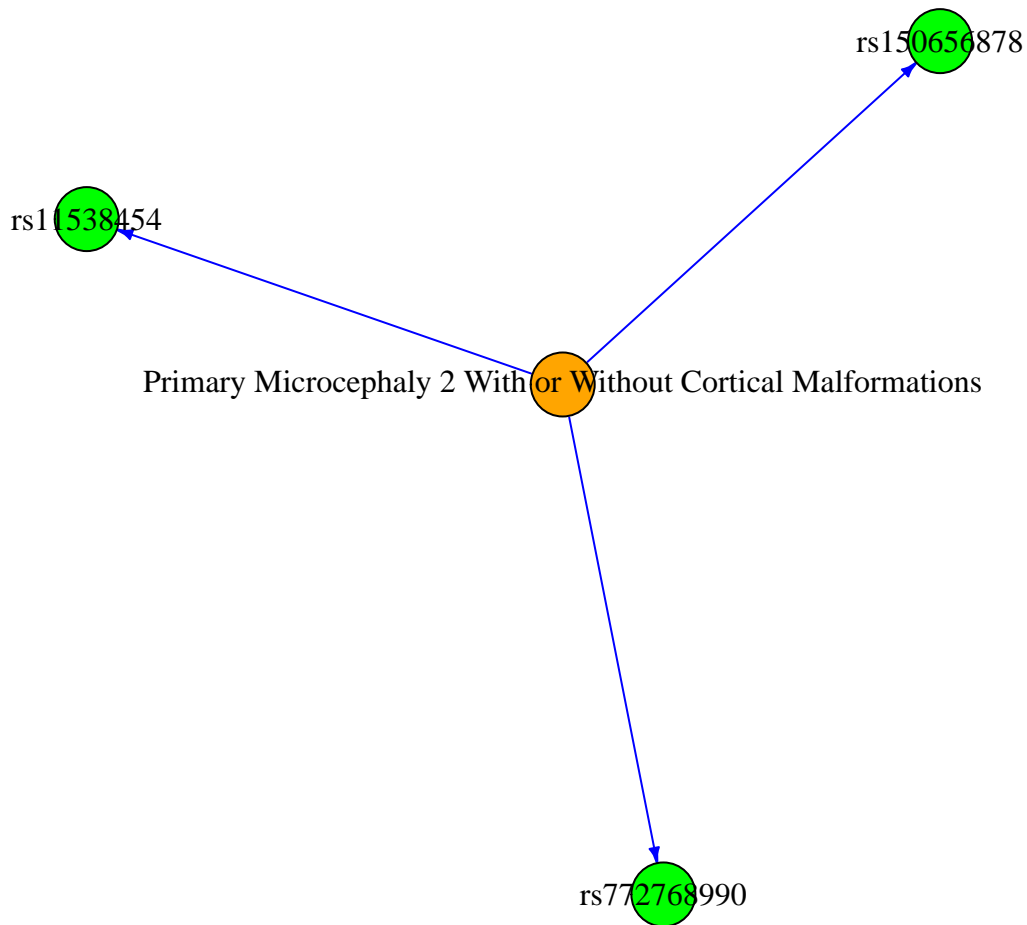

Variant–Disease Network (Primary open angle glaucoma)

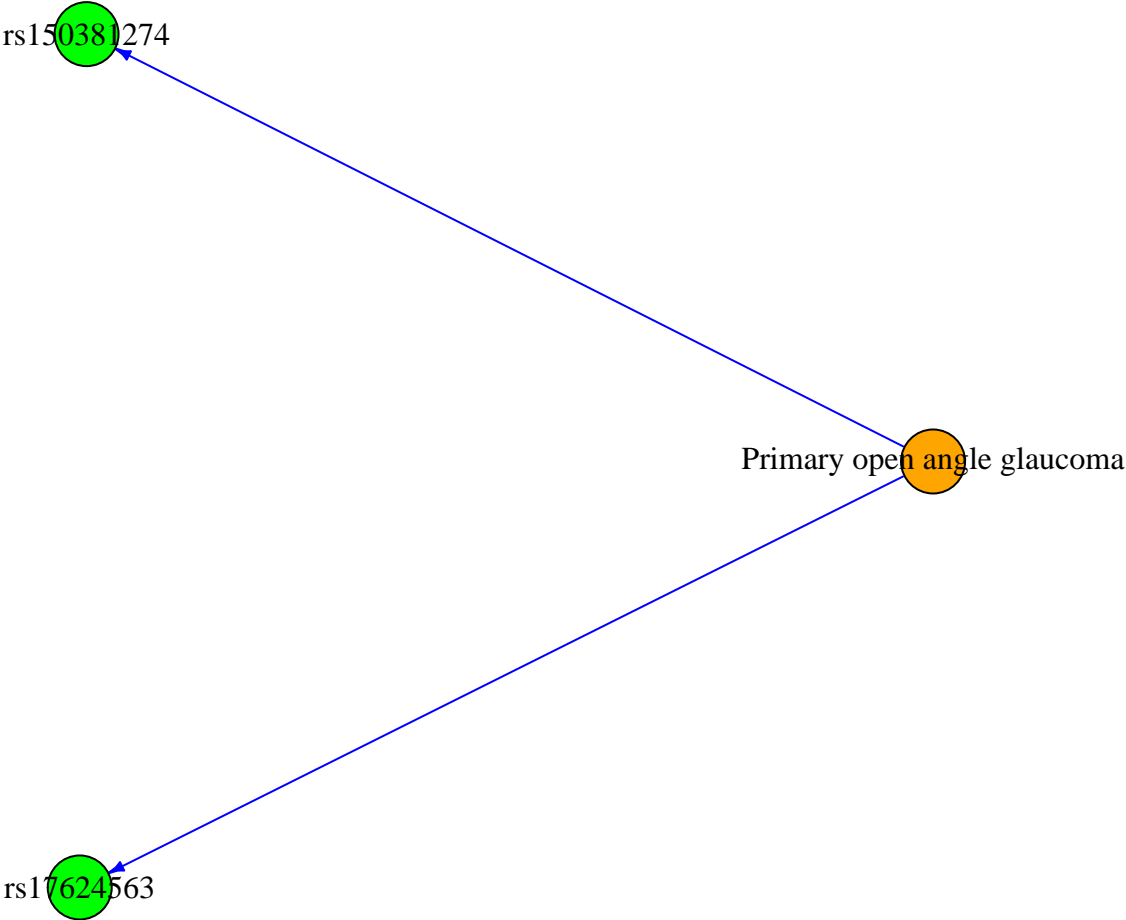

Variant–Disease Network (Profound global developmental delay)

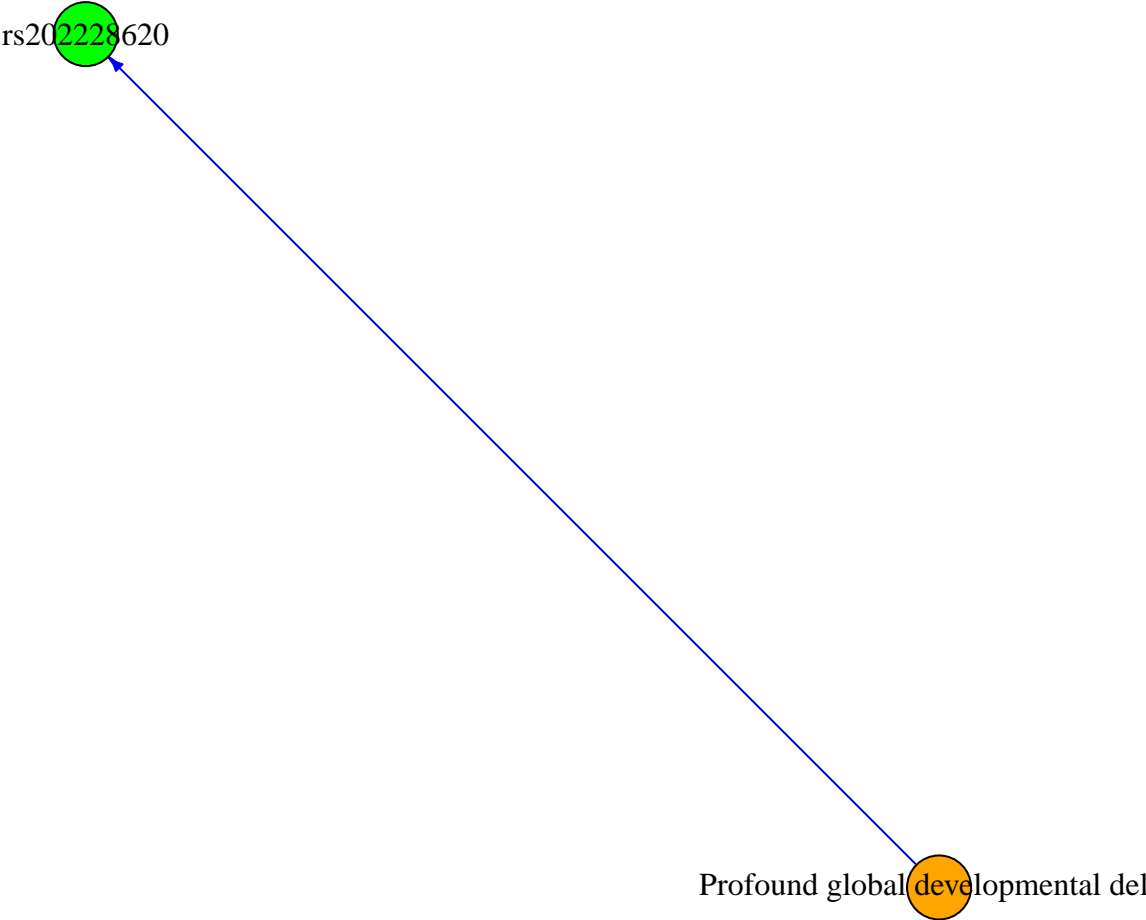

# Disease Network (Progressive External Ophthalmoplegia with Mitochondrial D

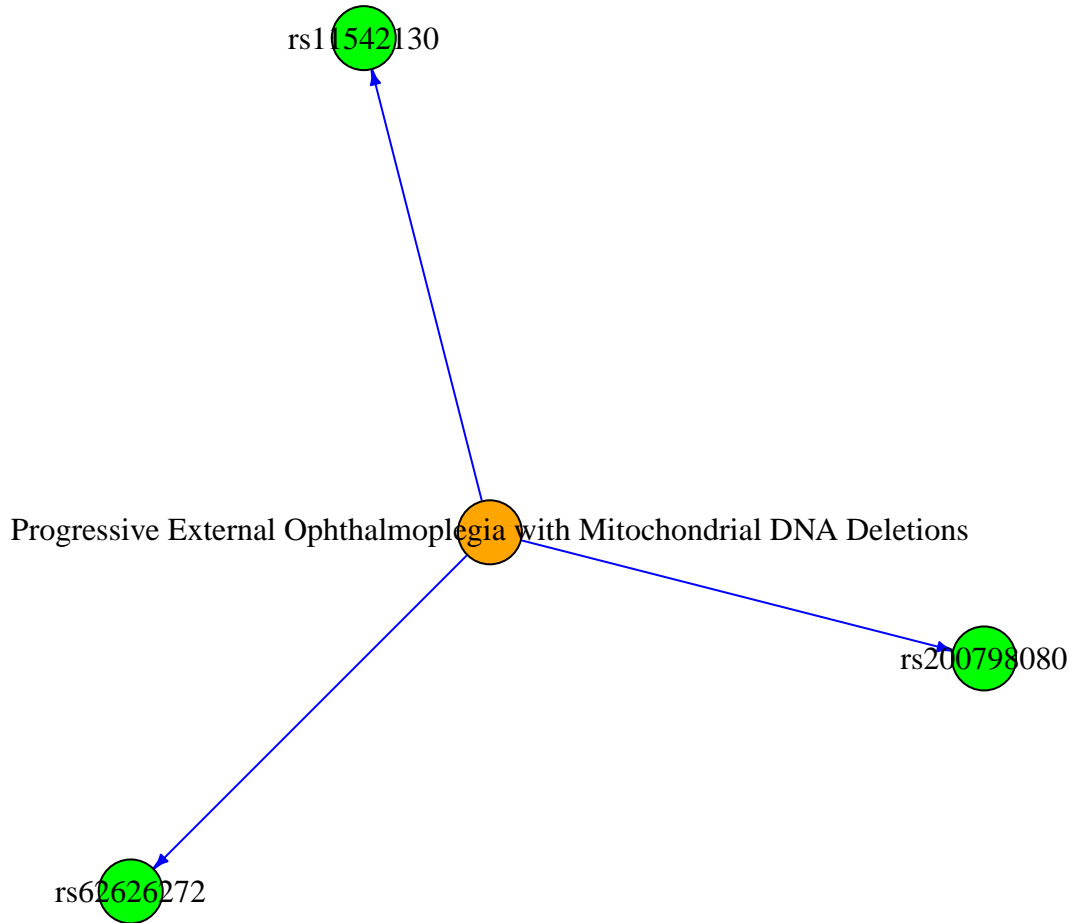

# Variant–Disease Network (Progressive familial heart block type 1B)

rs373953725

Progressive familial heart block type 1B

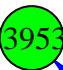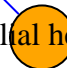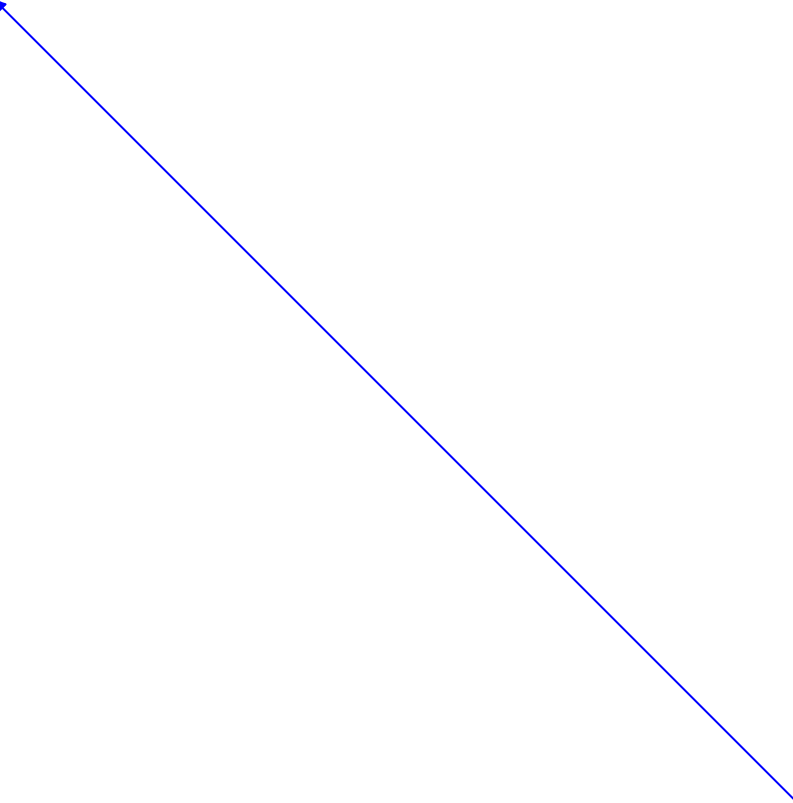

# Variant–Disease Network (Progressive familial intrahepatic cholestasis)

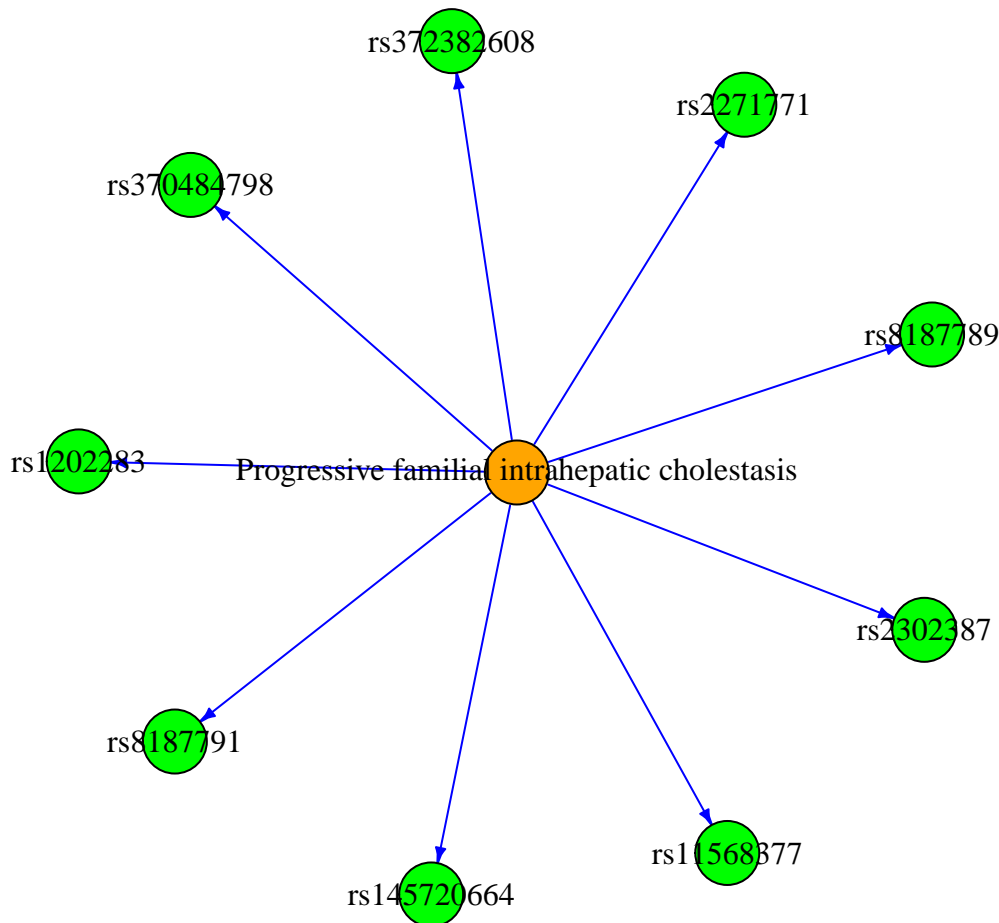

Variant–Disease Network (Progressive familial intrahepatic cholestasis 3

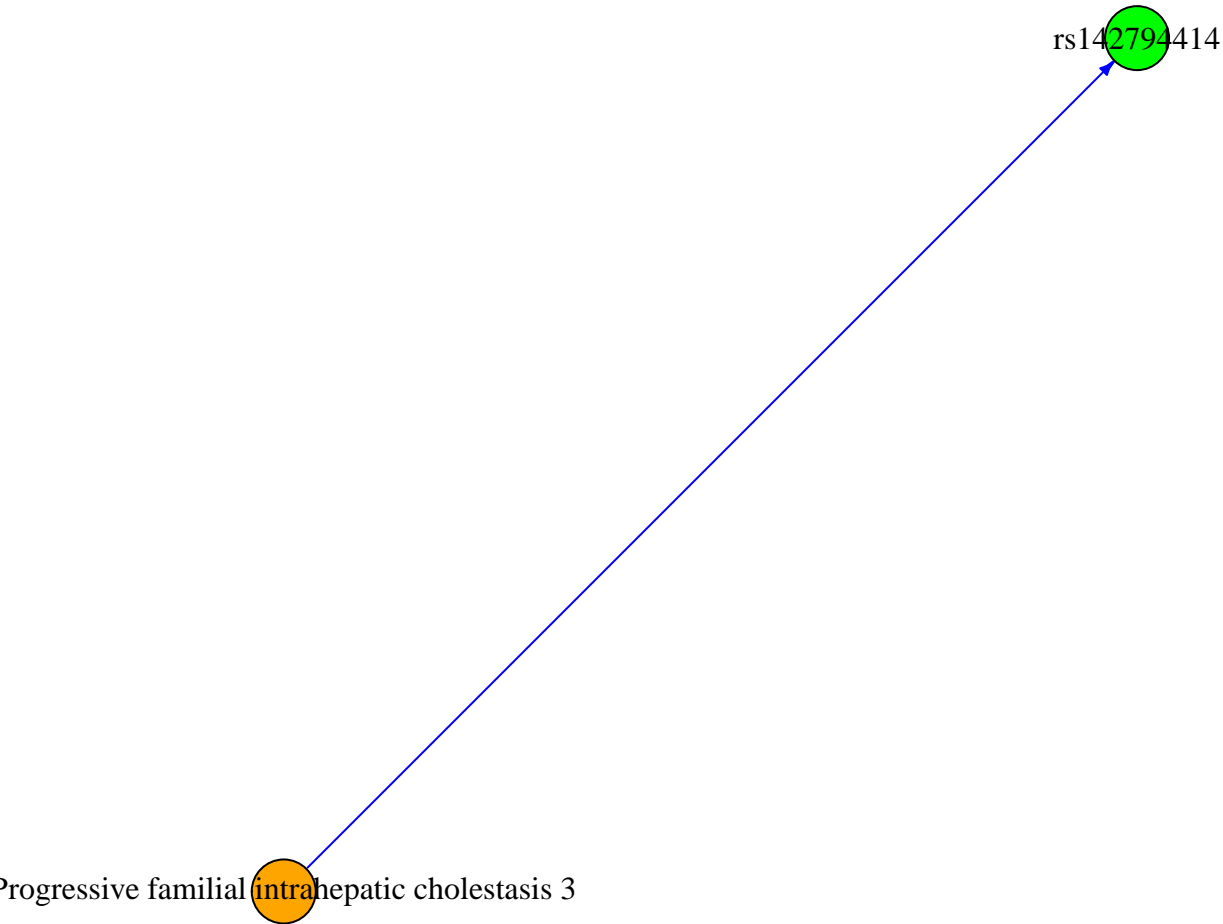



## Variant–Disease Network (Progressive myoclonic epilepsy)

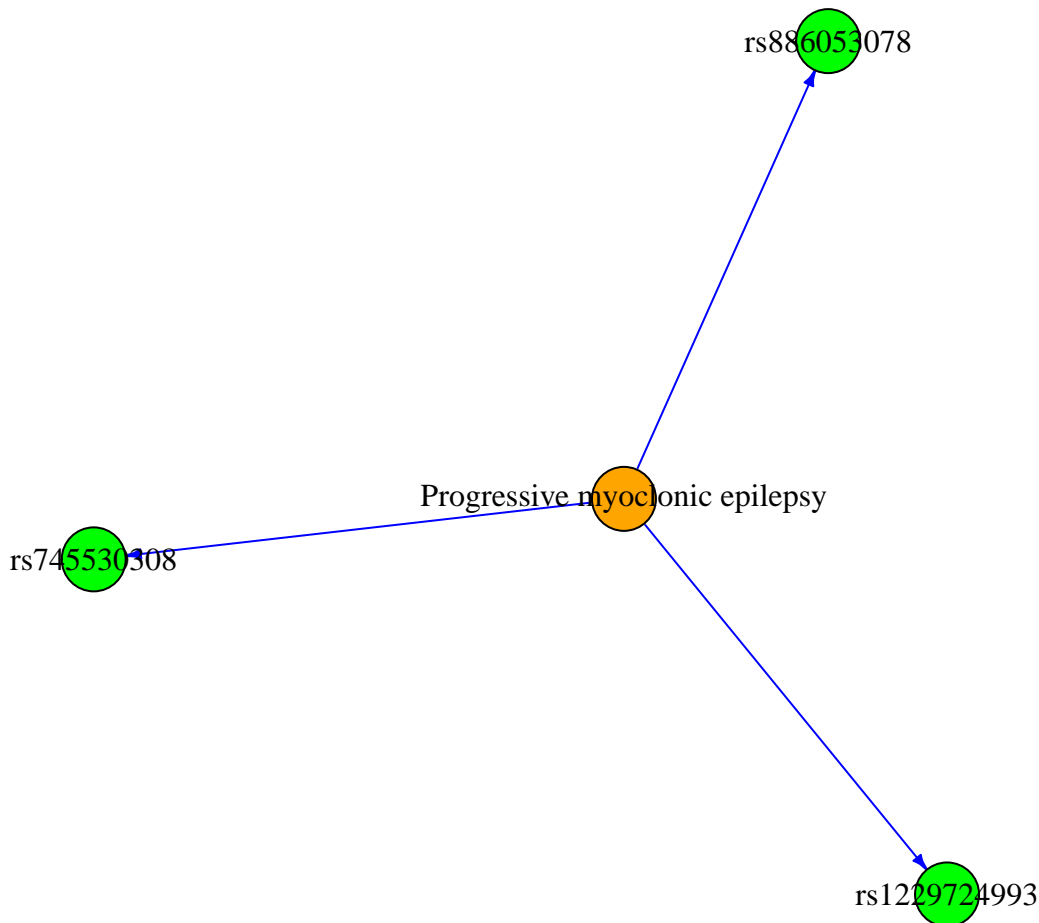

# Variant–Disease Network (Progressive myoclonus epilepsy with ataxia)

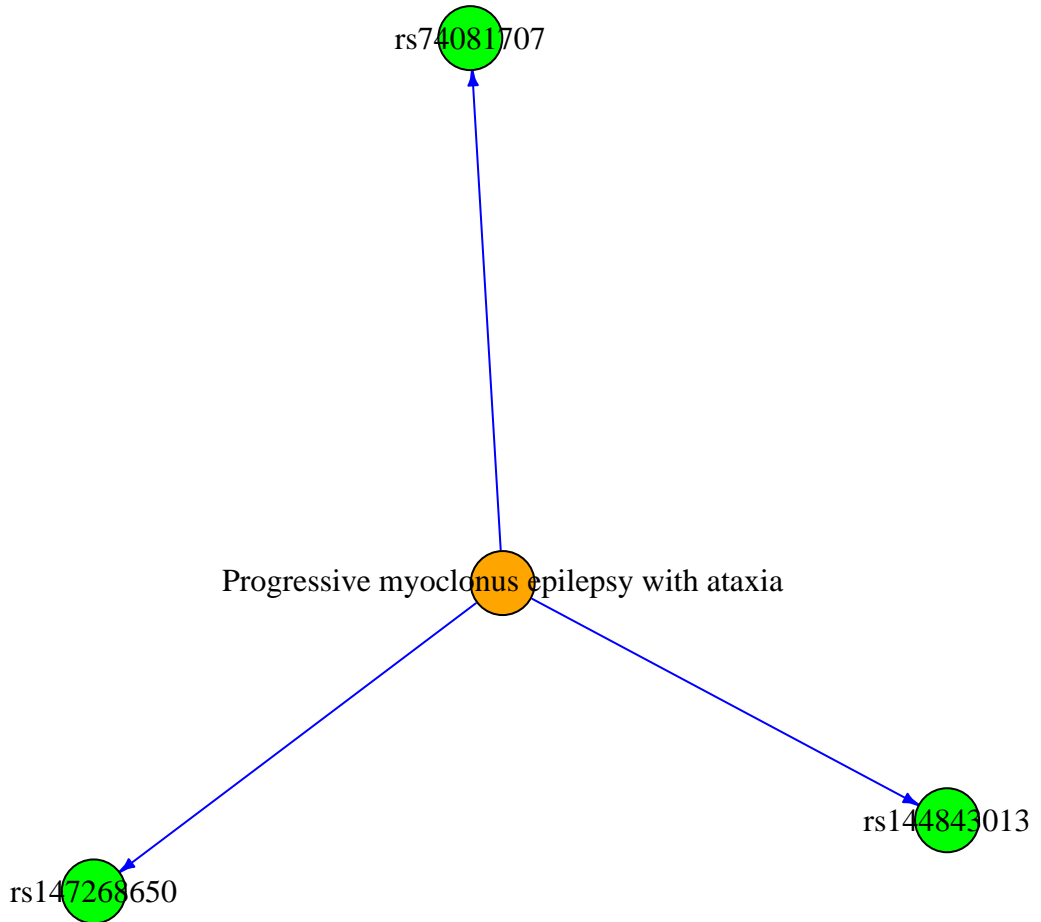

## Variant–Disease Network (Progressive myositis ossificans)

rs227861

Progressive myositis ossificans



**Variant–Disease Network (Progressive sclerosing poliodystrophy)**

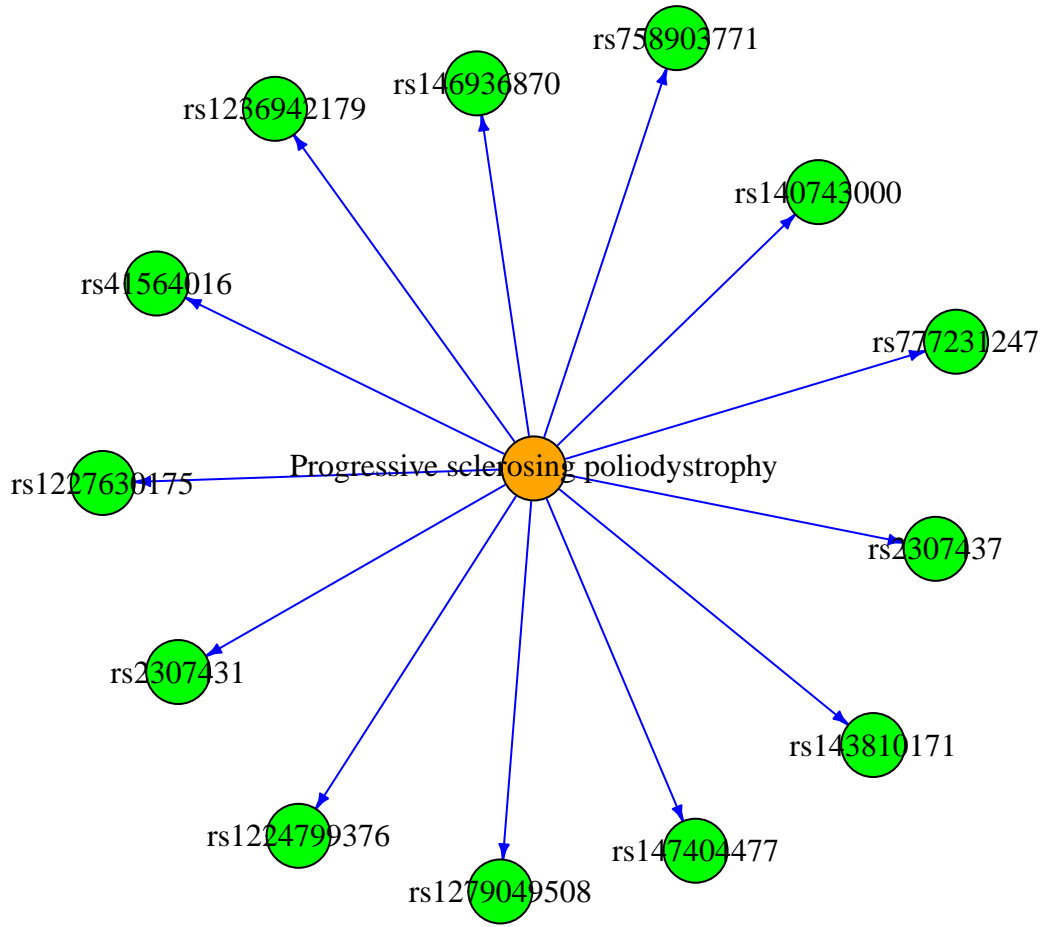

# sease Network (Proliferative vasculopathy and hydranencephaly–hydroceph

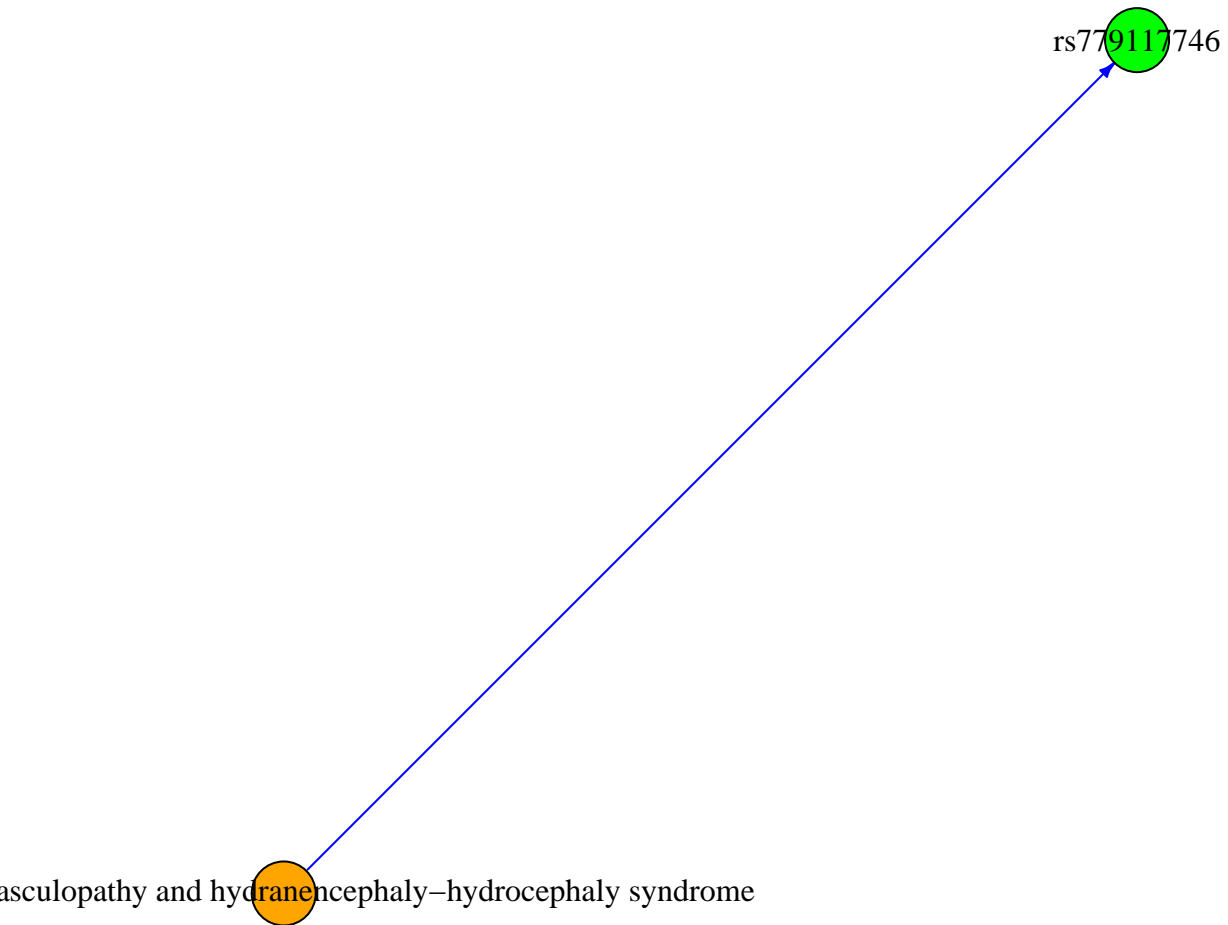

**Variant–Disease Network (Proline dehydrogenase deficiency)**

rs5992333

Proline dehydrogenase deficiency

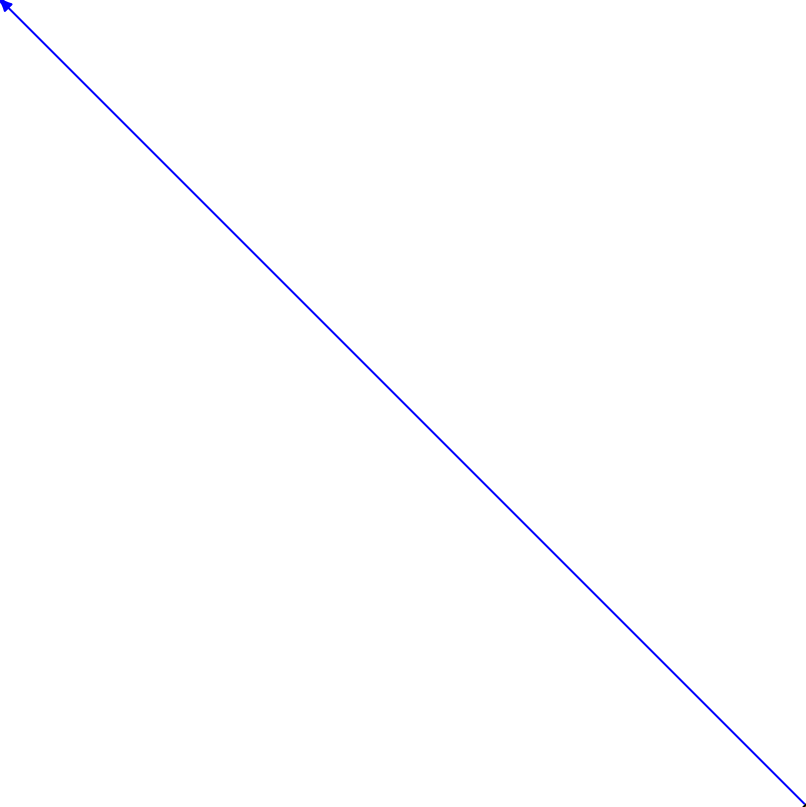

**Variant–Disease Network (Propionyl–CoA carboxylase deficiency)**

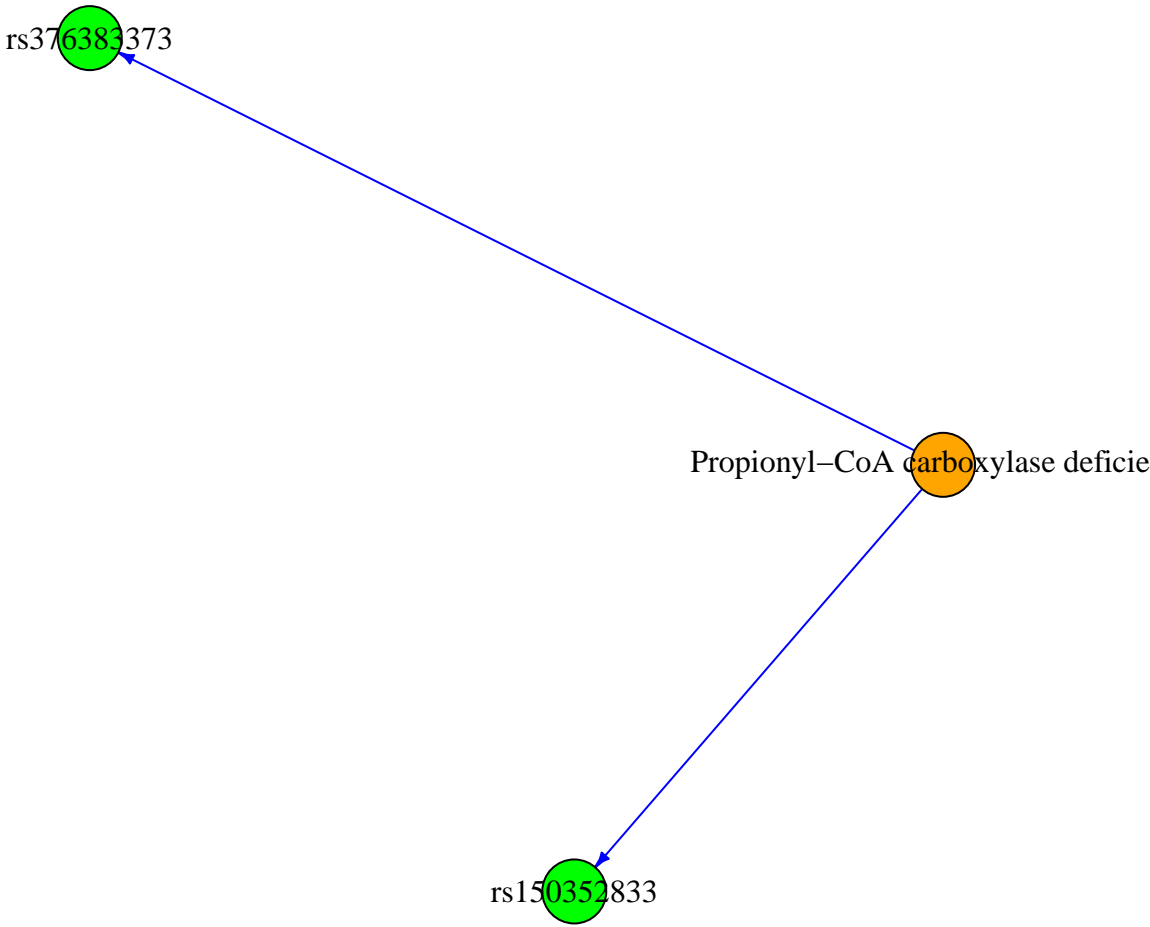

# Variant–Disease Network (Proprotein convertase 1/3 deficiency)

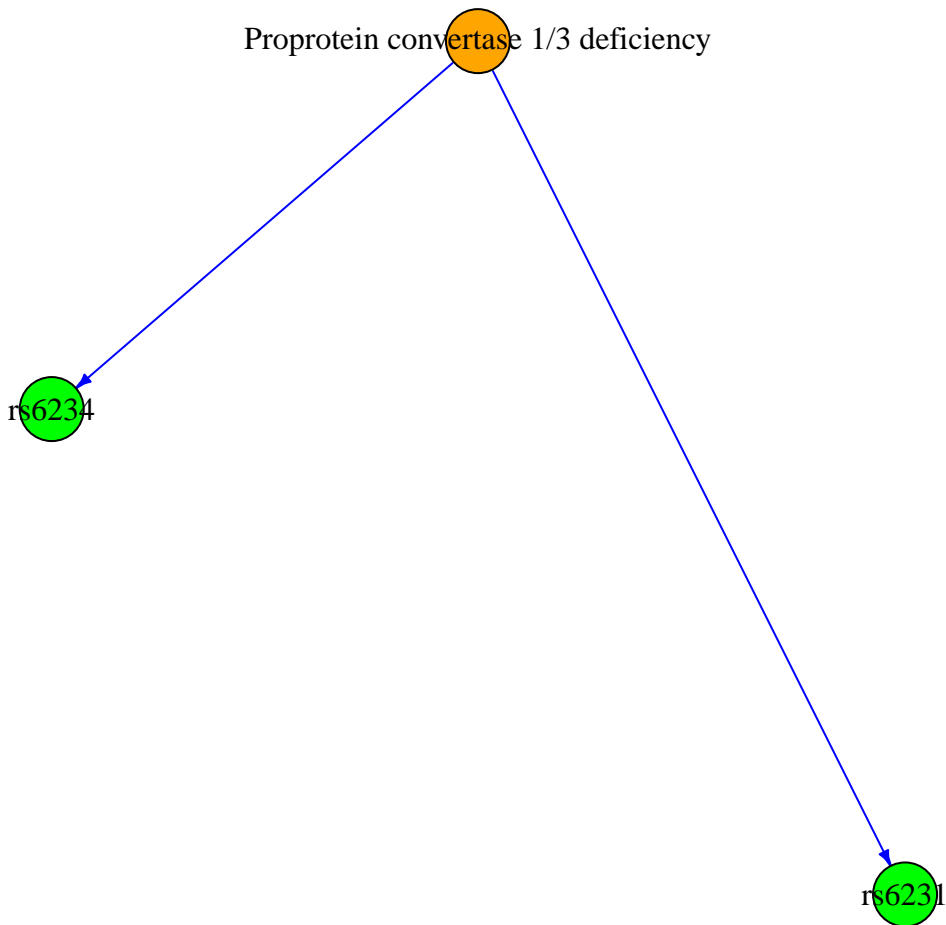



## Variant–Disease Network (Protein S deficiency)

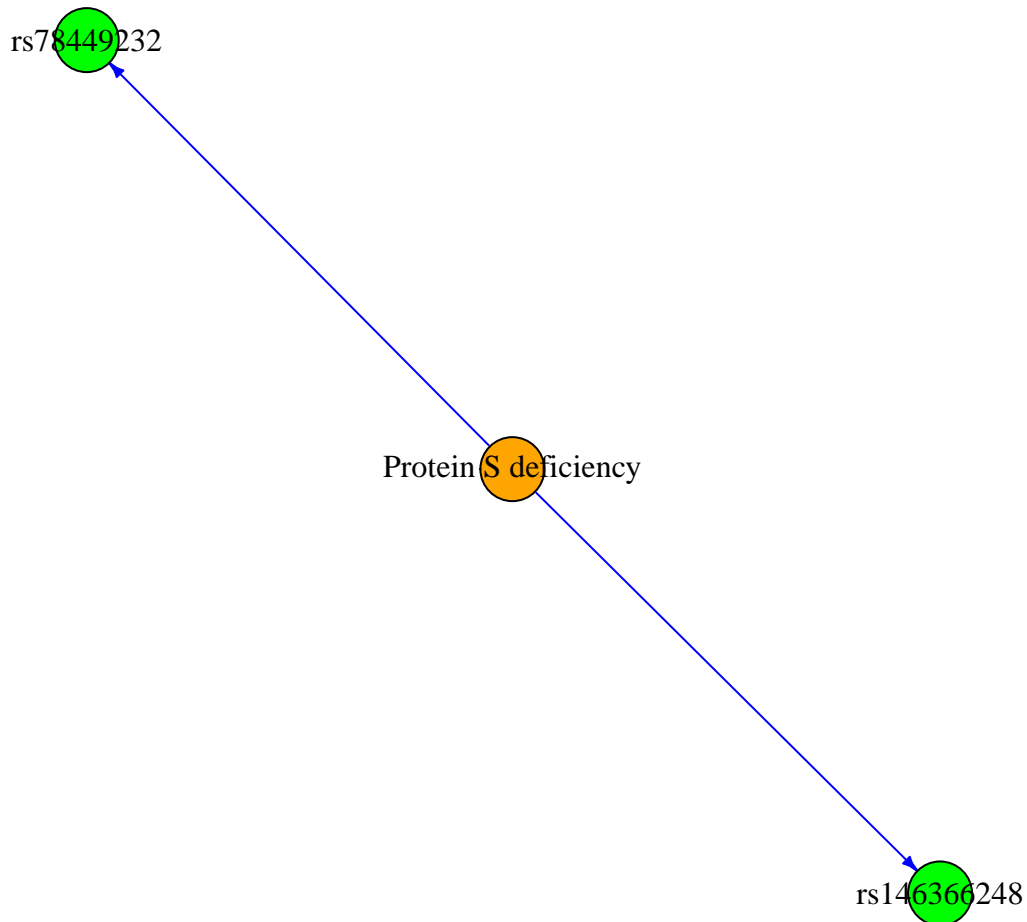

## Variant–Disease Network (Proteinuria)

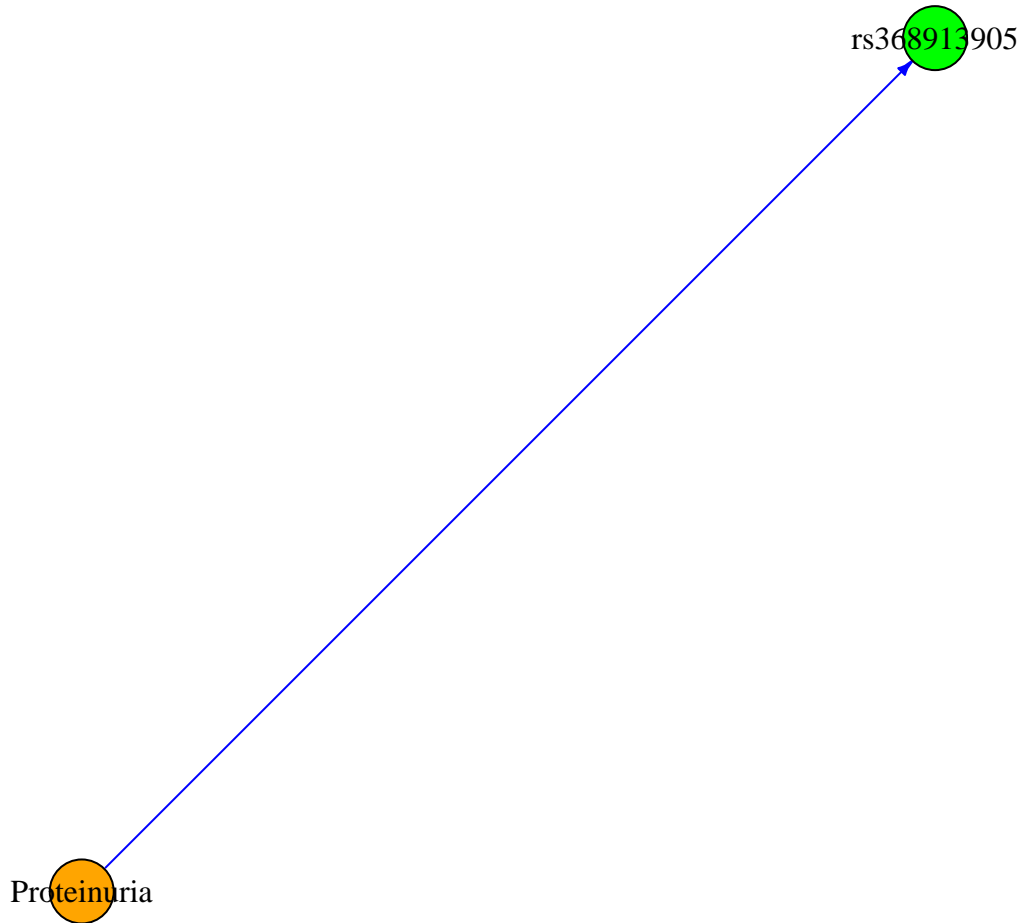

## Variant–Disease Network (Protoporphyrria)

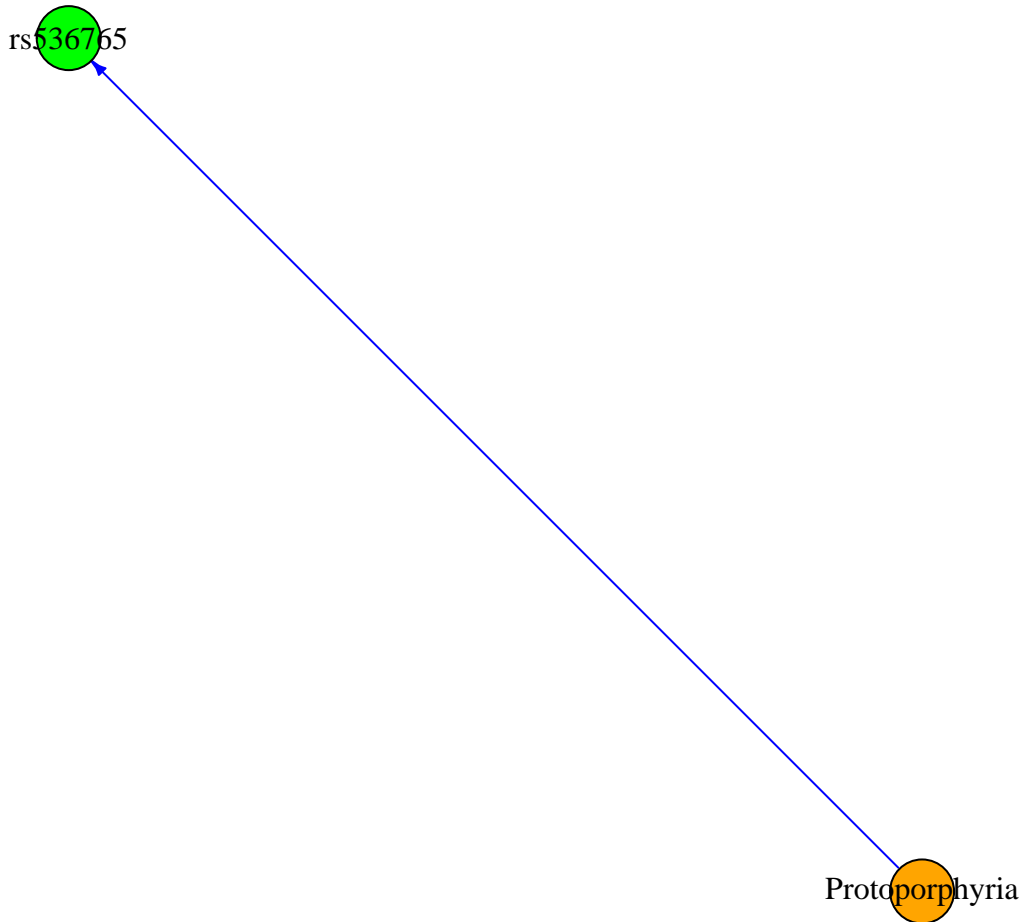

# Variant-Disease Network (Pseudohypoaldosteronism type 1 autosomal dominant)

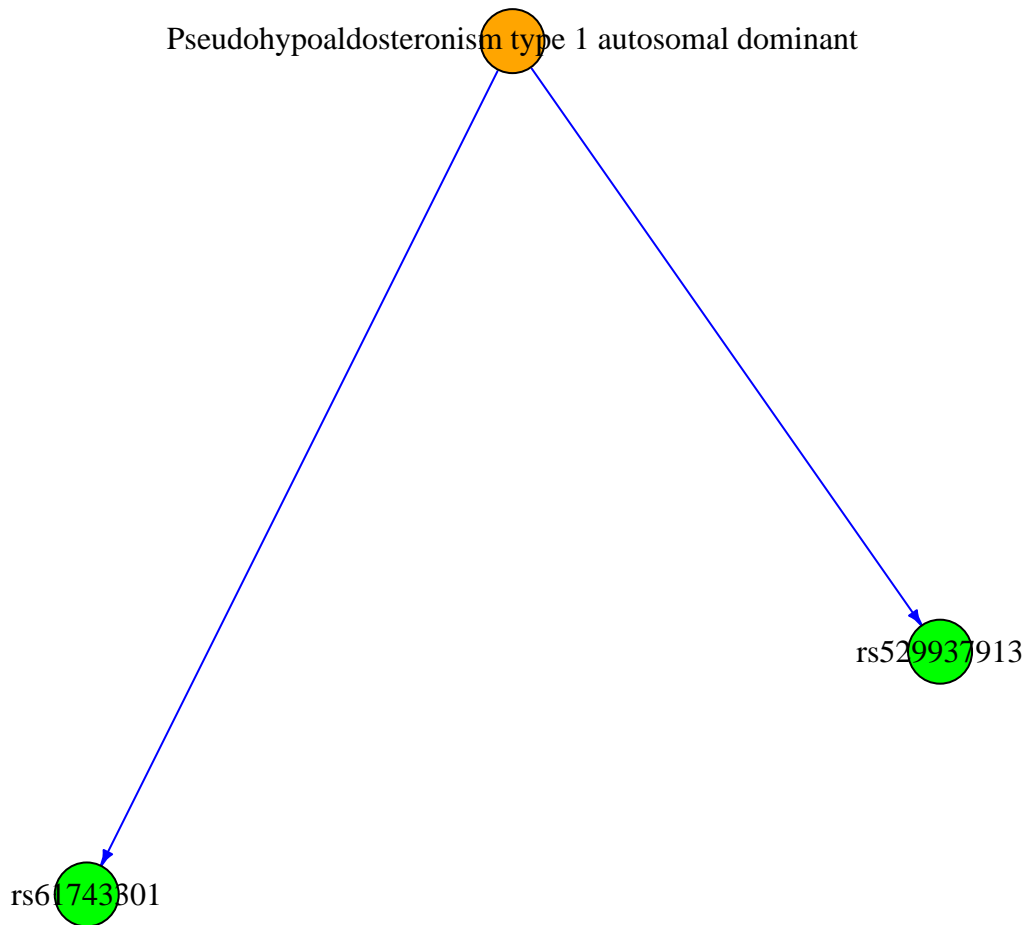

# Variant-Disease Network (Pseudohypoaldosteronism type 1 autosomal recessive)

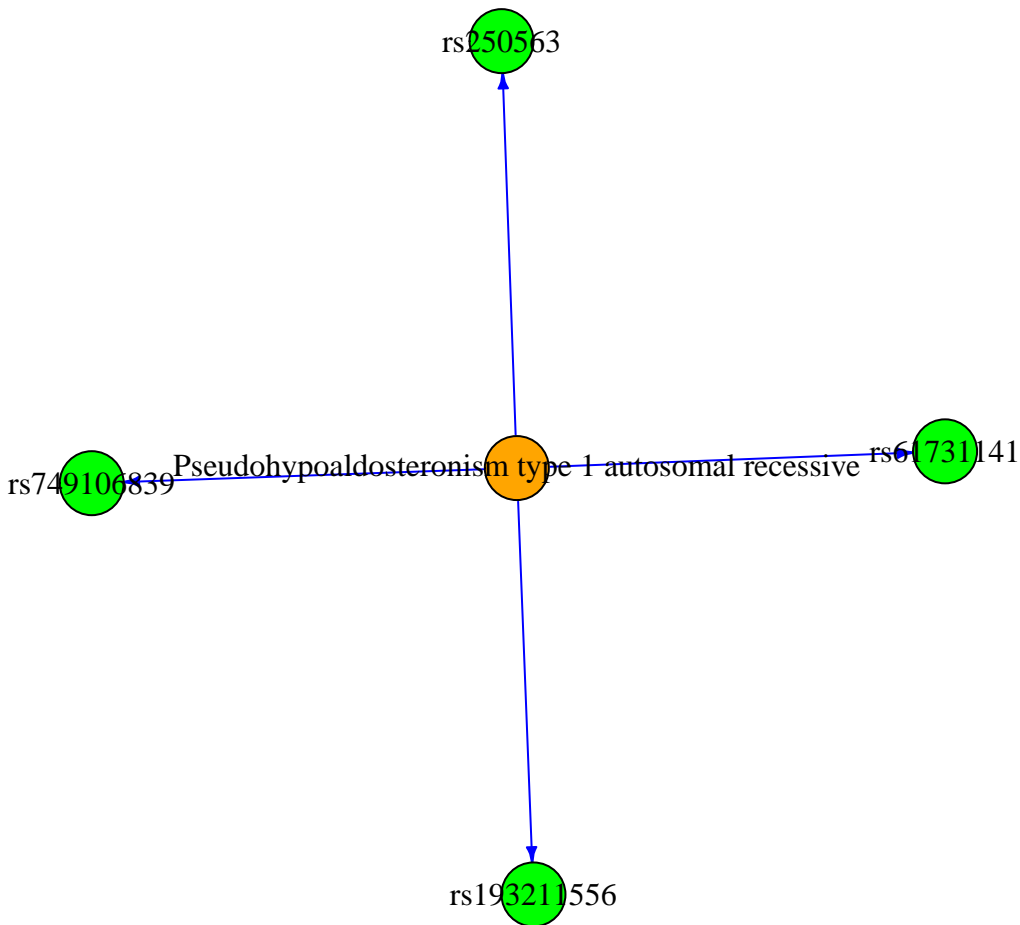

Variant–Disease Network (Pseudoinflammatory fundus dystrophy)

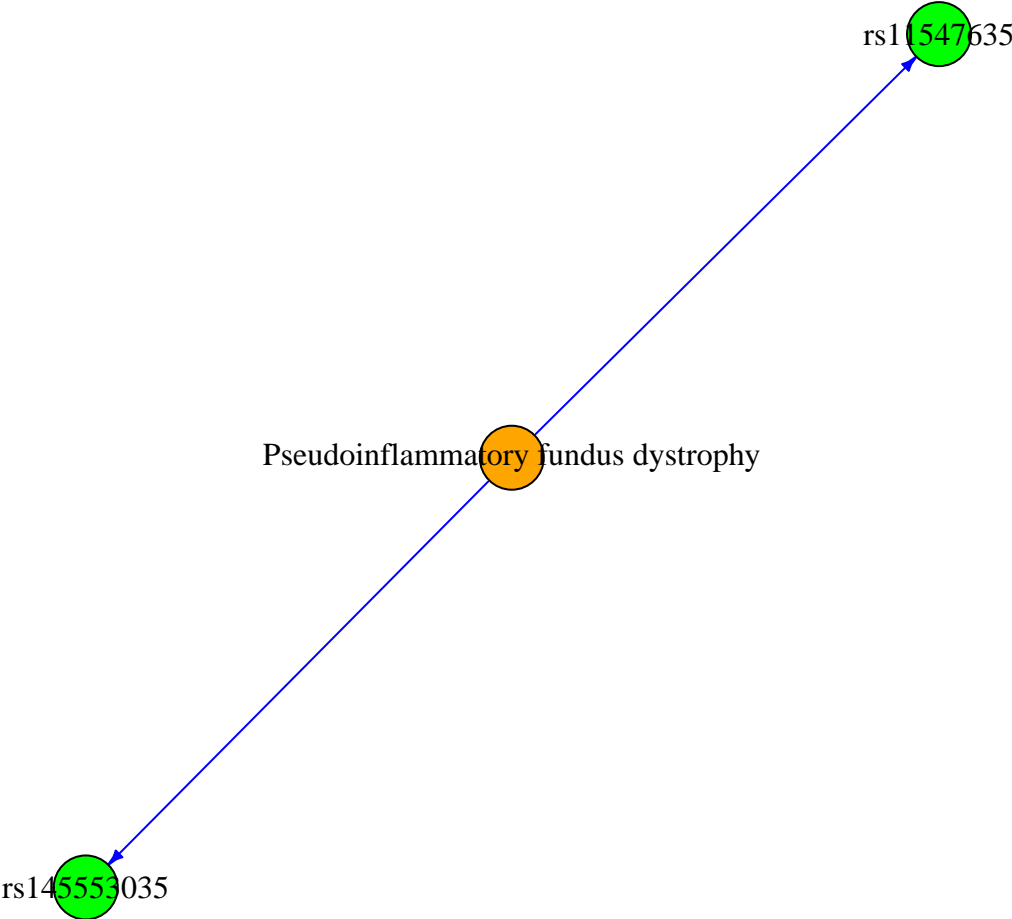

Variant–Disease Network (Pseudoneonatal adrenoleukodystrophy)

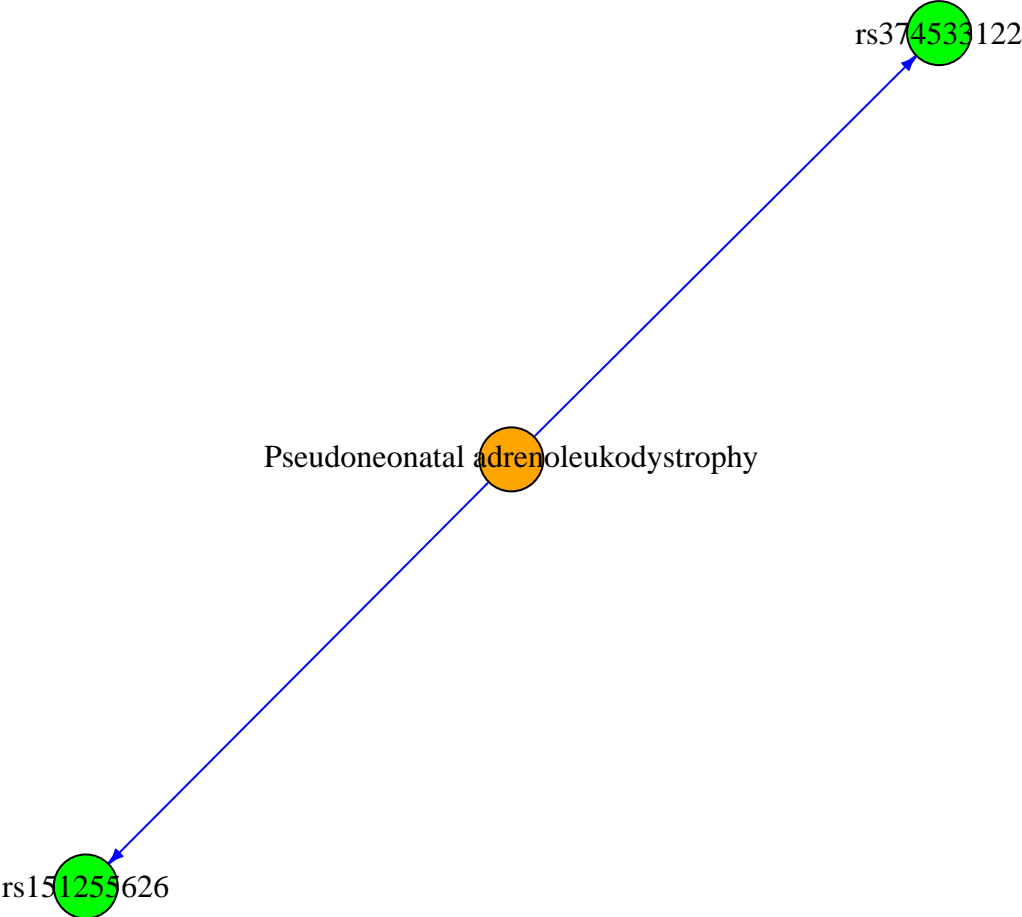

# Variant–Disease Network (Pseudo–TORCH syndrome 1)

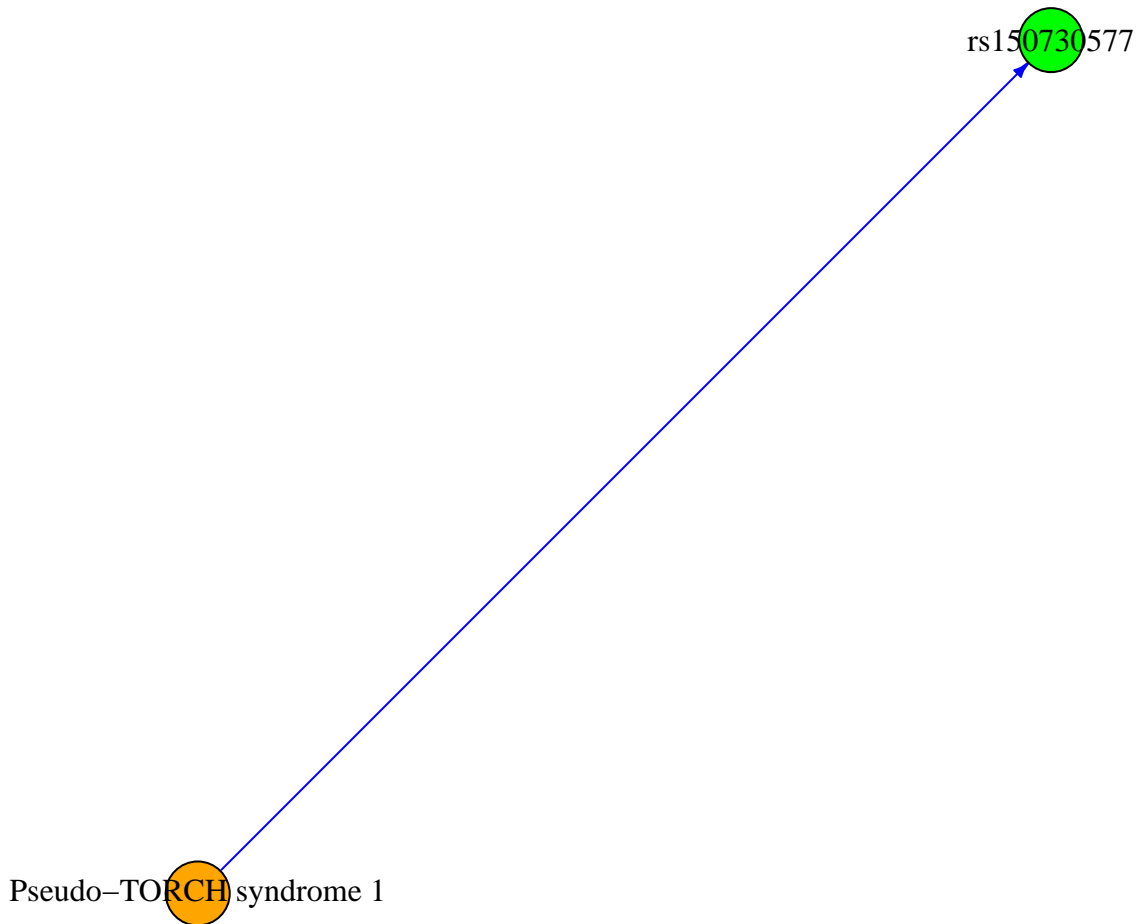



**Variant–Disease Network (Psoriasis susceptibility 2)**

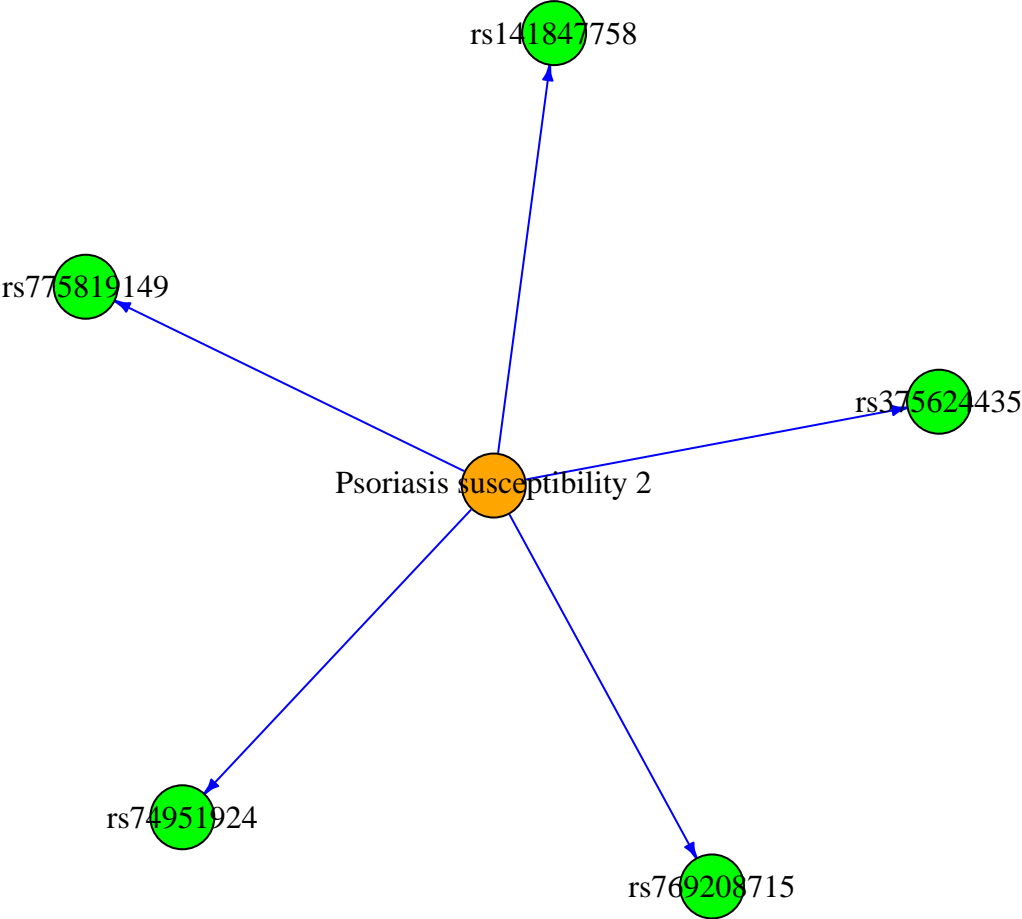

Variant–Disease Network (Pulmonary Surfactant Metabolism Dysfunction)

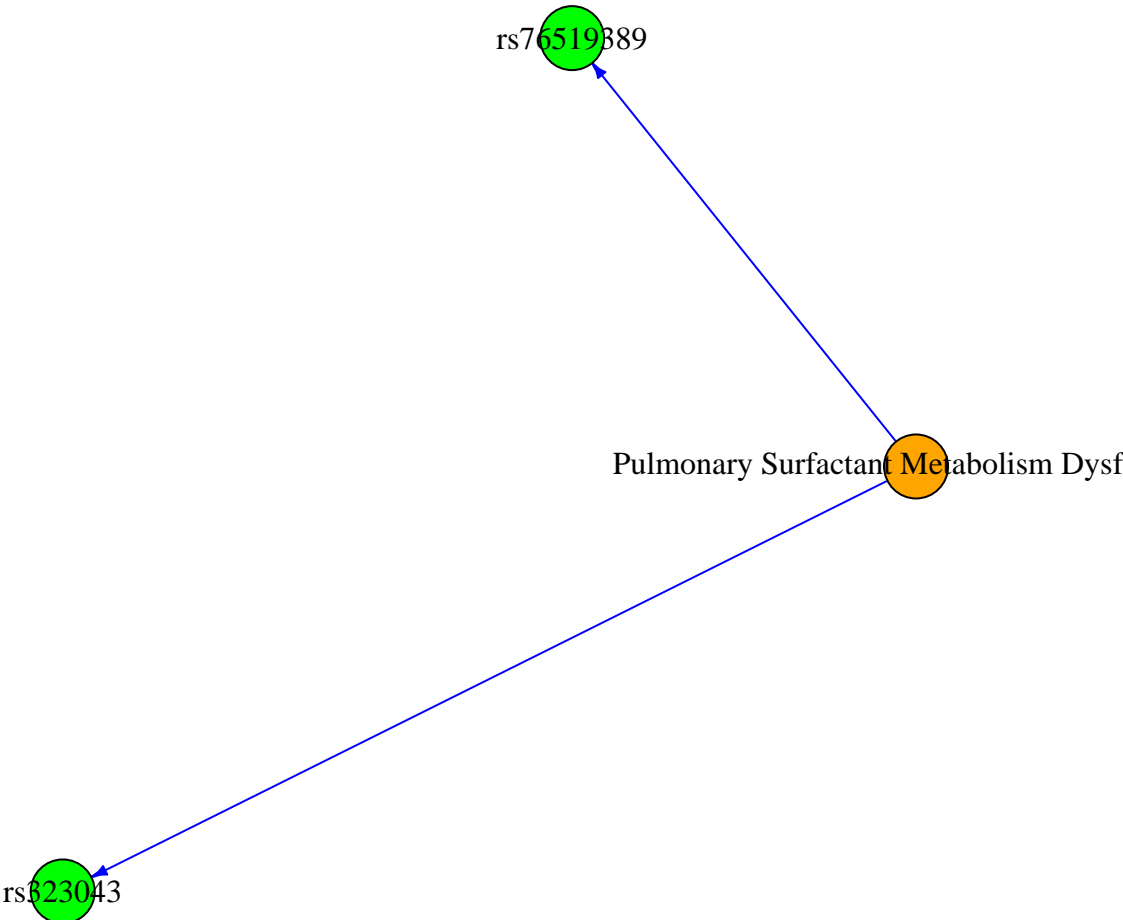

## Variant–Disease Network (Pyloric stenosis)

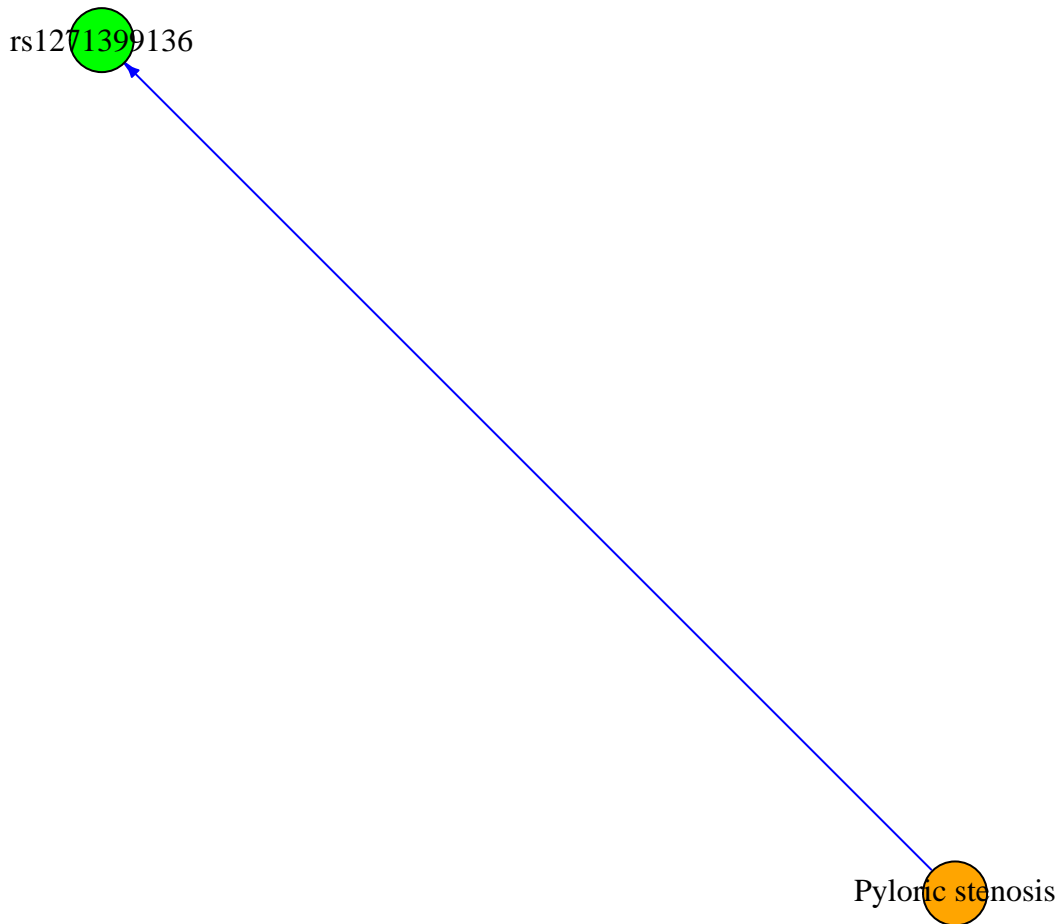

Variant–Disease Network (Pyridoxine–dependent epilepsy)

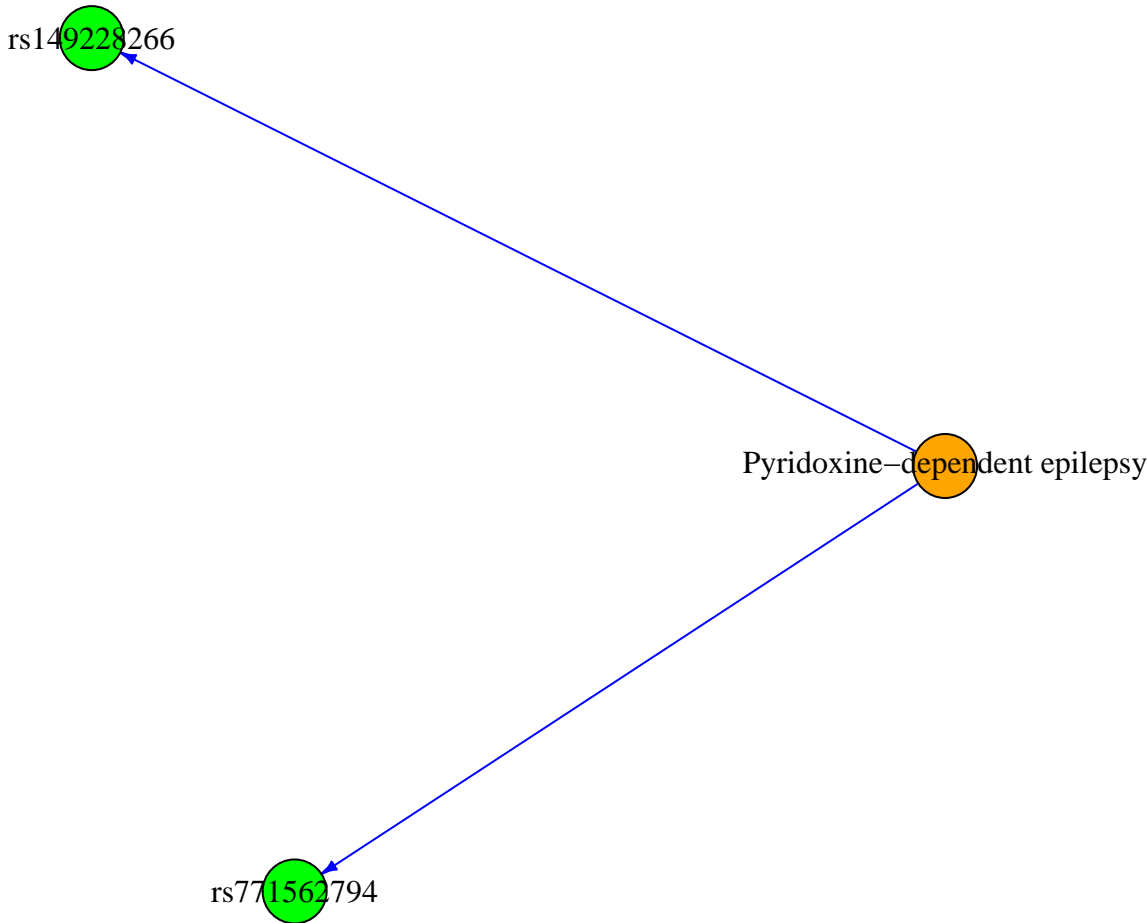

# Variant–Disease Network (Pyruvate carboxylase deficiency)

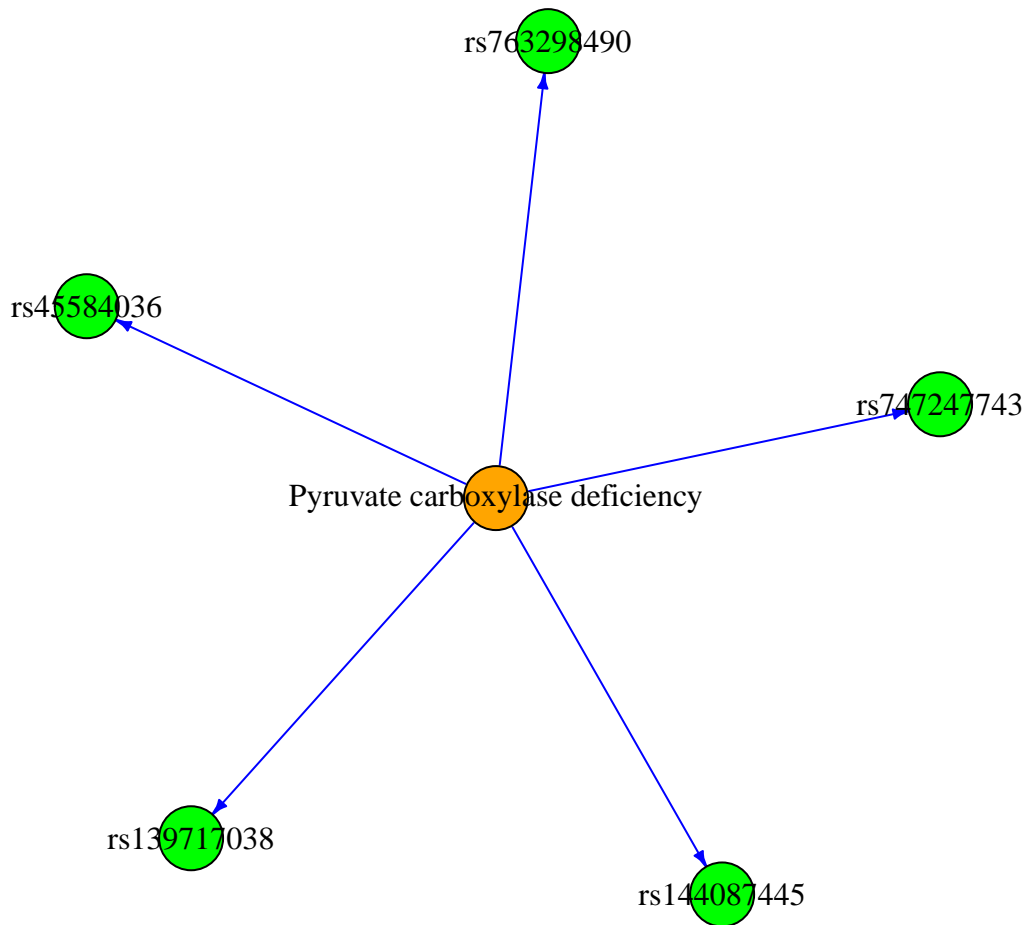

Variant–Disease Network (Pyruvate dehydrogenase phosphatase deficiency)

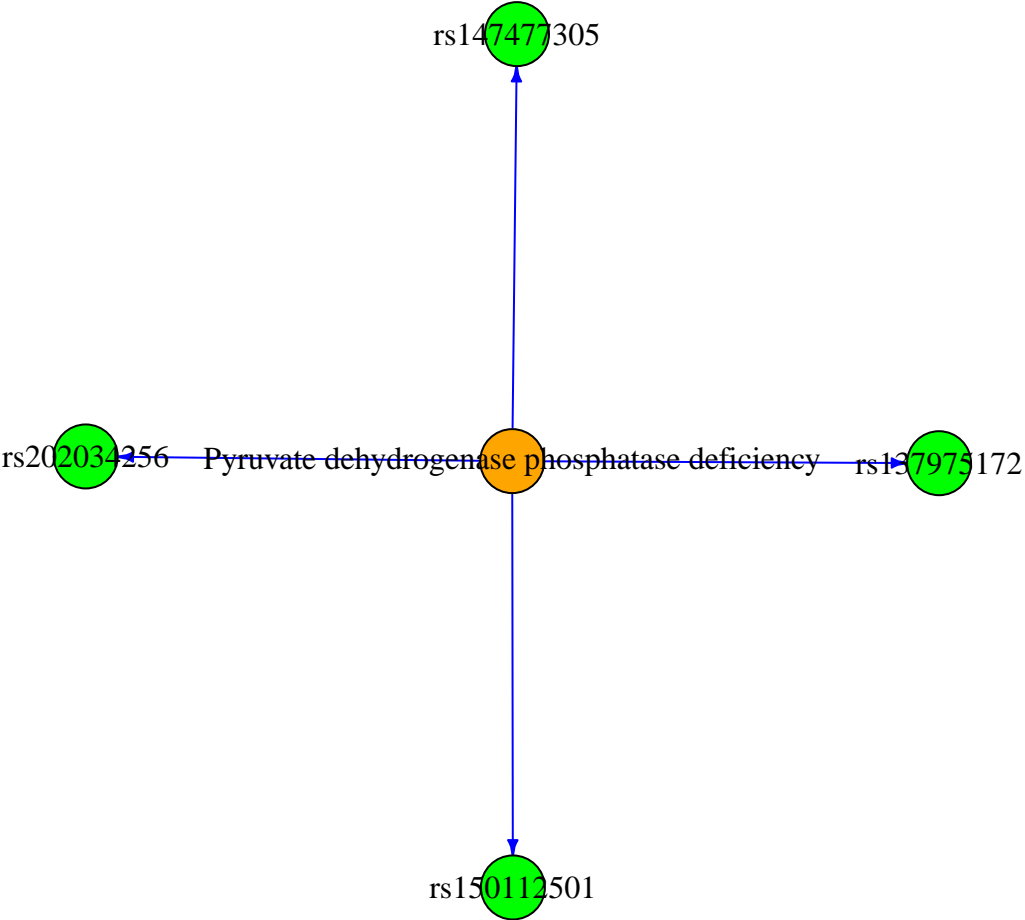

# Variant–Disease Network (Pyruvate kinase deficiency of red cells)

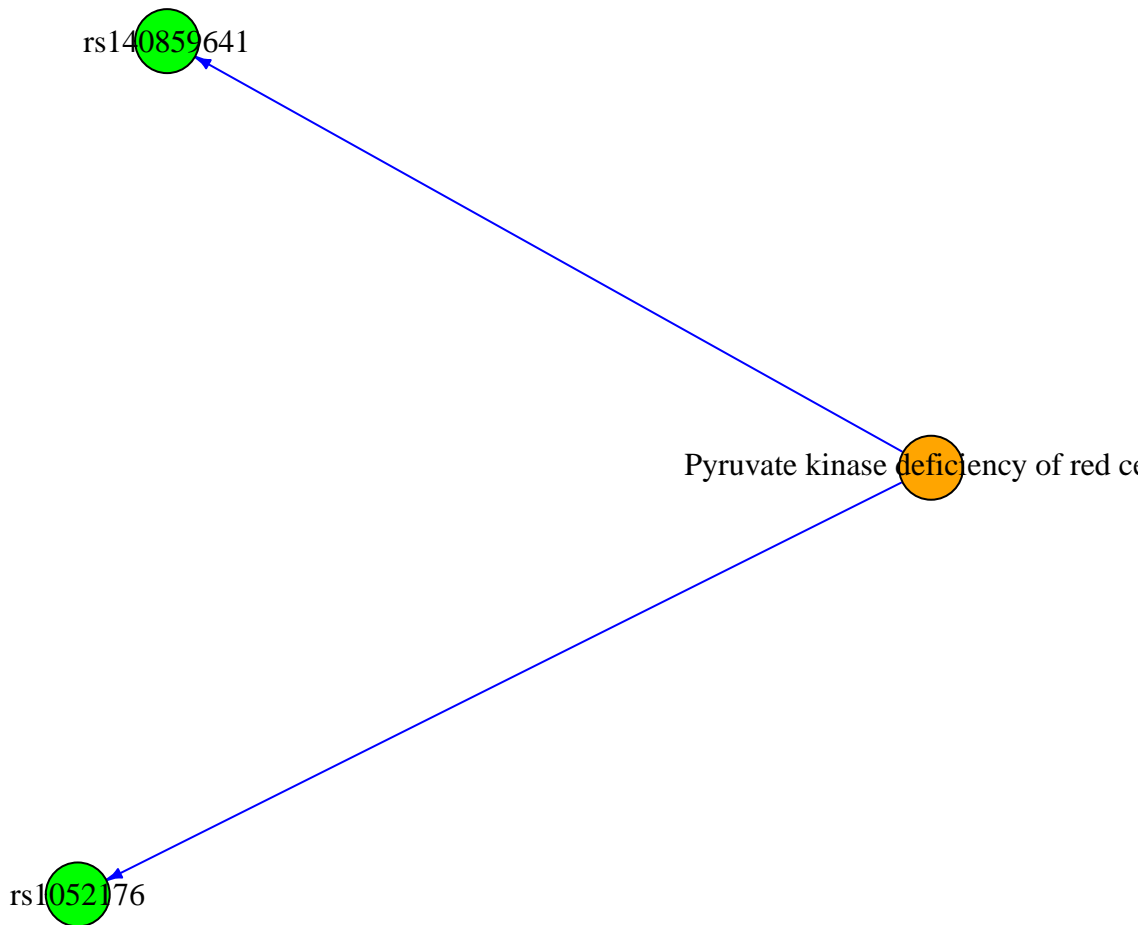

## Variant–Disease Network (Rare genetic deafness)

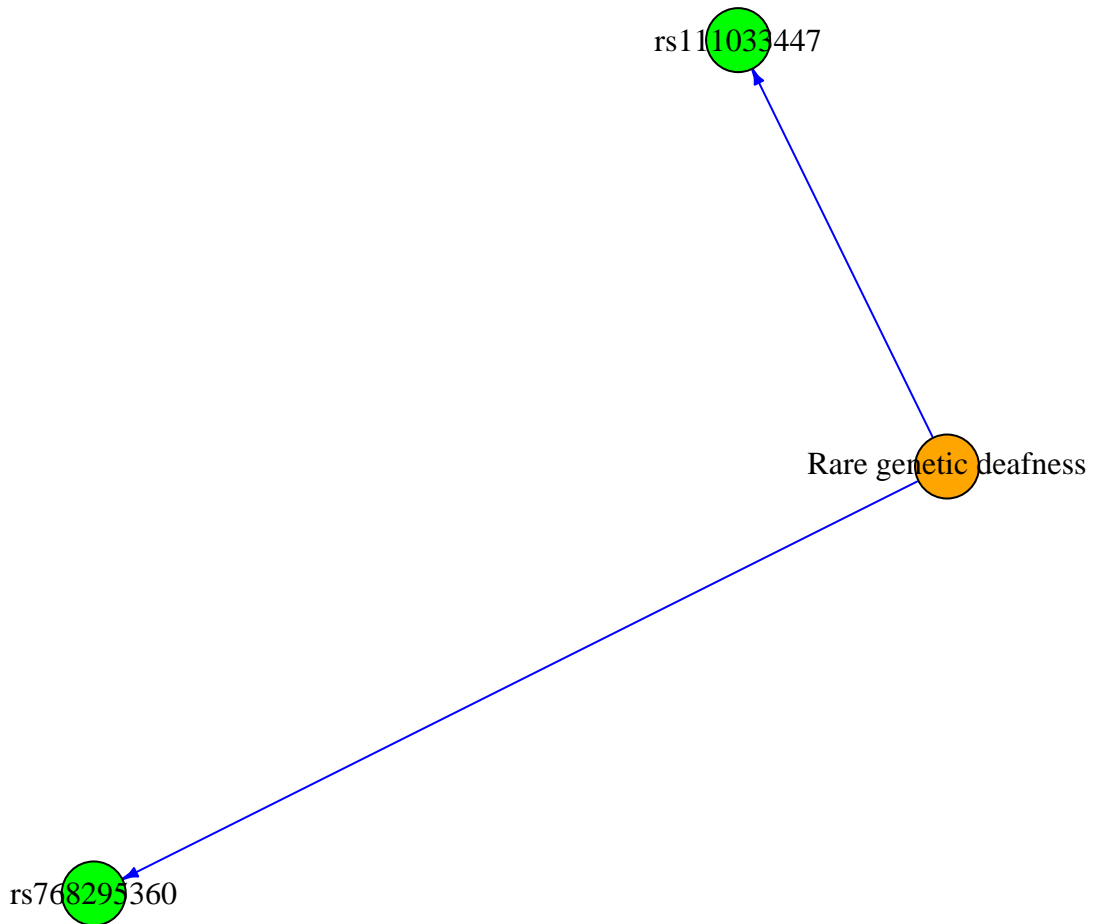



## Variant–Disease Network (Rasopathy)

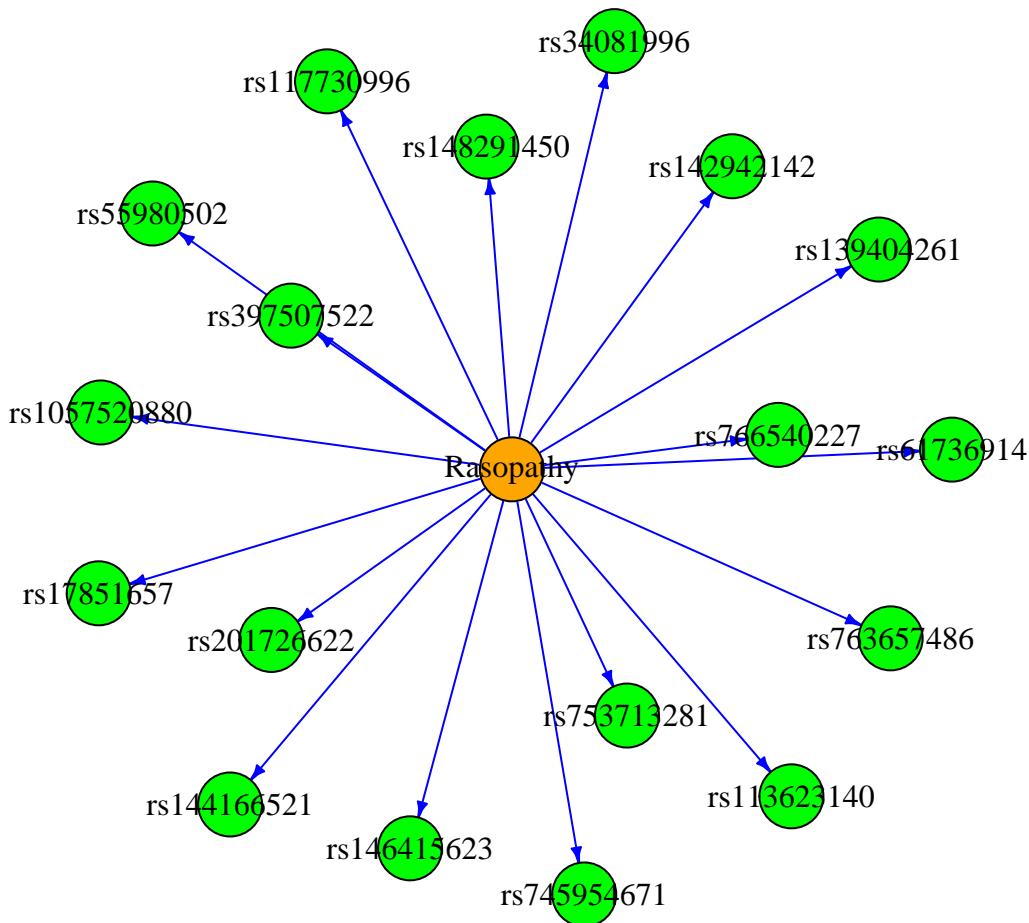

# Variant–Disease Network (Reduced antithrombin III activity)

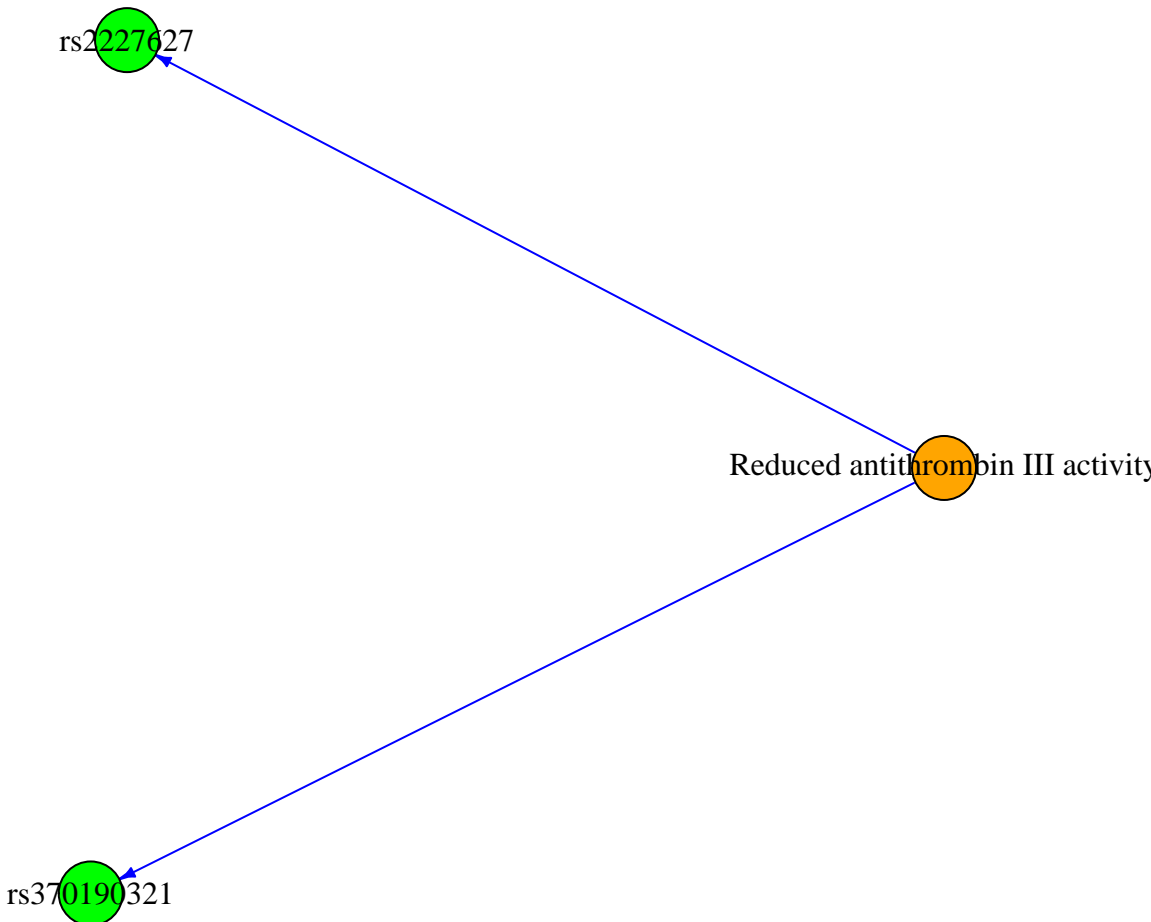

## Variant-Disease Network (Reduced protein C activity)

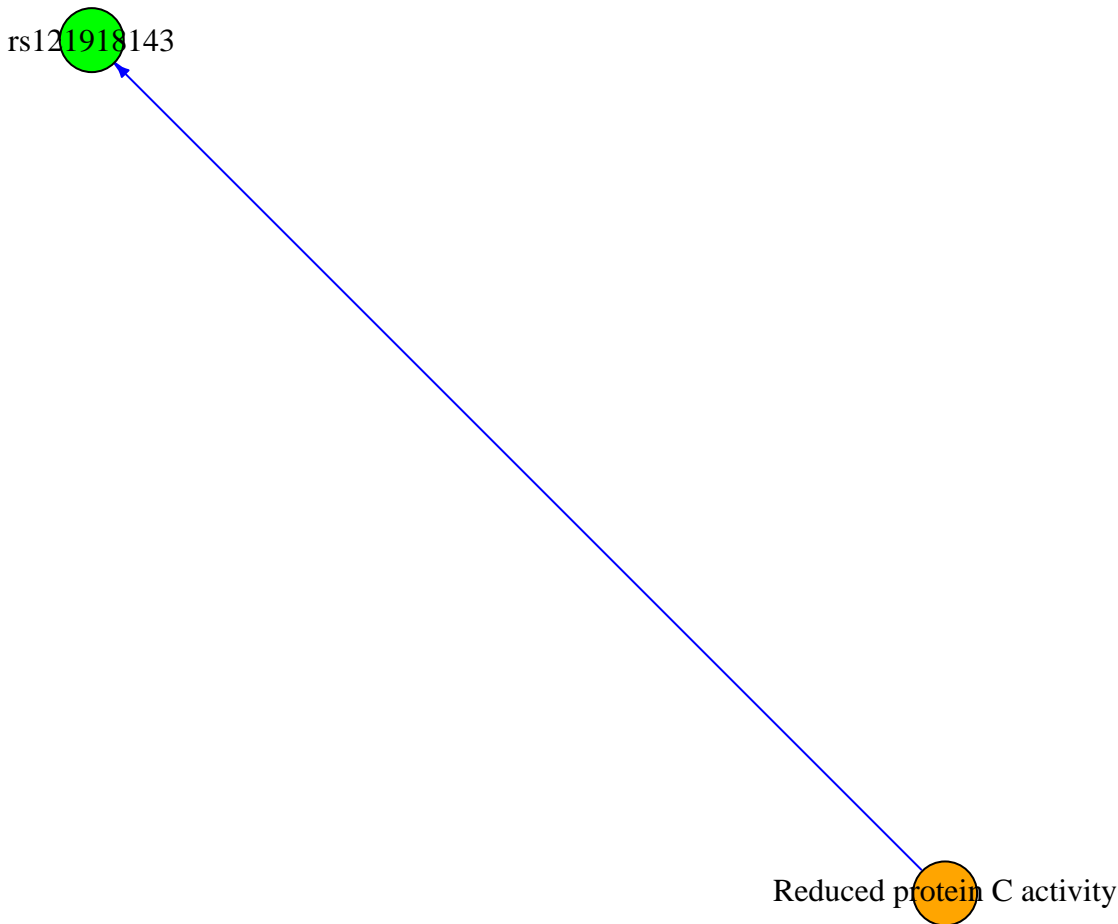

Variant–Disease Network (Renal carnitine transport defect)

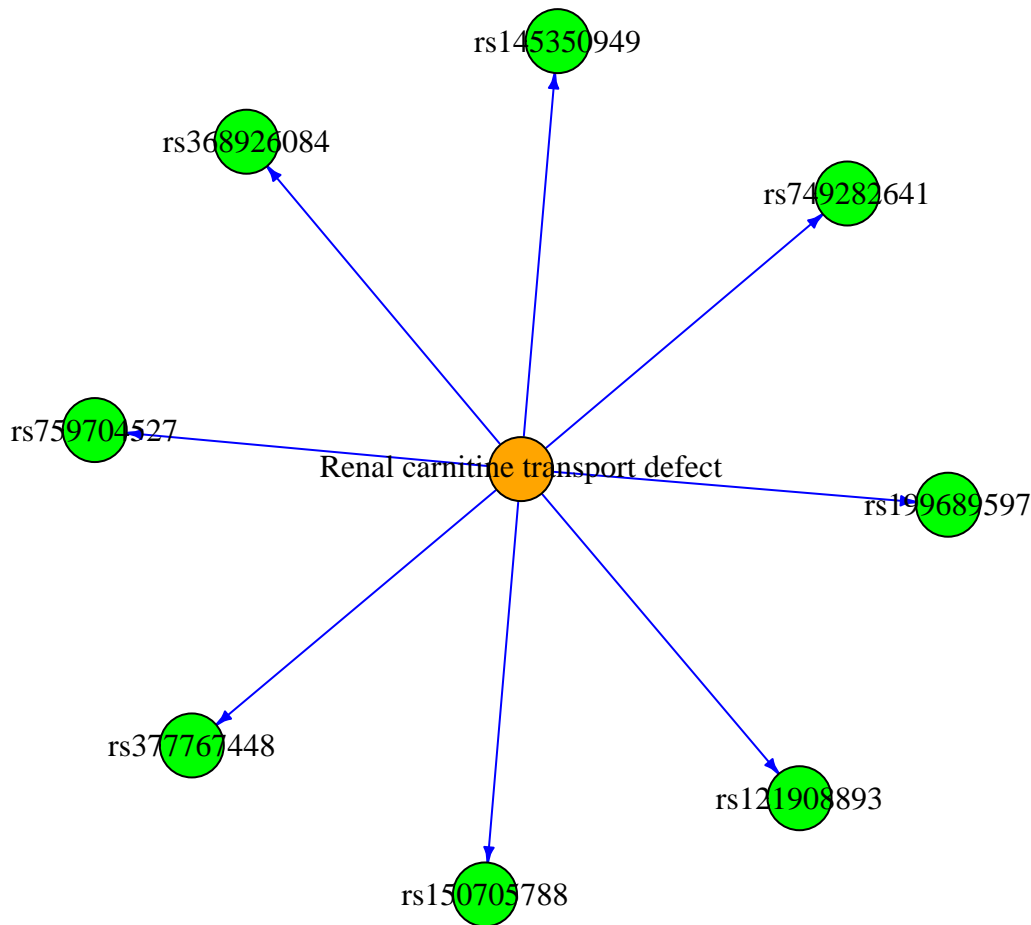

**Variant–Disease Network (Renal cysts and diabetes syndrome)**

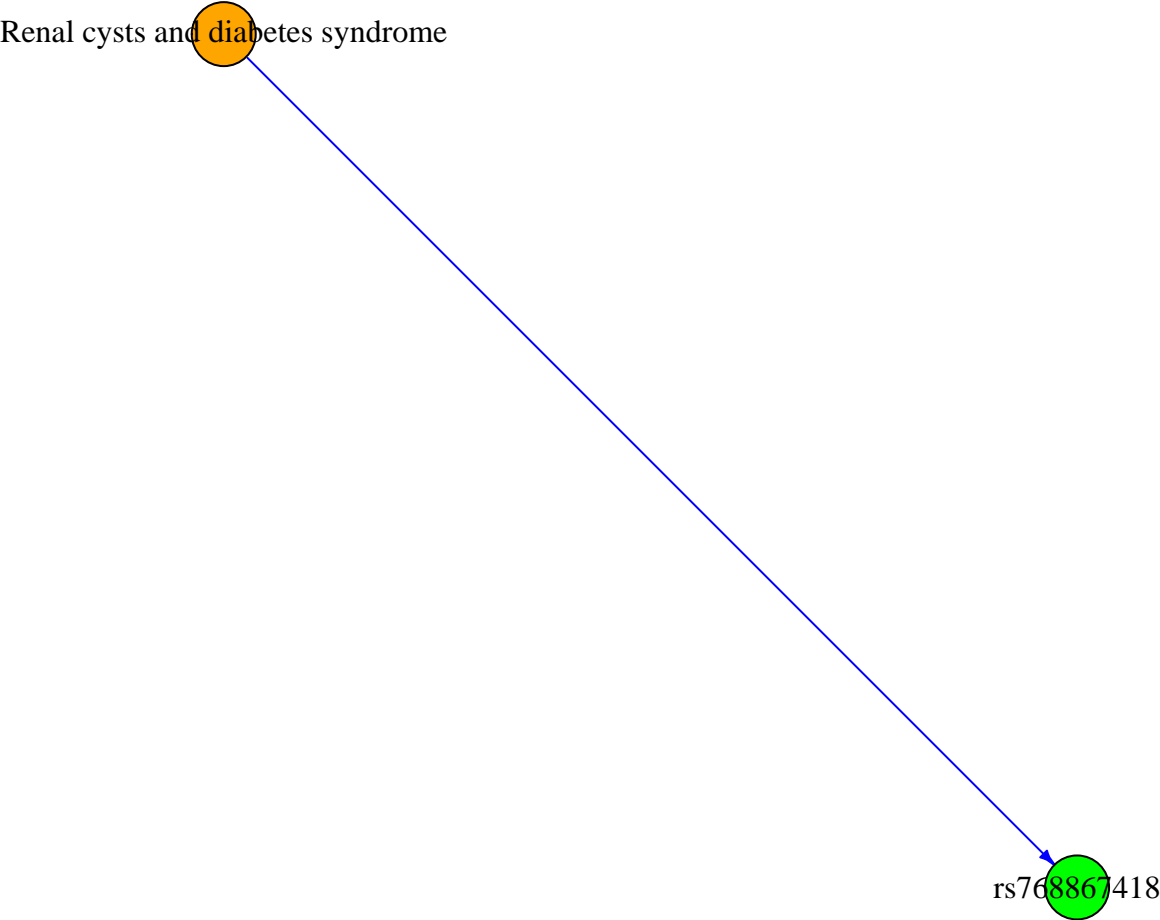

**Variant–Disease Network (Renal dysplasia)**

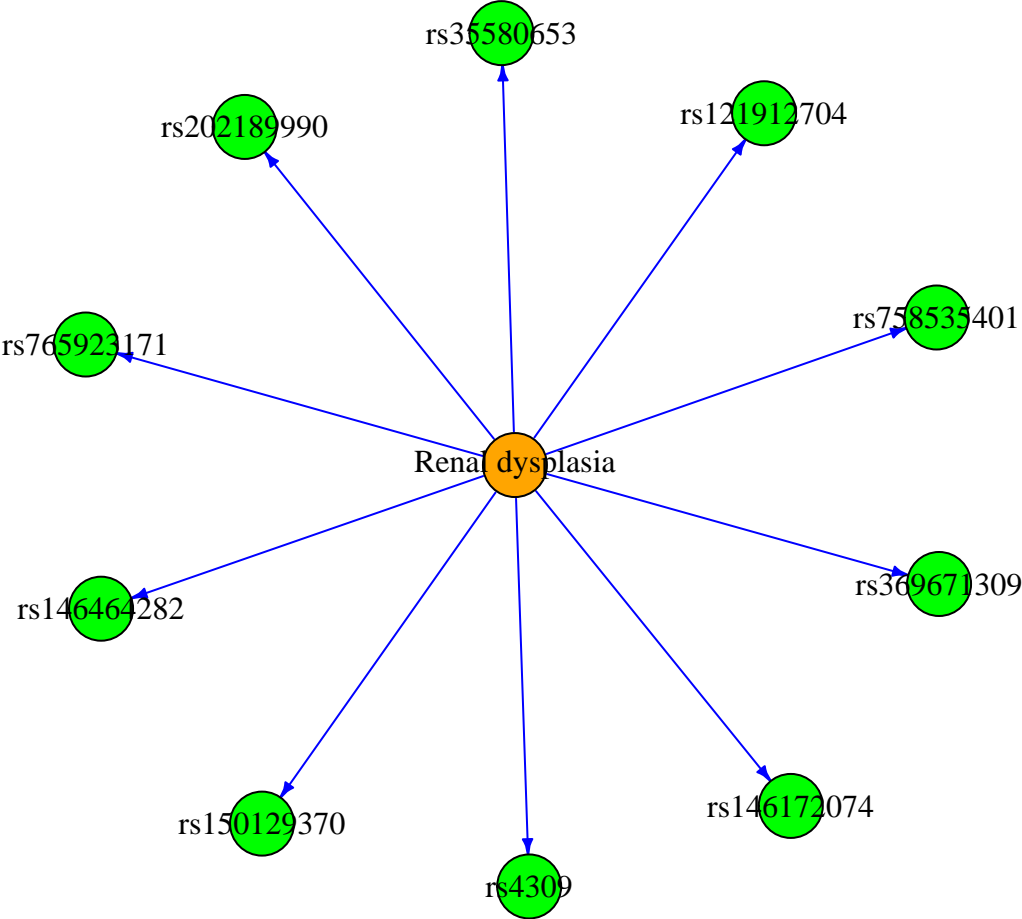

## Variant–Disease Network (Renal dysplasia and retinal aplasia)

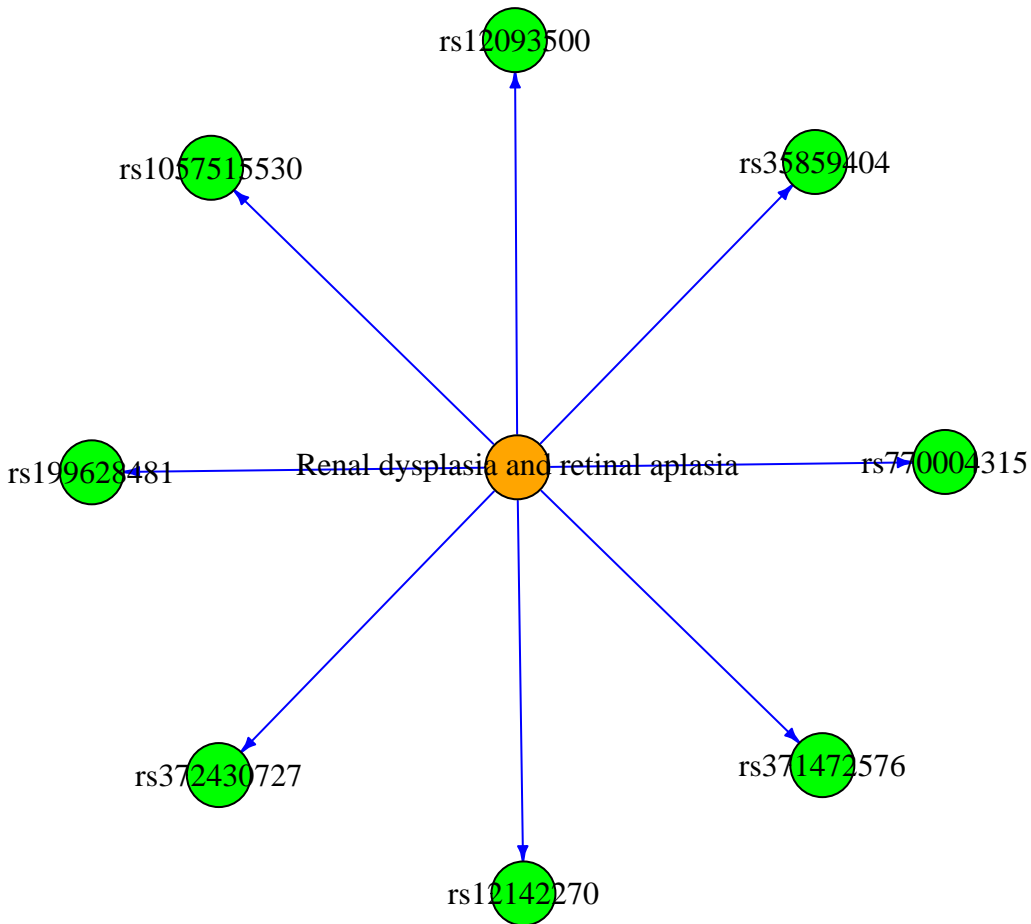

# ant-Disease Network (Renal hamartomas nephroblastomatosis and fetal gigantism)

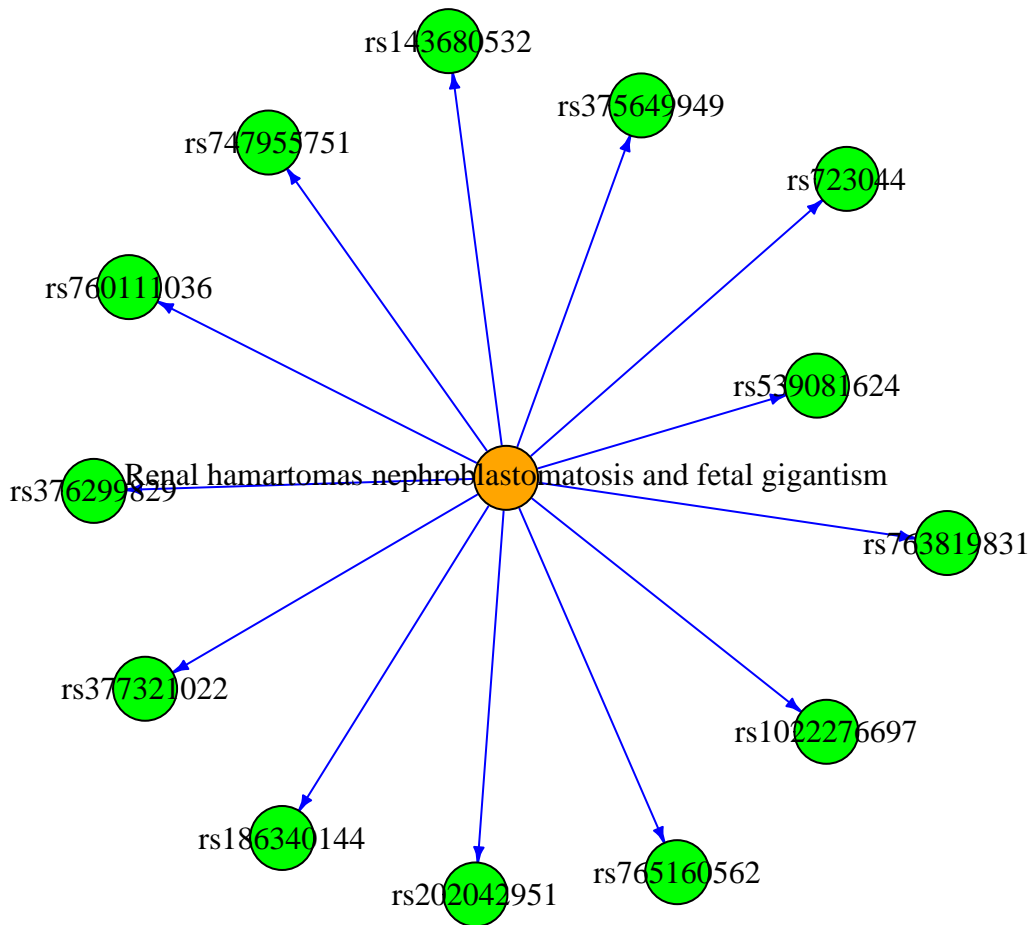



## Variant–Disease Network (Renal hypodysplasia/aplasia 1)

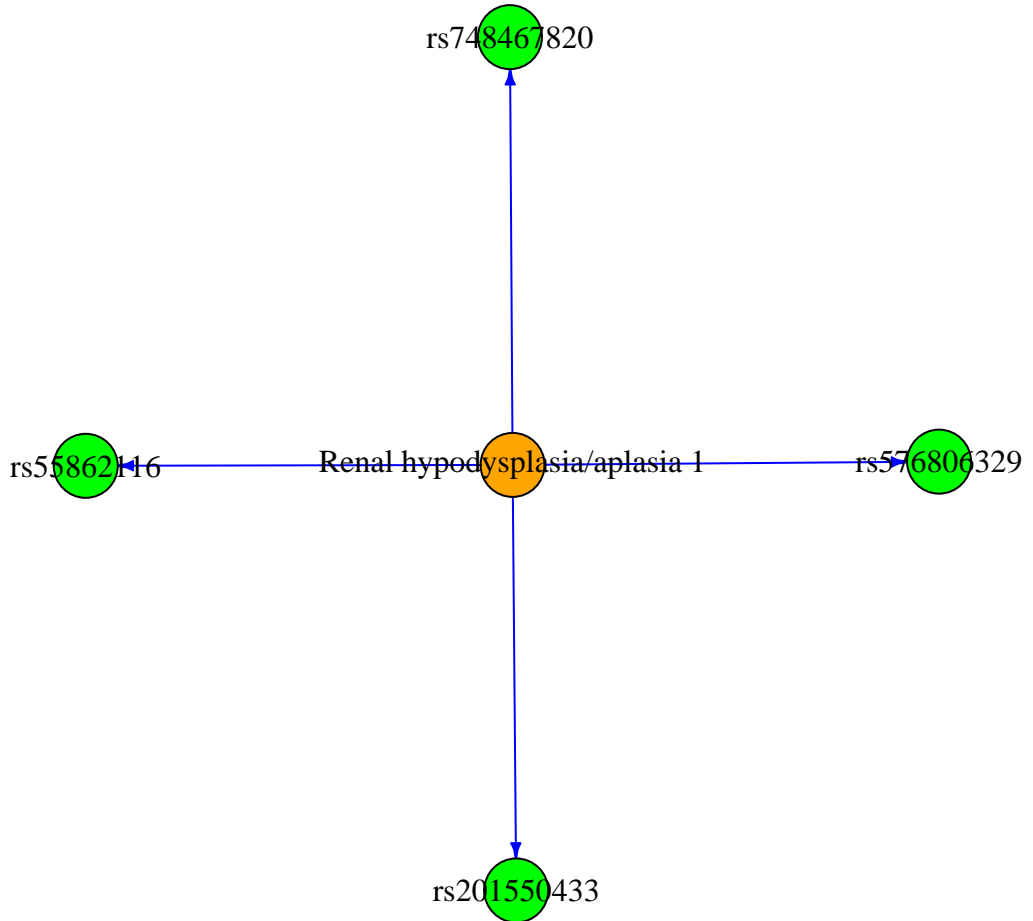

## Variant-Disease Network (Renal Hypomagnesemia)

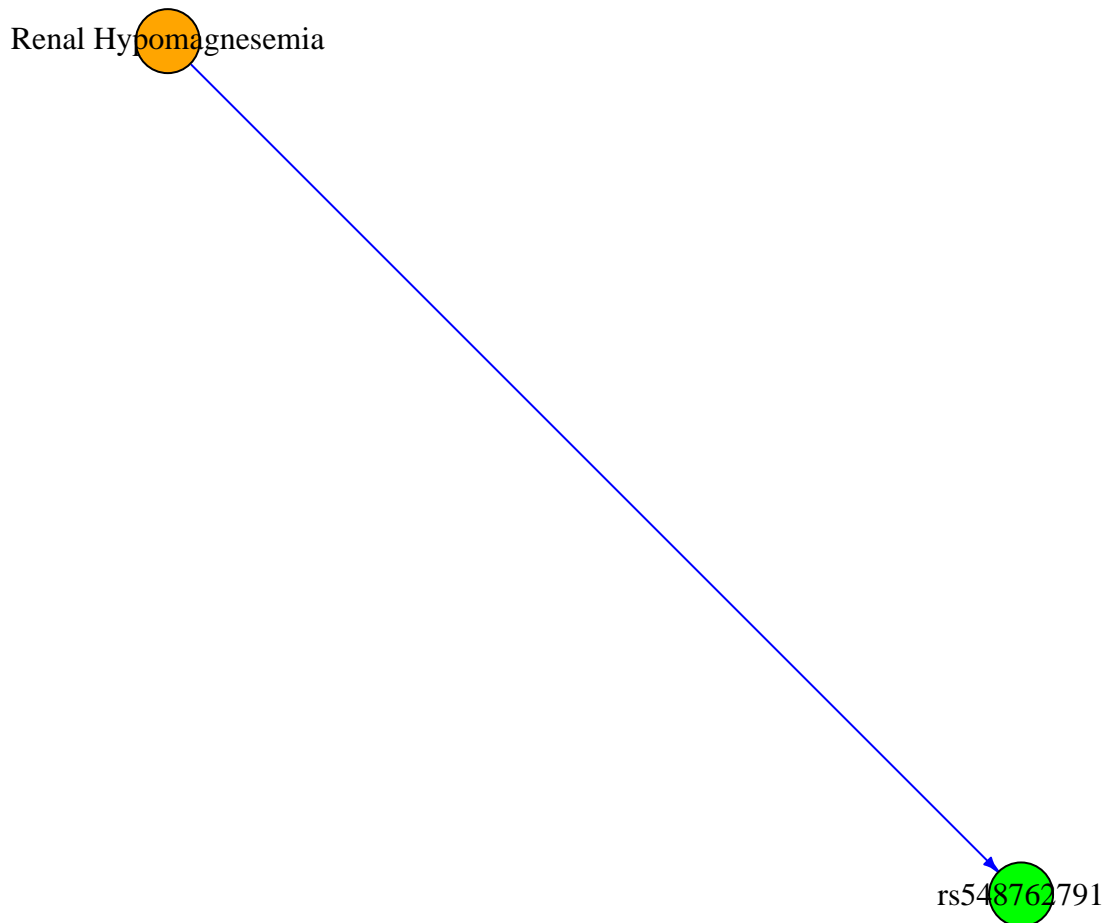

## Variant–Disease Network (Renal tubular acidosis)

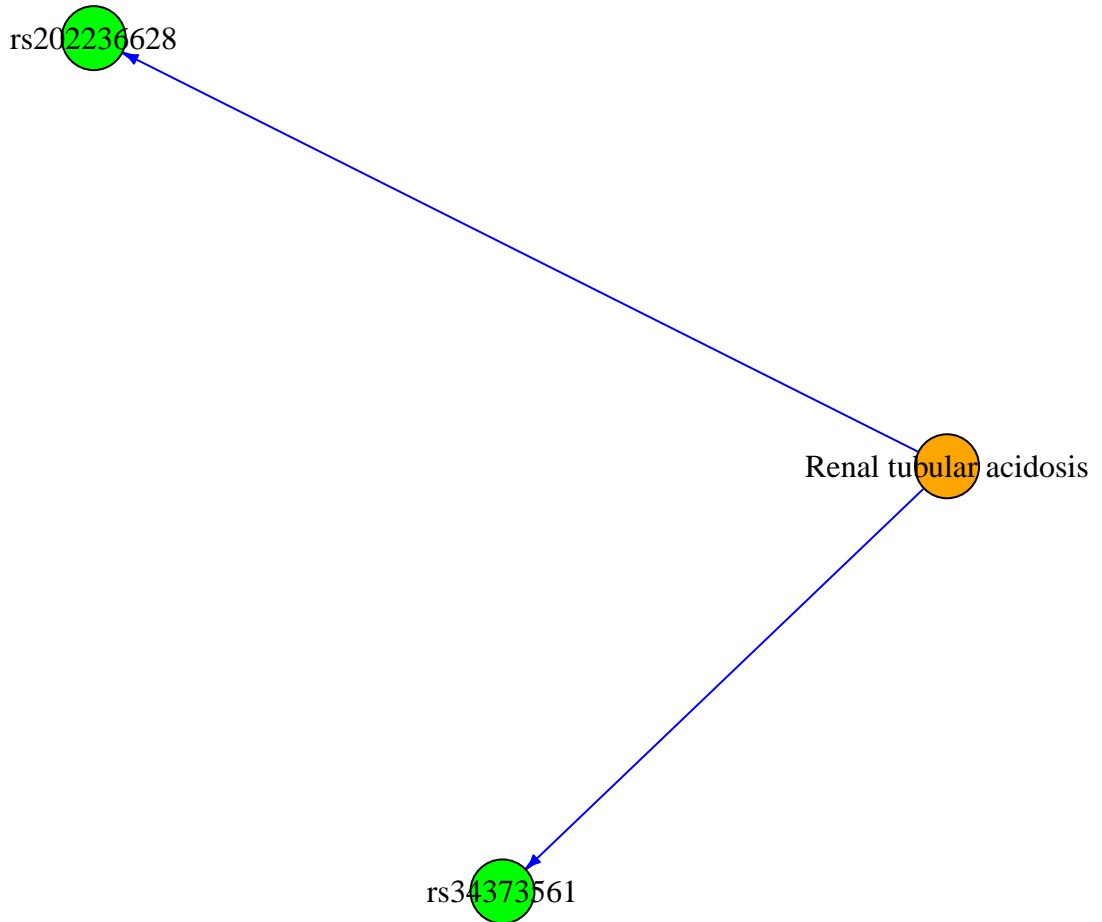

# Variant-Disease Network (Renal tubular acidosis with progressive nerve deafness)

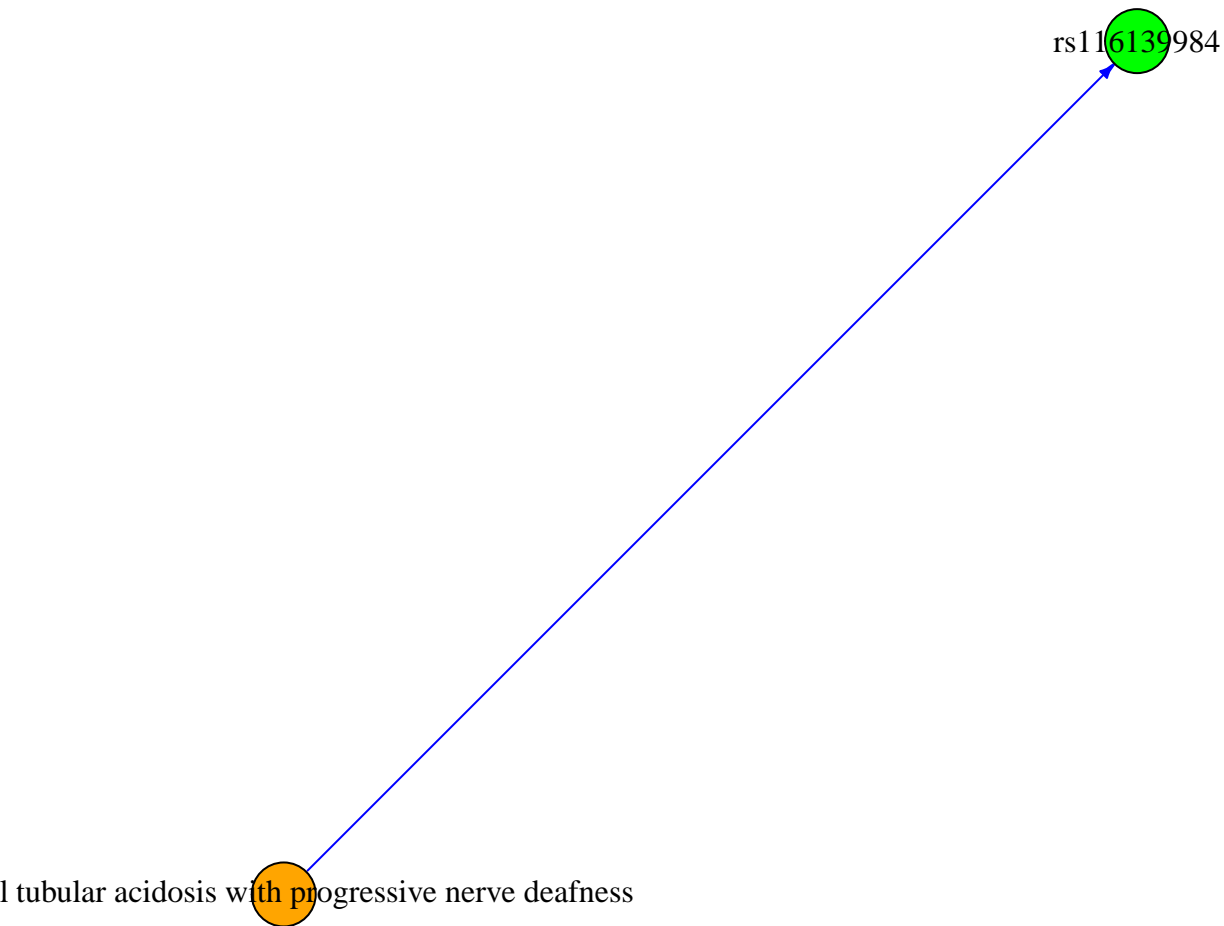

## Variant–Disease Network (Retinal dystrophy)

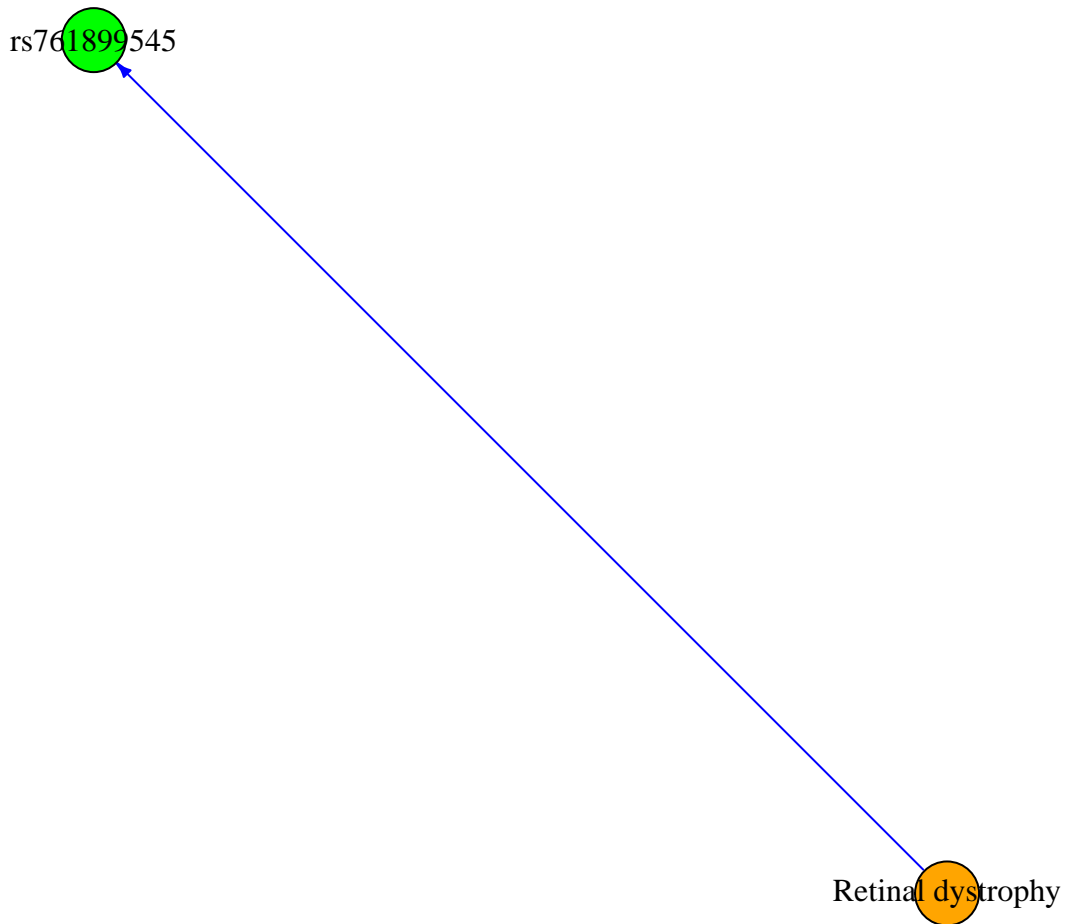

Variant–Disease Network (Retinitis Pigmentosa)

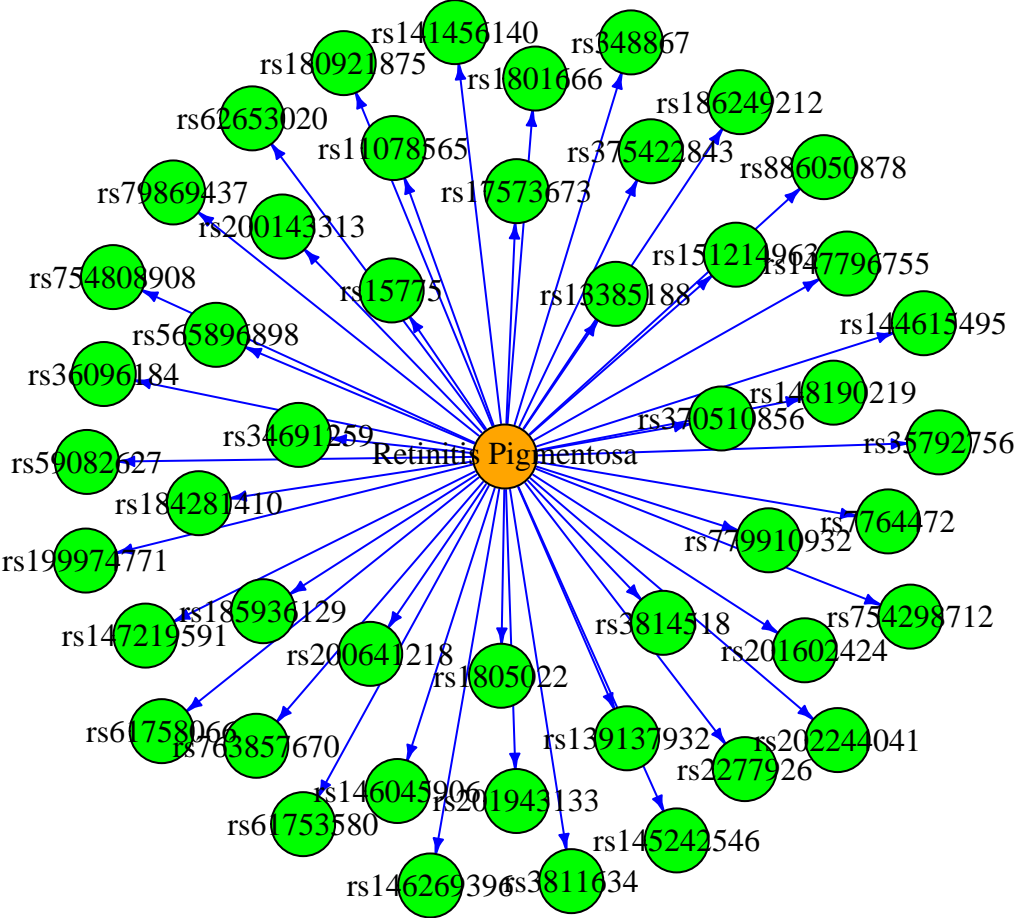

Variant–Disease Network (Retinitis pigmentosa 30)

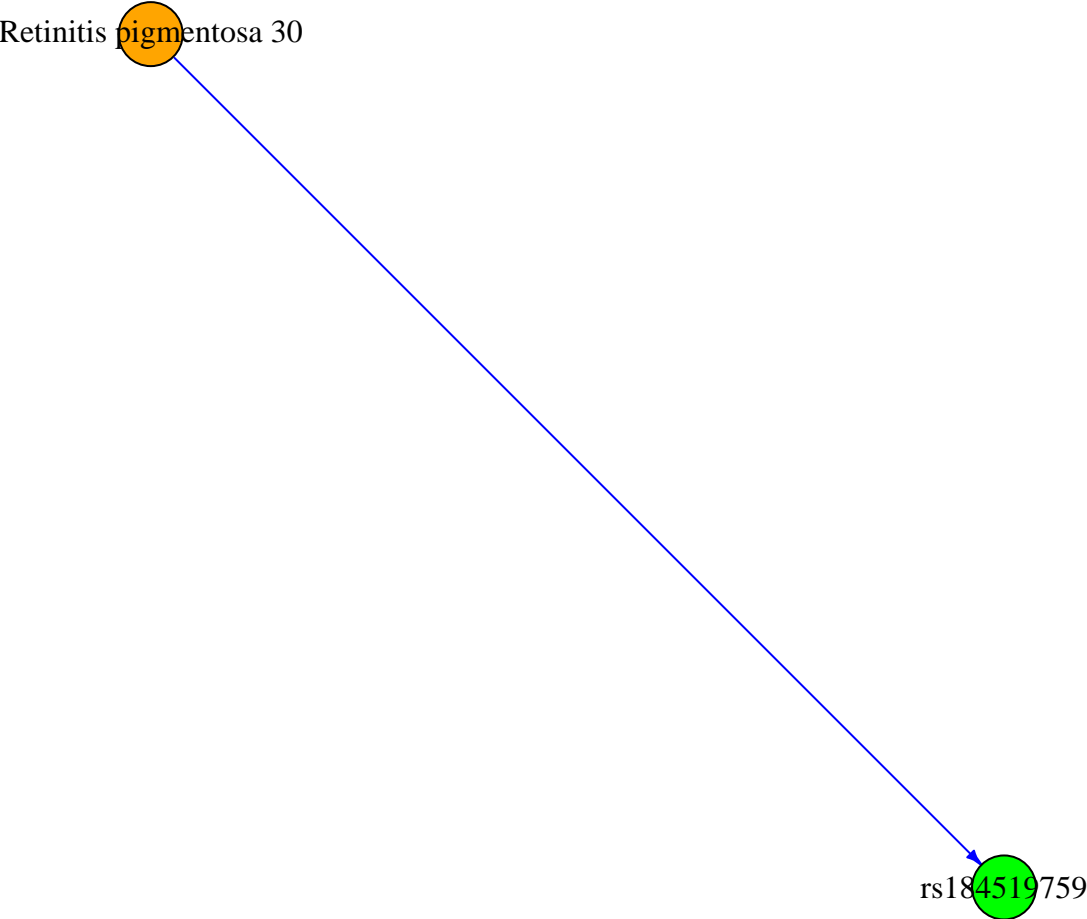

**Variant–Disease Network (Retinitis pigmentosa 37)**

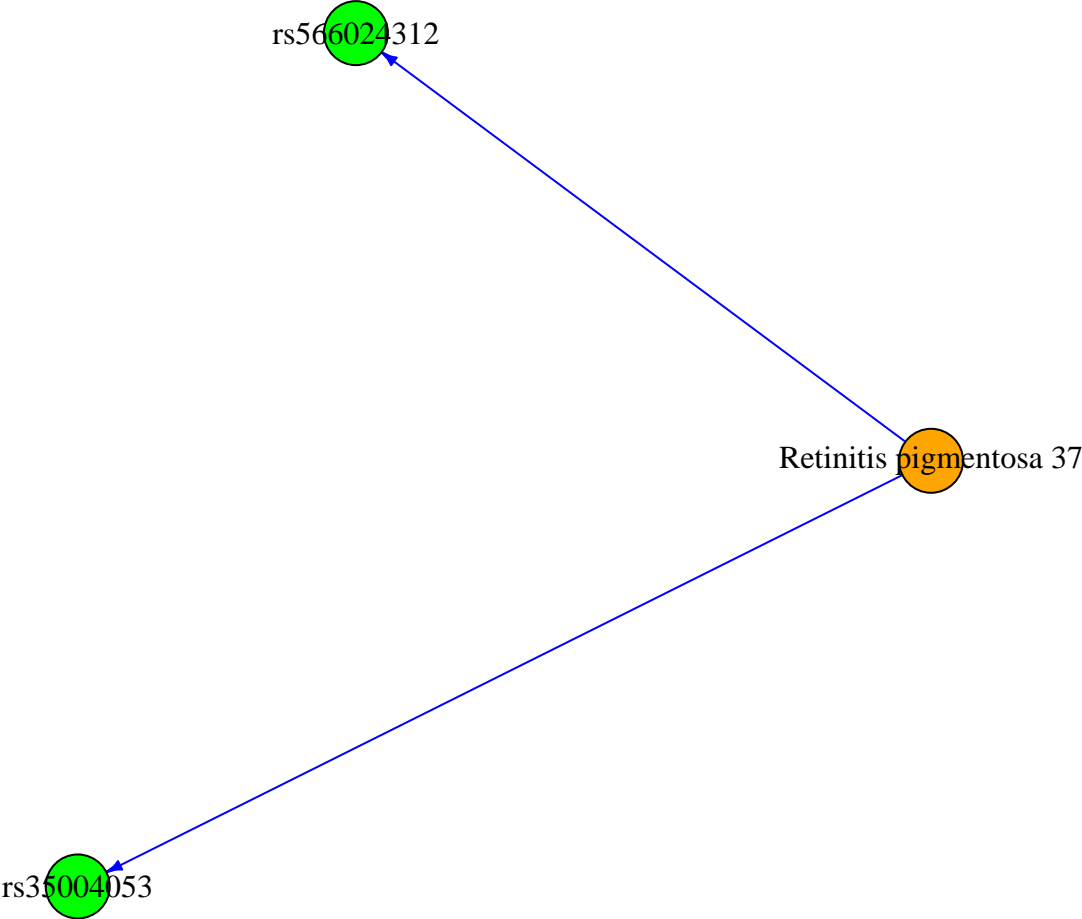



**Variant–Disease Network (Retinitis pigmentosa 66)**

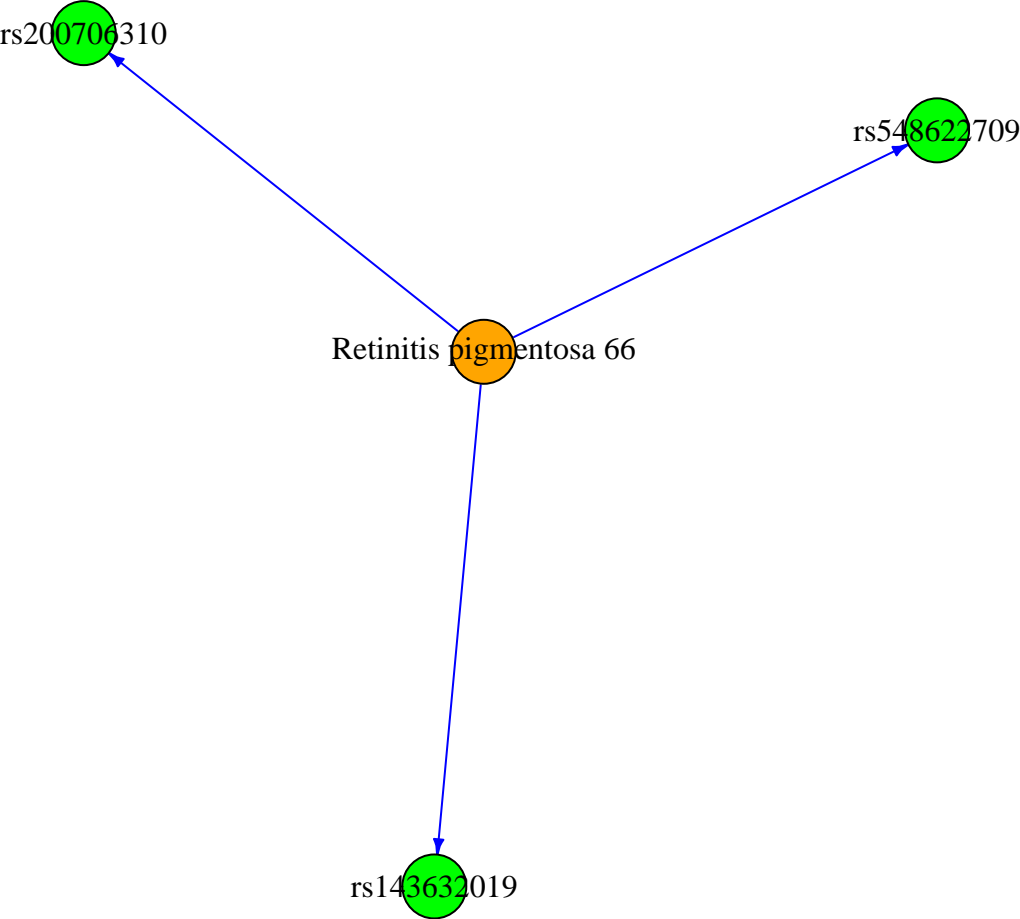

# Variant–Disease Network (Retinitis pigmentosa–deafness syndrome)

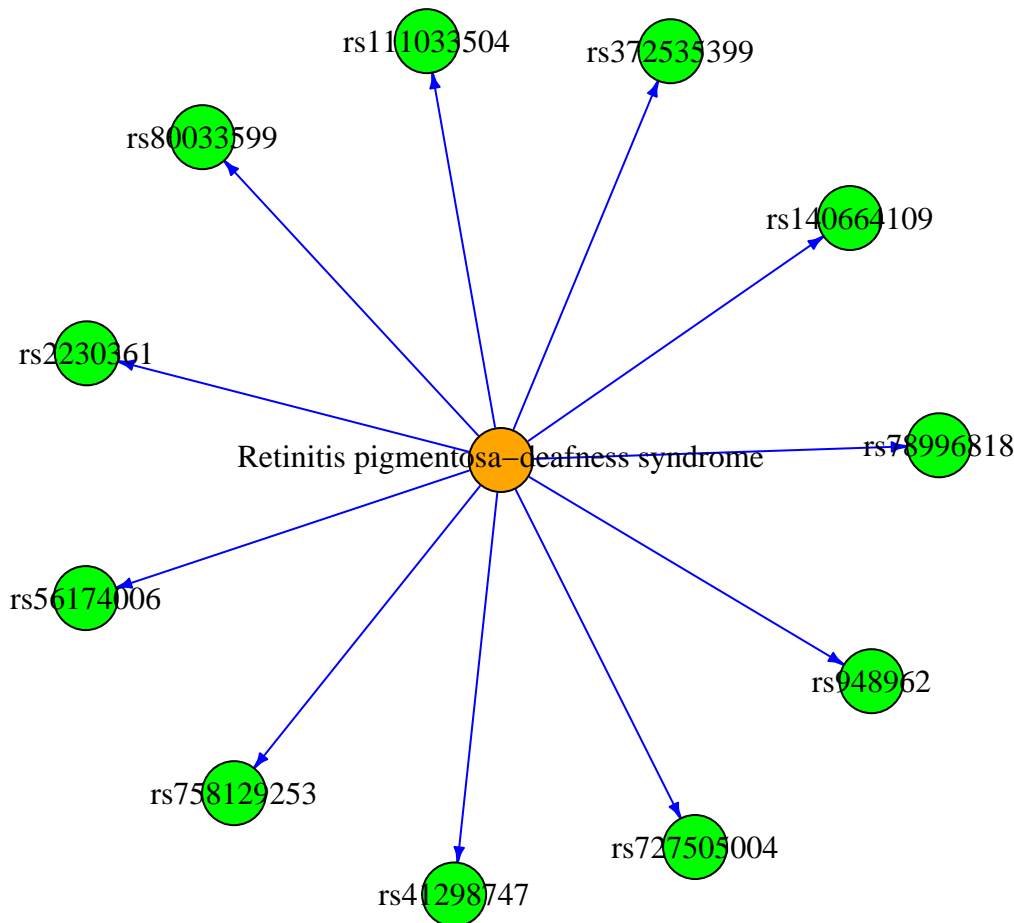

Variant–Disease Network (Retinoblastoma)

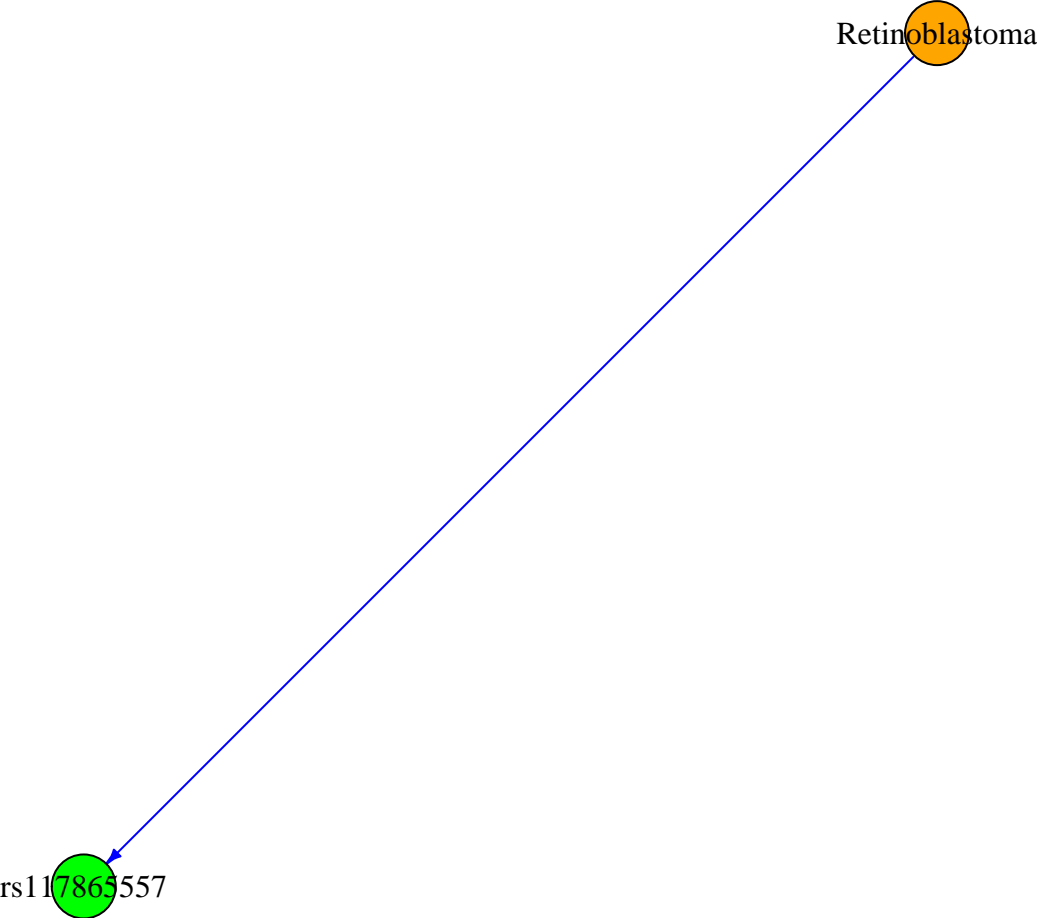

**Variant–Disease Network (Rhabdoid tumor predisposition syndrome 1)**

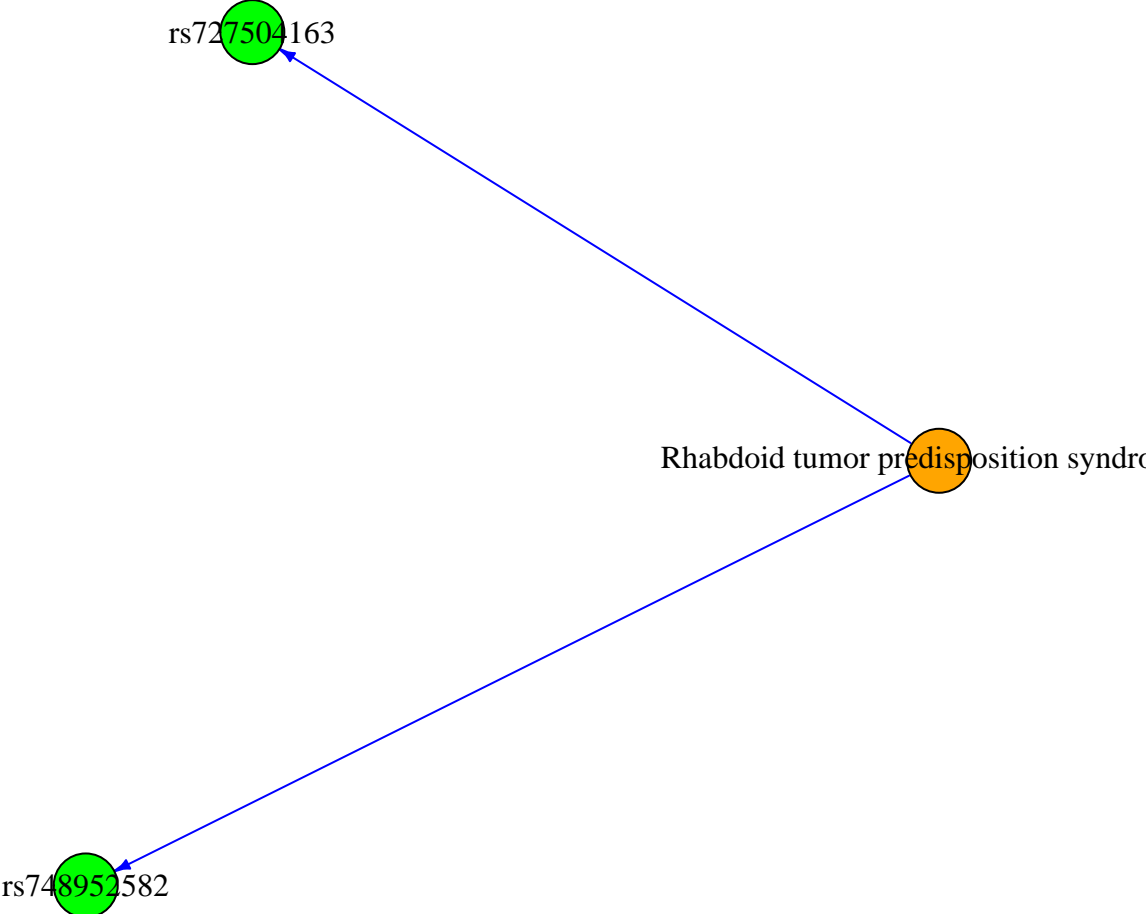

Variant–Disease Network (Rhizomelic chondrodysplasia punctata)

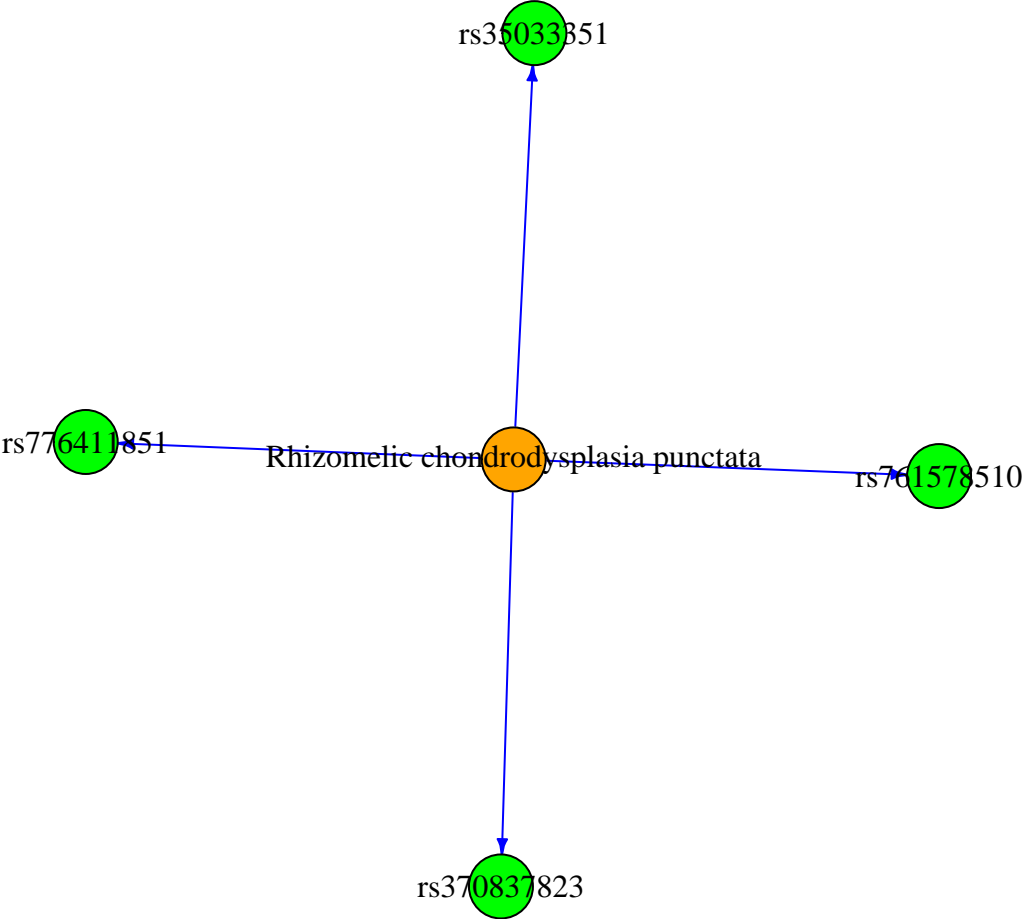

Variant–Disease Network (Rhizomelic chondrodysplasia punctata type 1

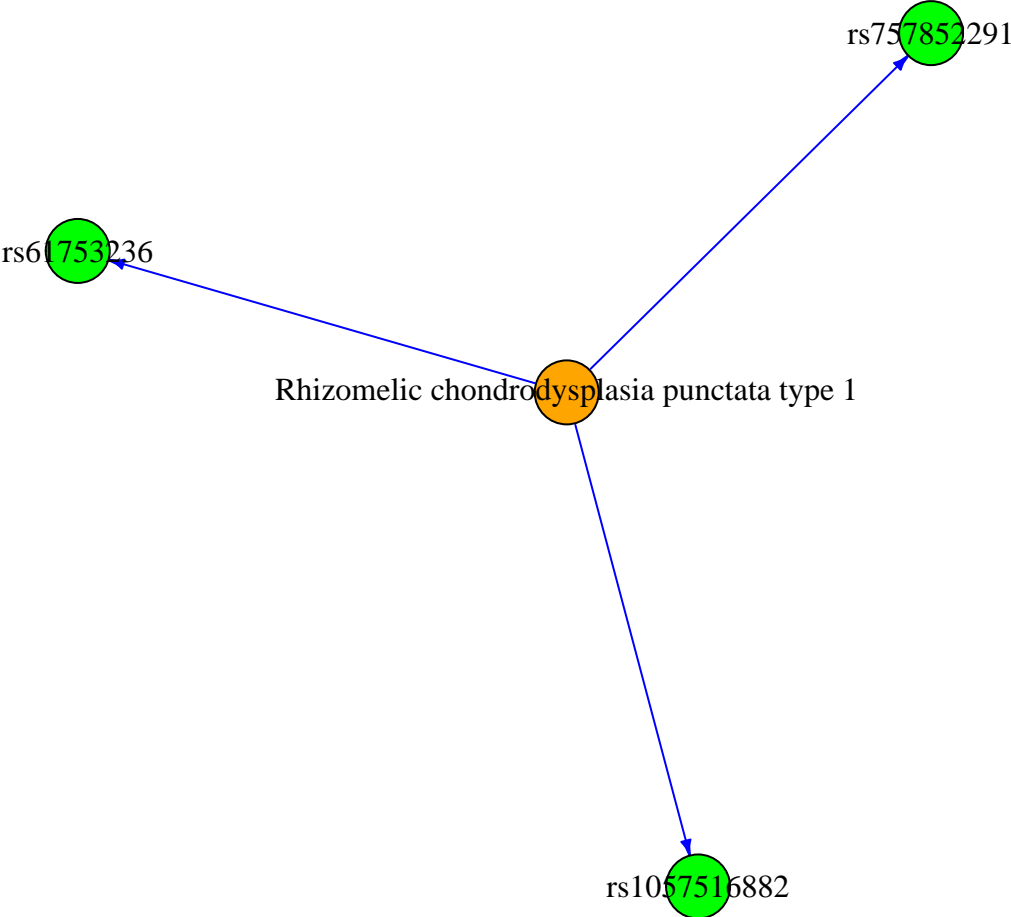

## Variant–Disease Network (Robinow syndrome)

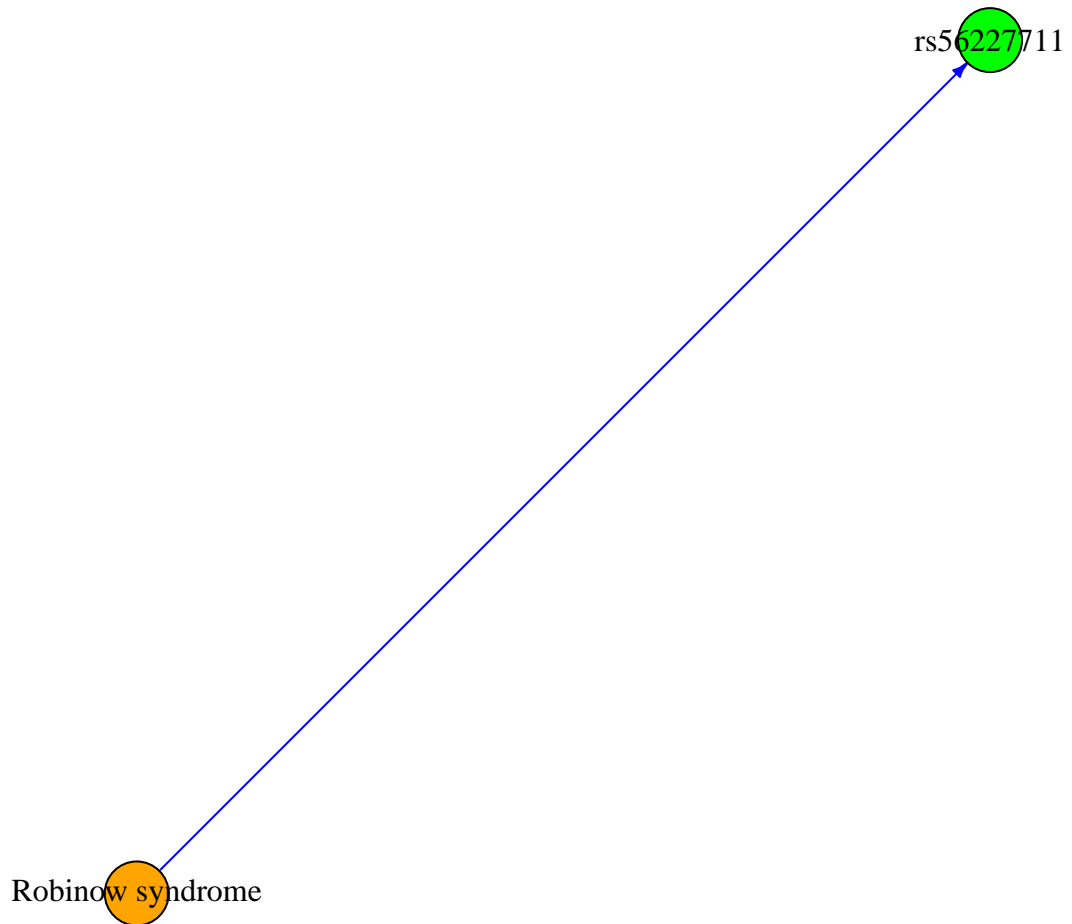

# nt-Disease Network (Rolandic epilepsy with mental retardation and speech c

epilepsy with mental retardation and speech dyspraxia

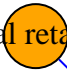

rs370033099

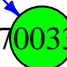



Variant–Disease Network (Romano–Ward syndrome)

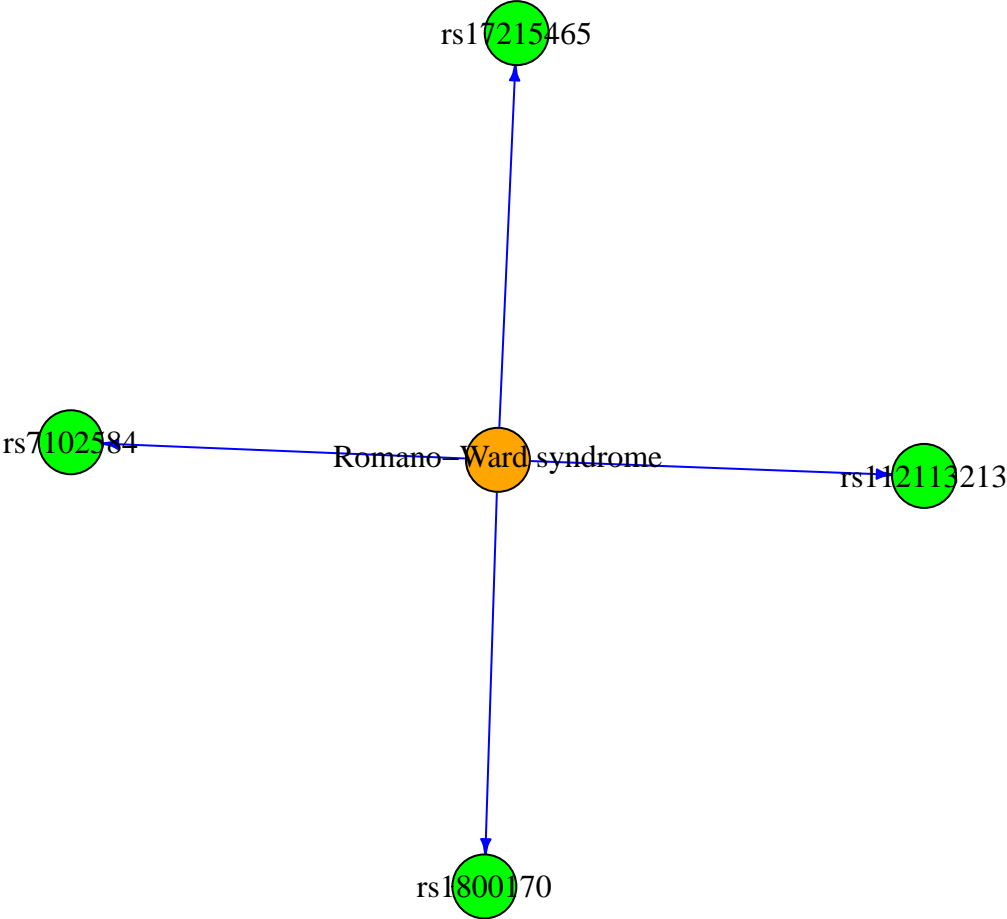

Variant–Disease Network (Rotor syndrome)

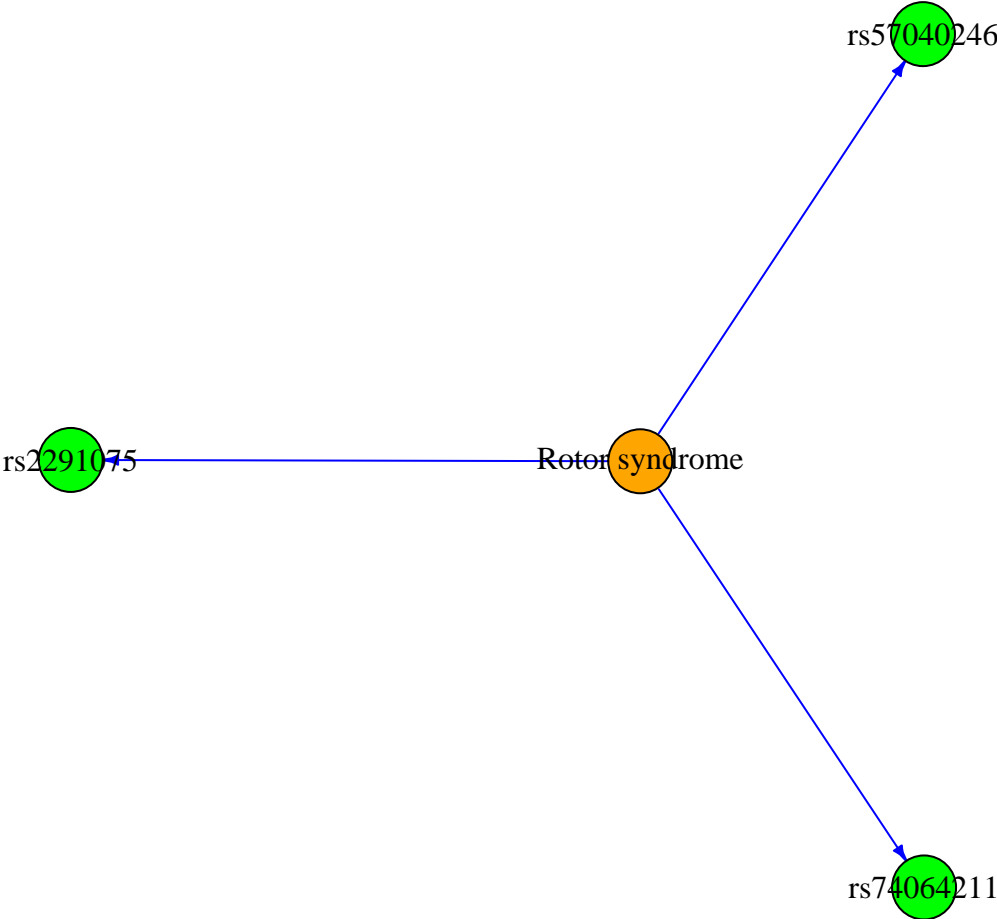

# Variant–Disease Network (Saethre–Chotzen syndrome)

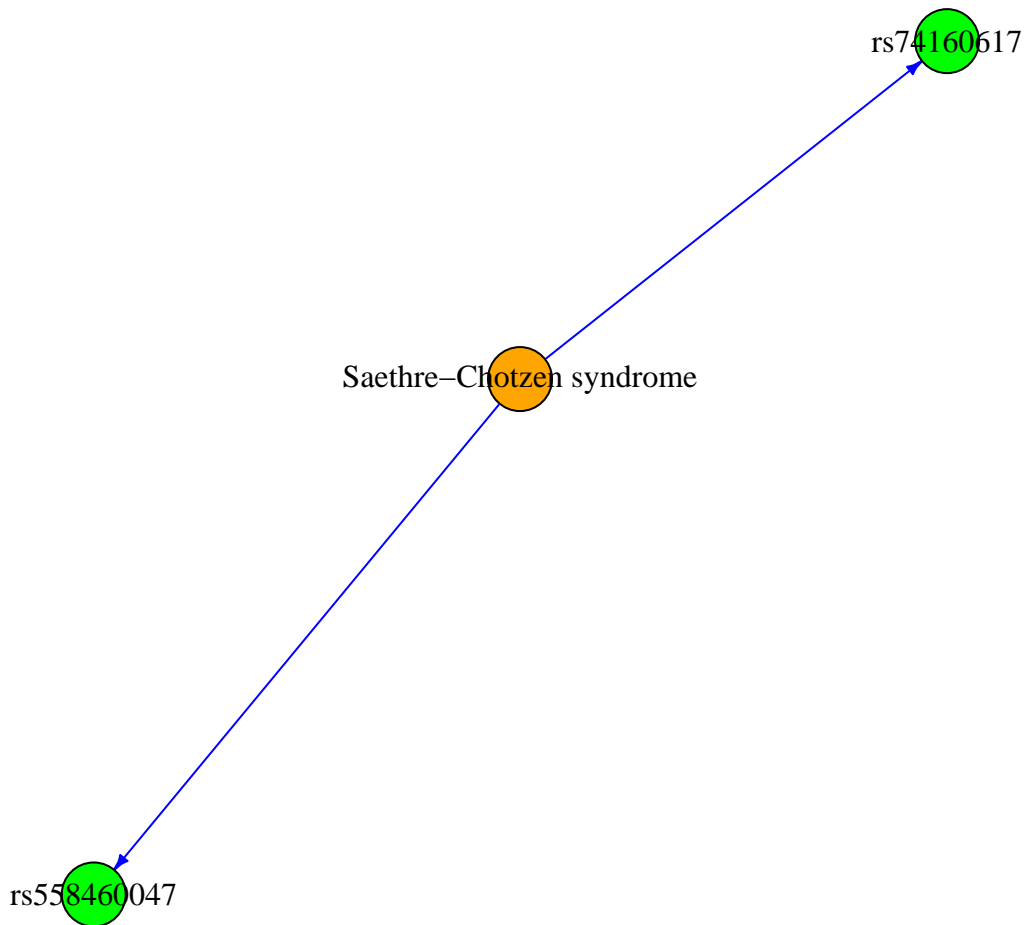

Variant–Disease Network (Sanfilippo syndrome)

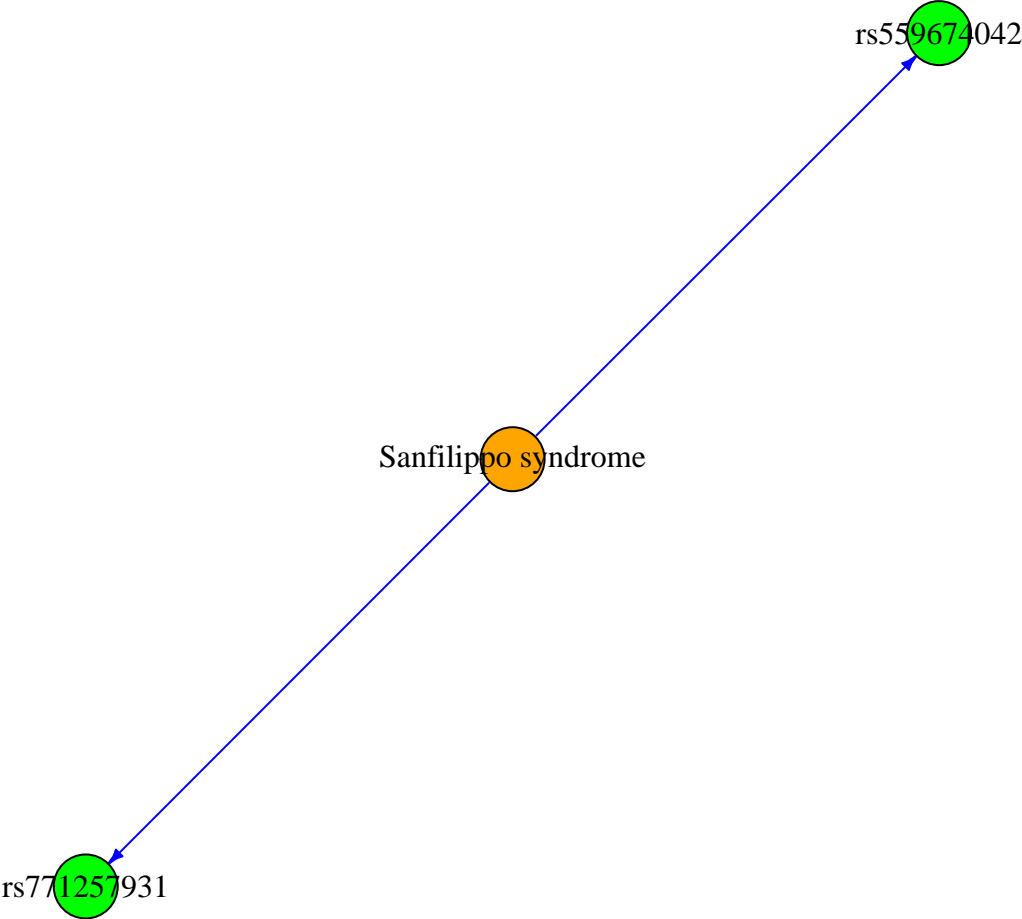

## Variant–Disease Network (Scapuloperoneal weakness)

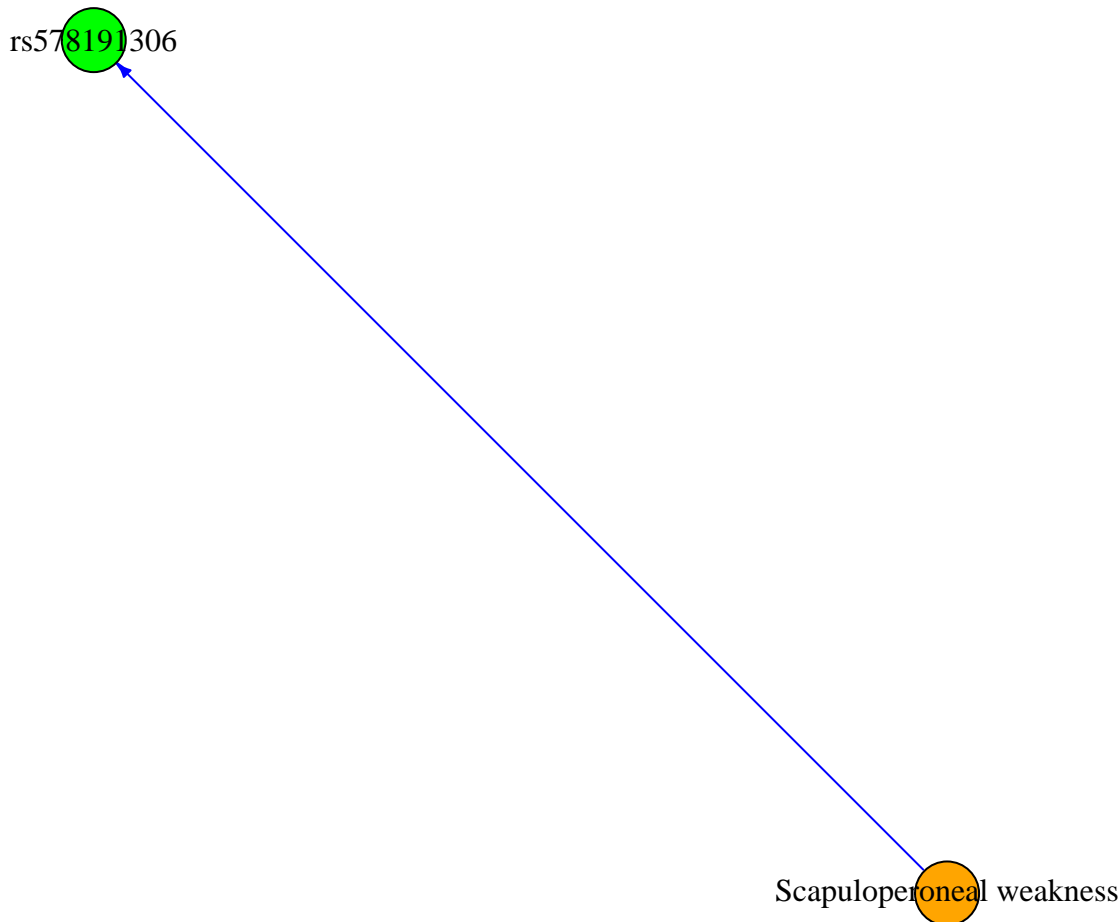

Variant–Disease Network (Schimke immunoosseous dysplasia)

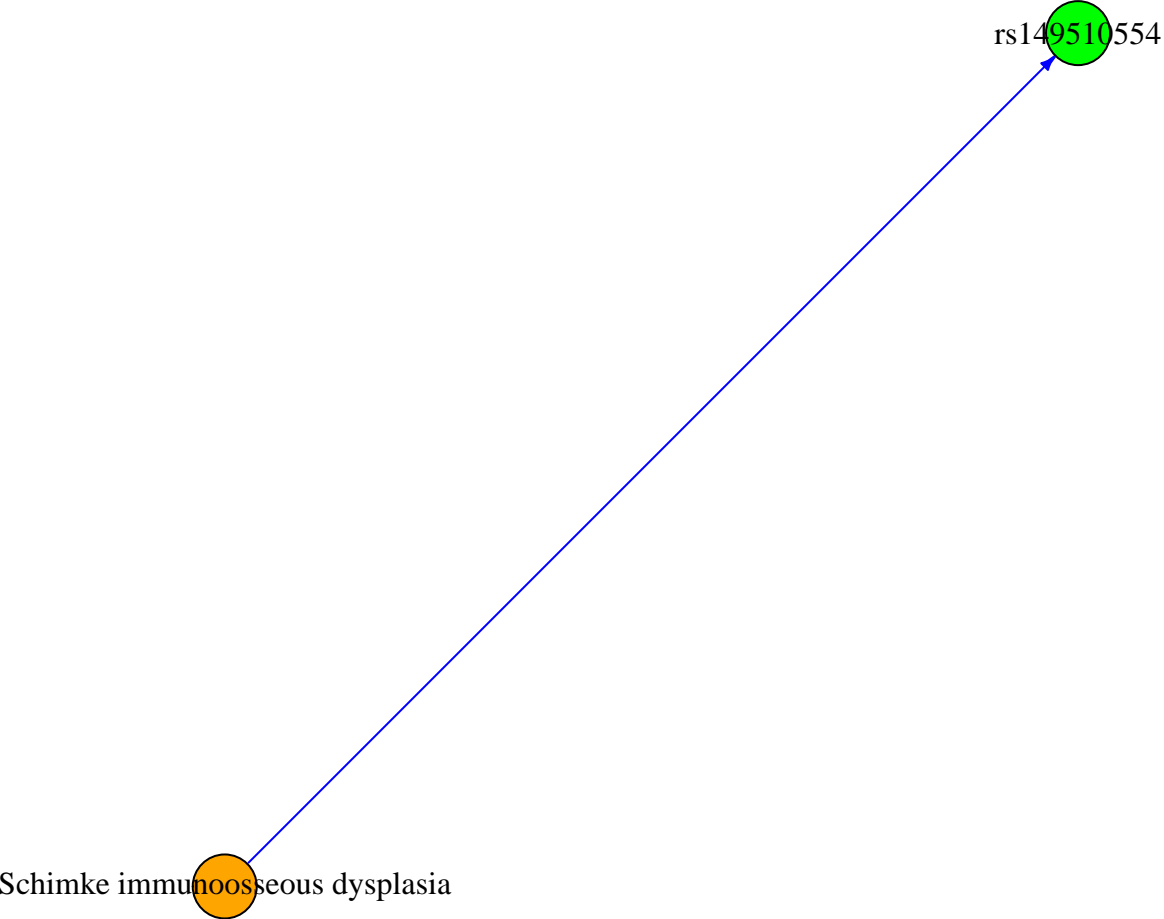

Variant–Disease Network (Schinzel–Giedion syndrome)

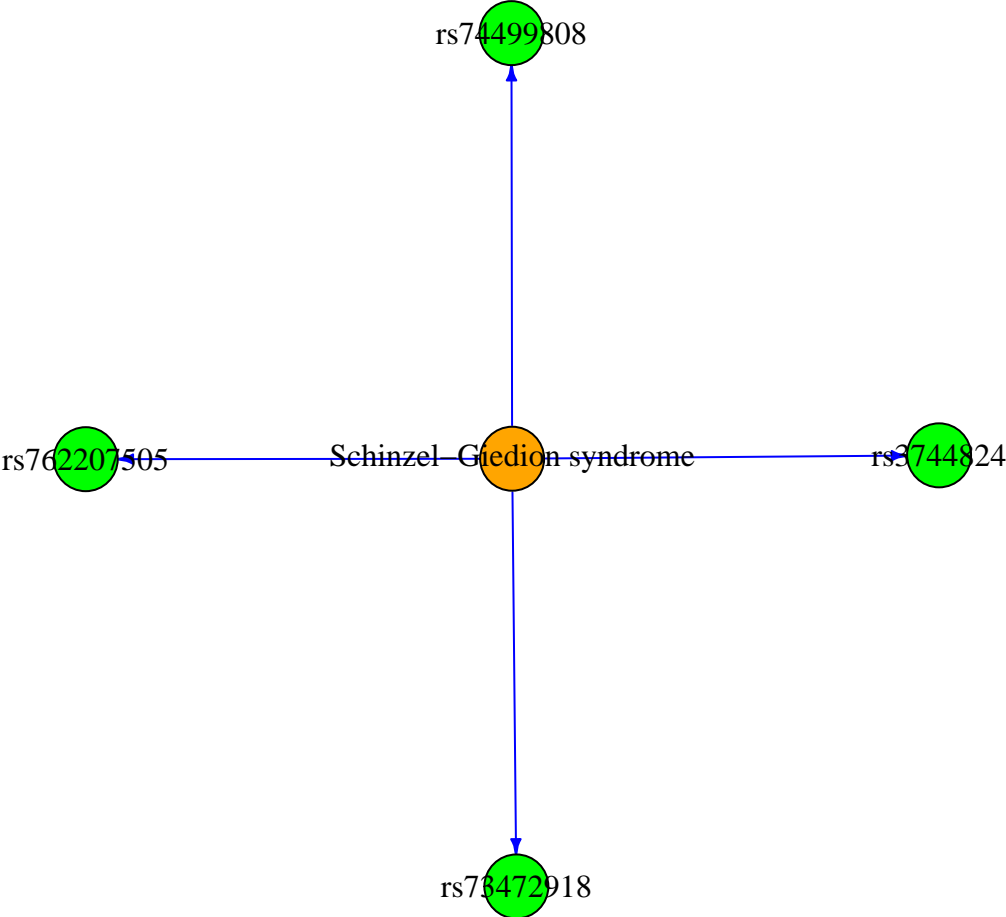

Variant–Disease Network (Schizophrenia)

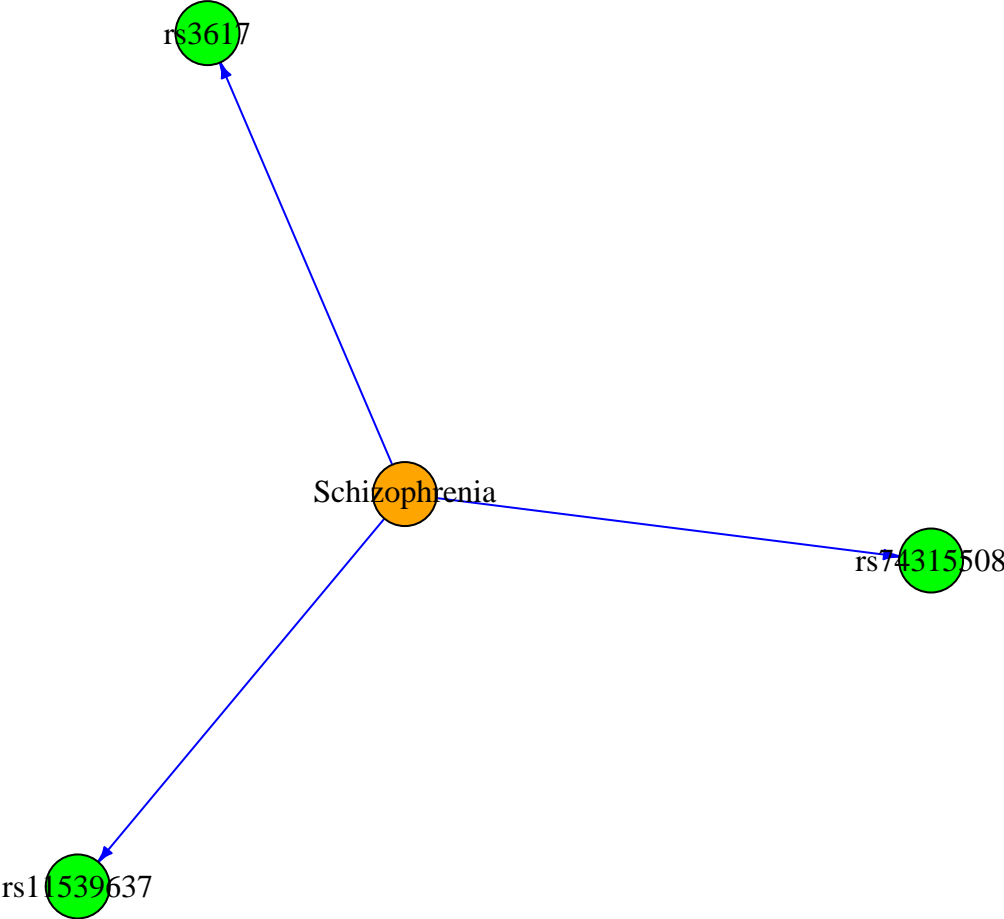



**Variant–Disease Network (Schneckenbecken dysplasia)**

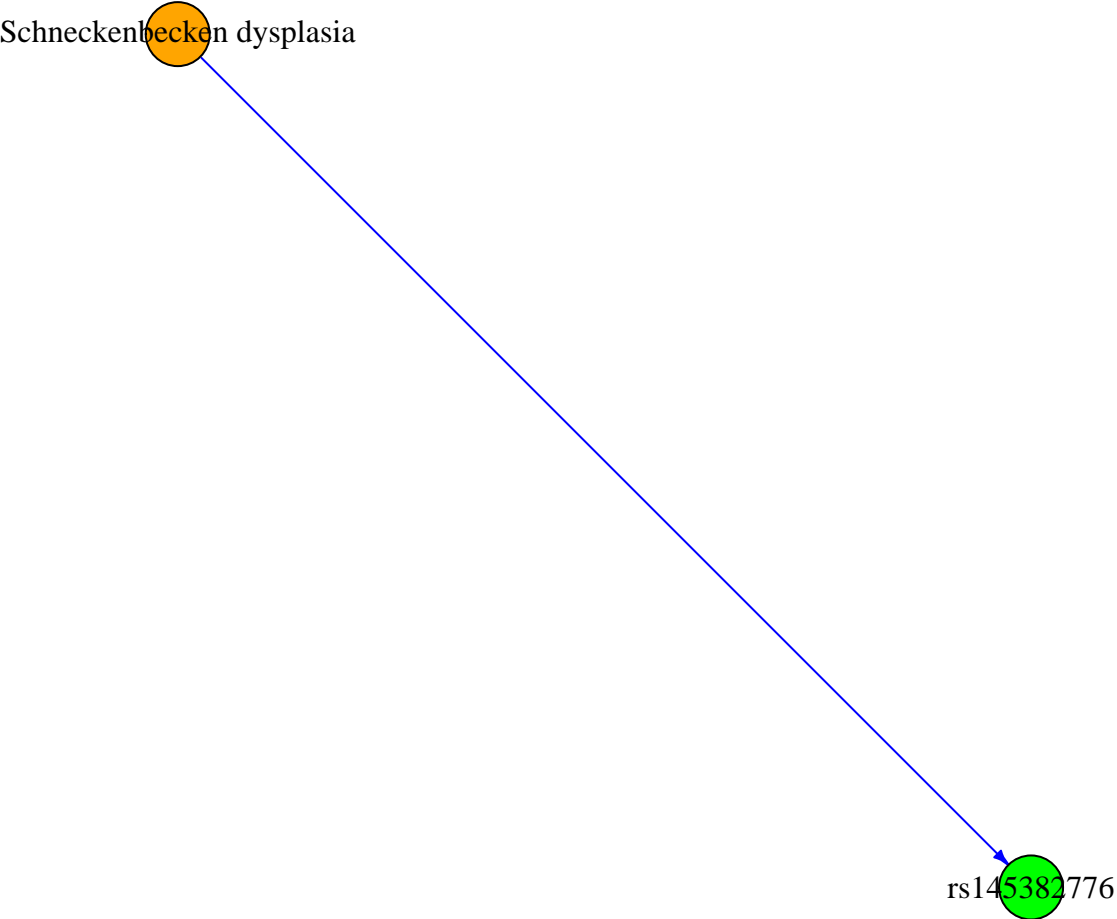

Variant–Disease Network (Schopf–Schulz–Passarge syndrome)

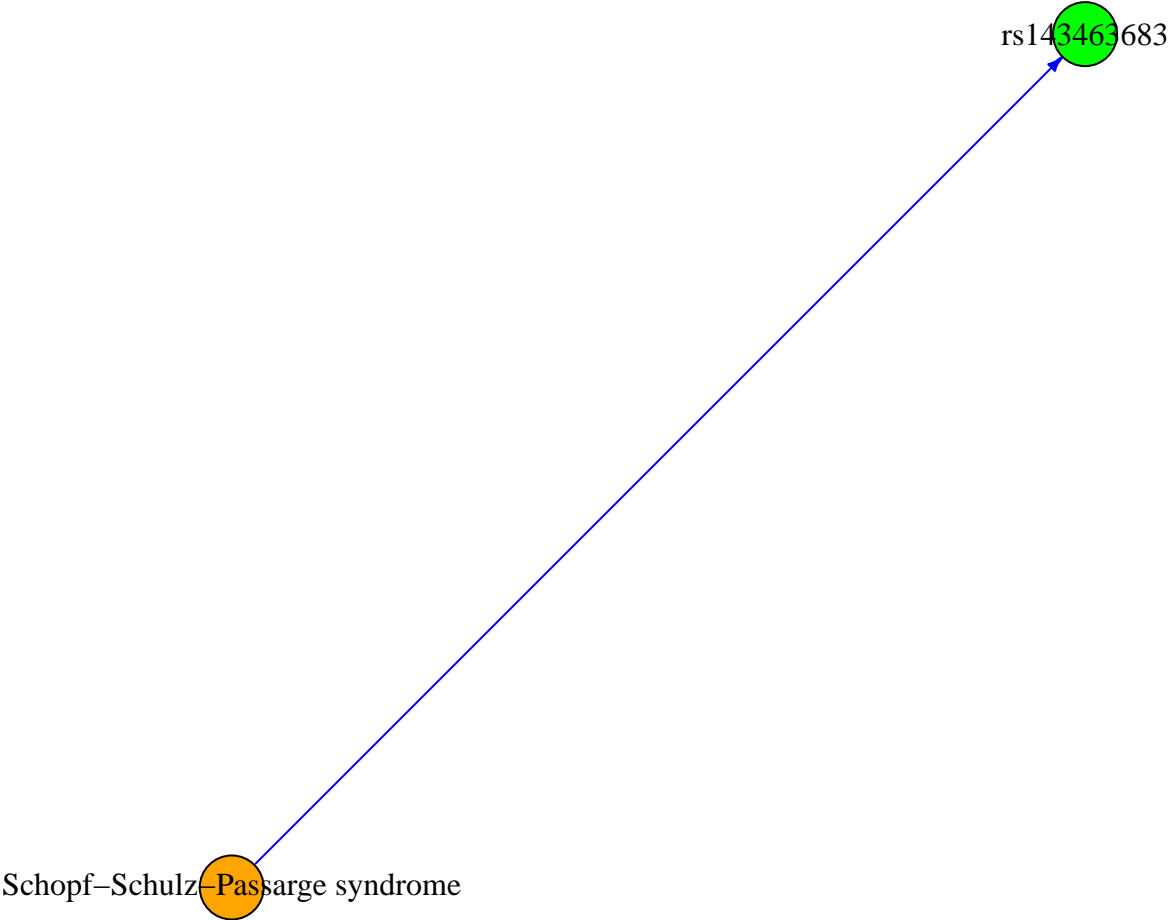

# Variant–Disease Network (Schuurs–hoeijmakers syndrome)

rs115328615

Schuurs–hoeijmakers syndrome

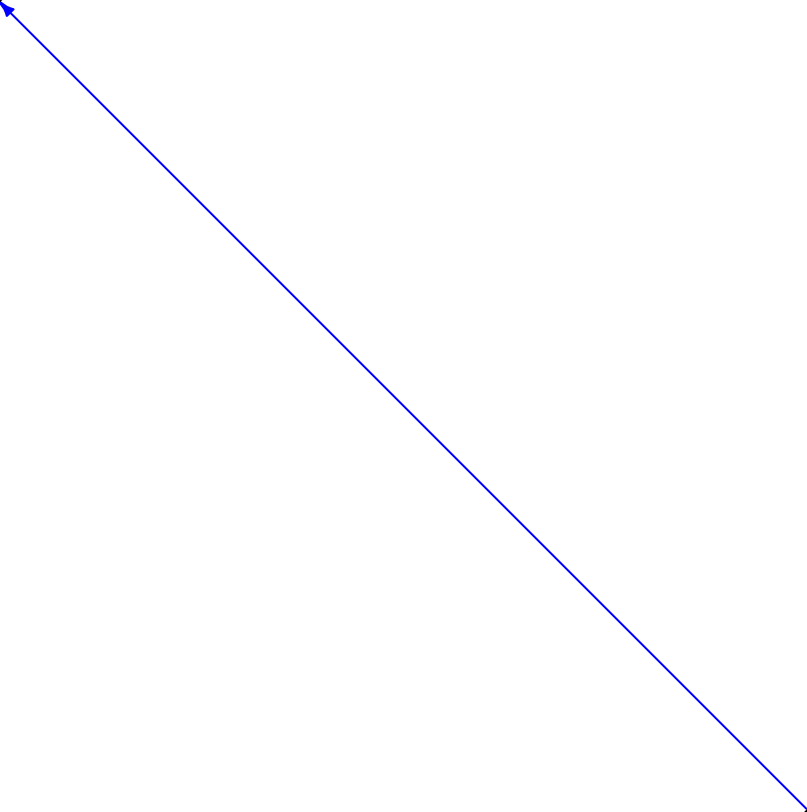

Variant–Disease Network (Schwartz Jampel syndrome type 1)

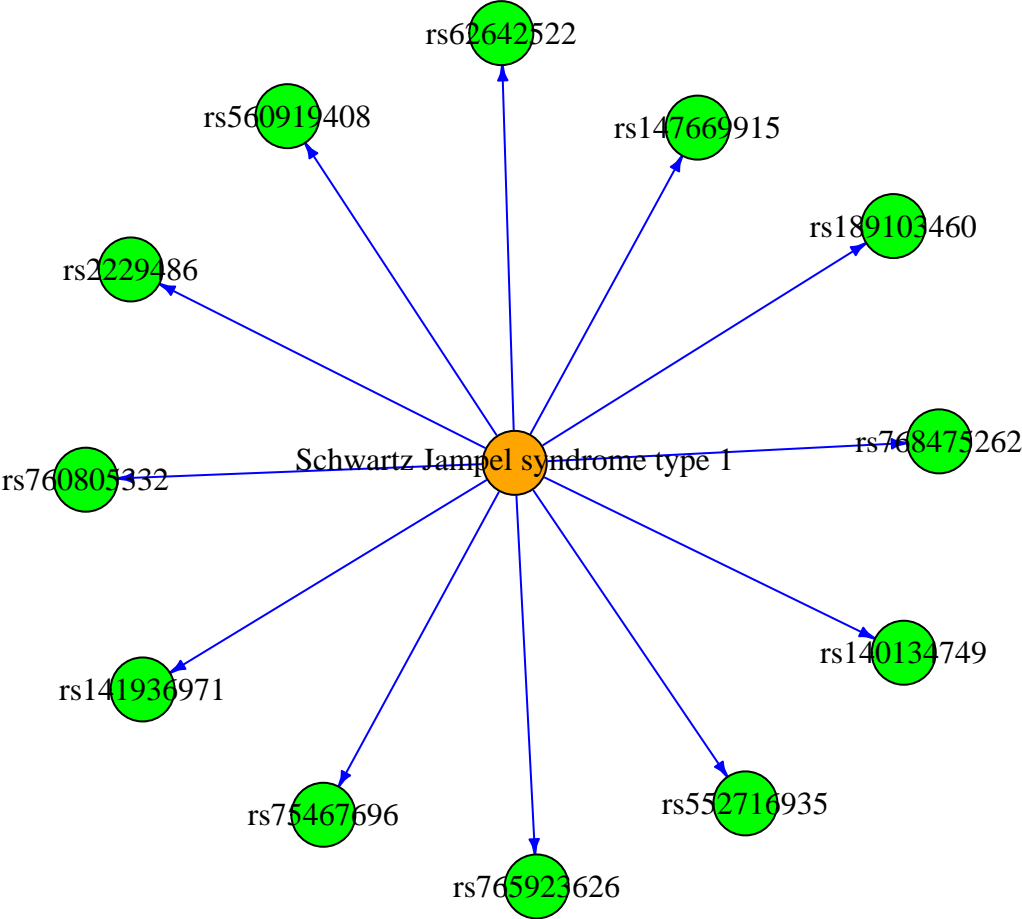

## Variant-Disease Network (SCID)

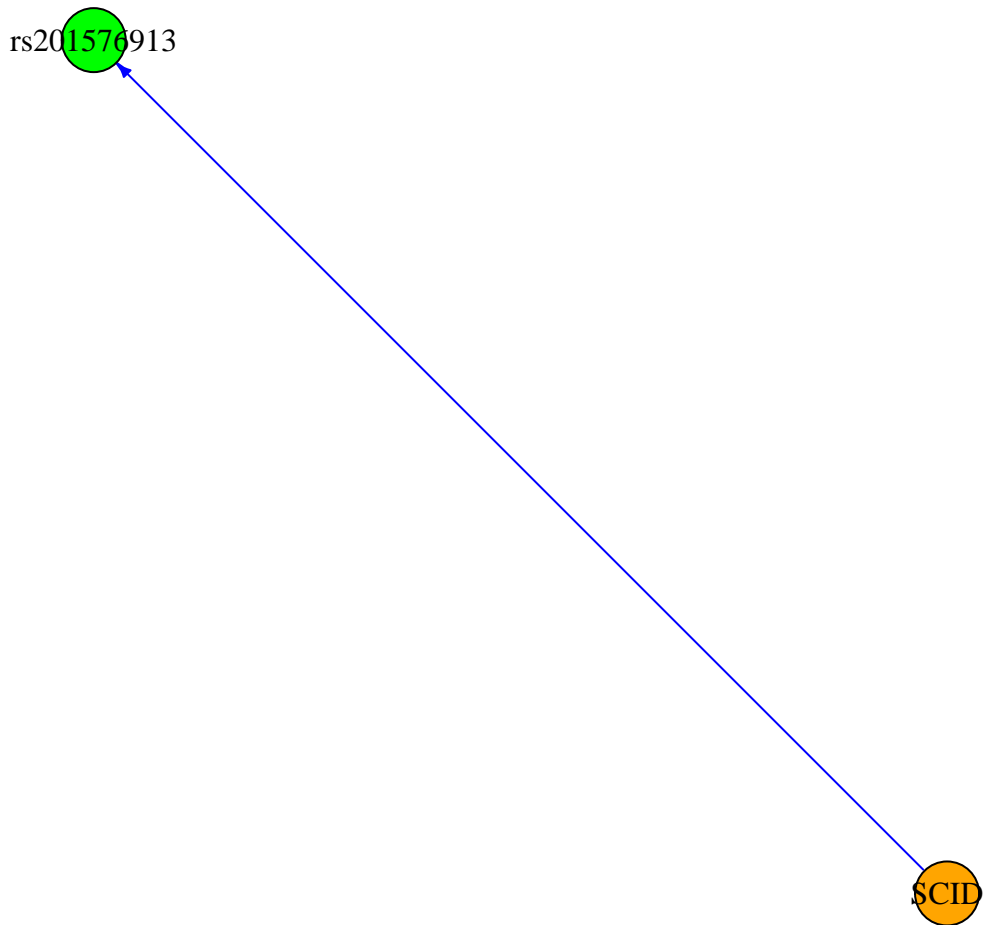

## Variant-Disease Network (Seckel syndrome)

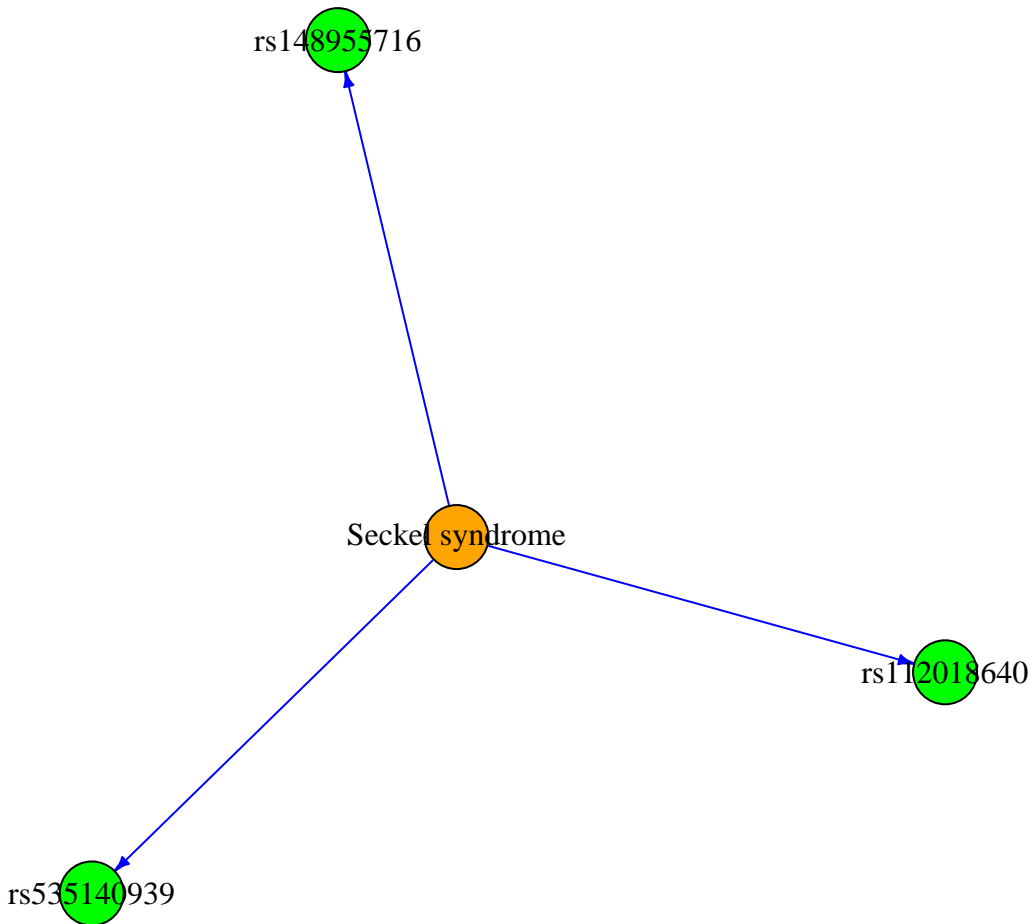

**Variant–Disease Network (Seckel syndrome 7)**

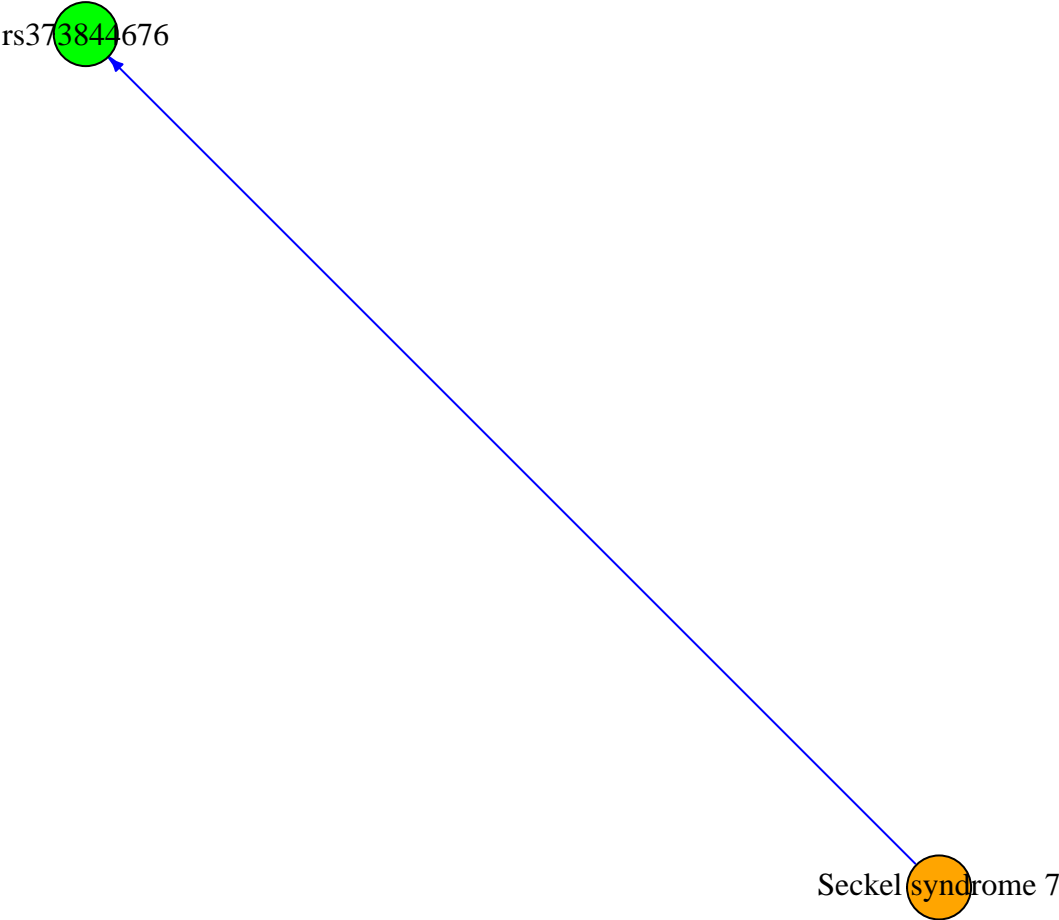

## Variant–Disease Network (Seizures)

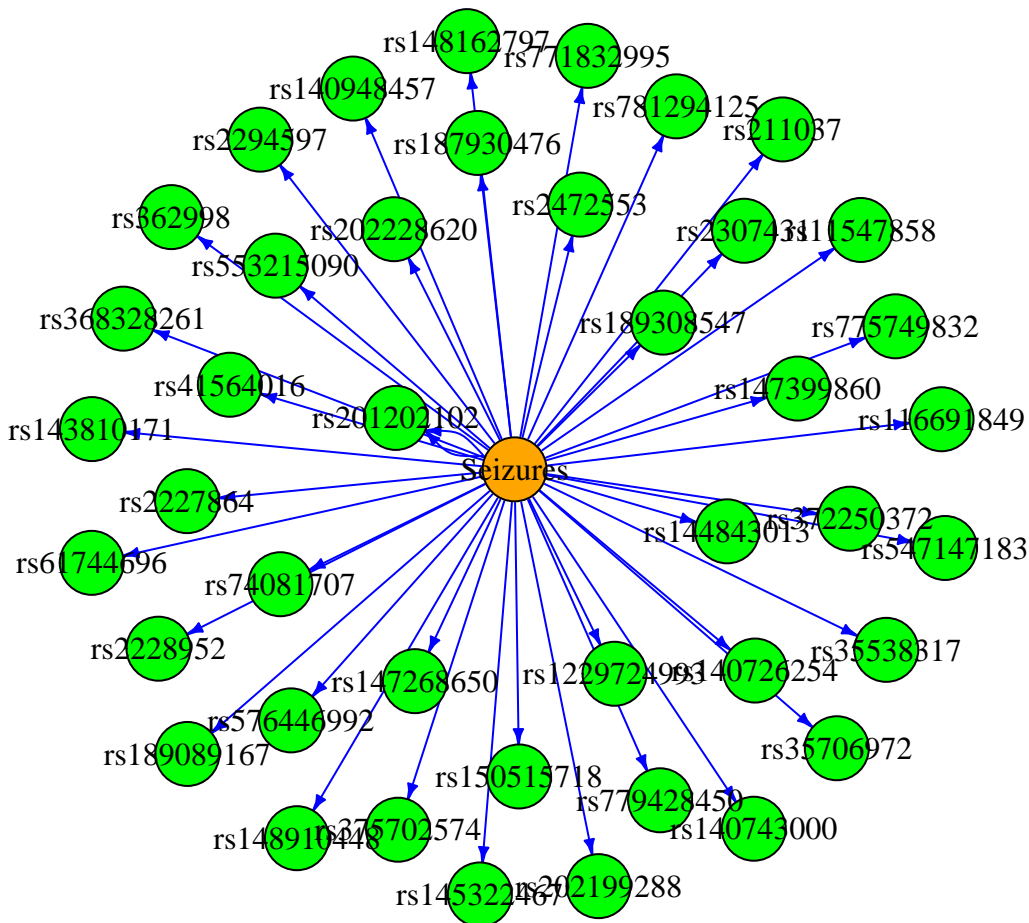



## Variant-Disease Network (Selective tooth agenesis)

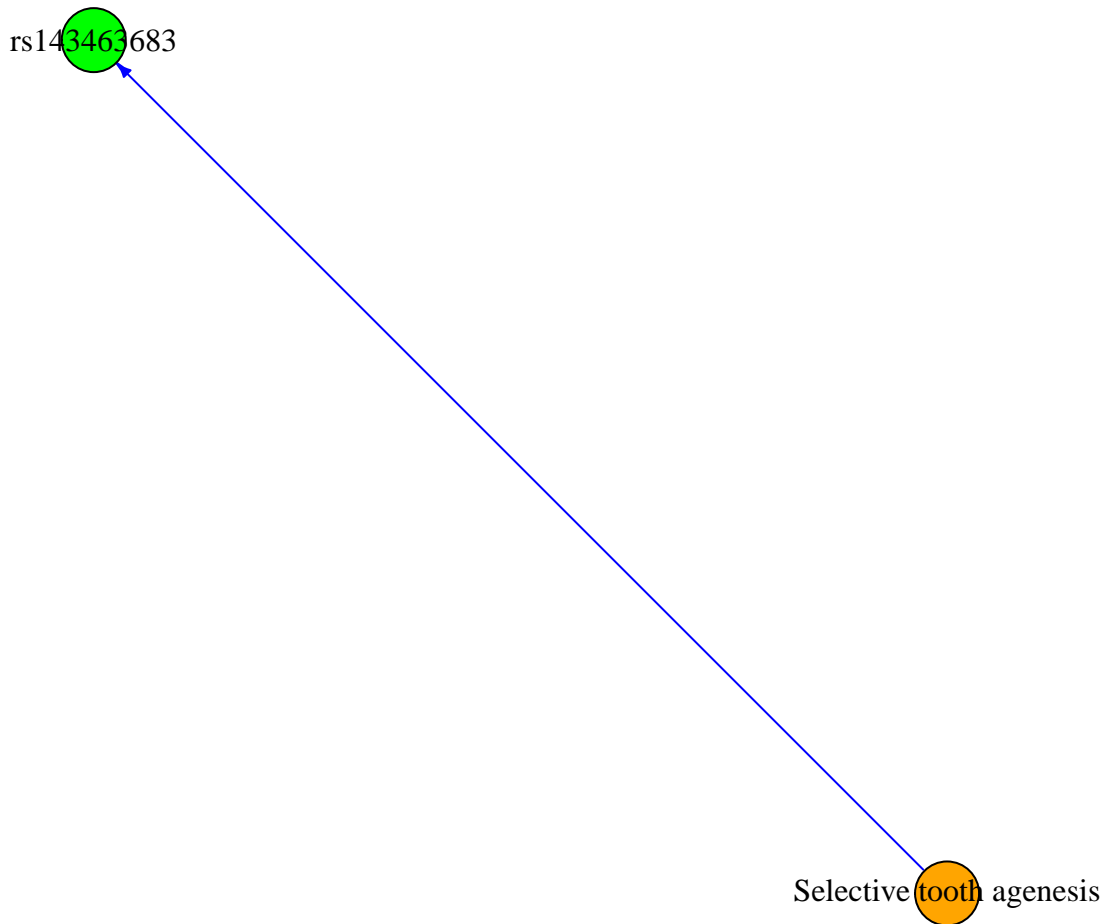

## Variant–Disease Network (Sensorineural hearing loss)

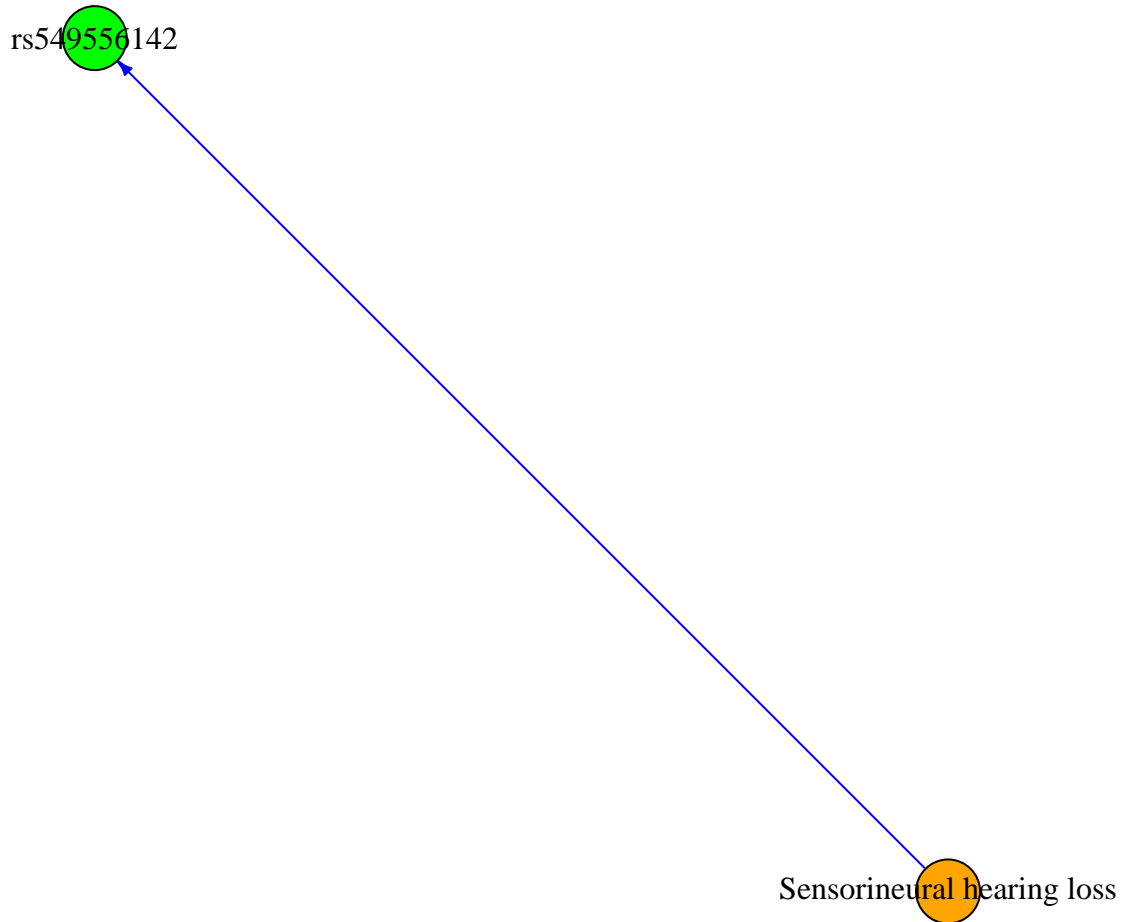

Variant–Disease Network (Severe Combined Immune Deficiency)

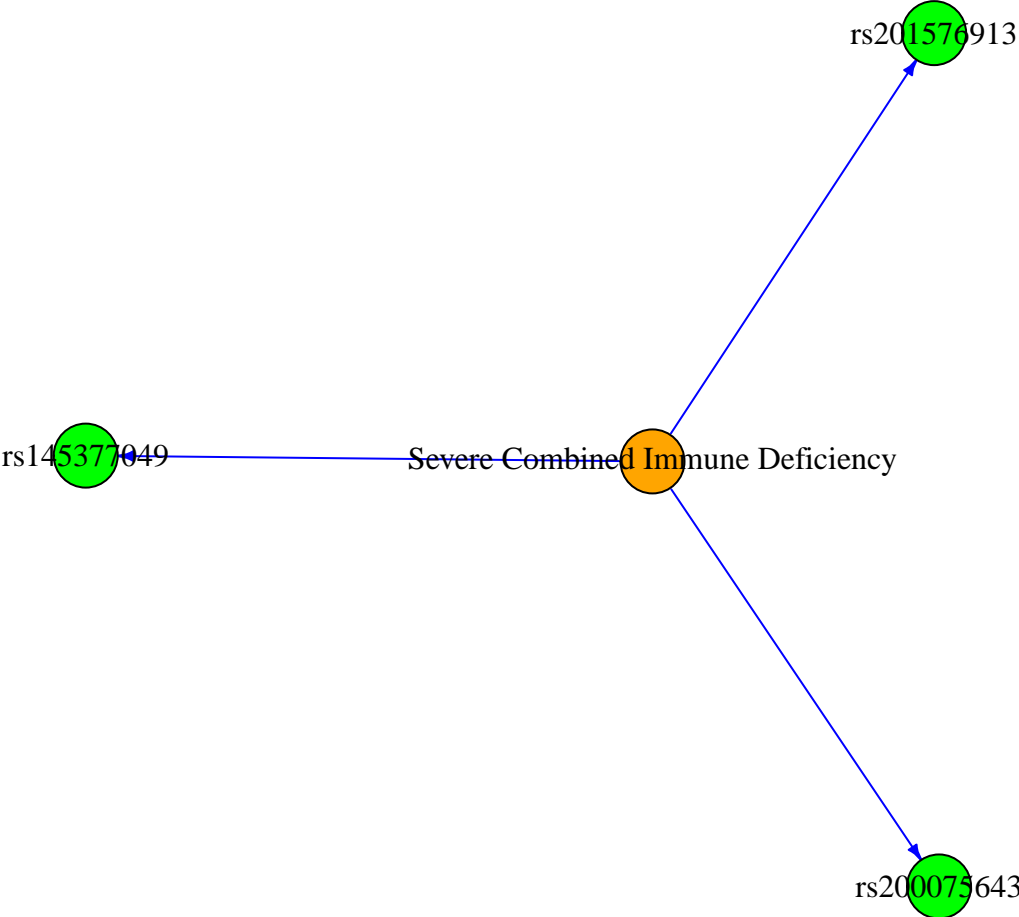

# Variant–Disease Network (Severe combined immunodeficiency)

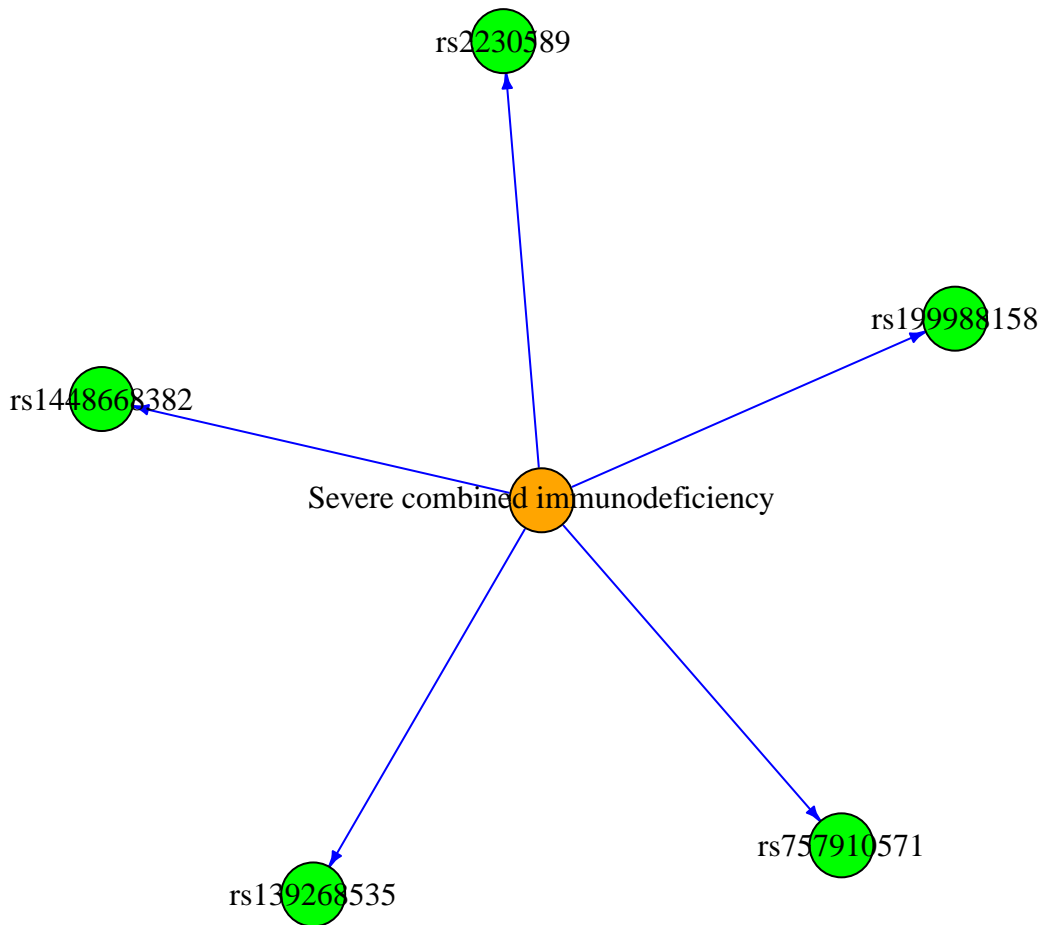

**Variant–Disease Network (Severe combined immunodeficiency disease)**

Severe combined immunodeficiency disease

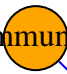

rs2230589

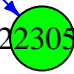

# Variant-Disease Network (Severe combined immunodeficiency due to ADA deficiency)

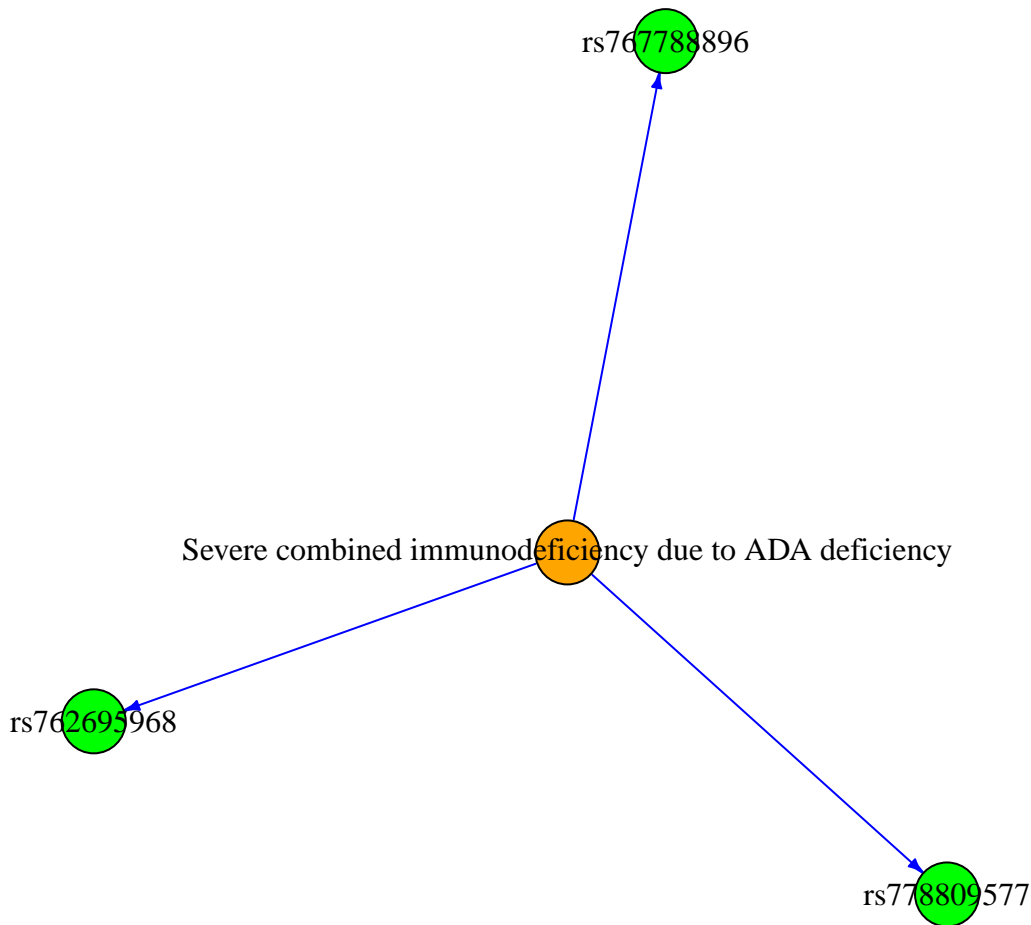

# Variant–Disease Network (Severe myoclonic epilepsy in infancy)

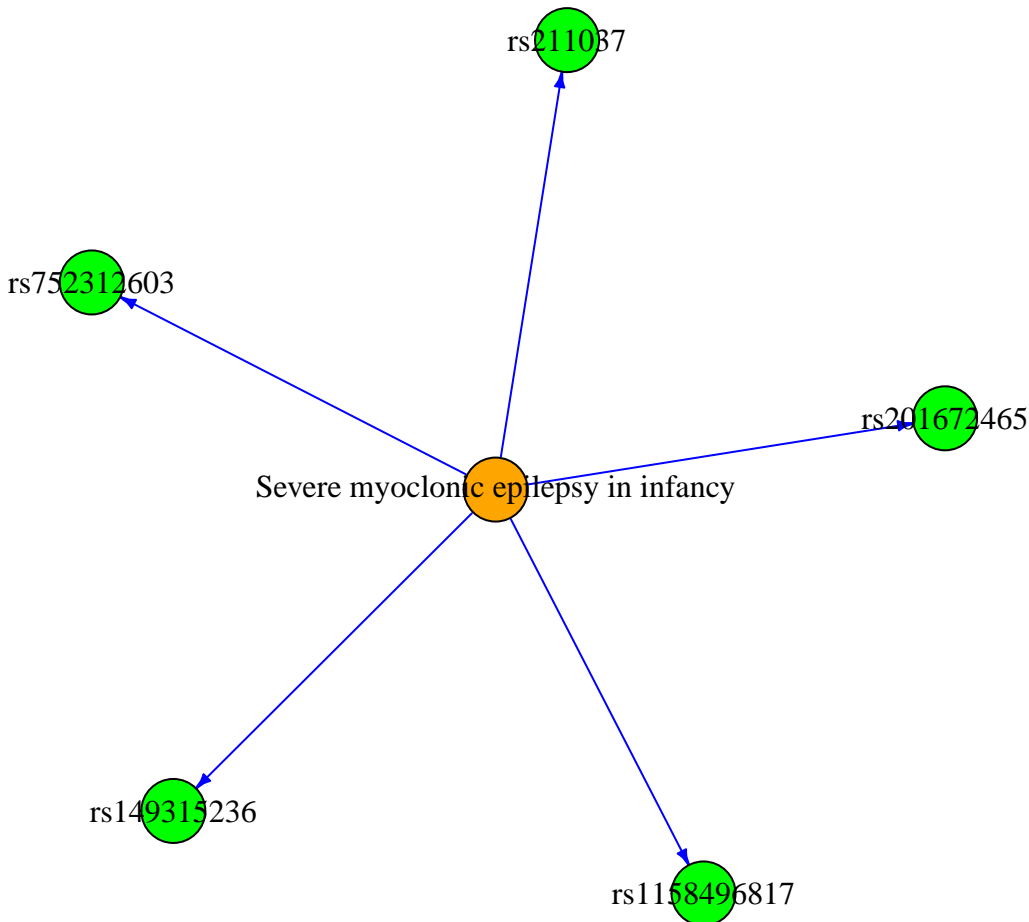

Variant–Disease Network (Shaheen syndrome)

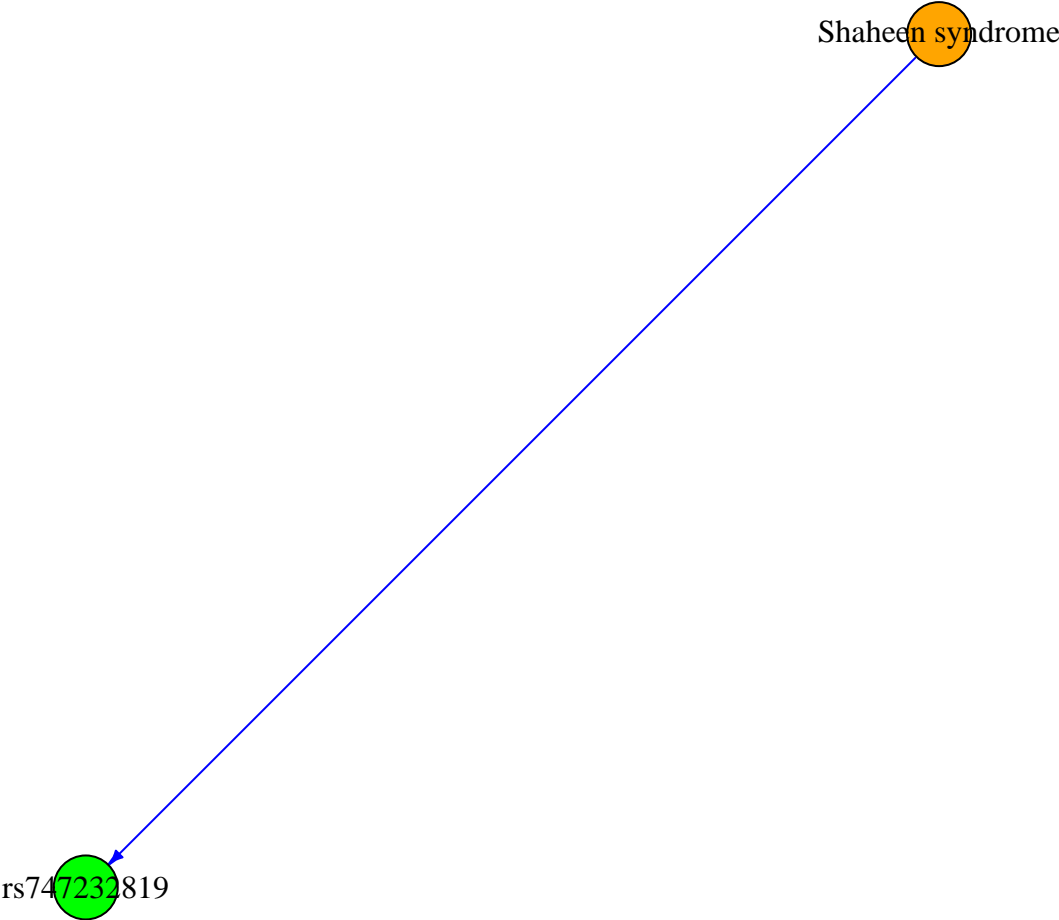



## Variant–Disease Network (short QT syndrome)

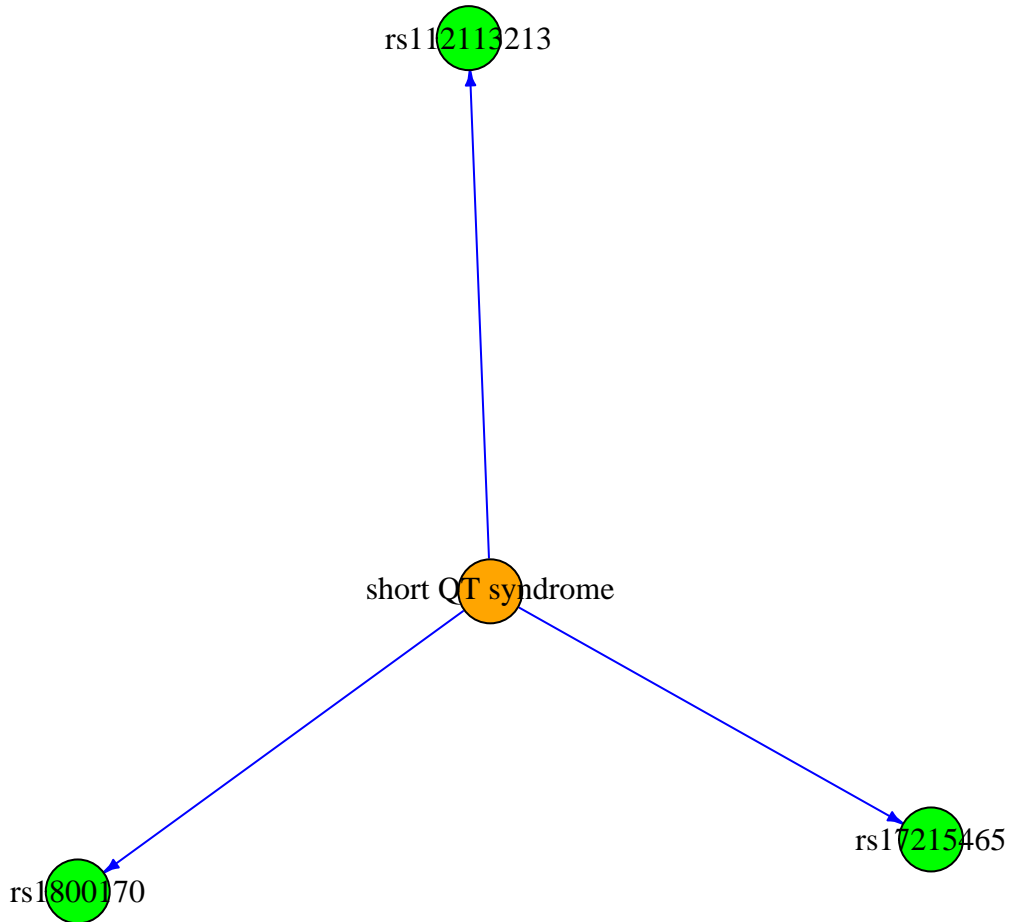

Variant–Disease Network (Short Rib Polydactyly Syndrome)

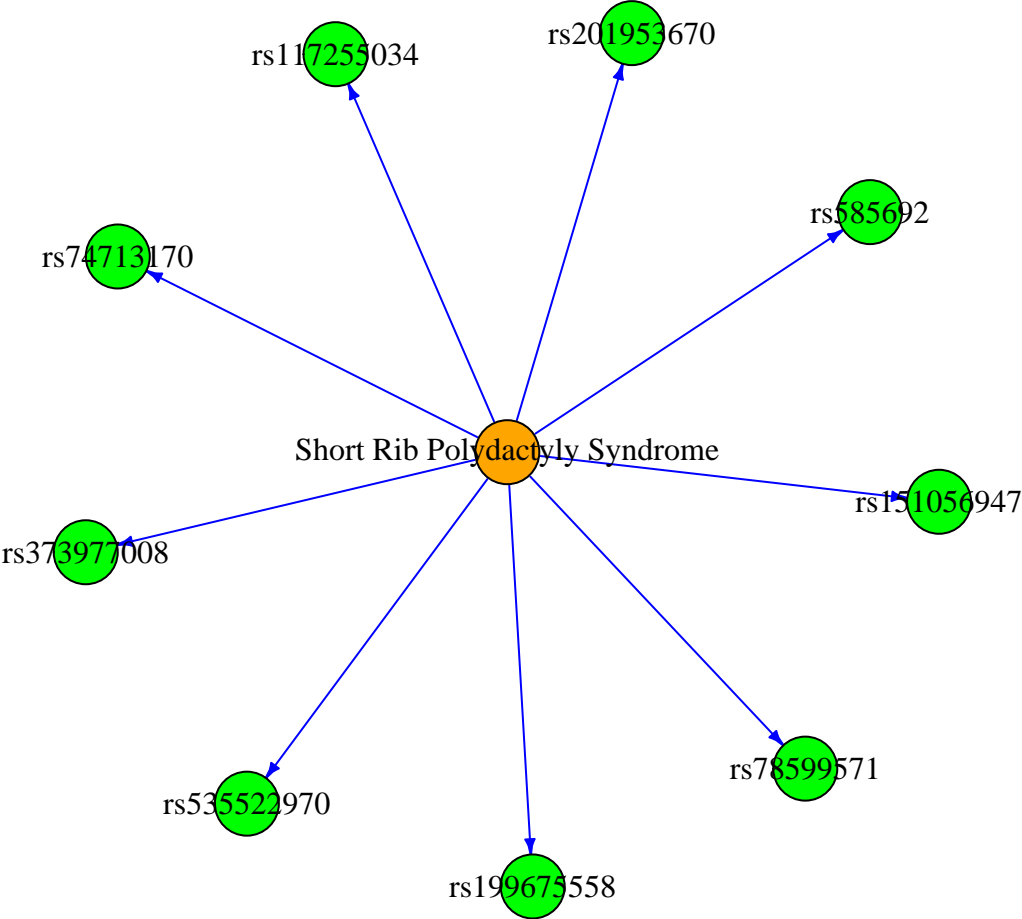

## Variant–Disease Network (Short stature)

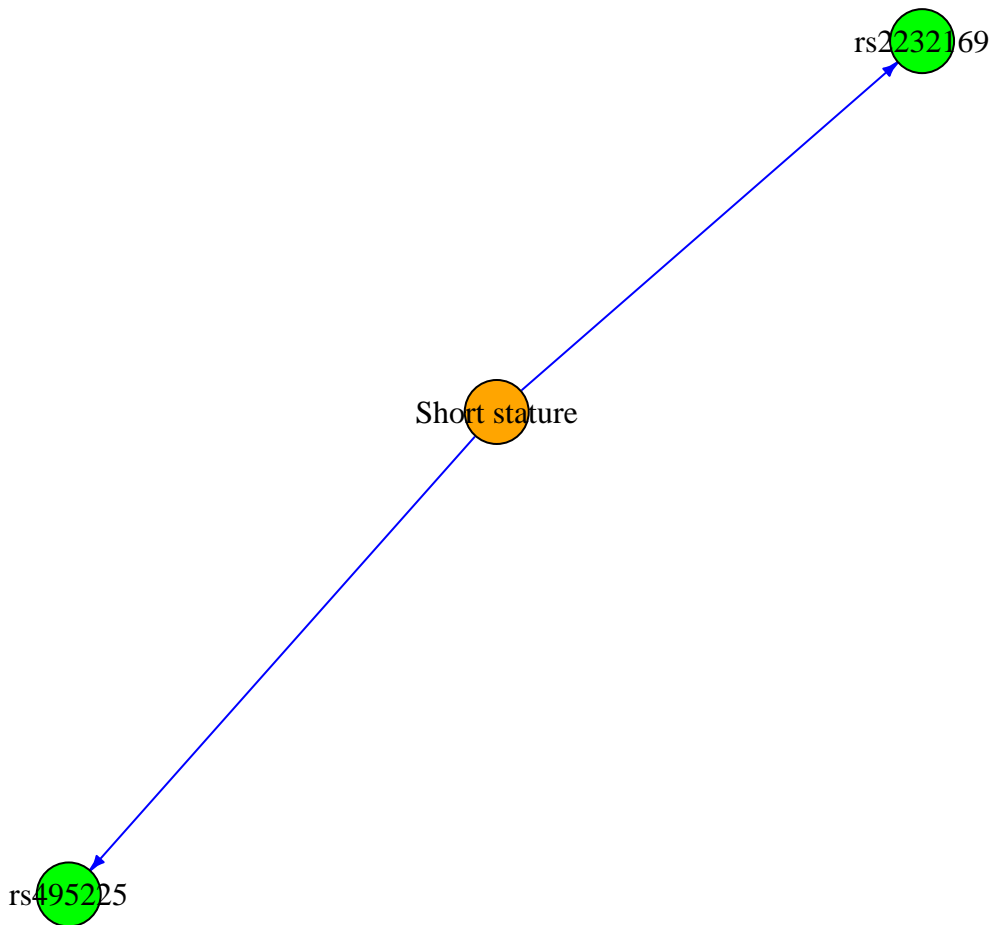

## Variant-Disease Network (Short toe)

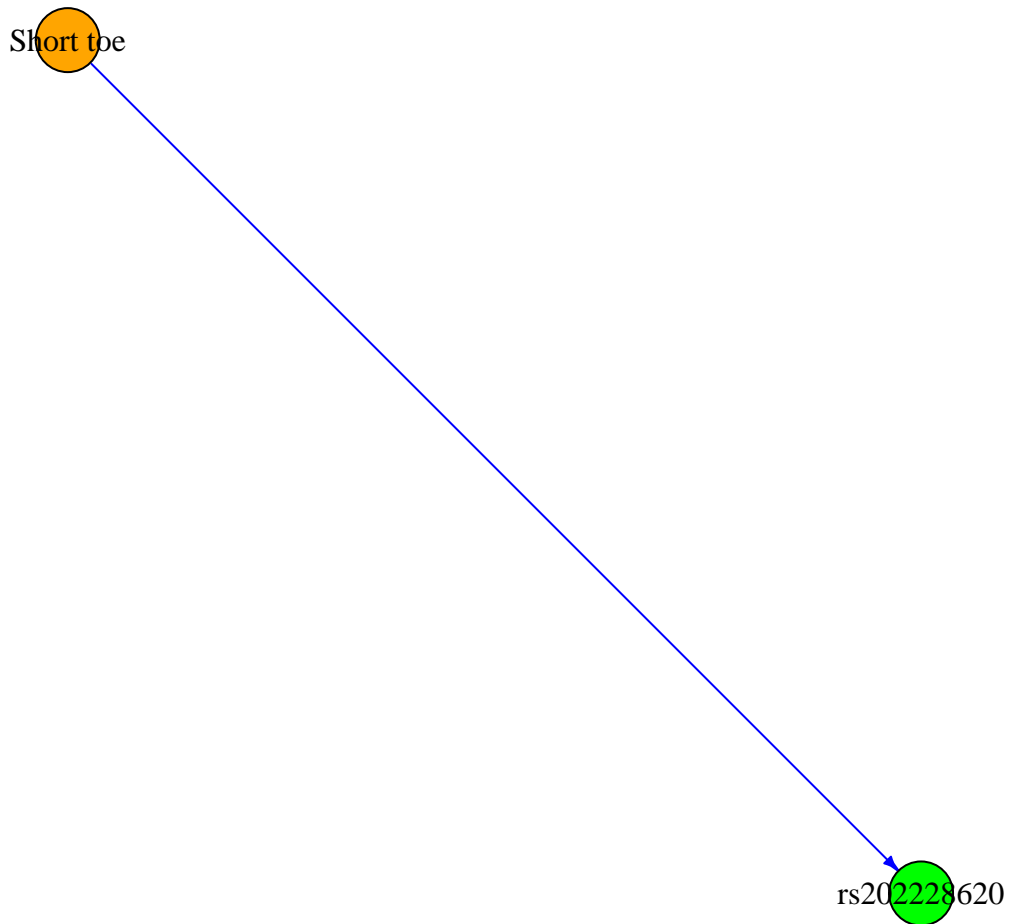

## Variant–Disease Network (Shortening of all phalanges of fingers)

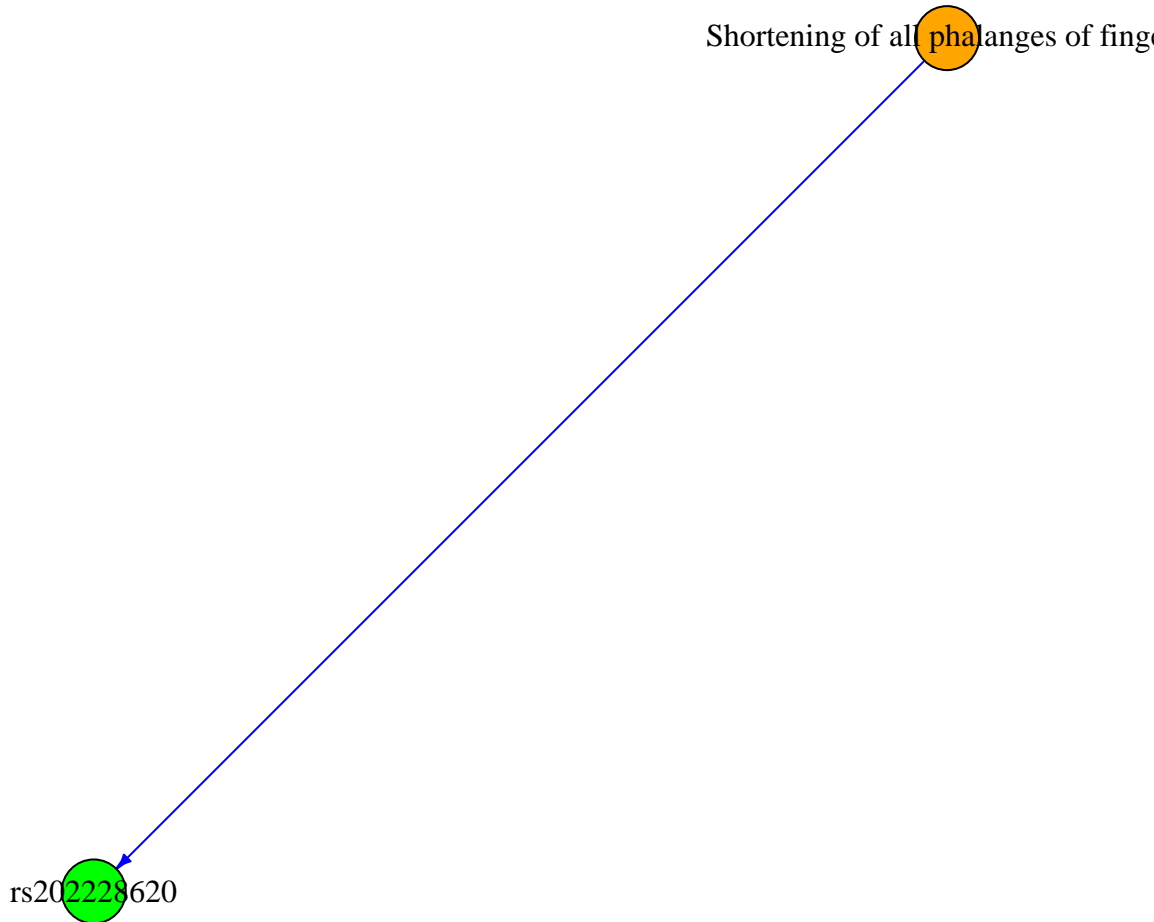

## Variant–Disease Network (Short-rib polydactyly syndrome type III)

rs137853032

Short-rib polydactyly syndrome type III

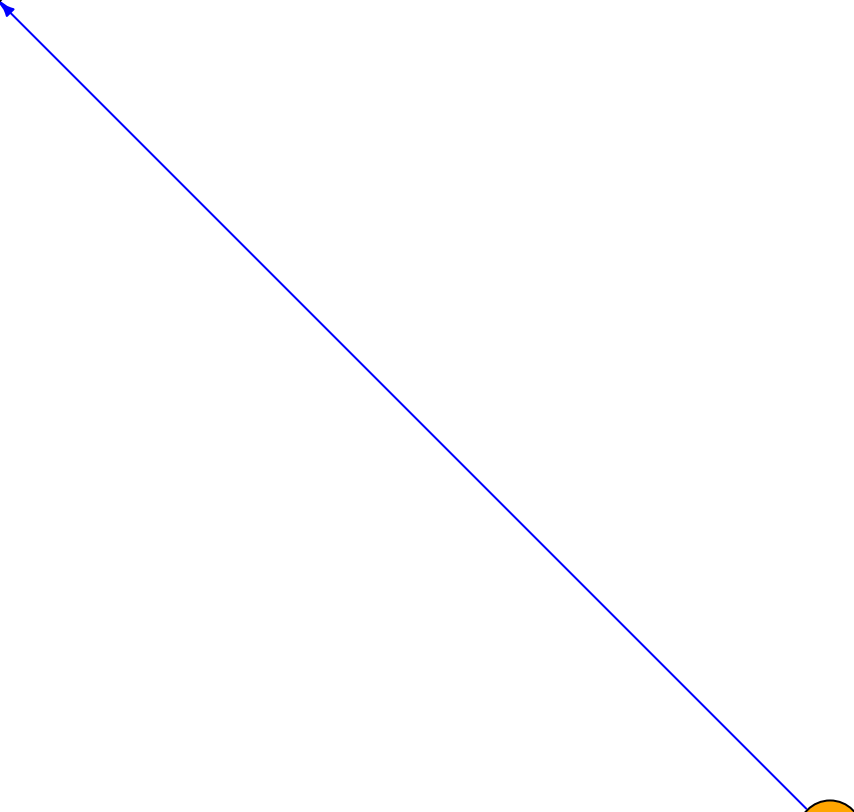

# Variant-Disease Network (Short-rib thoracic dysplasia 13 with or without polydactyly)

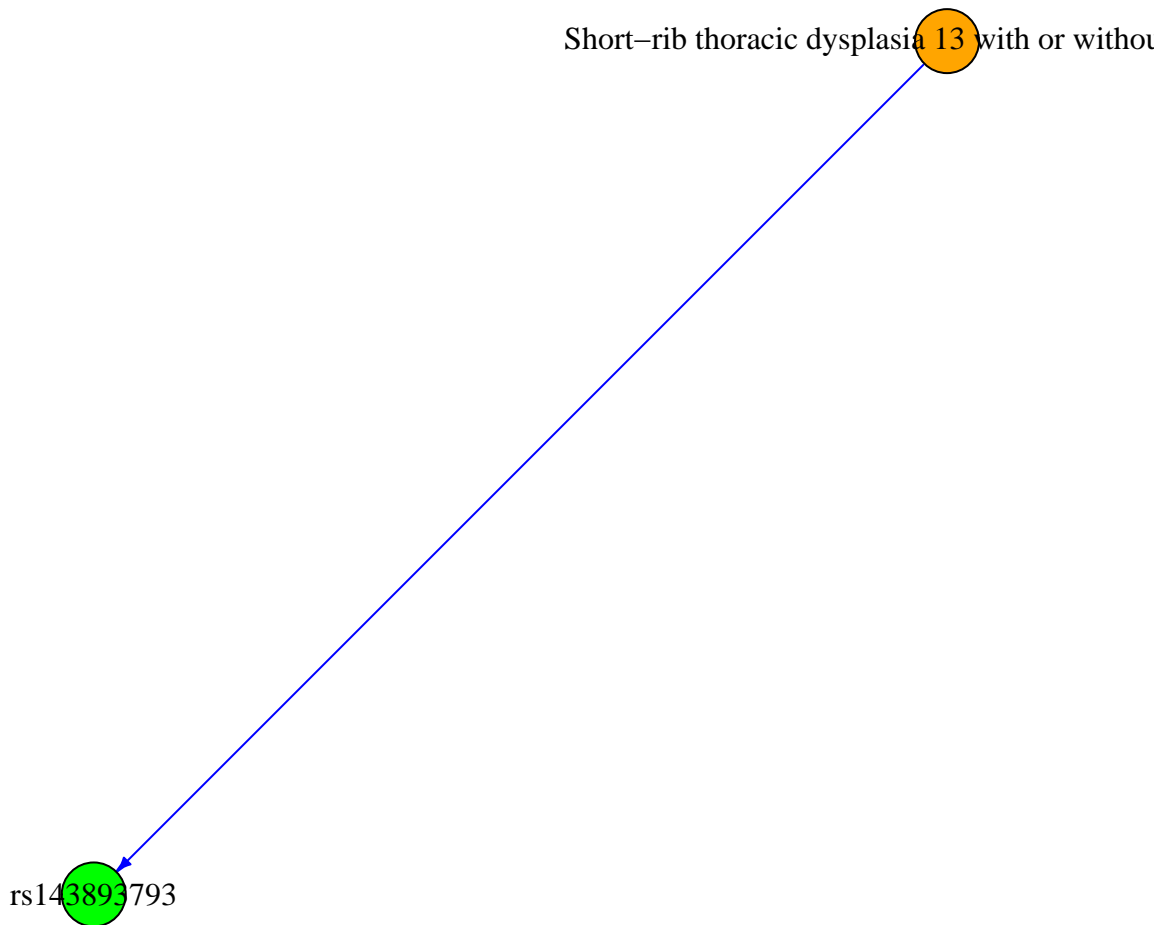

# Variant-Disease Network (Short-rib thoracic dysplasia 3 with or without polydactyly)

rs137853032

Short-rib thoracic dysplasia 3 with or without polydactyly





# Variant-Disease Network (Short-rib thoracic dysplasia 8 with or without polydactyly)

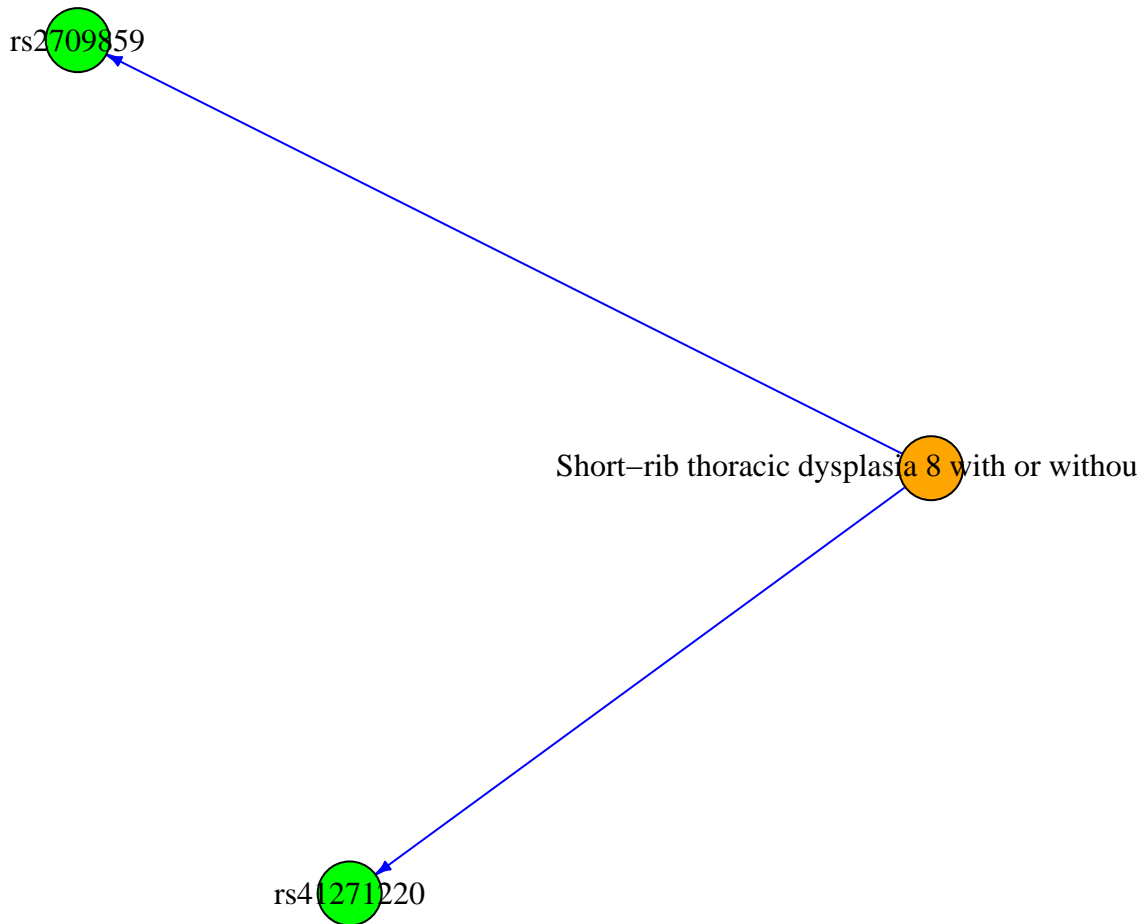

## Variant–Disease Network (Shprintzen–Goldberg syndrome)

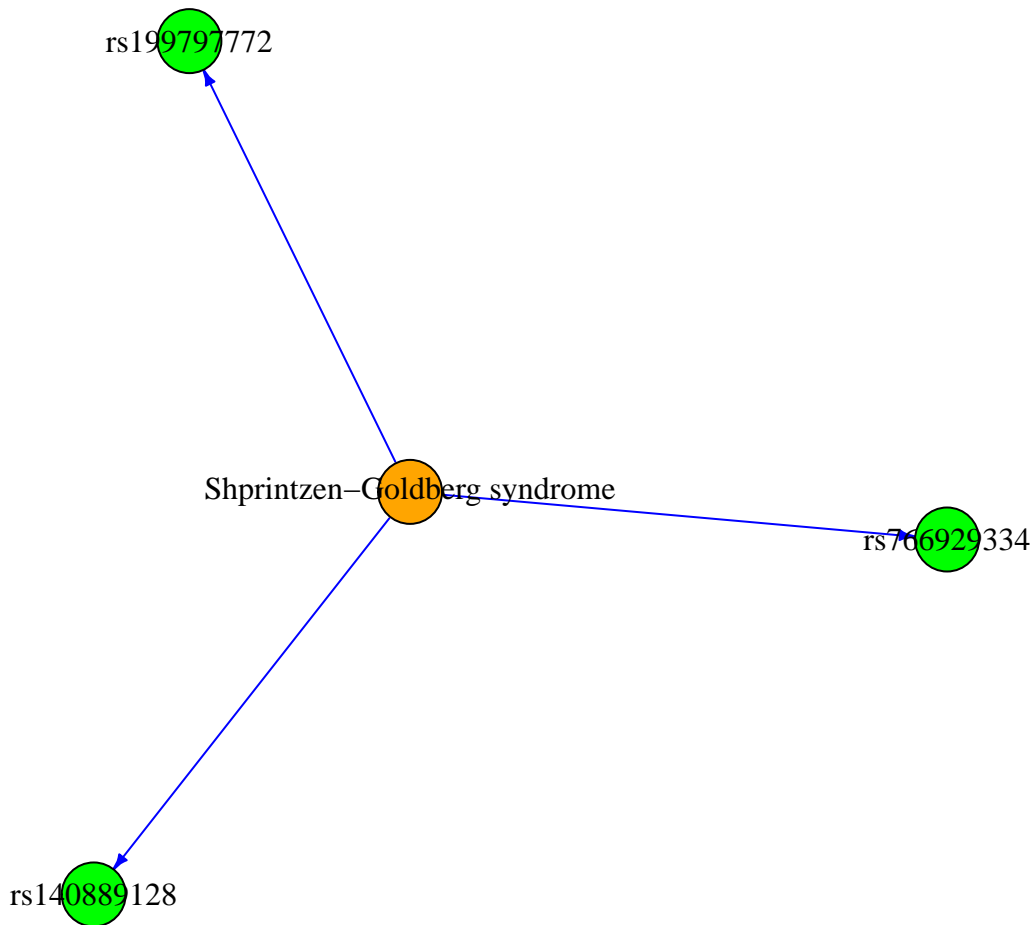

## Variant–Disease Network (Shwachman–Diamond syndrome 1)

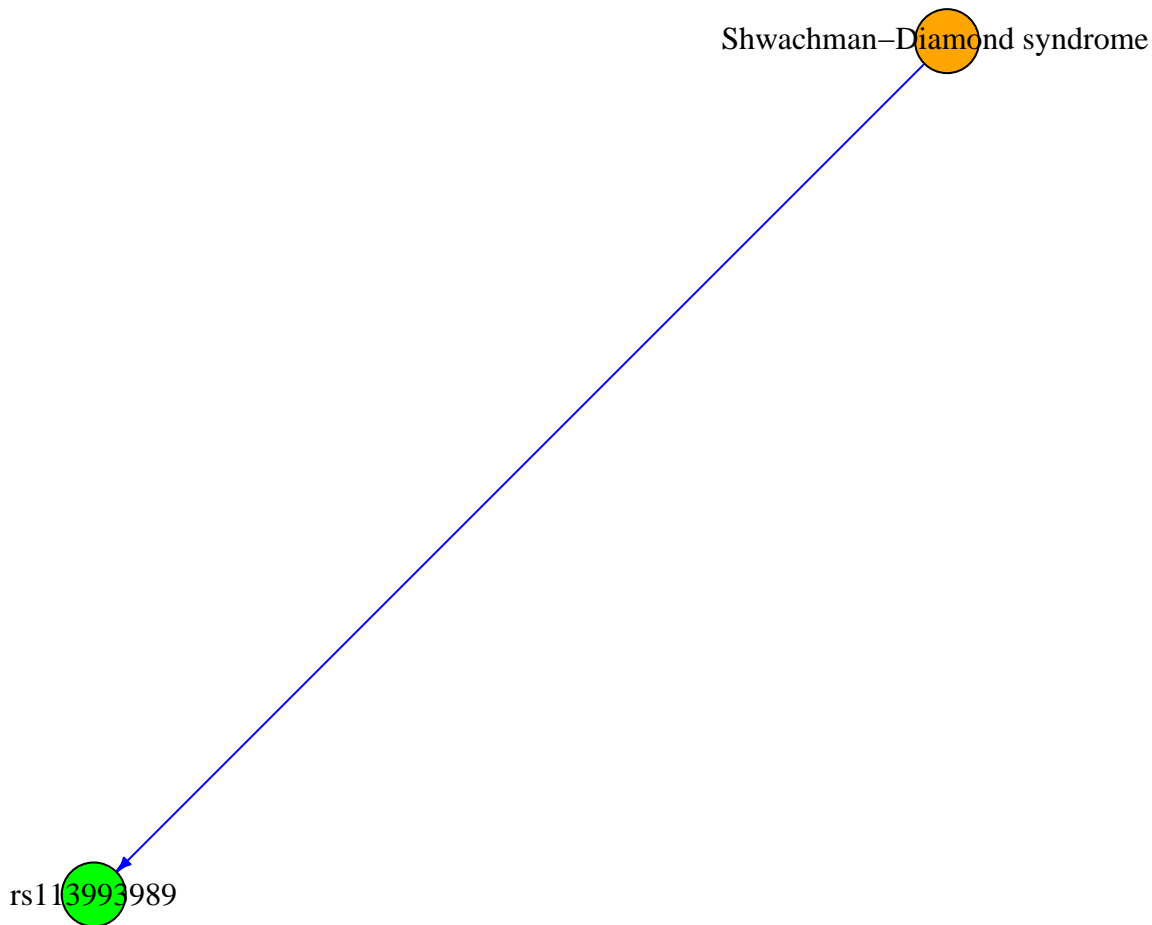

## Variant-Disease Network (Sialidosis)

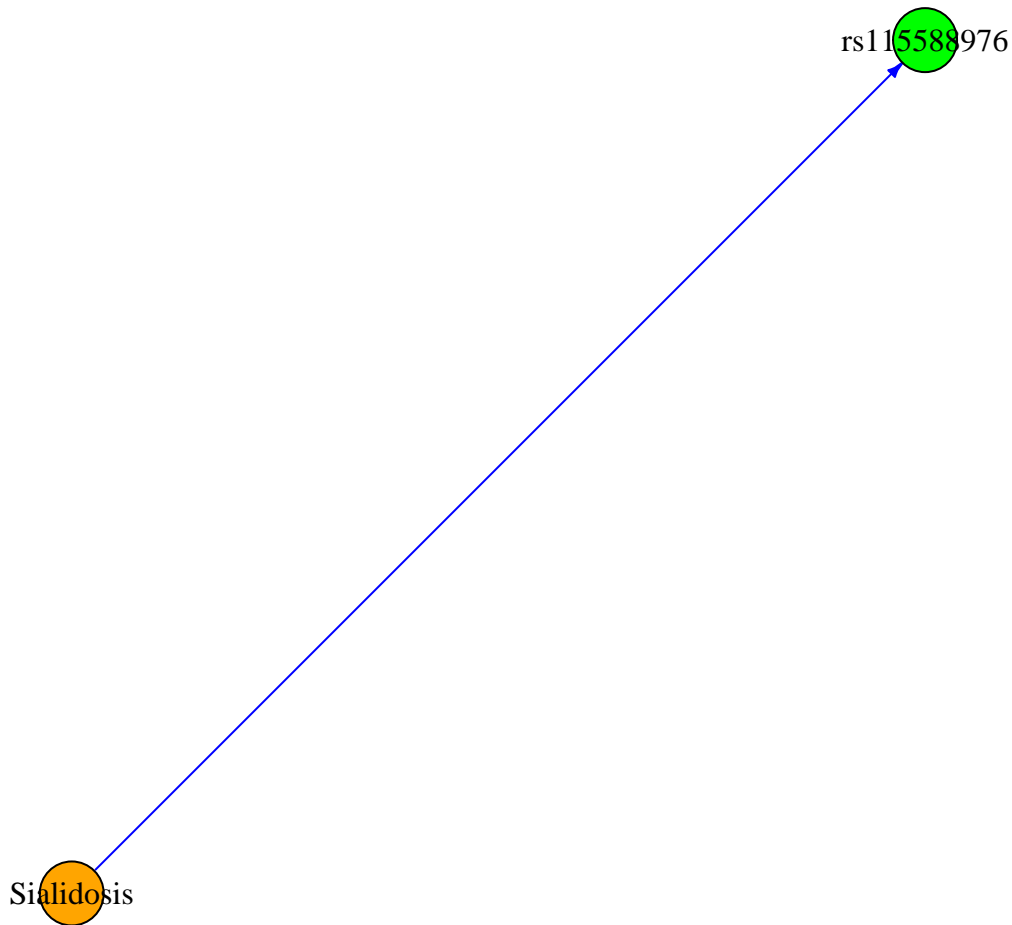

## Variant–Disease Network (Sialuria)

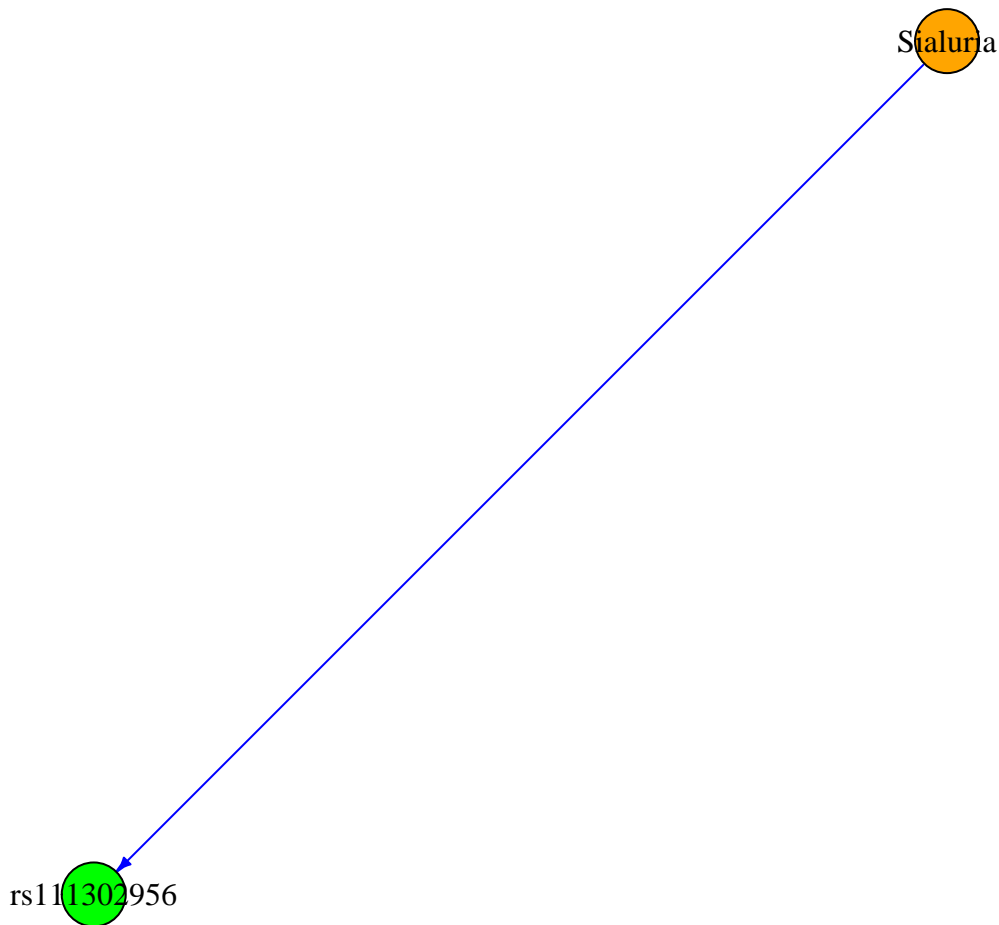

Variant–Disease Network (Sideroblastic anemia with B–cell immunodeficiency)

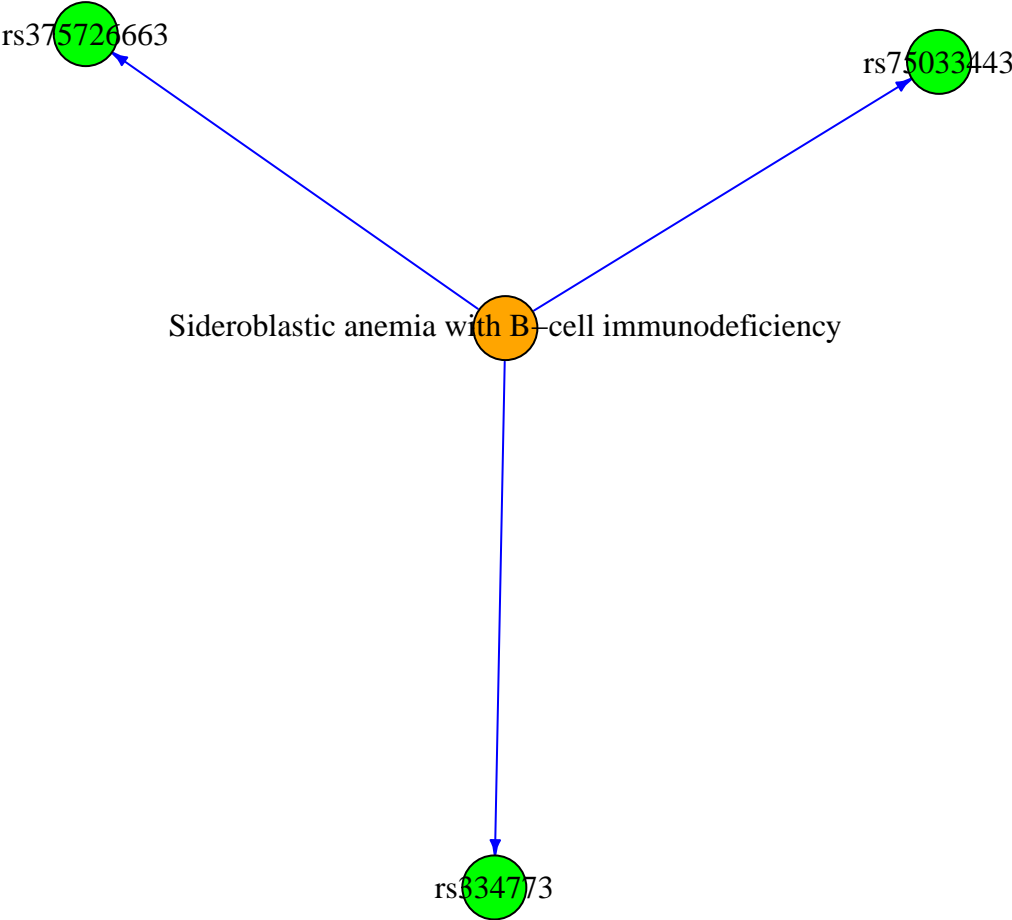

**Variant–Disease Network (sildenafil response – Efficacy)**

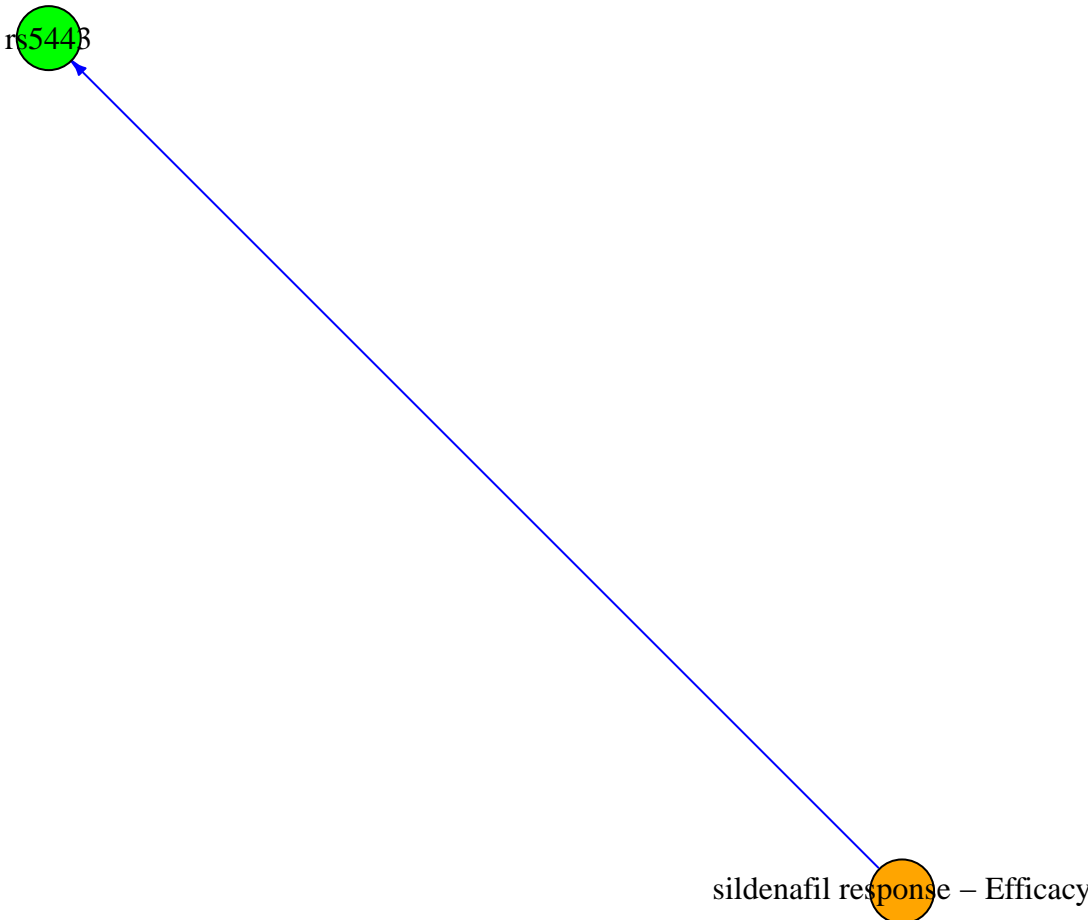

Variant–Disease Network (Singleton–Merten syndrome 1)

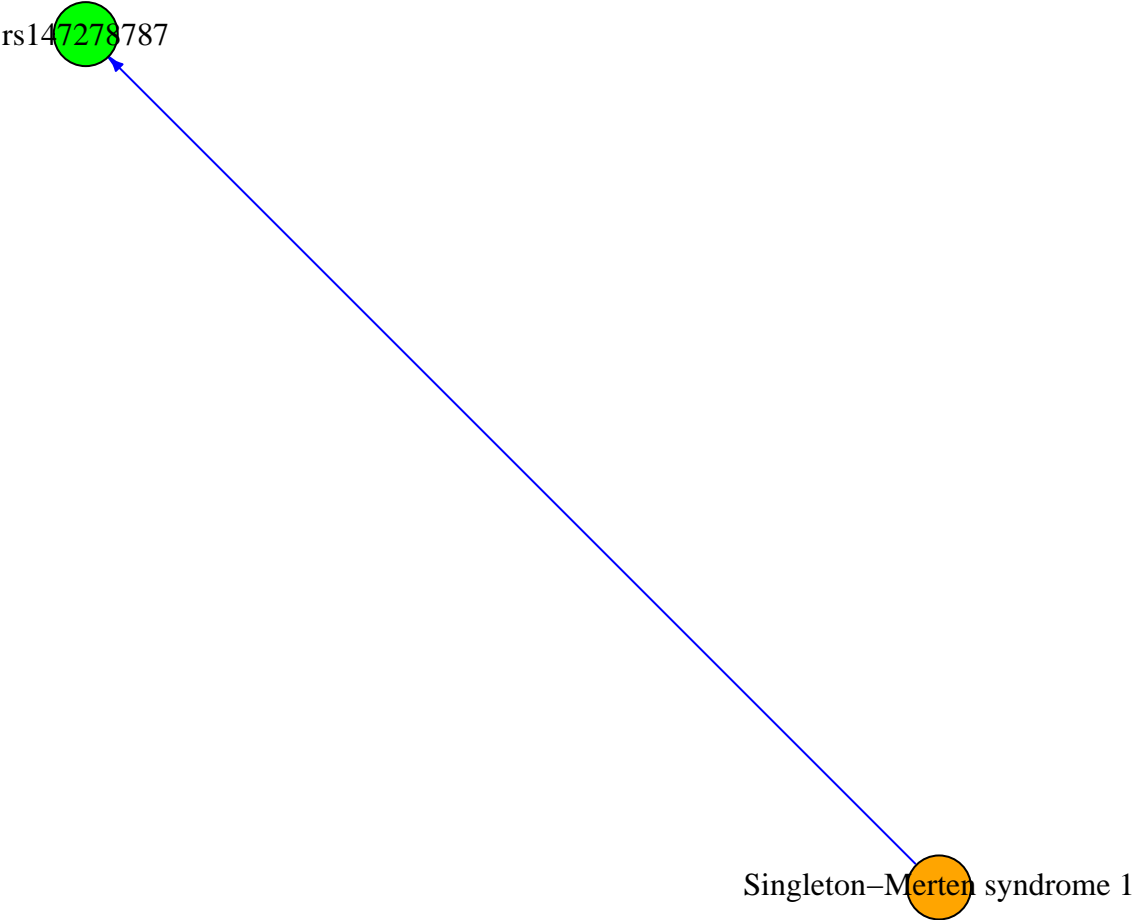



Variant–Disease Network (Sitosterolemia)

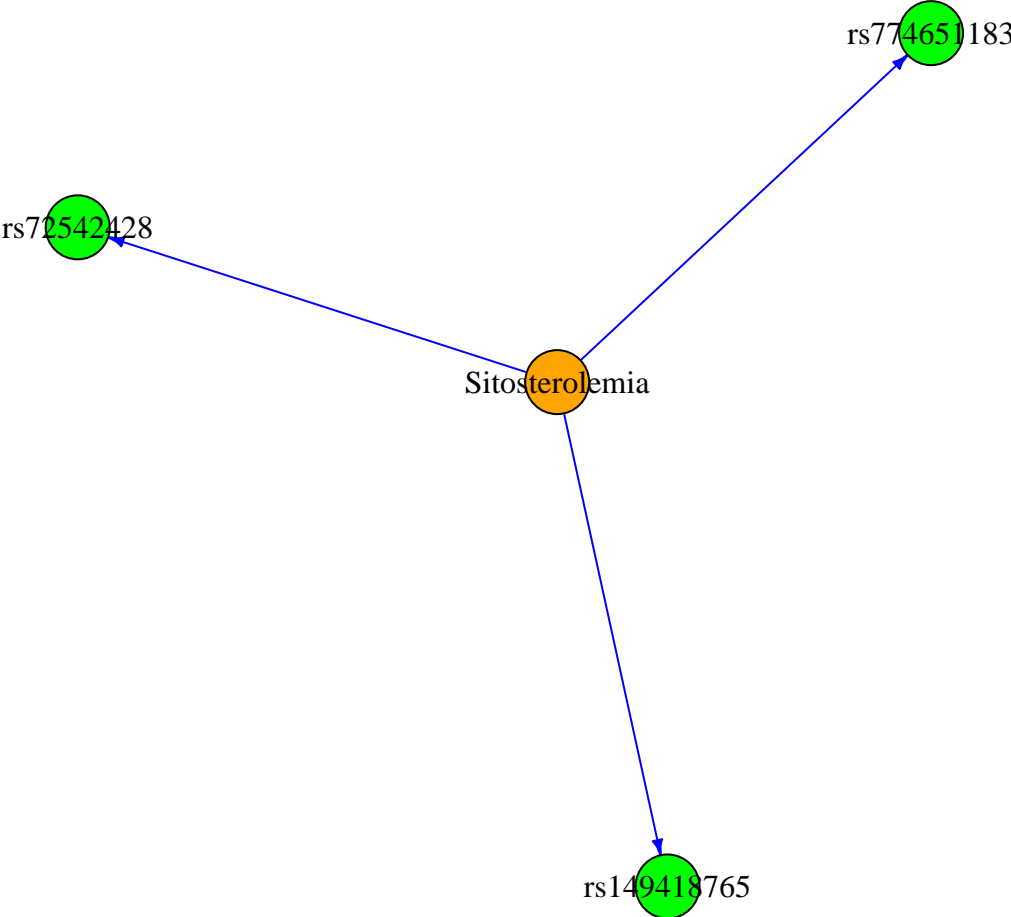

## Variant–Disease Network (Sjögren–Larsson syndrome)

## Variant–Disease Network (Skeletal dysplasia)

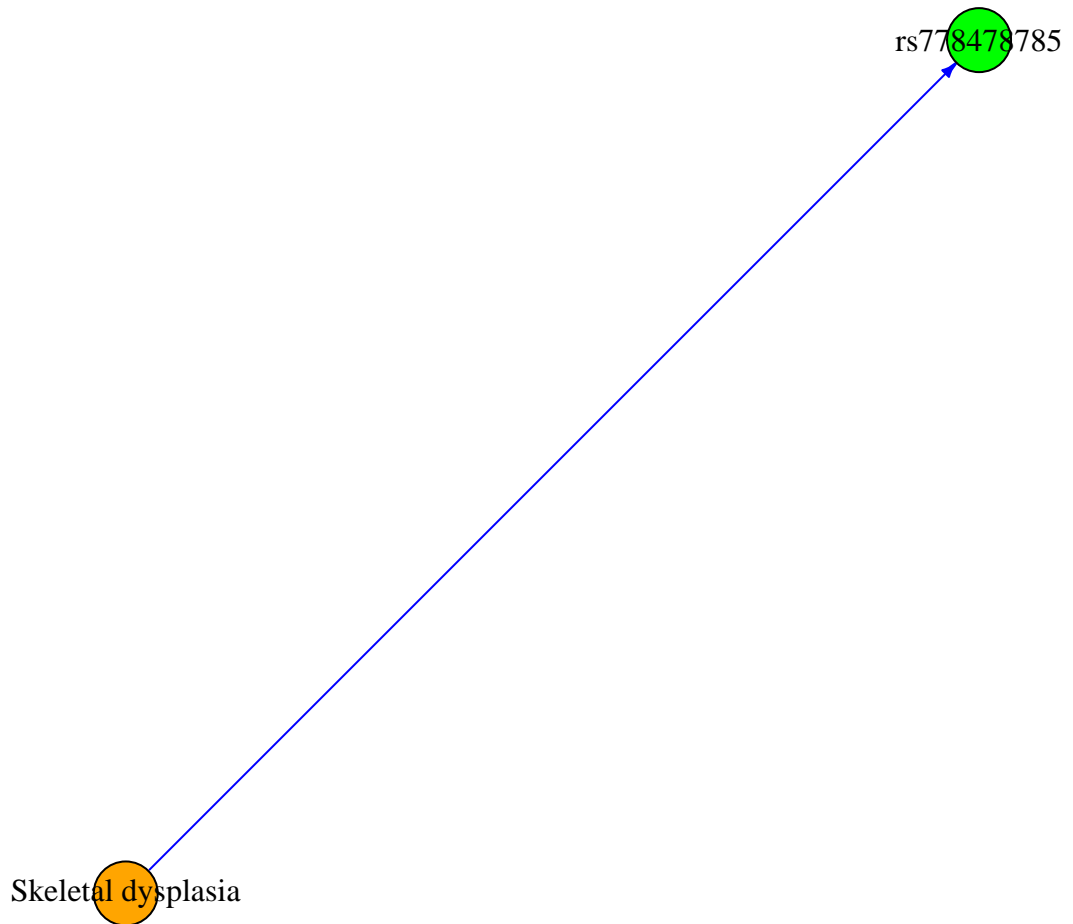

Variant–Disease Network (Skin fragility woolly hair syndrome)

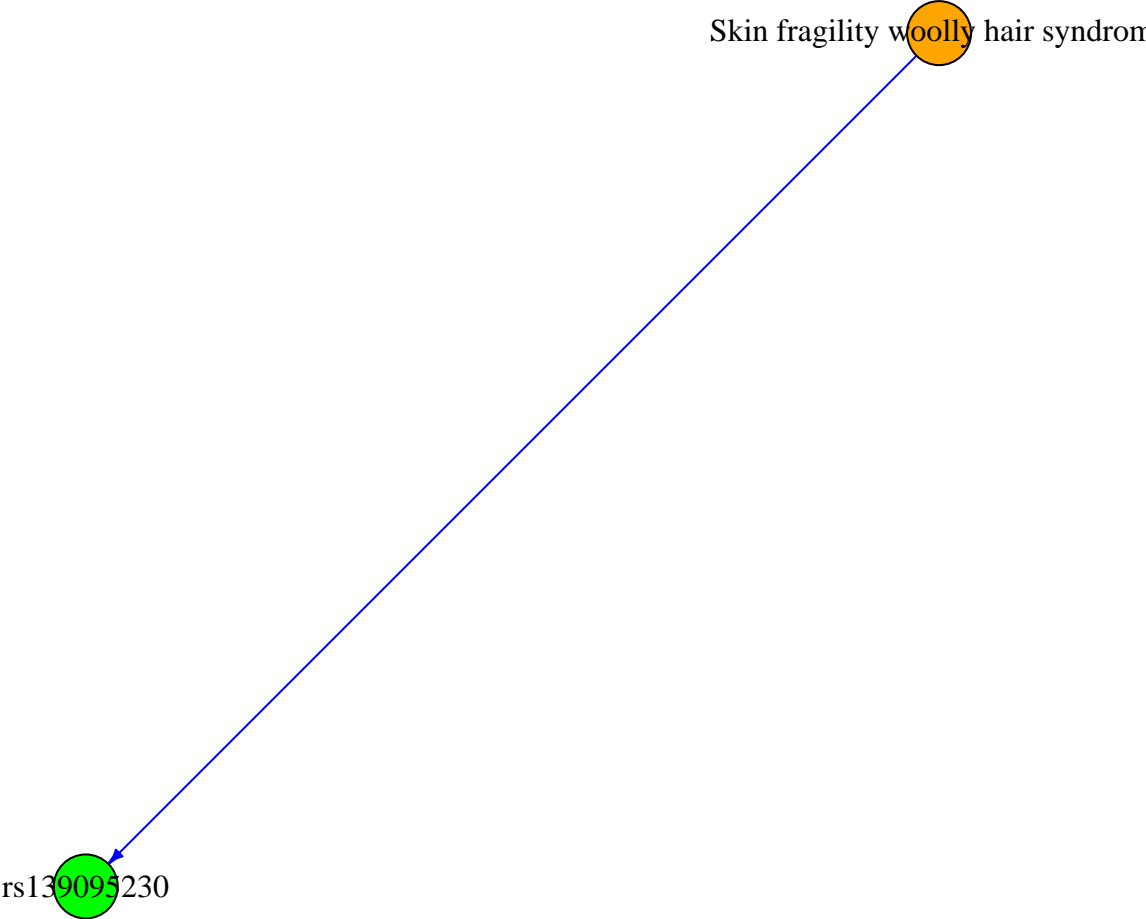

**Variant–Disease Network (Skin/hair/eye pigmentation)**

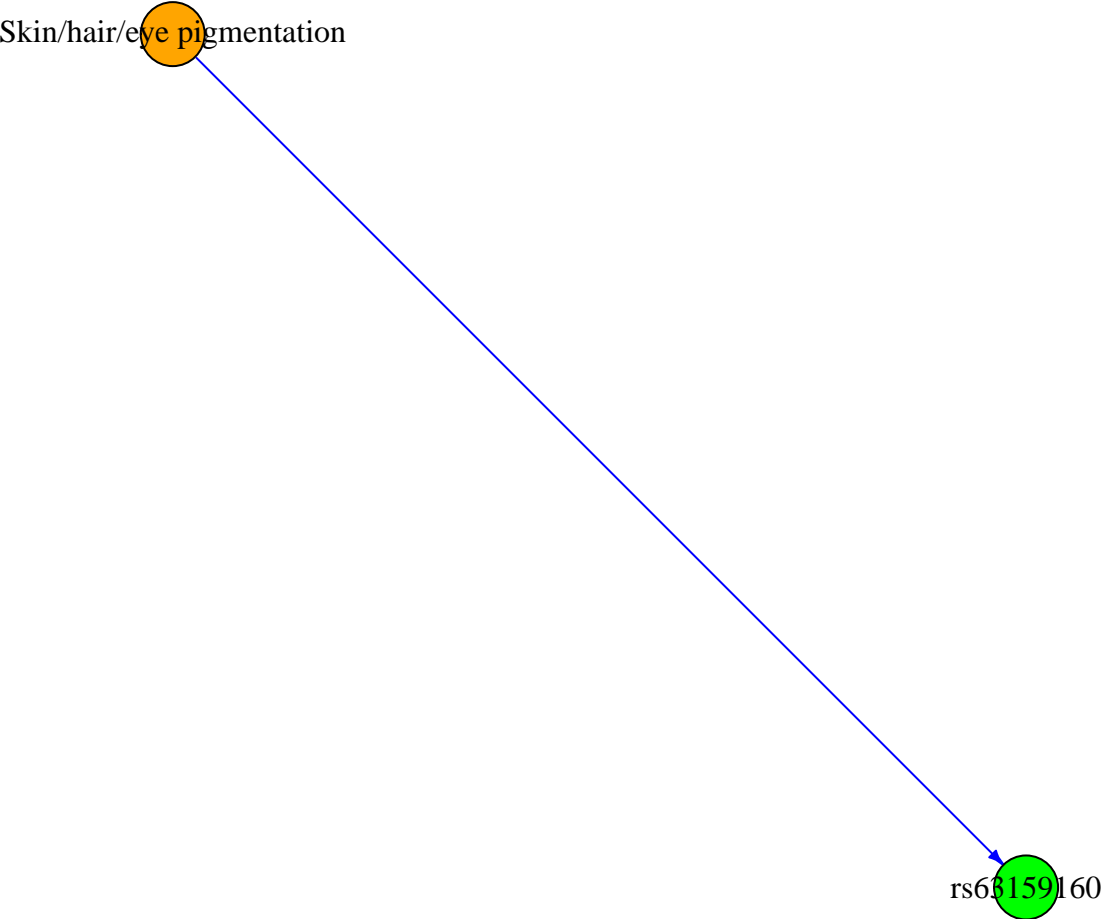

Variant–Disease Network (Slit-like opening of the exterior auditory meatus)

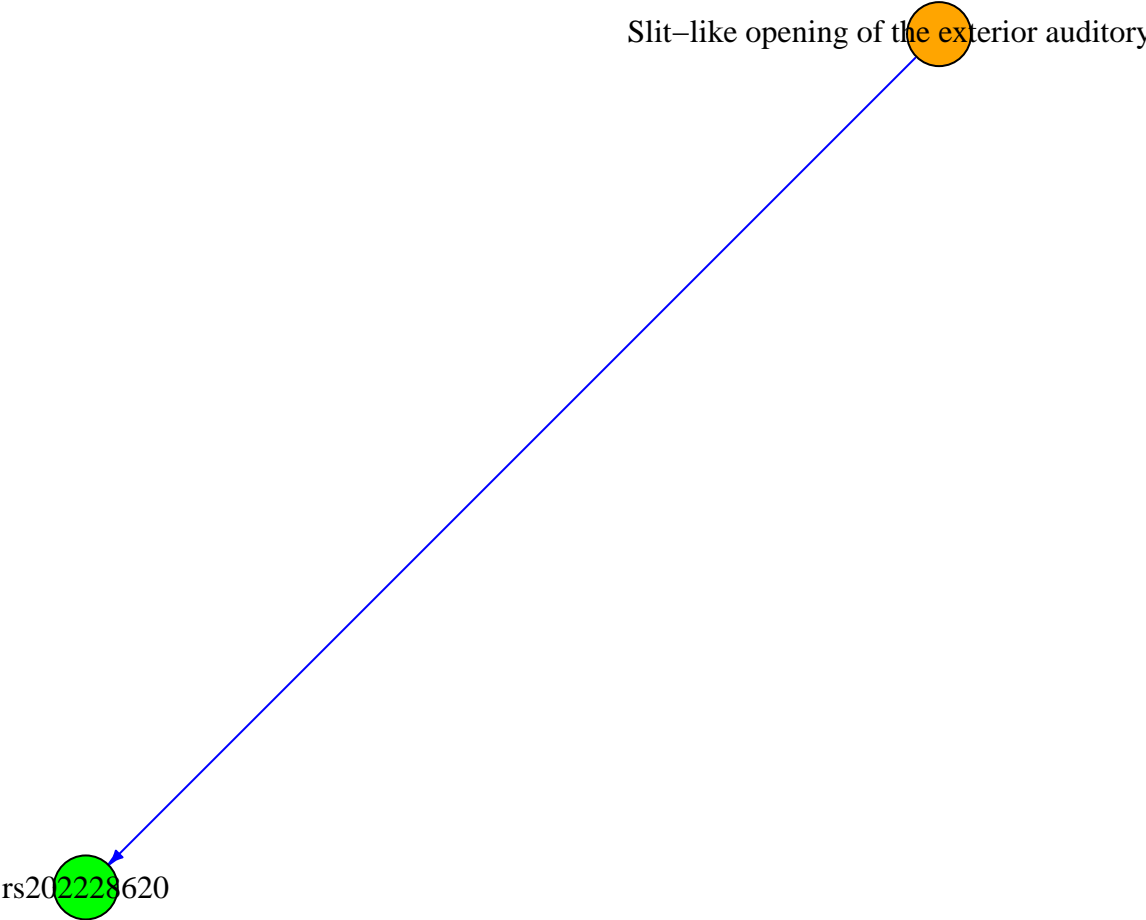

## Variant–Disease Network (Smith–McCort dysplasia)

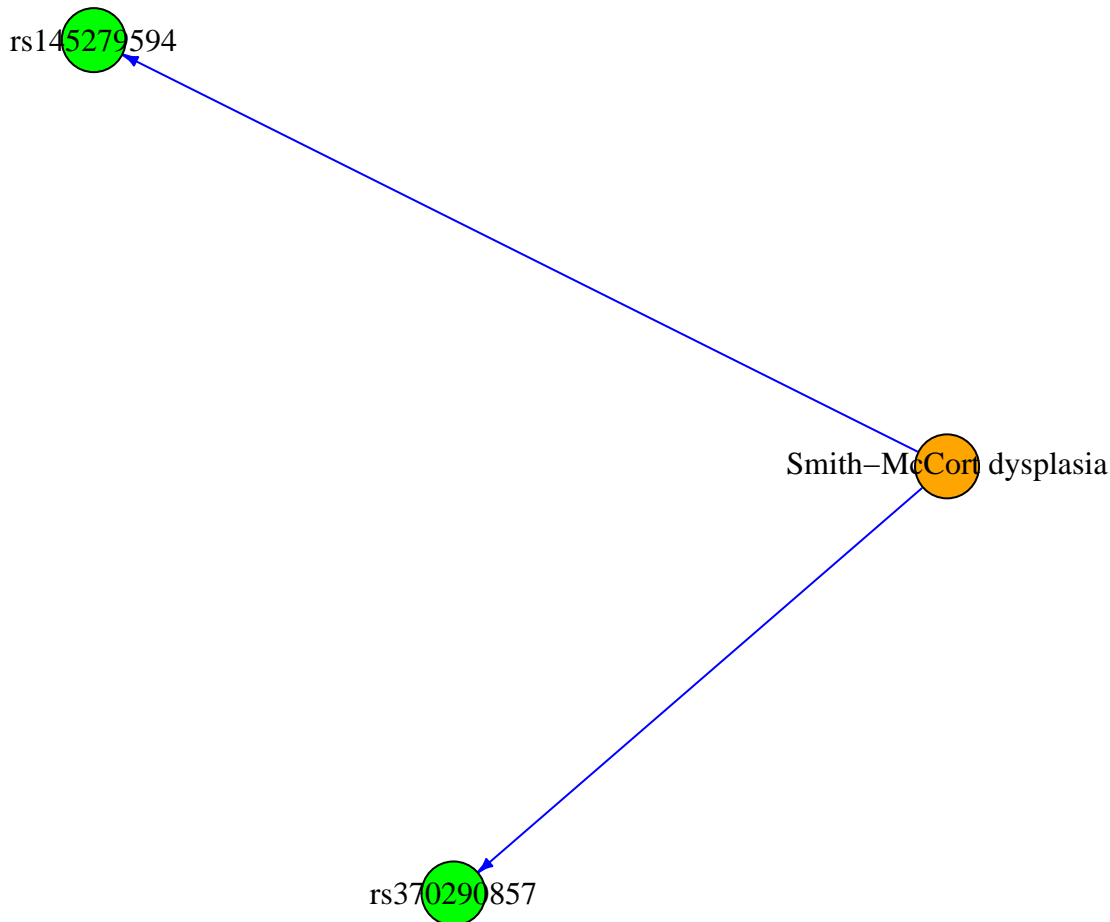

## Variant-Disease Network (Somatotroph adenoma)

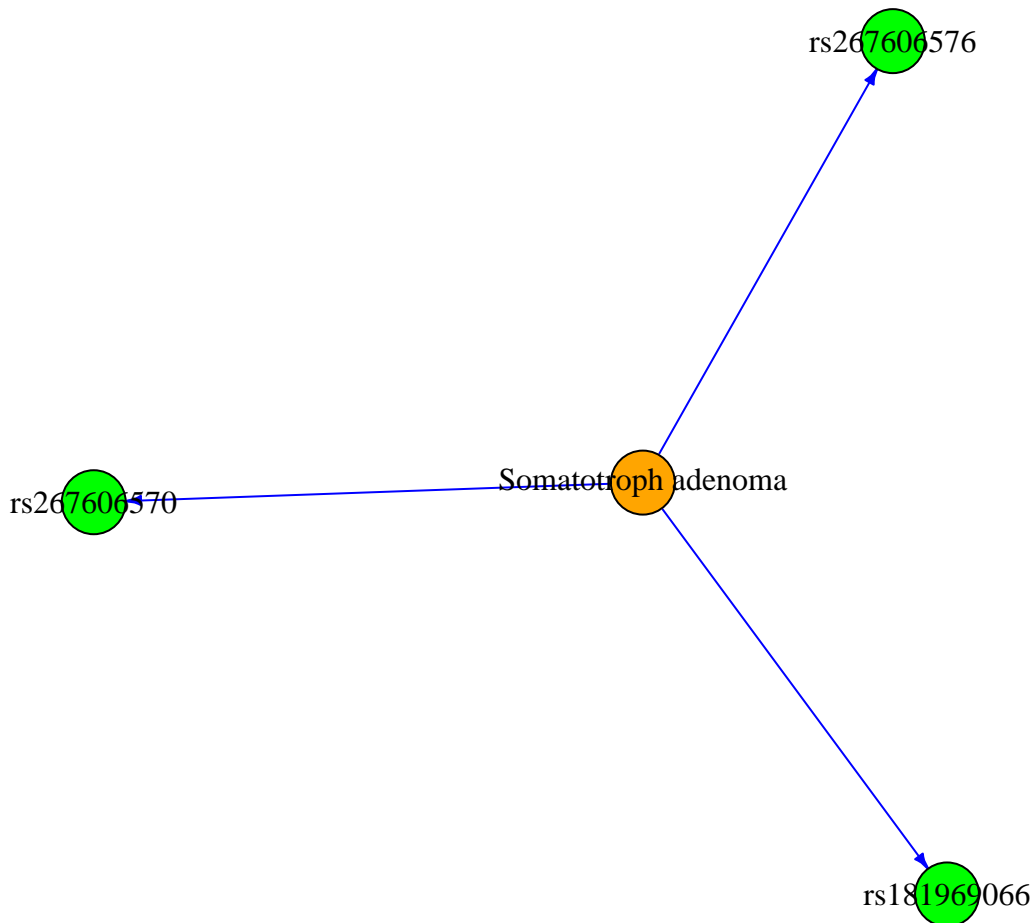



## Variant–Disease Network (Sotos syndrome)

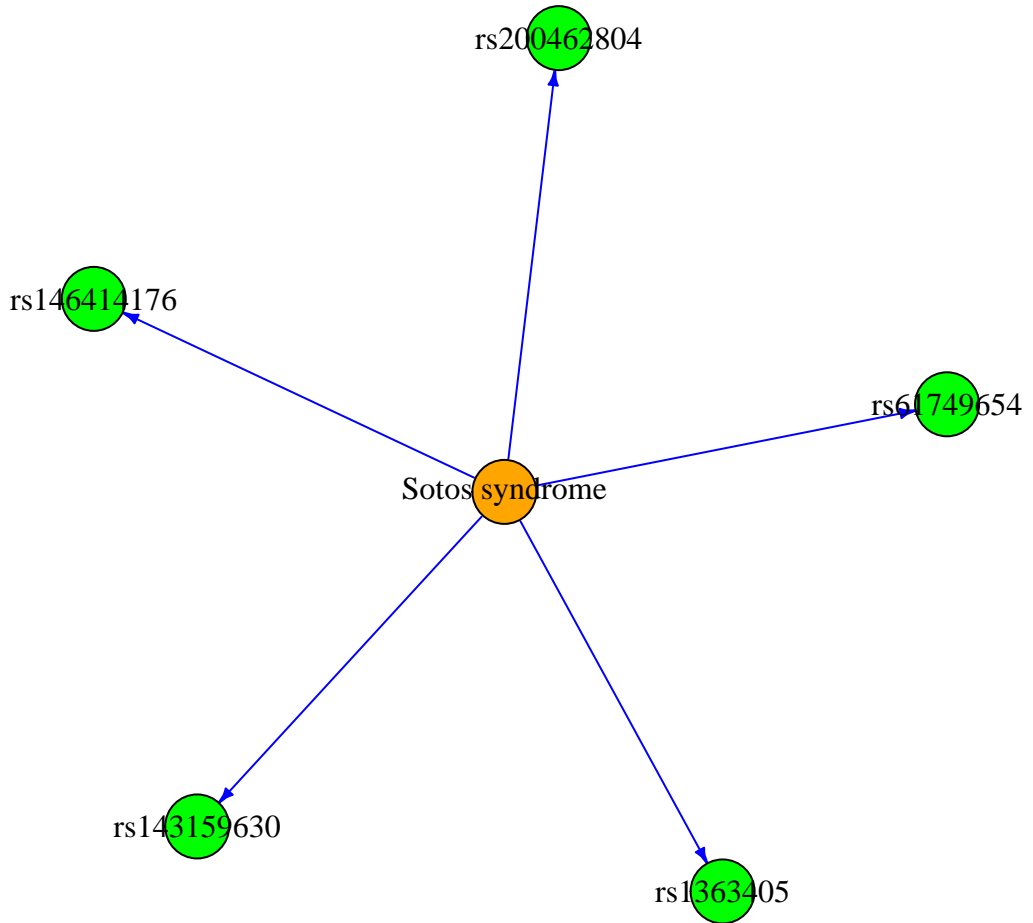

## Variant–Disease Network (Sotos syndrome 1)

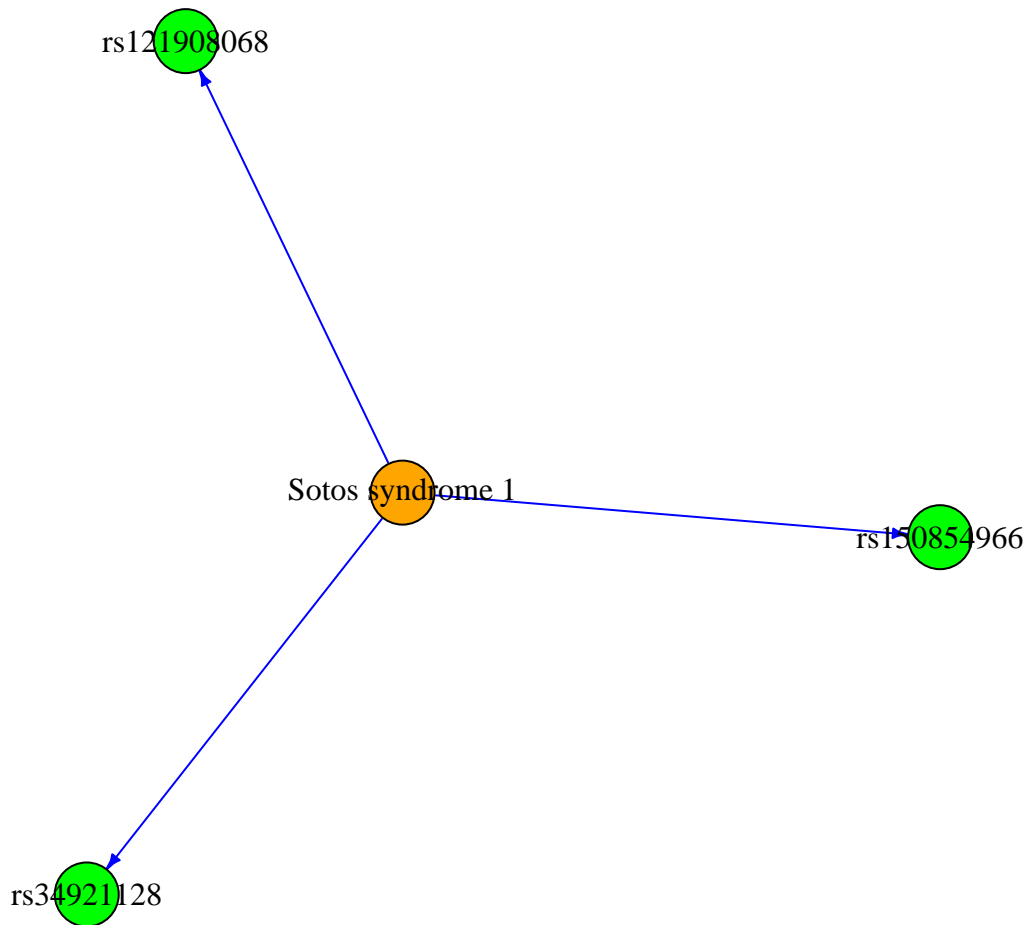

**Variant–Disease Network (Spastic ataxia Charlevoix–Saguenay type)**

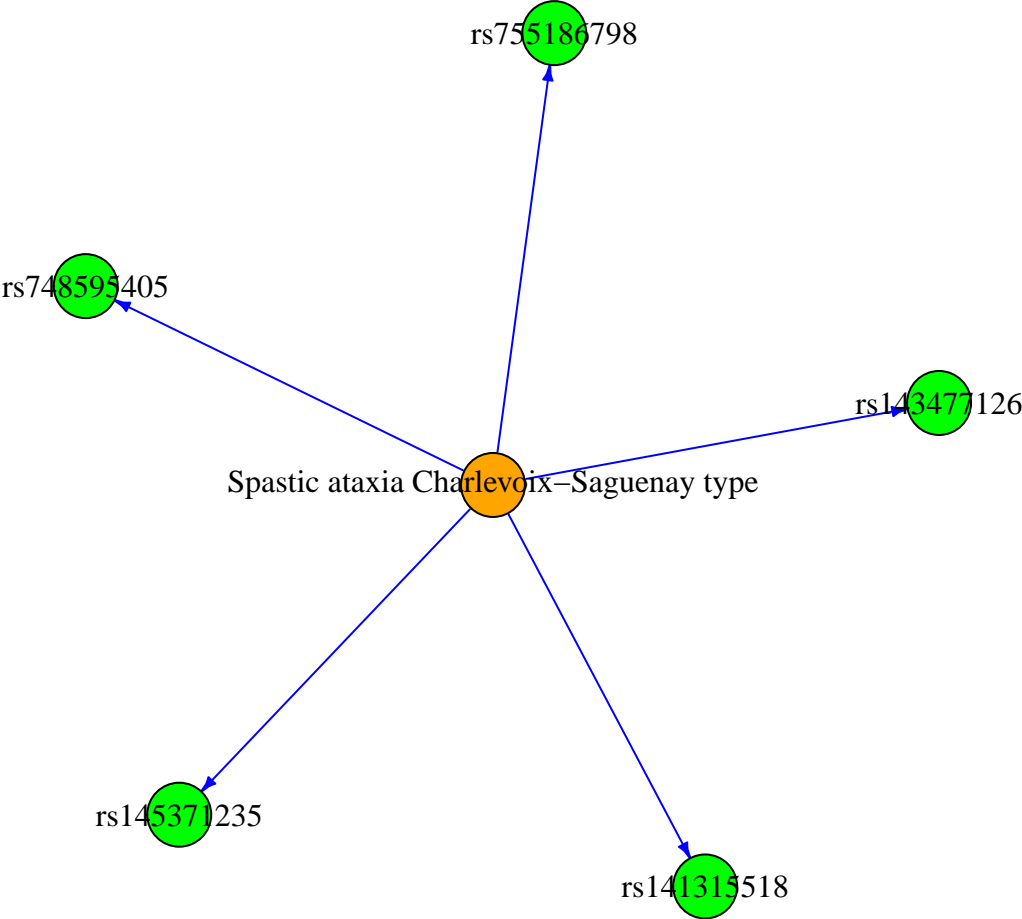

## Variant–Disease Network (Spastic paraplegia)

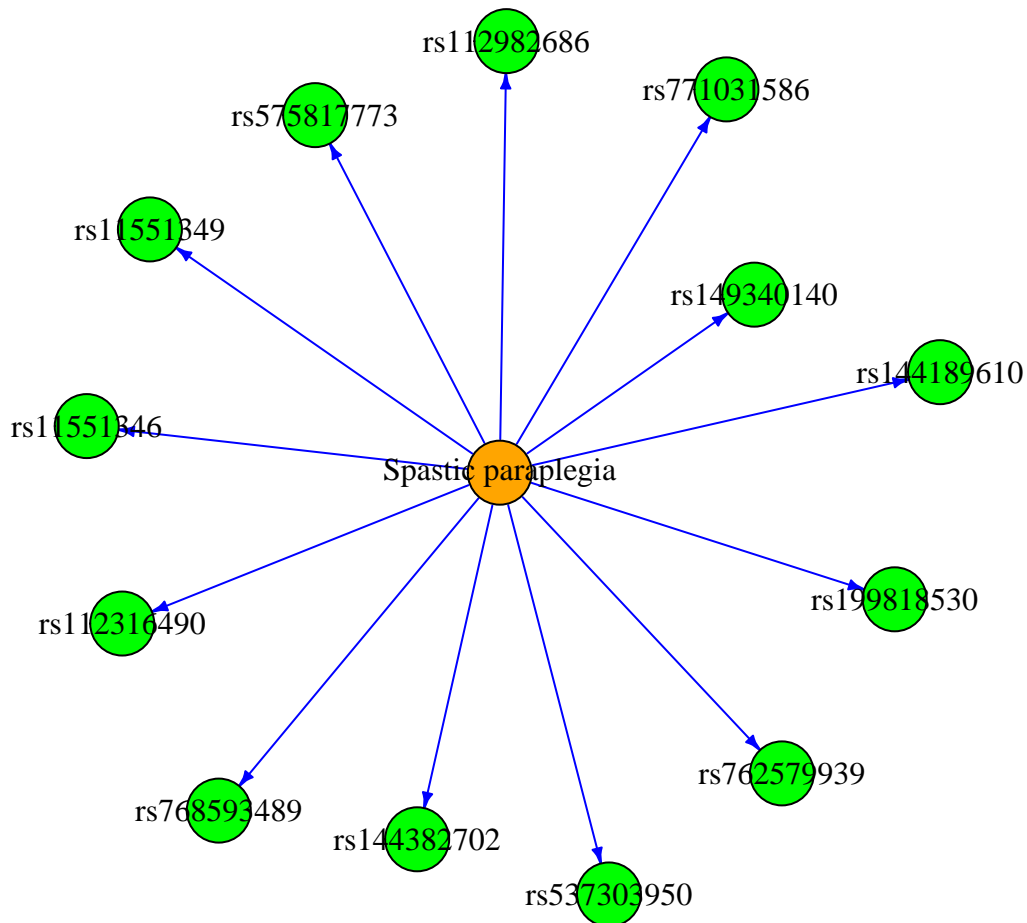

## Variant–Disease Network (Spastic paraplegia 11)

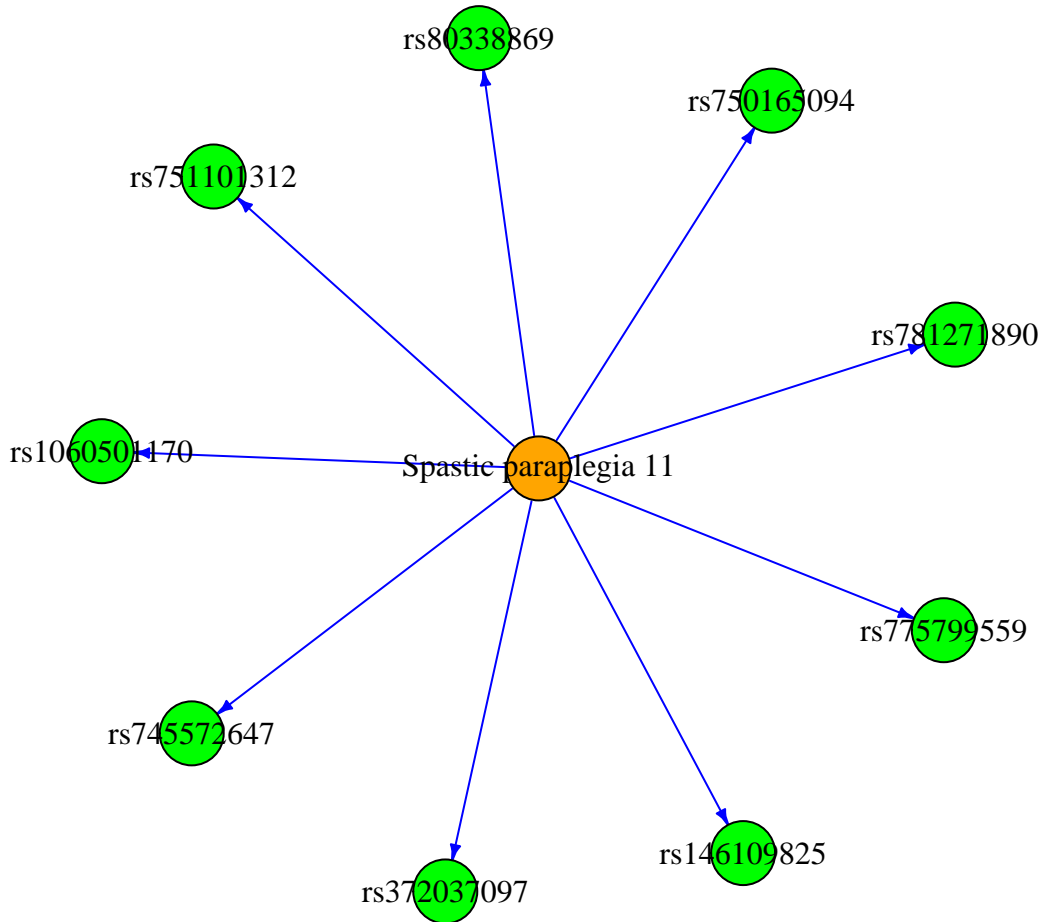

## Variant–Disease Network (Spastic paraplegia 15)

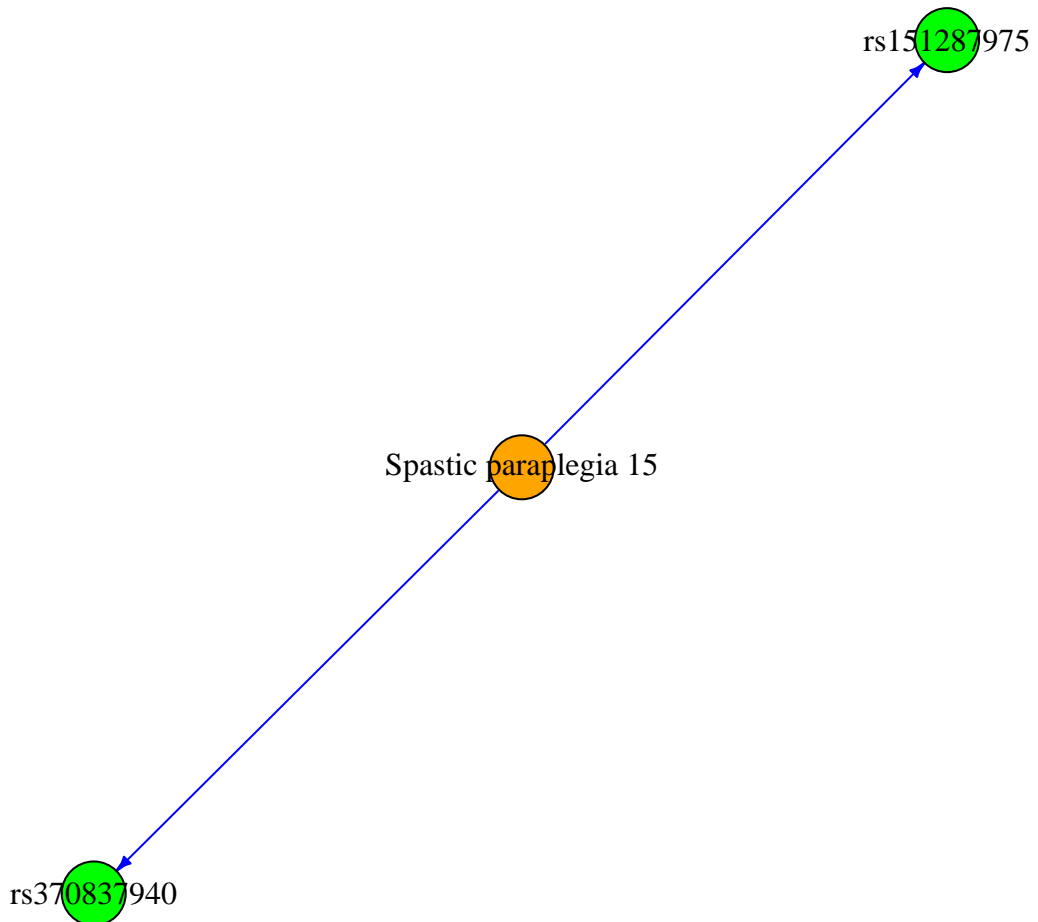

## Variant–Disease Network (Spastic paraplegia 3)

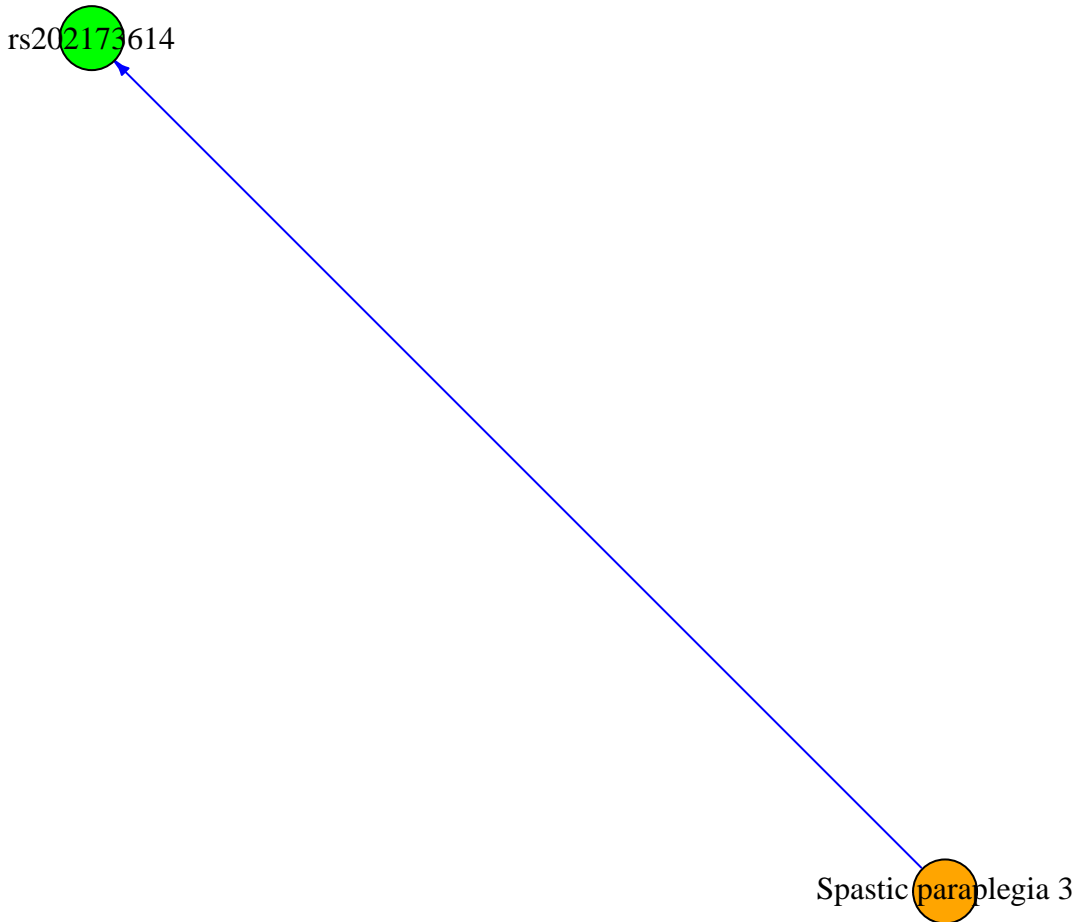

## Variant–Disease Network (Spastic paraplegia 35)

Spastic paraplegia 35

rs2301865

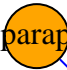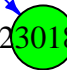



## Variant–Disease Network (Spastic paraplegia 50)

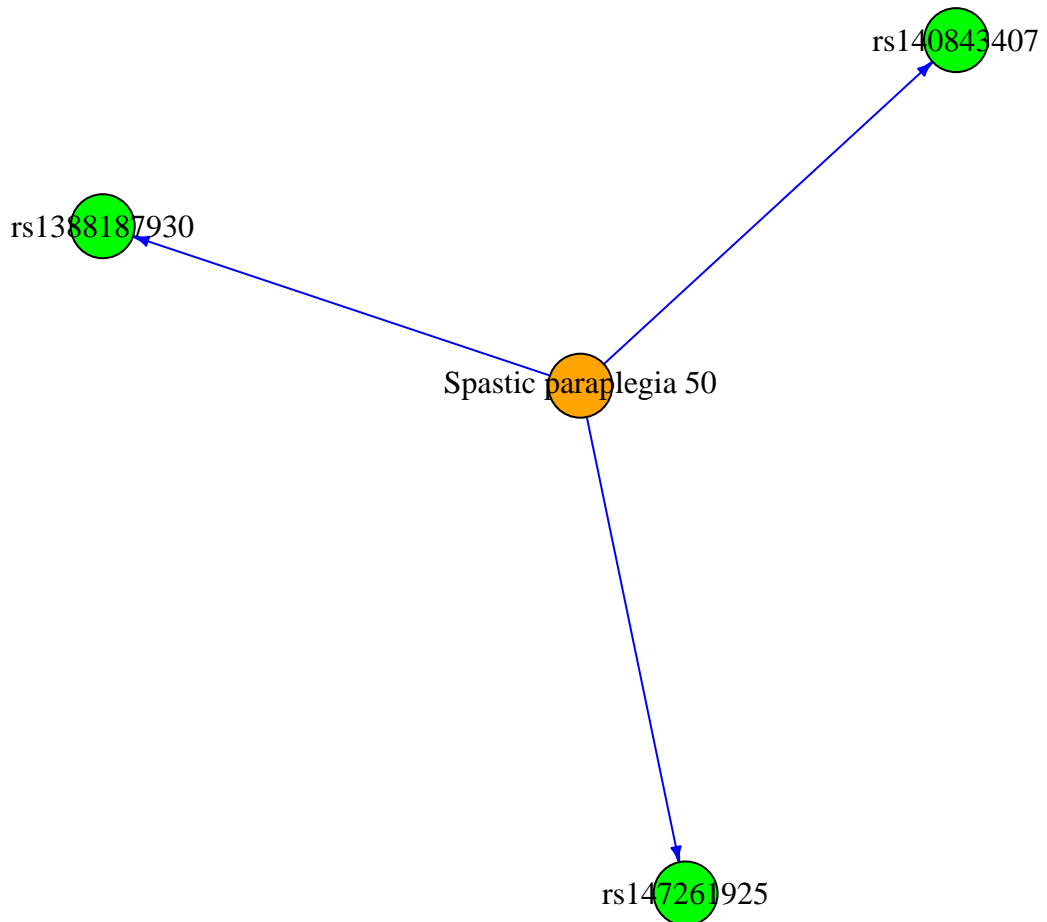

## Variant–Disease Network (Spastic paraplegia 53)

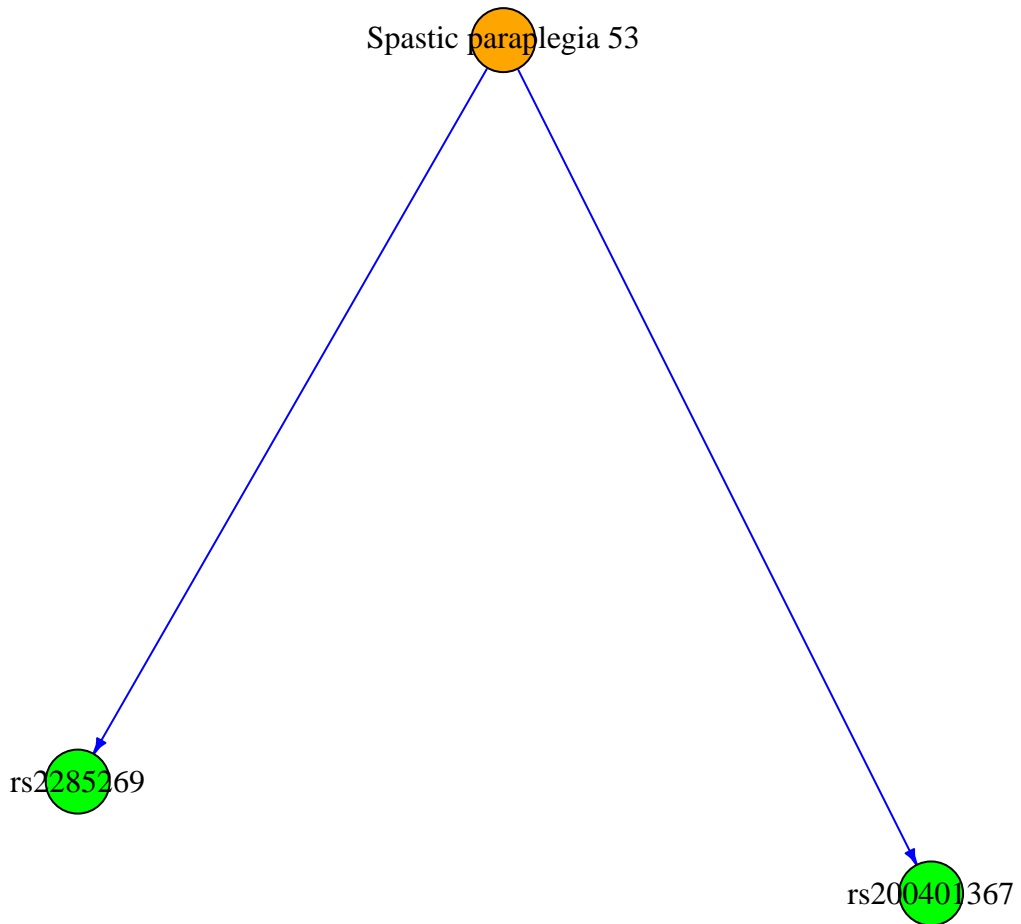

## Variant–Disease Network (Spastic paraplegia 54)

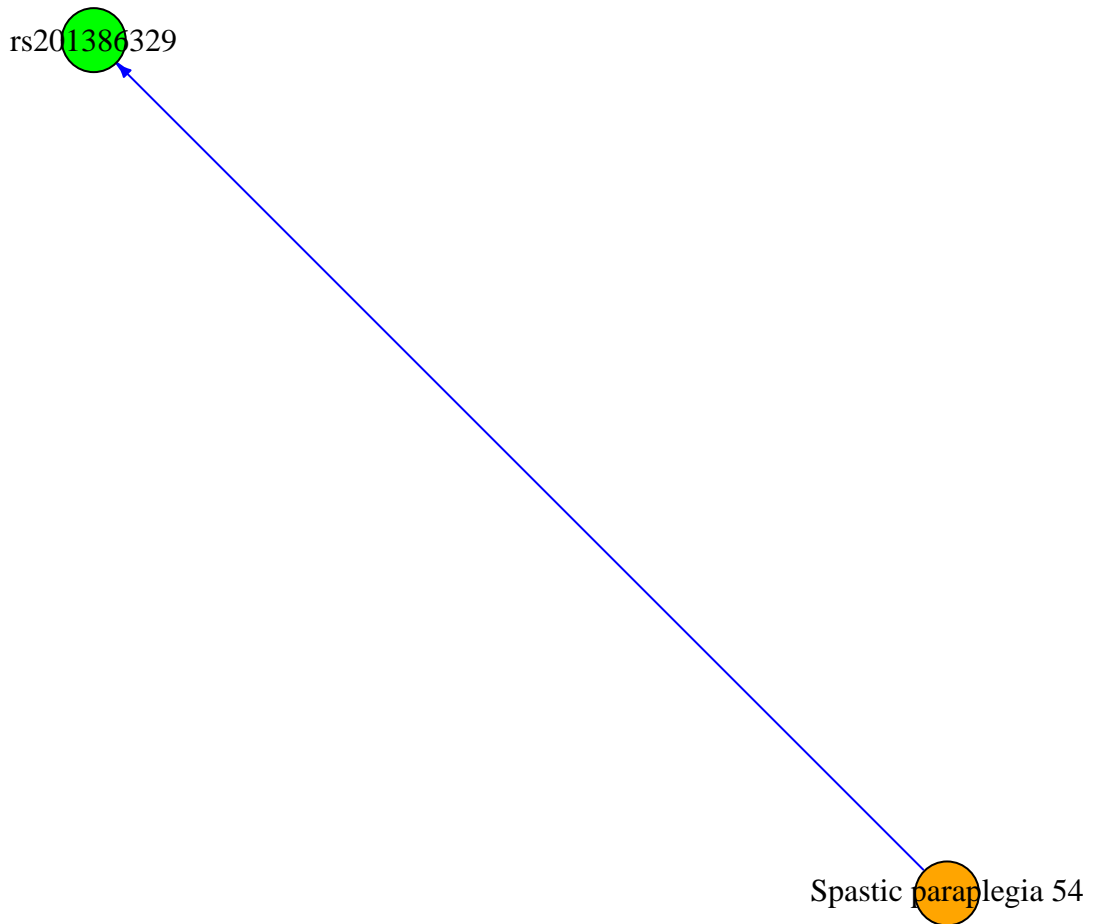

## Variant–Disease Network (Spastic paraplegia 6)

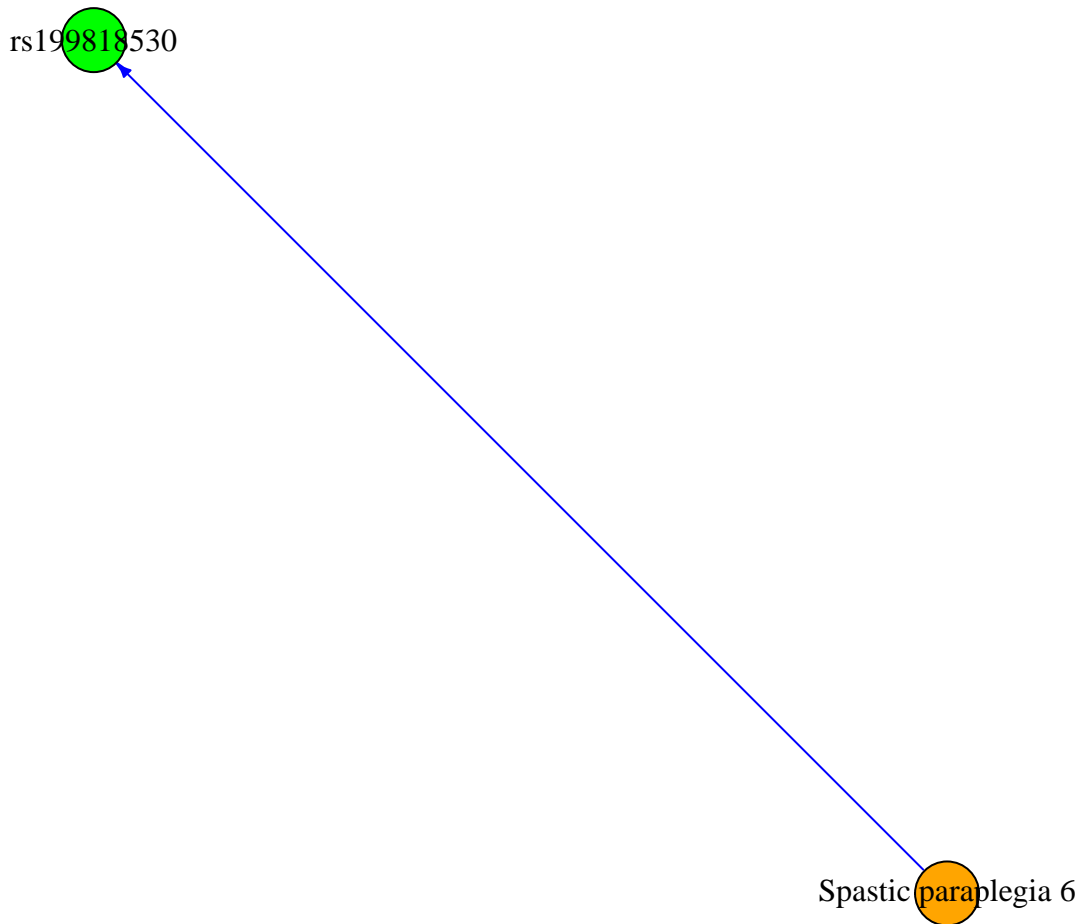

## Variant–Disease Network (Spastic paraplegia 73)

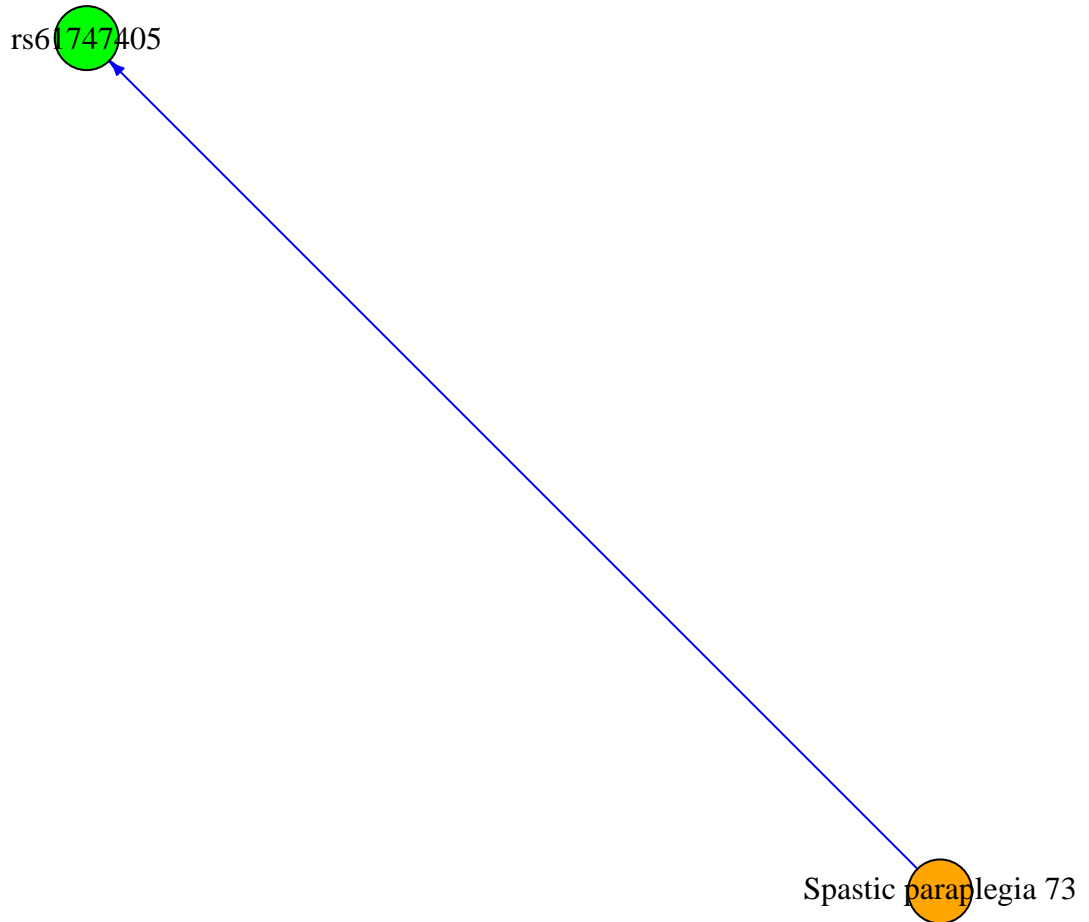

## Variant–Disease Network (Spastic paraplegia 78)

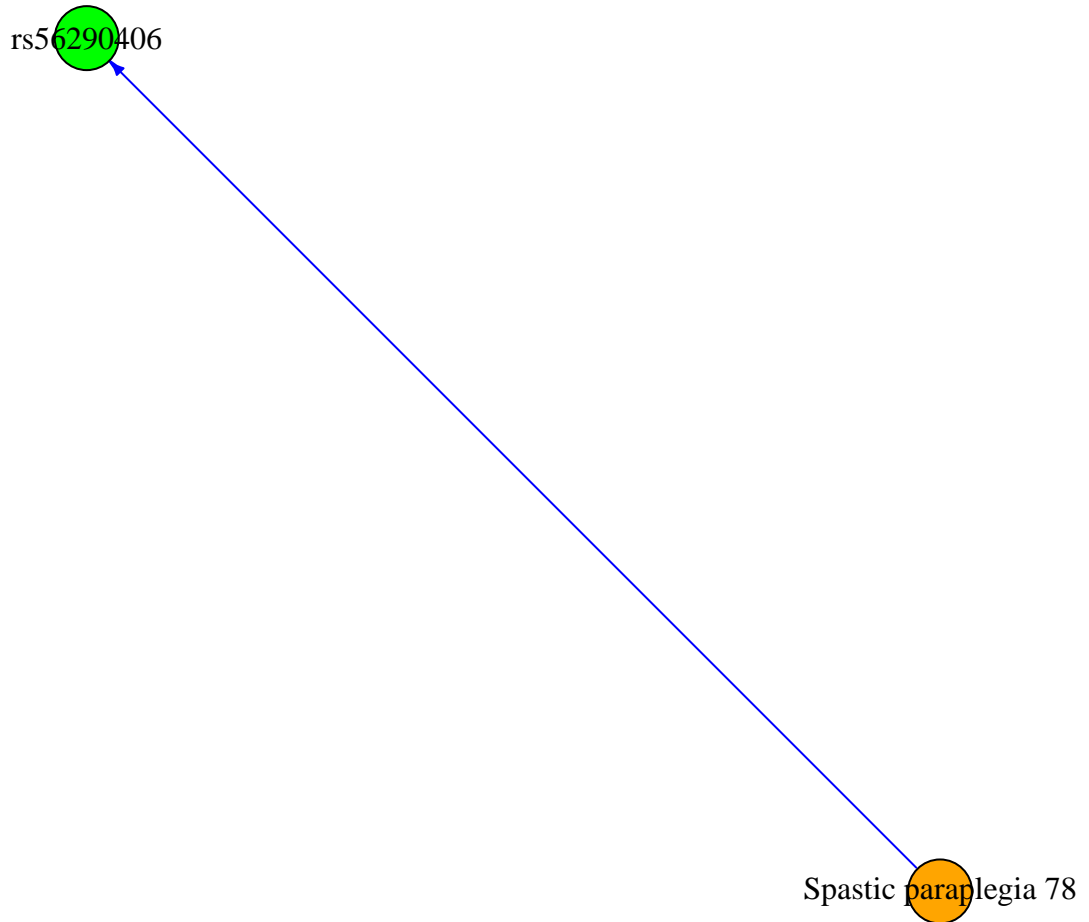

## Variant–Disease Network (Spastic paraplegia 9)

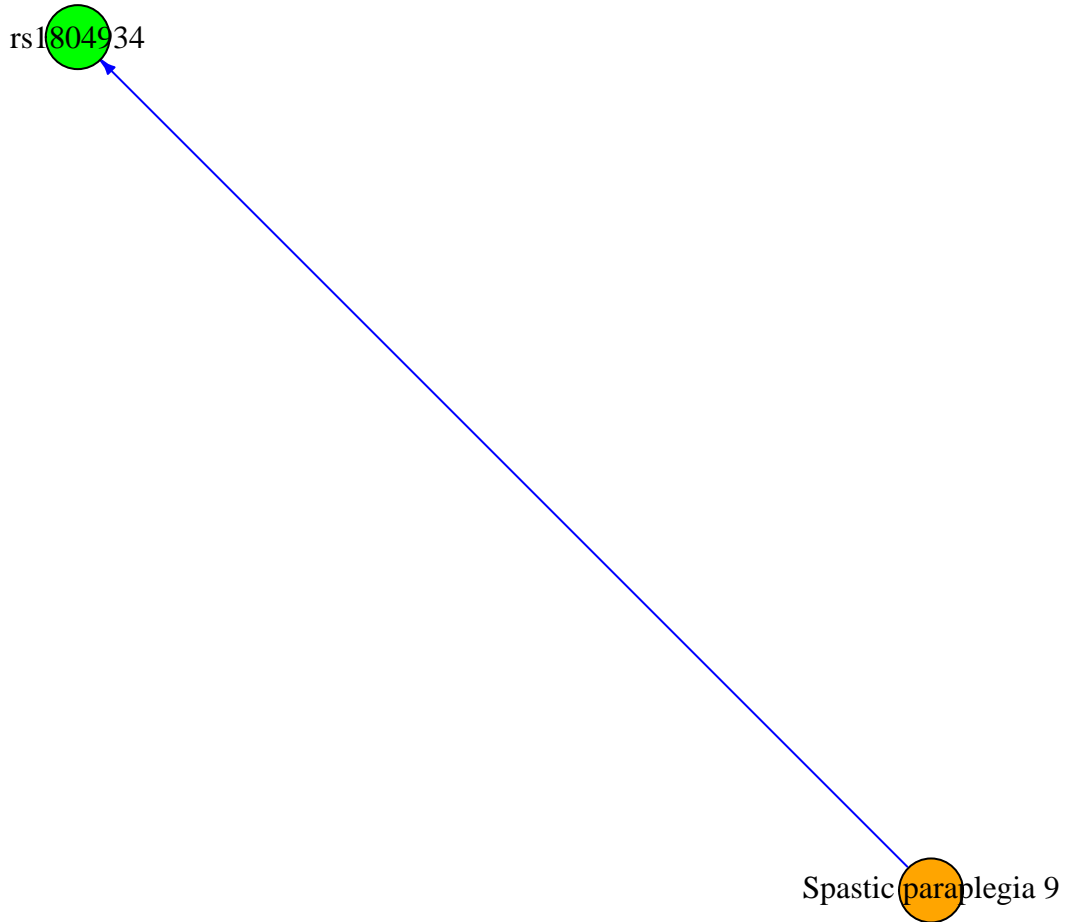

## Variant–Disease Network (Speech–language disorder 1)

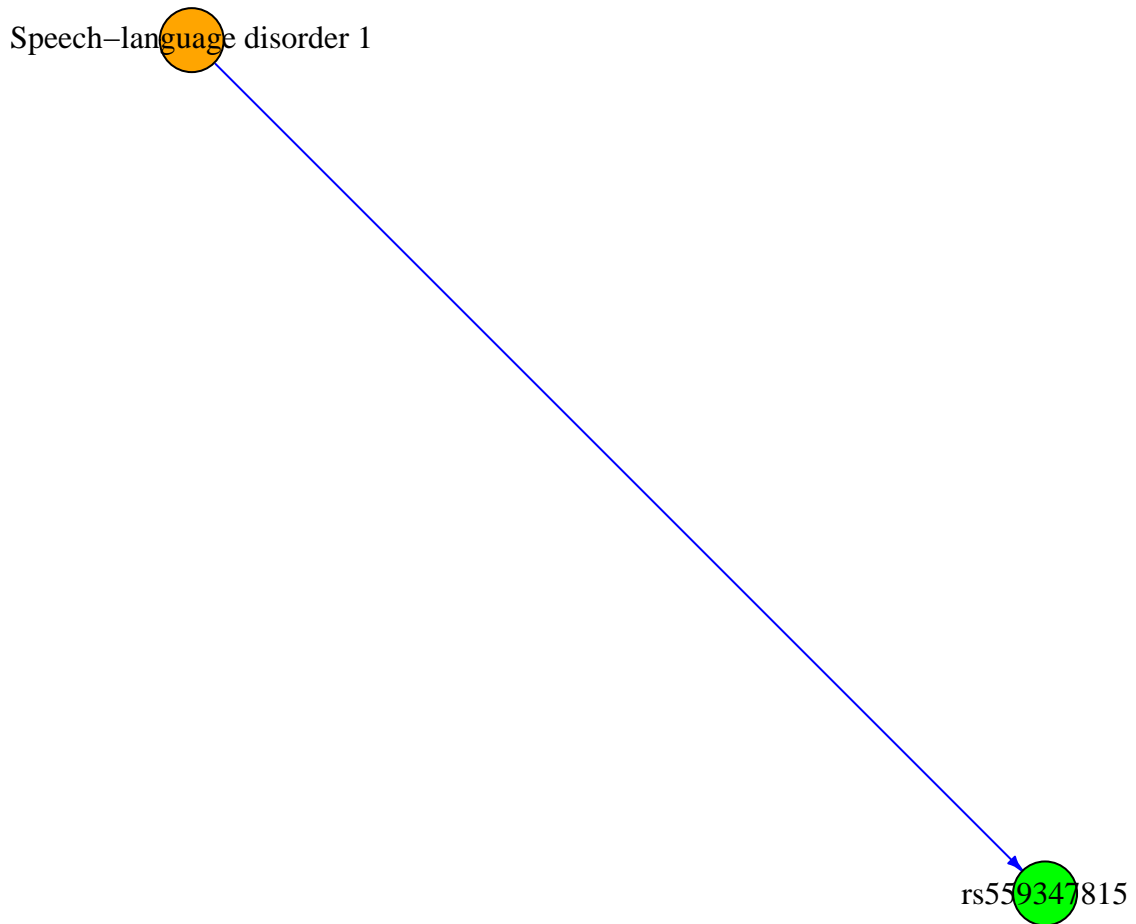



## Variant-Disease Network (Spermatogenic Failure)

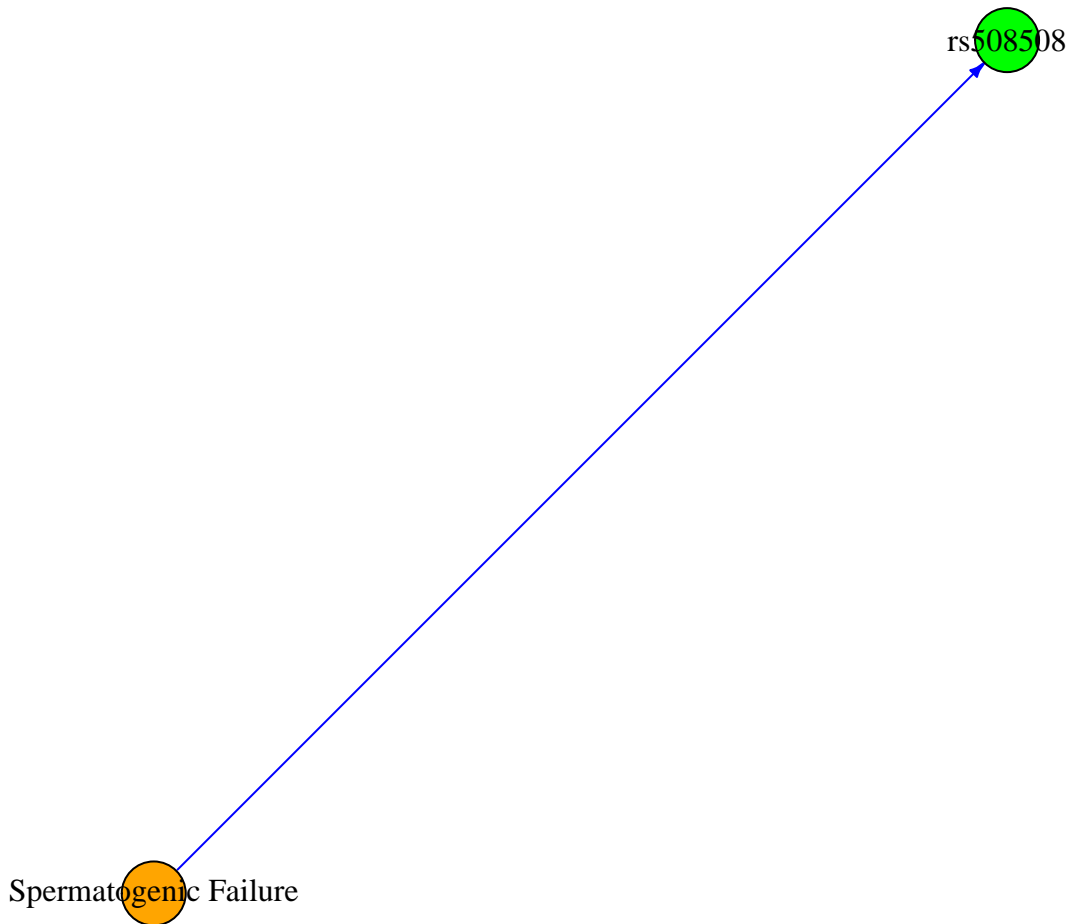

**Variant–Disease Network (Spermatogenic failure 13)**

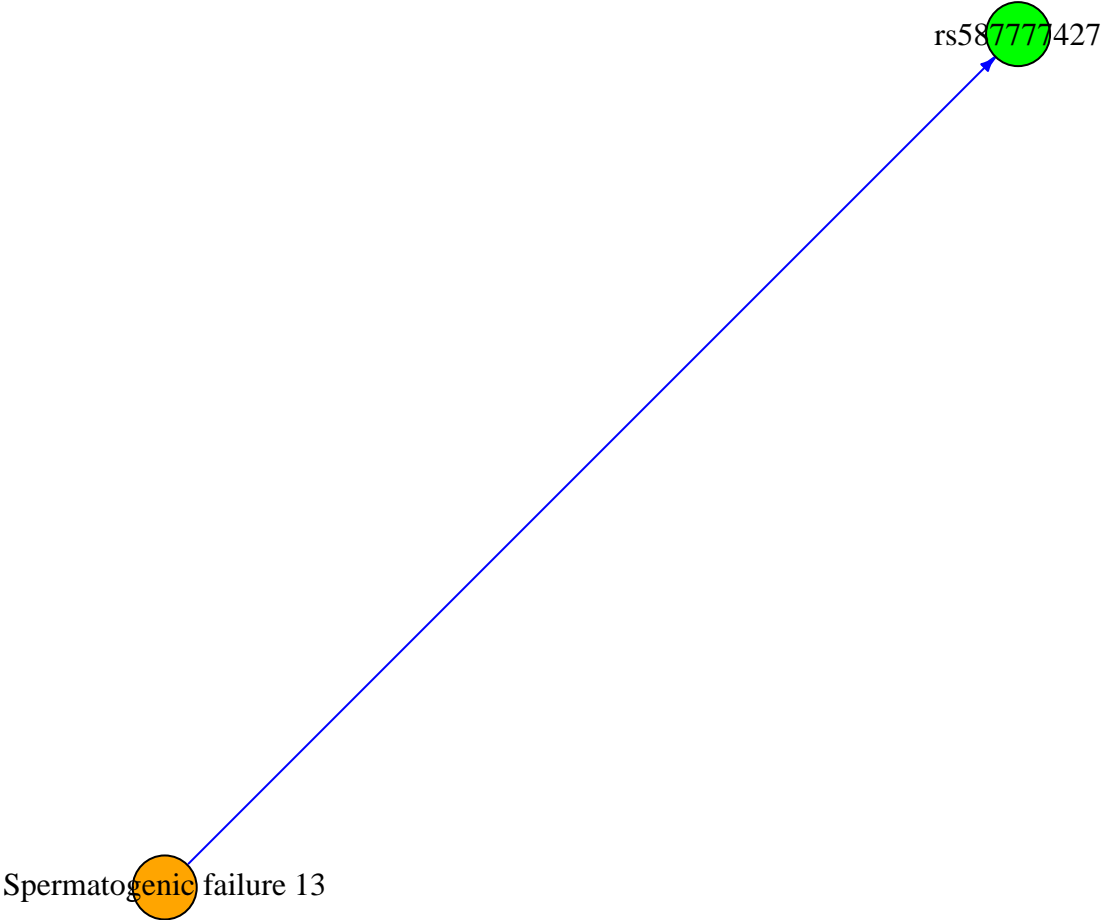

Variant–Disease Network (Spherocytosis)

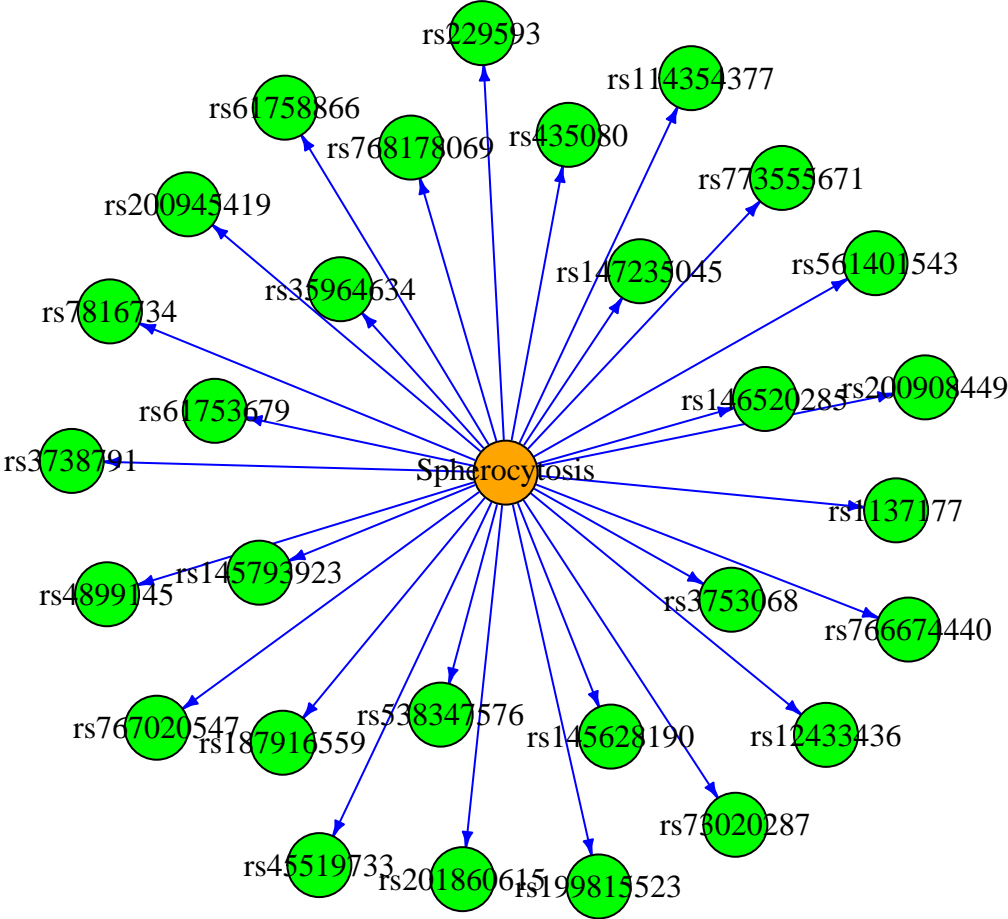

## Variant-Disease Network (Spherocytosis type 1)

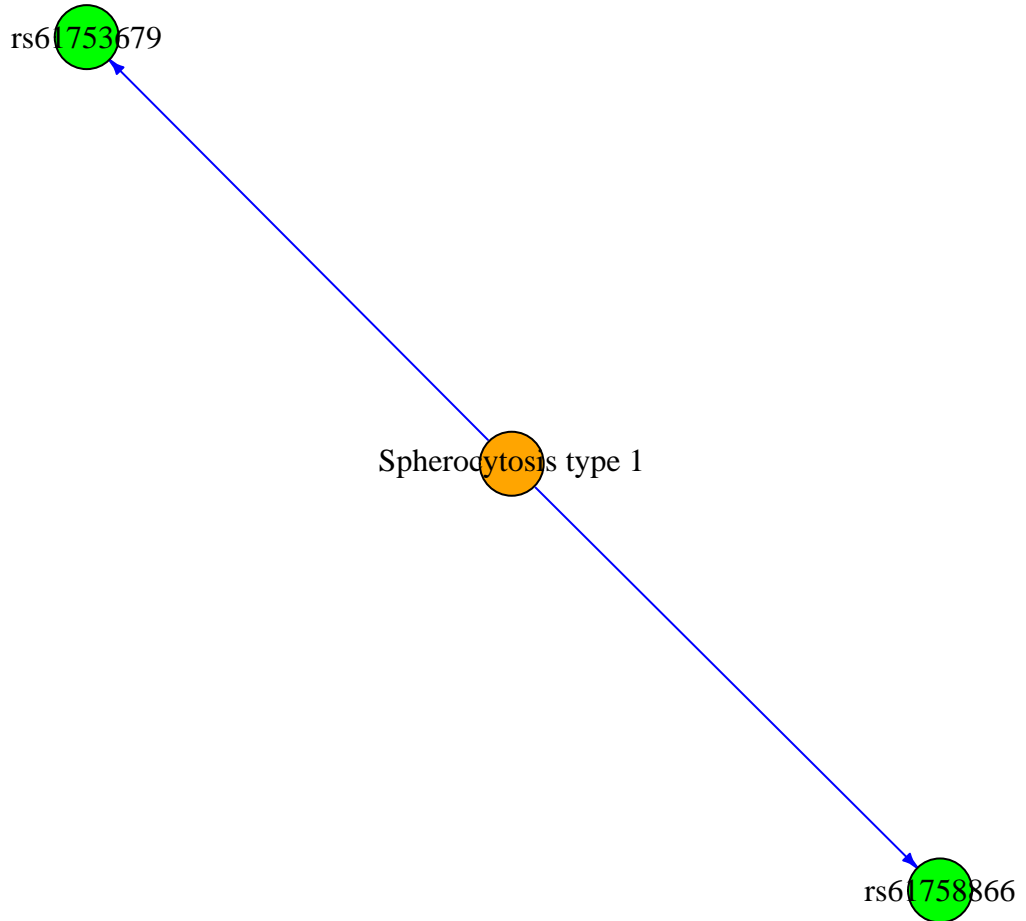

## Variant-Disease Network (Spherocytosis type 3)

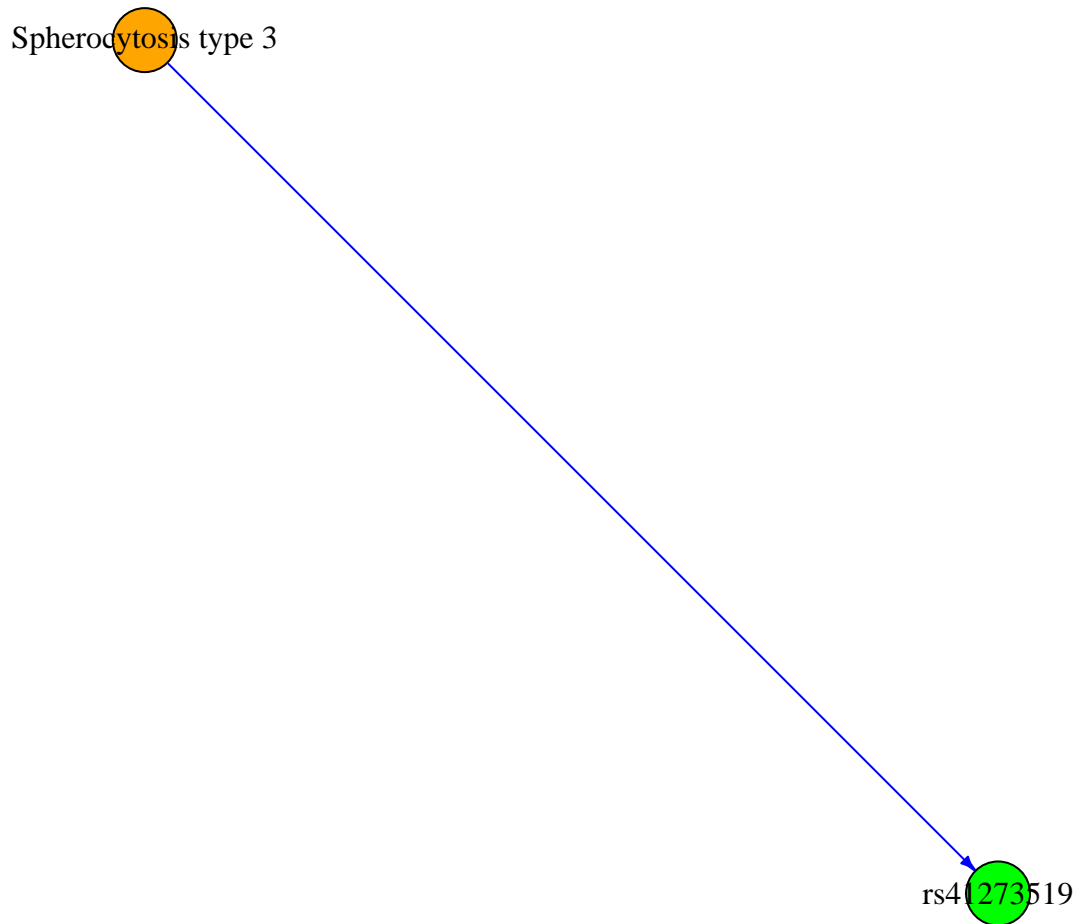

## Variant-Disease Network (Spherocytosis type 4)

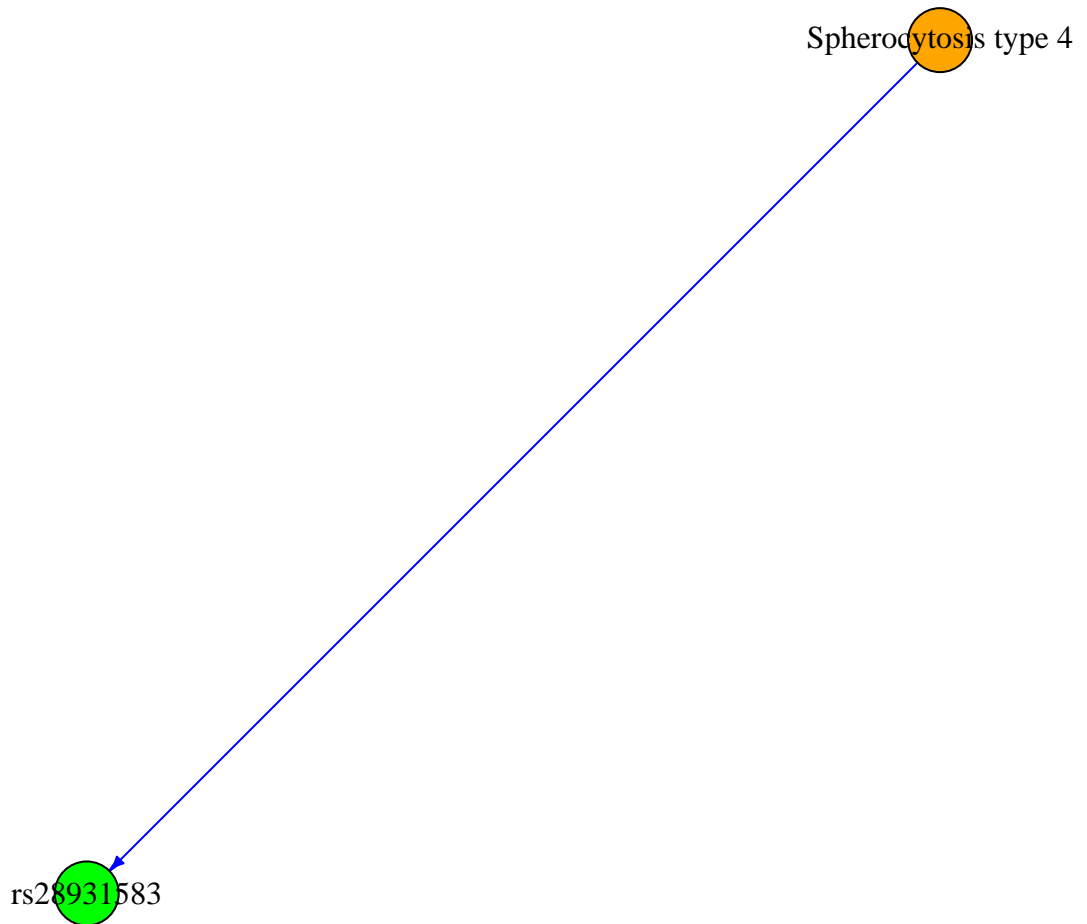

## Variant-Disease Network (Spherocytosis type 5)

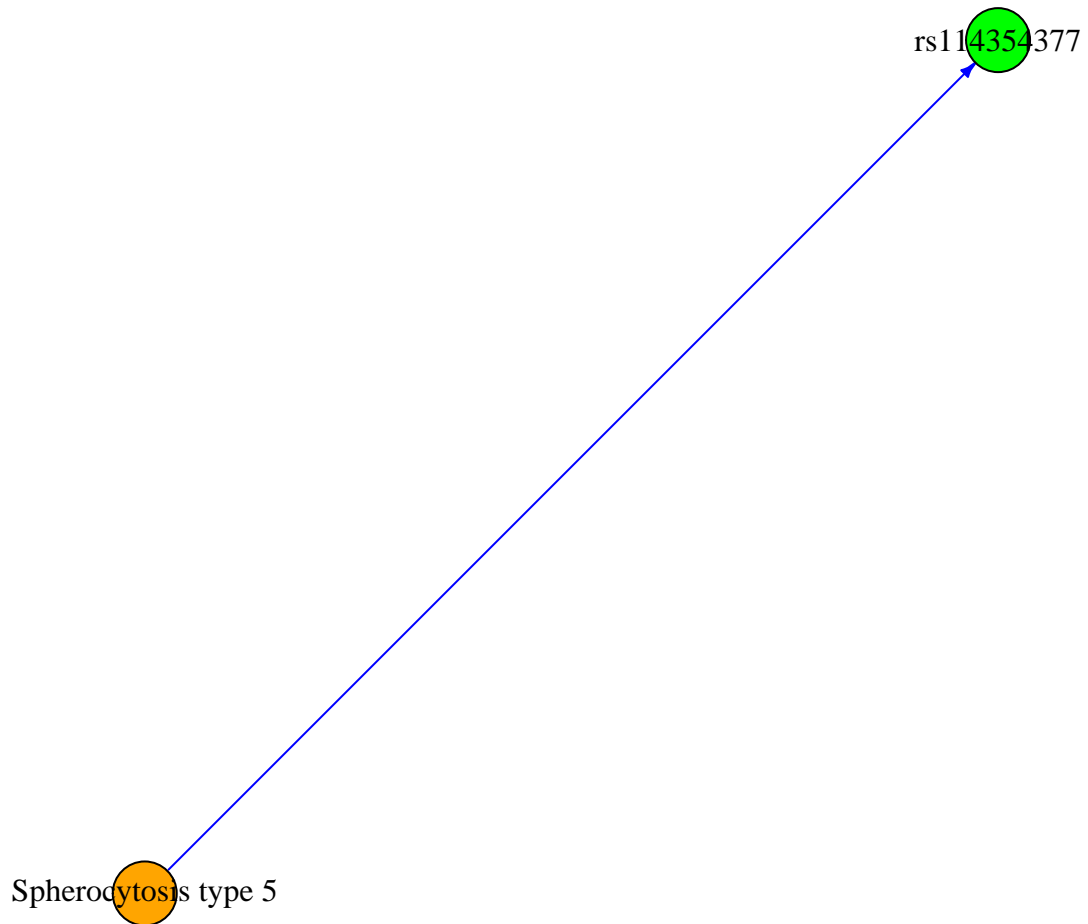

Variant–Disease Network (Sphingomyelin/cholesterol lipidosis)

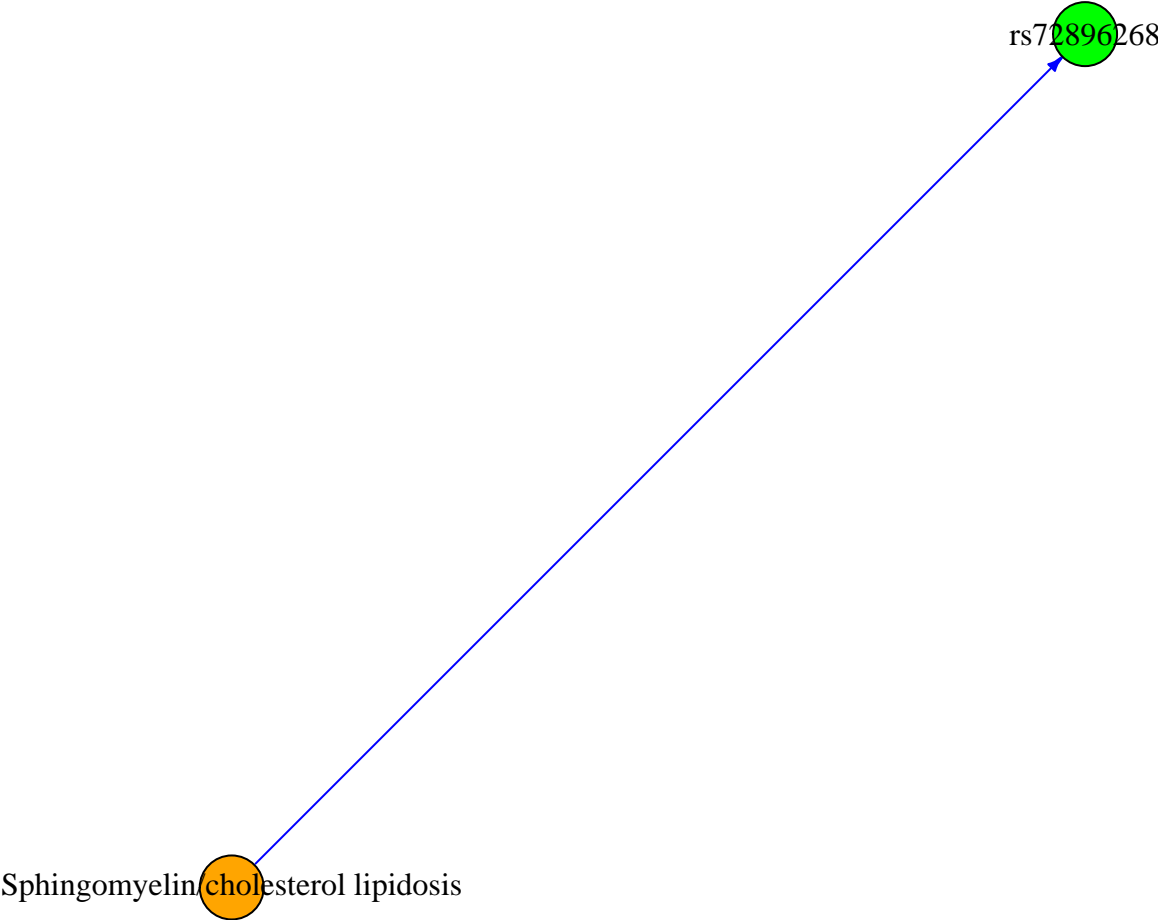



## Variant–Disease Network (Spiegler–Brooke syndrome)

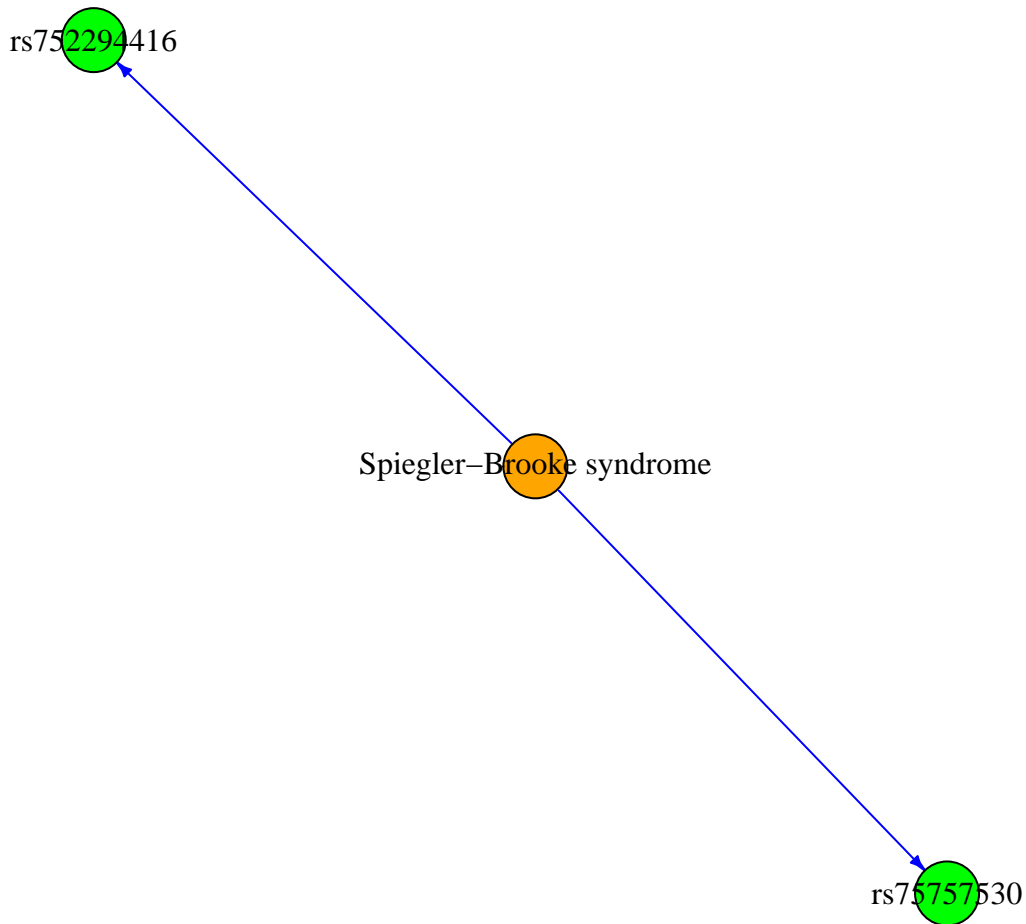

Variant–Disease Network (Spinal muscular atrophy)

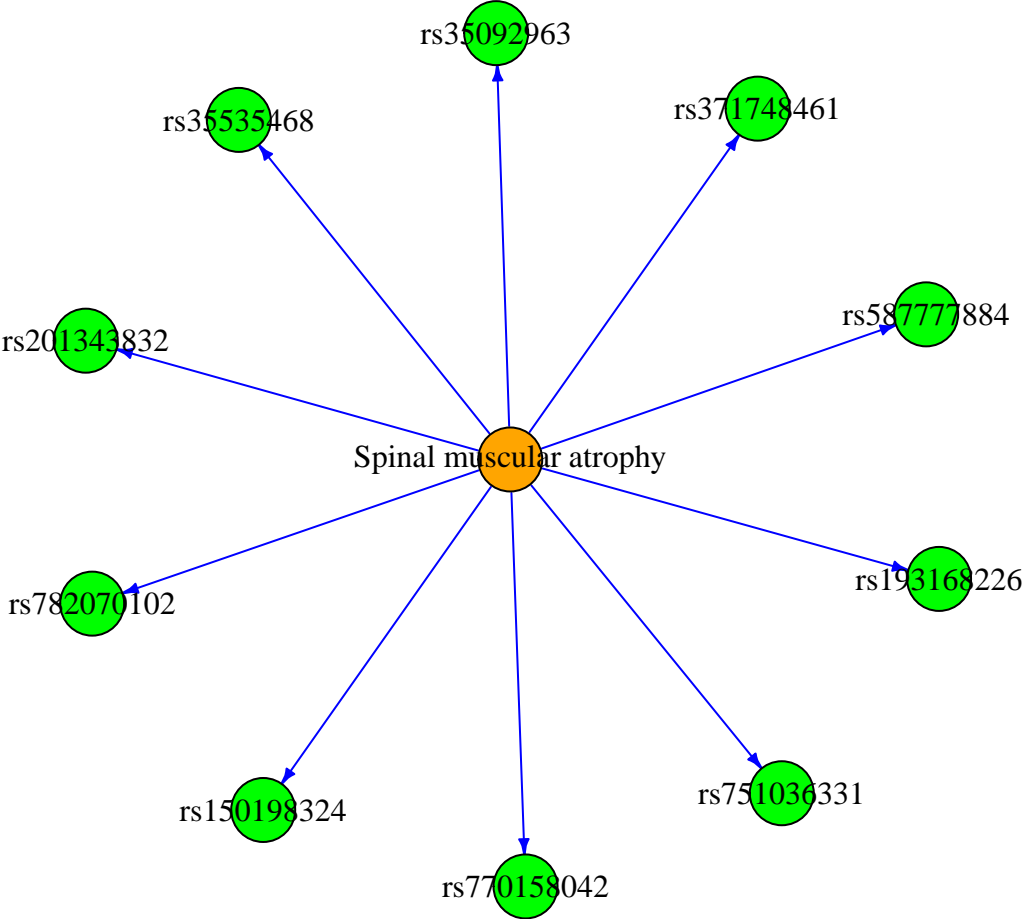

## Variant–Disease Network (Spinocerebellar ataxia)

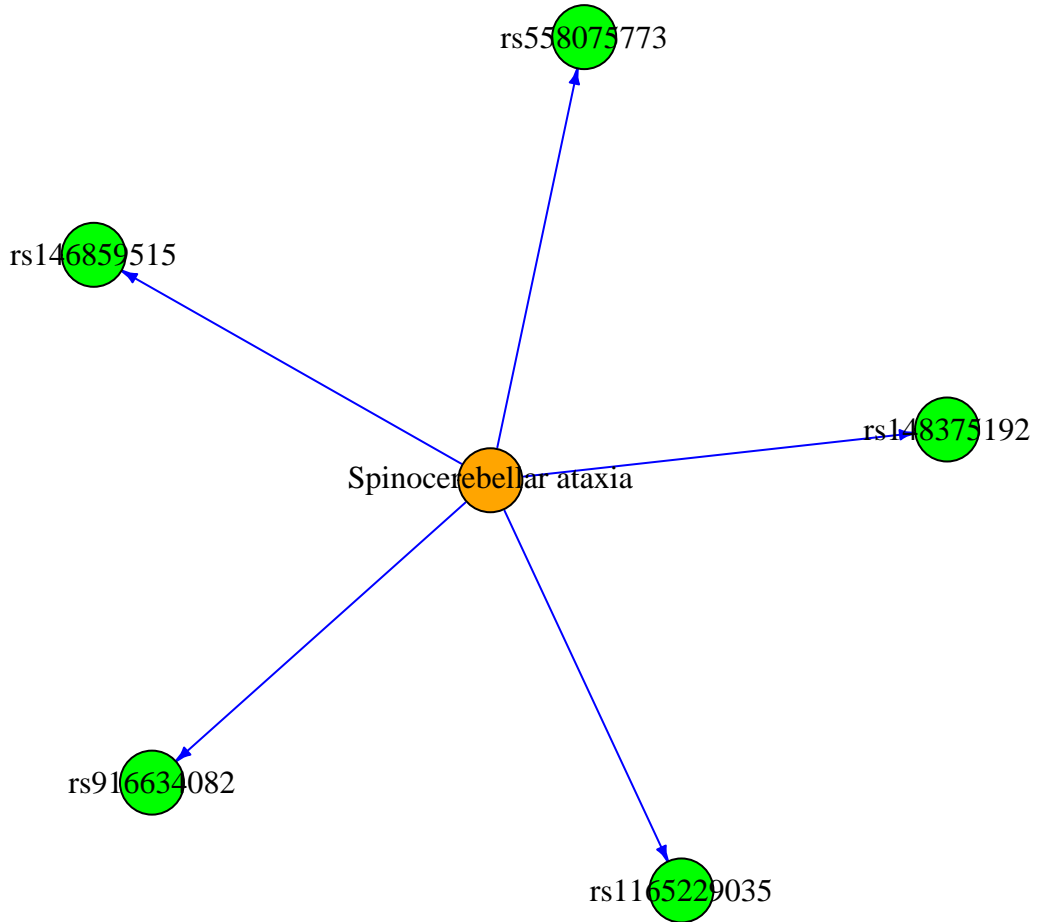

Variant–Disease Network (Spinocerebellar ataxia 14)

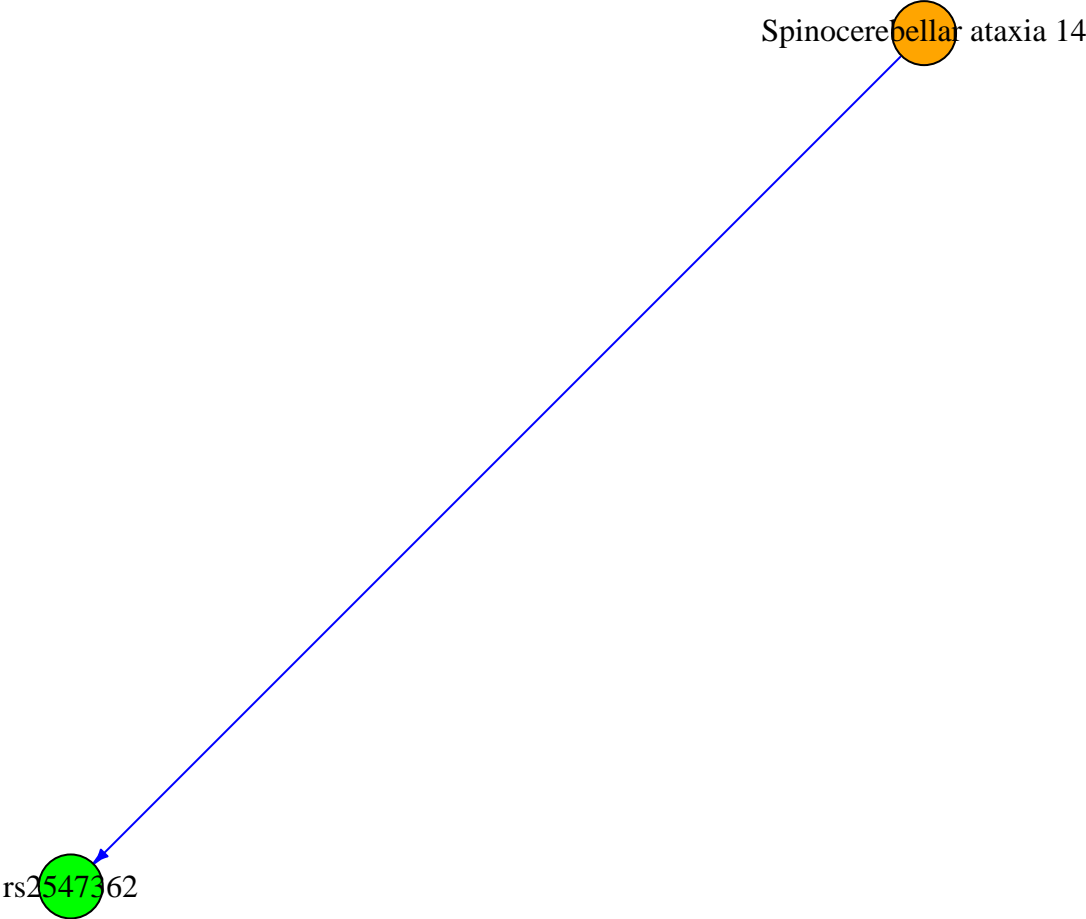

Variant–Disease Network (Spinocerebellar ataxia 21)

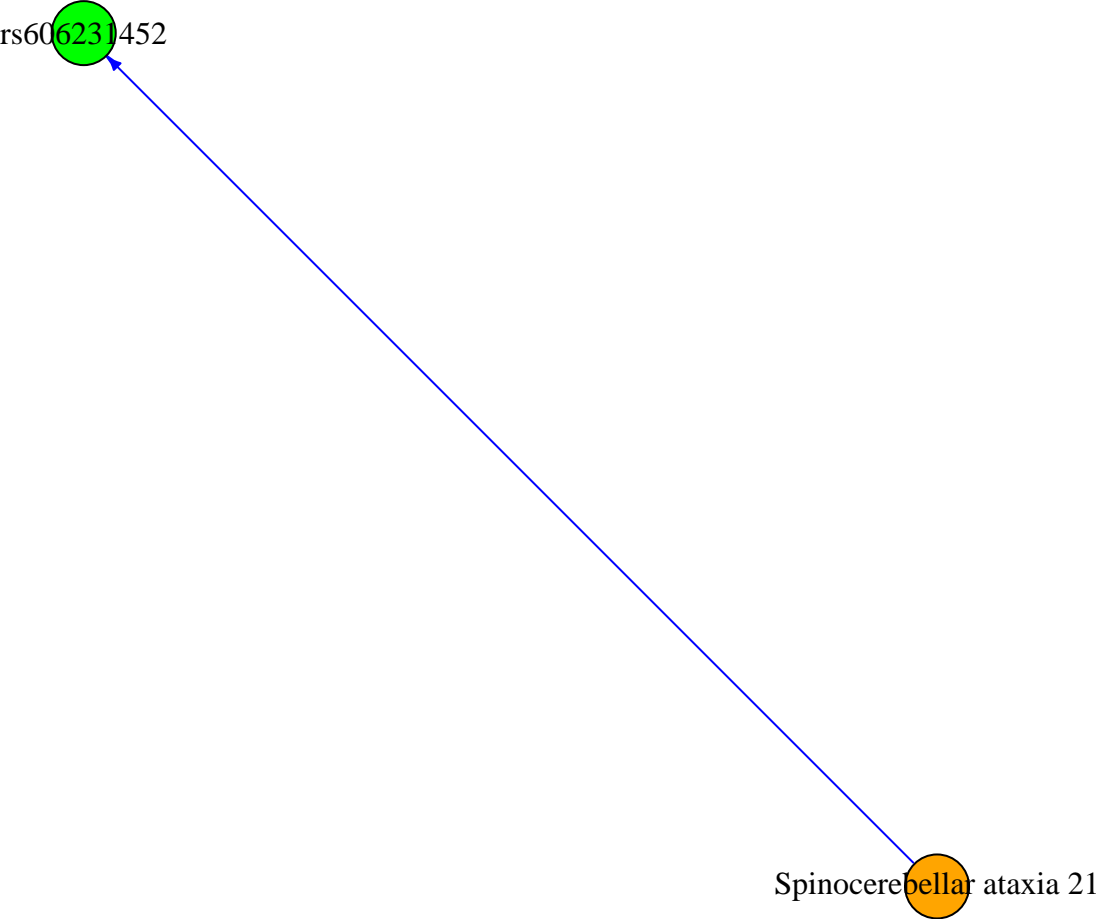

## Variant–Disease Network (Spinocerebellar ataxia 5)

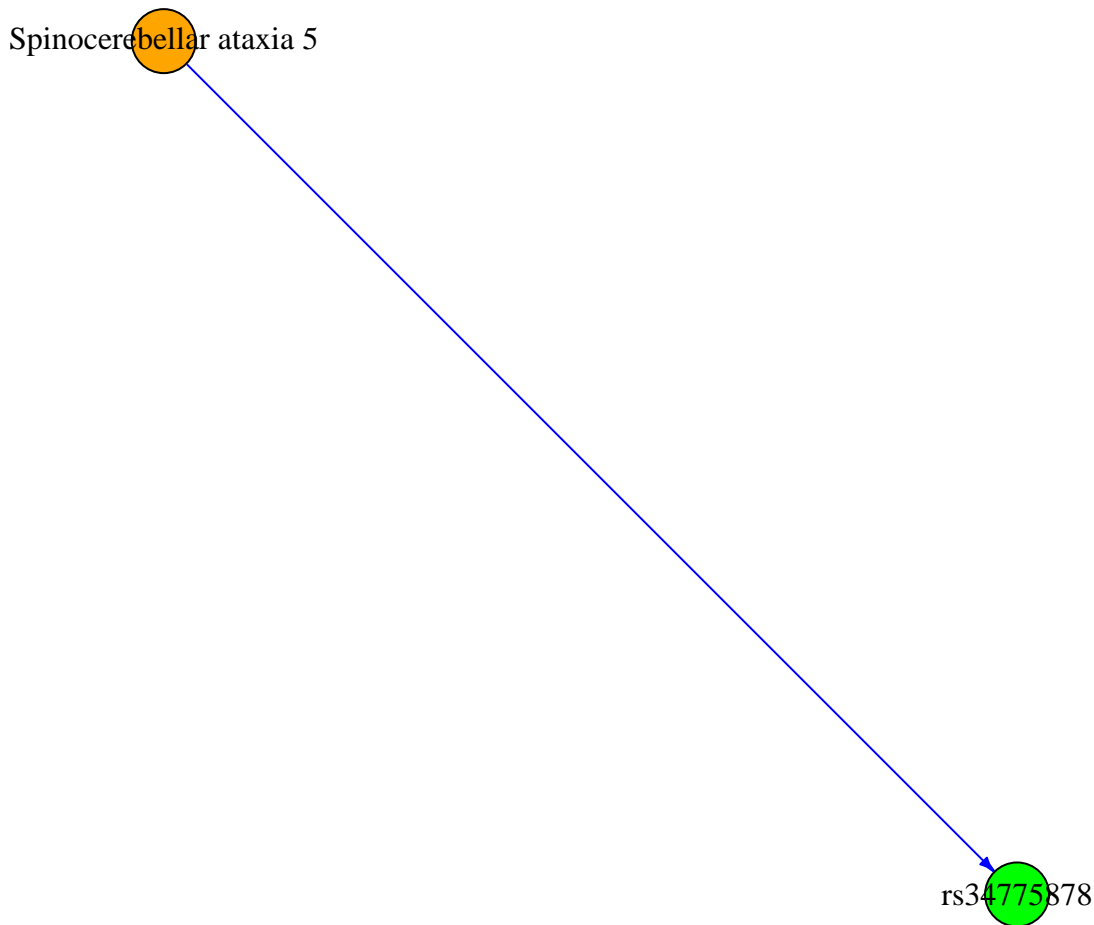

# Variant–Disease Network (Split–hand/foot malformation)

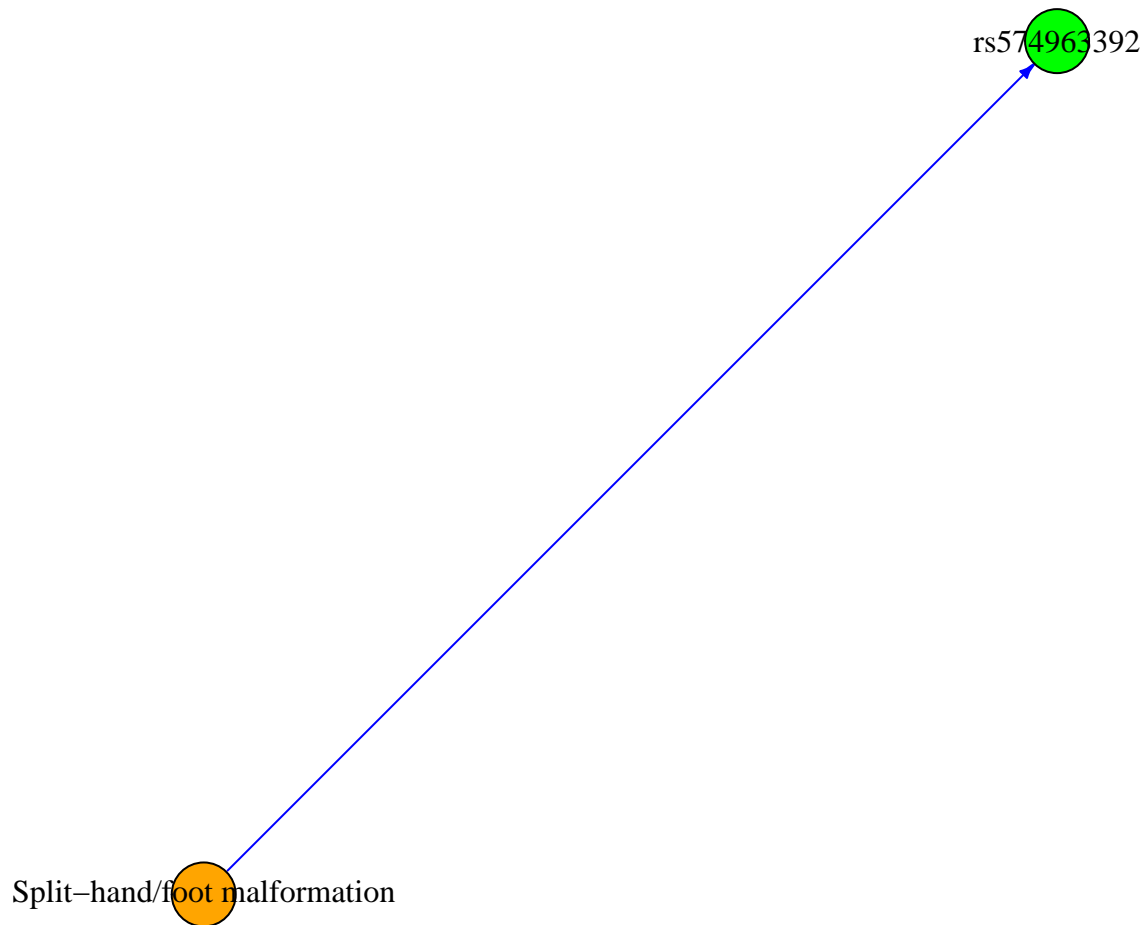

**Variant–Disease Network (Spondylocostal dysostosis 1)**

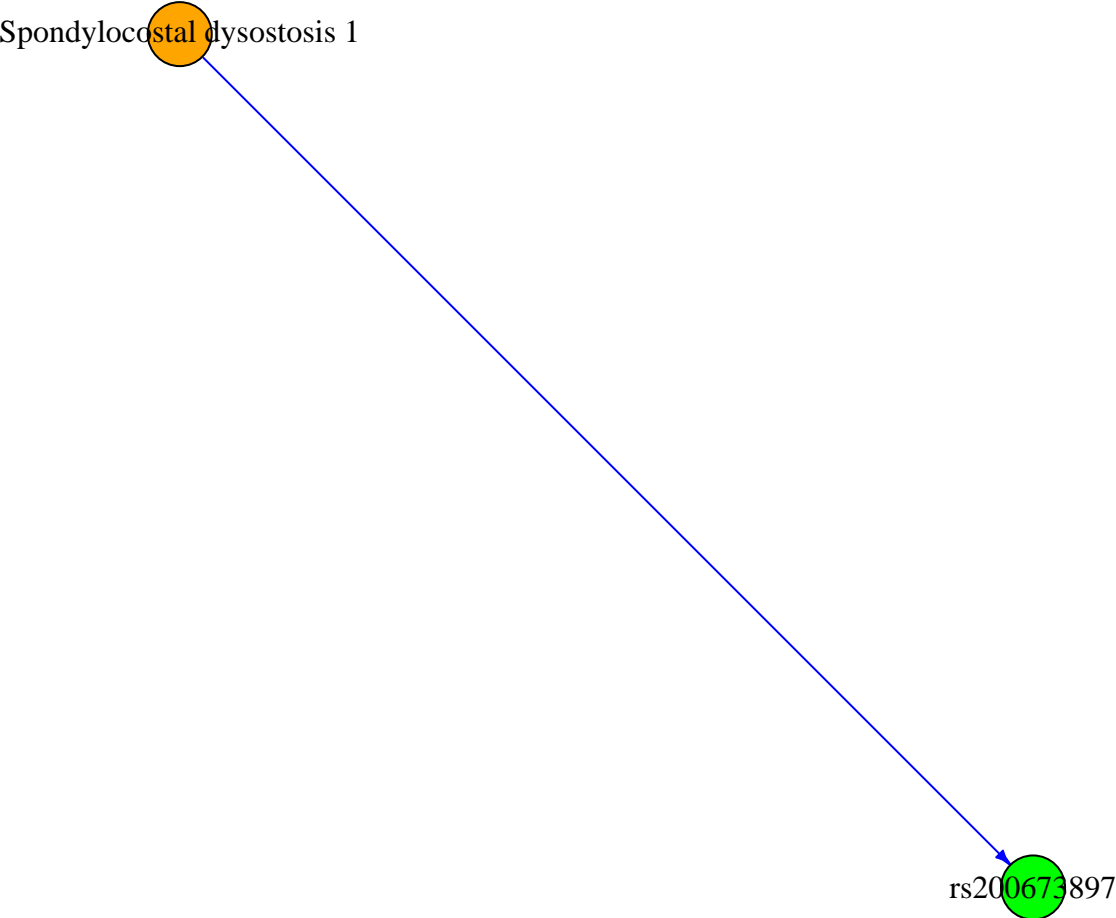



# Variant-Disease Network (Spondyloenchondrodysplasia with immune dysregulation)

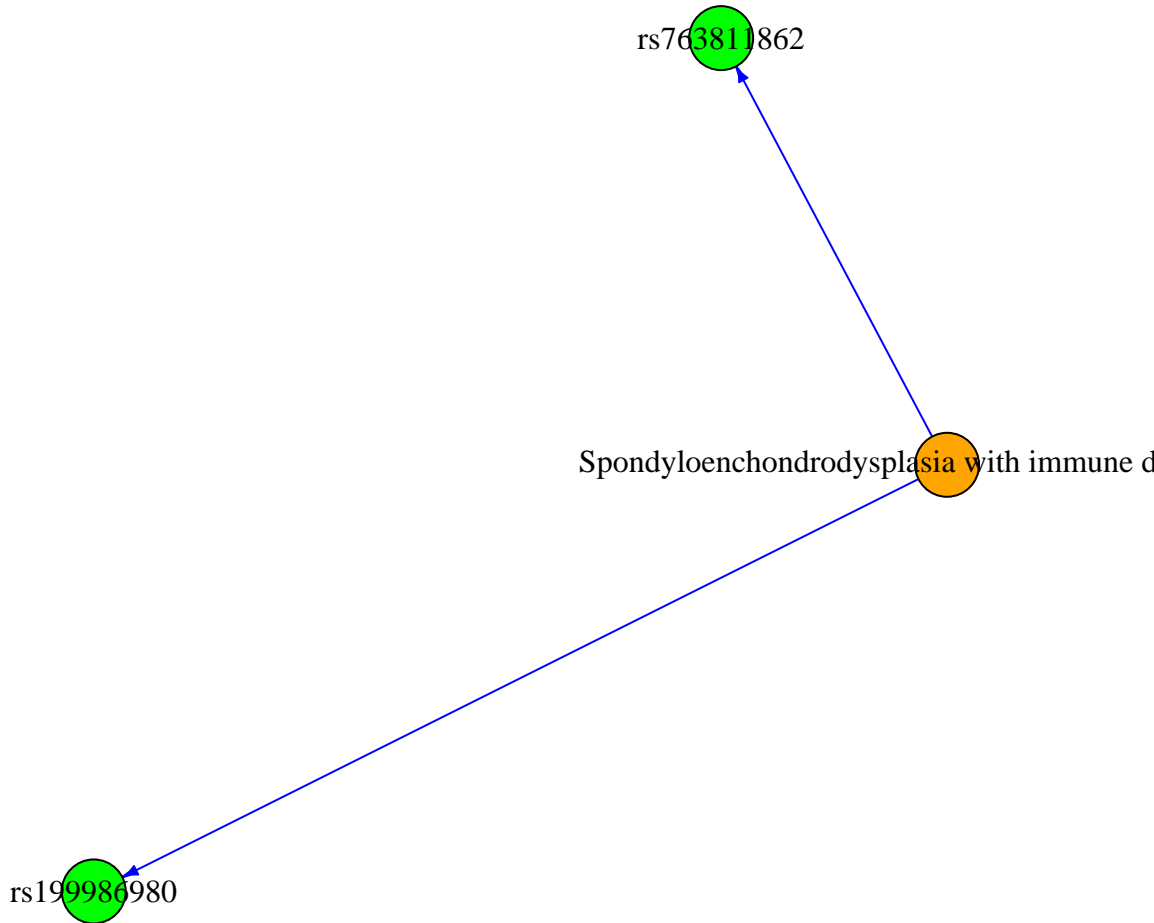

# Variant–Disease Network (Spondyloepimetaphyseal dysplasia)

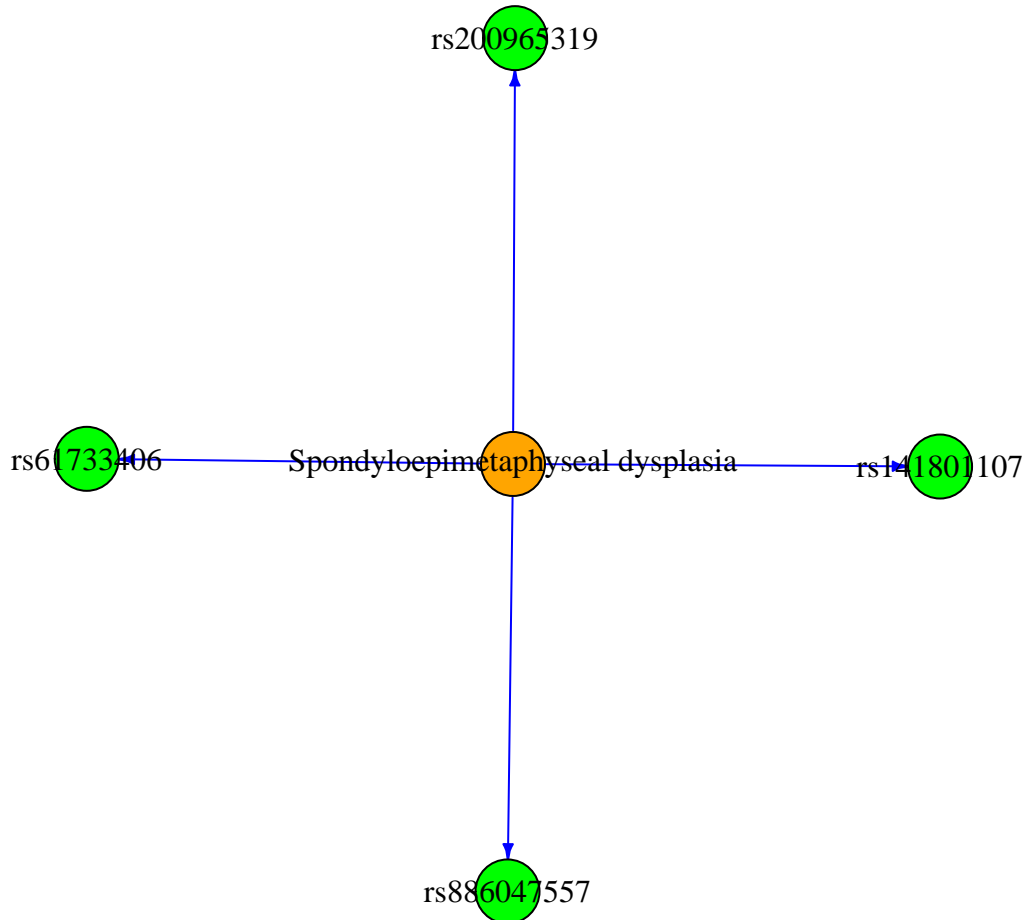

**Variant–Disease Network (Spondyloepiphyseal dysplasia)**

Spondyloepiphyseal dysplasia

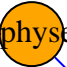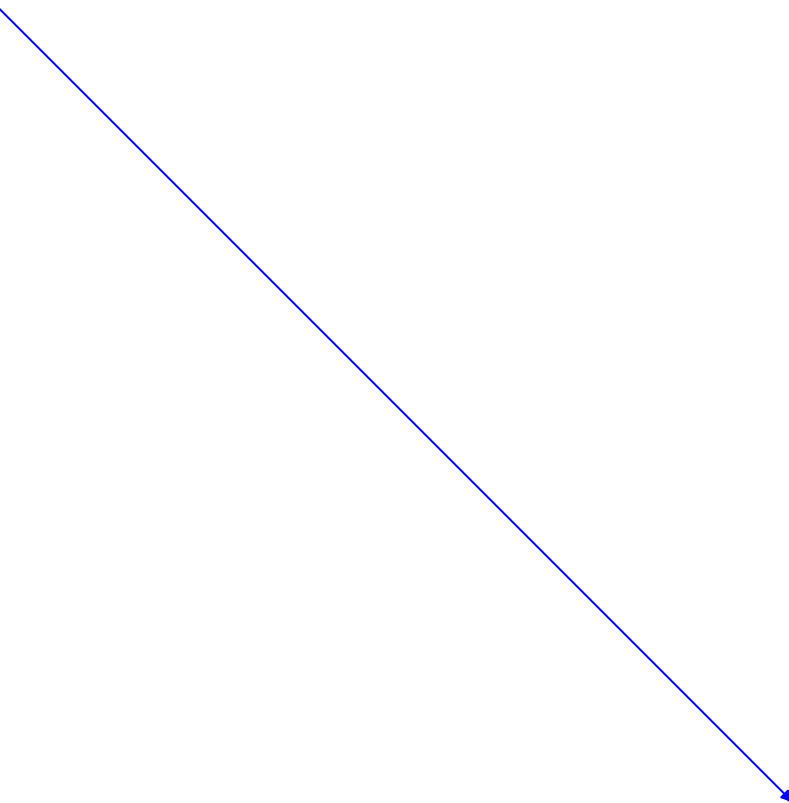

rs778478785

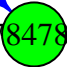

# nt-Disease Network (Spondyloepiphyseal dysplasia with congenital joint dis

epiphyseal dysplasia with congenital joint dislocations

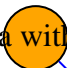

rs778478785

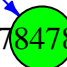

Variant–Disease Network (Spongy degeneration of central nervous system

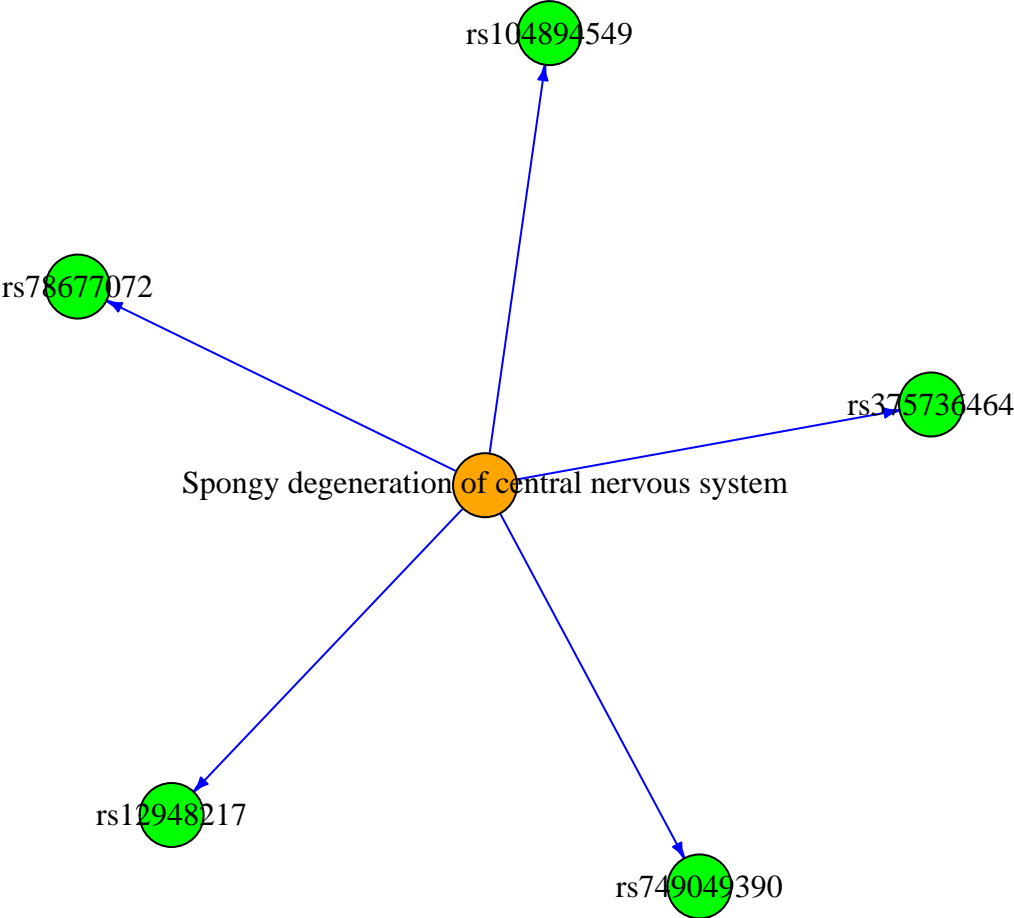

Variant–Disease Network (Stargardt Disease)

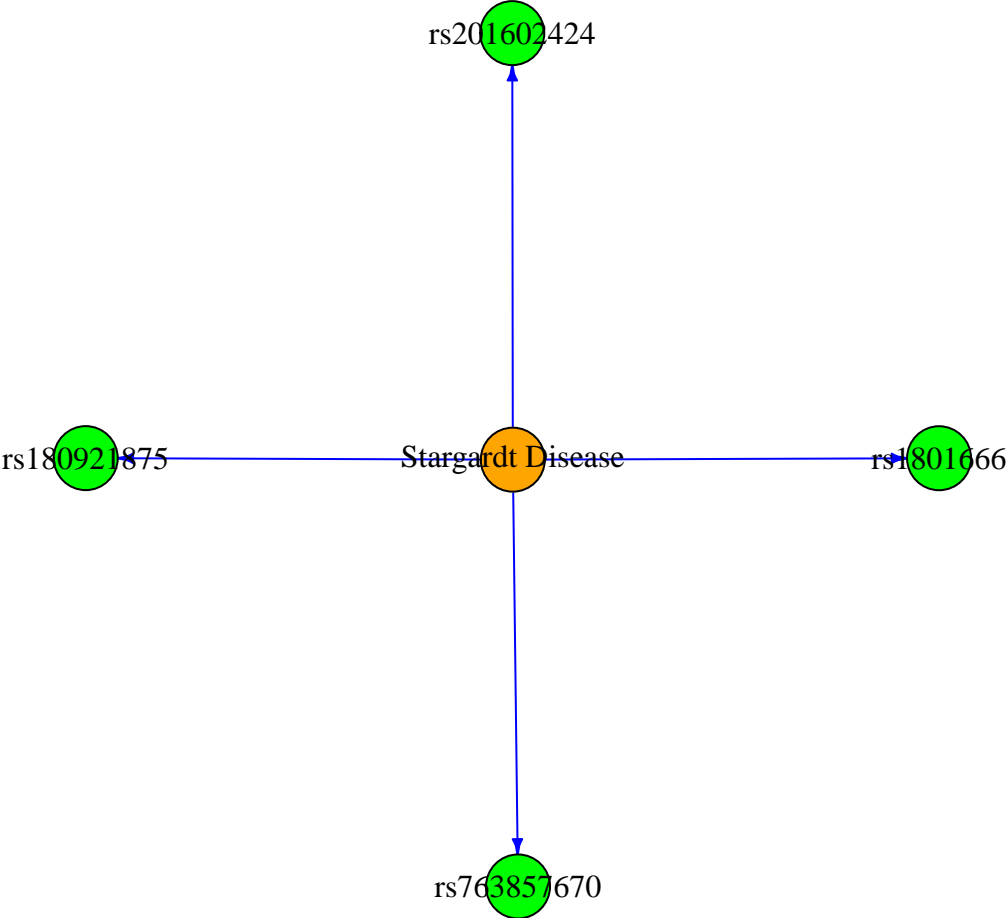

## Variant-Disease Network (Stargardt disease 1)

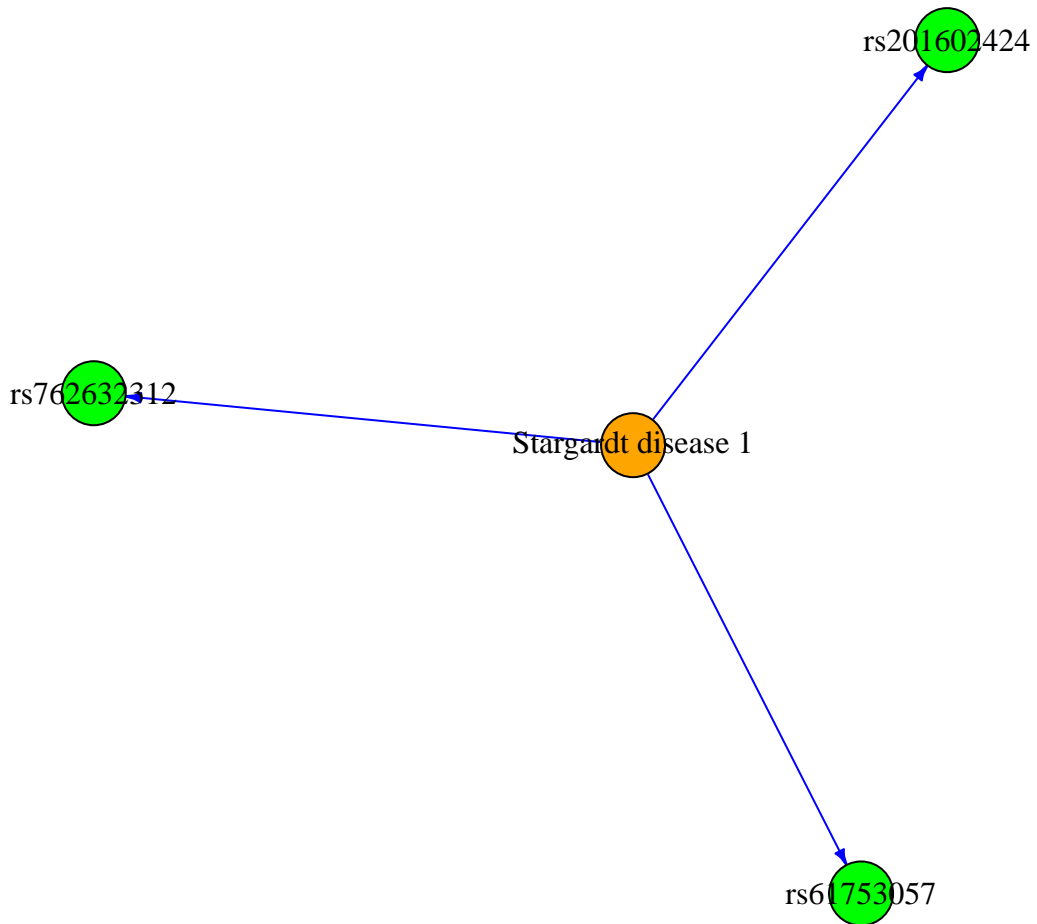

## Variant-Disease Network (STAT3 gain of function)

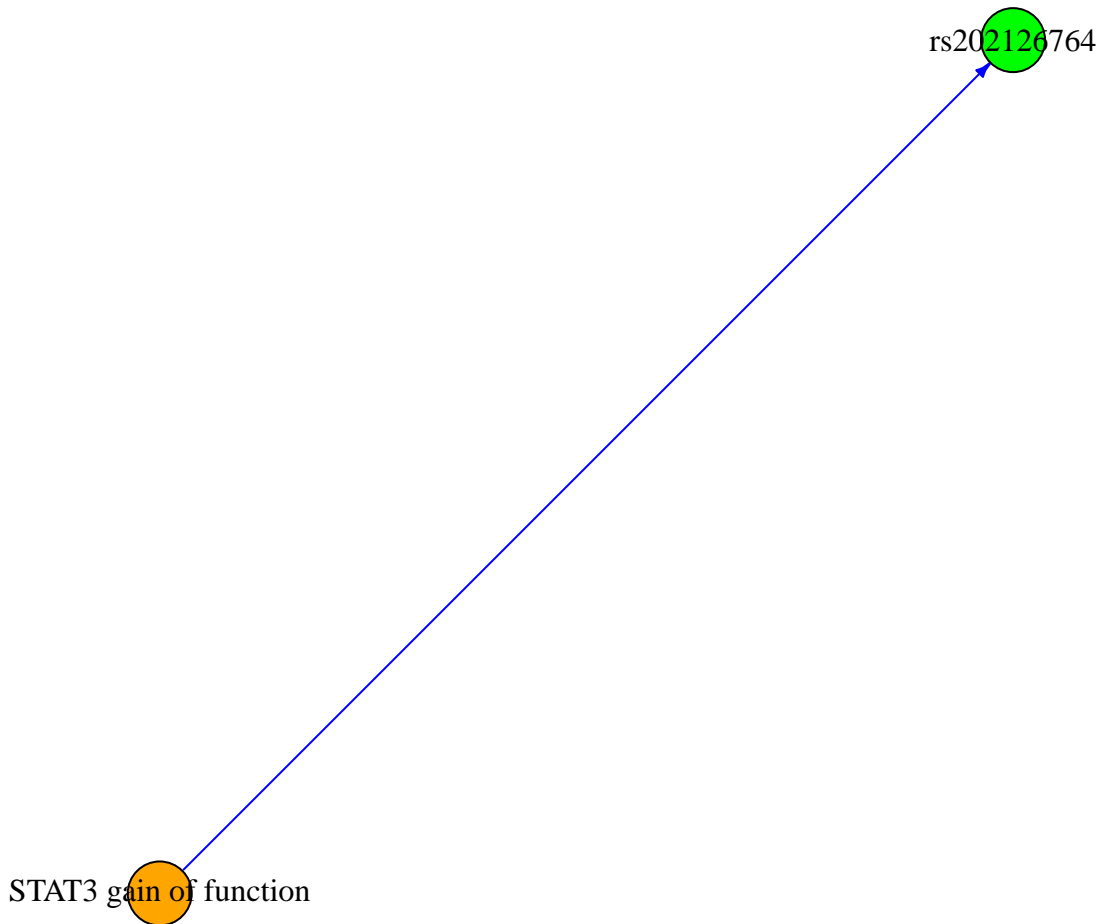



# Variant–Disease Network (Steroid-resistant nephrotic syndrome)

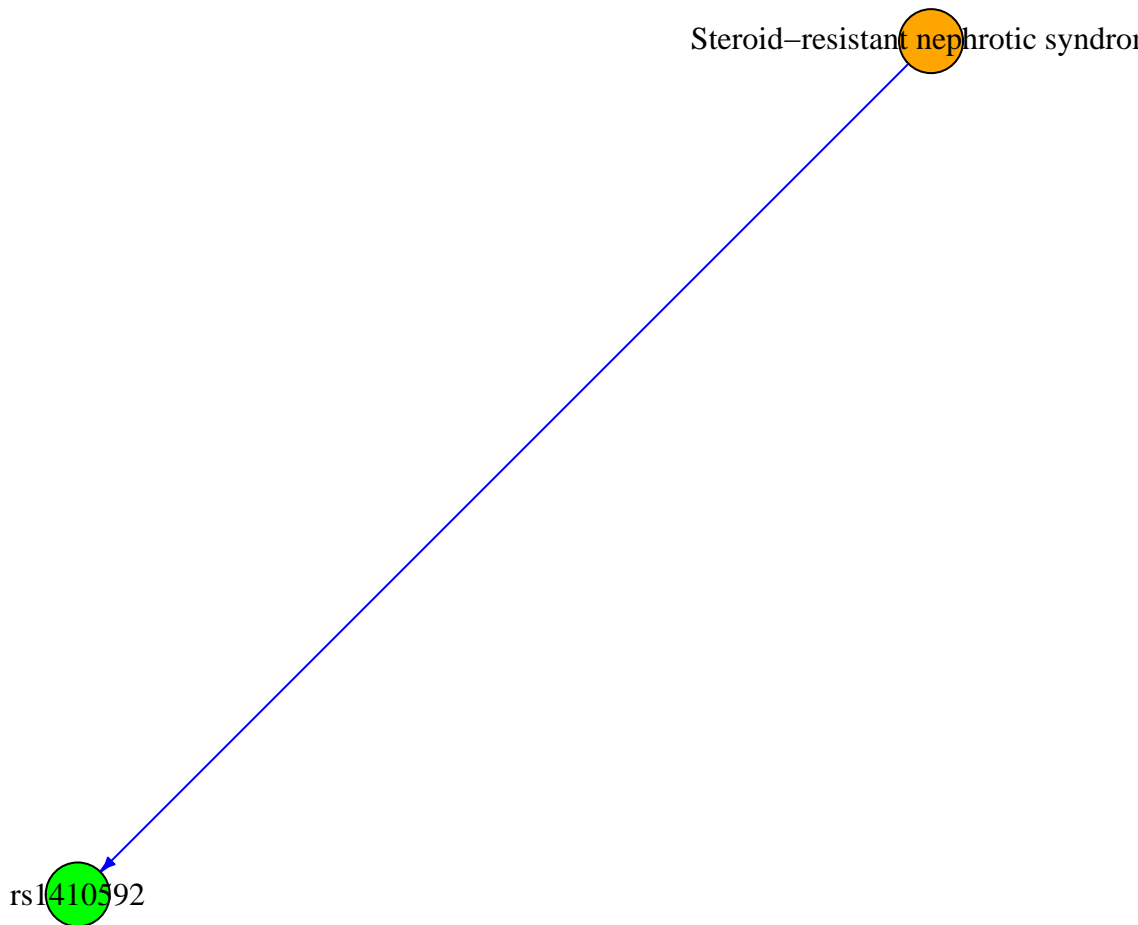

## Variant–Disease Network (Stickler Syndrome)

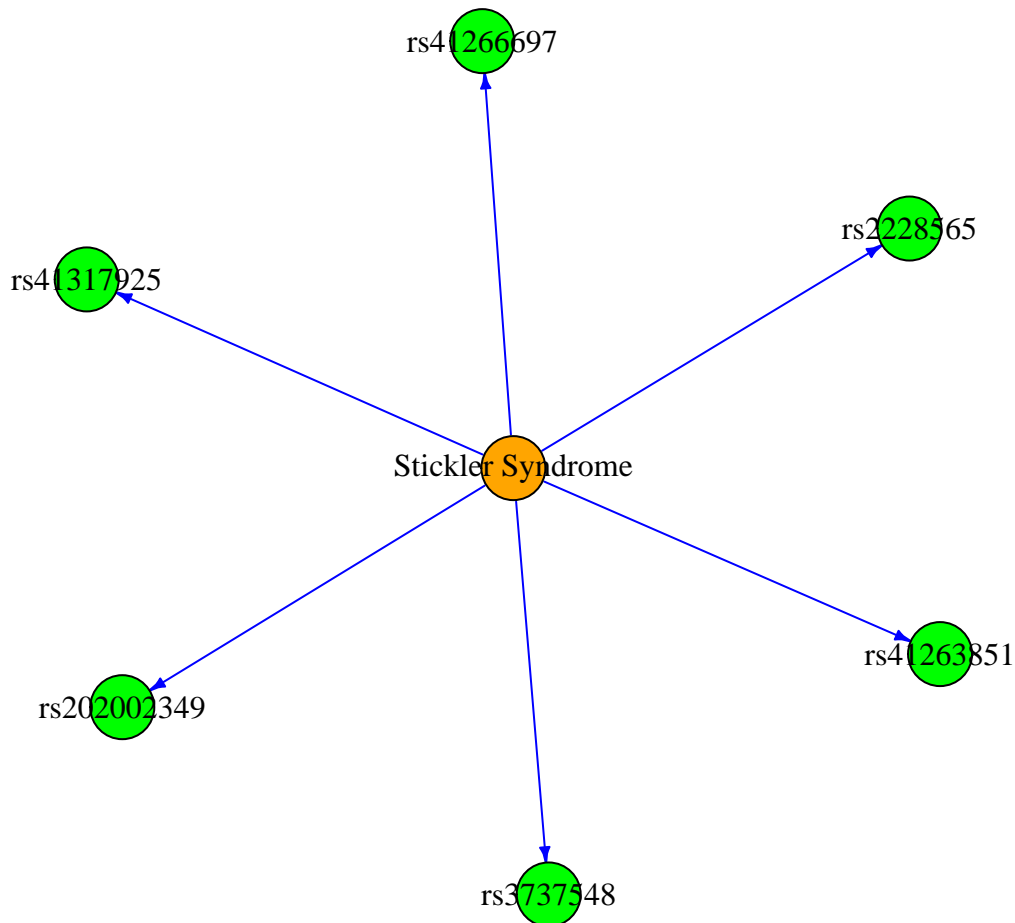

## Variant-Disease Network (Stickler syndrome type 1)

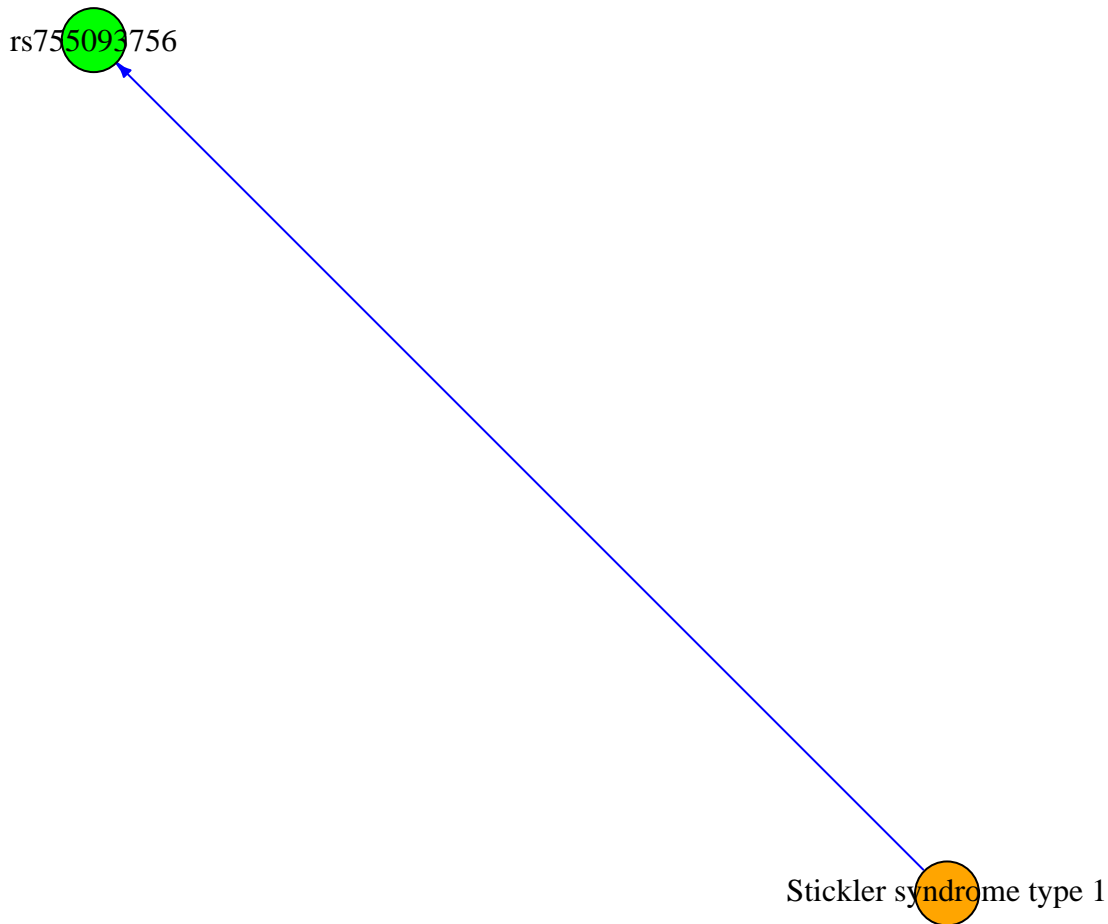

## Variant–Disease Network (Stiff skin syndrome)

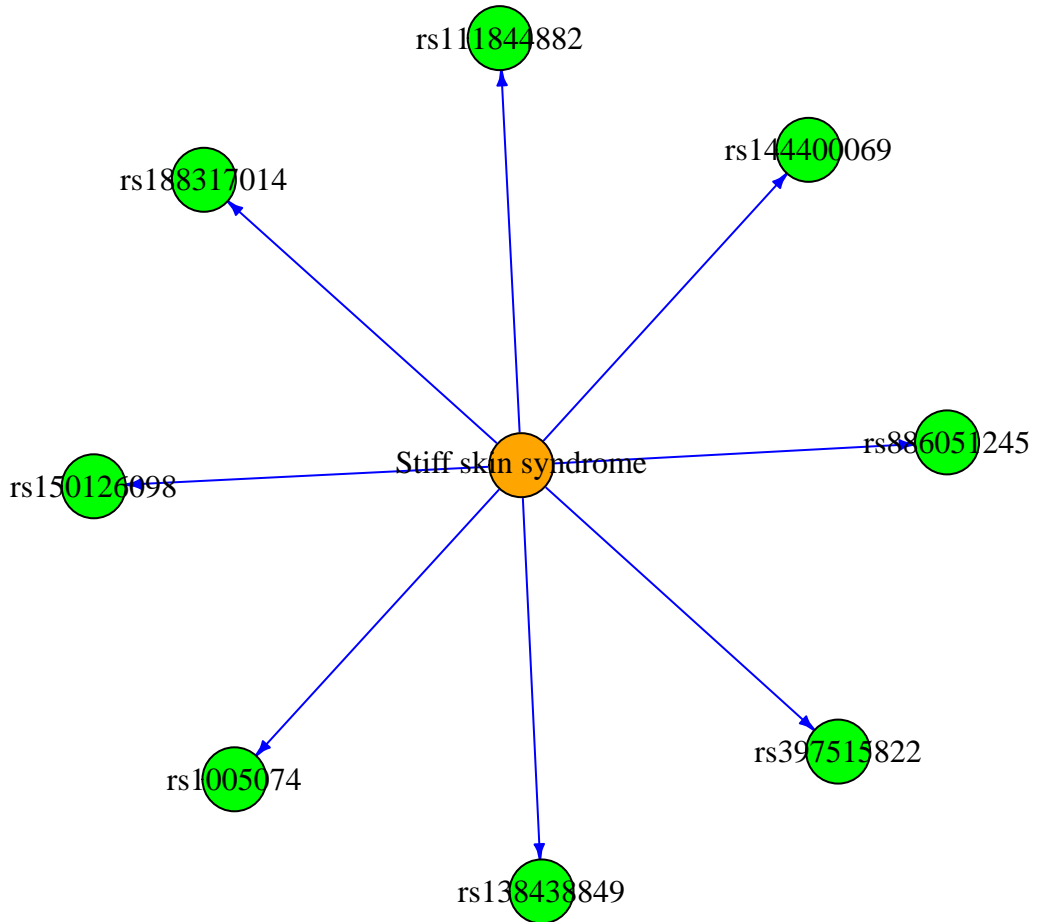

**Variant–Disease Network (Sting–associated vasculopathy)**

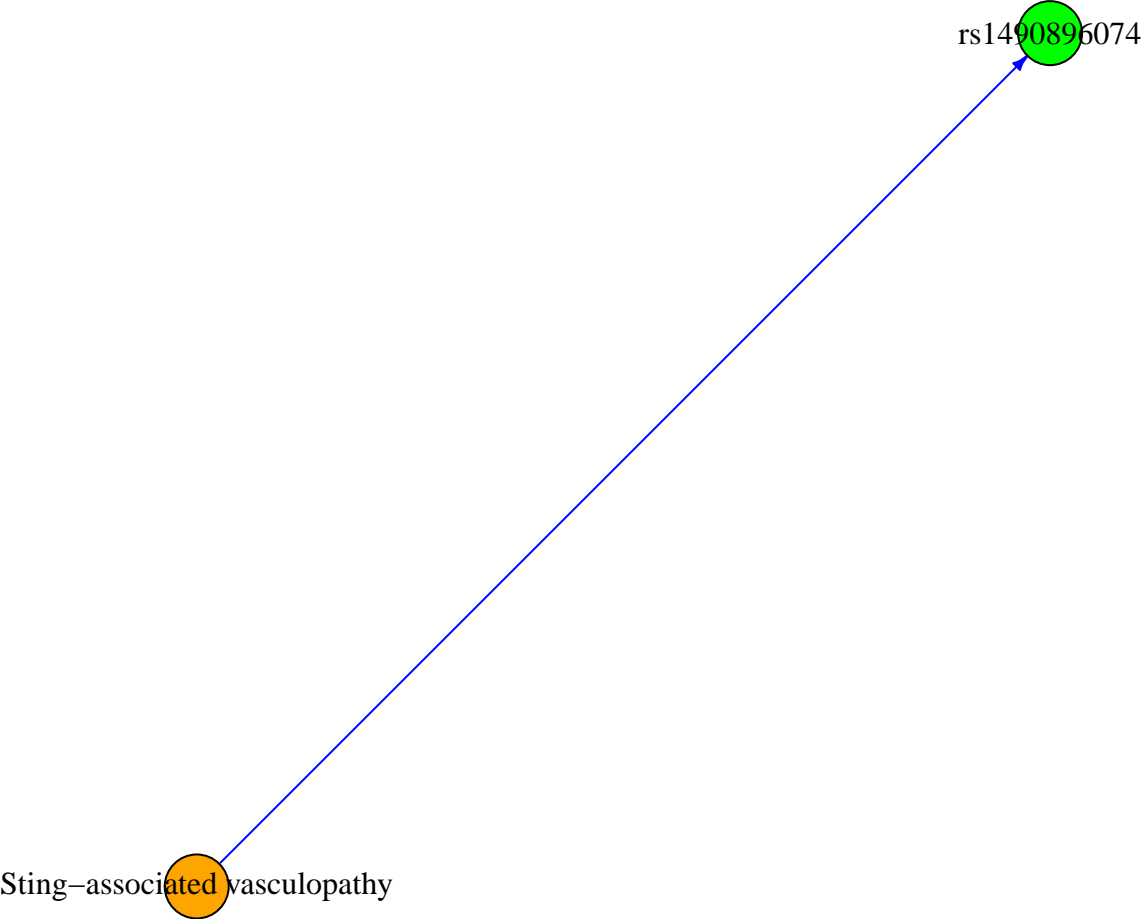

## Variant–Disease Network (Striatal Degeneration)

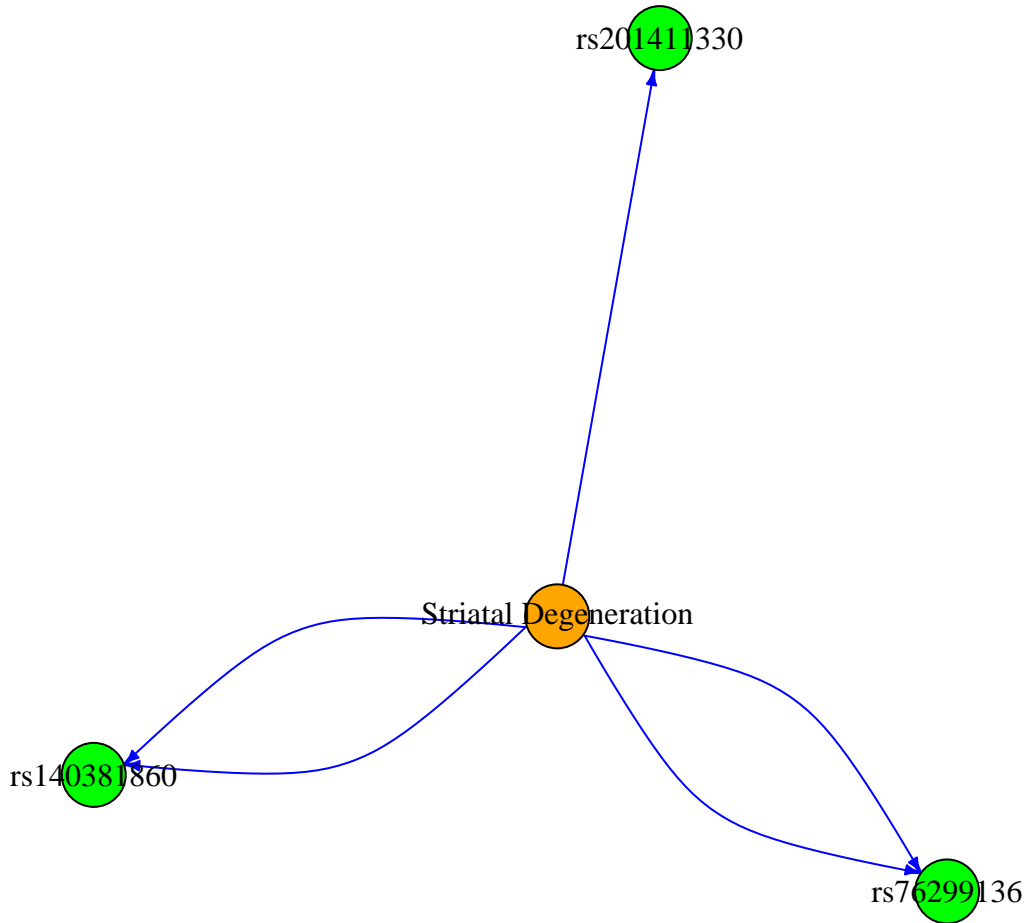

# Variant–Disease Network (Stuve–Wiedemann syndrome)

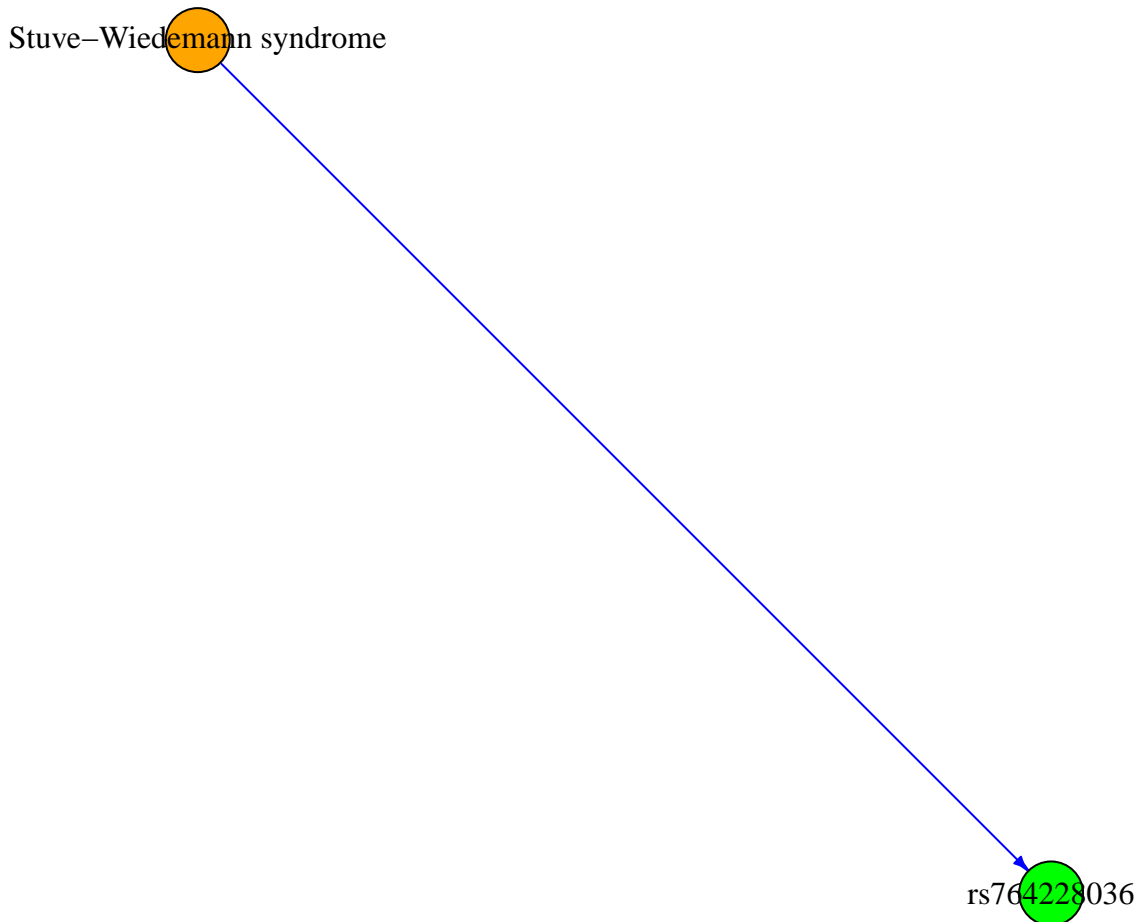

**Variant–Disease Network (Sucrase–isomaltase deficiency)**

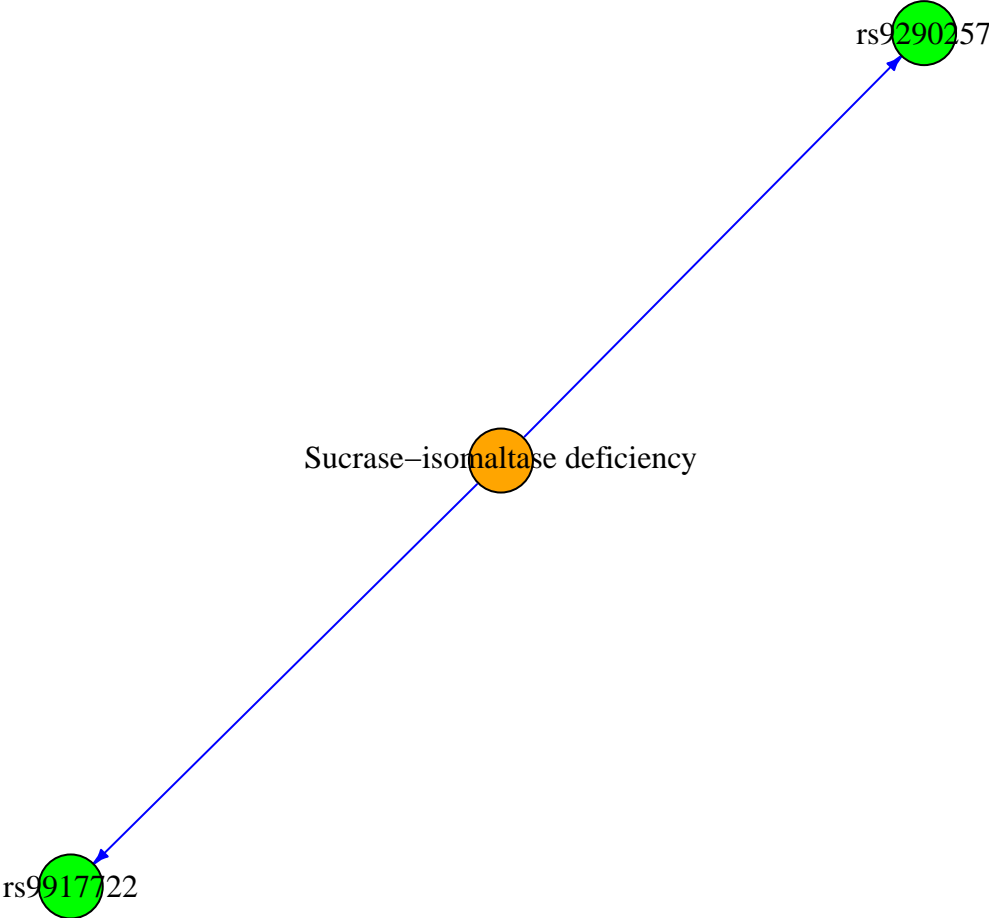



## Variant–Disease Network (Supraventricular tachycardia)

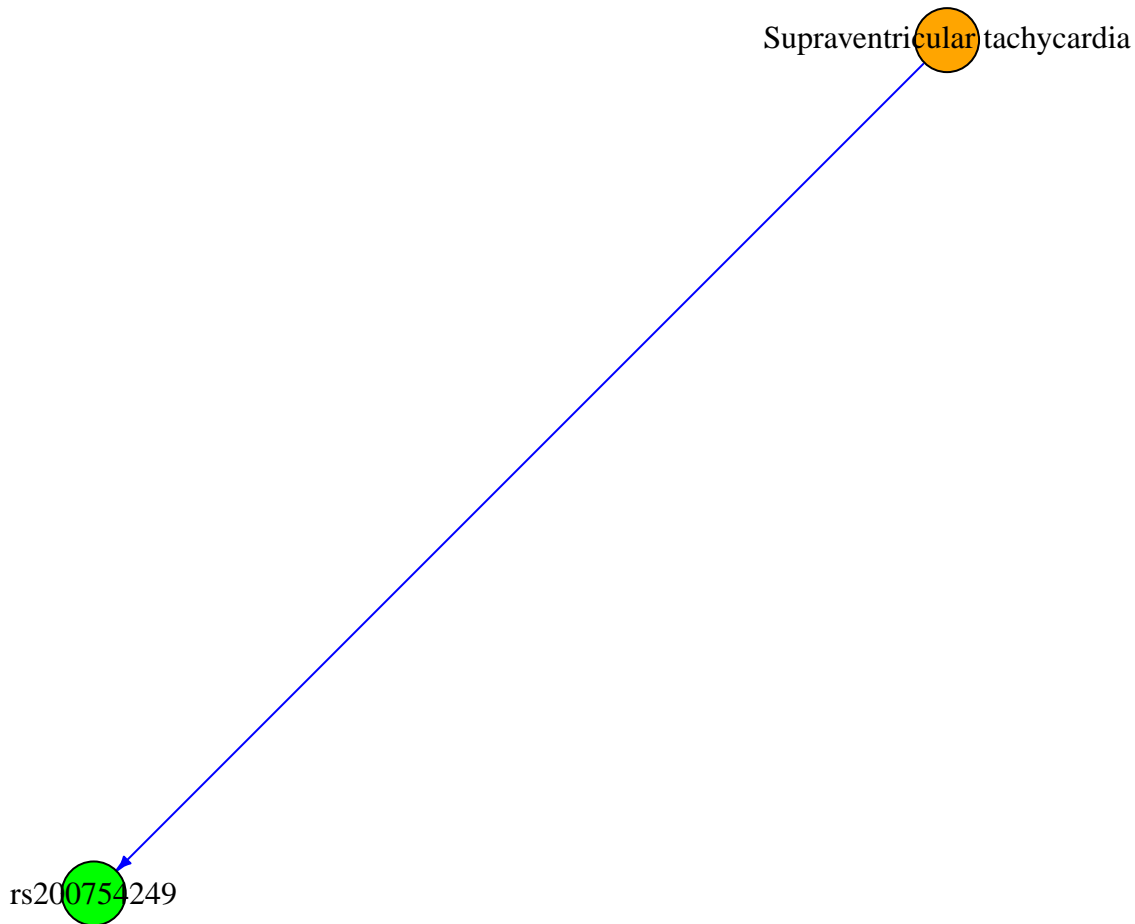

## Variant-Disease Network (Surfactant metabolism dysfunction)

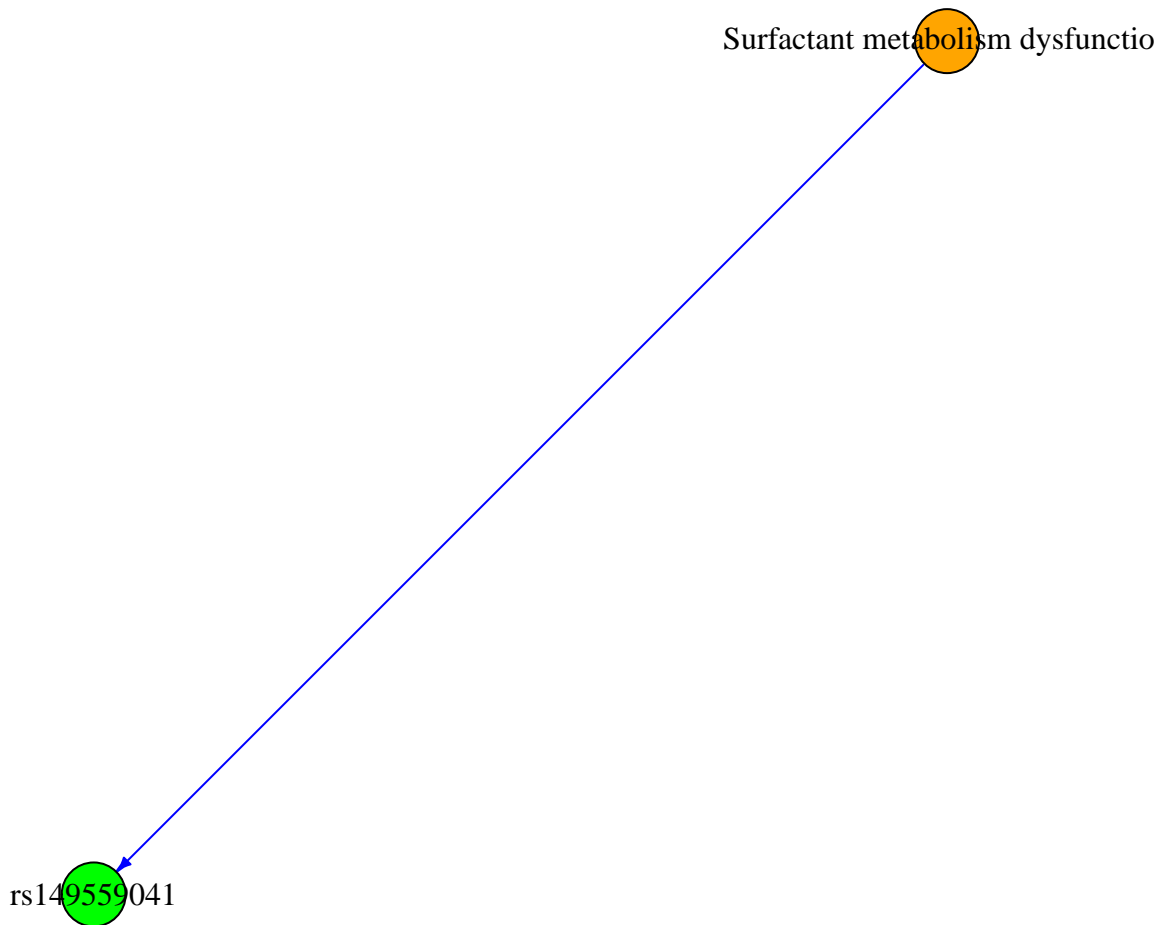

**Variant–Disease Network (Symmetrical dyschromatosis of extremities)**

rs200537032

Symmetrical dyschromatosis of extremities

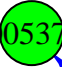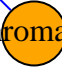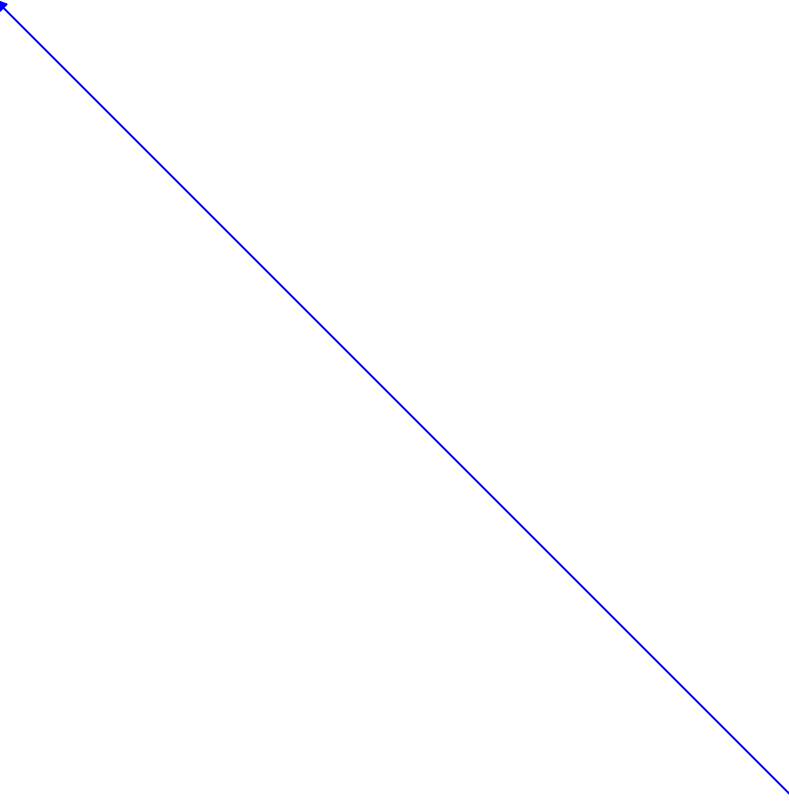

## Variant–Disease Network (Syndactyly)

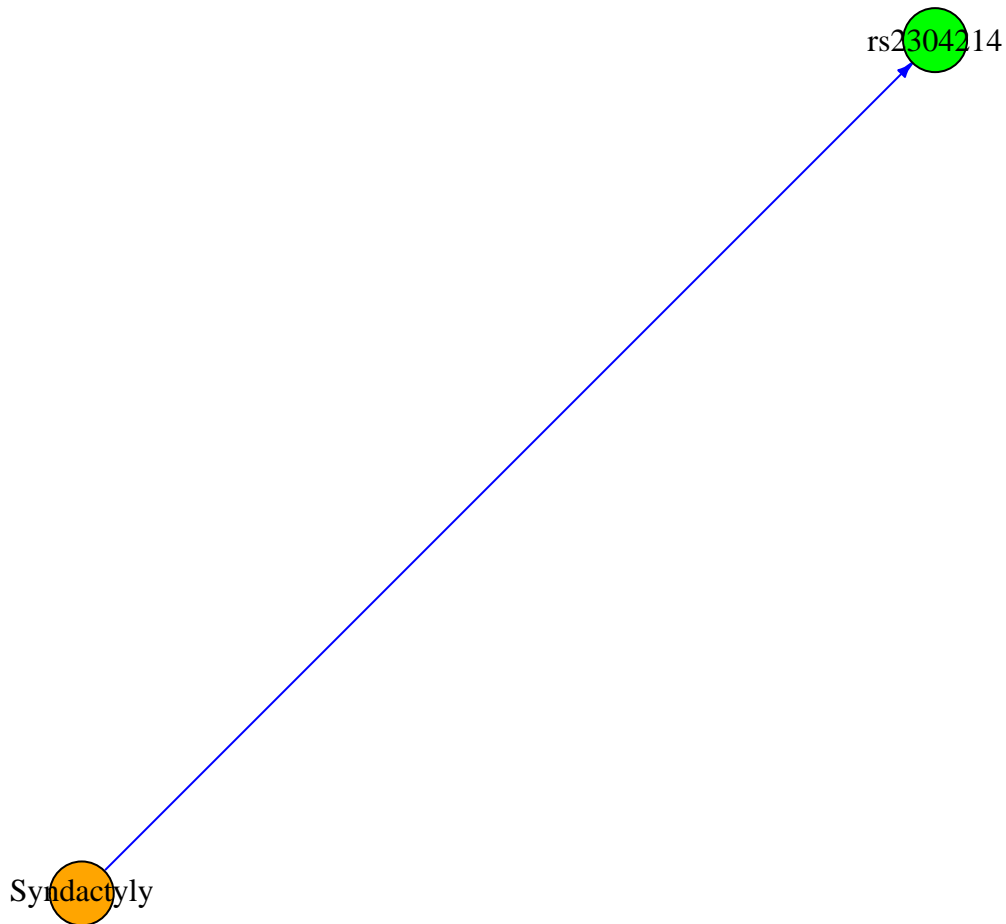

## Variant–Disease Network (Syndromic intellectual disability)

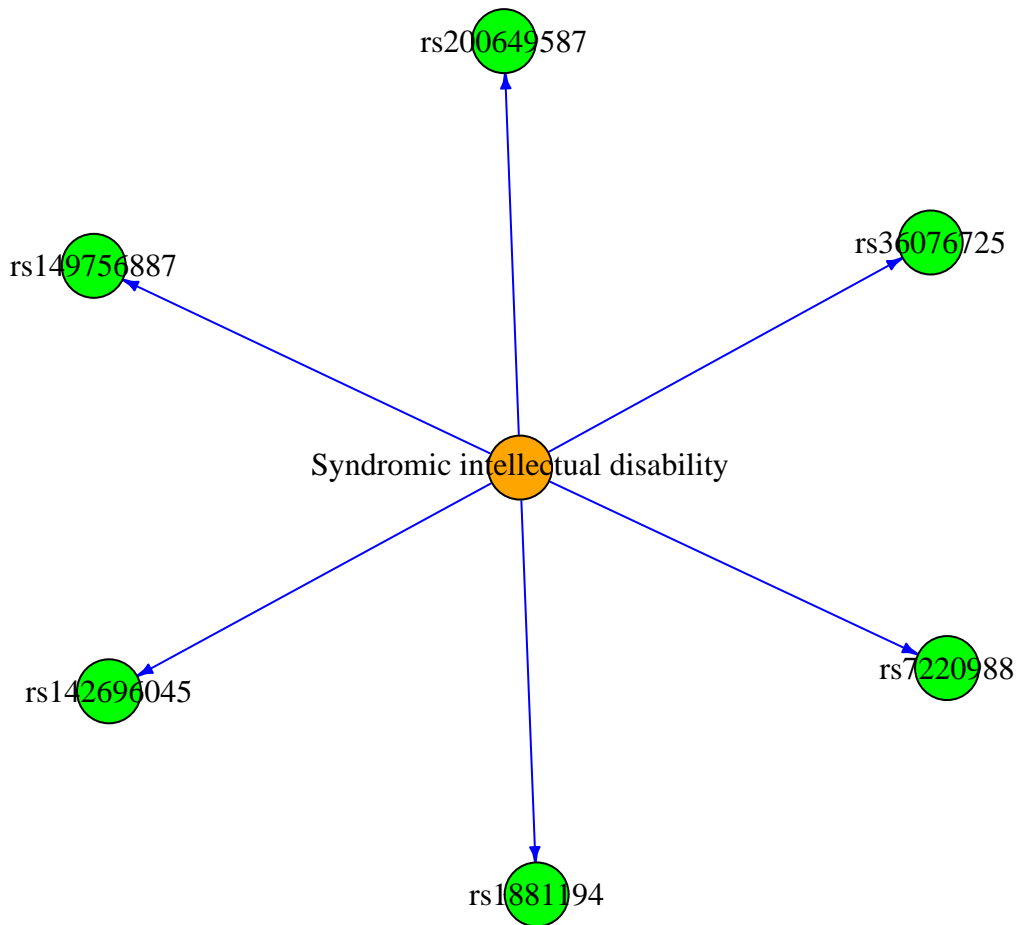

## Variant–Disease Network (Syndromic Microphthalmia)

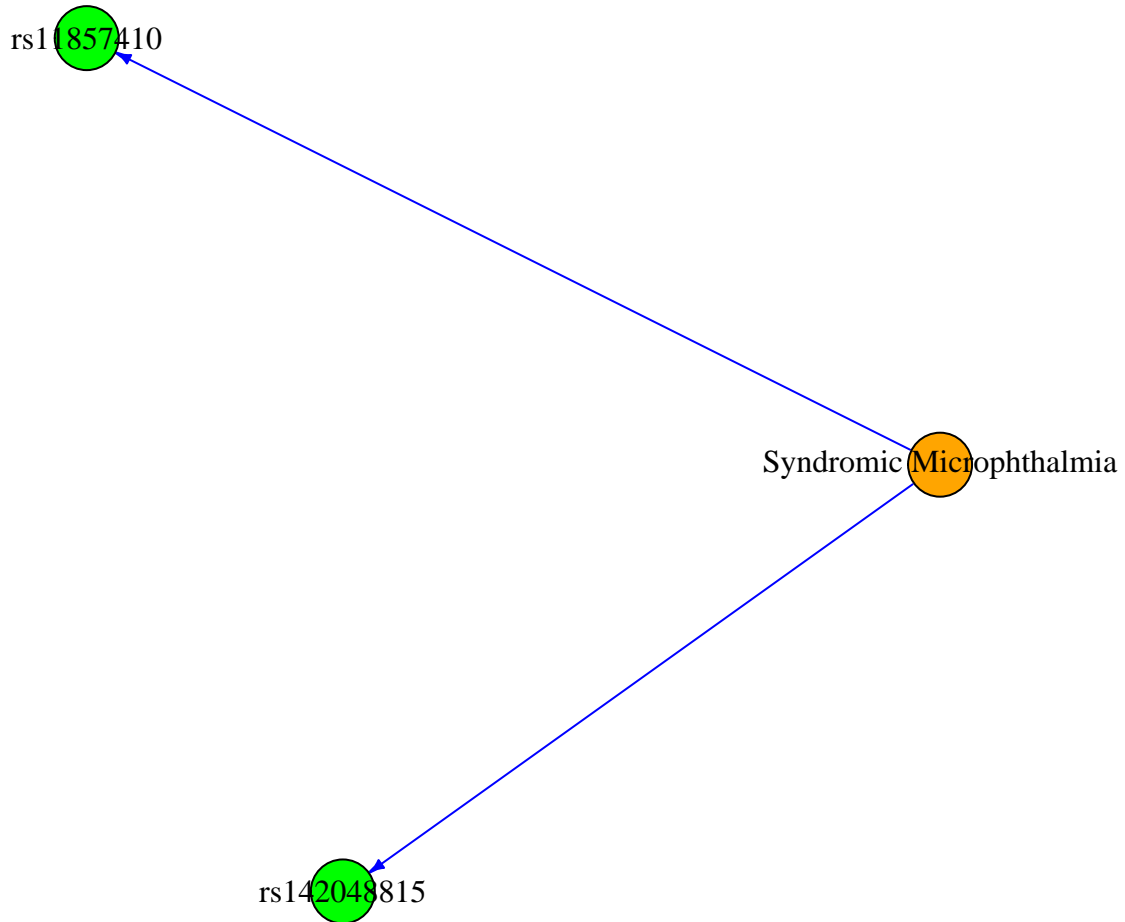

## Variant–Disease Network (Tangier disease)

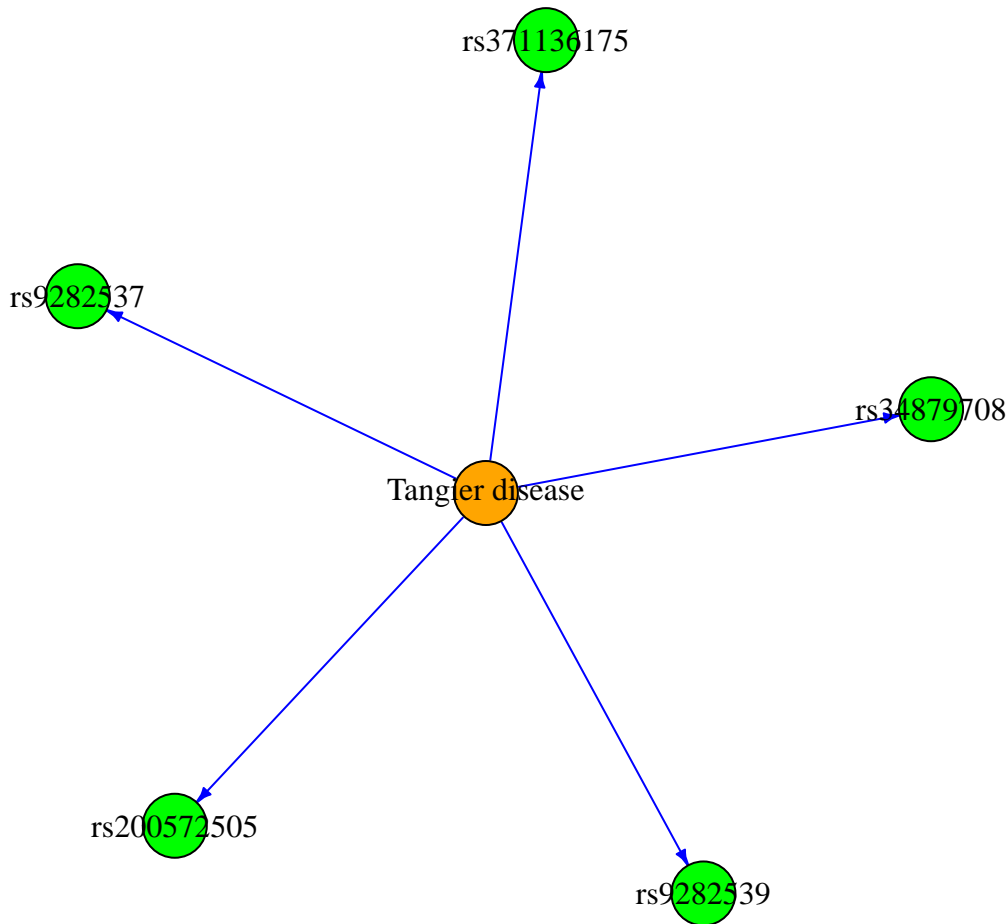

# Variant-Disease Network (Tatton-Brown-rahman syndrome)

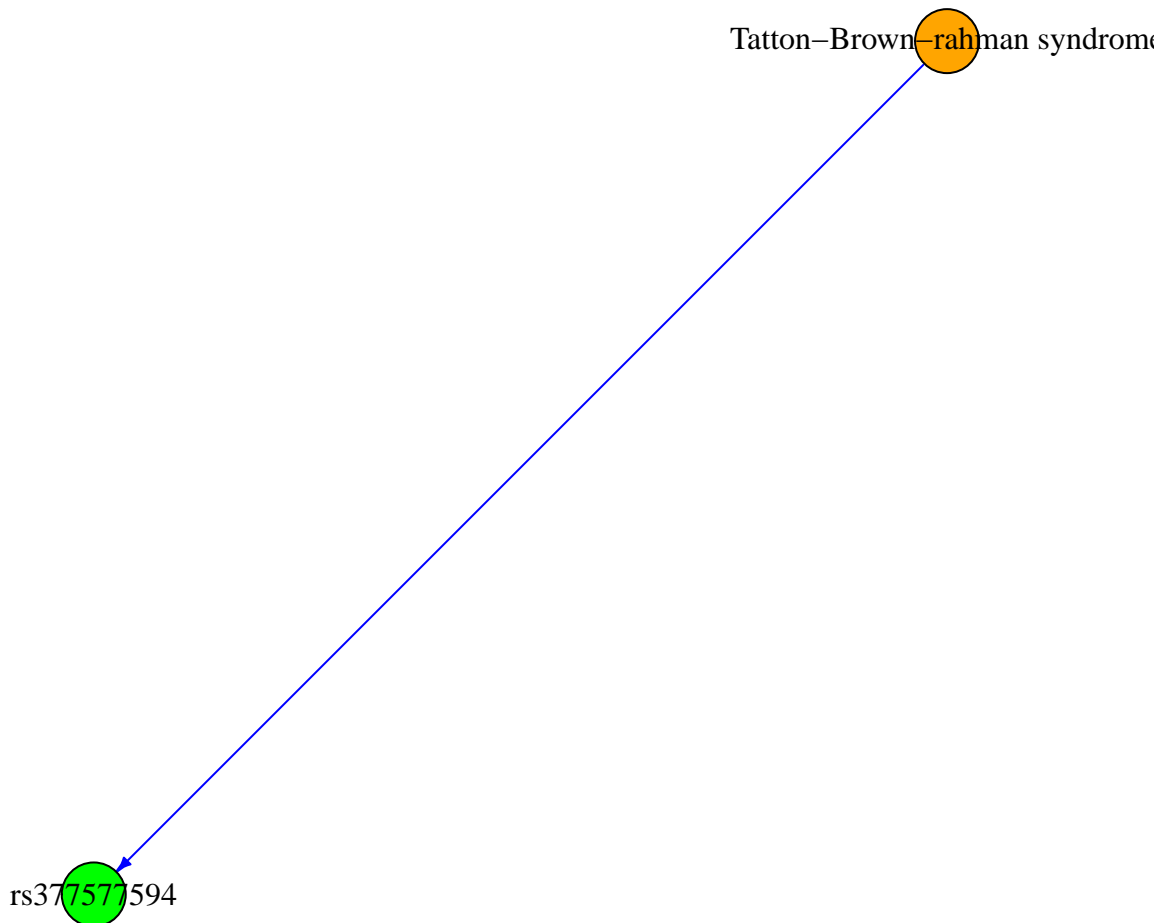



## Variant-Disease Network (Tay-Sachs disease)

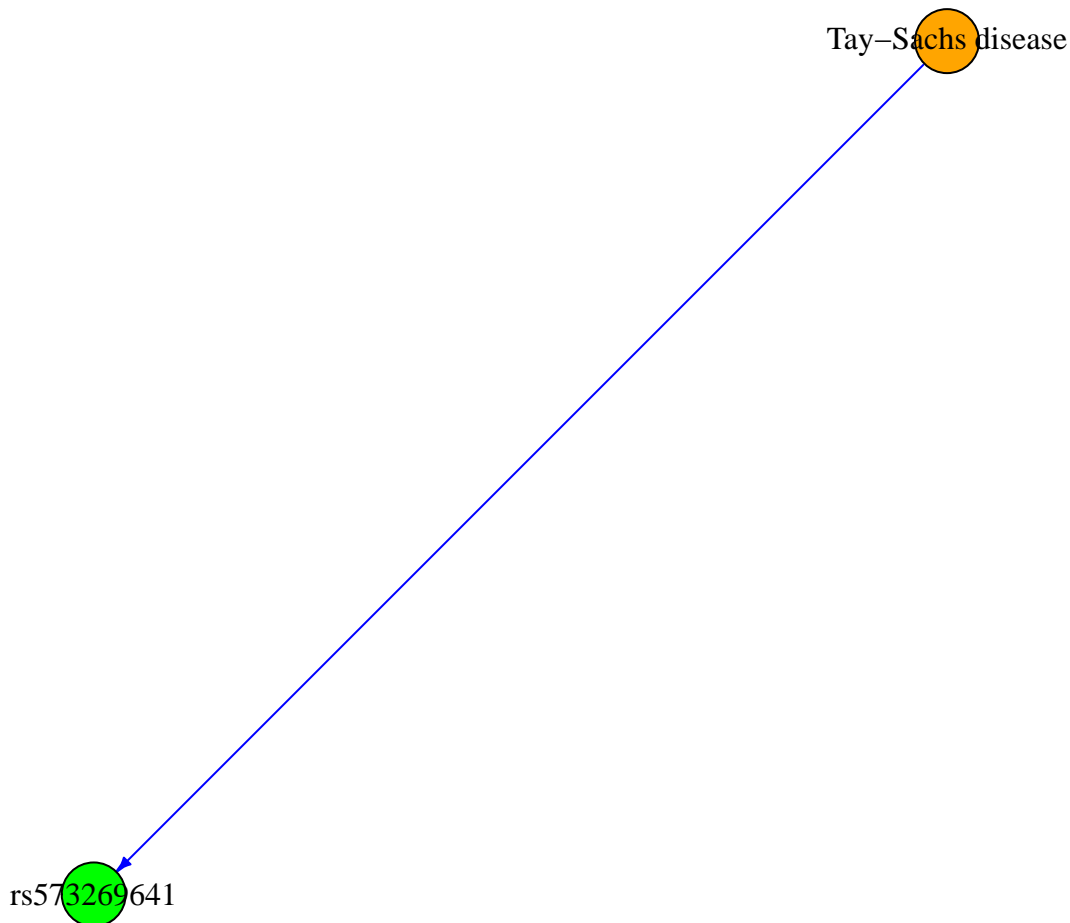

Variant–Disease Network (T–cell immunodeficiency)

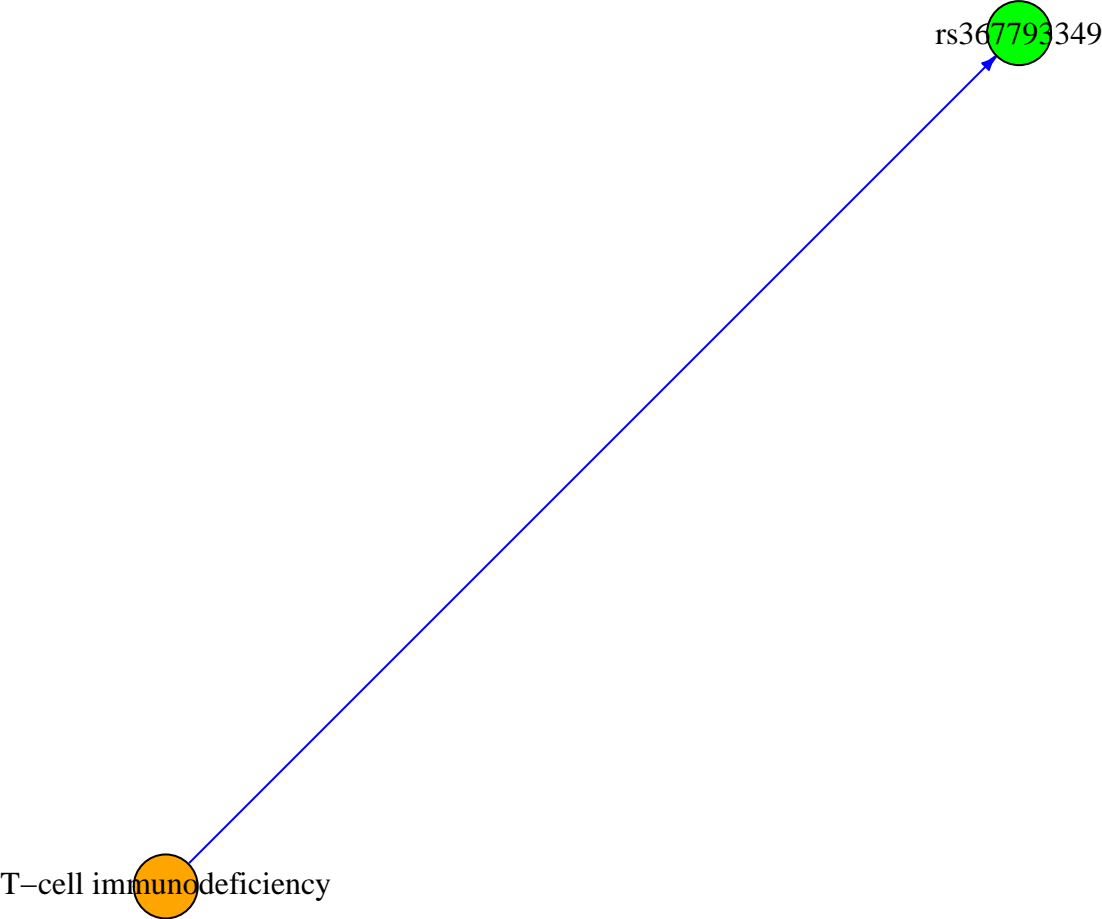

**Variant–Disease Network (Temtamy preaxial brachydactyly syndrome)**

Temtamy preaxial brachydactyly syndrome

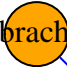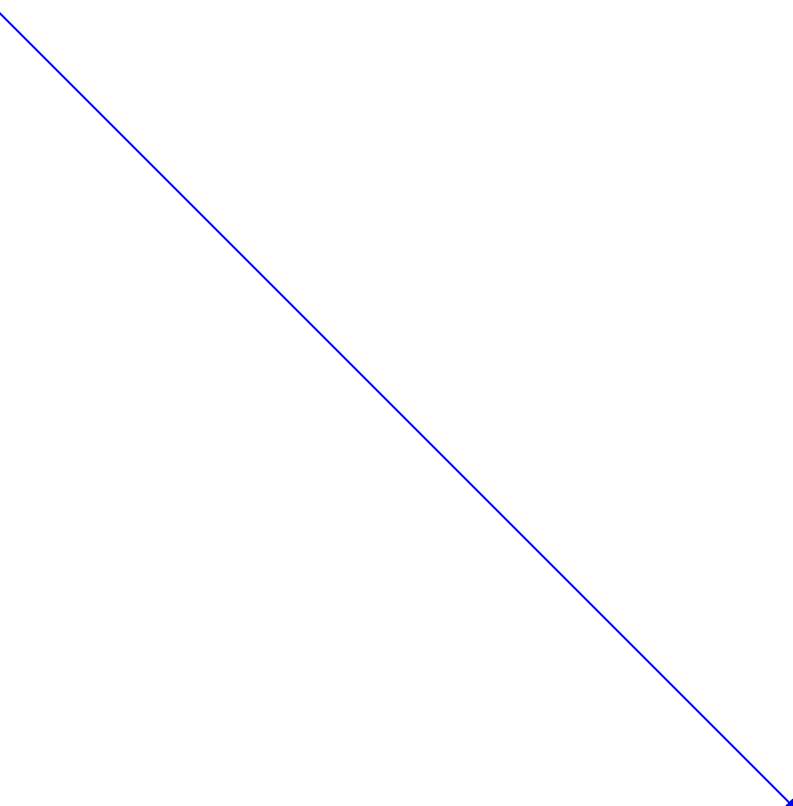

rs3803423

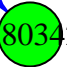

## Variant–Disease Network (Thick lower lip vermilion)

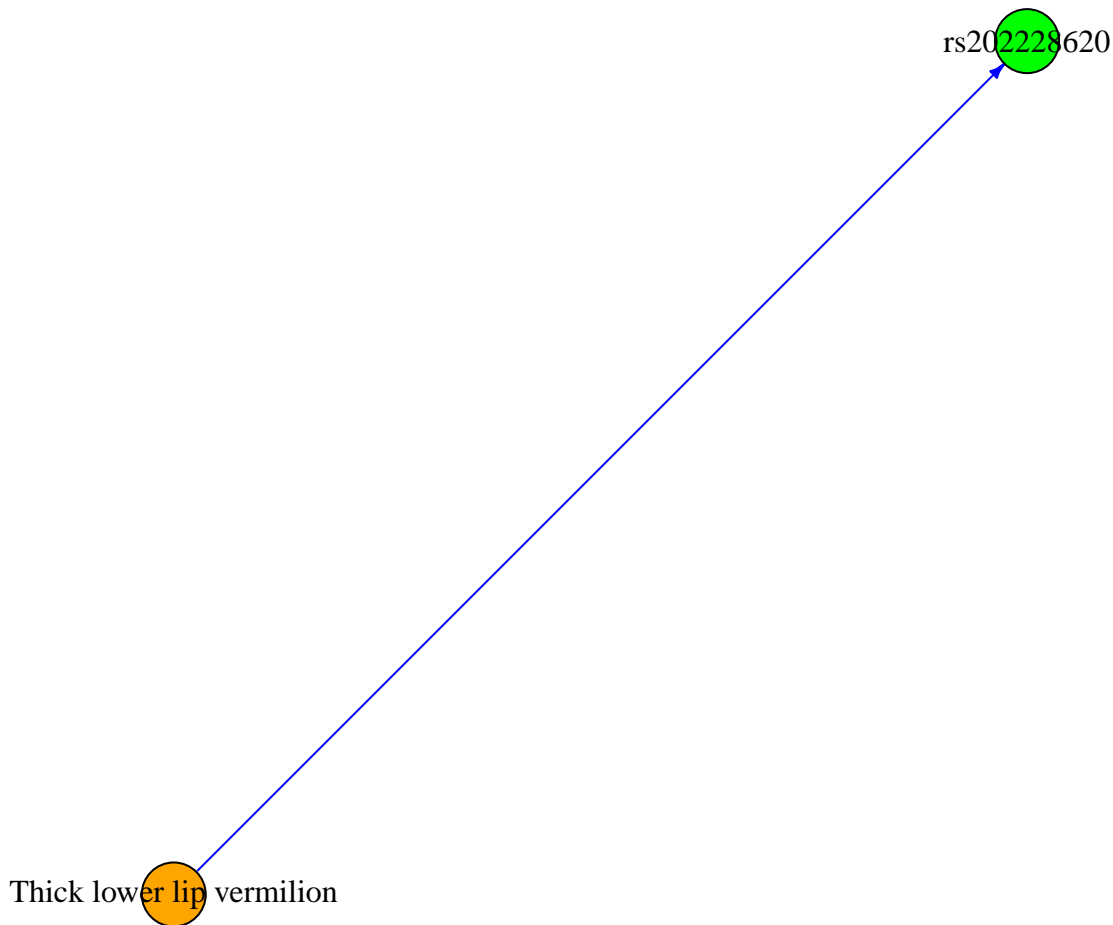

## Variant-Disease Network (Thoracic aortic aneurysm and aortic dissection)

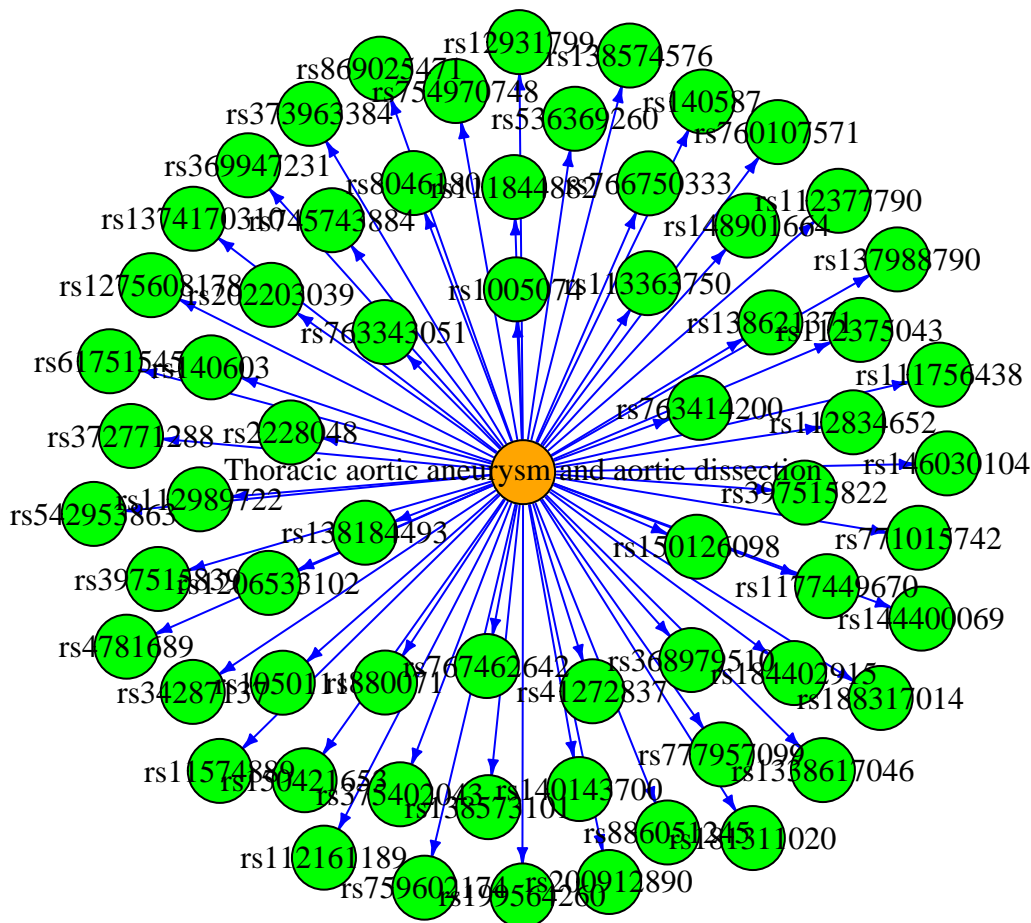

## Variant–Disease Network (Three M syndrome)

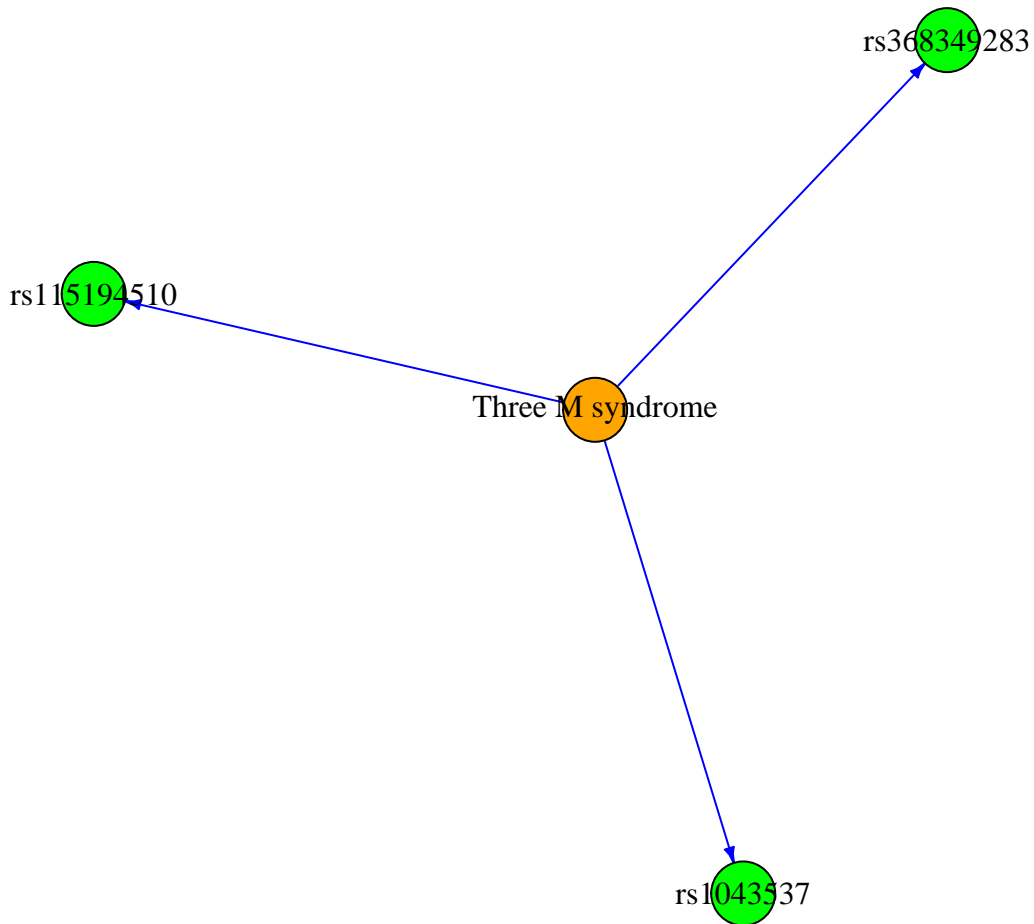

Variant–Disease Network (Thrombophilia)

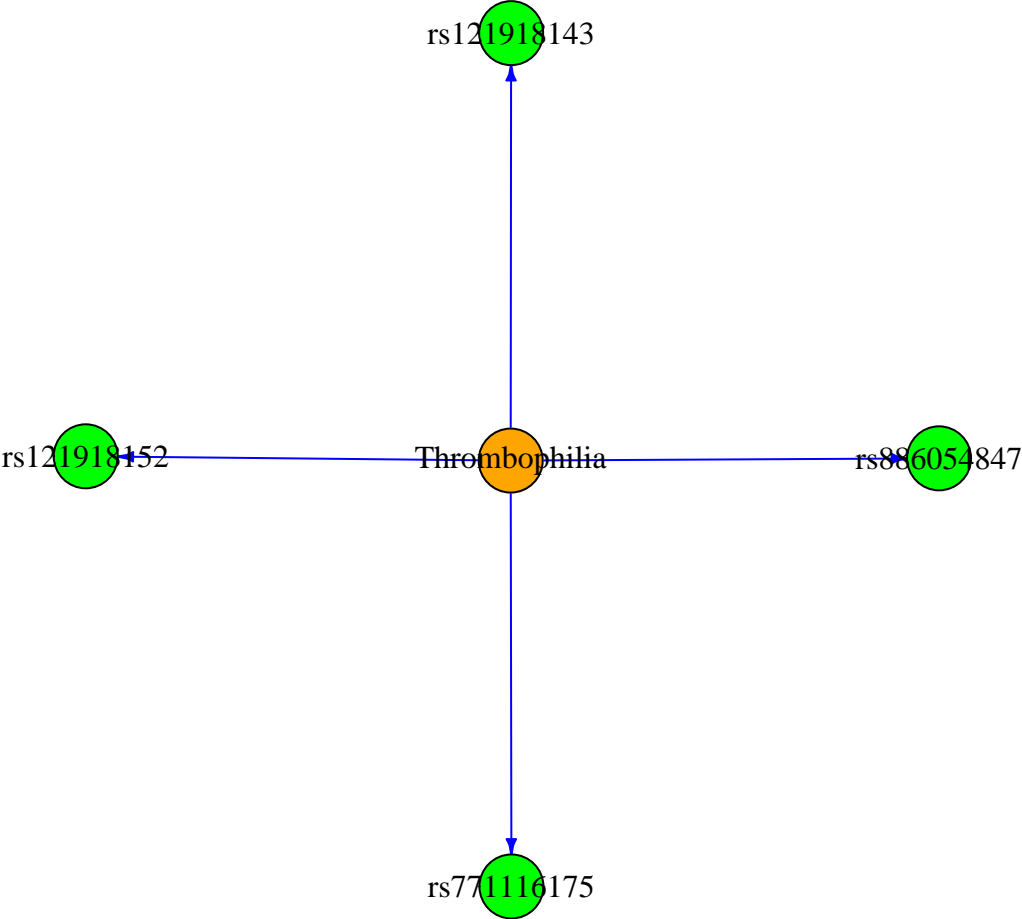

## Variant–Disease Network (Thyroid dysmorphogenesis)

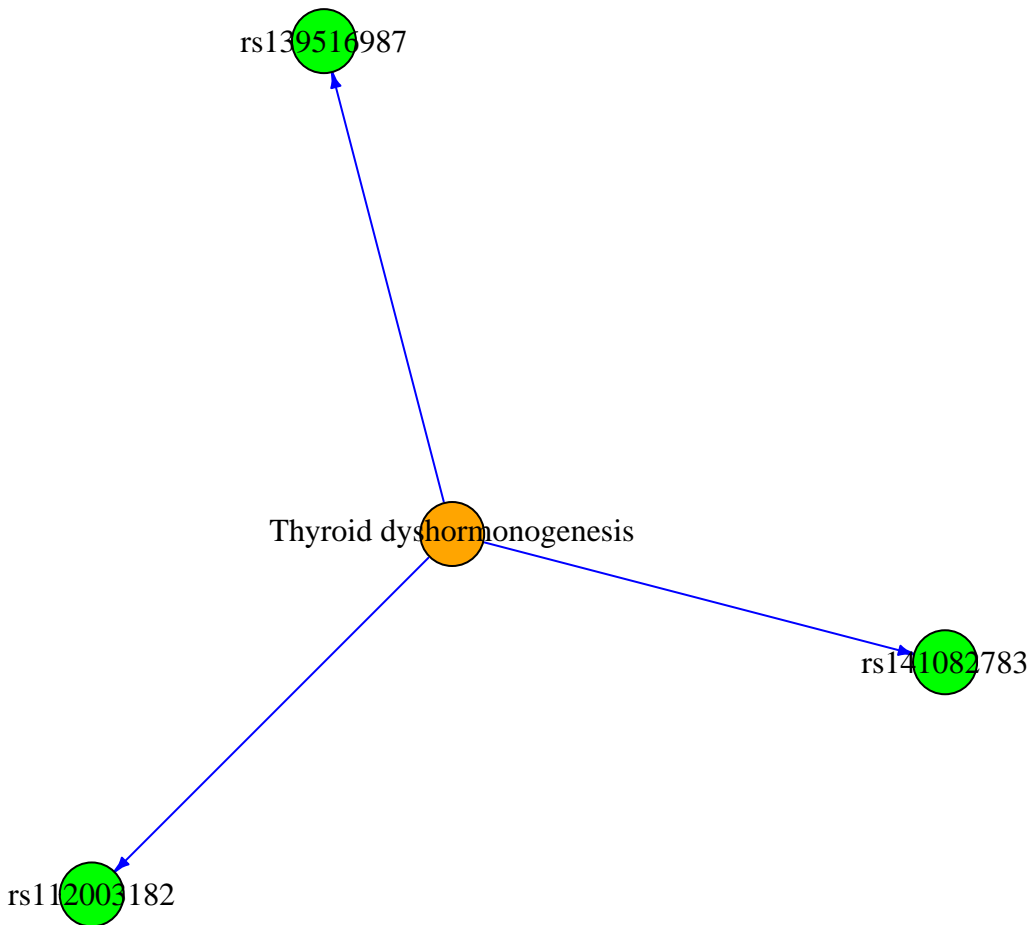



Variant–Disease Network (Transient Neonatal Diabetes)

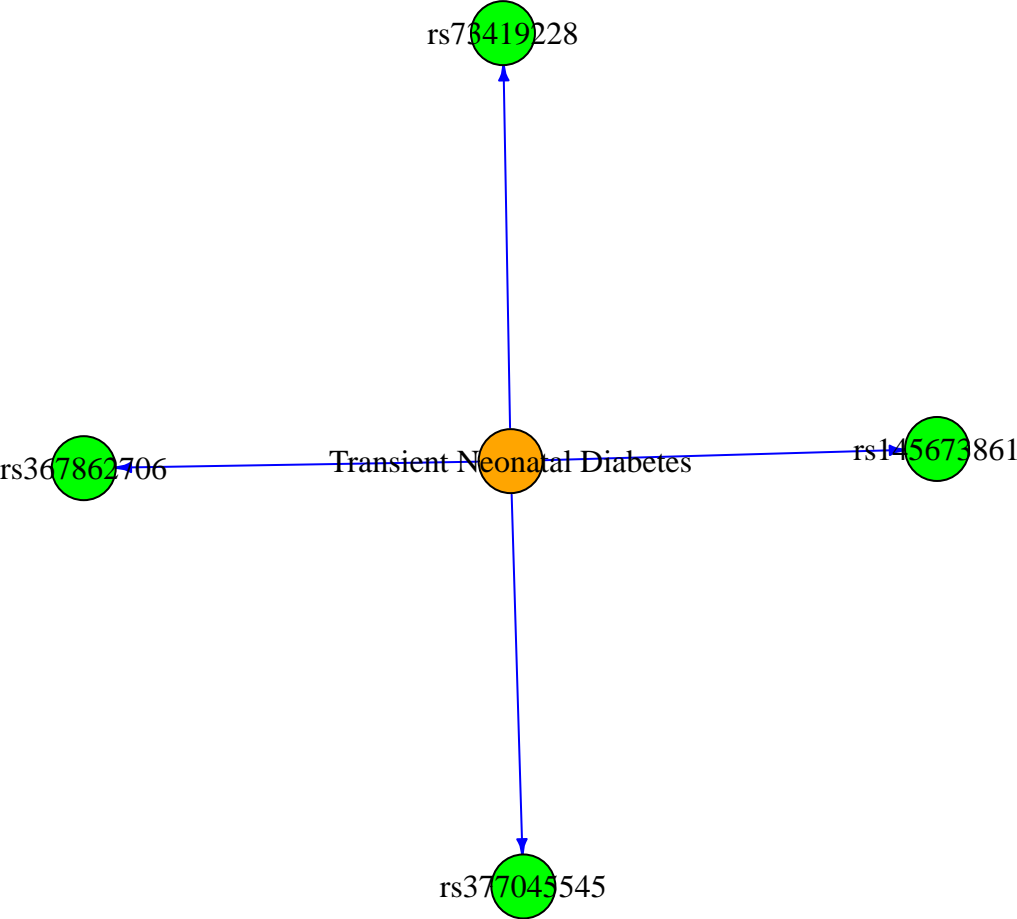

## Variant–Disease Network (Treacher Collins Syndrome)

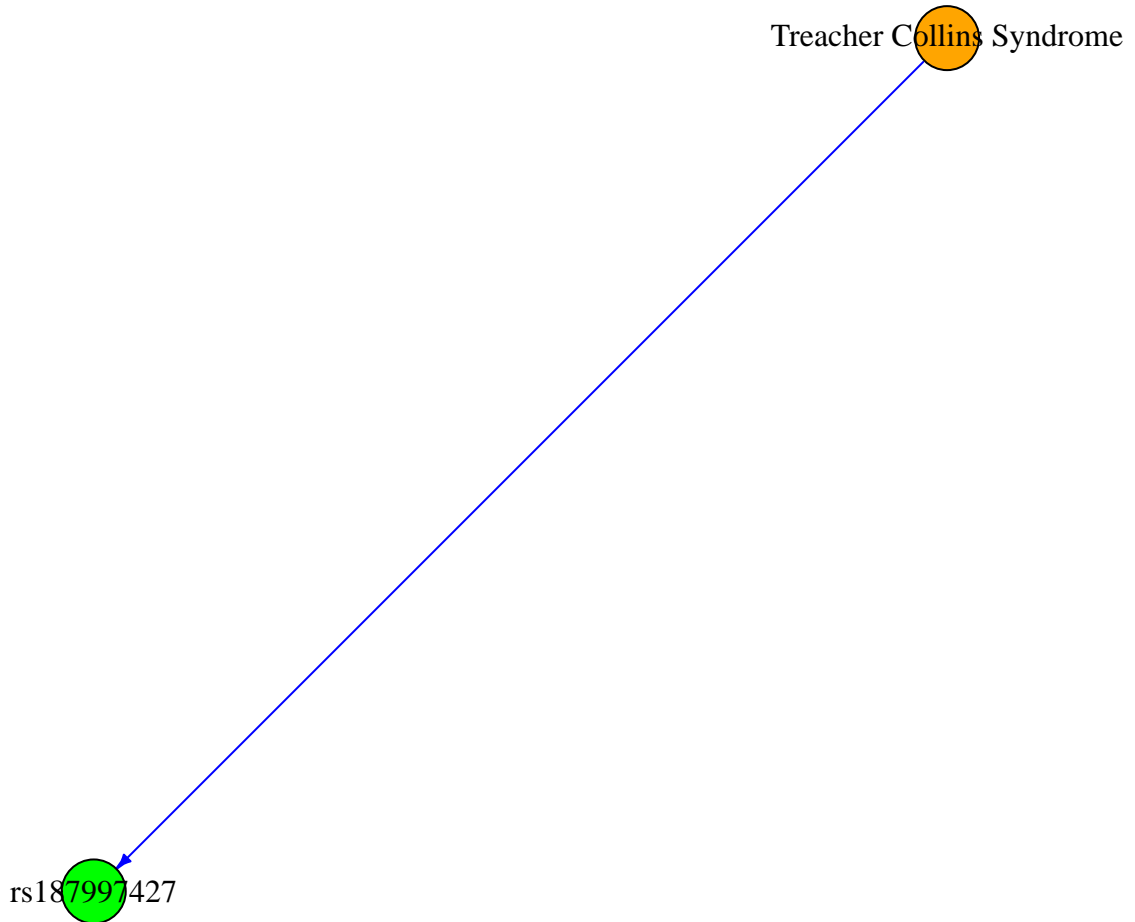

Variant–Disease Network (Trichoepithelioma multiple familial 2)

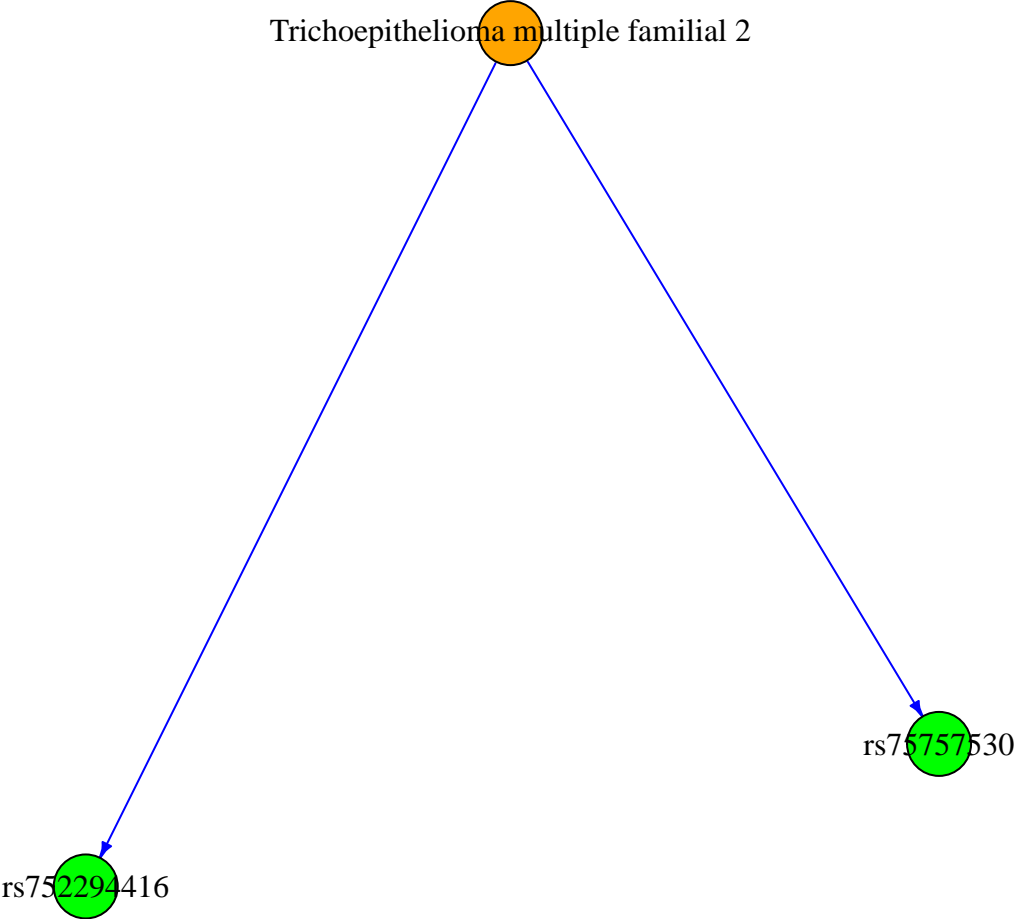

## Variant–Disease Network (Trichohepatoenteric syndrome)

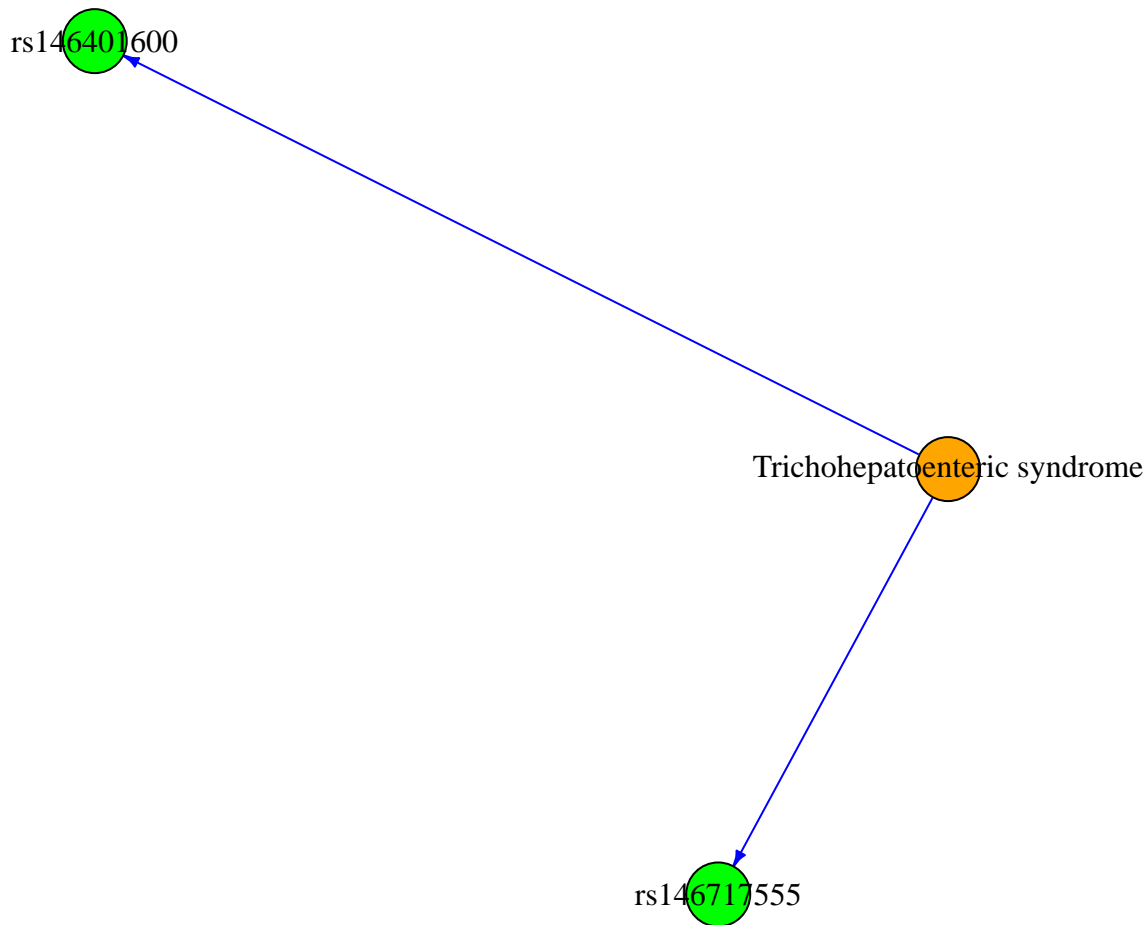

**Variant–Disease Network (Trichorhinophalangeal dysplasia type I)**

rs886040971

Trichorhinophalangeal dysplasia type I

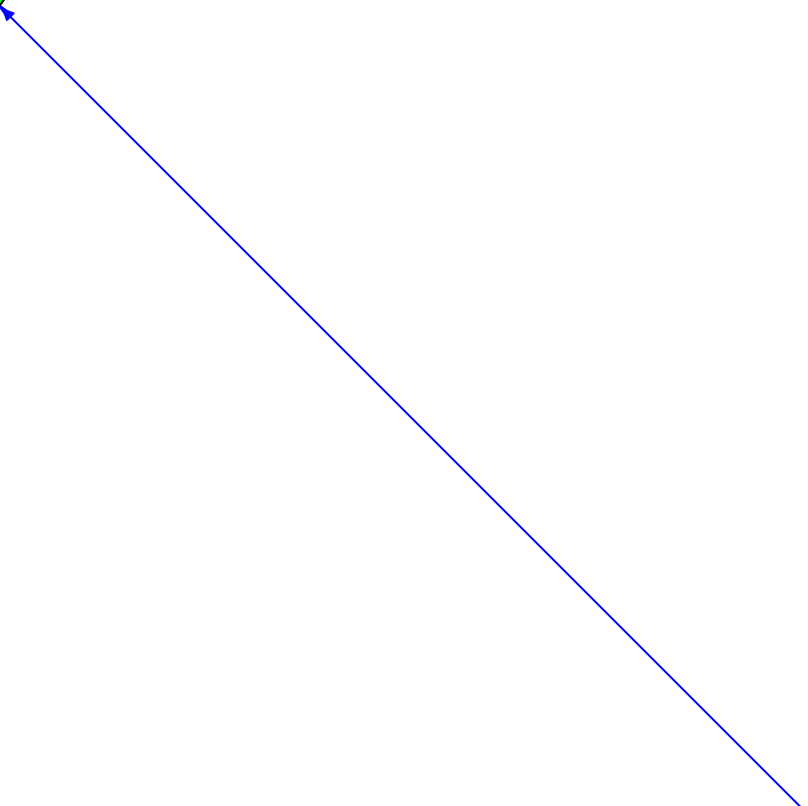

# Variant–Disease Network (Trichorhinophalangeal syndrome type 3)

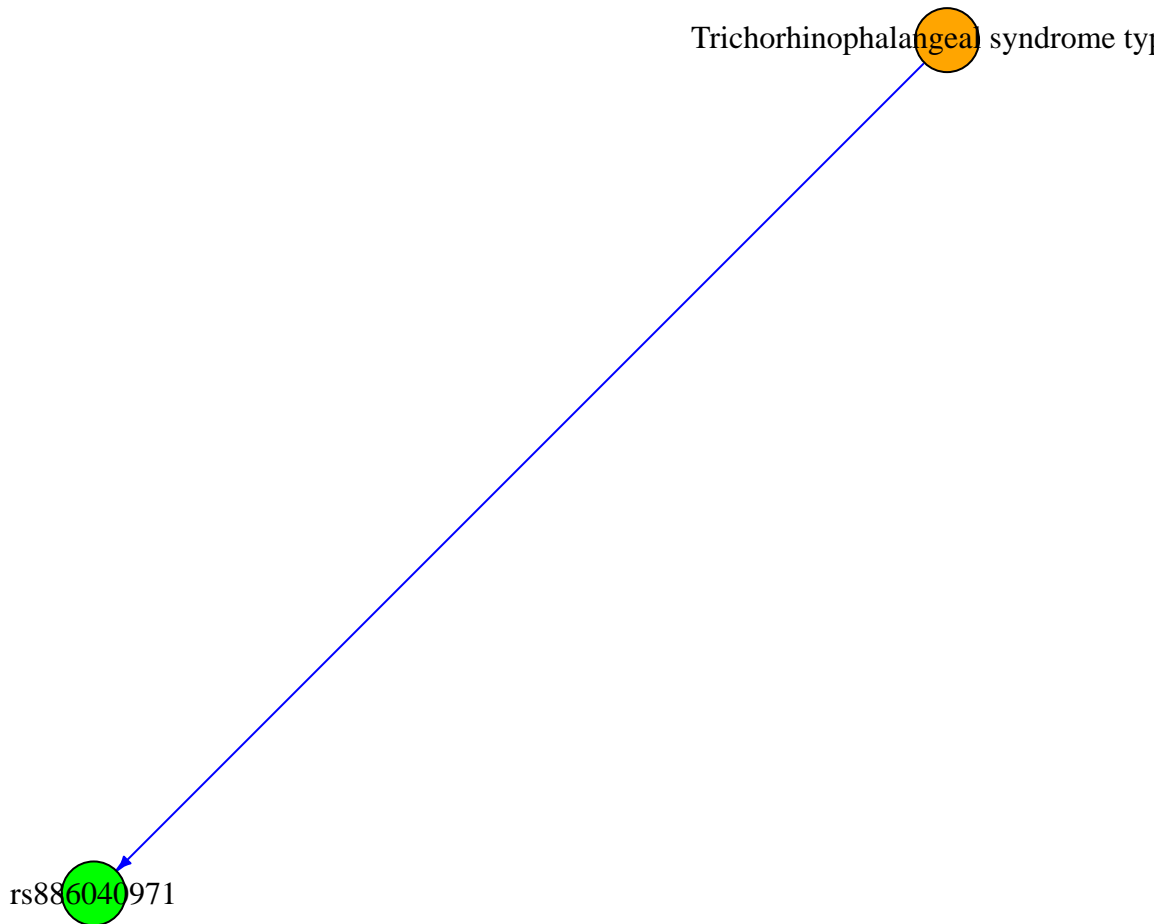

**Variant–Disease Network (Triglyceride storage disease with ichthyosis)**

rs746970260

Triglyceride storage disease with ichth

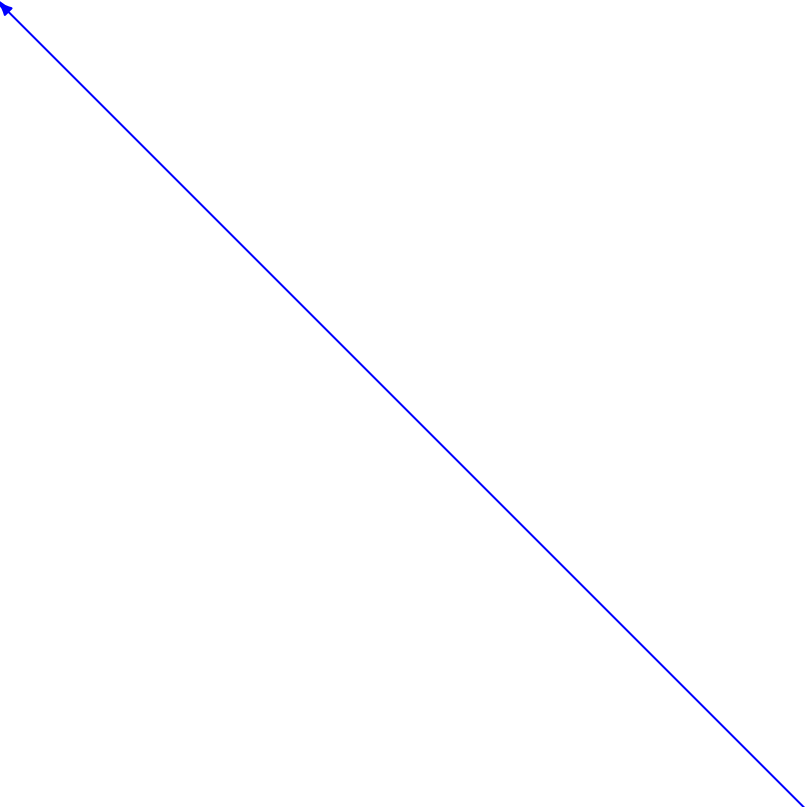

## Variant–Disease Network (Trimethylaminuria)

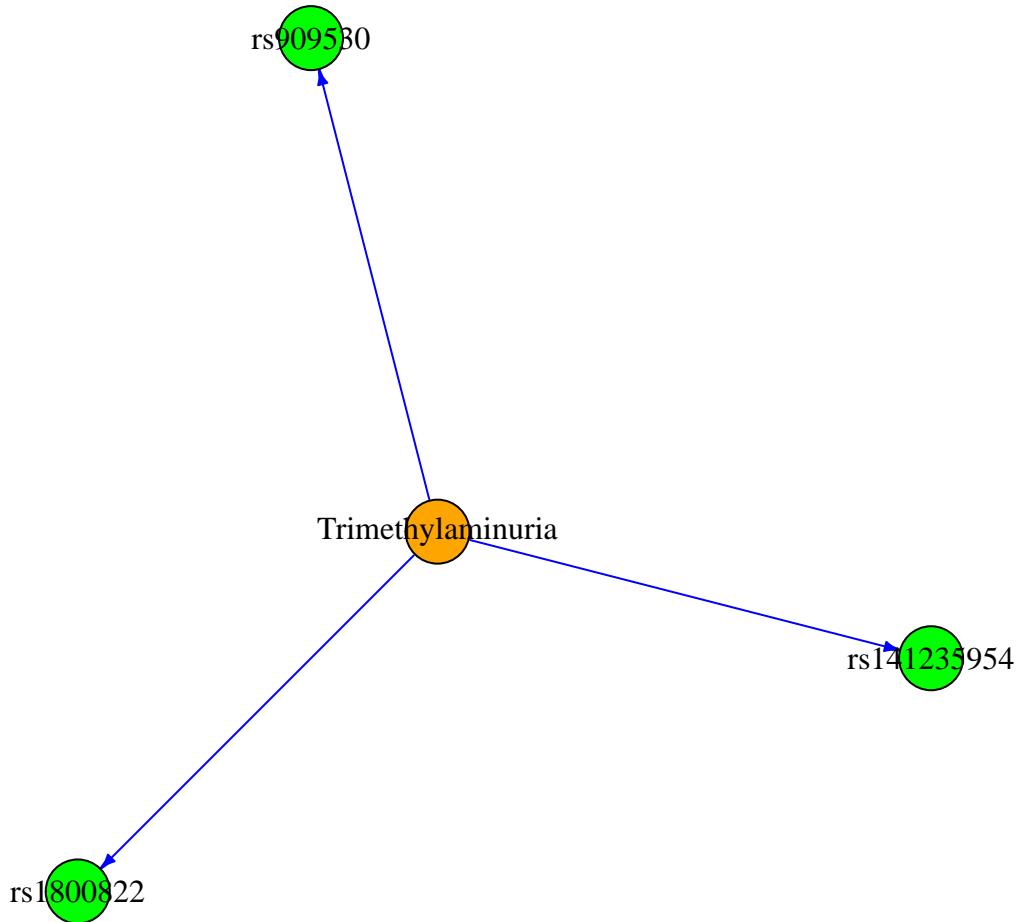



# Variant–Disease Network (Triple–Negative Breast Cancer Finding)

Triple–Negative Breast Cancer Finding

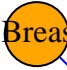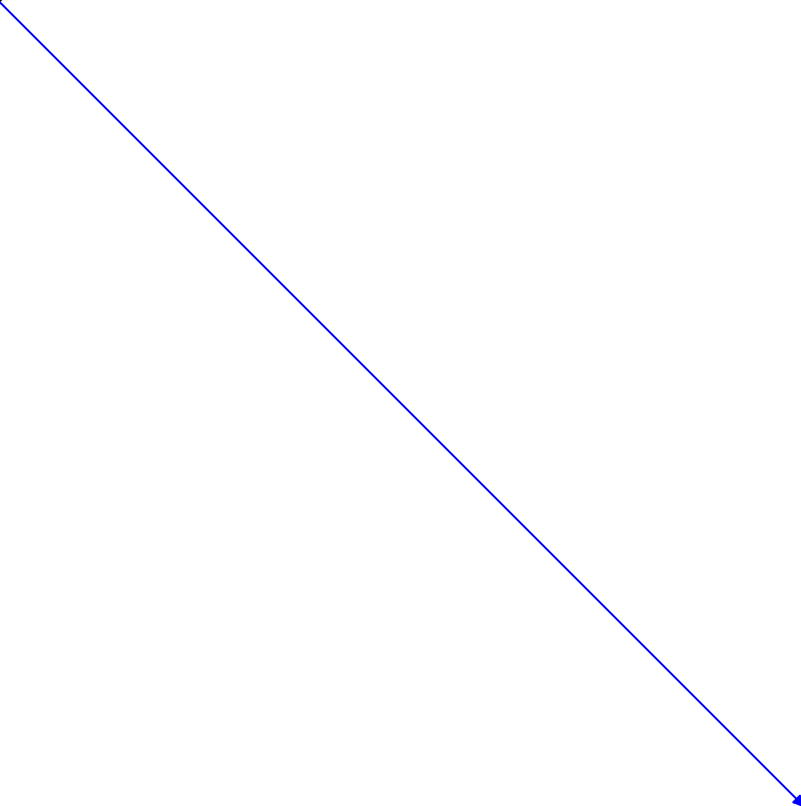

rs3738888

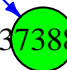

Variant–Disease Network (Tuberous sclerosis 1)

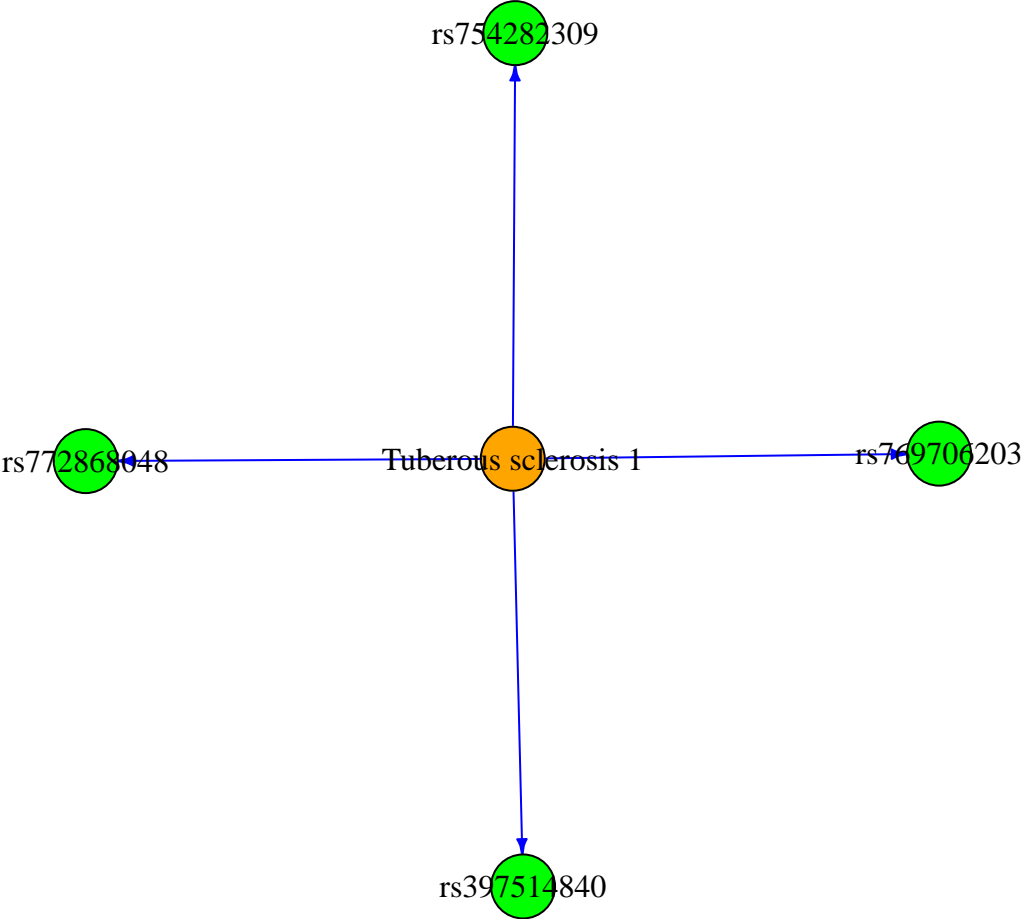

## Variant-Disease Network (Tuberous sclerosis 2)

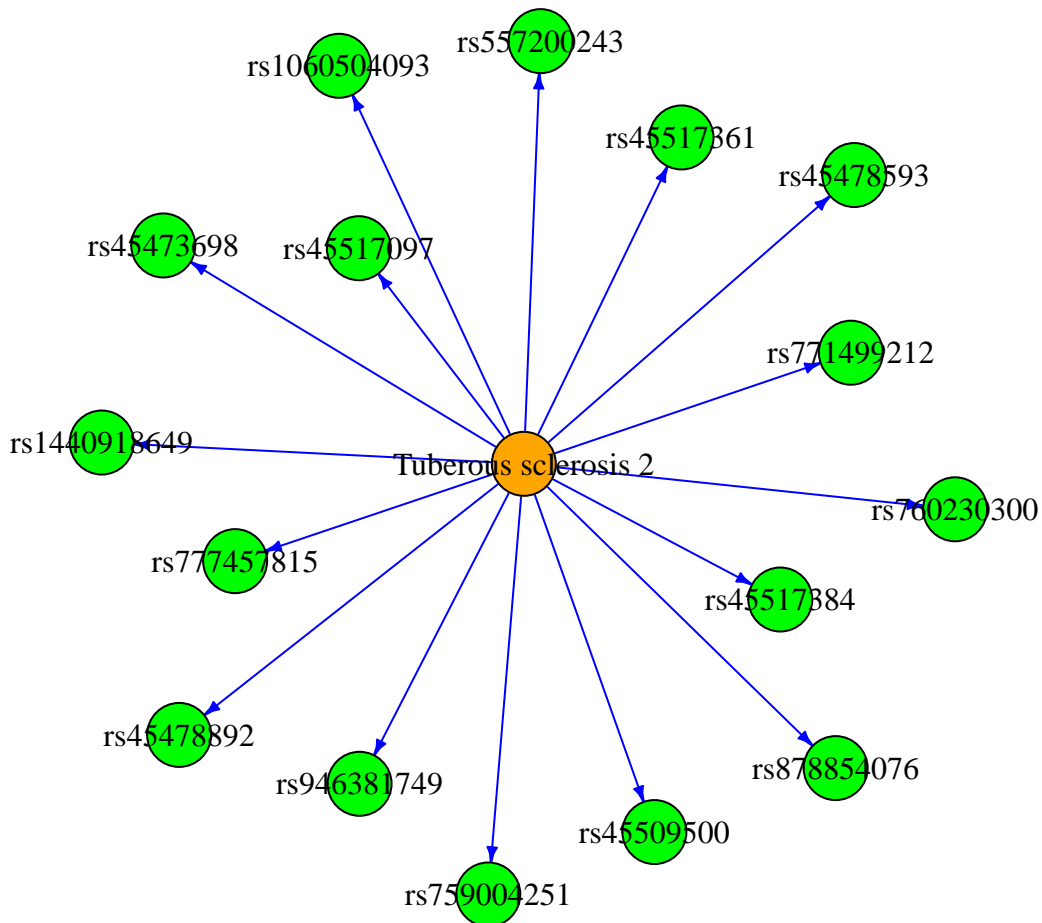

**Variant–Disease Network (Tuberous sclerosis syndrome)**

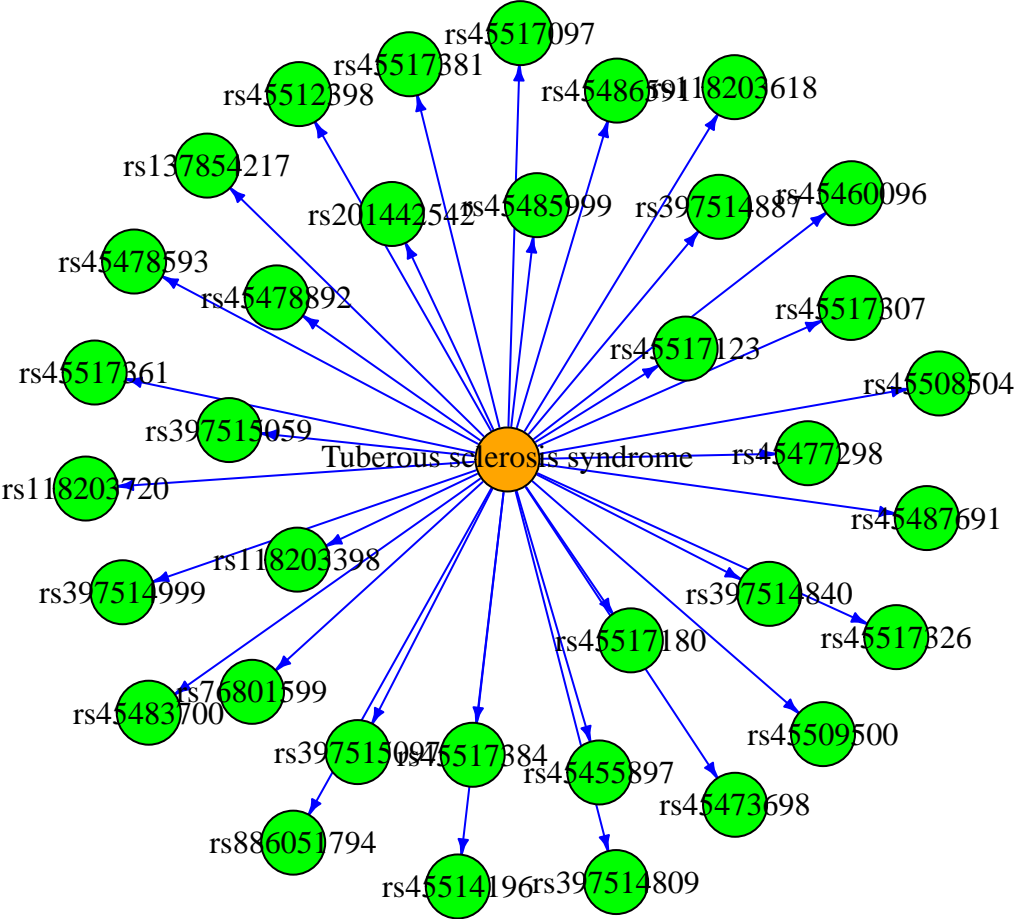

## Variant–Disease Network (Tubulinopathies)

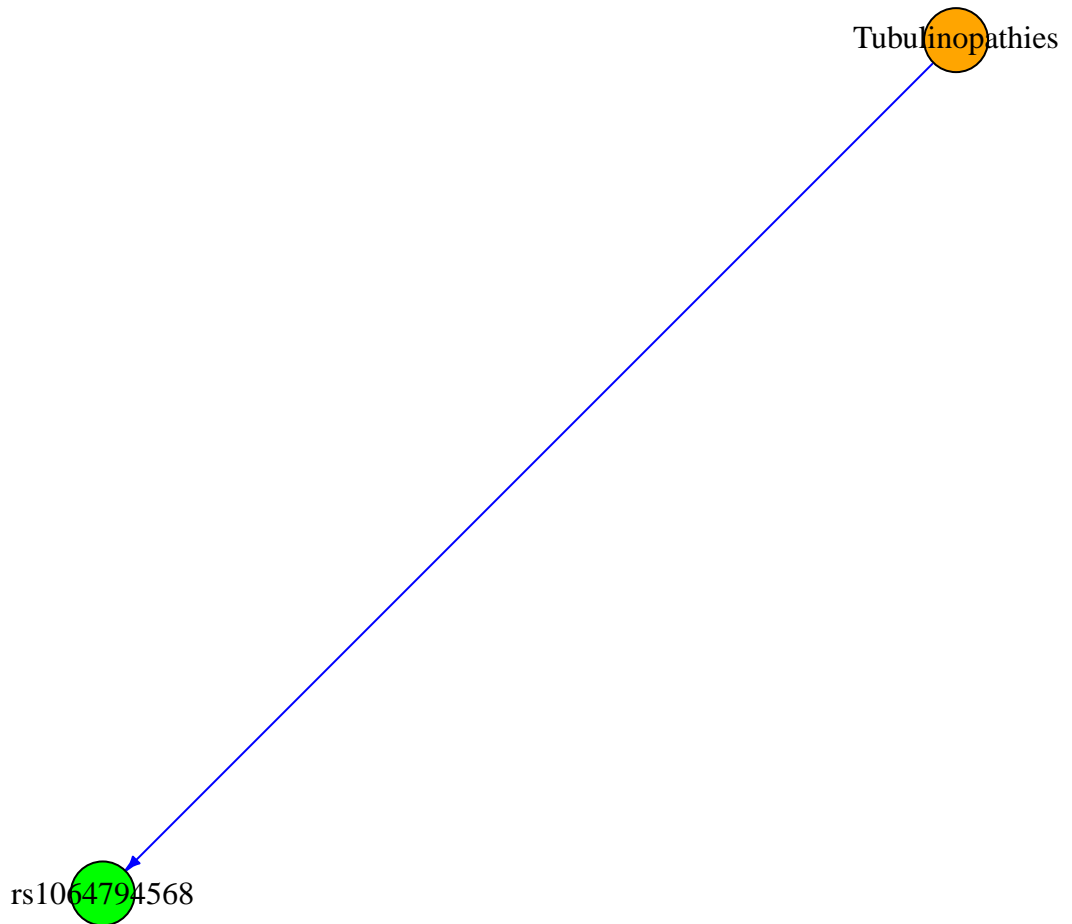

# Variant–Disease Network (Tumor susceptibility linked to germline BAP1 mutations)

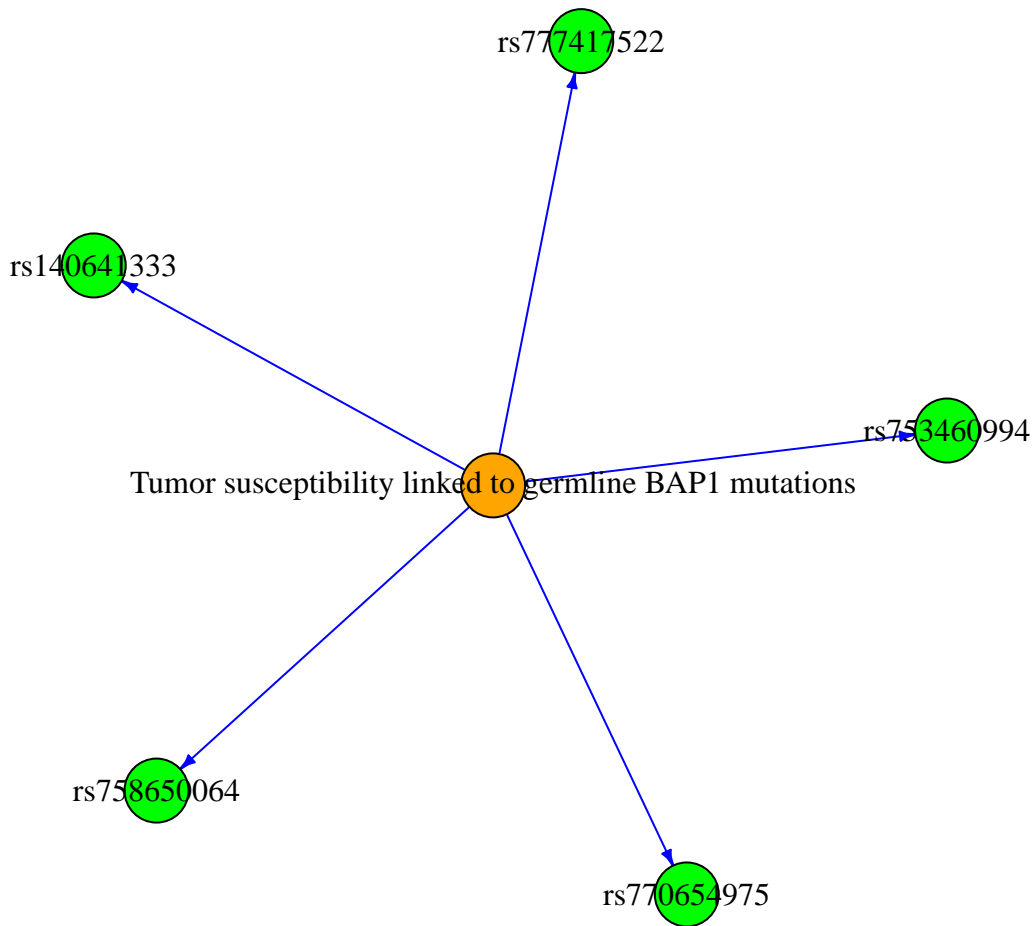

Variant–Disease Network (Type II Collagenopathies)

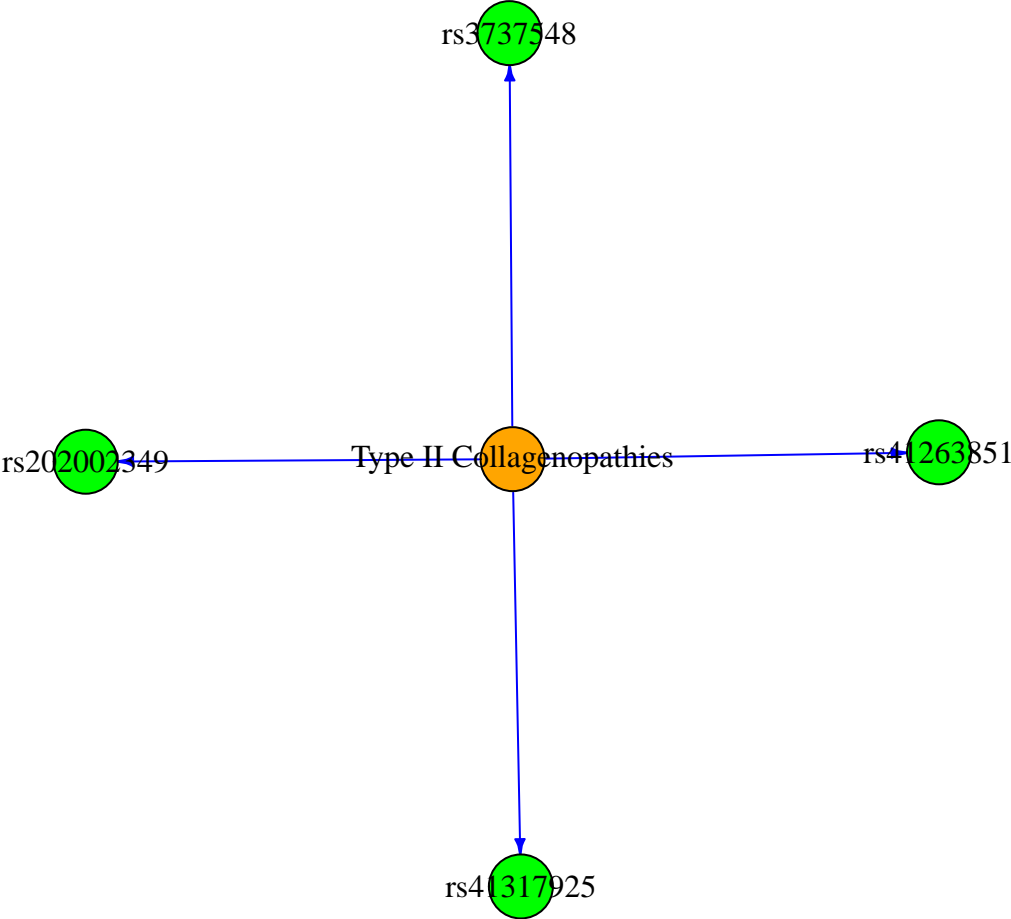

Variant–Disease Network (Tyrosinase–negative oculocutaneous albinism

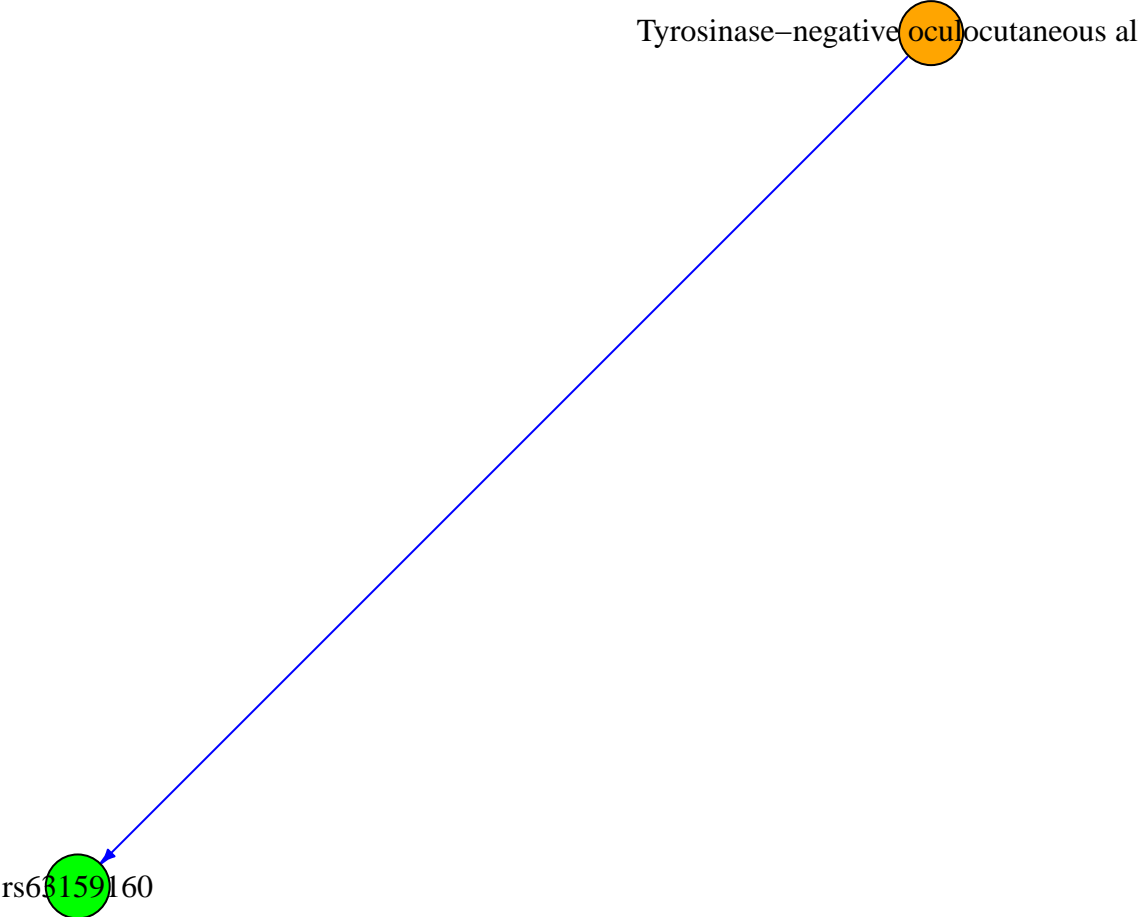



Variant–Disease Network (Tyrosine kinase 2 deficiency)

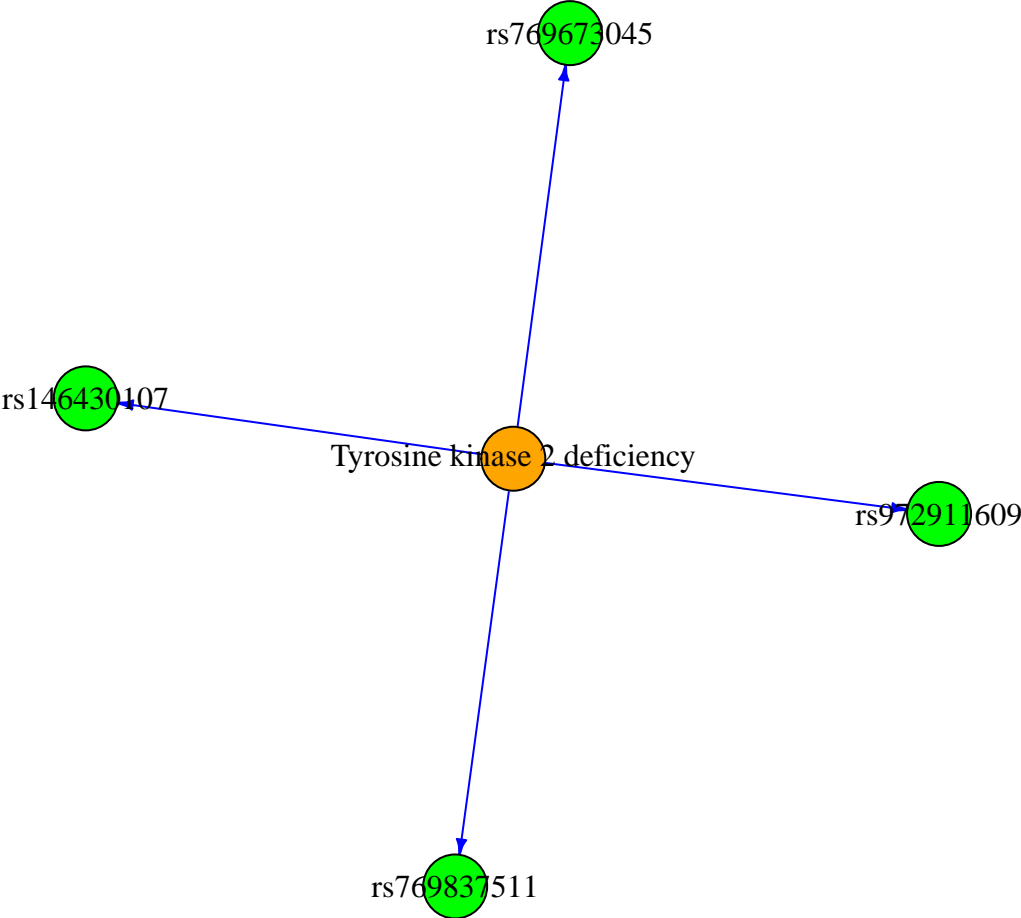

Variant–Disease Network (Tyrosinemia type 2)

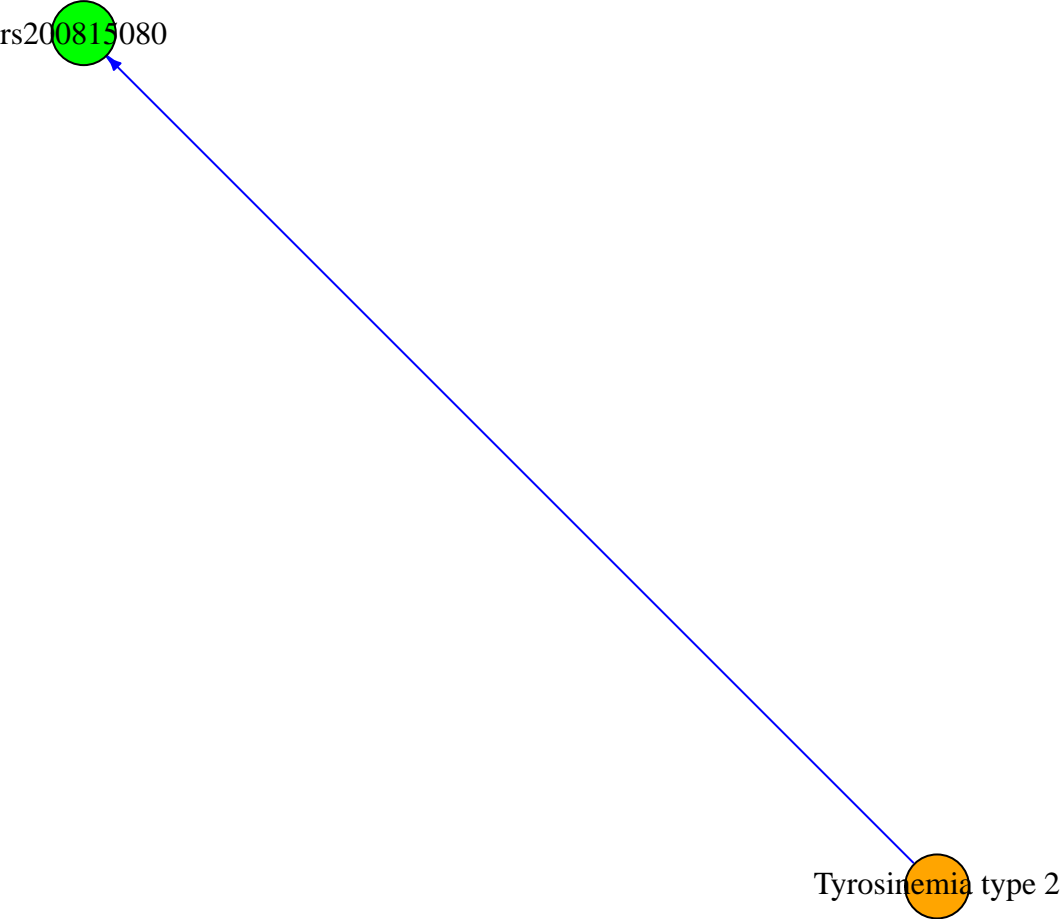

Variant–Disease Network (UDPglucose–4–epimerase deficiency)

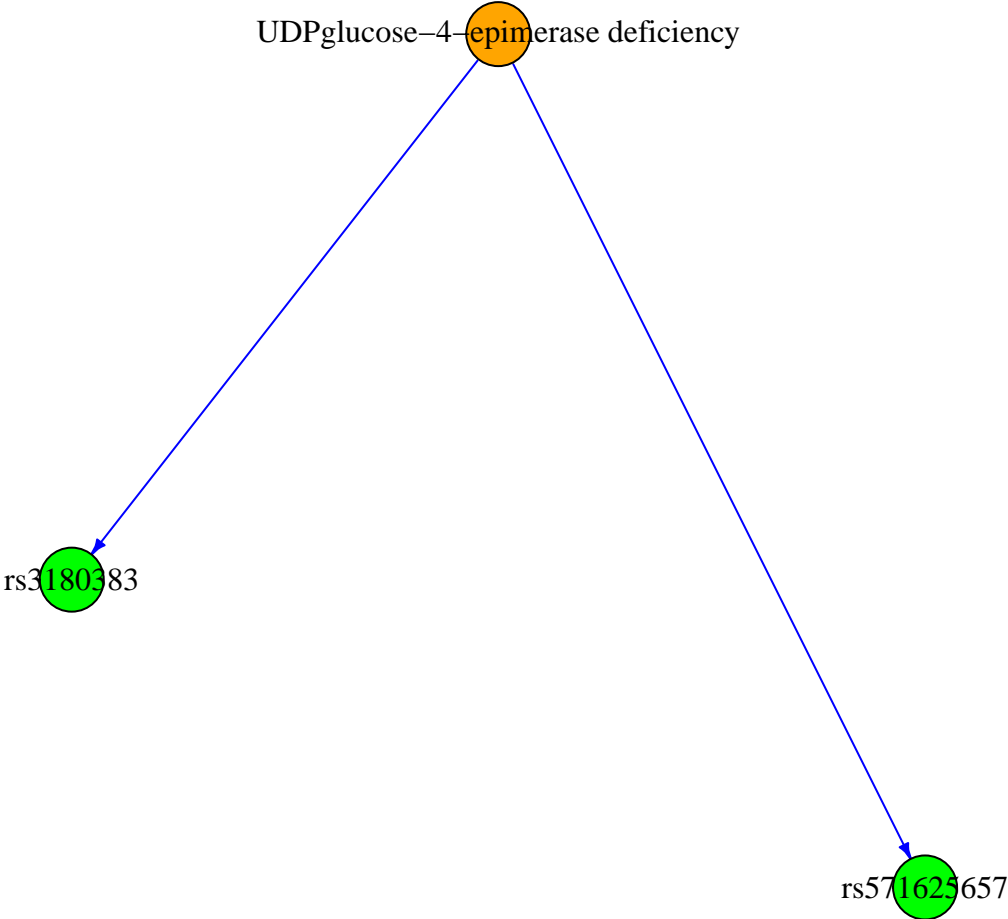

# Variant–Disease Network (Ullrich congenital muscular dystrophy 1)

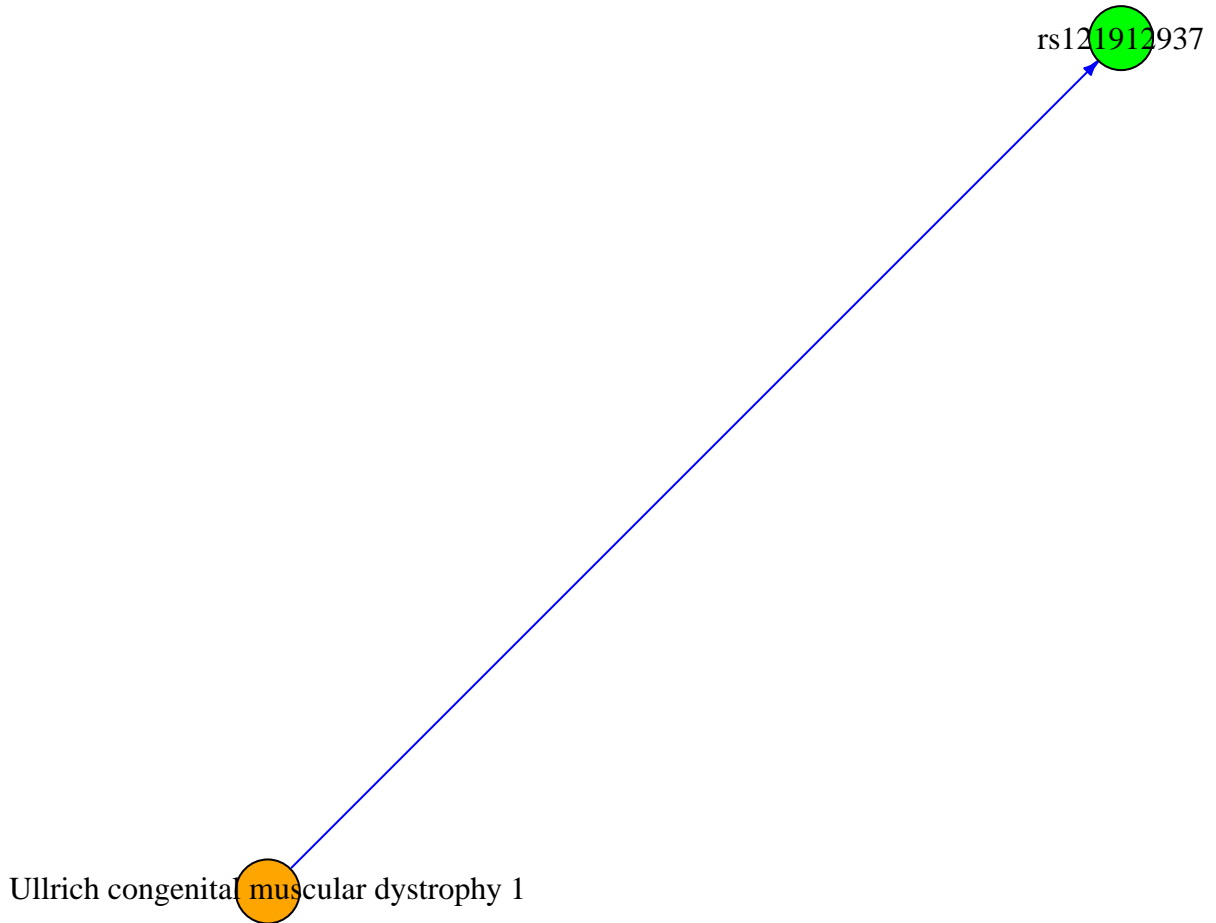

# Variant–Disease Network (Ullrich congenital muscular dystrophy 2)

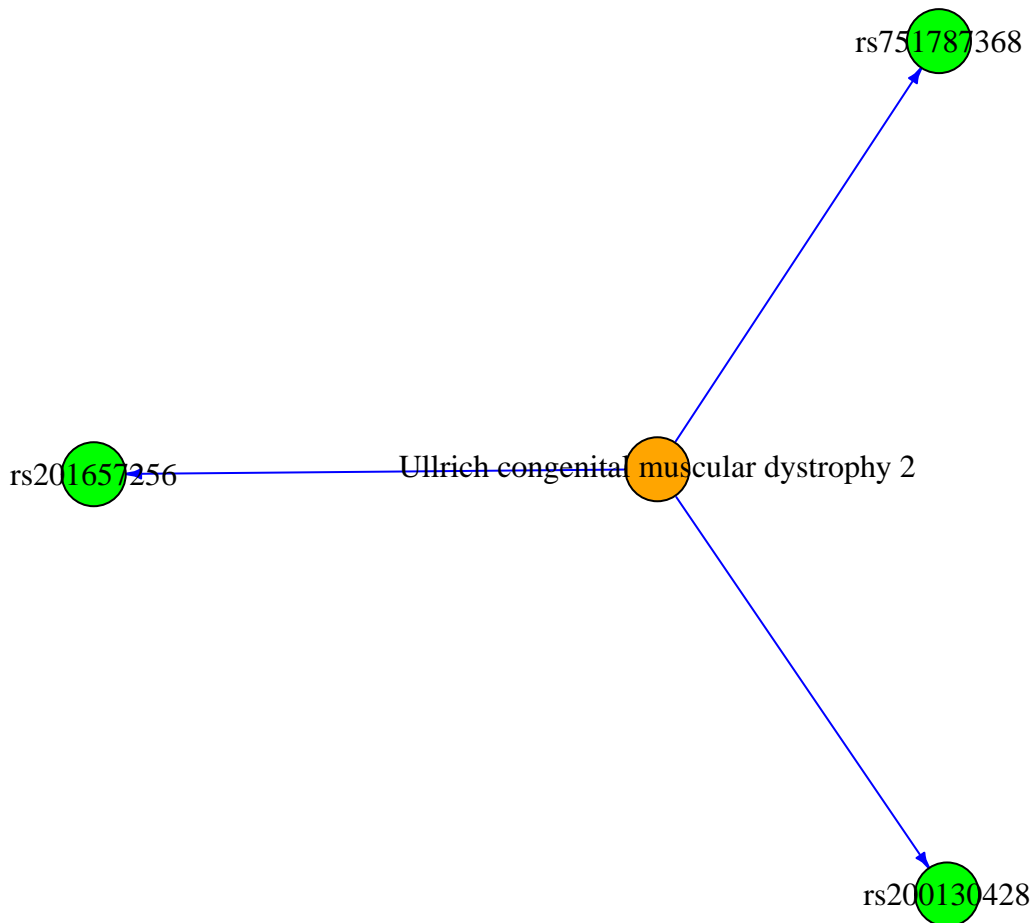

Variant–Disease Network (Upshaw–Schulman syndrome)

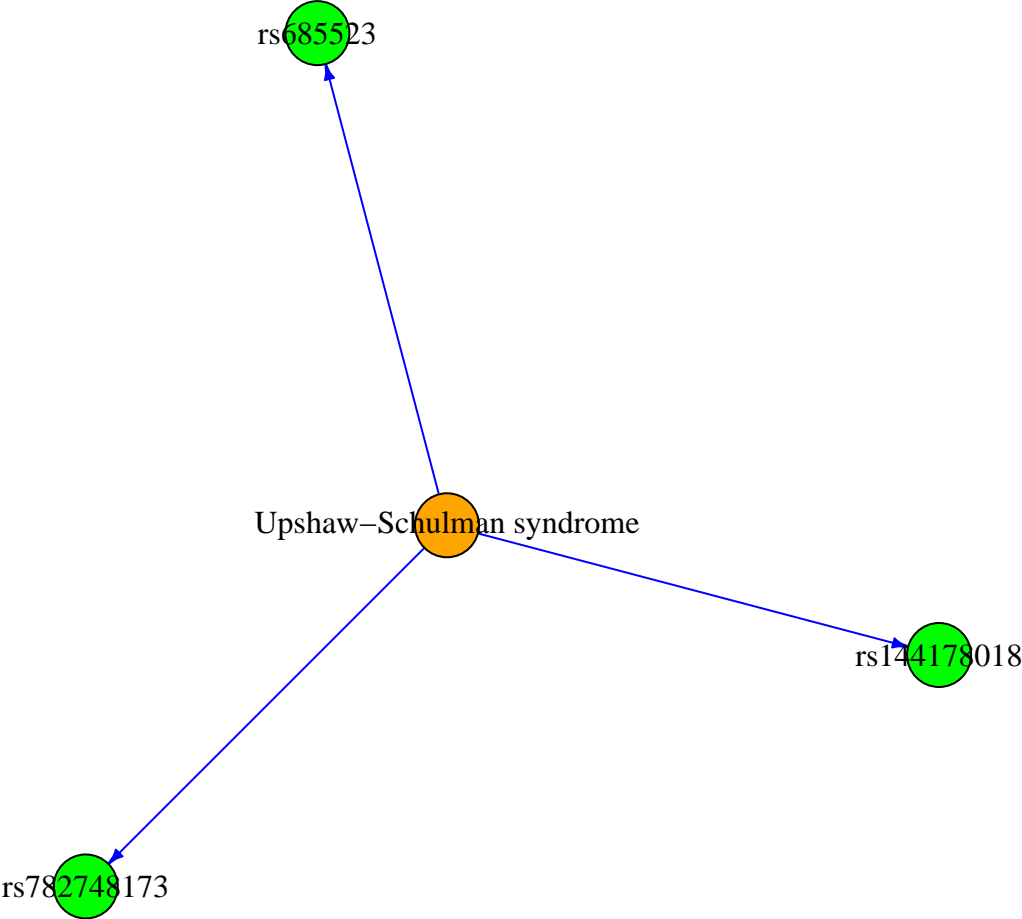

## Variant–Disease Network (Usher syndrome)

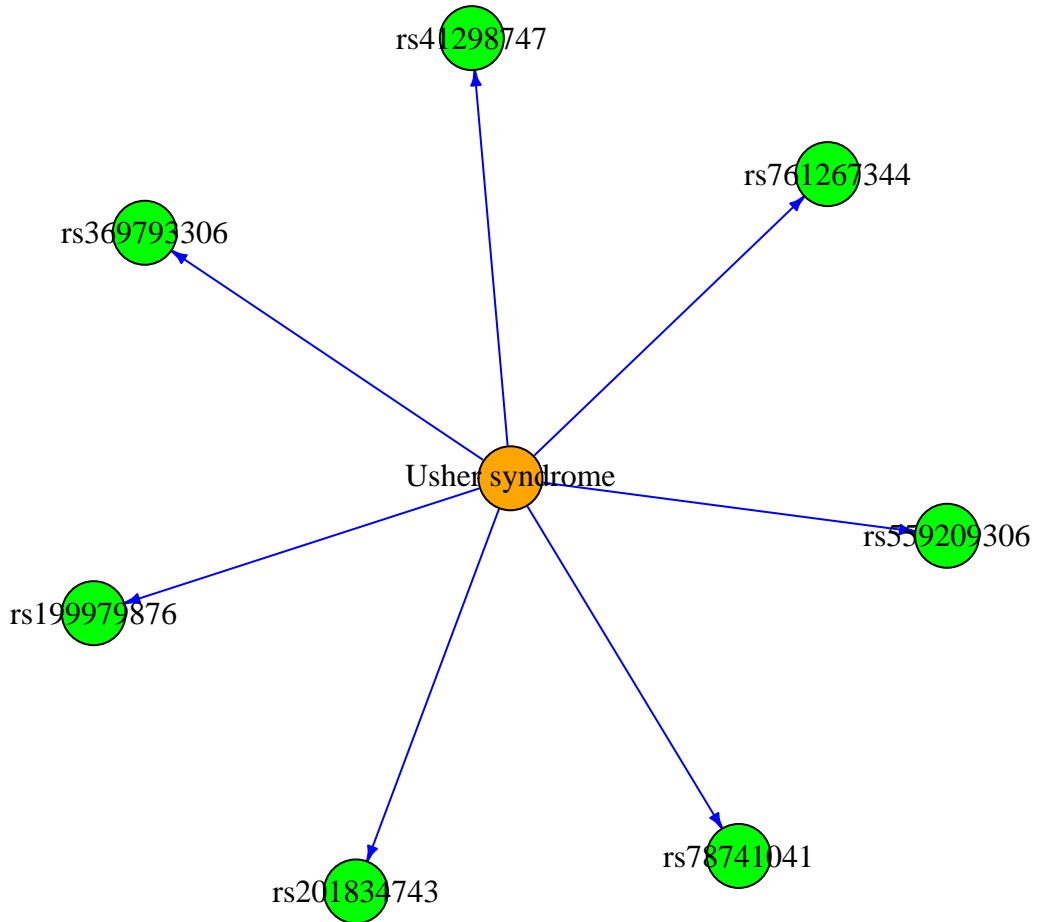

## Variant–Disease Network (Van der Woude syndrome)

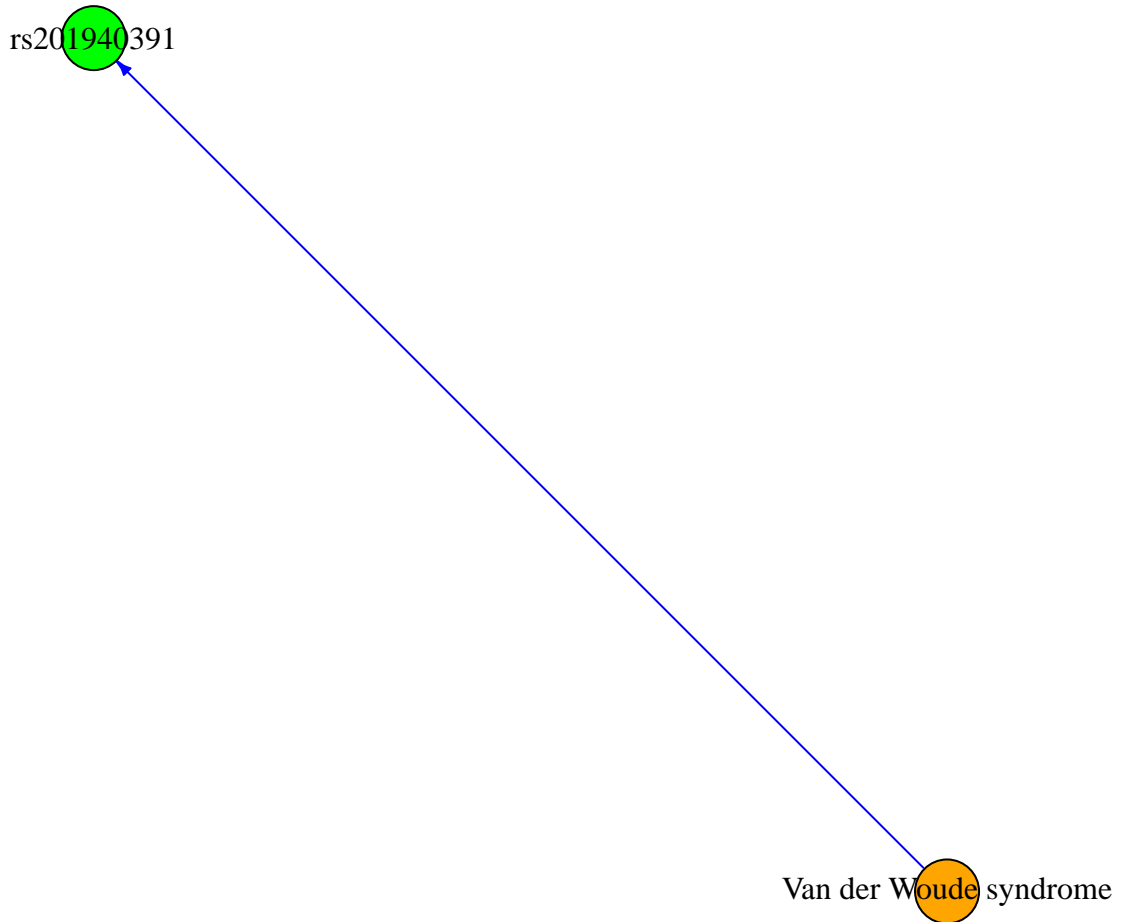



## Variant–Disease Network (Variegate porphyria)

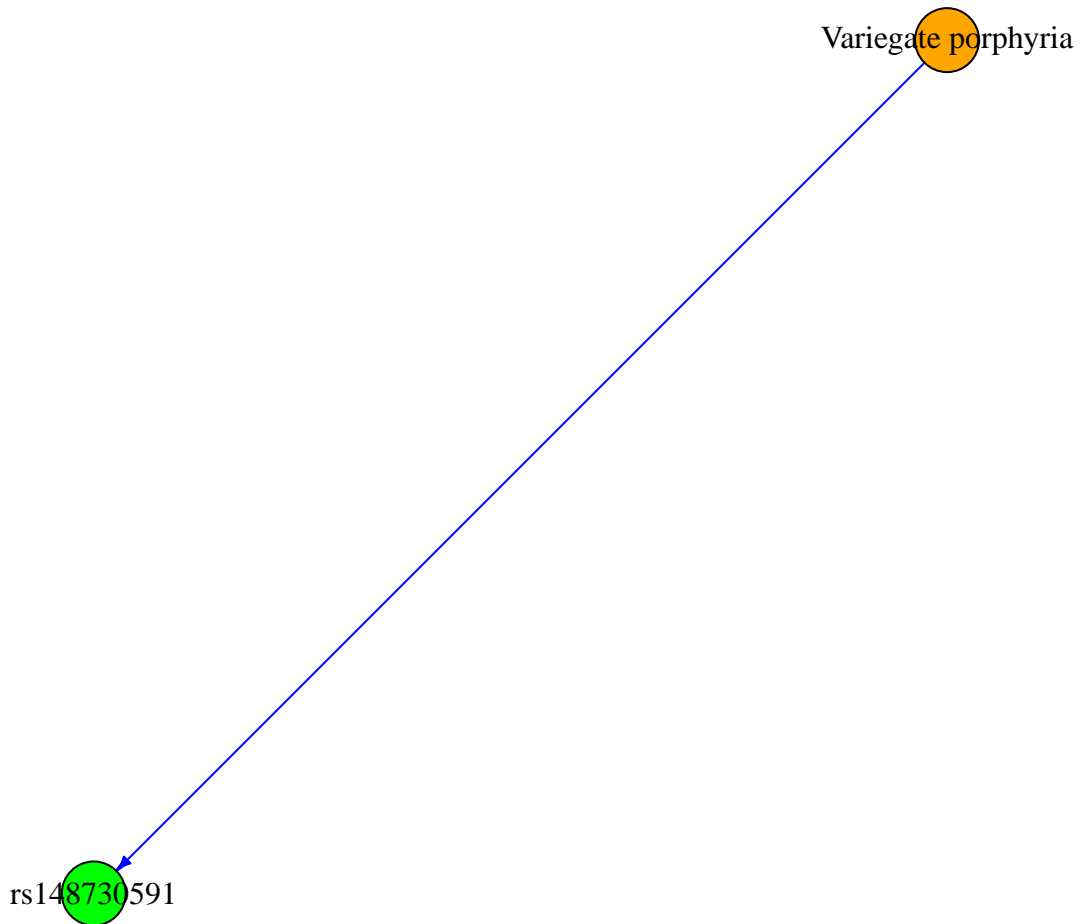

**Variant–Disease Network (Ventriculomegaly with cystic kidney disease)**

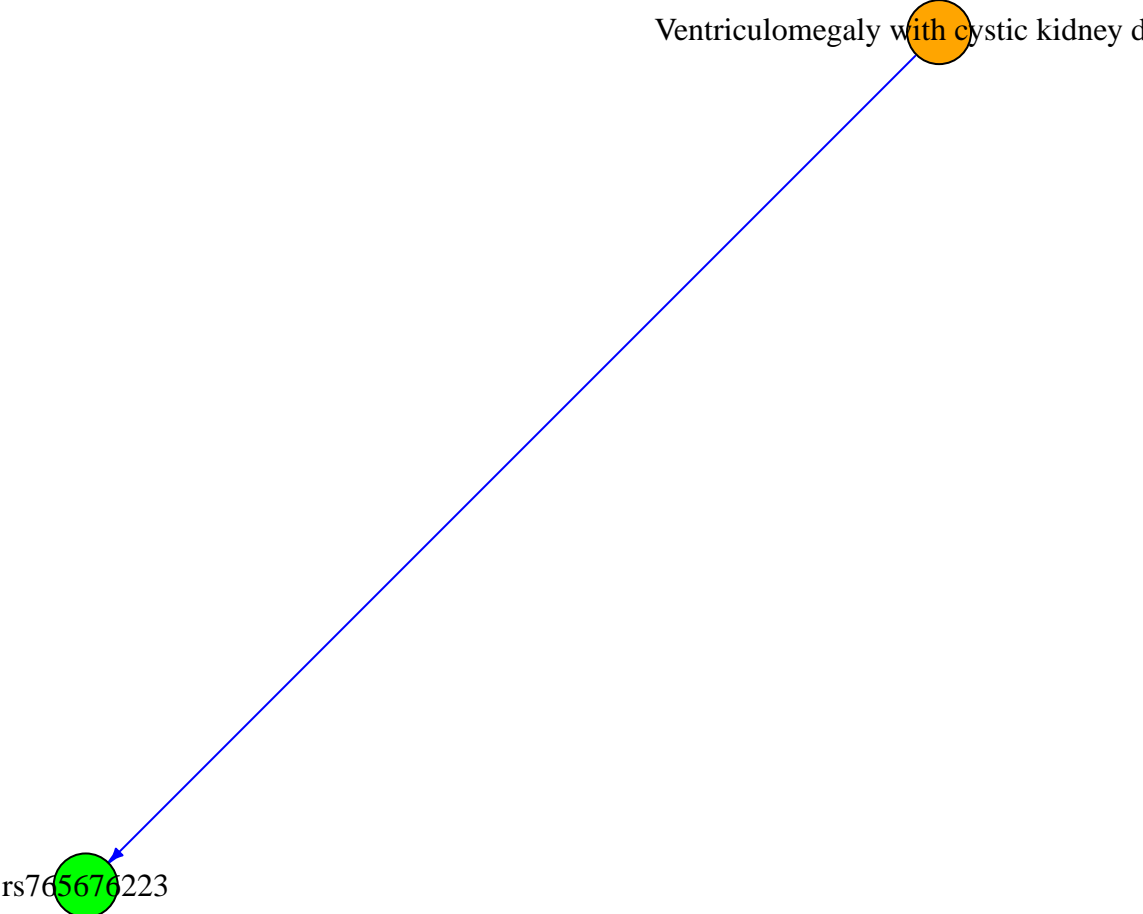

## Variant–Disease Network (Vesicoureteral reflux)

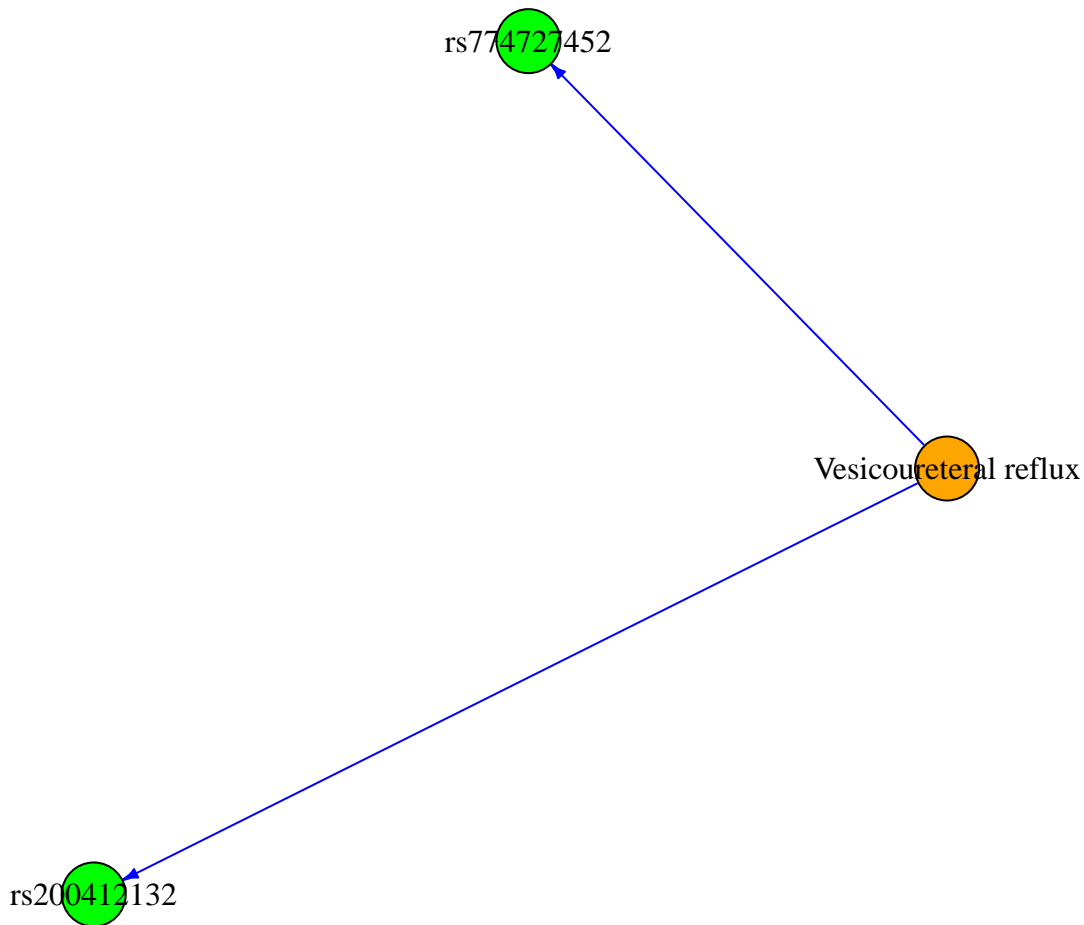

## Variant–Disease Network (Vici syndrome)

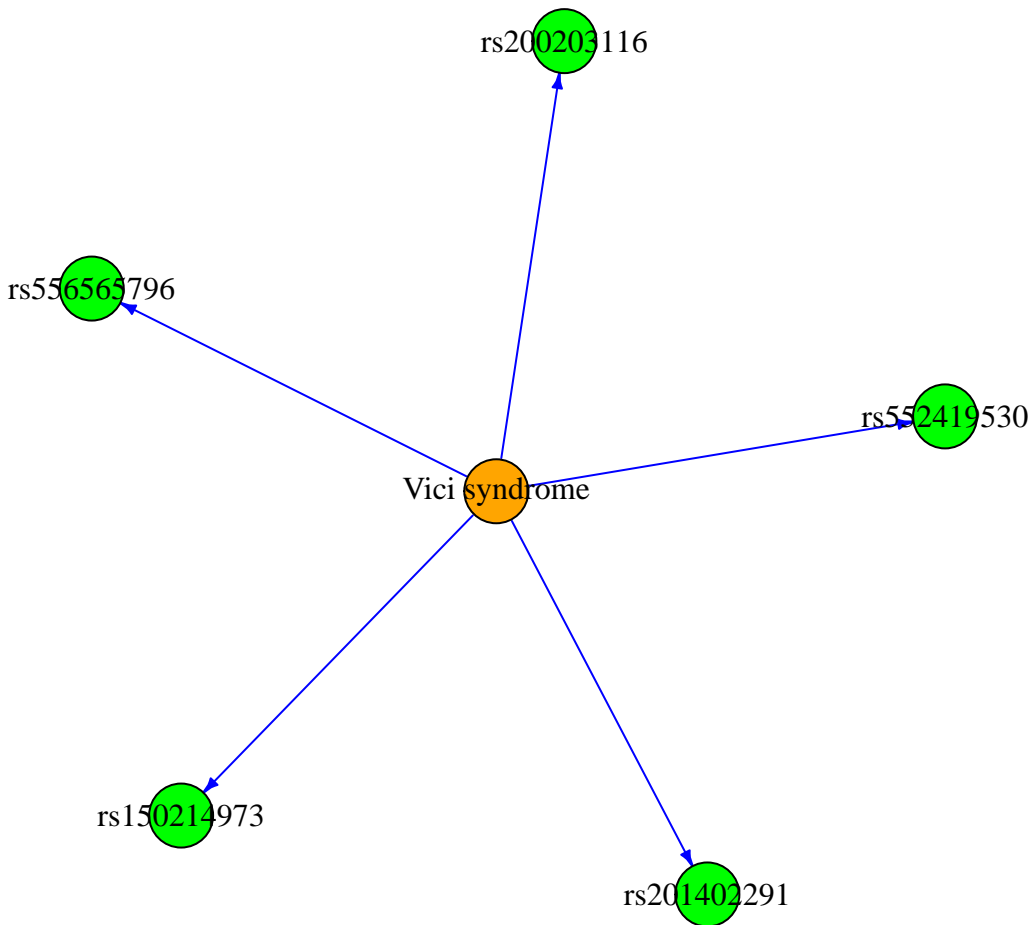

**Variant–Disease Network (Vitreoretinopathy)**

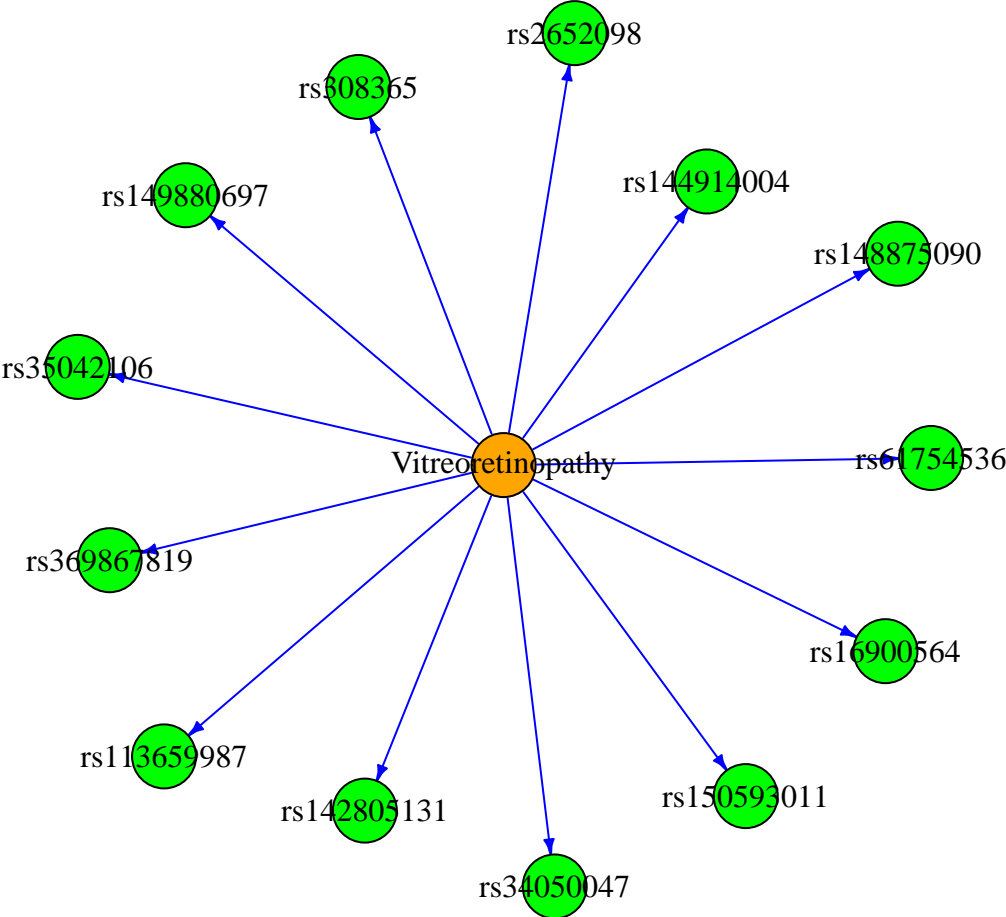

**Variant–Disease Network (Von Hippel–Lindau syndrome)**

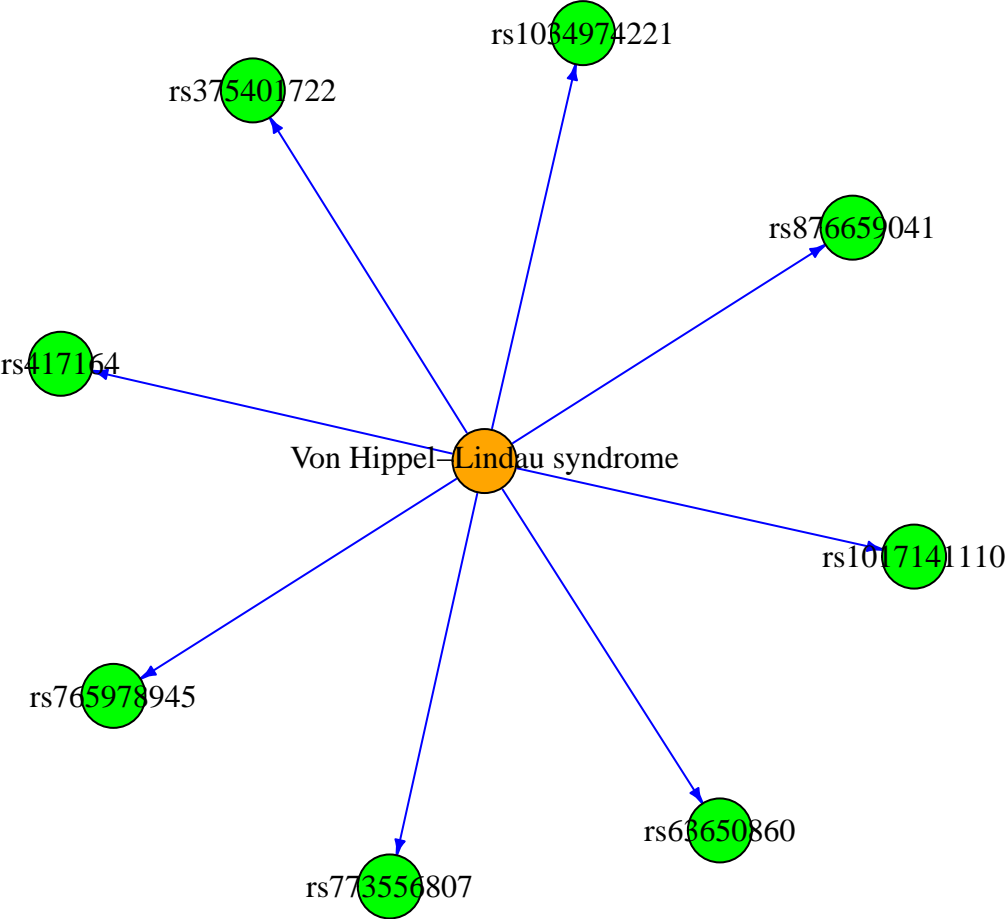

**Variant–Disease Network (Von Willebrand disease)**

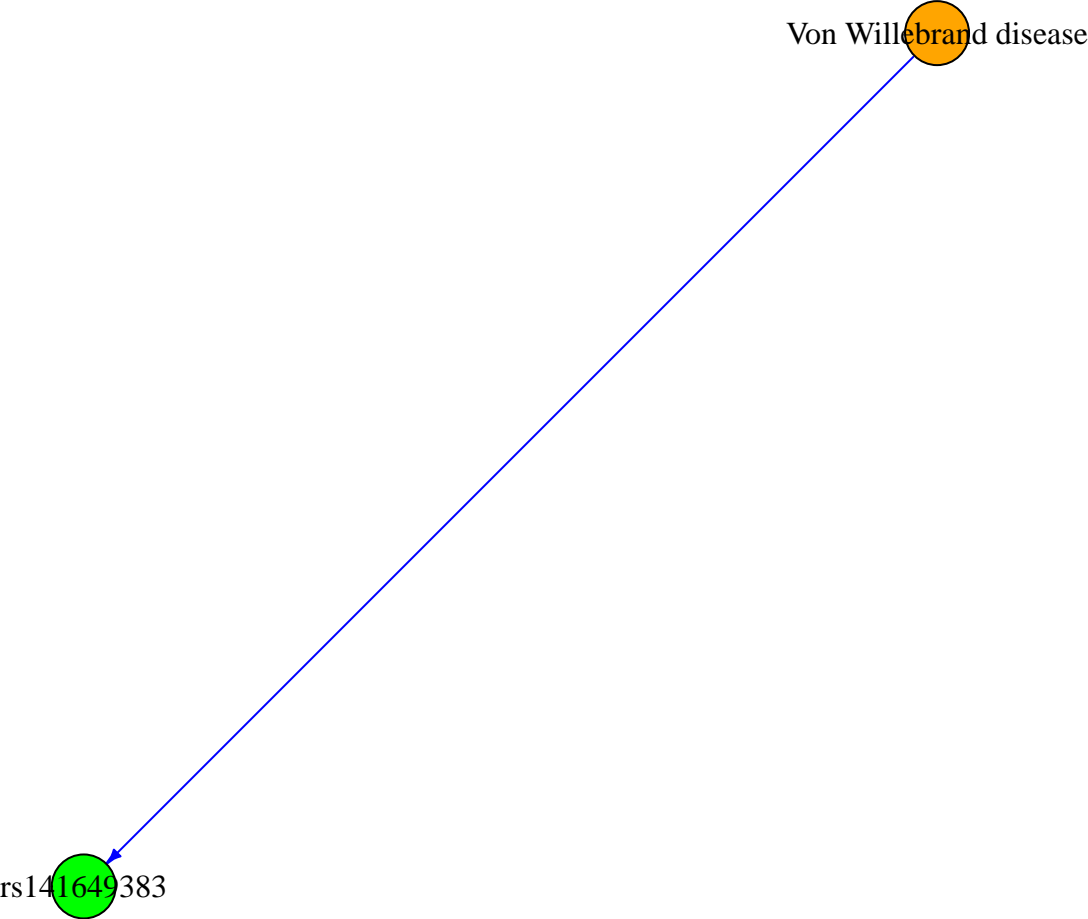

**Variant–Disease Network (von Willebrand disease type 1)**

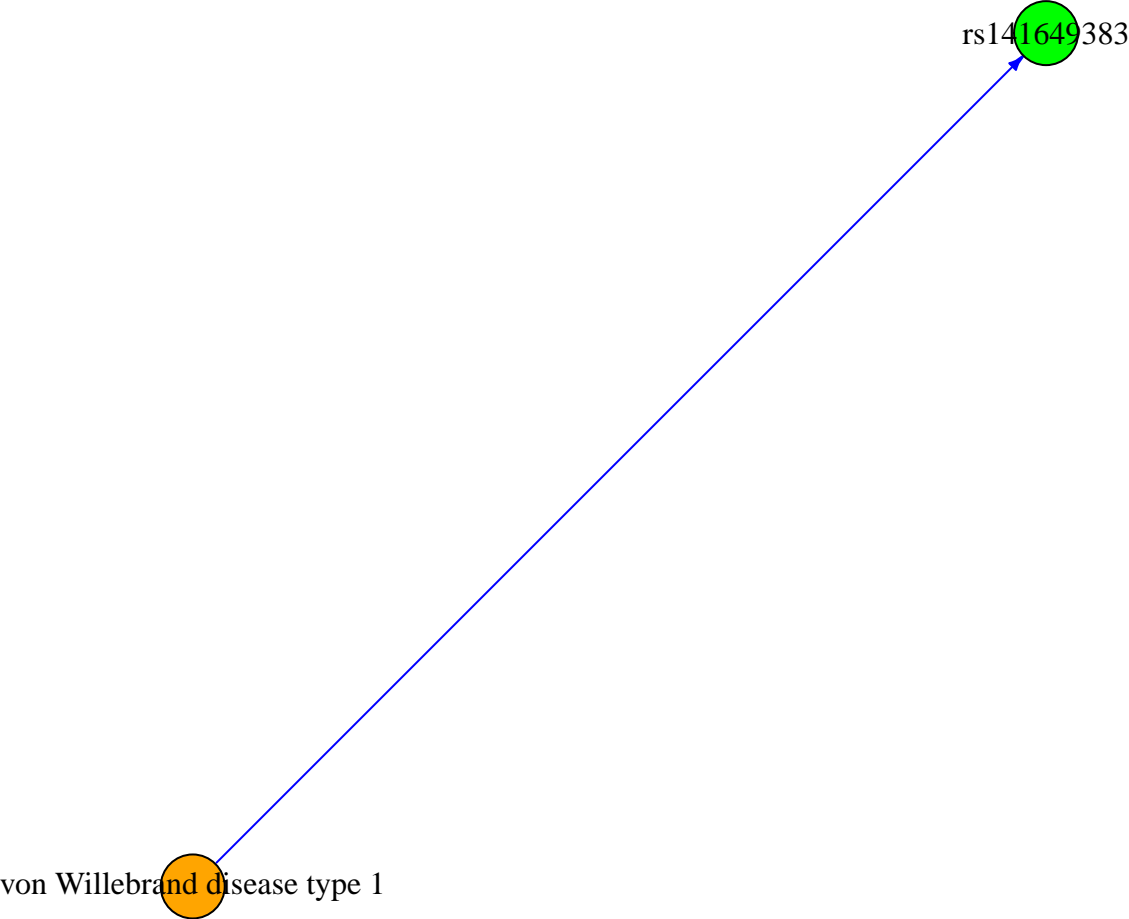



**Variant–Disease Network (von Willebrand disease type 2)**

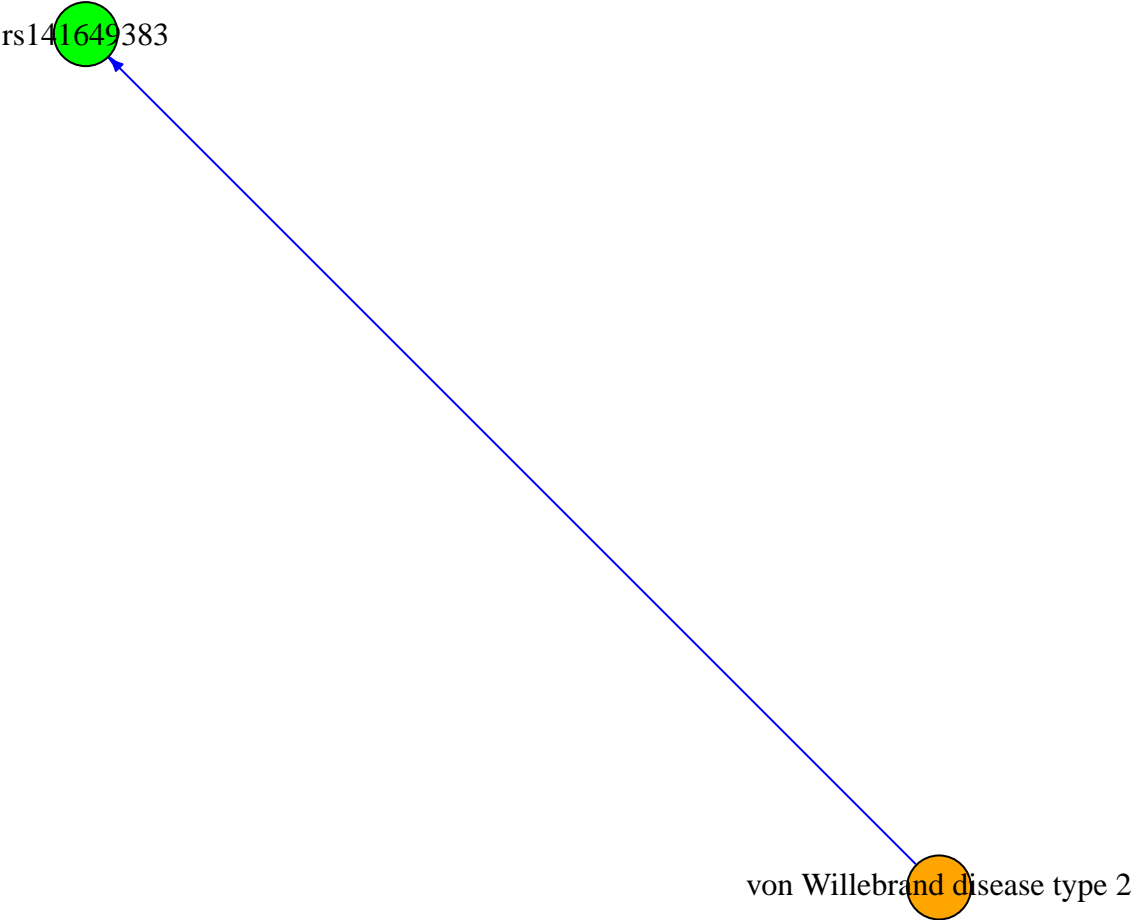

Variant–Disease Network (von Willebrand disorder)

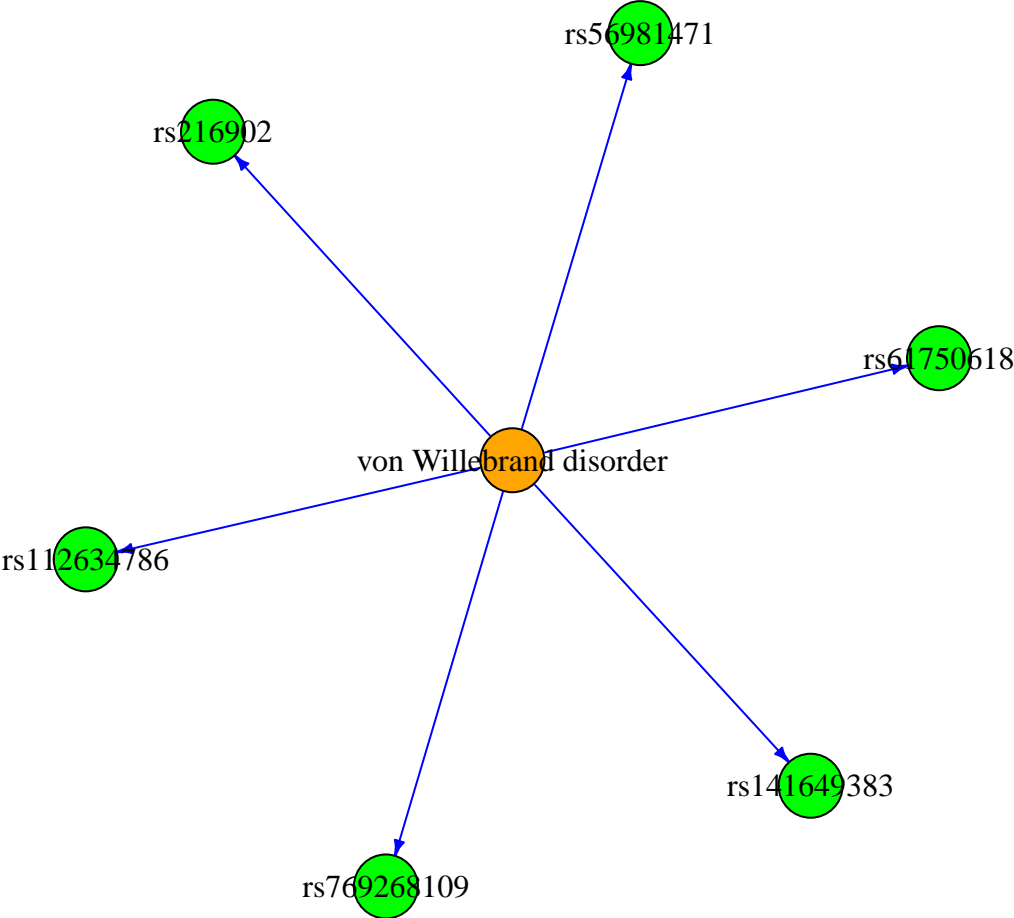

## Variant–Disease Network (Waardenburg syndrome)

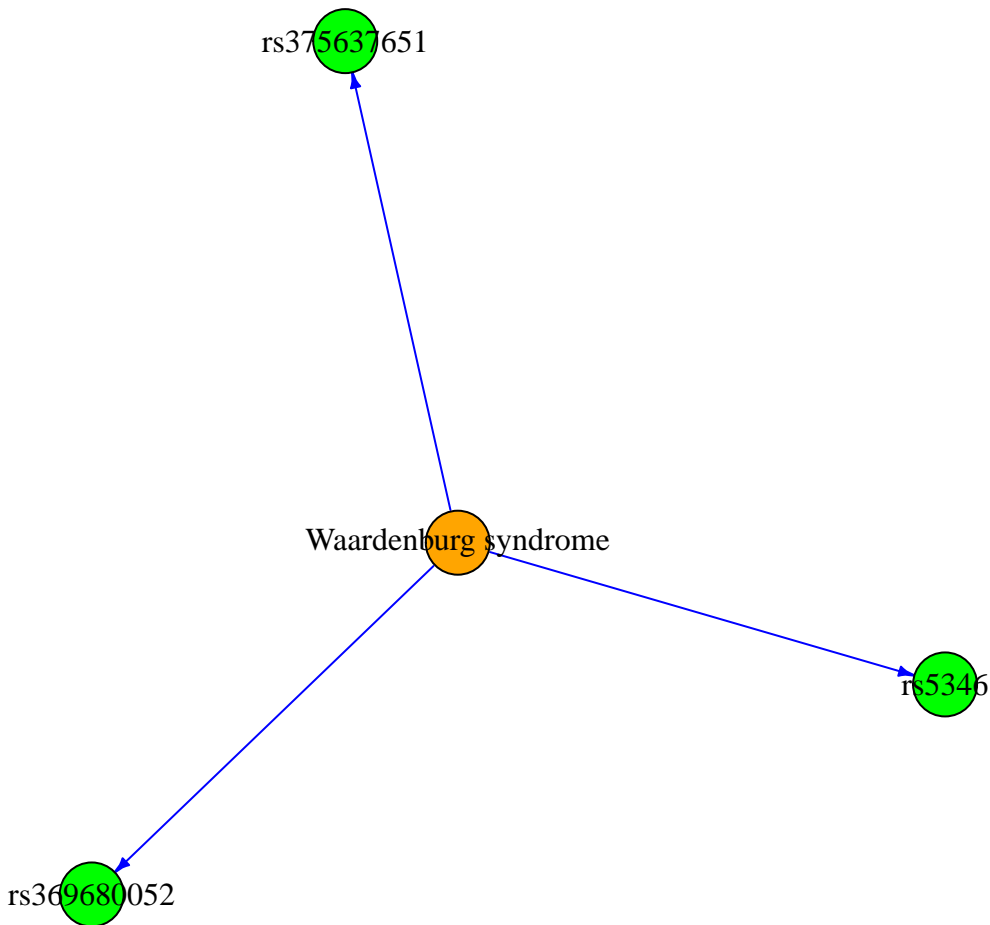

## Variant–Disease Network (Waardenburg syndrome type 2E)

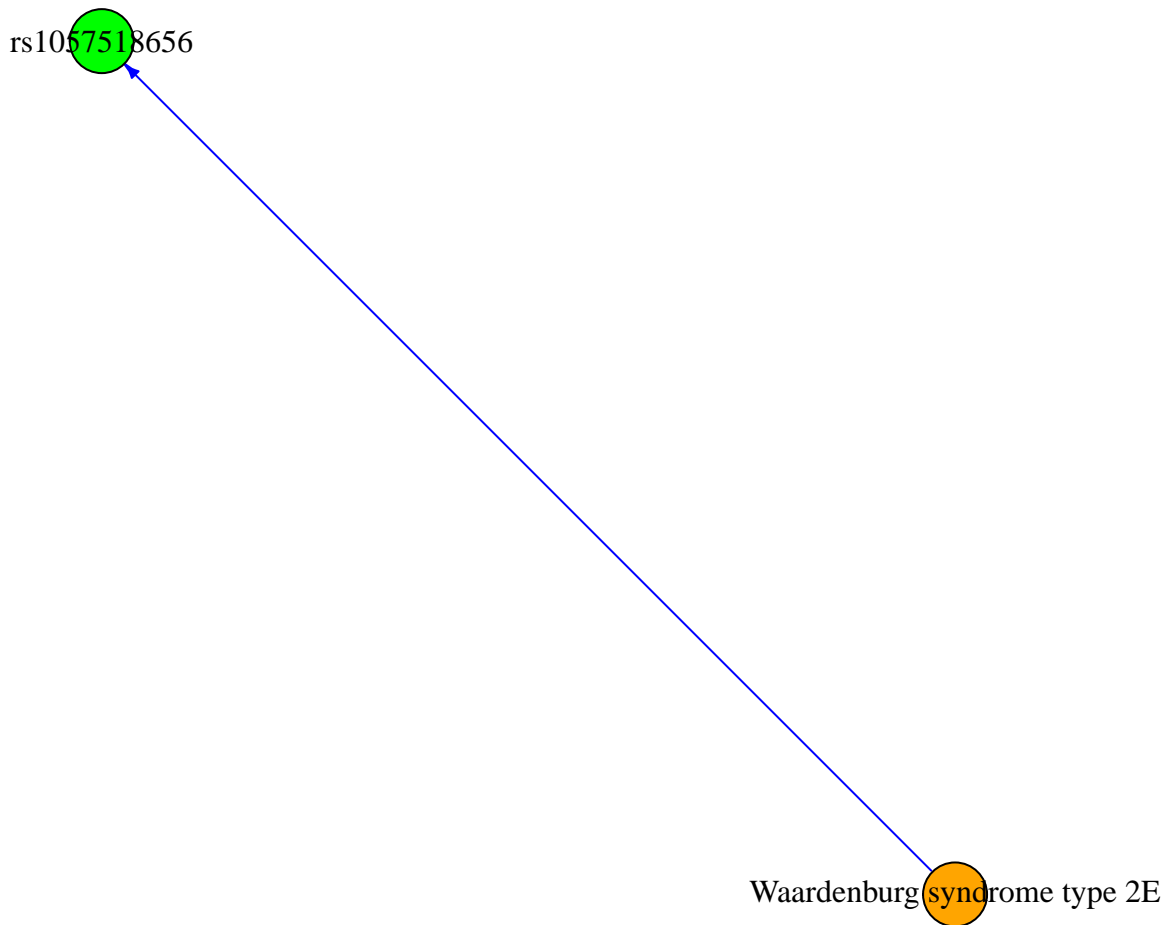

## Variant–Disease Network (Wagner syndrome)

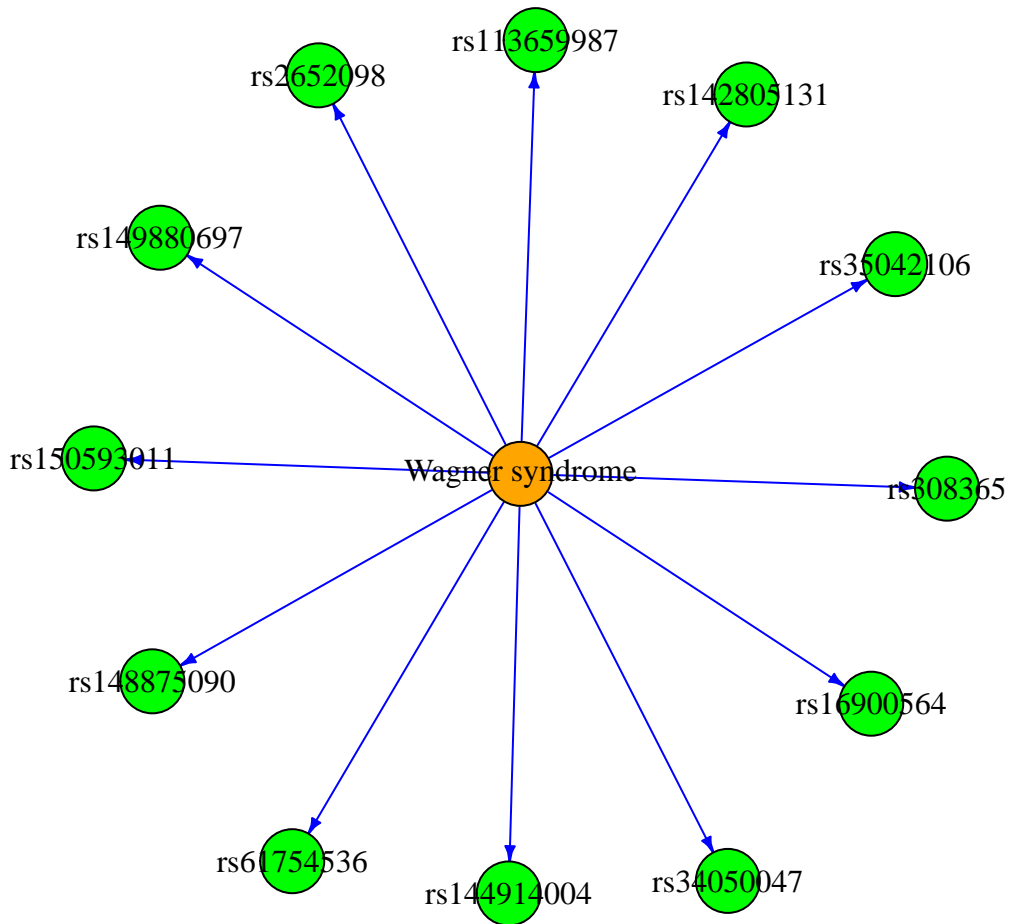

Variant–Disease Network (Warburg micro syndrome)

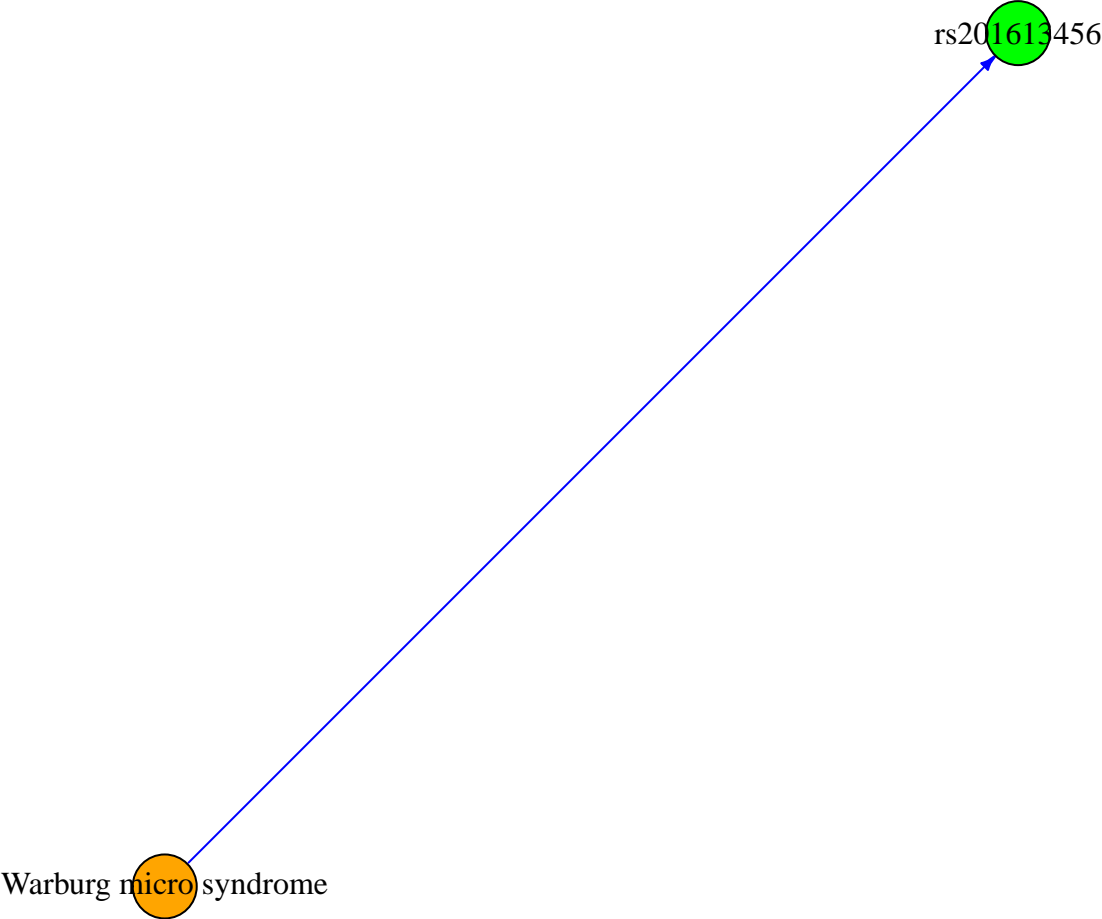

## Variant–Disease Network (Warburg micro syndrome 2)

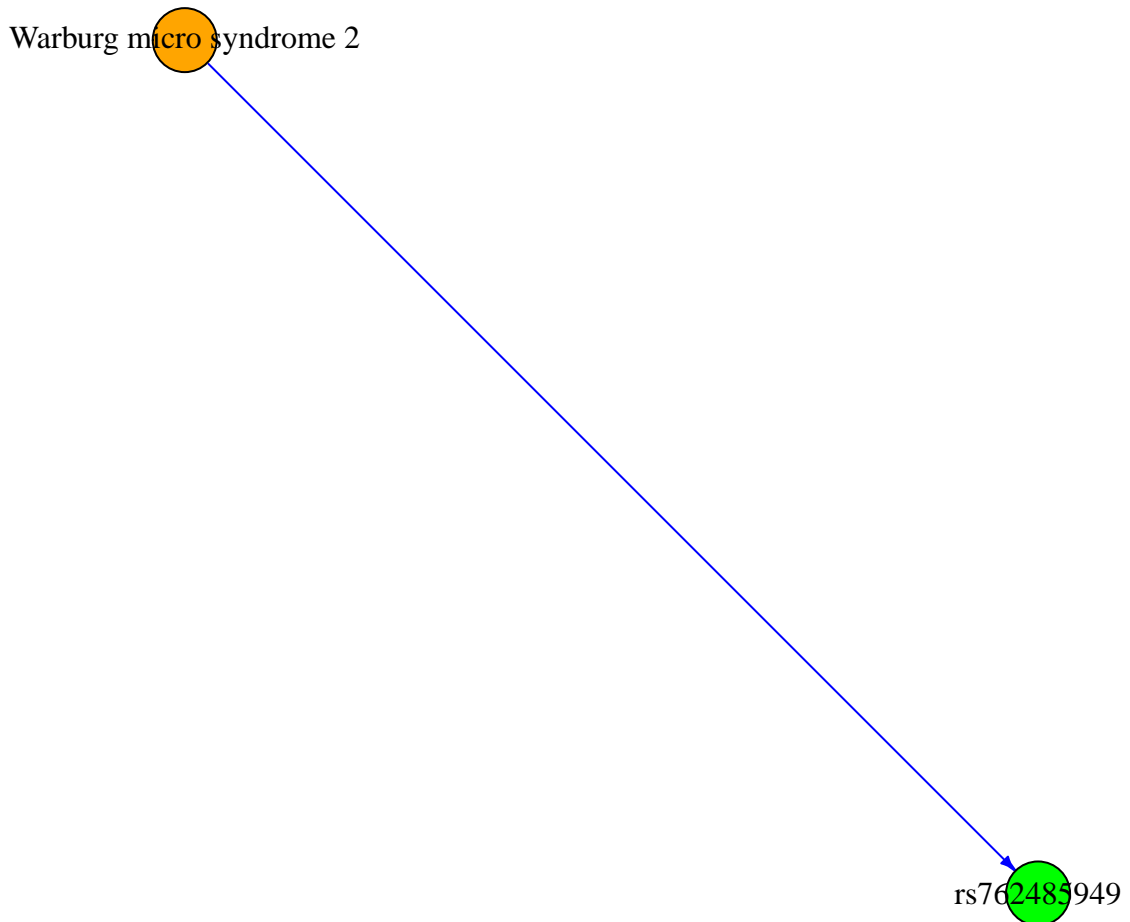

Variant–Disease Network (Warsaw breakage syndrome)

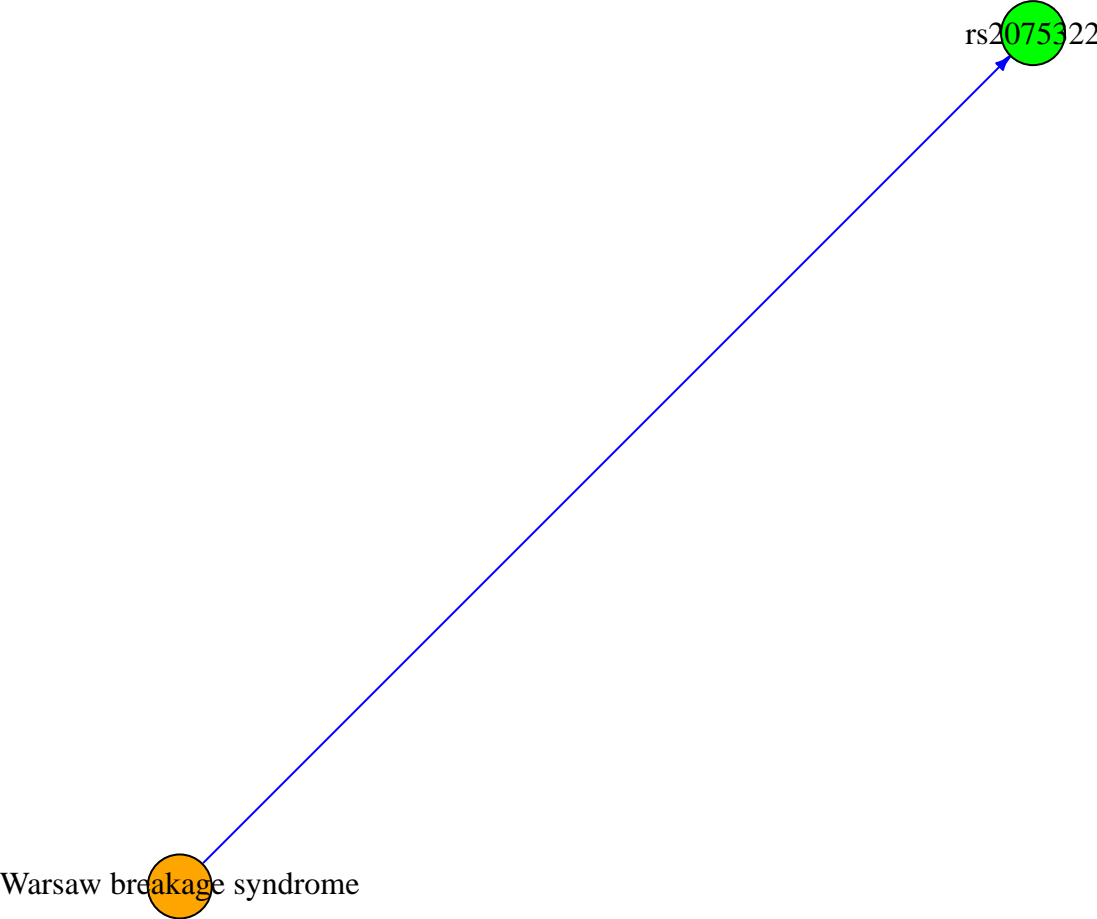



## Variant–Disease Network (Weaver syndrome)

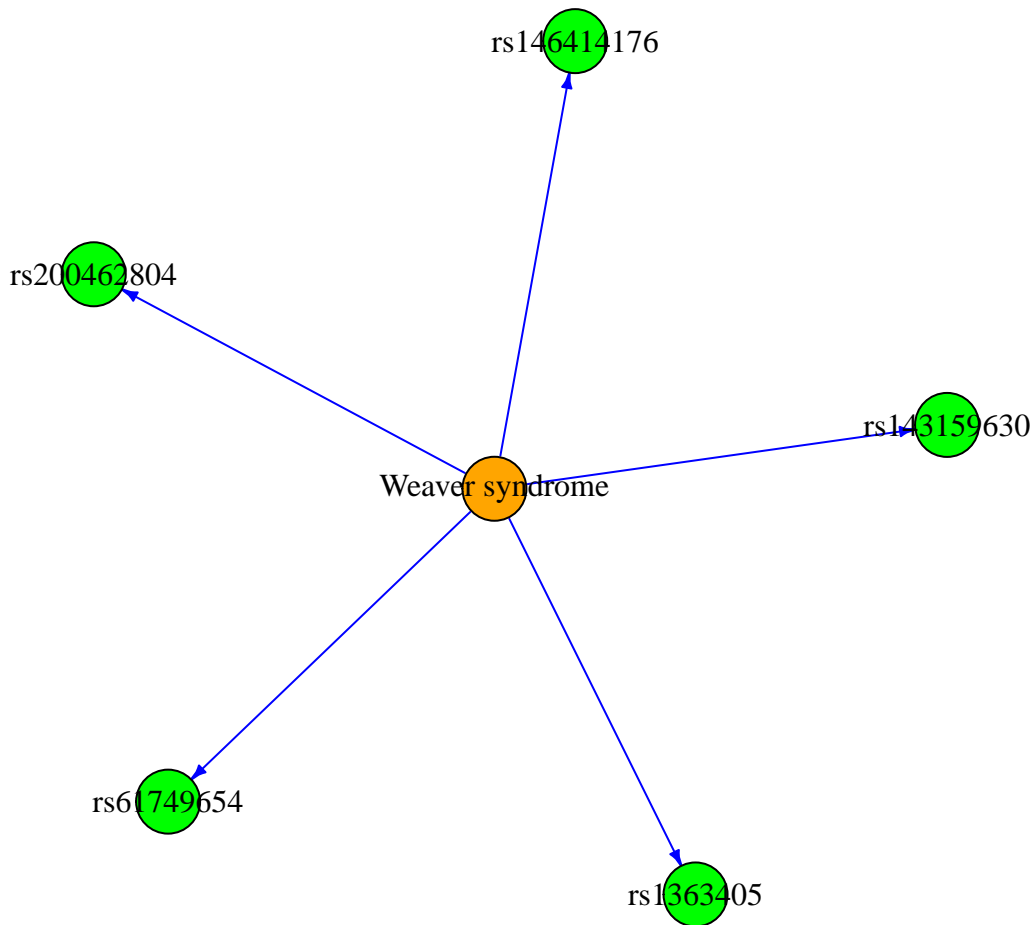

**Variant–Disease Network (Weill–Marchesani syndrome)**

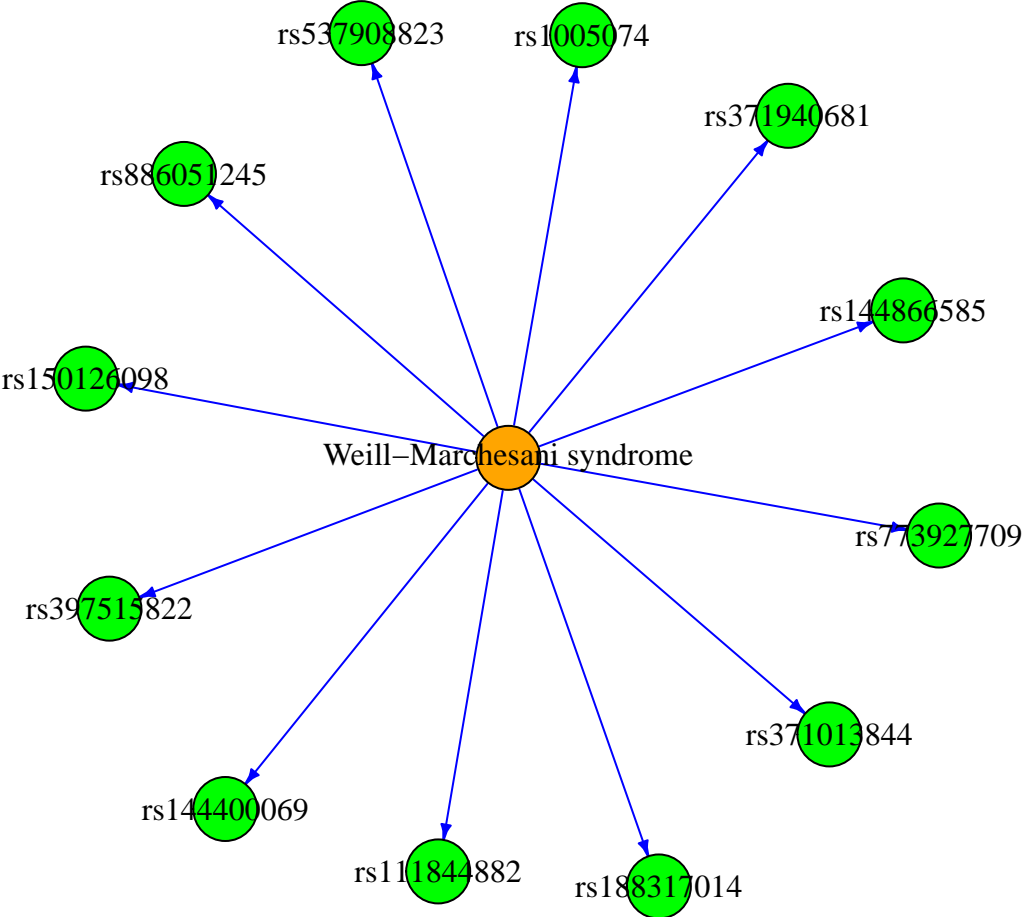

Variant–Disease Network (Weill–Marchesani syndrome 2)

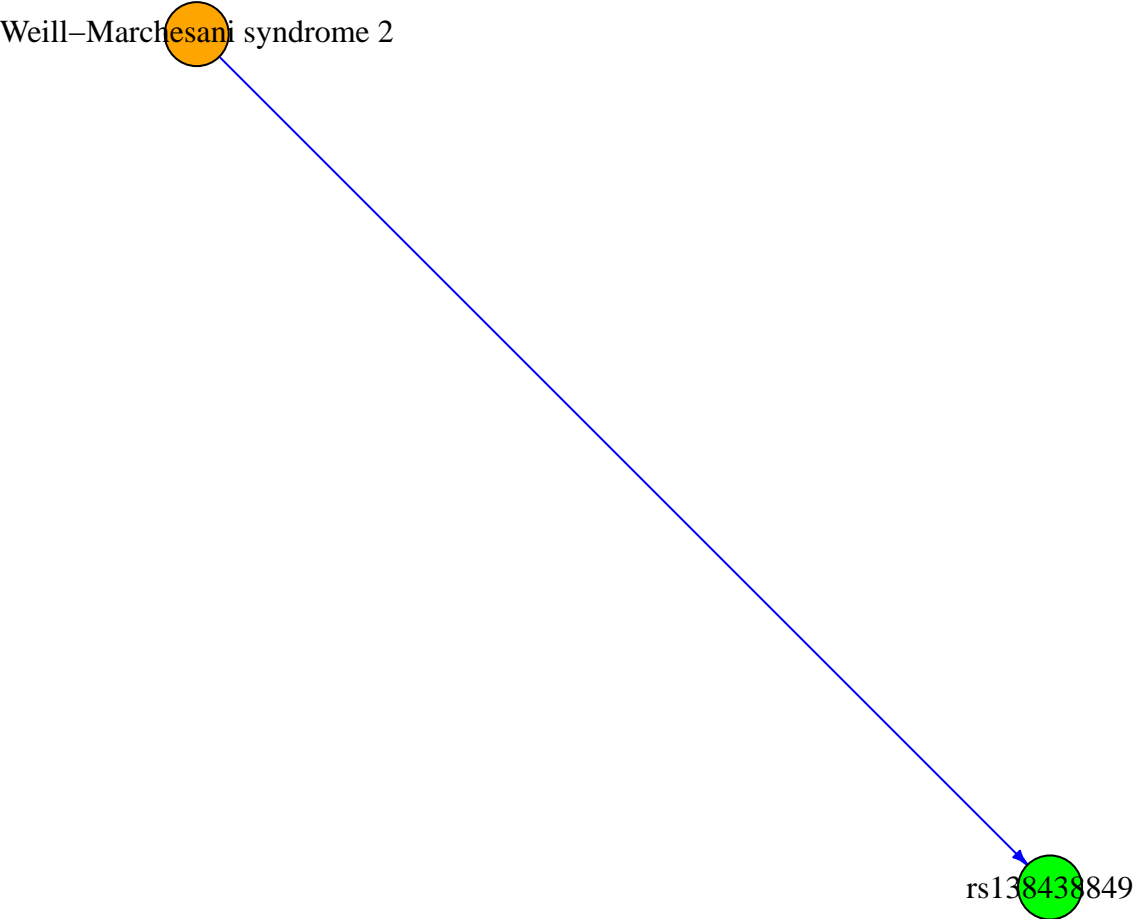

**Variant–Disease Network (Weill–Marchesani syndrome 4)**

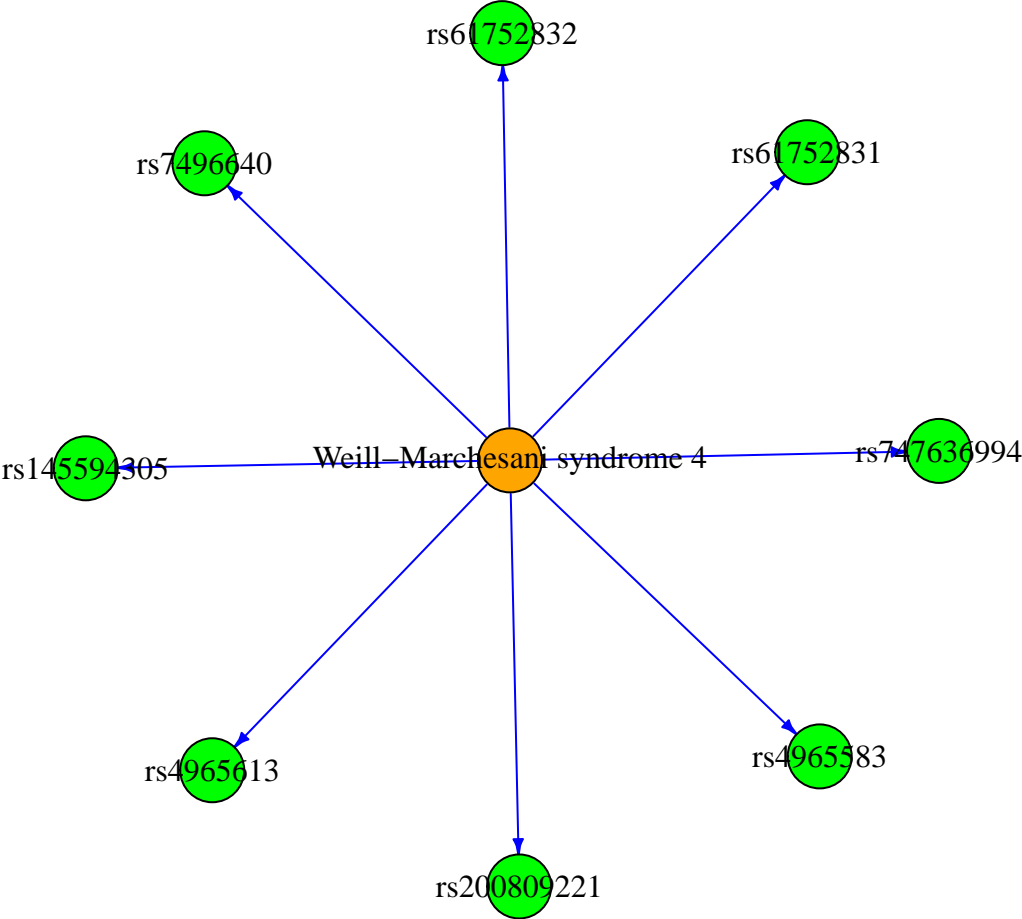

## Variant-Disease Network (Werner syndrome)

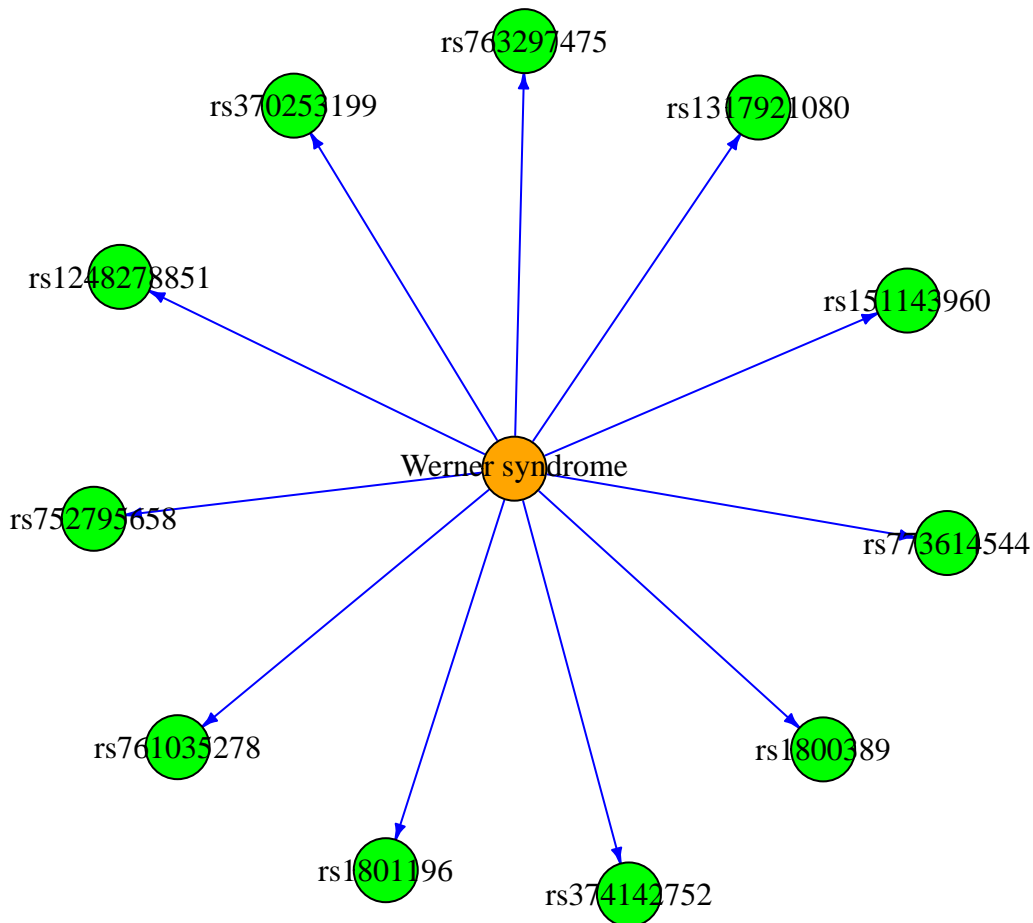

# Variant–Disease Network (WFS1–Related Spectrum Disorders)

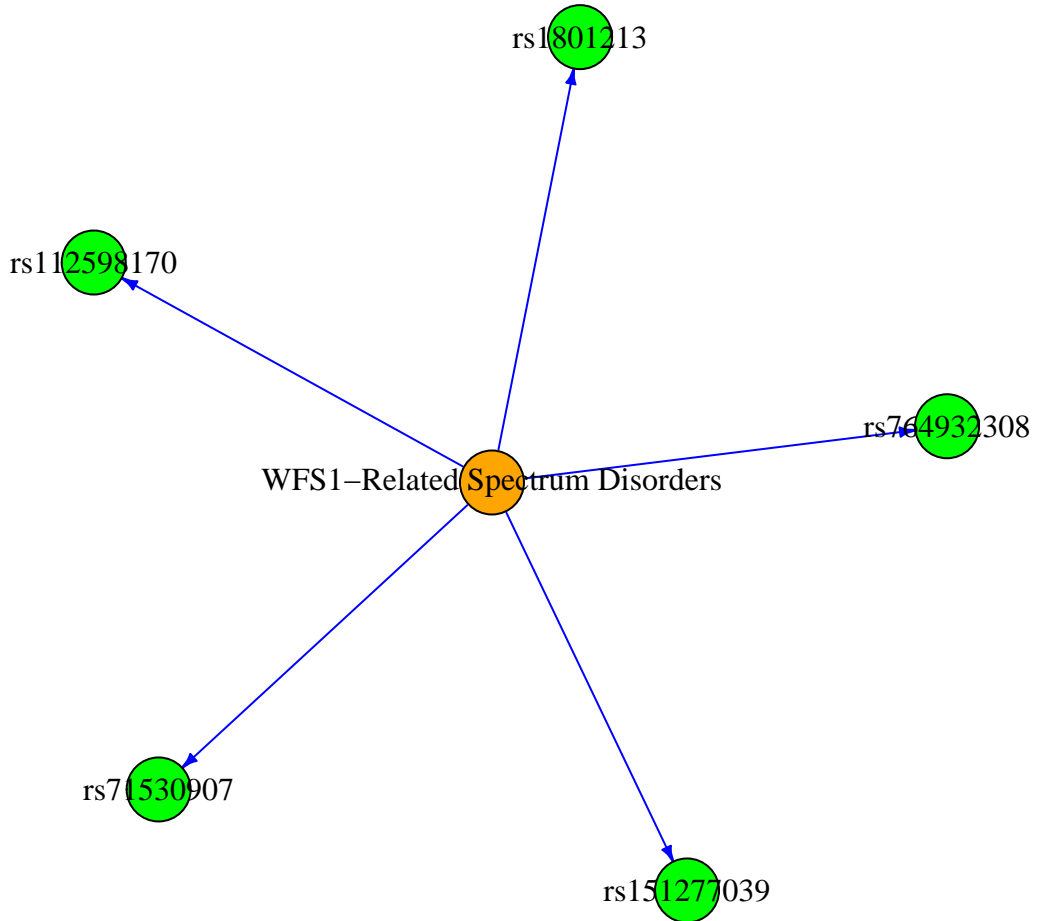

## Variant–Disease Network (Widely spaced teeth)

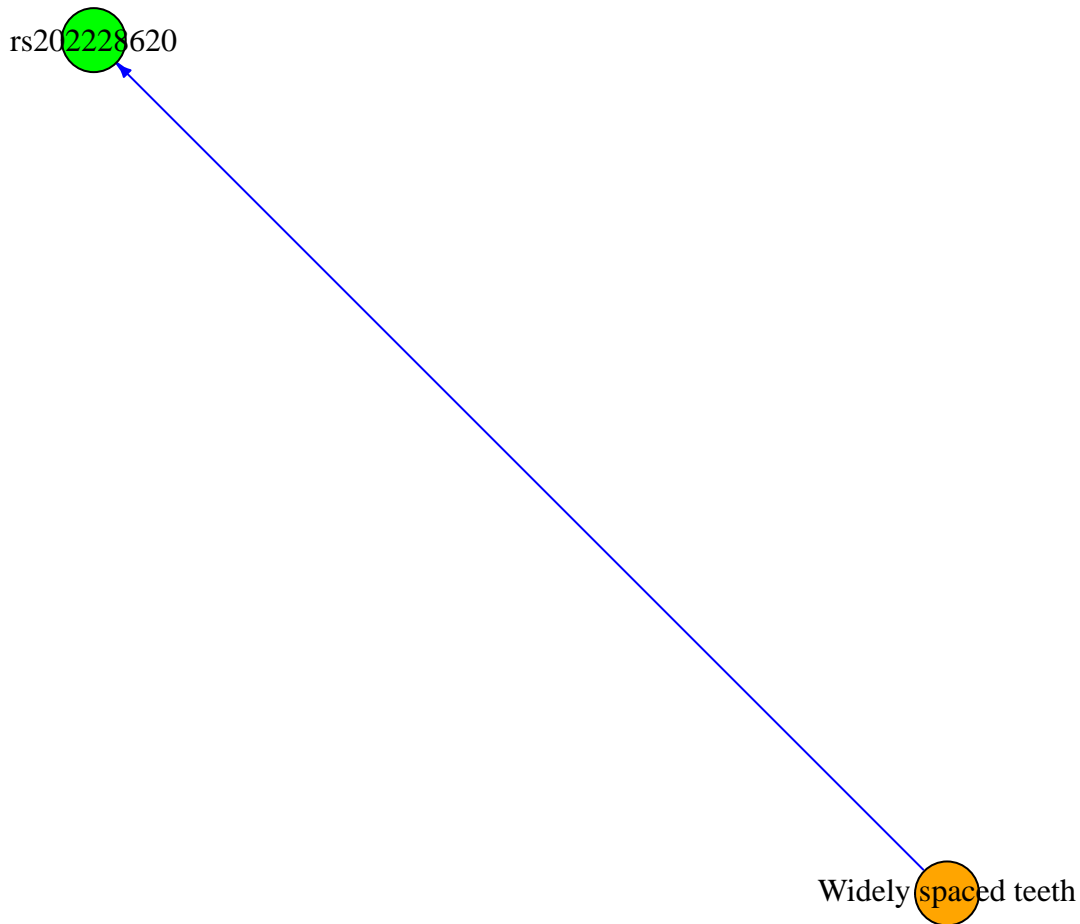

## Variant-Disease Network (Wilms tumor)

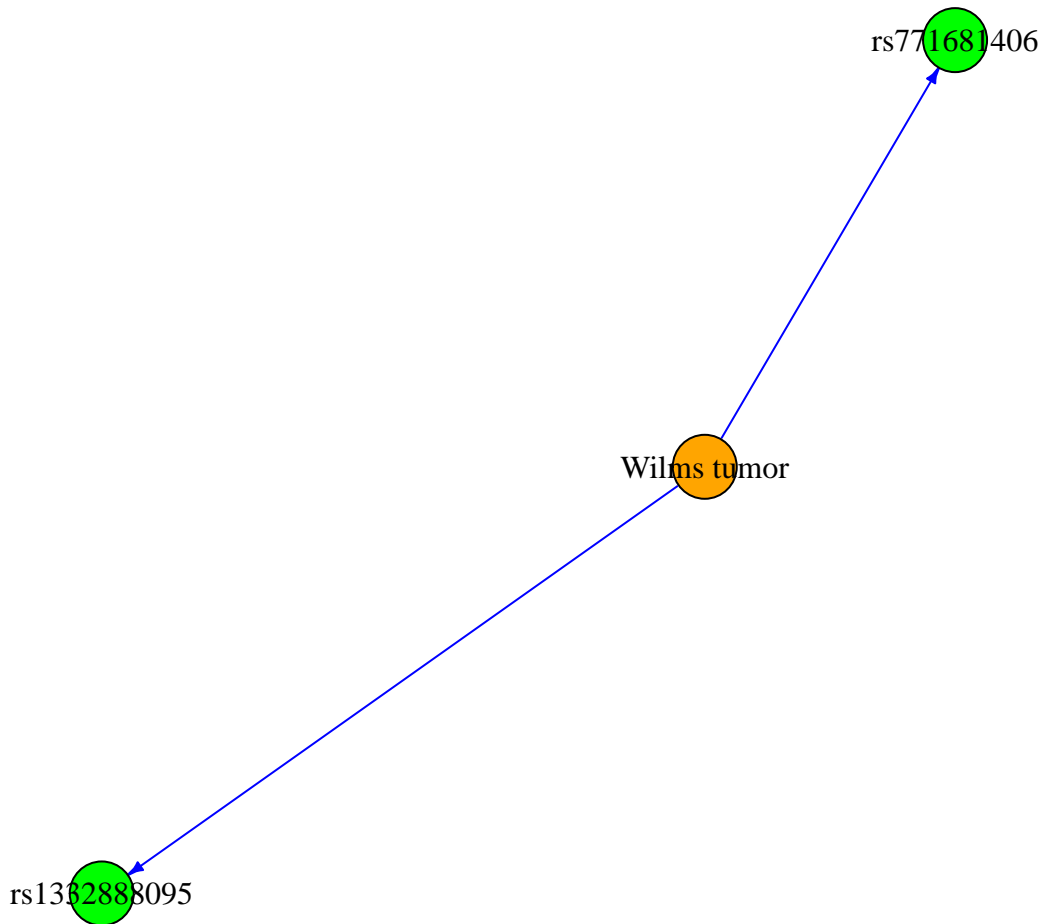



**Variant–Disease Network (Wilms tumor 1)**

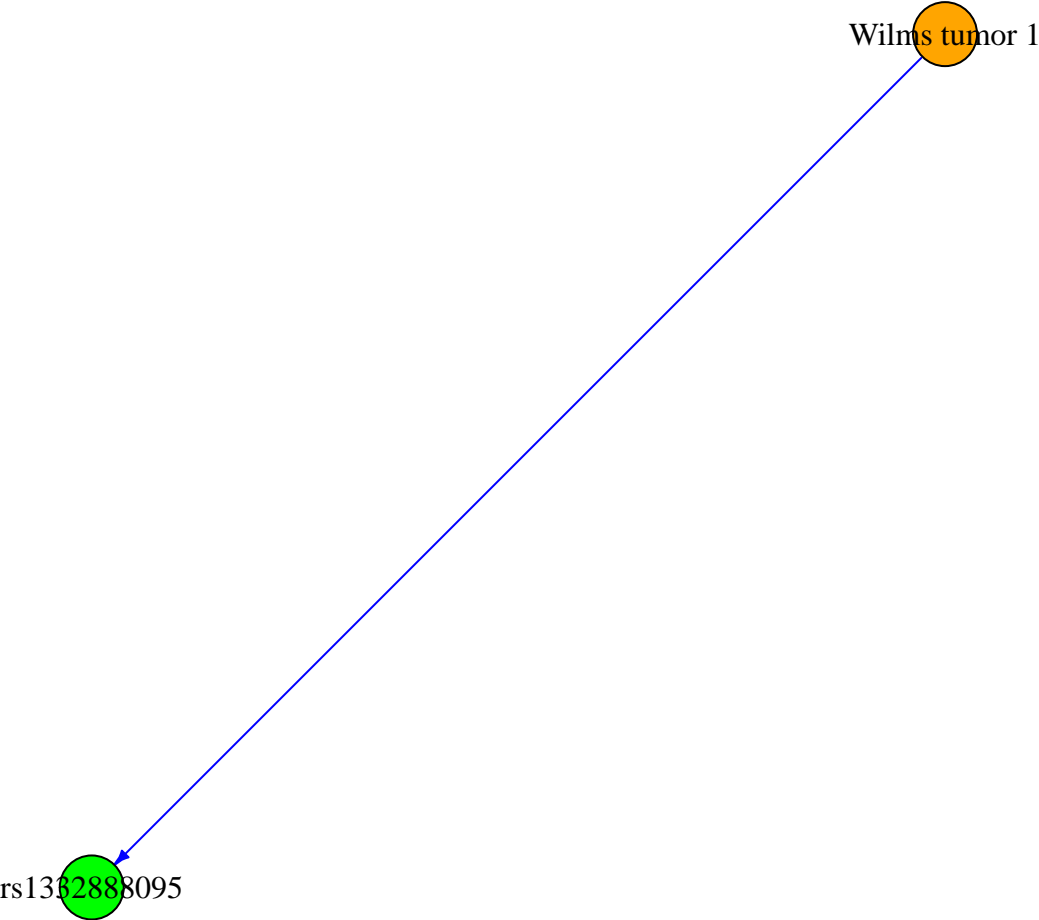

**Variant–Disease Network (Wolff–Parkinson–White syndrome)**

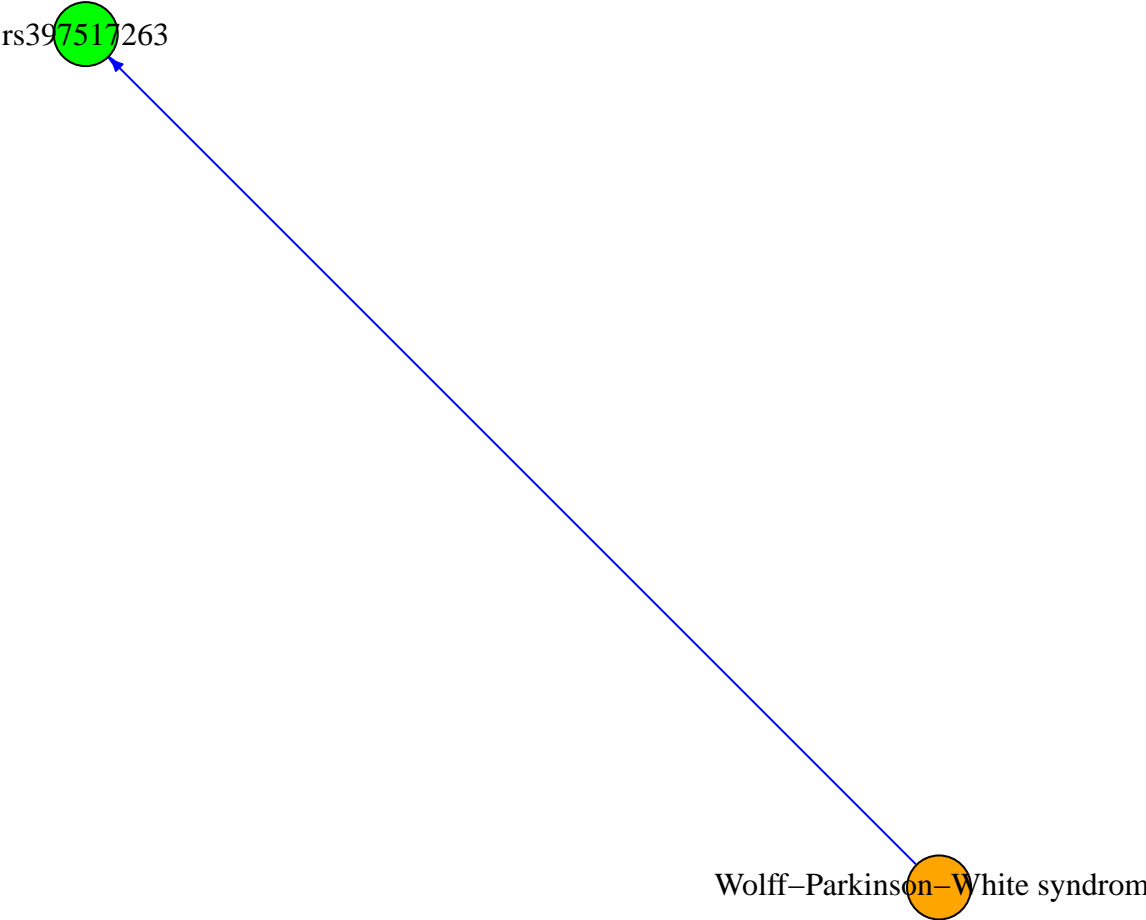

## Variant–Disease Network (Wolman disease)

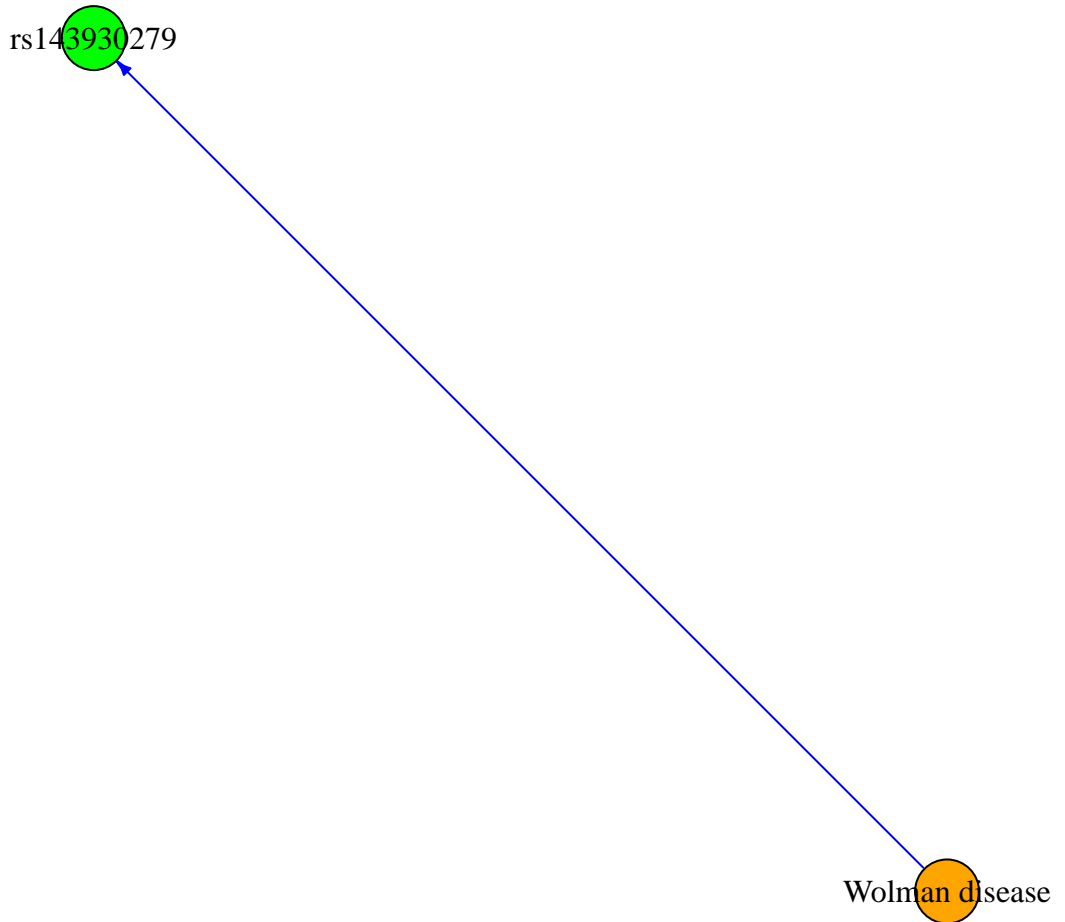

Variant–Disease Network (Xanthinuria)

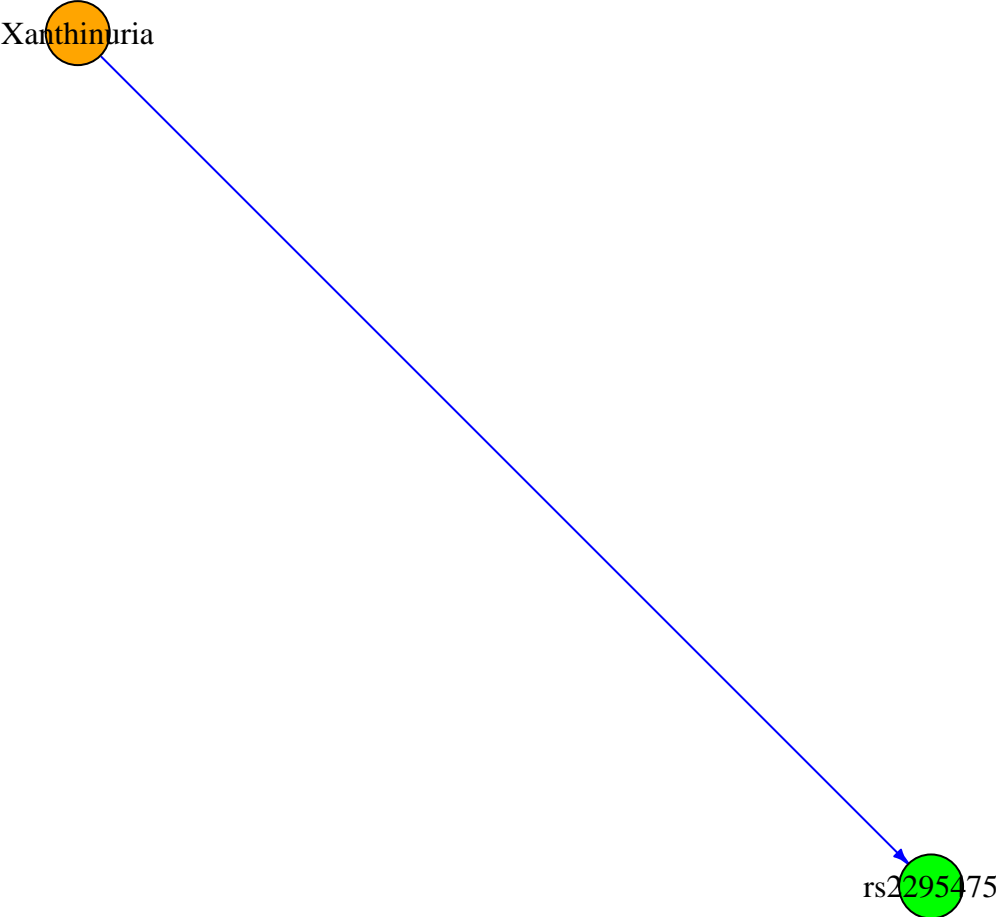

**Variant–Disease Network (Xeroderma pigmentosum)**

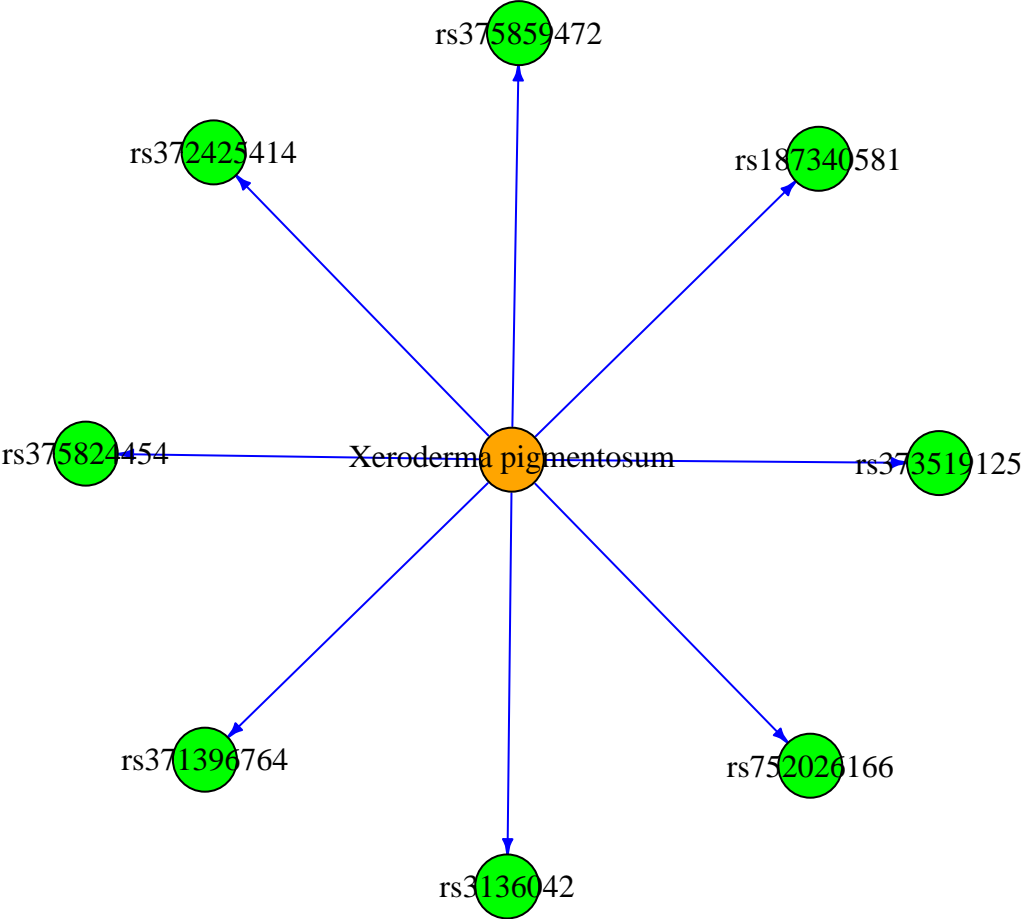

## Variant–Disease Network (X-linked agammaglobulinemia)

rs128621199

X-linked agammaglobulinemia

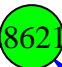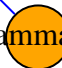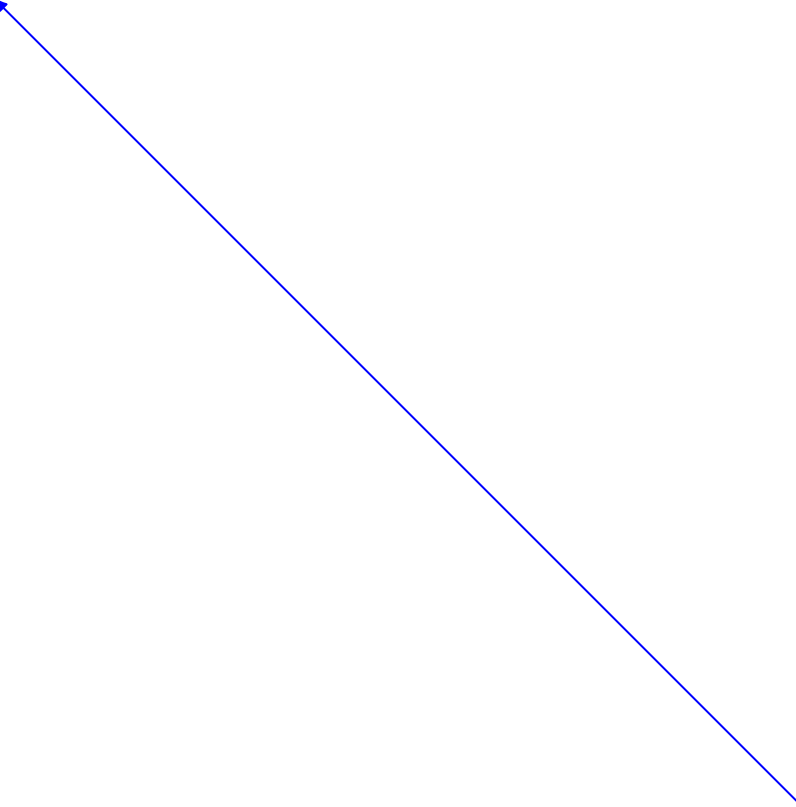

# nt-Disease Network (X-linked agammaglobulinemia with growth hormone d

agammaglobulinemia with growth hormone deficiency

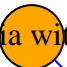

rs150917517

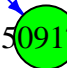

## Variant-Disease Network (XY sex reversal)

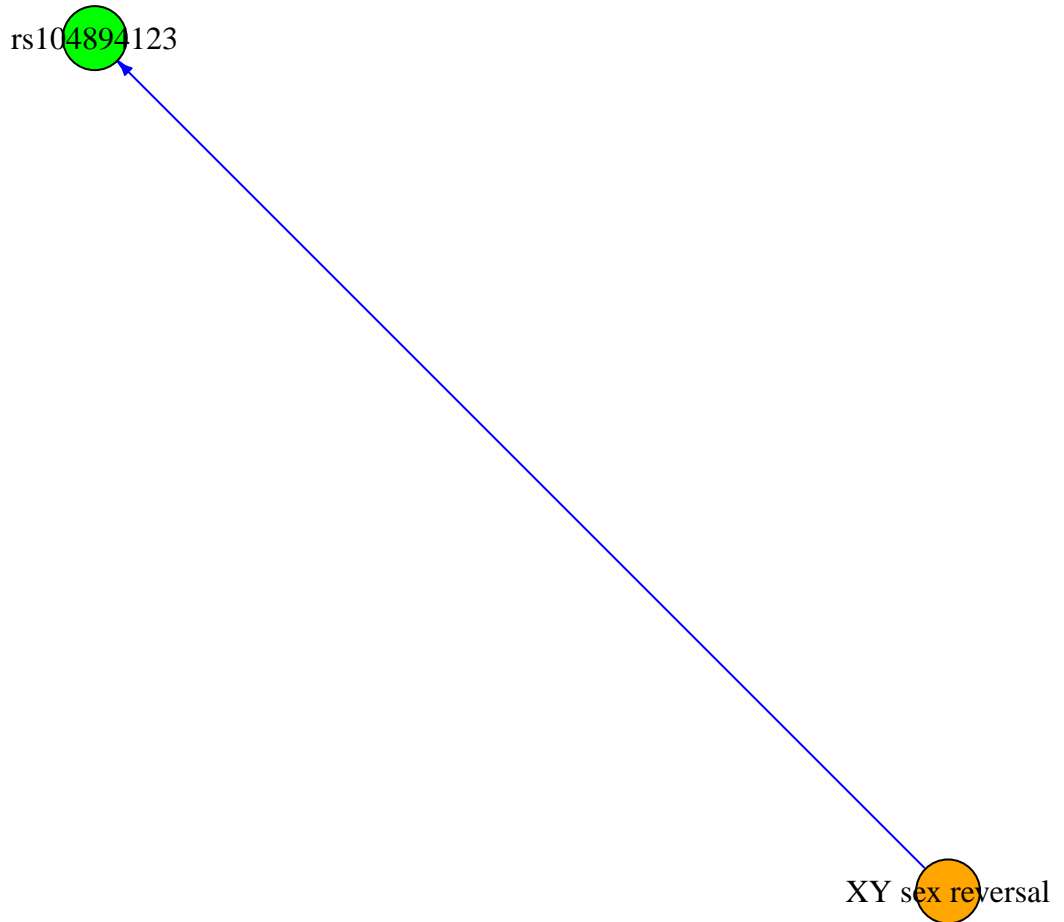



# Variant–Disease Network (Zonular Pulverulent Cataract)

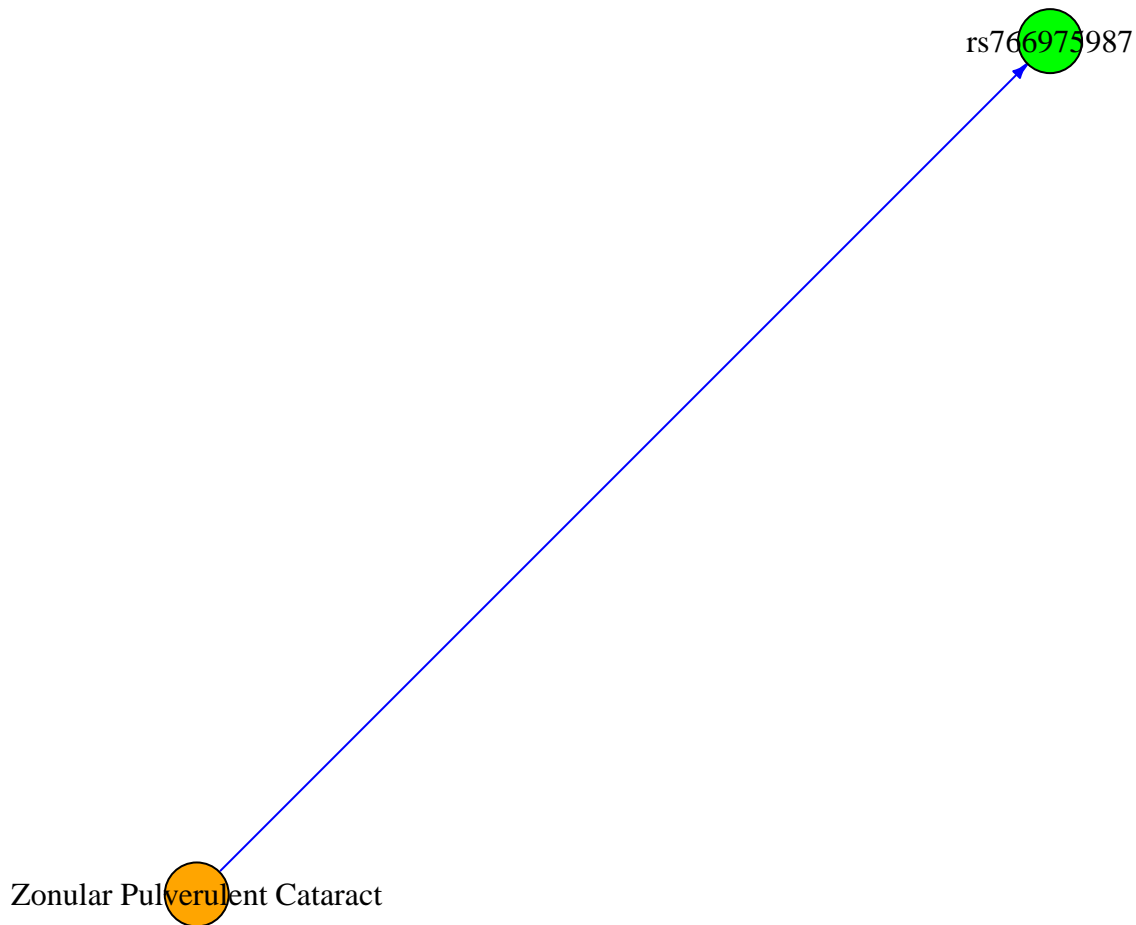

Variant–Disease Network (Zonular pulverulent cataract 3)

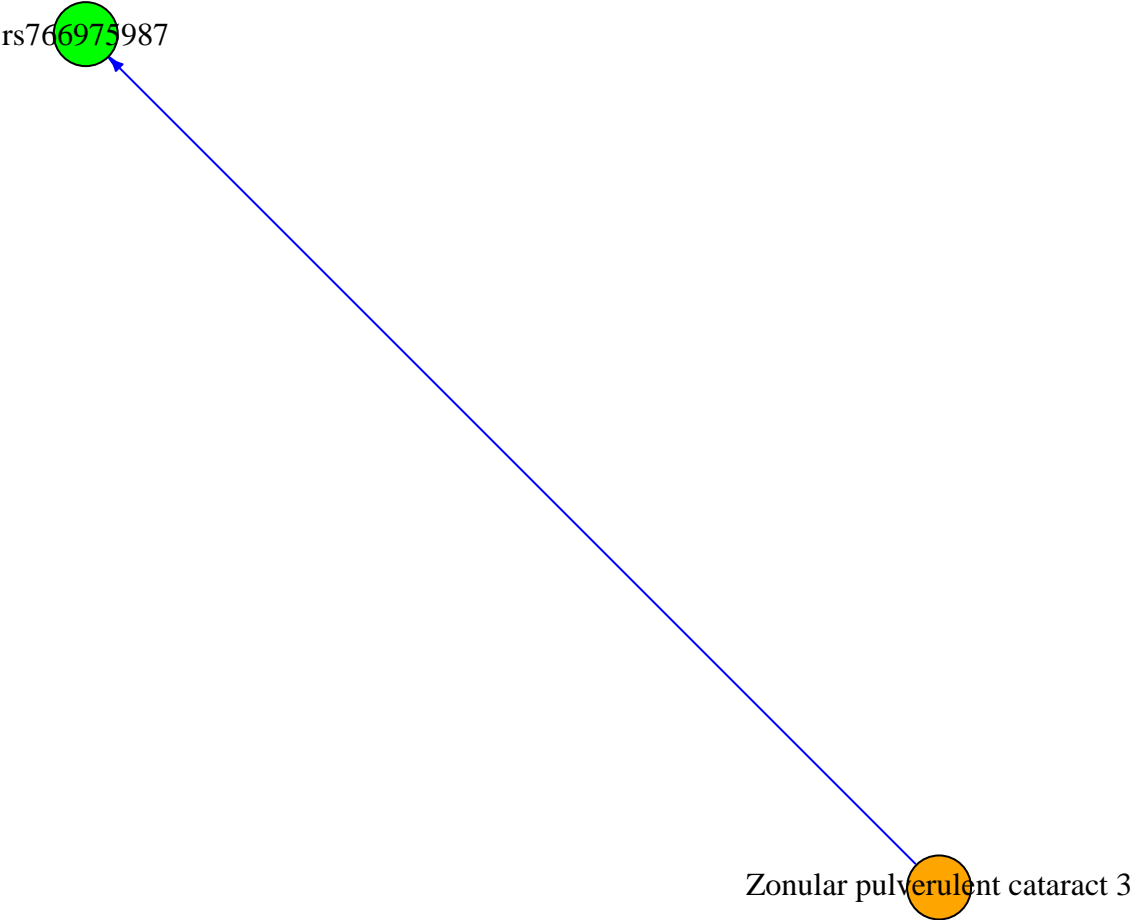

Variant–Disease Network (Adventurousness)

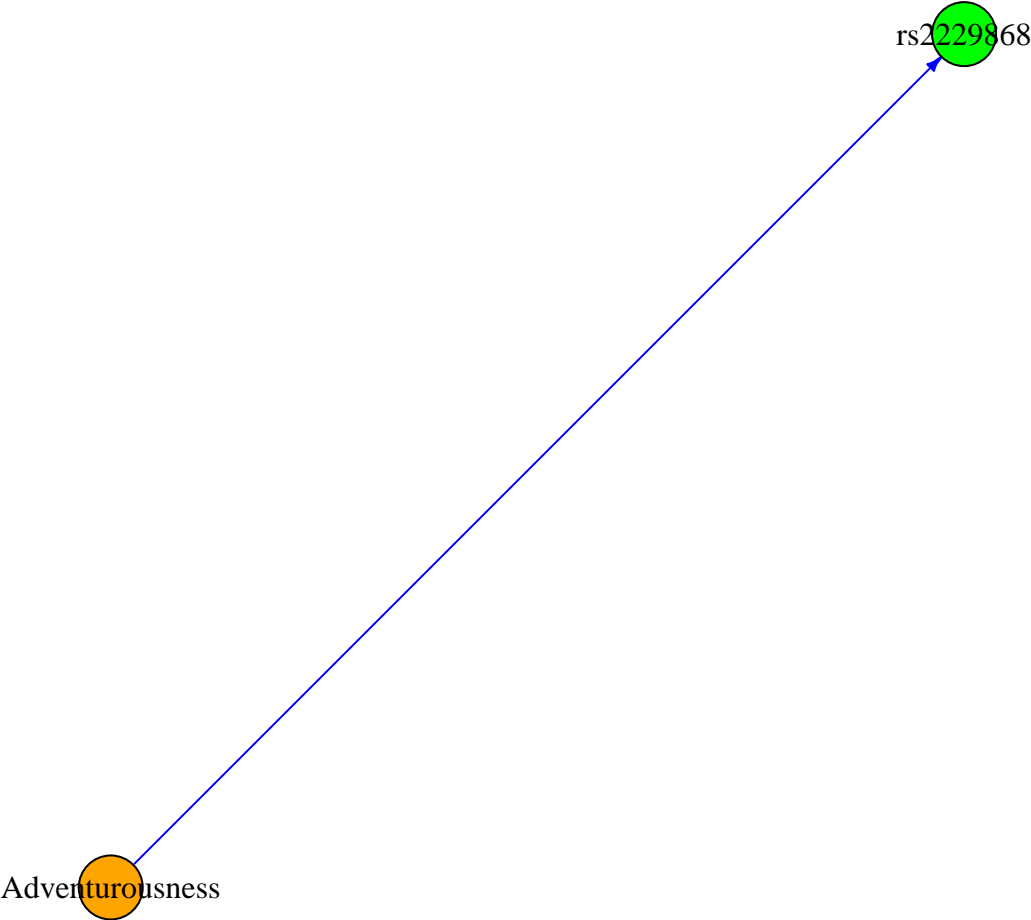

## Variant–Disease Network (Alcohol consumption)

rs7640



```
graph LR; A((Alcohol consumption)) --> B((rs7640))
```

The diagram illustrates a directed edge in a Variant–Disease Network. The source node, 'Alcohol consumption', is represented by an orange circle with a black outline. The target node, 'rs7640', is represented by a green circle with a black outline. A blue arrow points from the source node to the target node, indicating a directed relationship.

Alcohol consumption

**Variant–Disease Network (Alcoholic chronic pancreatitis)**

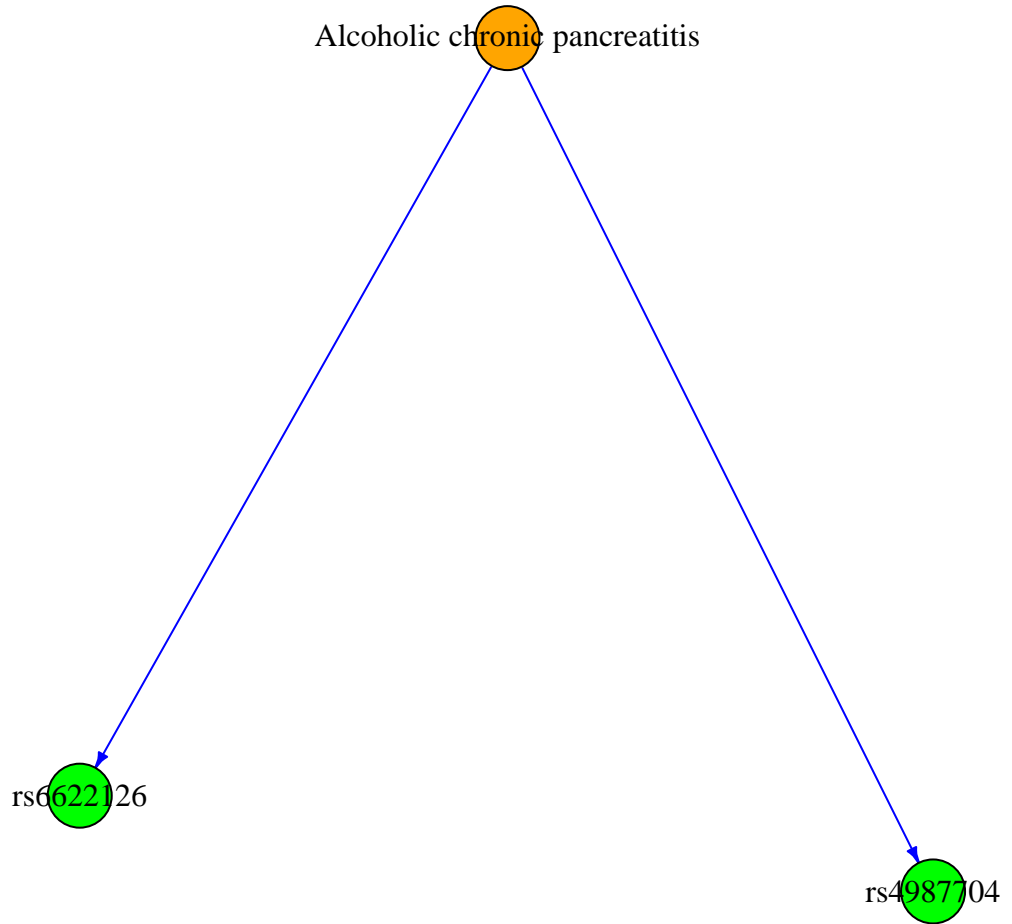

## Variant–Disease Network (Alzheimers disease)

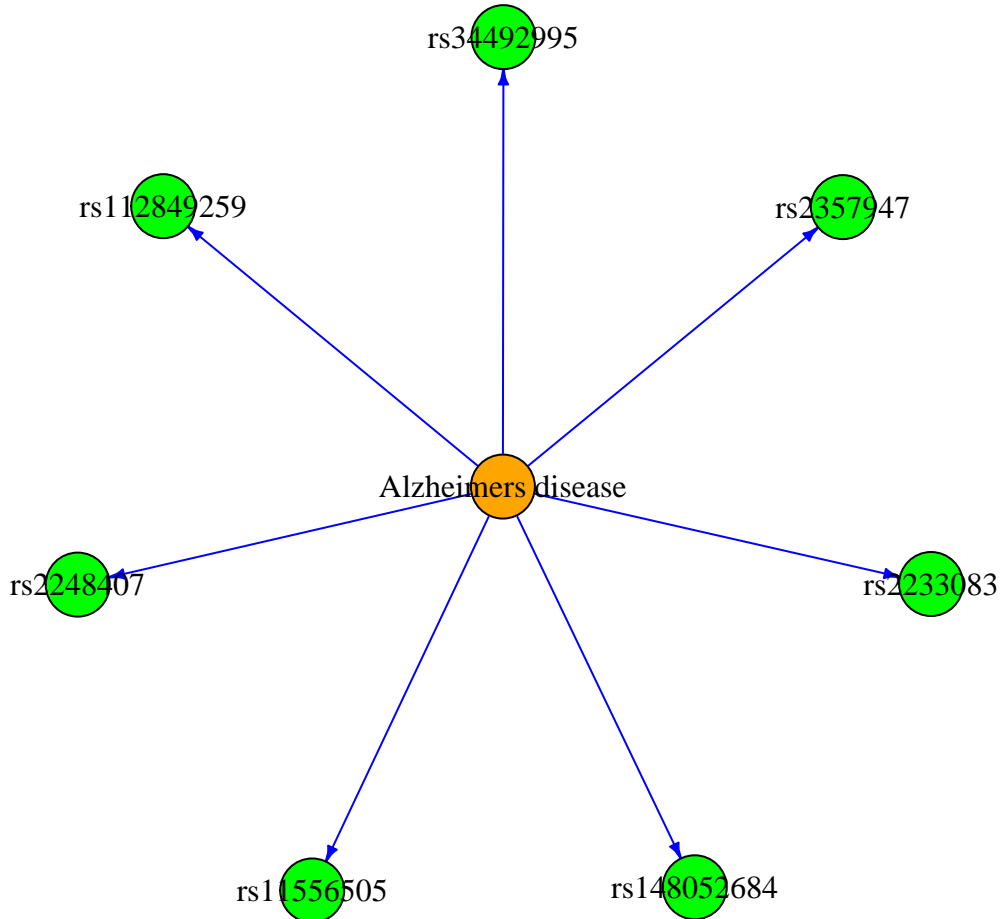

## Variant-Disease Network (Apolipoprotein A1 levels)

rs3814883

Apolipoprotein A1 levels



**Variant–Disease Network (Autism spectrum disorder or schizophrenia)**

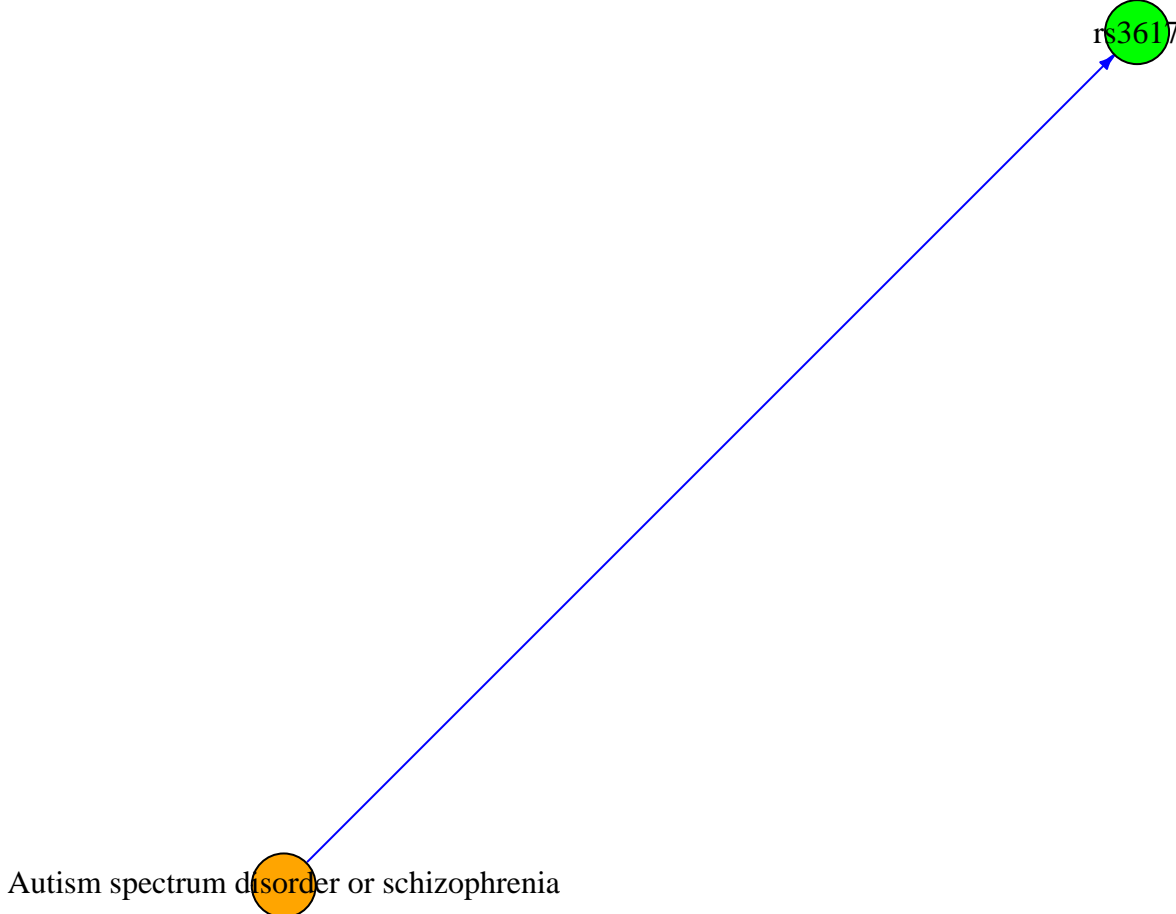



Variant–Disease Network (Balding type 1)

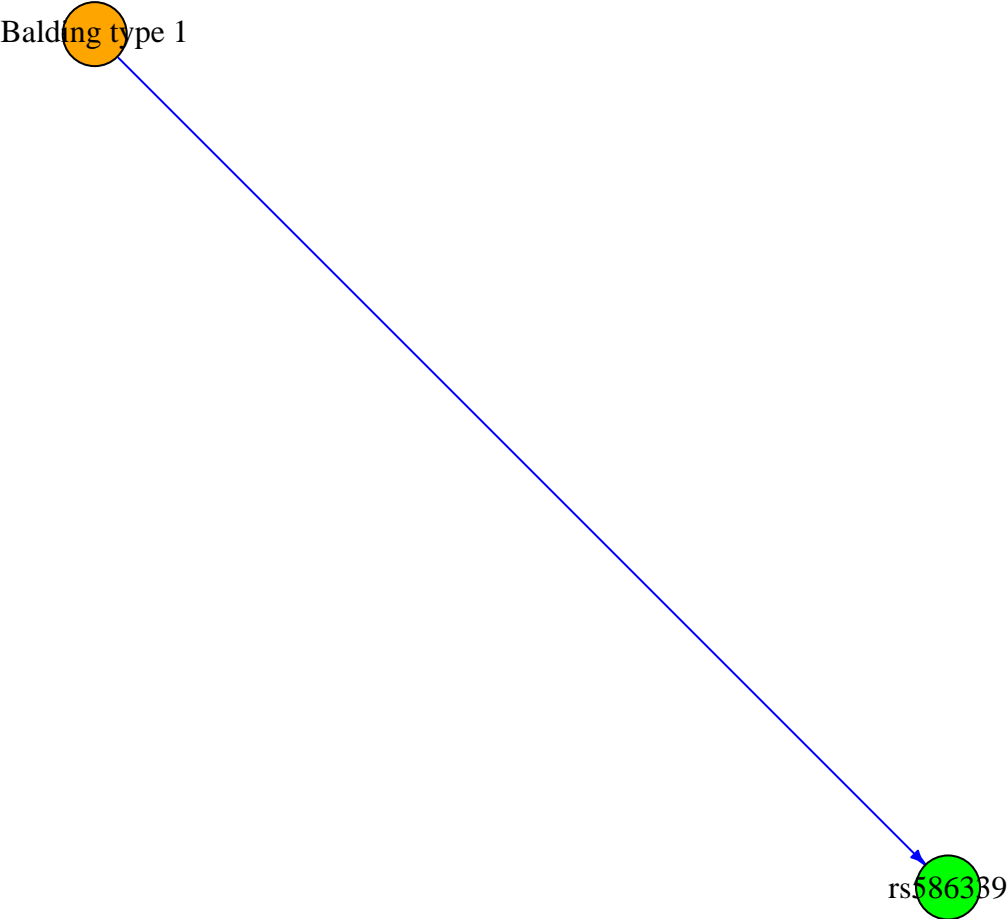

## Variant–Disease Network (Birth weight)

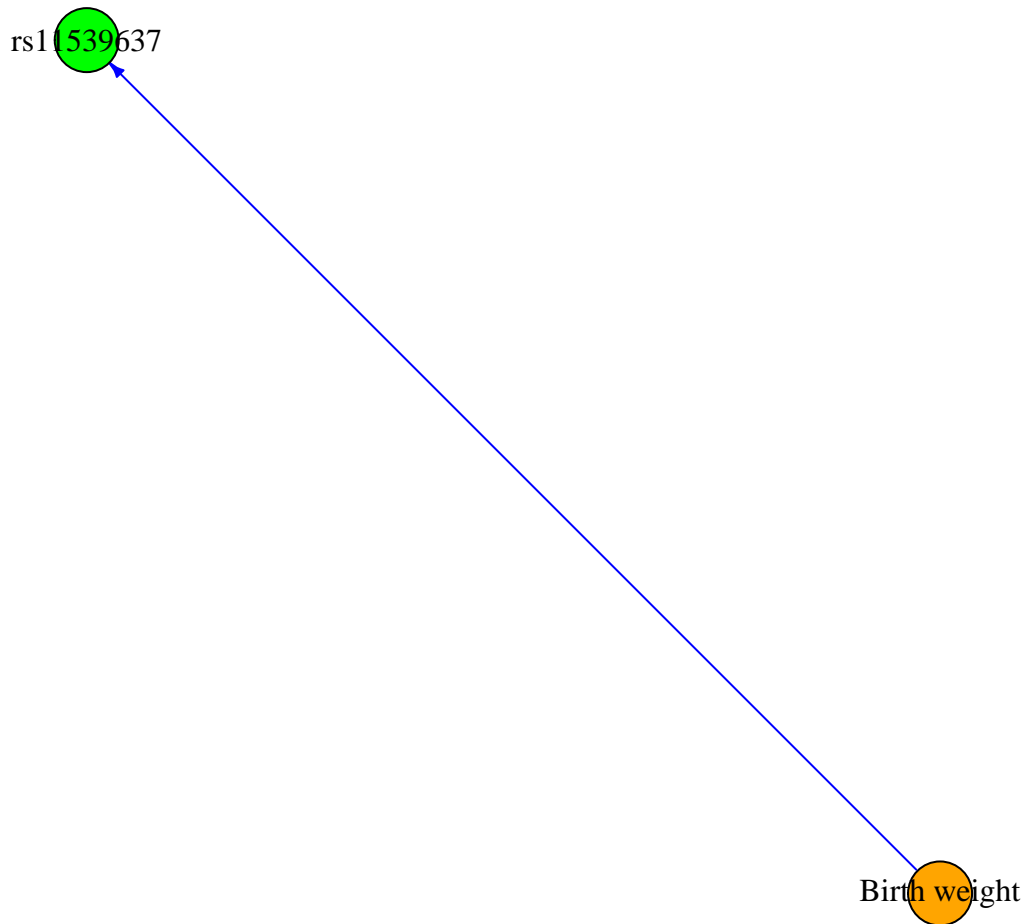

# Variant–Disease Network (Blond vs. brown/black hair color)

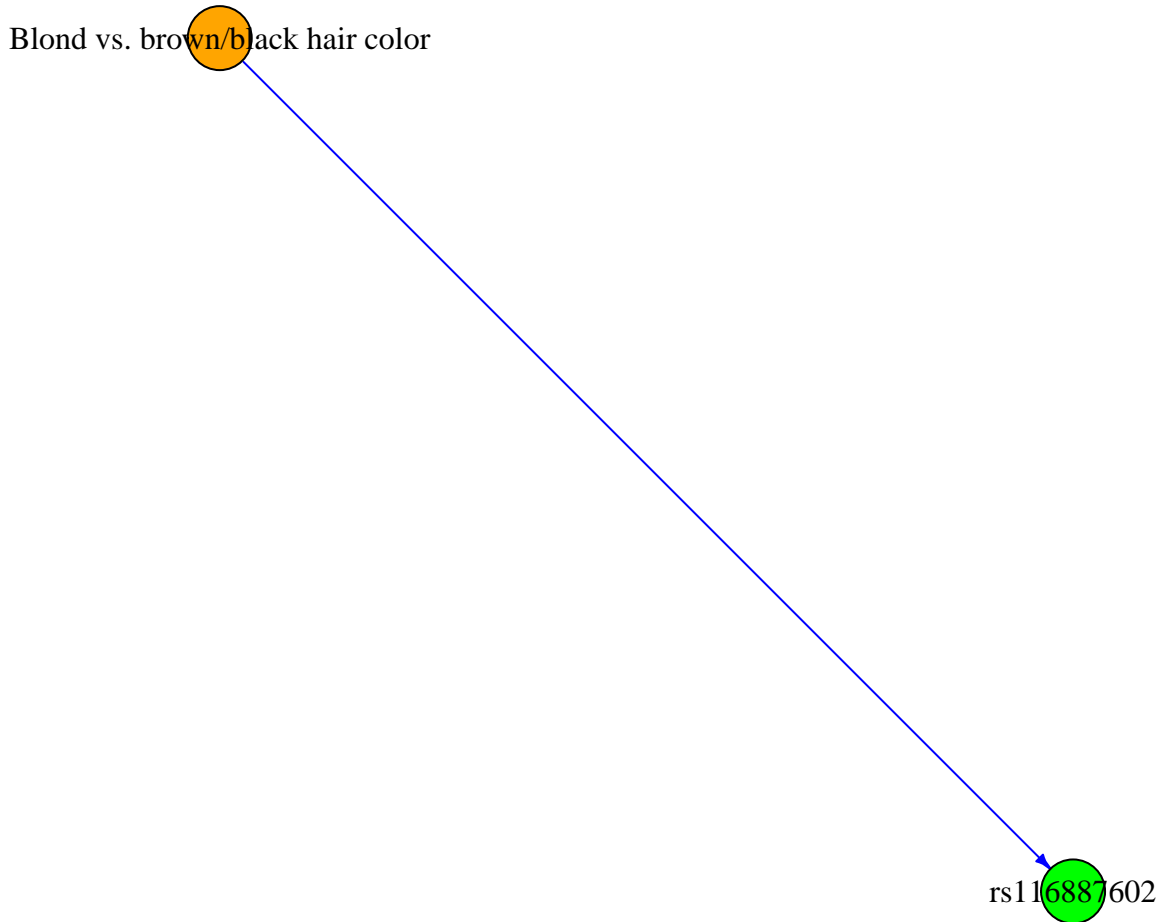

Variant–Disease Network (Blood metabolite ratios)

Blood metabolite ratios

rs1046080

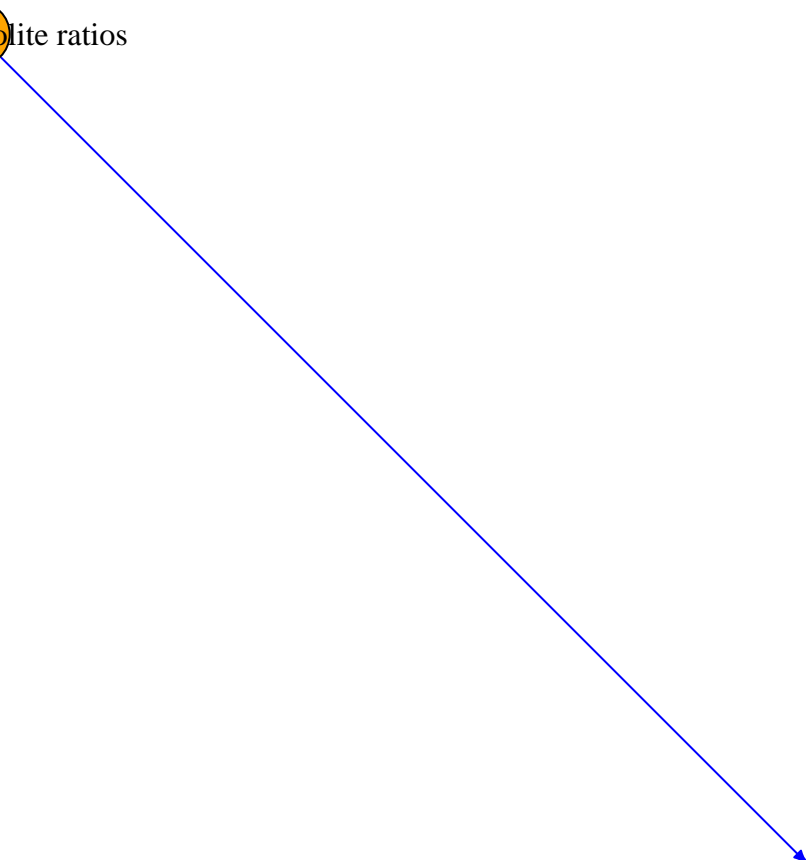

## Variant–Disease Network (Blood protein levels)

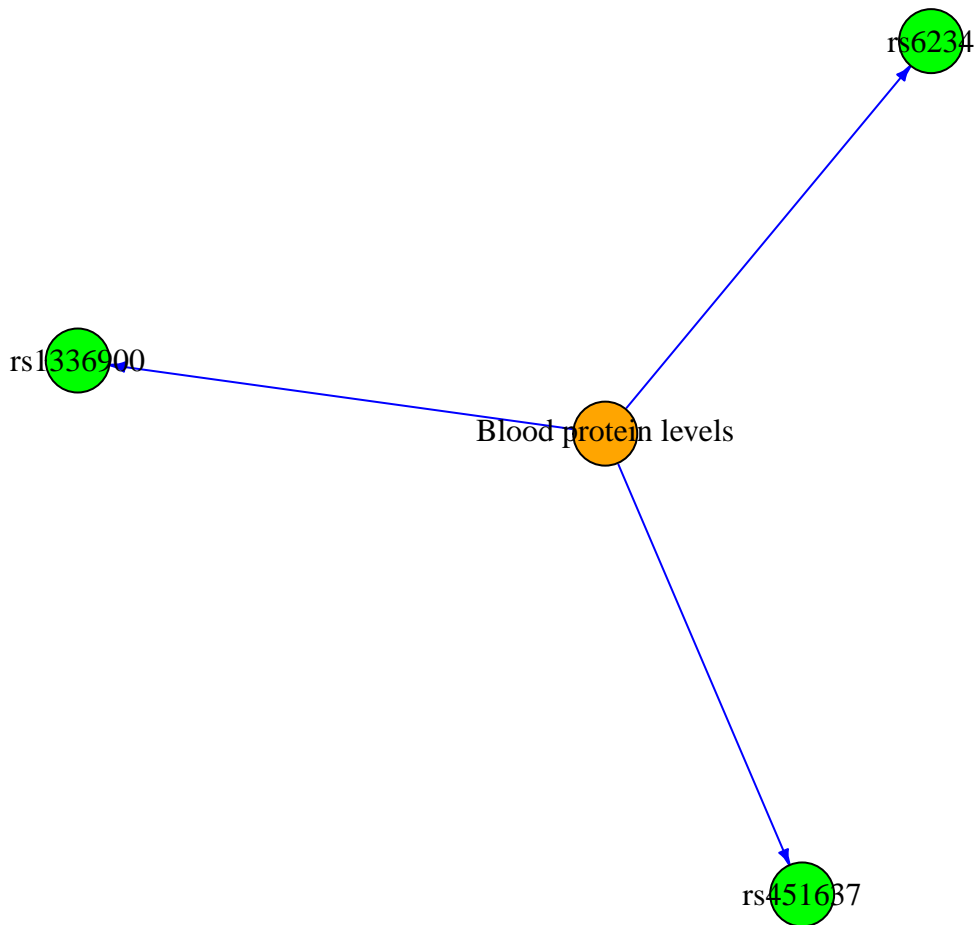

## Variant–Disease Network (Blood sugar levels)

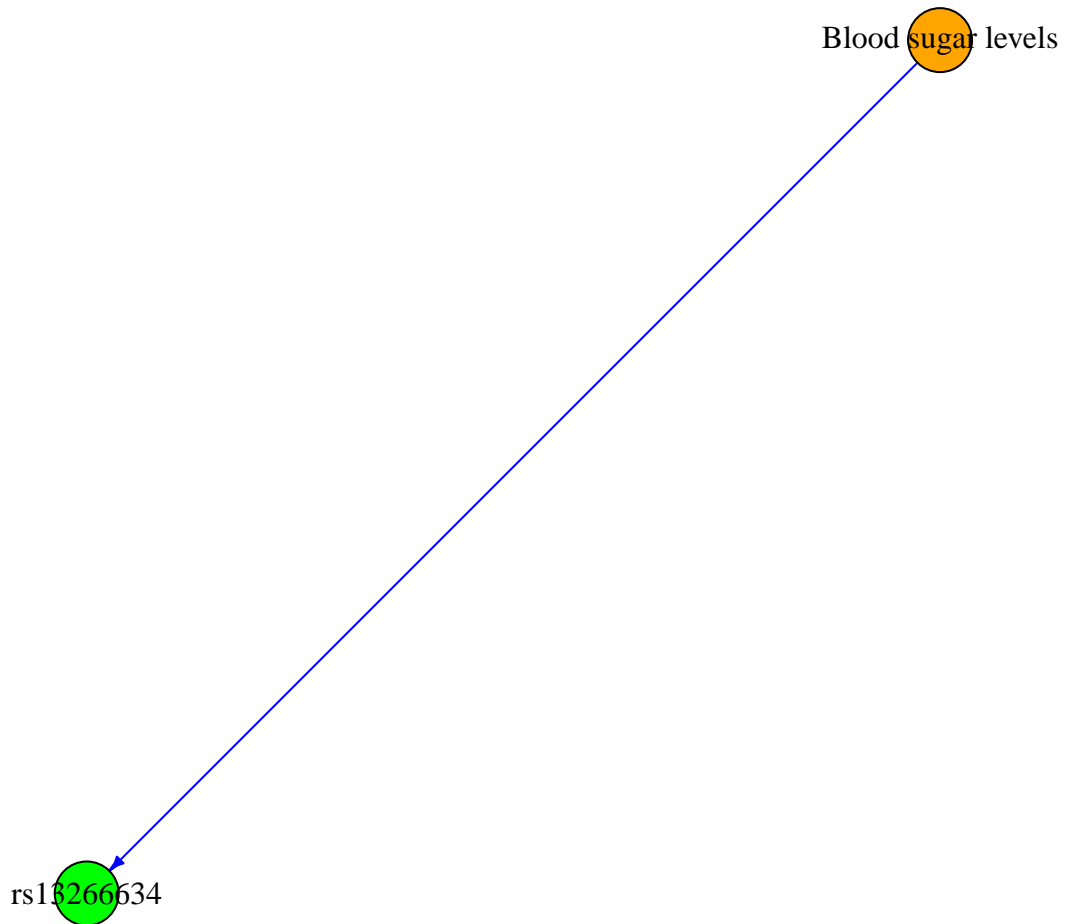

## Variant–Disease Network (Body fat percentage)

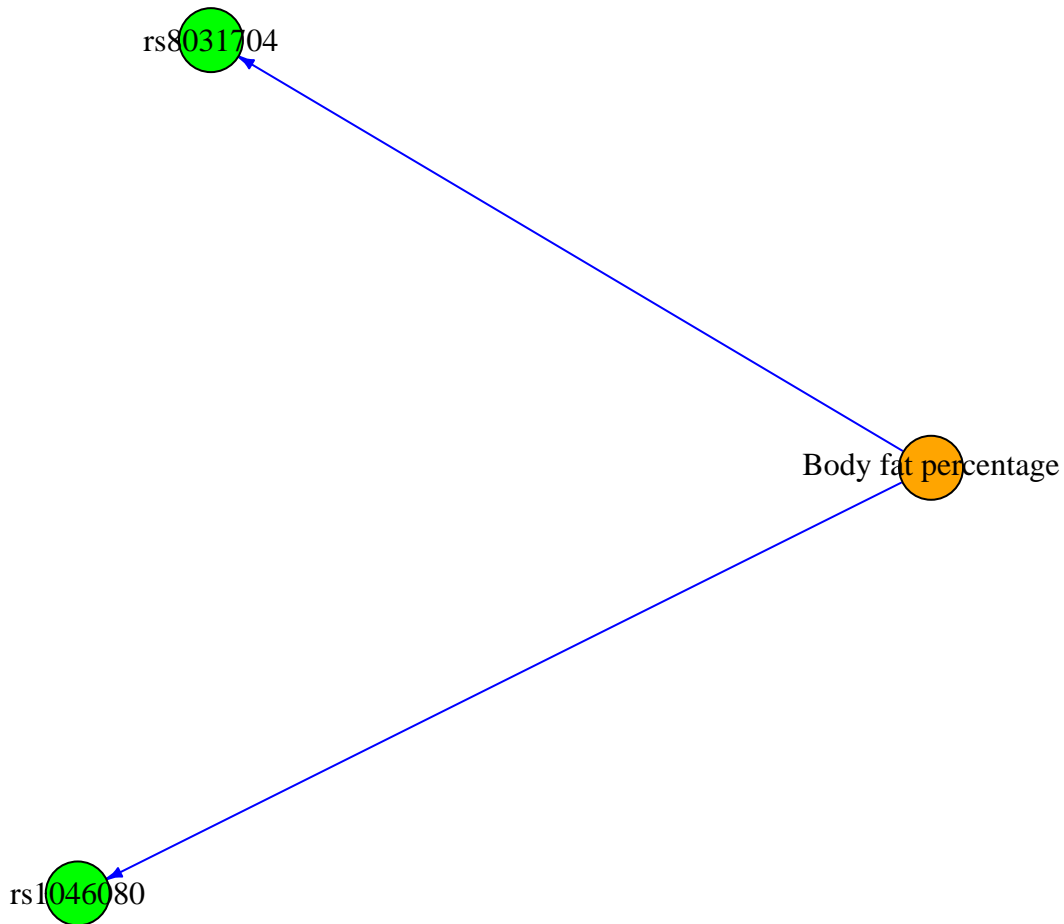

## Variant-Disease Network (Body mass index)

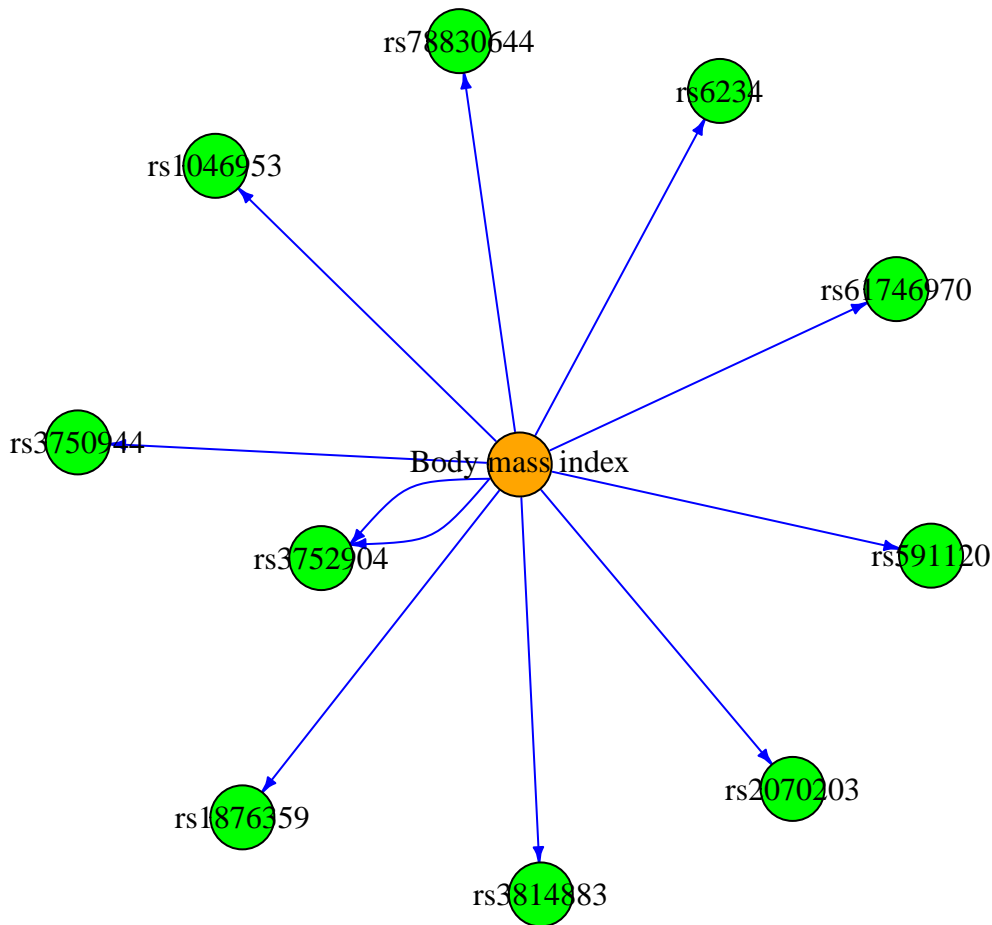



## Variant–Disease Network (Body mass index )

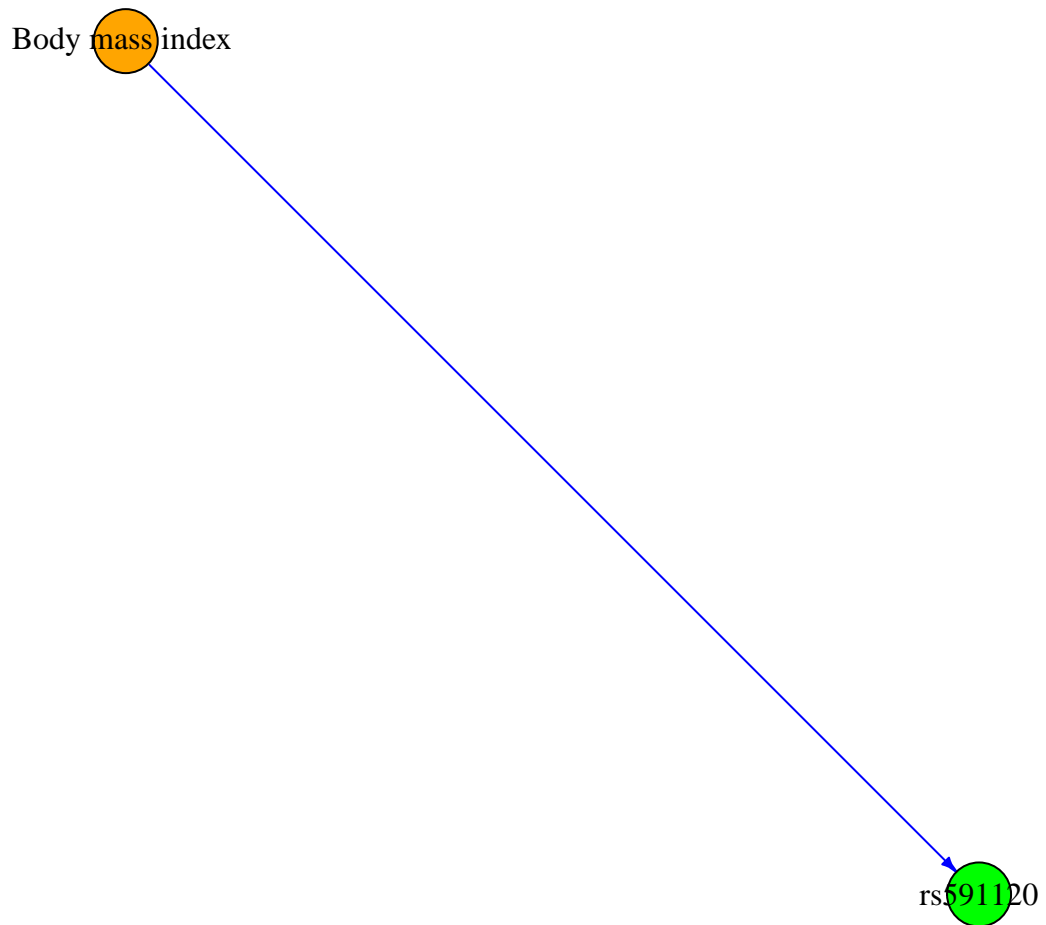

# Variant–Disease Network (Body mass index x sex x age interaction )

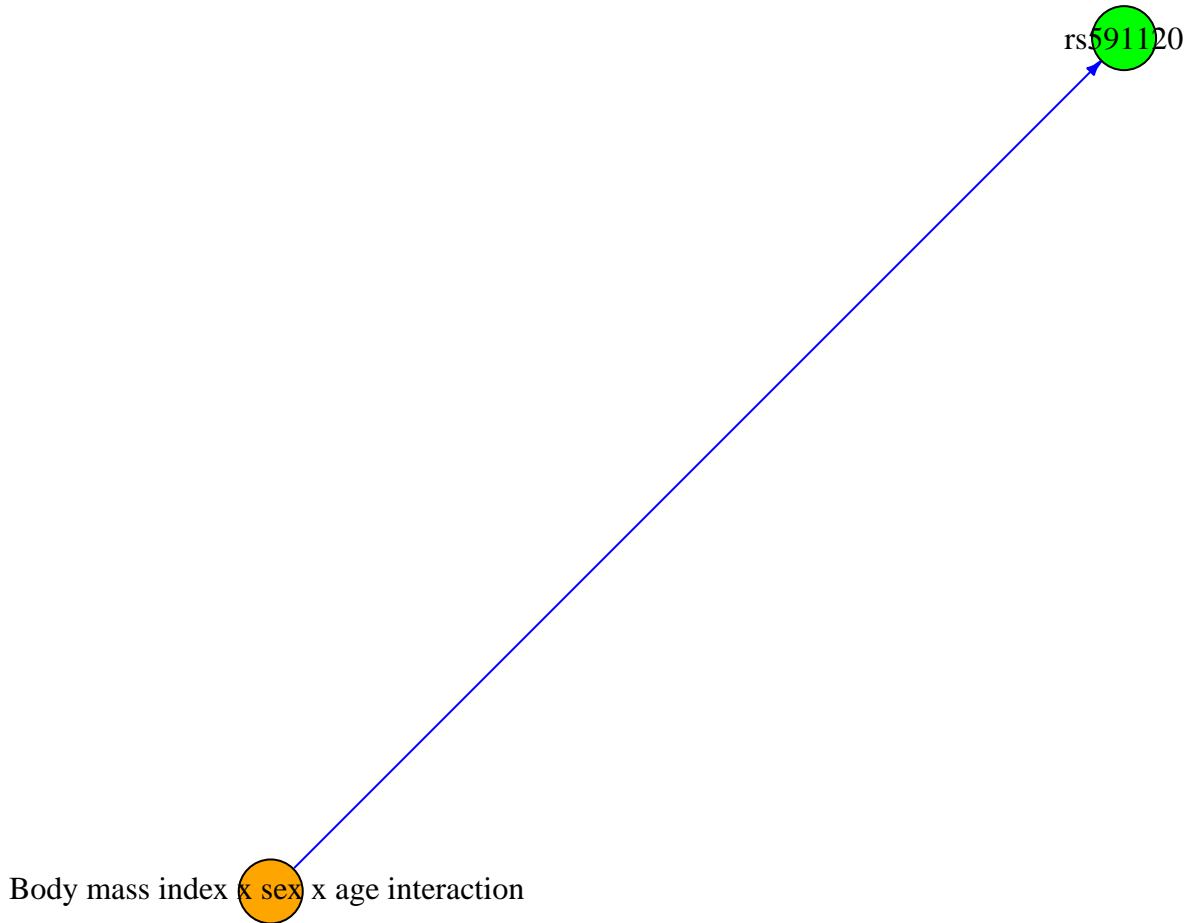

## Variant–Disease Network (Bone mineral content)

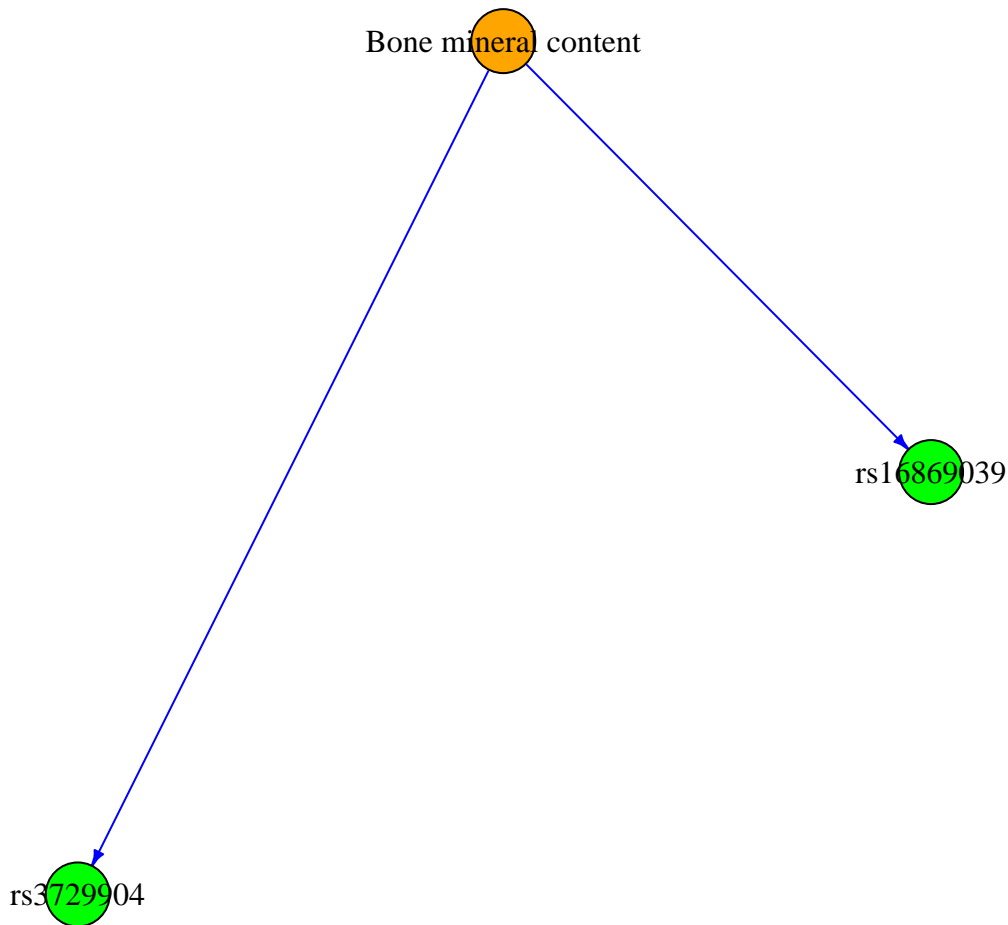

## Variant–Disease Network (Bone mineral density)

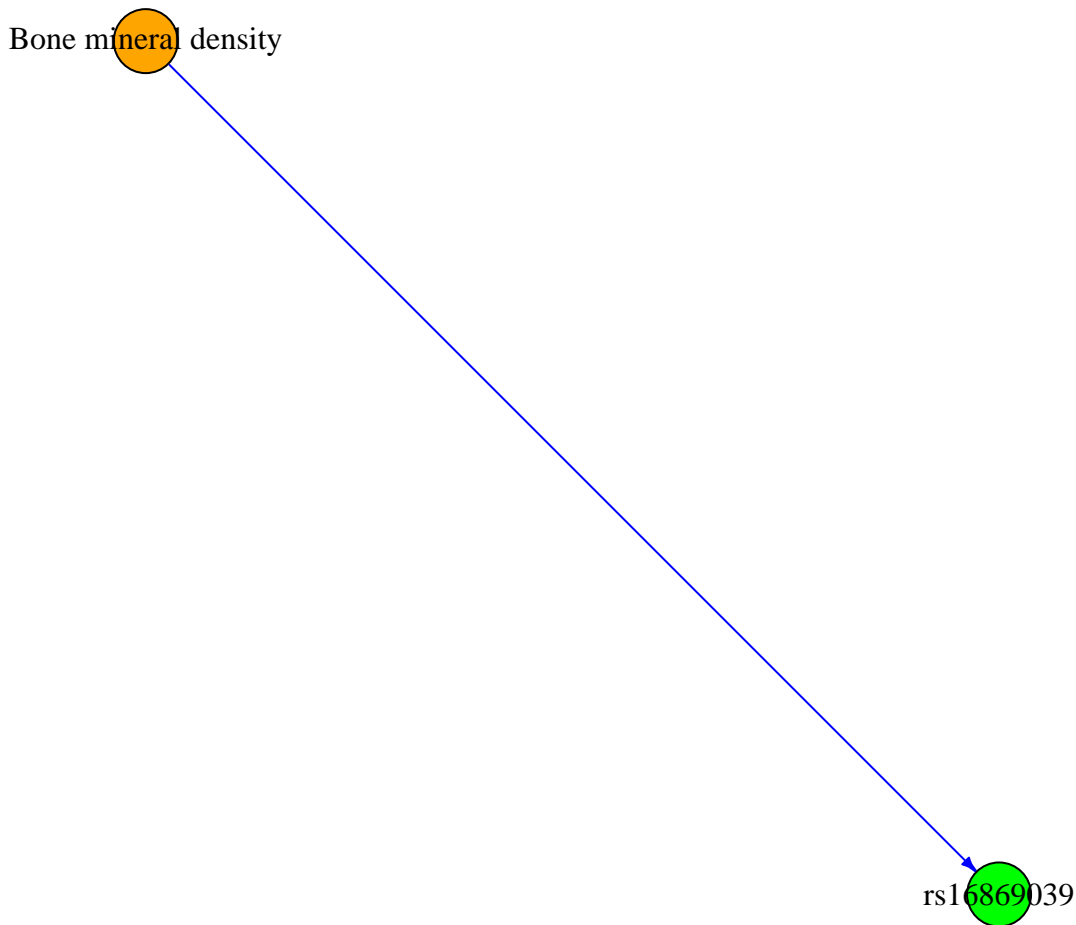

# Variant–Disease Network (Bone mineral density and hip bone size)

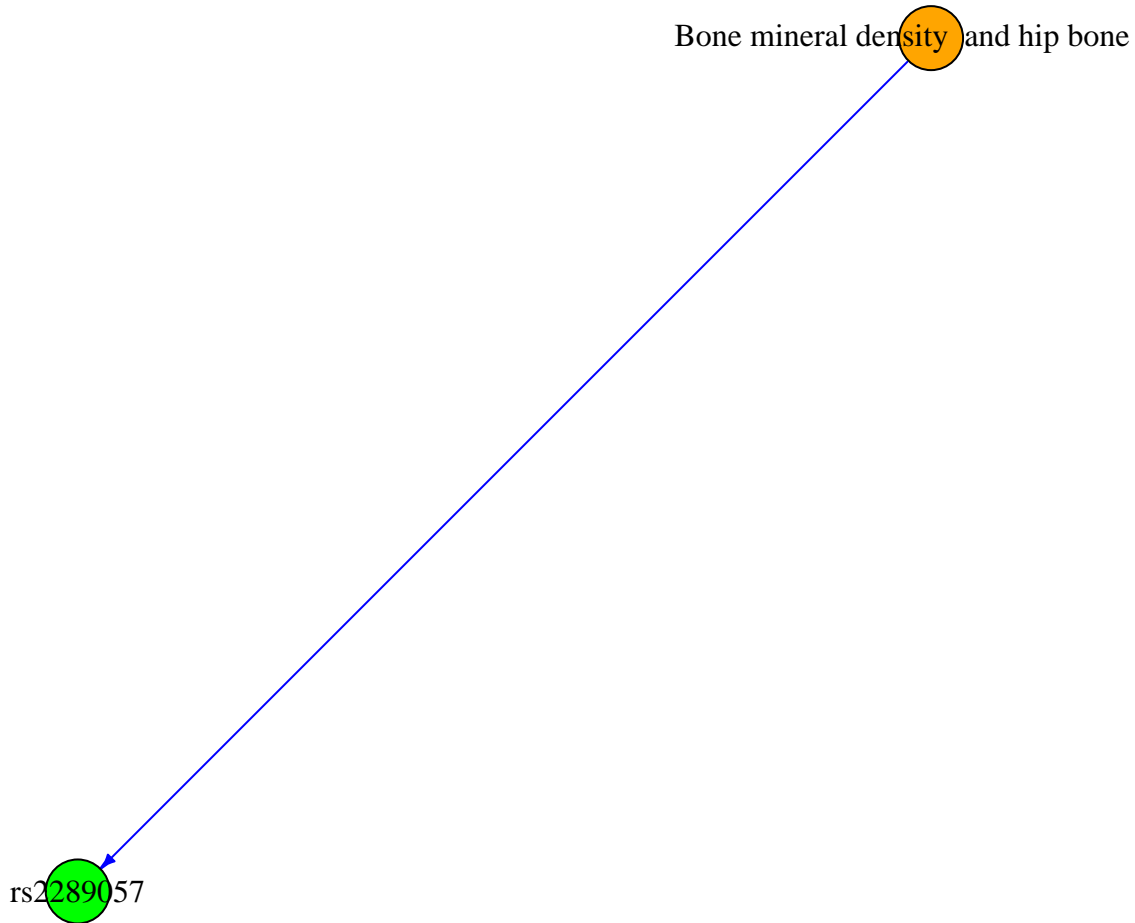

## Variant–Disease Network (Brain region volumes)

Brain region volumes

rs3741280

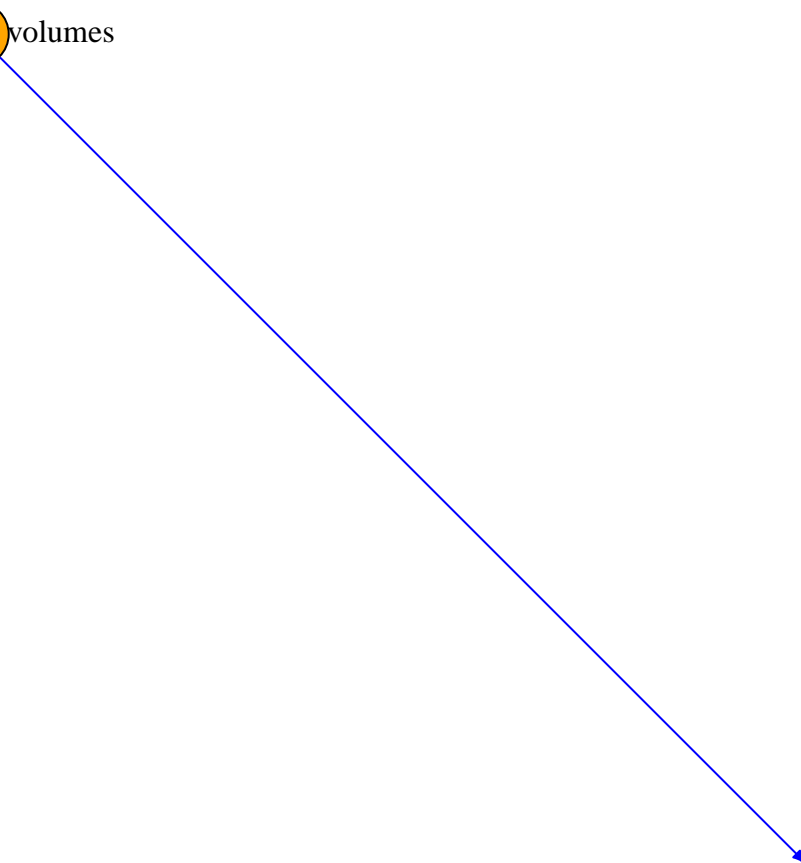

Variant–Disease Network (Calcium levels)

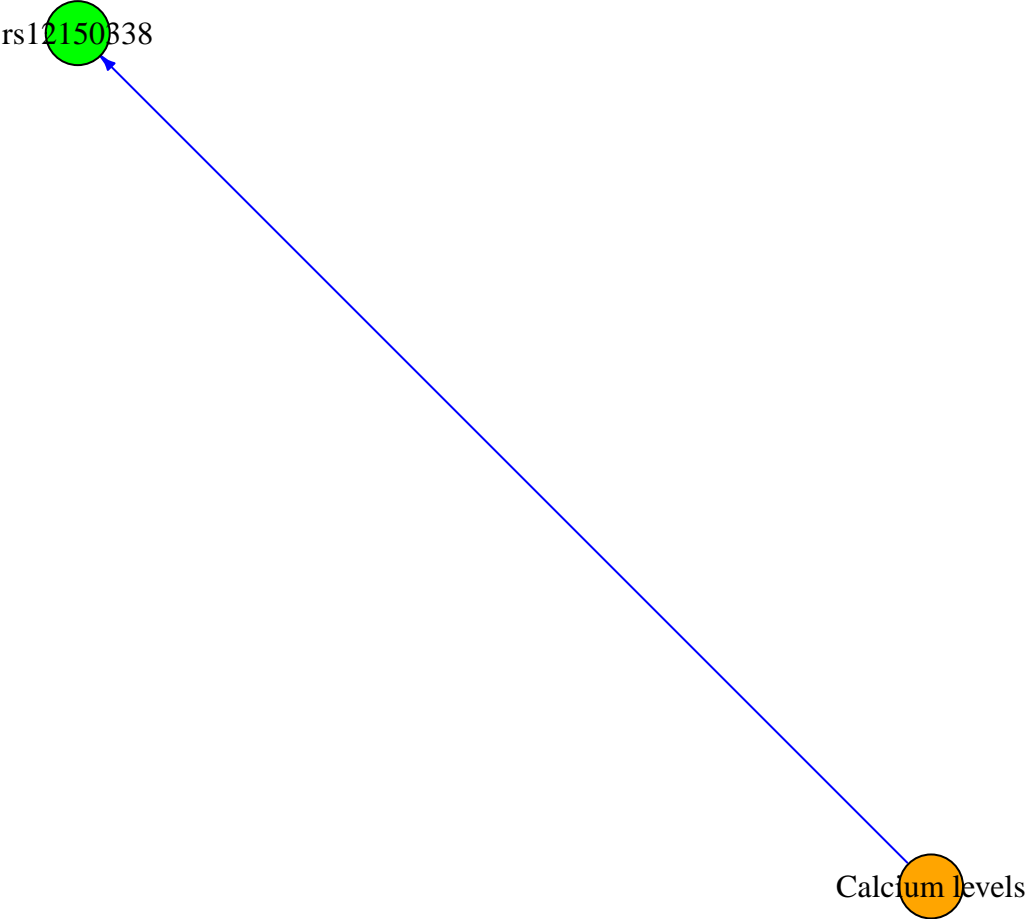

**Variant–Disease Network (Cardiovascular disease)**

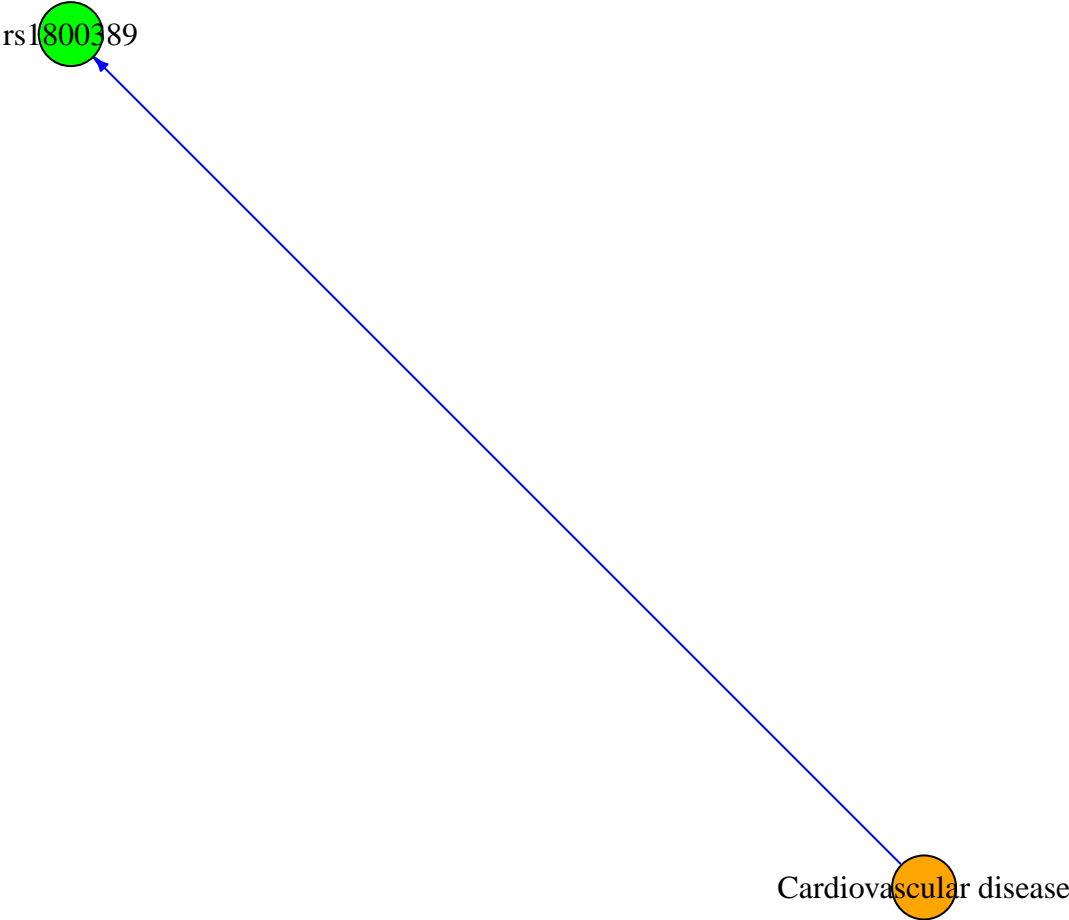



## Variant–Disease Network (Cerebral amyloid deposition )

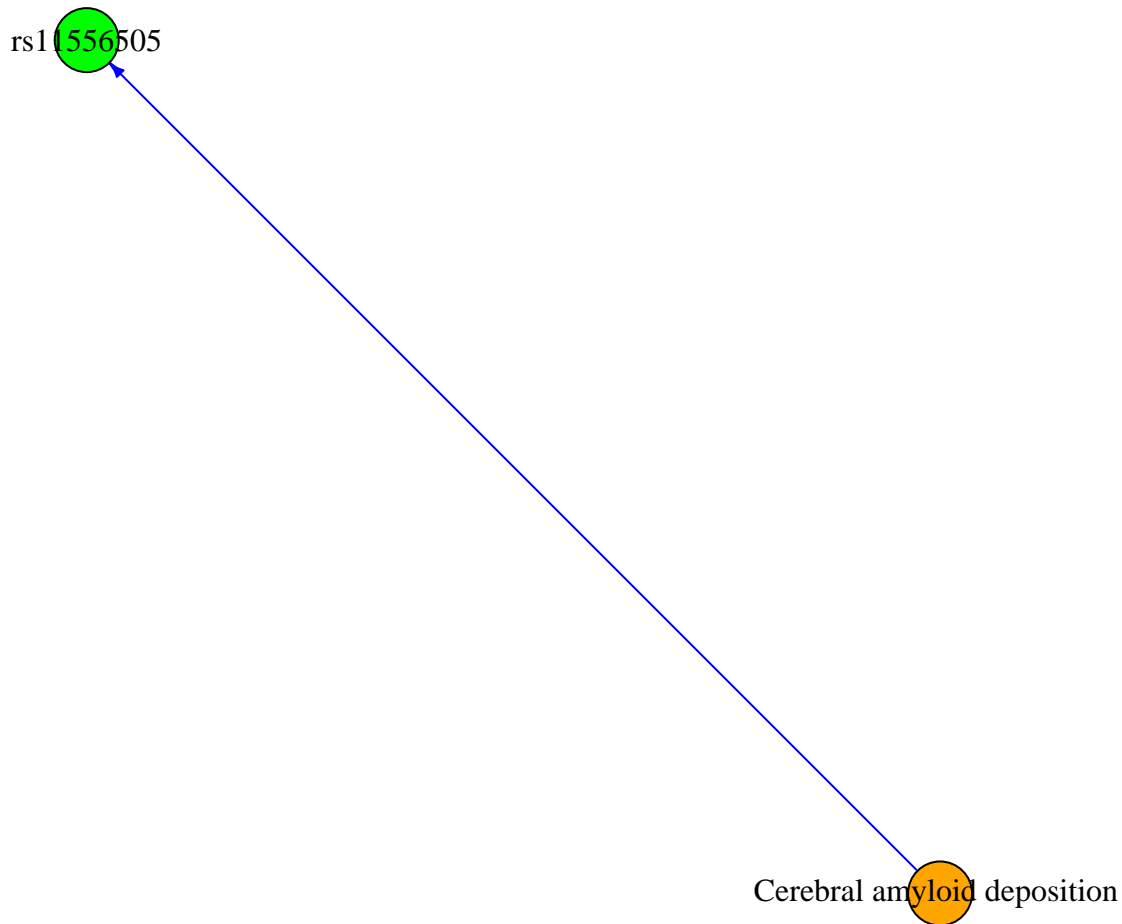

Variant–Disease Network (Cerebrospinal AB1–42 levels in normal cognition)

Cerebrospinal AB1–42 levels in normal cognition

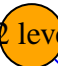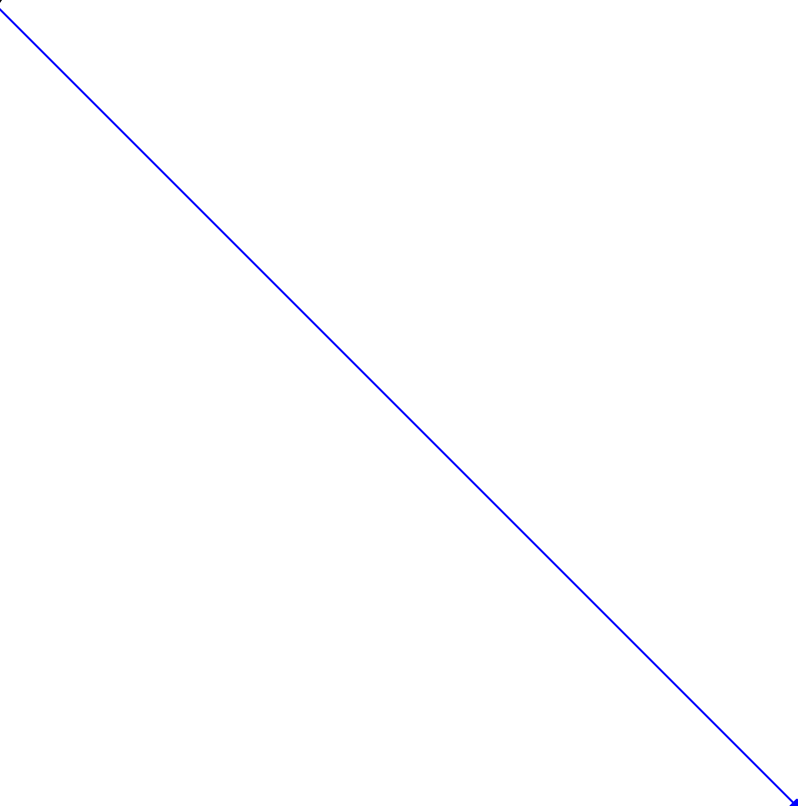

rs118098940

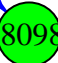

# Variant–Disease Network (Cerebrospinal fluid t-tau:AB1–42 ratio)

rs2280301

Cerebrospinal fluid t-tau:AB1–42 r

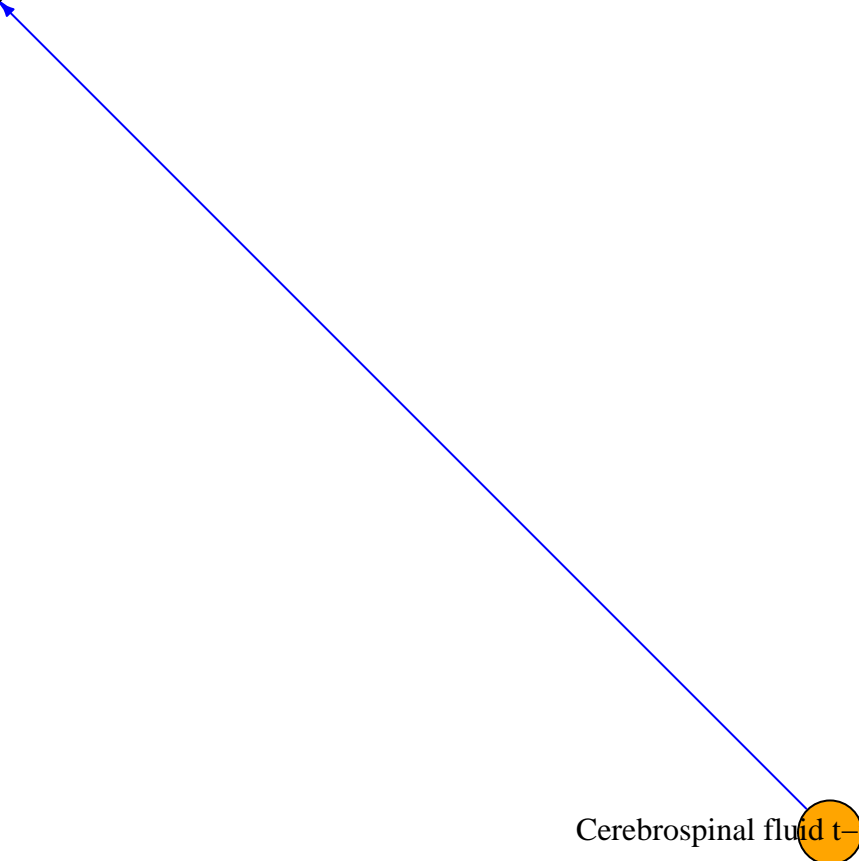

## Variant-Disease Network (Cholesterol, total)

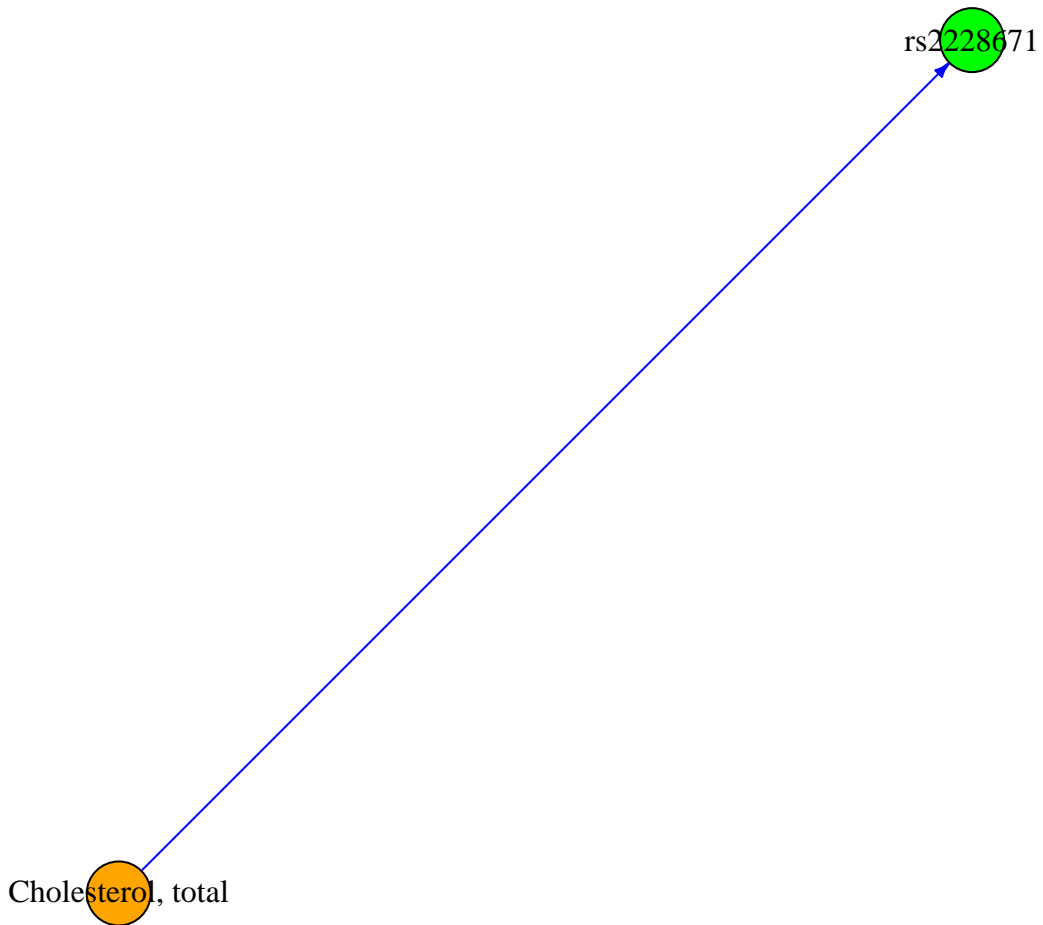

# Variant–Disease Network (Chronic inflammatory diseases )

rs2236379

Chronic inflammatory diseases

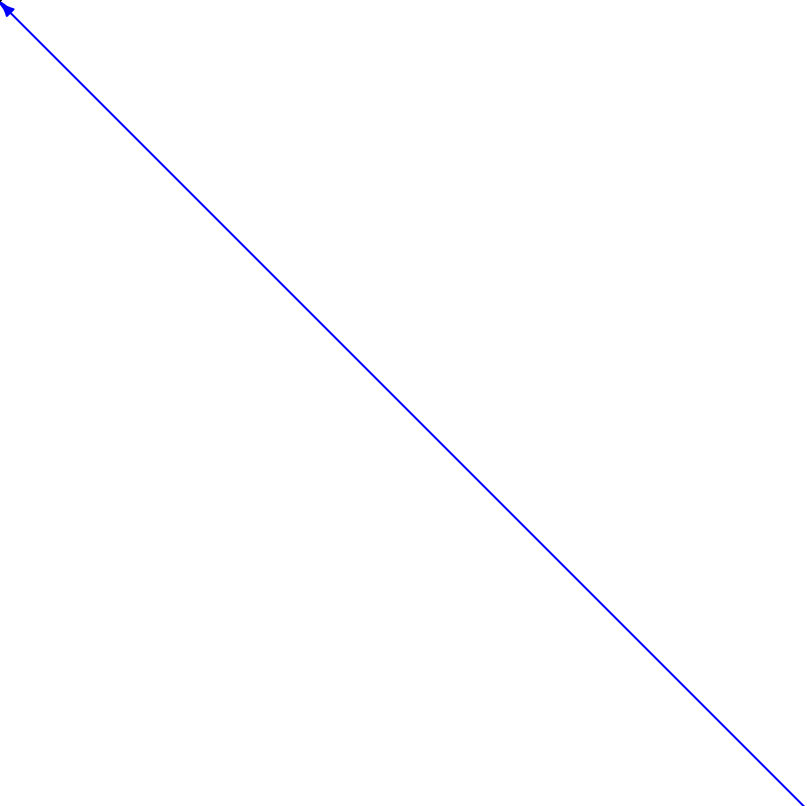

## Variant–Disease Network (Chronic obstructive pulmonary disease)

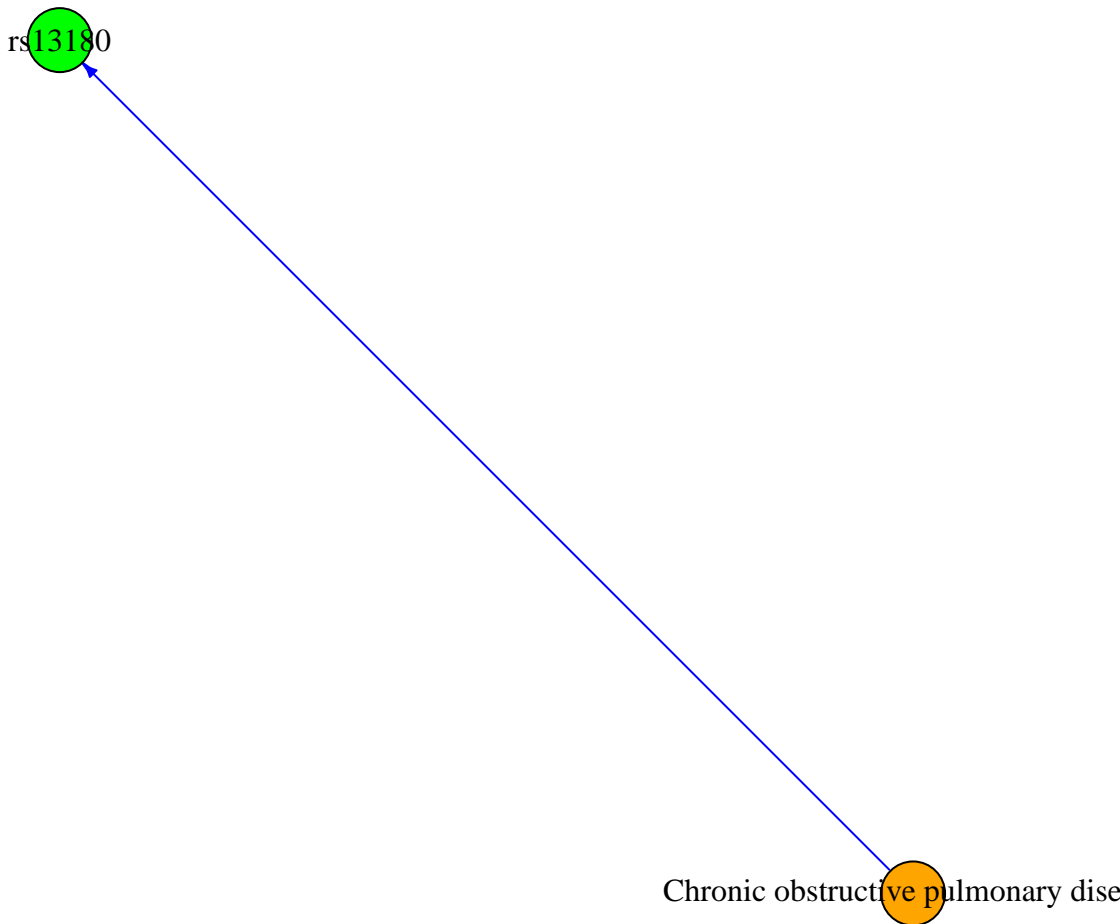

# -Disease Network (Cognitive ability, years of educational attainment or schizophrenia)

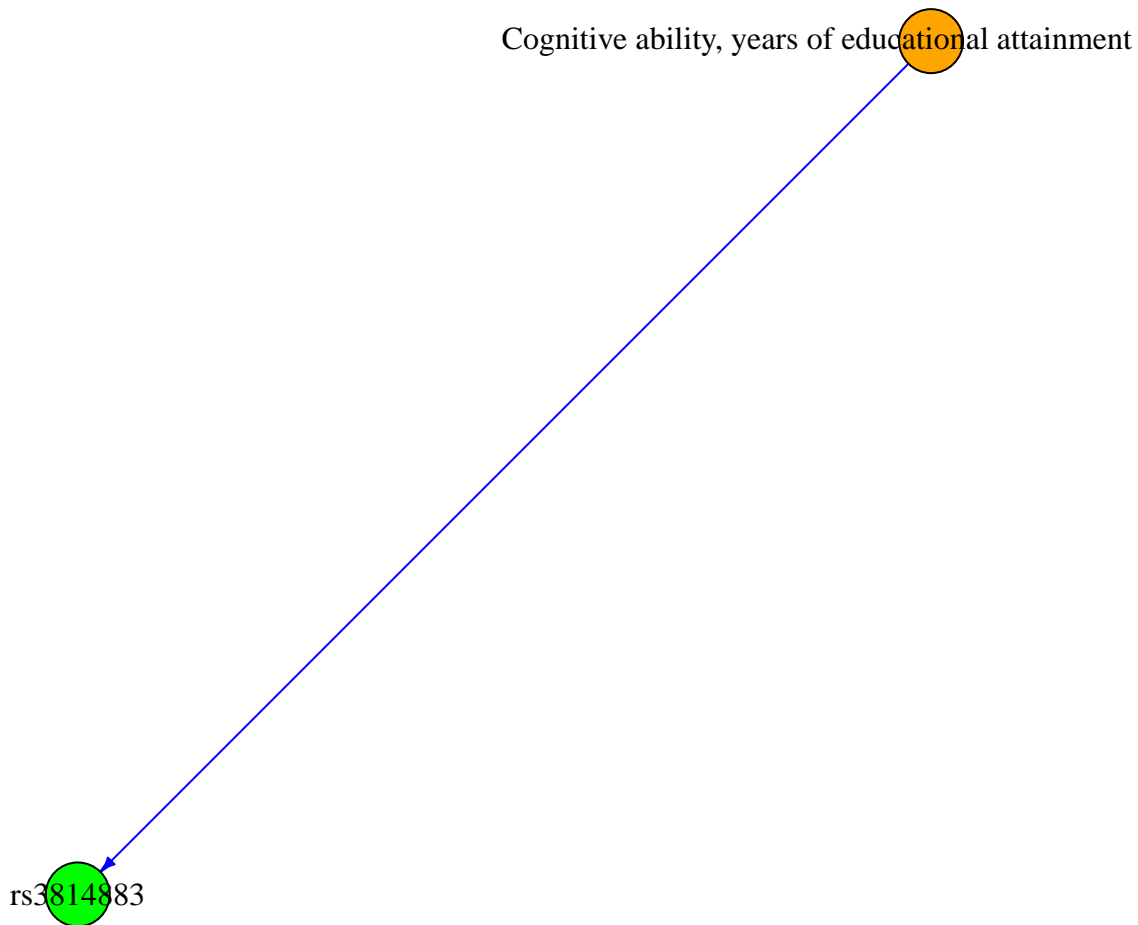

## Variant–Disease Network (Cognitive function)

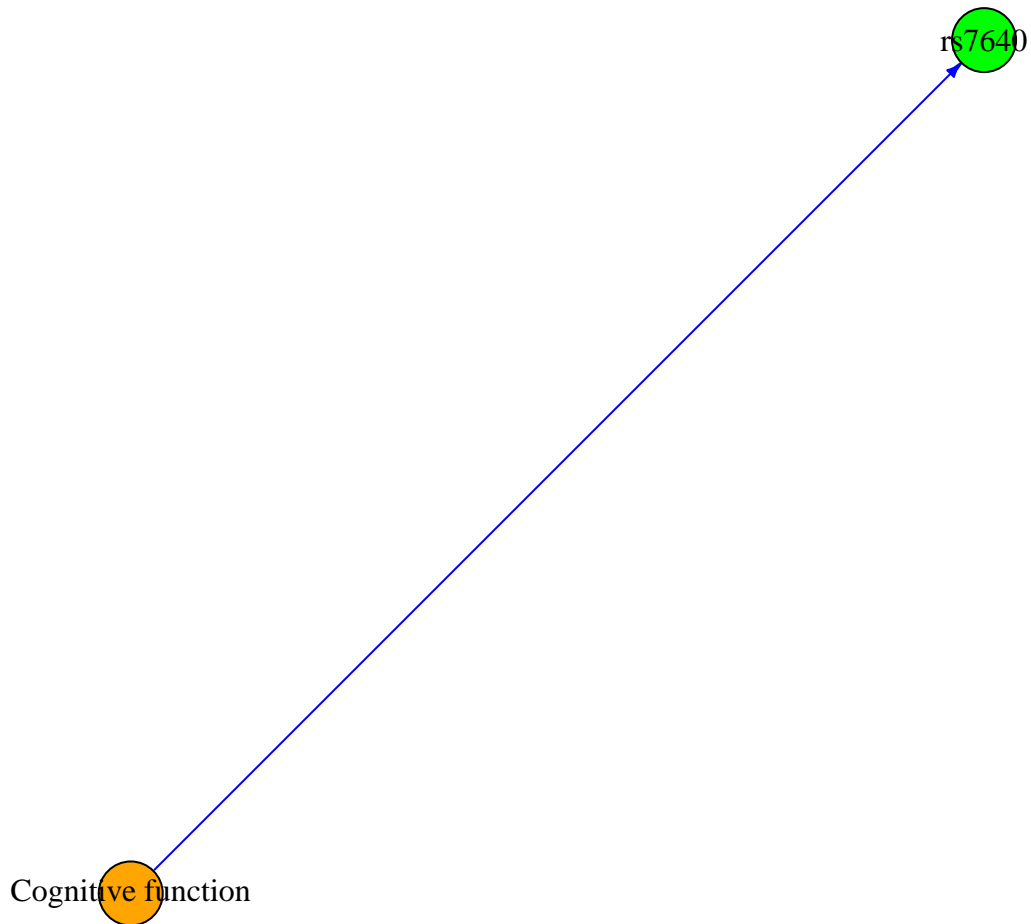



## Variant-Disease Network (Conduct disorder)

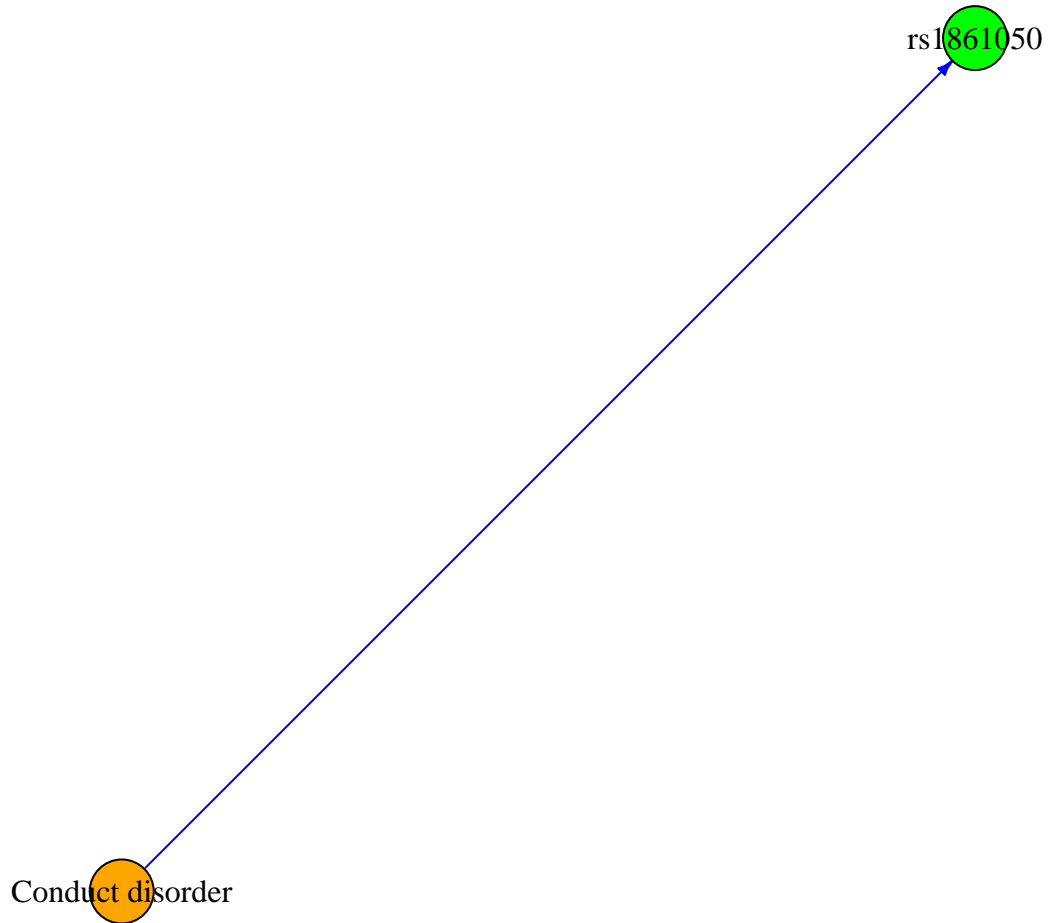

## Variant-Disease Network (Coronary artery disease)

rs1801251

Coronary artery disease



## Variant–Disease Network (Cortical thickness)

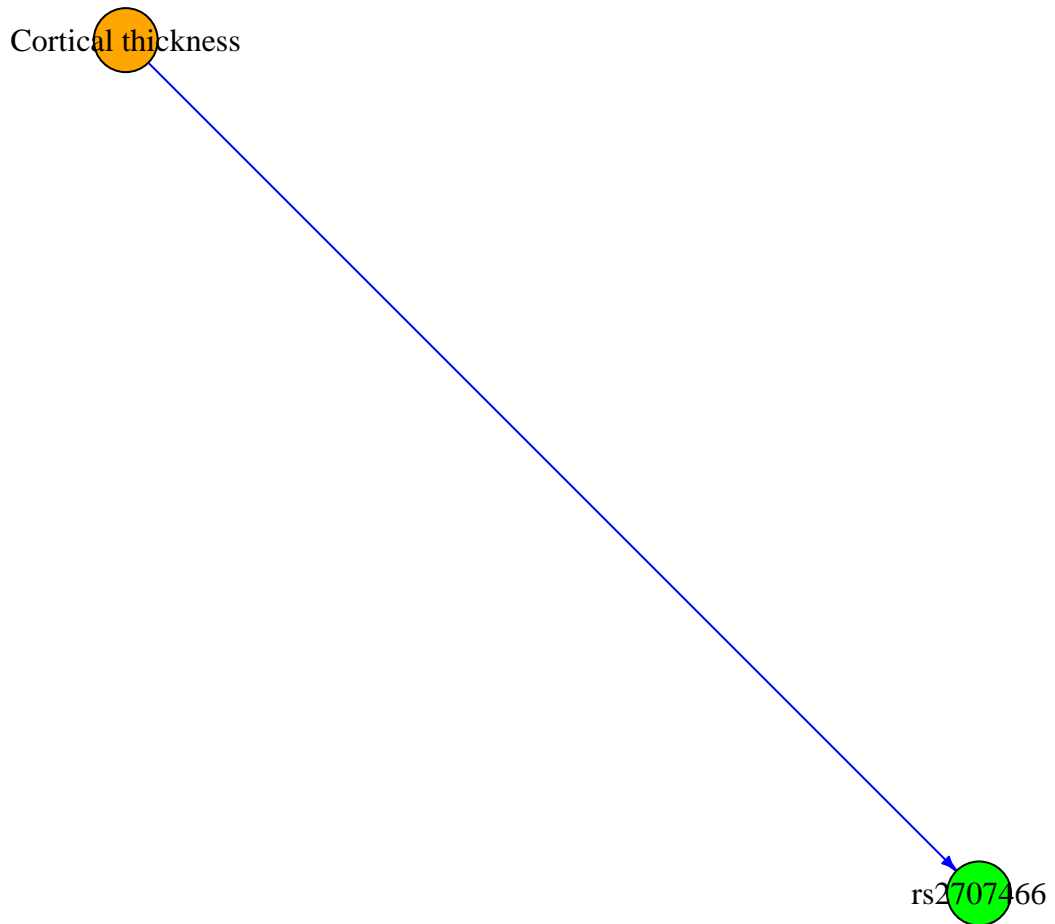

## Variant–Disease Network (Creatinine levels)

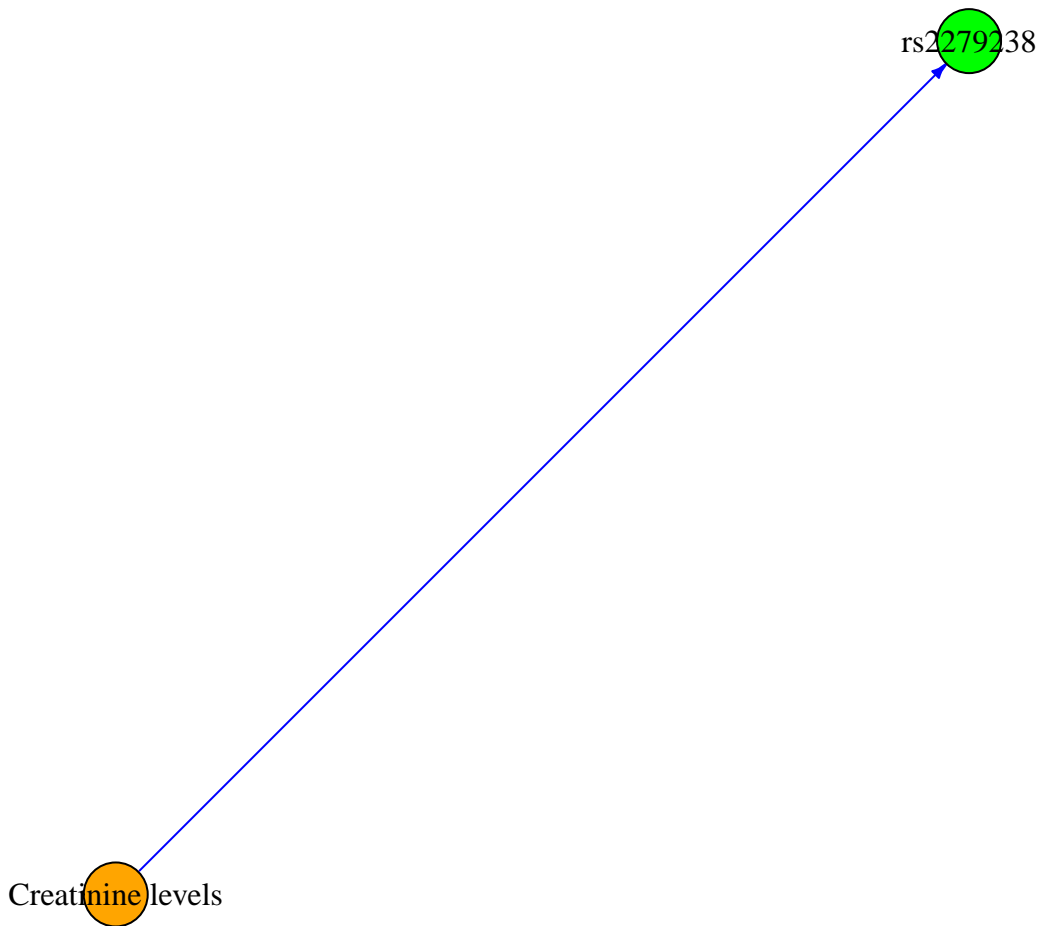

## Variant–Disease Network (Diastolic blood pressure)

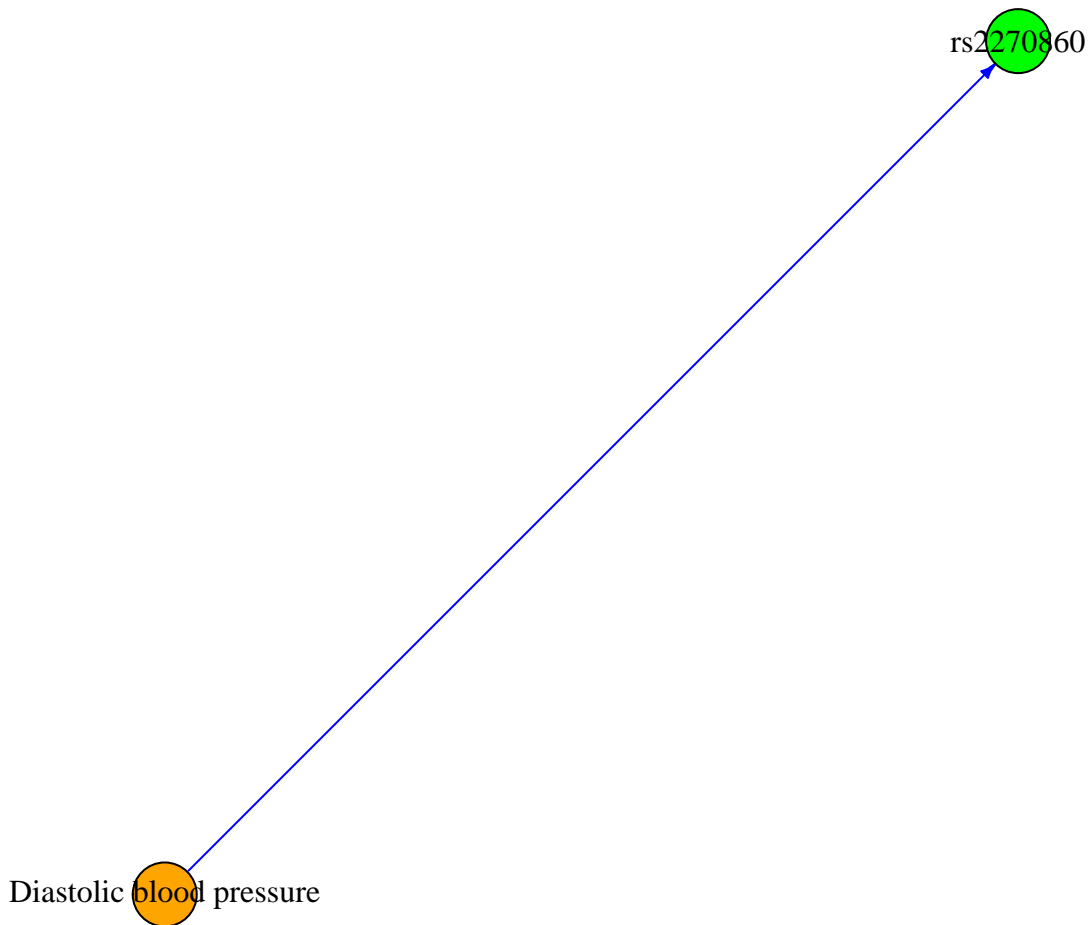

**Variant–Disease Network (Diastolic blood pressure )**

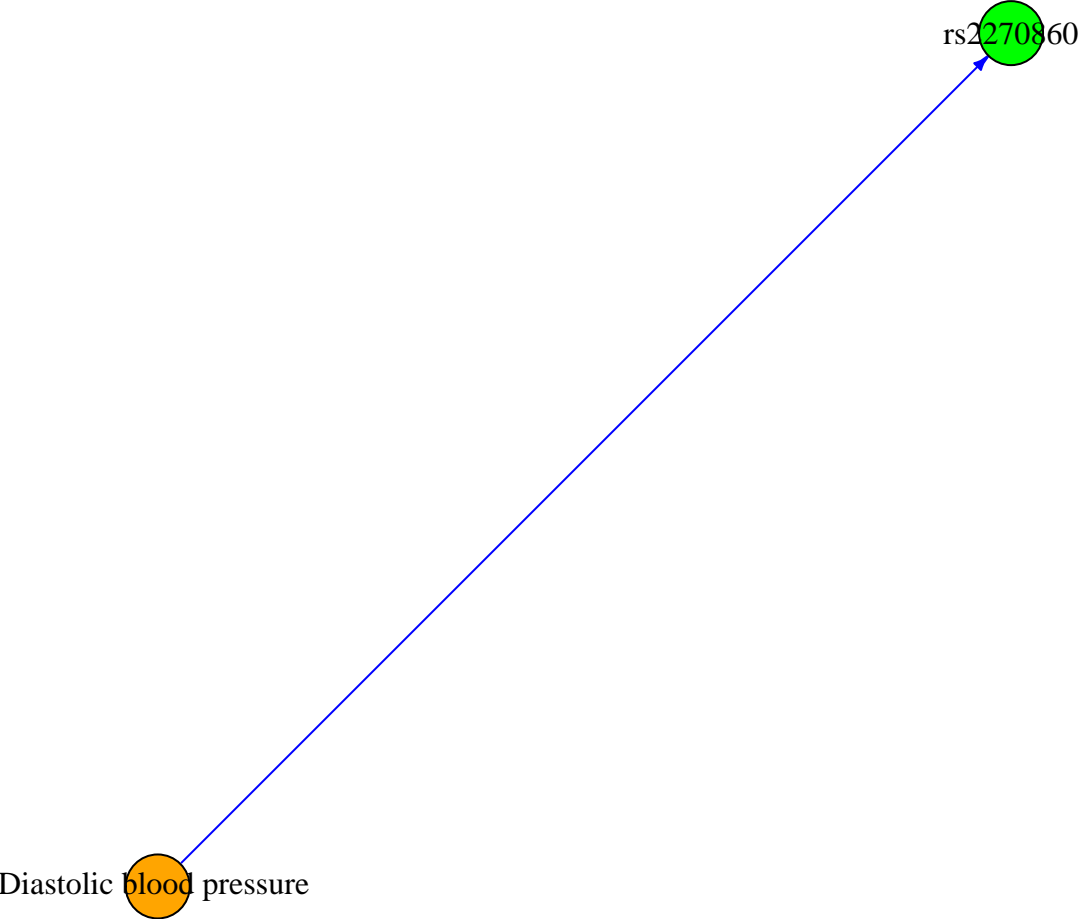

## Variant–Disease Network (Educational attainment )

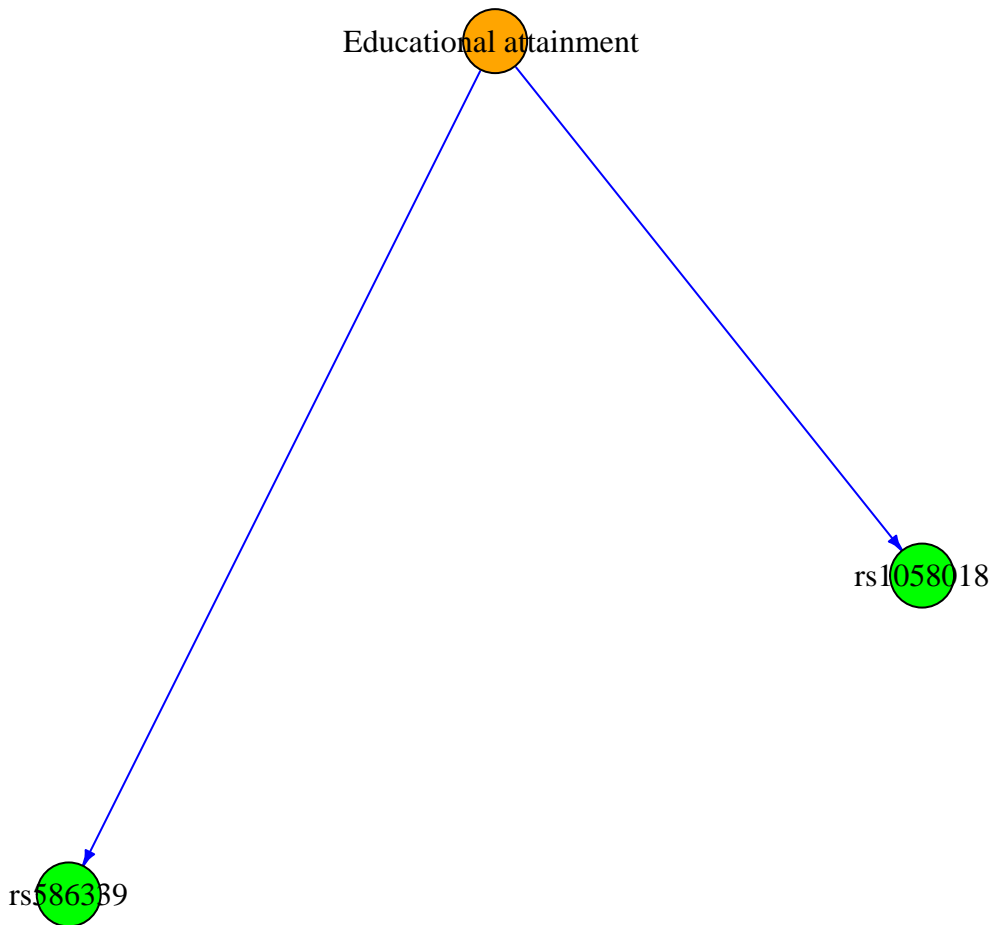

# nt-Disease Network (Elevated serum prostate-specific antigen levels in hea

rs746731143

Elevated serum prostate-specific antigen levels





## Variant-Disease Network (Erosive tooth wear )

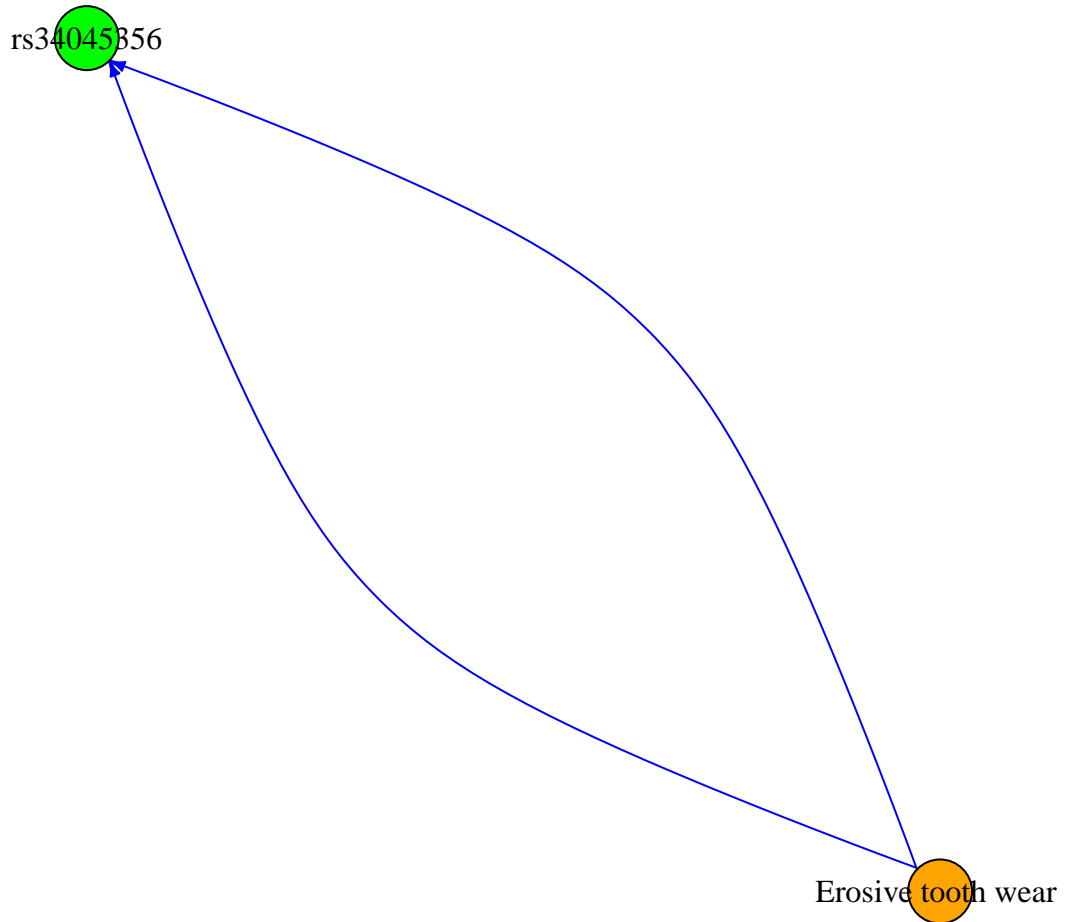

## Variant–Disease Network (Estimated glomerular filtration rate)

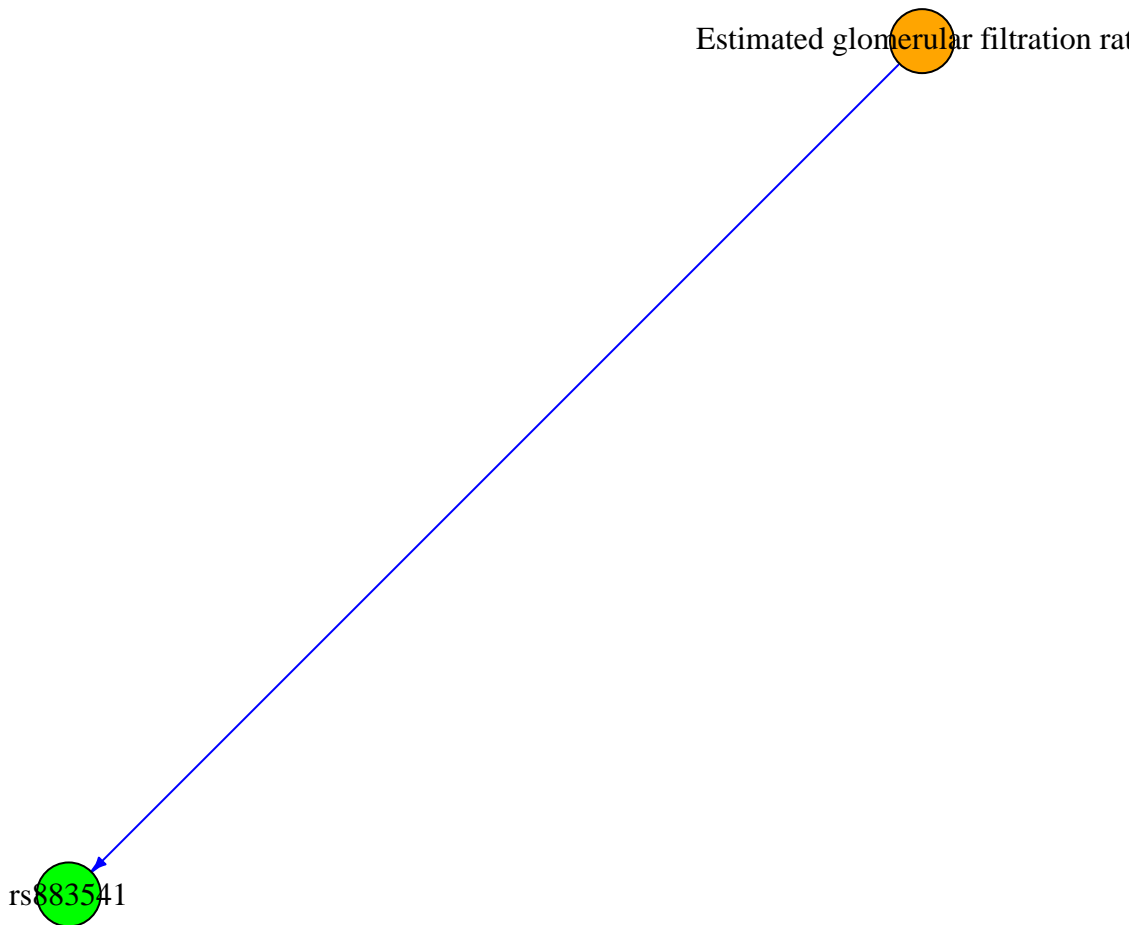

Variant–Disease Network (Fasting blood glucose adjusted for BMI)

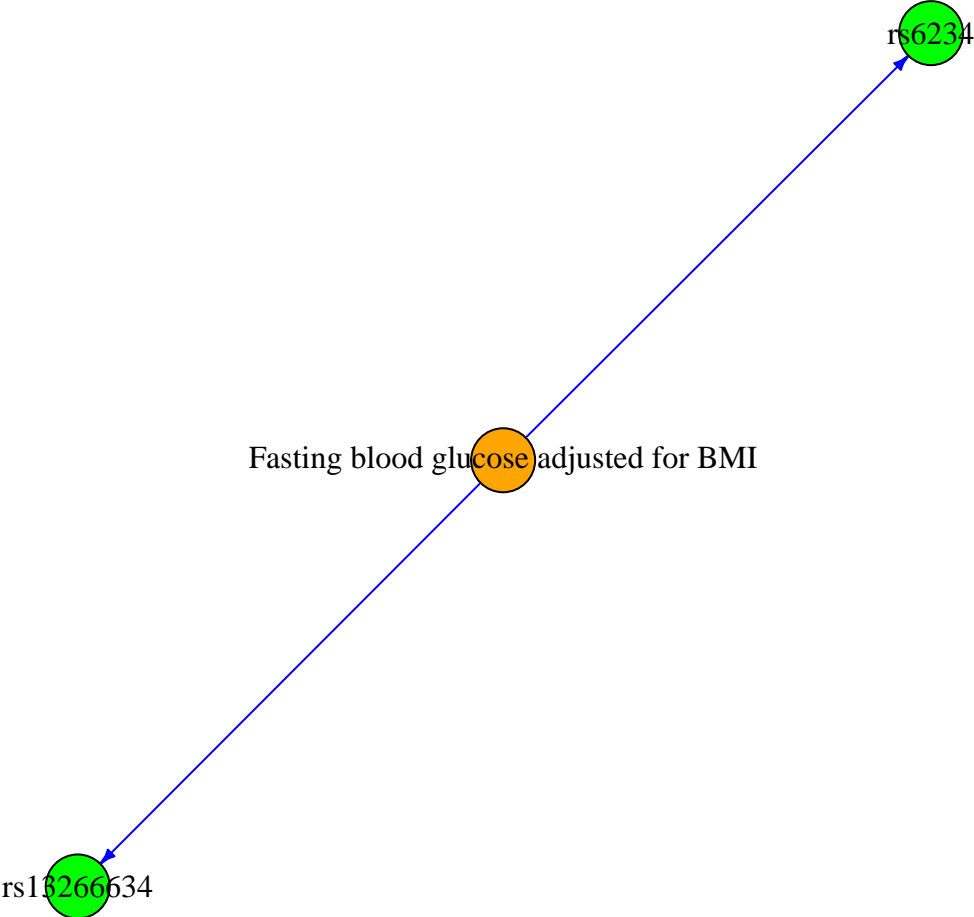

## Variant–Disease Network (Fasting plasma glucose)

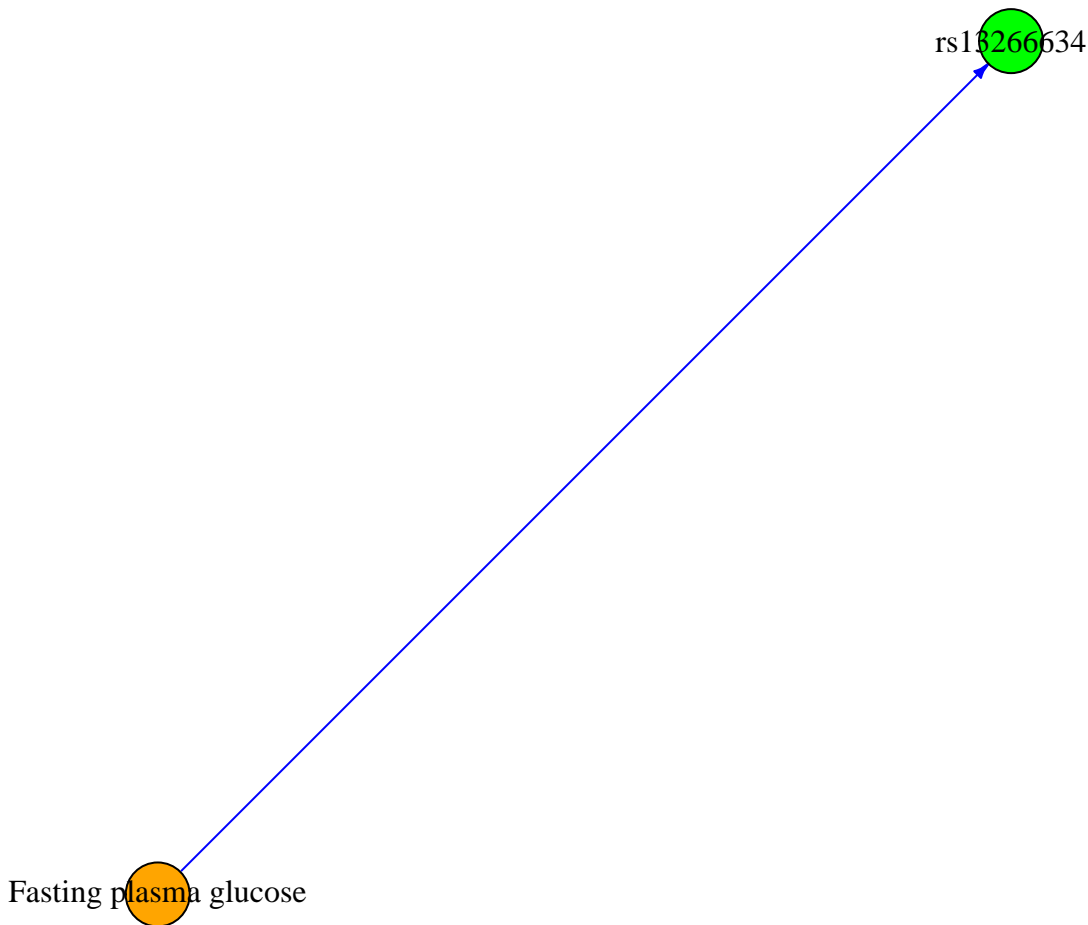

# Variant-Disease Network (FEV1)

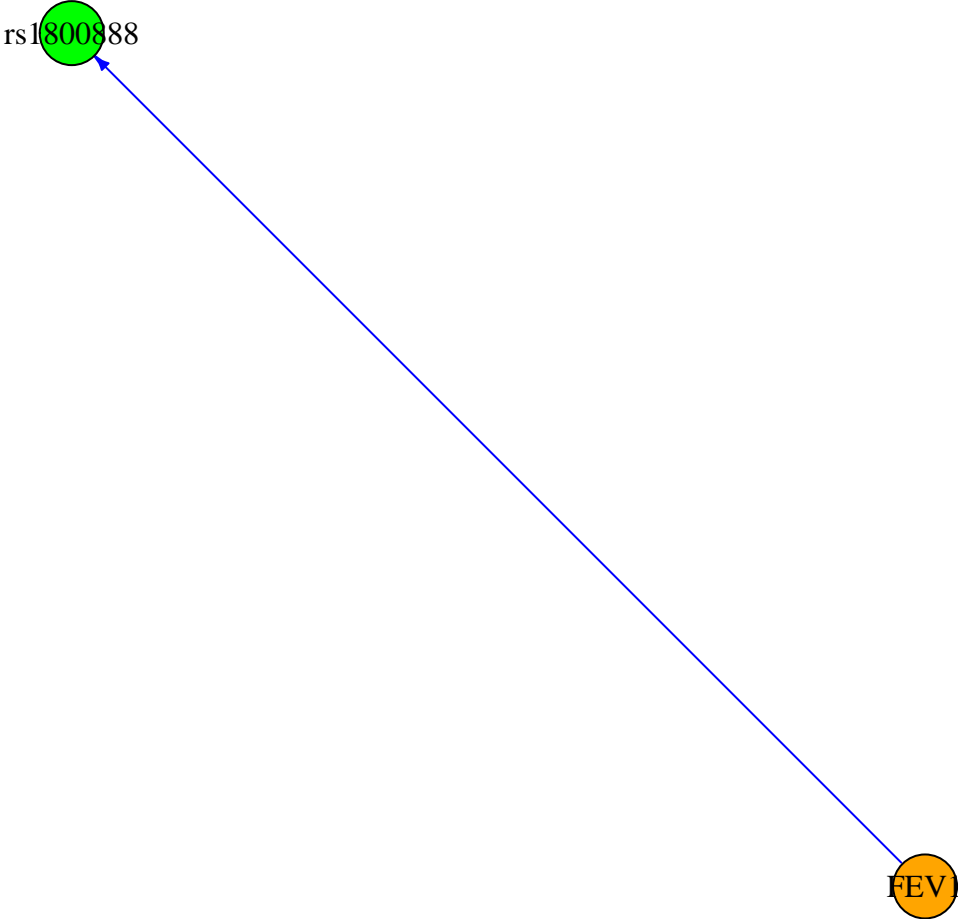

Variant–Disease Network (Fish– and plant–related diet)

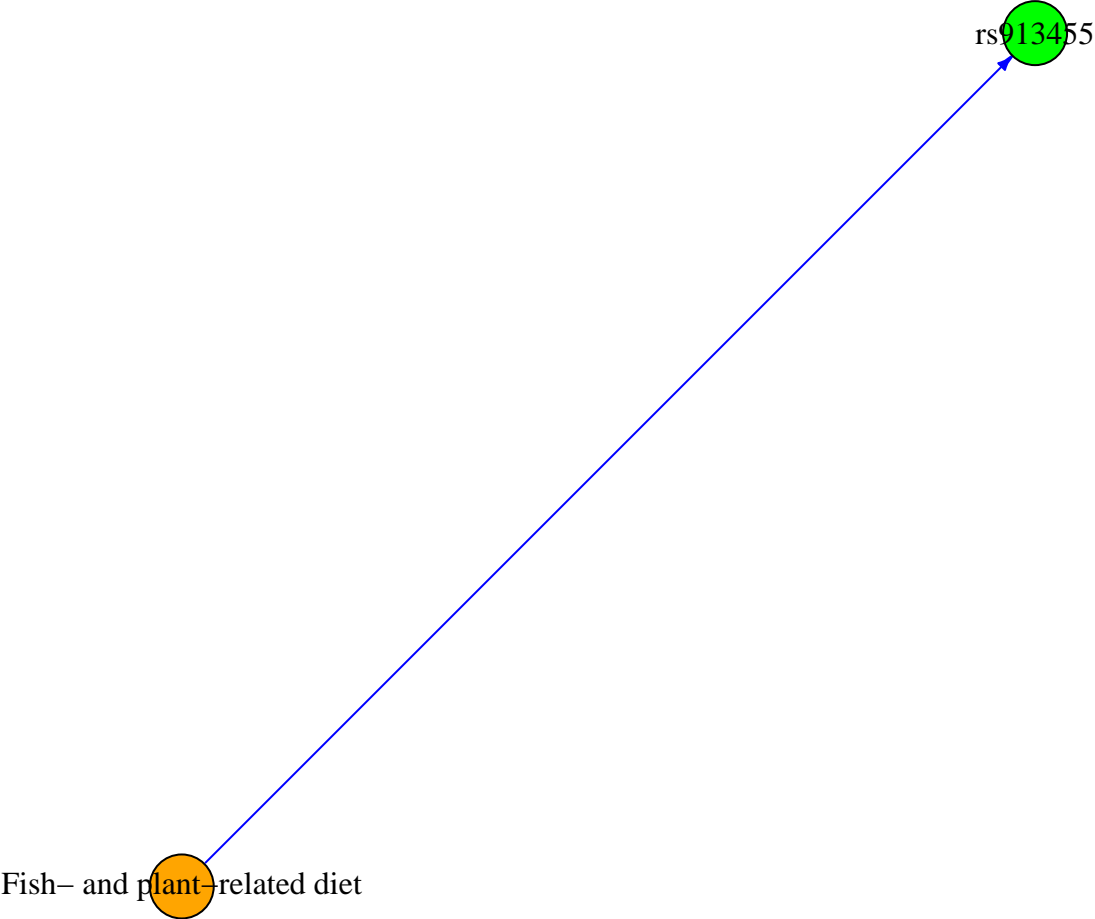

## Variant–Disease Network (General cognitive ability)

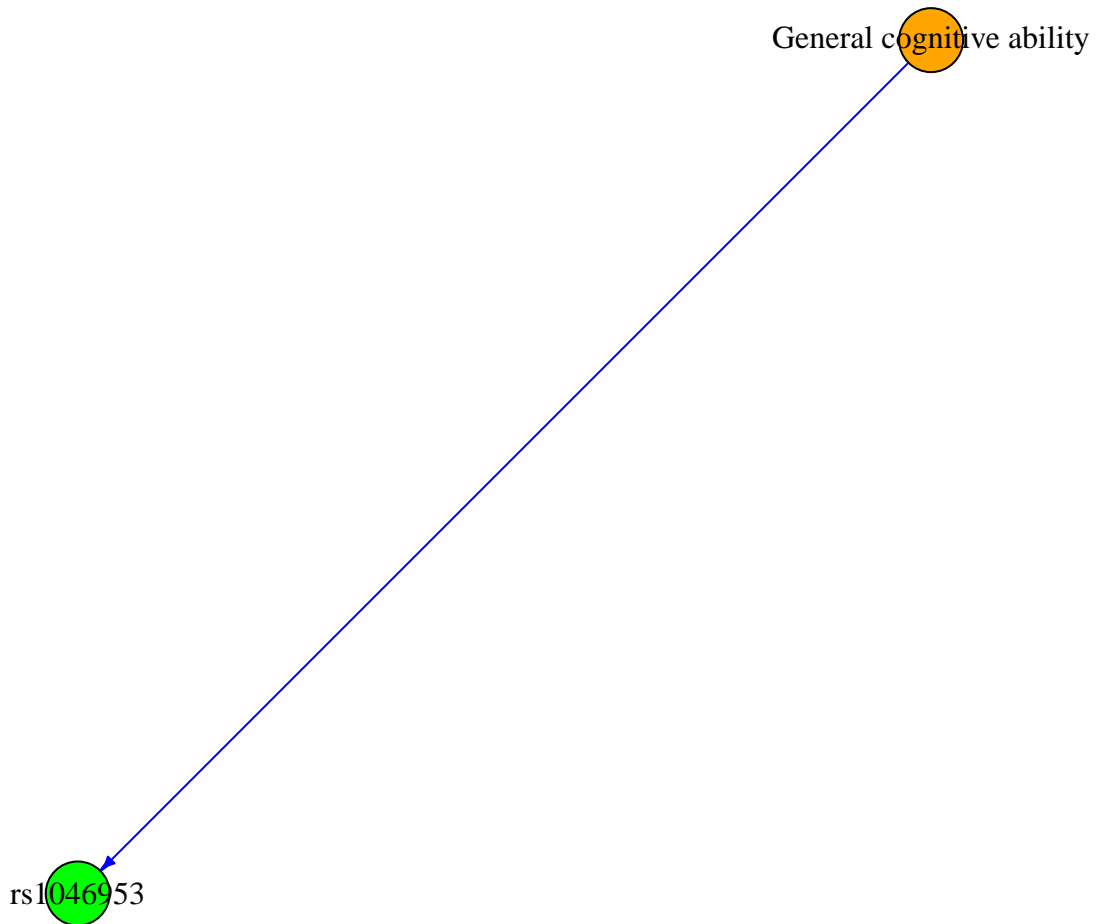

# Variant-Disease Network (GLP-1 levels in response to oral glucose tolerance

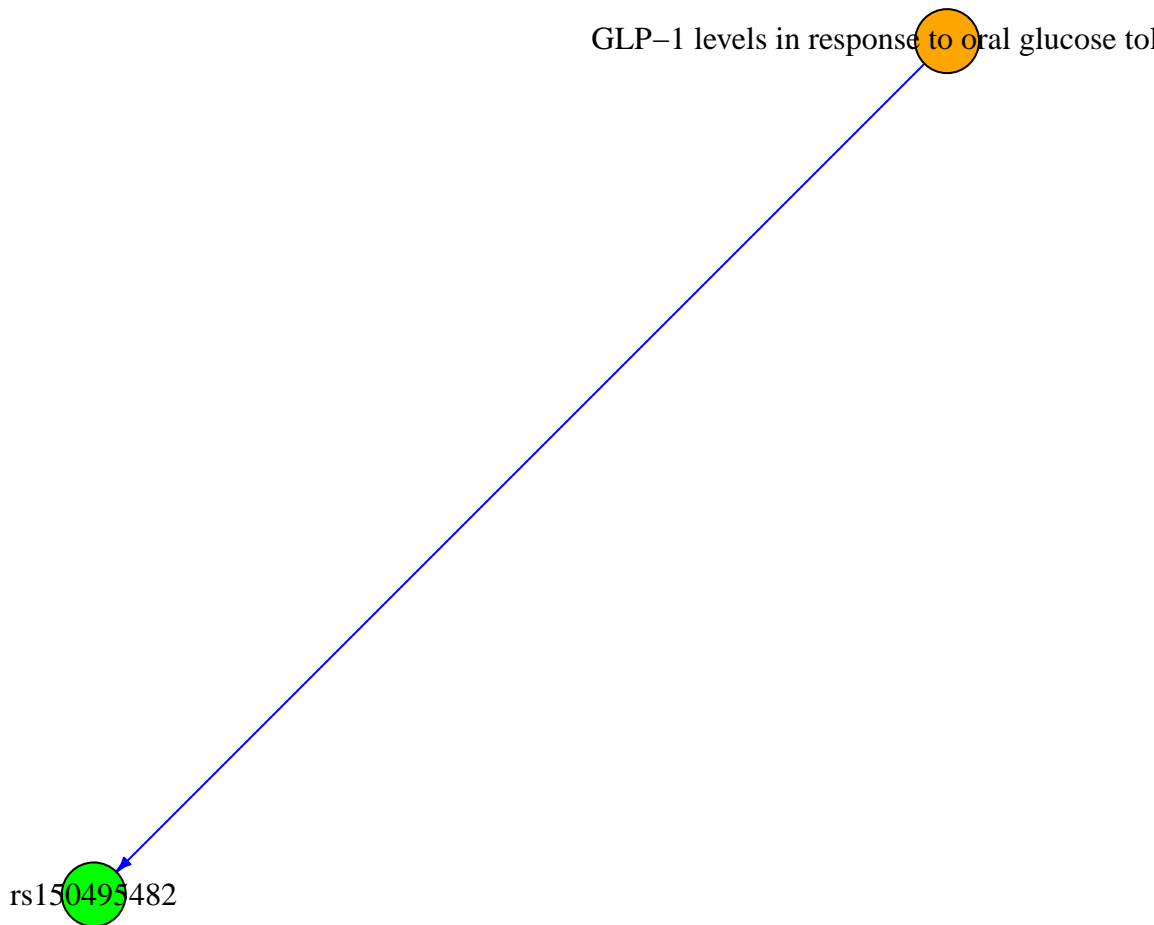



# Variant–Disease Network (Glycated hemoglobin levels)

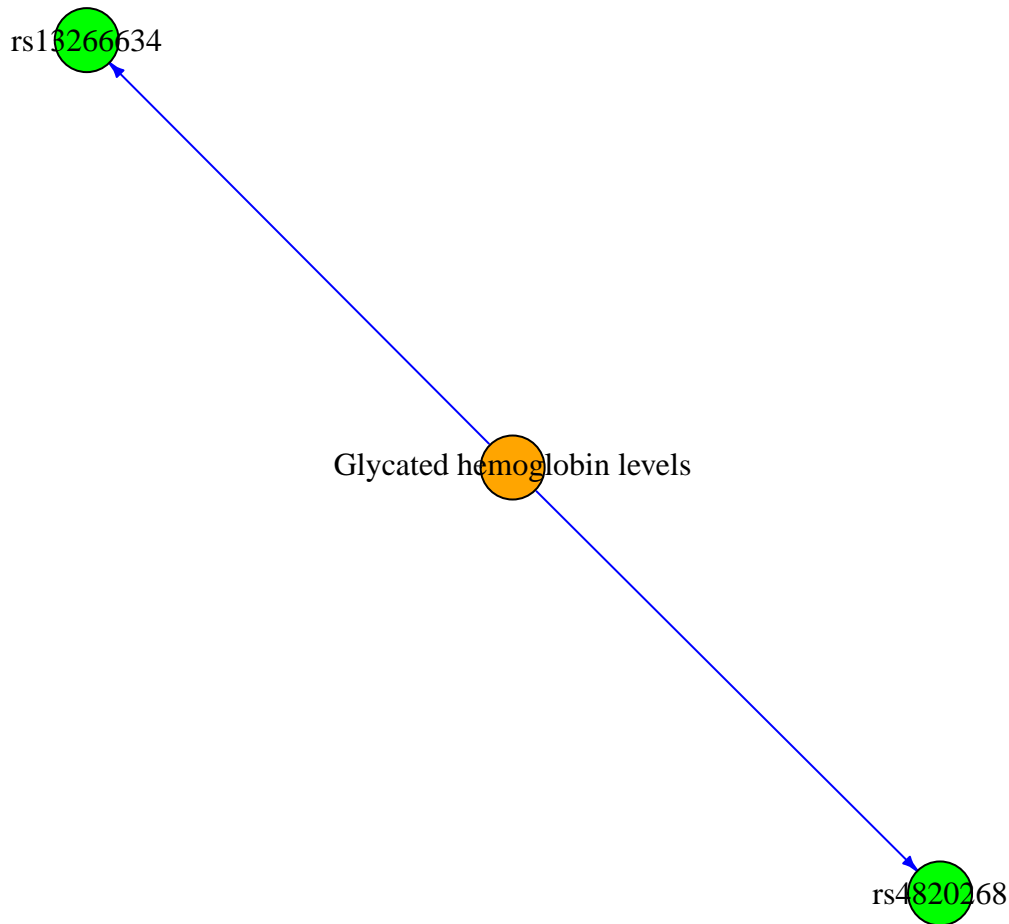

## Variant–Disease Network (Hair color)

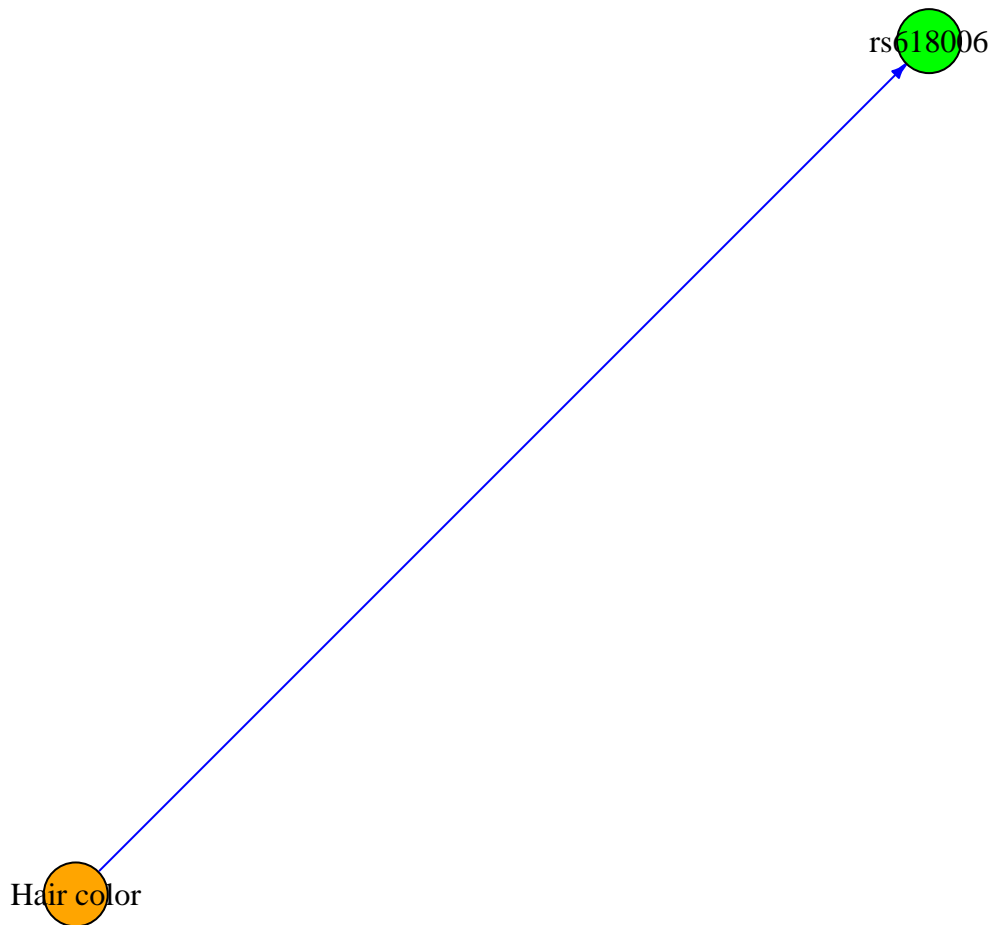

## Variant–Disease Network (HDL cholesterol levels)

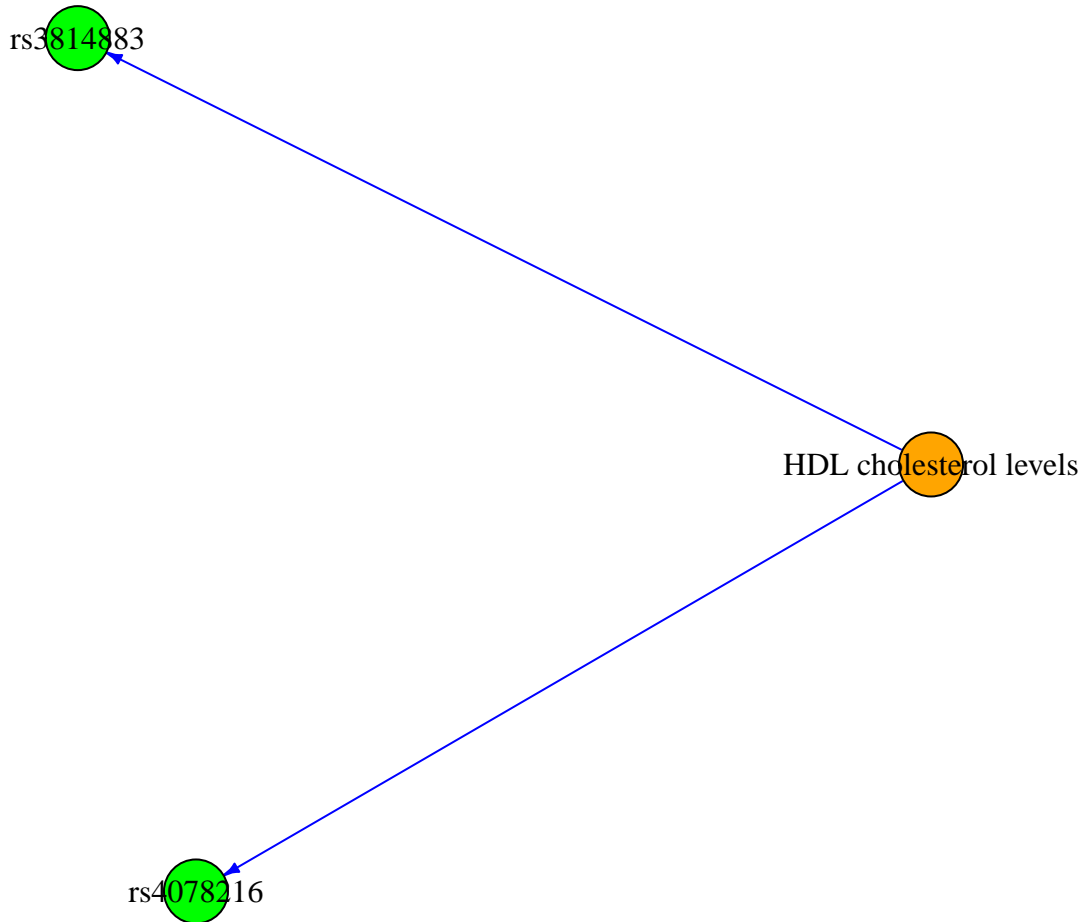

## Variant-Disease Network (Height)

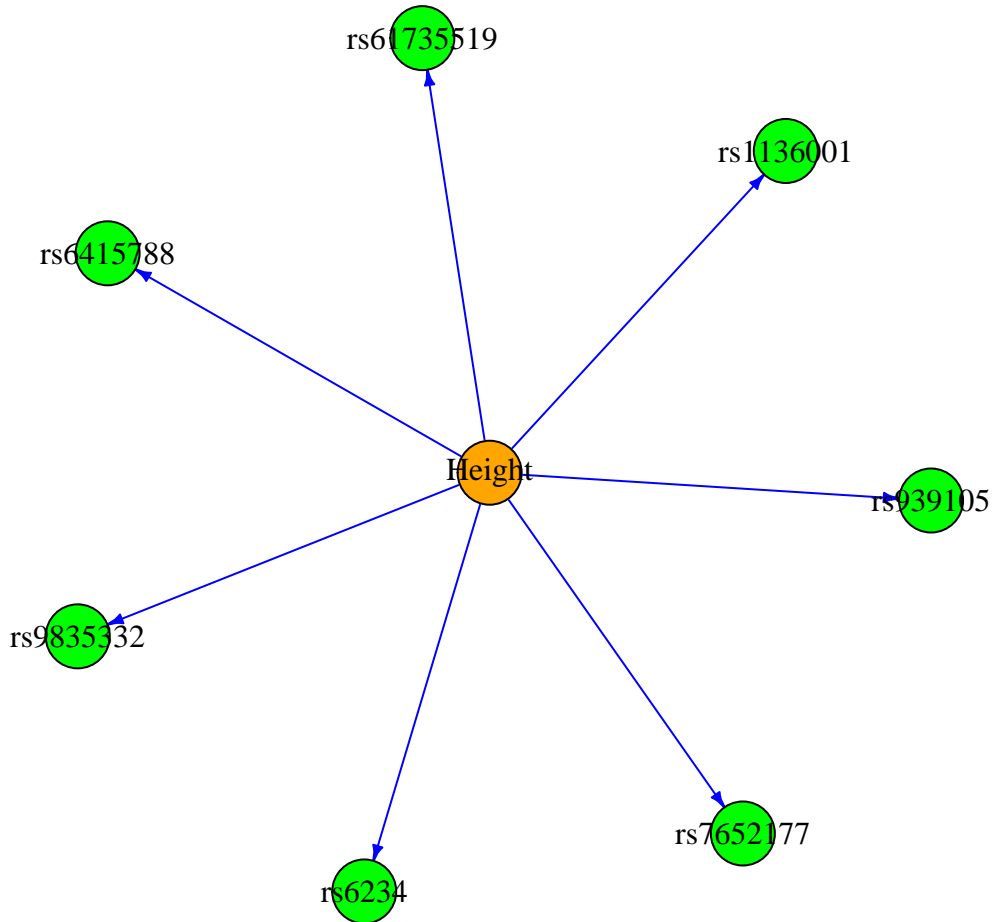

## Variant–Disease Network (Hematocrit)

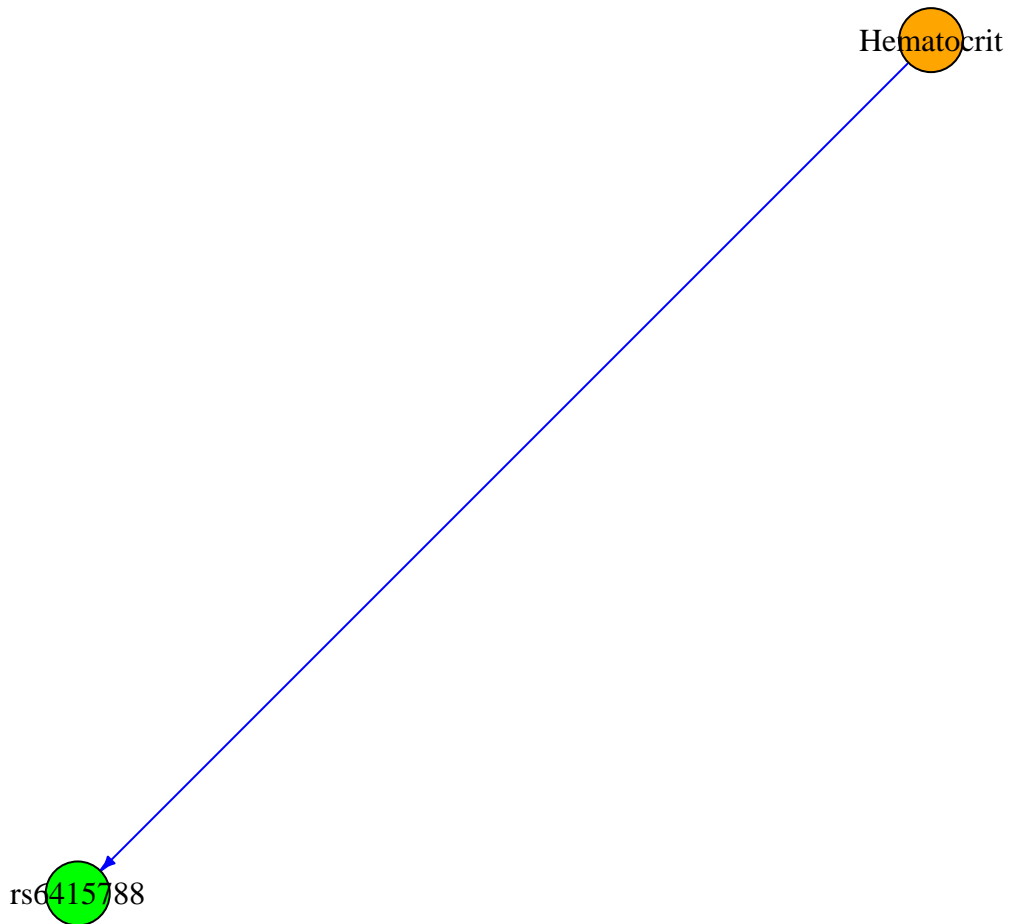

## Variant-Disease Network (Hemoglobin A1c levels)

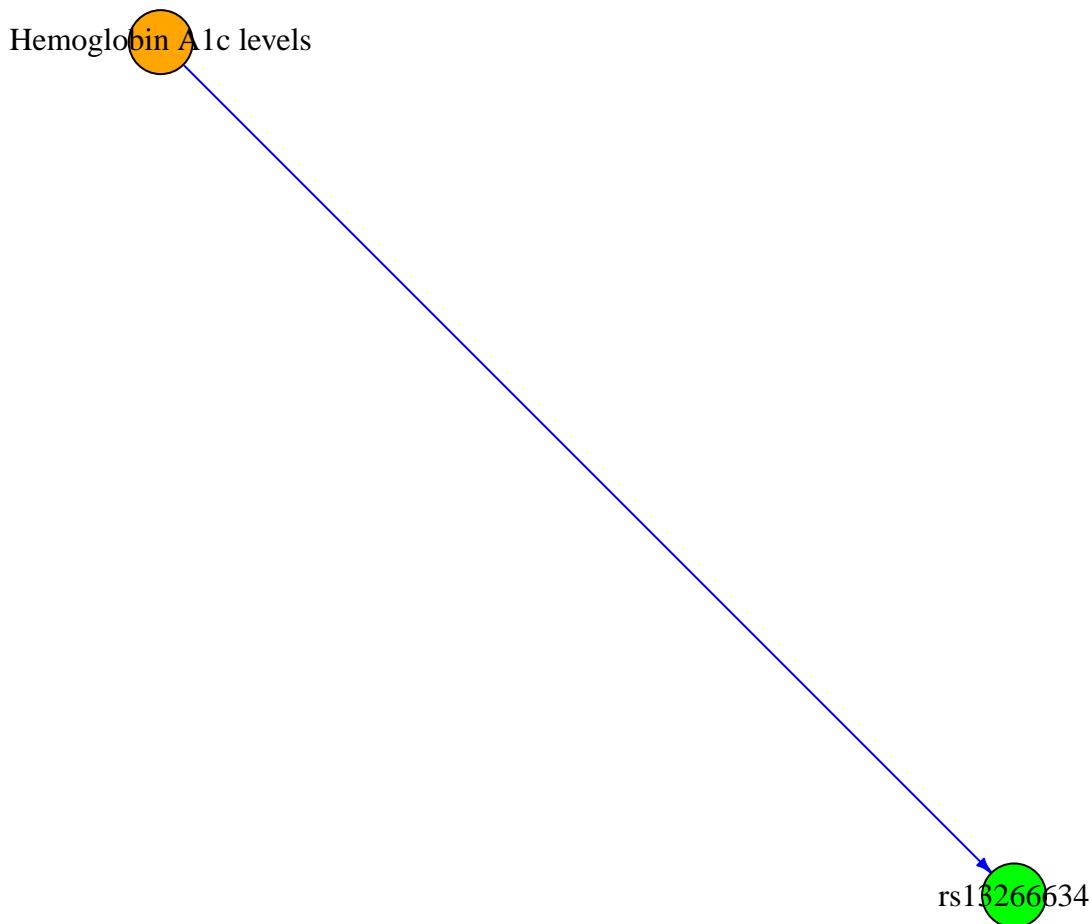

**Variant–Disease Network (Hemoglobin concentration)**

Hemoglobin concentration

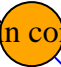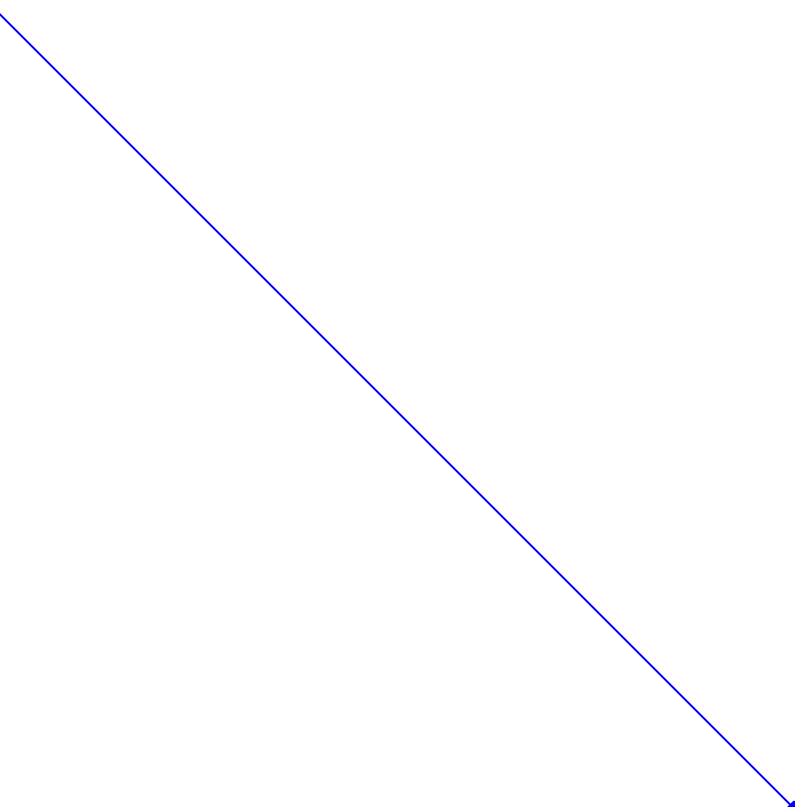

rs6415788

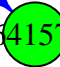

## Variant–Disease Network (Hemoglobin levels)

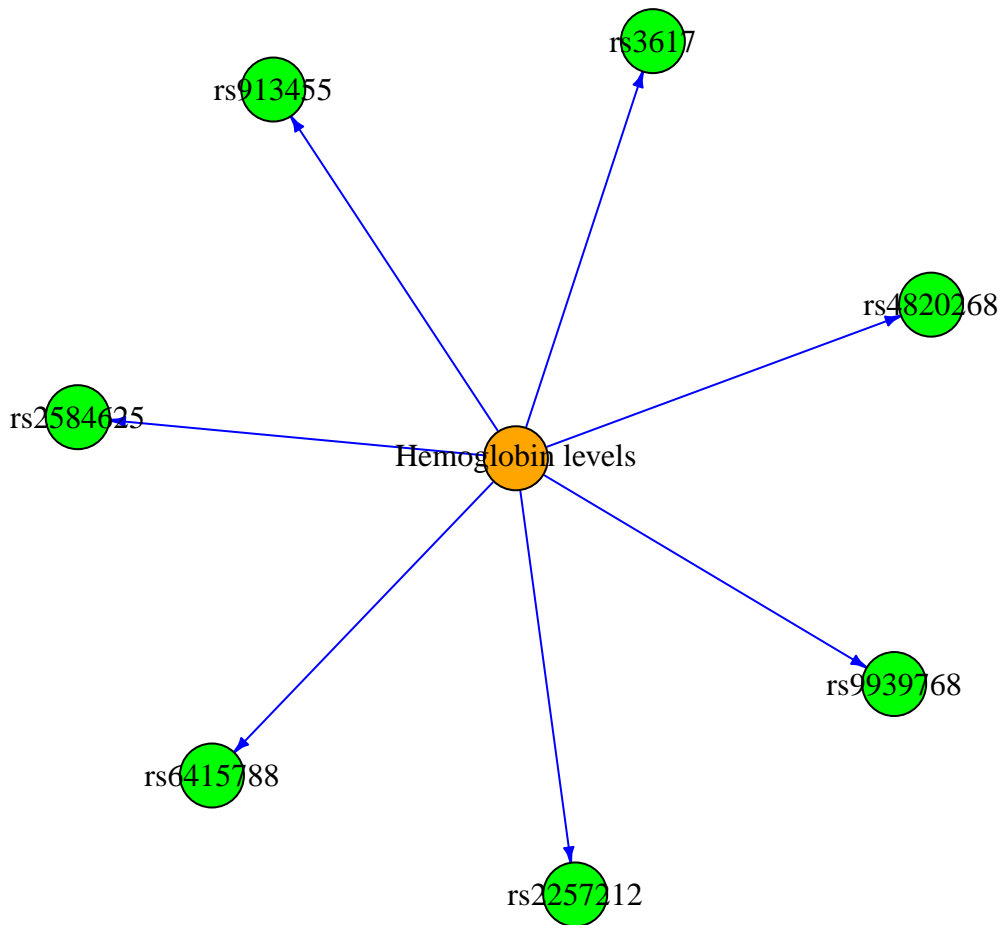



Variant–Disease Network (High light scatter reticulocyte count)

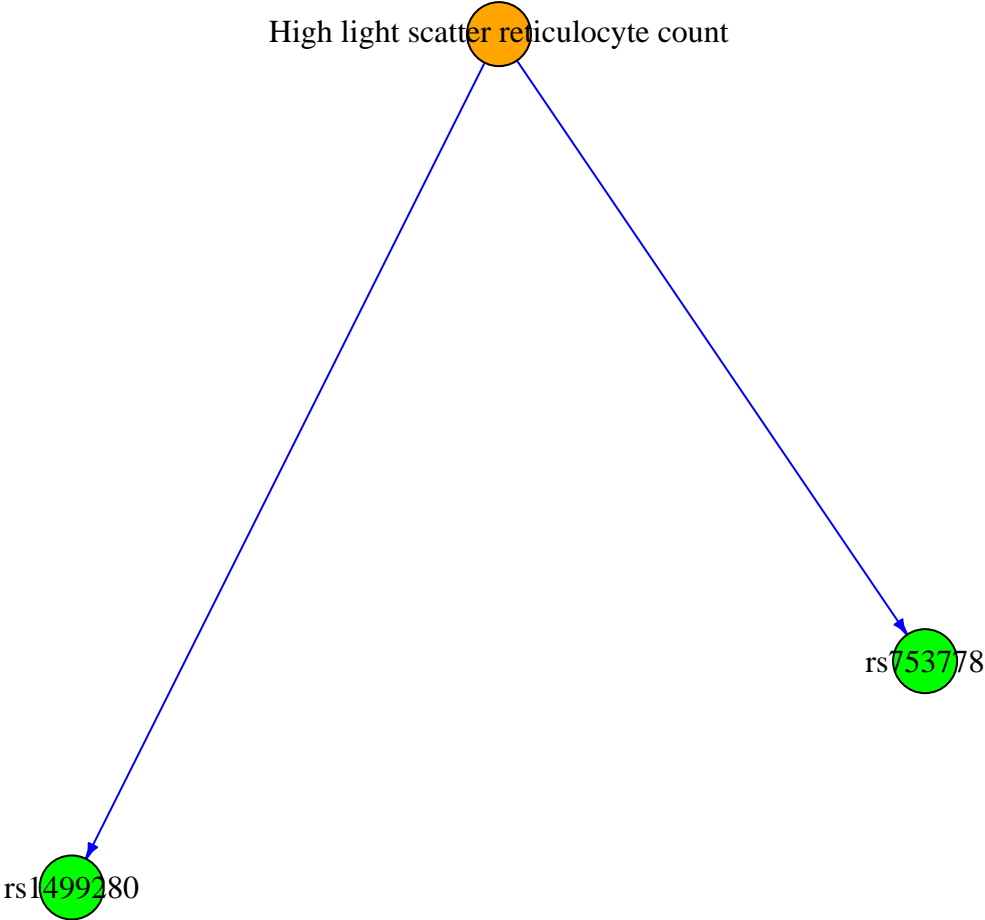

# Variant–Disease Network (High light scatter reticulocyte percentage of red c

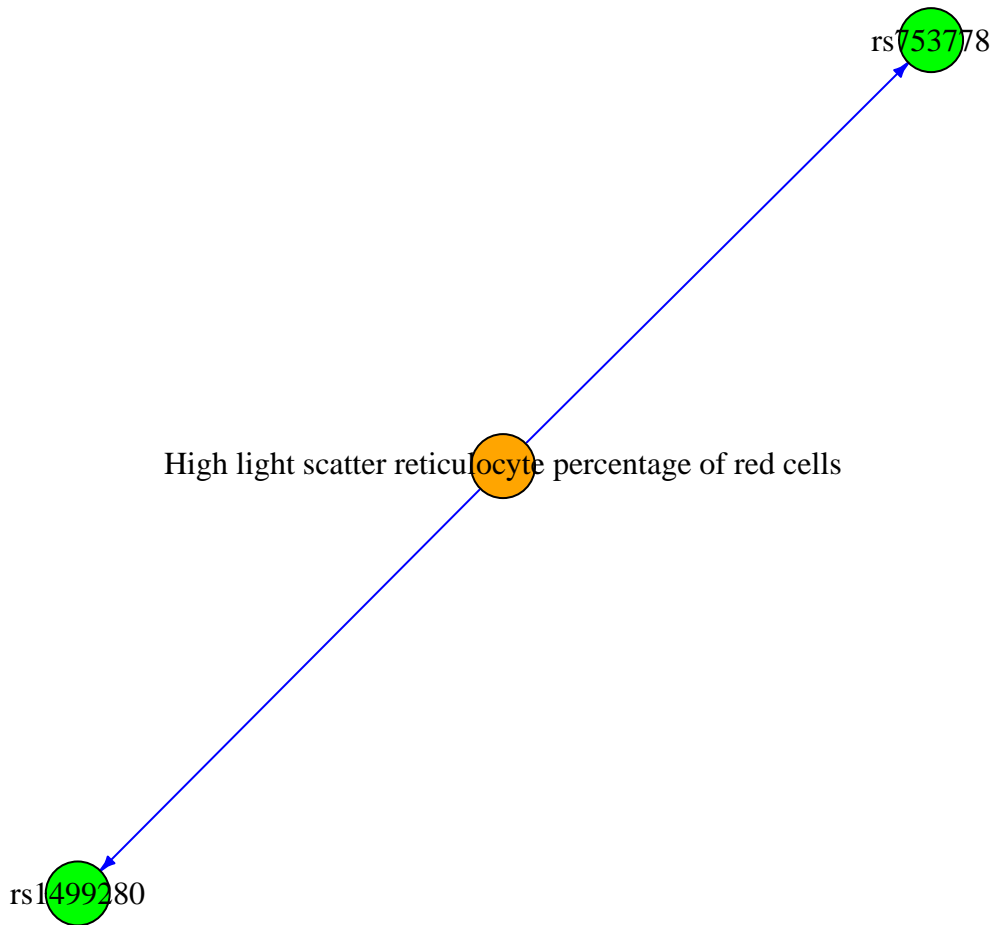

## Variant-Disease Network (Hip bone size)

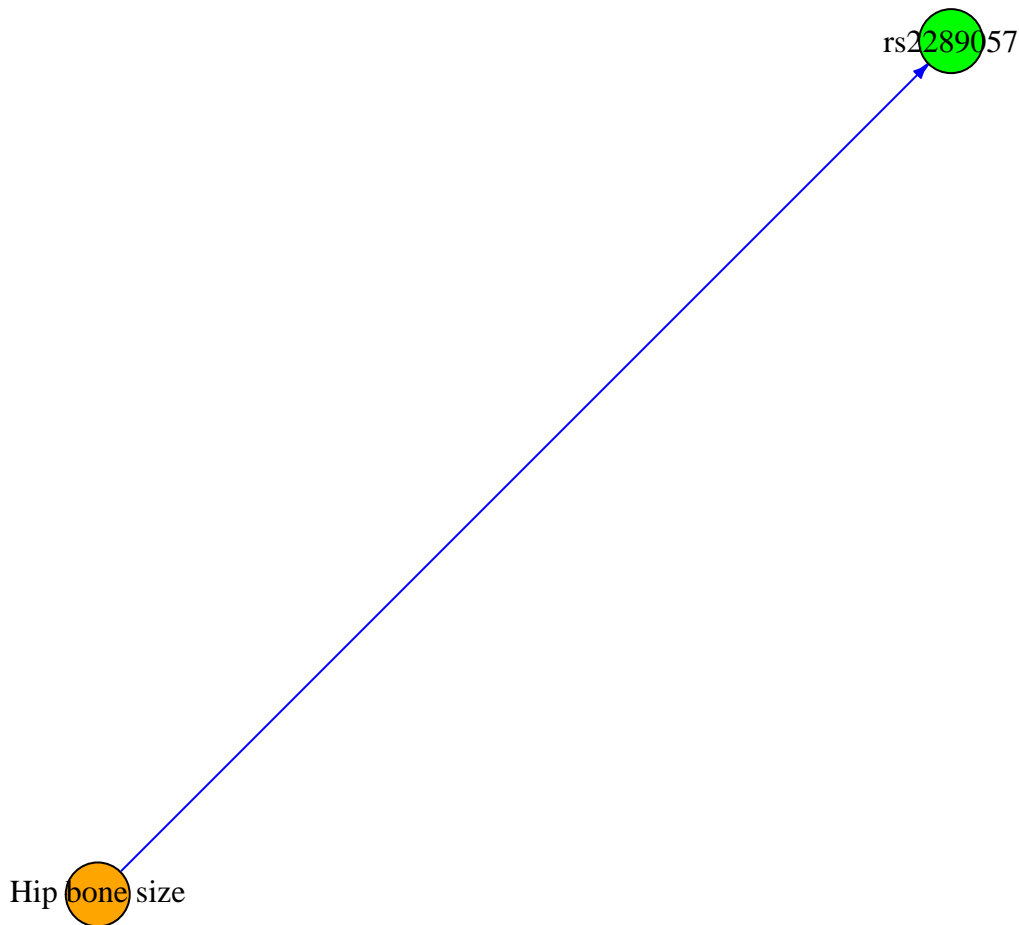

# Variant–Disease Network (Hip circumference adjusted for BMI)

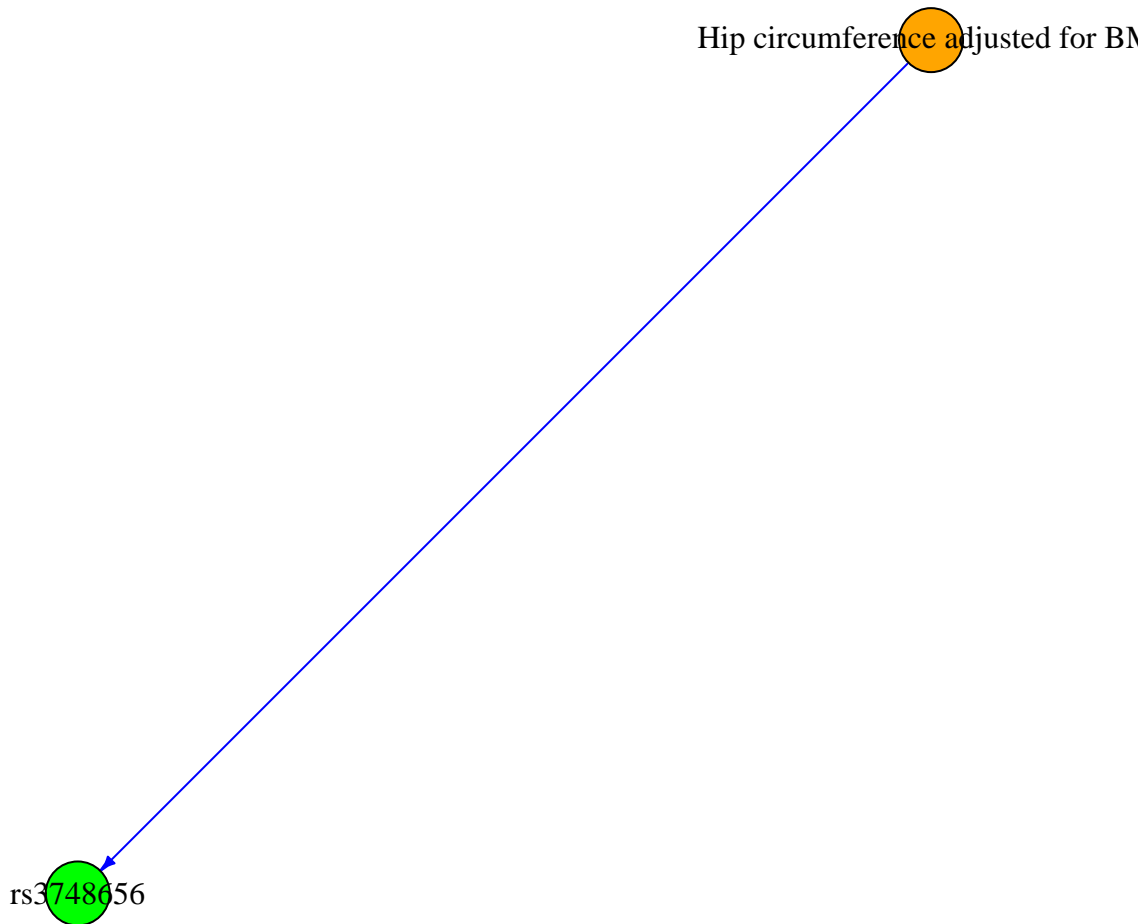

## Variant-Disease Network (Hypertension)

Hypertension

rs2270860

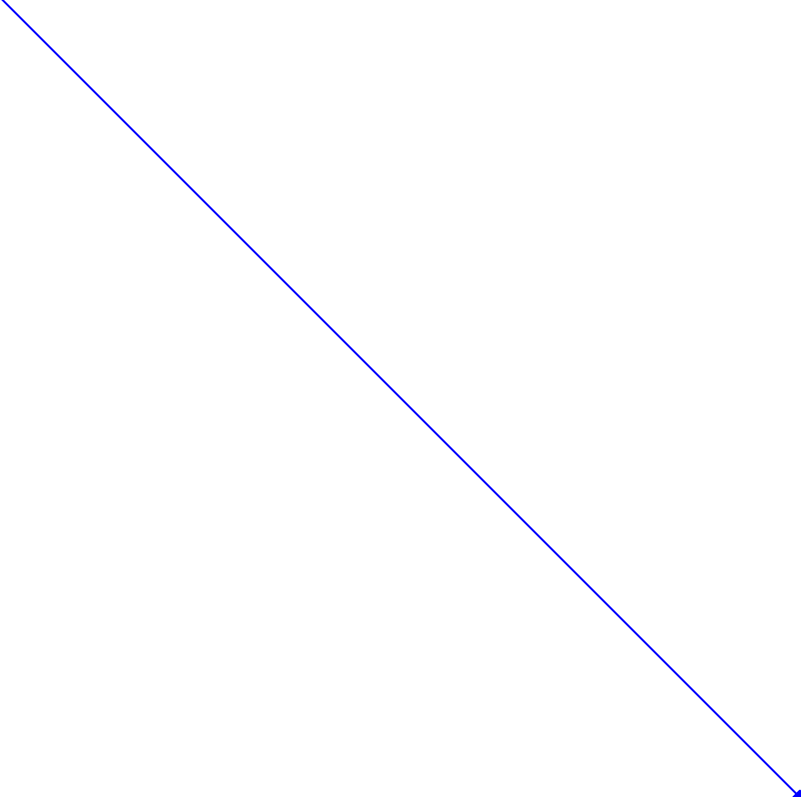

**Variant–Disease Network (Idiopathic dilated cardiomyopathy)**

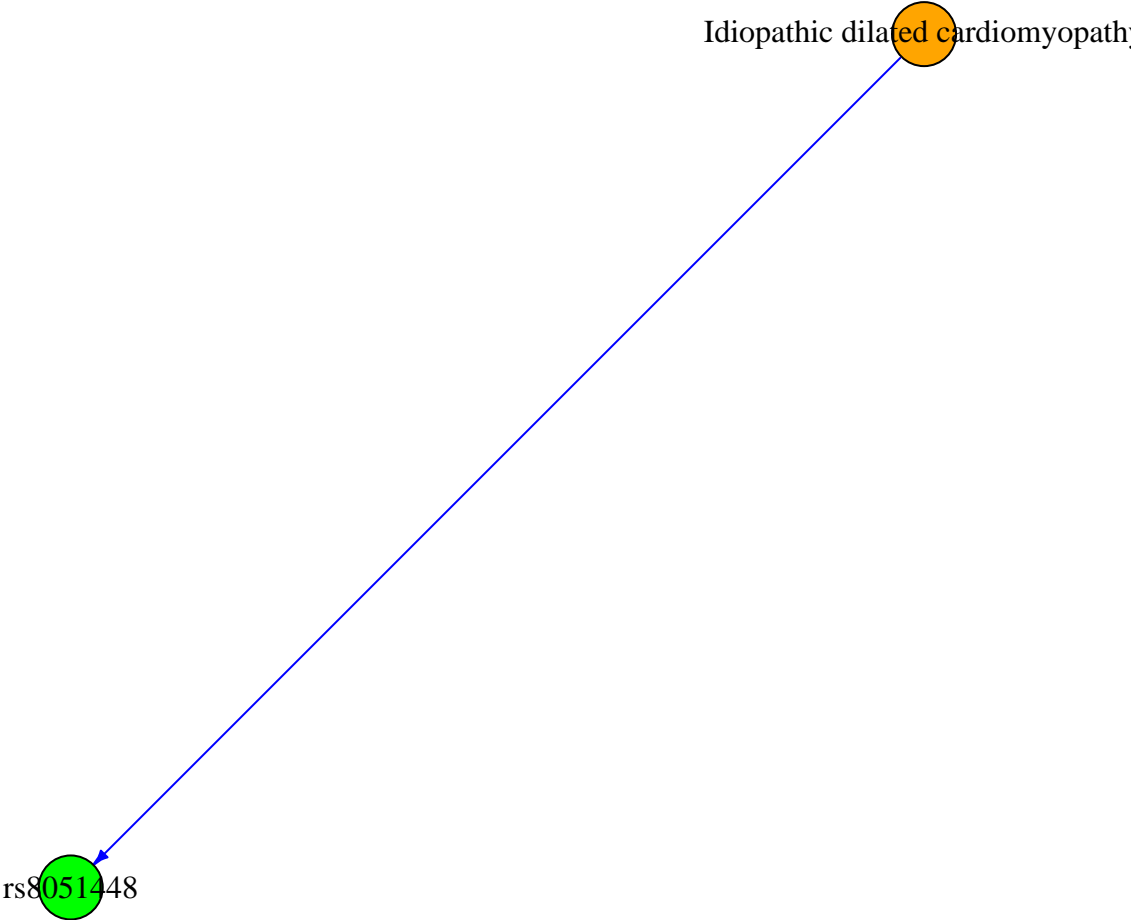

## Variant–Disease Network (IgG glycosylation)

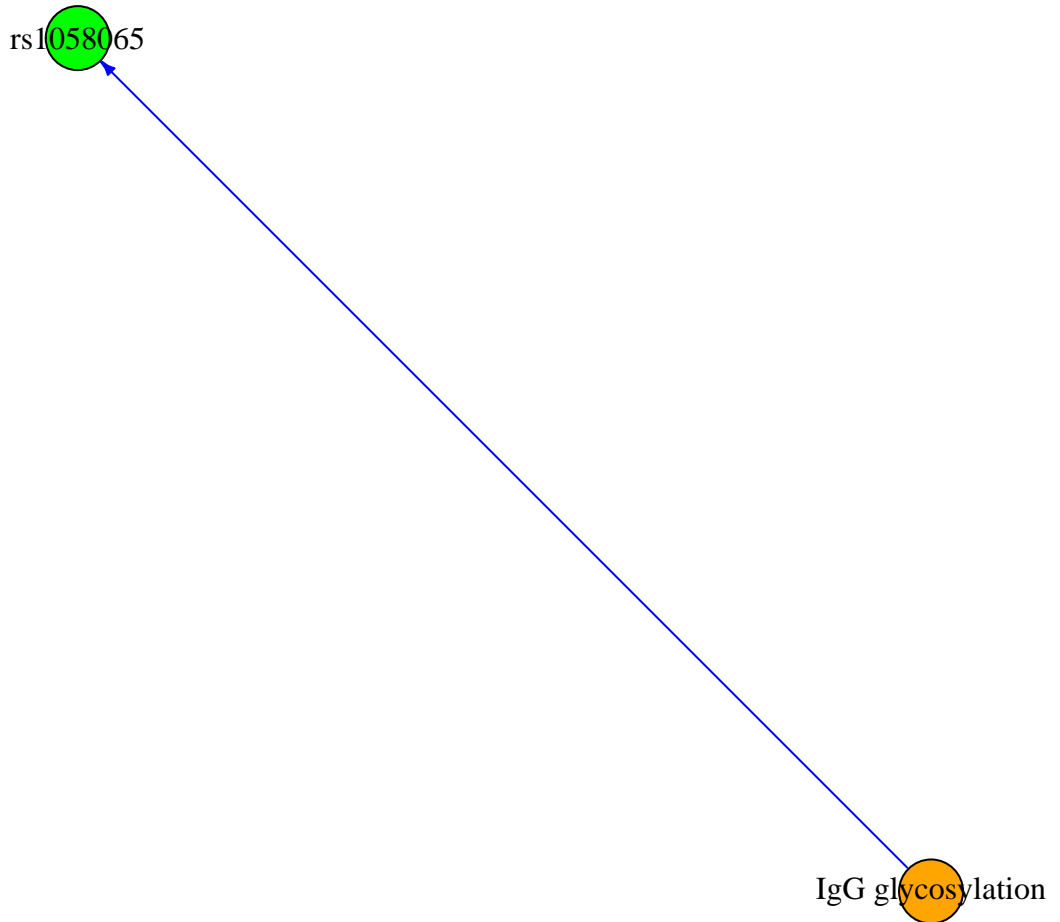

# Variant–Disease Network (Immature fraction of reticulocytes)

rs1499280

Immature fraction of reticulocyte

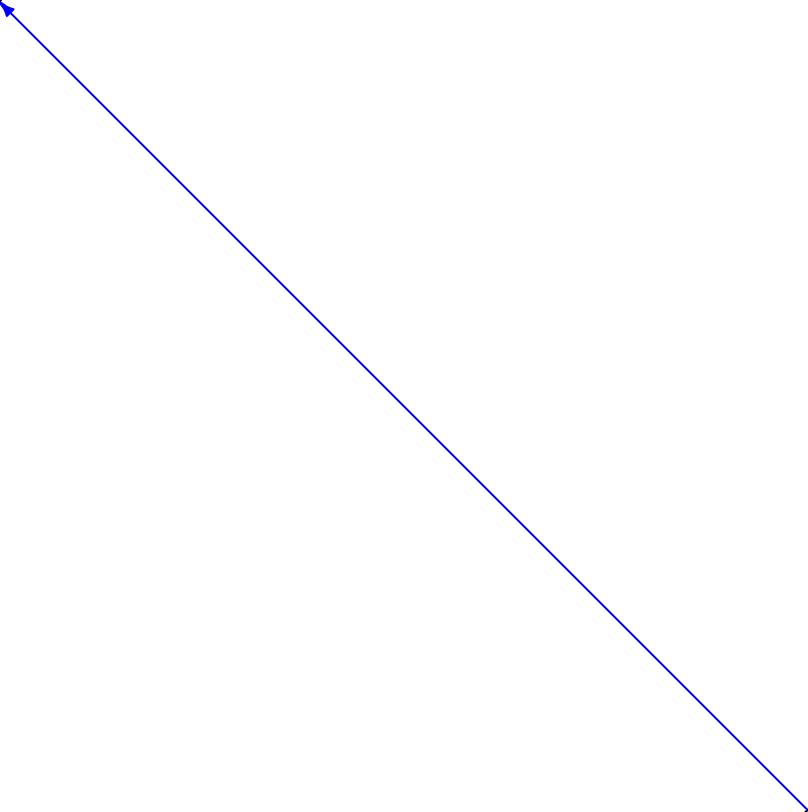



**Variant–Disease Network (Immune response to smallpox )**

Immune response to smallpox

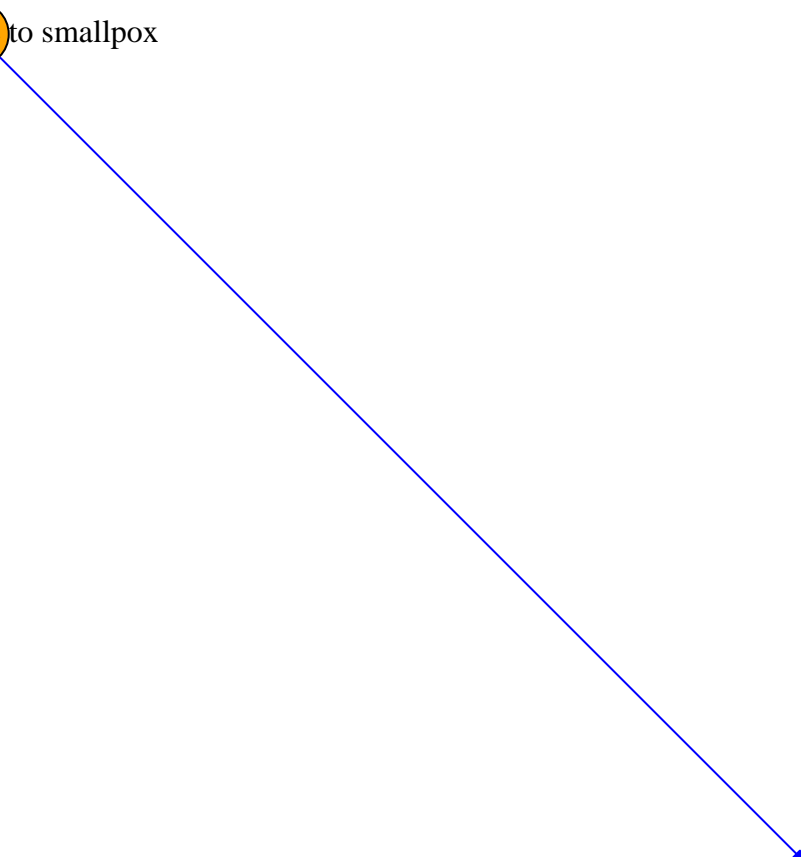

rs9408926

**Variant–Disease Network (Inflammatory bowel disease)**

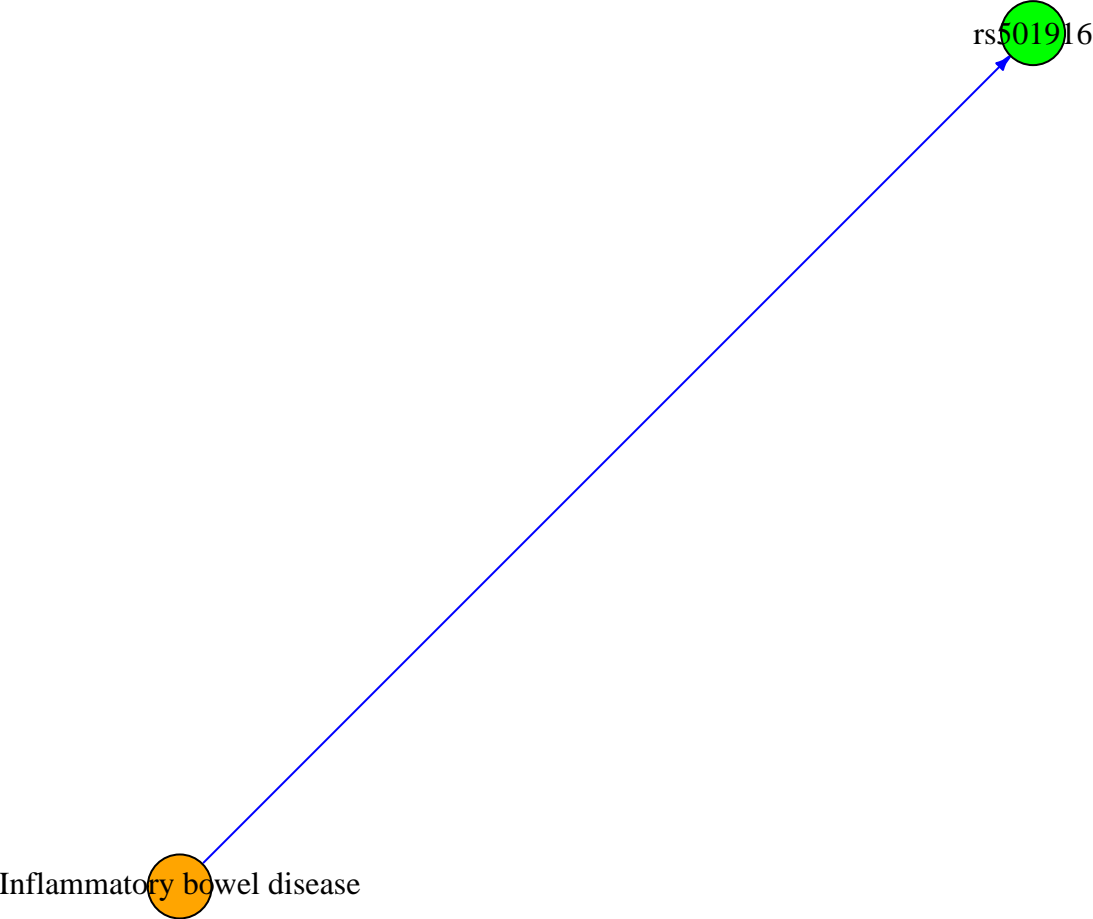

## Variant-Disease Network (Iron levels)

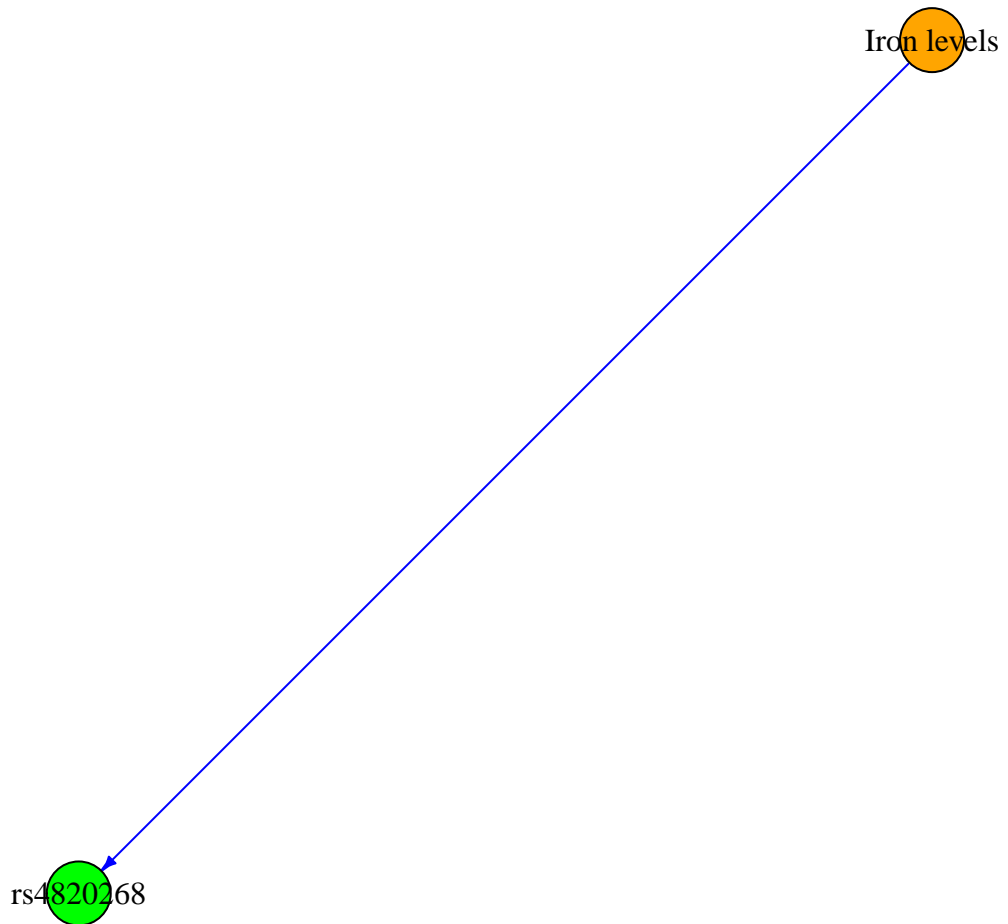

## Variant-Disease Network (Iron status biomarkers)

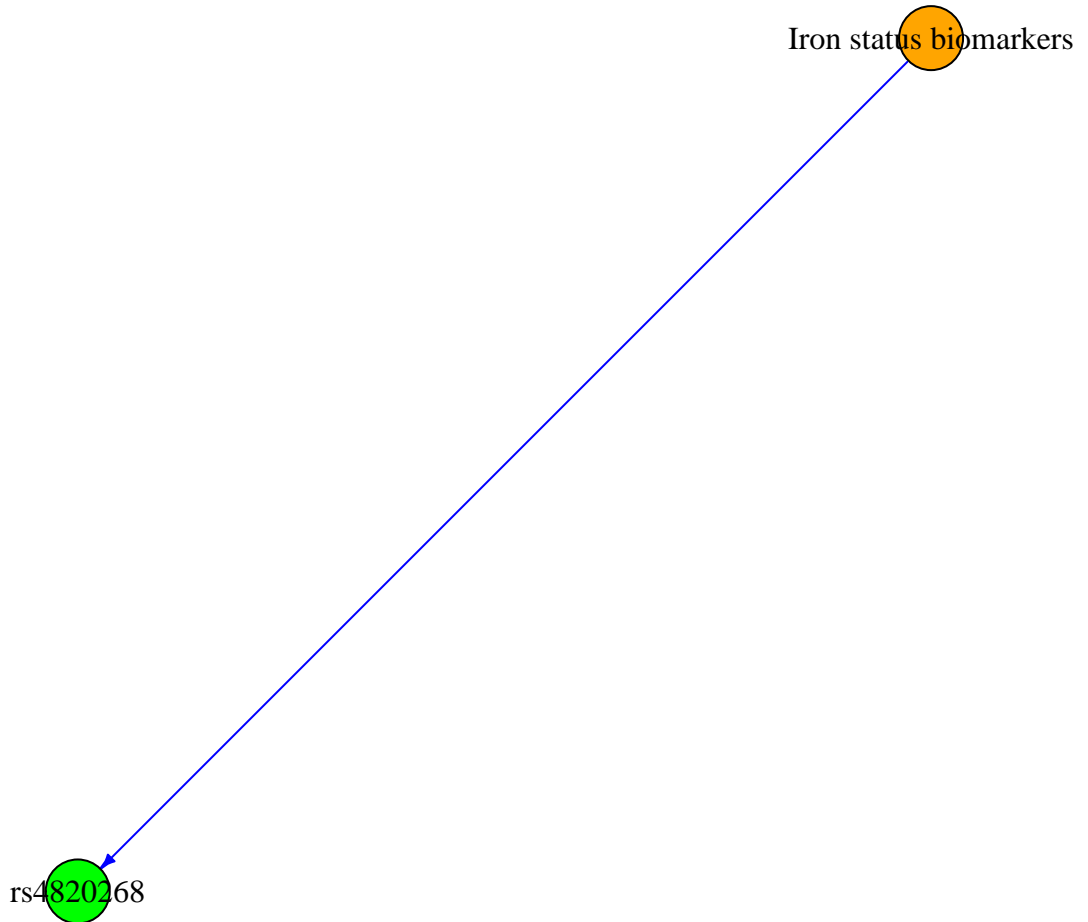

Variant–Disease Network (LDL cholesterol)

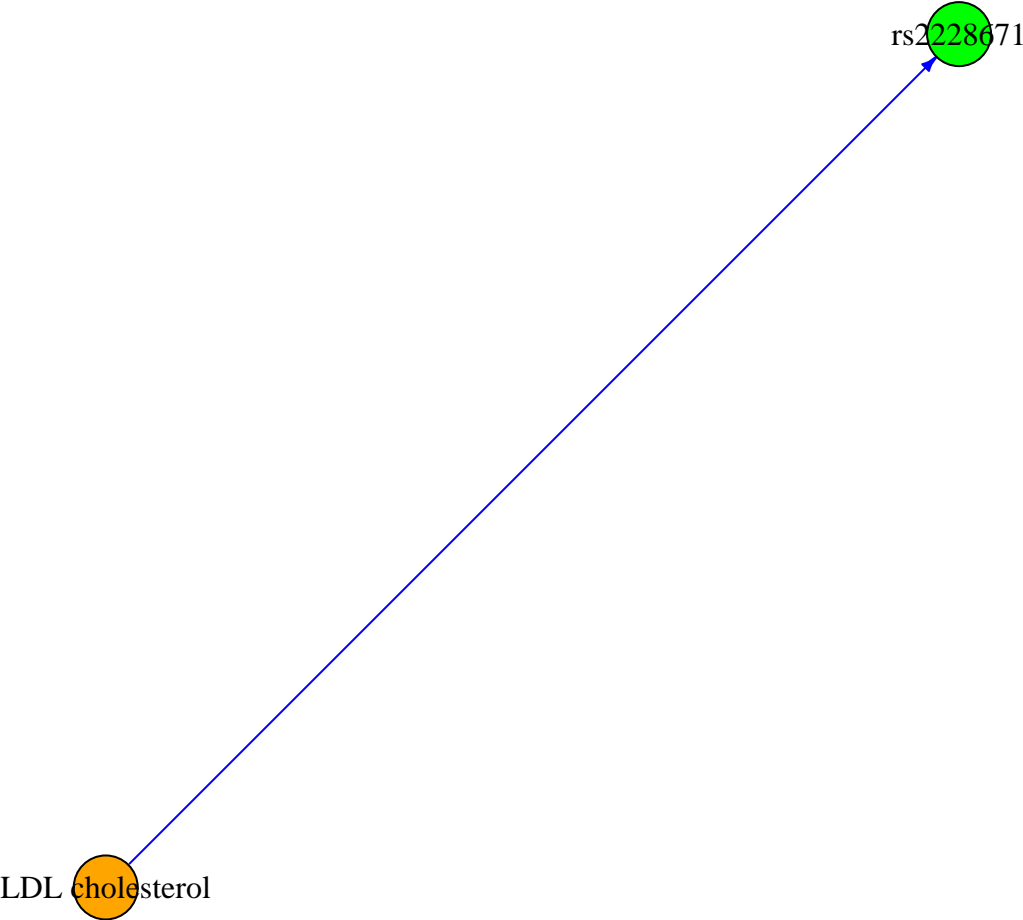

## Variant–Disease Network (Lipoprotein levels)

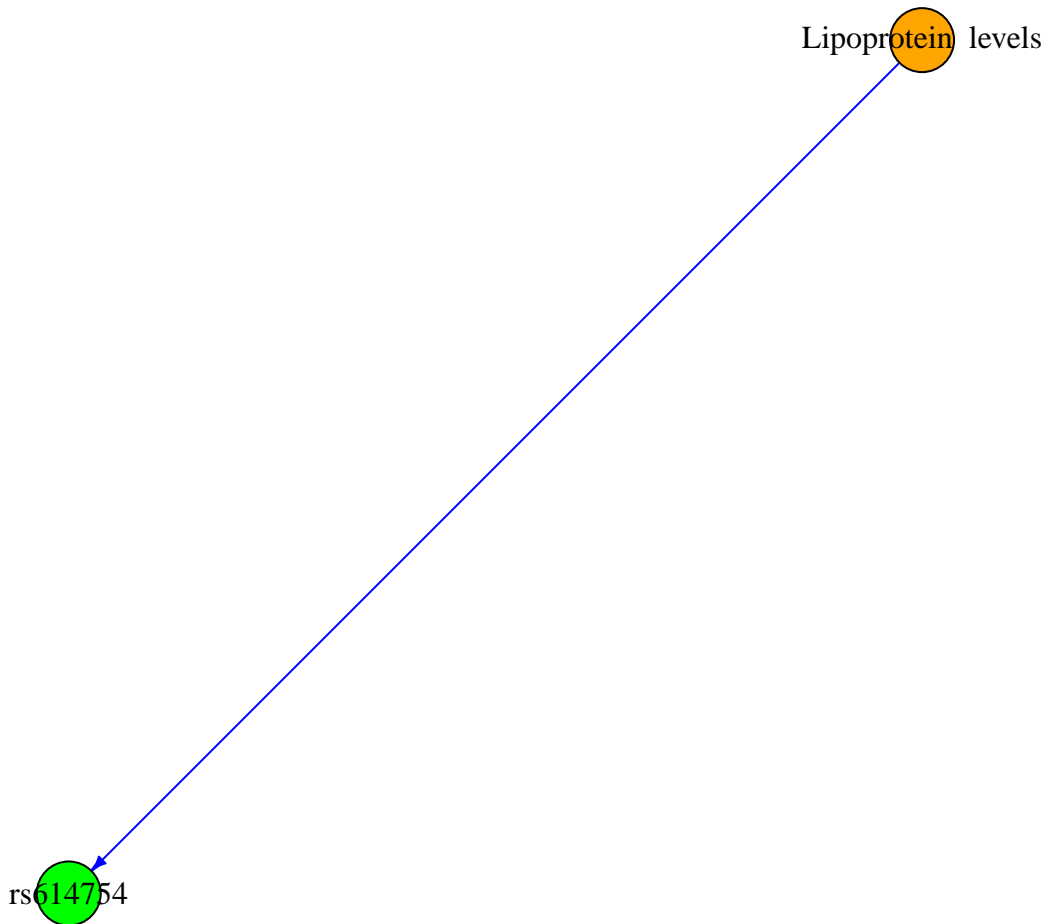

**Variant–Disease Network (Liver fibrosis and steatohepatitis severity )**

Liver fibrosis and steatohepatitis severity

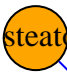

rs4820268

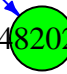

**Variant–Disease Network (Low density lipoprotein cholesterol levels)**

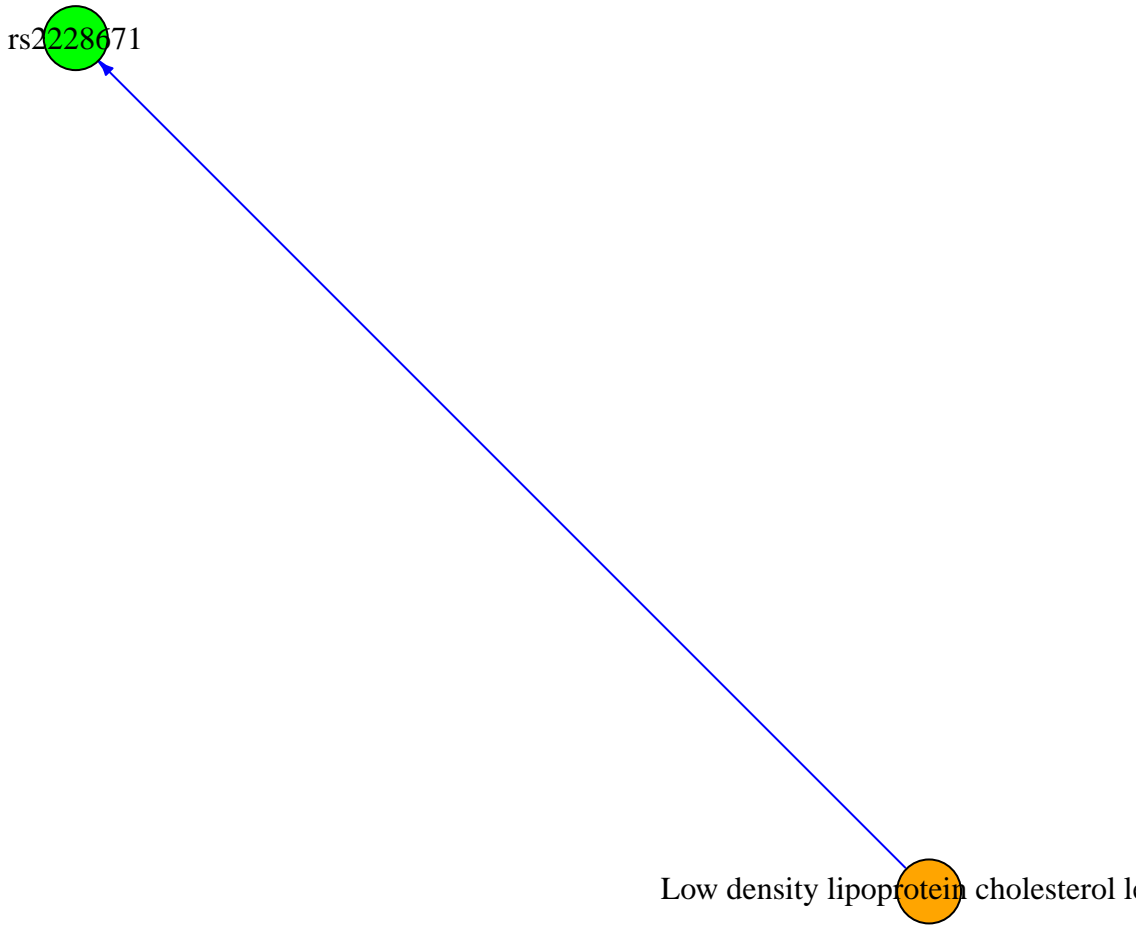



**Variant–Disease Network (Lung function )**

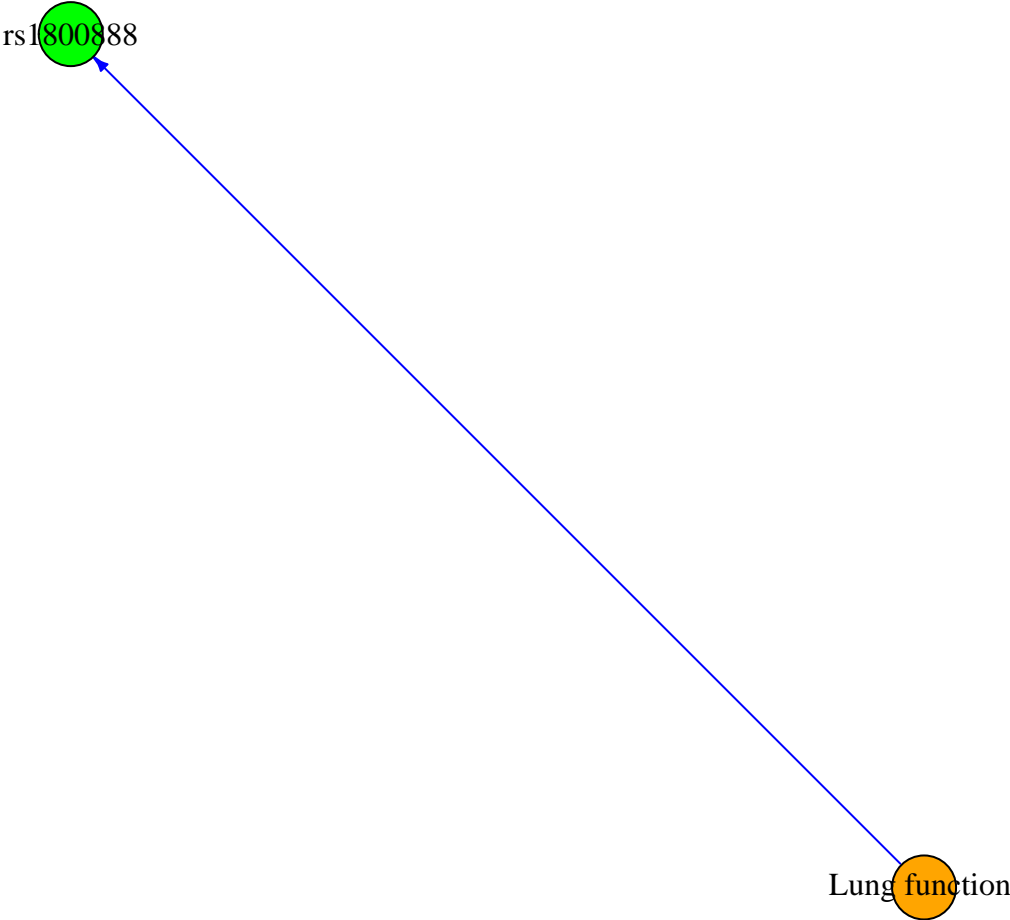

## Variant–Disease Network (Lymphocyte counts)

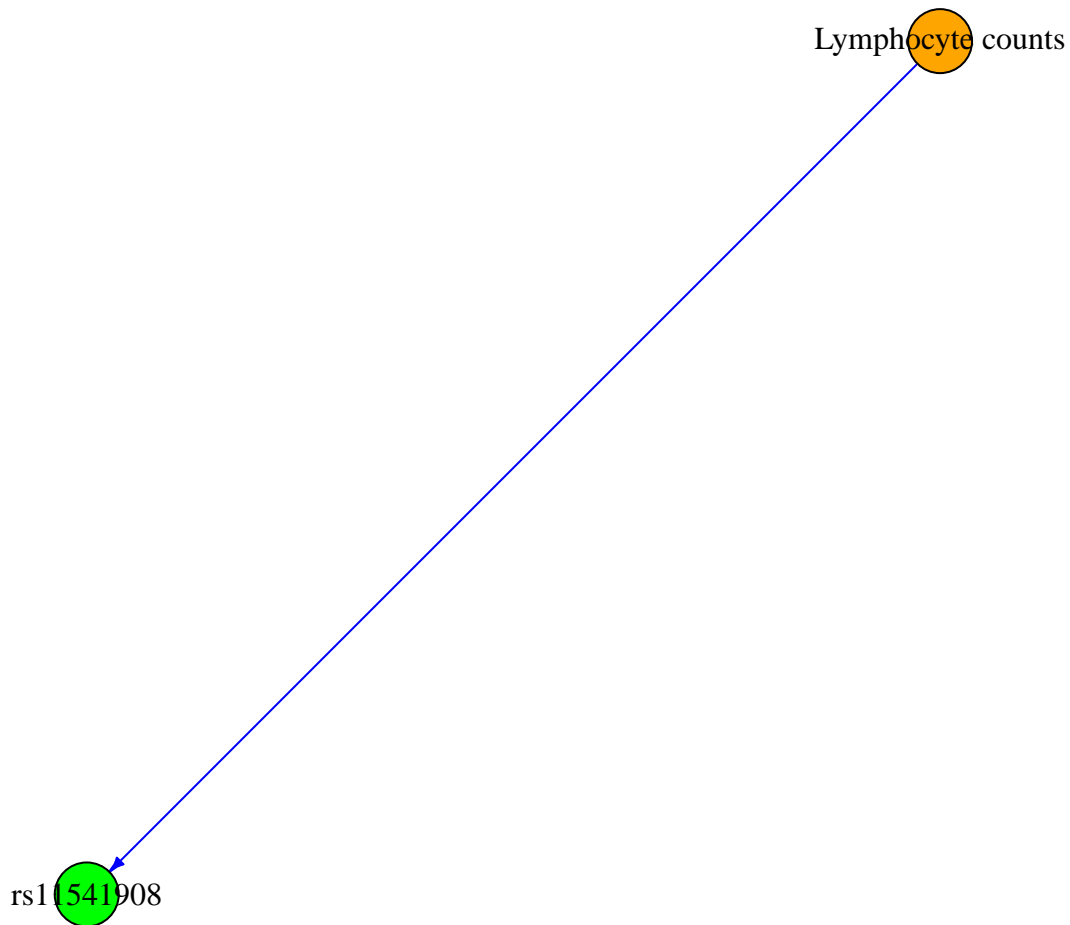

## Variant–Disease Network (Macular thickness)

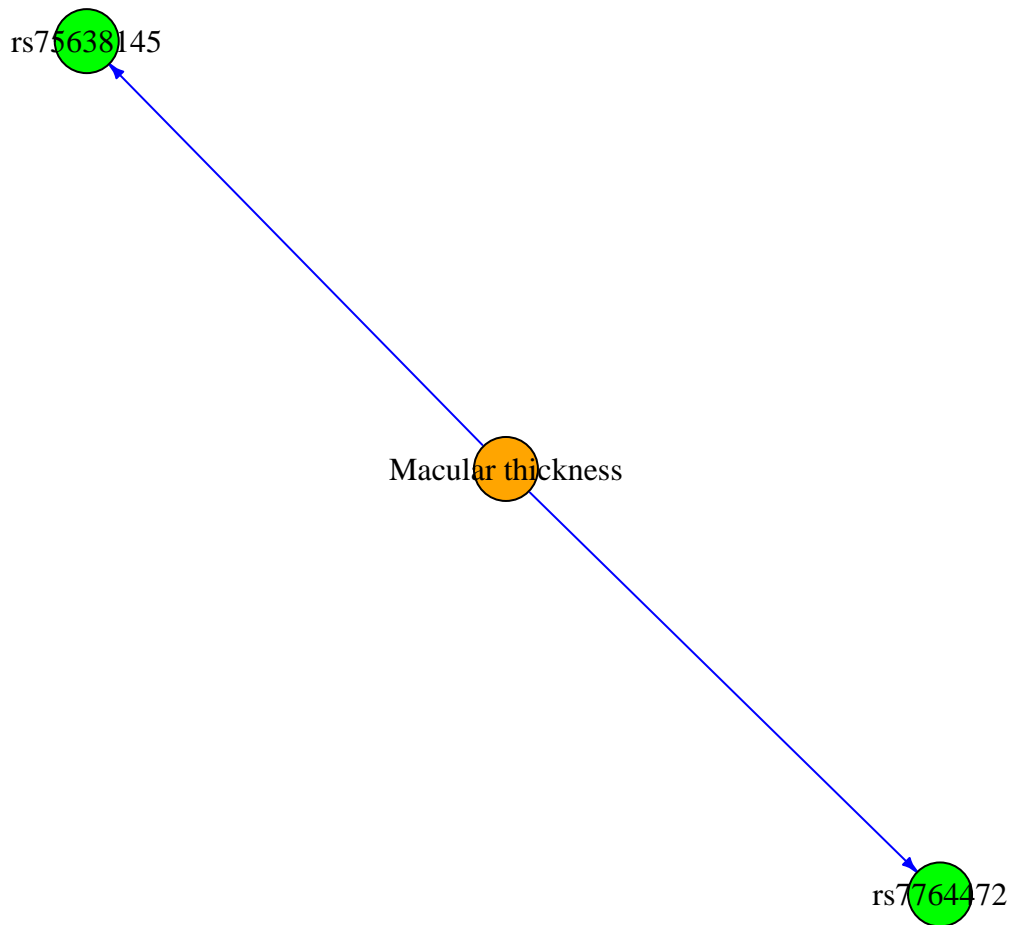

## Variant–Disease Network (Major depressive disorder)

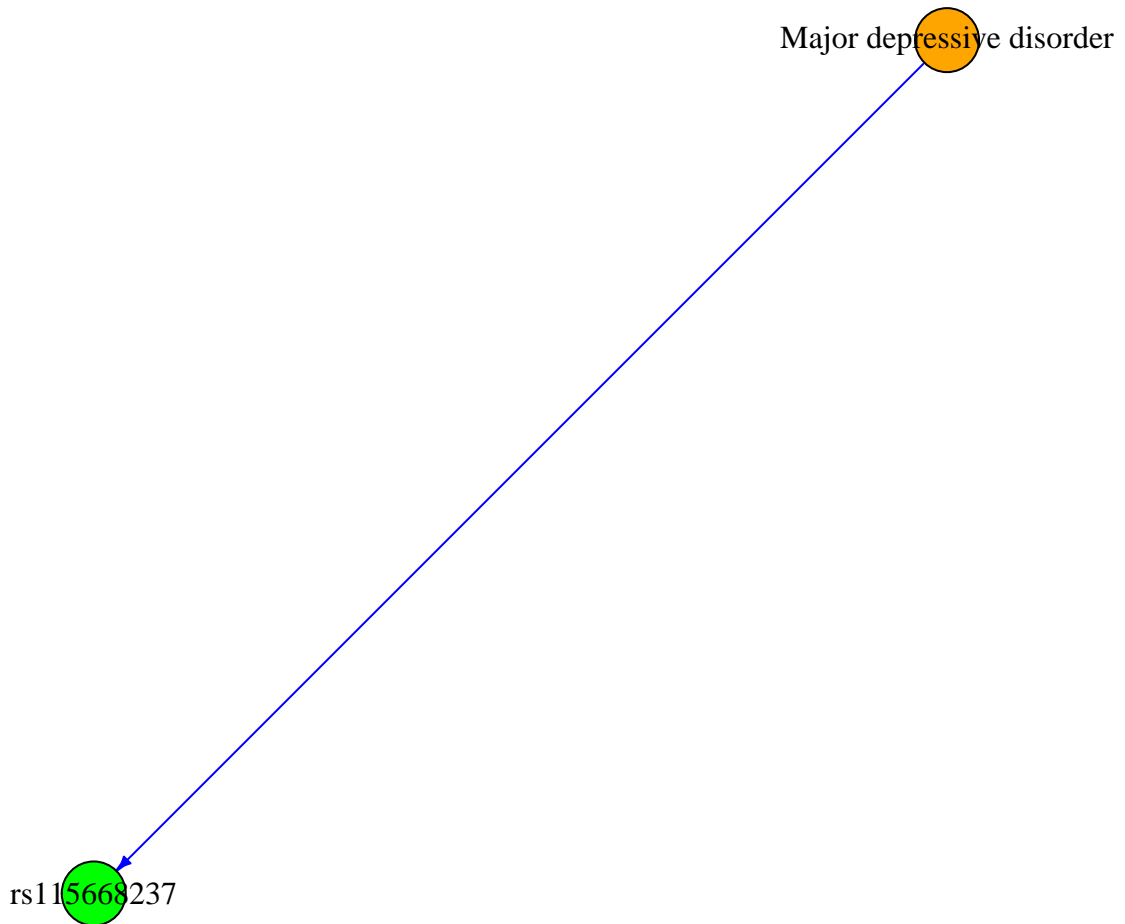

## Variant–Disease Network (Mean arterial pressure)

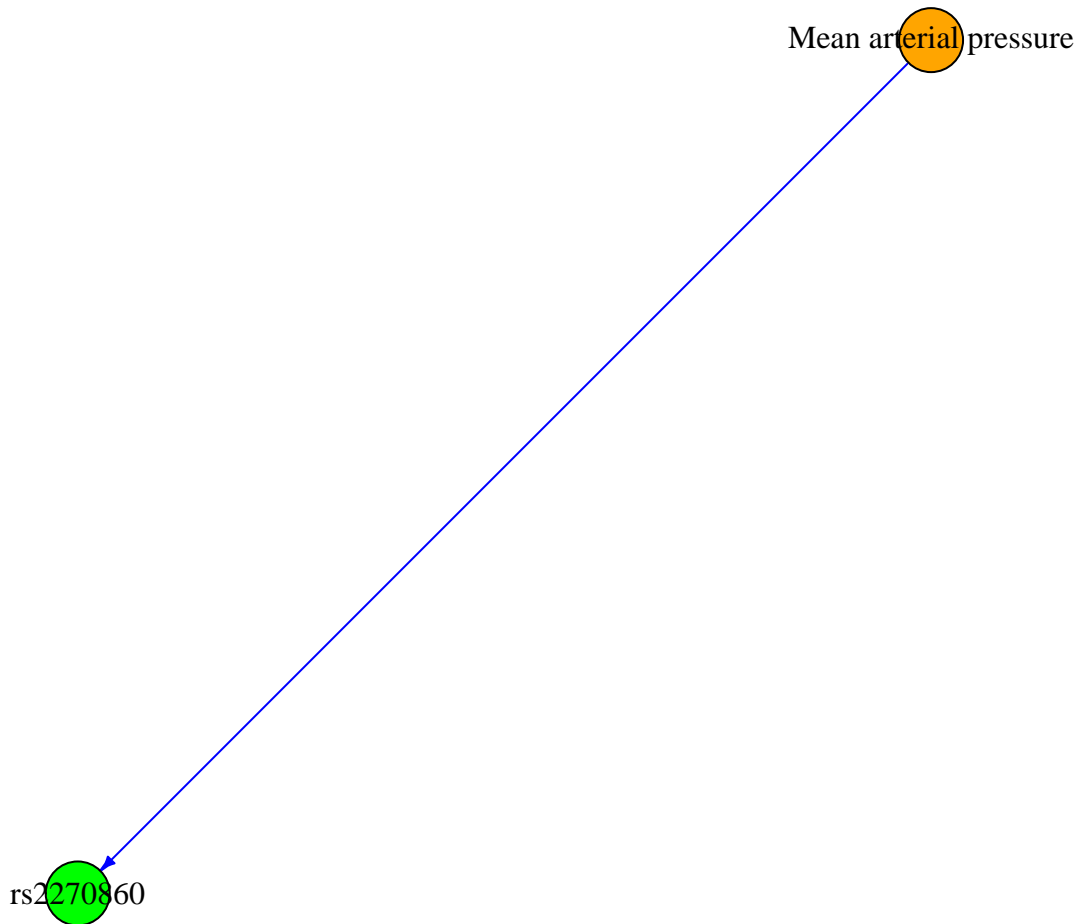

**Variant–Disease Network (Mean corpuscular hemoglobin)**

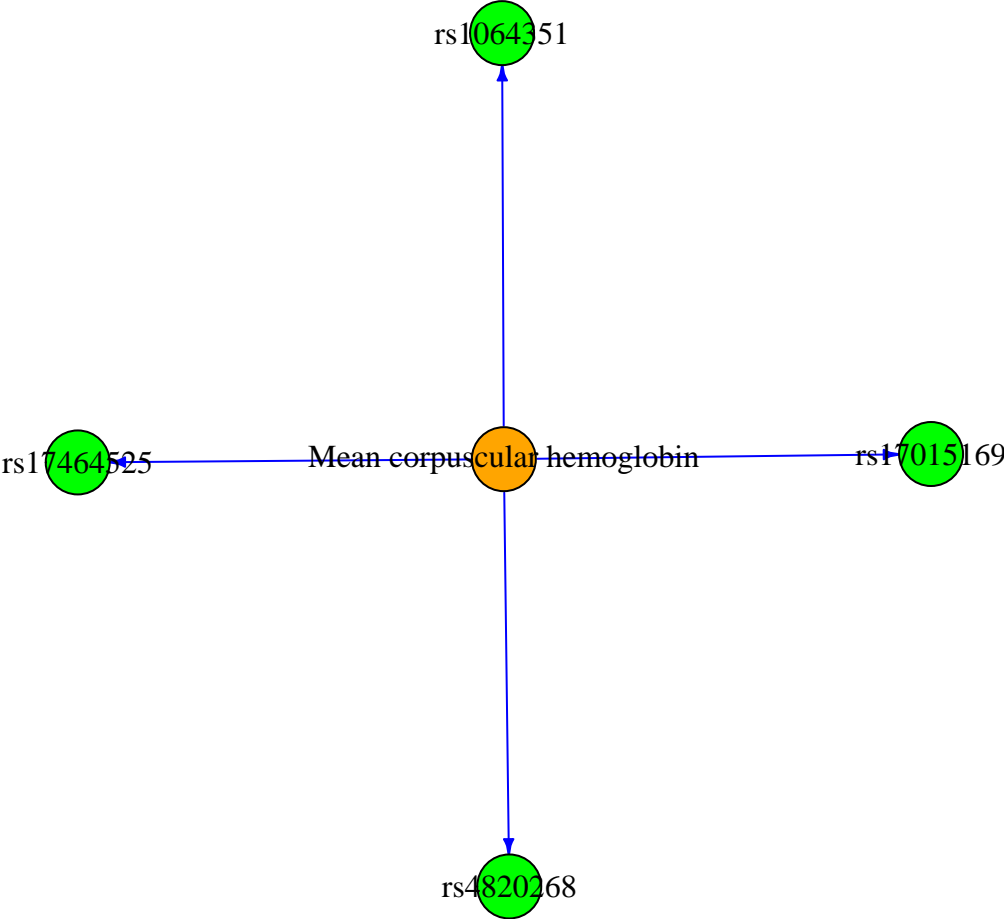

**Variant–Disease Network (Mean corpuscular hemoglobin concentration)**

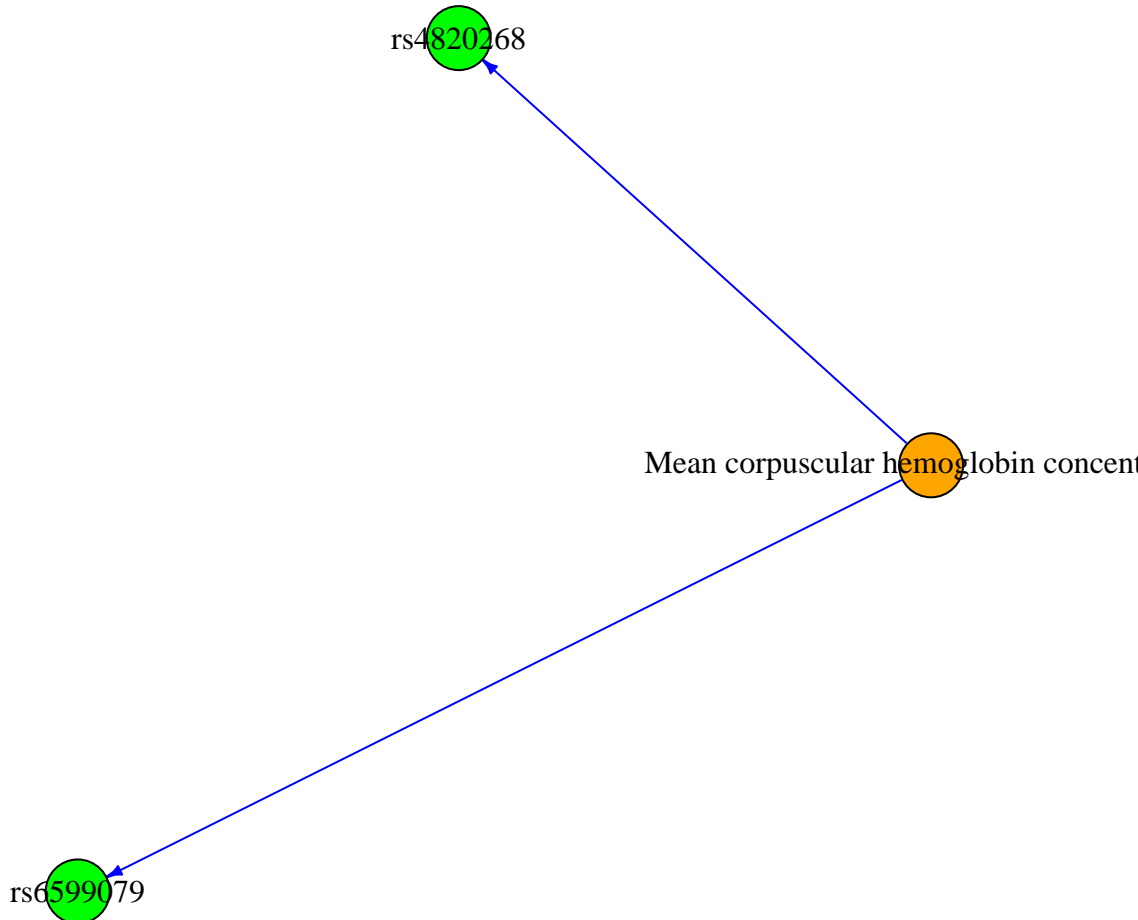

## Variant–Disease Network (Mean corpuscular volume)

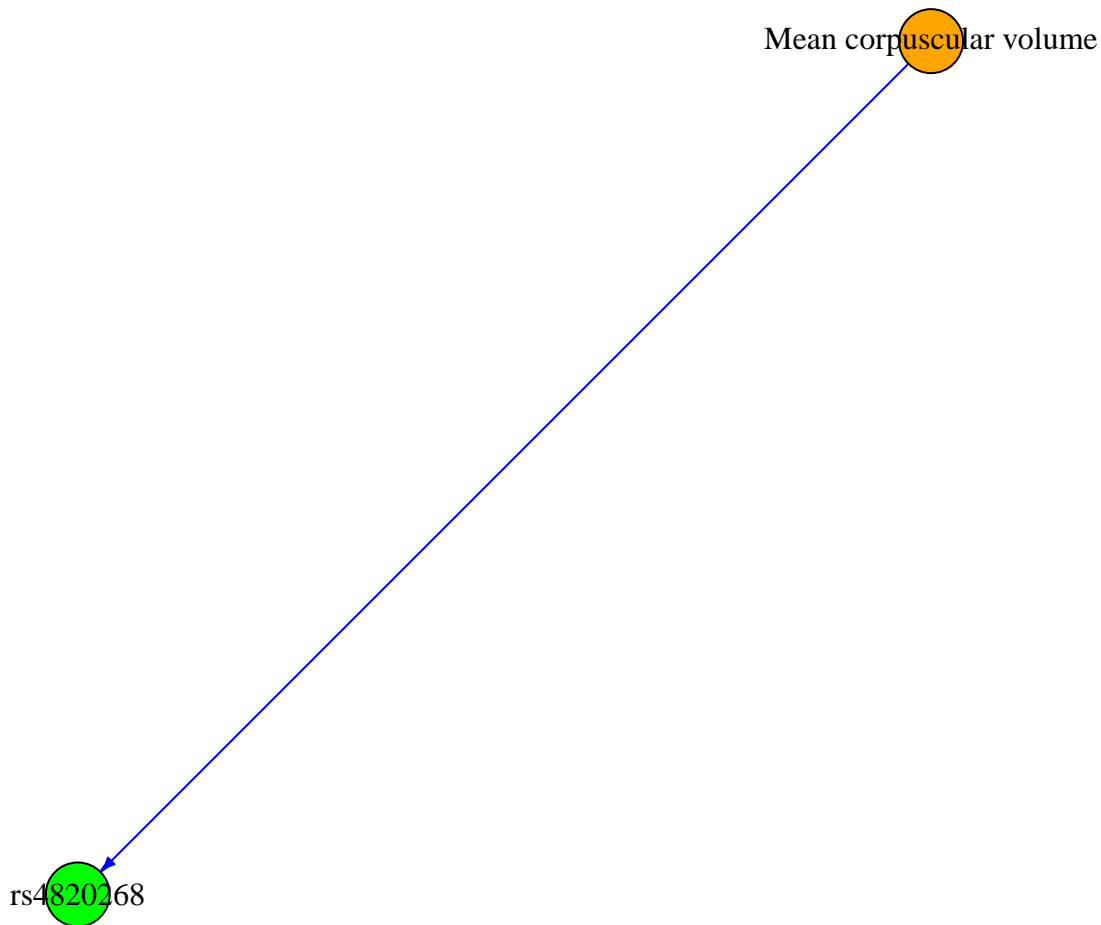



## Variant–Disease Network (Mean platelet volume)

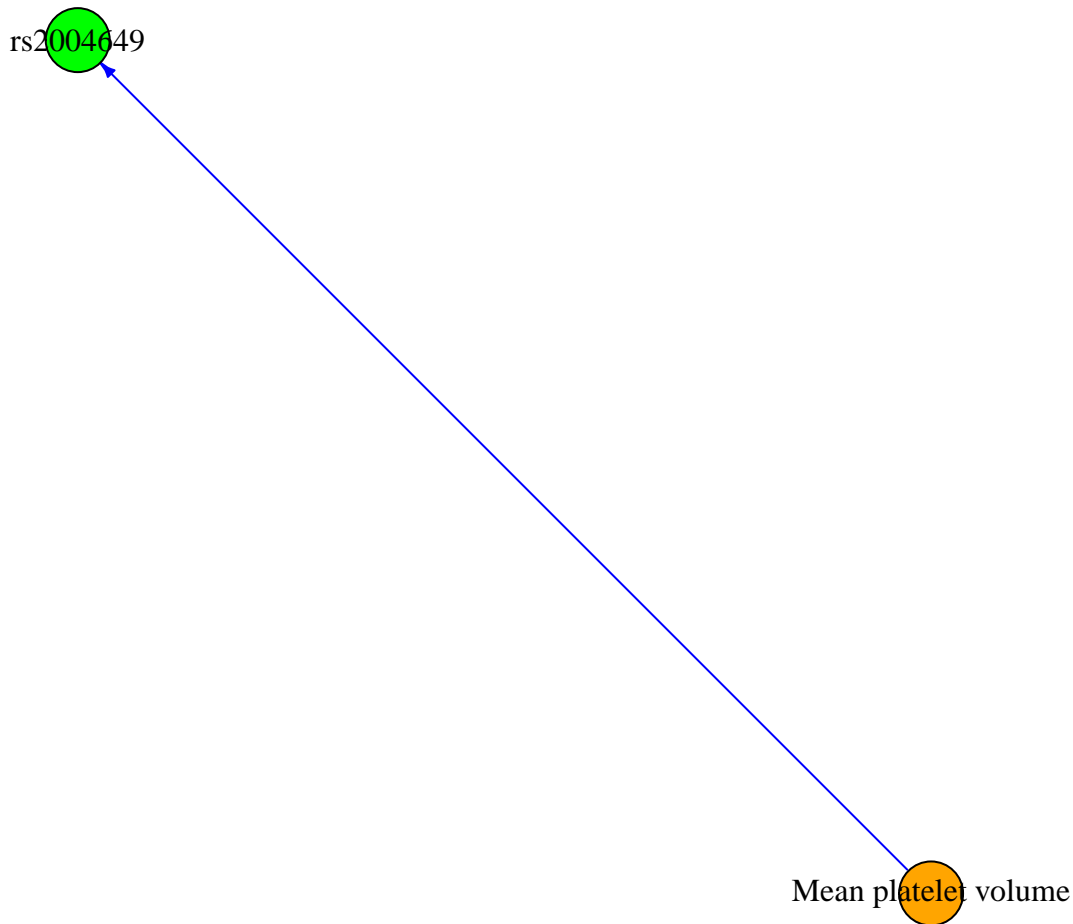

Variant–Disease Network (Medication use )

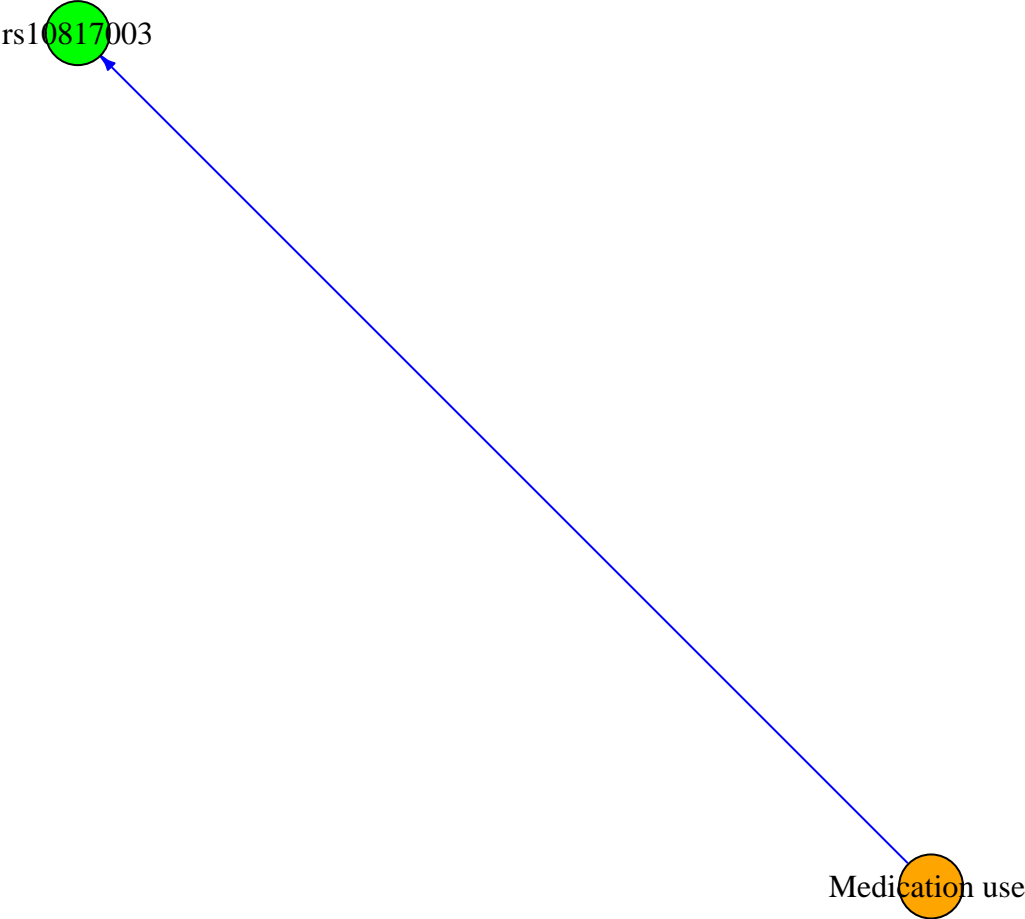

## Variant-Disease Network (Menarche )

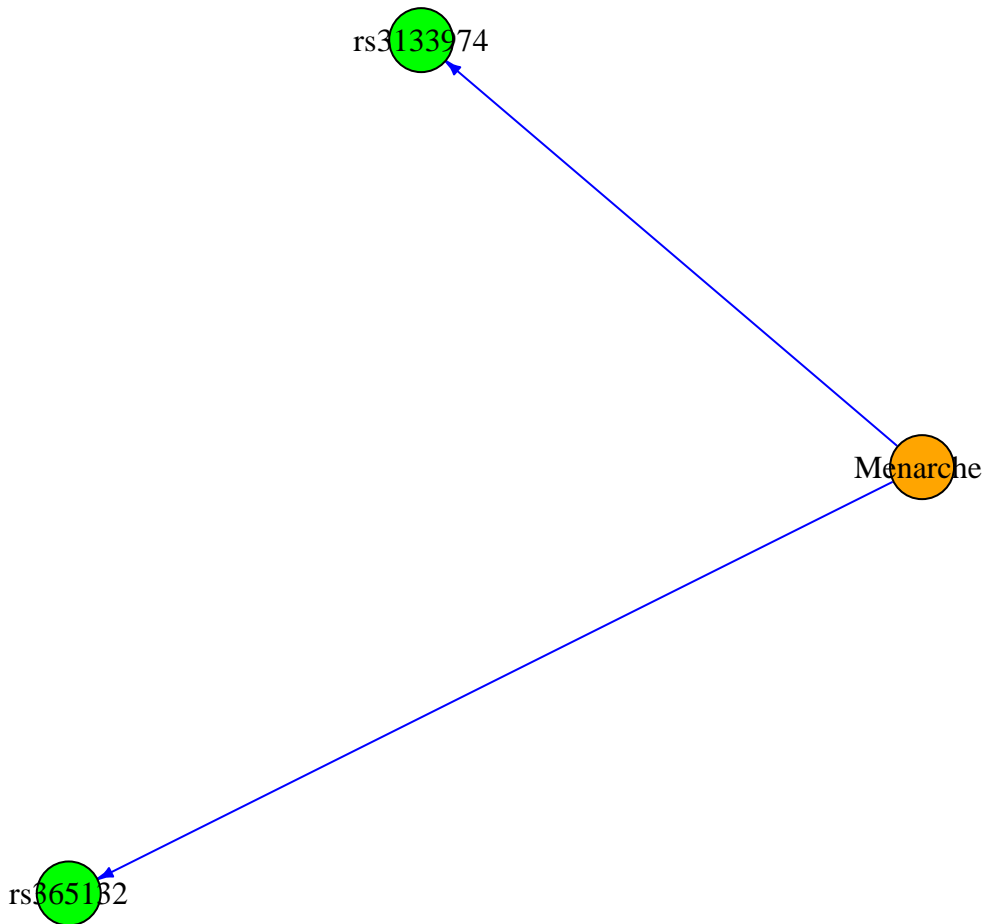

**Variant–Disease Network (Menarche and menopause )**

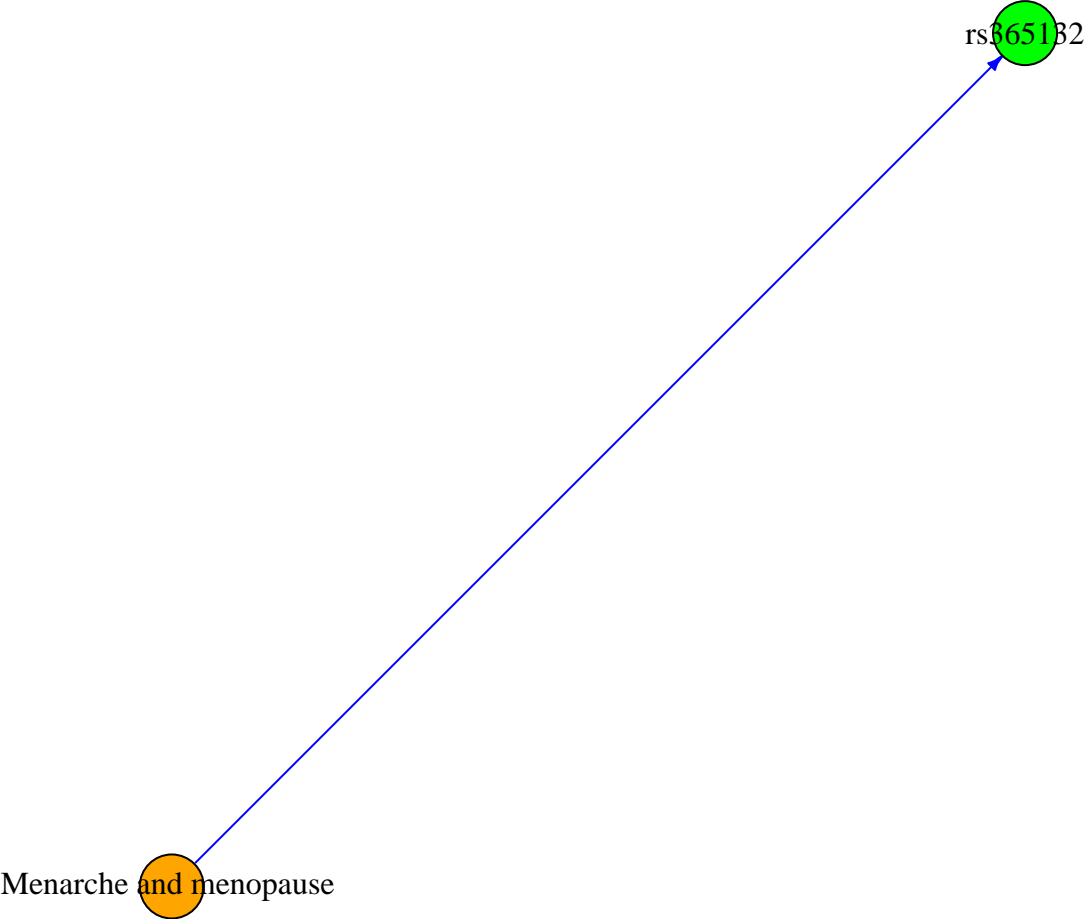

## Variant–Disease Network (Menopause )

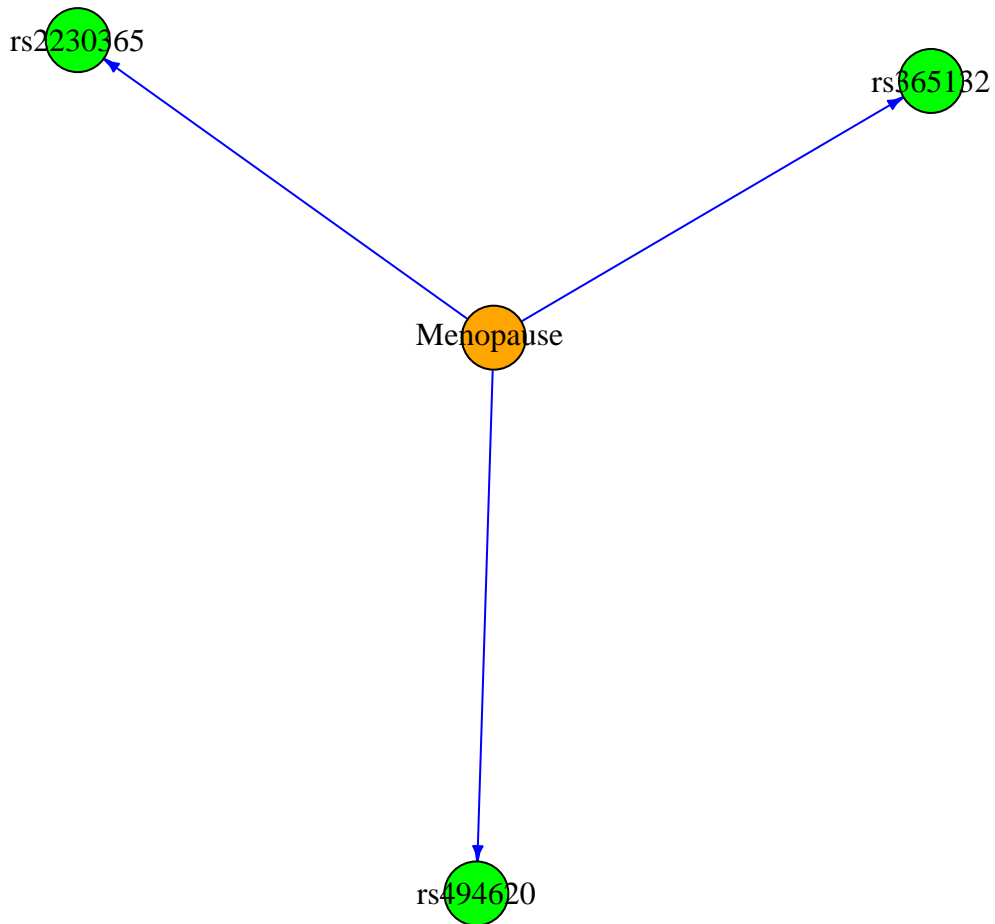

## Variant–Disease Network (Metabolic syndrome)

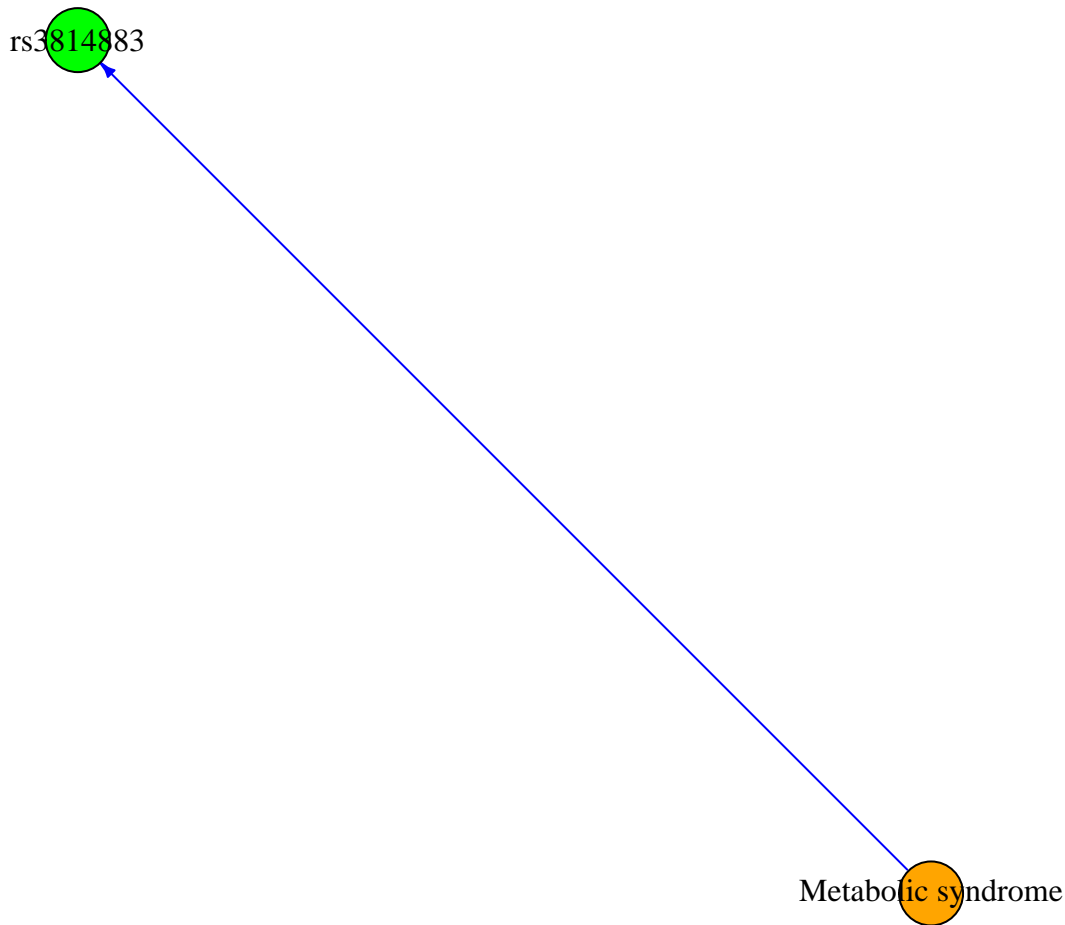

## Variant–Disease Network (Metabolite levels)

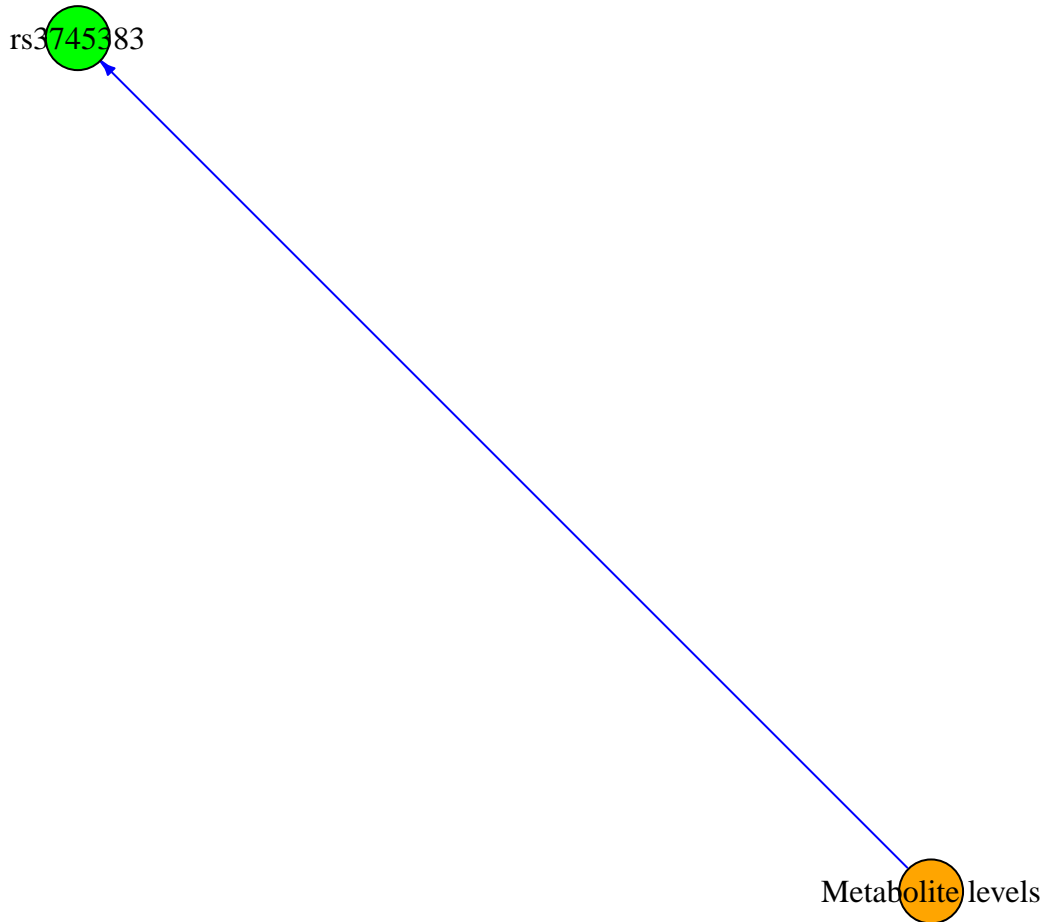

Variant–Disease Network (Monocyte count)

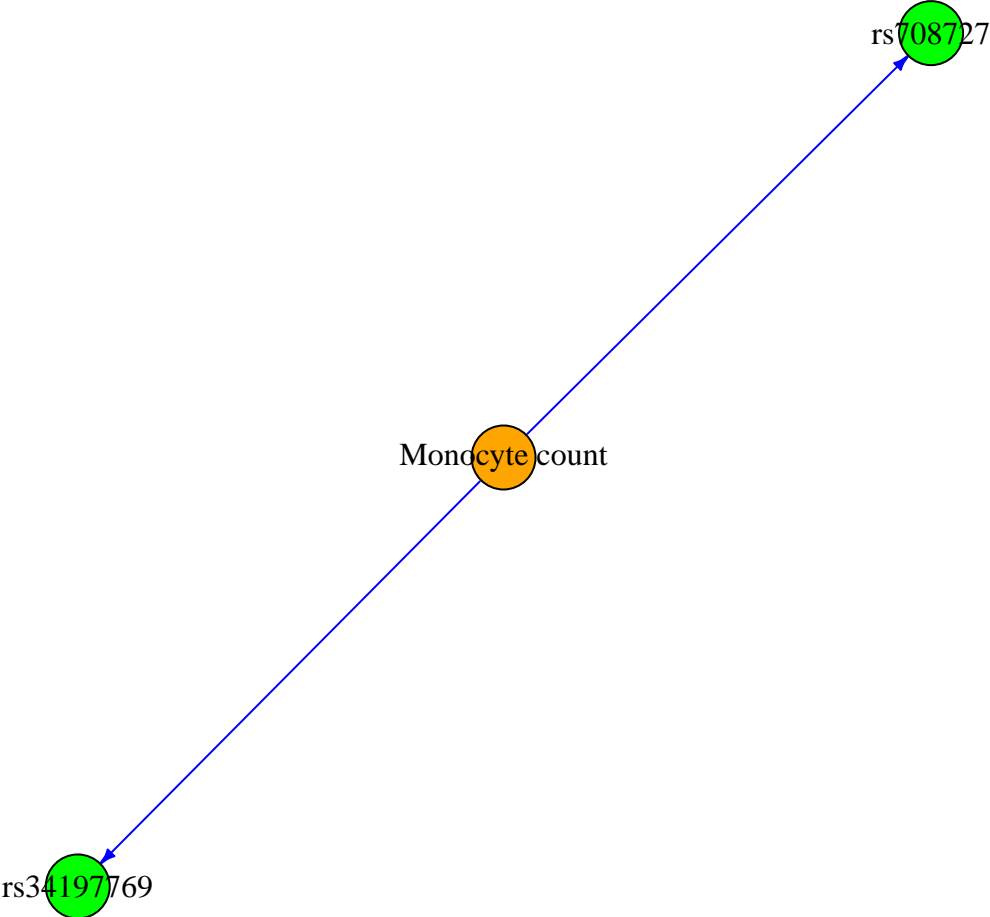



## Variant-Disease Network (Neuroticism)

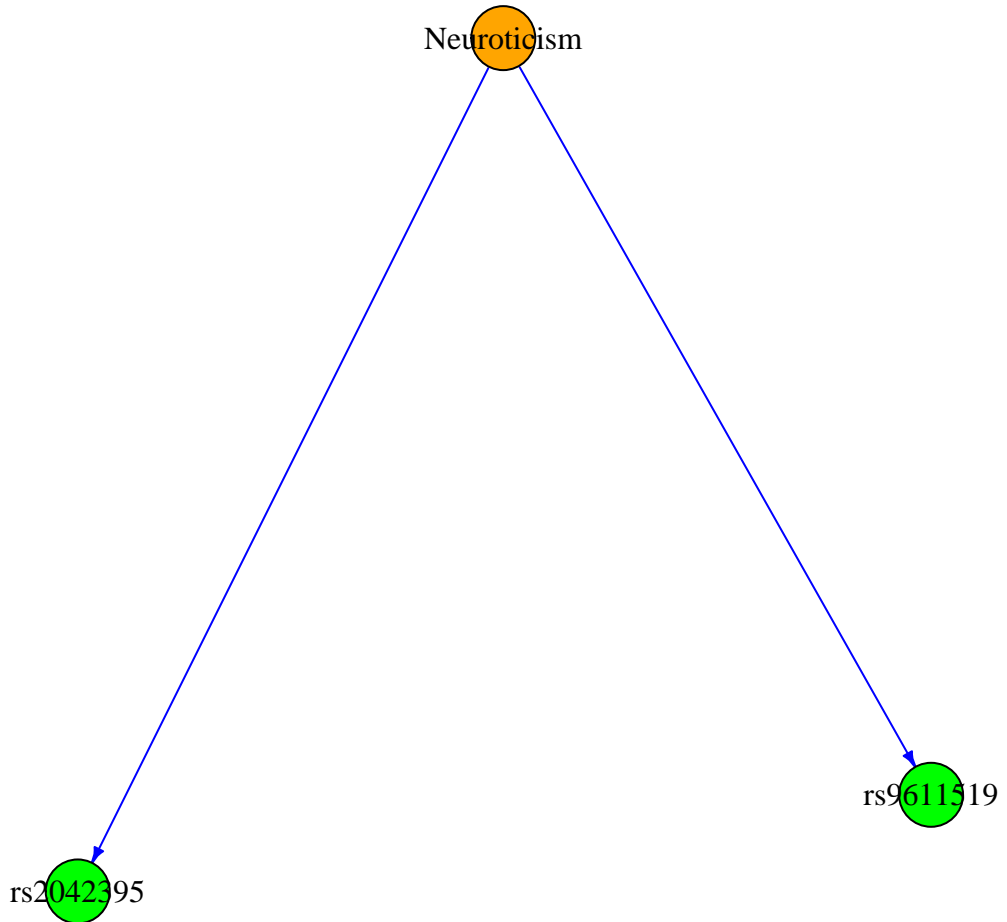

# Variant–Disease Network (Nonobstructive coronary artery disease)

Nonobstructive coronary artery disease

rs2301753

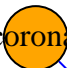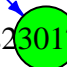

## Variant–Disease Network (Obesity–related traits)

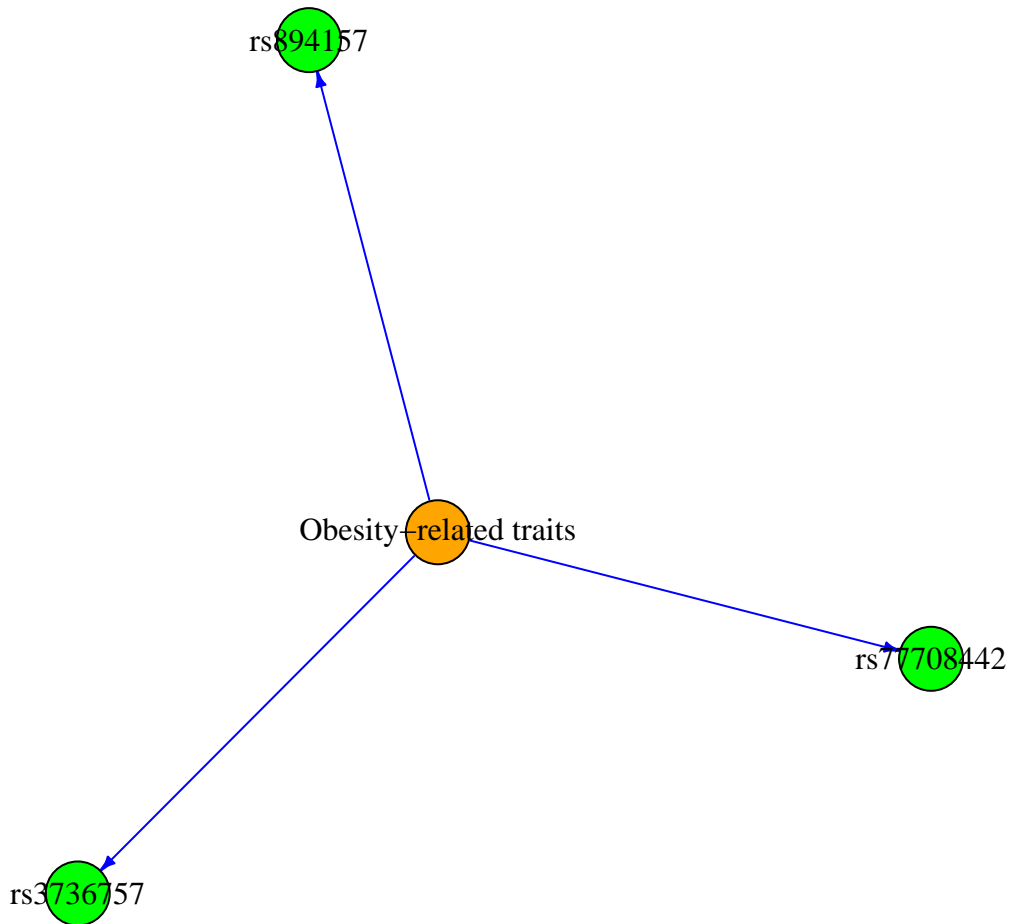

# Variant–Disease Network (Peak expiratory flow)

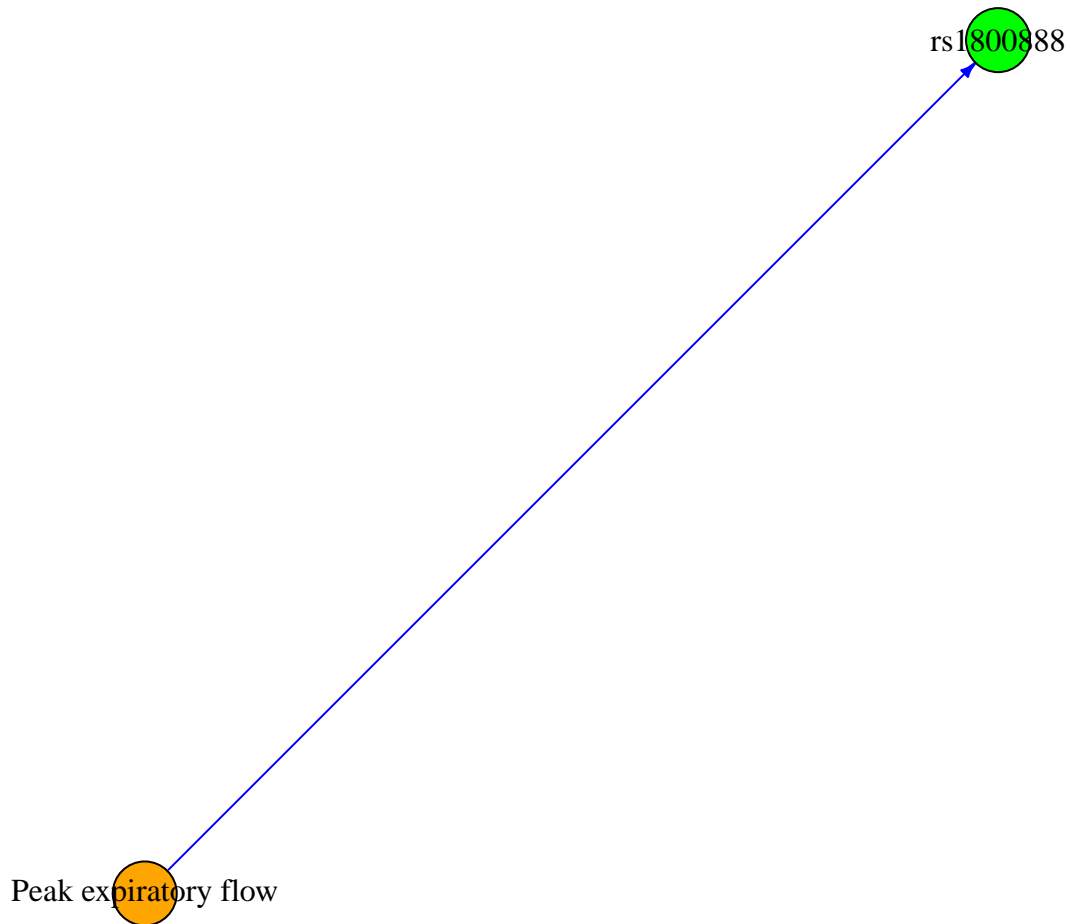

Variant–Disease Network (Plasma omega–6 polyunsaturated fatty acid leve

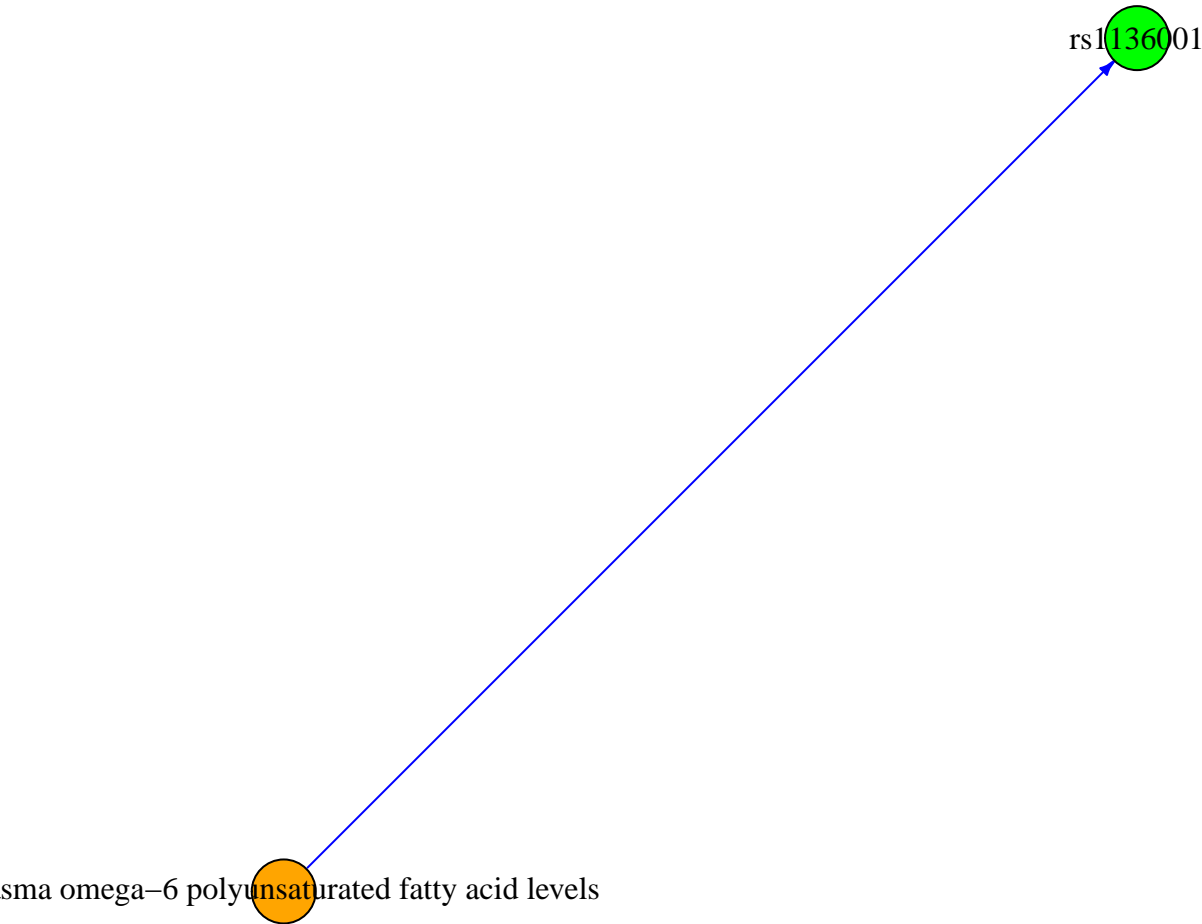

## Variant–Disease Network (Platelet aggregation)

rs1052763

Platelet aggregation



## Variant-Disease Network (Platelet count)

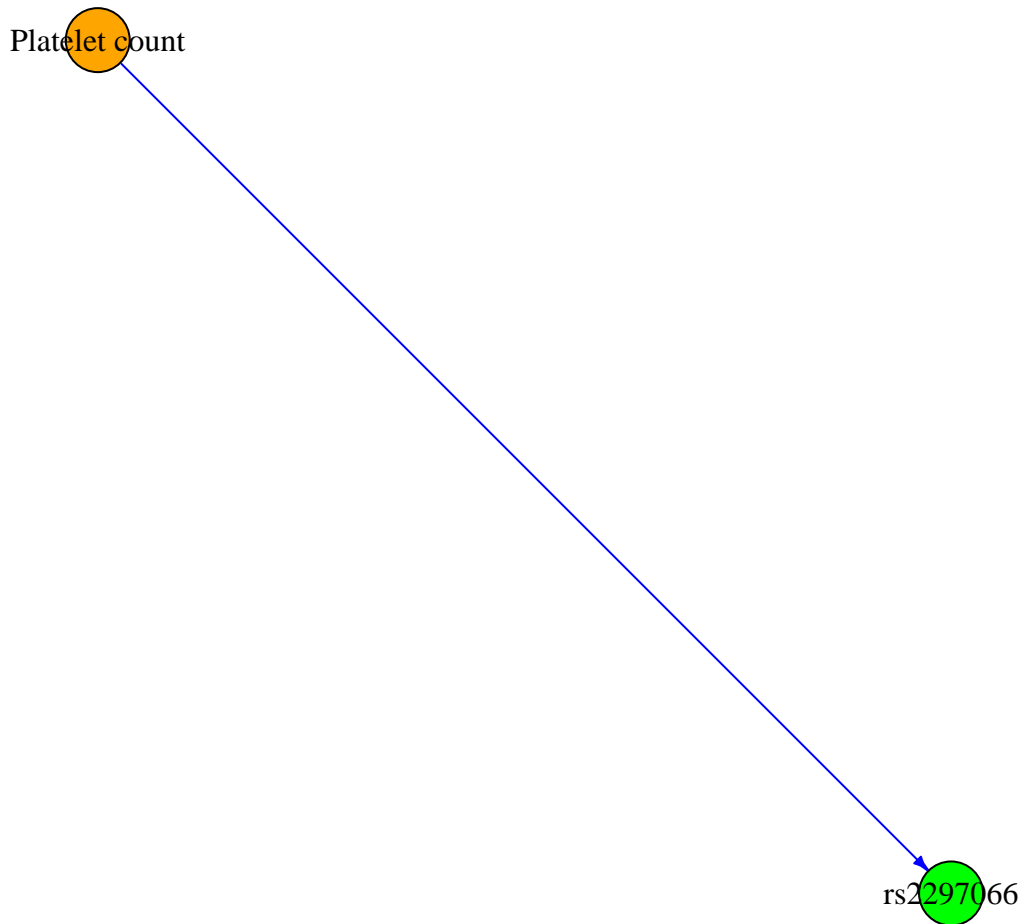

# Variant–Disease Network (Post bronchodilator FEV1)

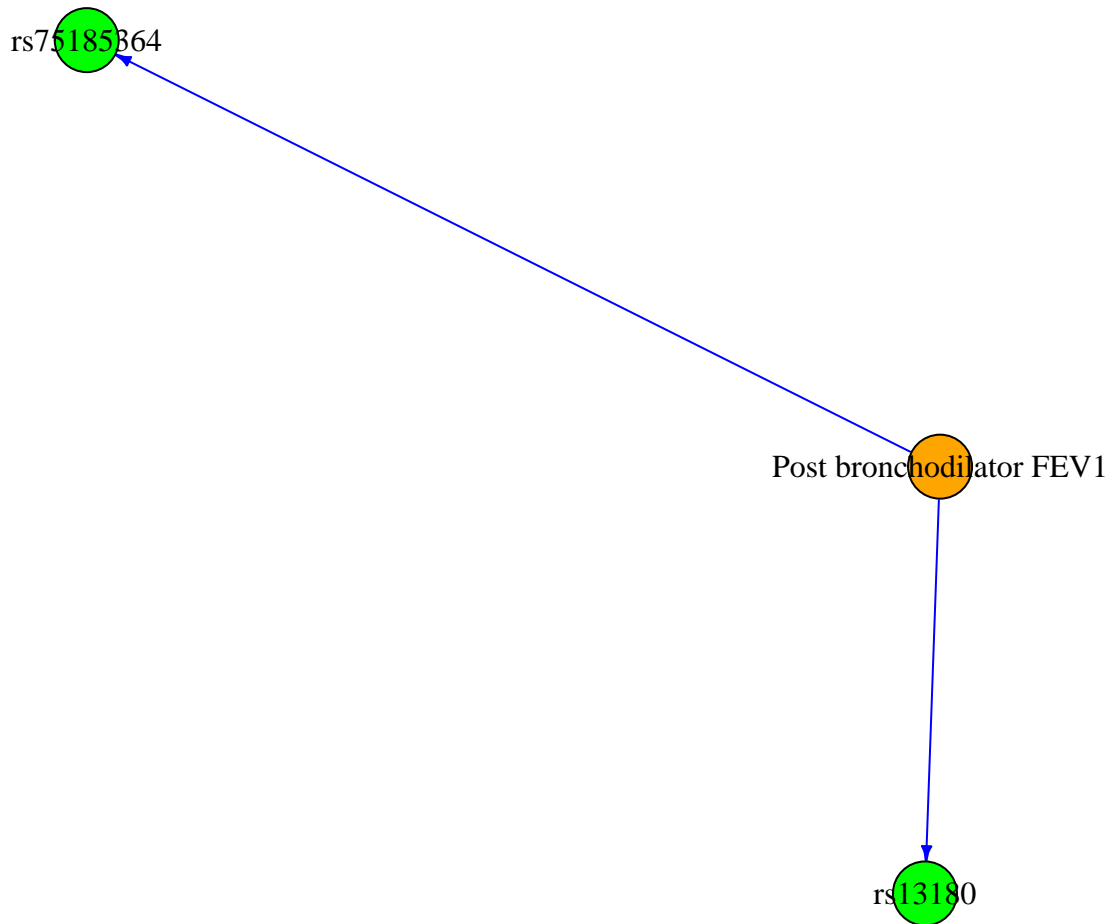



Variant–Disease Network (Post bronchodilator FEV1/FVC ratio)

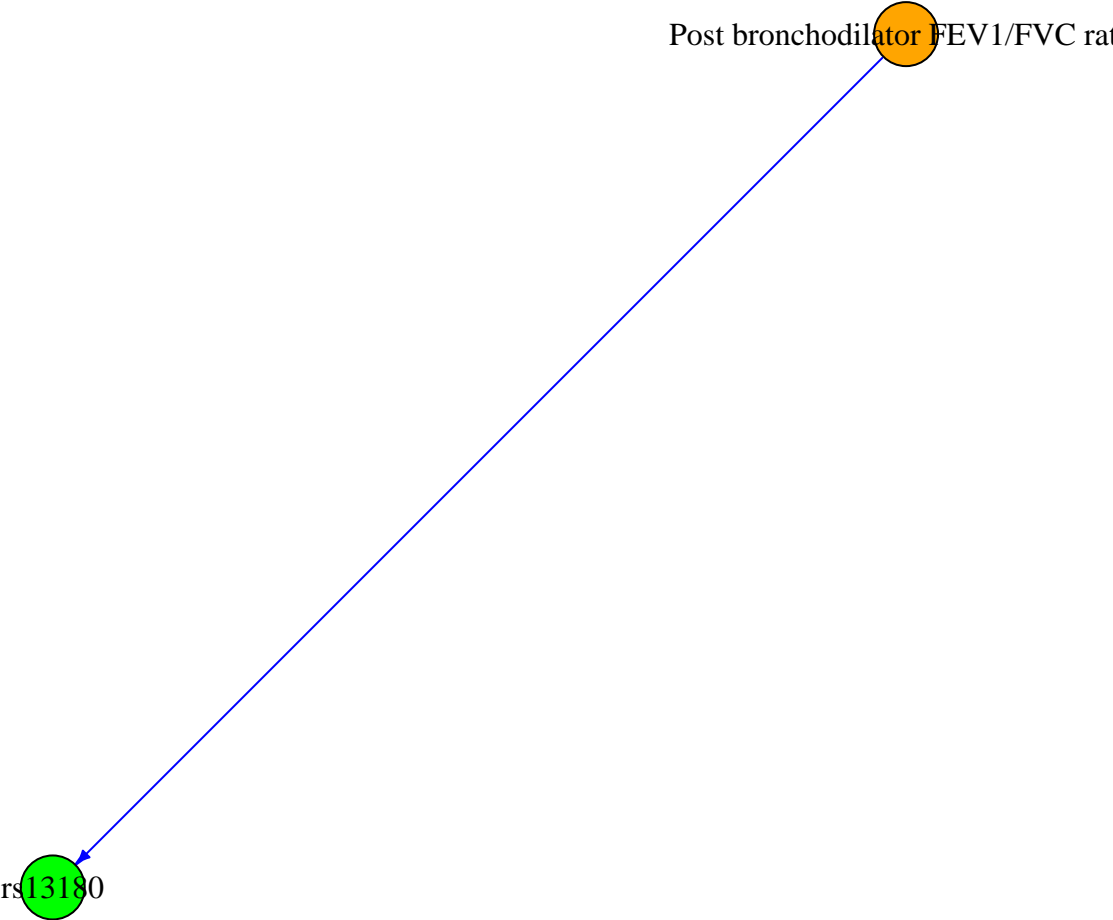

# Variant-Disease Network (Postoperative survival time in hepatocellular carcinoma)

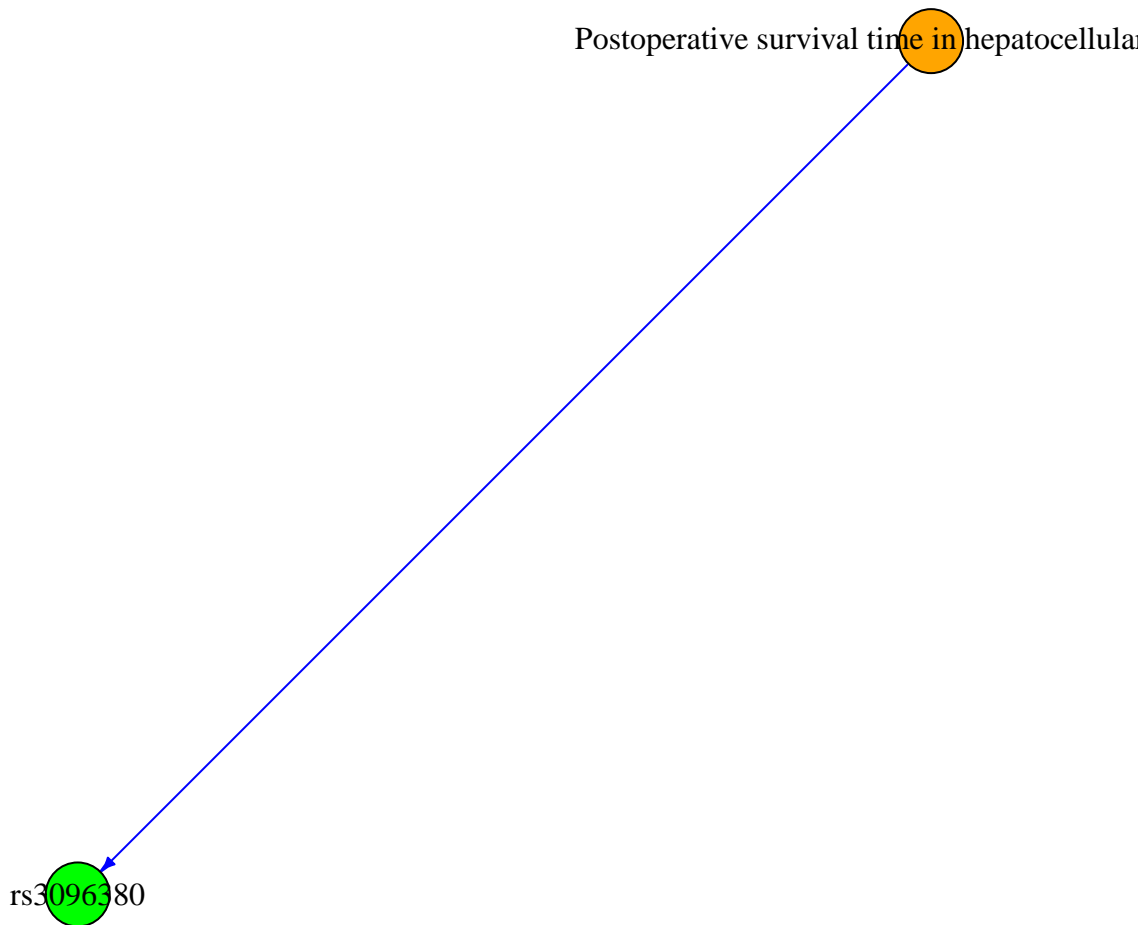

## Variant–Disease Network (Psoriasis)

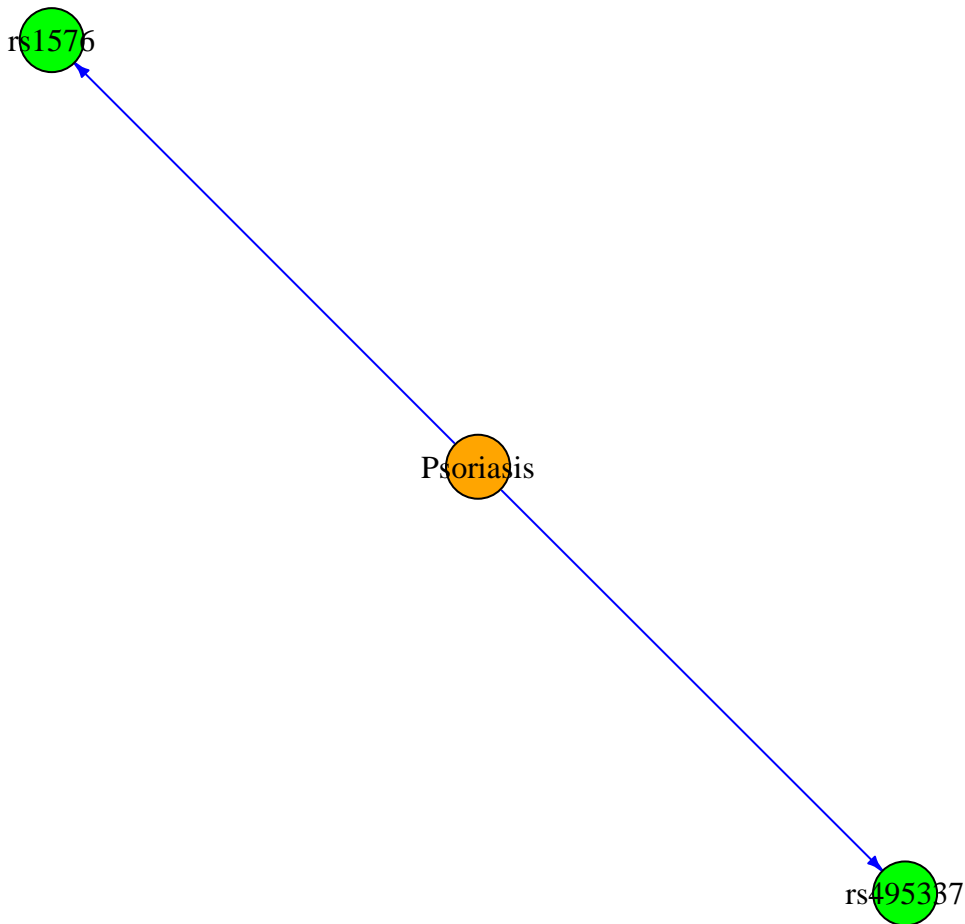

## Variant–Disease Network (Psoriatic arthritis)

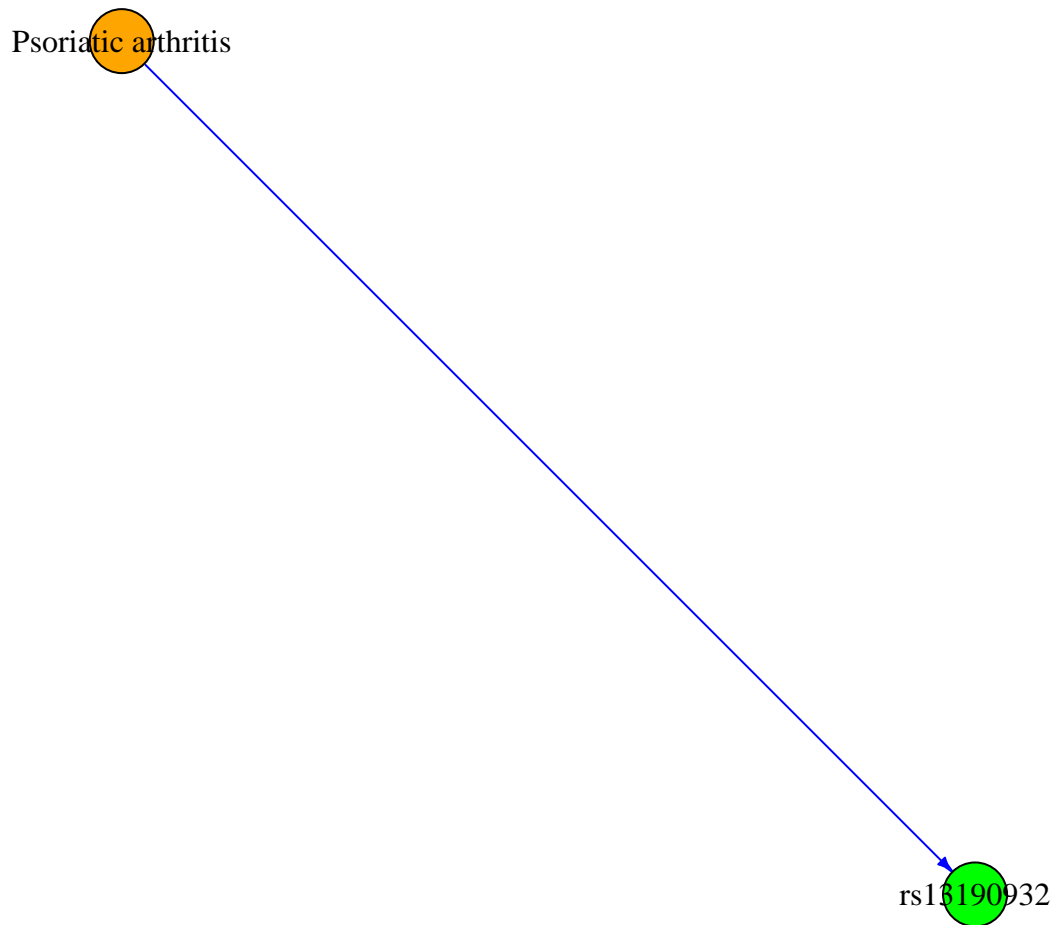

## Variant–Disease Network (Pulse pressure)

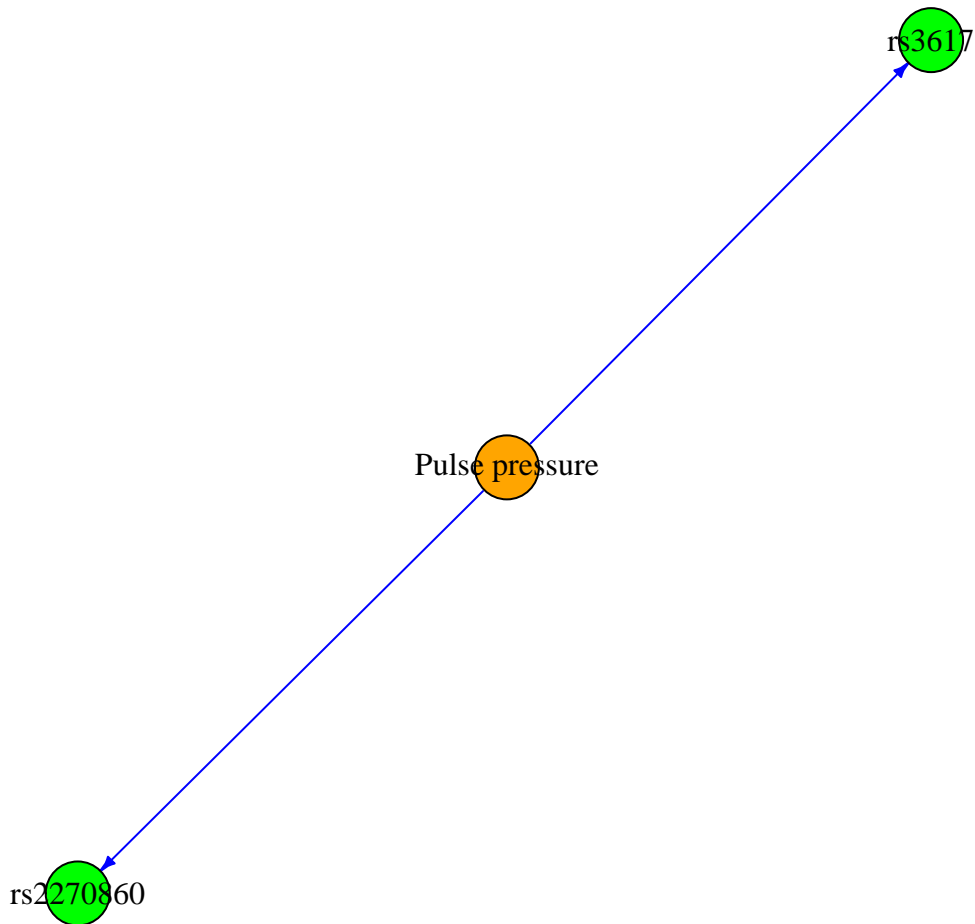

## Variant-Disease Network (QRS duration)

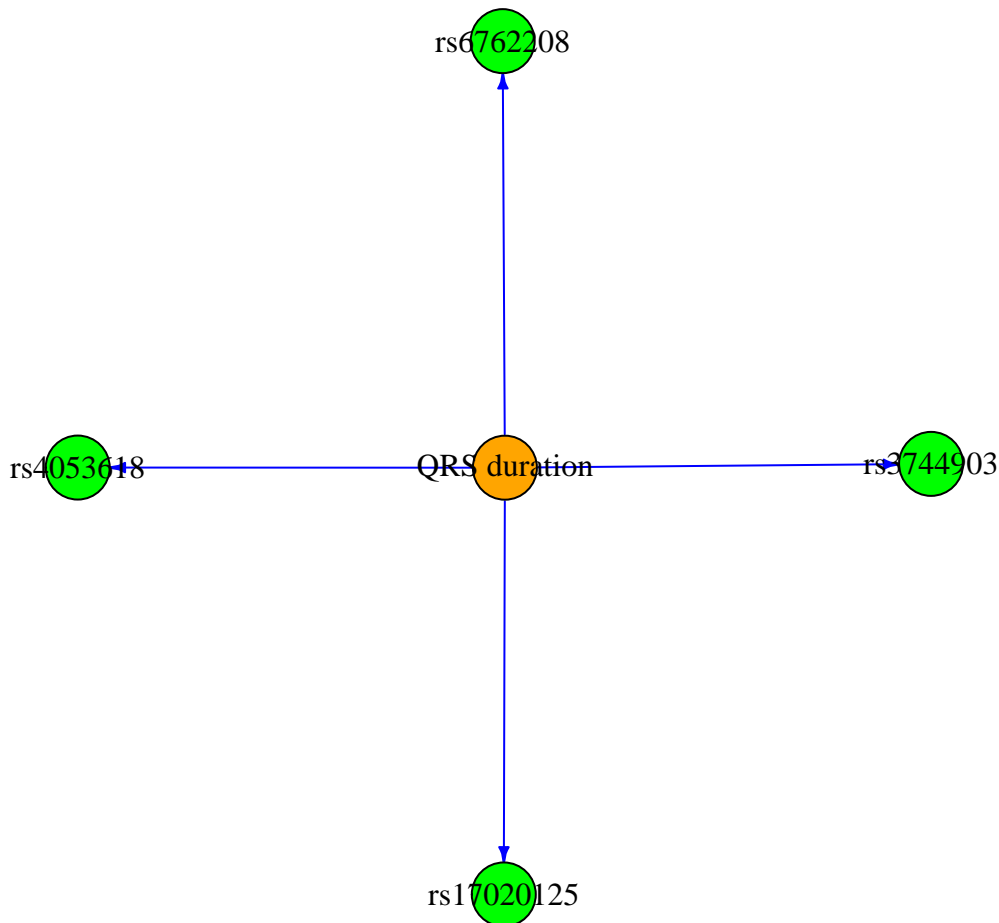

## Variant–Disease Network (Red blood cell count)

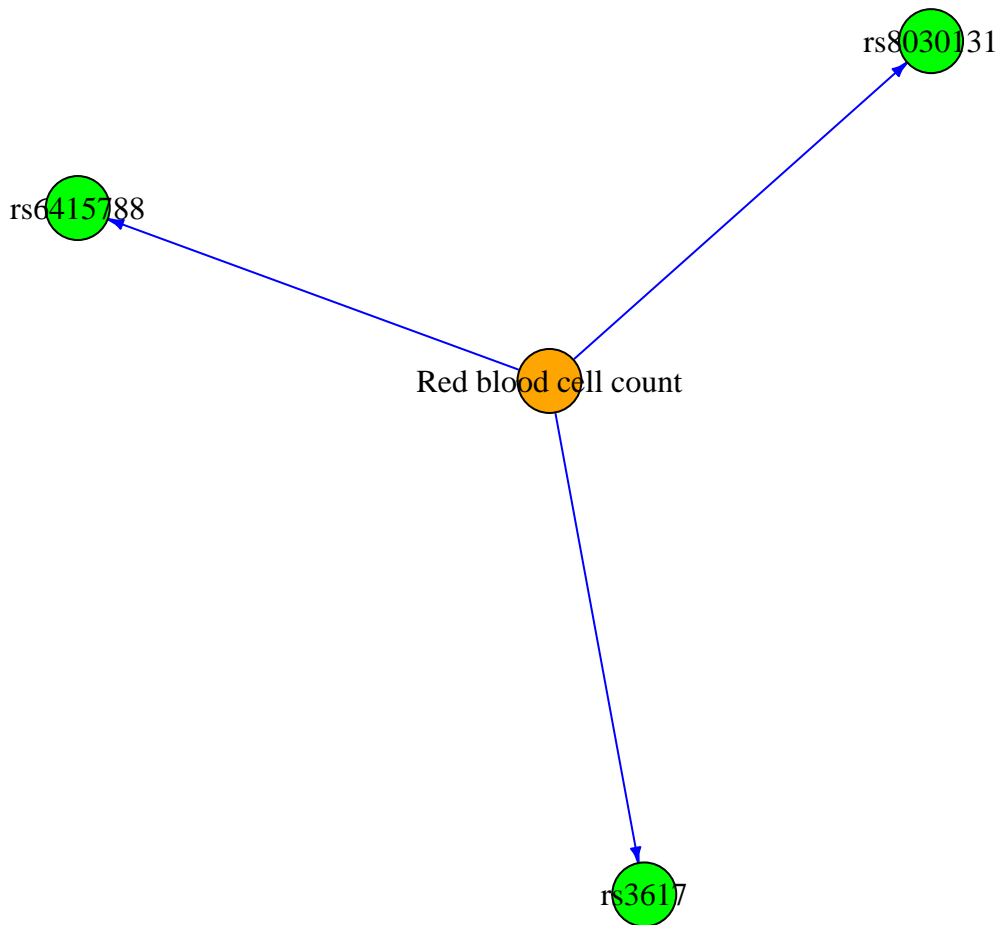

## Variant–Disease Network (Red blood cell traits)

Red blood cell traits

rs4820268

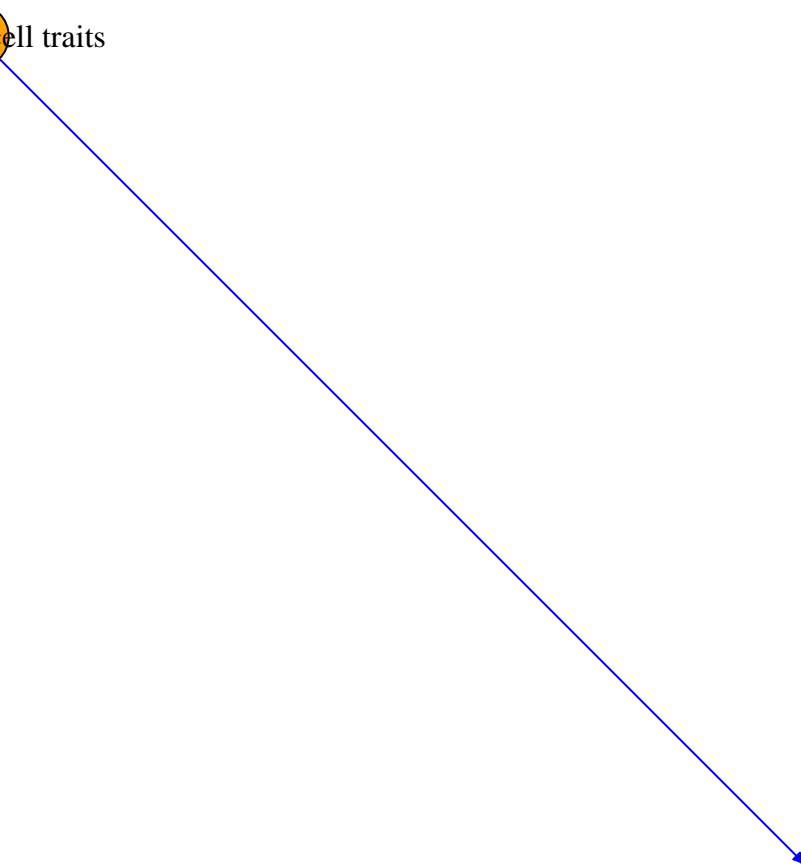



# Variant–Disease Network (Red cell distribution width)

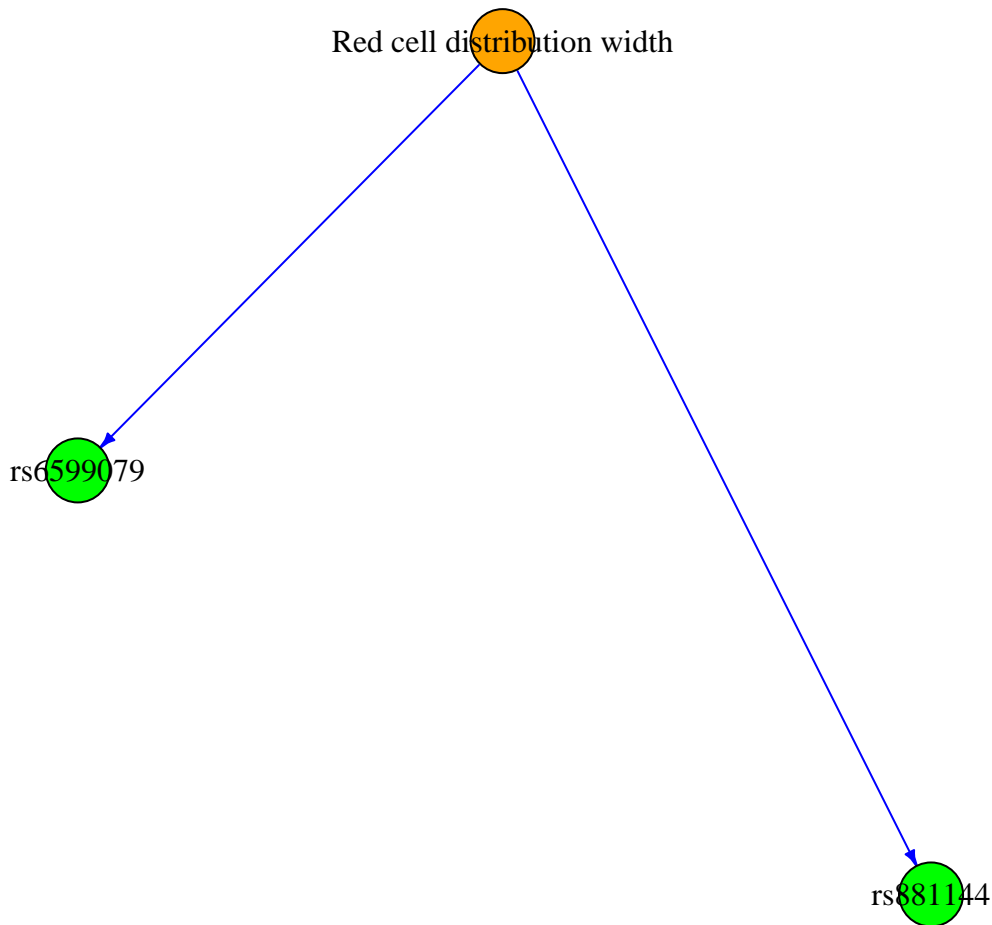

## Variant-Disease Network (Refractive error)

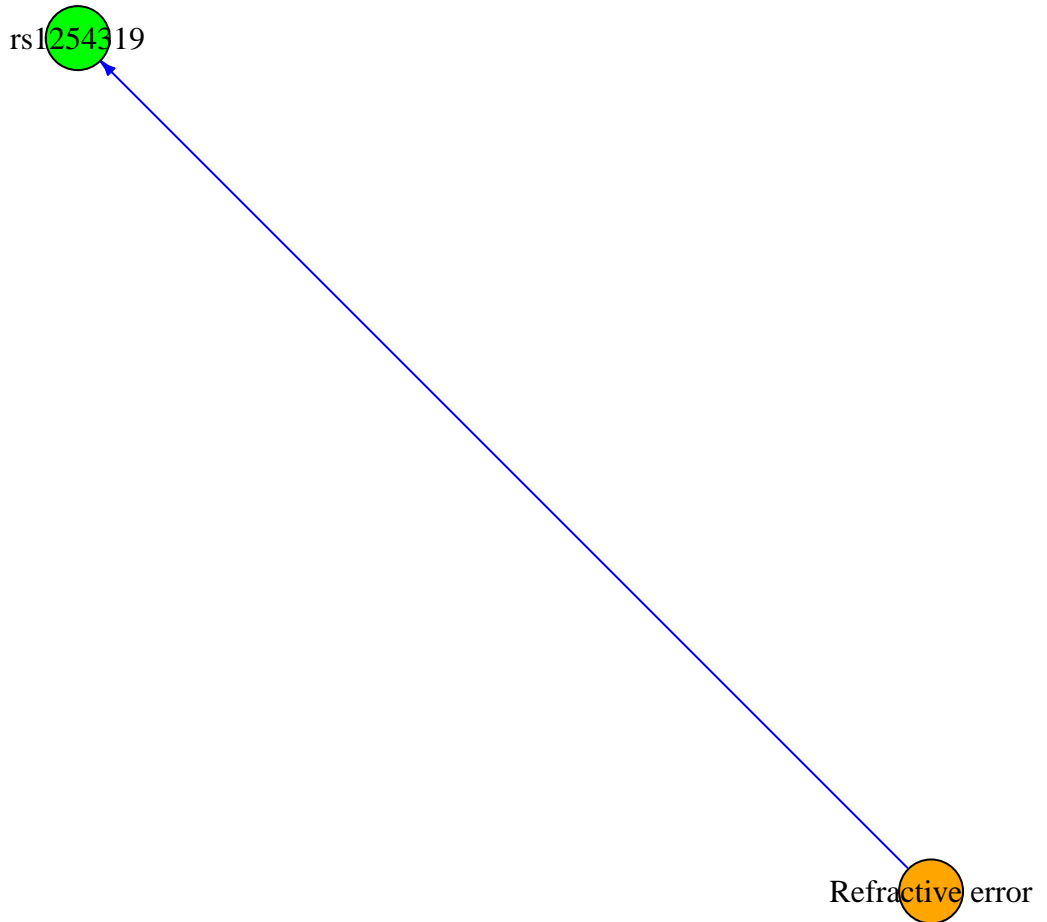

# Variant–Disease Network (Response to antipsychotic treatment)

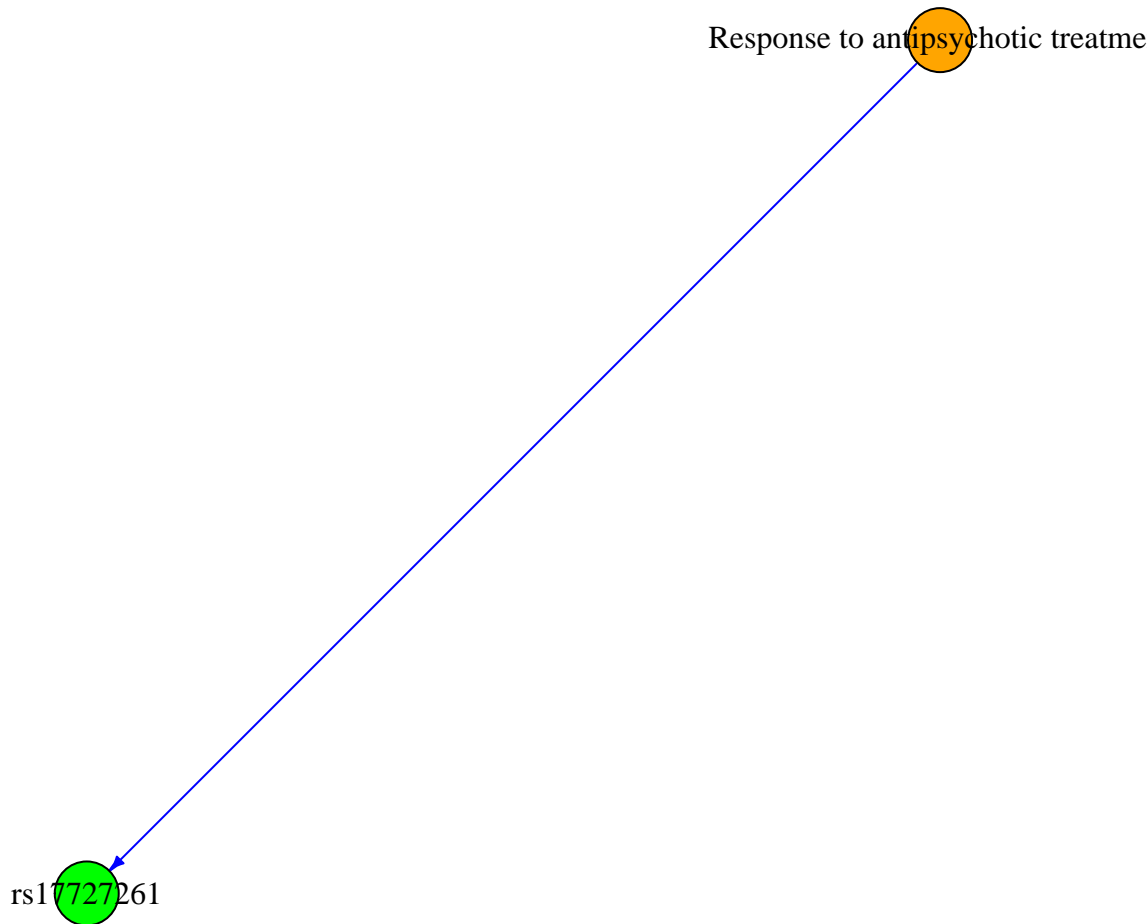

## Variant–Disease Network (Reticulocyte count)

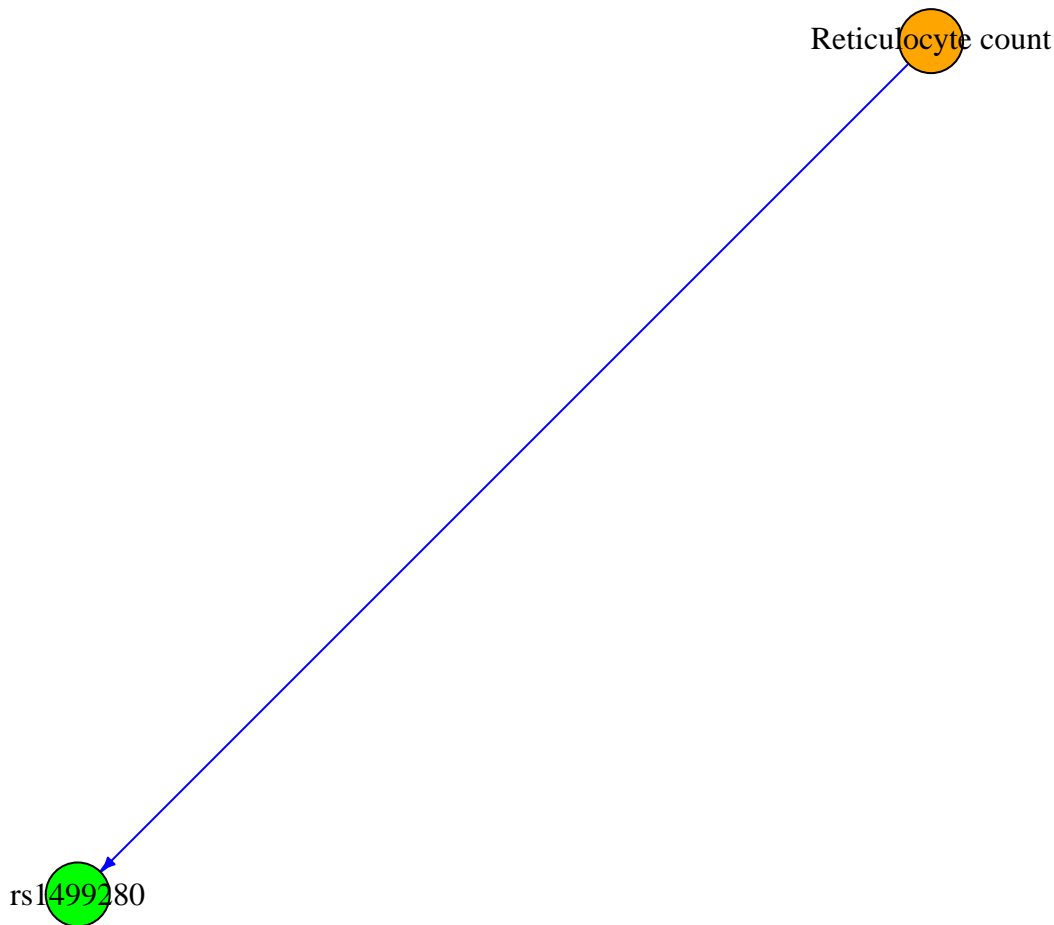

# Variant–Disease Network (Reticulocyte fraction of red cells)

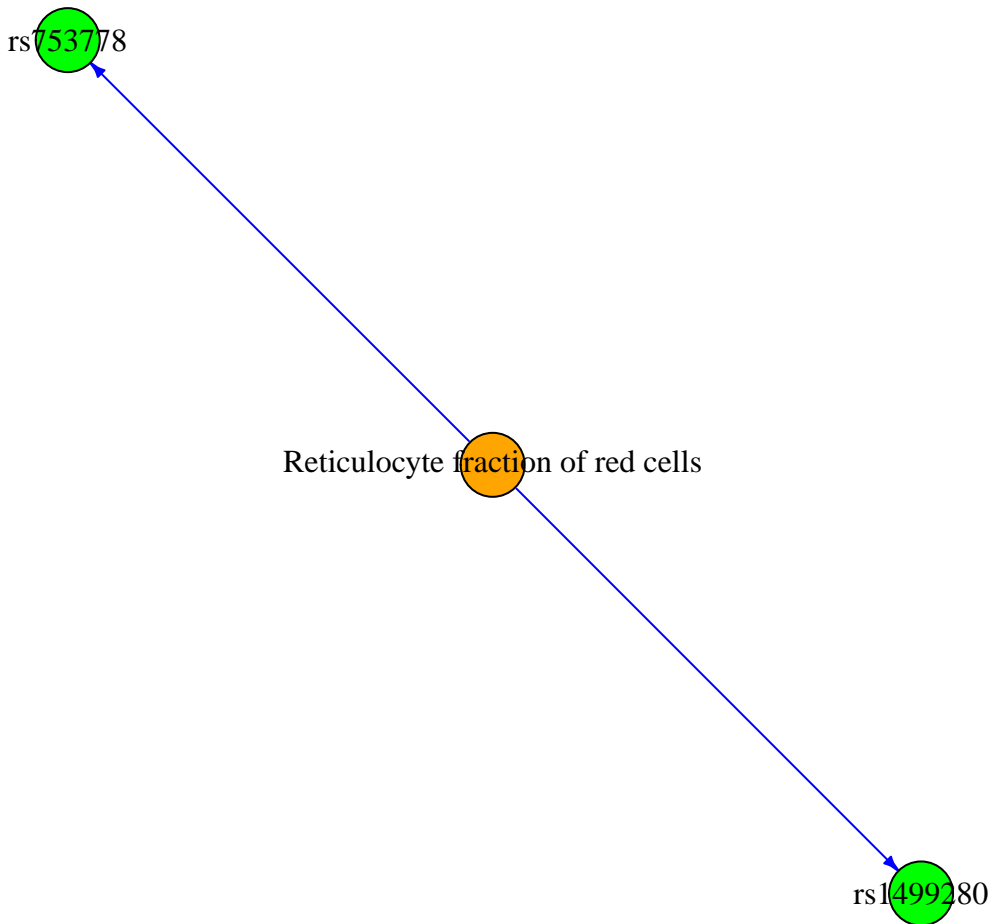

## Variant–Disease Network (Risk–taking tendency )

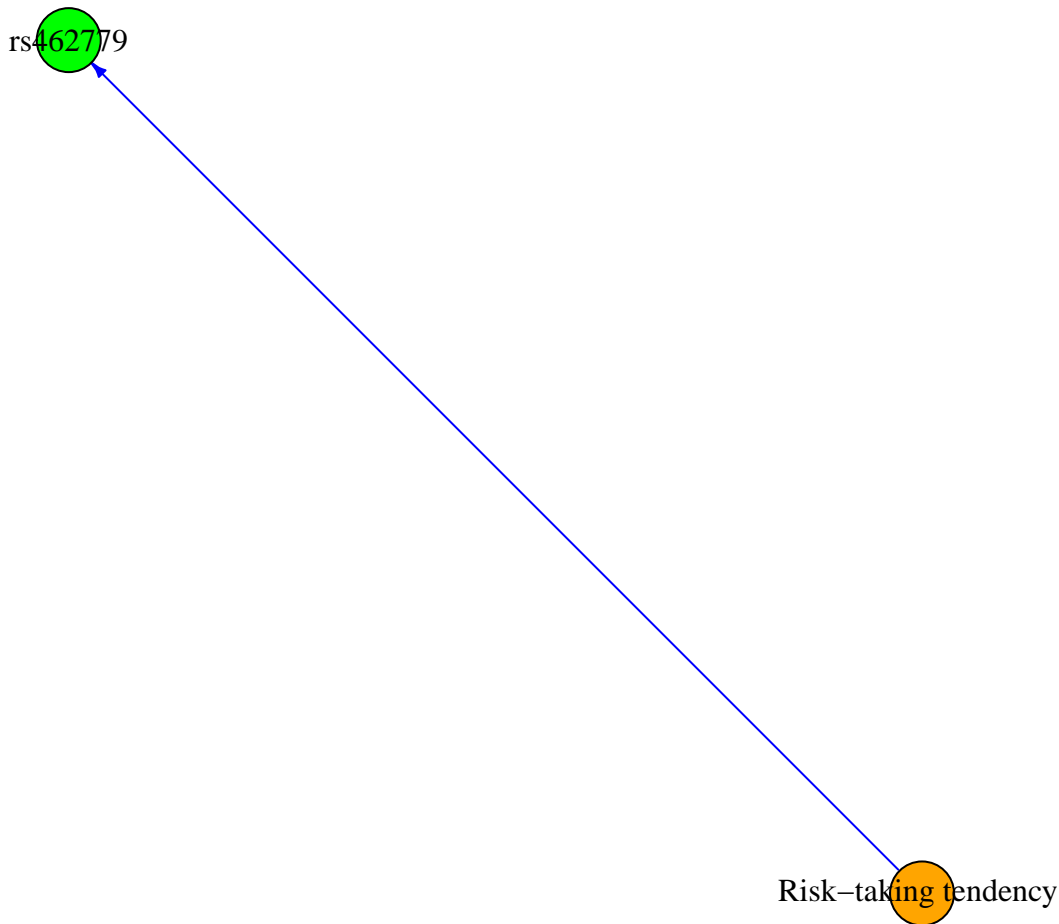

# Variant–Disease Network (Serum 25–Hydroxyvitamin D levels)

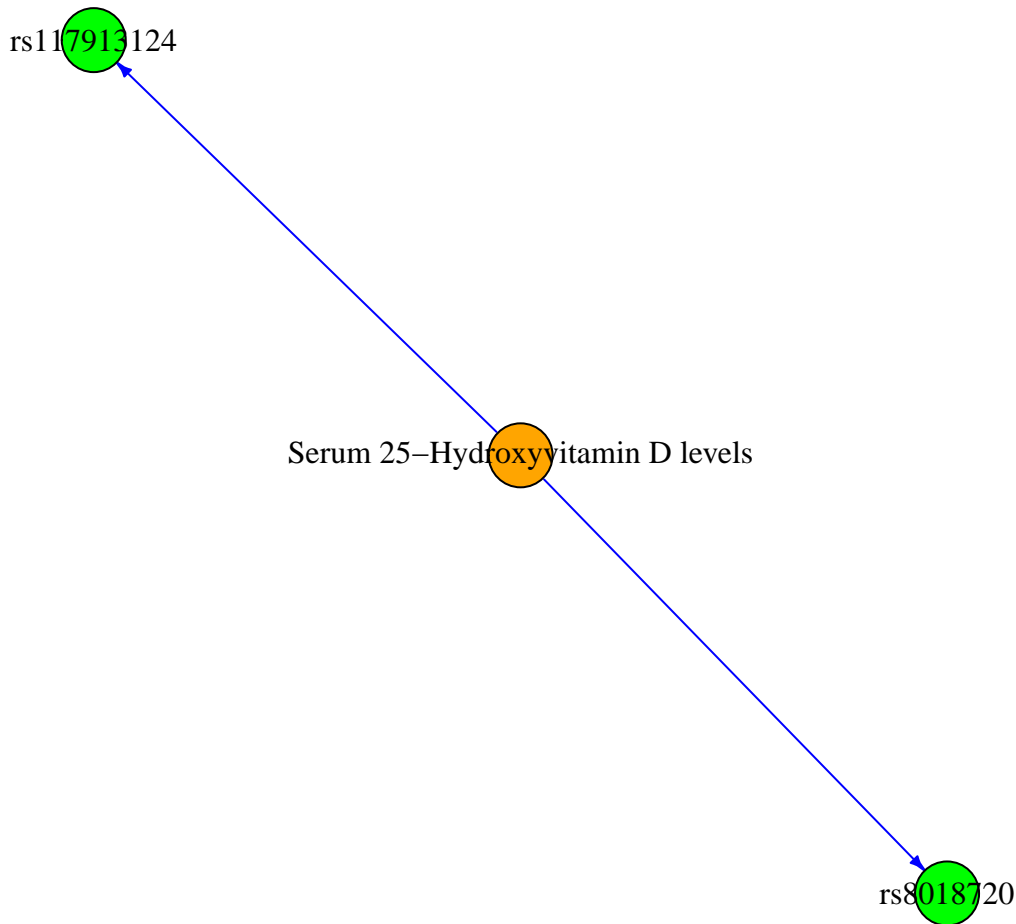

# Variant–Disease Network (Serum alkaline phosphatase levels)

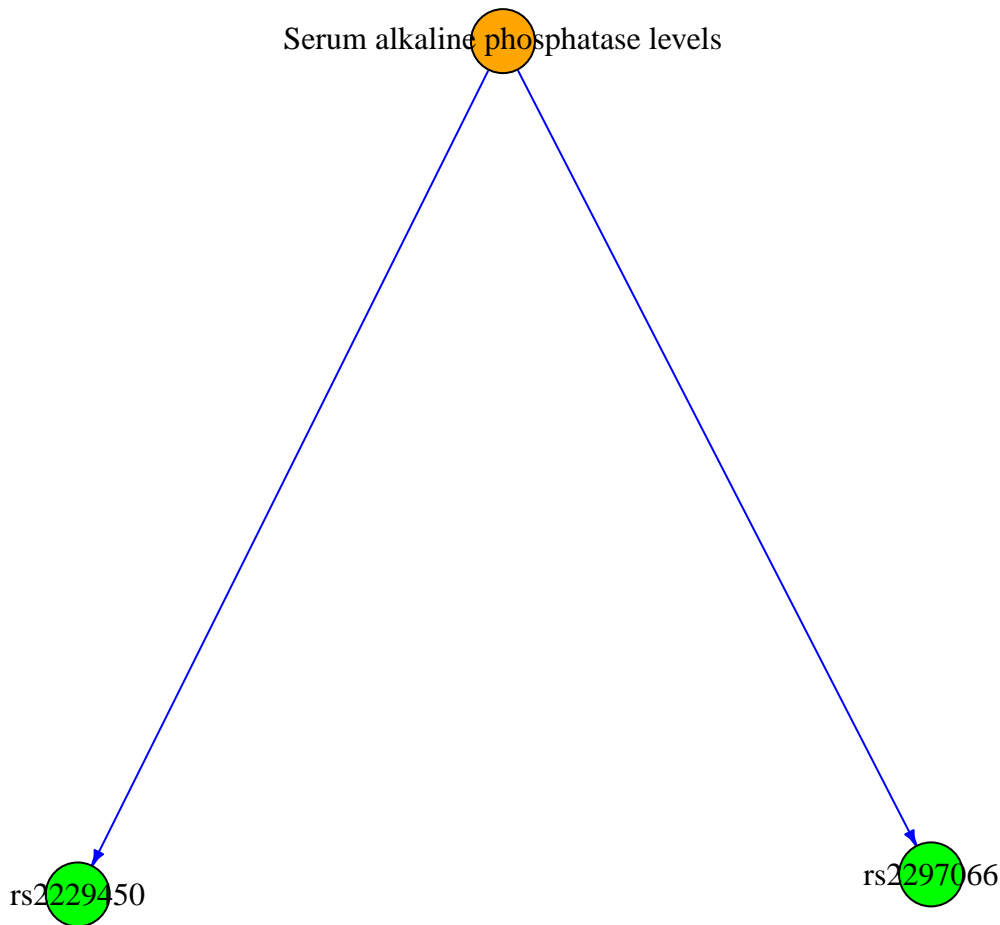



## Variant–Disease Network (Serum metabolite levels)

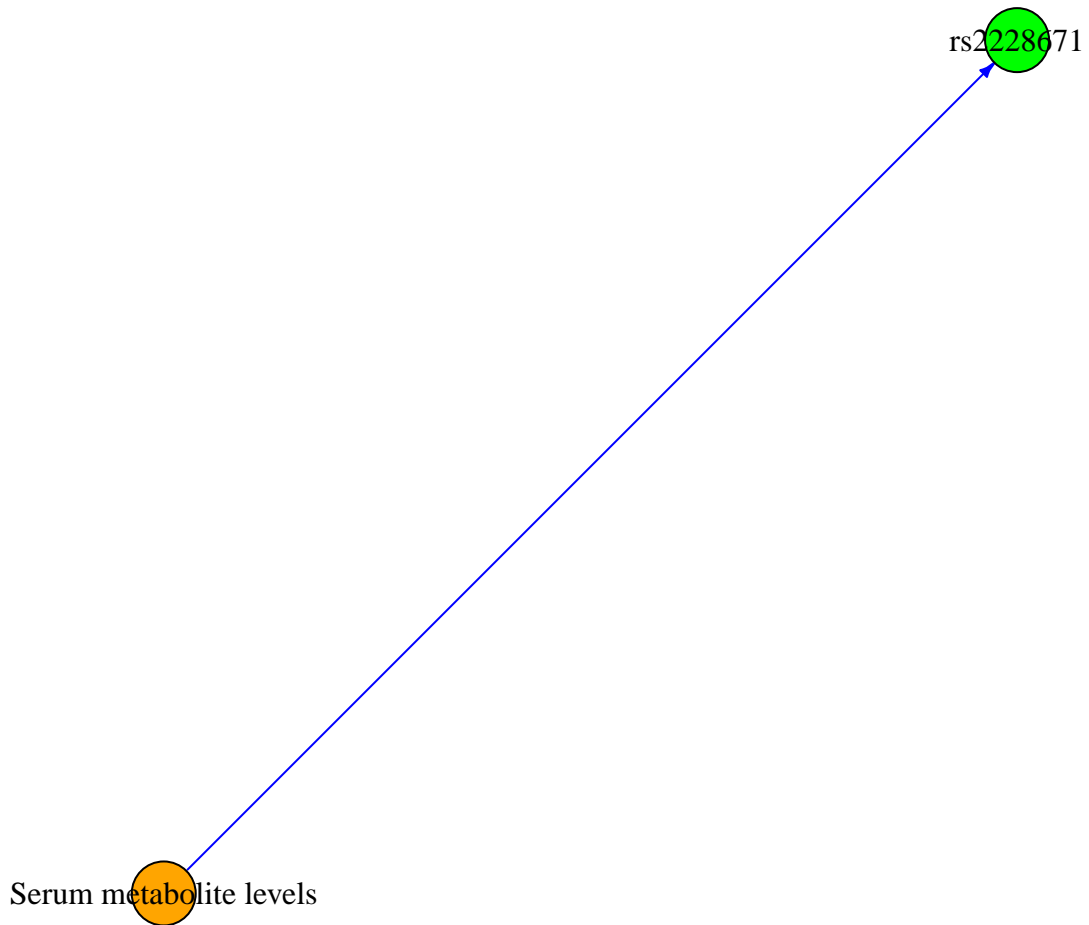

## Variant-Disease Network (Serum metabolite levels )

Serum metabolite levels

rs2228671

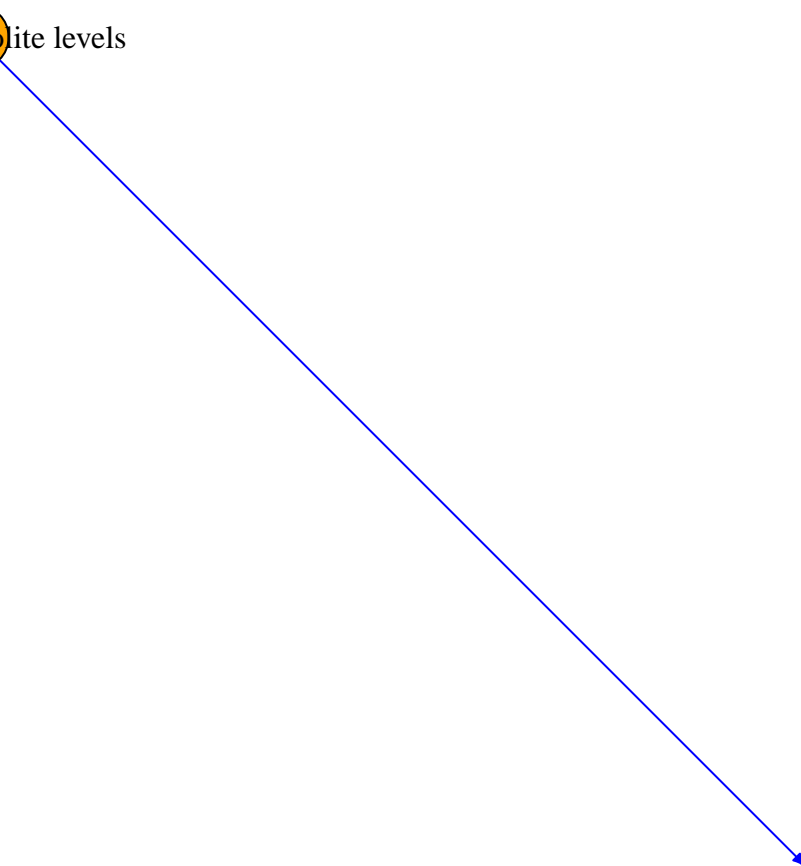

Variant–Disease Network (Smoking initiation )

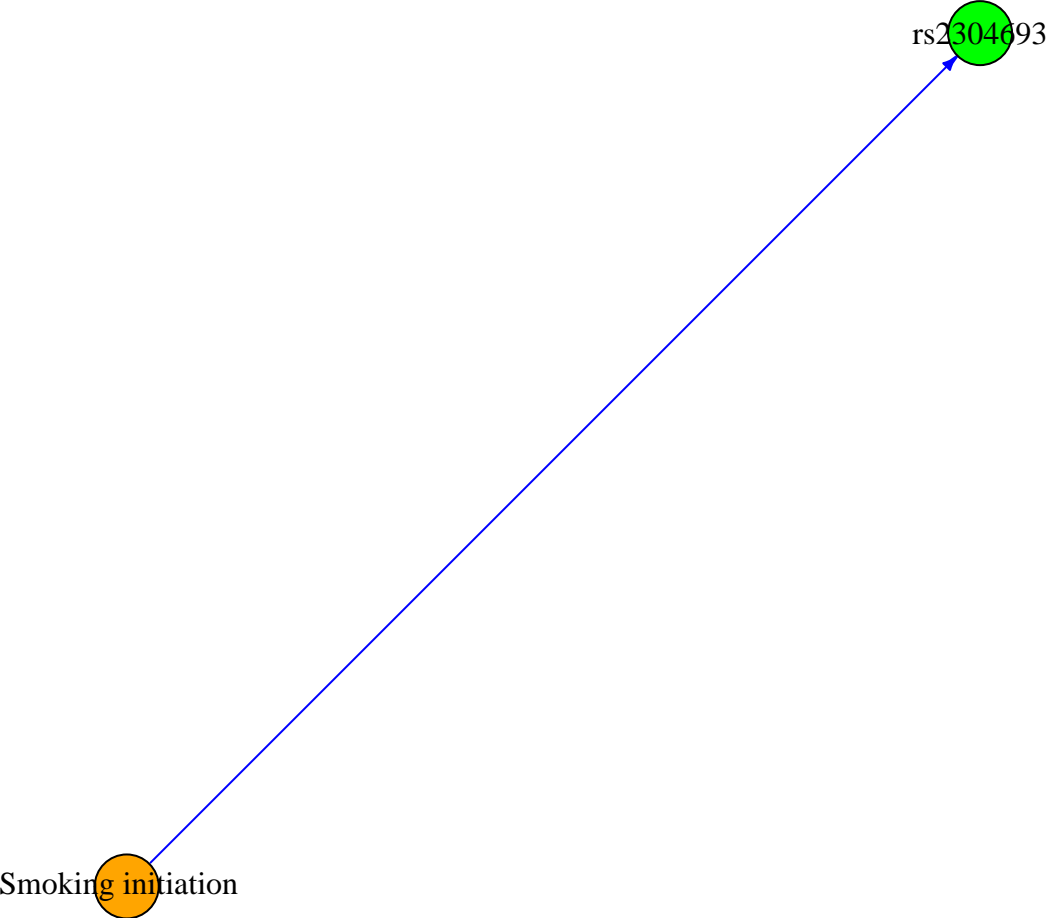

## Variant–Disease Network (Suicide behavior)

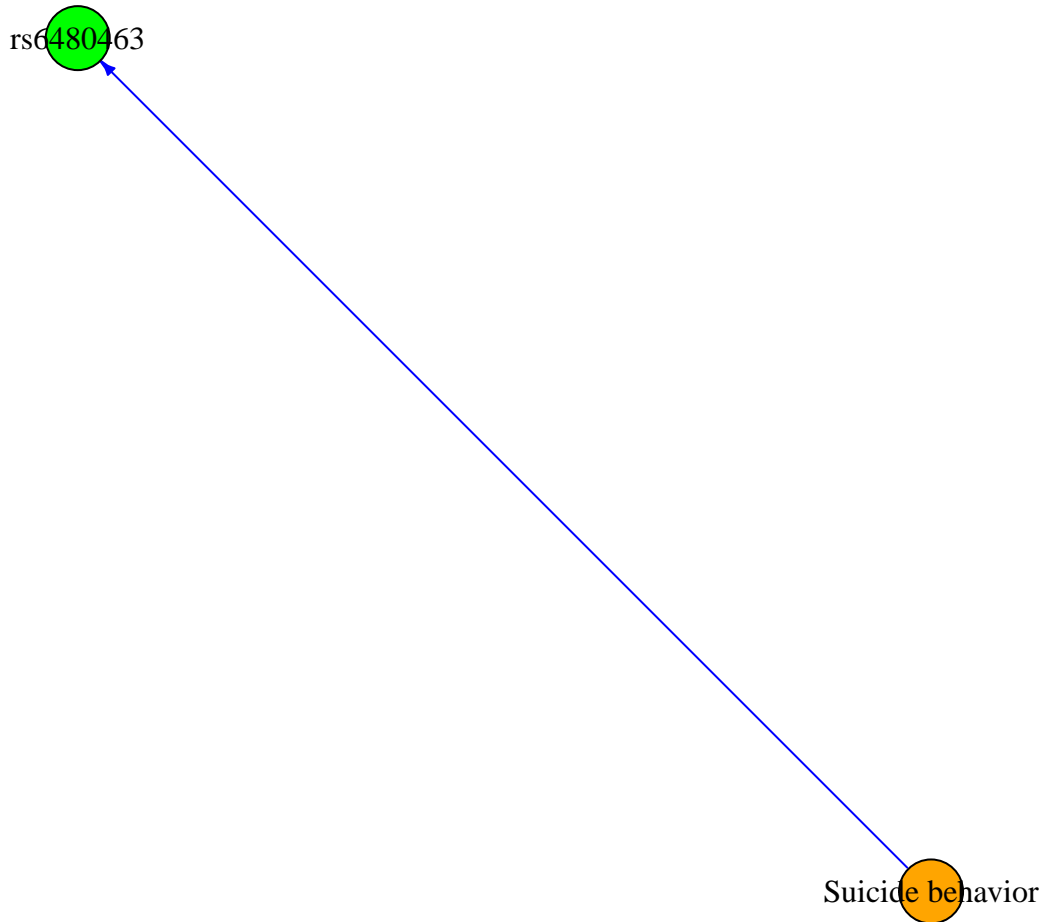

Variant–Disease Network (Systemic lupus erythematosus)

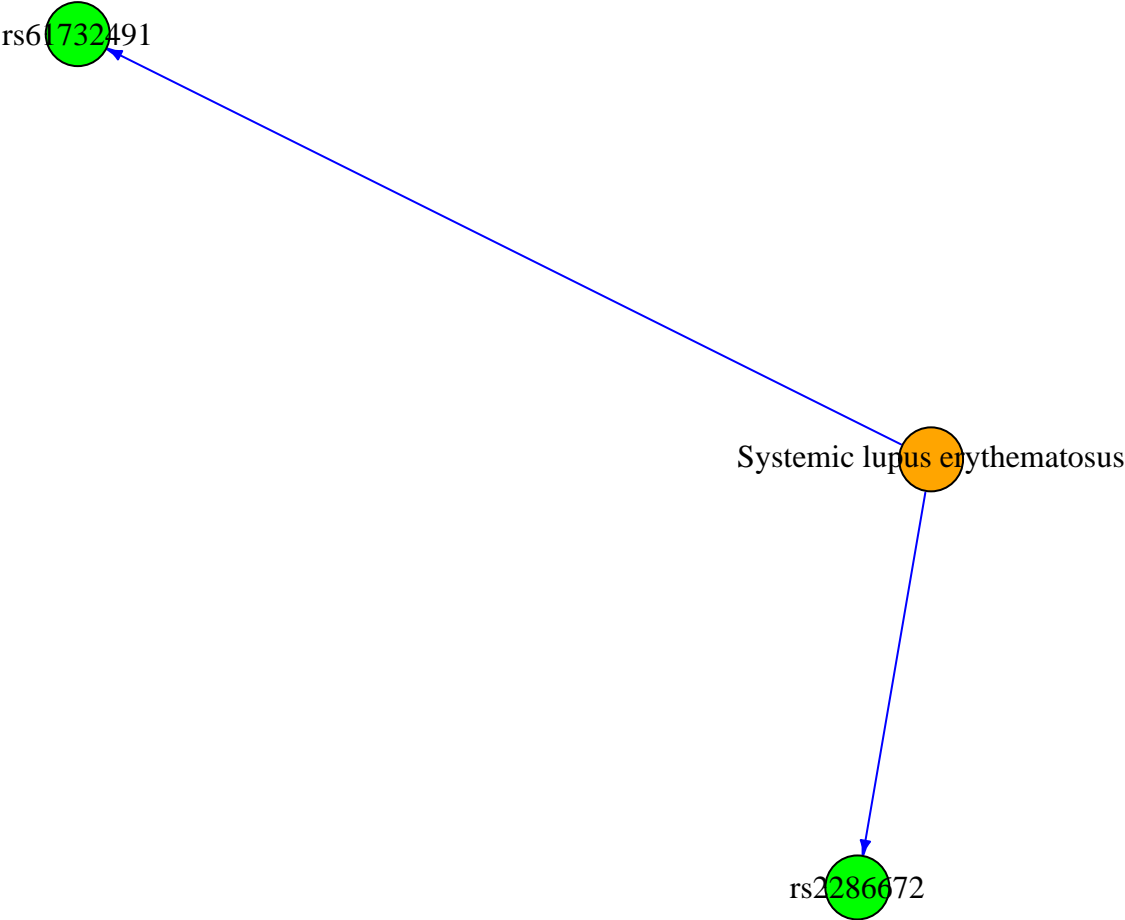

## Variant–Disease Network (Systolic blood pressure)

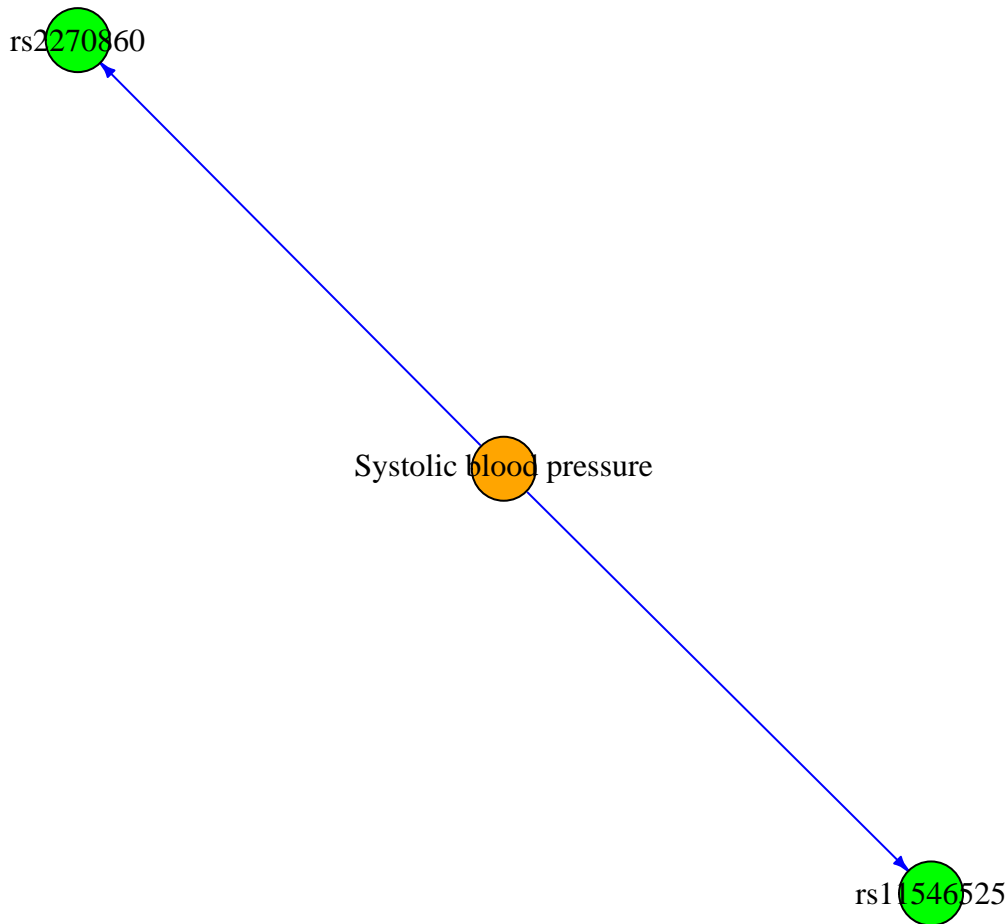

Variant–Disease Network (Systolic blood pressure )

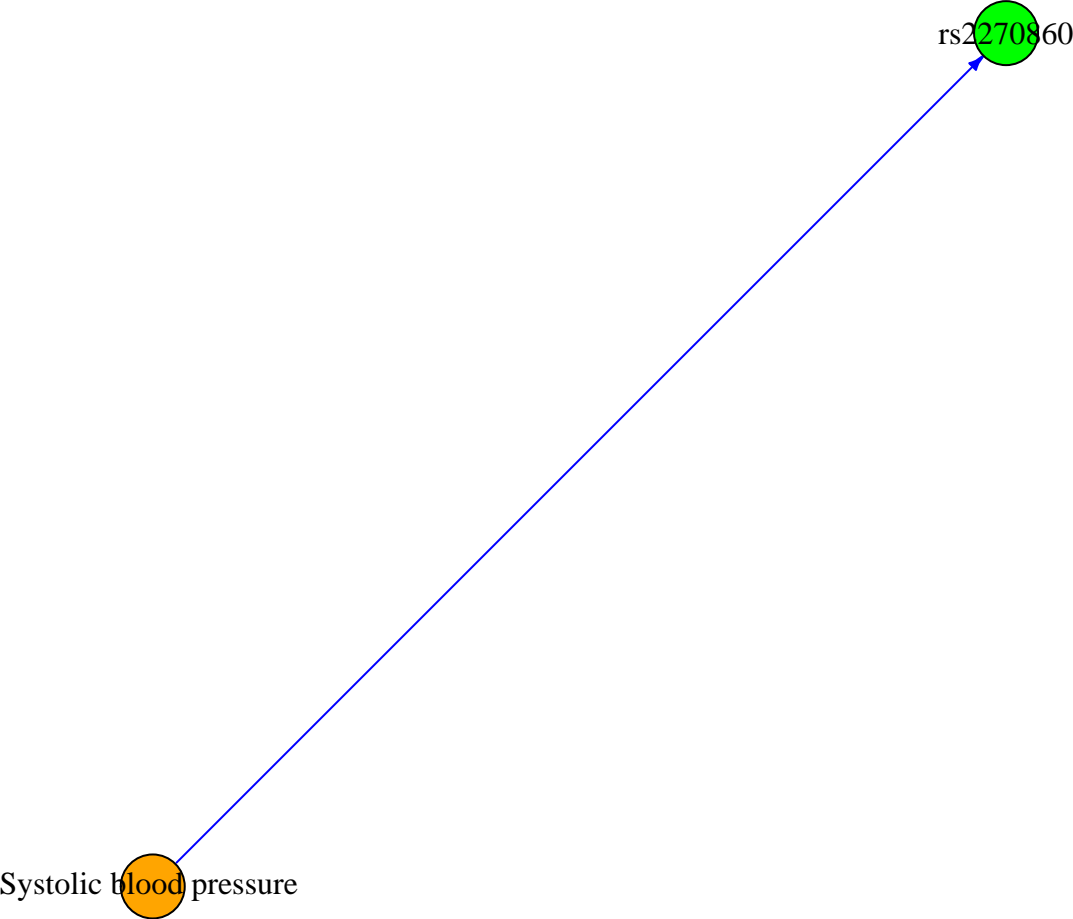

**Variant–Disease Network (Systolic blood pressure in sickle cell anemia)**

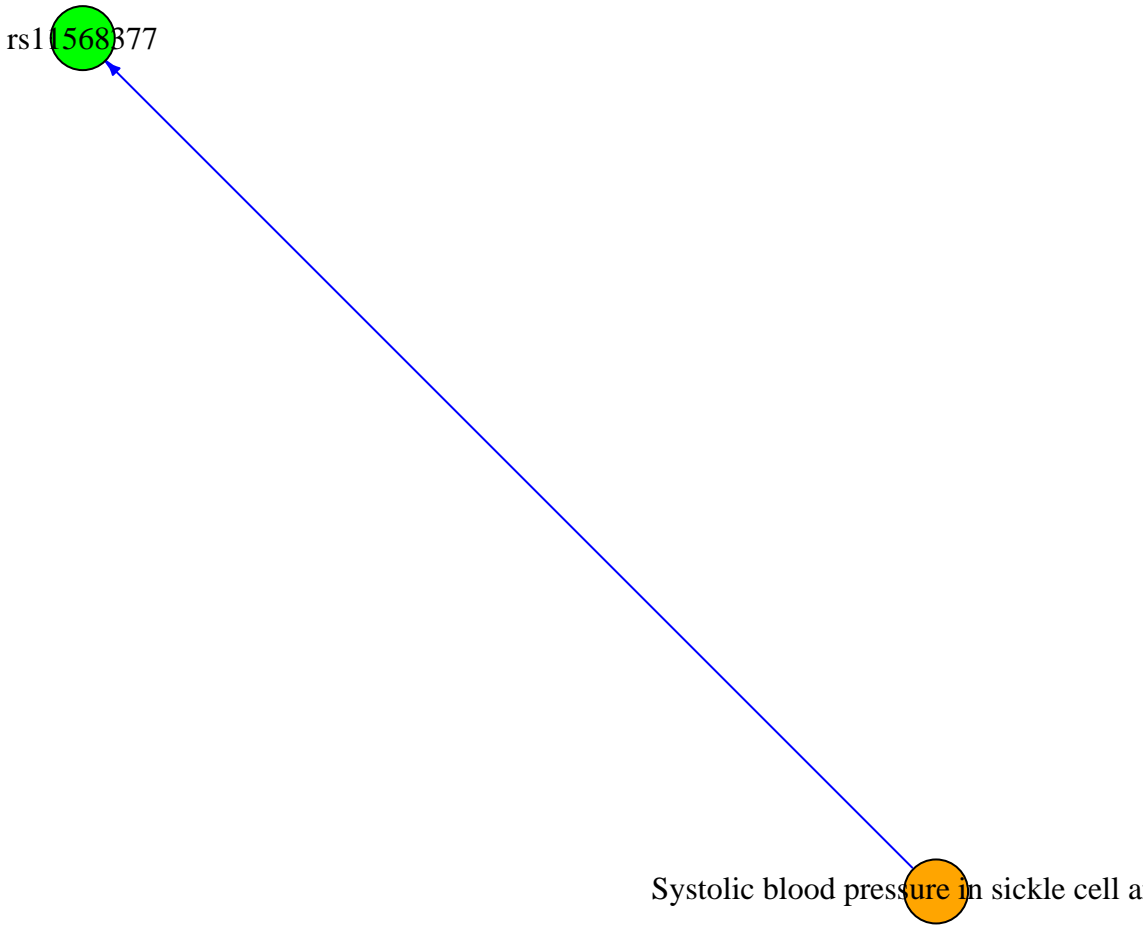



## Variant-Disease Network (Tonsillectomy)

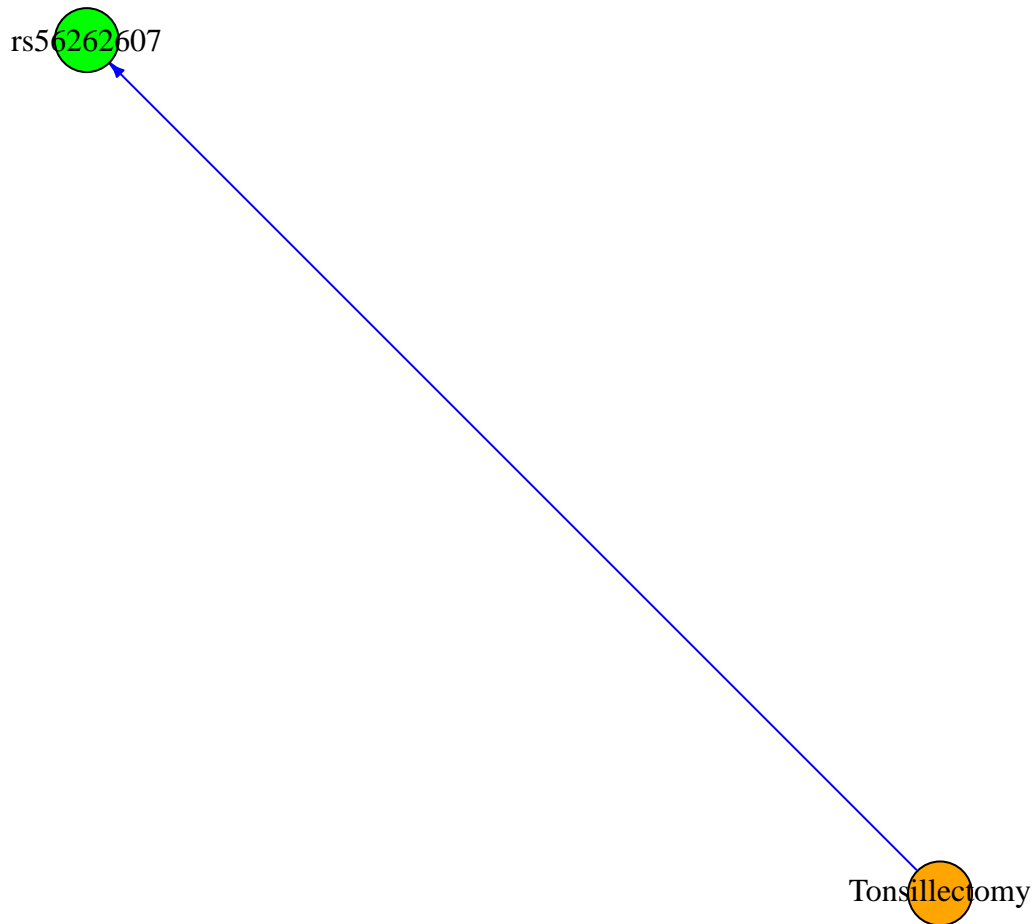

## Variant–Disease Network (Total cholesterol levels)

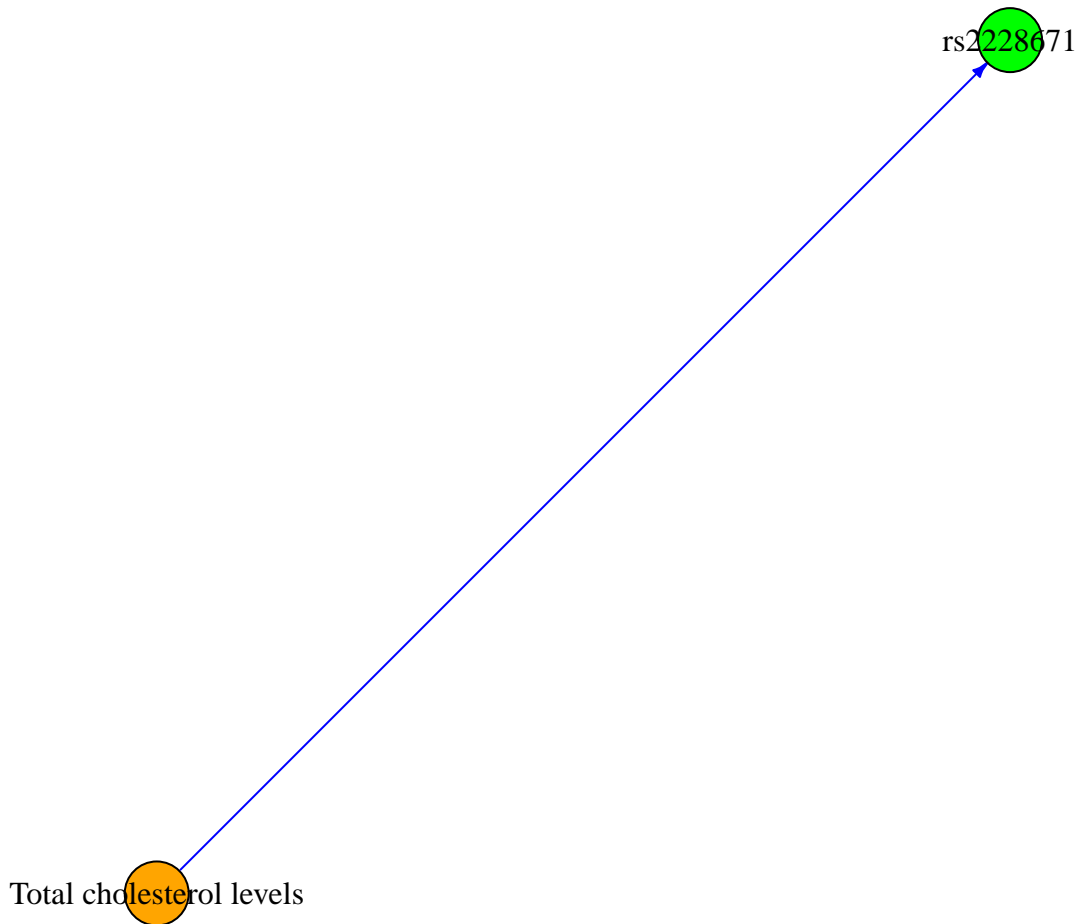

## Variant–Disease Network (Triglyceride levels)

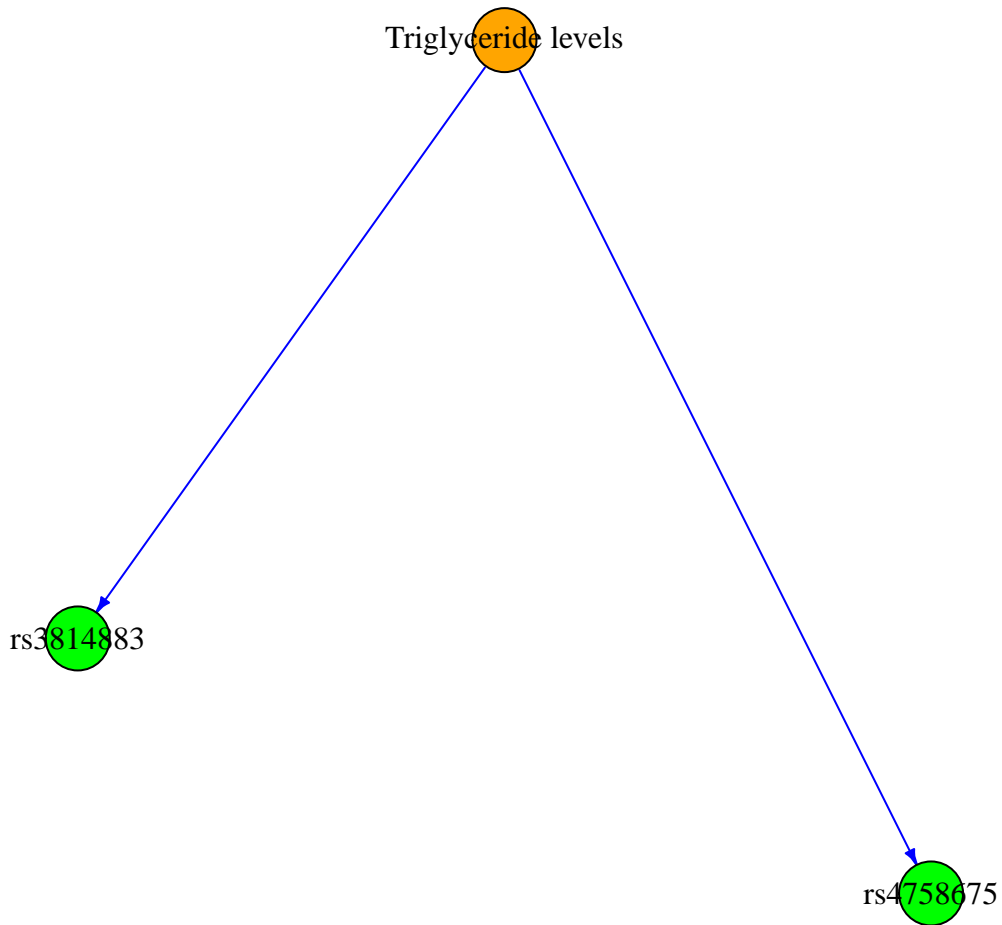

Variant–Disease Network (Triglyceride levels in non smokers)

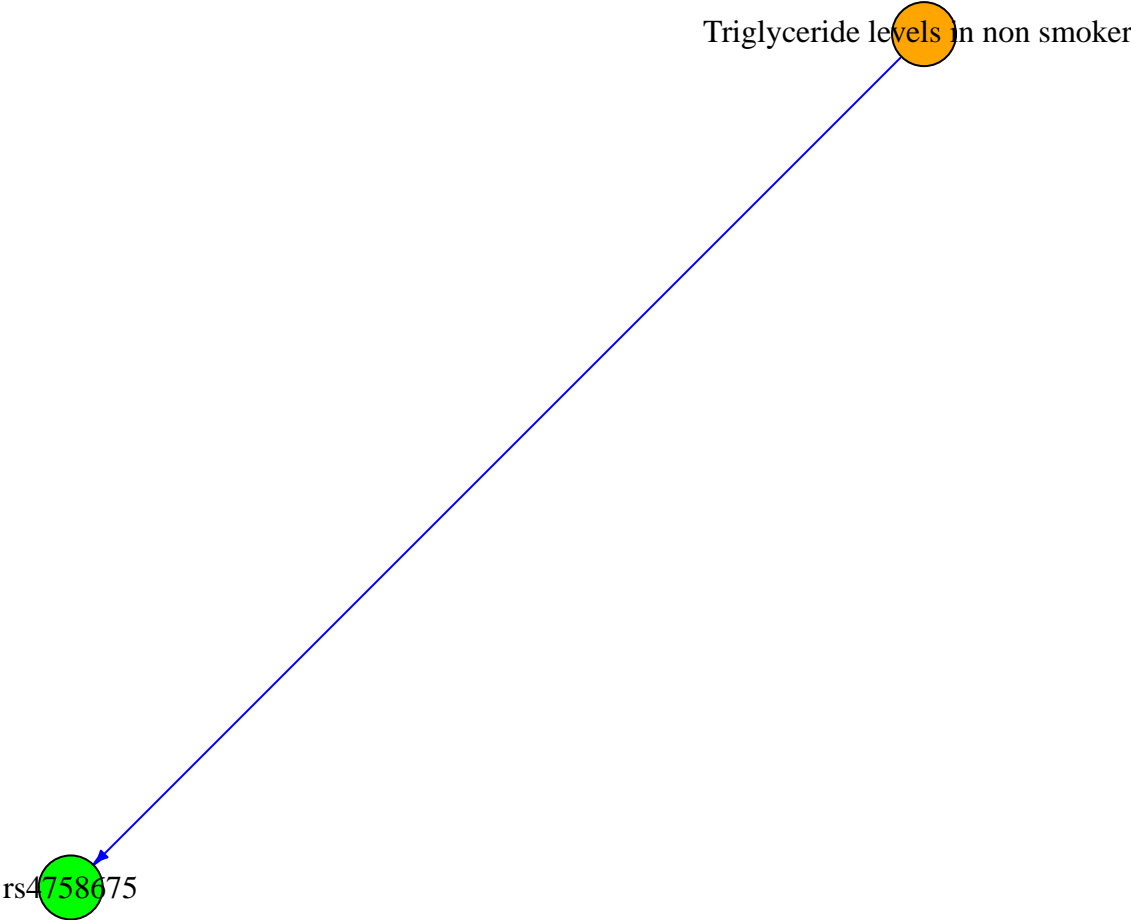

# Variant–Disease Network (Triglyceride levels x smoking interaction )

Triglyceride levels x smoking interaction

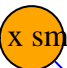

rs4758675

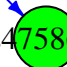

## Variant-Disease Network (Triglycerides)

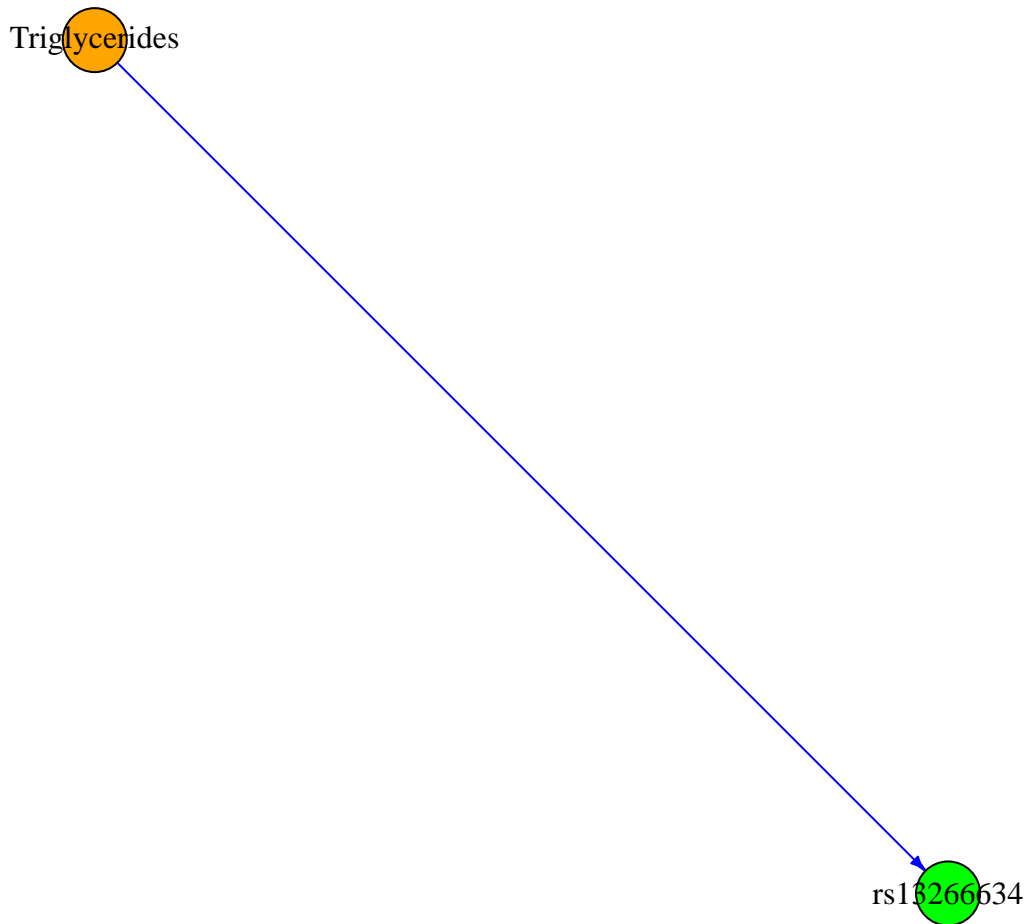

## Variant–Disease Network (Type 1 diabetes)

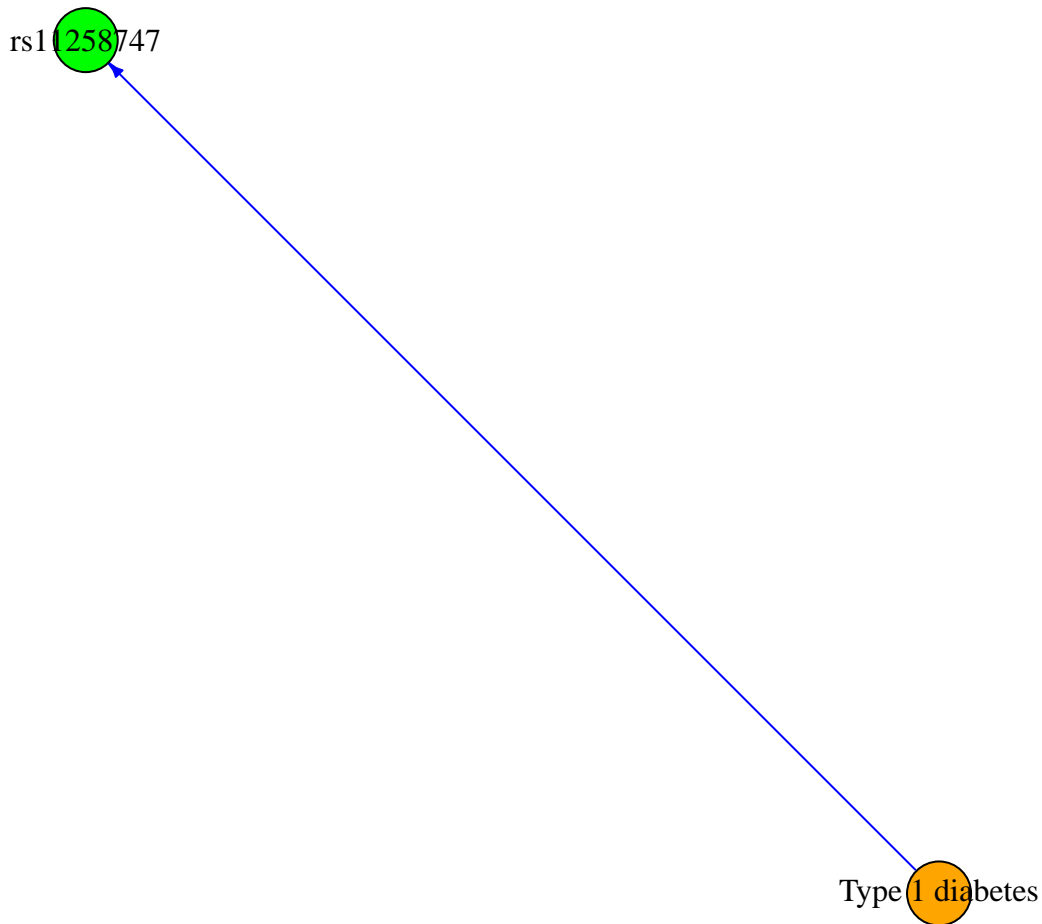

## Variant-Disease Network (Type 2 diabetes)

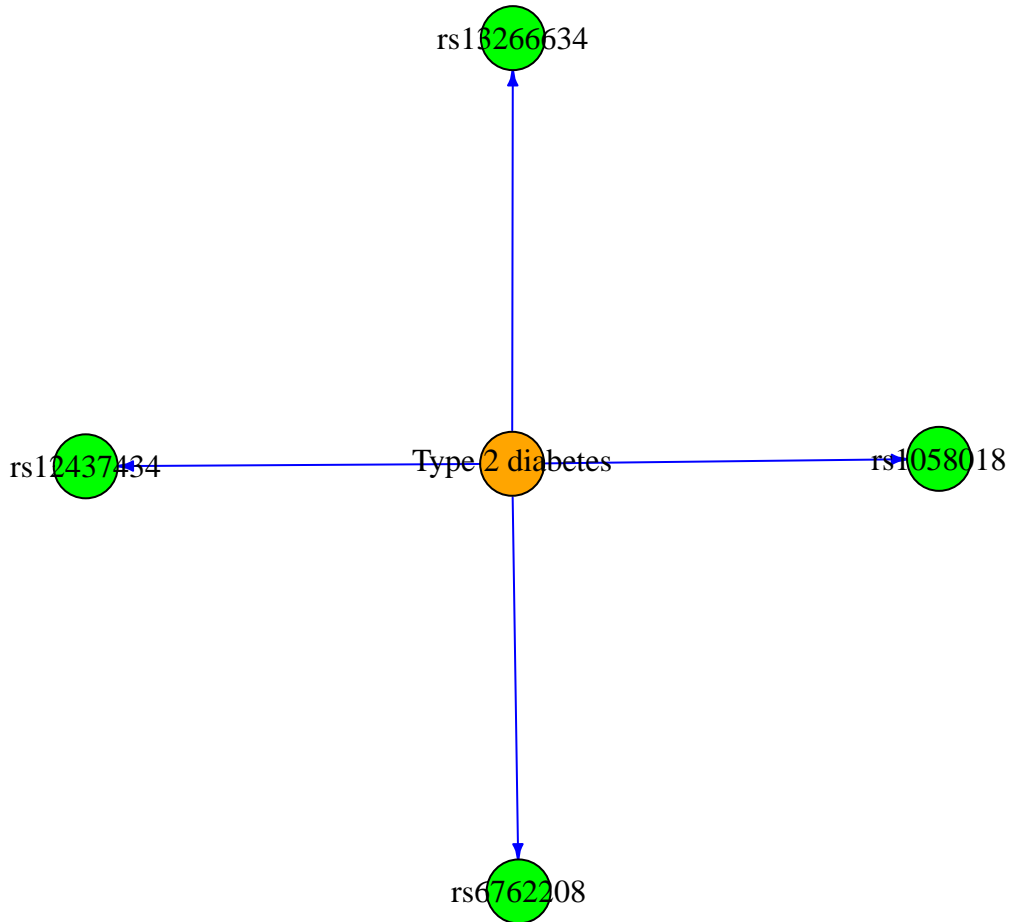



Variant–Disease Network (Type 2 diabetes )

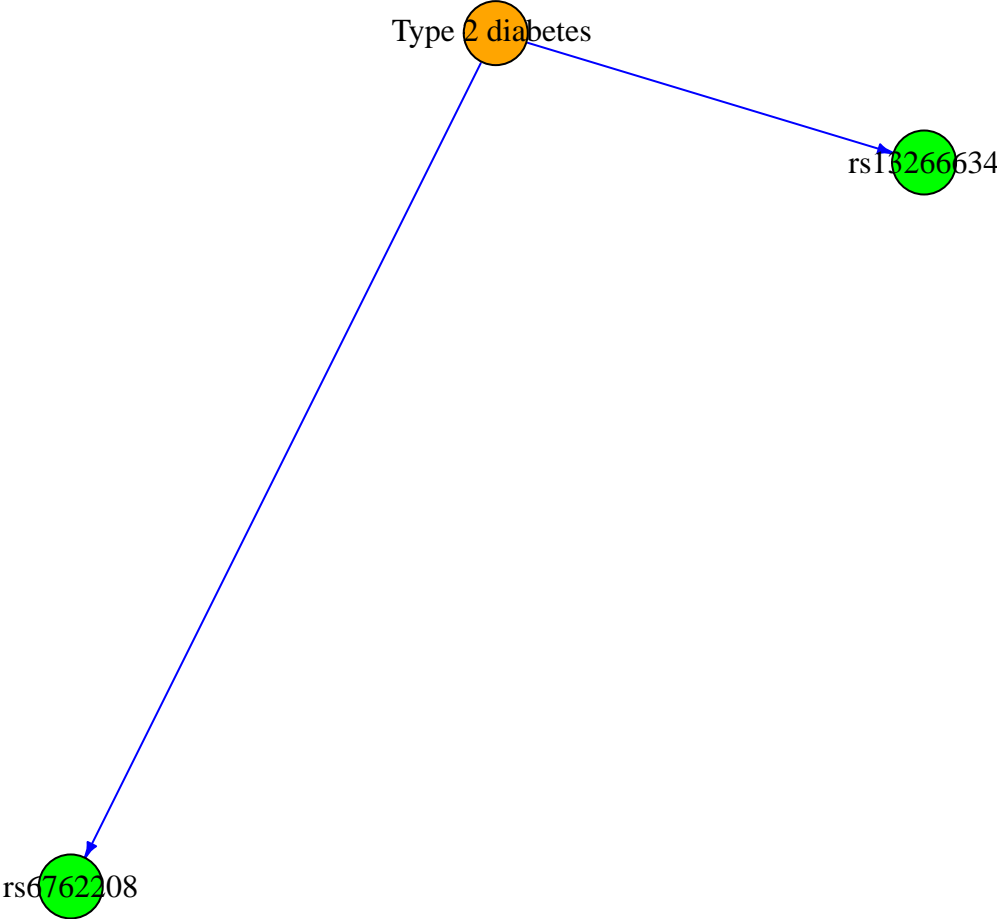

## Variant–Disease Network (Ulcerative colitis)

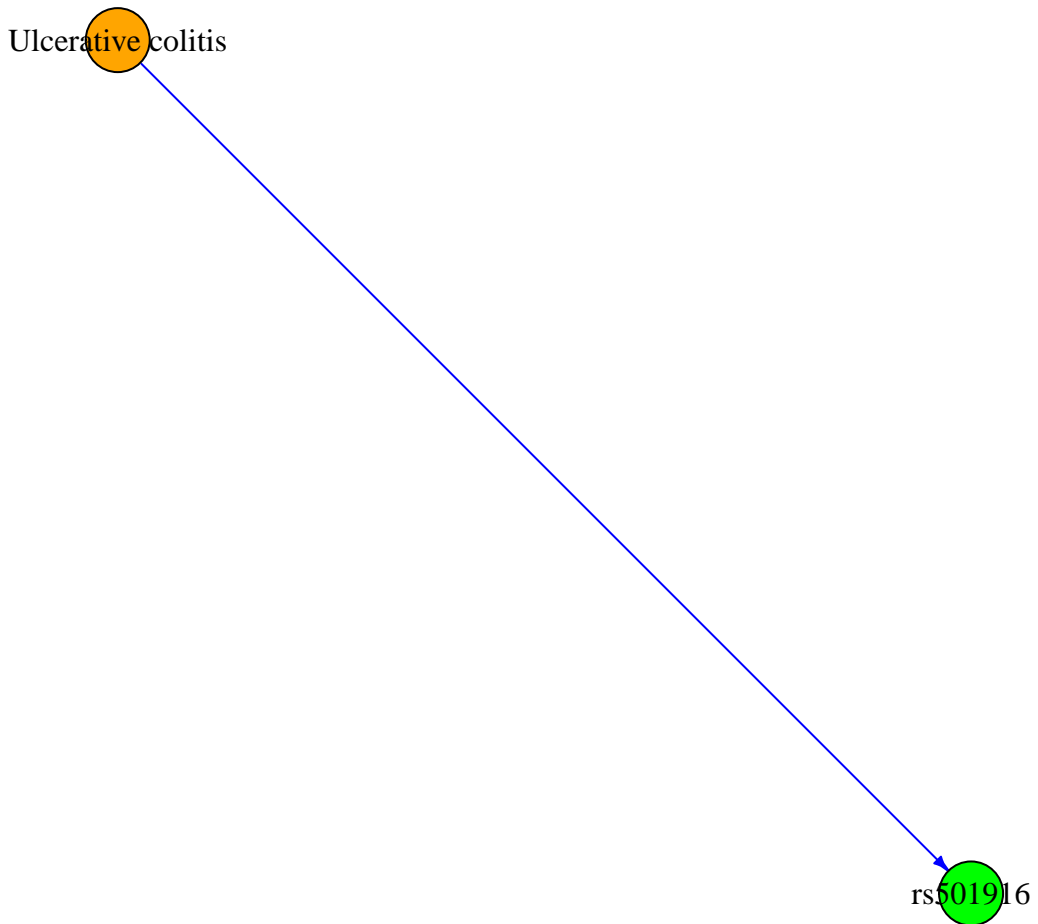

## Variant-Disease Network (Urate levels)

Urate levels

rs2304667



Variant–Disease Network (Vitamin D levels)

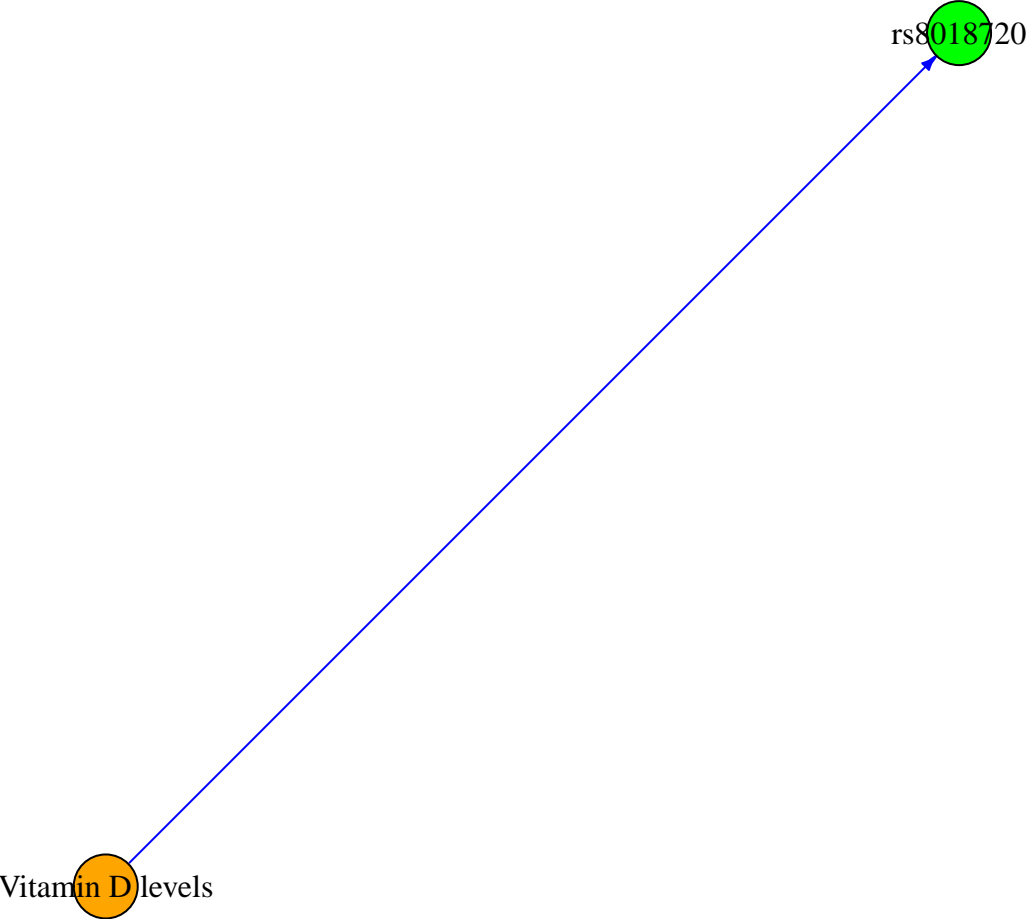

## Variant–Disease Network (Waist–hip ratio)

Waist–hip ratio

rs1254319



# Variant-Disease Network (Waist-to-hip ratio adjusted for BMI)

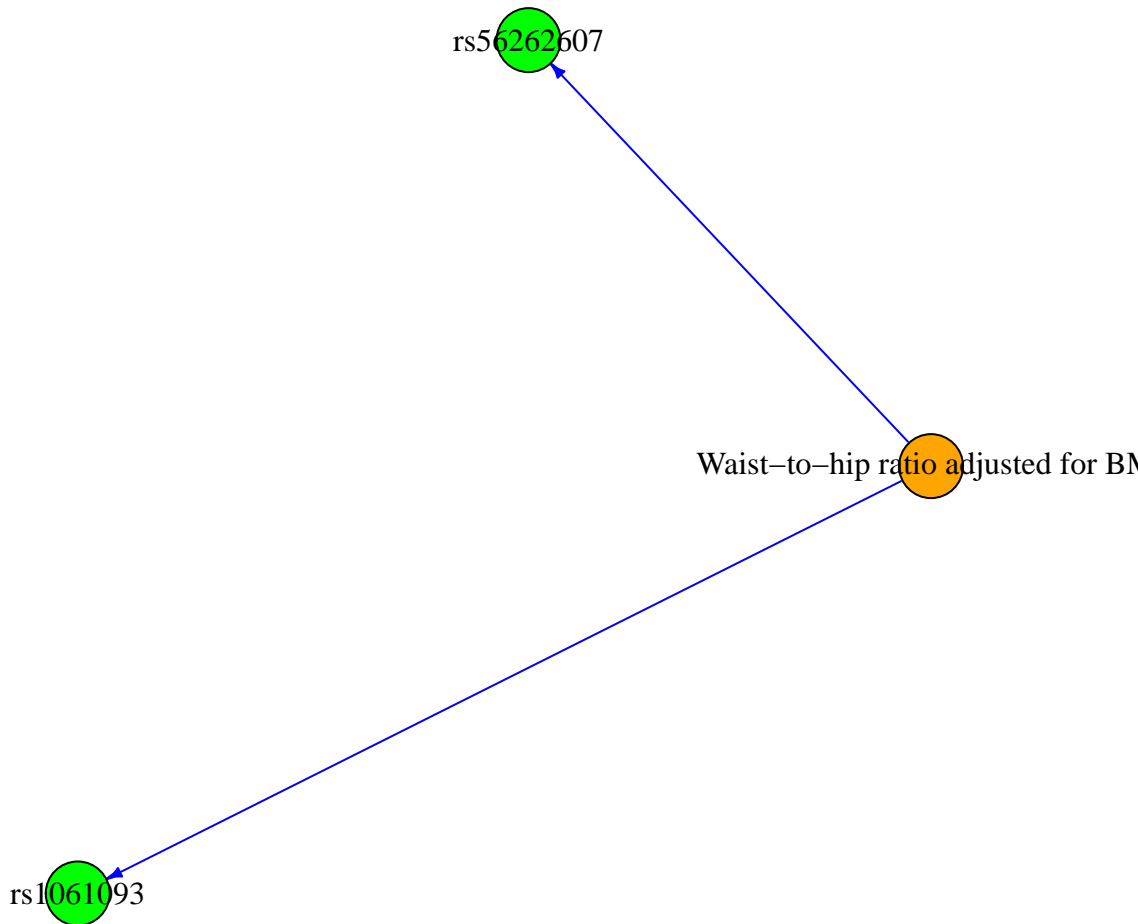

Variant–Disease Network (Waist–to–hip ratio adjusted for BMI )

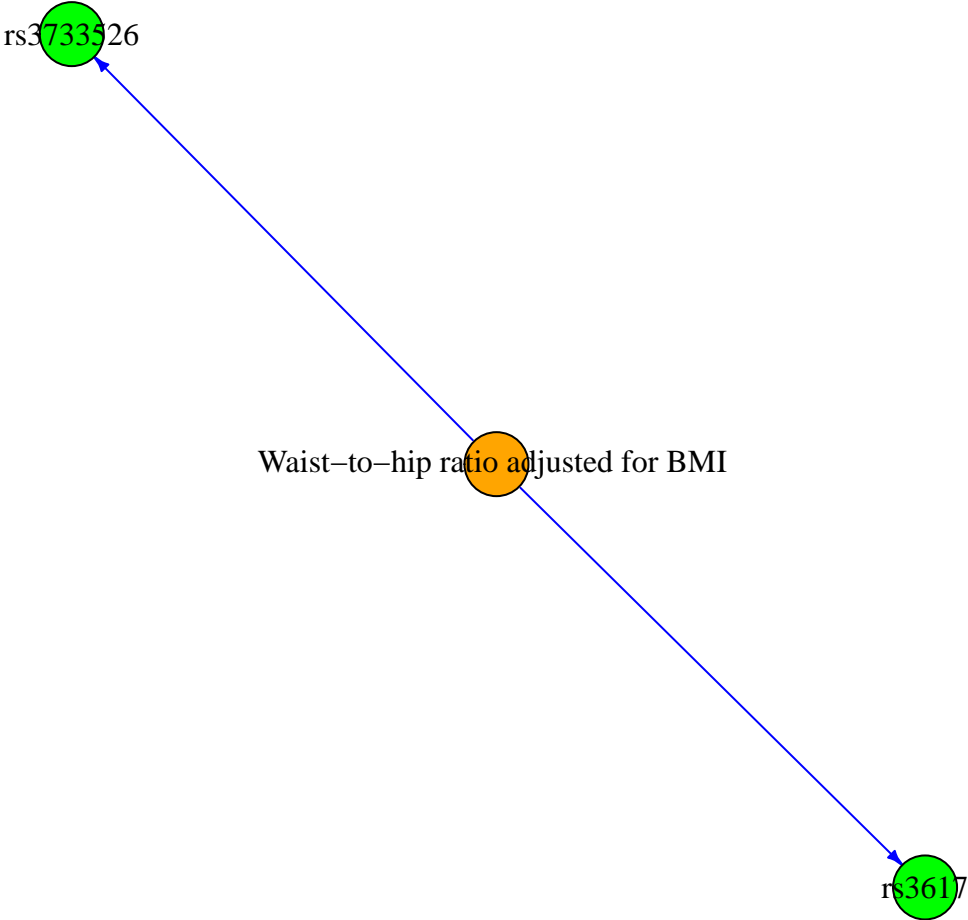

# Variant-Disease Network (Waist-to-hip ratio adjusted for BMI x sex x age interaction)

Waist-to-hip ratio adjusted for BMI x sex x age interaction

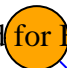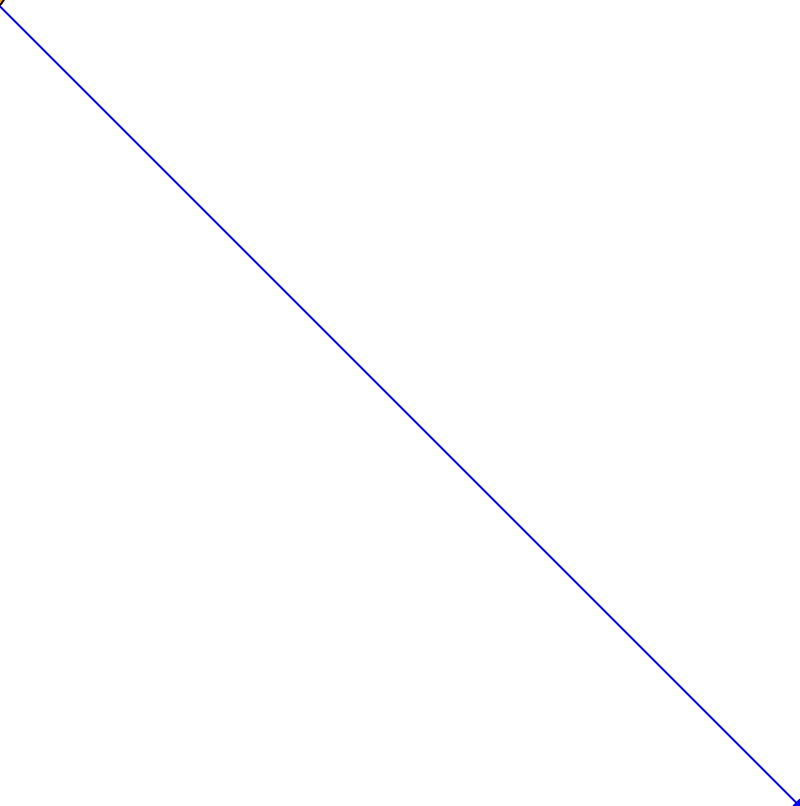

rs1061093

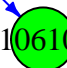



# Variant–Disease Network (Well-being spectrum )

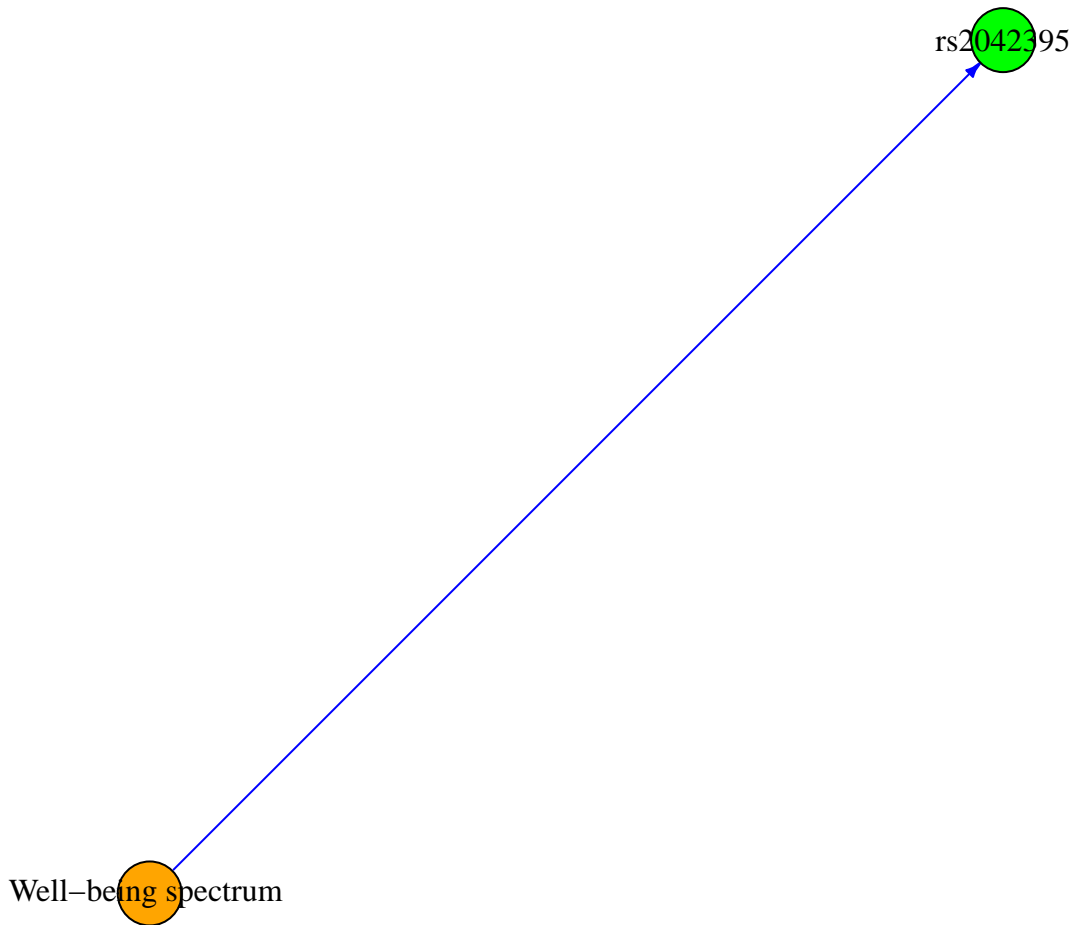

## Variant–Disease Network (White blood cell count)

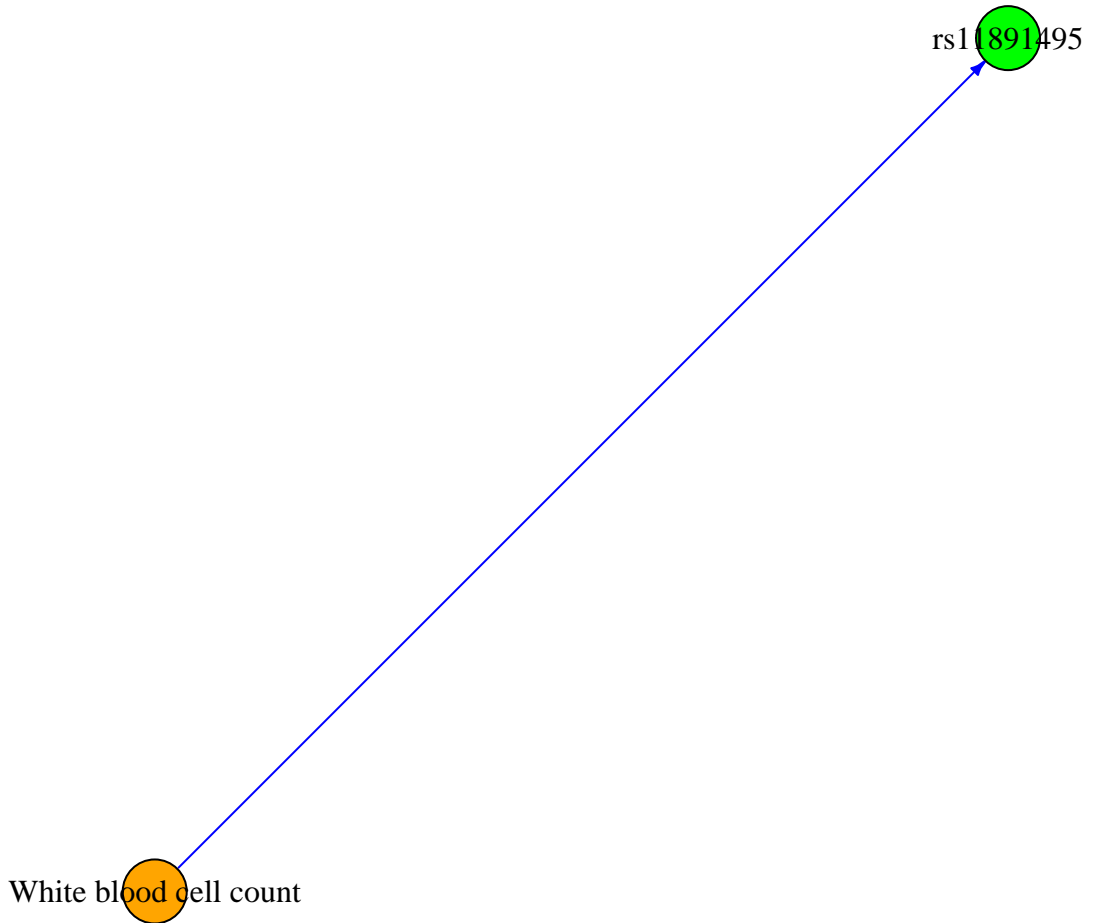

## Variant–Disease Network (bone density)

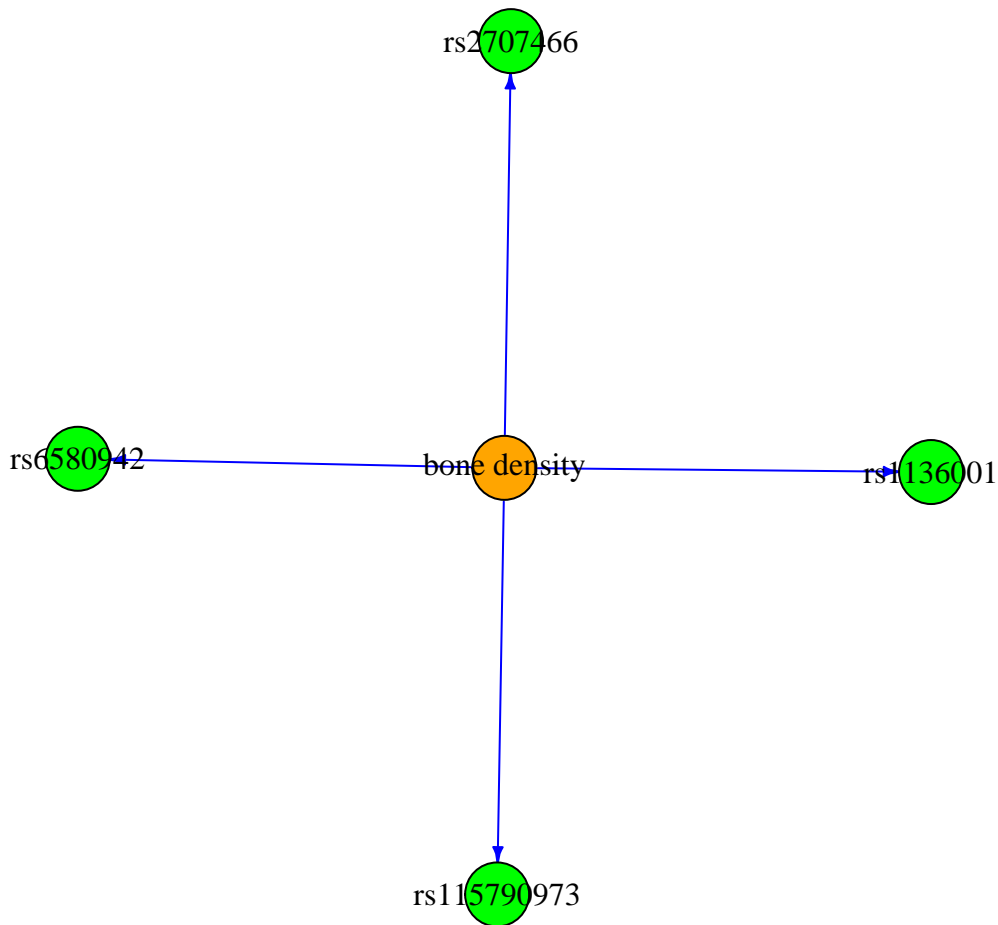

## Variant–Disease Network (response to statin)

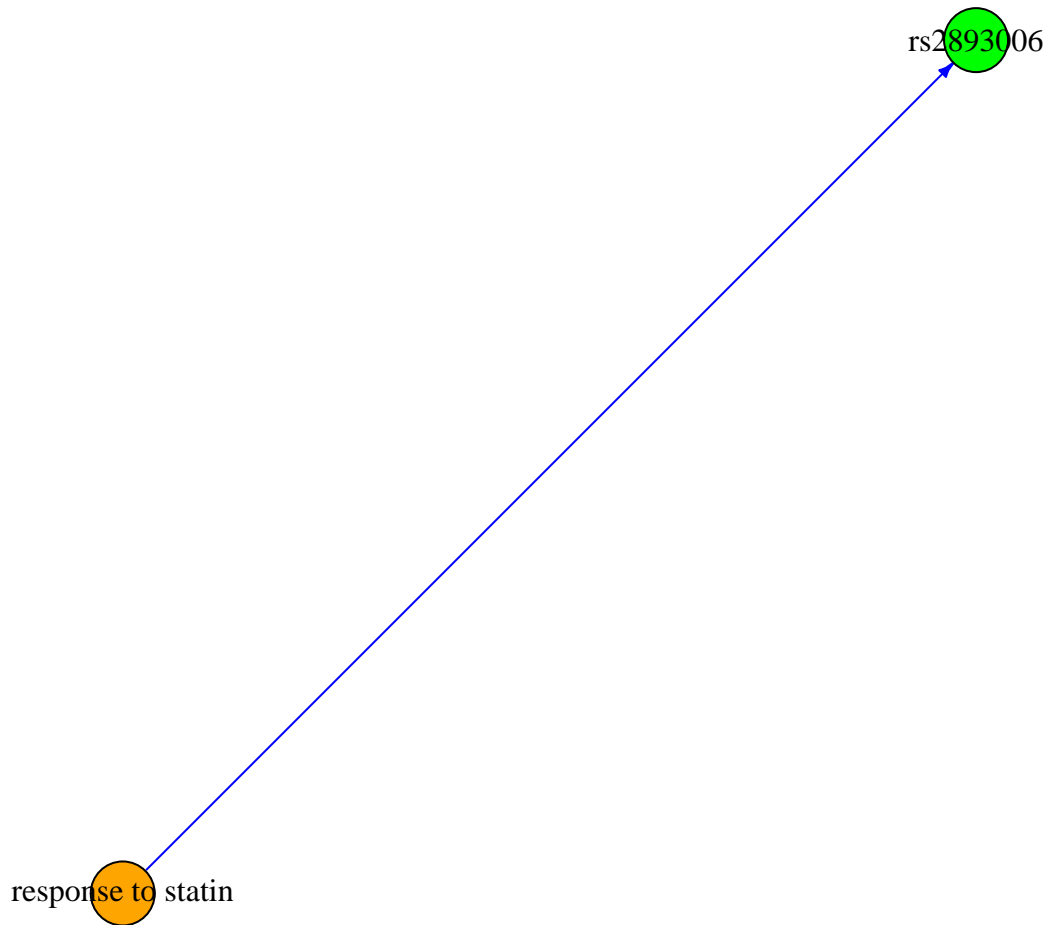

## Variant–Disease Network (gallbladder neoplasm)

gallbladder neoplasm

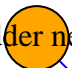

rs2302387

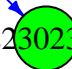

Variant–Disease Network (low density lipoprotein cholesterol measurement)

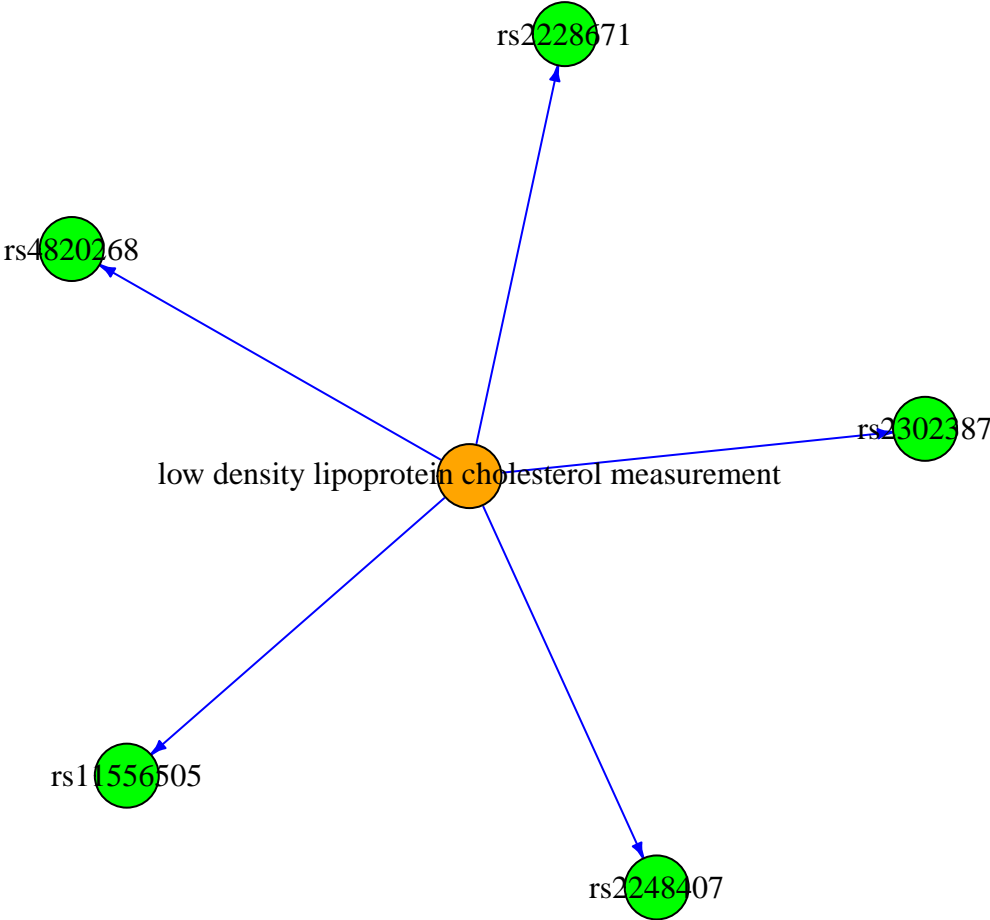

Variant–Disease Network (serum alanine aminotransferase measurement)

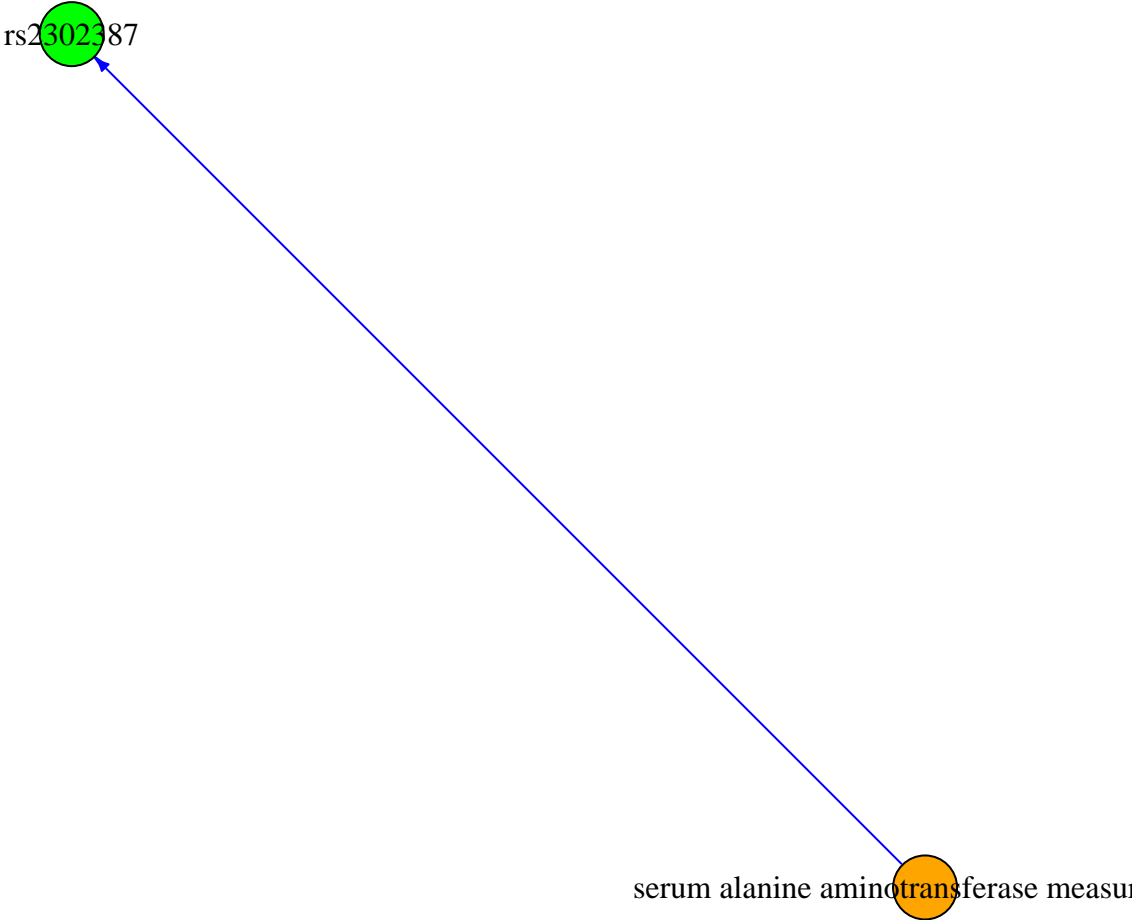

**Variant–Disease Network (total cholesterol measurement)**

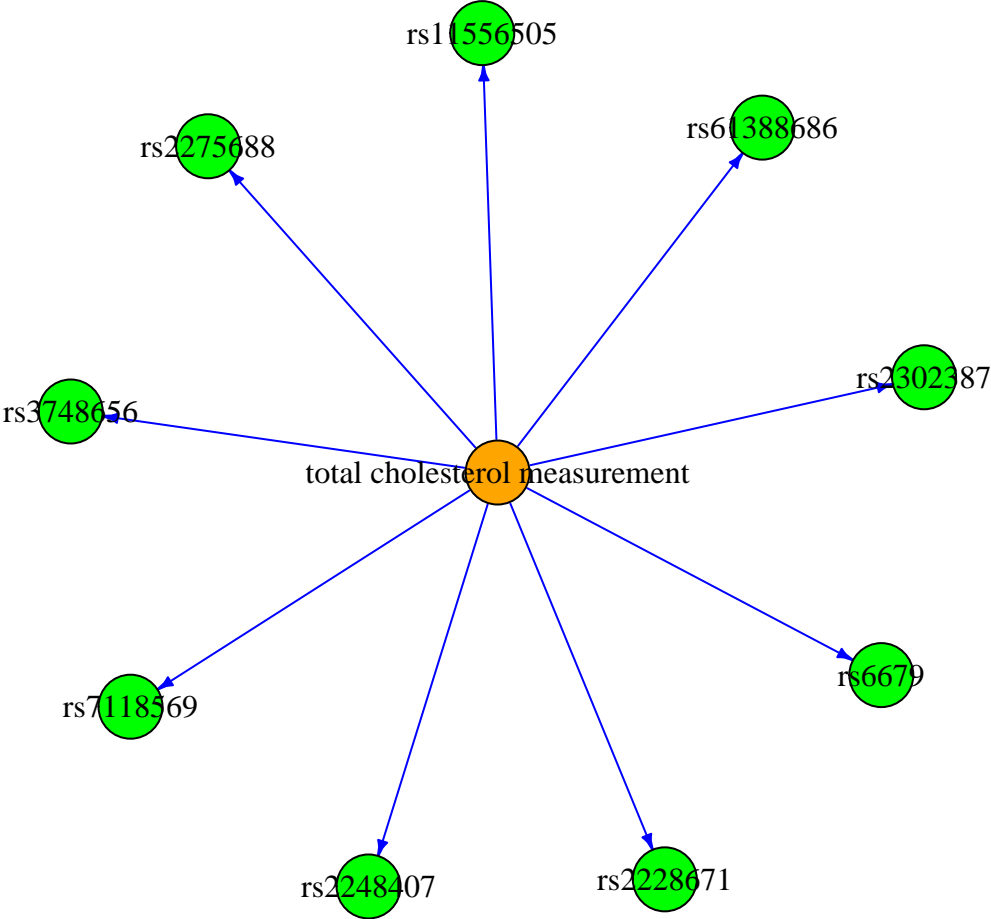



**Variant–Disease Network (blood metabolite measurement)**

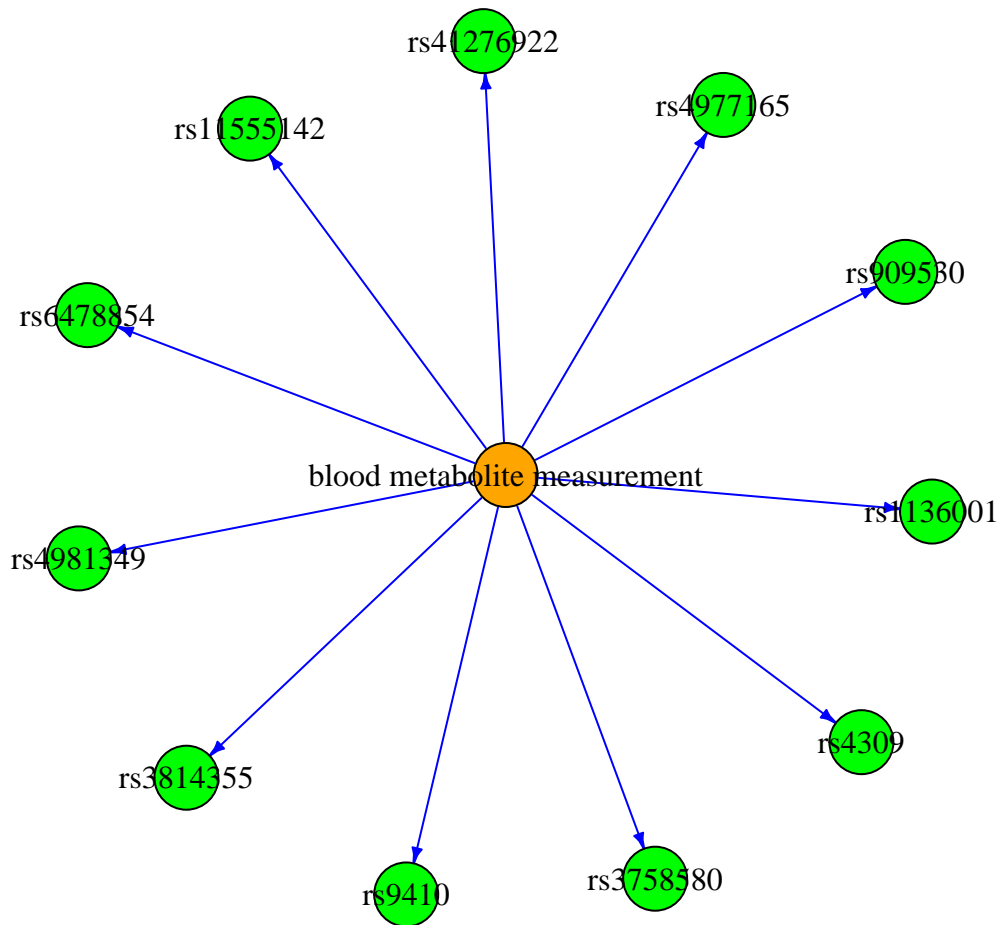

## Variant-Disease Network (QRS complex)

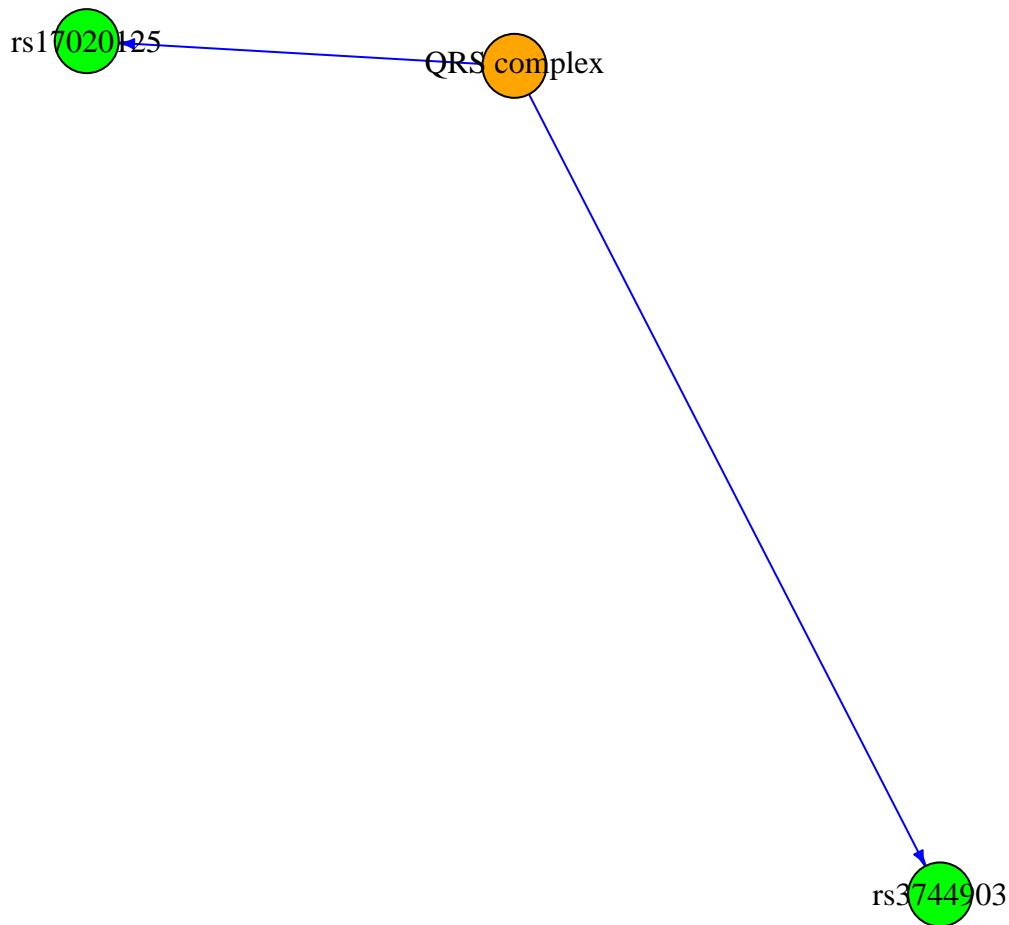

## Variant-Disease Network (erythrocyte count)

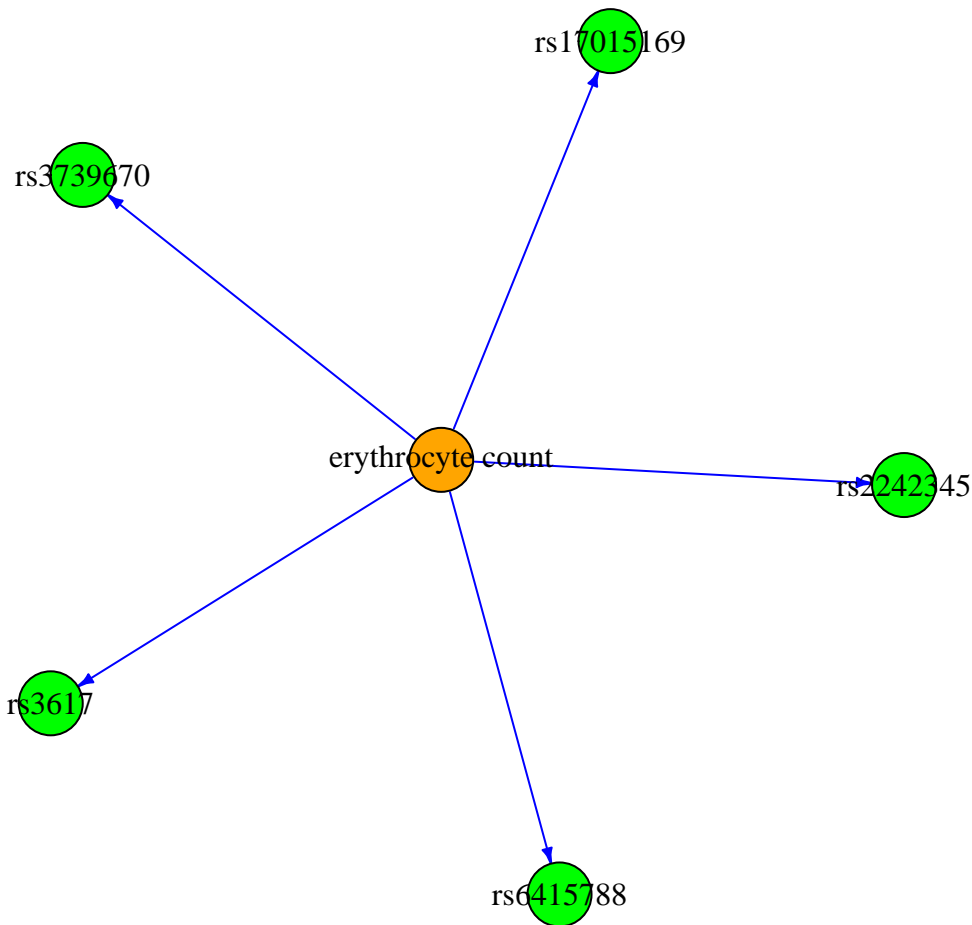

## Variant–Disease Network (cleft lip)

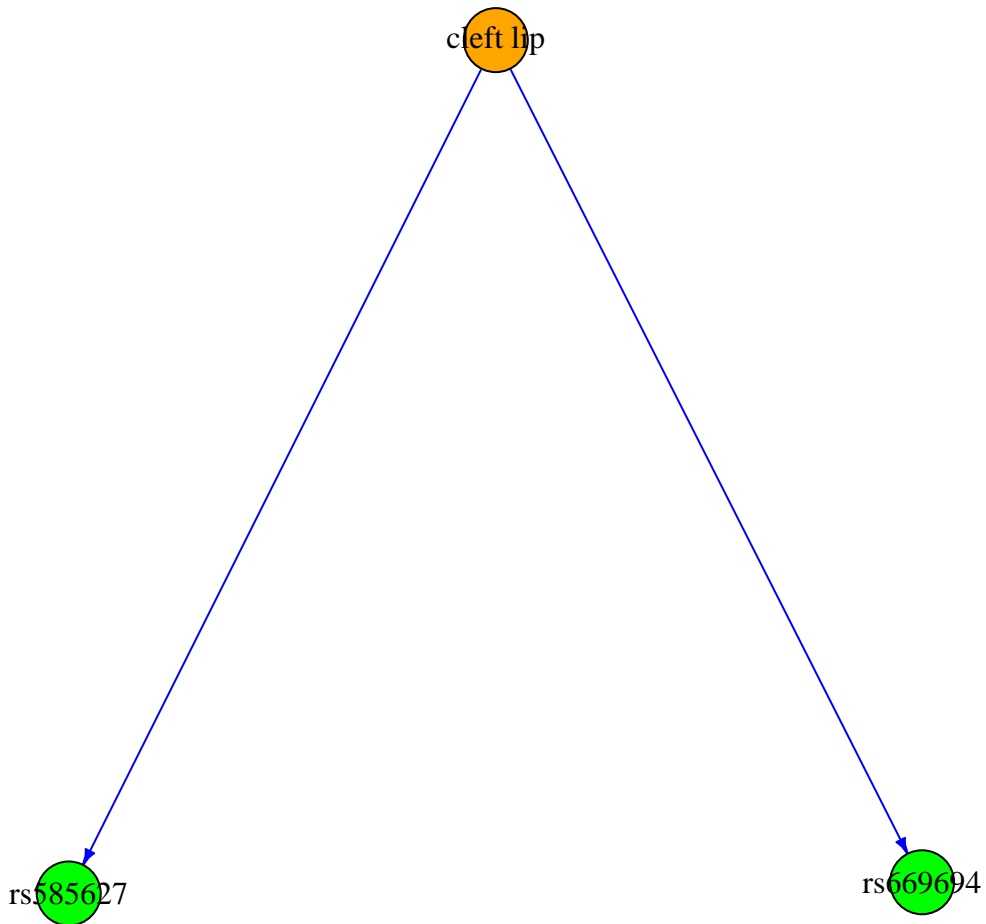

## Variant–Disease Network (progranulin measurement)

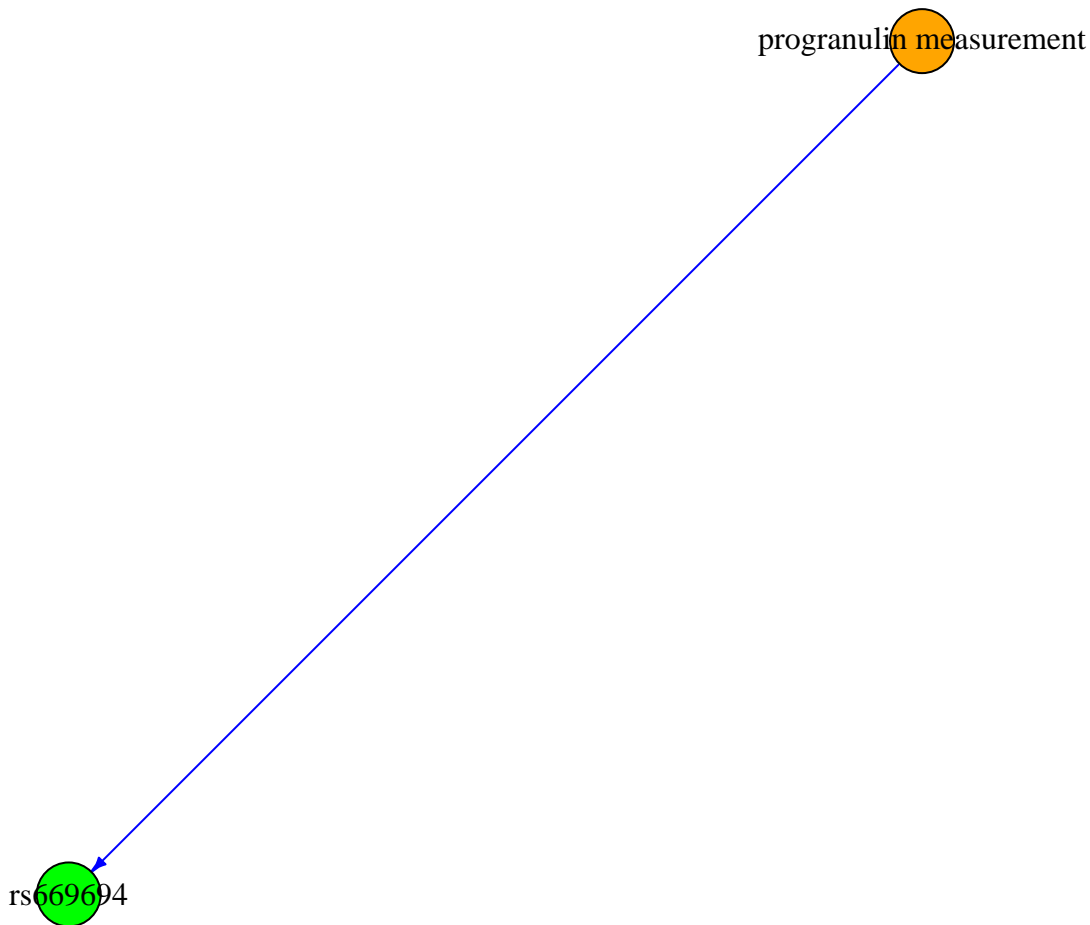

Variant–Disease Network (alkaline phosphatase measurement)

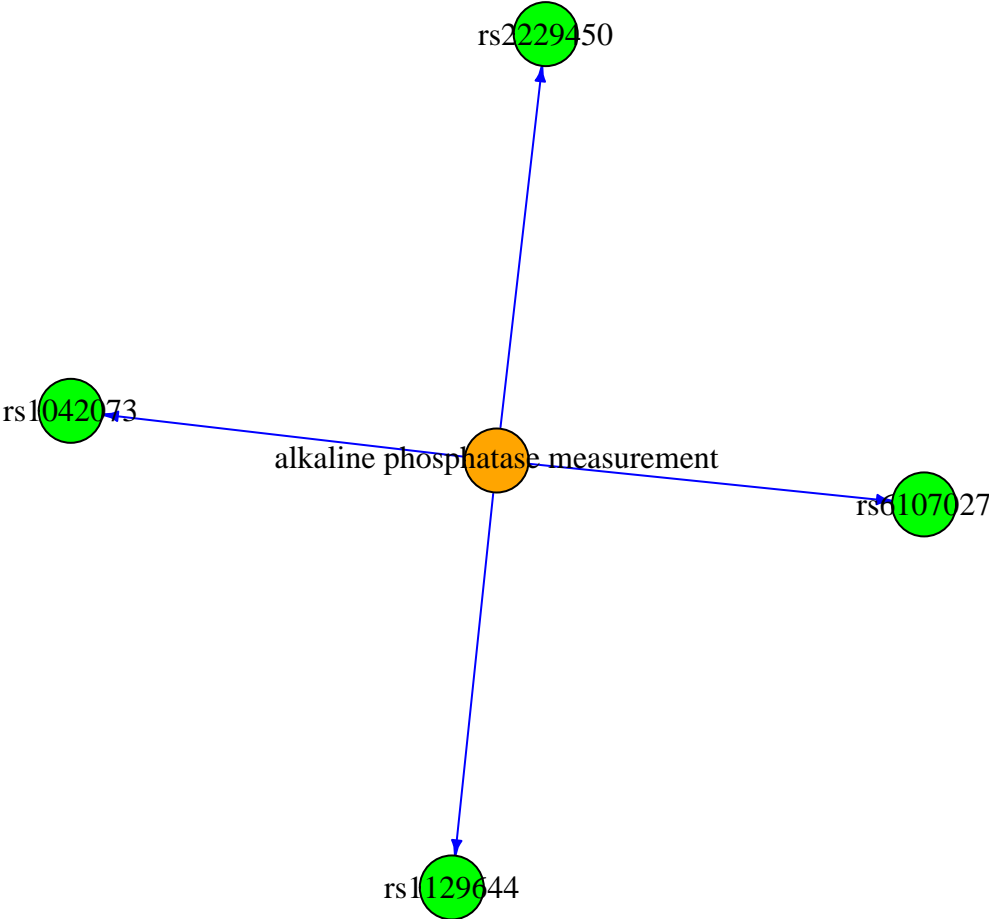

## Variant–Disease Network (unipolar depression)

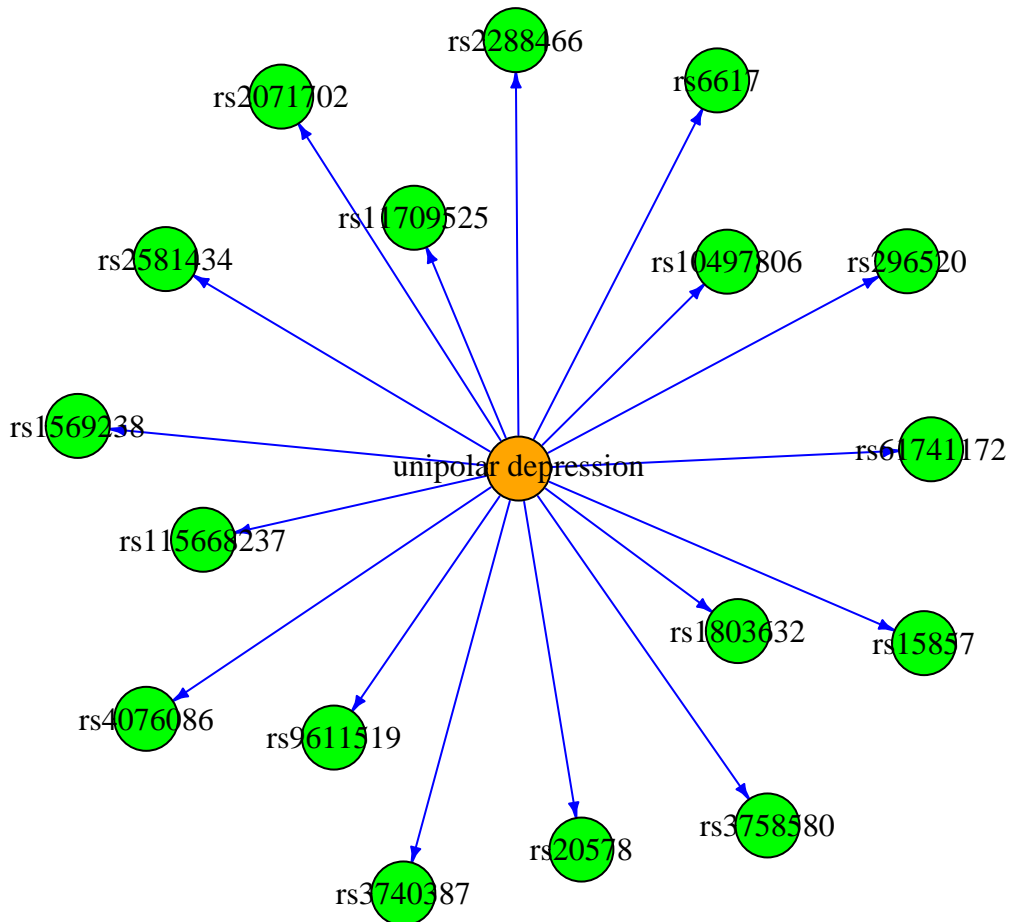

**Variant–Disease Network (helping behavior measurement)**

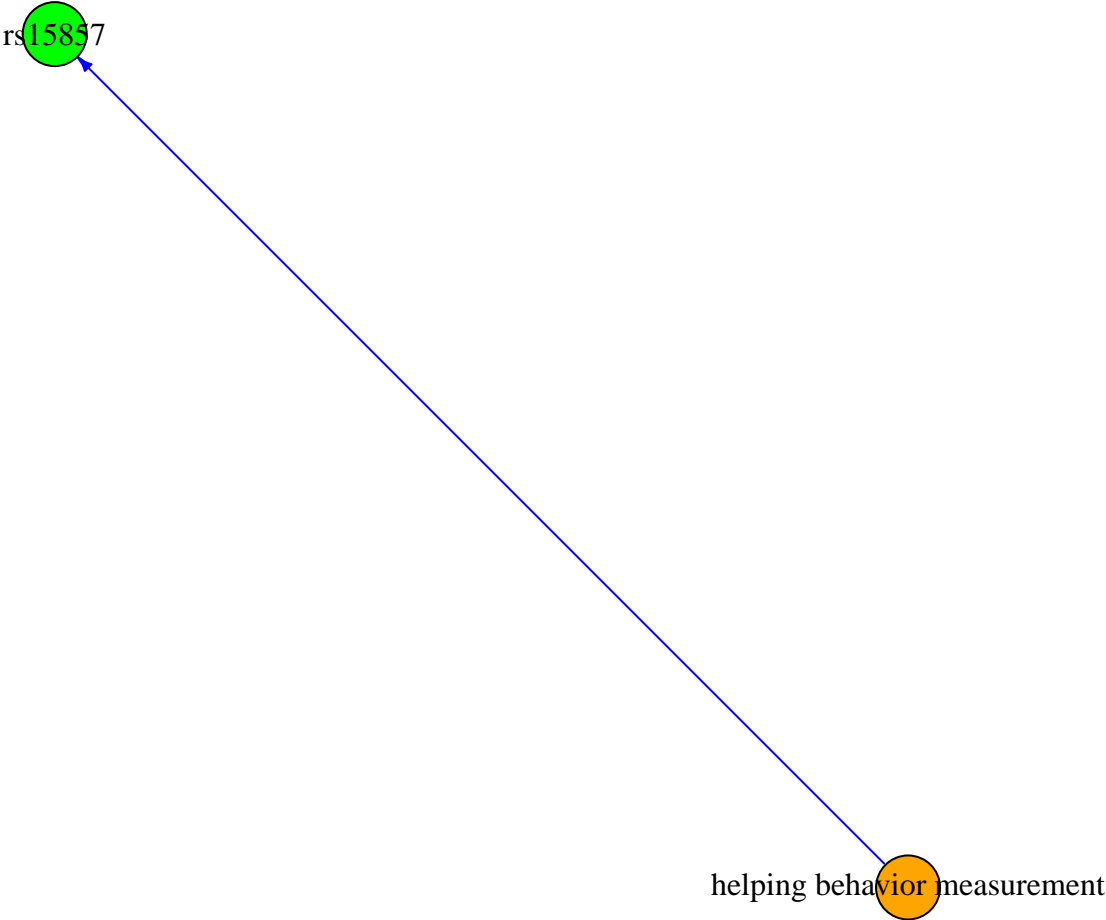



# Variant–Disease Network (cognitive function measurement)

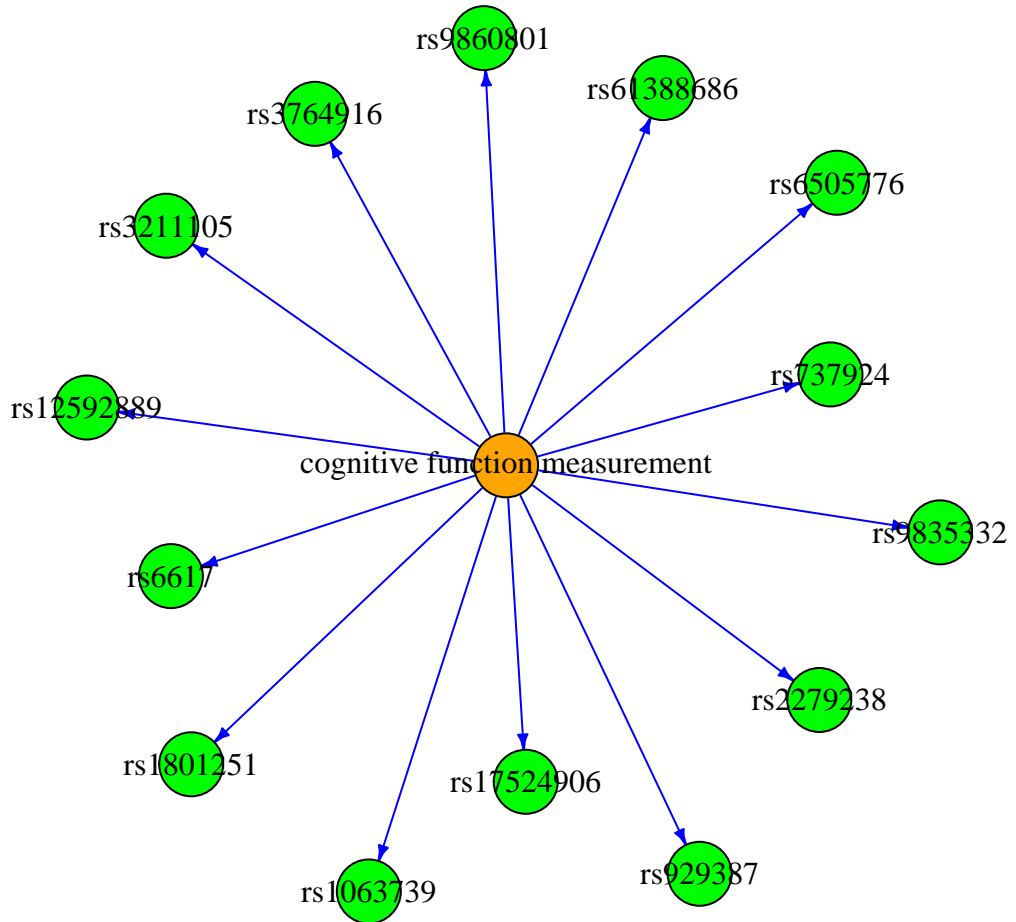

## Variant–Disease Network (corneal astigmatism)

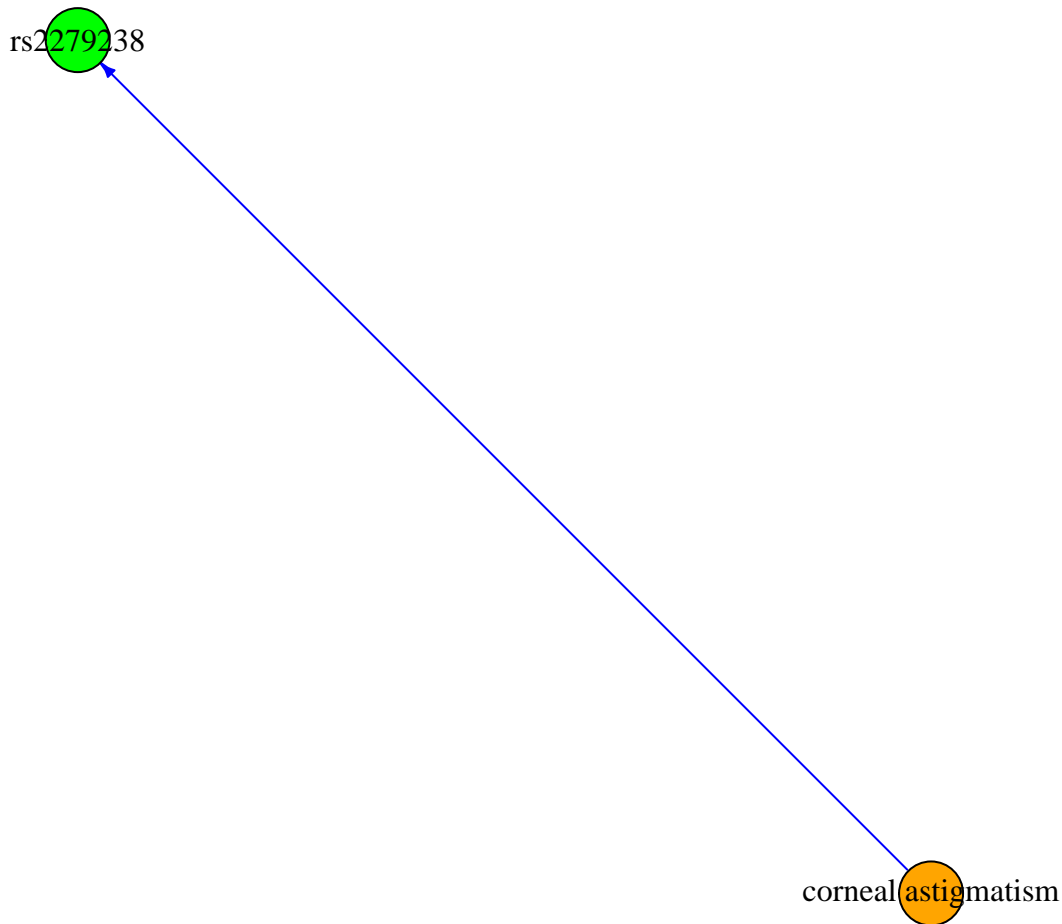

Variant–Disease Network (high density lipoprotein cholesterol measurement)

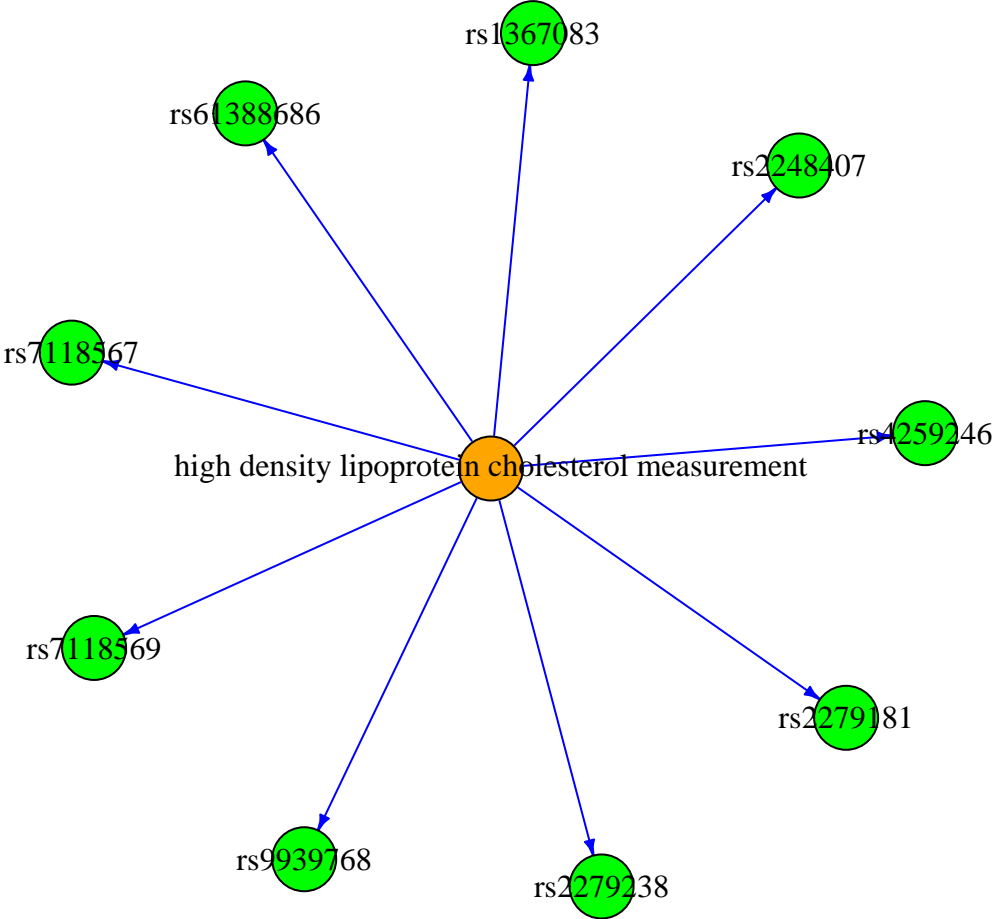

## Variant–Disease Network (insulin measurement)

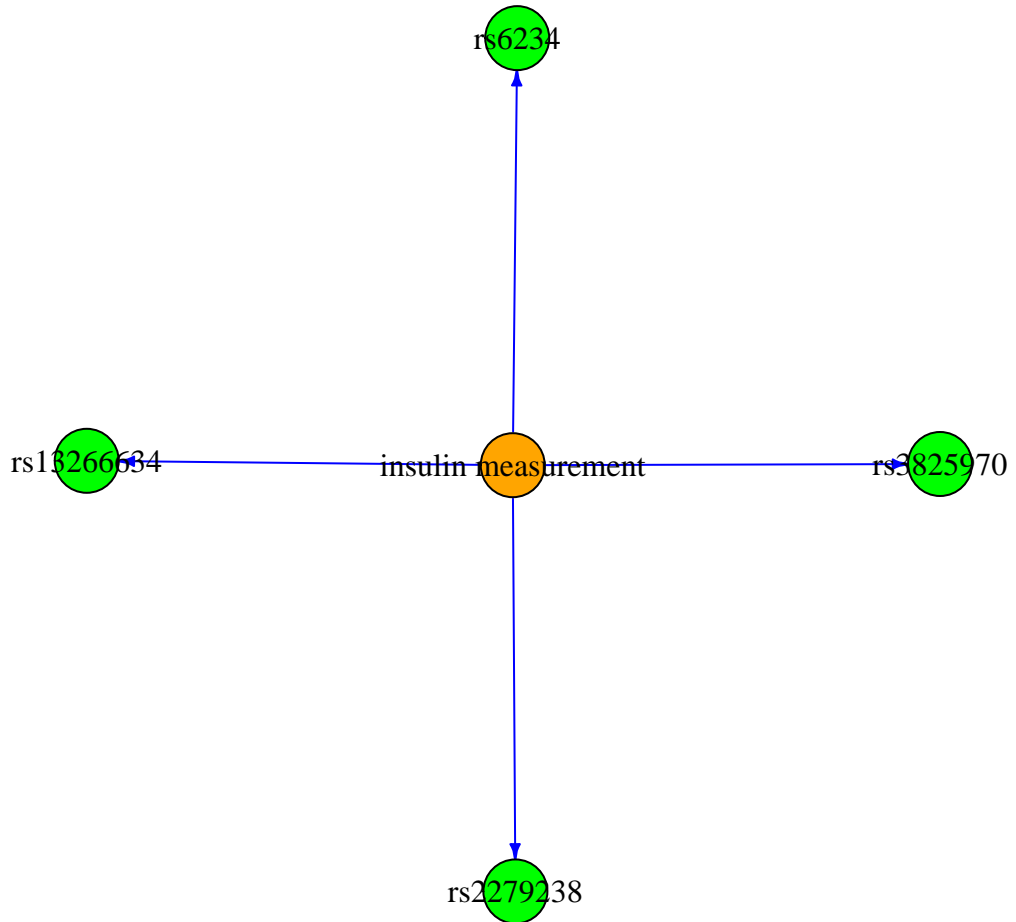

Variant–Disease Network (lymphocyte percentage of white cells)

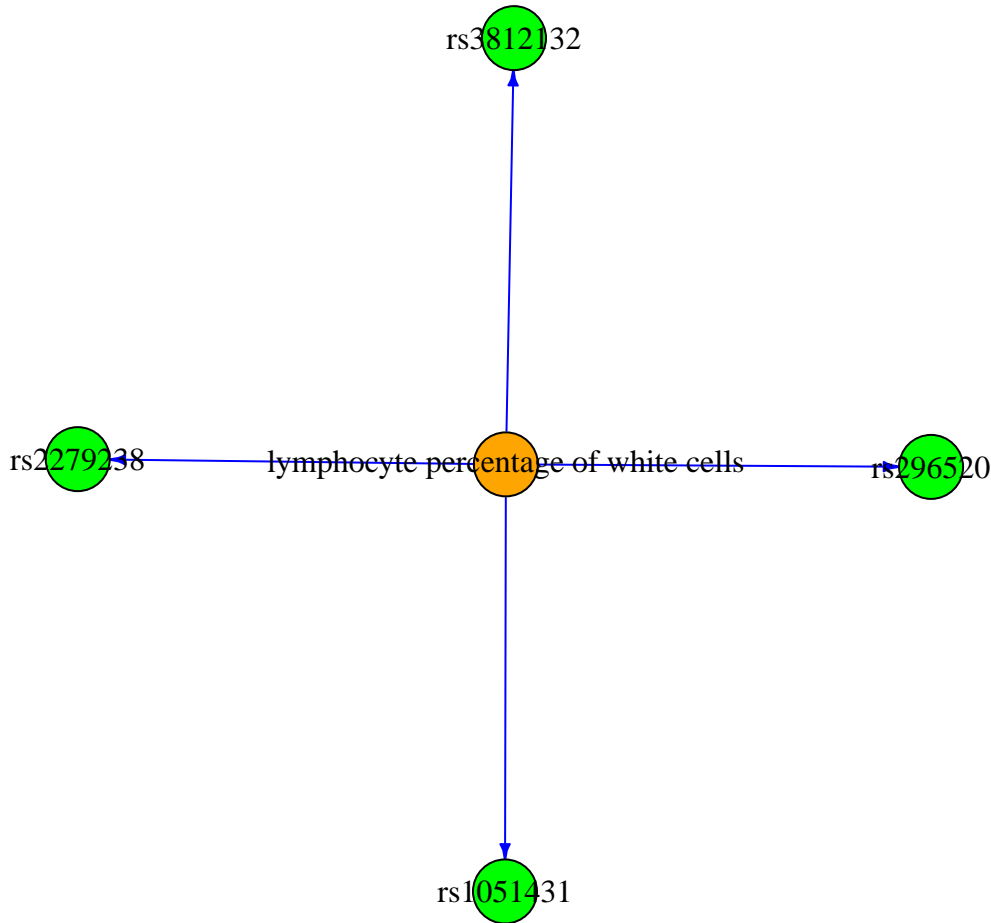

**Variant–Disease Network (serum creatinine measurement)**

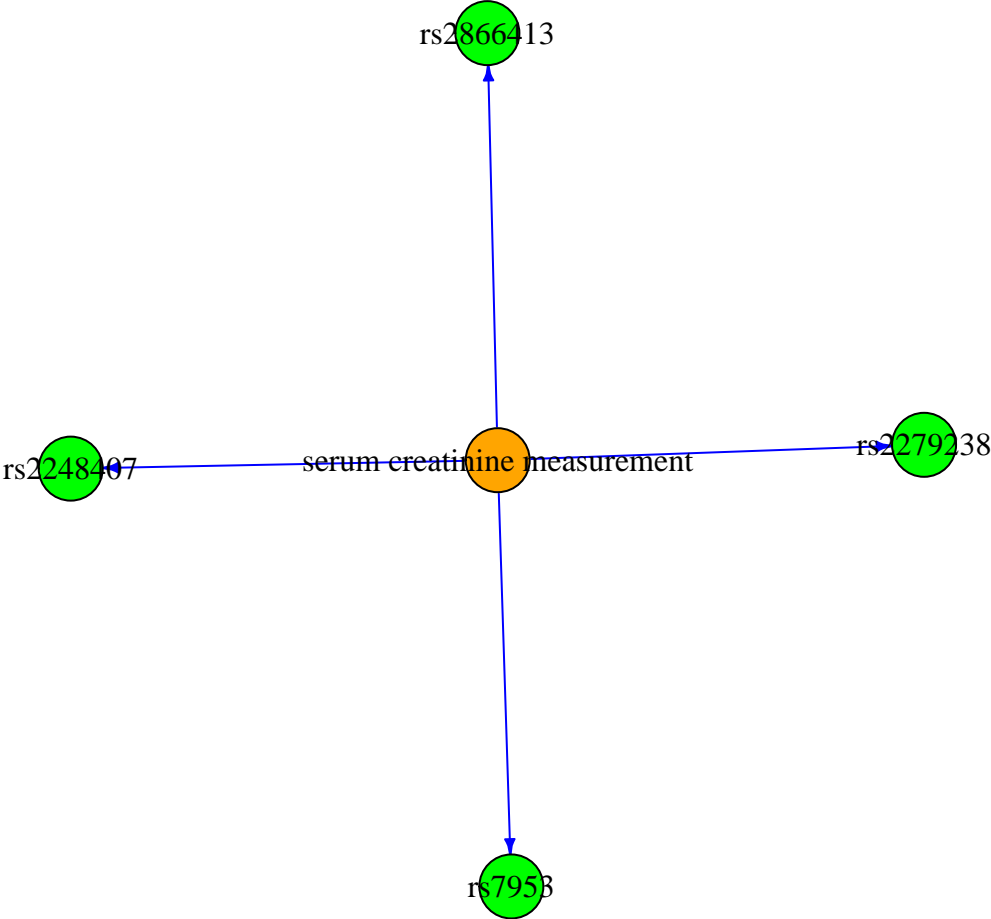

## Variant–Disease Network (age at menarche)

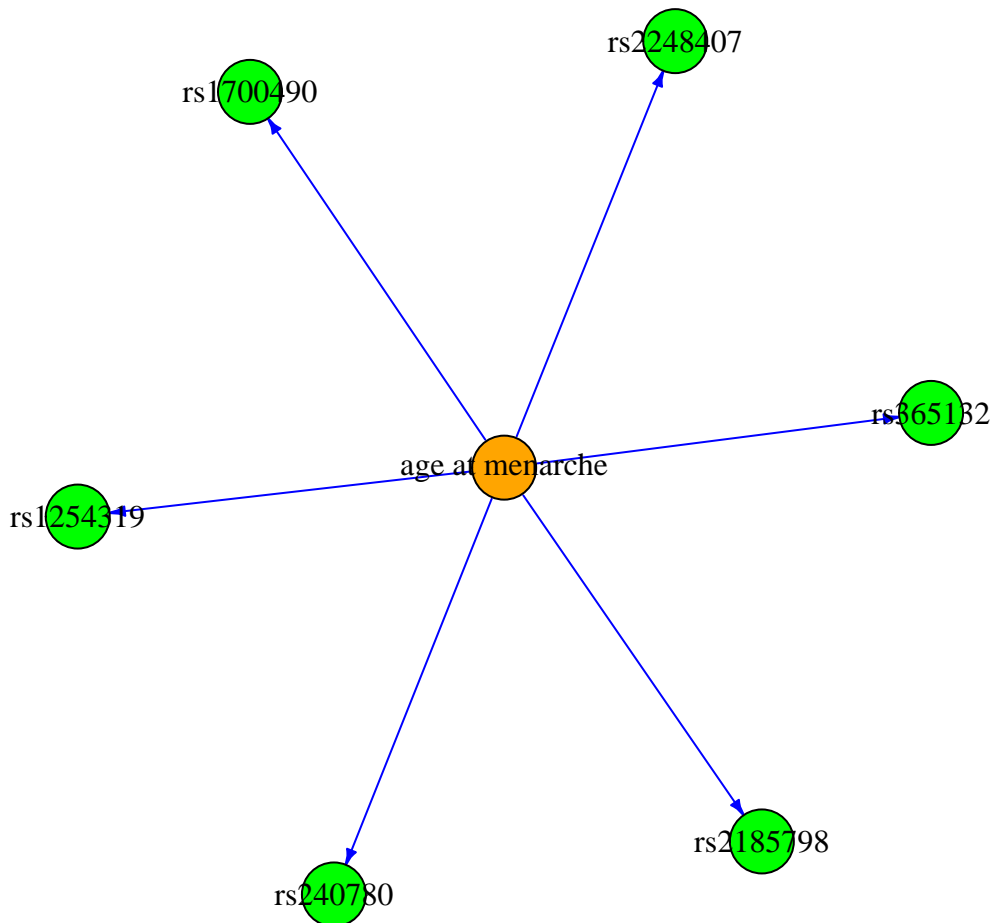

**Variant–Disease Network (creatine kinase measurement)**

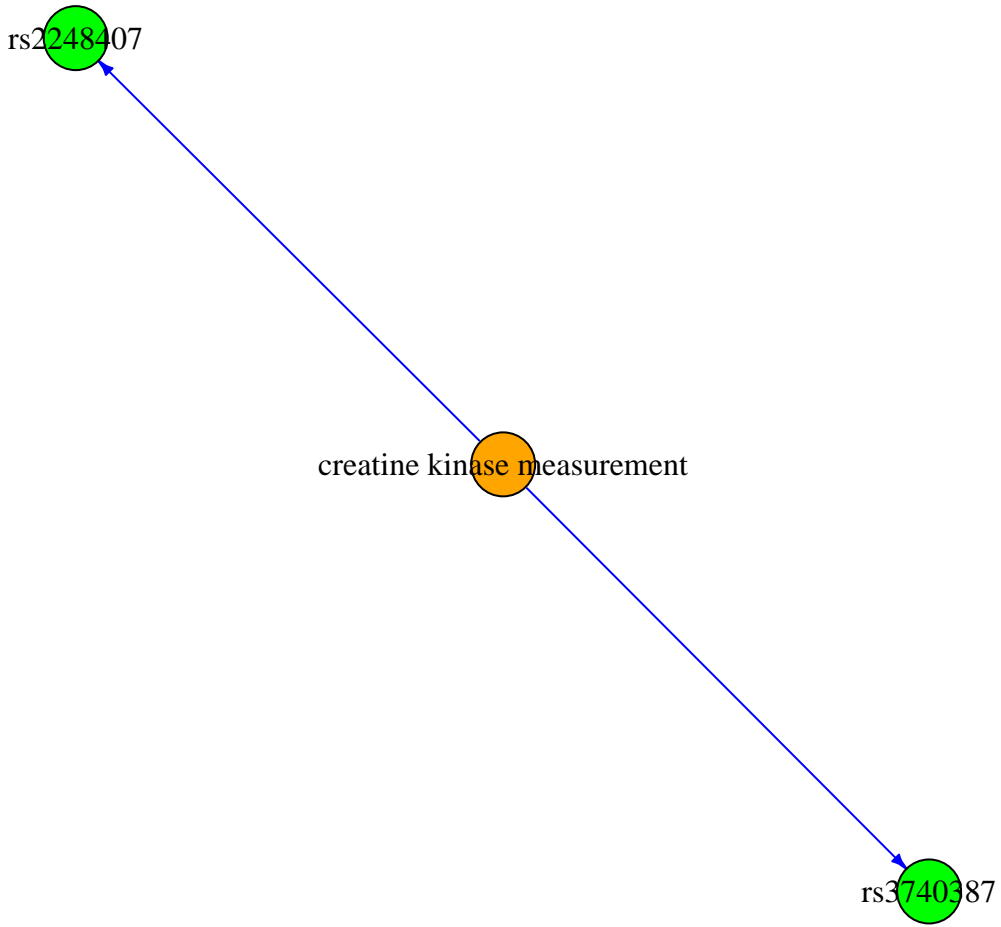



## Variant–Disease Network (glomerular filtration rate)

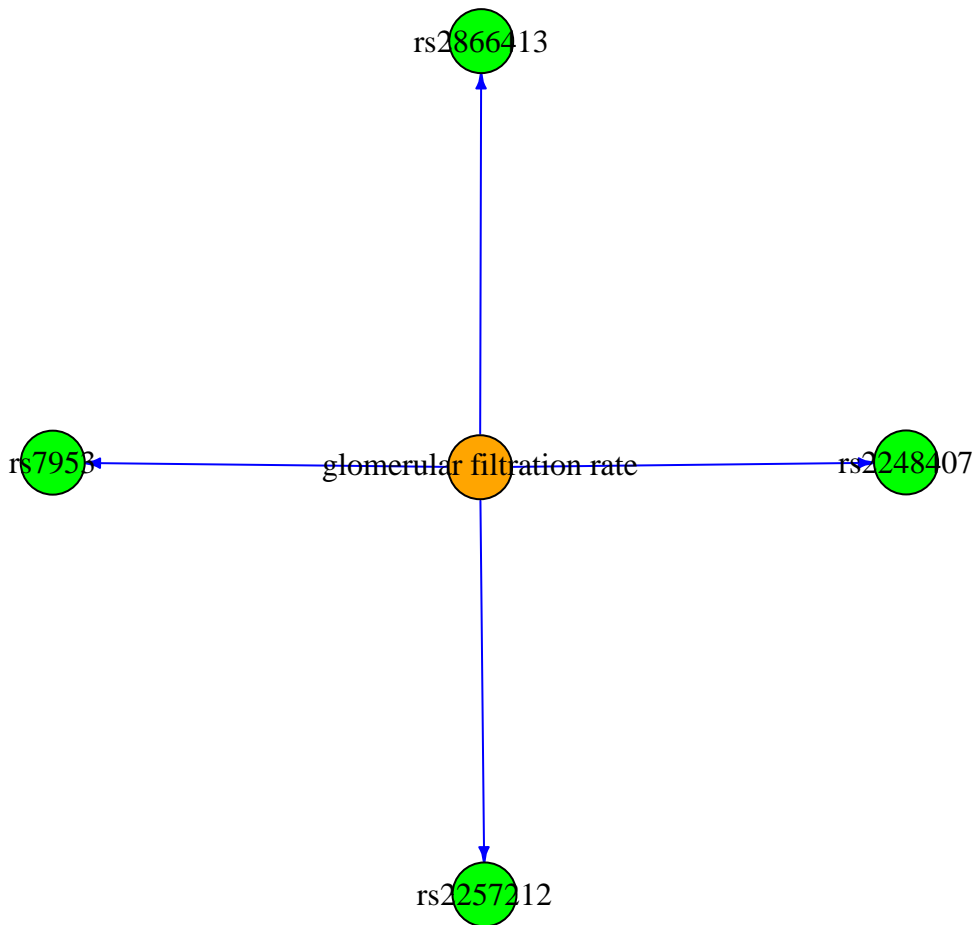

**Variant–Disease Network (hair colour measurement)**

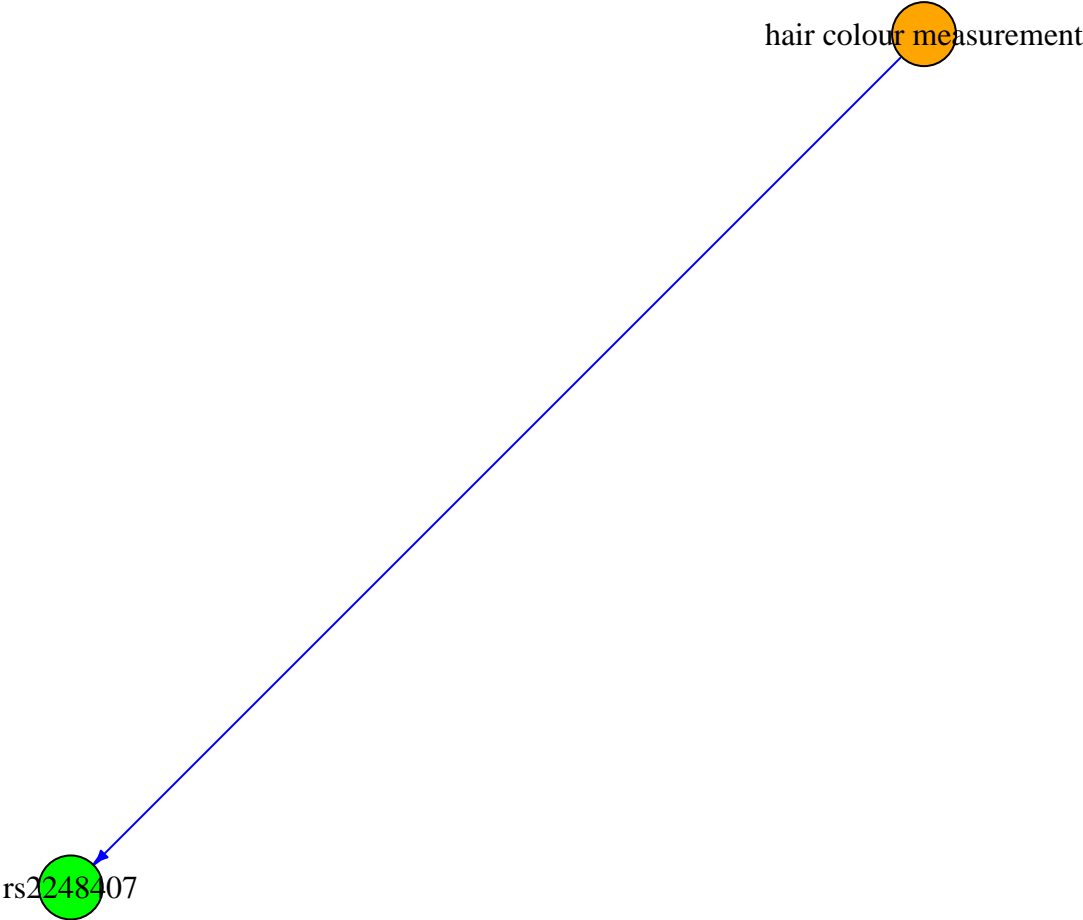

## Variant–Disease Network (intraocular pressure measurement)

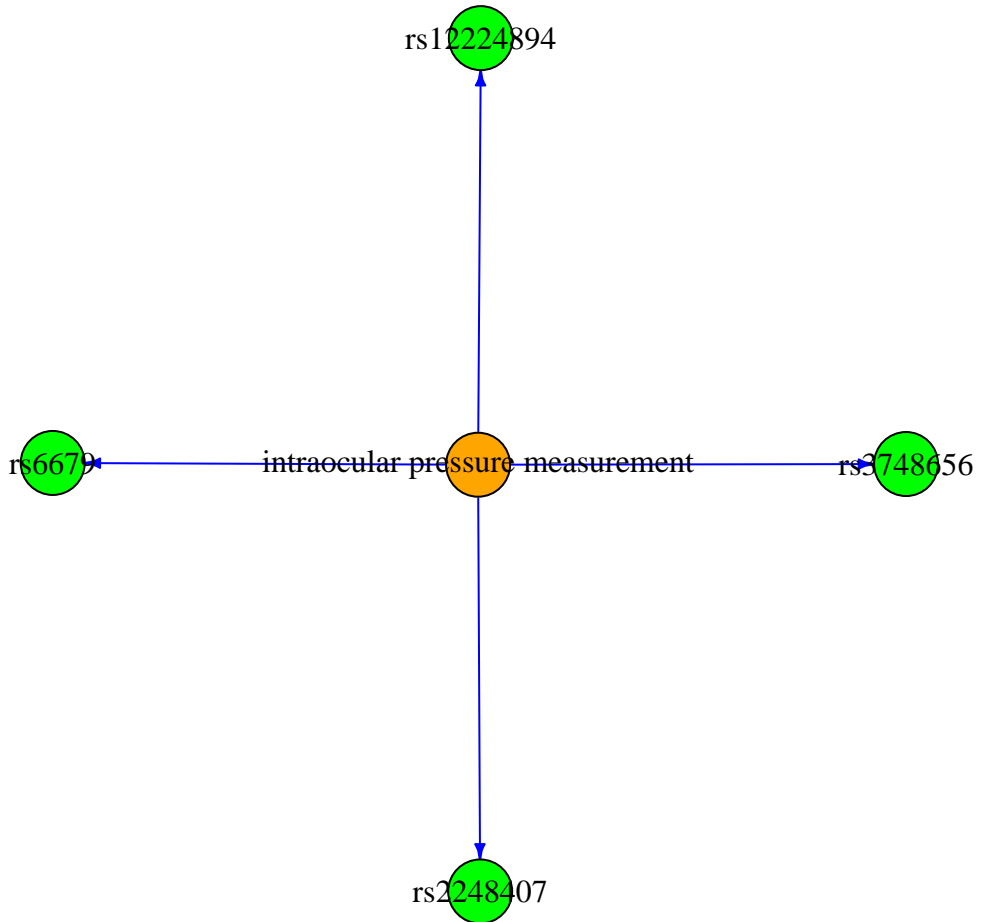

# Variant–Disease Network (l lactate dehydrogenase measurement)

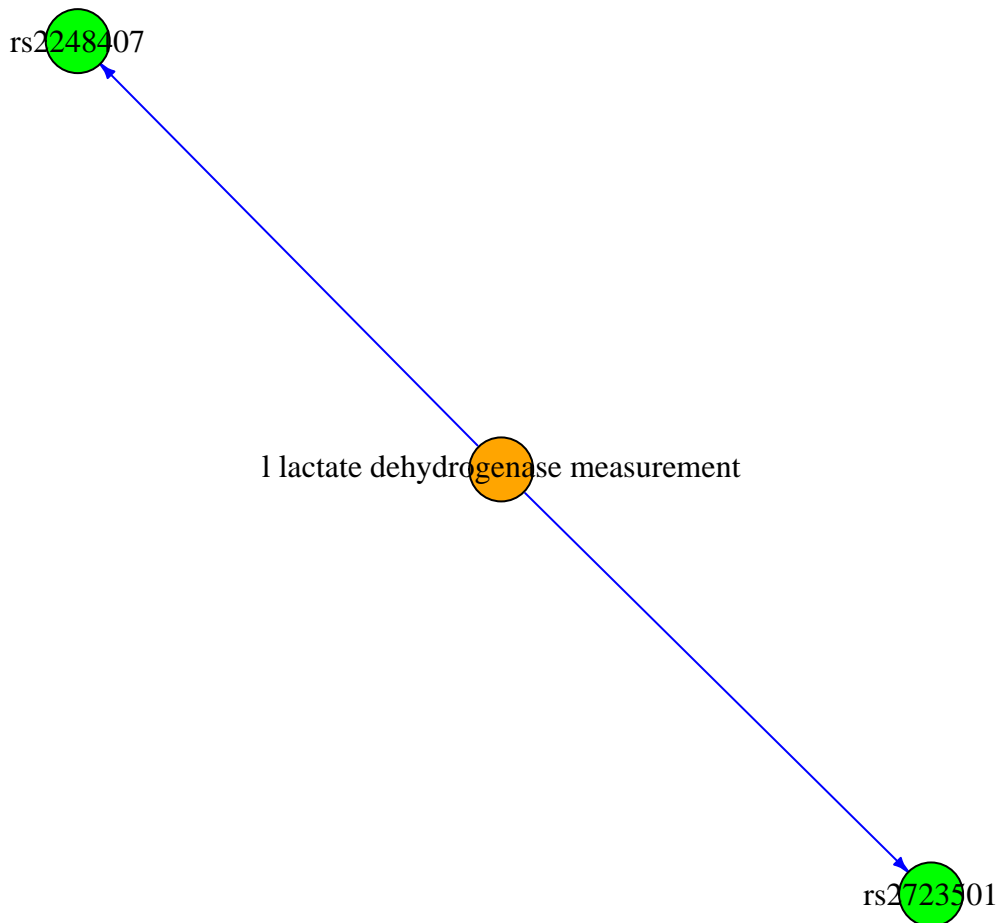

## Variant–Disease Network (Testicular Germ Cell Tumor)

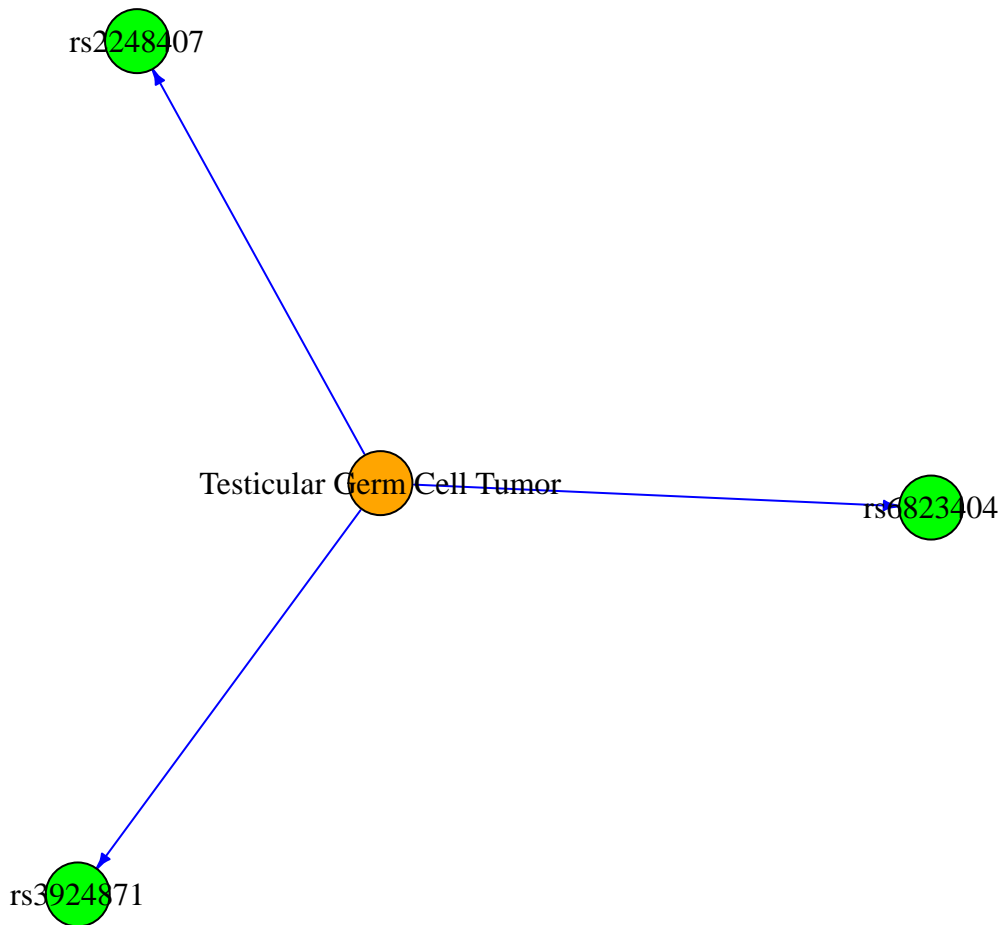

## Variant–Disease Network (triglyceride measurement)

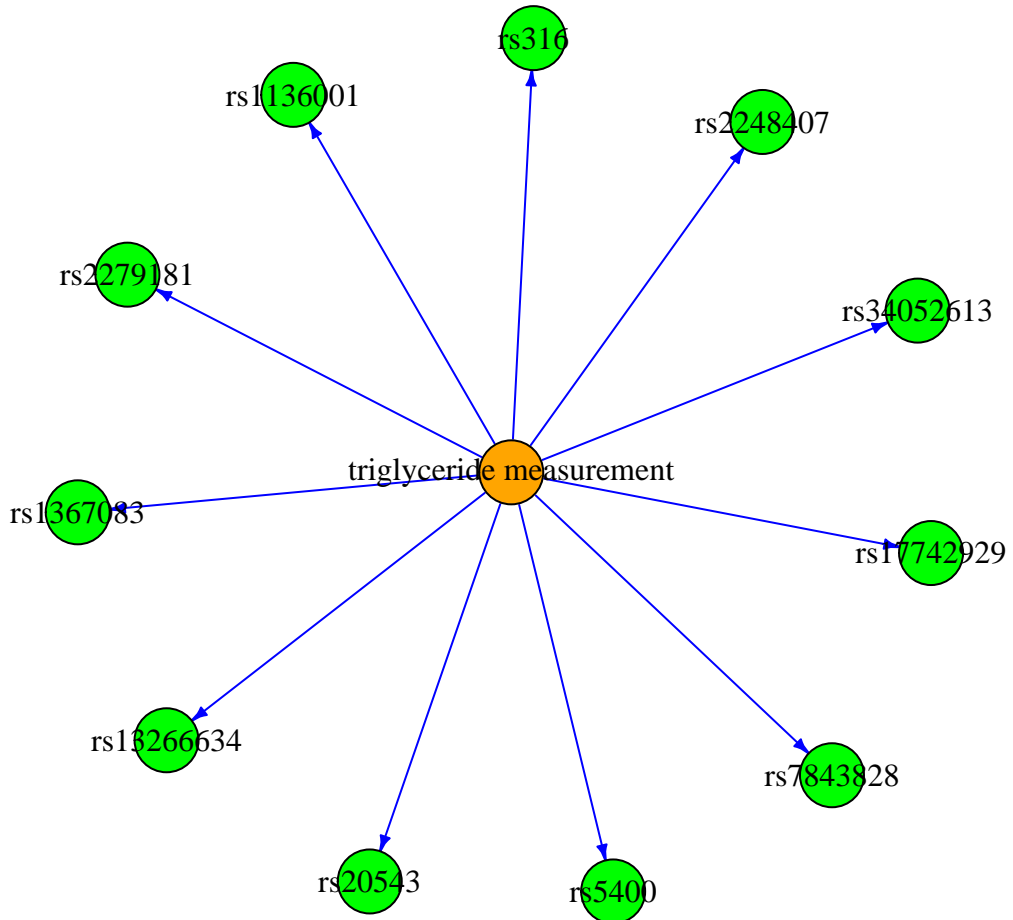

## Variant–Disease Network (diverticulitis)

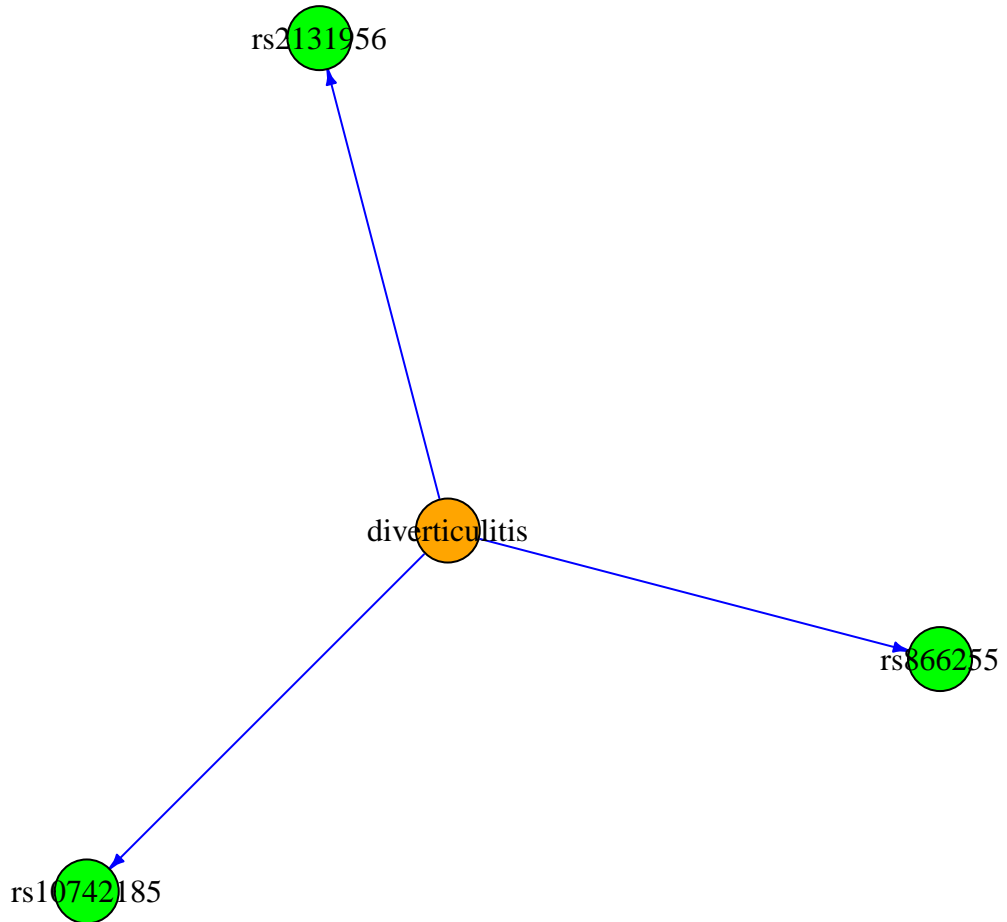

## Variant–Disease Network (albumin:globulin ratio measurement)

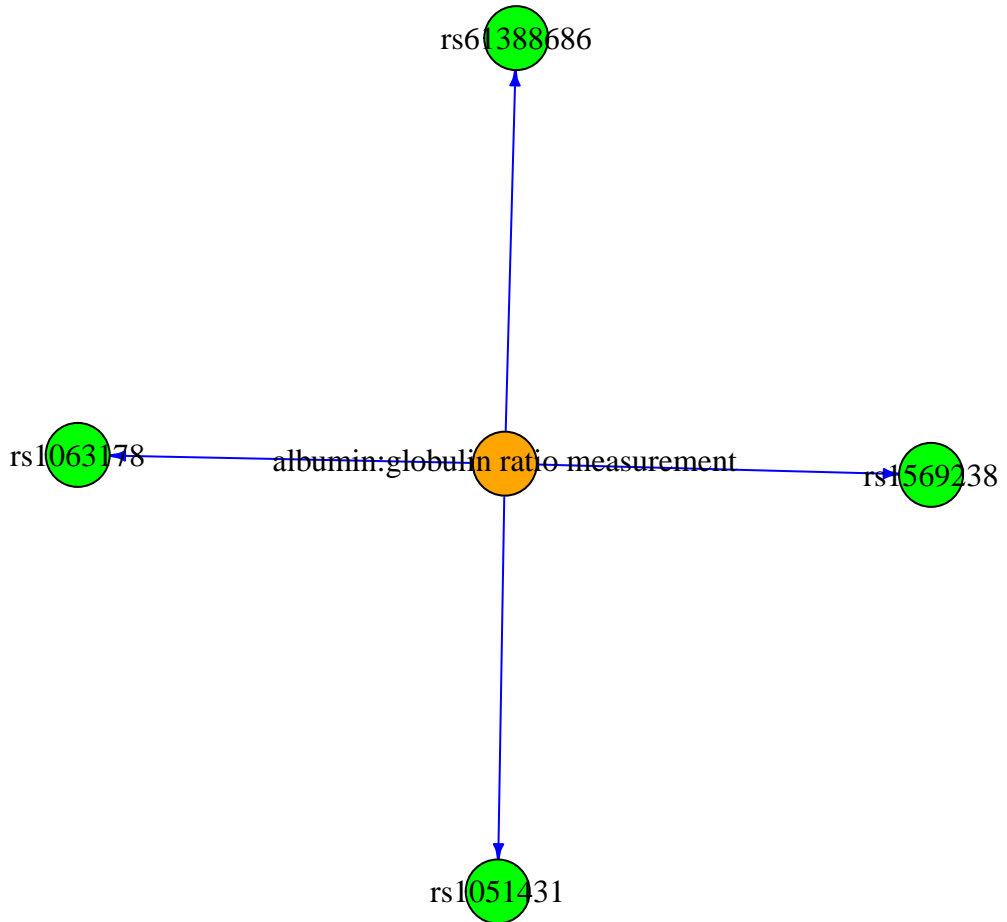



## Variant–Disease Network (allergic rhinitis)

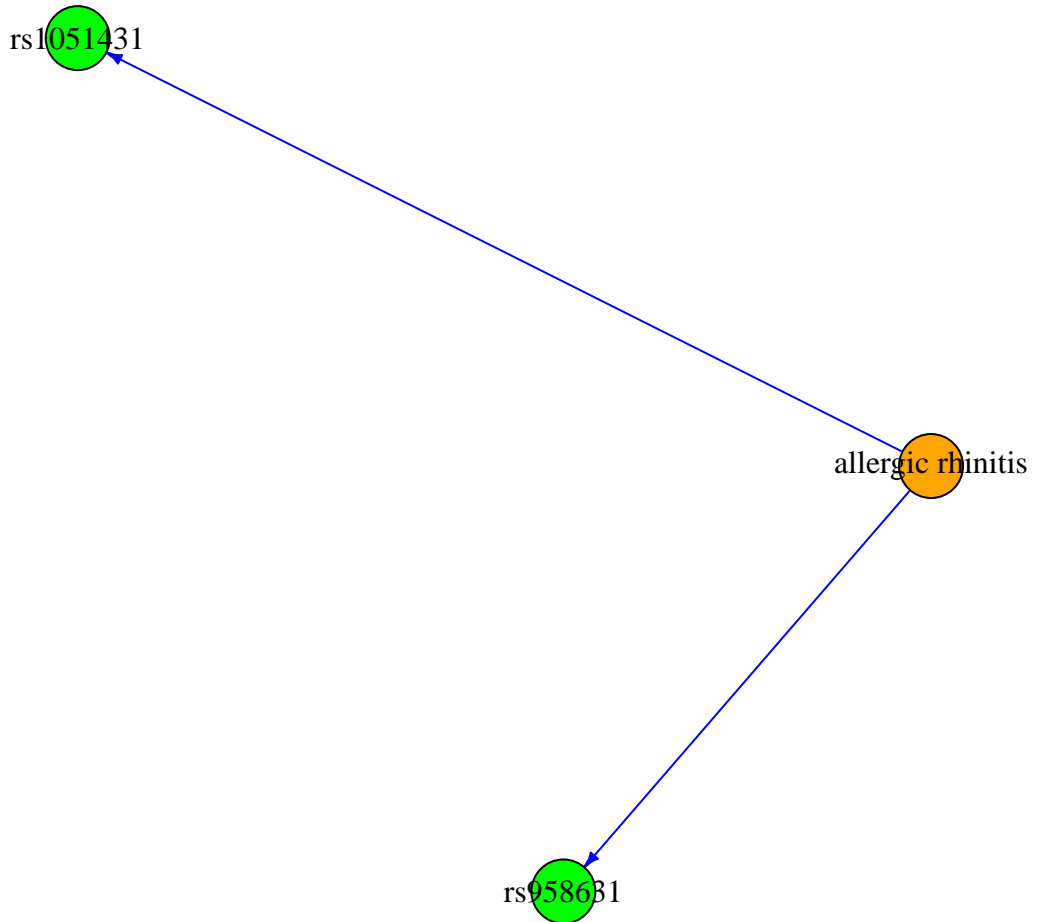

## Variant-Disease Network (allergy)

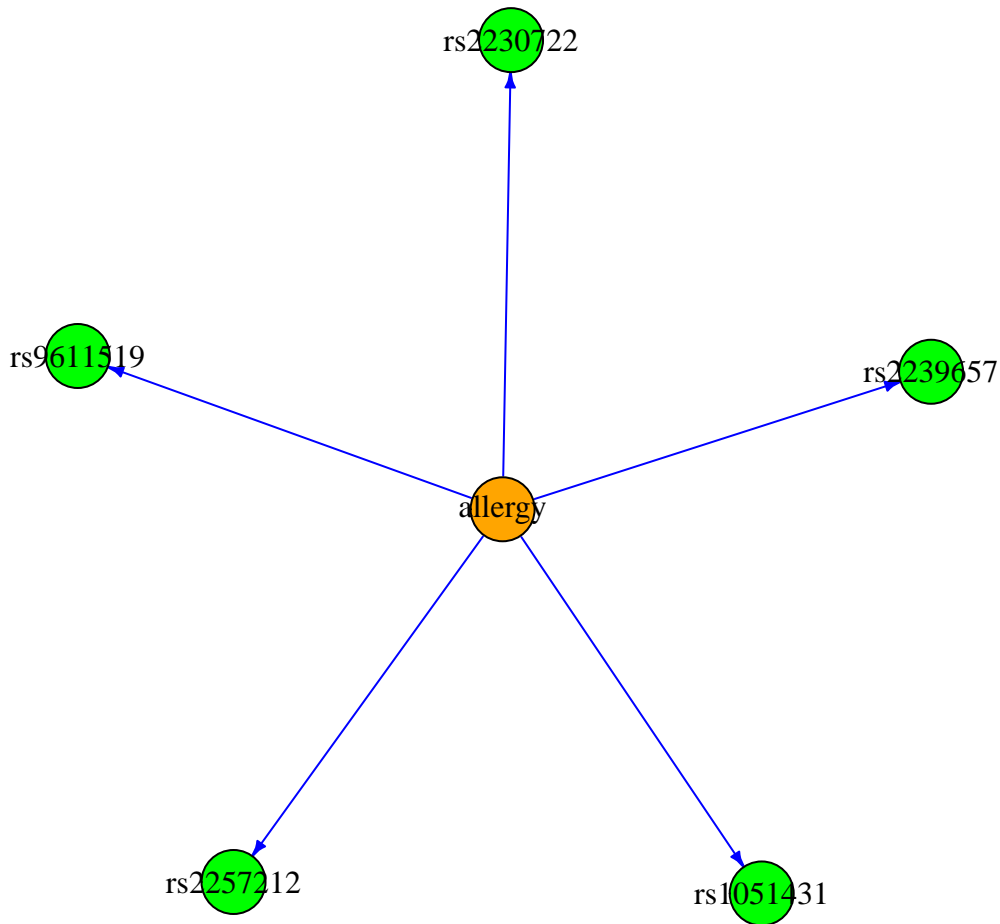

## Variant-Disease Network (body height)

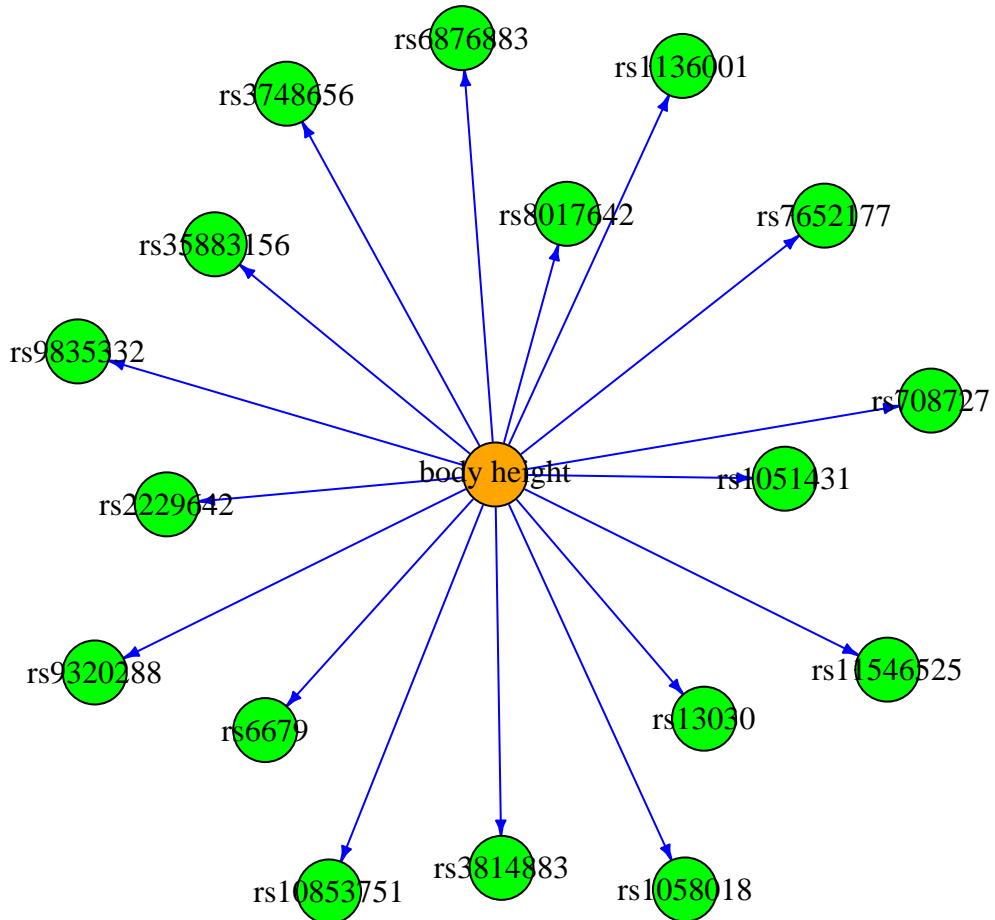

## Variant–Disease Network (hip circumference)

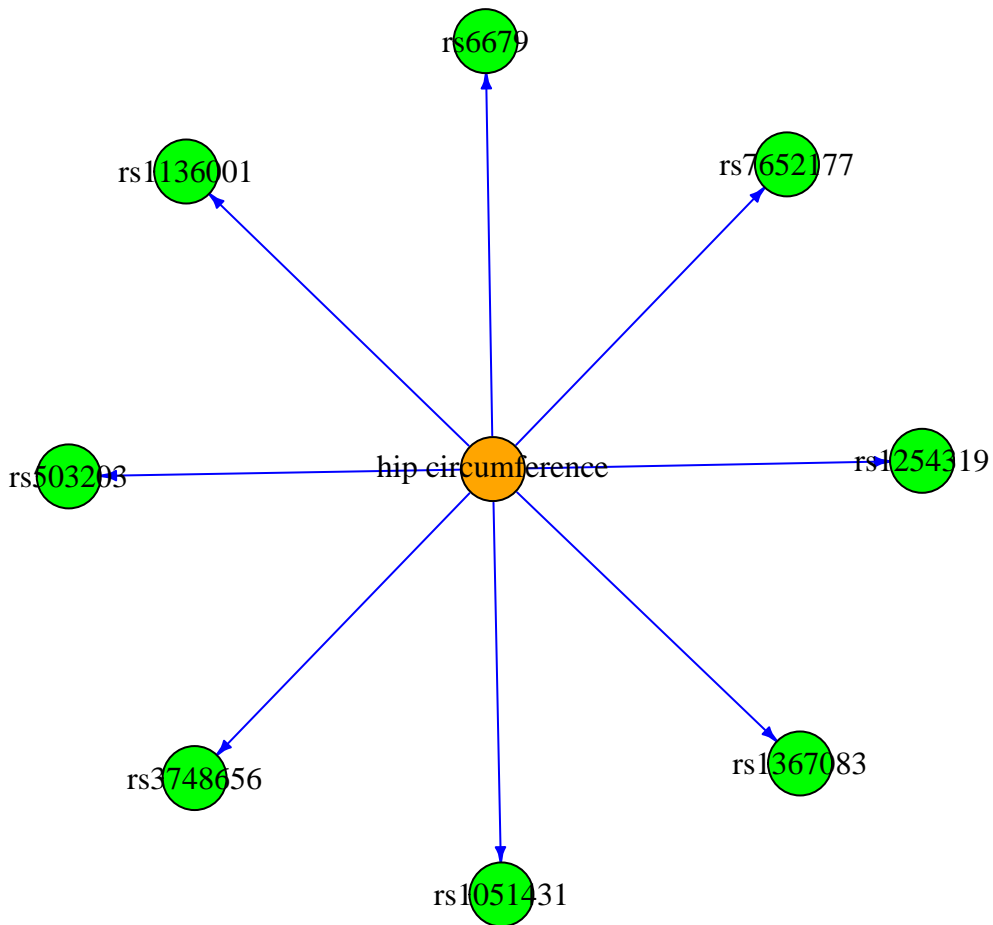

## Variant–Disease Network (infant head circumference)

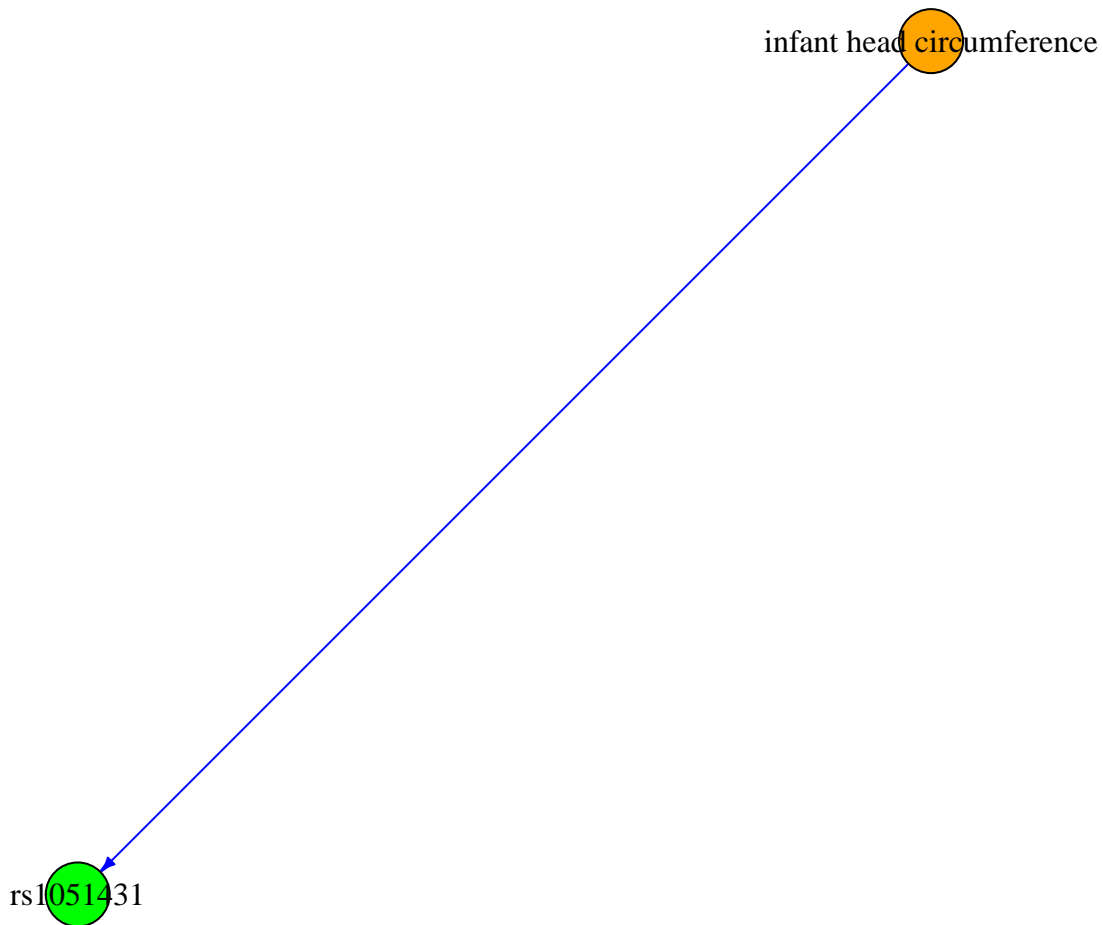

## Variant-Disease Network (multiple sclerosis)

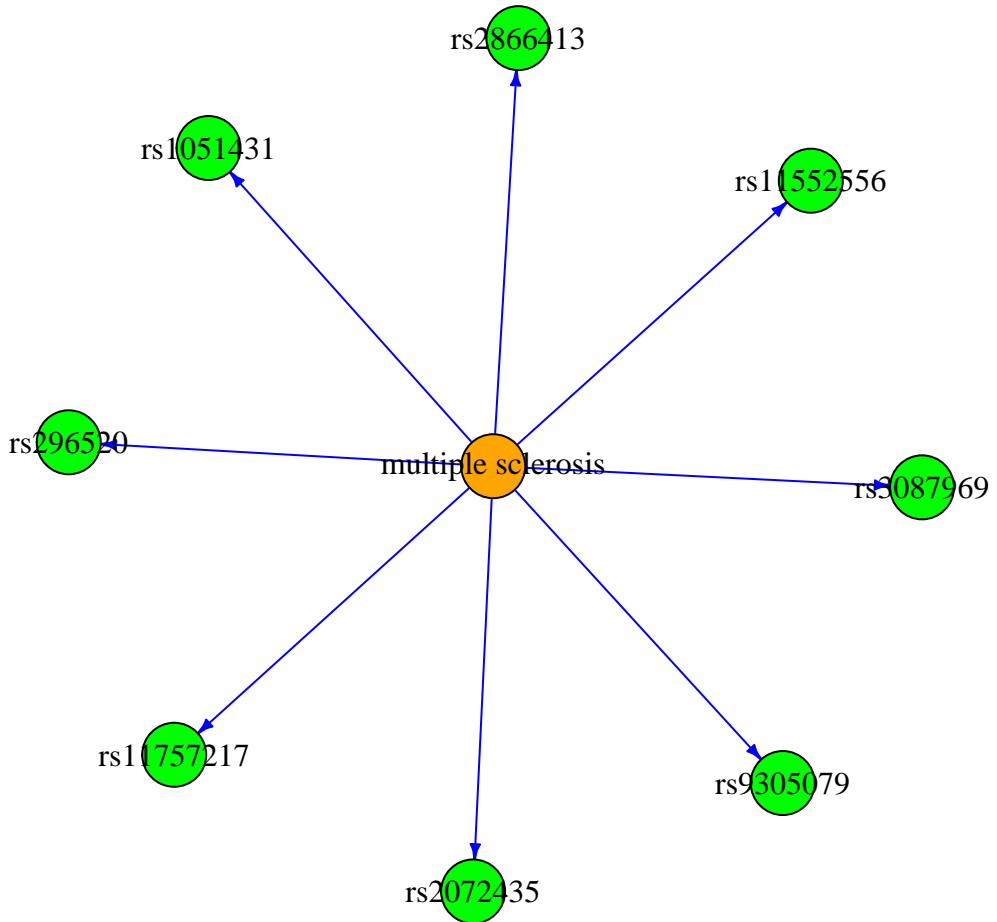

## Variant–Disease Network (plateletcrit)

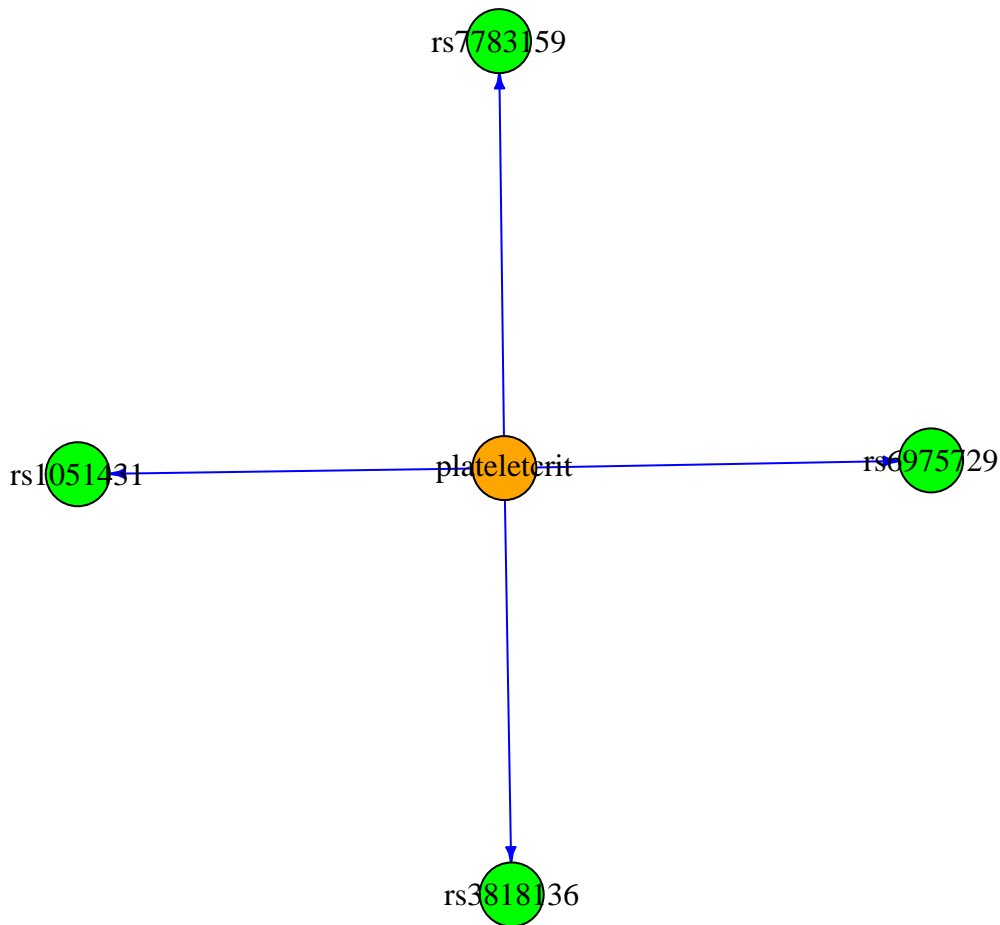

**Variant–Disease Network (type ii diabetes mellitus)**

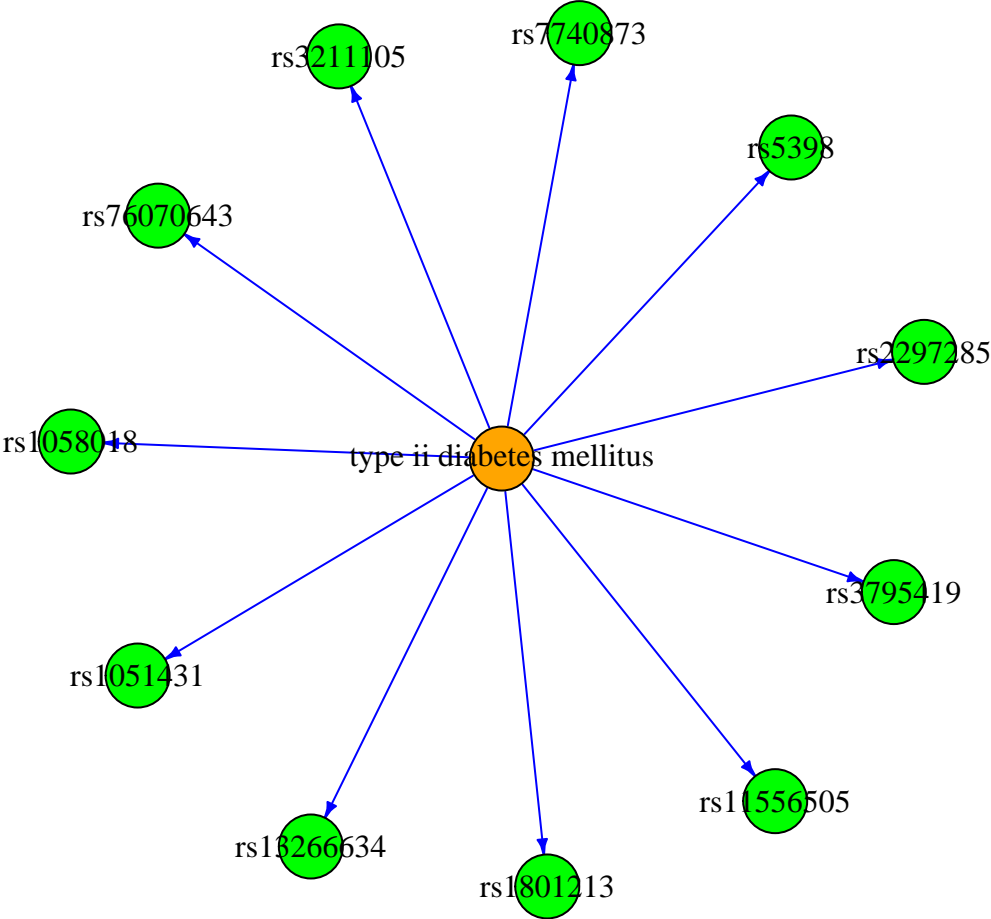



Variant–Disease Network (granulocyte percentage of myeloid white cells)

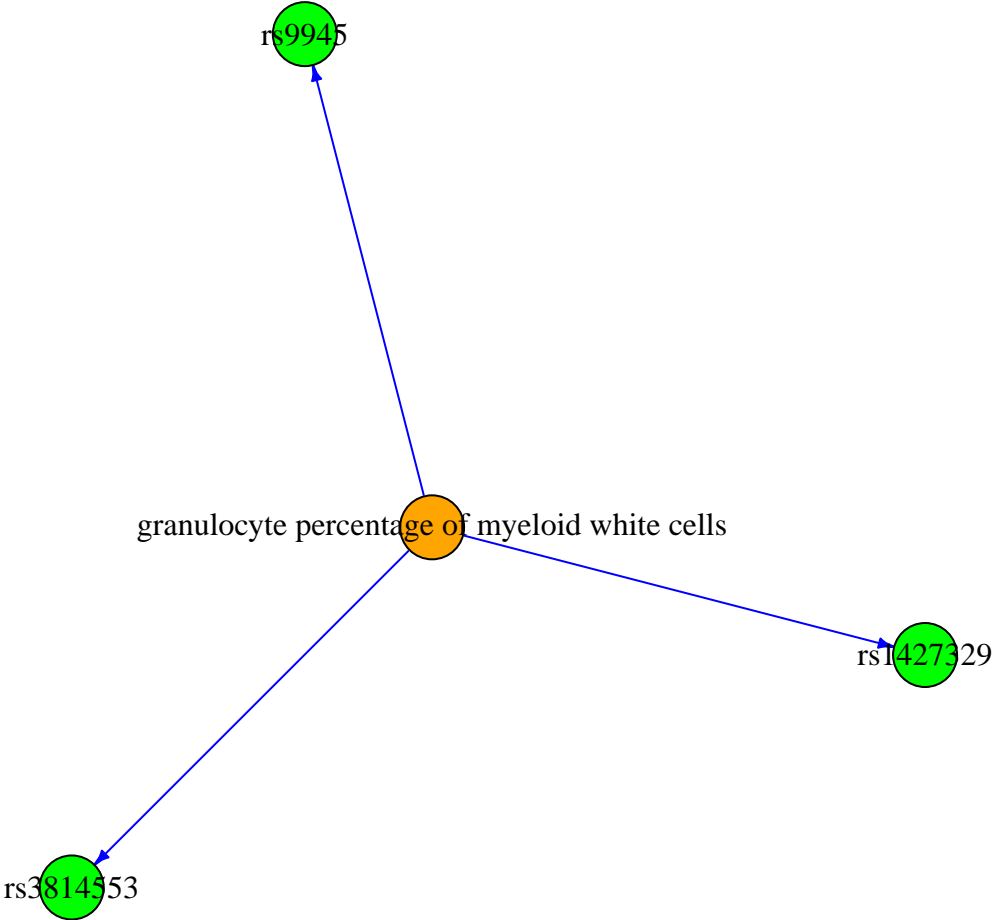

## Variant–Disease Network (cranial vault morphology measurement)

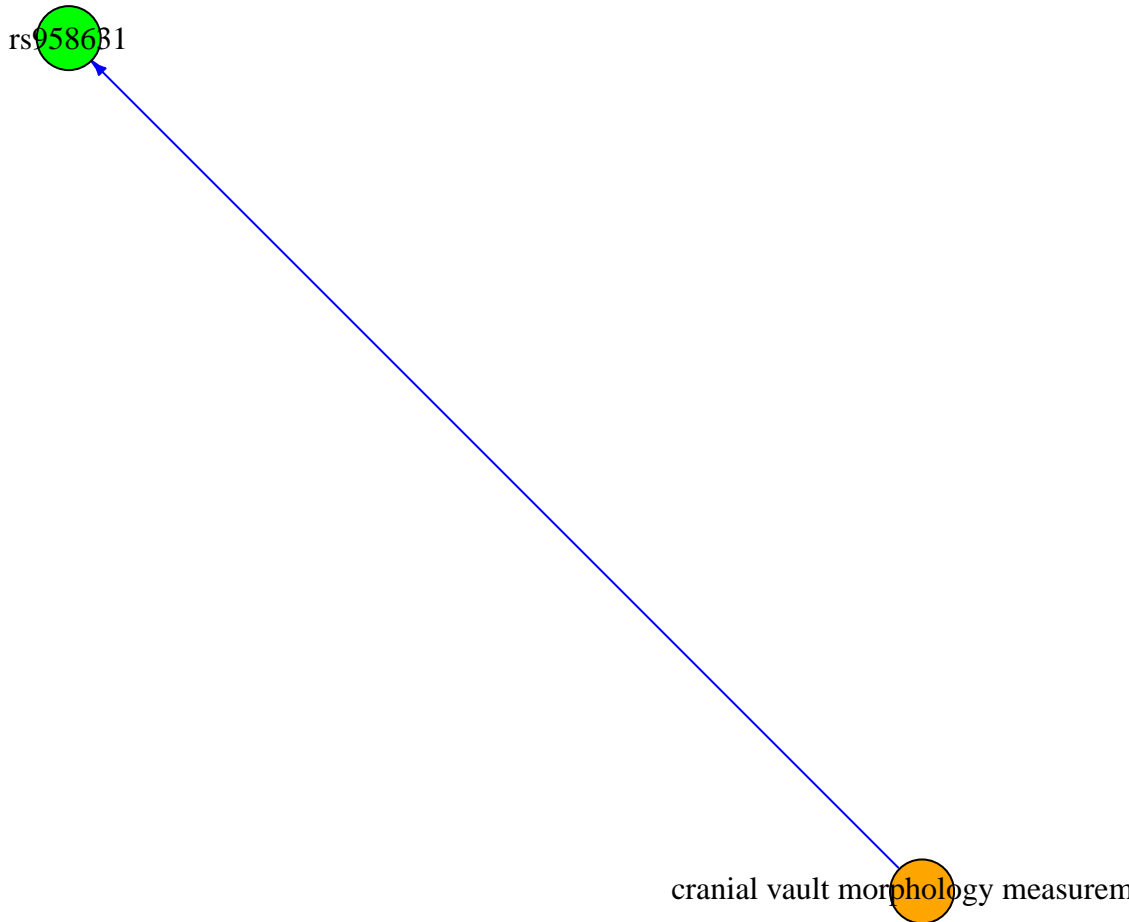

## Variant–Disease Network (ovarian carcinoma)

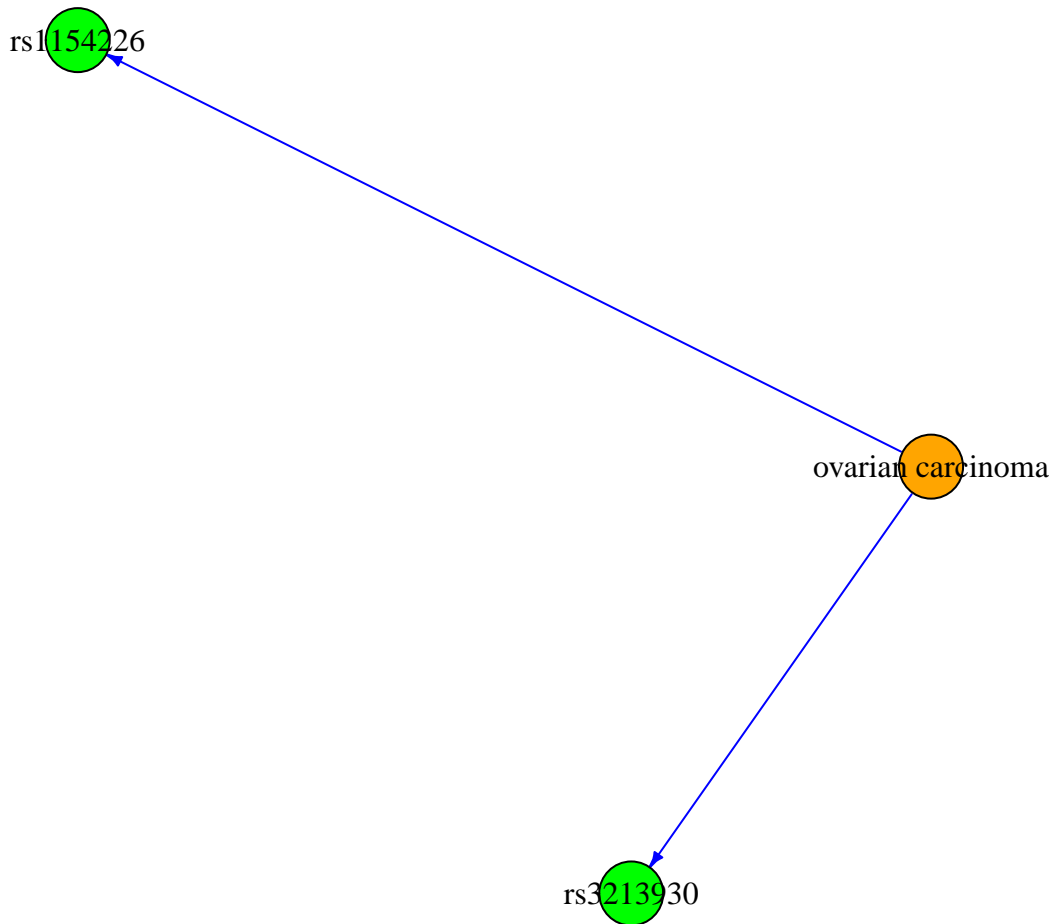

## Variant–Disease Network (ovarian serous carcinoma)

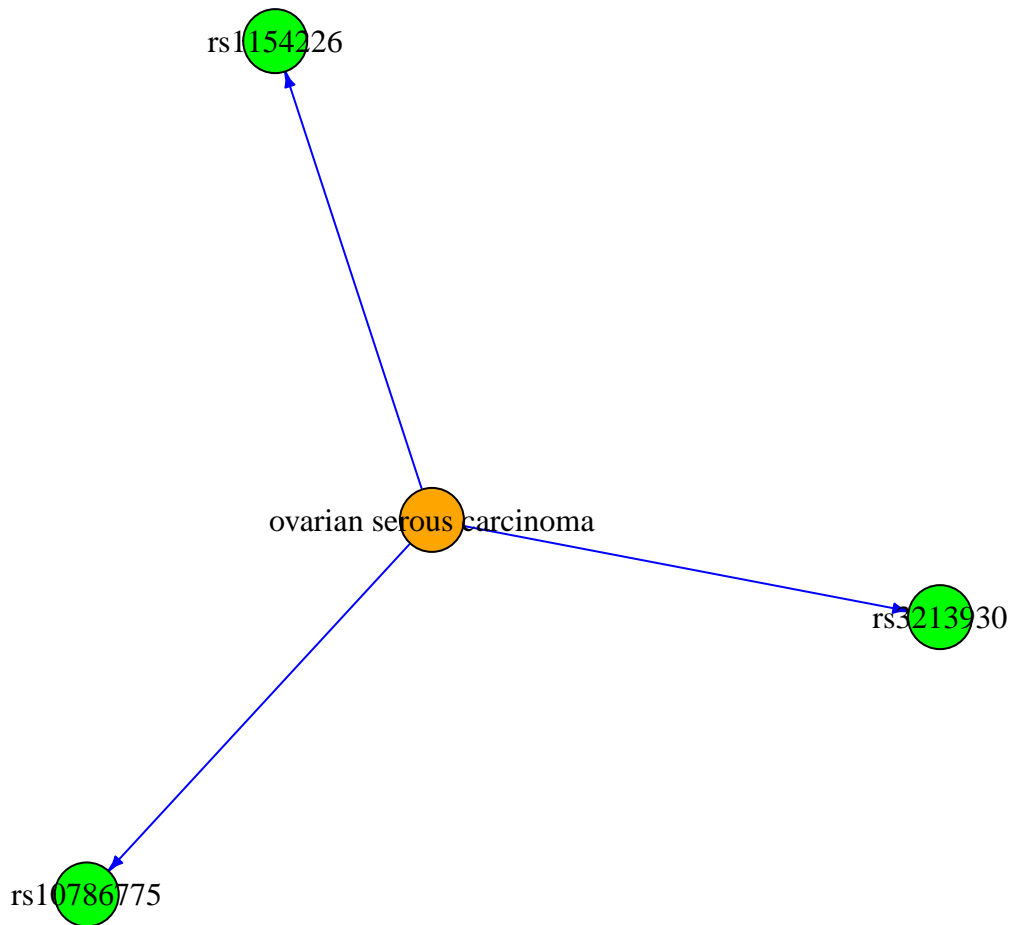

## Variant-Disease Network (crohns disease)

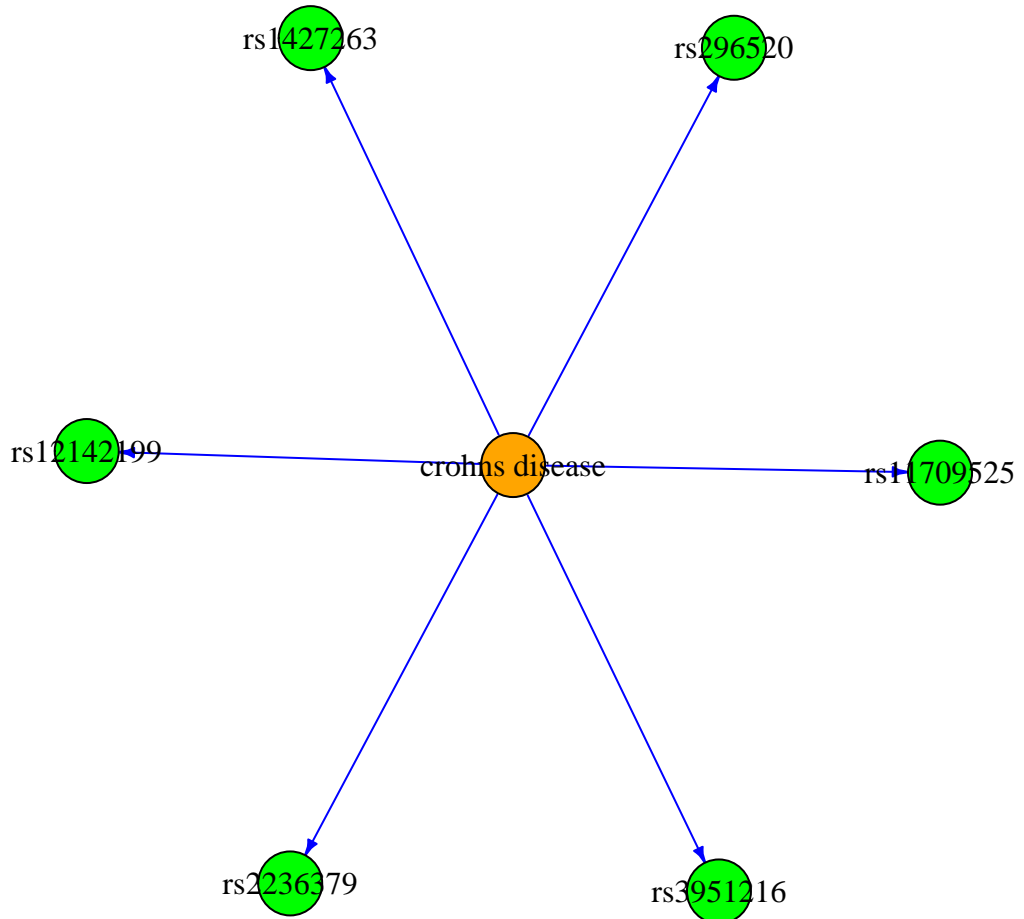

## Variant–Disease Network (erythema nodosum)

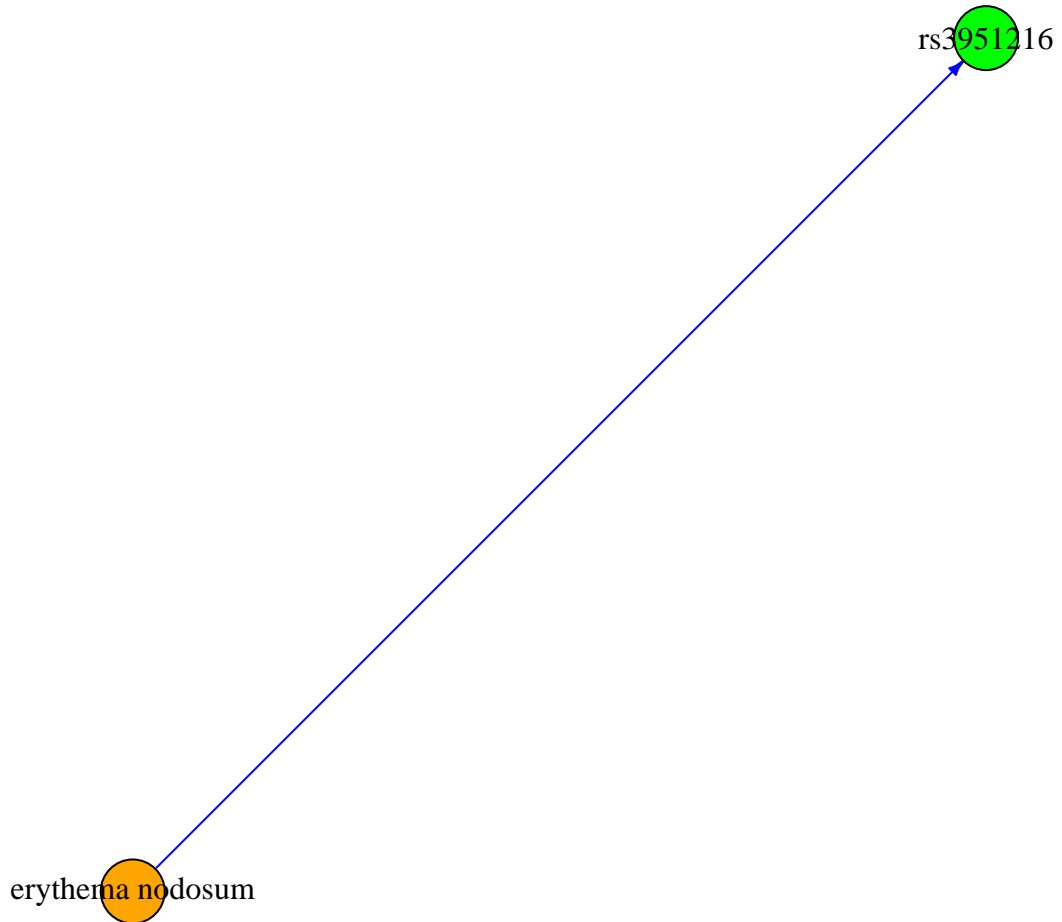

## Variant–Disease Network (leukocyte count)

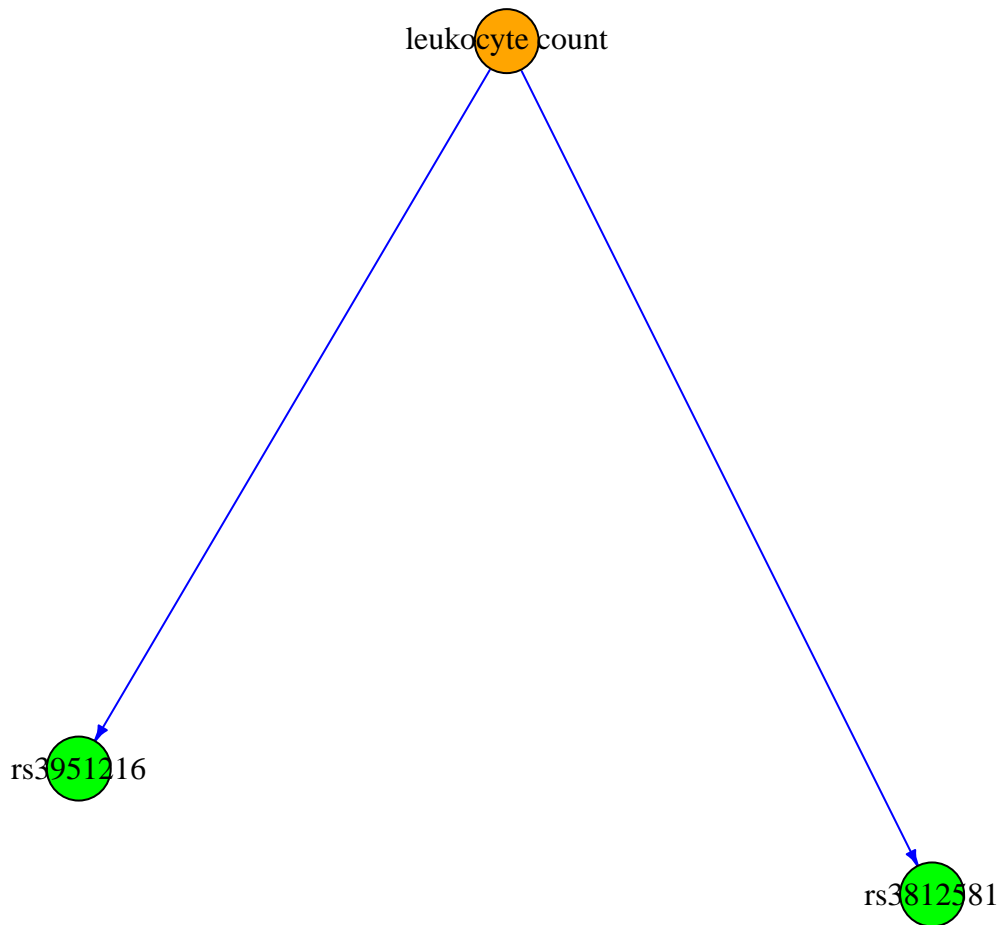

Variant–Disease Network (head and neck squamous cell carcinoma)

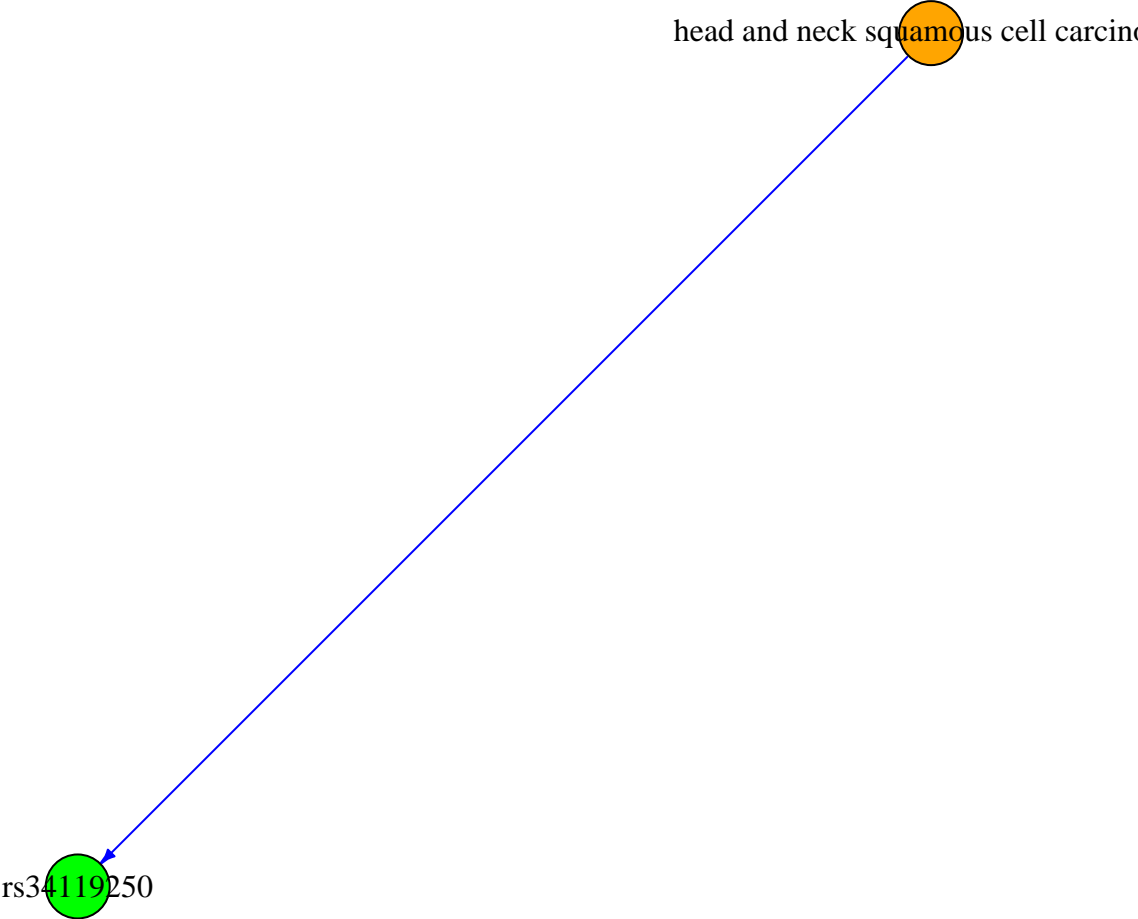



## Variant-Disease Network (pain)

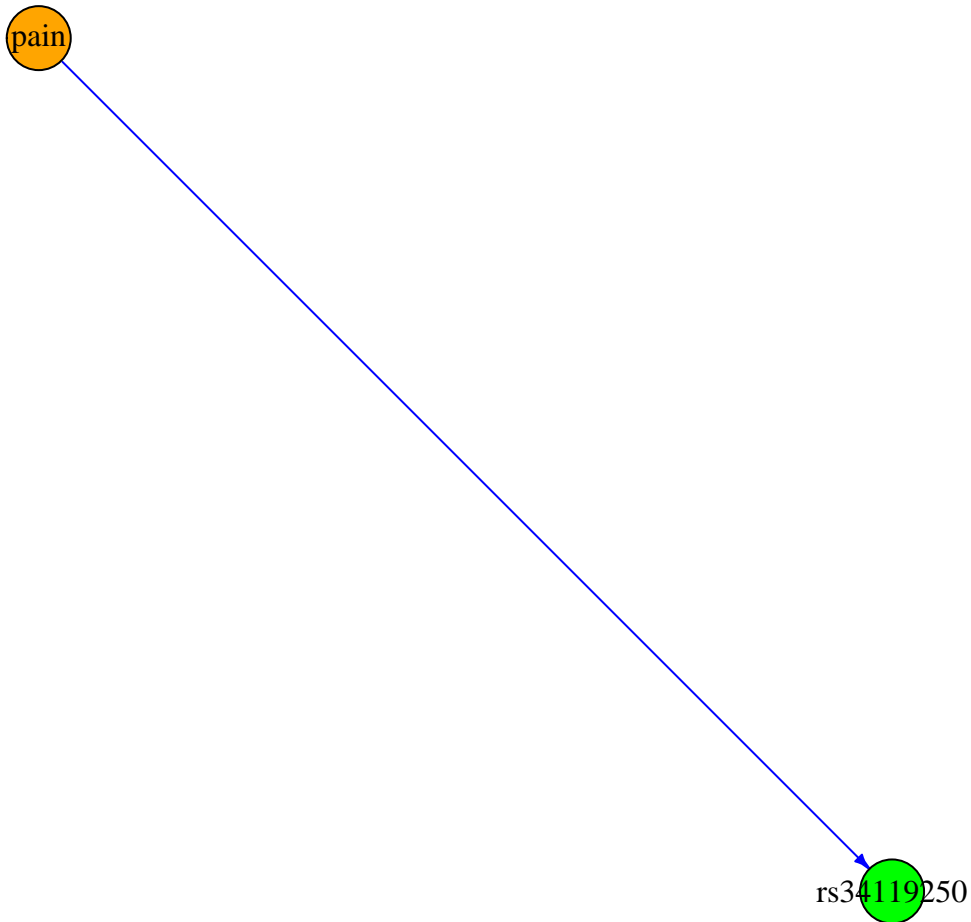

## Variant-Disease Network (immune system disease)

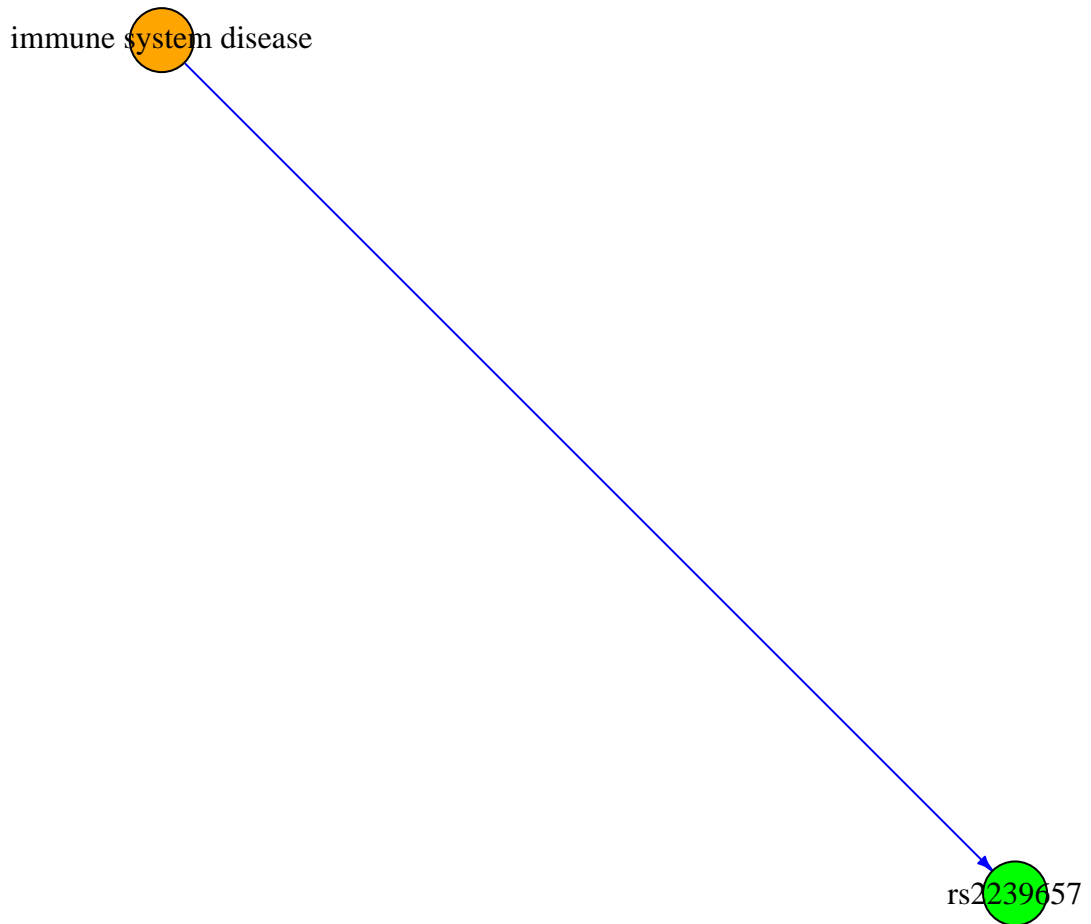

## Variant–Disease Network (lymphocyte count)

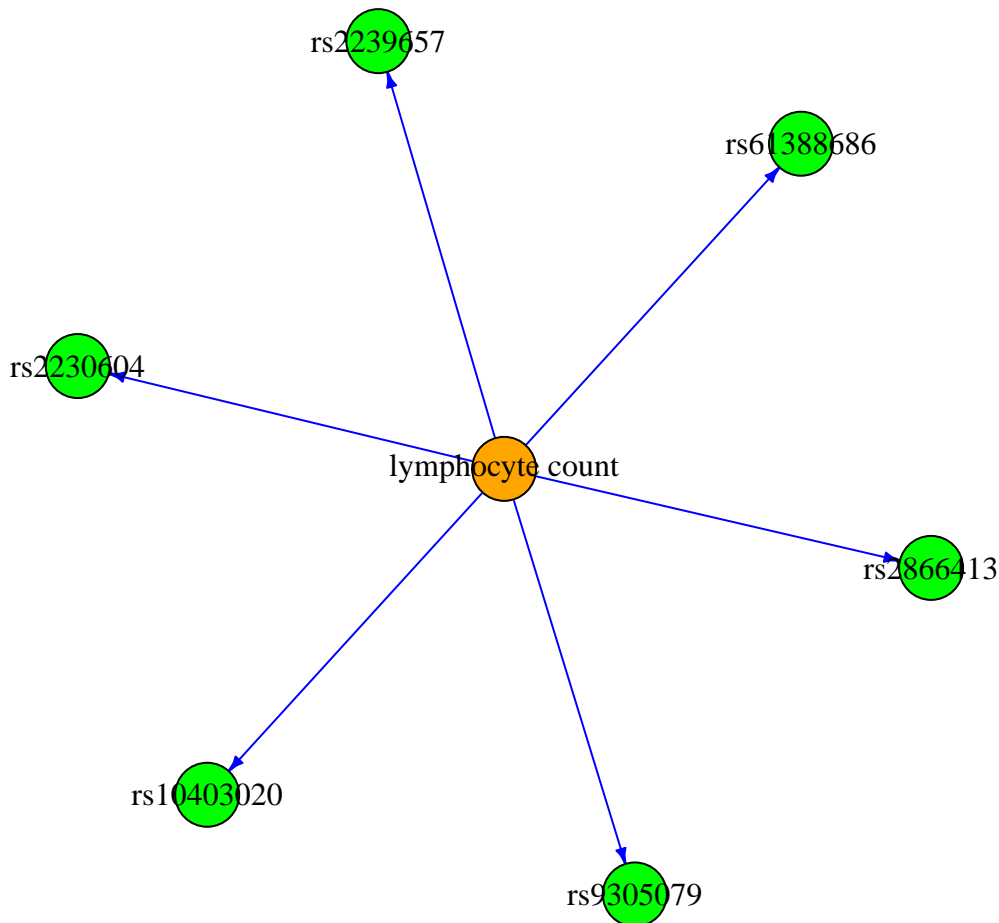

**Variant–Disease Network (prostate specific antigen measurement)**

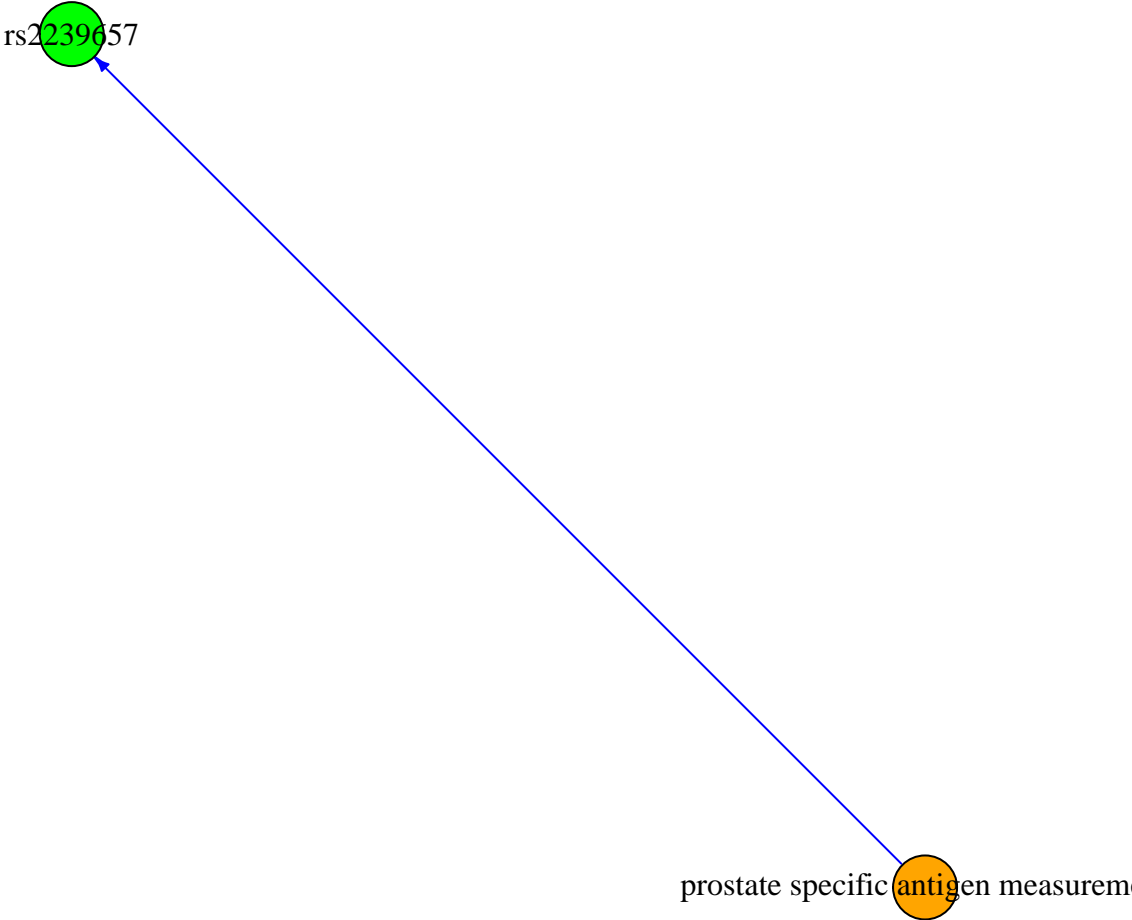

# Variant–Disease Network (pulse pressure measurement)

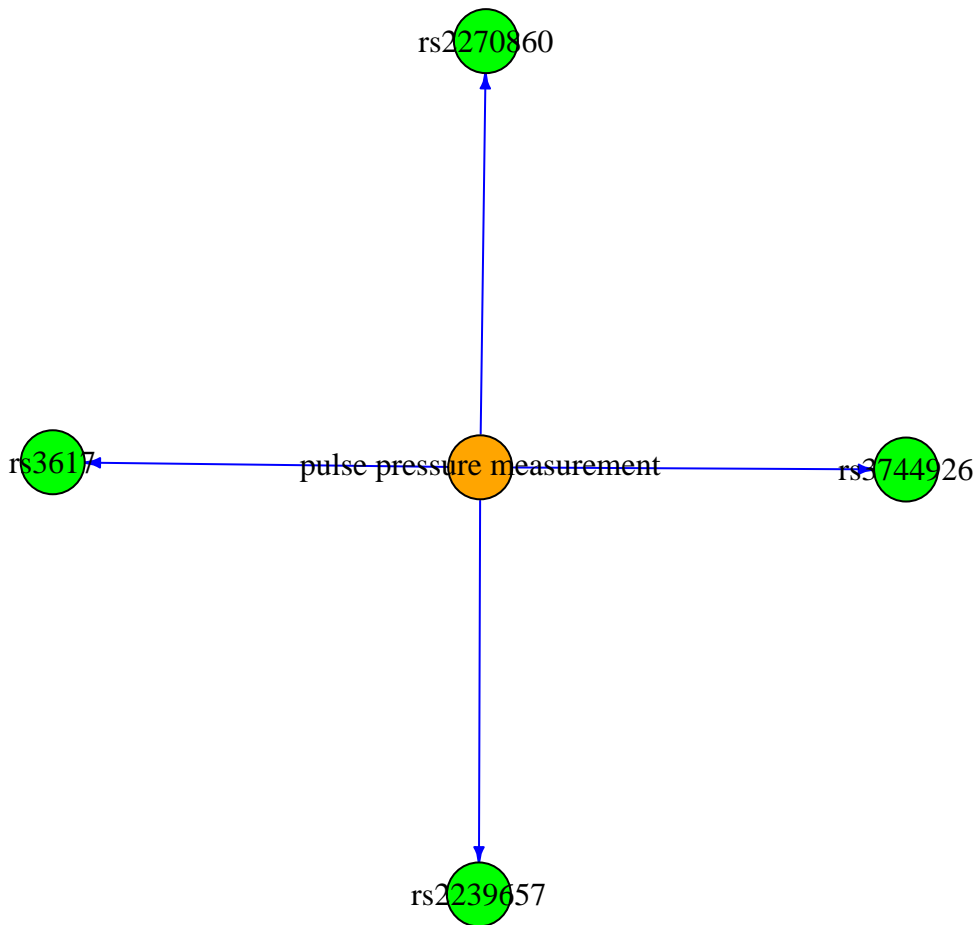

## Variant–Disease Network (rheumatoid arthritis)

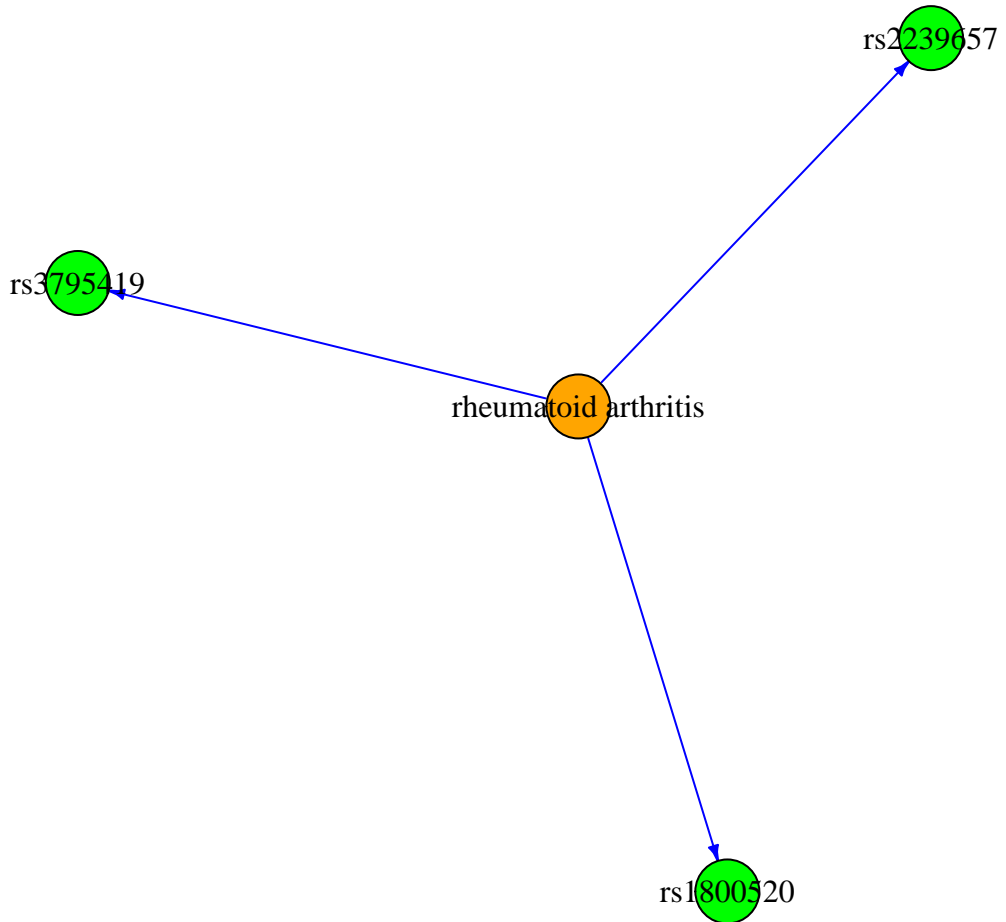

## Variant–Disease Network (psoriasis vulgaris)

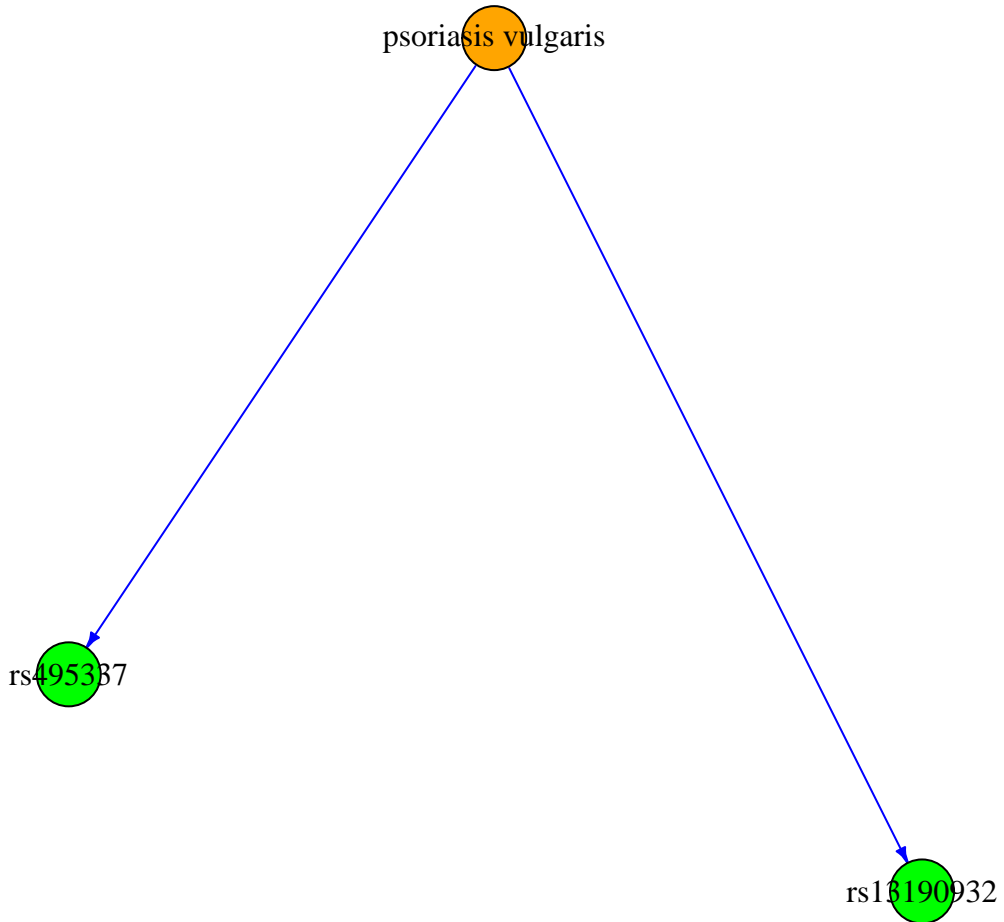

## Variant–Disease Network (HIV–1 infection)

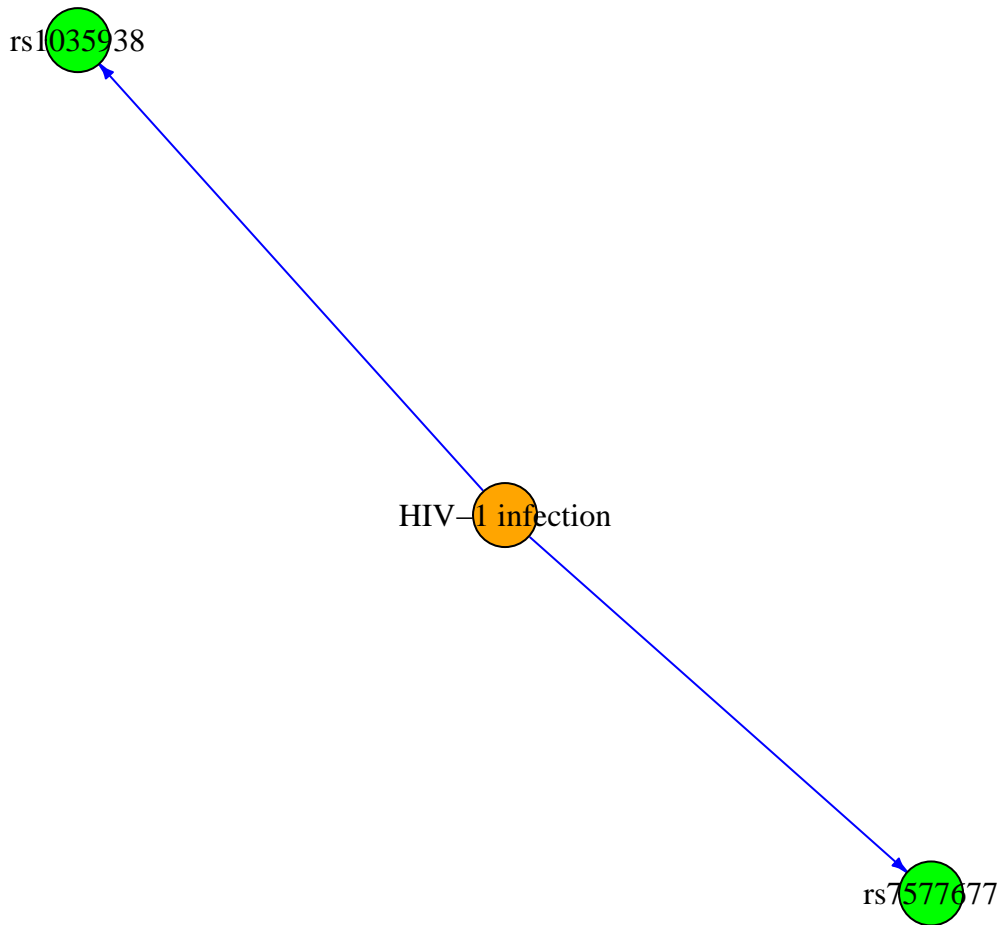



Variant–Disease Network (susceptibility to viral and mycobacterial infection)

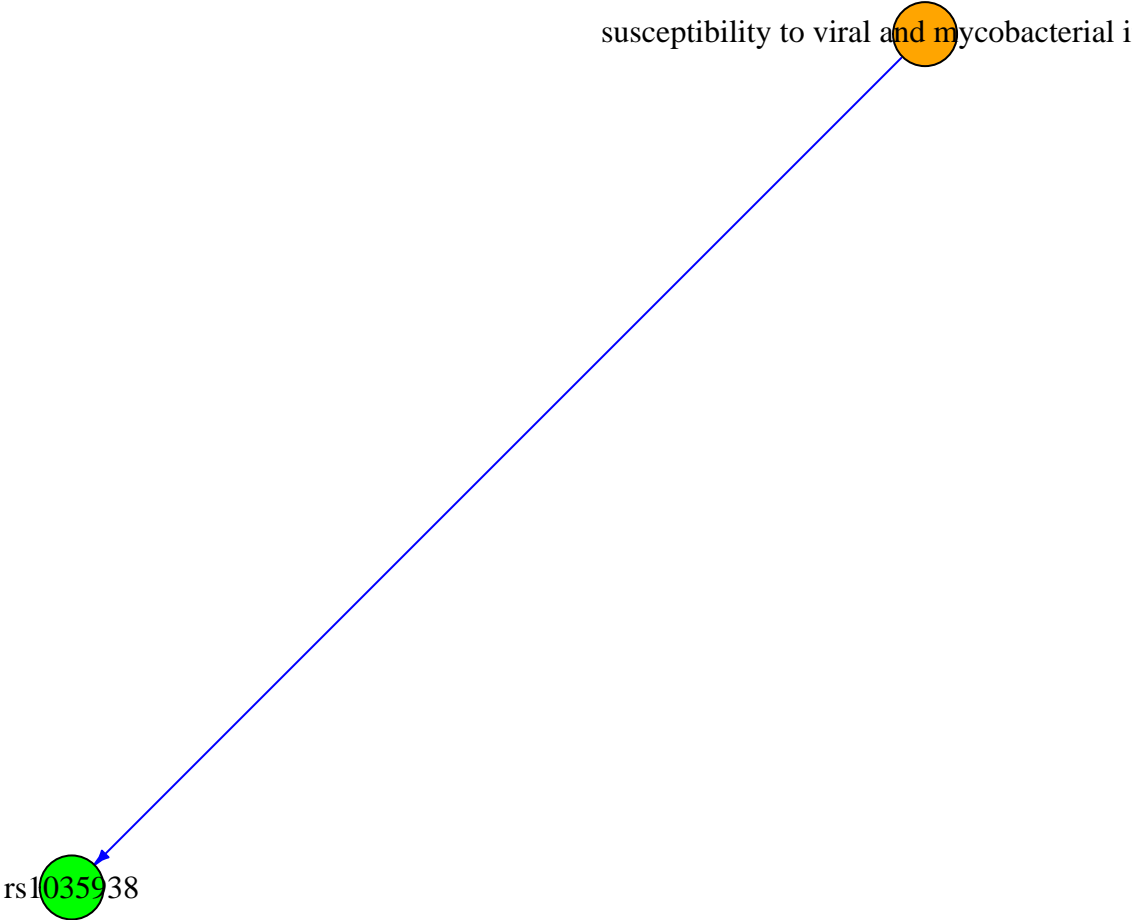

## Variant–Disease Network (grip strength measurement)

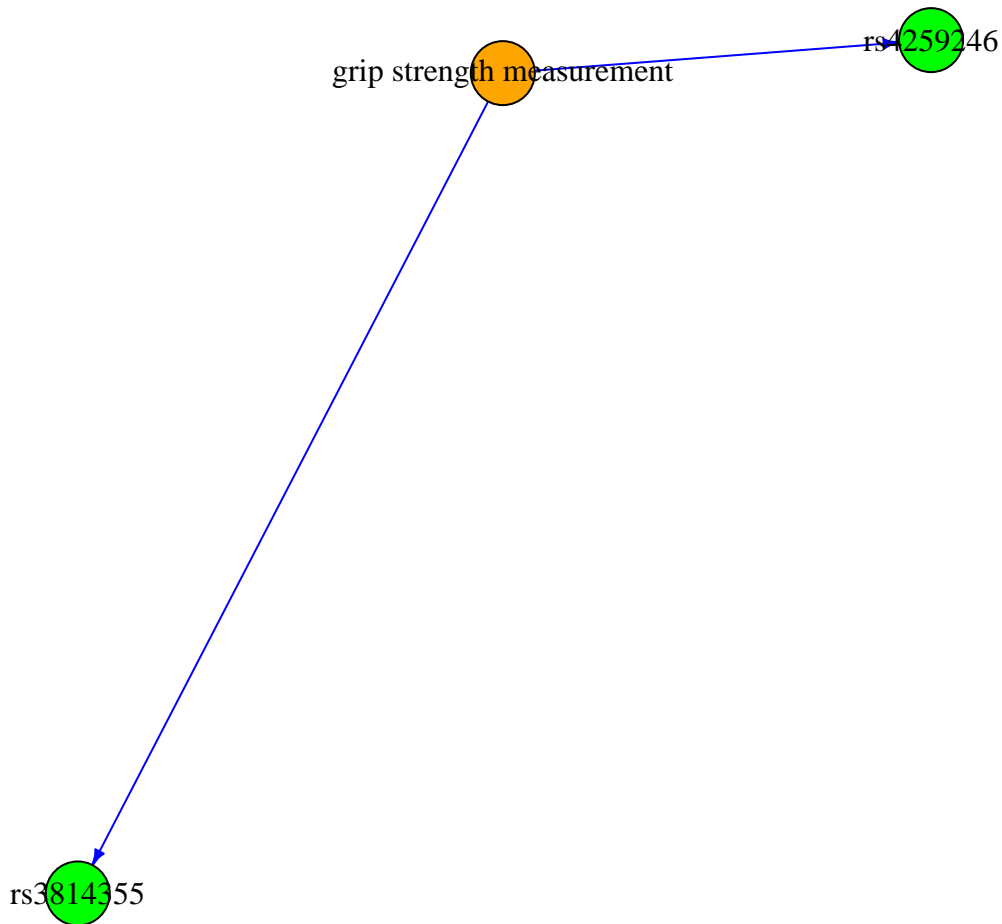

## Variant–Disease Network (smoking behavior)

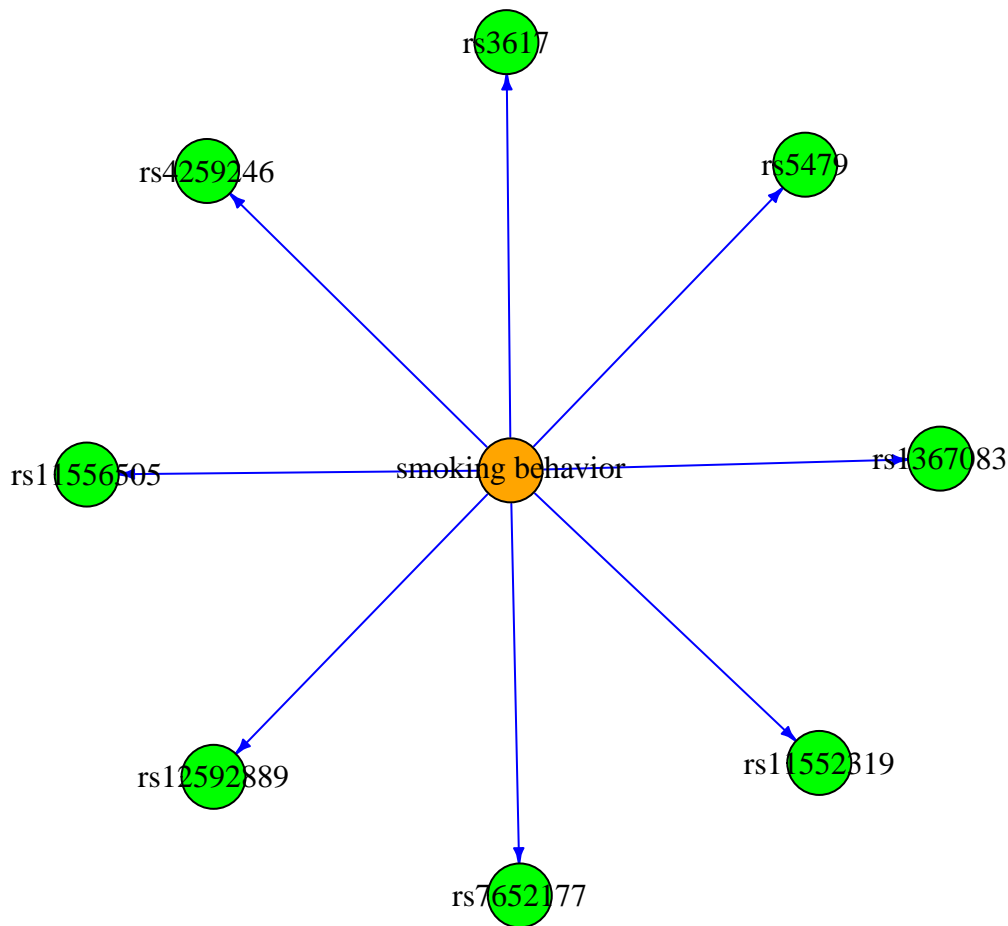

## Variant–Disease Network (ankylosing spondylitis)

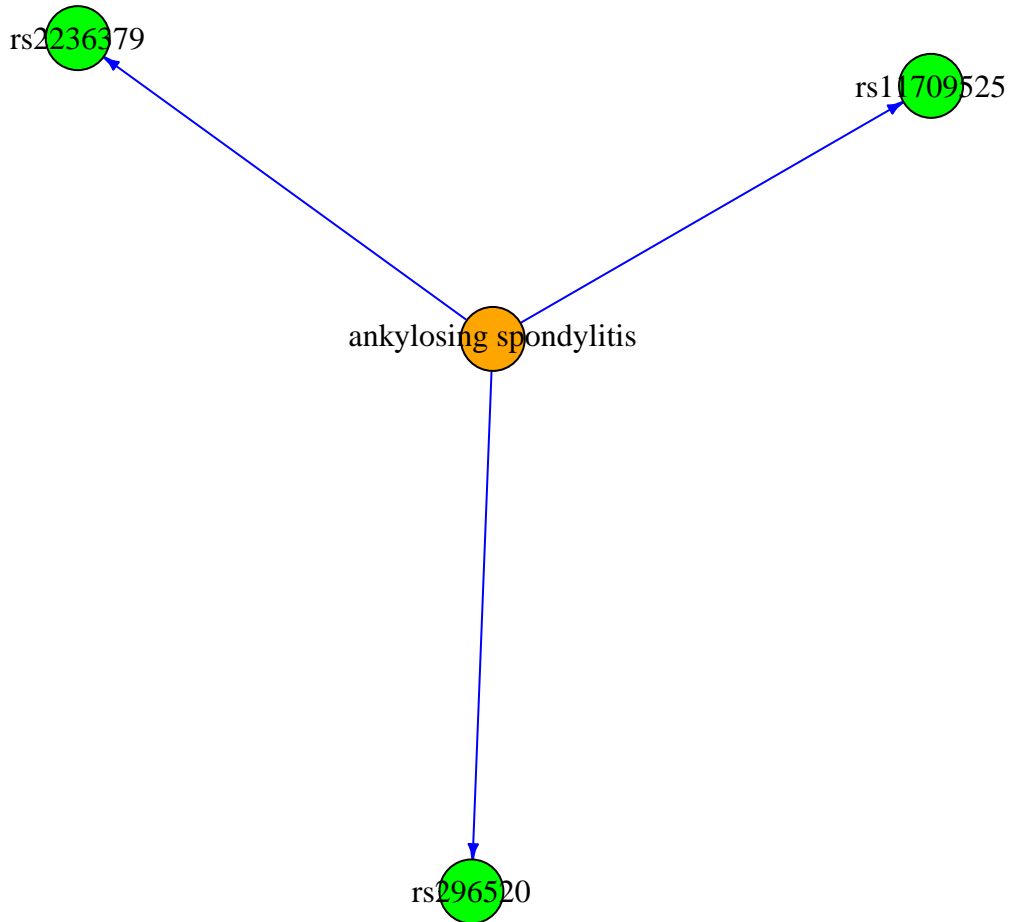

## Variant–Disease Network (sclerosing cholangitis)

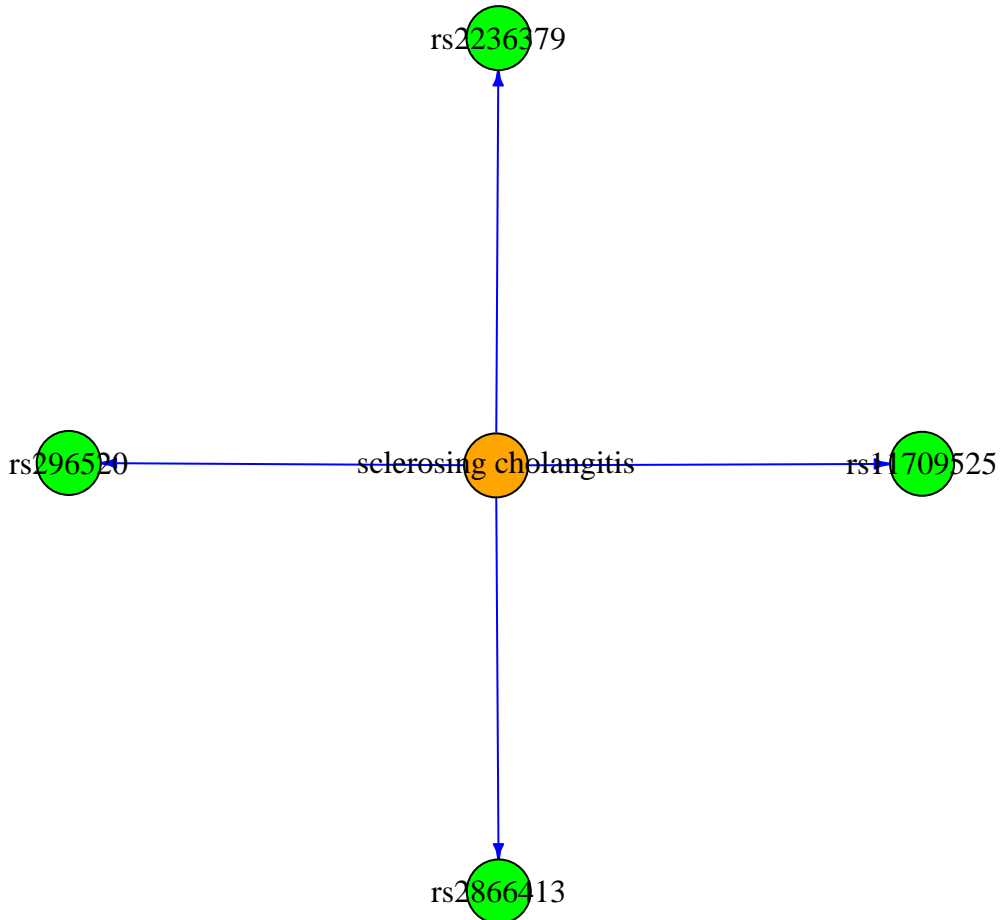

## Variant–Disease Network (type i diabetes mellitus)

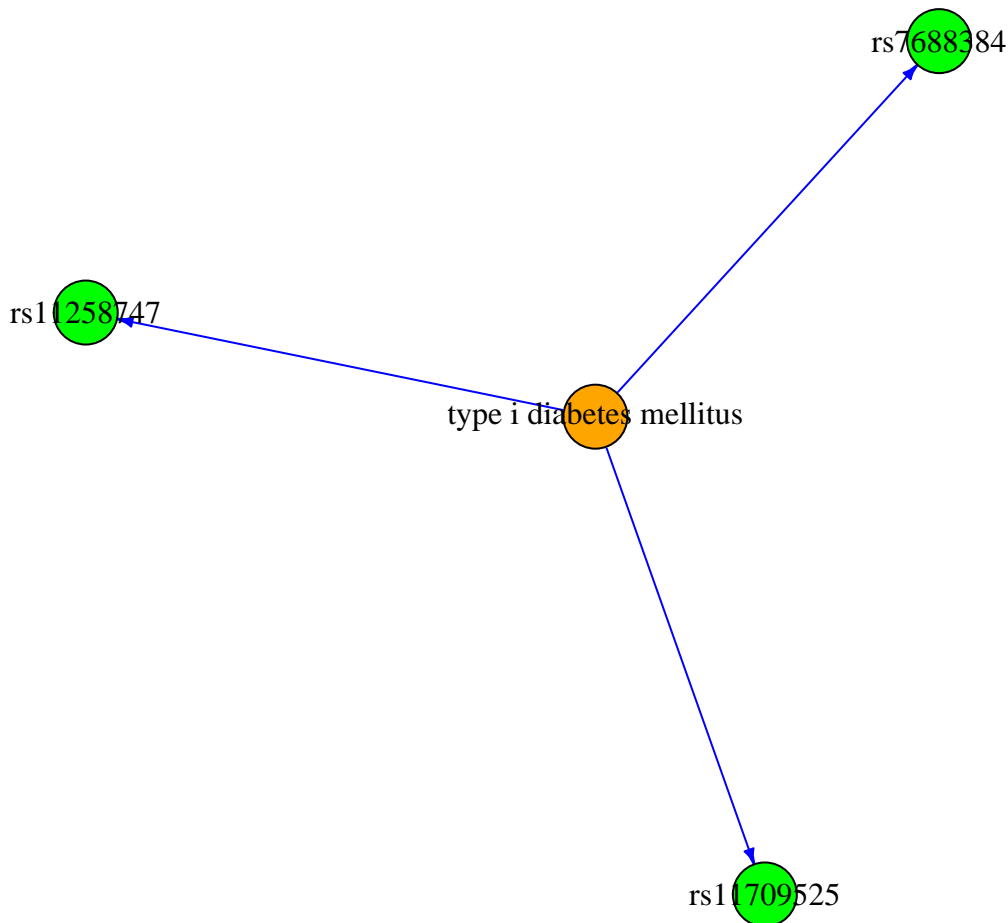

## Variant–Disease Network (lobe attachment)

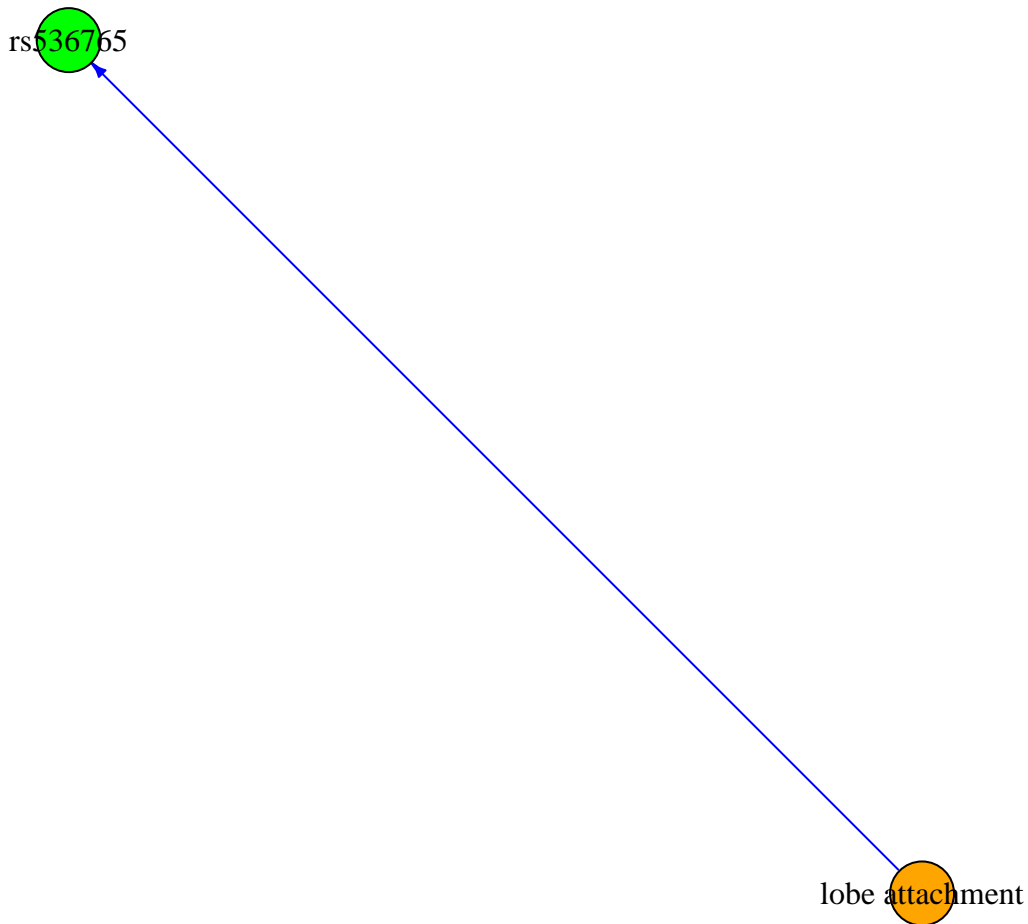

**Variant–Disease Network (facial emotion recognition measurement)**

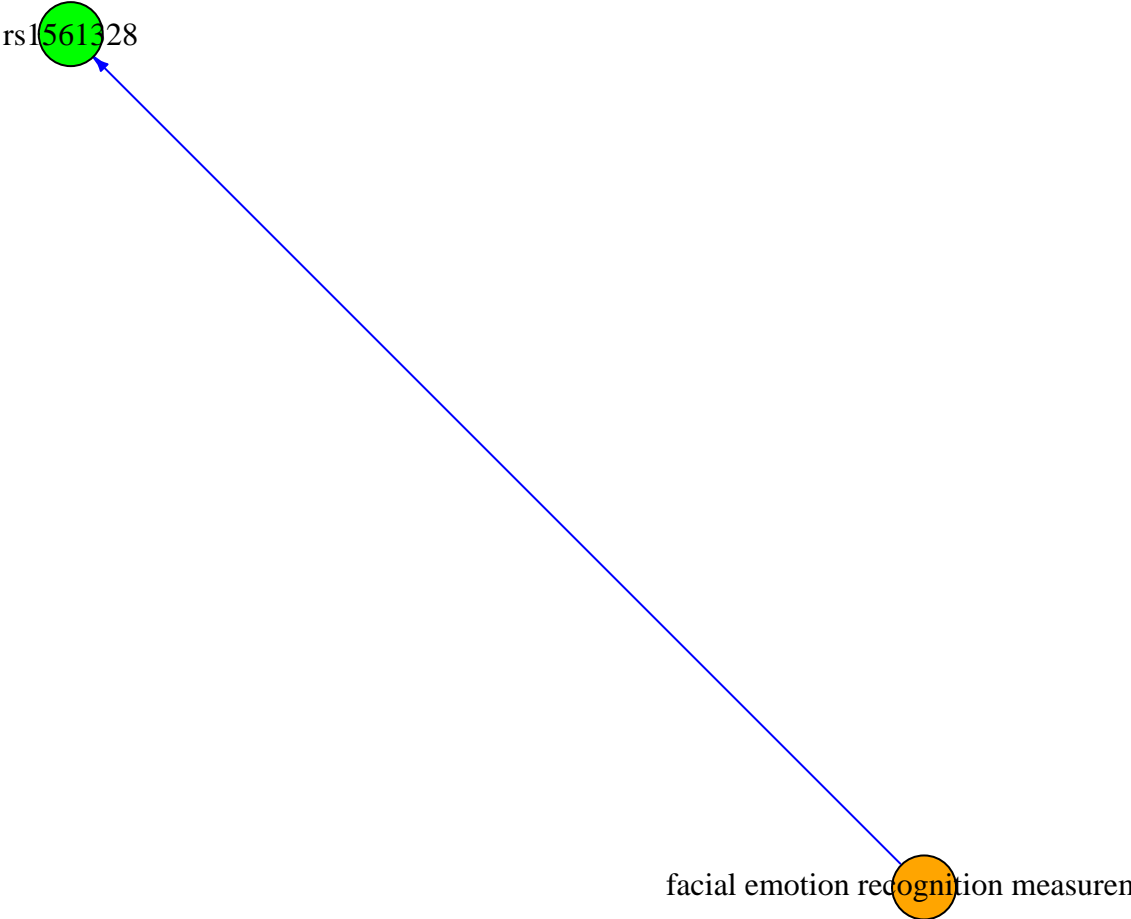



## Variant–Disease Network (response to methylphenidate)

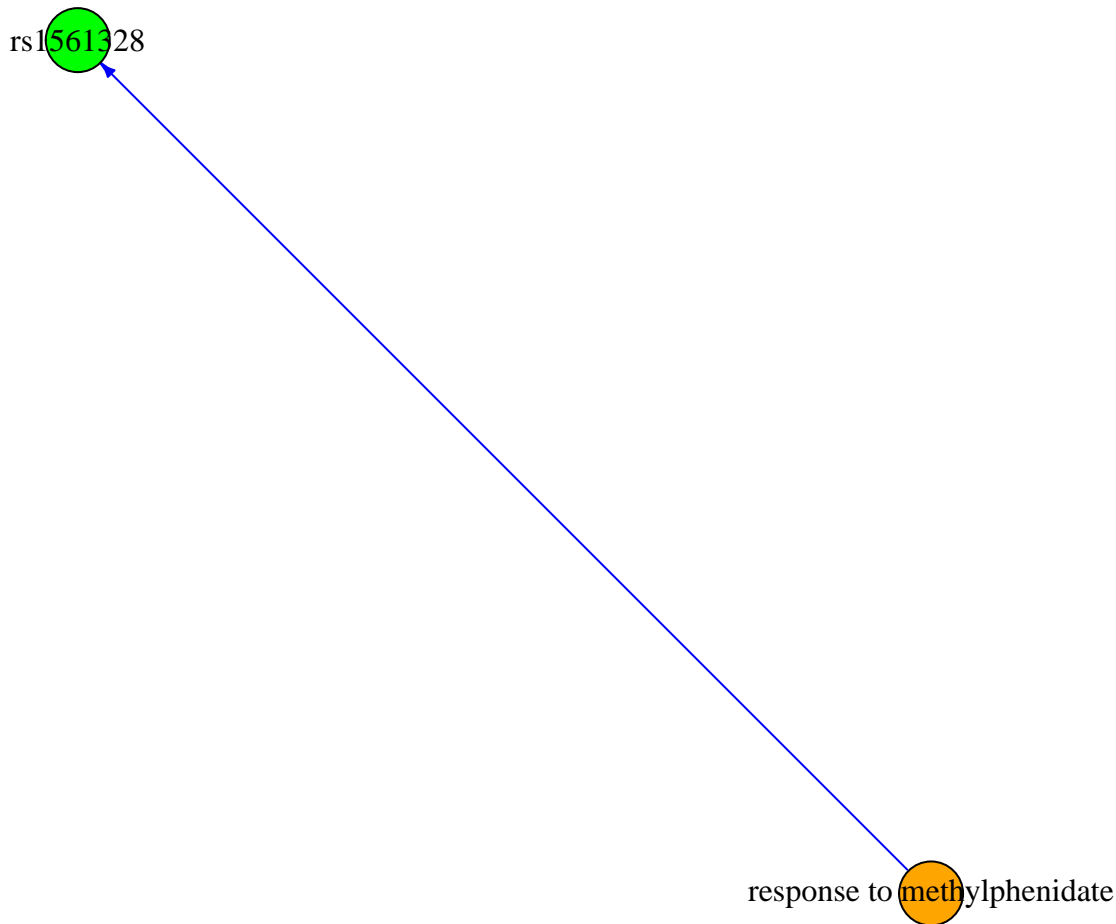

## Variant–Disease Network (parkinsons disease)

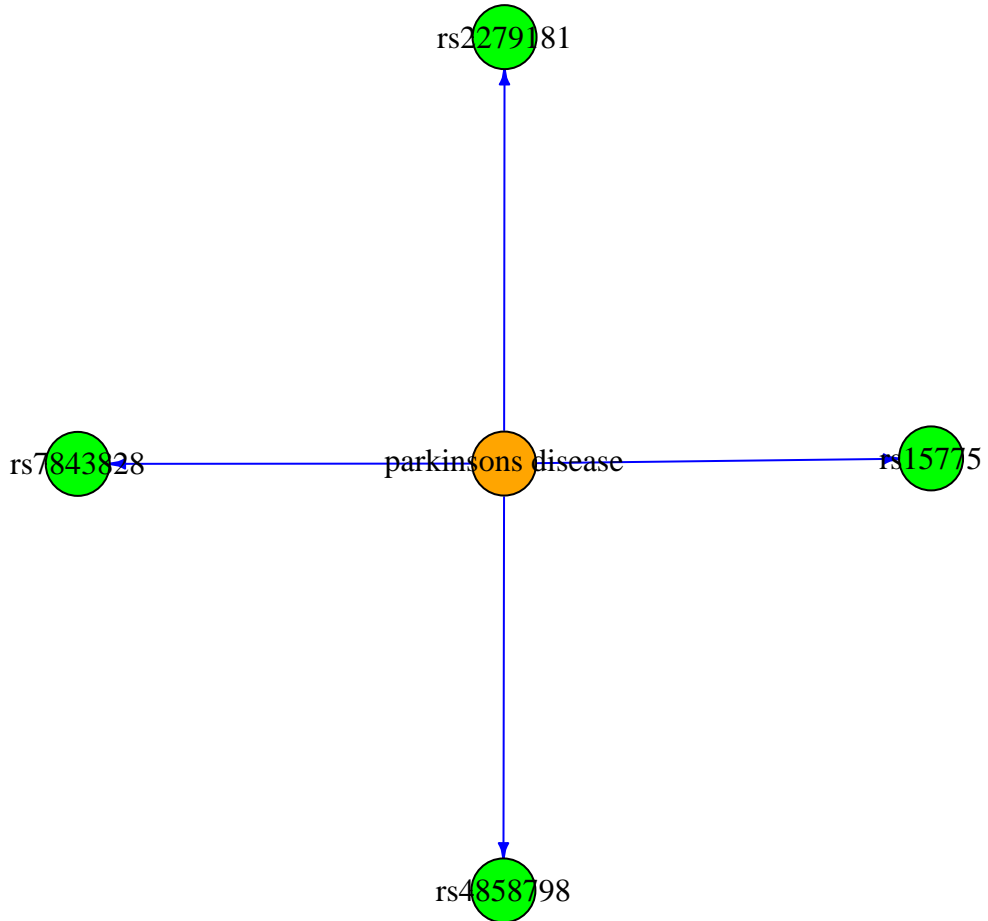

# Variant–Disease Network (late-onset Alzheimers disease)

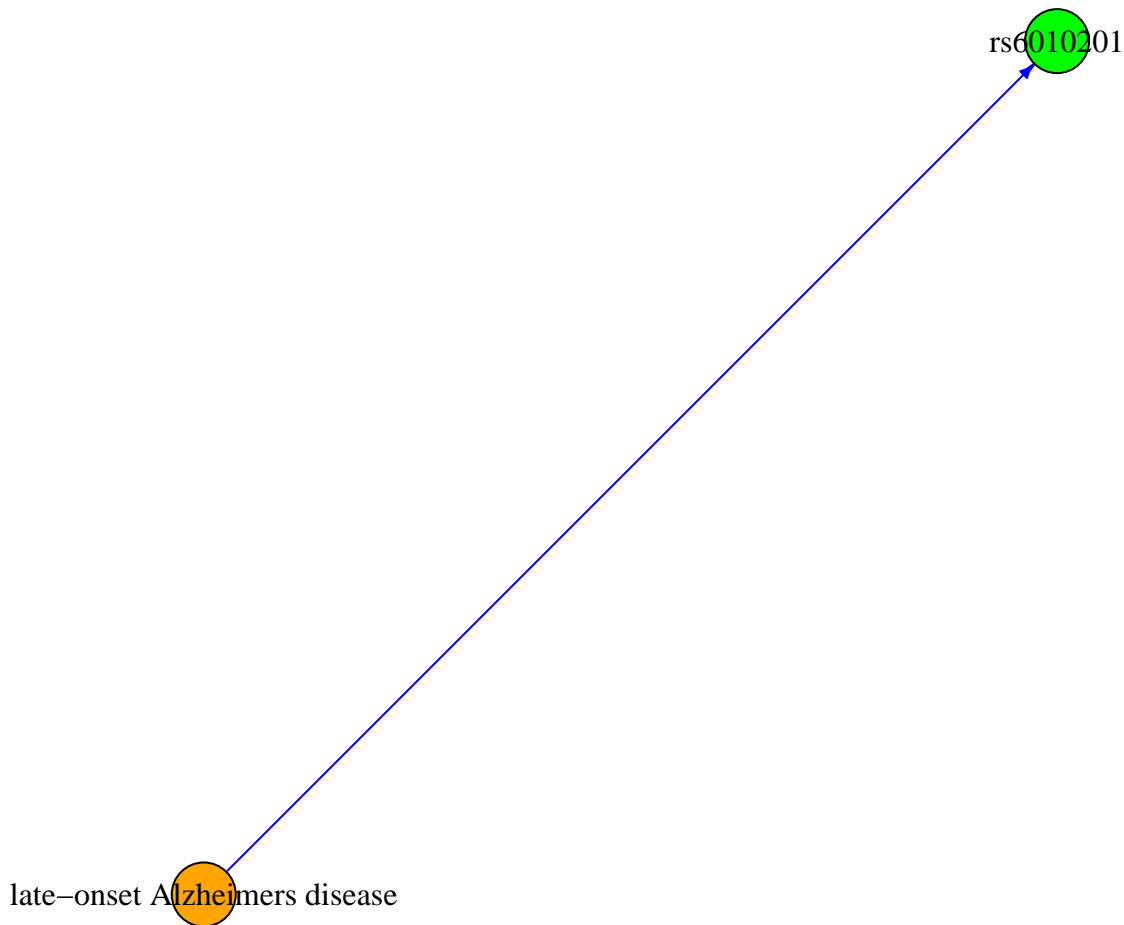

## **Variant–Disease Network (family history of Alzheimer’s disease)**

## Variant–Disease Network (sickle cell anemia)

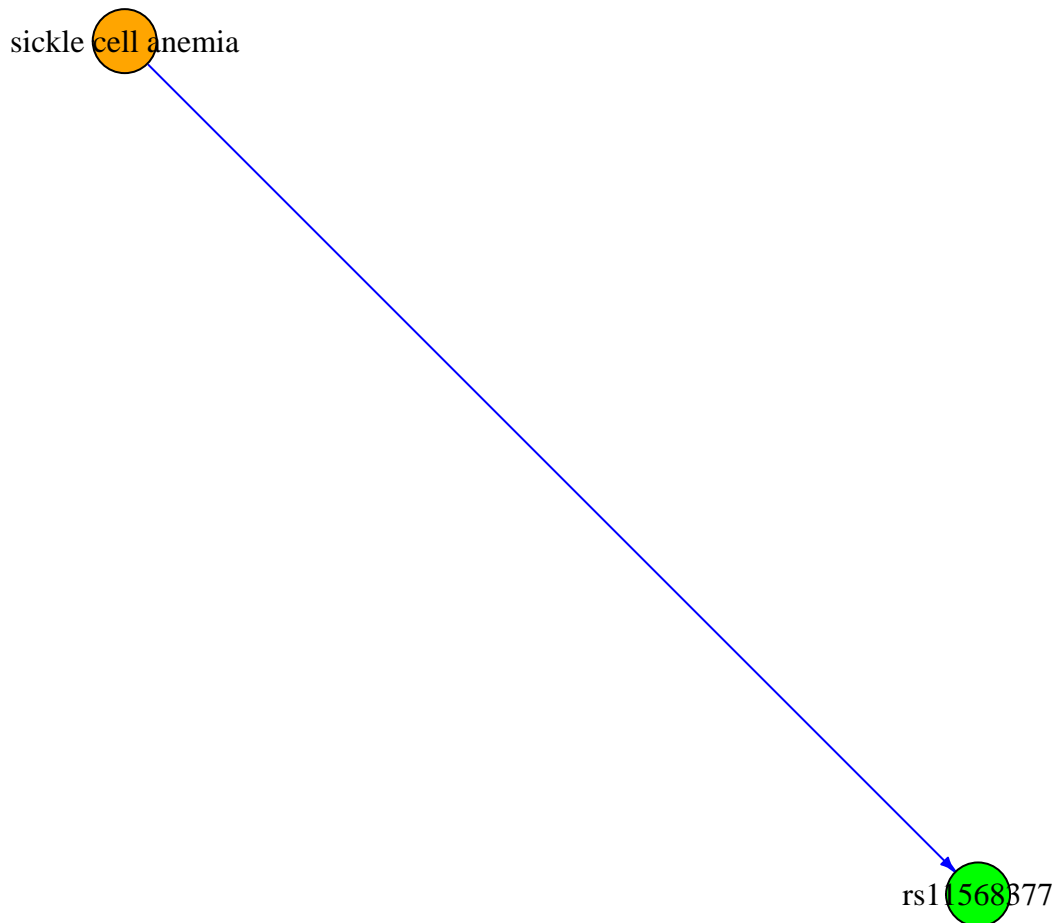

# Variant–Disease Network (pulmonary function measurement)

pulmonary function measurement

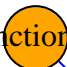

rs3732577

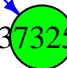

## Variant–Disease Network (neuroticism measurement)

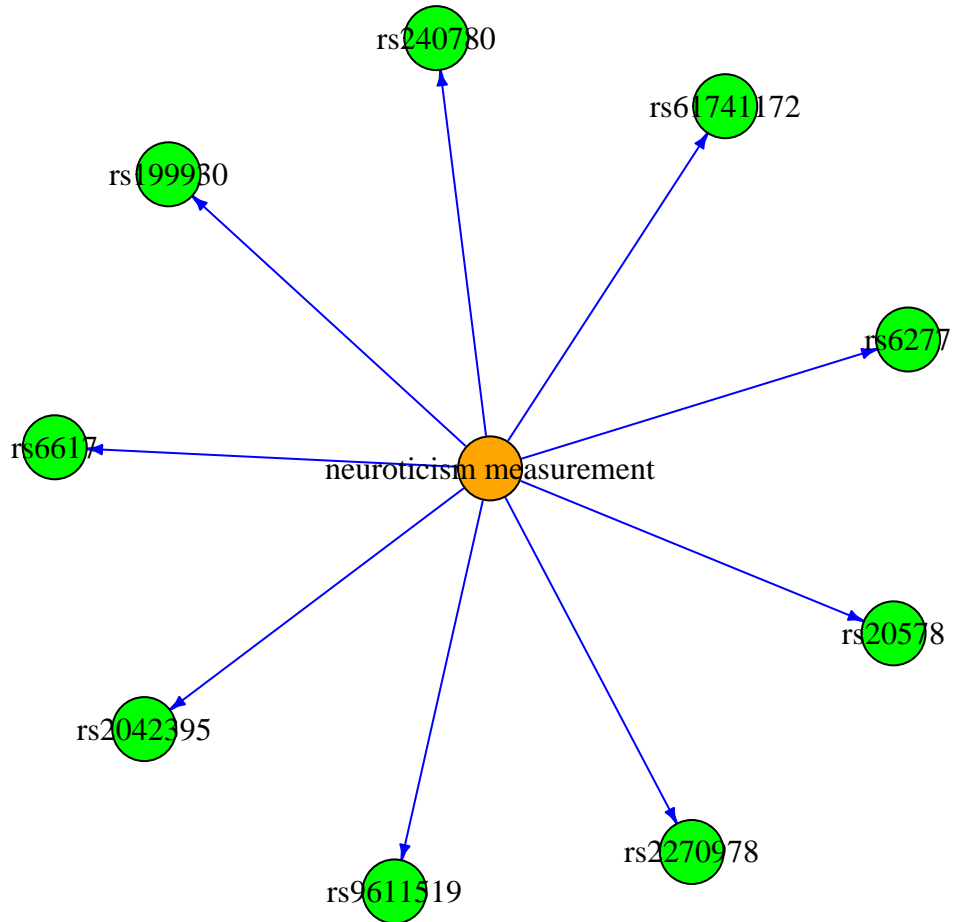

## Variant–Disease Network (age at onset)

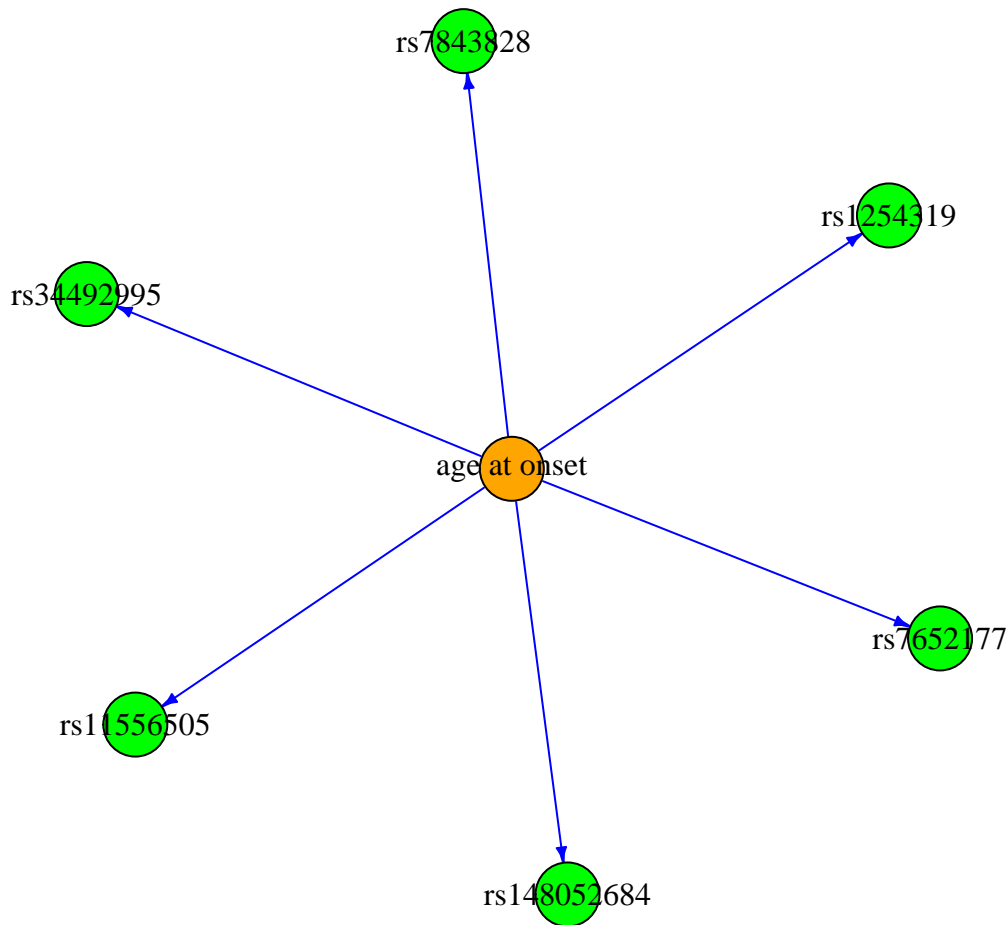



Variant–Disease Network (BMI-adjusted waist circumference)

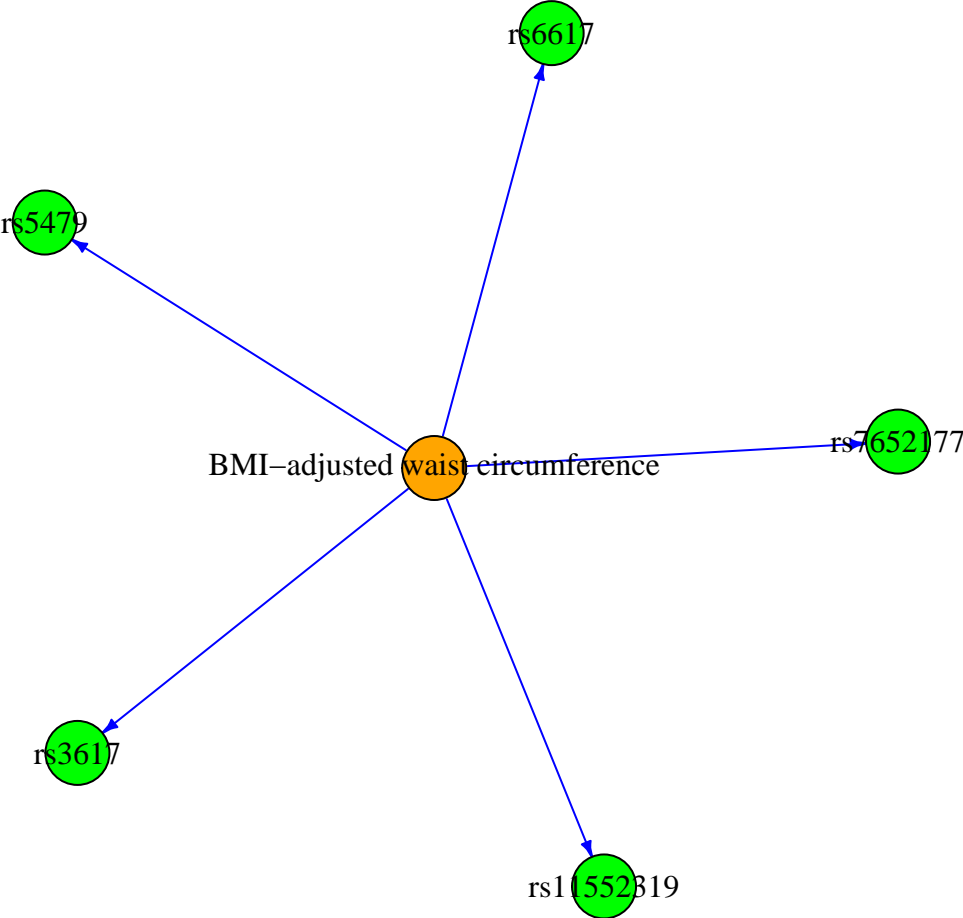

## Variant–Disease Network (Myopia)

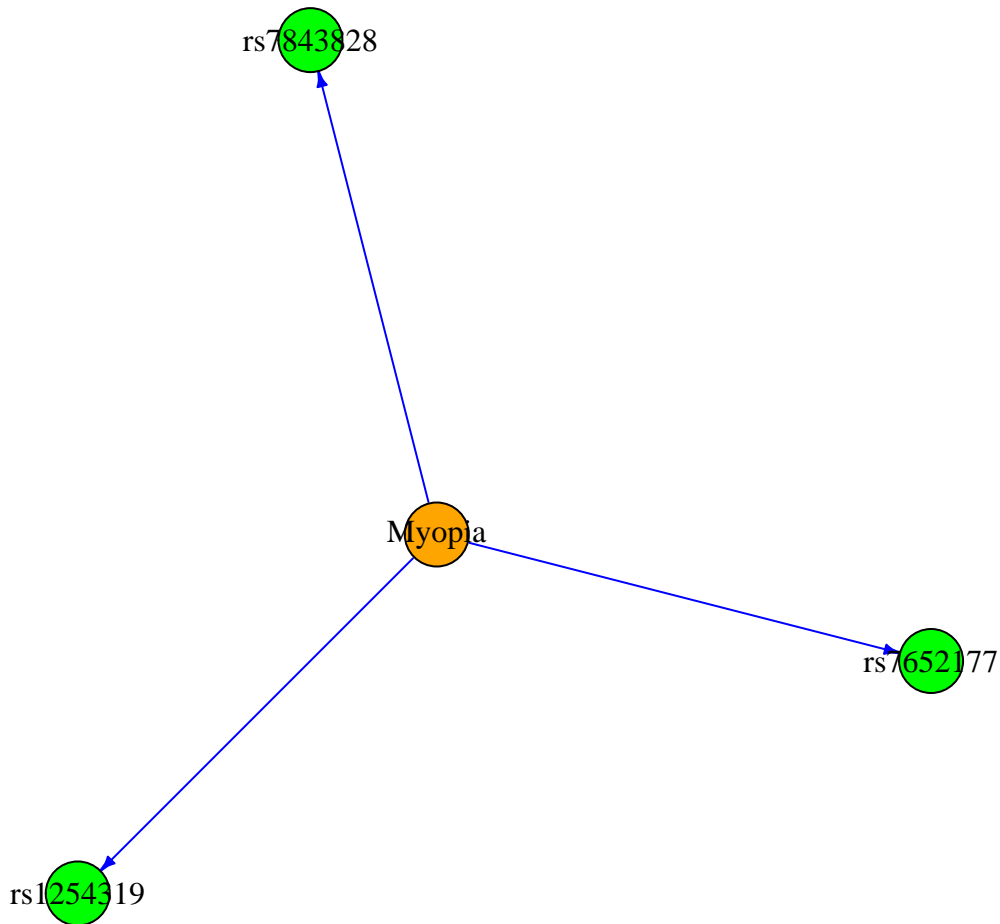

## Variant–Disease Network (physical activity measurement)

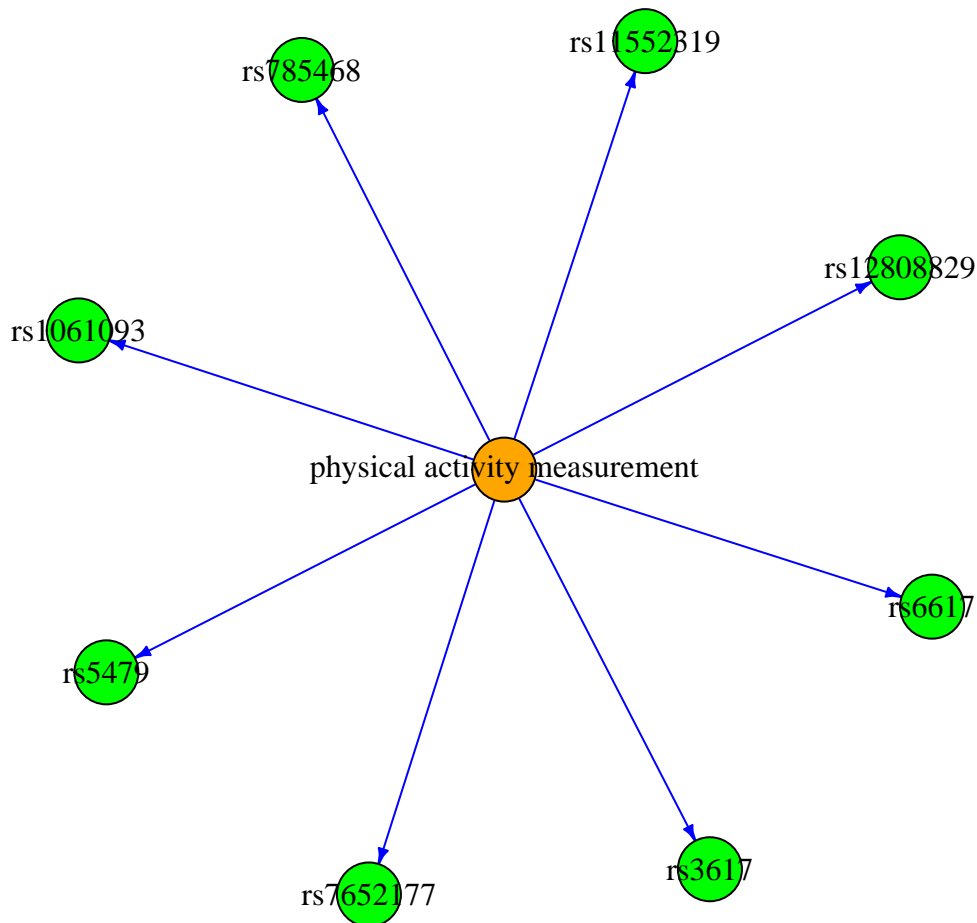

## Variant–Disease Network (refractive error measurement)

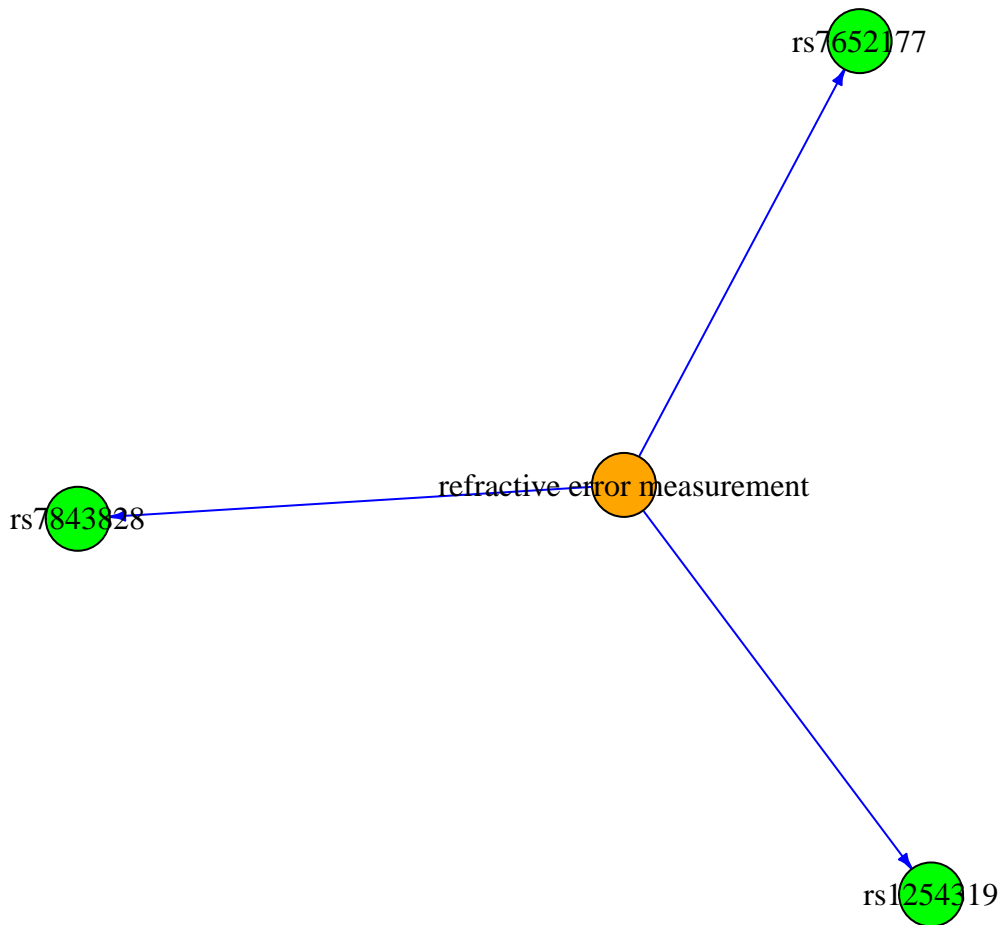

## Variant–Disease Network (waist circumference)

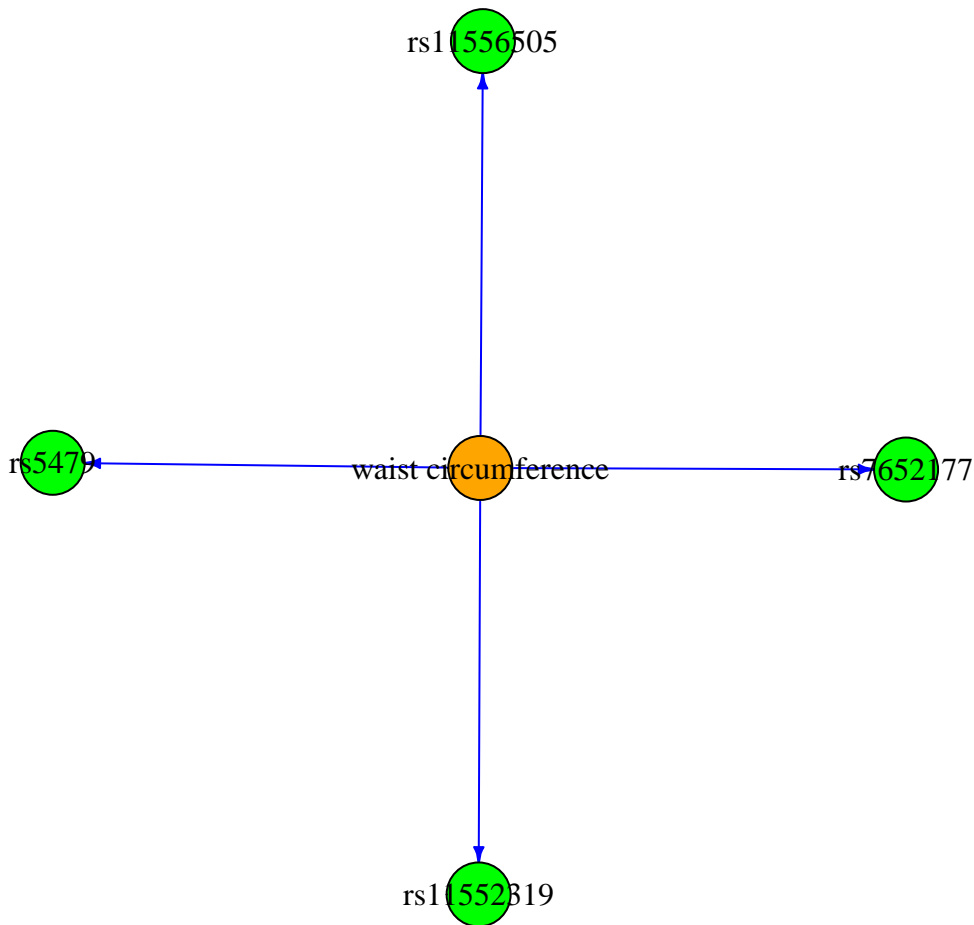

## Variant–Disease Network (dental caries)

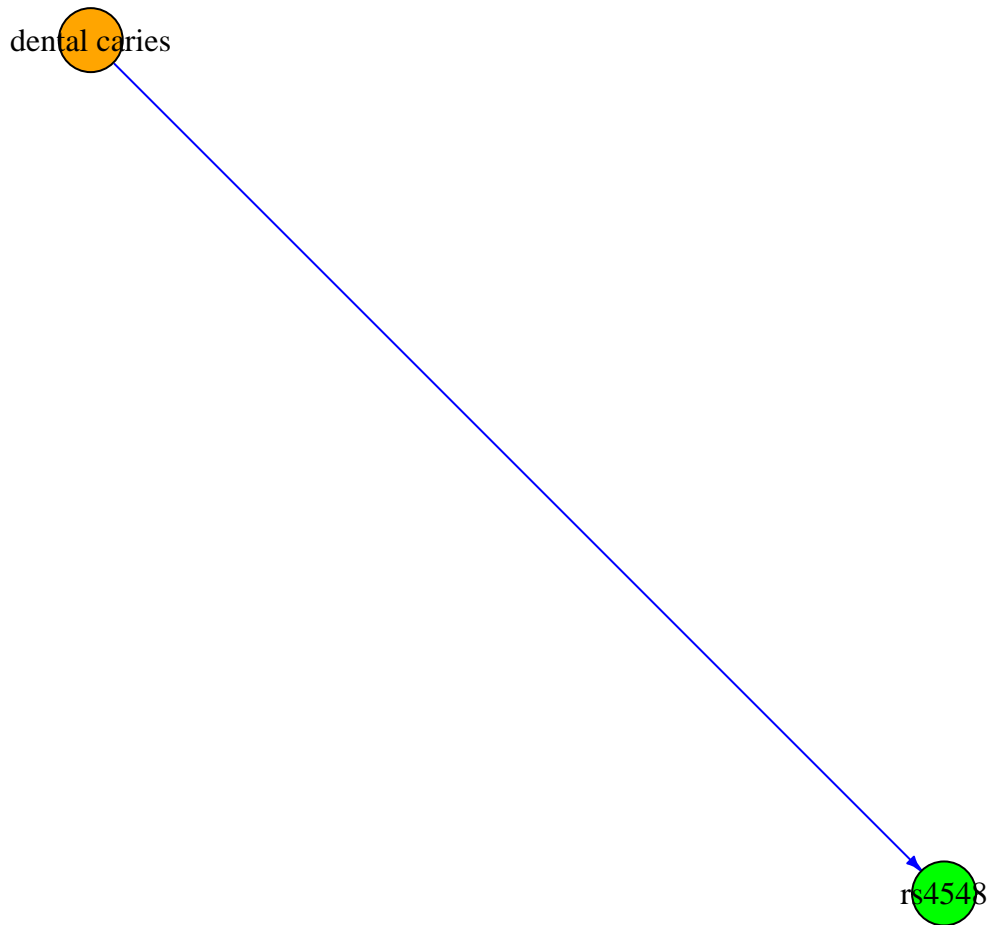

**Variant–Disease Network (fatty acid measurement)**

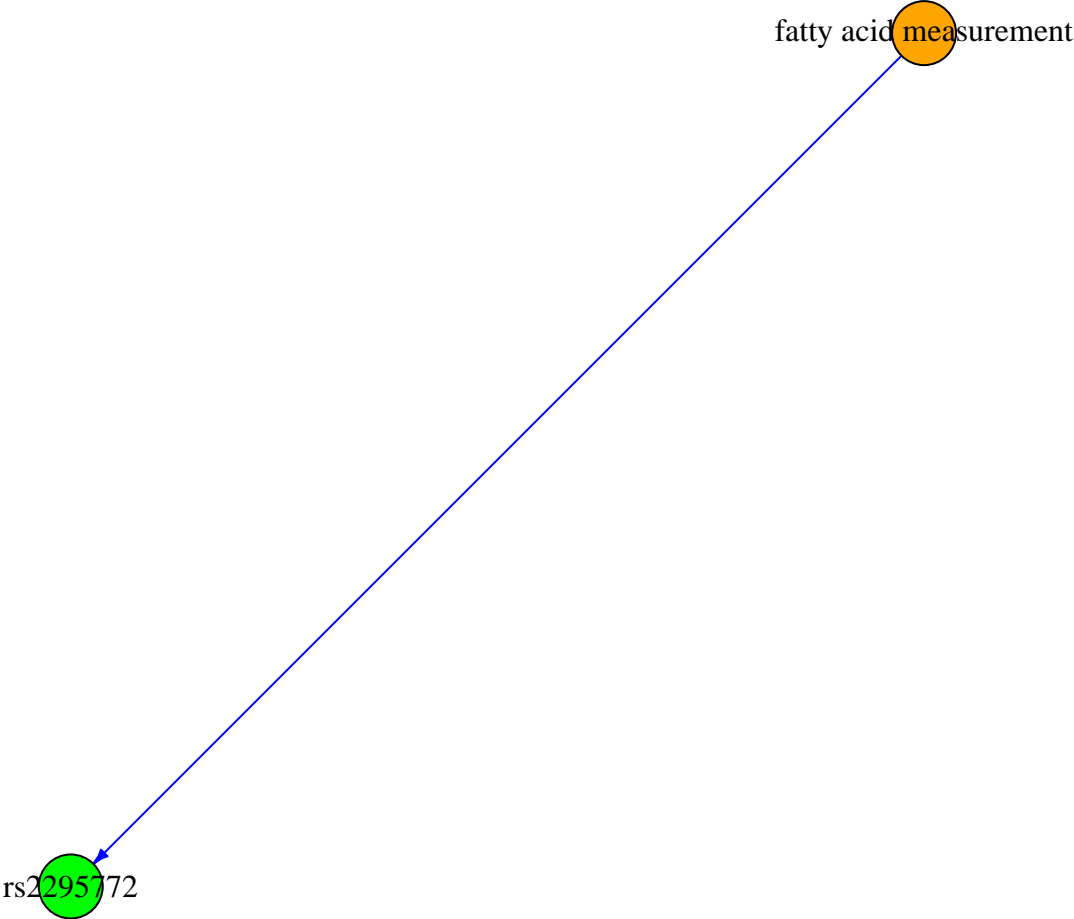

Variant–Disease Network (palmitoleic acid measurement)

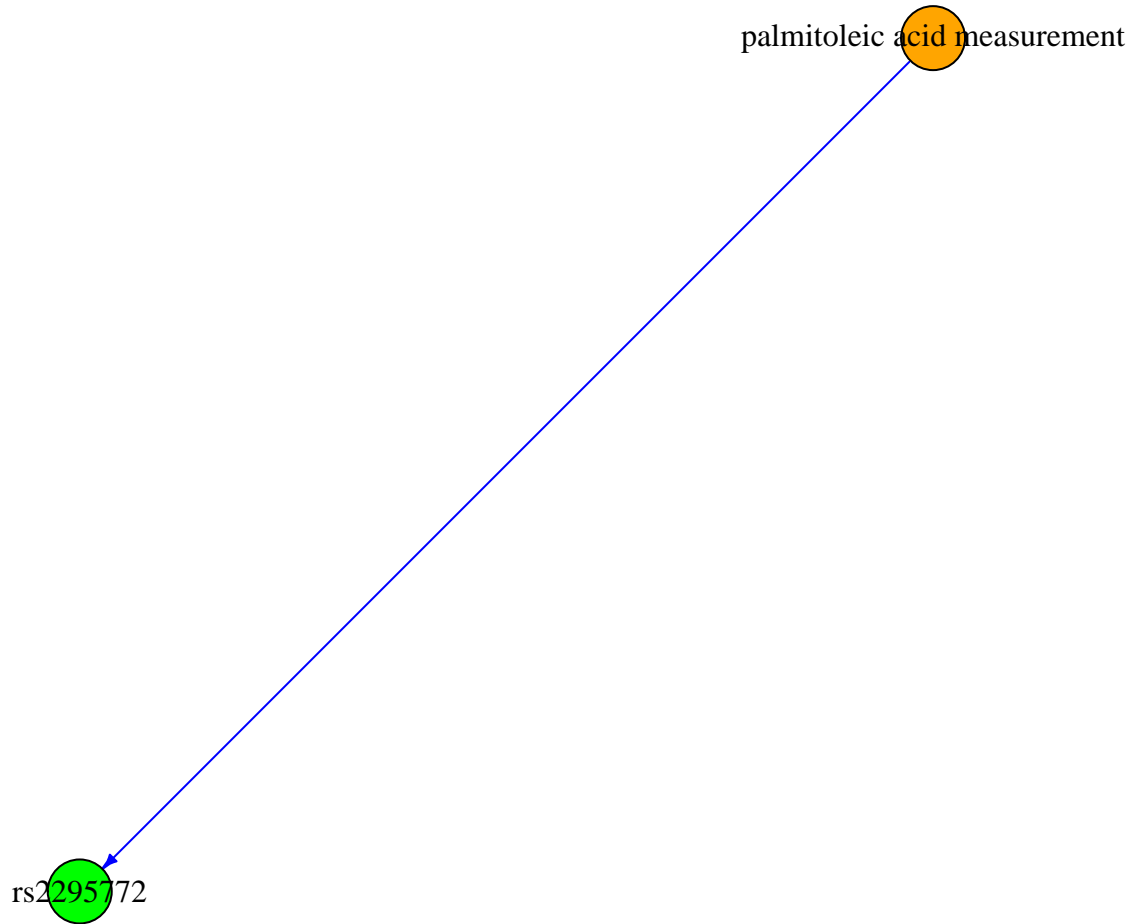



## Variant–Disease Network (anxiety)

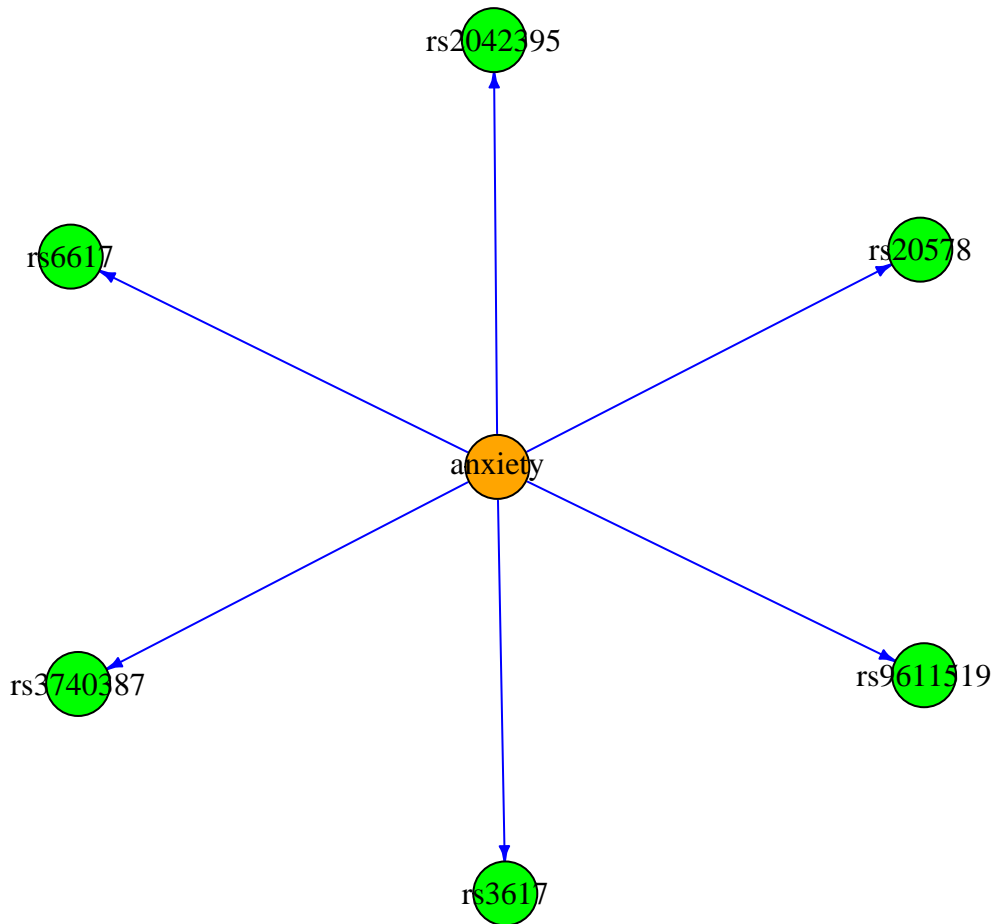

# Variant–Disease Network (attention deficit hyperactivity disorder)

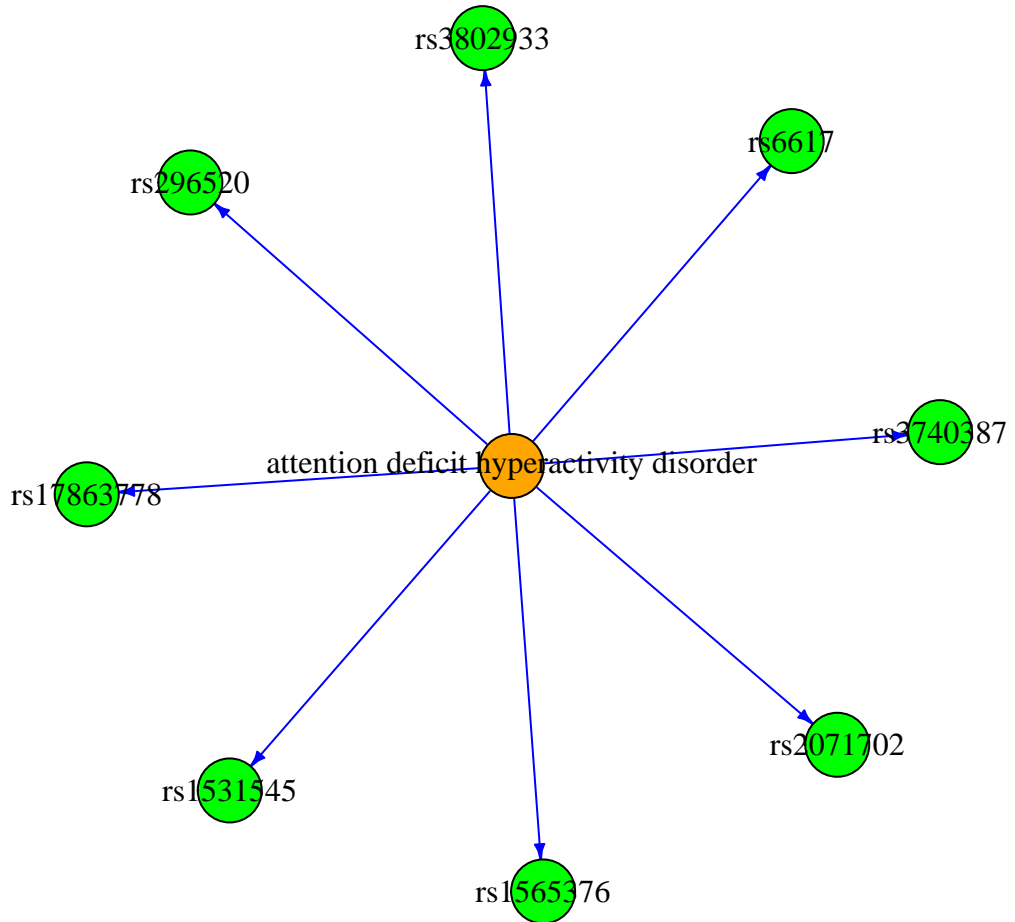

## Variant–Disease Network (bipolar disorder)

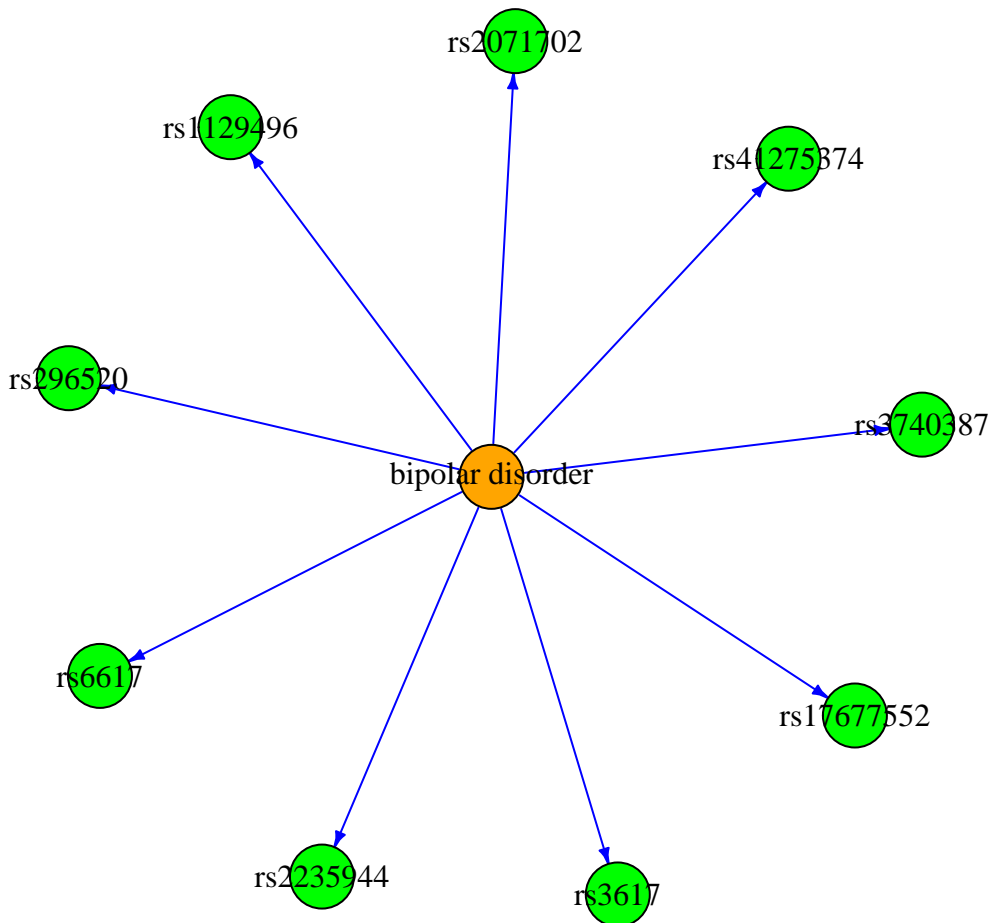

## Variant–Disease Network (migraine disorder)

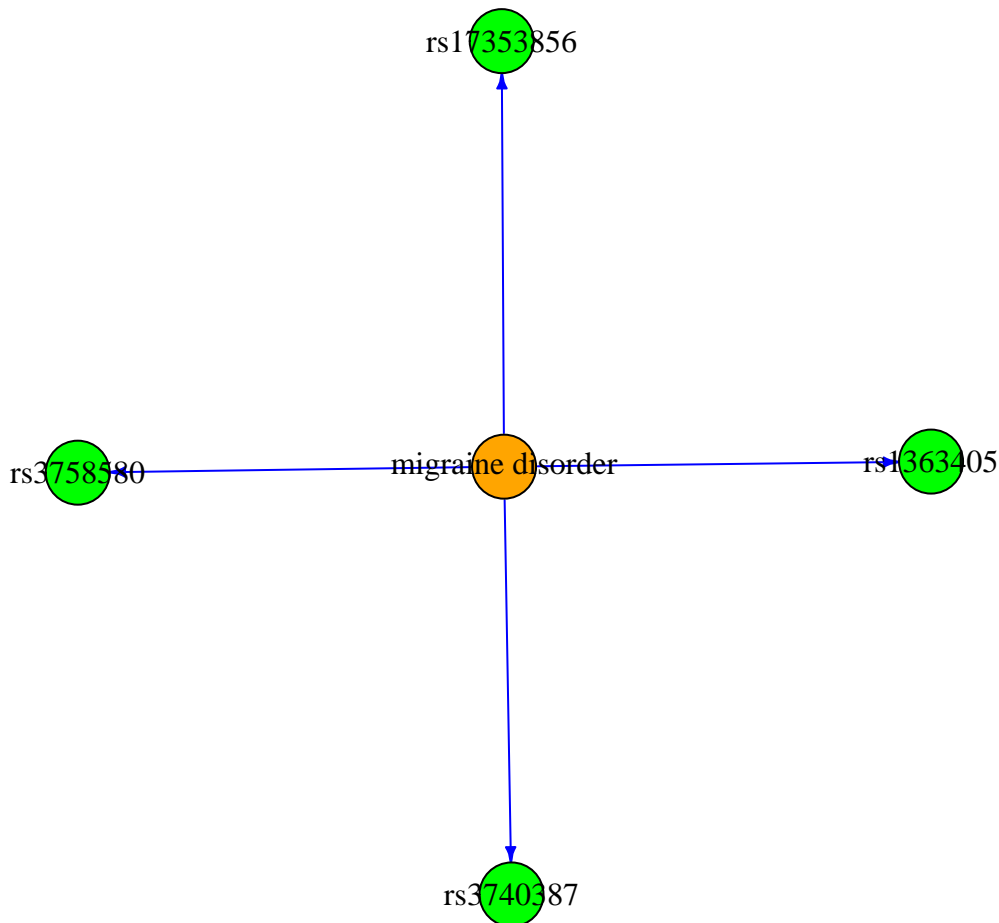

Variant–Disease Network (white matter lesion progression measurement)

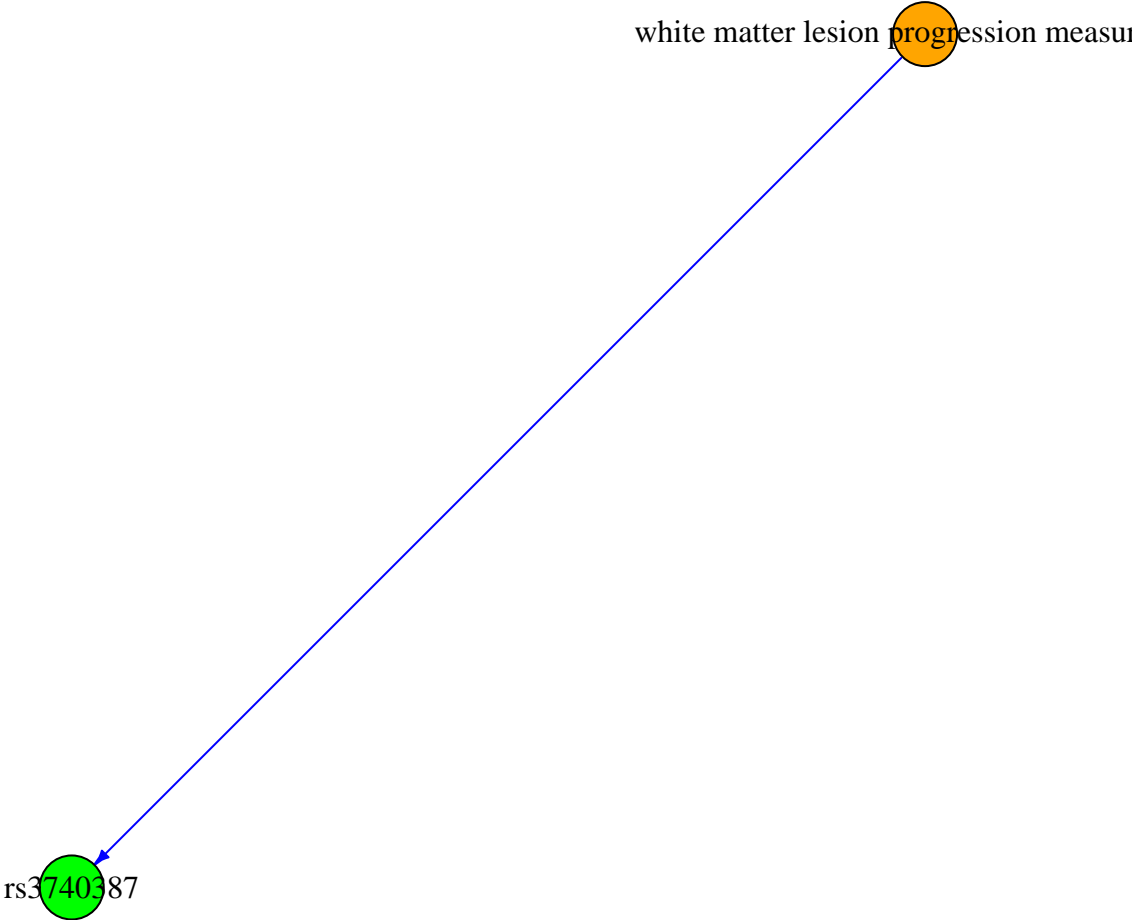

**Variant–Disease Network (adolescent idiopathic scoliosis)**

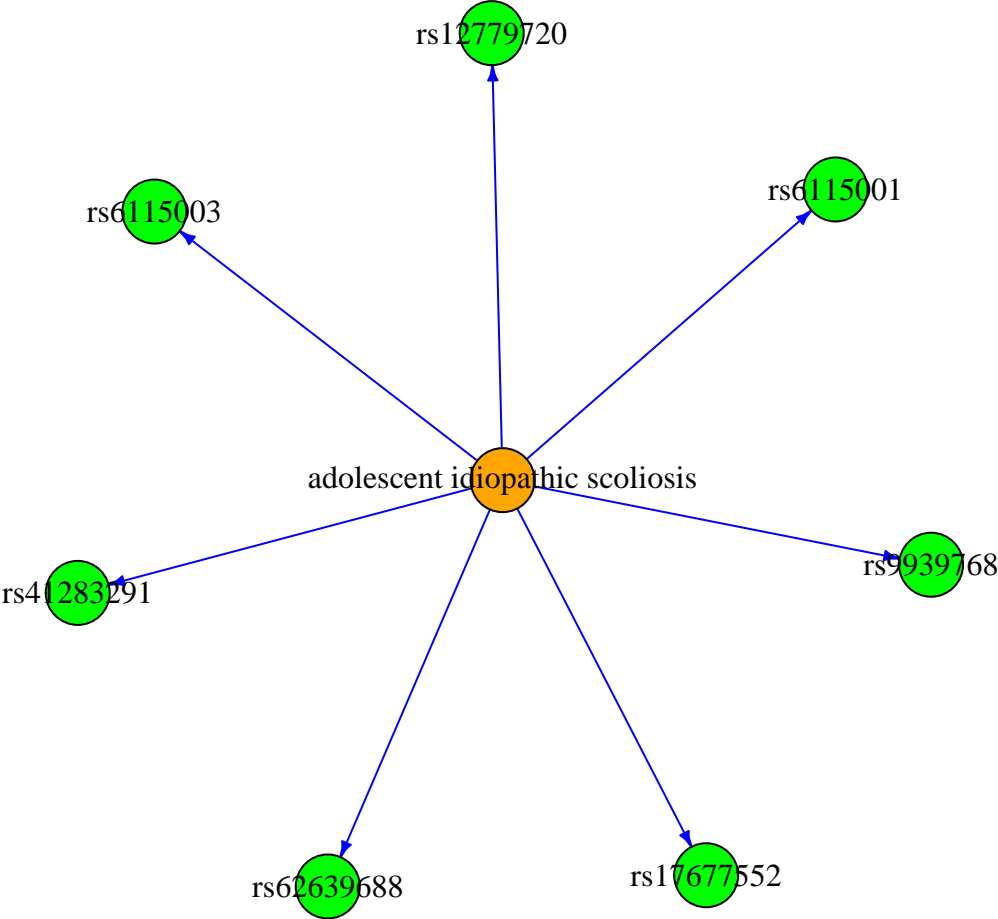

# Variant–Disease Network (parental genotype effect measurement)

rs5764698

parental genotype effect measurement

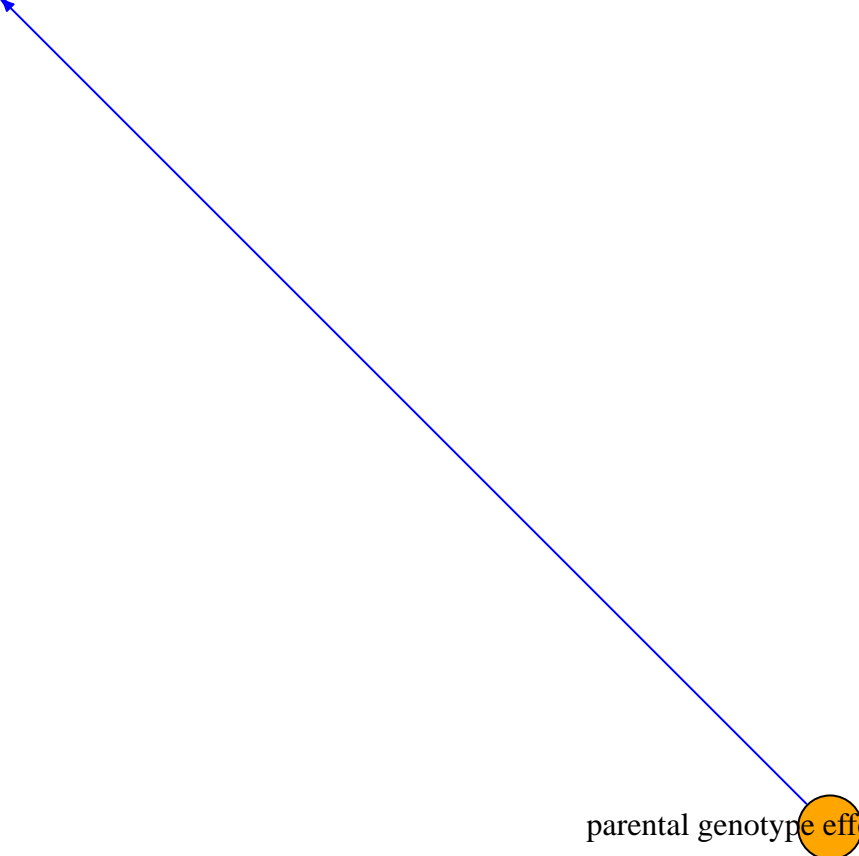

Variant–Disease Network (peanut allergy measurement)

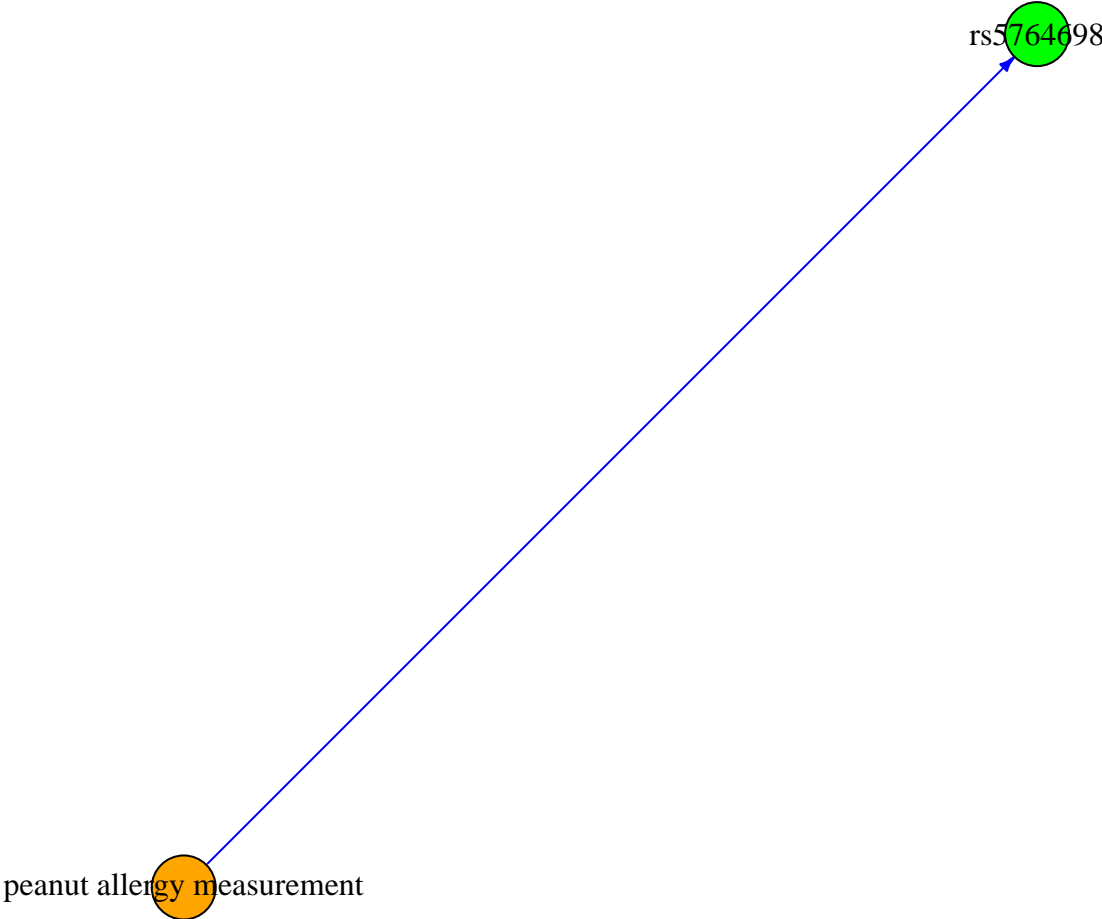



Variant–Disease Network (age-related macular degeneration)

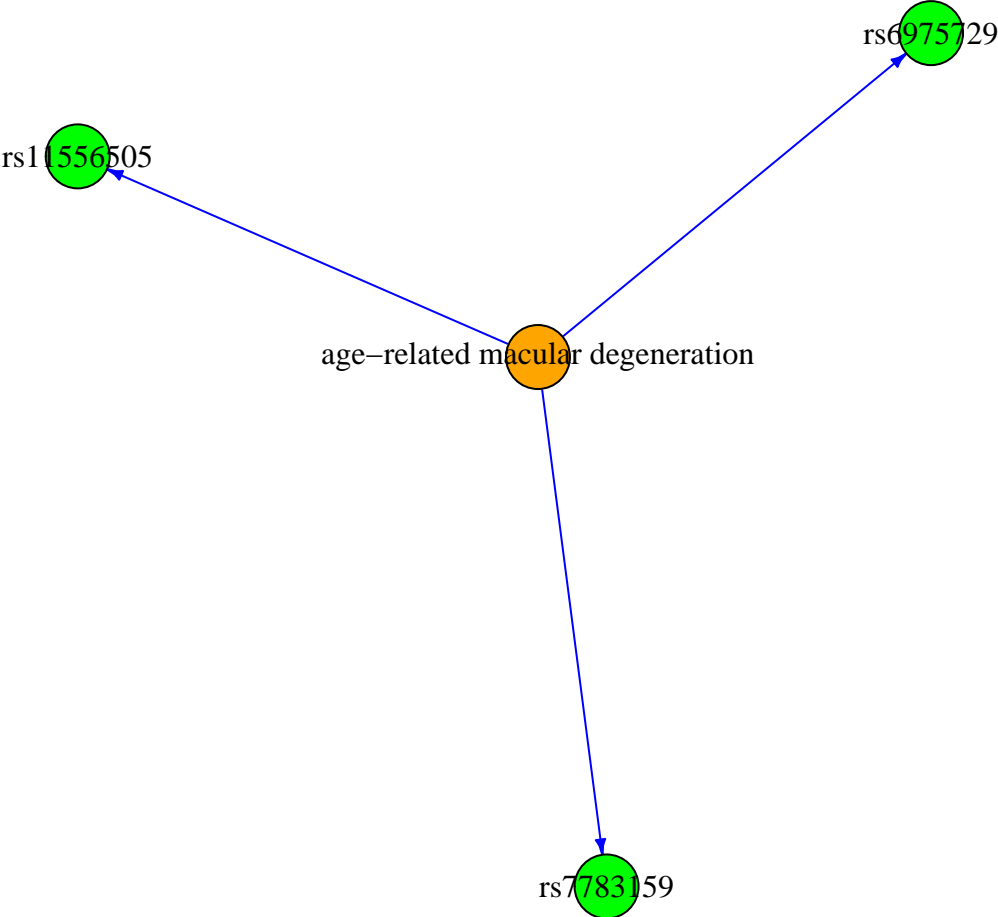

## Variant–Disease Network (atrophic macular degeneration)

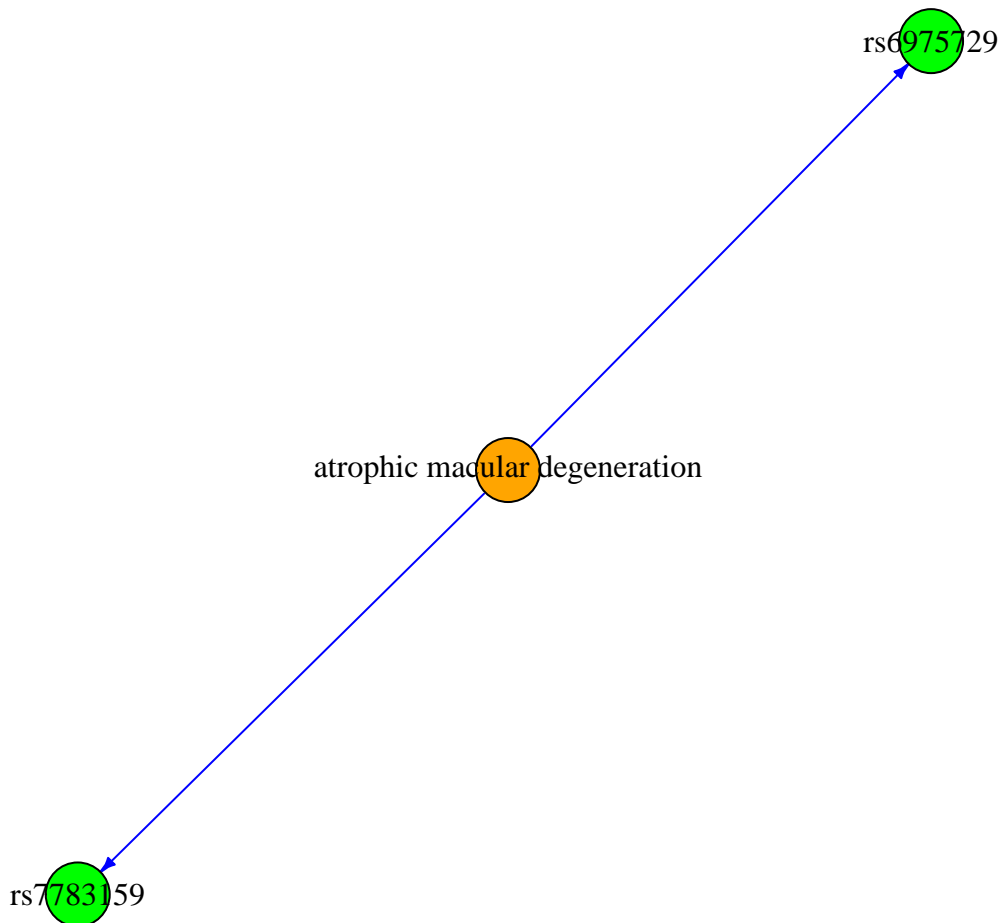

## Variant–Disease Network (platelet distribution width)

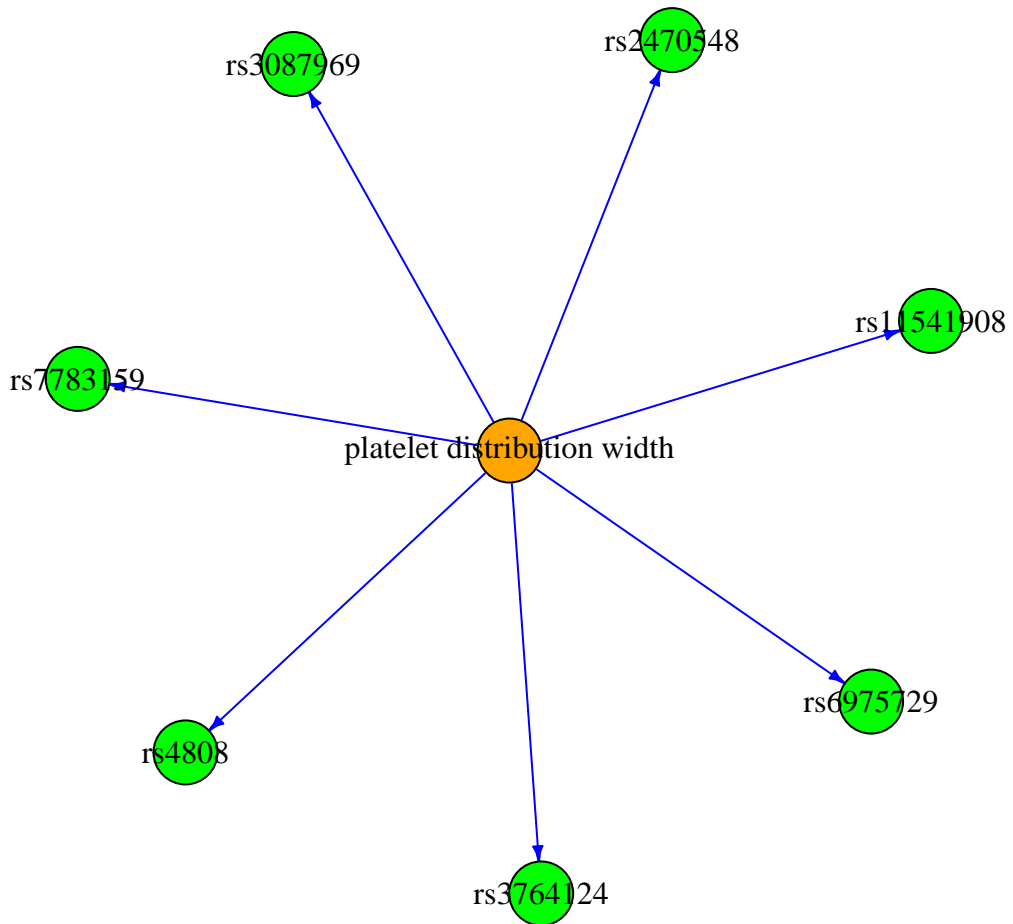

## Variant–Disease Network (wet macular degeneration)

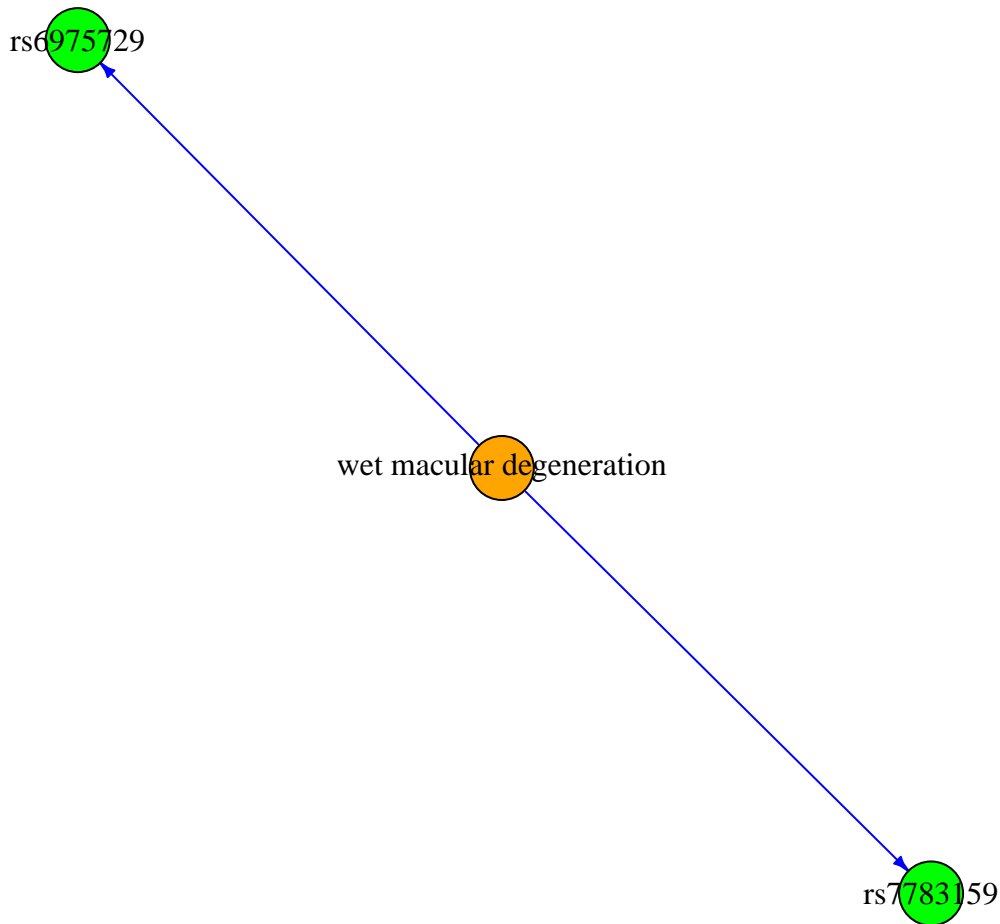

## Variant–Disease Network (D dimer measurement)

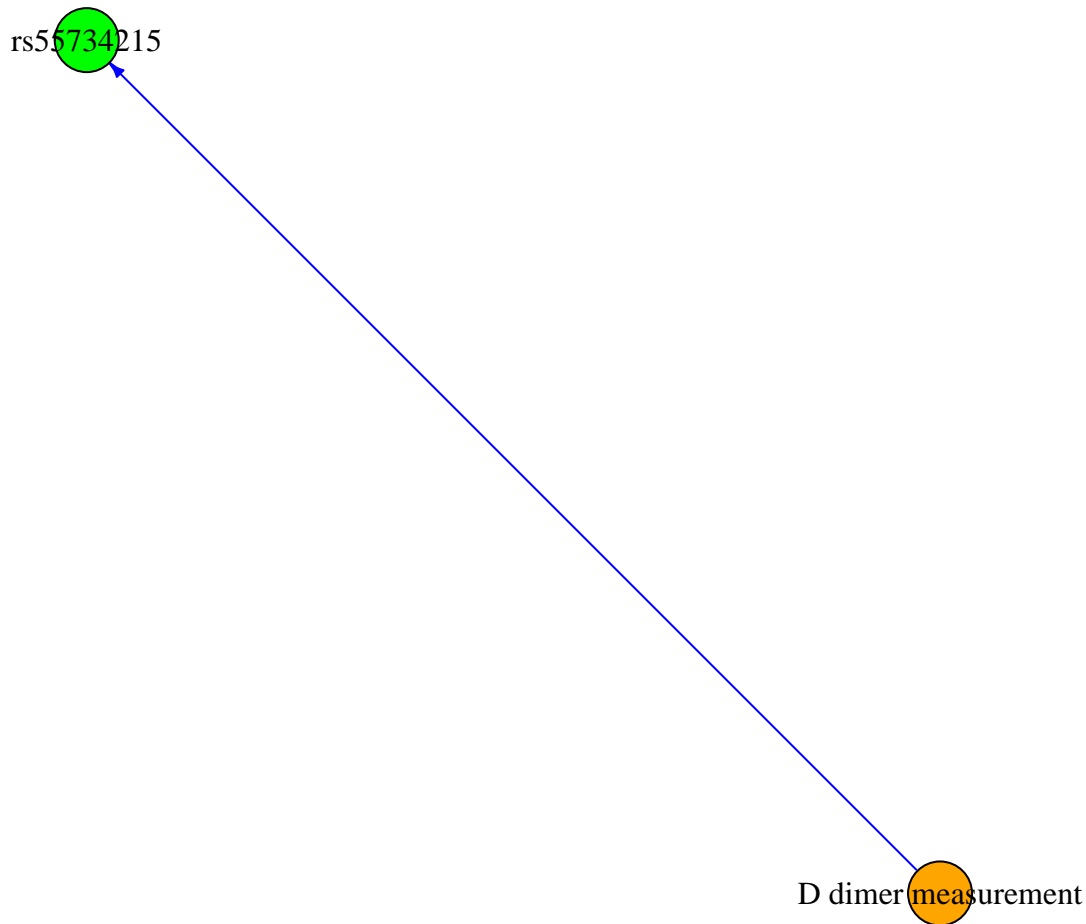

# Variant–Disease Network (factor VII measurement)

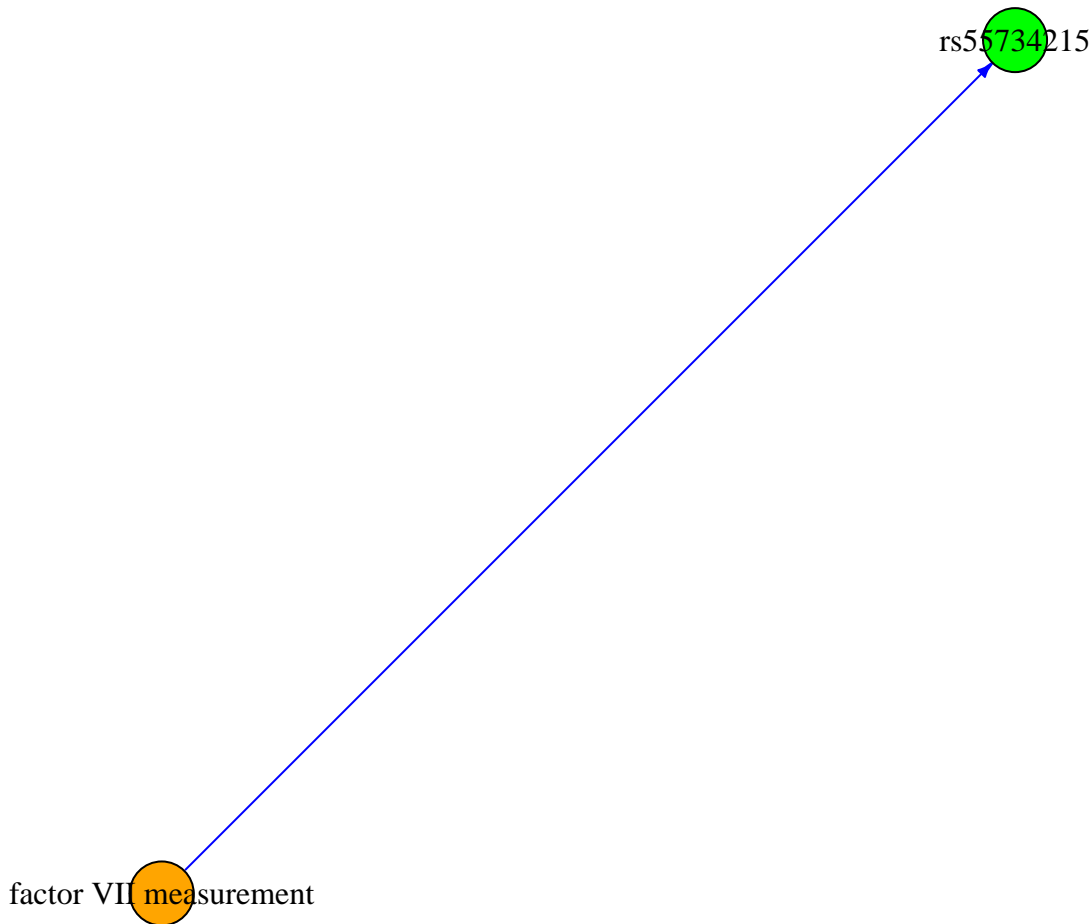

## Variant-Disease Network (hematological measurement)

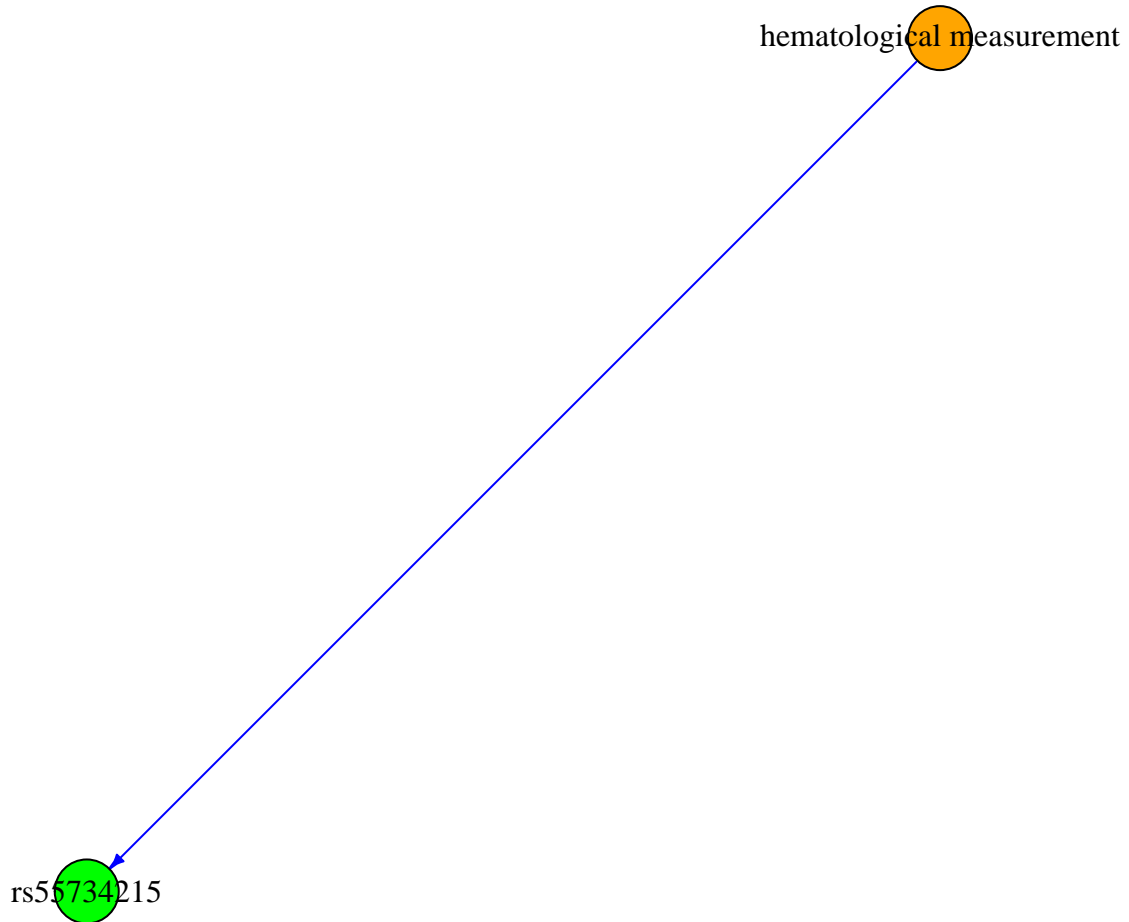

## Variant–Disease Network (protein c measurement)

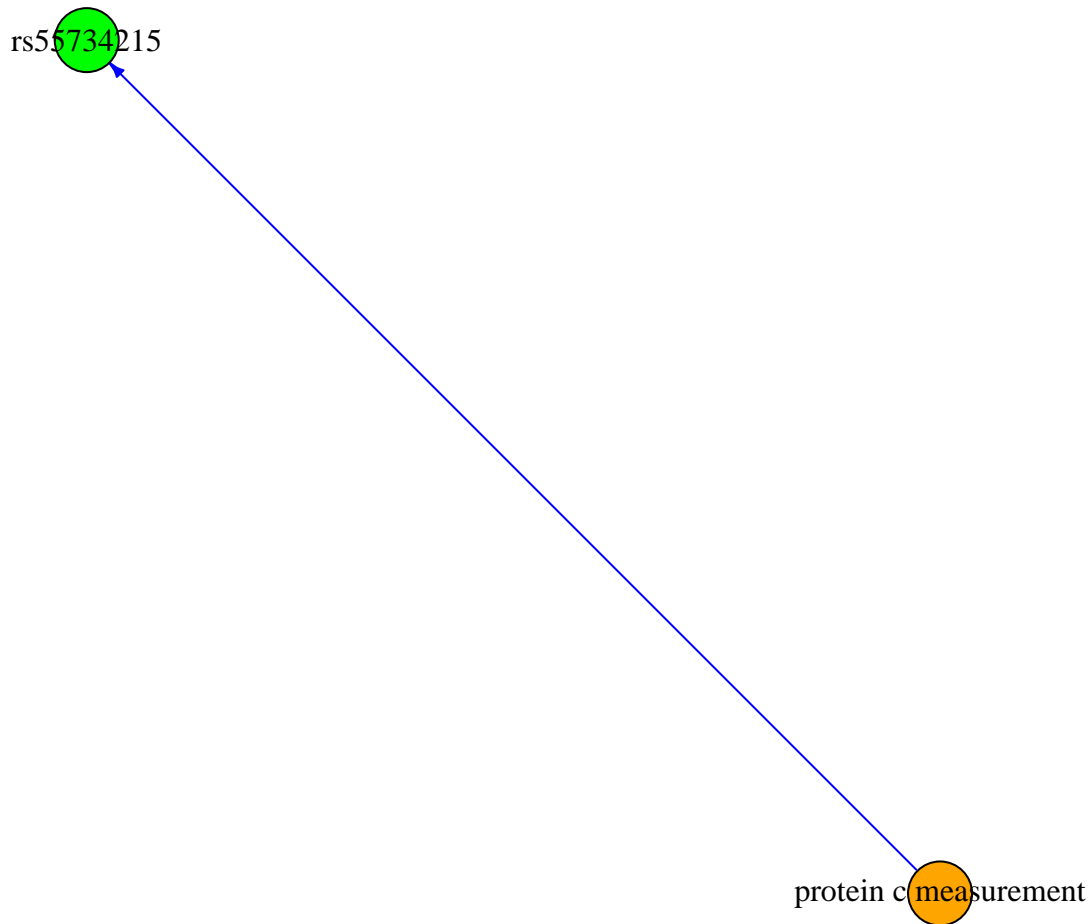



Variant–Disease Network (prothrombin time measurement)

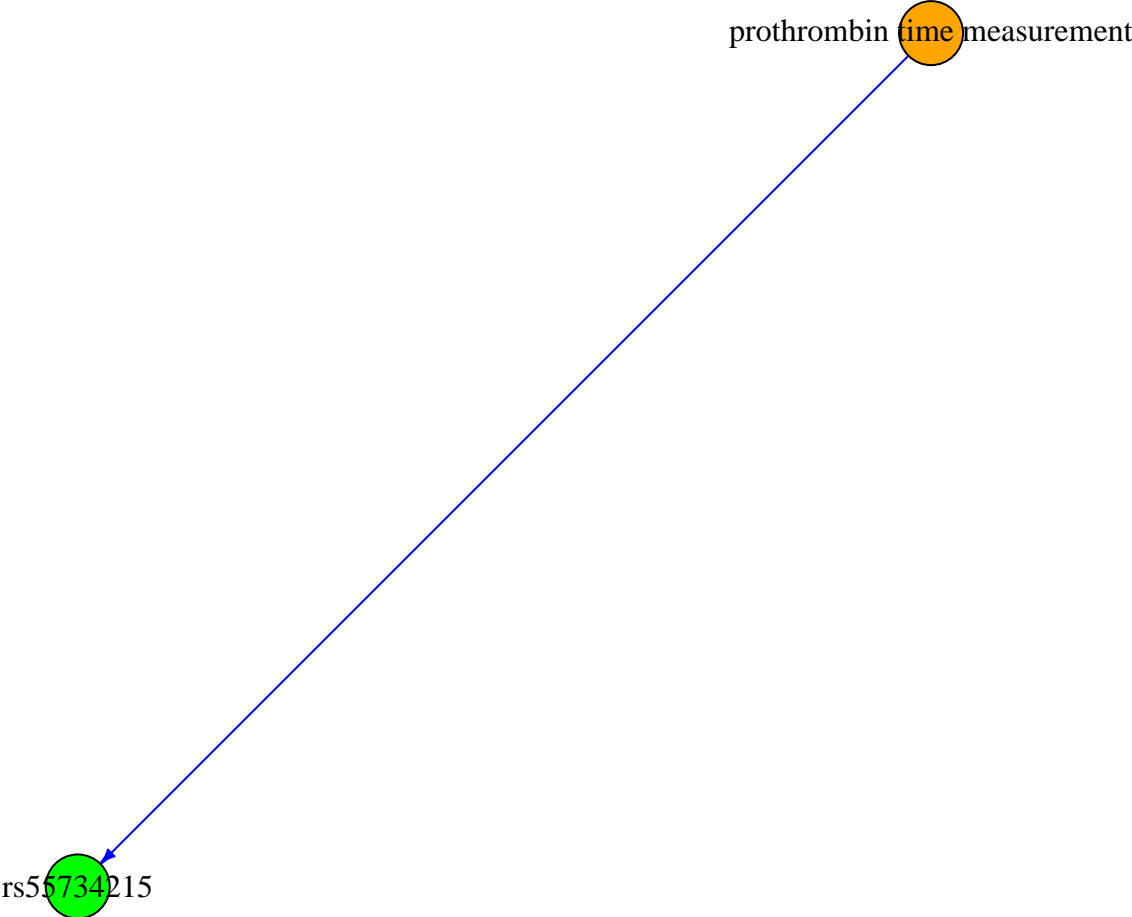

# Variant–Disease Network (sporadic amyotrophic lateral sclerosis)

sporadic amyotrophic lateral sclerosis

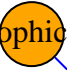

rs55734215

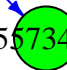

**Variant–Disease Network (vitamin K–dependent protein C measurement)**

rs55734215

vitamin K–dependent protein C measur

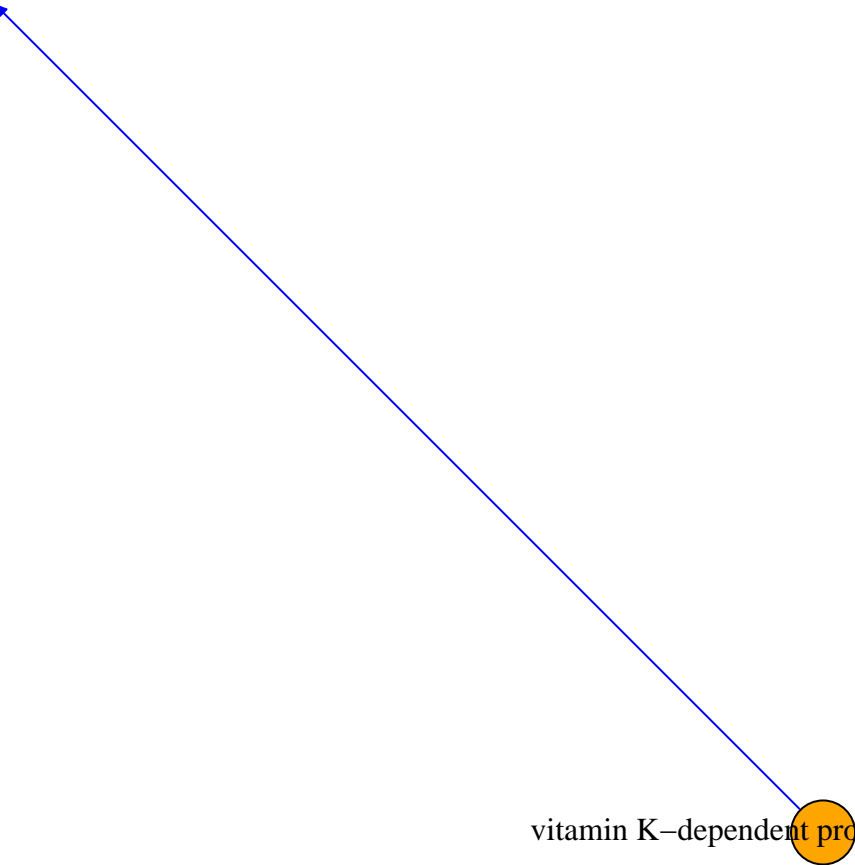

Variant–Disease Network (smoking status measurement)

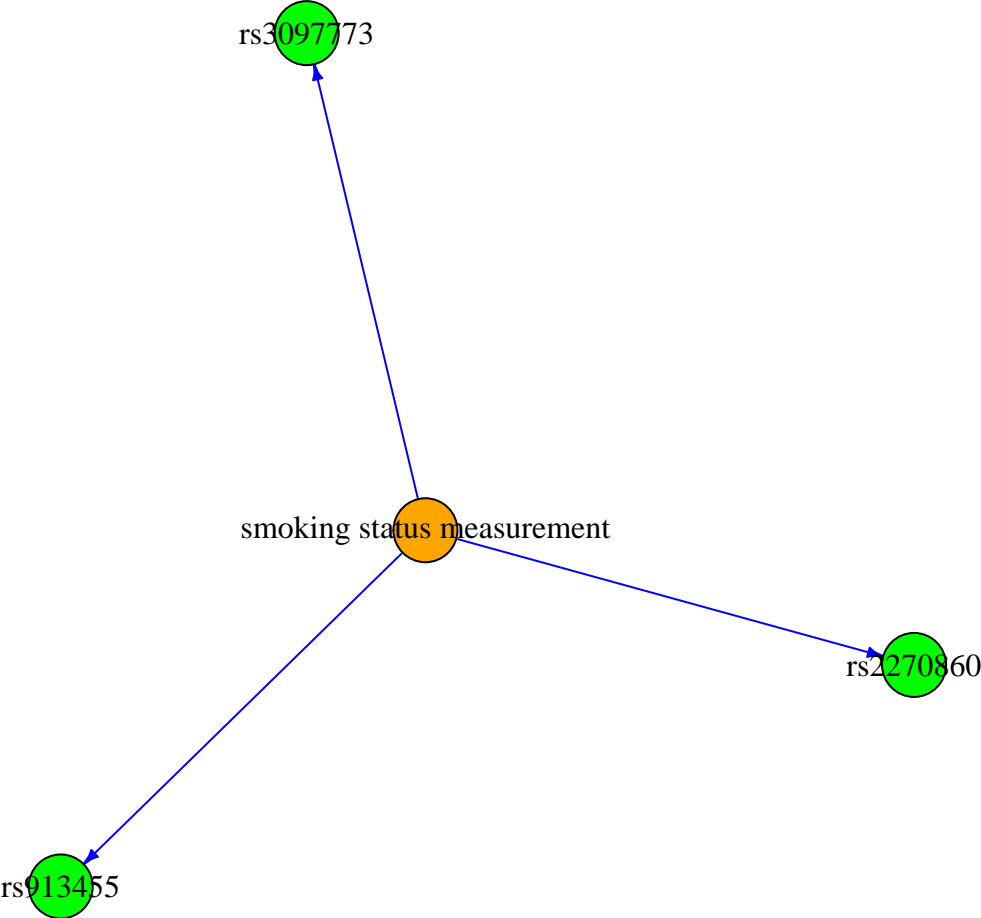

## Variant–Disease Network (squamous cell lung carcinoma)

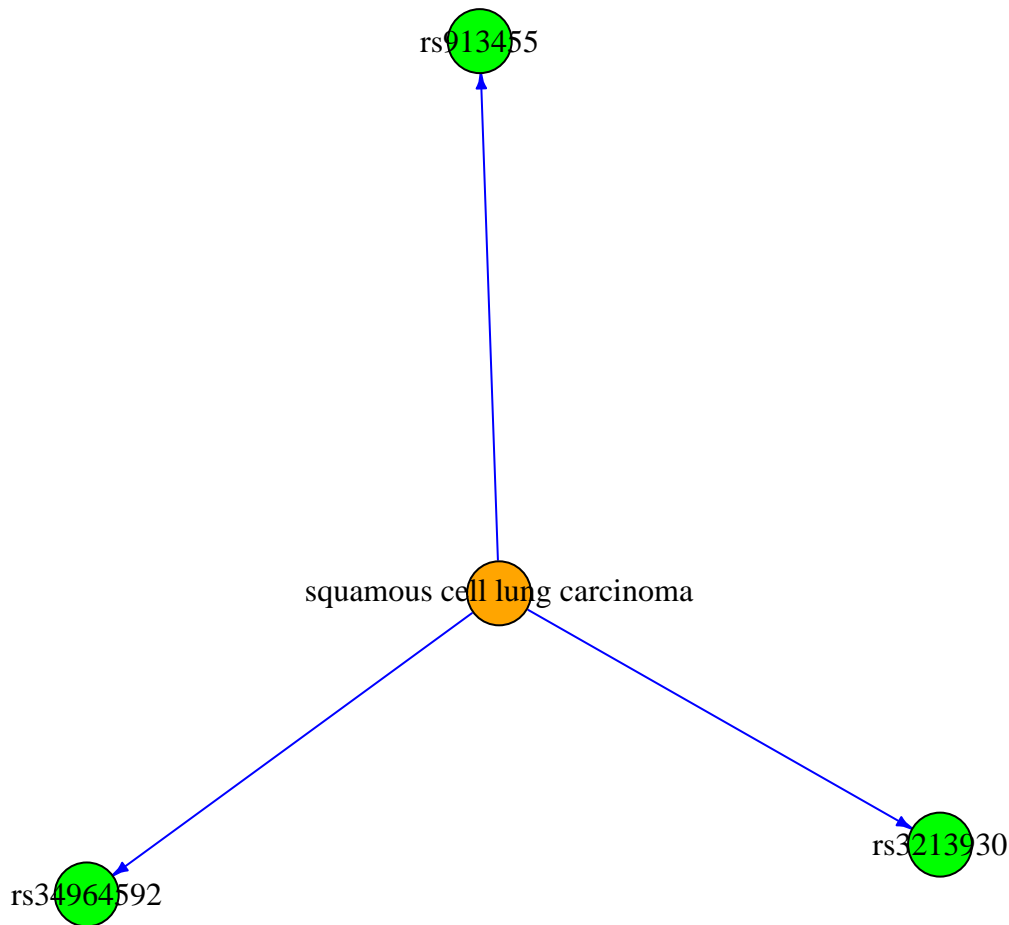

Variant–Disease Network (serum non–albumin protein measurement)

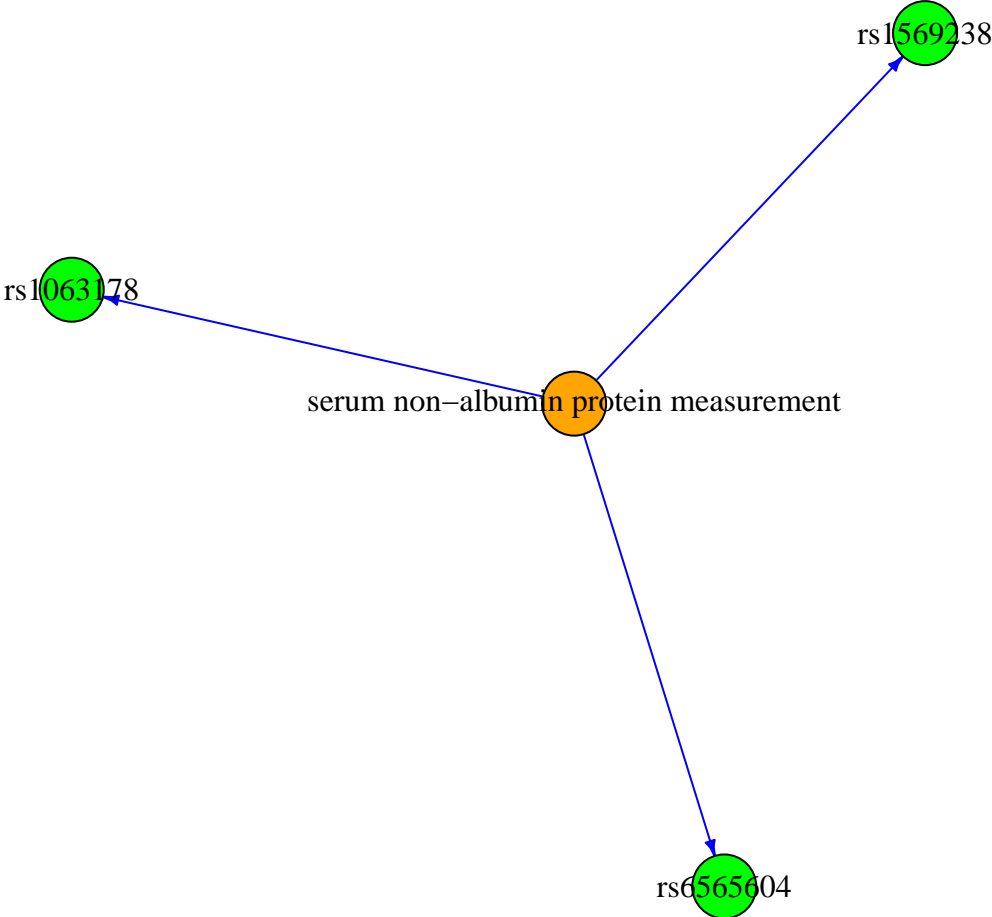

## Variant-Disease Network (asthma)

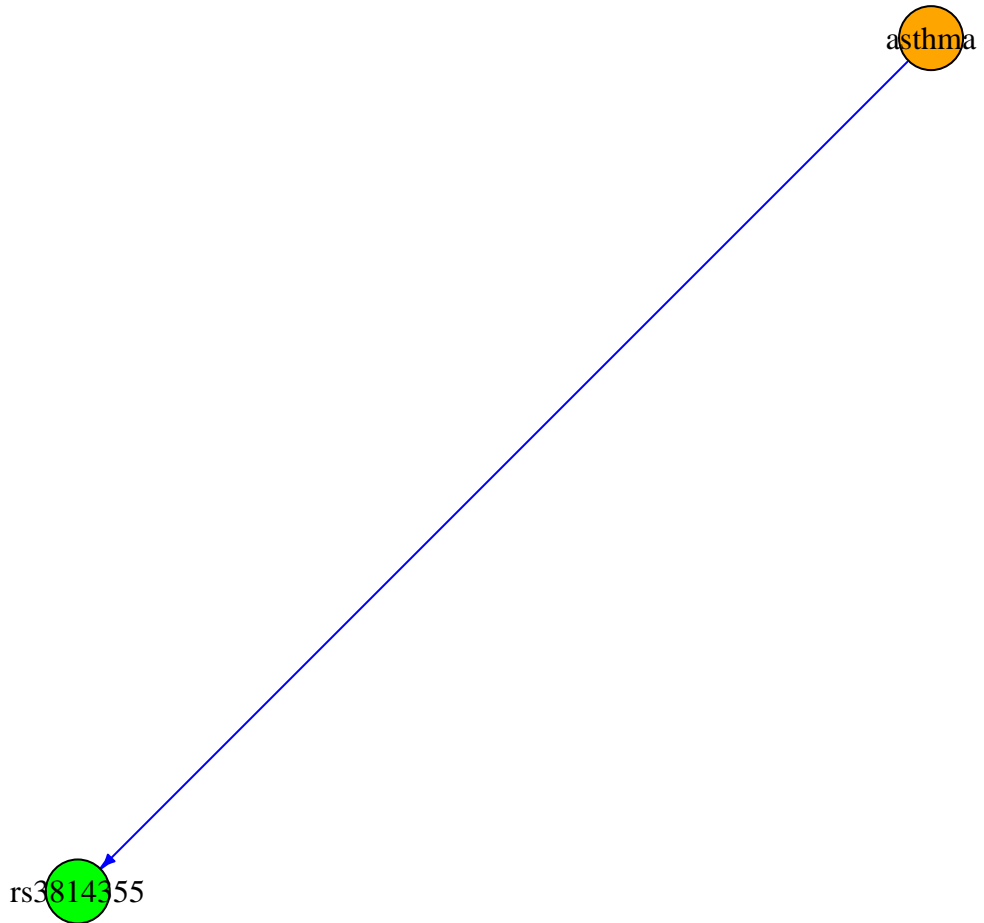

## Variant–Disease Network (response to diisocyanate)

response to diisocyanate

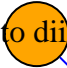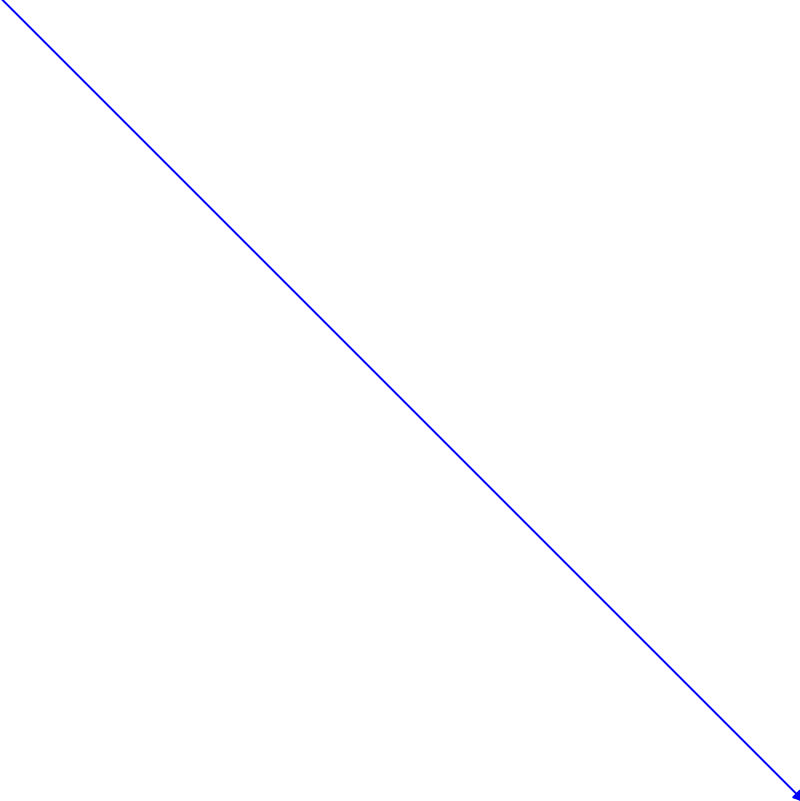

rs3814355

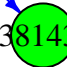



## Variant–Disease Network (reaction time measurement)

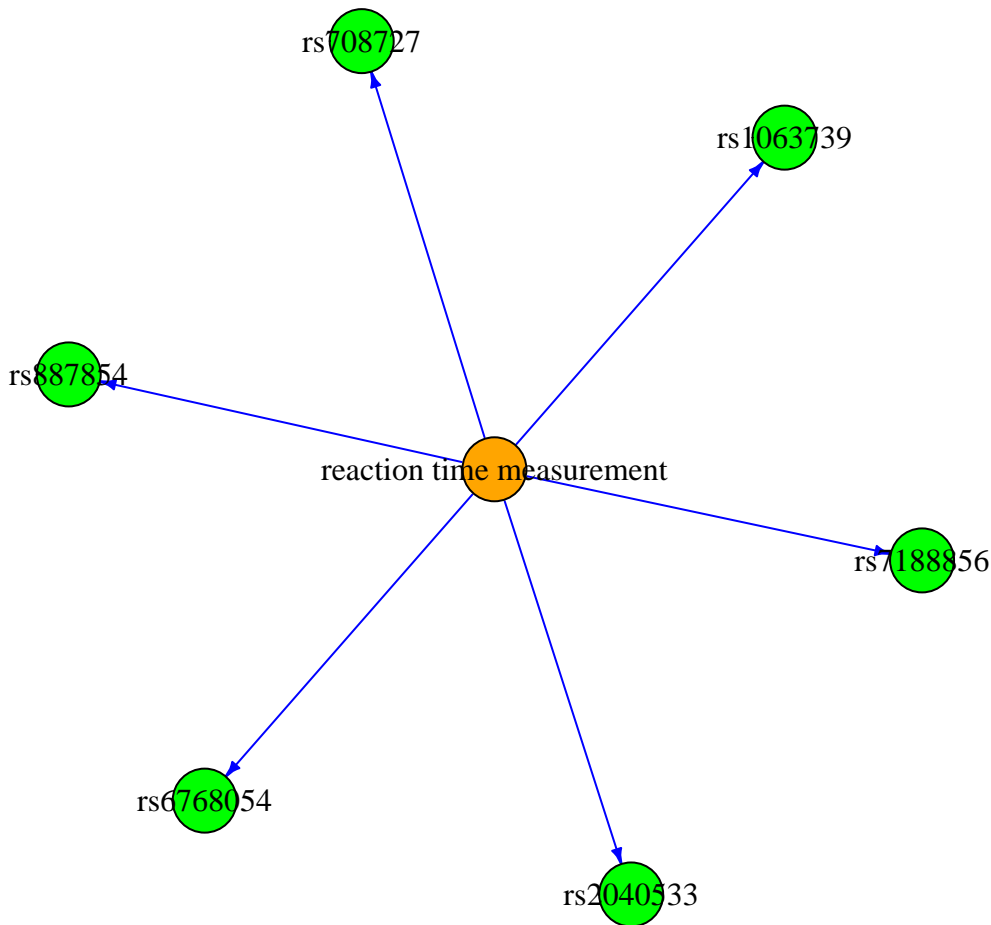

## Variant–Disease Network (small cell lung carcinoma)

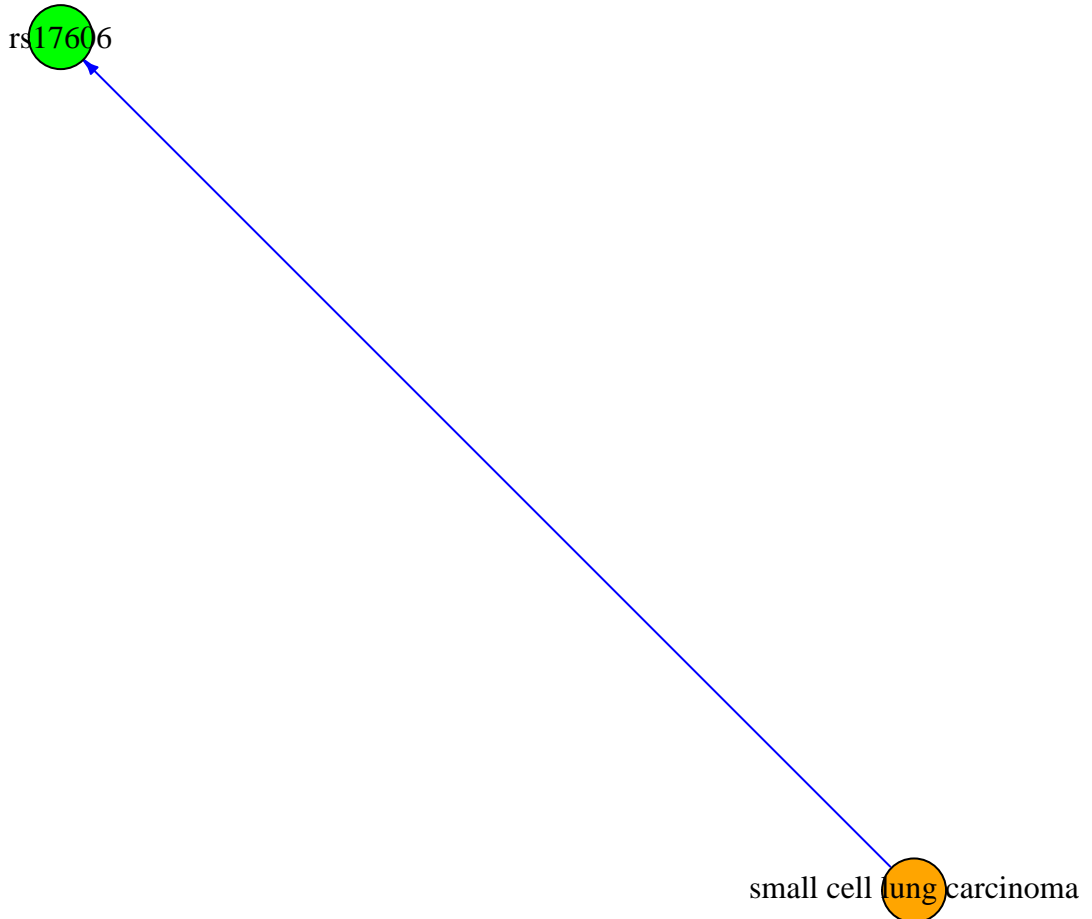

## Variant-Disease Network (homocysteine measurement)

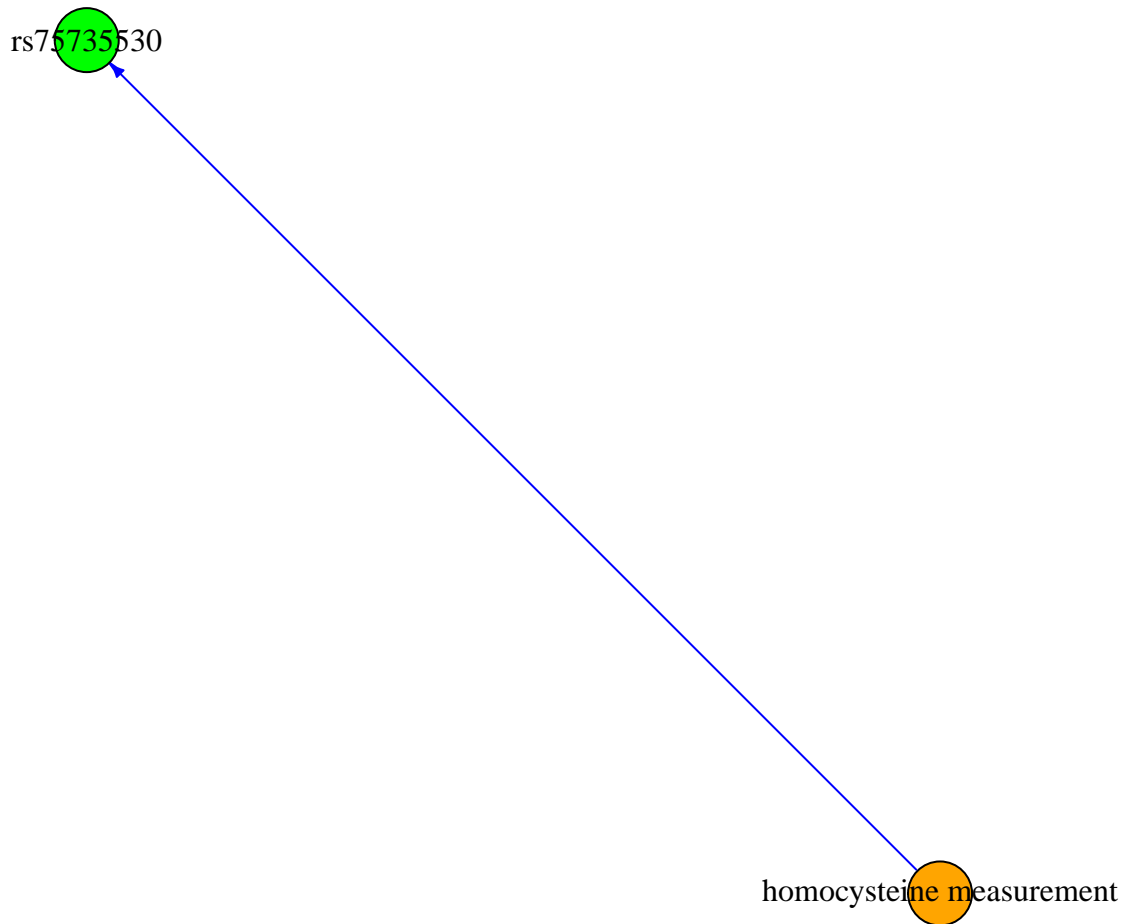

## Variant–Disease Network (age at menopause)

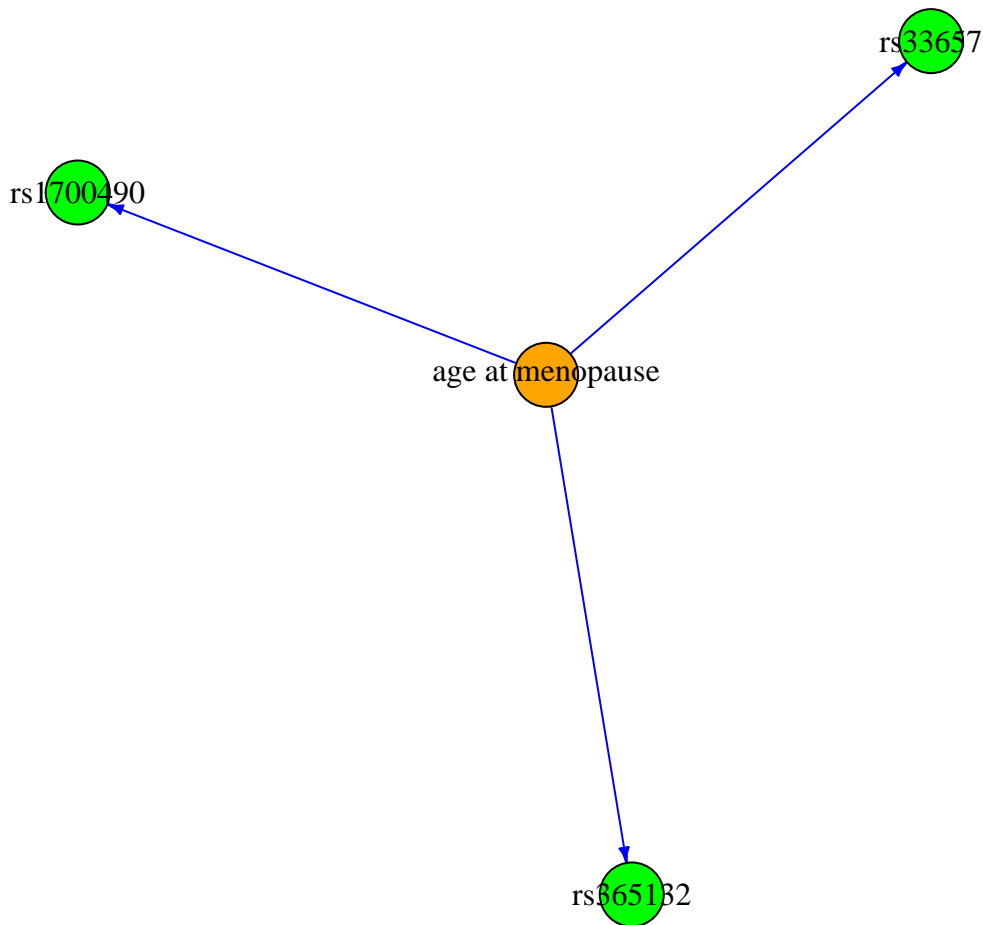

## Variant–Disease Network (uterine fibroid)

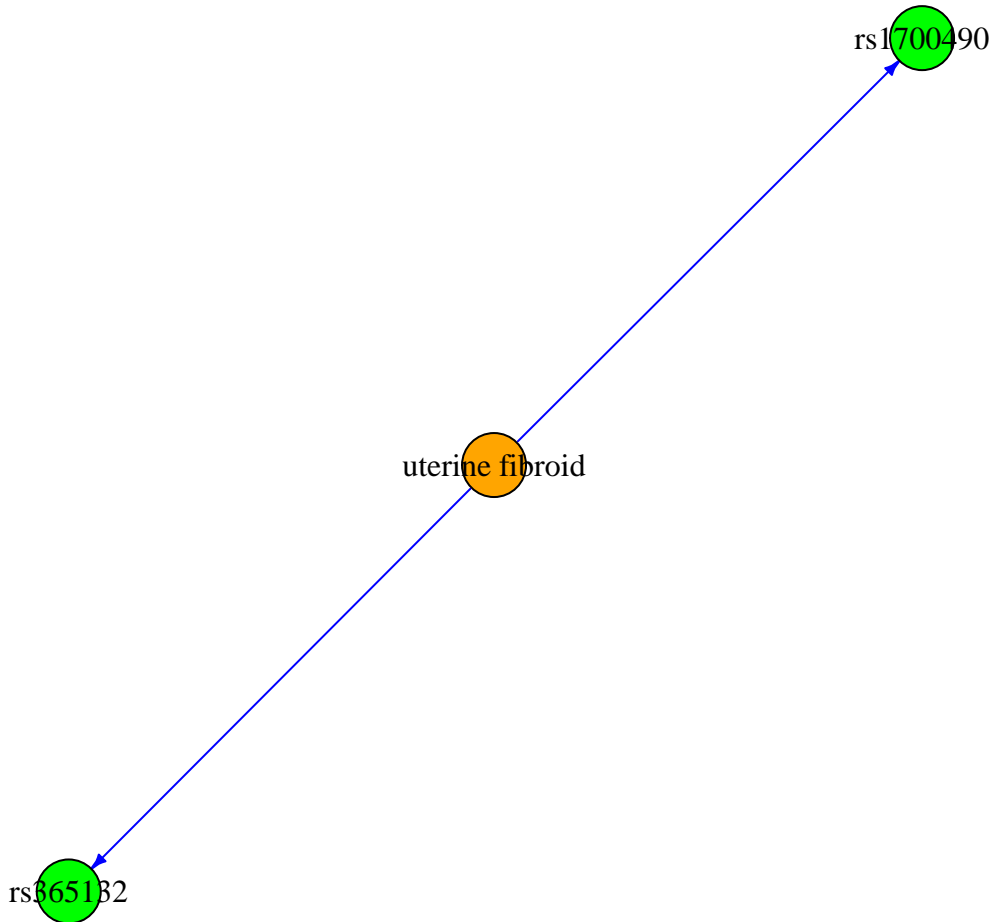

## Variant–Disease Network (1,5 anhydroglucitol measurement)

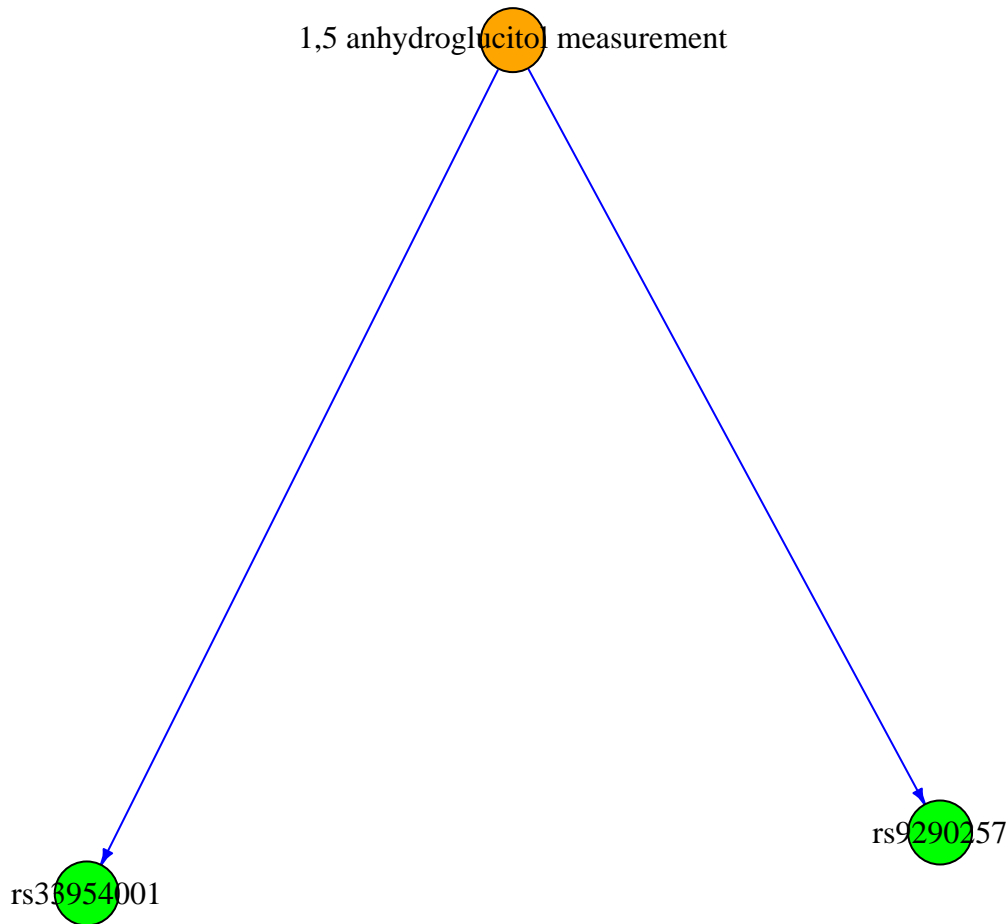

## Variant–Disease Network (monocyte percentage of white cells)

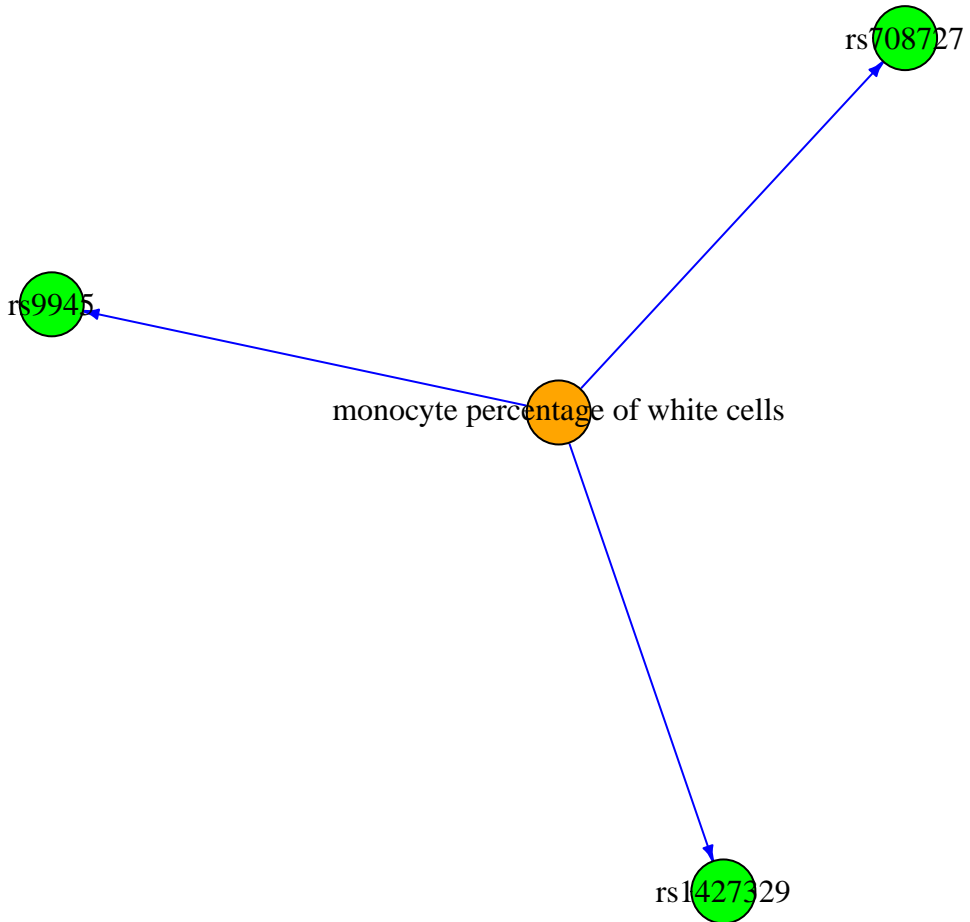

Variant–Disease Network (glucagon–like peptide–1 measurement)

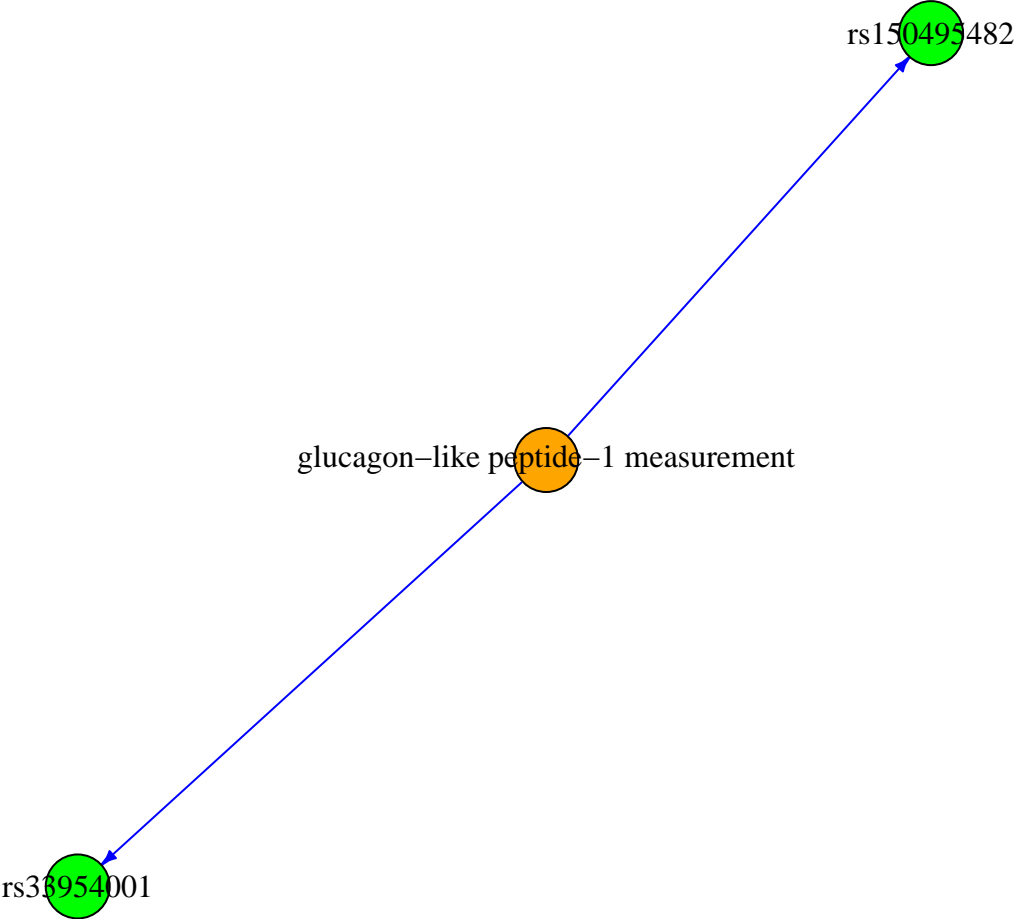



## Variant–Disease Network (glucose tolerance test)

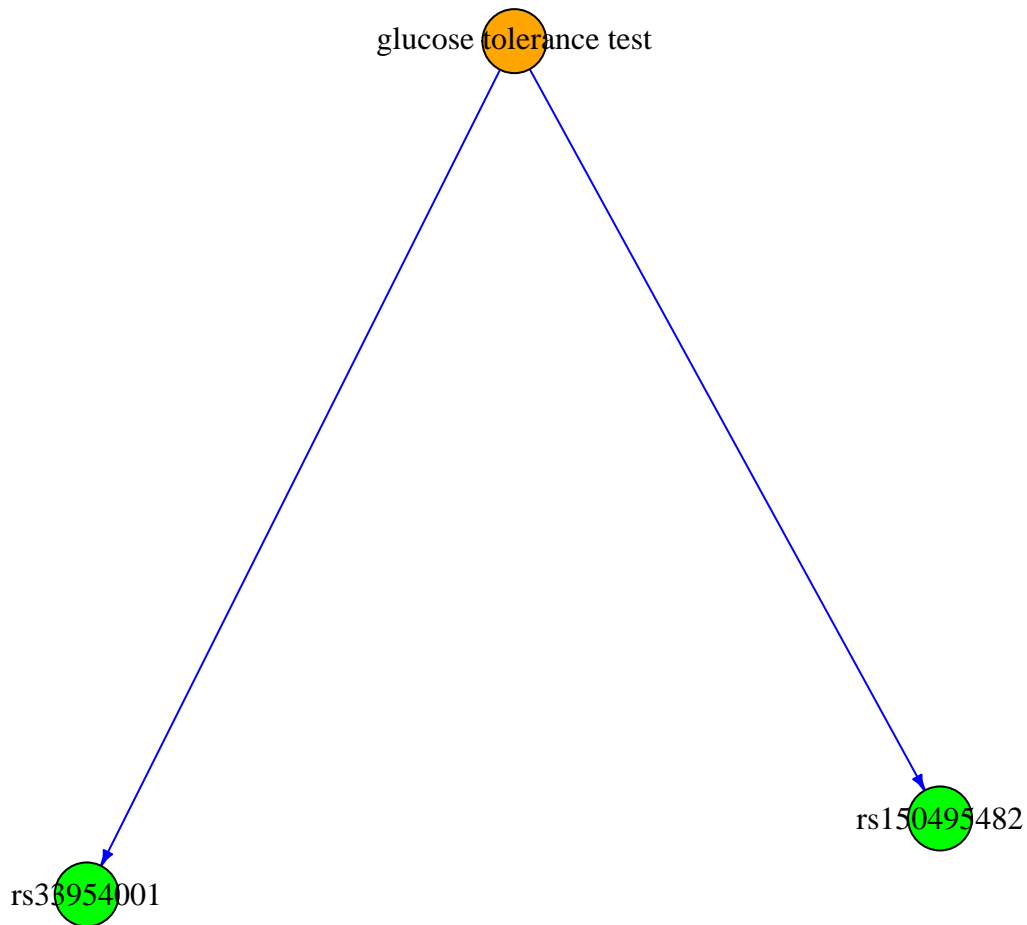

# Variant–Disease Network (cortisol secretion measurement)

rs1048100

cortisol secretion measurement

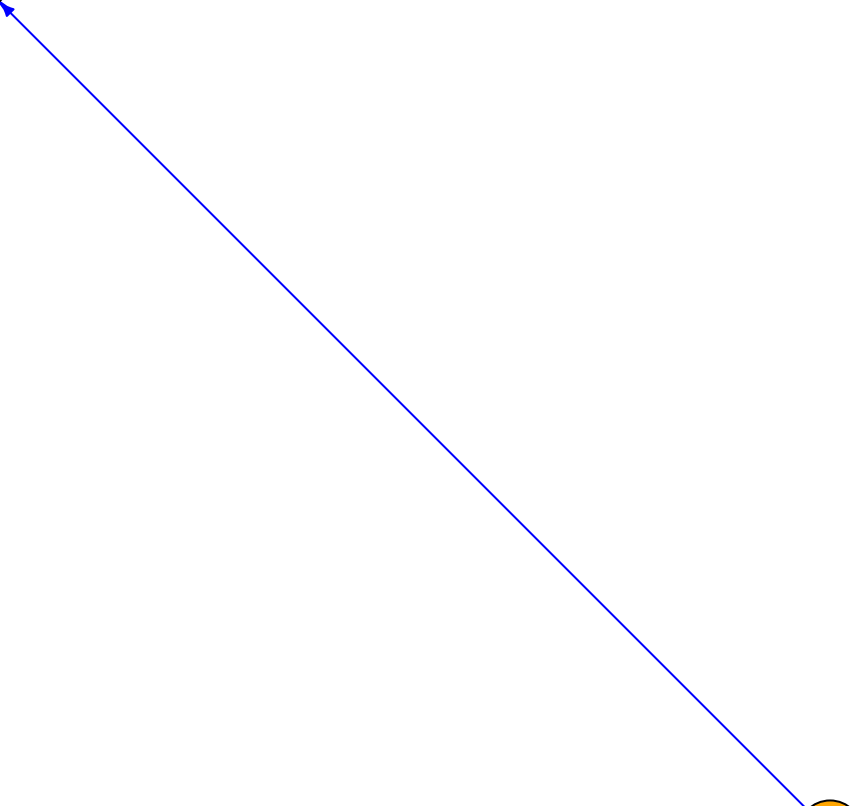

## Variant–Disease Network (coronary heart disease)

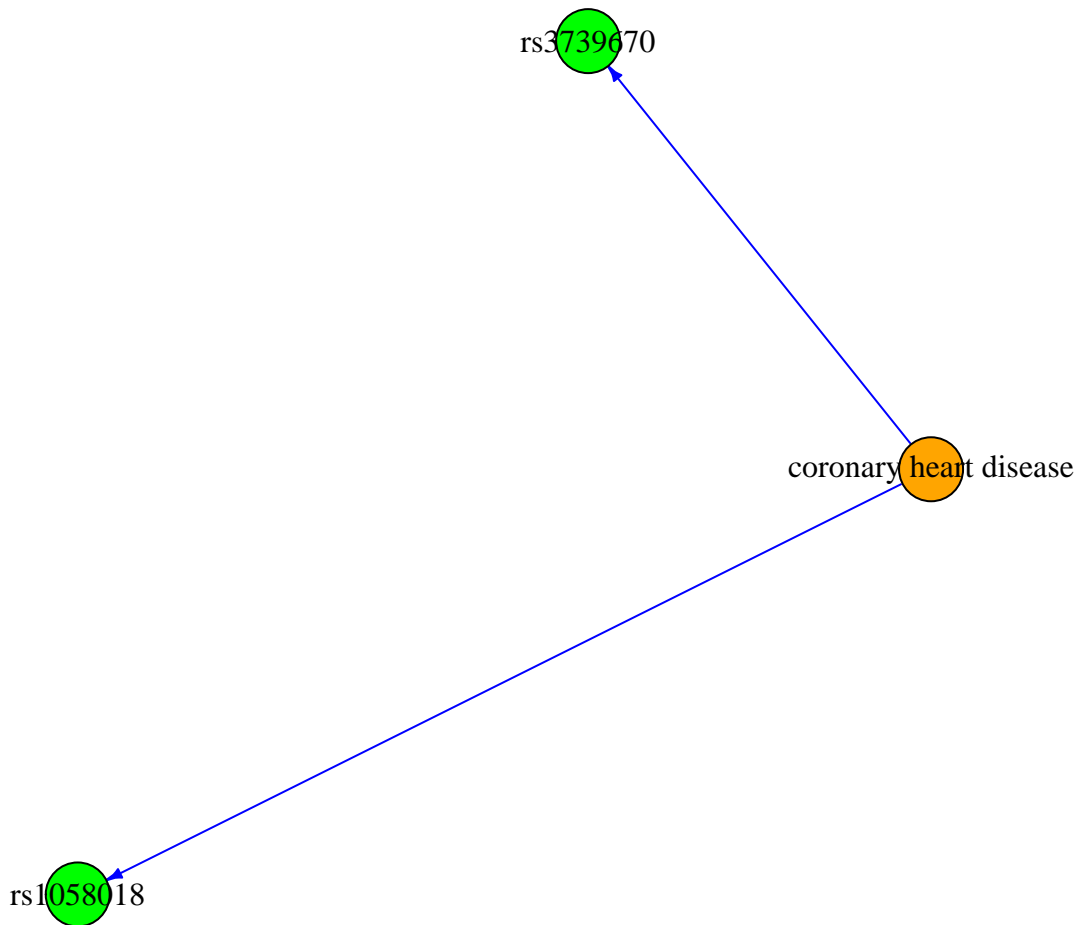

## Variant–Disease Network (basophil count)

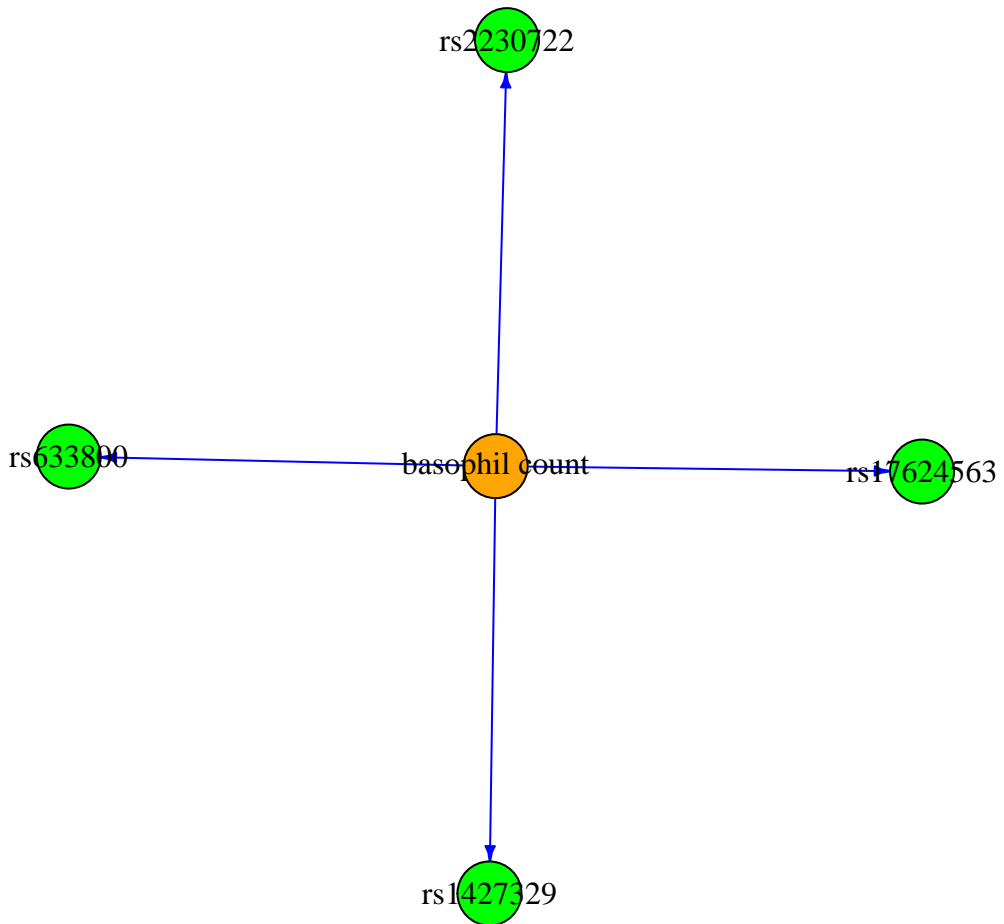

## Variant–Disease Network (eosinophil count)

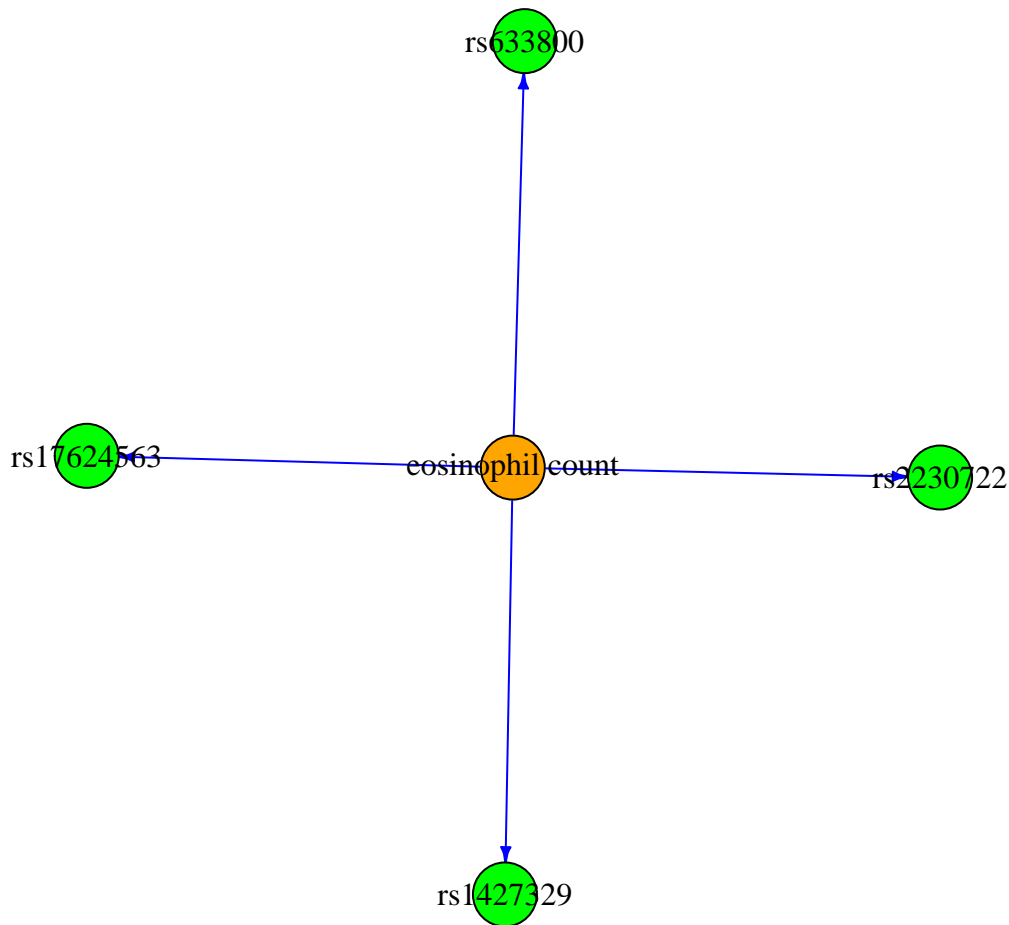

## Variant–Disease Network (myeloproliferative disorder)

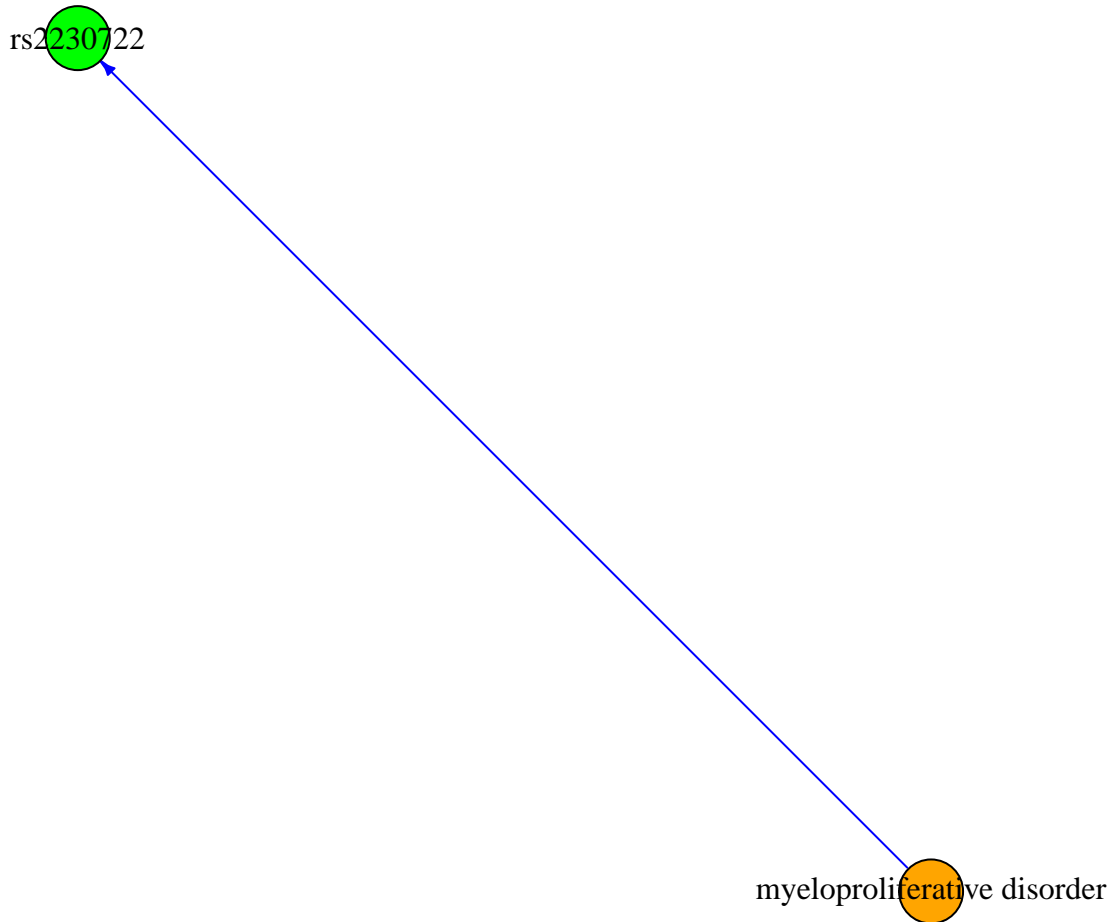

# Variant–Disease Network (brain serotonin transporter measurement)

brain serotonin transporter measurement

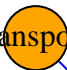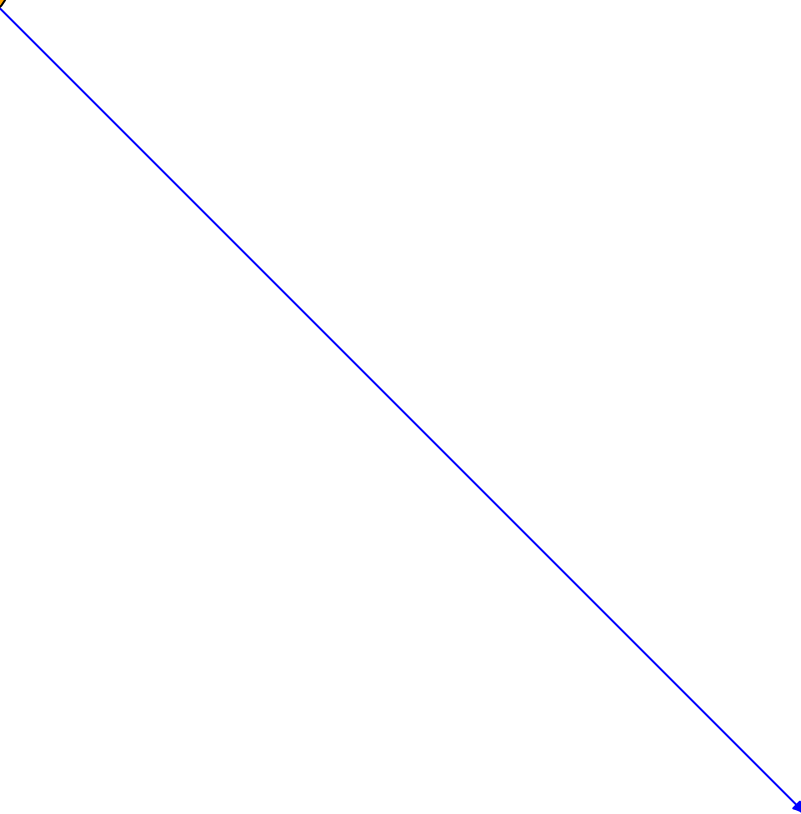

rs2040533

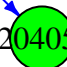

## Variant–Disease Network (diabetic nephropathy)

diabetic nephropathy

rs2040533





## Variant–Disease Network (response to paclitaxel)

response to paclitaxel

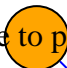

rs2040533

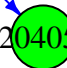

# ant-Disease Network (glucose-dependent insulintropic peptide (GIP) meas

rs31954001

glucose-dependent insulintropic peptide (GIP

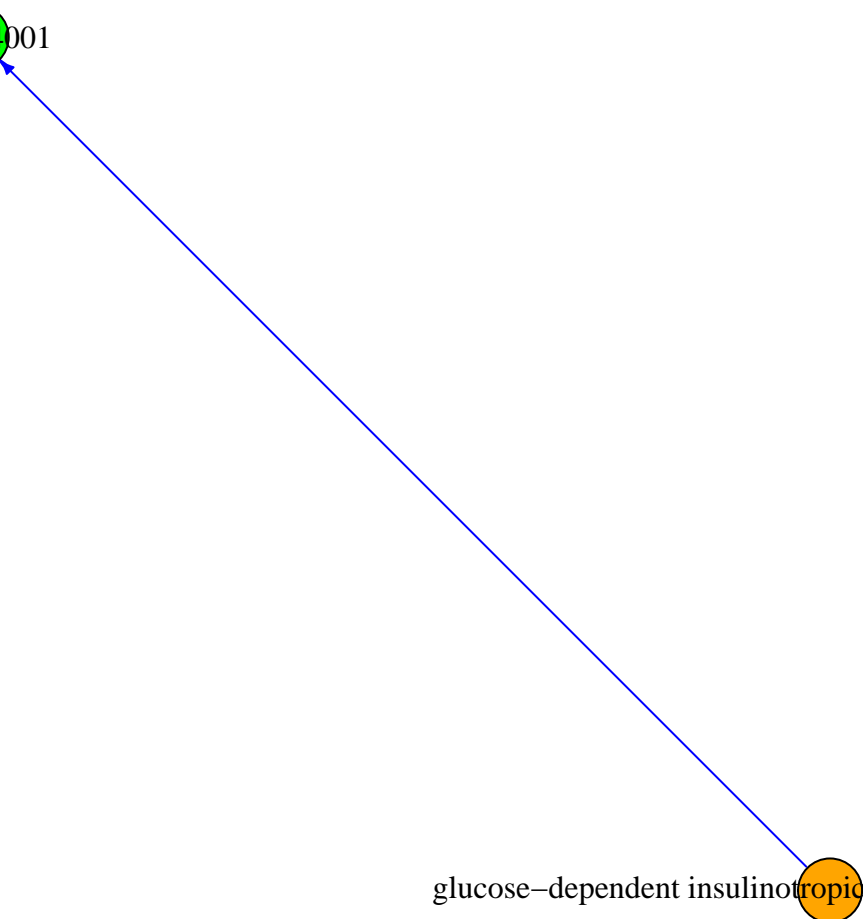

# Variant–Disease Network (depressive symptom measurement)

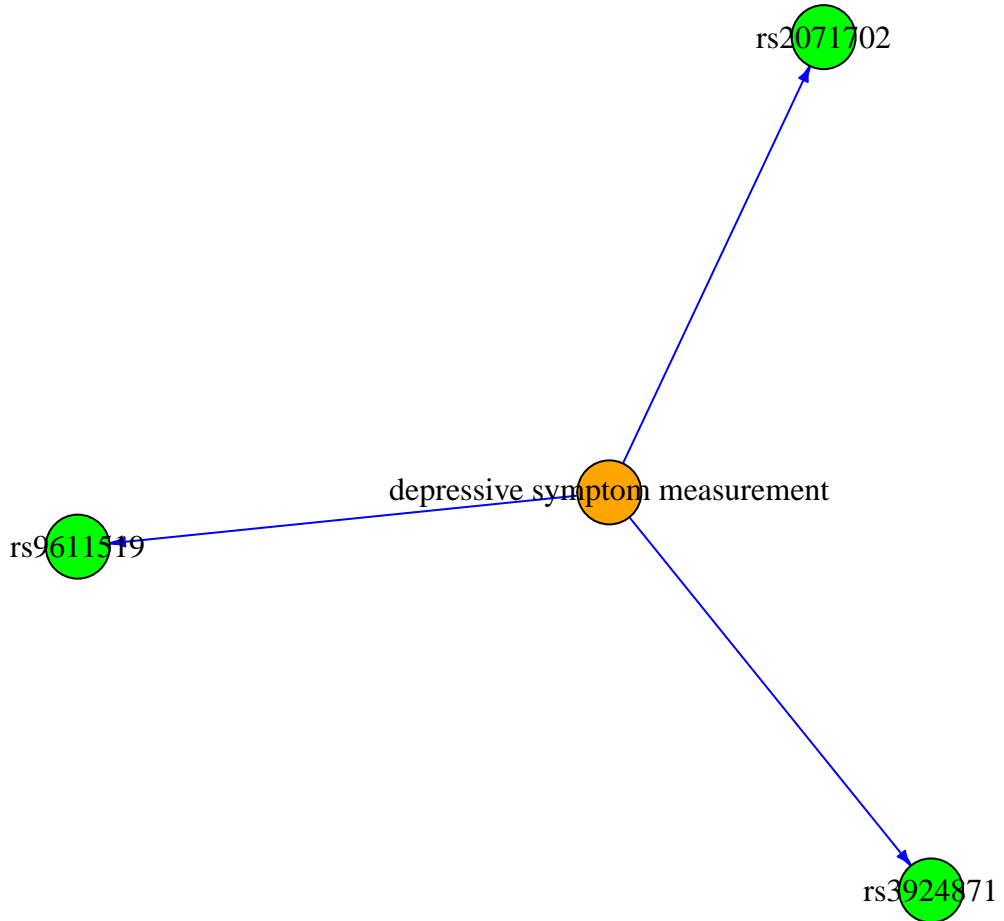

## Variant–Disease Network (neutrophil count)

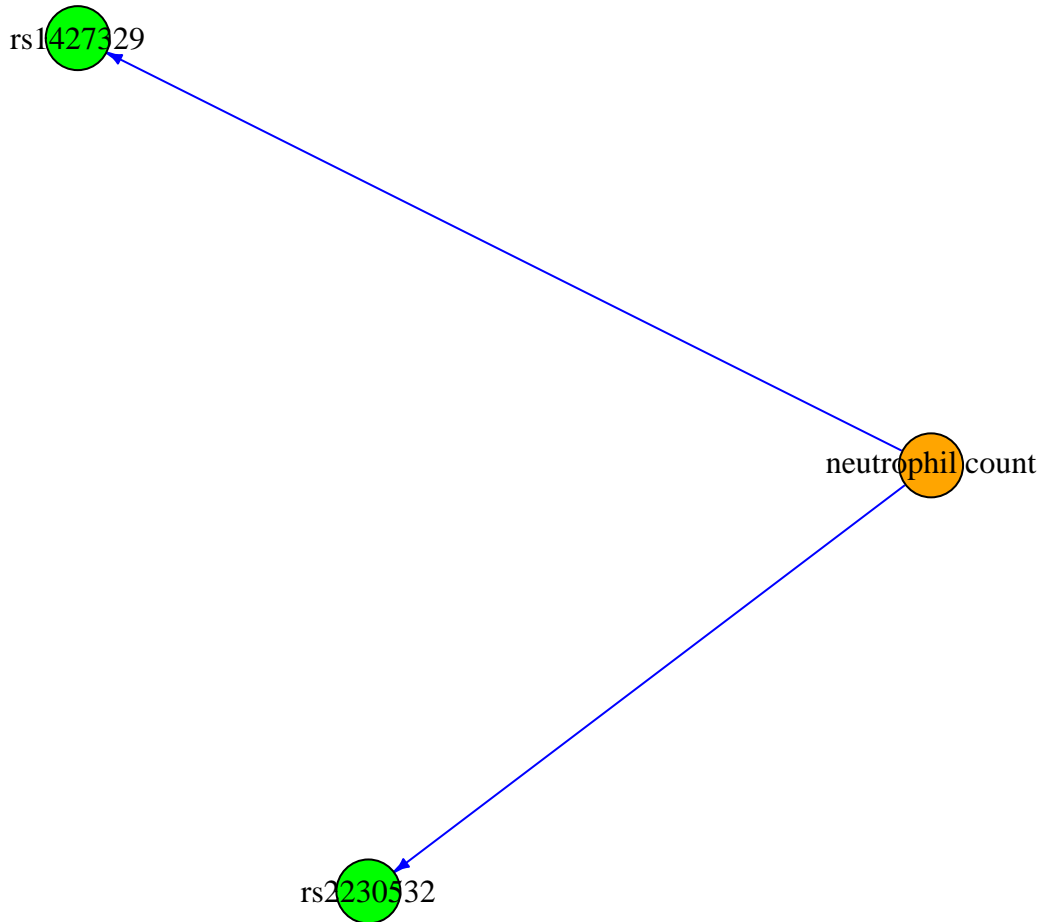

## Variant–Disease Network (vitamin D measurement)

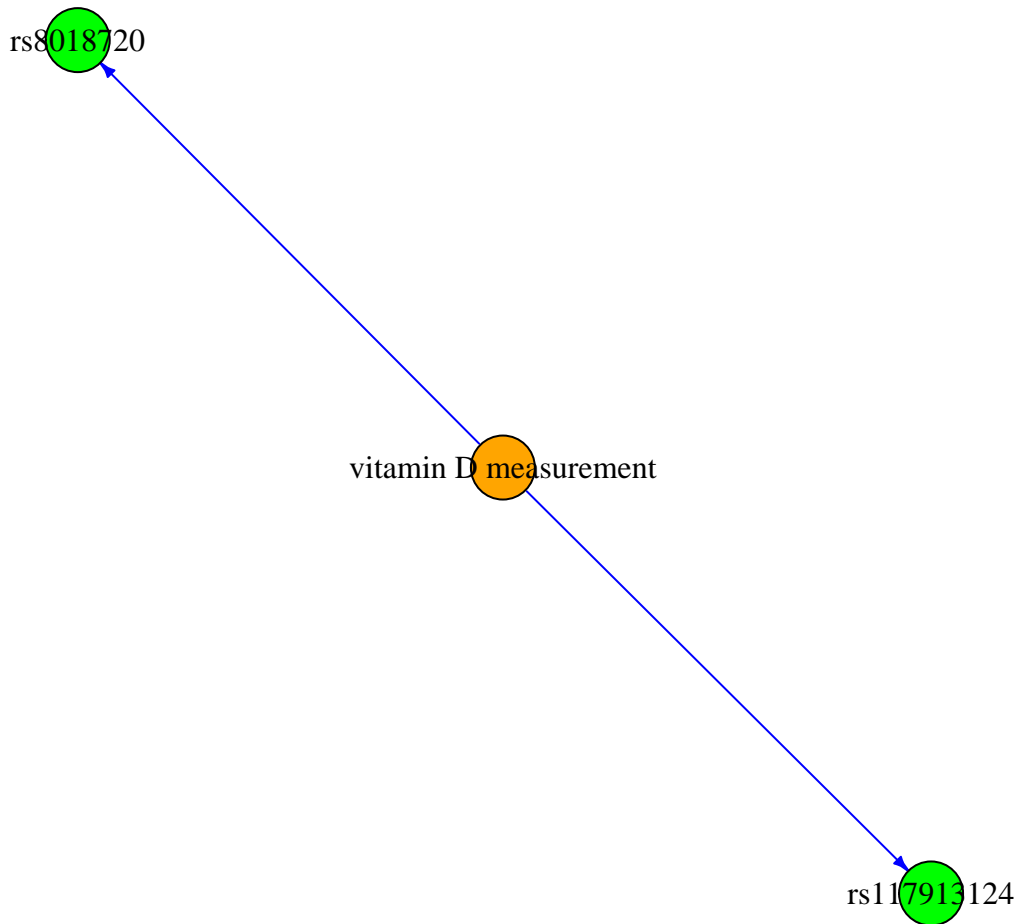

## Variant–Disease Network (eating disorder)

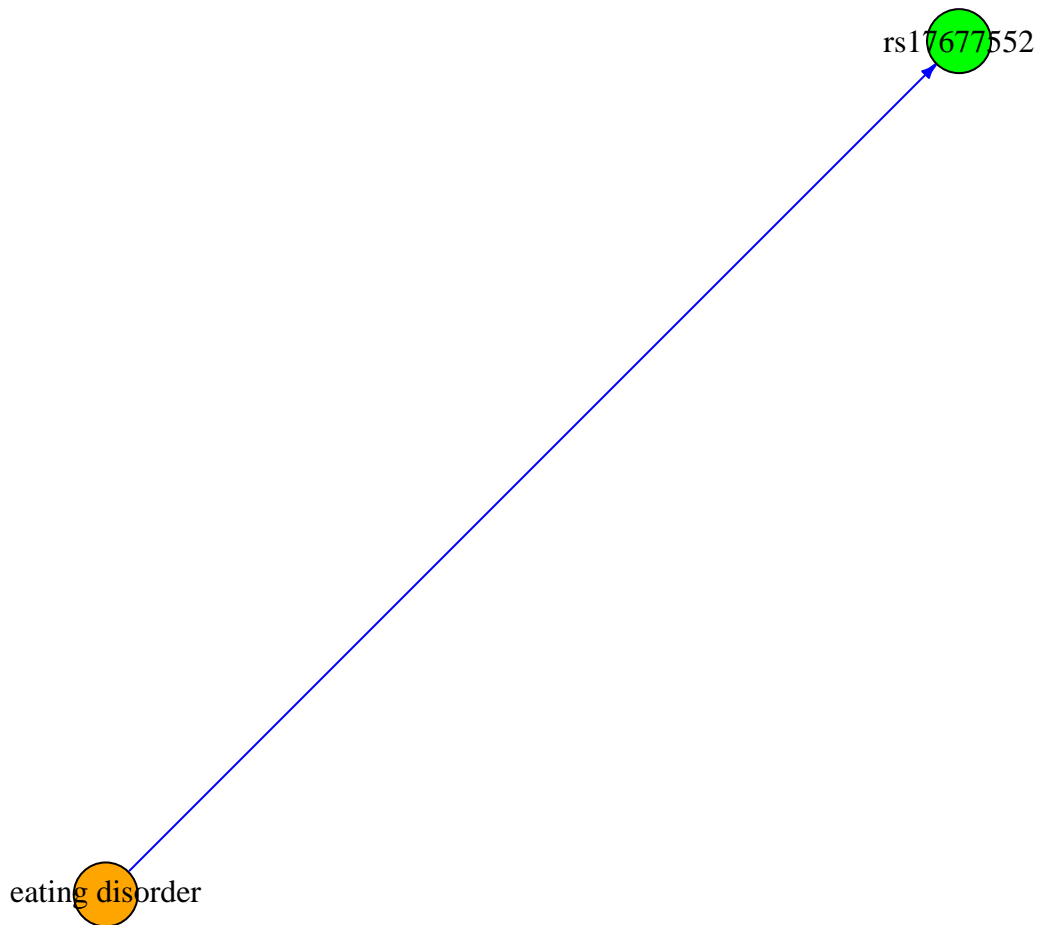

## Variant–Disease Network (disease progression measurement)

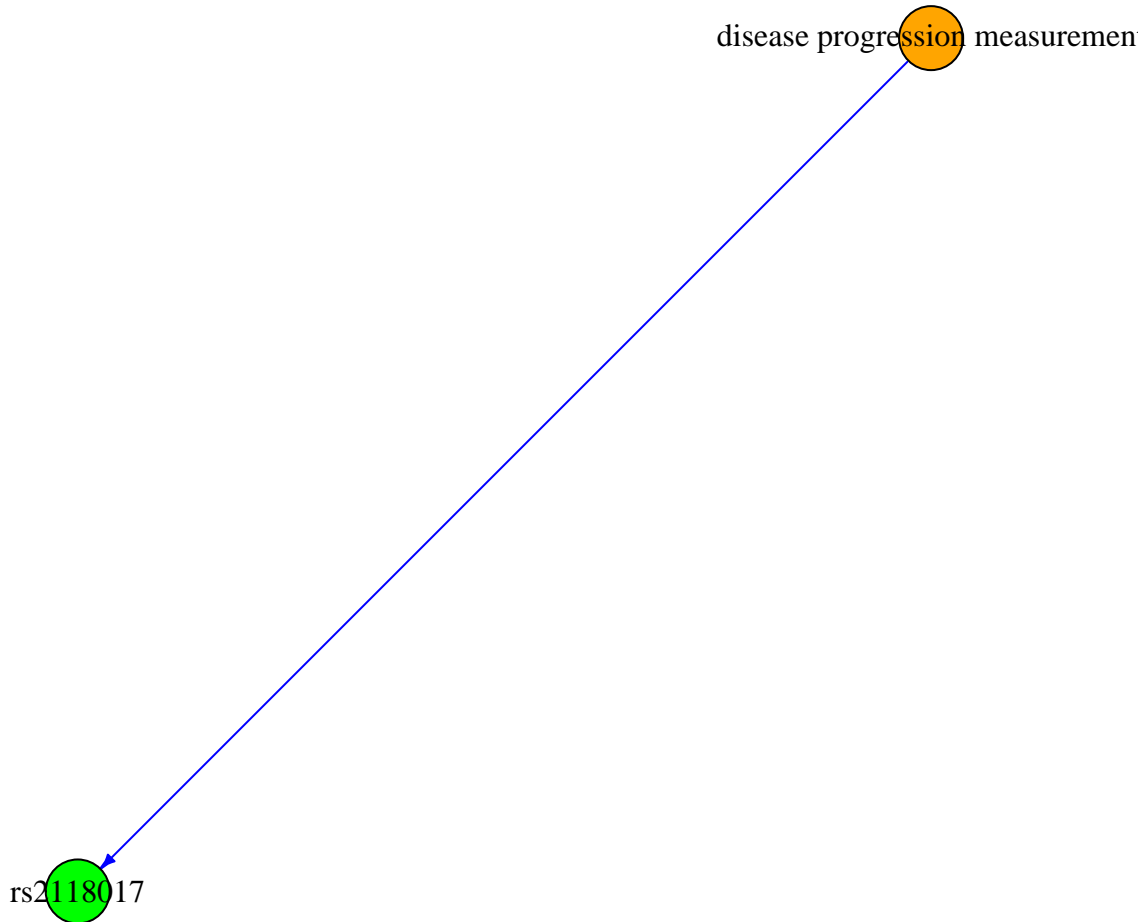

## Variant–Disease Network (response to mTOR inhibitor)

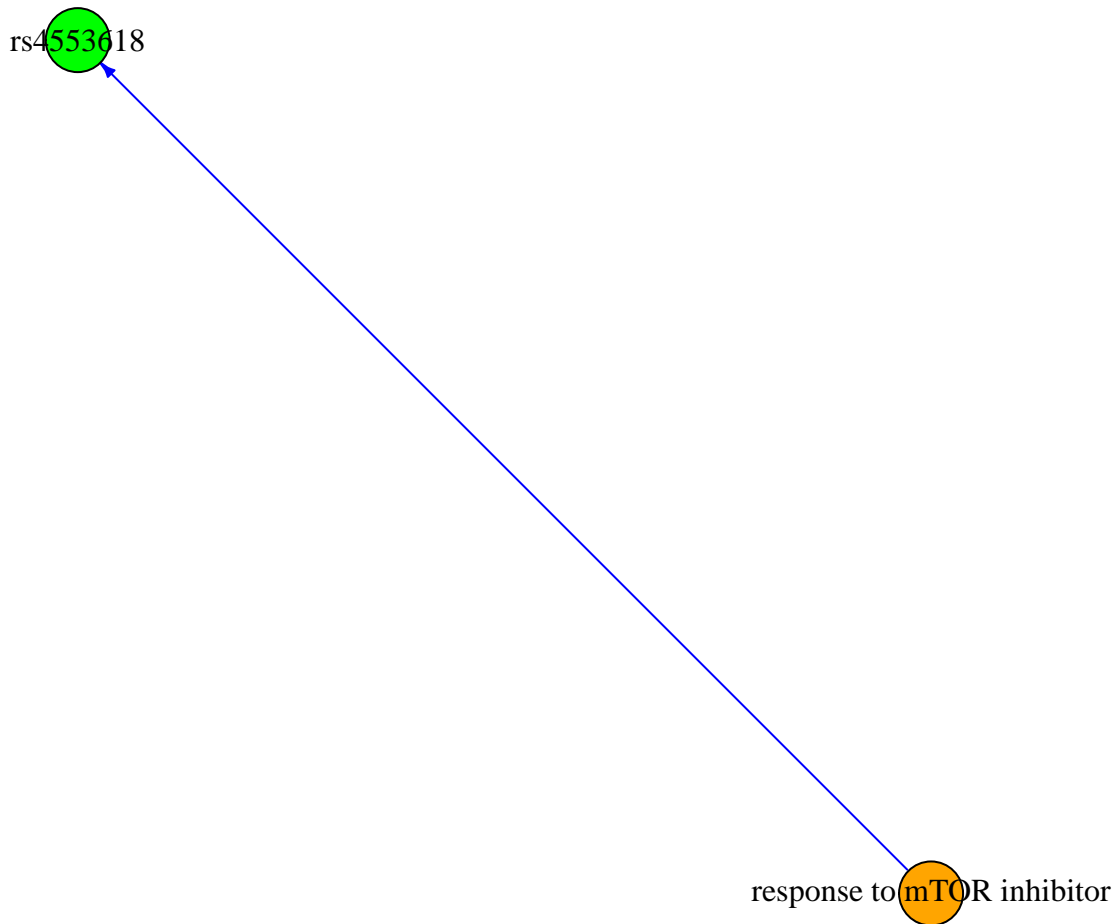



## Variant-Disease Network (emphysema)

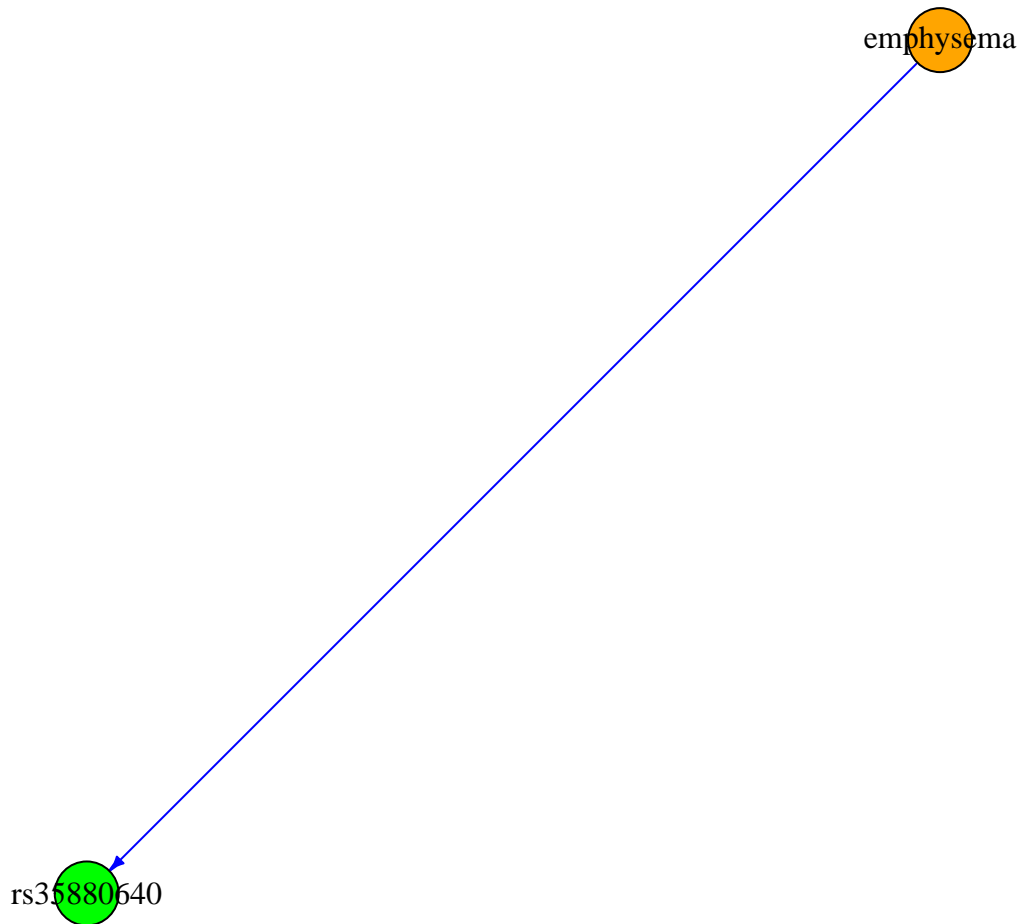

## Variant-Disease Network (loneliness measurement)

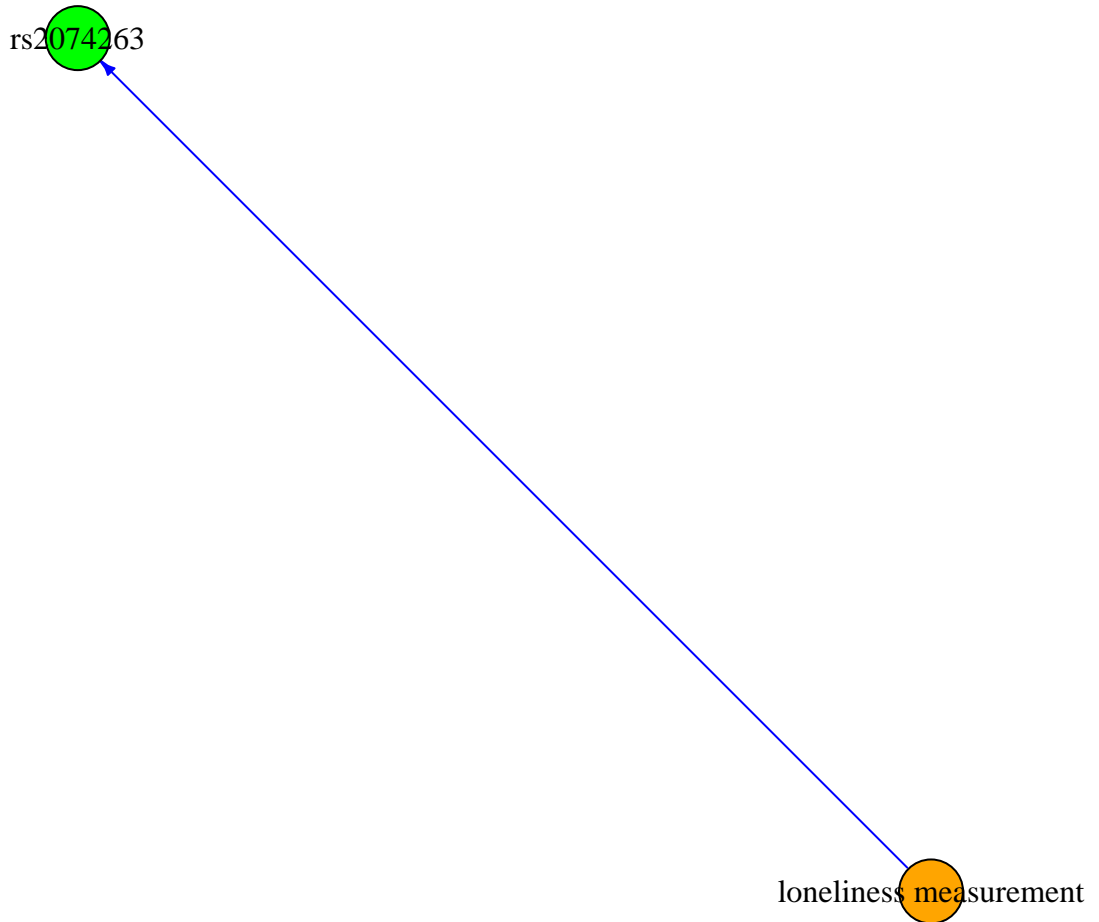

Variant–Disease Network (eosinophilic esophagitis)

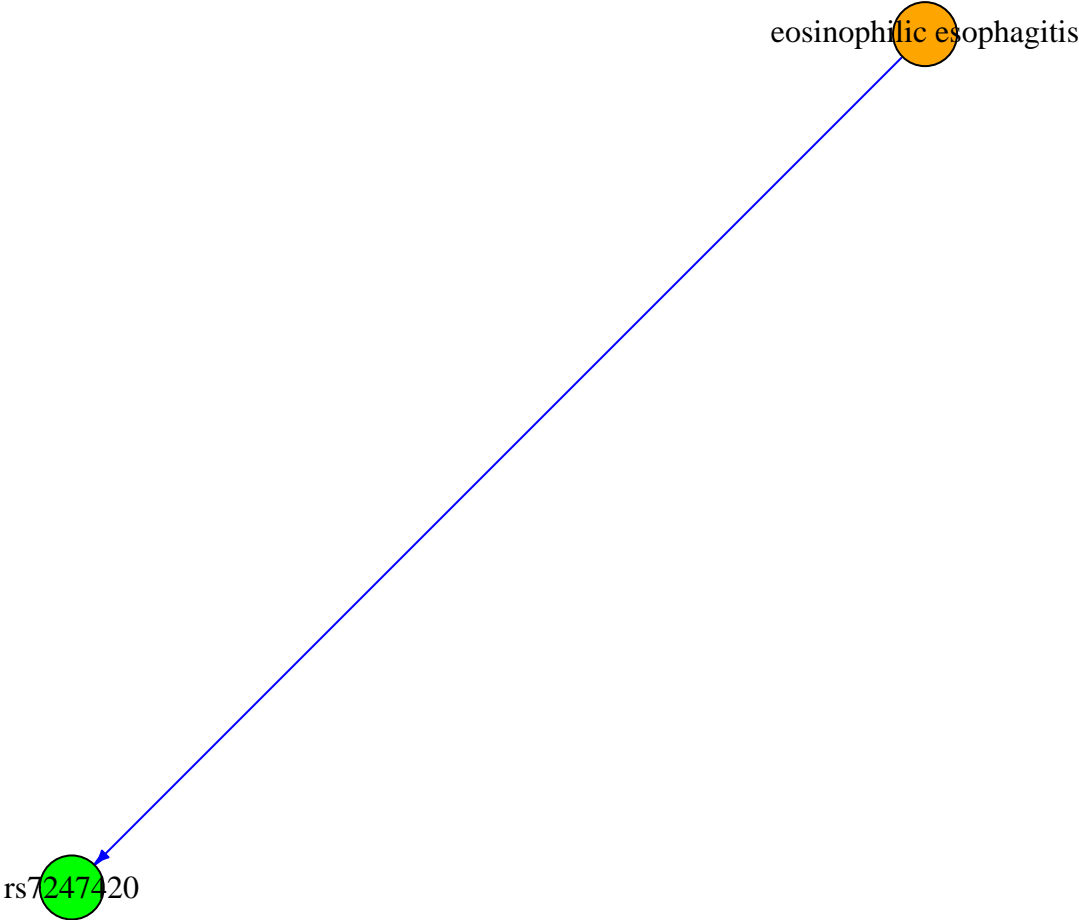

## Variant–Disease Network (forced expiratory volume)

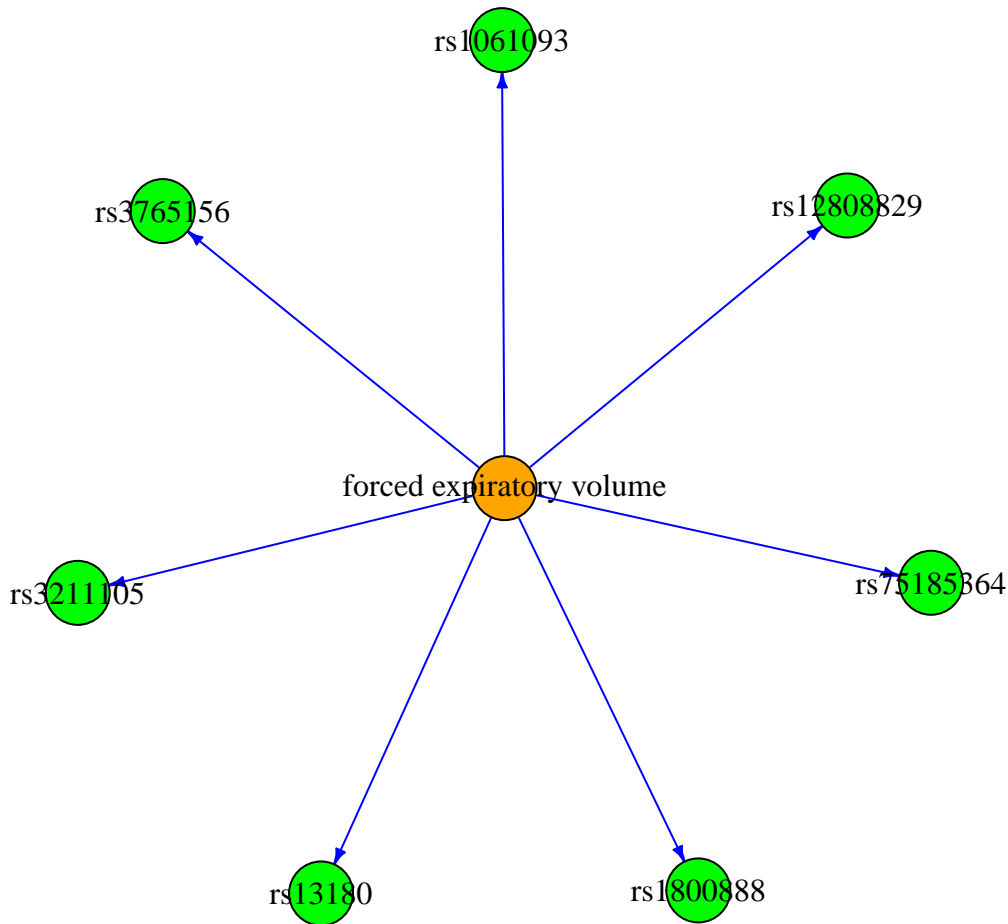

**Variant–Disease Network (erosive tooth wear measurement)**

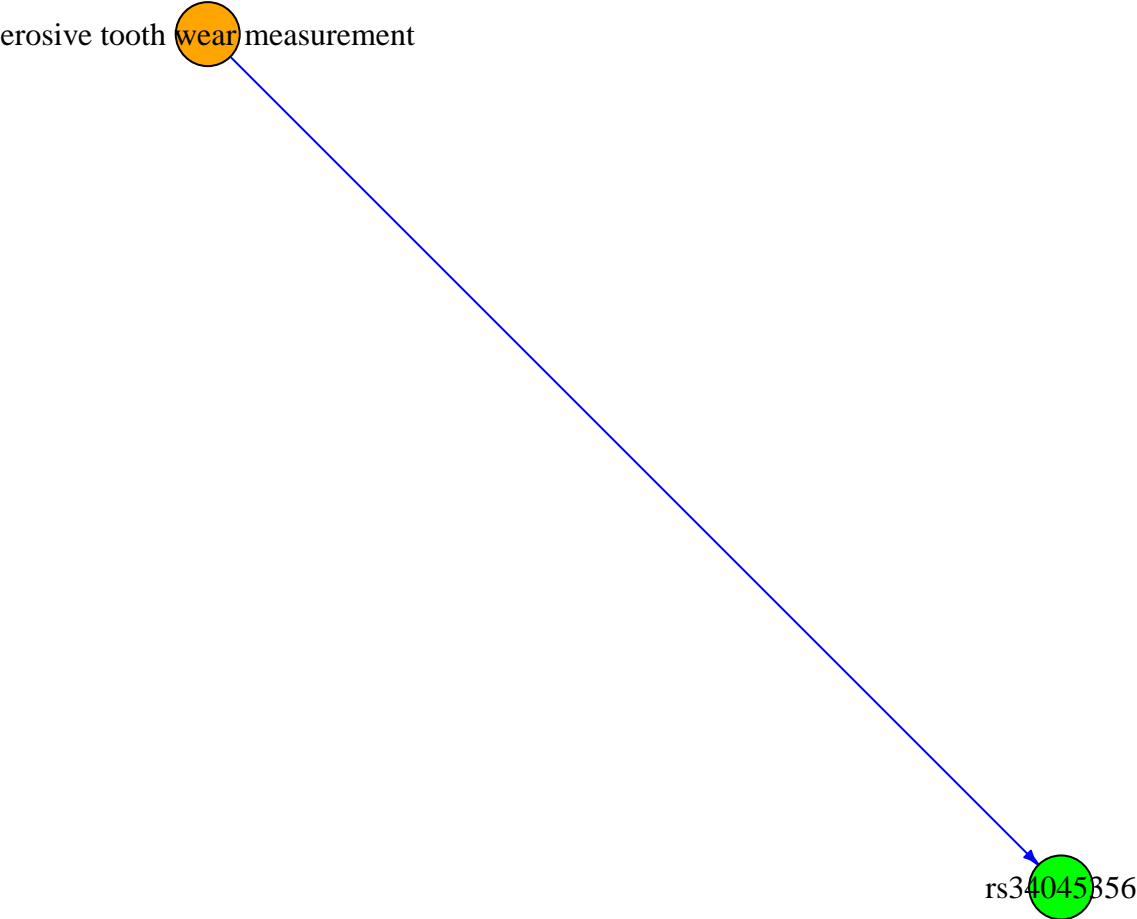

## Variant–Disease Network (clostridium difficile infection)

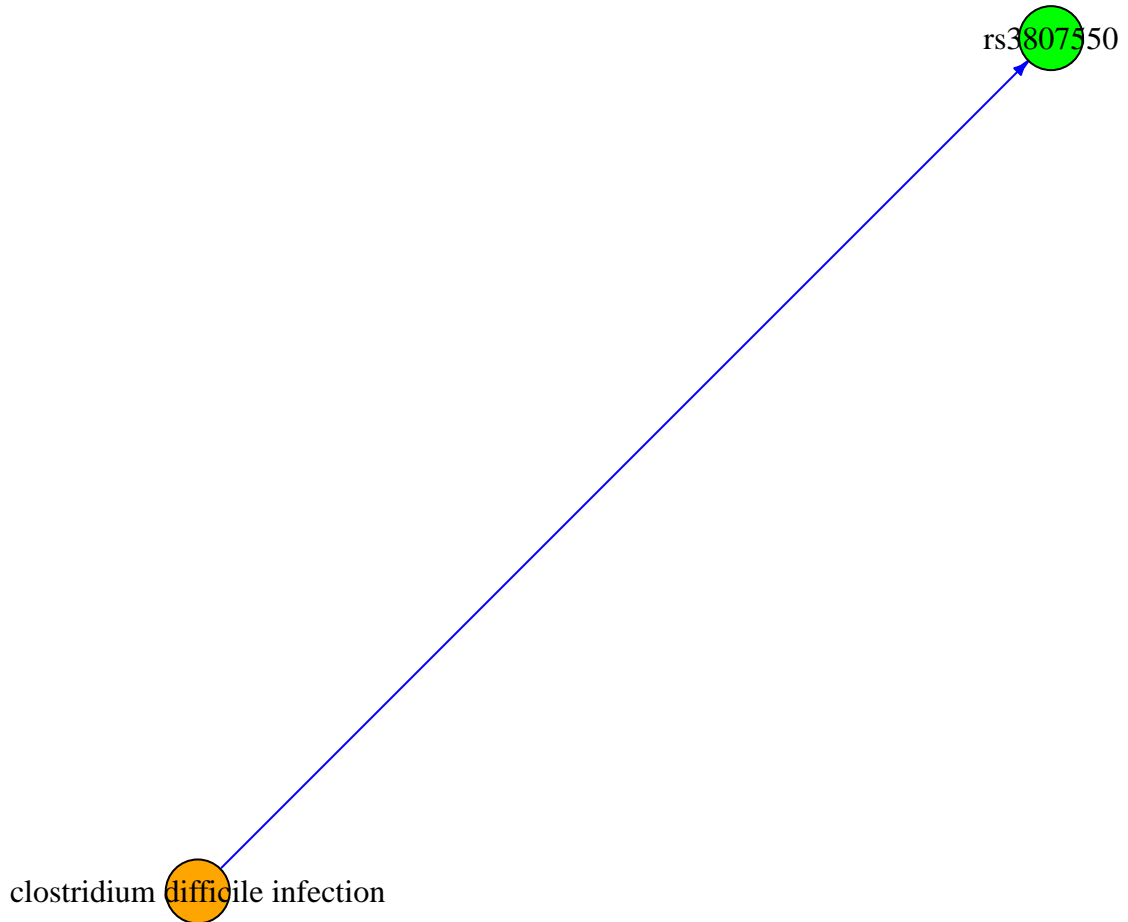

## Variant-Disease Network (multiple myeloma)

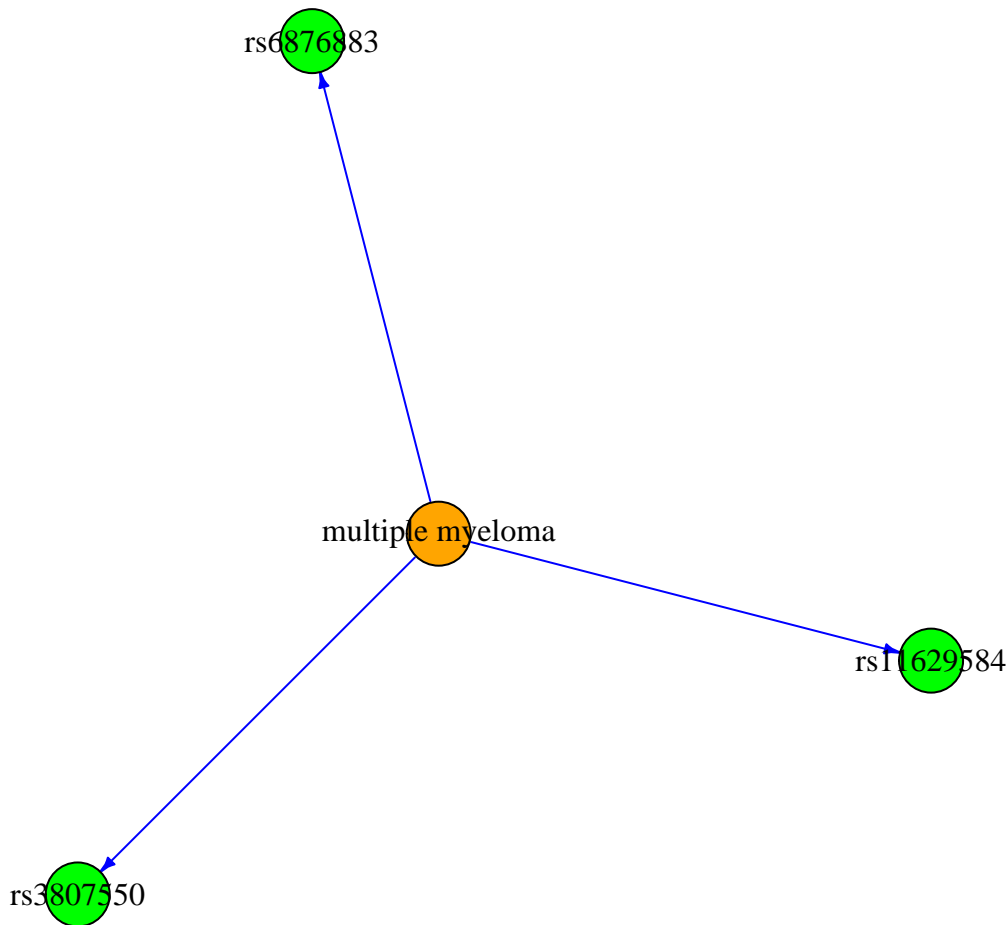

## Variant–Disease Network (diffuse scleroderma)

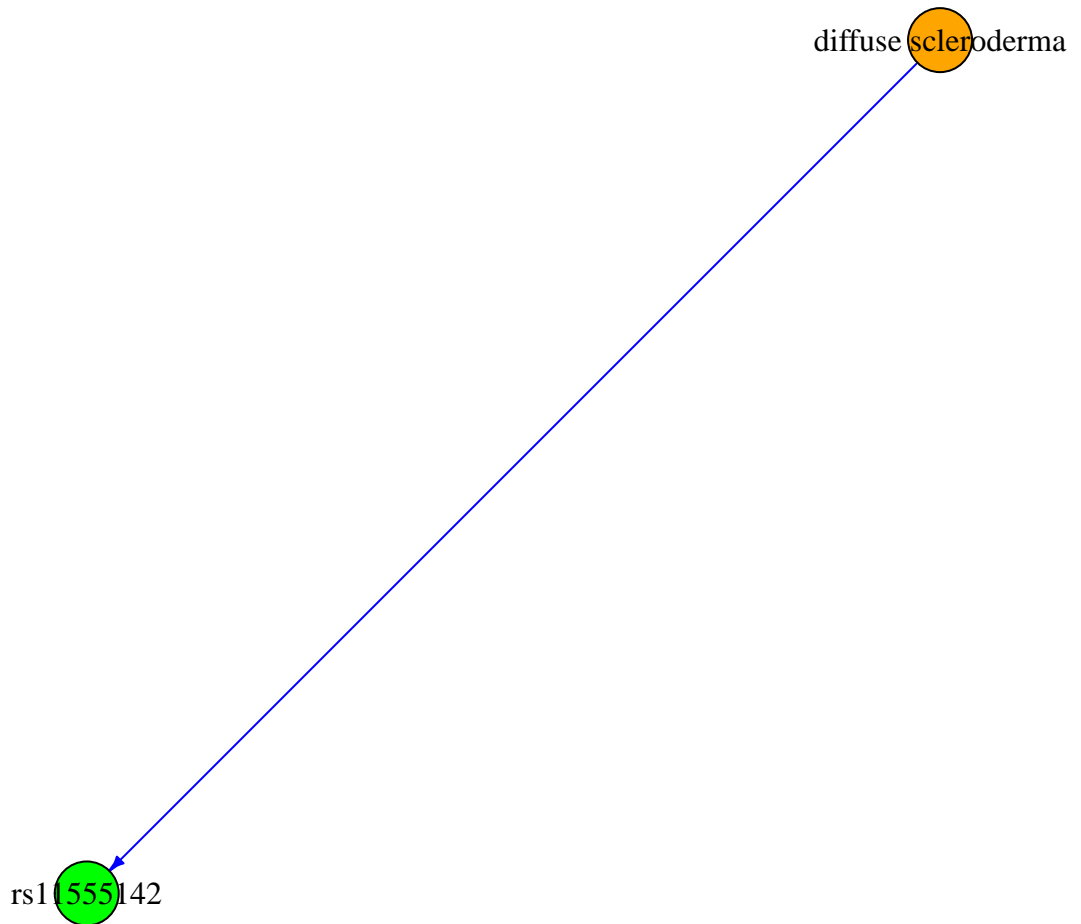



# Variant–Disease Network (hormone measurement)

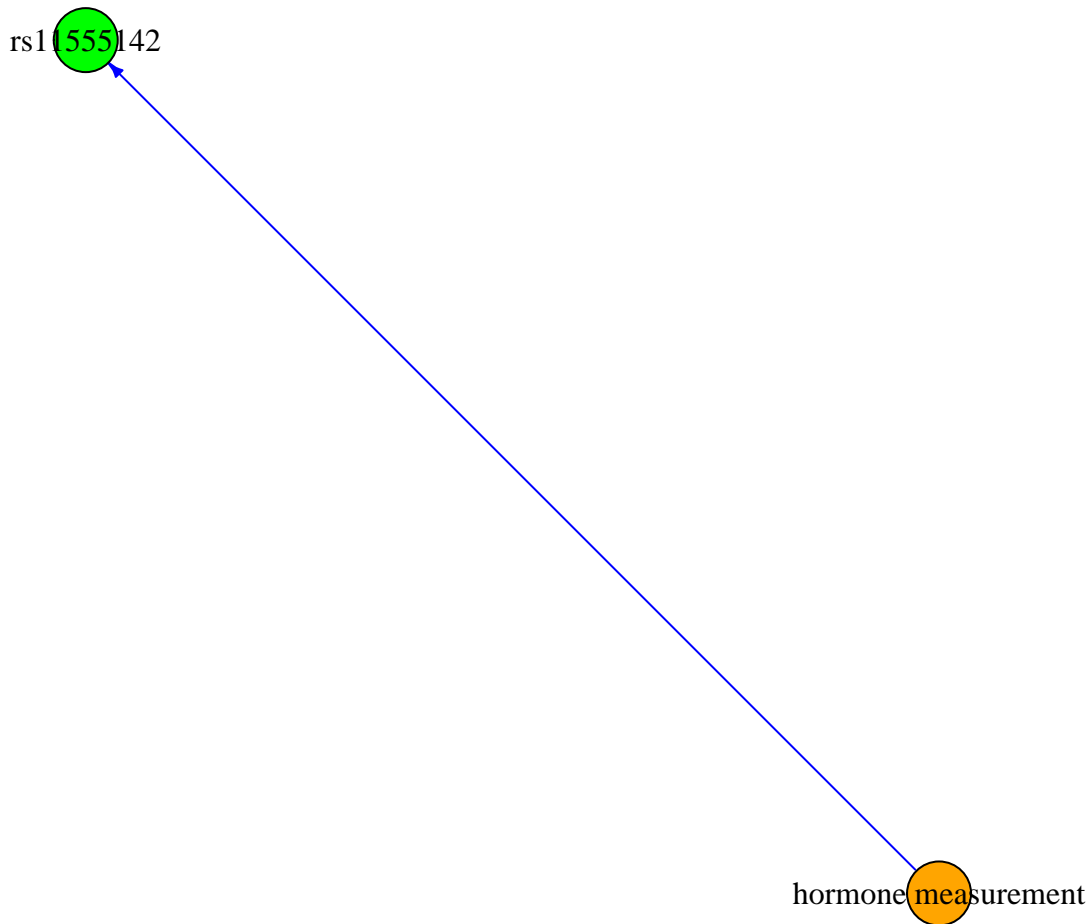

**Variant–Disease Network (serum metabolite measurement)**

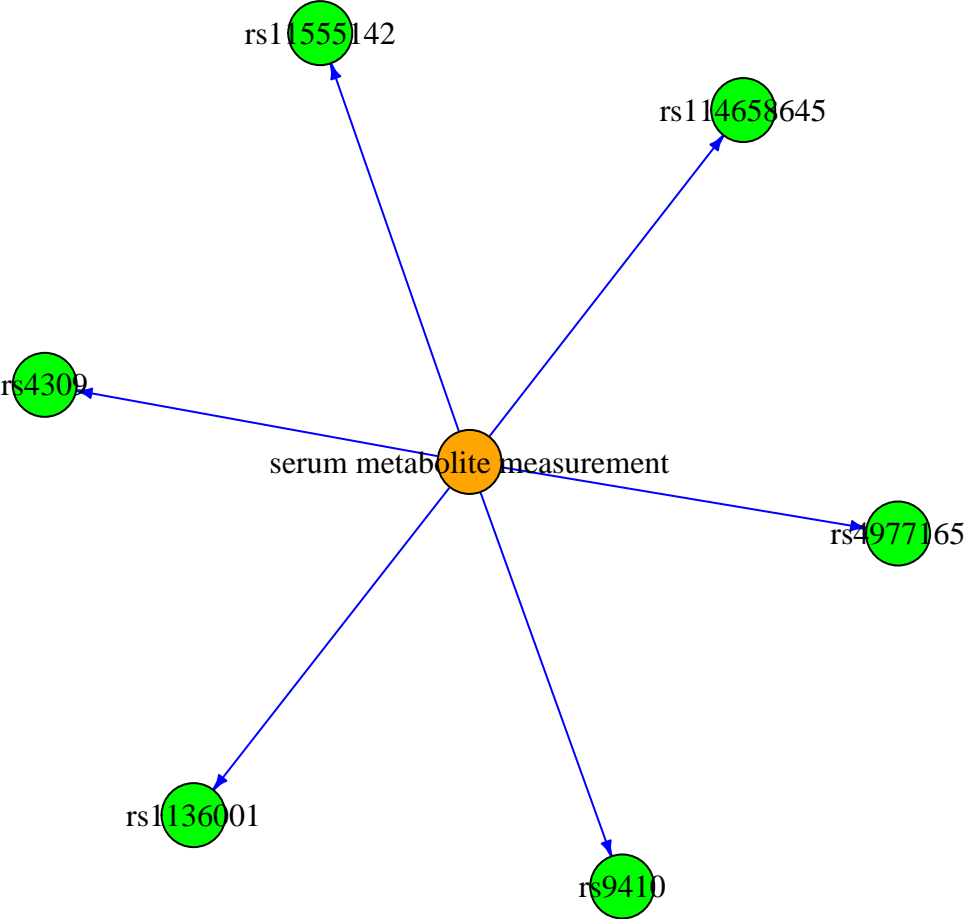

# Variant–Disease Network (seasonal gut microbiome composition measurement)

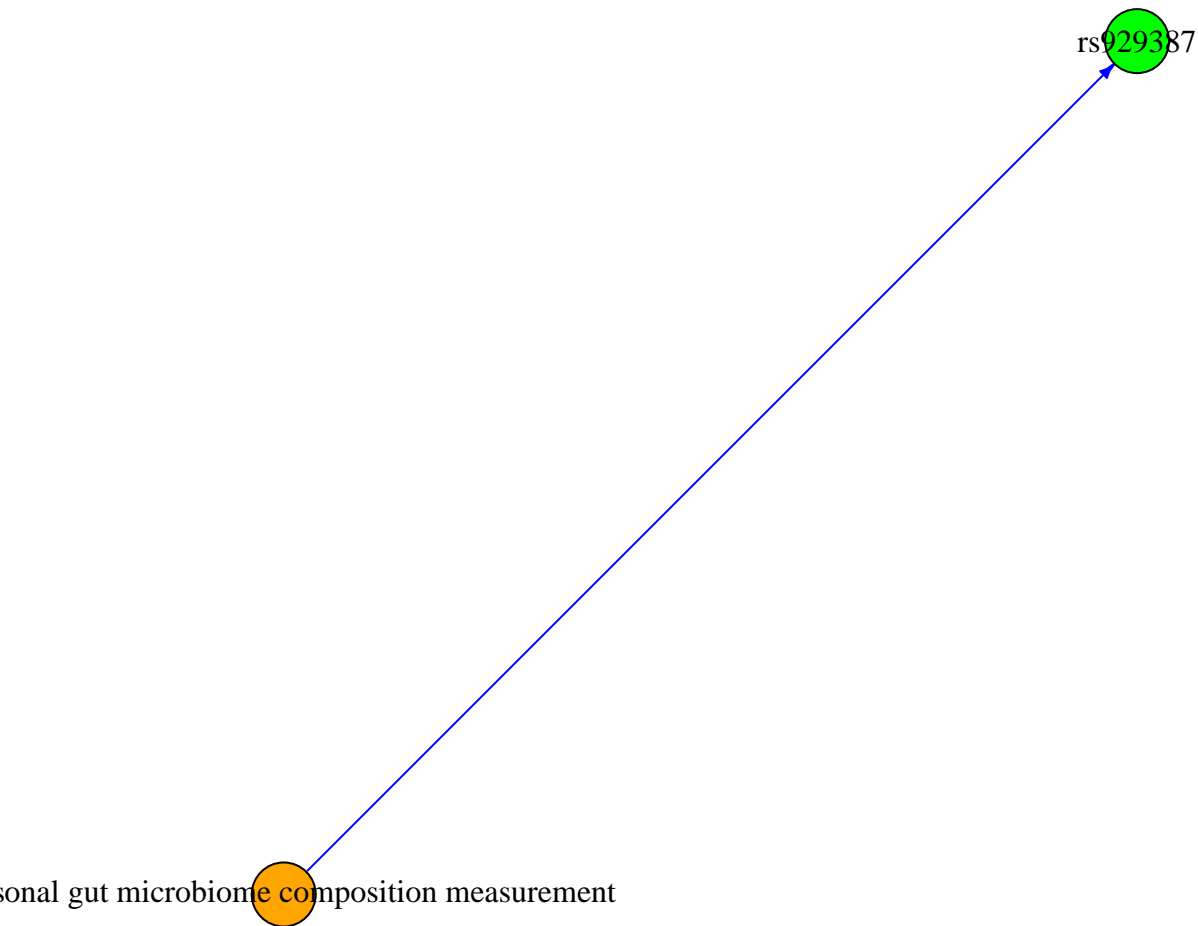

## Variant–Disease Network (hemoglobin measurement)

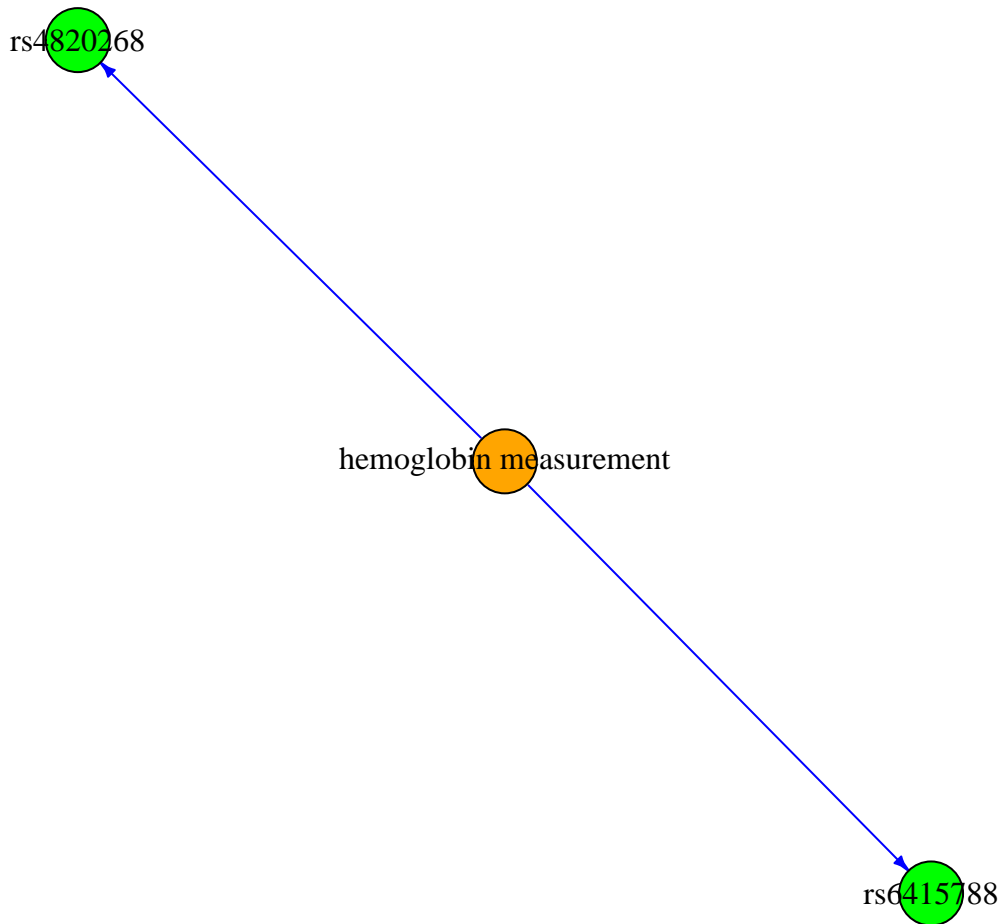

## Variant-Disease Network (telomere length)

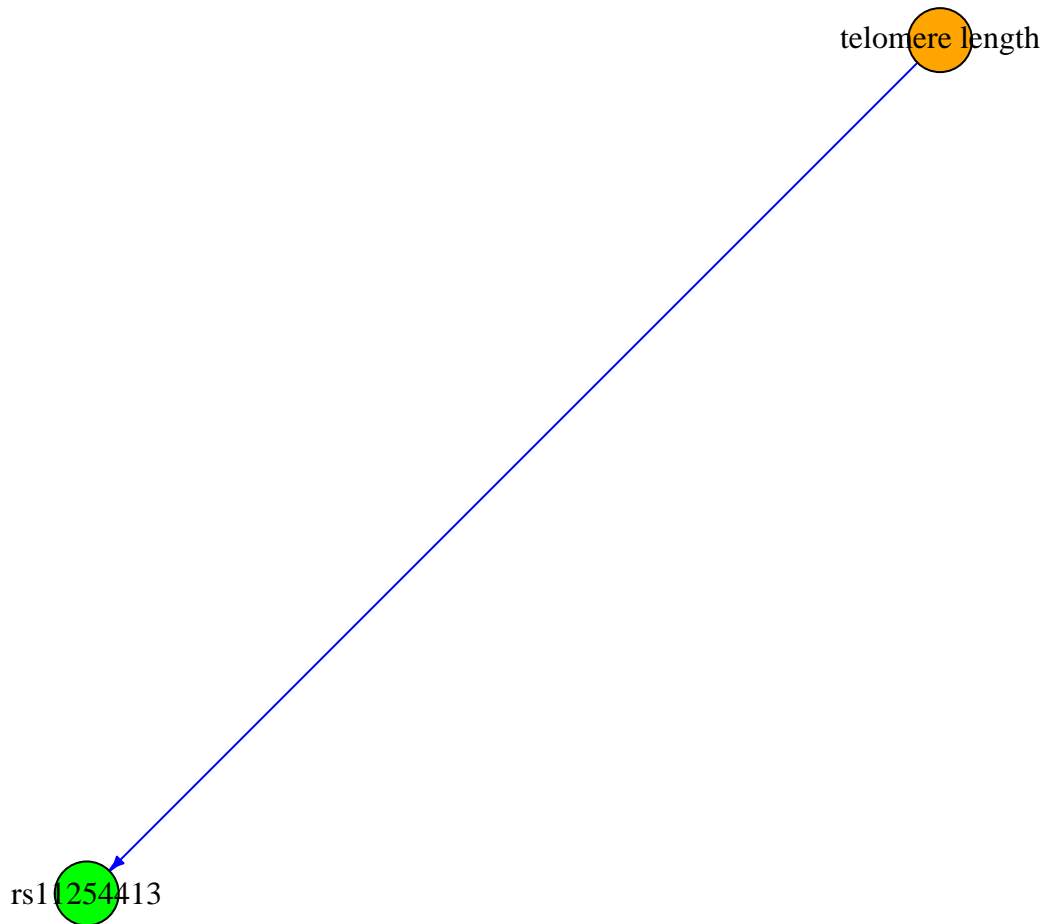

## Variant–Disease Network (cutaneous melanoma)

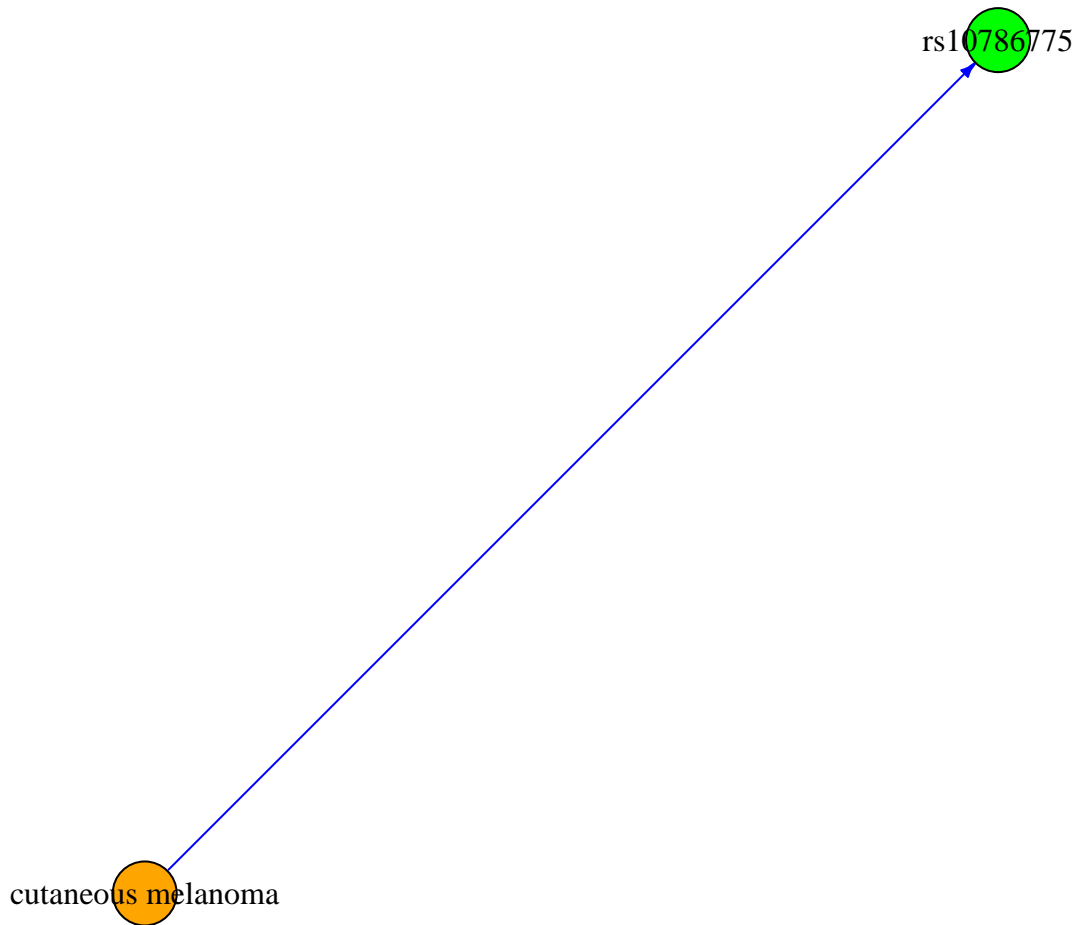

**Variant–Disease Network (lip morphology measurement)**

lip morphology measurement

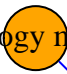

rs4788902

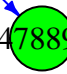

## Variant-Disease Network (rotator cuff tear)

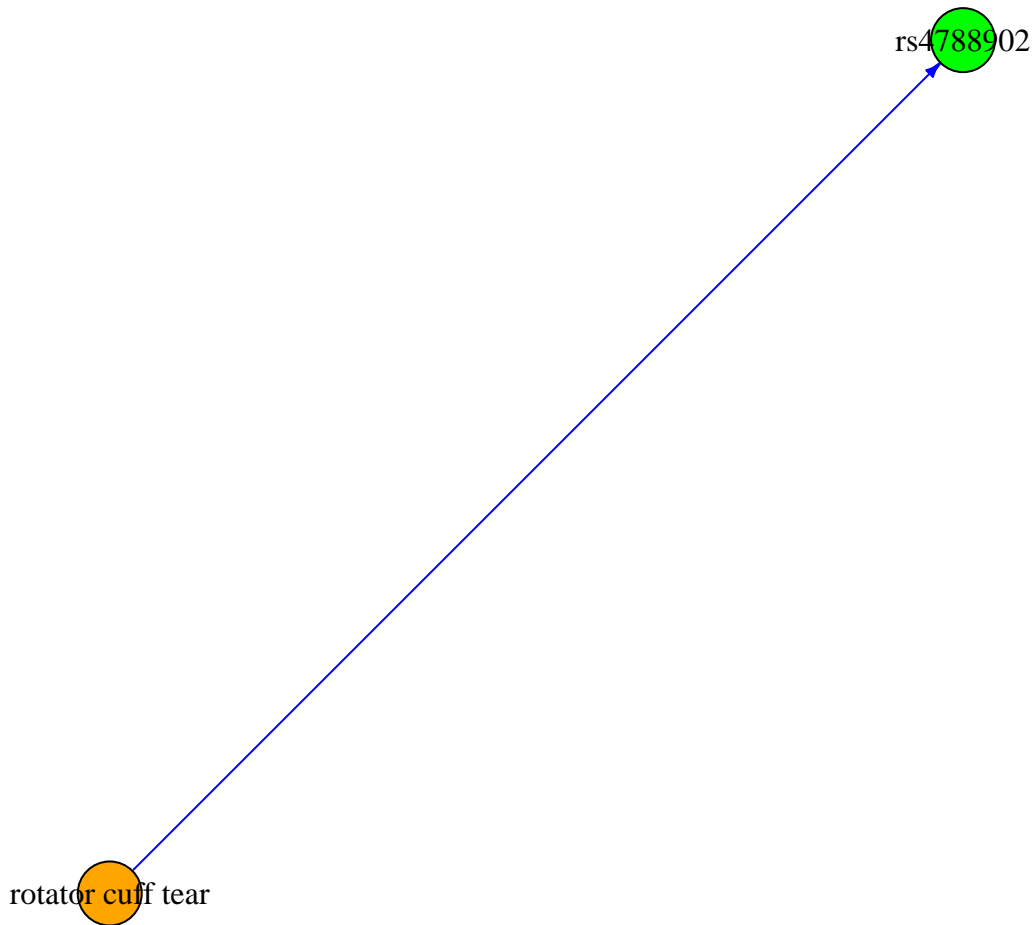



## Variant–Disease Network (diet measurement)

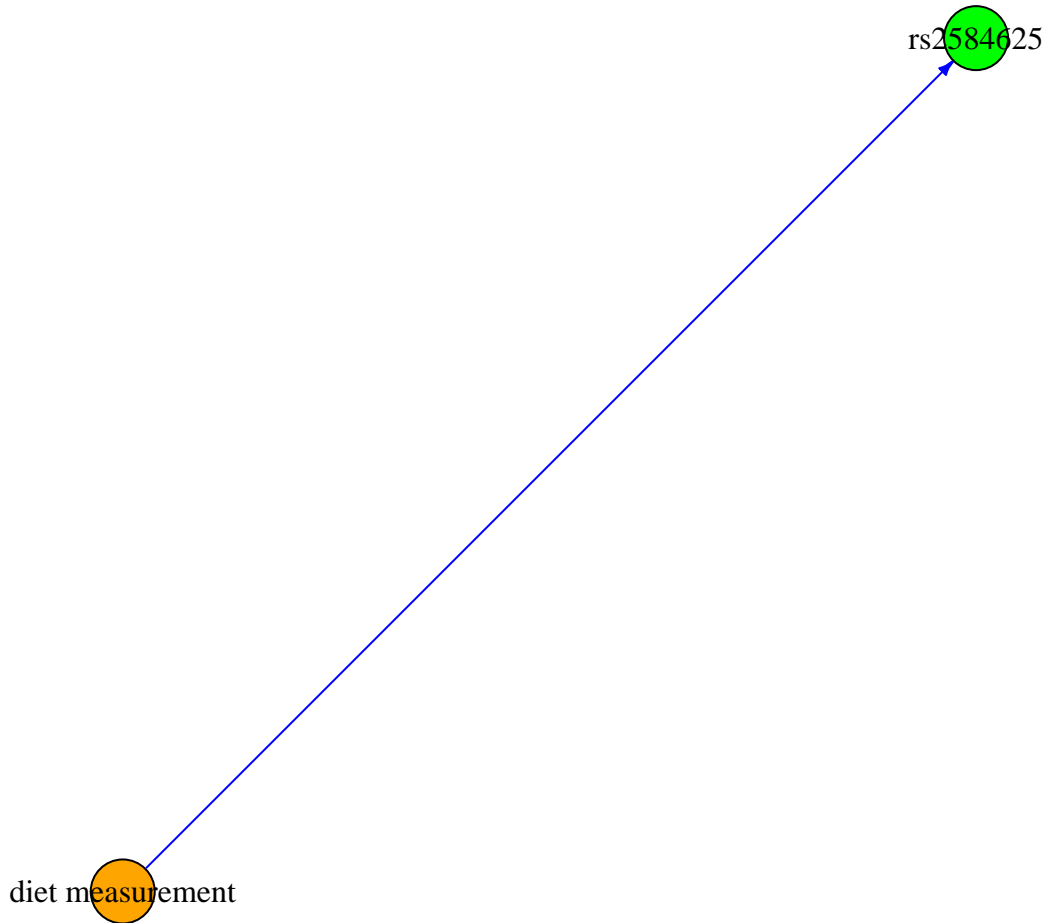

## Variant–Disease Network (biliary liver cirrhosis)

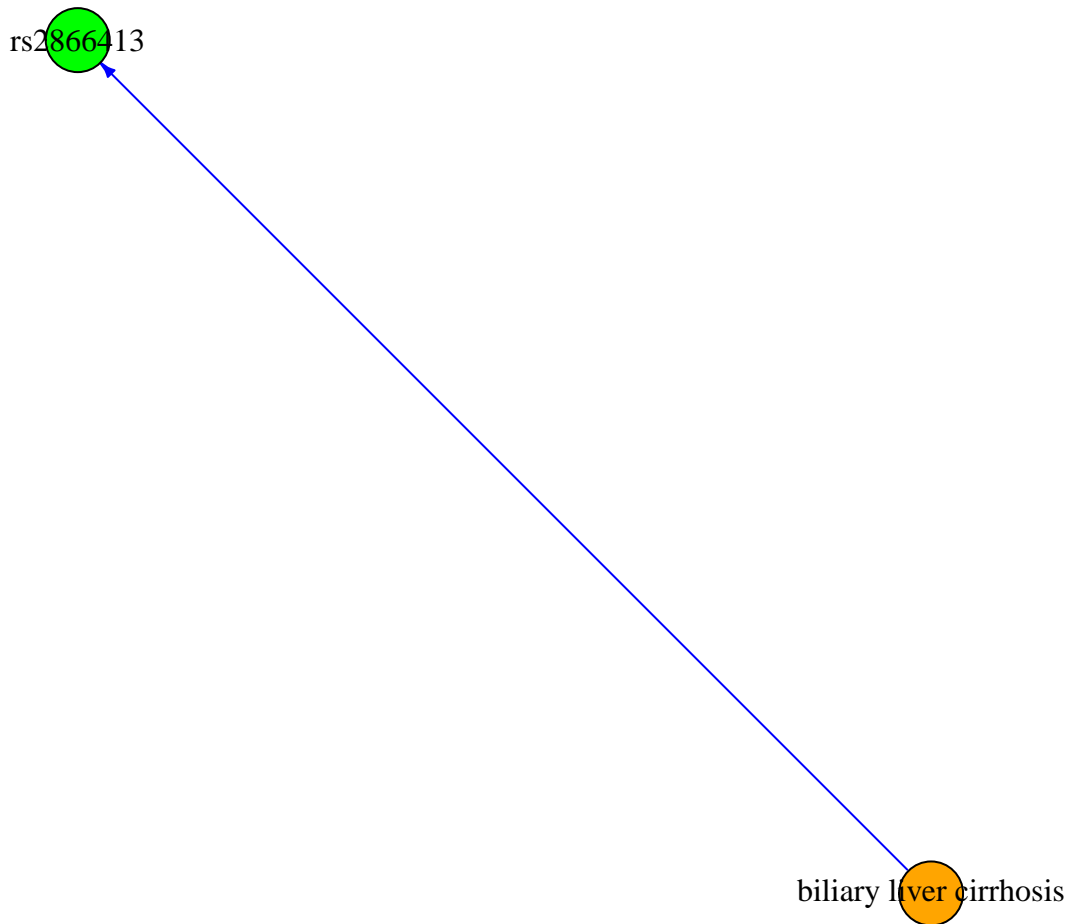

## Variant–Disease Network (primary biliary cirrhosis)

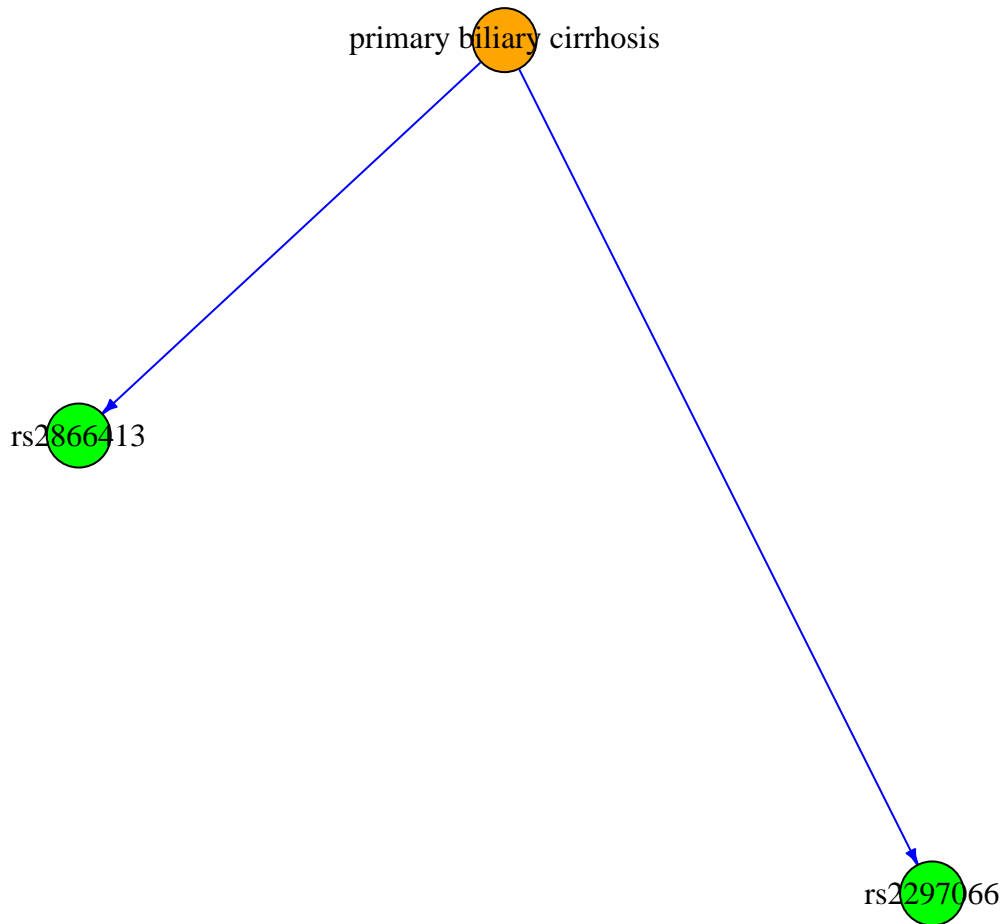

## Variant–Disease Network (attempted suicide)

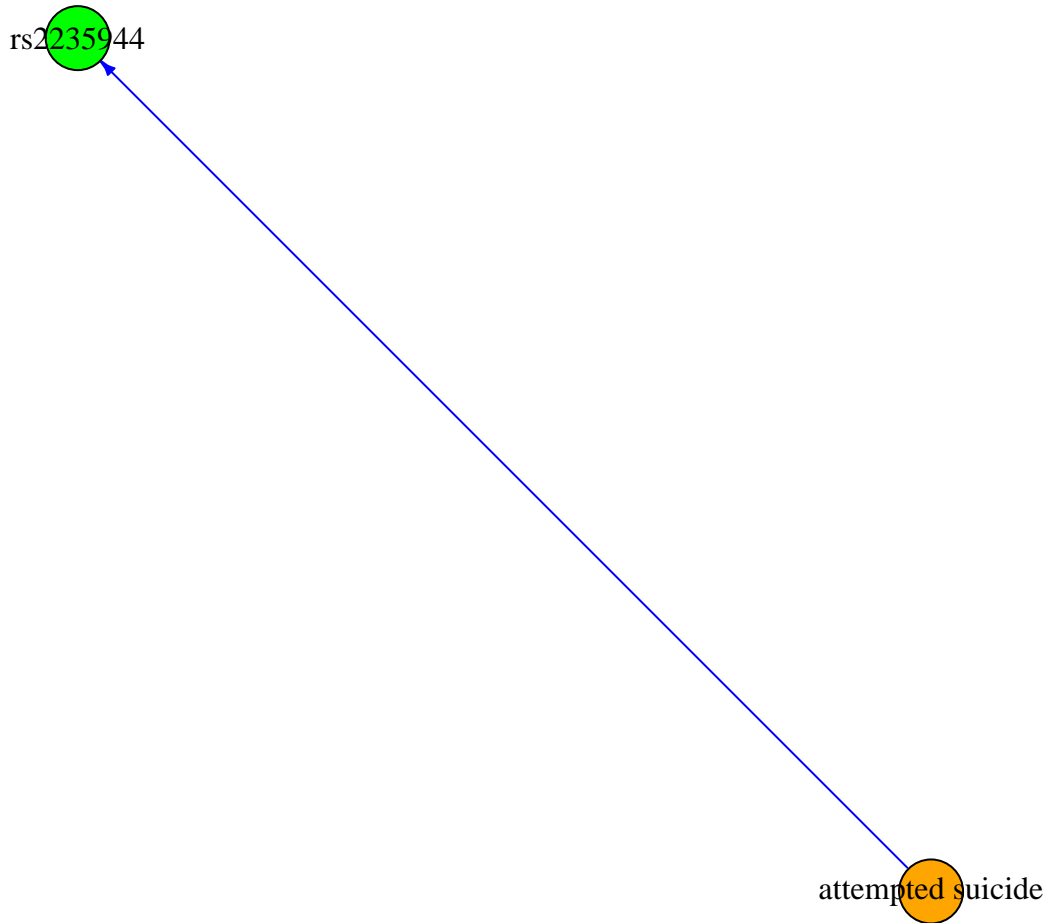

## Variant-Disease Network (cirrhosis of liver)

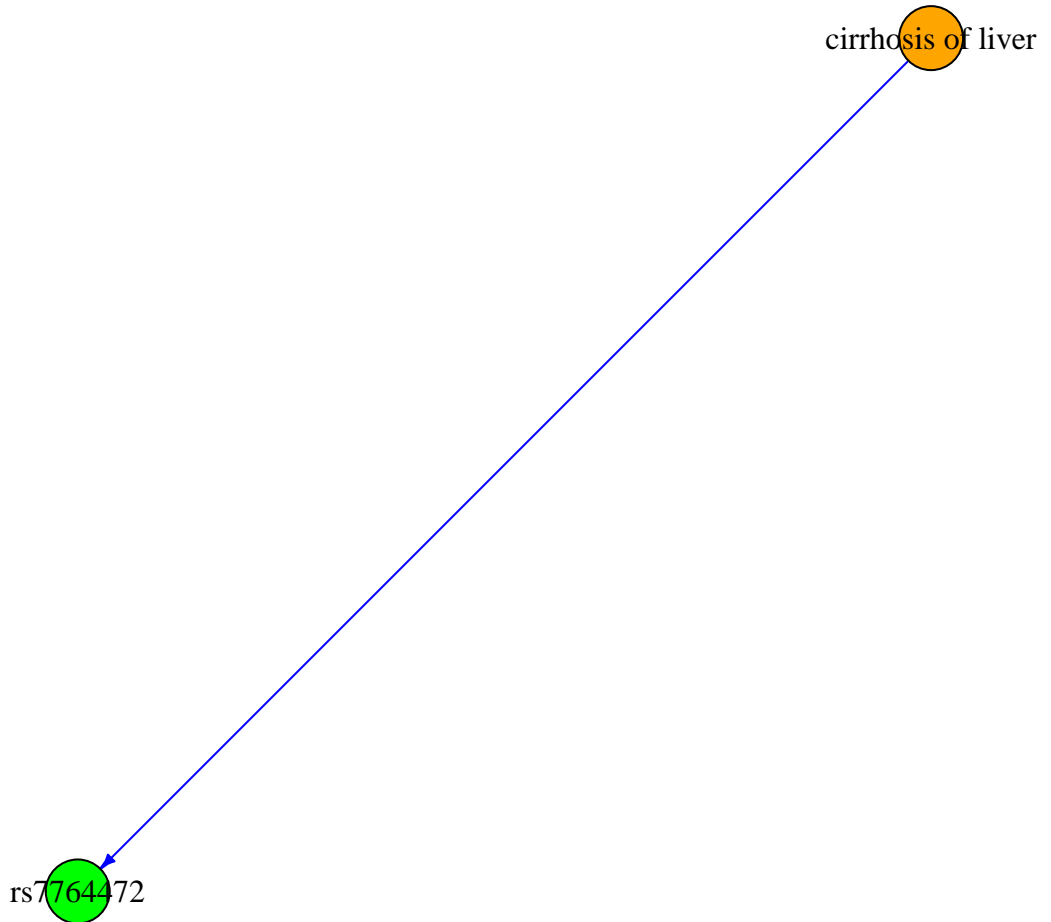

## Variant–Disease Network (hepatitis C infection)

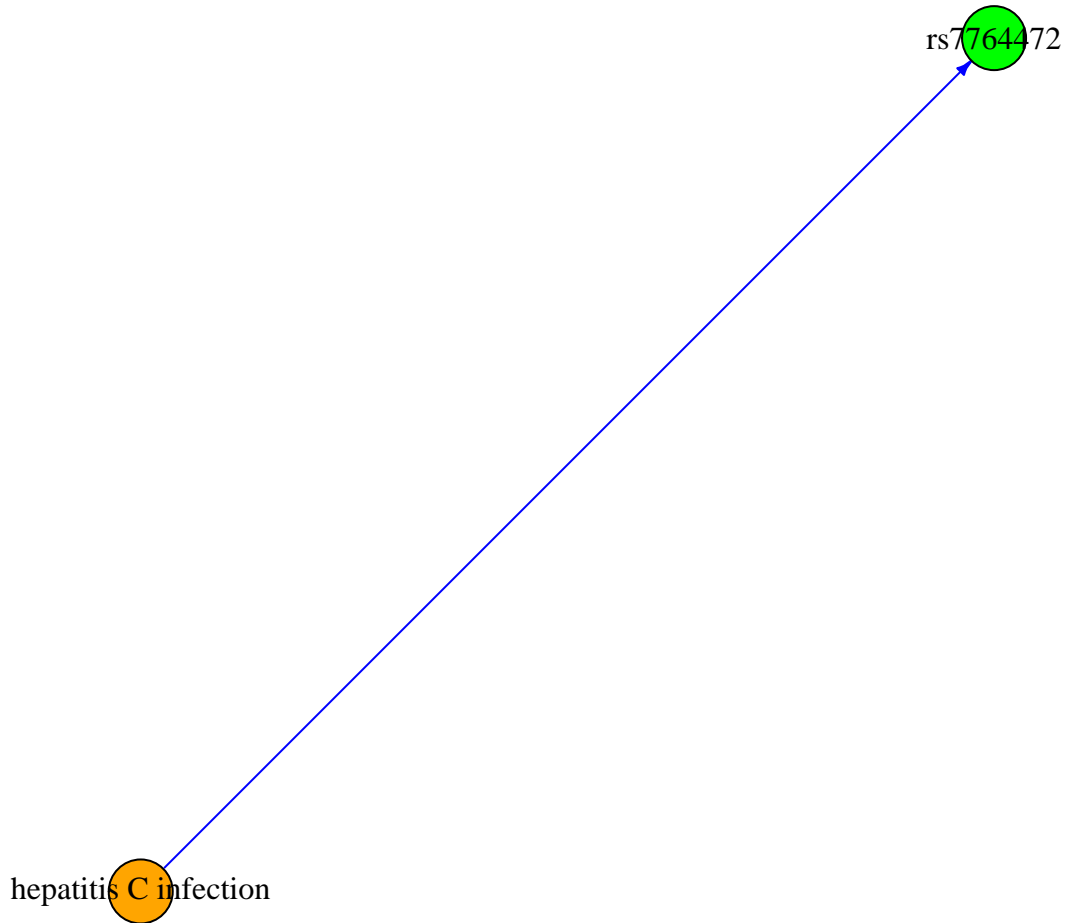

# Variant–Disease Network (response to sulfonylurea)

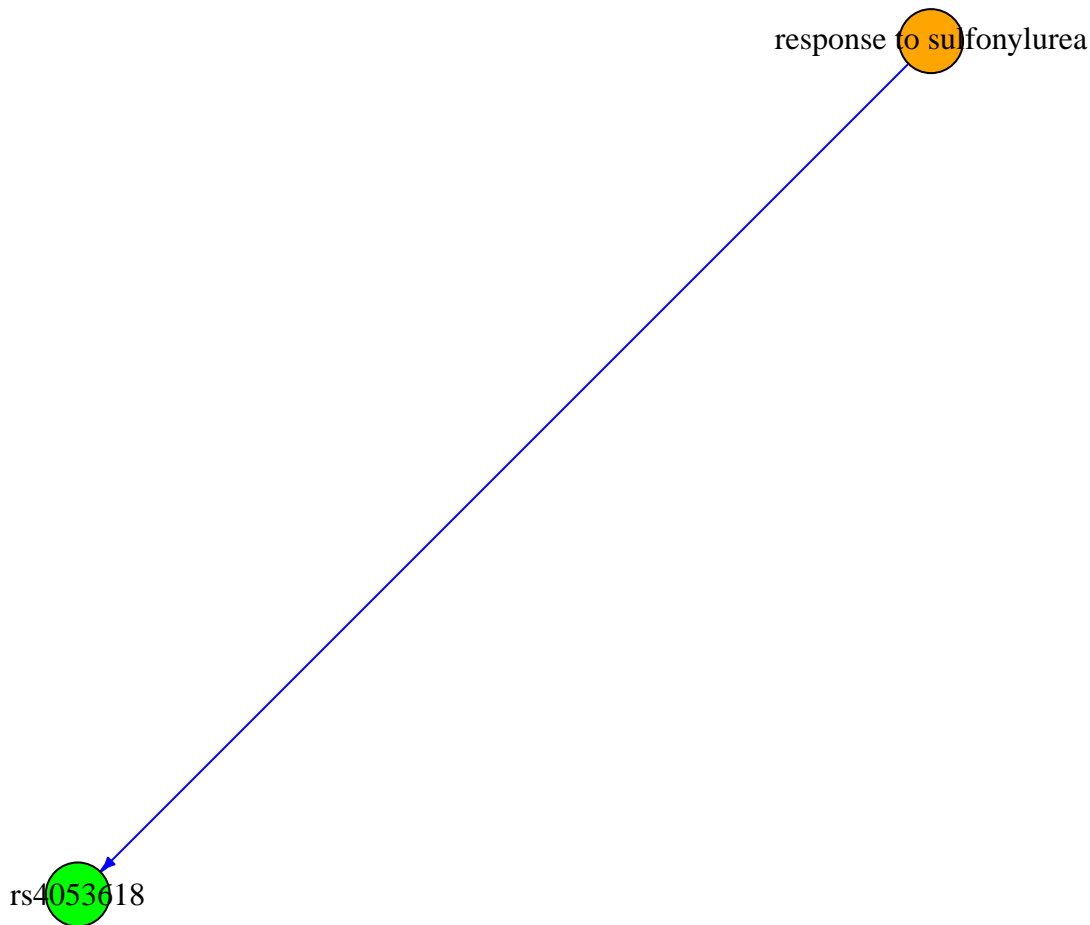

# Variant–Disease Network (venous thromboembolism)

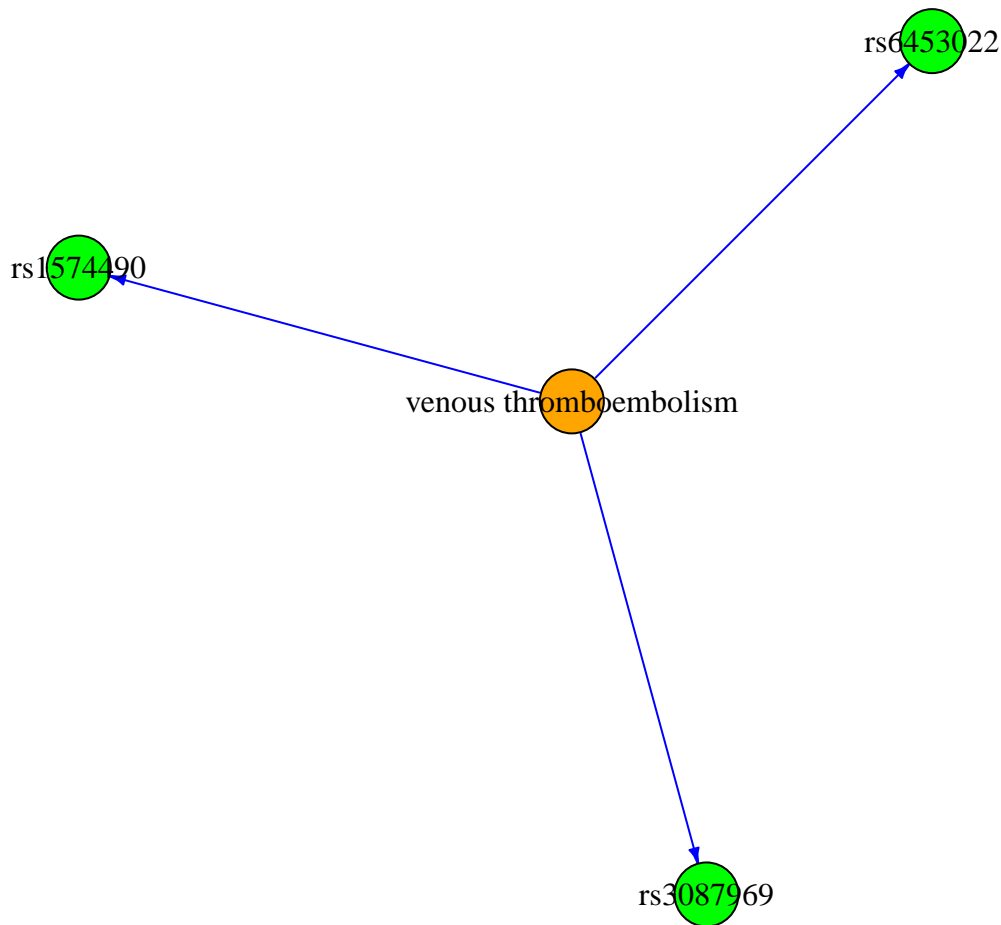



## Variant–Disease Network (a1c measurement)

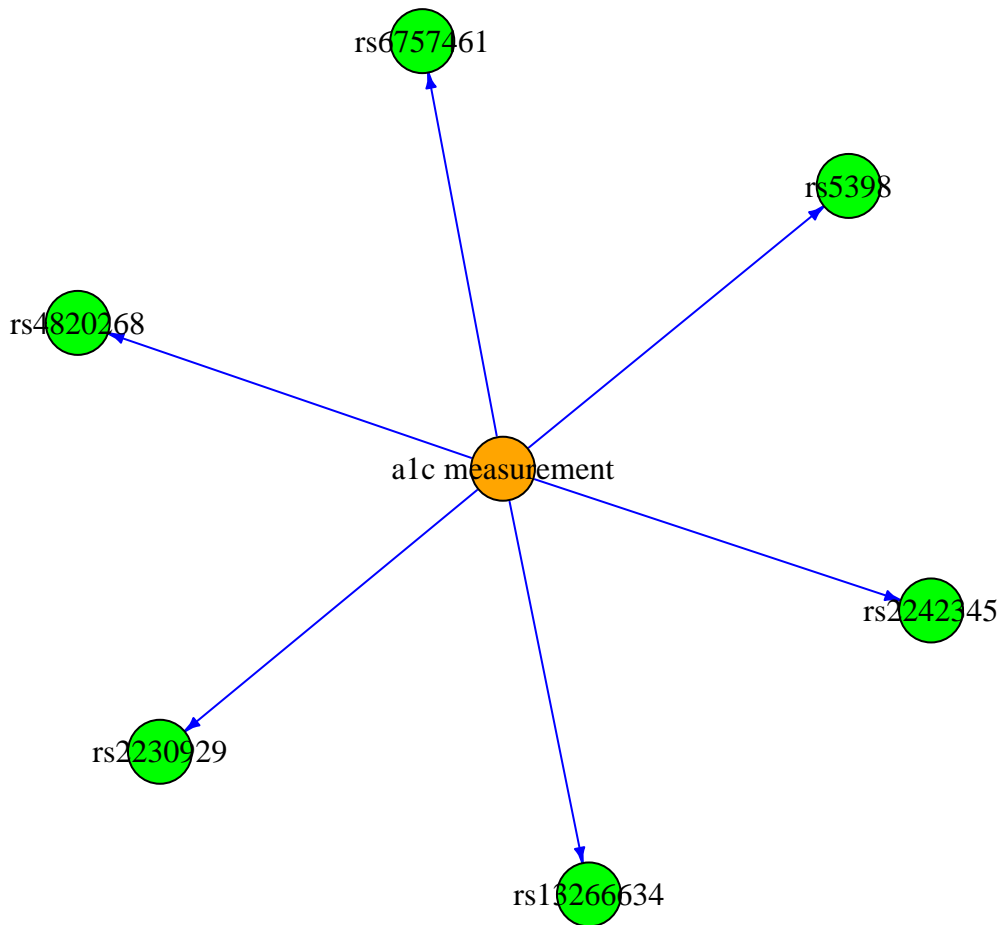

## Variant–Disease Network (functional laterality)

rs2293312

functional laterality



Variant–Disease Network (mood disorder)

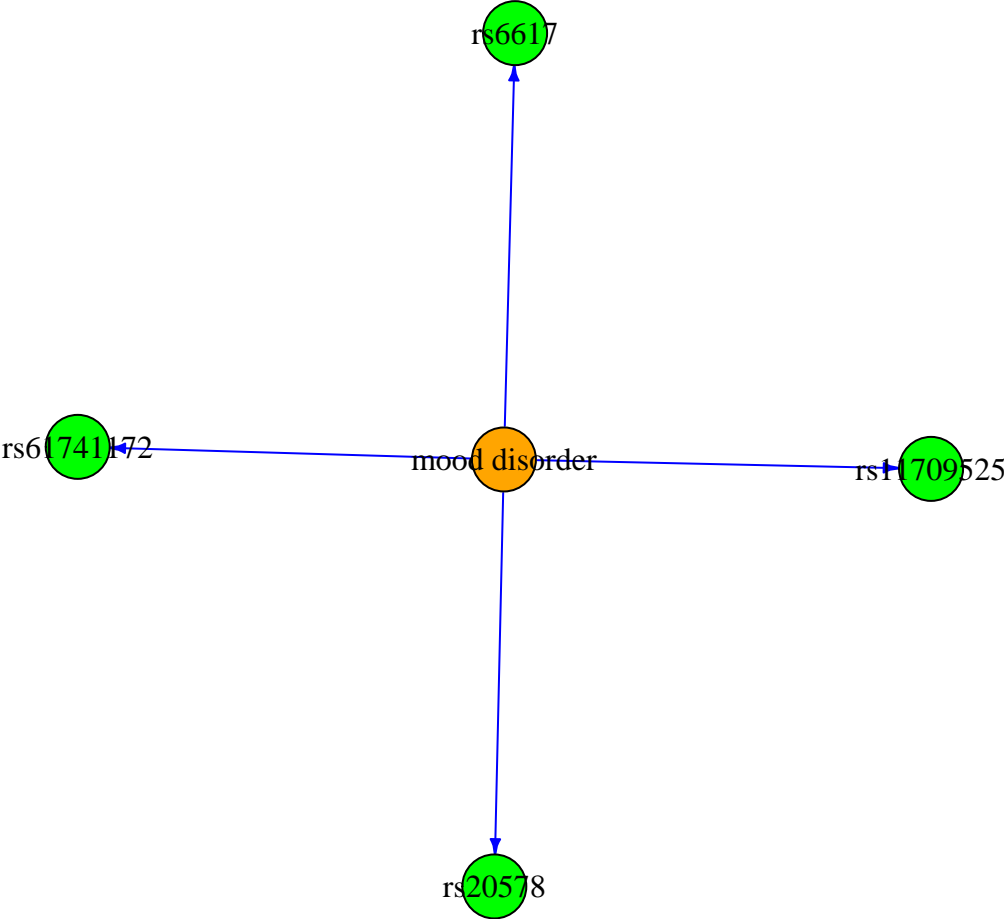

## Variant-Disease Network (osteoarthritis)

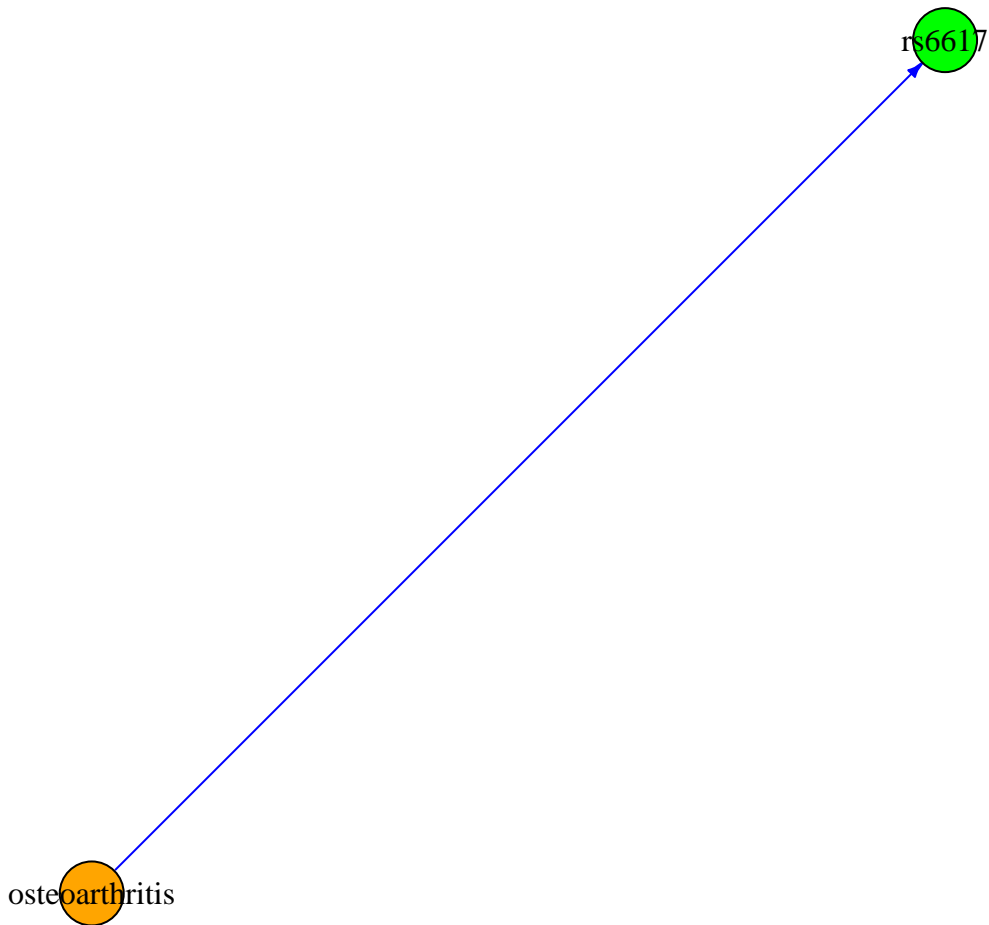

**Variant–Disease Network (serum IgG glycosylation measurement)**

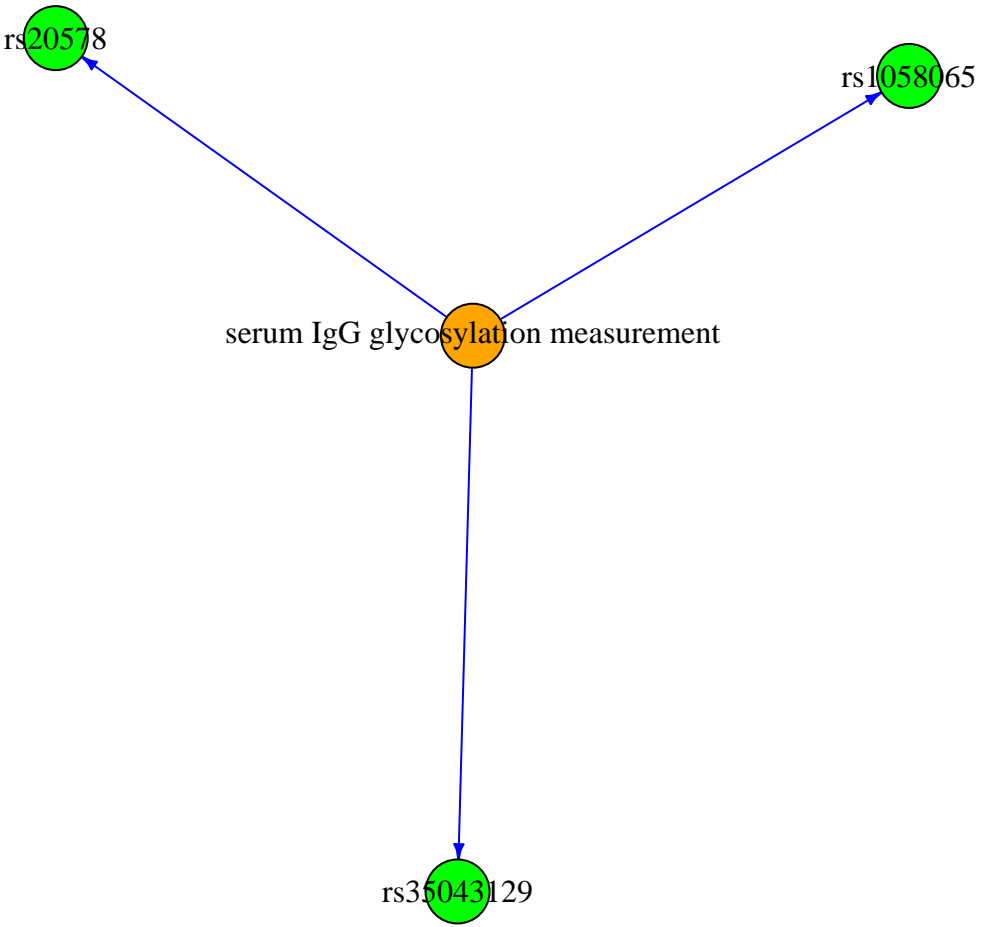

## Variant–Disease Network (cytotoxicity measurement)

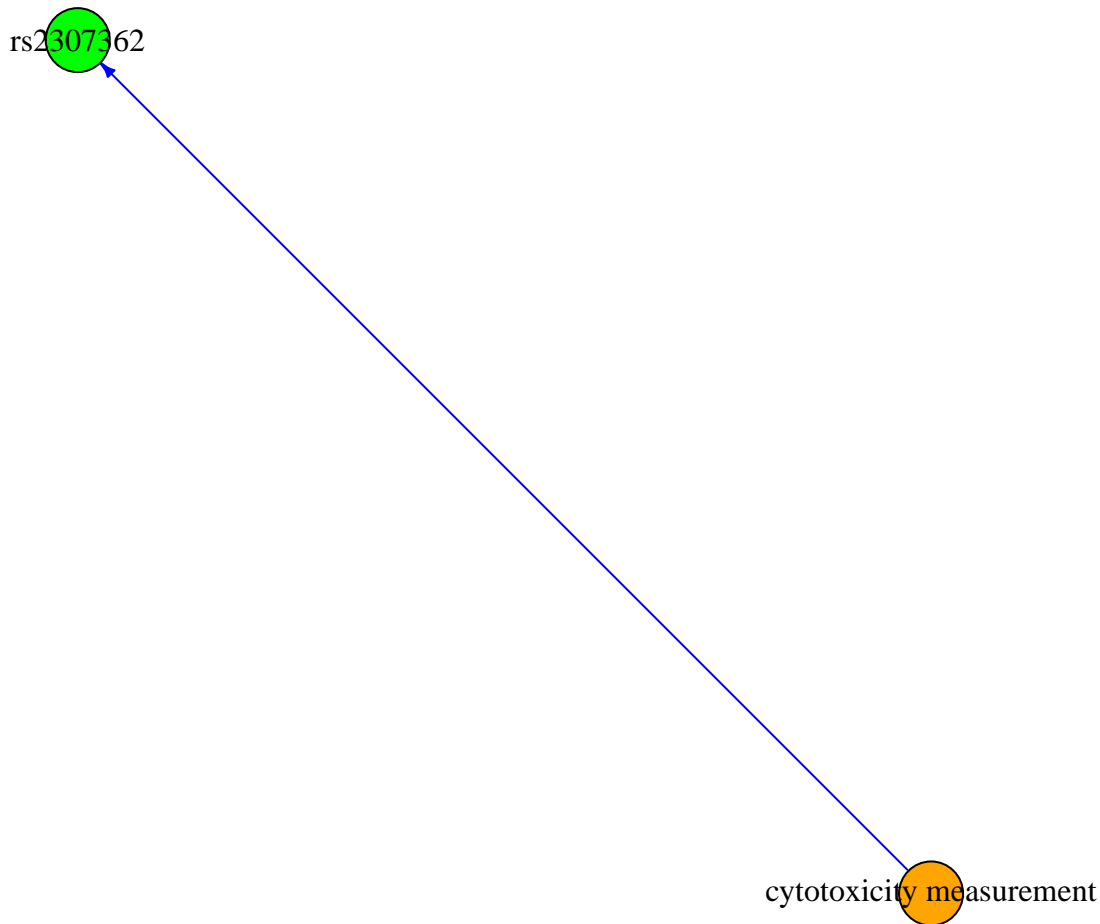

# Variant–Disease Network (outer ear morphology trait)

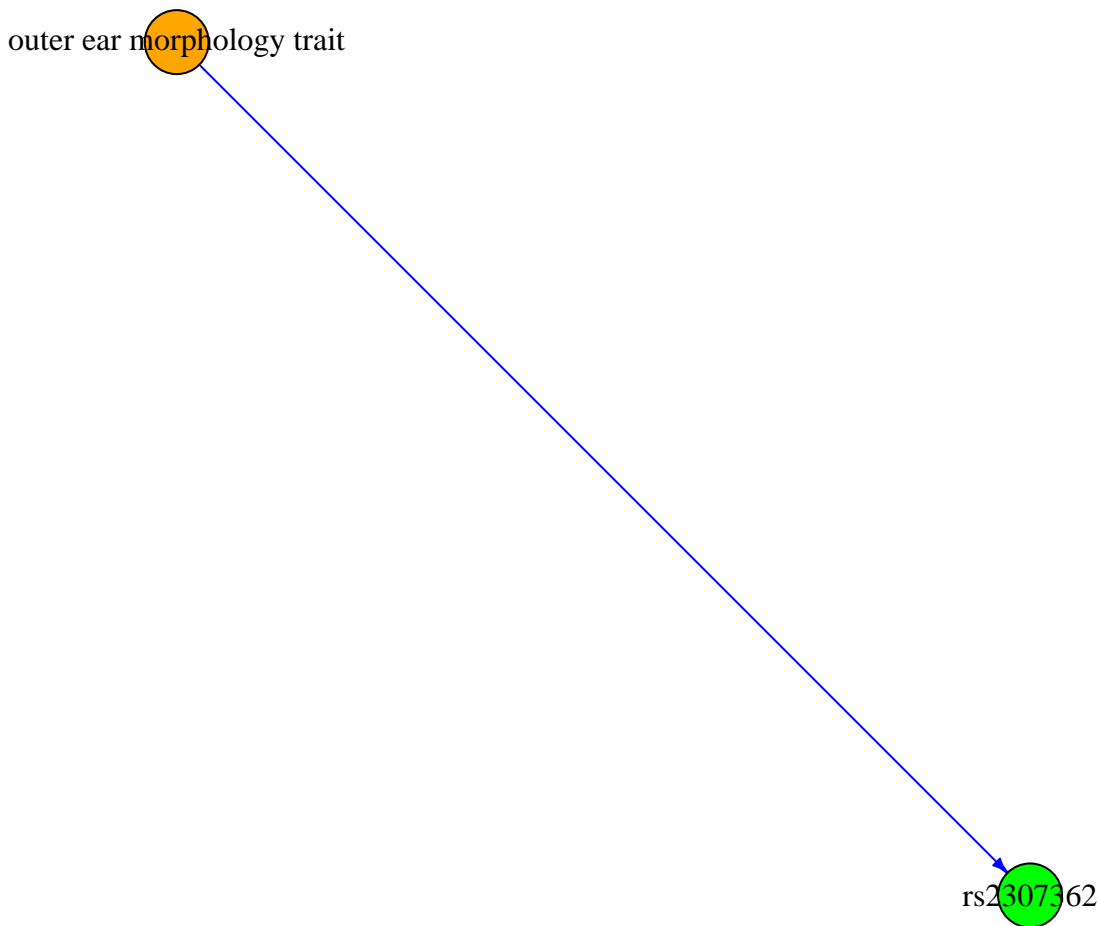

## Variant–Disease Network (parathyroid hormone measurement)

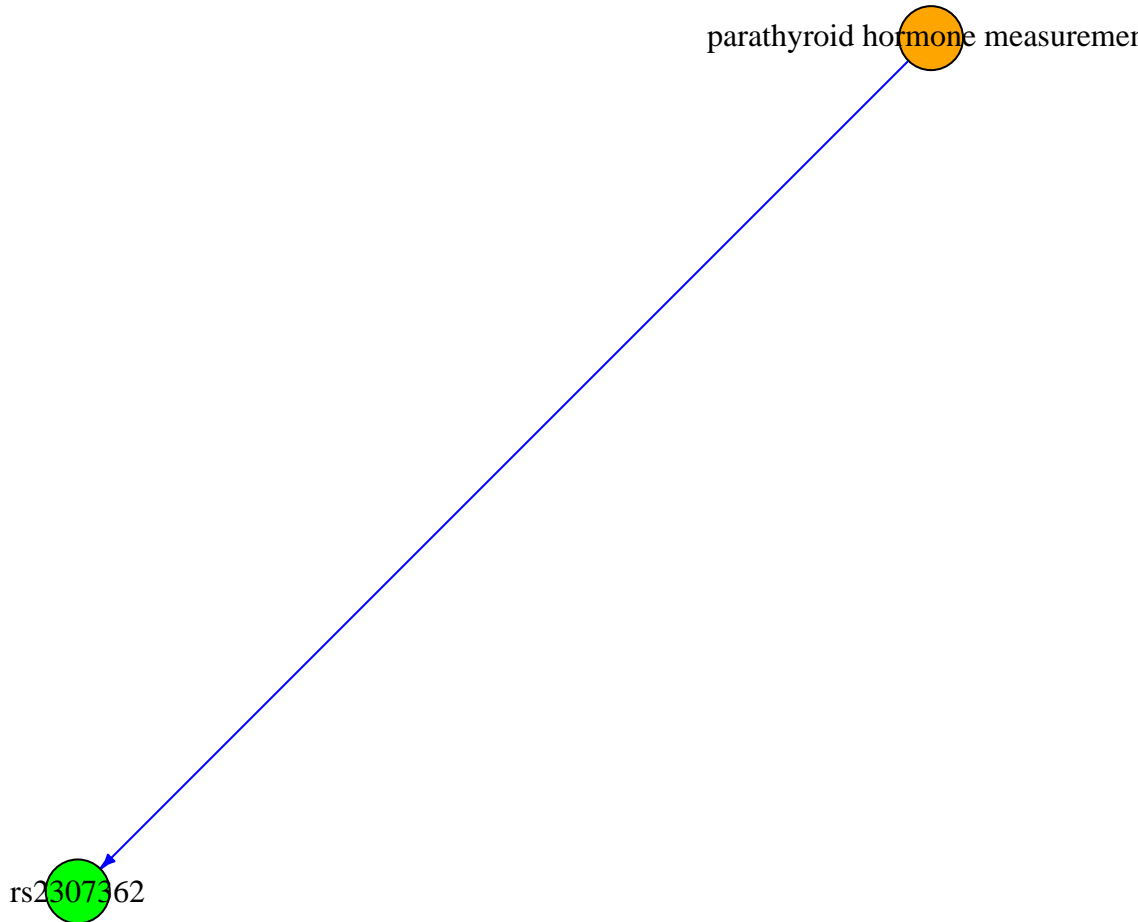



## Variant–Disease Network (QT interval)

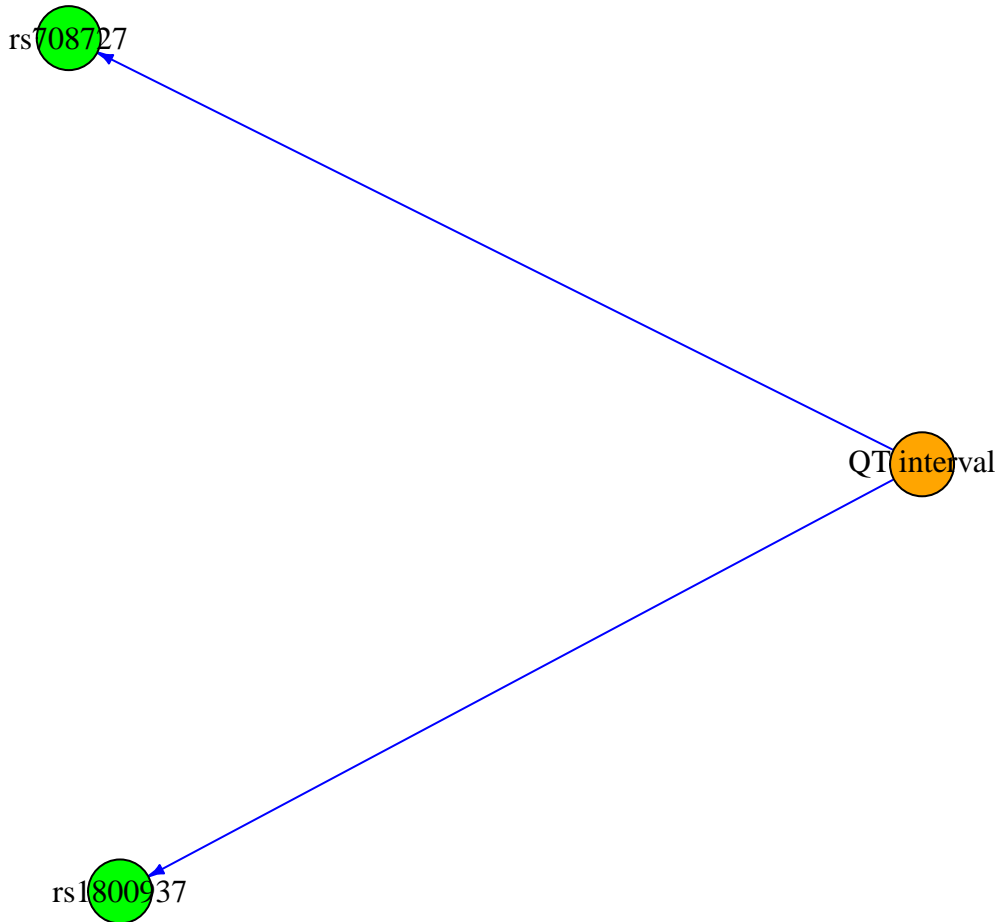

## Variant–Disease Network (Trypanosoma cruzi seropositivity)

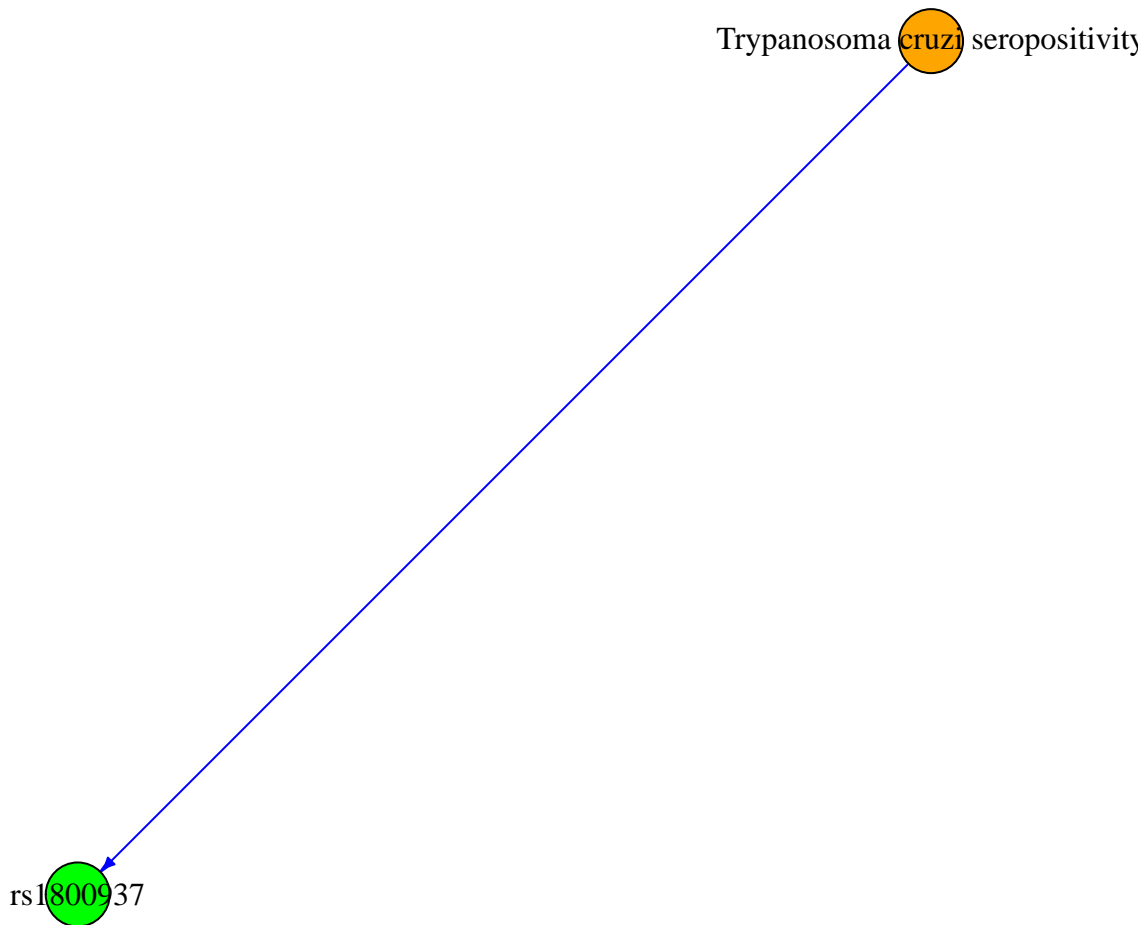

# Variant–Disease Network (body composition measurement)

rs3736757

body composition measurement

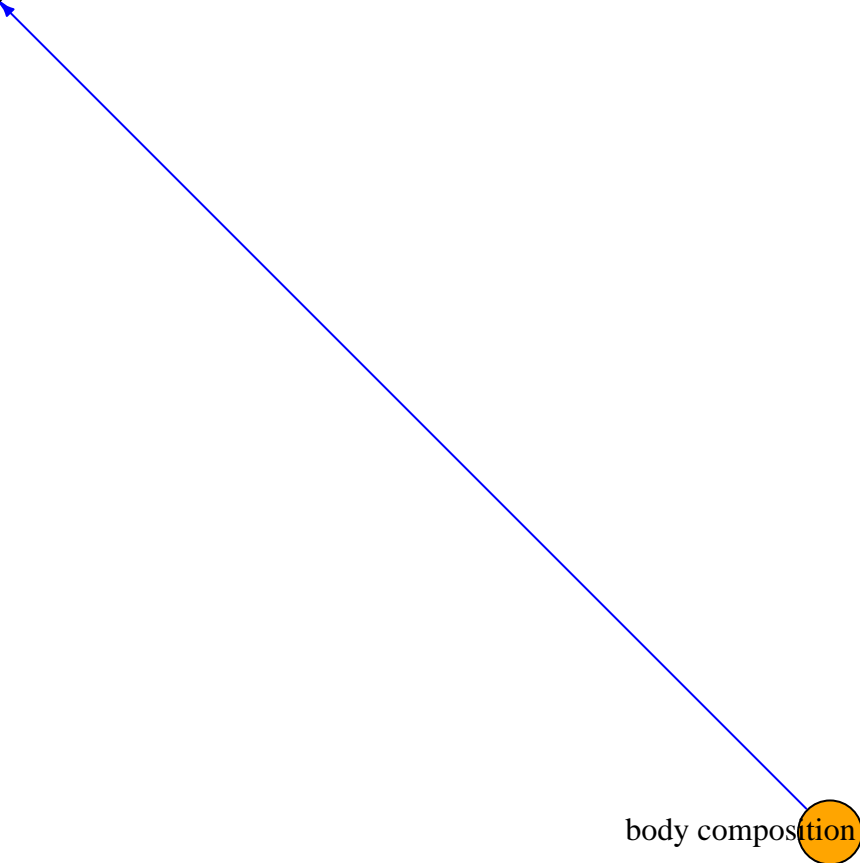

## Variant–Disease Network (sodium measurement)

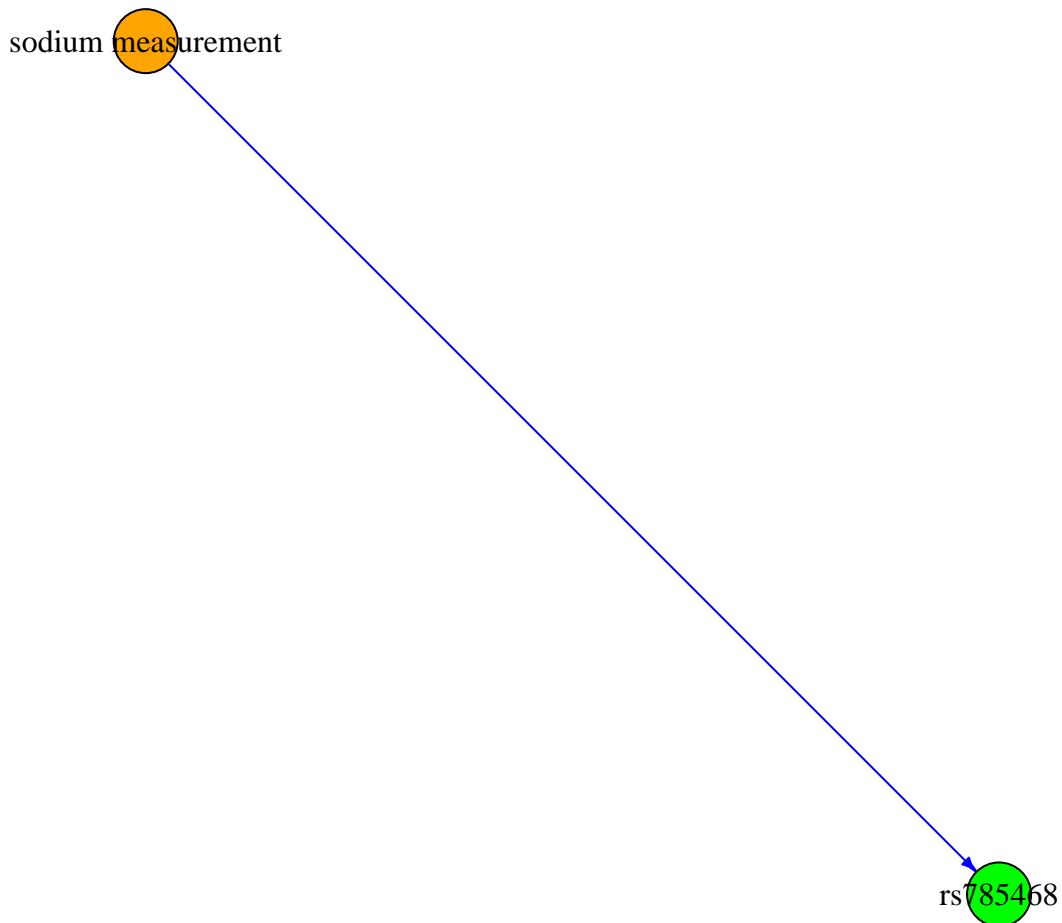

## Variant–Disease Network (generalised epilepsy)

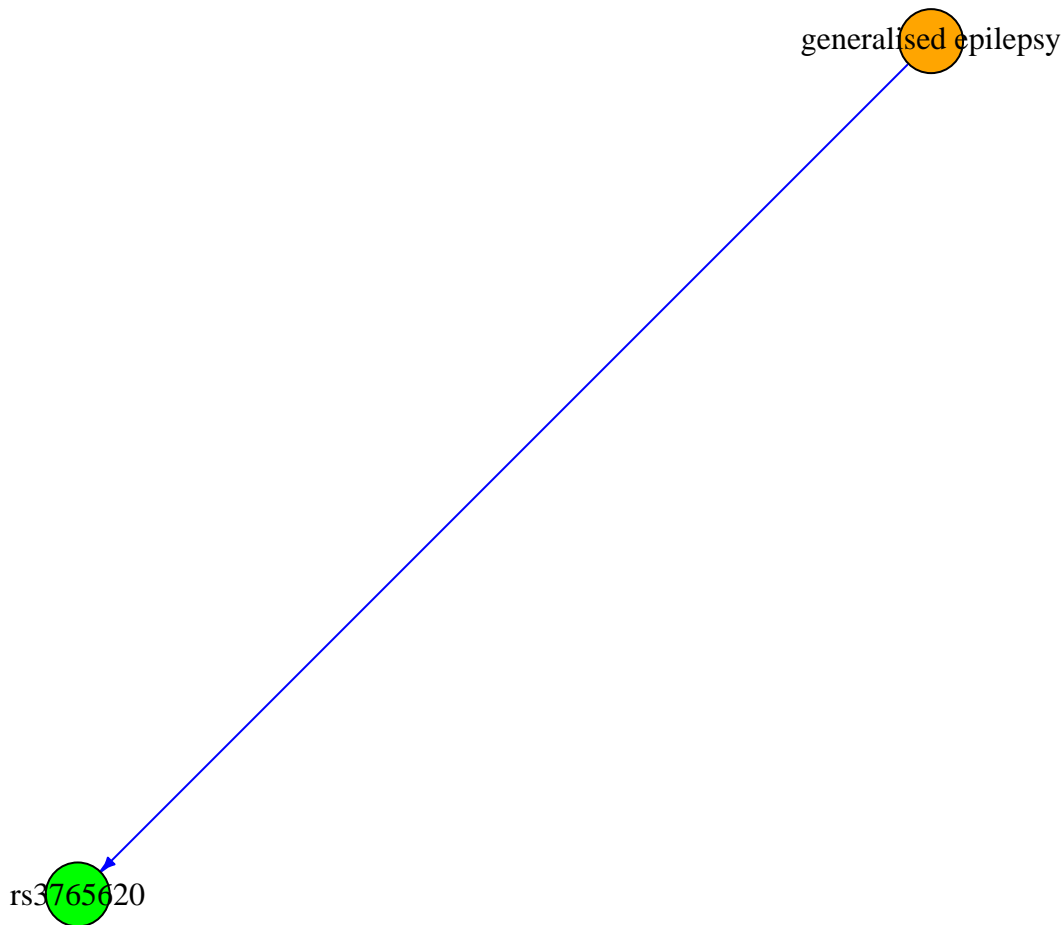

**Variant–Disease Network (sleep quality)**

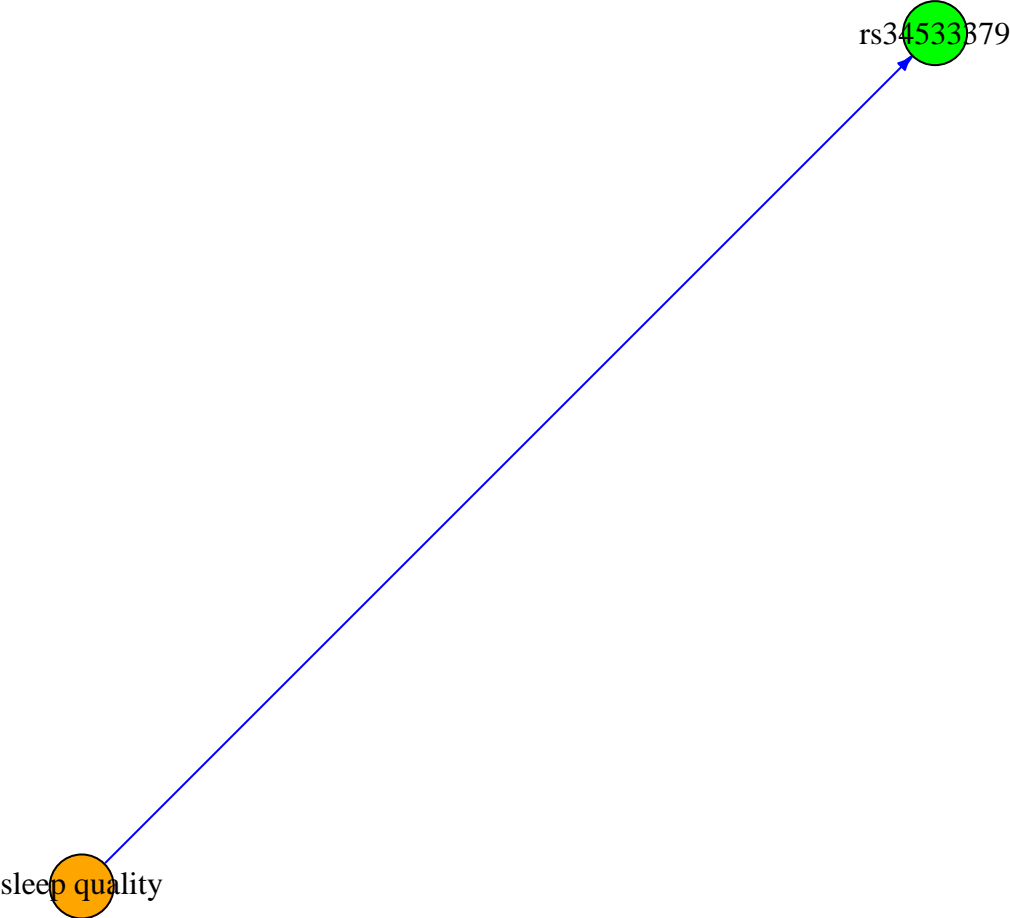

## Variant–Disease Network (cytokine measurement)

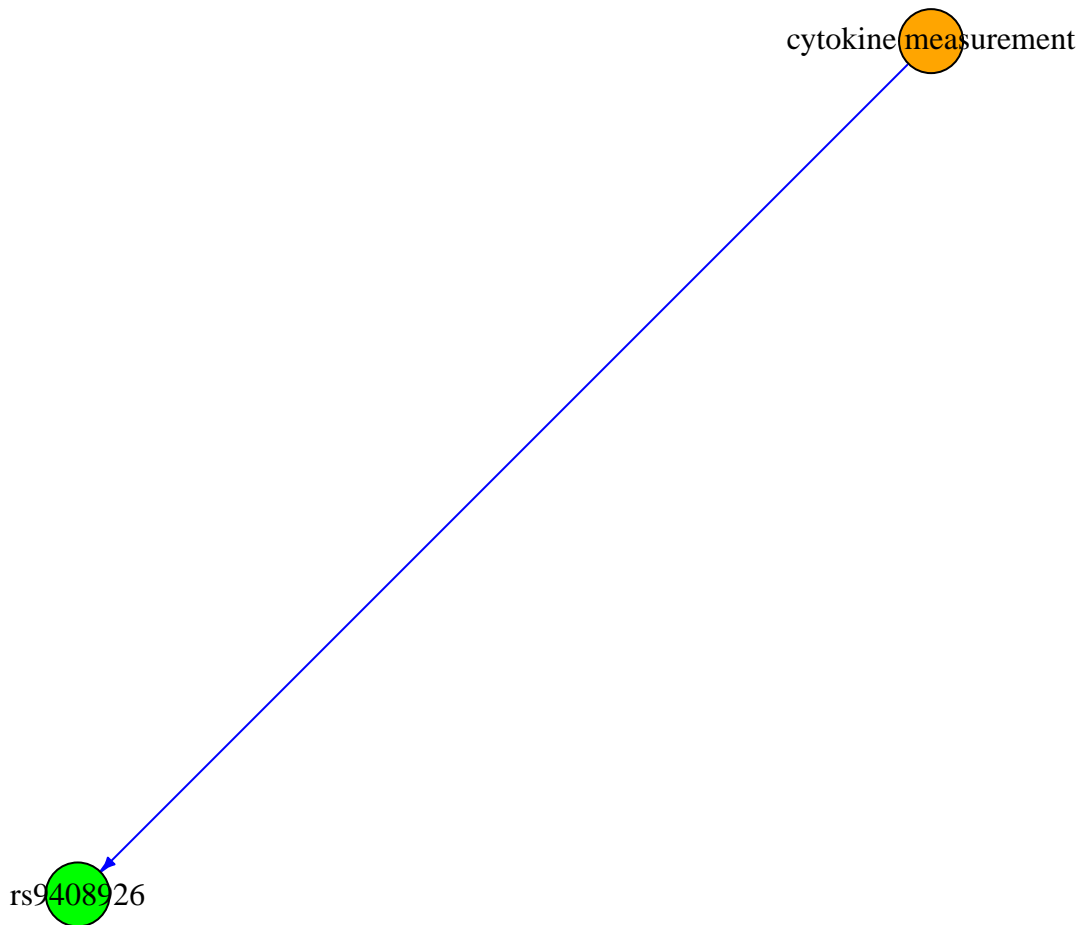

## Variant–Disease Network (response to vaccine)

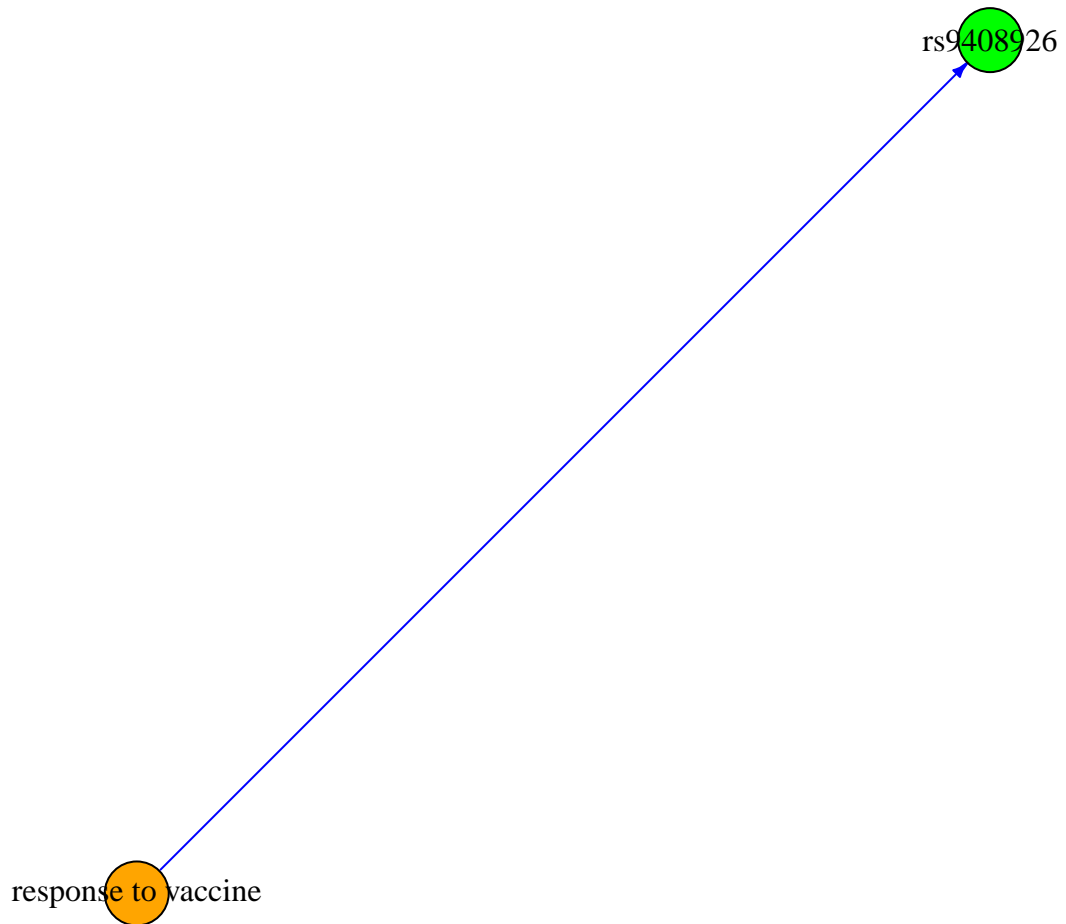



## Variant–Disease Network (parental longevity)

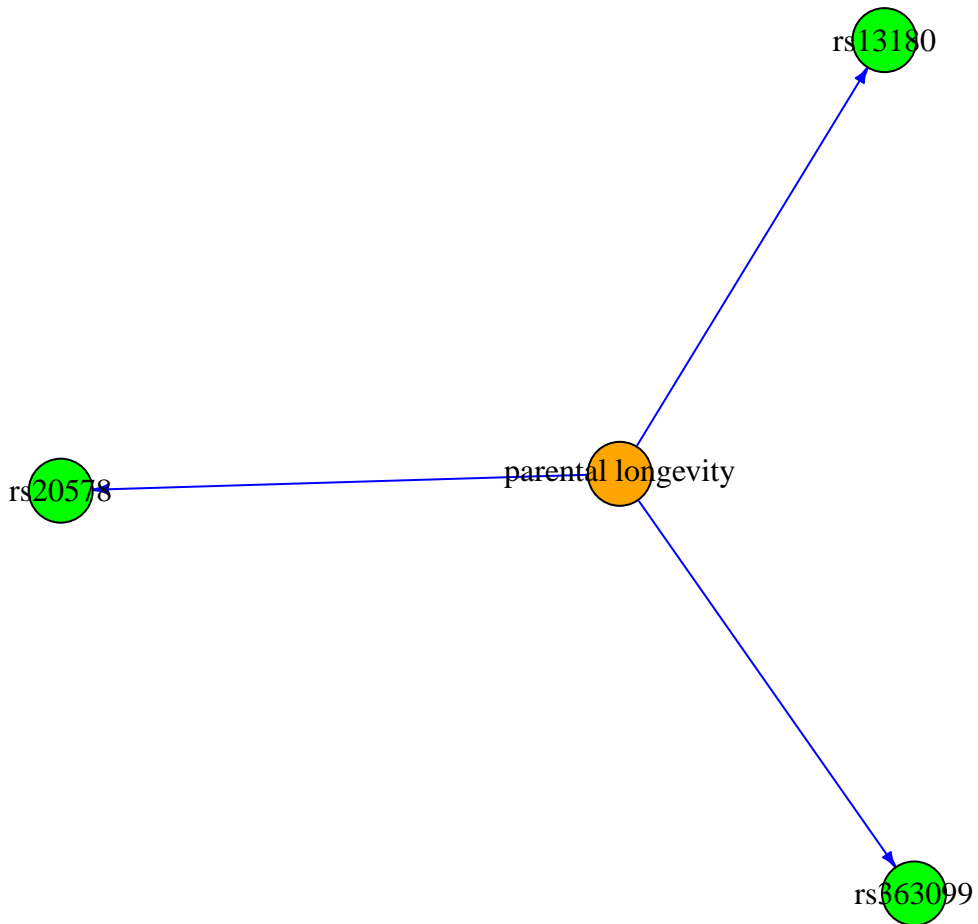

## Variant–Disease Network (age at assessment)

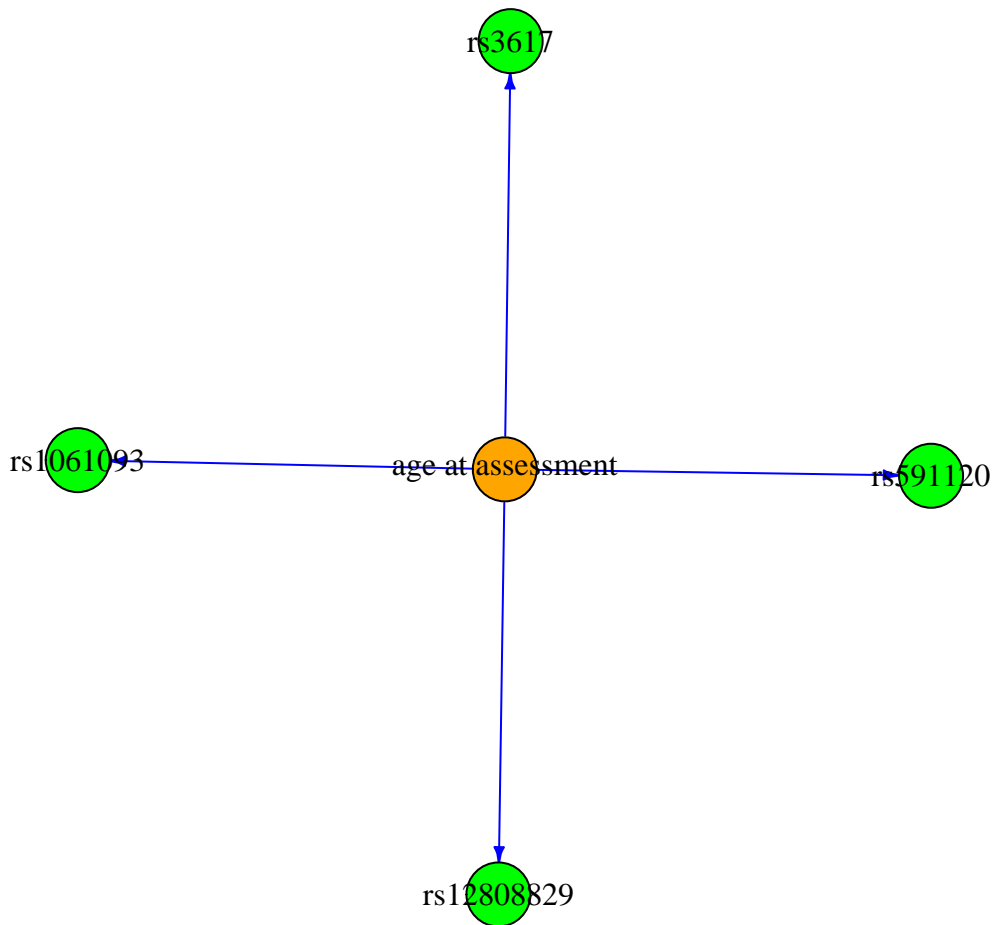

# Variant–Disease Network (sex interaction measurement)

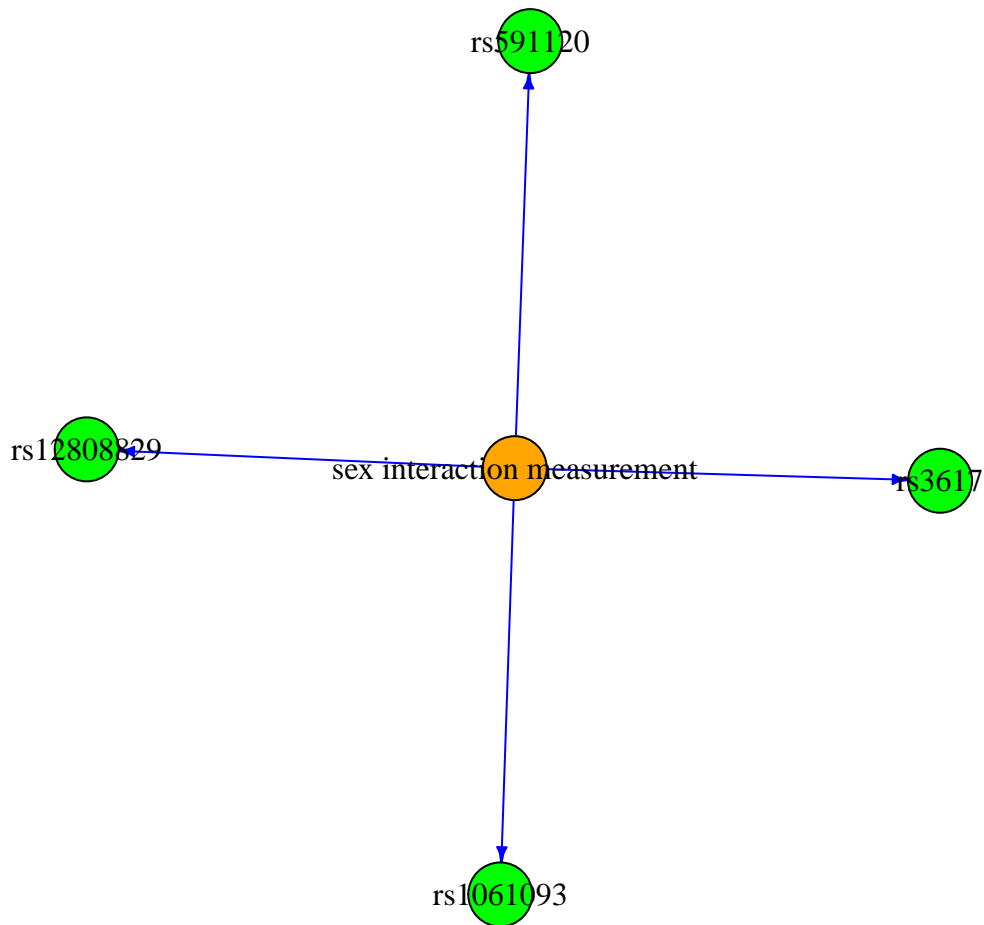

## Variant–Disease Network (brain measurement)

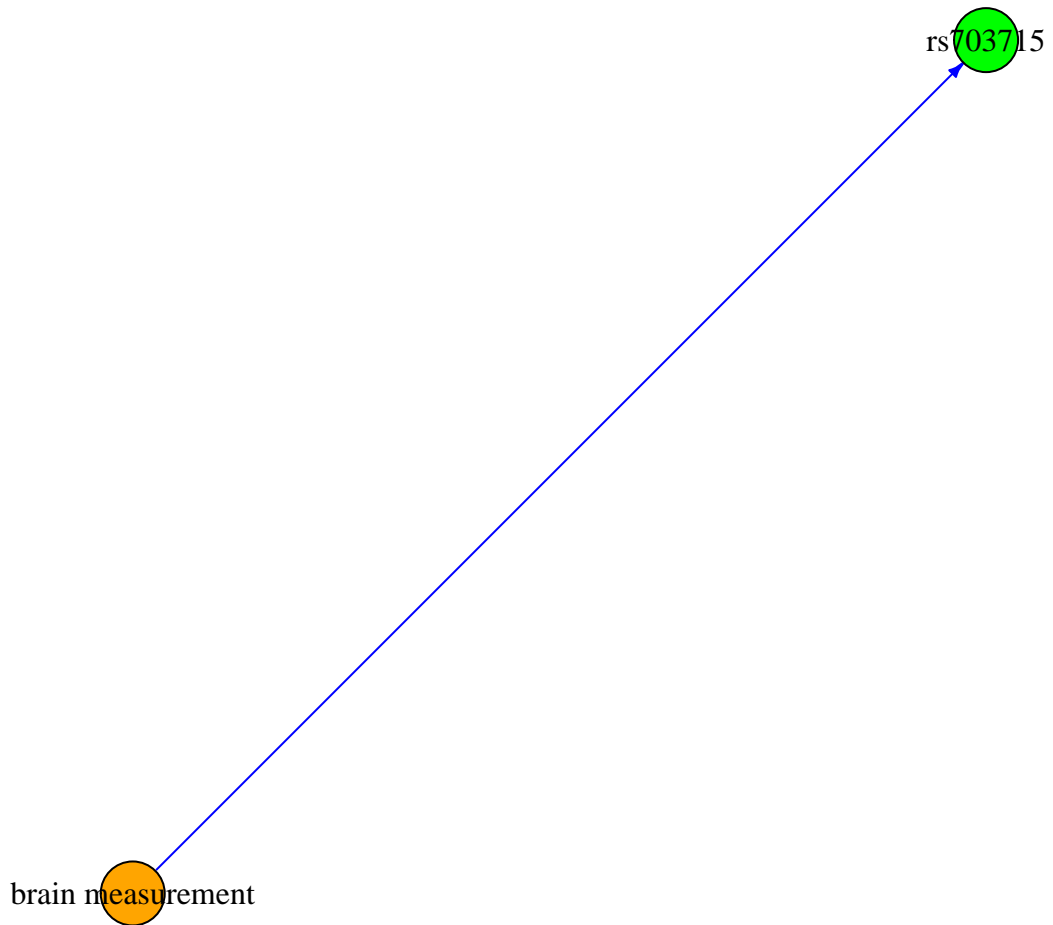

## Variant–Disease Network (hippocampal volume)

hippocampal volume

rs703715

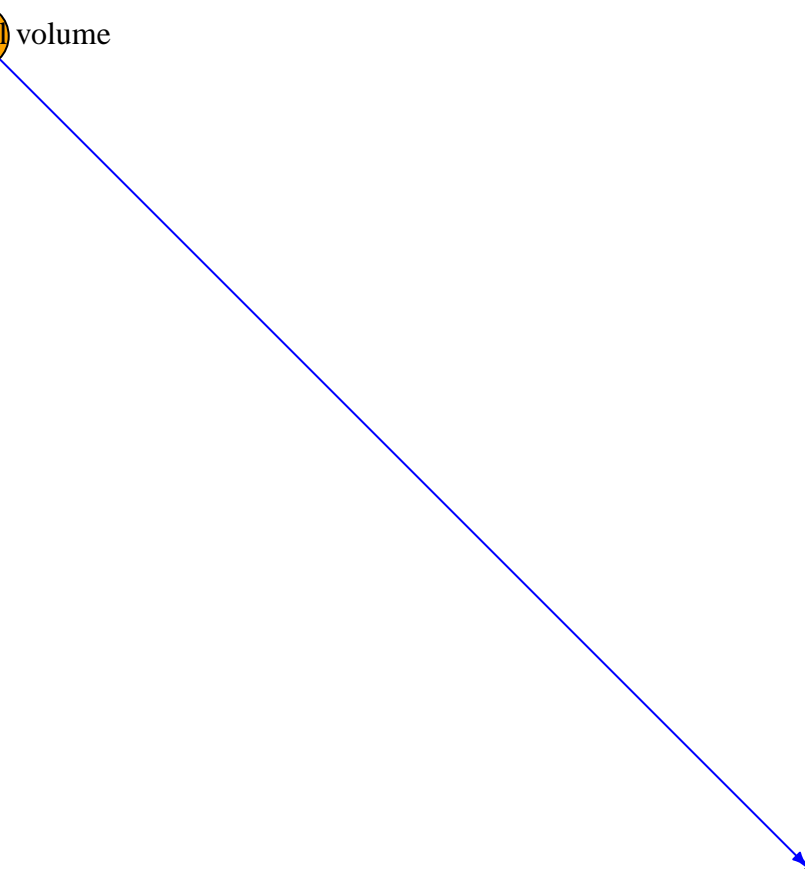

## Variant-Disease Network (catalase measurement)

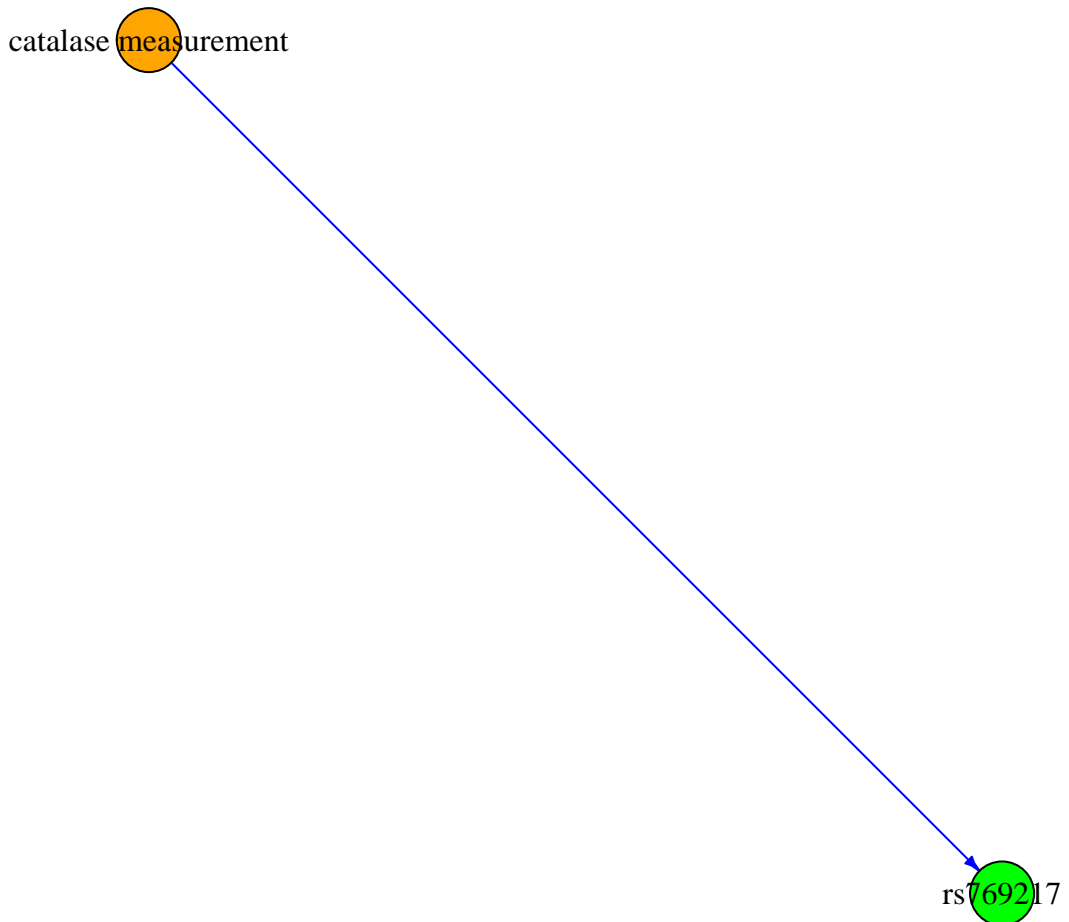

## Variant–Disease Network (estradiol measurement)

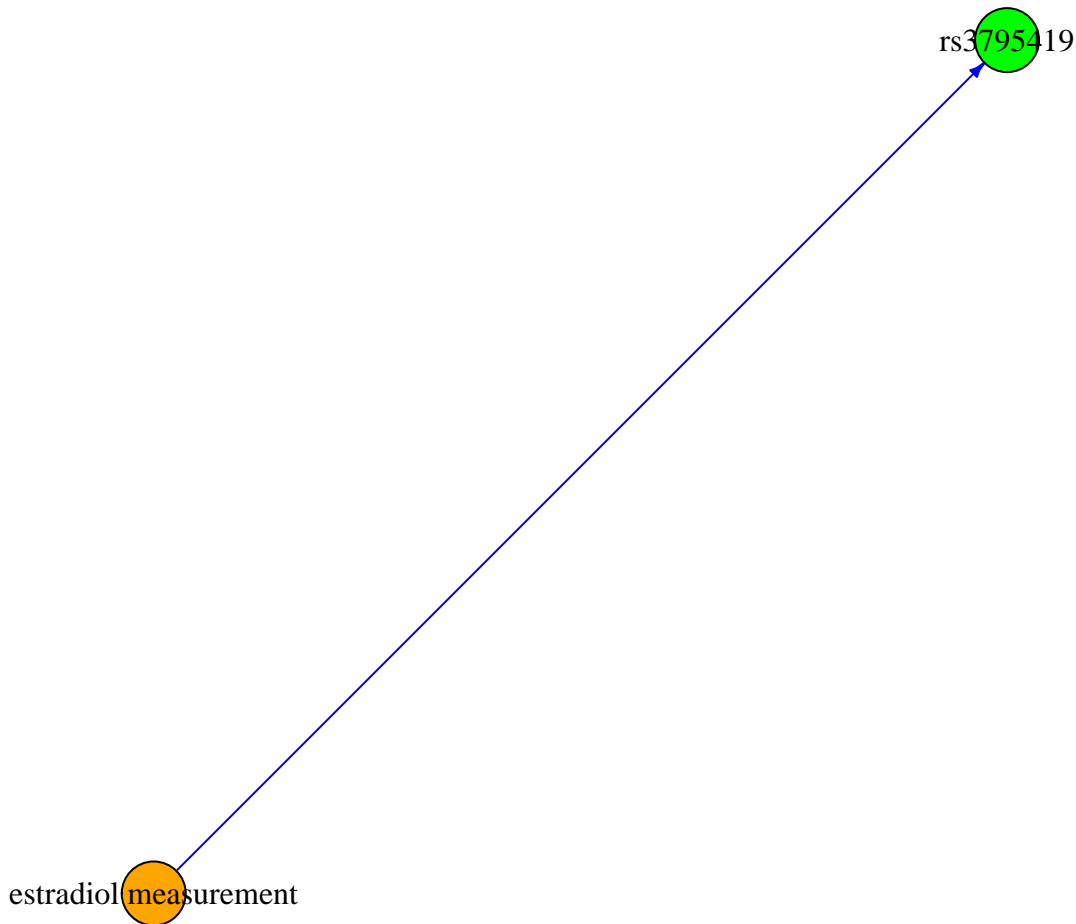

## Variant-Disease Network (neuropathic pain)

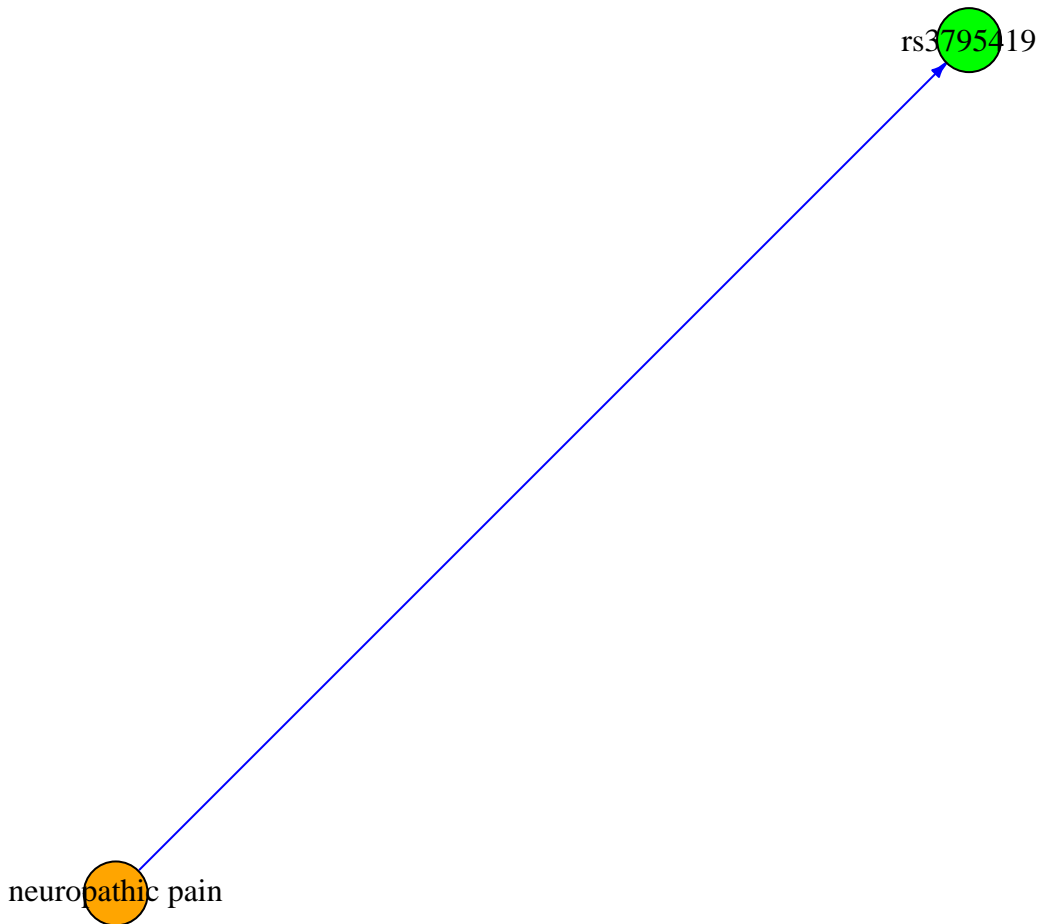



## Variant-Disease Network (response to tnf antagonist)

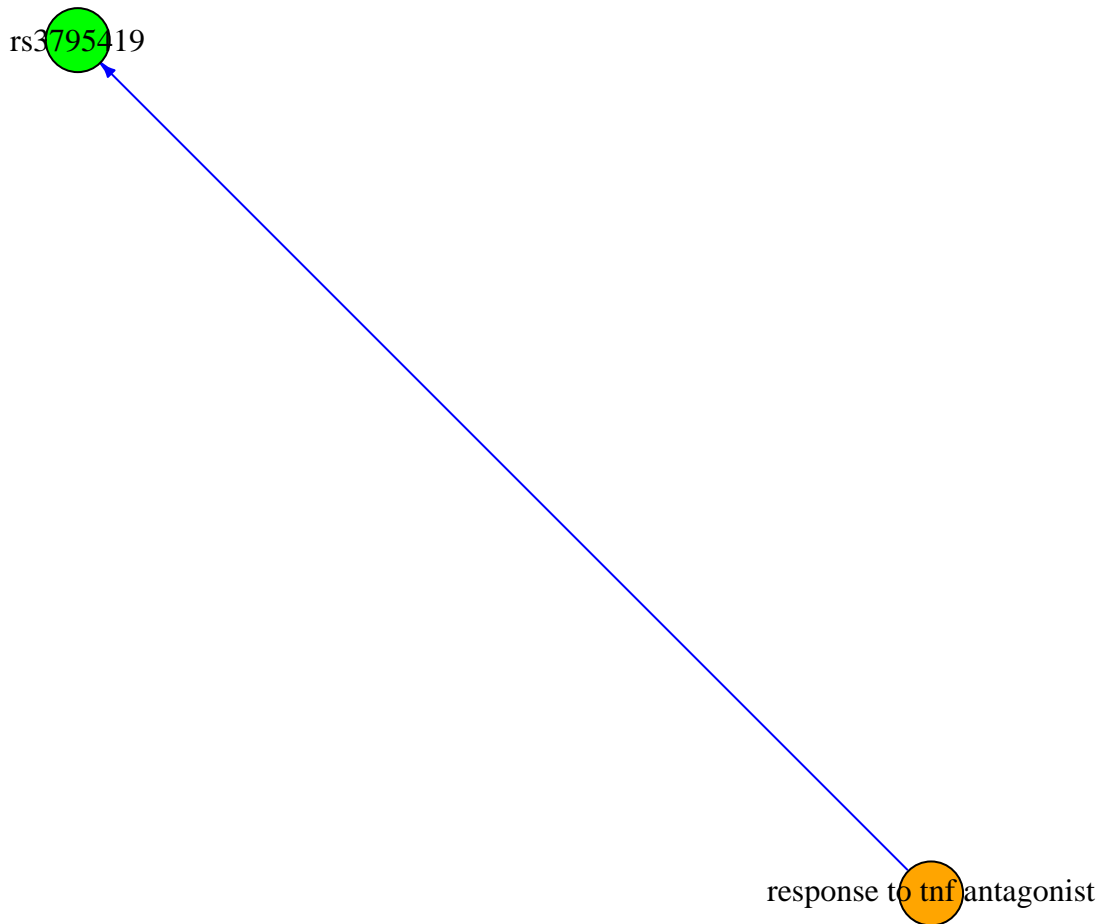

Variant–Disease Network (carotid artery intima media thickness)

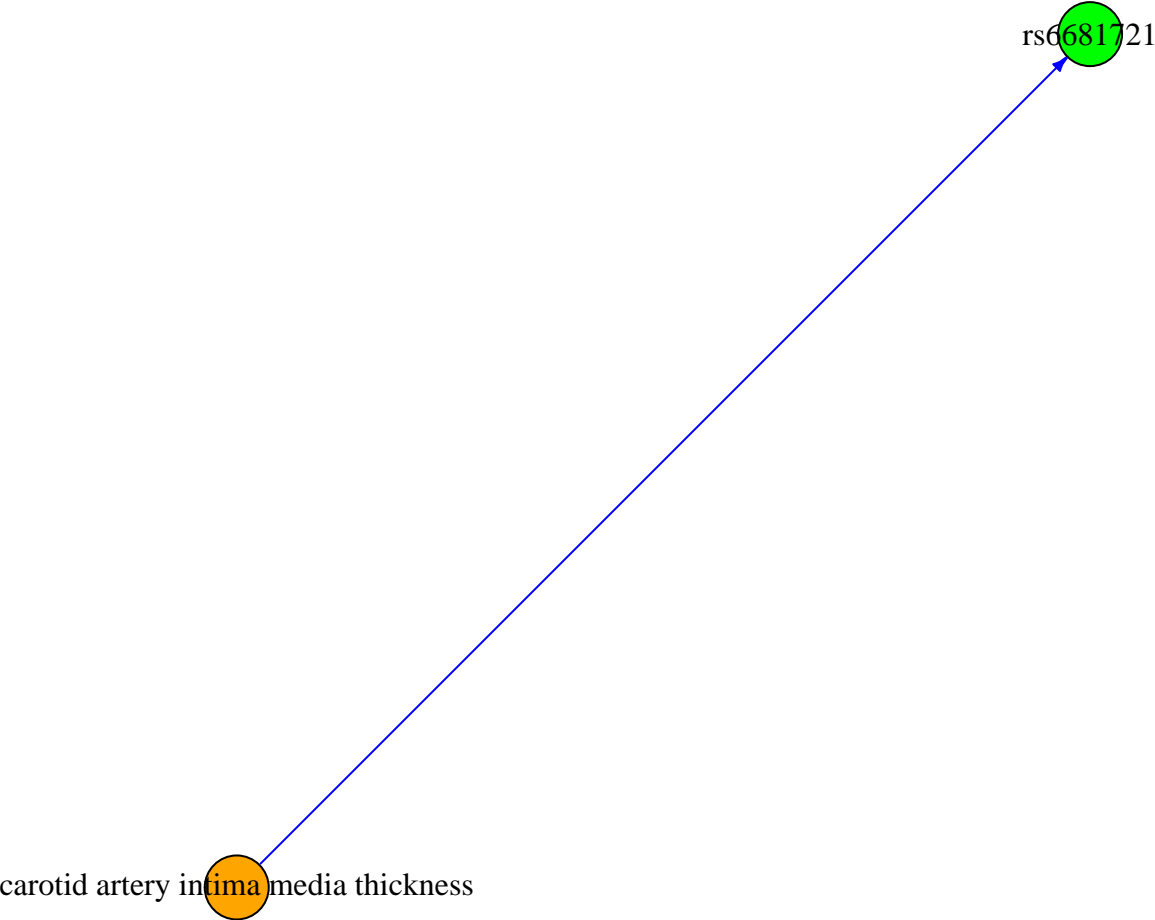

Variant–Disease Network (transmembrane glycoprotein NMB measurement)

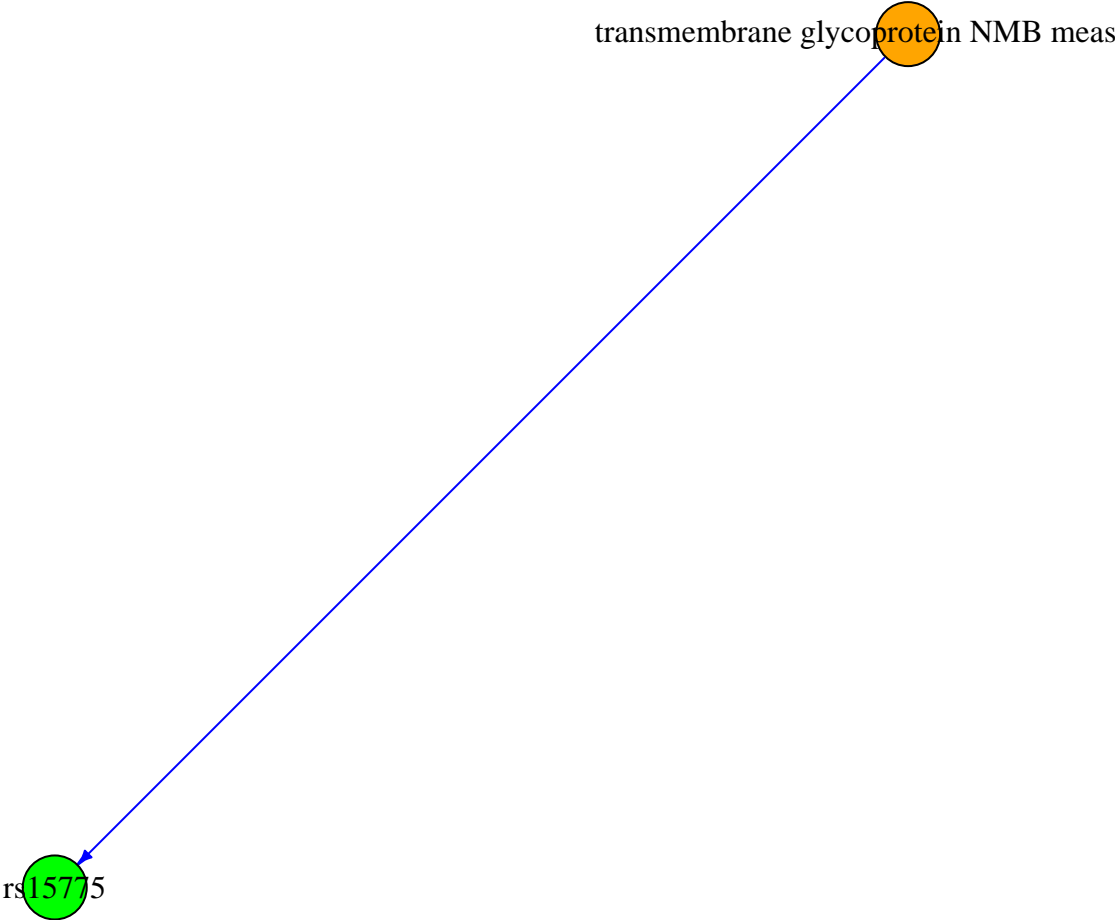

**Variant–Disease Network (creatinine clearance measurement)**

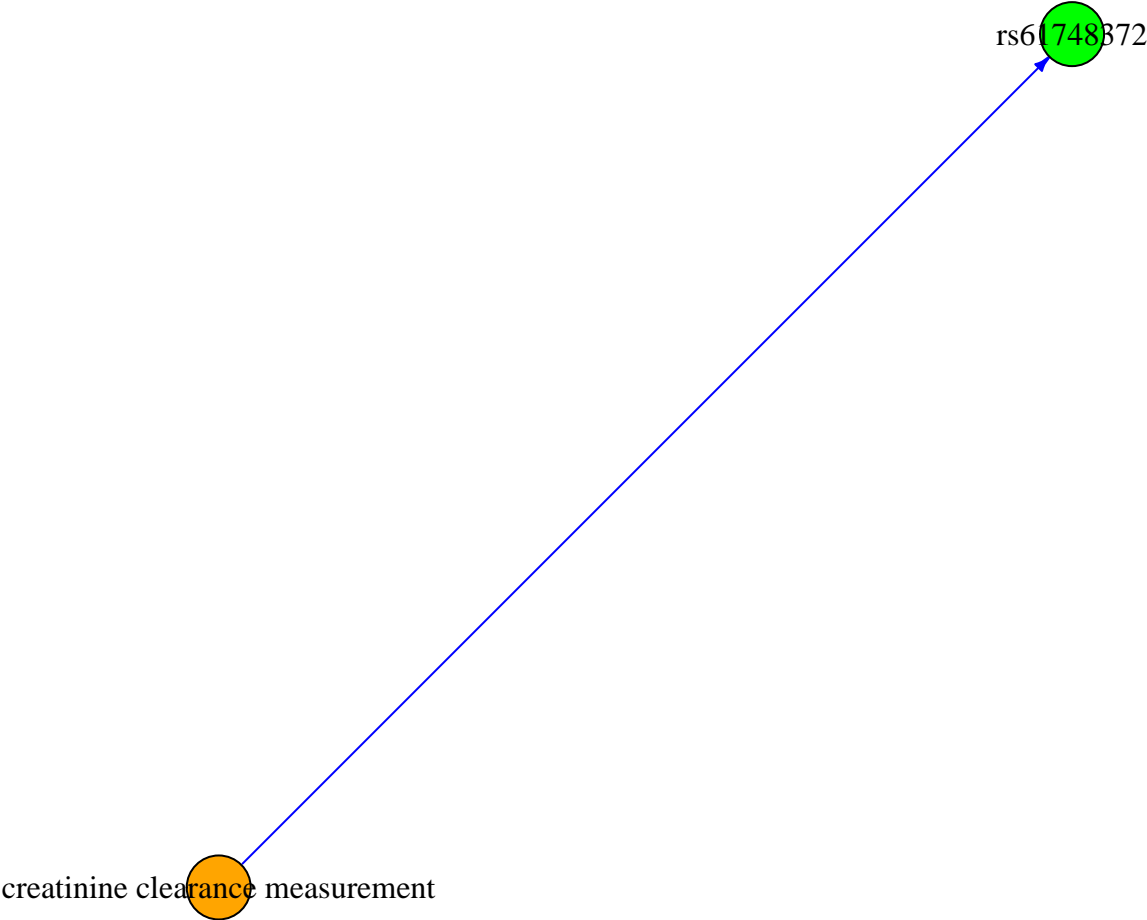

Variant–Disease Network (HIV infection)

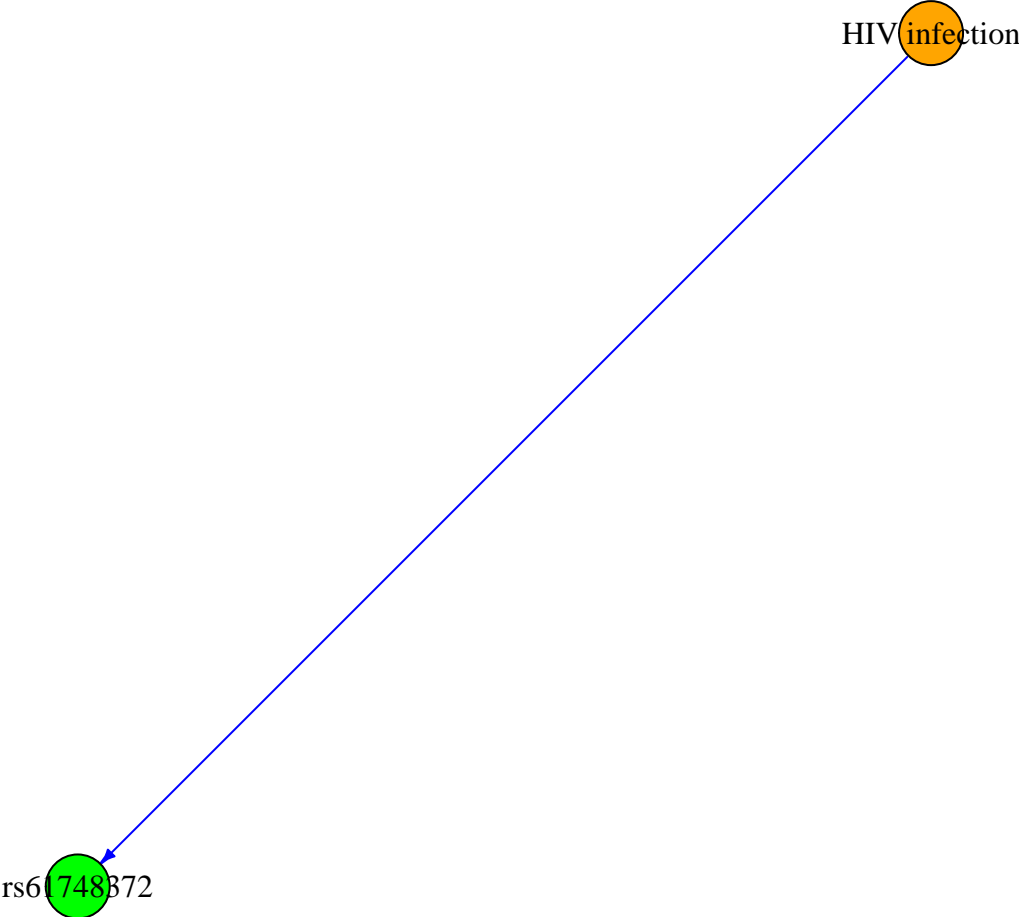

## Variant–Disease Network (response to tenofovir)

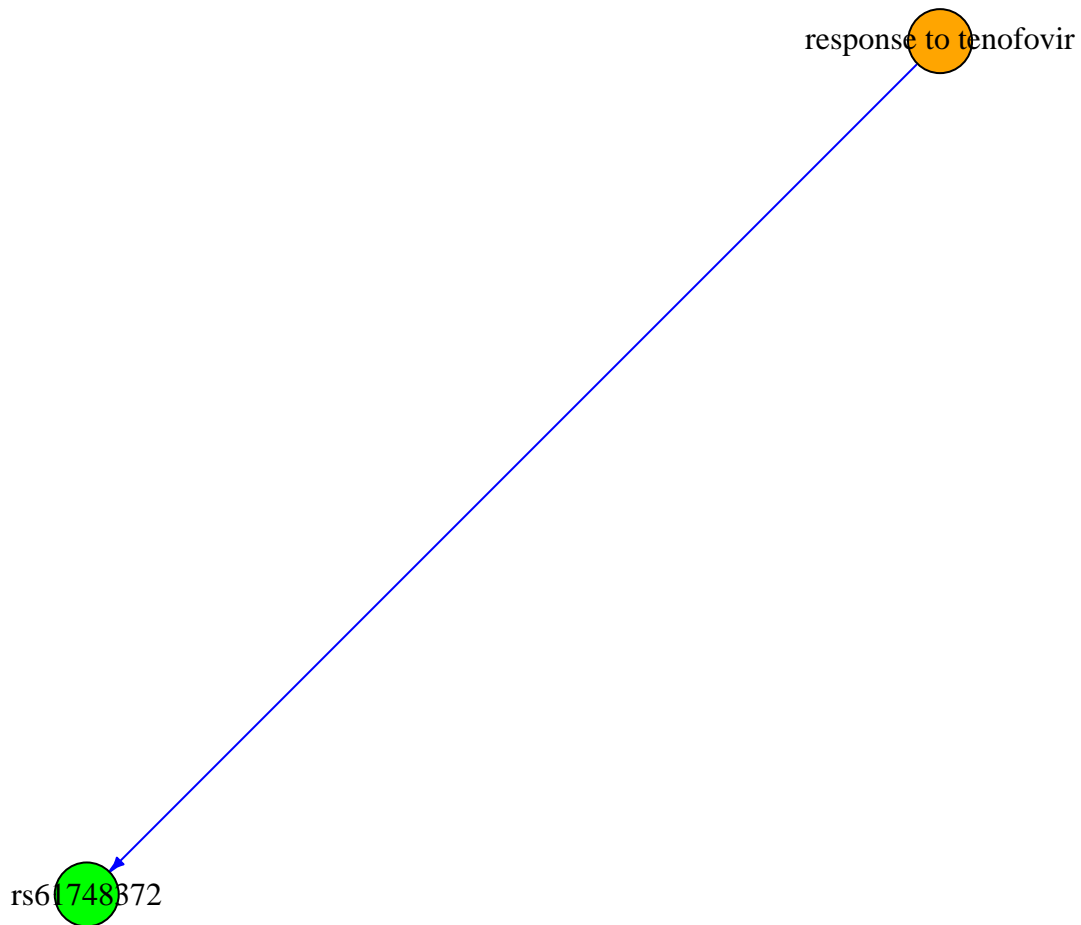

# Variant–Disease Network (mosquito bite reaction size measurement)

mosquito bite reaction size measurement

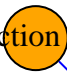

rs11541311

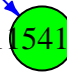

# Variant–Disease Network (tonsillectomy risk measurement)

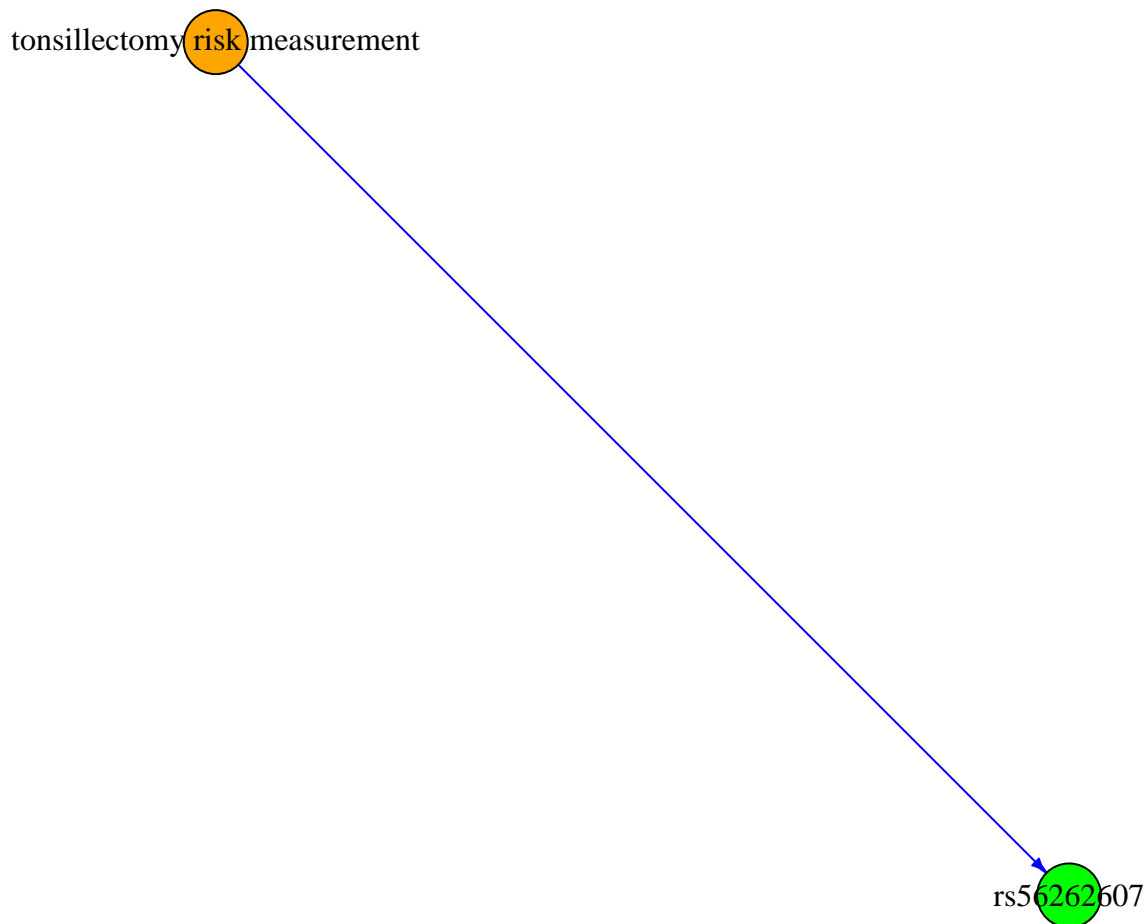



# Variant–Disease Network (pursuit maintenance gain measurement)

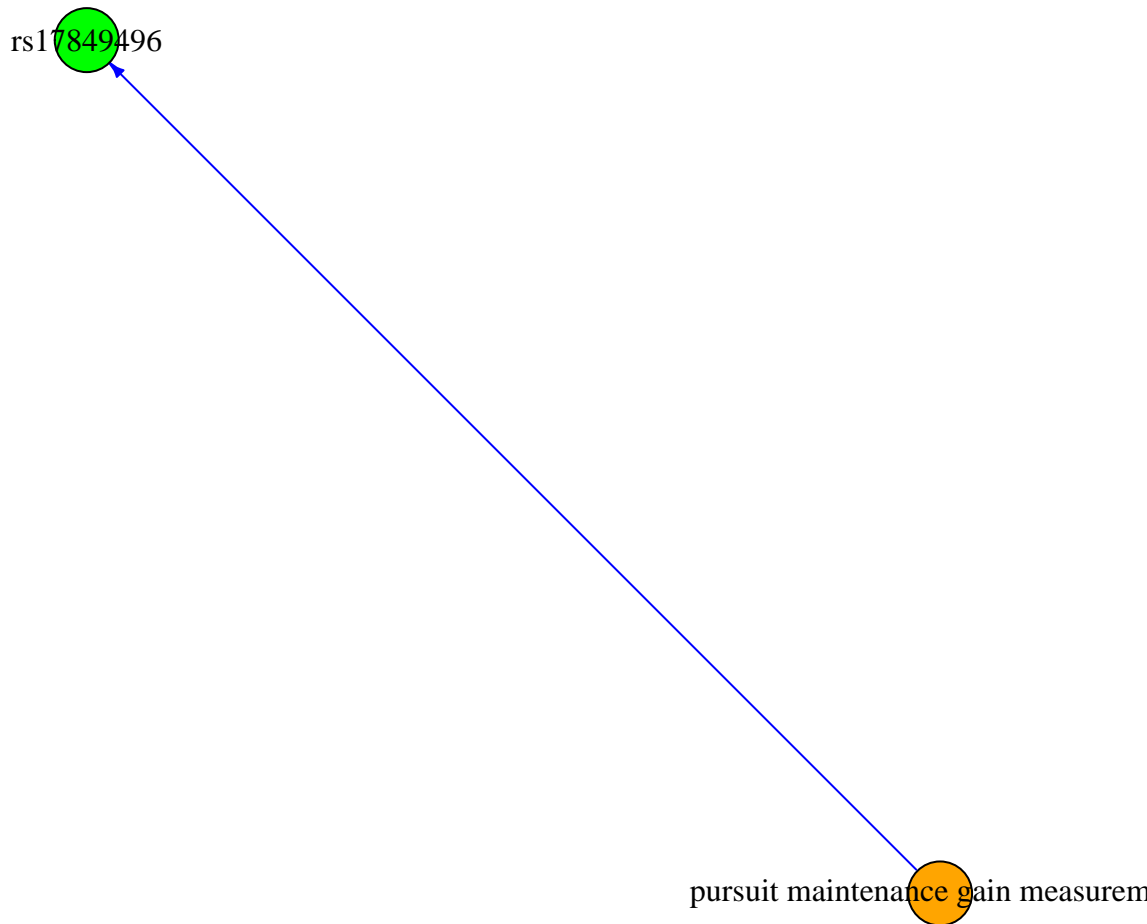

## Variant–Disease Network (mental or behavioural disorder)

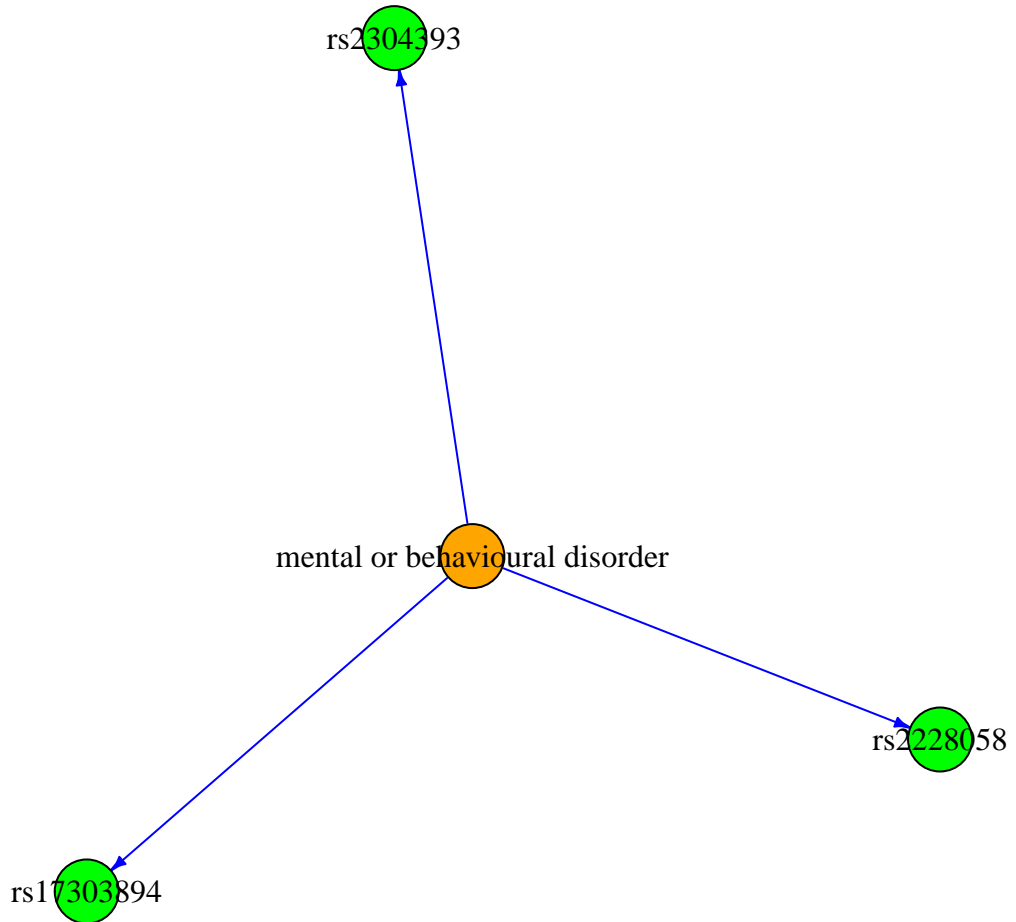

## Variant–Disease Network (abnormal thrombosis)

abnormal thrombosis

rs3087969



## Variant–Disease Network (deep vein thrombosis)

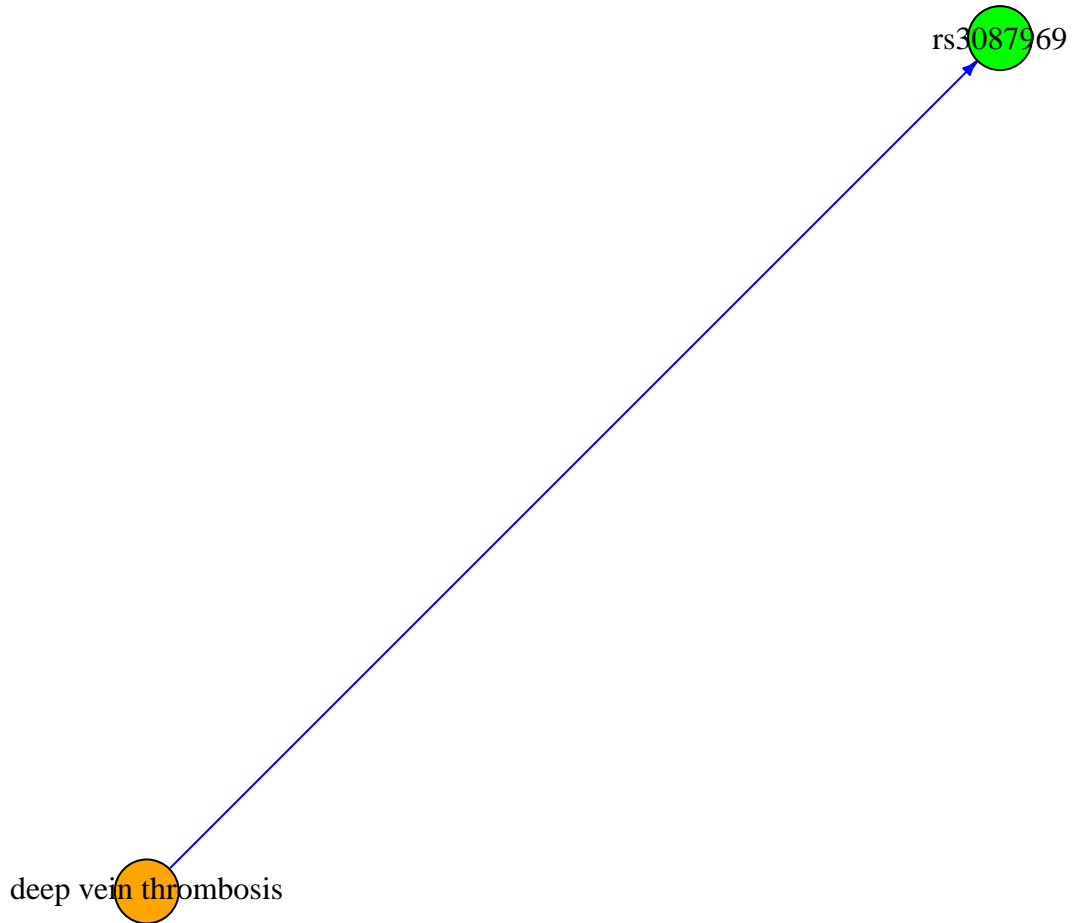

## Variant–Disease Network (Ischemic stroke)

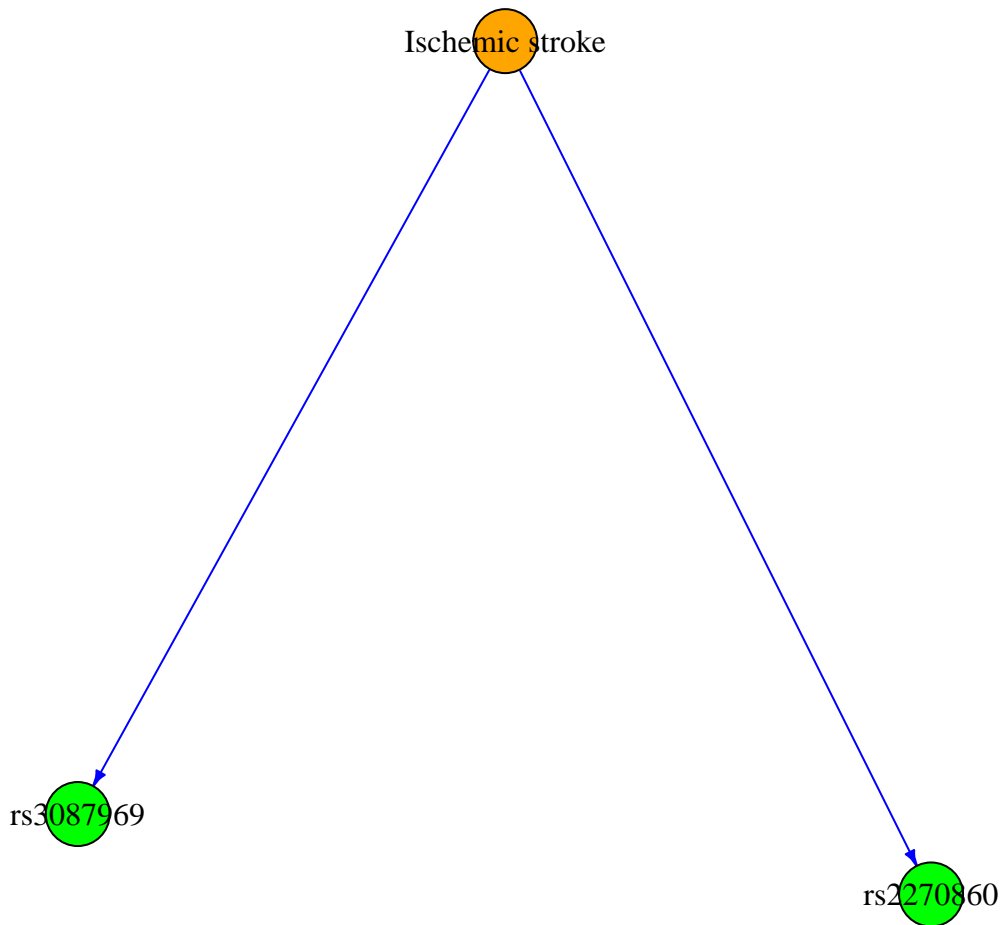

## Variant–Disease Network (pulmonary embolism)

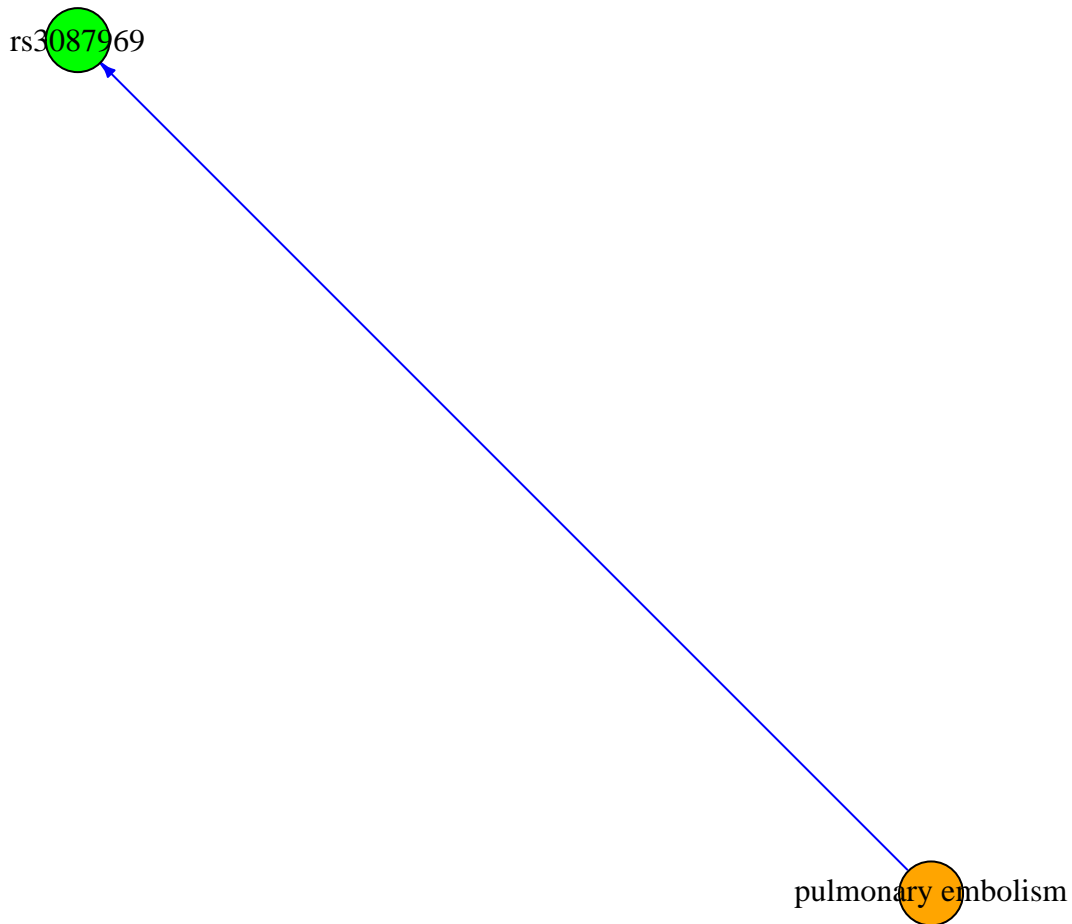

## Variant-Disease Network (stroke)

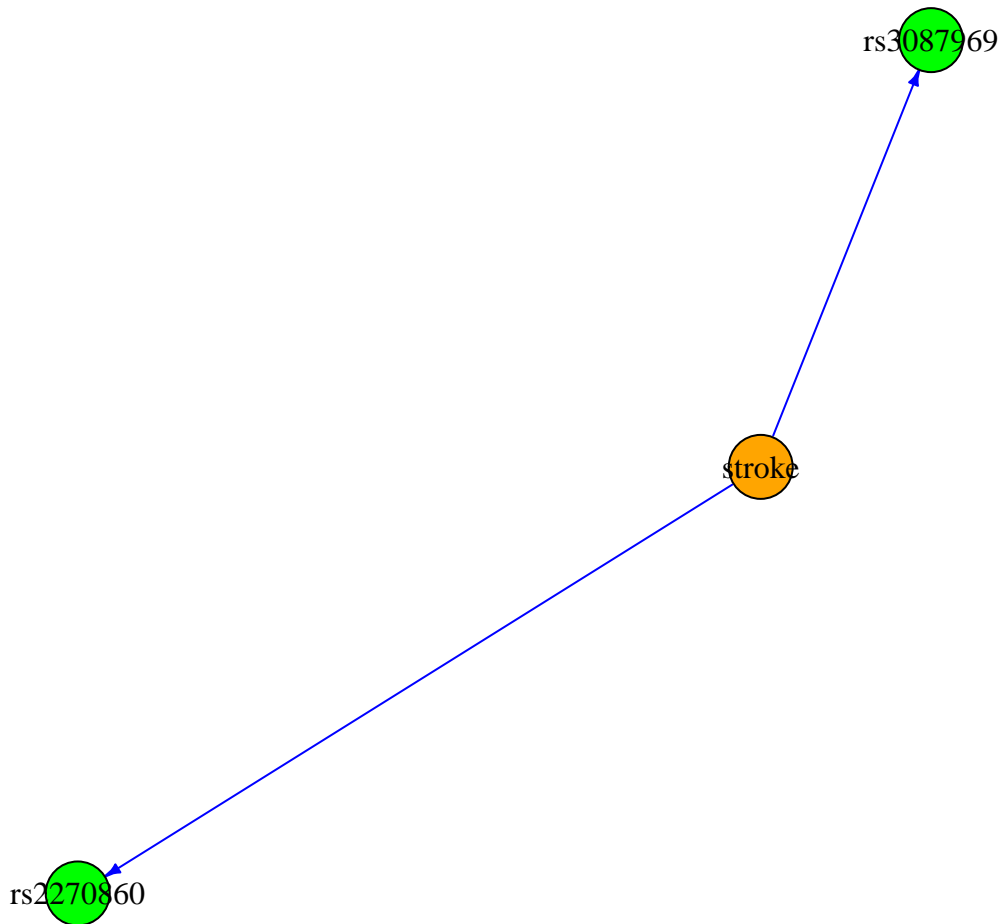

**Variant–Disease Network (Alzheimers disease neuropathologic change)**

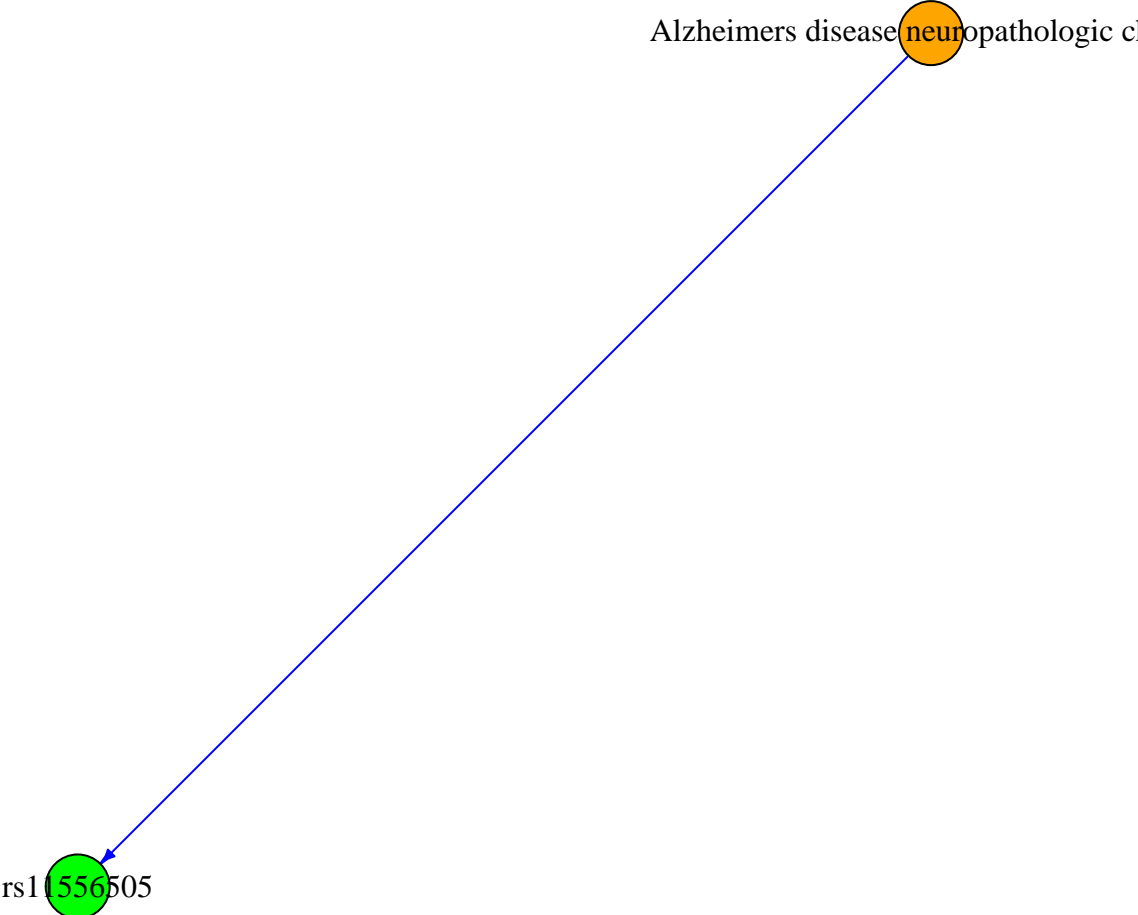



## Variant–Disease Network (amyloid–beta measurement)

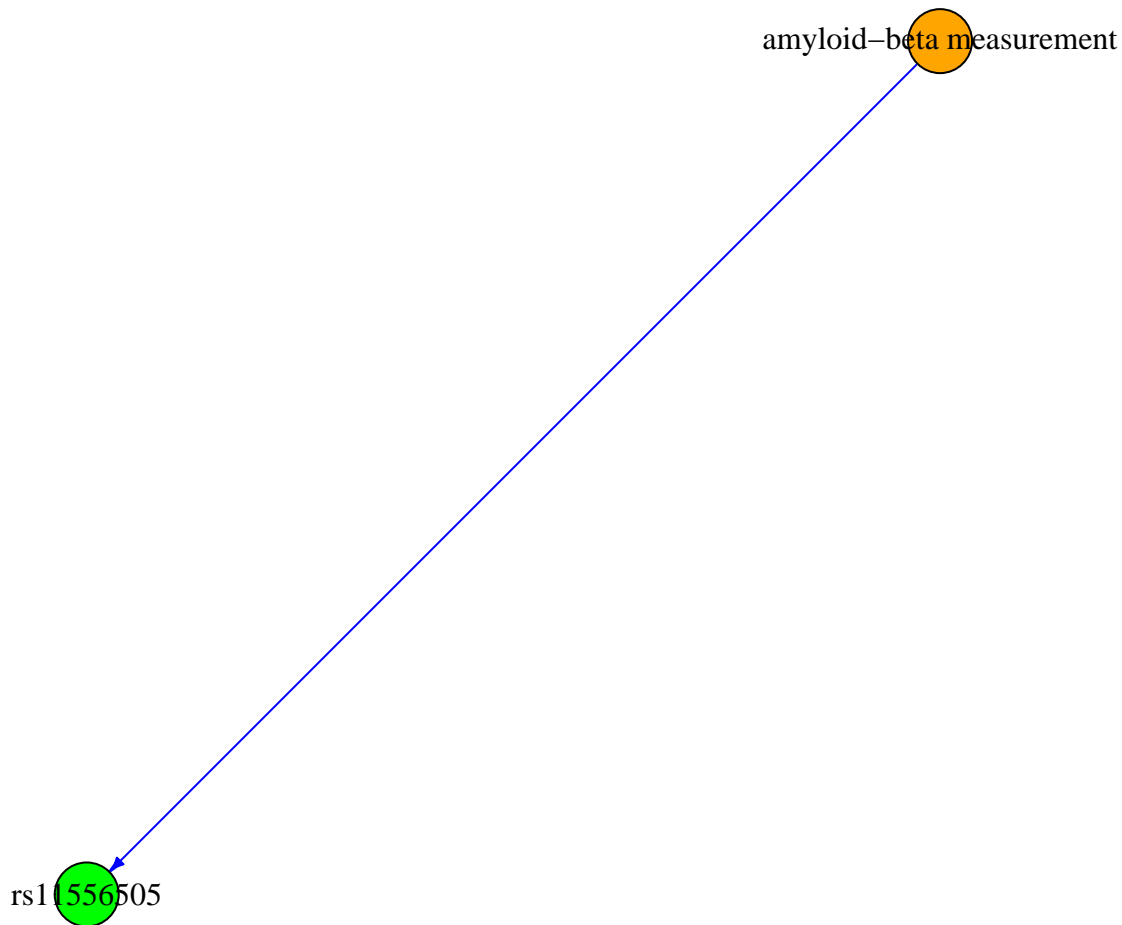

**Variant–Disease Network (beta–amyloid 1–42 measurement)**

beta–amyloid 1–42 measurement

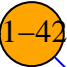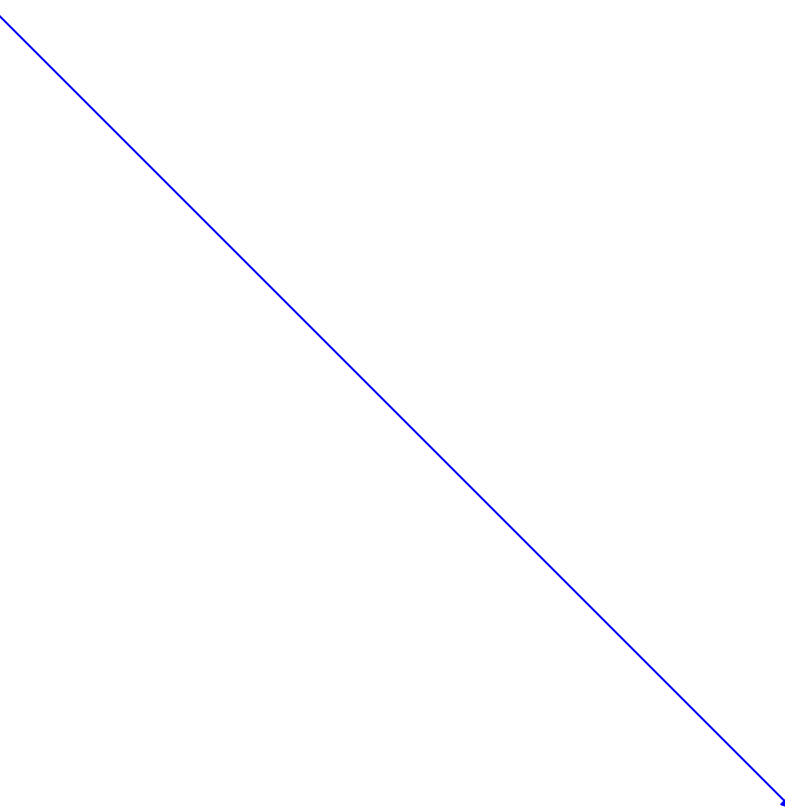

rs11556505

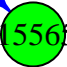

## Variant–Disease Network (cerebral amyloid angiopathy)

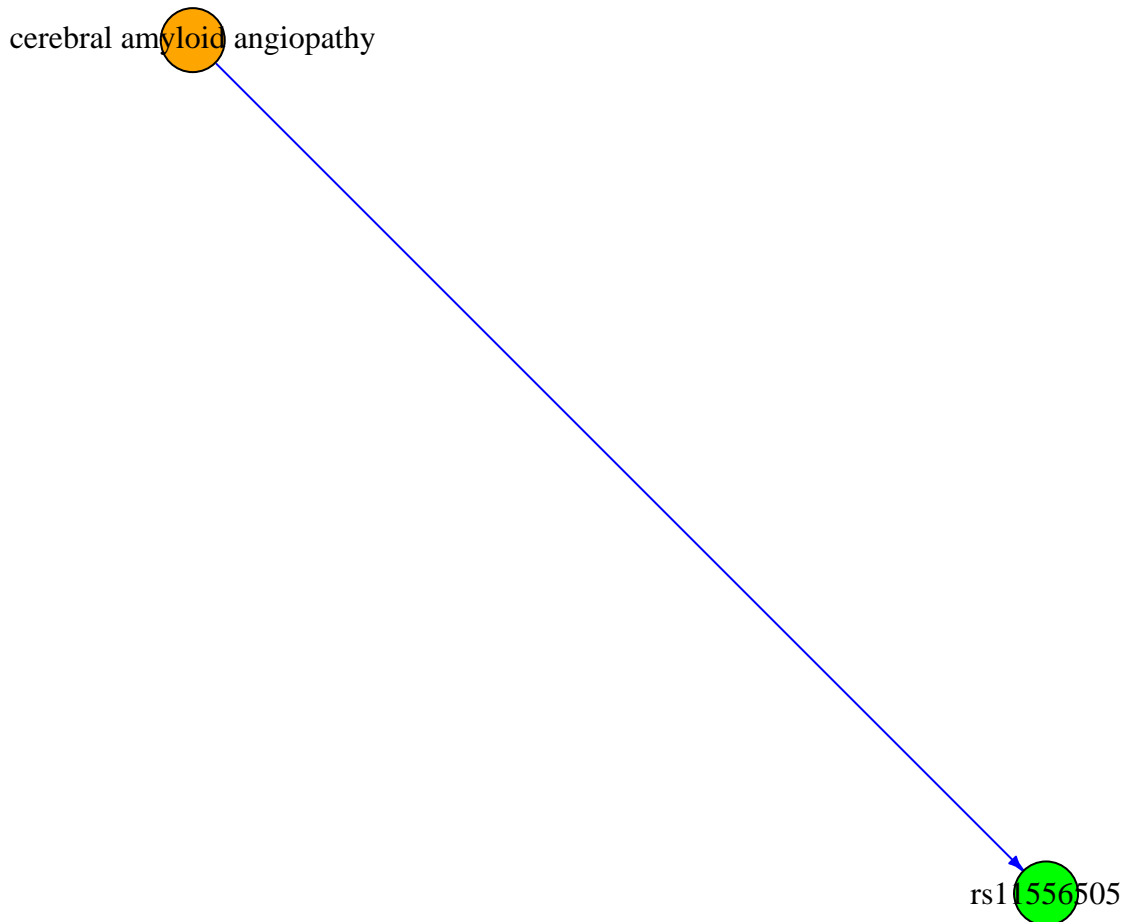

## Variant-Disease Network (cognitive decline)

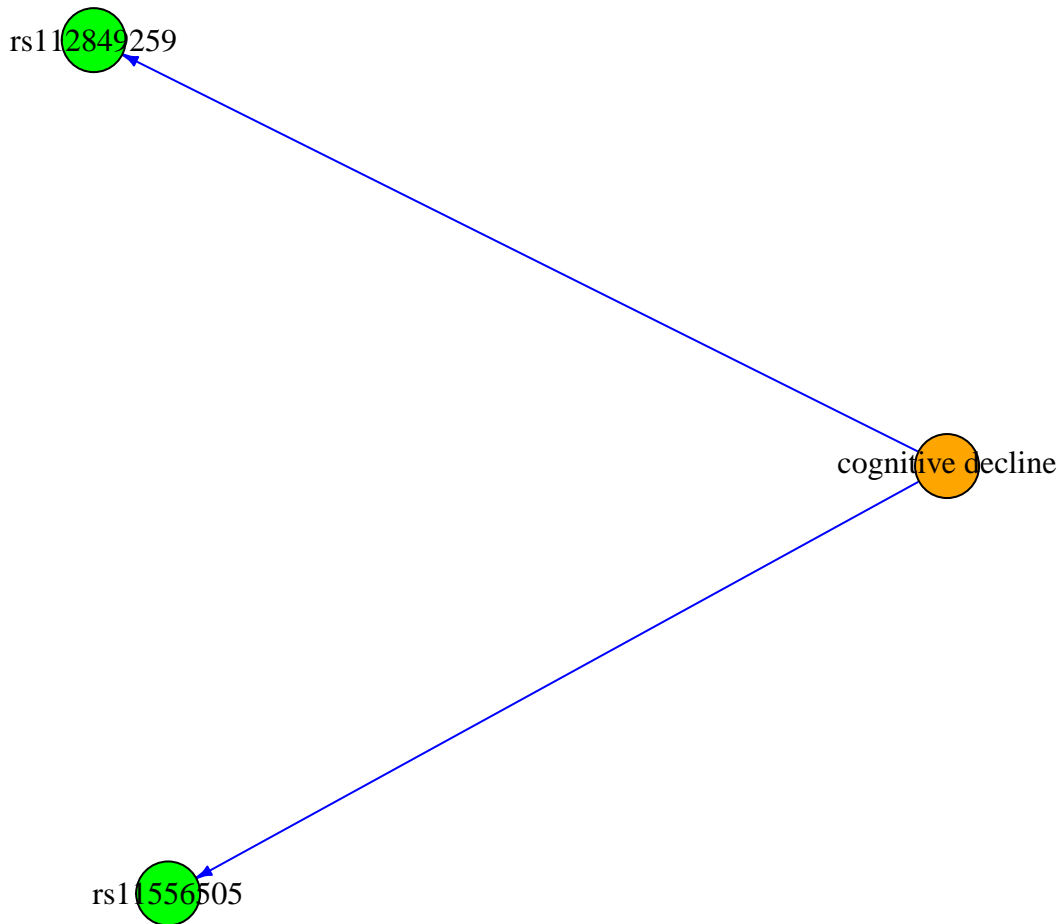

## Variant–Disease Network (c–reactive protein measurement)

rs11556505

c–reactive protein measurement



# Variant-Disease Network (frontotemporal dementia)

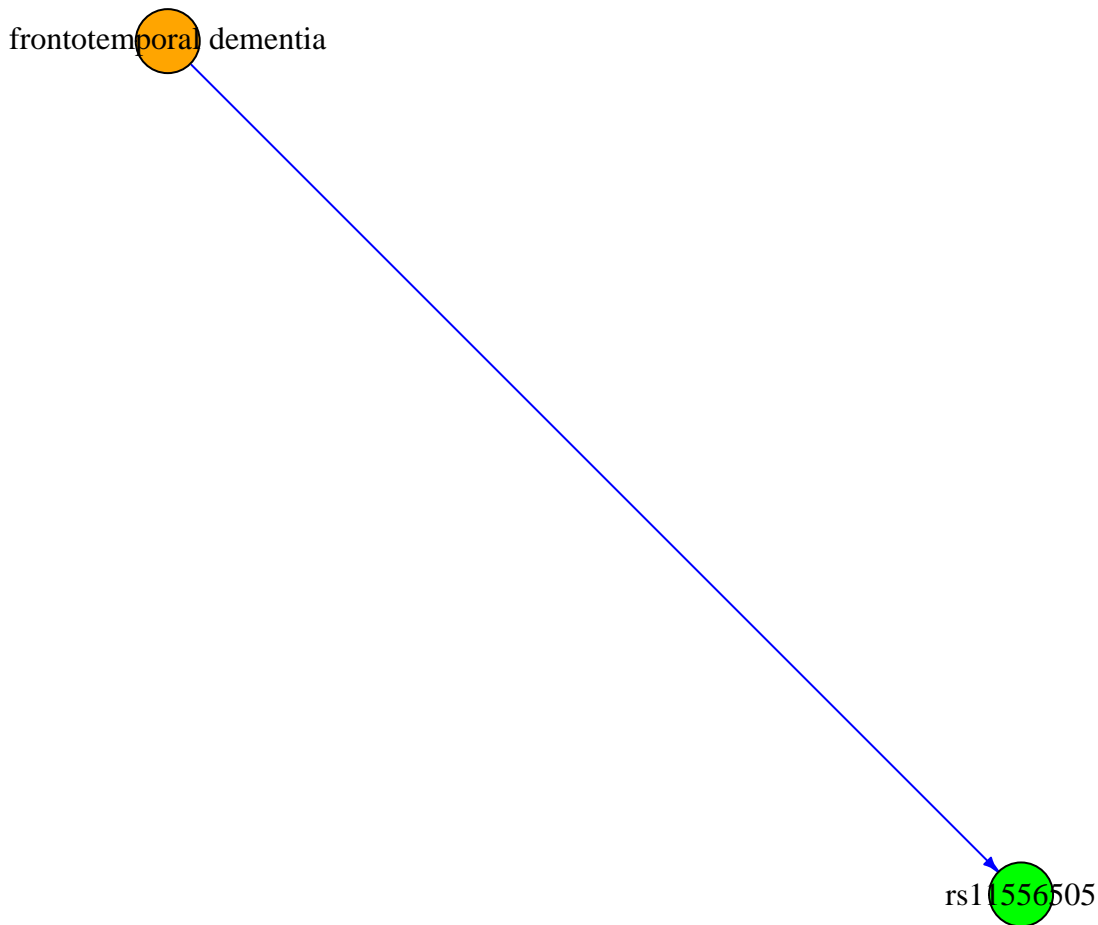

## Variant–Disease Network (longevity)

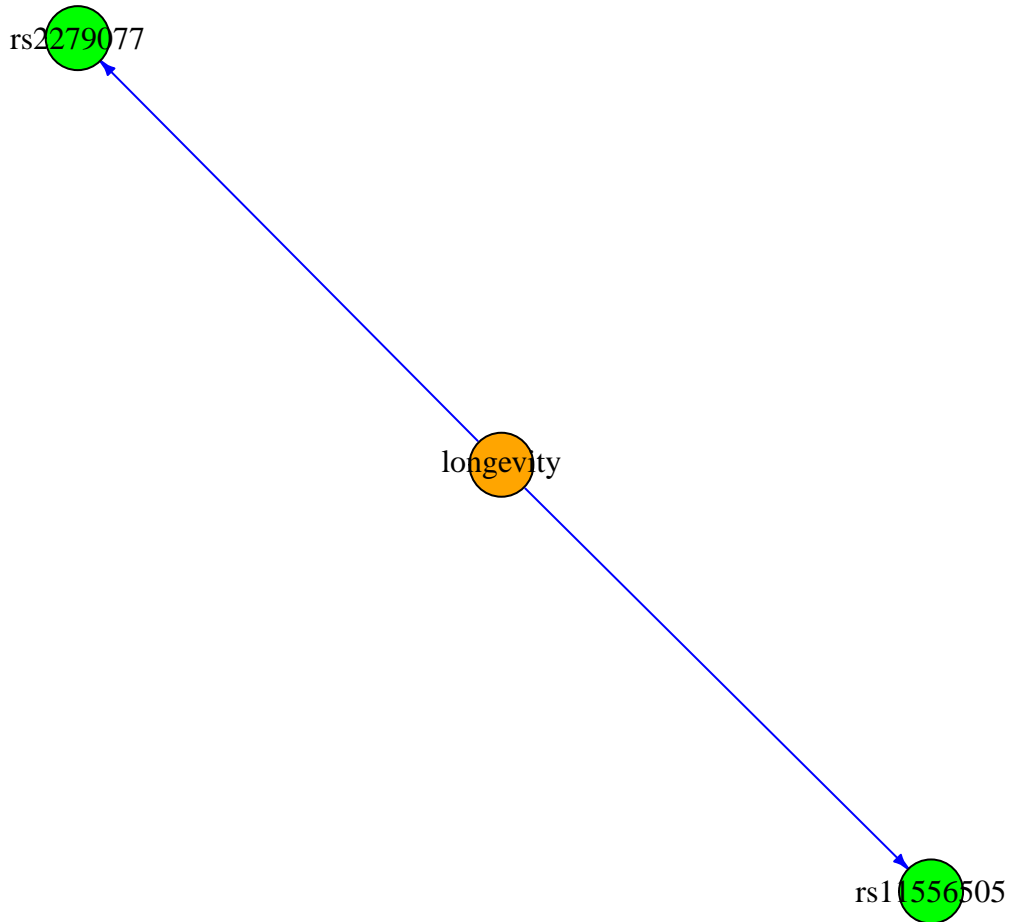

## Variant–Disease Network (memory performance)

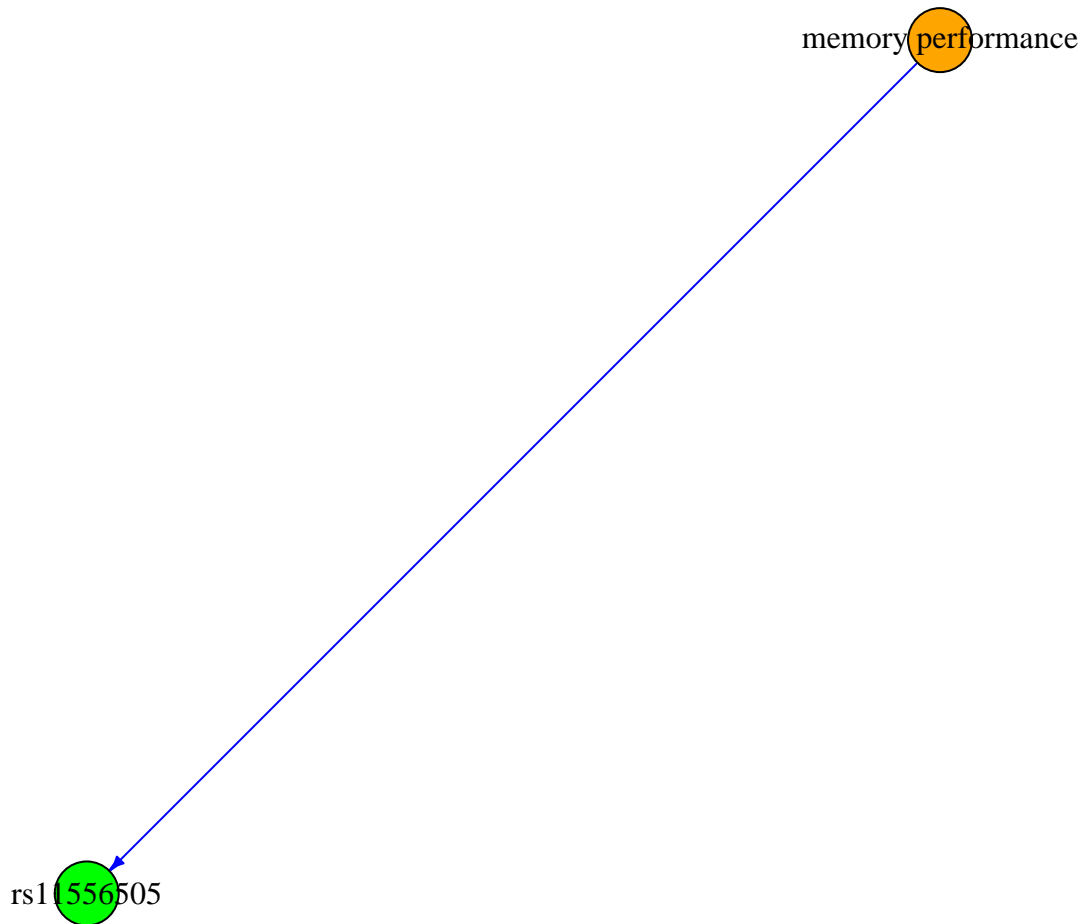



# Variant–Disease Network (neuritic plaque measurement)

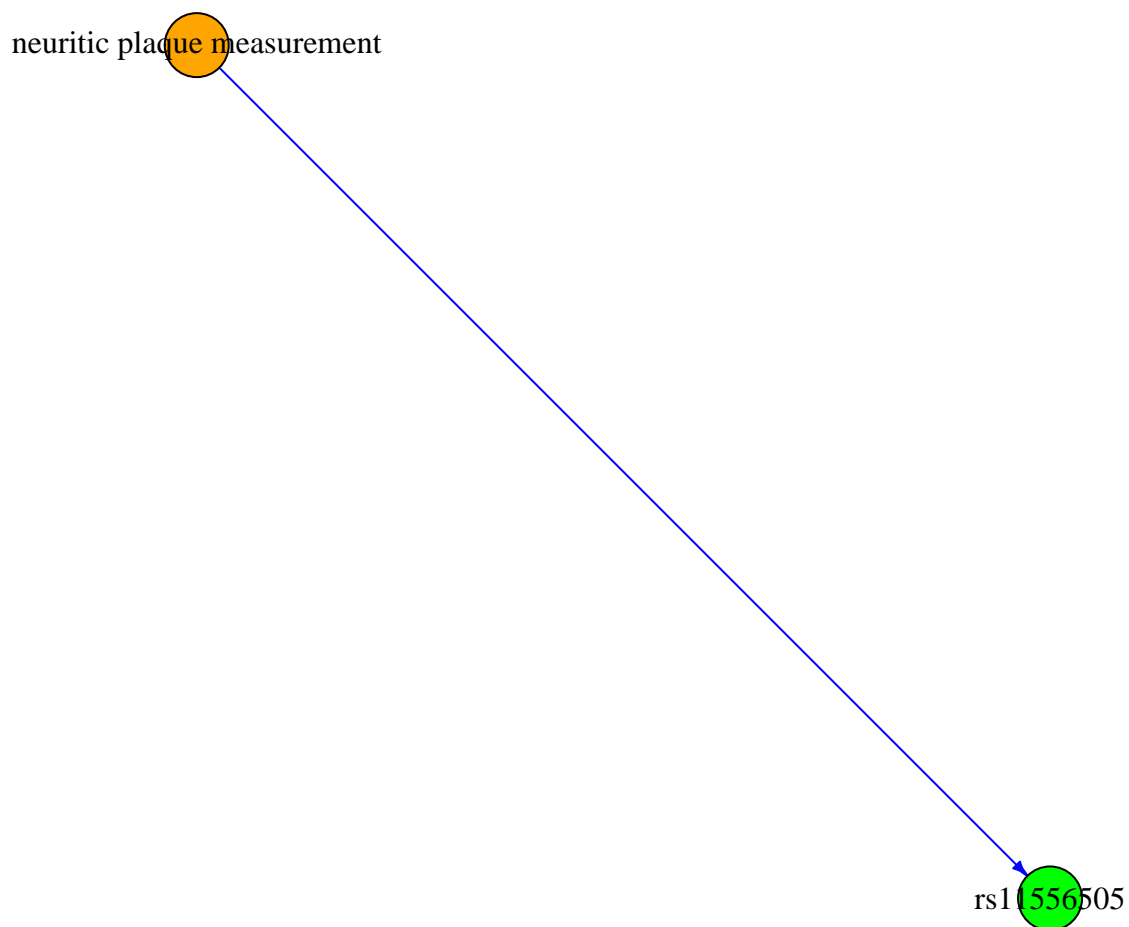

# Variant–Disease Network (neurofibrillary tangles measurement)

rs1556505

neurofibrillary tangles measurement

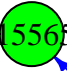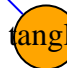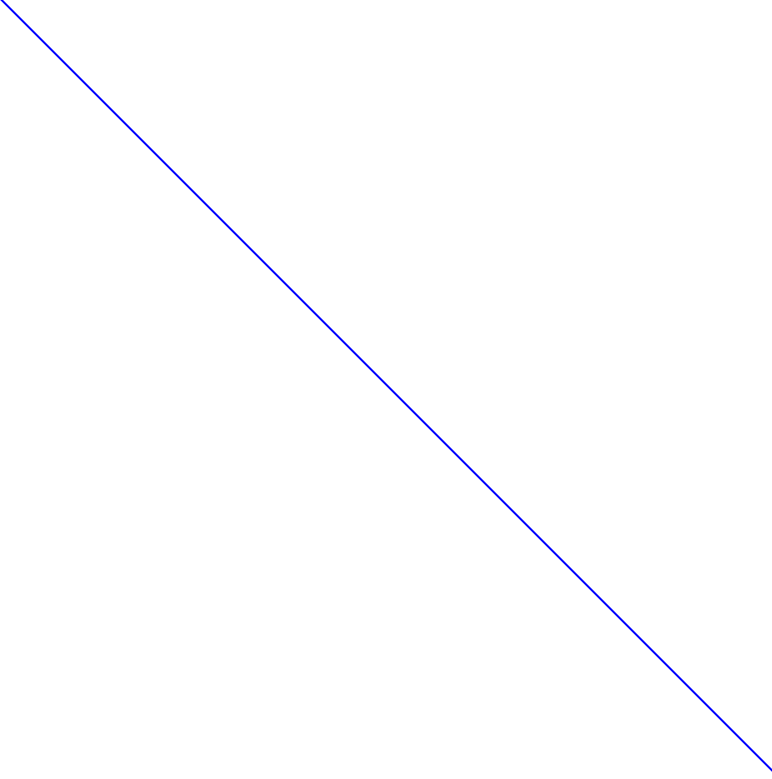

**Variant–Disease Network (neuroimaging measurement)**

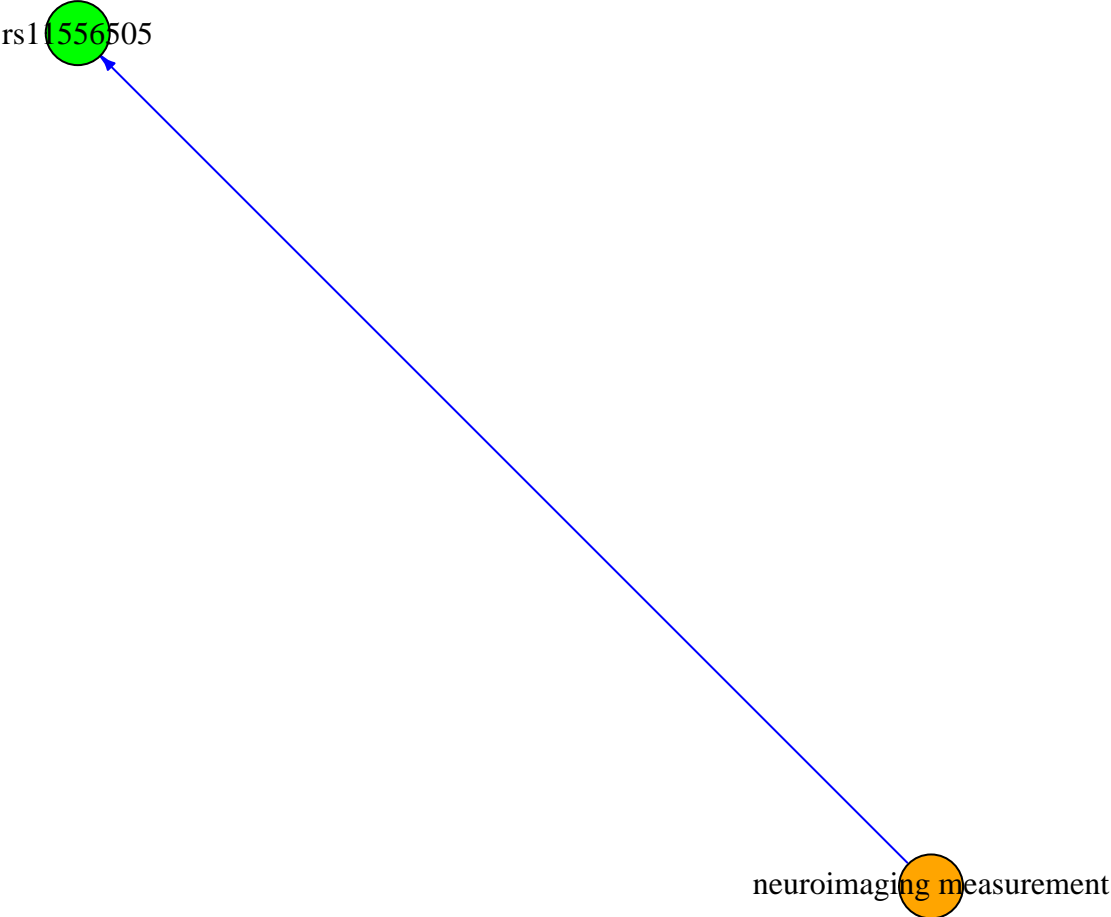

Variant–Disease Network (paragraph delayed recall measurement)

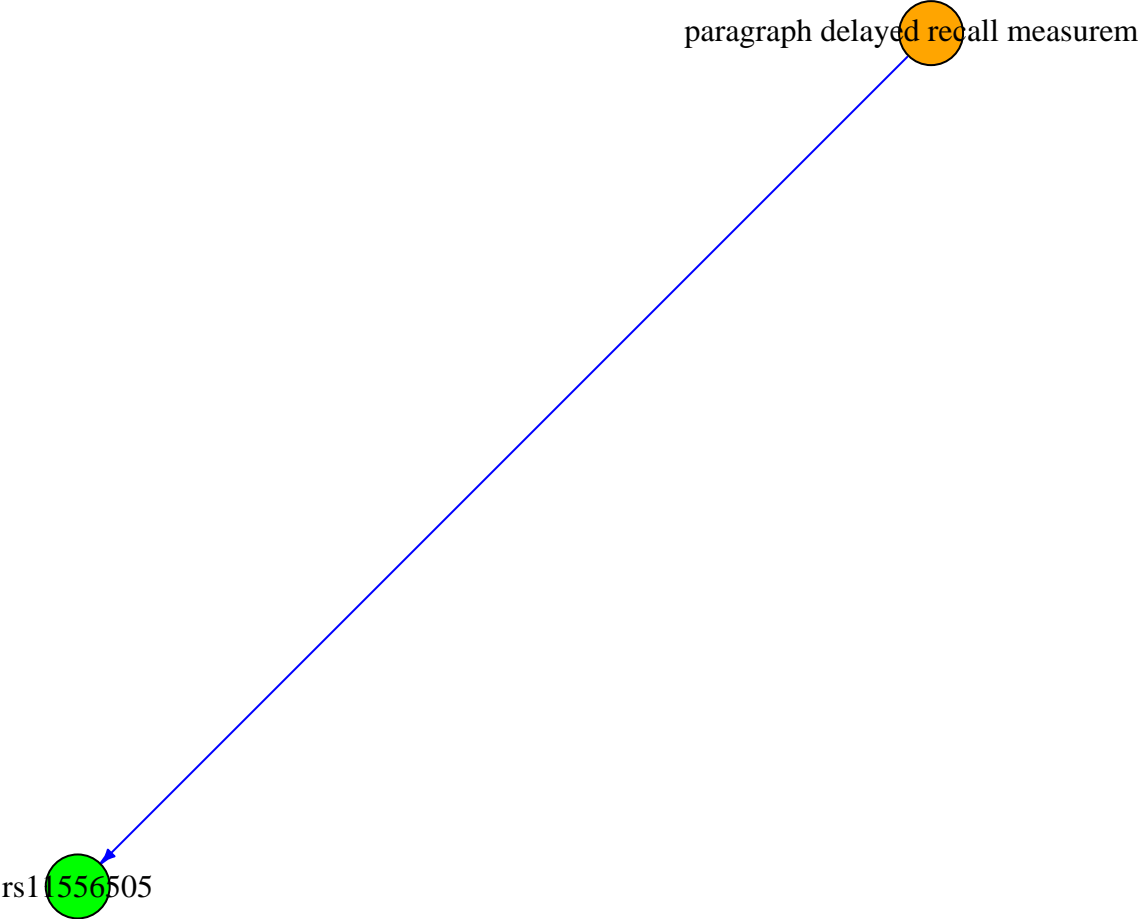

## Variant–Disease Network (posterior cortical atrophy)

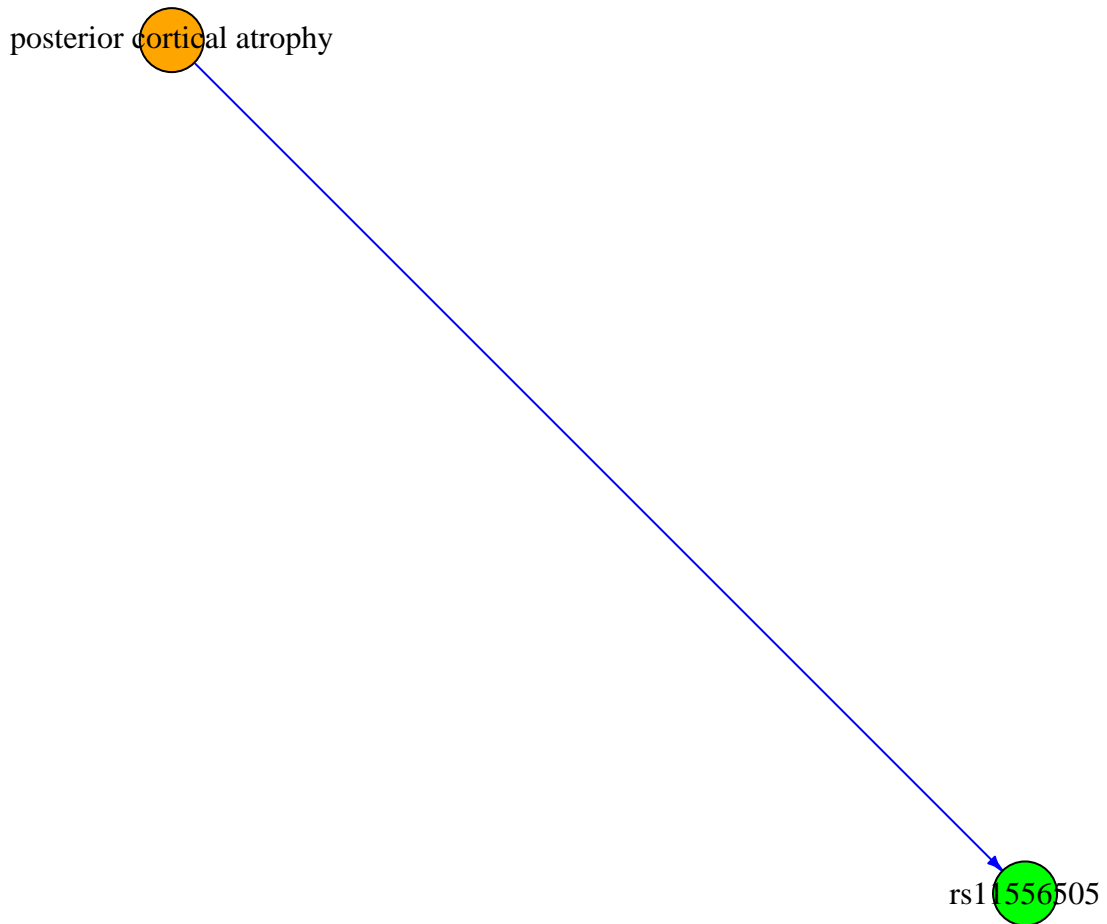

## Variant–Disease Network (p-tau measurement)

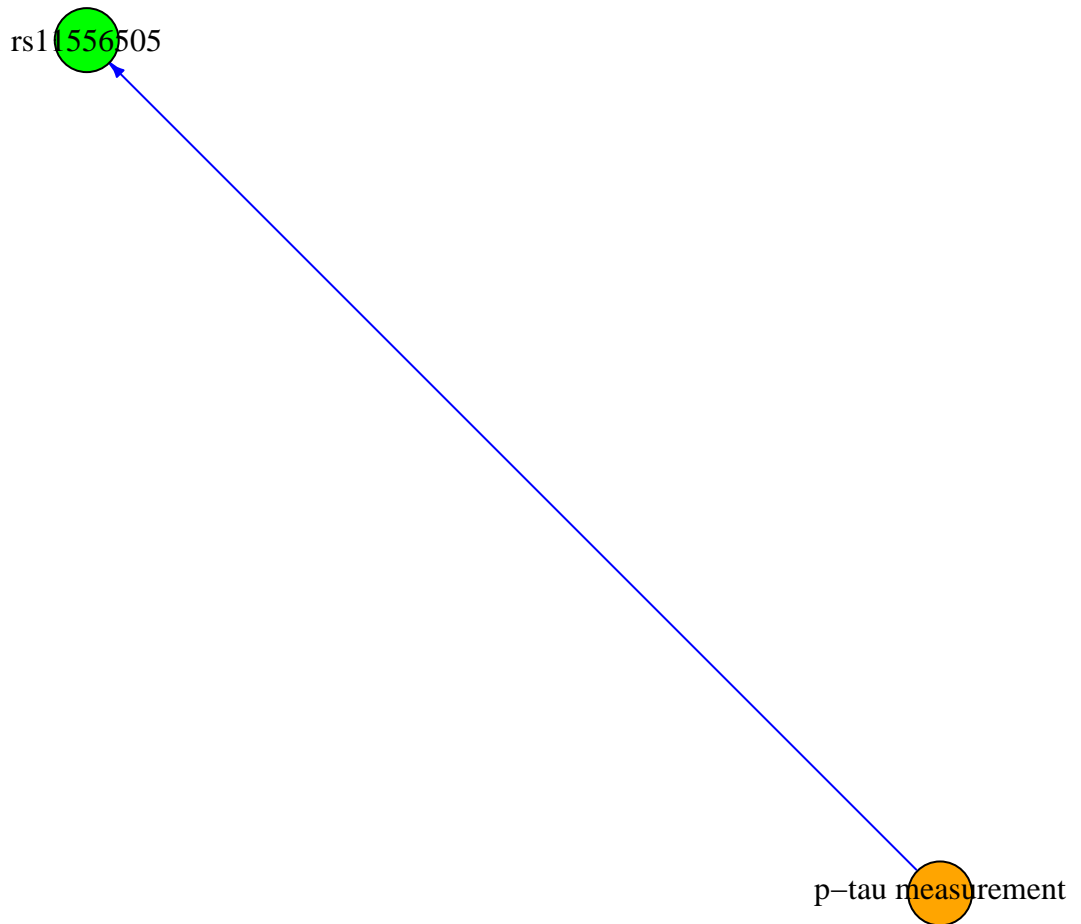

## Variant–Disease Network (sensory perception of smell)

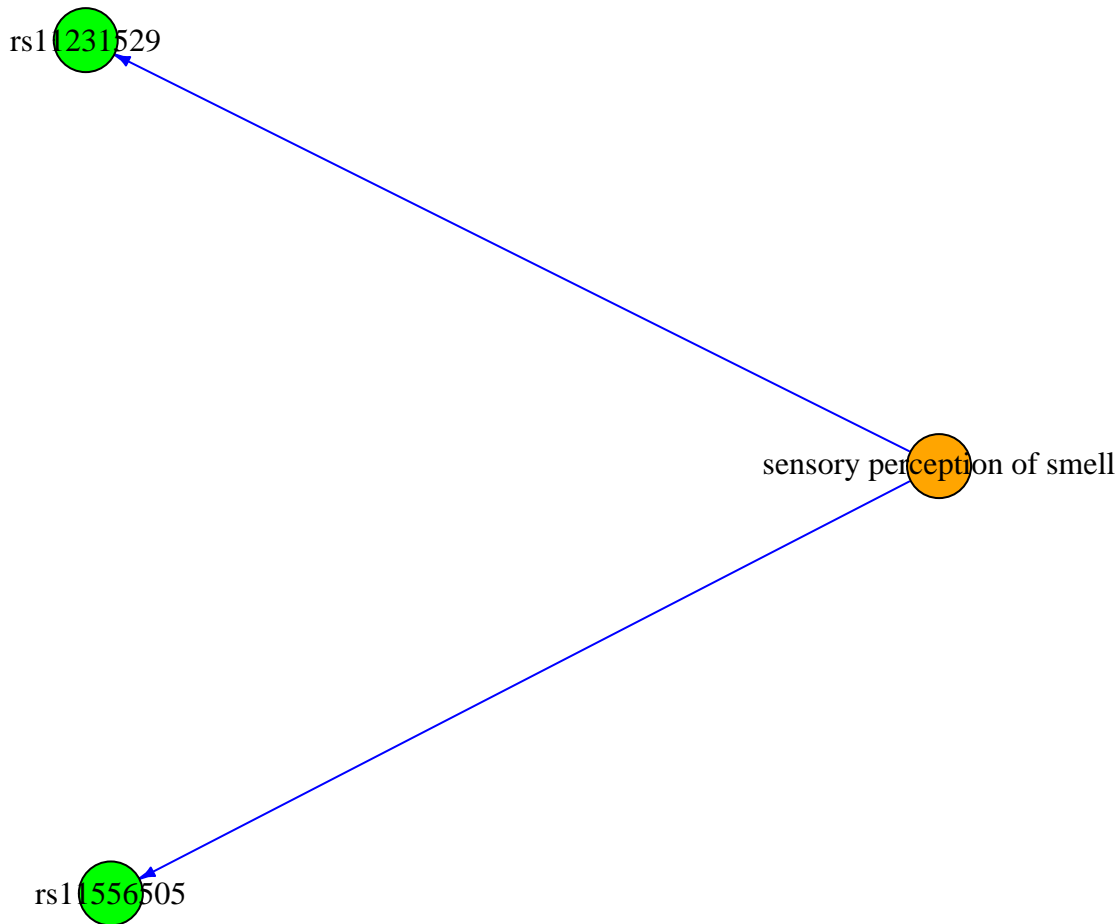

## Variant–Disease Network (t-tau:Ab1:42 ratio)

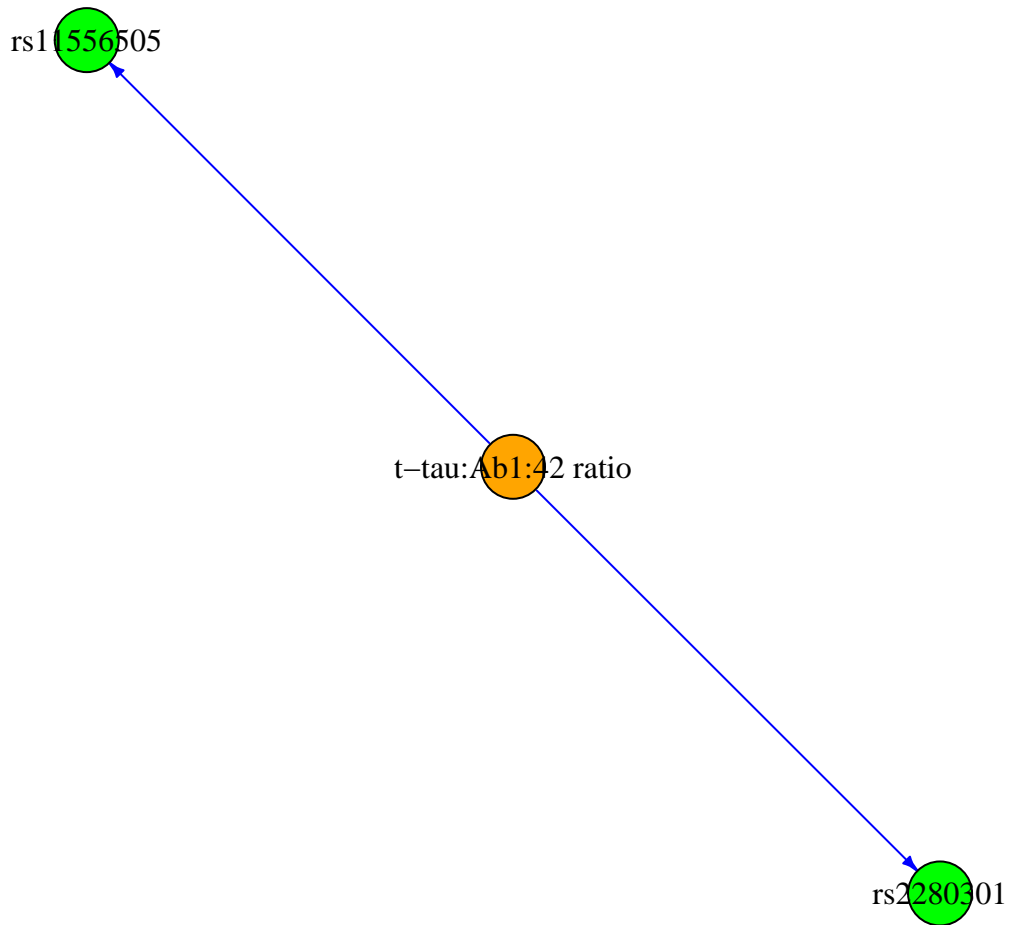



## Variant-Disease Network (t-tau measurement)

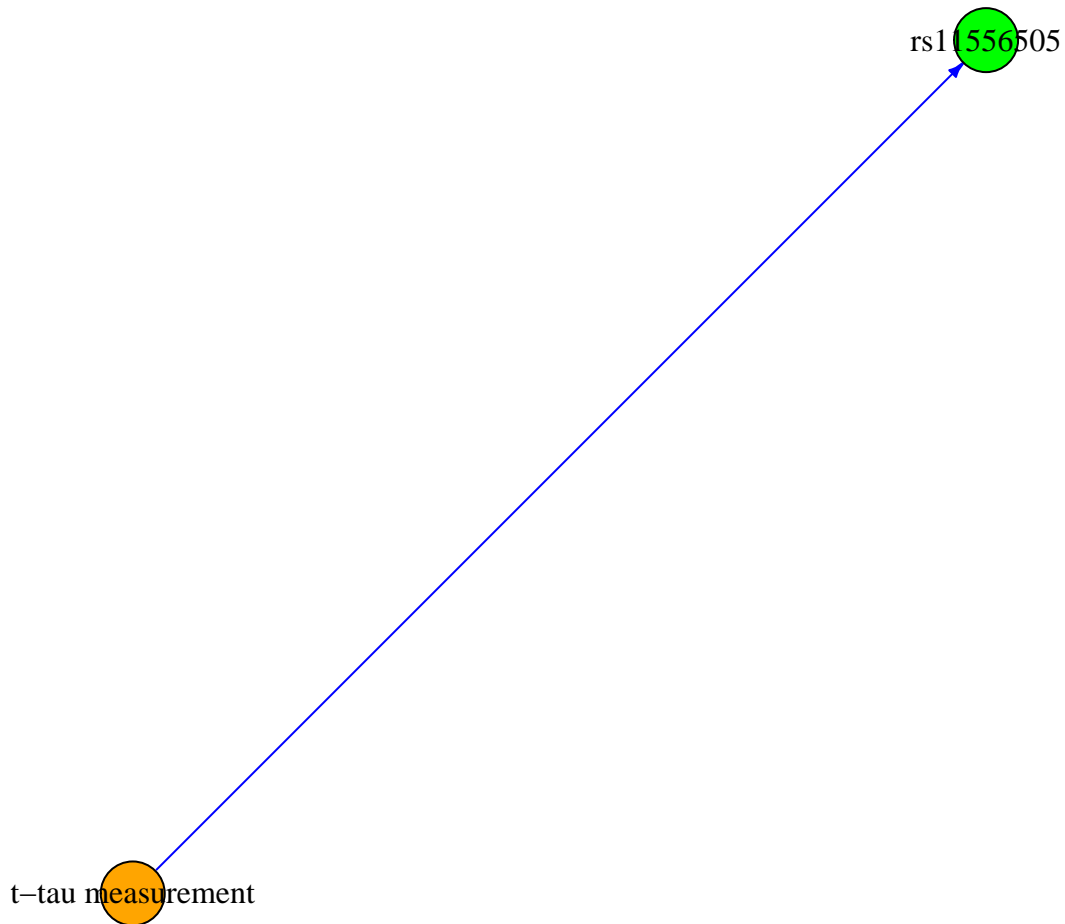

**Variant–Disease Network (atrial fibrillation)**

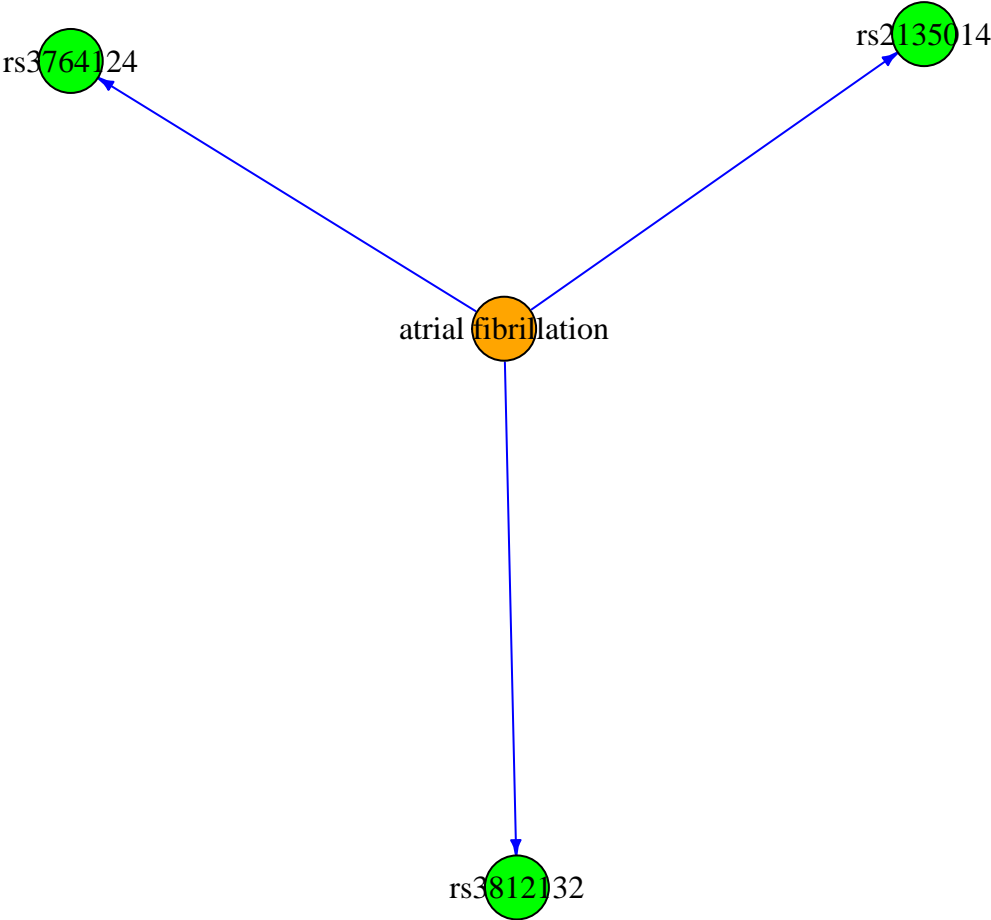

Variant–Disease Network (response to paliperidone)

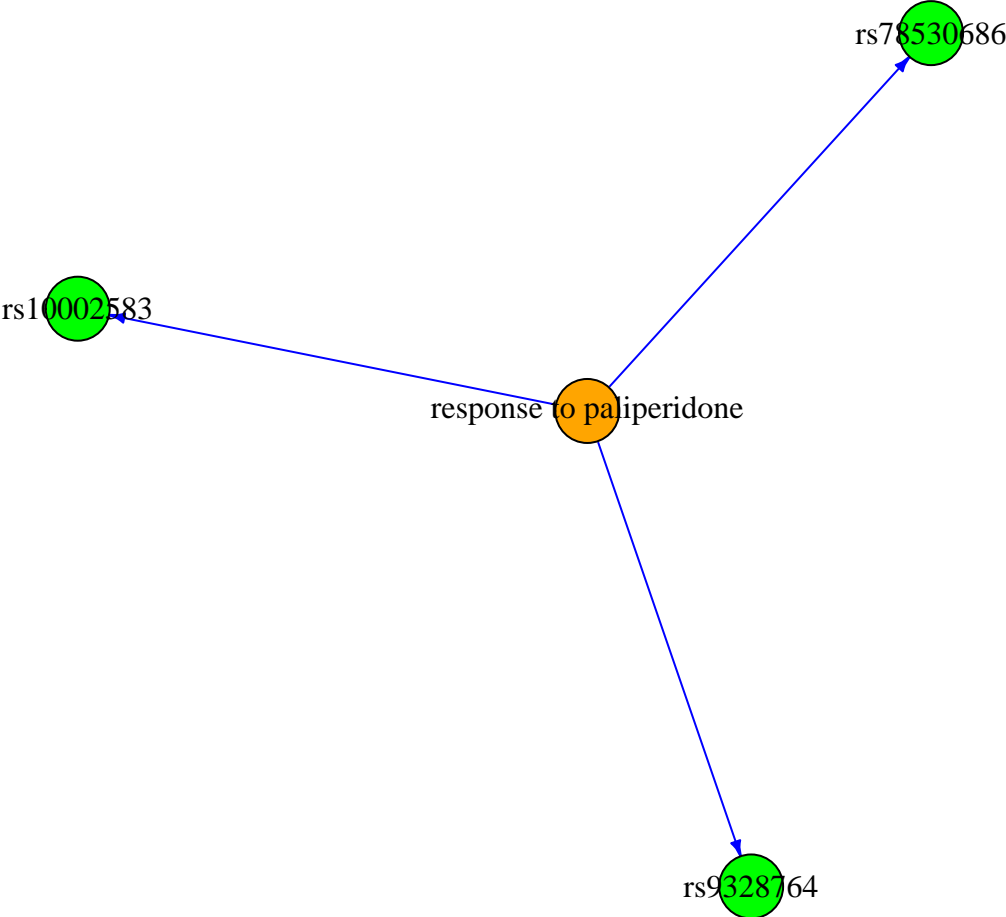

Variant–Disease Network (schizophrenia symptom severity measurement)

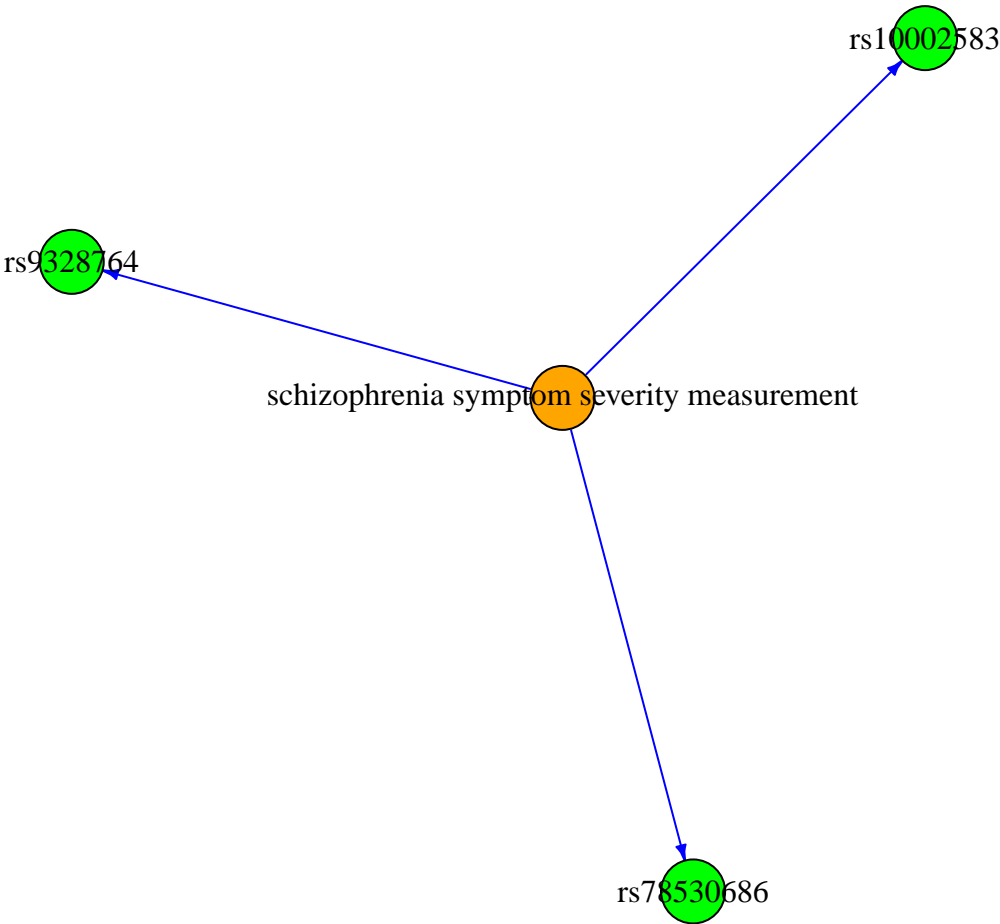

**Variant–Disease Network (nicotine dependence symptom count)**

nicotine dependence symptom count

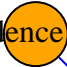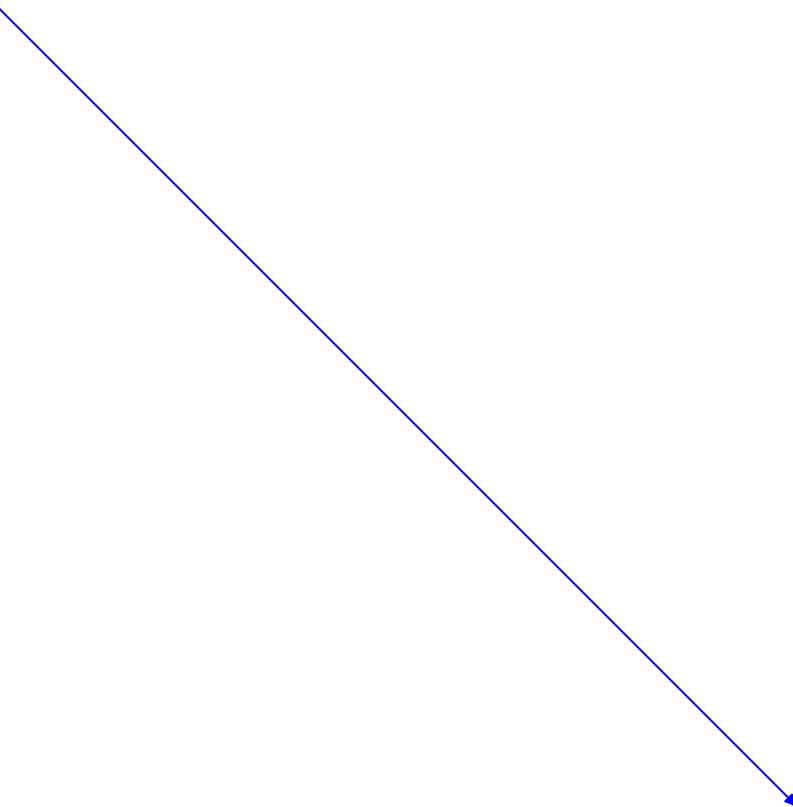

rs3924871

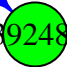

## Variant–Disease Network (endometrial neoplasm)

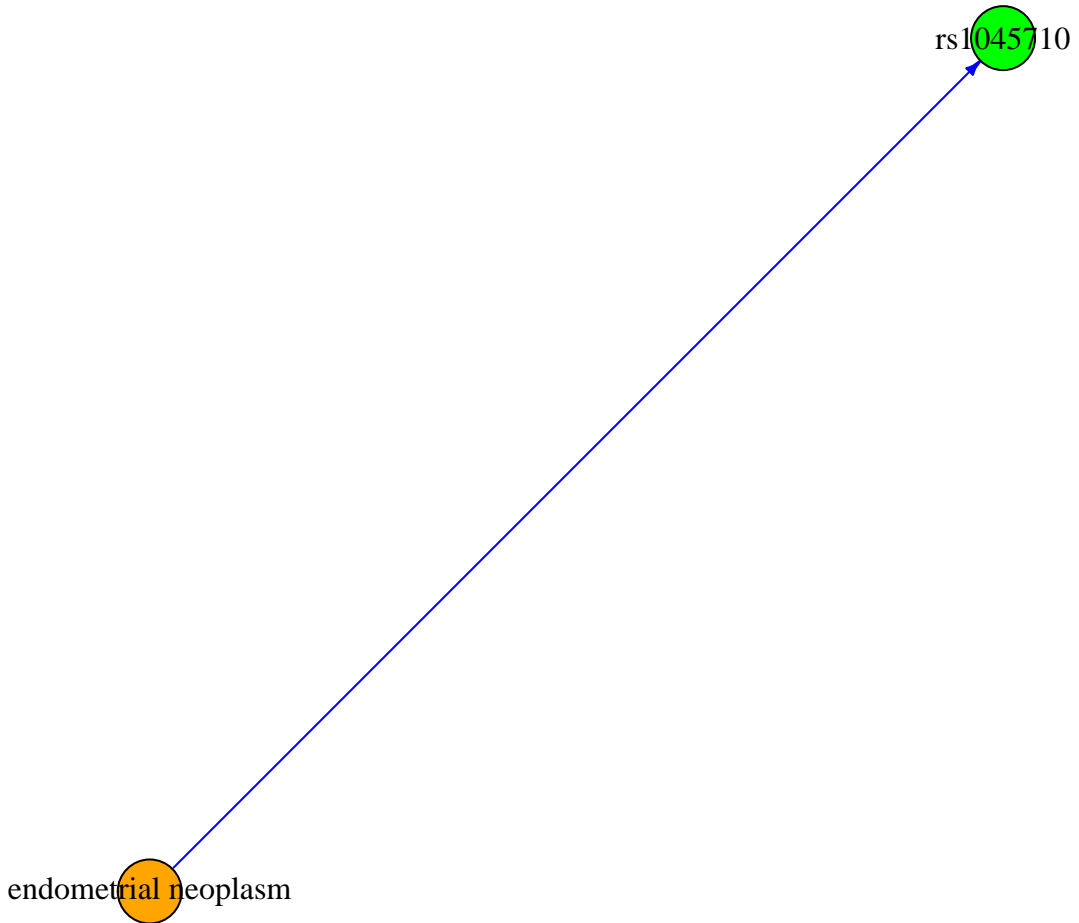

## Variant–Disease Network (Astigmatism)

Astigmatism

rs3803423



# Variant–Disease Network (white matter hyperintensity measurement)

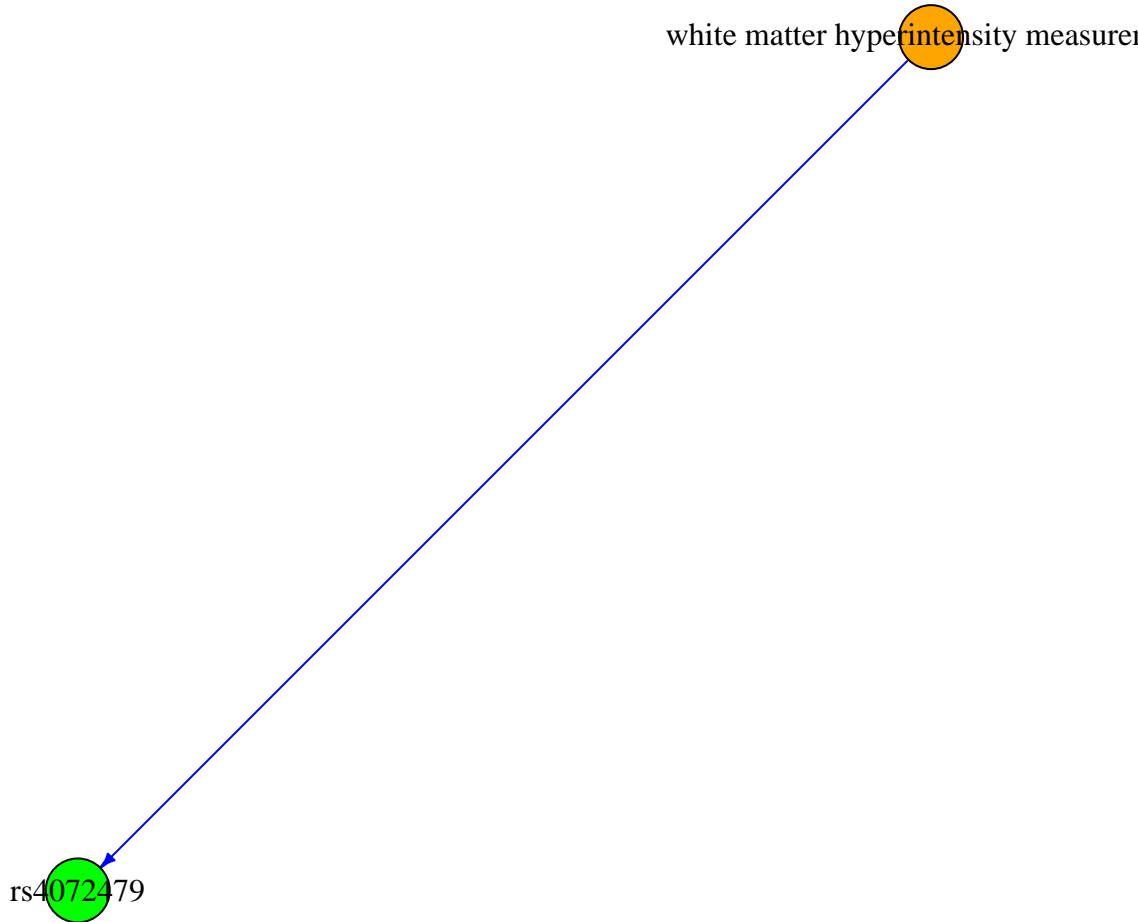



# Variant–Disease Network (red blood cell distribution width)

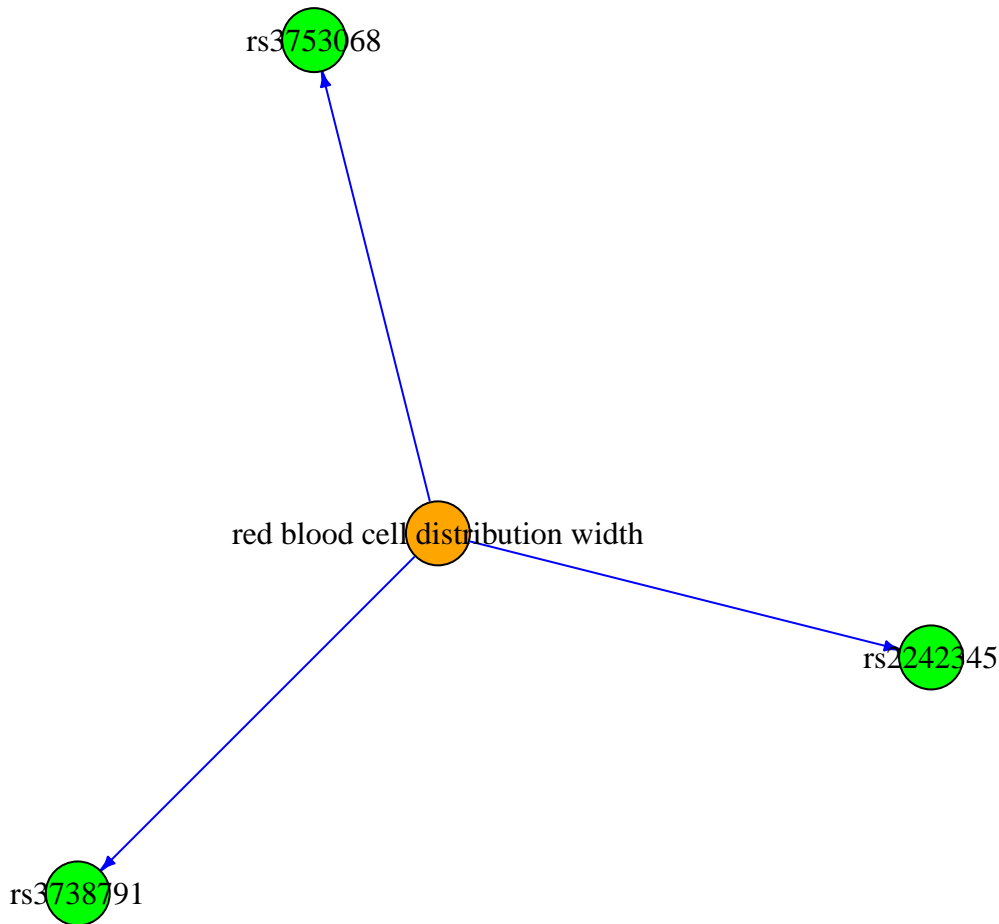

Variant–Disease Network (selenium measurement)

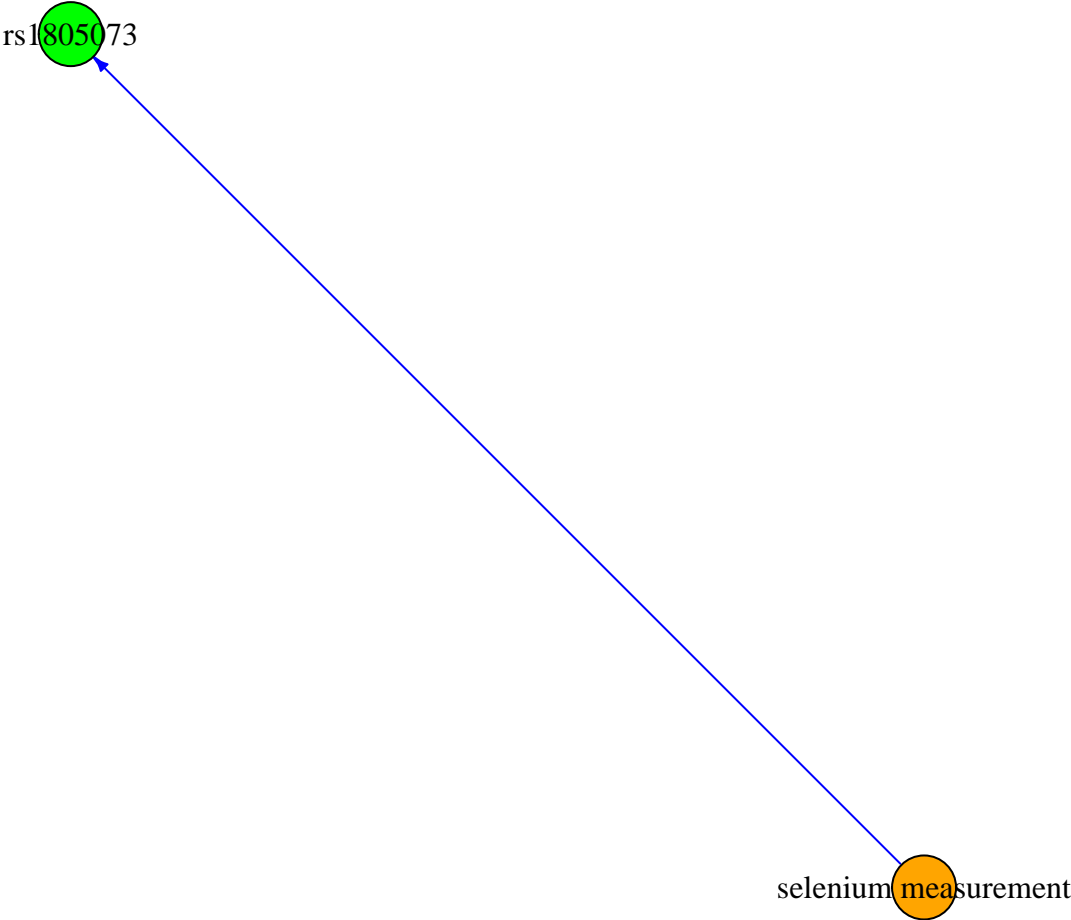

## Variant–Disease Network (serum selenium measurement)

serum selenium measurement

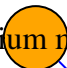

rs1805073

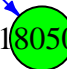

## Variant–Disease Network (vital capacity)

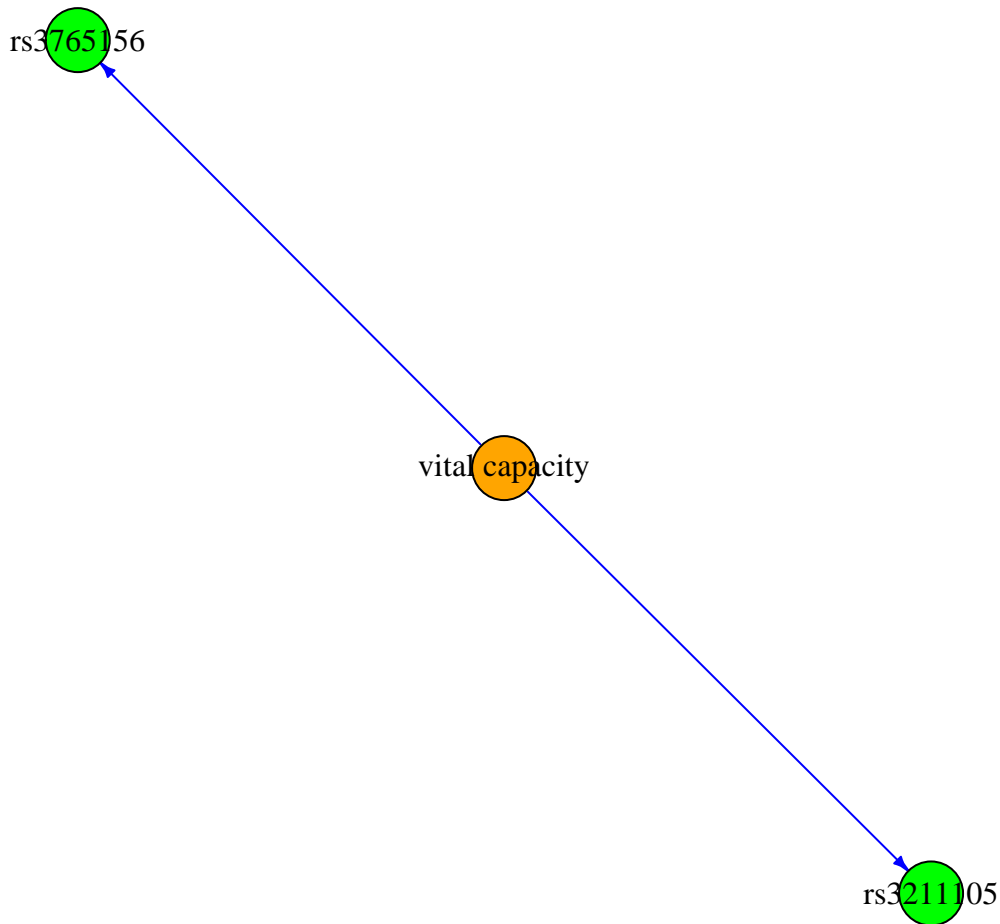

## Variant–Disease Network (essential tremor)

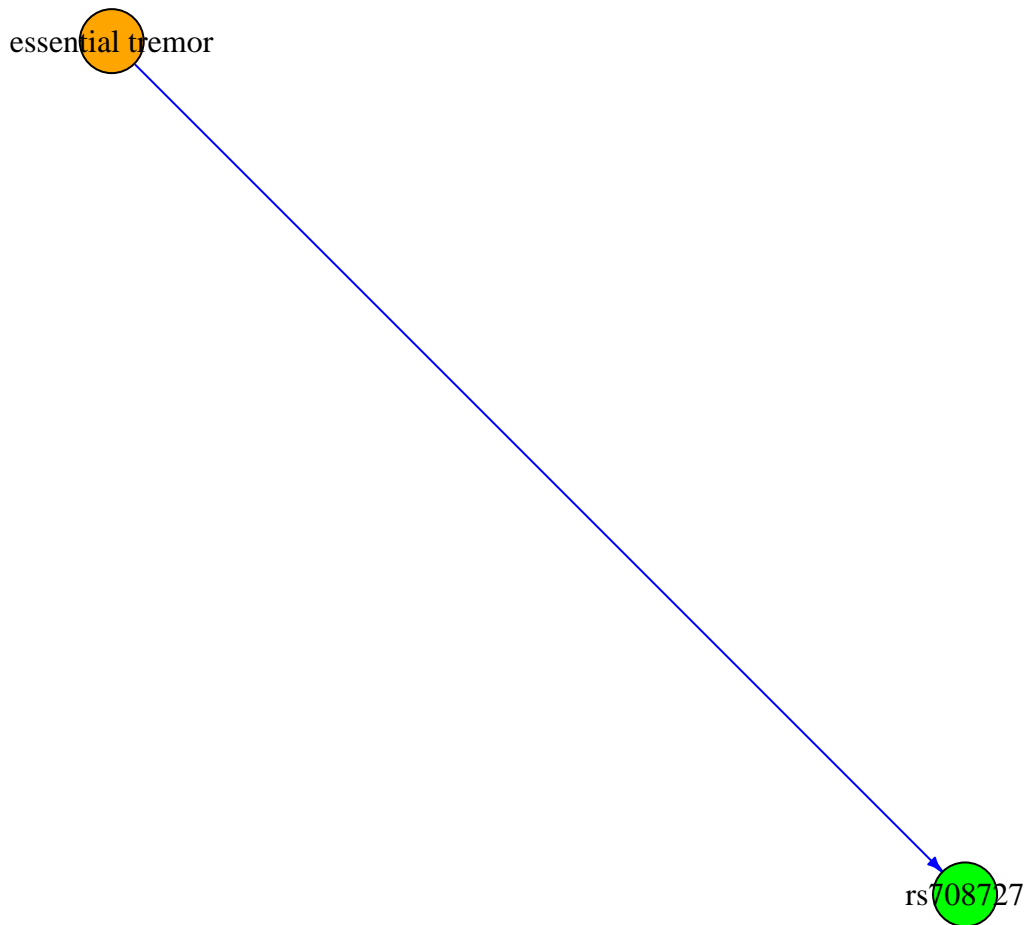

## Variant–Disease Network (alcoholic pancreatitis)

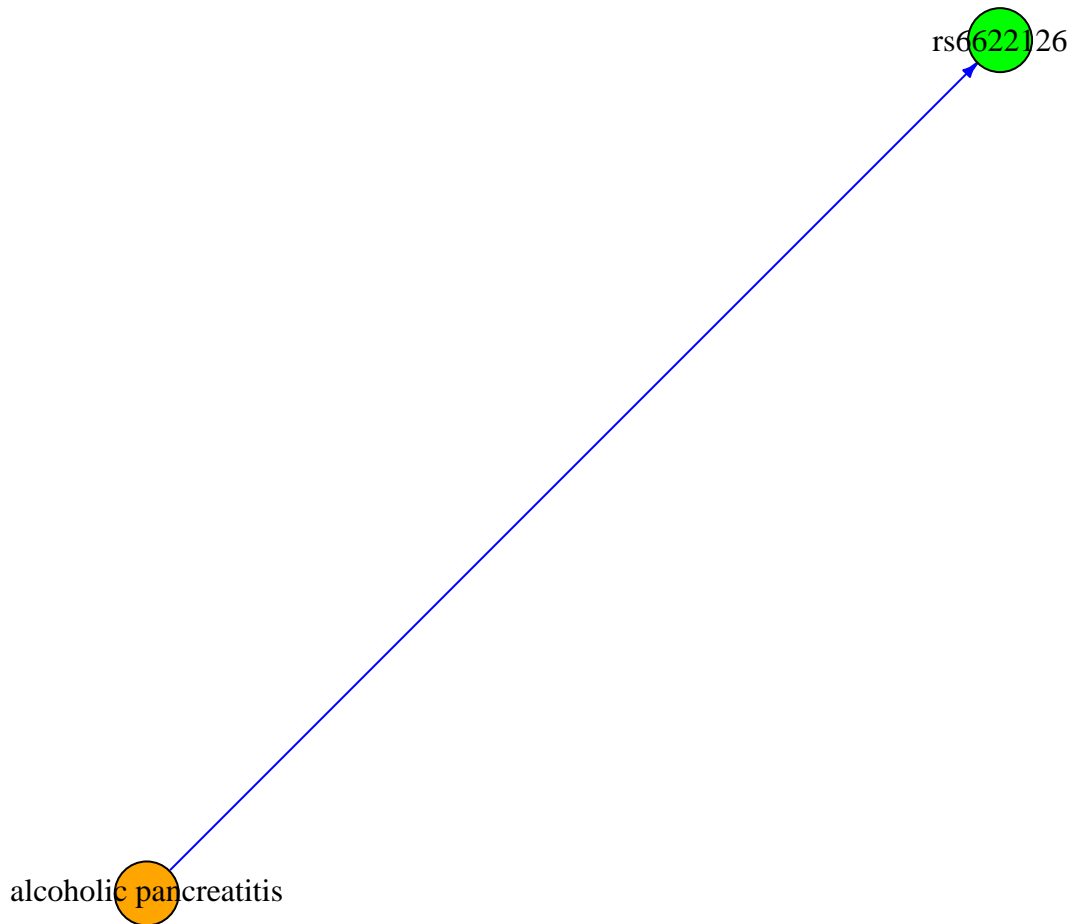

# Variant–Disease Network (eosinophil percentage of granulocytes)

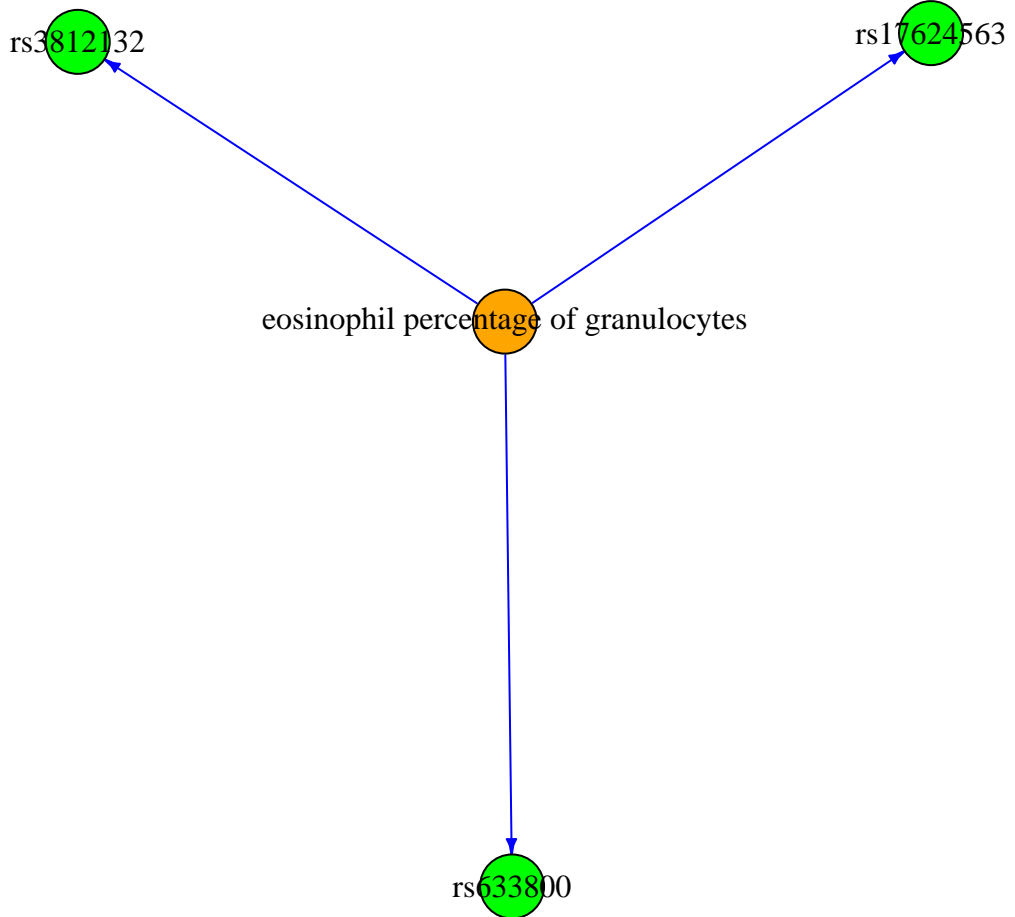

Variant–Disease Network (eosinophil percentage of white cells)

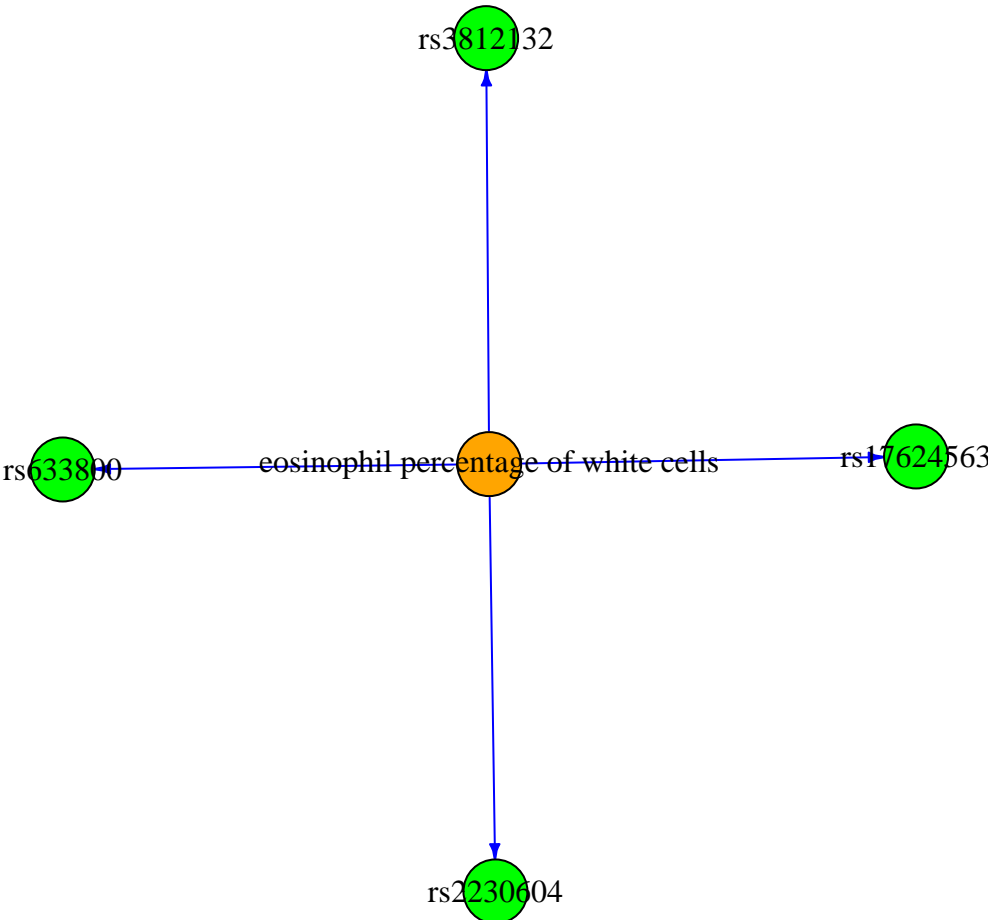



# Variant–Disease Network (neutrophil percentage of granulocytes)

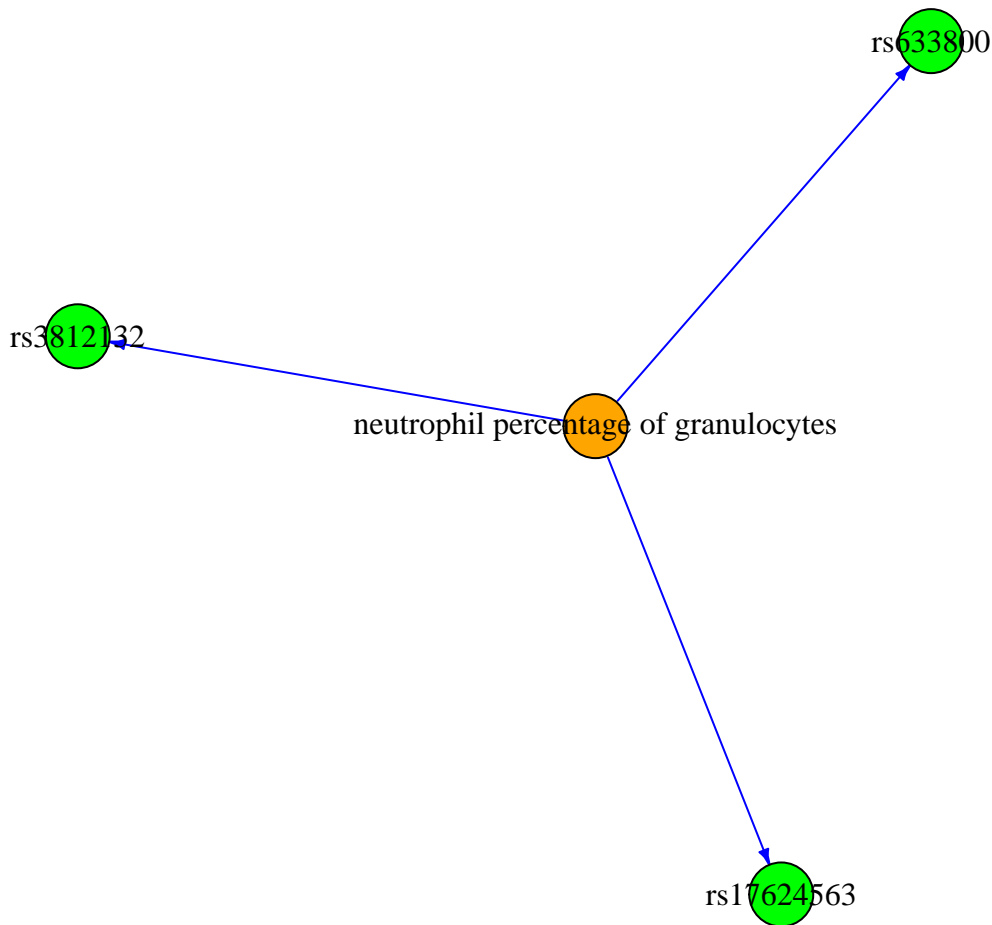

## Variant–Disease Network (chronic kidney disease)

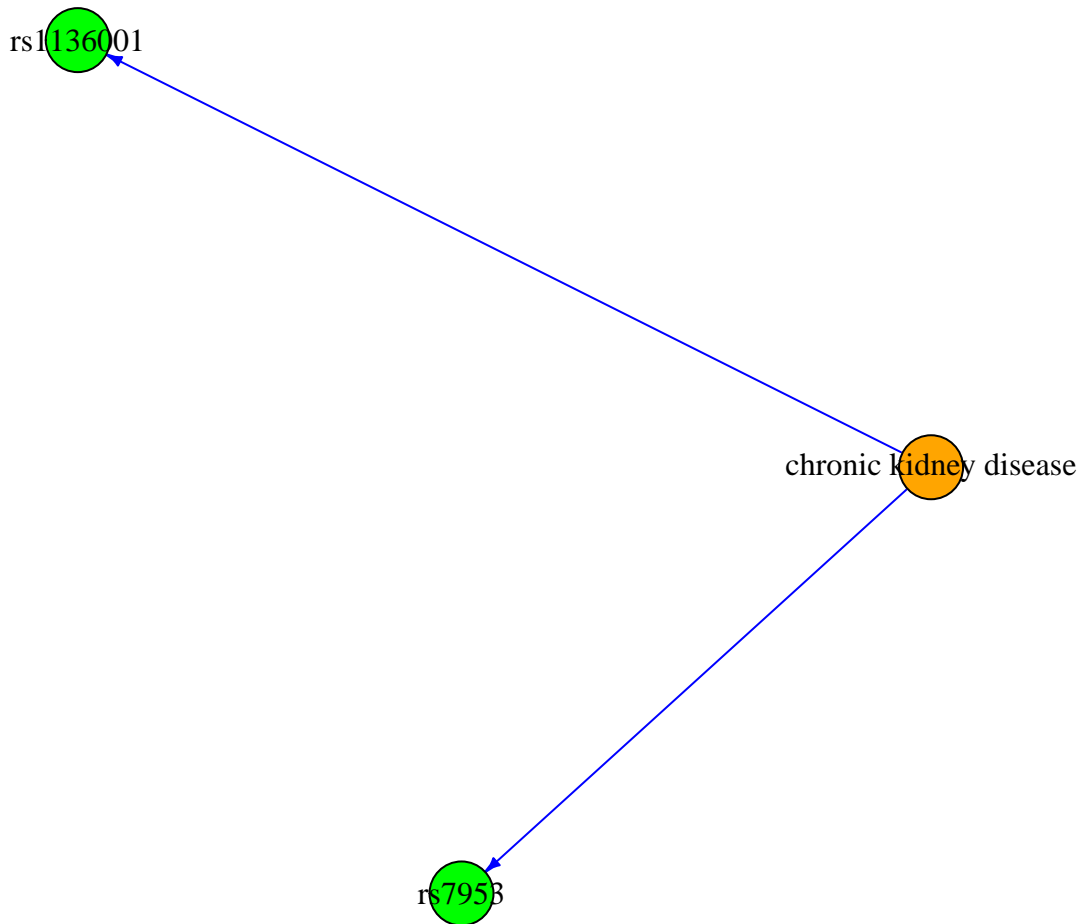

## Variant–Disease Network (colorectal health)

colorectal health

rs6580942

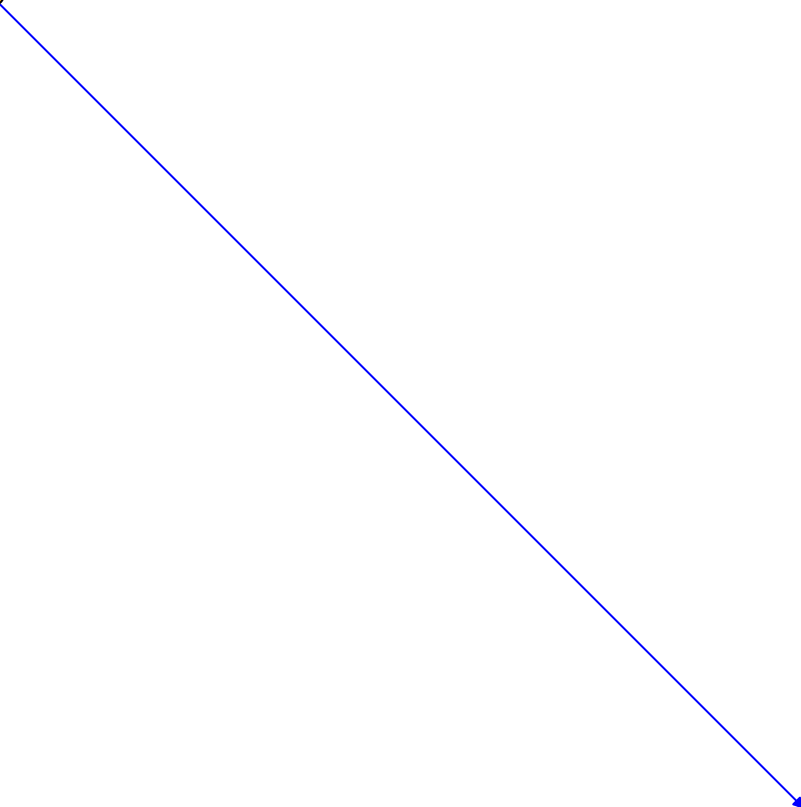

**Variant–Disease Network (femoral neck bone mineral density)**

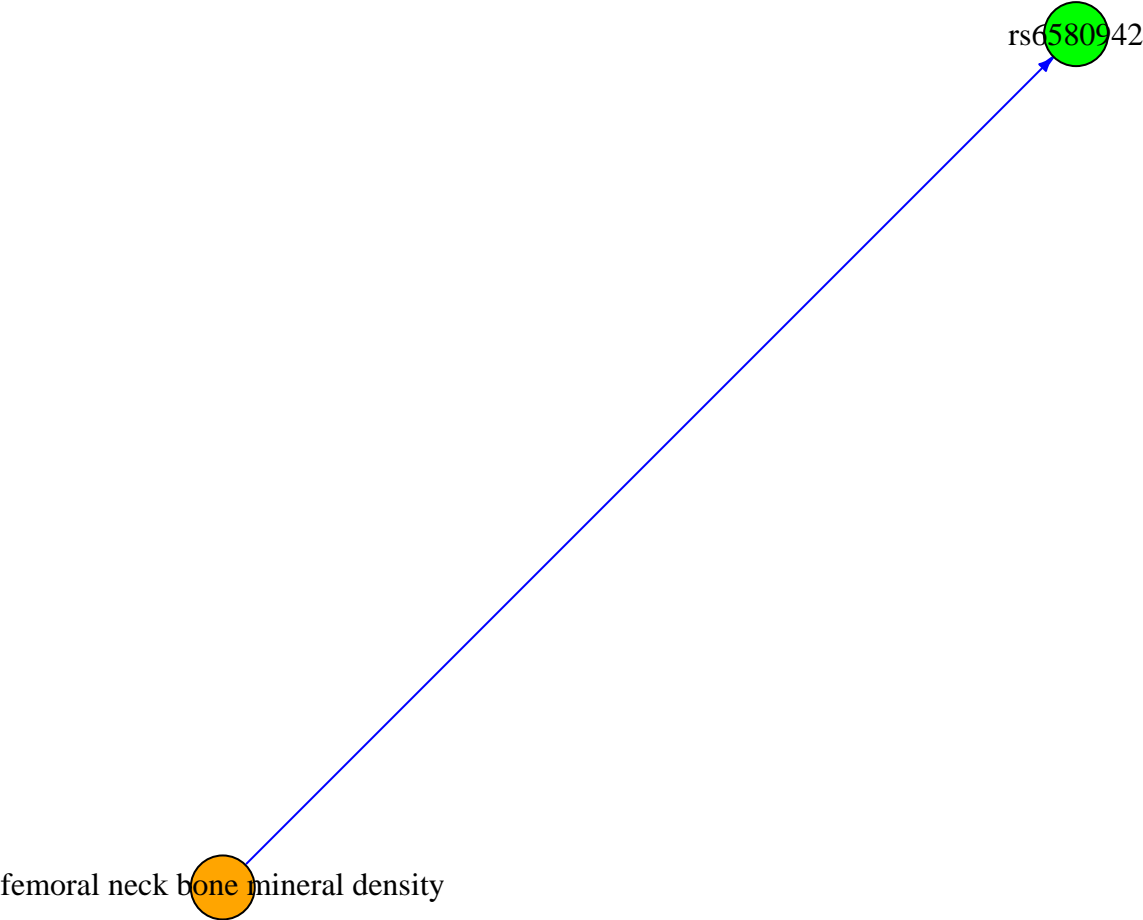

## Variant–Disease Network (spine bone mineral density)

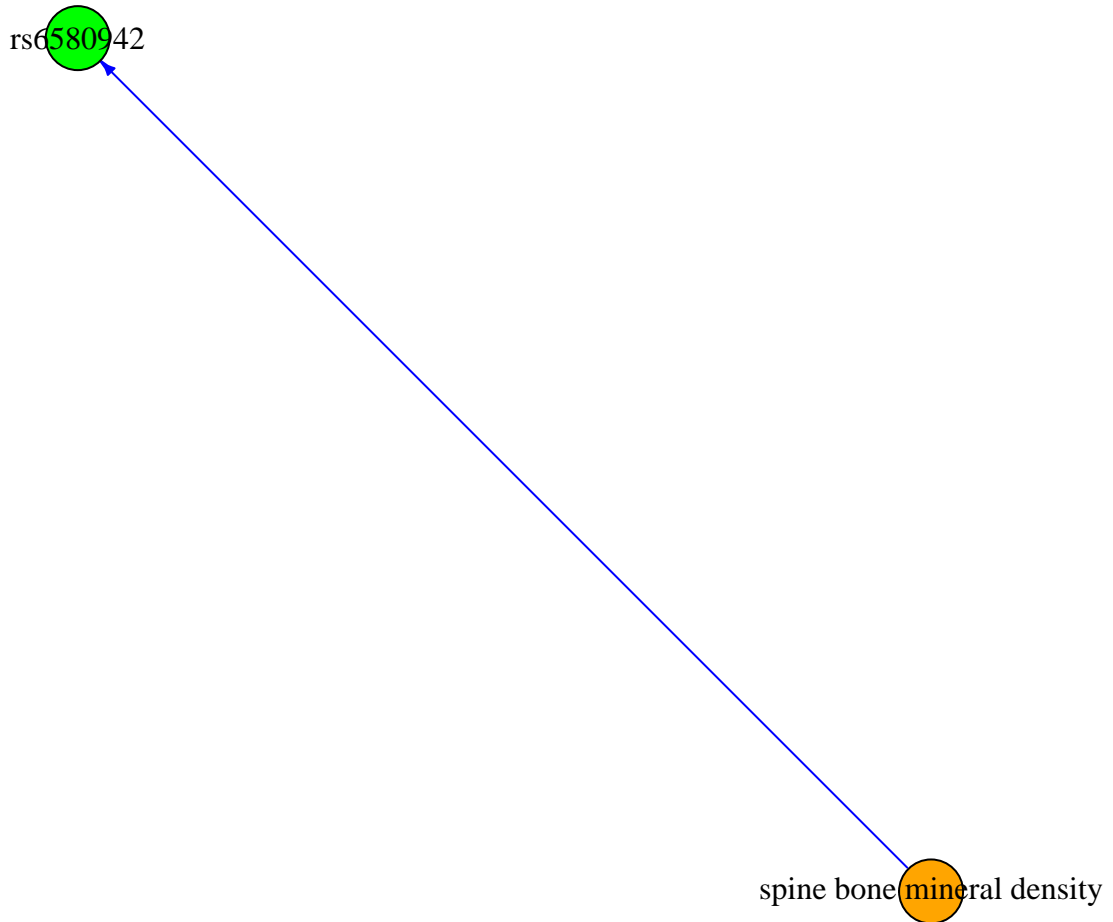

Variant–Disease Network (response to selective serotonin reuptake inhibitor)

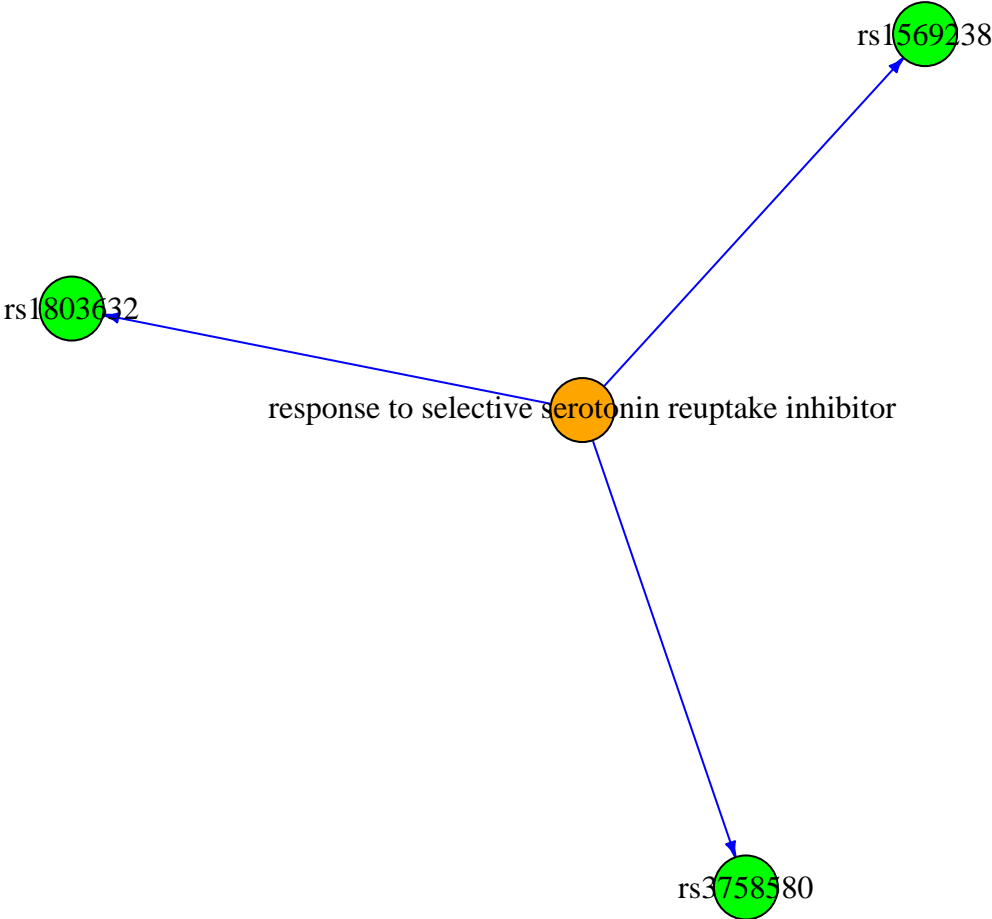

## Variant–Disease Network (granulocyte count)

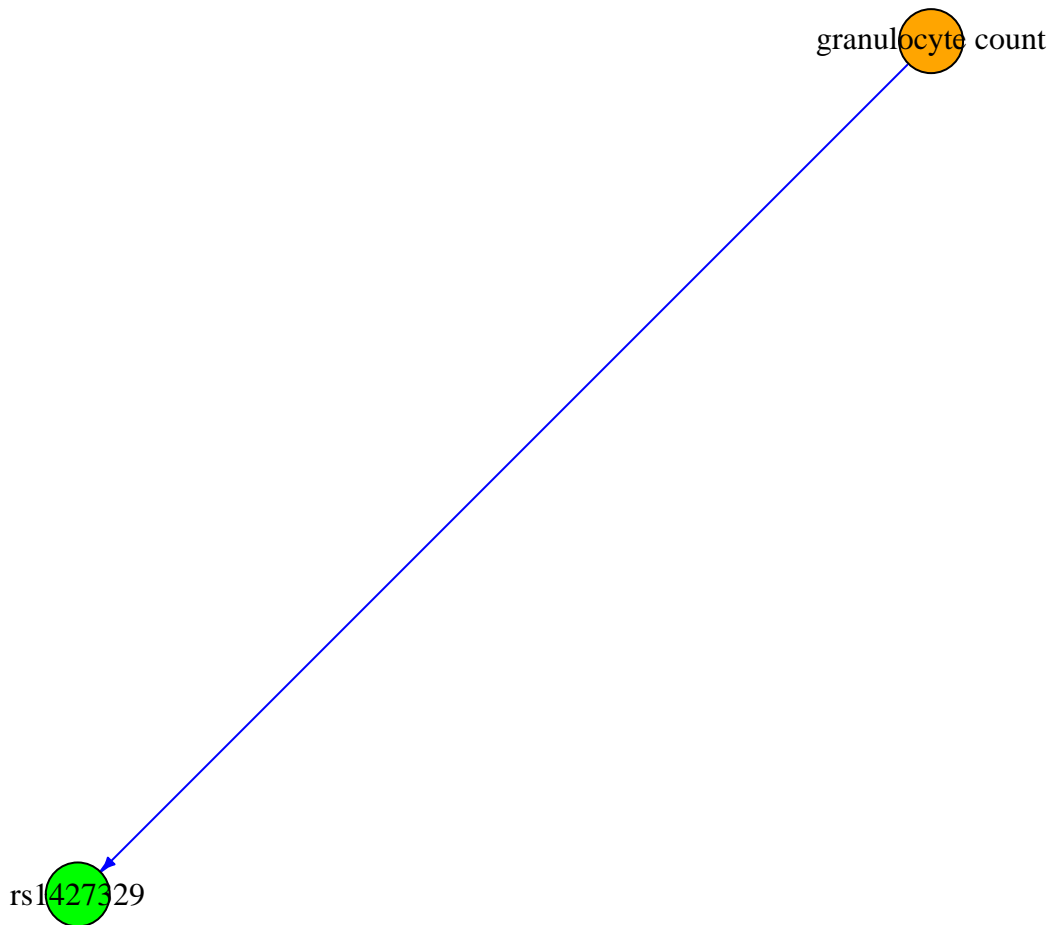

Variant–Disease Network (neutrophil percentage of white cells)

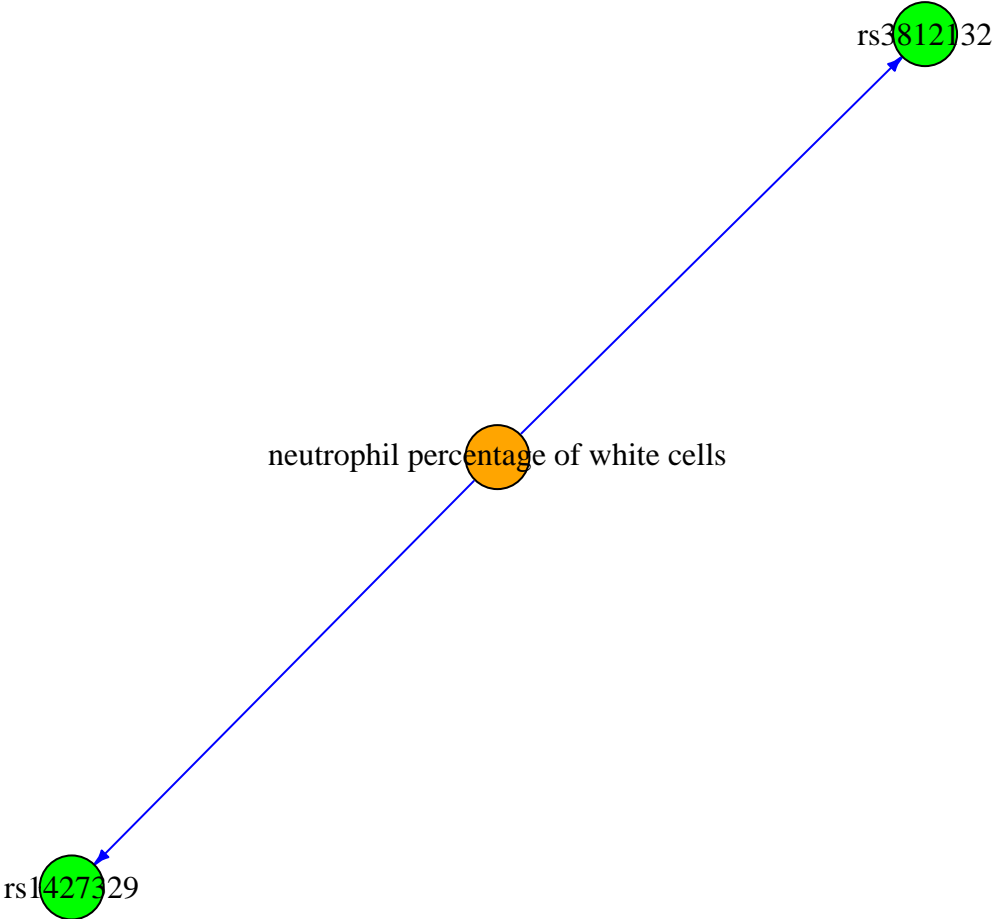



## Variant–Disease Network (alcohol drinking)

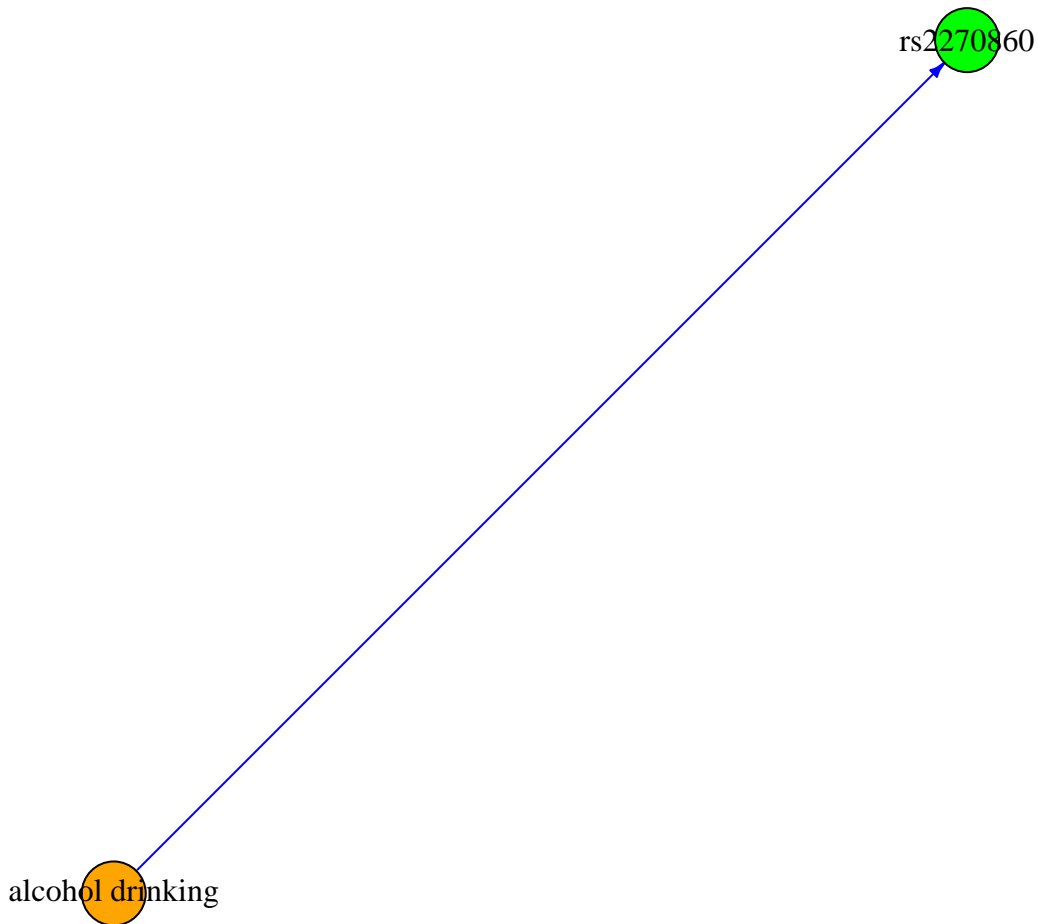

## Variant–Disease Network (igfbp–3 measurement)

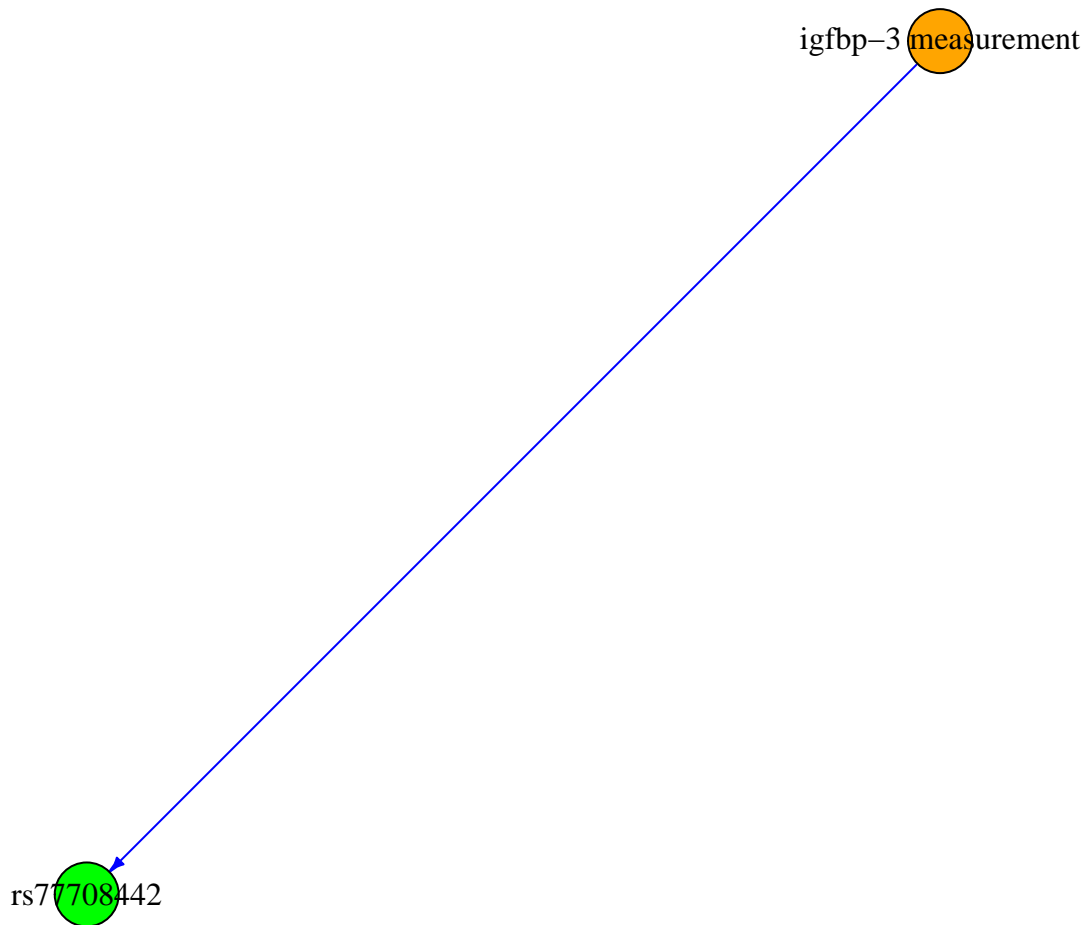

## Variant–Disease Network (suntan)

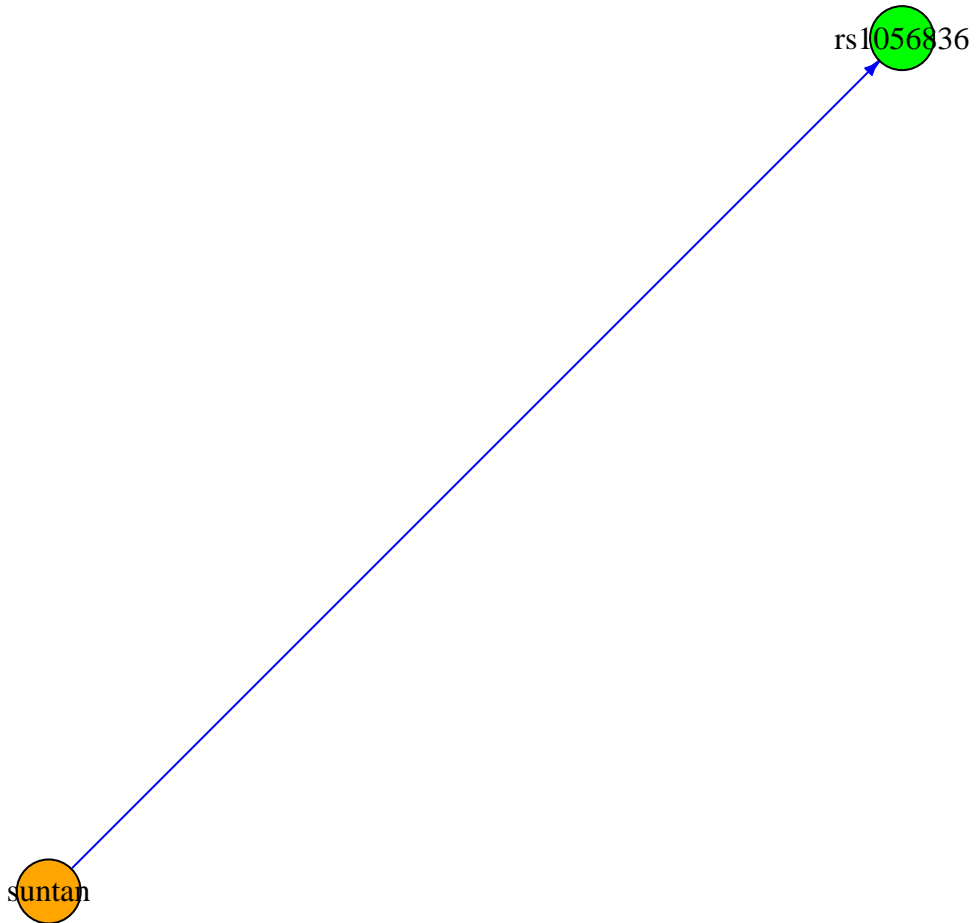

## Variant–Disease Network (suicide behaviour)

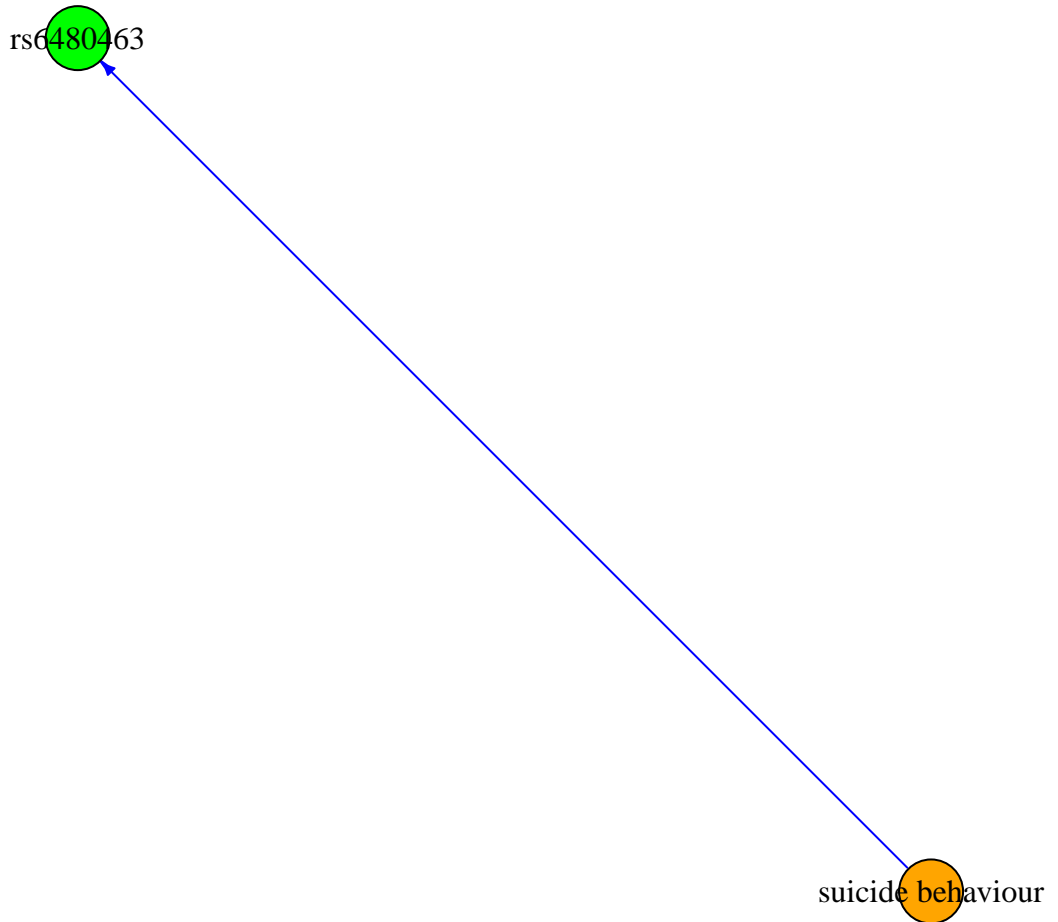

## Variant–Disease Network (progressive supranuclear palsy)

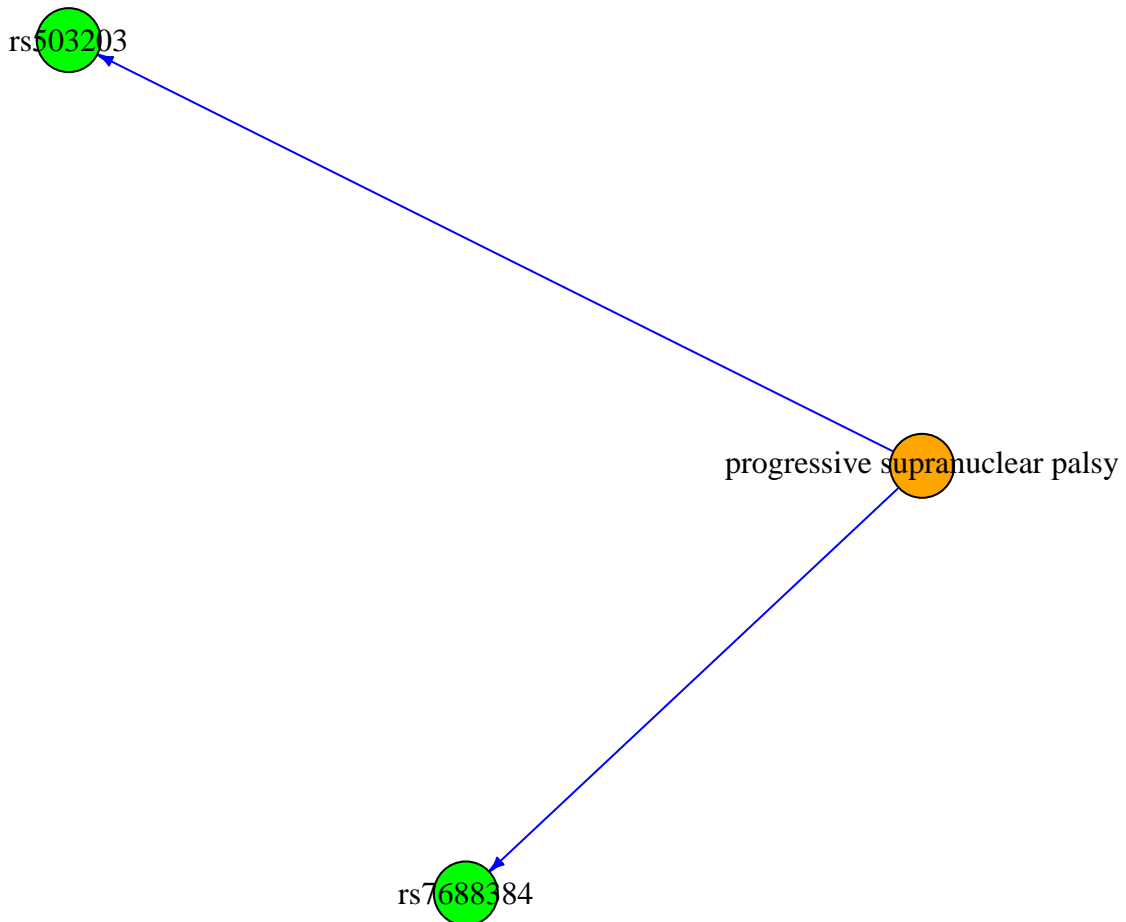

# Disease Network (dual specificity mitogen-activated protein kinase kinase 2 network)

by mitogen-activated protein kinase kinase 2 measurement

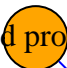

rs3764124

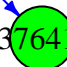

## Variant–Disease Network (lupus nephritis)

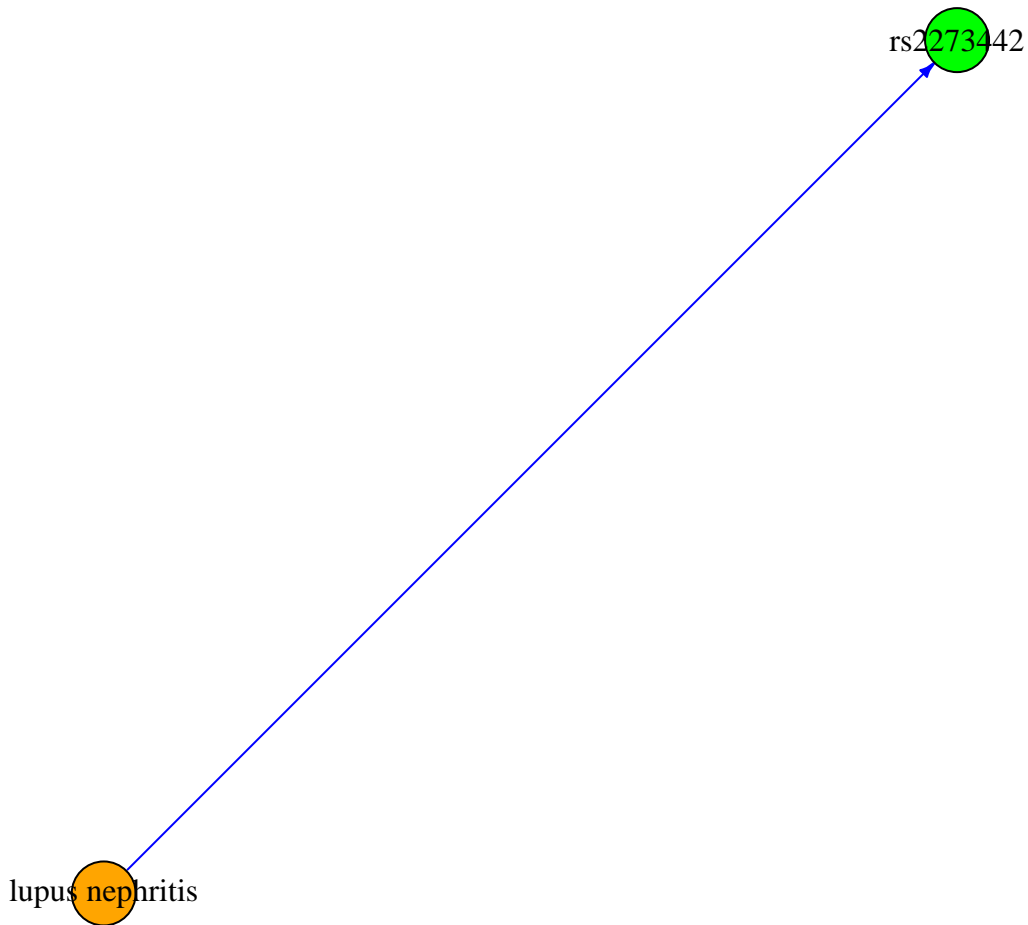

## Variant–Disease Network (IgF–1 measurement)

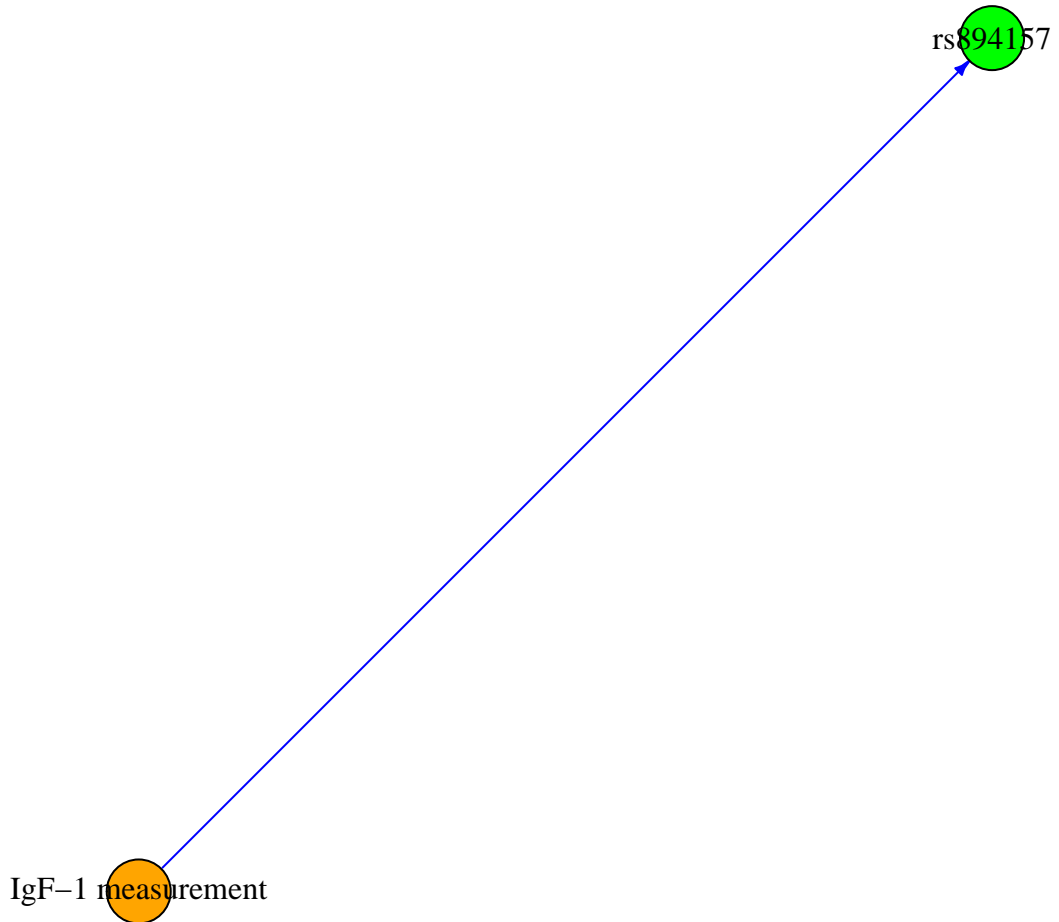



## Variant–Disease Network (cathepsin S measurement)

cathepsin S measurement

rs1336900

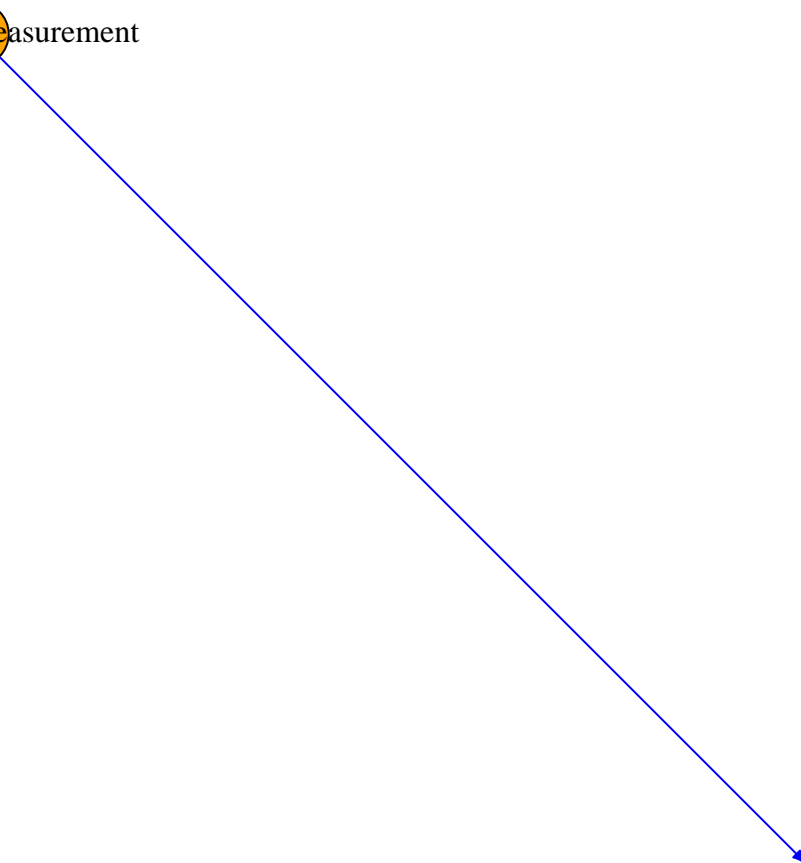

## Variant–Disease Network (CCL2 measurement)

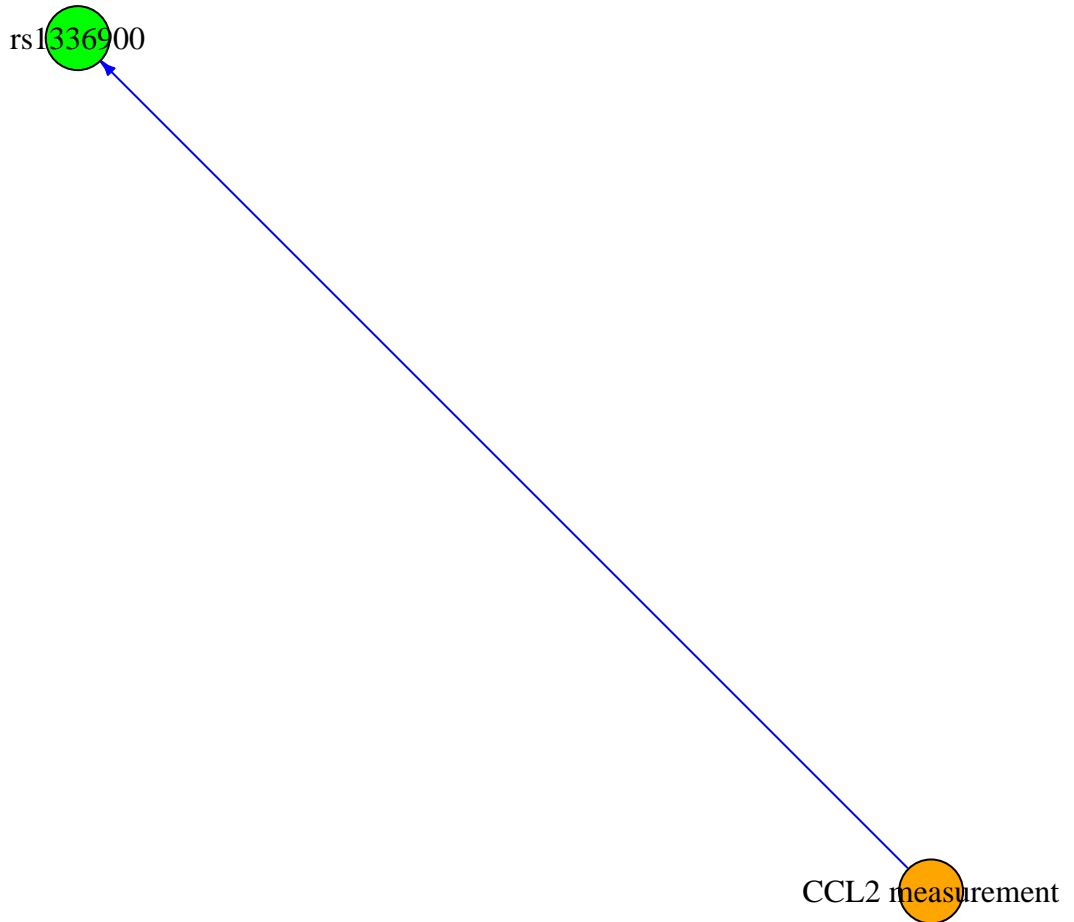

## Variant–Disease Network (fat body mass)

fat body mass

rs1336900



Variant–Disease Network (behavior or behavioral disorder measurement

behavior or behavioral disorder measurement

rs41275374

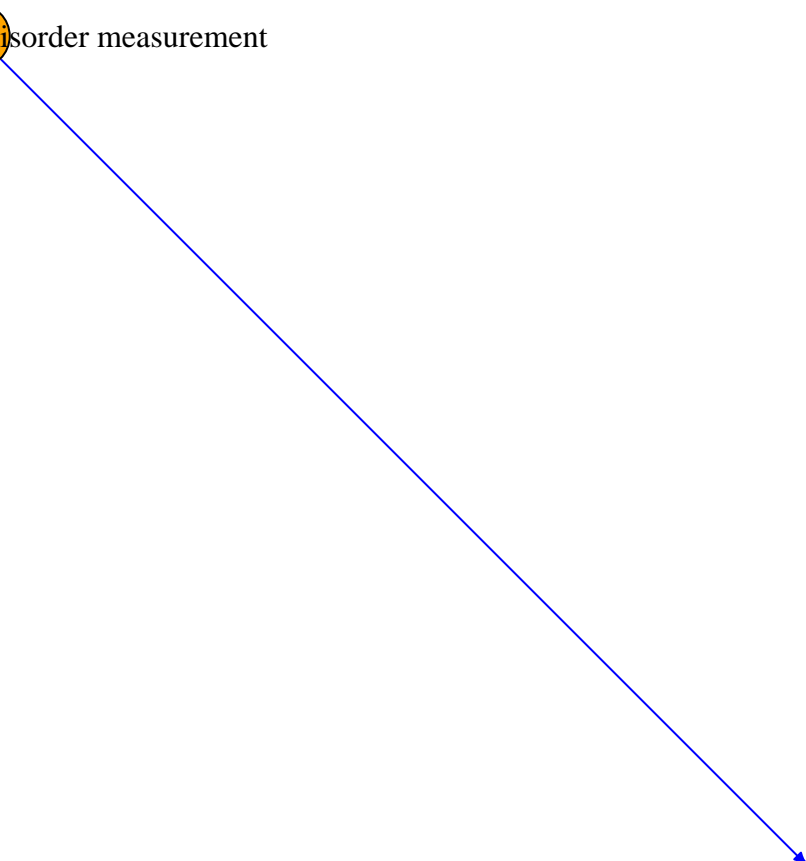

Variant–Disease Network (personality trait)

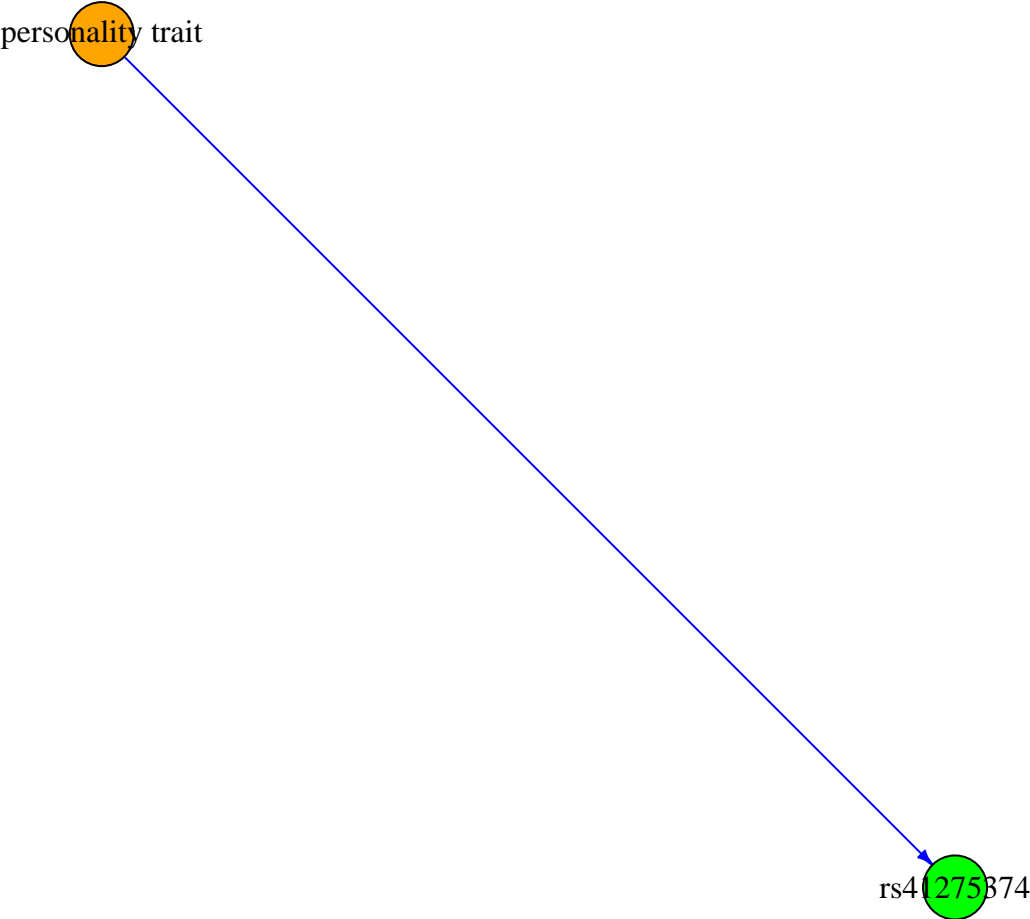

Variant–Disease Network (alpha-carotene measurement)

alpha-carotene measurement

rs1153936

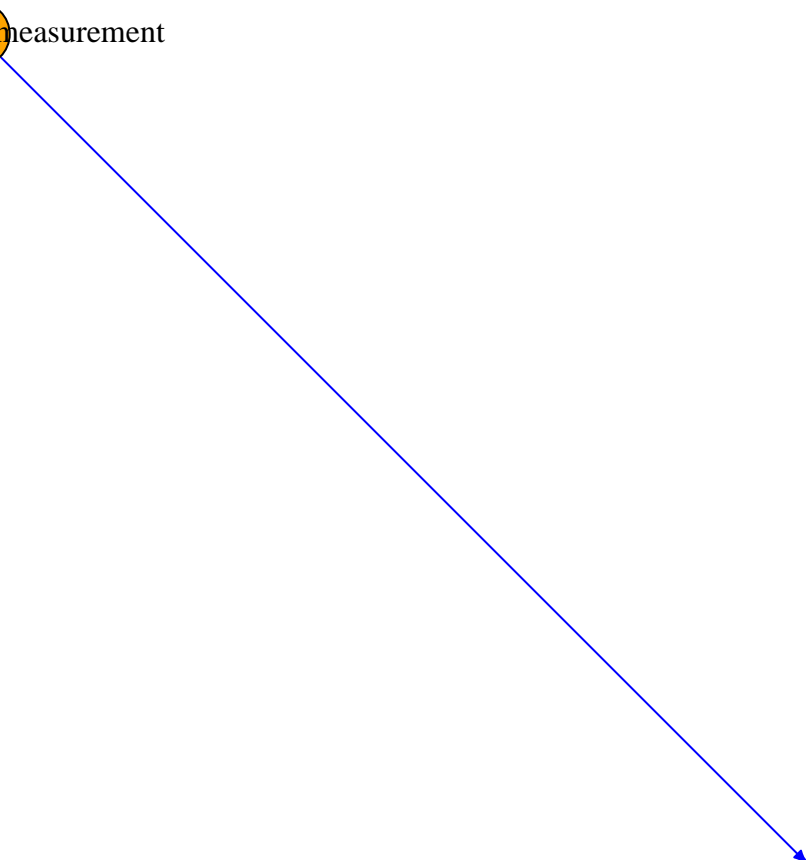

# Variant–Disease Network (amyloid plaque accumulation rate)

amyloid plaque accumulation rate

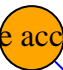

rs2303555

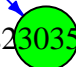

# Variant–Disease Network (maximal midexpiratory flow rate)

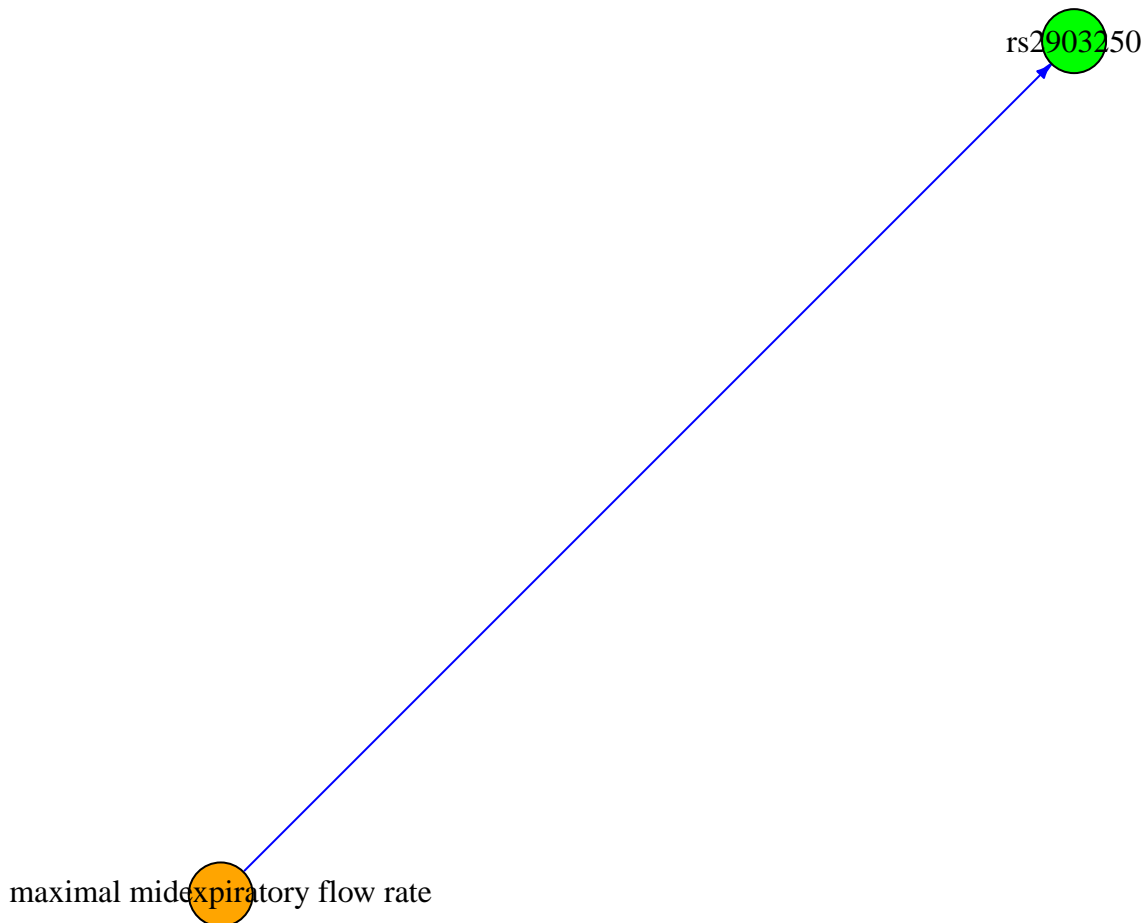



# Variant–Disease Network (cannabis dependence measurement)

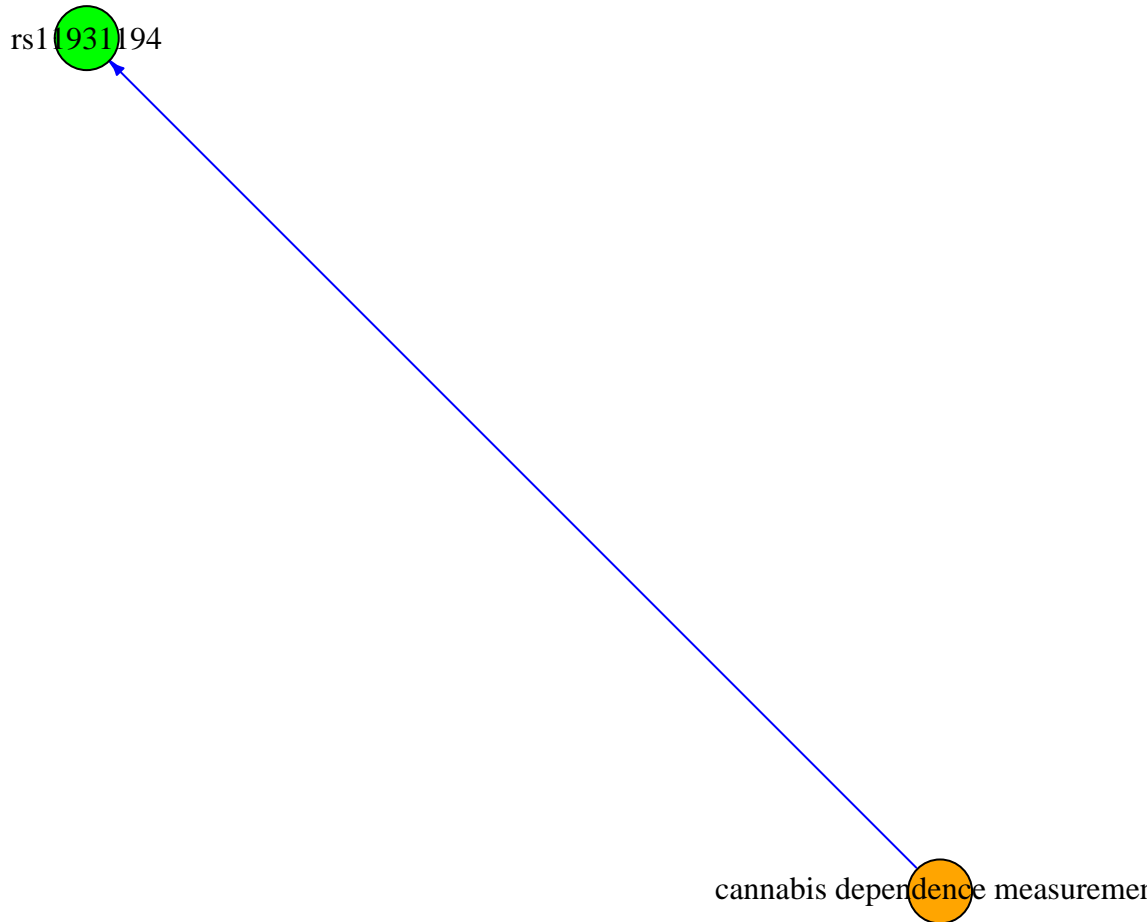

**Variant–Disease Network (congenital left–sided heart lesions)**

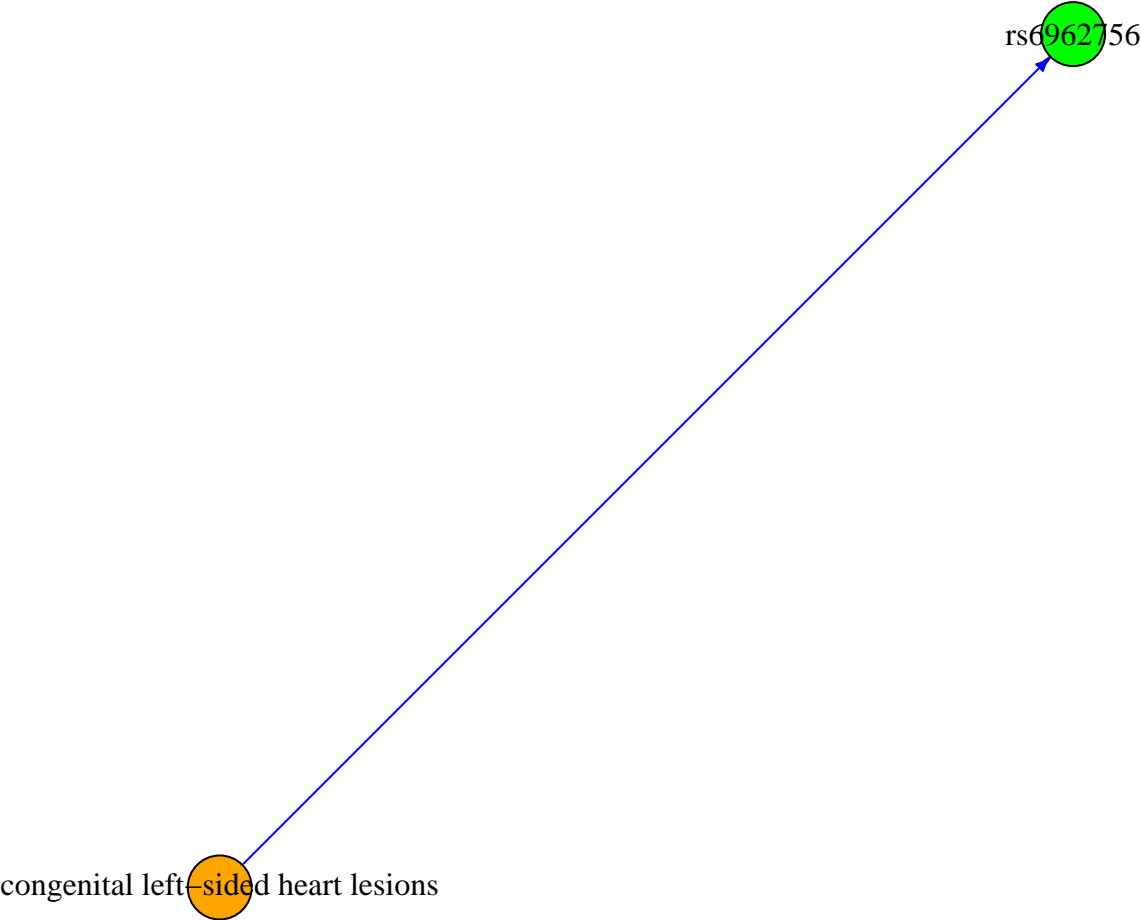

**Variant–Disease Network (information processing speed)**

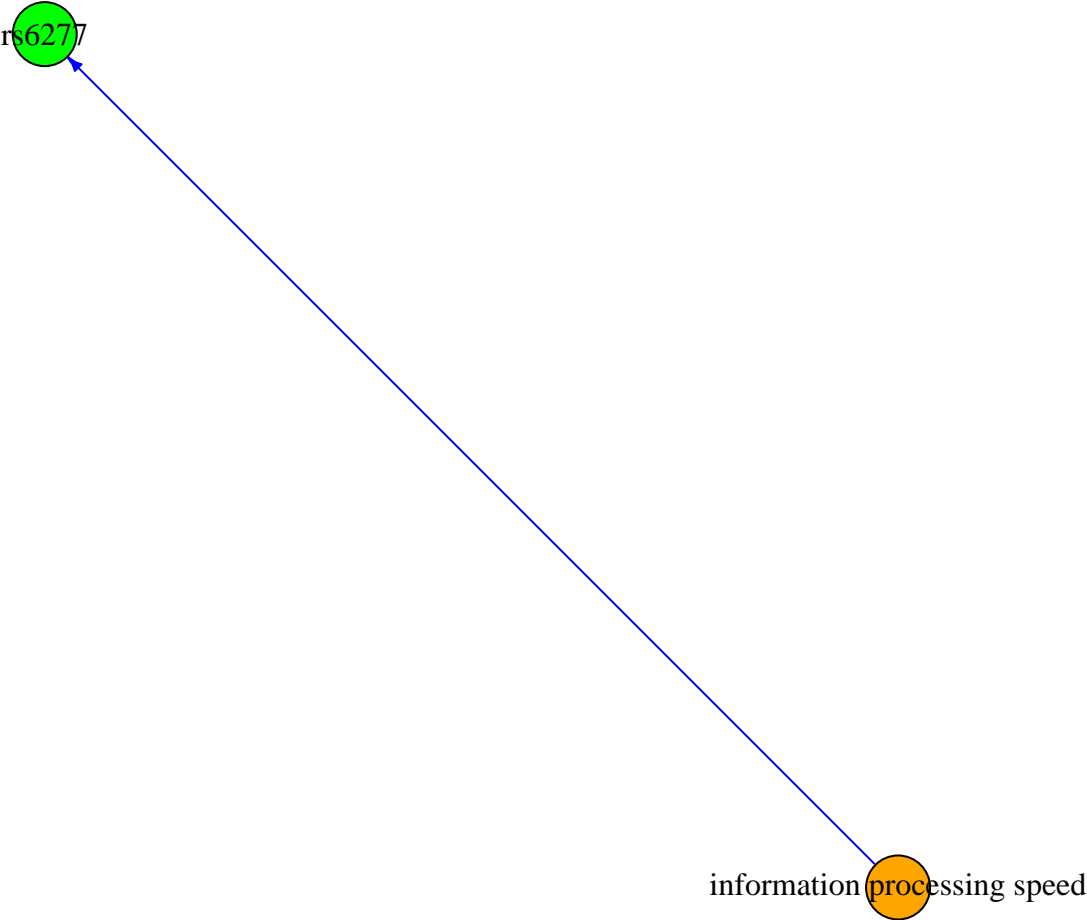

# Variant–Disease Network (BMI-adjusted waist–hip ratio)

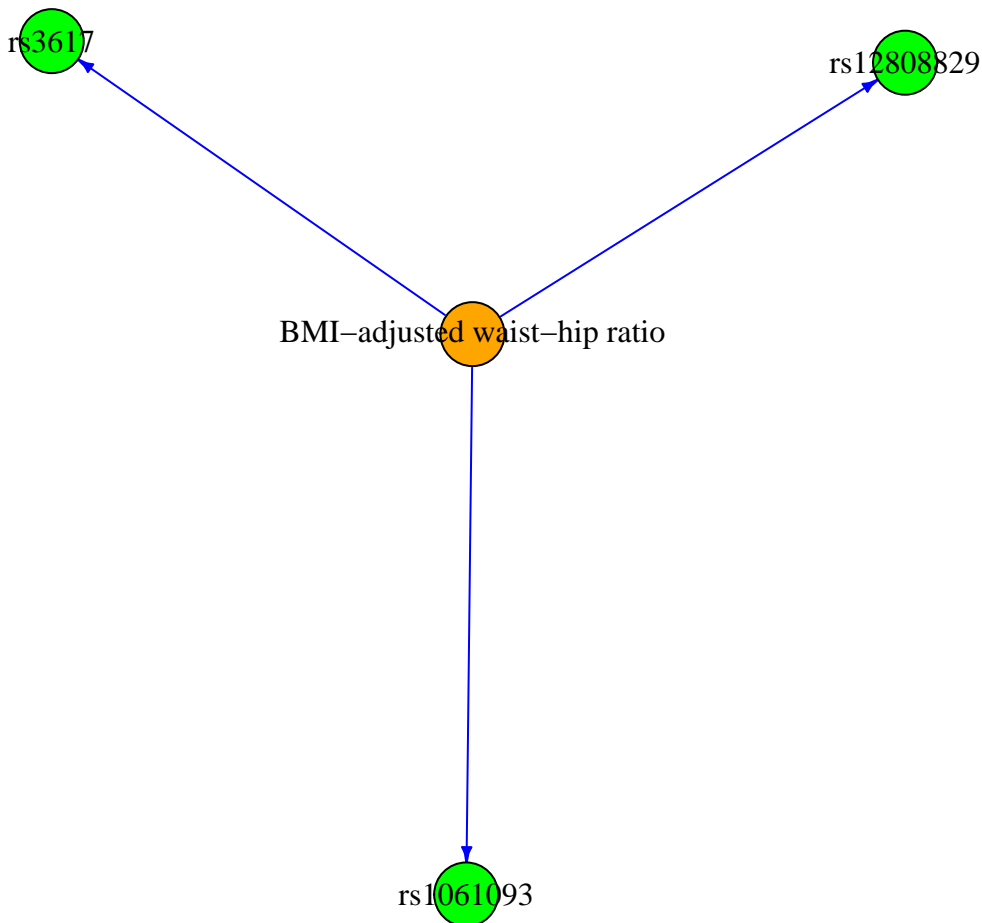

## Variant–Disease Network (DNA methylation)

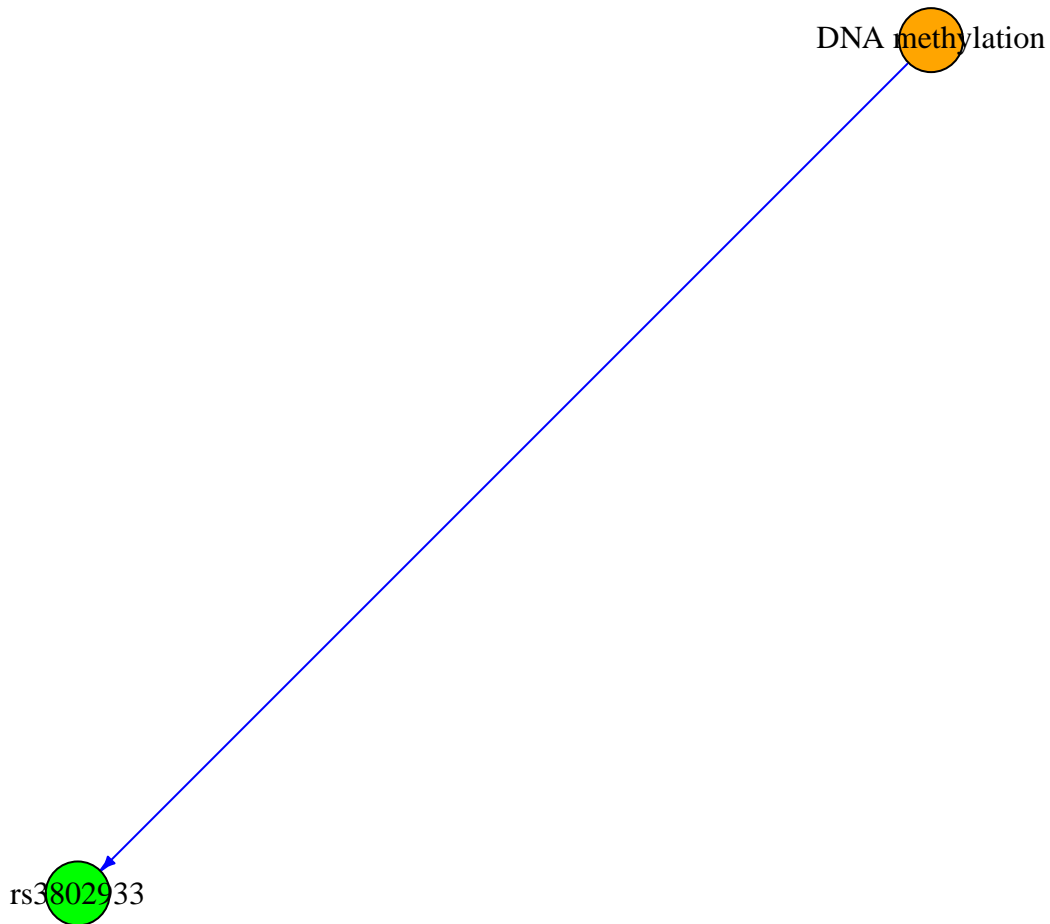

## Variant–Disease Network (response to risperidone)

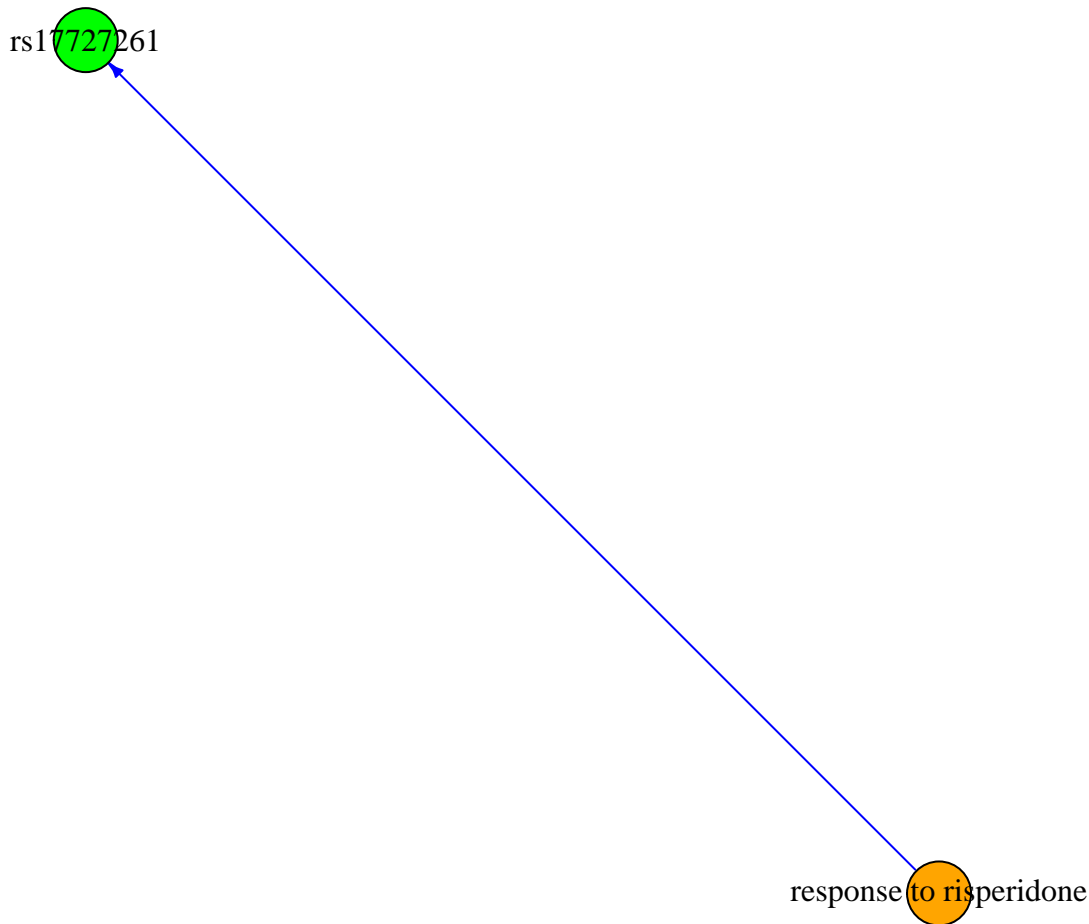

## Variant–Disease Network (calcium measurement)

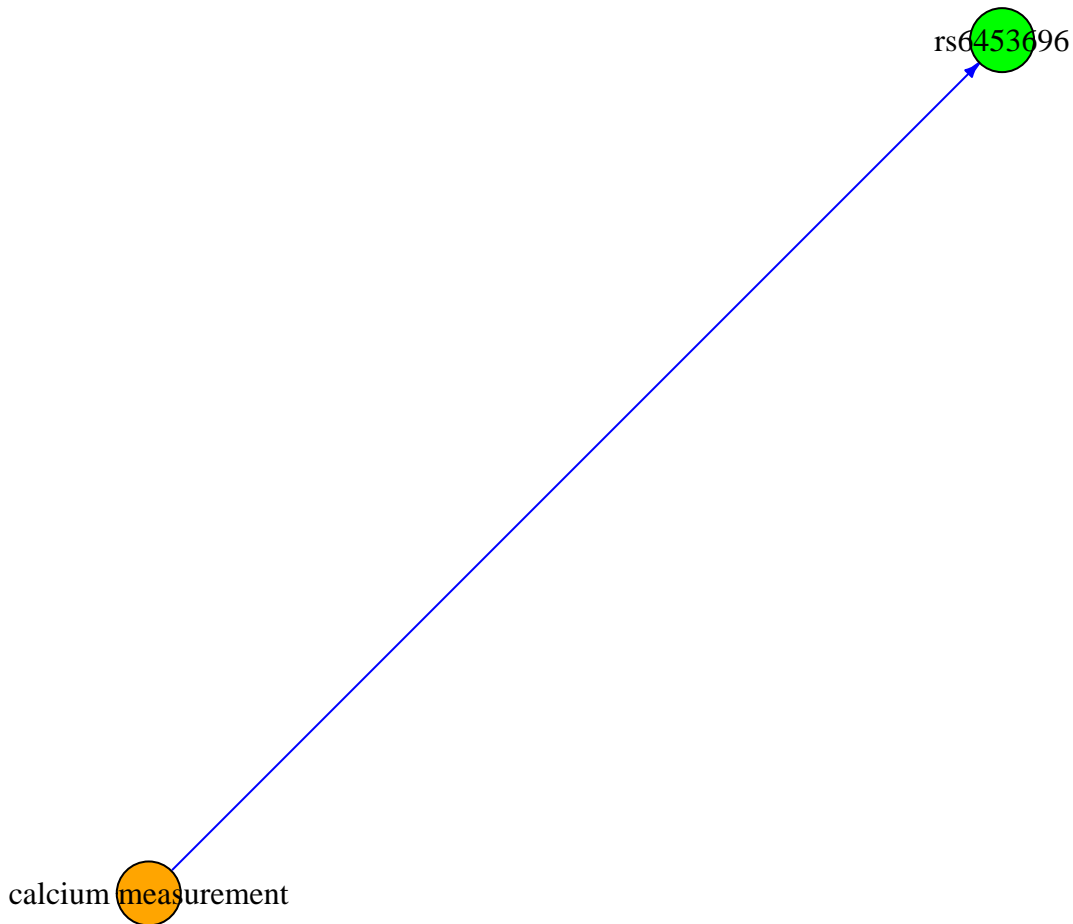

# Variant–Disease Network (CD109 antigen measurement)

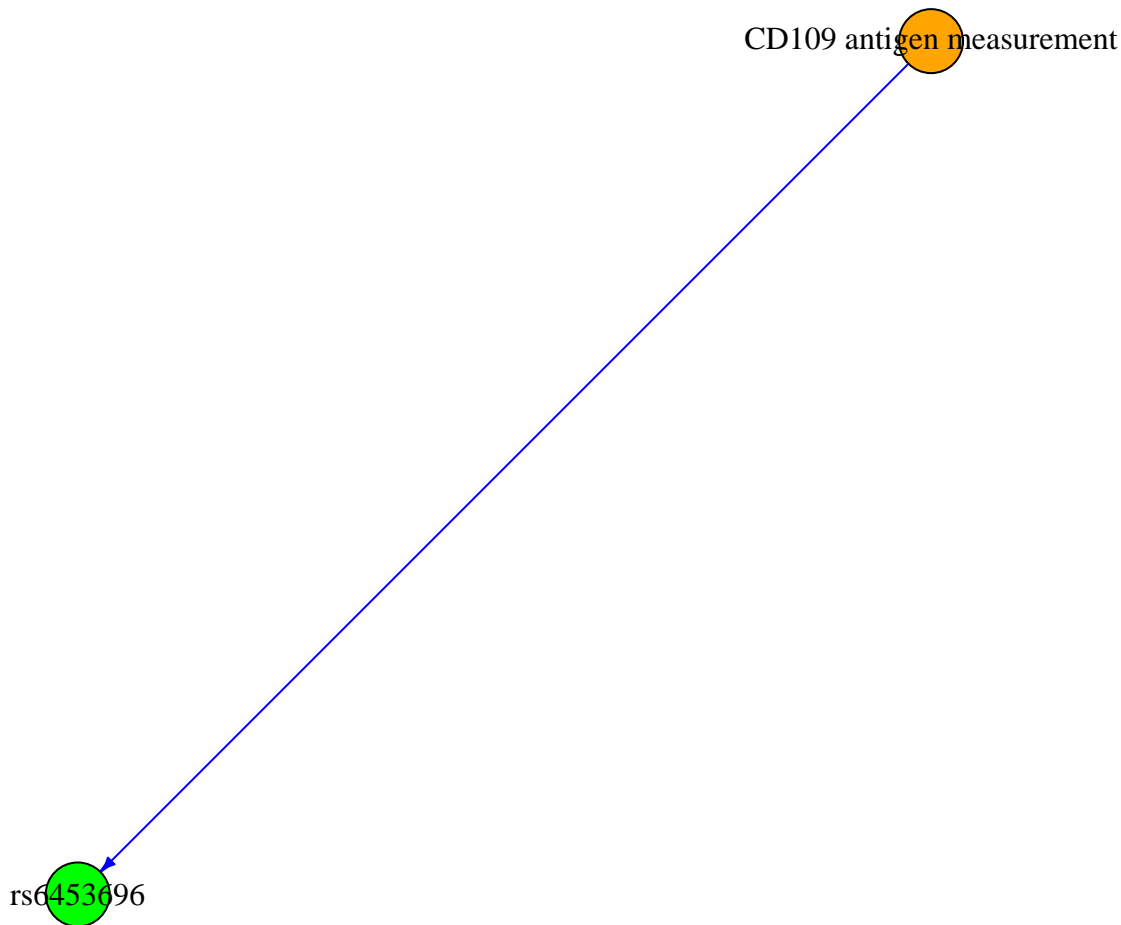



# Variant–Disease Network (glycerophospholipid measurement)

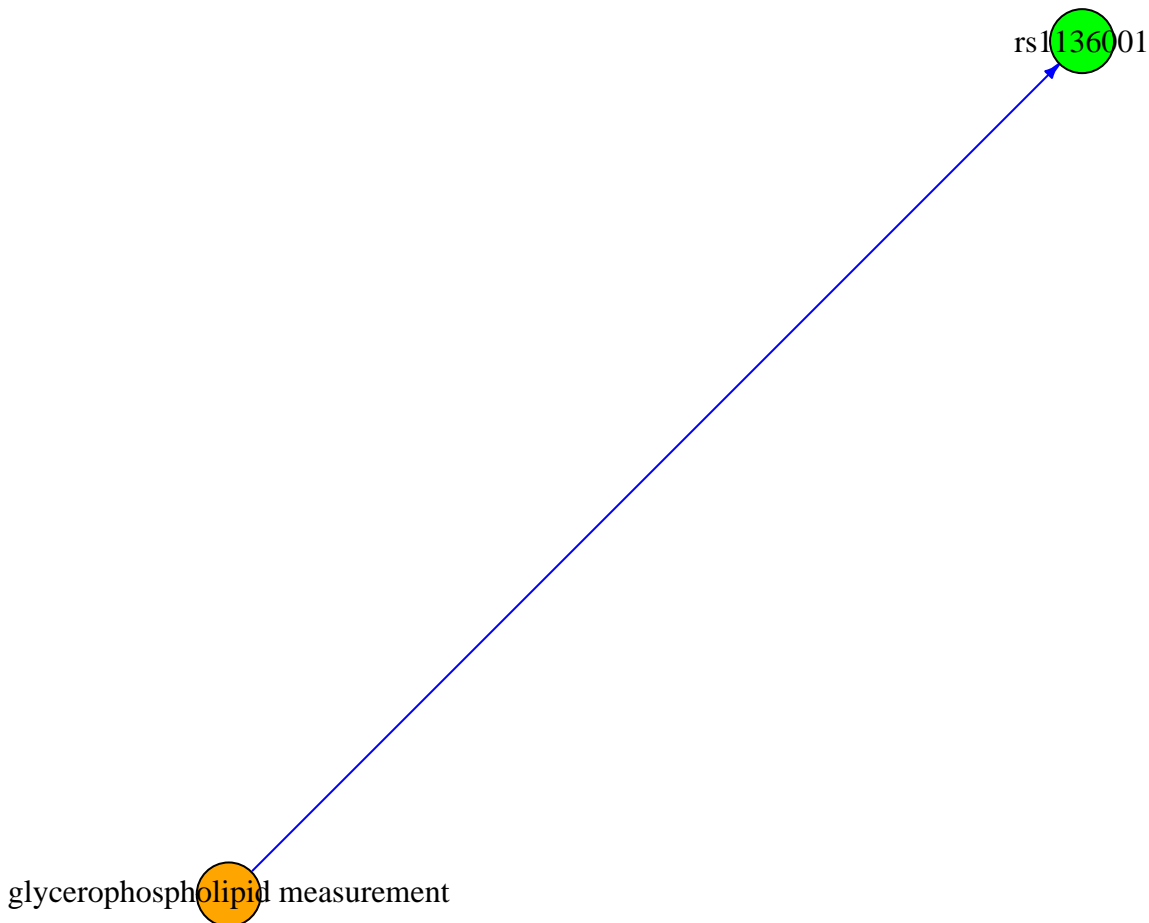

# Variant-Disease Network (metabolite measurement)

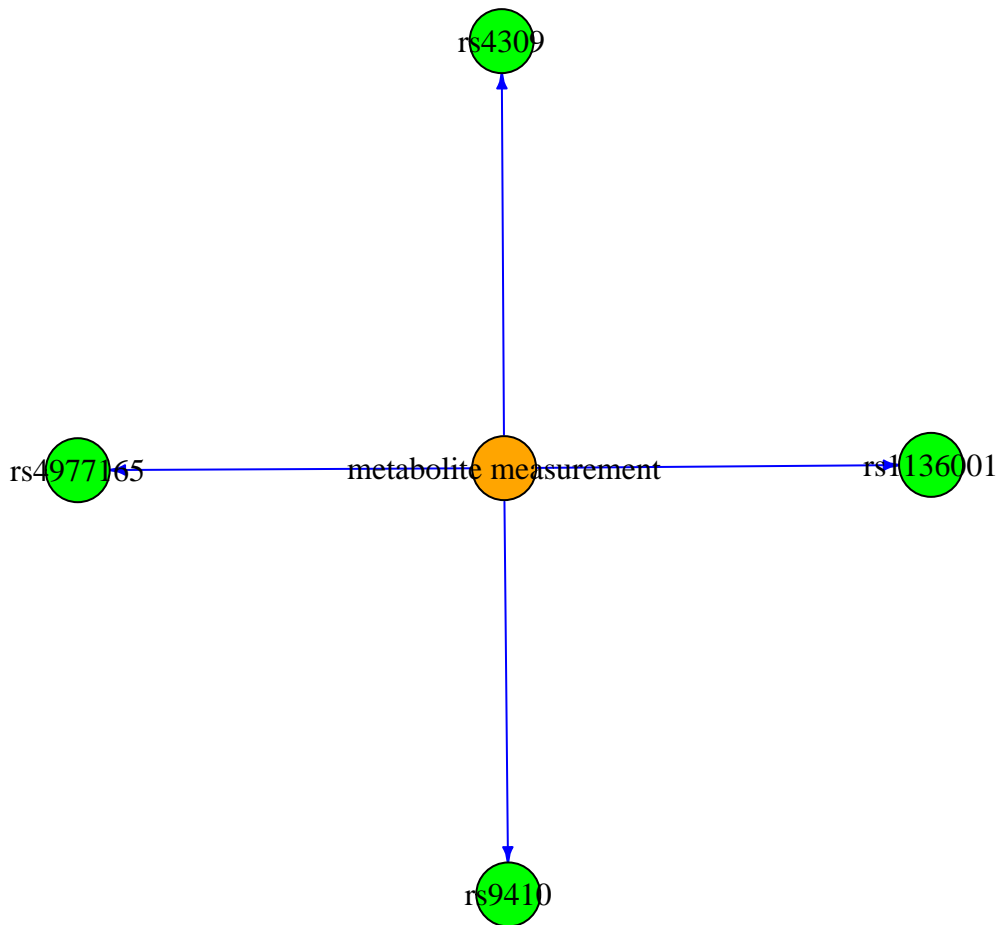

Variant–Disease Network (omega–6 polyunsaturated fatty acid measurement

omega–6 polyunsaturated fatty acid measurement

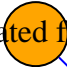

rs1136001

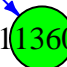

## Variant–Disease Network (phospholipid measurement)

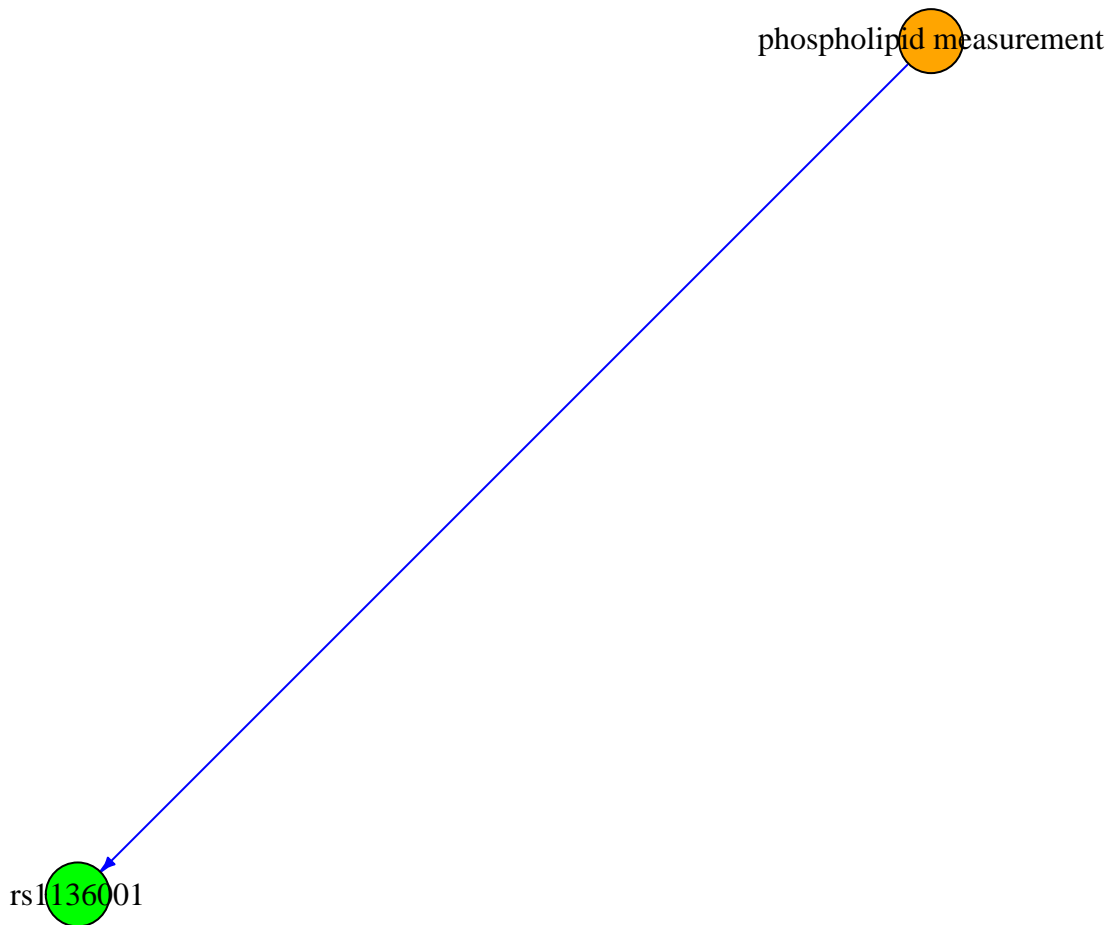

**Variant–Disease Network (urinary metabolite measurement)**

urinary metabolite measurement

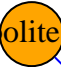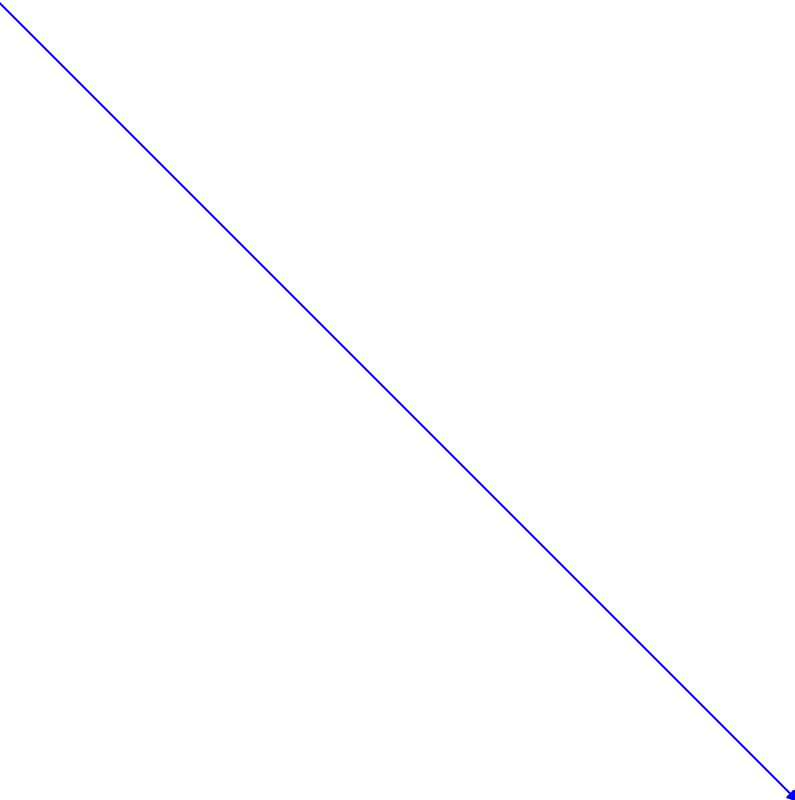

rs2295475

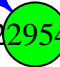

# Variant–Disease Network (exploratory eye movement measurement)

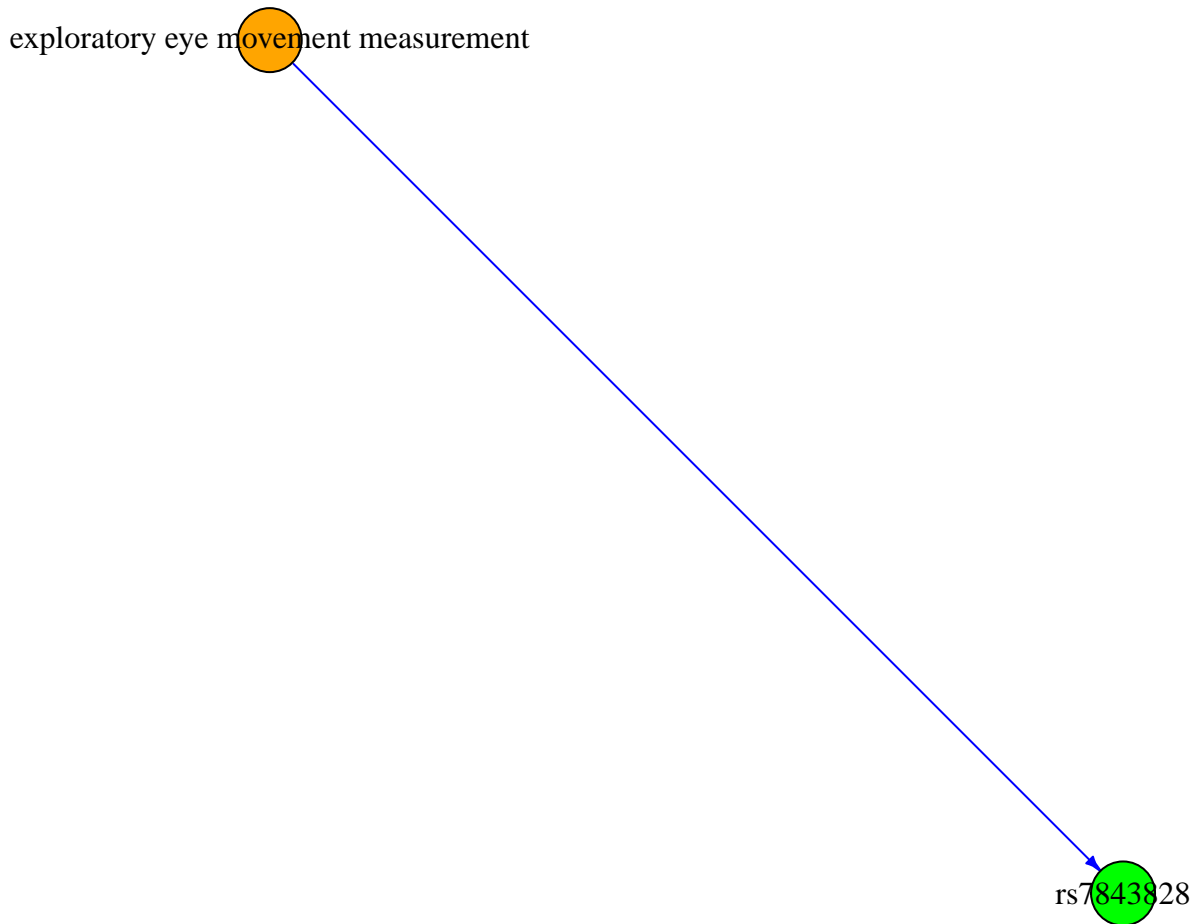

# Variant-Disease Network (angiotensin converting enzyme activity measurement)

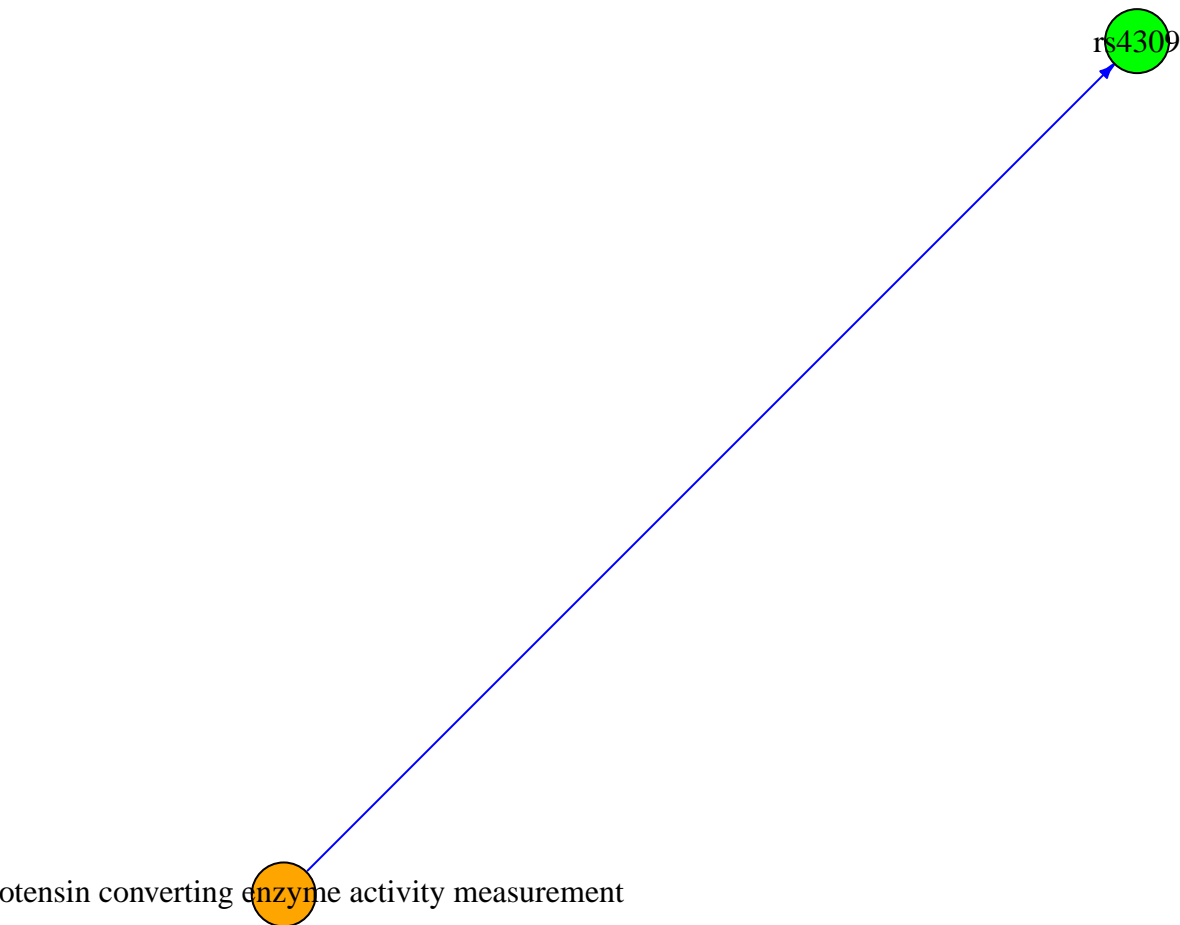

Variant–Disease Network (Agouti–related protein measurement)

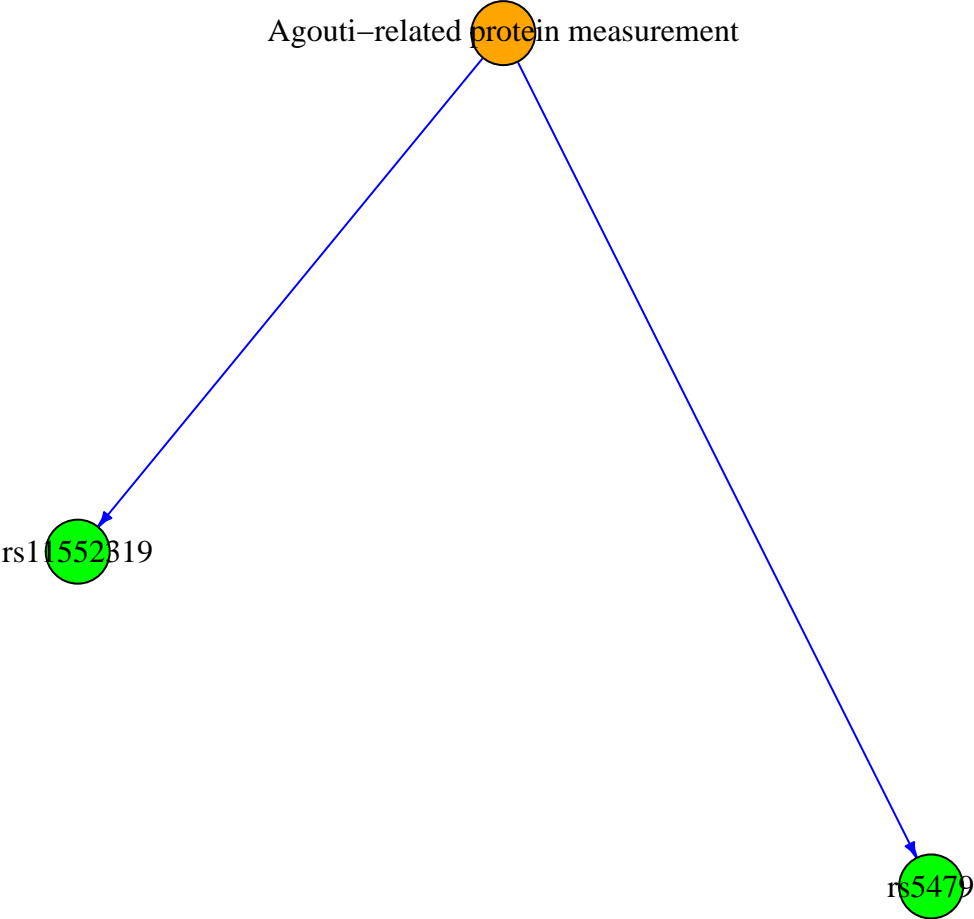



# Variant–Disease Network (resting heart rate)

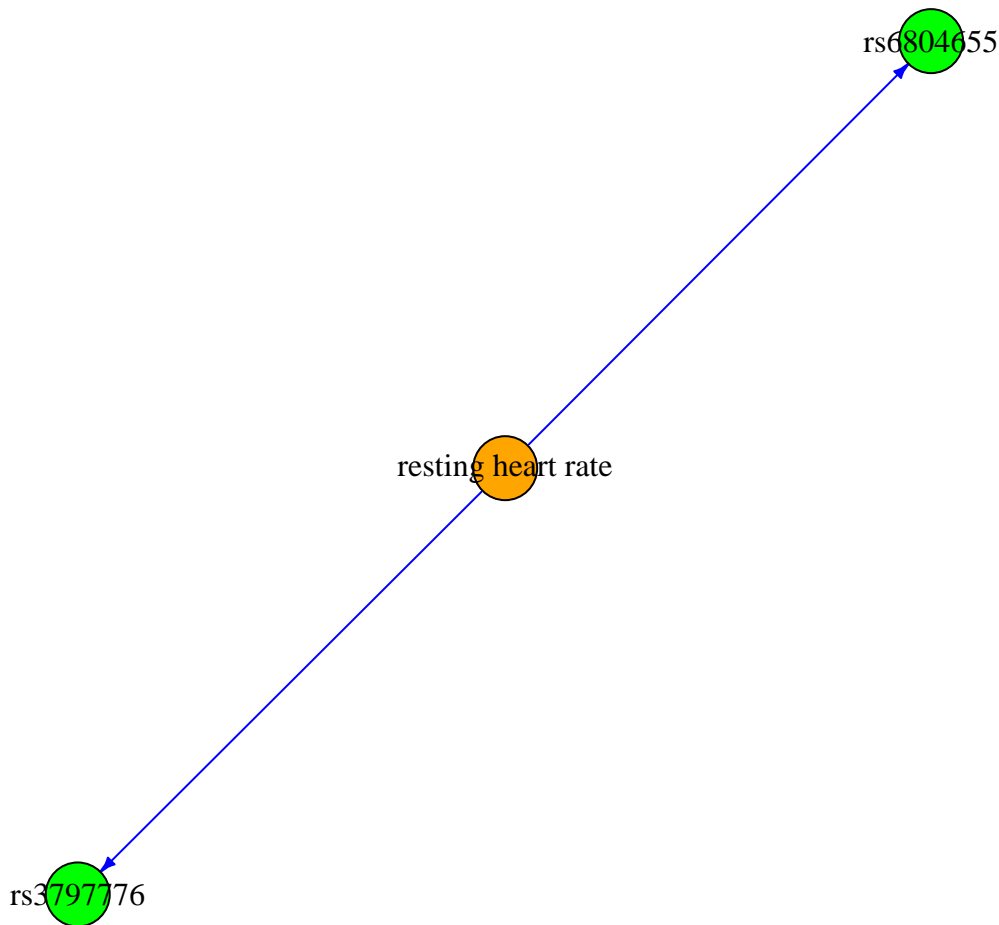

# Variant–Disease Network (serum IgM measurement)

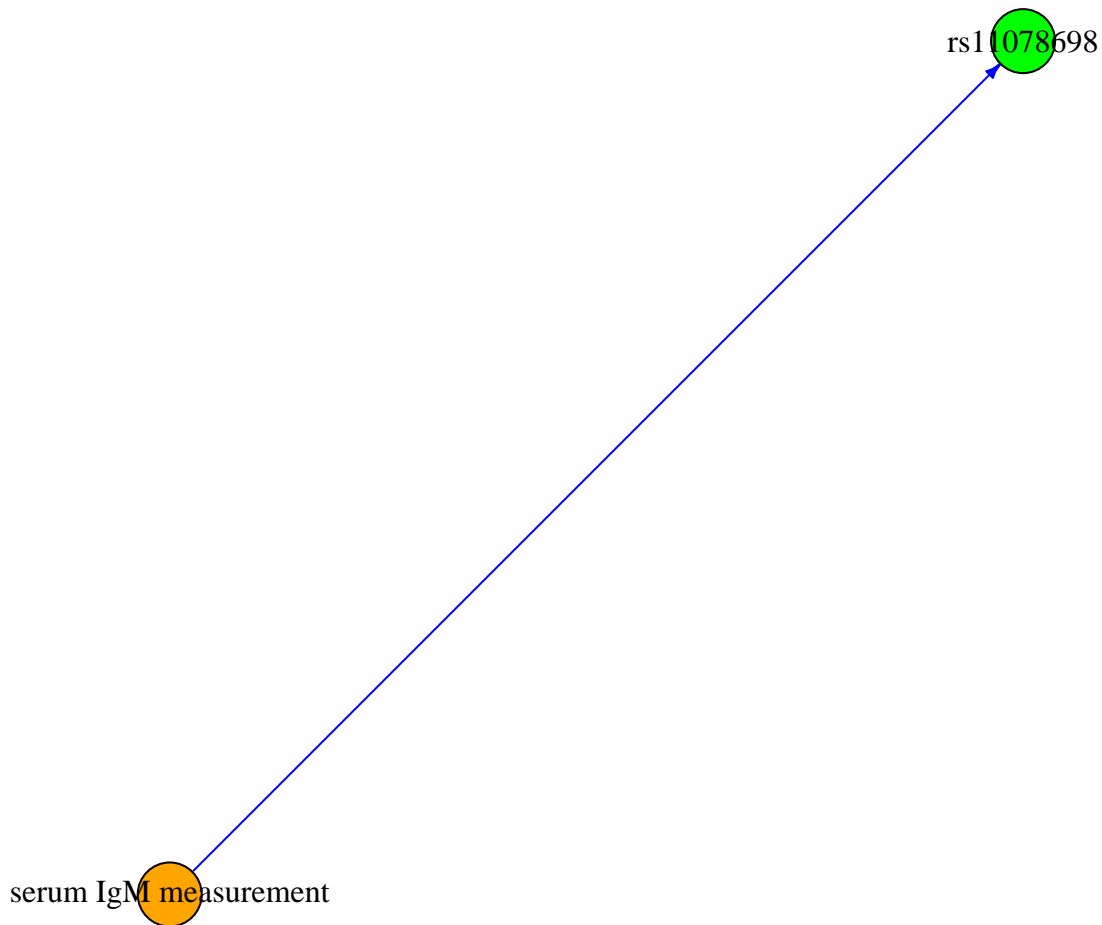

## Variant–Disease Network (adiponectin measurement)

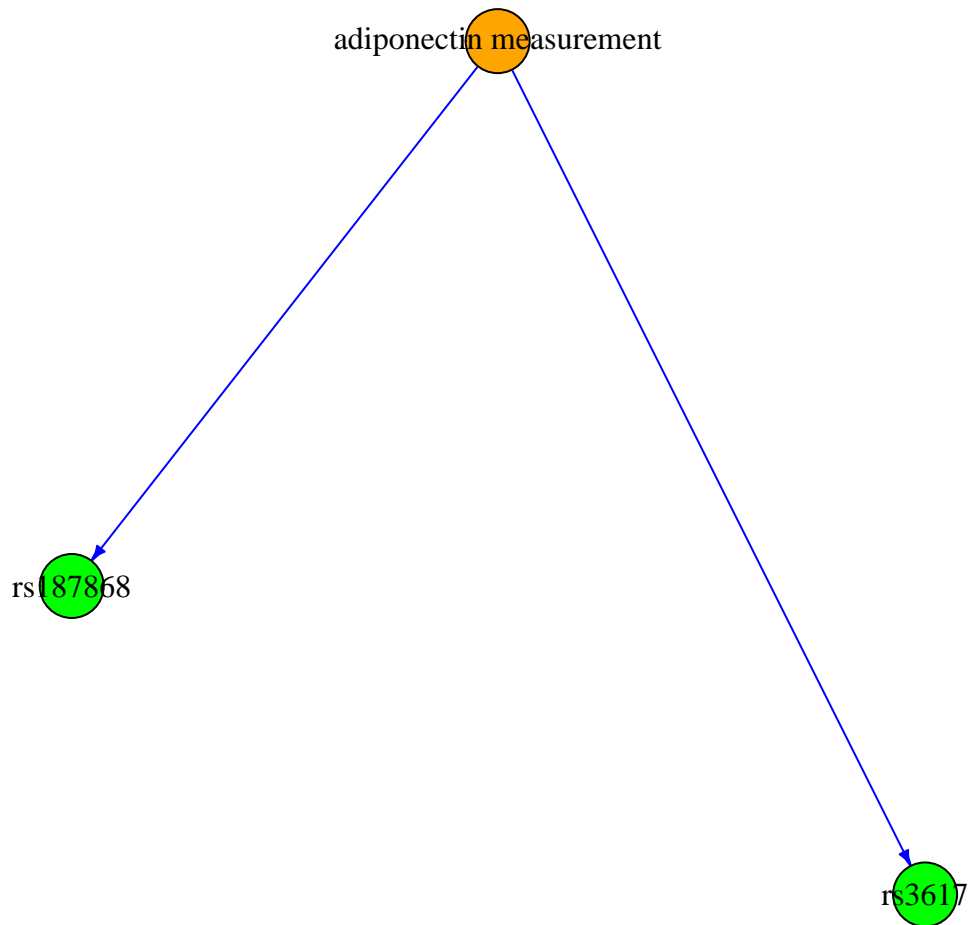

## Variant–Disease Network (open–angle glaucoma)

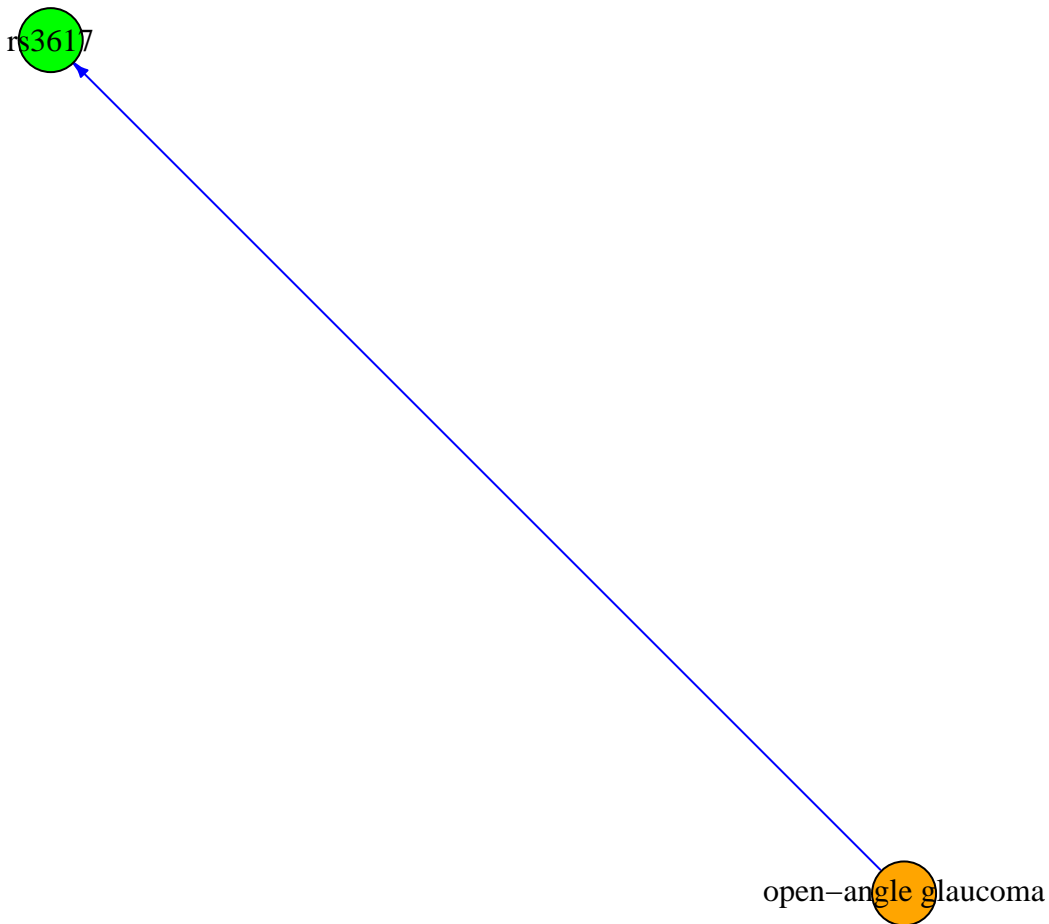

## Variant–Disease Network (schizoaffective disorder)

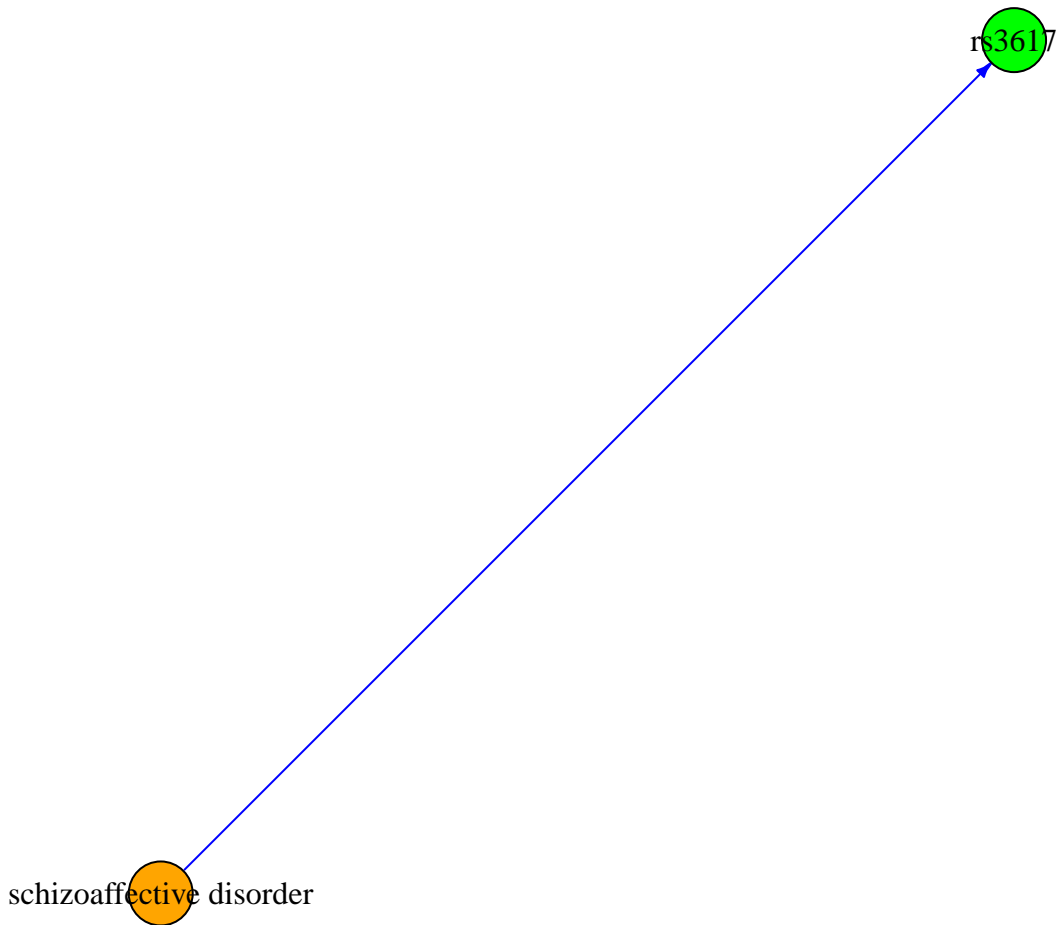

## Variant–Disease Network (openness measurement)

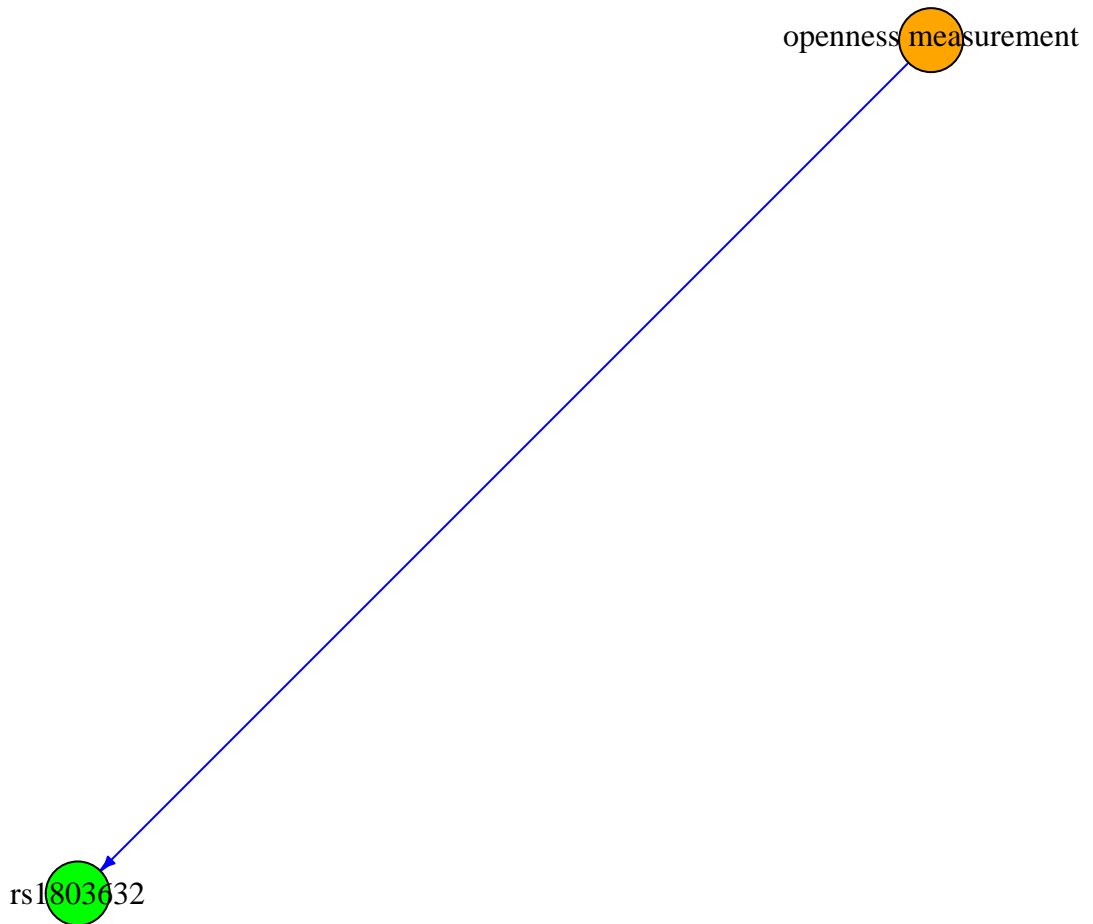

**Variant–Disease Network (psychosocial stress measurement)**

psychosocial stress measurement

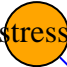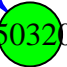

rs503203

## Variant–Disease Network (alcohol dependence)

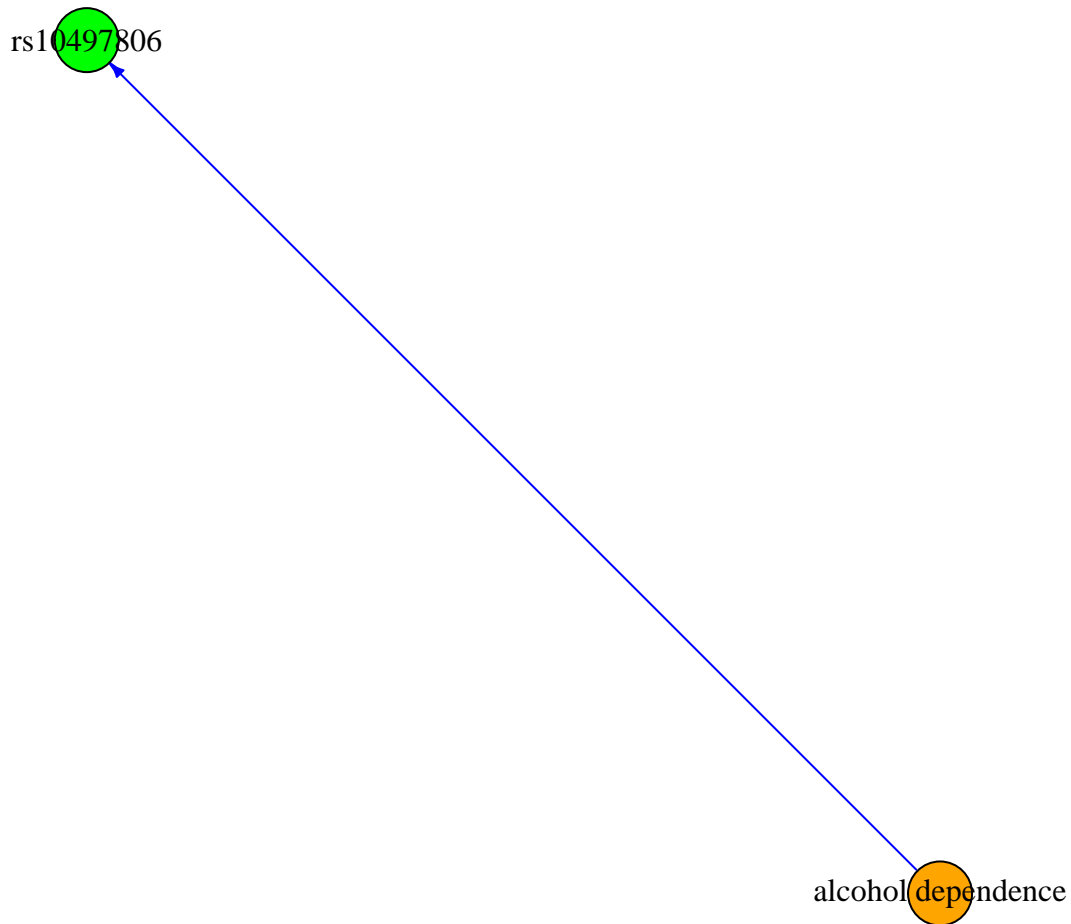



## Variant-Disease Network (brain aneurysm)

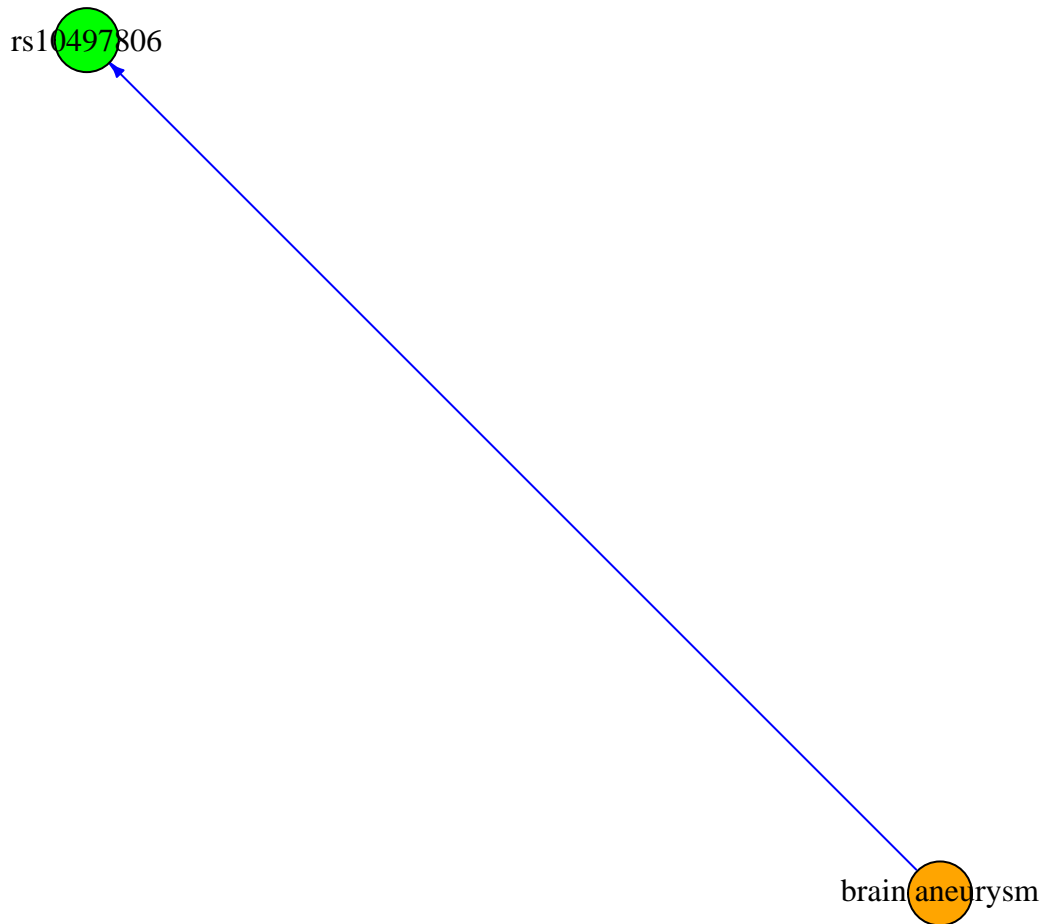

Variant–Disease Network (testicular carcinoma)

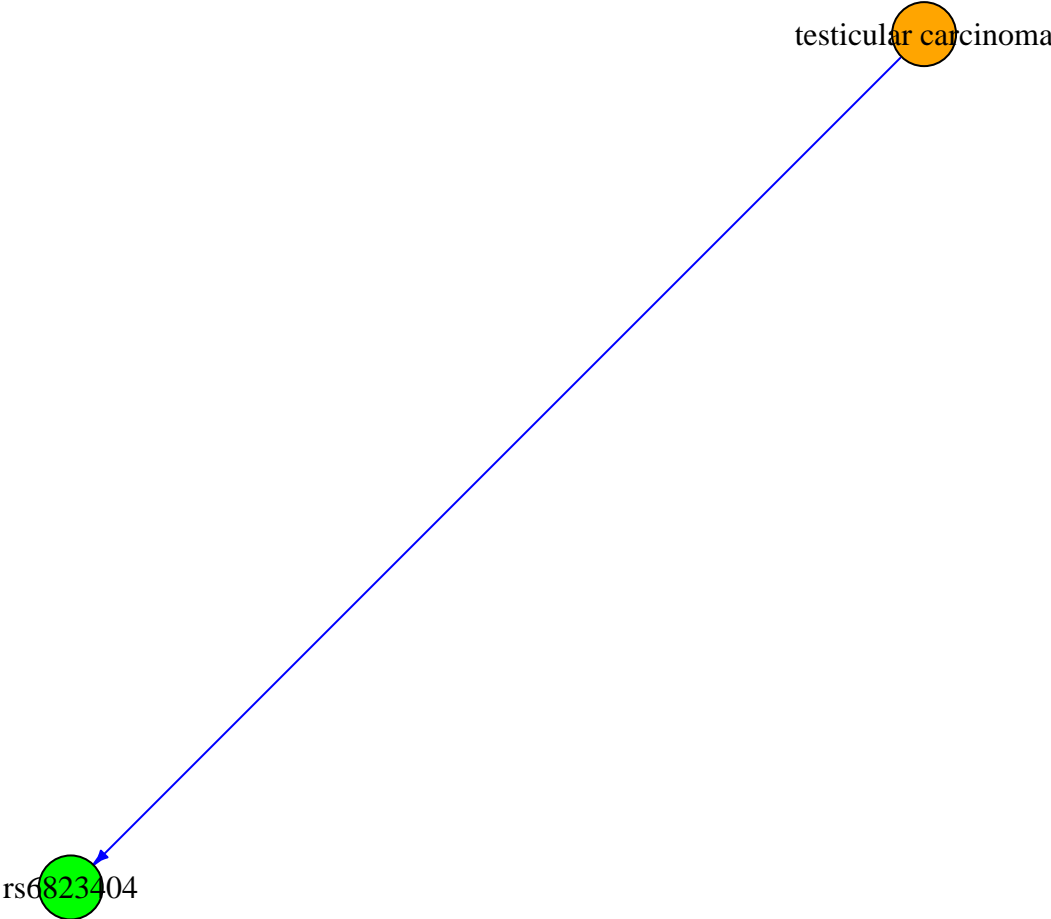

## Variant–Disease Network (celiac disease)

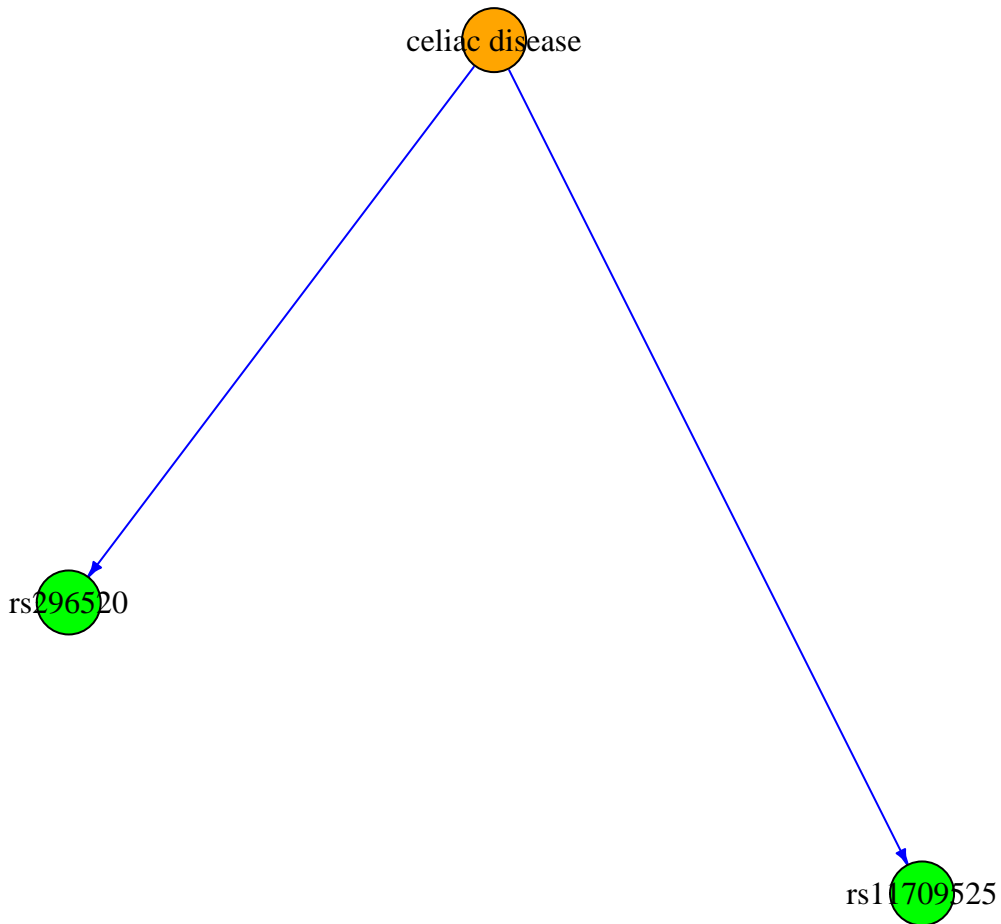

# Variant–Disease Network (blood urea nitrogen measurement)

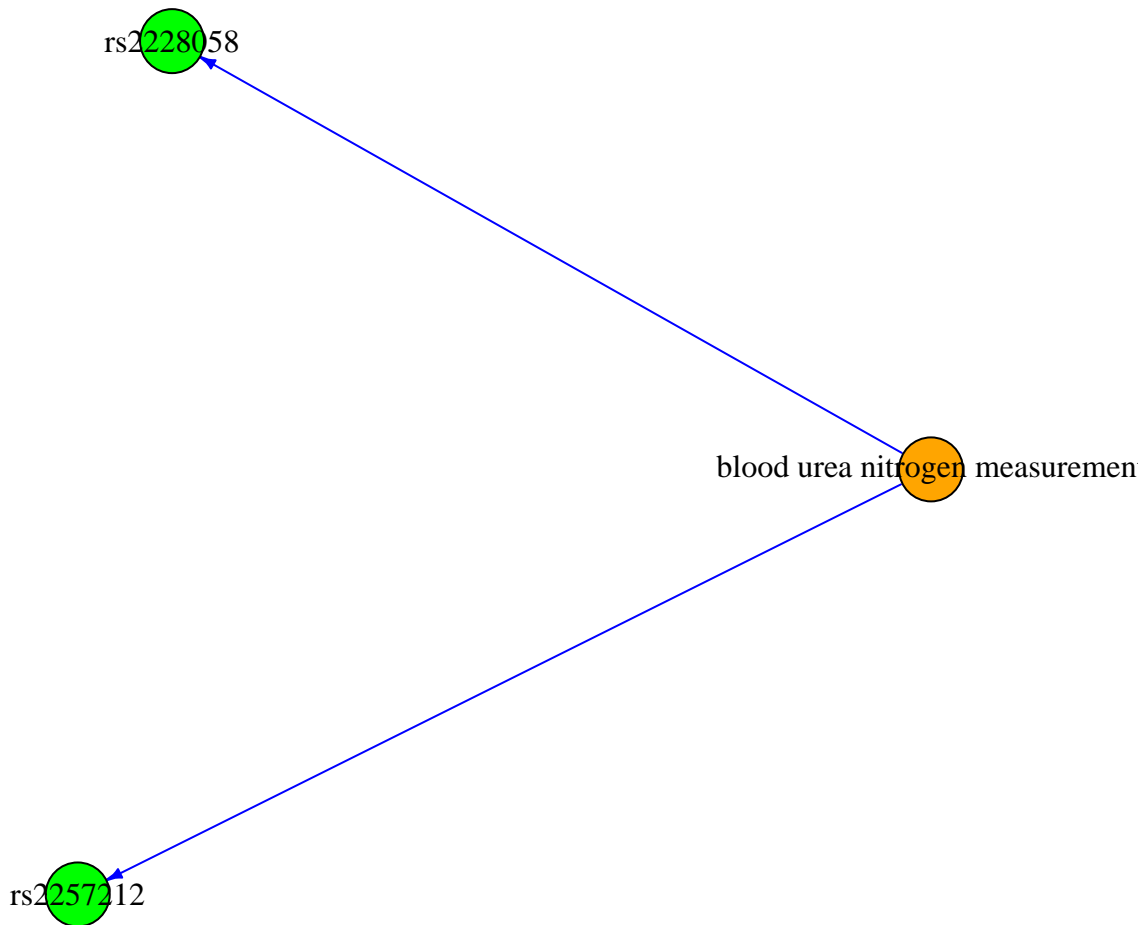

# Variant–Disease Network (estrogen receptor negative breast cancer)

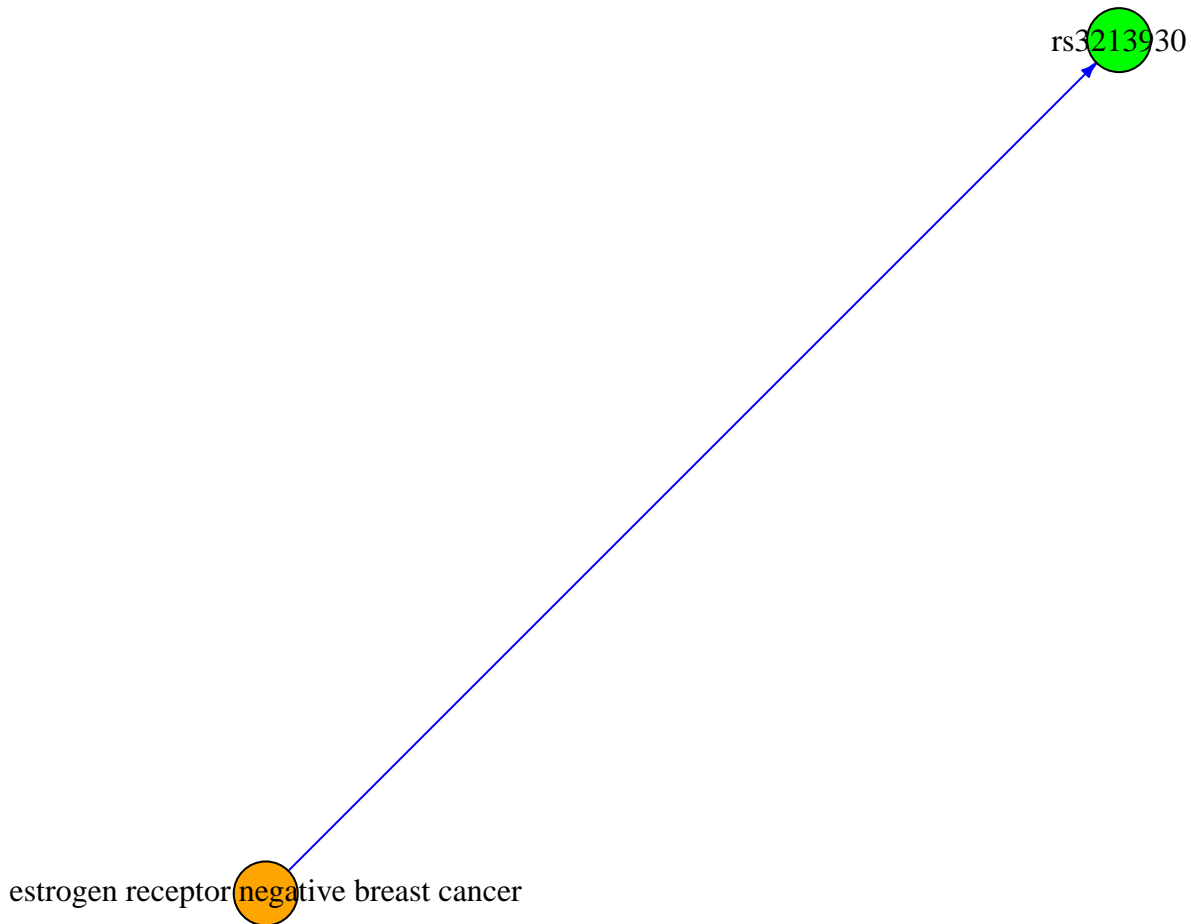

# Variant–Disease Network (ovarian endometrioid carcinoma)

ovarian endometrioid carcinoma

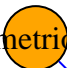

rs3213930

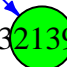

Variant–Disease Network (fasting blood glucose measurement)

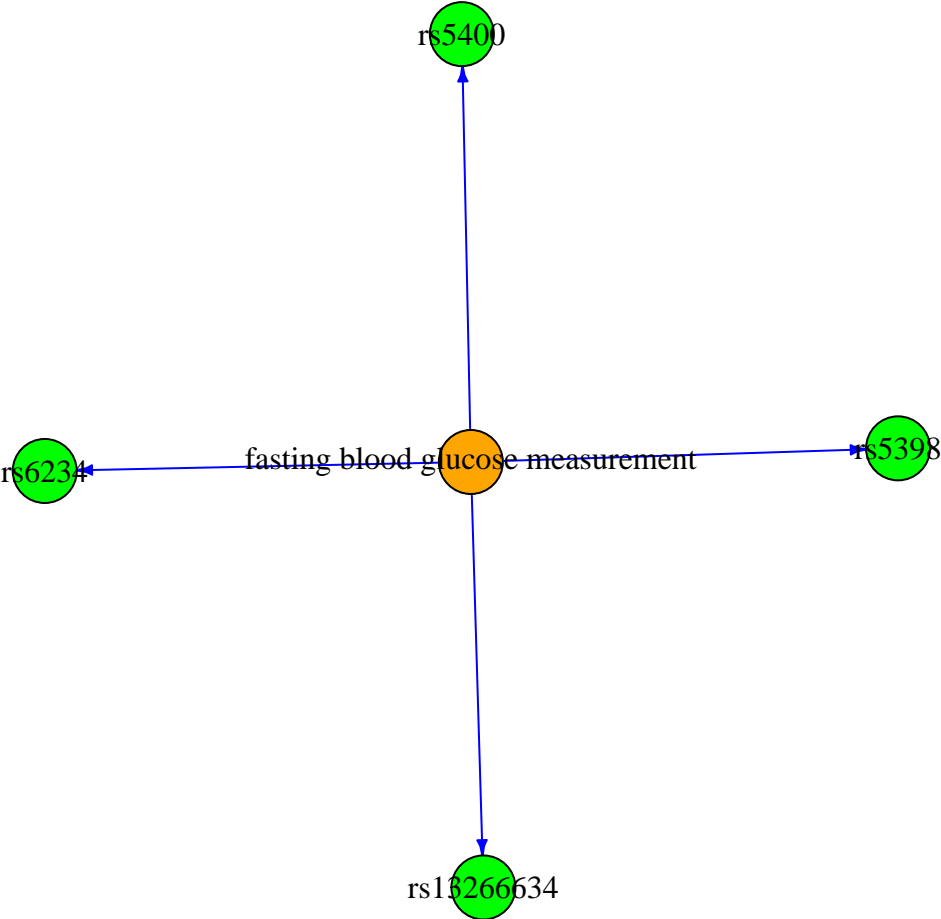

## Variant–Disease Network (HOMA–B)

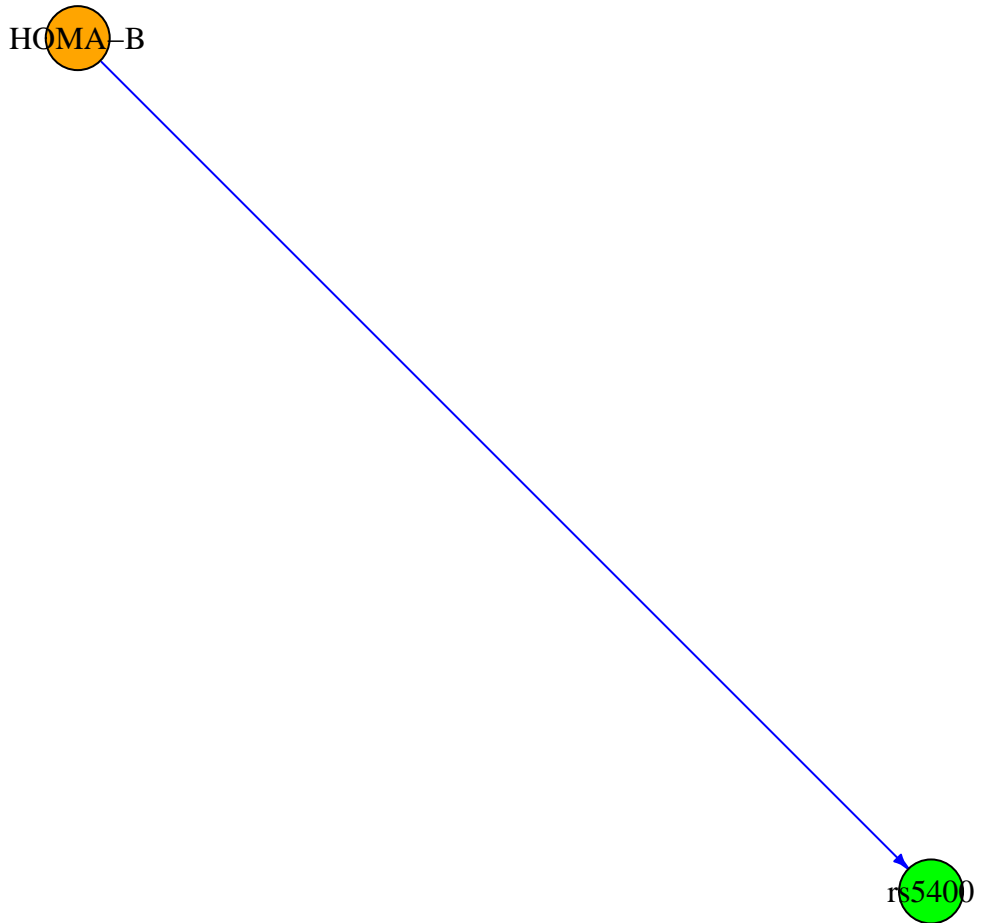



Variant–Disease Network (serum gamma–glutamyl transferase measurement)

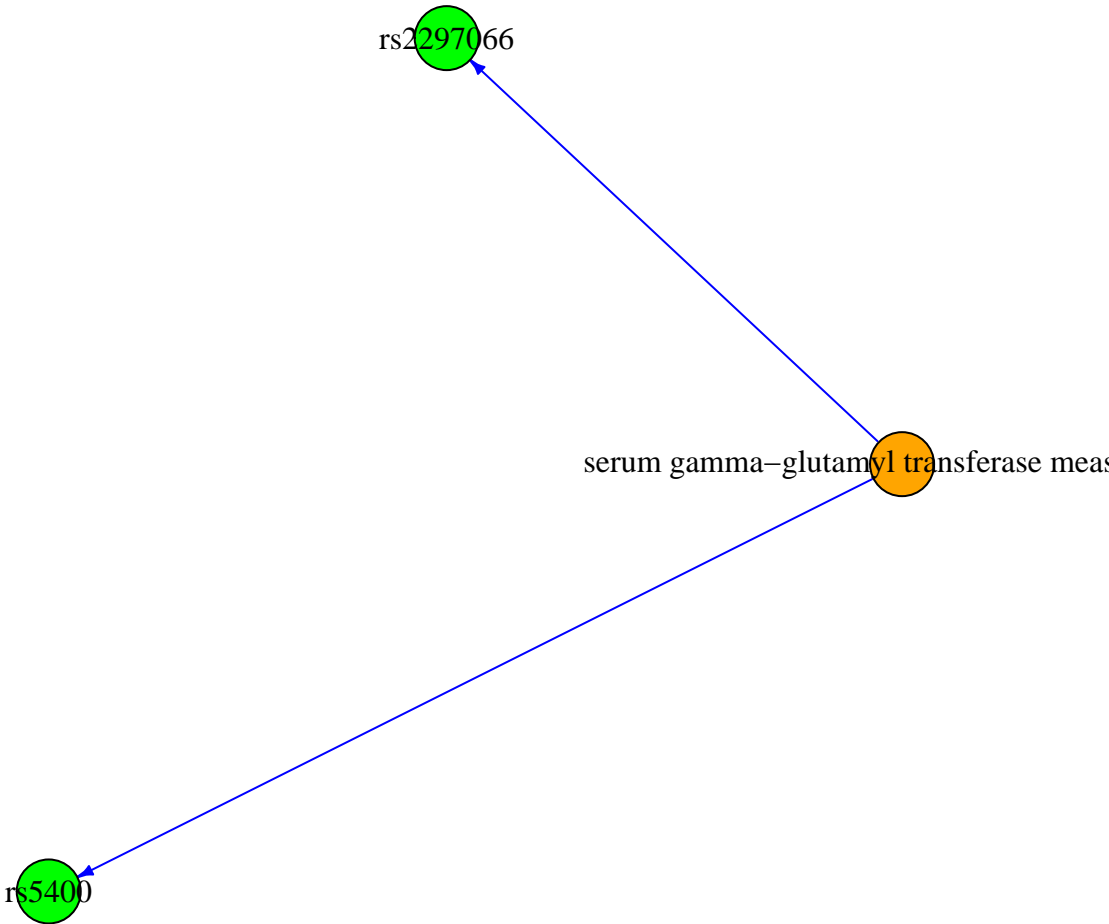

## Variant–Disease Network (glucose measurement)

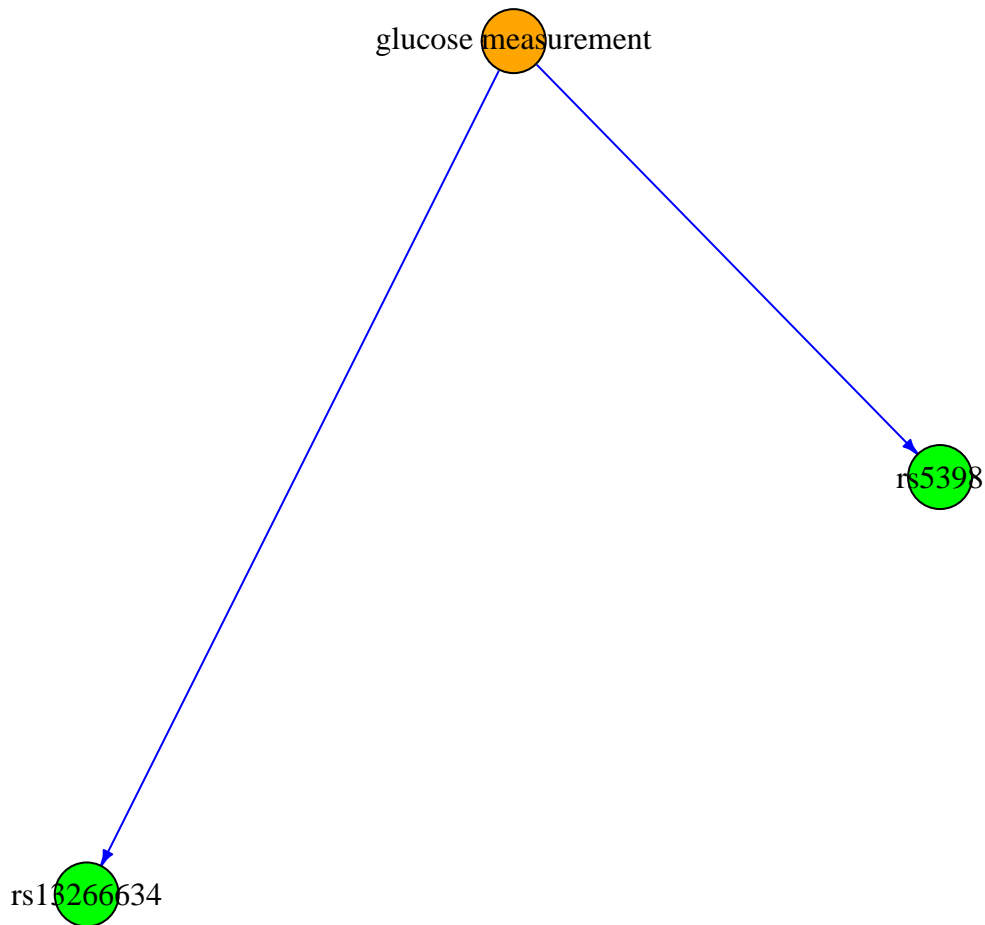

## Variant-Disease Network (response to metformin)

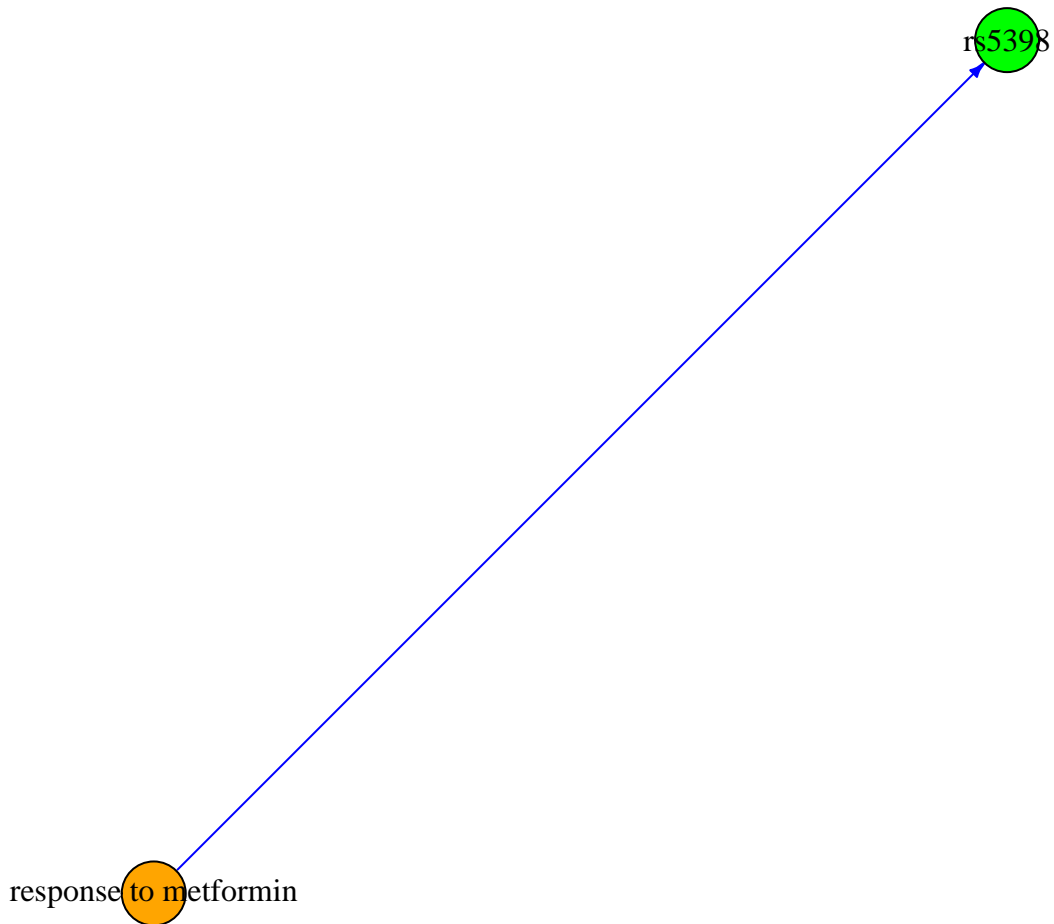

## Variant–Disease Network (seborrheic dermatitis)

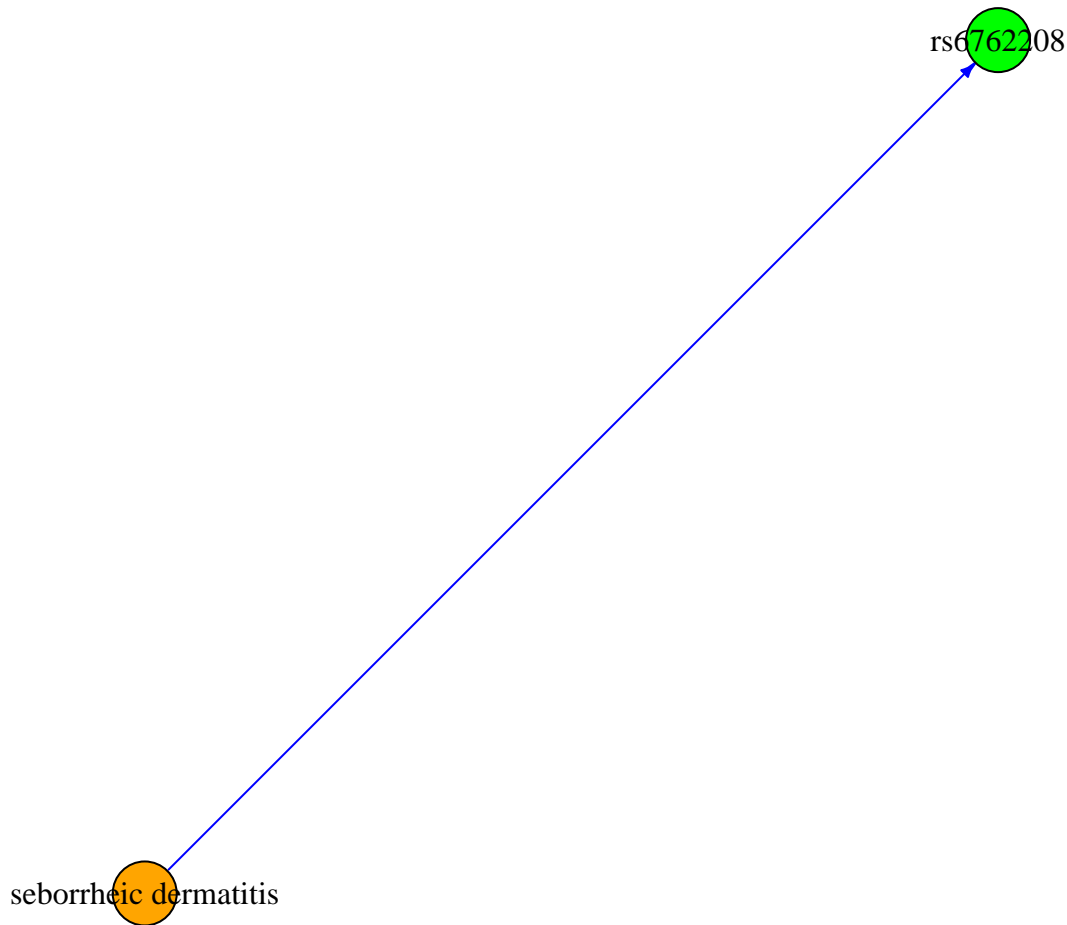

# Variant-Disease Network (attention function measurement)

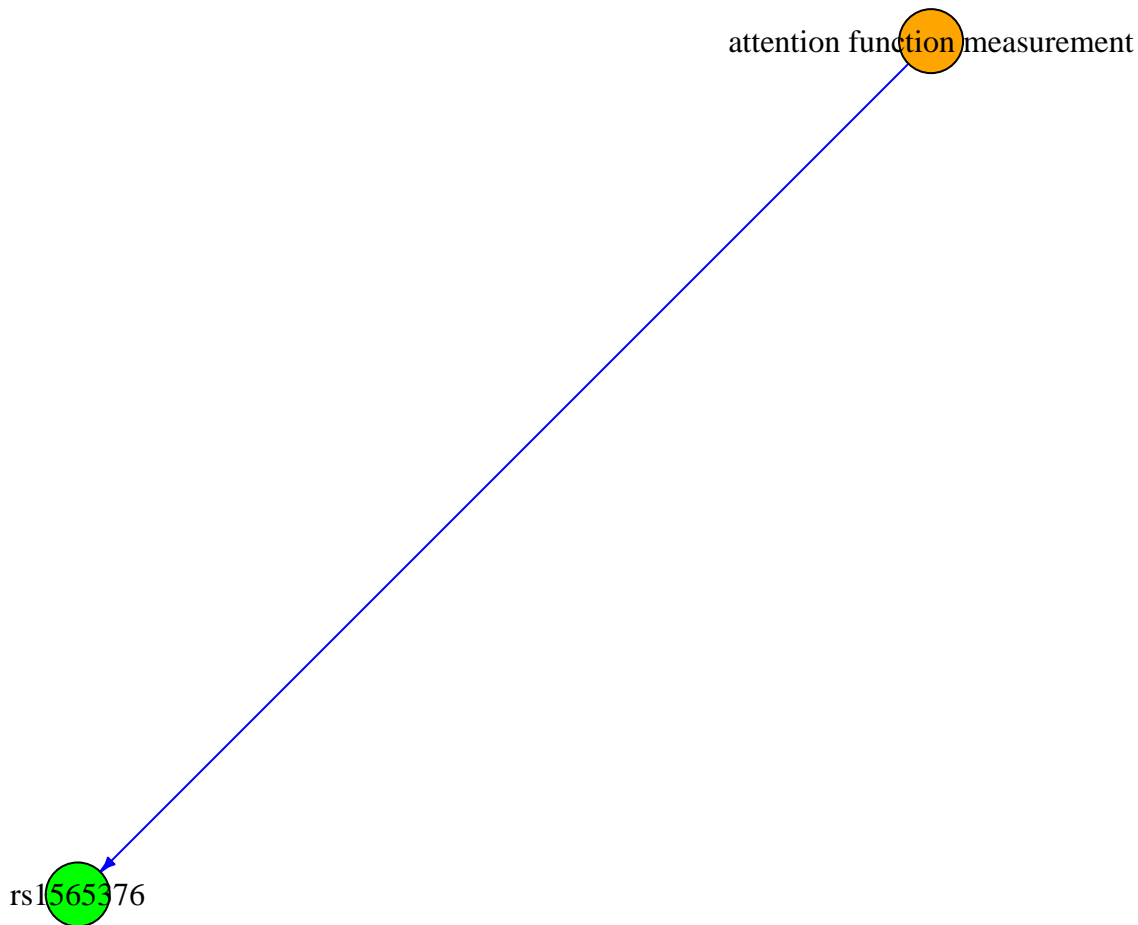

Variant-Disease Network (autoimmune disease)

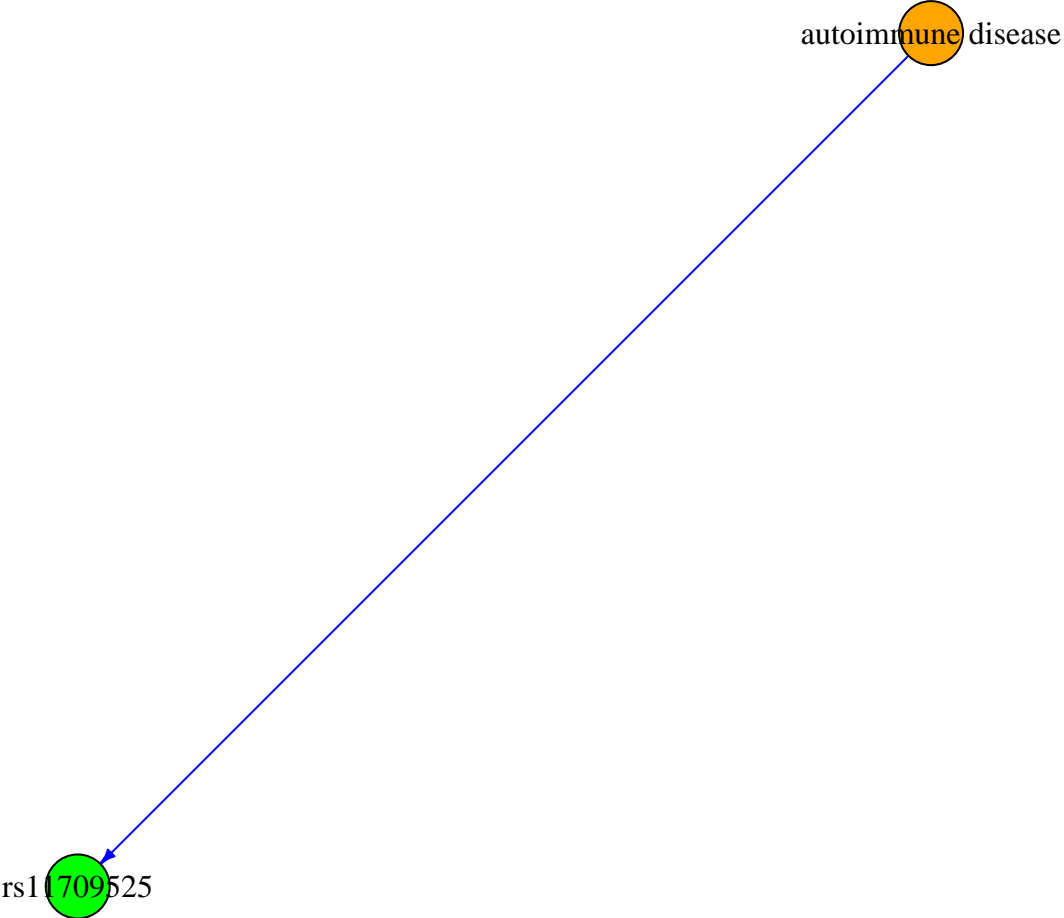

**Variant–Disease Network (autoimmune thyroid disease)**

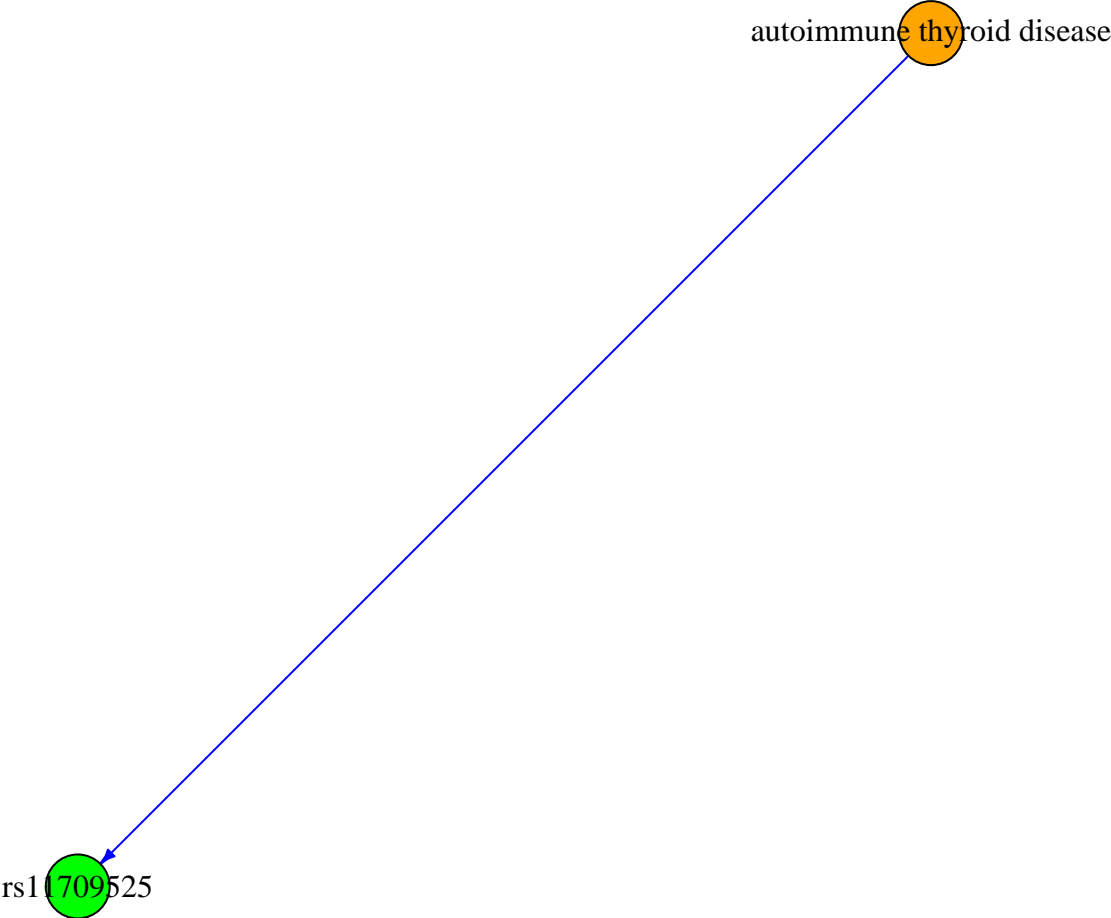

**Variant–Disease Network (chronic childhood arthritis)**

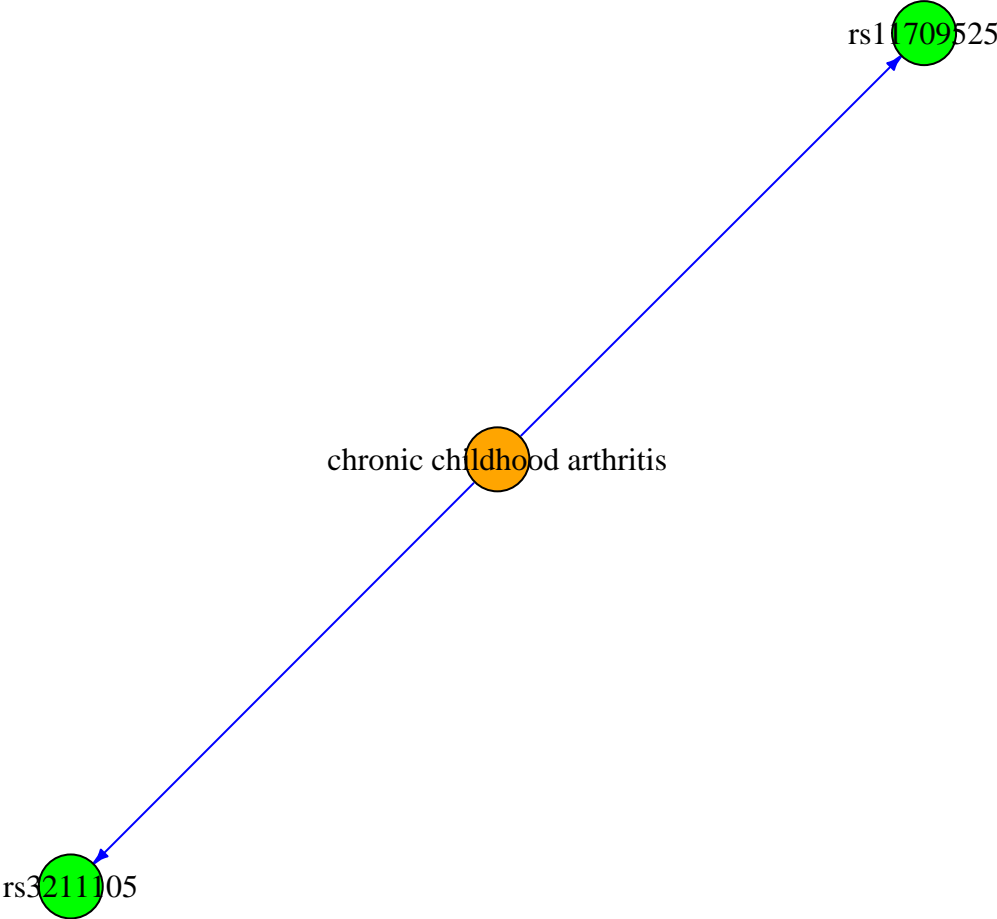



**Variant–Disease Network (common variable immunodeficiency)**

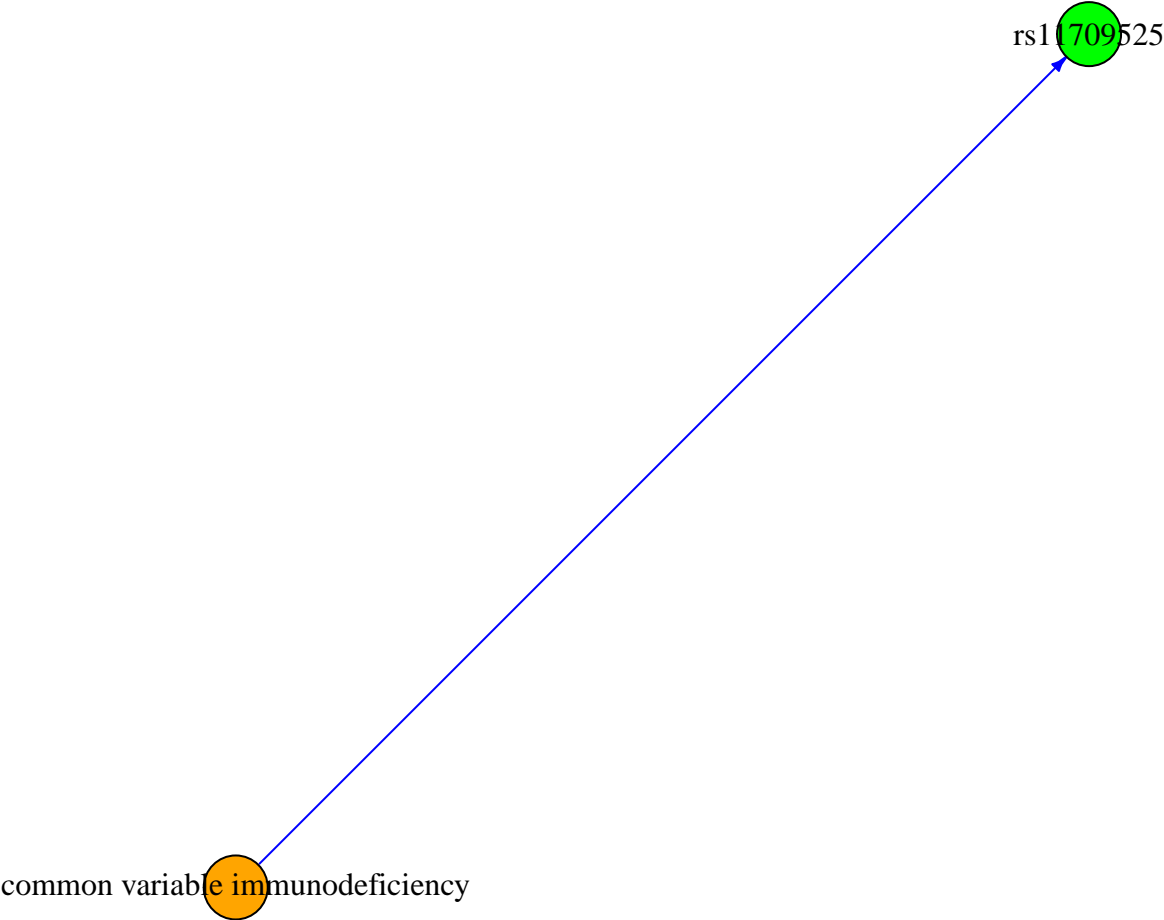

Variant–Disease Network (gut microbiome measurement)

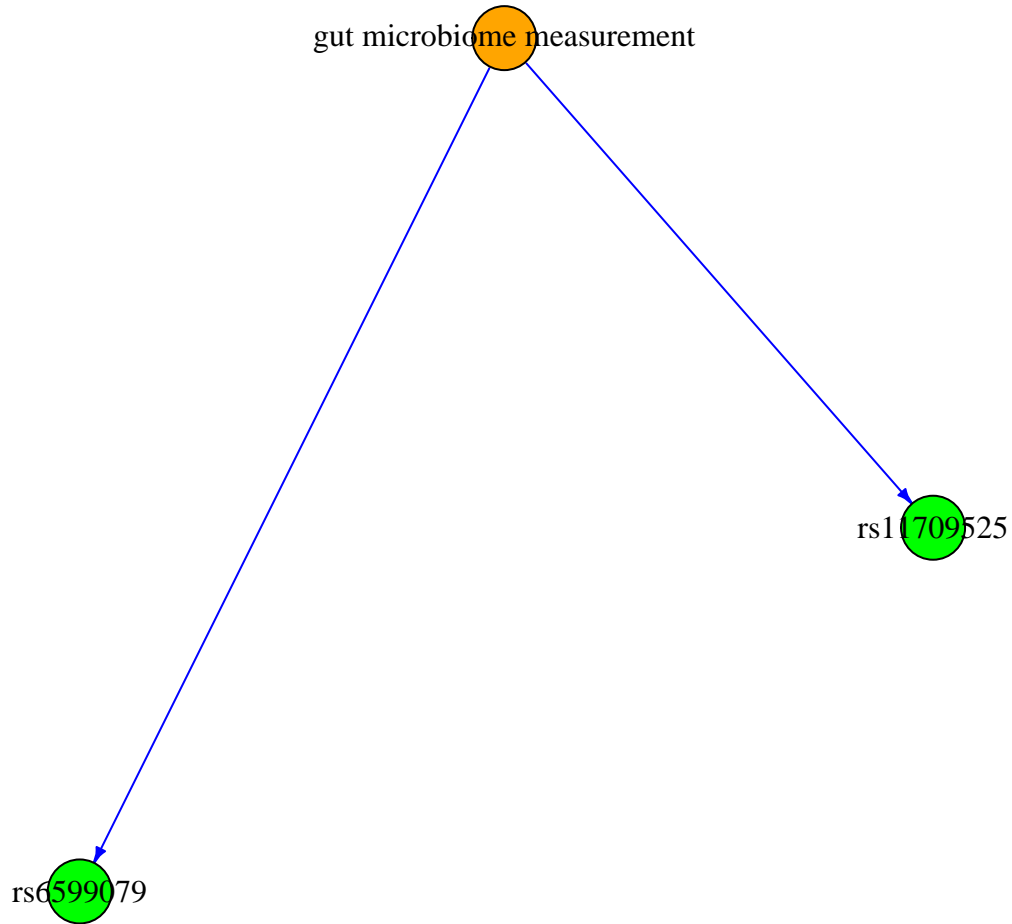

Variant–Disease Network (hepatocyte growth factor–like protein measurement)

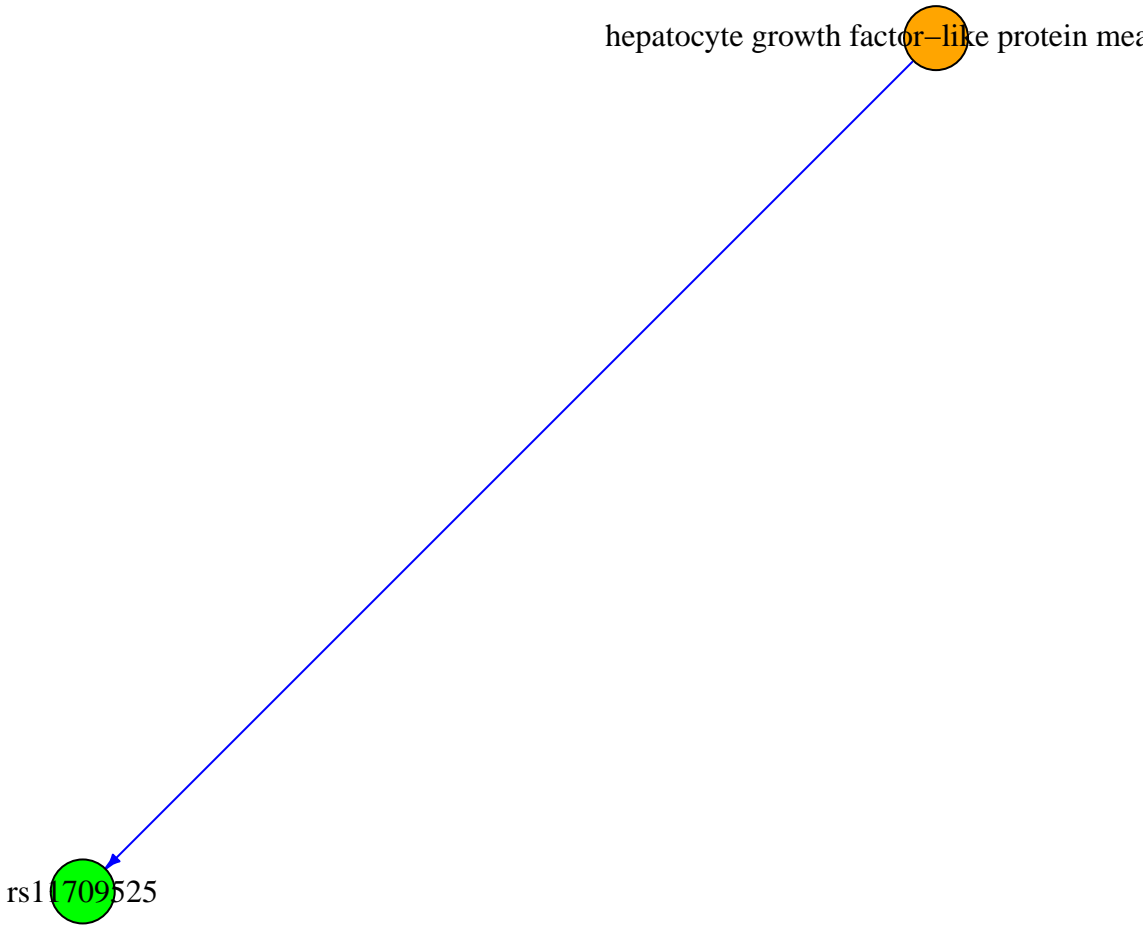

## Variant–Disease Network (self rated health)

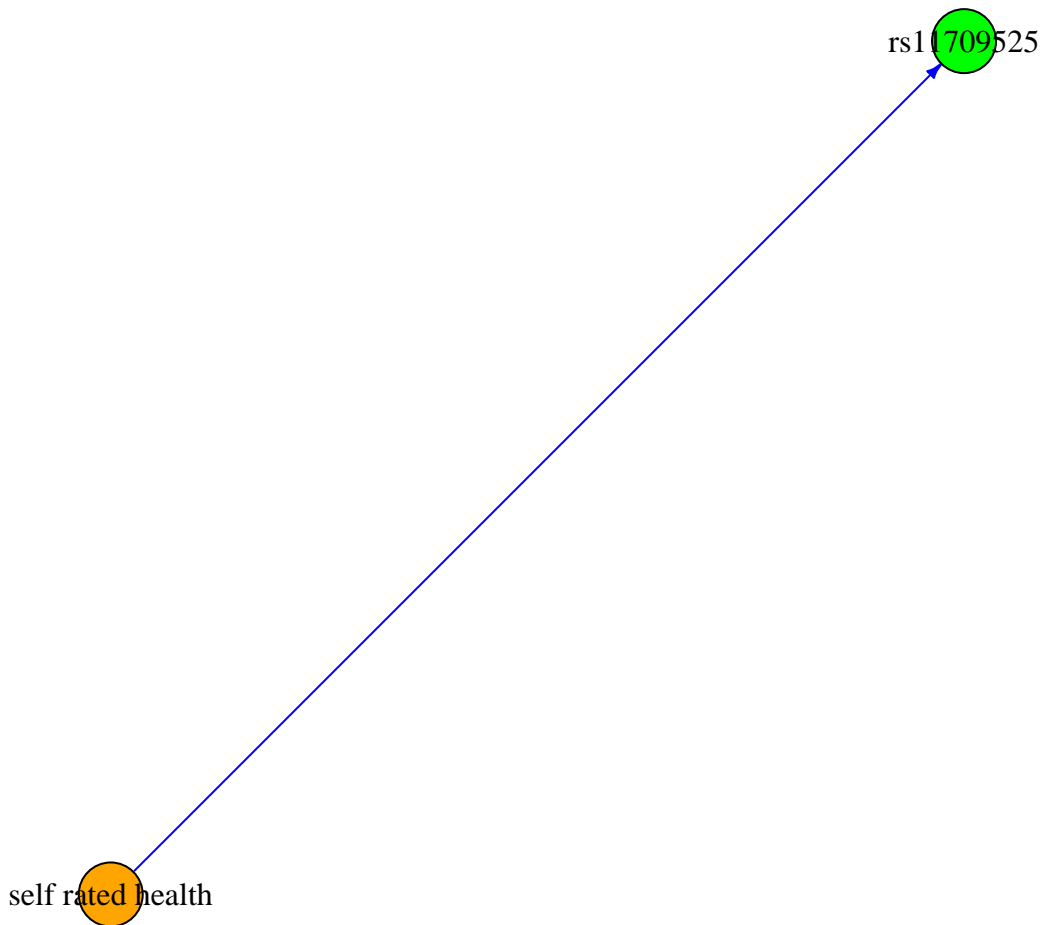

## Variant–Disease Network (physical activity)

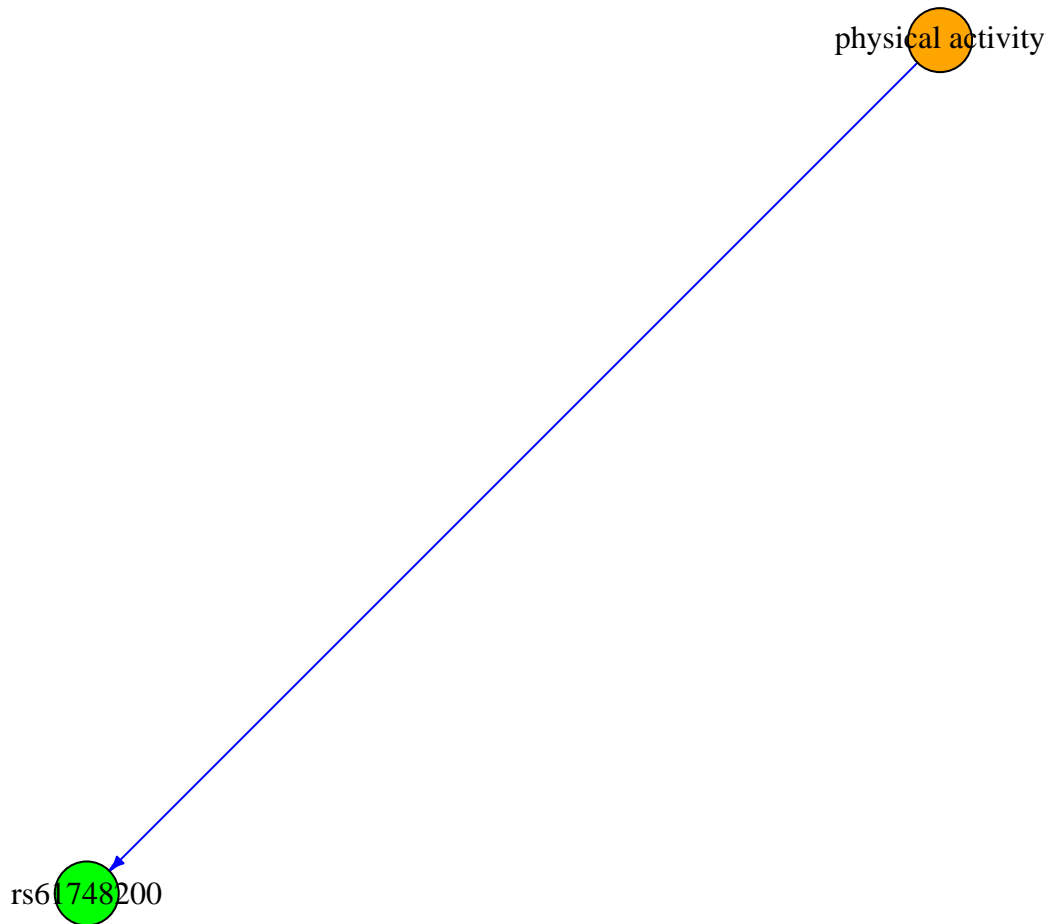

## Variant–Disease Network (autoantibody measurement)

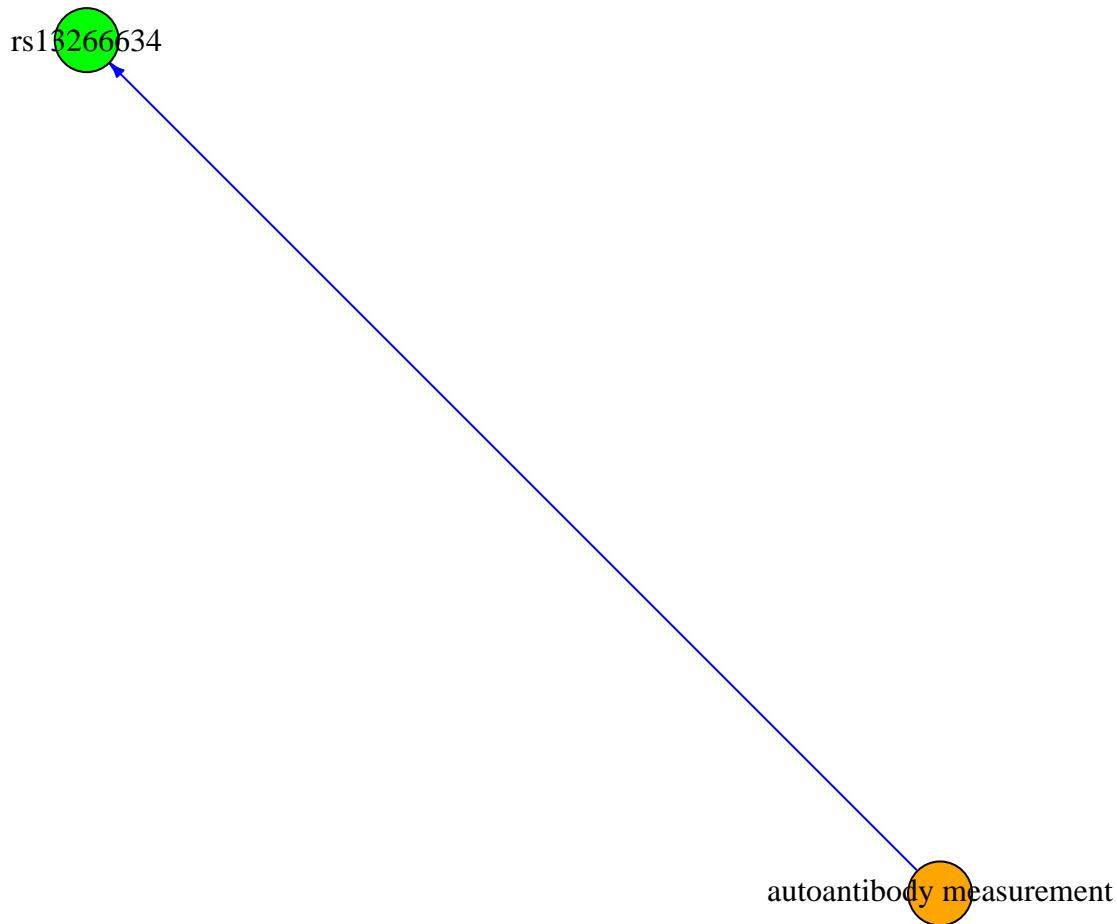

**Variant–Disease Network (abdominal aortic artery calcification)**

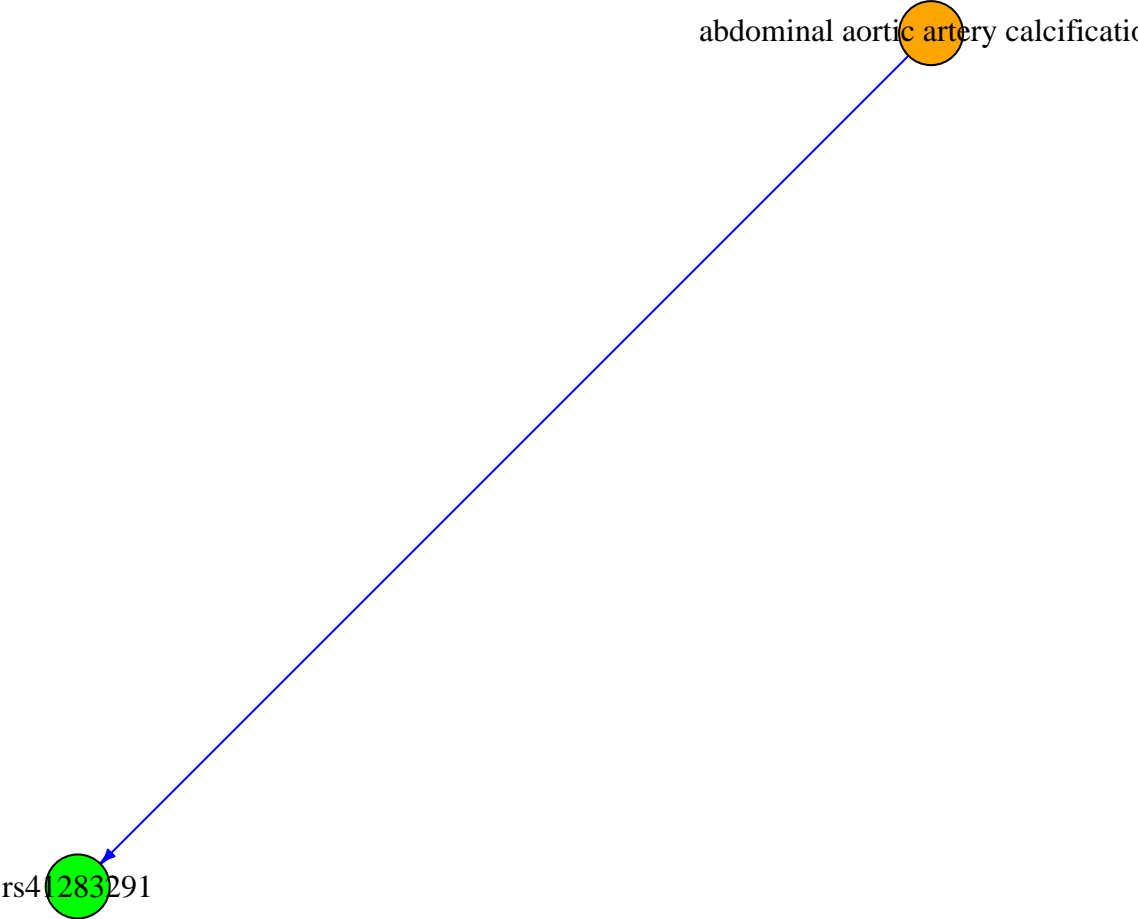

## Variant-Disease Network (exercise test)

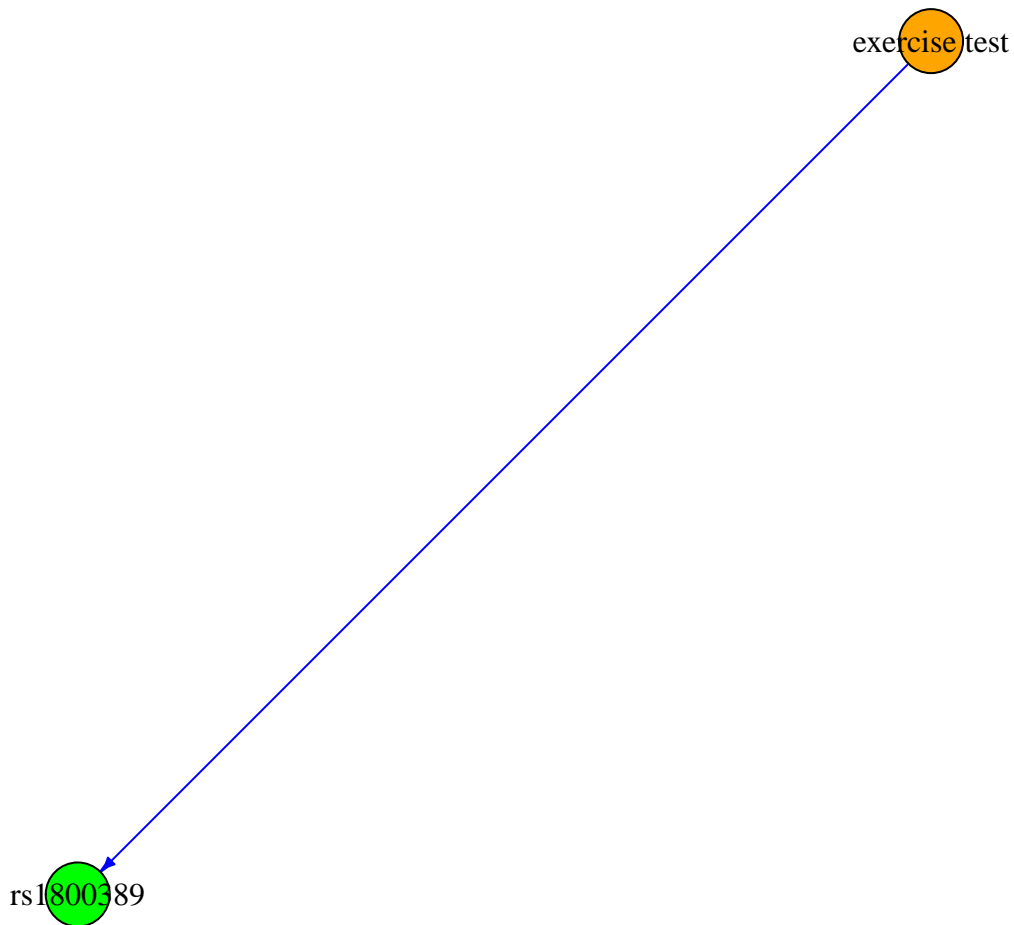



Variant–Disease Network (amino acid measurement)

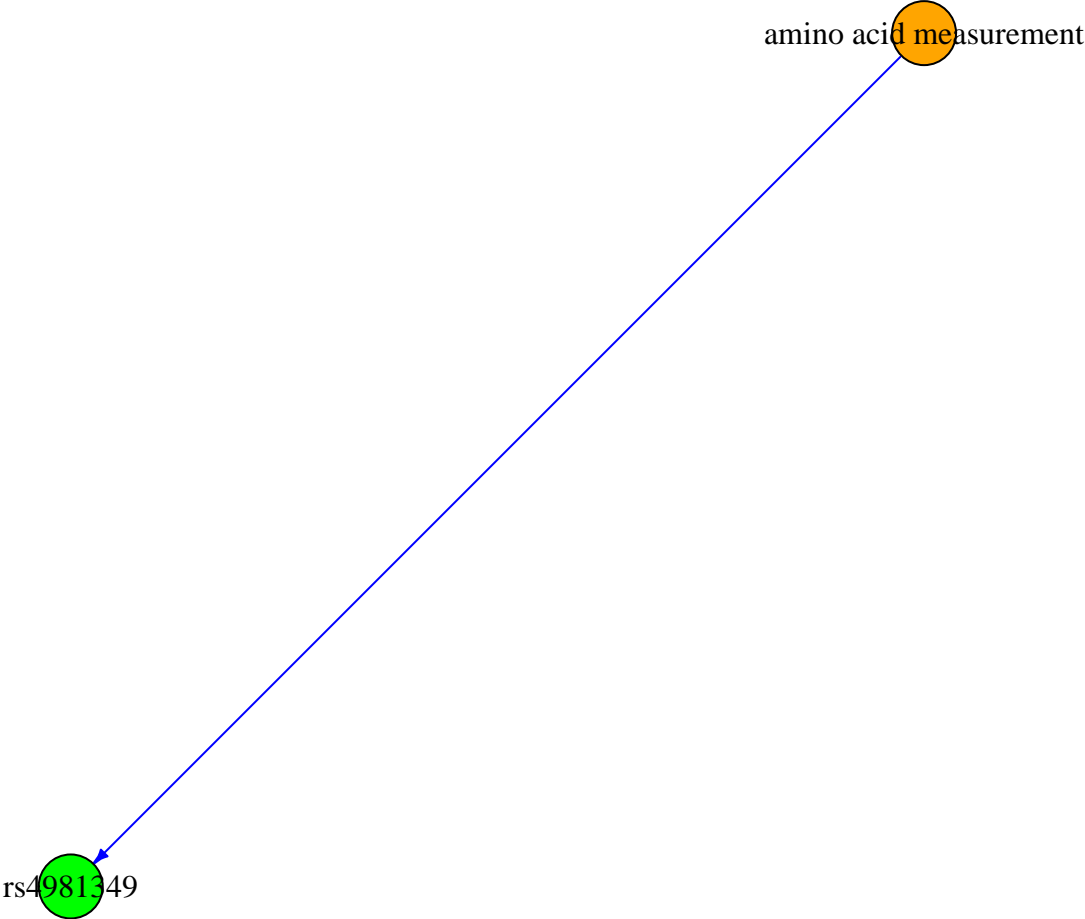

## Variant–Disease Network (protein measurement)

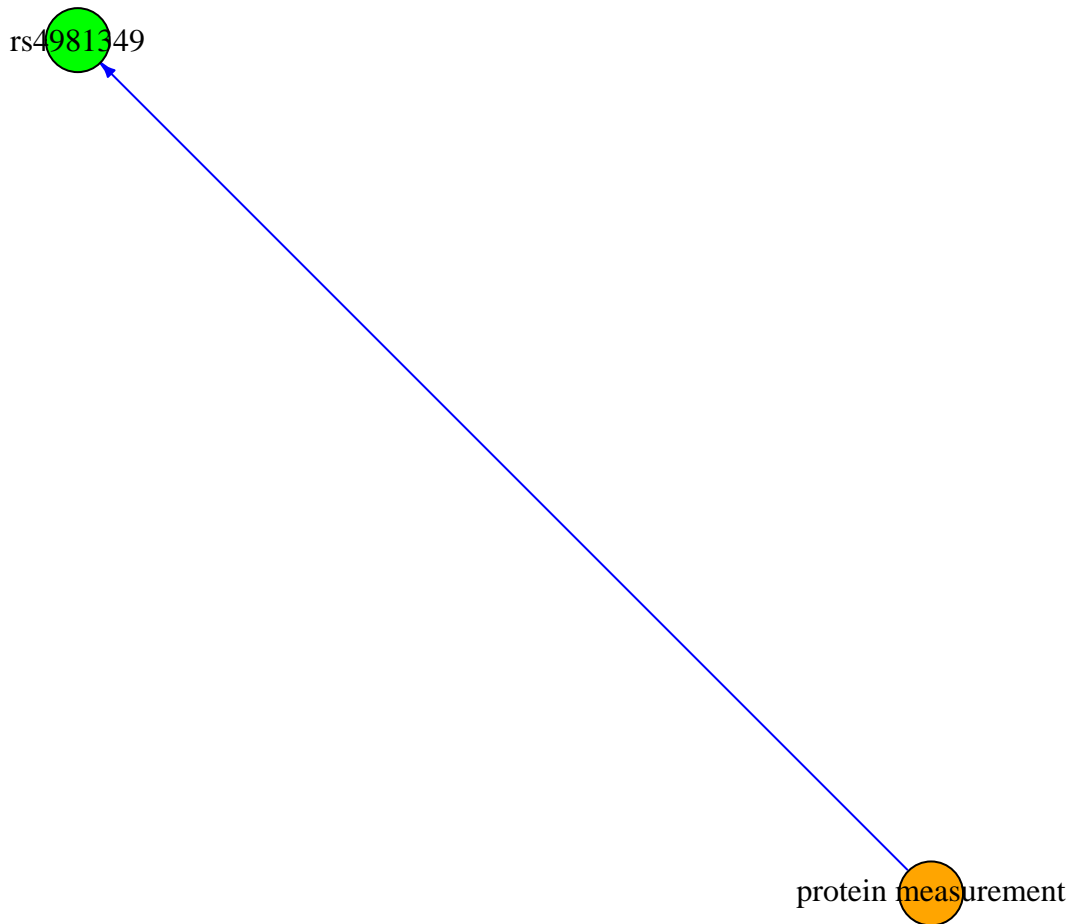

## Variant-Disease Network (response to anticoagulant)

response to anticoagulant

rs3758580

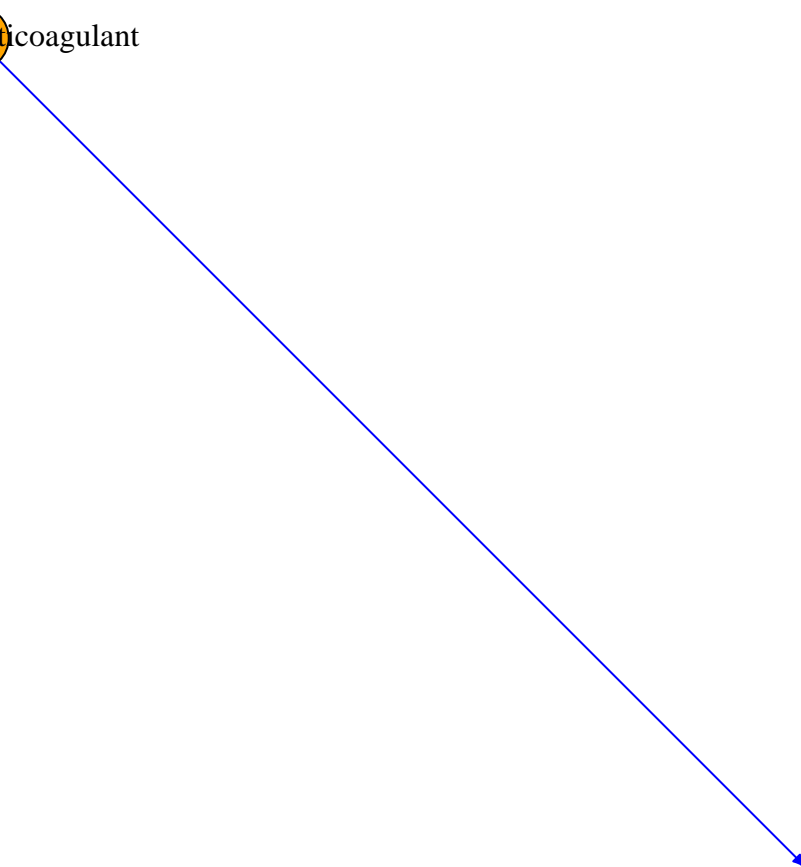

# Variant–Disease Network (response to platelet aggregation inhibitor)

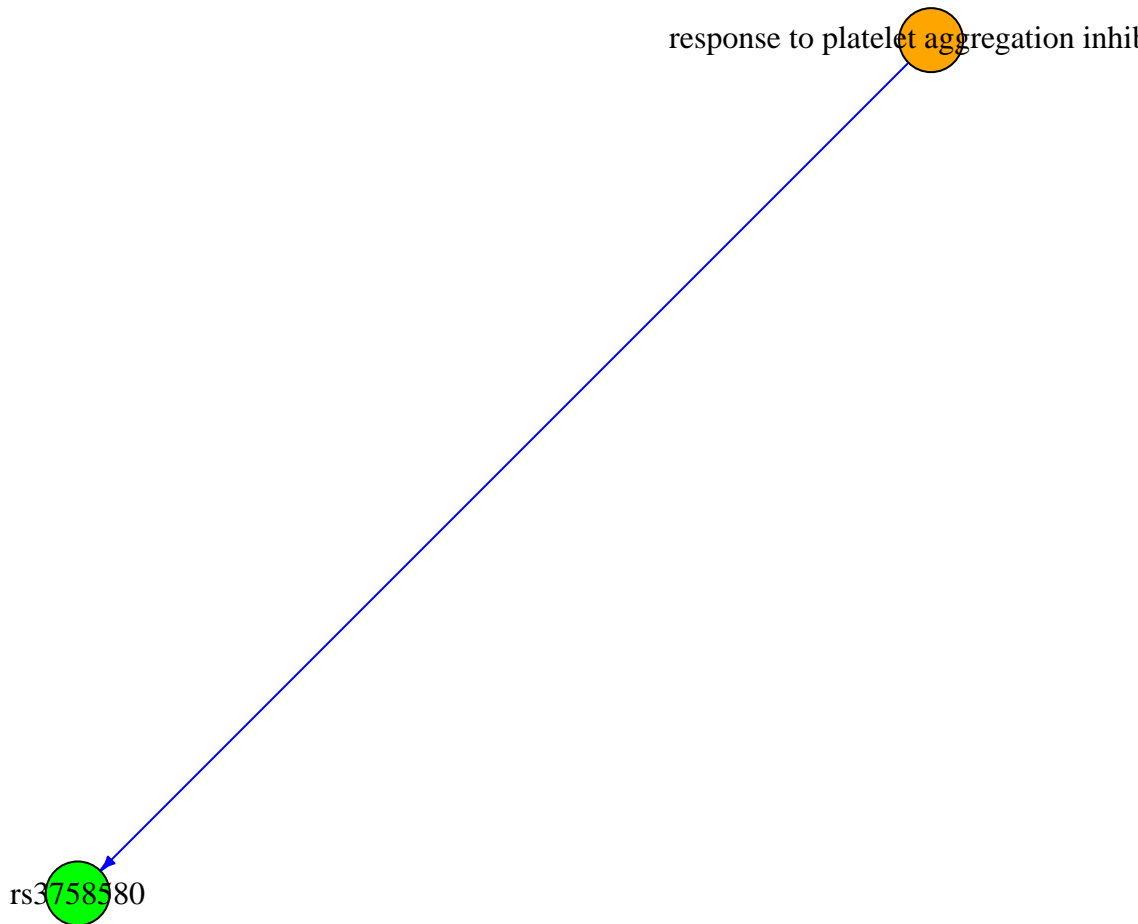

## Variant–Disease Network (coronary aneurysm)

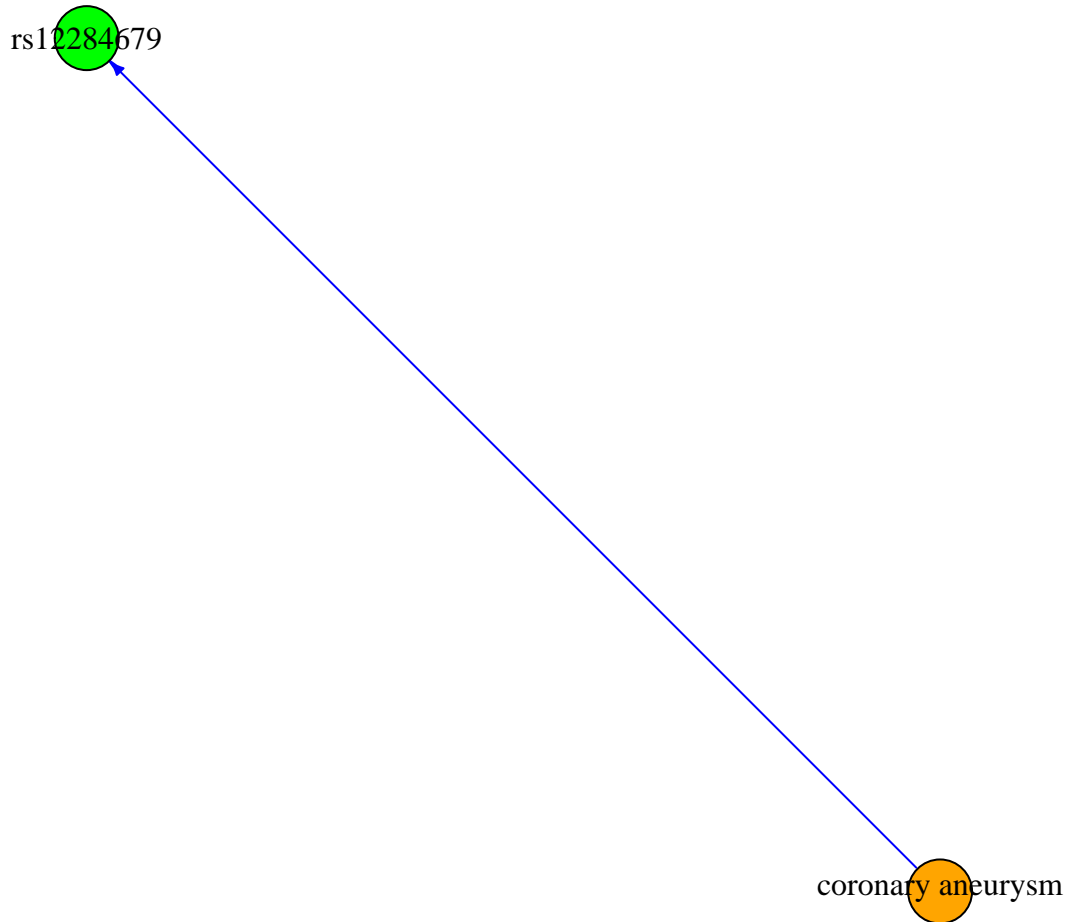

**Variant–Disease Network (mucocutaneous lymph node syndrome)**

mucocutaneous lymph node syndrome

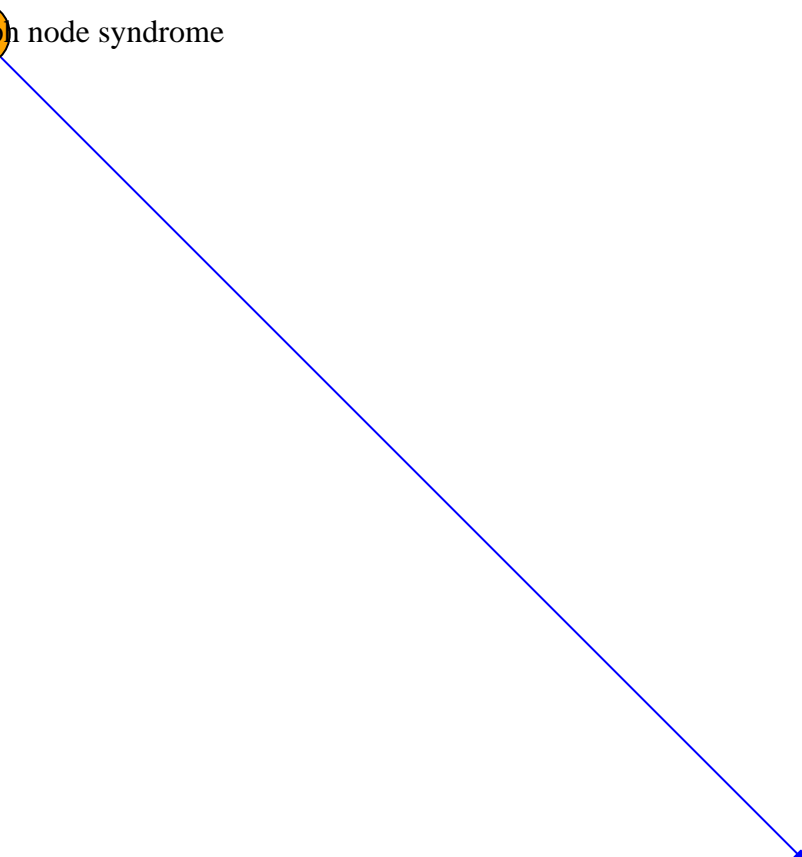

rs12284679

## Variant–Disease Network (age at first birth measurement)

rs1063739

age at first birth measurement

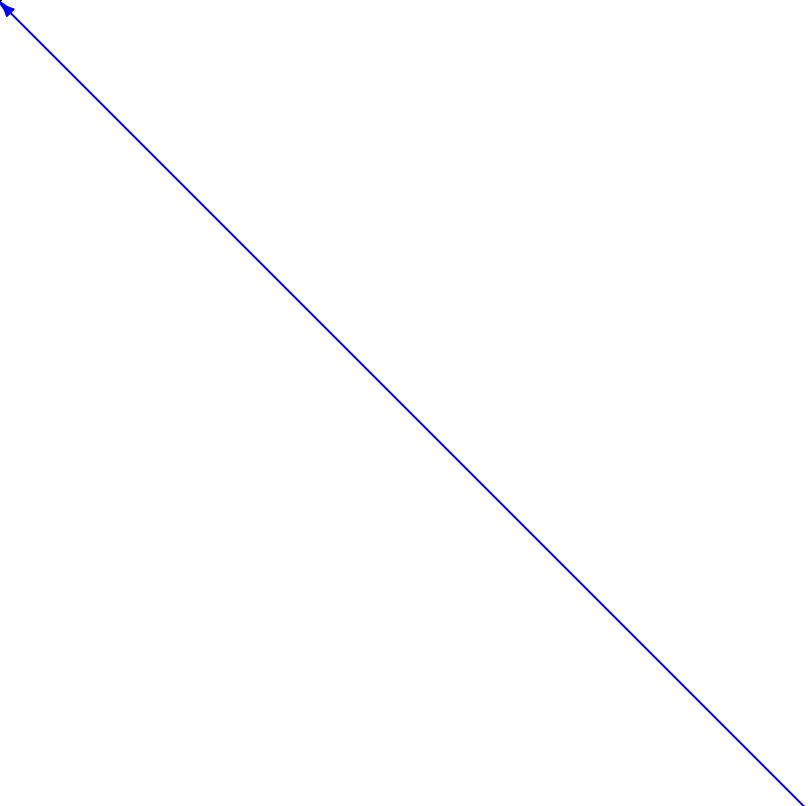

## Variant-Disease Network (albuminuria)

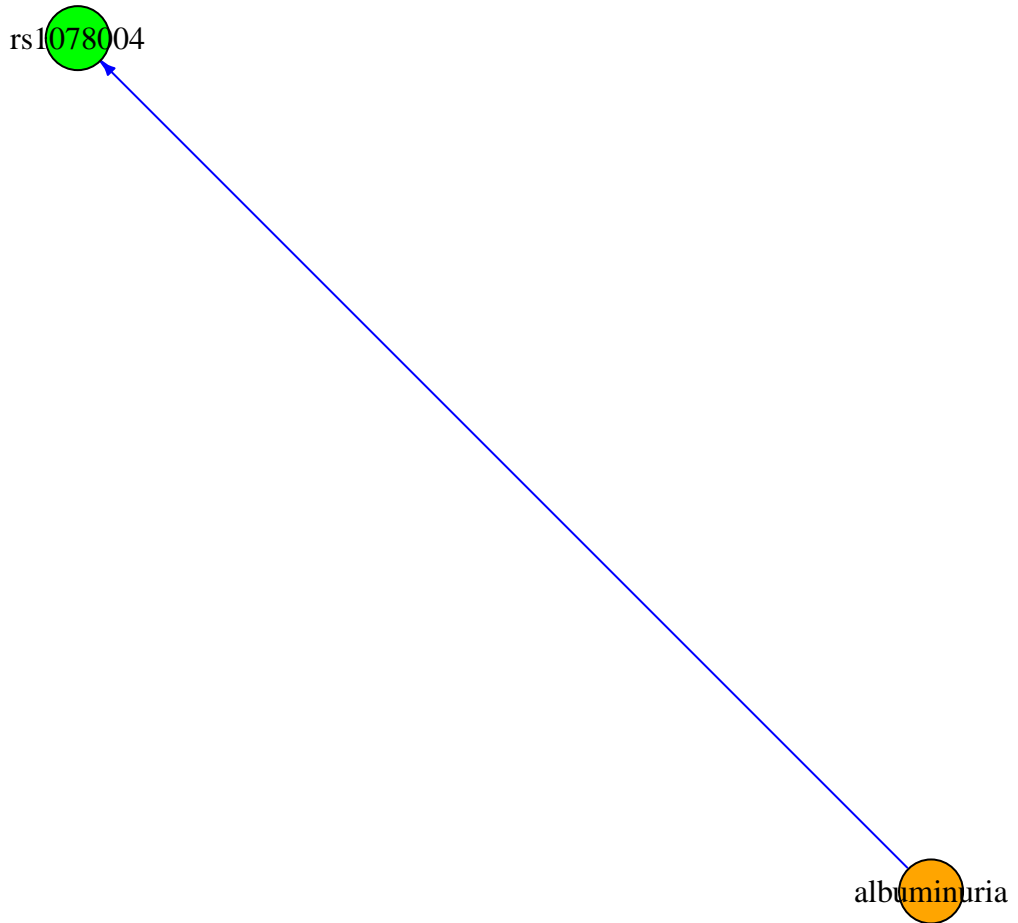



# Variant–Disease Network (blood osmolality measurement)

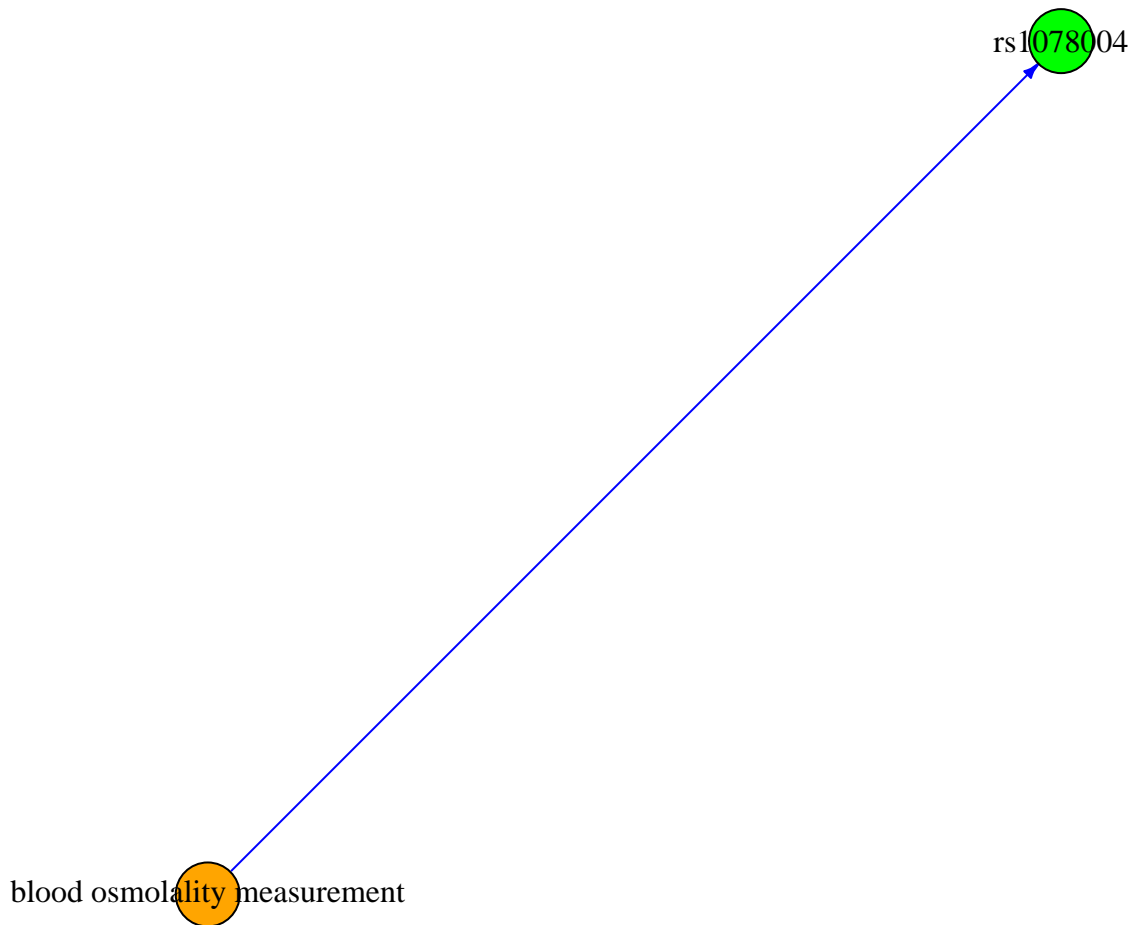

## Variant-Disease Network (myocardial infarction)

myocardial infarction

rs1078004



## Variant–Disease Network (body weight)

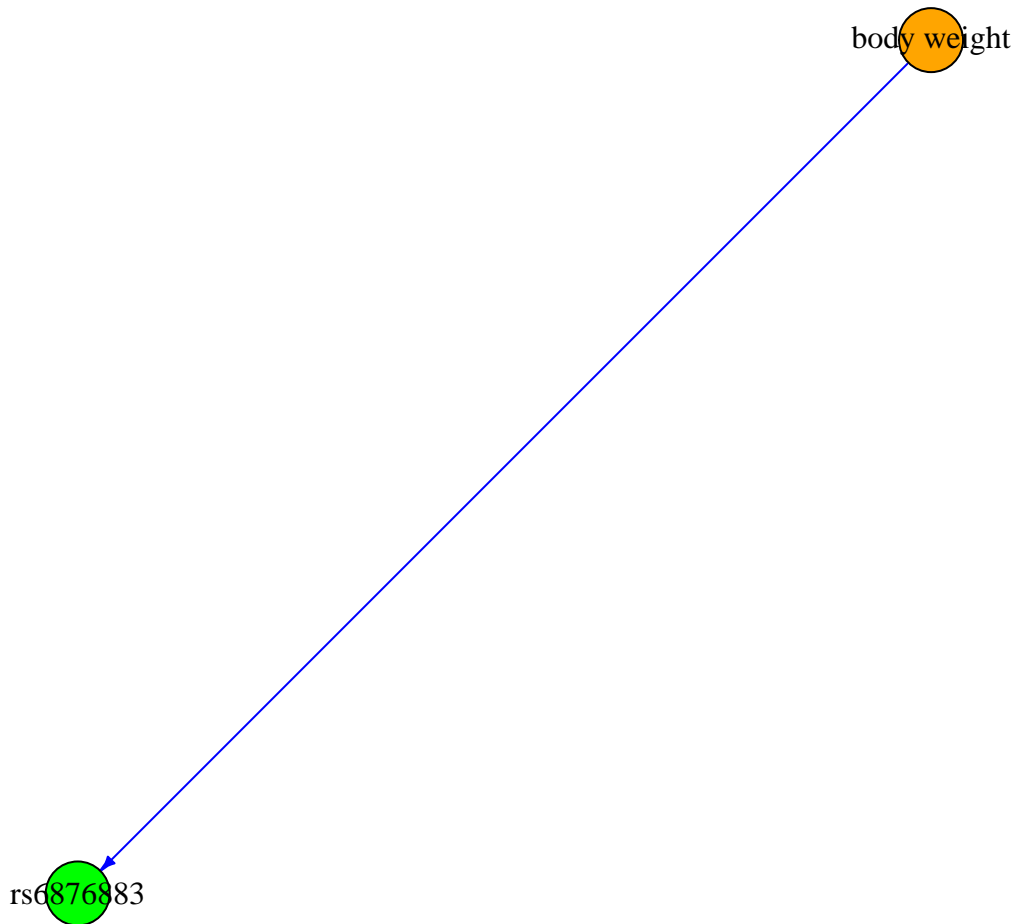

## Variant–Disease Network (beta wave measurement)

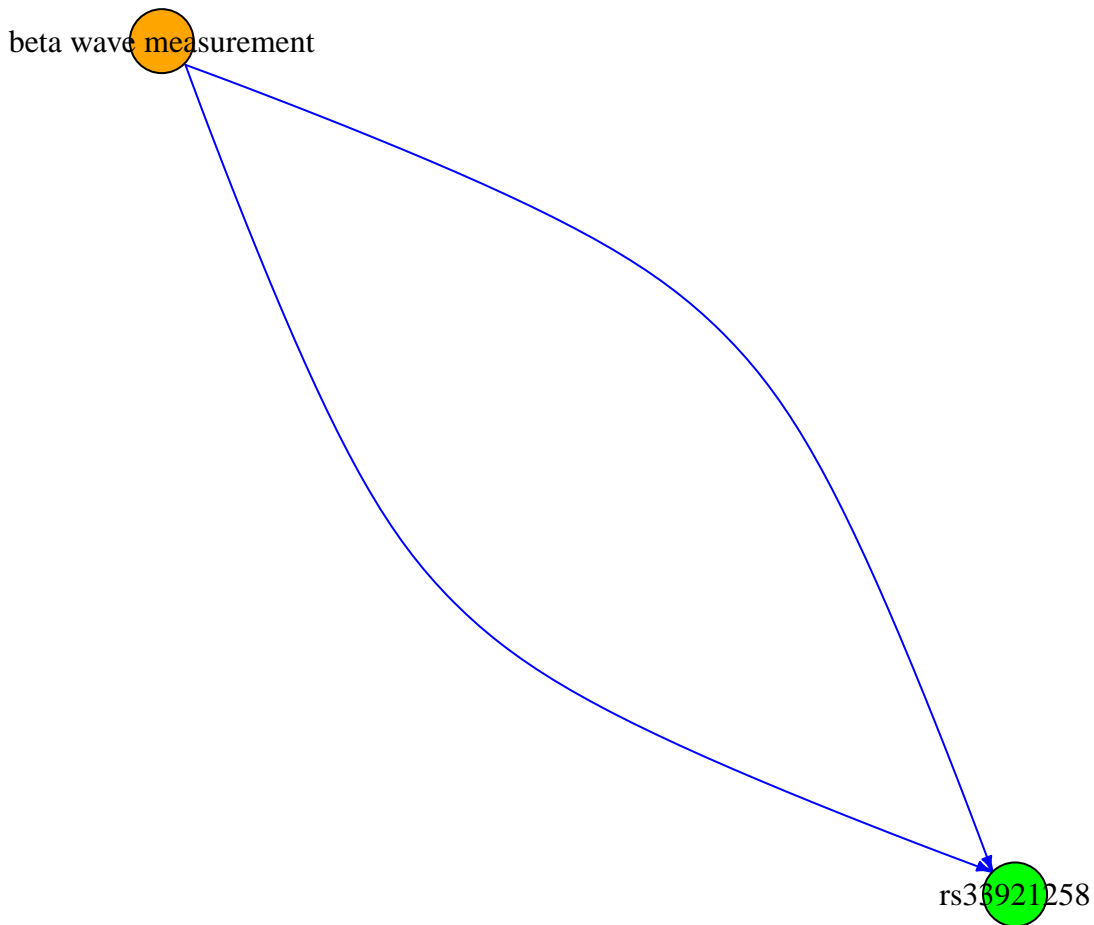

# Variant–Disease Network (electroencephalogram measurement)

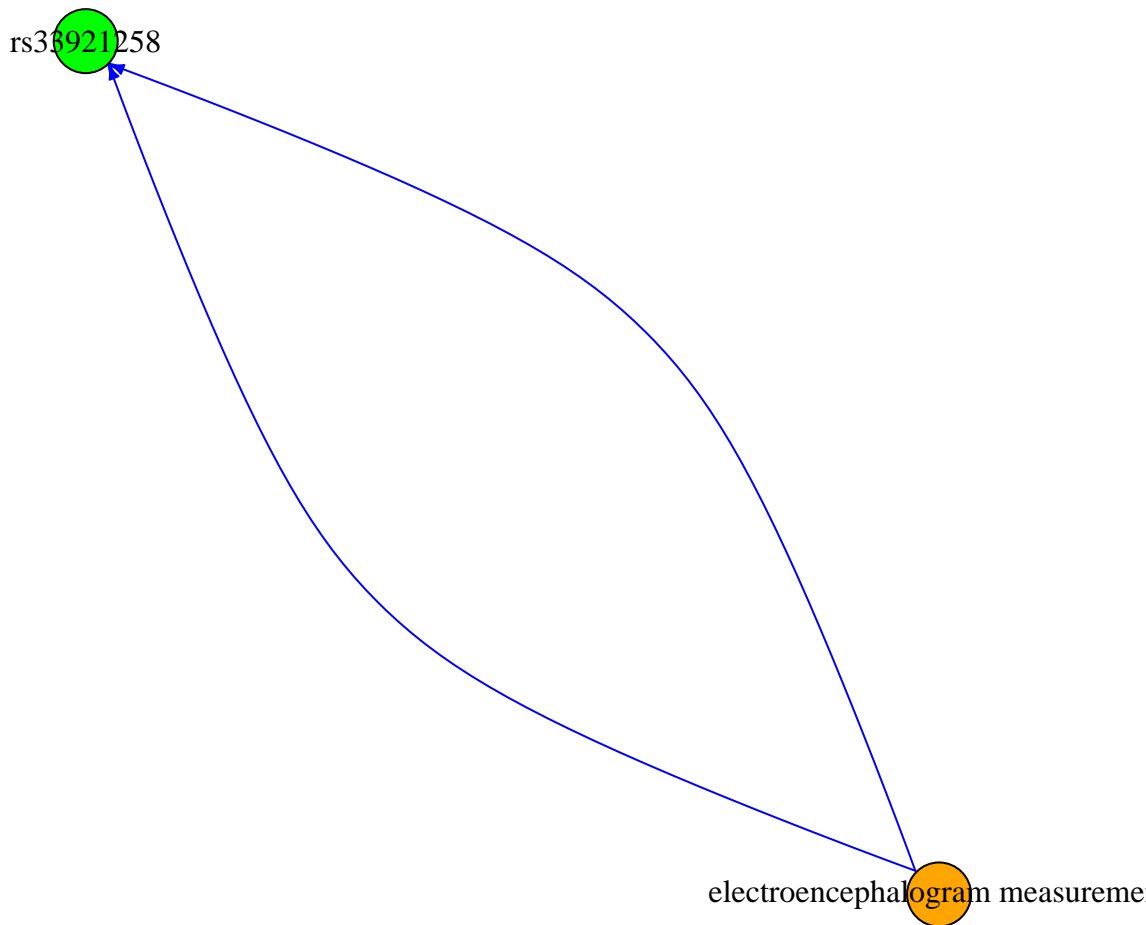

# Variant-Disease Network (nose morphology measurement)

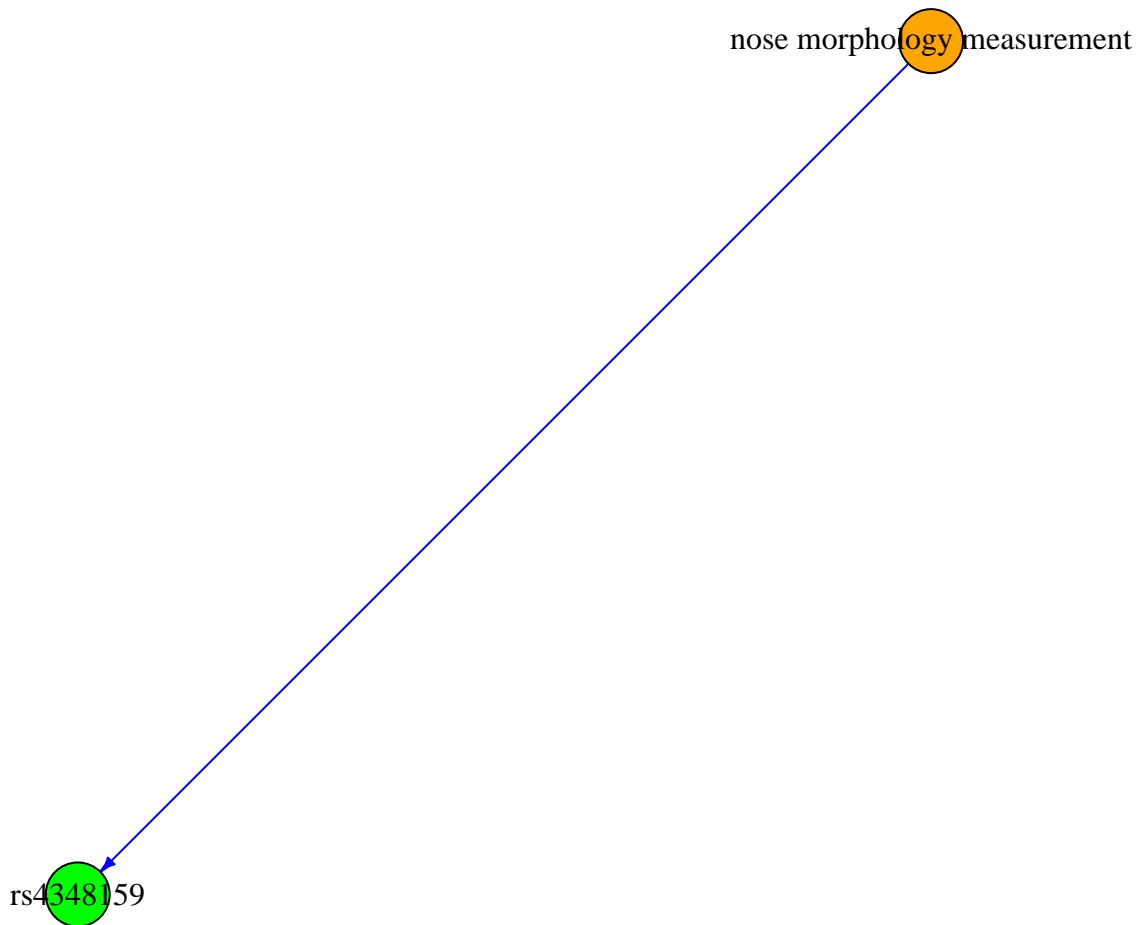

## Variant–Disease Network (acylcarnitine measurement)

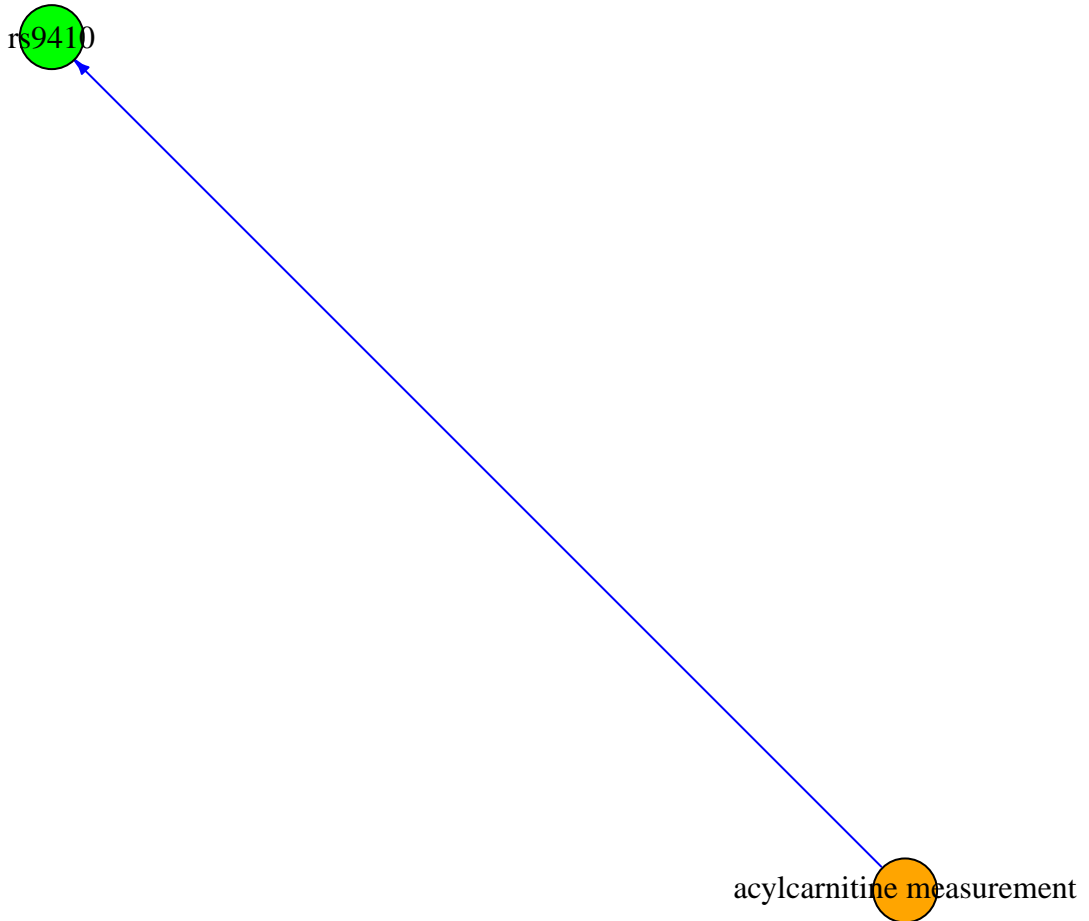

# Variant–Disease Network (peptidyl–prolyl cis–trans isomerase D measurement)

rs94110

peptidyl–prolyl cis–trans isomerase D measurement





**Variant–Disease Network (chronic hepatitis C infection)**

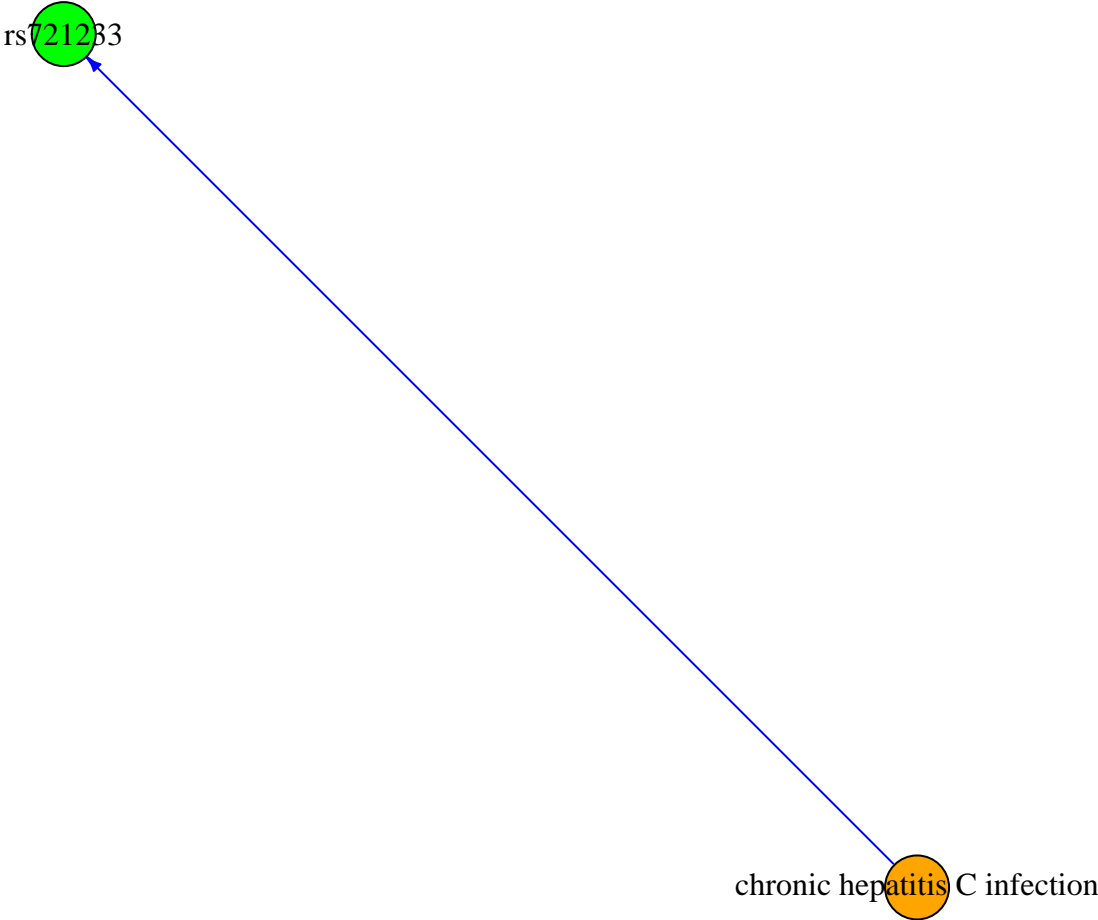

## Variant–Disease Network (allergic sensitization measurement)

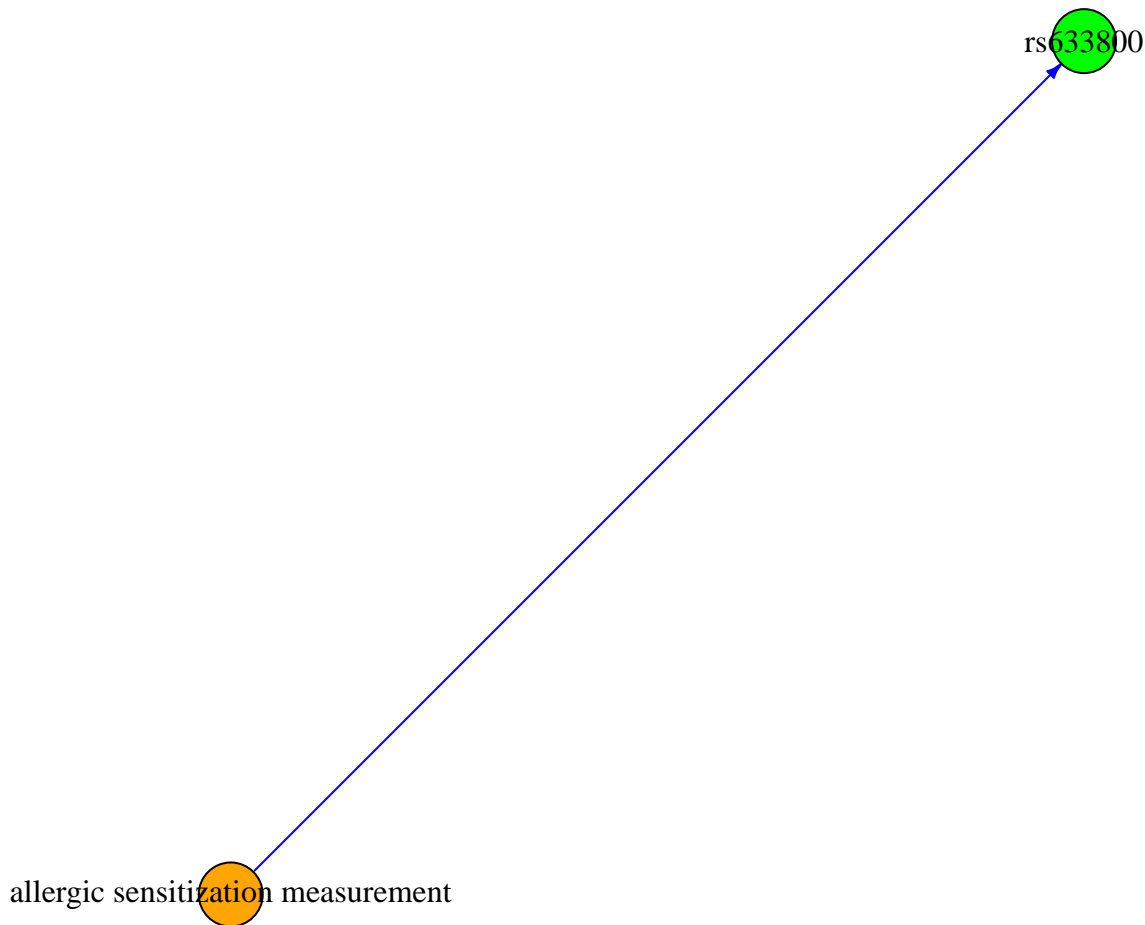

Variant–Disease Network (taxonomic microbiome measurement)

taxonomic microbiome measurement

rs6599079

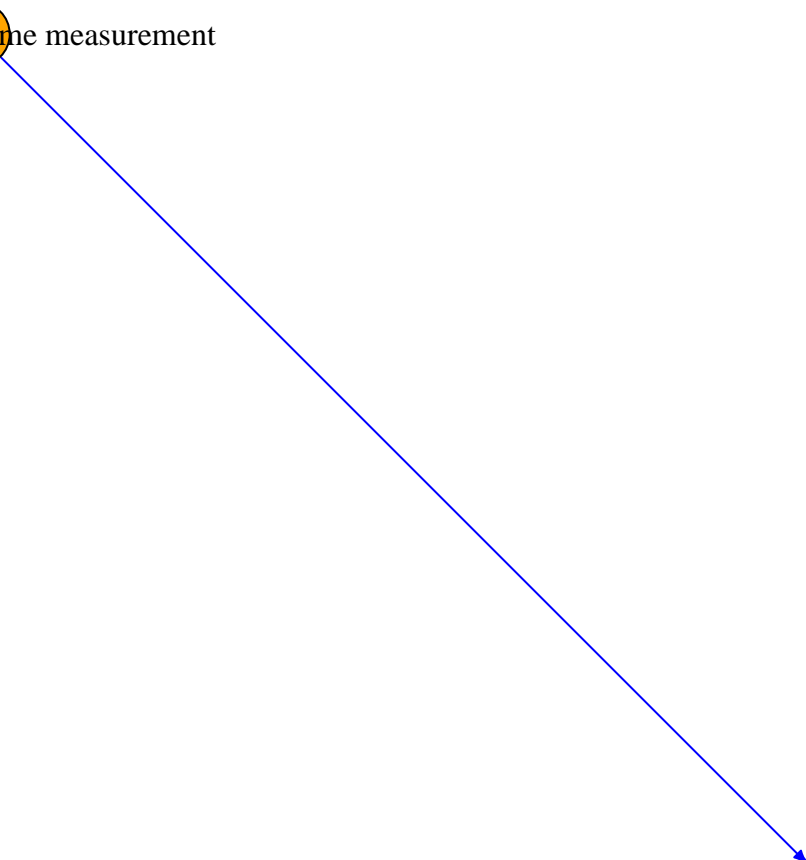

**Variant–Disease Network (fibroblast growth factor basic measurement)**

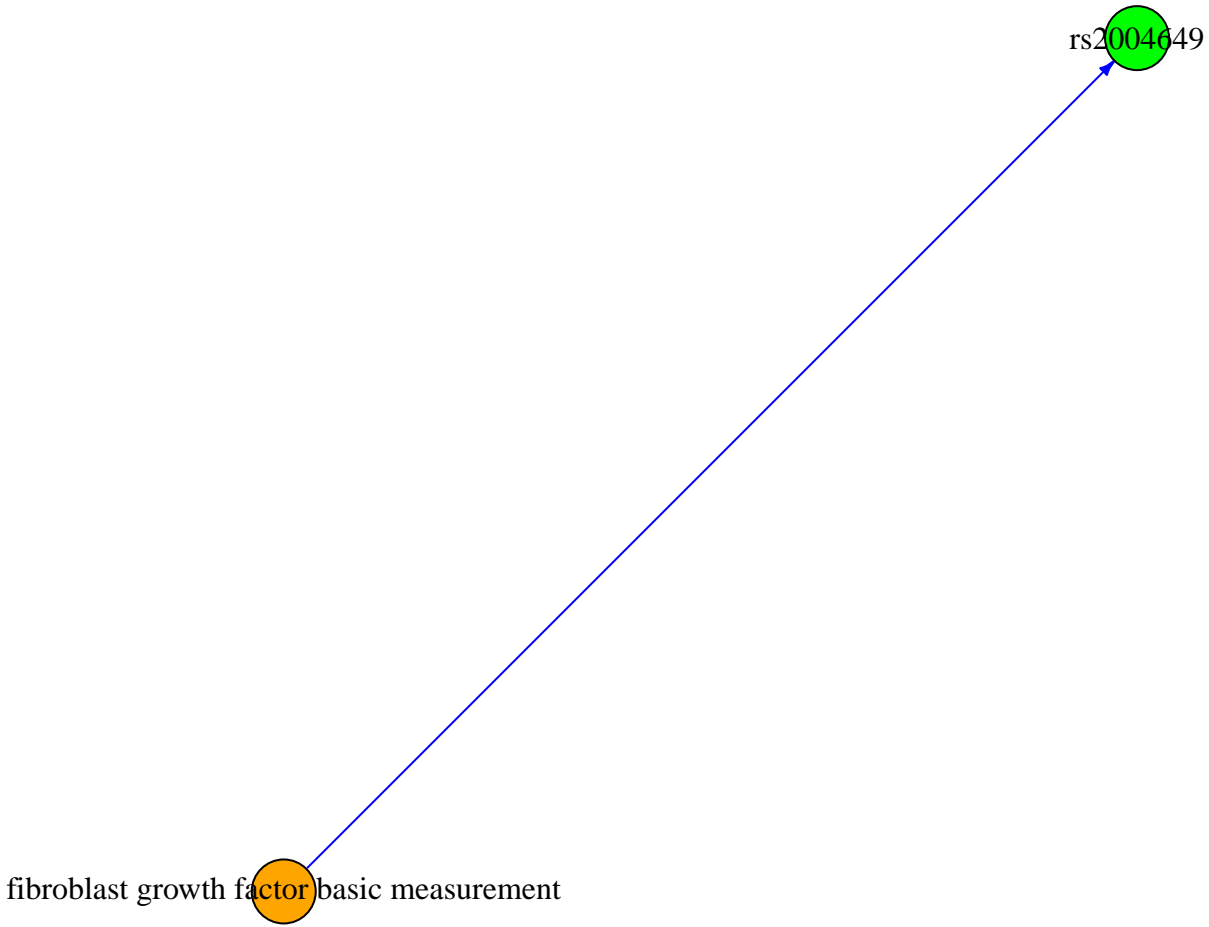

# Variant–Disease Network (beta–nerve growth factor measurement)

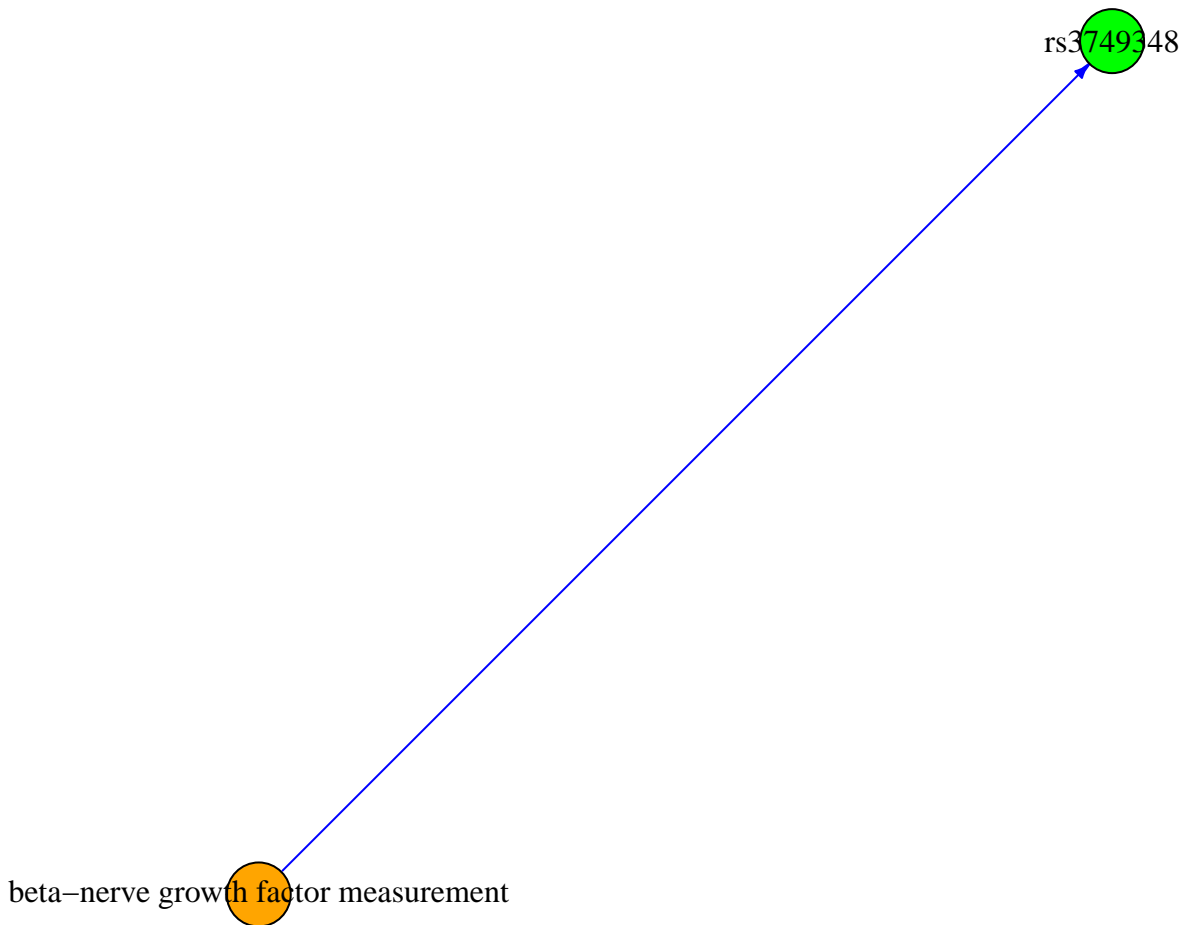

## Variant-Disease Network (response to drug)

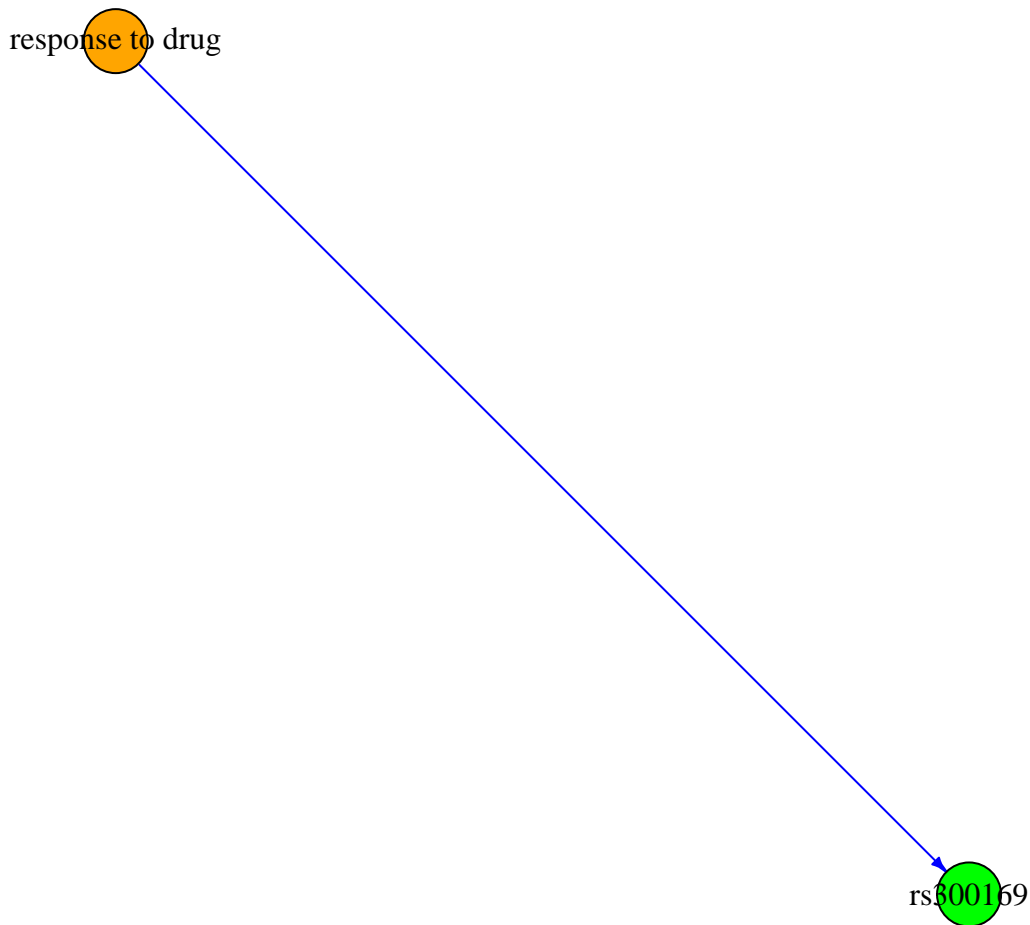

**Variant–Disease Network (Abnormality of refraction)**

Abnormality of refraction

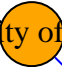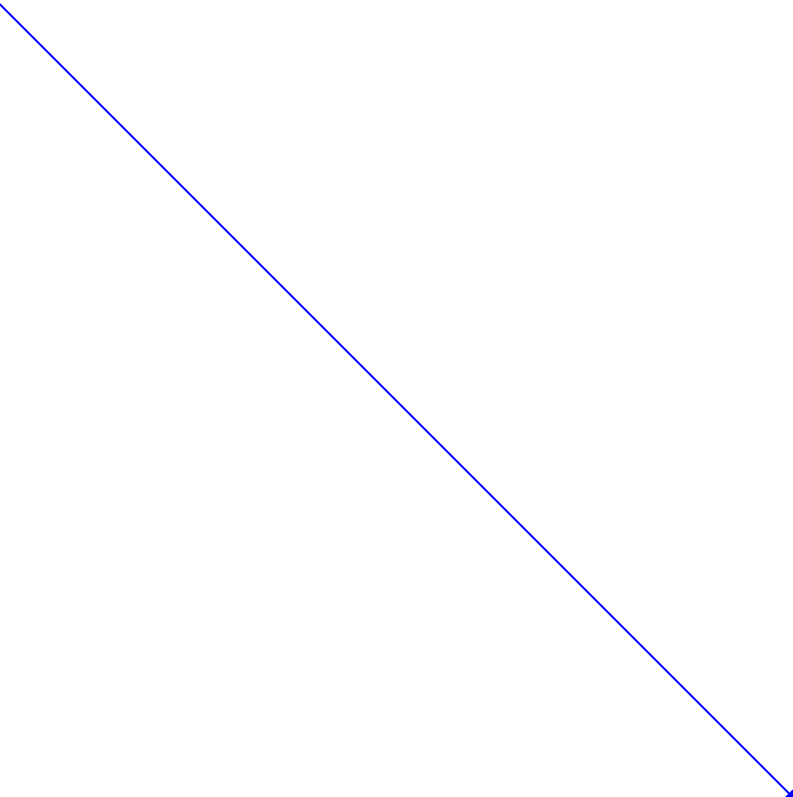

rs1254319

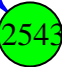

## Variant–Disease Network (estrone measurement)

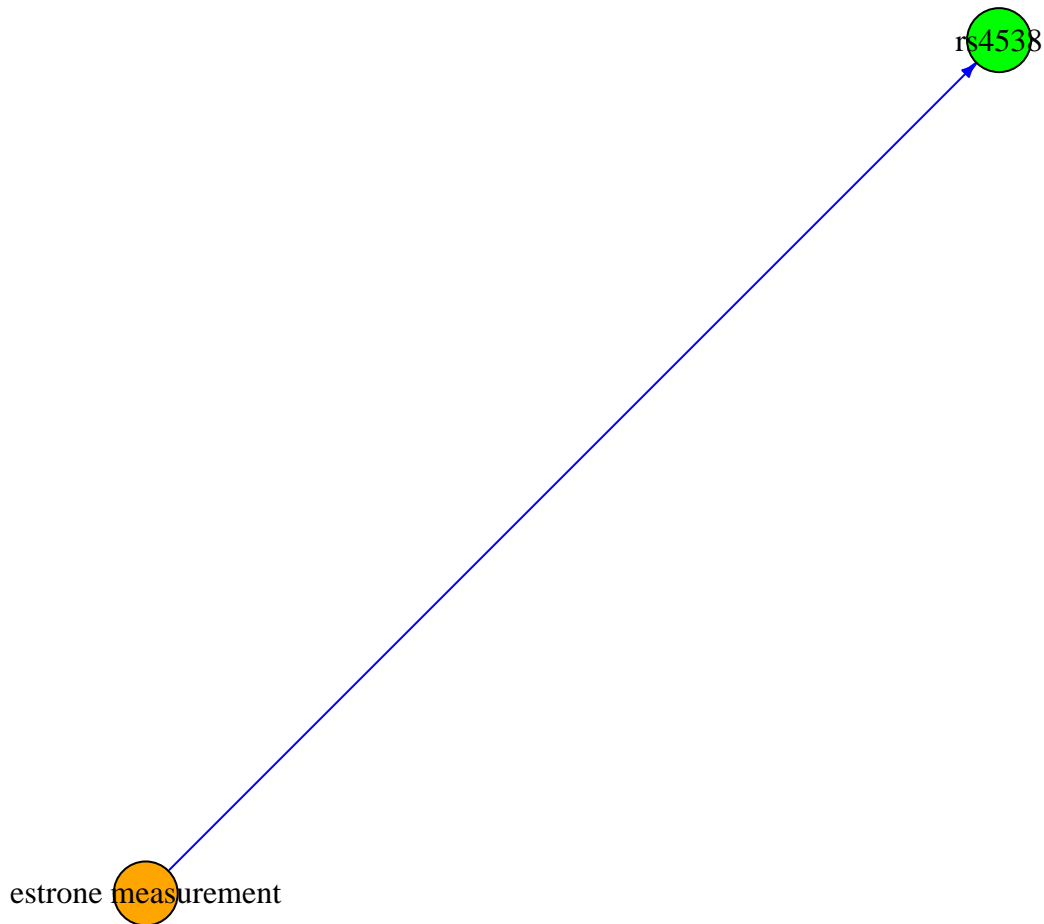



## Variant–Disease Network (eye color)

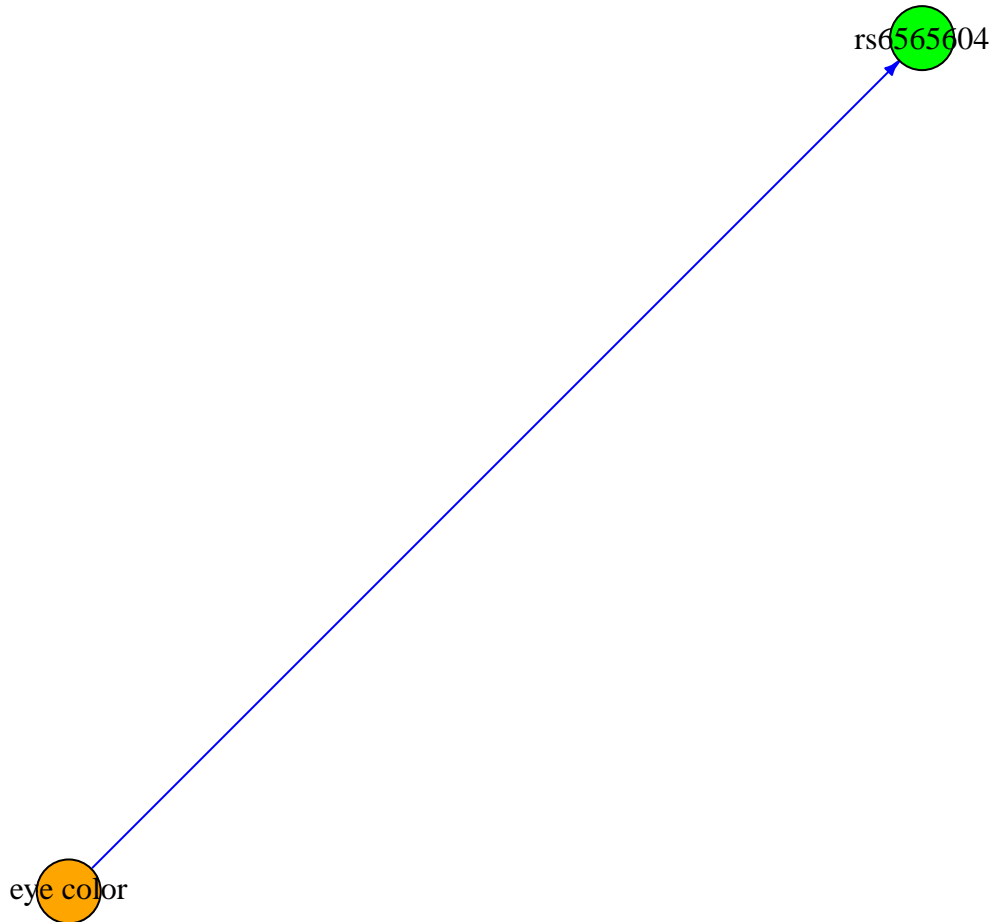

## Variant-Disease Network (bilirubin measurement)

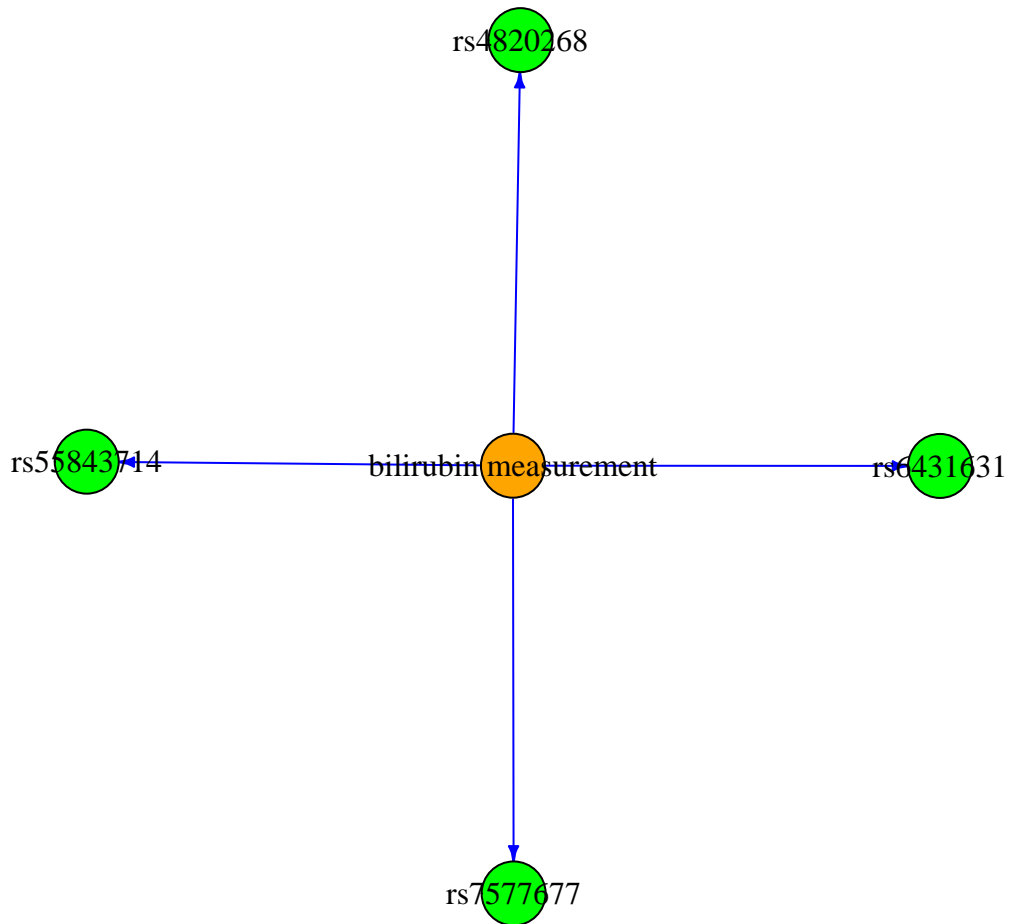

# Disease Network (autosomal dominant compelling helio-ophthalmic outburst syndrome)

autosomal dominant compelling helio-ophthalmic outburst syndrome

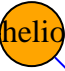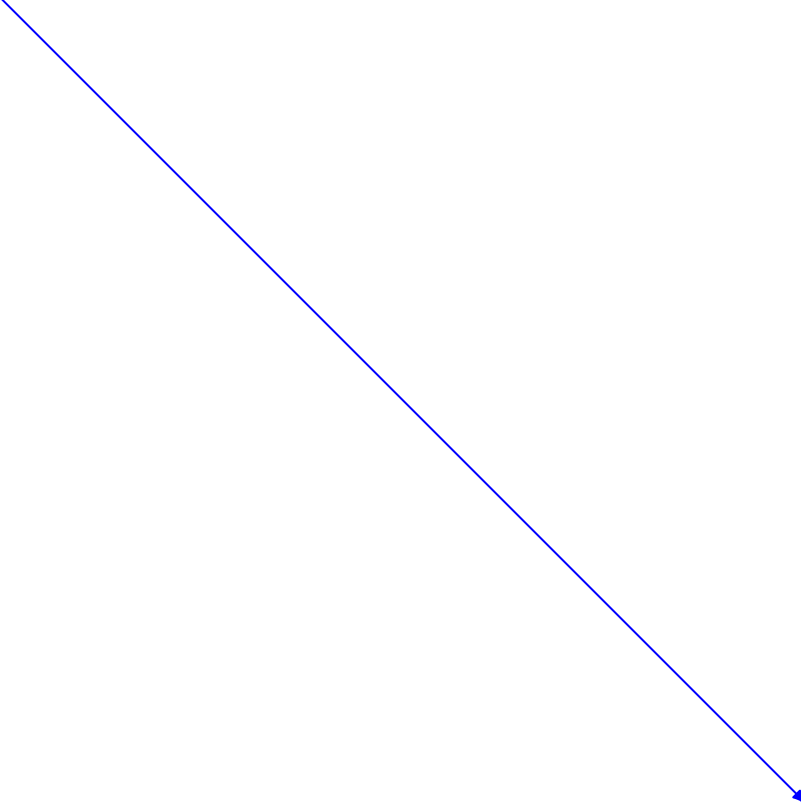

rs17101193

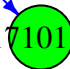

**Variant–Disease Network (coronary artery calcification)**

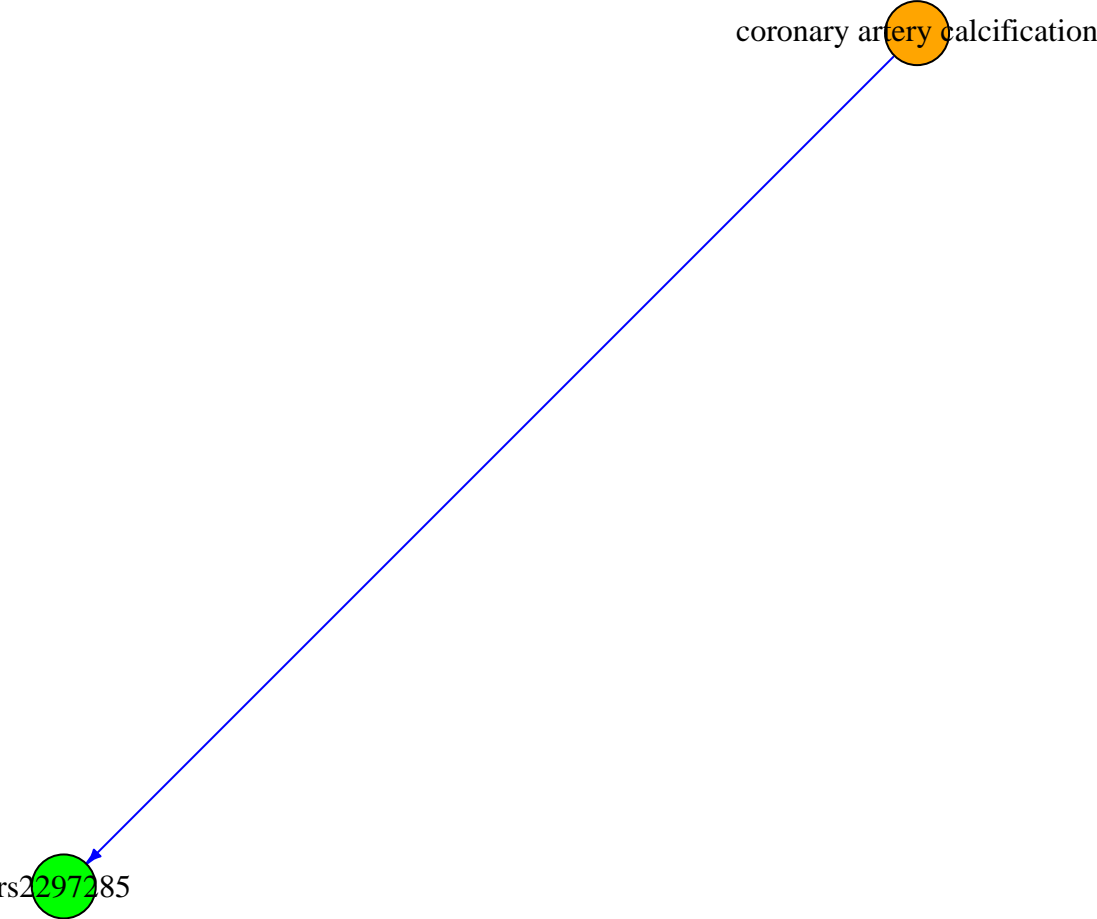

# Variant–Disease Network (clinical laboratory measurement)

rs4820268

clinical laboratory measurement



## Variant–Disease Network (ferritin measurement)

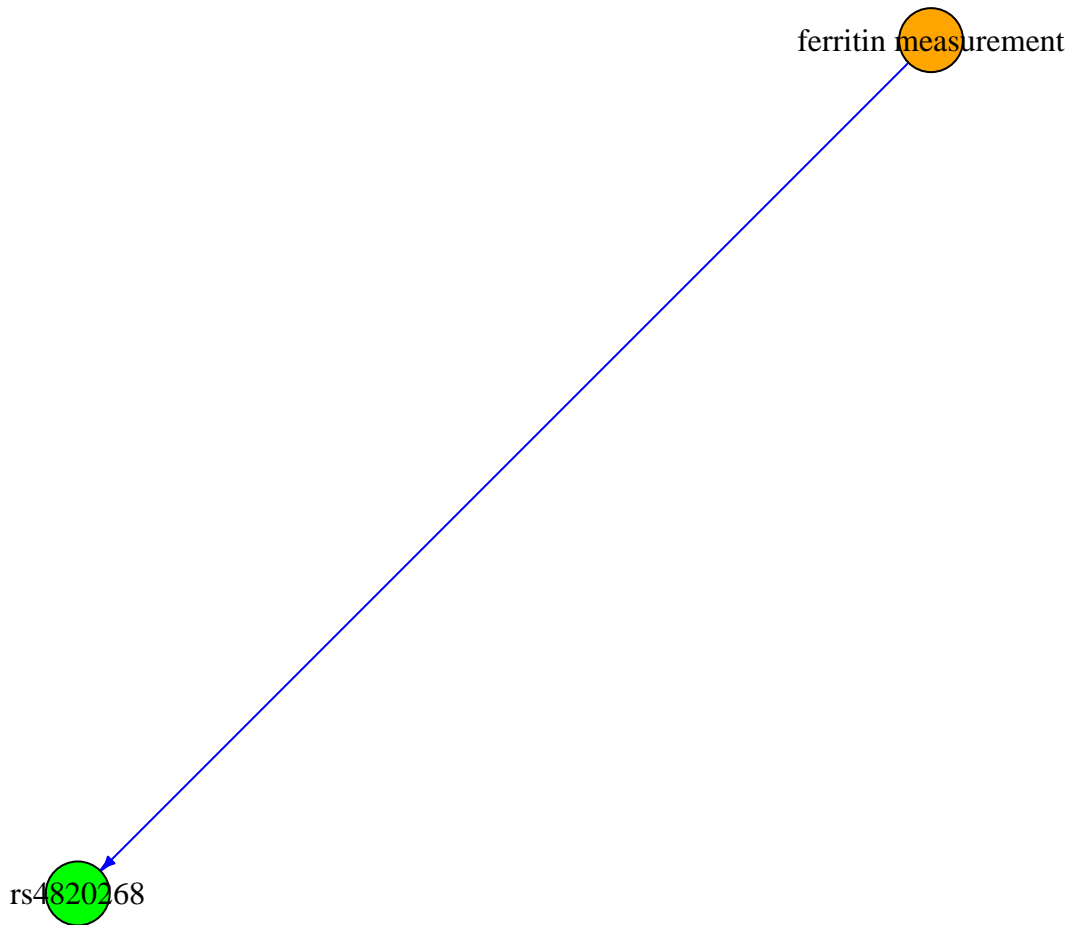

## Variant–Disease Network (hepcidin:ferritin ratio)

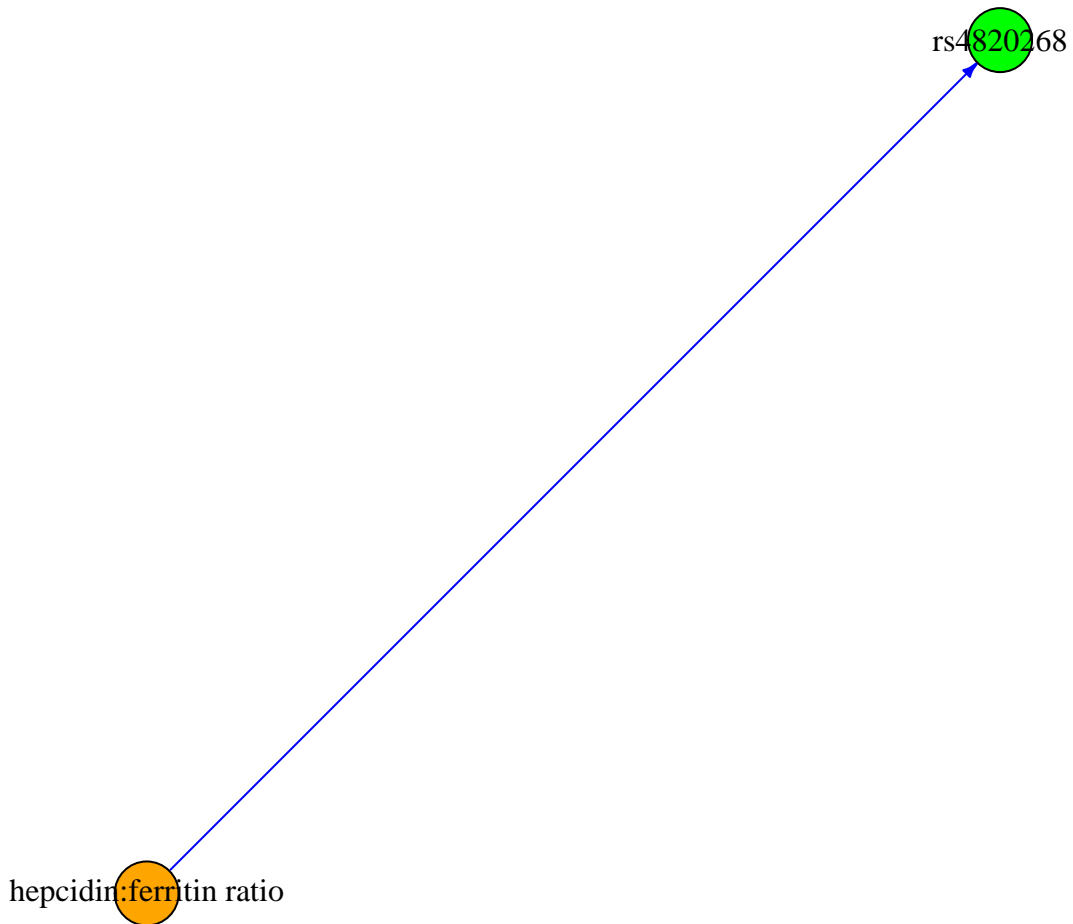

Variant–Disease Network (hepcidin:transferrin saturation ratio)

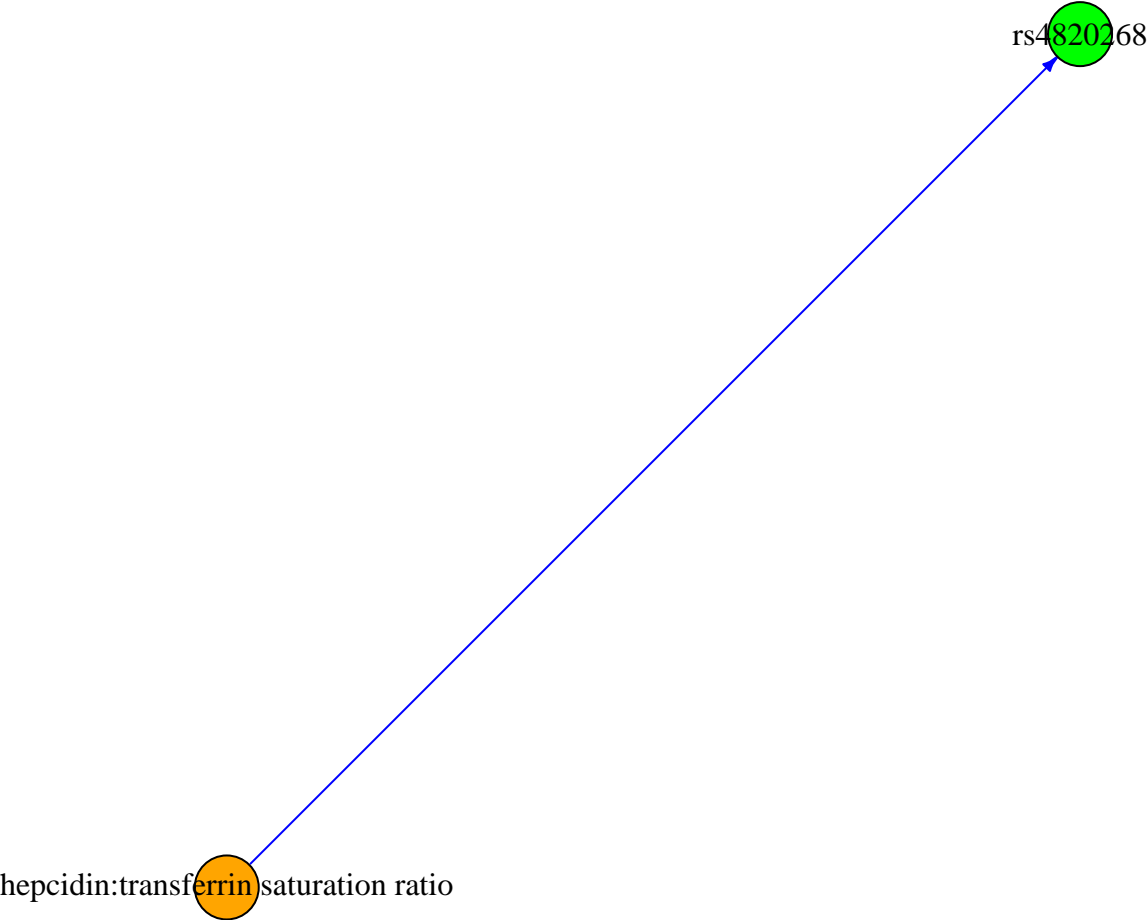



# Variant–Disease Network (iron biomarker measurement)

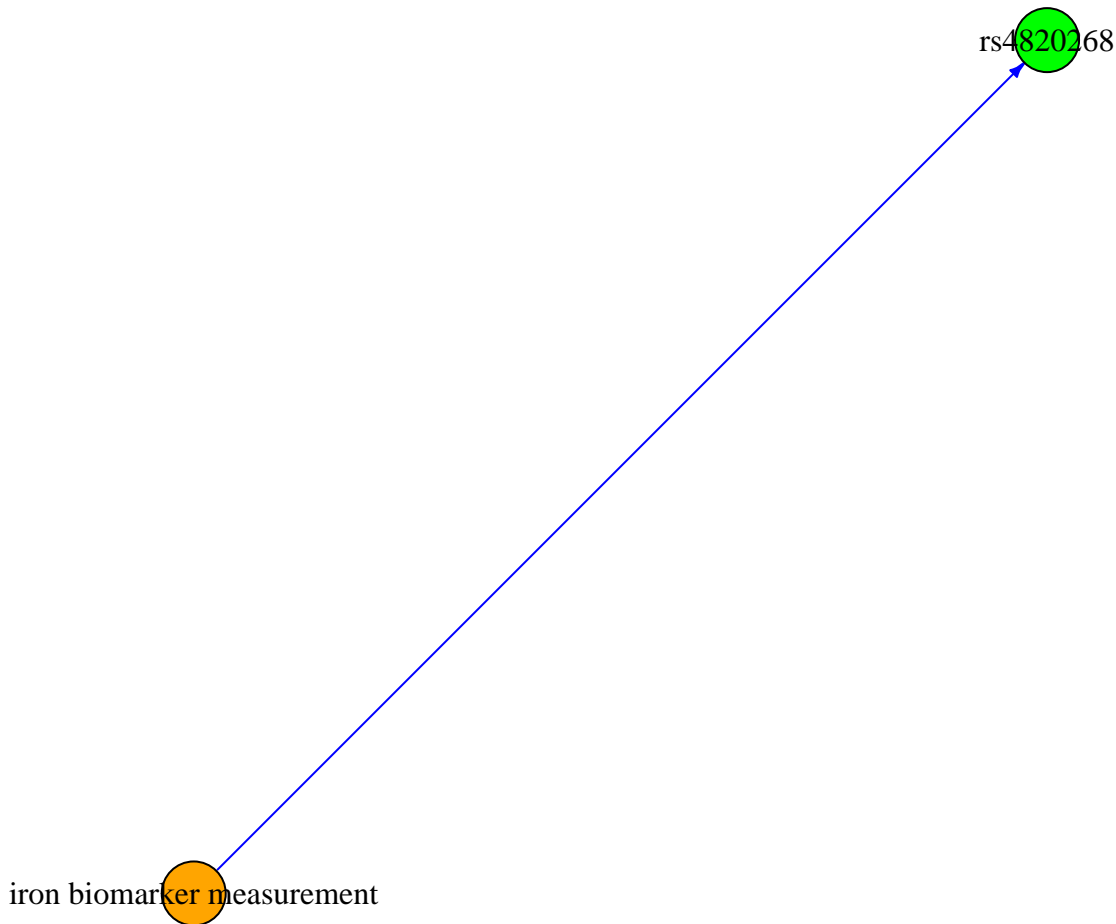

**Variant–Disease Network (serum hepcidin measurement)**

serum hepcidin measurement

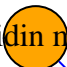

rs4820268

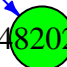

## Variant–Disease Network (serum iron measurement)

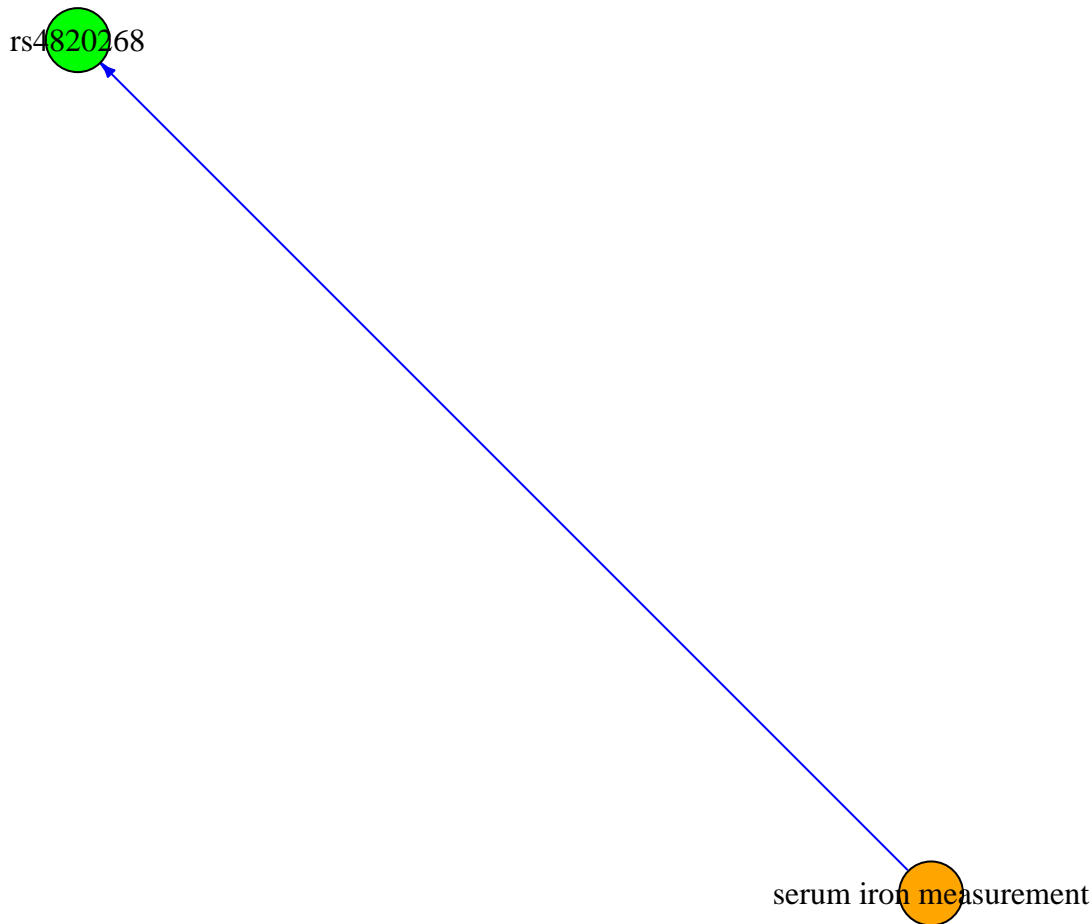

**Variant–Disease Network (soluble transferrin receptor measurement)**

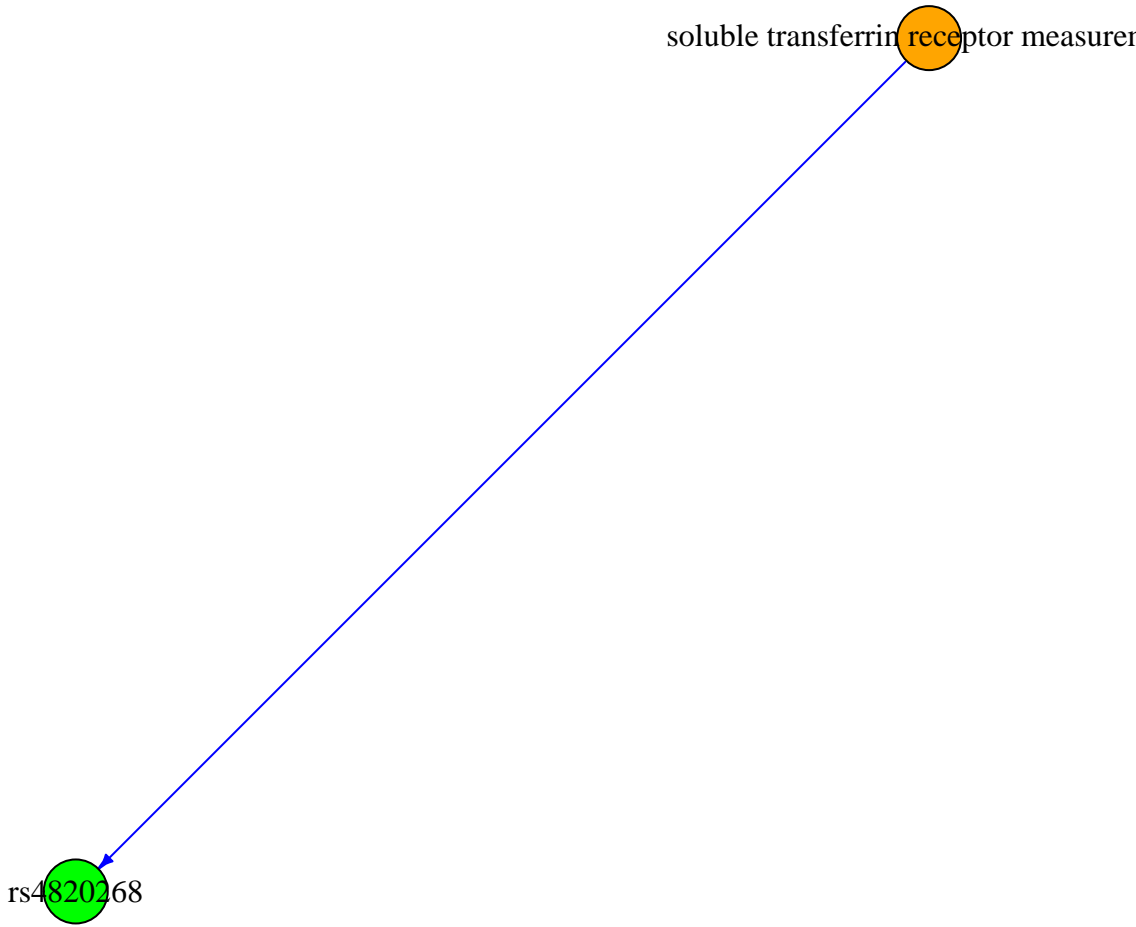

# Variant–Disease Network (transferrin measurement)

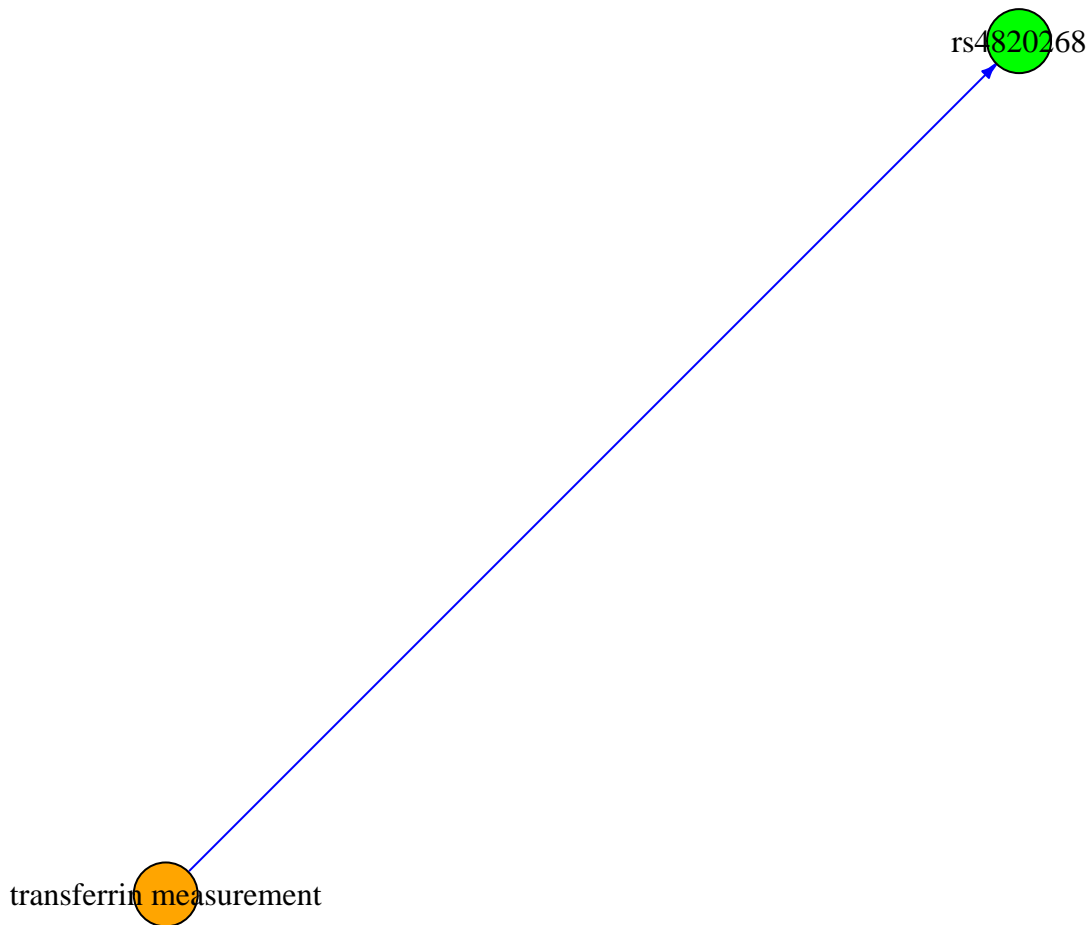

# Variant–Disease Network (transferrin saturation measurement)

transferrin saturation measurement

rs4820268

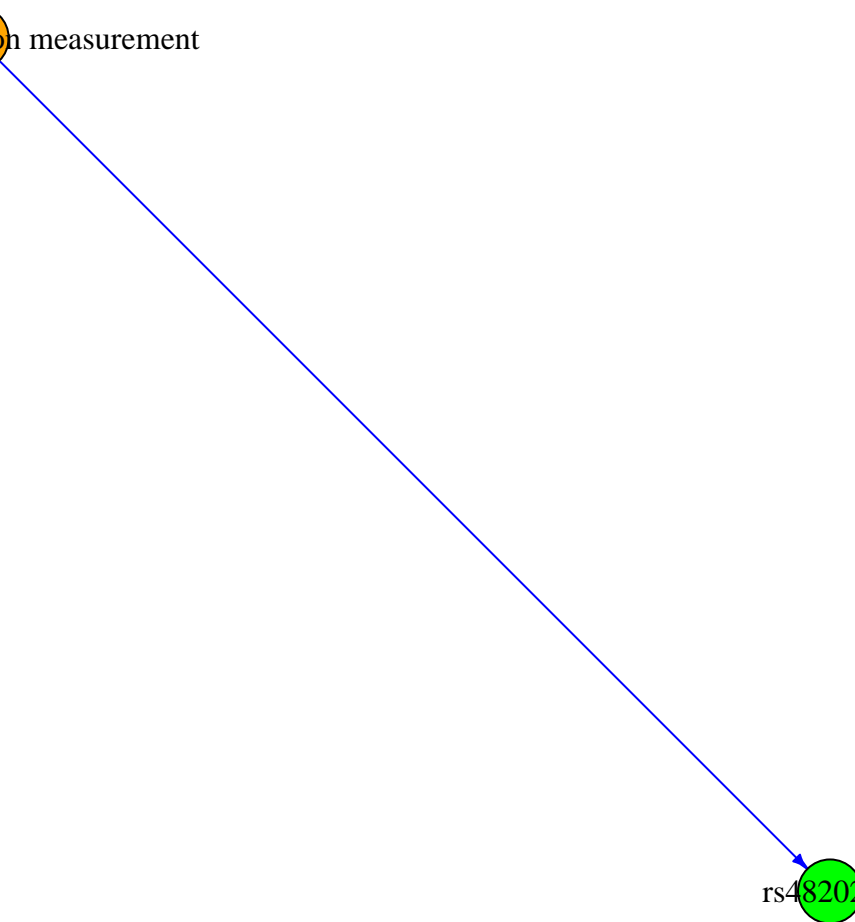

## Variant–Disease Network (lipoprotein A measurement)

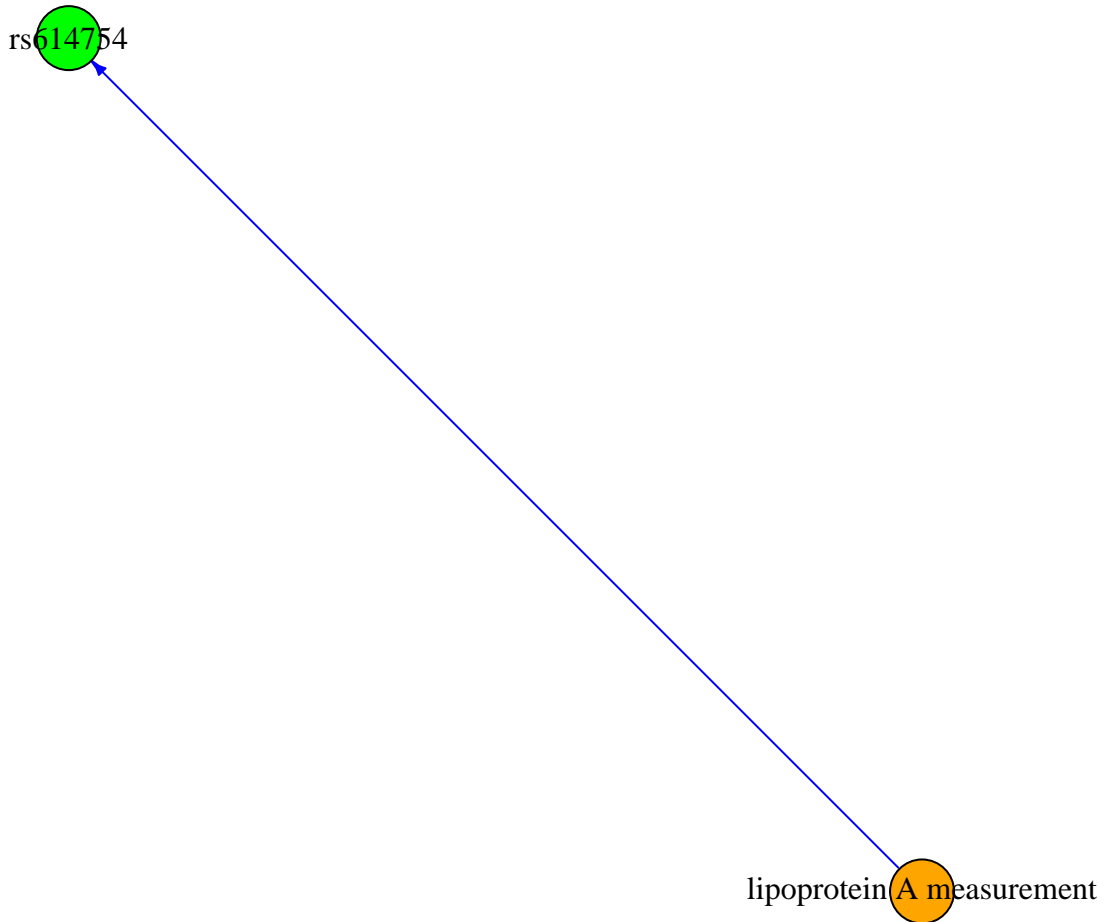

## Variant-Disease Network (sulfate measurement)

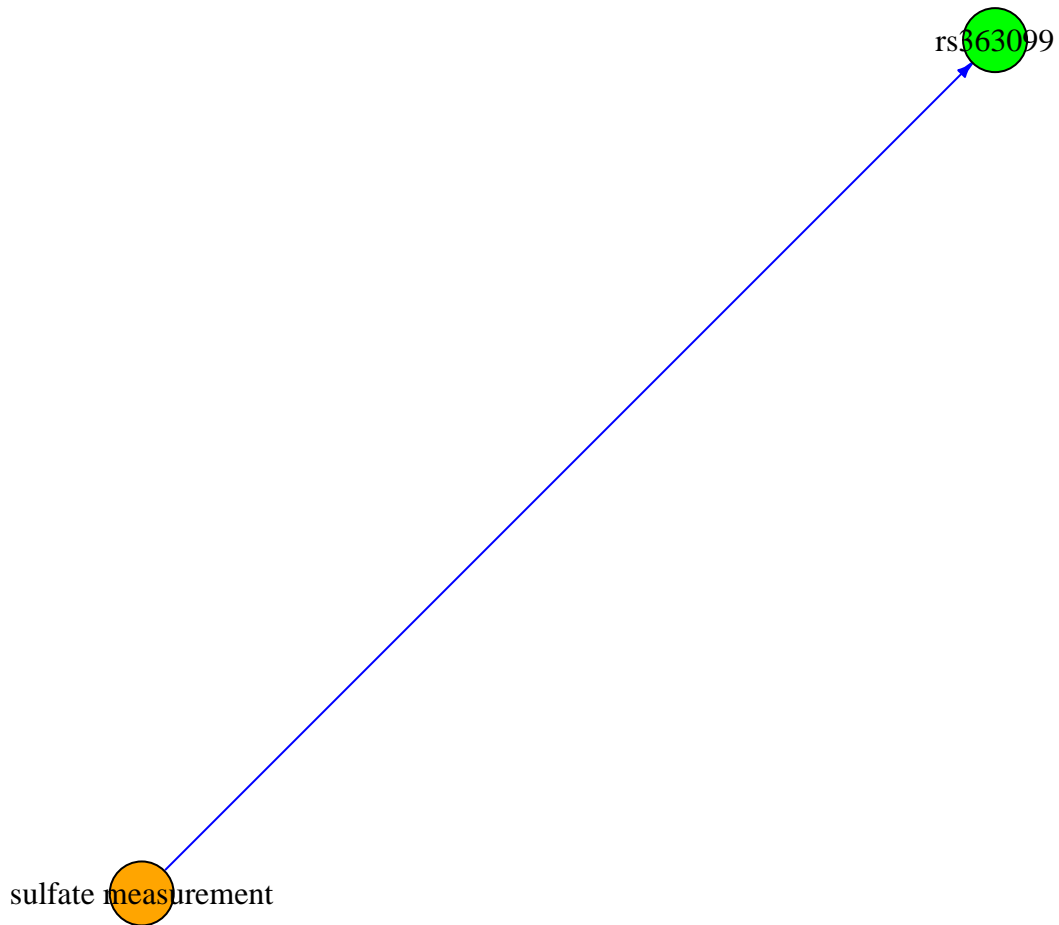



# Variant-Disease Network (synophrys measurement)

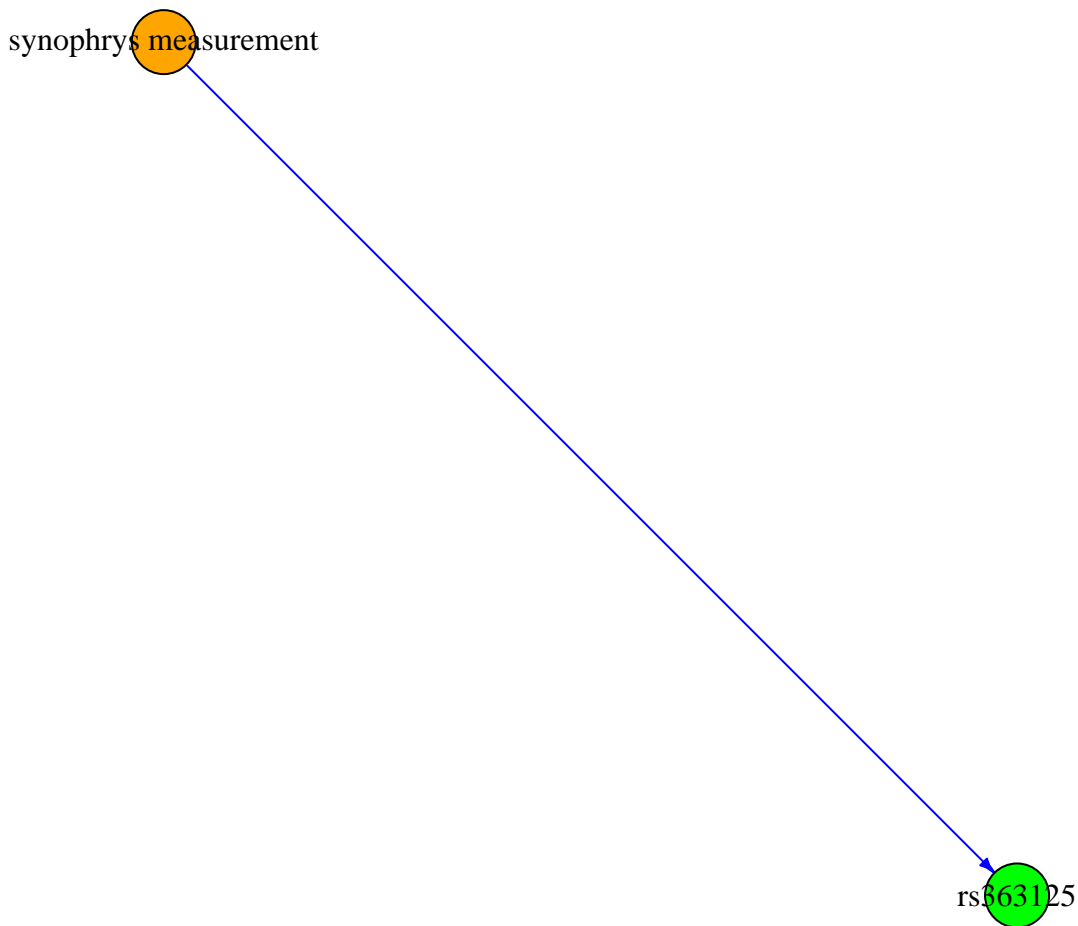

Variant–Disease Network (response to antineoplastic agent)

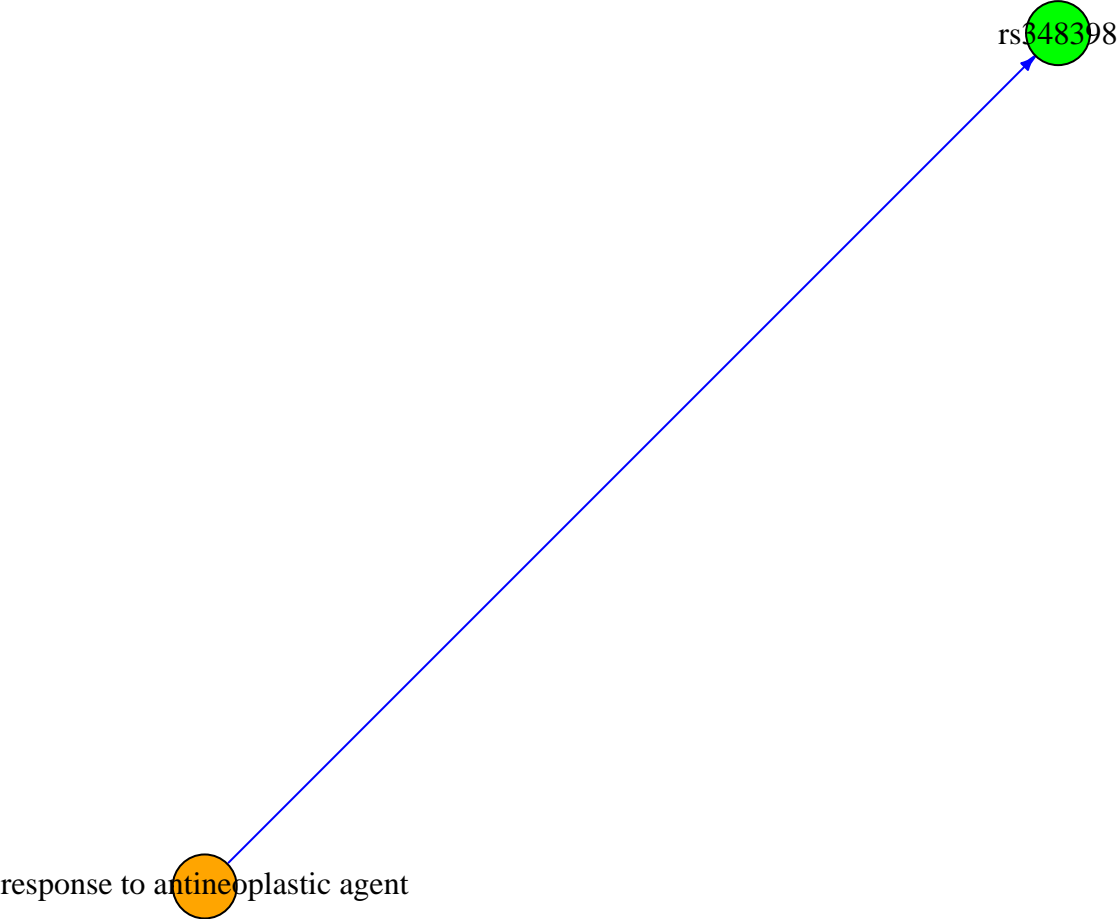

# Variant-Disease Network (response to cyclophosphamide)

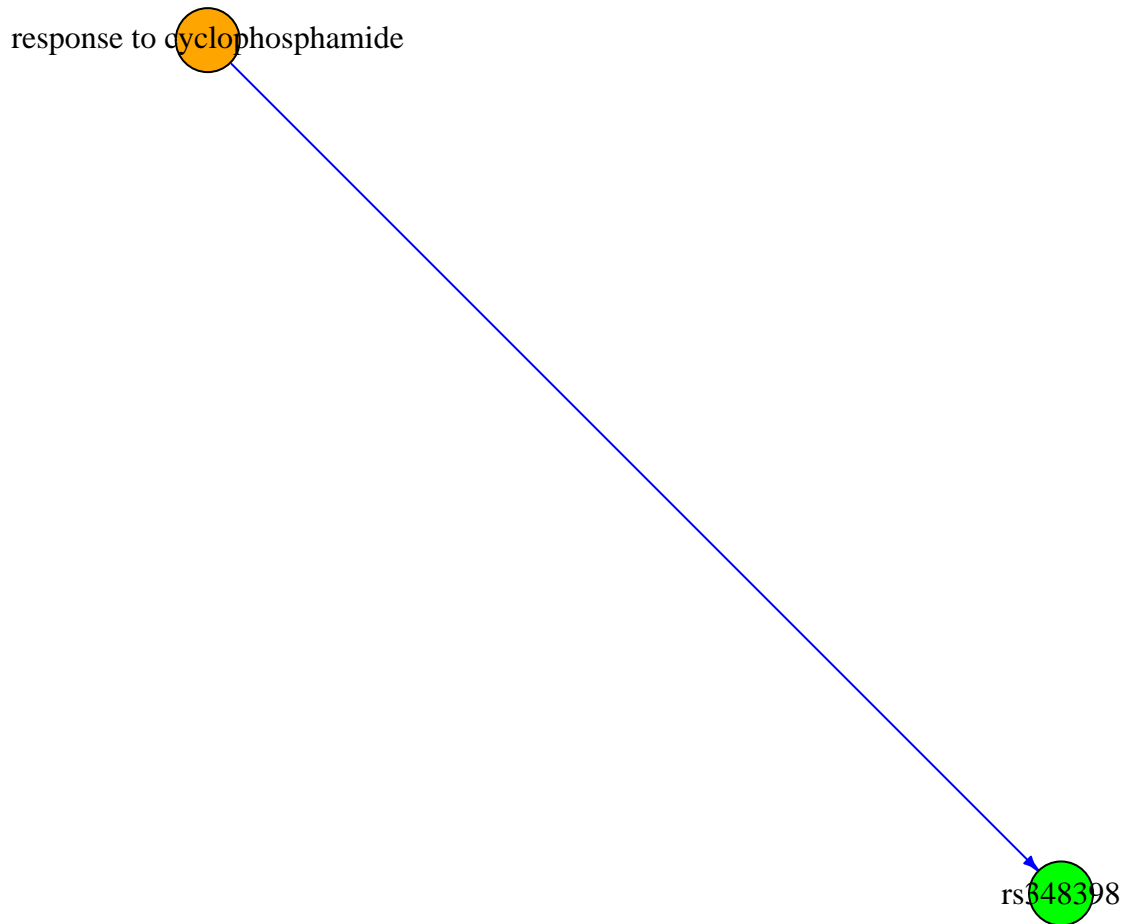

# Variant-Disease Network (cancer biomarker measurement)

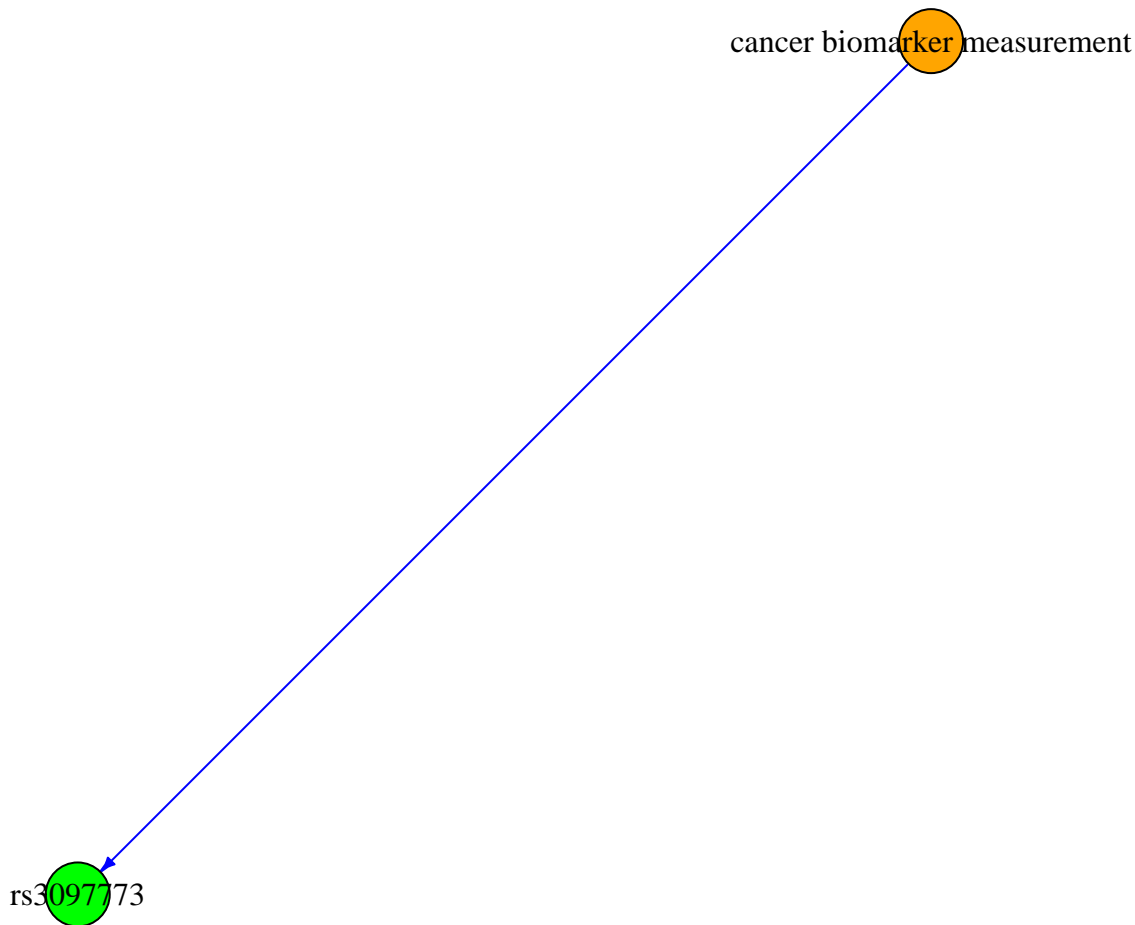

## Variant-Disease Network (oral cavity cancer)

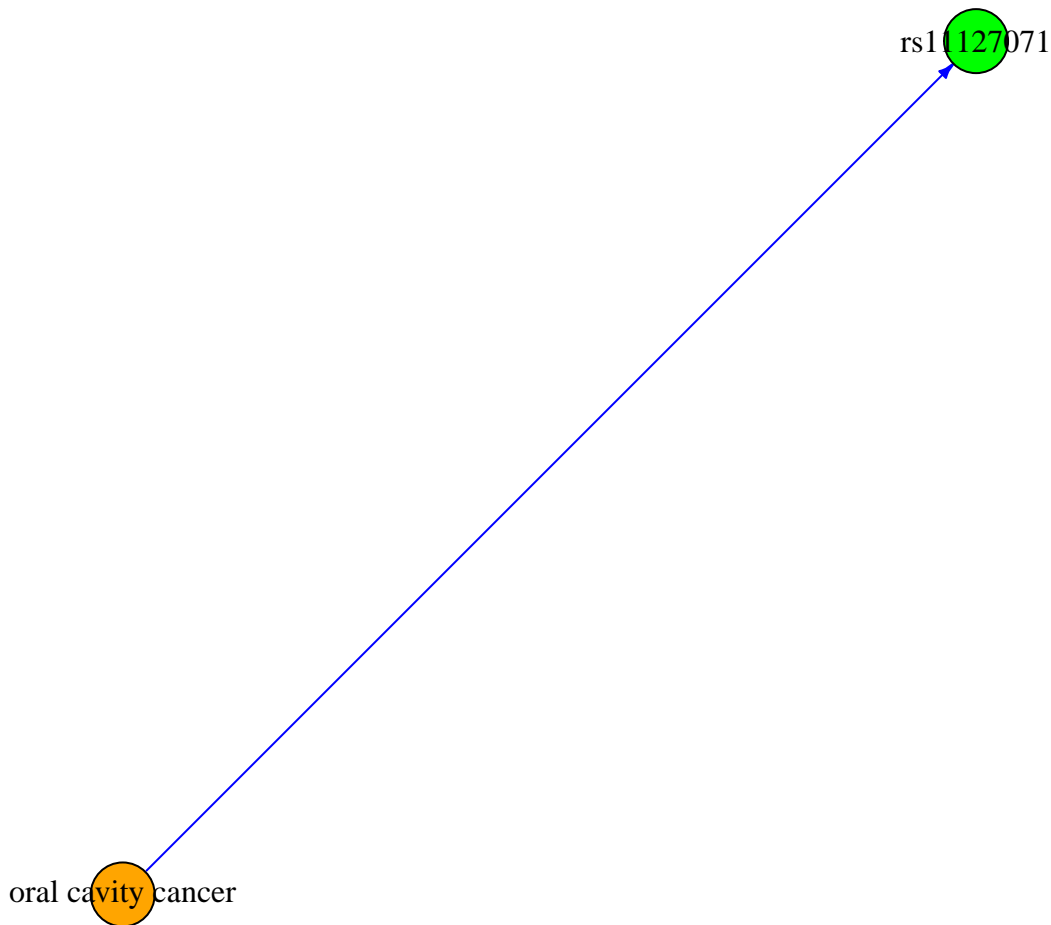

Supplement: Supplementary file 6 [file Supplementary_Fig_S4.pdf › Supplementary files/Supplementary_Fig_S4.pdf]
