# Supplementary material for: Evaluation of Five Mammalian Models for Human Disease Research Using Genomic and Bioinformatic Approaches
Source: Preprints.org preprint supplement (doi:10.20944/preprints202305.1816.v1), 2023-05-26

**Variant–Disease Network (upper aerodigestive tract carcinoma)**

upper aerodigestive tract carcinoma

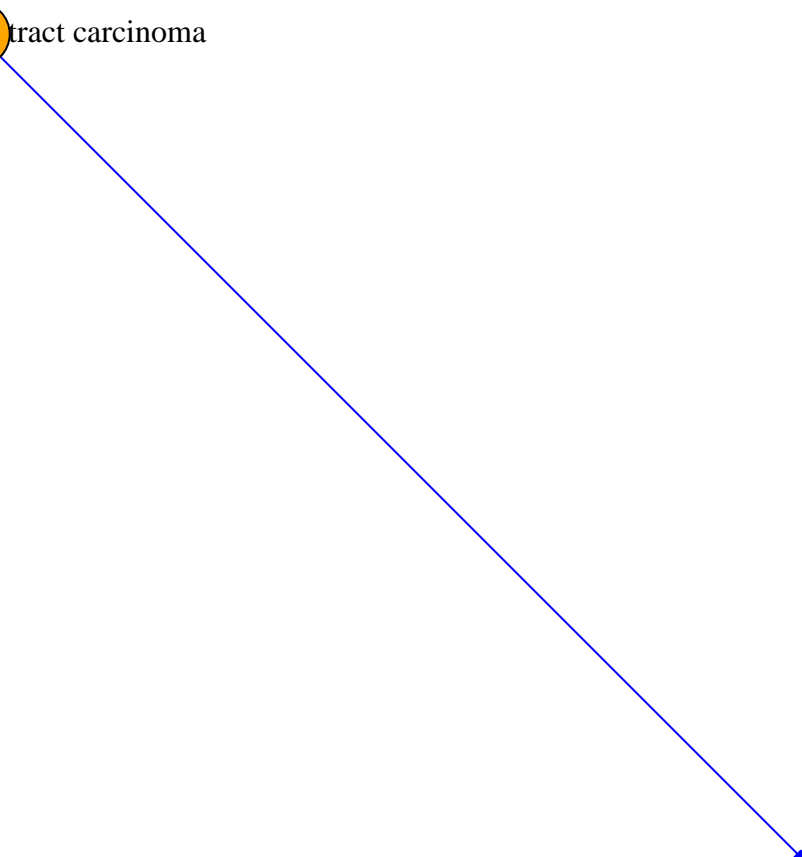

rs1282913811

## Variant–Disease Network (stomach carcinoma)

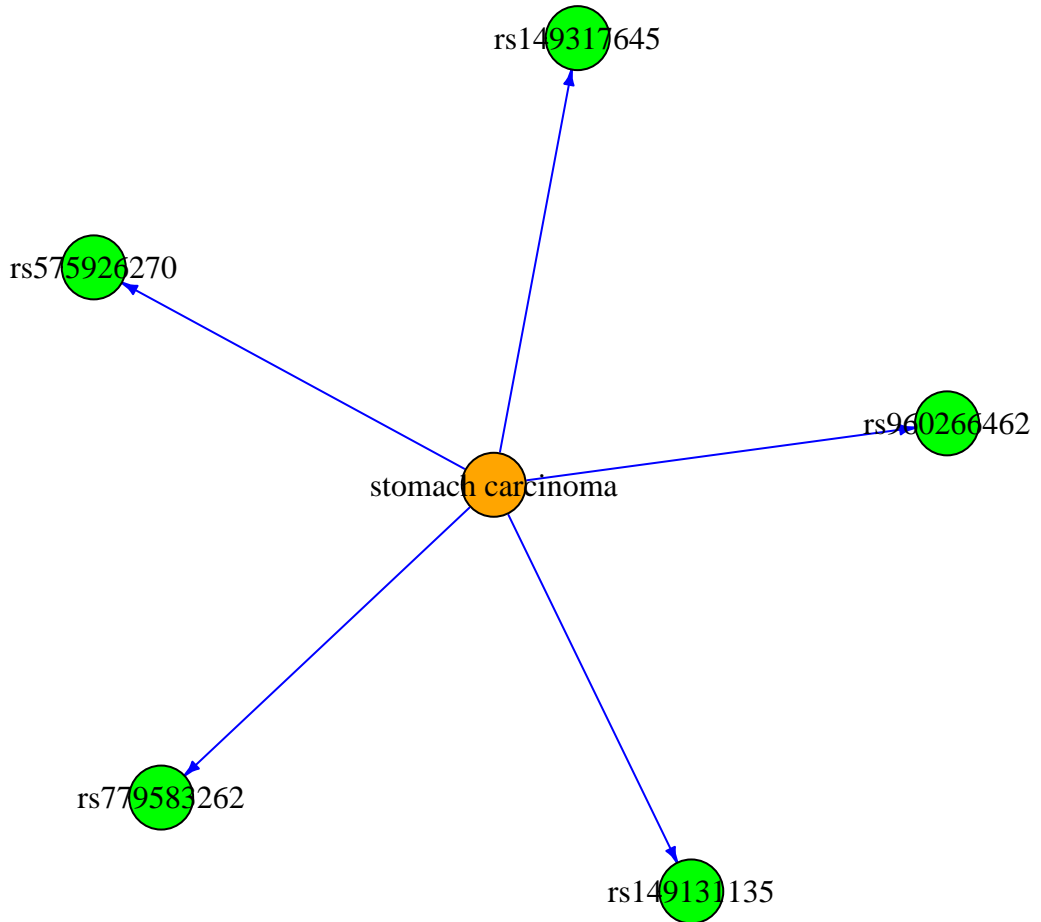

**Variant–Disease Network (large intestine carcinoma)**

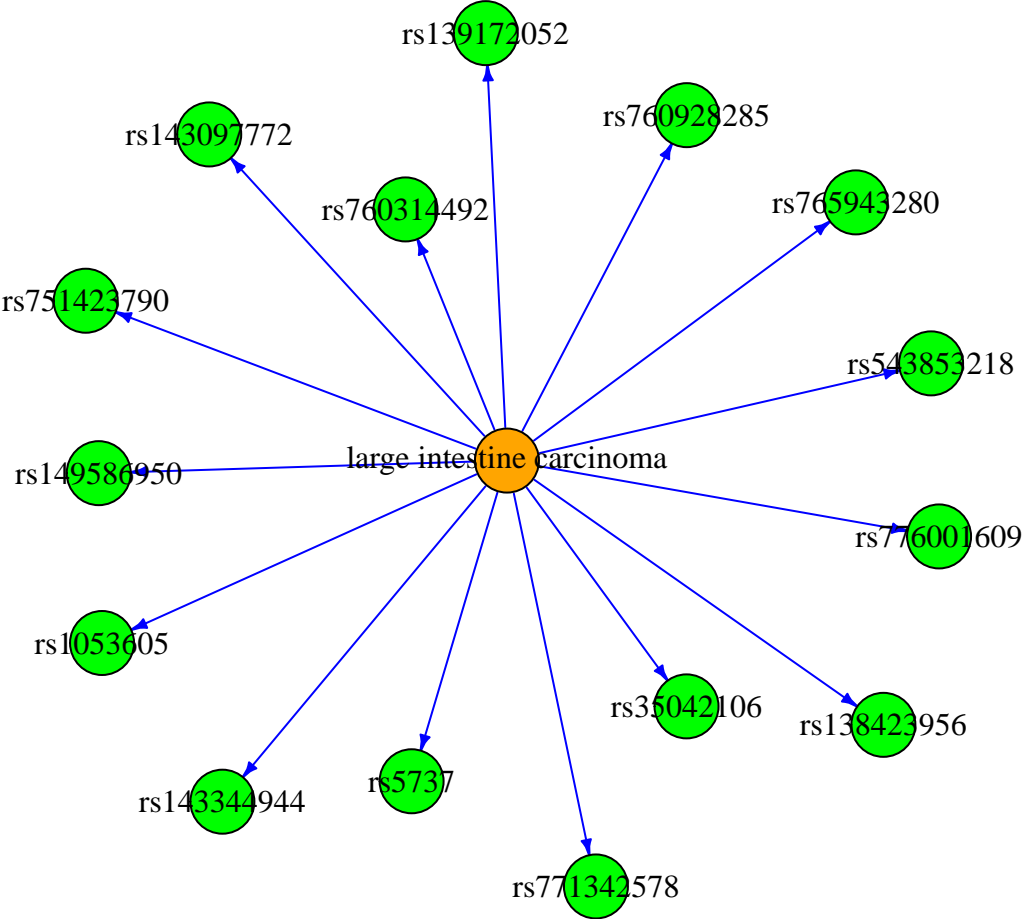

## Variant-Disease Network (prostate carcinoma)

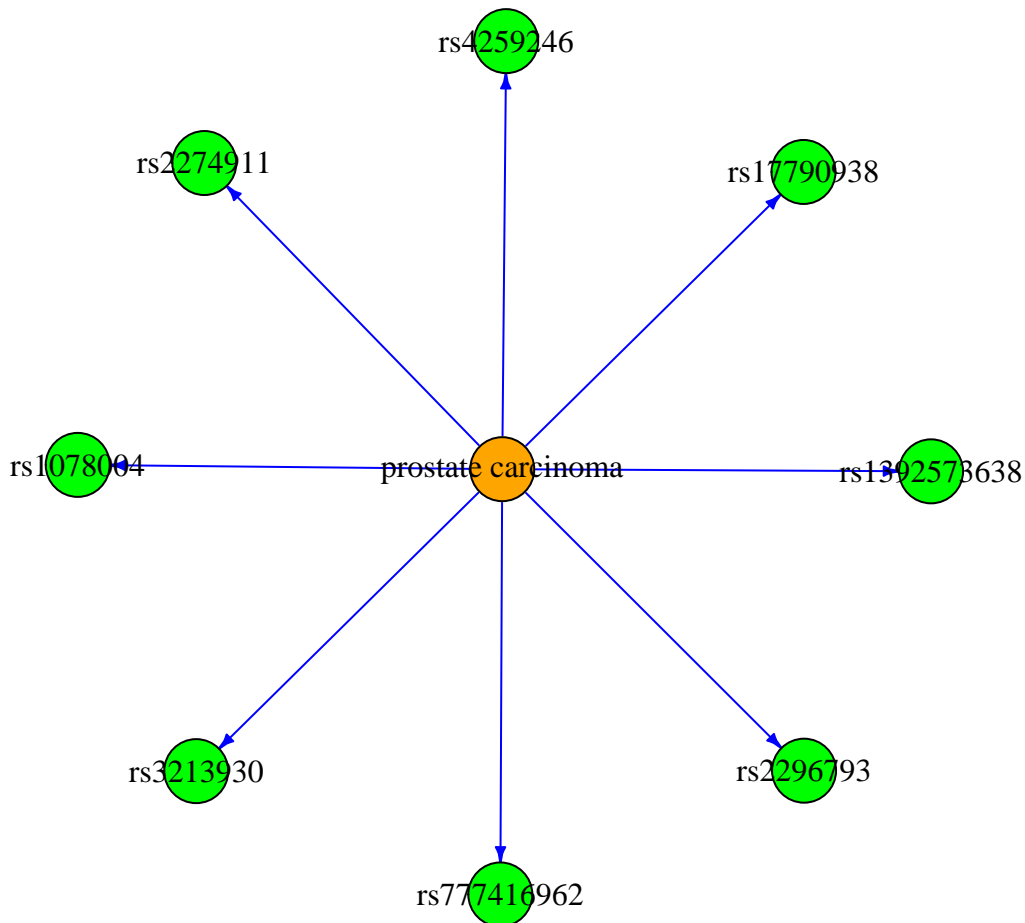

## Variant-Disease Network (liver carcinoma)

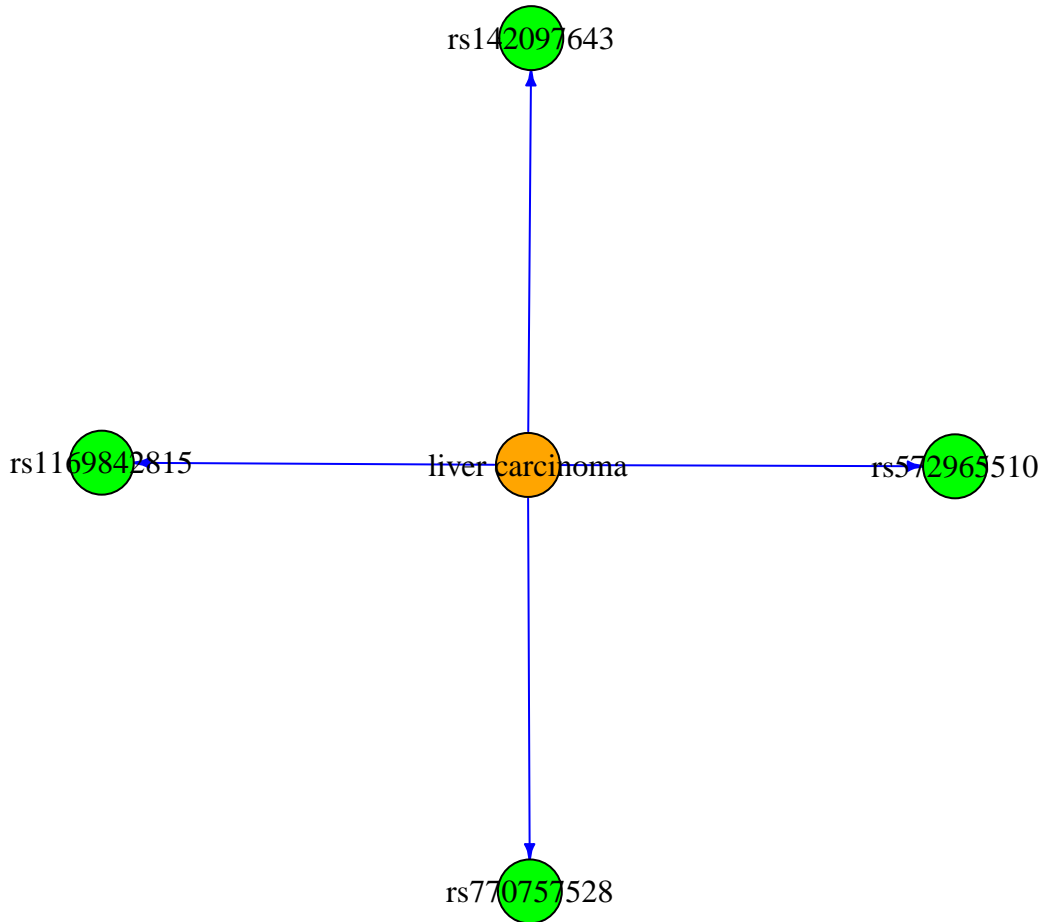

Variant–Disease Network (breast carcinoma)

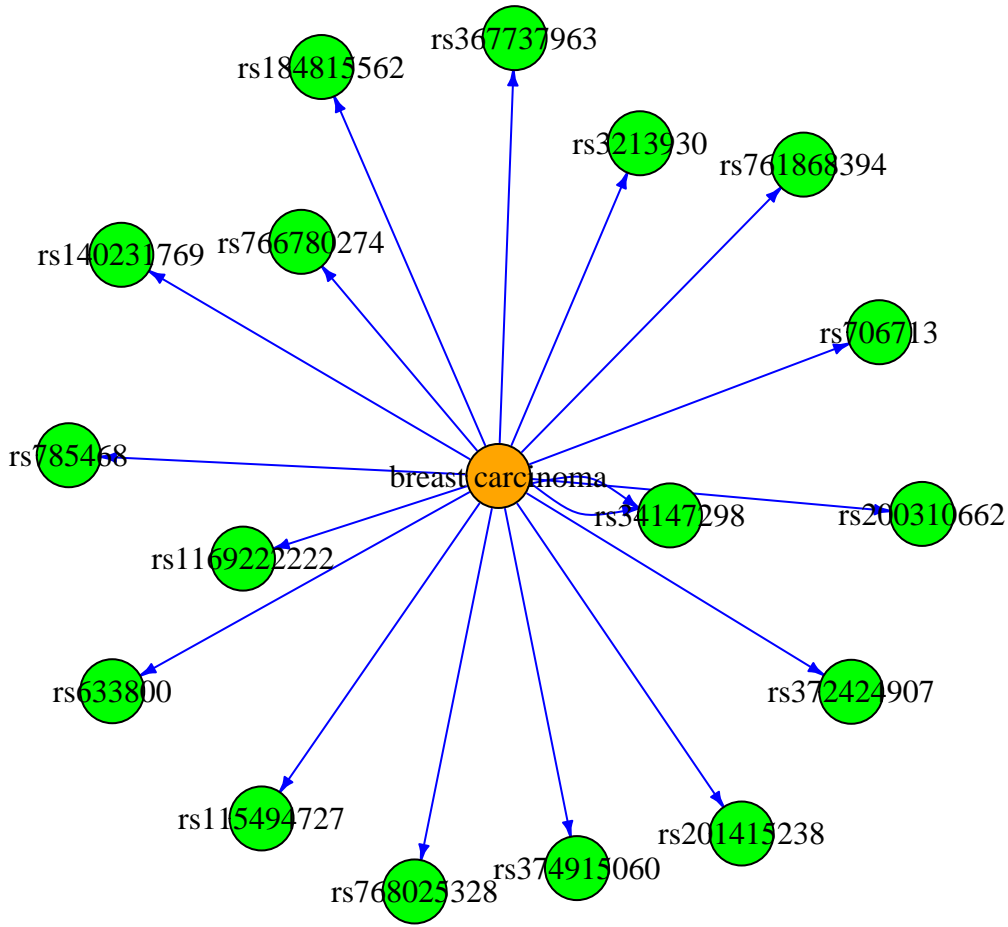

Variant–Disease Network (oesophagus carcinoma)

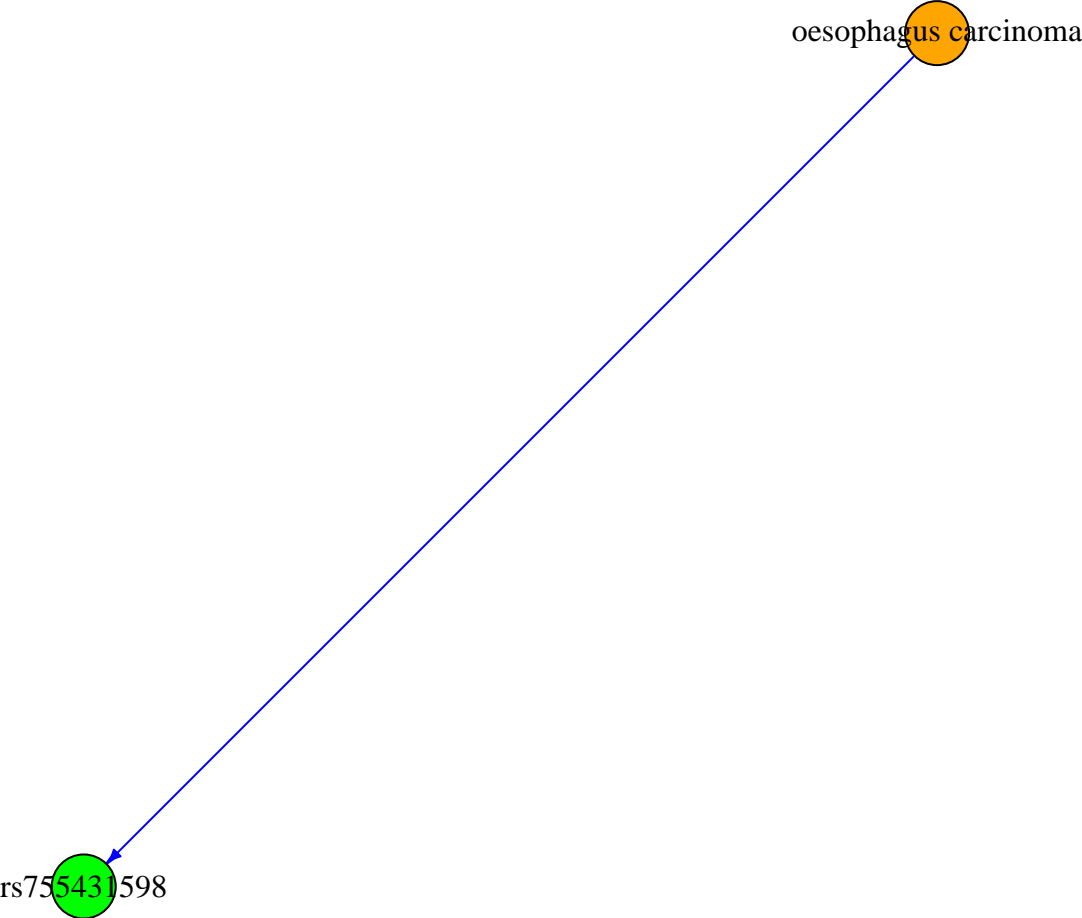

## Variant–Disease Network (ovary carcinoma)

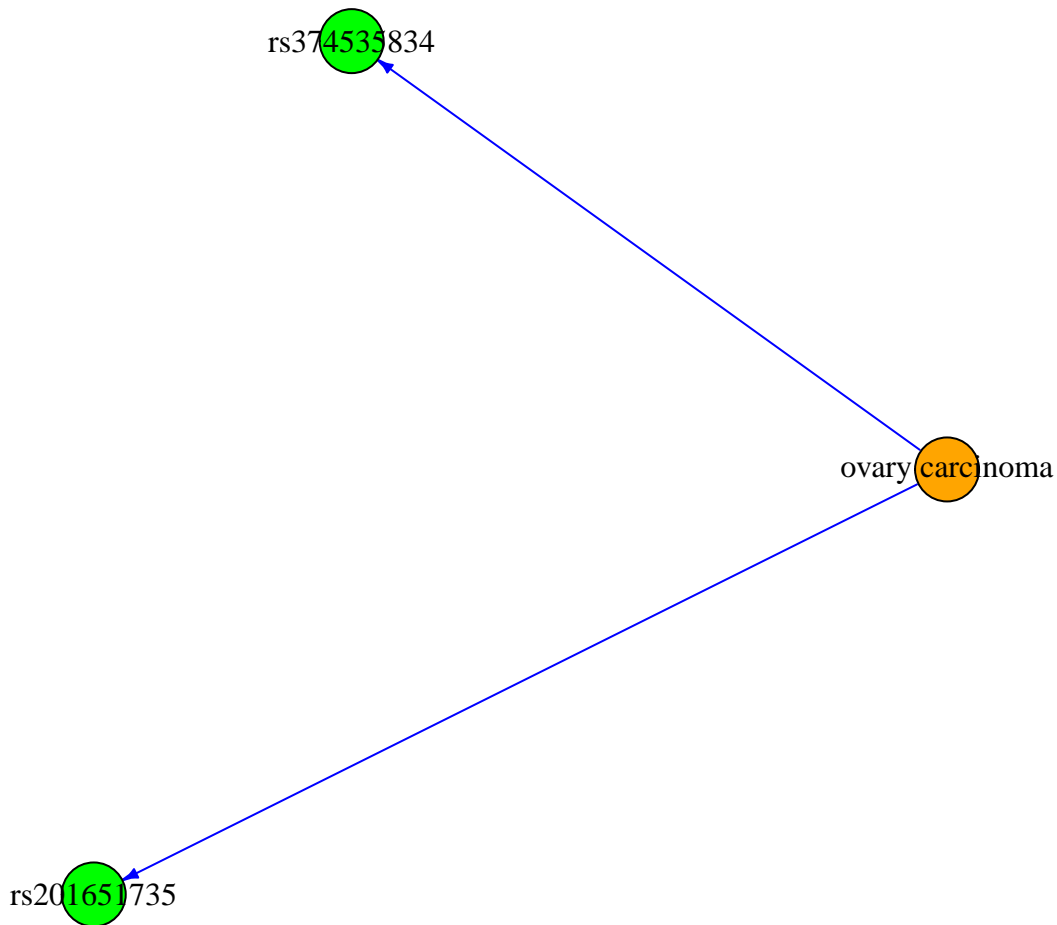



## Variant-Disease Network (endometrium carcinoma)

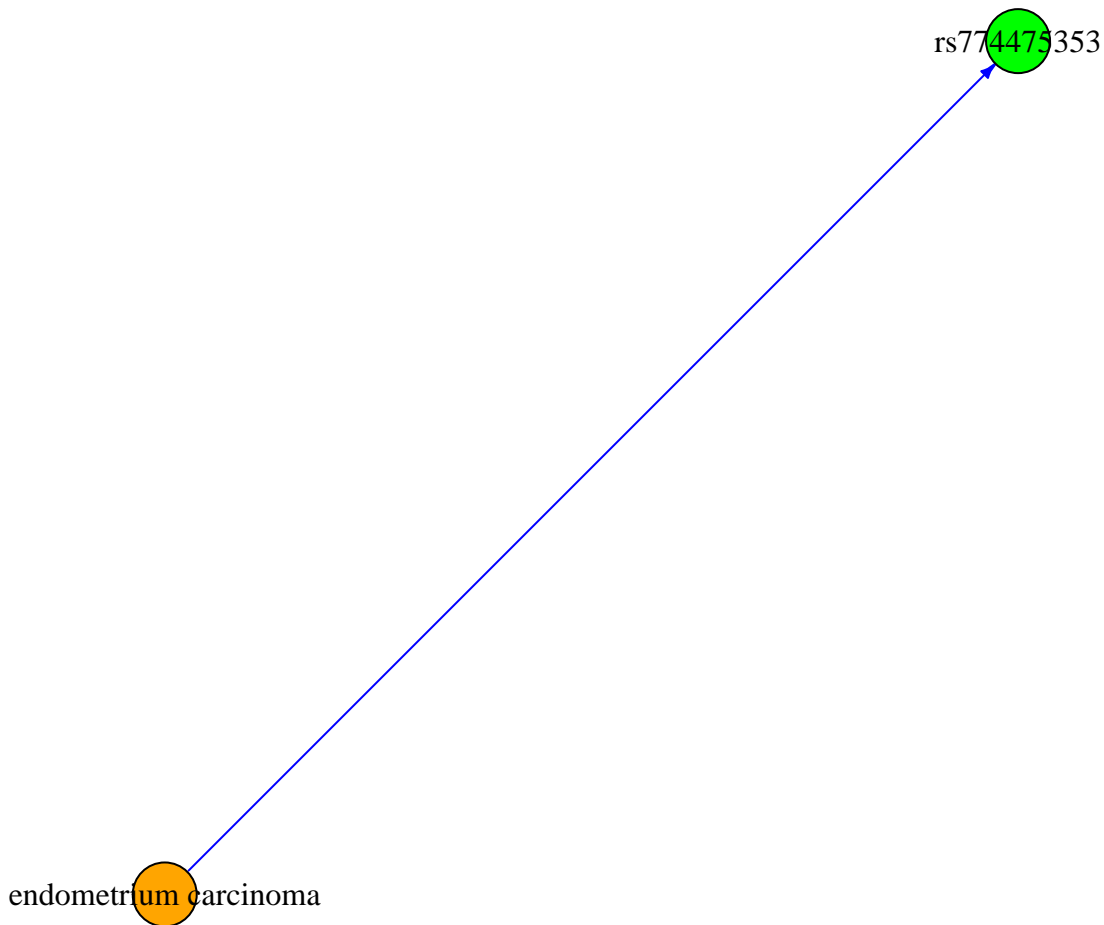

## Variant-Disease Network (lung carcinoma)

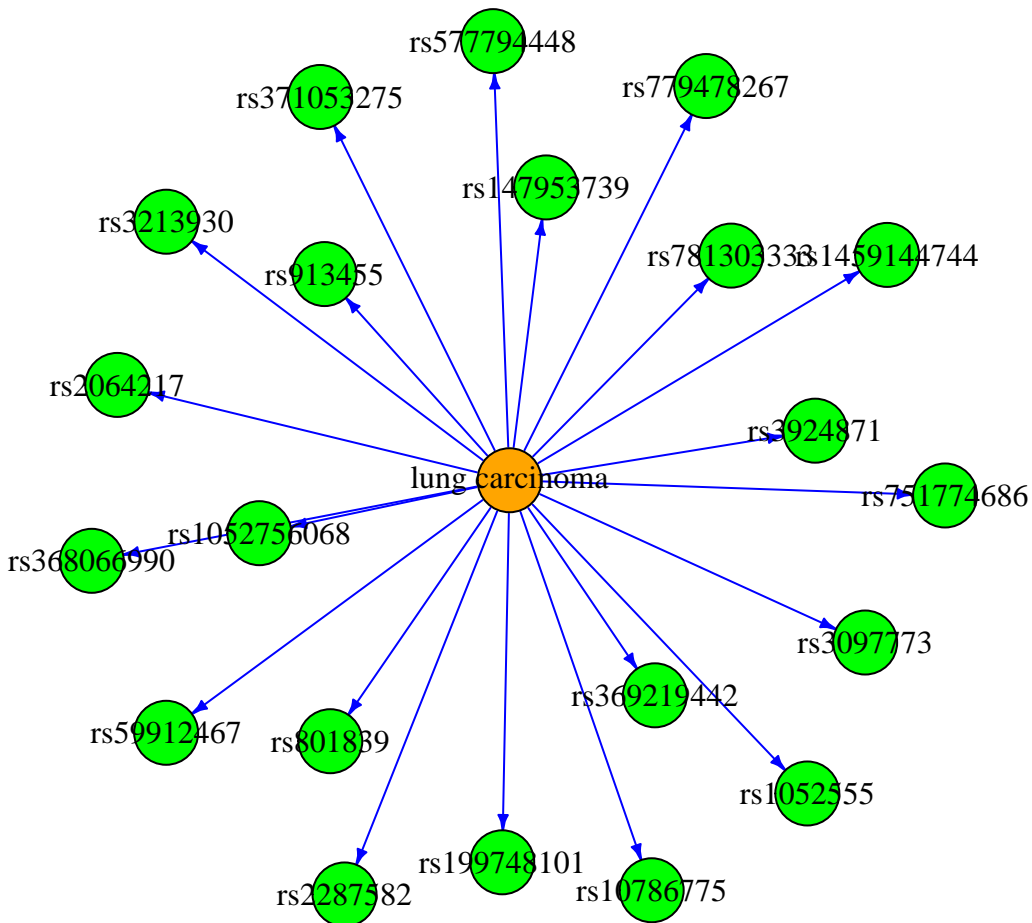

## Variant-Disease Network (skin carcinoma)

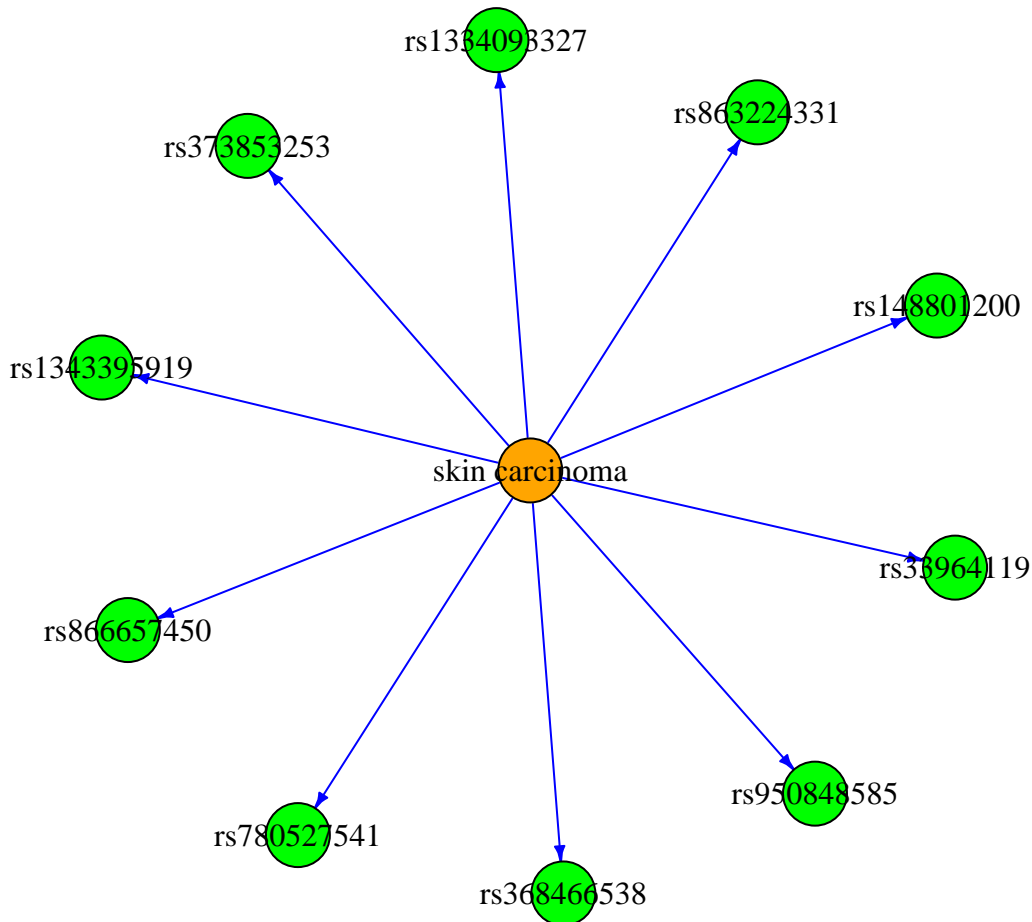

## Variant–Disease Network (kidney carcinoma)

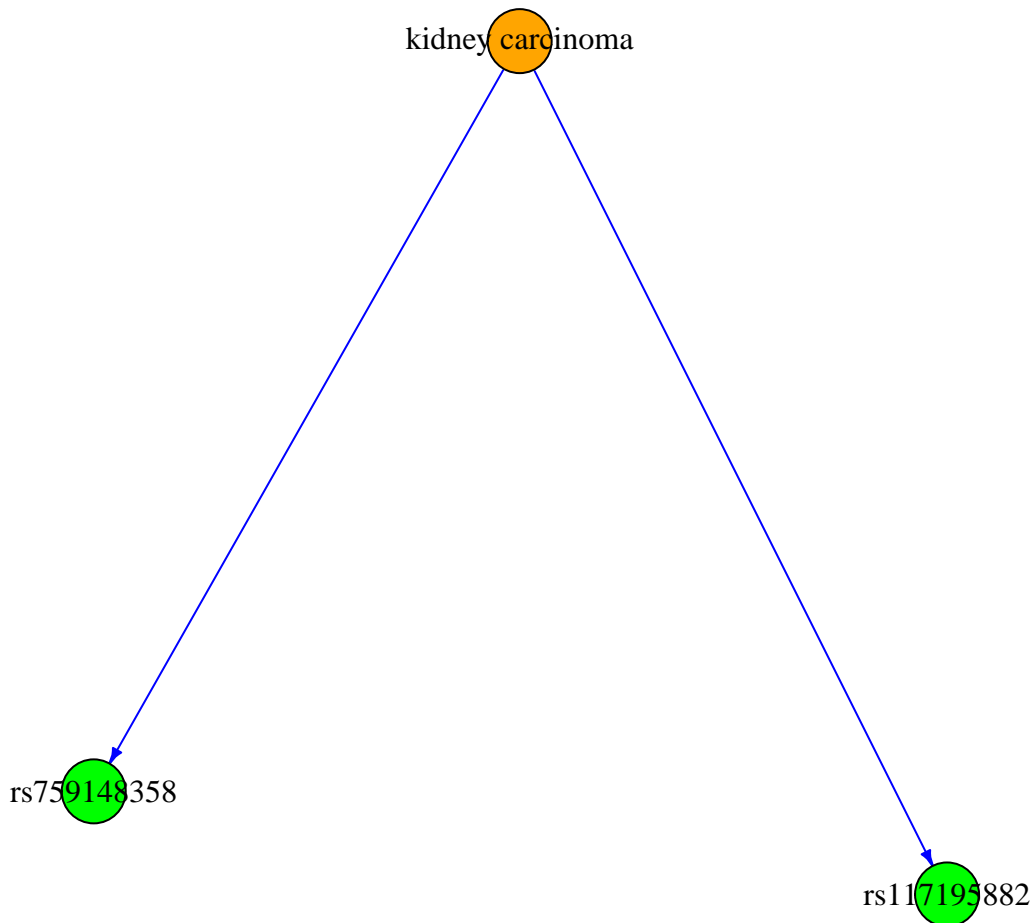

# Variant–Disease Network (urinary tract carcinoma)

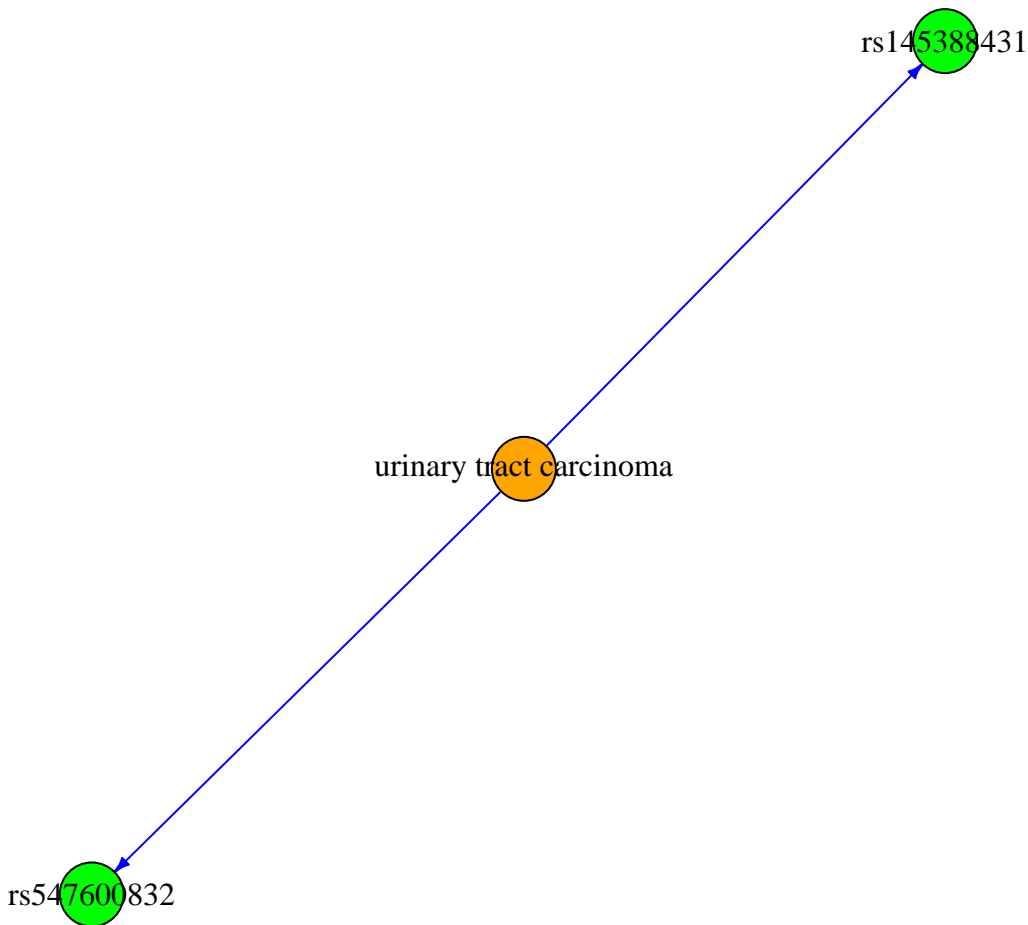

## Variant–Disease Network (biliary tract carcinoma)

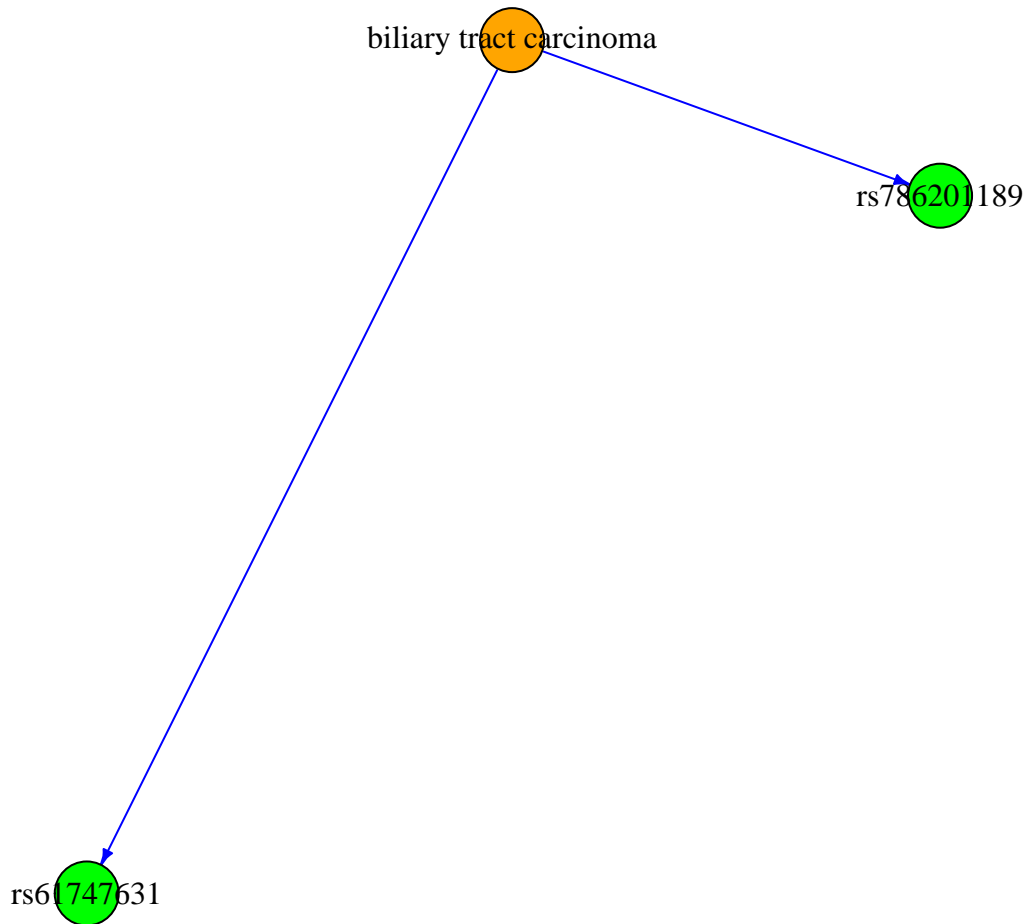

## Variant-Disease Network (cervix carcinoma)

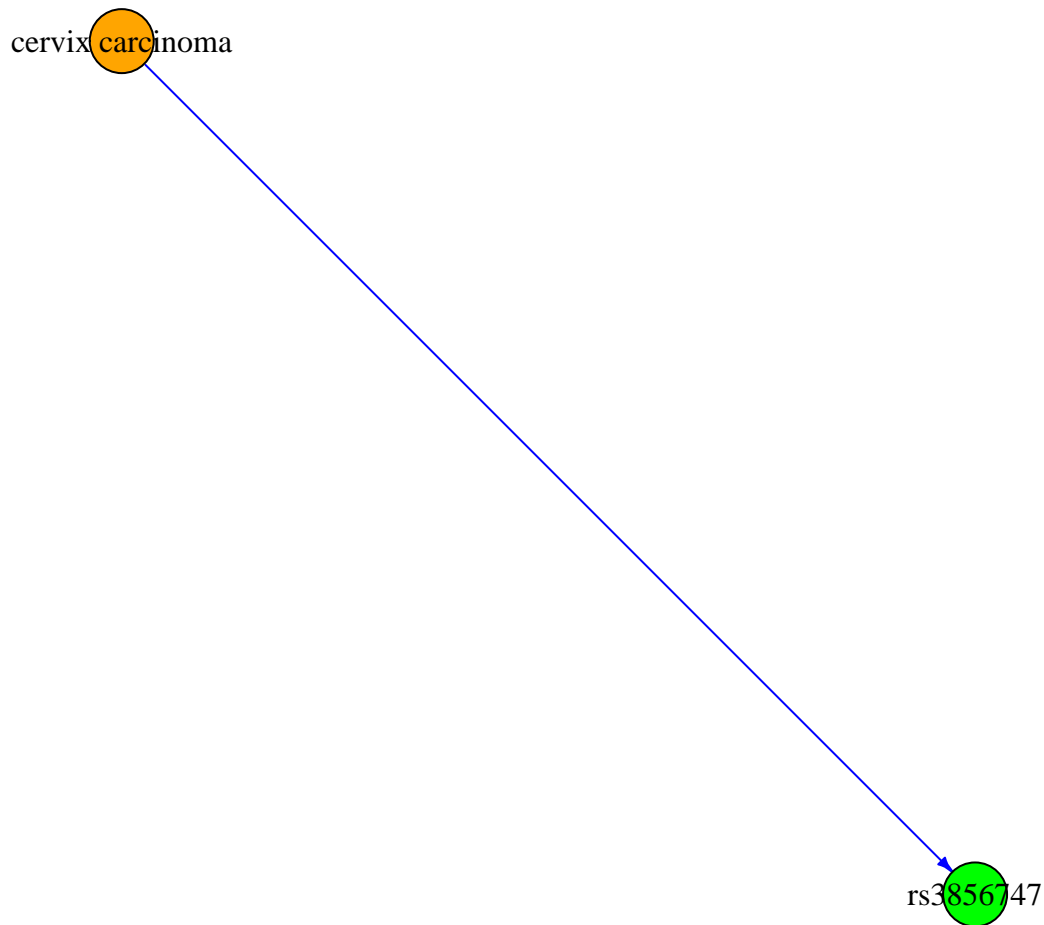

## Variant-Disease Network (fibroepithelial neoplasm)

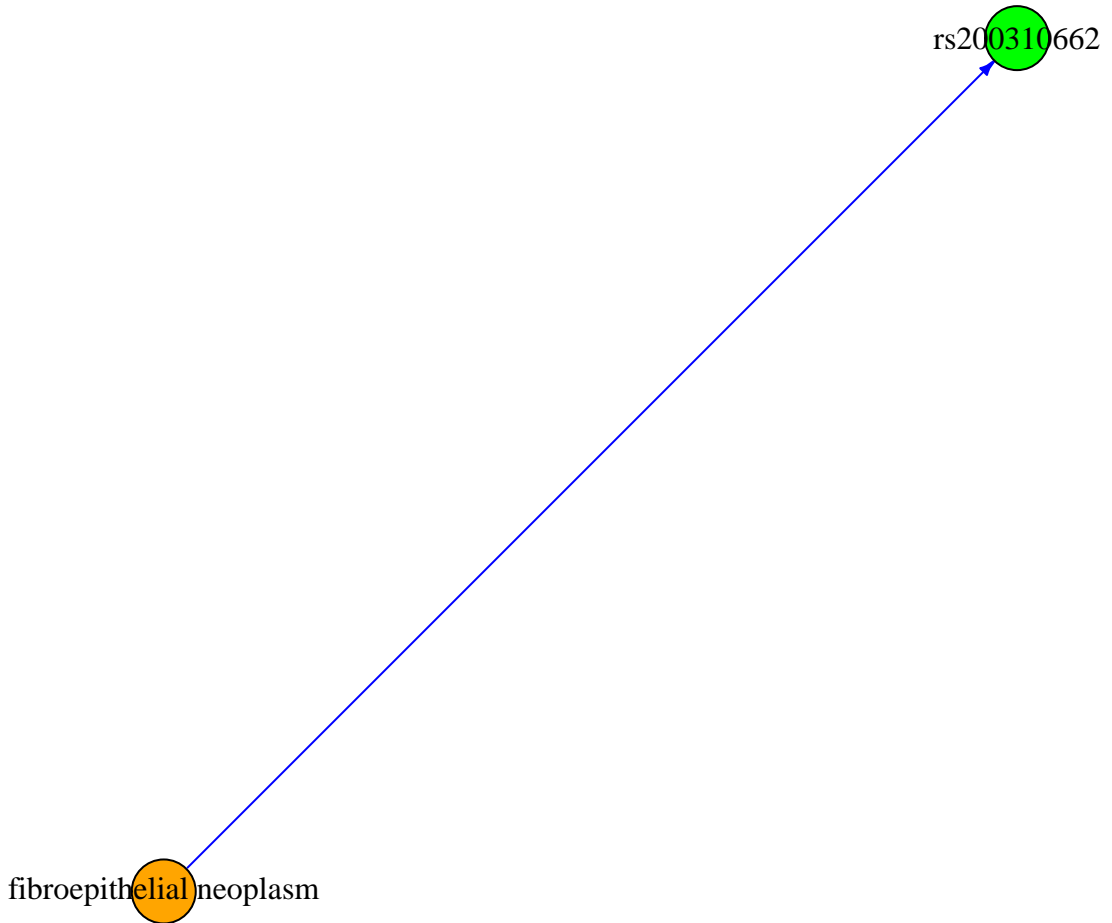



**Variant–Disease Network (glioma)**

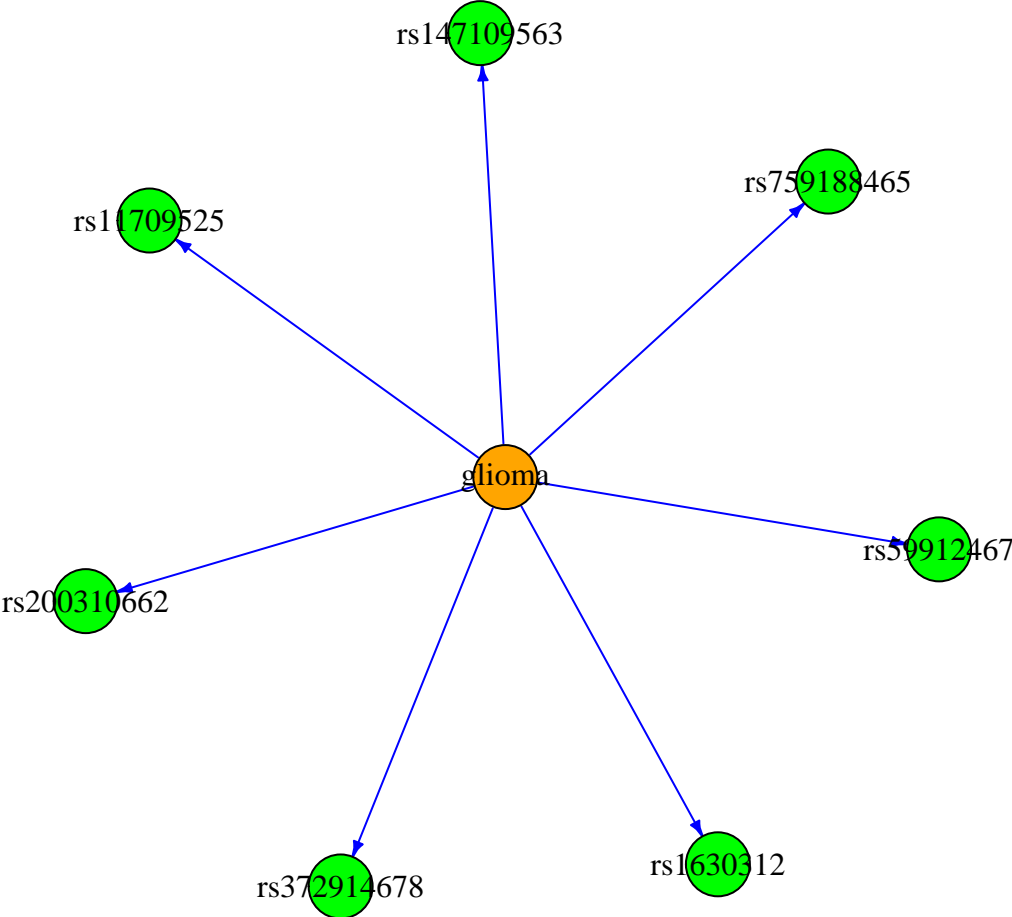

## Variant-Disease Network (haemangioblastoma)

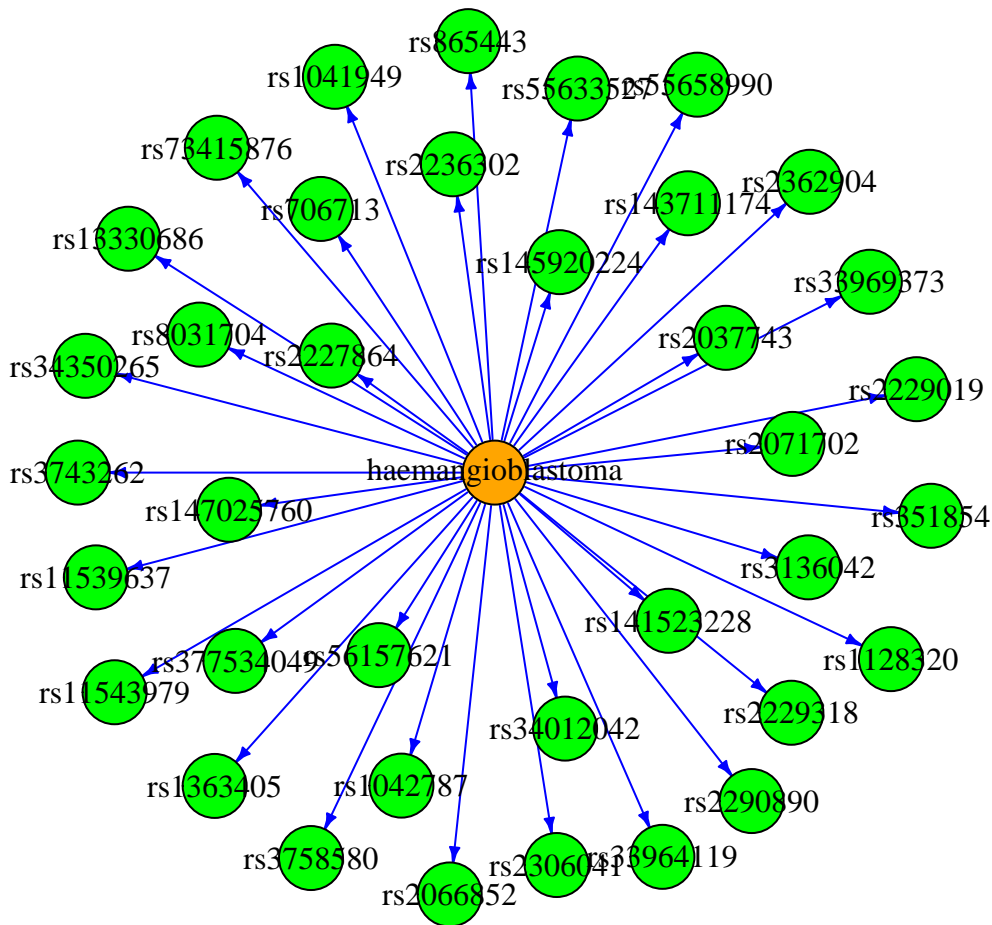

# Variant–Disease Network (haematopoietic neoplasm)

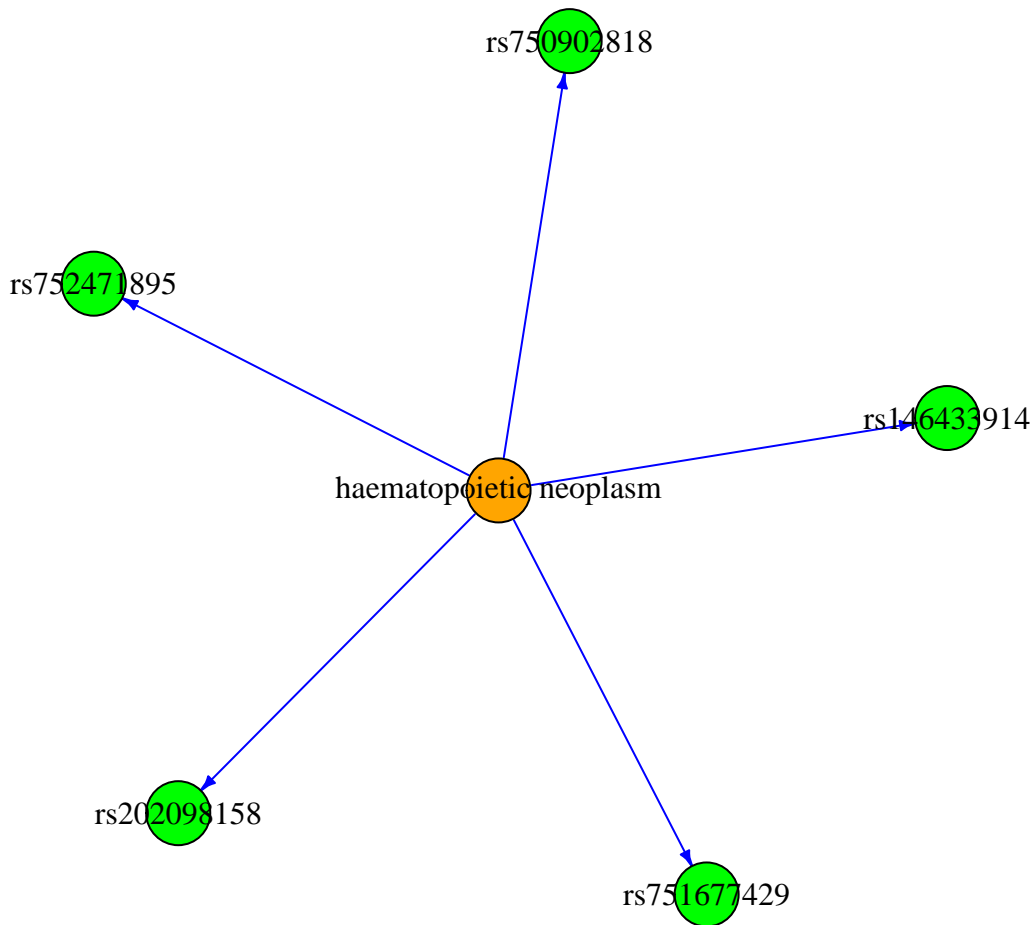

## Variant–Disease Network (lymphoid neoplasm)

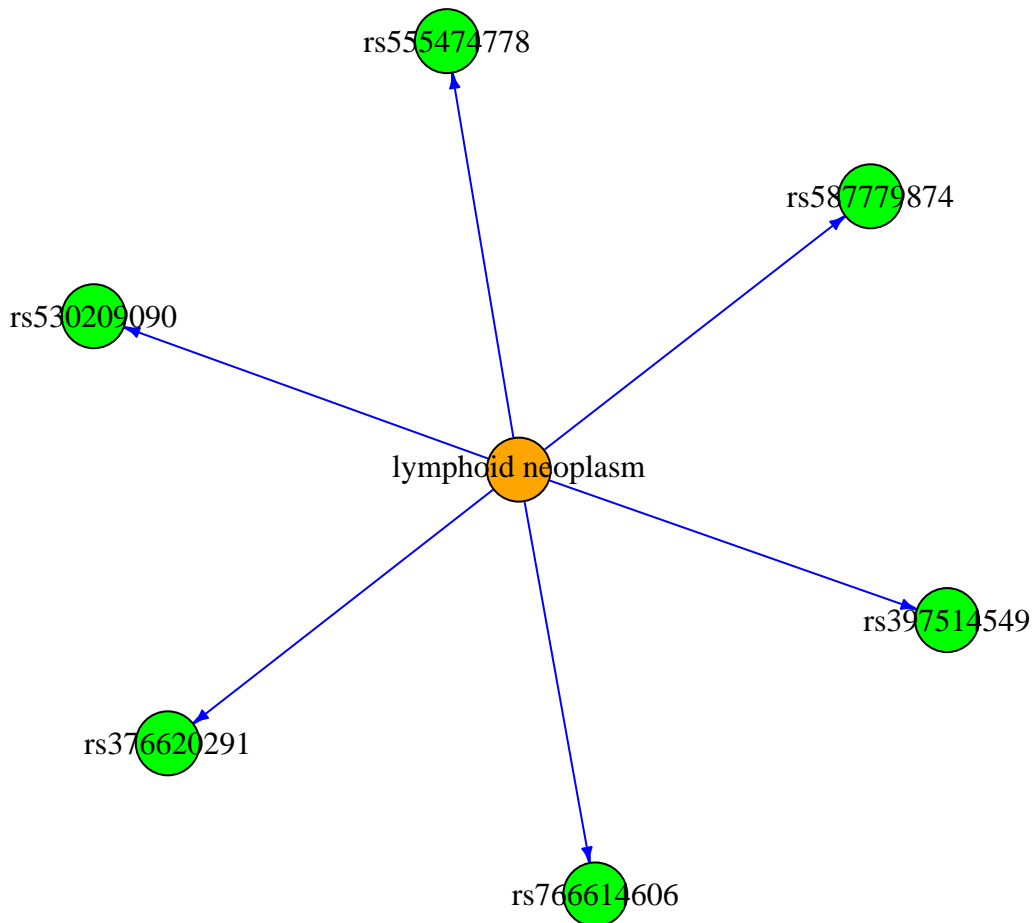

## Variant–Disease Network (malignant melanoma)

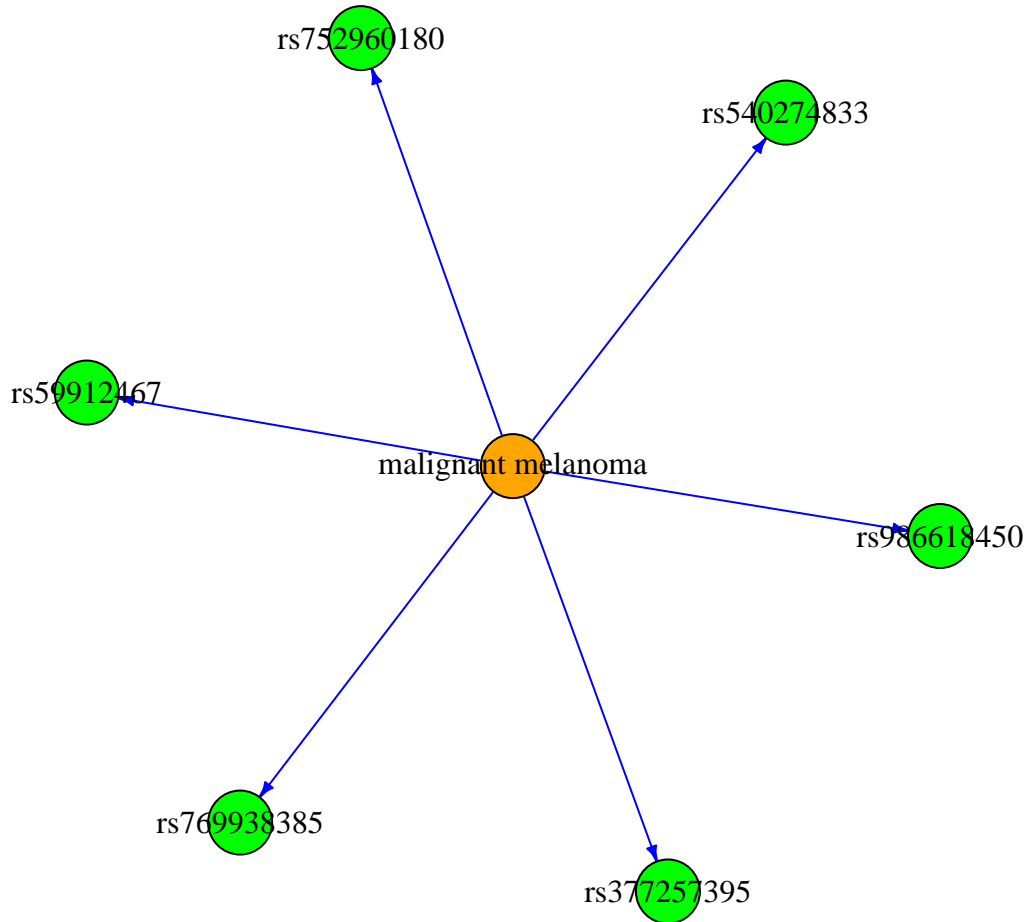

## Variant-Disease Network (mesothelioma)

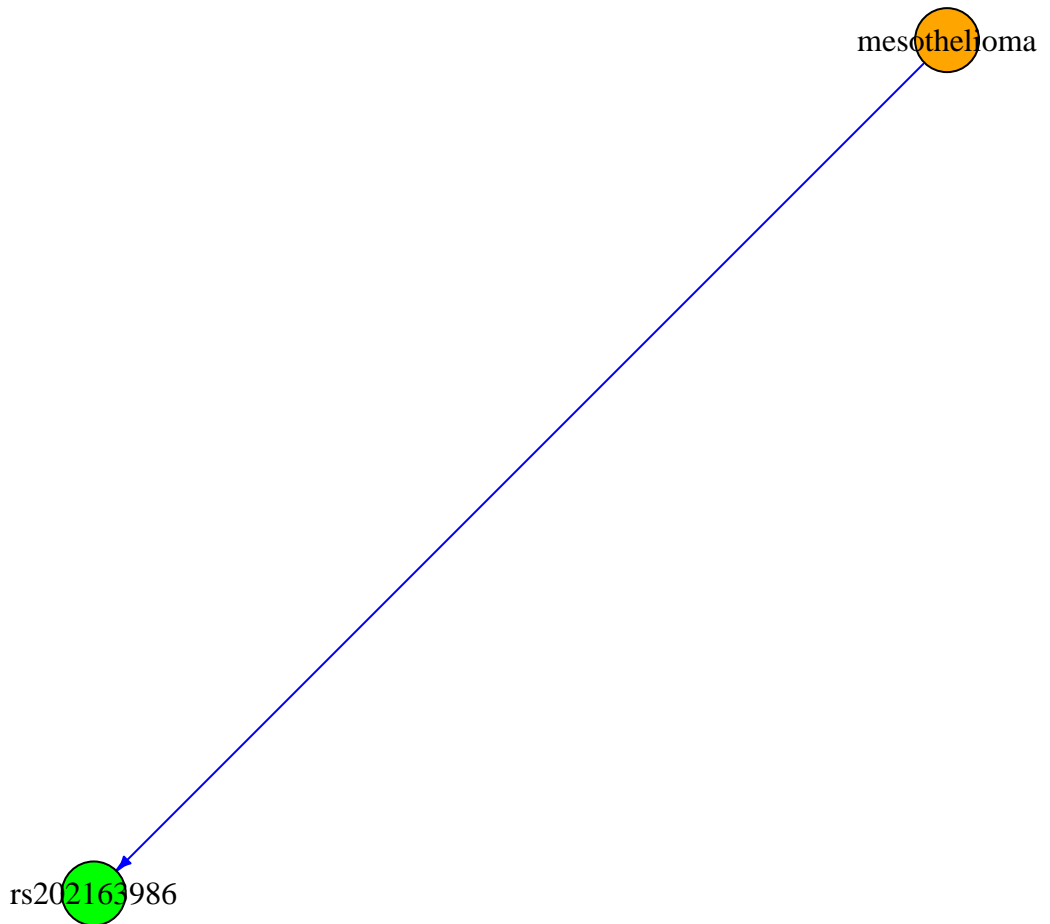

# Variant–Disease Network (primitive neuroectodermal tumour–medulloblastoma)

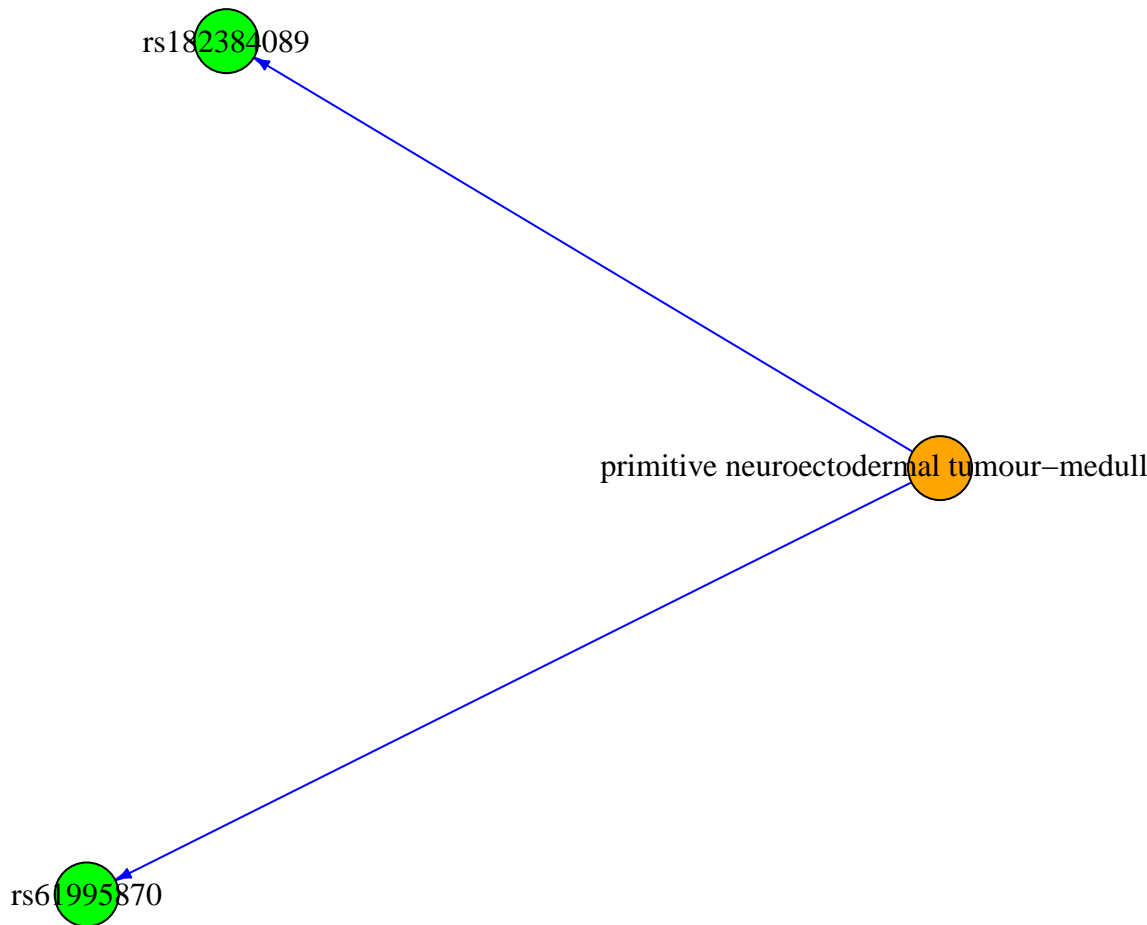

## Variant–Disease Network ( Autosomal Dominant)

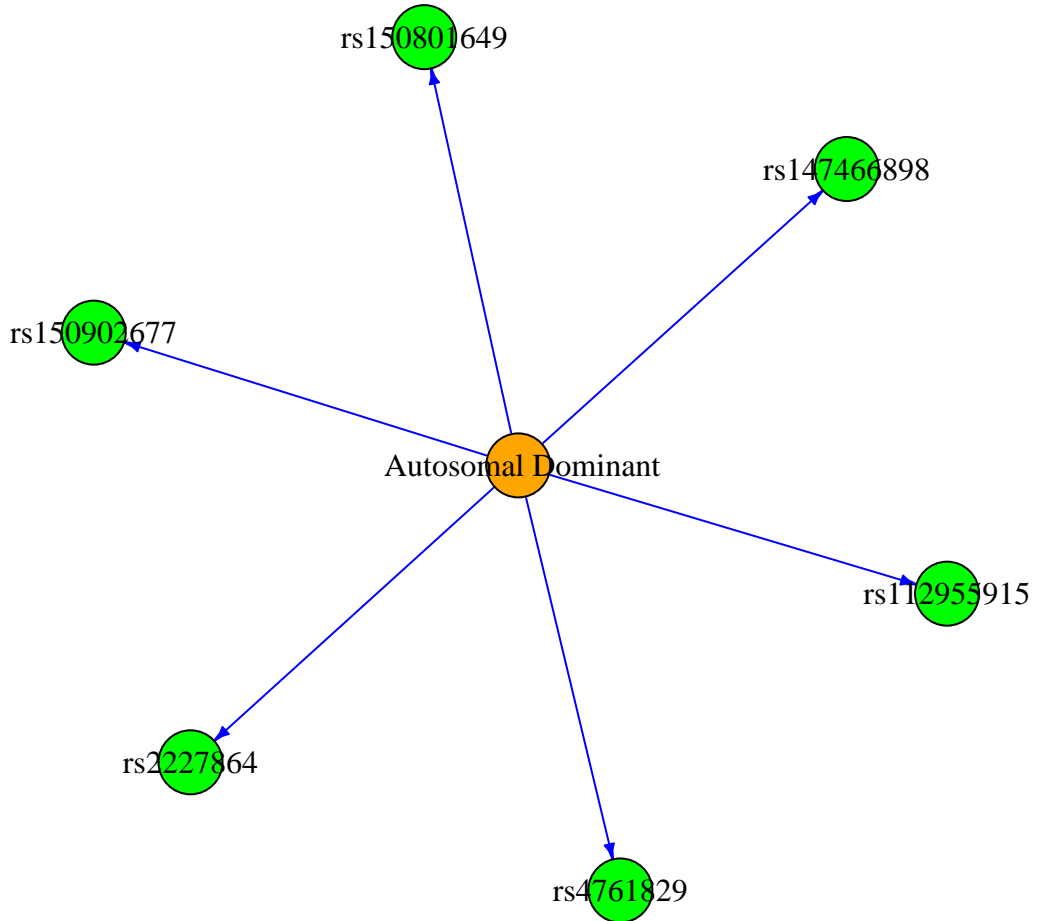



## Variant–Disease Network ( Autosomal Recessive)

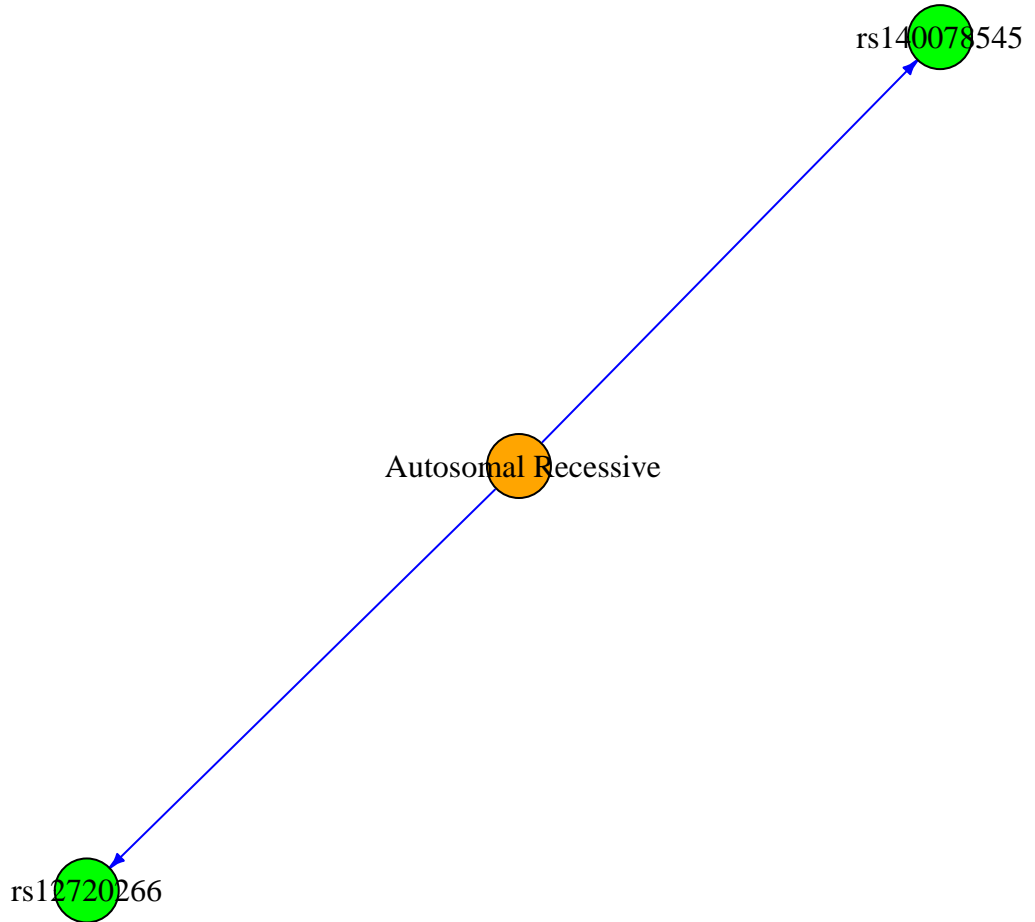

## Variant–Disease Network ( Factor IX Deficiency)

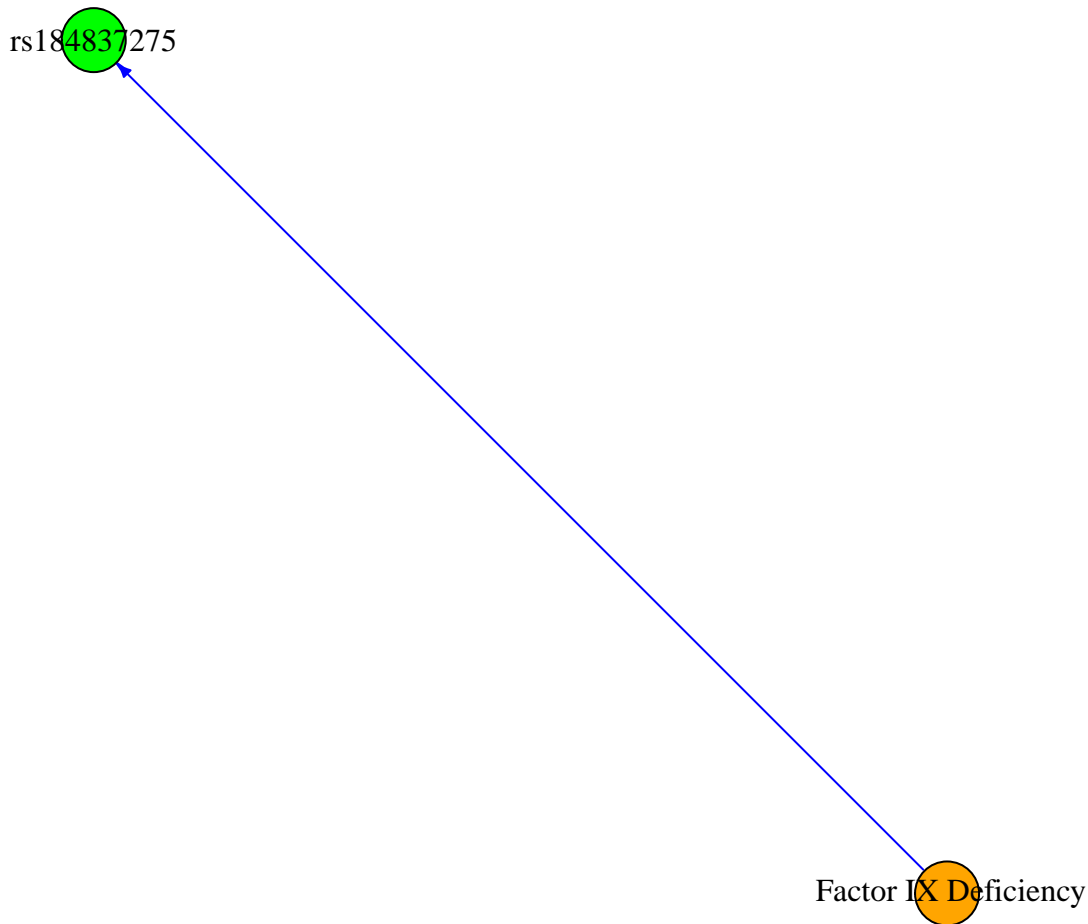

## Variant-Disease Network ( MPS-IV-A)

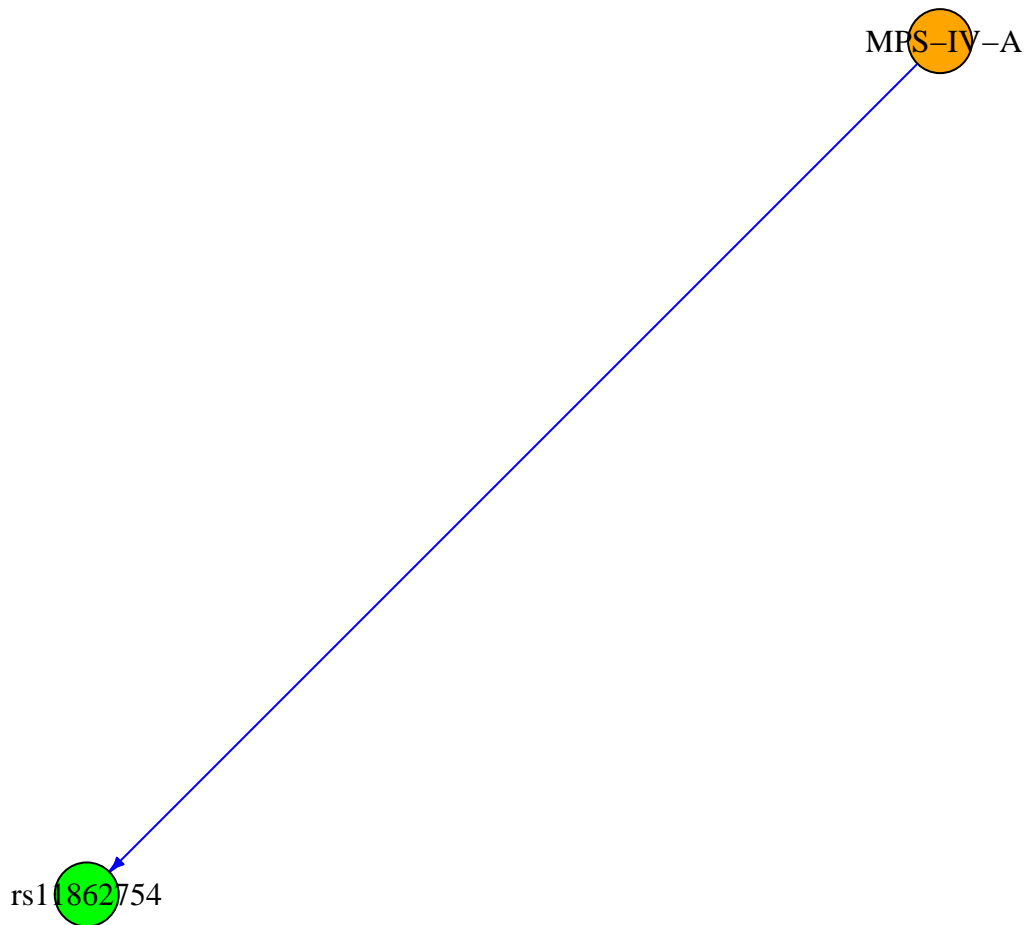

## Variant-Disease Network ( MPS-IV-B)

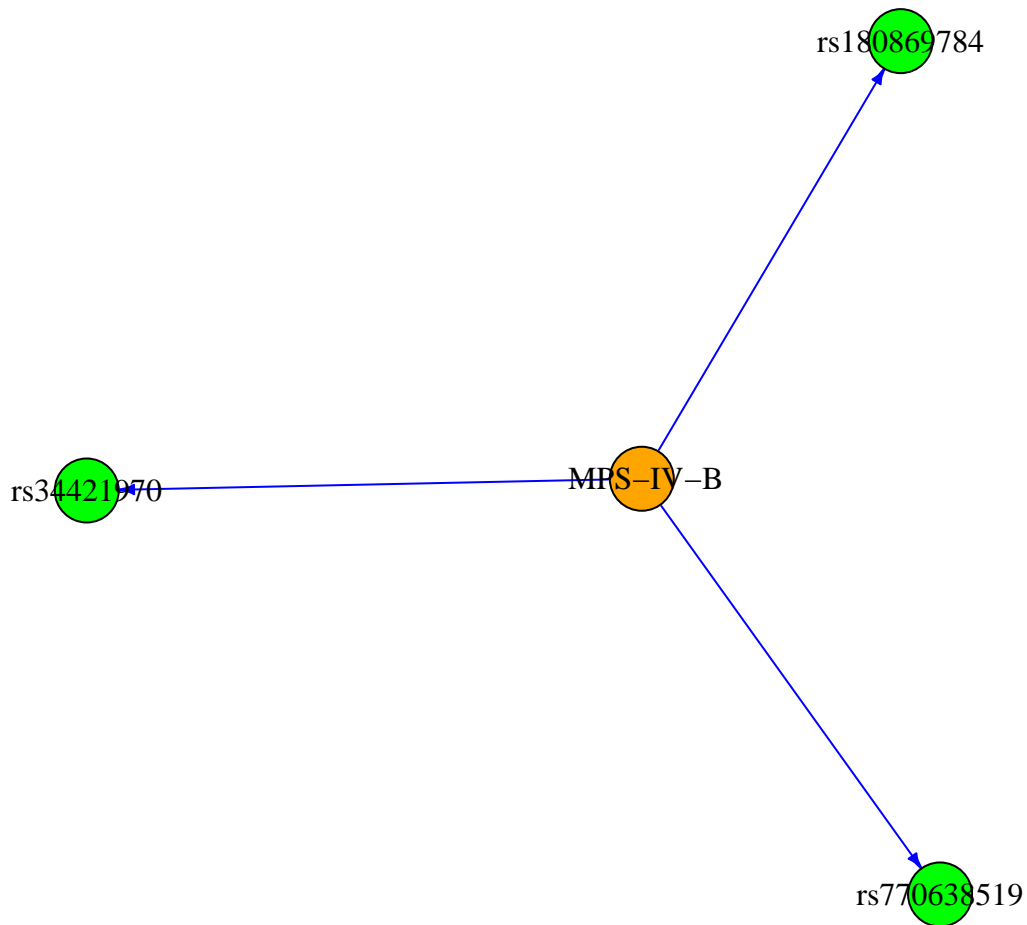

**Variant–Disease Network ( Noninsulin–Dependent)**

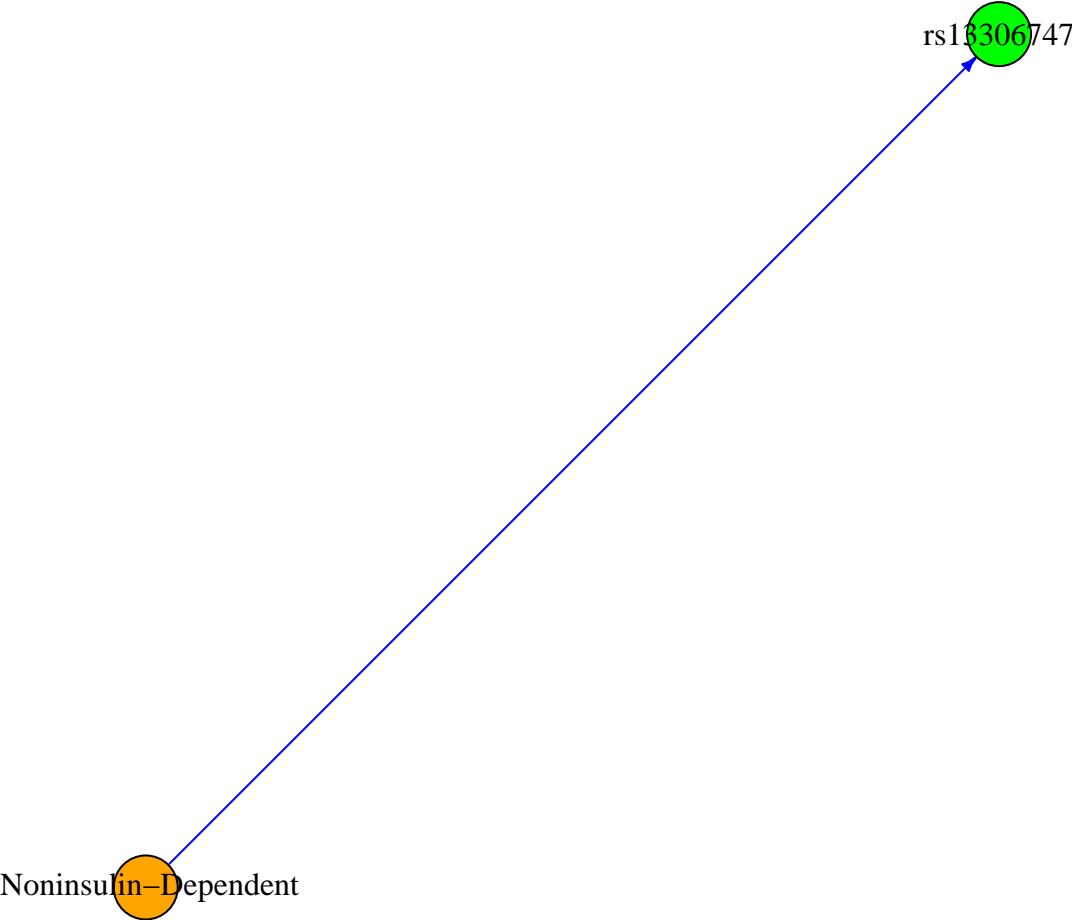

## Variant-Disease Network ( Sensory Neuropathy)

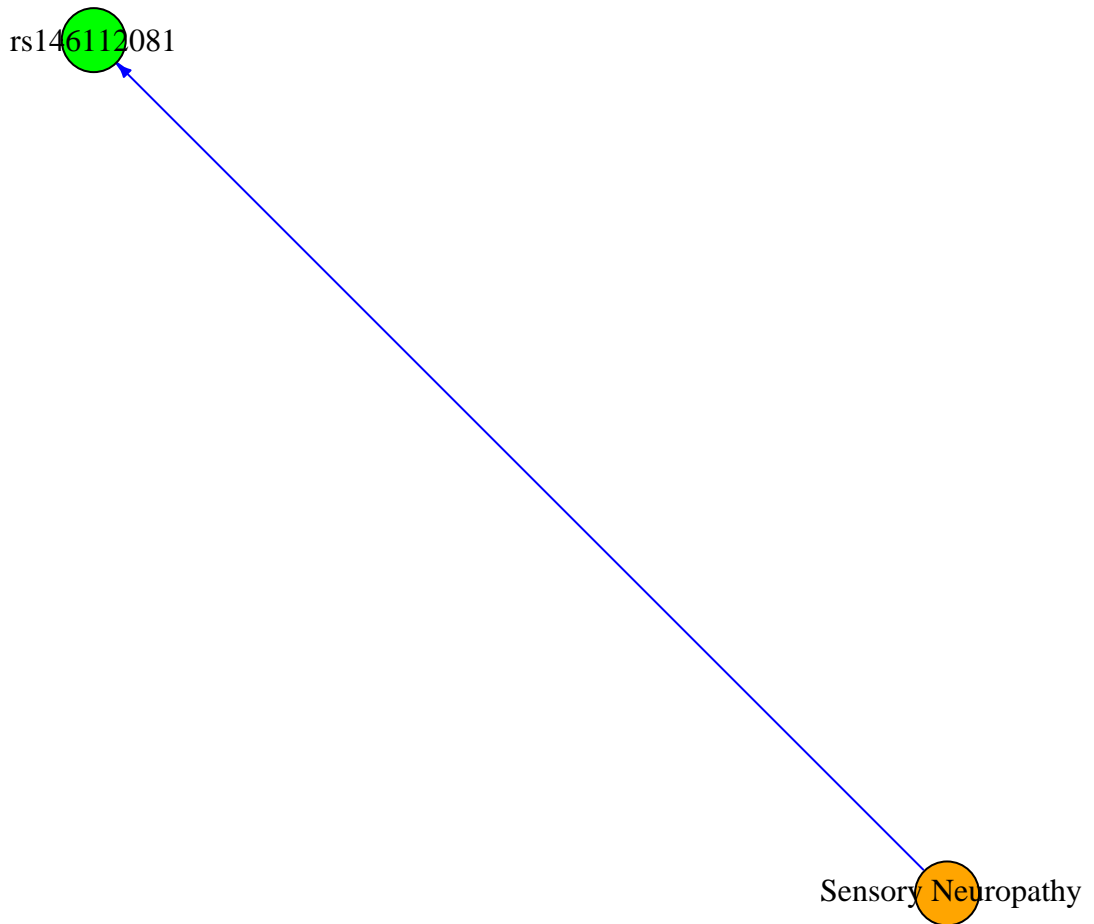

# Variant-Disease Network ( Waardenburg syndrome)

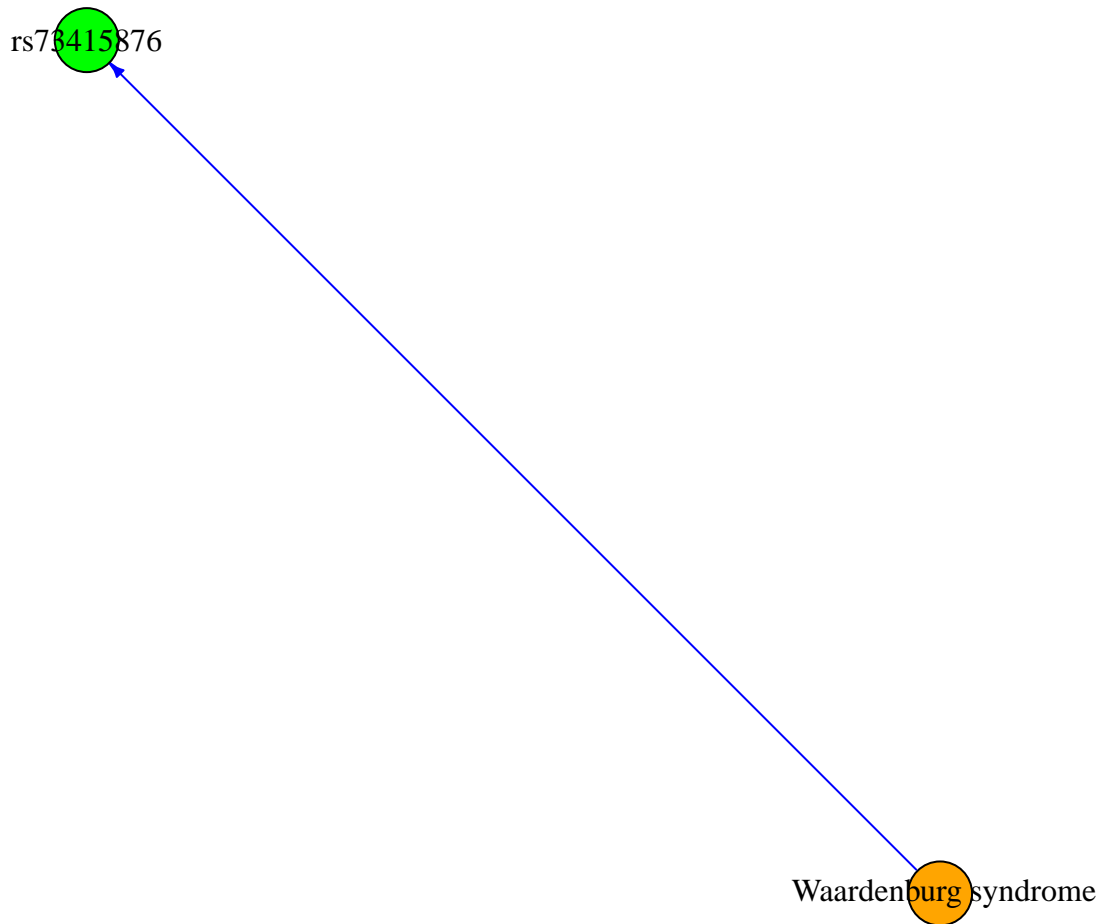

## Variant-Disease Network (Abnormal bleeding)

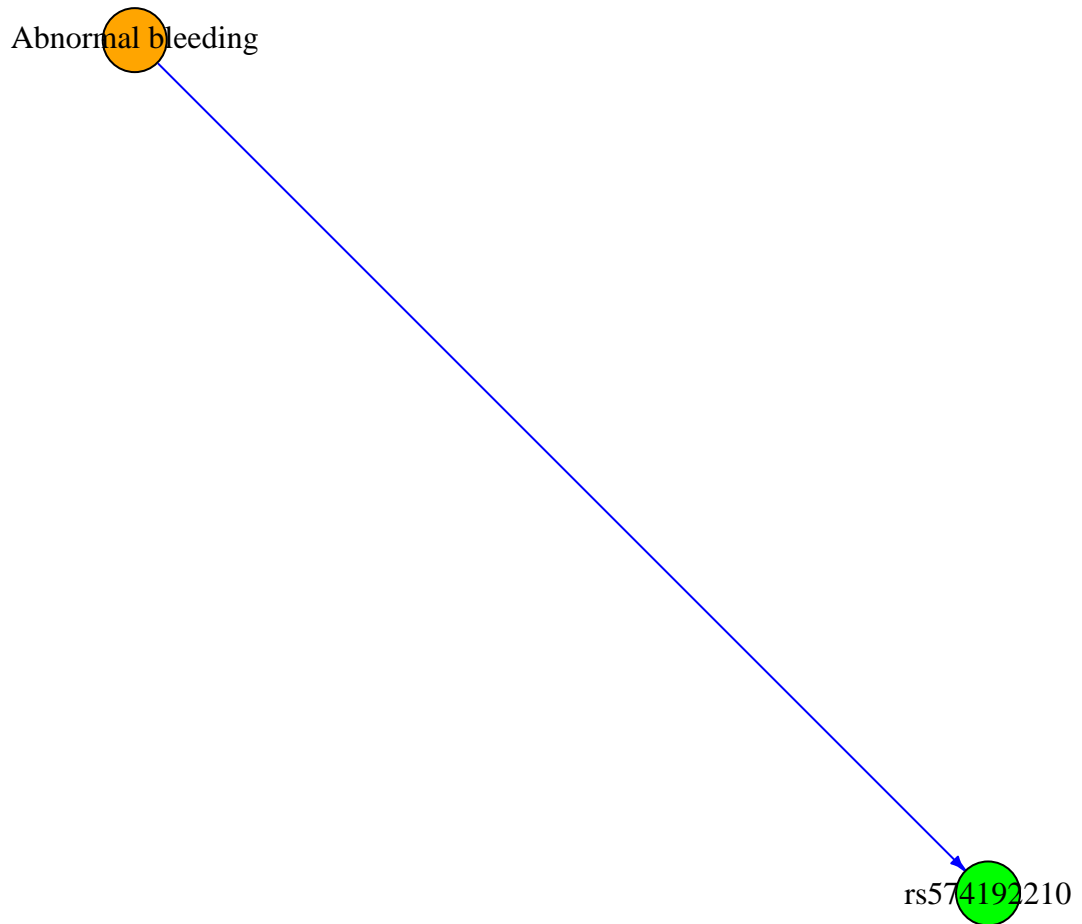



**Variant–Disease Network (Abnormality of neuronal migration)**

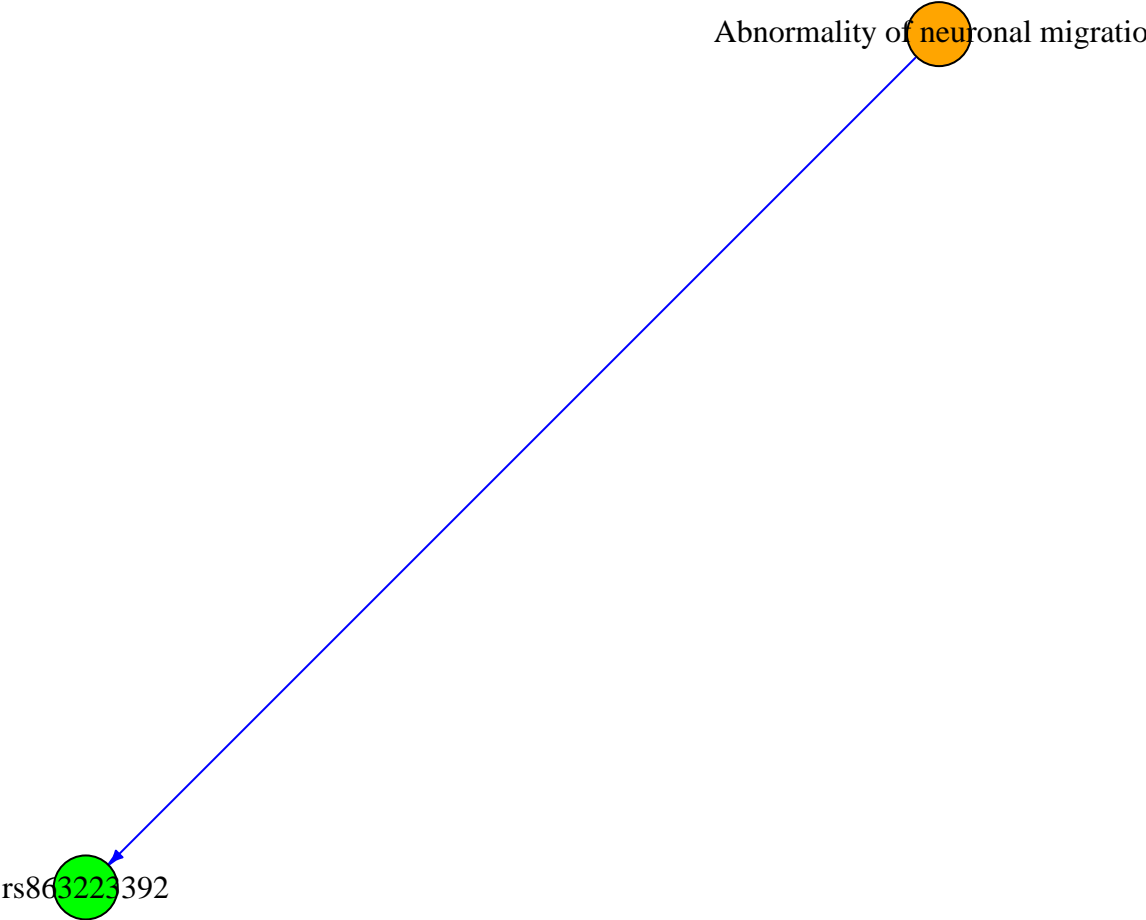

Variant–Disease Network (Acrodysostosis)

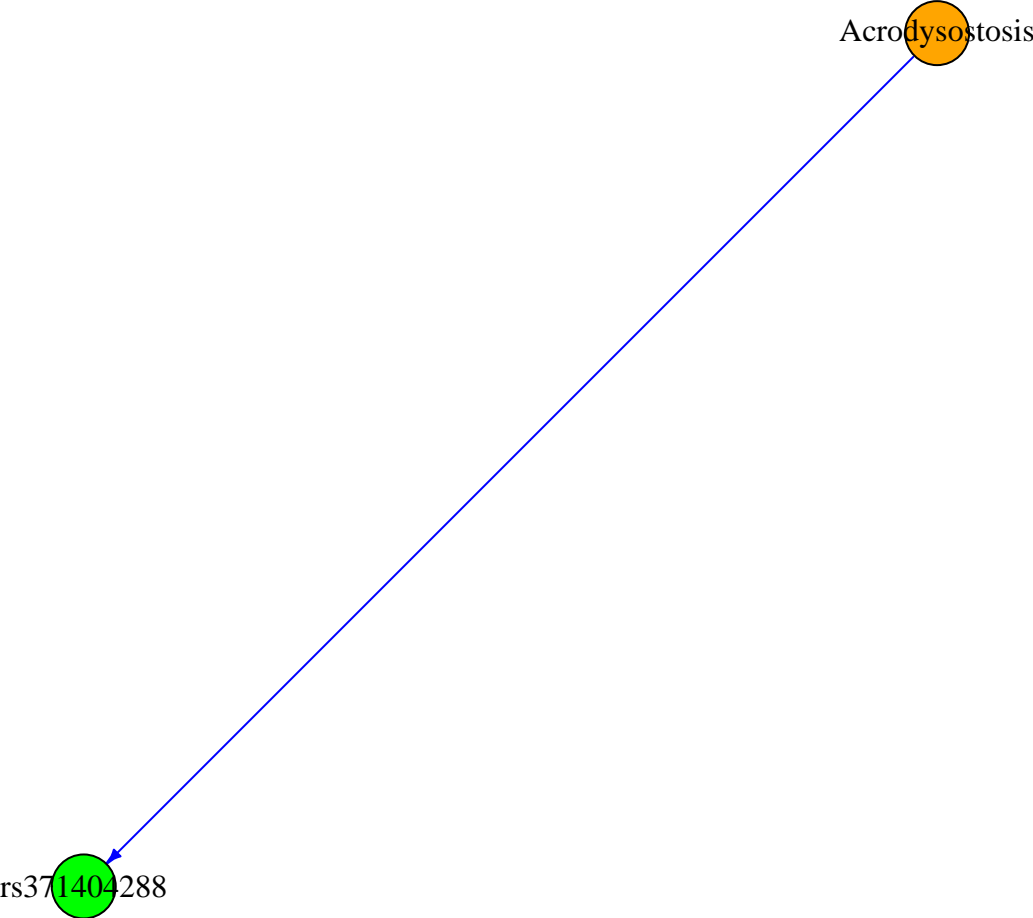

## Variant–Disease Network (Acromesomelic Dysplasia)

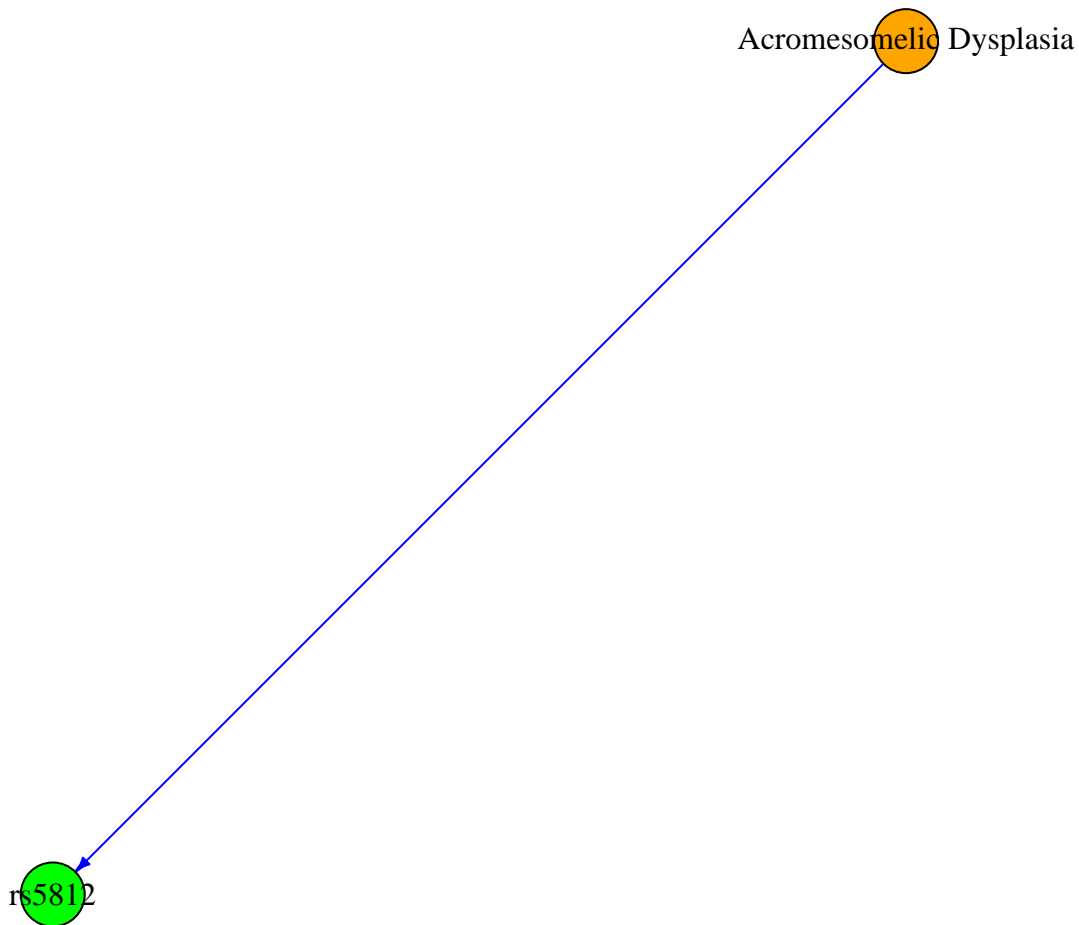

## Variant–Disease Network (Acromicric dysplasia)

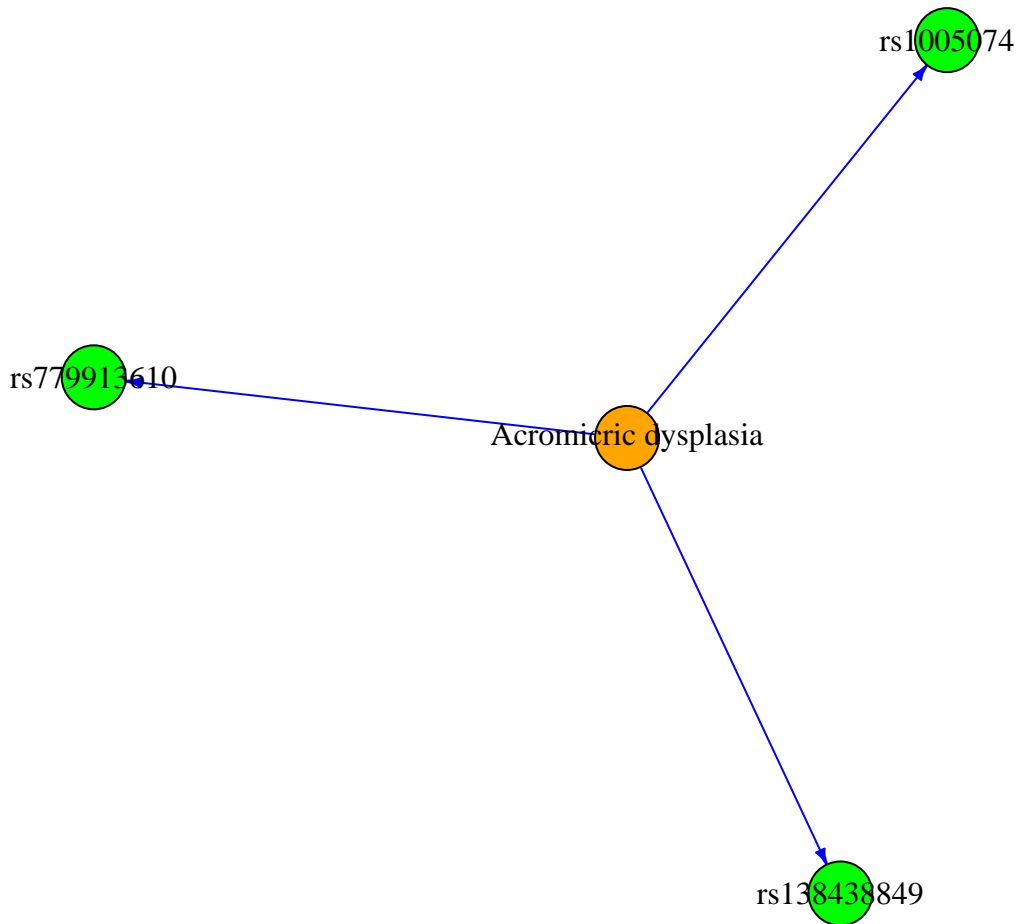

## Variant–Disease Network (Acute myeloid leukemia)

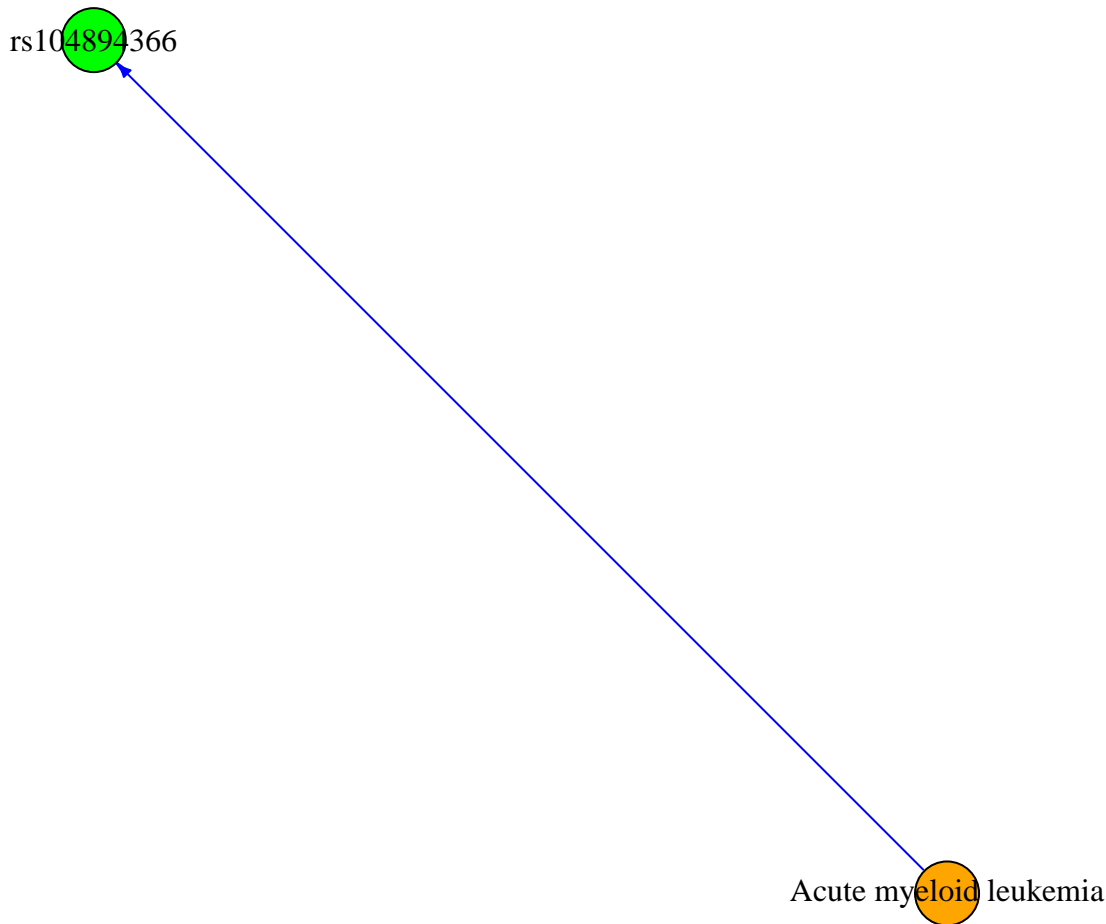

Variant–Disease Network (Acute Recurrent Myoglobinuria)

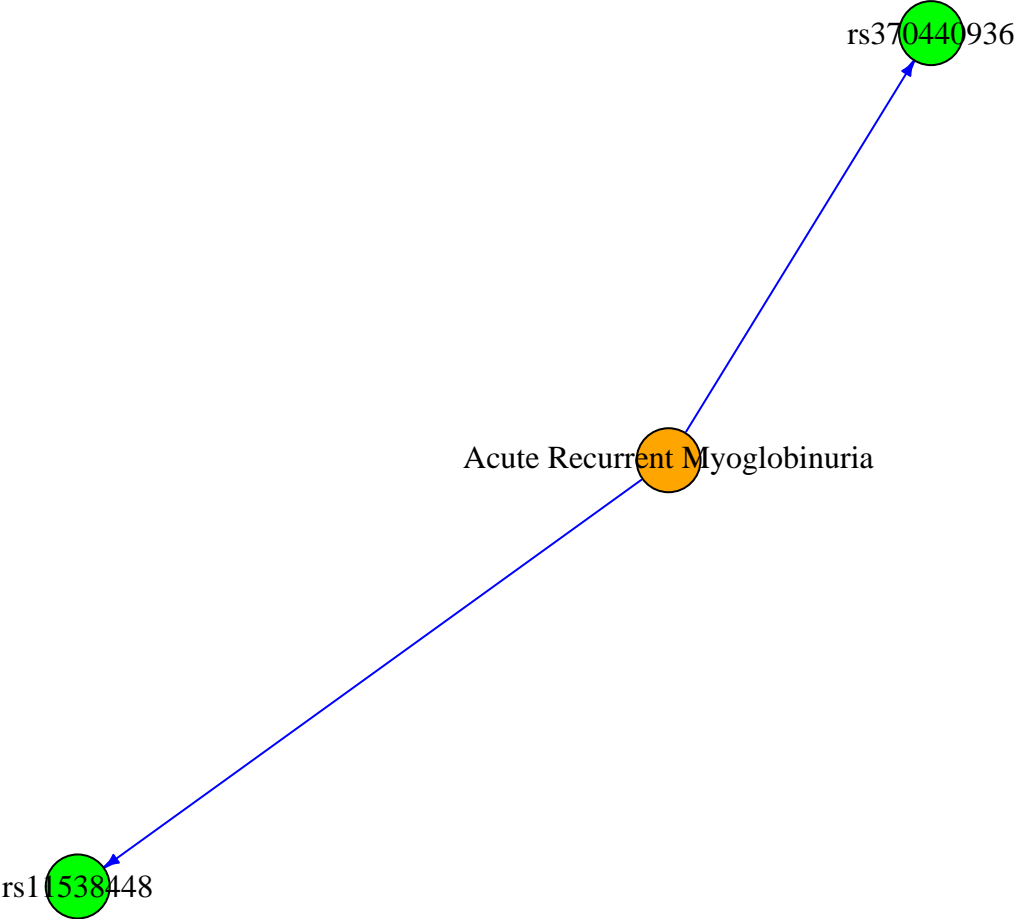

# Variant–Disease Network (Adams–Oliver syndrome 5)

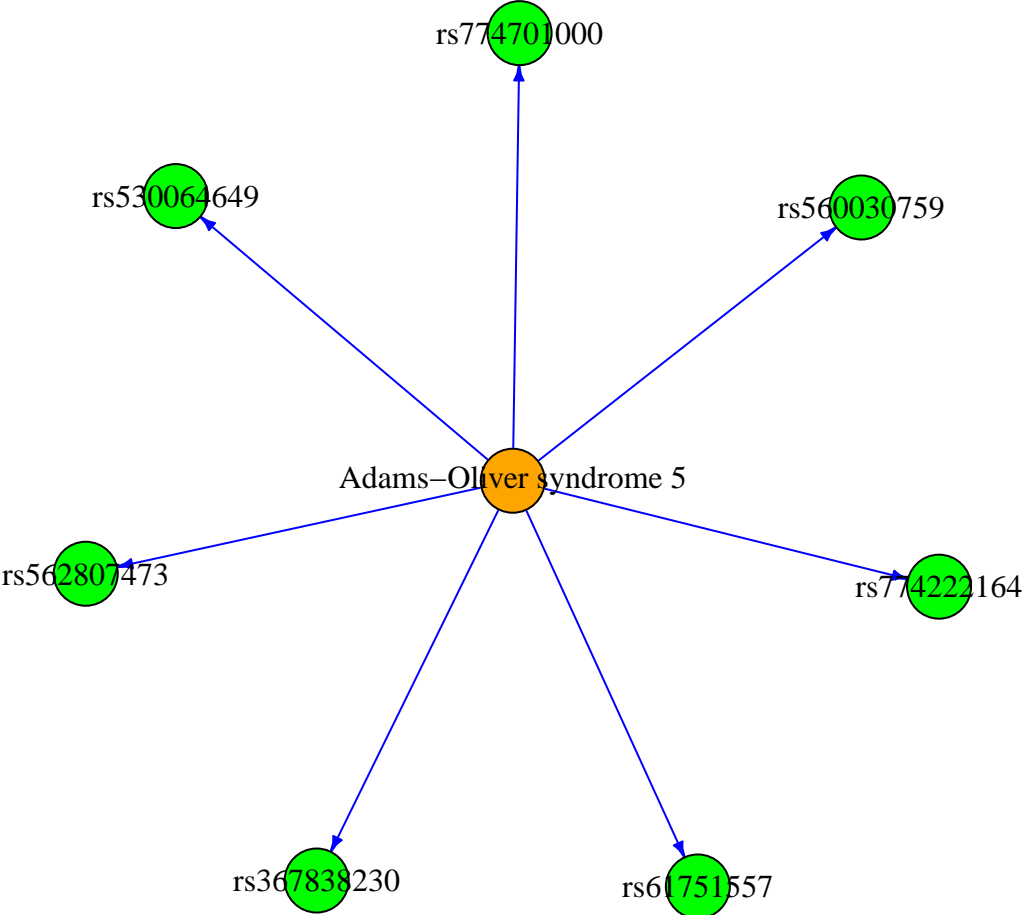

## Variant–Disease Network (Age-related cortical cataract)

Age-related cortical cataract

rs10907223

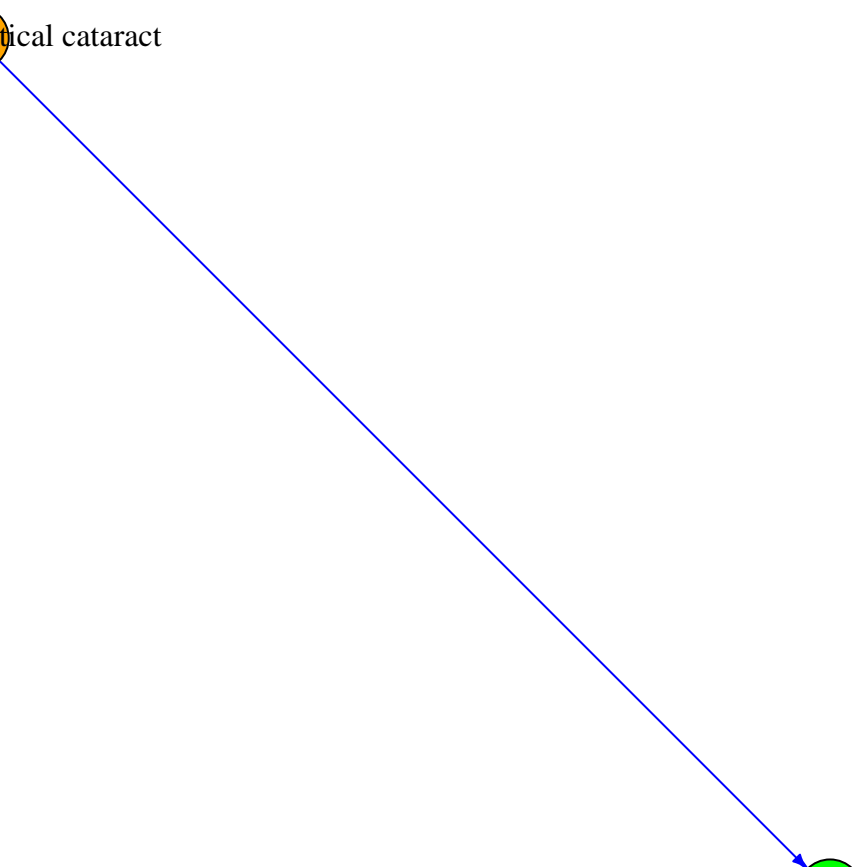



## Variant–Disease Network (Alagille syndrome 1)

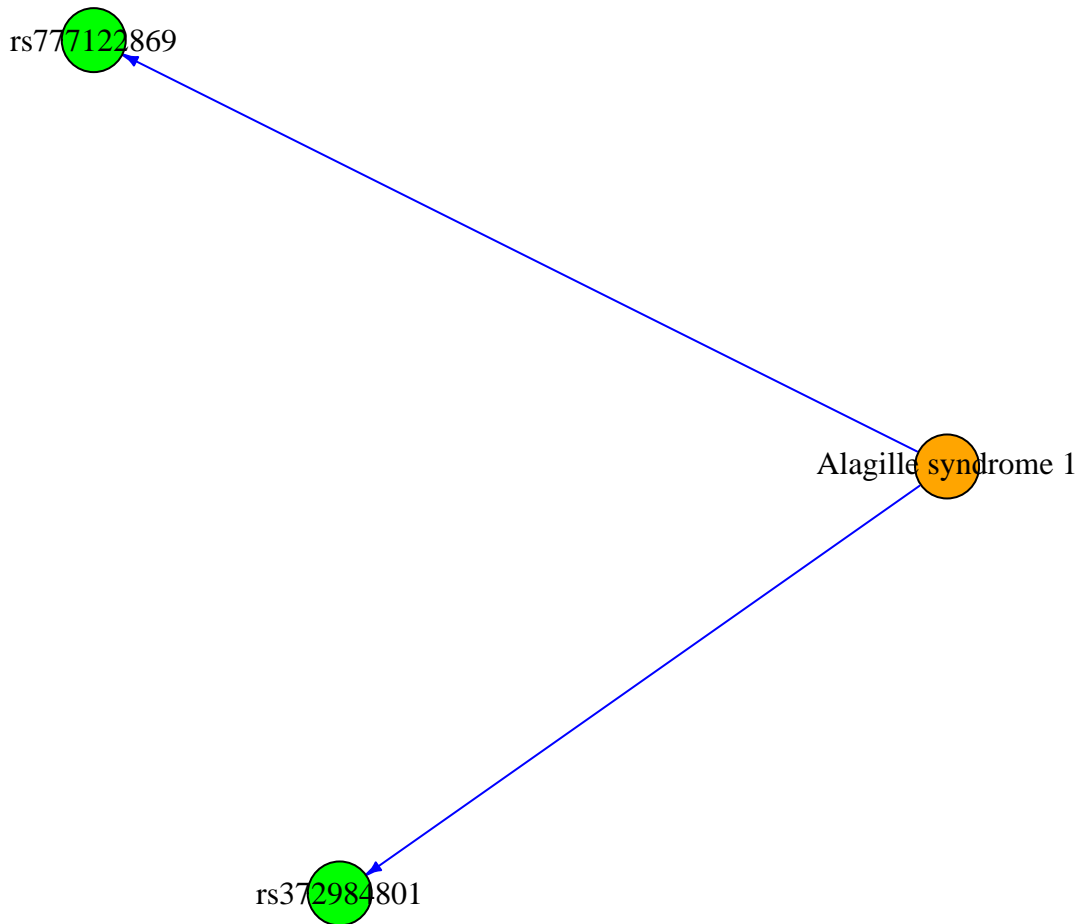

# Variant–Disease Network (ALG12–congenital disorder of glycosylation)

ALG12–congenital disorder of glycosylation

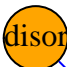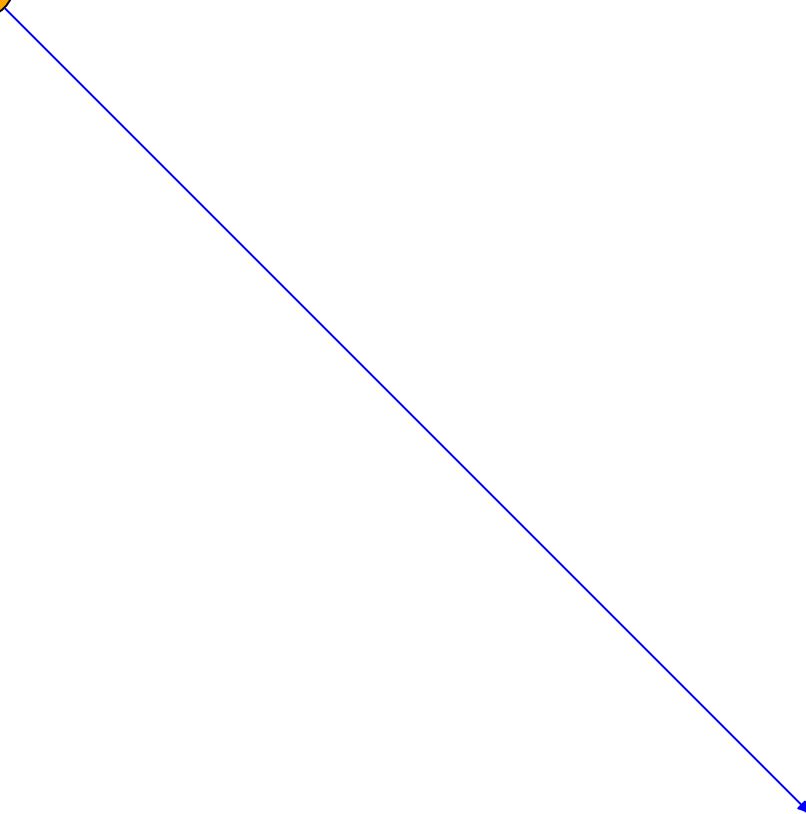

rs121907935

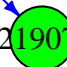

Variant–Disease Network (ALS2–Related Disorders)

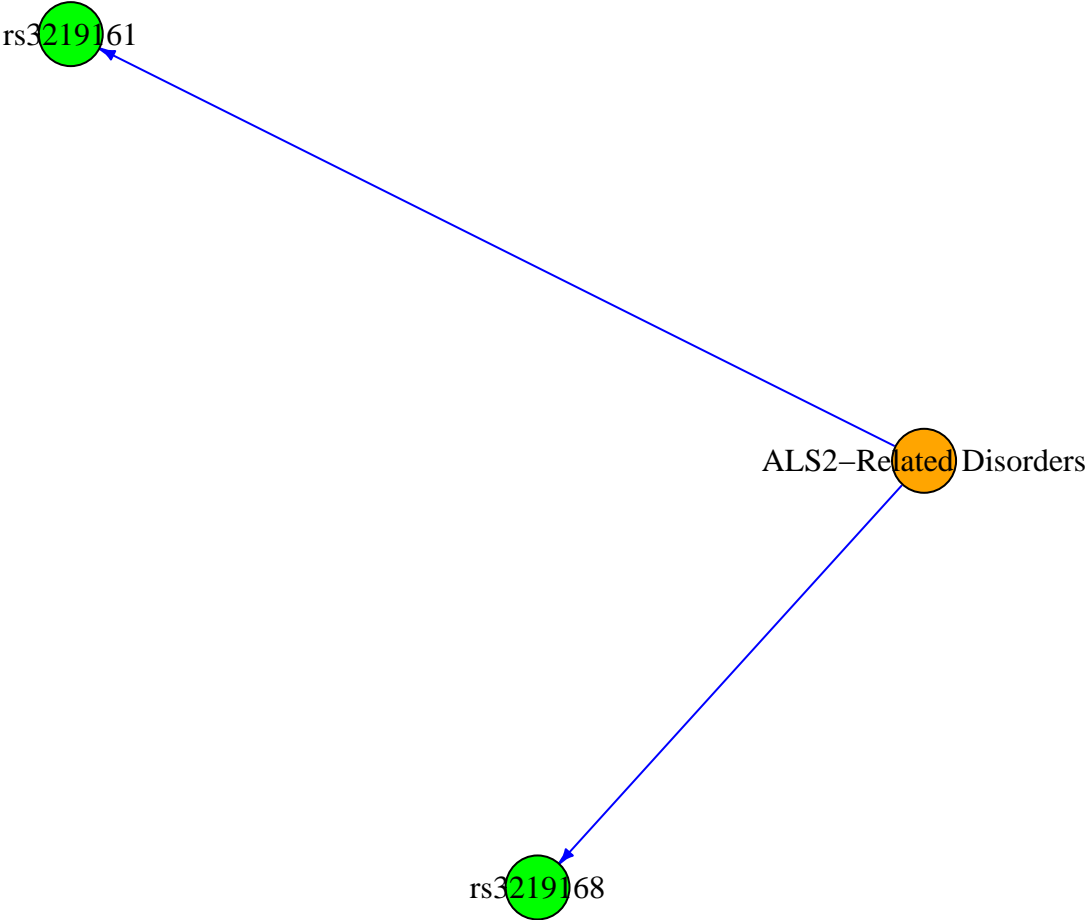

Variant–Disease Network (Amelogenesis Imperfecta)

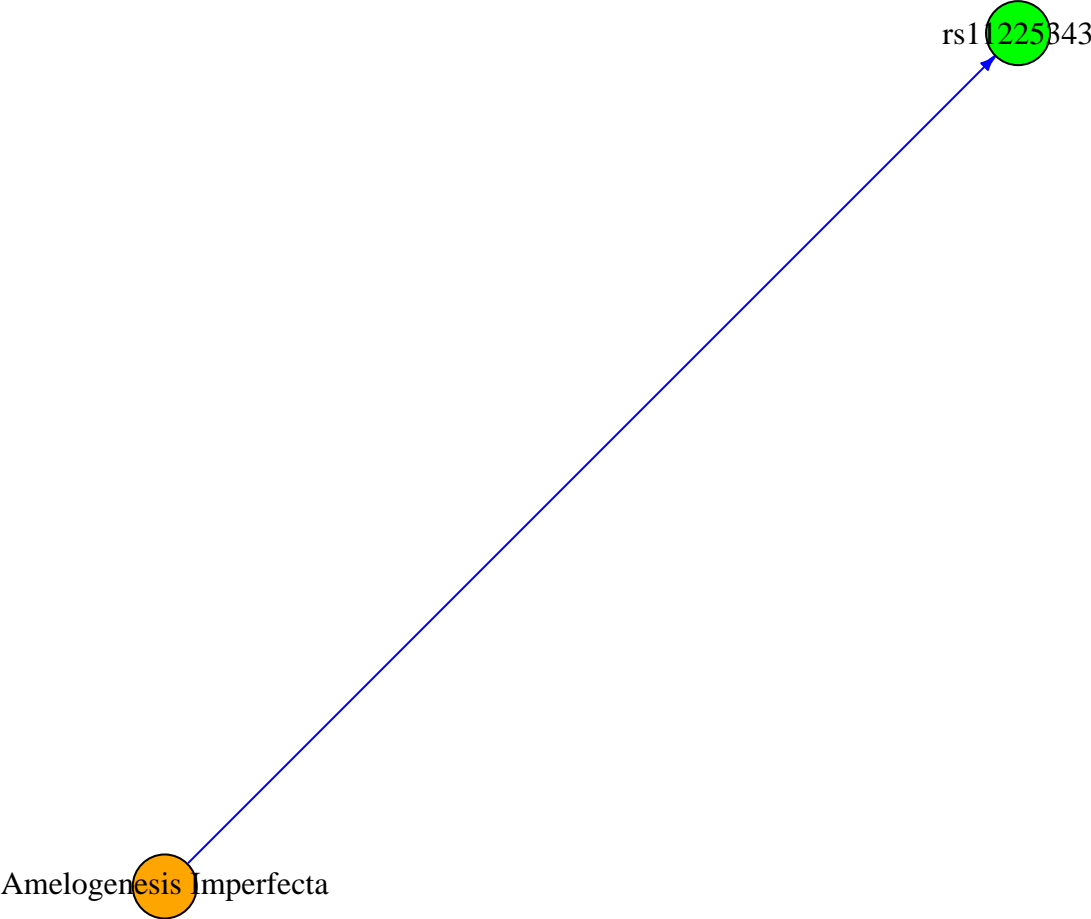

## Variant–Disease Network (Amyloidosis)

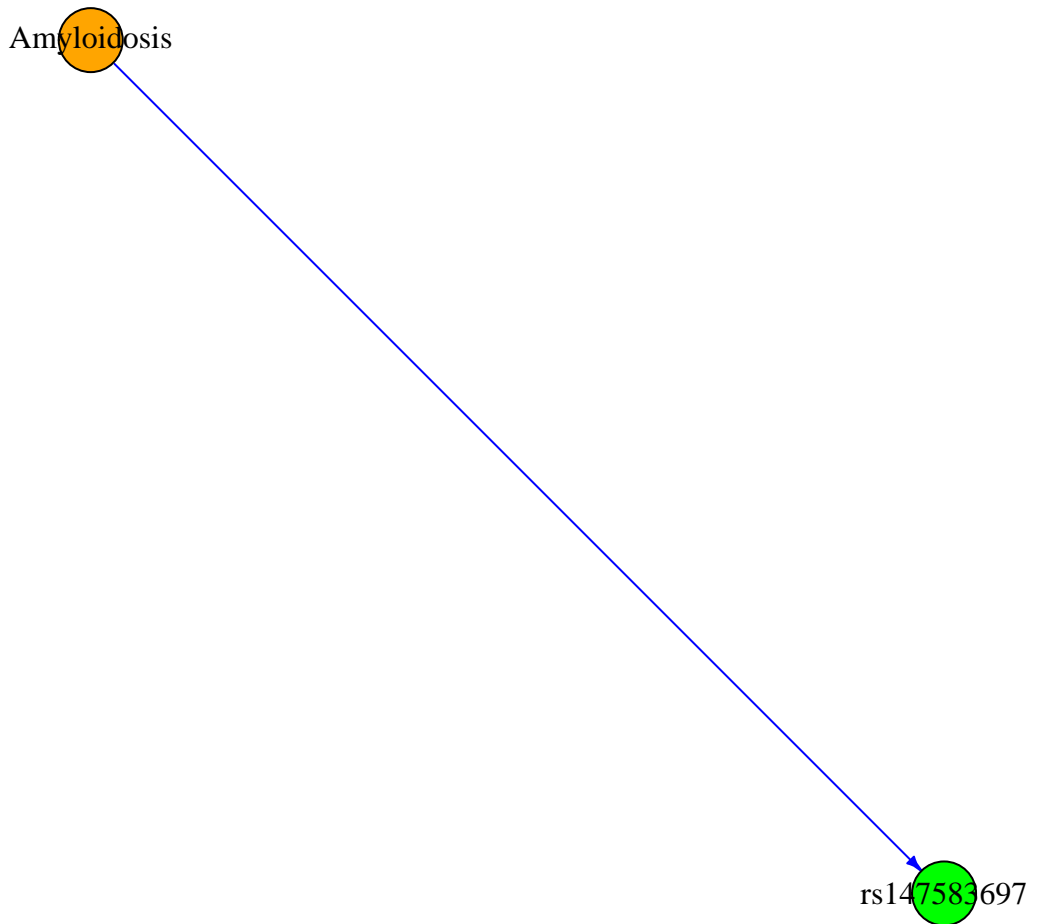

Variant–Disease Network (Amyotrophic Lateral Sclerosis)

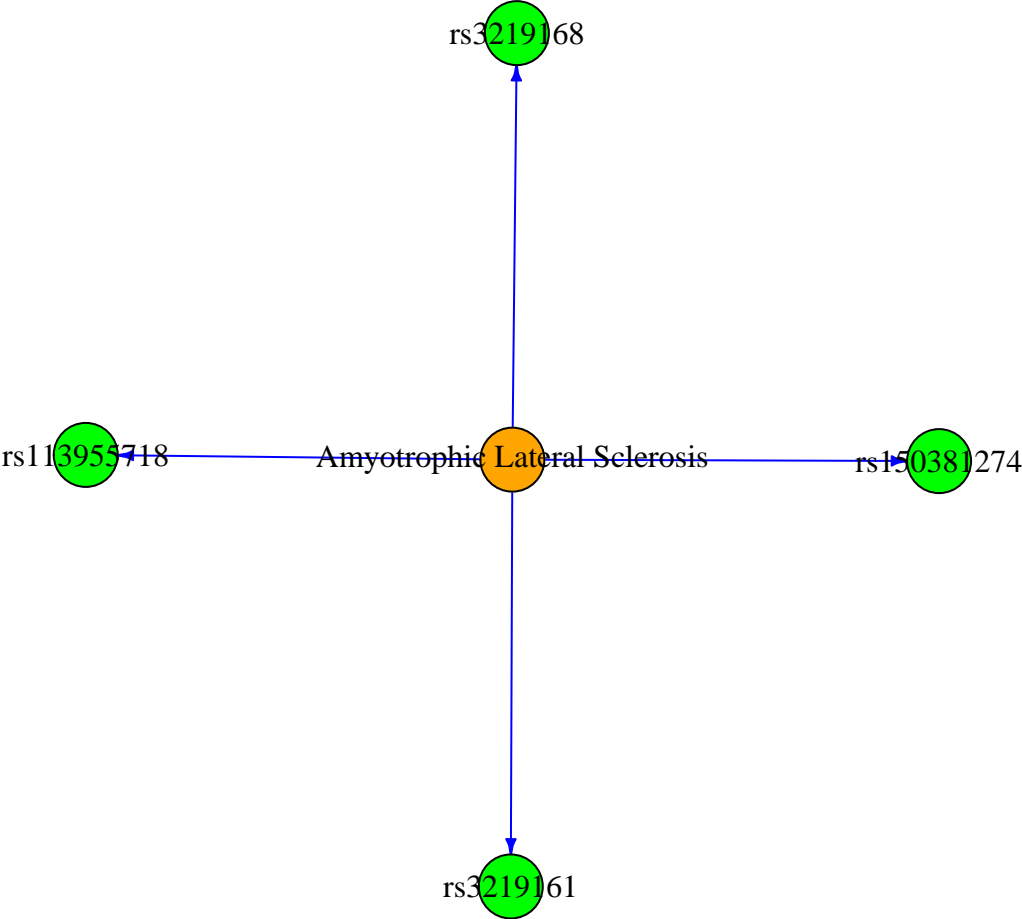

Variant–Disease Network (Amyotrophic lateral sclerosis type 1)

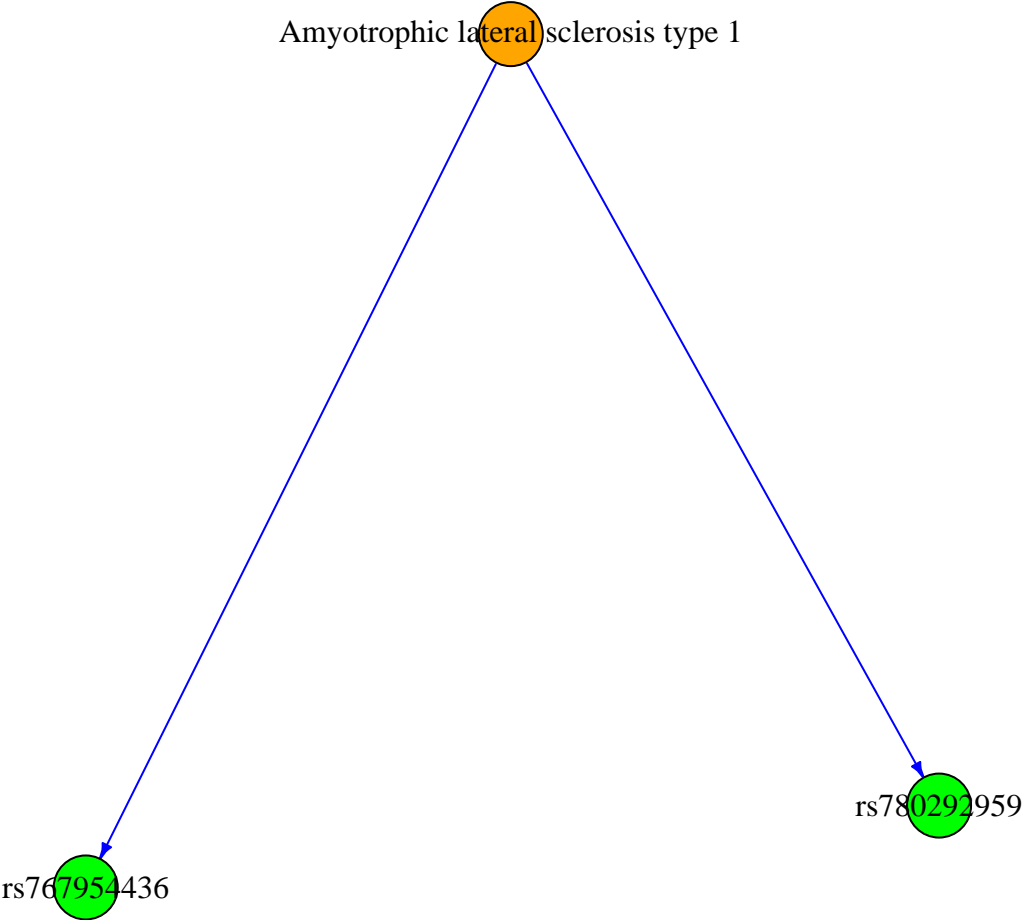

# Variant–Disease Network (Amyotrophic lateral sclerosis type 12)

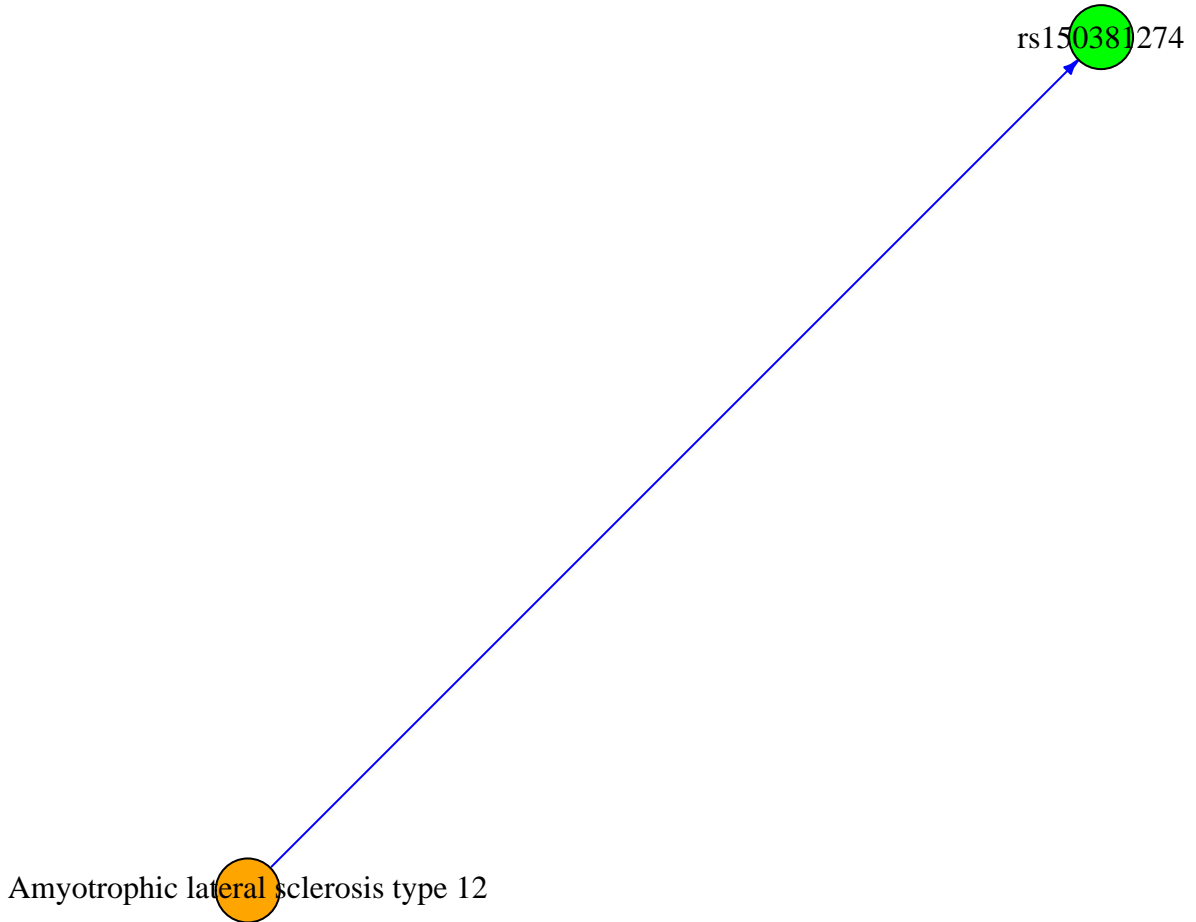



Variant–Disease Network (Amyotrophic lateral sclerosis type 4)

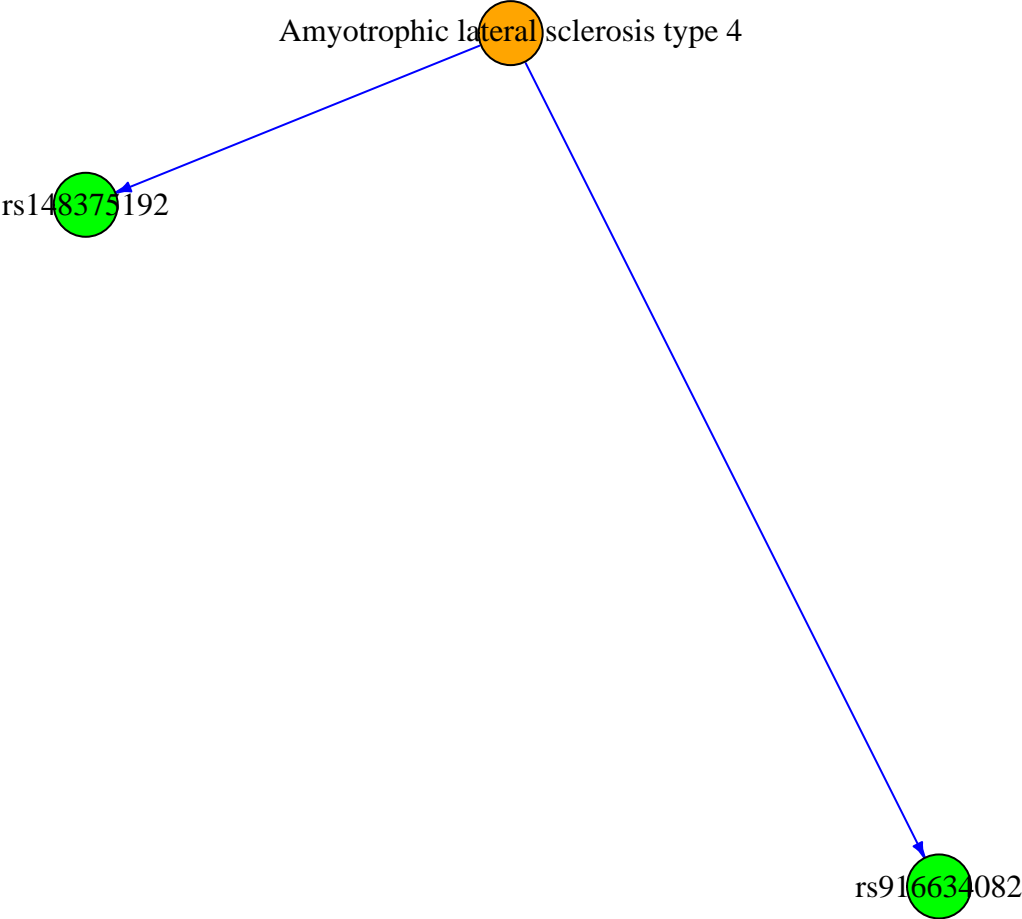

## Variant–Disease Network (Andermann syndrome)

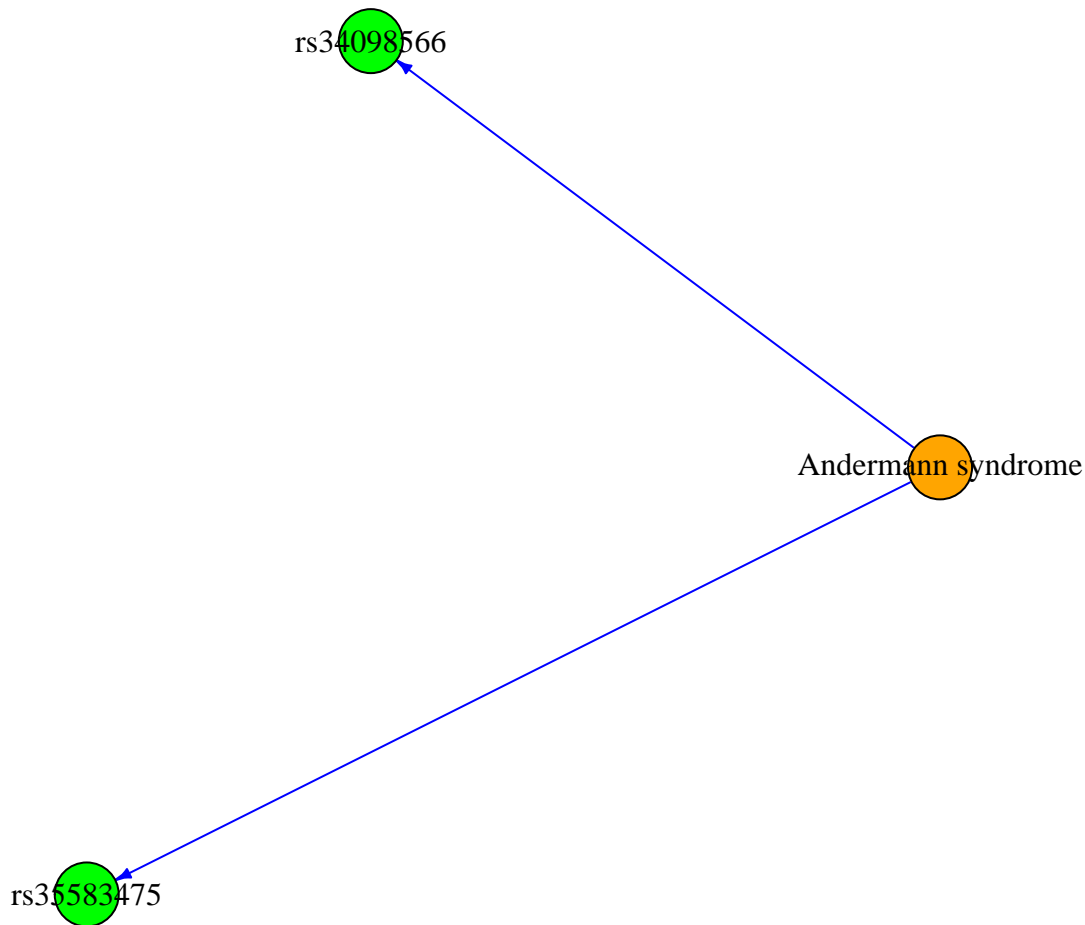

## Variant–Disease Network (Andersen Tawil syndrome)

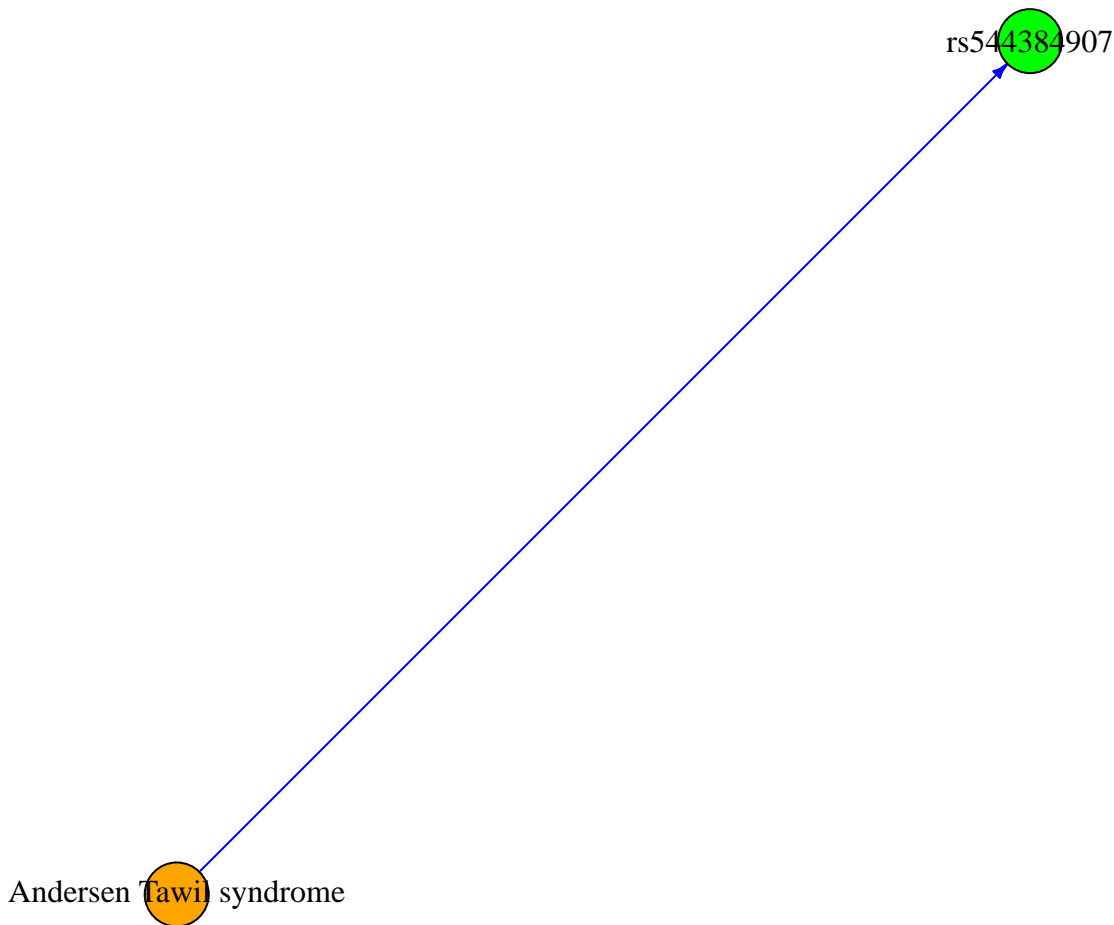

Variant–Disease Network (Angelman syndrome)

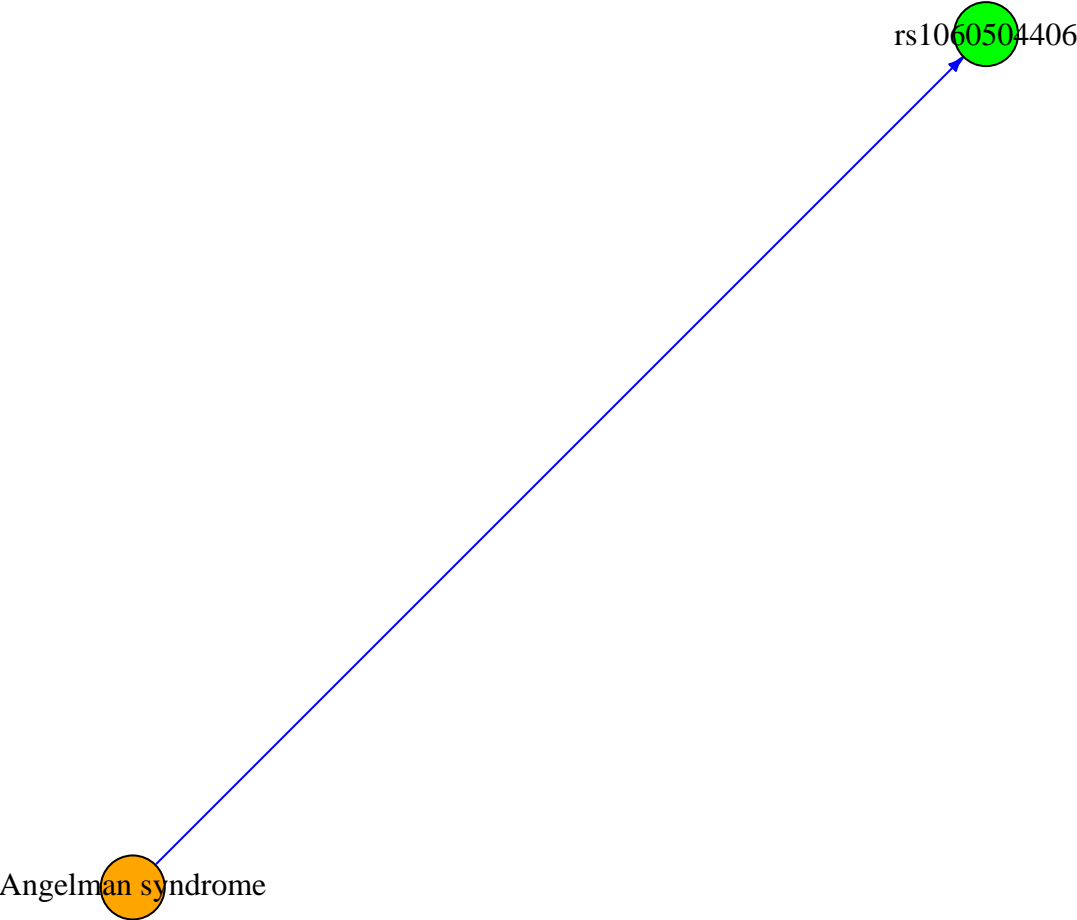

# ant-Disease Network (Angiokeratoma corporis diffusum with arteriovenous

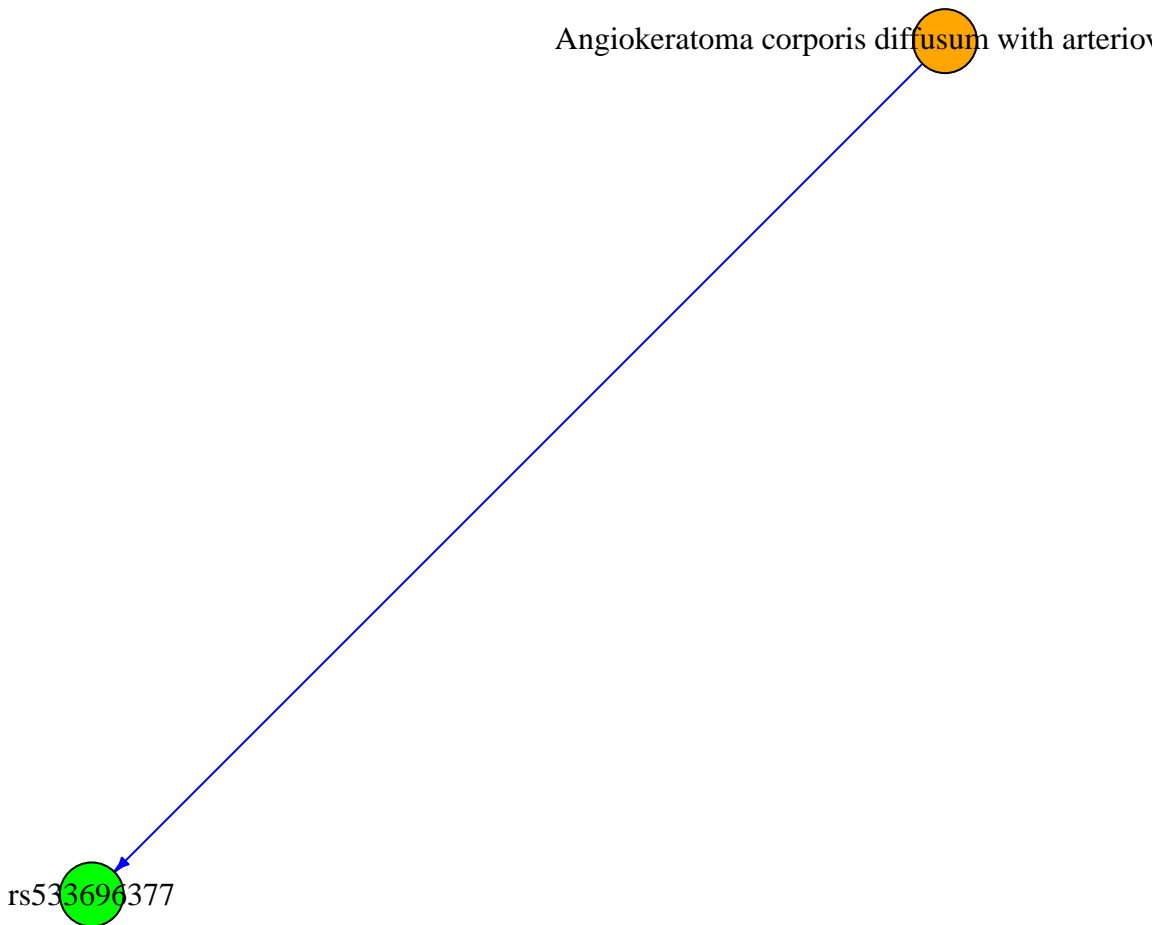

## Variant–Disease Network (Aniridia 1)

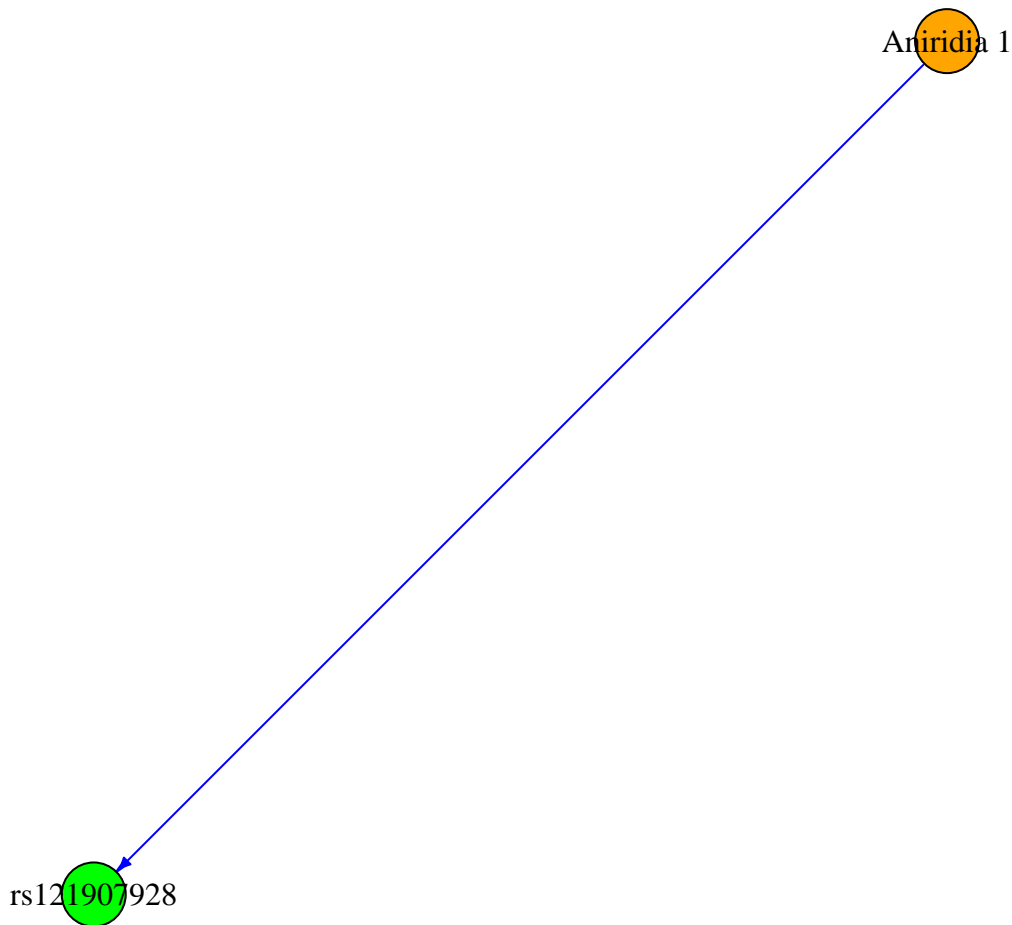

Variant–Disease Network (Antenatal Bartter Syndrome)

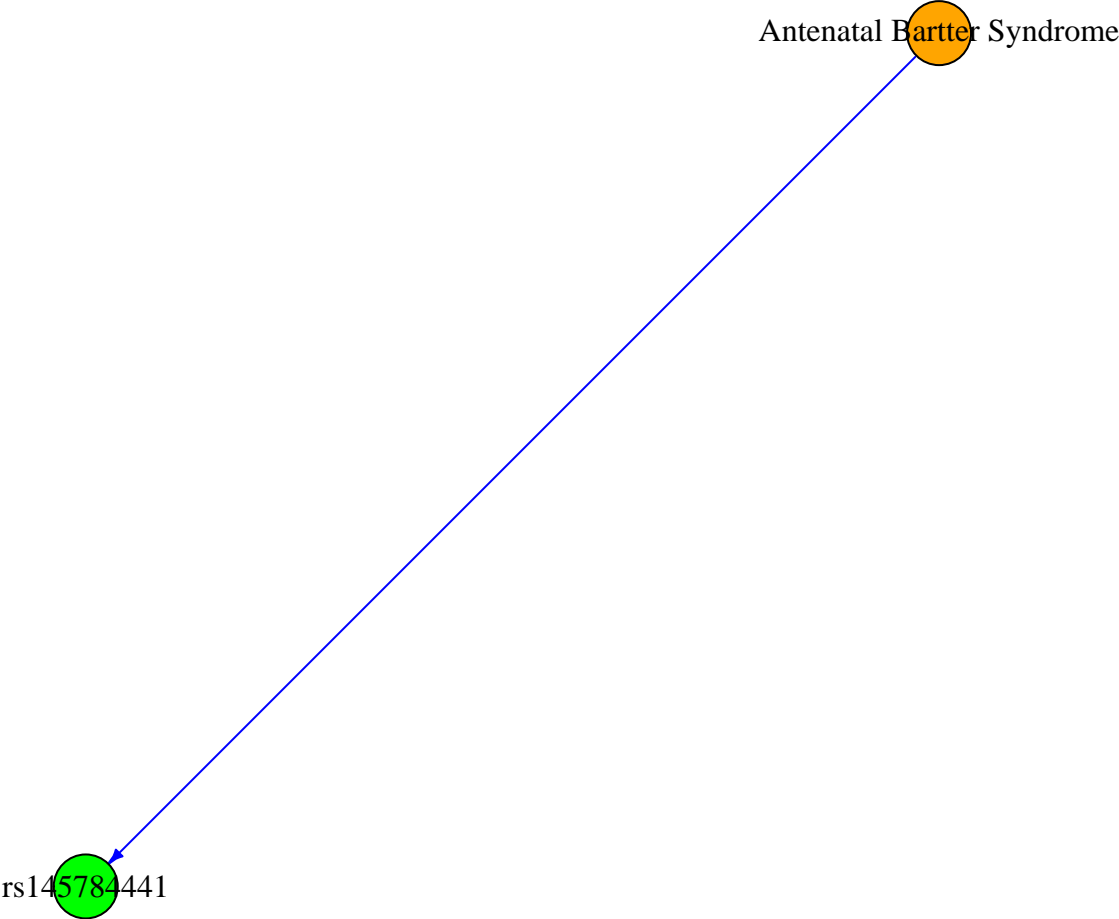

## Variant–Disease Network (Aortic aneurysm)

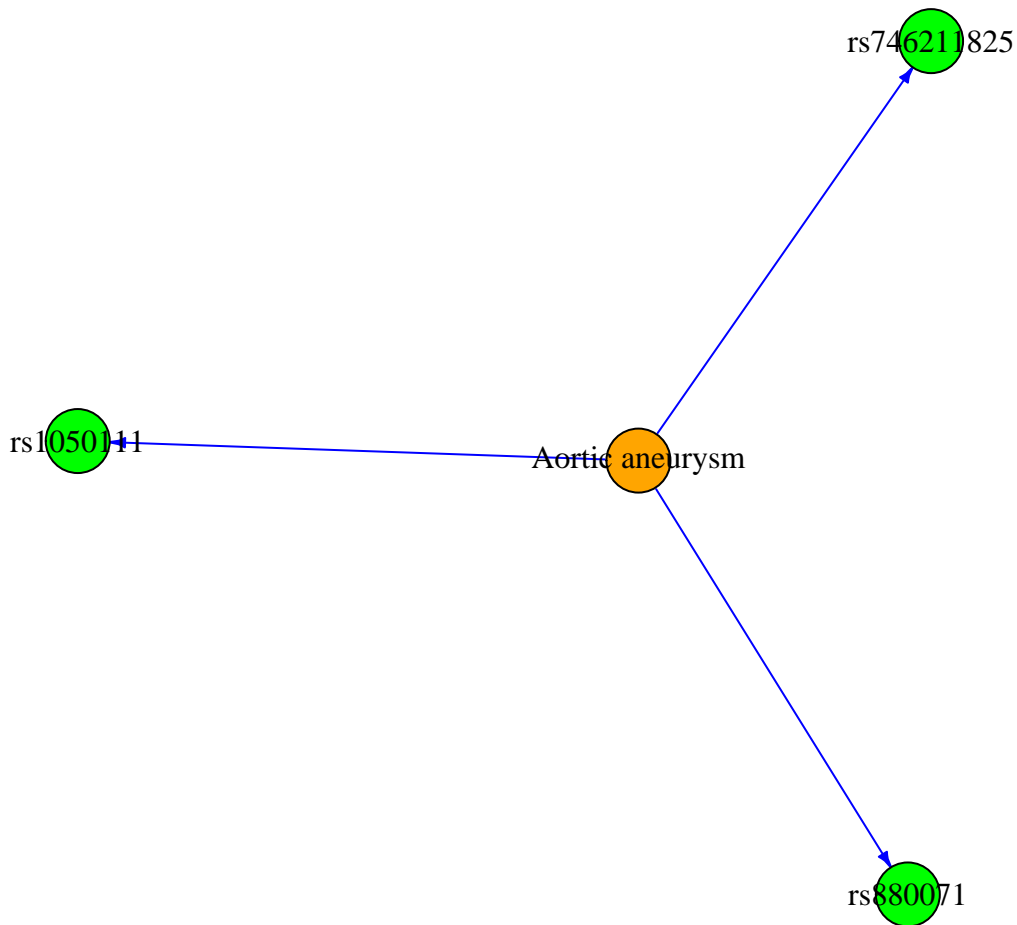



## Variant–Disease Network (Arginase deficiency)

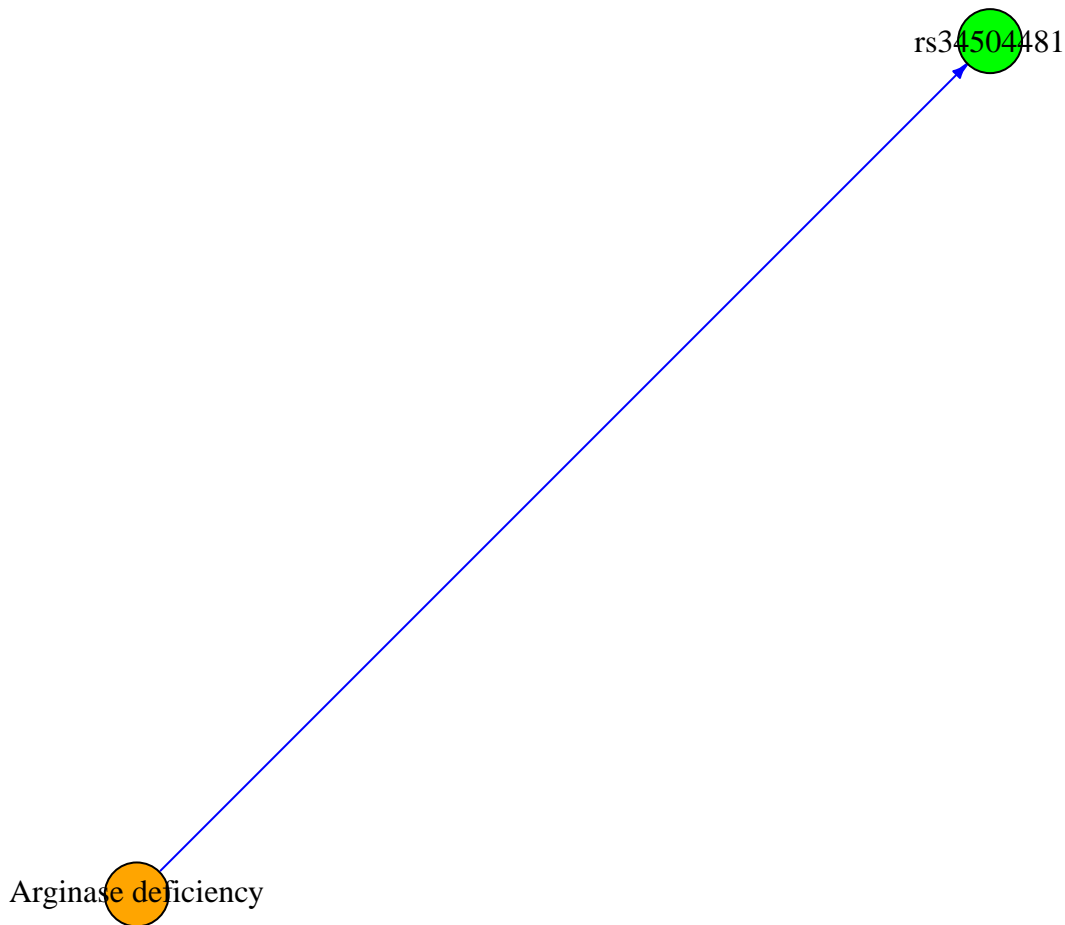

## Variant-Disease Network (Argininosuccinate lyase deficiency)

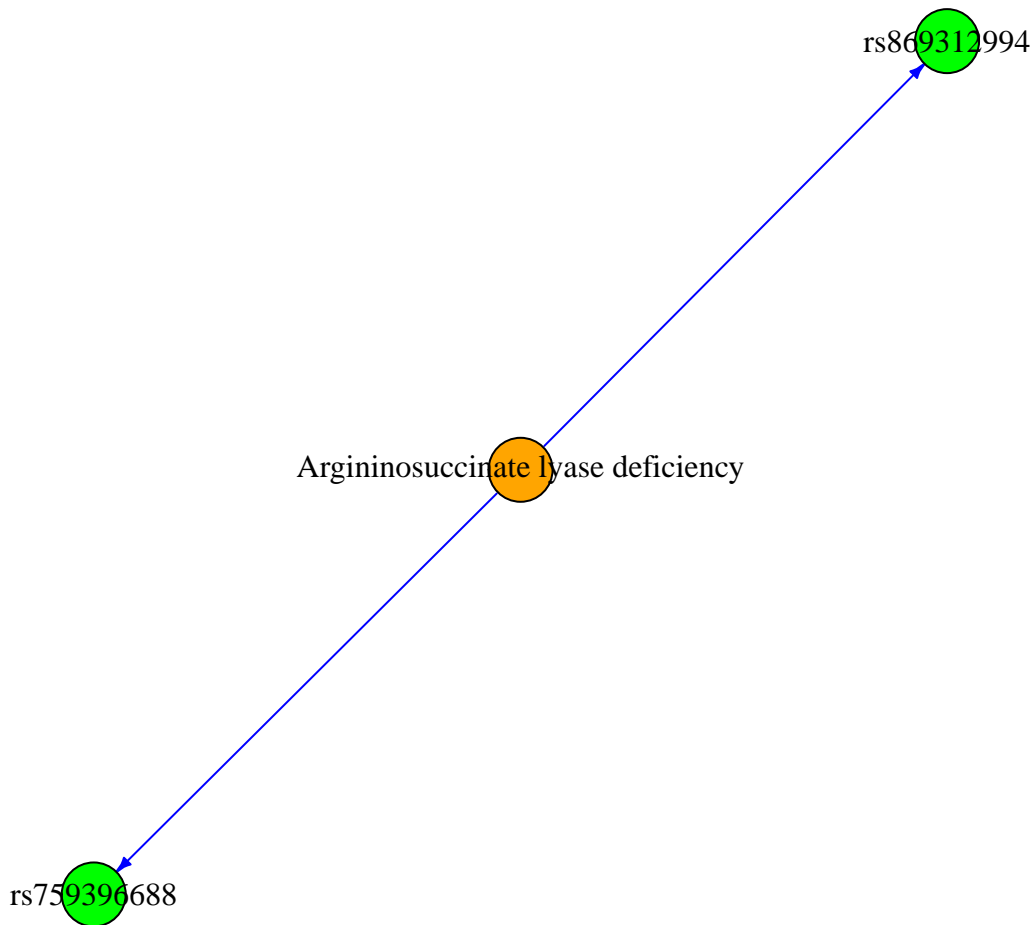

## Variant–Disease Network (Aromatase deficiency)

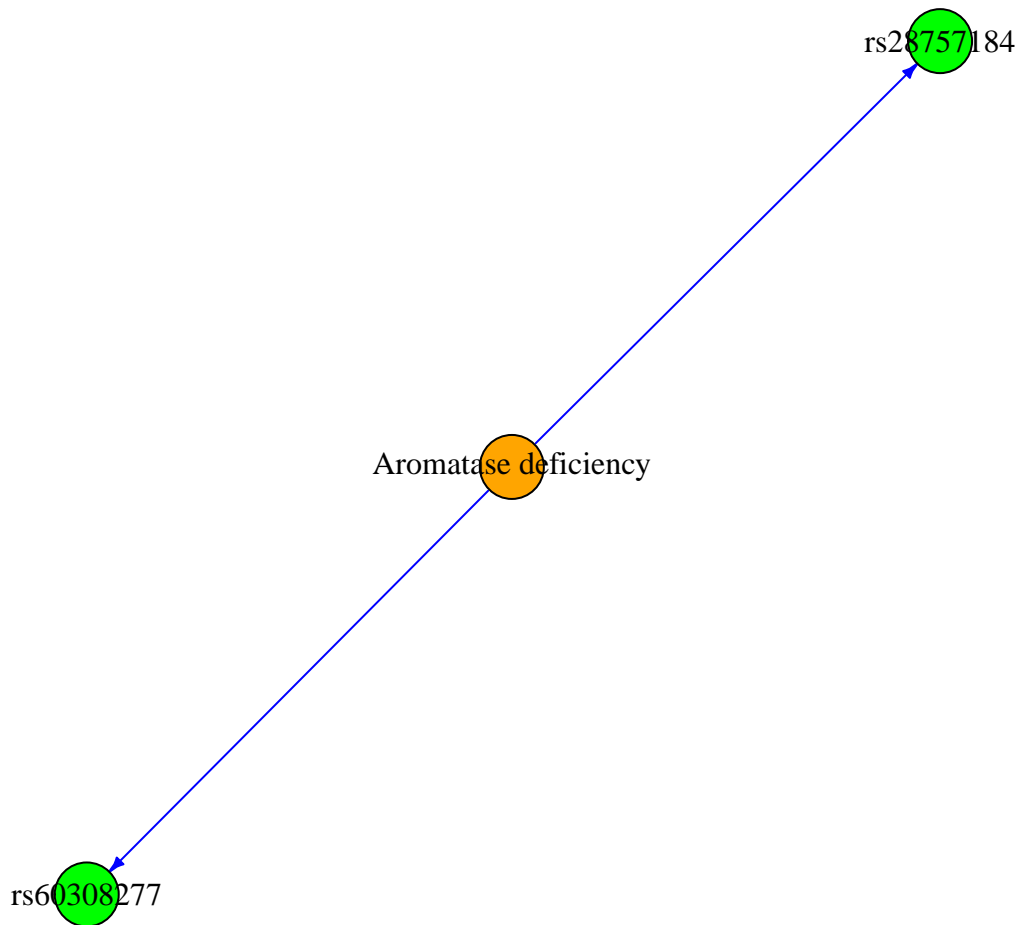

## Variant–Disease Network (Arrhythmia)

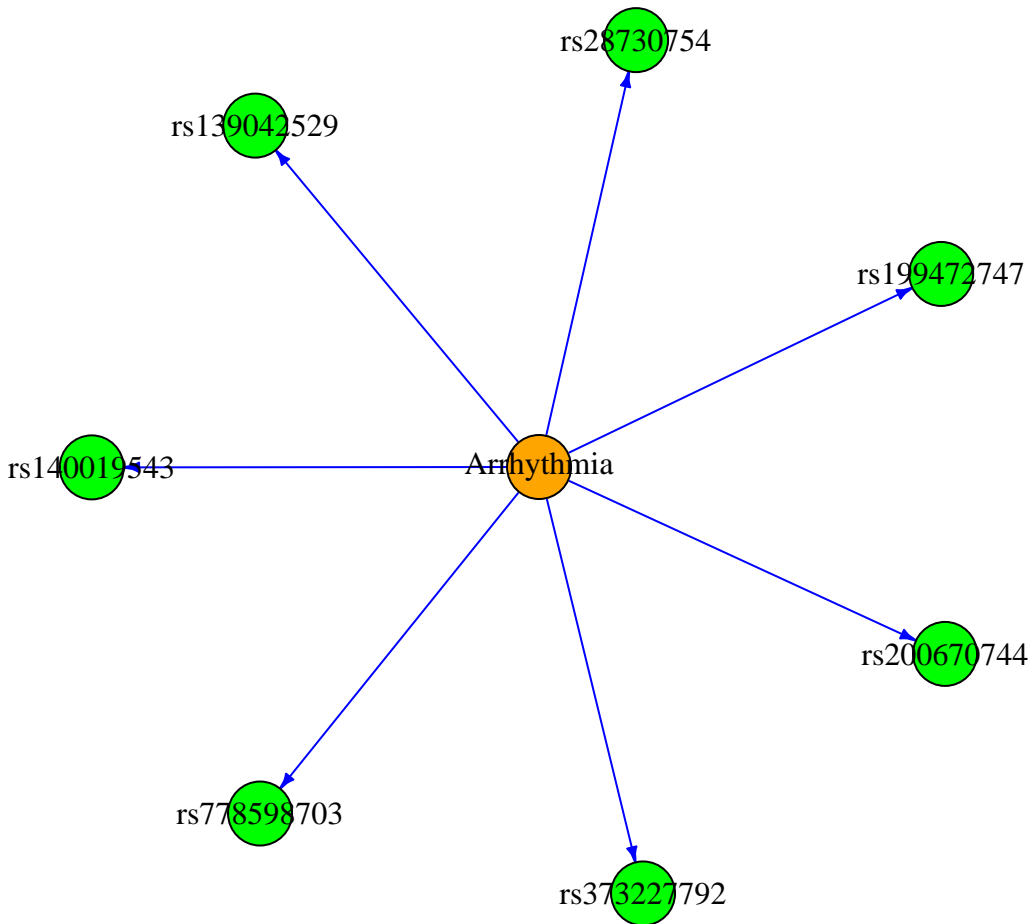

Variant–Disease Network (Arrhythmogenic right ventricular cardiomyopathy)

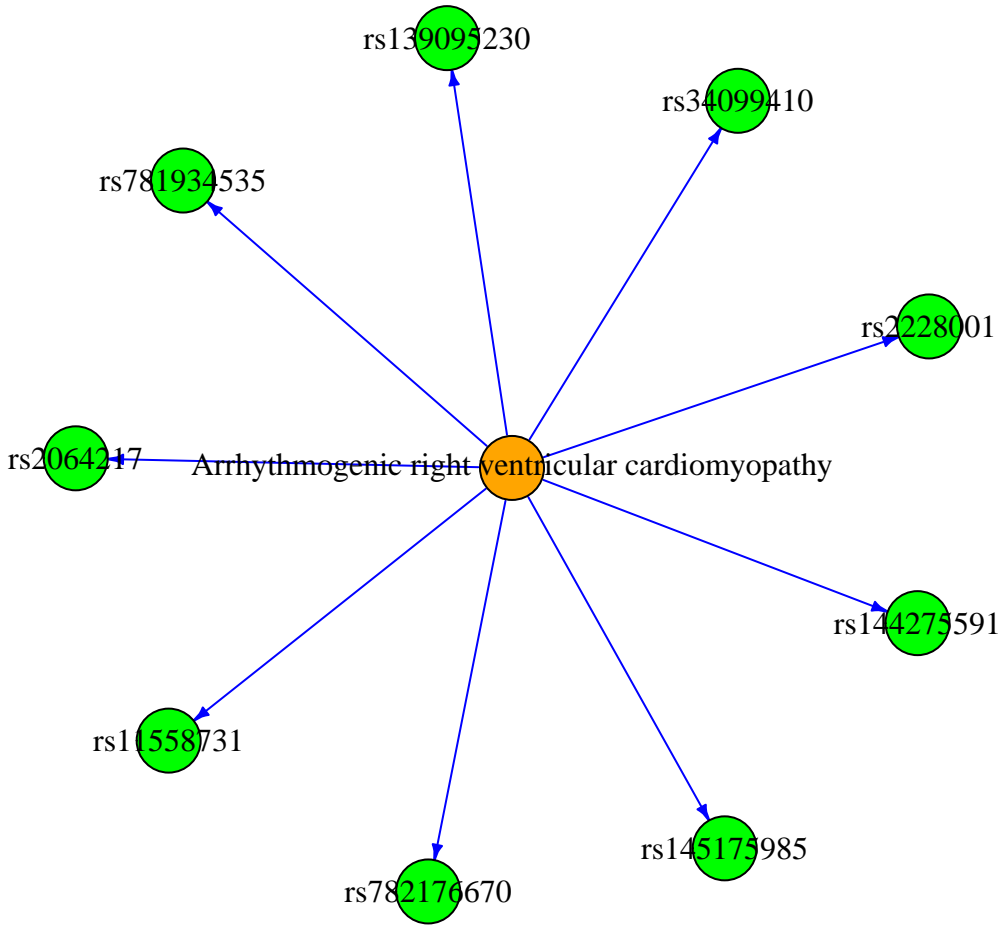

# Variant–Disease Network (Arrhythmogenic right ventricular dysplasia)

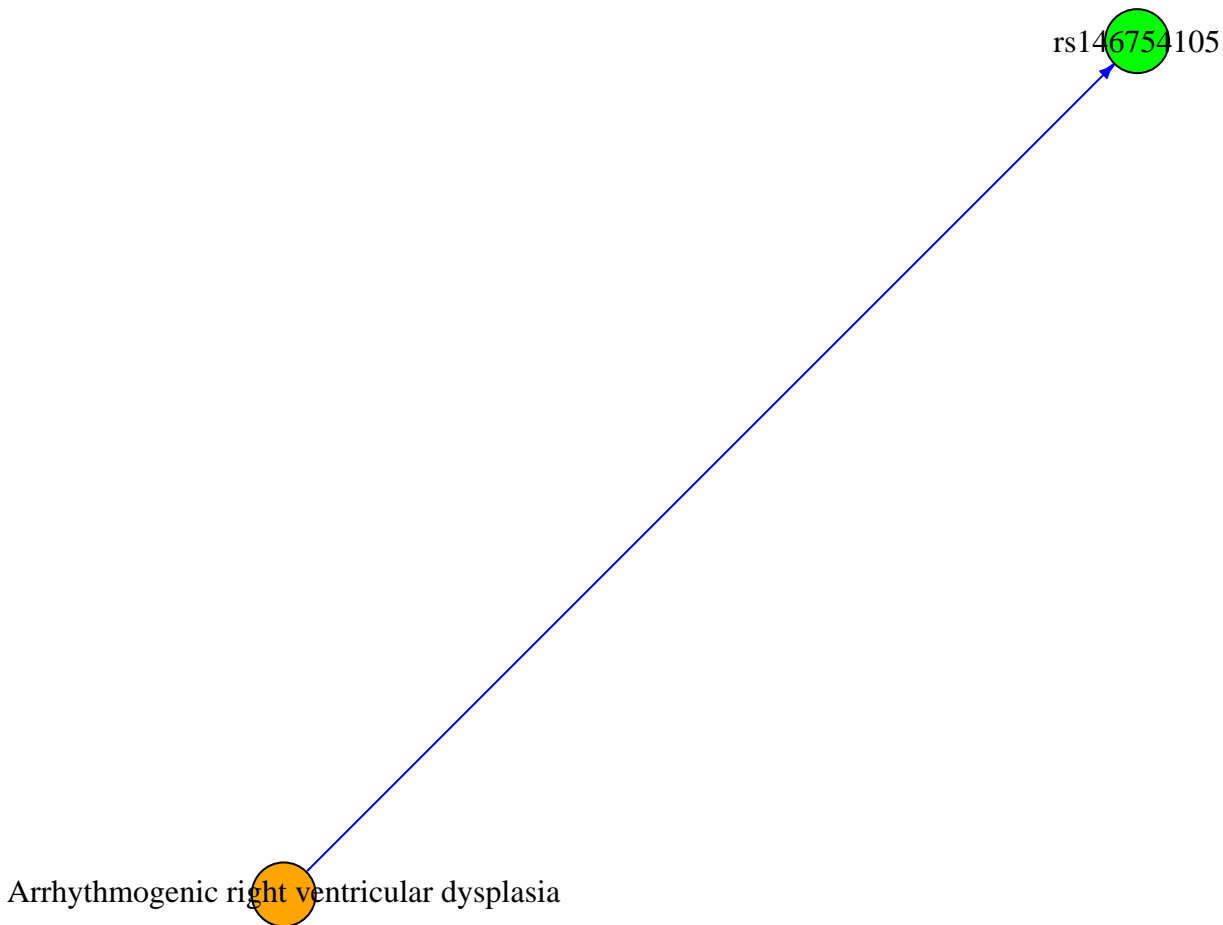

## Variant–Disease Network (Arterial calcification)

Arterial calcification

rs140521704

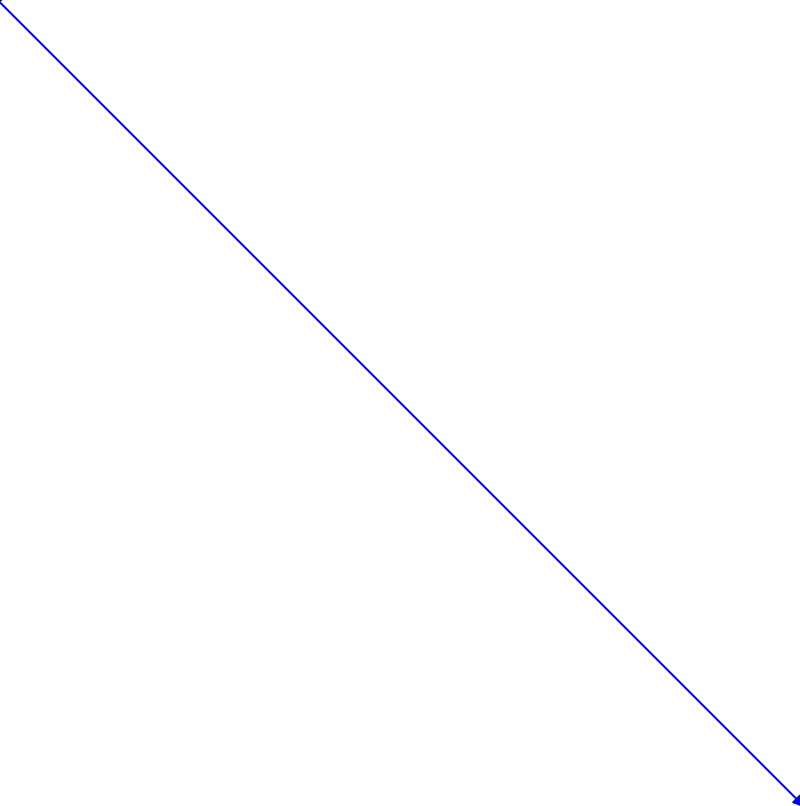

**Variant–Disease Network (Arterial tortuosity syndrome)**

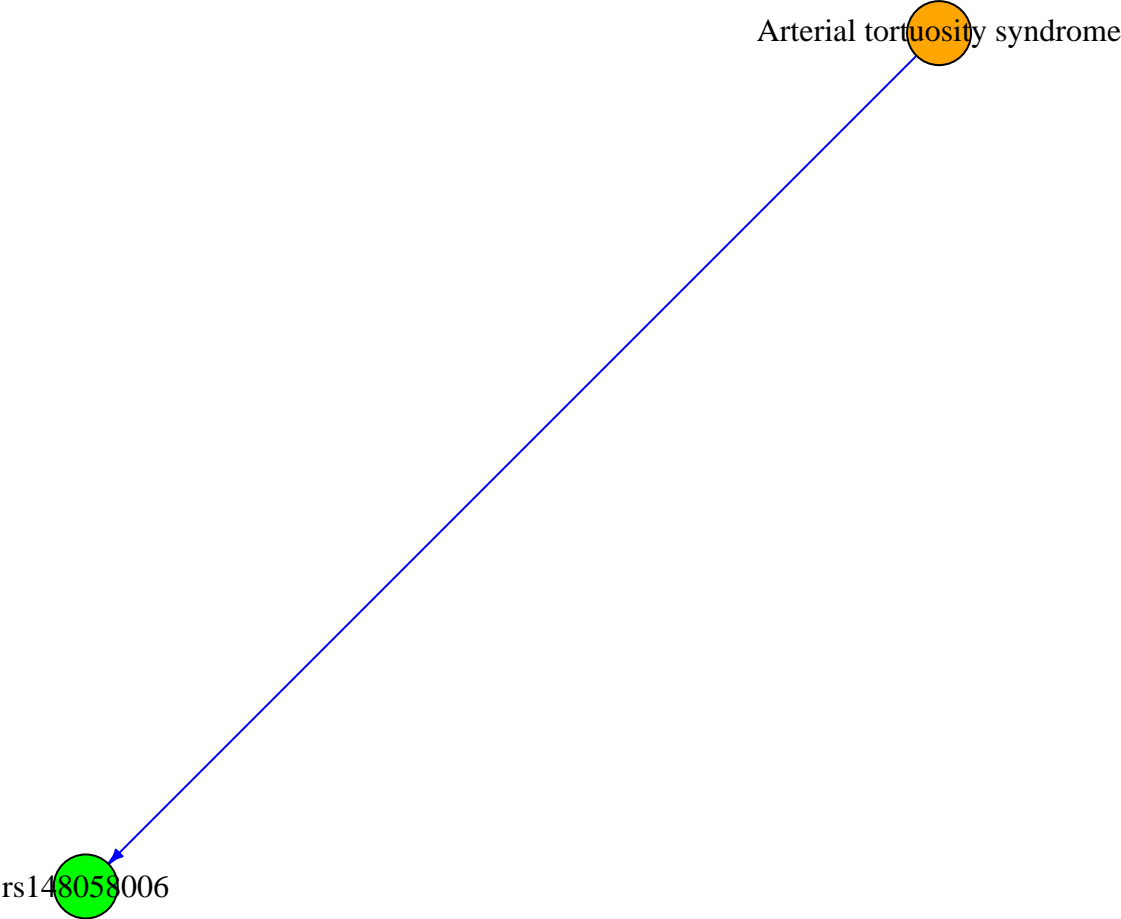



Variant–Disease Network (Arteriovenous malformation)

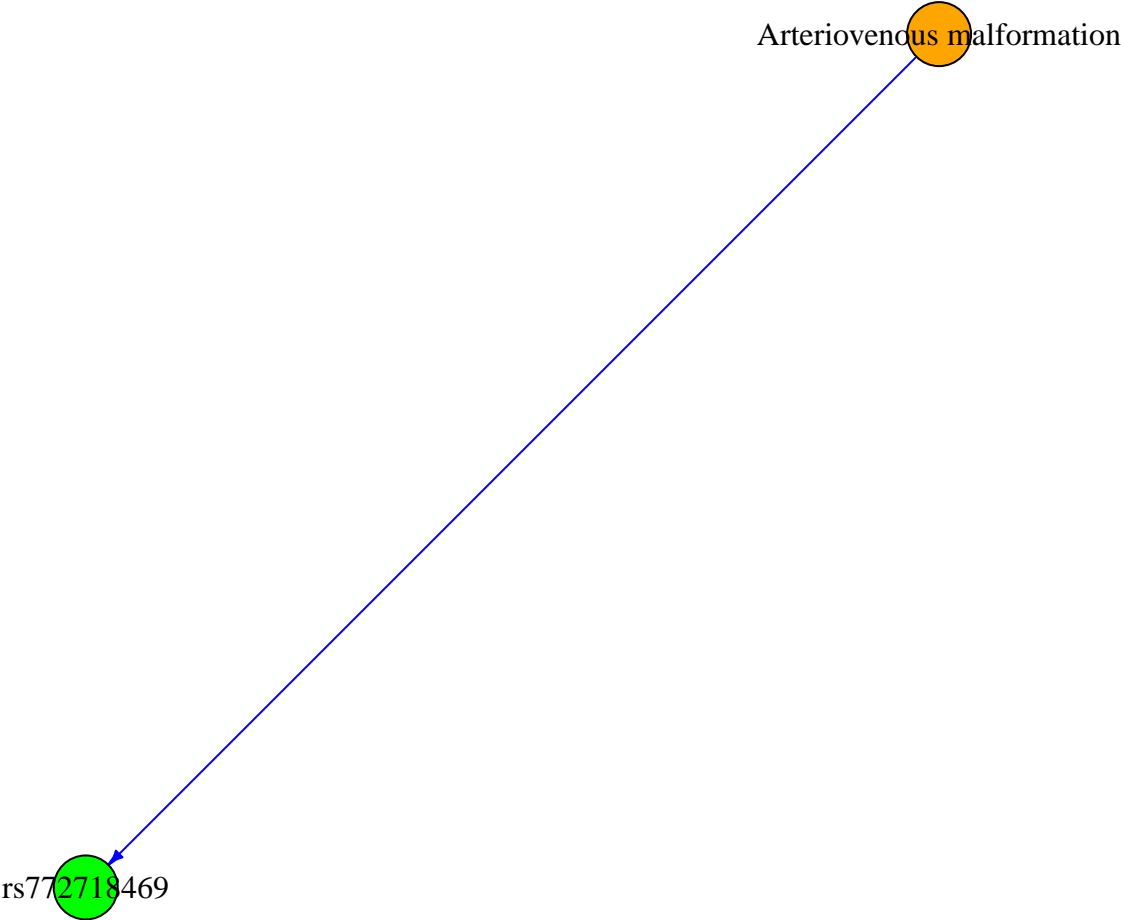

# Variant–Disease Network (Arthrogryposis multiplex congenita)

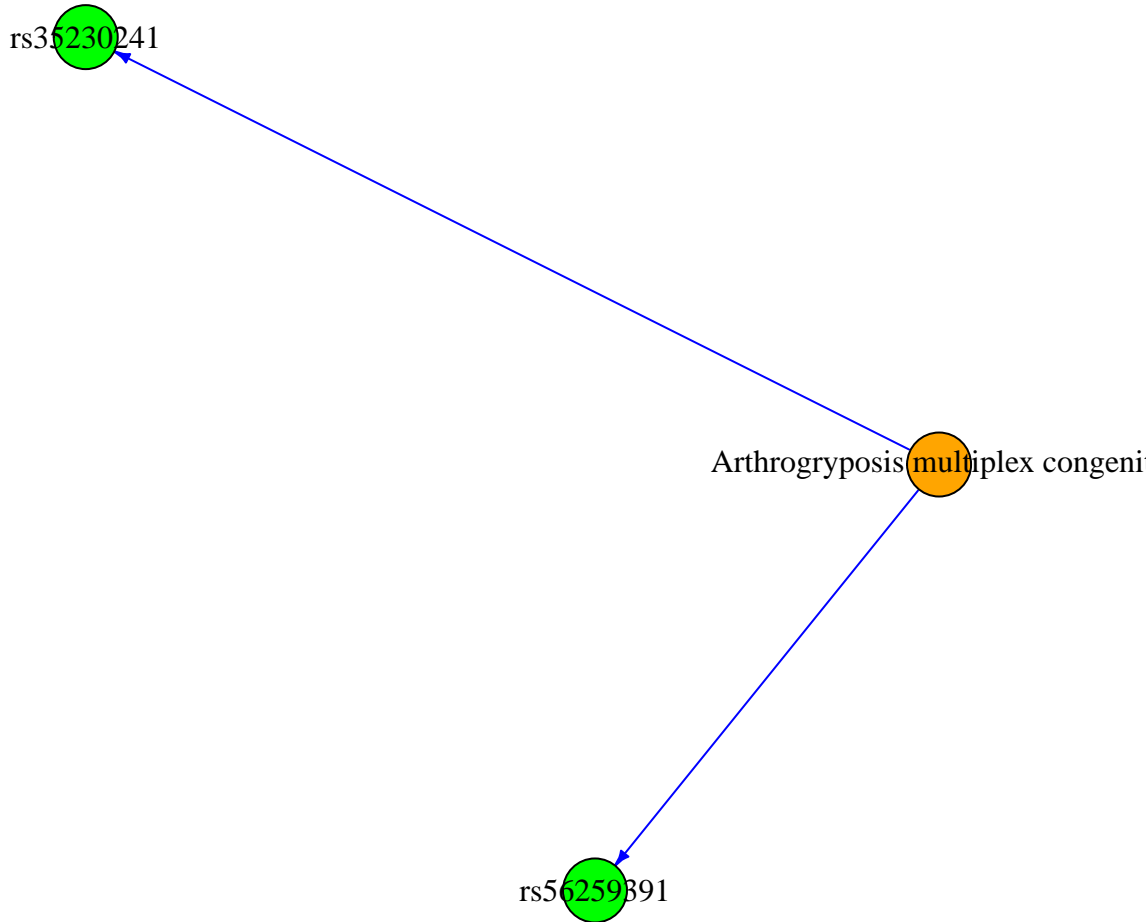

Variant–Disease Network (Aspartylglucosaminuria)

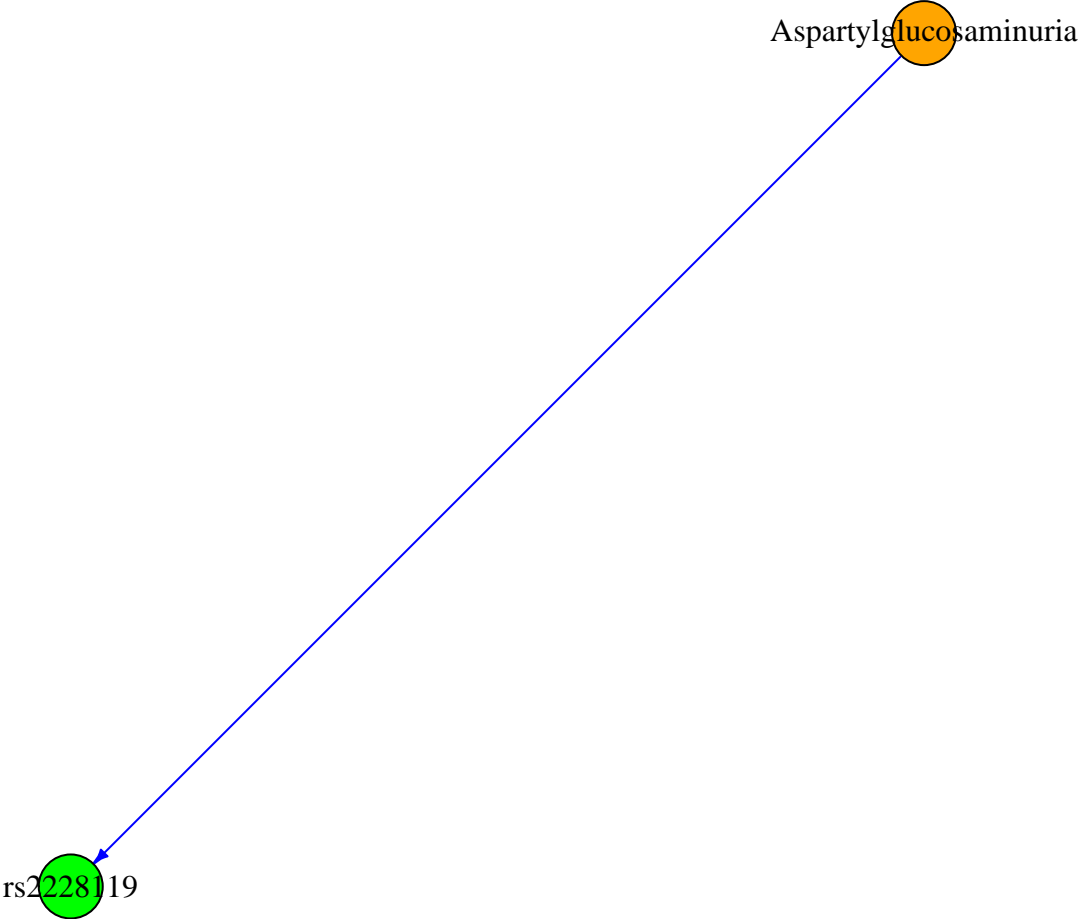

## Variant–Disease Network (Asplenia)

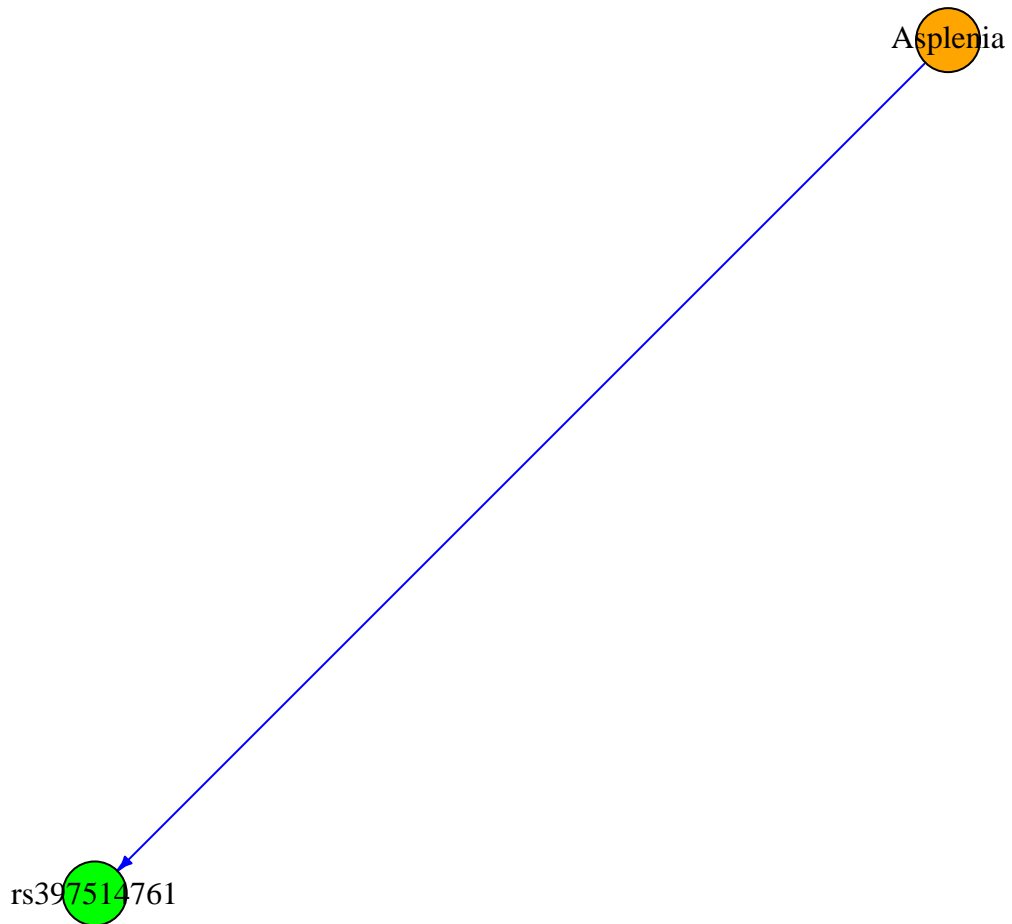

## Variant–Disease Network (Ataxia–telangiectasia syndrome)

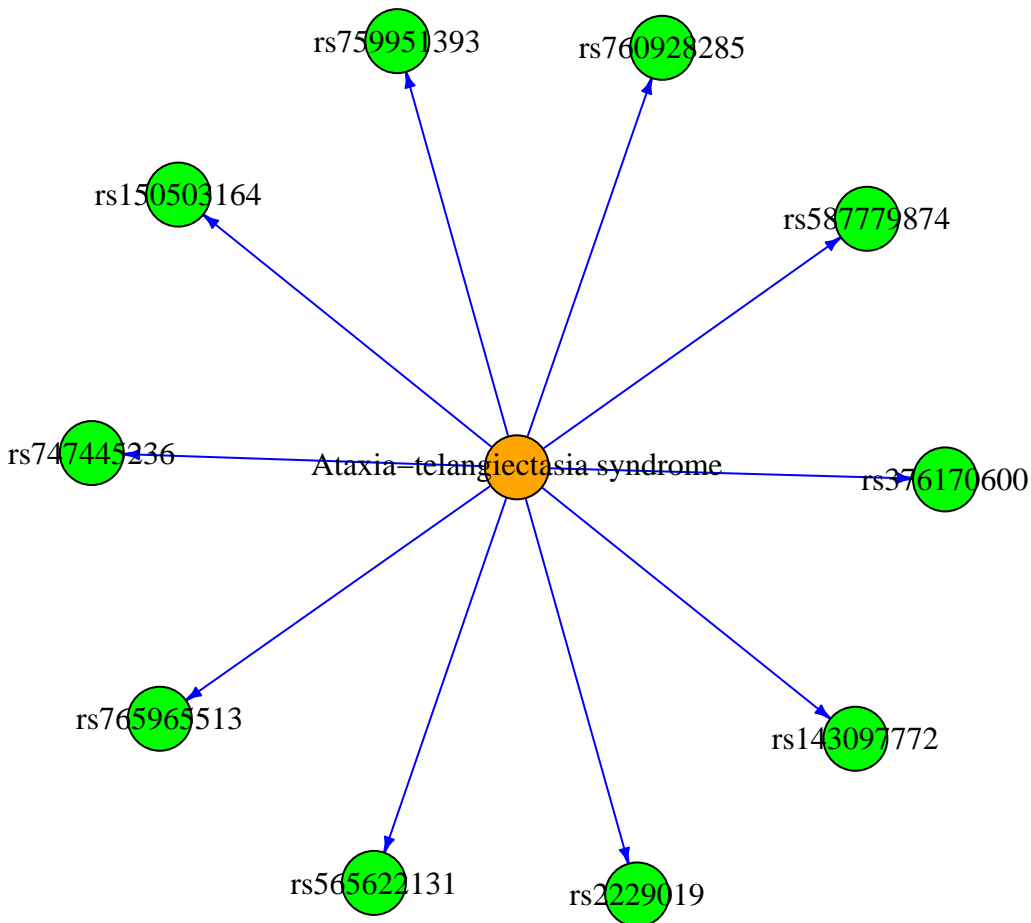

# Variant–Disease Network (Ataxia–telangiectasia–like disorder 1)

rs374685908

Ataxia–telangiectasia–like disorder

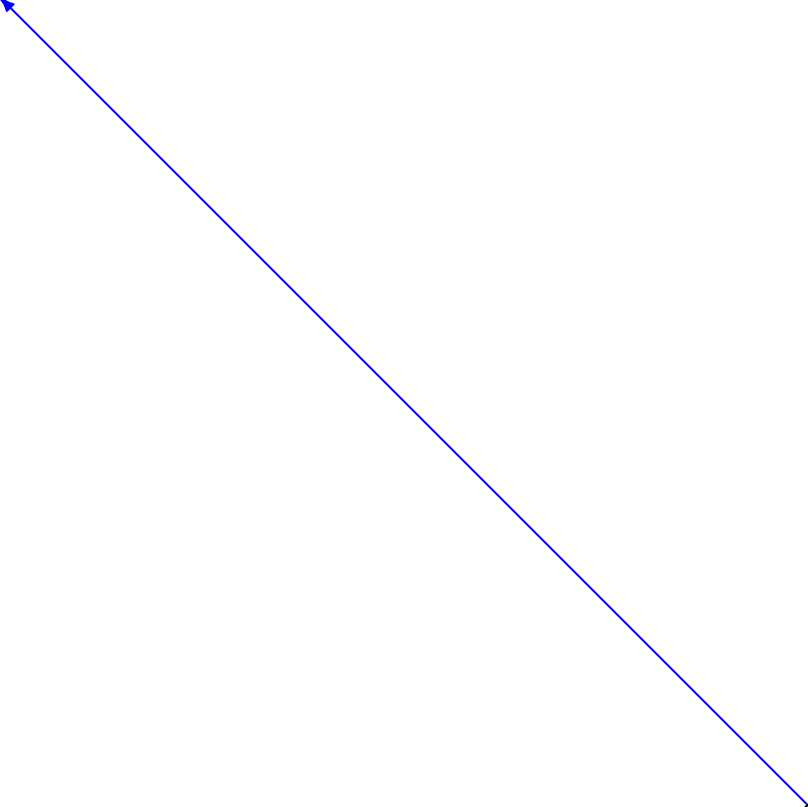

Variant–Disease Network (Atrophia bulborum hereditaria)

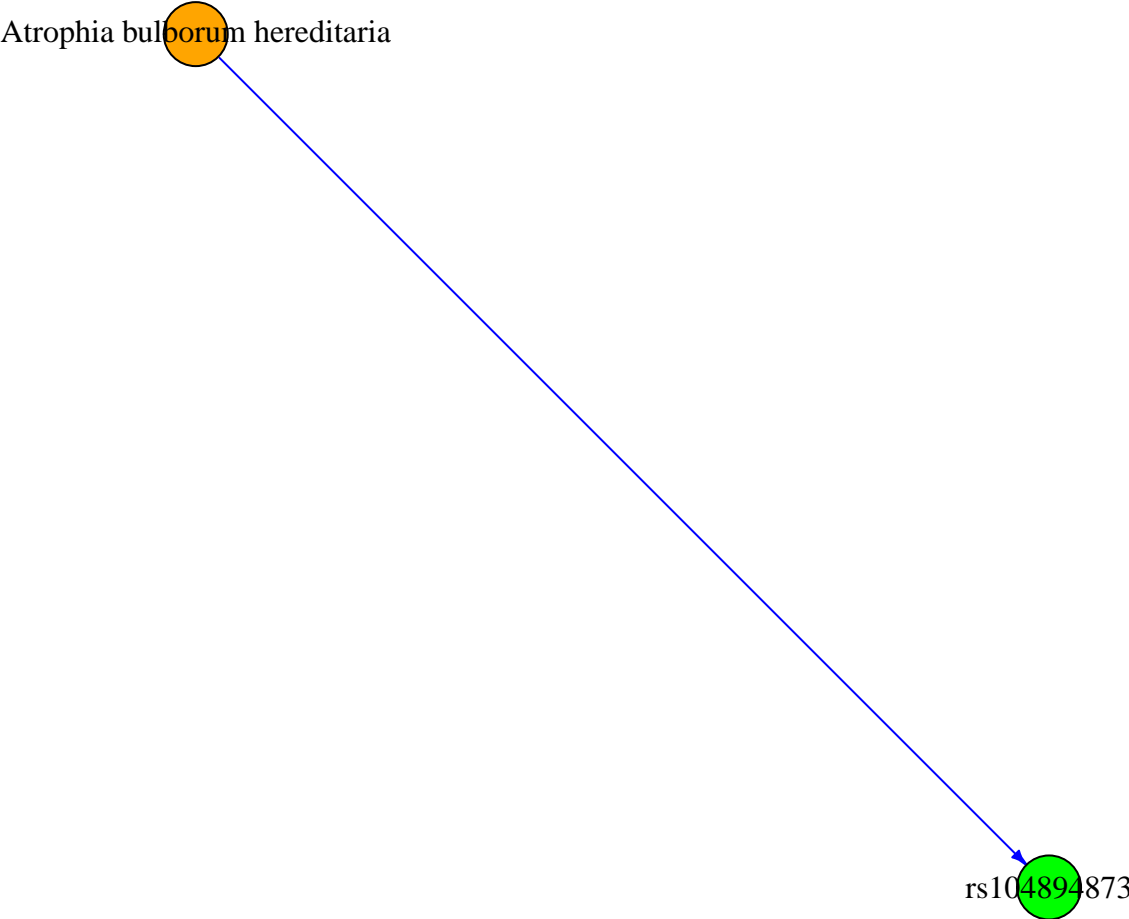

Variant–Disease Network (Atypical hemolytic uremic syndrome)

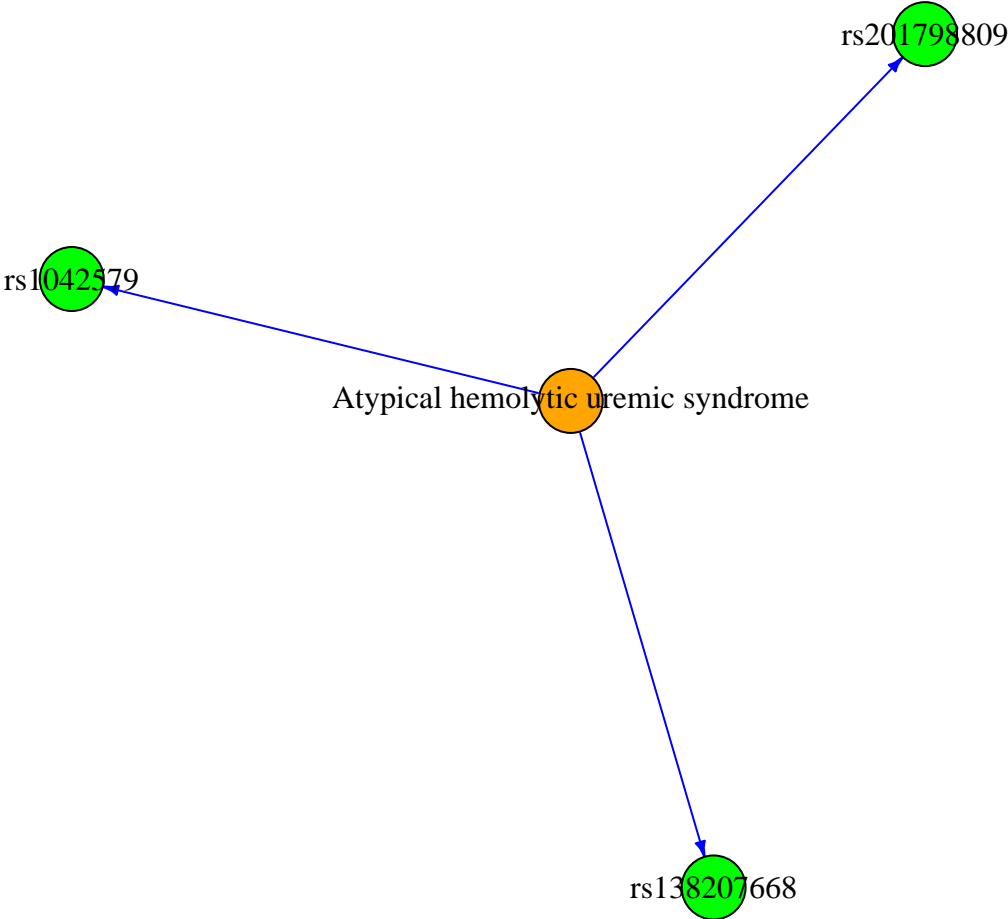



**Variant–Disease Network (Atypical hemolytic–uremic syndrome 4)**

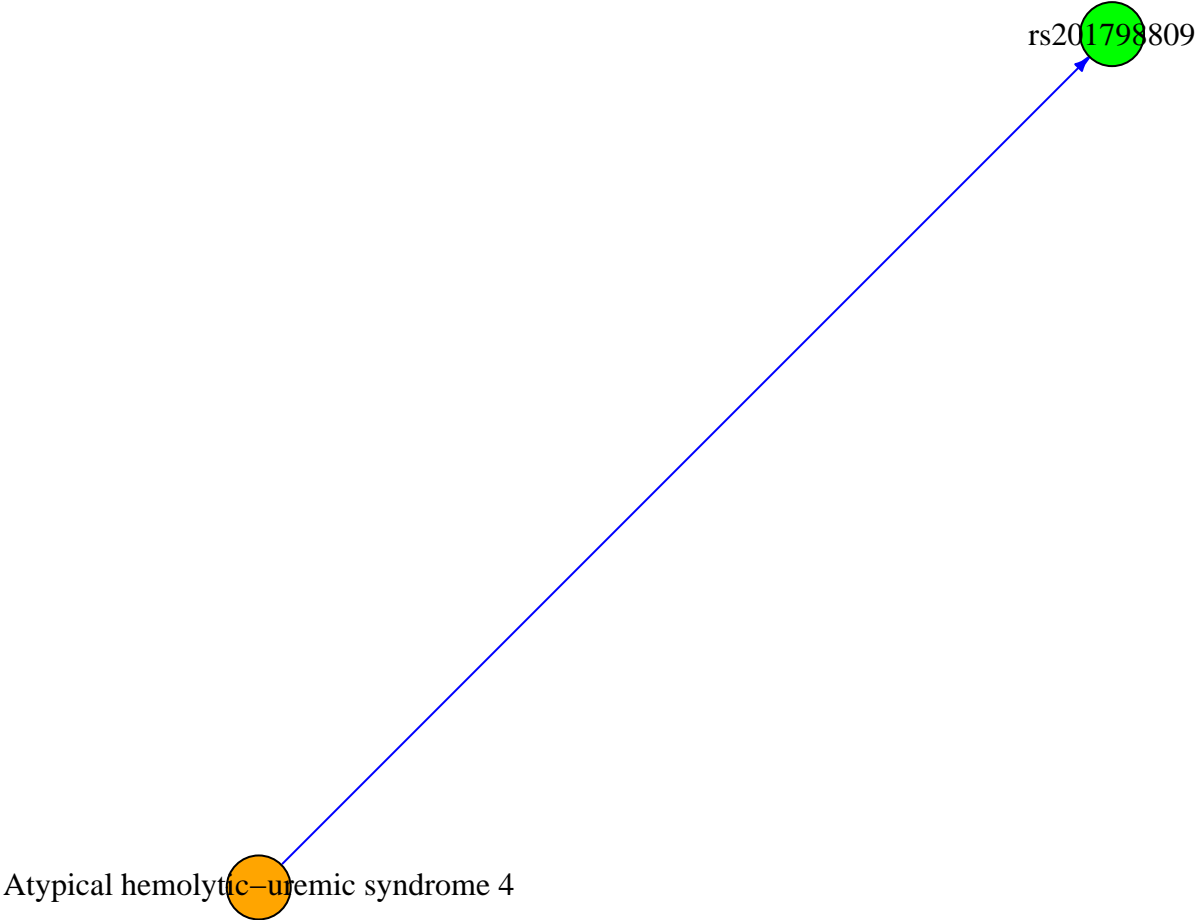

## Variant–Disease Network (Aural atresia)

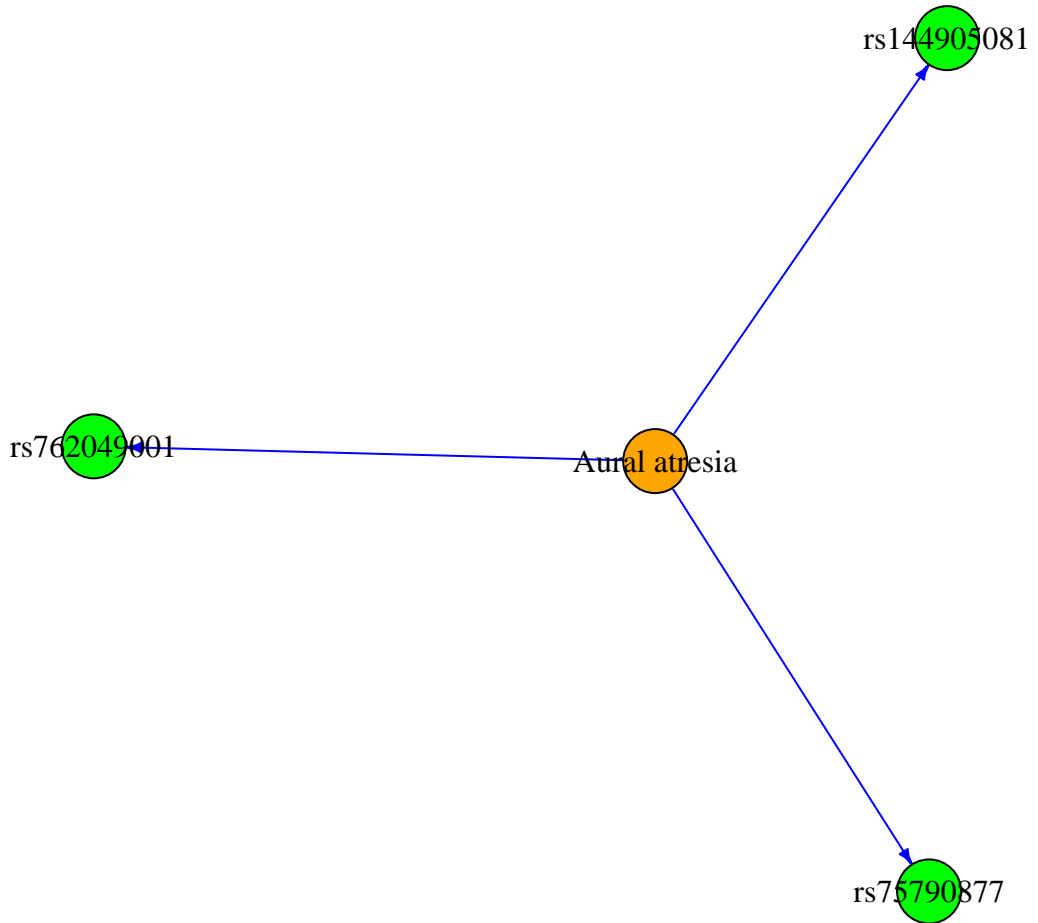

# Variant–Disease Network (Auriculocondylar syndrome)

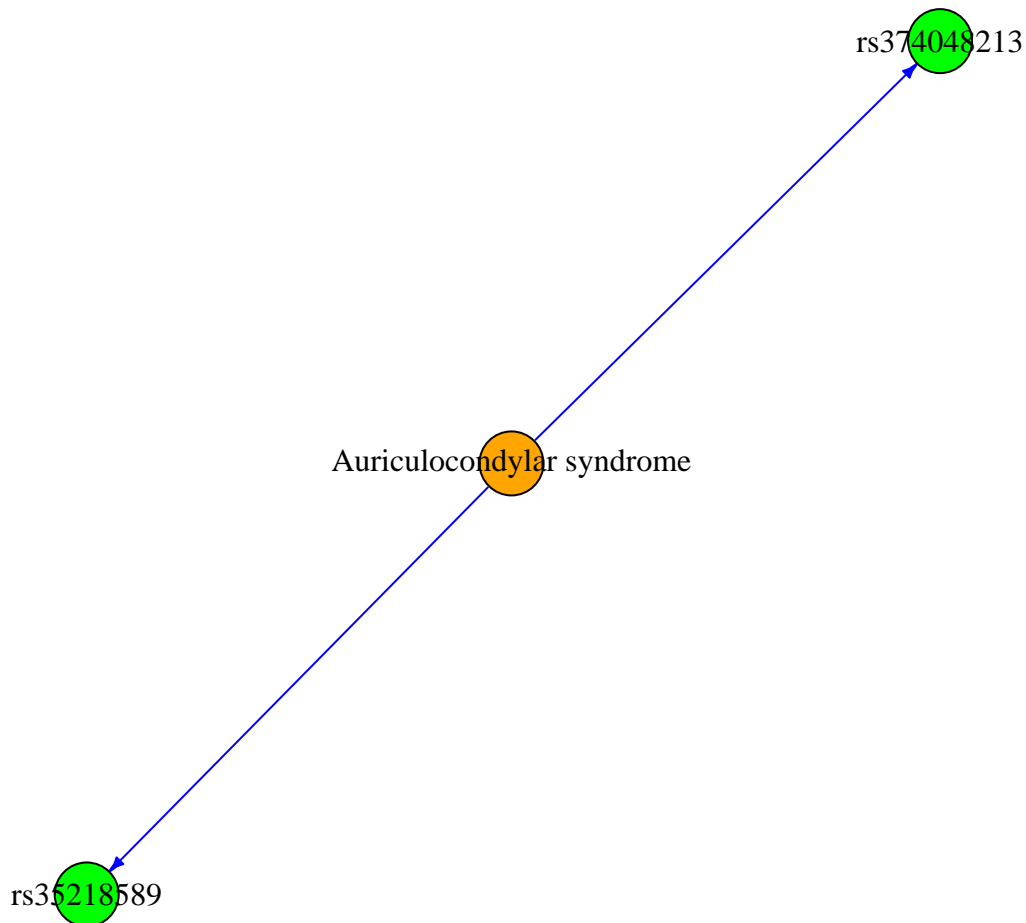

## Variant–Disease Network (Autoinflammation)

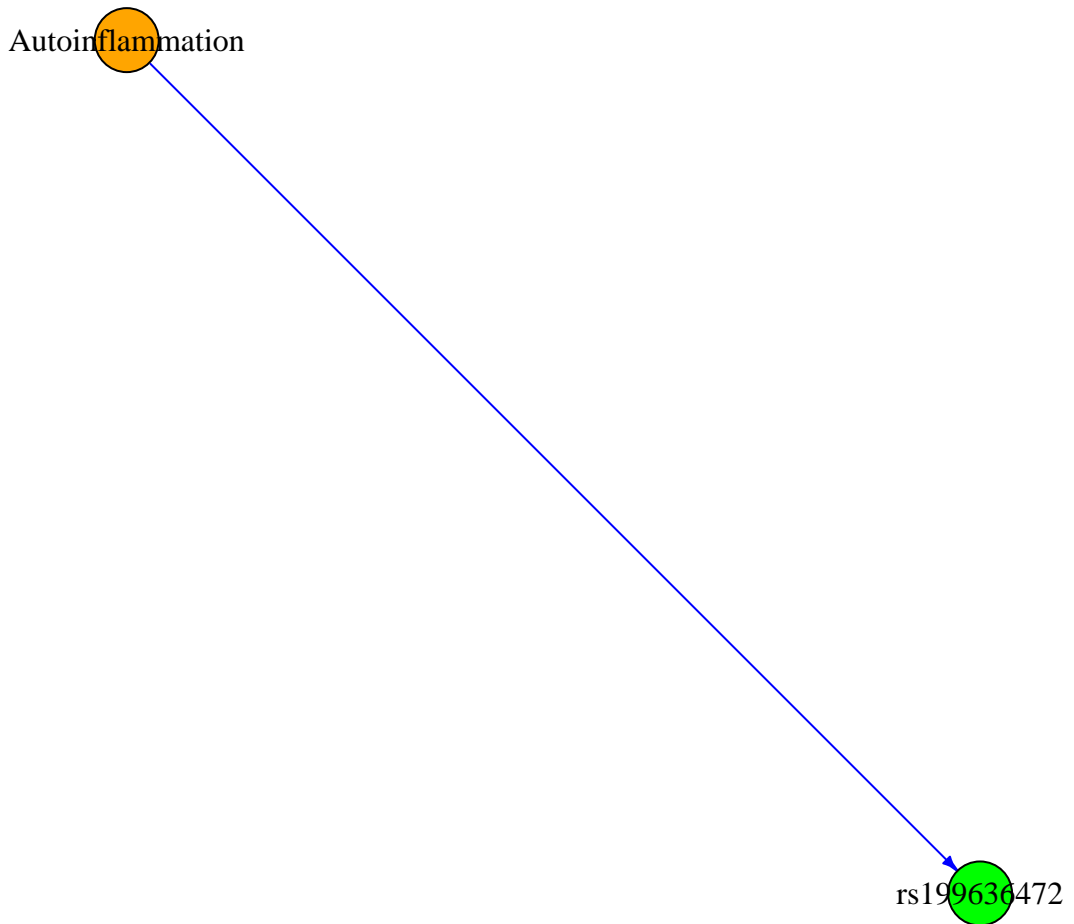

Variant–Disease Network (Autosomal recessive centronuclear myopathy)

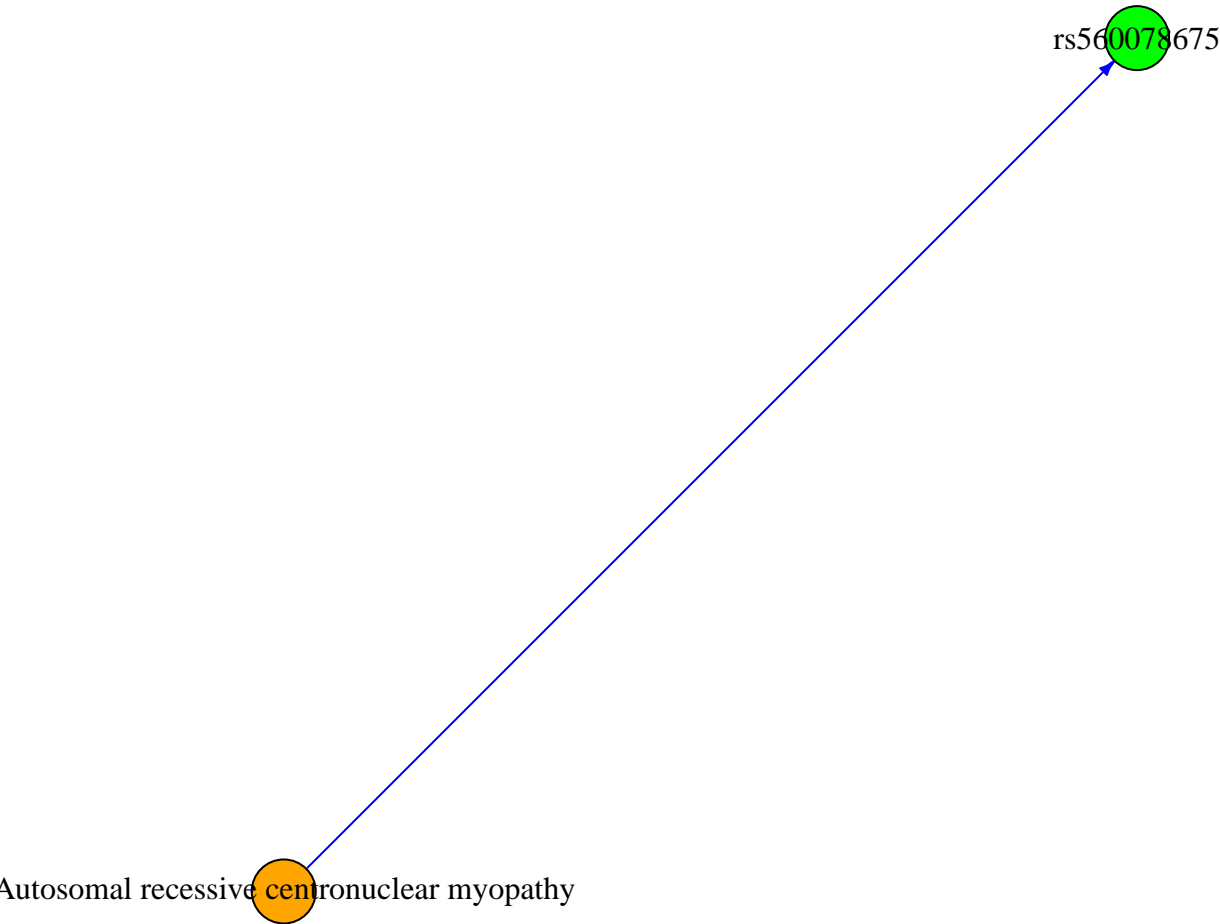

# Variant–Disease Network (Autosomal recessive cerebellar ataxia)

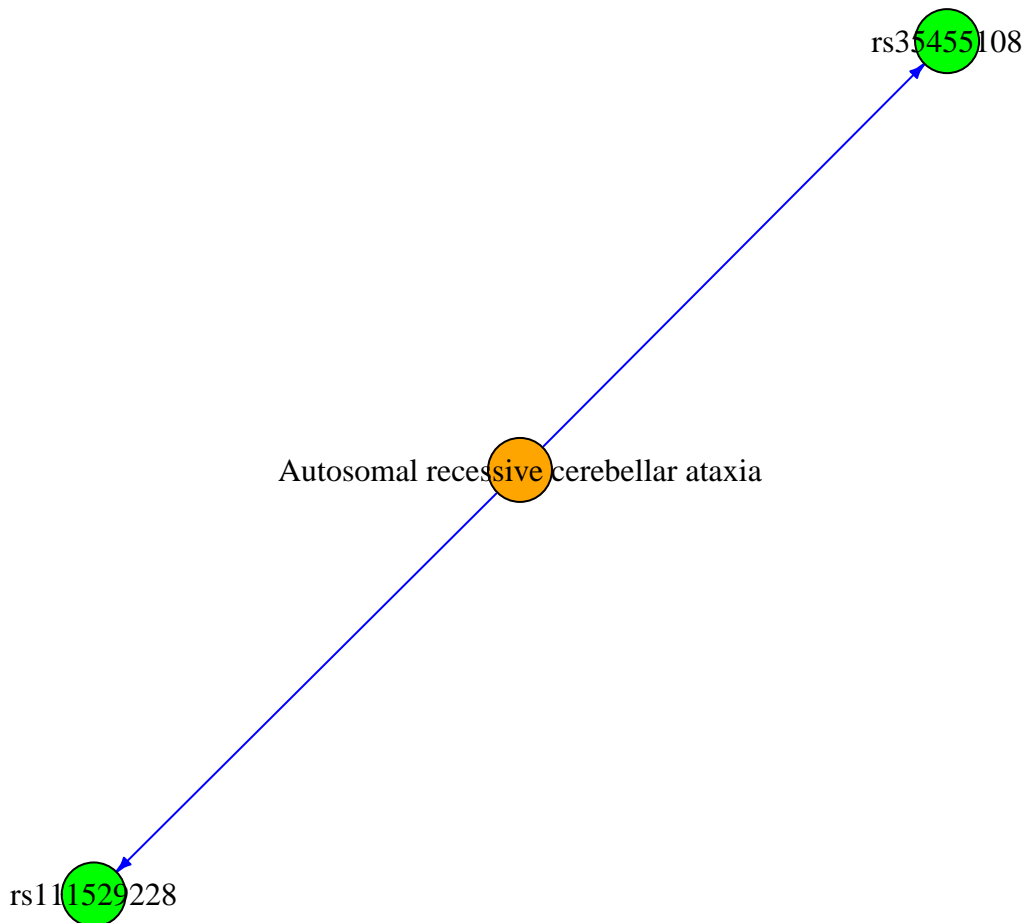

Variant–Disease Network (Autosomal recessive congenital ichthyosis 4B

Autosomal recessive congenital ichthyosis 4B

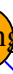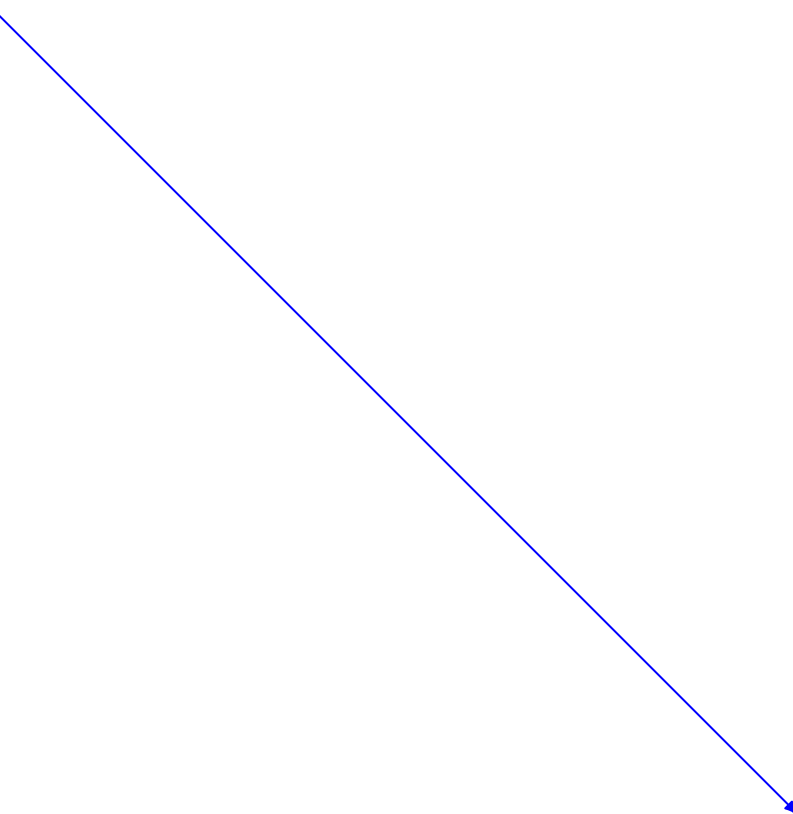

rs137853289

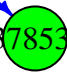

**Variant–Disease Network (Autosomal recessive congenital ichthyosis 6)**

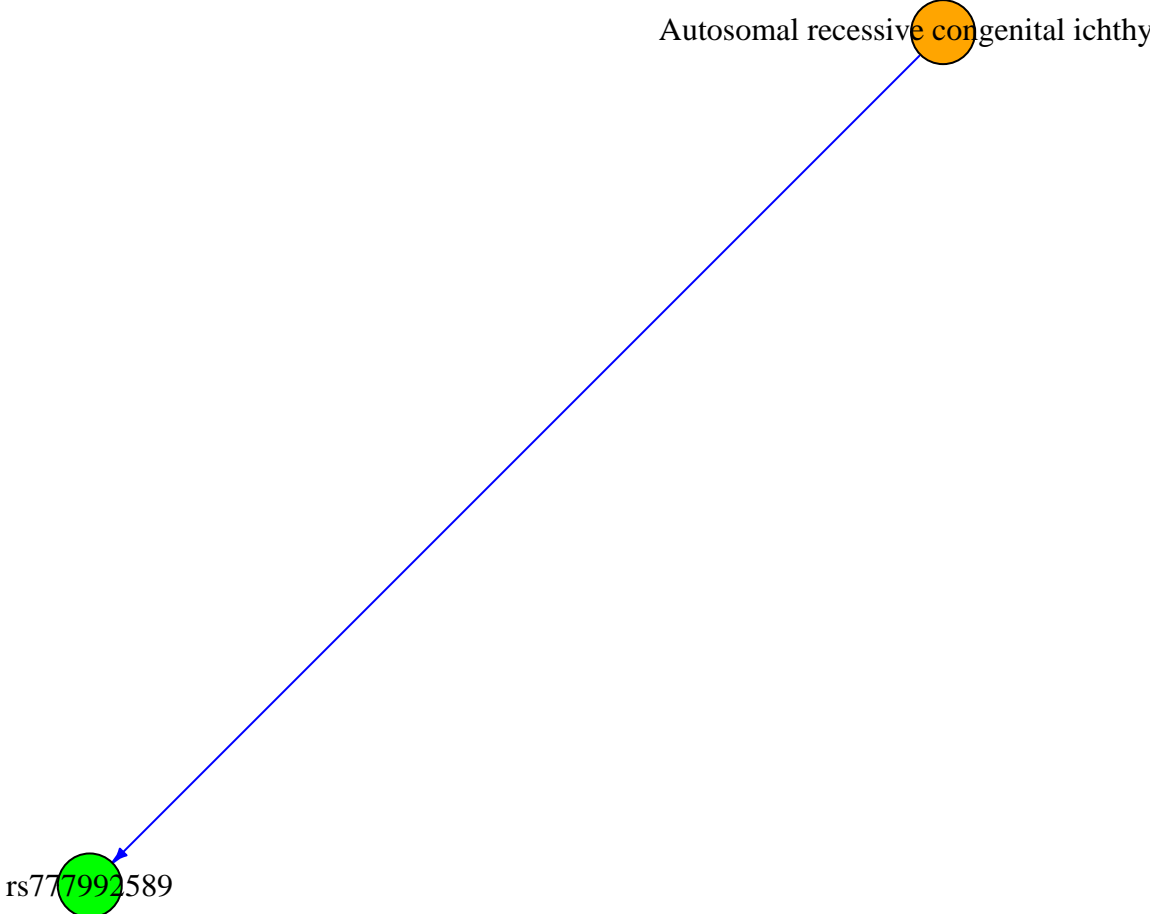



# Variant–Disease Network (Autosomal recessive cutis laxa type 1B)

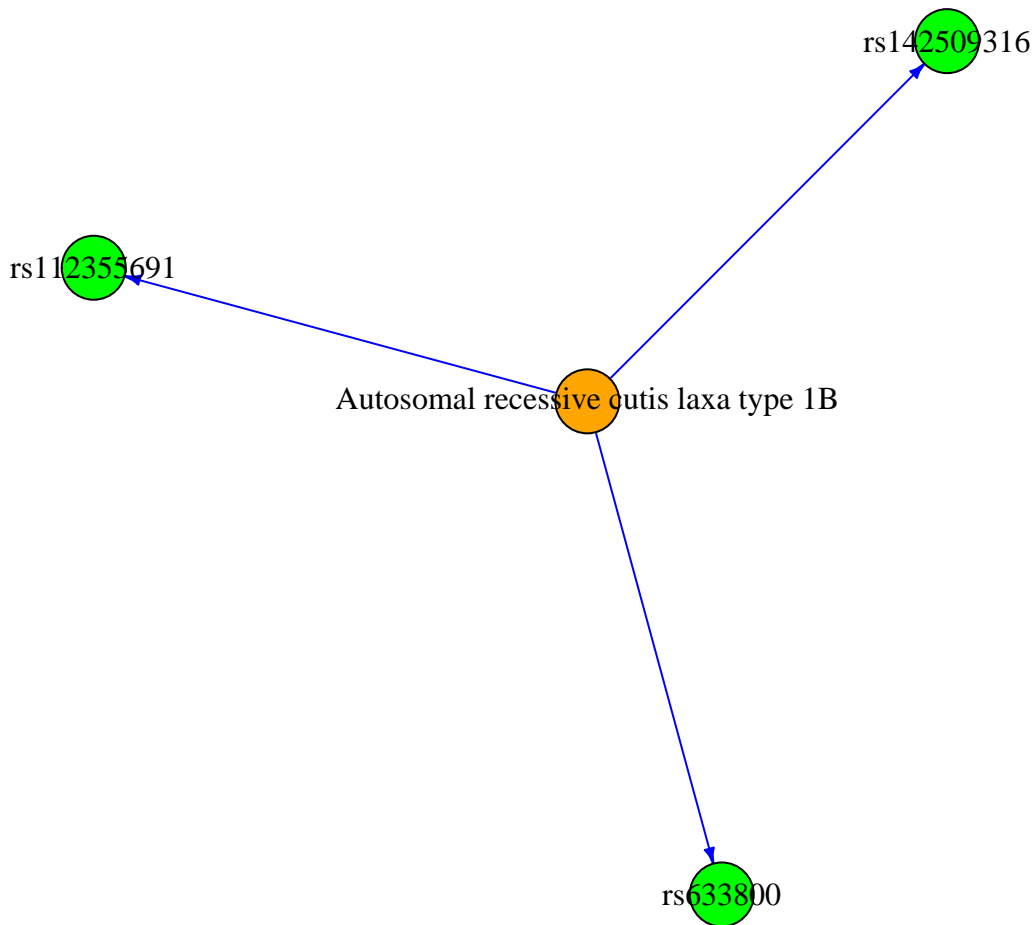

**Variant–Disease Network (Bardet–Biedl syndrome)**

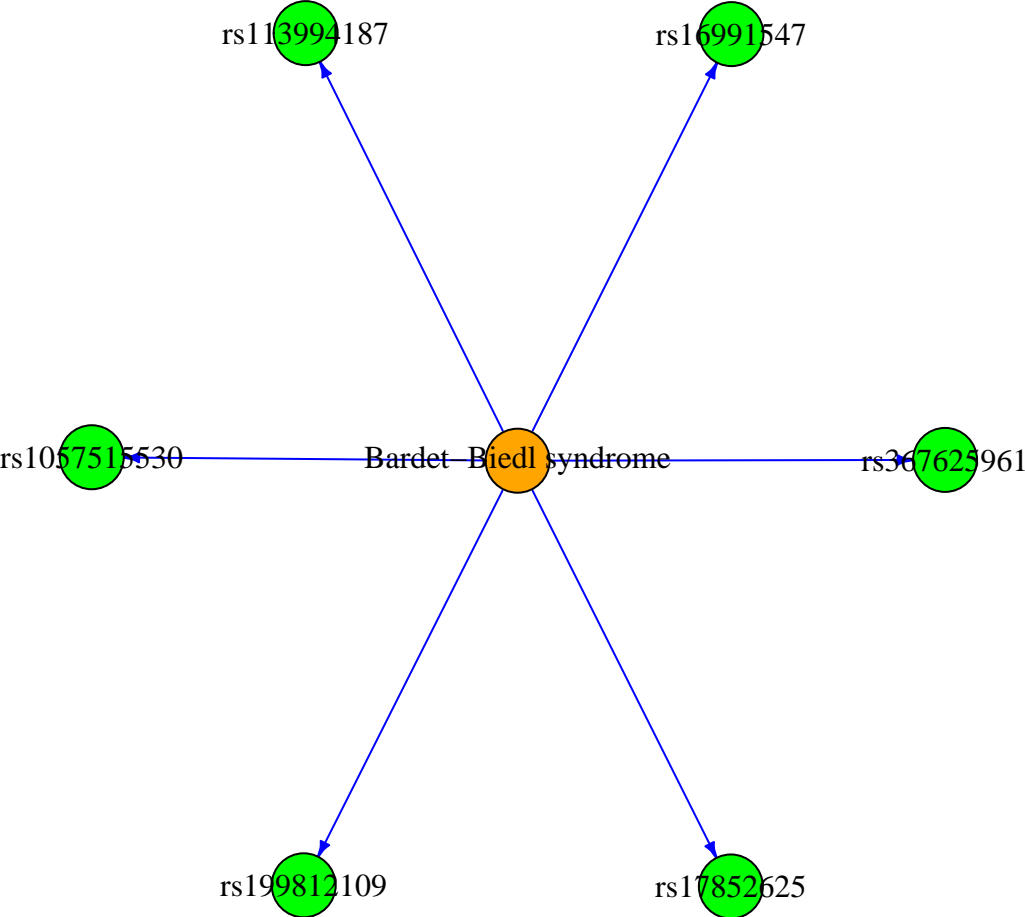

**Variant–Disease Network (Bardet–Biedl syndrome 10)**

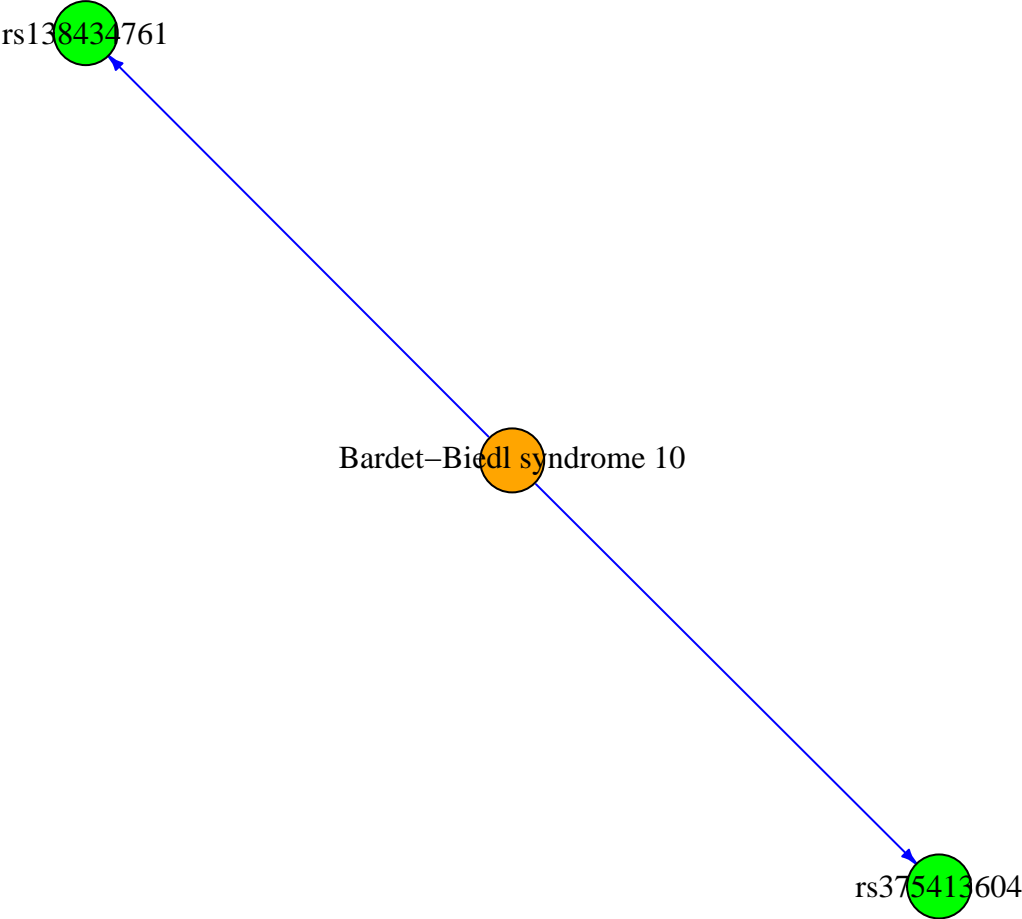

Variant–Disease Network (Bardet–Biedl syndrome 2)

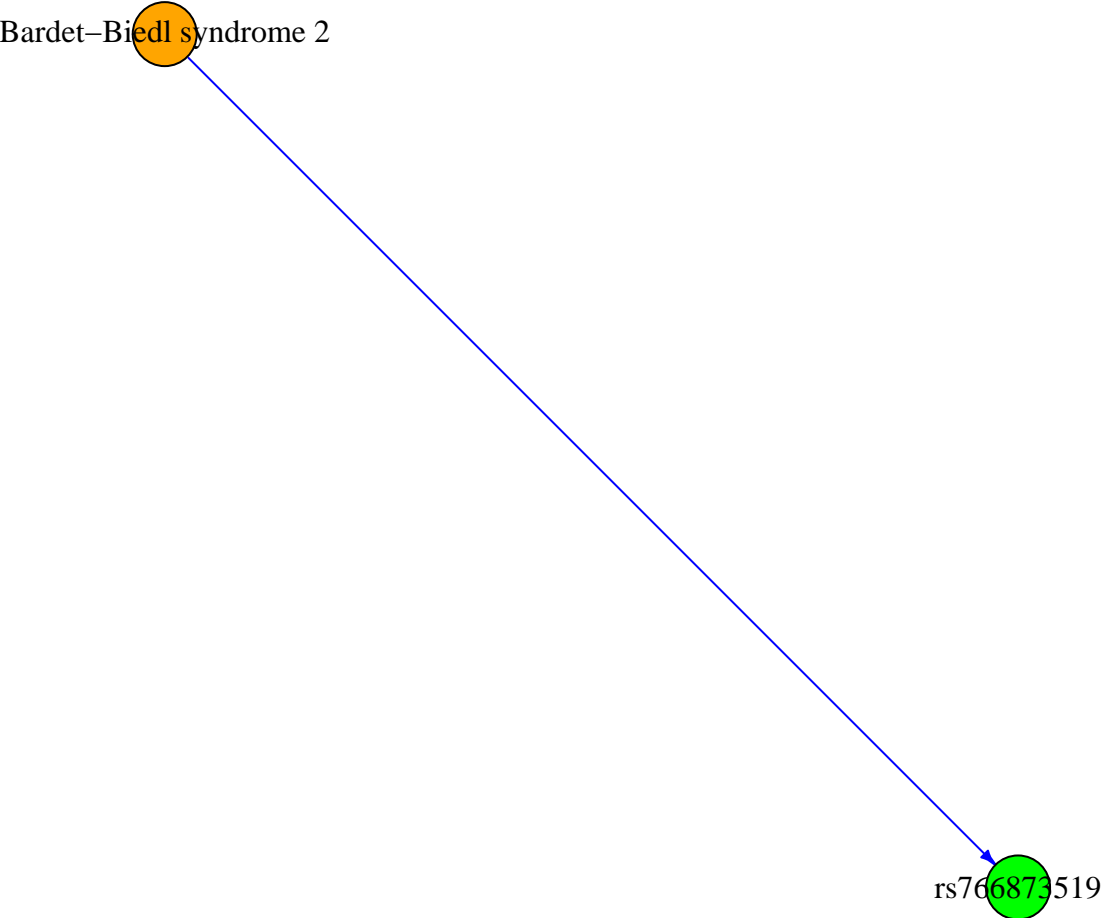

## Variant–Disease Network (Bare lymphocyte syndrome 2)

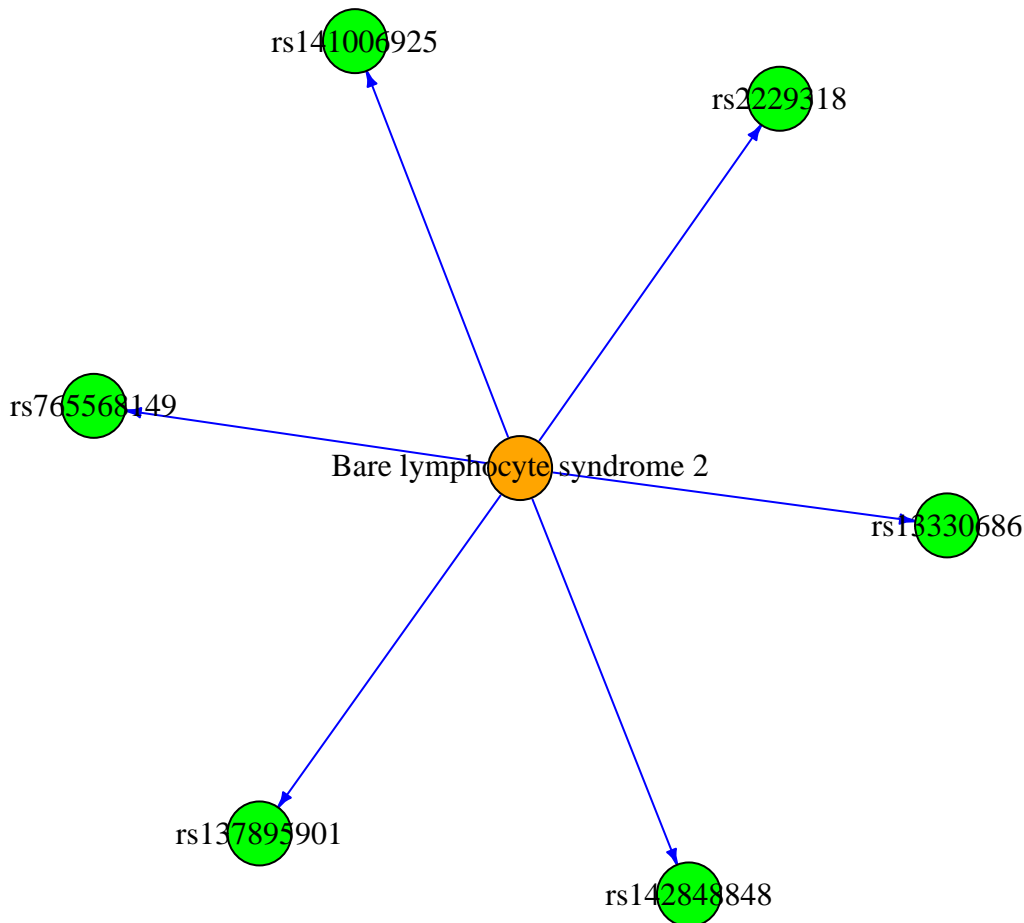

# Variant–Disease Network (Beaulieu–Boycott–Innes syndrome)

rs772533643

Beaulieu–Boycott–Innes syndrome



**Variant–Disease Network (Beckwith–Wiedemann syndrome)**

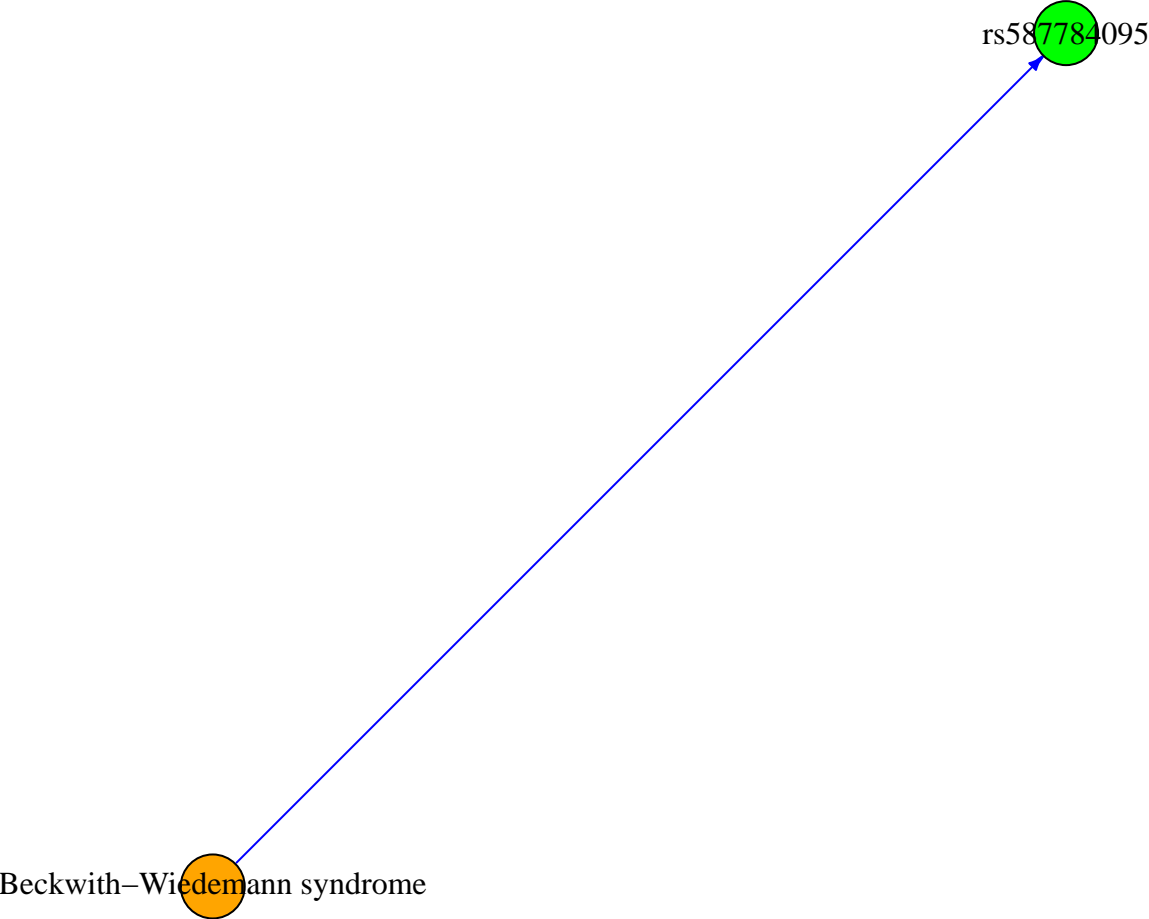

Variant–Disease Network (Benign familial neonatal seizures)

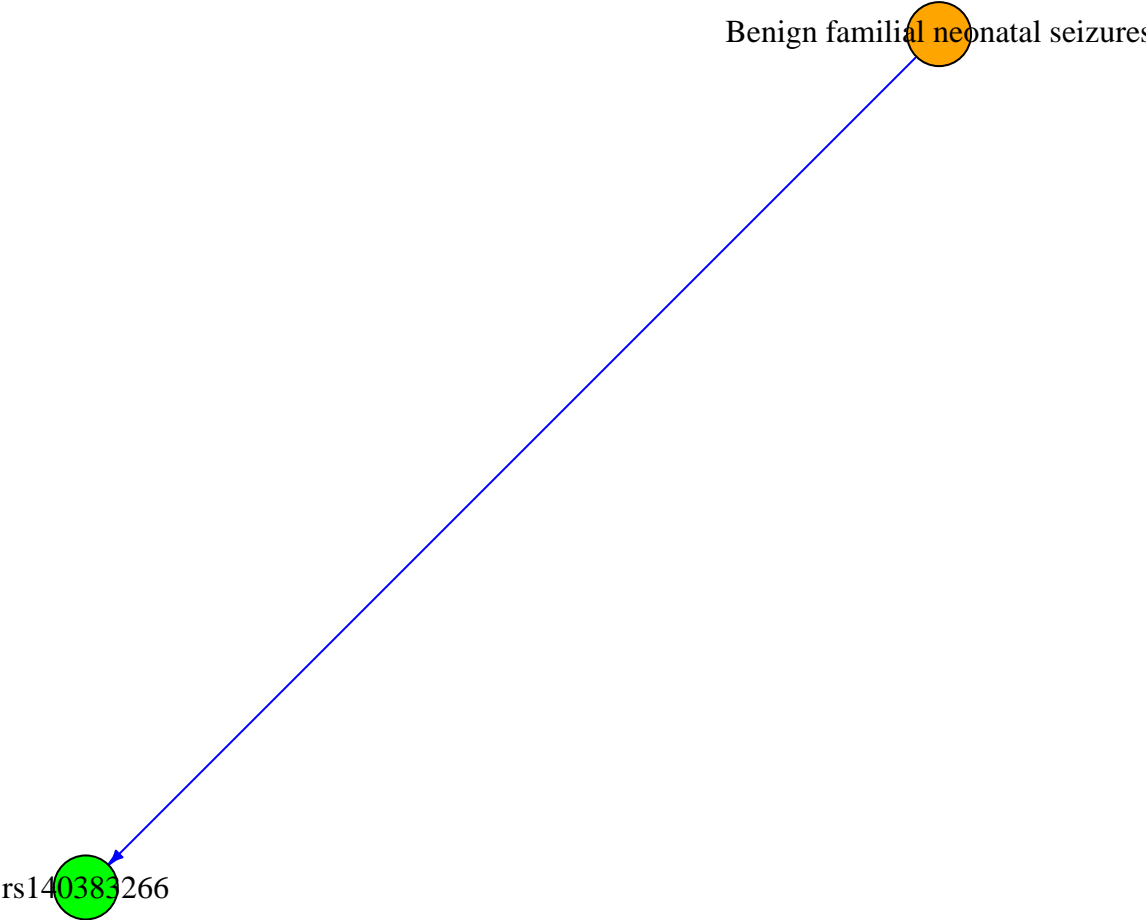



## Variant–Disease Network (Benign familial neonatal seizures 2)

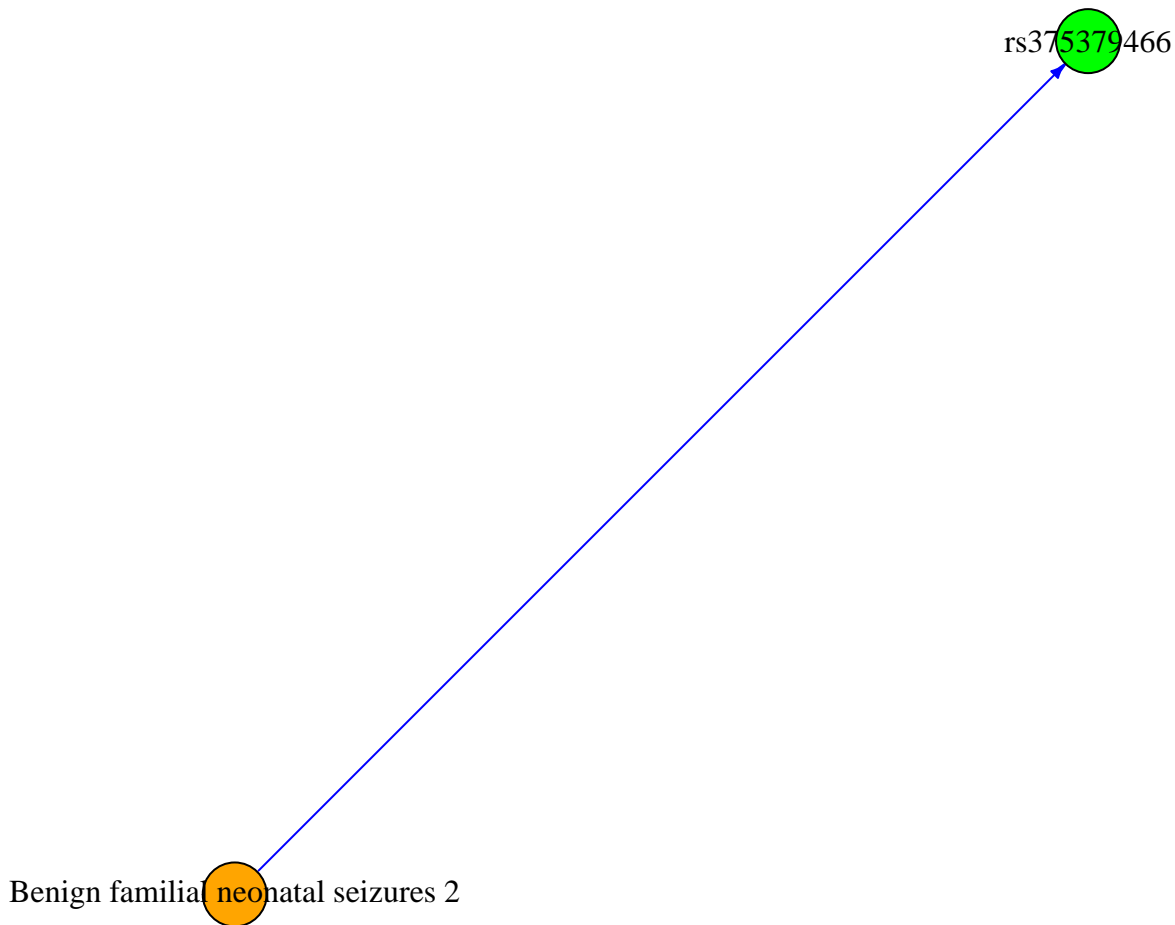

## Variant–Disease Network (beta Thalassemia)

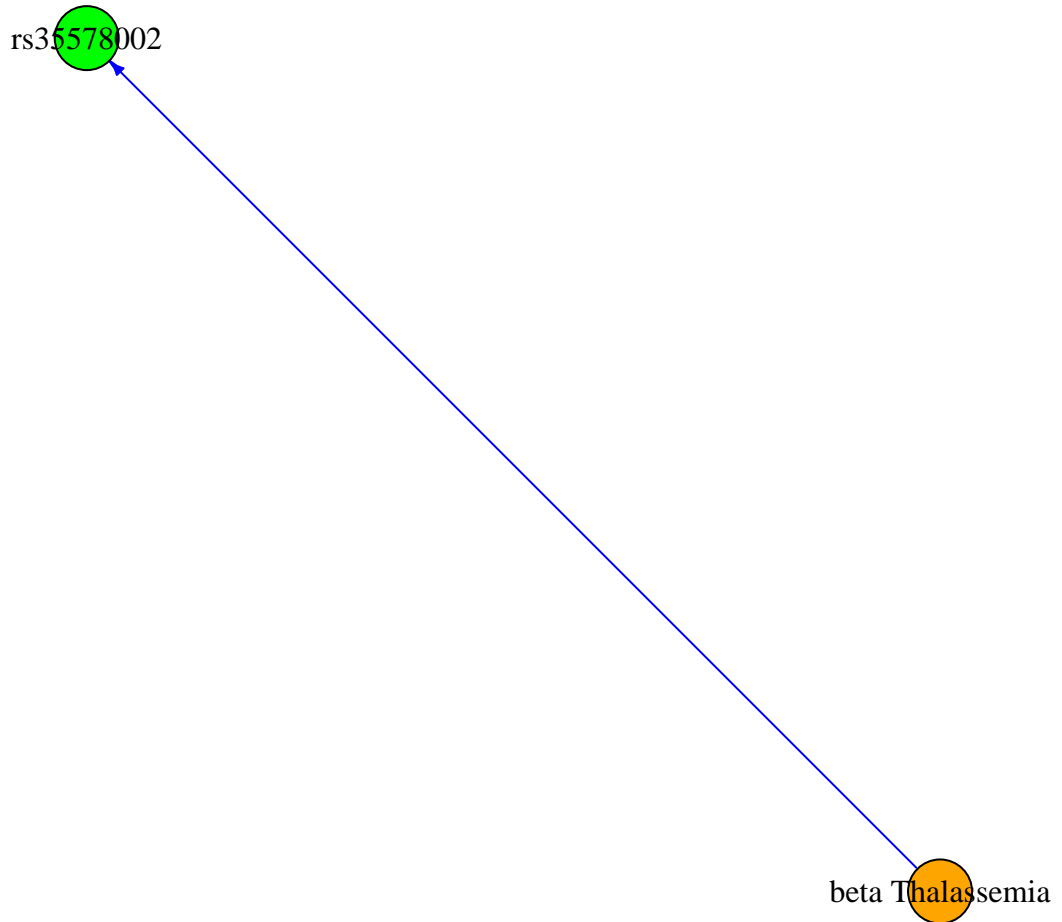

**Variant–Disease Network (Bethlem myopathy 1)**

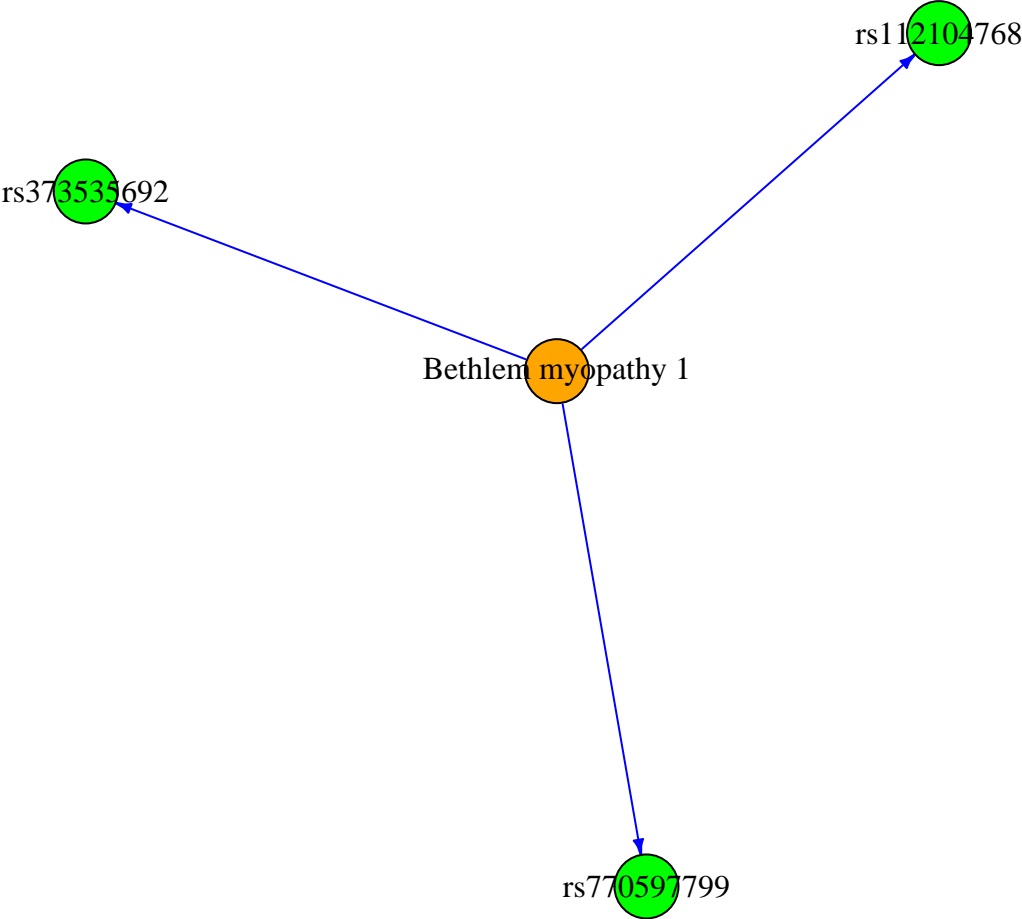

**Variant–Disease Network (Bethlem myopathy 2)**

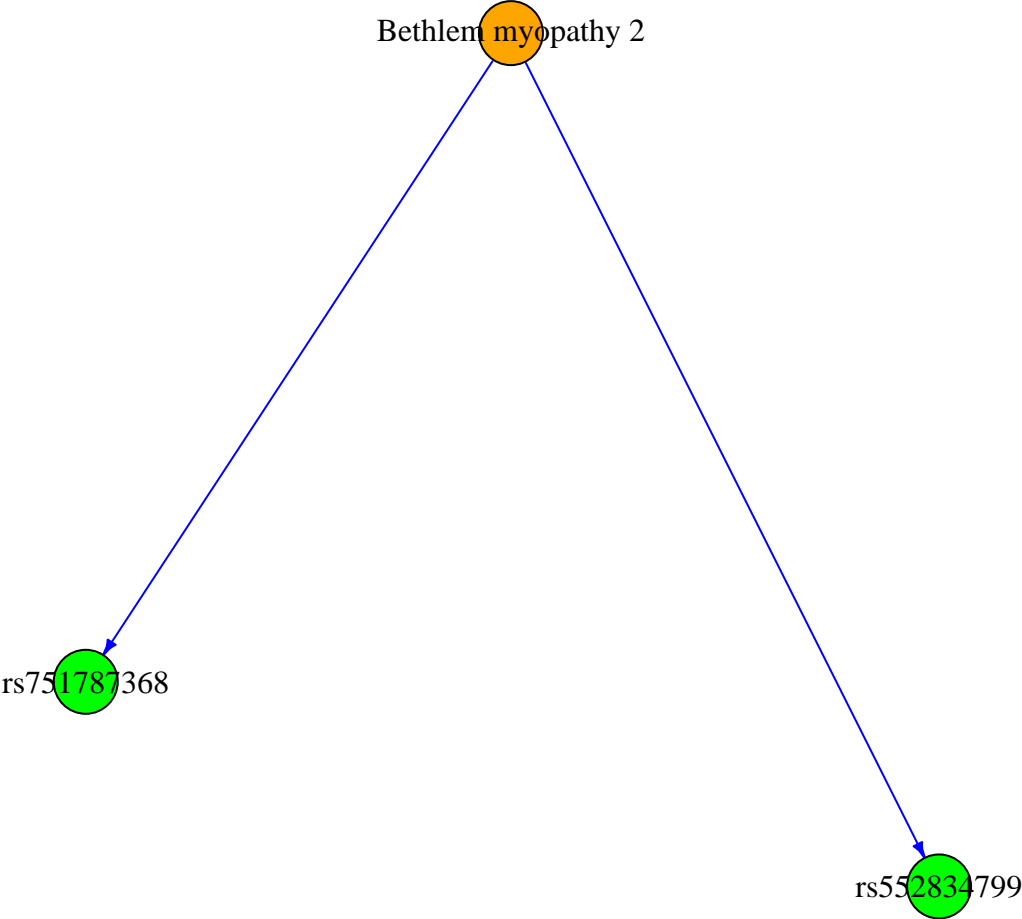

**Variant–Disease Network (Bifunctional peroxisomal enzyme deficiency)**

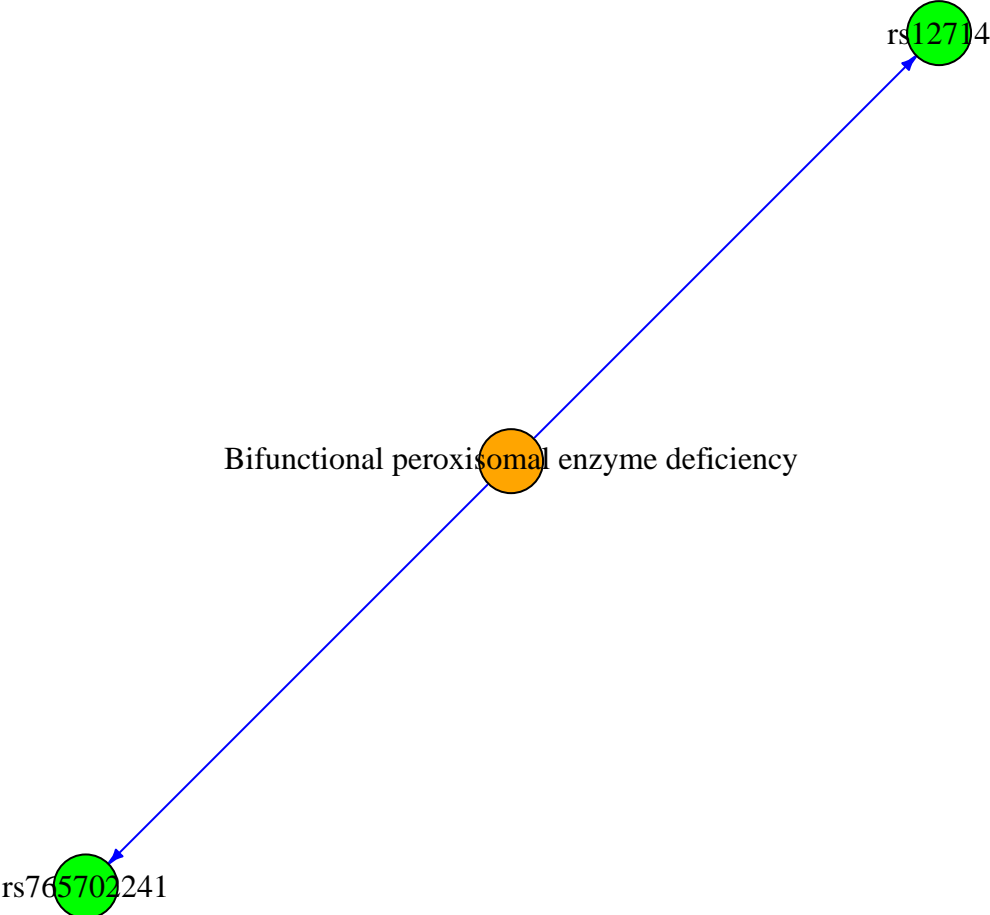

## Variant–Disease Network (Bilateral right–sidedness sequence)

rs121434422

Bilateral right–sidedness sequence



## Variant–Disease Network (Bladder cancer)

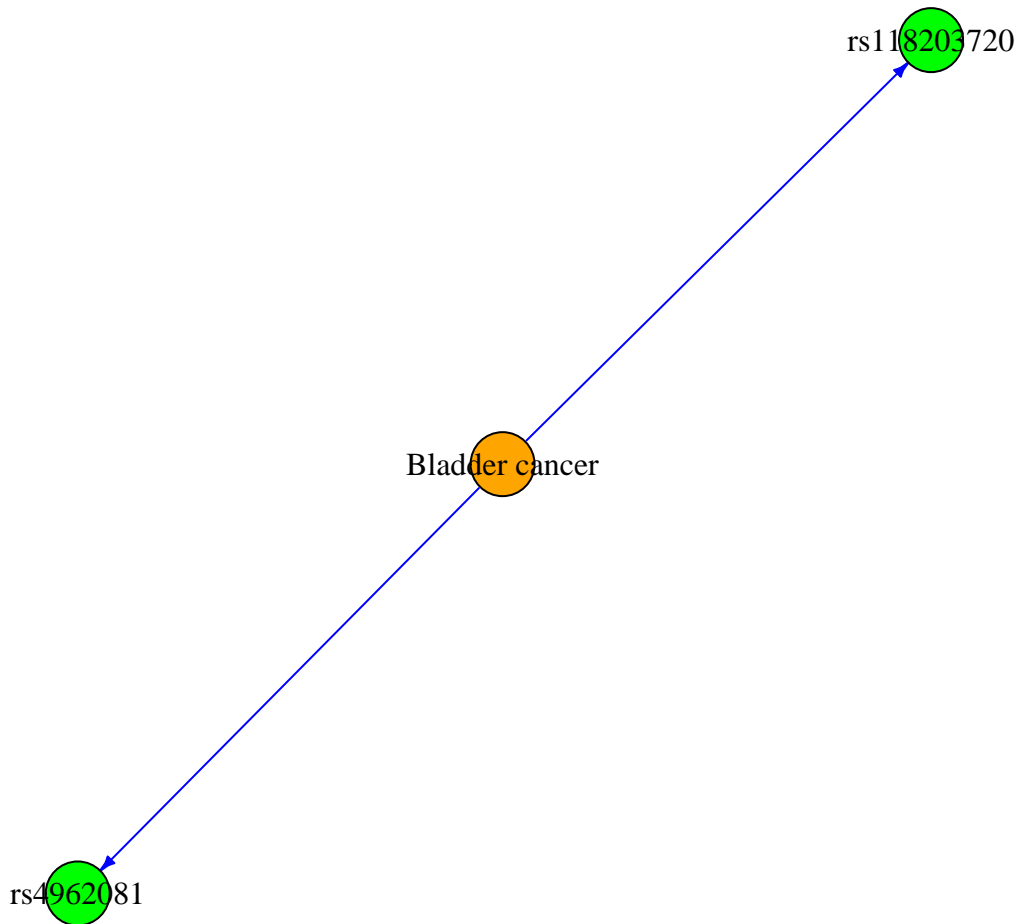

## Variant–Disease Network (Blau syndrome)

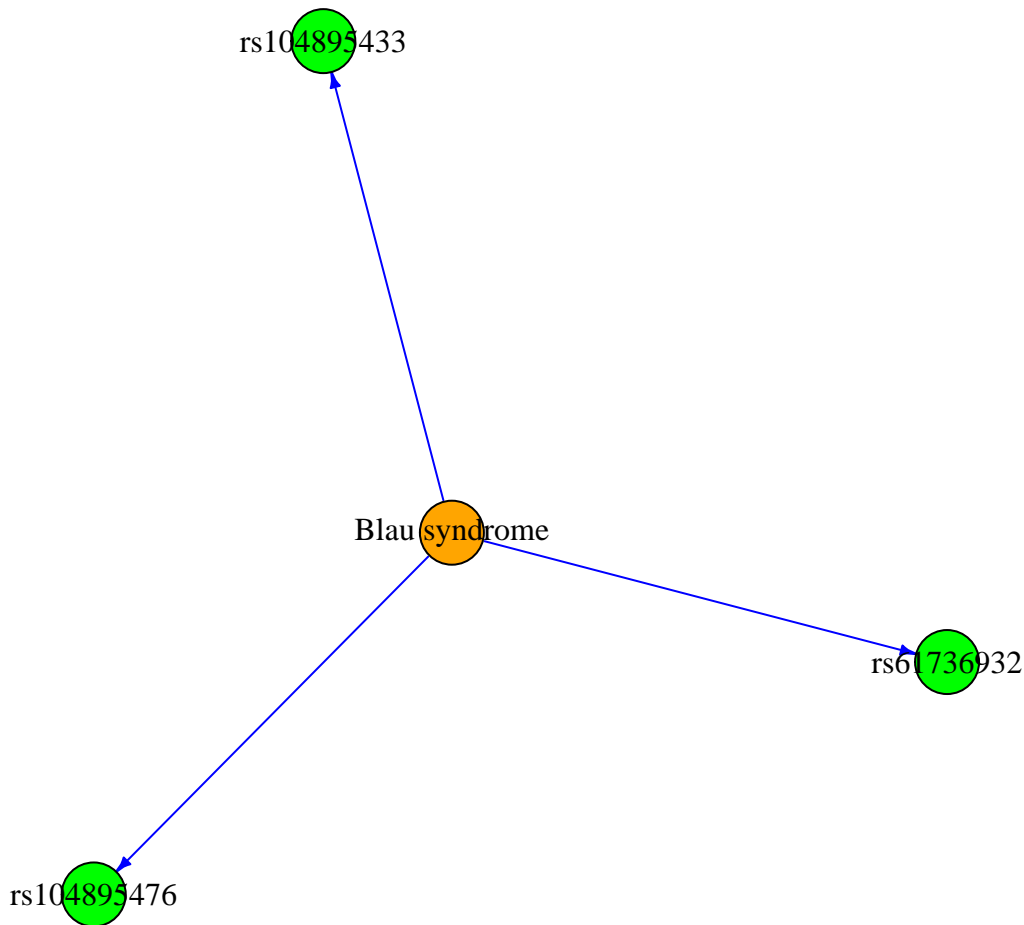



## Variant-Disease Network (Bloom syndrome)

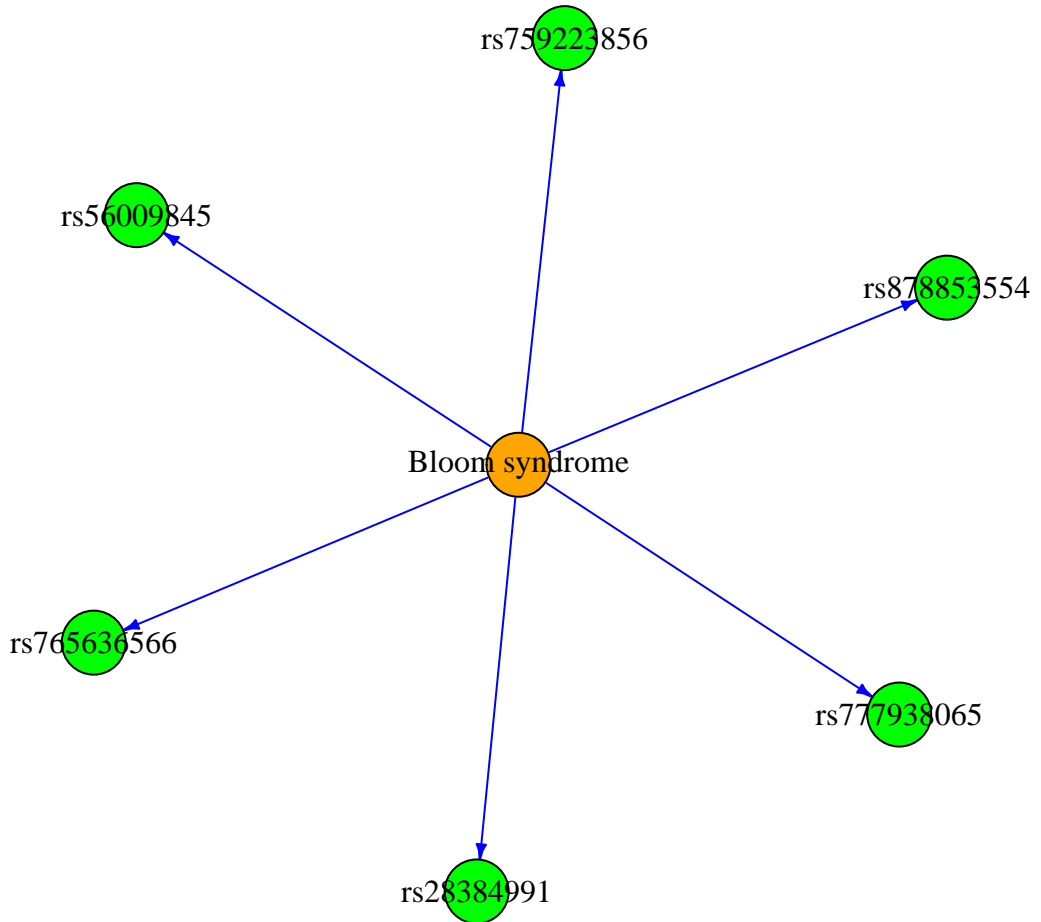

Variant–Disease Network (Bone fragility with contractures)

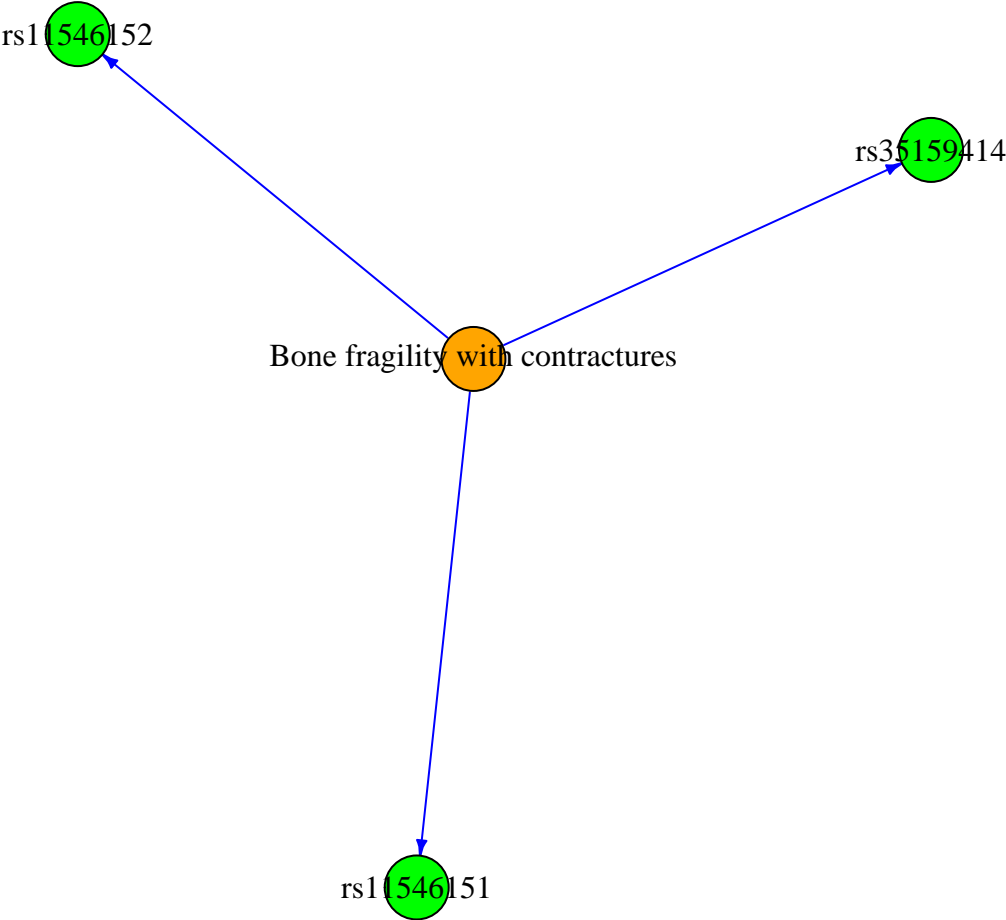

## Variant–Disease Network (Brachydactyly)

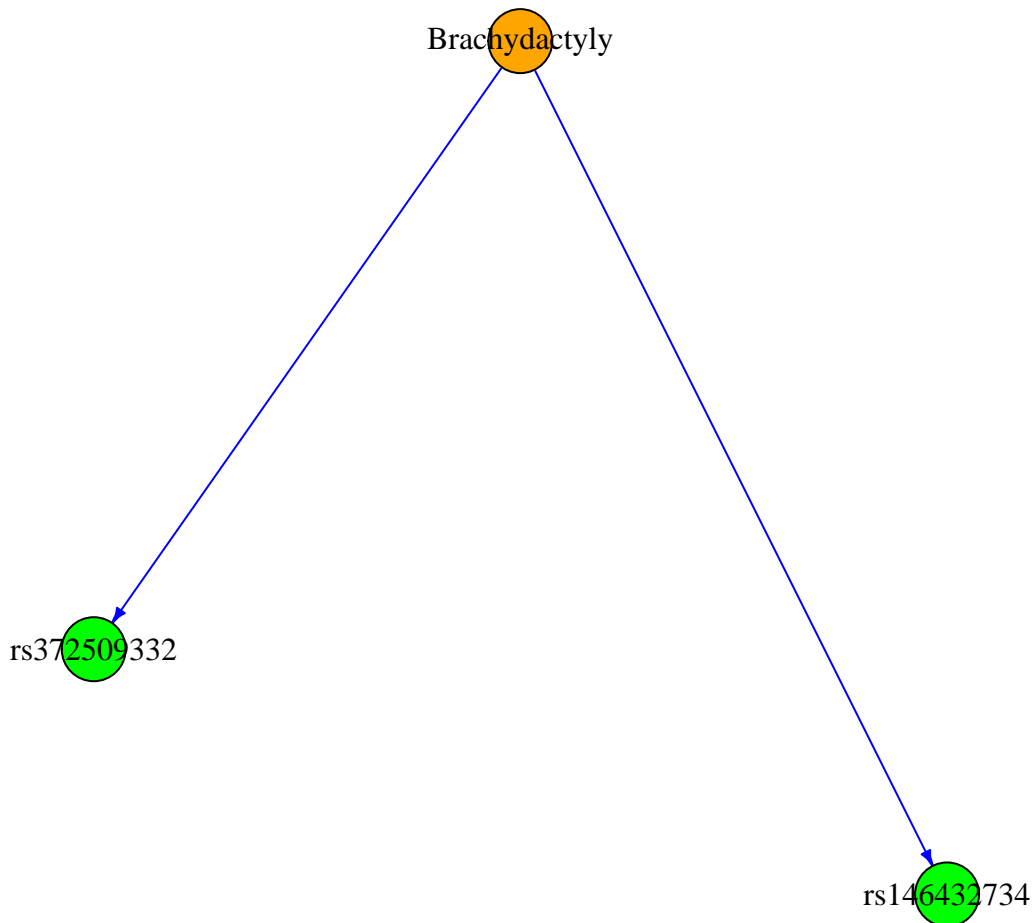

## Variant-Disease Network (breast cancer)

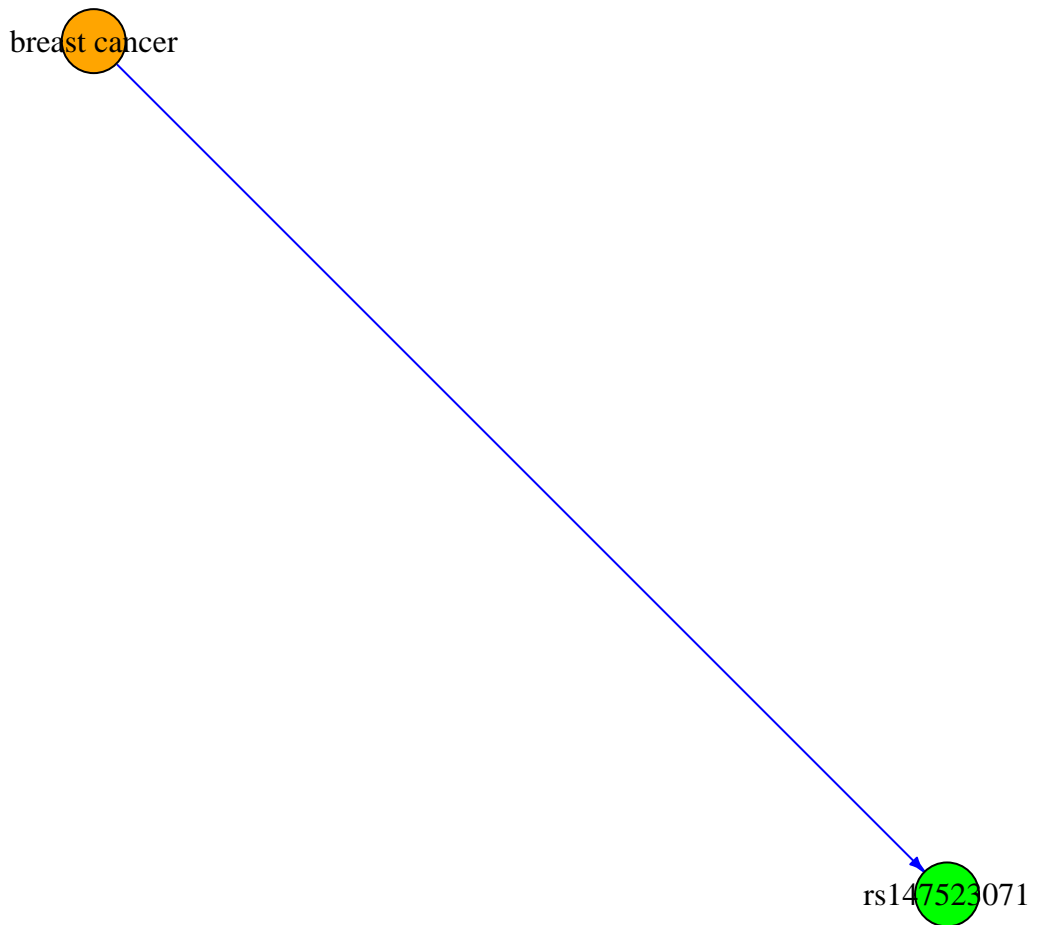

## Variant-Disease Network (Breast-ovarian cancer)

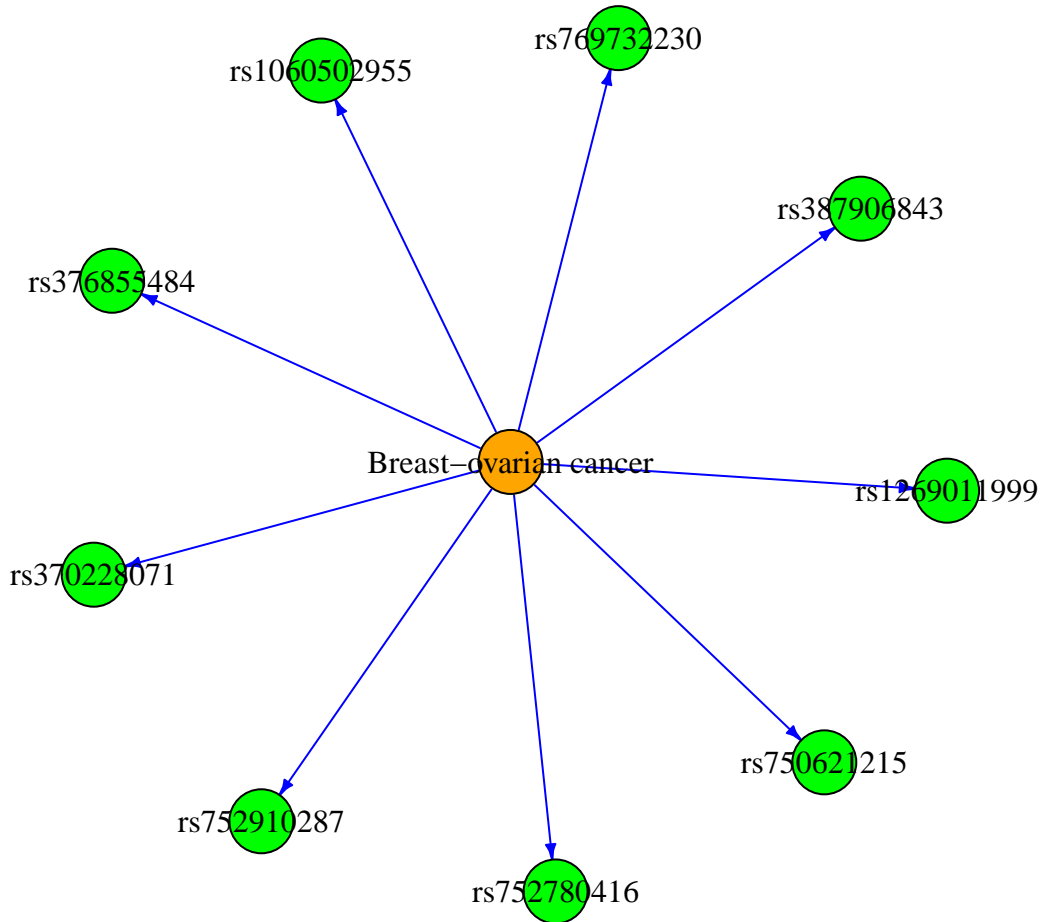

# Variant-Disease Network (Bronchiectasis with or without elevated sweat chloride)

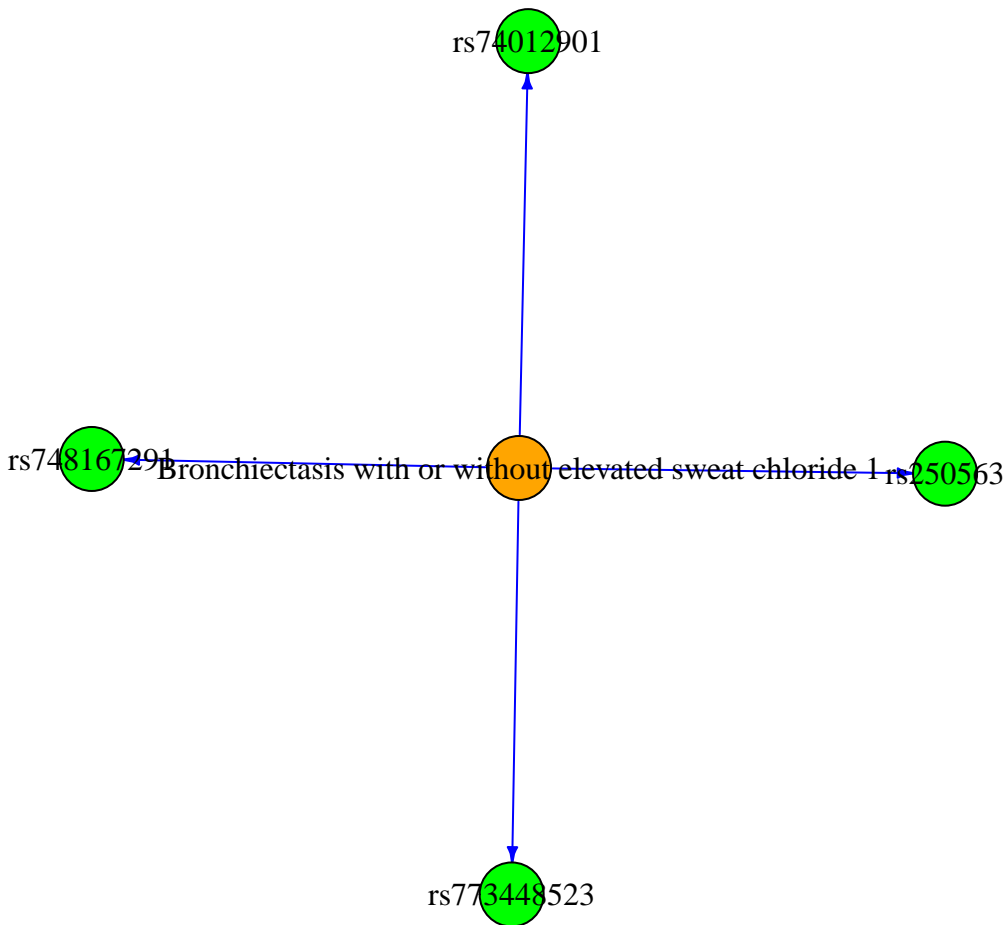

## Variant–Disease Network (Brugada syndrome)

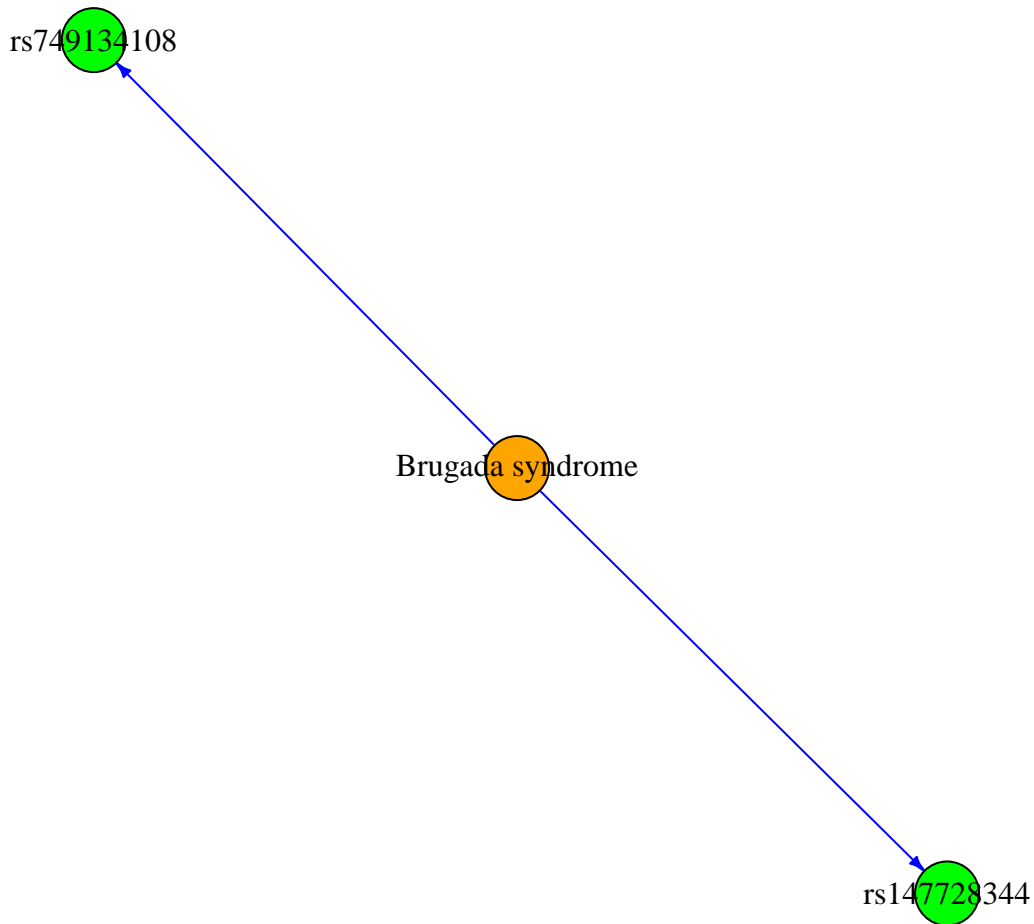

## Variant-Disease Network (Brugada syndrome 5)

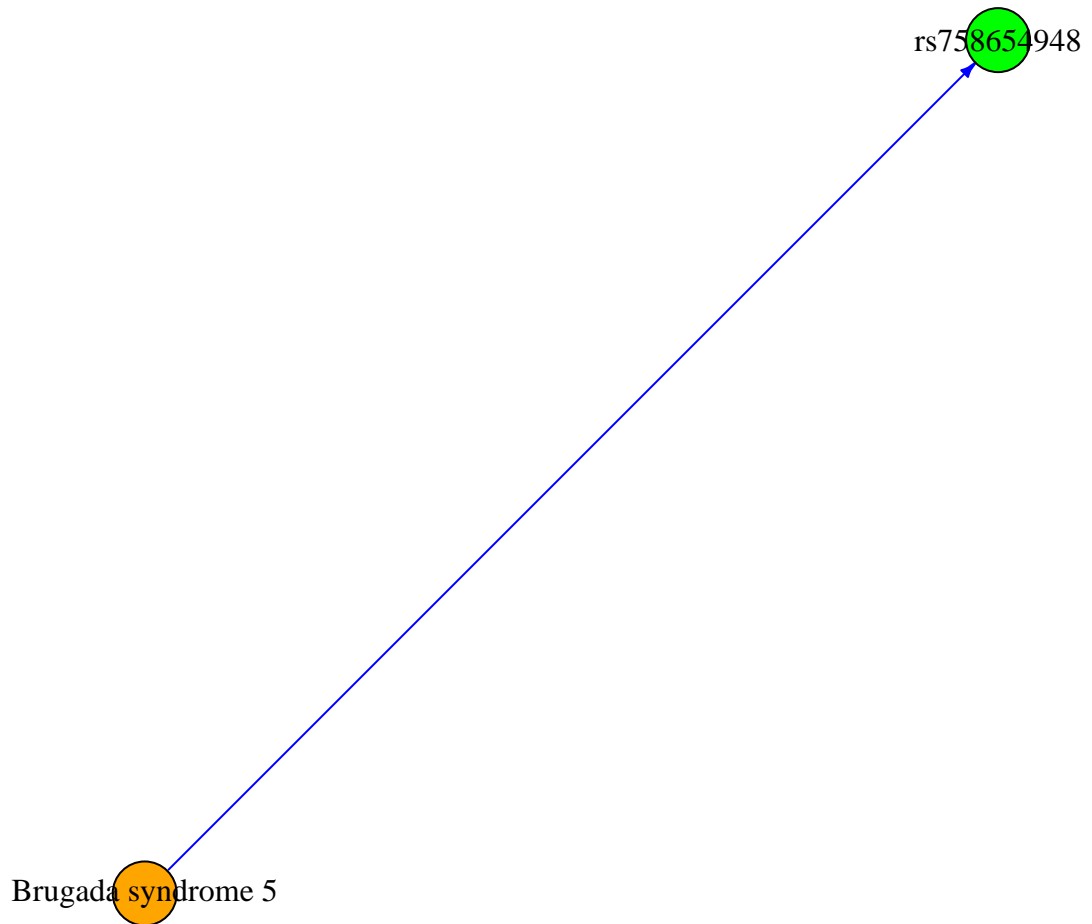



## Variant–Disease Network (Brugada syndrome 8)

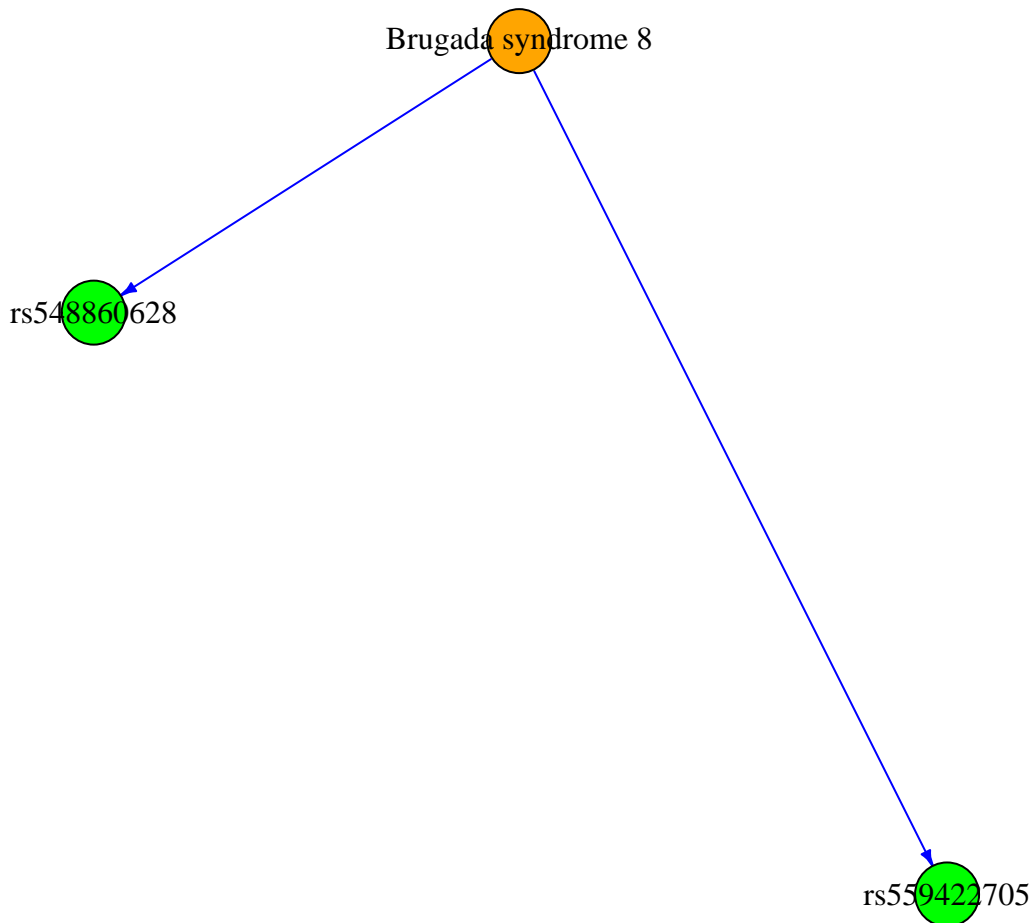

## Variant–Disease Network (Budd–Chiari syndrome)

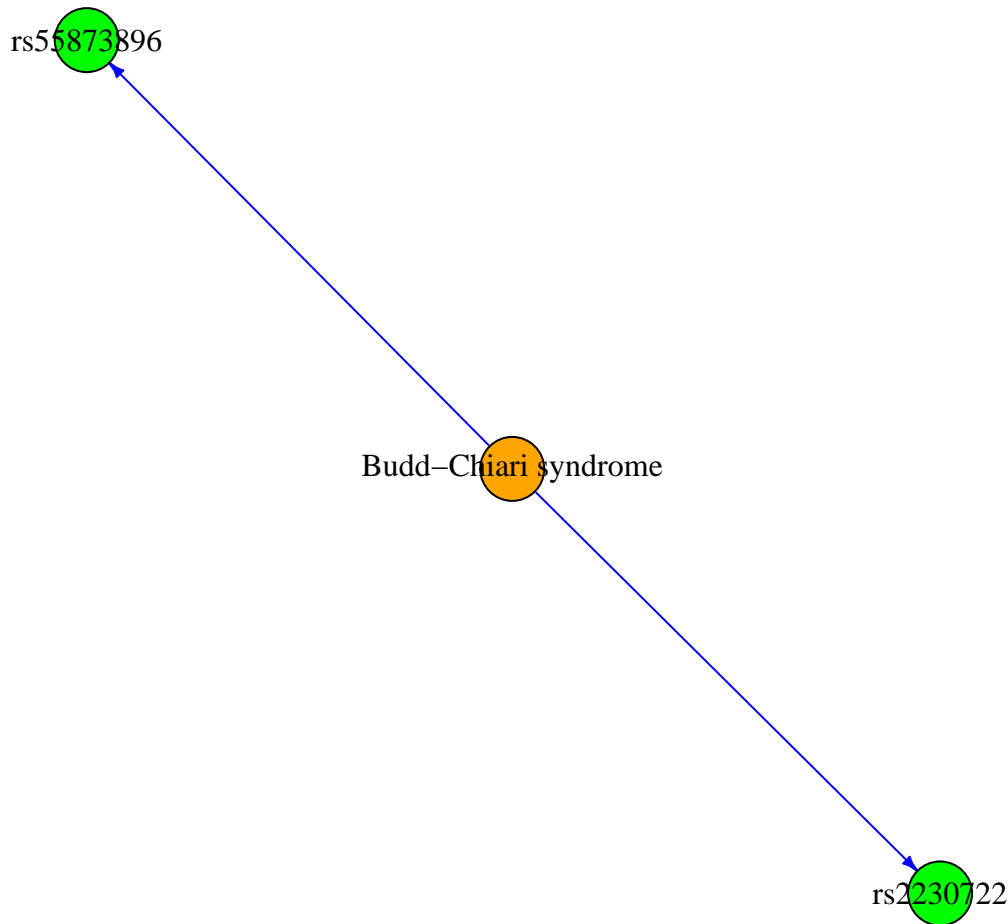

Variant–Disease Network (Bullous ichthyosiform erythroderma)

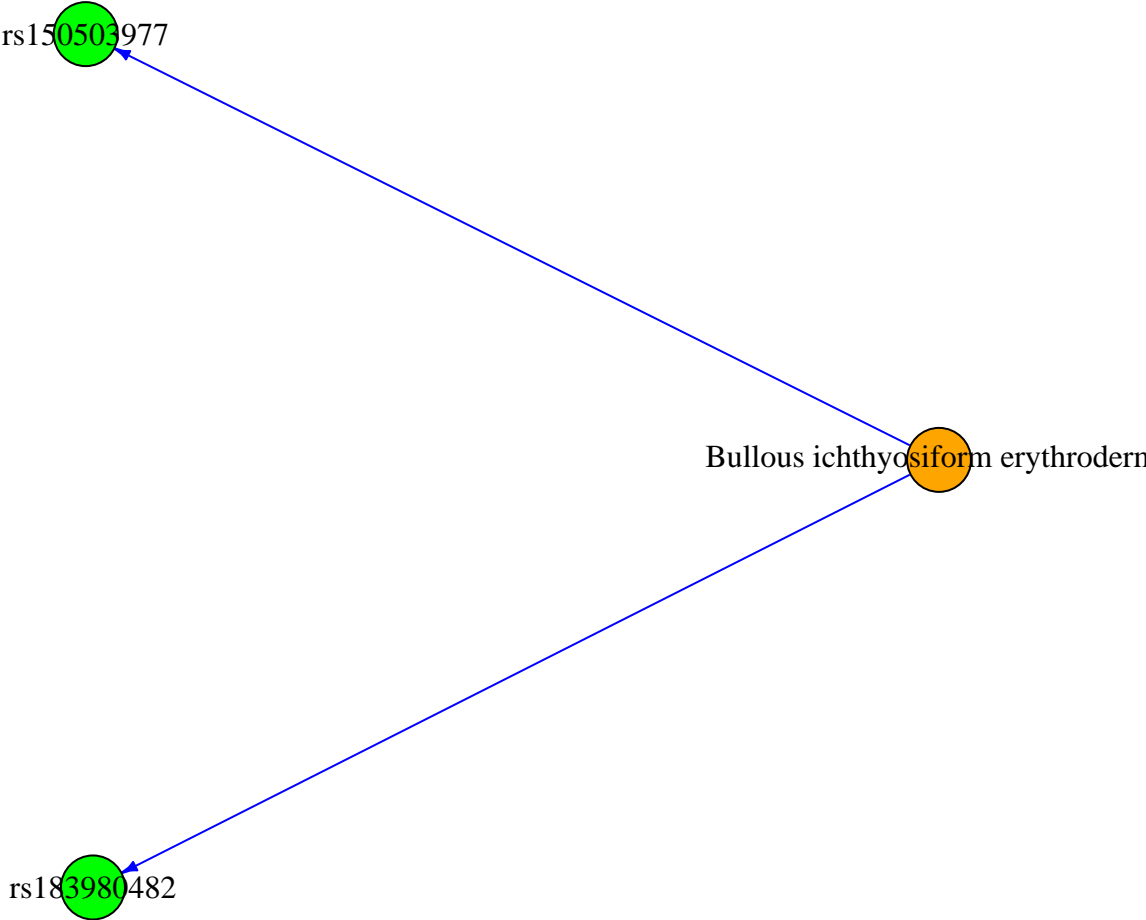

## Variant–Disease Network (Bulls eye maculopathy)

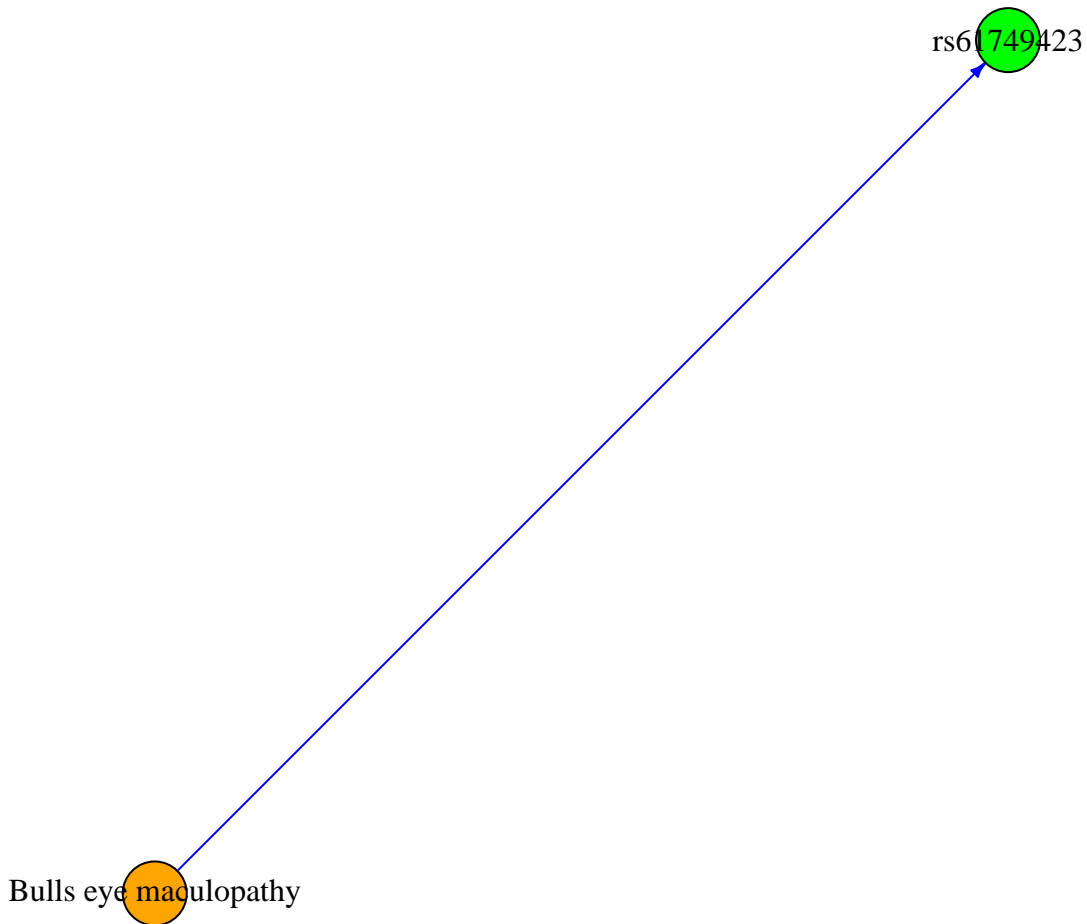

## Variant-Disease Network (Candidiasis)

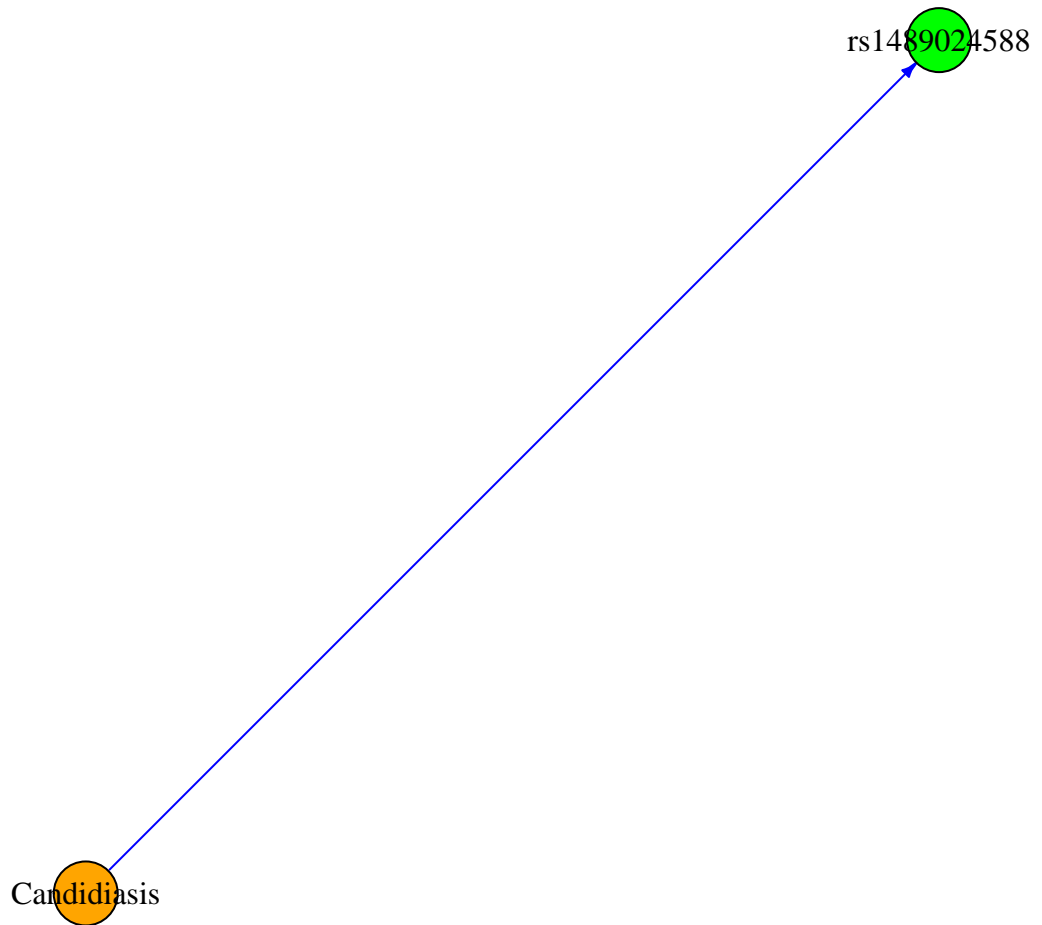

## Variant-Disease Network (Cardio-facio-cutaneous syndrome)

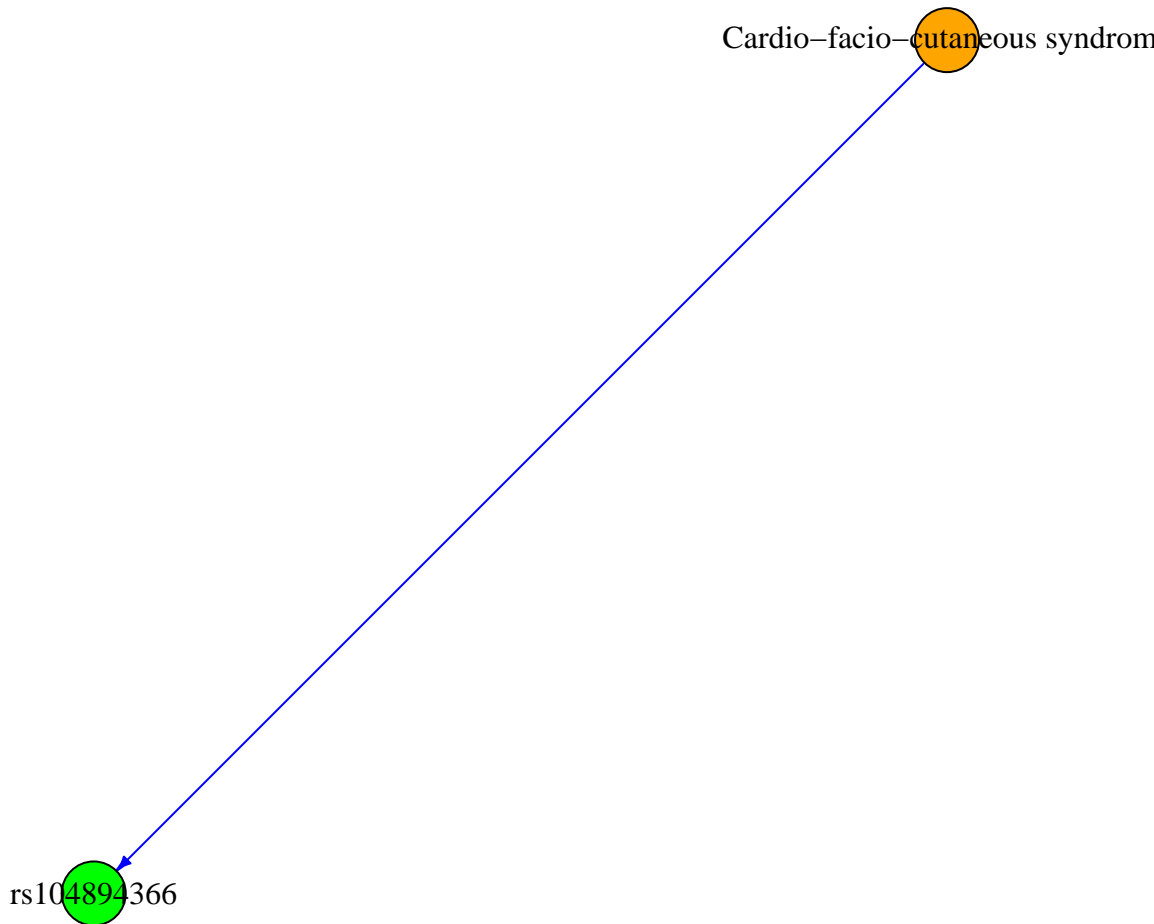

**Variant–Disease Network (Cardiofaciocutaneous syndrome 2)**

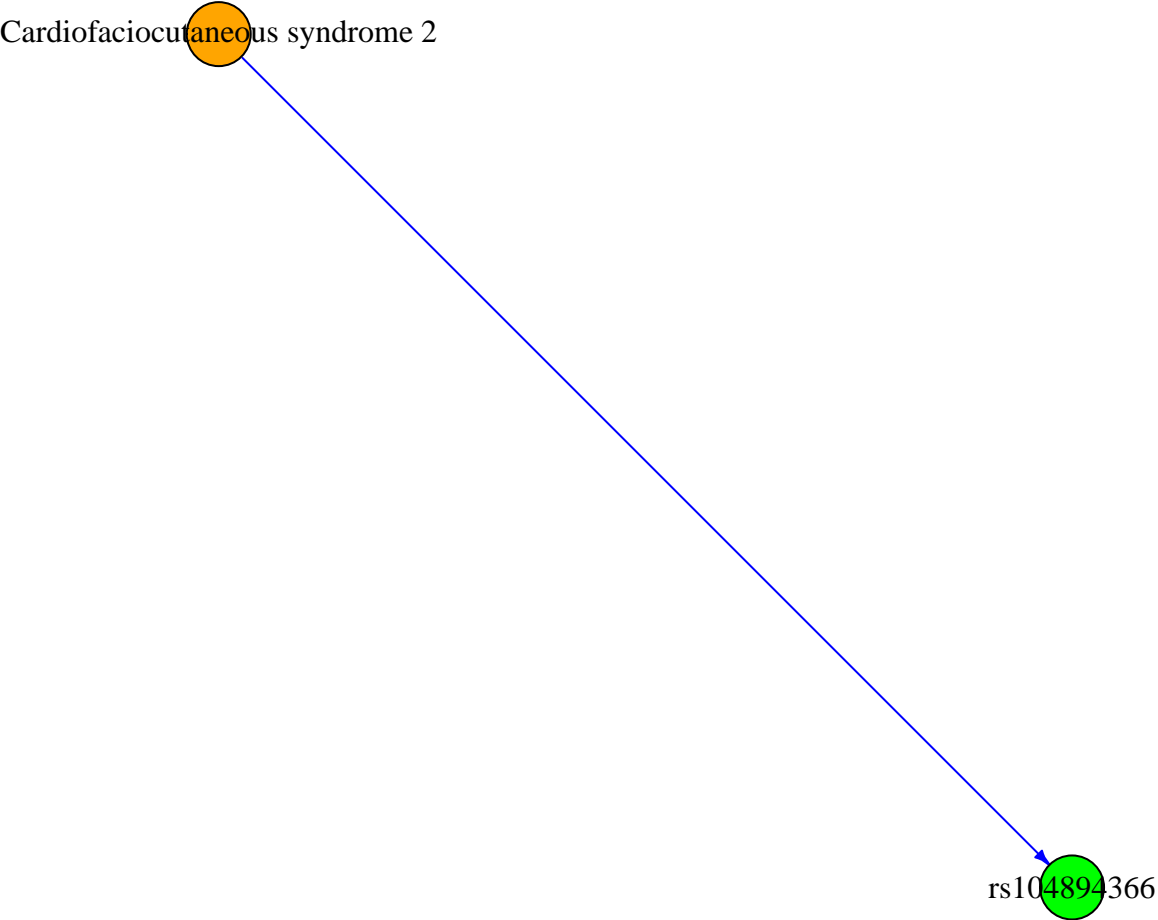

Variant–Disease Network (Cardiofaciocutaneous syndrome 4)

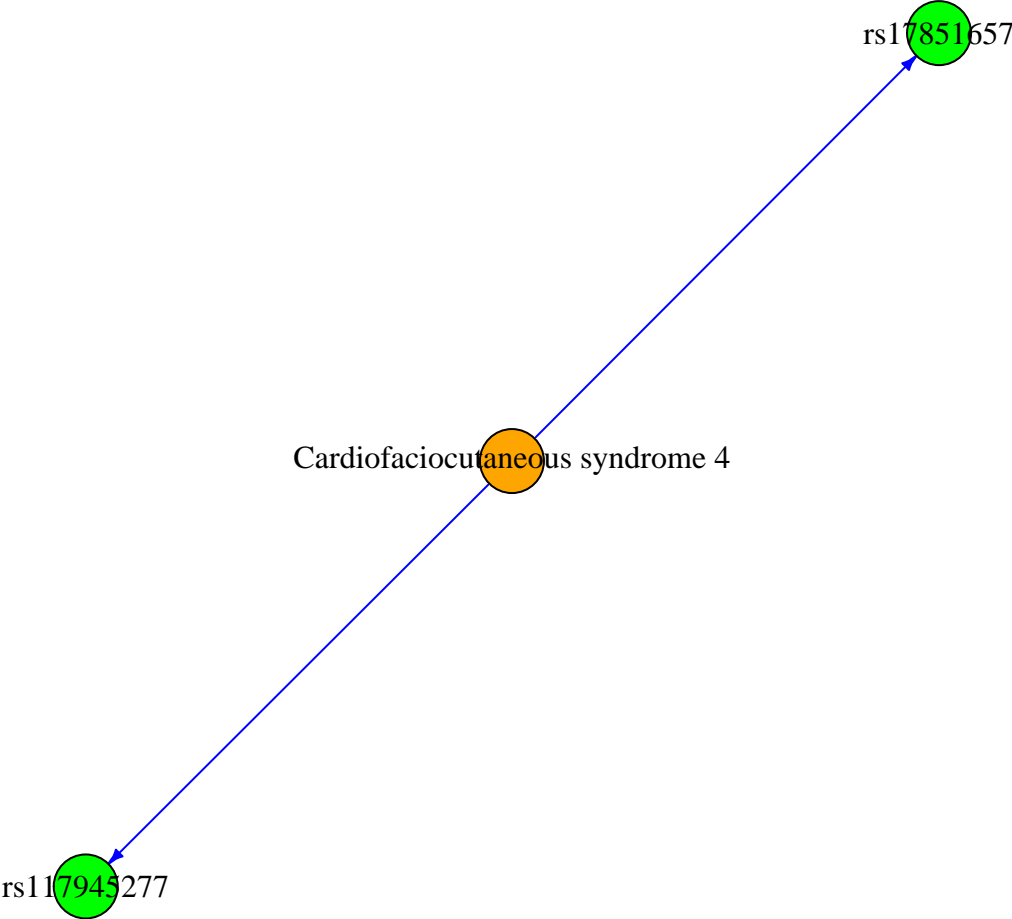



## Variant-Disease Network (Cardiomyopathy)

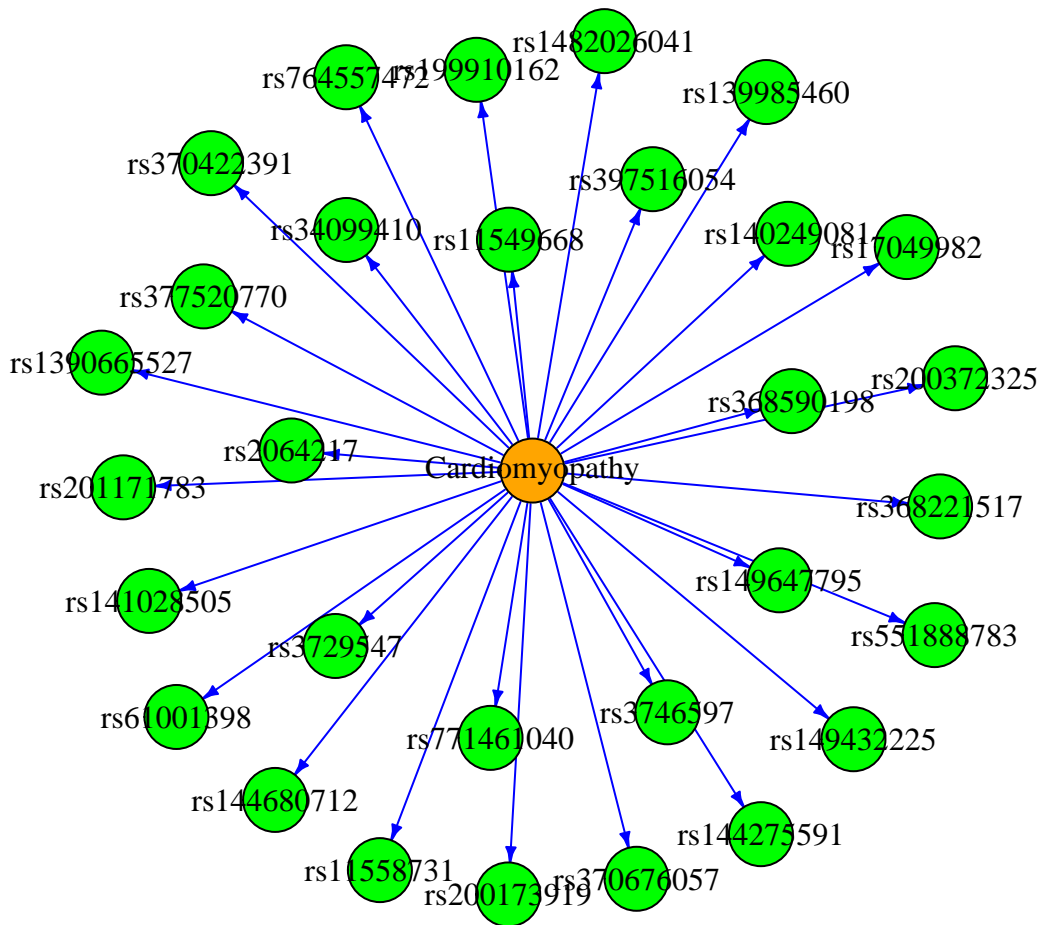

### Variant–Disease Network (Cardiovascular phenotype)

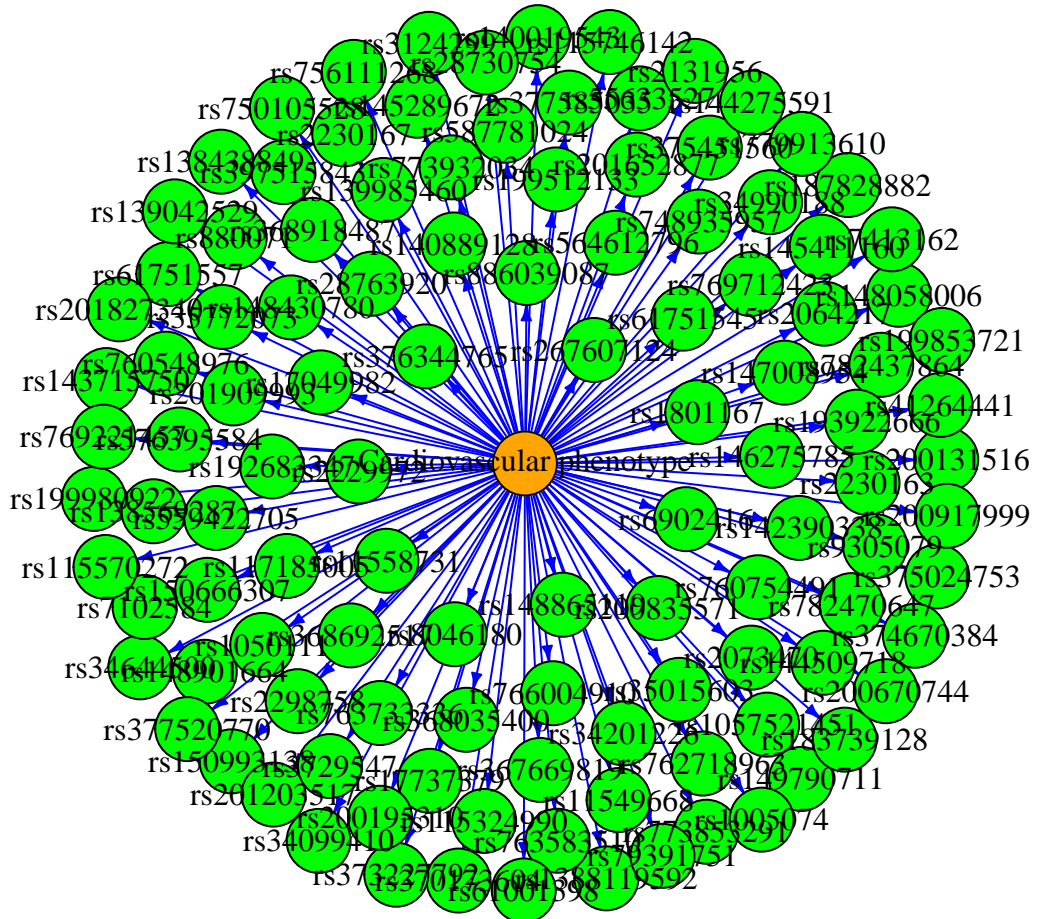

**Variant–Disease Network (Carnitine palmitoyl transferase 1 deficiency)**

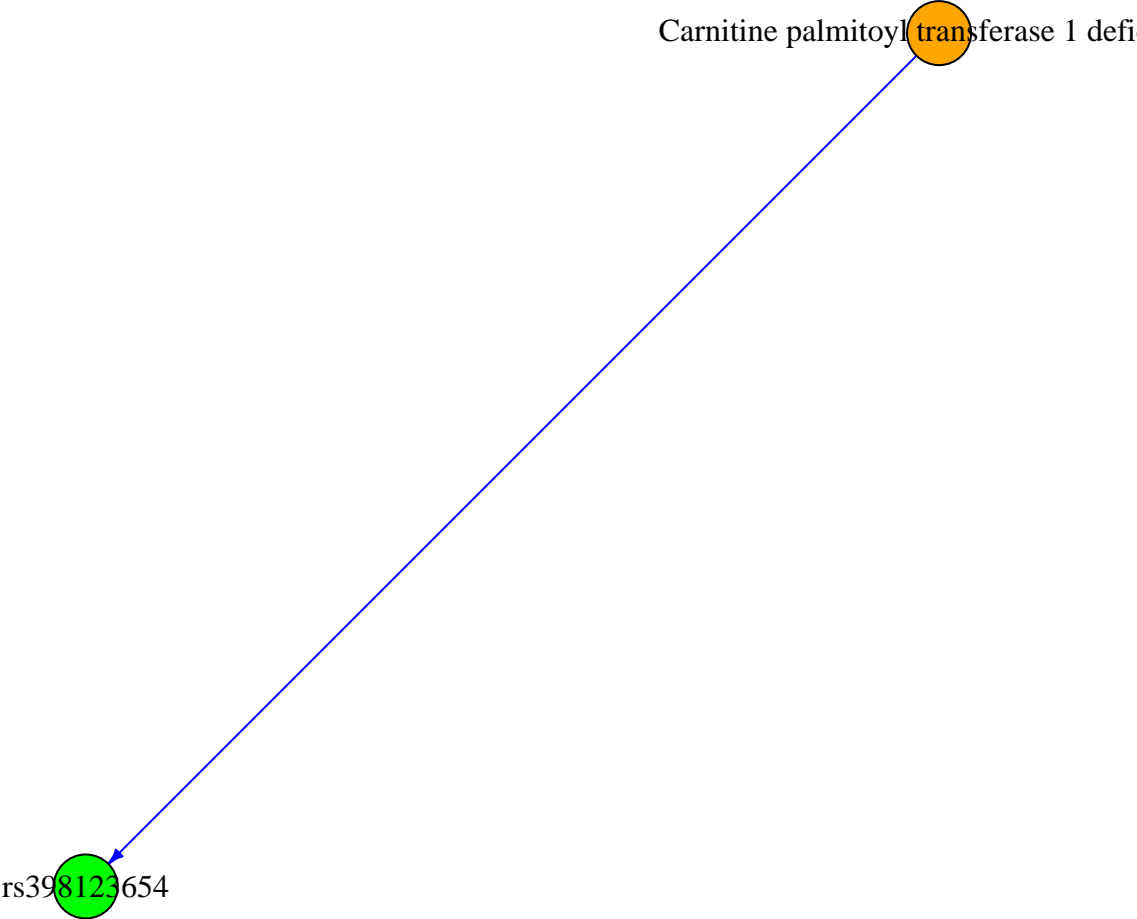

**Variant–Disease Network (Carnitine palmitoyltransferase I deficiency)**

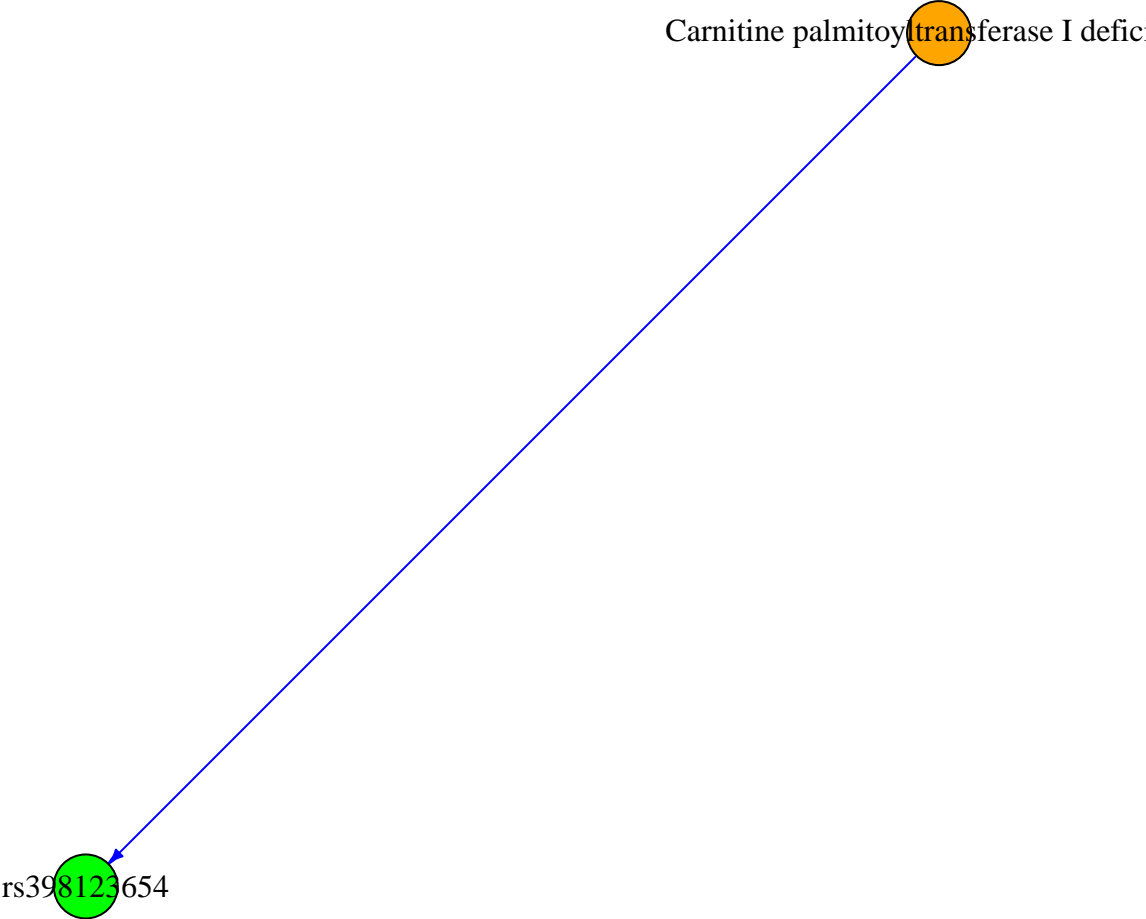

## Variant–Disease Network (Carpenter syndrome 2)

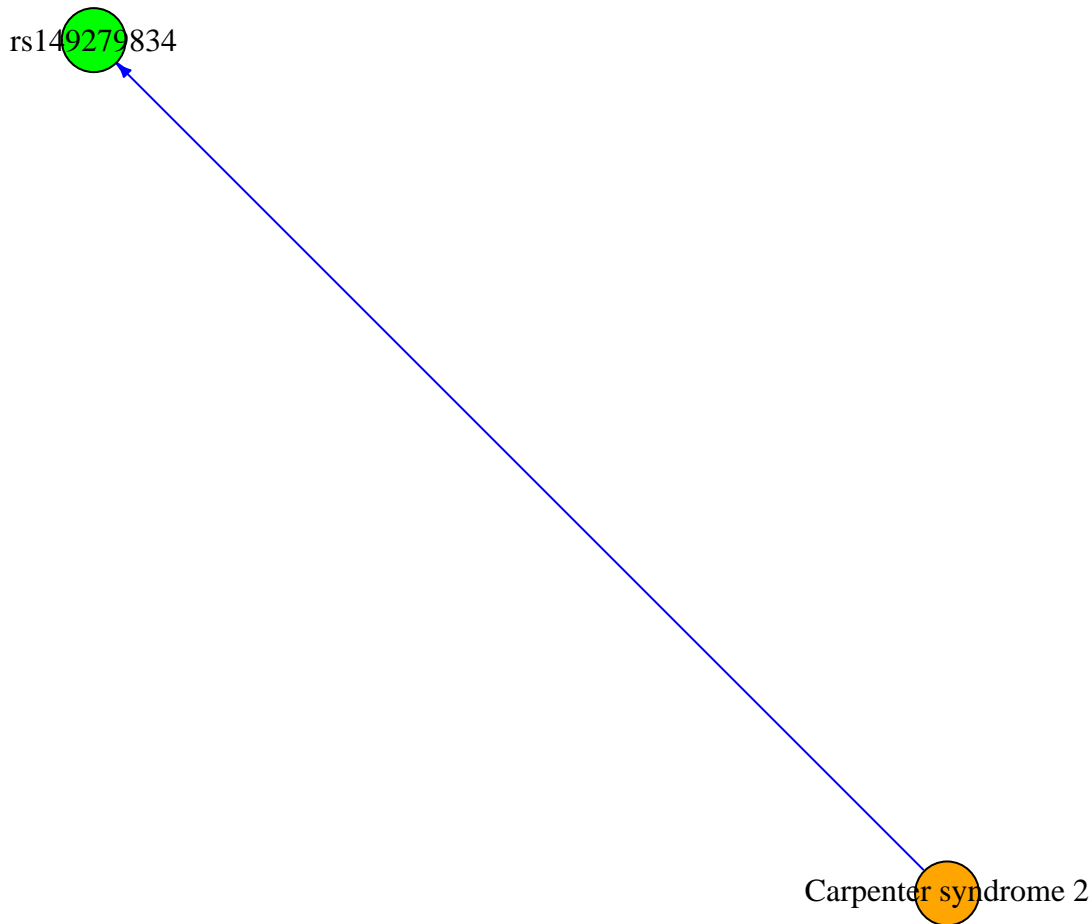

## Variant-Disease Network (Cataract 1)

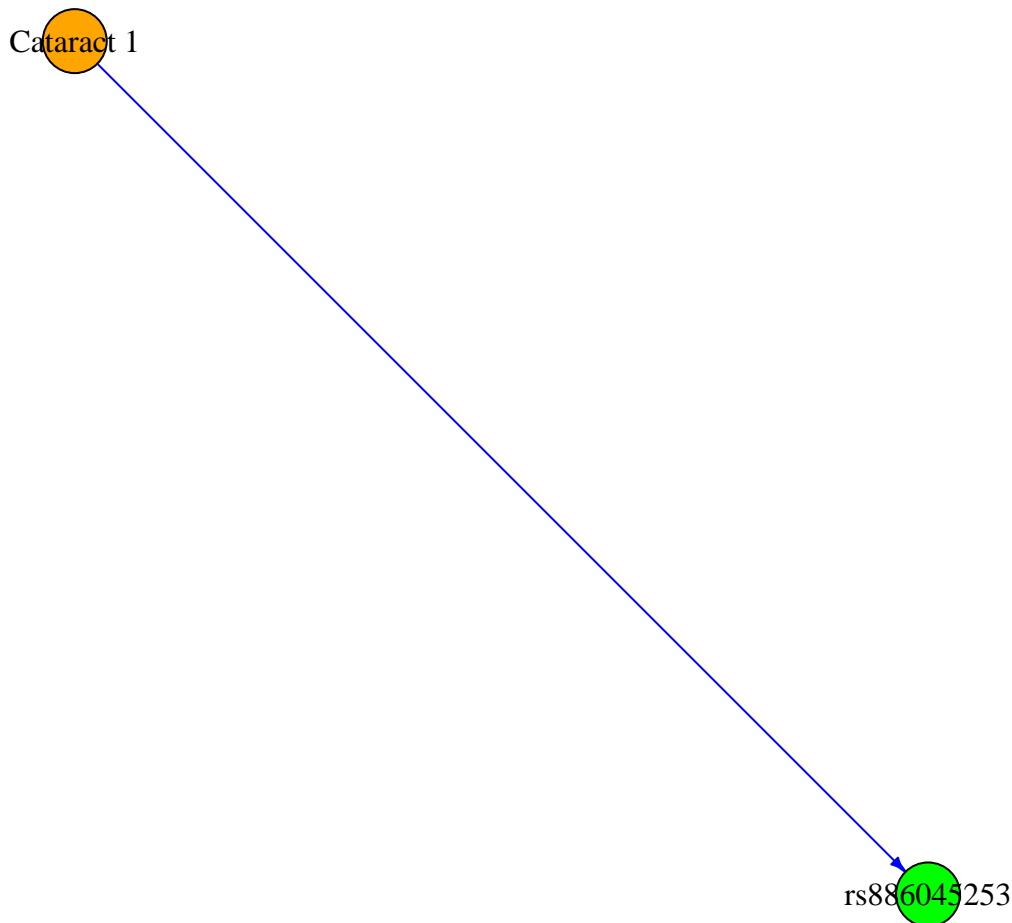

Variant–Disease Network (Cataract 33)

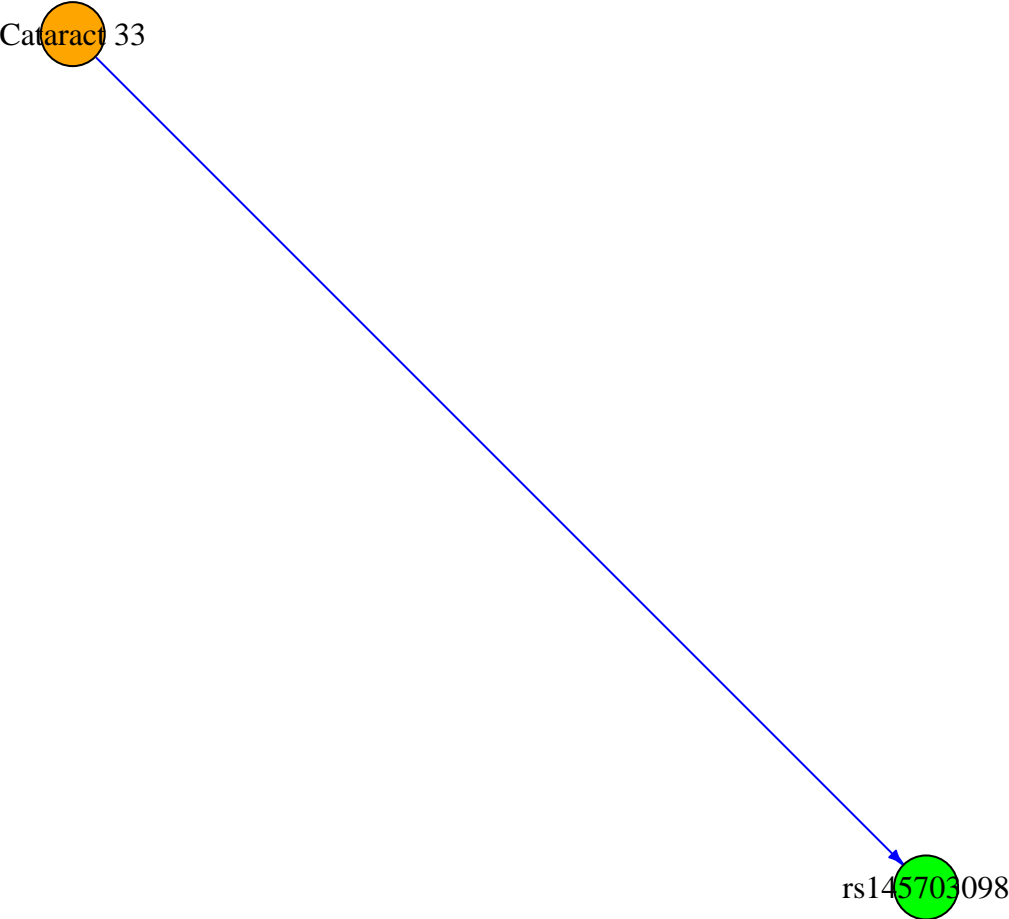

## Variant-Disease Network (Cataract 4)

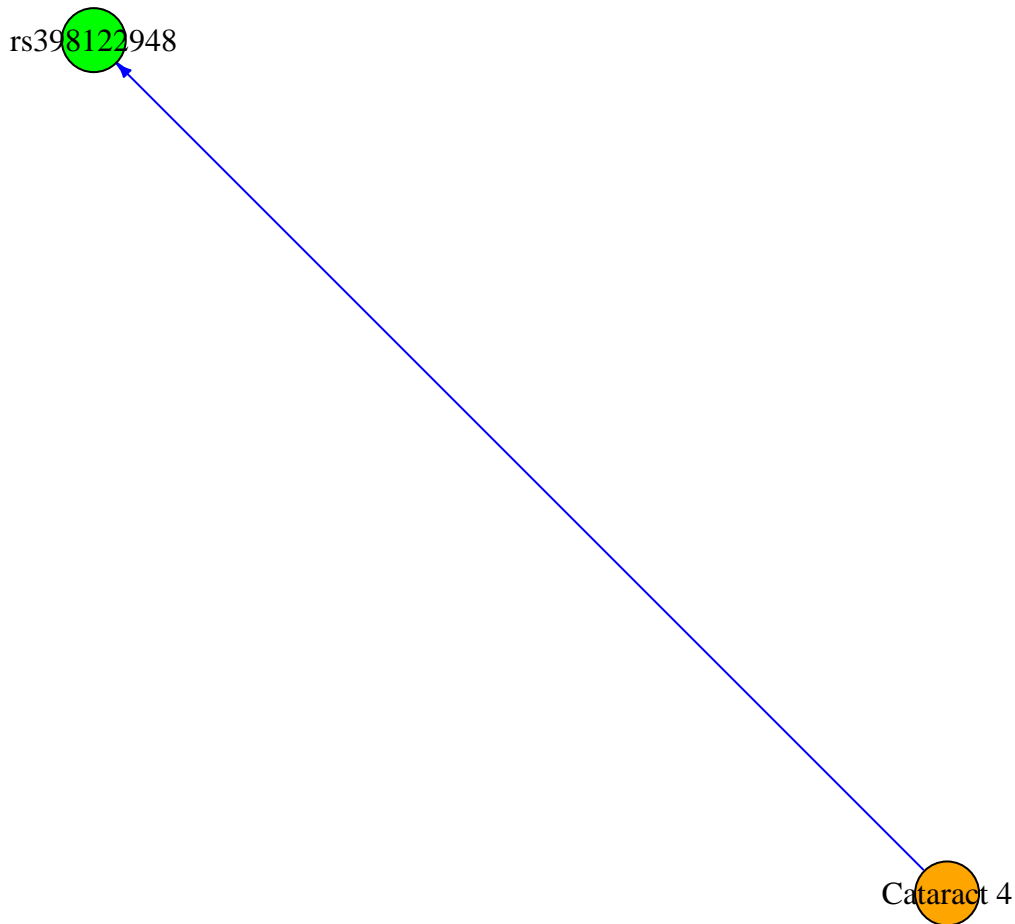



# Variant-Disease Network (Catecholaminergic polymorphic ventricular tachycardia)

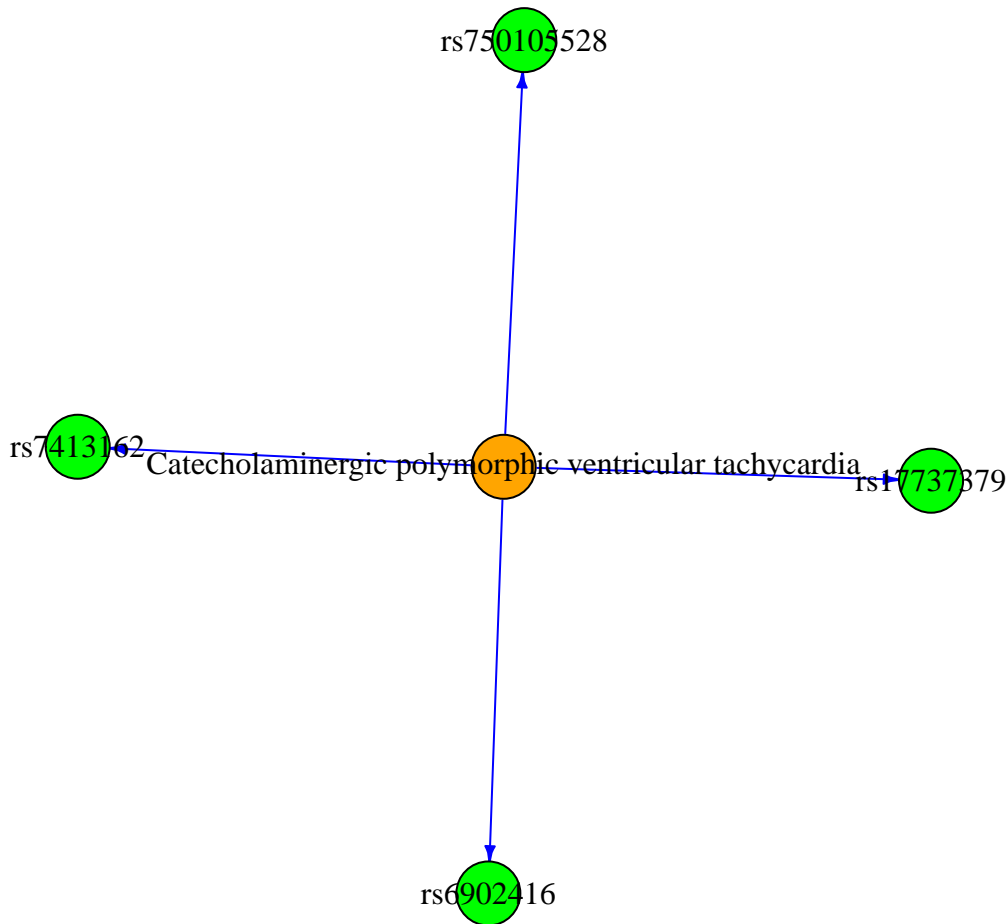

**Variant–Disease Network (Caudal dysgenesis syndrome)**

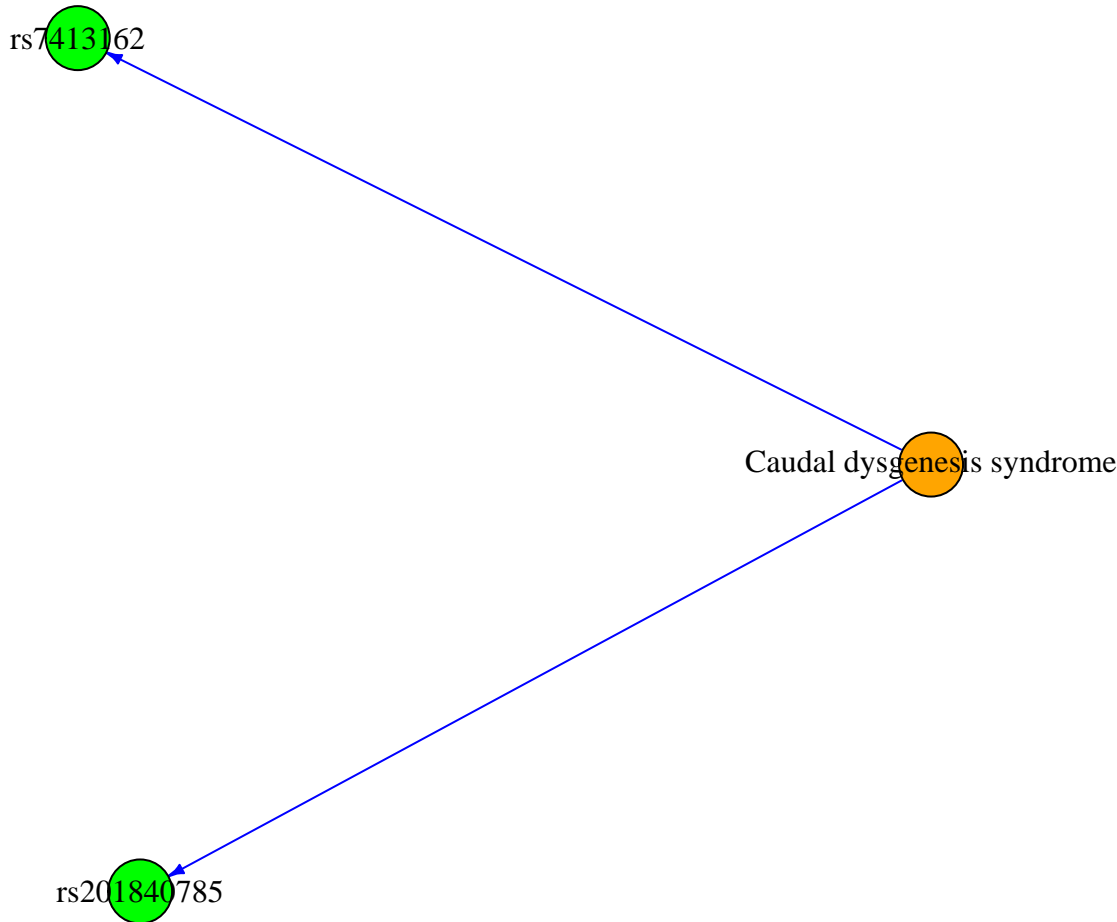

# Variant–Disease Network (Caused by mutation in the TBC1 domain family)

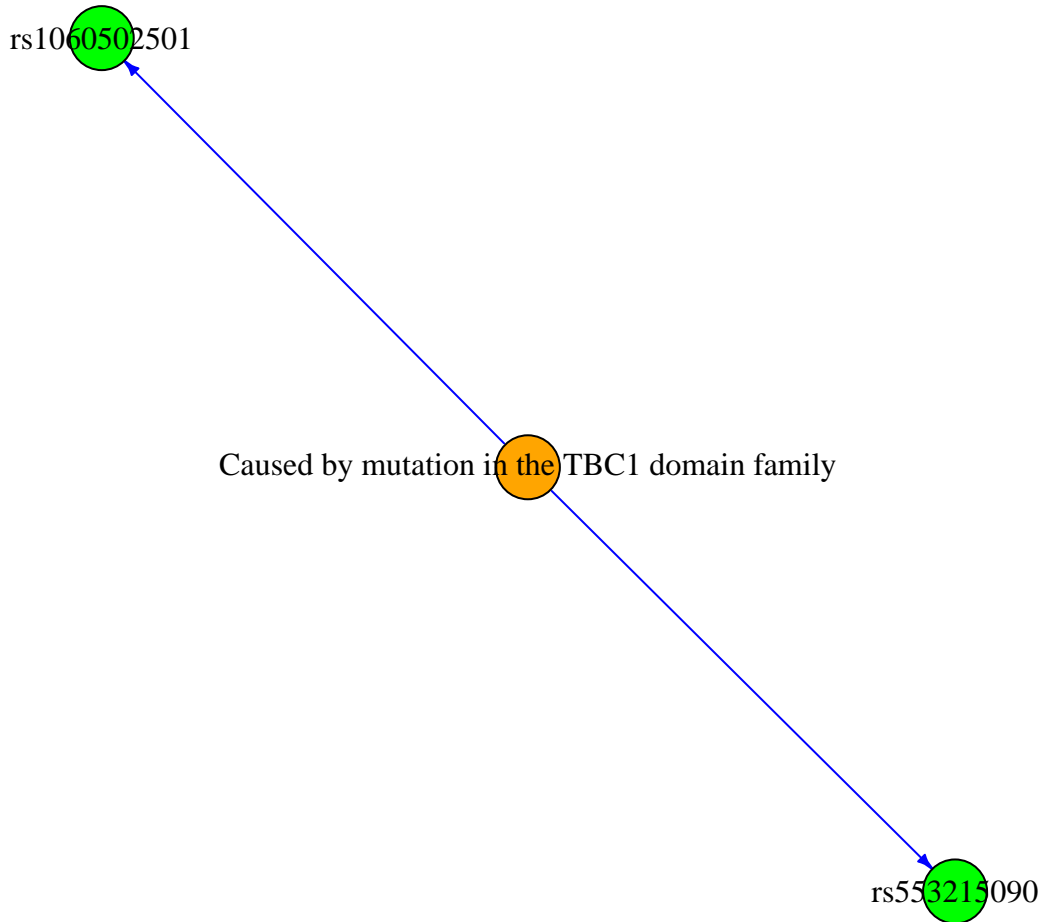

# Variant–Disease Network (CC2D2A–Related Disorders)

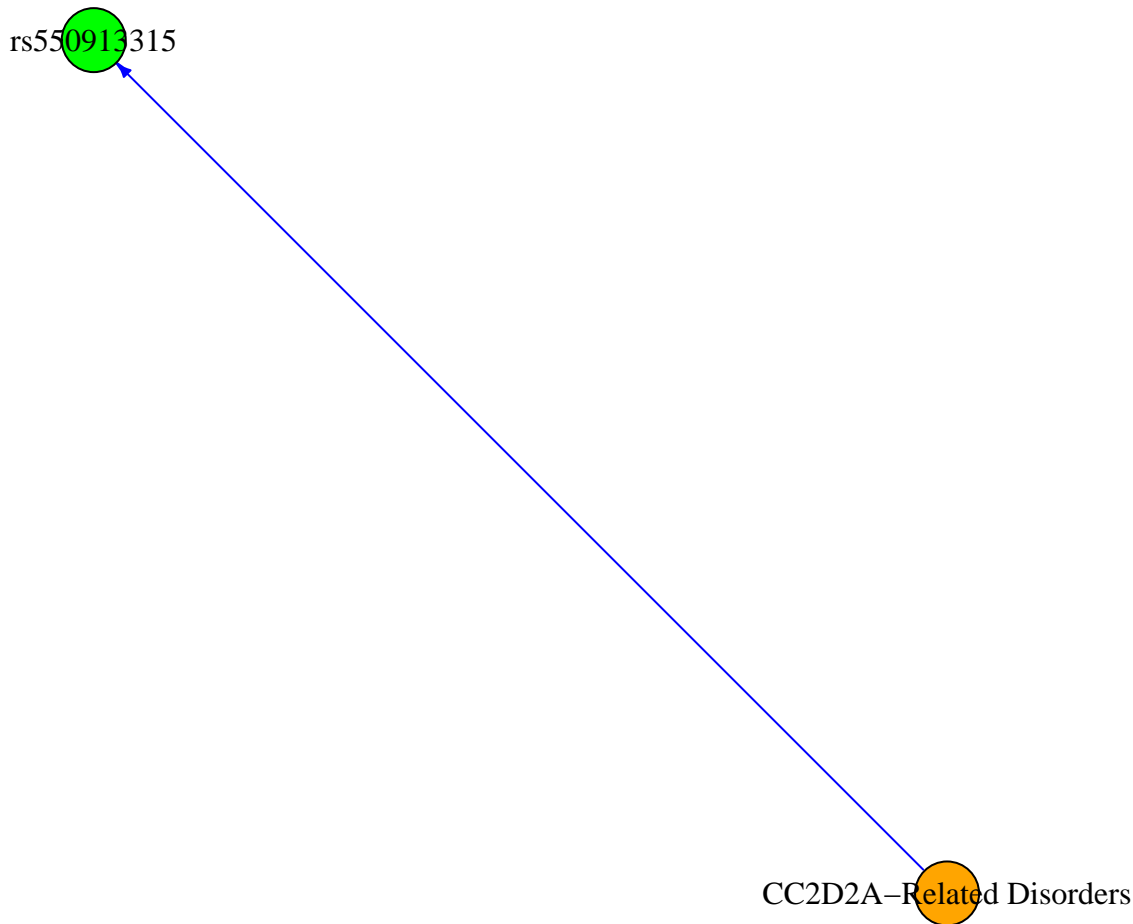

# Variant-Disease Network (Centronuclear Myopathy)

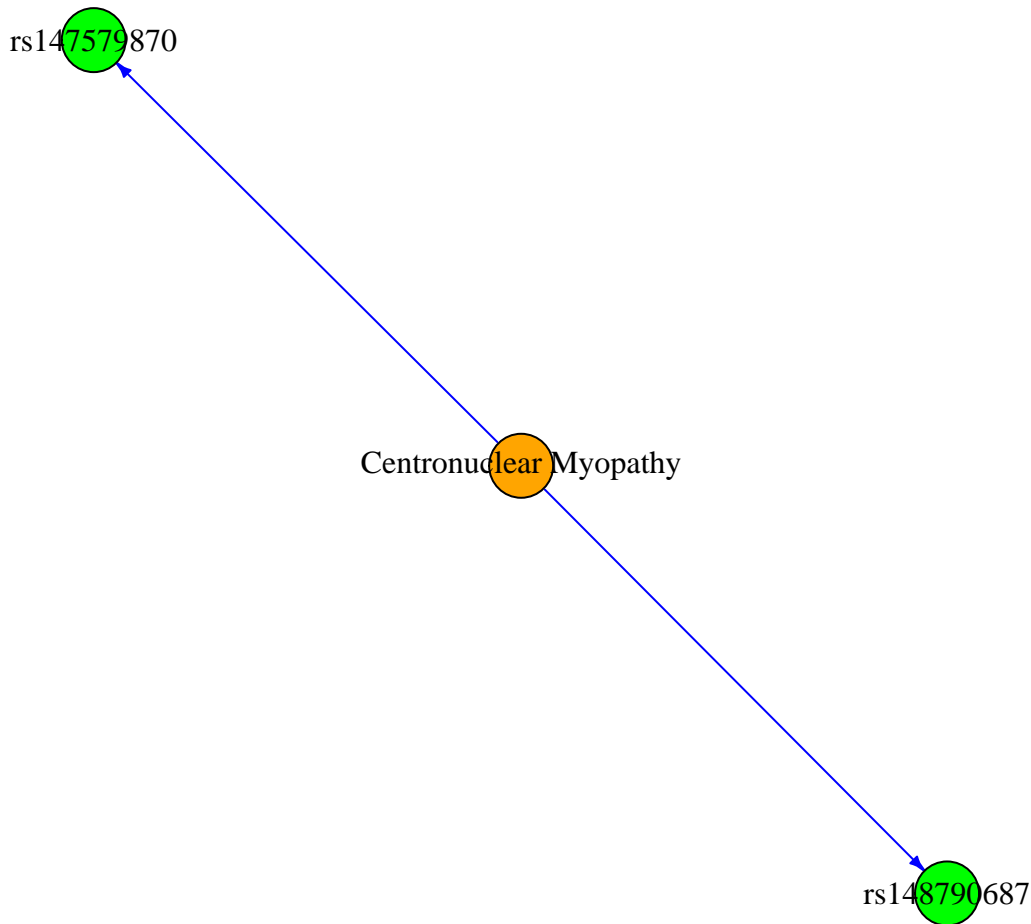

# Disease Network (Cerebellar ataxia infantile with progressive external ophthalmoplegia)

Cerebellar ataxia infantile with progressive external ophthalmoplegia

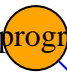

rs769410130

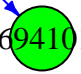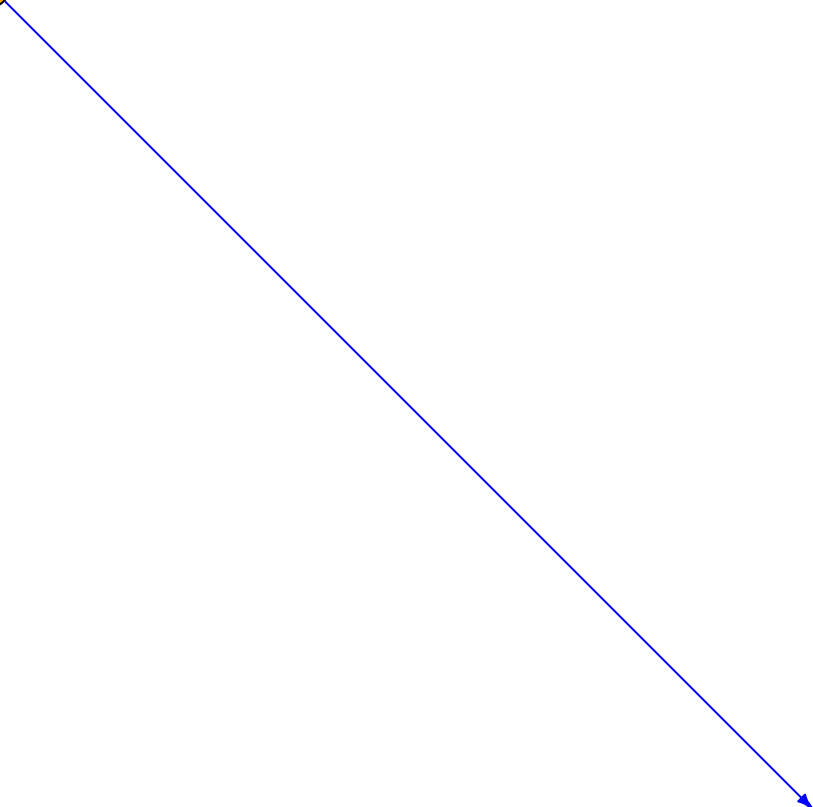

## Variant–Disease Network (Cerebellar atrophy)

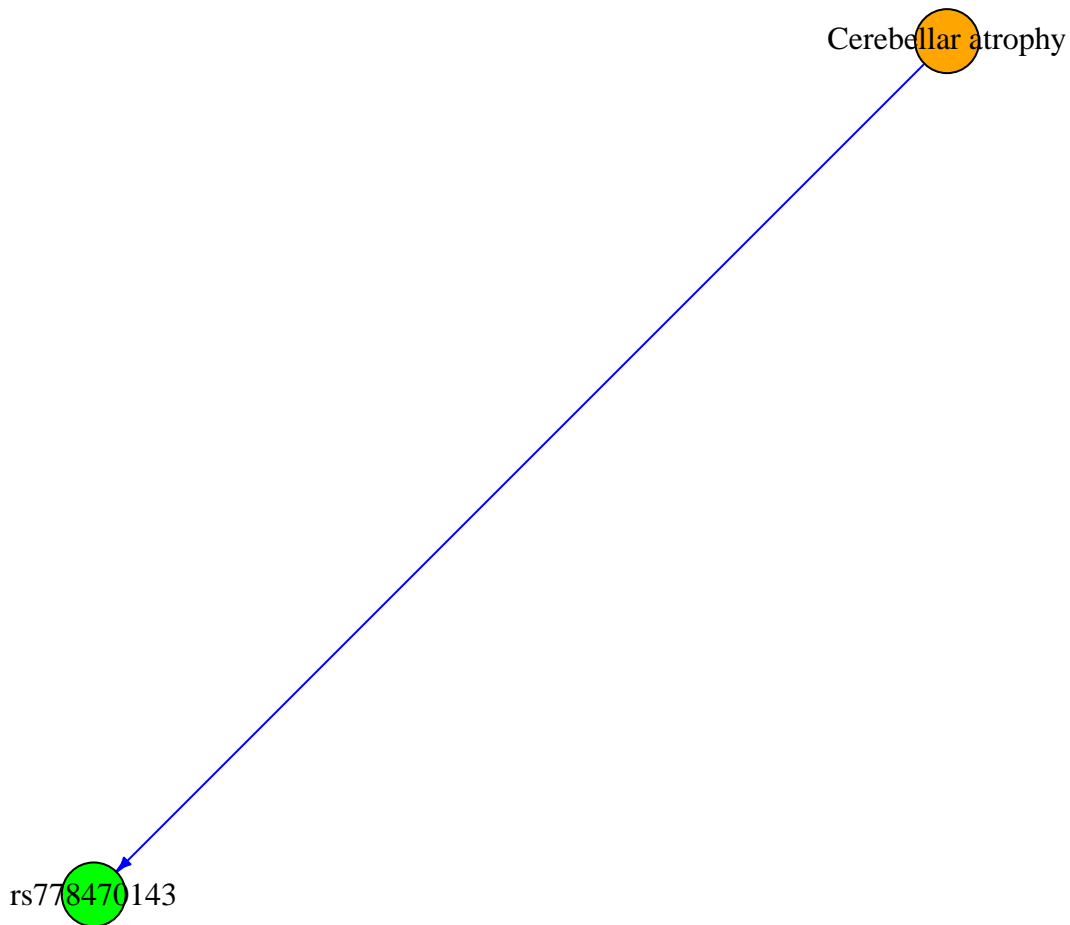

## Variant–Disease Network (Cerebellar vermis hypoplasia)

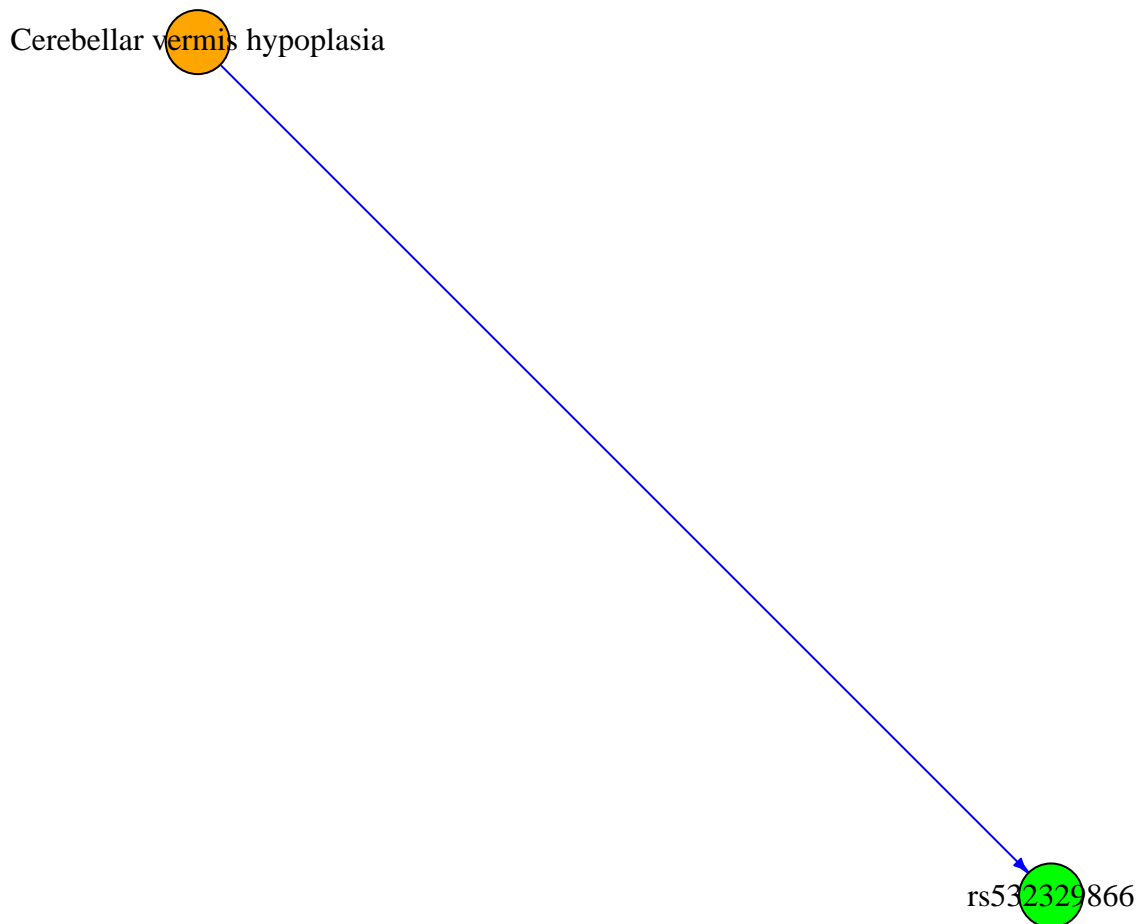



# Variant–Disease Network (Cerebral arteriovenous malformation)

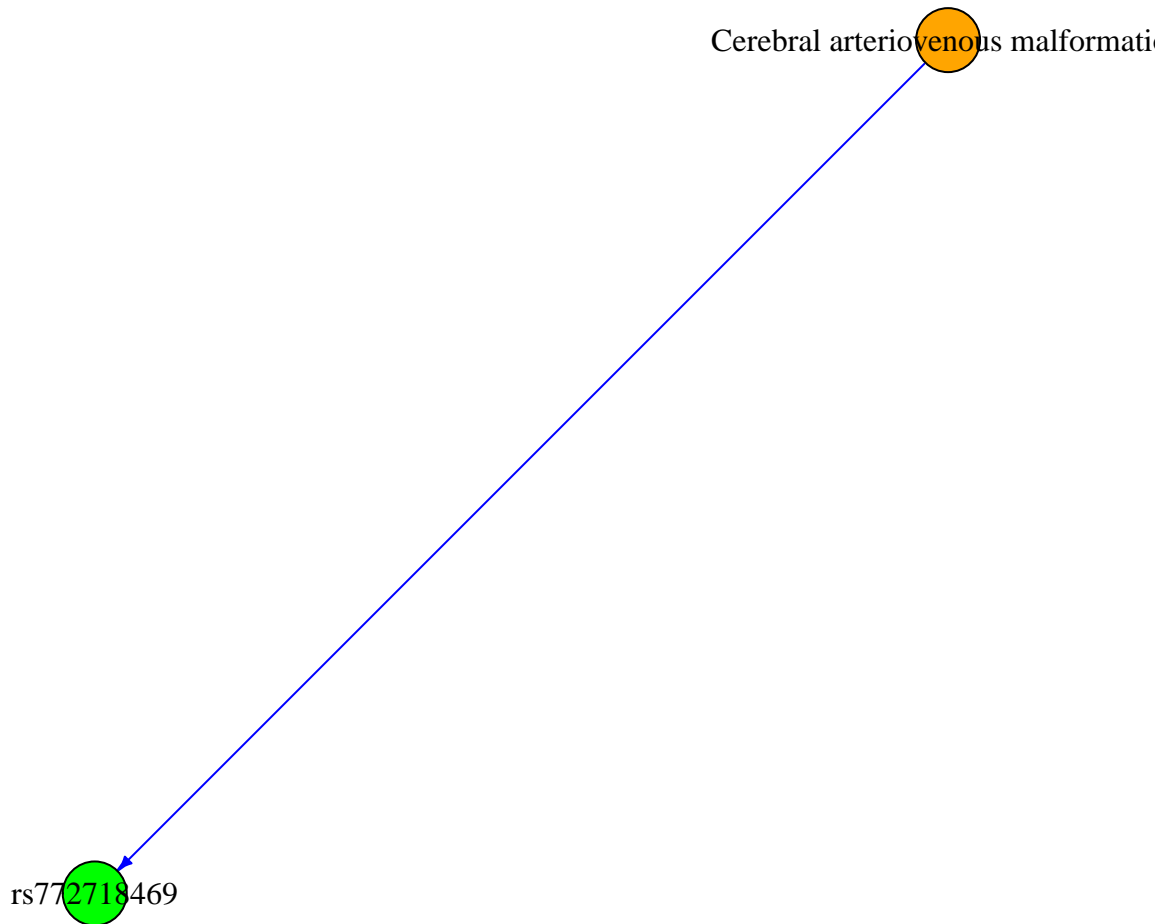

## Variant–Disease Network (Cerebral atrophy)

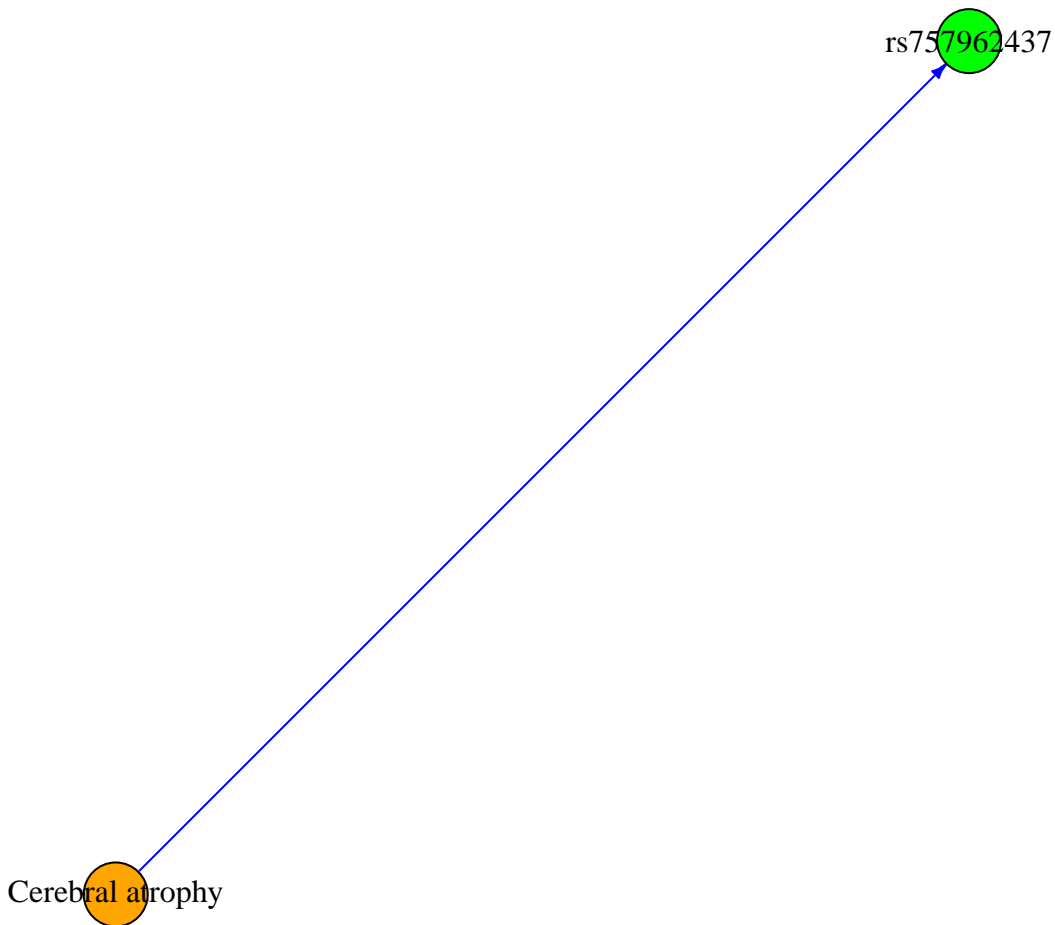

# rs112197217 (Cerebral autosomal dominant arteriopathy with subcortical infarcts and leukoencephalopathy)

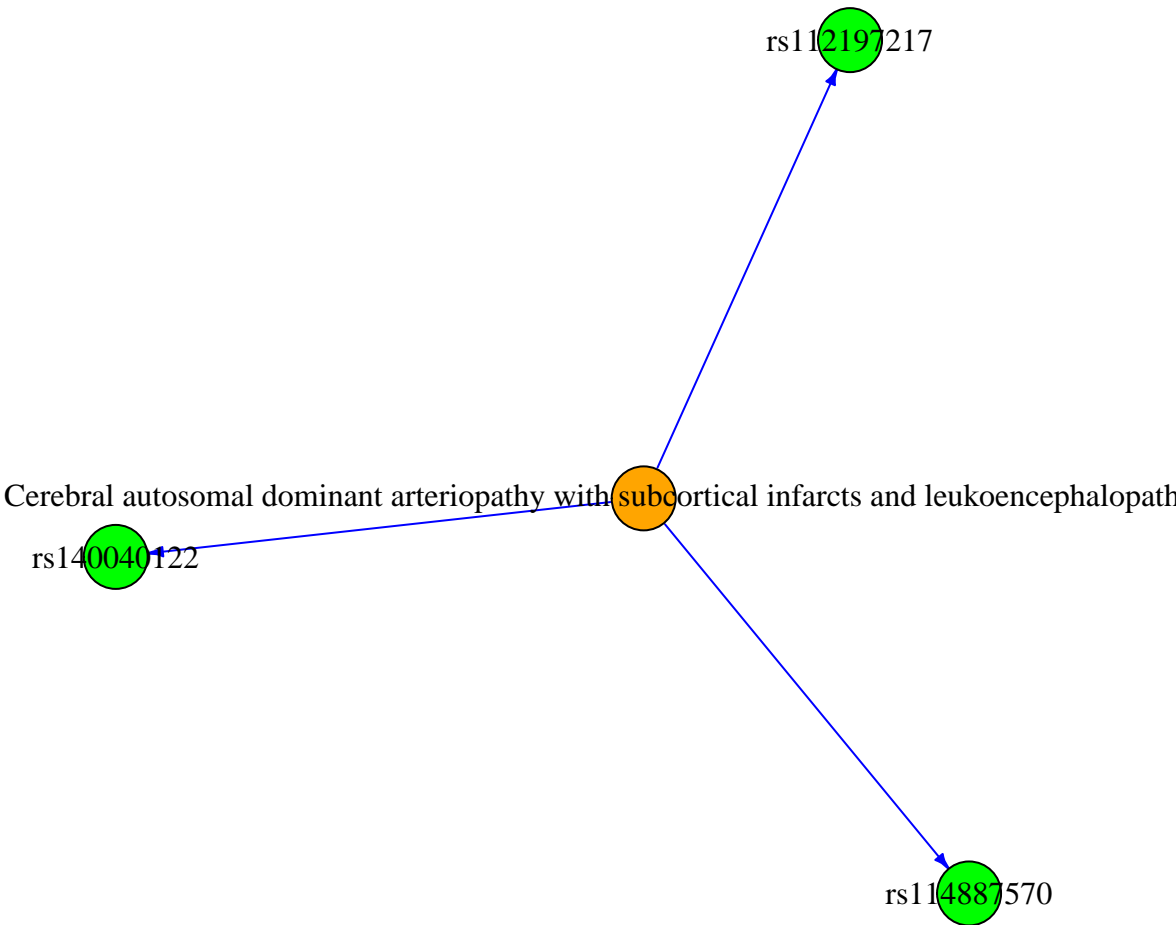

## Variant-Disease Network (Cerebral cavernous malformation)

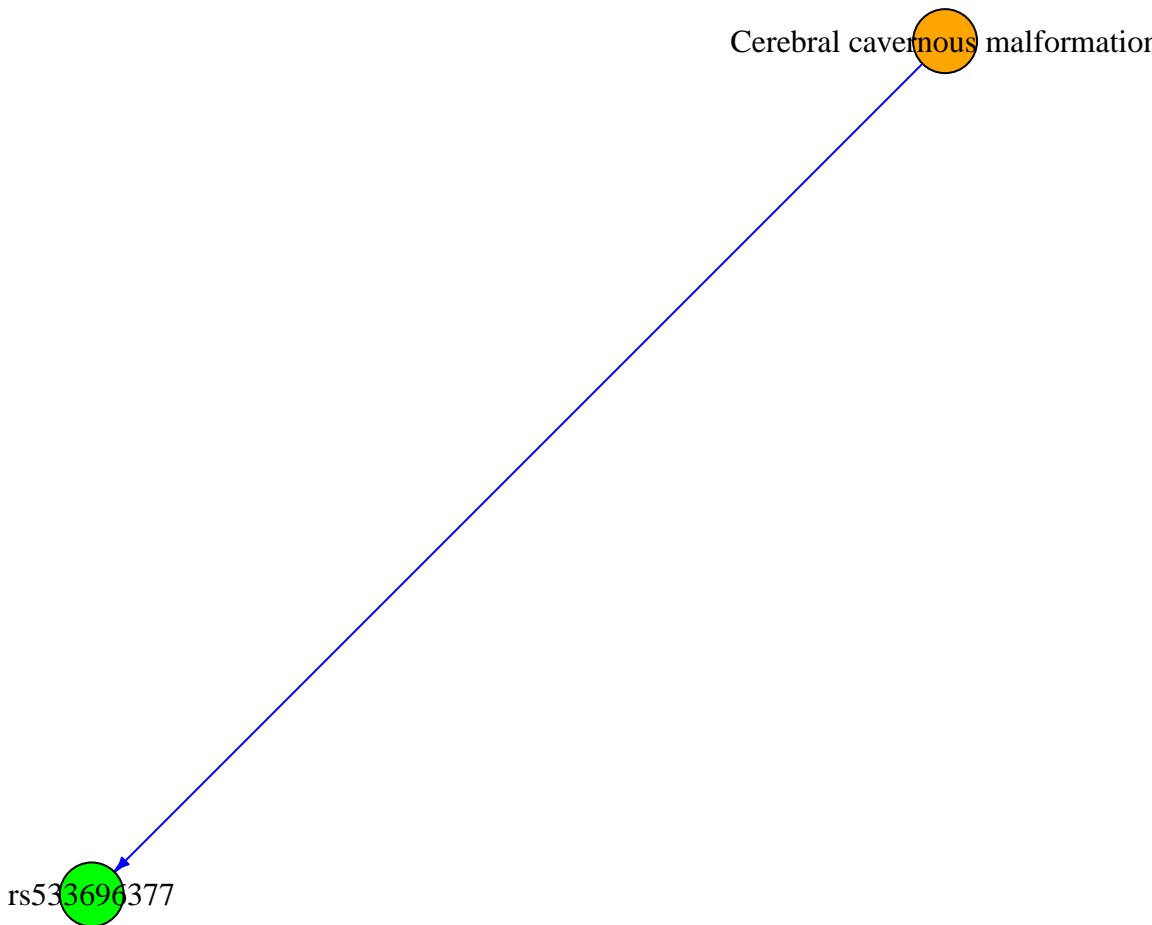

## Variant–Disease Network (Cerebral cavernous malformations 2)

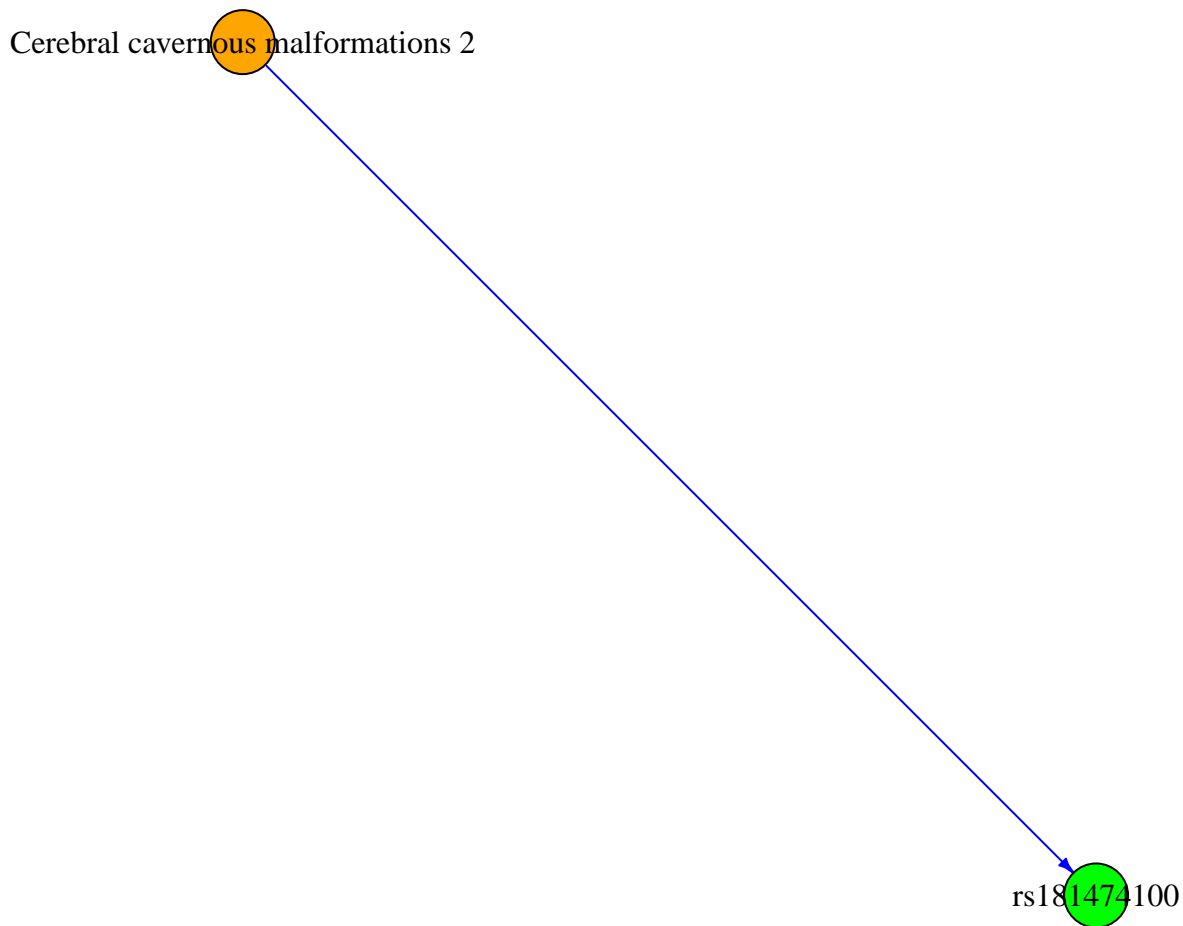

# Variant–Disease Network (Cerebral palsy spastic quadriplegic)

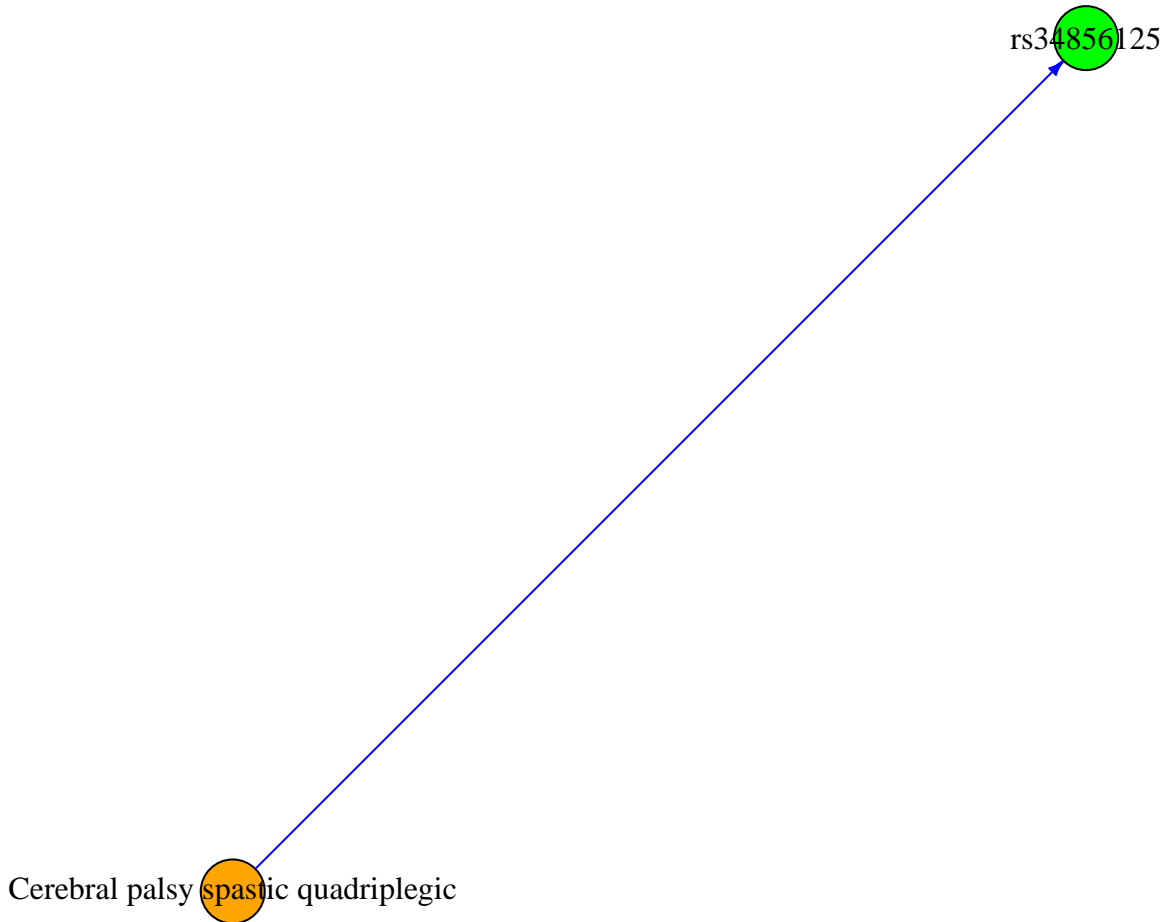

## Variant–Disease Network (Charcot–Marie–Tooth)

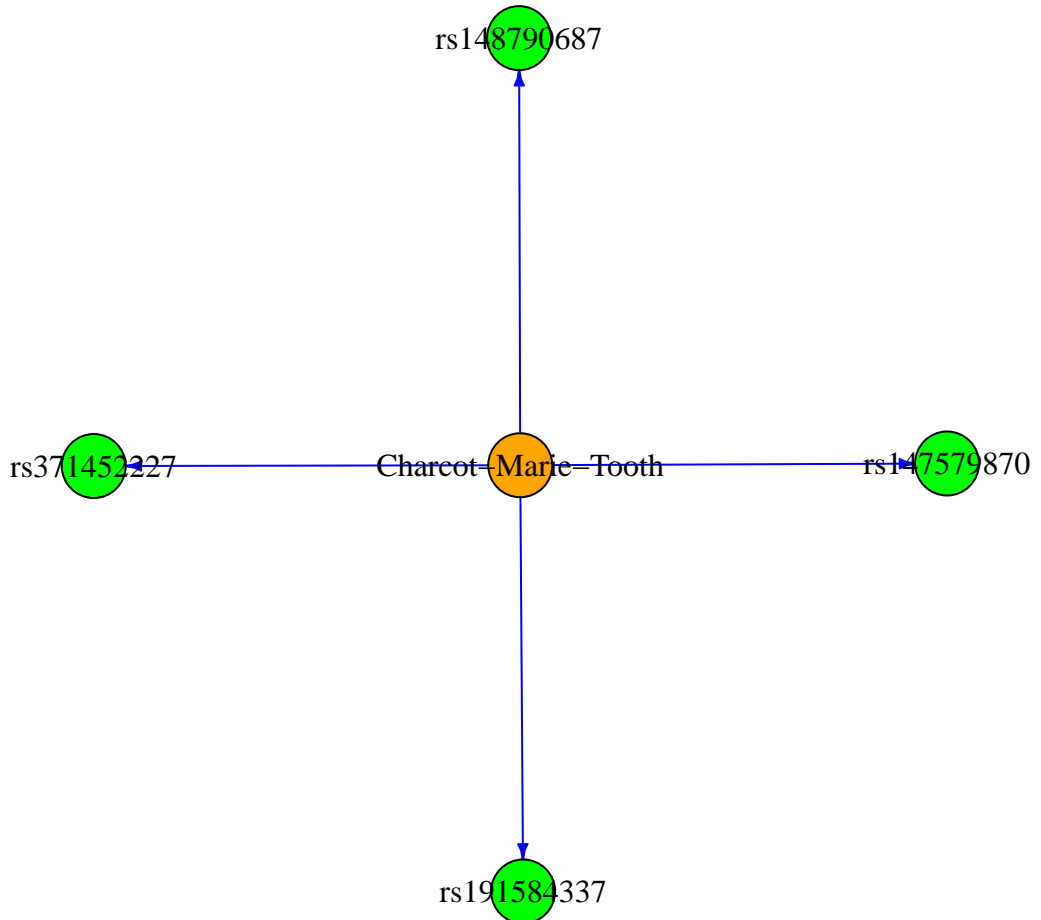

Variant–Disease Network (Charcot–Marie–Tooth disease)

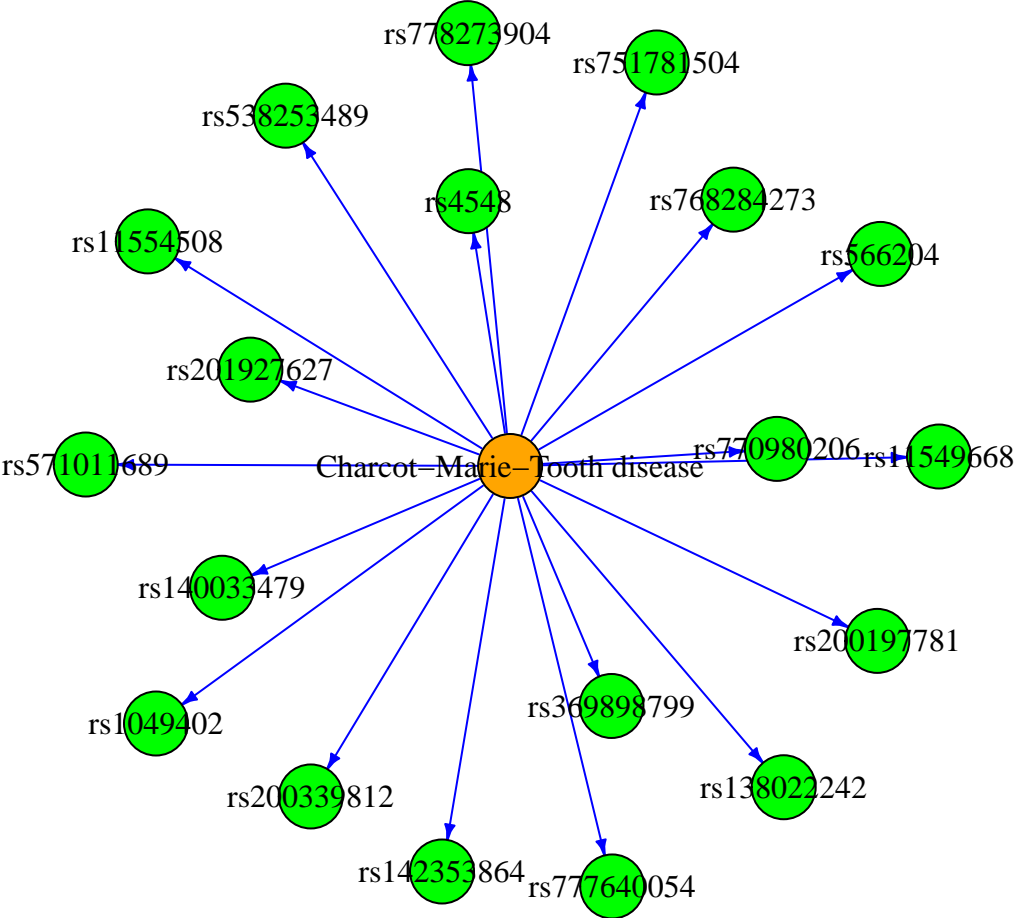



# Variant–Disease Network (Charcot–Marie–Tooth disease type 2D)

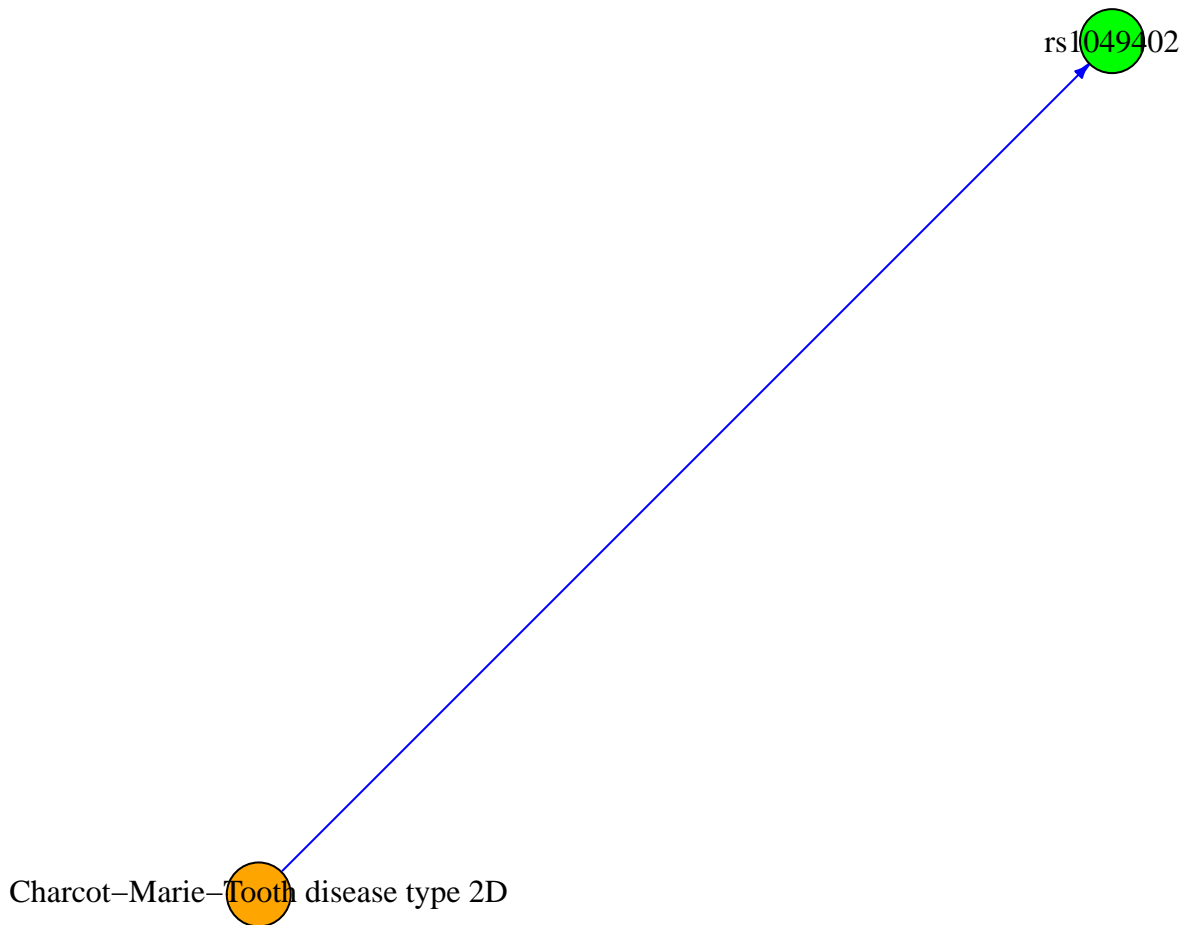

# Variant–Disease Network (Charcot–Marie–Tooth disease type 2E)

rs751512030

Charcot–Marie–Tooth disease type

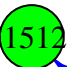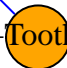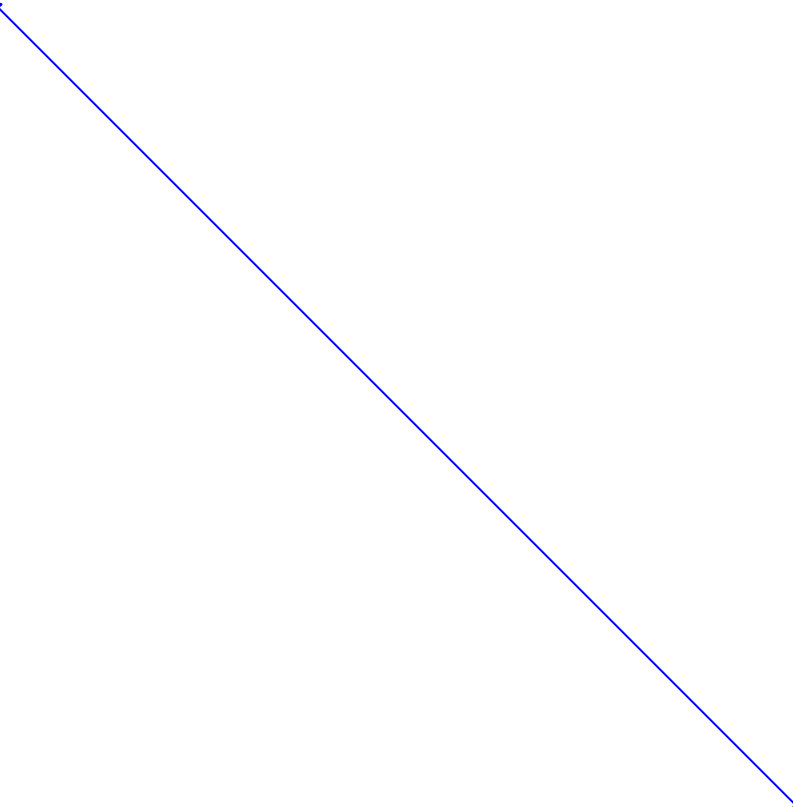

# Variant–Disease Network (Charcot–Marie–Tooth disease type 4)

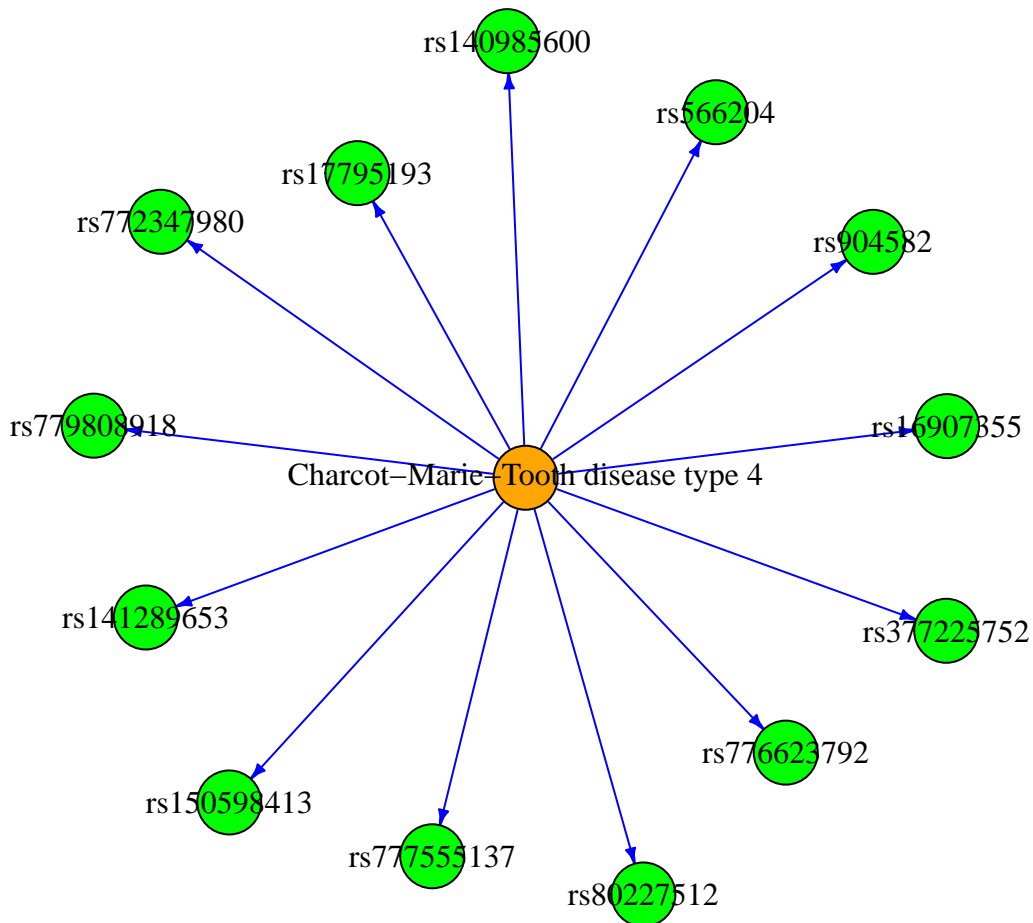

Variant–Disease Network (Childhood–Onset Schizophrenia)

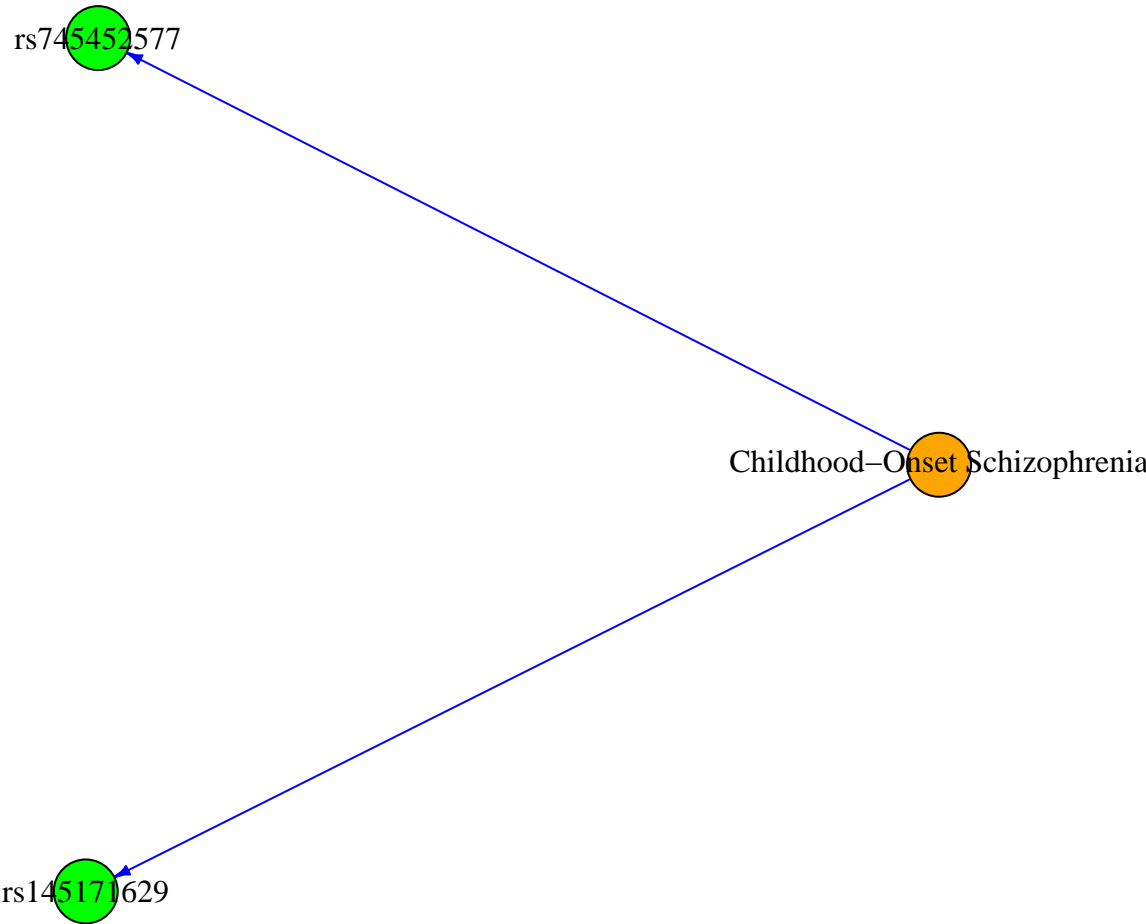

## Variant–Disease Network (Chitotriosidase deficiency)

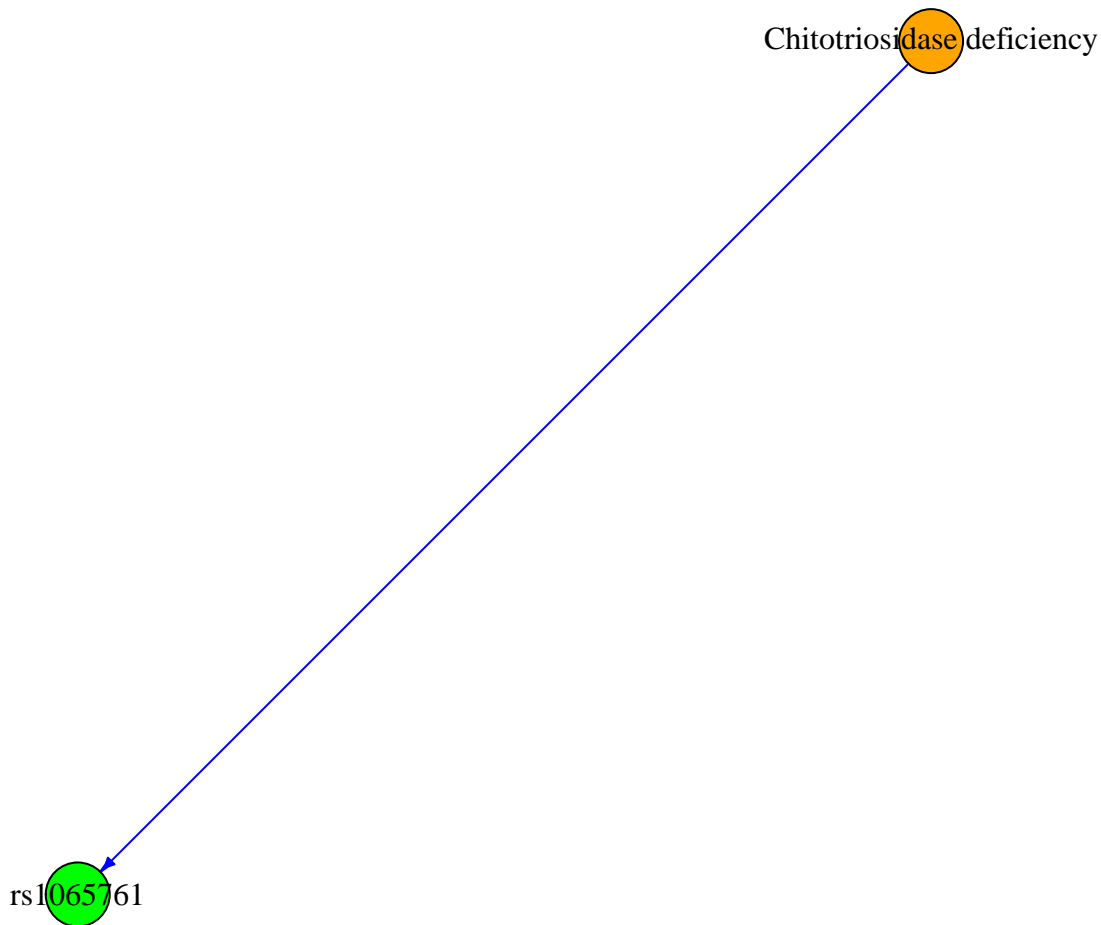

## Variant-Disease Network (Cholestanol storage disease)

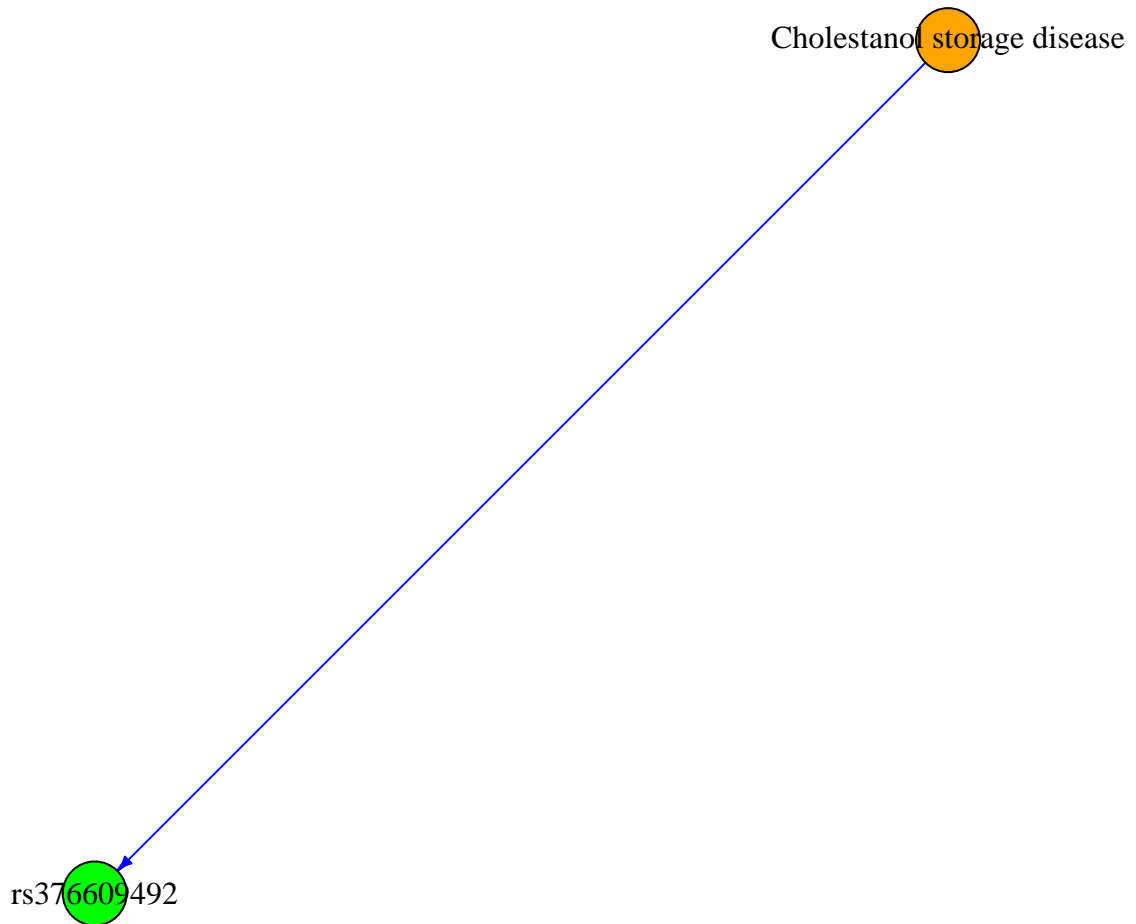

## Variant-Disease Network (Cholestasis)

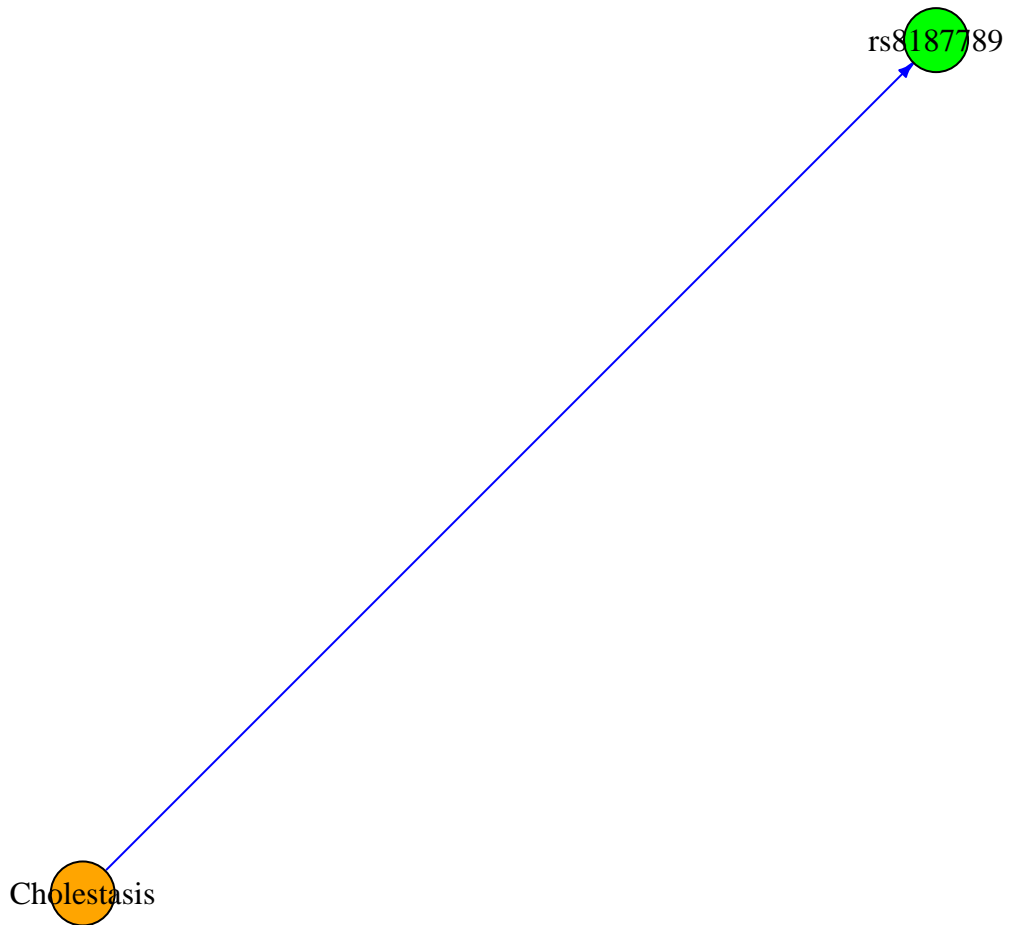

Variant–Disease Network (Chondrocalcinosis)

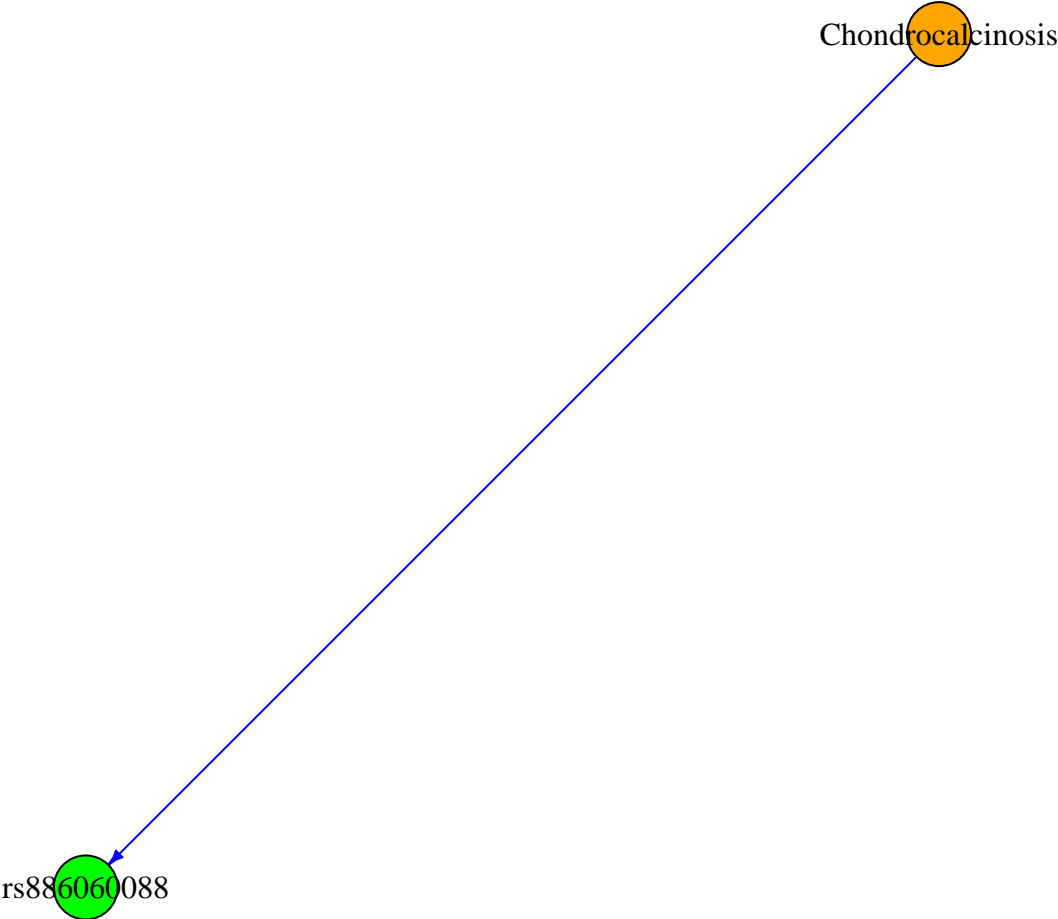



## Variant–Disease Network (Chondrodysplasia)

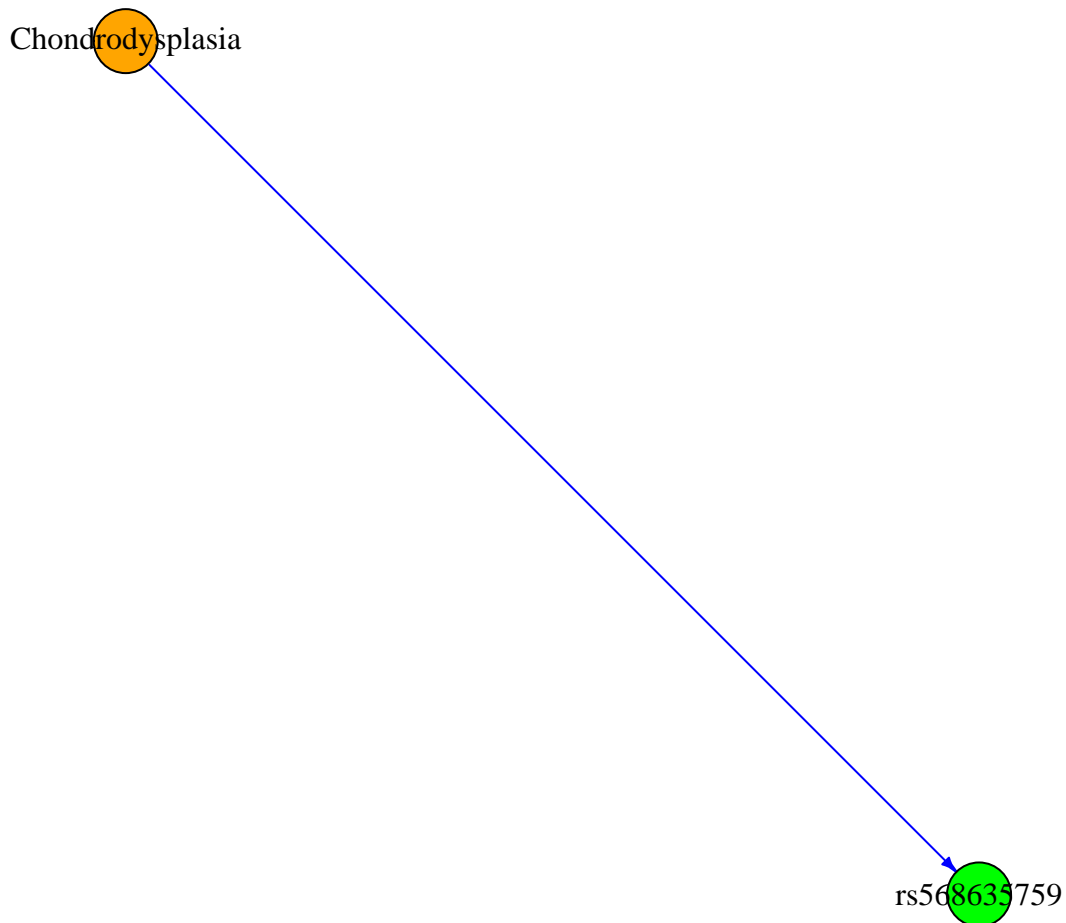

## Variant-Disease Network (Choreoacanthocytosis)

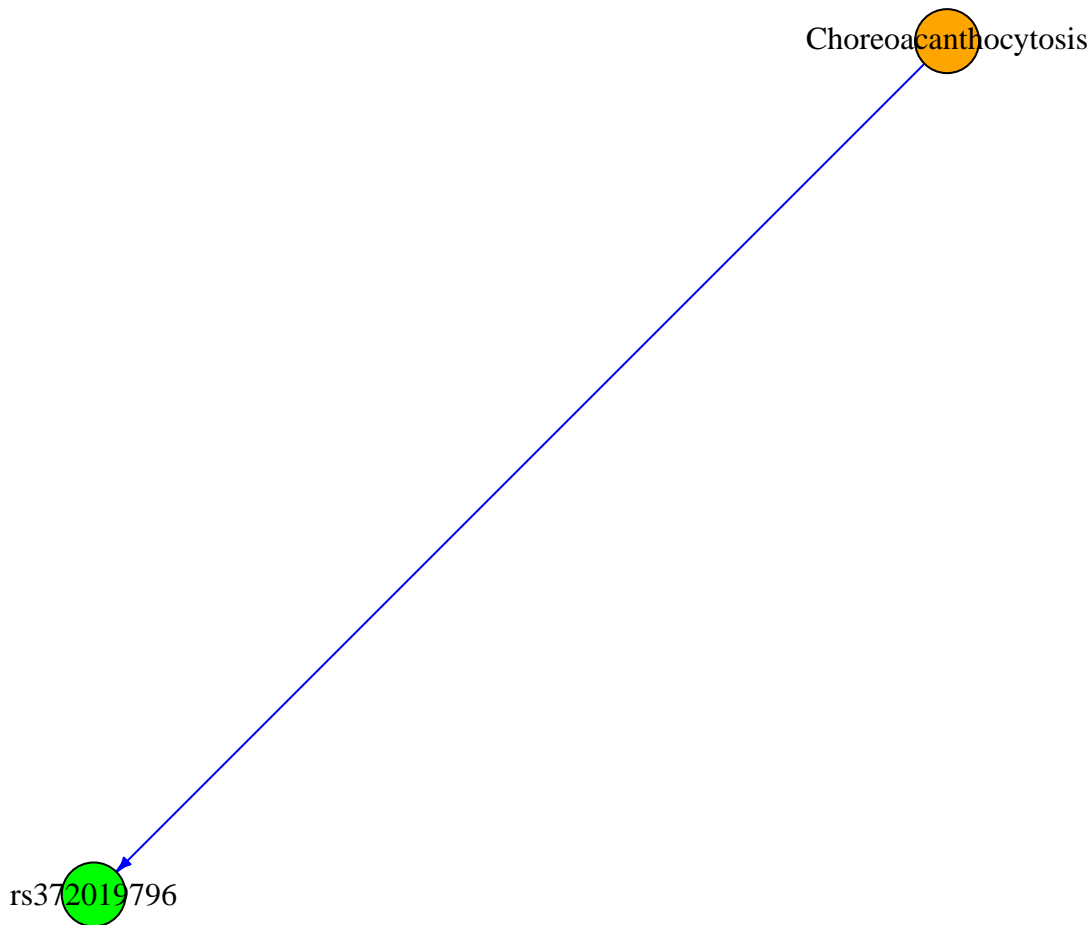

**Variant–Disease Network (Chronic infantile neurological)**

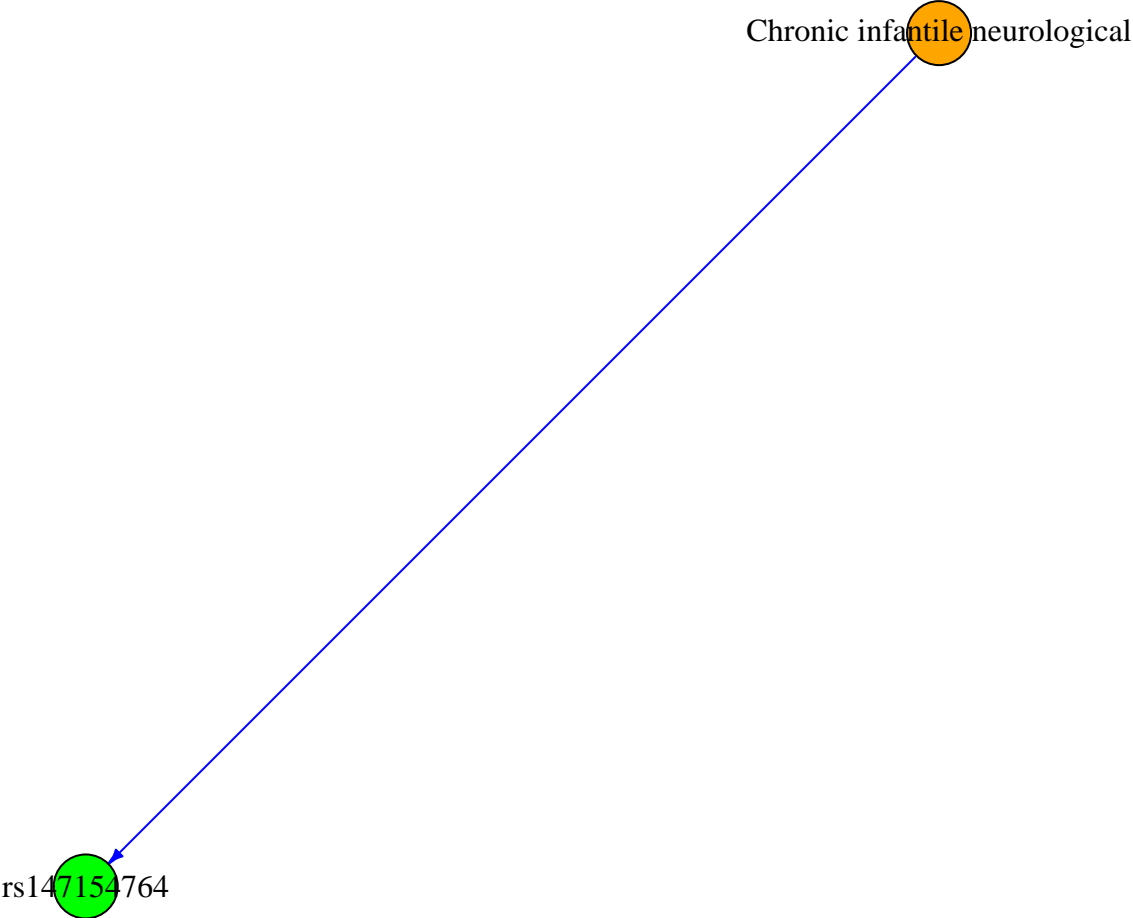

## Variant–Disease Network (Chronic obstructive pulmonary disease)

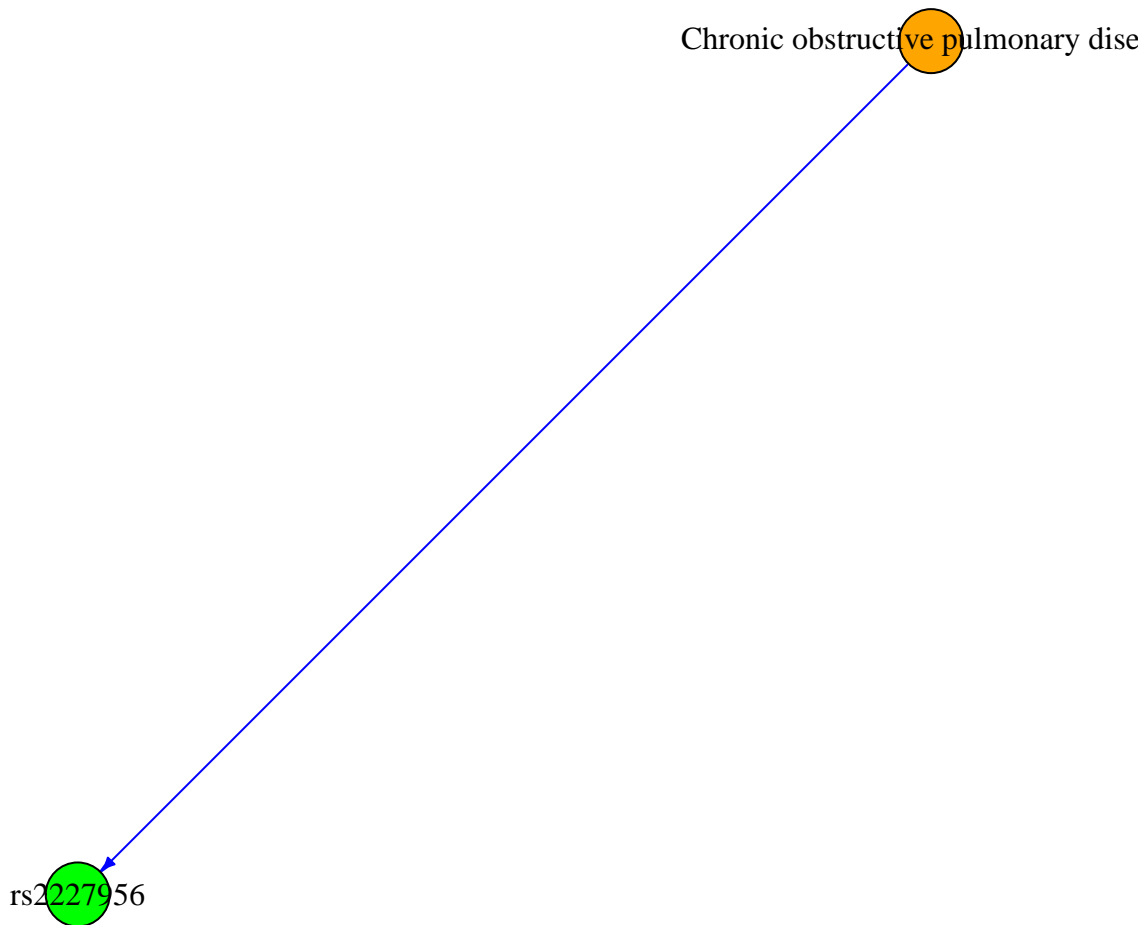

## Variant–Disease Network (Ciliary dyskinesia)

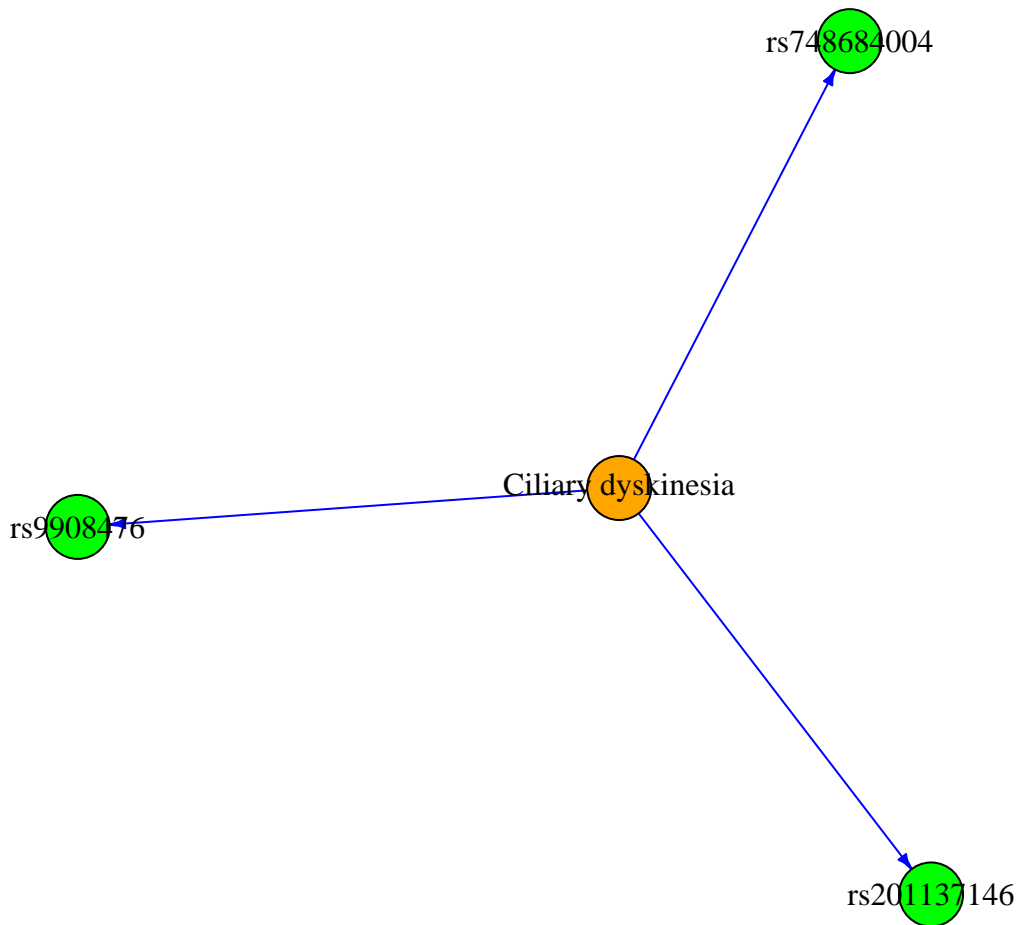

**Variant–Disease Network (cisplatin response – Toxicity/ADR)**

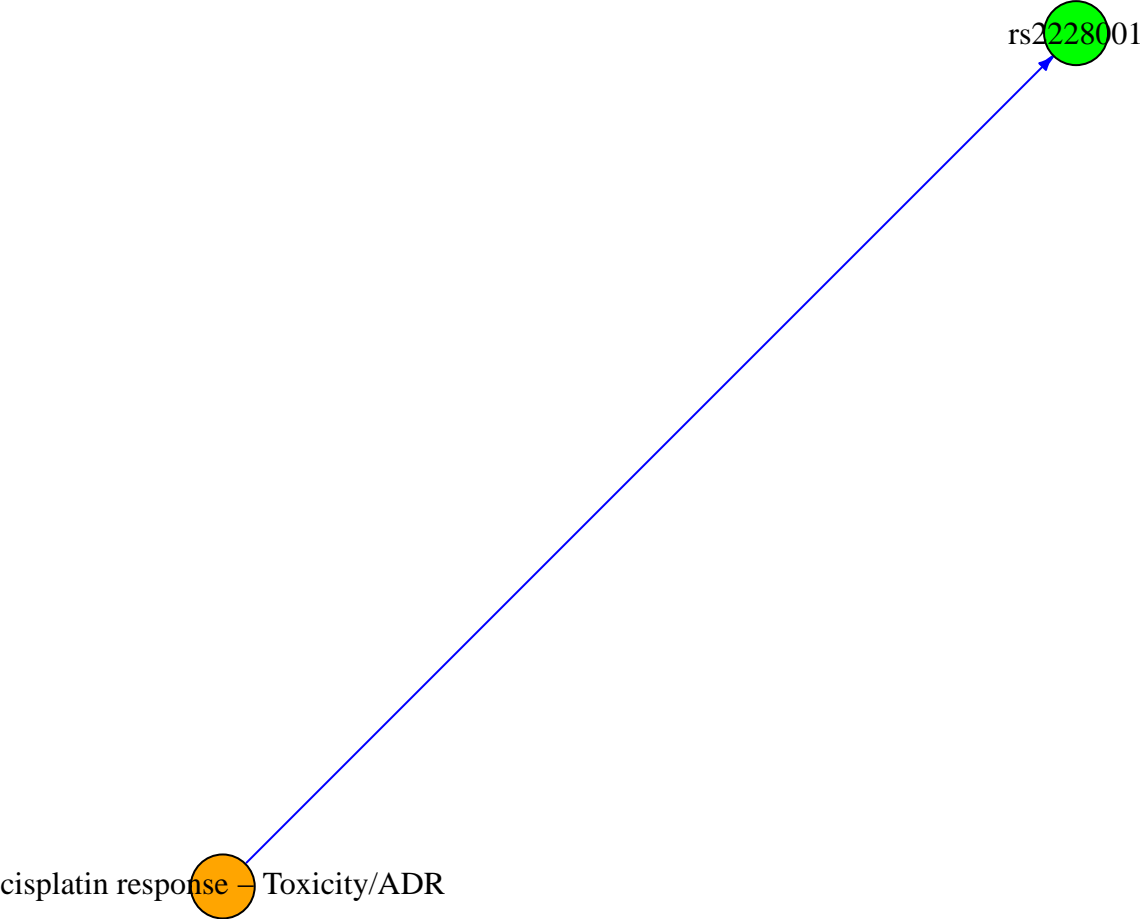

**Variant–Disease Network (Cleft palate)**

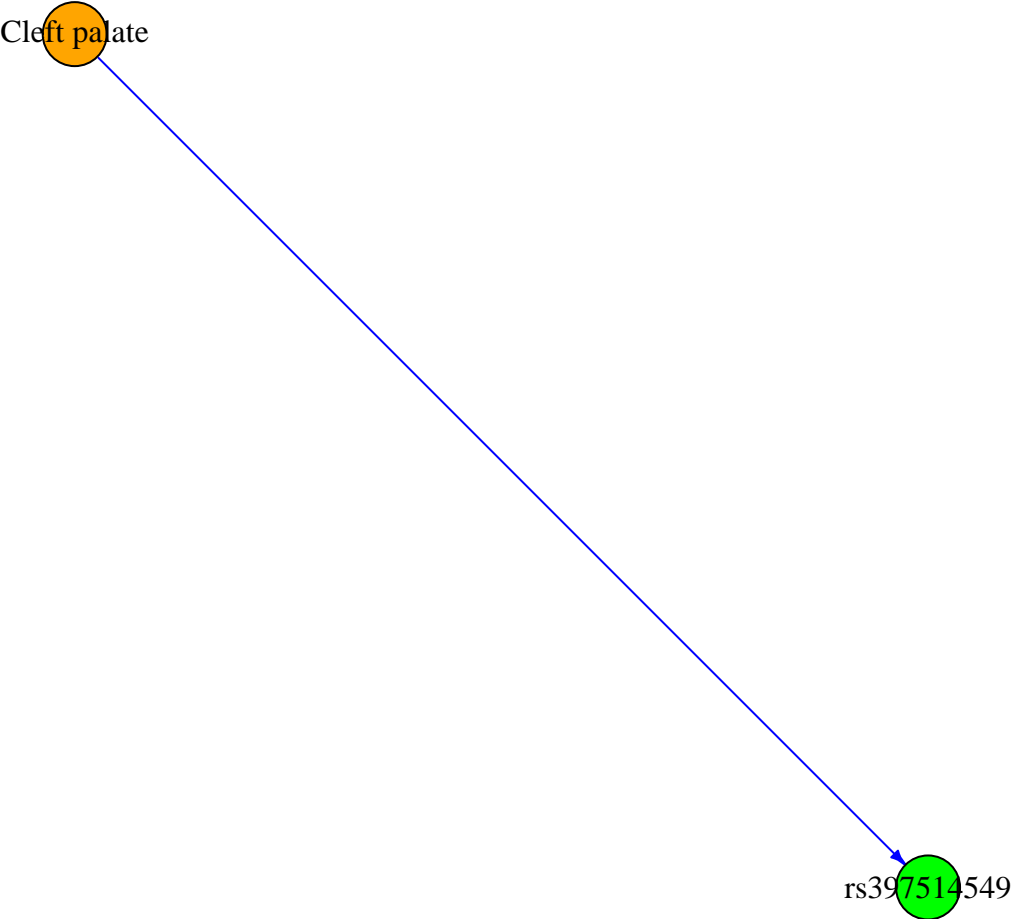

## Variant–Disease Network (C-like syndrome)

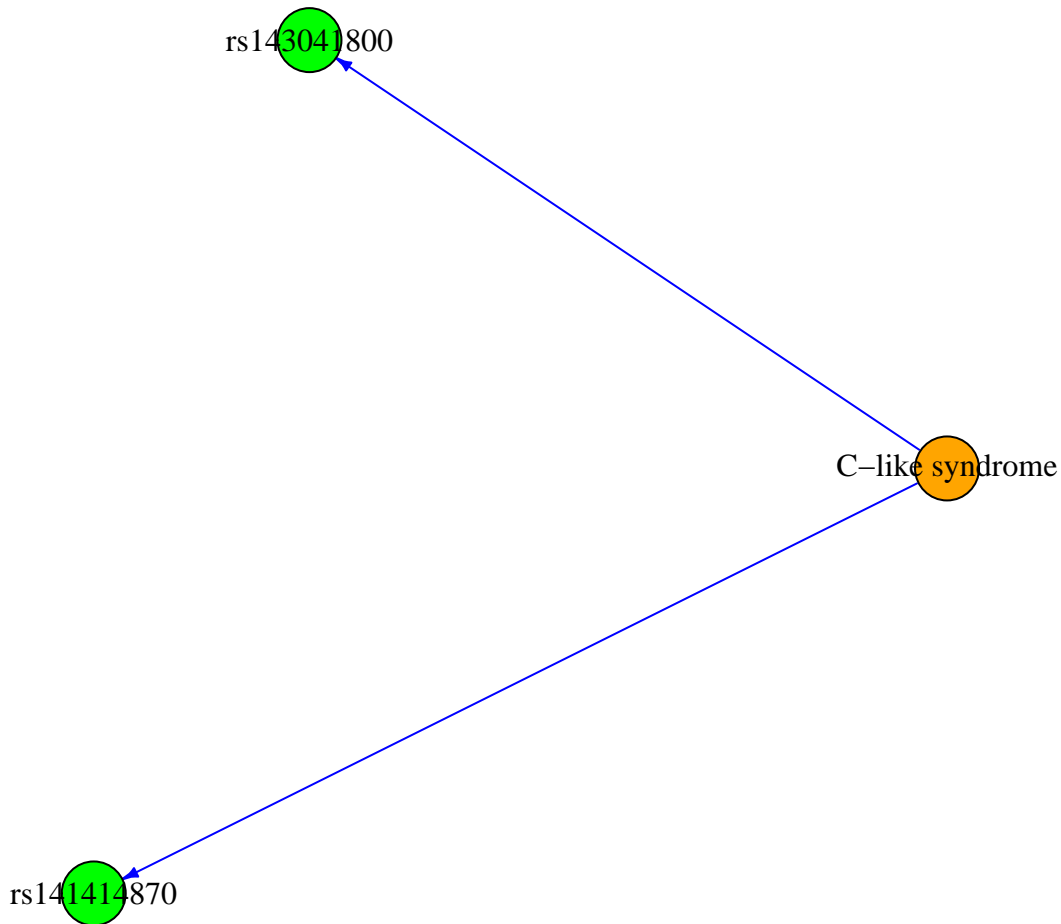



Variant–Disease Network (Cockayne syndrome)

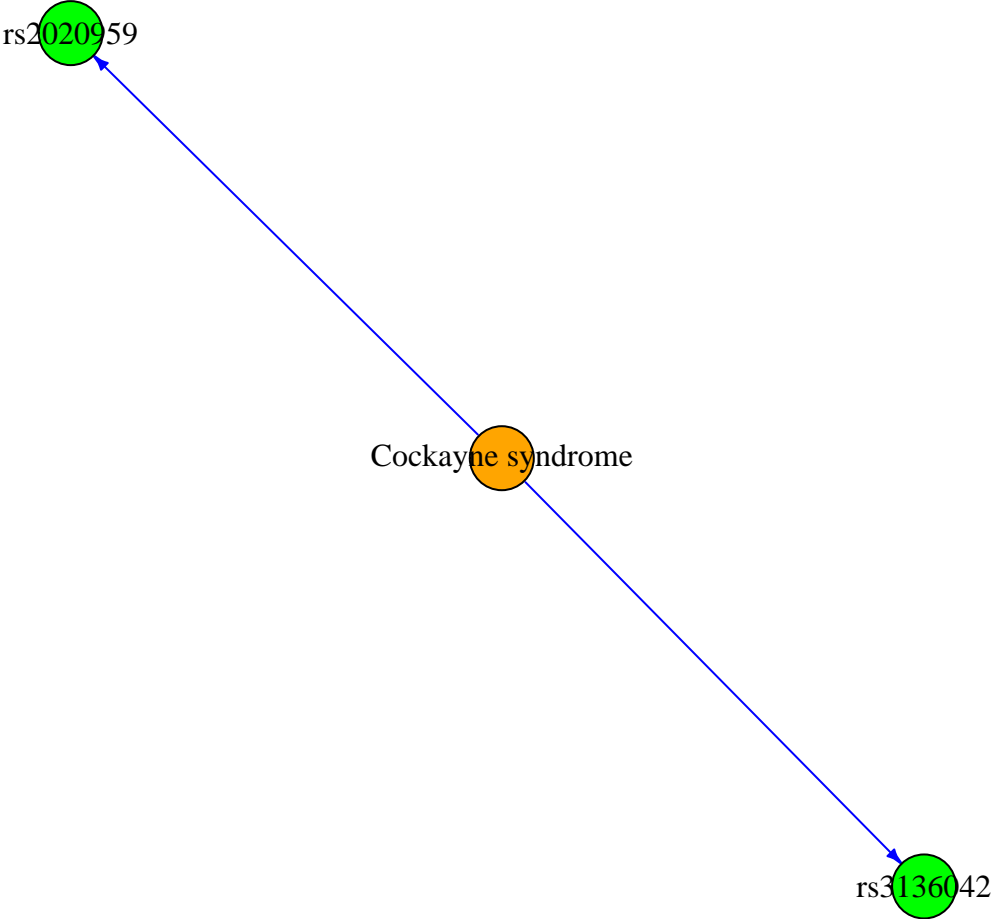

## Variant–Disease Network (Coenzyme Q10 deficiency)

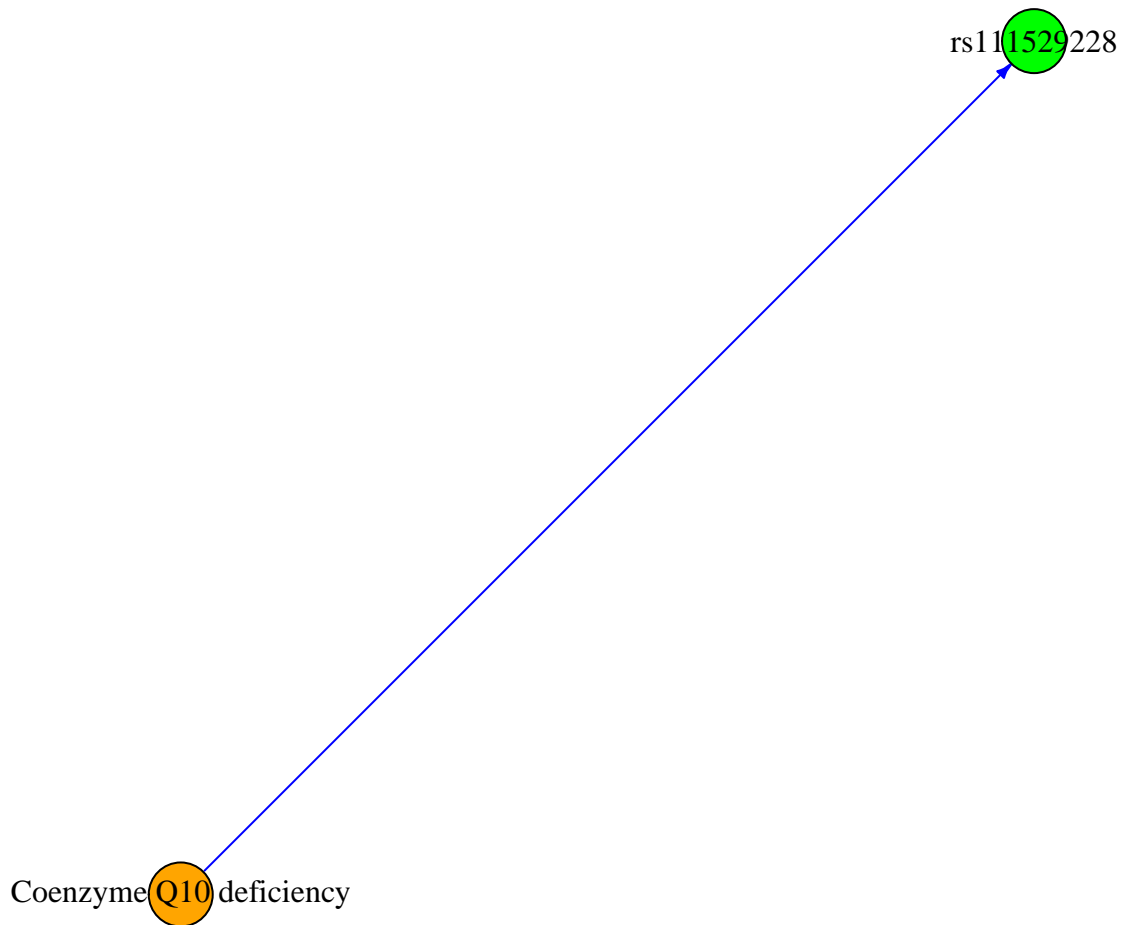

## Variant–Disease Network (Cognitive impairment)

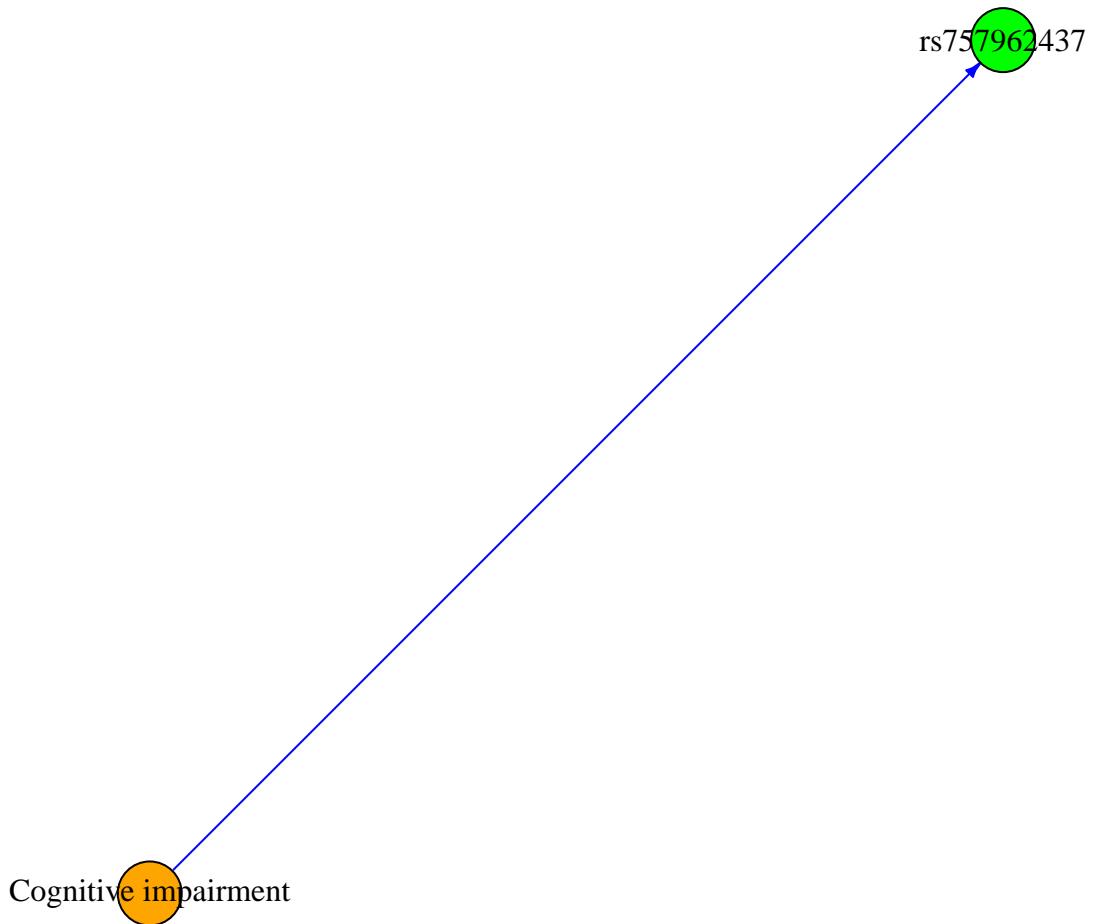

Variant–Disease Network (Collagen VI–related myopathy)

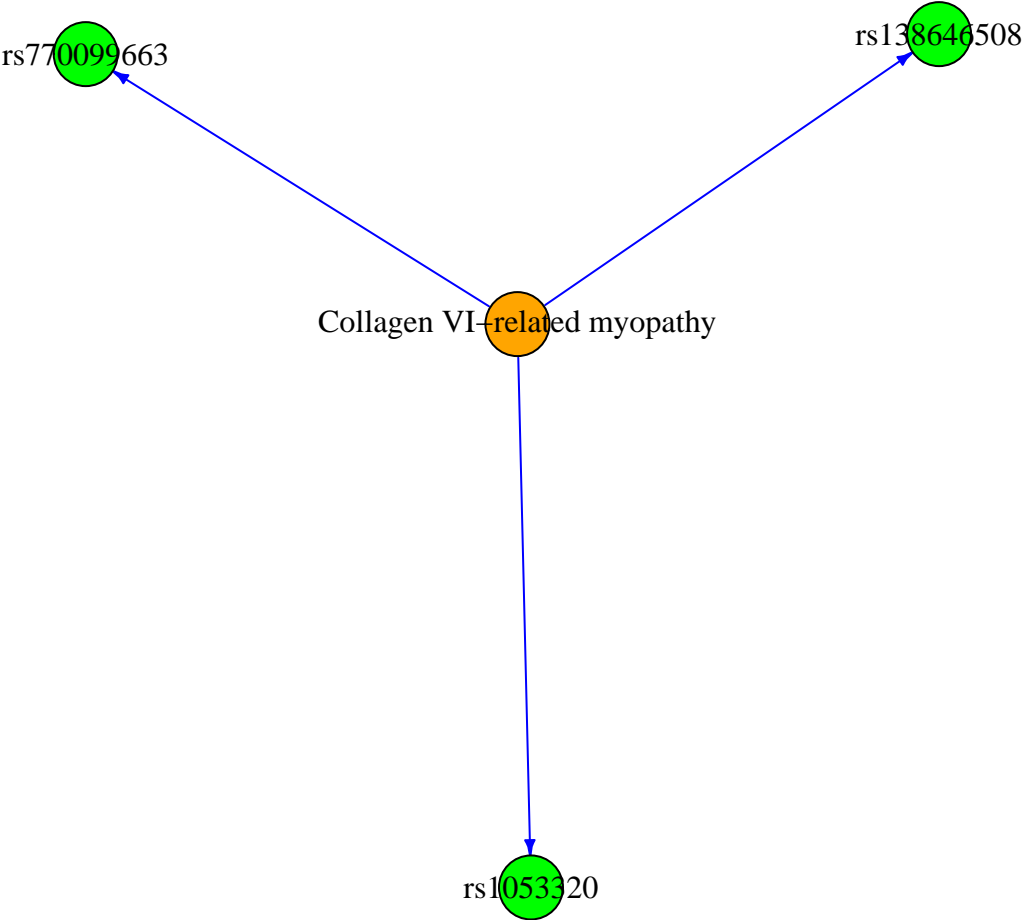

## Variant-Disease Network (Colorectal cancer)

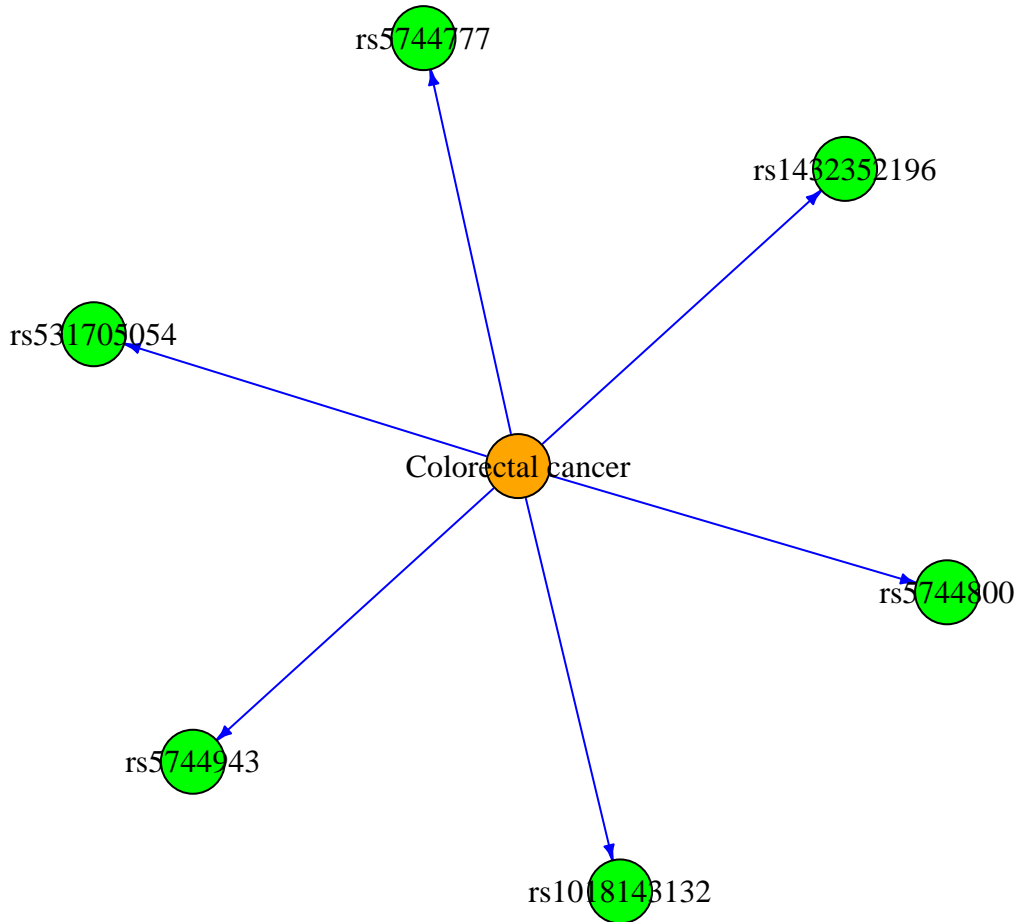

Variant–Disease Network (Combined oxidative phosphory deficiency)

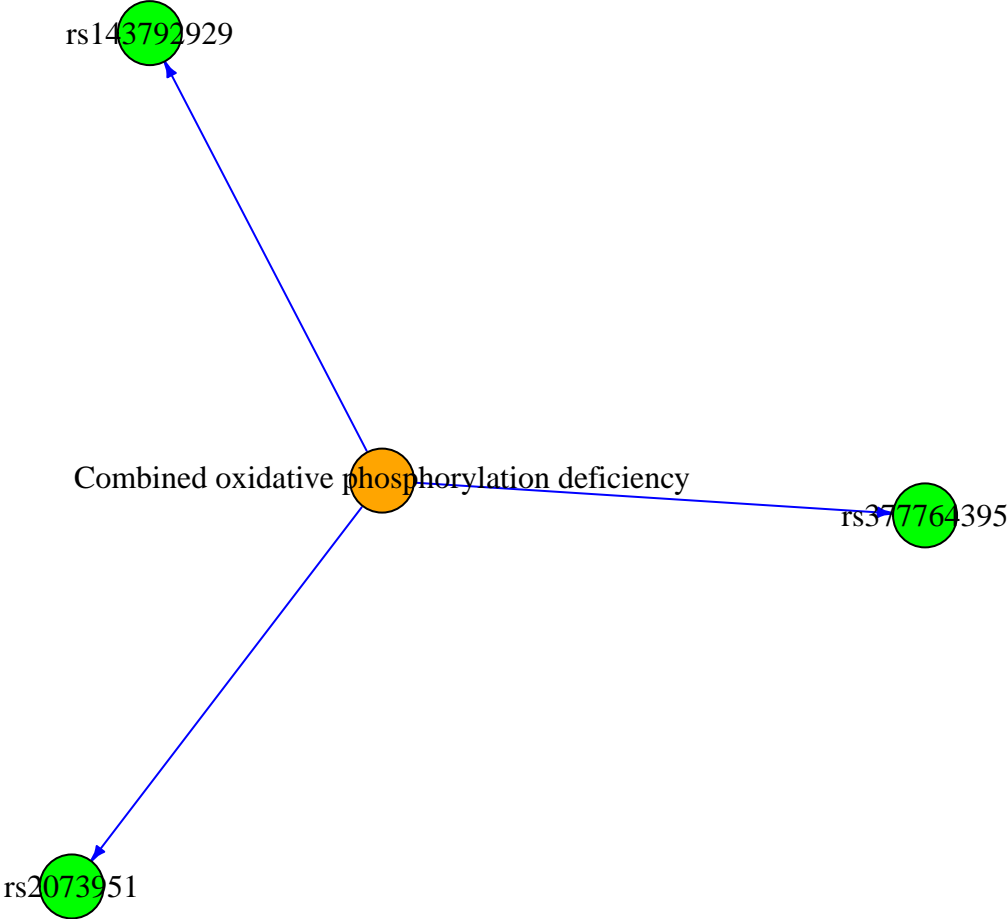

Variant–Disease Network (Combined oxidative phosphorylation deficiency

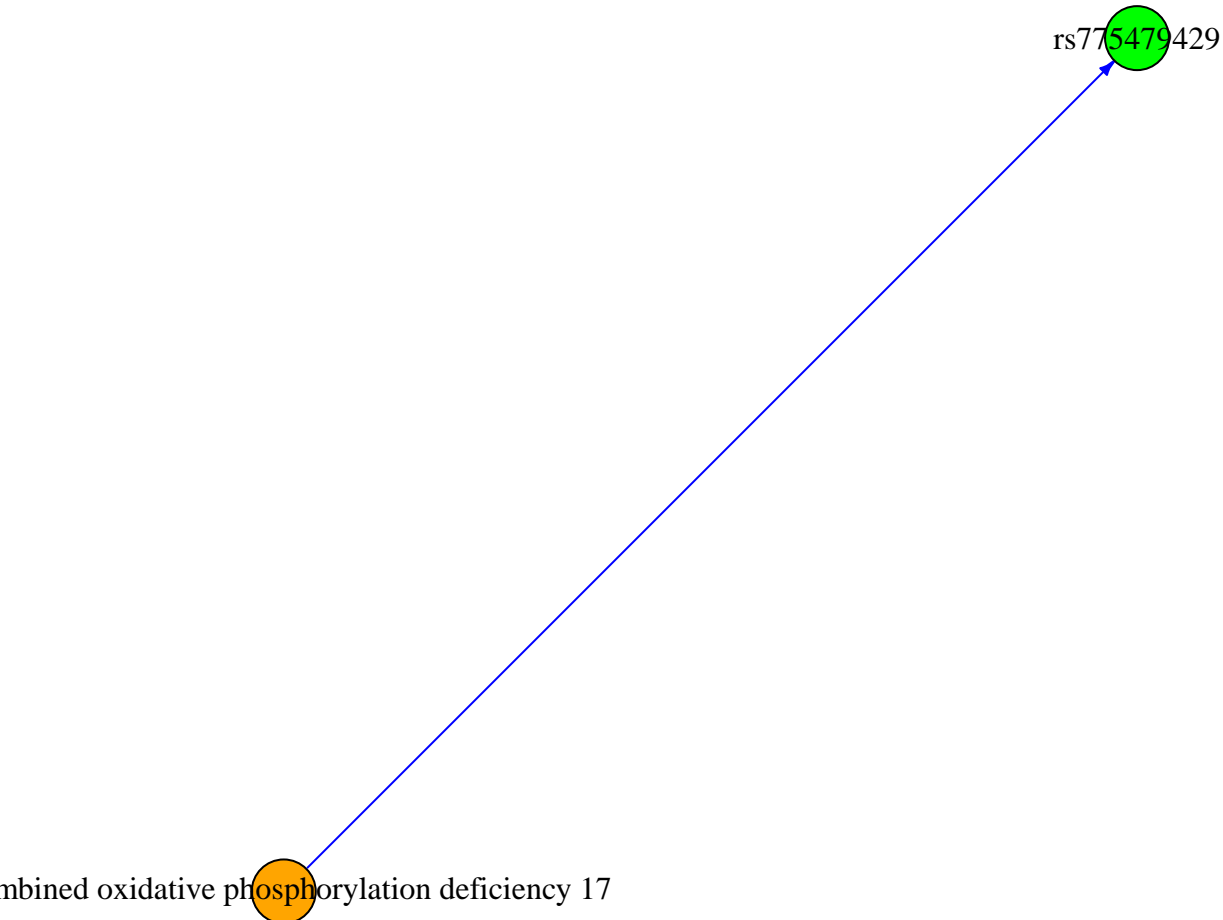

**Variant–Disease Network (Combined Pituitary Hormone Deficiency)**

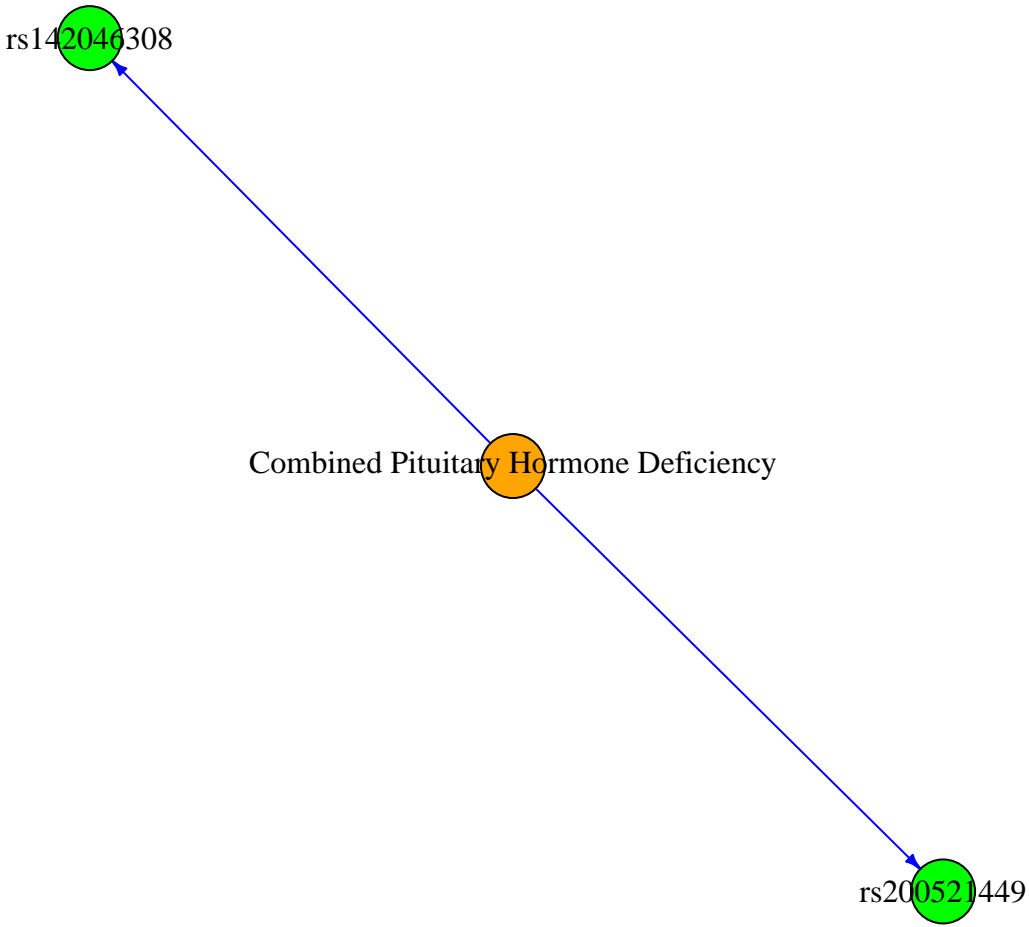



## Variant–Disease Network (Cone dystrophy 3)

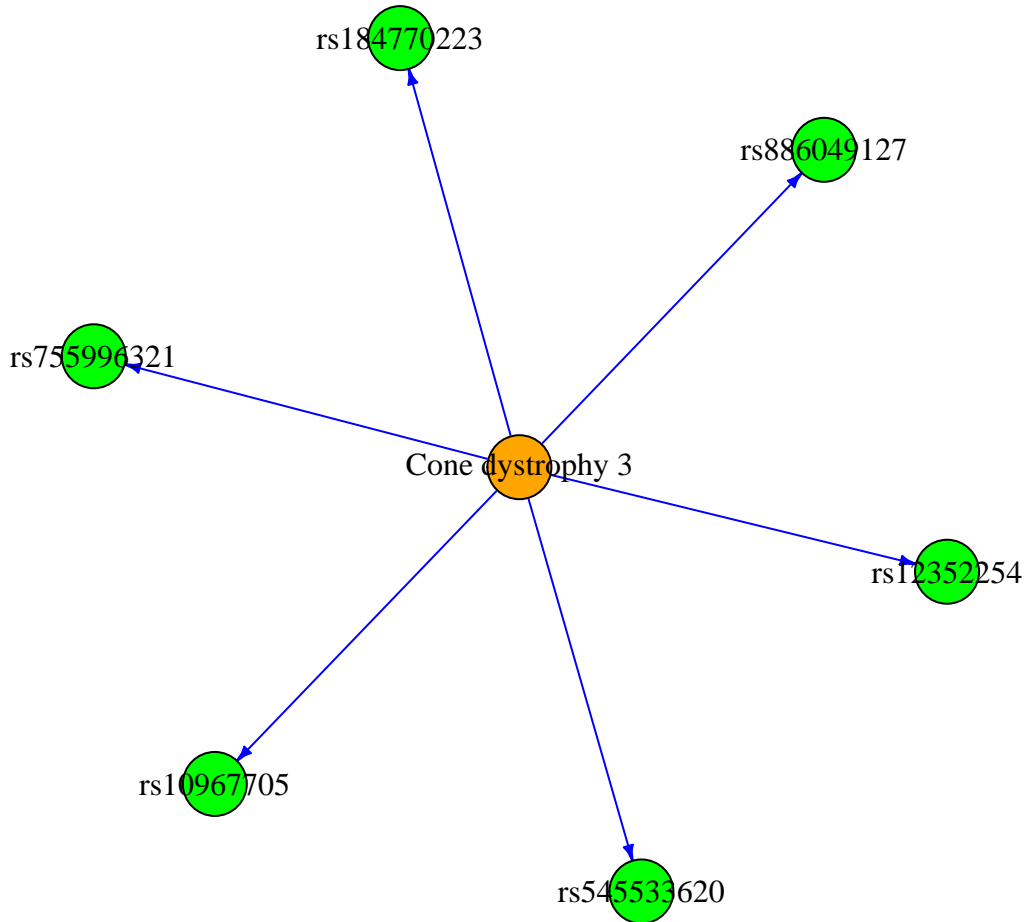

## Variant-Disease Network (Cone-rod degeneration)

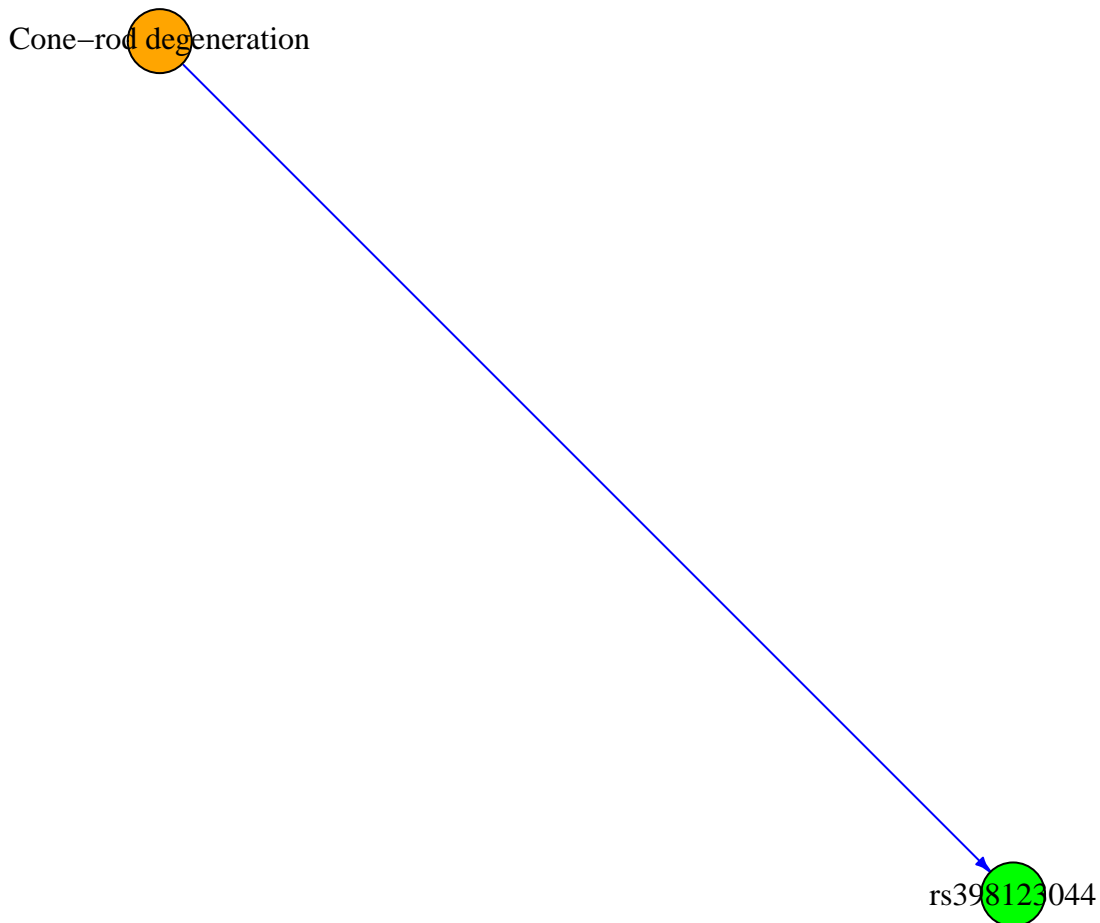

## Variant–Disease Network (Cone–Rod Dystrophy)

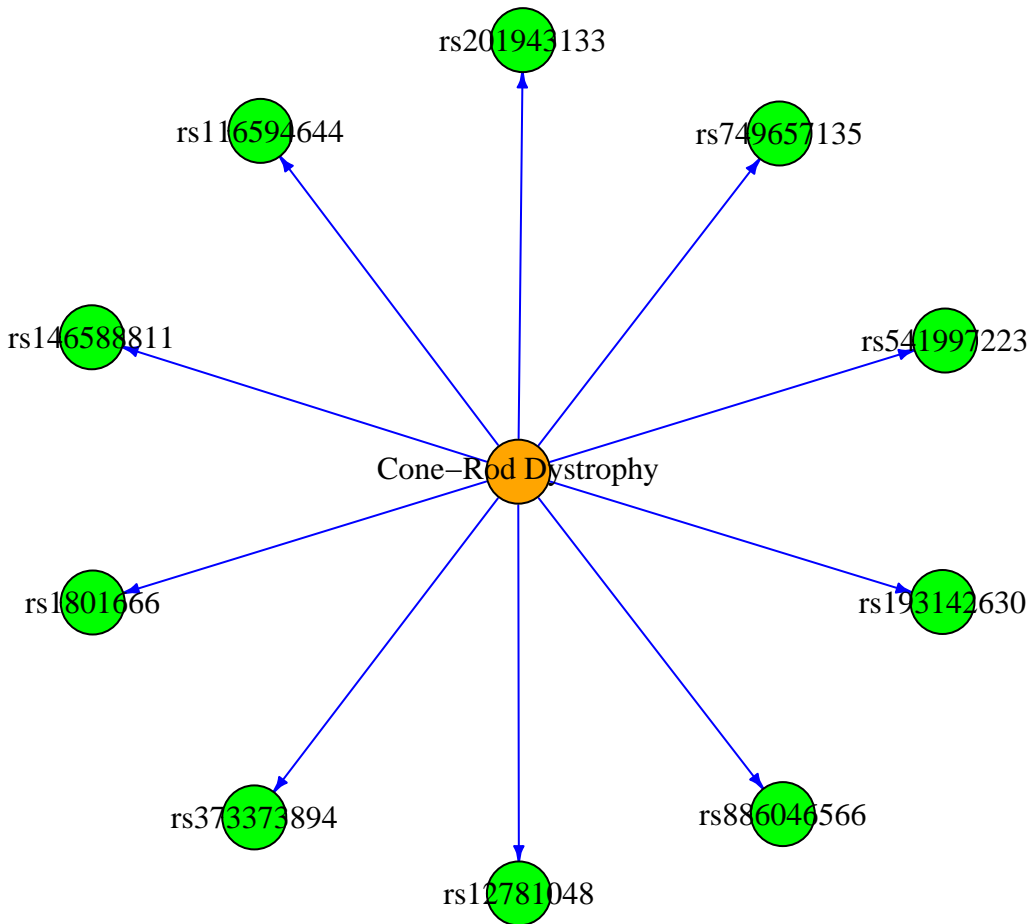

Variant–Disease Network (Cone–rod dystrophy 15)

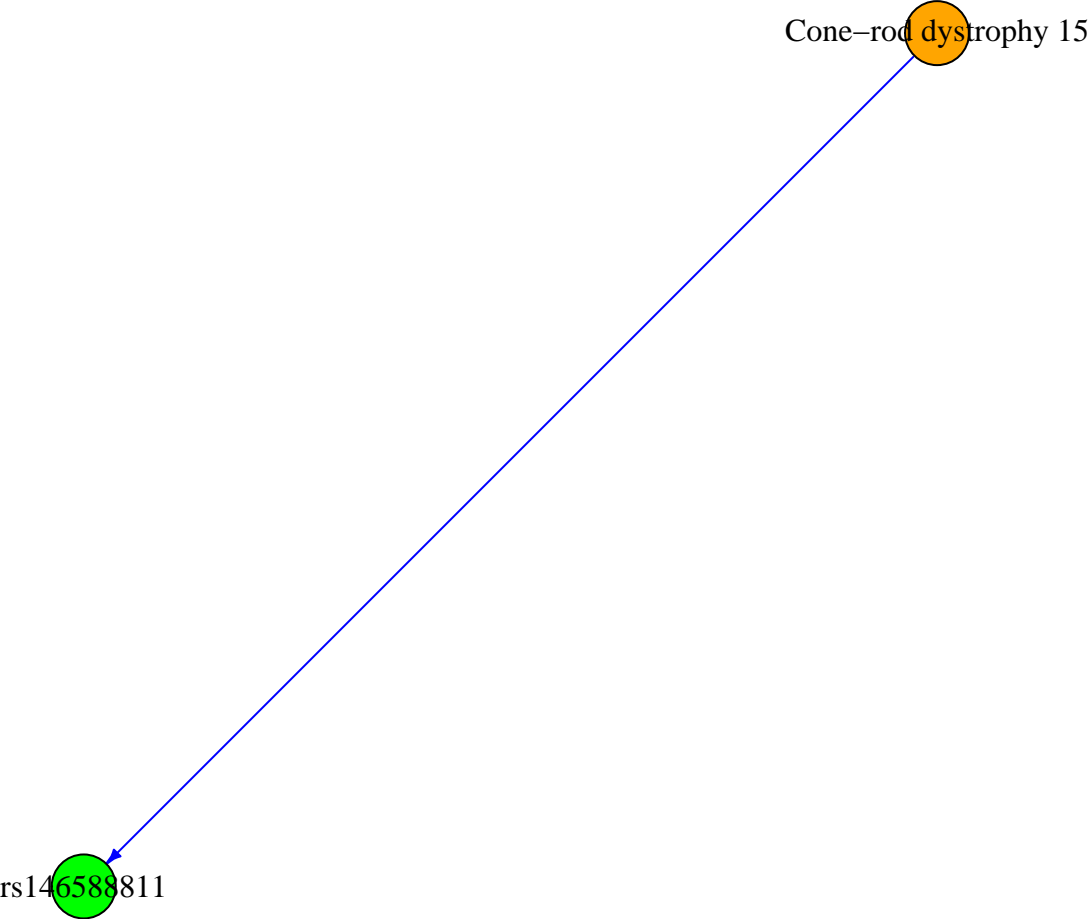

Variant–Disease Network (Cone–rod dystrophy 18)

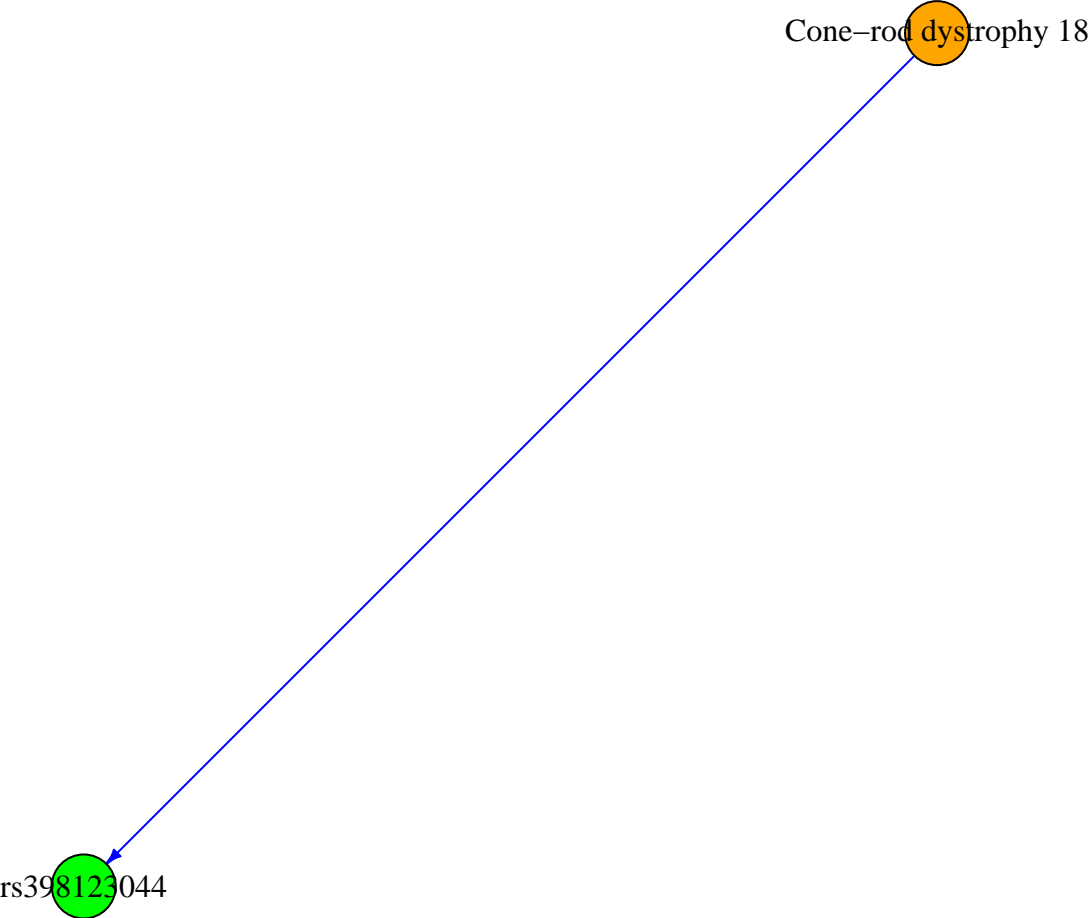

**Variant–Disease Network (Congenital adrenal hyperplasia)**

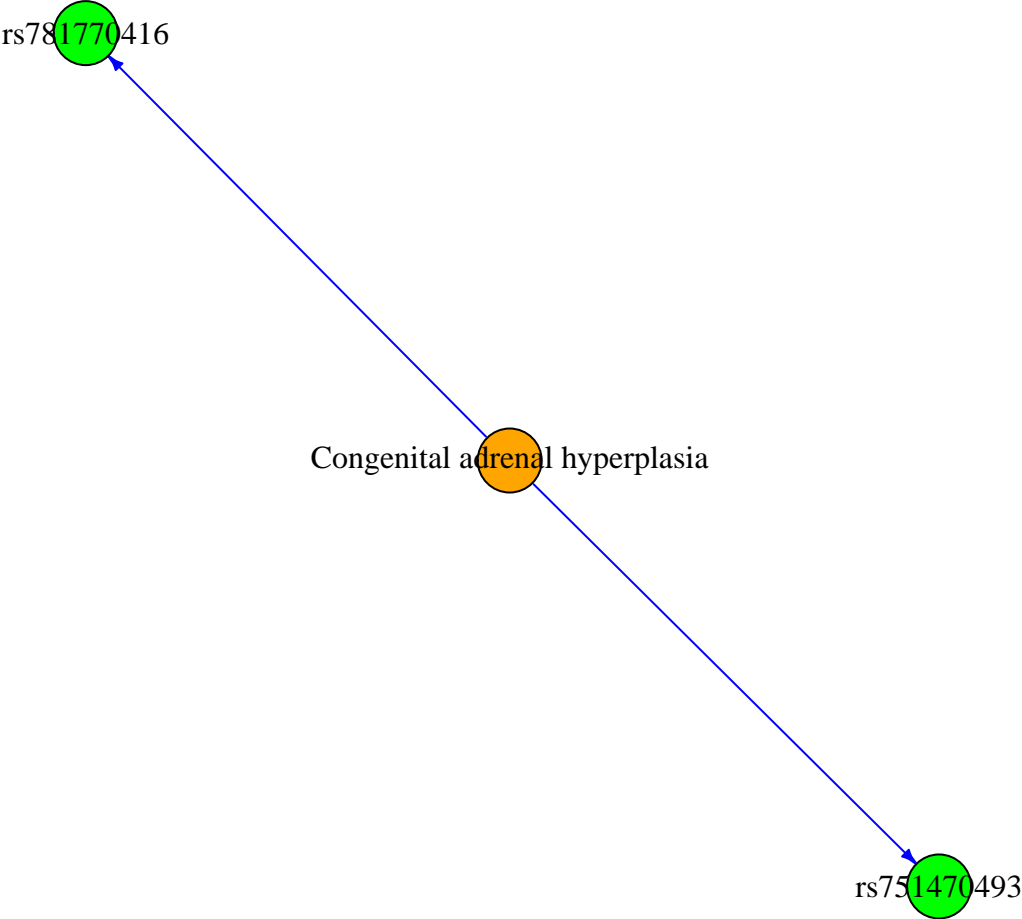

**Variant–Disease Network (Congenital cerebellar hypoplasia)**

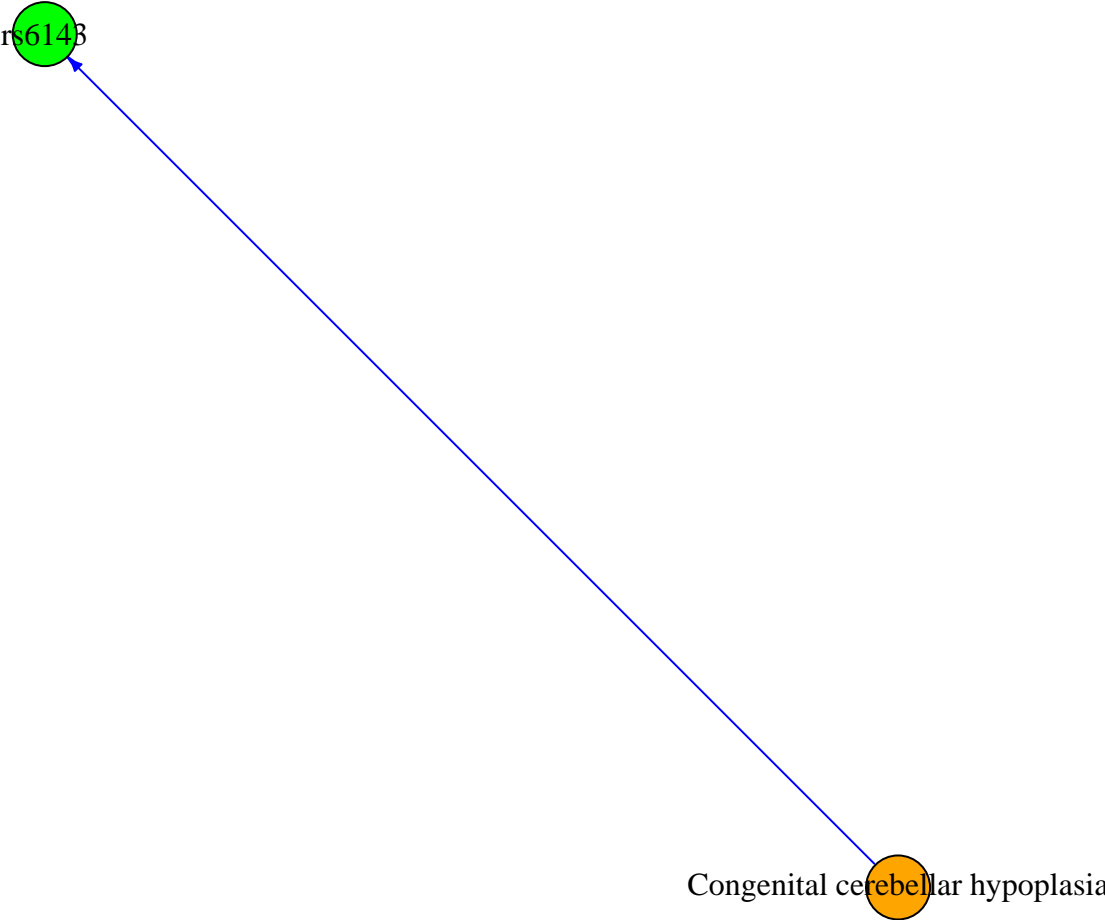

**Variant–Disease Network (Congenital contractural arachnodactyly)**

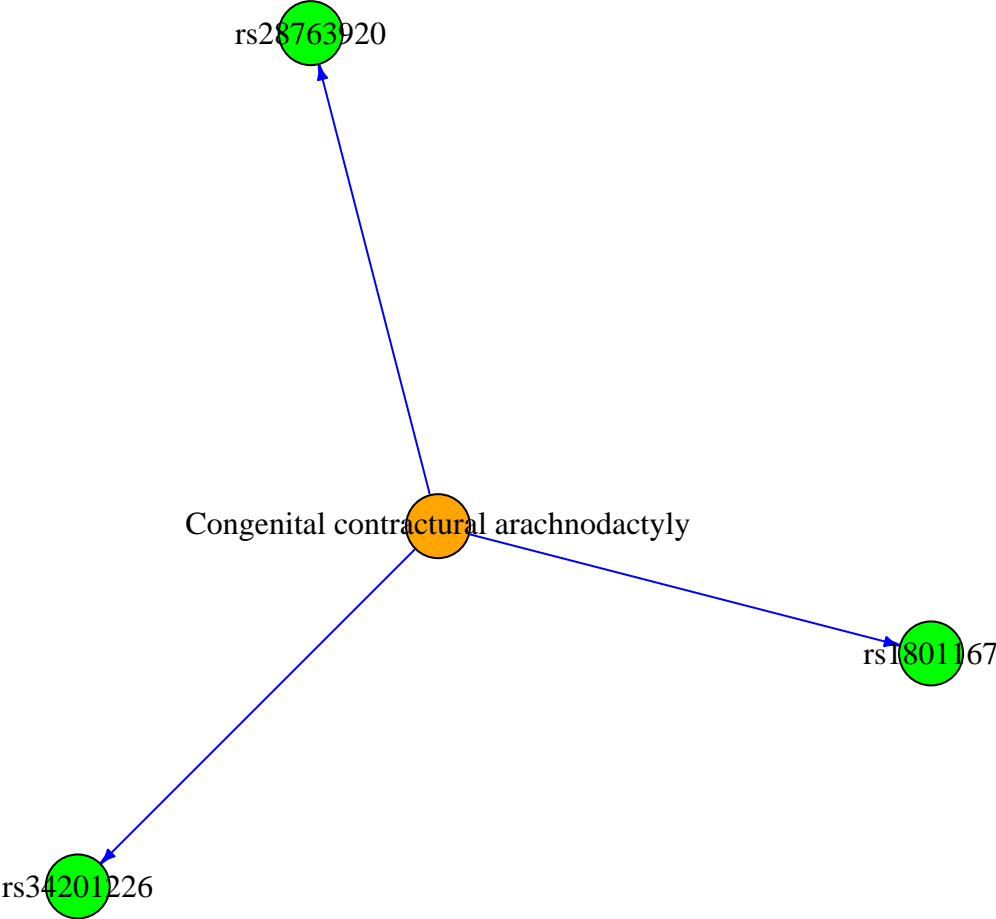



Variant–Disease Network (Congenital defect of folate absorption)

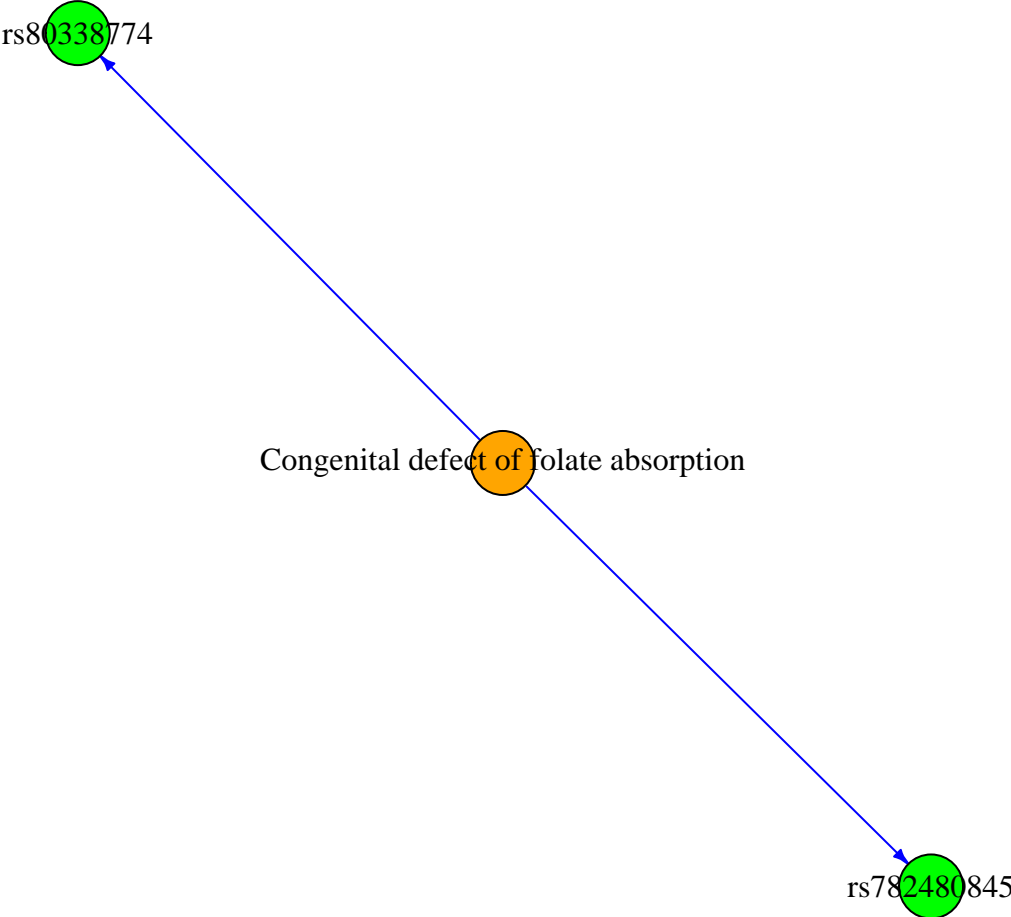

# Variant–Disease Network (Congenital disorder of glycosylation)

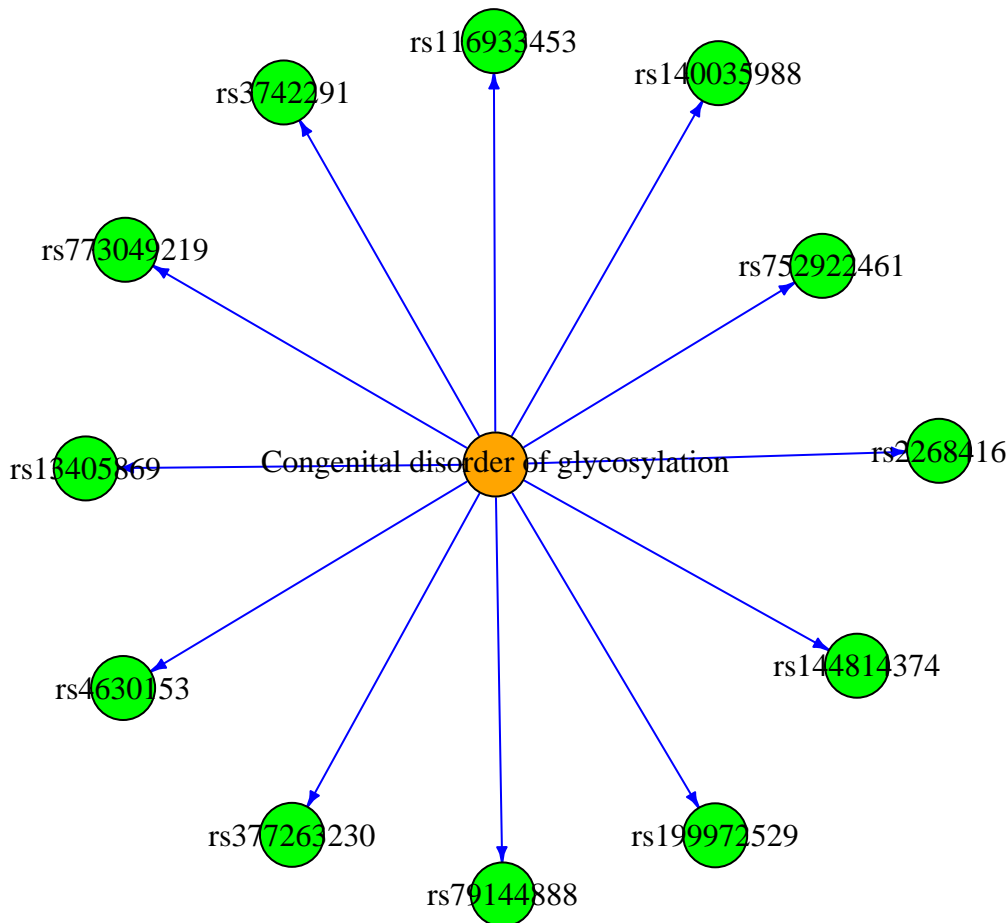

**Variant–Disease Network (Congenital disorder of glycosylation type 1t)**

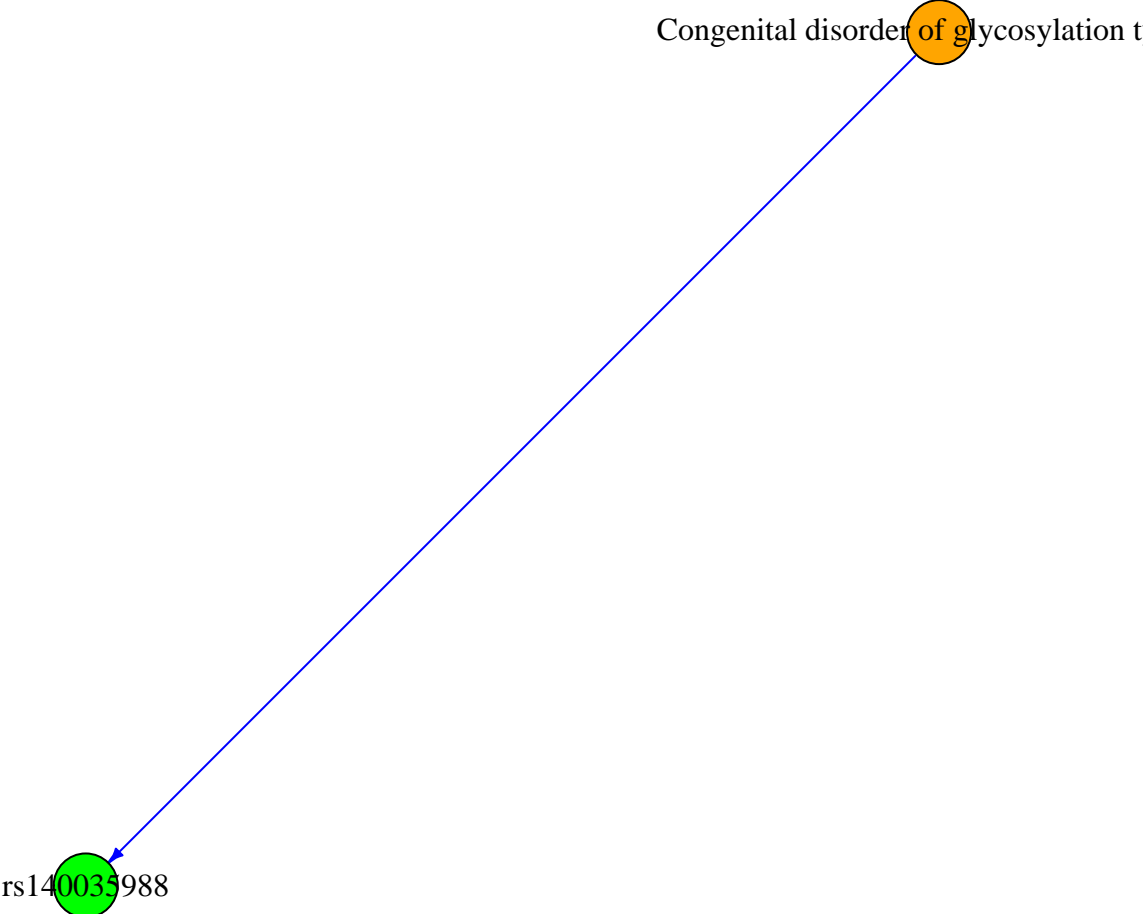

**Variant–Disease Network (Congenital disorder of glycosylation type 2H)**

rs121434387

Congenital disorder of glycosylation type 2H

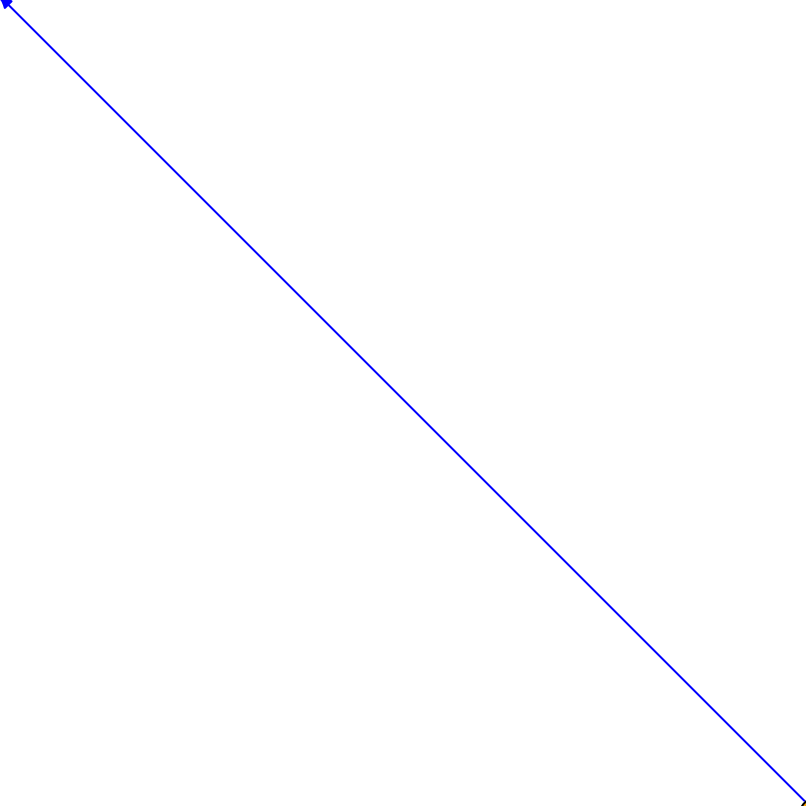

Variant–Disease Network (Congenital generalized lipodystrophy)

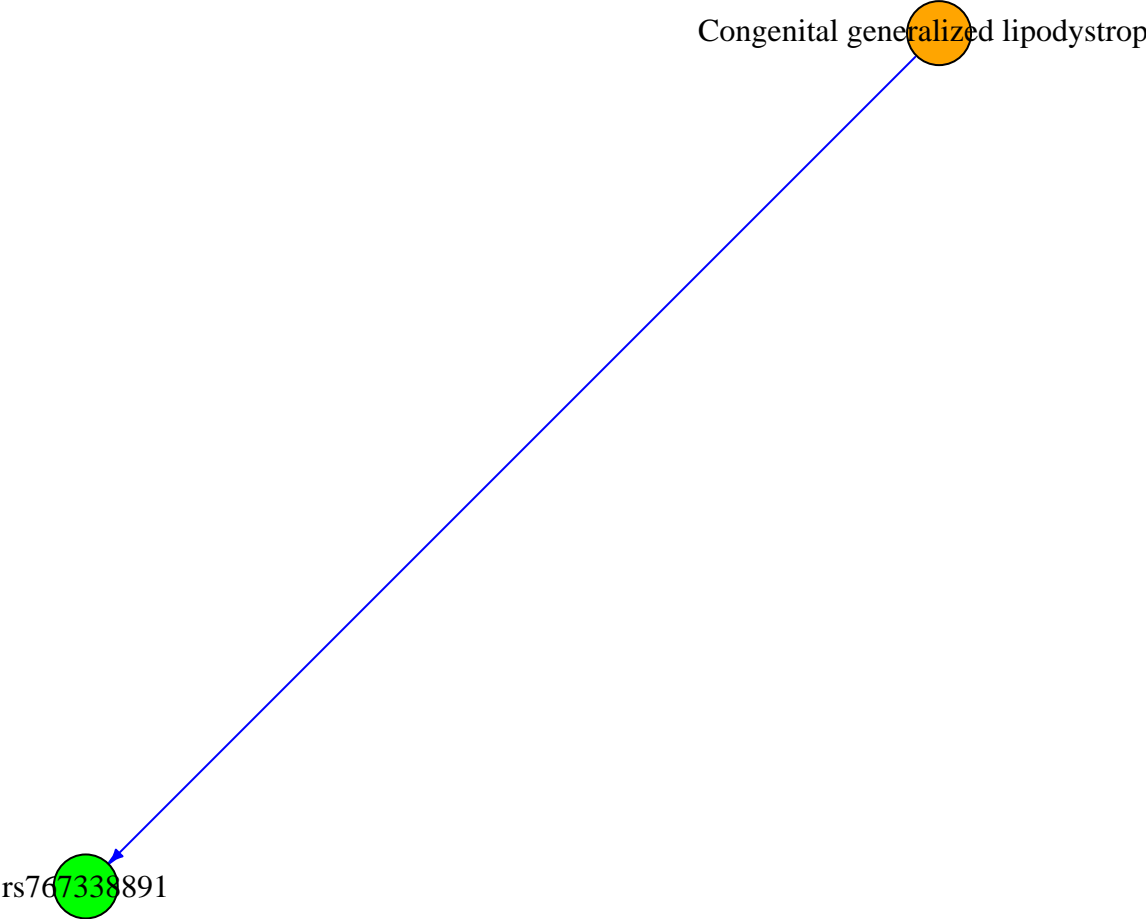

# Variant–Disease Network (Congenital generalized lipodystrophy type 1)

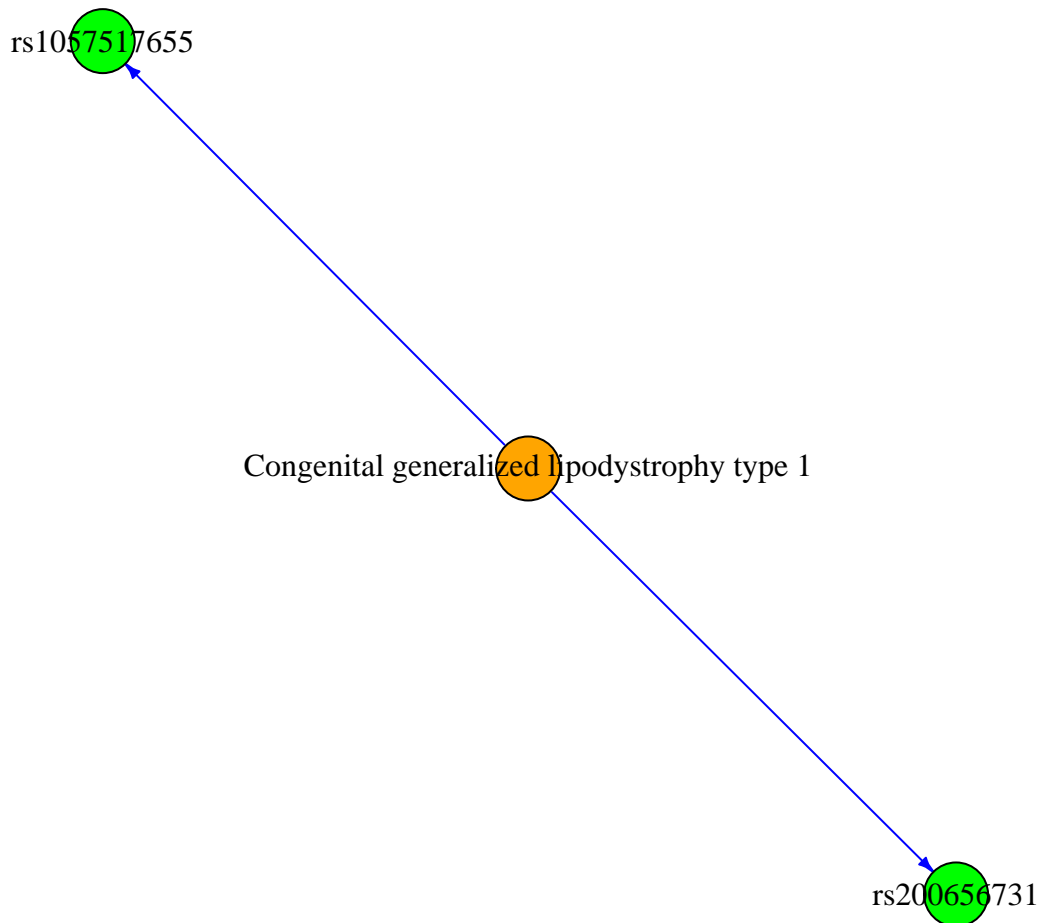

Variant–Disease Network (Congenital glucose–galactose malabsorption)

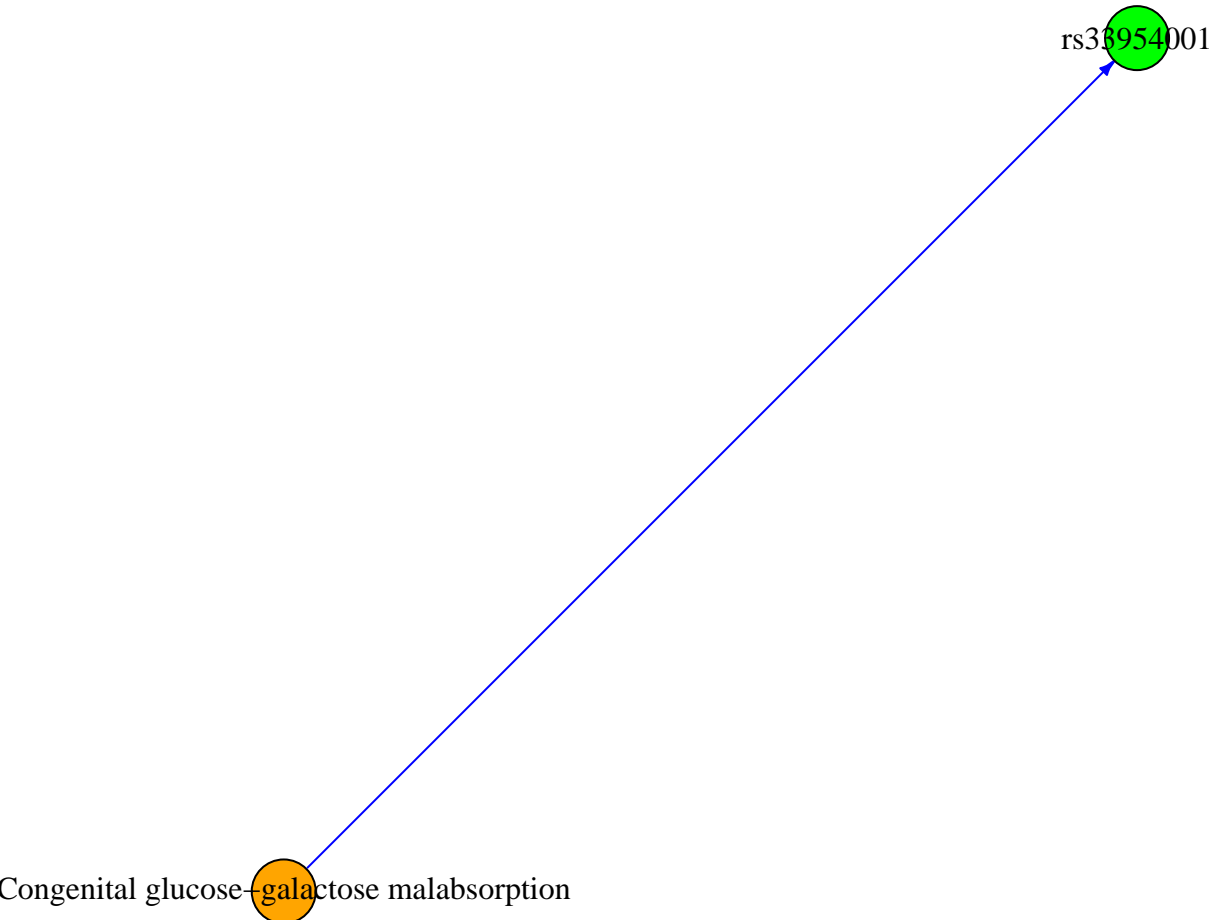

## Variant–Disease Network (Congenital hyperammonemia)

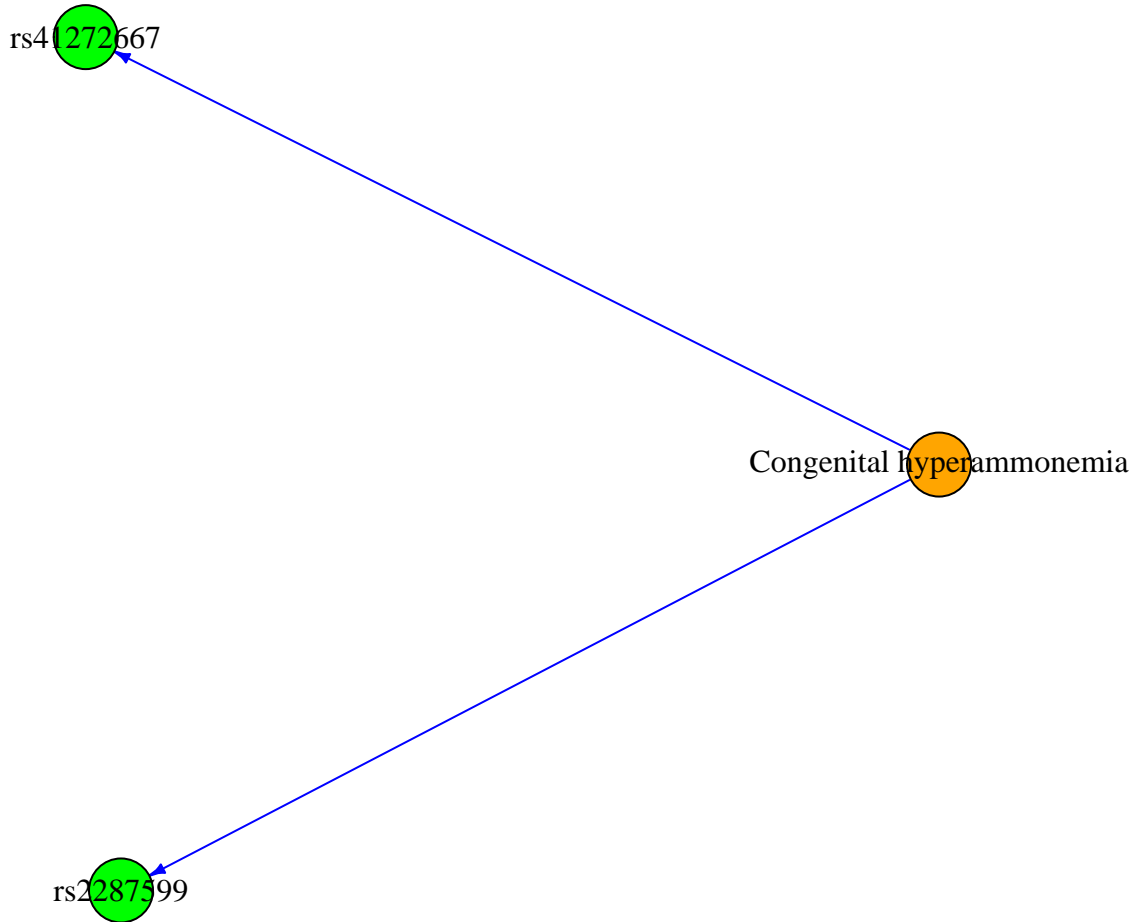



## Variant–Disease Network (Congenital hypothyroidism)

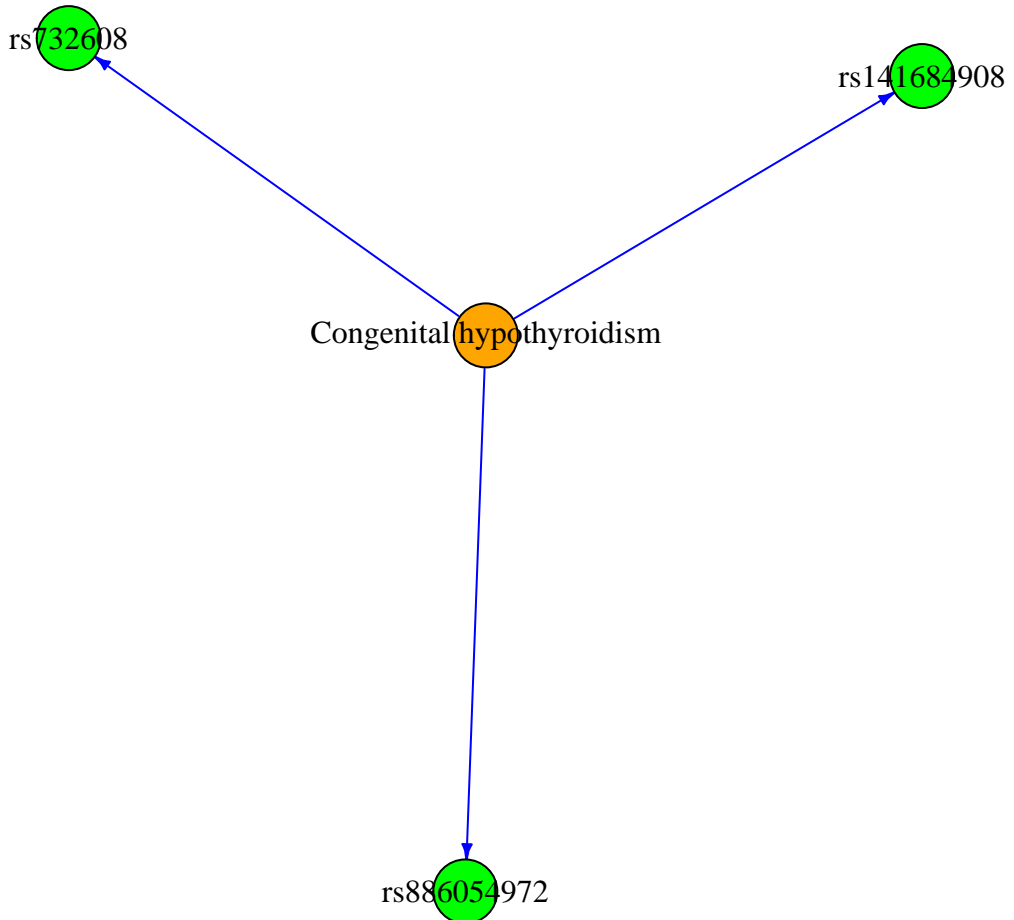

**Variant–Disease Network (Congenital ichthyosiform erythroderma)**

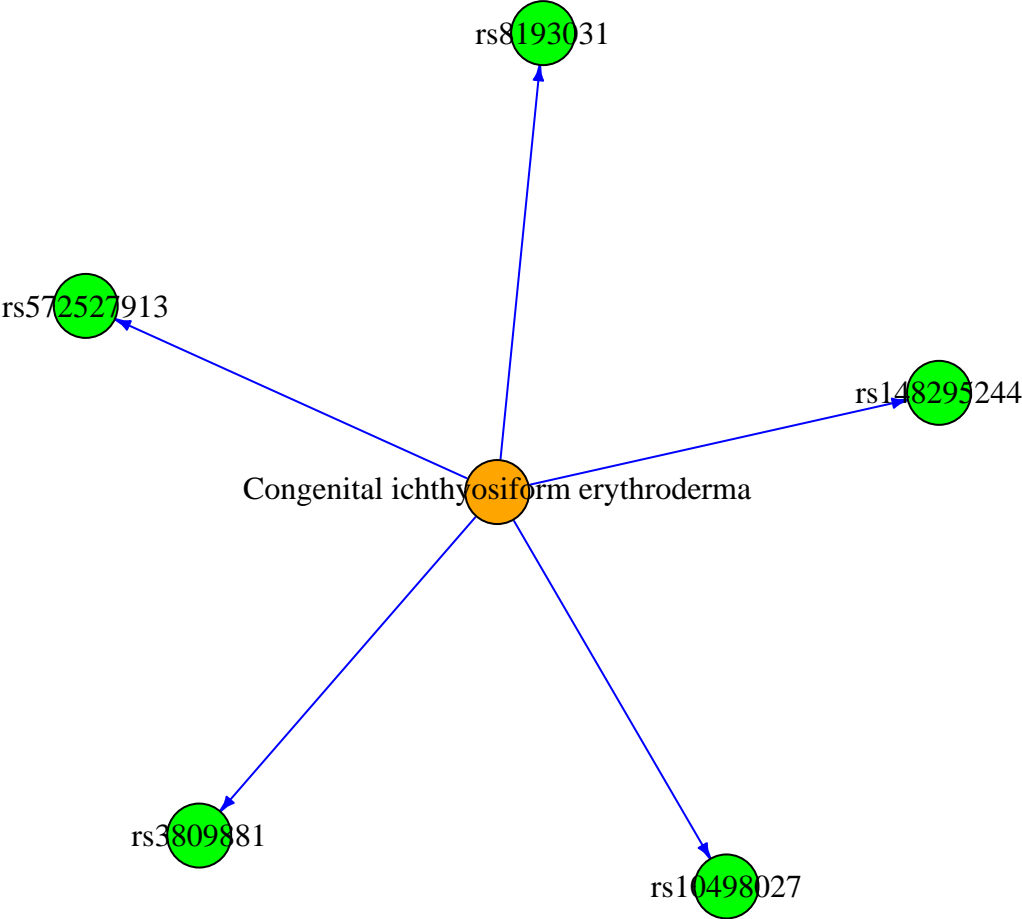

Variant–Disease Network (Congenital lactase deficiency)

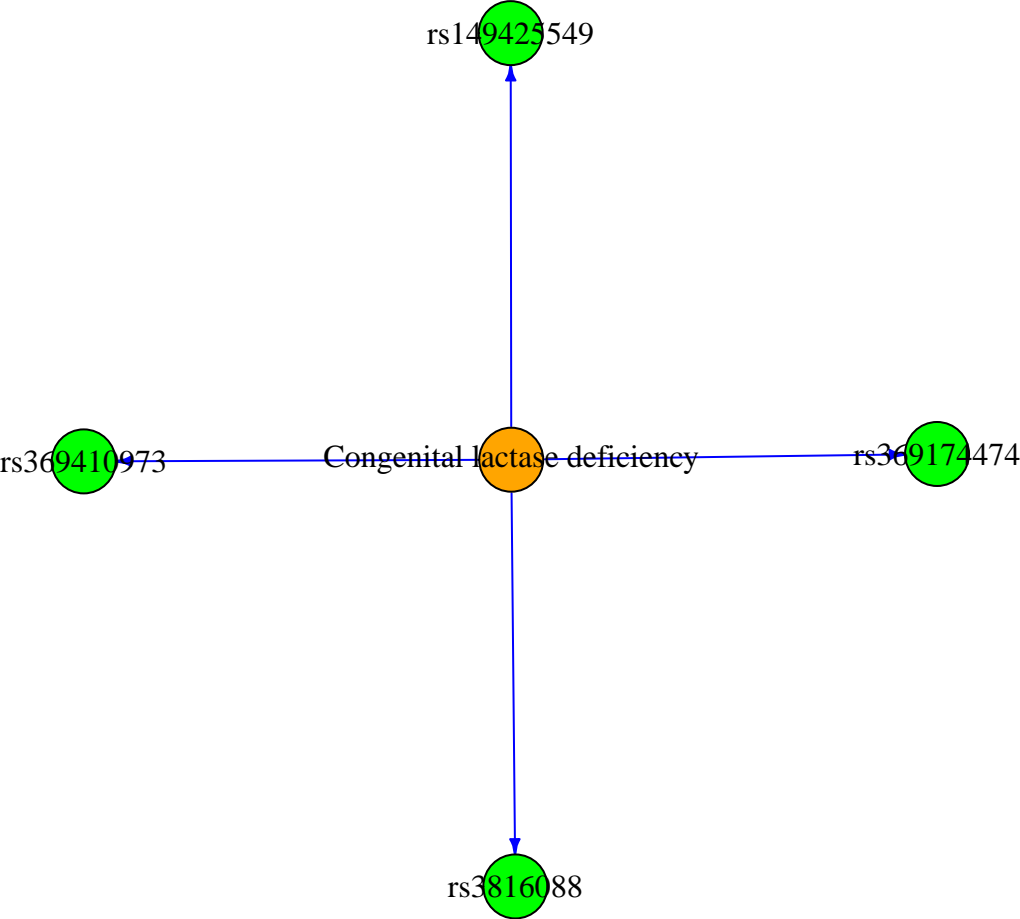

## Variant-Disease Network (Congenital long QT syndrome)

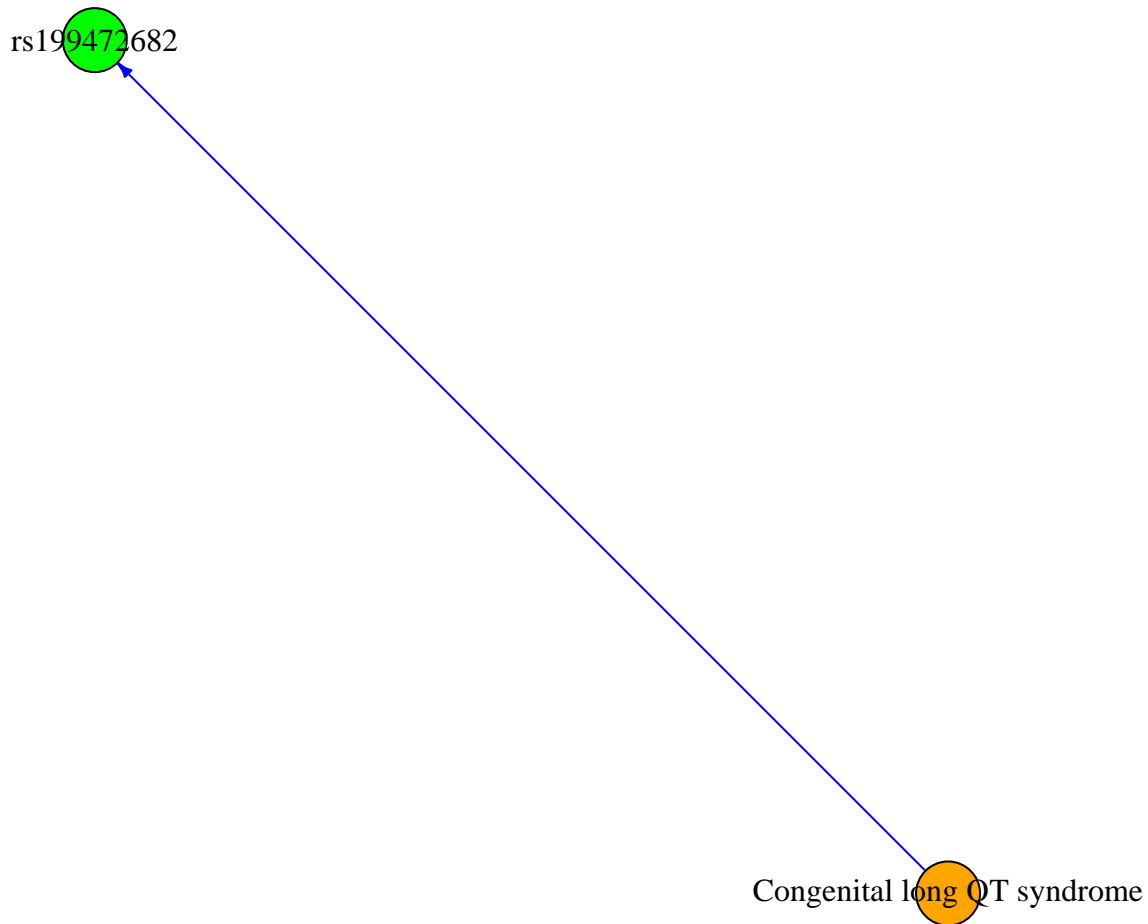

Variant–Disease Network (Congenital Muscular Dystrophy)

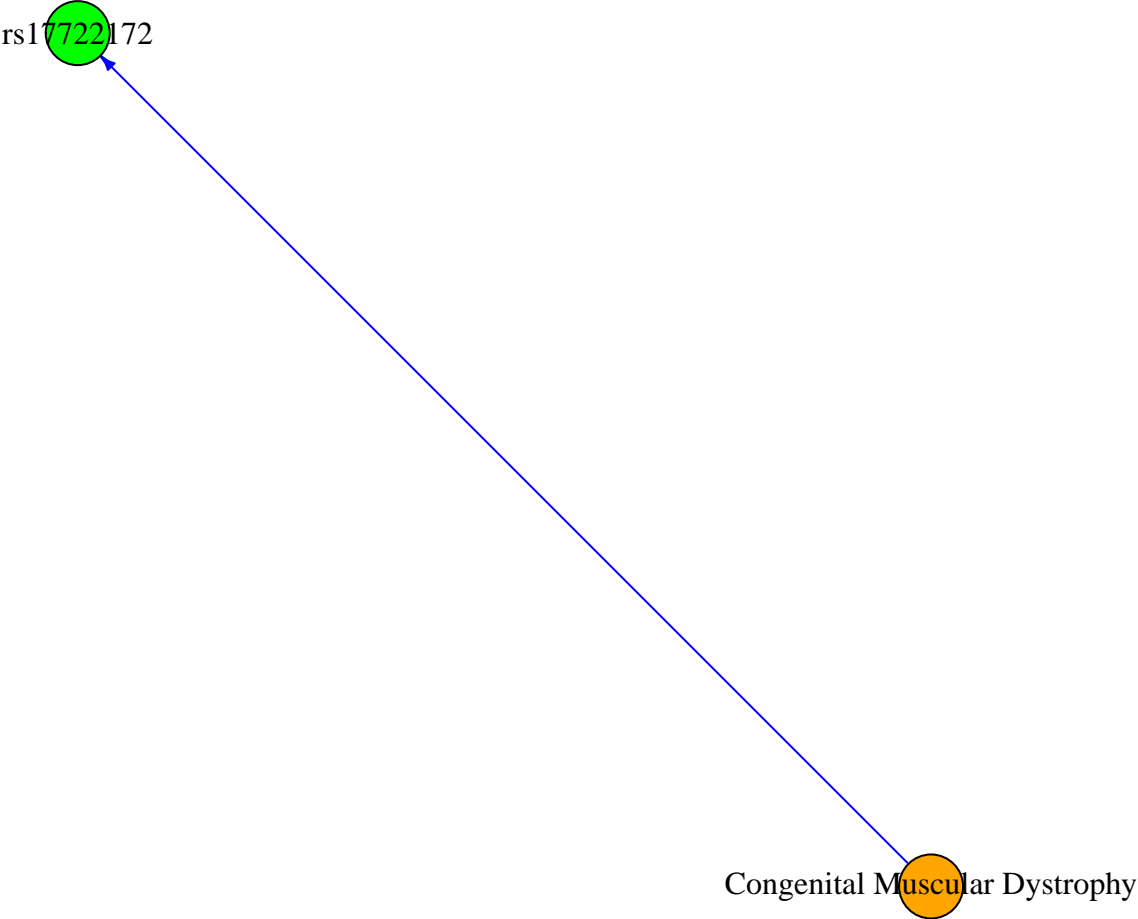

# se Network (Congenital muscular dystrophy–dystroglycanopathy with brain a

rs746221148

Congenital muscular dystrophy–dystroglycanopathy with

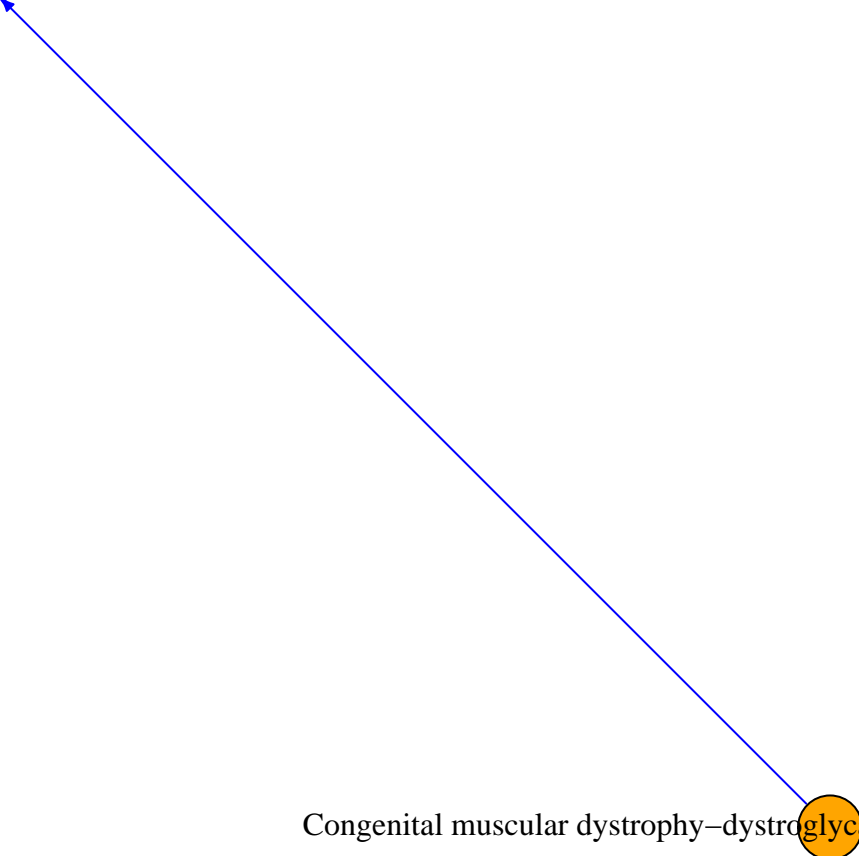

# Disease Network (Congenital muscular dystrophy–dystroglycanopathy with me

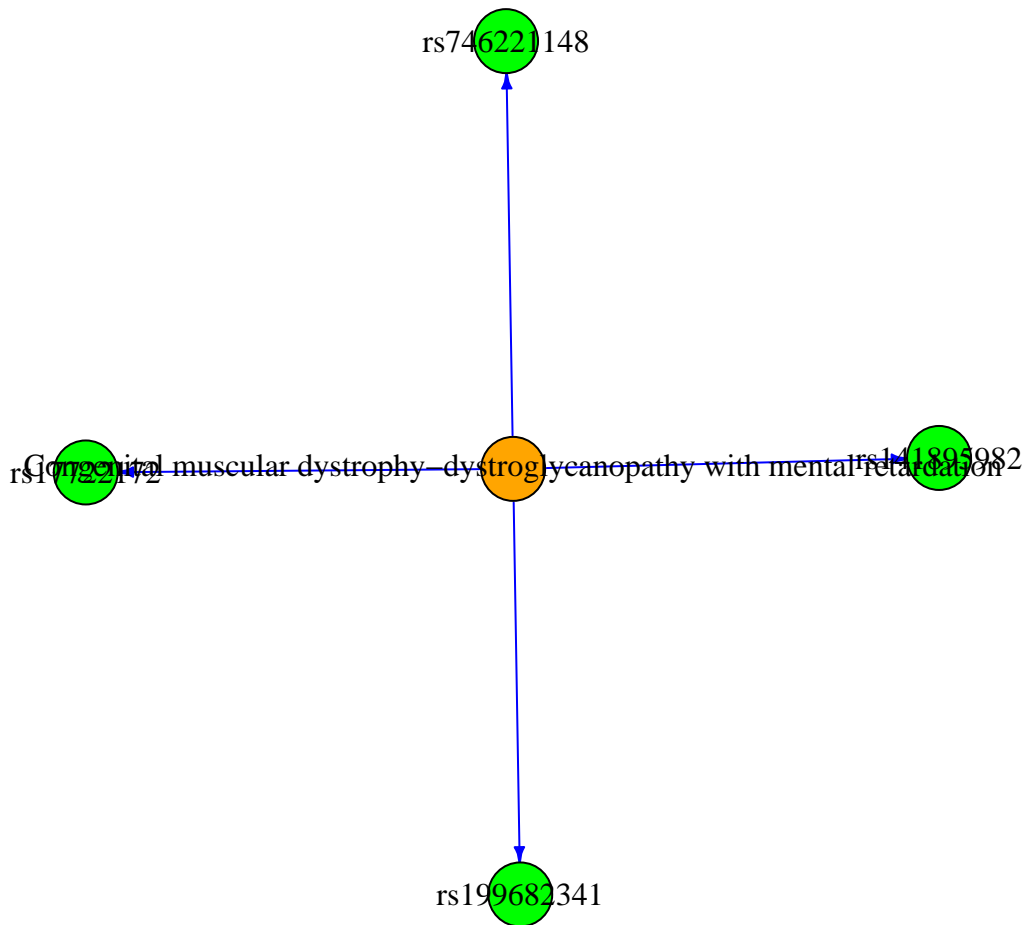

Variant–Disease Network (Congenital Myasthenic Syndrome)

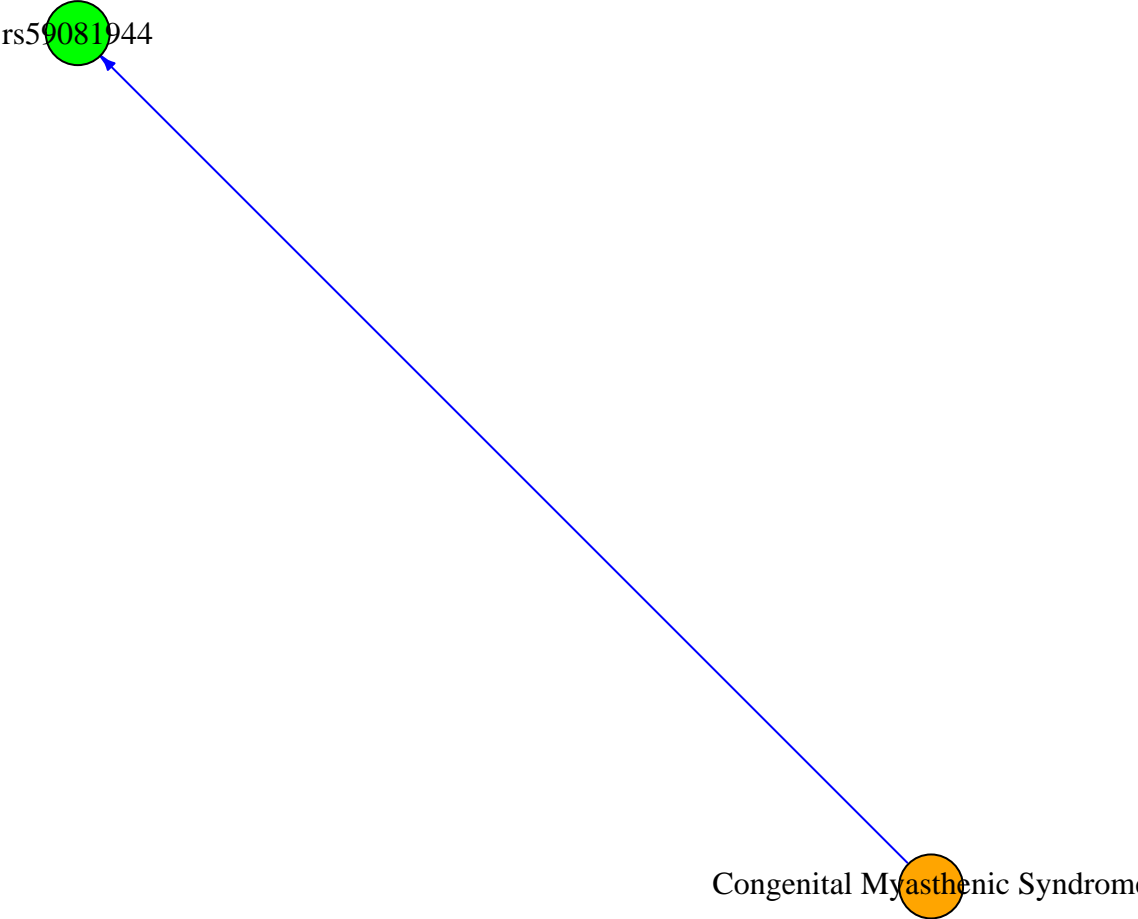



## Variant–Disease Network (Congenital myotonia)

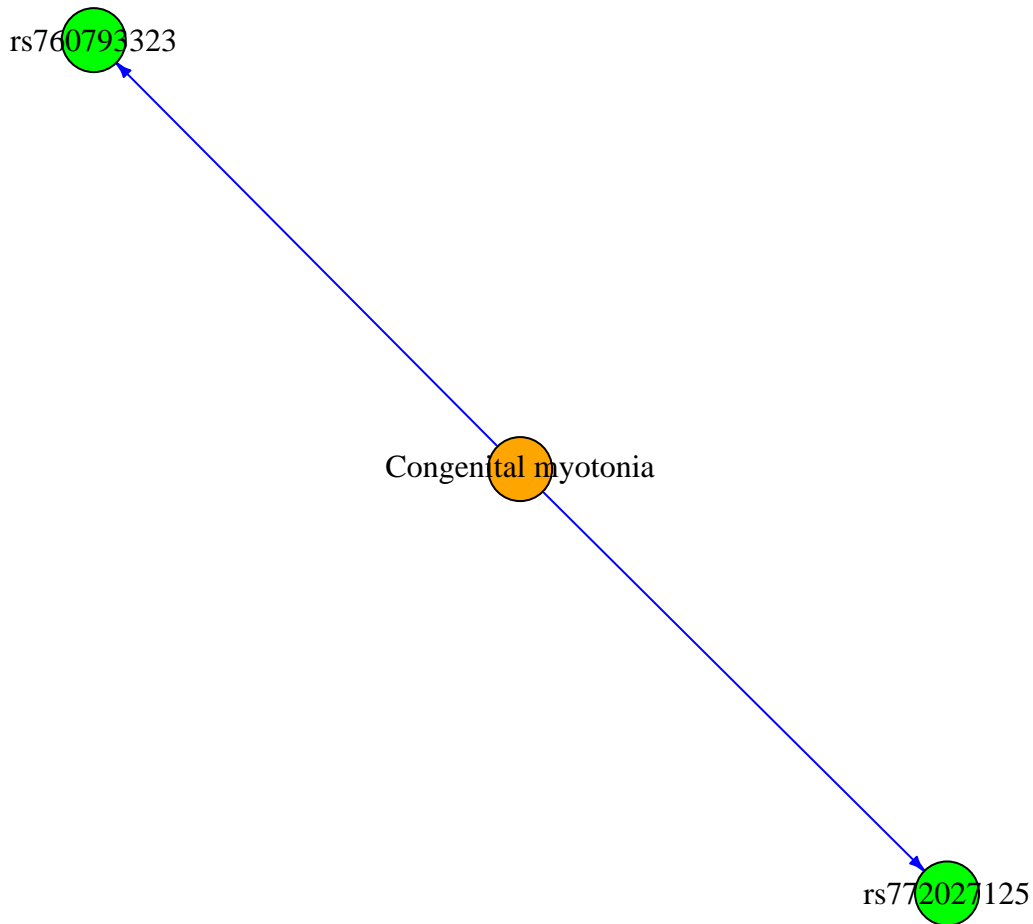

Variant–Disease Network (Congenital secretory diarrhea)

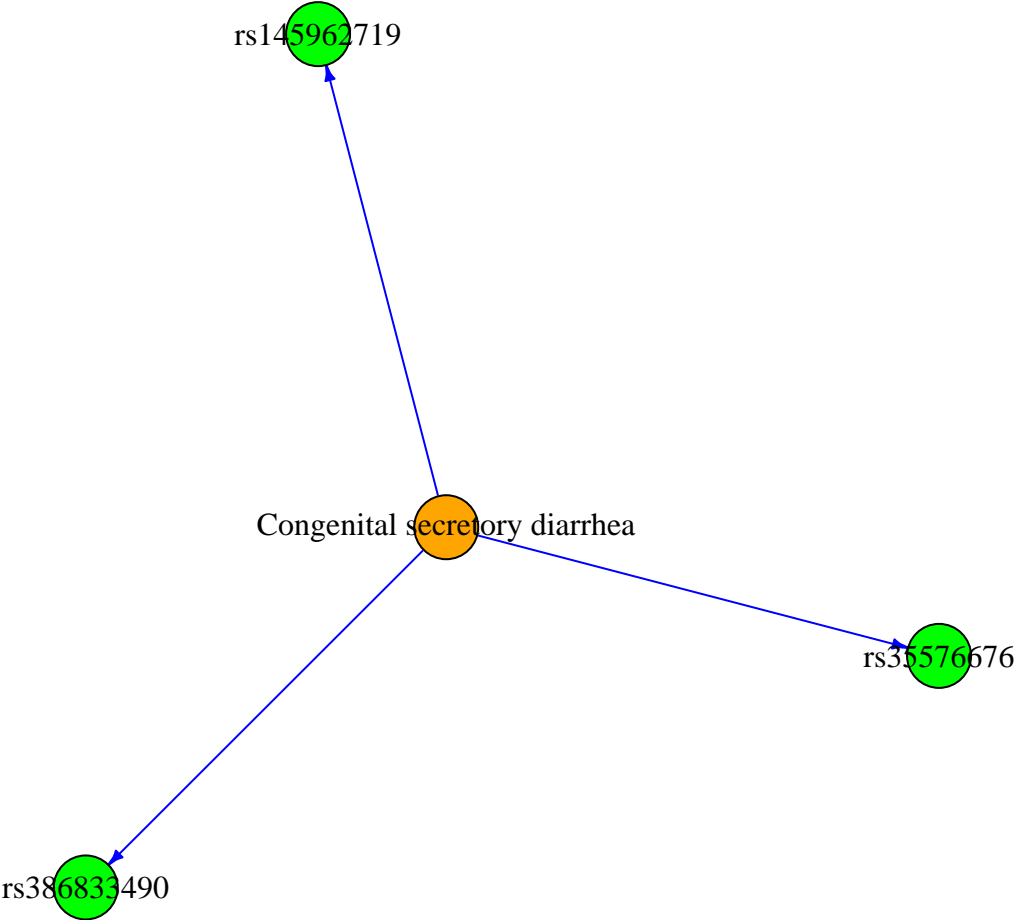

# Disease Network (Congenital sensory neuropathy with selective loss of small m

rs770647680

Congenital sensory neuropathy with selective loss of s



# Variant–Disease Network (Congenital Stationary Night Blindness)

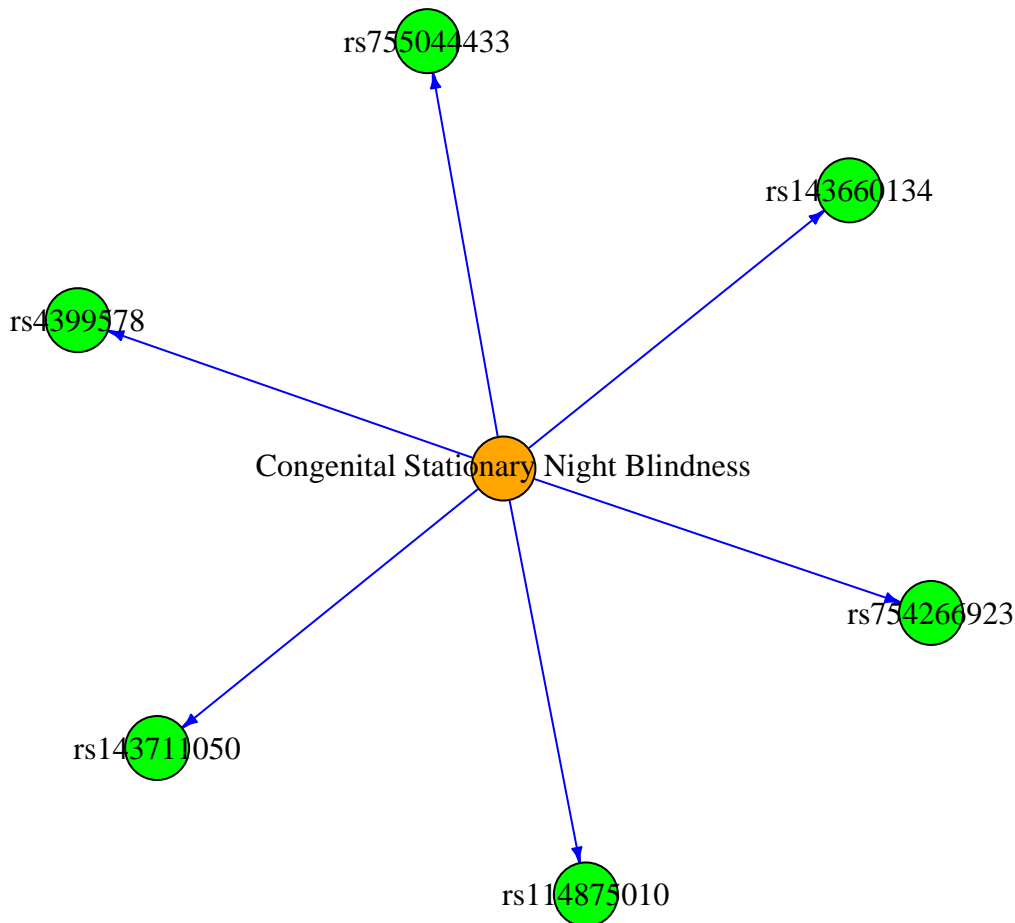

## Variant–Disease Network (Connective tissue disorder)

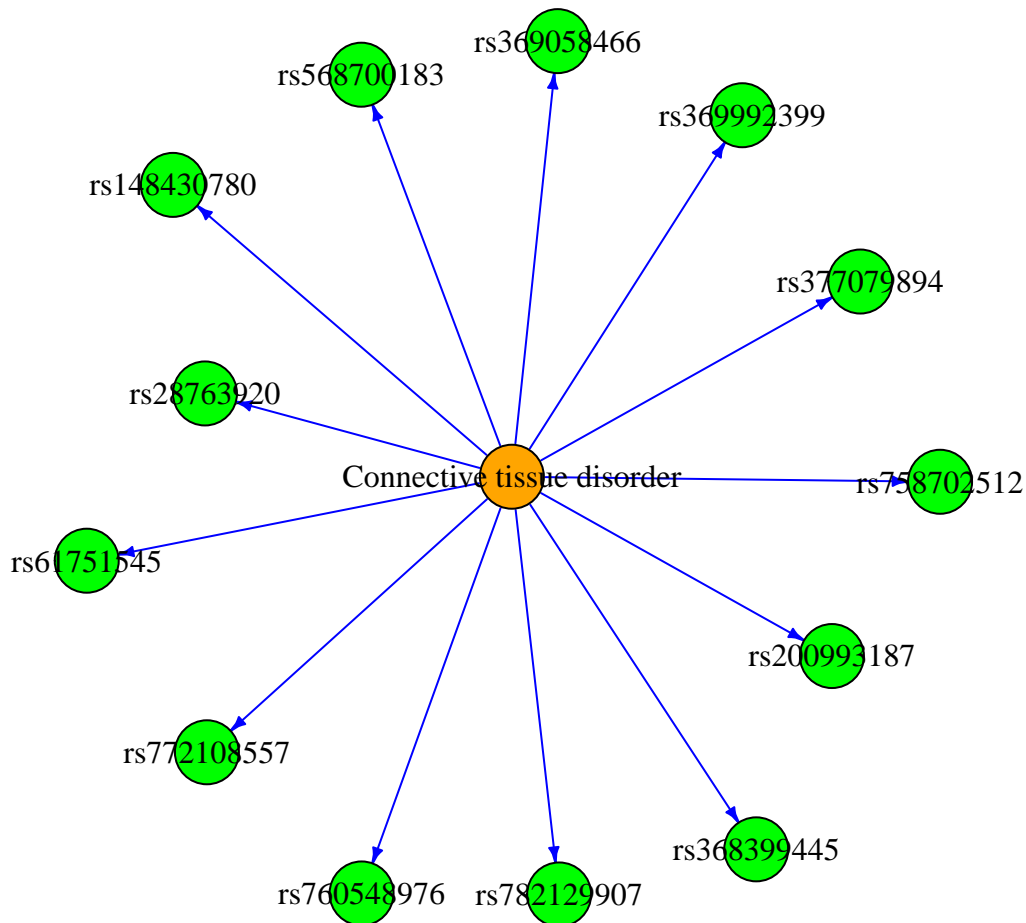

## Variant–Disease Network (Corneal Dystrophy)

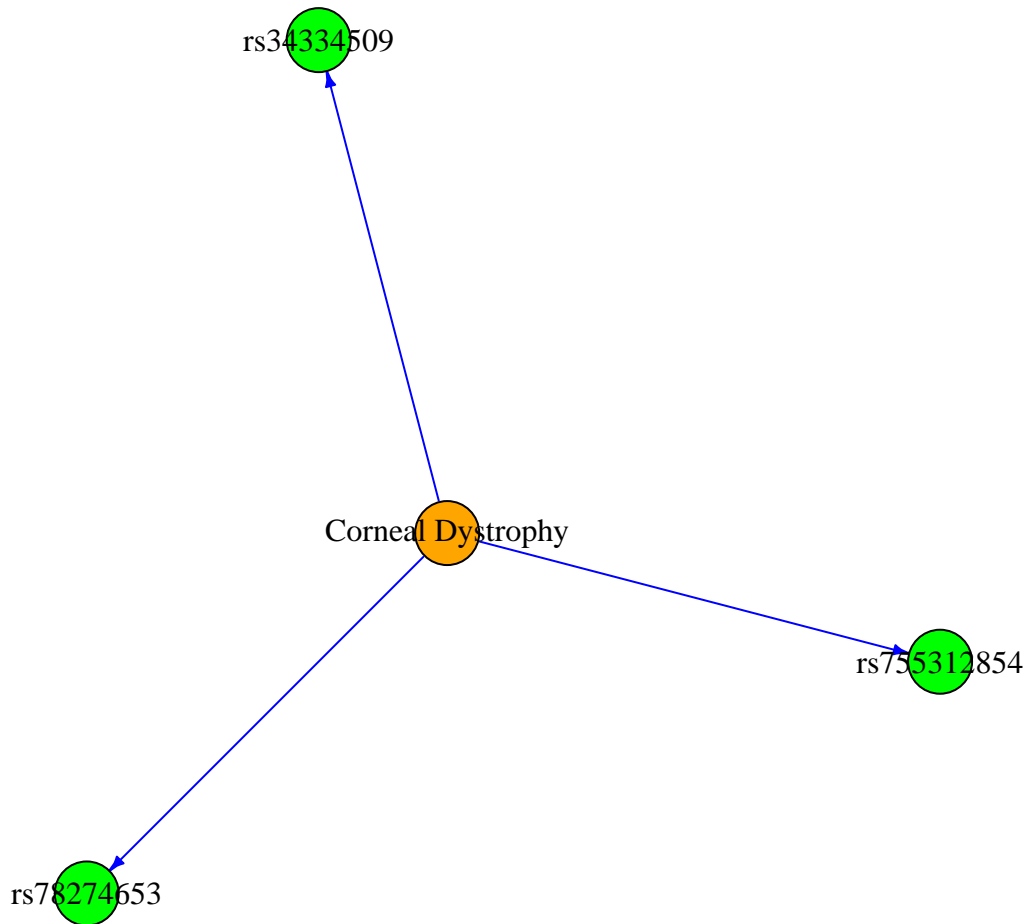

## Variant–Disease Network (Cornelia de Lange syndrome 3)

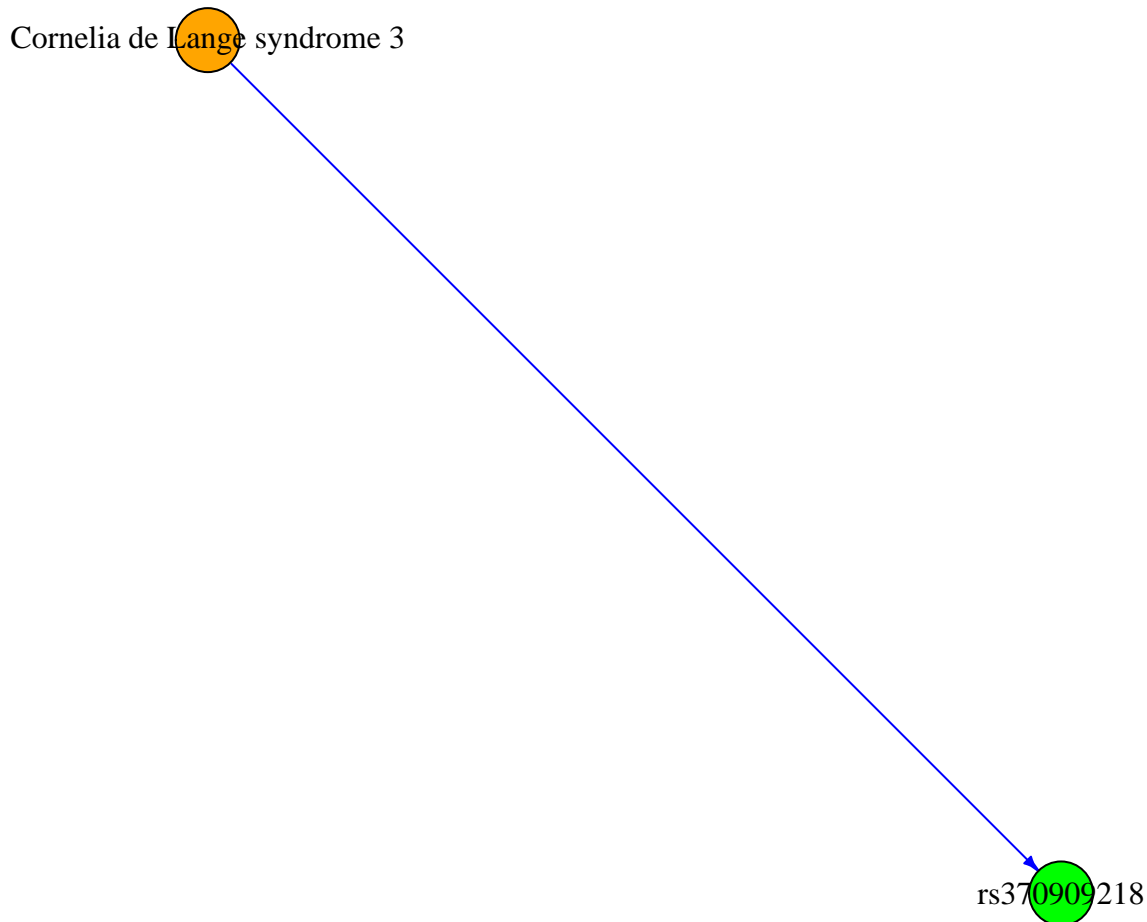

## Variant-Disease Network (Cortical malformations)

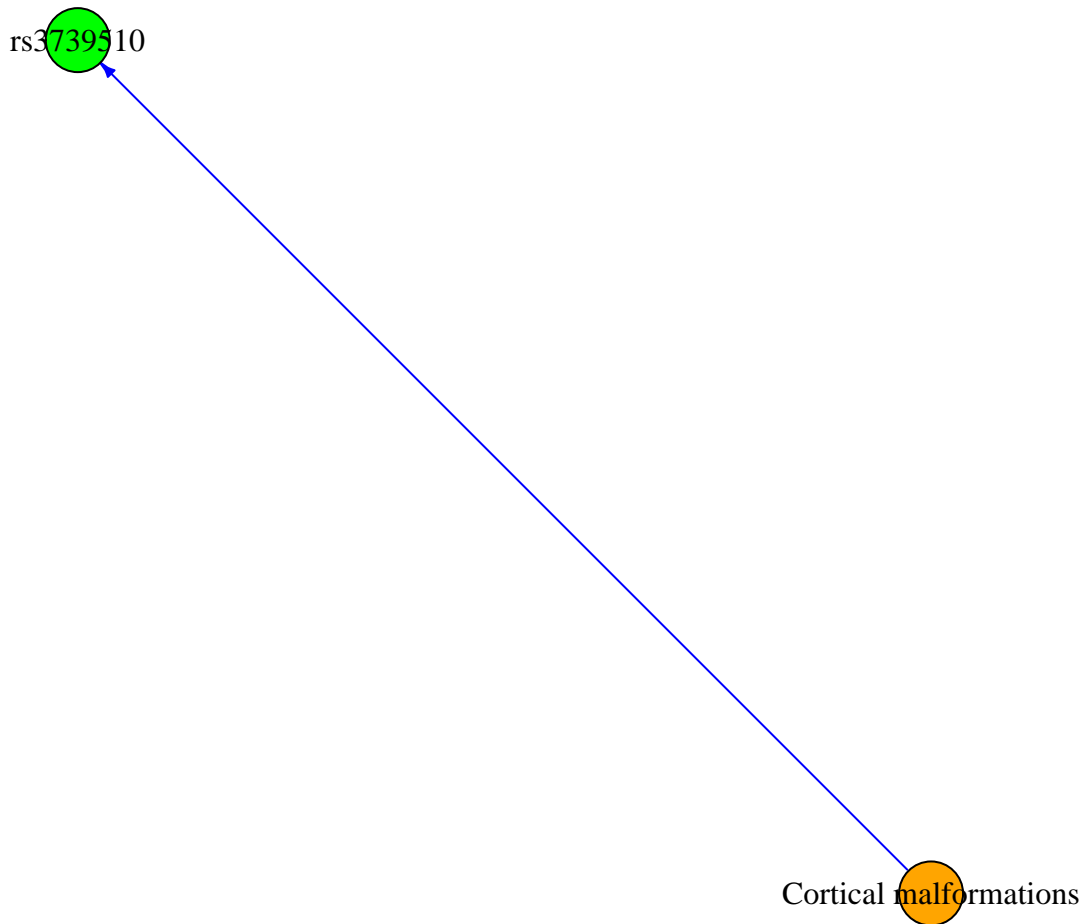



Variant–Disease Network (Corticosterone methyloxidase type 1 deficiency)

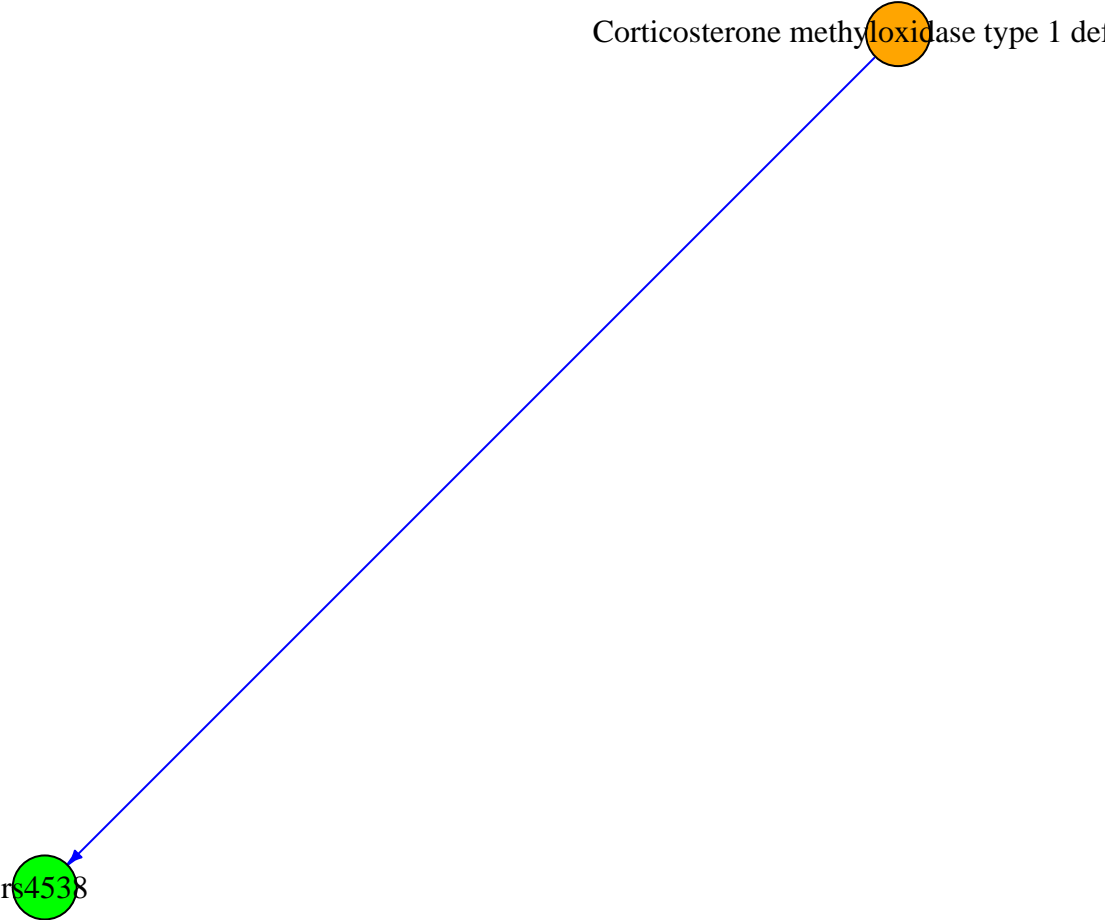

Variant–Disease Network (Corticosterone methyloxidase type 2 deficiency)

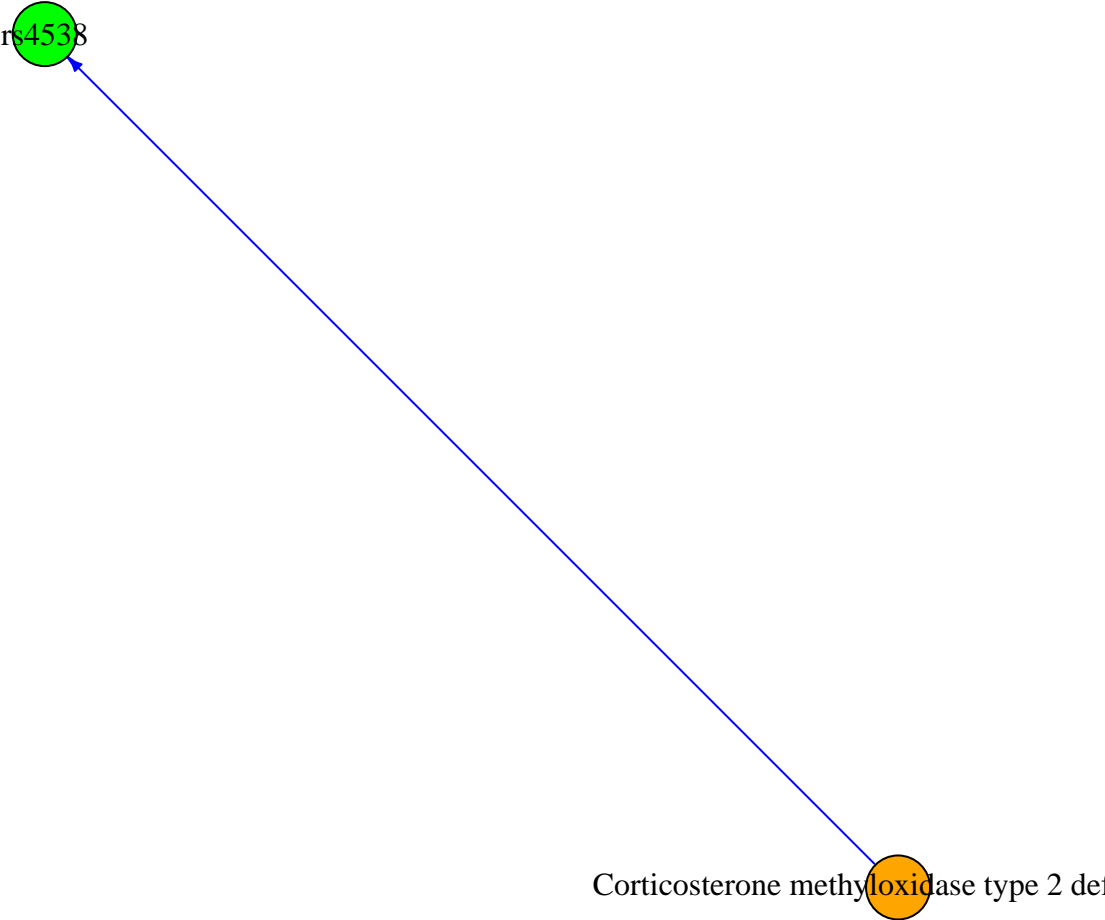

**Variant–Disease Network (Cowden syndrome 6)**

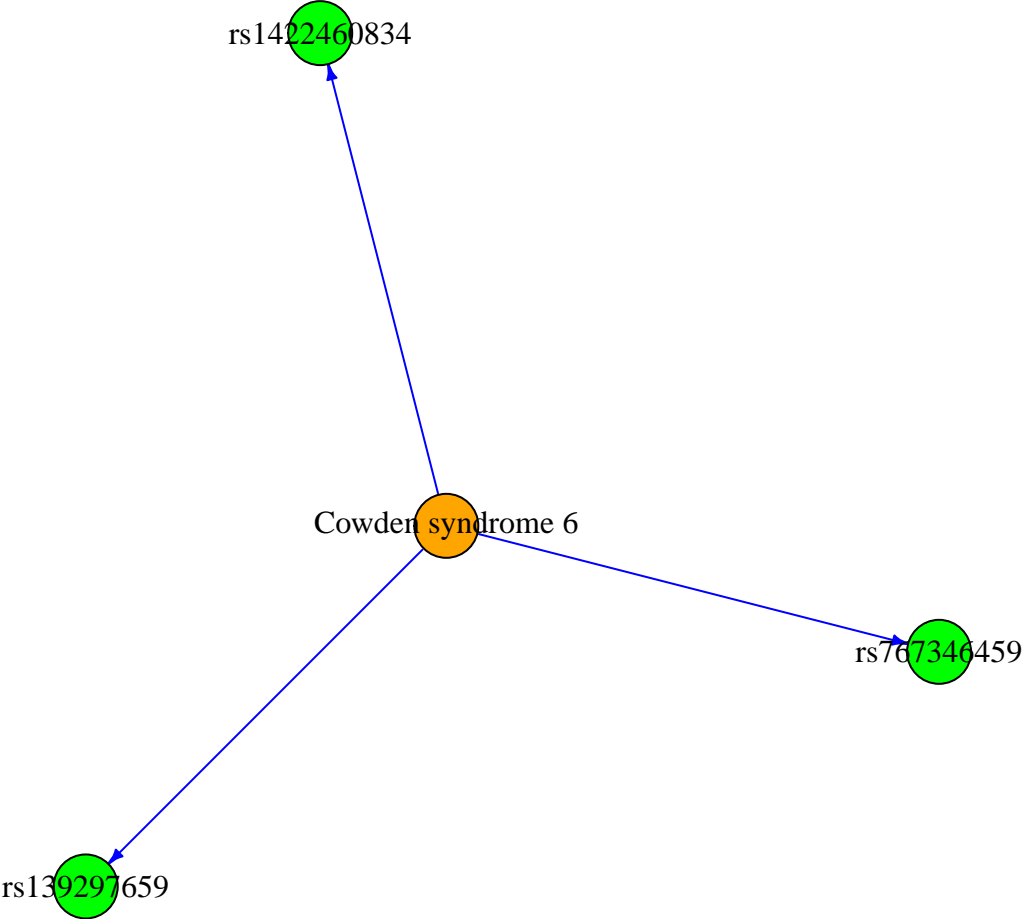

Variant–Disease Network (Cranioectodermal dysplasia)

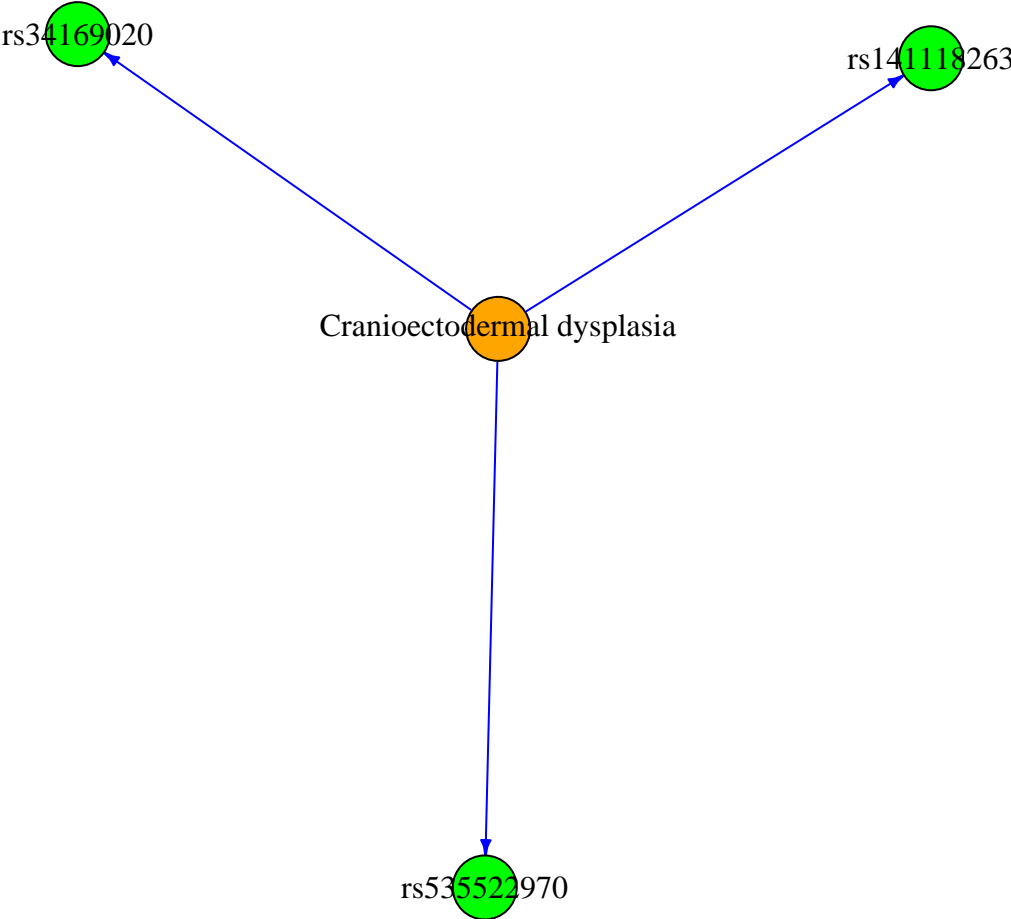

Variant–Disease Network (Cranioectodermal dysplasia 2)

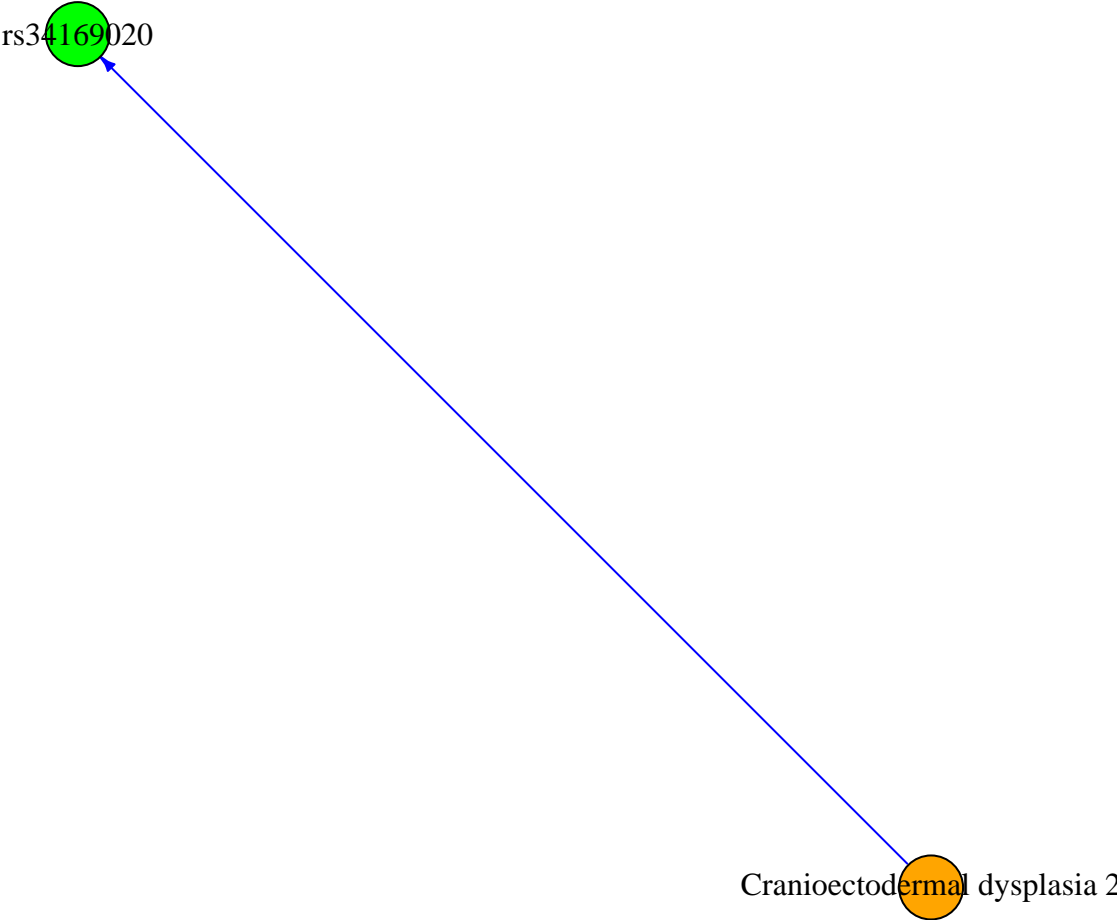

**Variant–Disease Network (Cranio metaphyseal dysplasia)**

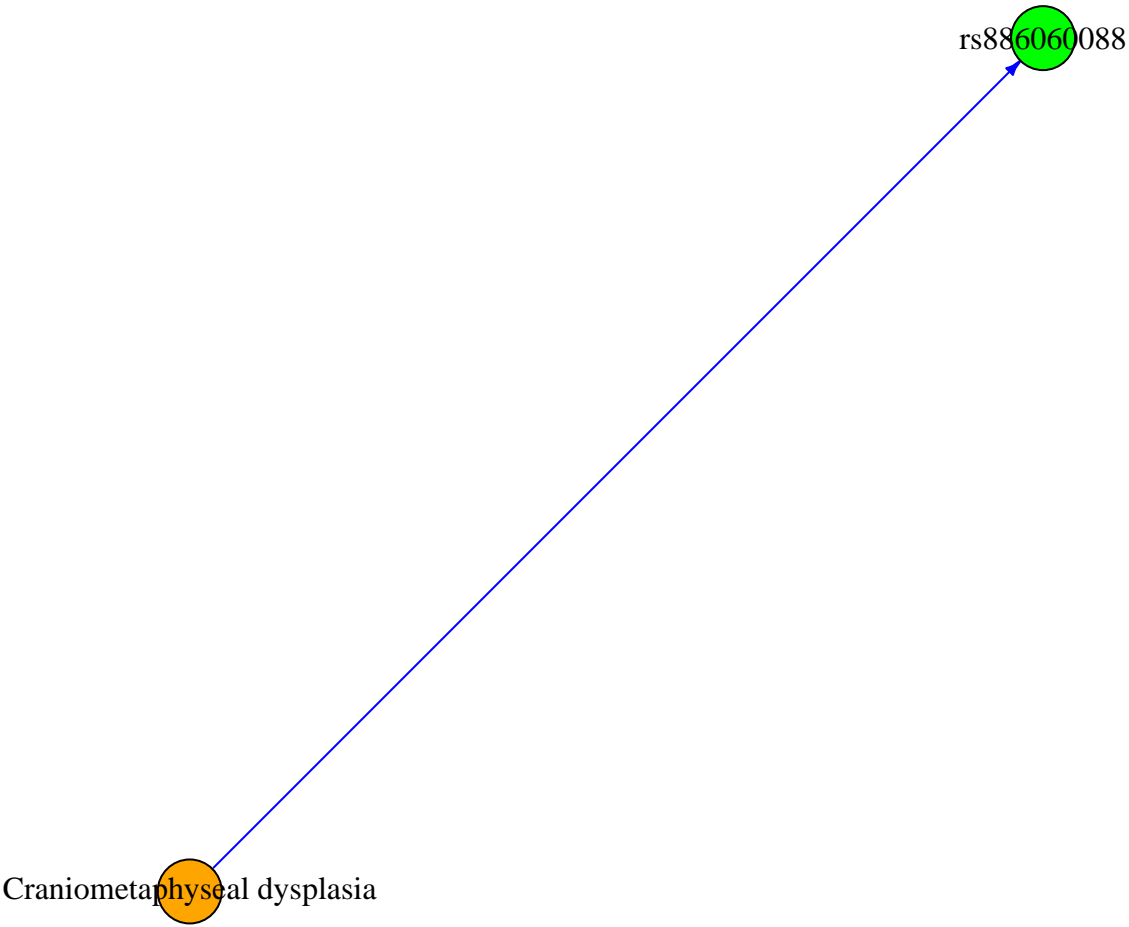

## Variant-Disease Network (Craniosynostosis)

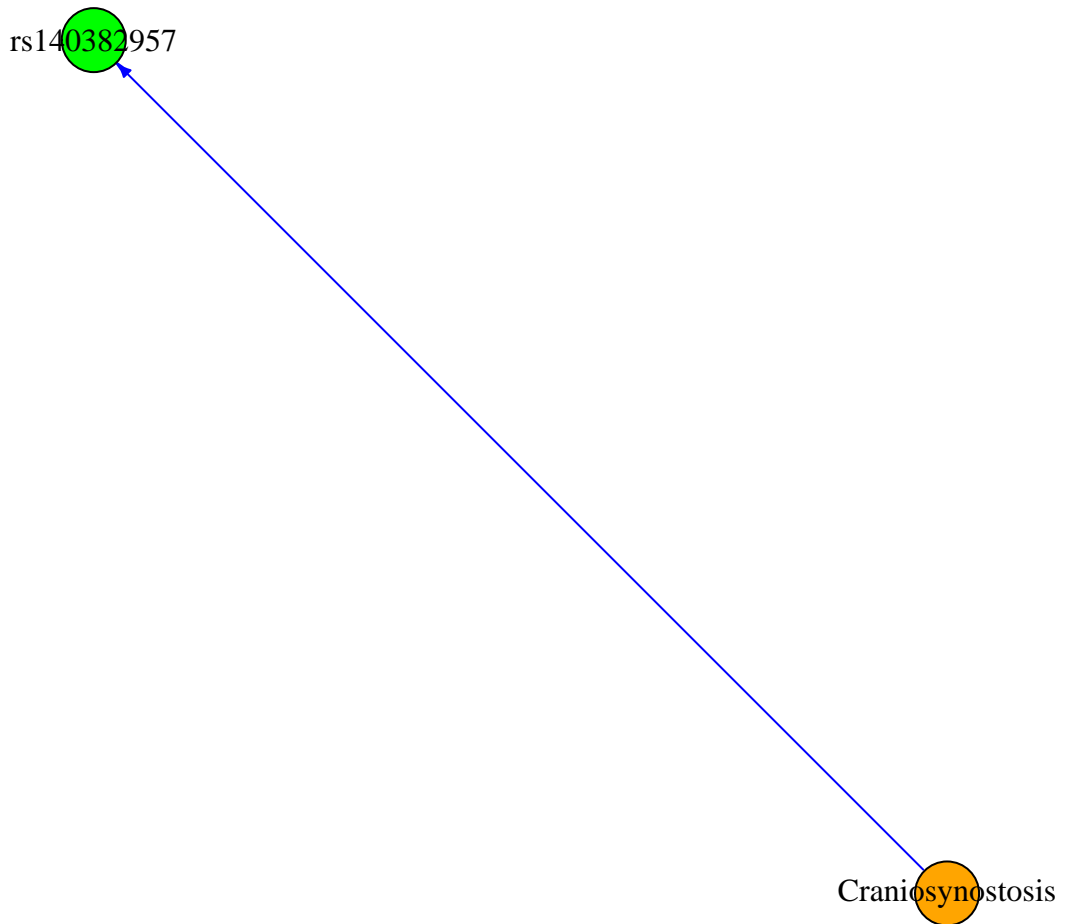

**Variant–Disease Network (Crohn disease)**

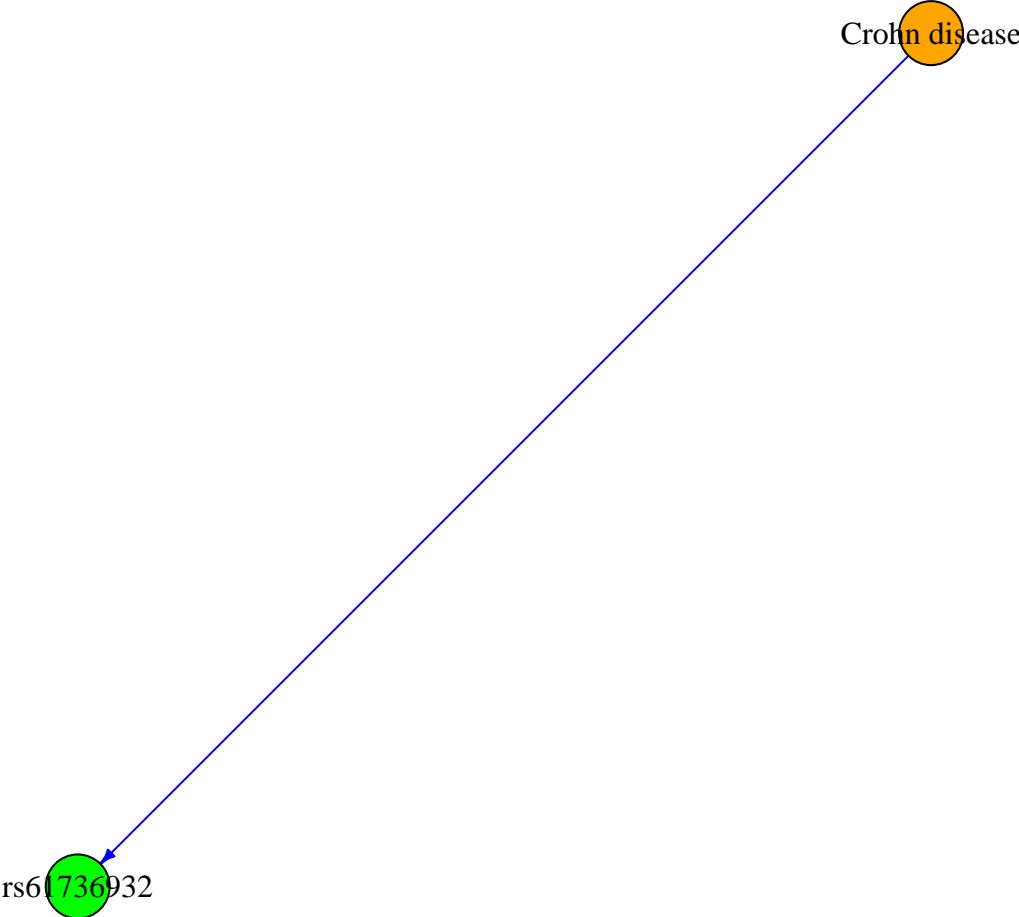



**Variant–Disease Network (Cryopyrin associated periodic syndrome)**

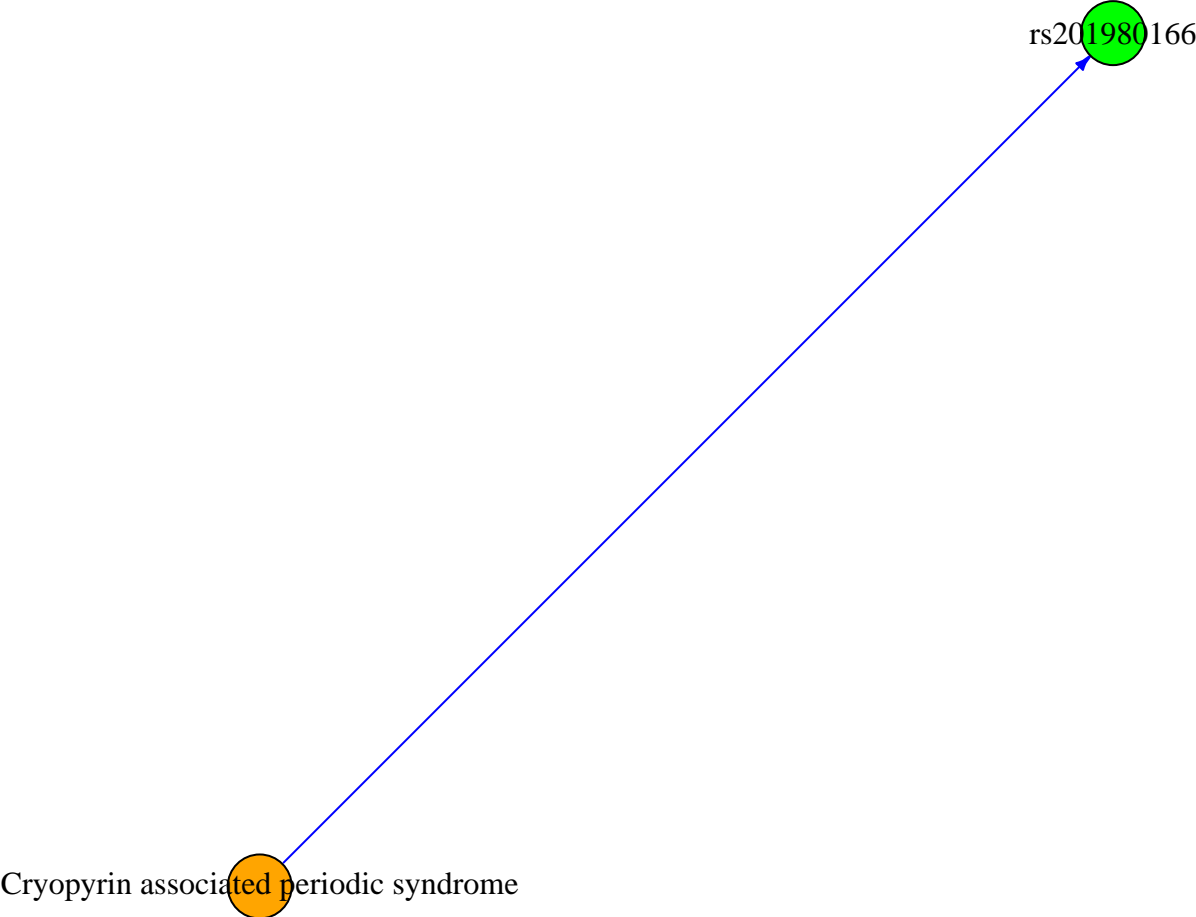

**Variant–Disease Network (Cutaneous malignant melanoma 3)**

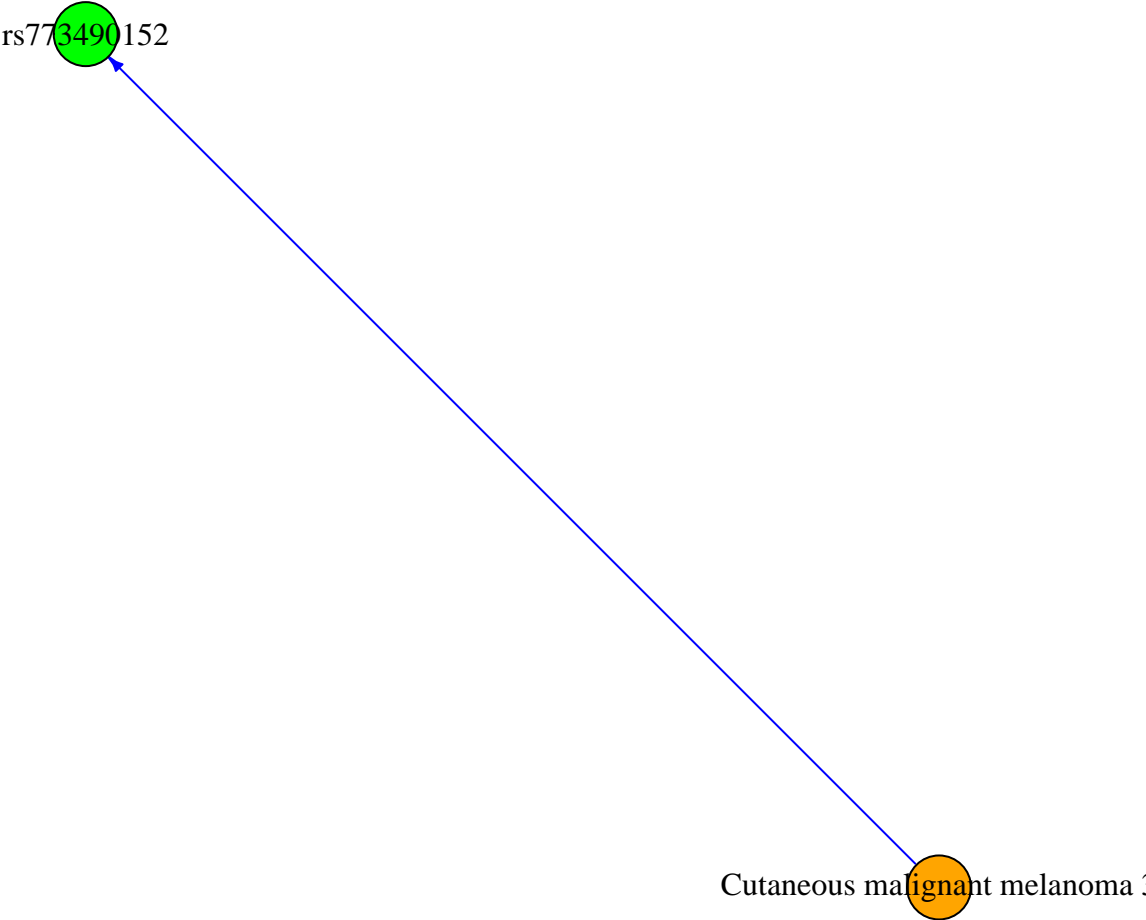

**Variant–Disease Network (Cutis laxa)**

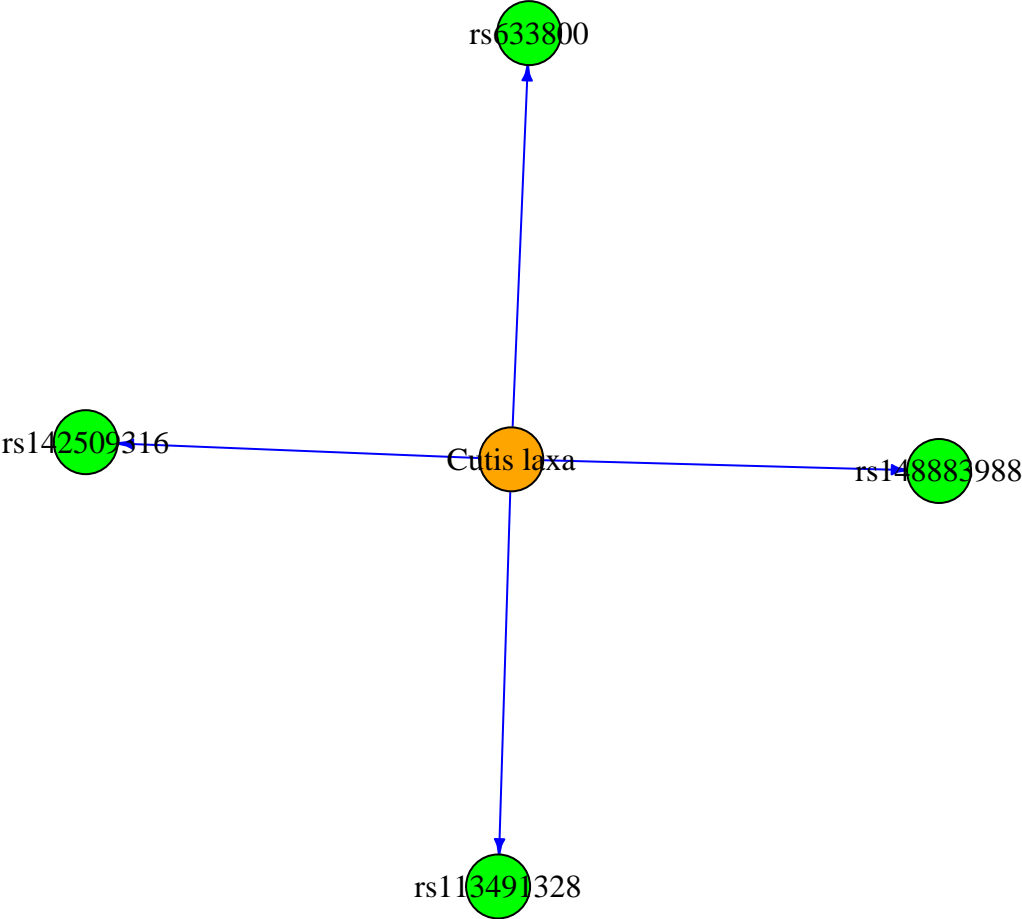

## Variant–Disease Network (Cutis laxa with severe pulmonary)

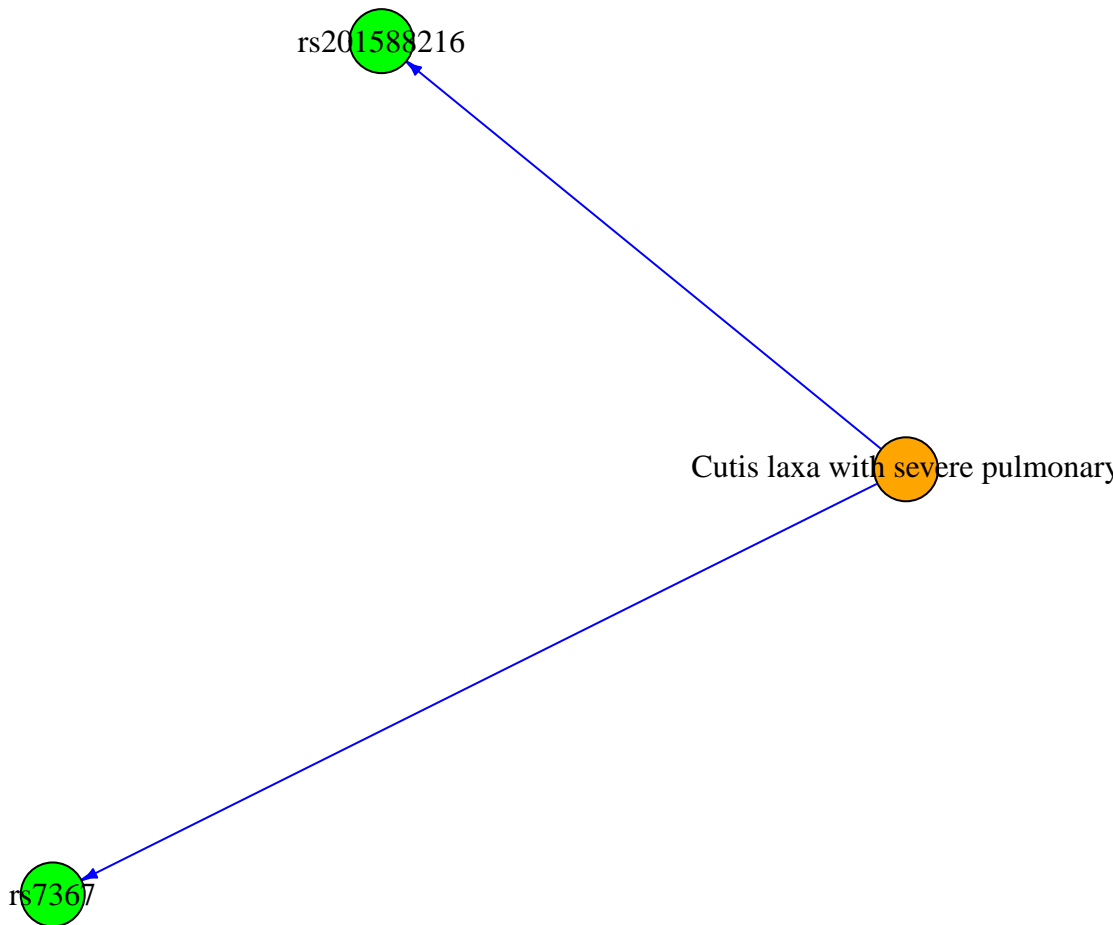

## Variant–Disease Network (Cylindromatosis)

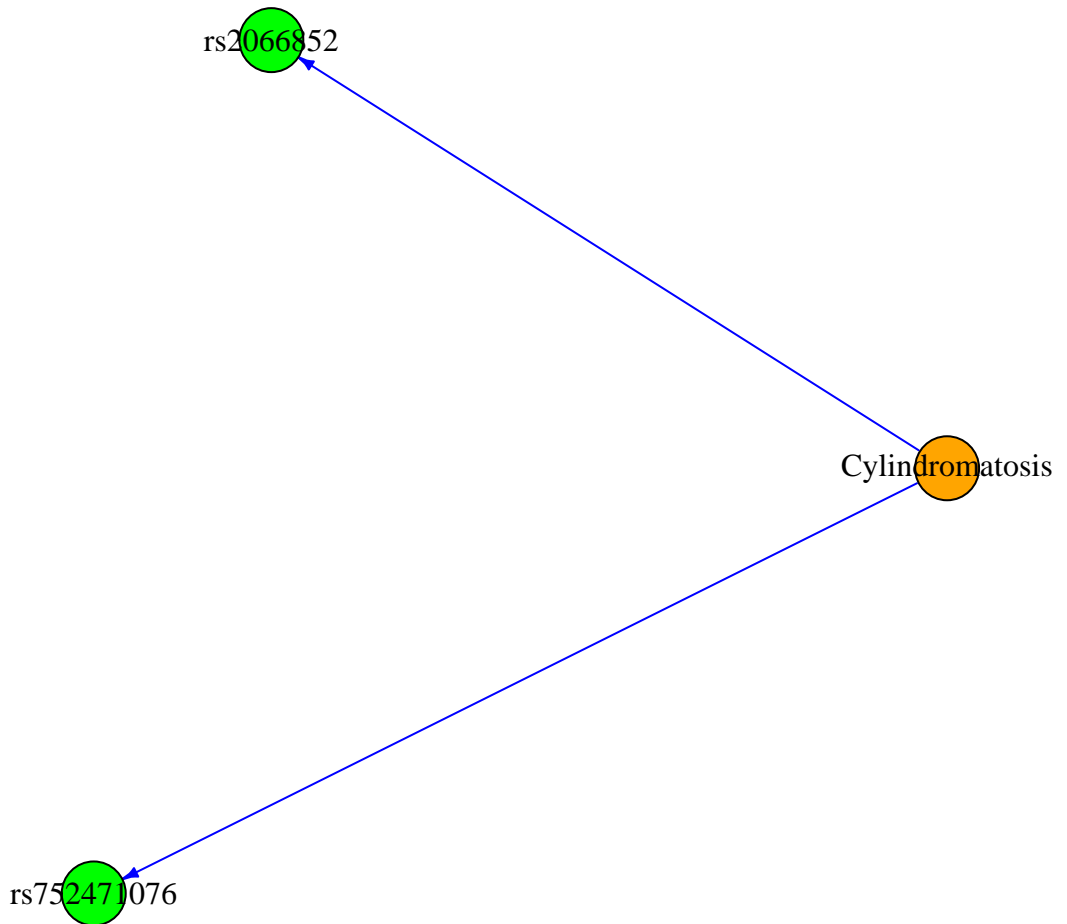

# Variant–Disease Network (CYP2C8 POLYMORPHISM)

CYP2C8 POLYMORPHISM

rs1058930

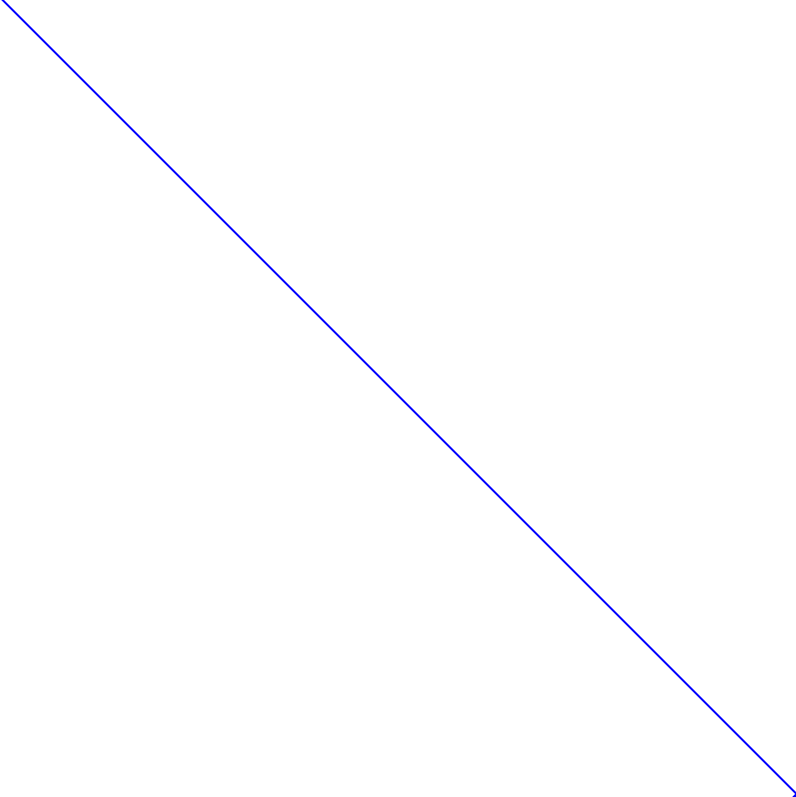

Variant–Disease Network (Cystic fibrosis)

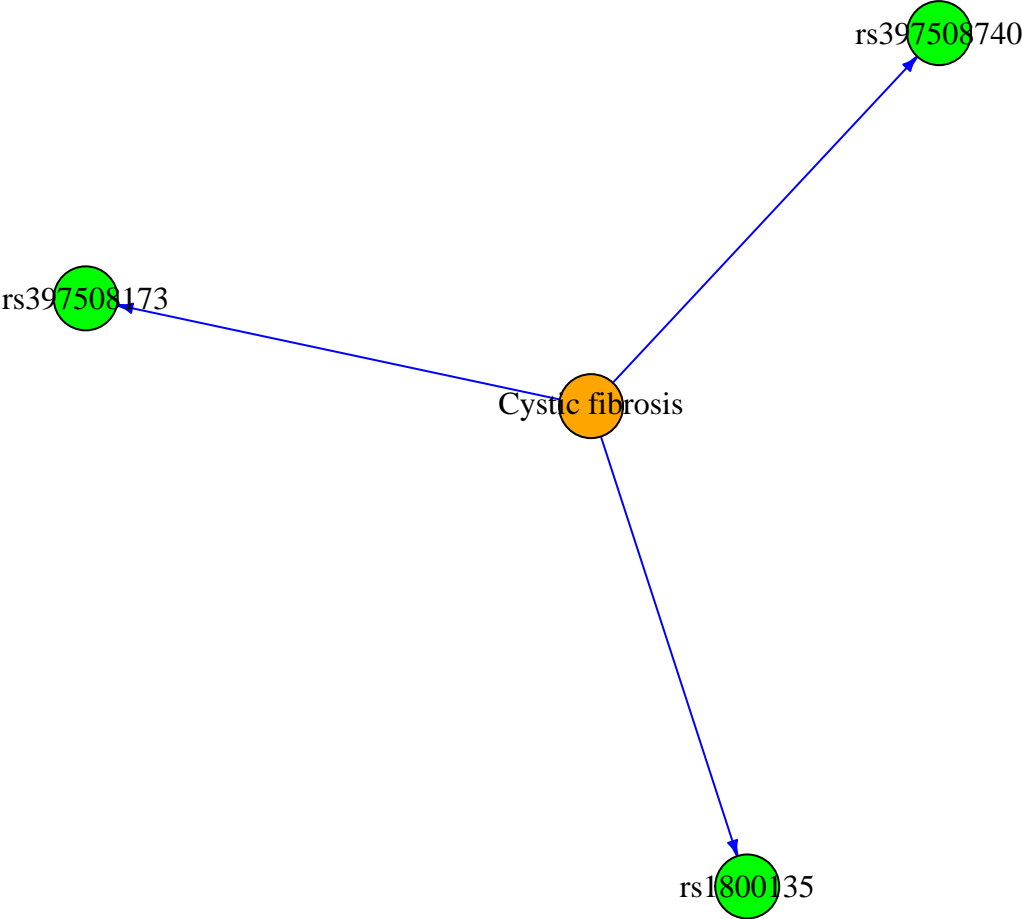

## Variant-Disease Network (Cystinuria)

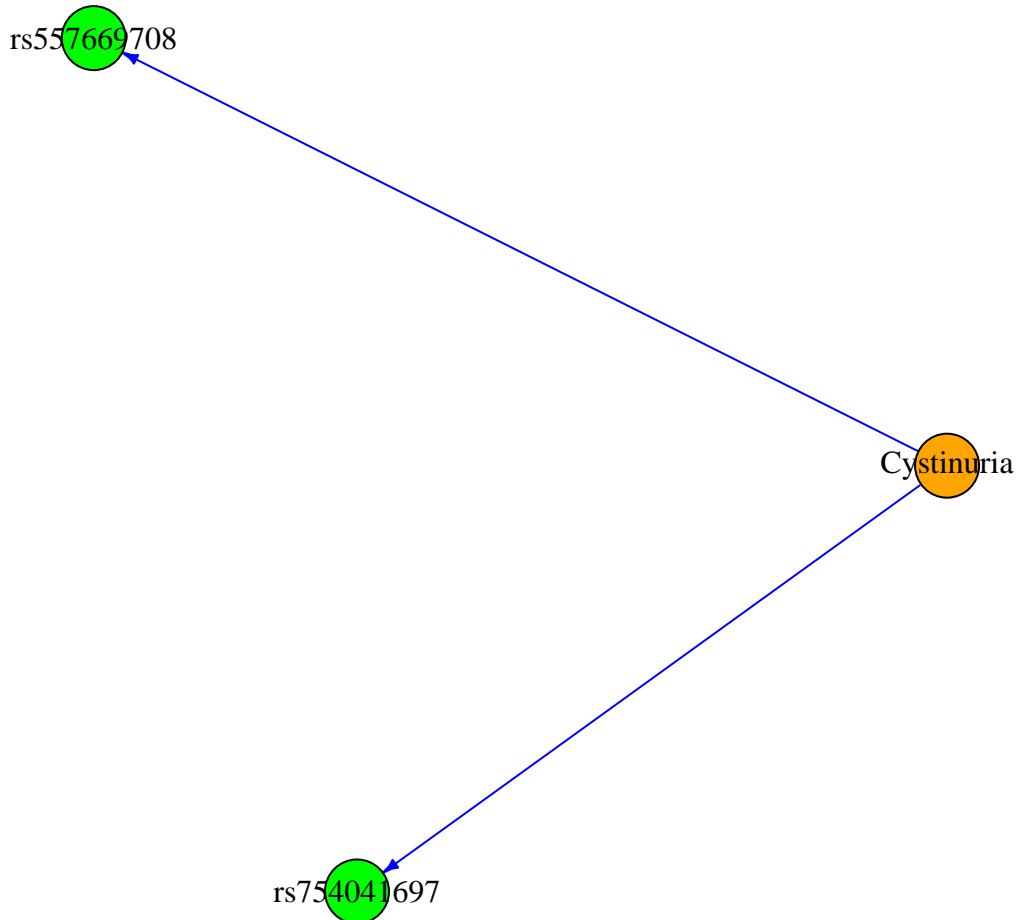



Variant–Disease Network (Danon disease)

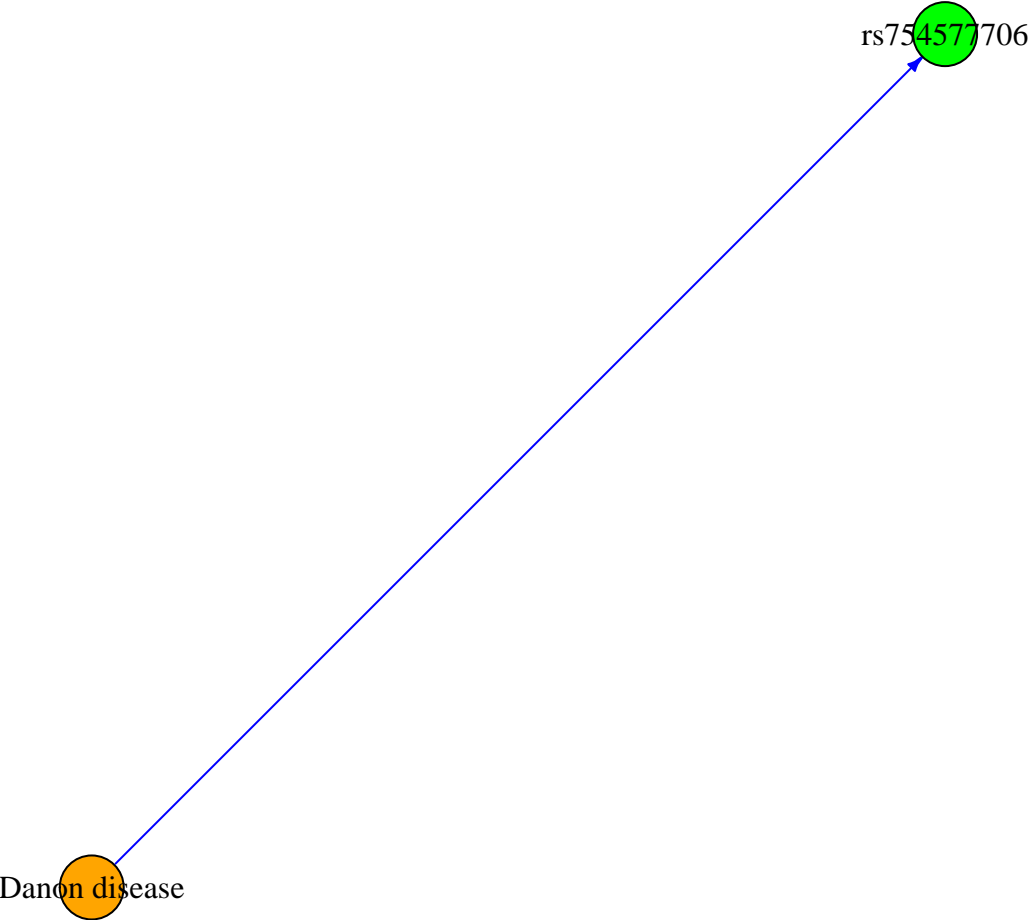

## Variant–Disease Network (Deafness)

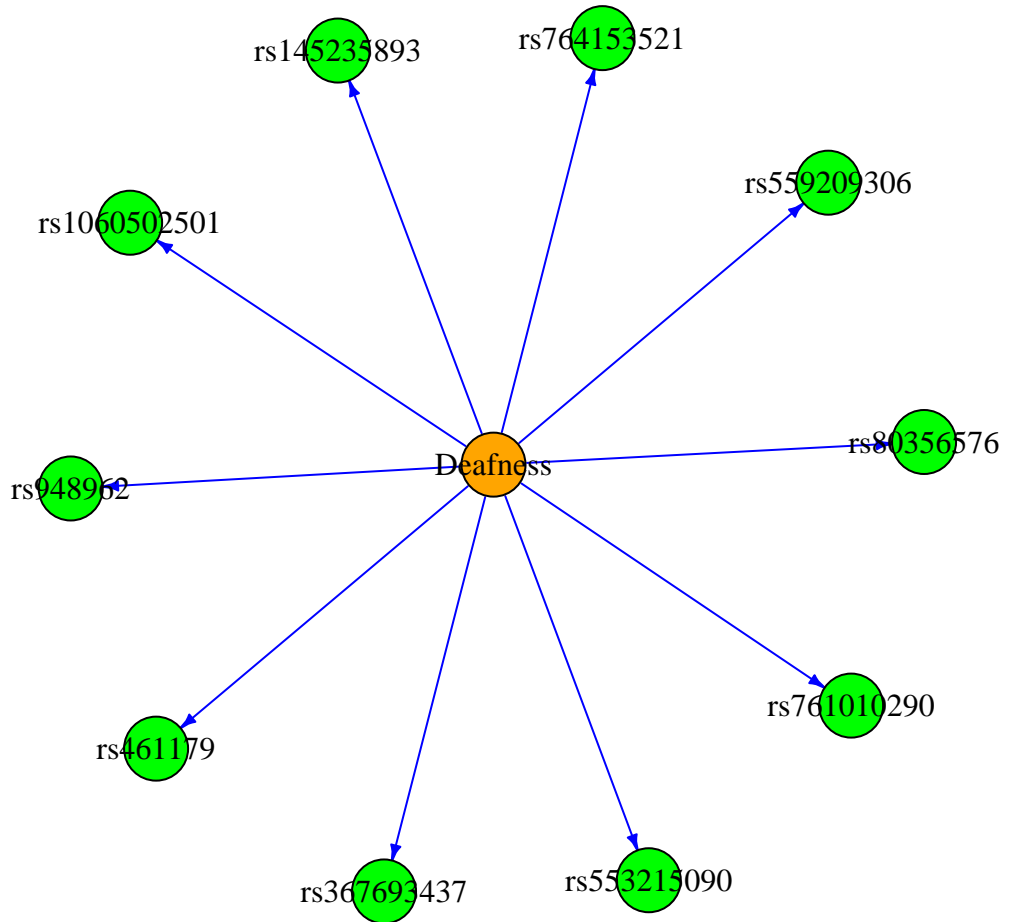

# Variant-Disease Network (Deficiency of alpha-mannosidase)

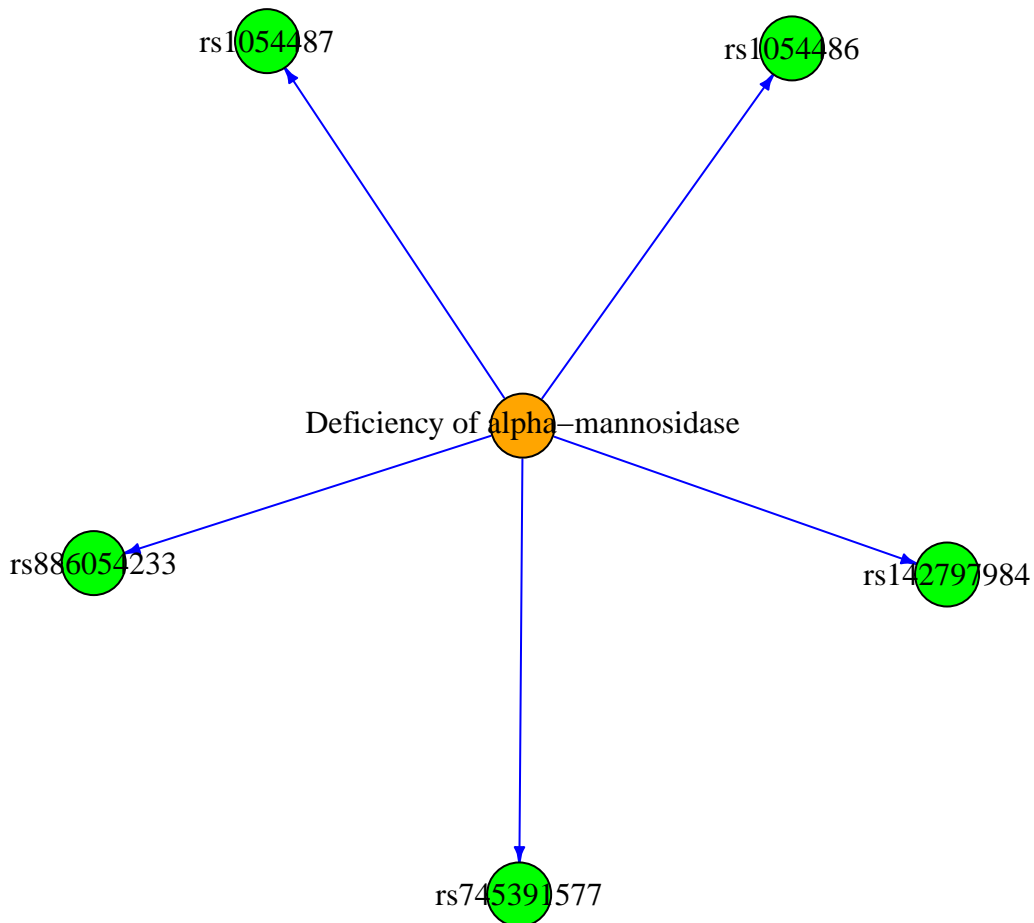

Variant–Disease Network (Deficiency of butyryl–CoA dehydrogenase)

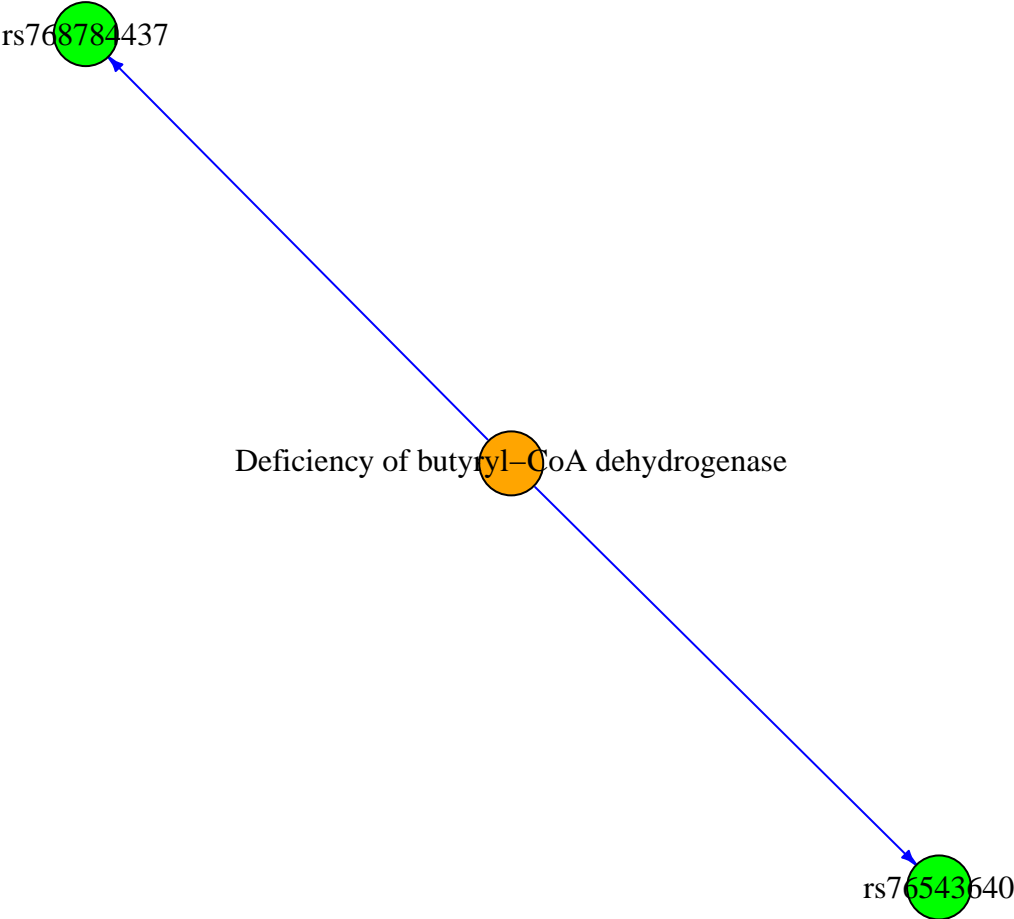

# Variant–Disease Network (Deficiency of ferroxidase)

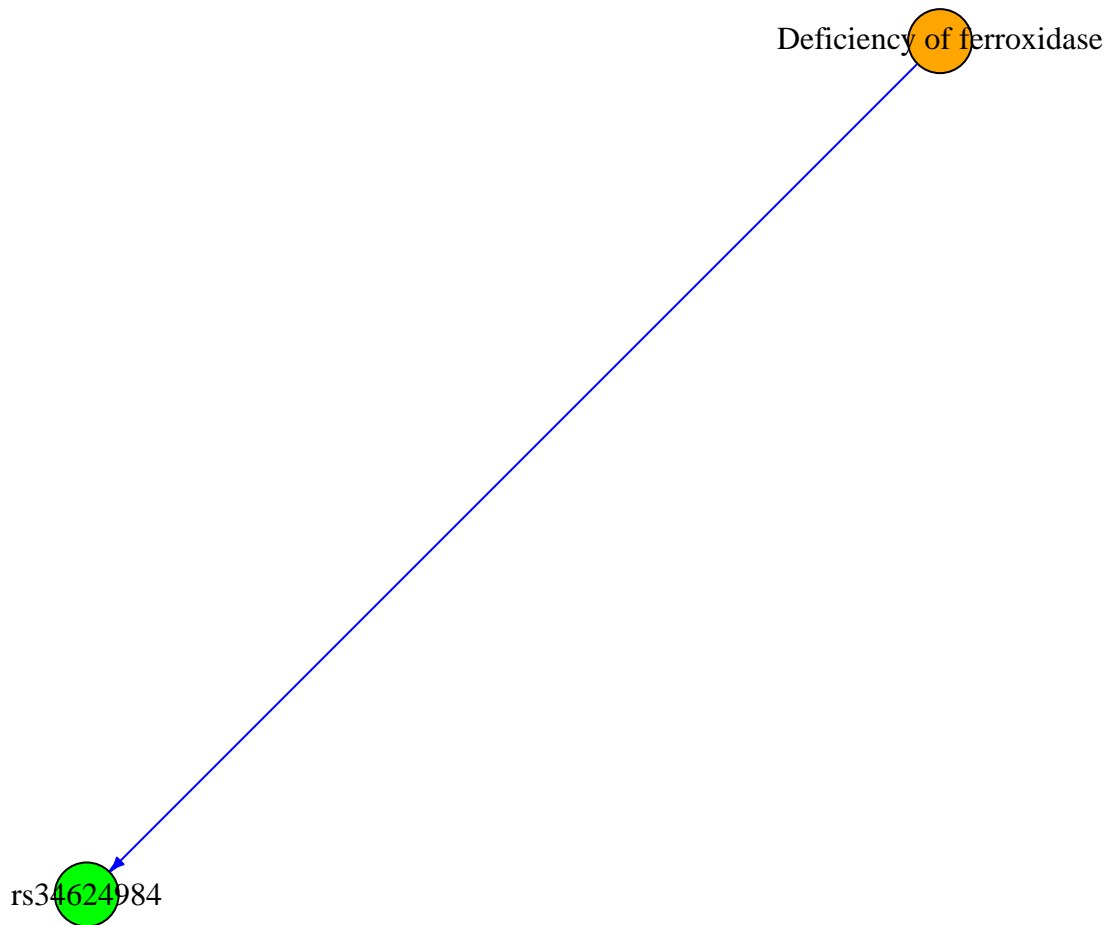

## Variant–Disease Network (Deficiency of galactokinase)

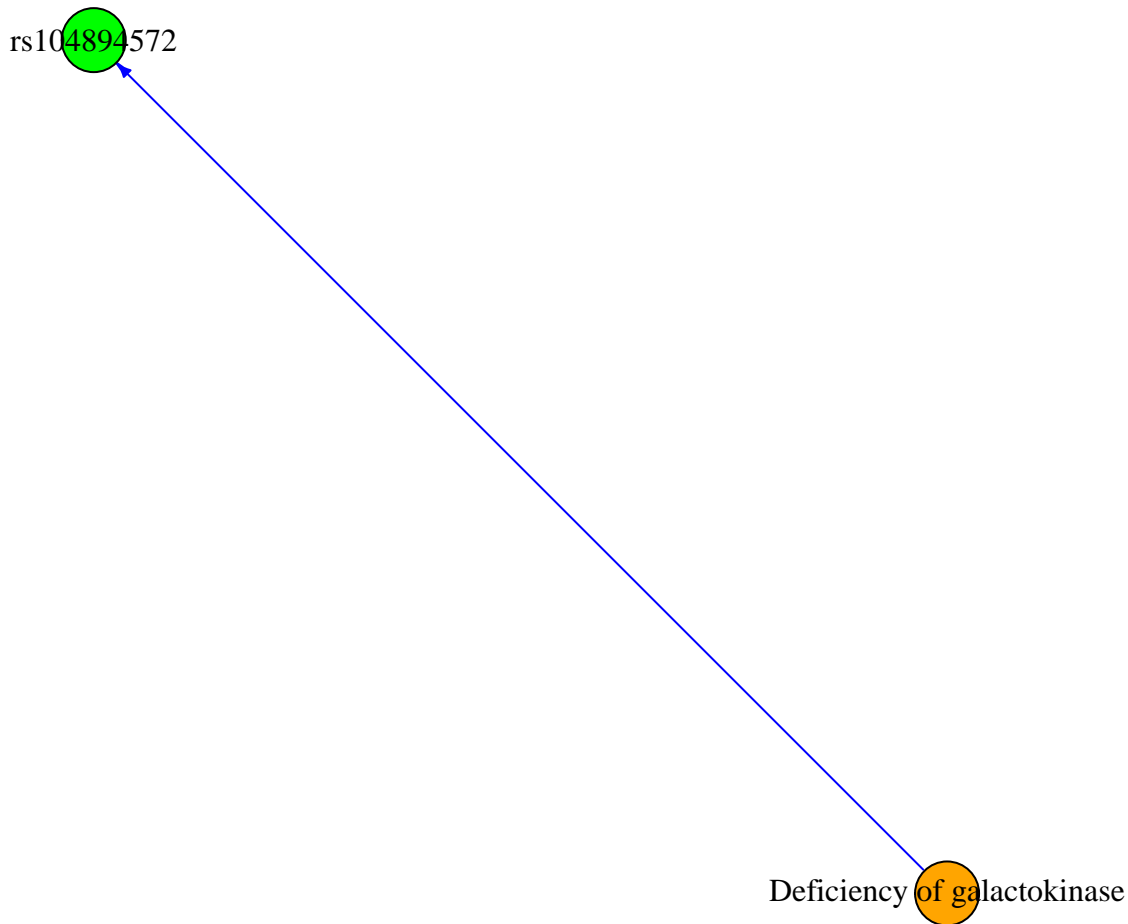

Variant–Disease Network (Deficiency of hyaluronoglucosaminidase)

Deficiency of hyaluronoglucosaminidase

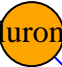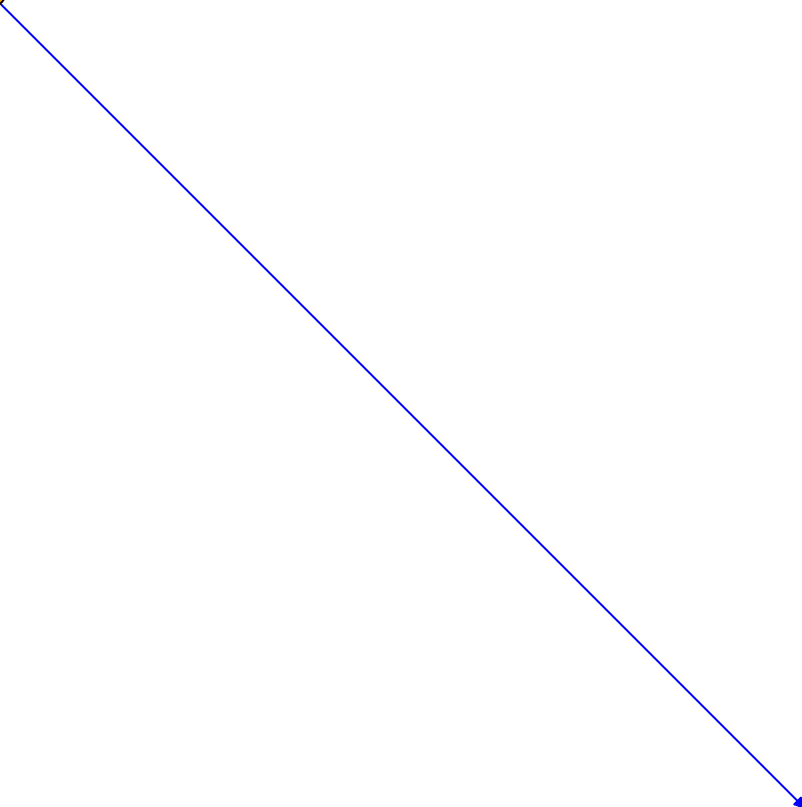

rs142342237

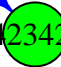

## Variant–Disease Network (Deficiency of iodide peroxidase)

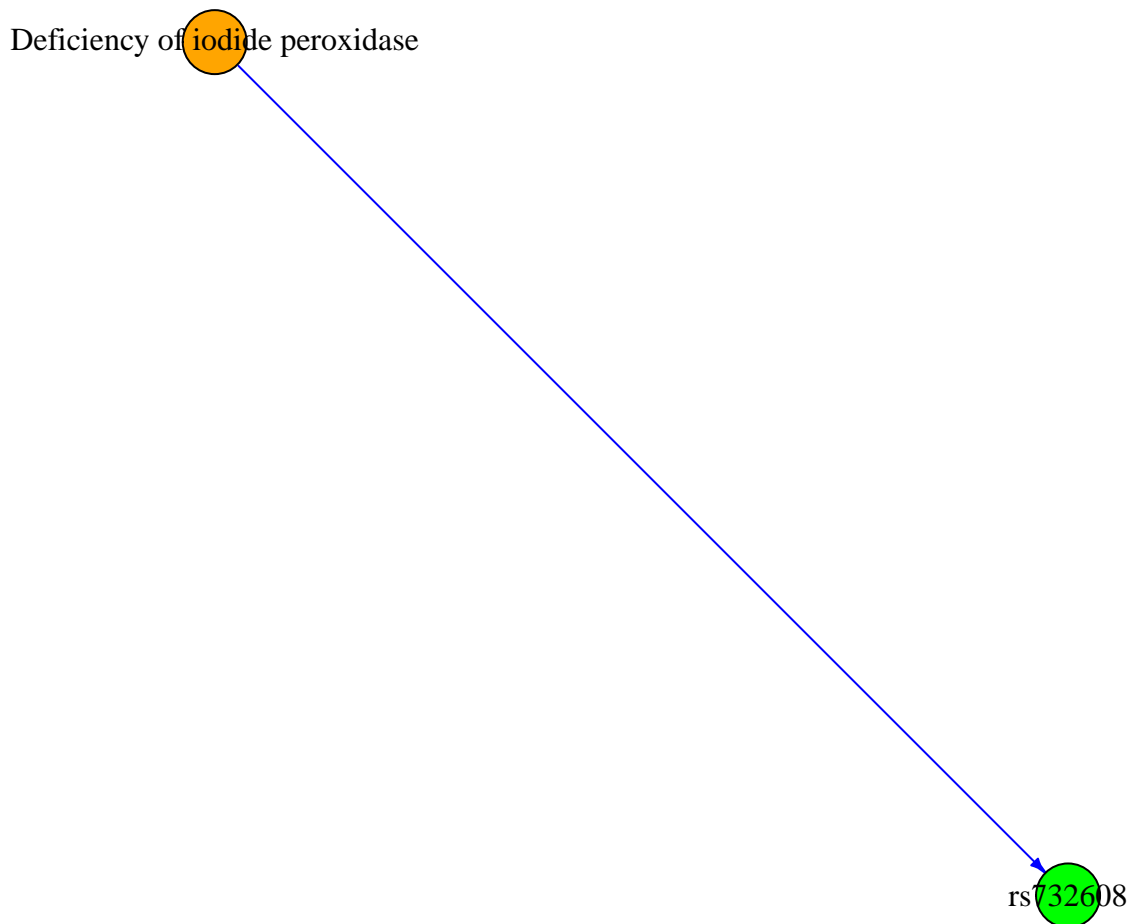



## Variant–Disease Network (Deficiency of transaldolase)

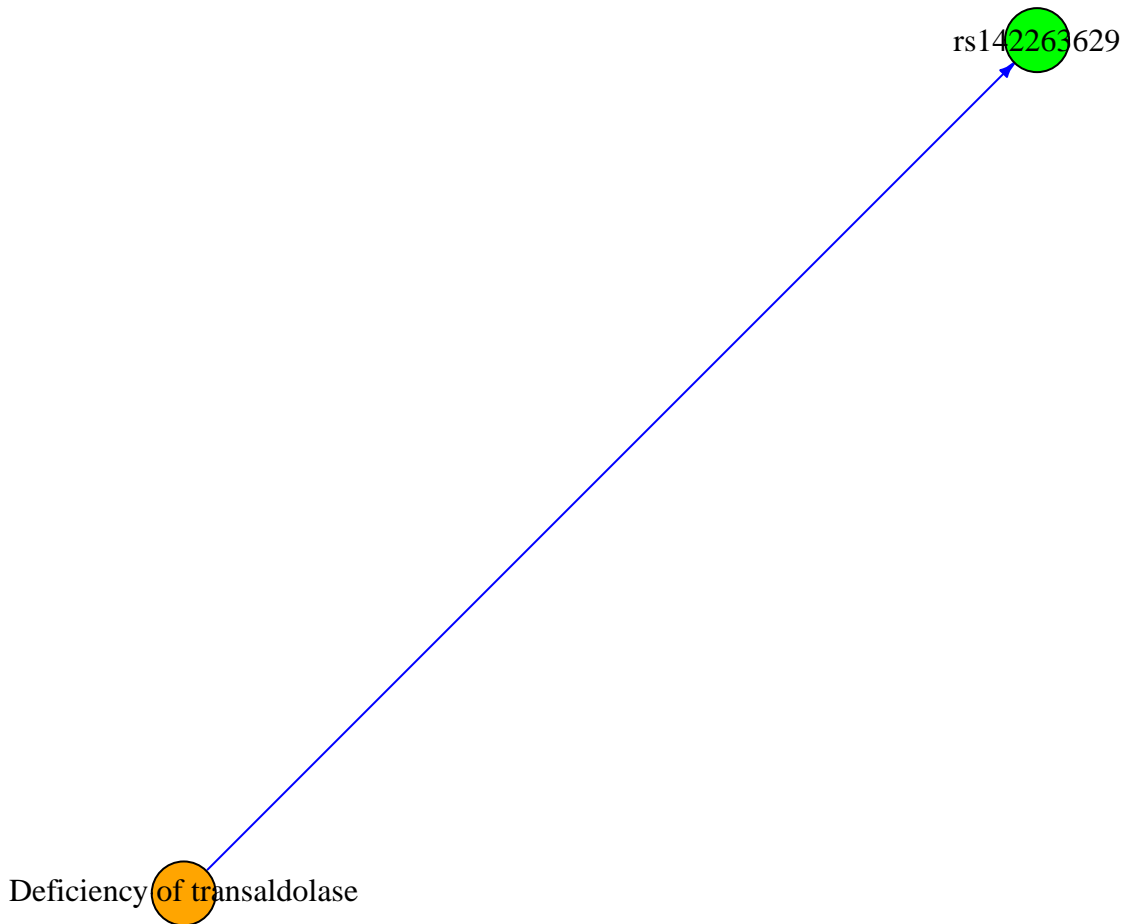

# -Disease Network (Deficiency of UDPglucose–hexose–1–phosphate uridylyl

rs111033823

Deficiency of UDPglucose–hexose–1–phosphate u

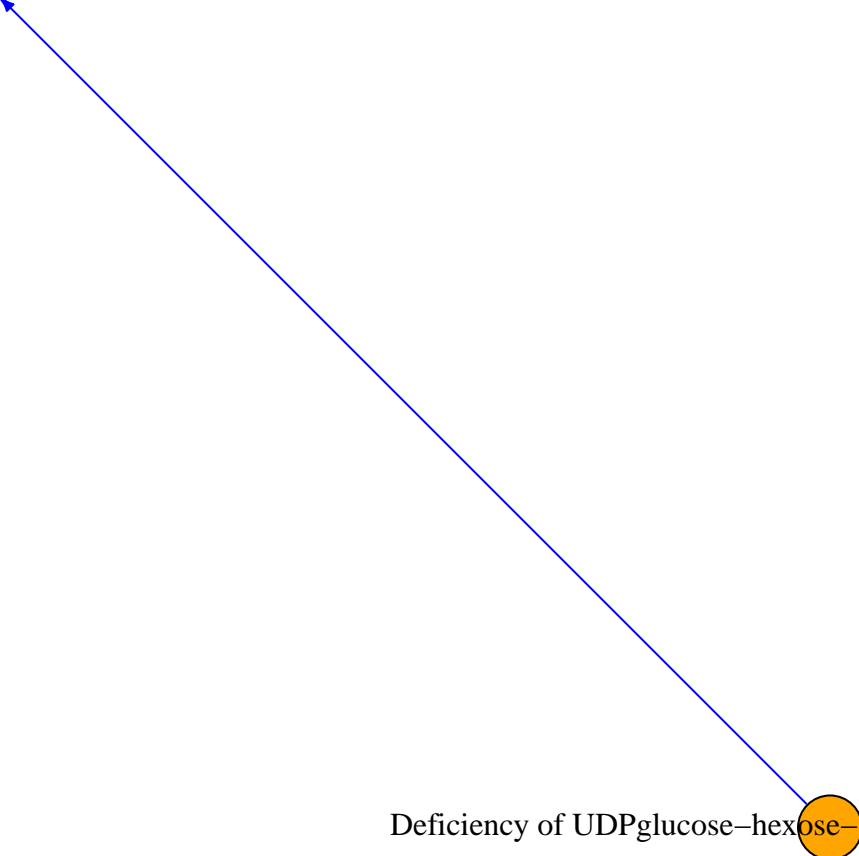

## Variant-Disease Network (Dementia)

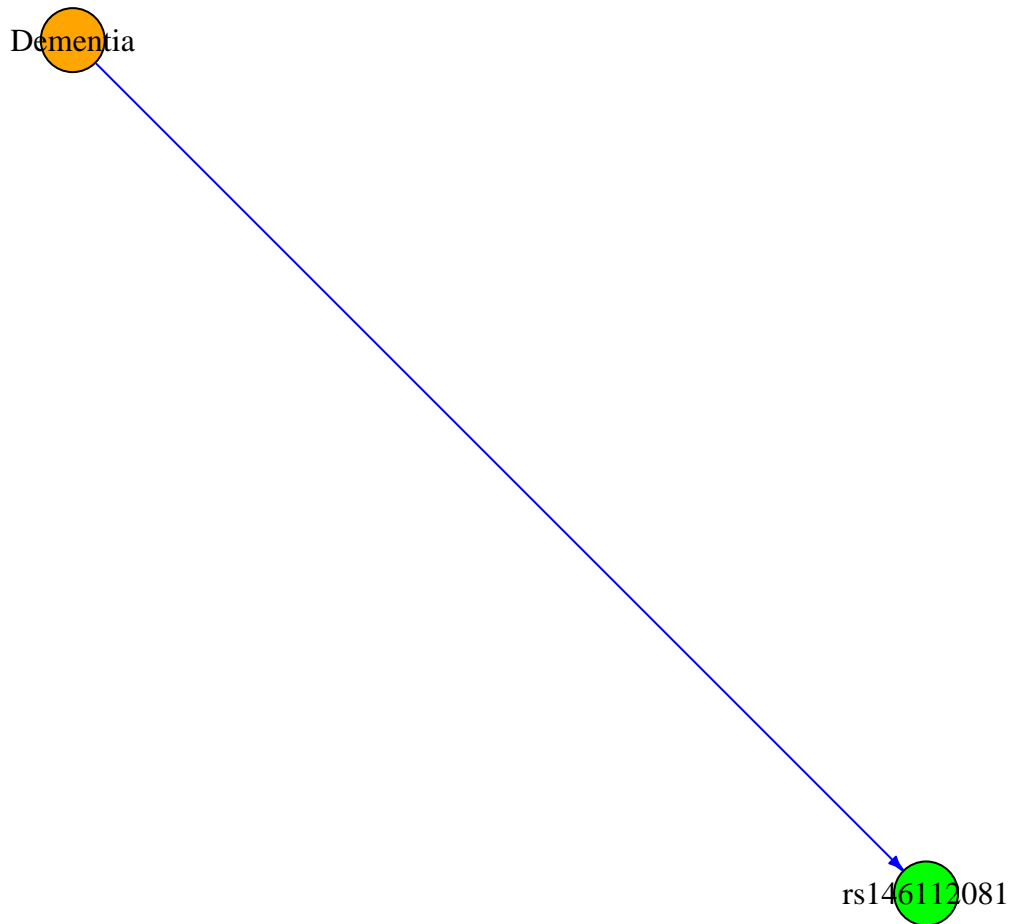

## Variant–Disease Network (Dendritic cell)

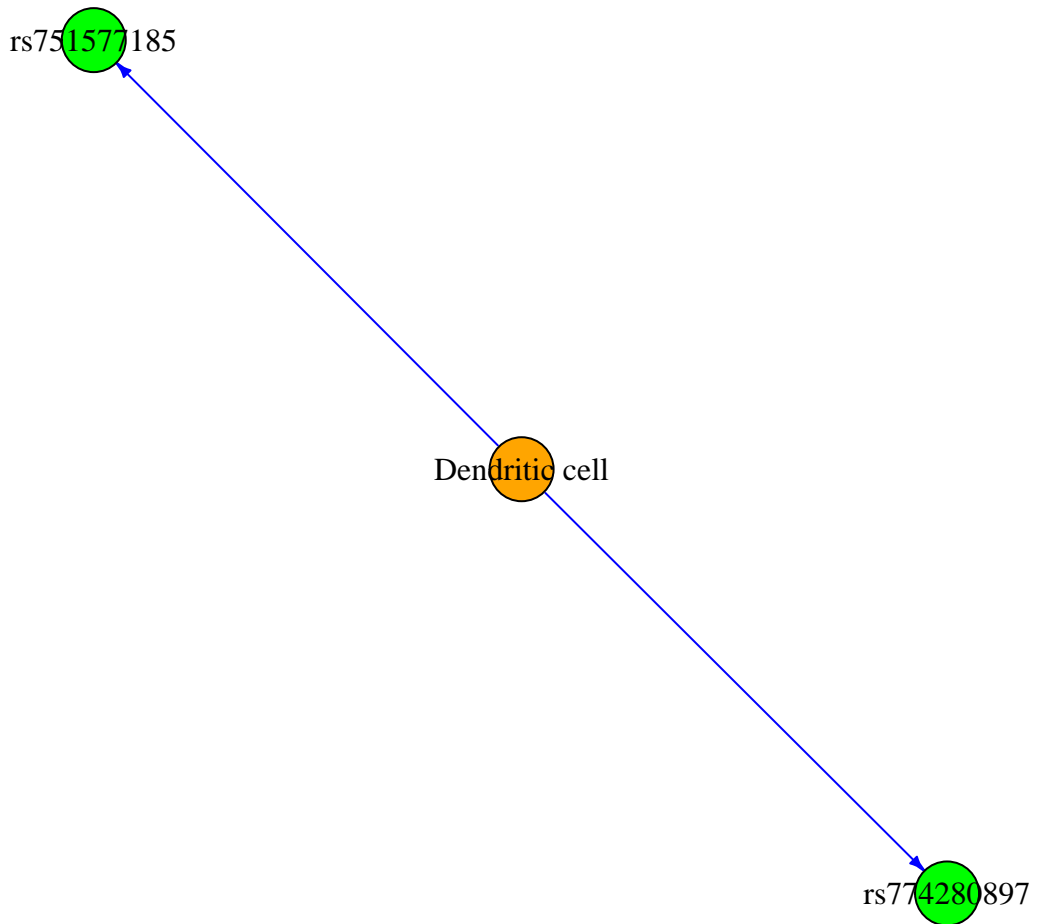

## Variant–Disease Network (Dental anomalies and short stature)

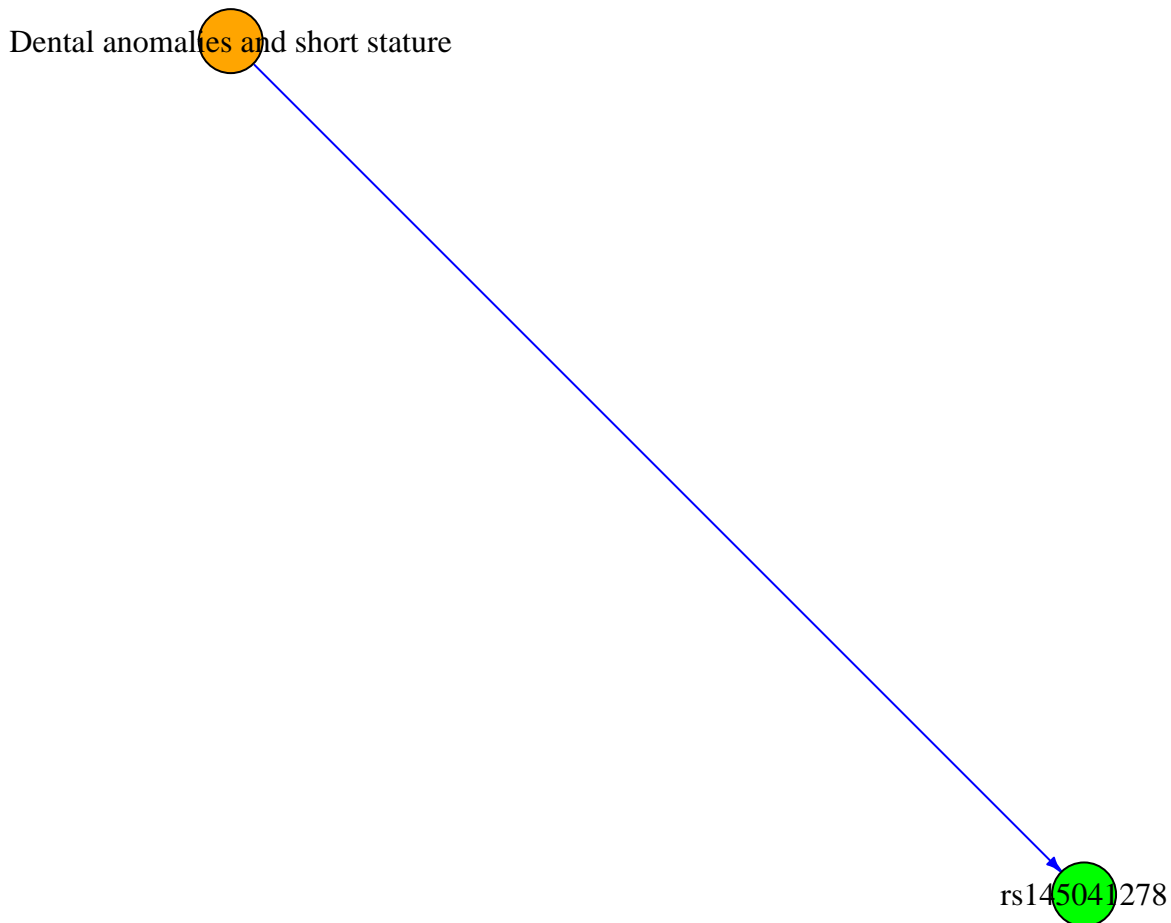

Variant–Disease Network (Diabetes mellitus)

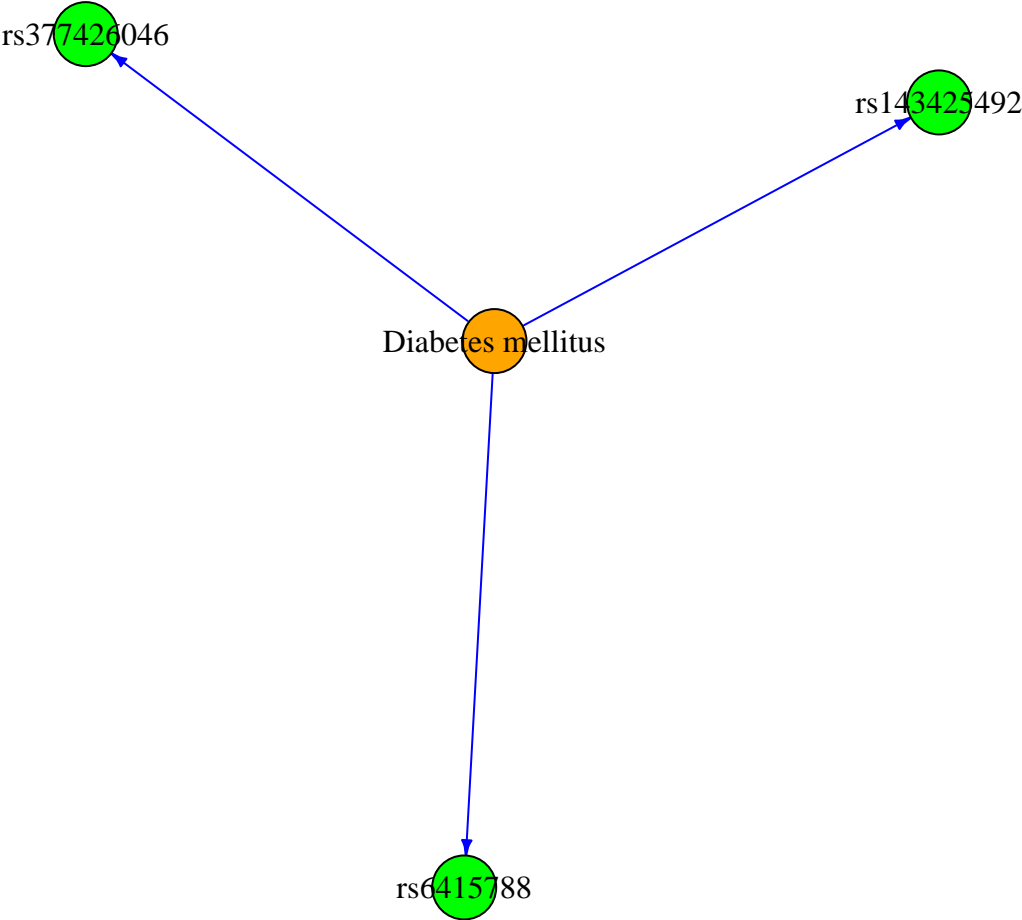

**Variant–Disease Network (Diamond–Blackfan anemia)**

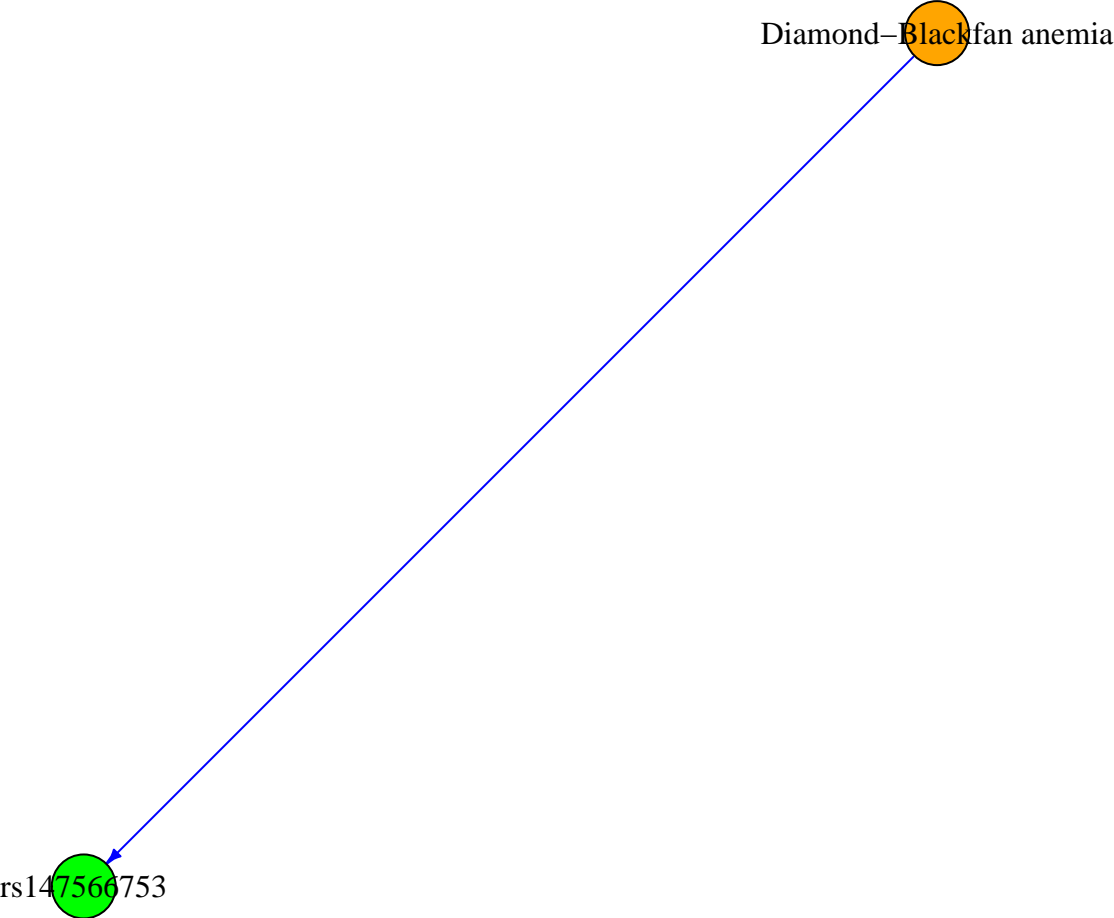

# Disease Network (DICER1-related pleuropulmonary blastoma cancer predispos

rs367797765

DICER1-related pleuropulmonary blastoma cancer pr





## Variant–Disease Network (Dilated Cardiomyopathy)

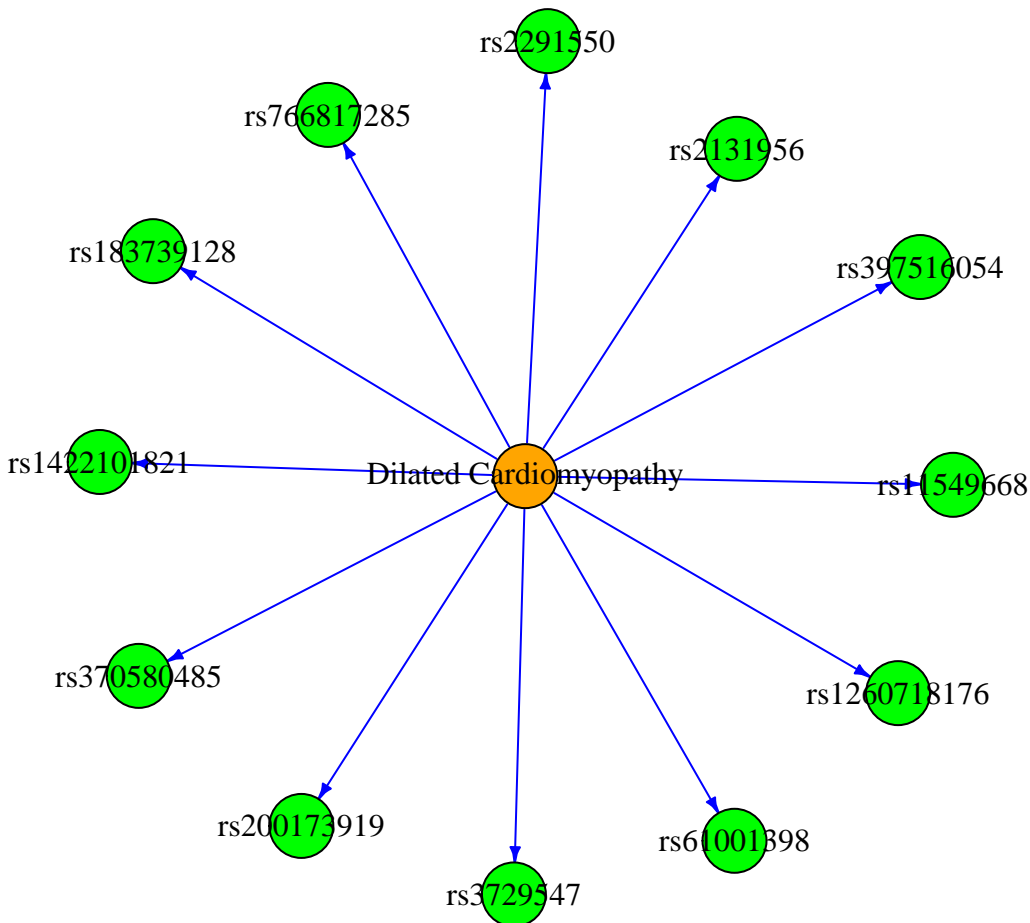

Variant–Disease Network (Dilated cardiomyopathy 1AA)

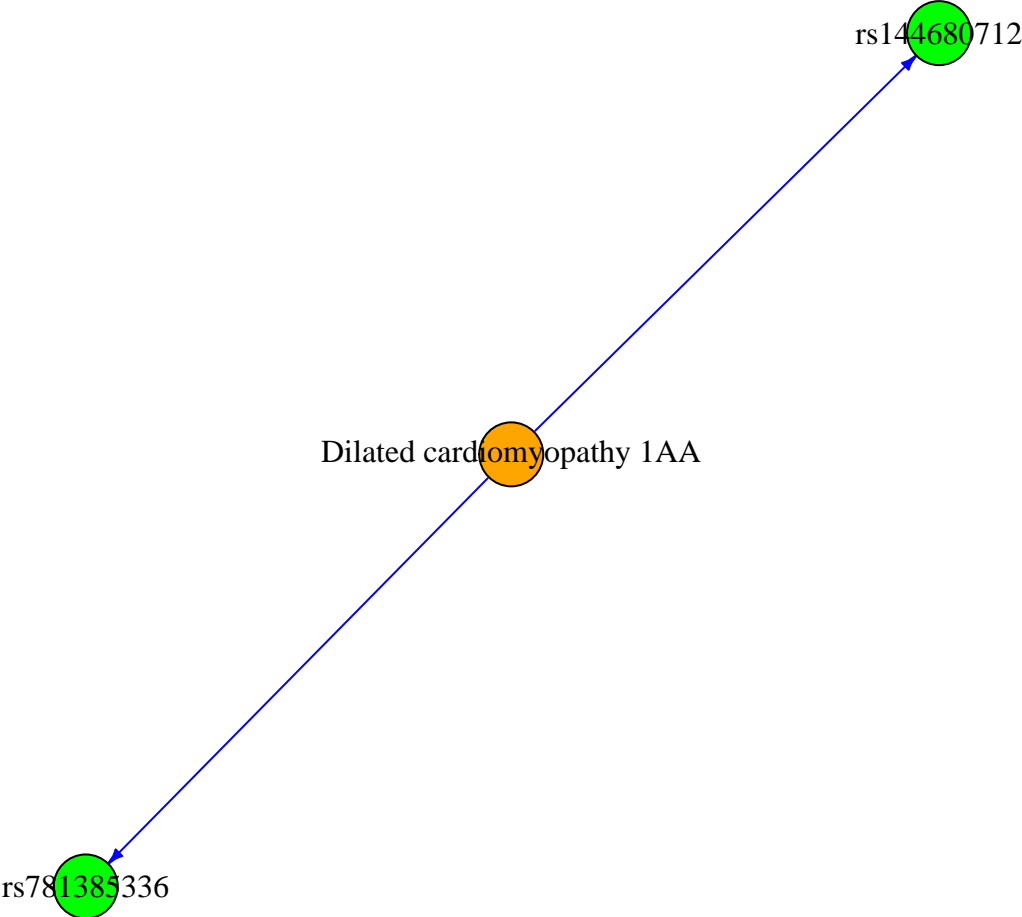

## Variant–Disease Network (Dilated cardiomyopathy 1JJ)

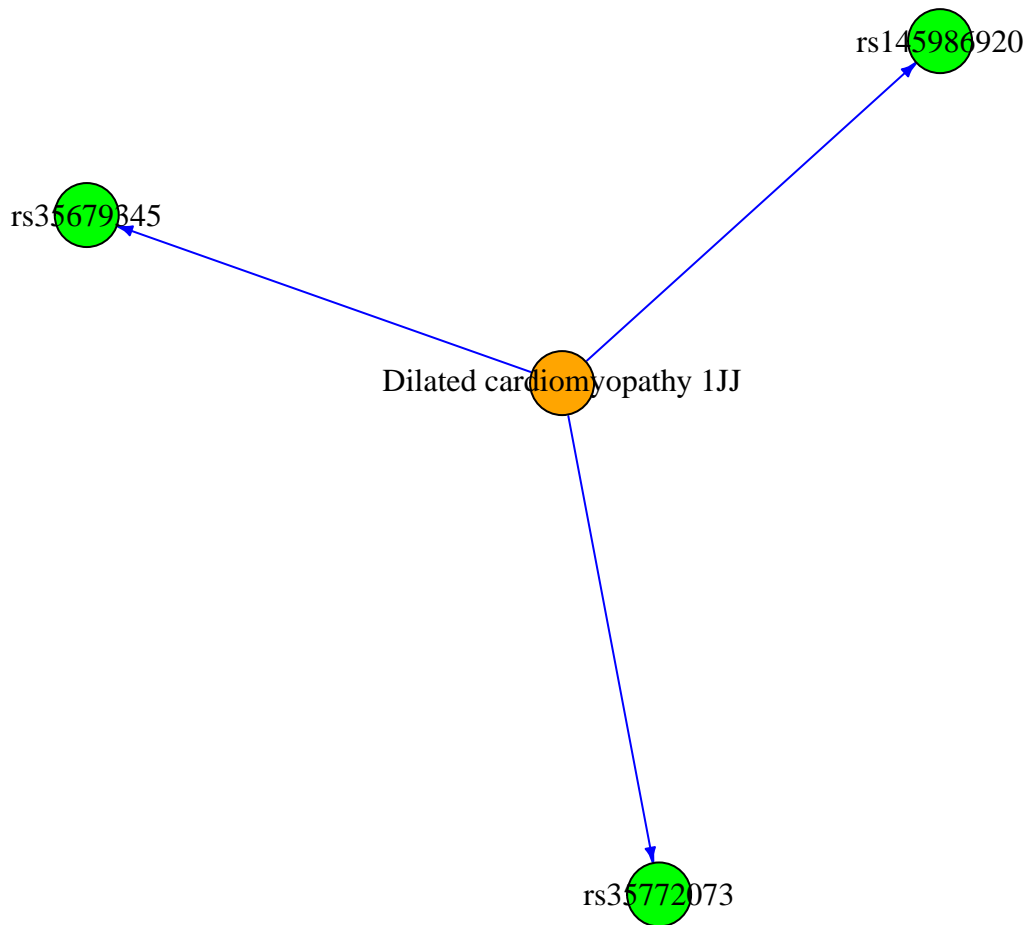

## Variant–Disease Network (Dilated cardiomyopathy 1KK)

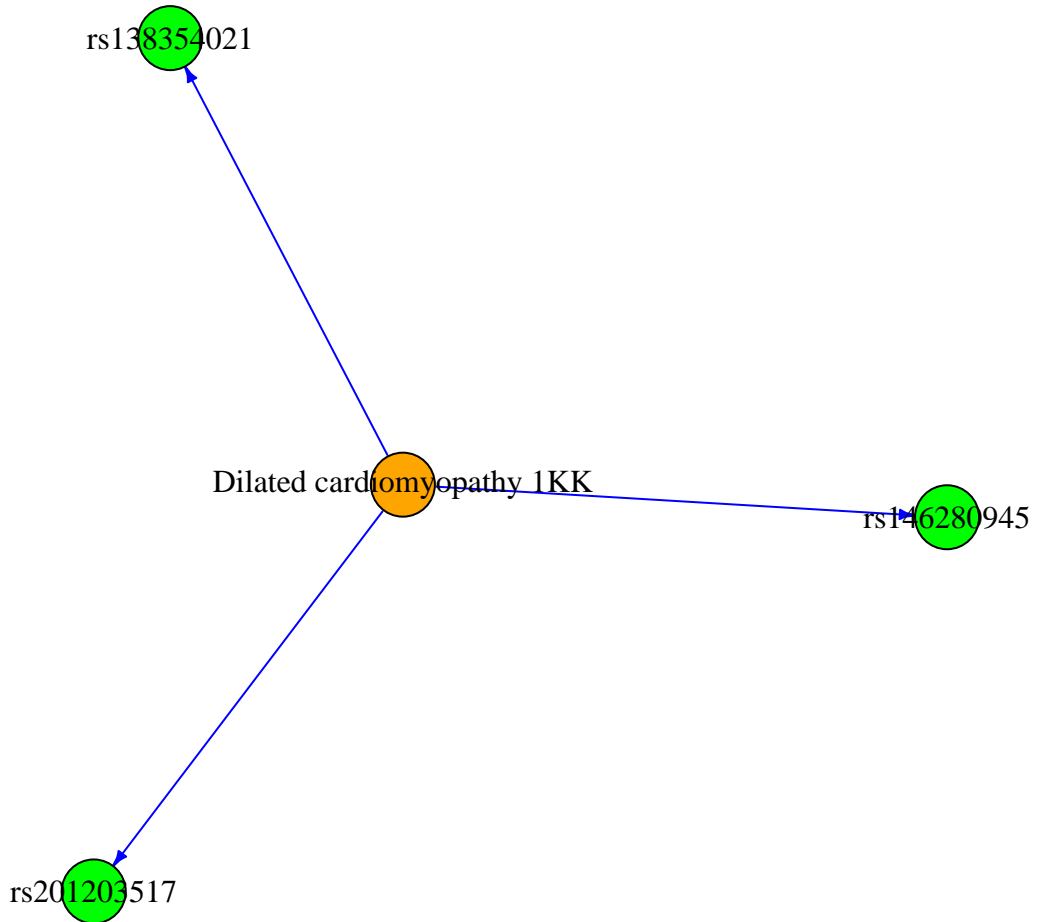

**Variant–Disease Network (Dilated cardiomyopathy 1L)**

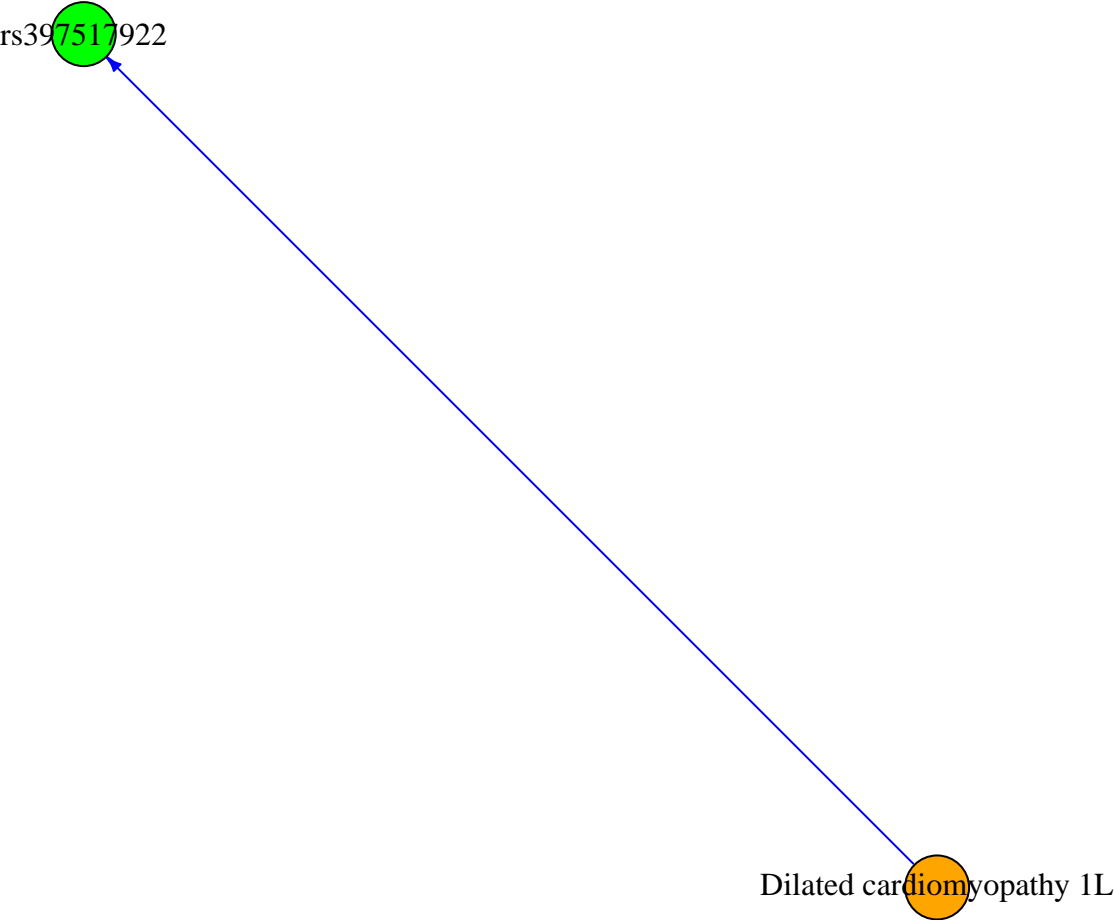

## Variant–Disease Network (Dilated cardiomyopathy 1M)

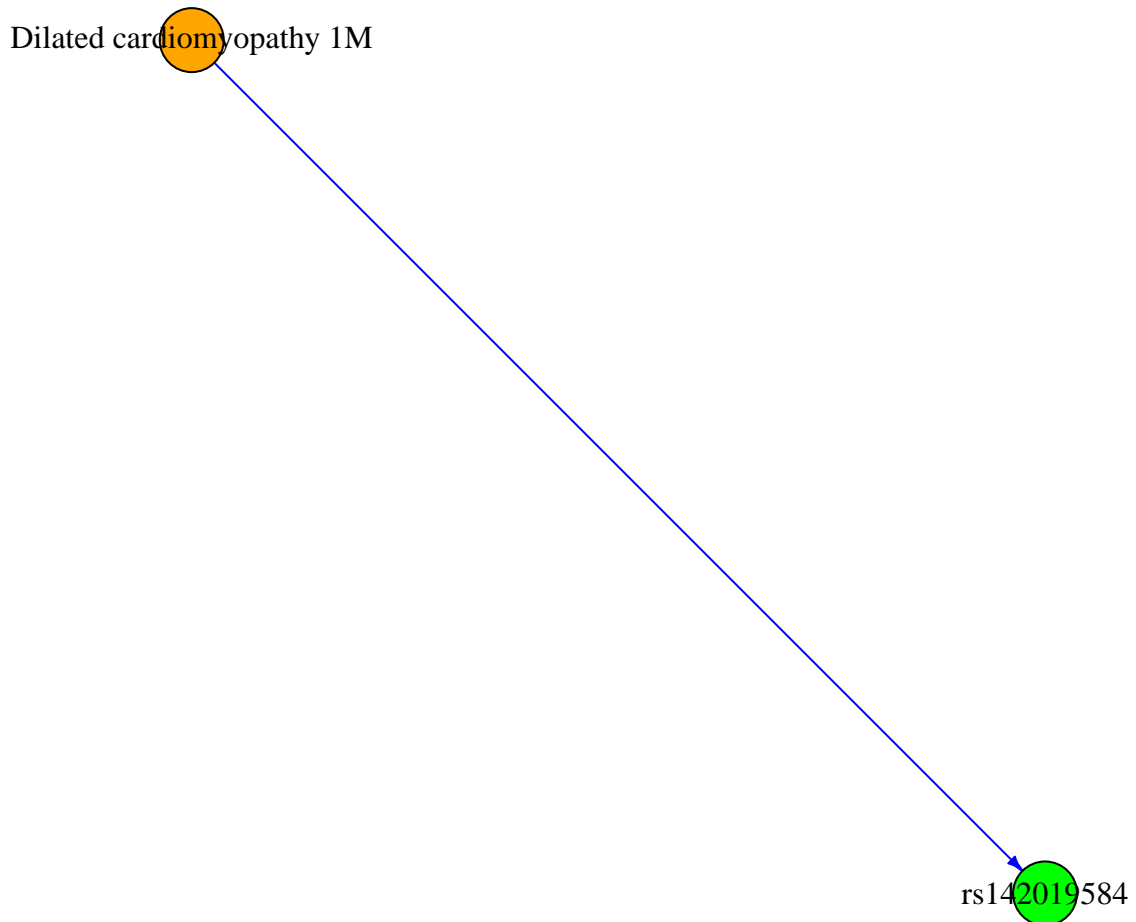

## Variant–Disease Network (Dilated cardiomyopathy 10)

Dilated cardiomyopathy 10

rs1060504811

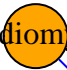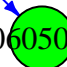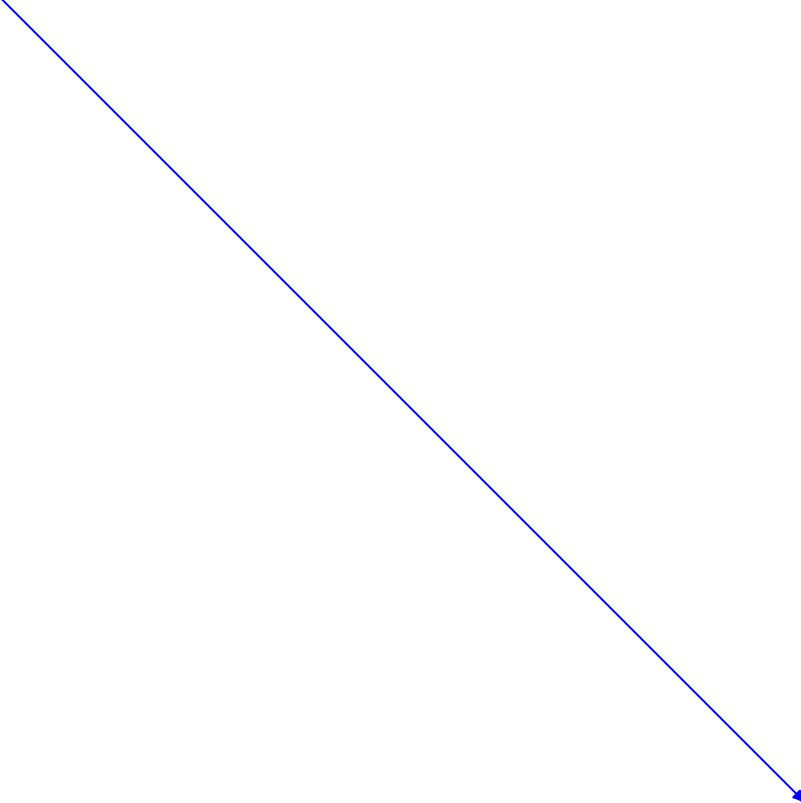

## Variant–Disease Network (Dilated cardiomyopathy 1S)

rs267607124

Dilated cardiomyopathy 1S

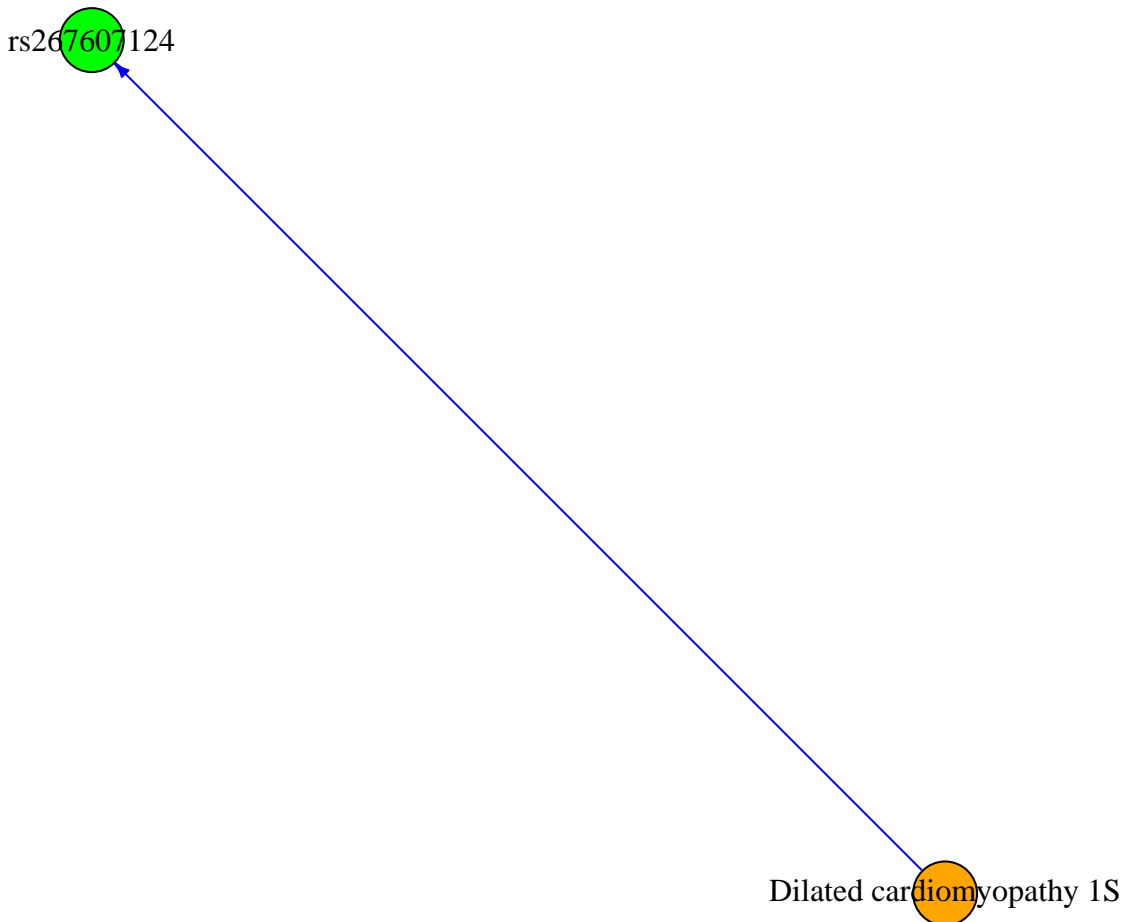



## Variant–Disease Network (Dilated cardiomyopathy 1W)

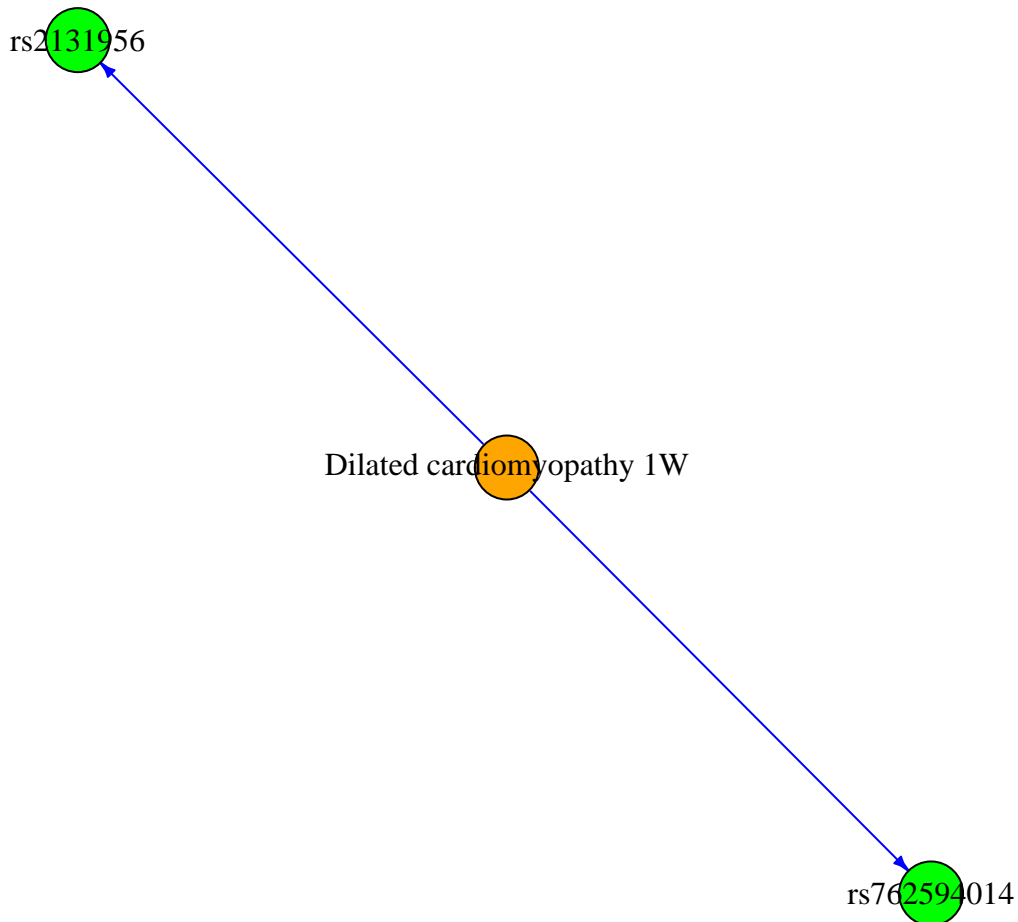

**Variant–Disease Network (Dilated cardiomyopathy 1Z)**

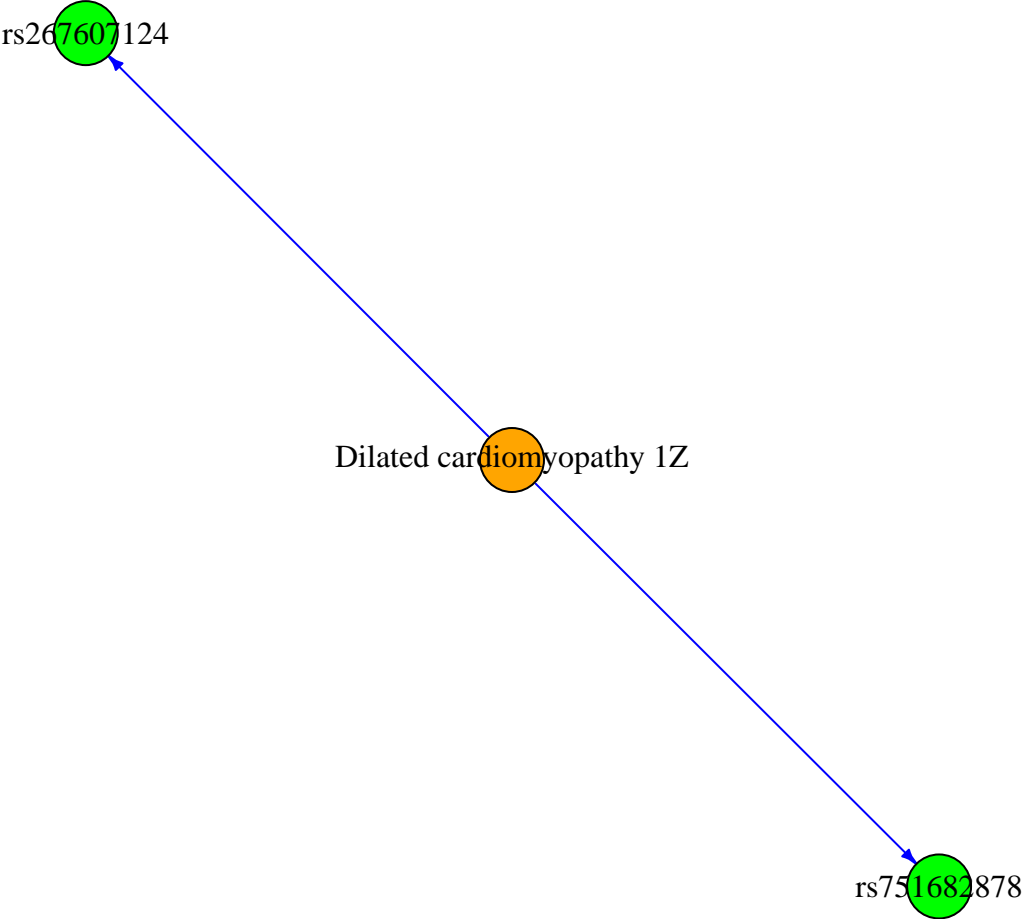

# Variant-Disease Network (Dilated cardiomyopathy with woolly hair and keratosis)

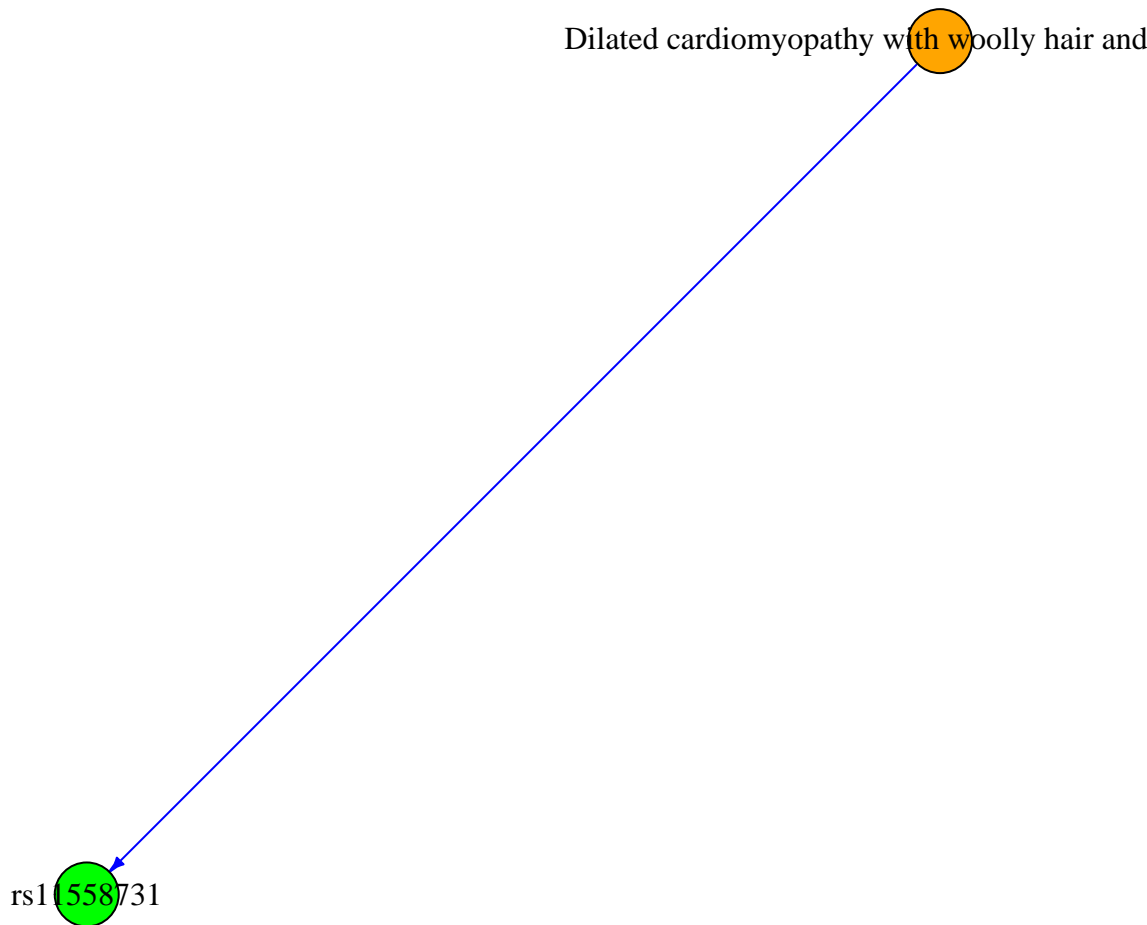

Variant–Disease Network (Disorders of Intracellular Cobalamin Metabolism)

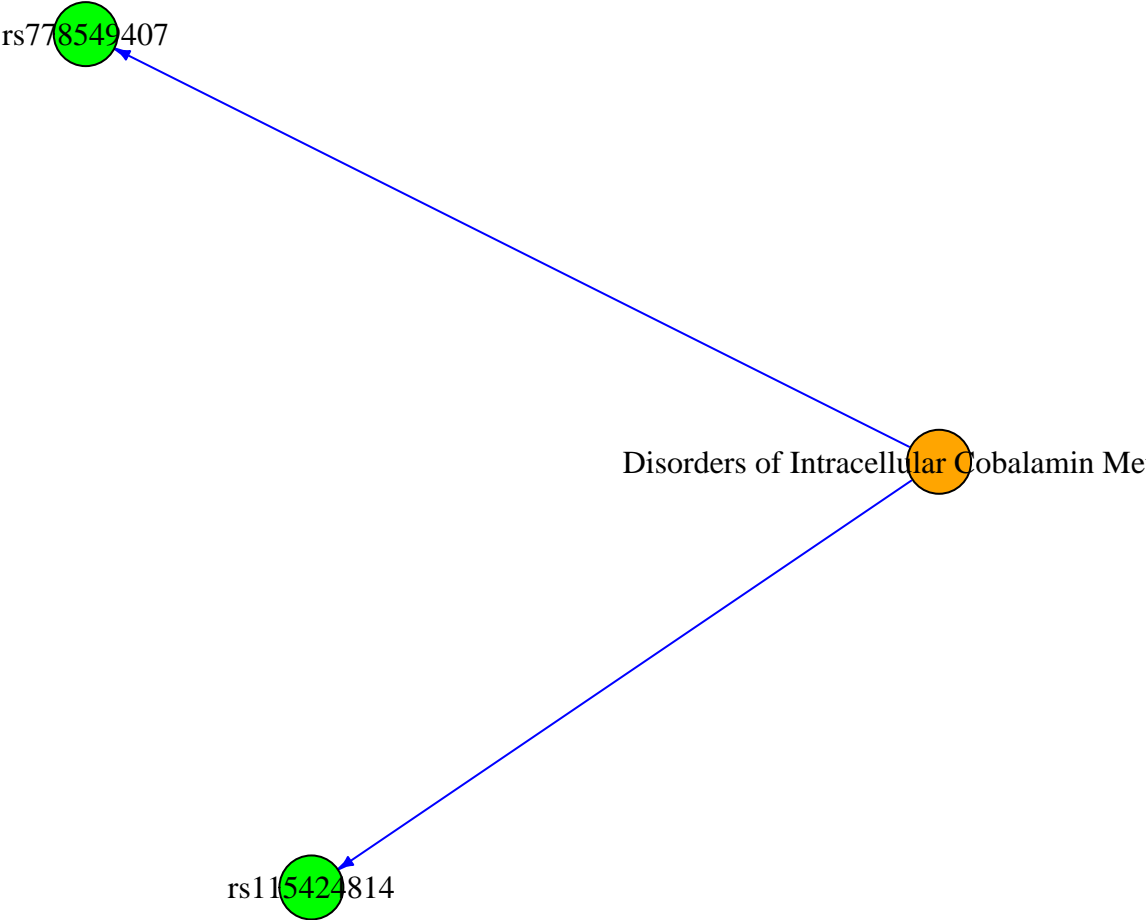

## Variant–Disease Network (Distal arthrogryposis)

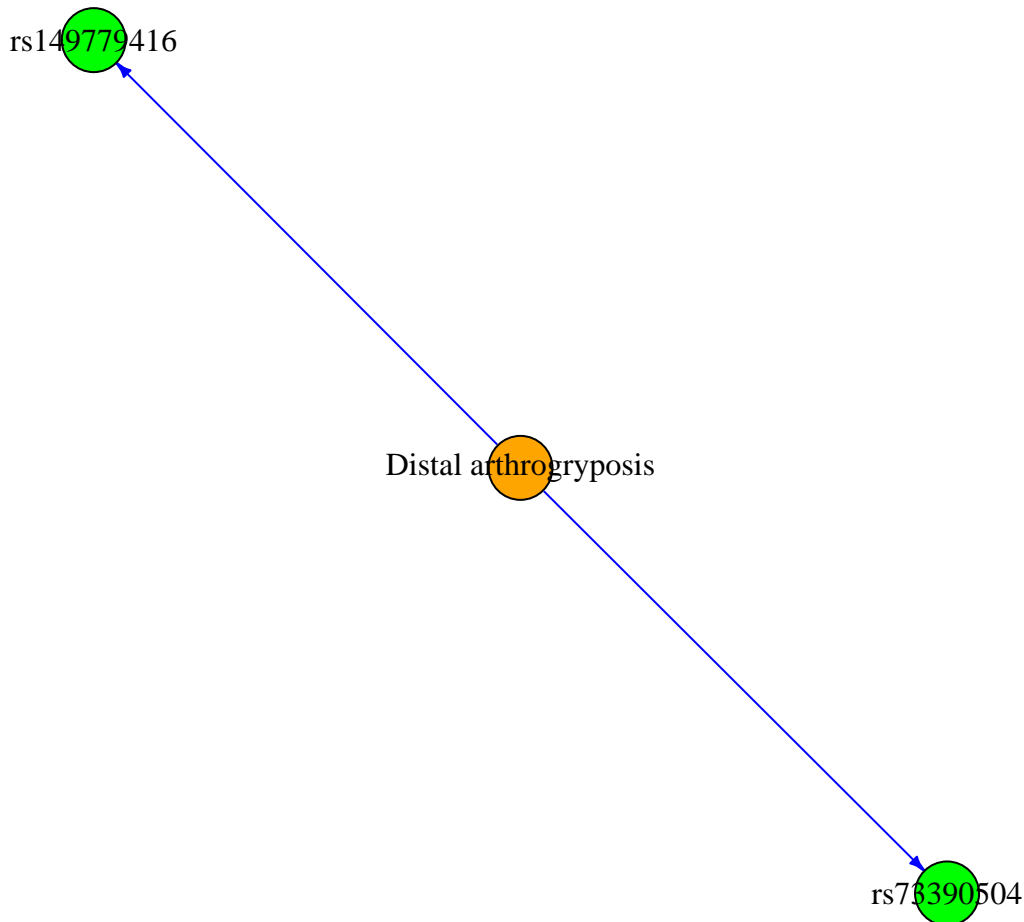

# Variant–Disease Network (Distal arthrogryposis type 1A)

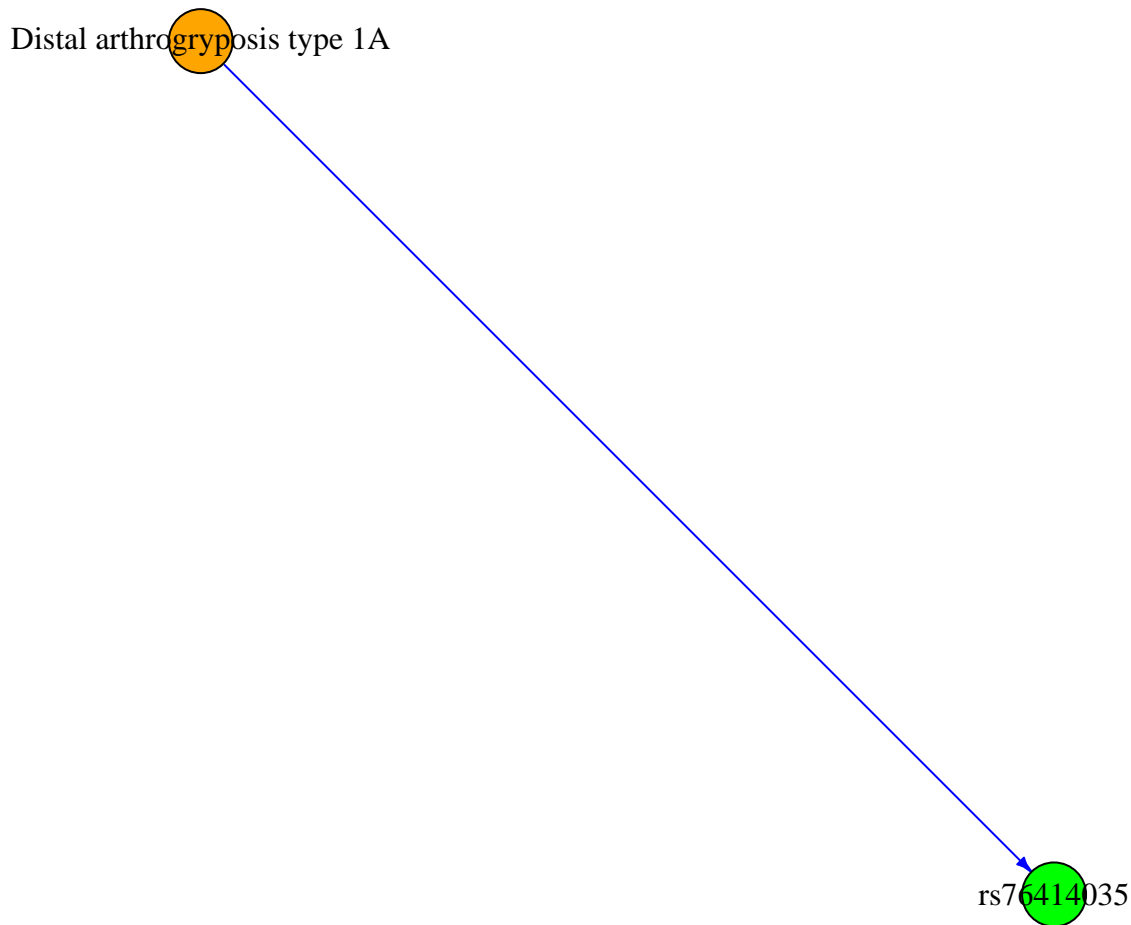

**Variant–Disease Network (Distal hereditary motor neuropathy type 5)**

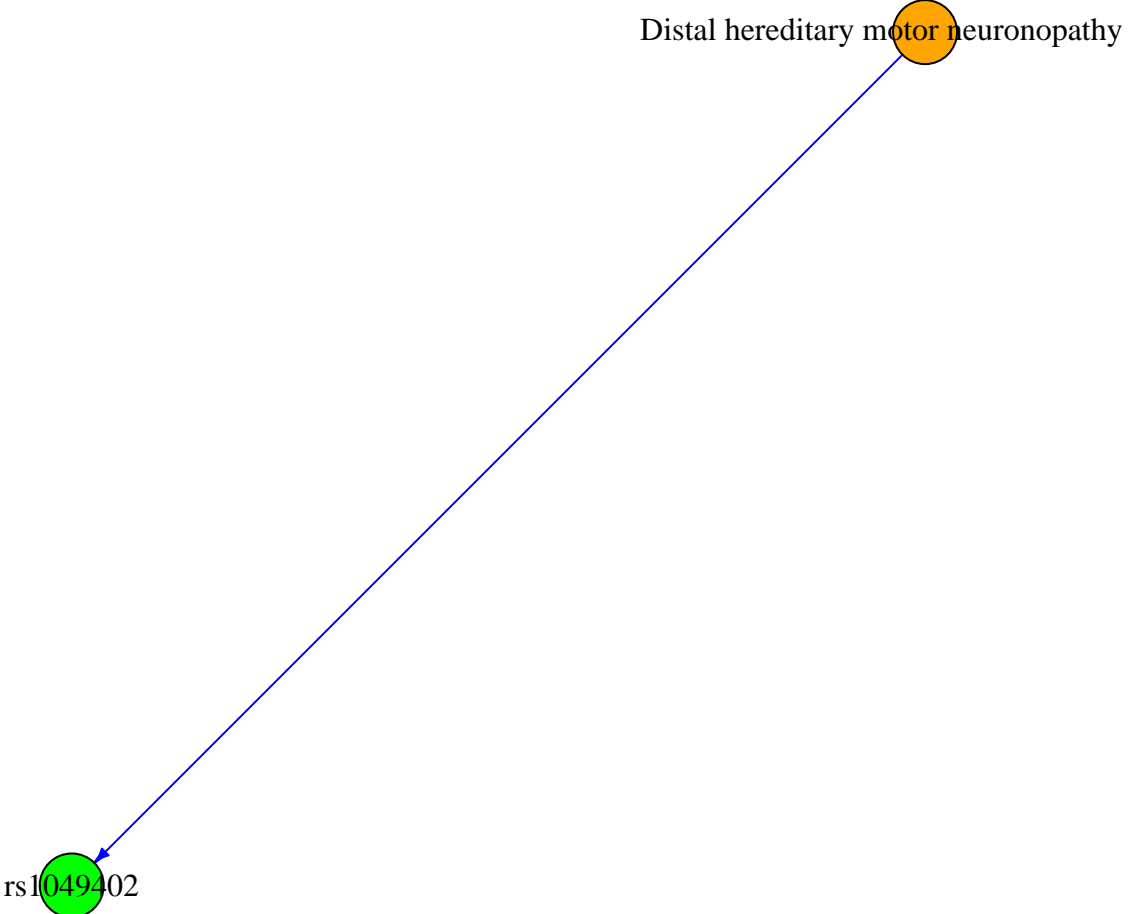

Variant–Disease Network (Distal hereditary motor neuropathy type 7B)

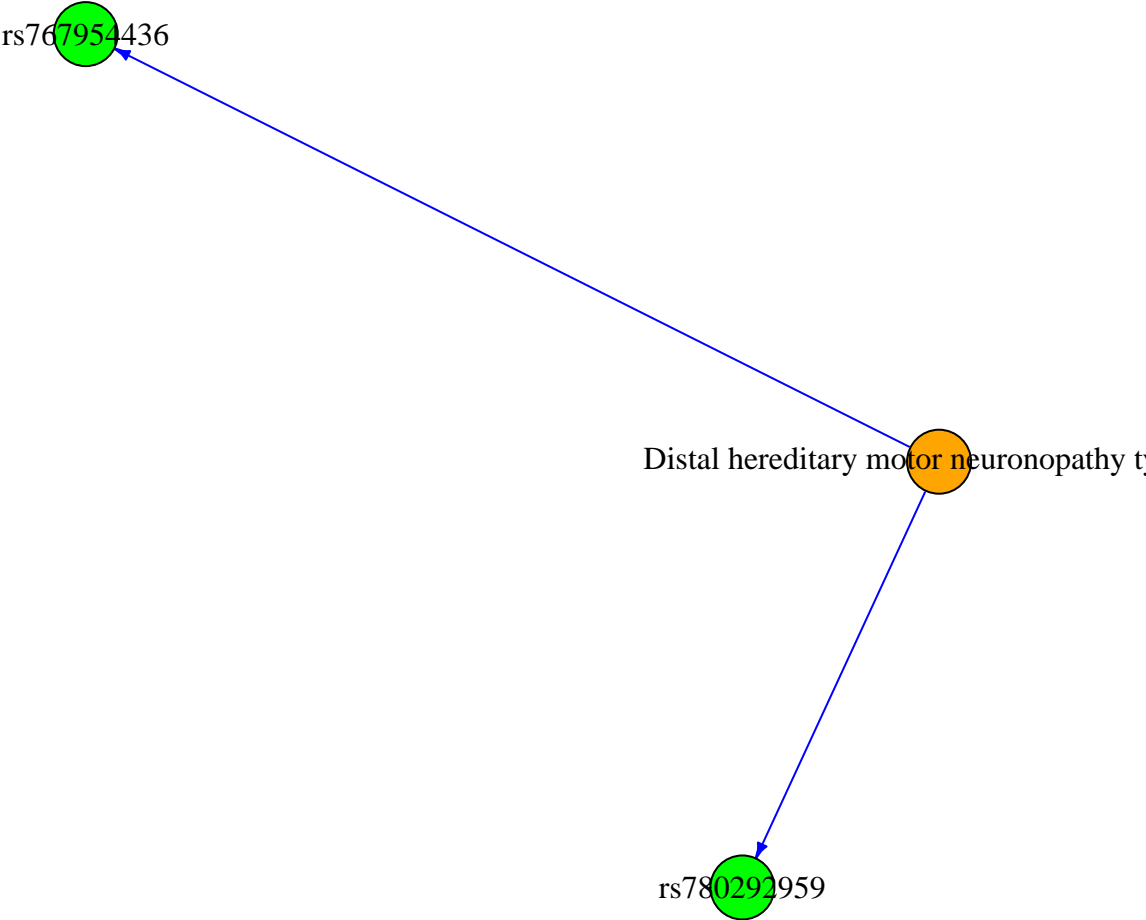



## Variant–Disease Network (Distal myopathy)

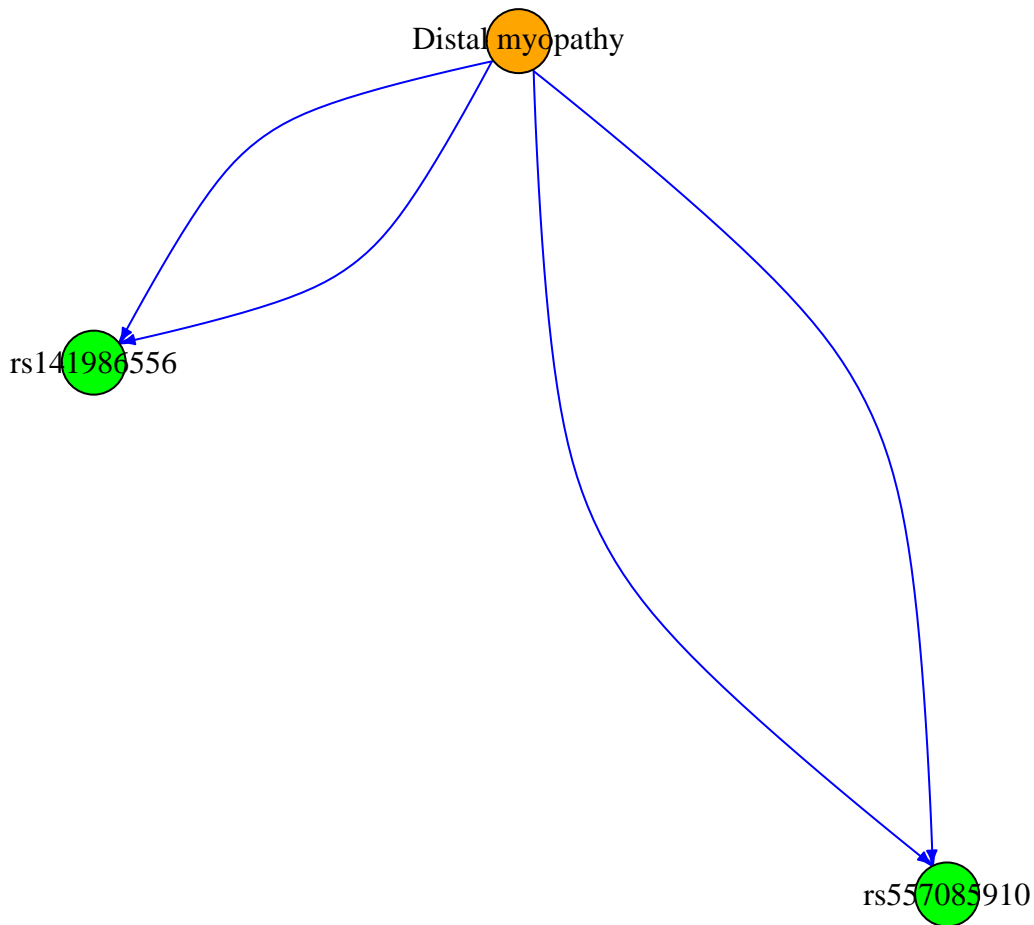

Variant–Disease Network (Distal spinal muscular atrophy)

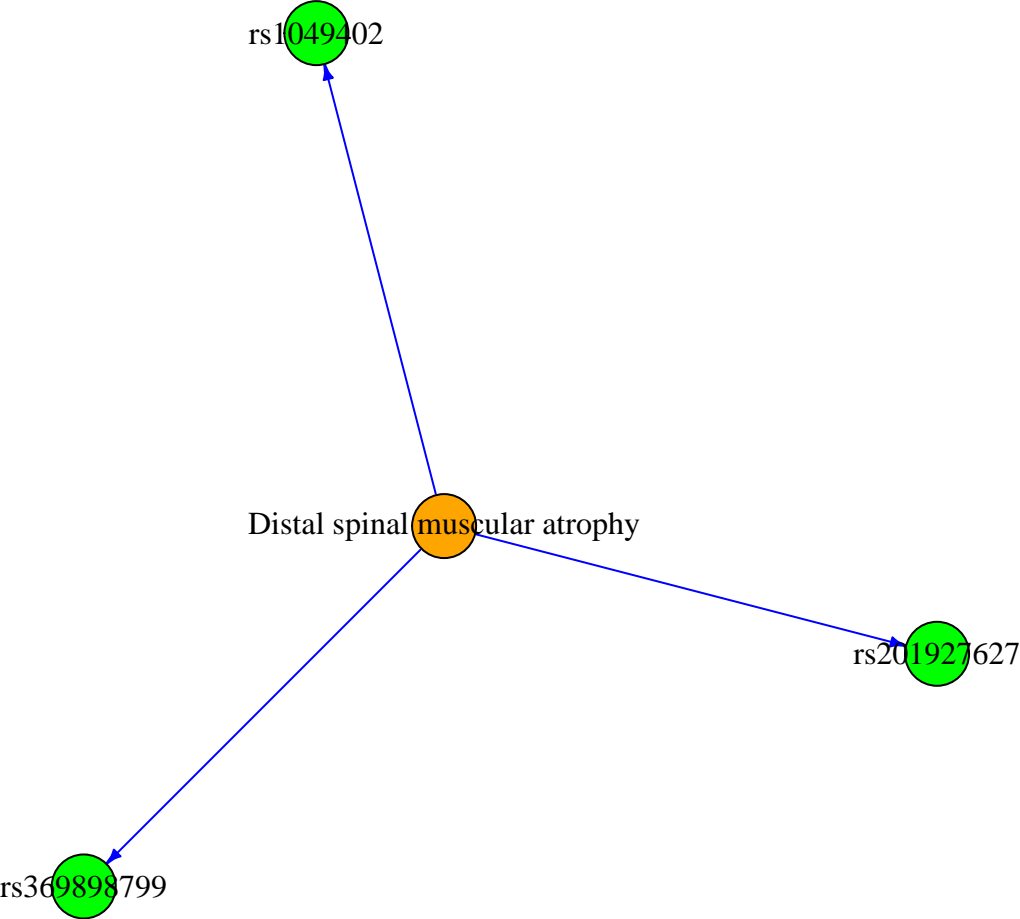

**Variant–Disease Network (Donnai Barrow syndrome)**

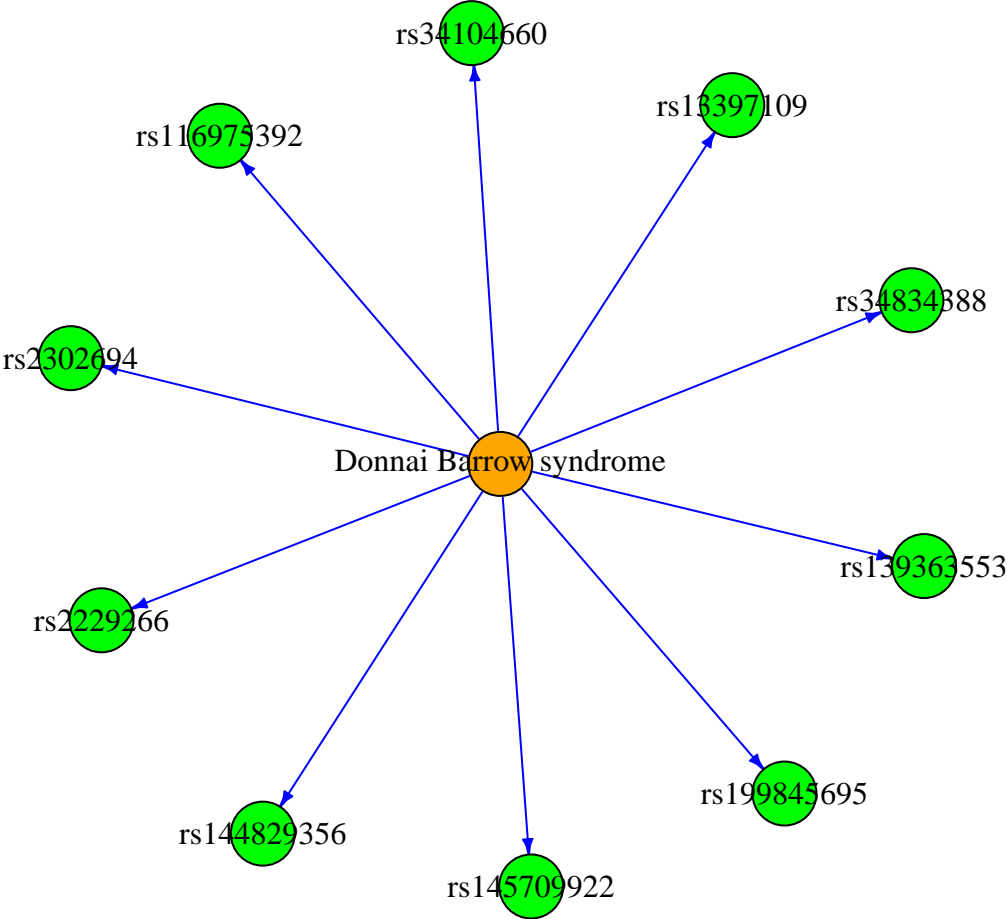

## Variant–Disease Network (Drash syndrome)

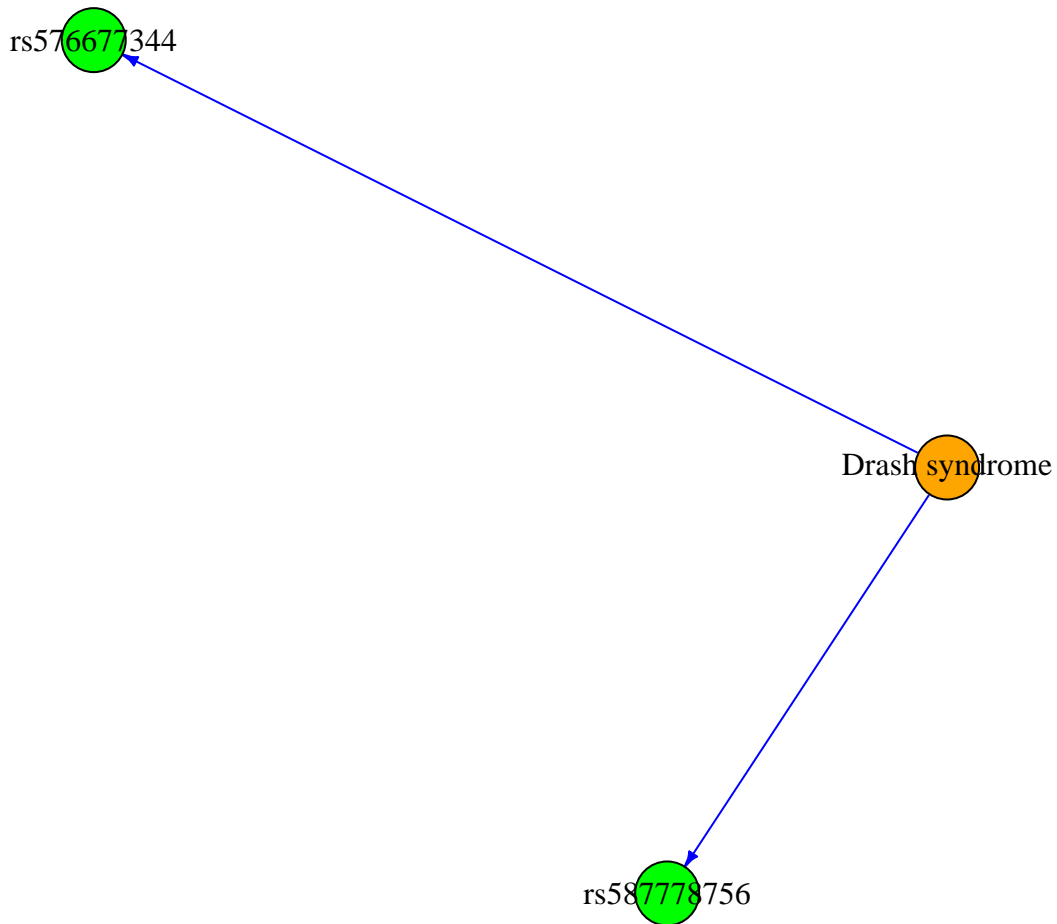

# Variant–Disease Network (Duchenne muscular dystrophy)

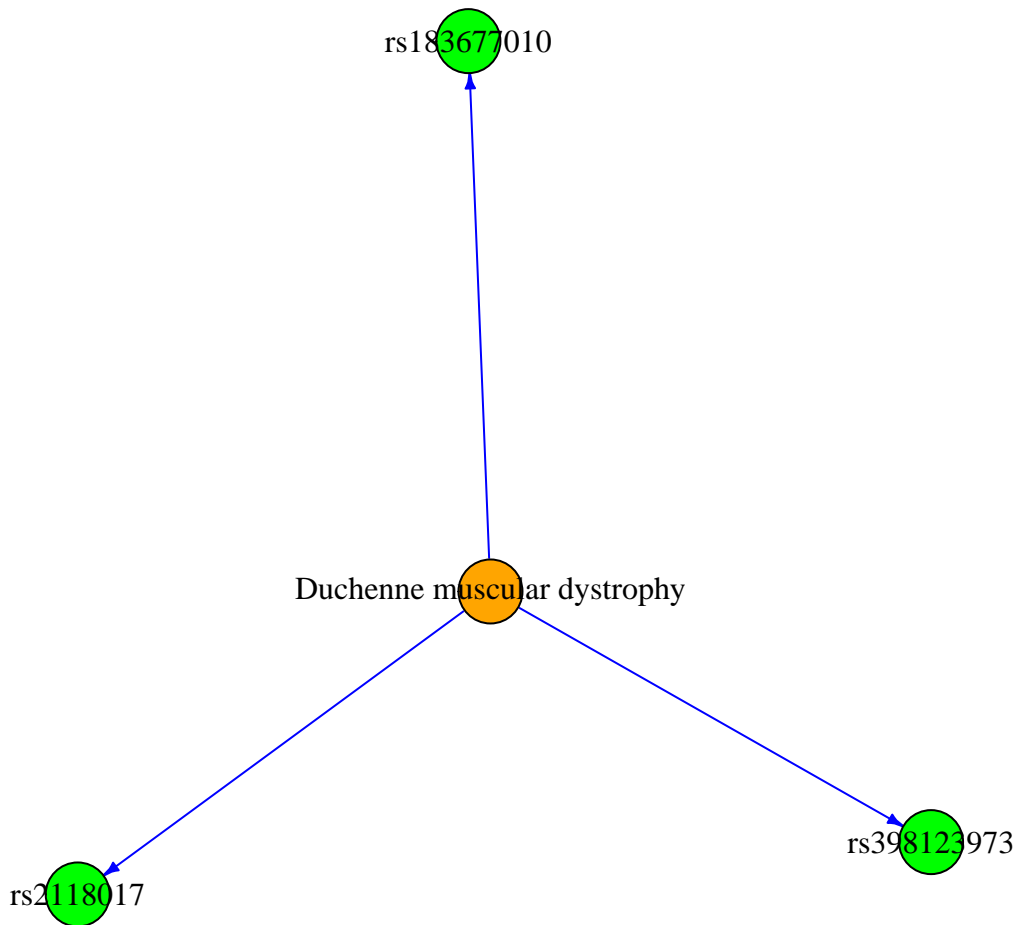

## Variant–Disease Network (Dyskeratosis congenita)

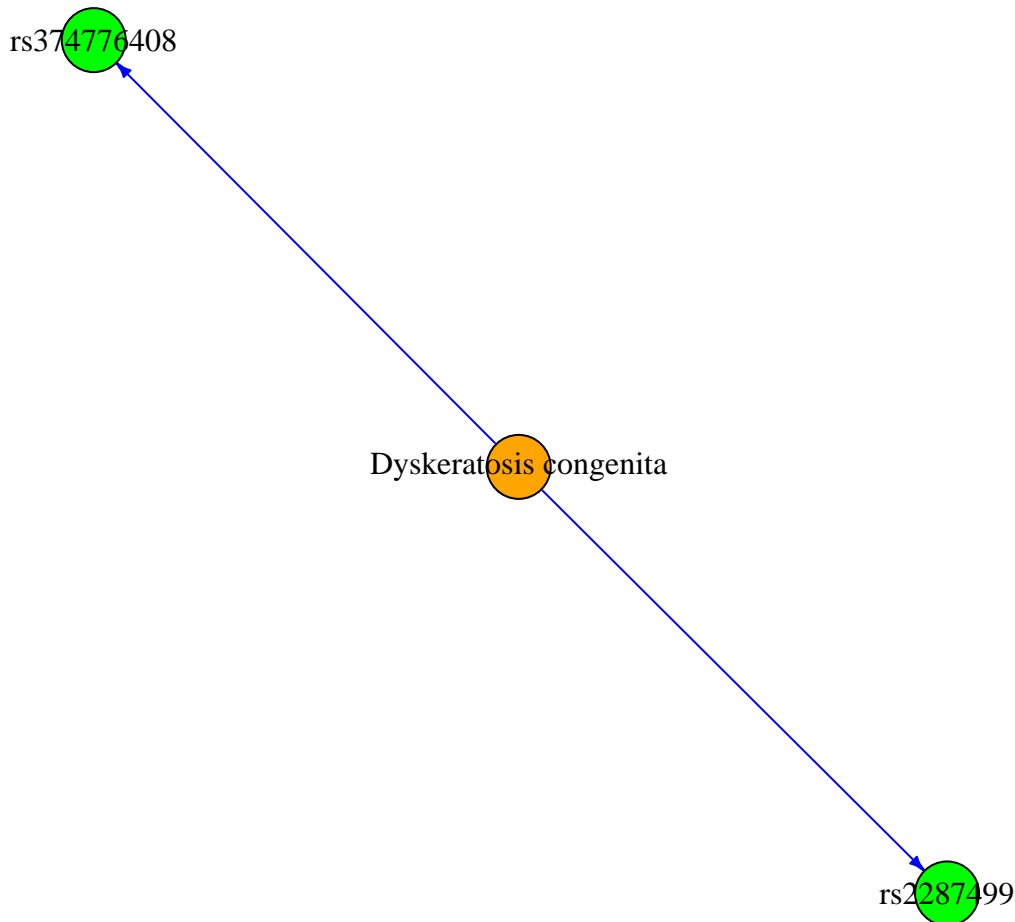

Variant–Disease Network (Dyssegmental Dysplasia)

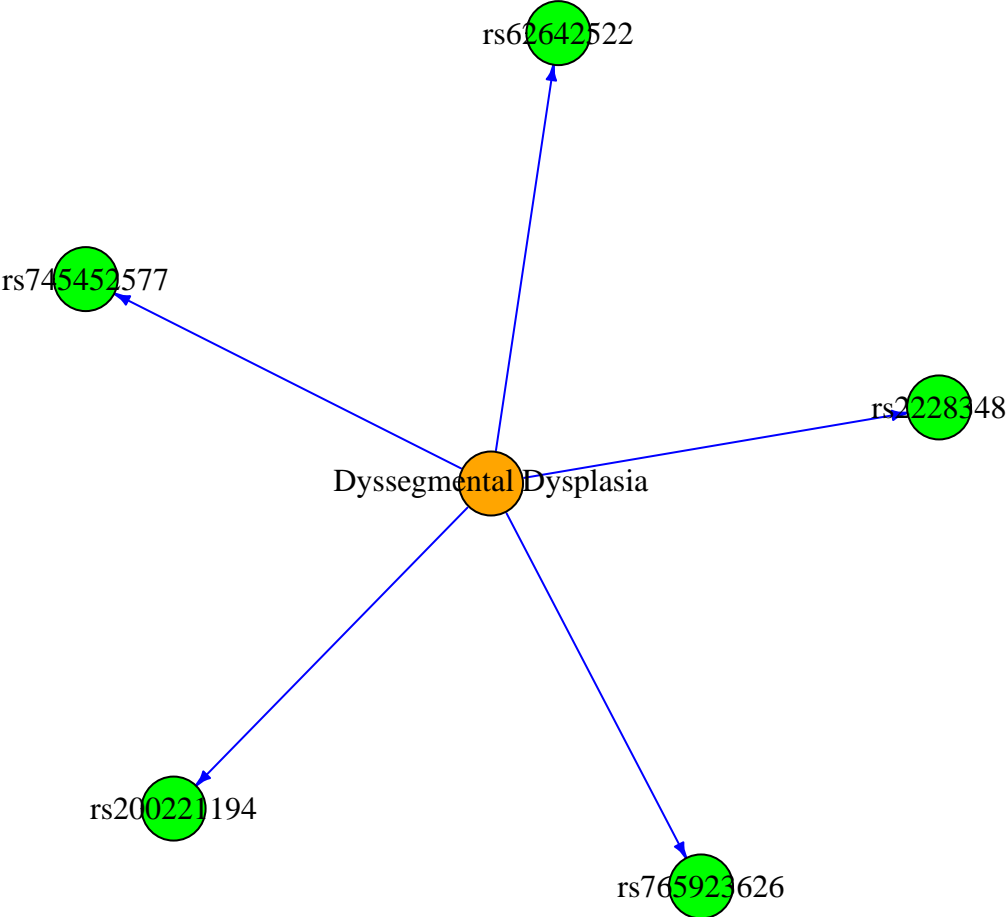

## Variant–Disease Network (Dystonia)

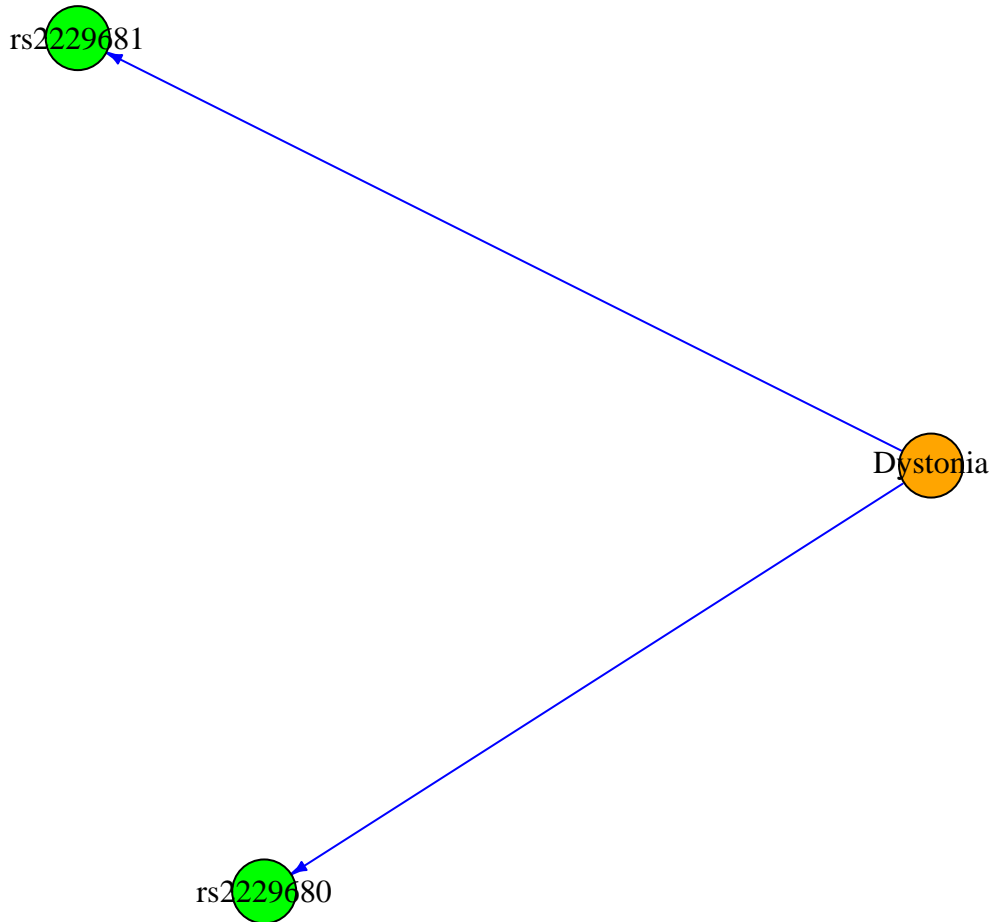



## Variant–Disease Network (Dystonia 1)

Dystonia 1

rs2296793

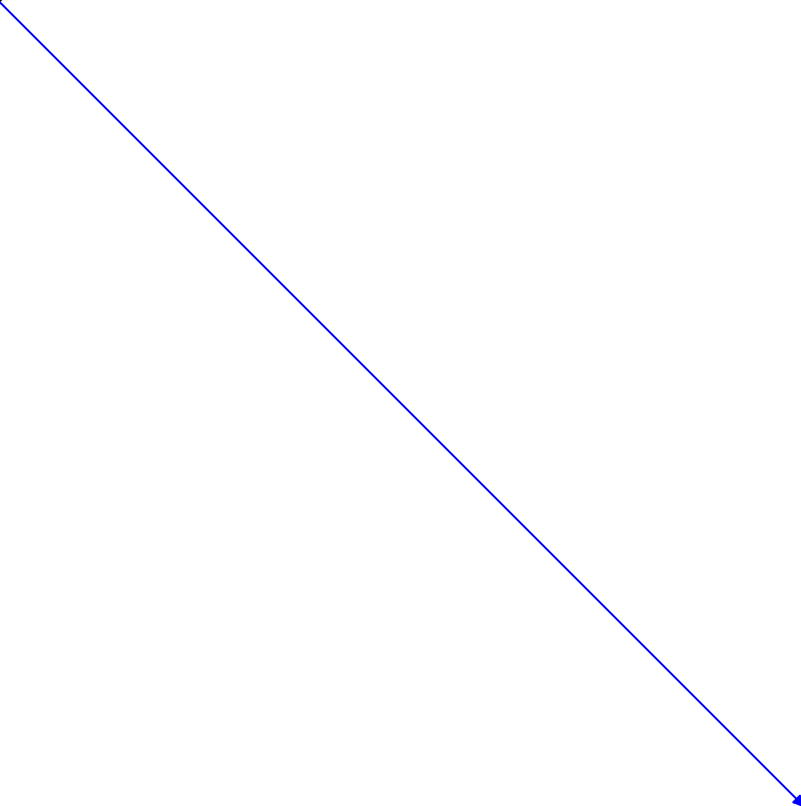

# Variant–Disease Network (Early infantile epileptic encephalopathy)

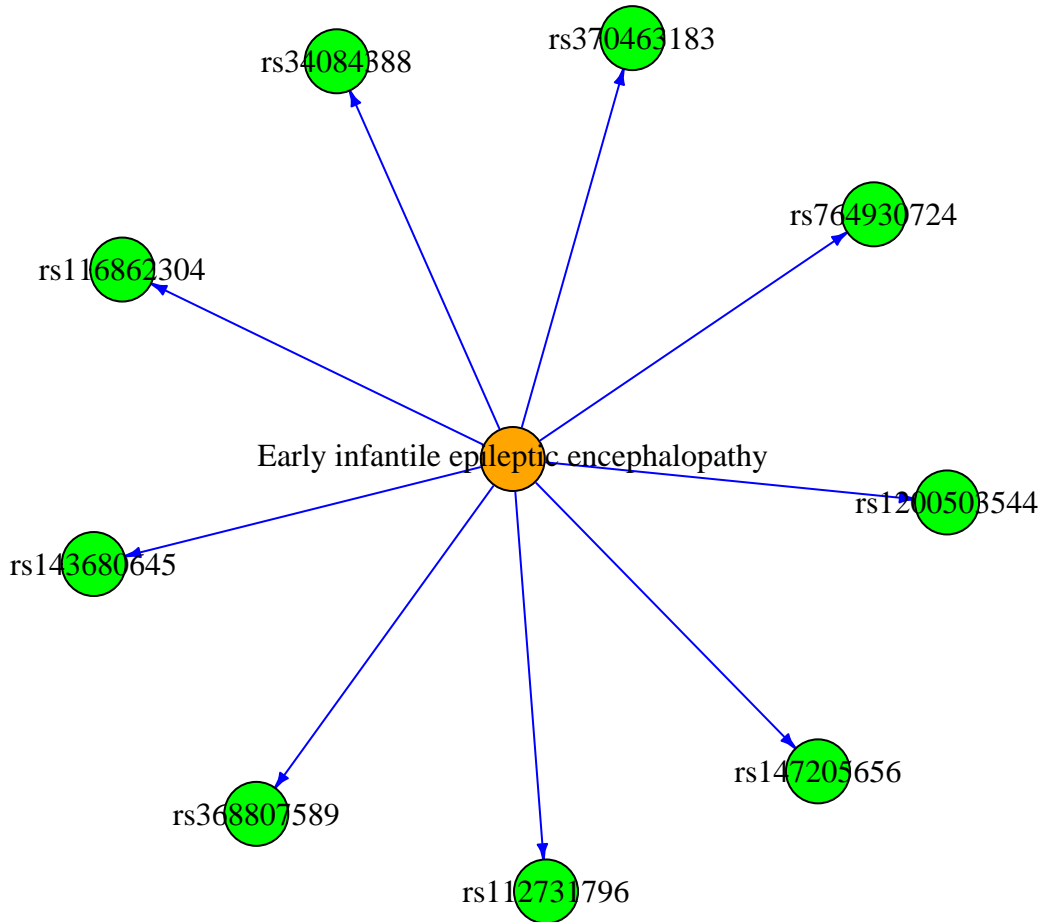

**Variant–Disease Network (Early infantile epileptic encephalopathy 12)**

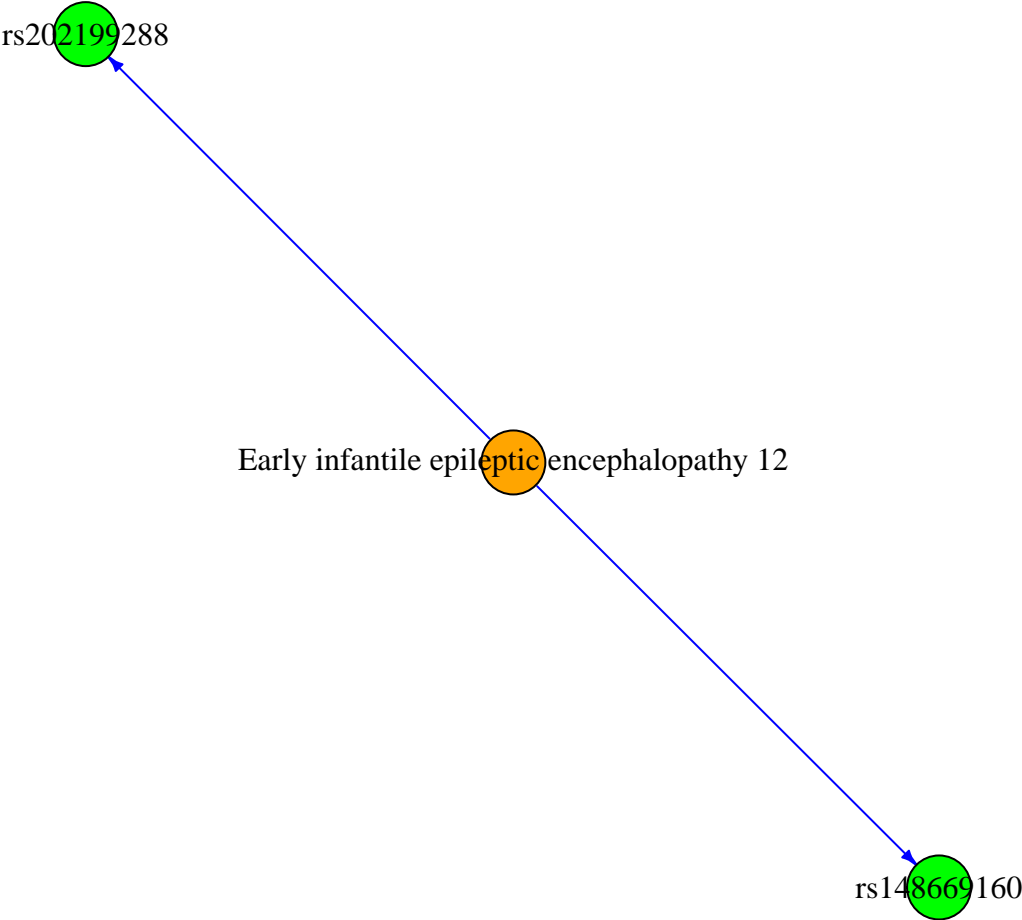

**Variant–Disease Network (Early infantile epileptic encephalopathy 14)**

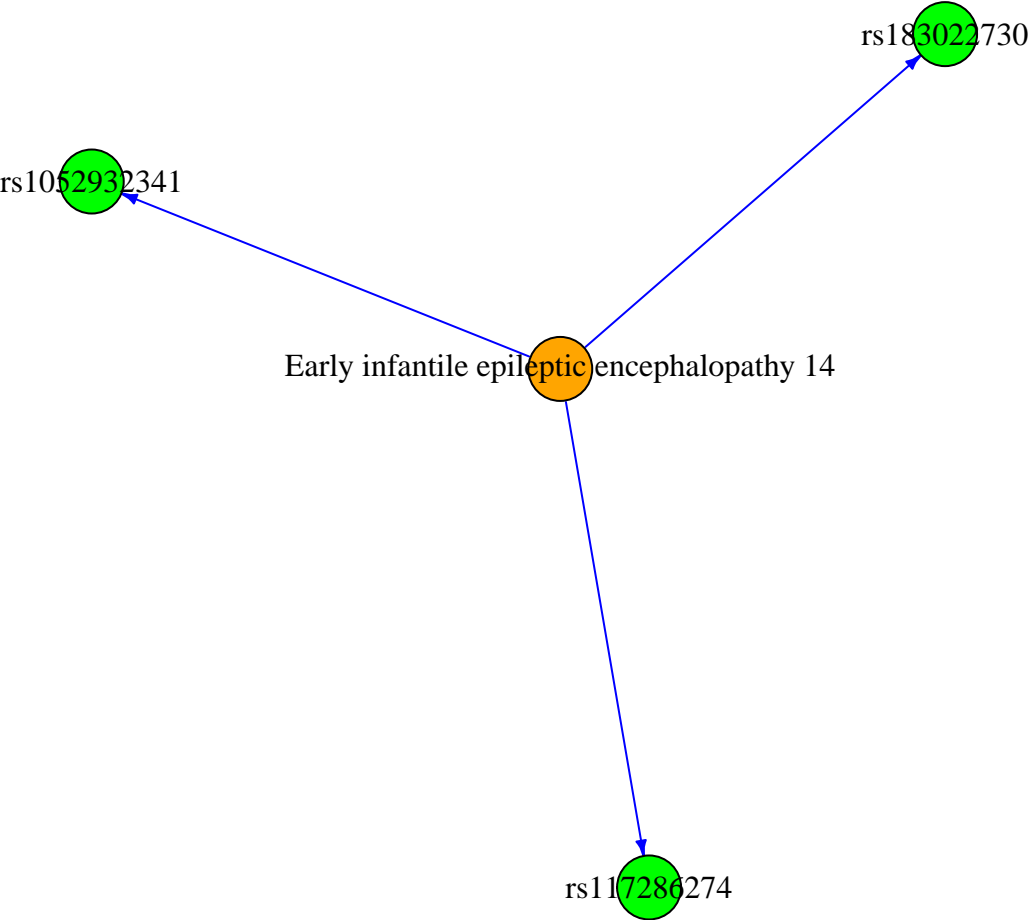

## Variant–Disease Network (Early infantile epileptic encephalopathy 2)

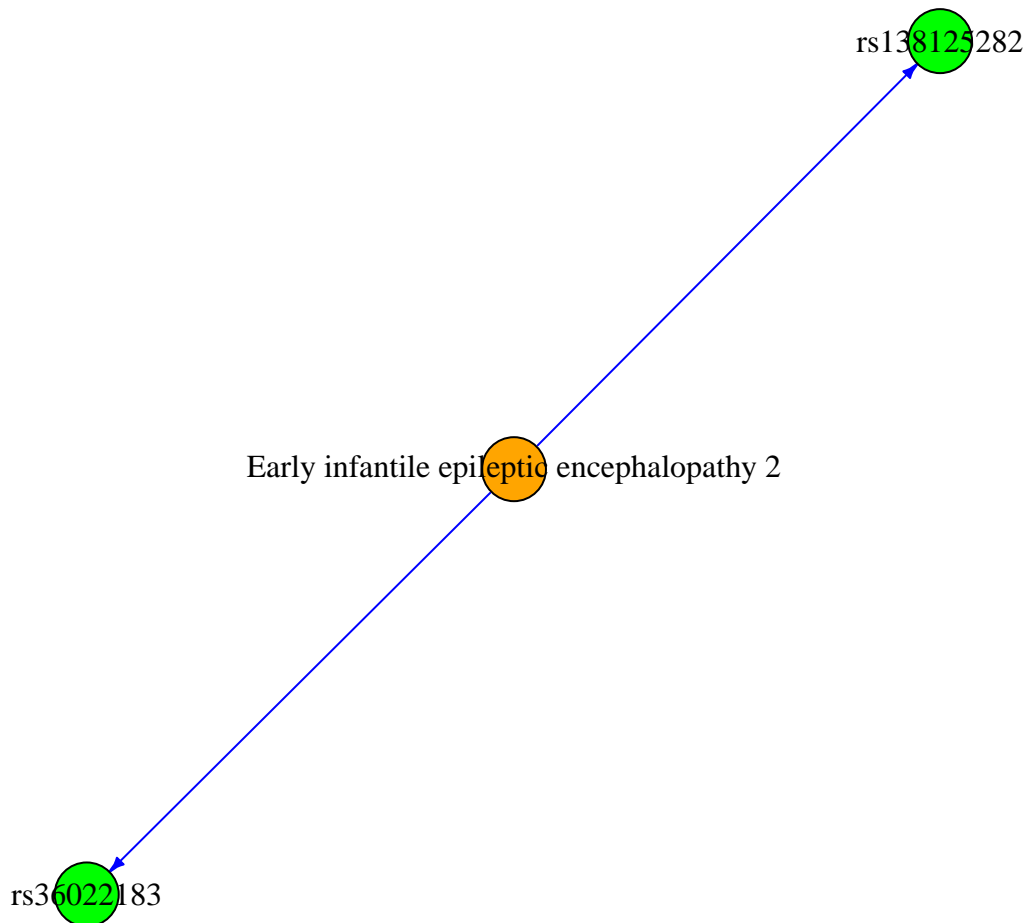

**Variant–Disease Network (Early infantile epileptic encephalopathy 34)**

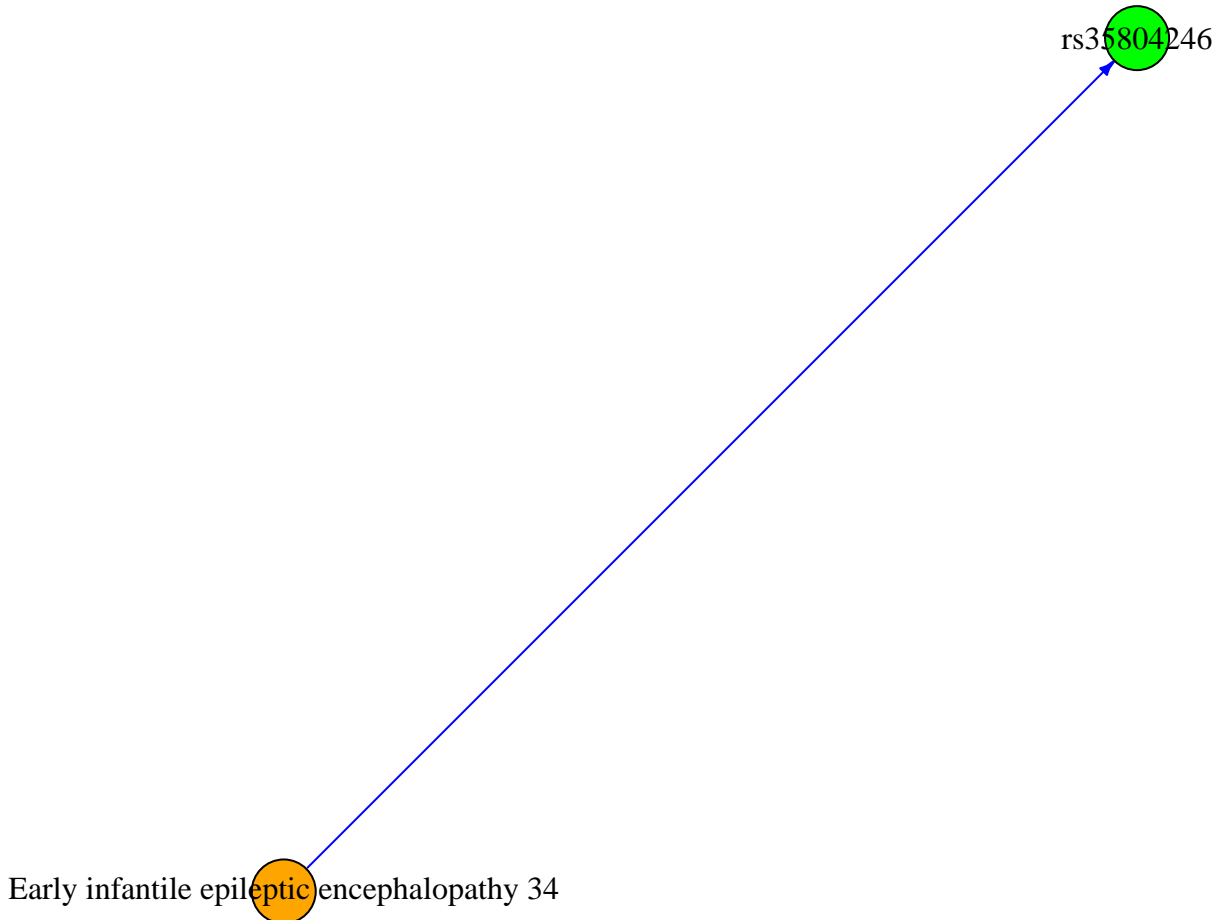

**Variant–Disease Network (Early infantile epileptic encephalopathy 5)**

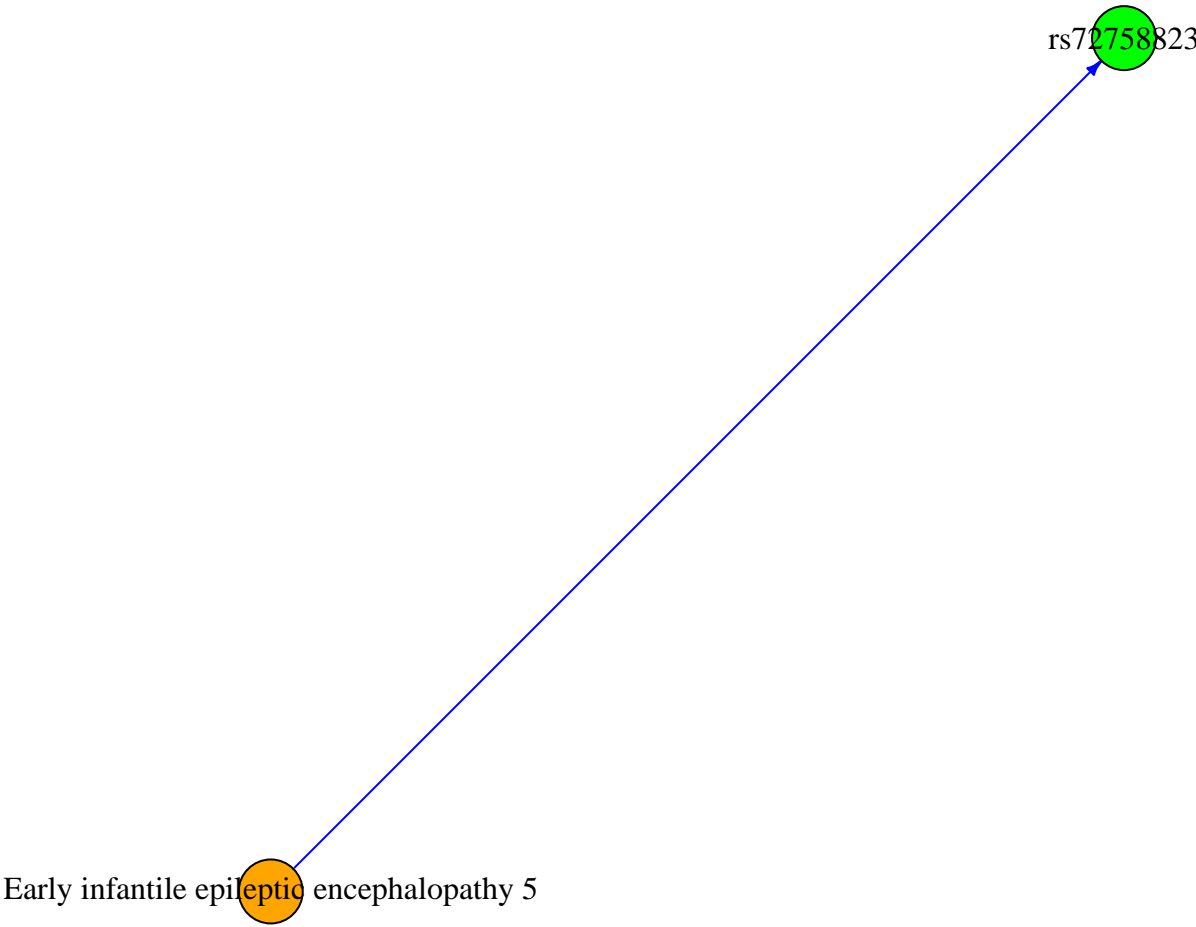

**Variant–Disease Network (Early infantile epileptic encephalopathy 9)**

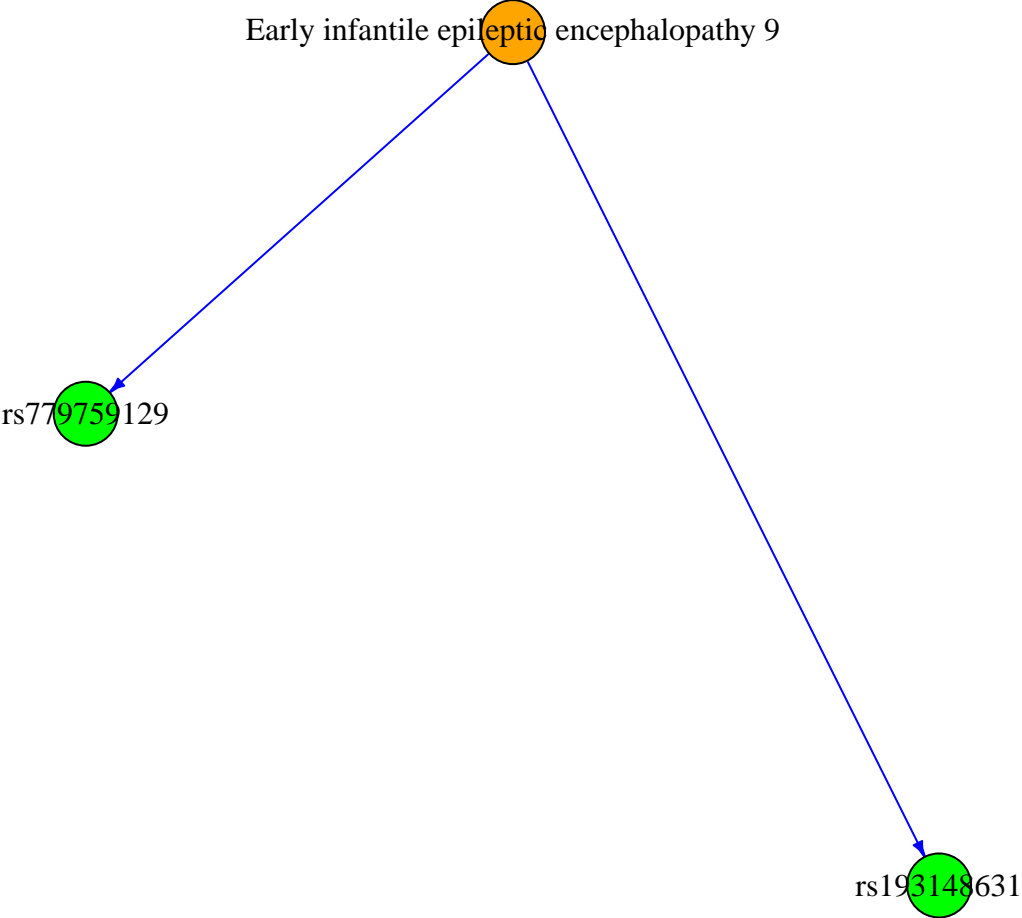



Variant–Disease Network (Early myoclonic encephalopathy)

rs7124179

Early myoclonic encephalopathy

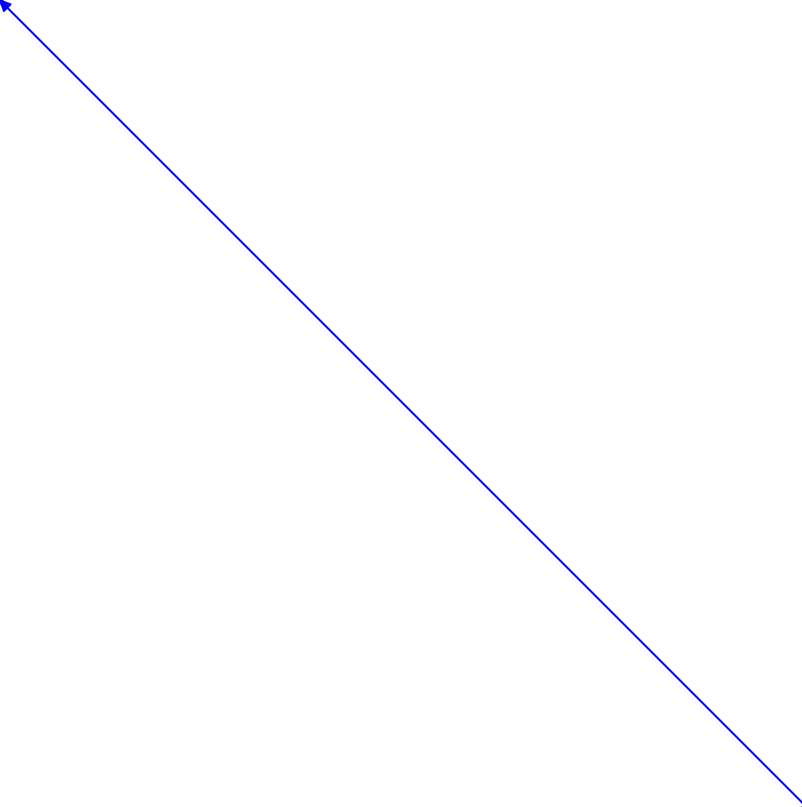

**Variant–Disease Network (Ectodermal dysplasia skin fragility syndrome)**

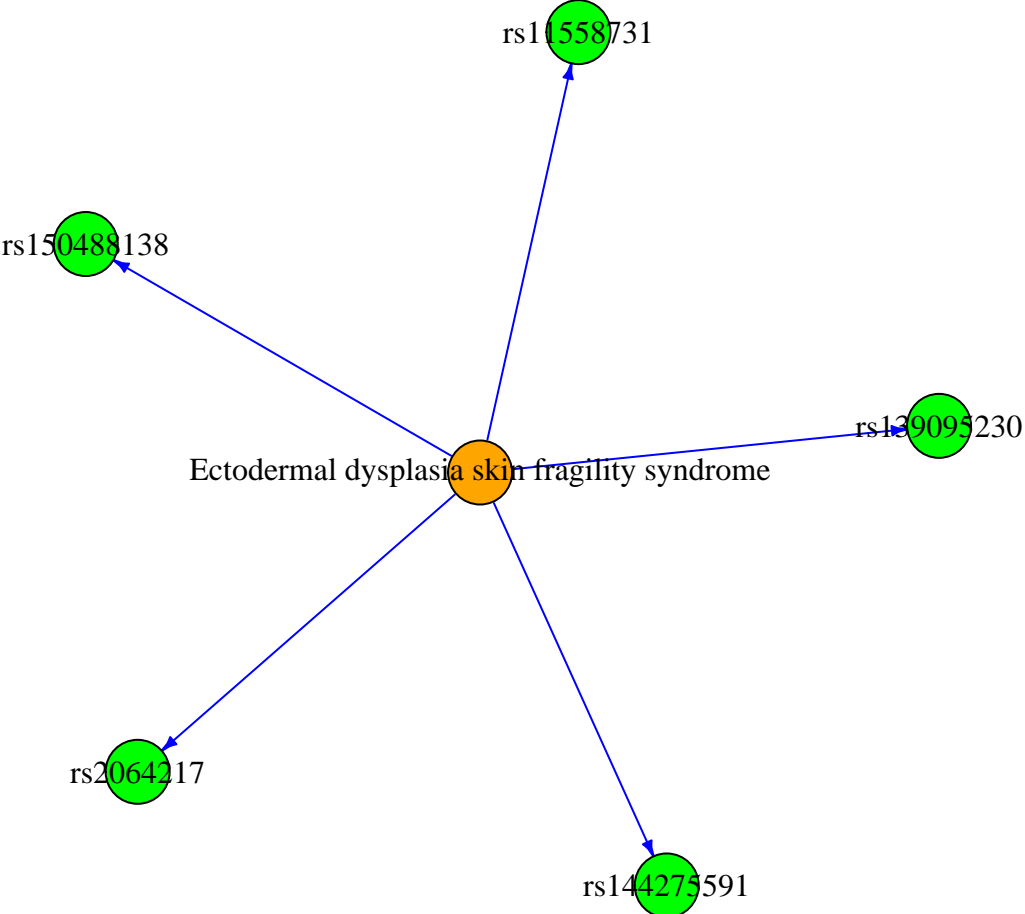

**Variant–Disease Network (Ectodermal dysplasia–syndactyly syndrome 1**

Ectodermal dysplasia–syndactyly syndrome 1

rs1537044

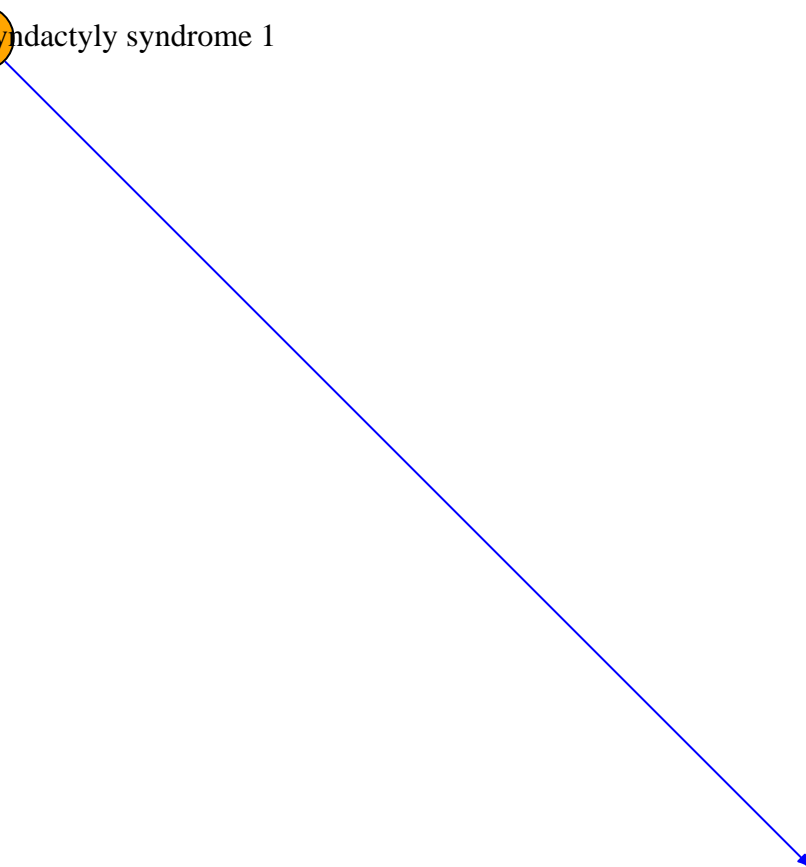

## Variant-Disease Network (Ectopia lentis)

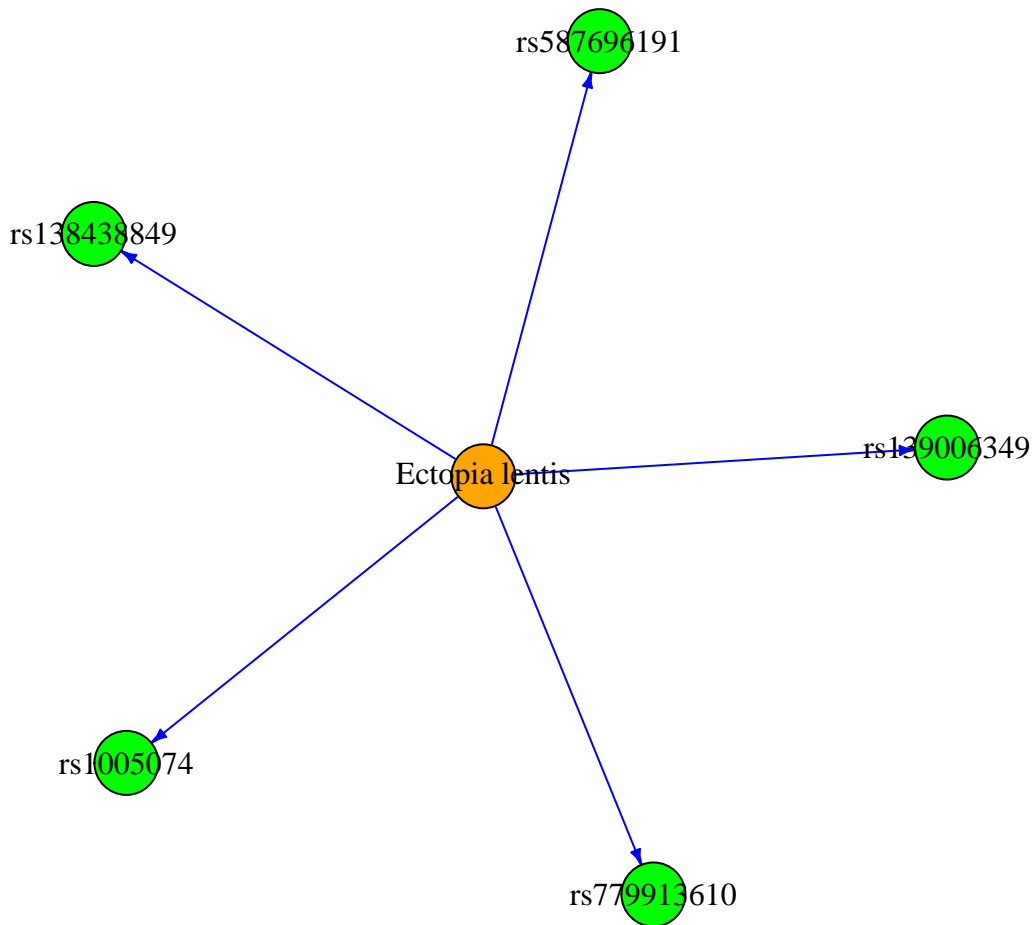

**Variant–Disease Network (Ehlers–Danlos syndrome)**

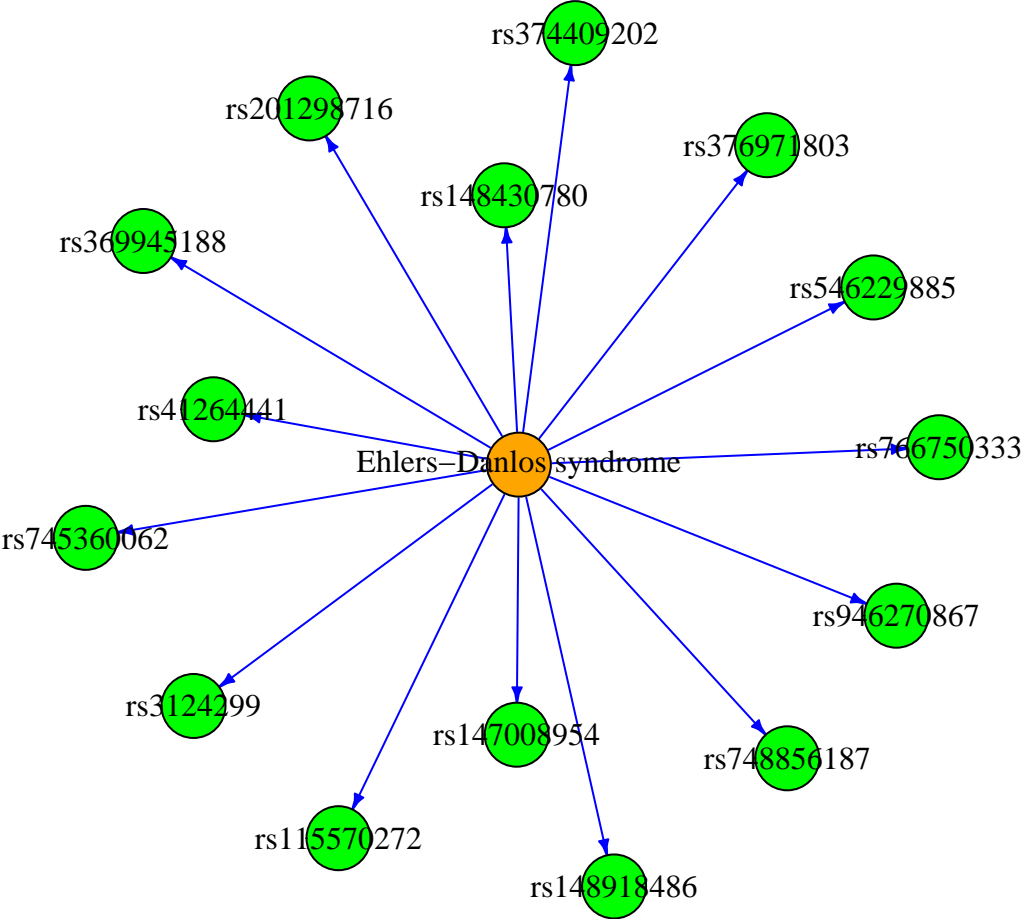

## Variant–Disease Network (Ehlers–Danlos syndrome classic type 2)

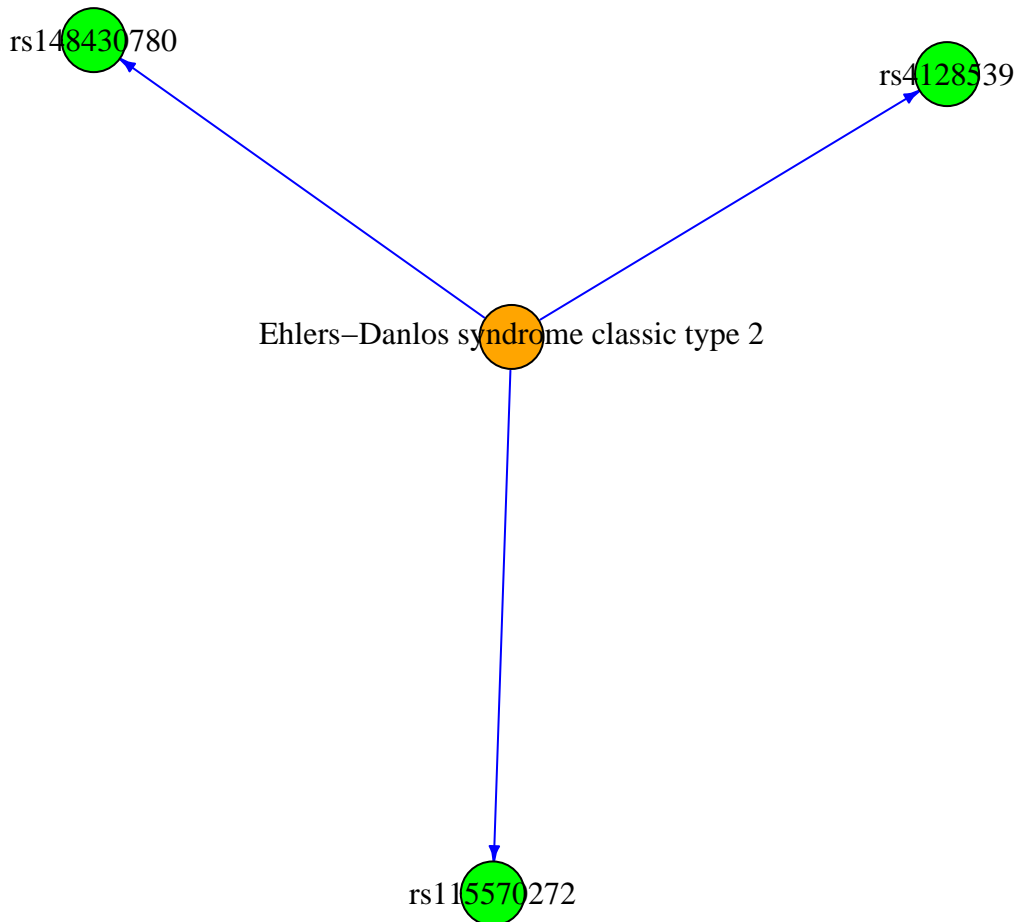

Variant–Disease Network (Ehlers–Danlos syndrome dermatosparaxis type)

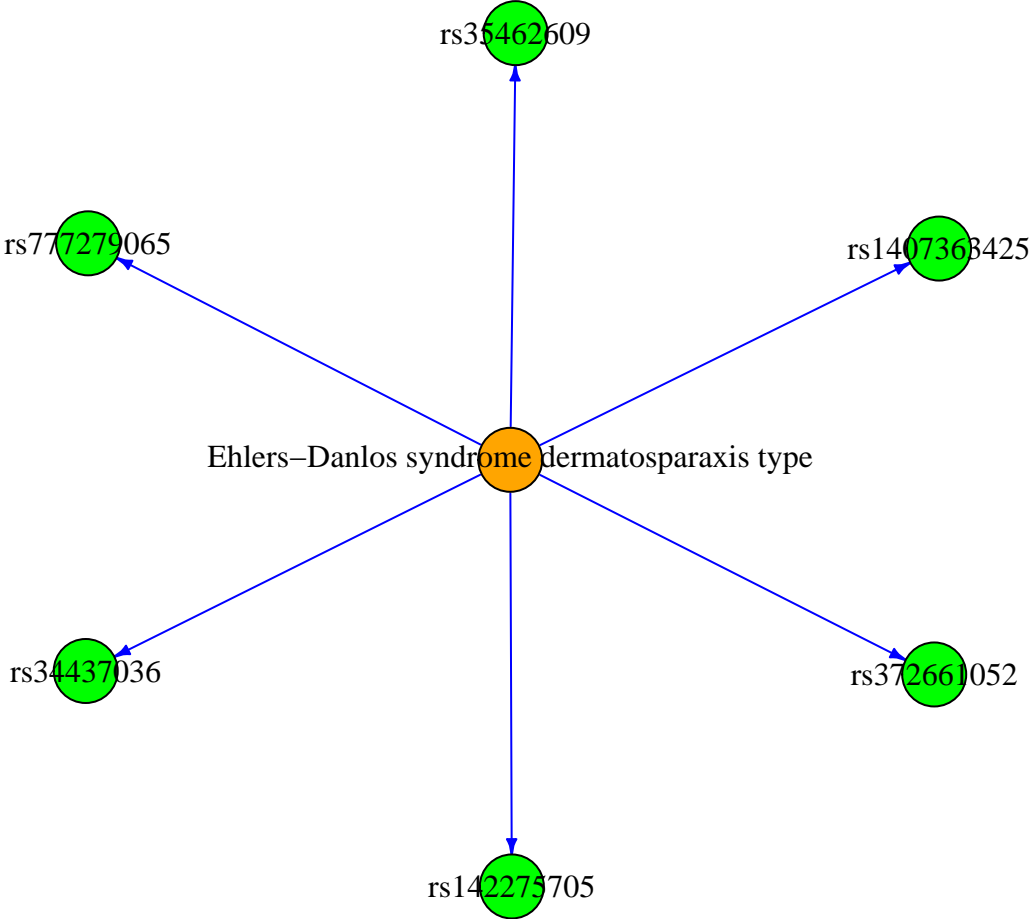

**Variant–Disease Network (Ehlers–Danlos syndrome progeroid type)**

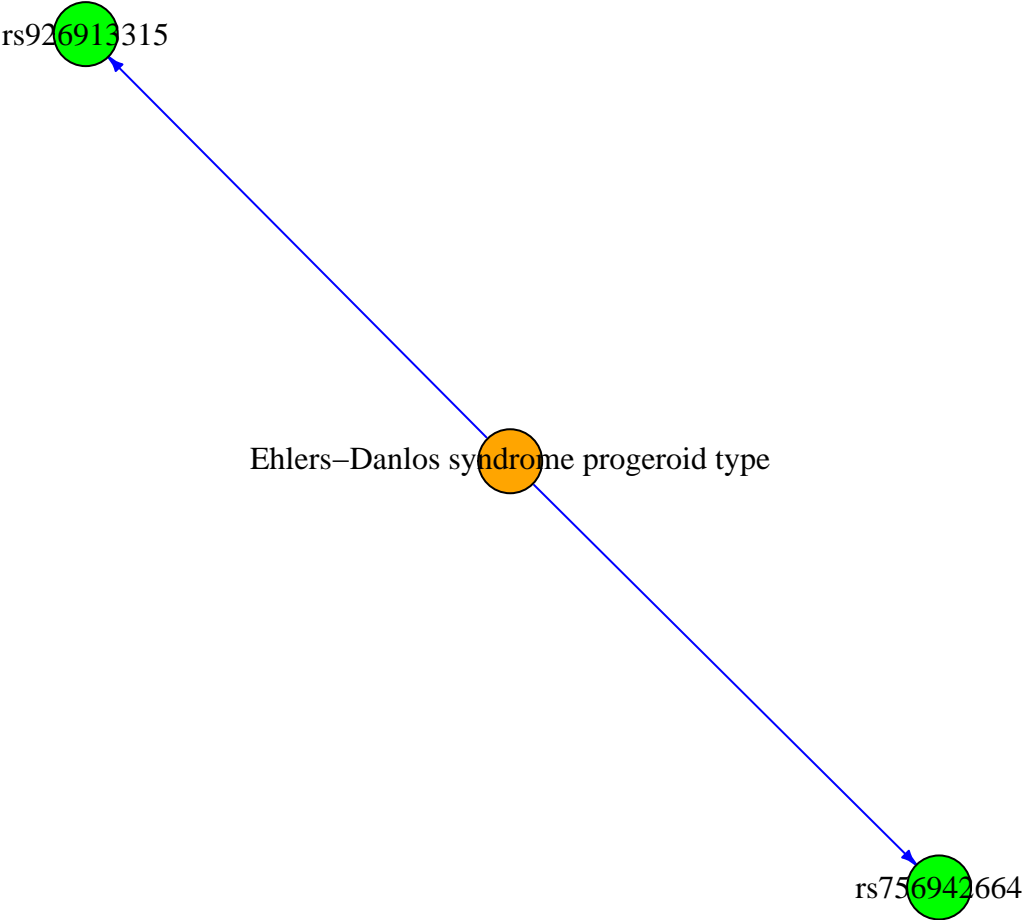



## Variant-Disease Network (Elliptocytosis)

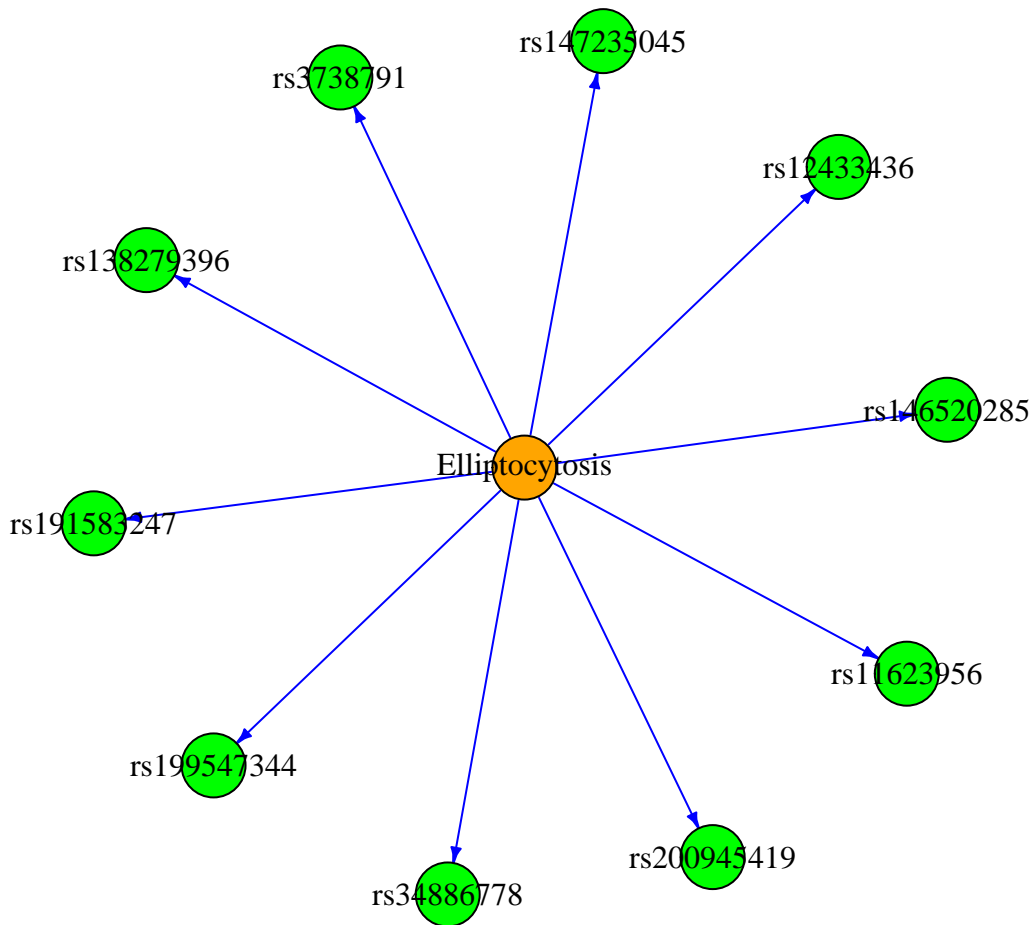

# Variant–Disease Network (Emery–Dreifuss muscular dystrophy)

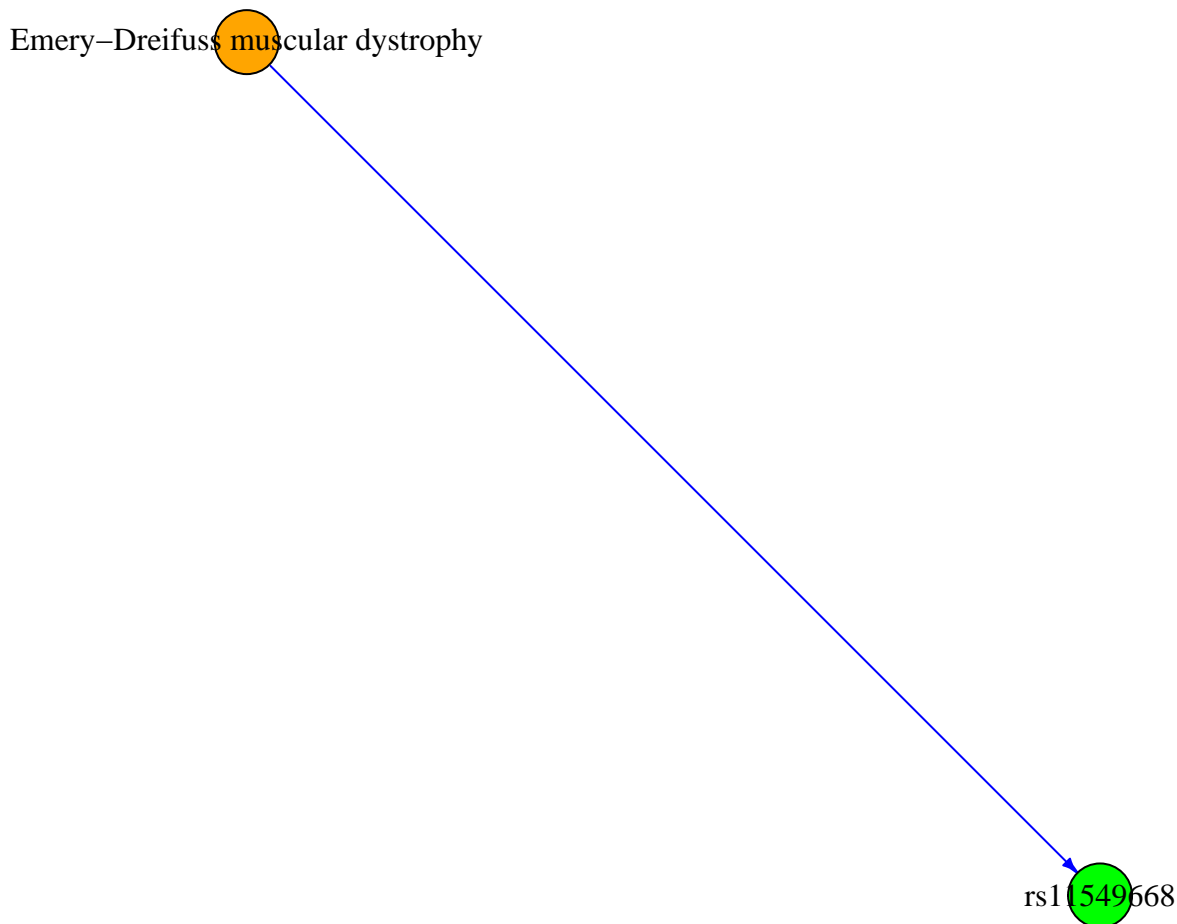

Variant–Disease Network (Encephalopathy)

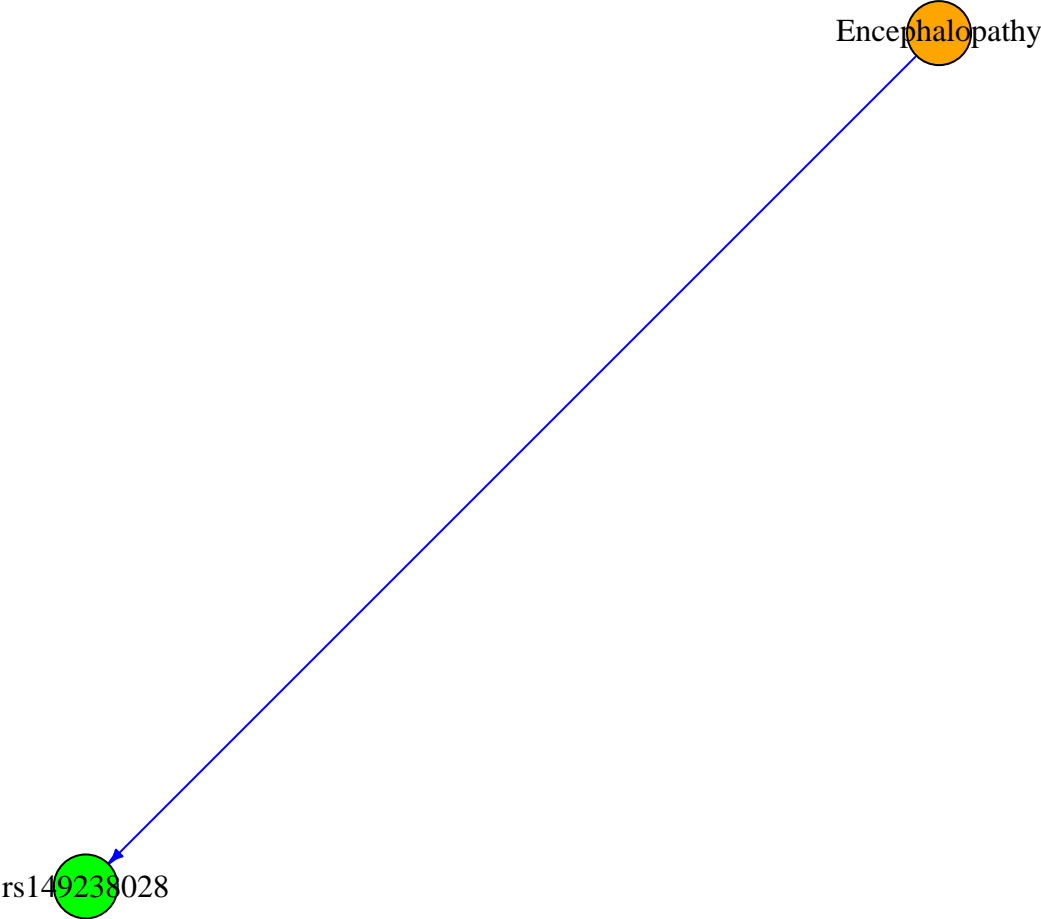

# Variant–Disease Network (Enlarged vestibular aqueduct)

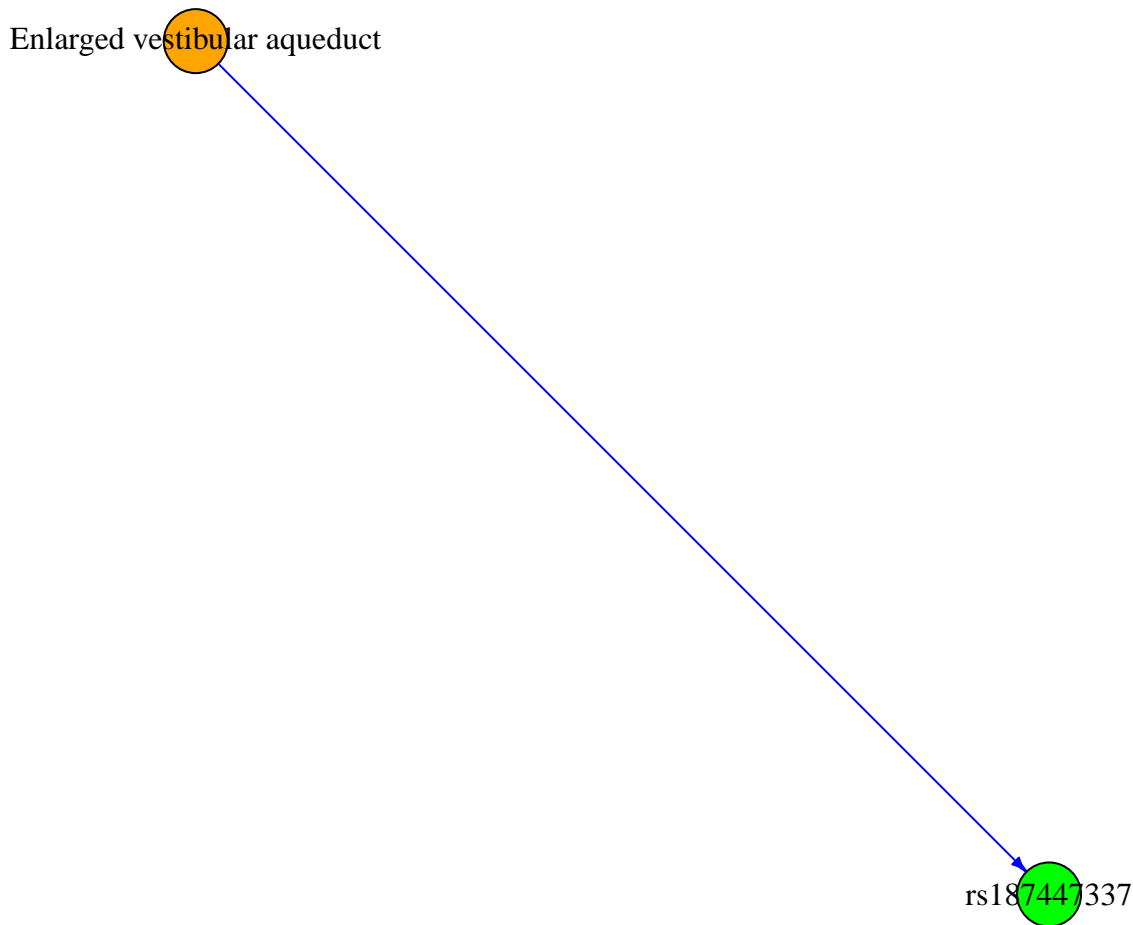

## Variant–Disease Network (Epidermolysis bullosa)

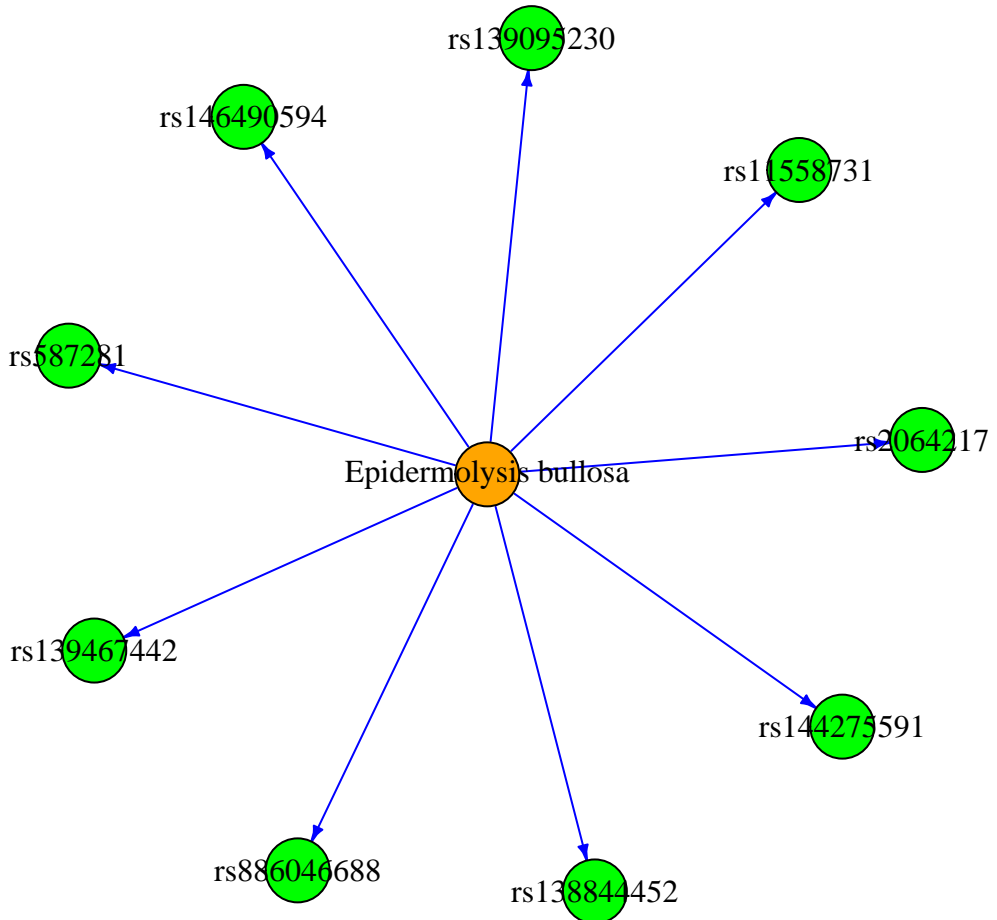

# Variant-Disease Network (Epidermolysis bullosa junctionalis with pyloric atresia)

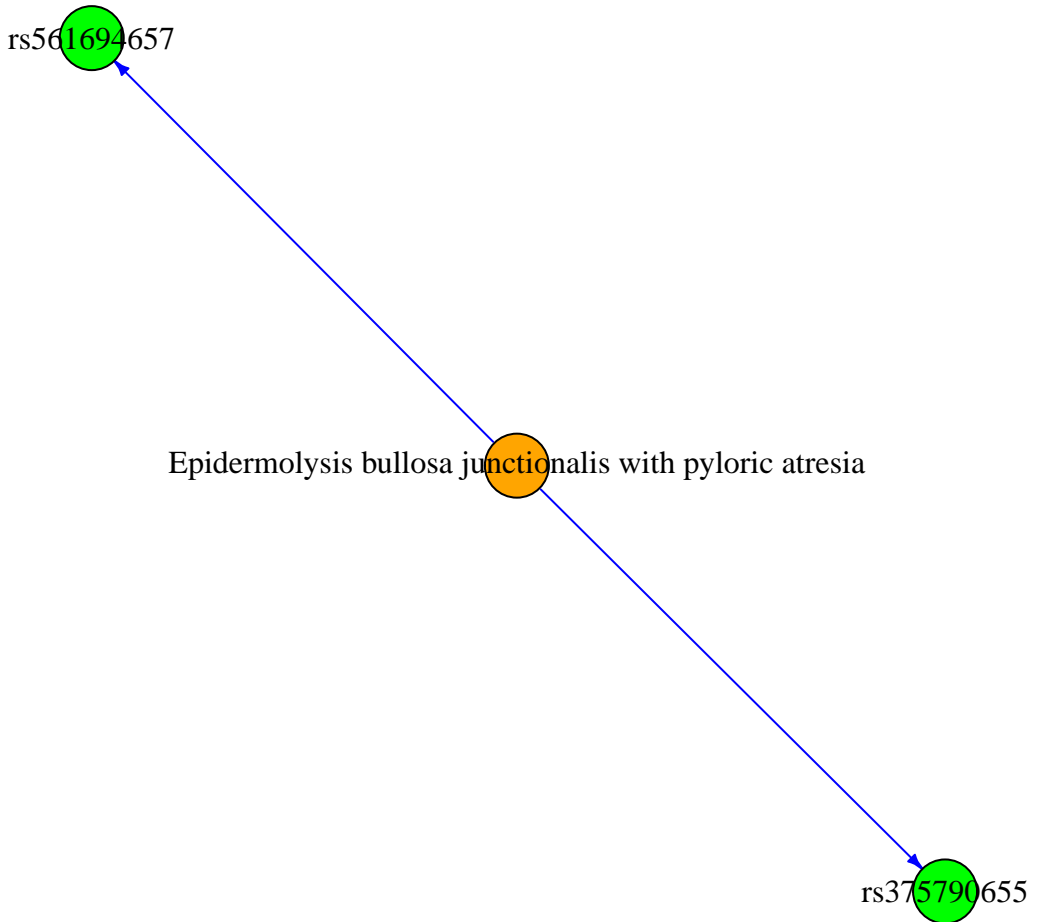

Variant–Disease Network (Epidermolysis bullosa simplex)

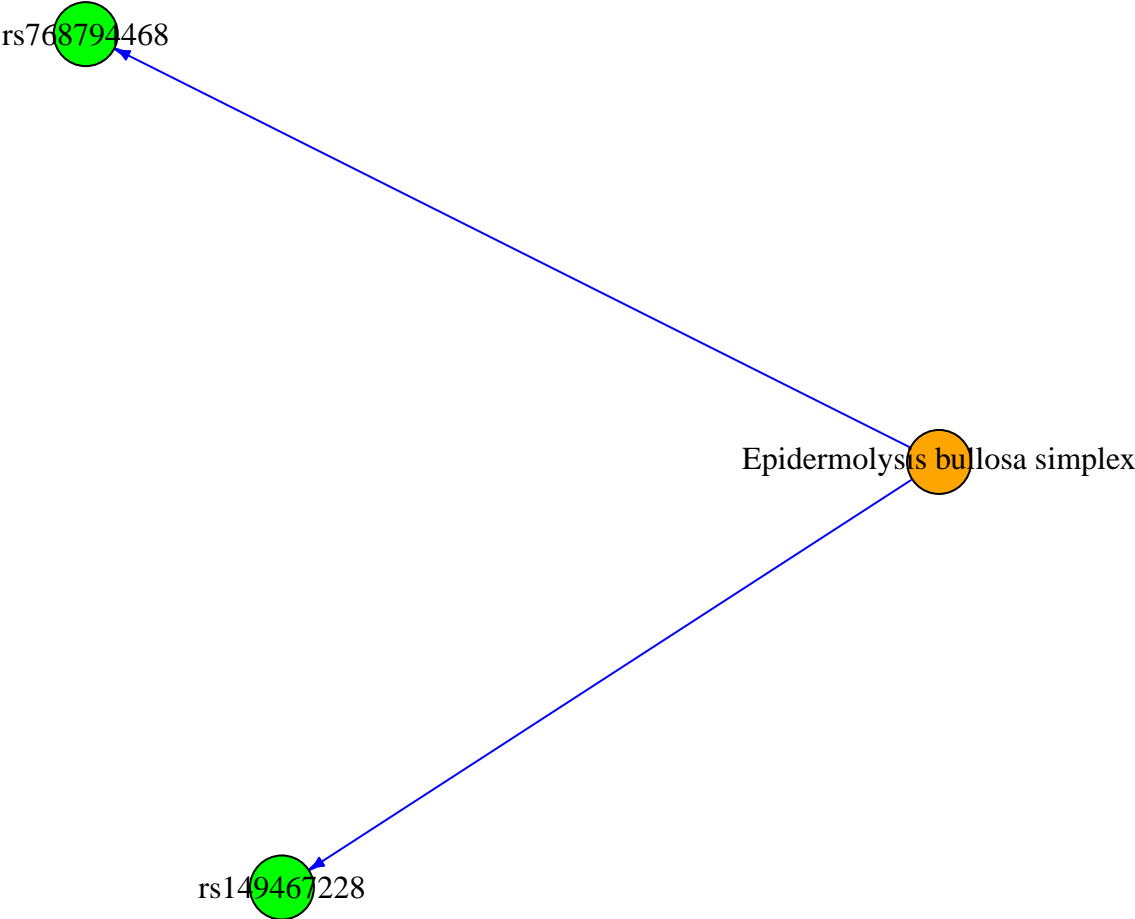

## Variant–Disease Network (Epilepsy)

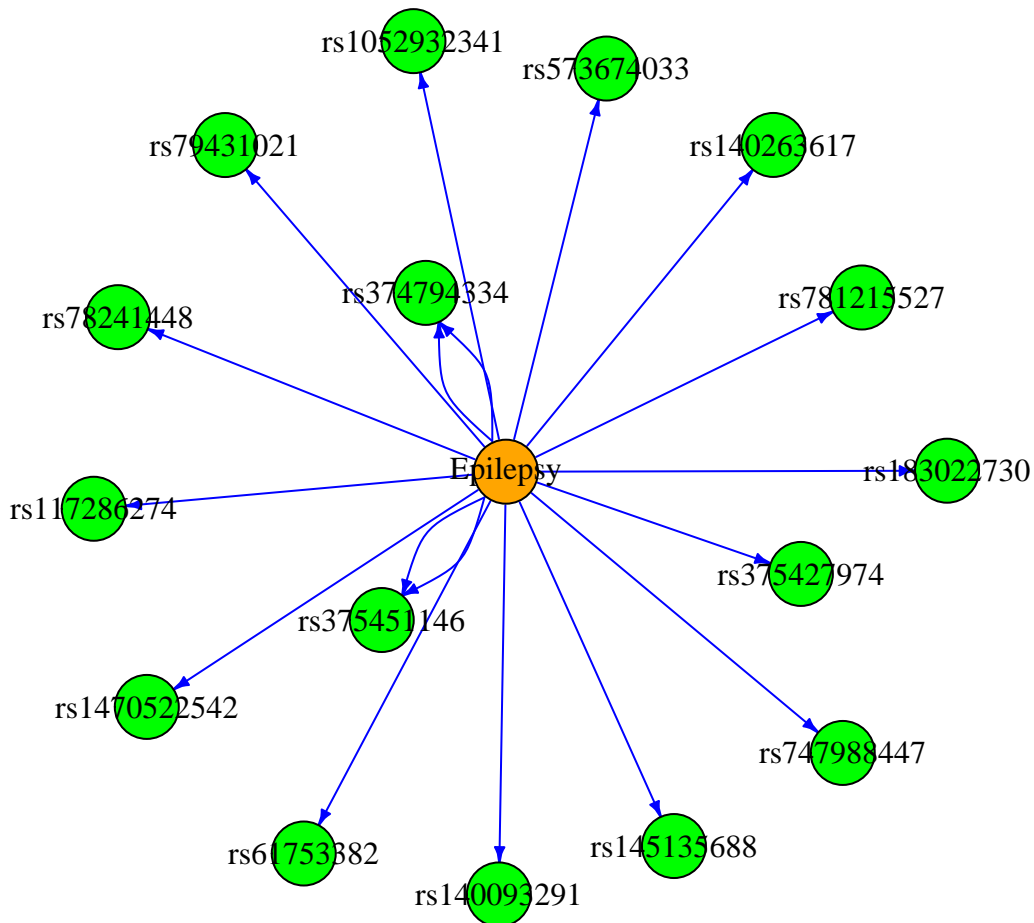



**Variant–Disease Network (Epileptic encephalopathy)**

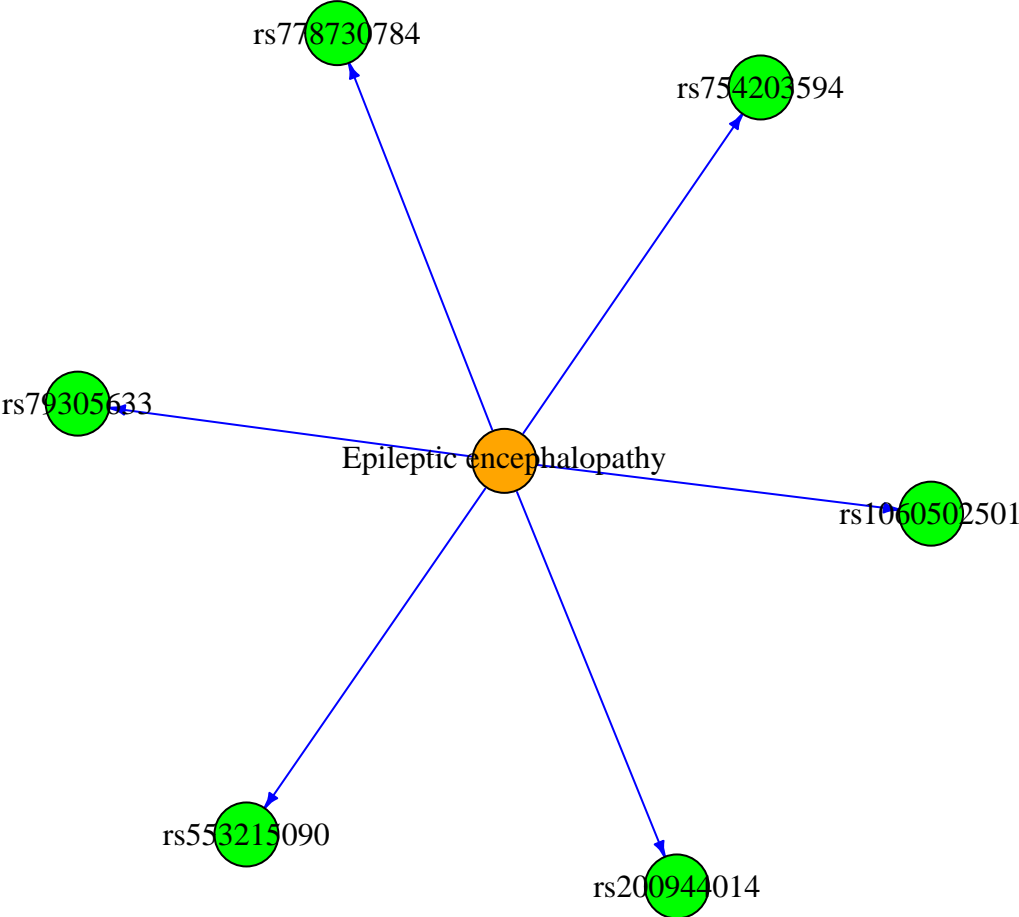

Variant–Disease Network (Erythrocyte AMP deaminase deficiency)

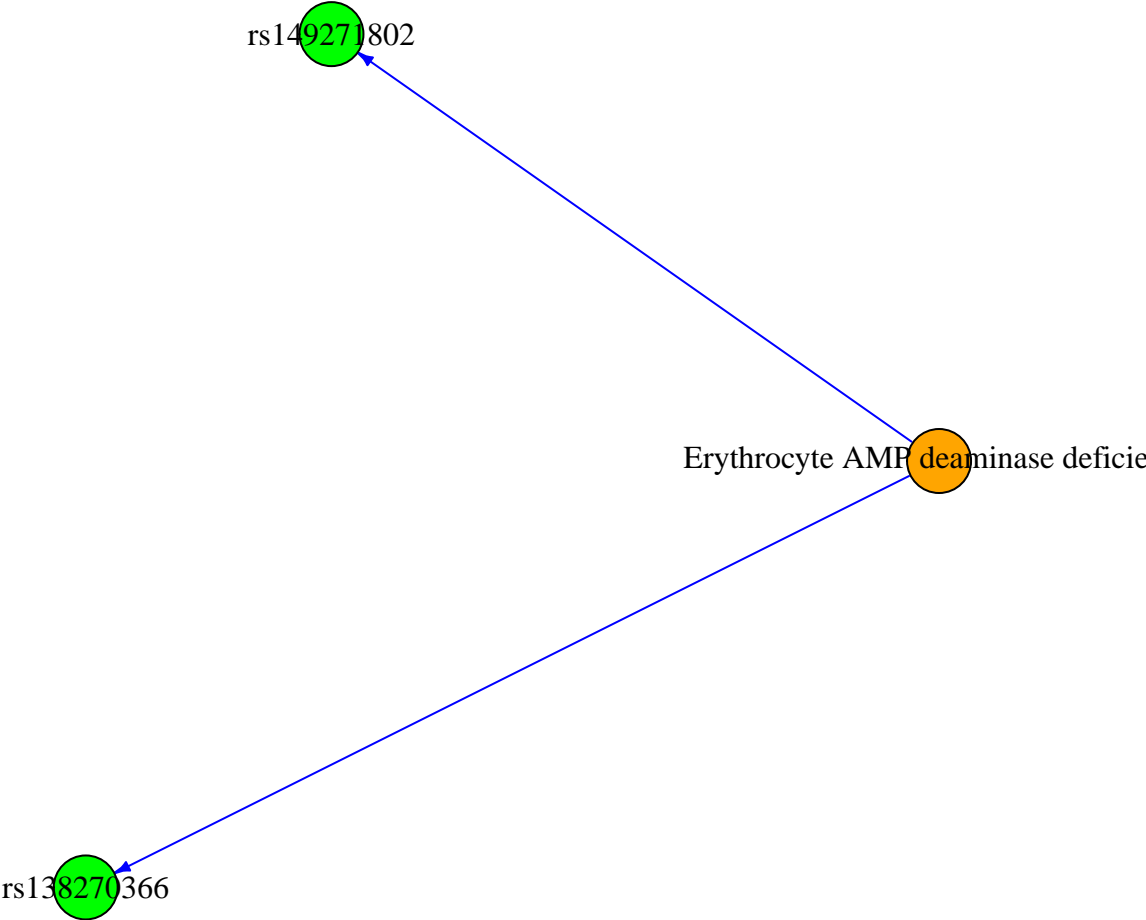

Variant–Disease Network (Erythrocytosis)

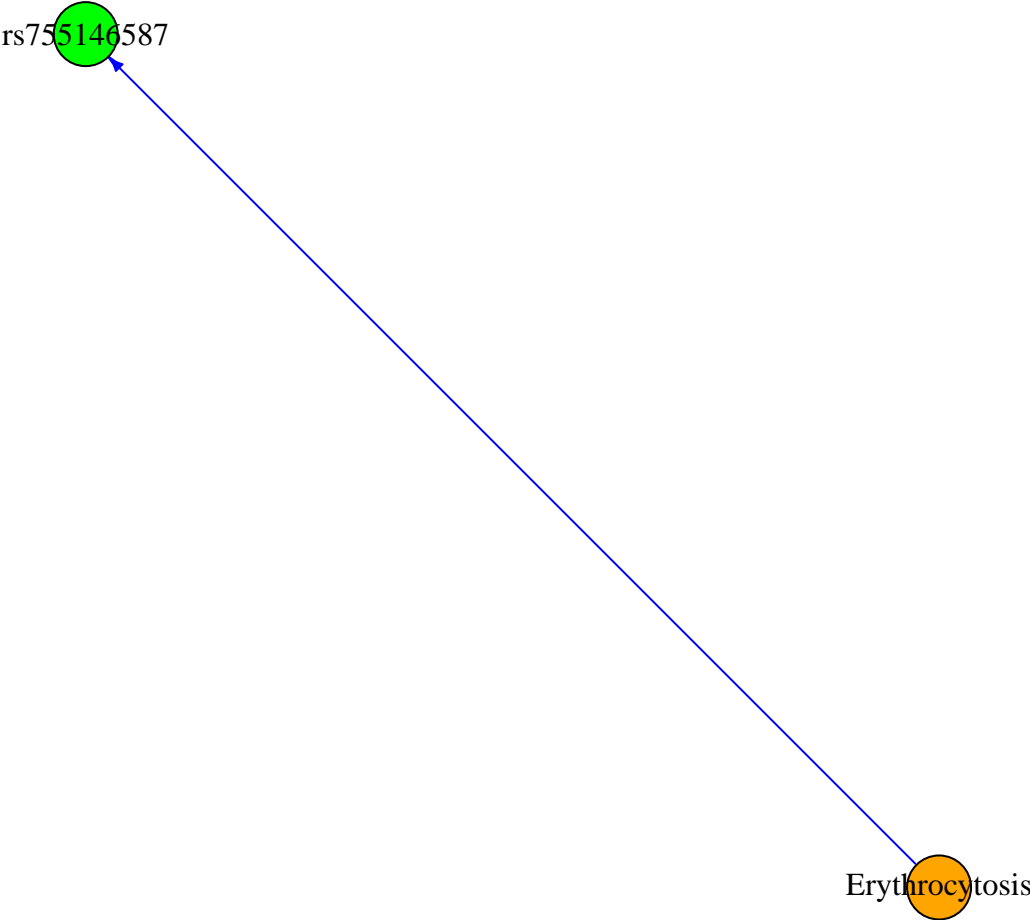

## Variant-Disease Network (Fabry disease)

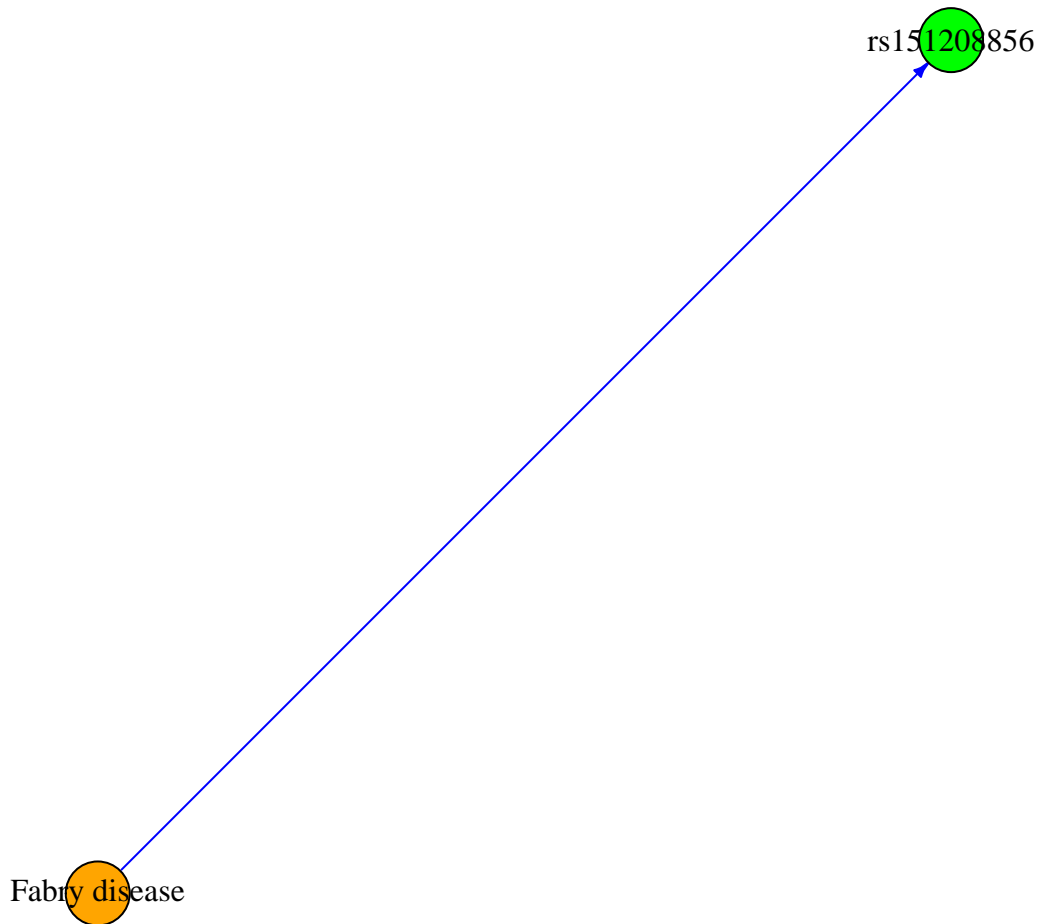

**Variant–Disease Network (Factor XIII subunit B deficiency)**

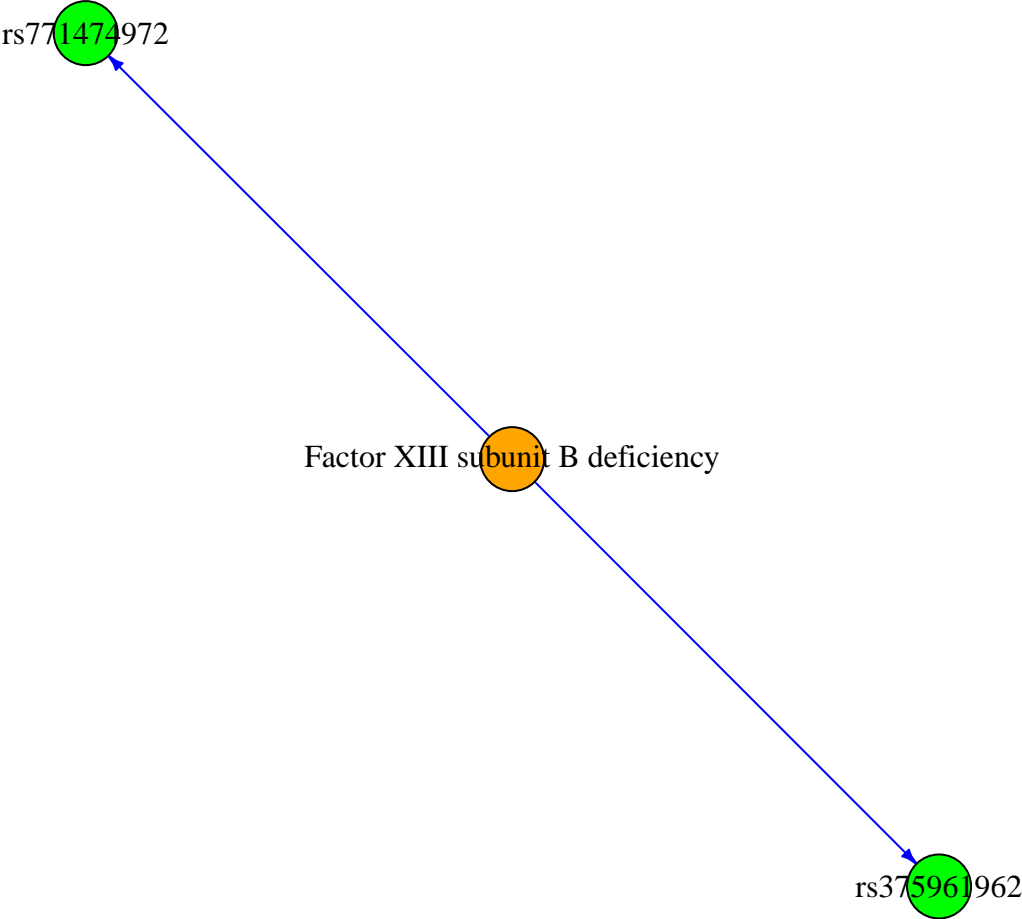

Variant–Disease Network (Familial adenomatous polyposis 1)

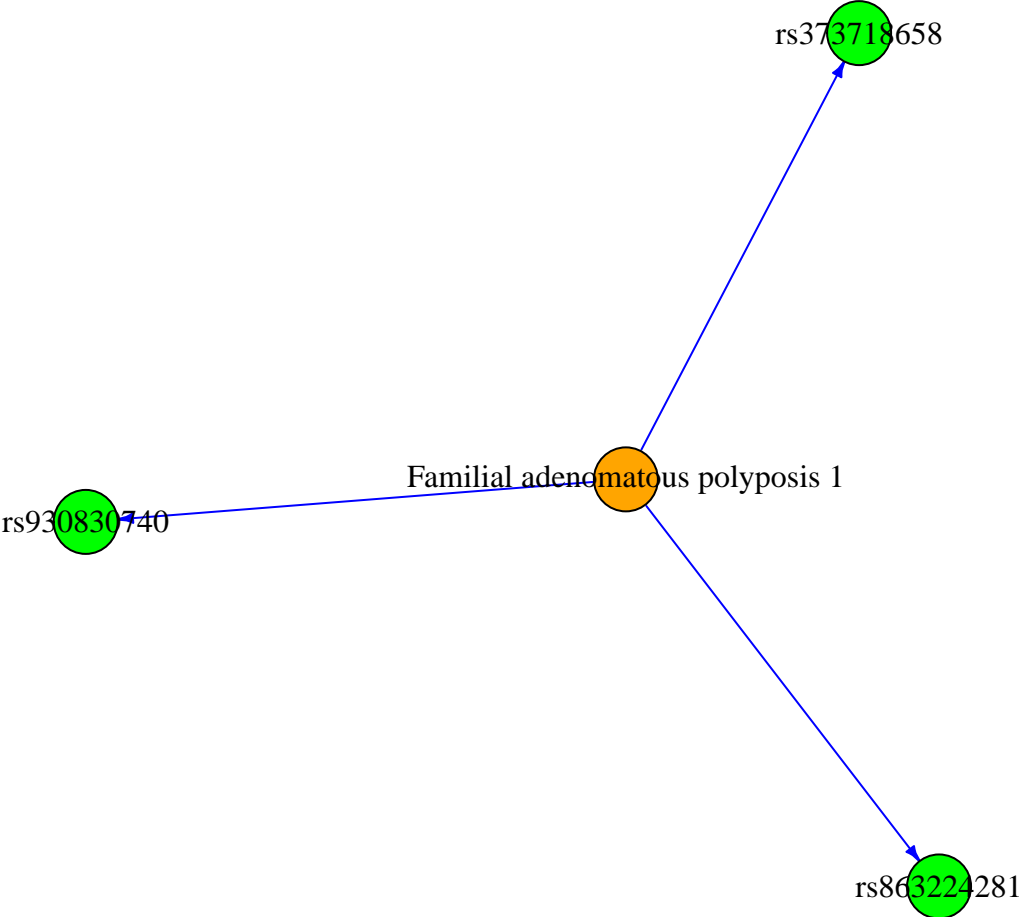

# Variant-Disease Network (Familial amyloid nephropathy with urticaria AND dea

rs147154764

Familial amyloid nephropathy with urticaria A

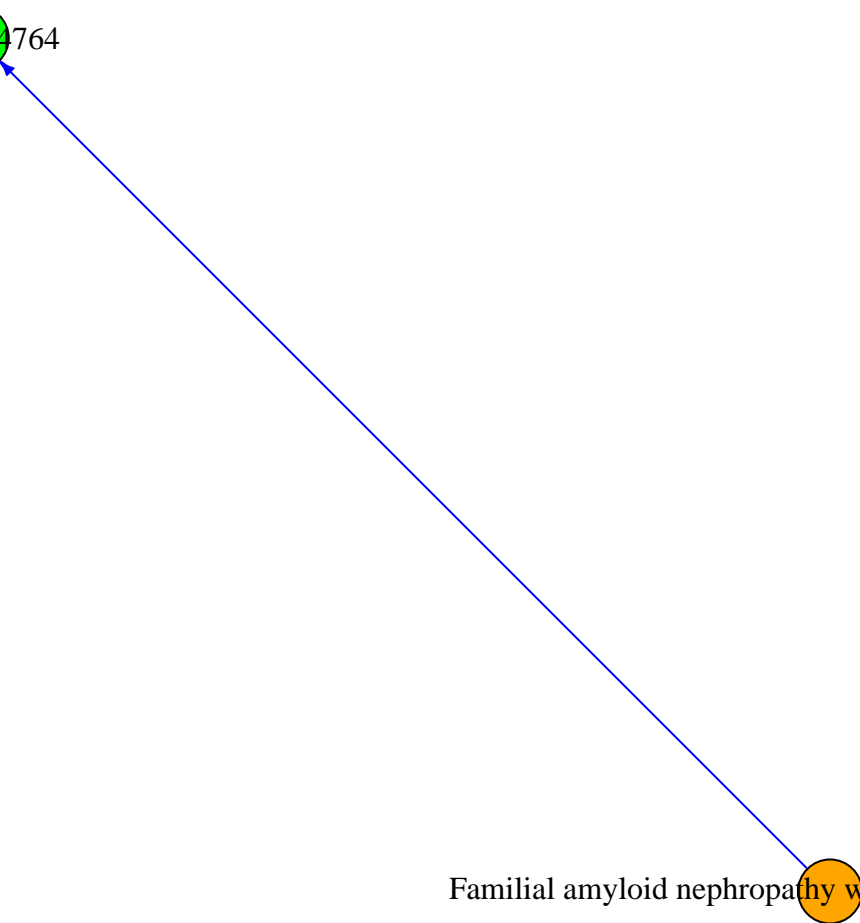

## Variant–Disease Network (Familial atrial fibrillation)

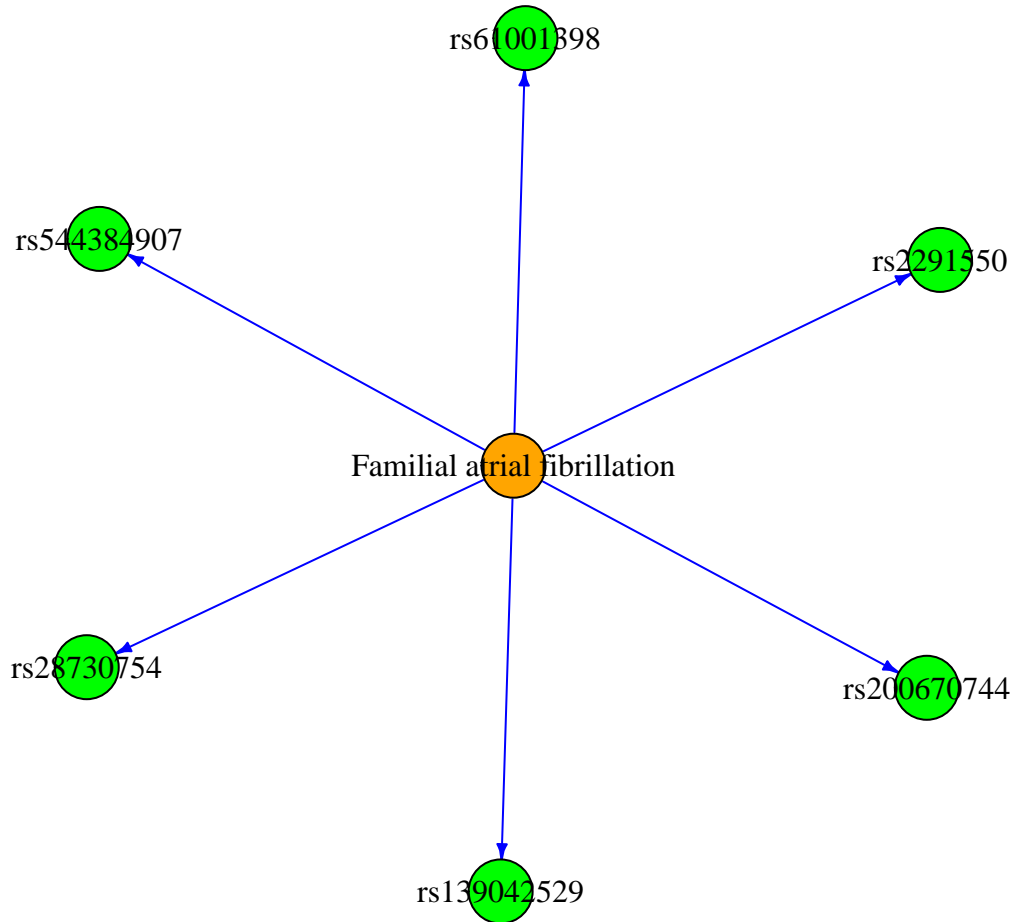



**Variant–Disease Network (Familial Atypical Mycobacteriosis)**

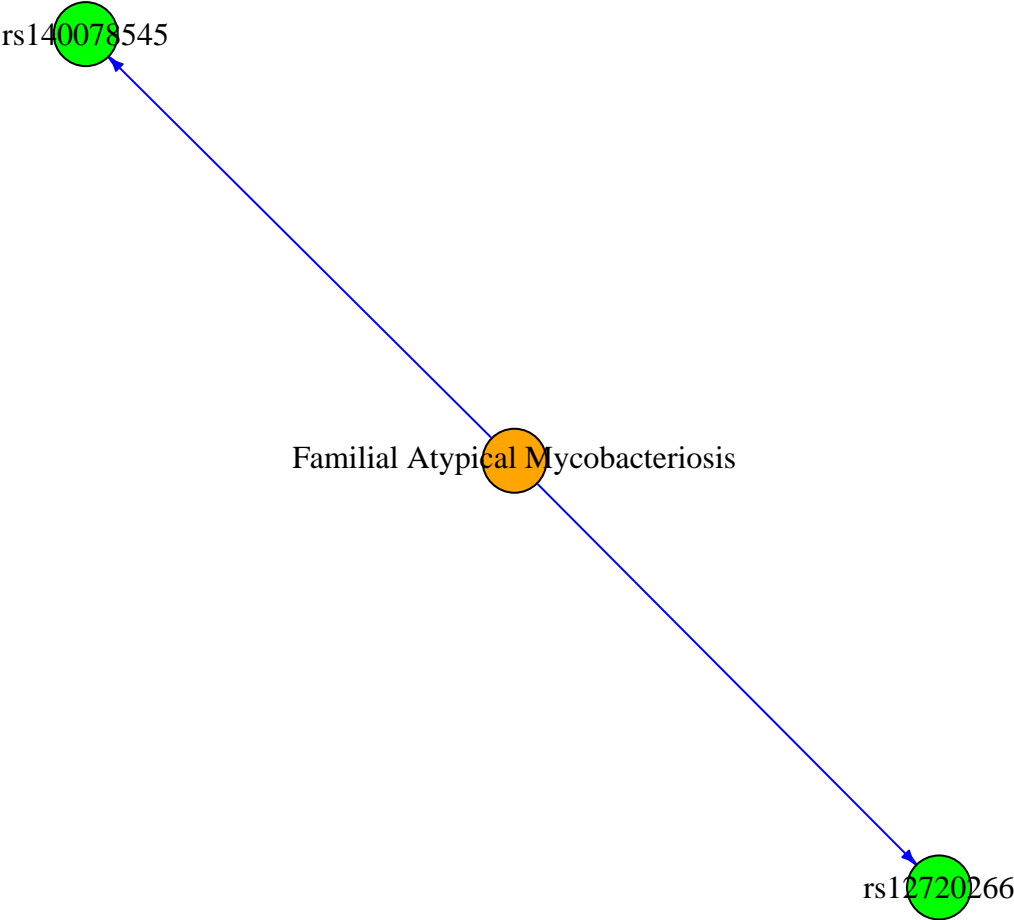

# Variant-Disease Network (Familial cancer of breast)

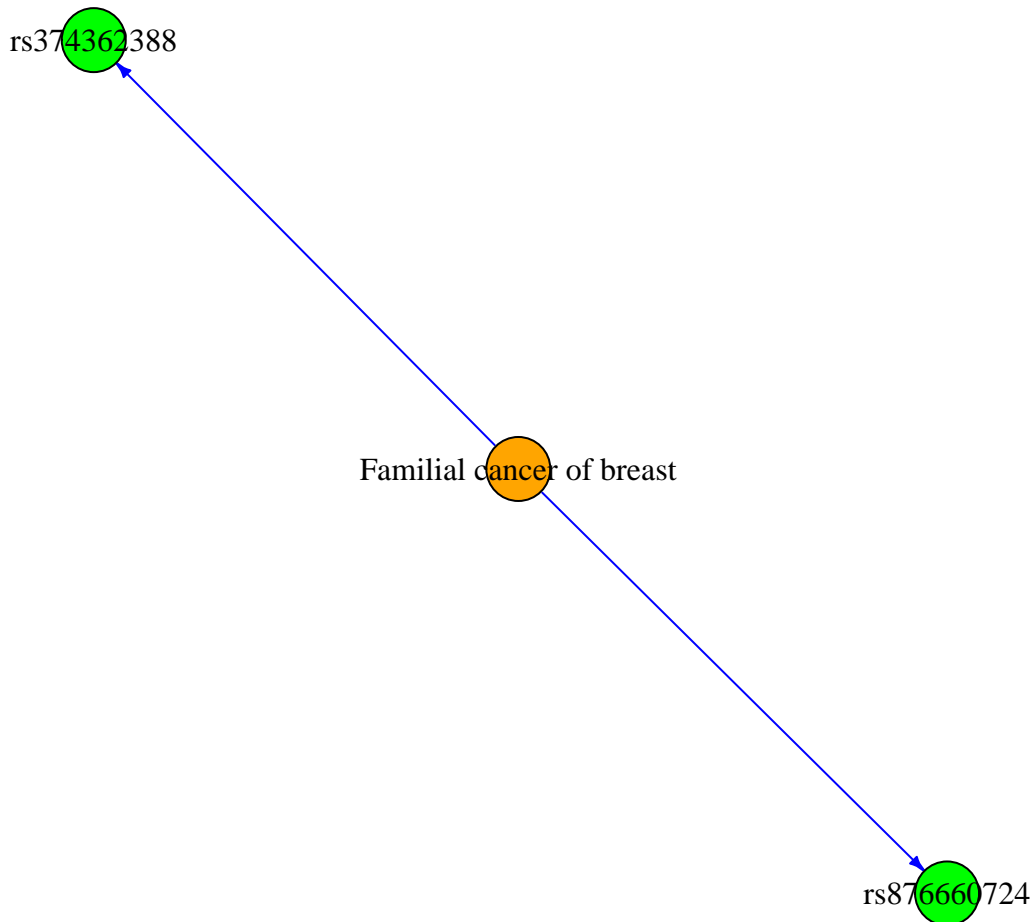

## Variant–Disease Network (Familial Candidiasis)

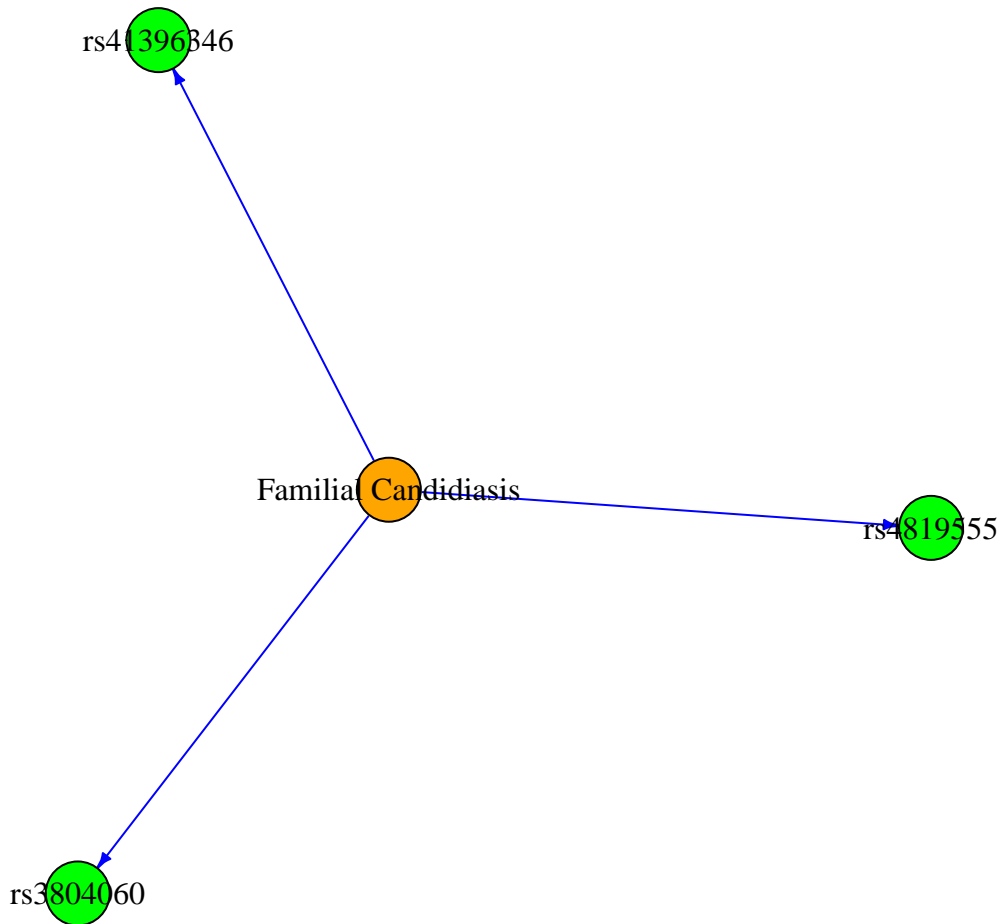

# Variant–Disease Network (Familial cold autoinflammatory syndrome)

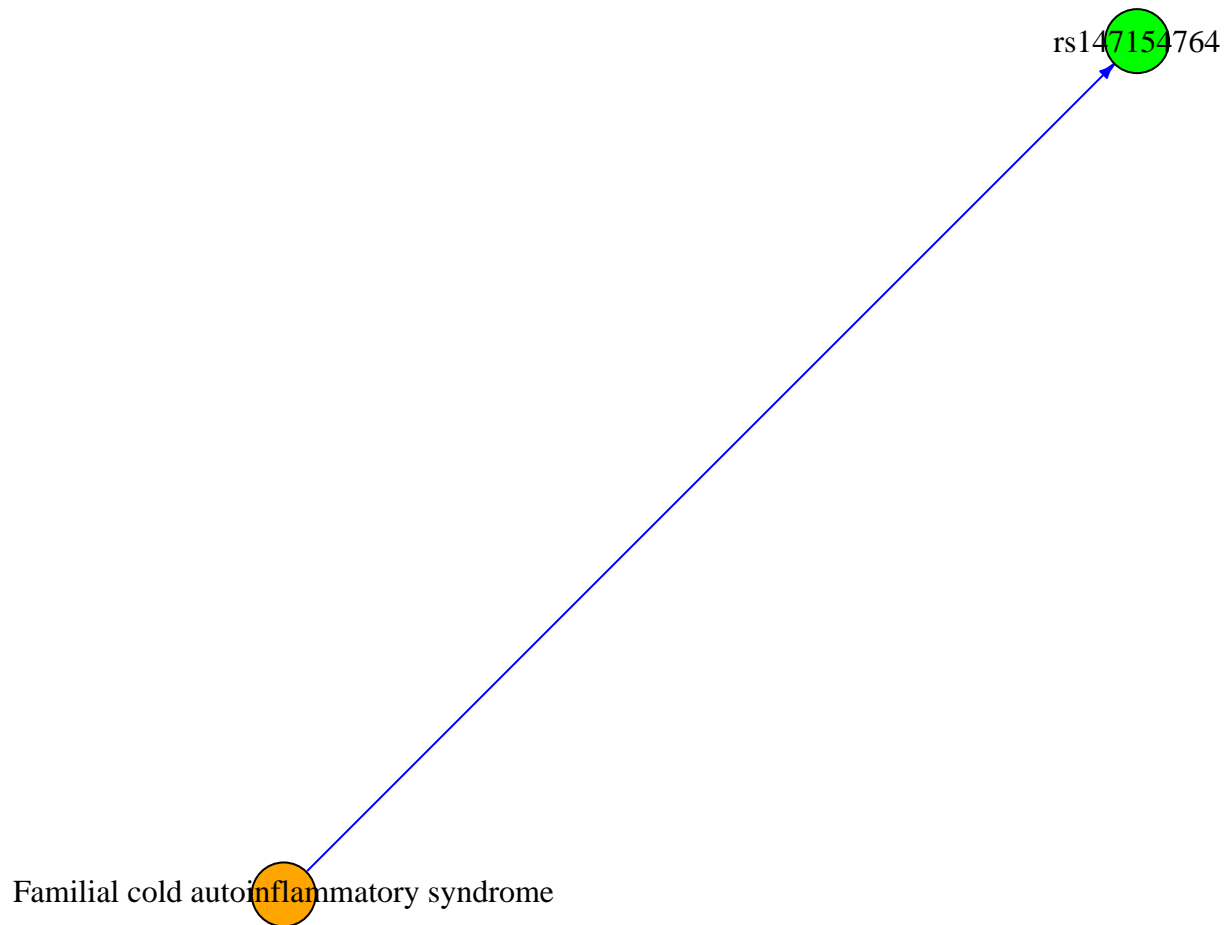

**Variant–Disease Network (Familial cold autoinflammatory syndrome 2)**

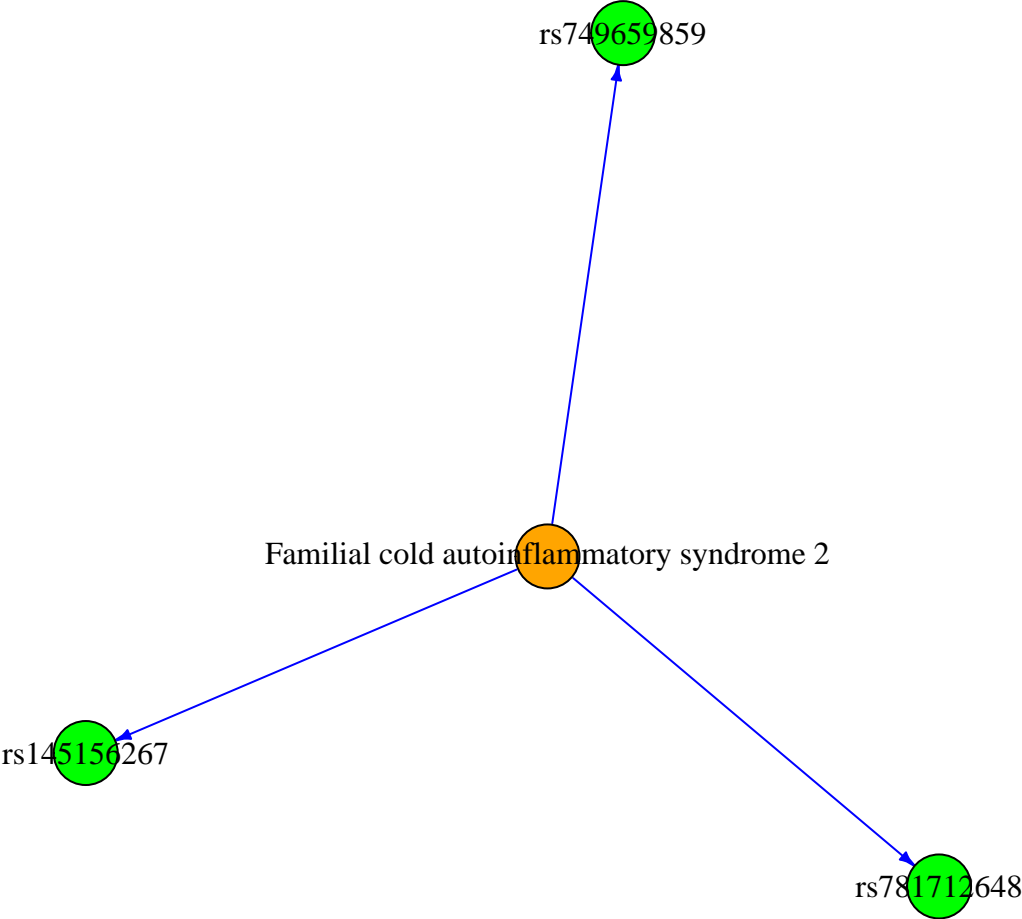

**Variant–Disease Network (Familial cold autoinflammatory syndrome 3)**

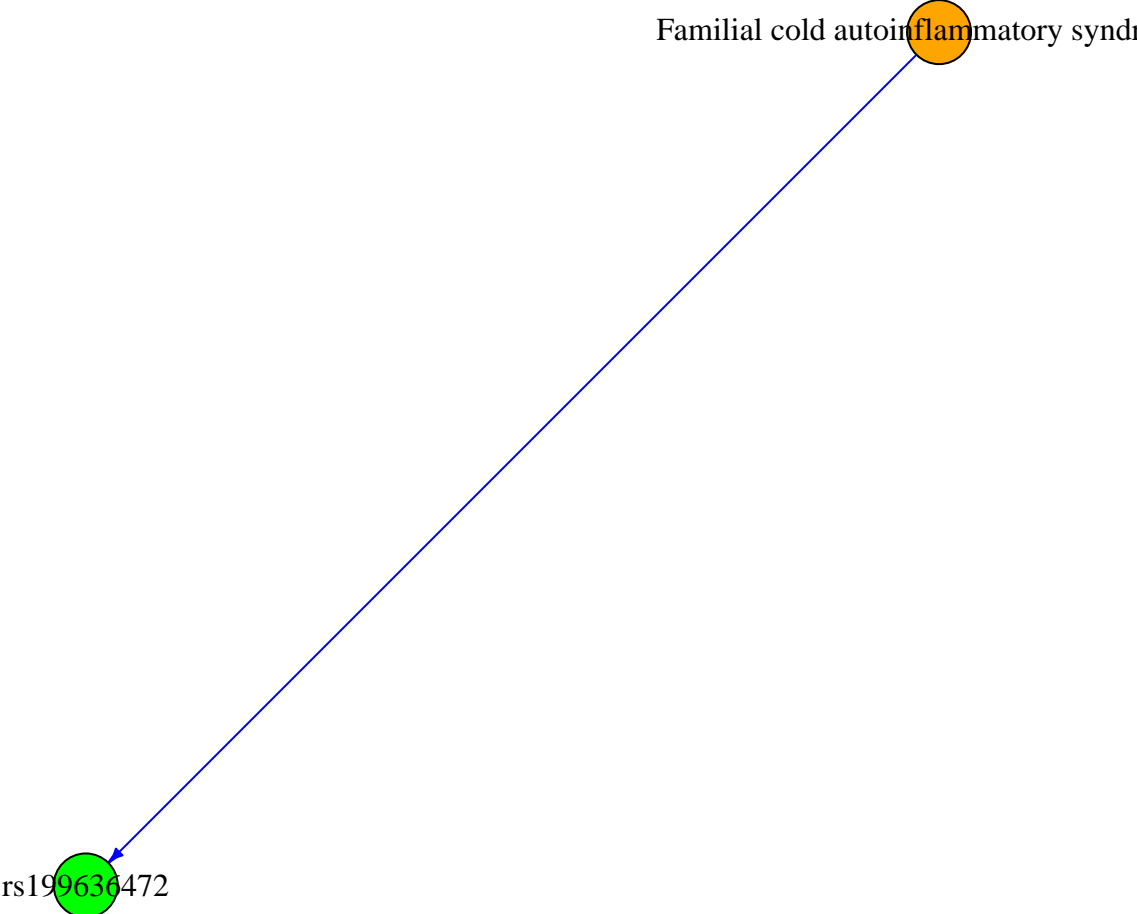

## Variant–Disease Network (Familial colorectal cancer)

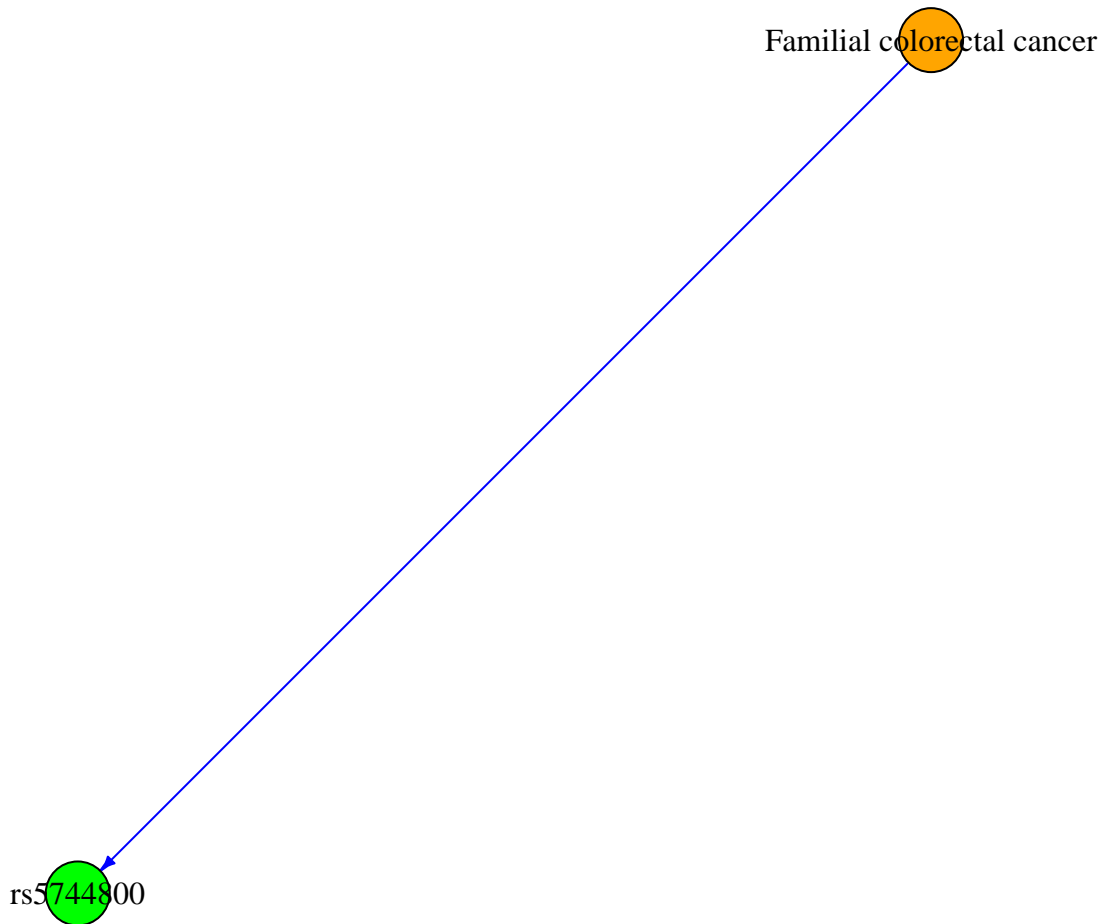

## Variant–Disease Network (Familial dilated cardiomyopathy)

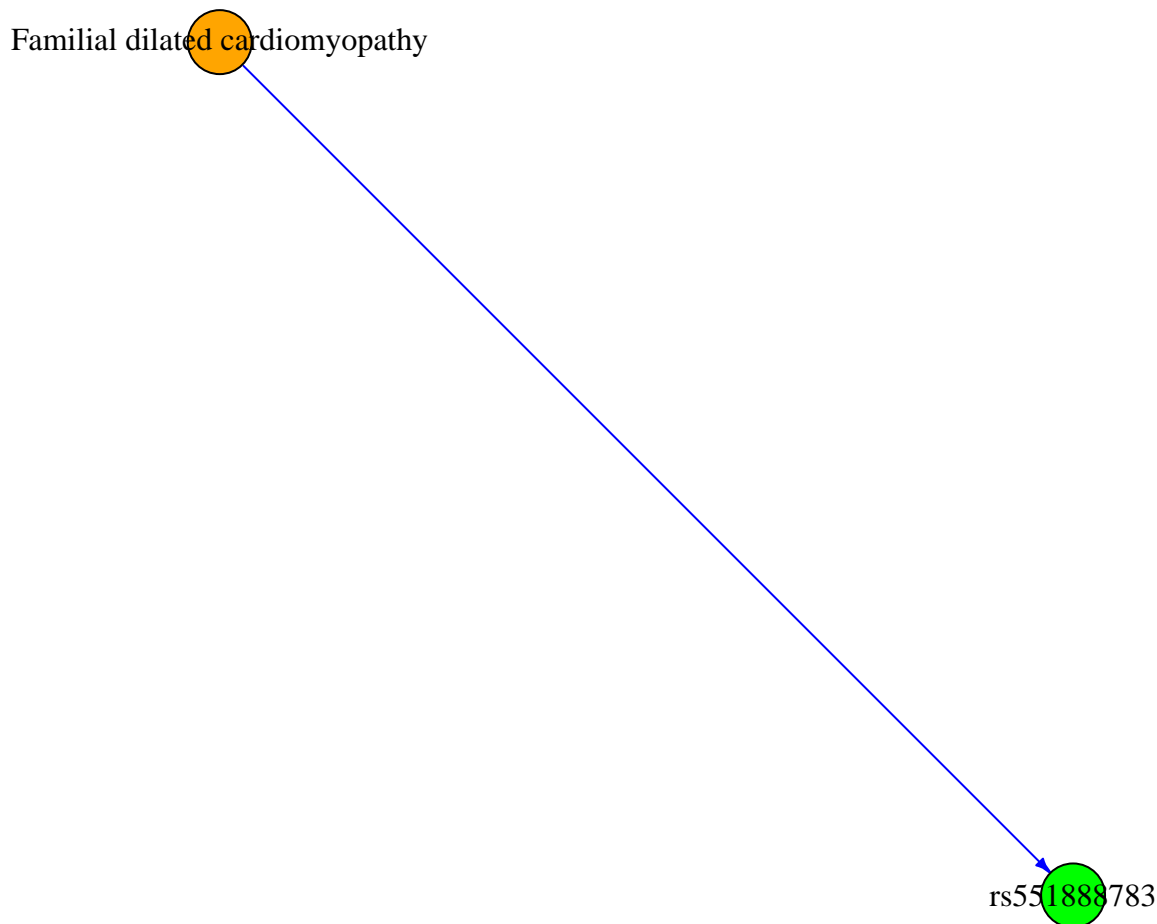



## Variant–Disease Network (Familial erythrocytosis)

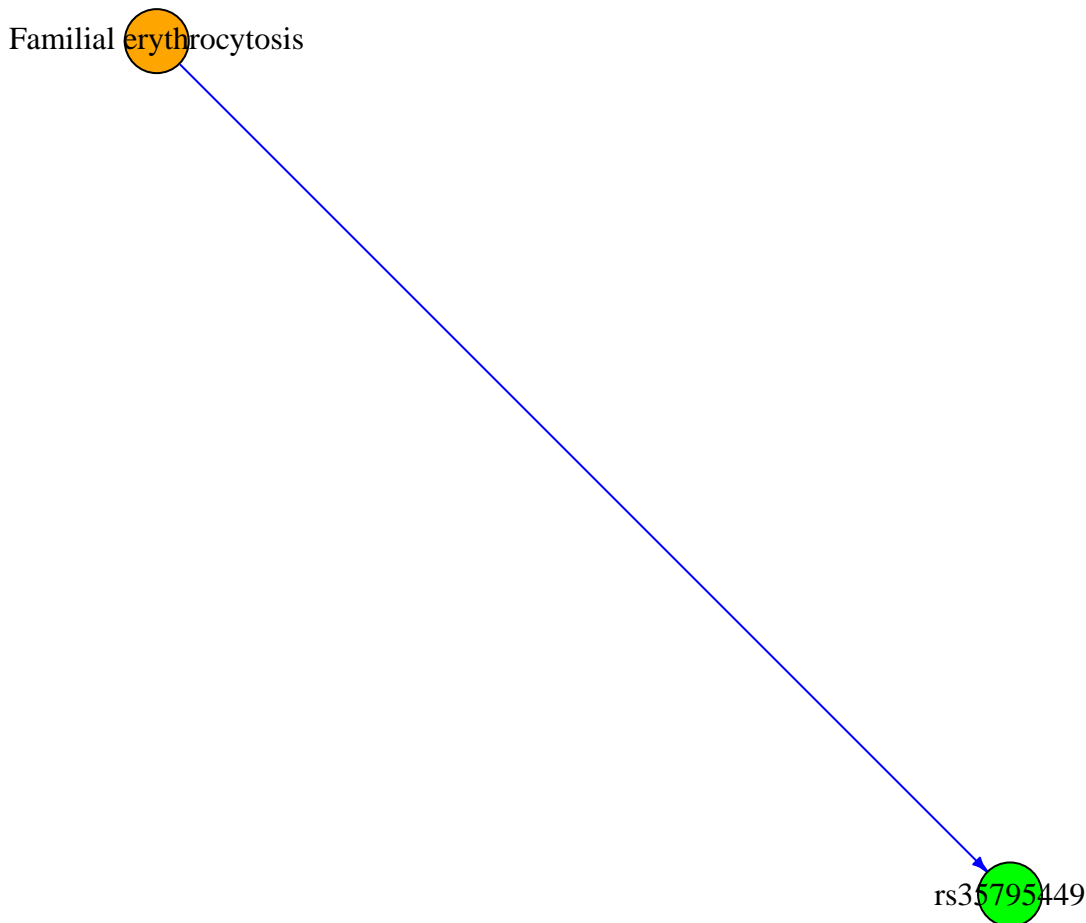

Variant–Disease Network (Familial febrile seizures 8)

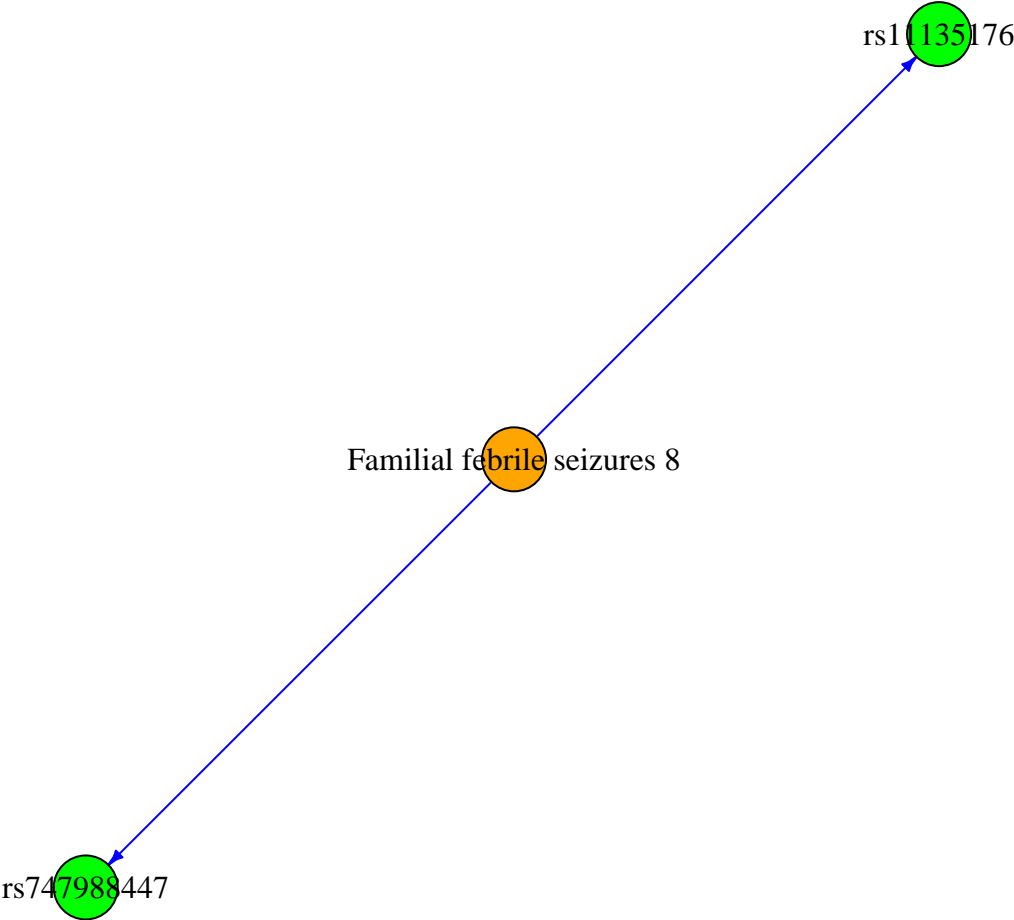

## Variant–Disease Network (Familial hemiplegic migraine type 3)

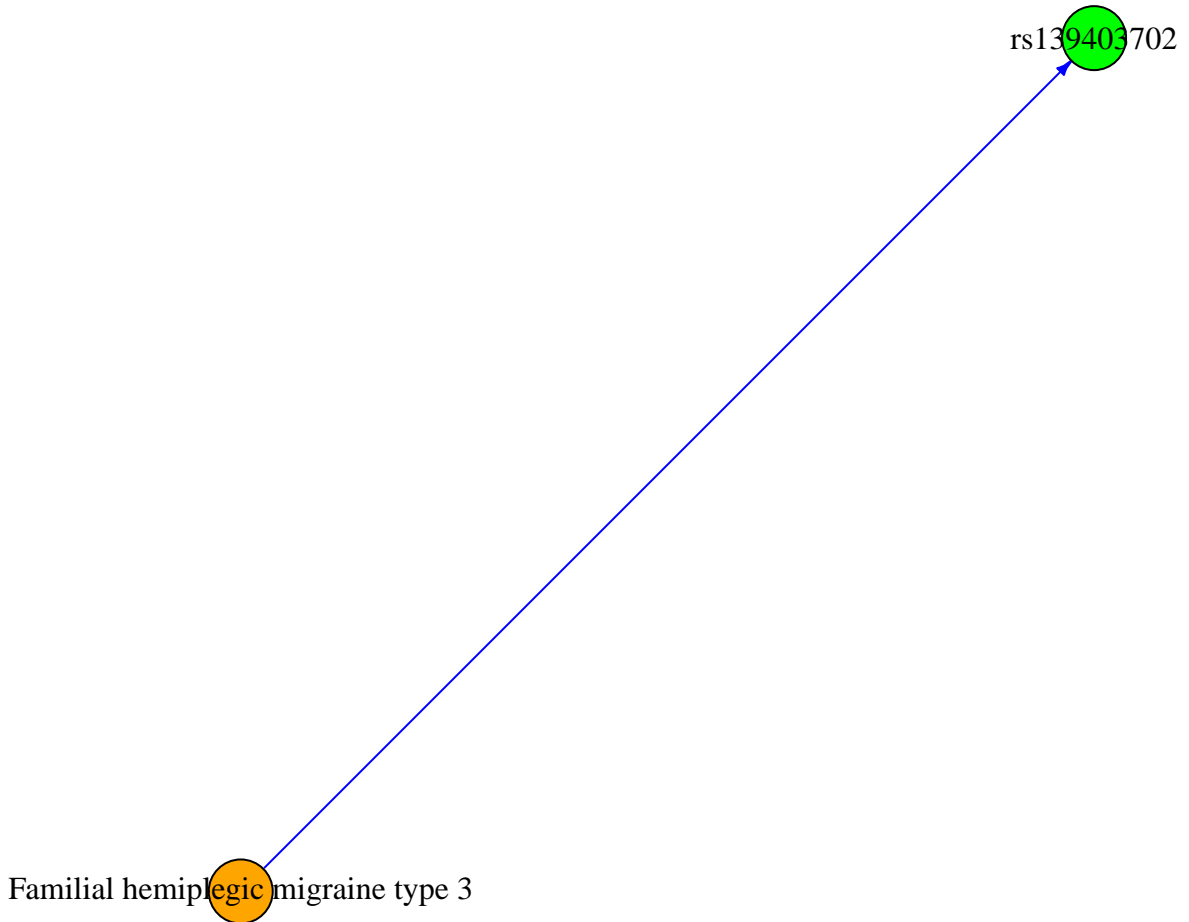

Variant–Disease Network (Familial hemophagocytic lymphohistiocytosis)

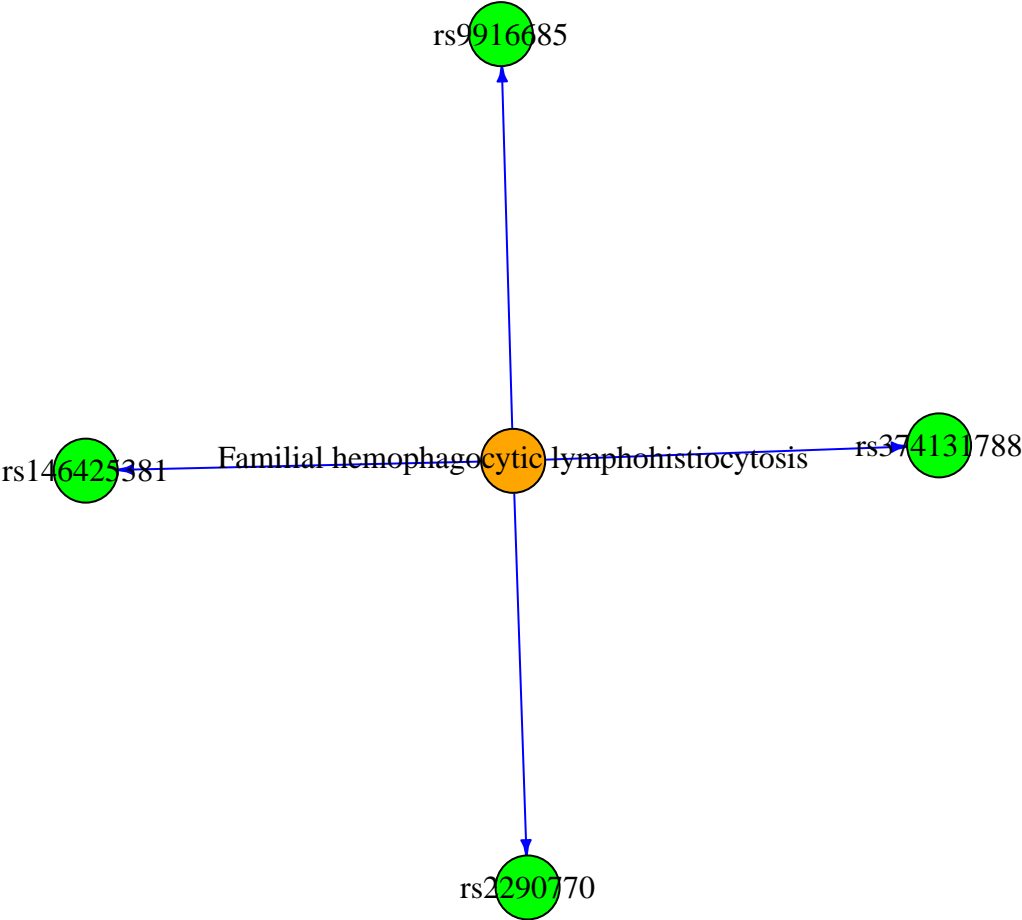

# Variant-Disease Network (Familial High Density Lipoprotein Deficiency)

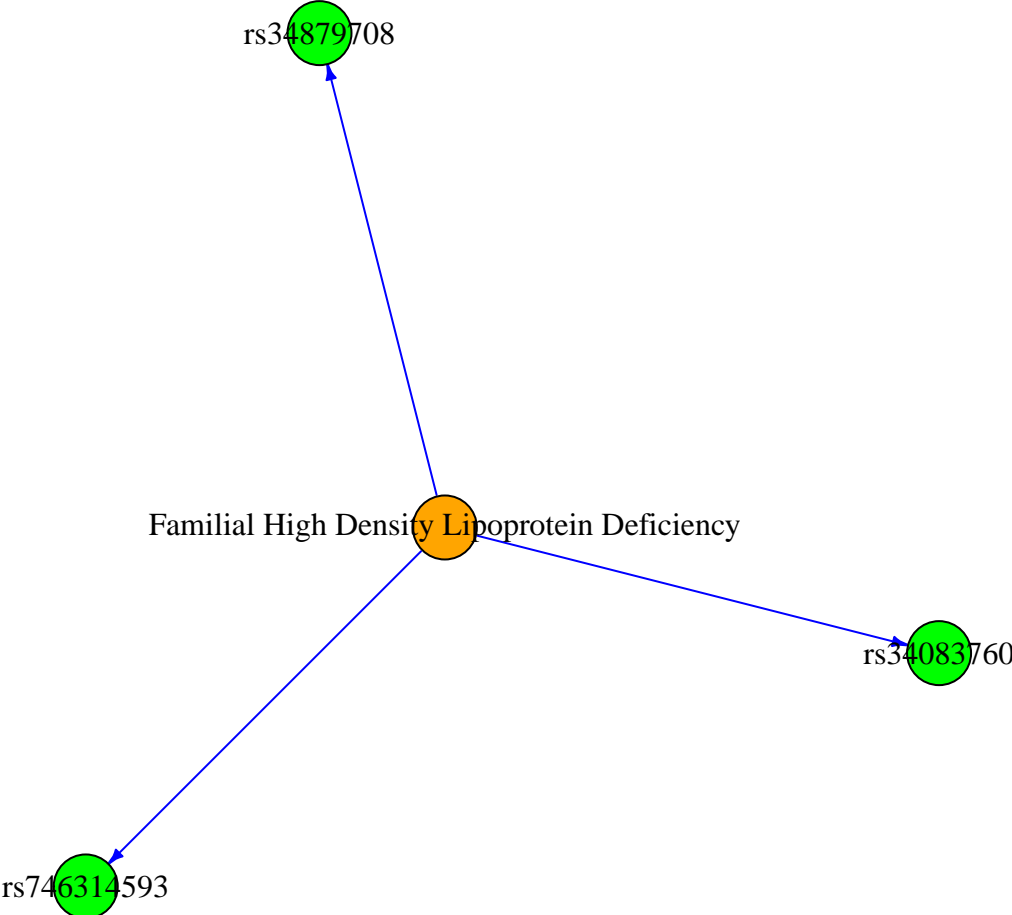

Variant–Disease Network (Familial hyperaldosteronism)

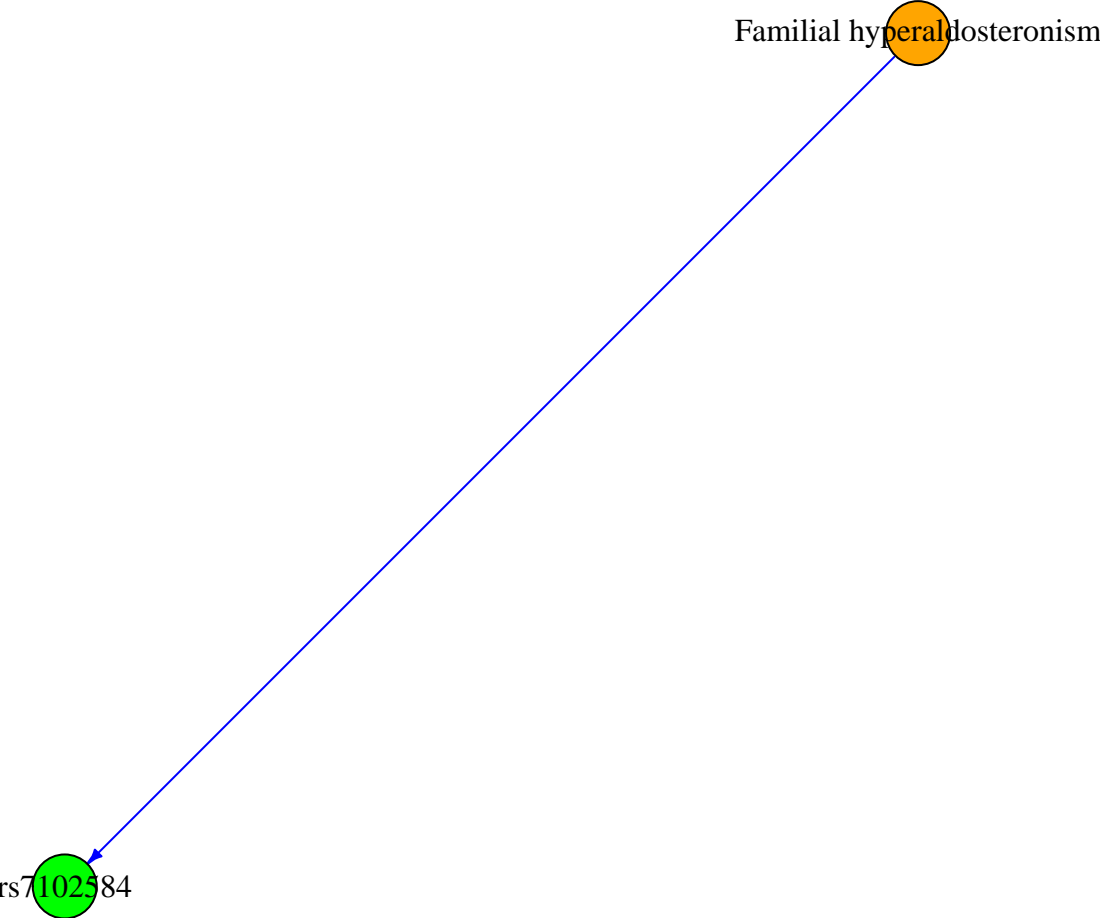

Variant–Disease Network (Familial hypercholesterolemia)

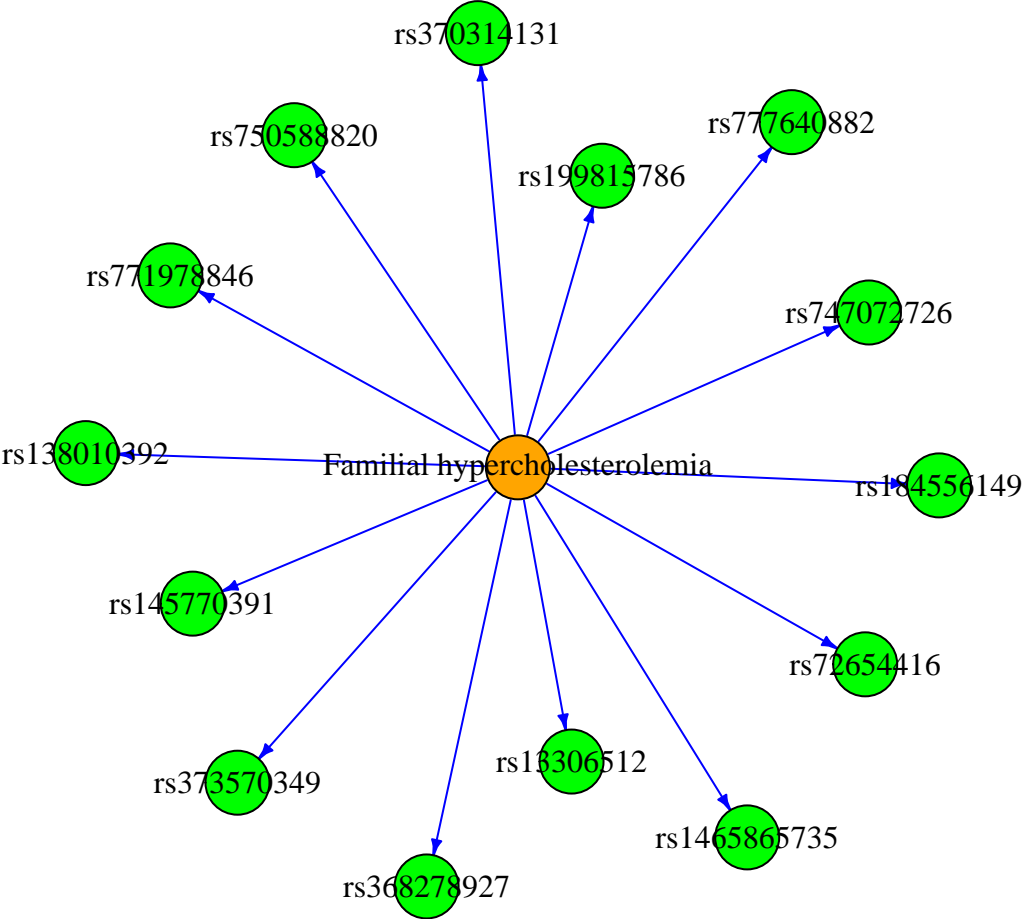

# Variant-Disease Network (Familial hypercholesterolemia 1)

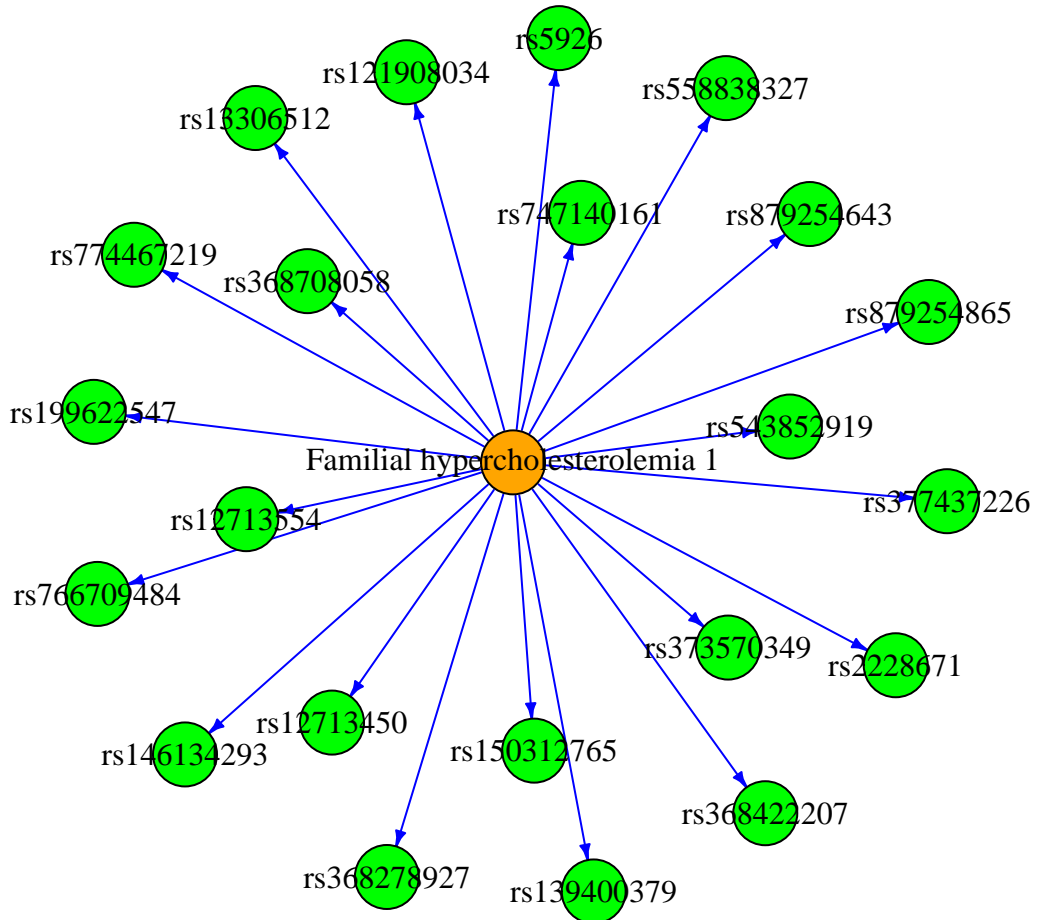



## Variant–Disease Network (Familial hypercholesterolemia 2)

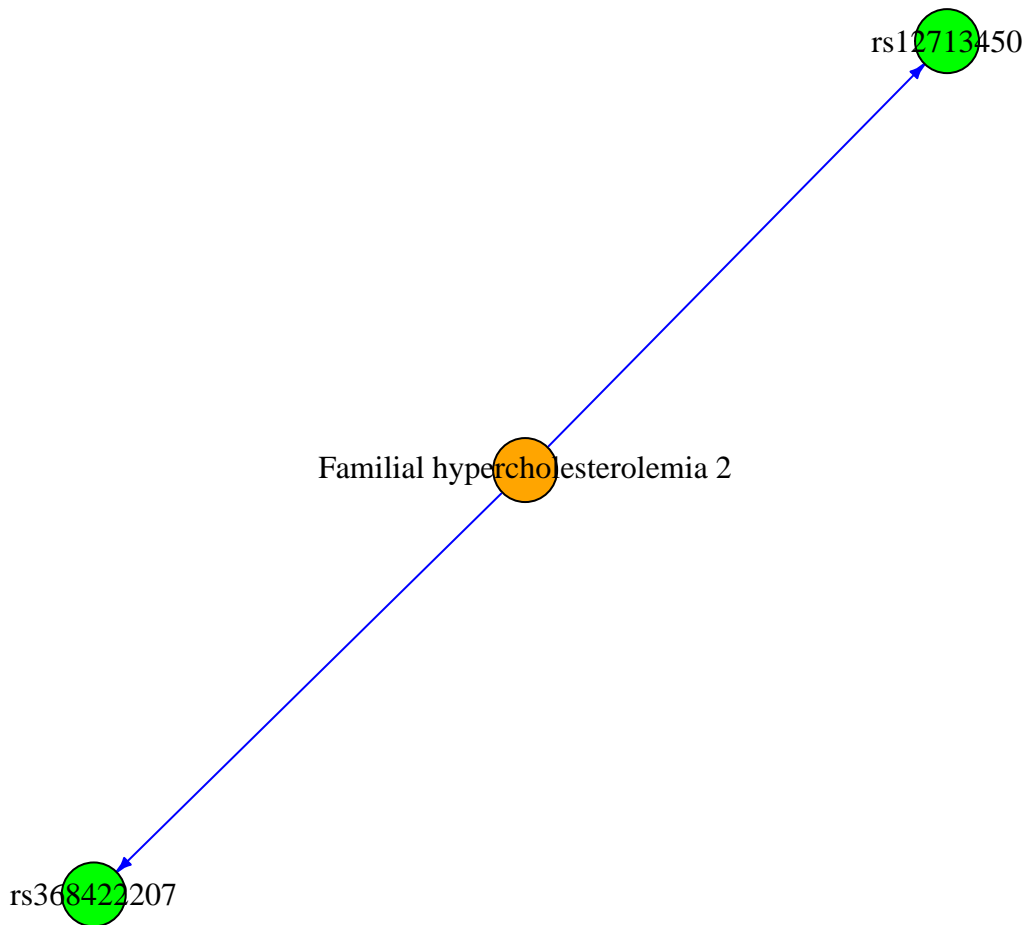

## Variant–Disease Network (Familial hypercholesterolemia 4)

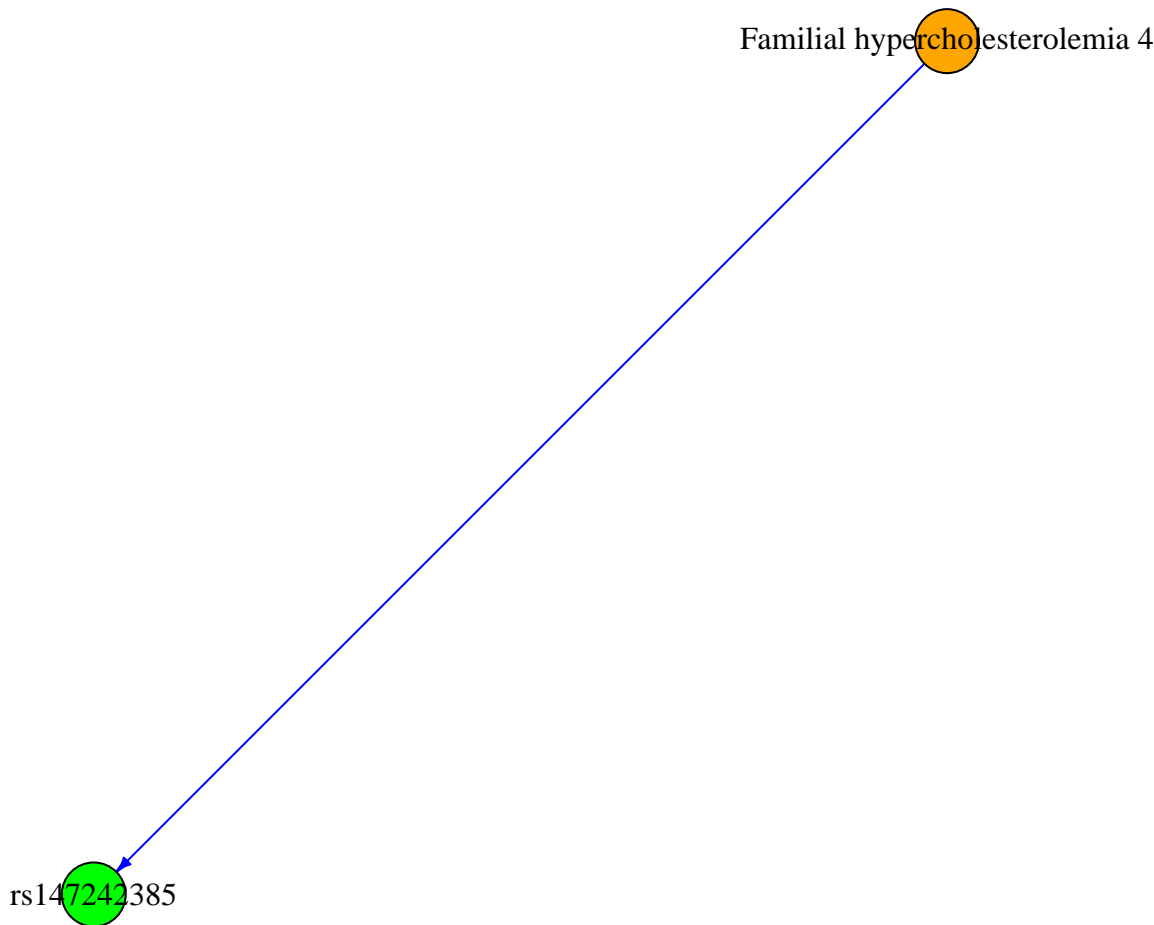

**Variant–Disease Network (Familial hypertrophic cardiomyopathy 1)**

Familial hypertrophic cardiomyopathy 1

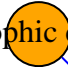

rs374538348

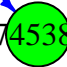

**Variant–Disease Network (Familial hypertrophic cardiomyopathy 12)**

Familial hypertrophic cardiomyopathy 12

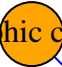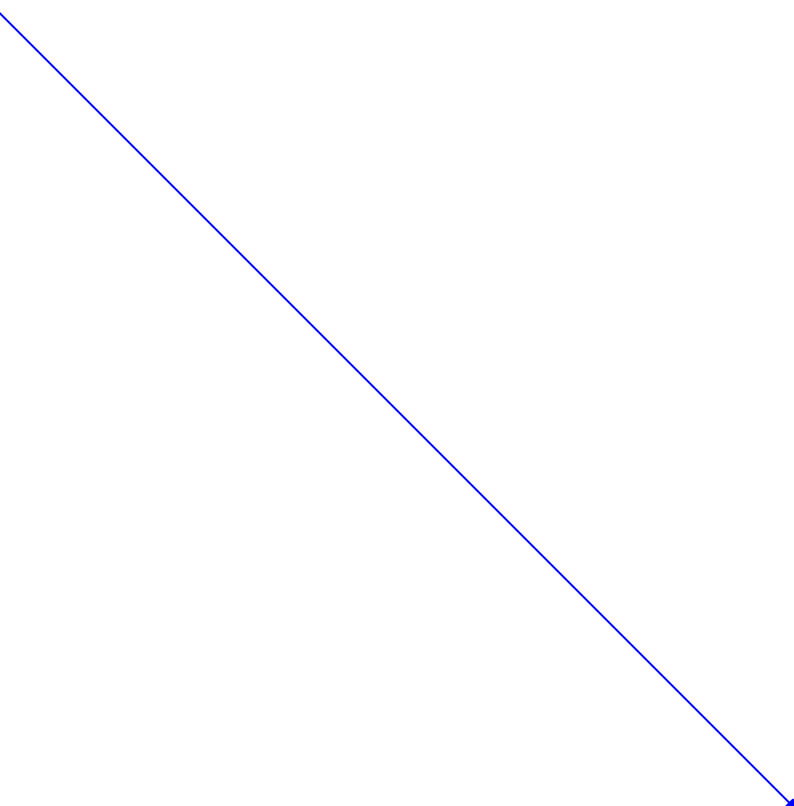

rs142019584

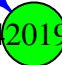

**Variant–Disease Network (Familial hypertrophic cardiomyopathy 13)**

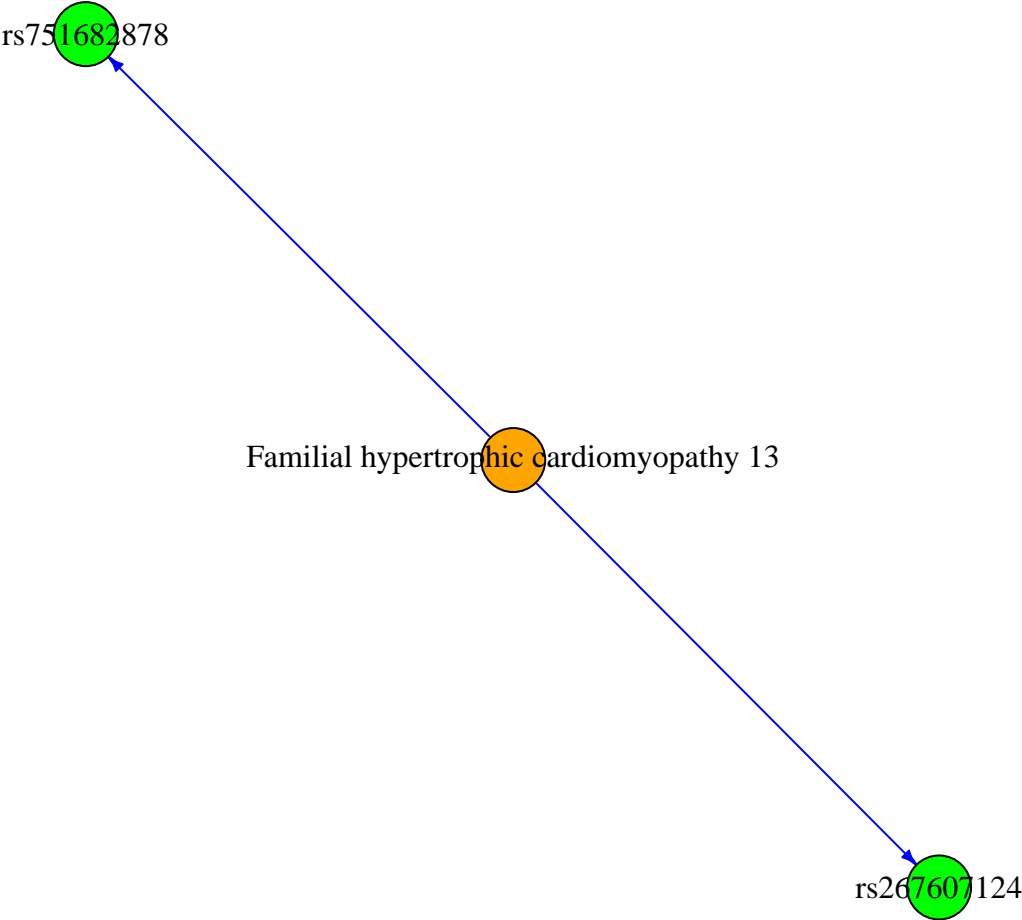

**Variant–Disease Network (Familial hypertrophic cardiomyopathy 16)**

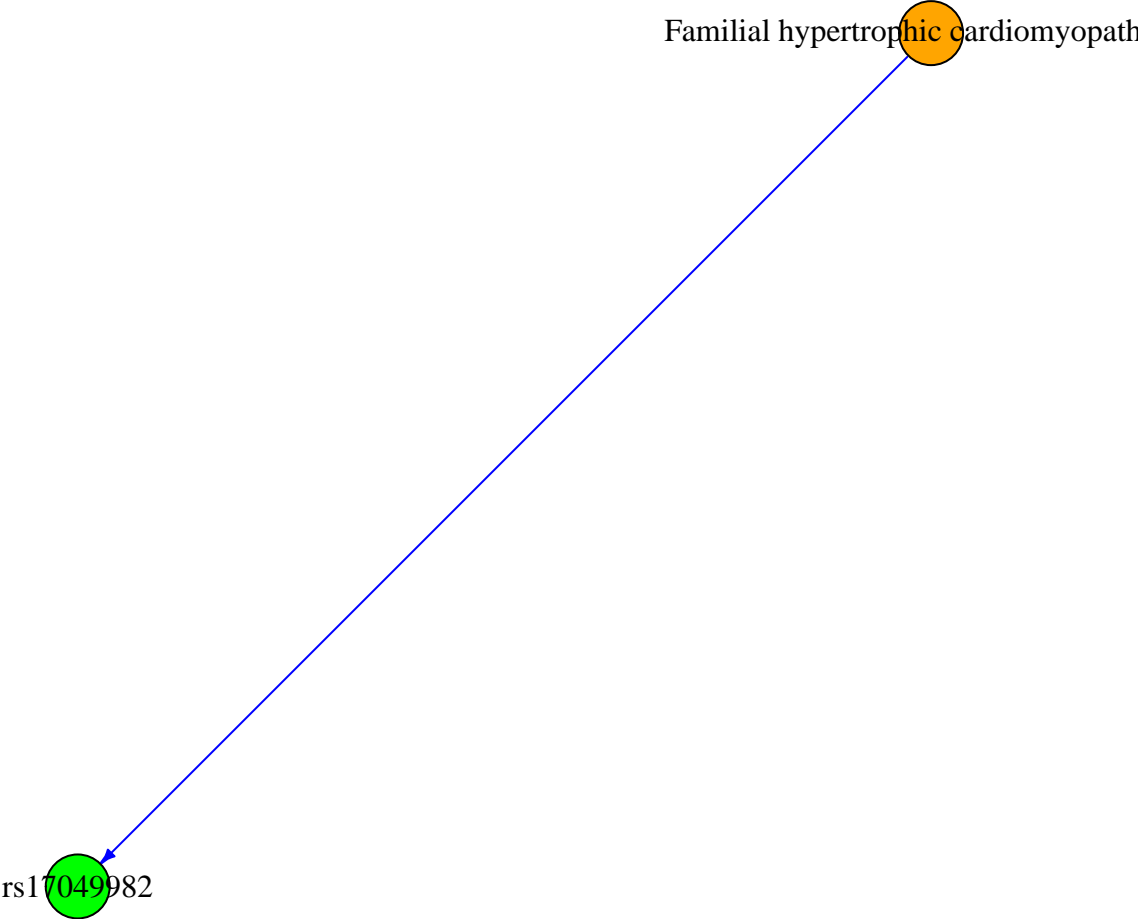

Variant–Disease Network (Familial hypertrophic cardiomyopathy 19)

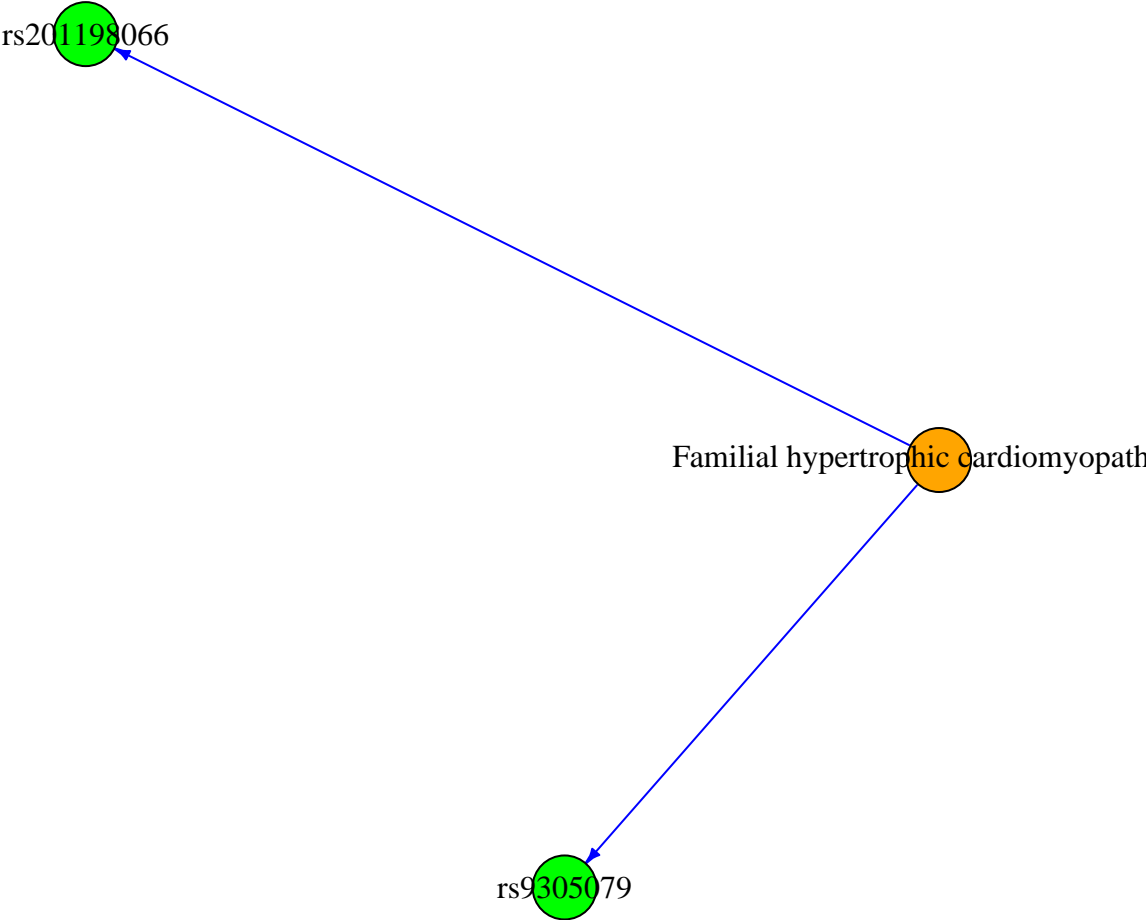

**Variant–Disease Network (Familial hypertrophic cardiomyopathy 2)**

Familial hypertrophic cardiomyopathy 2

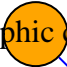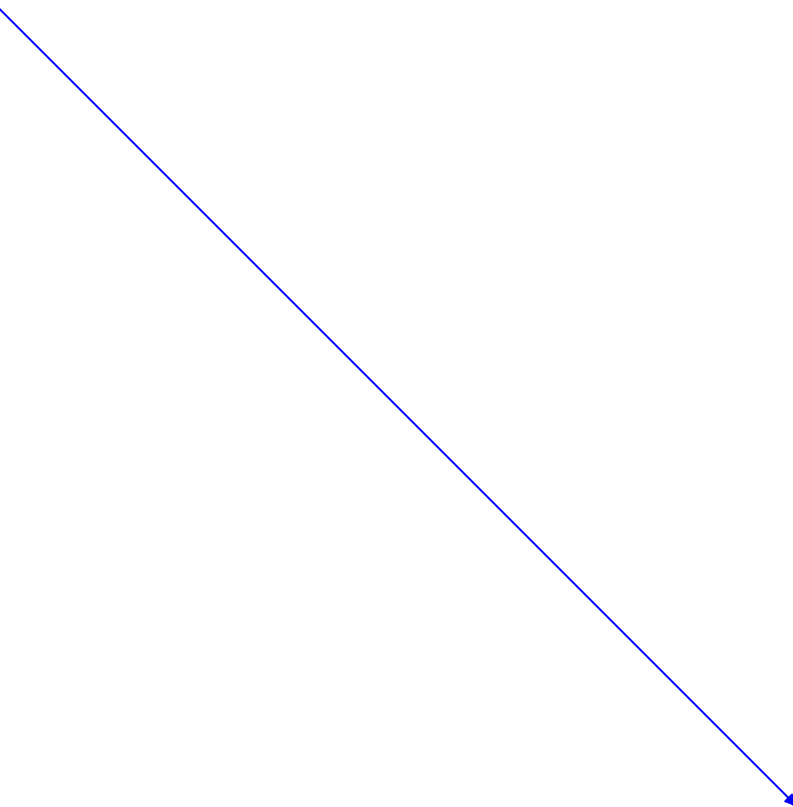

rs977853063

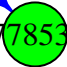



**Variant–Disease Network (Familial hypertrophic cardiomyopathy 4)**

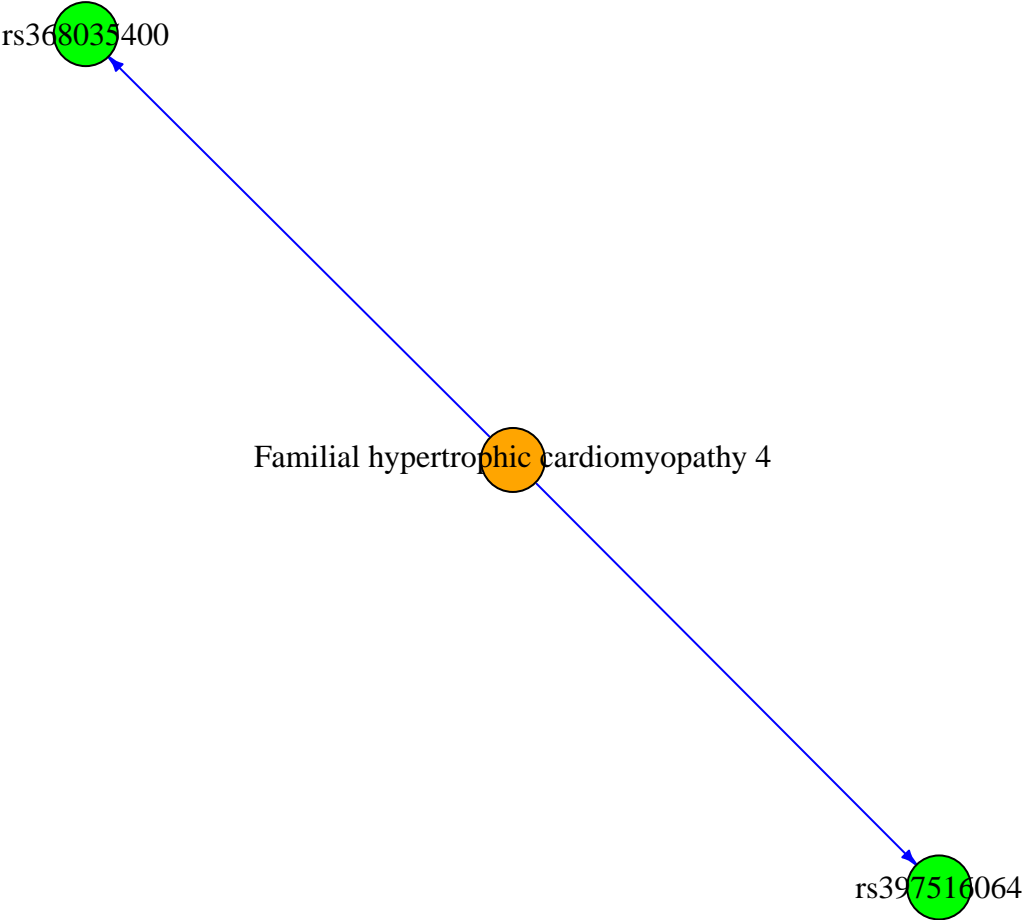

# Variant–Disease Network (Familial hypobetalipoproteinemia)

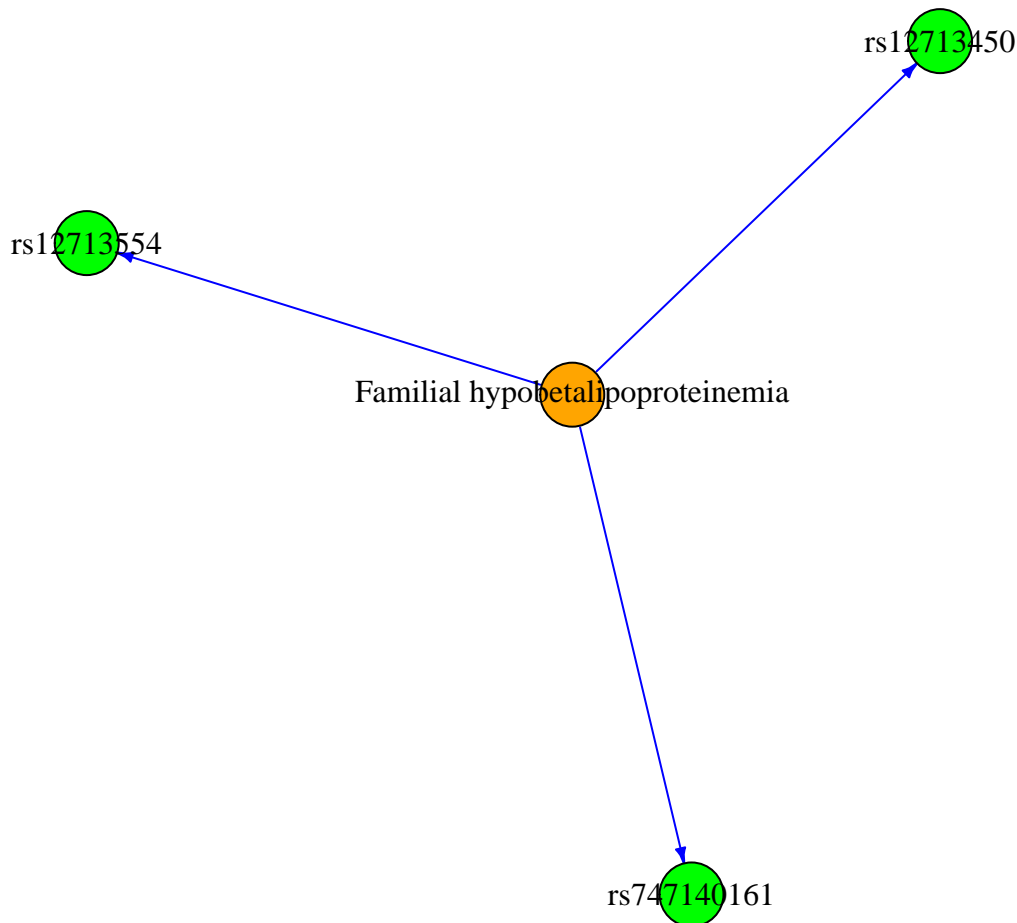

# Variant–Disease Network (Familial hypokalemia–hypomagnesemia)

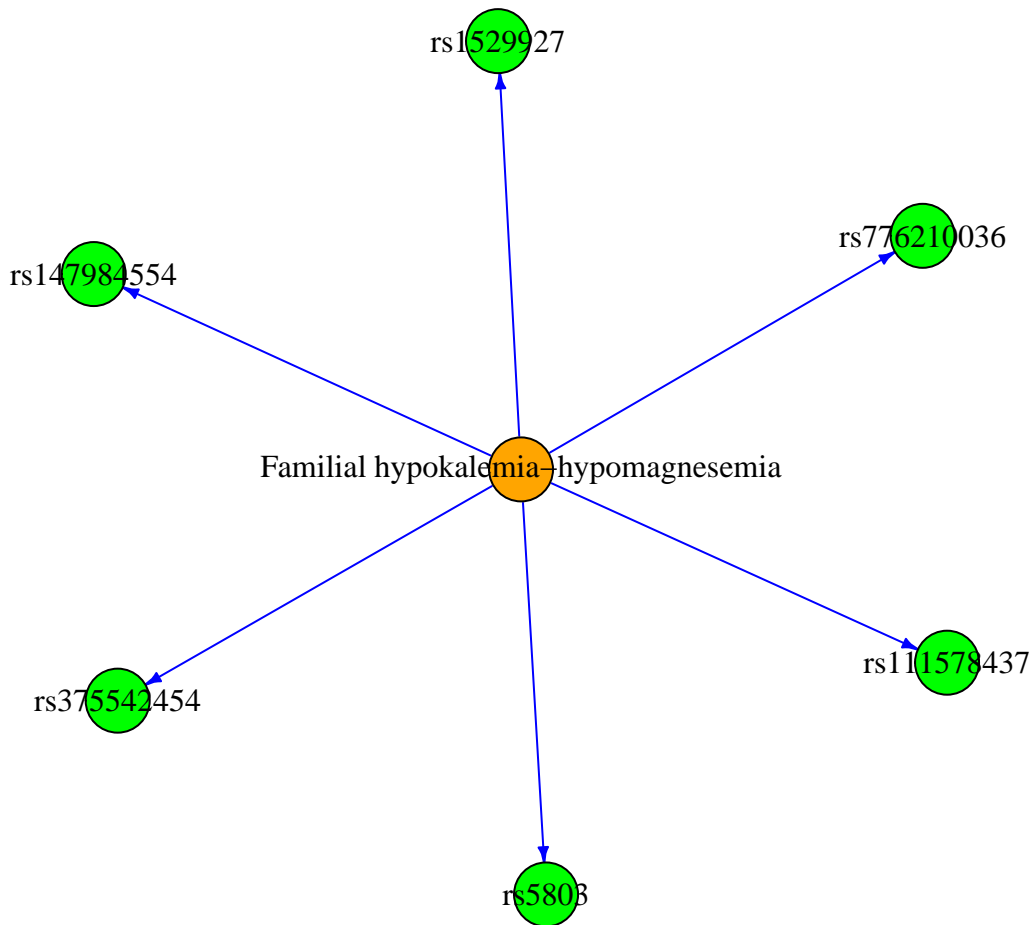

## Variant–Disease Network (Familial infantile myasthenia)

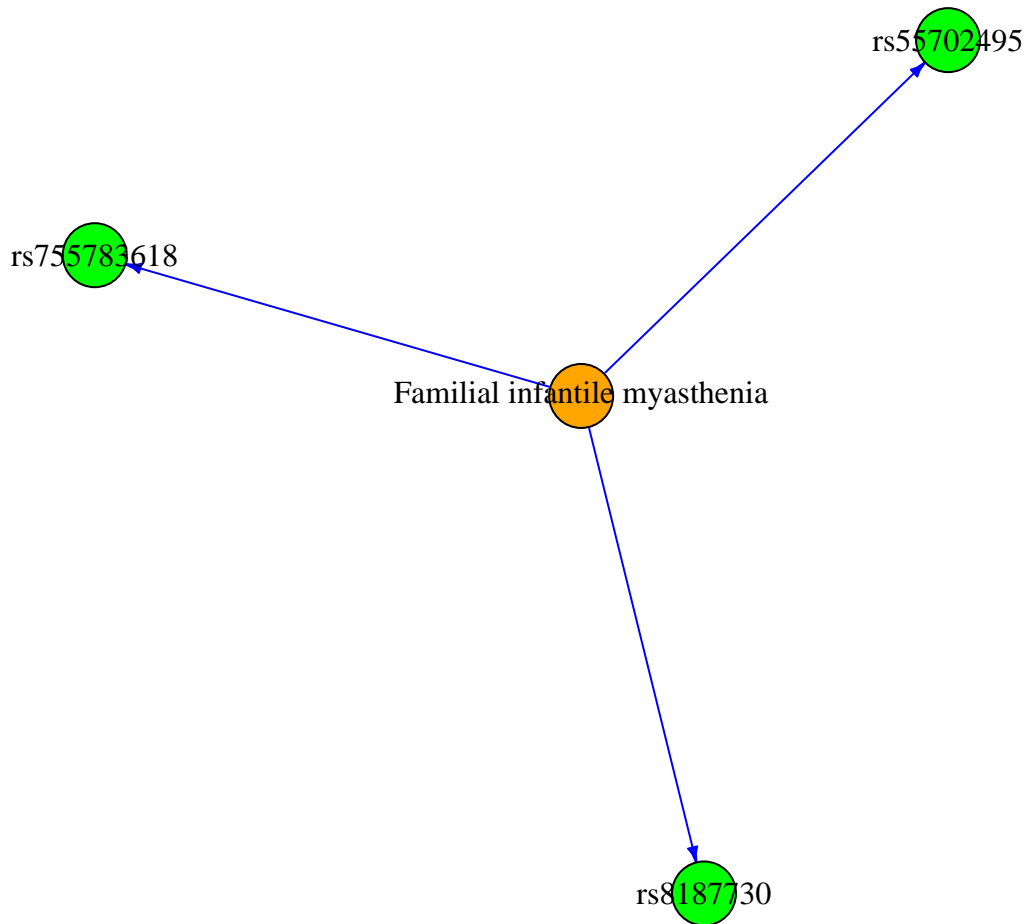

# Variant–Disease Network (Familial isolated hypoparathyroidism)

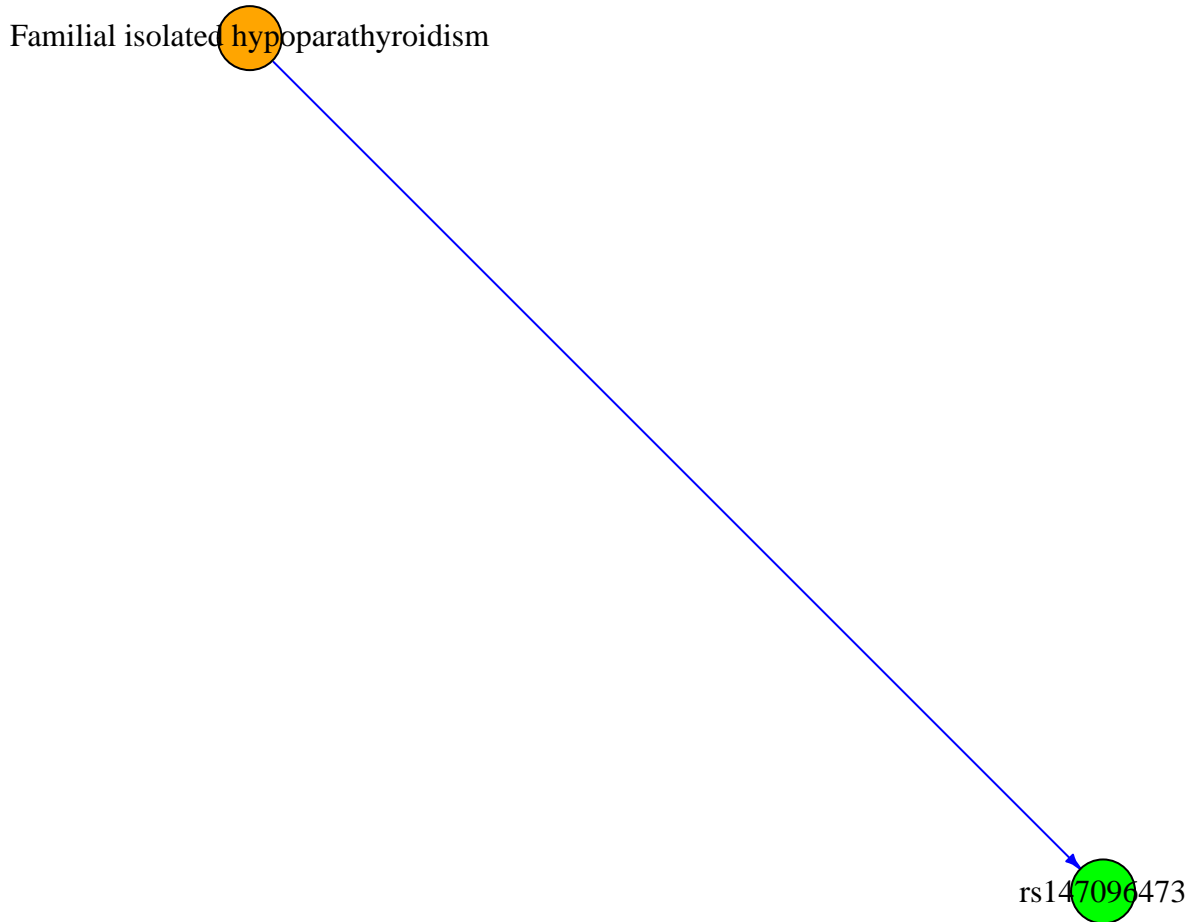

Variant–Disease Network (Familial Isolated Pituitary Adenomas)

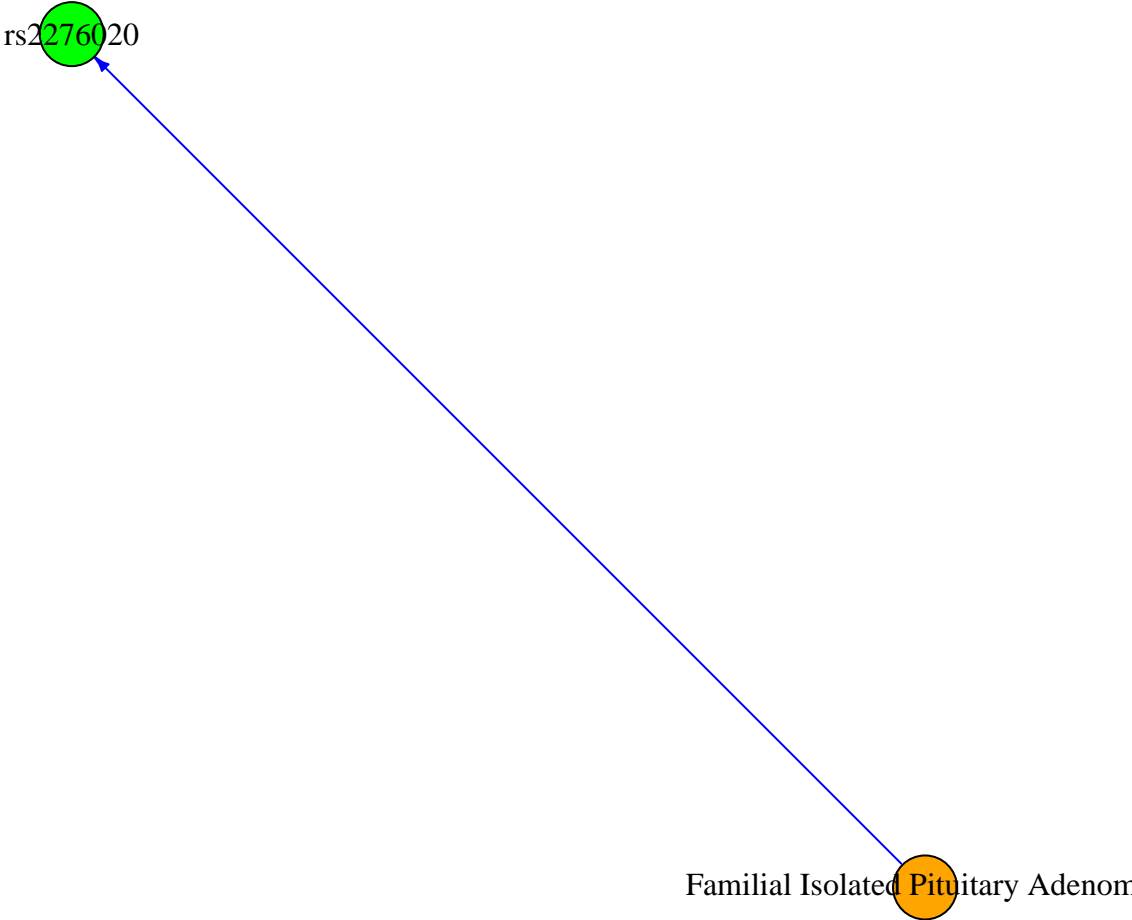

# Variant–Disease Network (Familial medullary thyroid carcinoma)

rs552776147

Familial medullary thyroid carcinoma

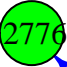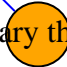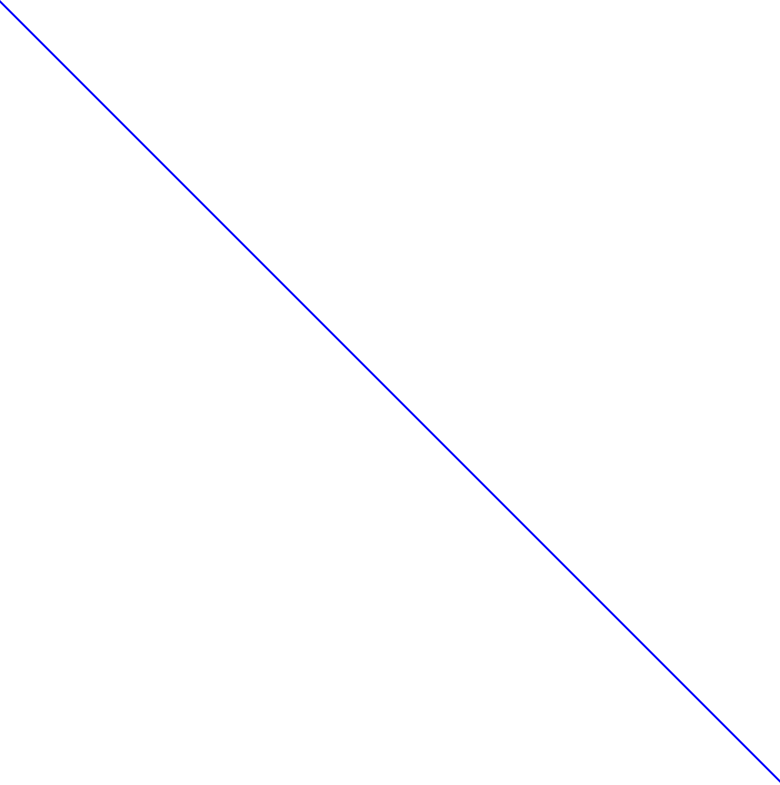

# Variant–Disease Network (Familial partial lipodystrophy)

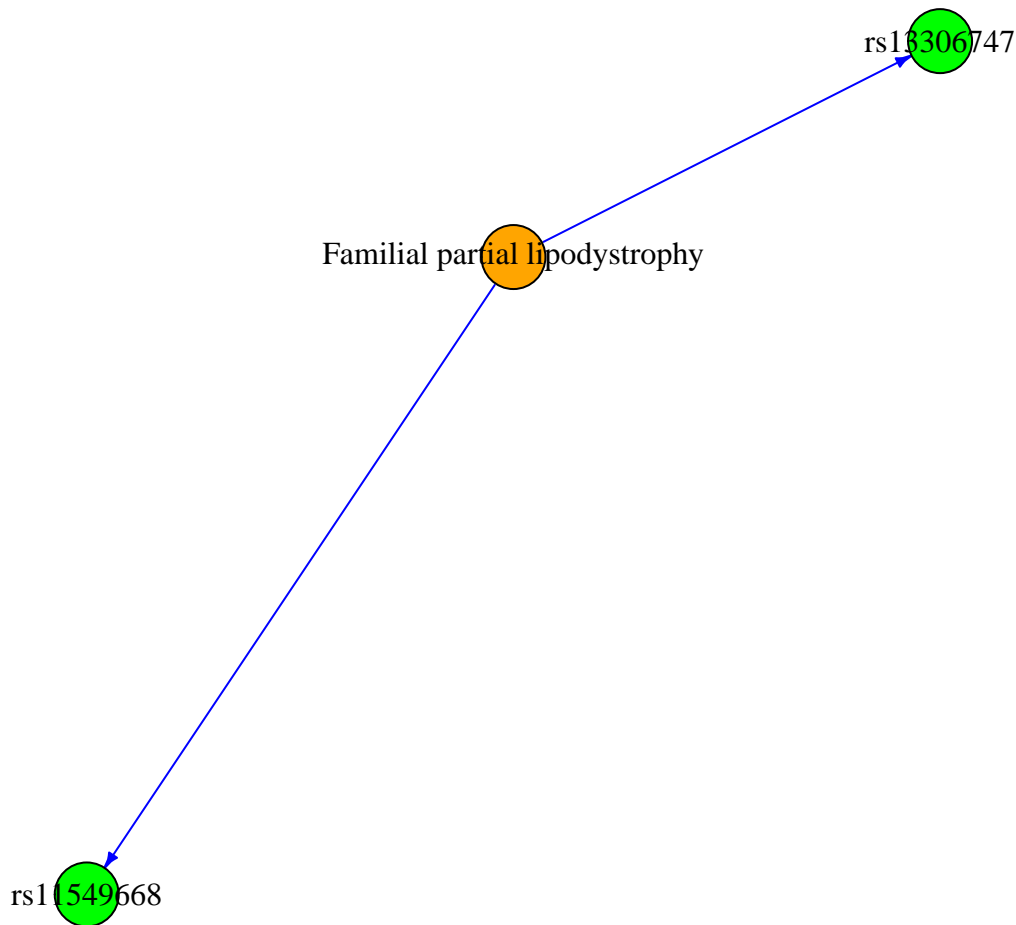



# Variant–Disease Network (Familial restrictive cardiomyopathy)

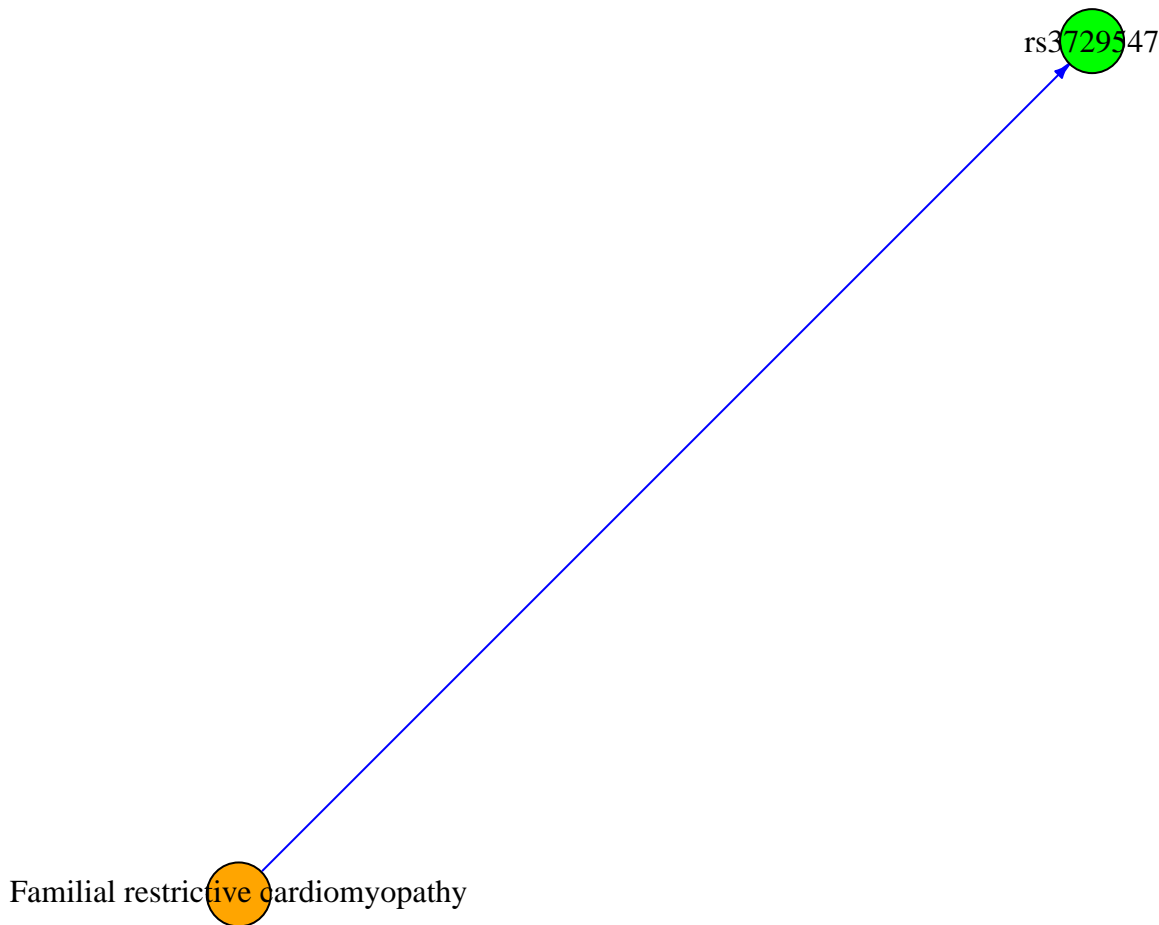

# Variant–Disease Network (Familial restrictive cardiomyopathy 3)

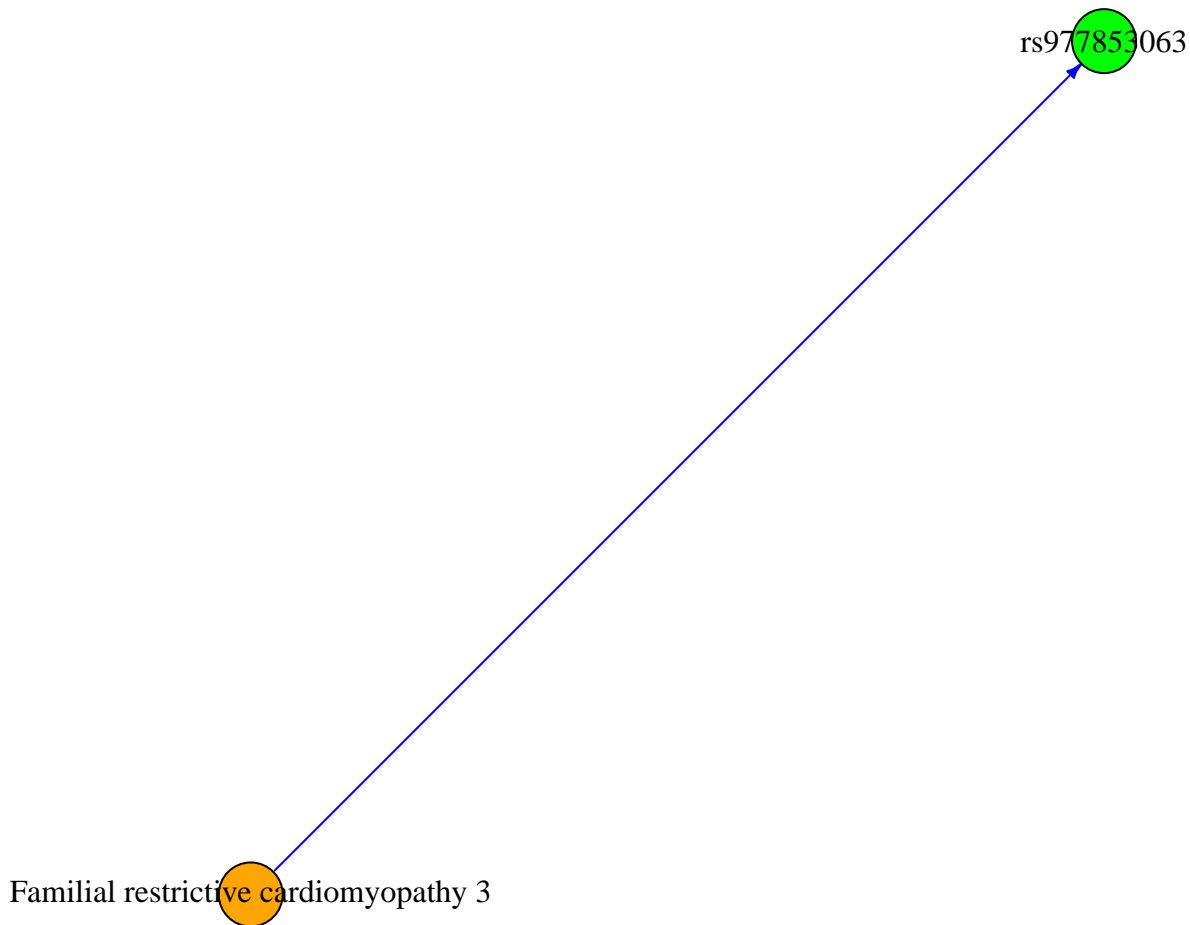

**Variant–Disease Network (Familial temporal lobe epilepsy 1)**

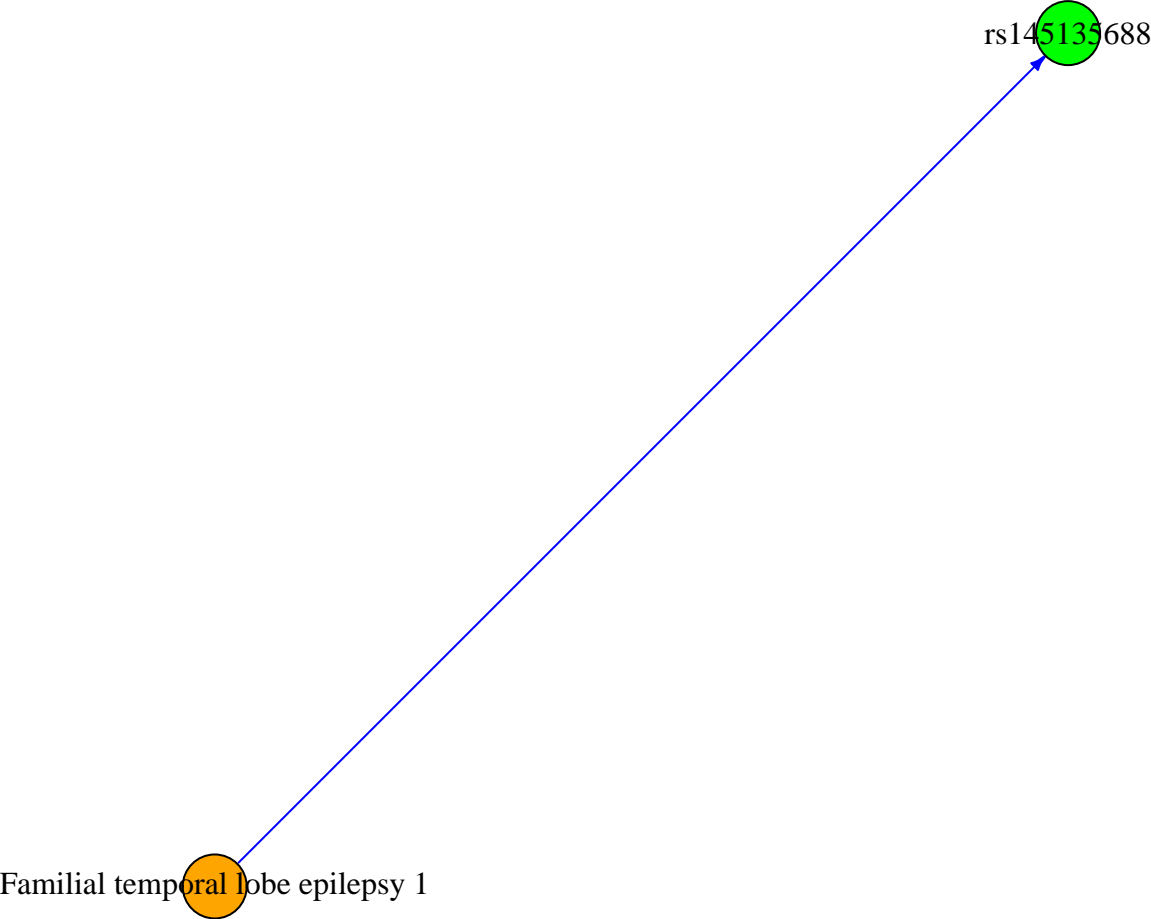

## Variant–Disease Network (Familial visceral amyloidosis)

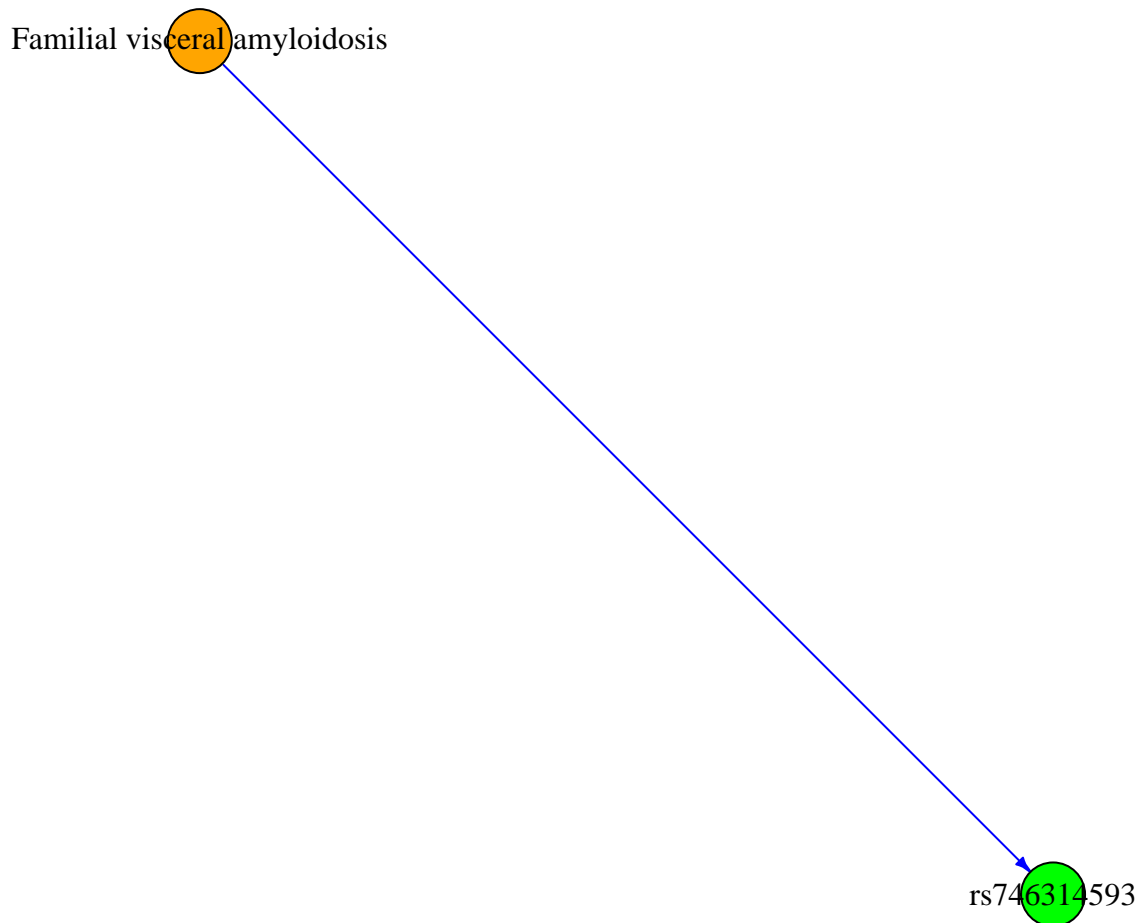

**Variant–Disease Network (Fanconi anemia)**

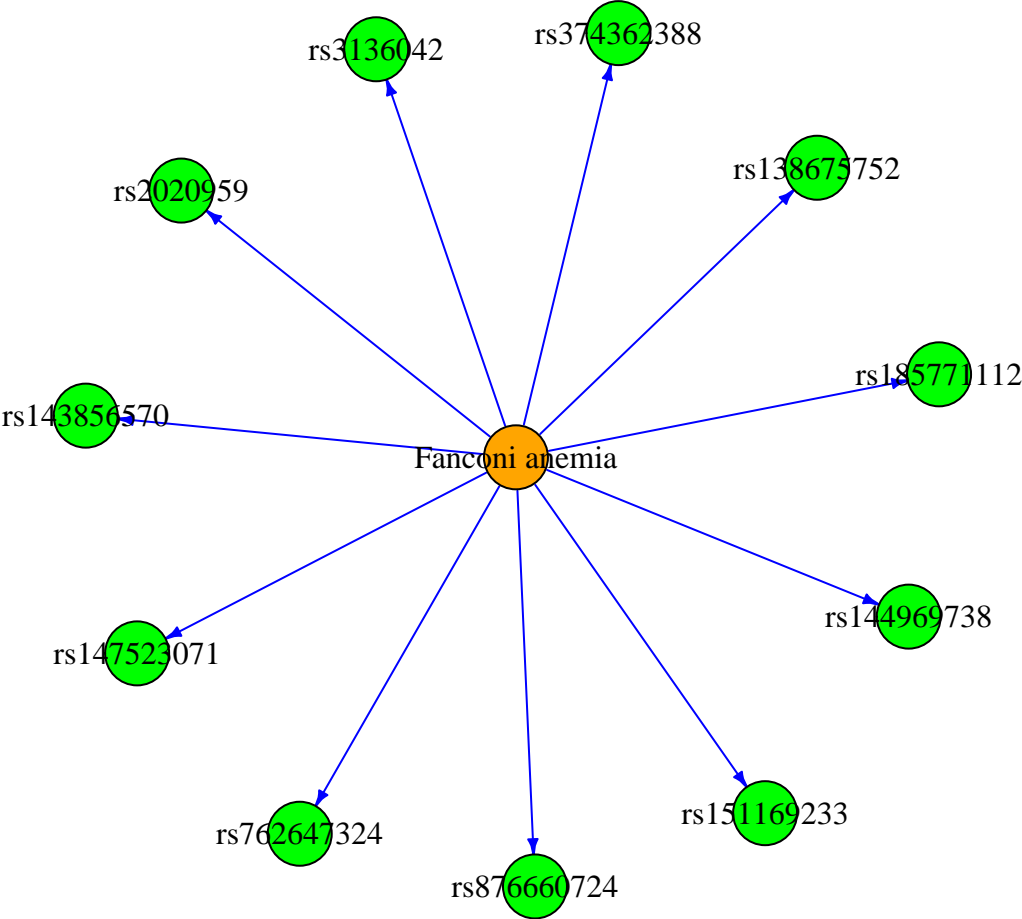

## Variant–Disease Network (Fanconi–Bickel syndrome)

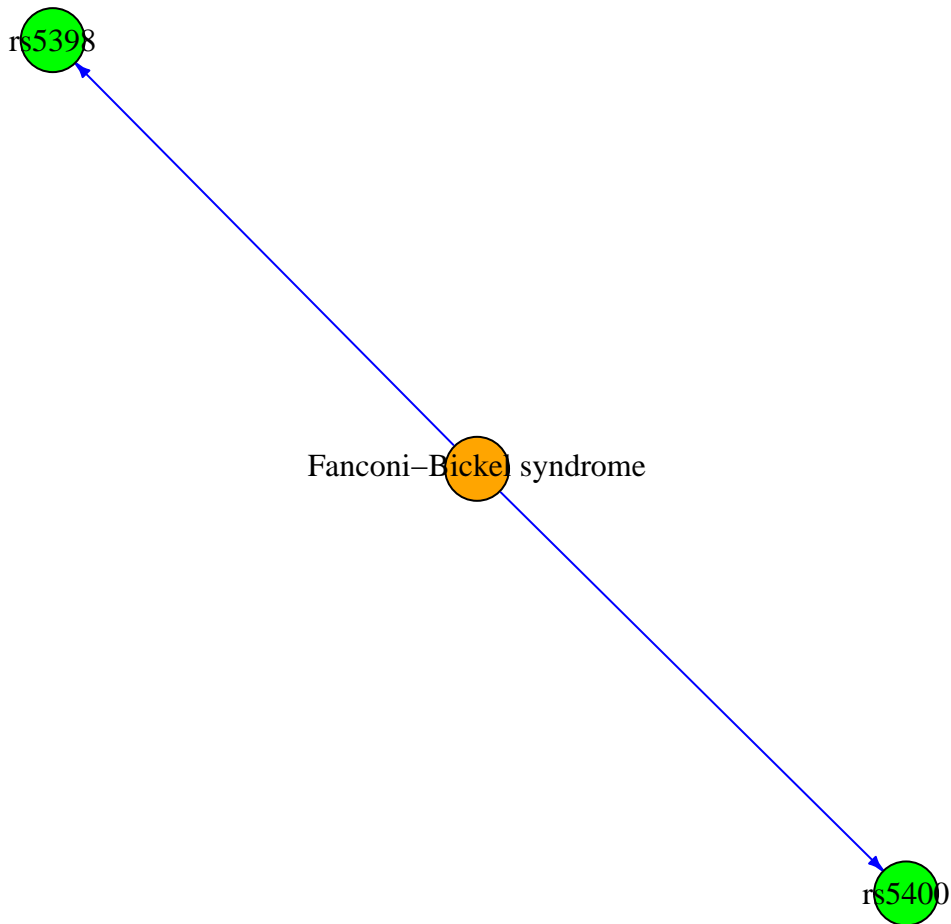

## Variant–Disease Network (Fibrochondrogenesis 1)

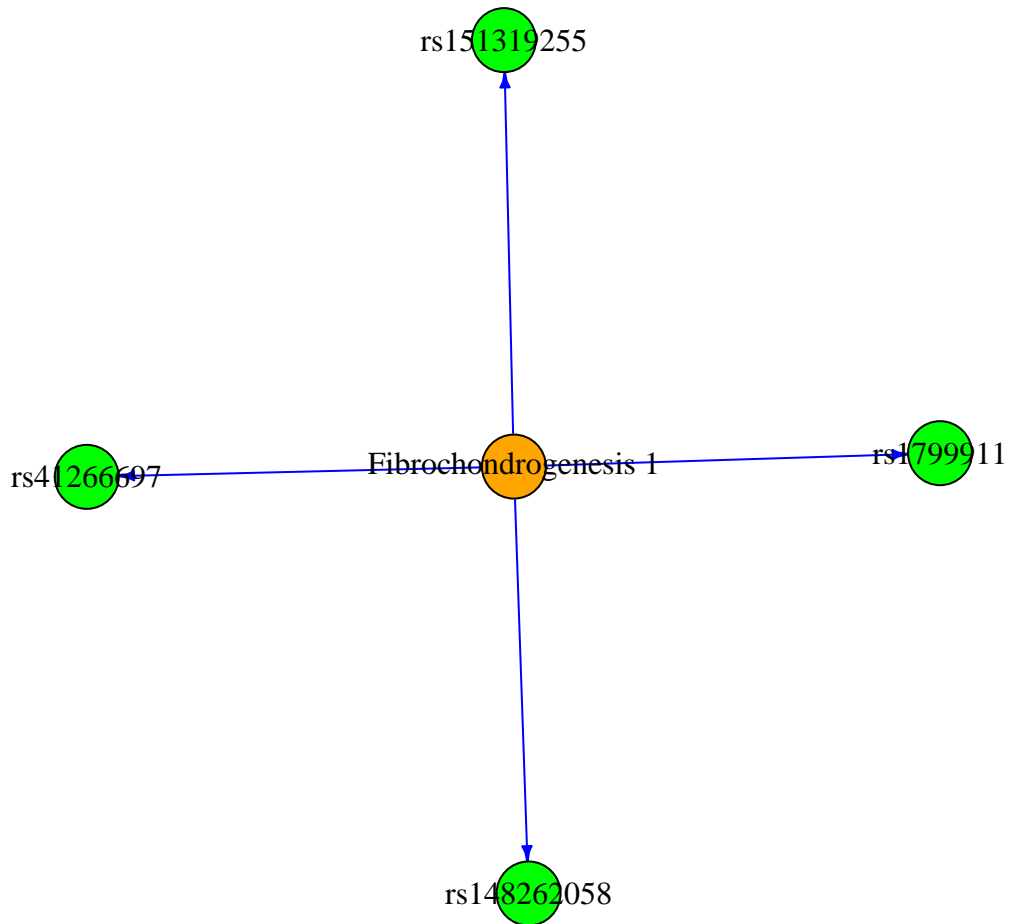

## Variant–Disease Network (Fibrous dysplasia of jaw)

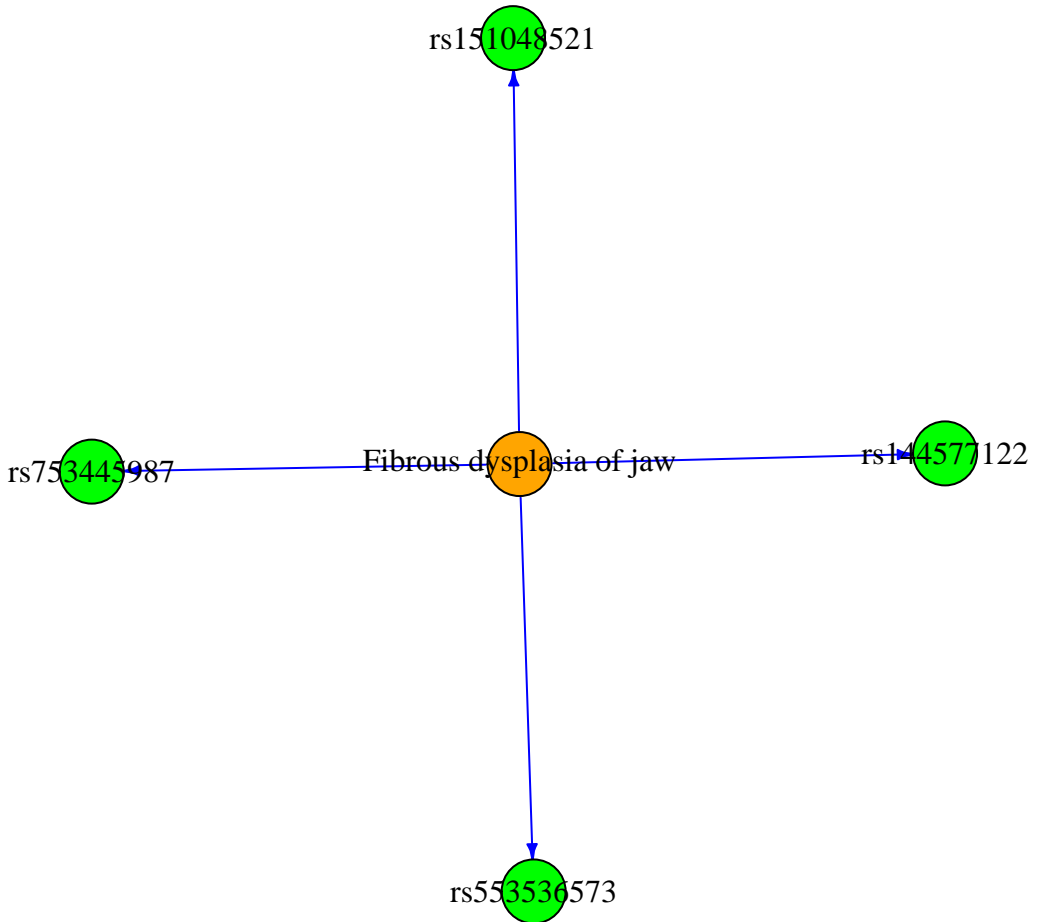



# Variant–Disease Network (Finnish congenital nephrotic syndrome)

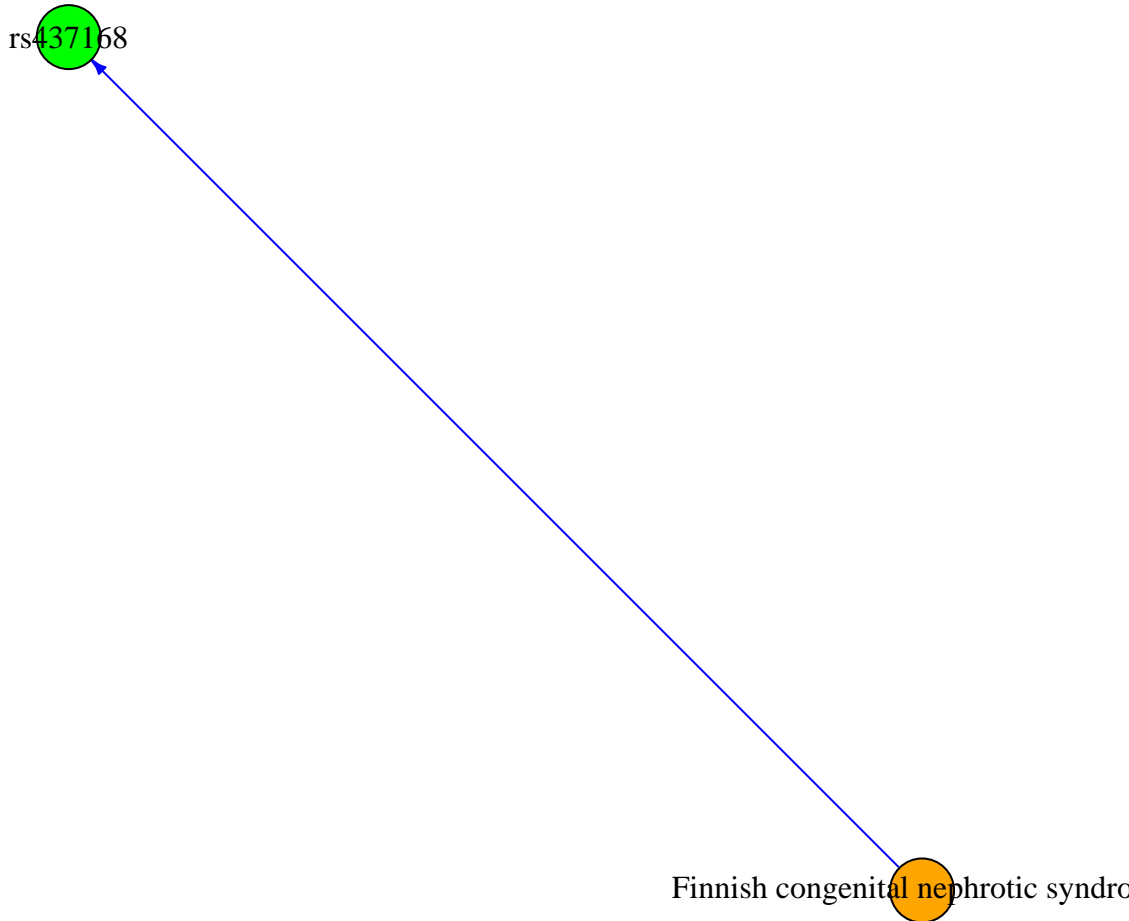

## Variant–Disease Network (Fleck corneal dystrophy)

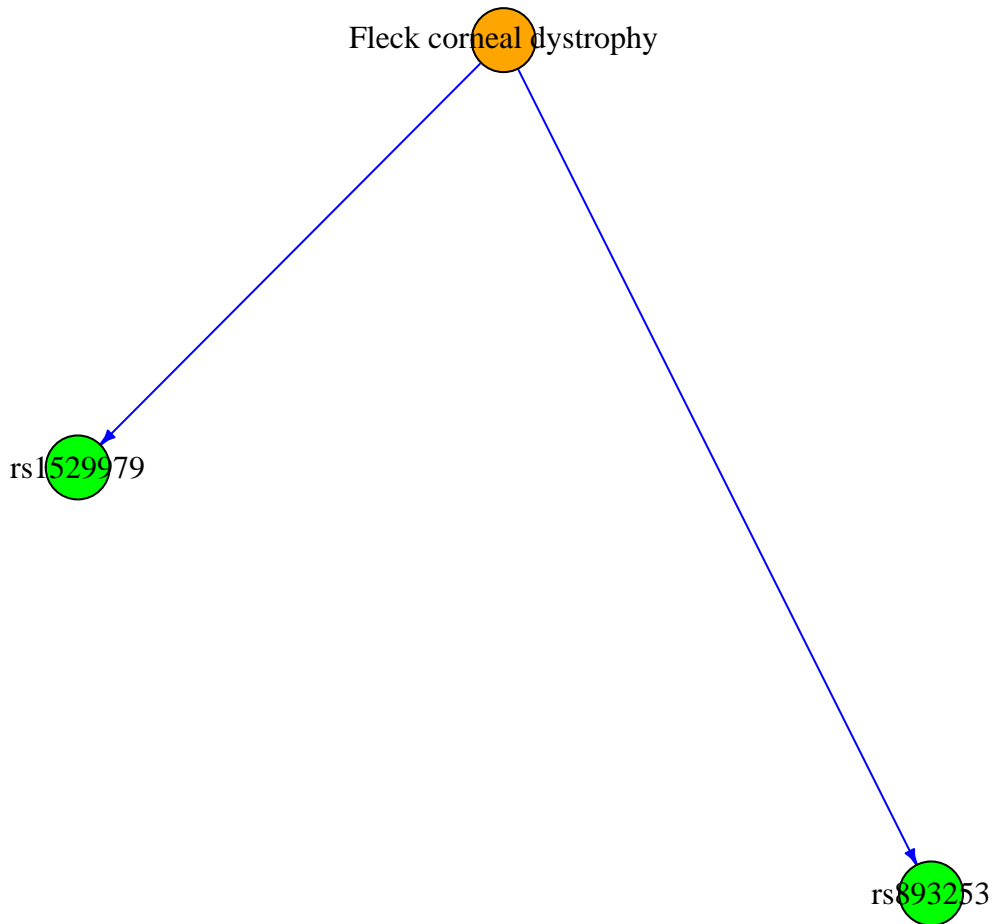

# Variant–Disease Network (FLNB–Related Spectrum Disorders)

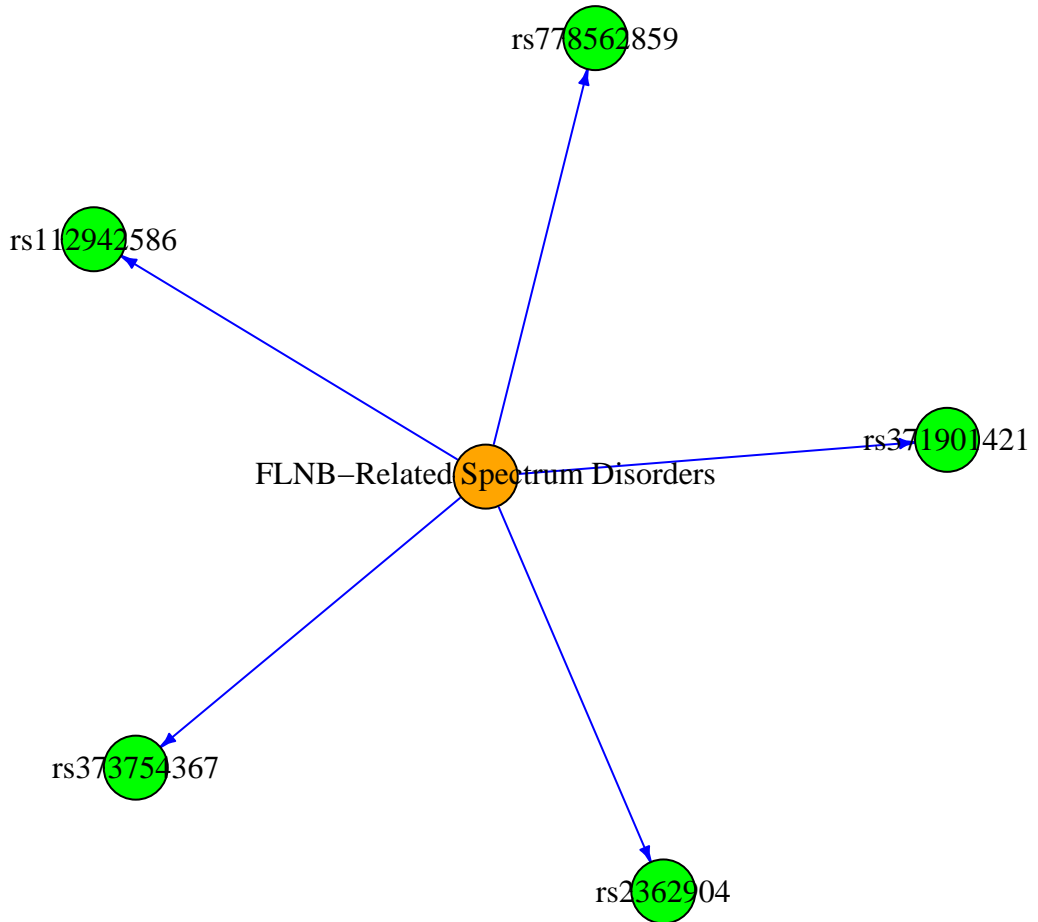

**Variant–Disease Network (Focal cortical dysplasia type II)**

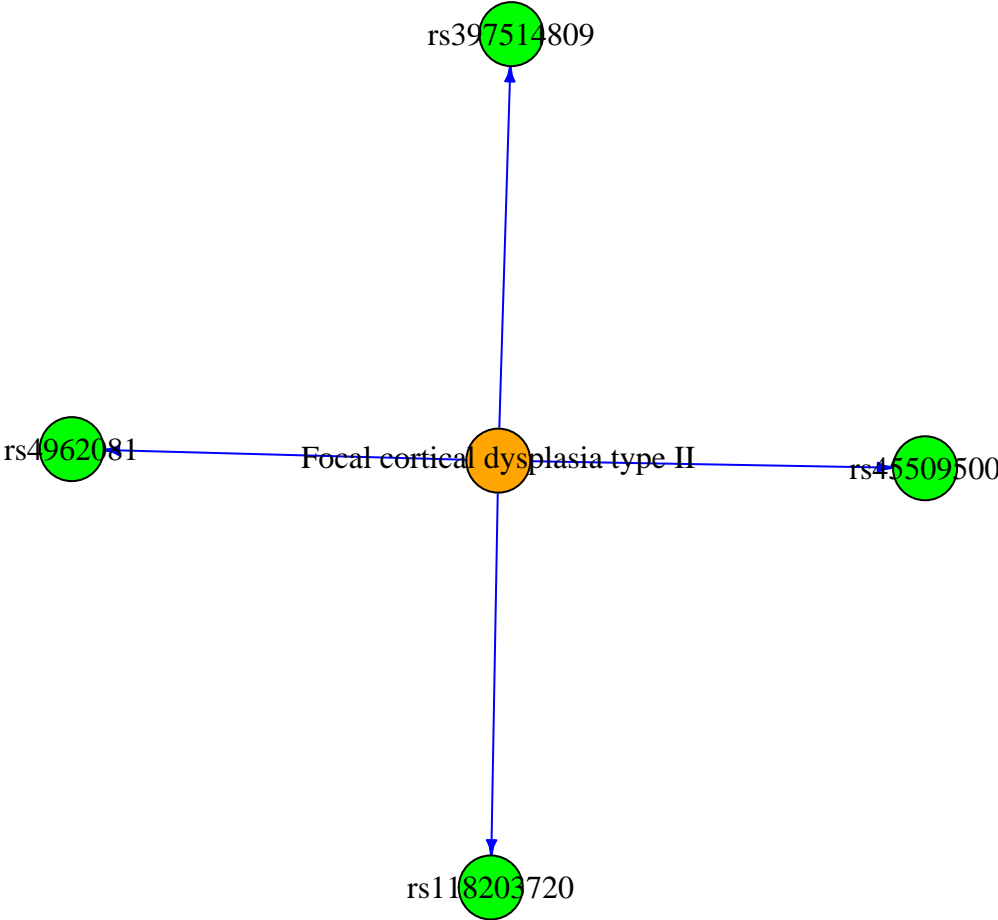

# Variant–Disease Network (Focal segmental glomerulosclerosis)

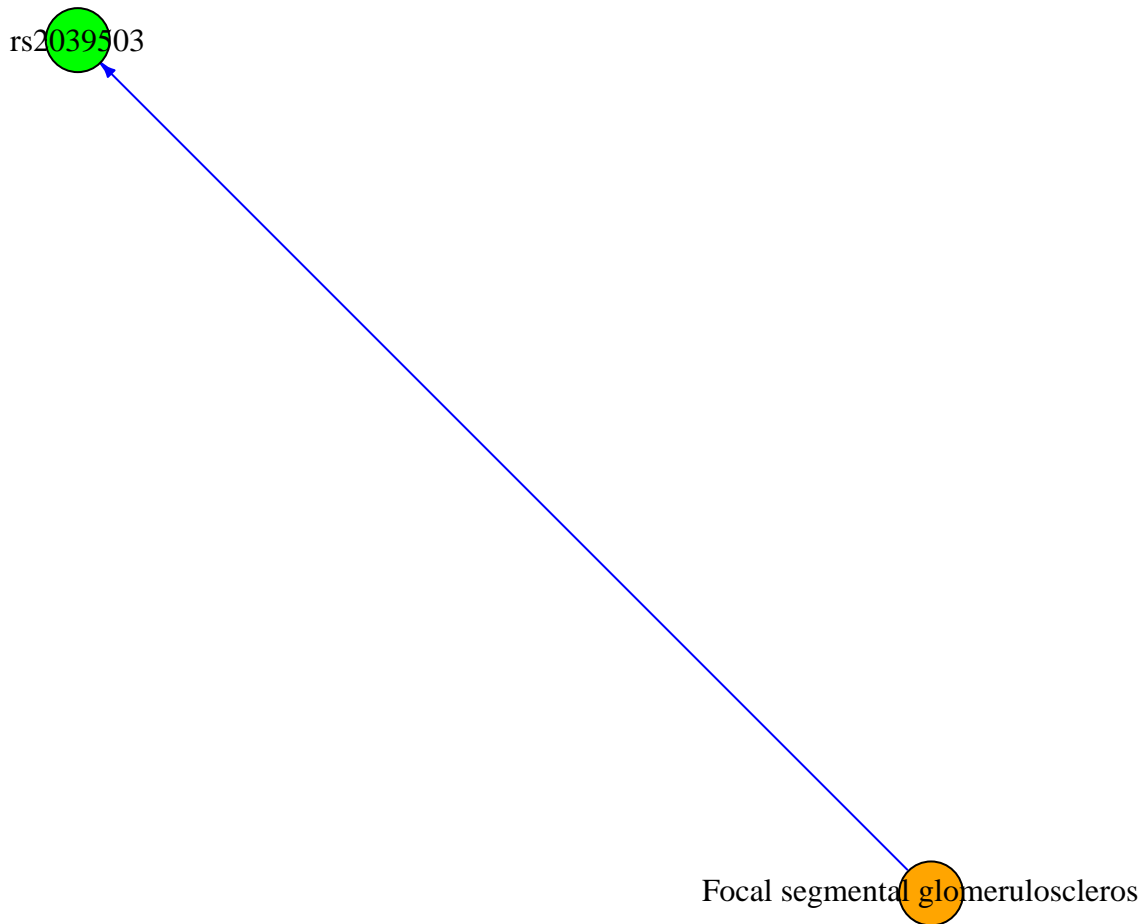

## Variant–Disease Network (Focal segmental glomerulosclerosis 3)

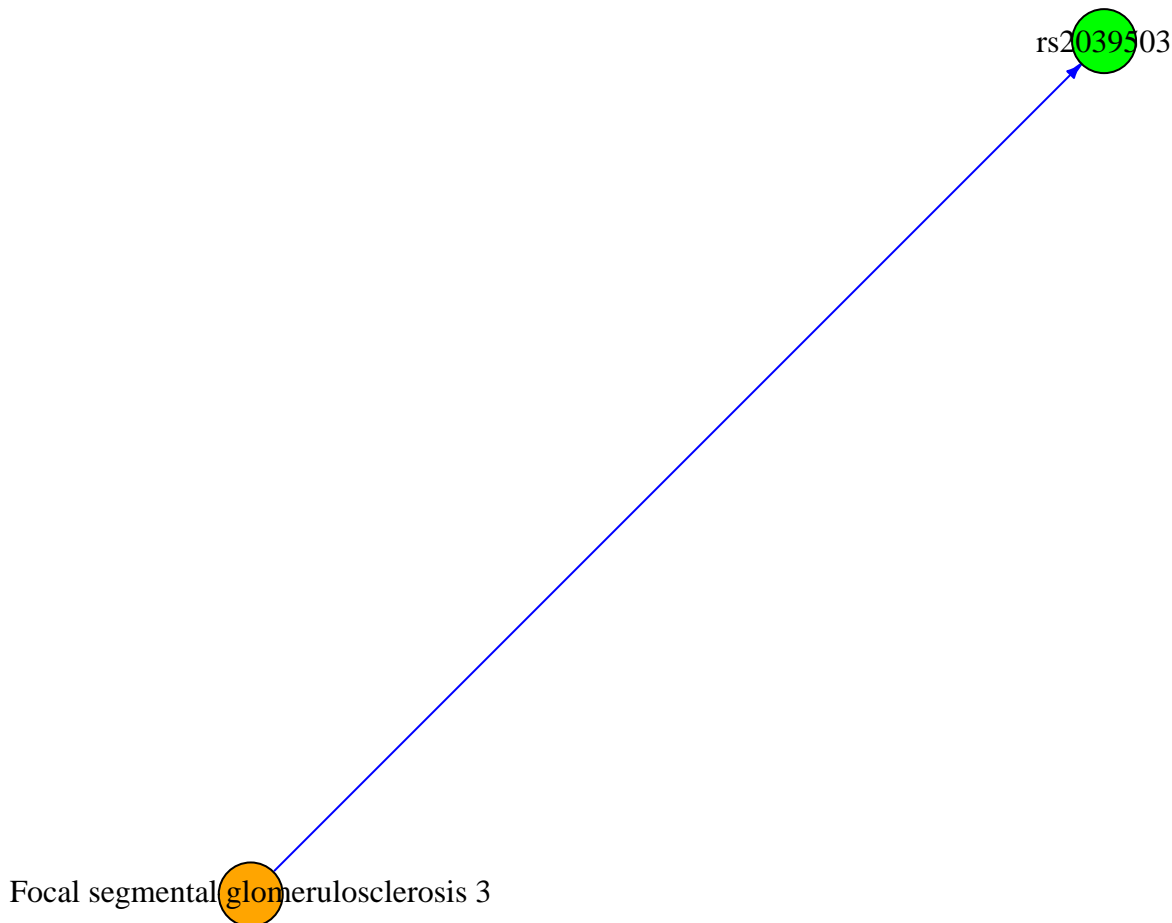

Variant–Disease Network (Frank Ter Haar syndrome)

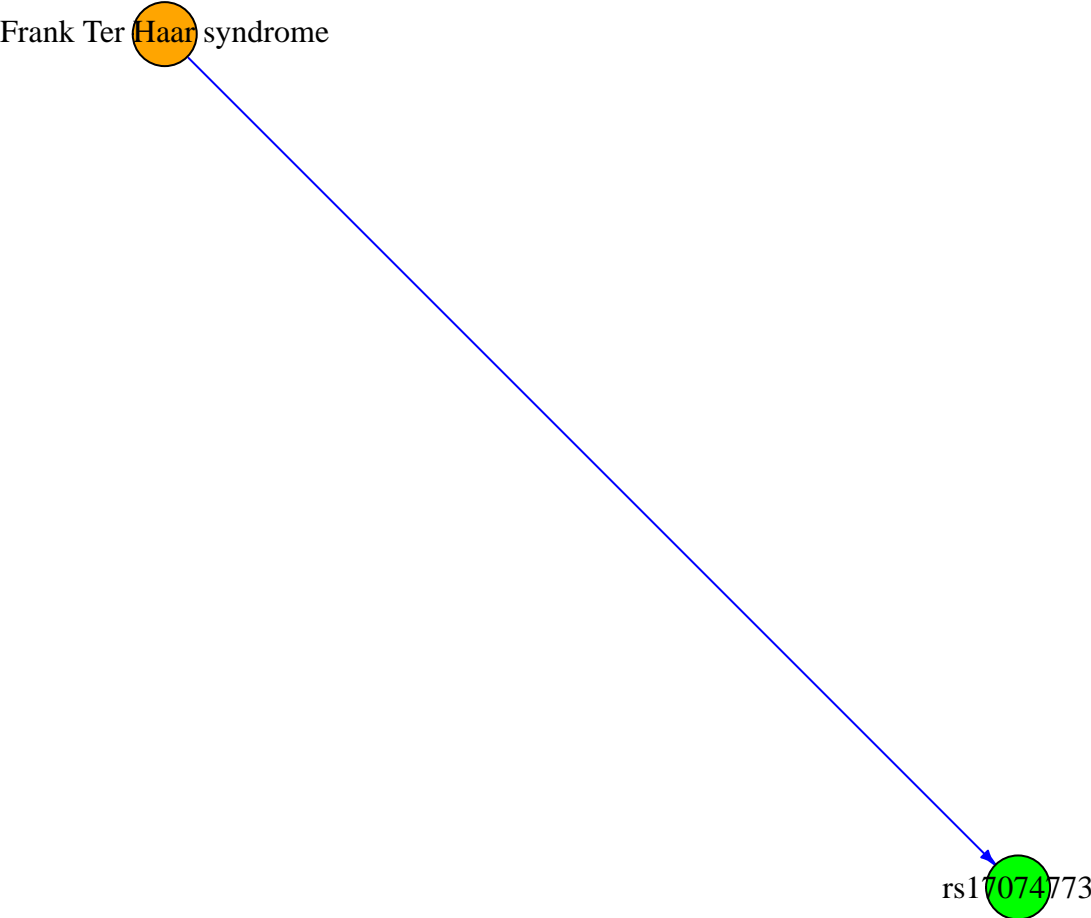

## Variant–Disease Network (Fraser syndrome 1)

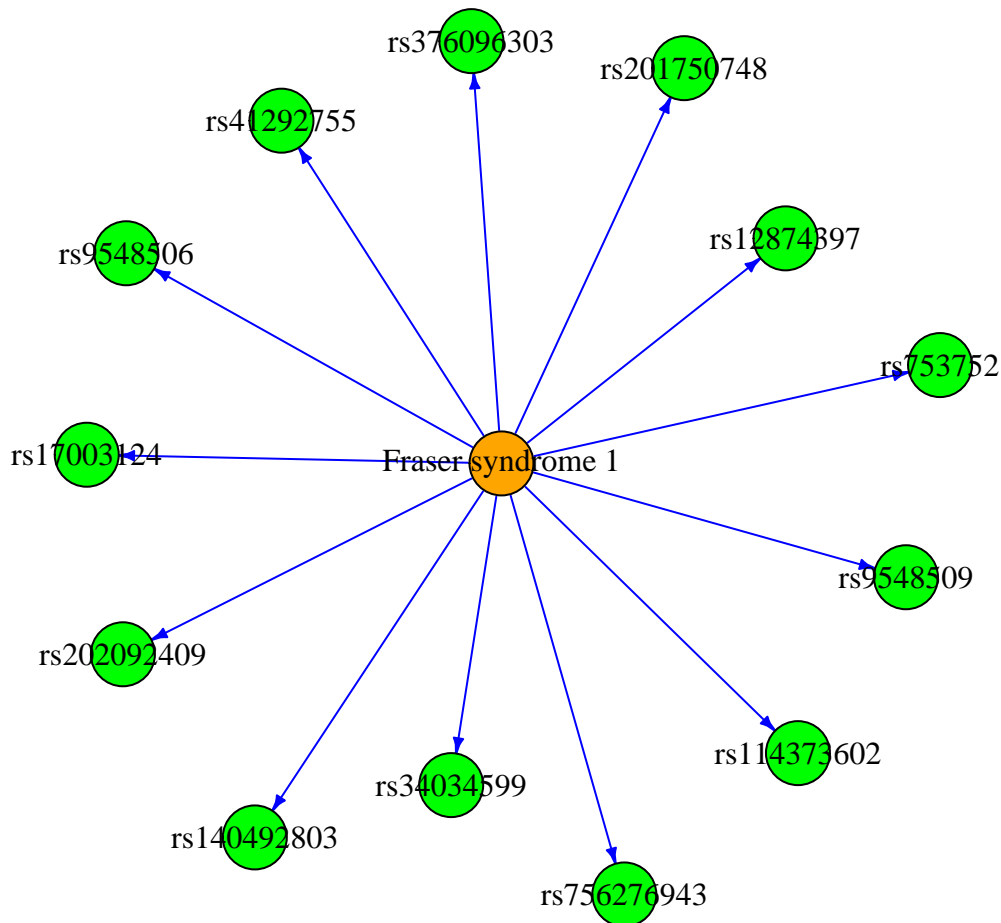



## Variant-Disease Network (Frasier syndrome)

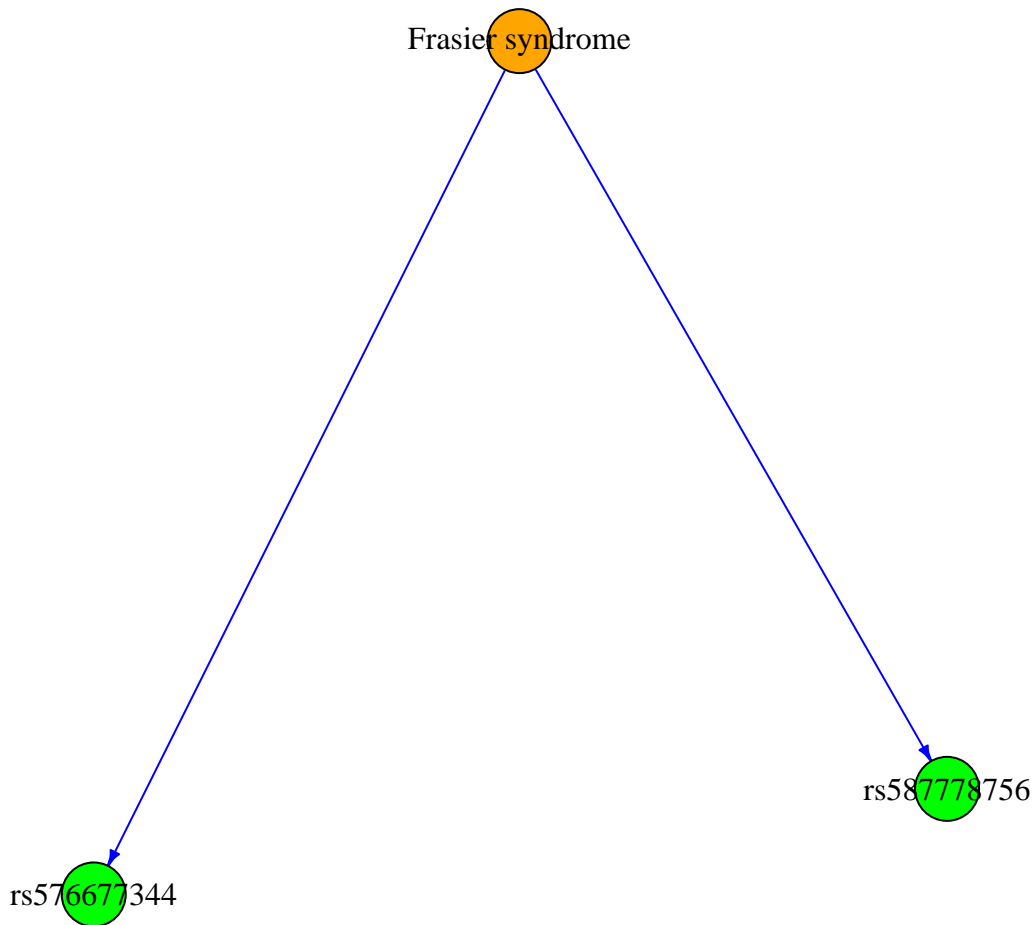

# Variant–Disease Network (Freeman–Sheldon syndrome)

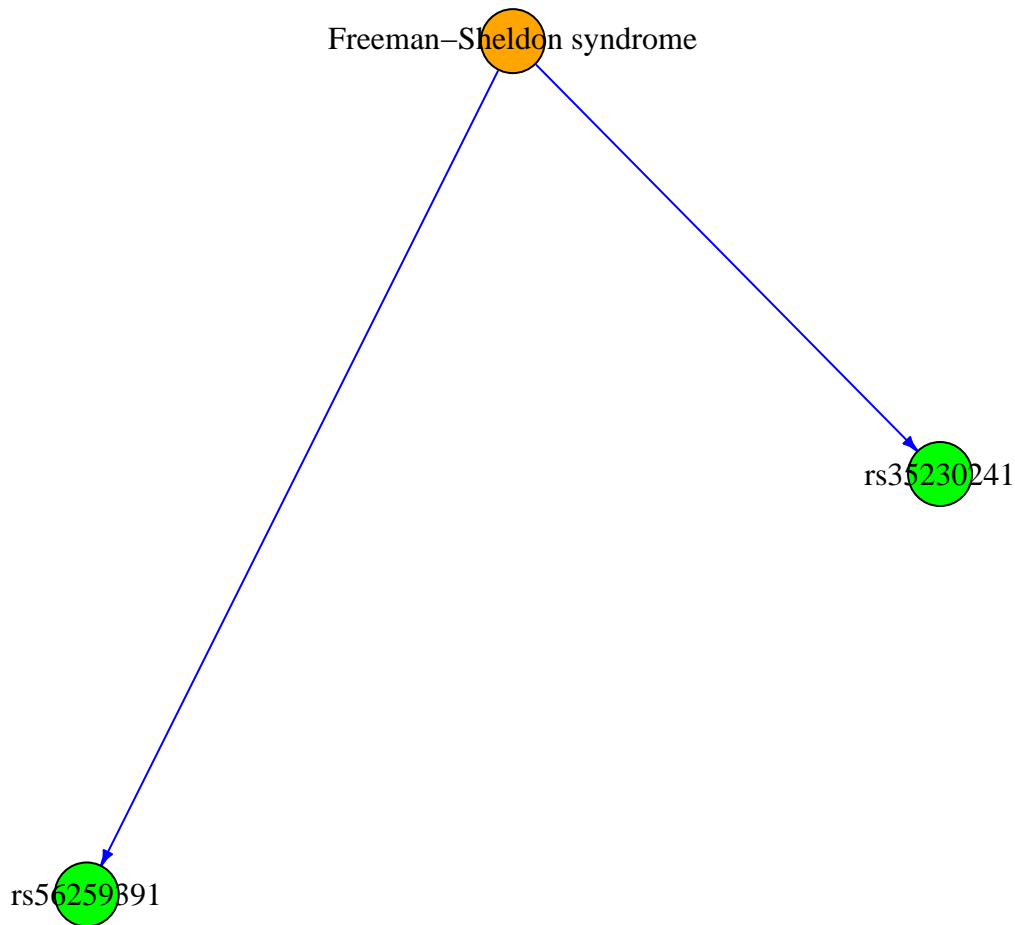

Variant–Disease Network (Frontometaphyseal dysplasia 1)

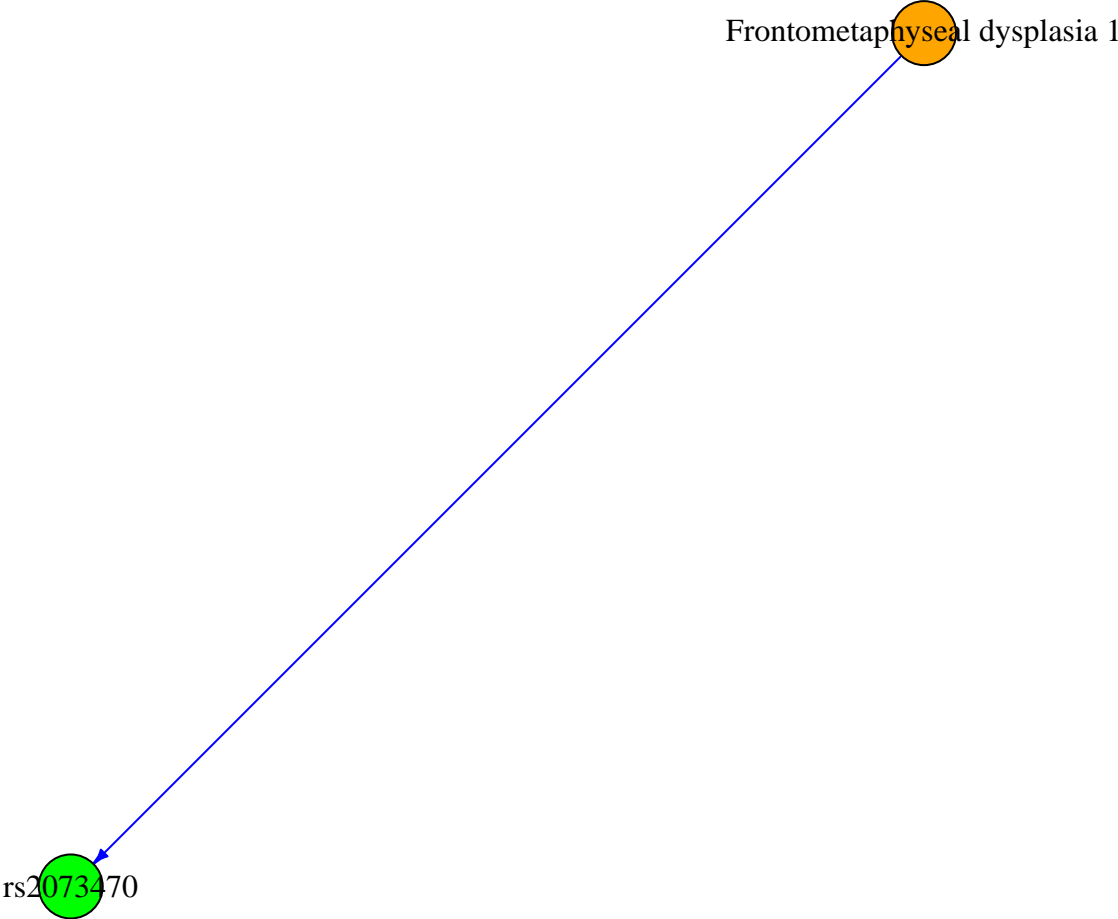

## Variant-Disease Network (Fumarase deficiency)

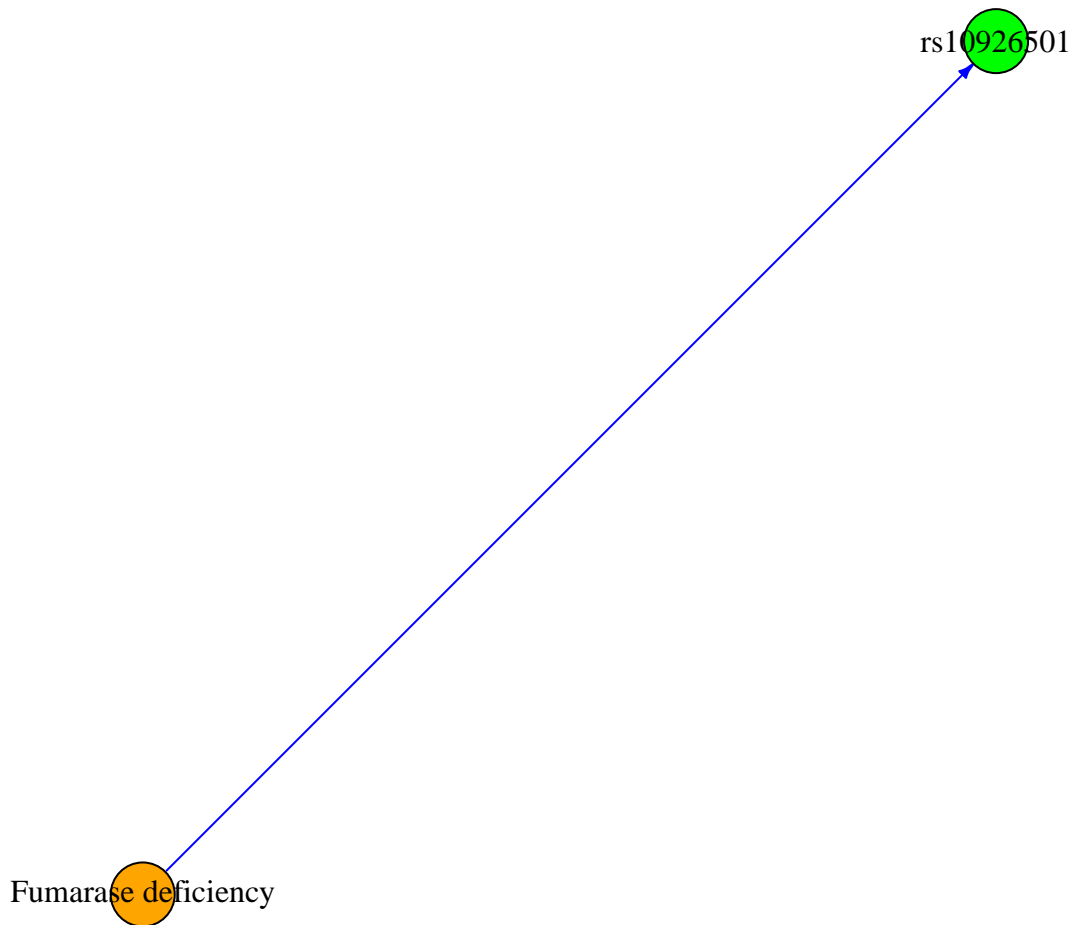

Variant–Disease Network (Galactosylceramide beta–galactosidase deficiency)

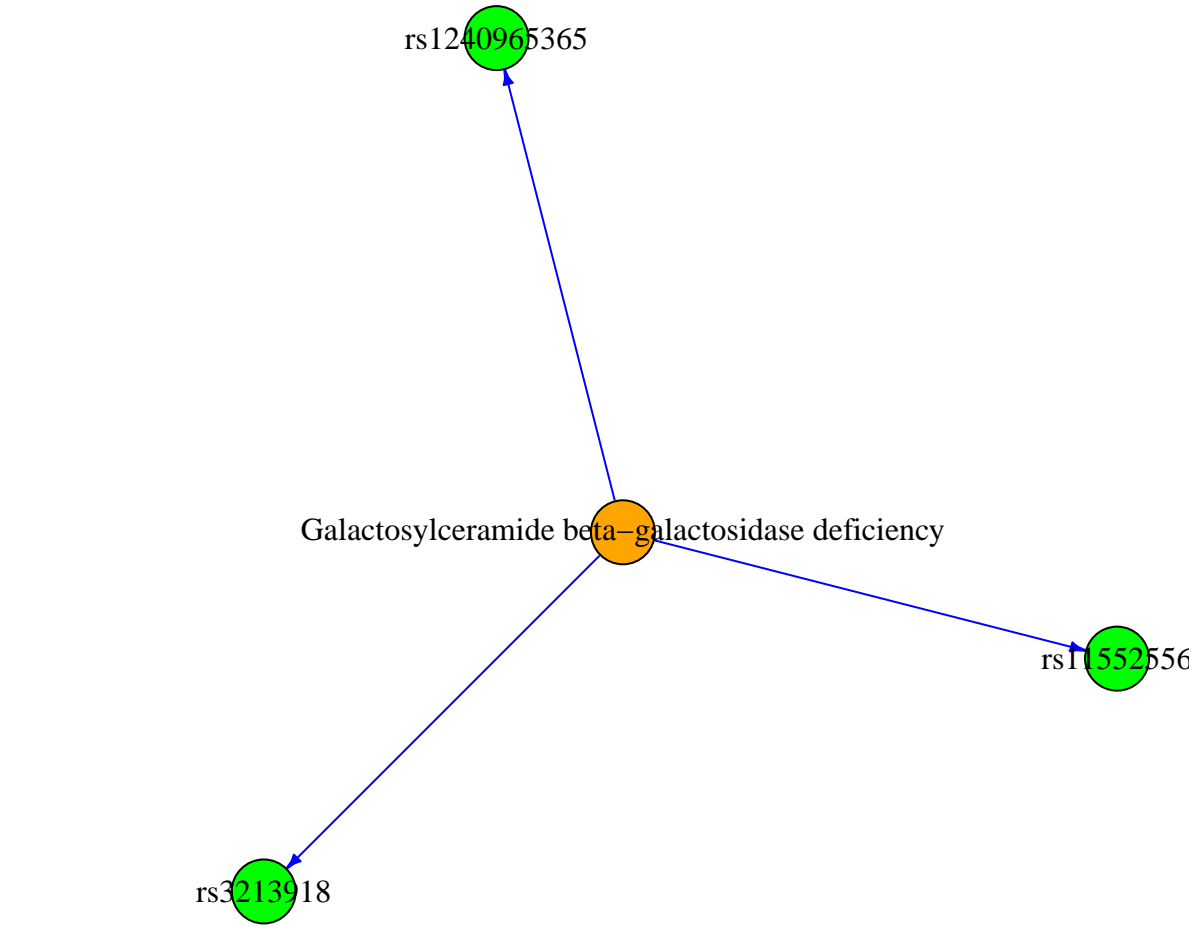

Variant–Disease Network (Gamma–aminobutyric acid transaminase deficiency)

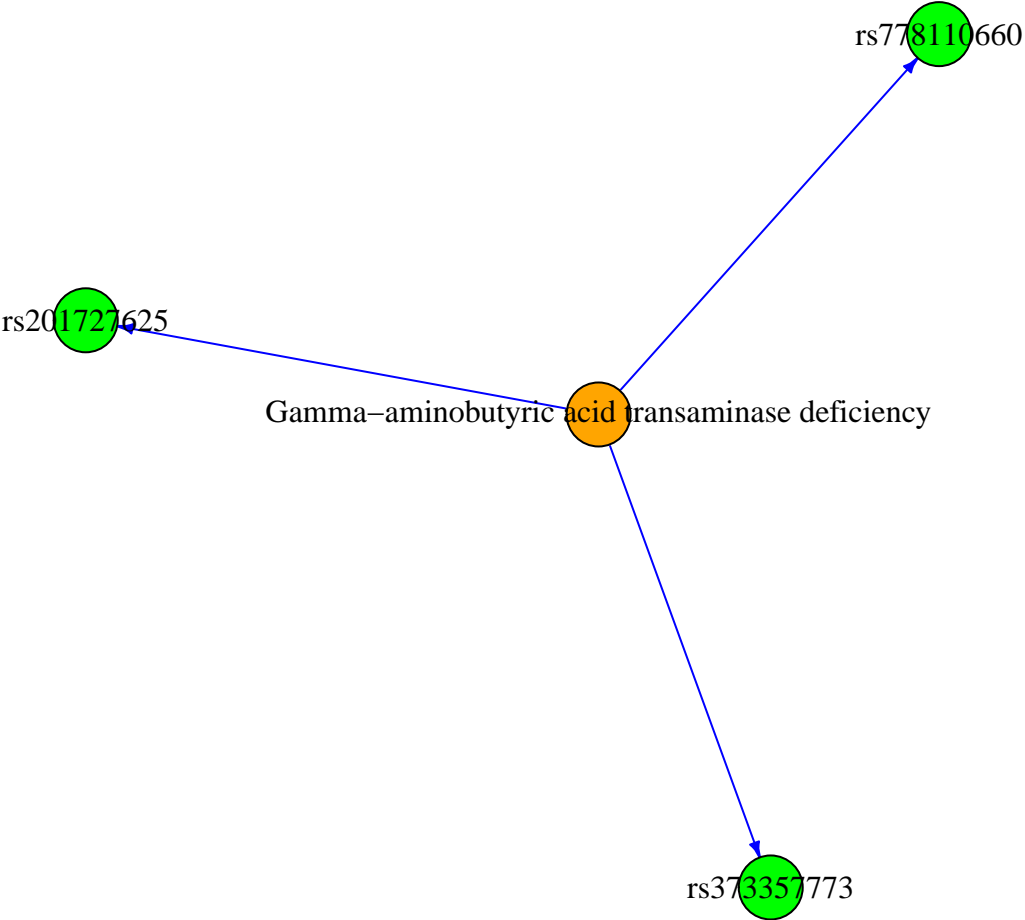

**Variant–Disease Network (Gangliosidosis GM1 type 3)**

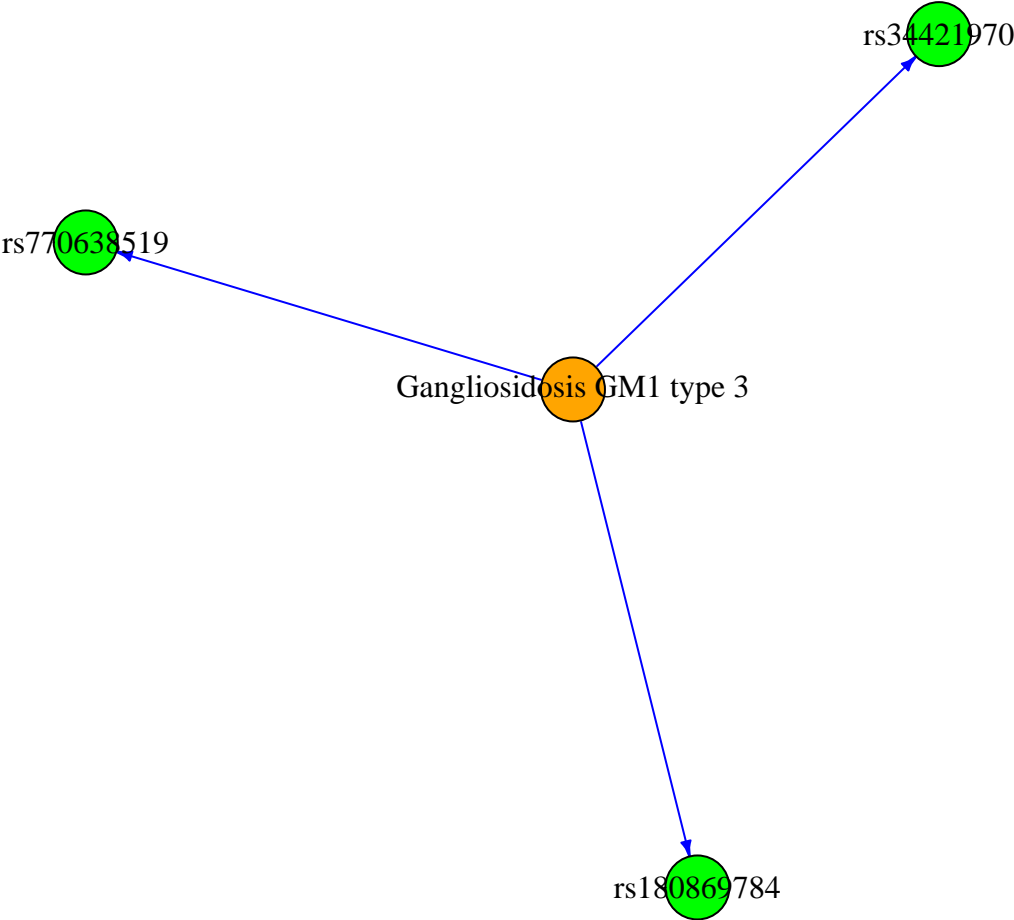

Variant–Disease Network (Gastrointestinal stroma tumor)

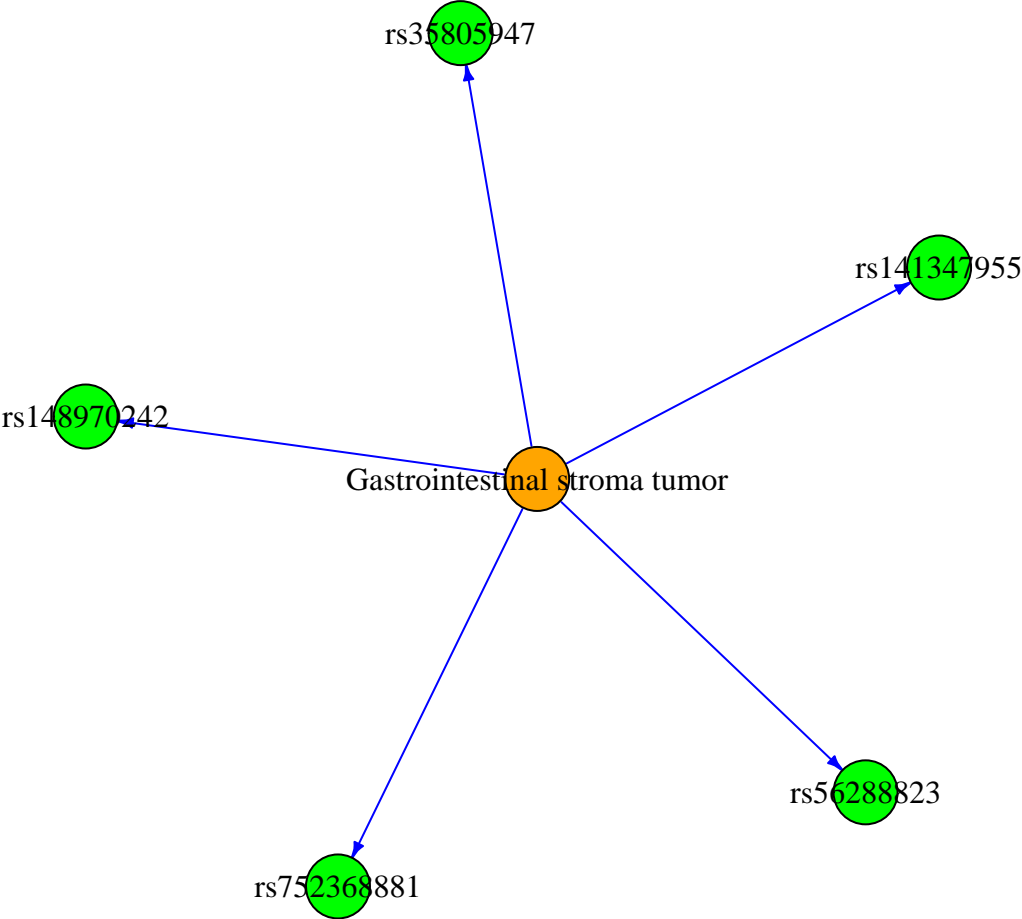



## Variant–Disease Network (Gaze palsy)

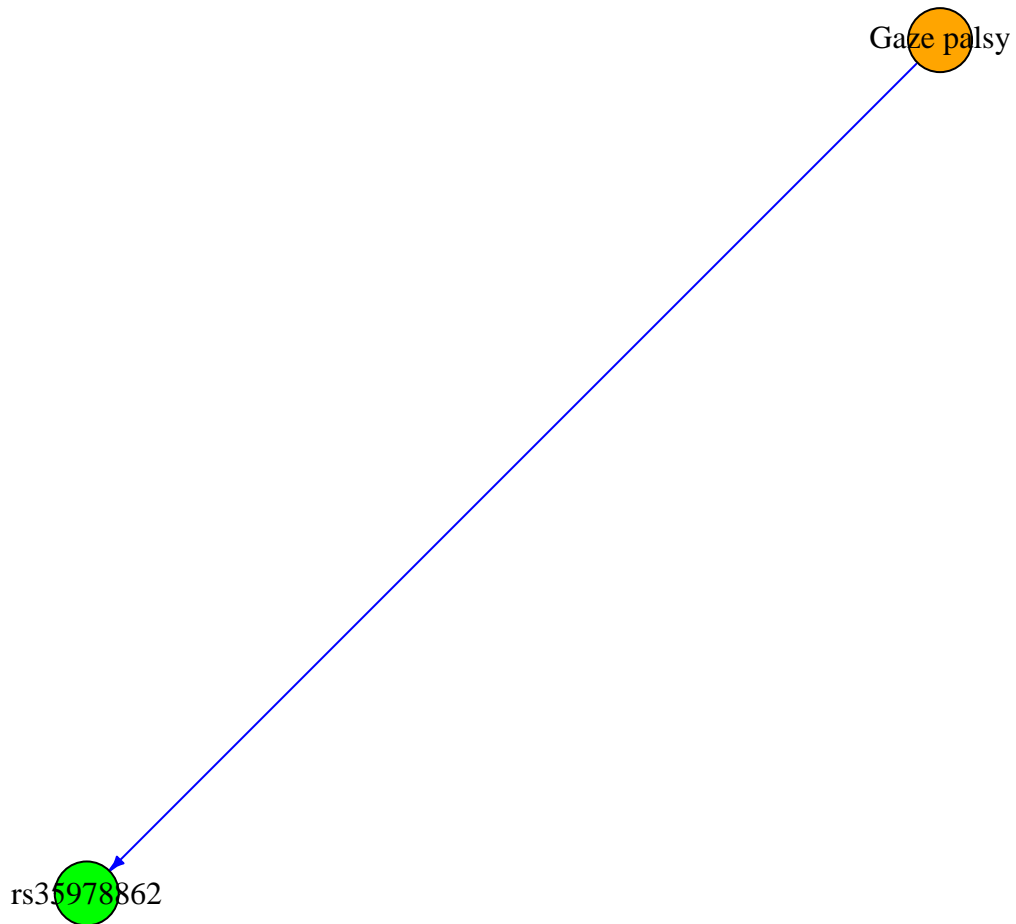

## Variant–Disease Network (Geleophysic dysplasia)

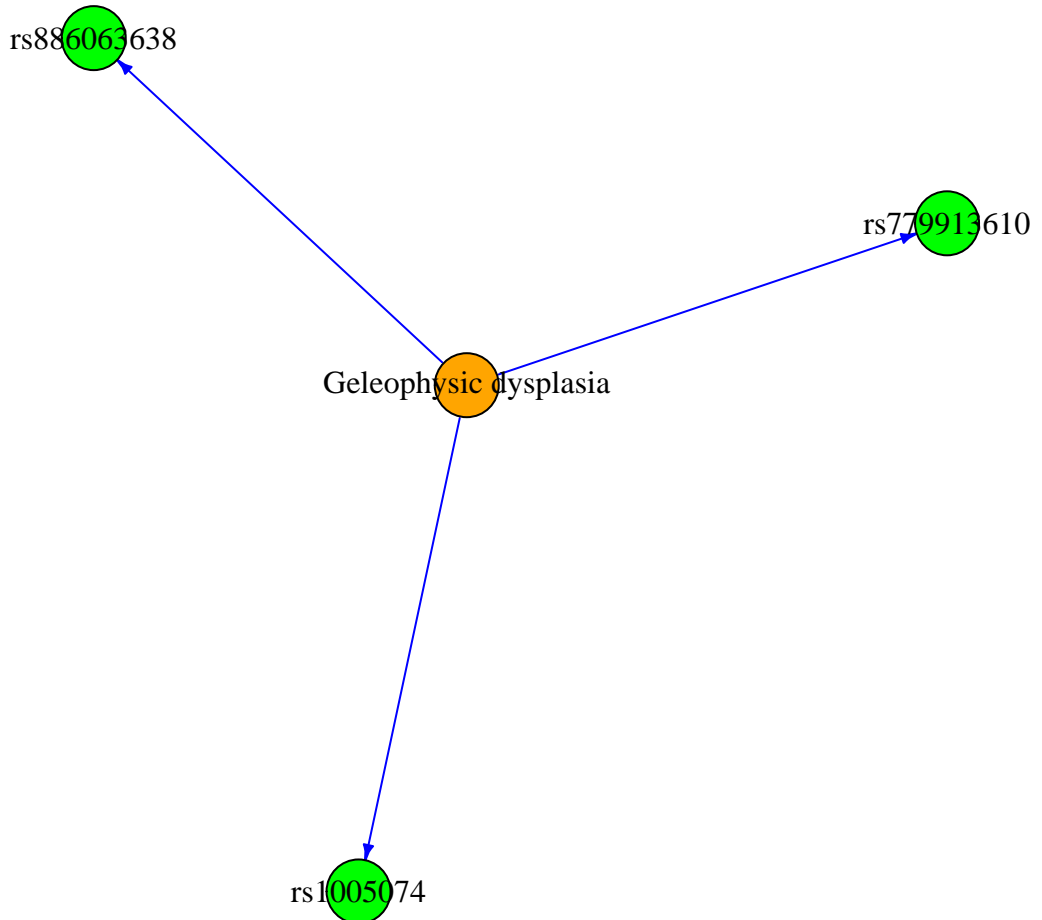

## Variant-Disease Network (Geleophysic dysplasia 1)

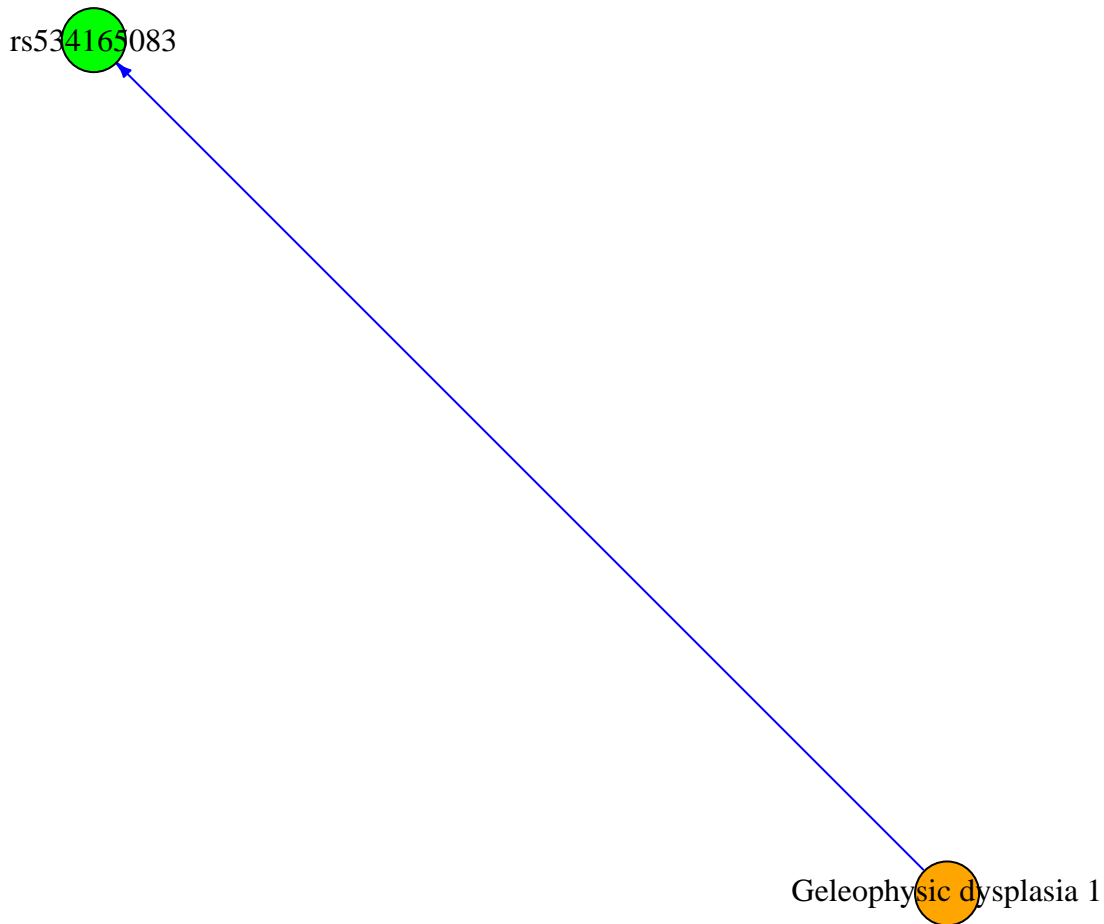

## Variant–Disease Network (Geleophysic dysplasia 2)

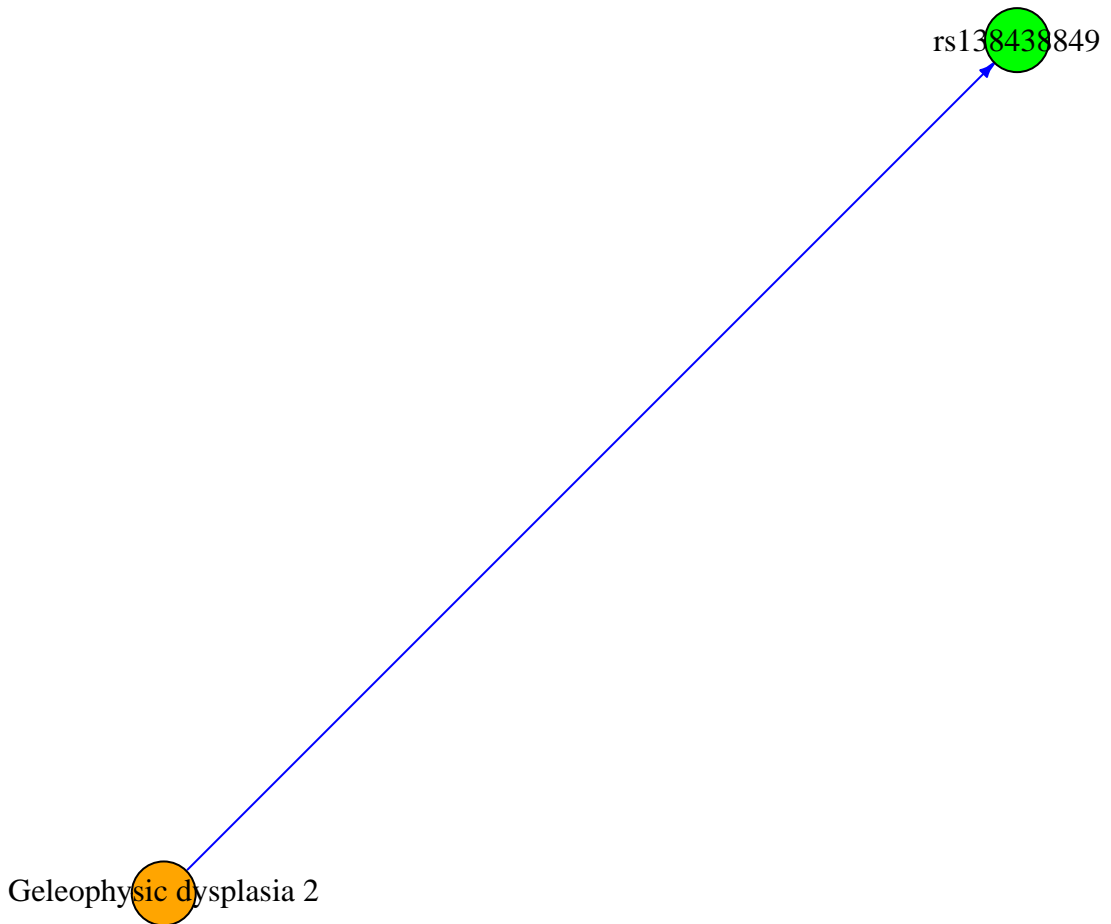

Variant–Disease Network (Generalized epilepsy and paroxysmal dyskinesia)

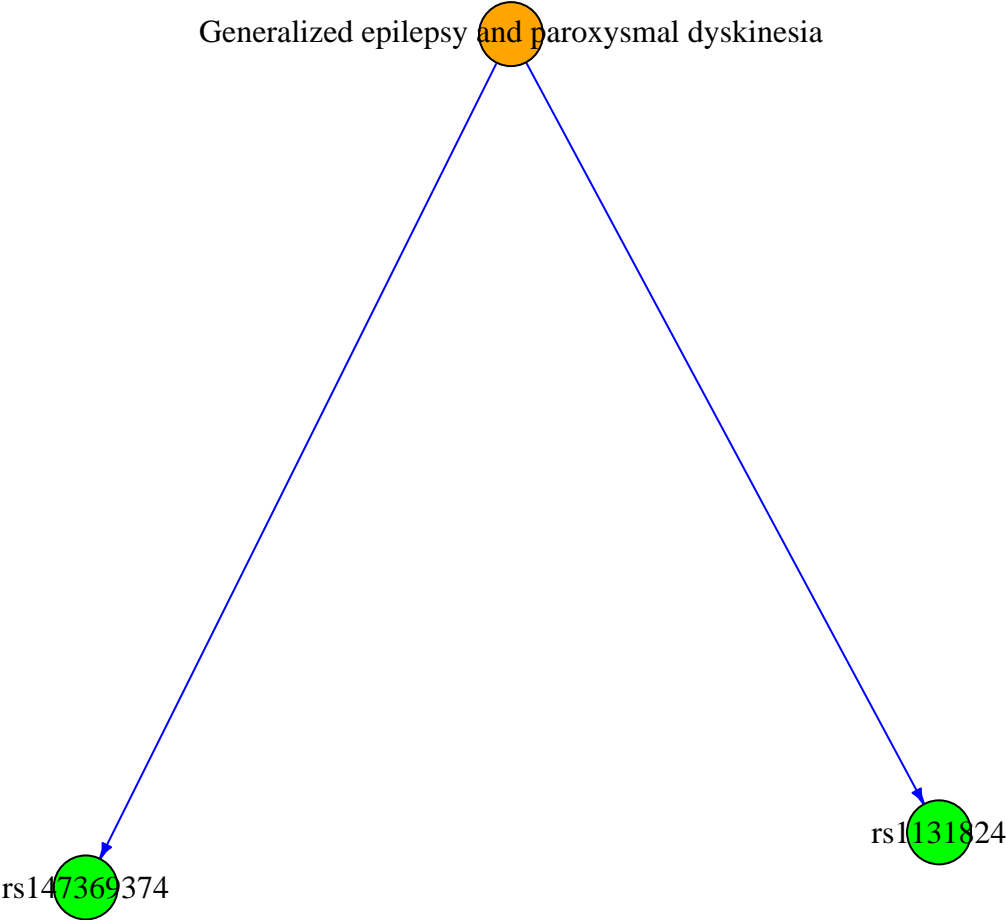

Variant–Disease Network (Generalized epilepsy with febrile seizures plus

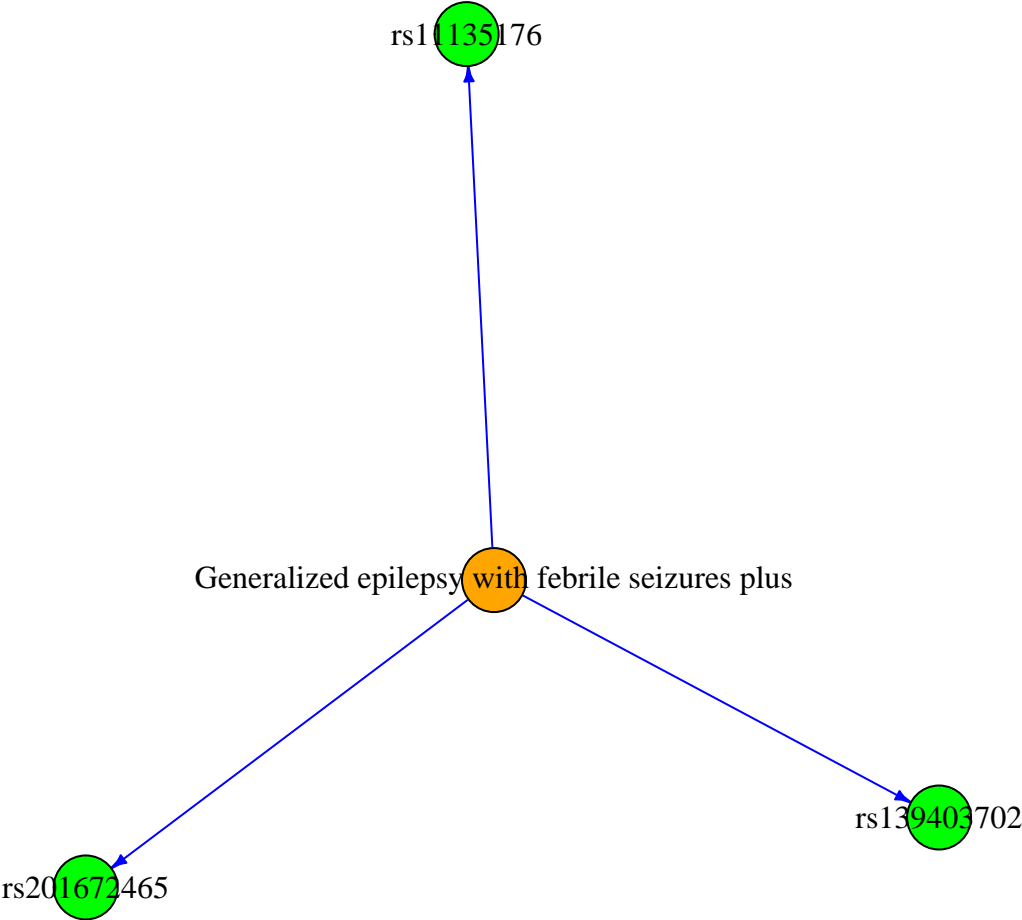

# Variant–Disease Network (Geroderma osteodysplastica)

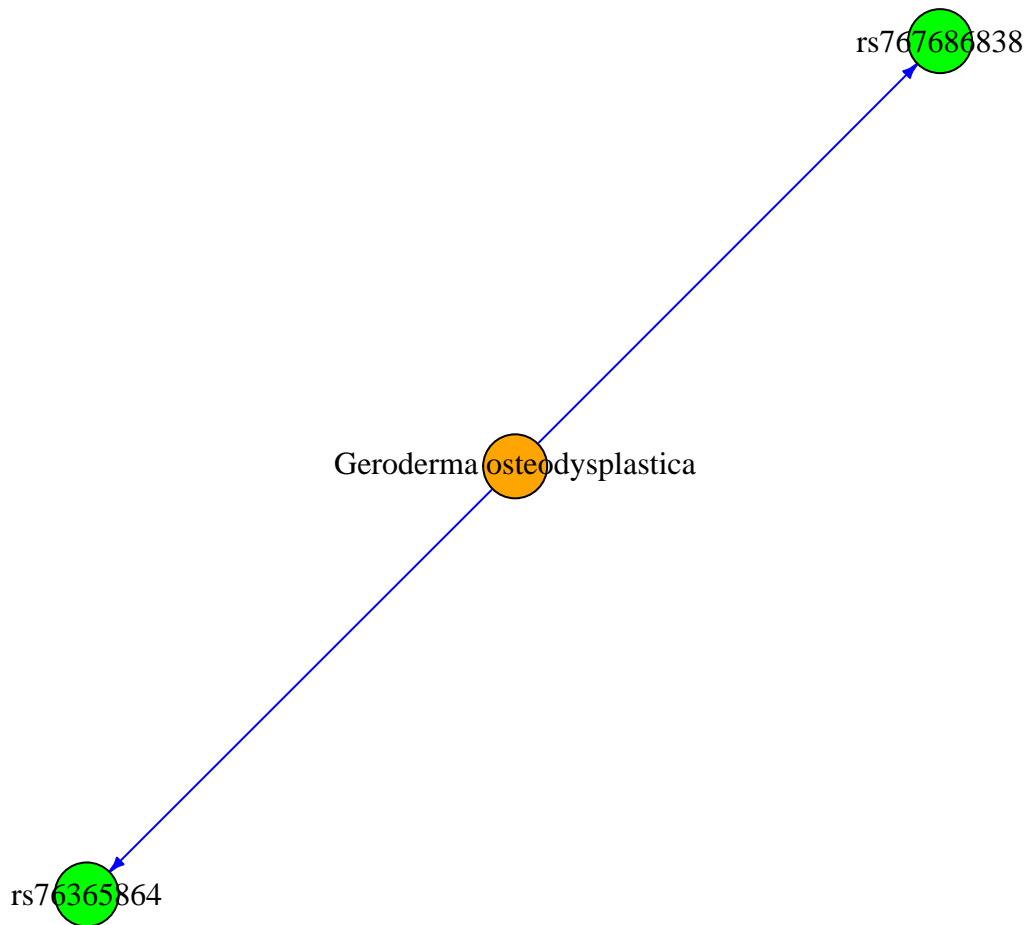

# Variant-Disease Network (Giant axonal neuropathy 1)

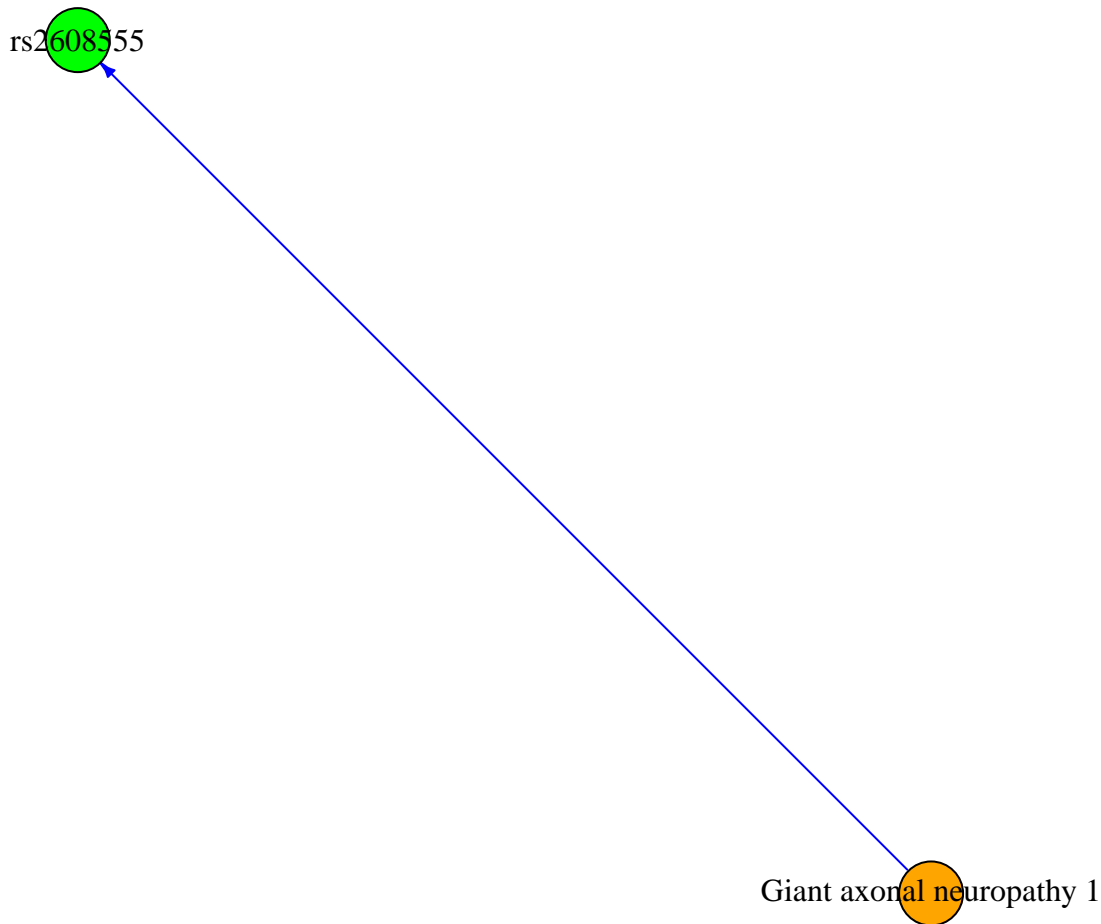



## Variant–Disease Network (Gingival fibromatosis)

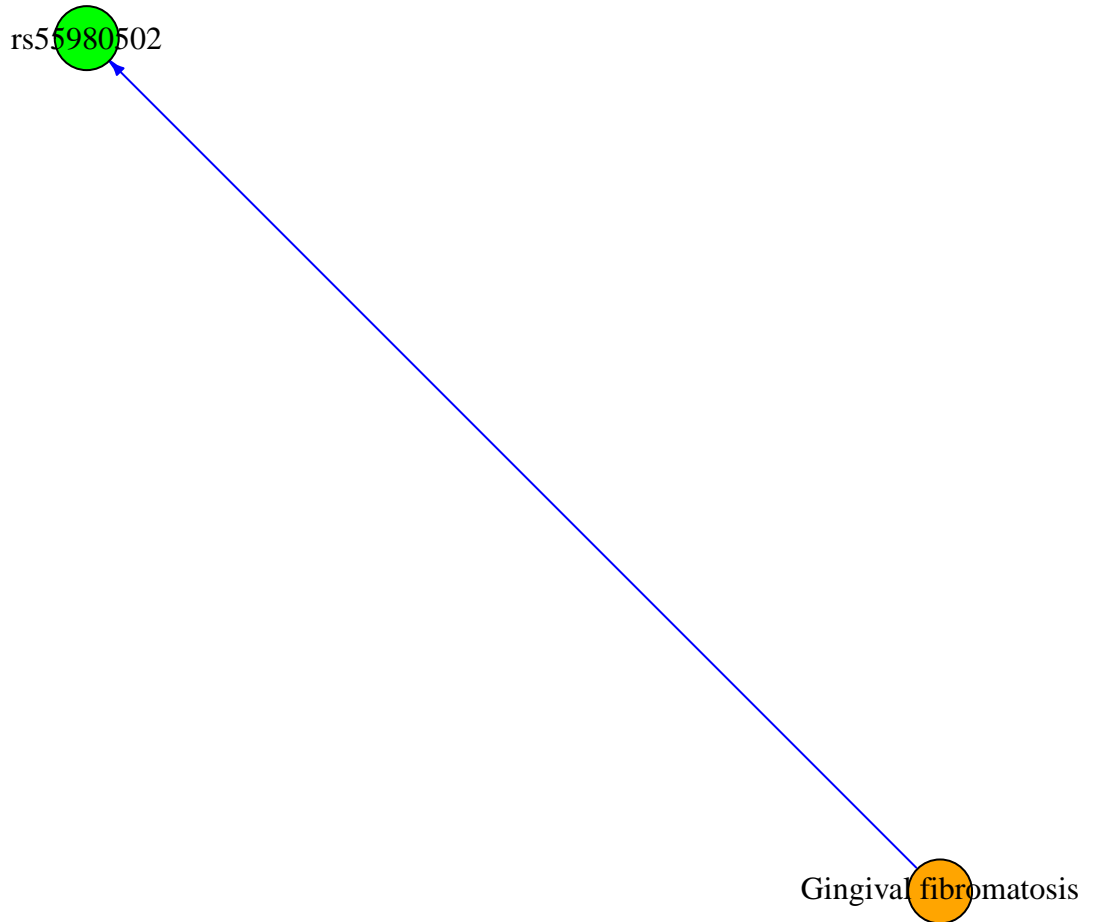

## Variant-Disease Network (Glaucoma 1)

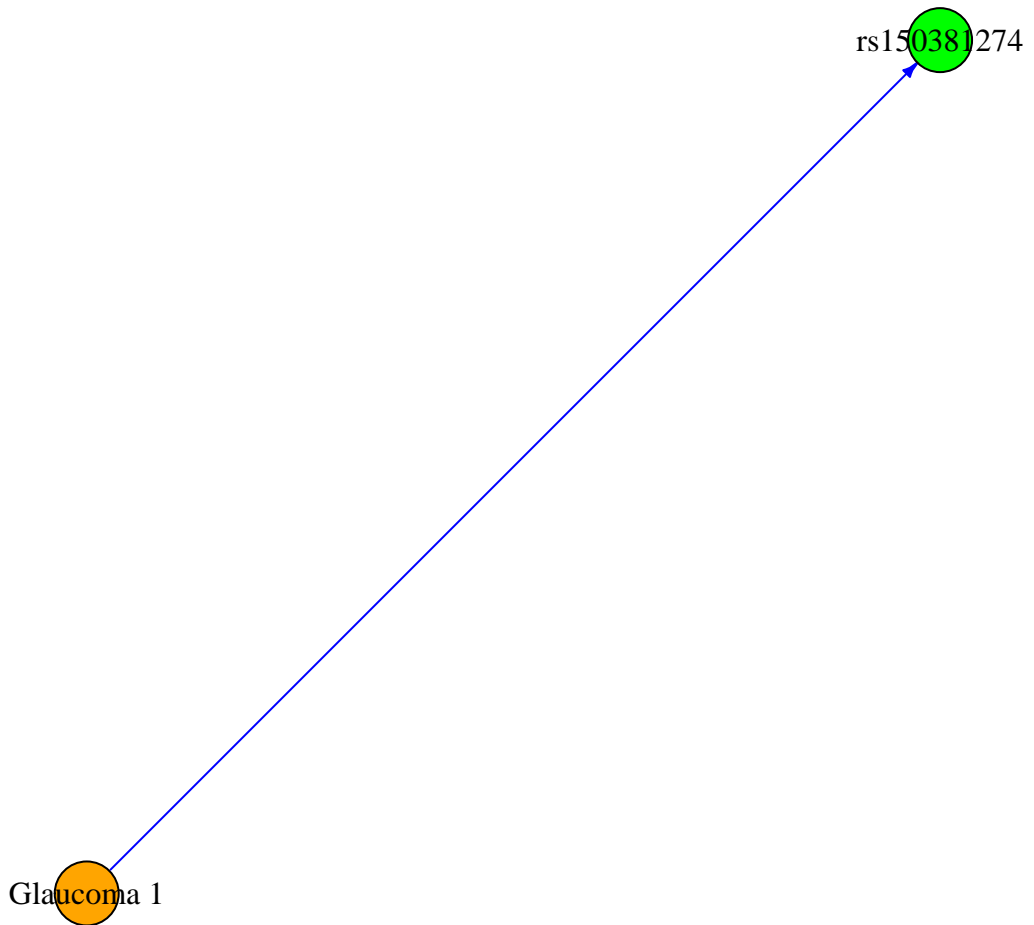

## Variant-Disease Network (Glaucoma 3)

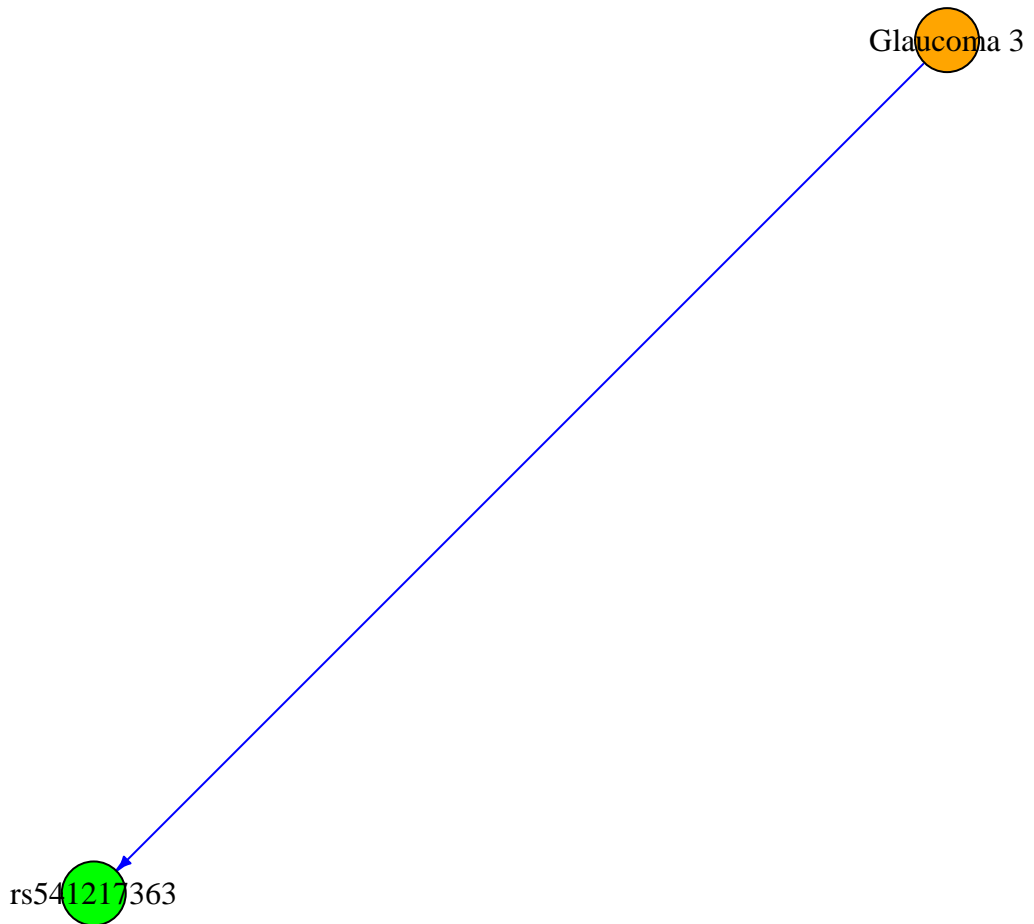

# Variant–Disease Network (Global developmental delay)

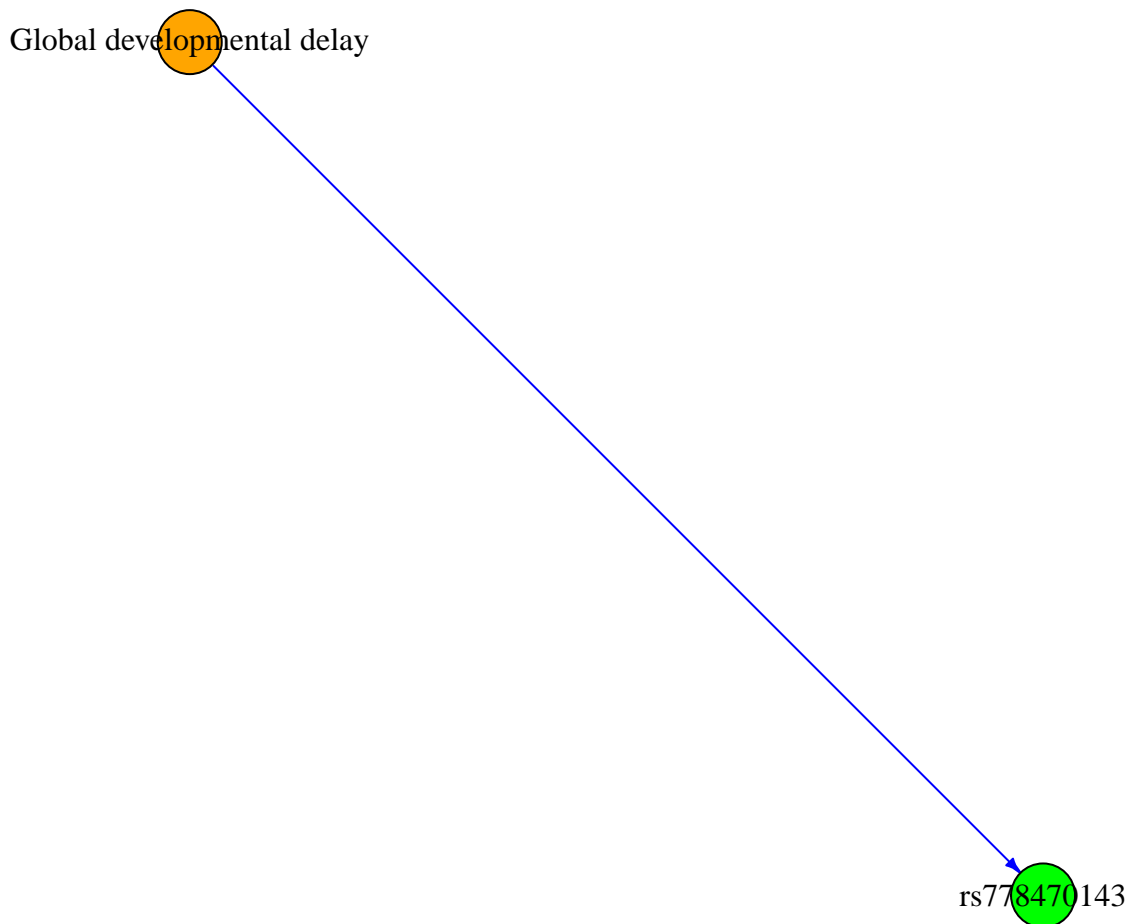

**Variant–Disease Network (Glucocorticoid deficiency with achalasia)**

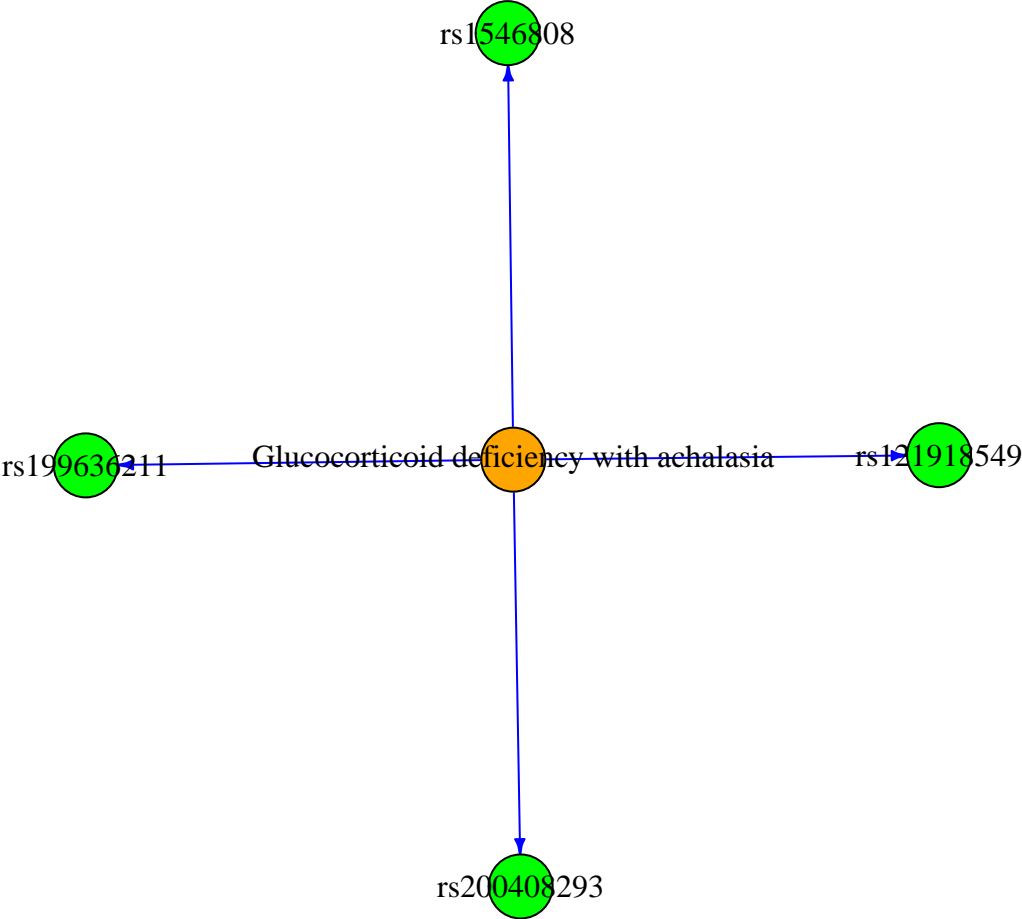

Variant–Disease Network (Glucose transporter type 1 deficiency syndrome)

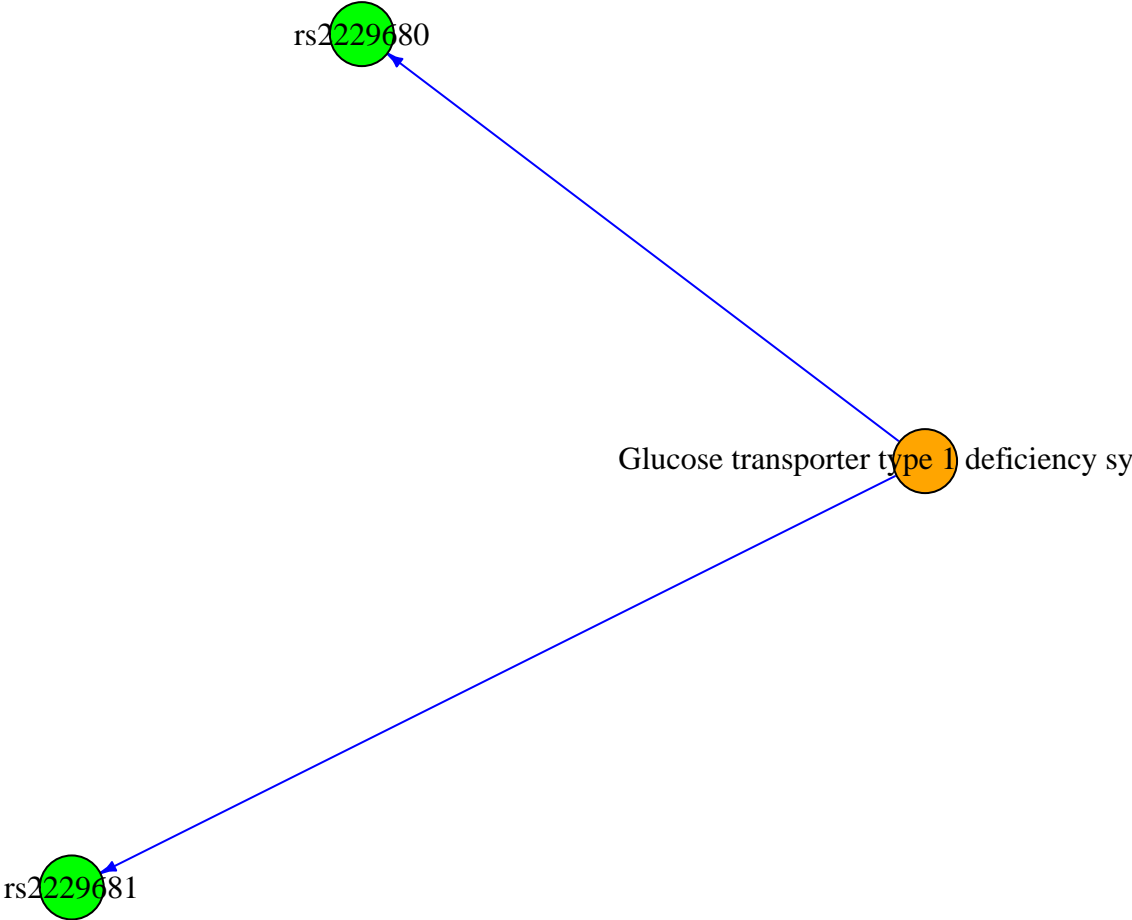

Variant–Disease Network (GLUT1 deficiency syndrome 1)

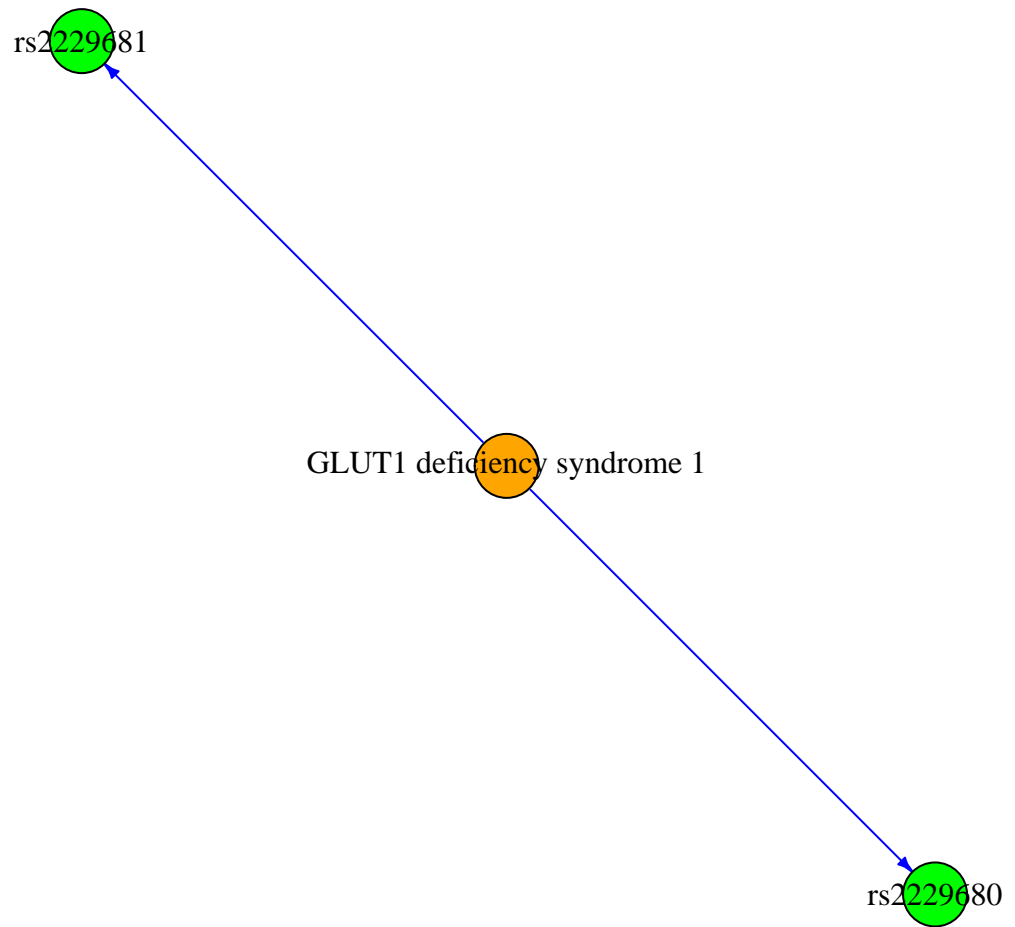

# Variant-Disease Network (GLUTAMIC PYRUVATE TRANSAMINASE POLYMORPHISM)

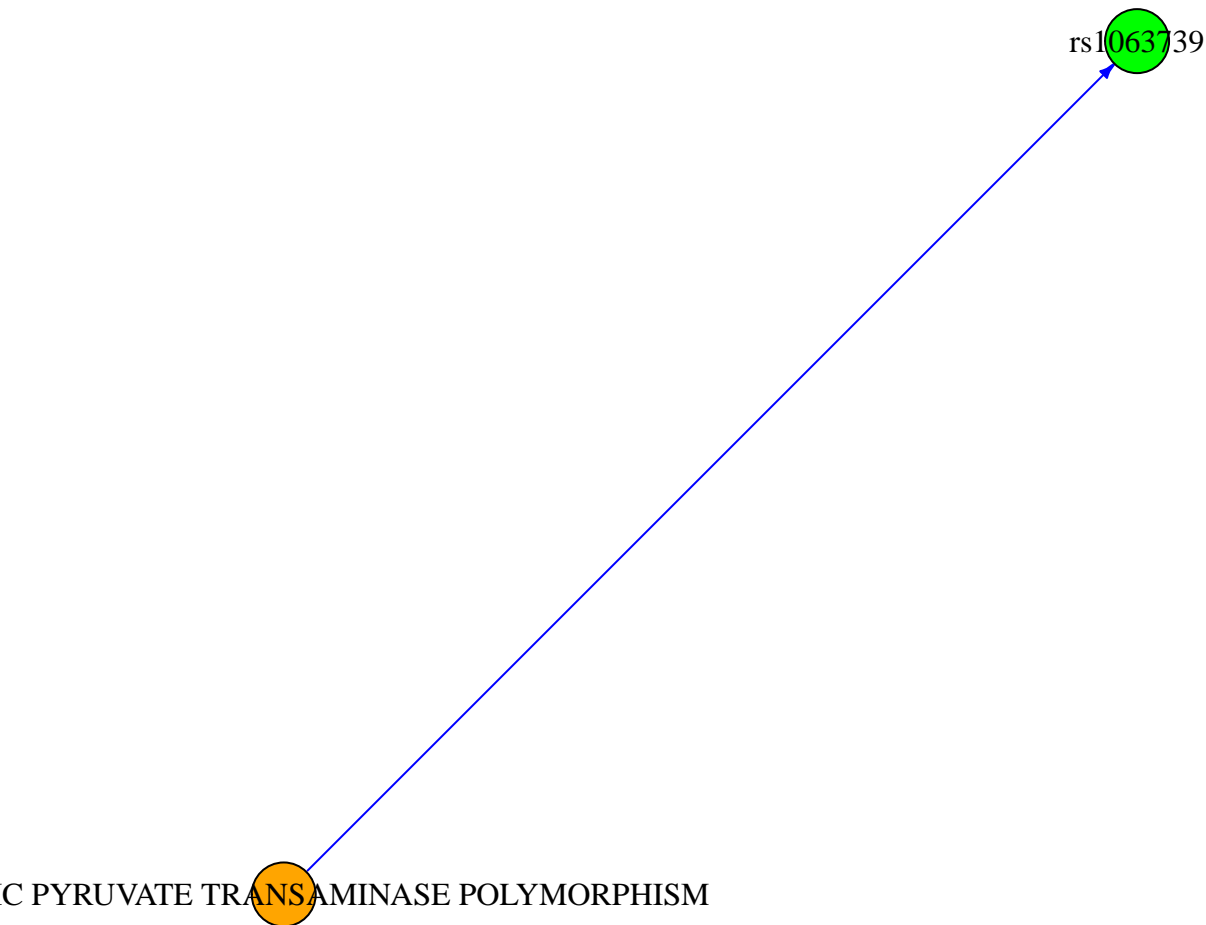



## Variant–Disease Network (Glycogen storage disease)

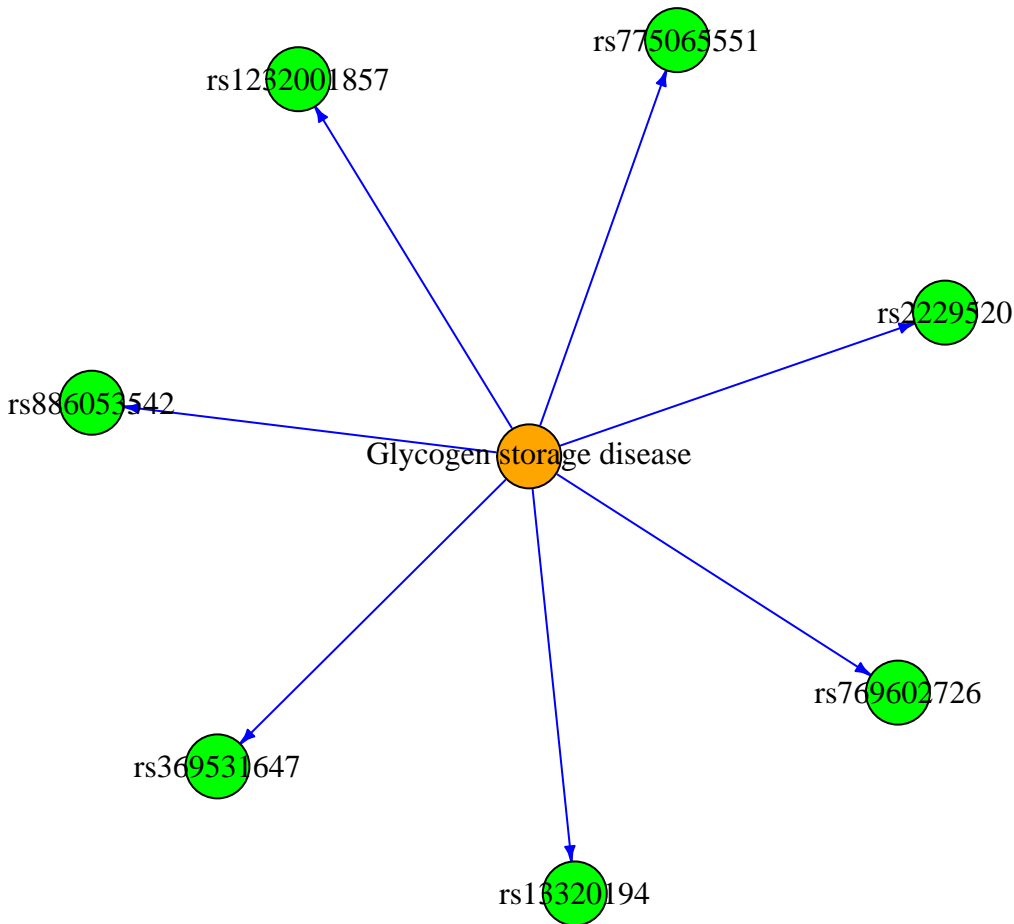

## Variant–Disease Network (Glycogen storage disease 0)

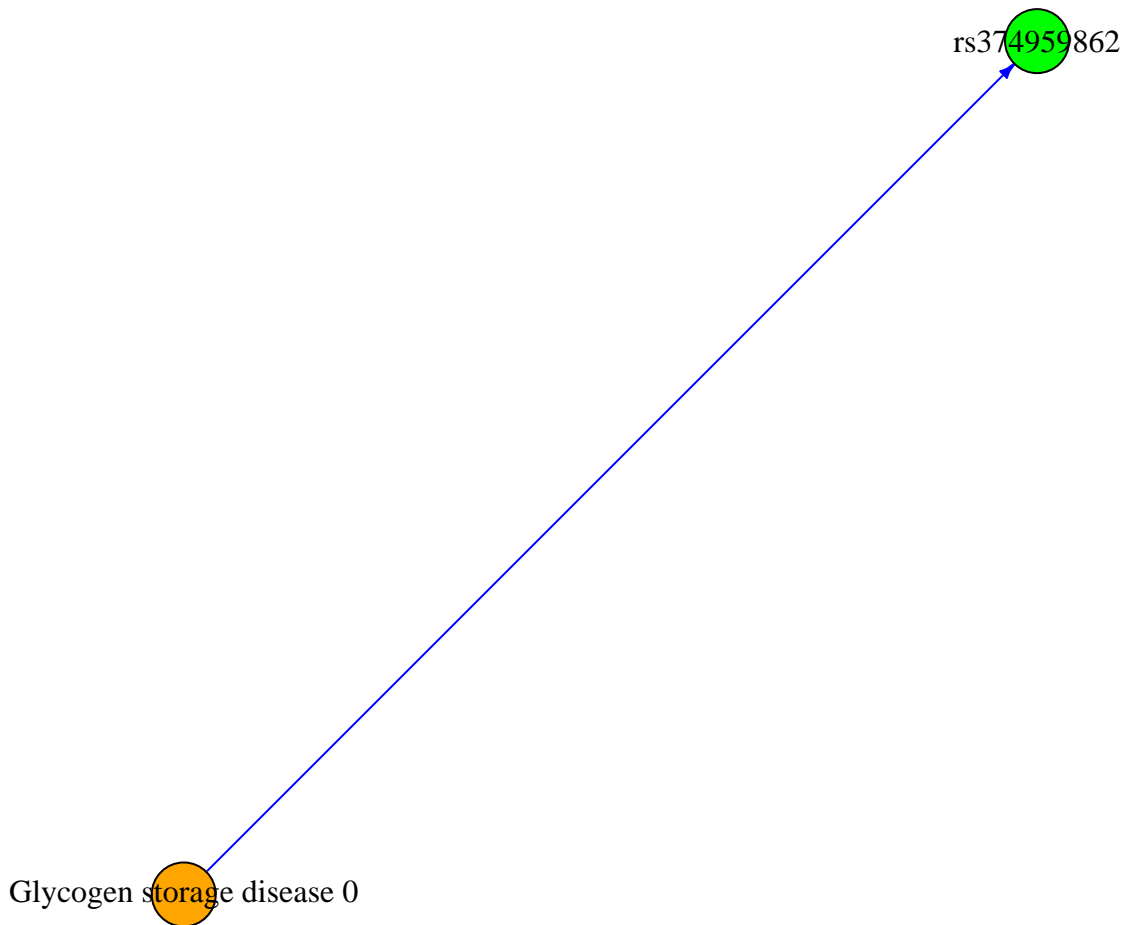

## Variant–Disease Network (Glycogen storage disease type III)

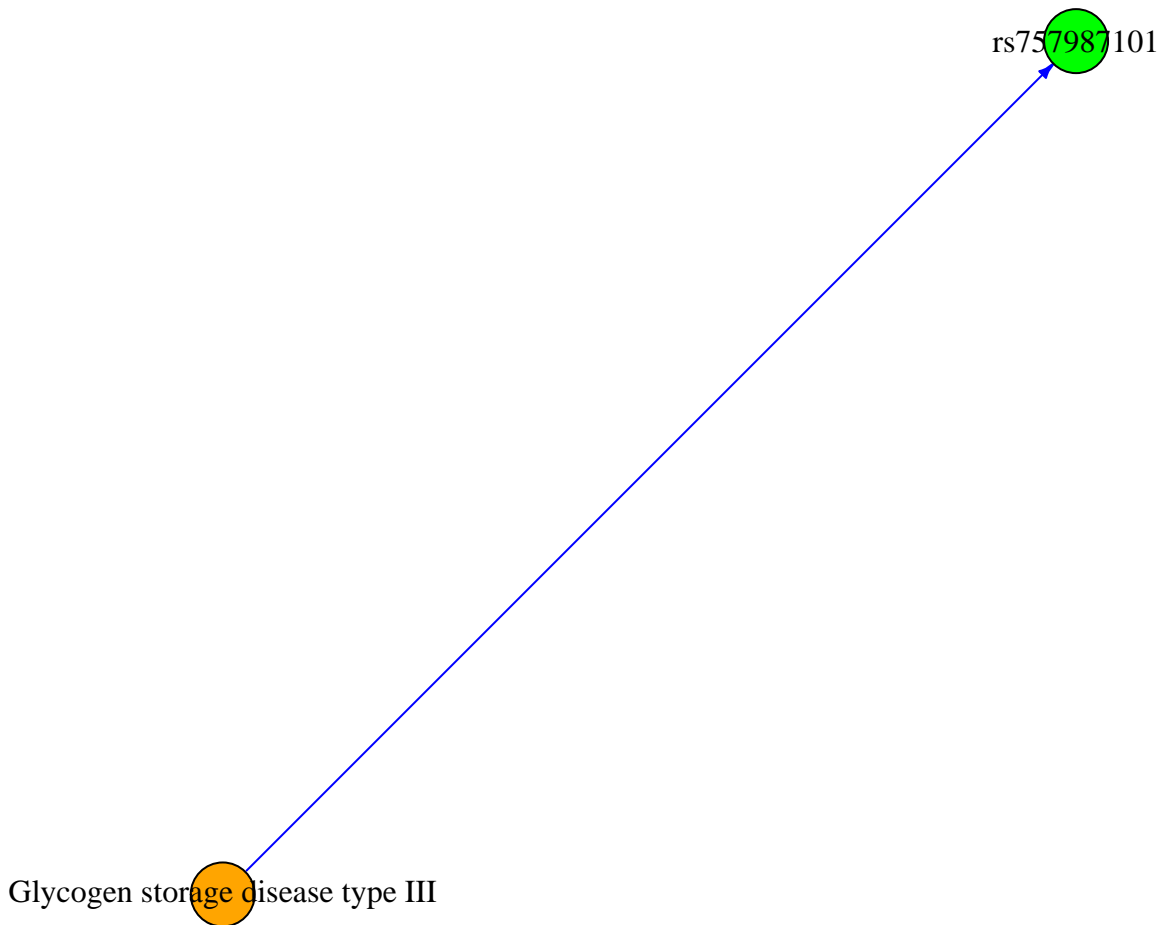

**Variant–Disease Network (Glycogen storage disease type X)**

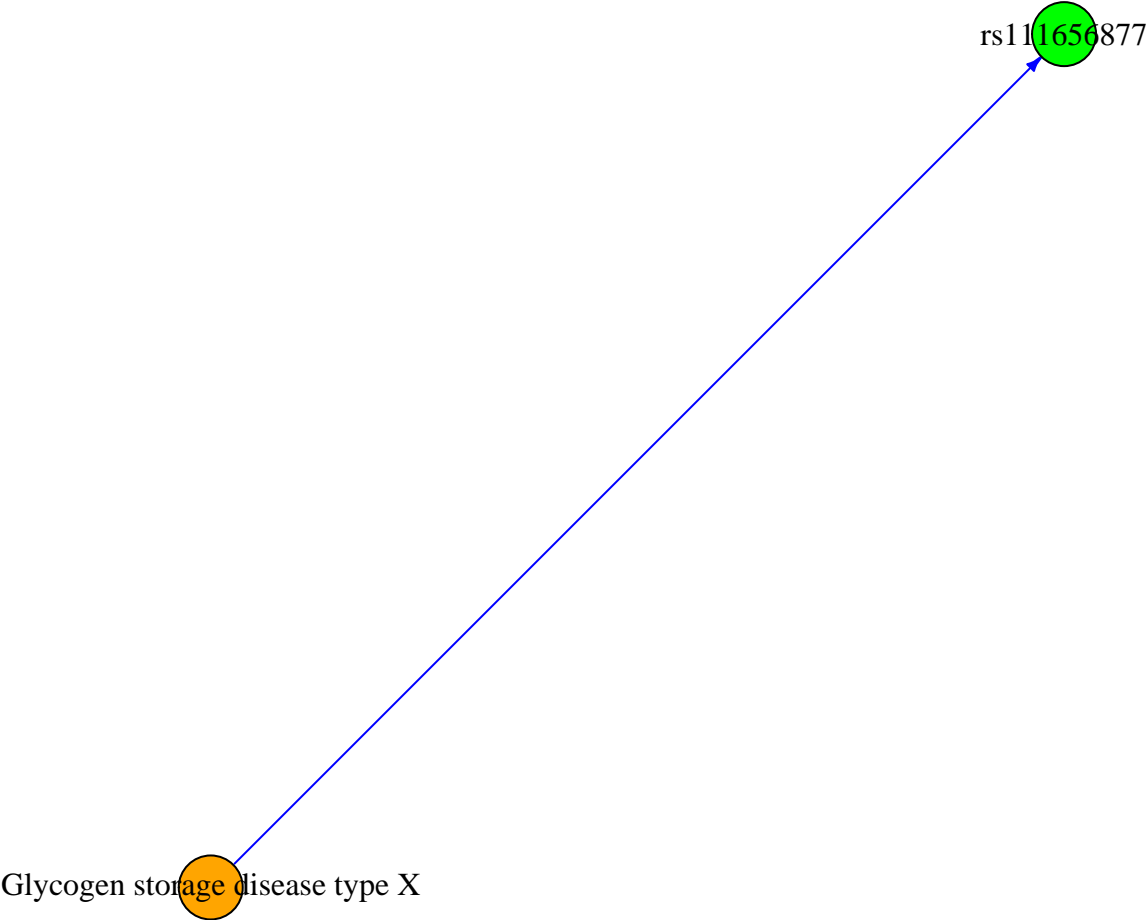

## Variant–Disease Network (Glycogen storage disease XI)

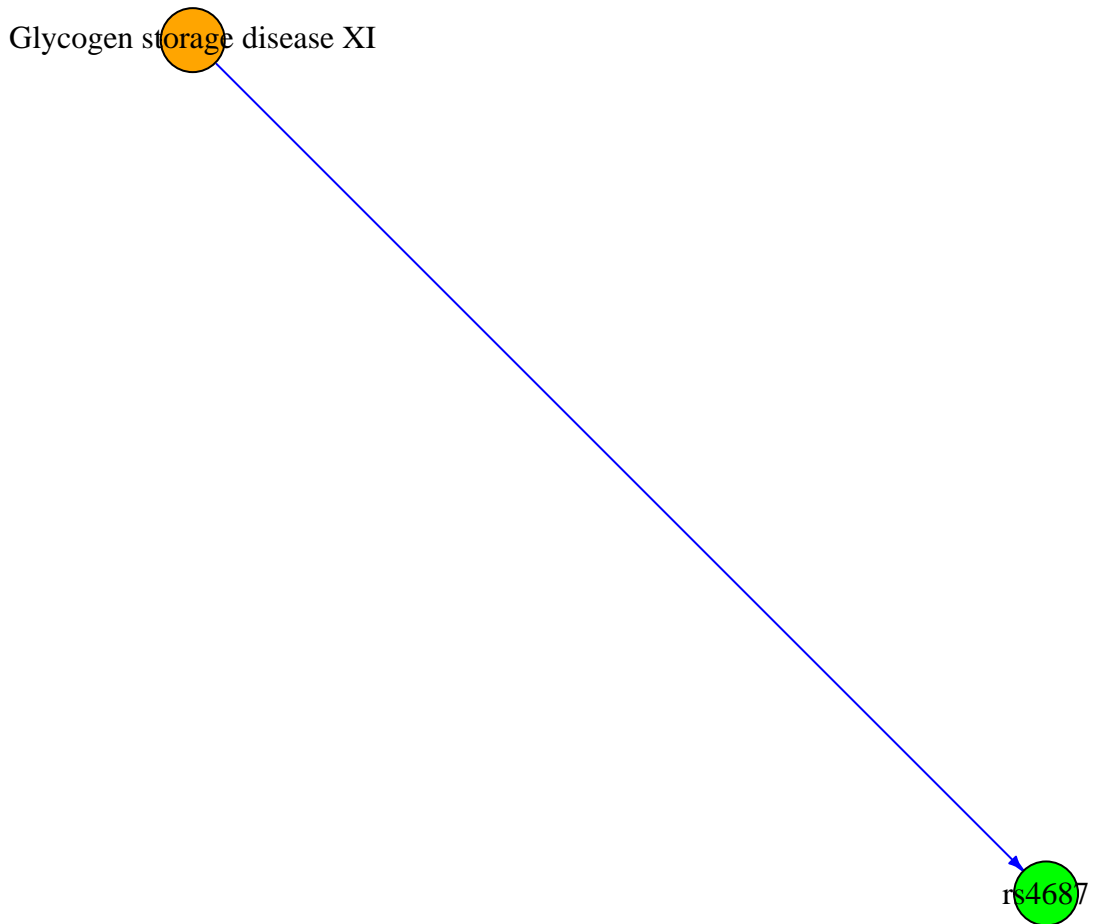

**Variant–Disease Network (GM1 gangliosidosis type 2)**

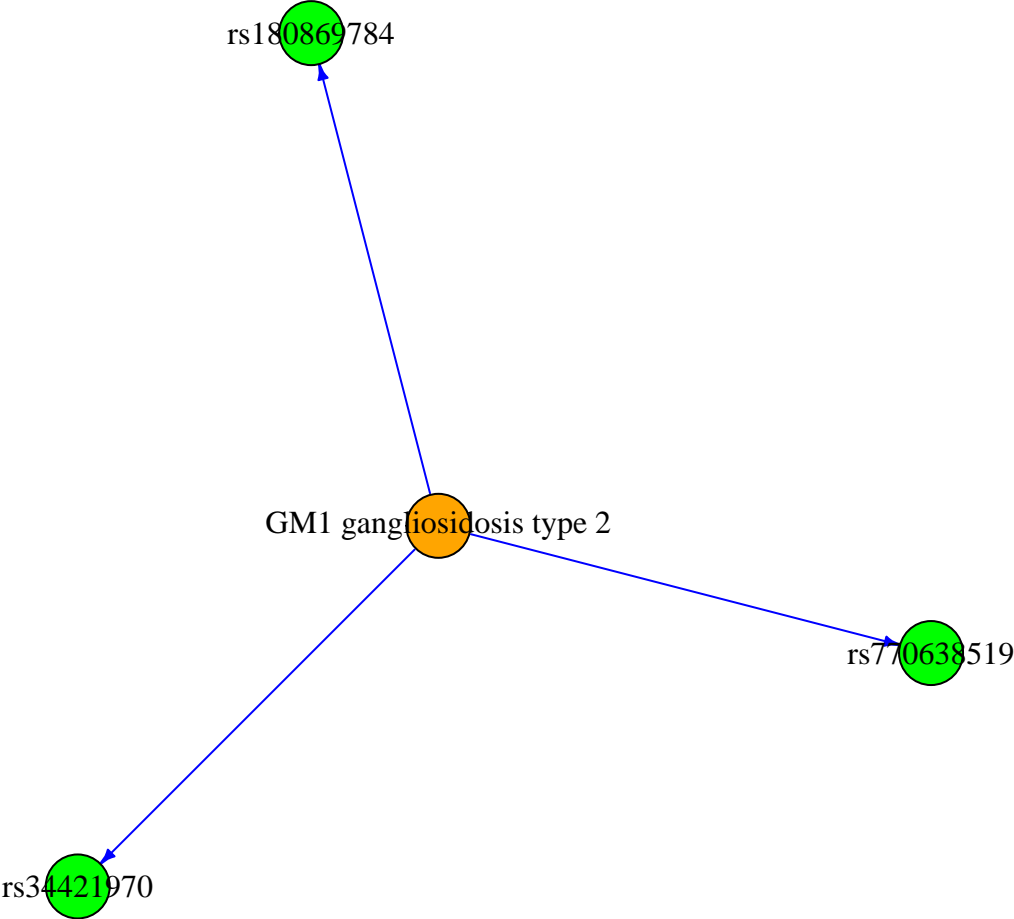

## Variant–Disease Network (Gorlin syndrome)

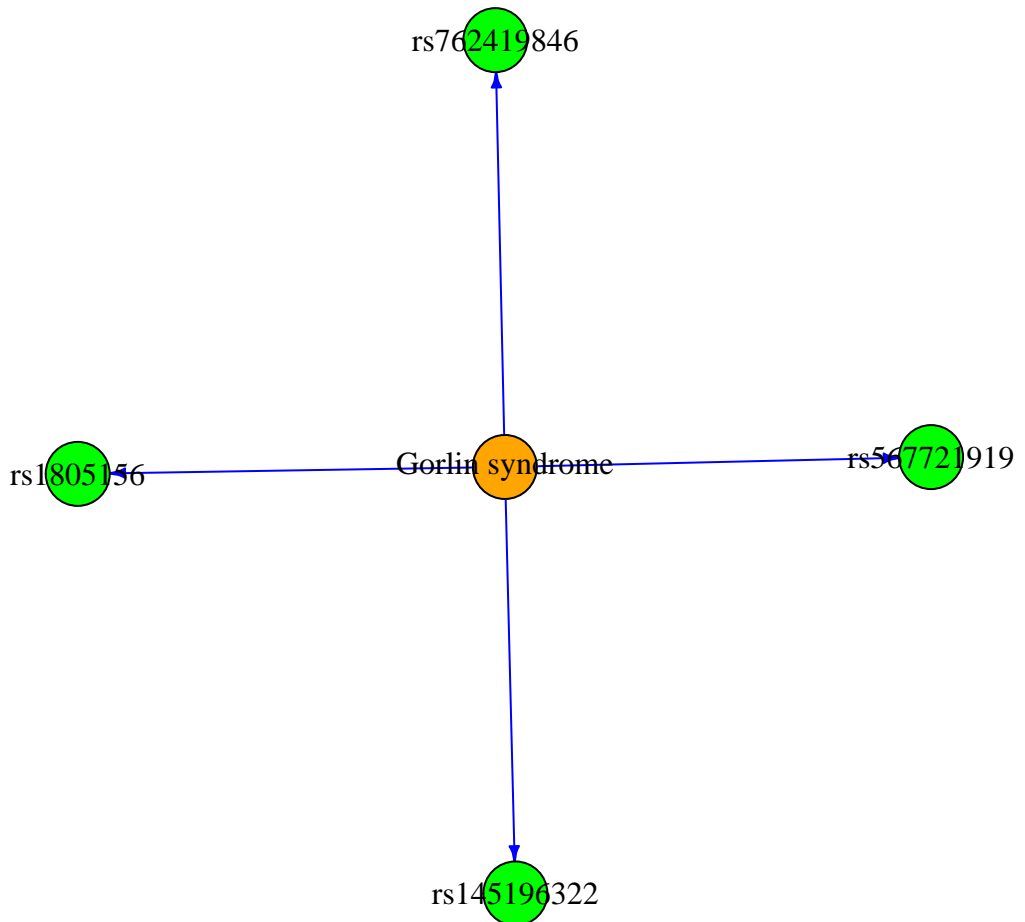

**Variant–Disease Network (Gray platelet syndrome)**

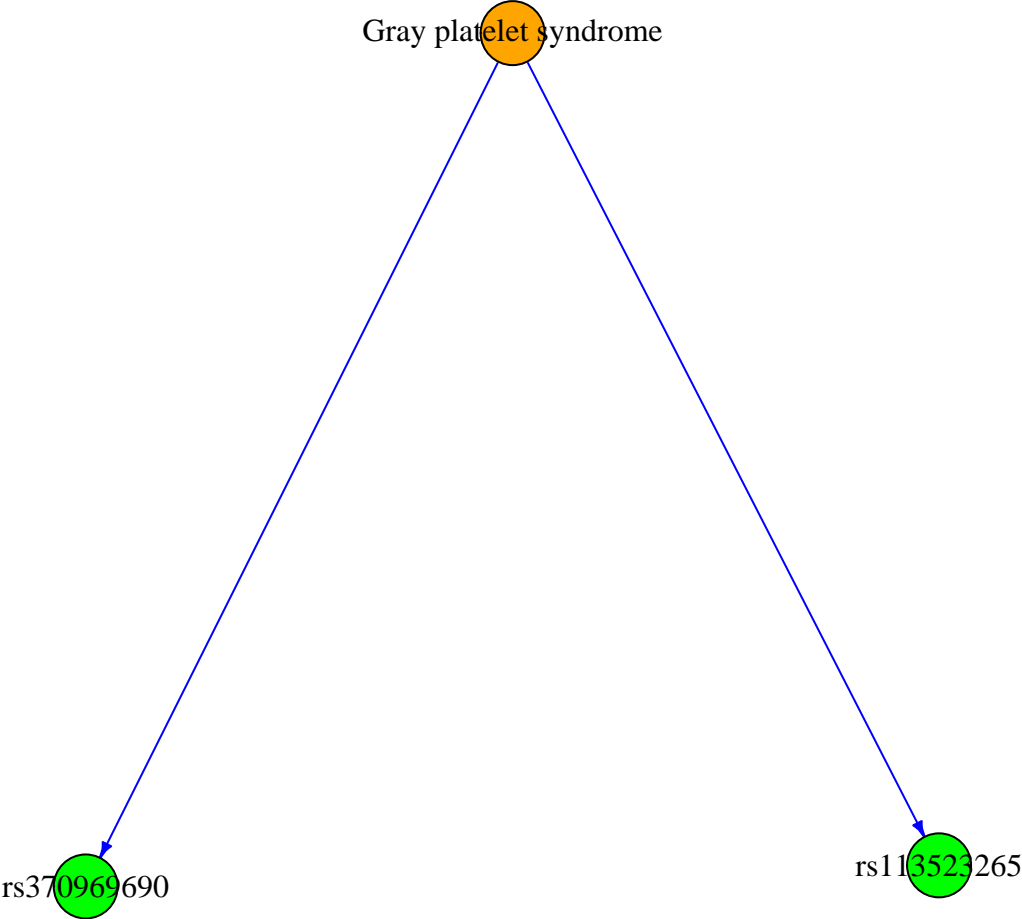



# Variant–Disease Network (Greig cephalopolysyndactyly syndrome)

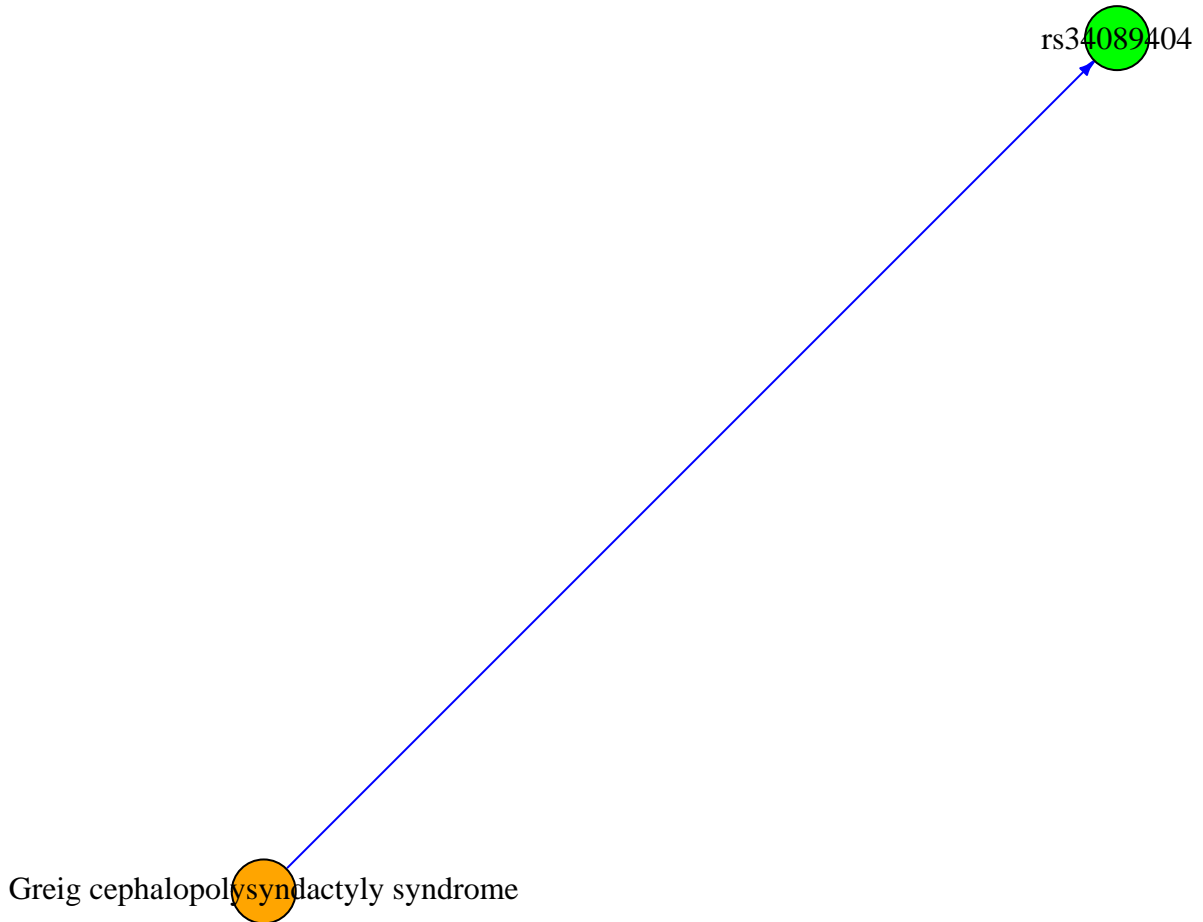

## Variant–Disease Network (Haemorrhagic telangiectasia 1)

Haemorrhagic telangiectasia 1

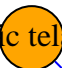

rs369997021

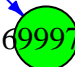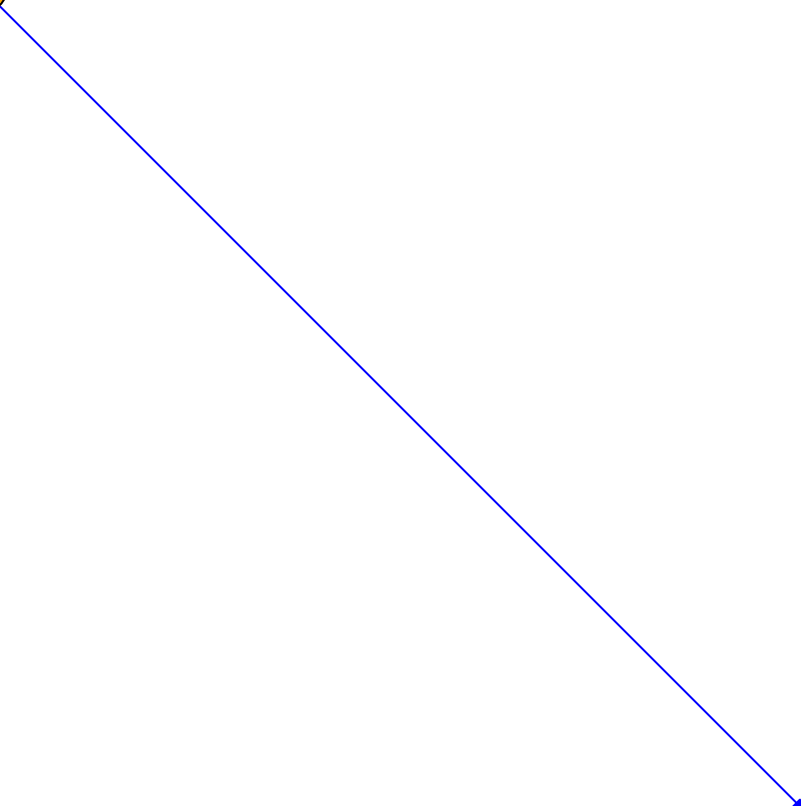

## Variant–Disease Network (Hand tremor)

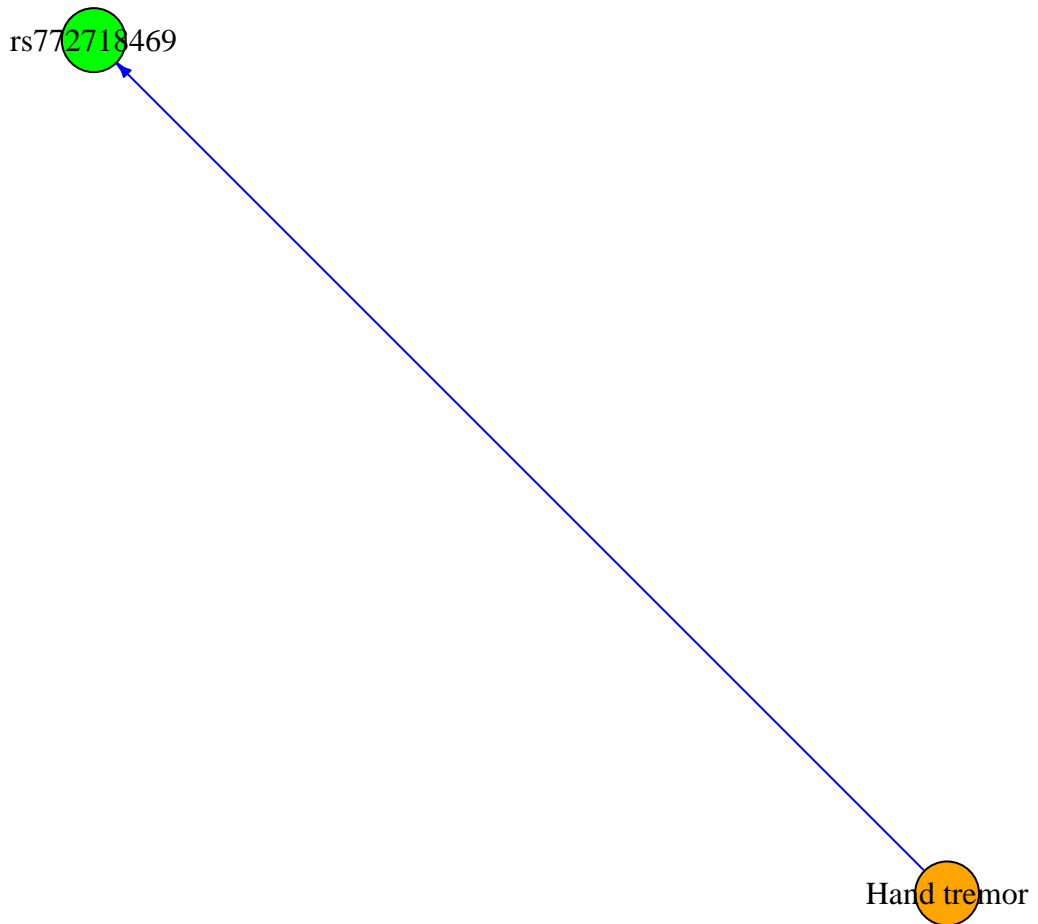

## Variant–Disease Network (Hawkinsinuria)

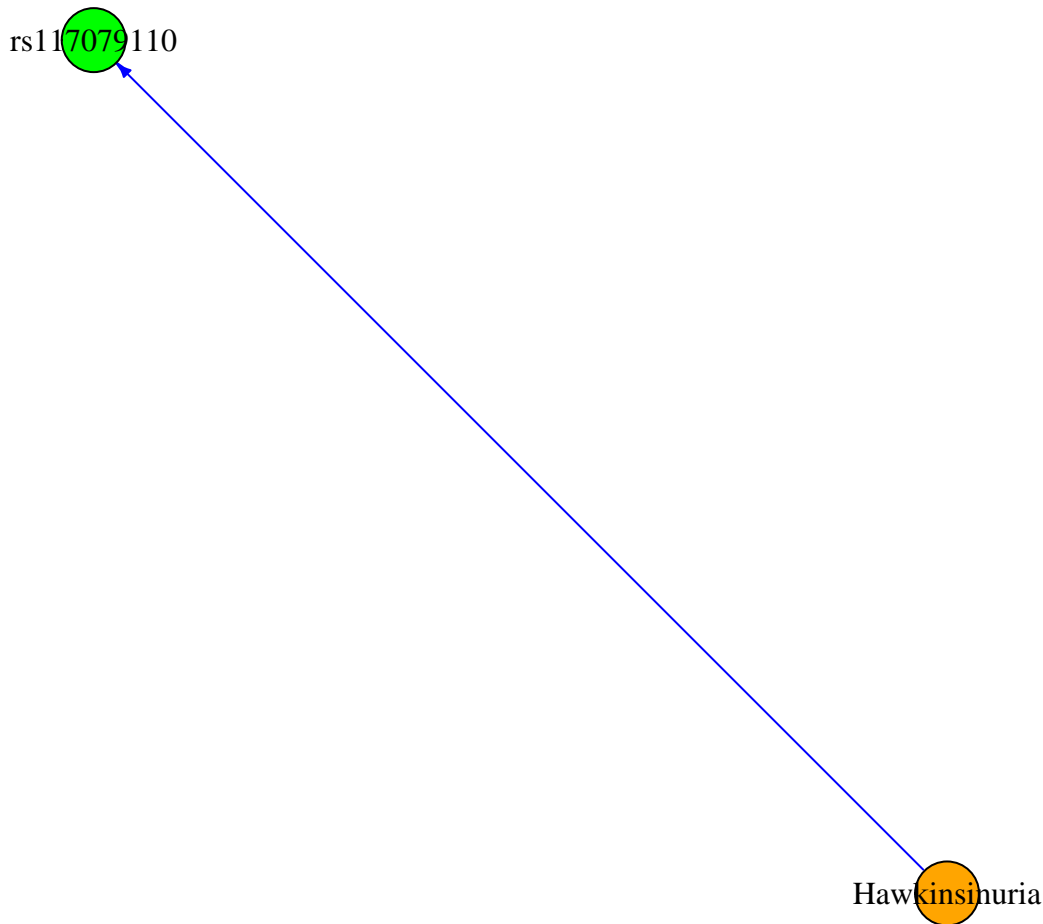

## Variant–Disease Network (Hecht syndrome)

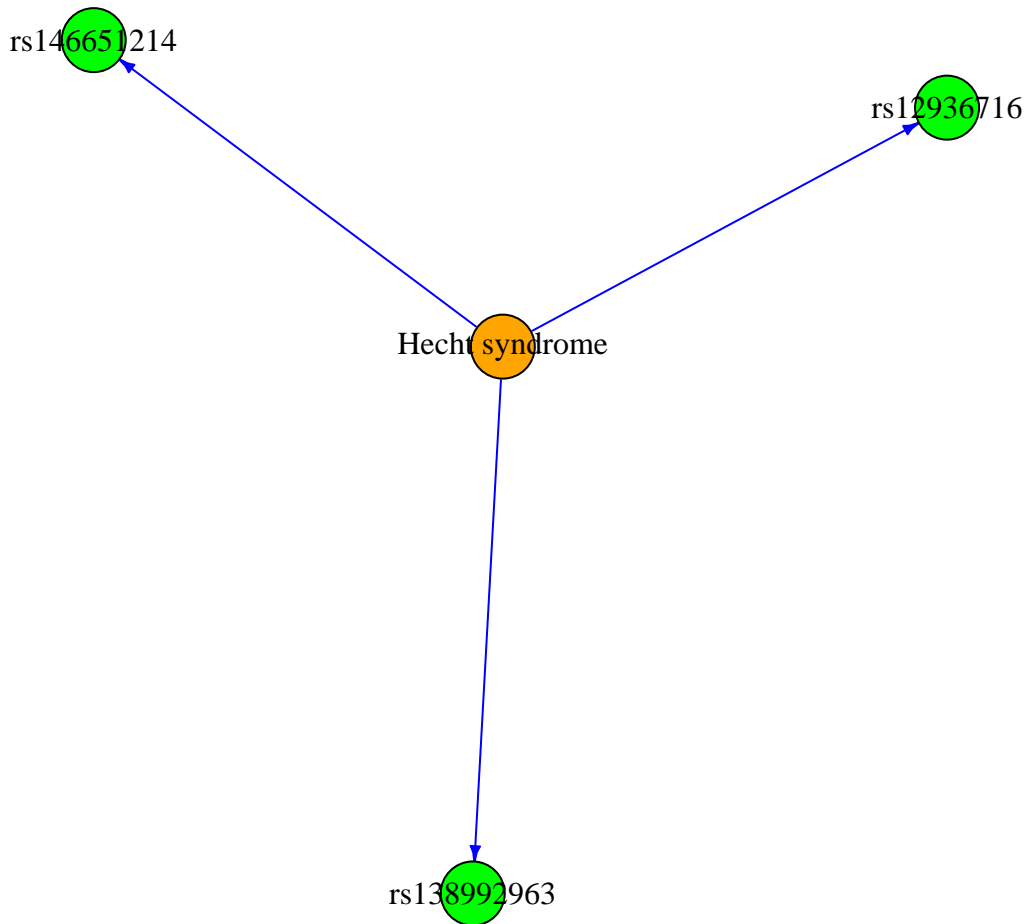

# Variant–Disease Network (Helsmoortel–Van der Aa Syndrome)

rs587777526

Helsmoortel–Van der Aa Syndrome



# Variant–Disease Network (Hemophagocytic lymphohistiocytosis)

Hemophagocytic lymphohistiocytosis

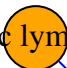

rs2290770

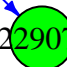

## Variant-Disease Network (Hemophilia B)

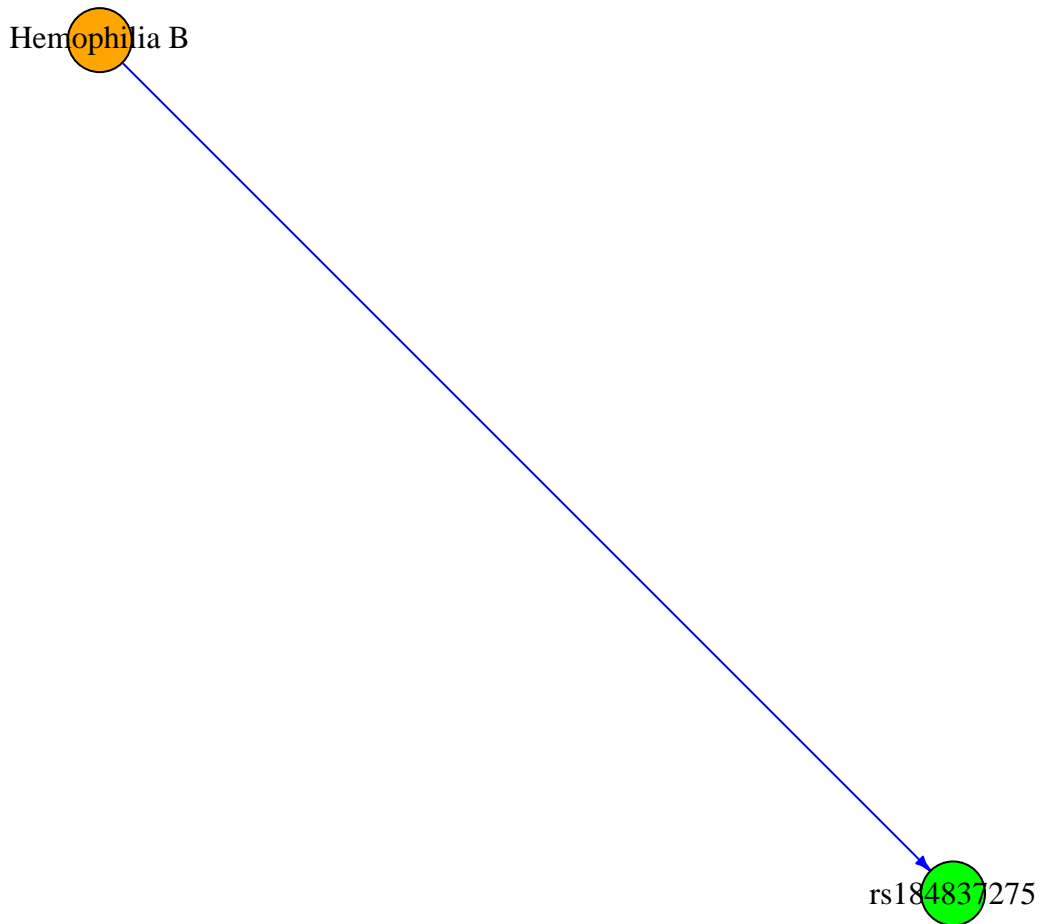



Variant–Disease Network (Hepatic failure)

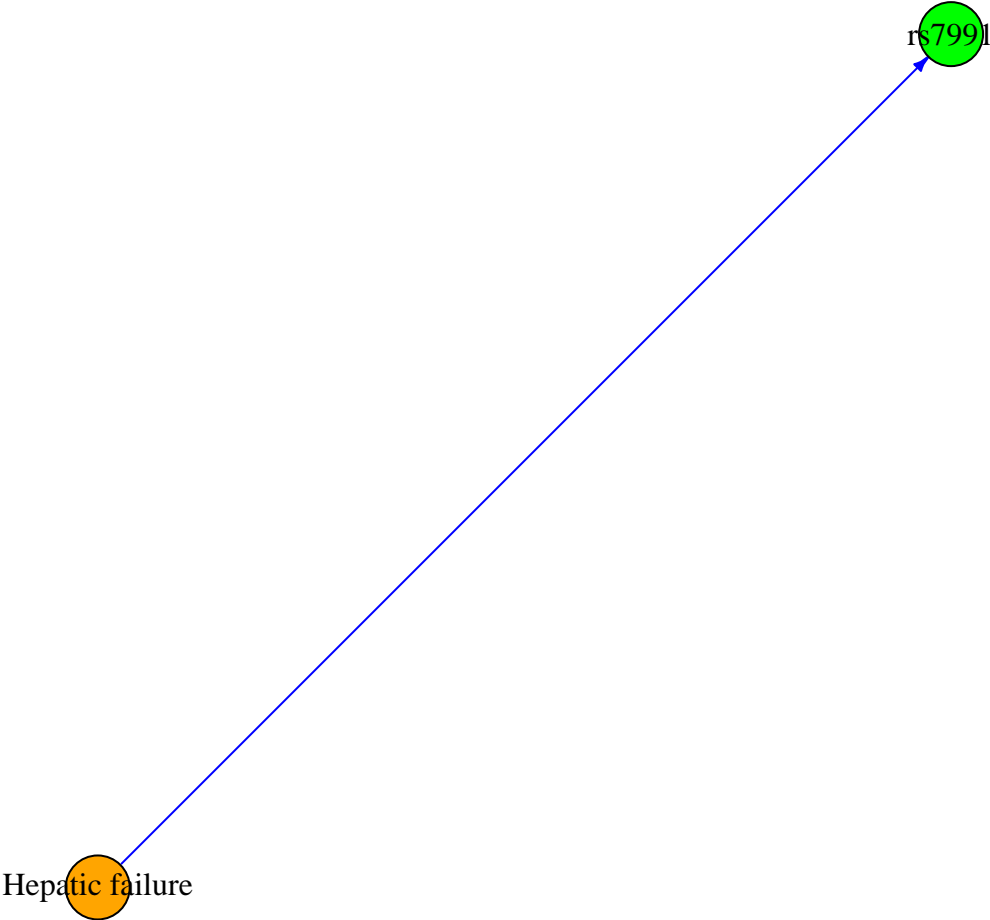

**Variant–Disease Network (Hepatic lipase deficiency)**

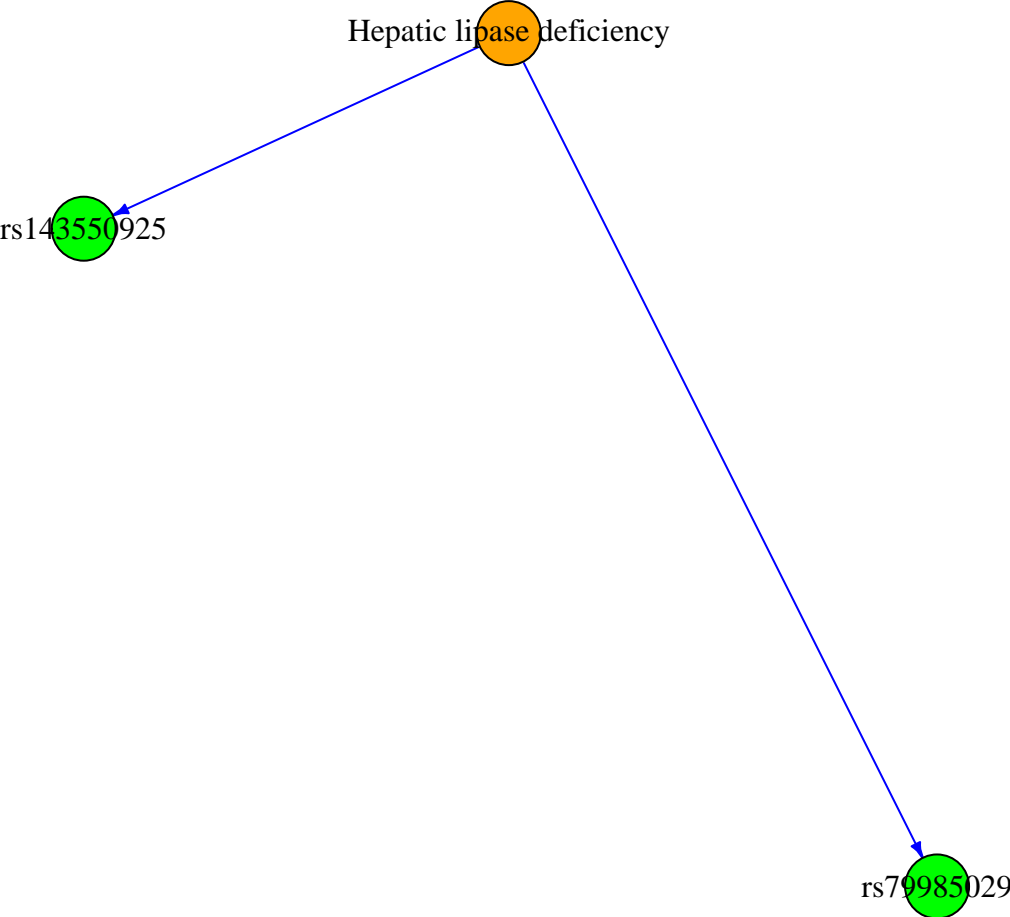

## Variant–Disease Network (Hepatoblastoma)

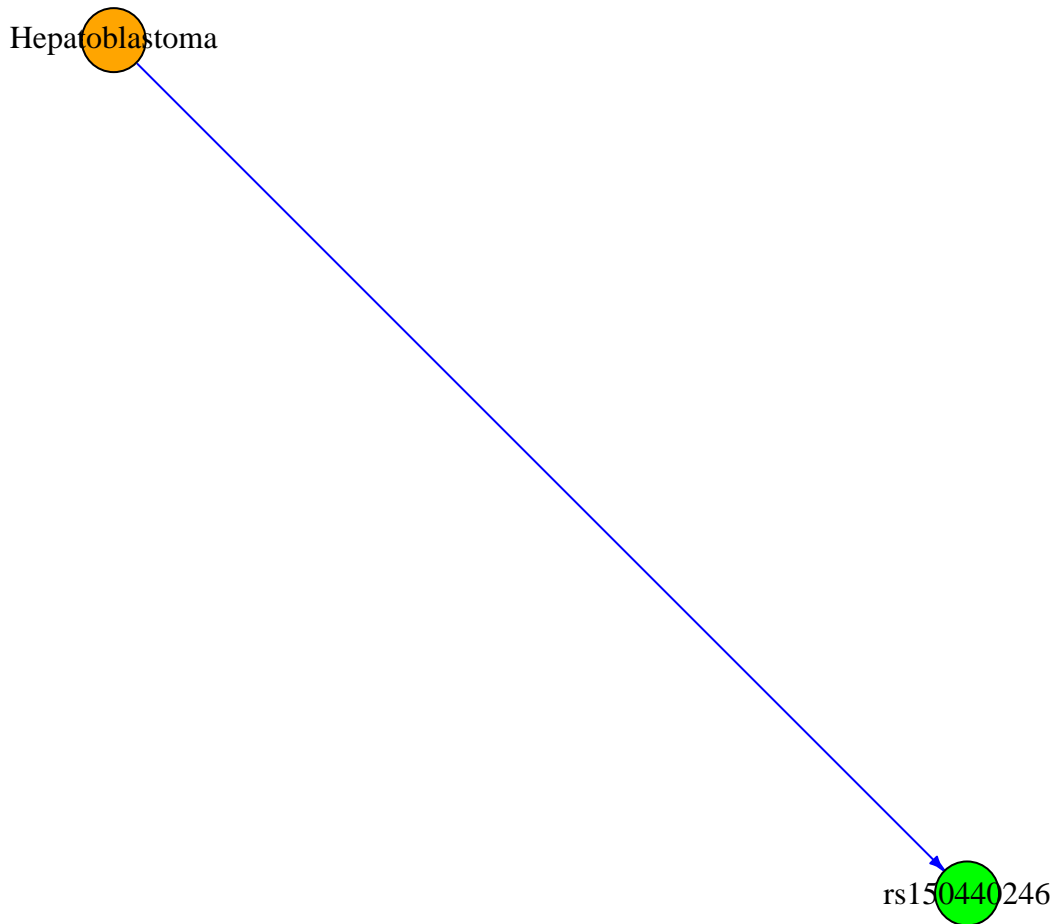

Variant–Disease Network (Hereditary breast and ovarian cancer syndrome)

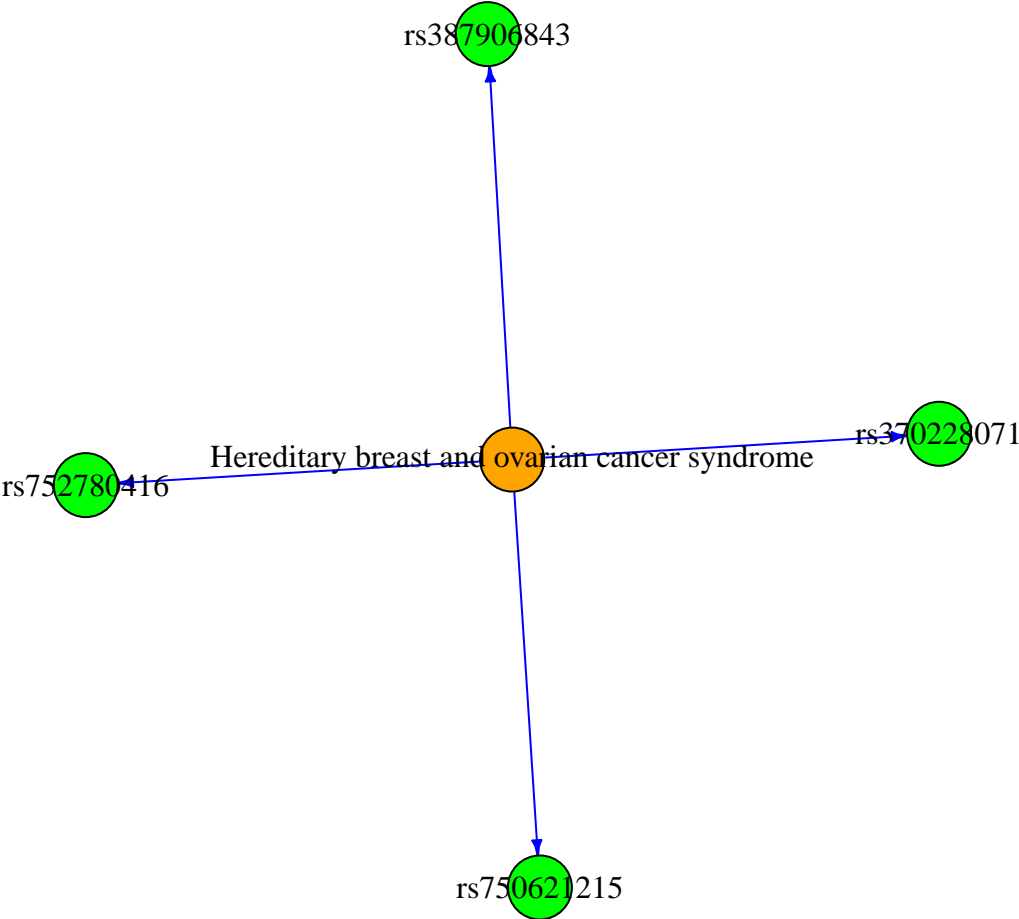

# Variant–Disease Network (Hereditary Cancer Syndrome)

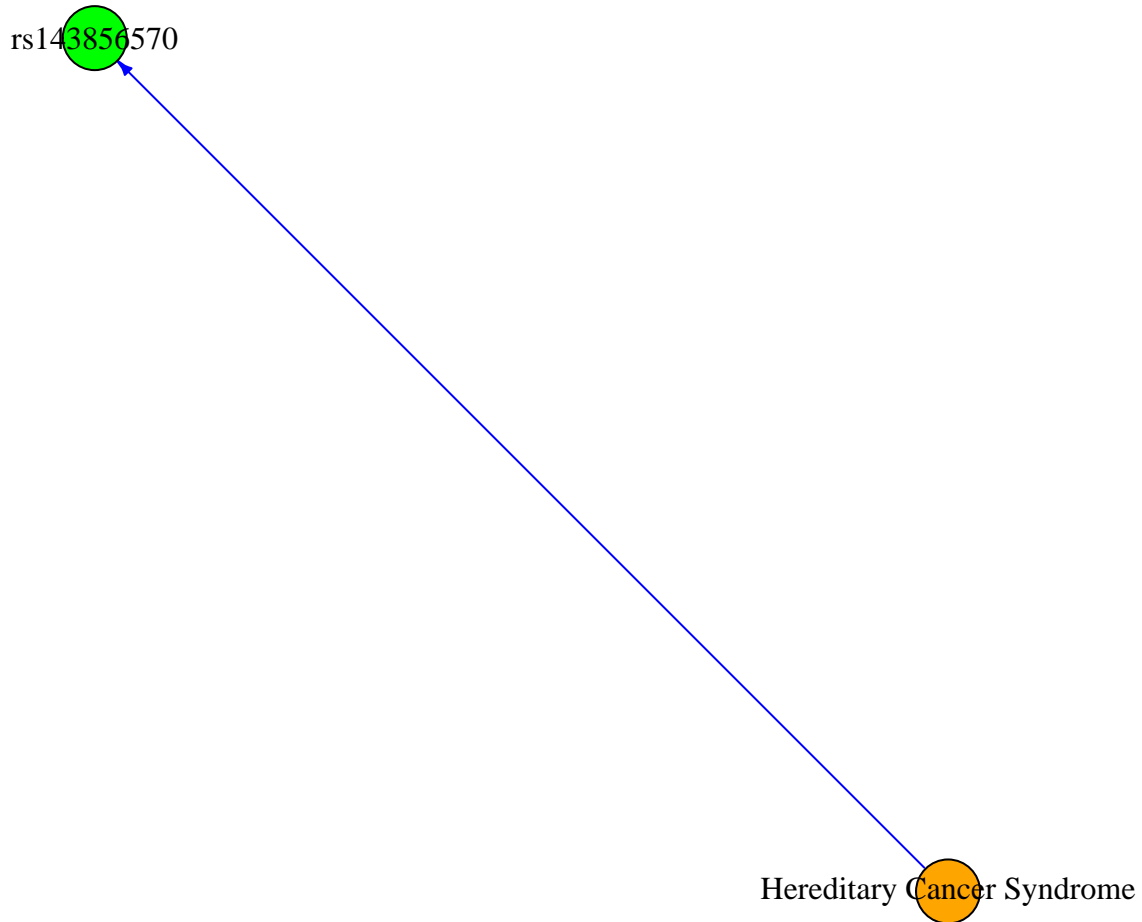

Variant–Disease Network (Hereditary cancer–predisposing syndrome)

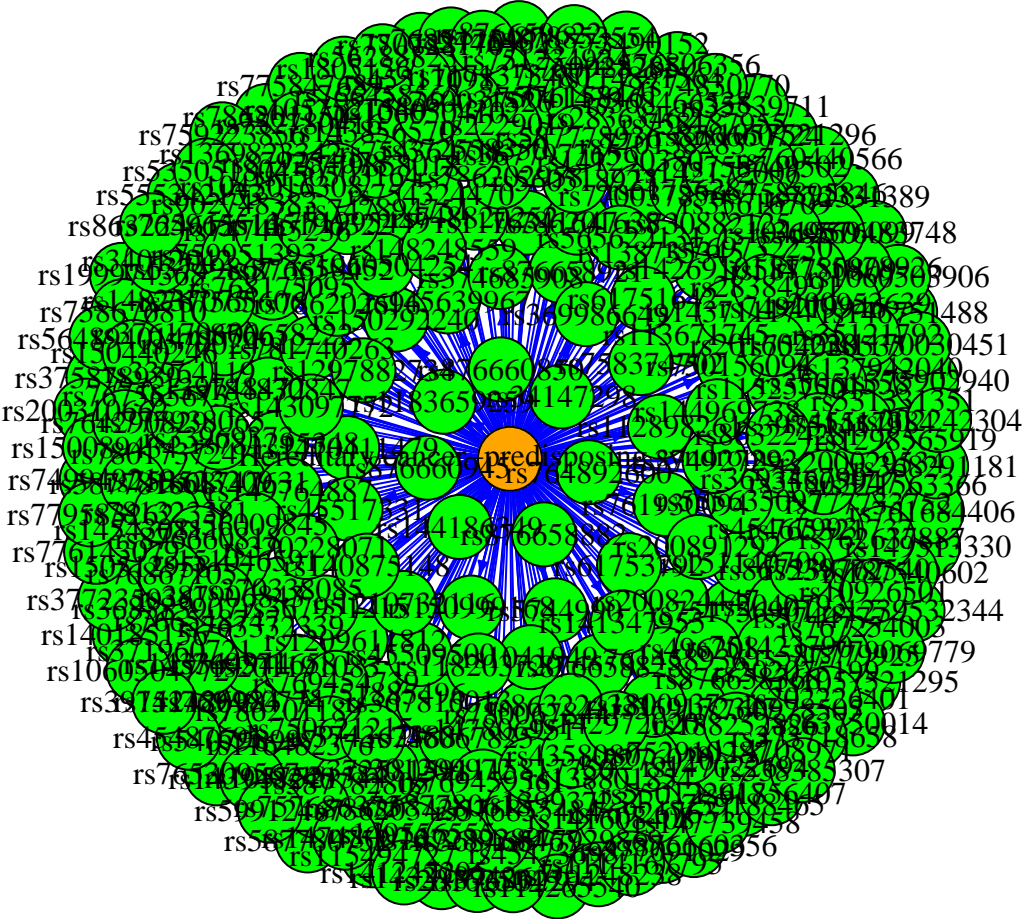

Variant–Disease Network (Hereditary cutaneous melanoma)

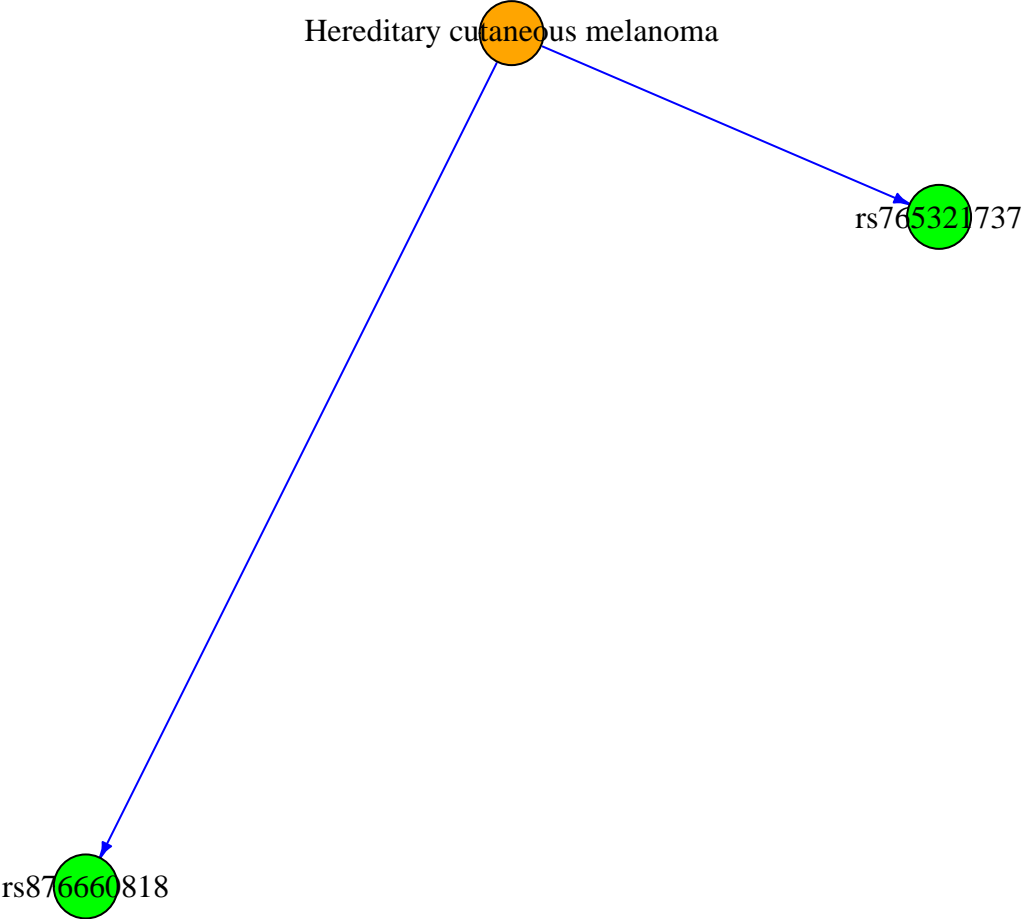

**Variant–Disease Network (Hereditary diffuse gastric cancer)**

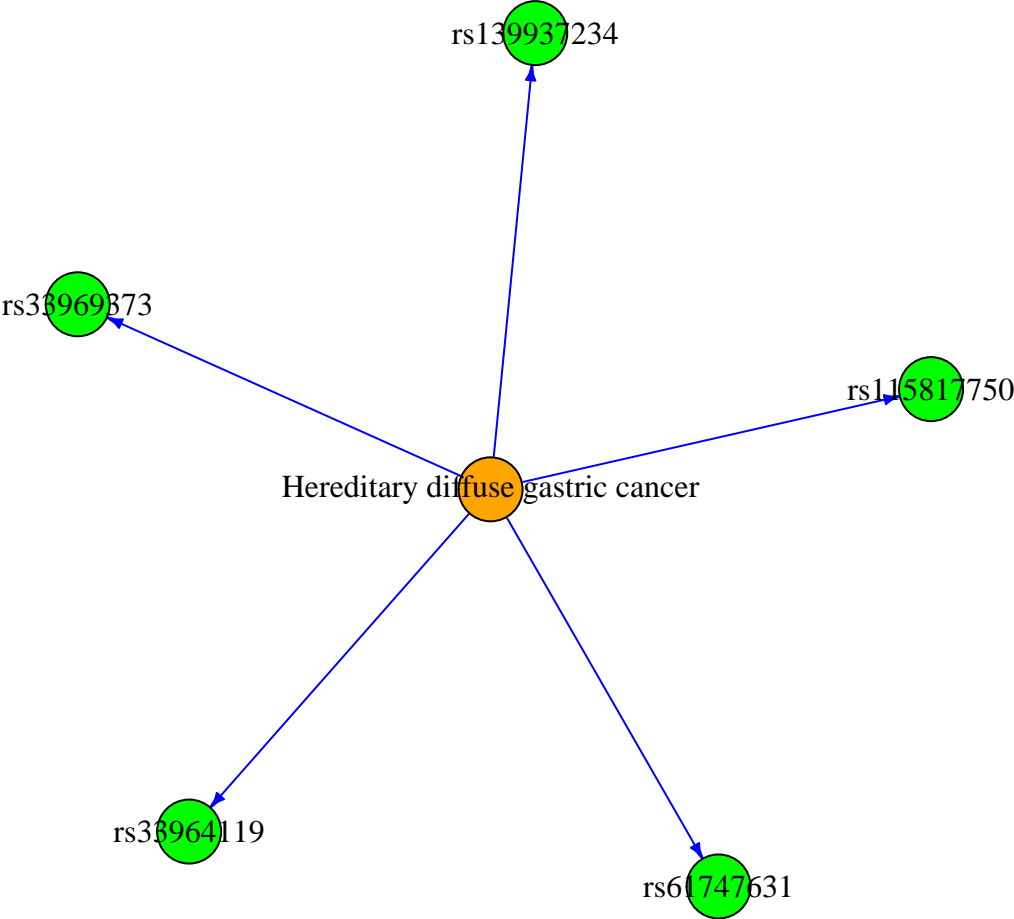



# Variant-Disease Network (Hereditary diffuse leukoencephalopathy with spheroids)

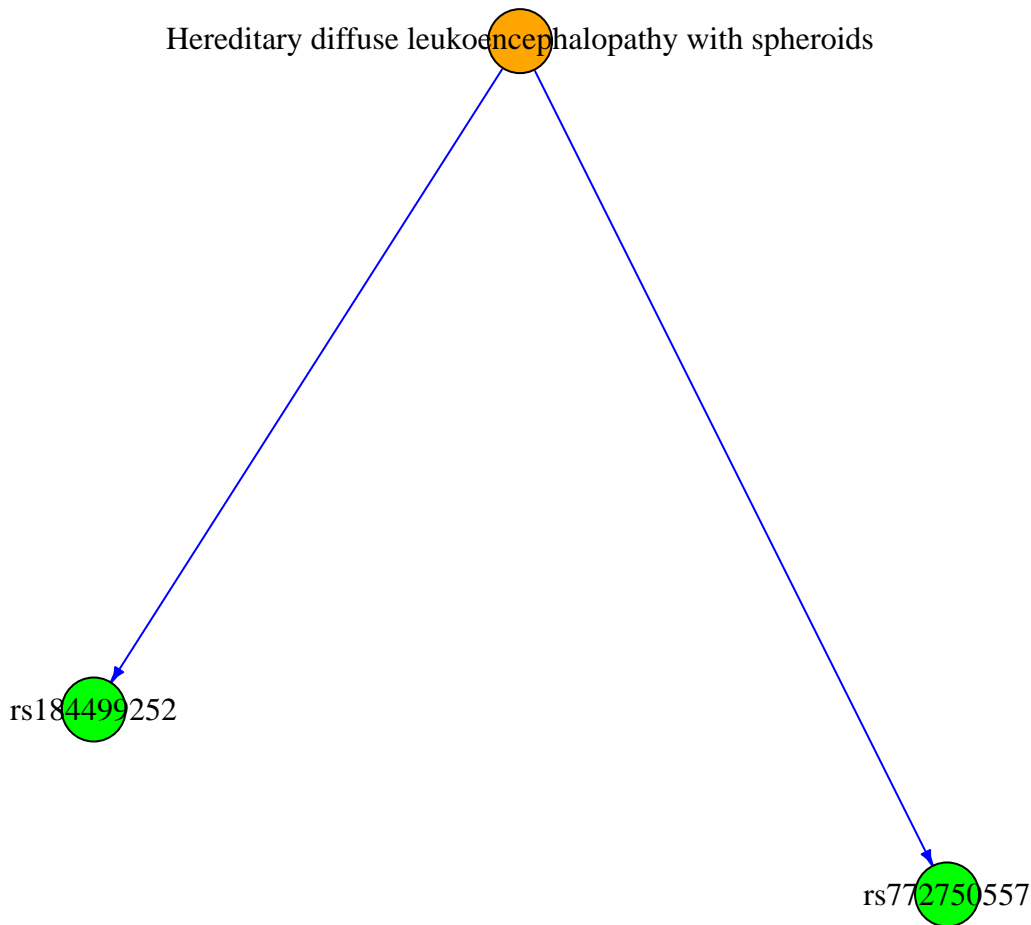

Variant–Disease Network (Hereditary factor II deficiency disease)

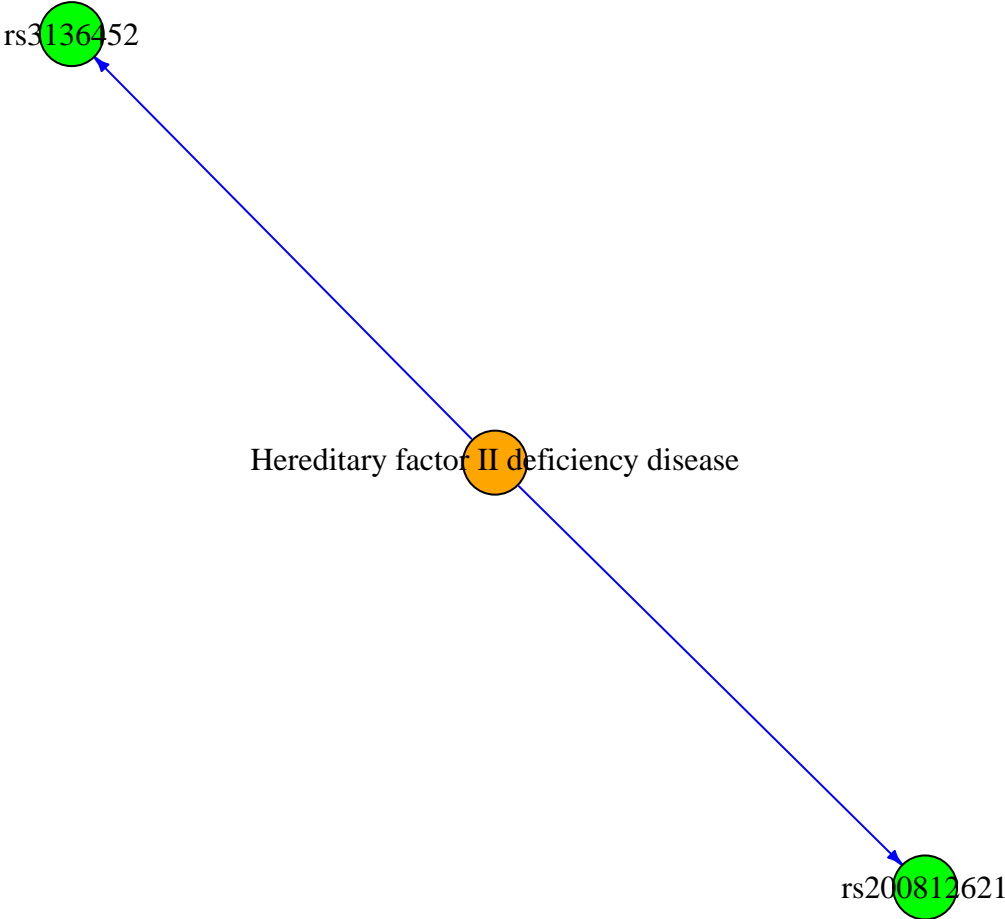

# Variant–Disease Network (Hereditary factor XI deficiency disease)

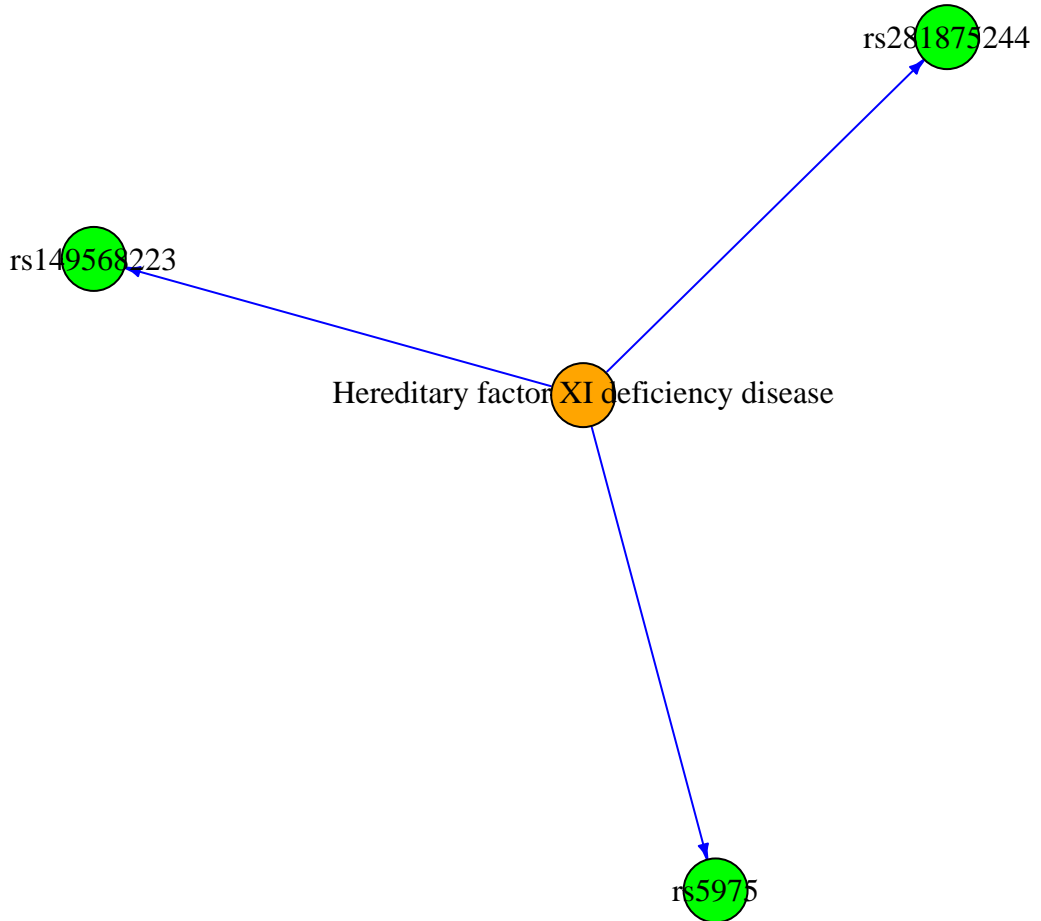

## Variant–Disease Network (Hereditary fructosuria)

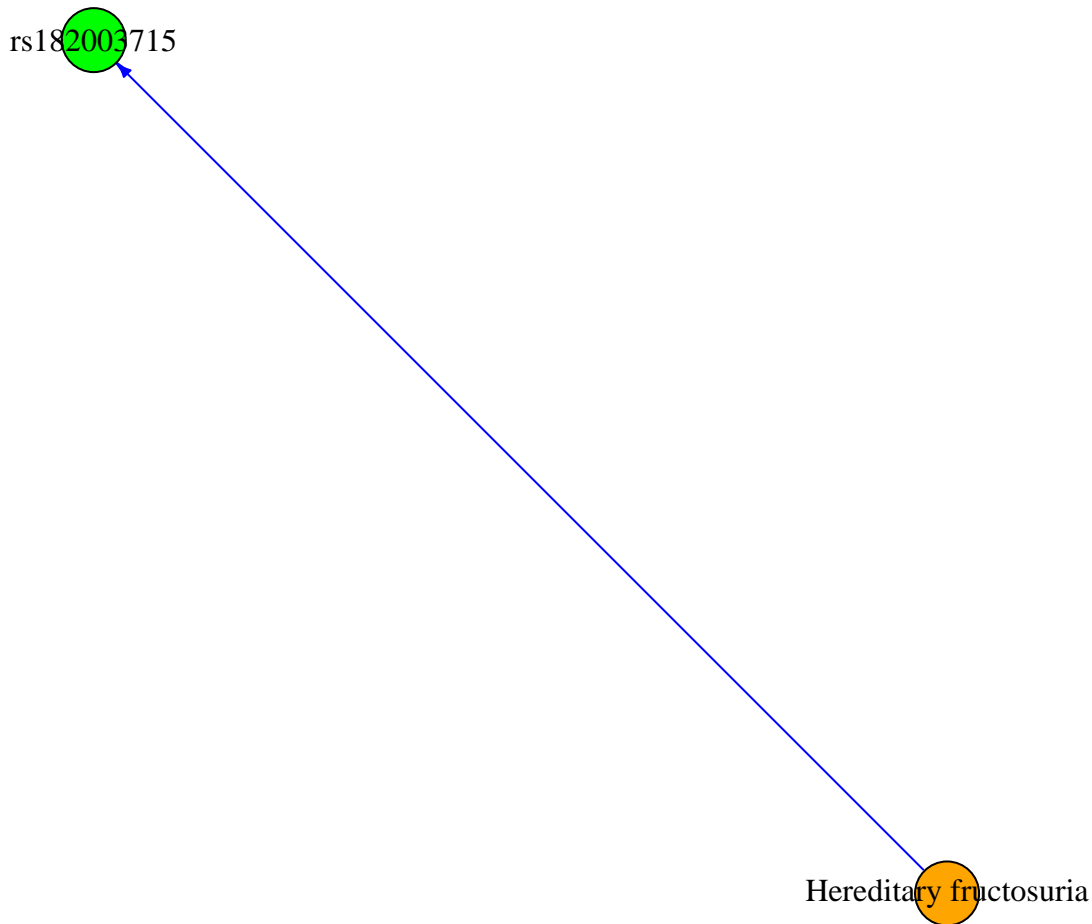

# Variant–Disease Network (Hereditary hemorrhagic telangiectasia)

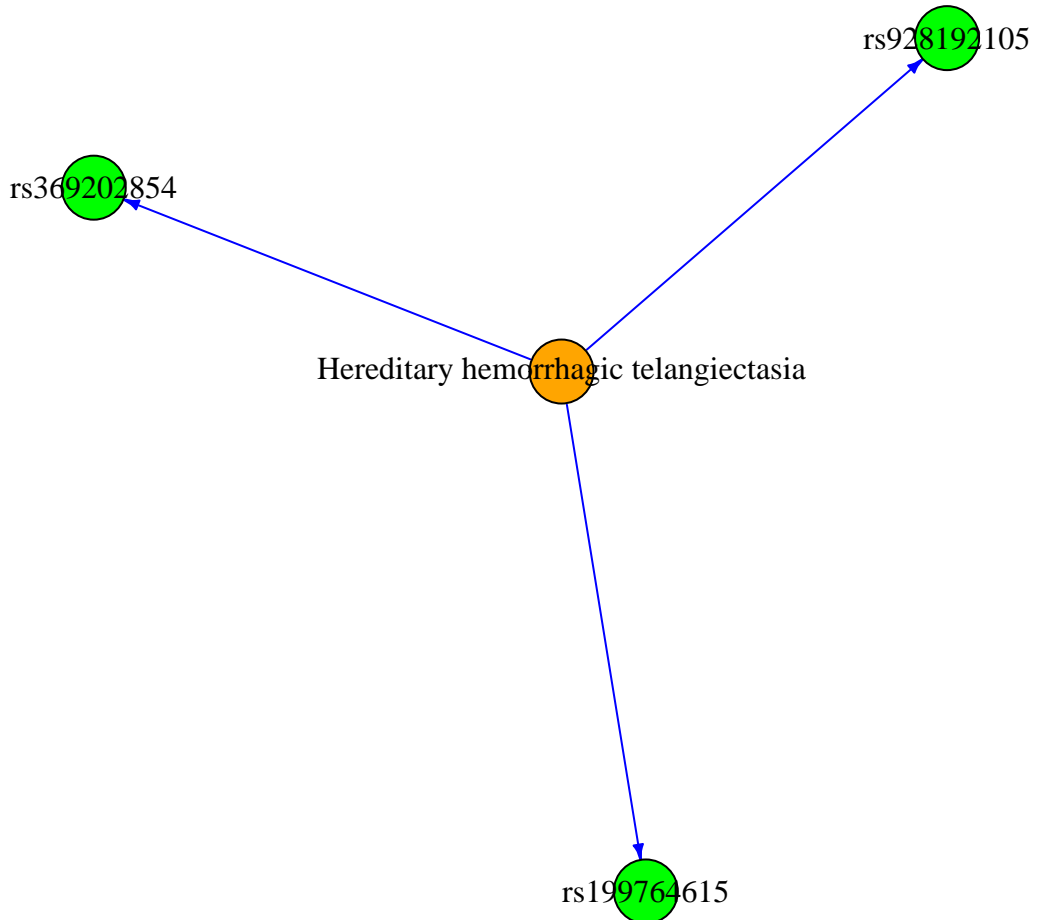

**Variant–Disease Network (Hereditary hemorrhagic telangiectasia type 1)**

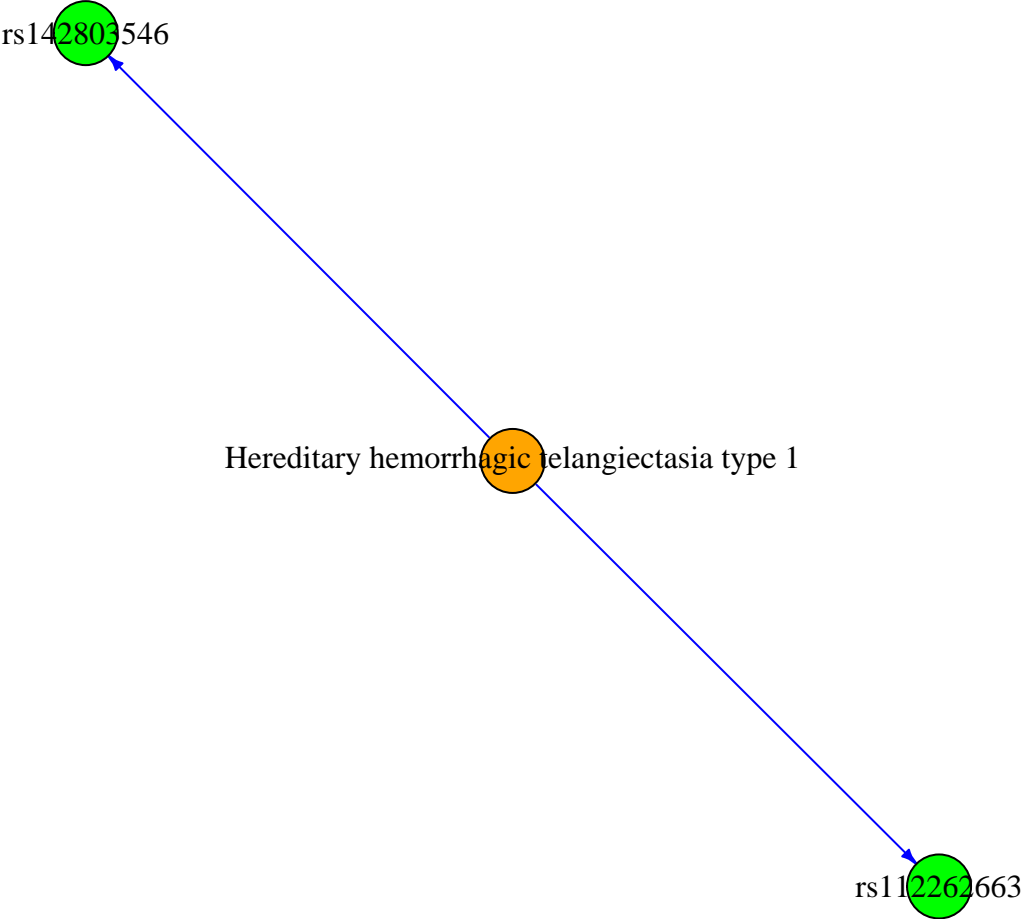

**Variant–Disease Network (Hereditary hemorrhagic telangiectasia type 2)**

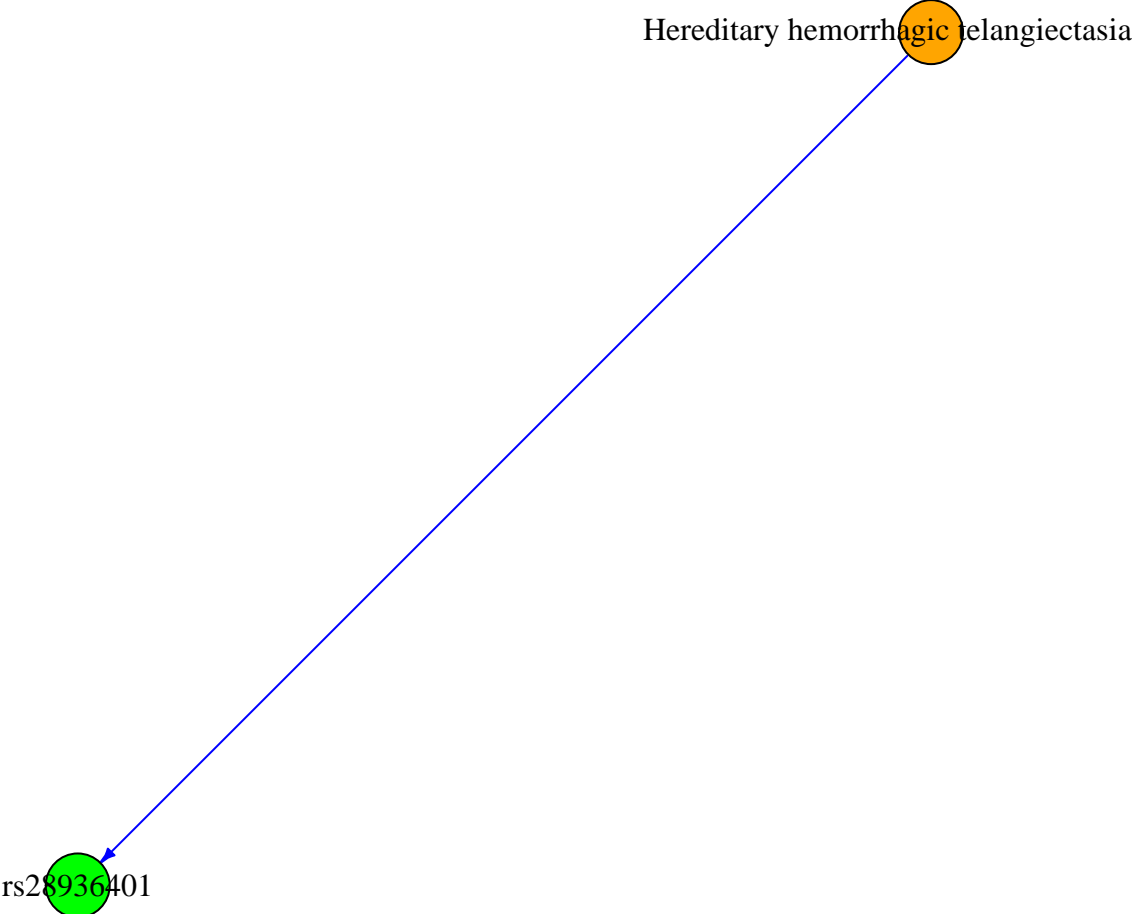

Variant–Disease Network (Hereditary insensitivity to pain with anhidrosis)

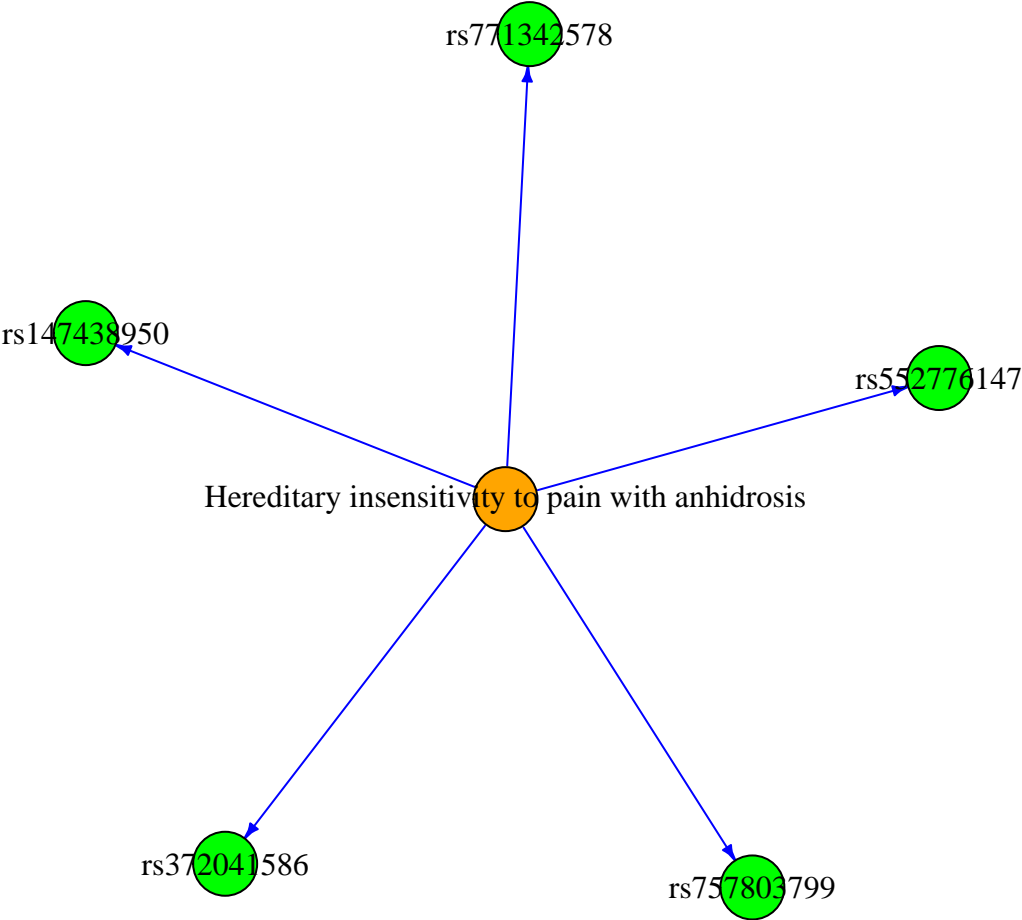



**Variant–Disease Network (Hereditary motor and sensory neuropathy)**

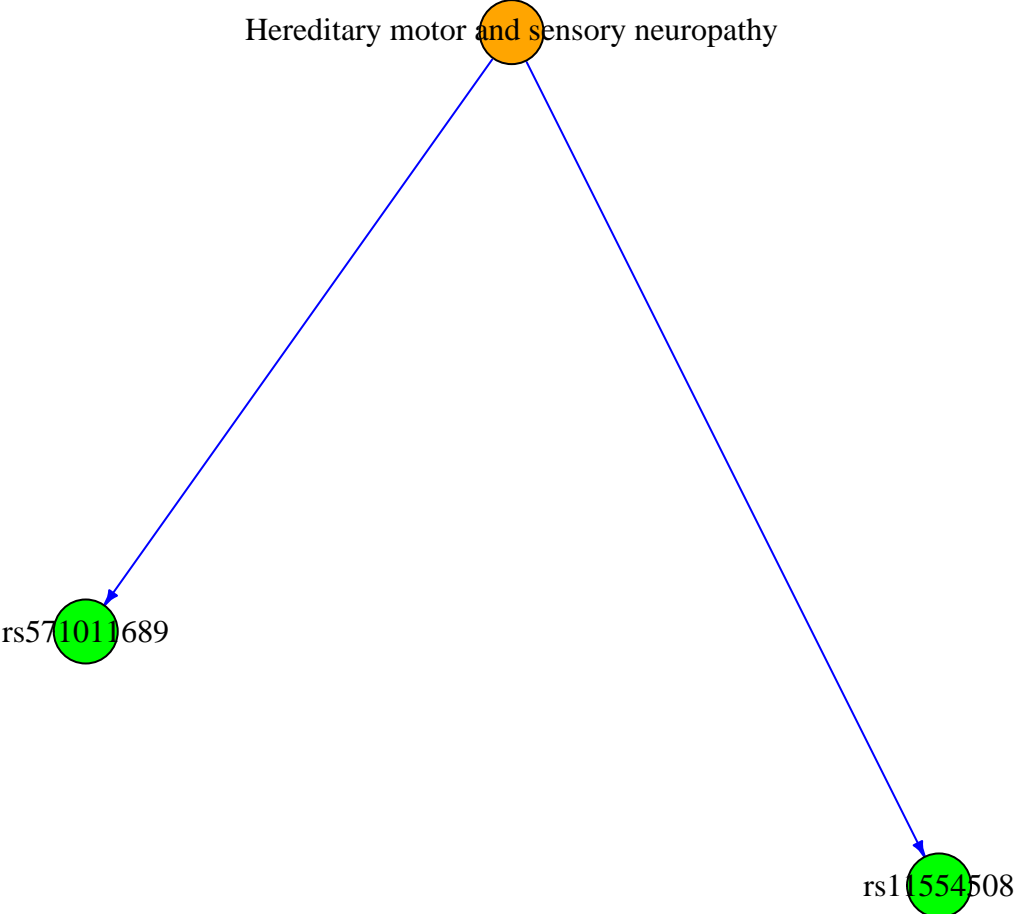

**Variant–Disease Network (Hereditary Multiple Osteochondromatosis)**

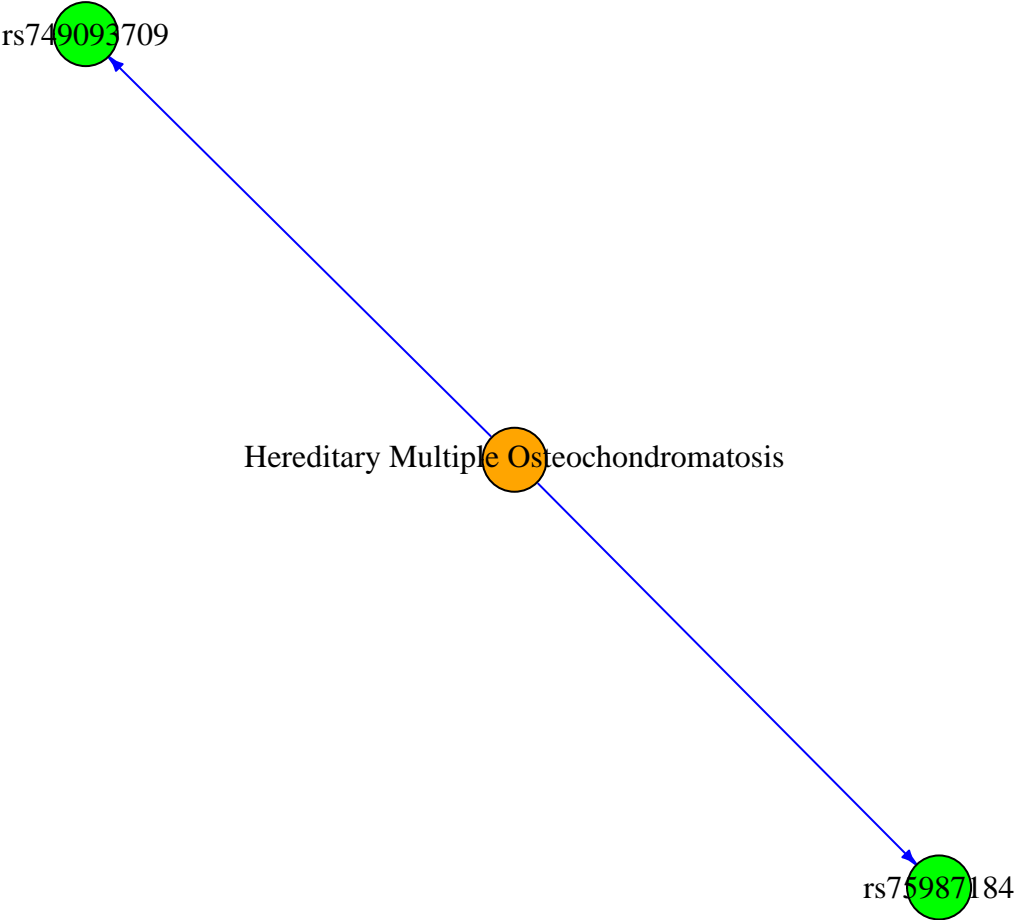

# Variant–Disease Network (Hereditary Neuralgic Amyotrophy (HNA))

rs187657144

Hereditary Neuralgic Amyotrophy (HNA)



# Variant–Disease Network (Hereditary nonpolyposis colon cancer)

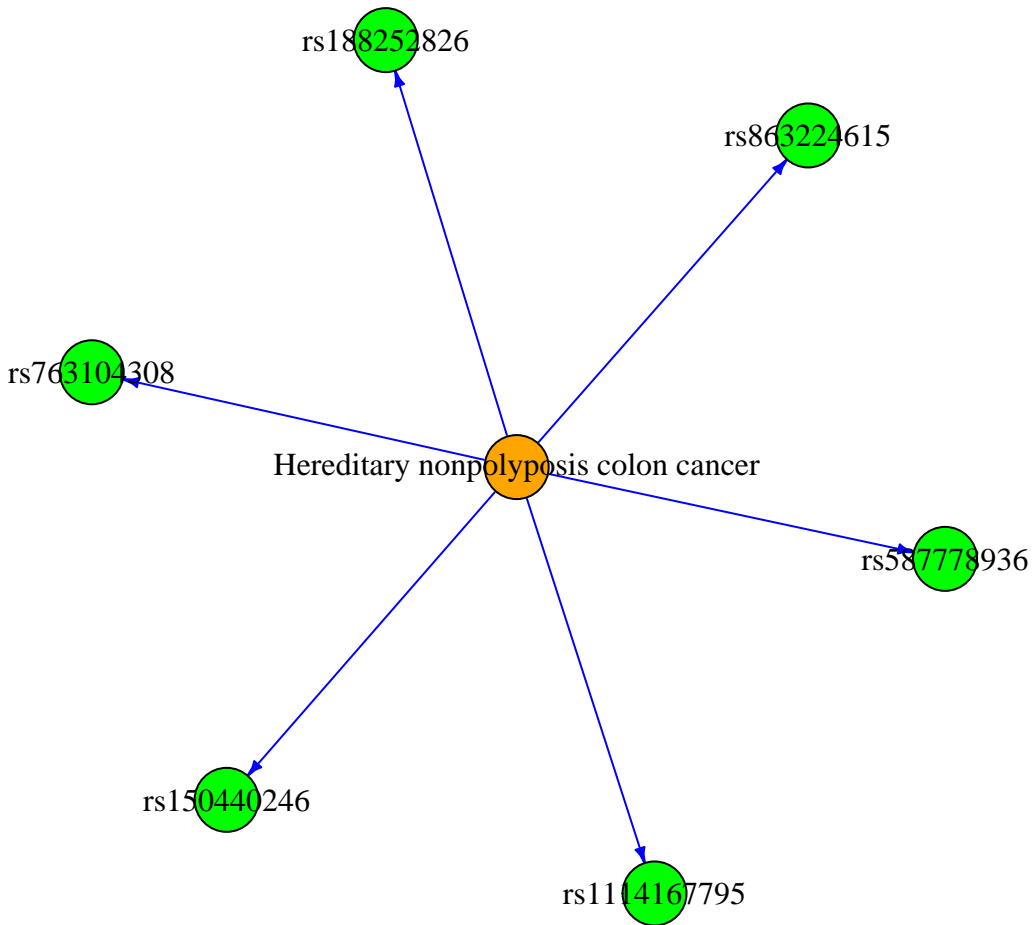

Variant–Disease Network (Hereditary nonpolyposis colorectal cancer type

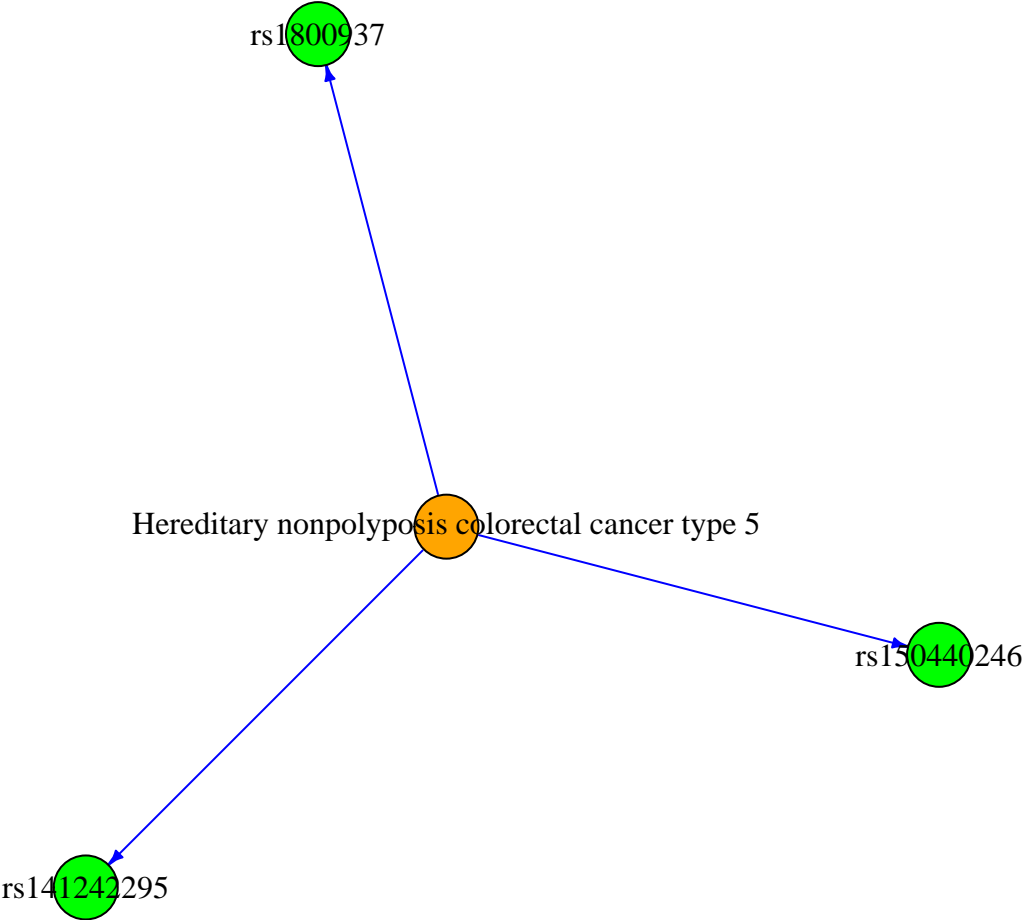

Variant–Disease Network (Hereditary pyropoikilocytosis)

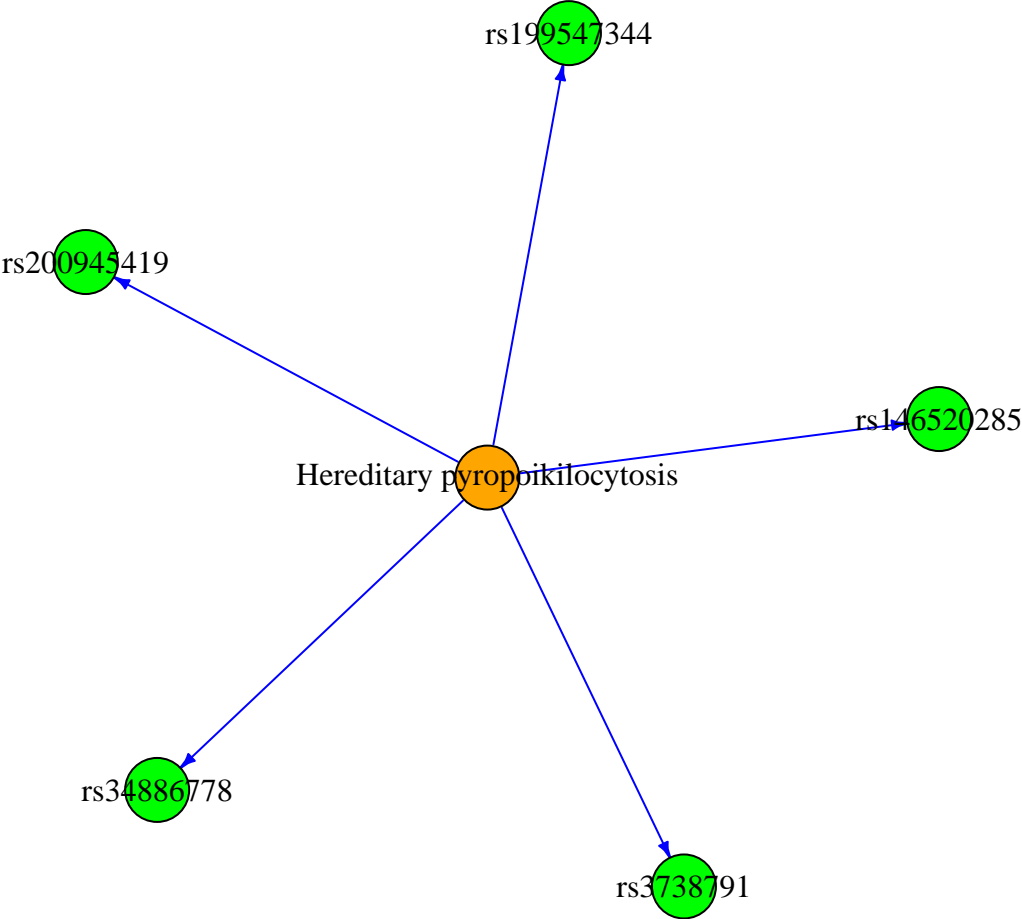

# Variant–Disease Network (Hereditary sensory and autonomic neuropathy type II)

Hereditary sensory and autonomic neuropathy type II

rs162848

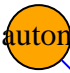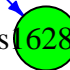

# Variant-Disease Network (Hereditary sensory and autonomic neuropathy type 1)

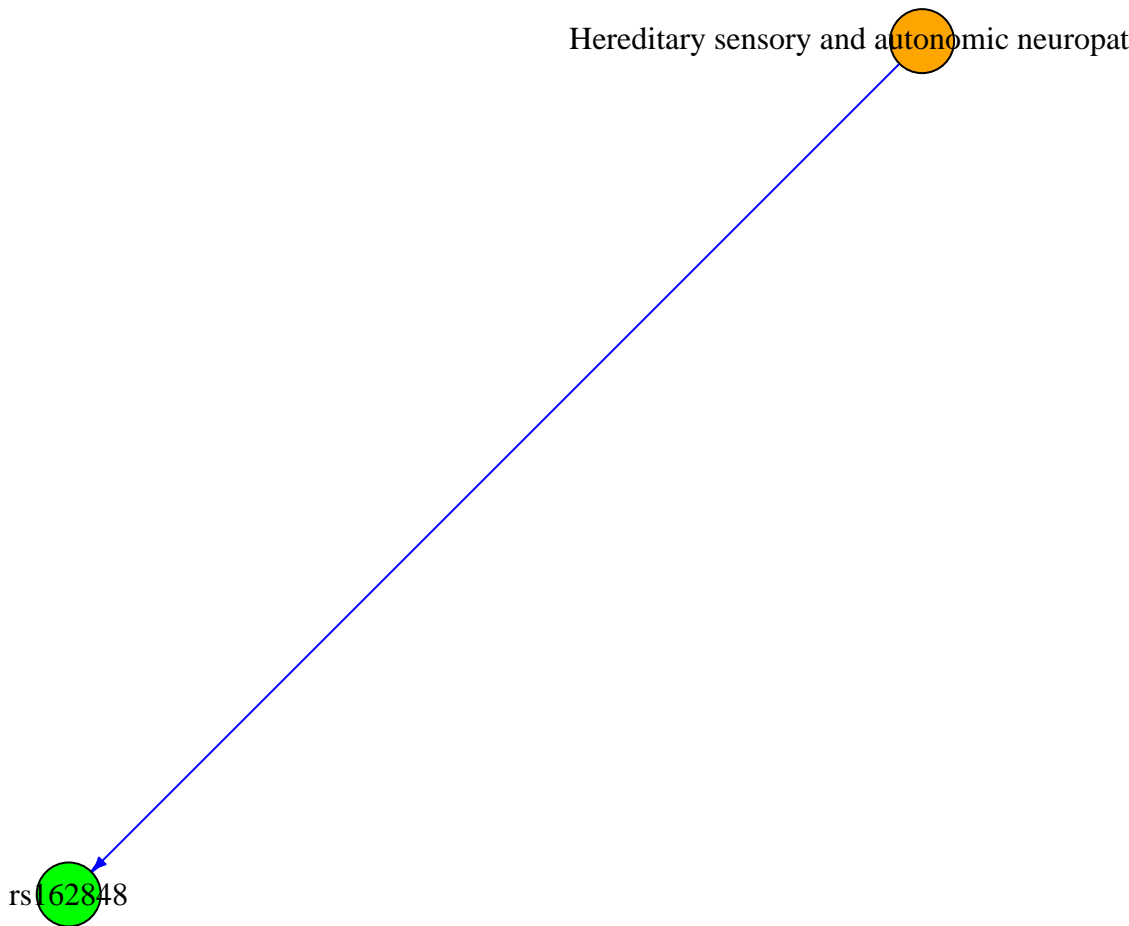



# Variant–Disease Network (Hereditary sensory neuropathy type IE)

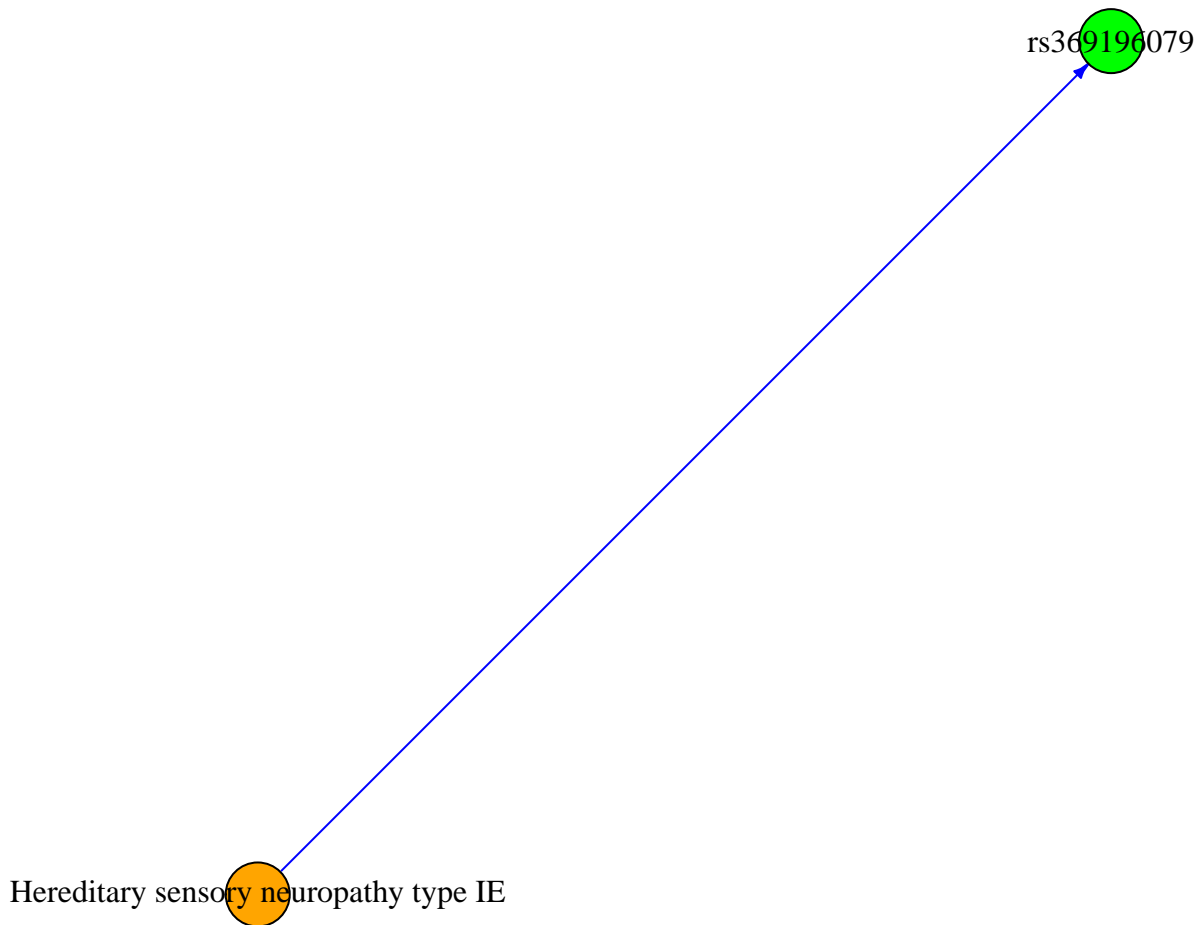

**Variant–Disease Network (Hermansky Pudlak syndrome 2)**

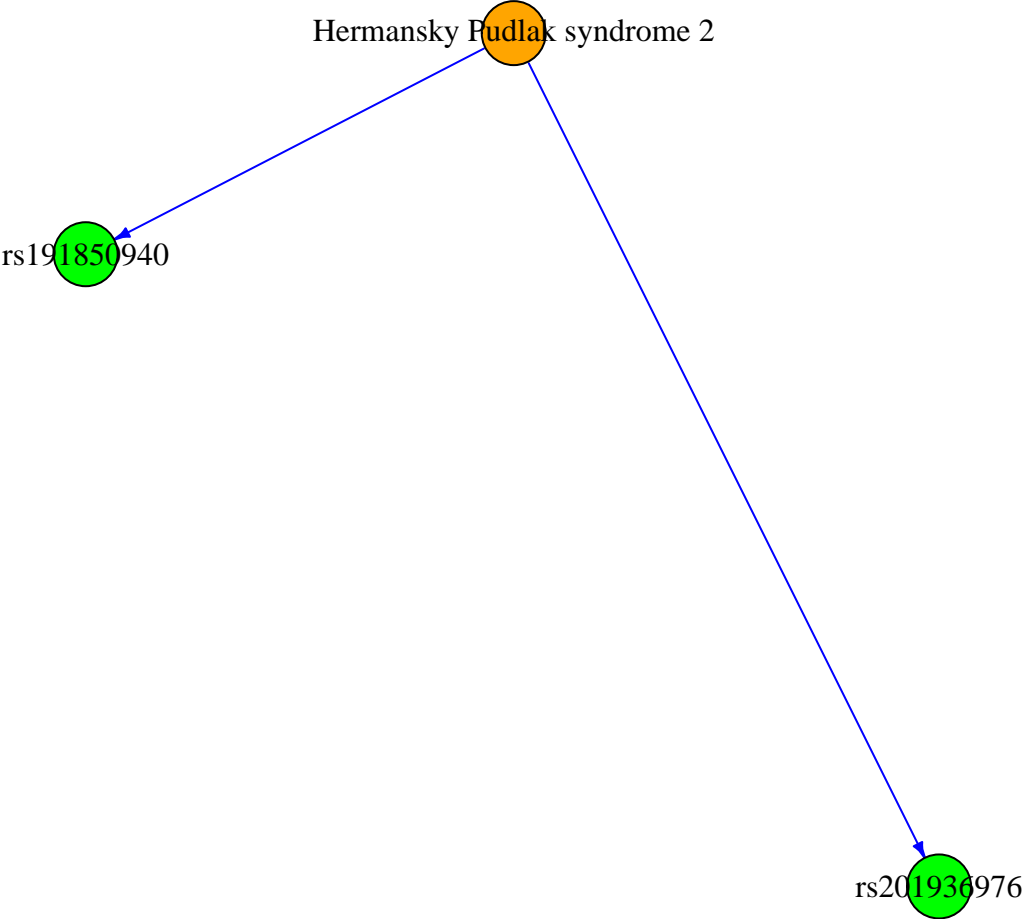

Variant–Disease Network (Hermansky–Pudlak syndrome)

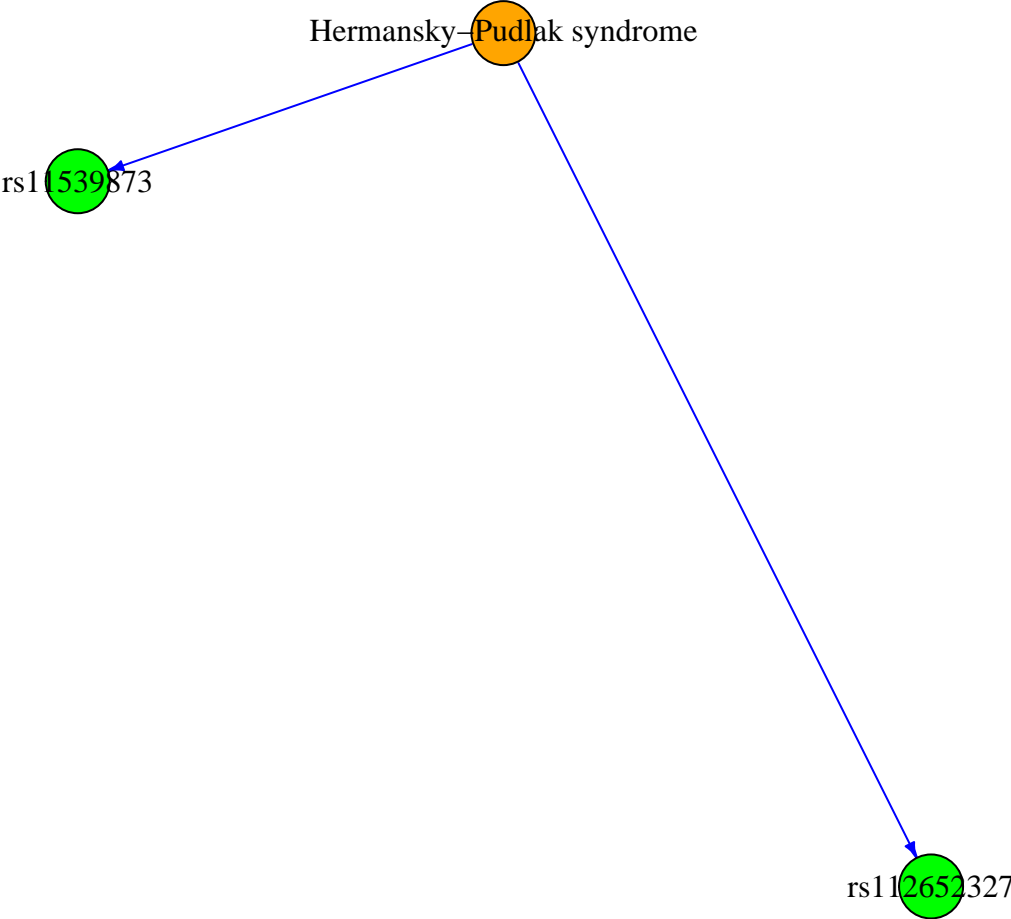

Variant–Disease Network (Heterotaxia)

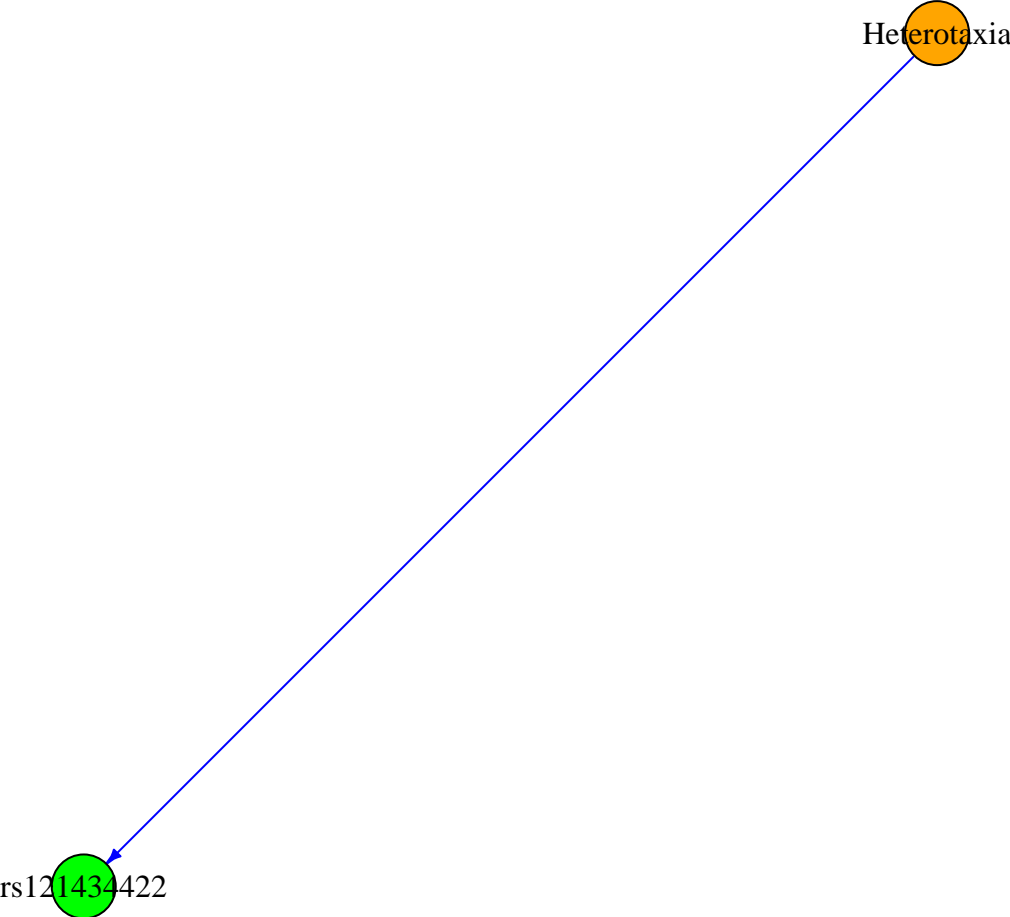

## Variant–Disease Network (Heterotopia)

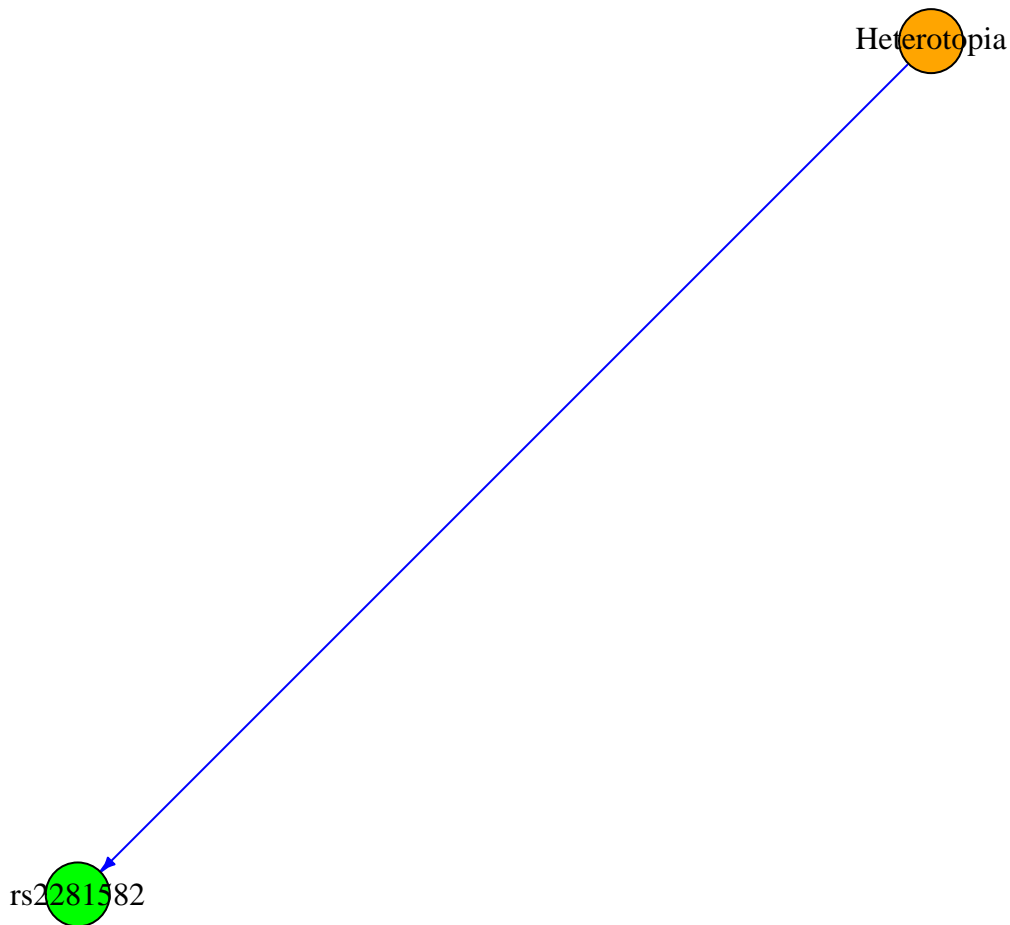

## Variant–Disease Network (Hirschsprung Disease)

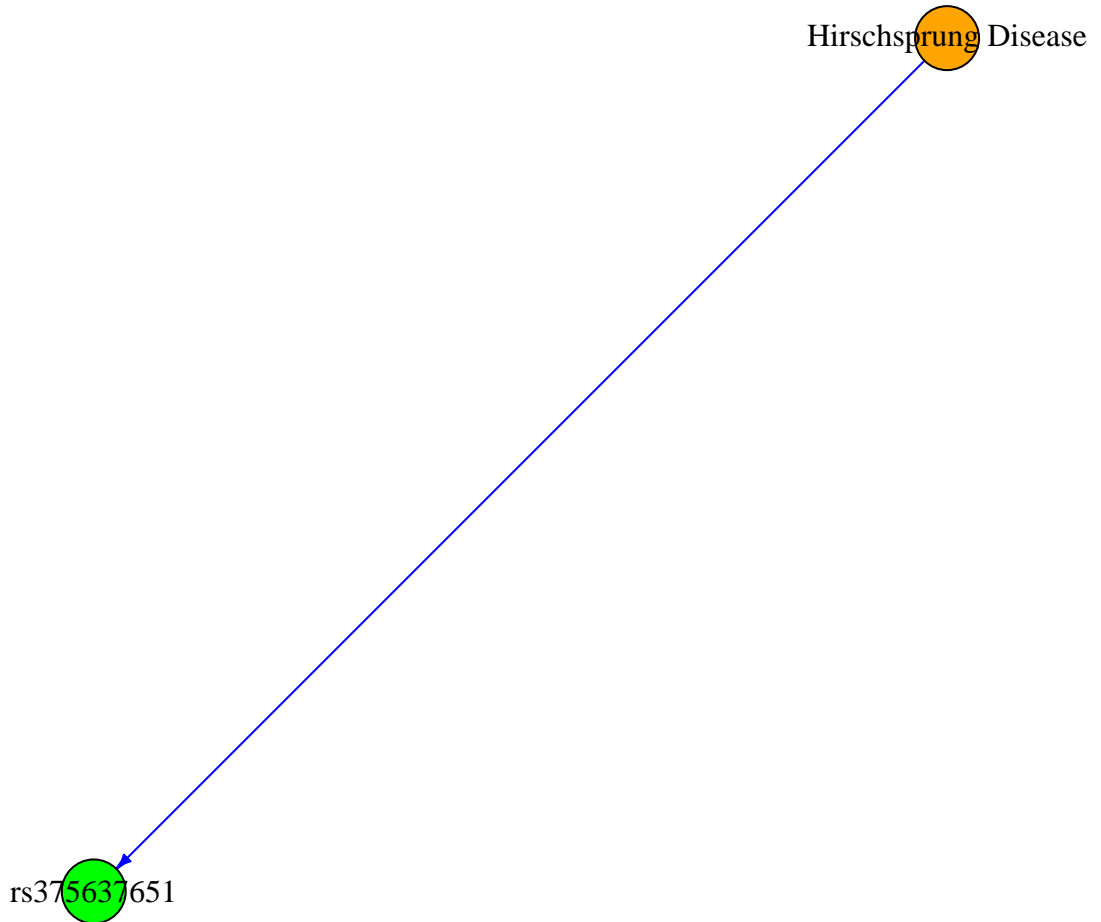

## Variant–Disease Network (Histiocytic medullary reticulosis)

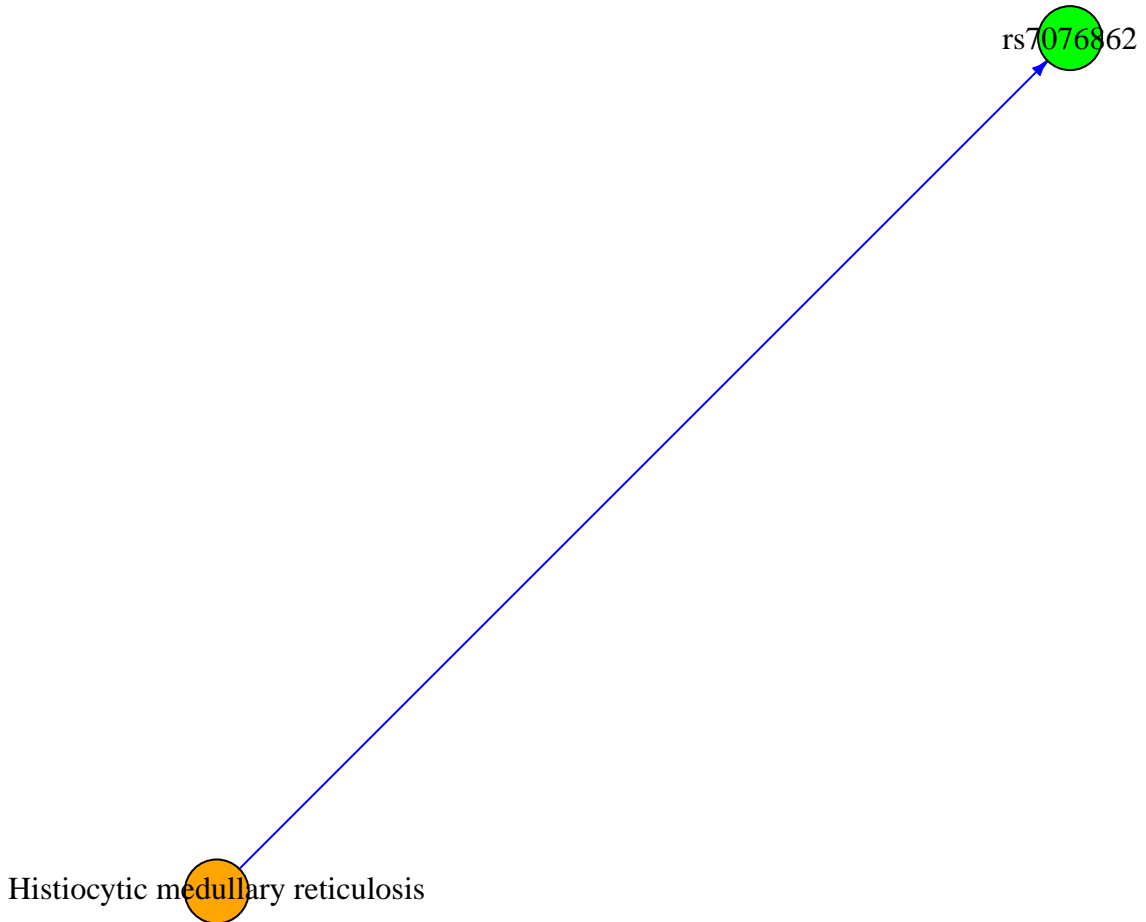

Variant–Disease Network (Histiocytosis–lymphadenopathy plus syndrome)

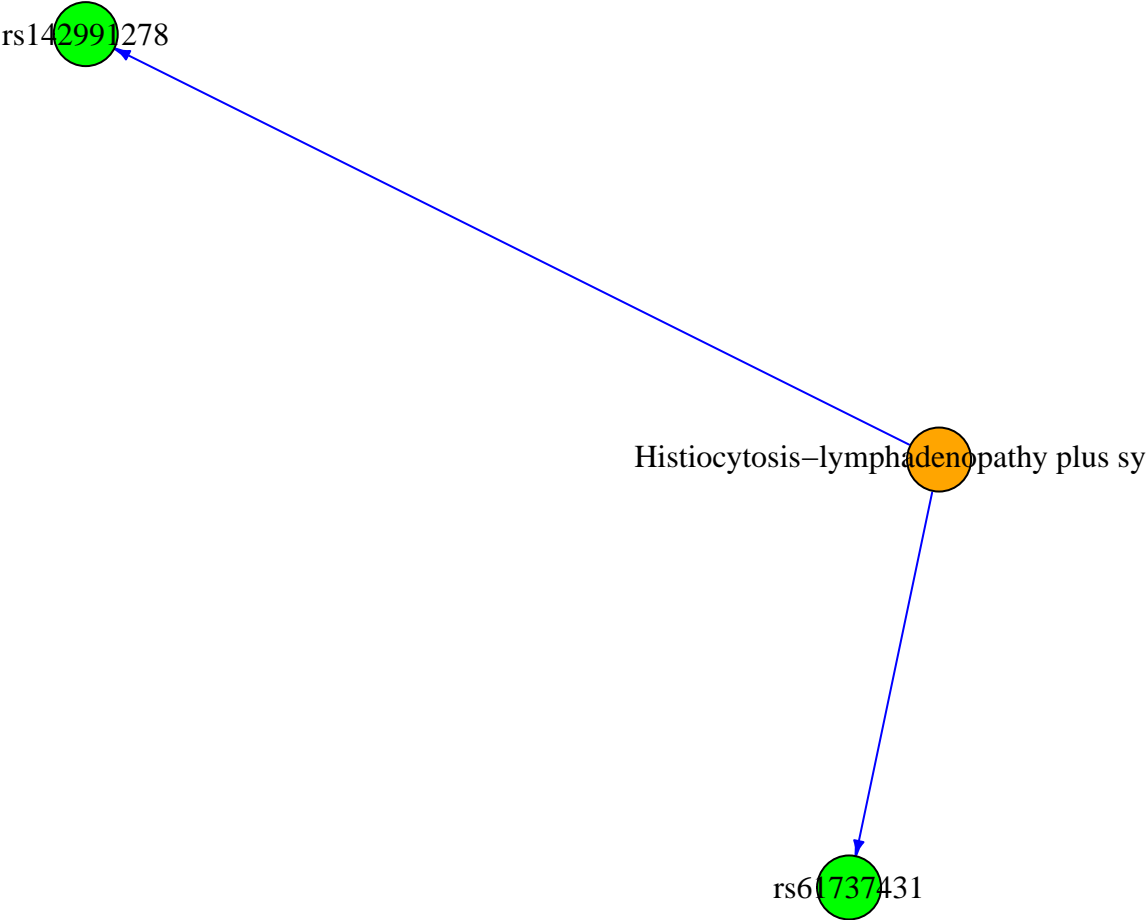



## Variant–Disease Network (History of neurodevelopmental disorder)

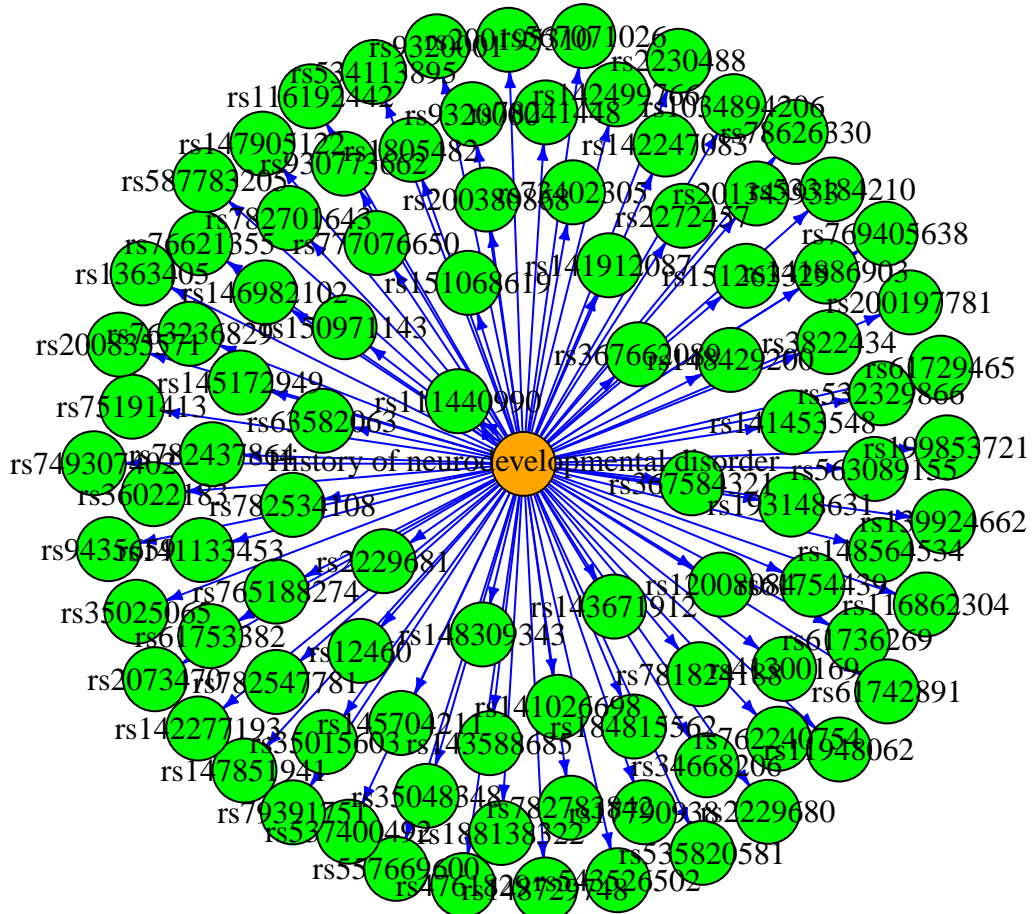

## Variant–Disease Network (HNSHA due to aldolase A deficiency)

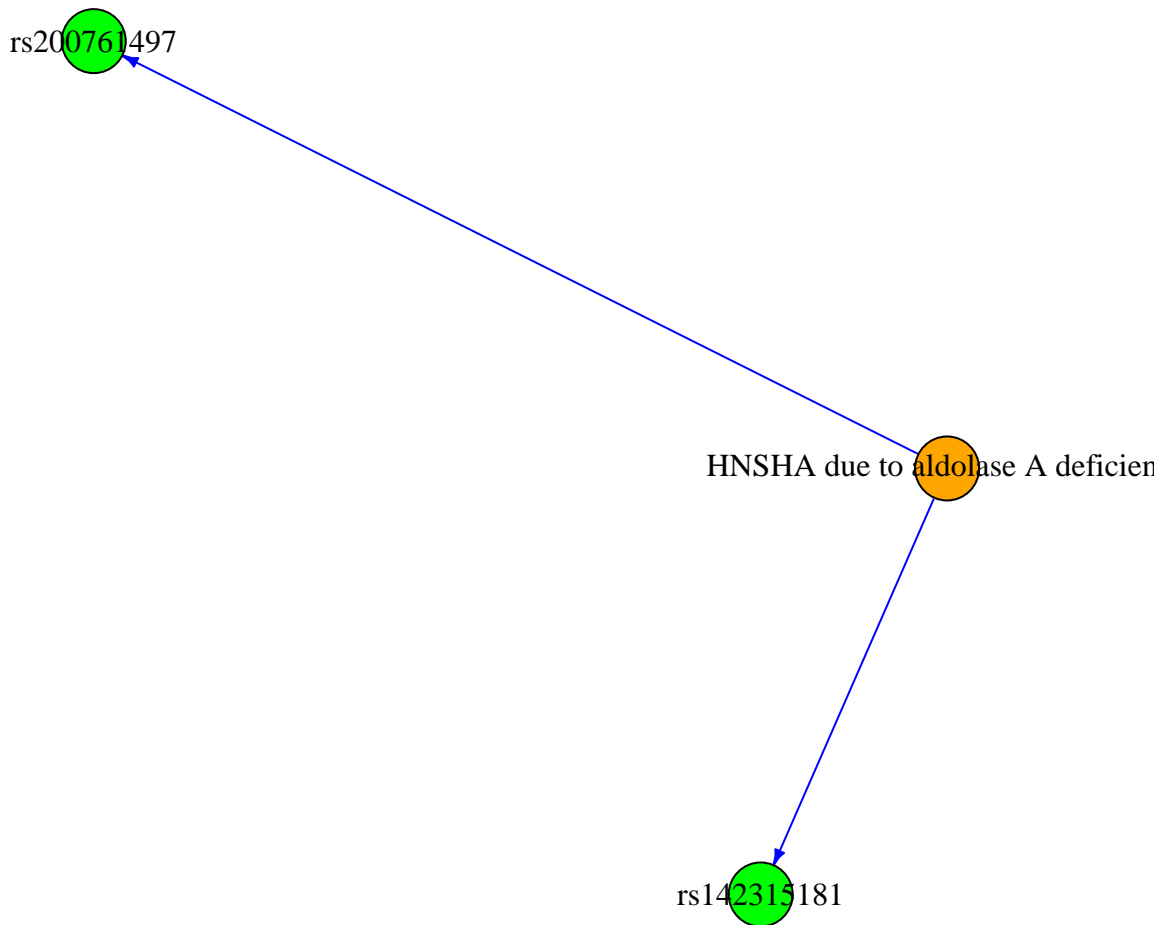

## Variant-Disease Network (Holoprosencephaly 3)

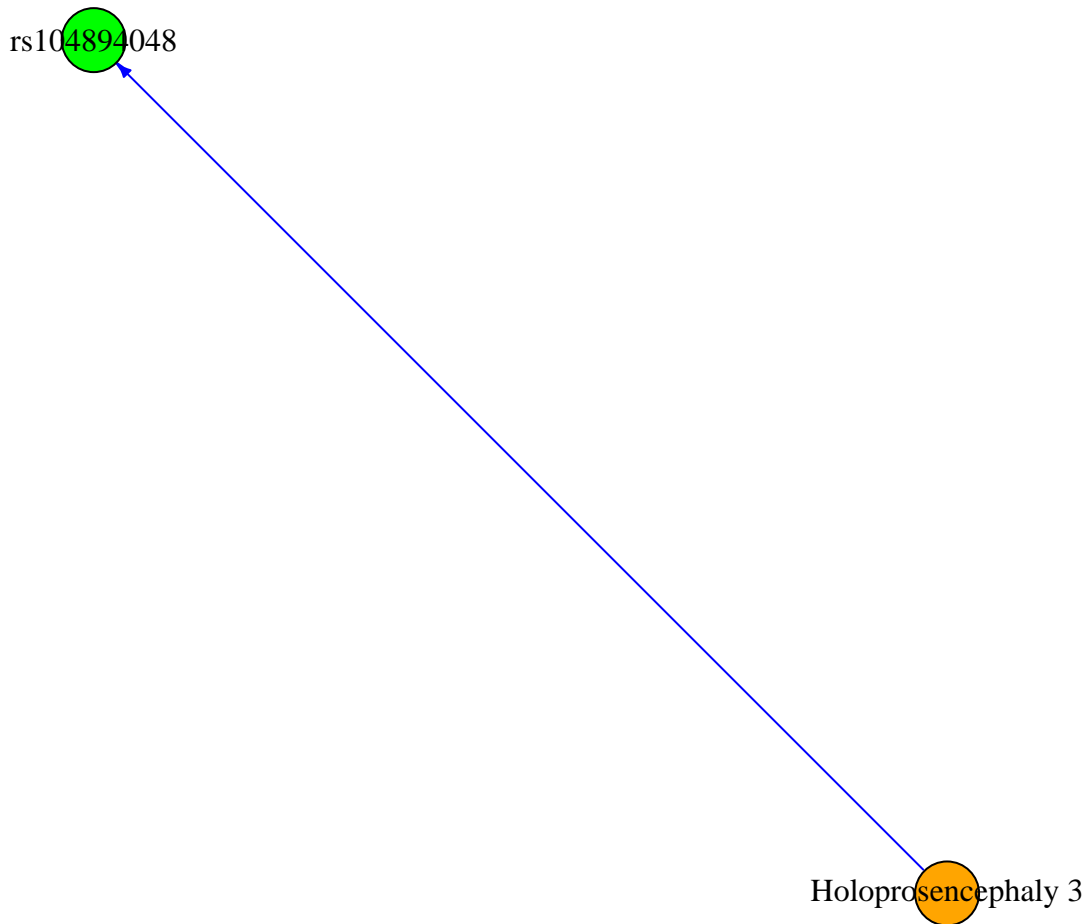

## Variant-Disease Network (Holoprosencephaly 4)

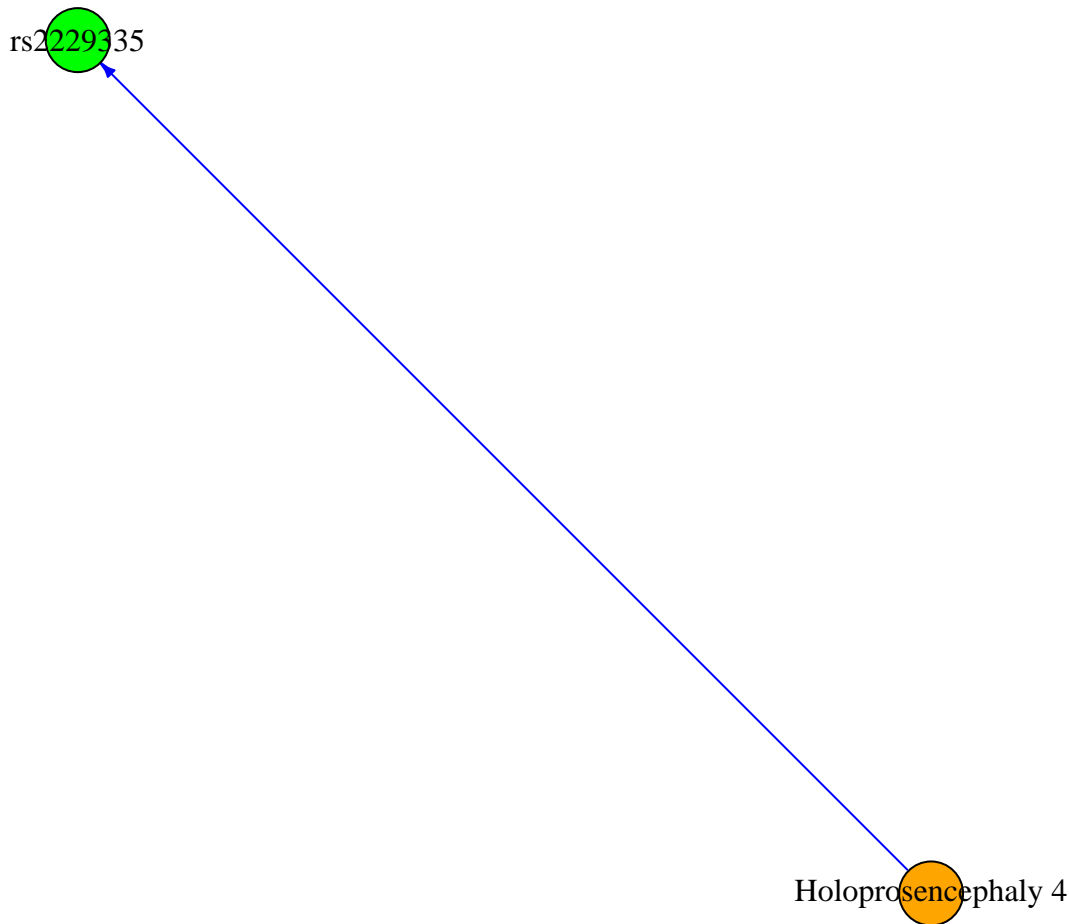

**Variant–Disease Network (Holoprosencephaly sequence)**

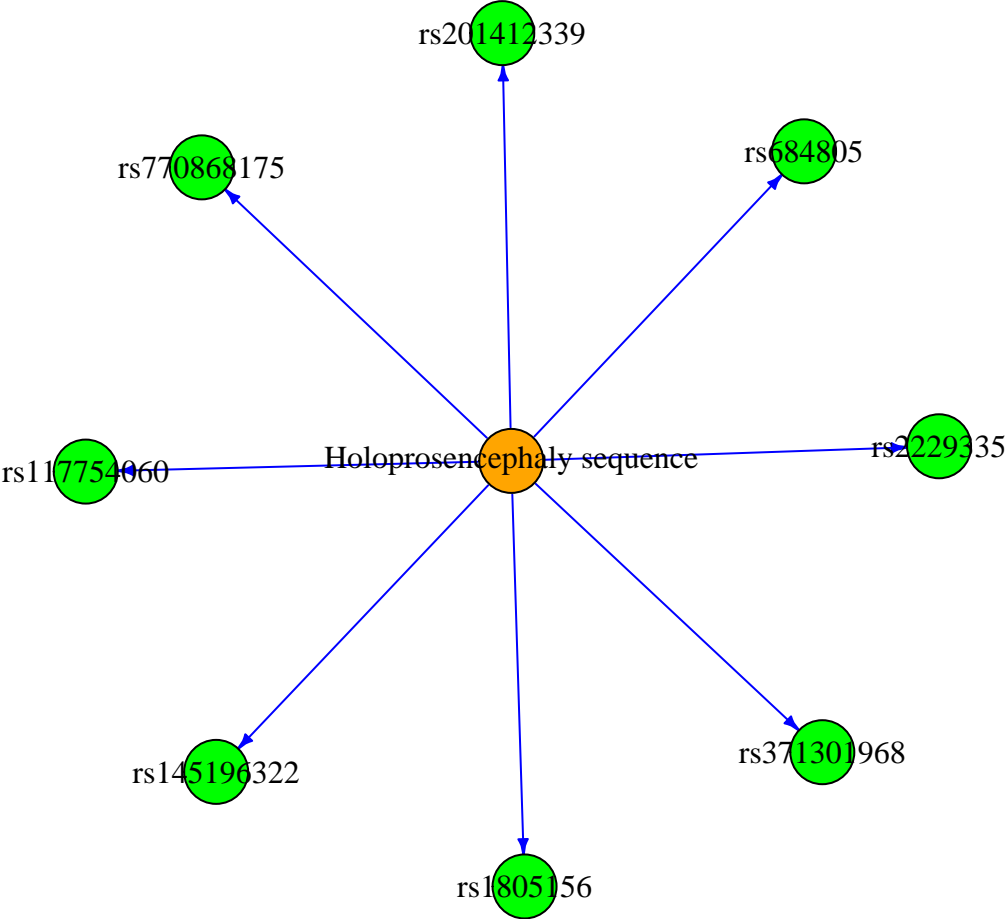

## Variant–Disease Network (Holt–Oram syndrome)

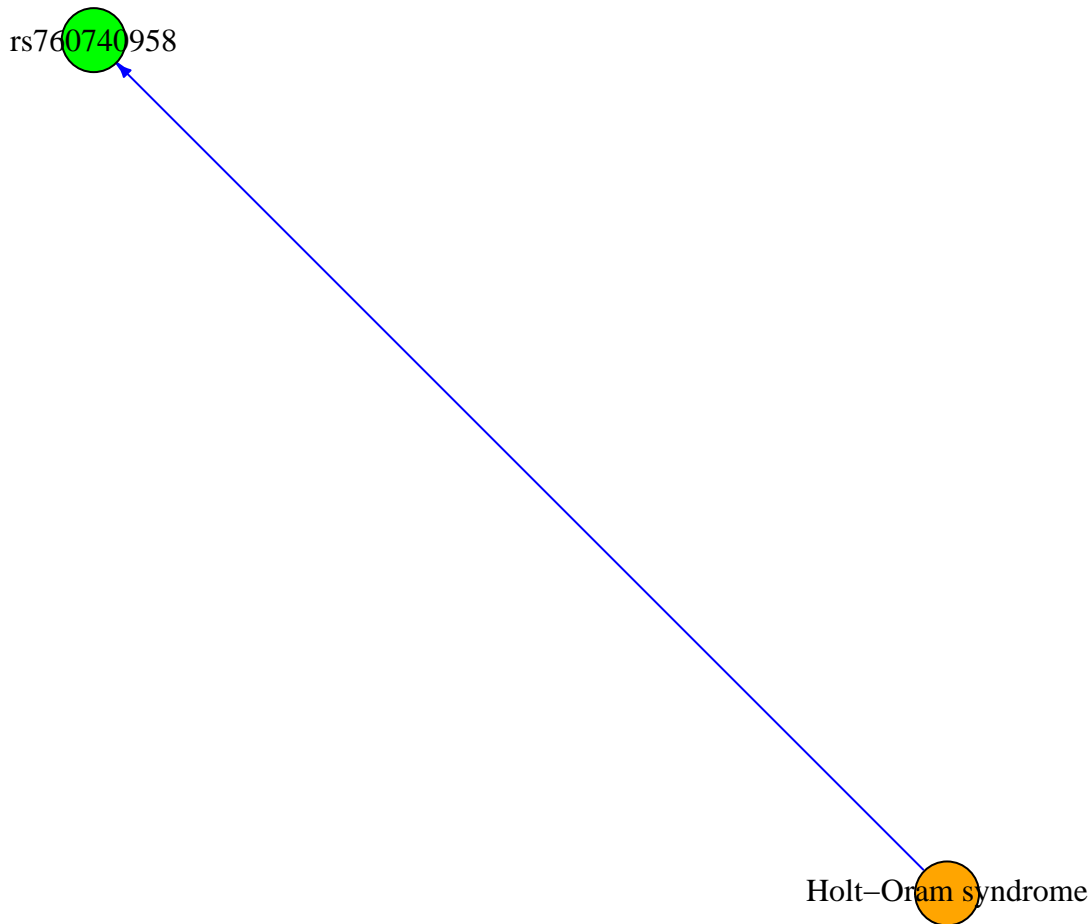

**Variant–Disease Network (Homocysteinemia due to MTHFR deficiency)**

rs35737219

Homocysteinemia due to MTHFR defi

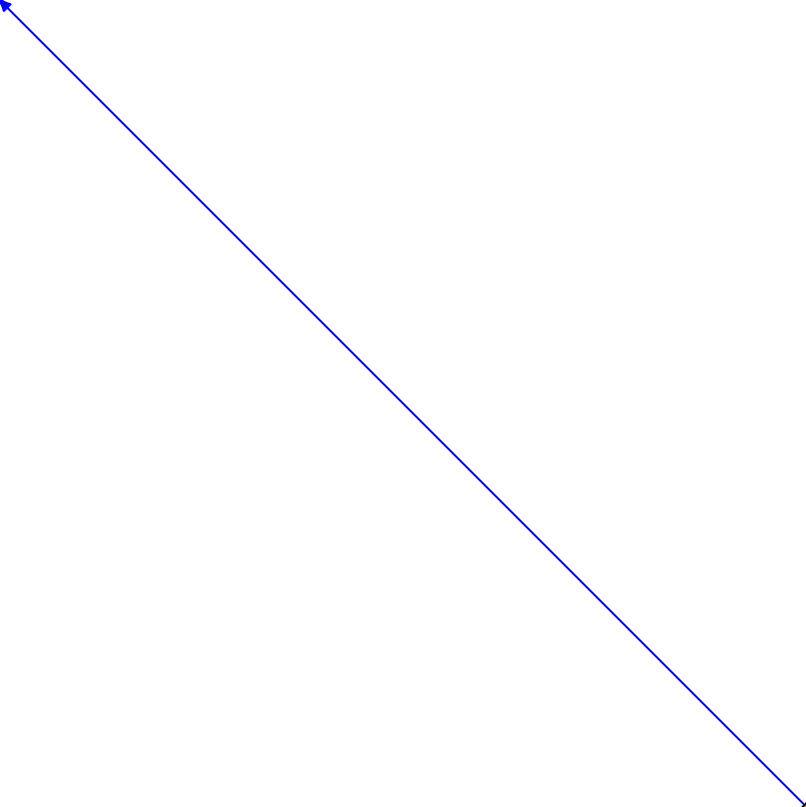

Variant–Disease Network (Homocystinuria)

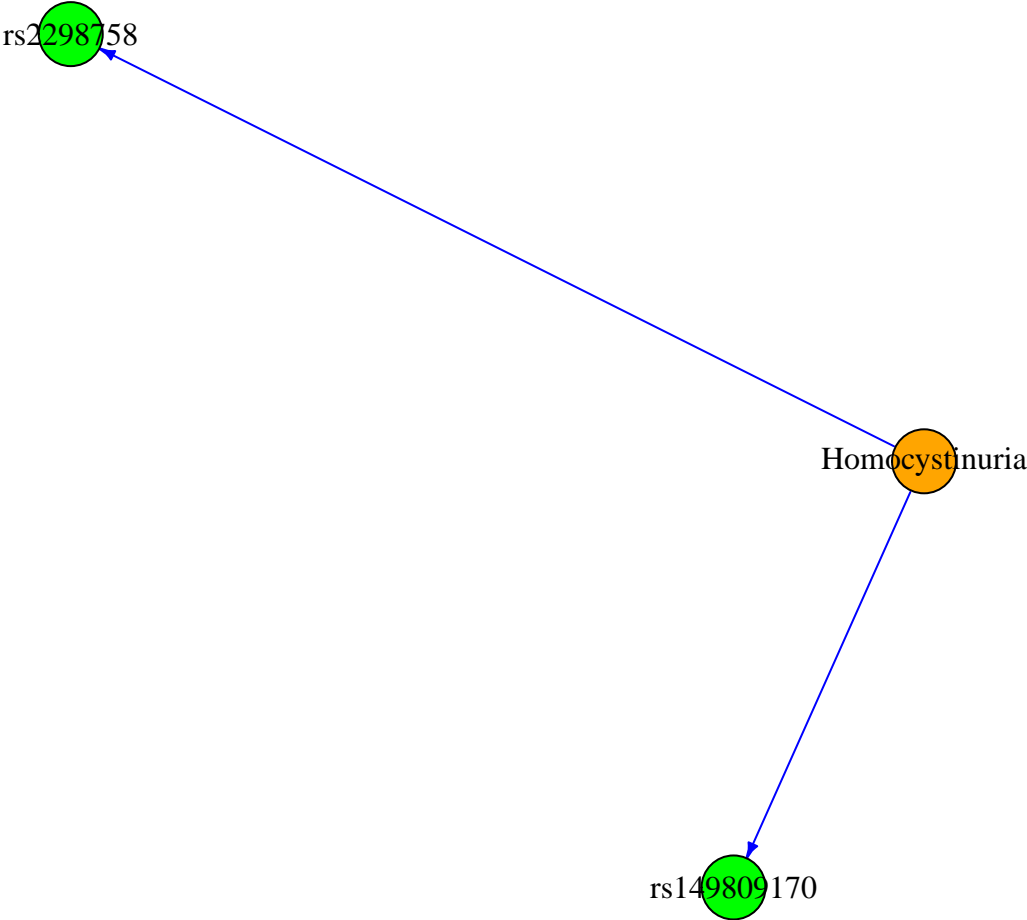



**Variant–Disease Network (Homocystinuria due to CBS deficiency)**

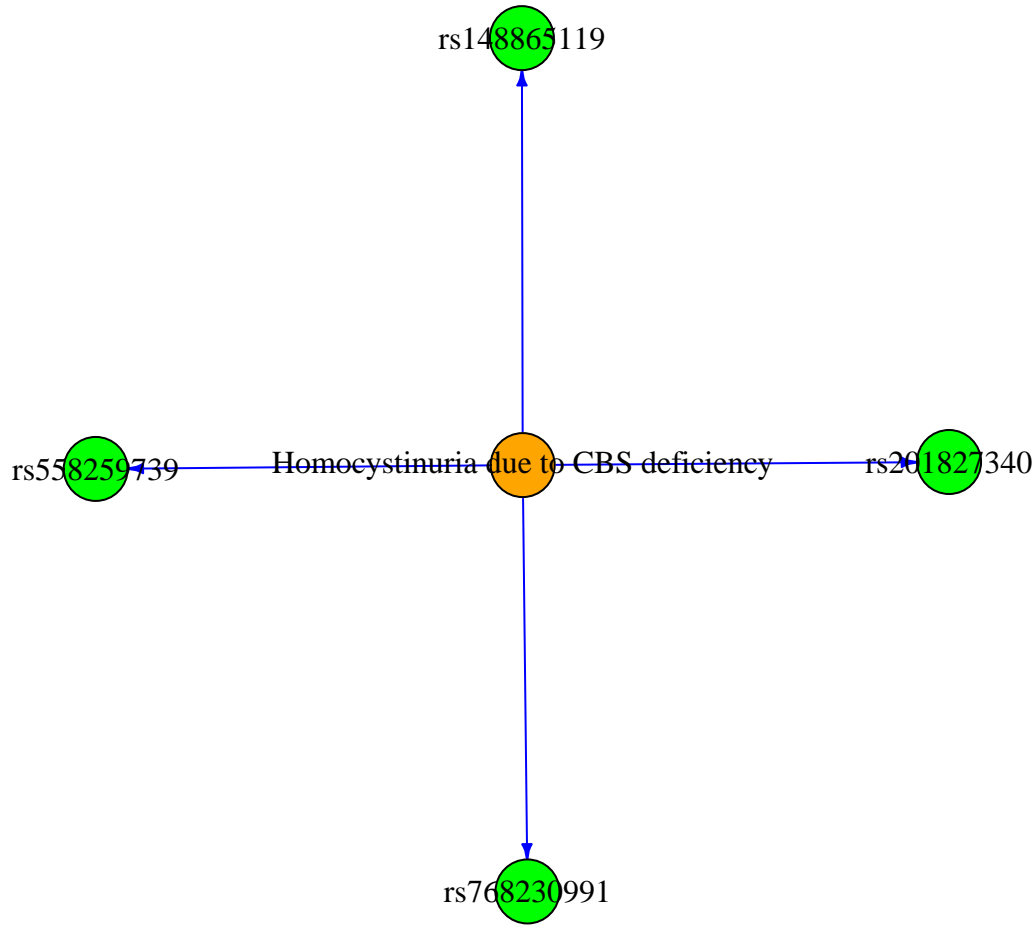

## Variant-Disease Network (Howel-Evans syndrome)

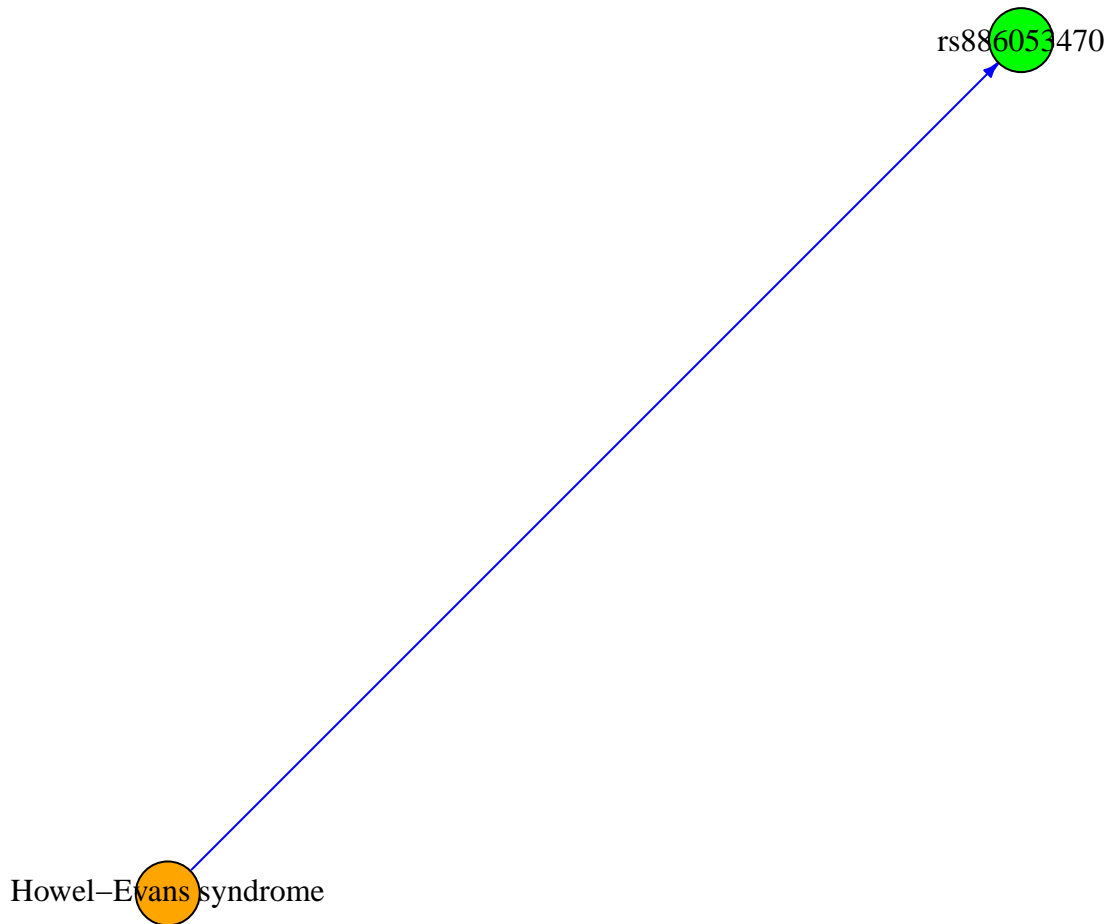

## Variant-Disease Network (Hurler syndrome)

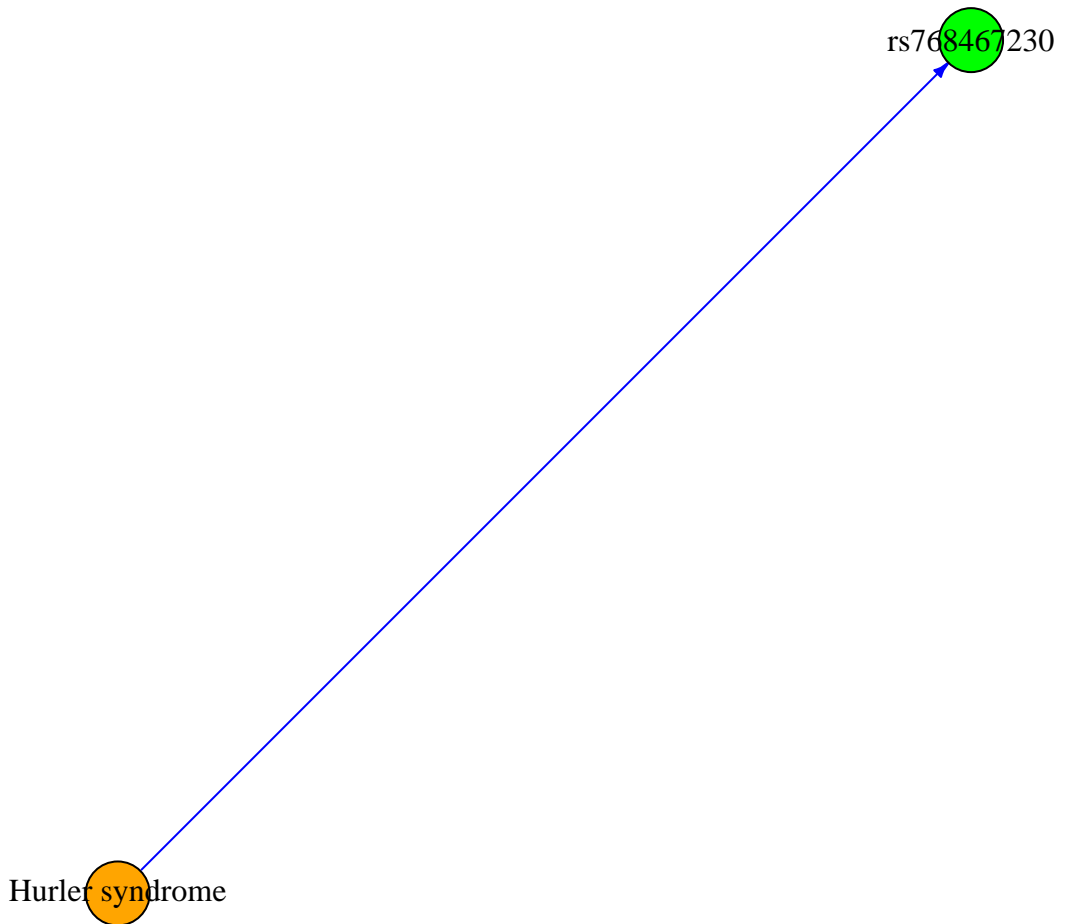

Variant–Disease Network (Hutchinson–Gilford syndrome)

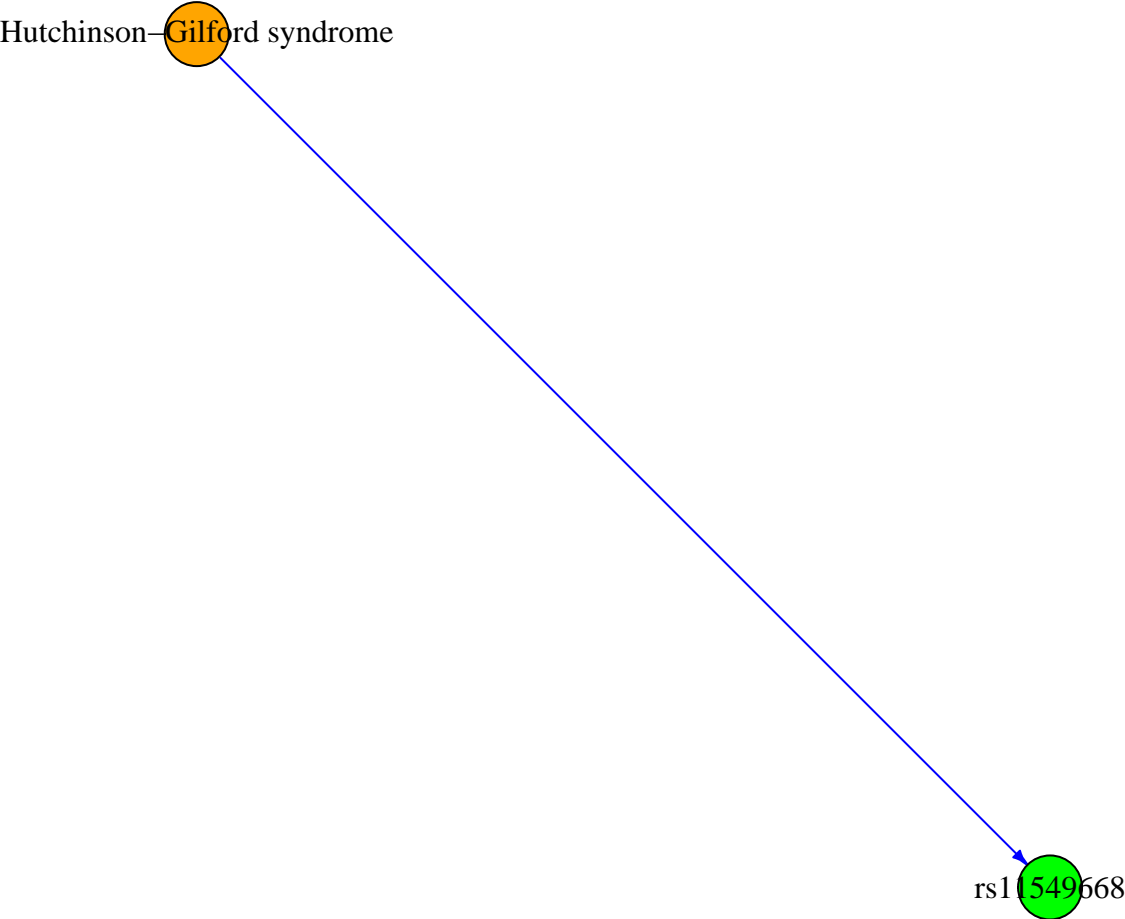

## Variant–Disease Network (Hyperaldosteronism)

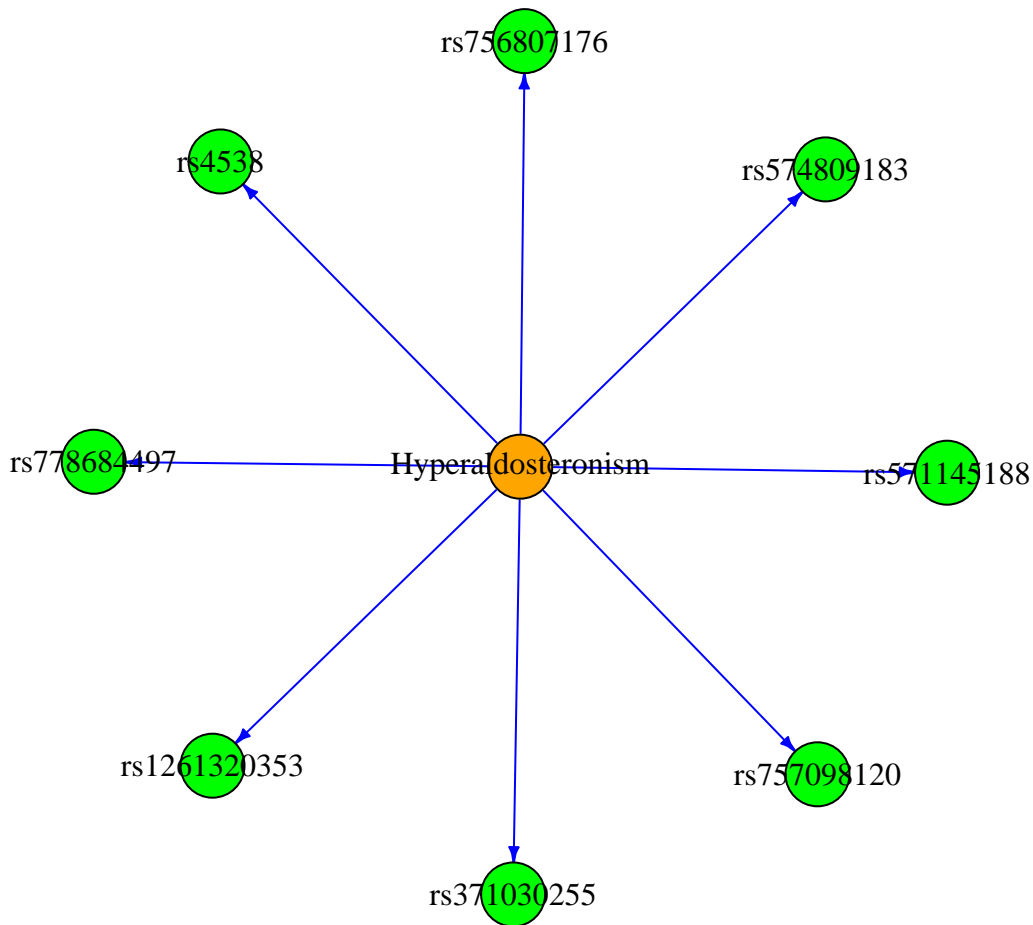

## Variant–Disease Network (Hyperekplexia)

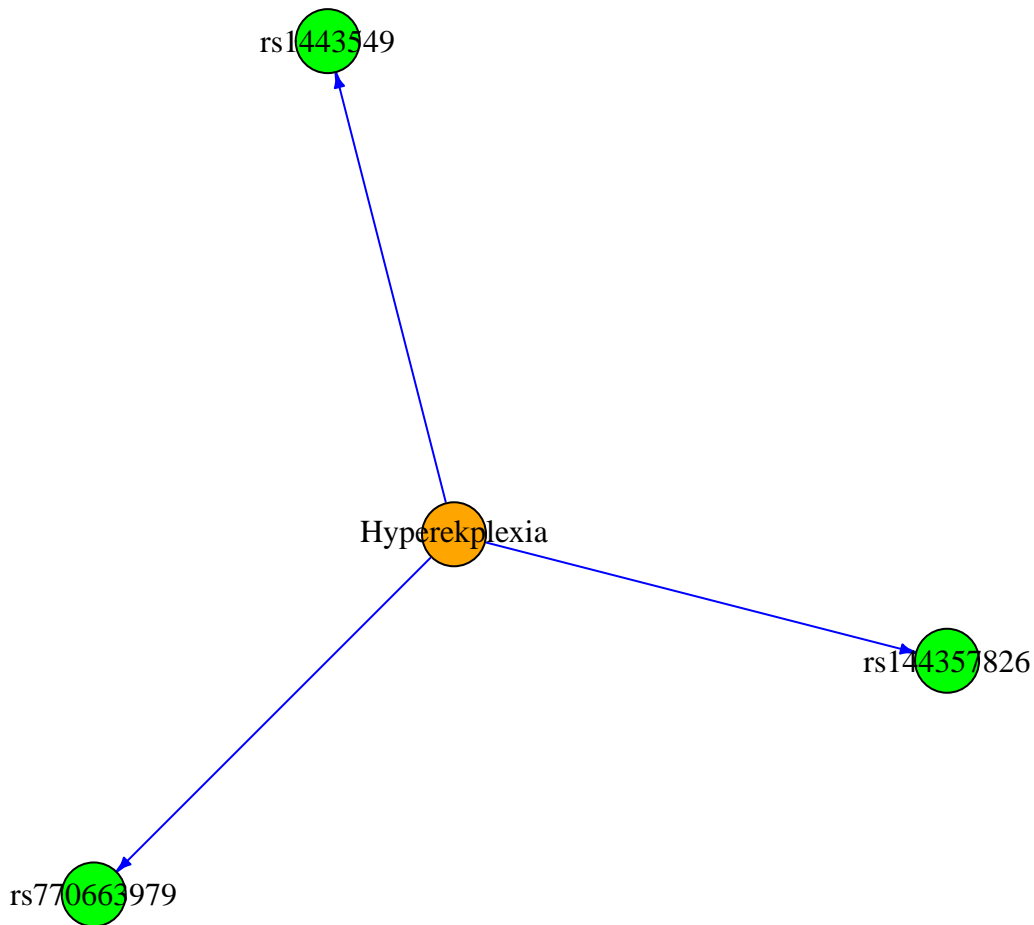

Variant–Disease Network (Hyperekplexia 1)

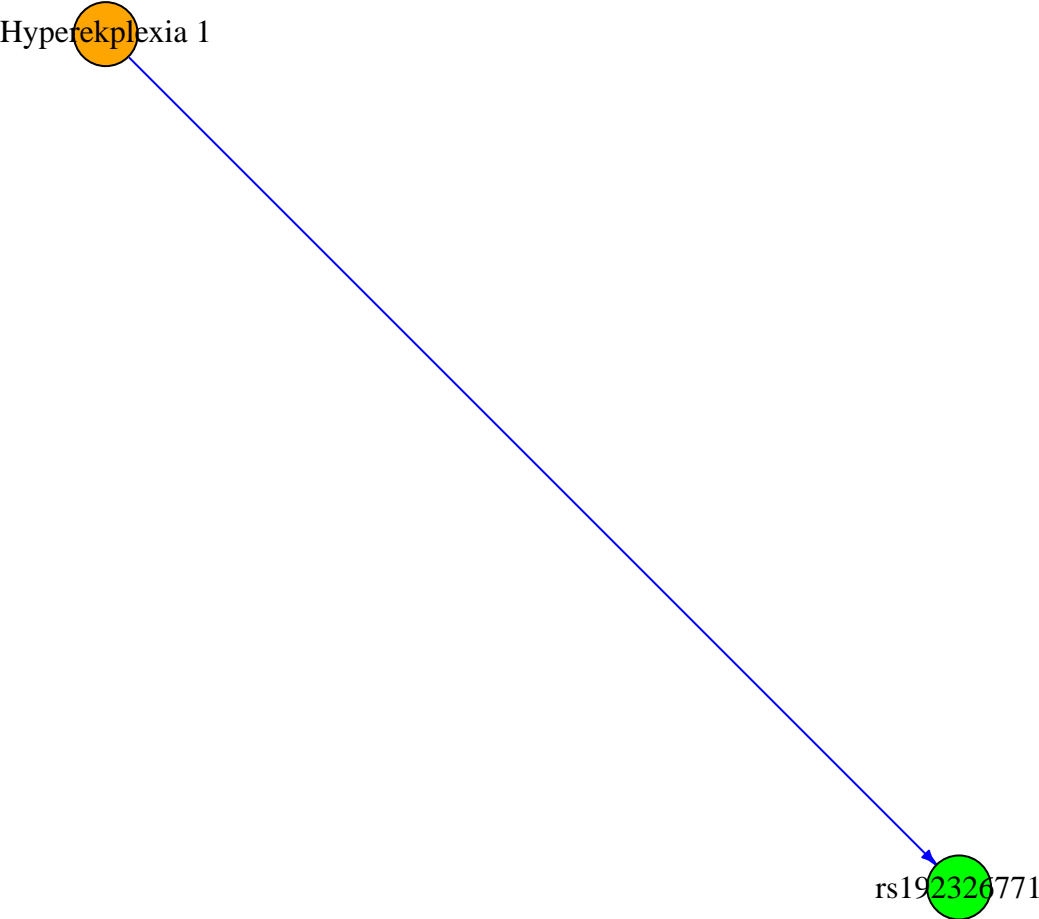

## Variant–Disease Network (Hyperekplexia 3)

Hyperekplexia 3

rs1443549

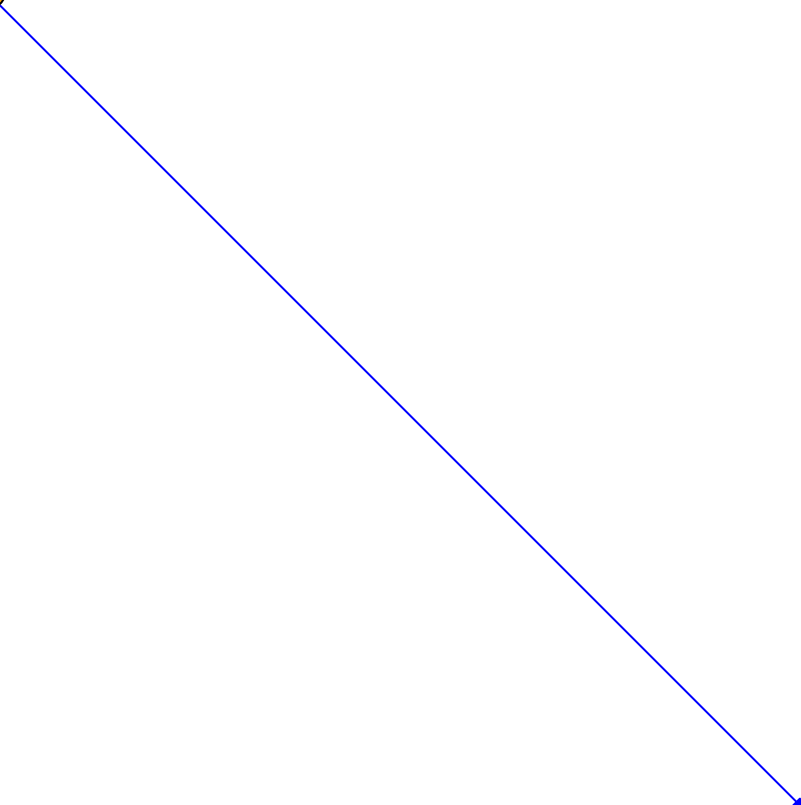



Variant–Disease Network (Hyperglycinuria)

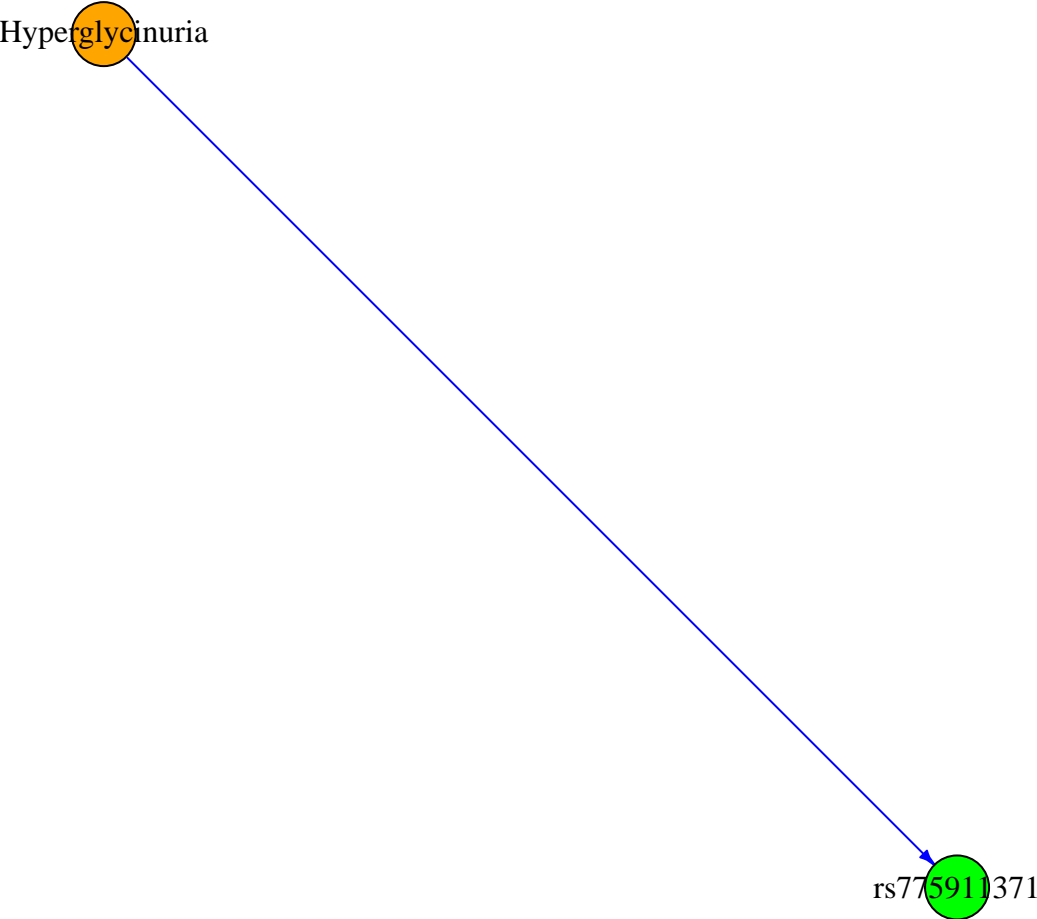

**Variant–Disease Network (Hyper–IgE recurrent infection syndrome 1)**

rs147955721

Hyper–IgE recurrent infection syndrome 1

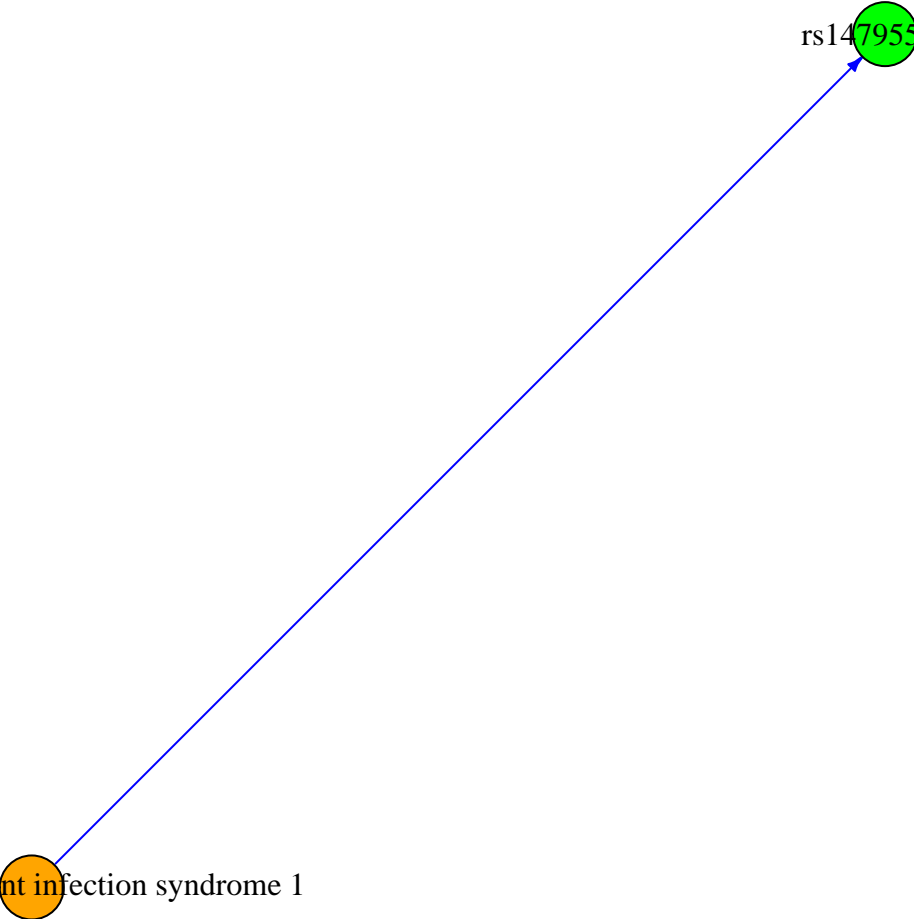

## Variant-Disease Network (Hyper-IgE syndrome)

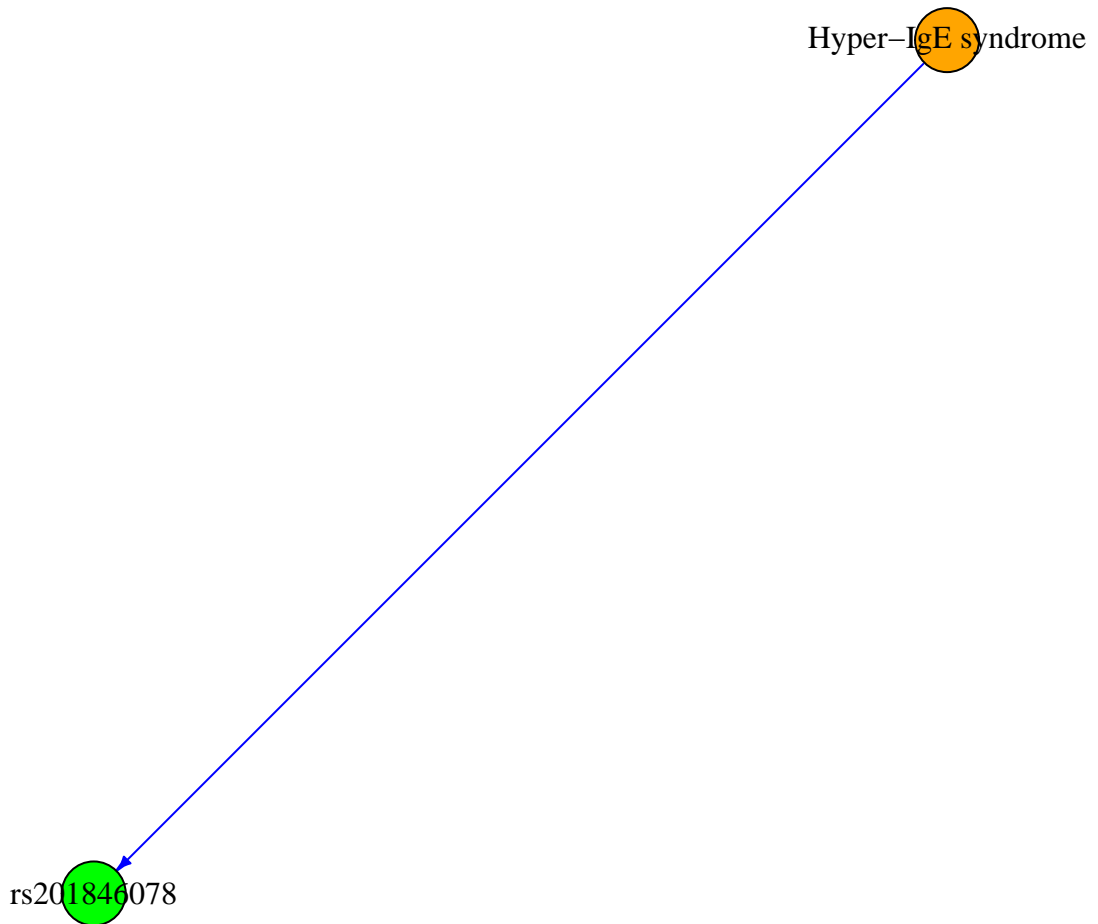

## Variant–Disease Network (Hyperinsulinemic hypoglycemia)

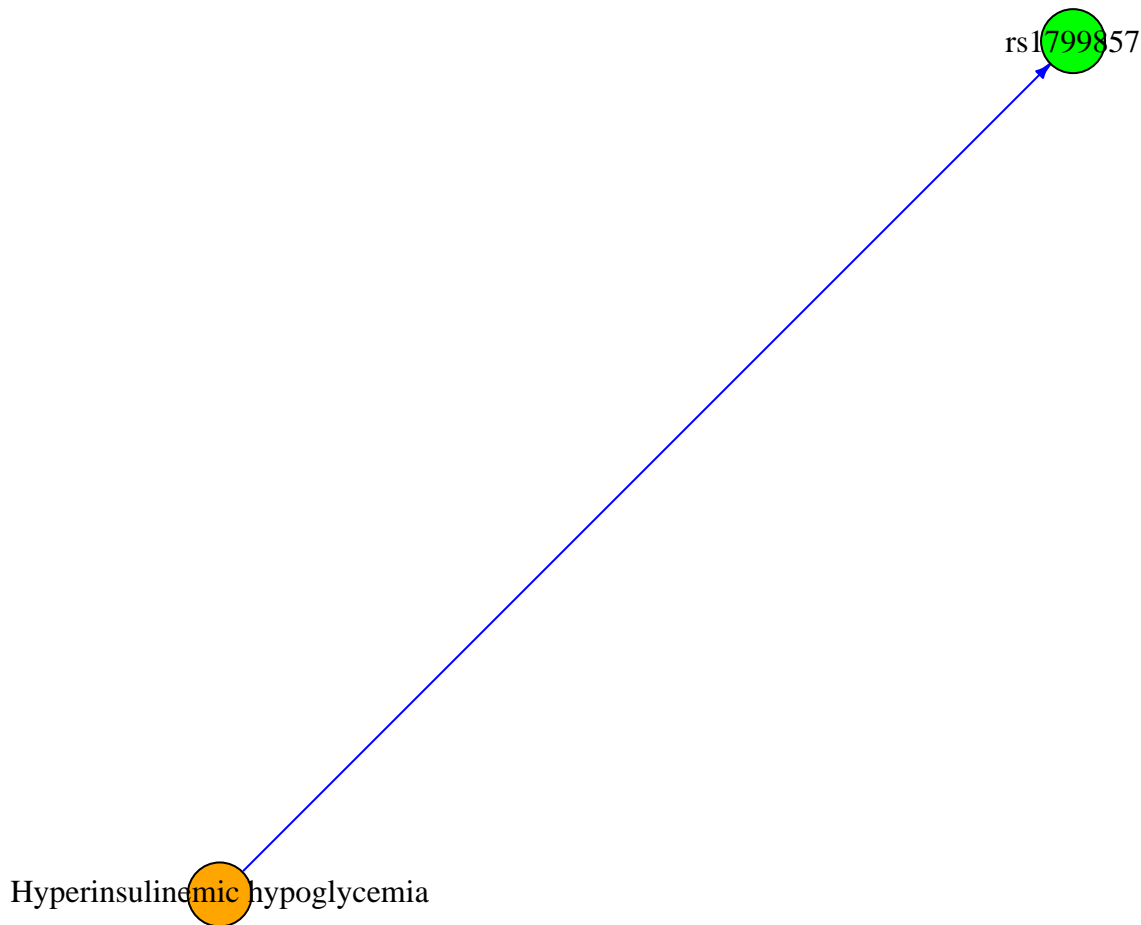

## Variant–Disease Network (Hyperinsulinism)

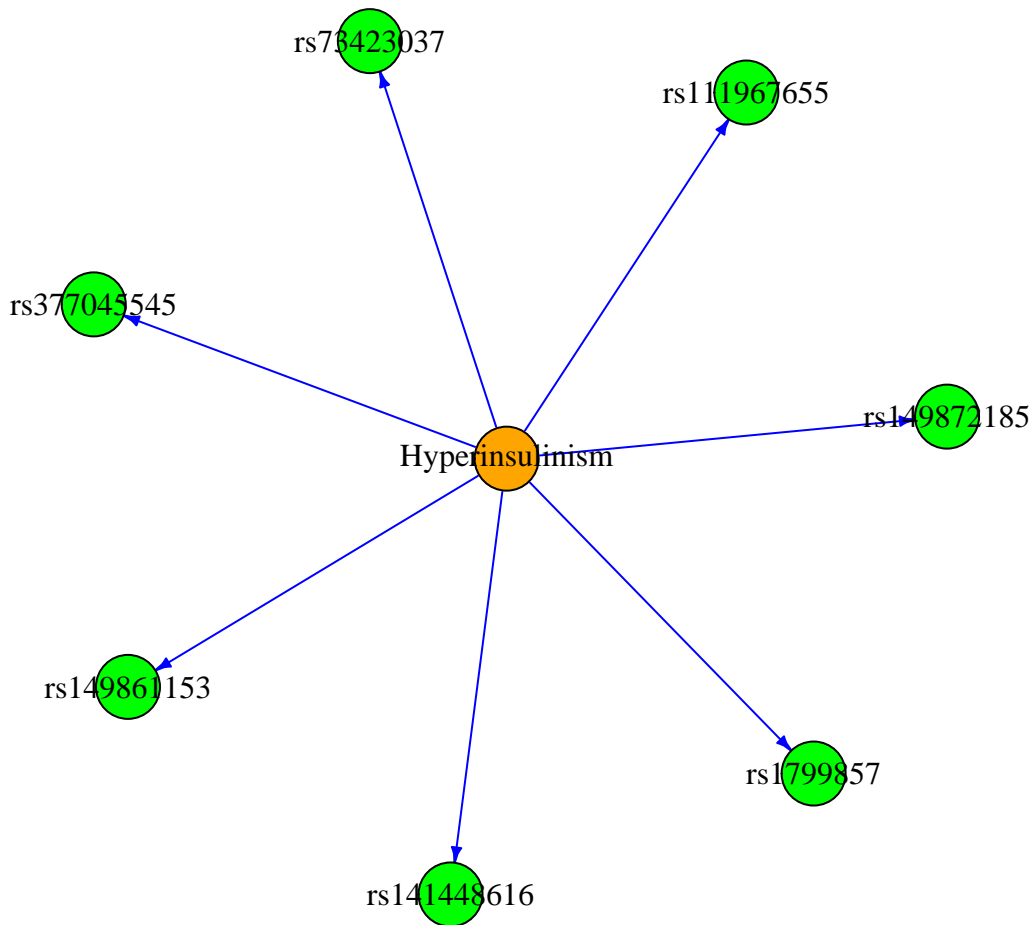

# Variant–Disease Network (Hyperkalemic Periodic Paralysis)

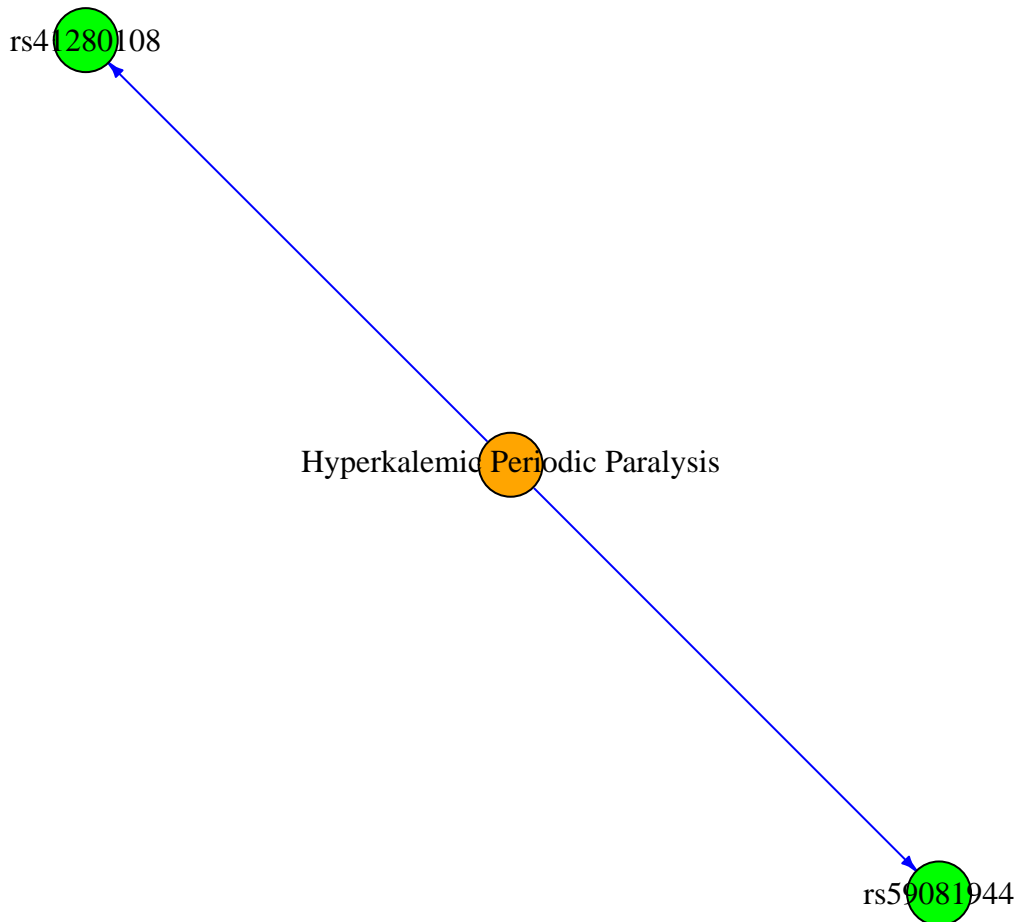

# Variant–Disease Network (Hyperkalemic Periodic Paralysis Type 1)

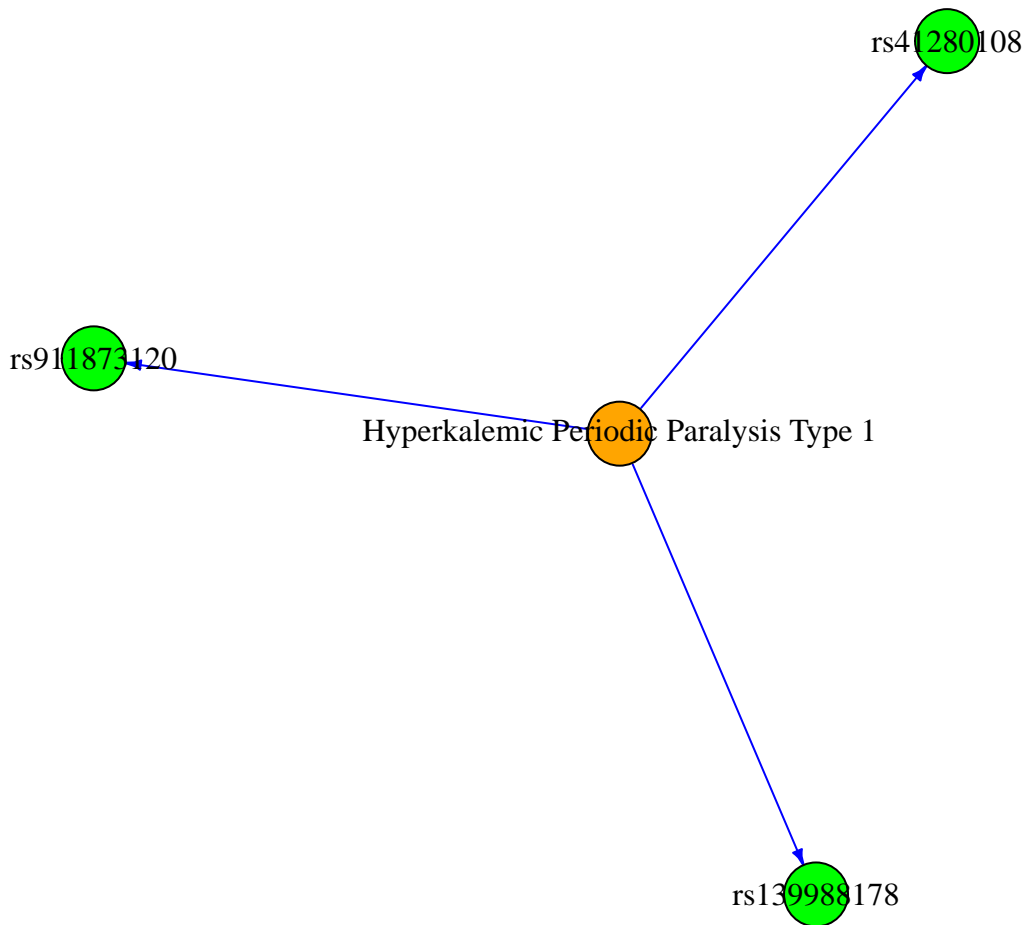

## Variant–Disease Network (Hyperlipoproteinemia)

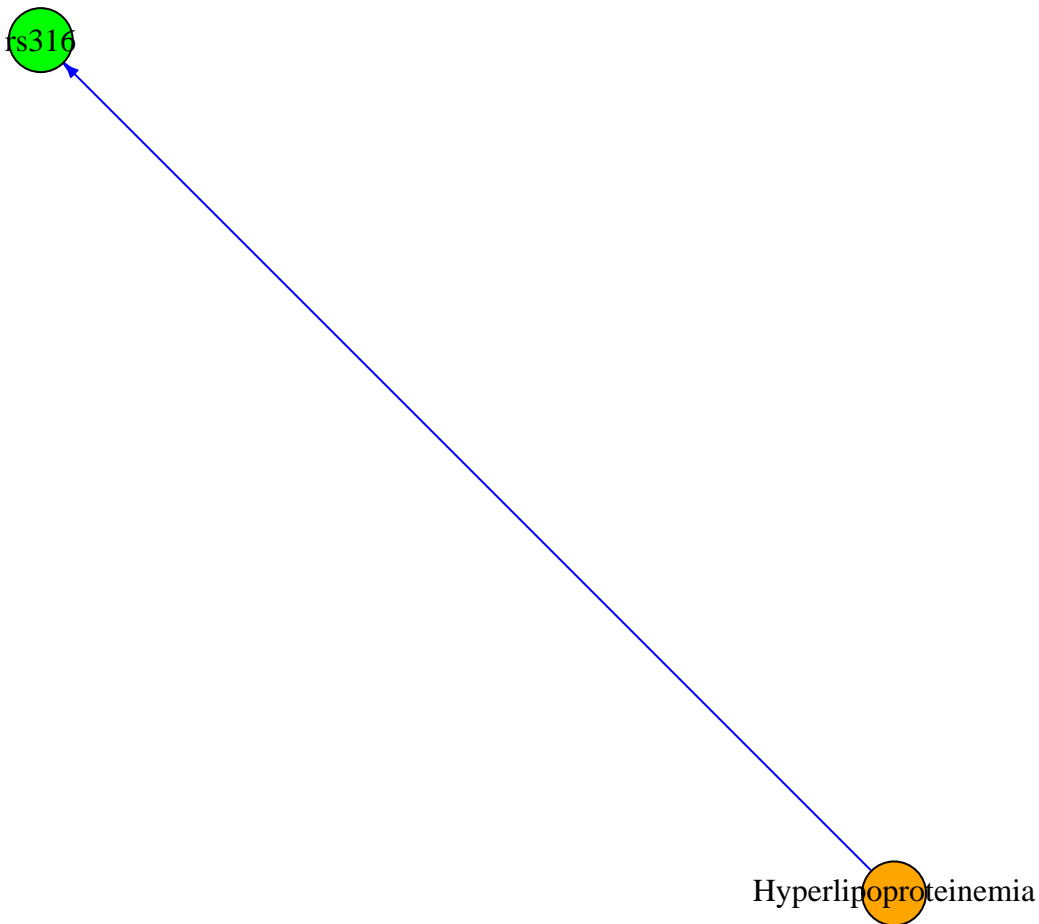



## Variant-Disease Network (Hypermethioninemia)

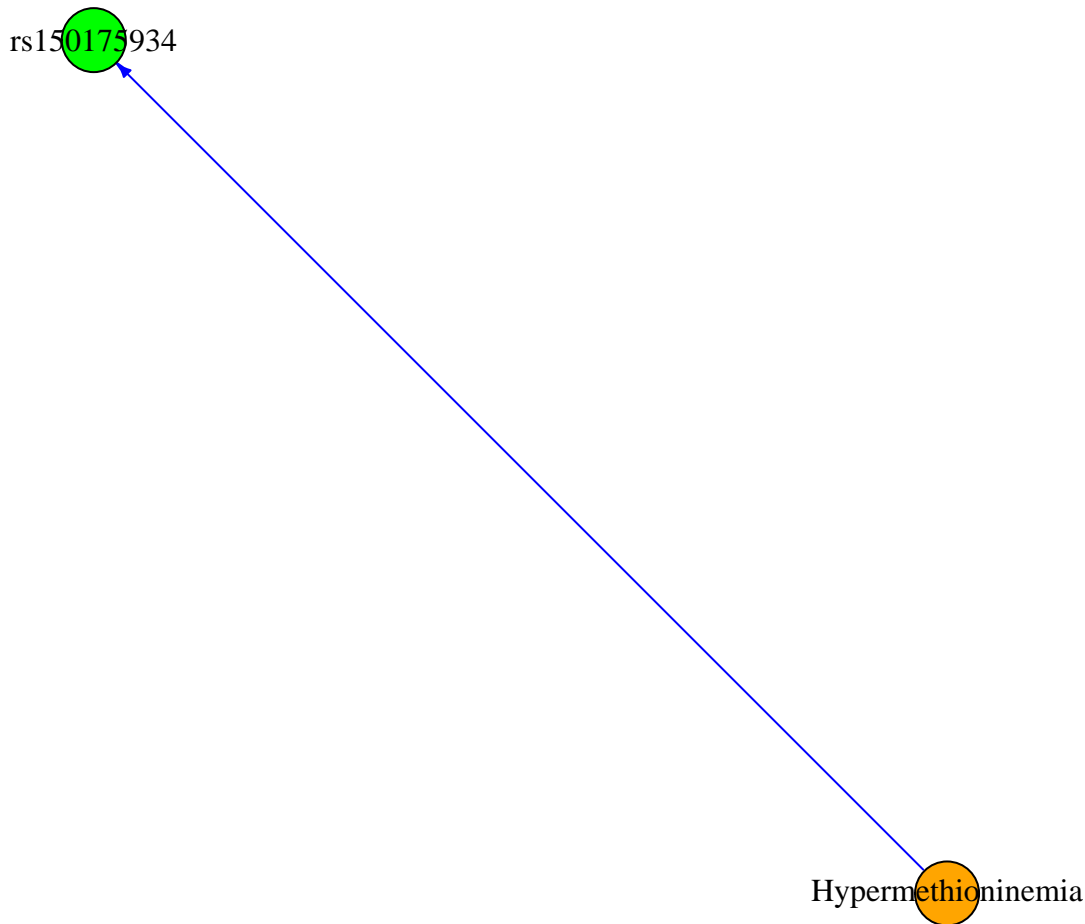

# -Disease Network (Hyperornithinemia–hyperammonemia–homocitrullinuria

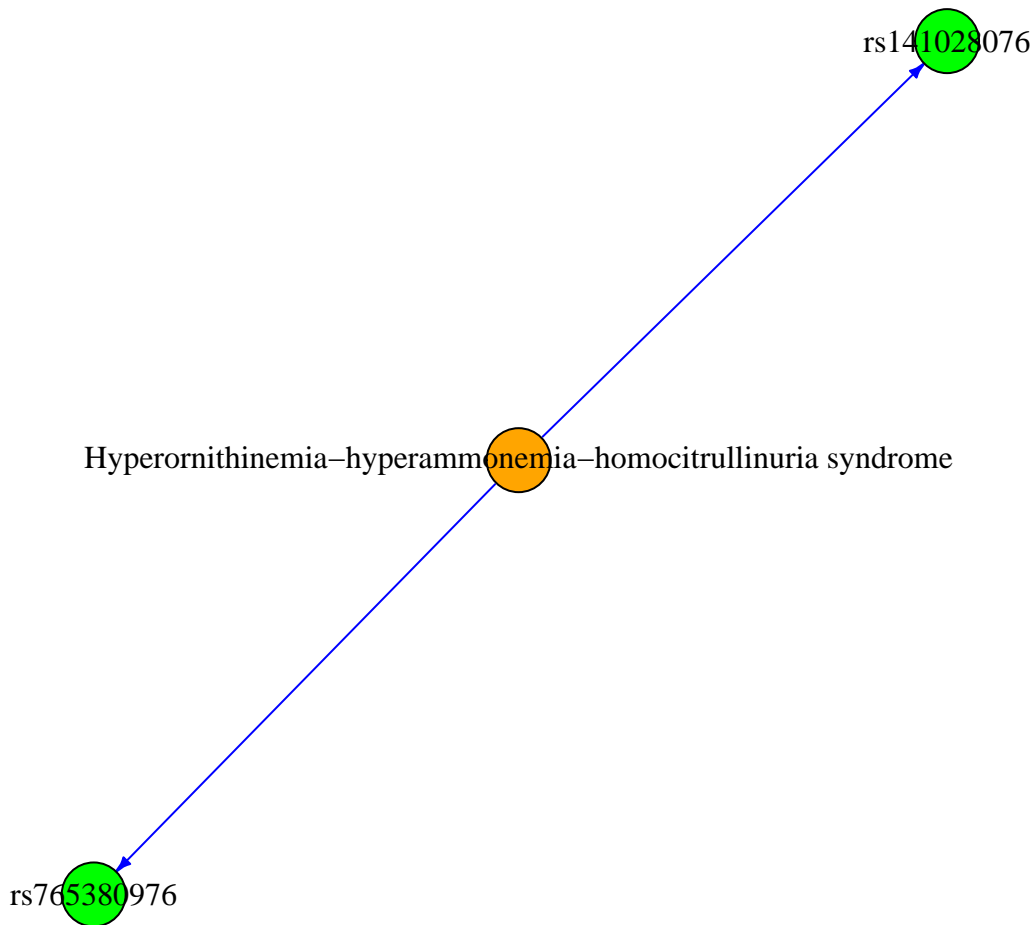

## Variant-Disease Network (Hyperparathyroidism 2)

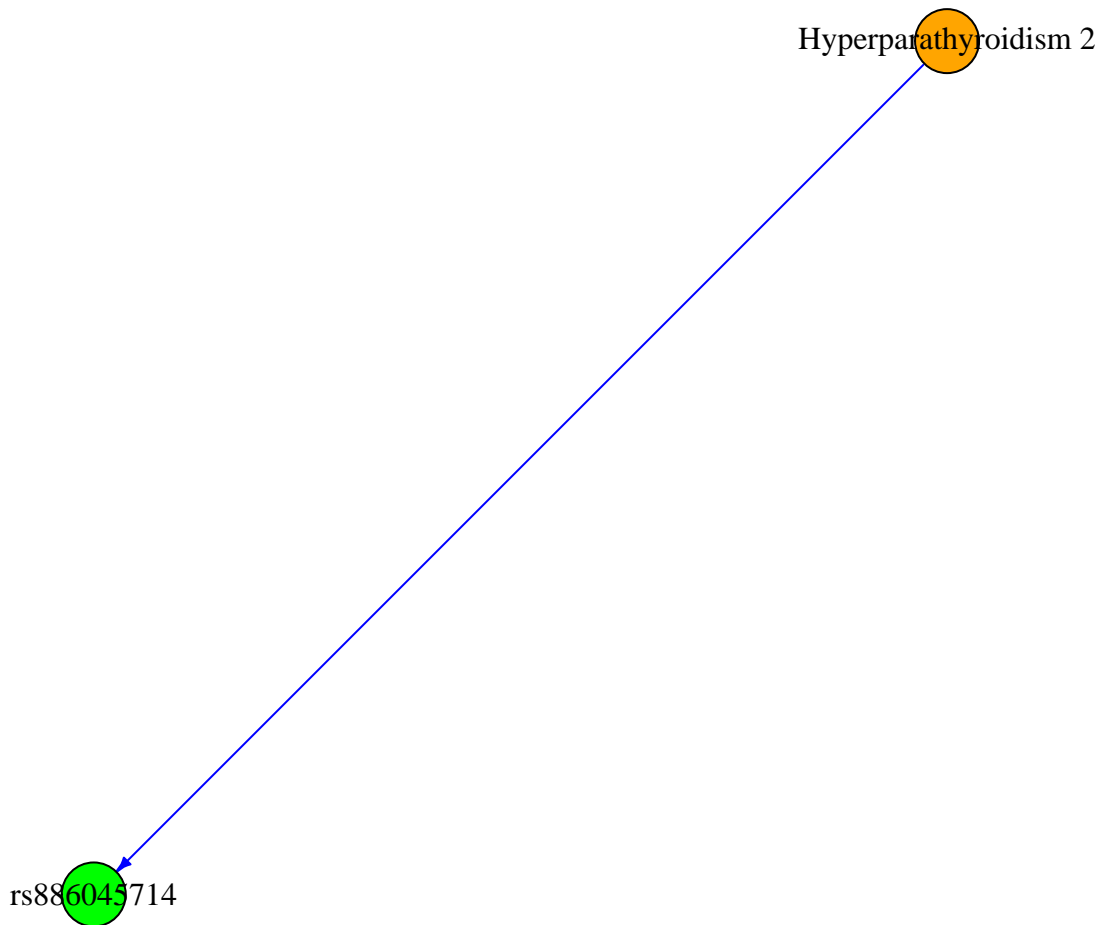

Variant–Disease Network (Hyperphosphatasia–intellectual disability syndrome)

rs775041042

Hyperphosphatasia–intellectual disability

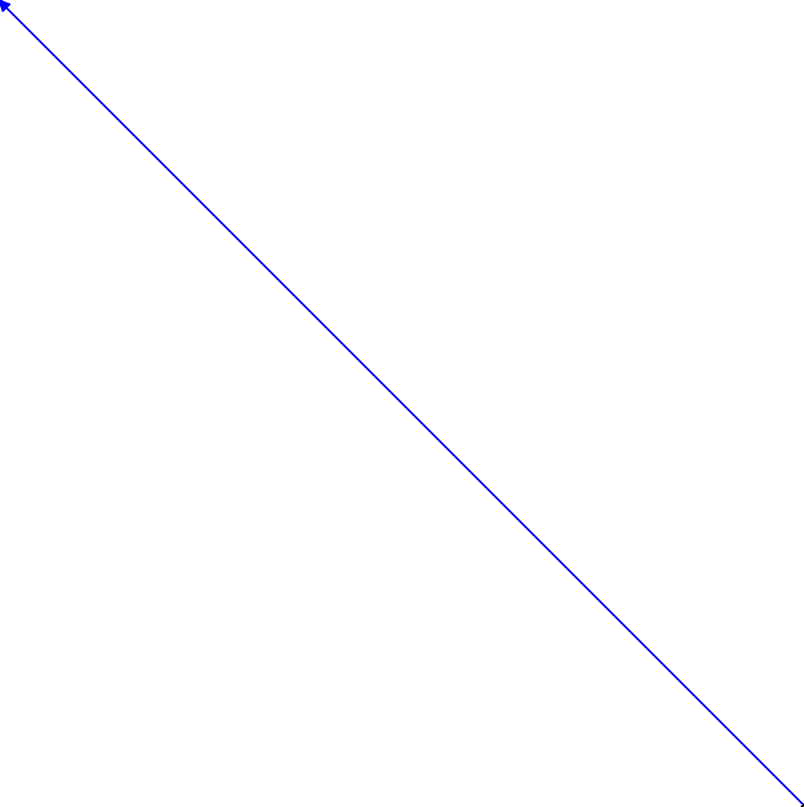

# Variant–Disease Network (Hypertrichotic osteochondrodysplasia)

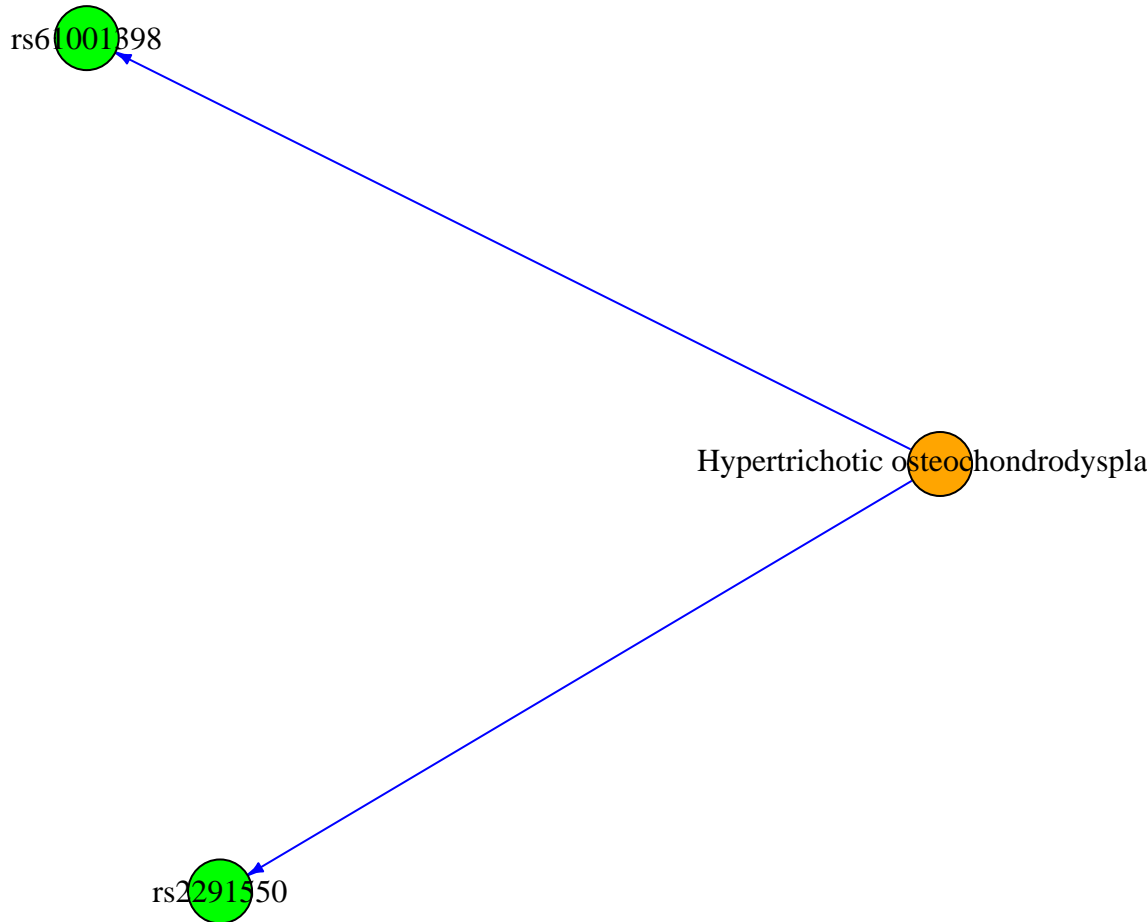

**Variant–Disease Network (Hypertrophic cardiomyopathy)**

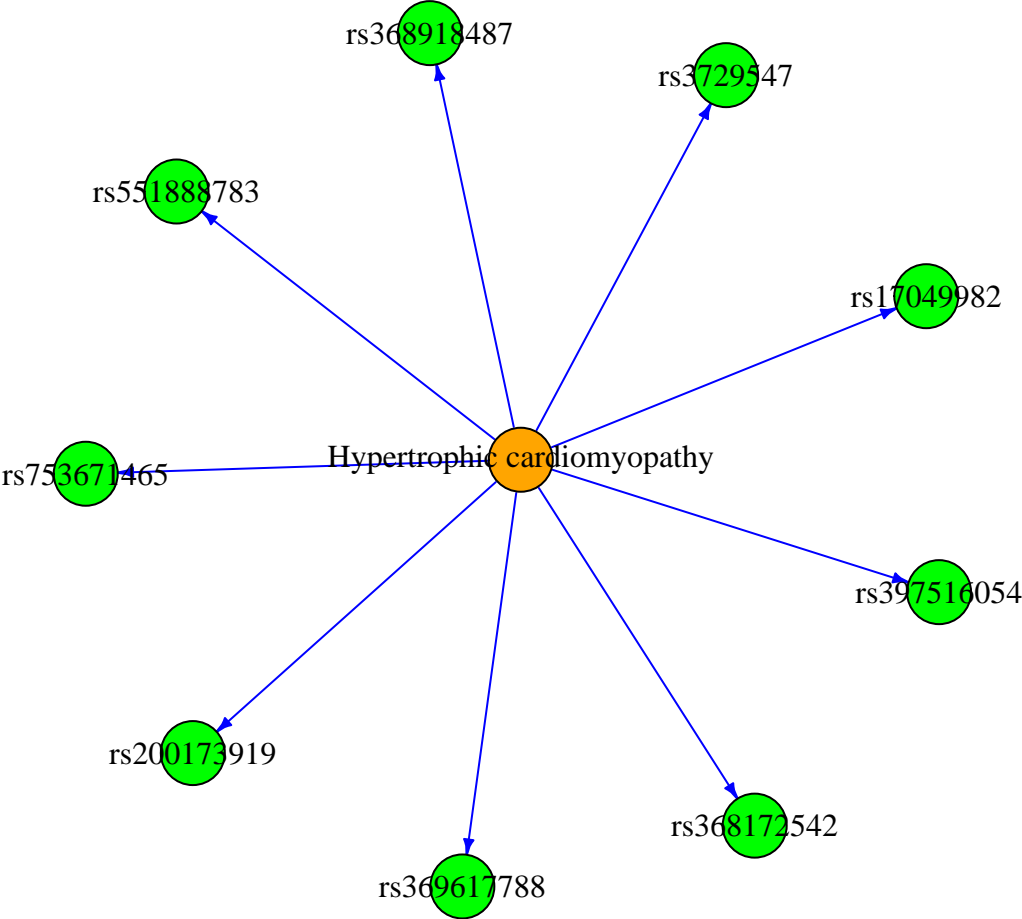

Variant–Disease Network (Hypertyrosinemia)

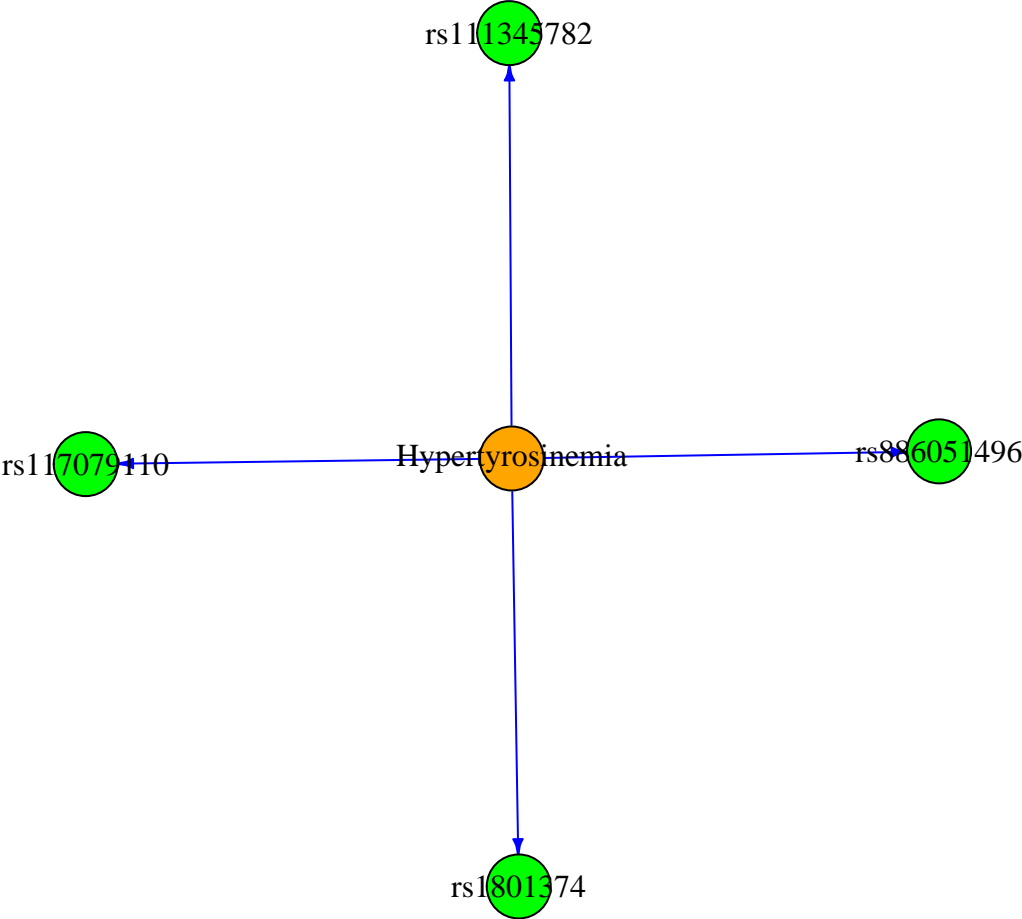

Variant–Disease Network (Hypobetalipoproteinemia)

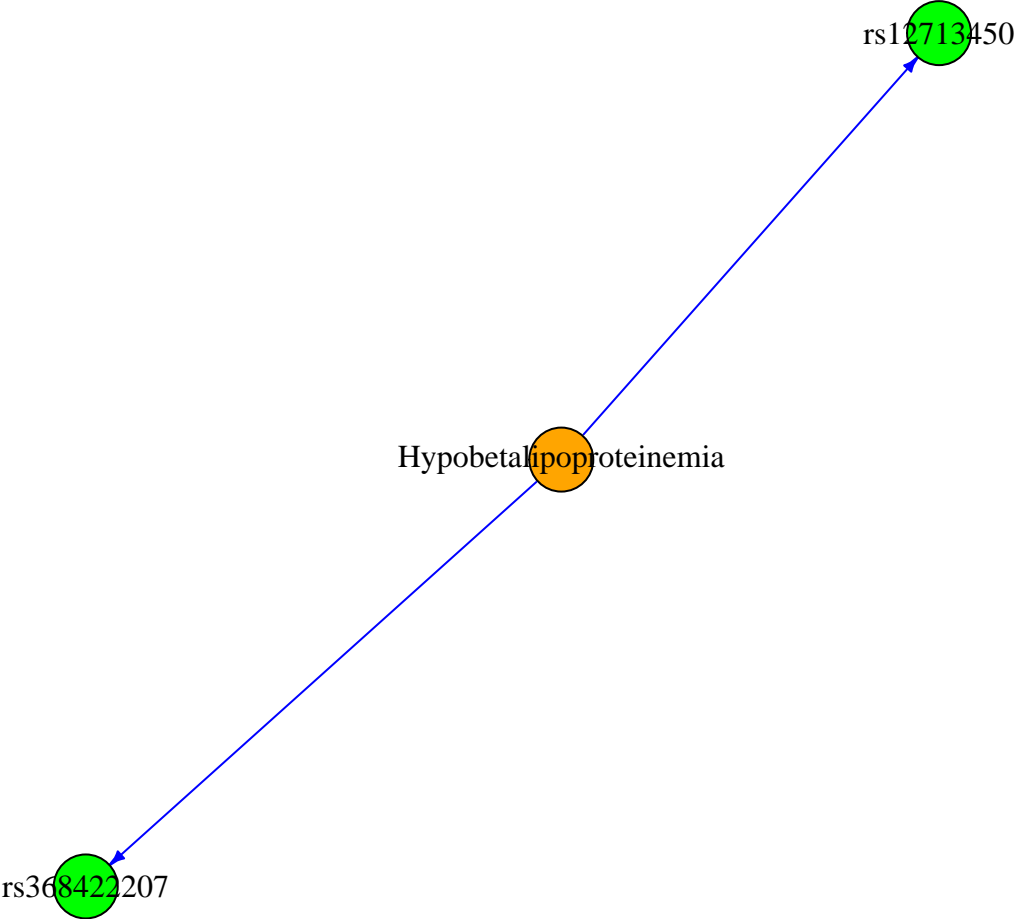



# Genetic-Disease Network (Hypoglycemia with deficiency of glycogen synthetase in the liver)

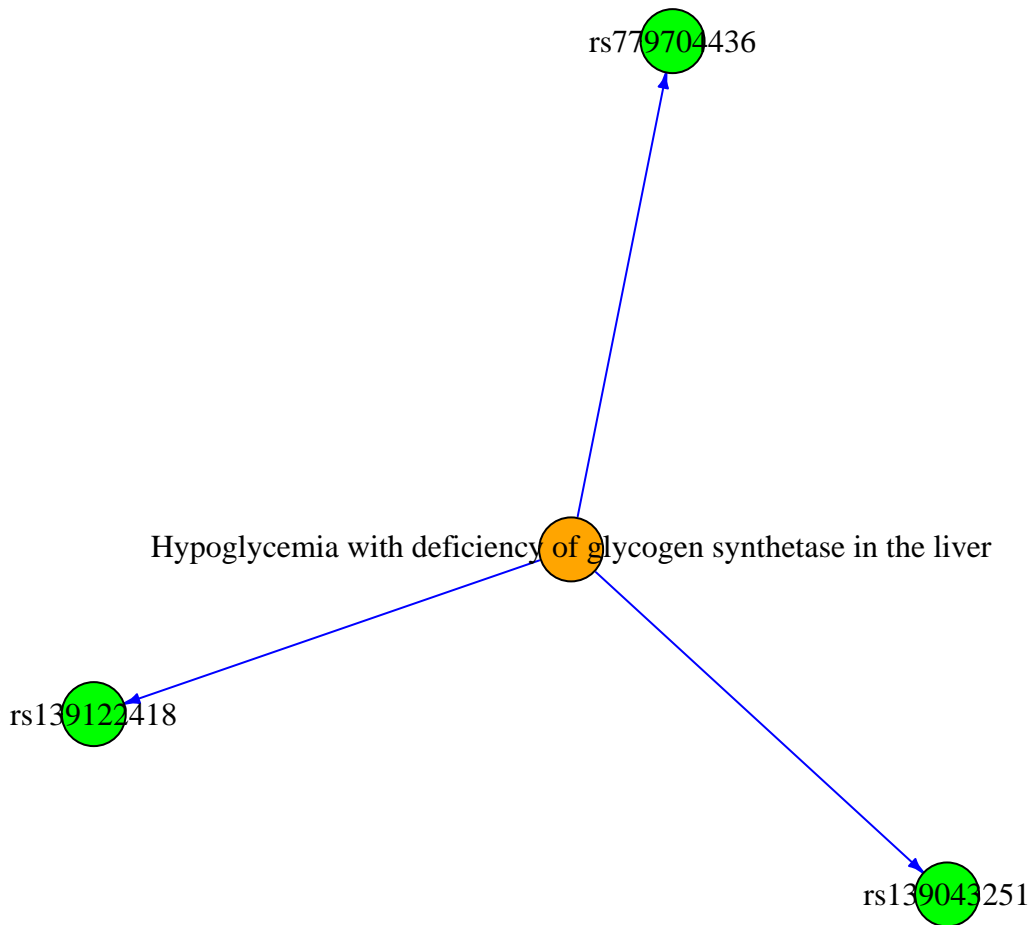

## Variant–Disease Network (Hypogonadism)

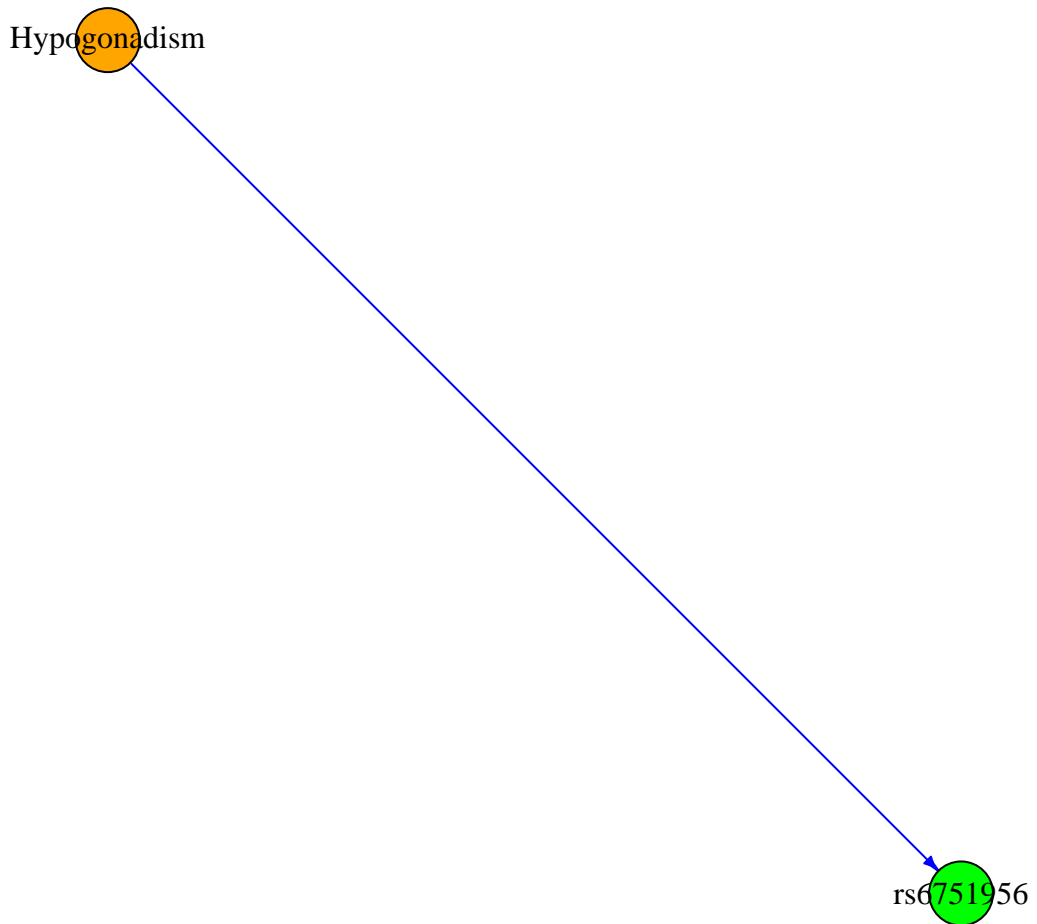

## Variant–Disease Network (Hypogonadism with anosmia)

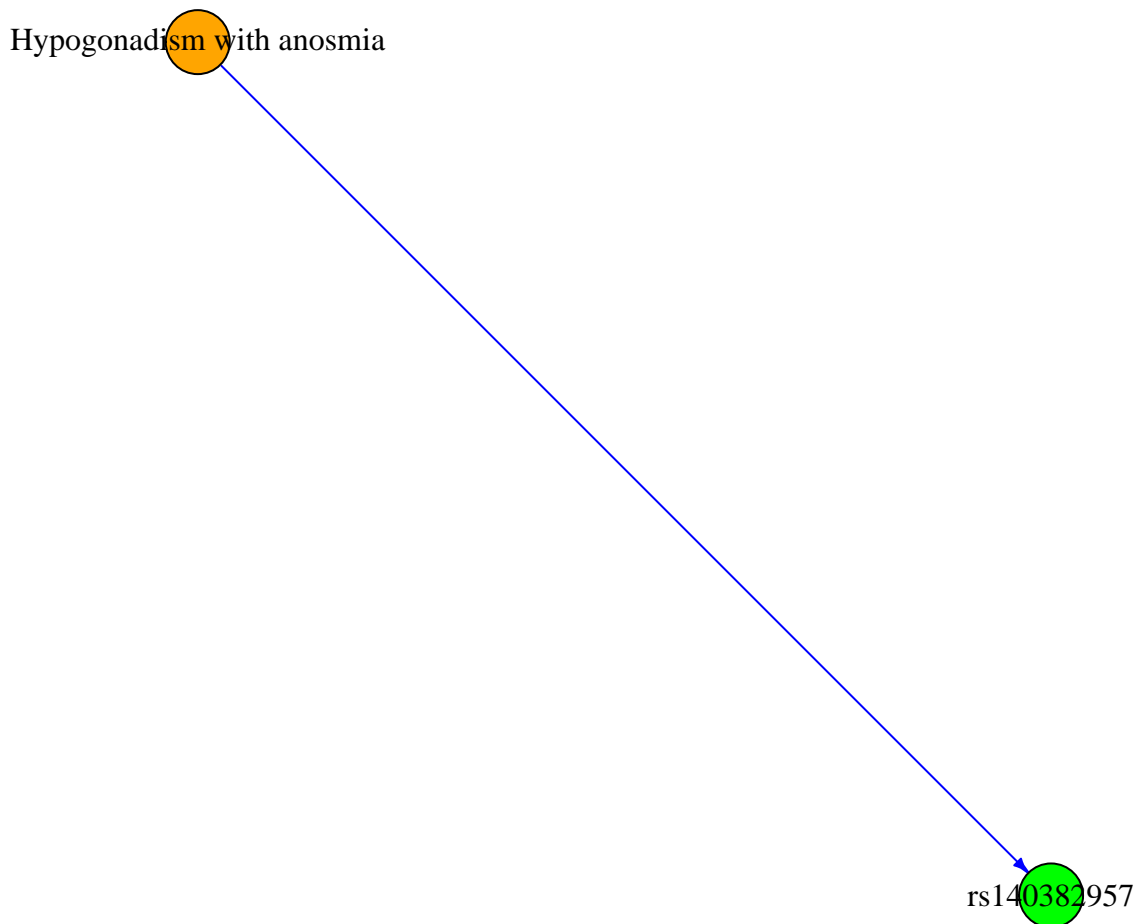

Variant–Disease Network (Hypokalemic periodic paralysis)

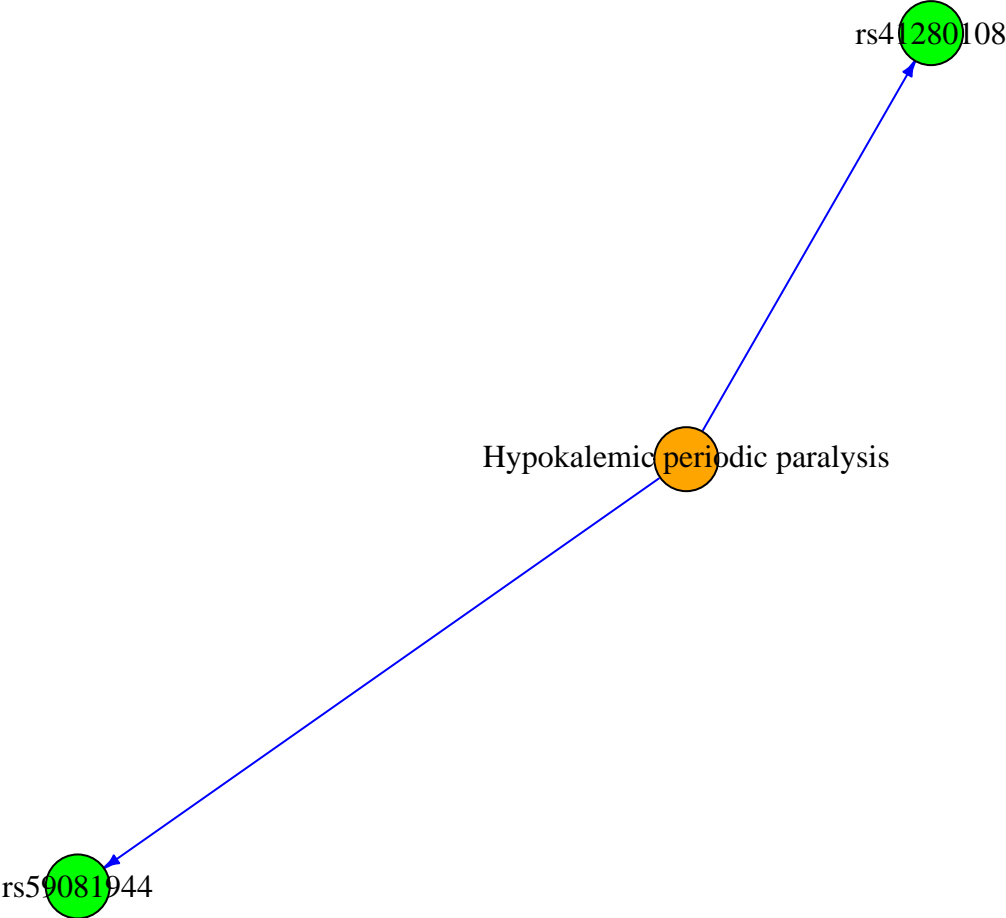

## Variant–Disease Network (Hypomyelinating leukodystrophy 8)

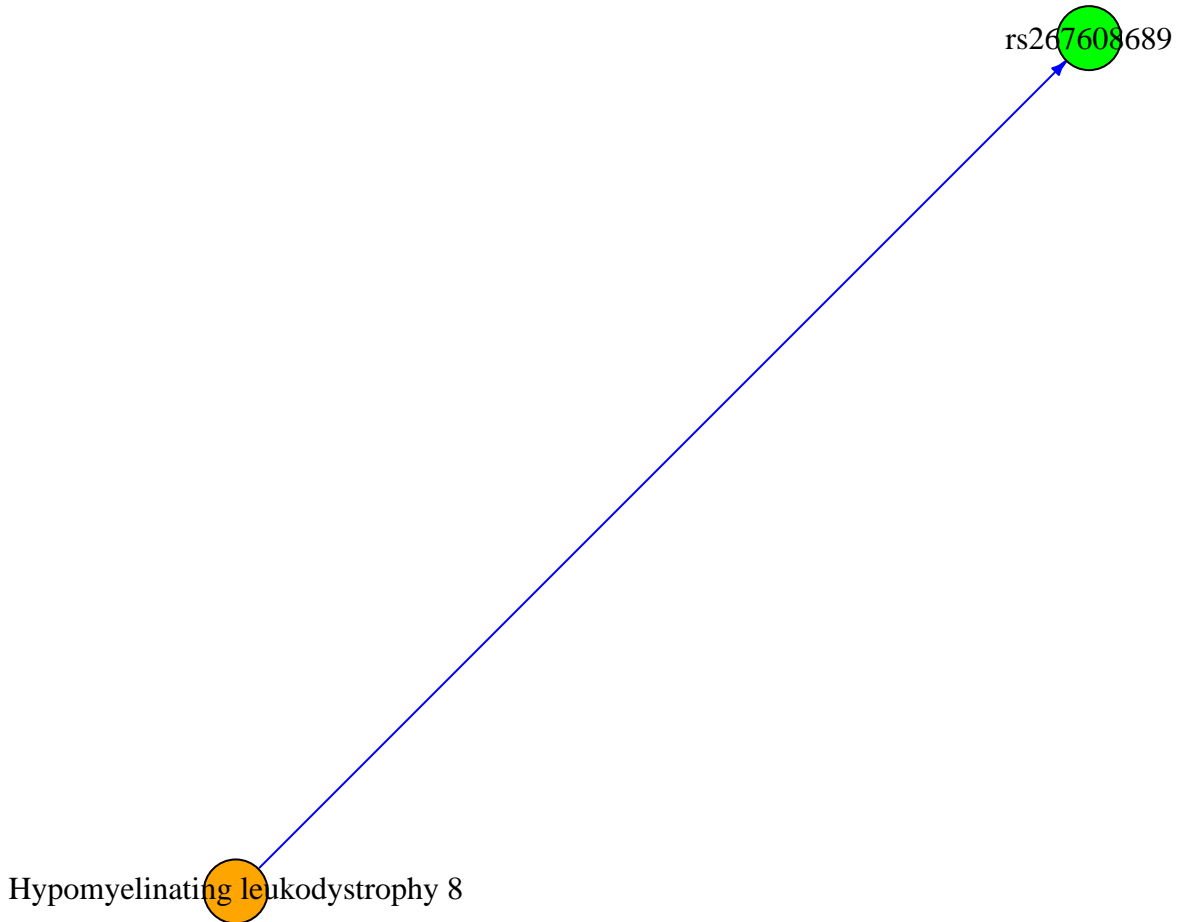

# Variant–Disease Network (Hypophosphatemic Rickets)

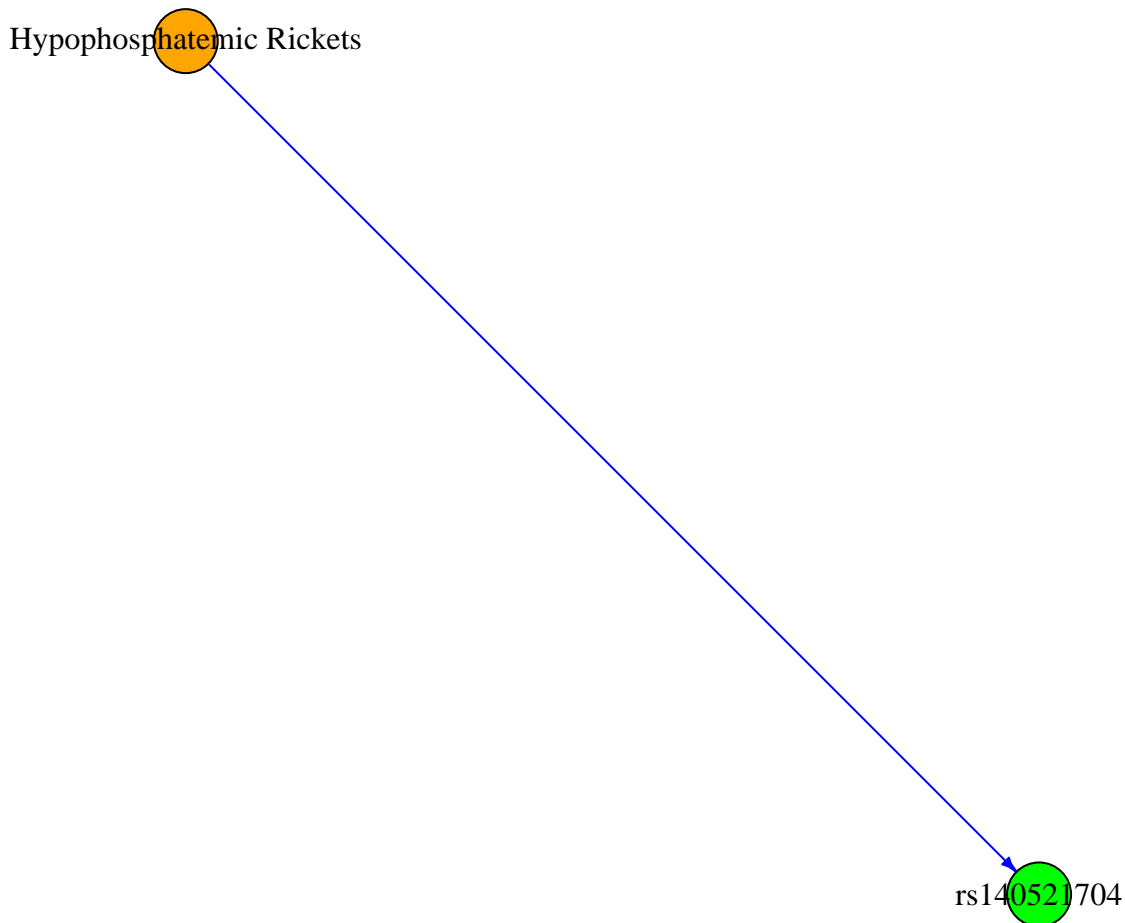

## Variant–Disease Network (Hypoplasia of the corpus callosum)

Hypoplasia of the corpus callosum

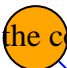

rs757962437

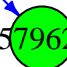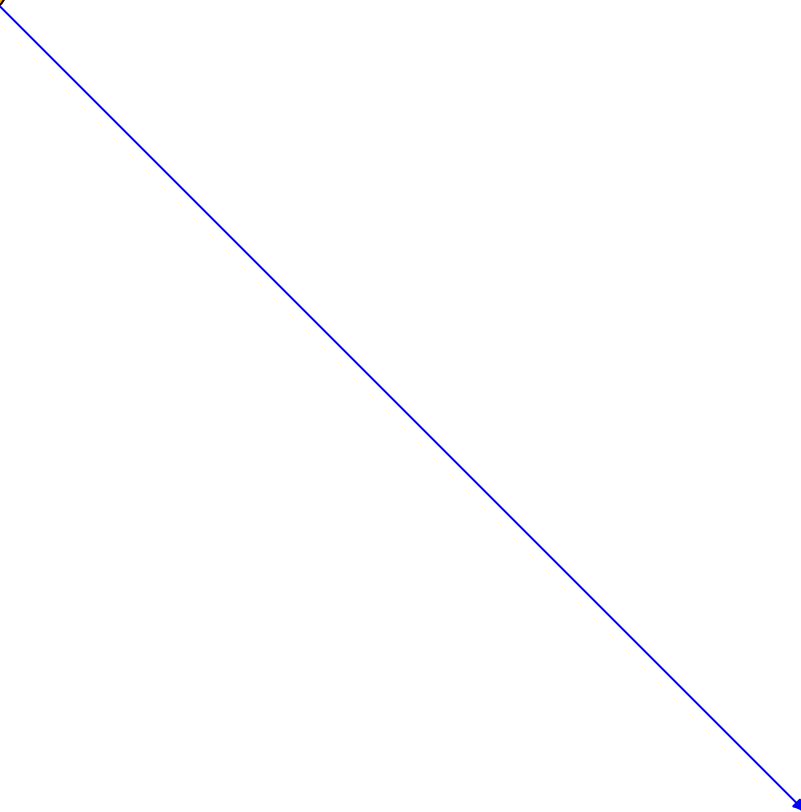

## Variant-Disease Network (Hypotonia)

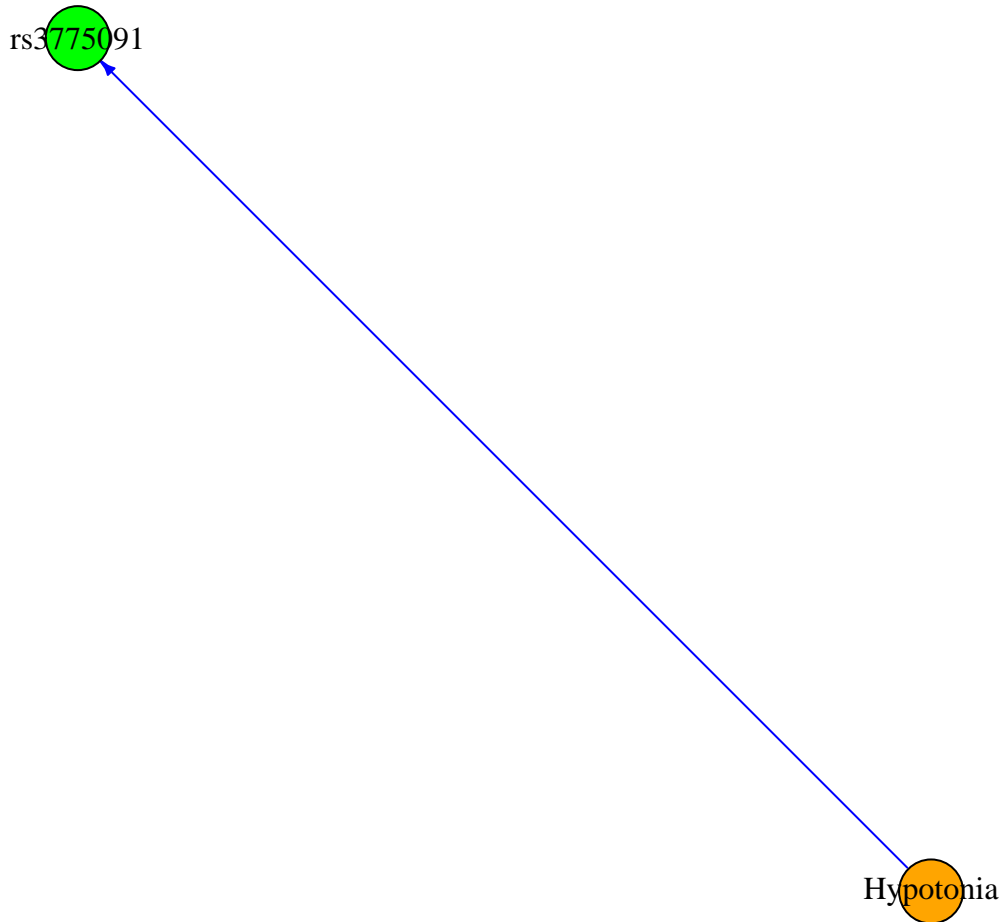



# Variant–Disease Network (Idiopathic basal ganglia calcification 1)

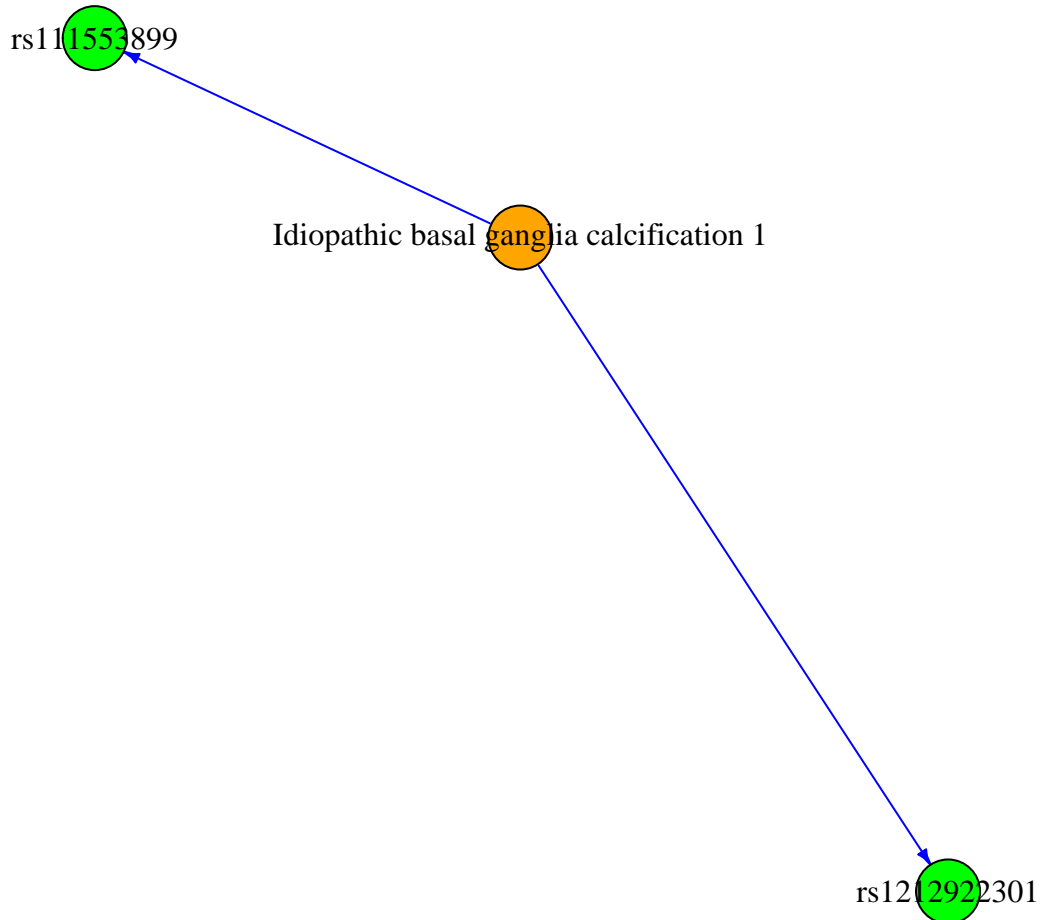

**Variant–Disease Network (Idiopathic generalized epilepsy)**

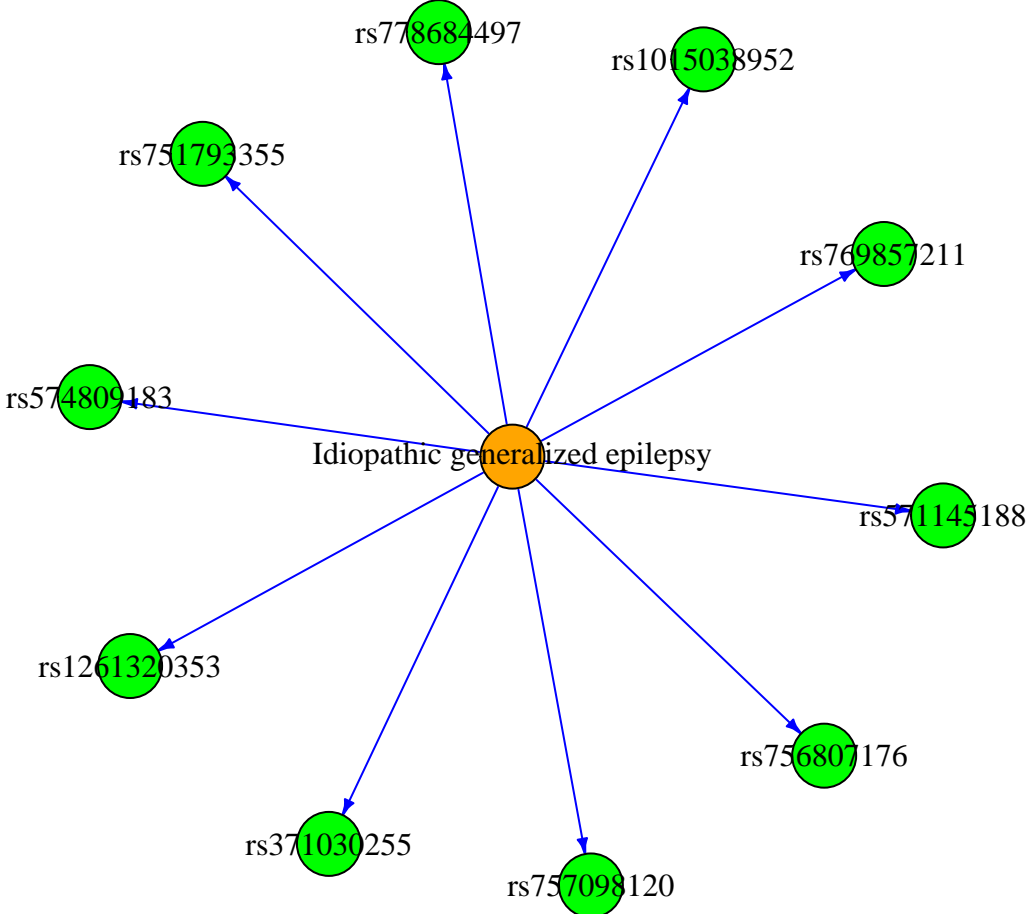

**Variant–Disease Network (Idiopathic hypereosinophilic syndrome)**

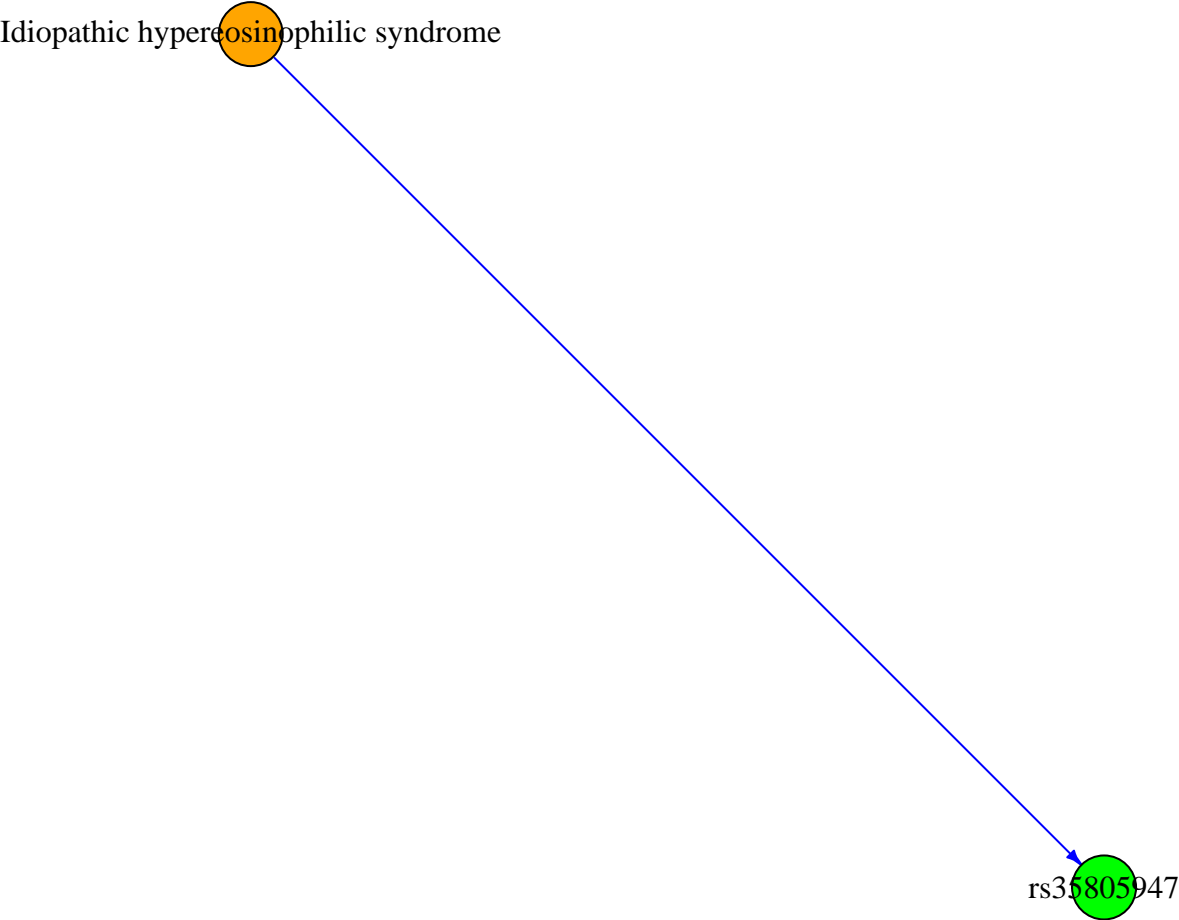

# Ant-Disease Network (Immunodeficiency 26 with or without neurologic abnor

rs750761283

Immunodeficiency 26 with or without neurologic

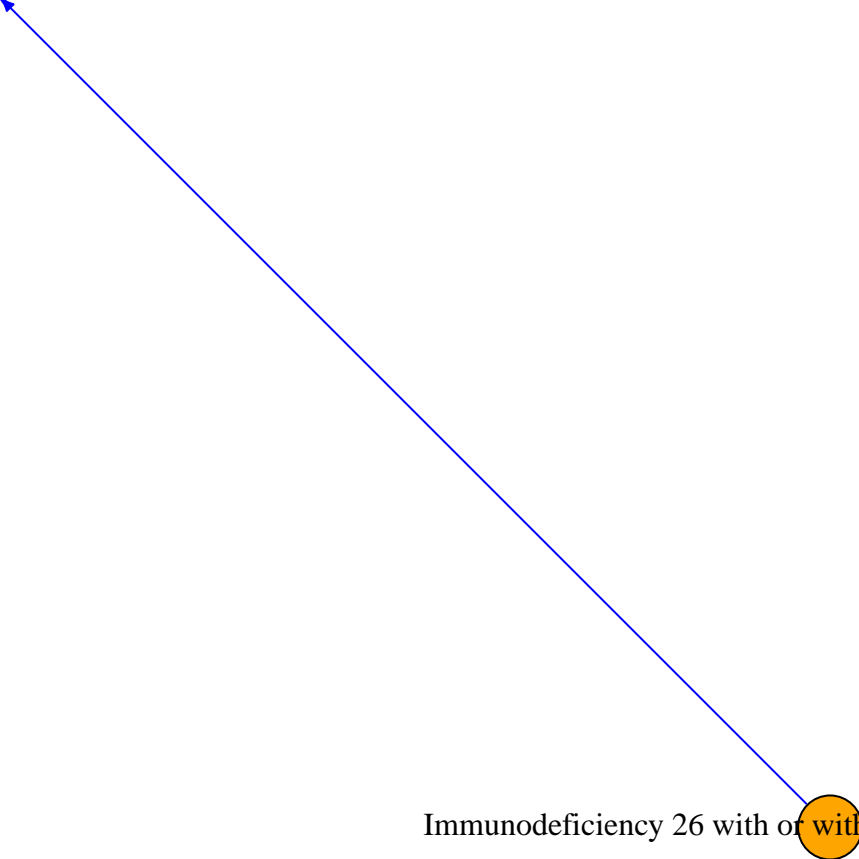

## Variant–Disease Network (Immunodeficiency 44)

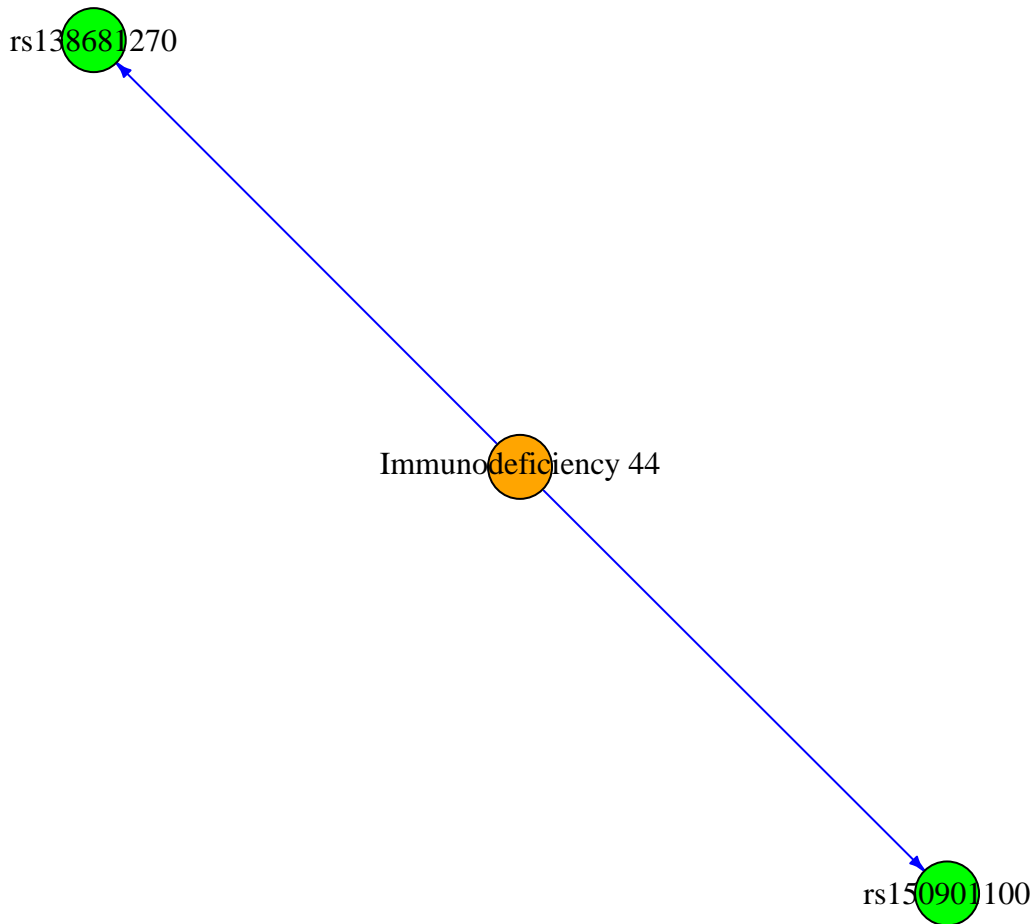

## Variant–Disease Network (Immunodeficiency 51)

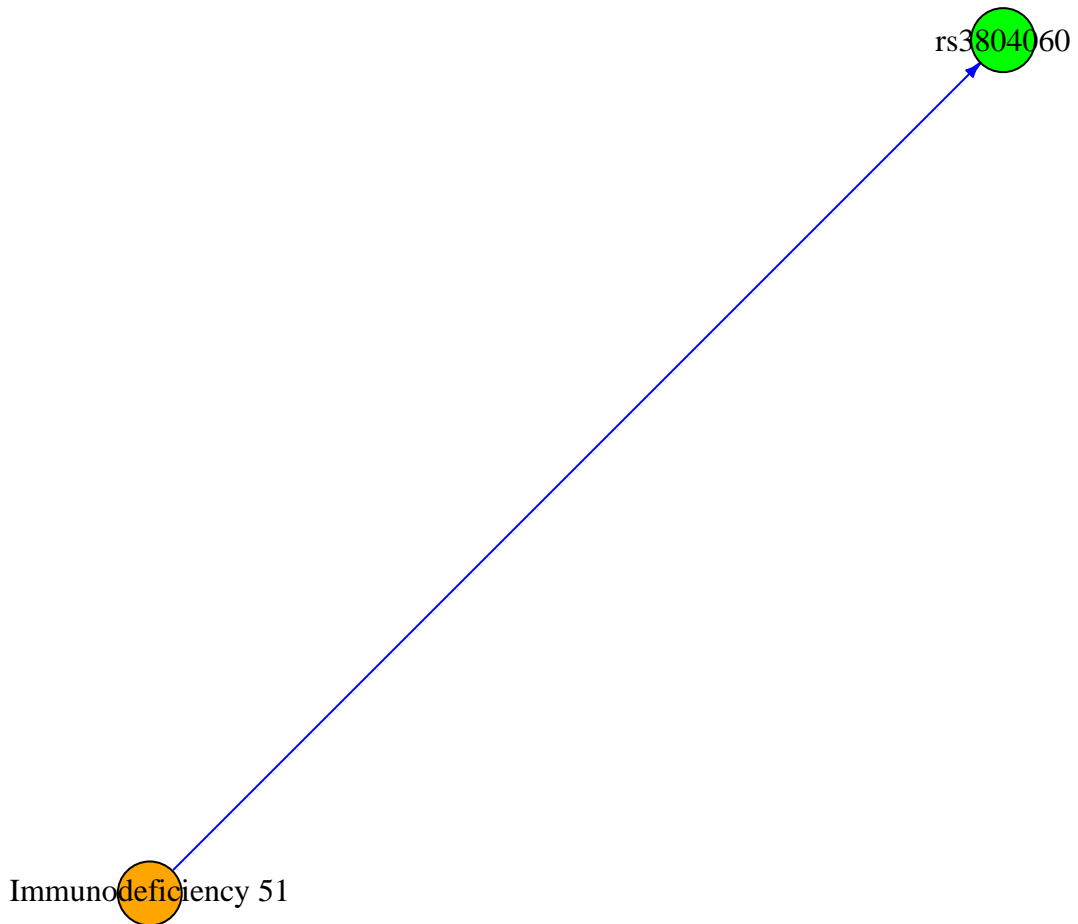

**Variant–Disease Network (Immunodeficiency with hyper IgM type 2)**

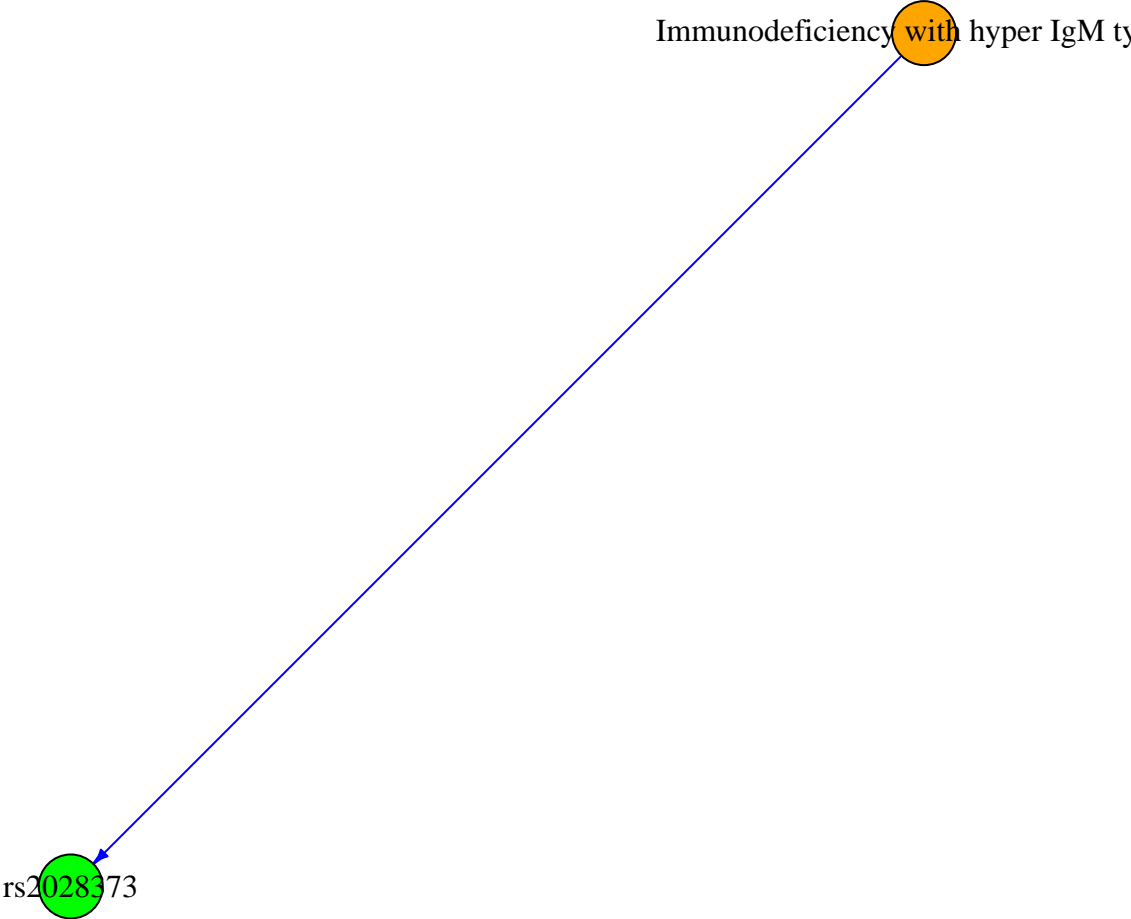

Variant–Disease Network (Immunodeficiency with Hyper-IgM)

Immunodeficiency with Hyper-IgM

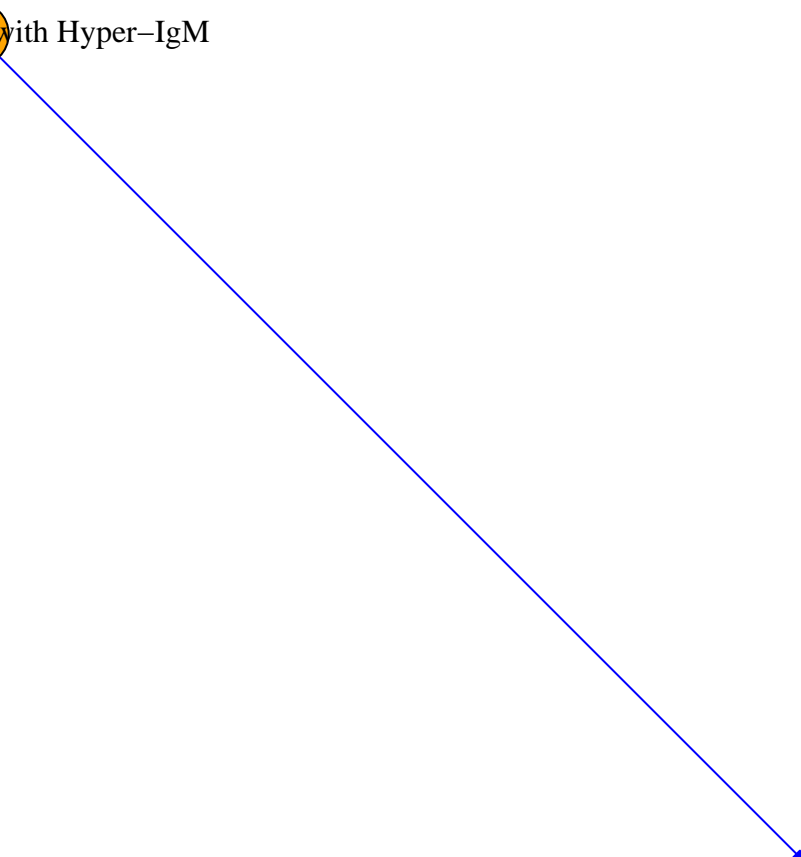

rs2028373



# Disease Network (Immunodeficiency–centromeric instability–facial anomalies)

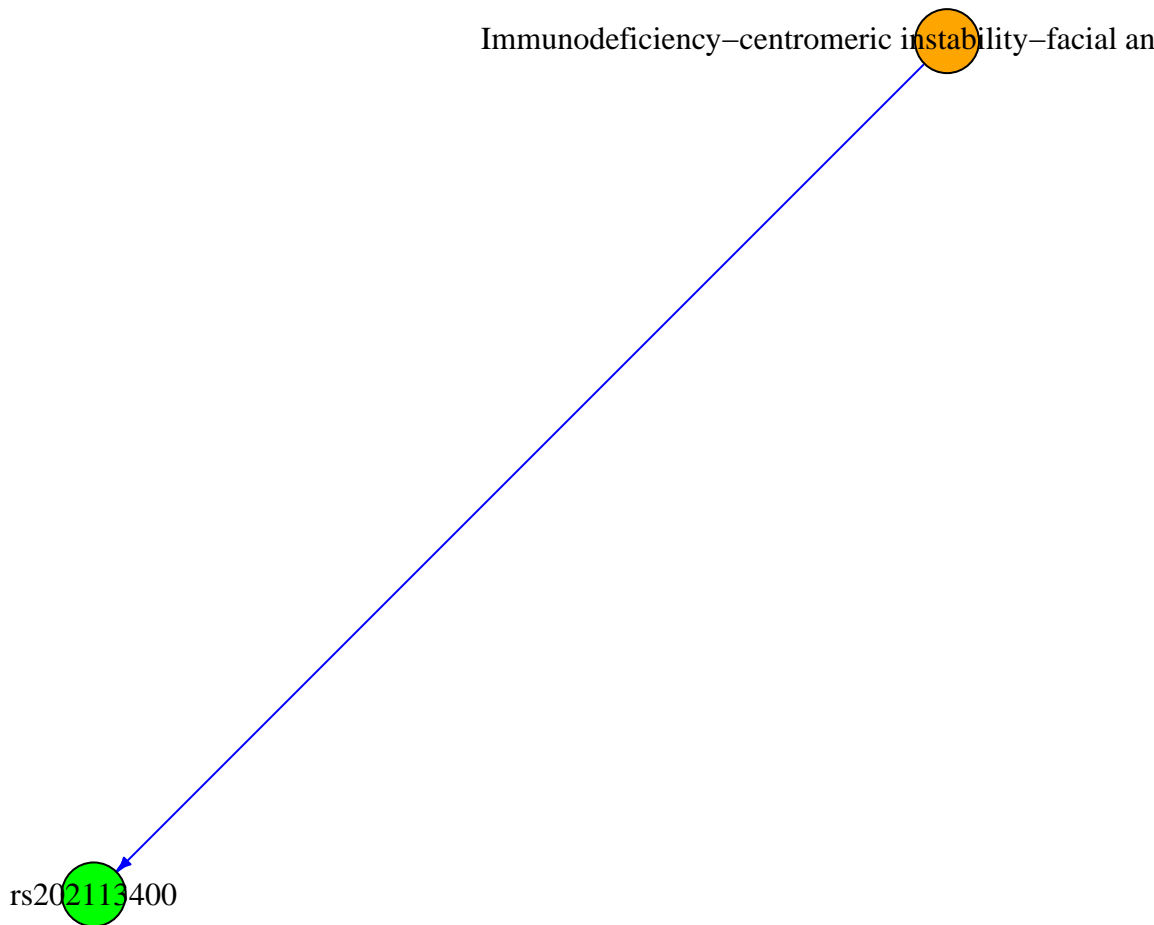

## Variant–Disease Network (Inborn genetic diseases)

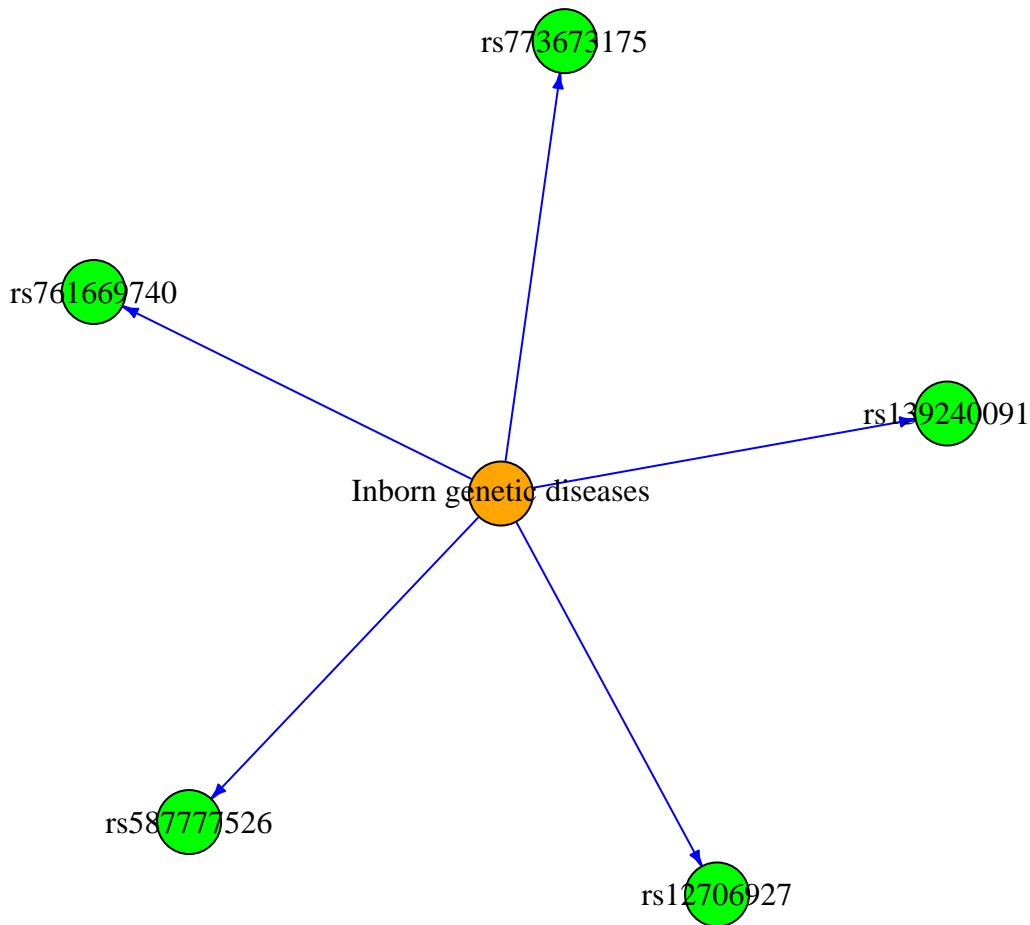

Variant–Disease Network (Inclusion Body Myopathy)

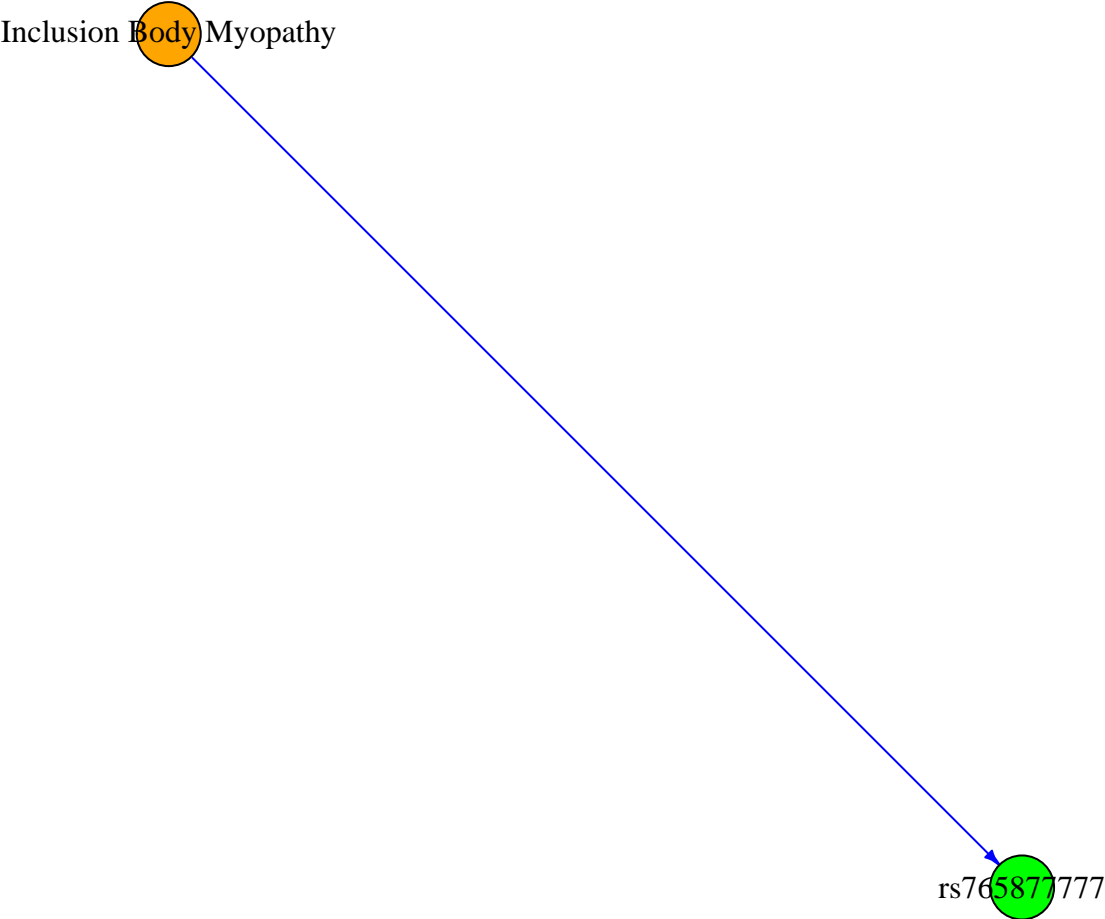

**Variant–Disease Network (Inclusion body myopathy 3)**

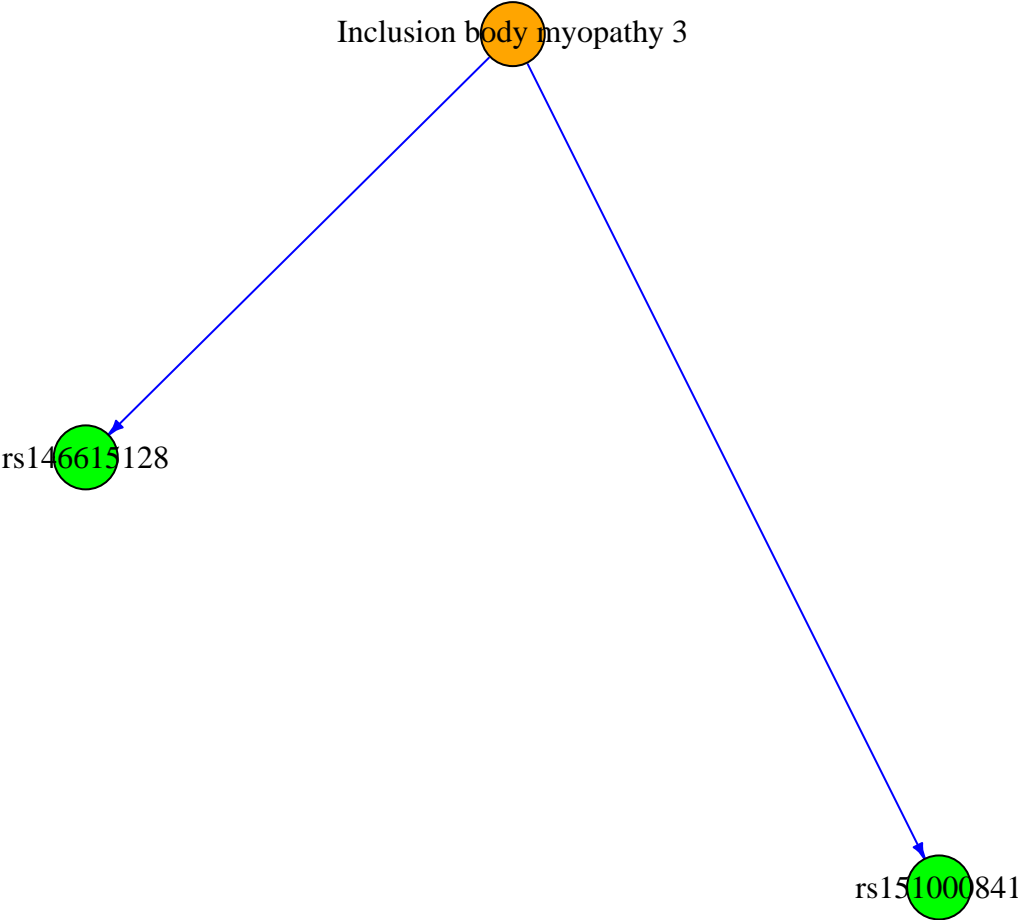

## Variant–Disease Network (Increased CSF lactate)

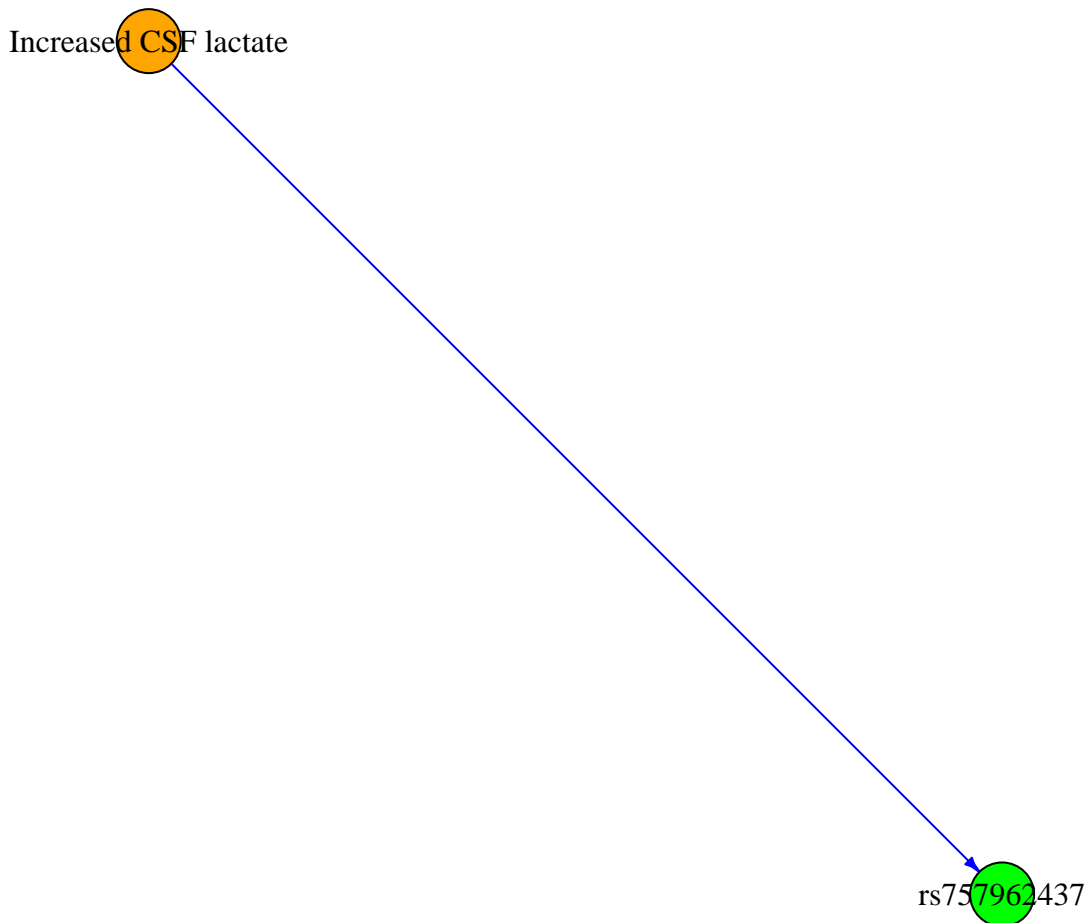

## Variant–Disease Network (Increased serum pyruvate)

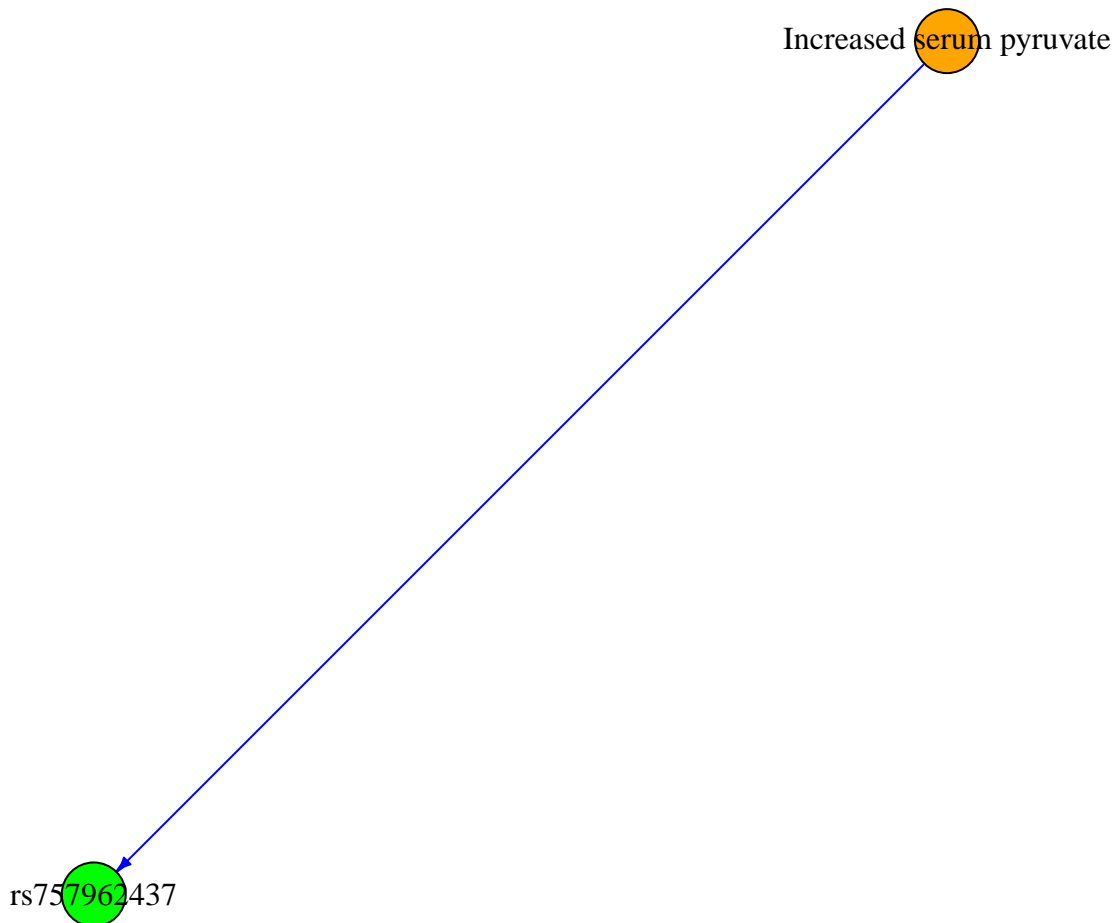

**Variant–Disease Network (Infantile cortical hyperostosis)**

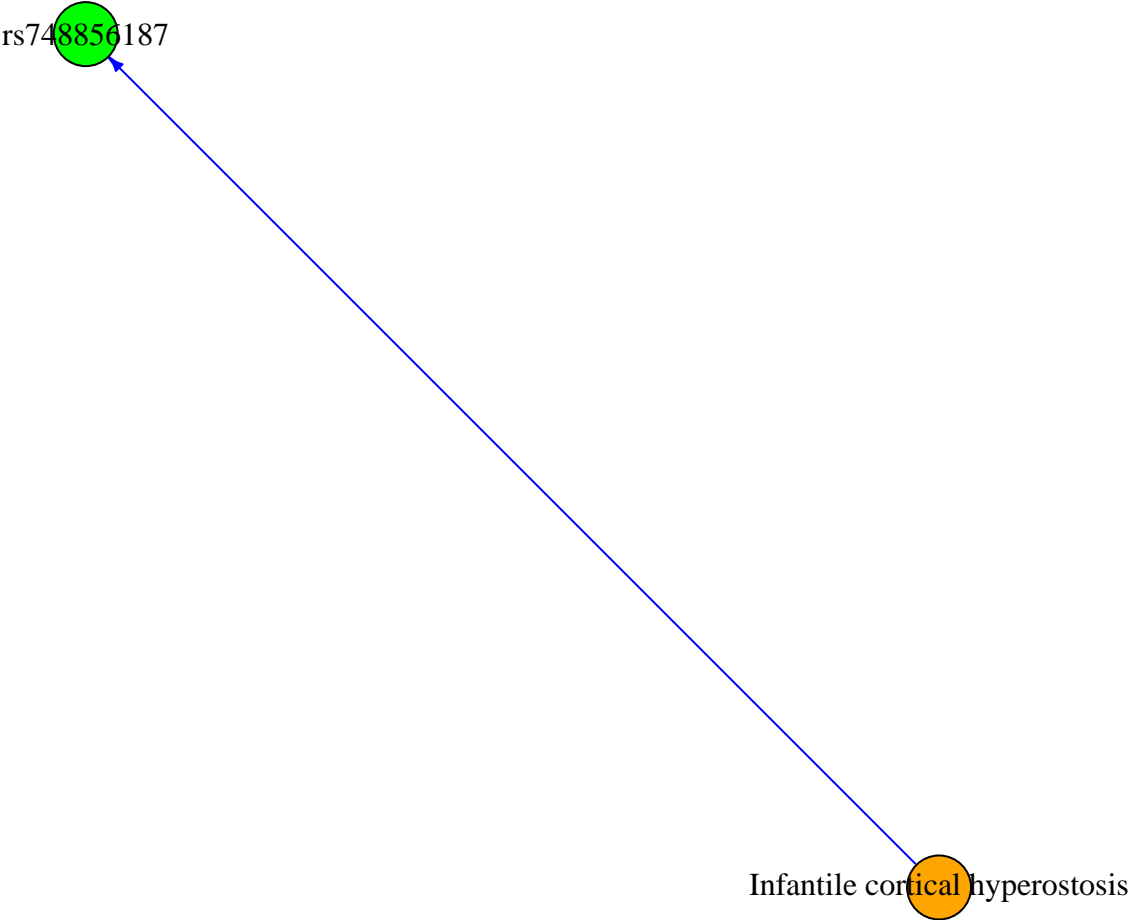

# Variant–Disease Network (Infantile GM1 gangliosidosis)

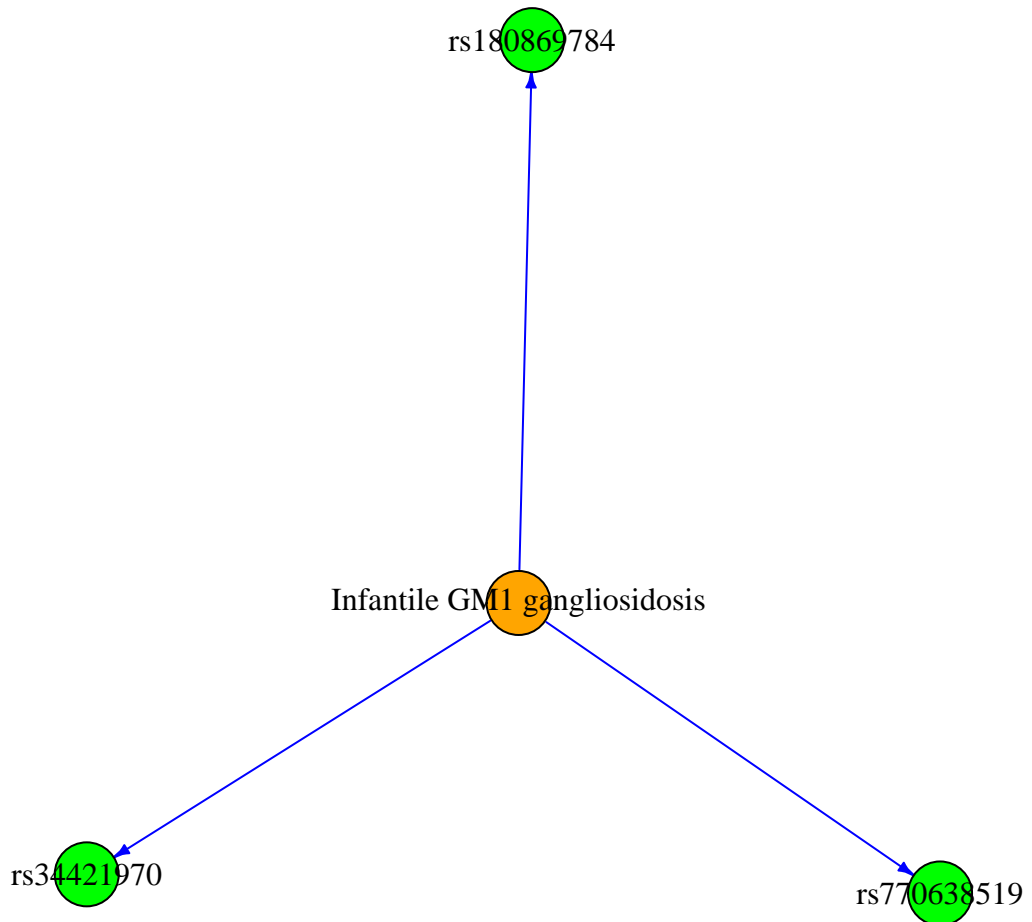



# Variant–Disease Network (Infantile histiocytoid cardiomyopathy)

rs748520978

Infantile histiocytoid cardiomyopathy



## Variant–Disease Network (Infantile Nystagmus)

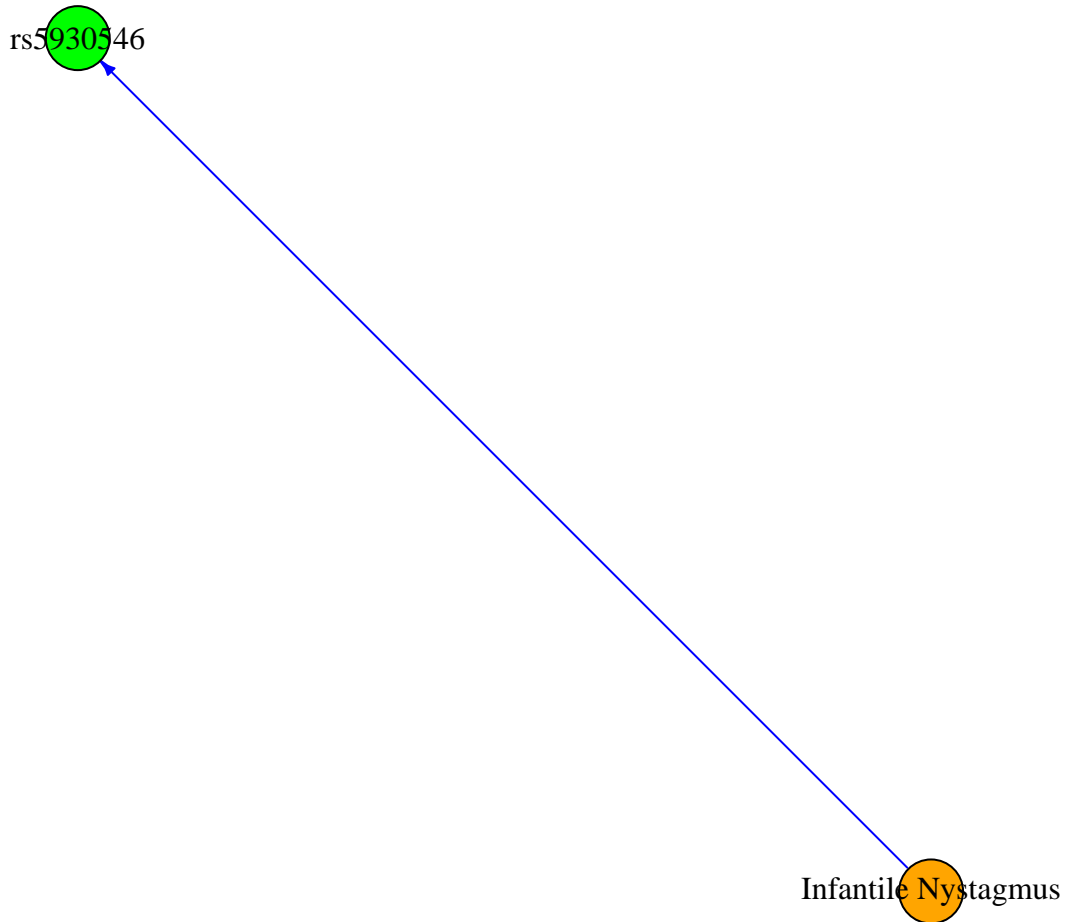

## Variant–Disease Network (Infantile spasms)

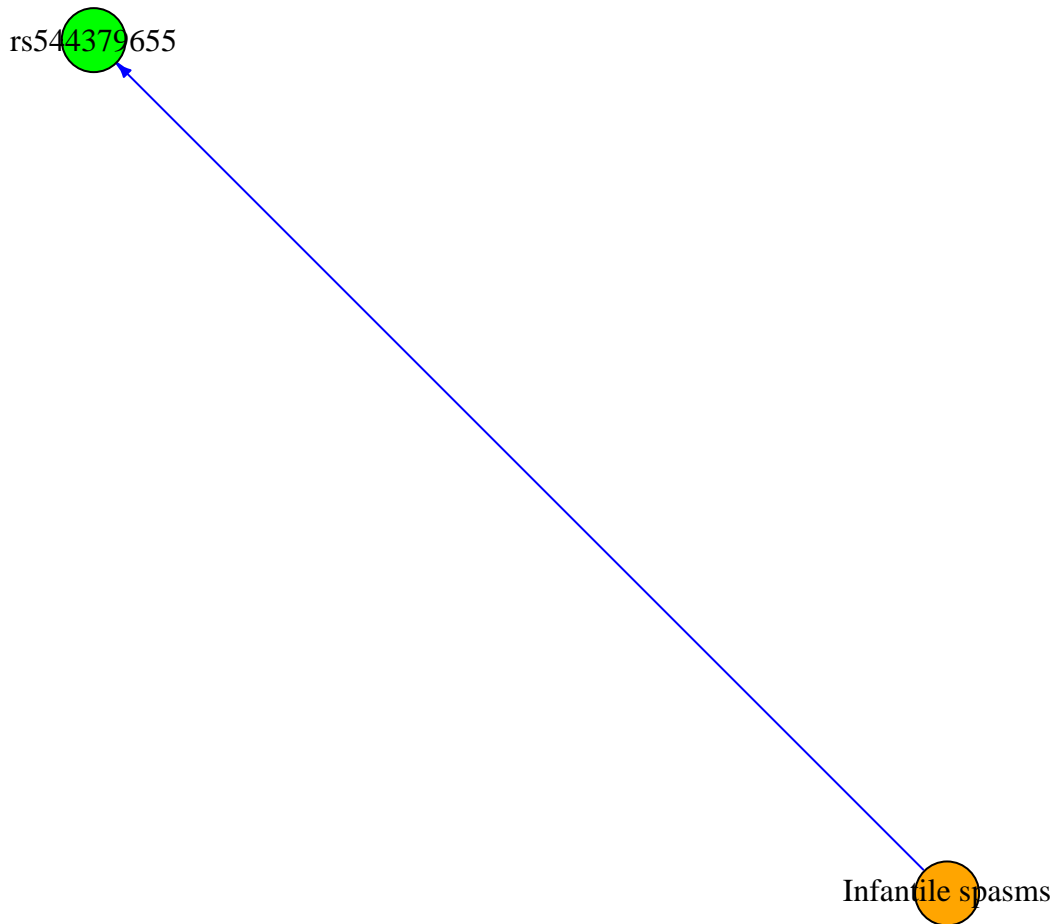

# Variant–Disease Network (Inosine triphosphatase deficiency)

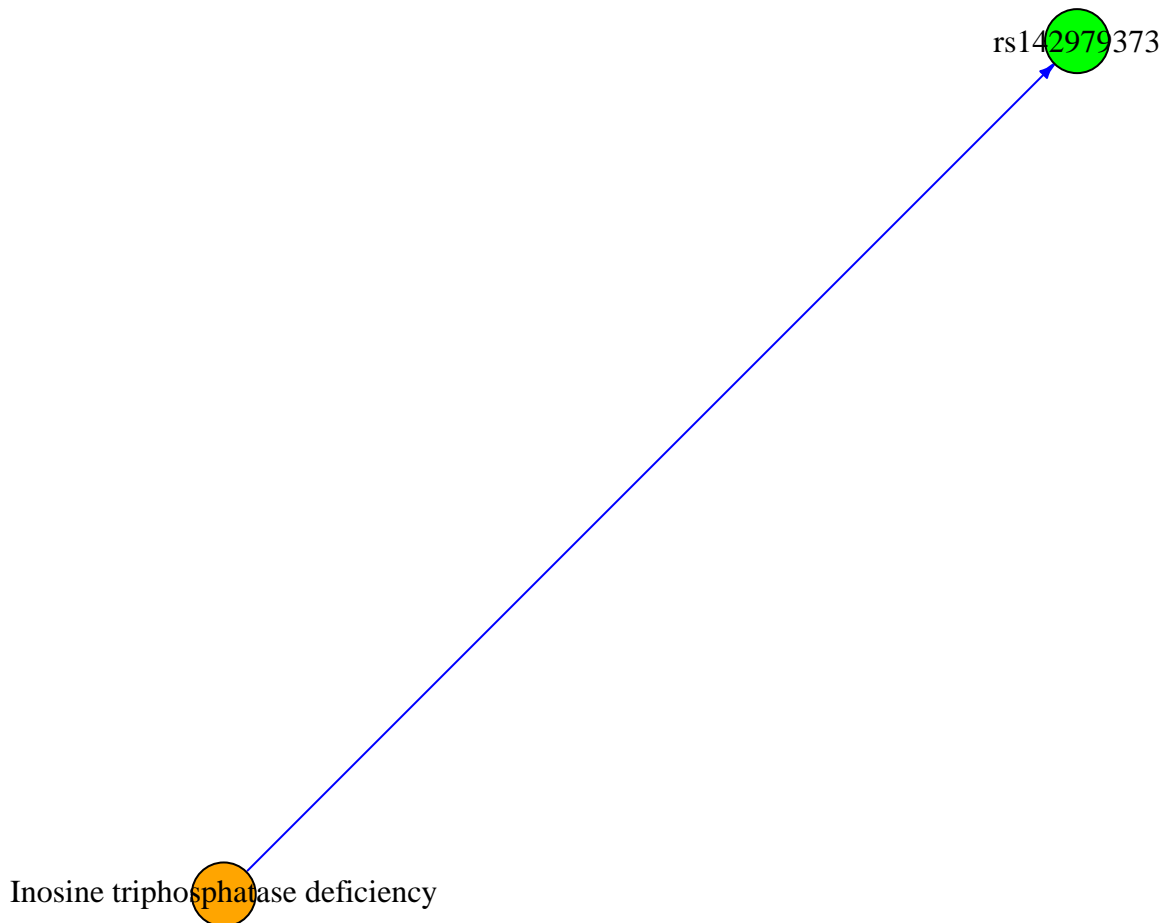

# Variant–Disease Network (Insulin–like growth factor 1 resistance to)

rs3743262

Insulin–like growth factor 1 resistance

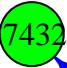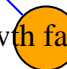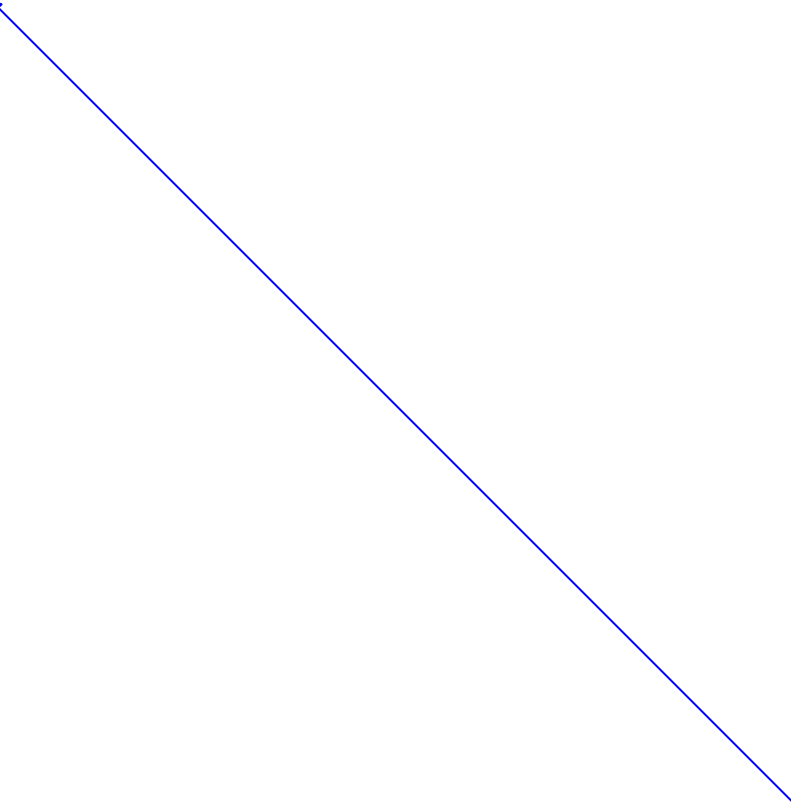

## Variant–Disease Network (Intellectual Disability)

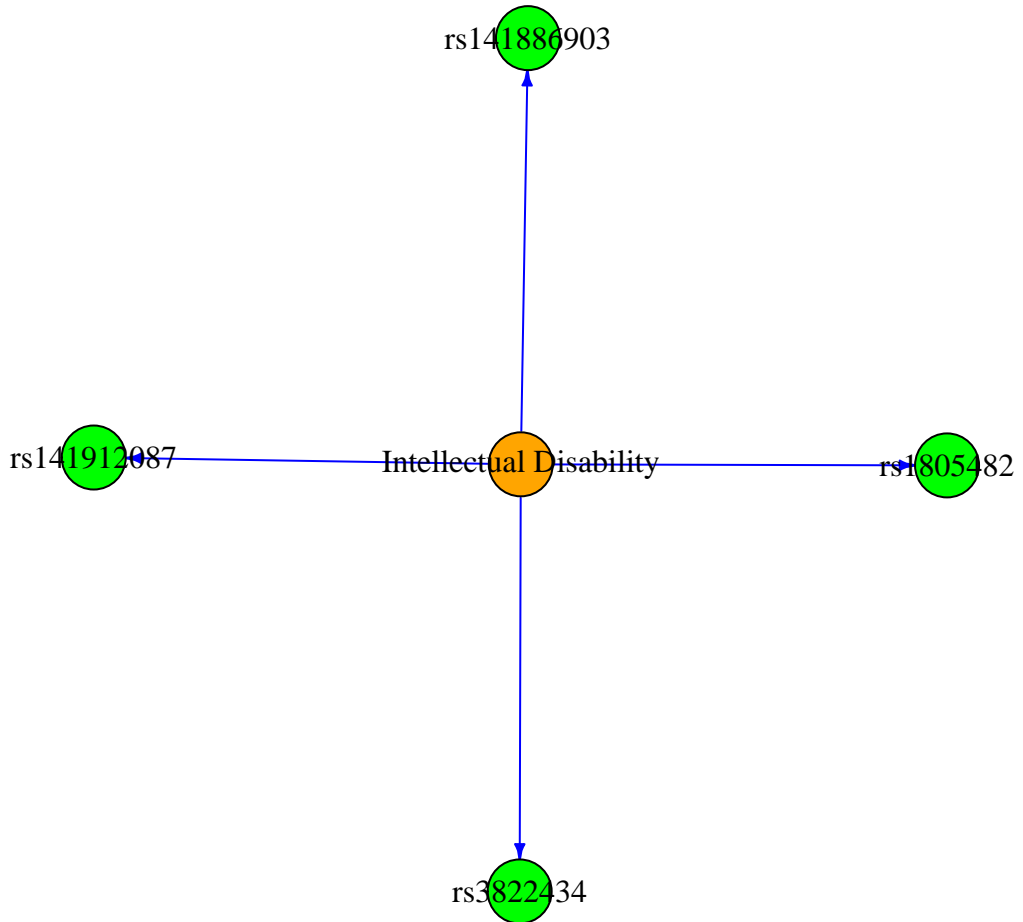

# Disease Network (Intellectual Disability with Language Impairment and Autistic Features)

Intellectual Disability with Language Impairment and Autistic Features

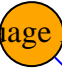

rs532329866

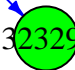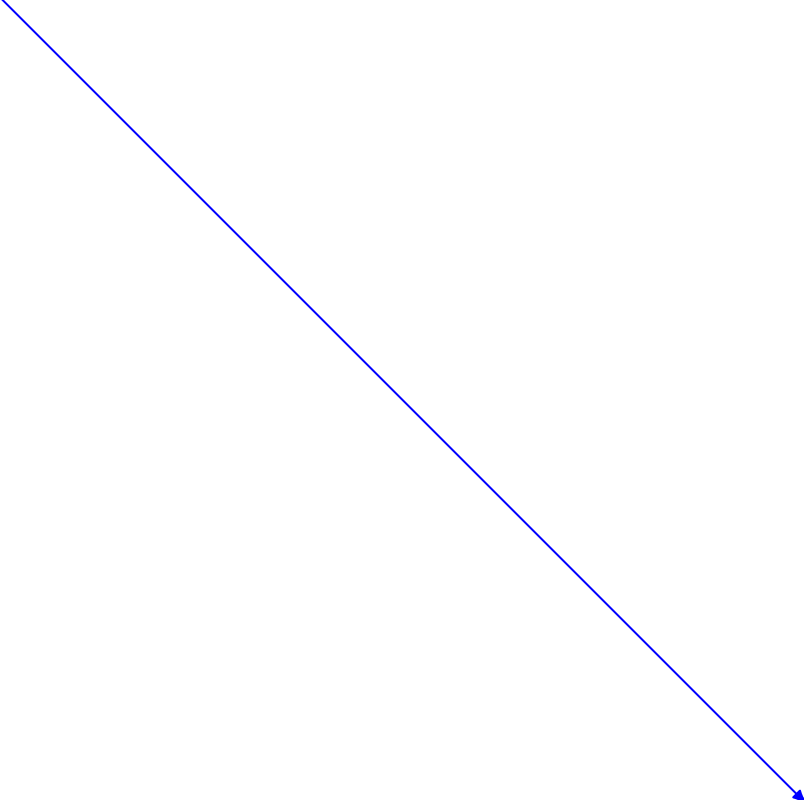

# Variant–Disease Network (Iodotyrosyl coupling defect)

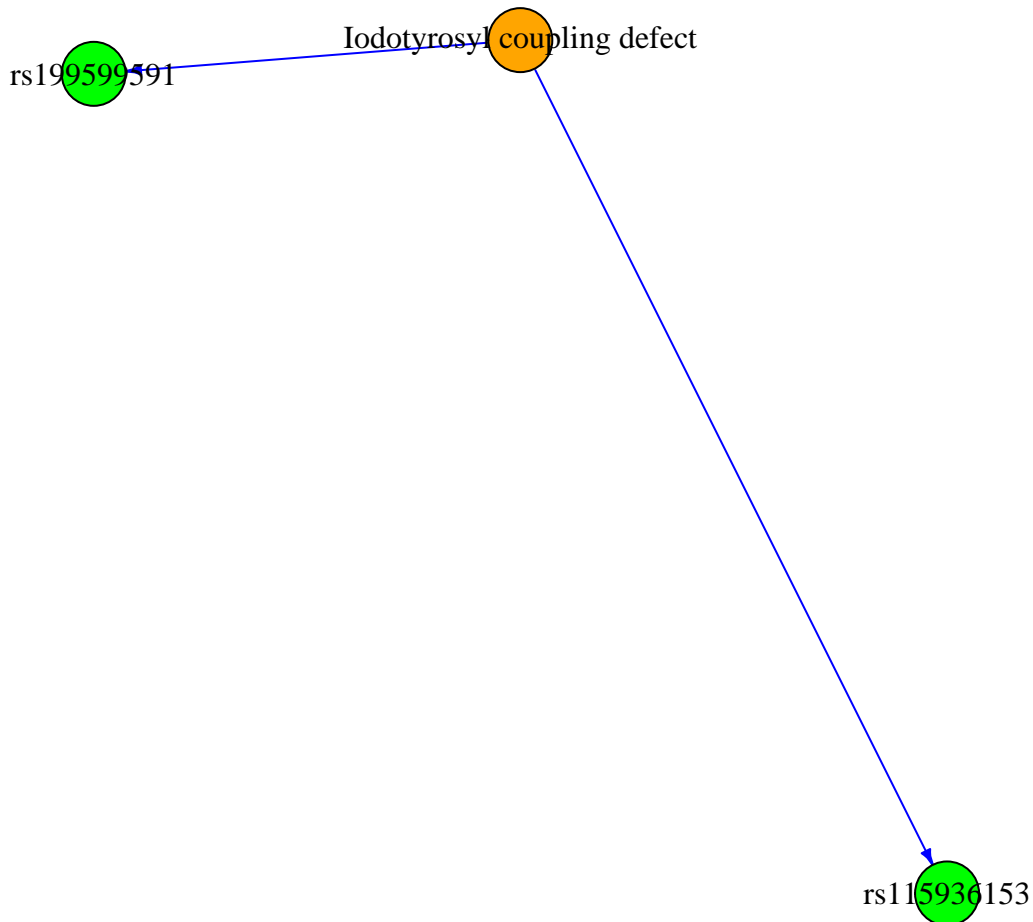



## Variant-Disease Network (Iron Overload)

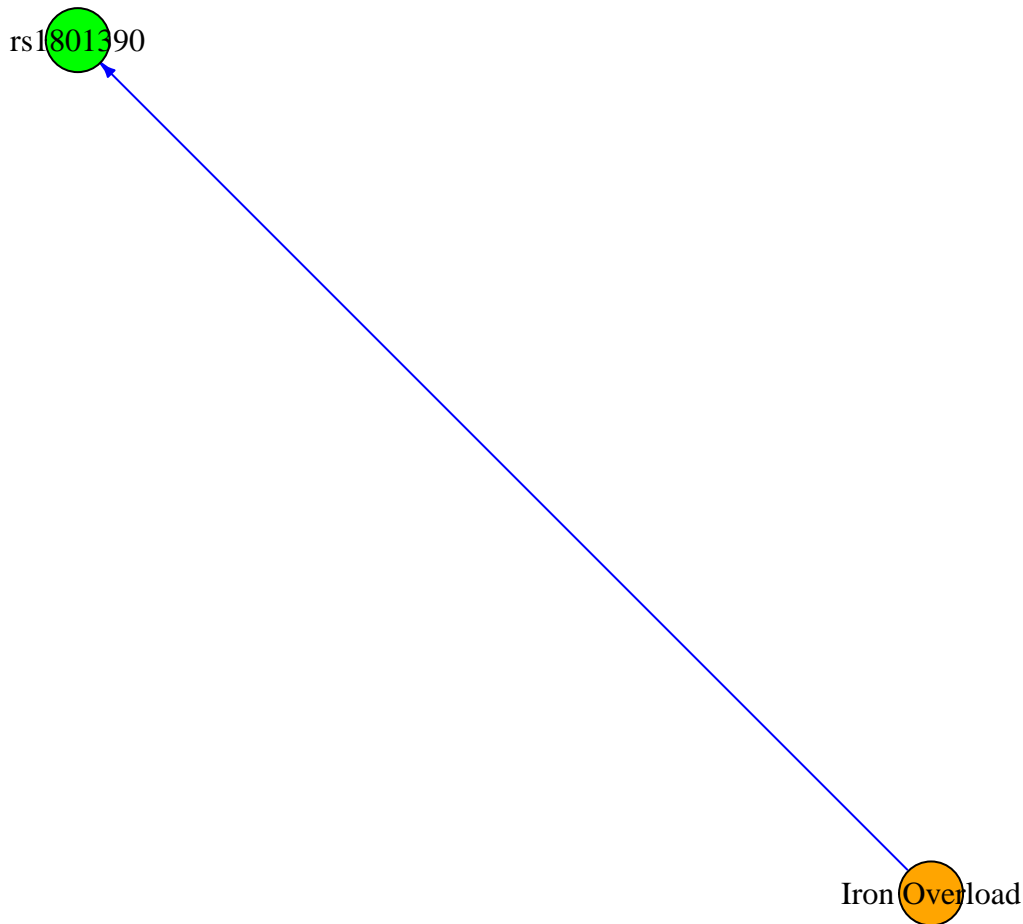

Variant–Disease Network (Ischiopatellar dysplasia)

Ischiopatellar dysplasia

rs7218485

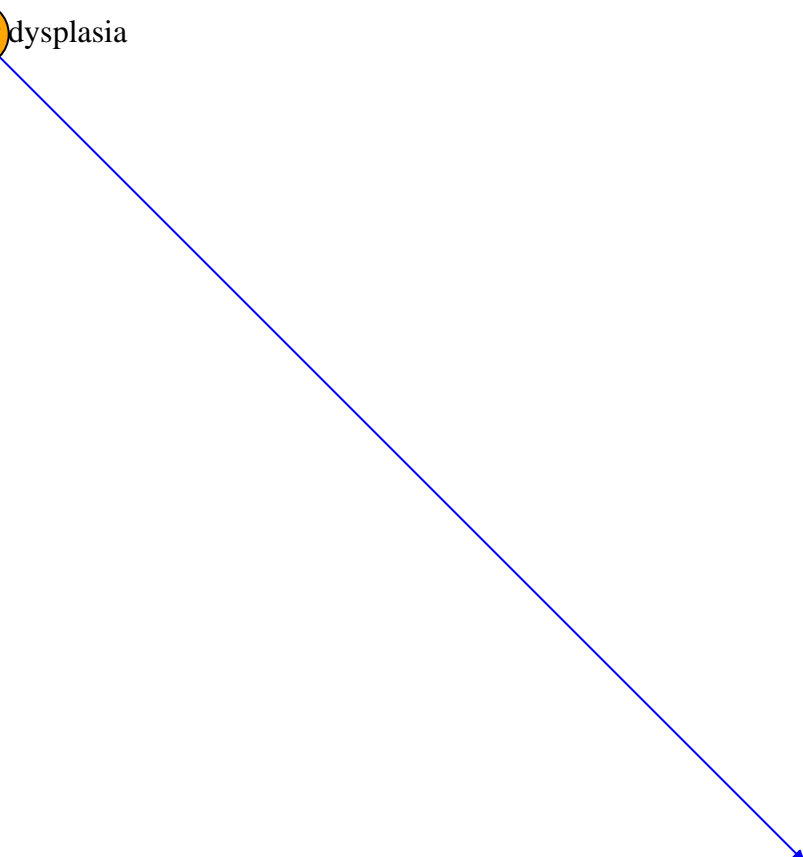

Variant–Disease Network (isolated follicle–stimulating hormone deficiency)

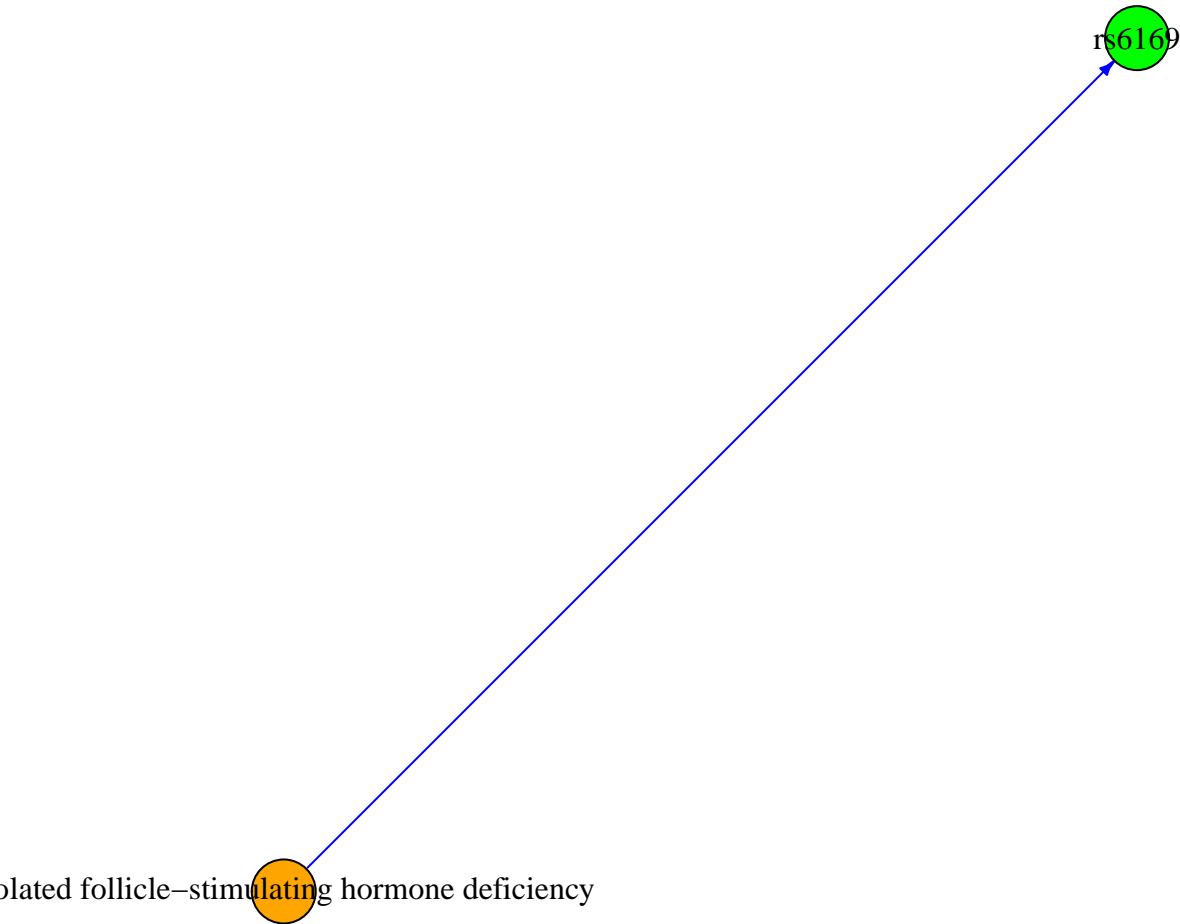

Variant–Disease Network (Isolated growth hormone deficiency)

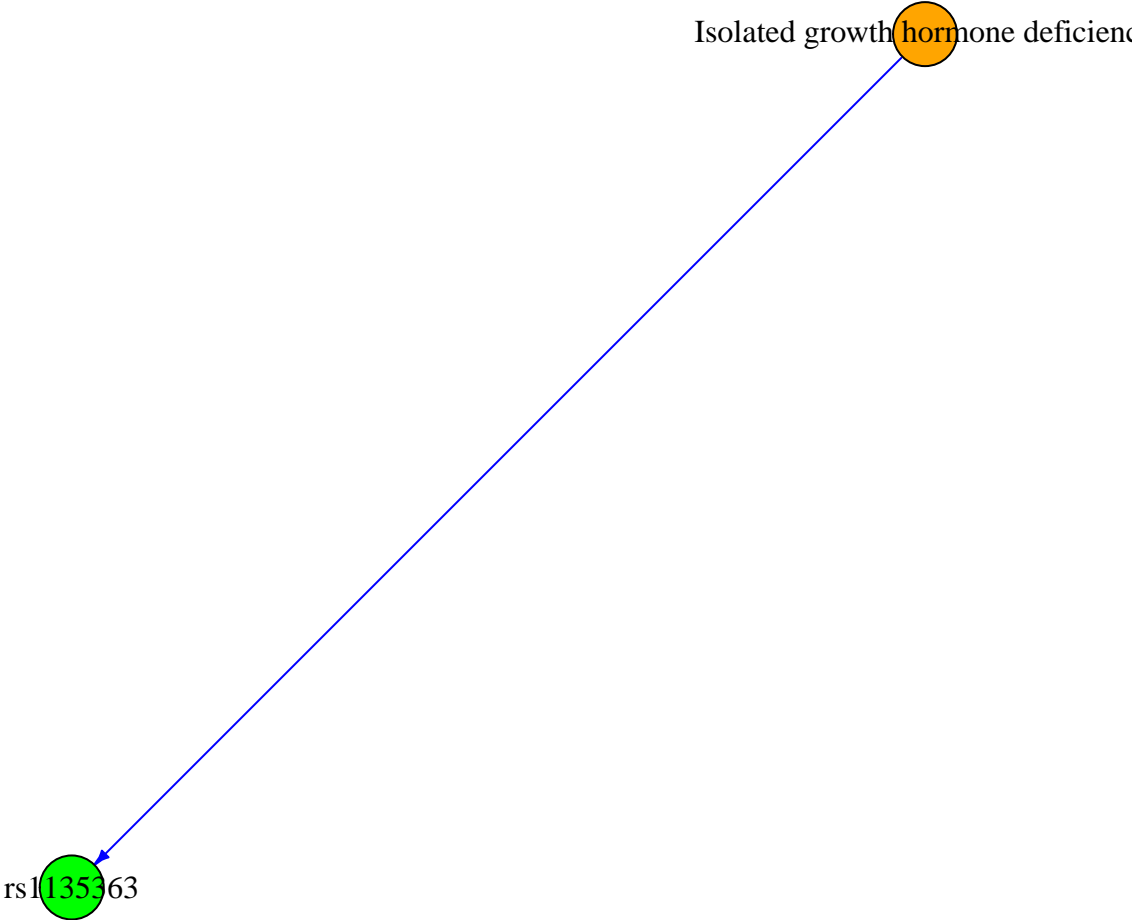

**Variant–Disease Network (Isolated Hyperparathyroidism)**

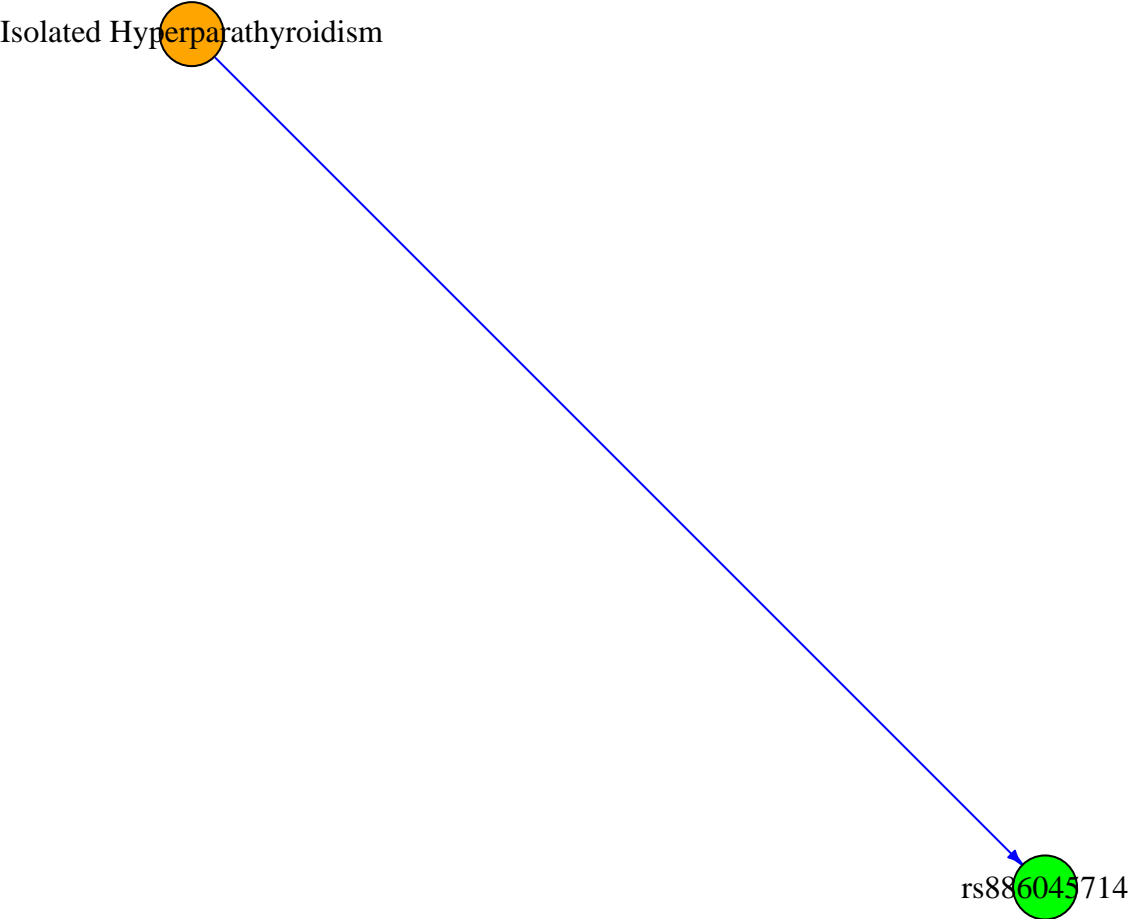

**Variant–Disease Network (Isovaleryl–CoA dehydrogenase deficiency)**

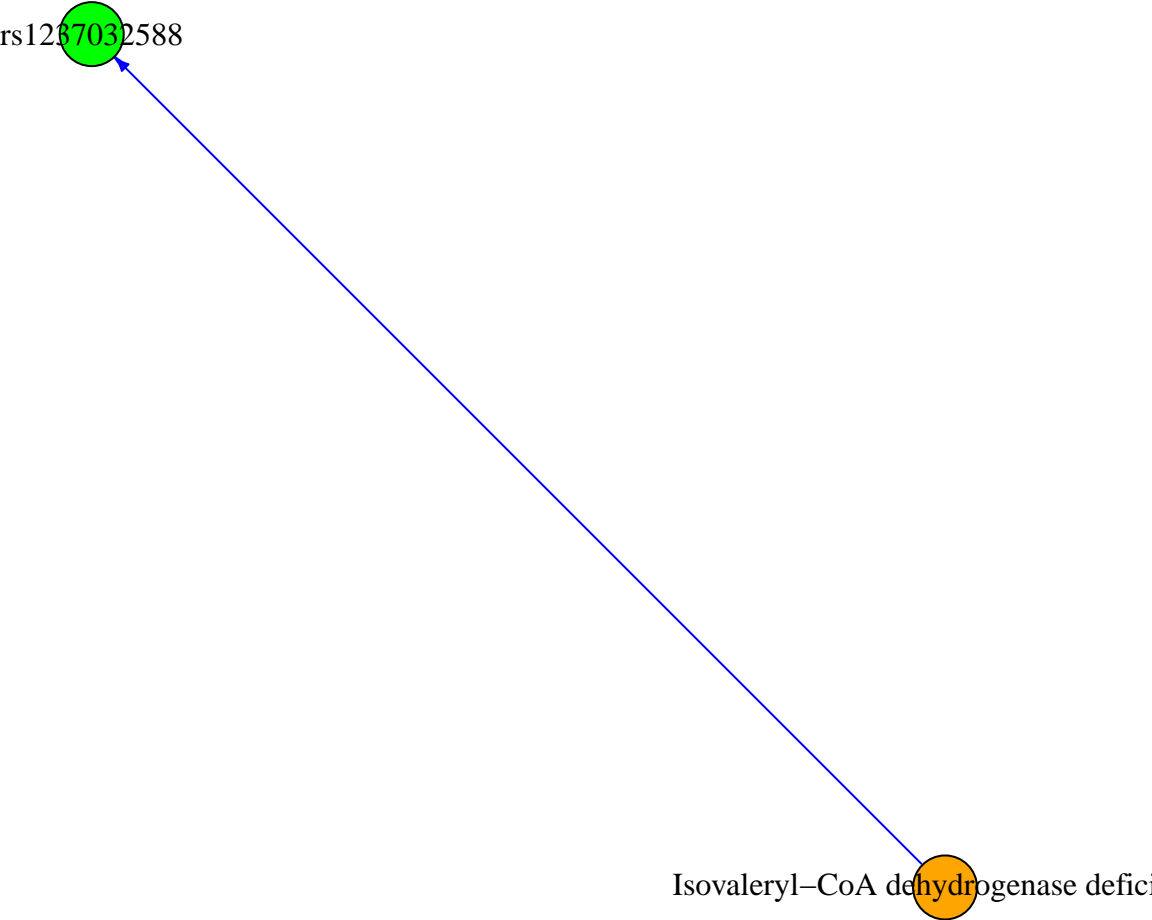

Variant–Disease Network (Jervell and Lange–Nielsen syndrome)

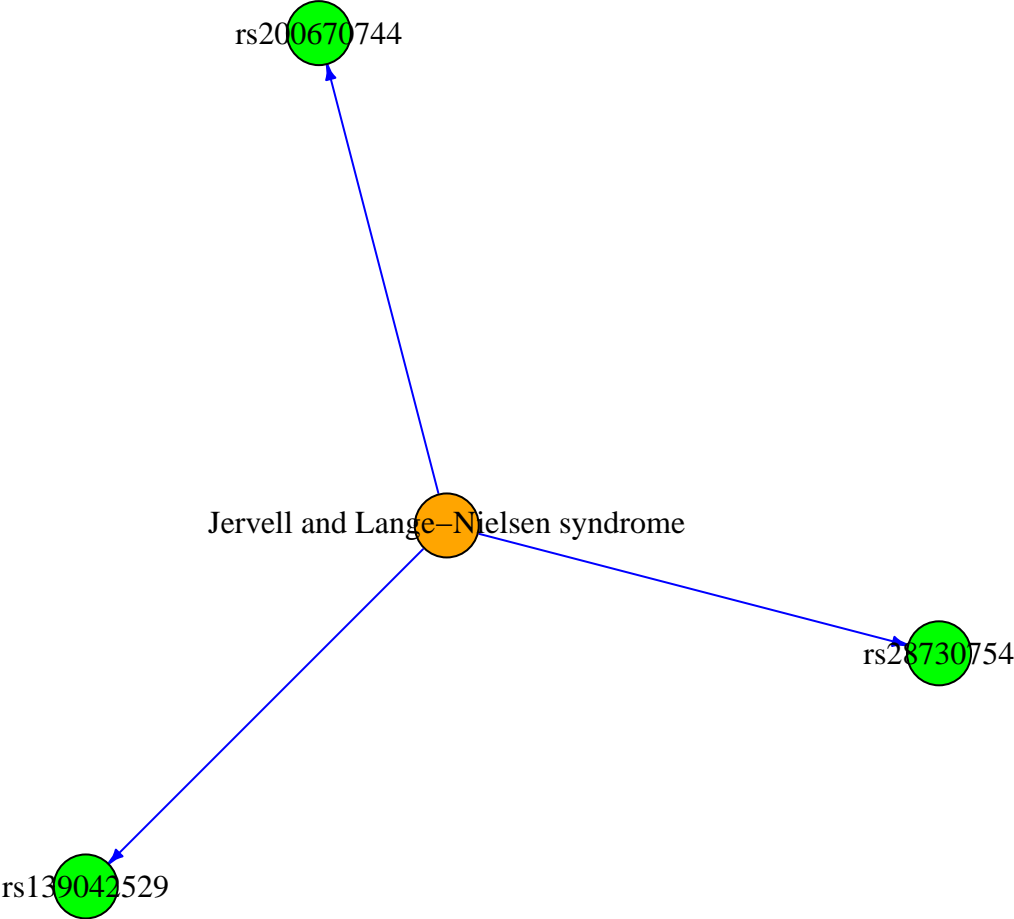

## Variant–Disease Network (Jeune thoracic dystrophy)

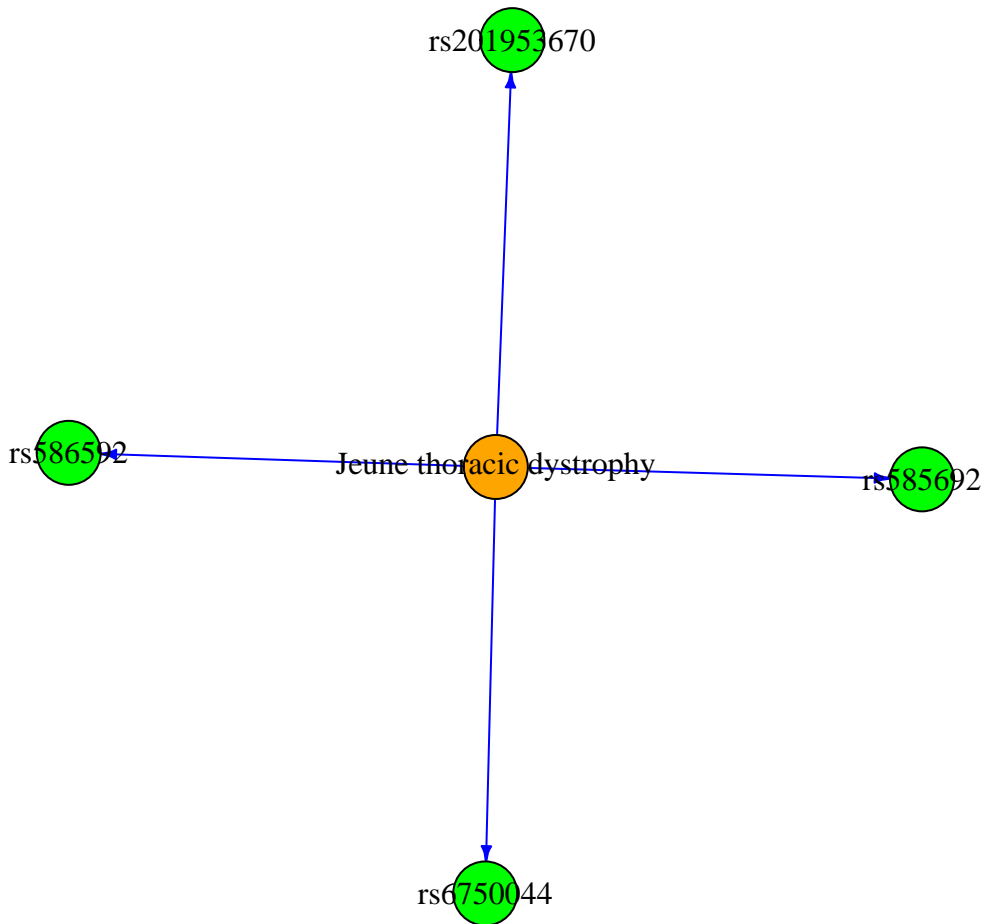



## Variant–Disease Network (Joubert syndrome)

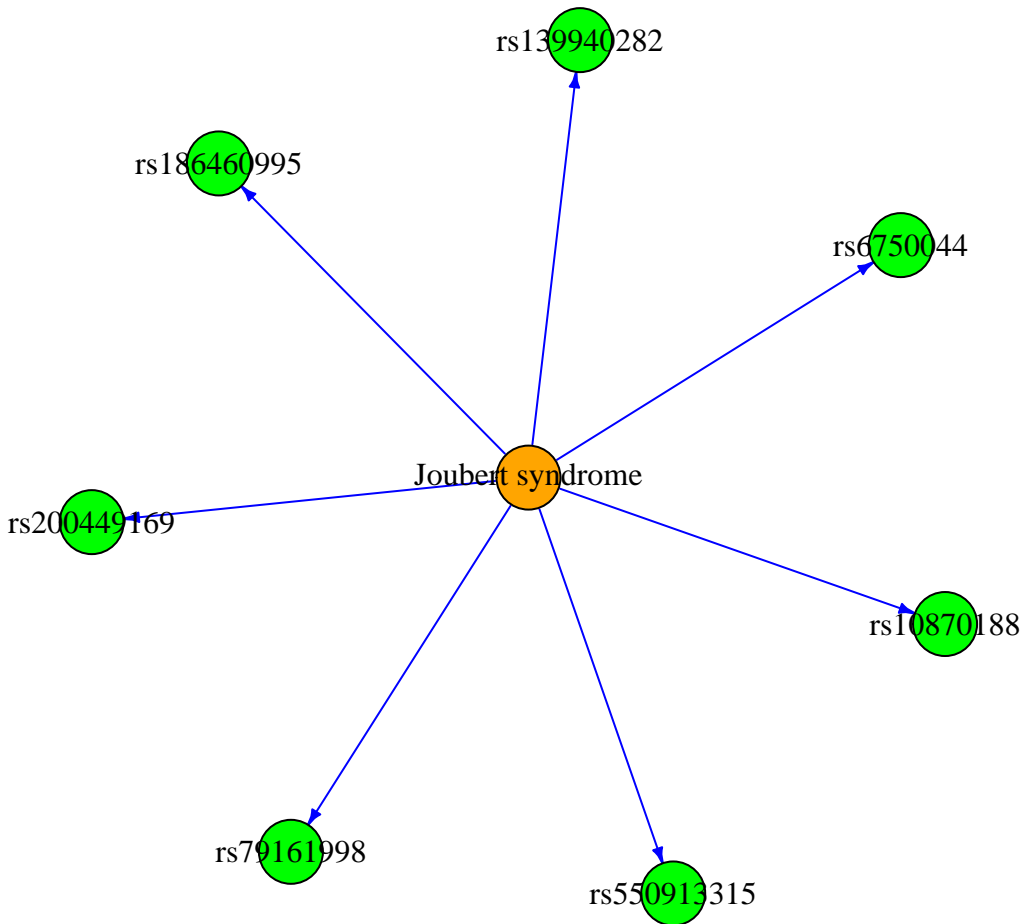

## Variant–Disease Network (Joubert syndrome 16)

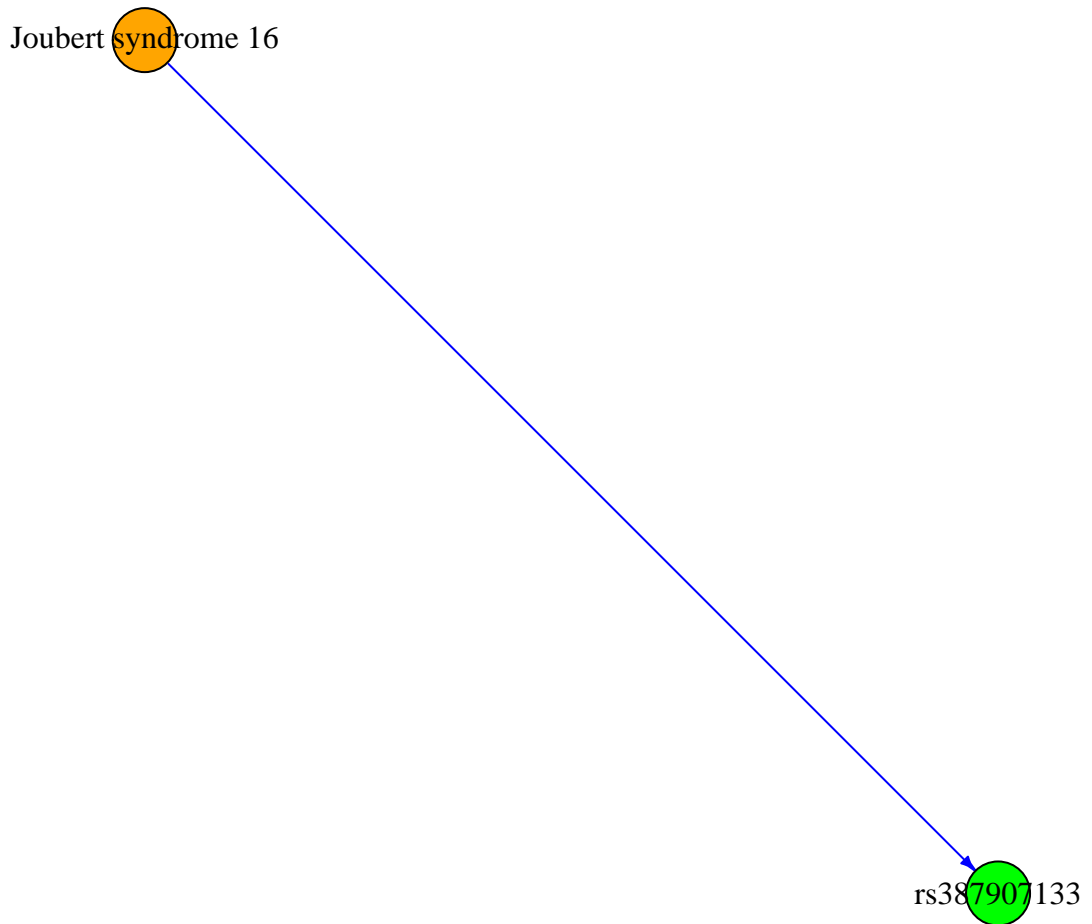

## Variant–Disease Network (Joubert syndrome 20)

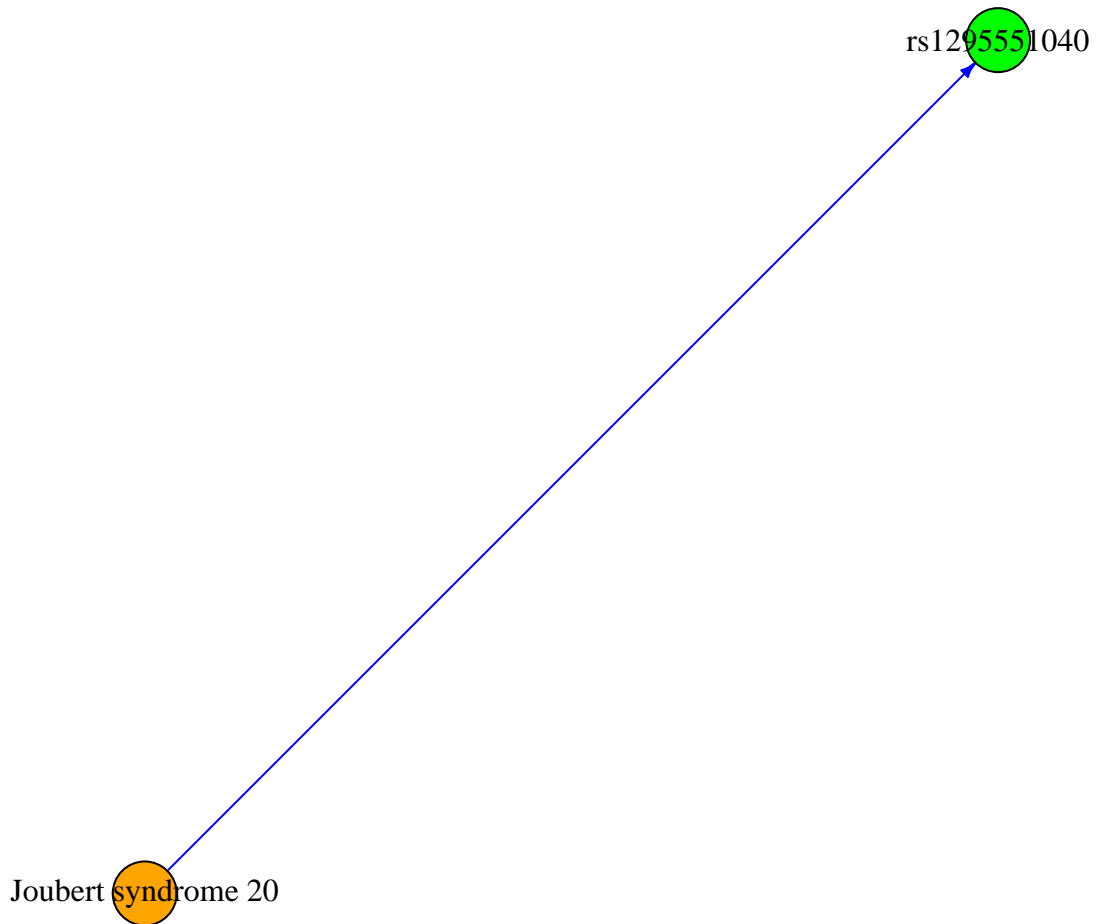

Variant–Disease Network (Junctional epidermolysis bullosa gravis of Herli

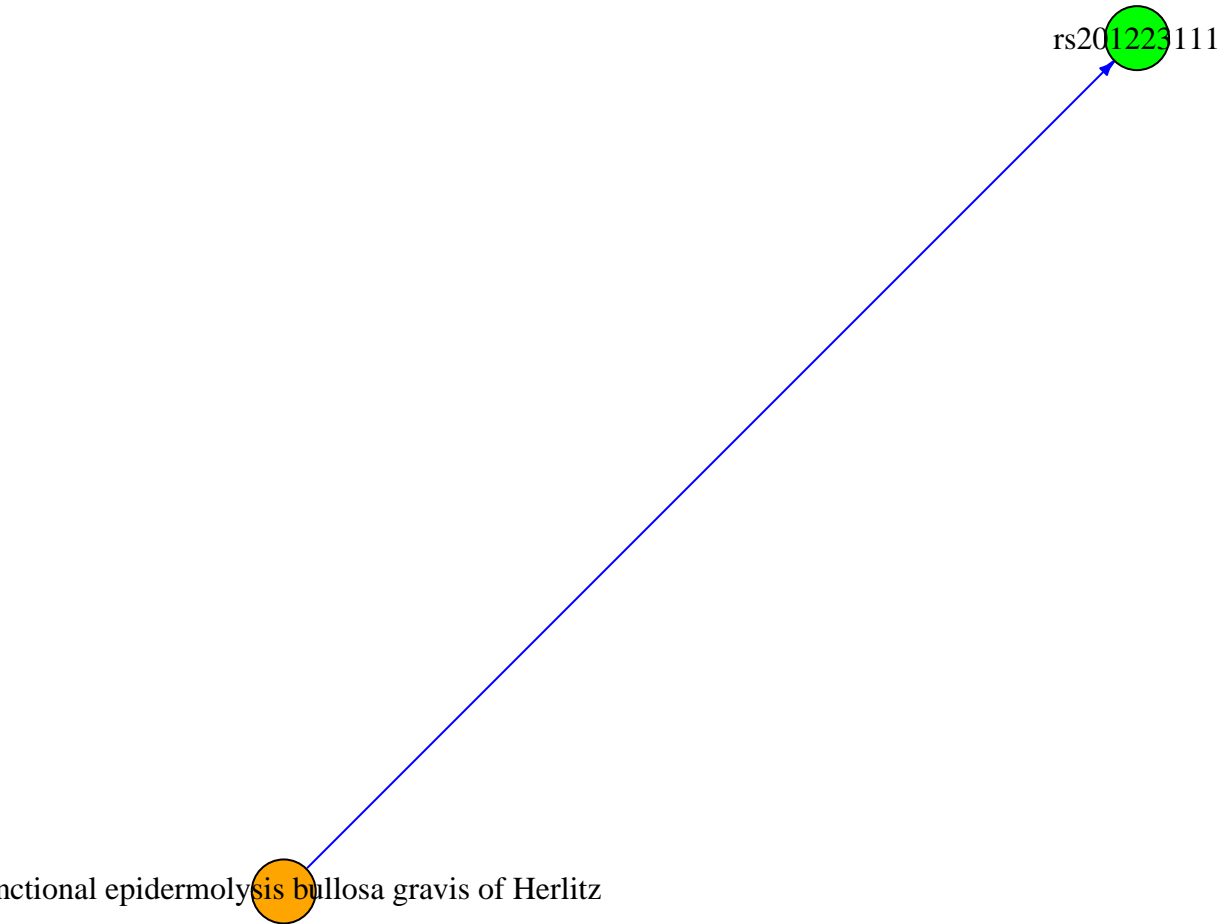

## Variant–Disease Network (Juvenile Polyposis)

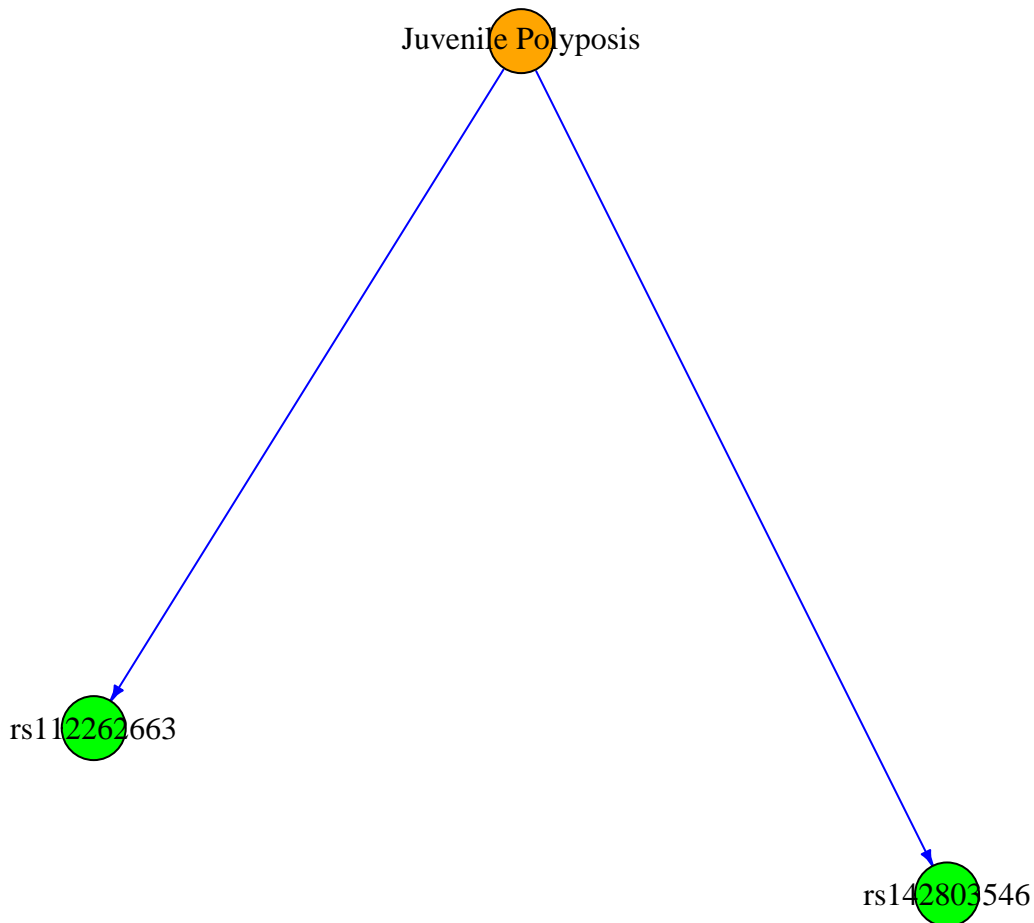

## Variant–Disease Network (Kallmann syndrome 2)

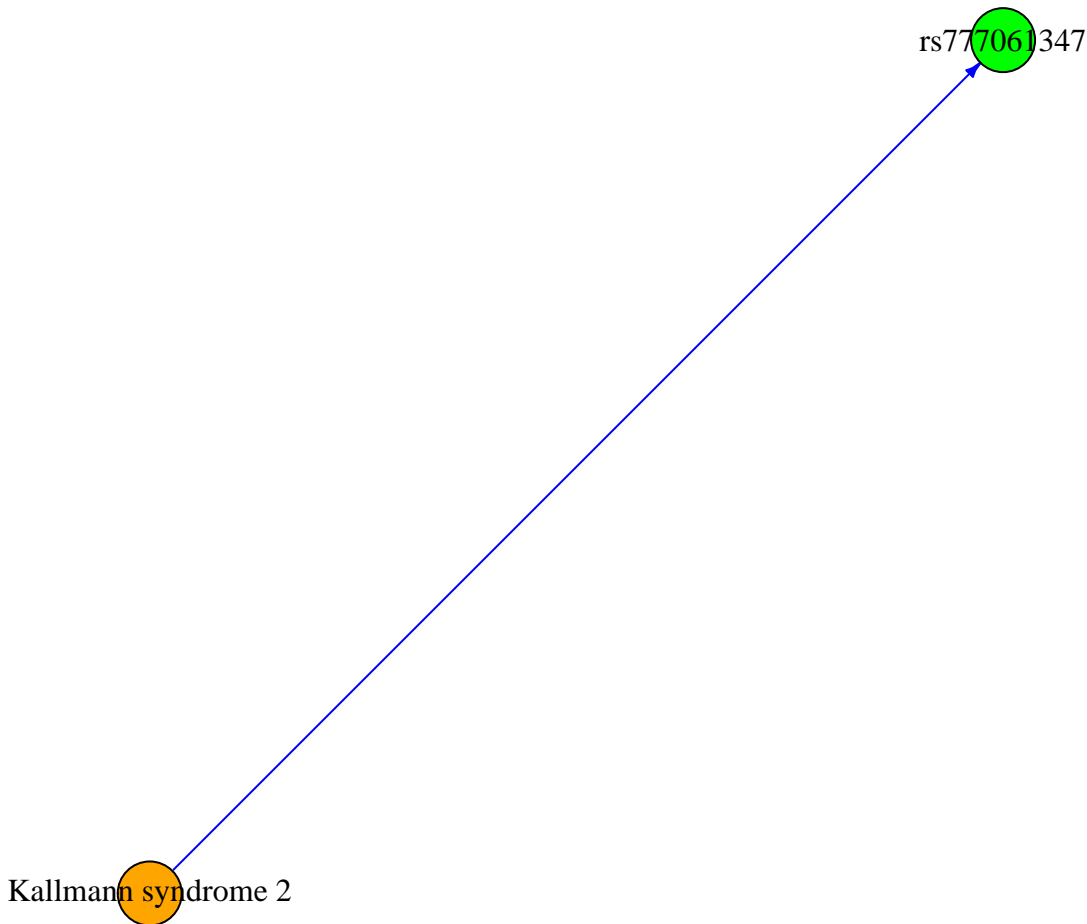

**Variant–Disease Network (Keratosis follicularis)**

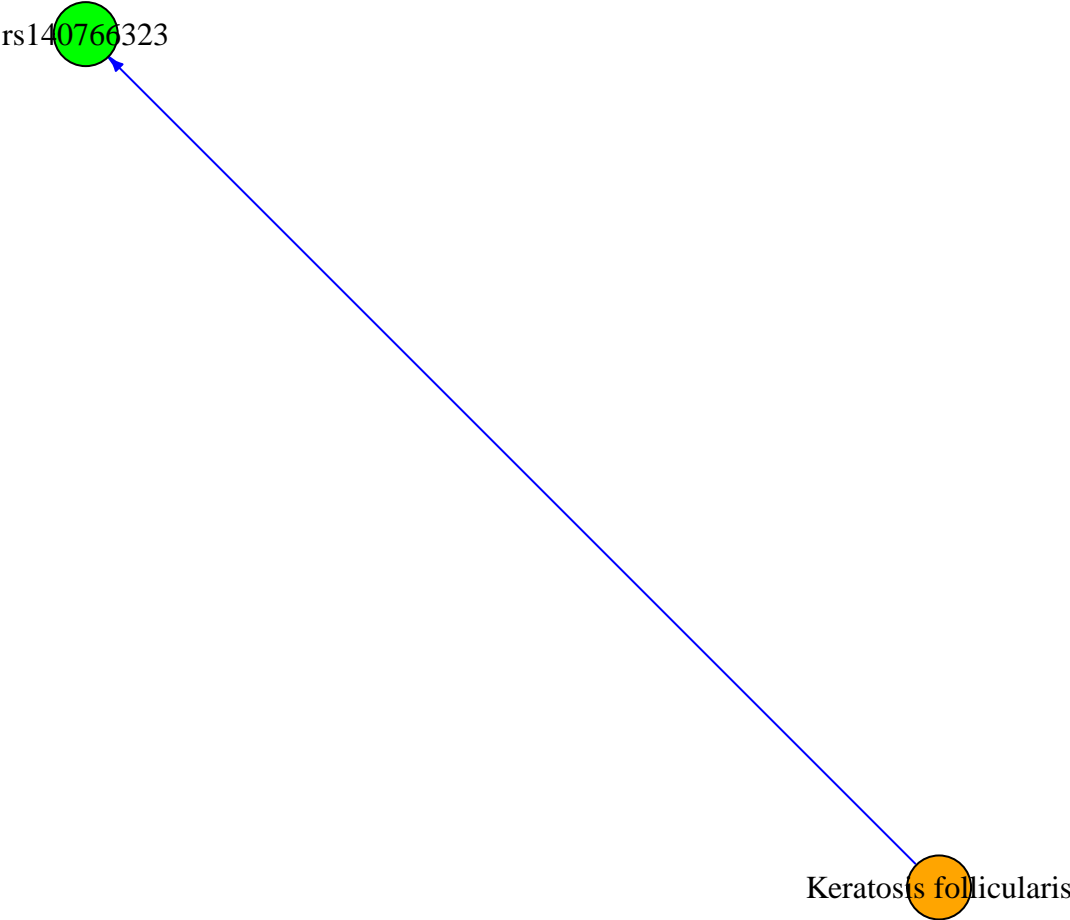

## Variant–Disease Network (Kindlers syndrome)

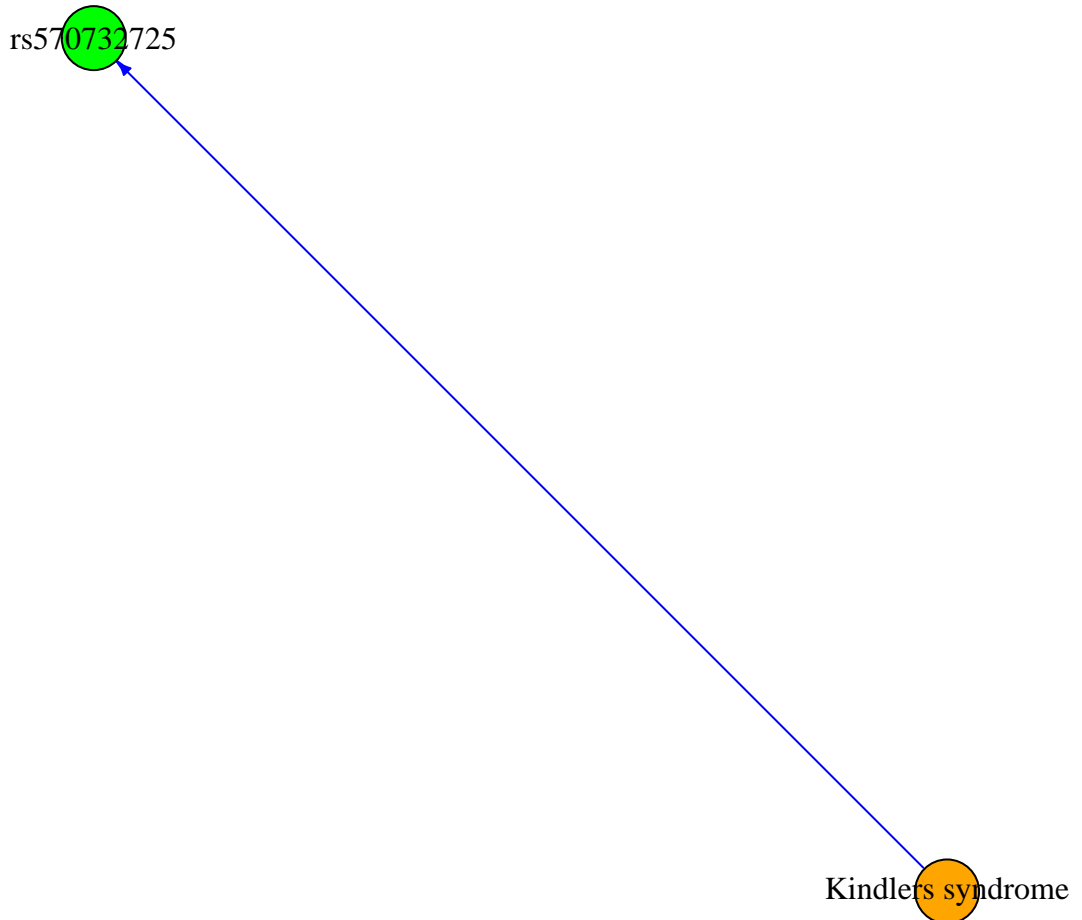



## Variant–Disease Network (Kleefstra syndrome 1)

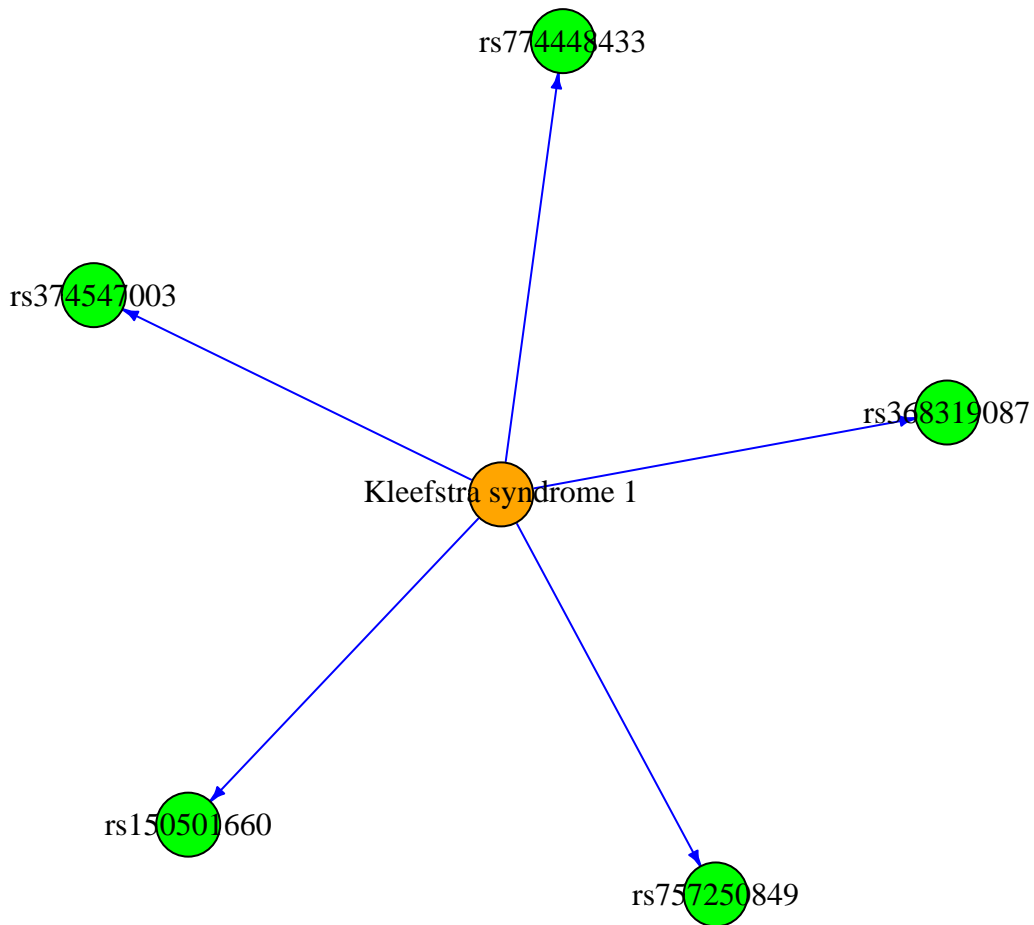

## Variant-Disease Network (Kohlschutters syndrome)

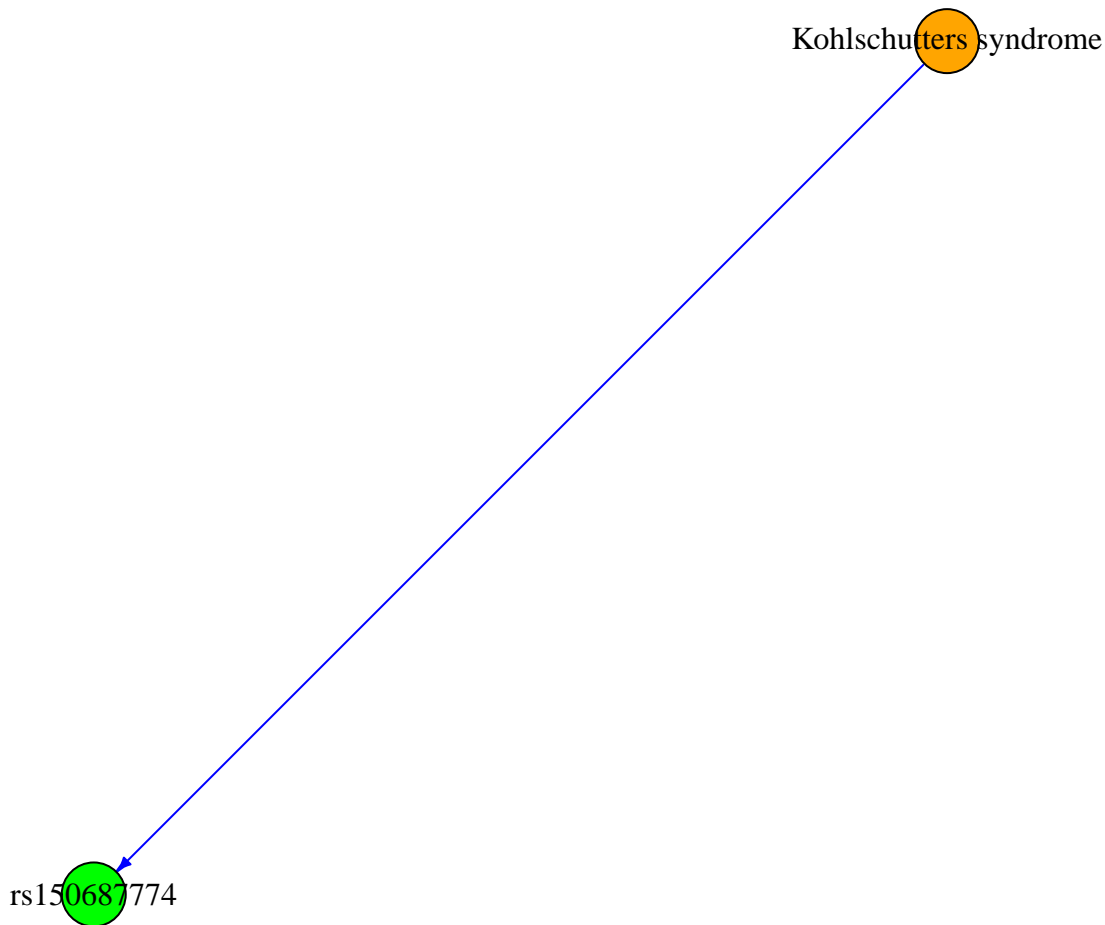

## Variant–Disease Network (Lactose intolerance)

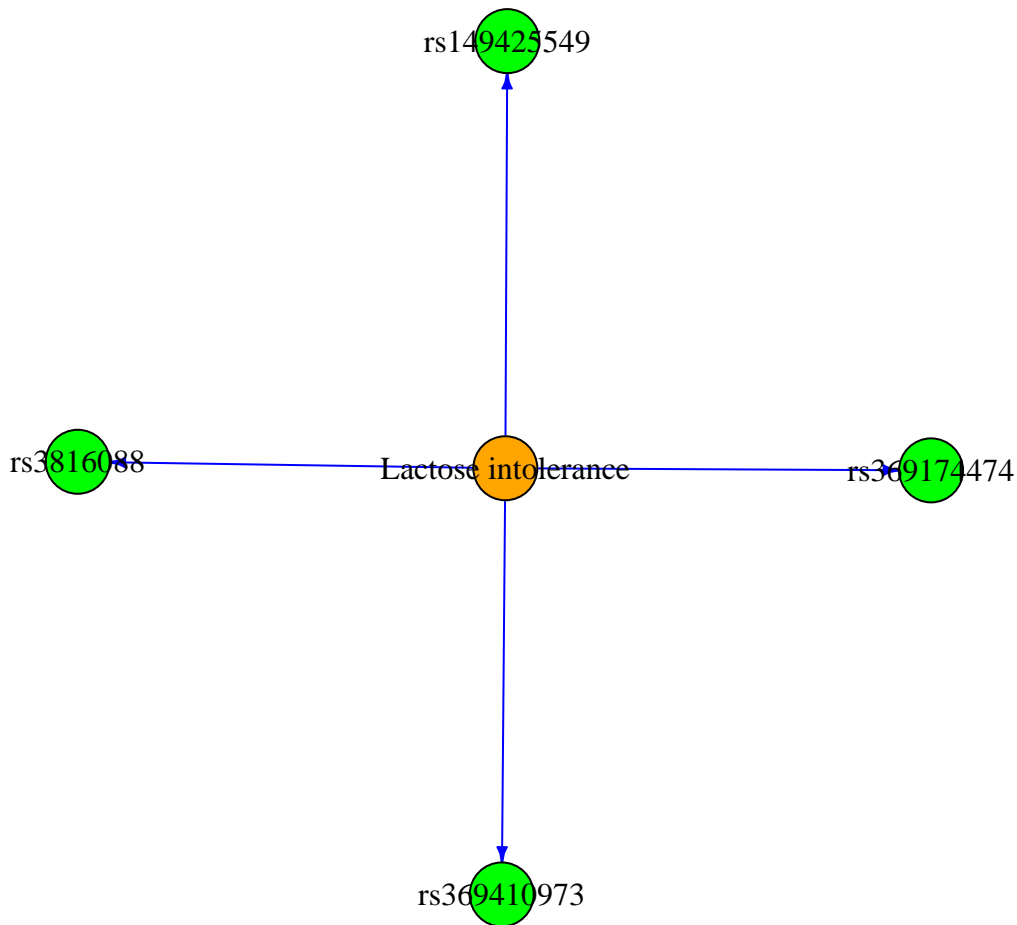

Variant–Disease Network (Lafora disease)

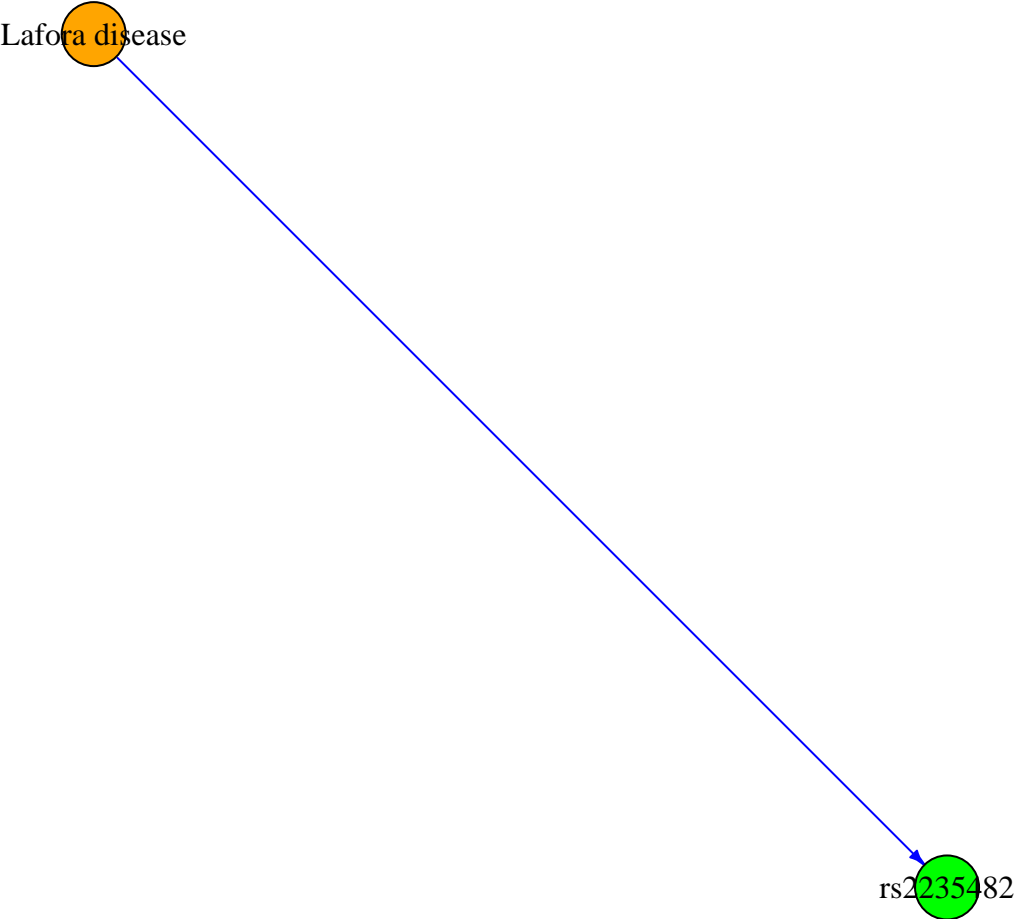

## Variant–Disease Network (Larsen syndrome)

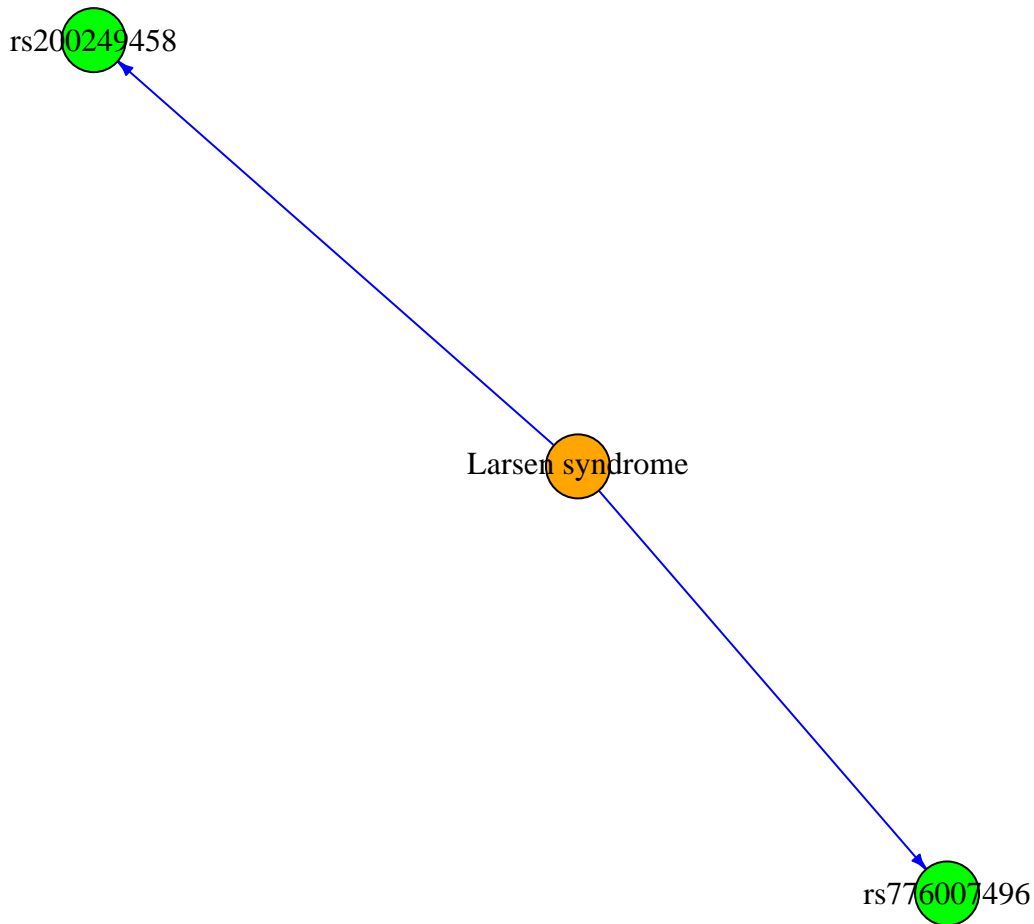

Variant–Disease Network (Leber congenital amaurosis)

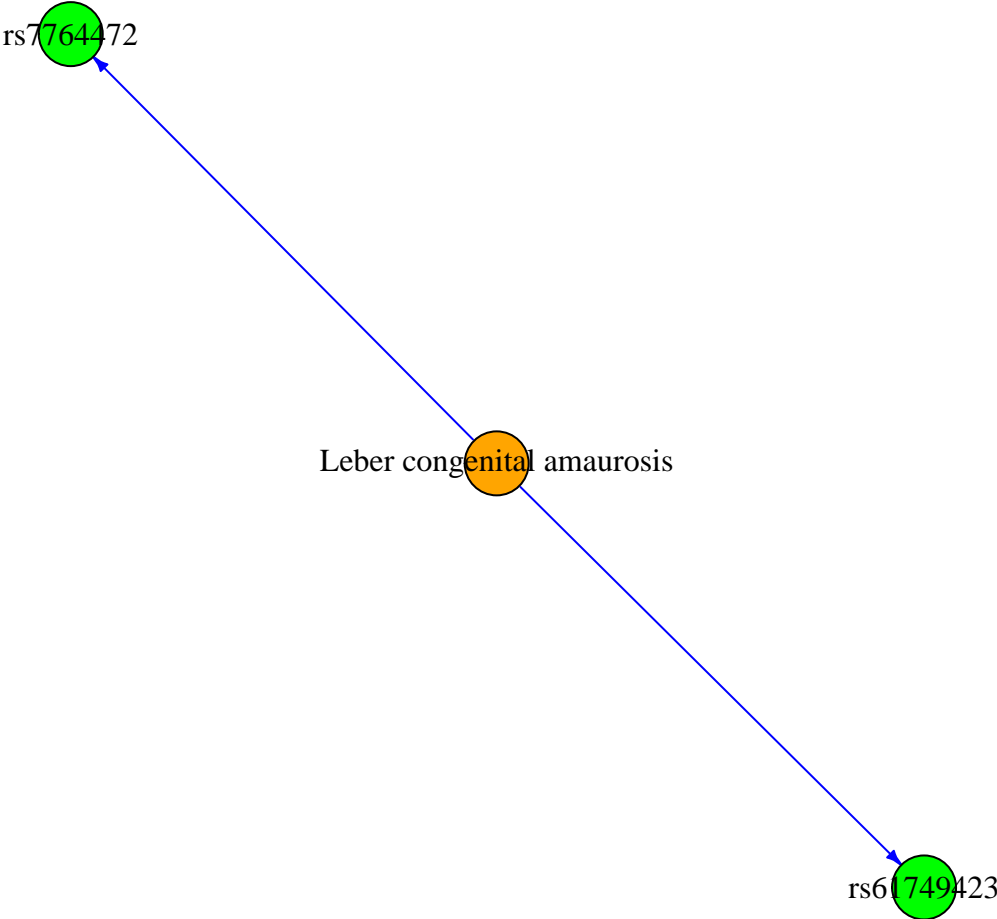

**Variant–Disease Network (Leber congenital amaurosis 4)**

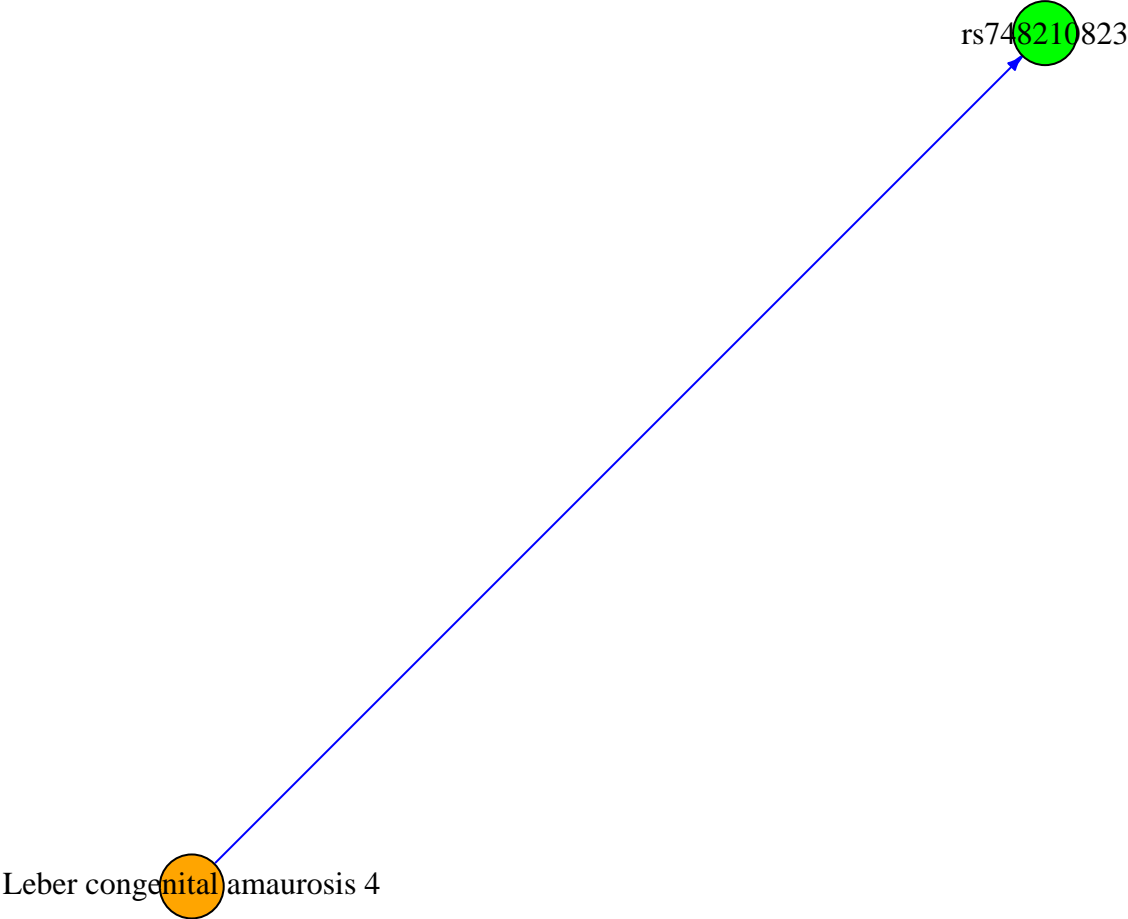

## Variant–Disease Network (Left ventricular noncompaction 6)

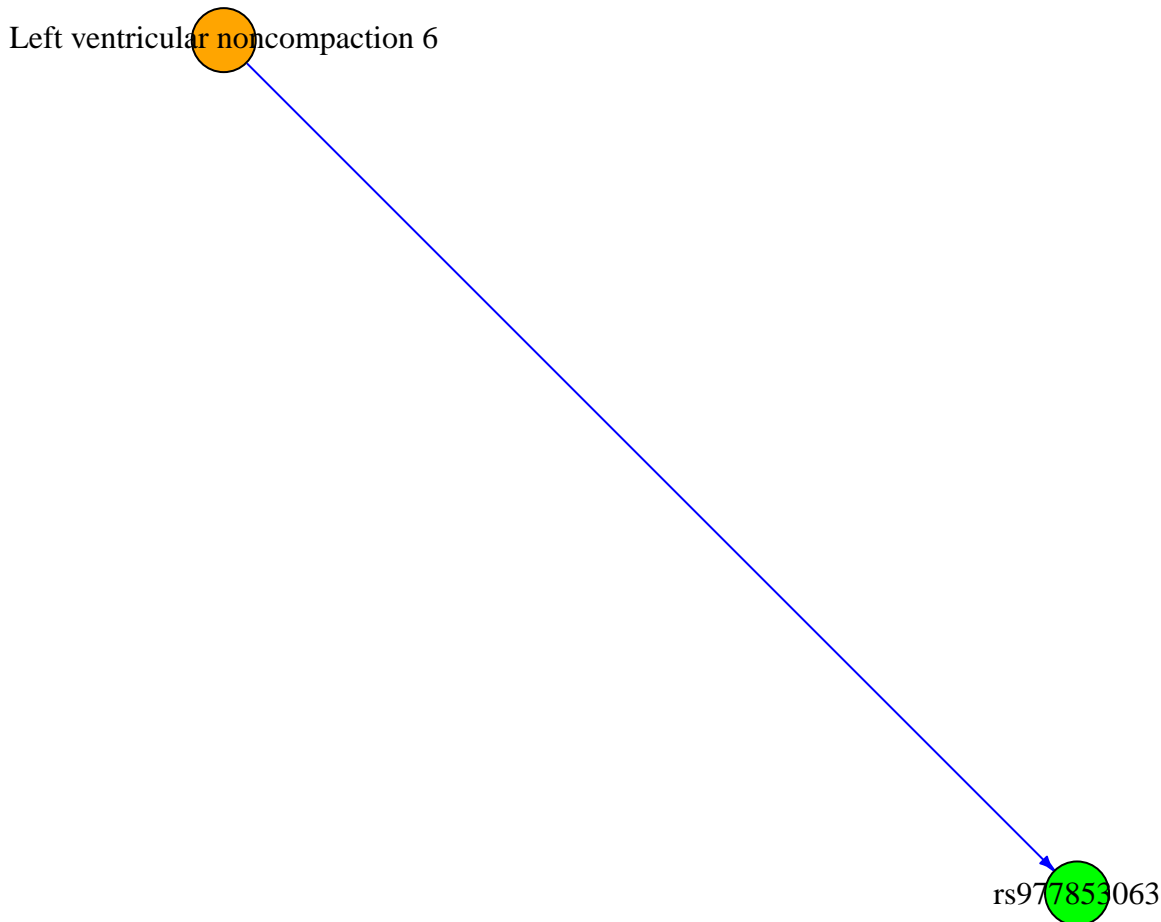



**Variant–Disease Network (Left ventricular noncompaction 8)**

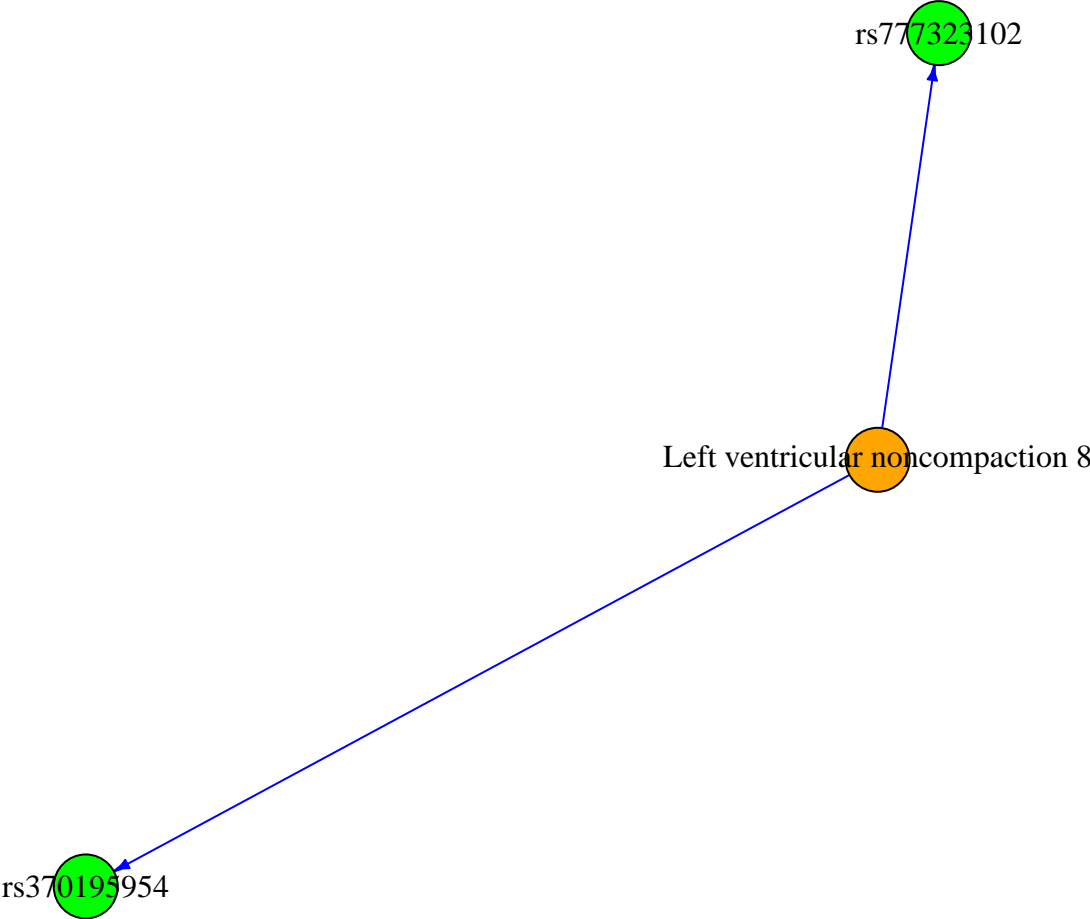

Variant–Disease Network (Left ventricular noncompaction cardiomyopath

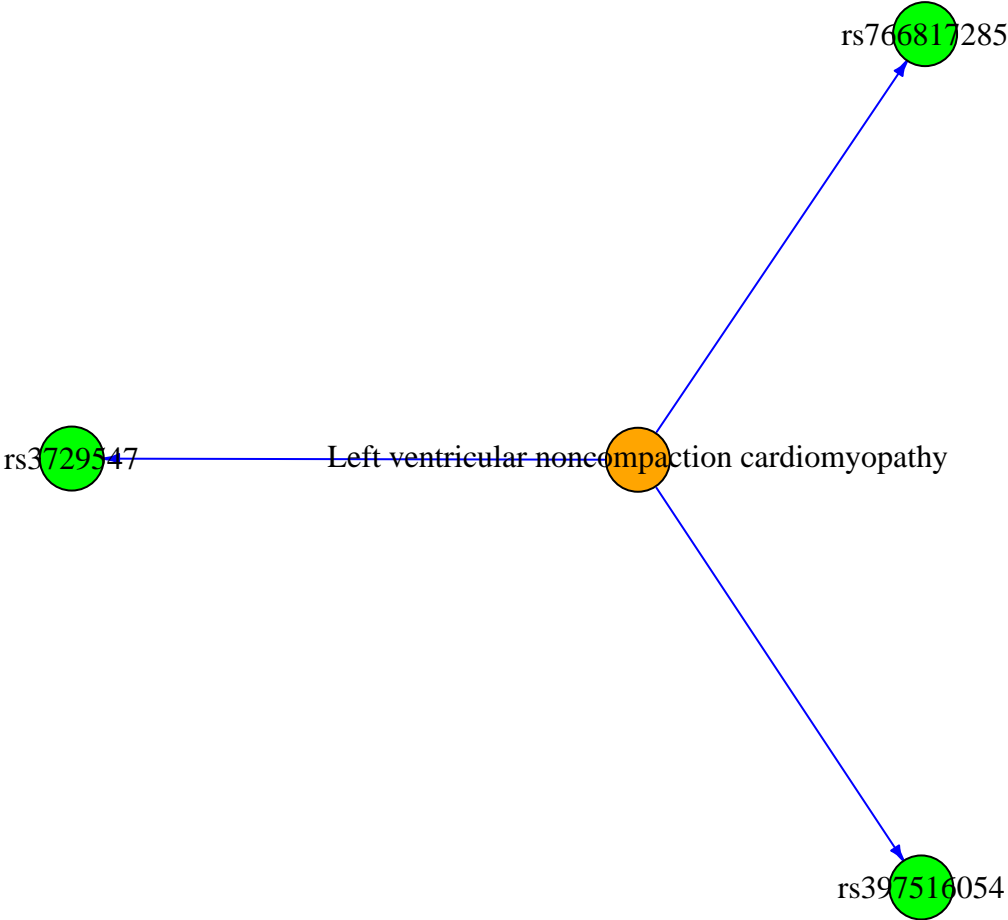

## Variant–Disease Network (Leigh syndrome)

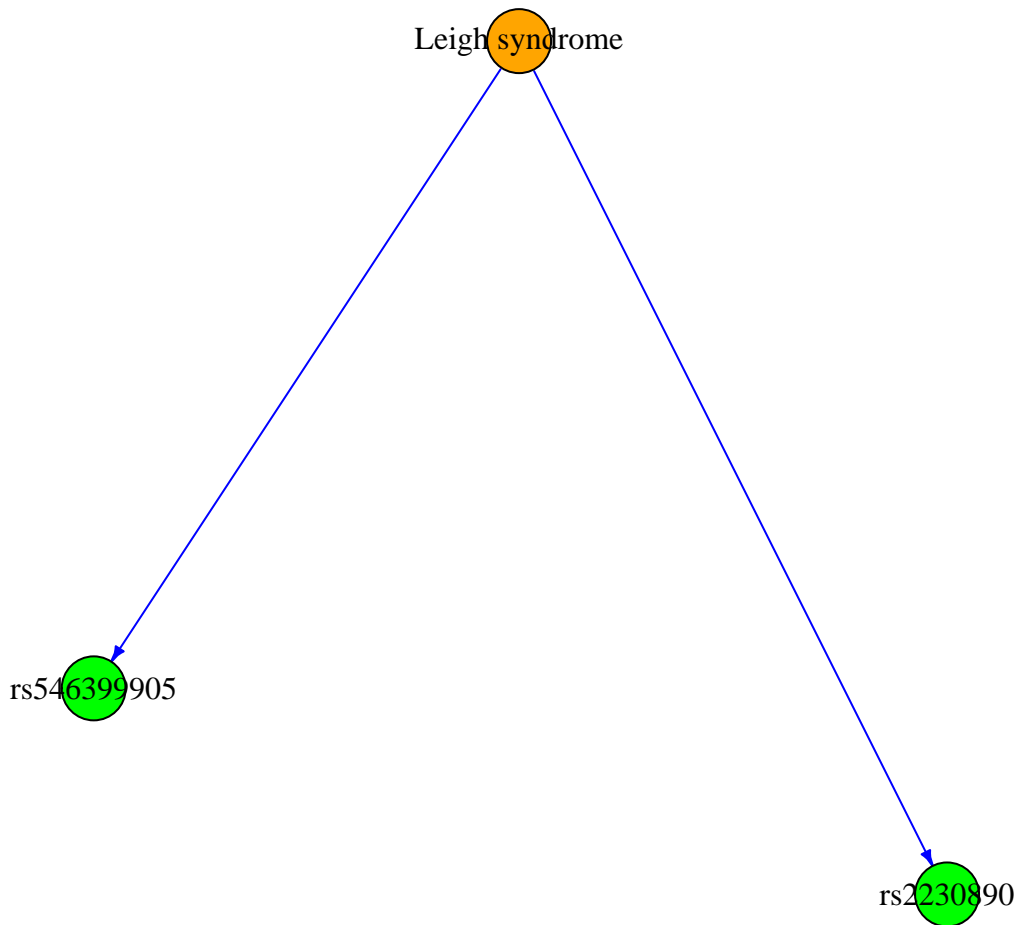

## Variant–Disease Network (Leptin receptor deficiency)

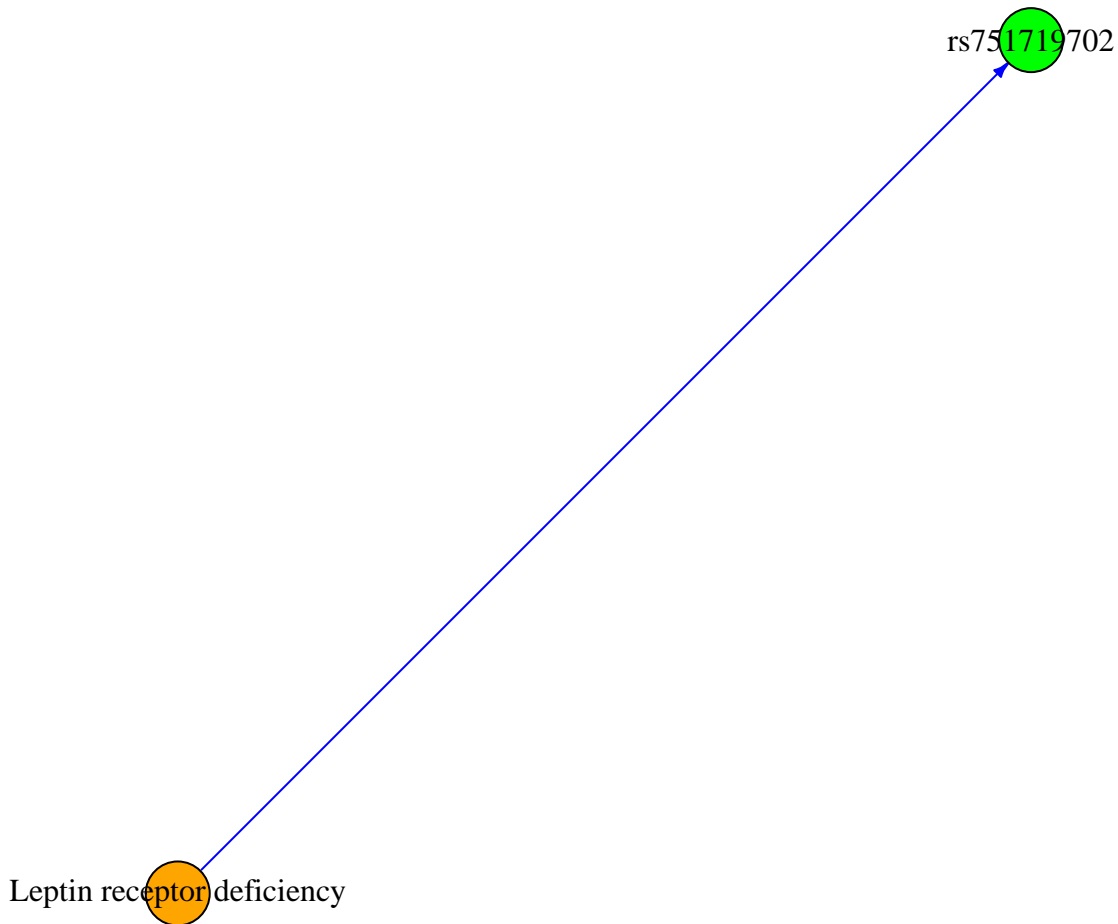

## Variant–Disease Network (Lethal Encephalopathy)

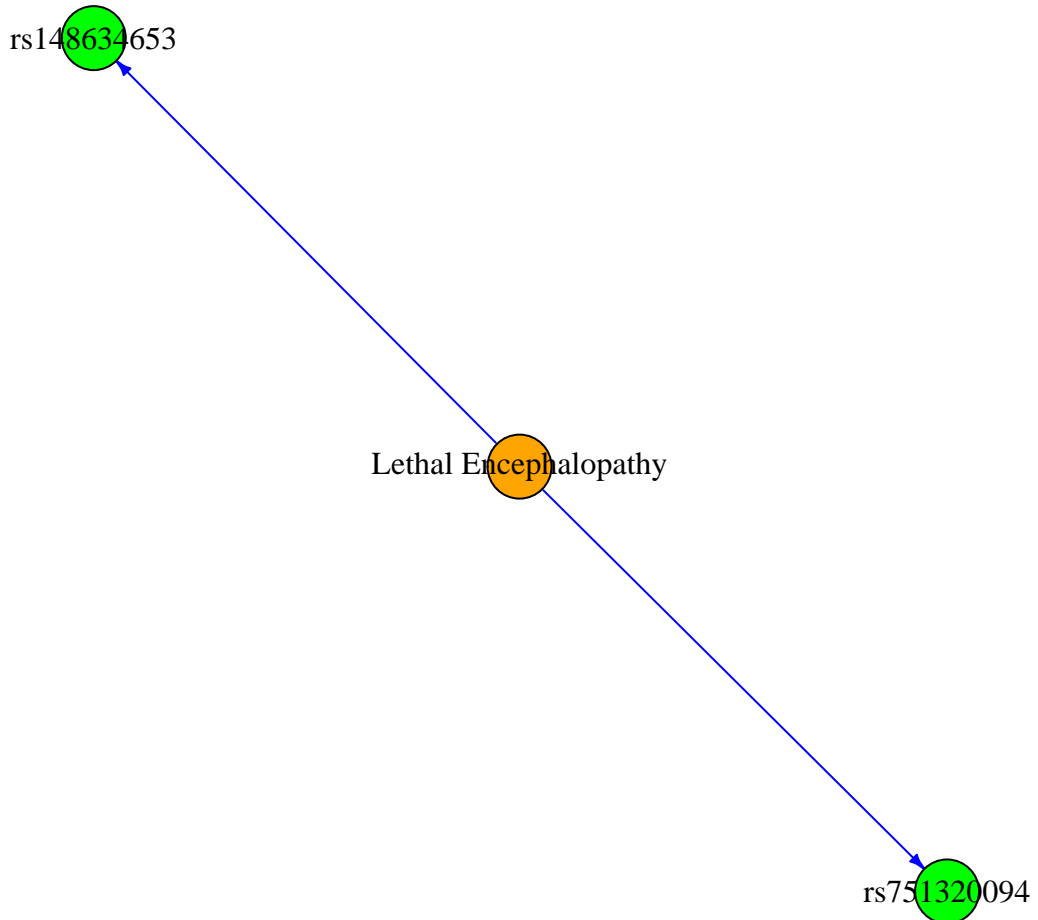

Variant–Disease Network (Lethal multiple pterygium syndrome)

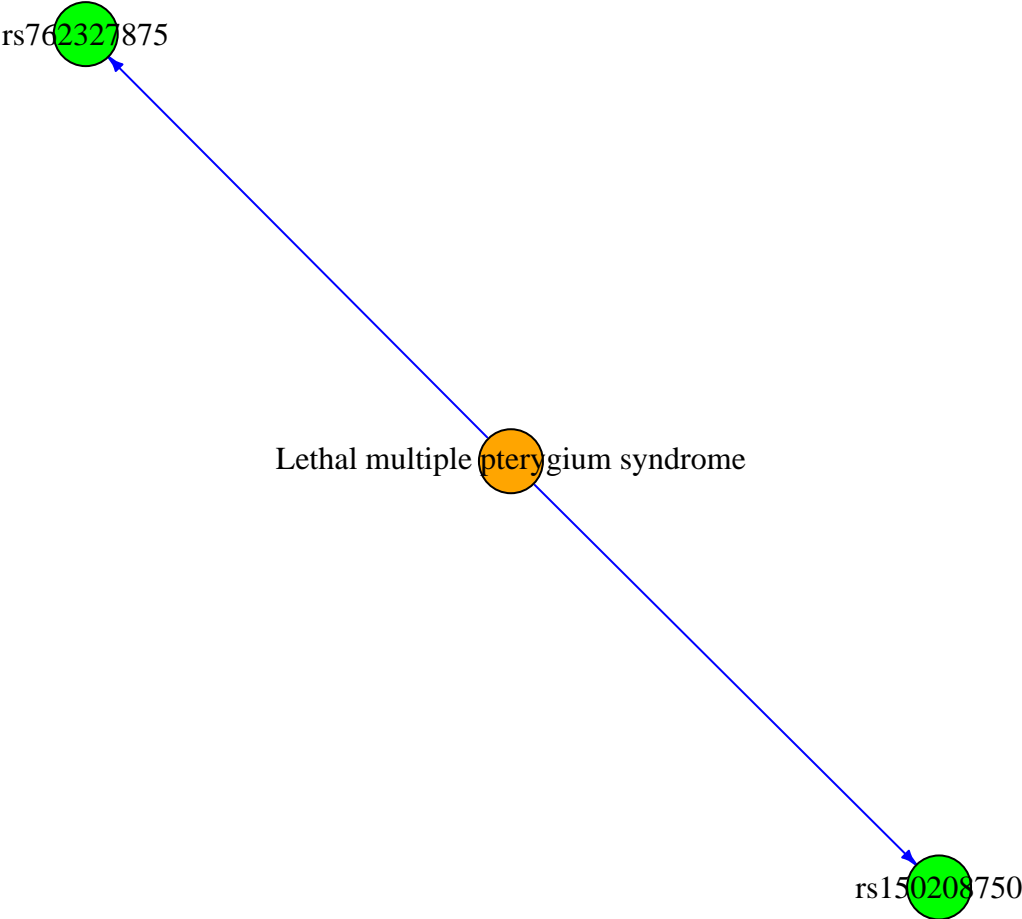

**Variant–Disease Network (Lethal tight skin contracture syndrome)**

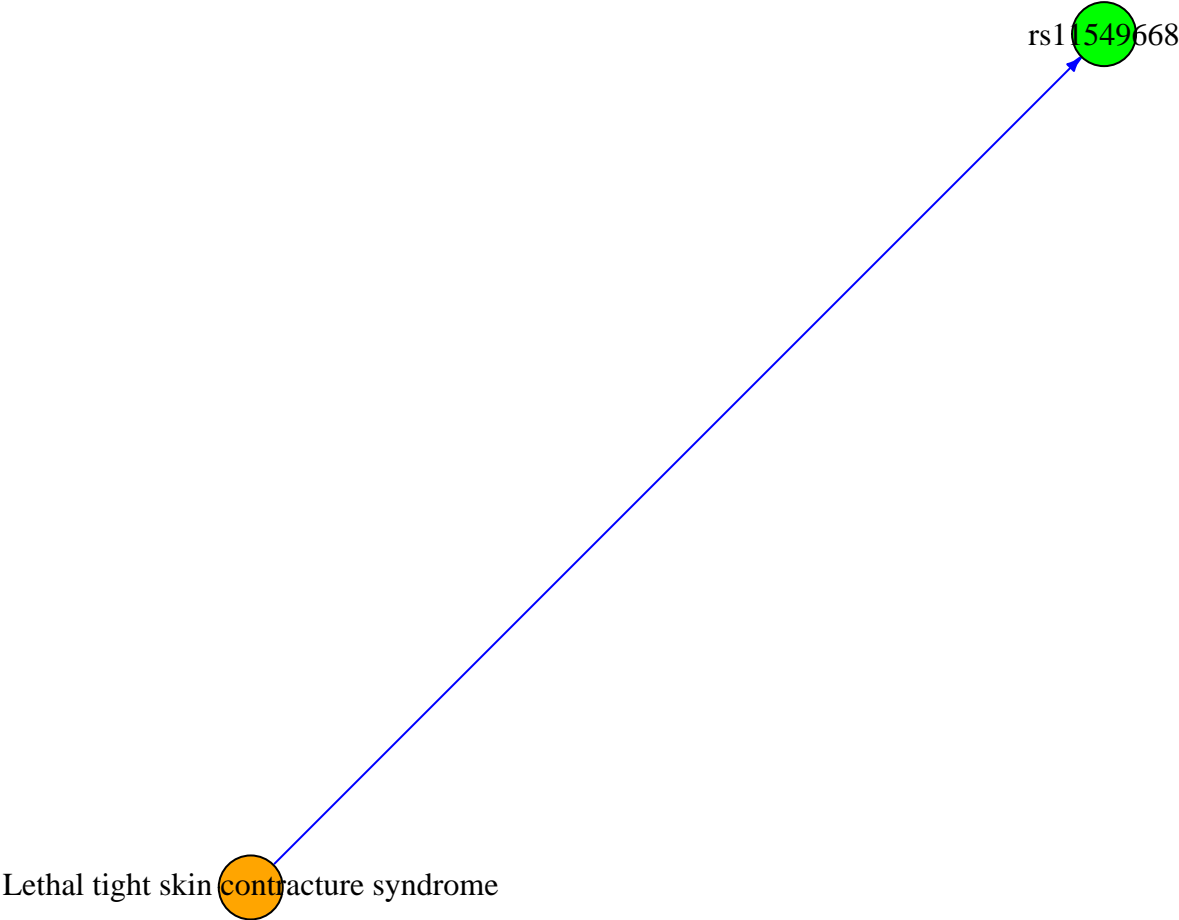

## Variant–Disease Network (Leukodystrophy)

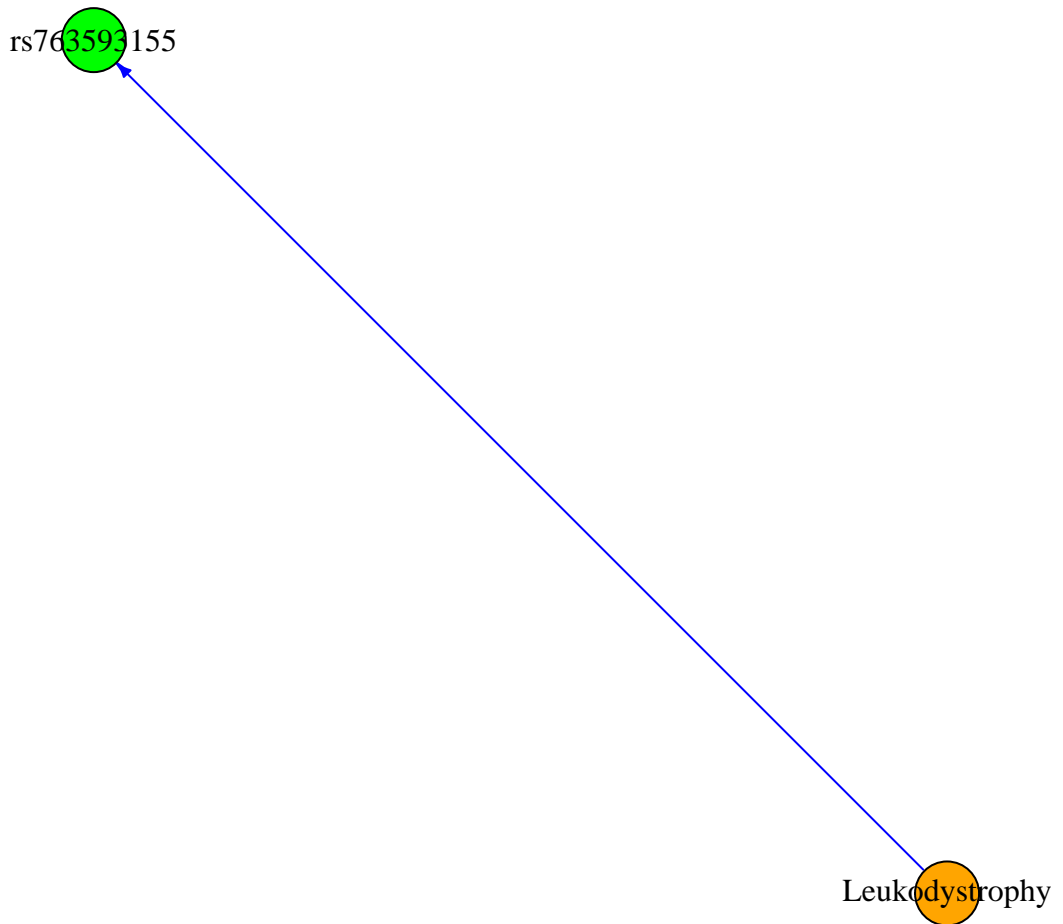



**Variant–Disease Network (Leukoencephalopathy with ataxia)**

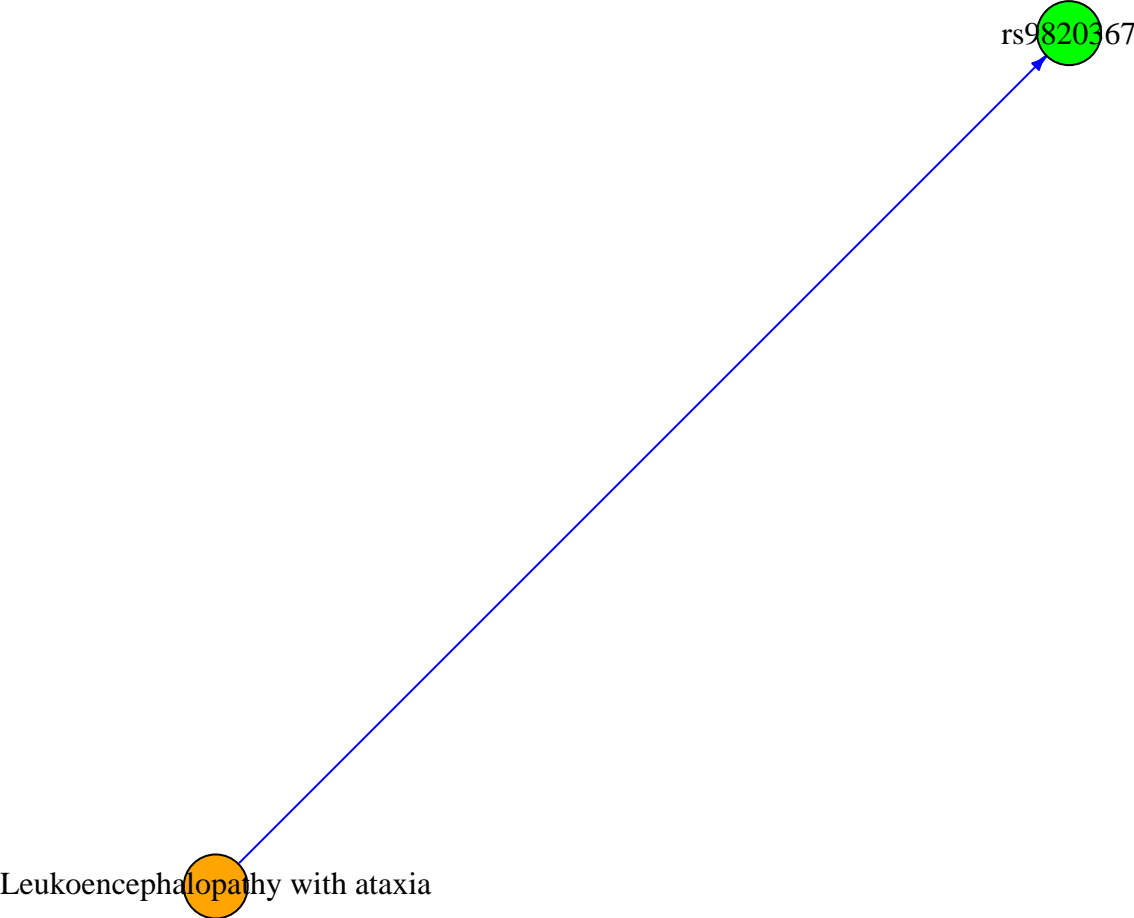

Variant–Disease Network (Leukoencephalopathy with vanishing white matter)

Leukoencephalopathy with vanishing white matter

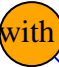

rs11556200

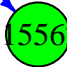

## Variant–Disease Network (Liddle syndrome 1)

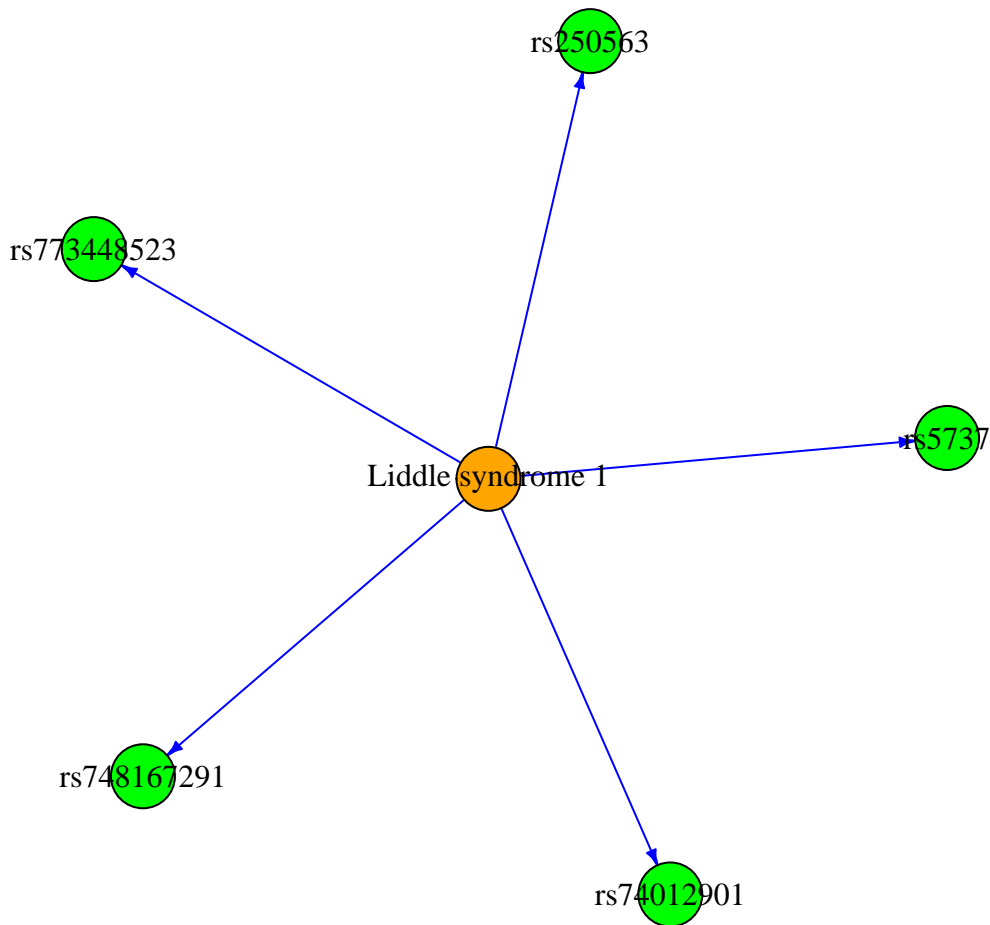

## Variant–Disease Network (Li–Fraumeni syndrome)

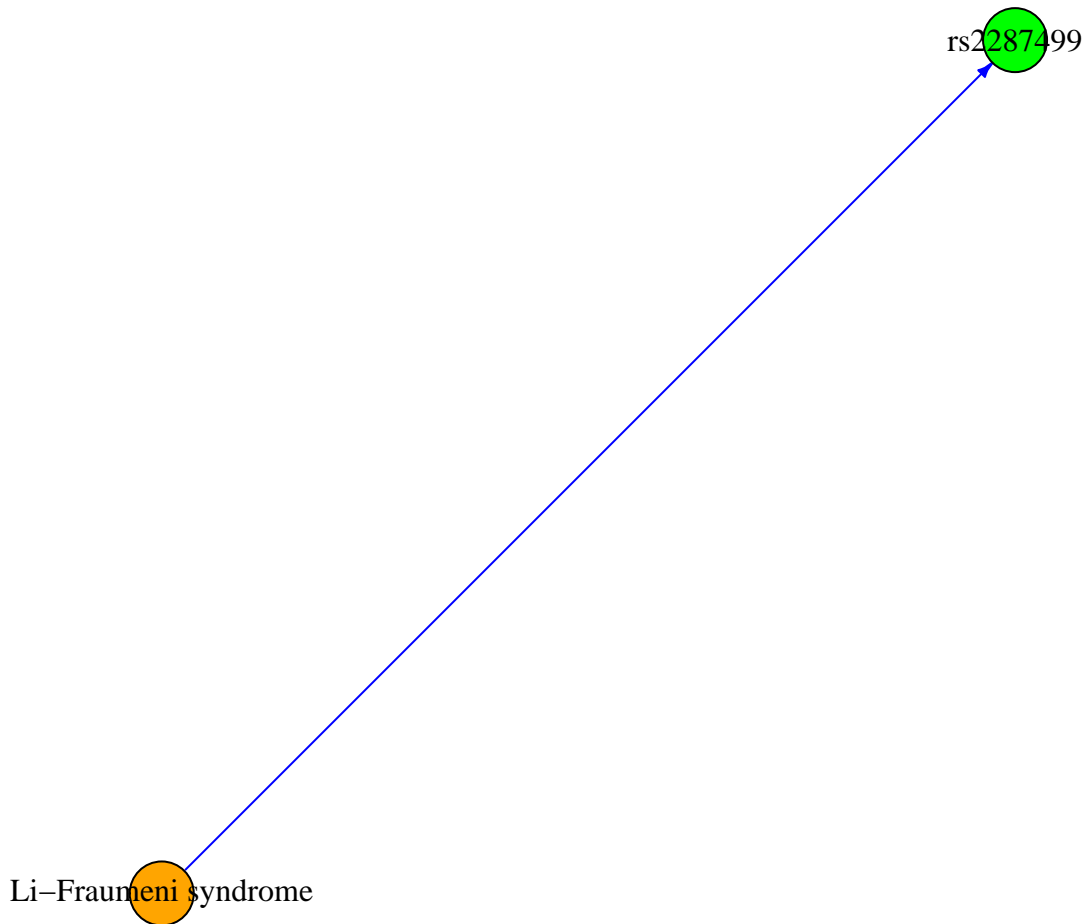

Variant–Disease Network (Lig4 syndrome)

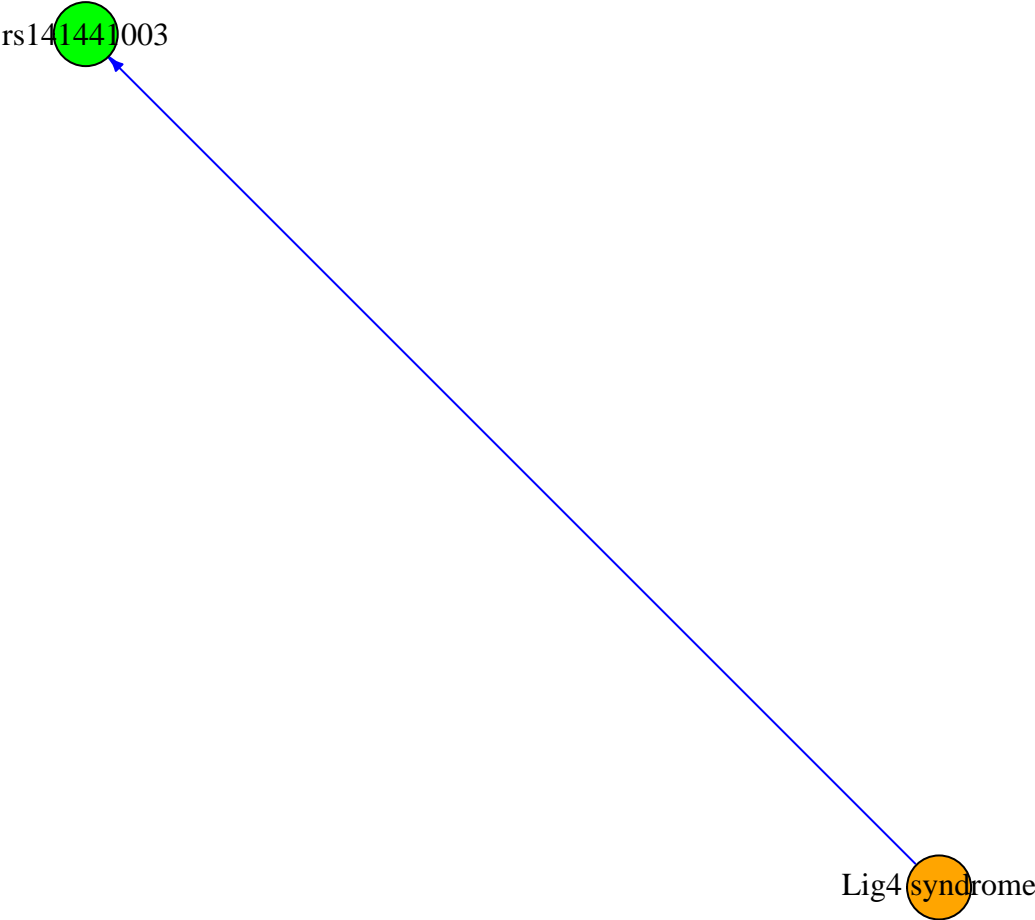

# Variant–Disease Network (Limb–girdle muscular dystrophy)

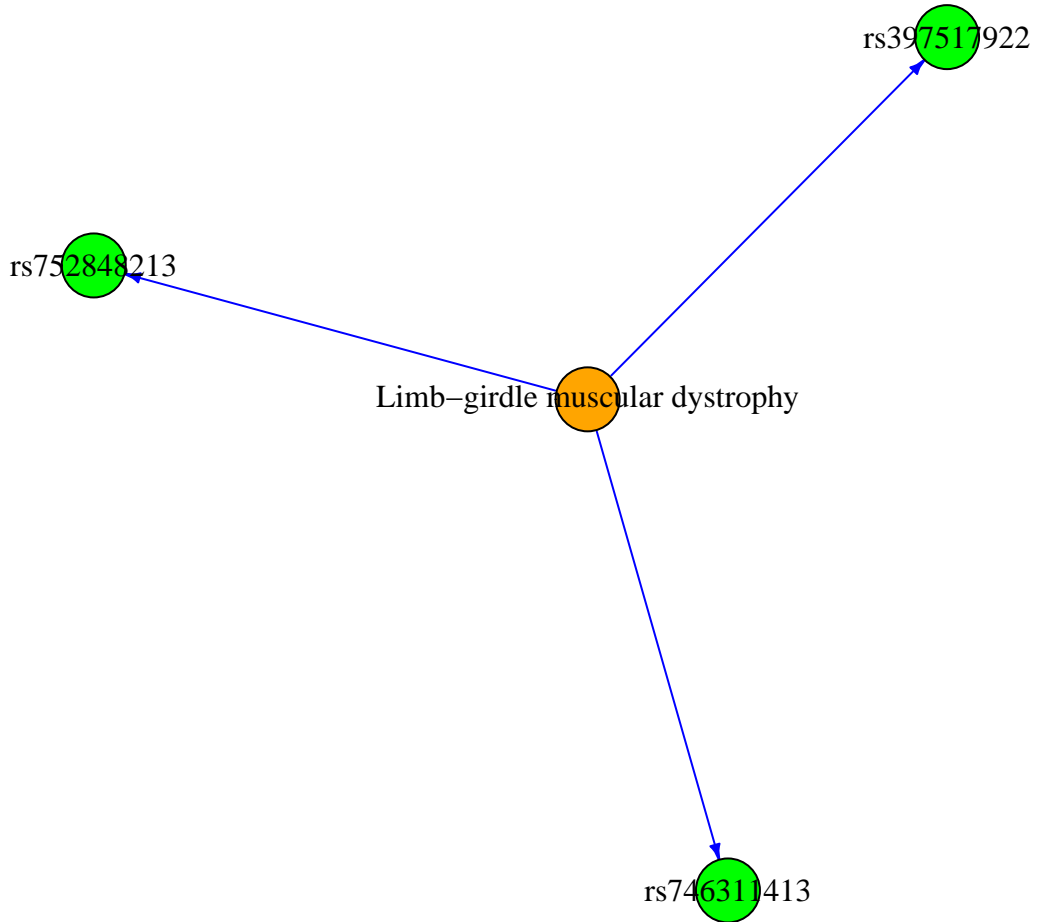

# Variant-Disease Network (Limb-girdle muscular dystrophy-dystroglycanopathy)

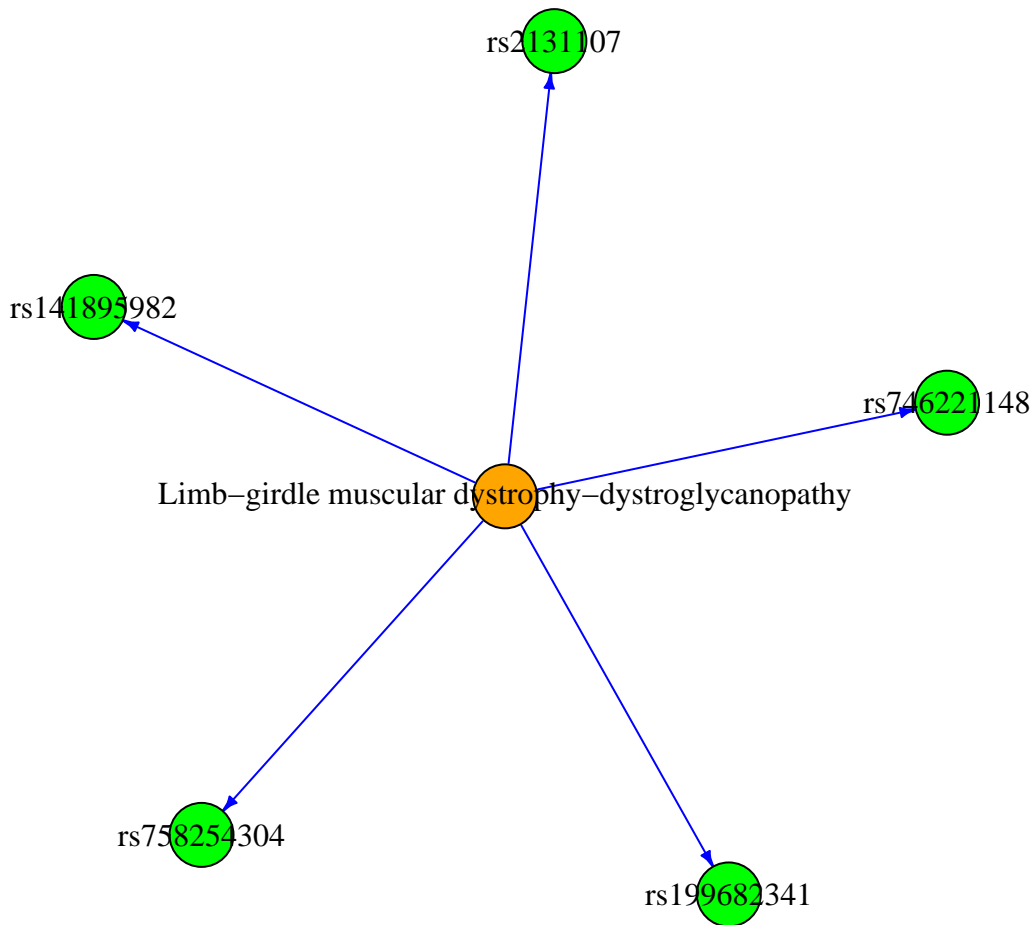

# Variant-Disease Network (Lipoatrophy with Diabetes)

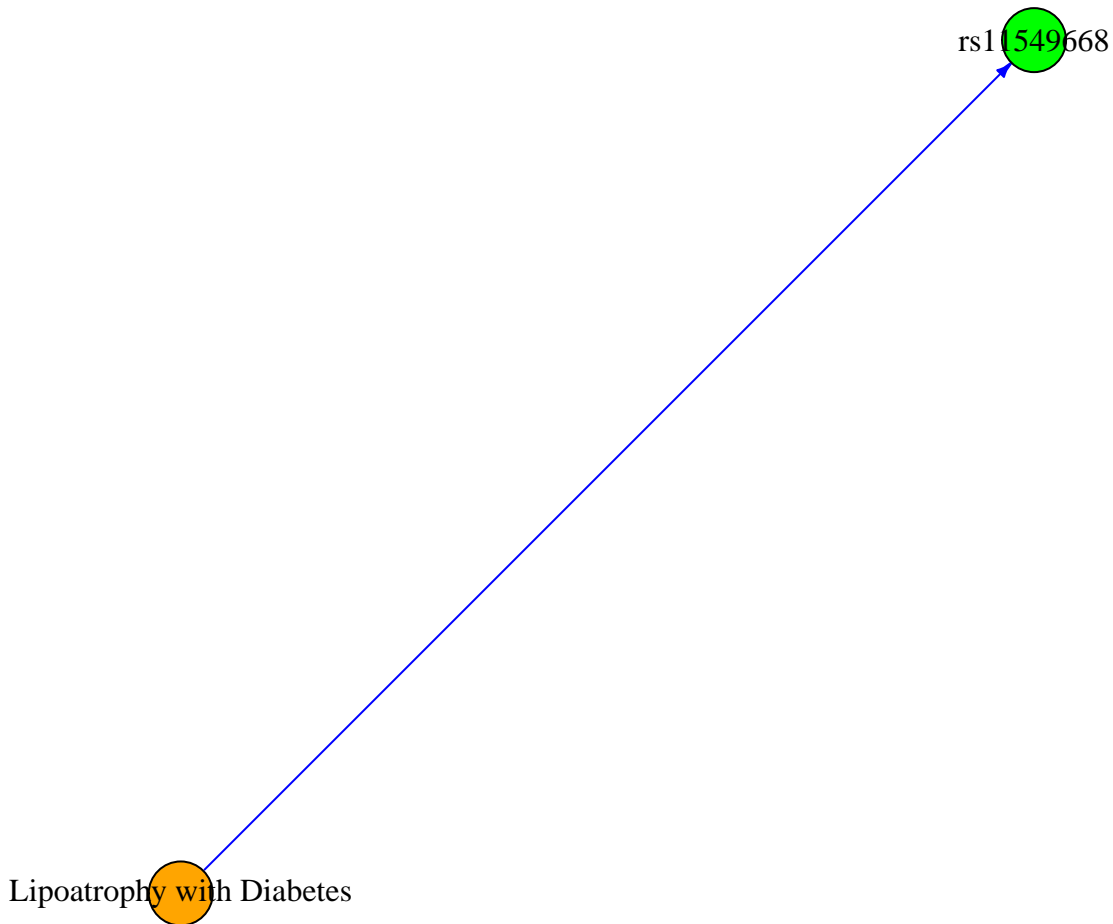



**Variant–Disease Network (Lissencephaly)**

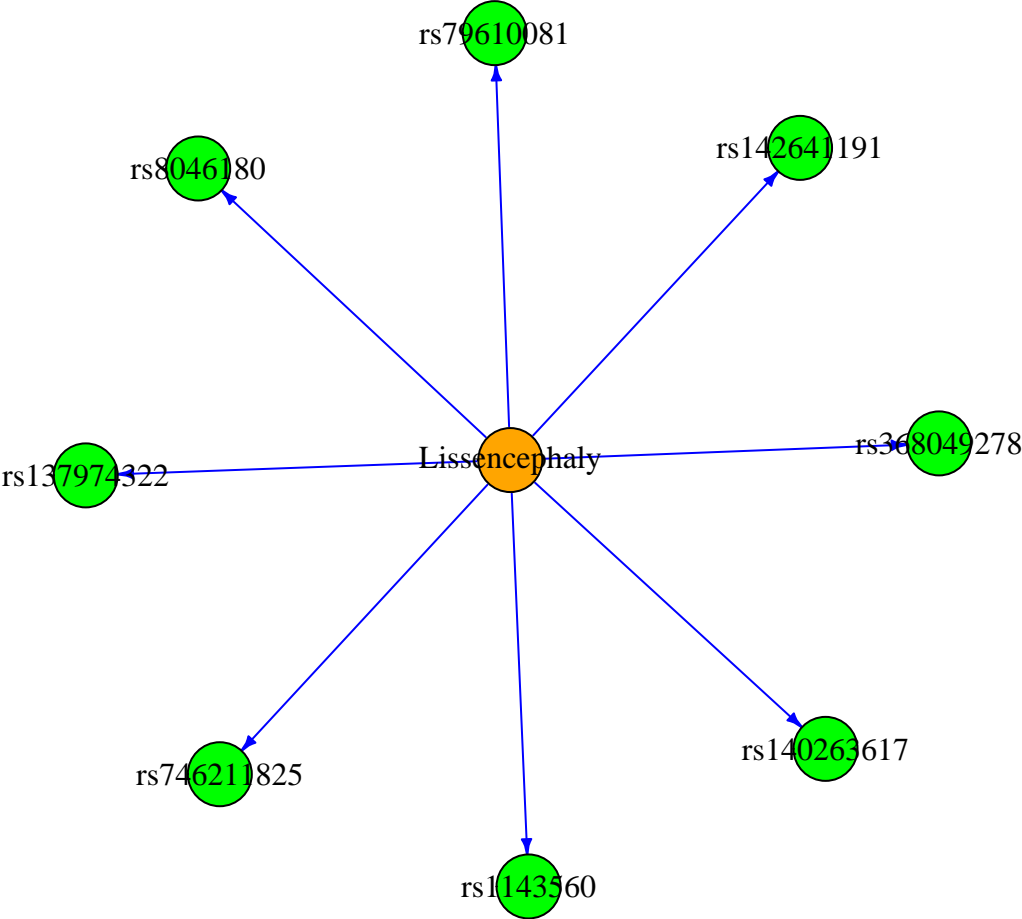

Variant–Disease Network (Lissencephaly 2)

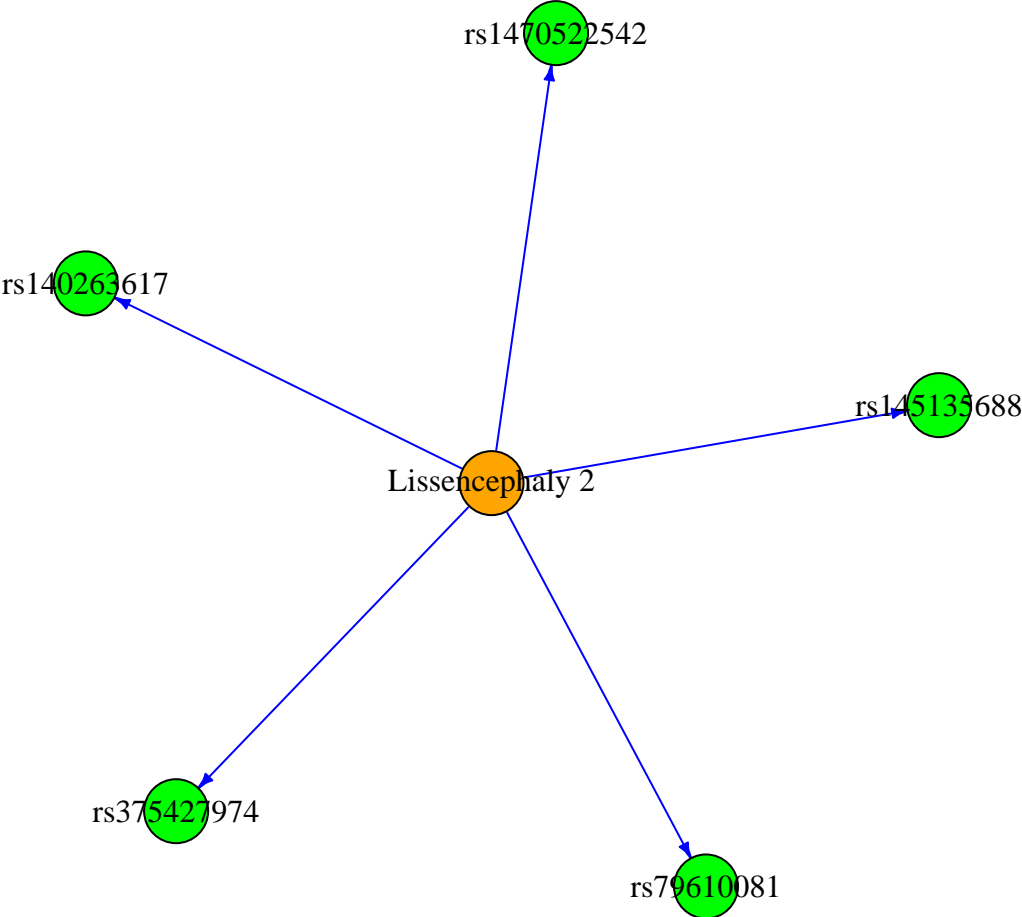

Variant–Disease Network (Lissencephaly 3)

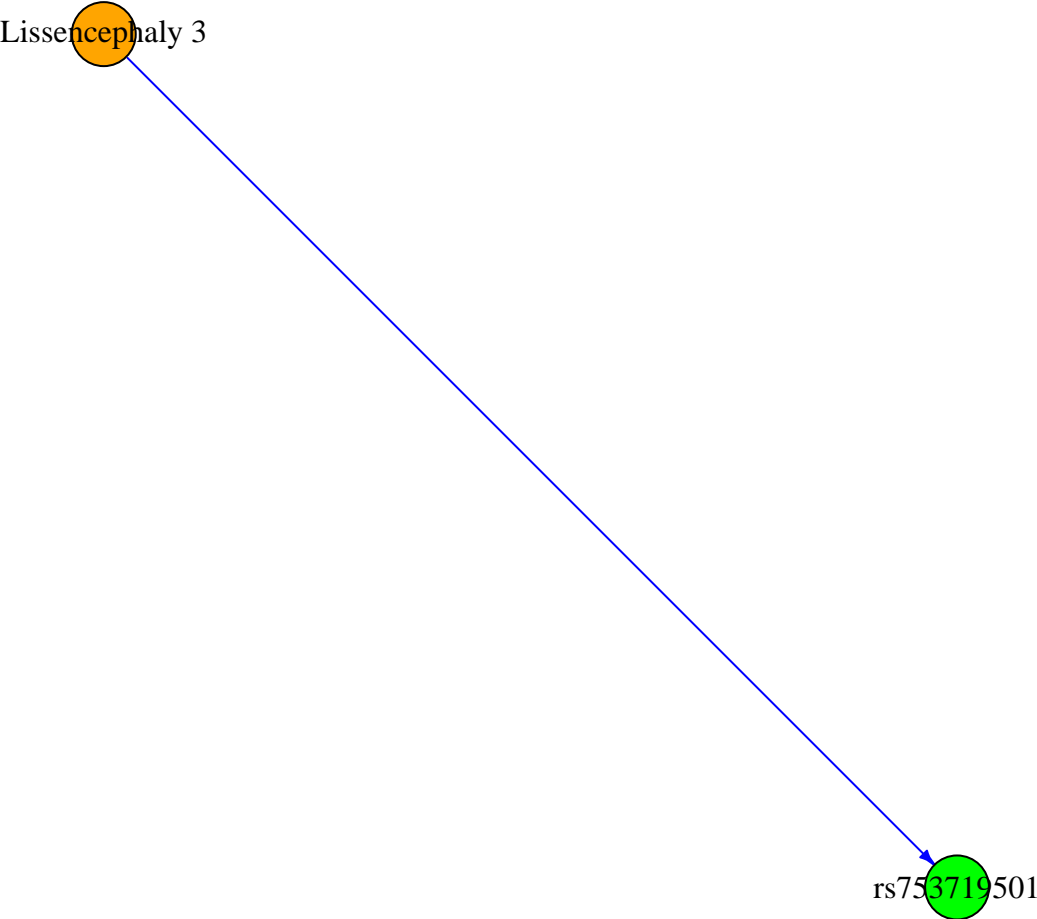

**Variant–Disease Network (Liver failure acute infantile)**

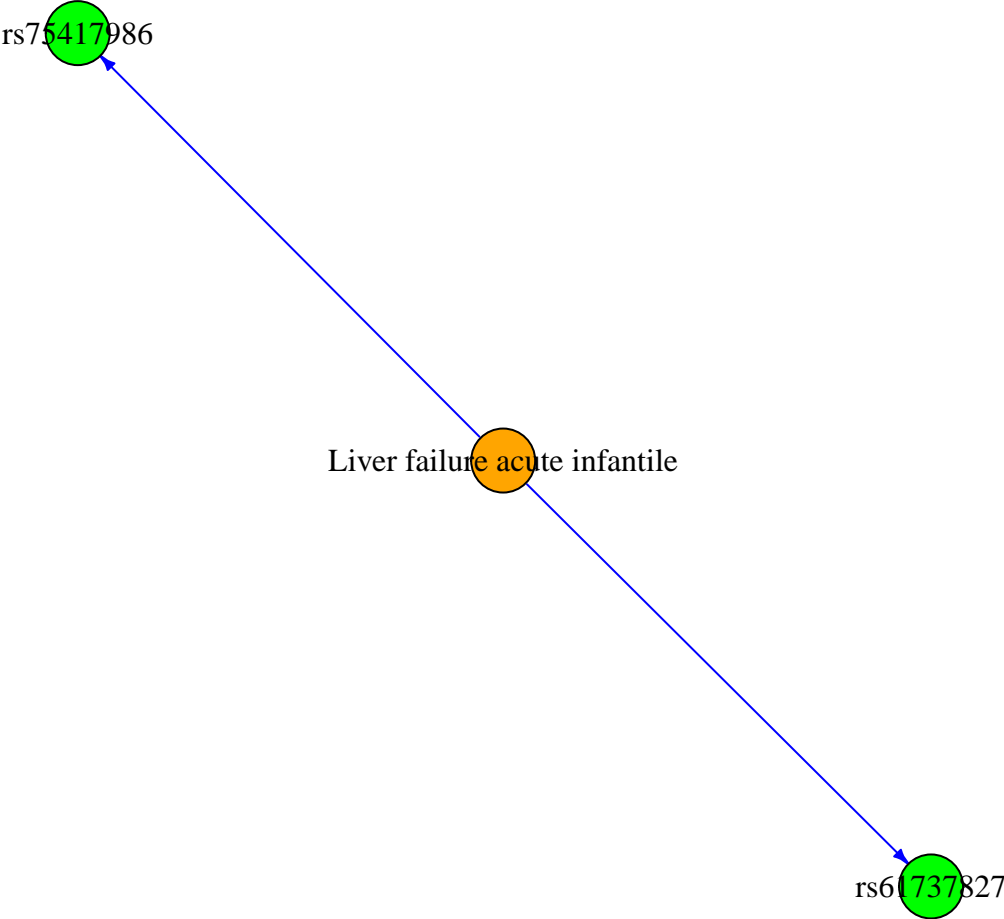

# Variant–Disease Network (Localized AR Hypotrichosis)

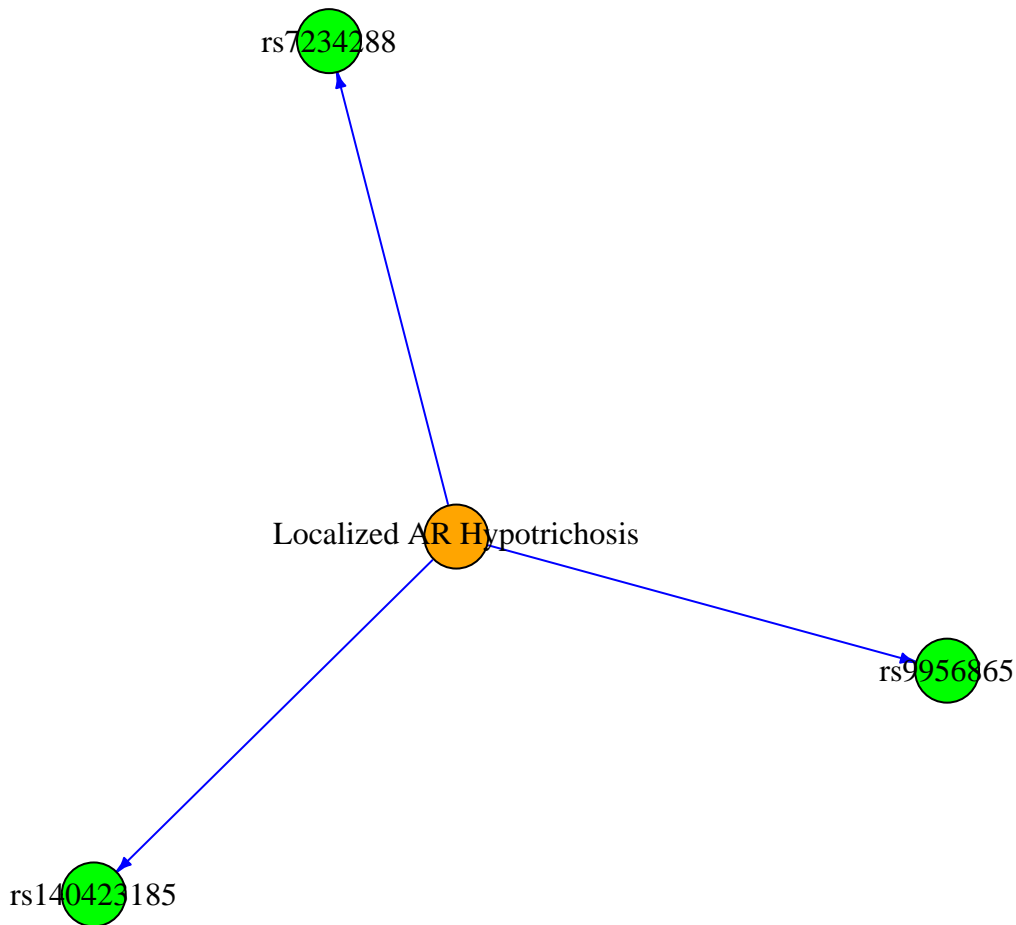

## Variant–Disease Network (Loeys–Dietz syndrome)

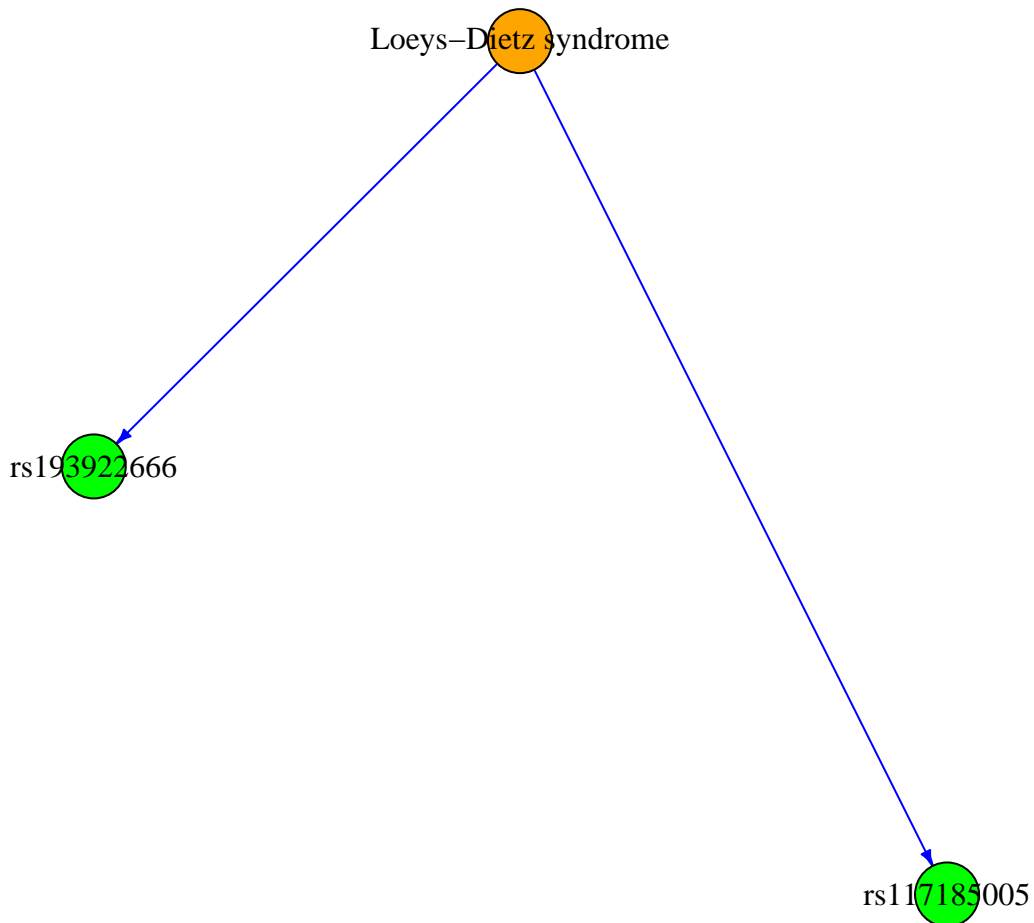

# Variant-Disease Network (Loeys-Dietz syndrome 3)

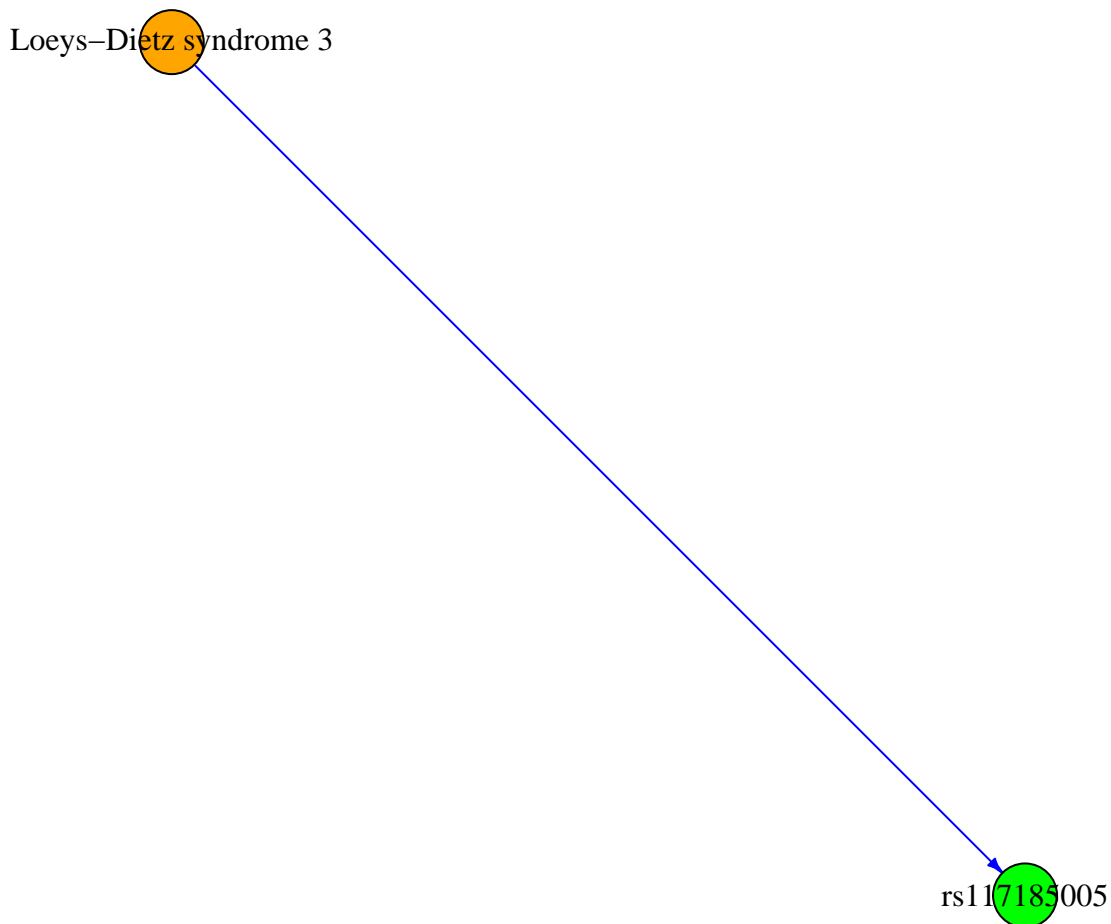

## Variant–Disease Network (Long QT syndrome)

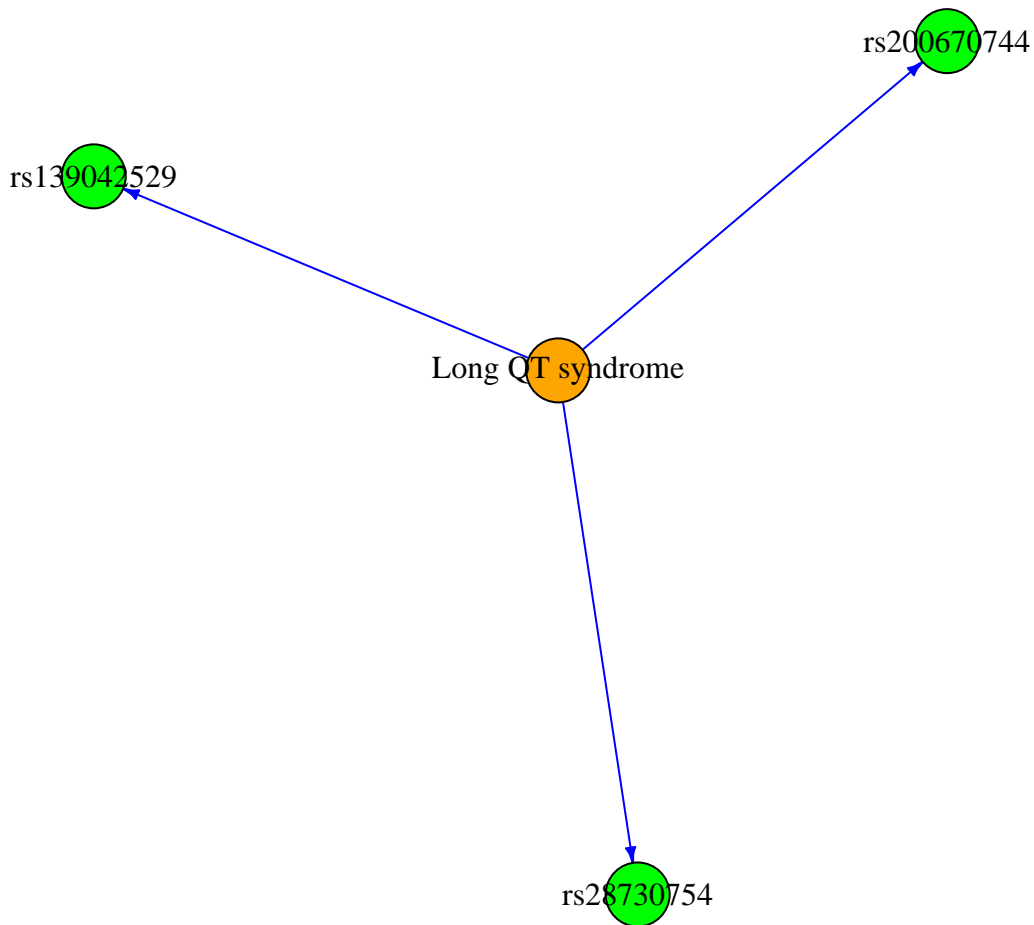



## Variant–Disease Network (Lowe syndrome)

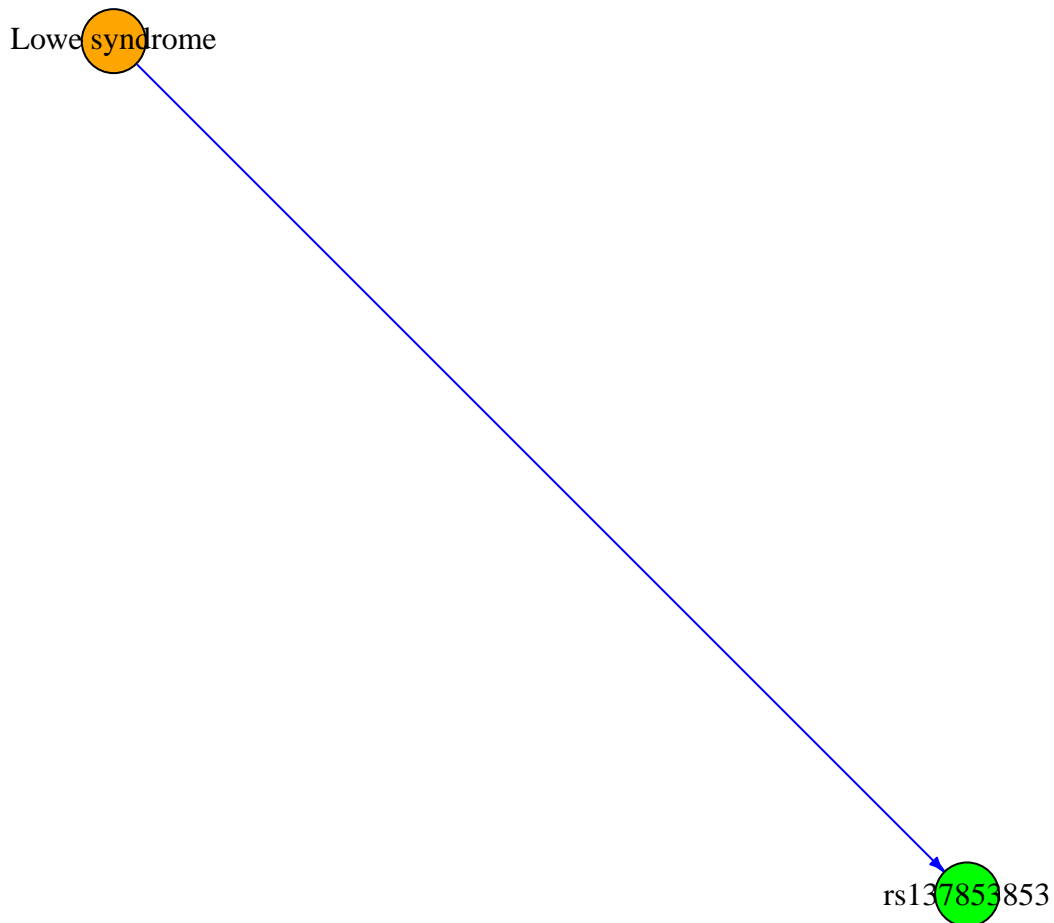

## Variant-Disease Network (Lung cancer)

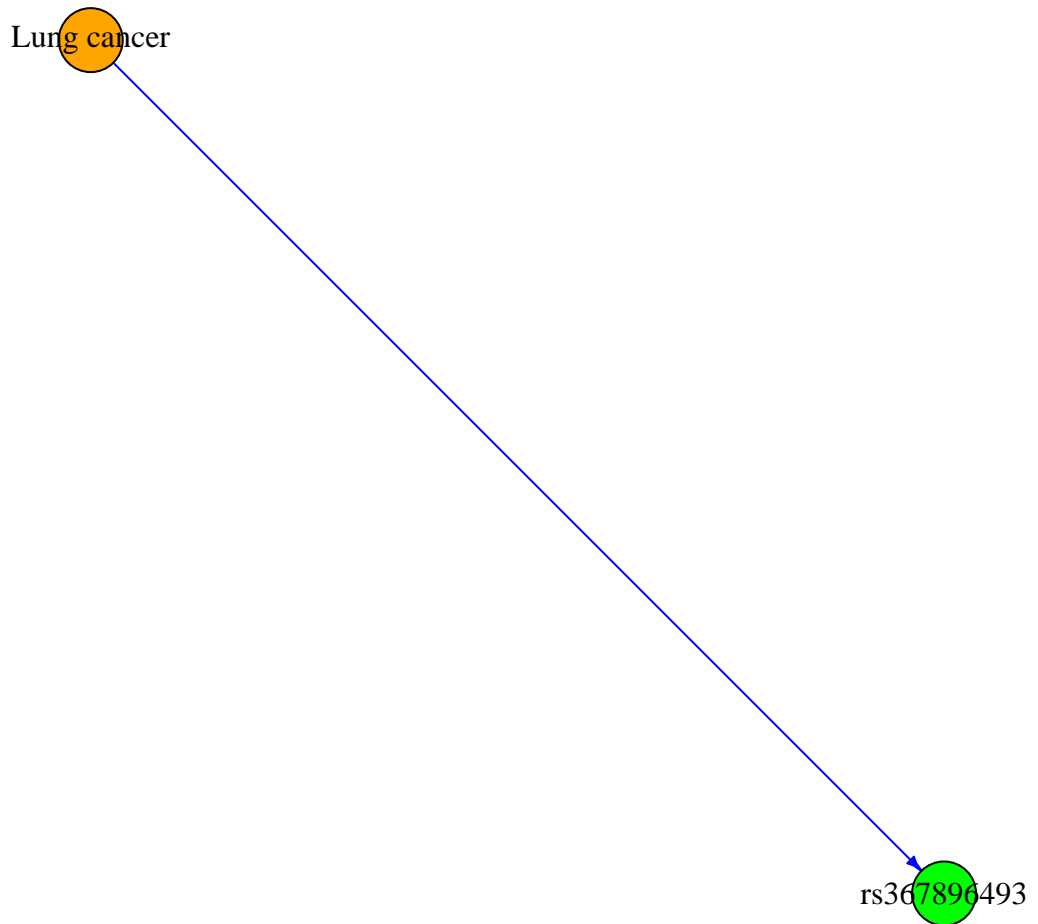

Variant–Disease Network (Lymphangiomyomatosis)

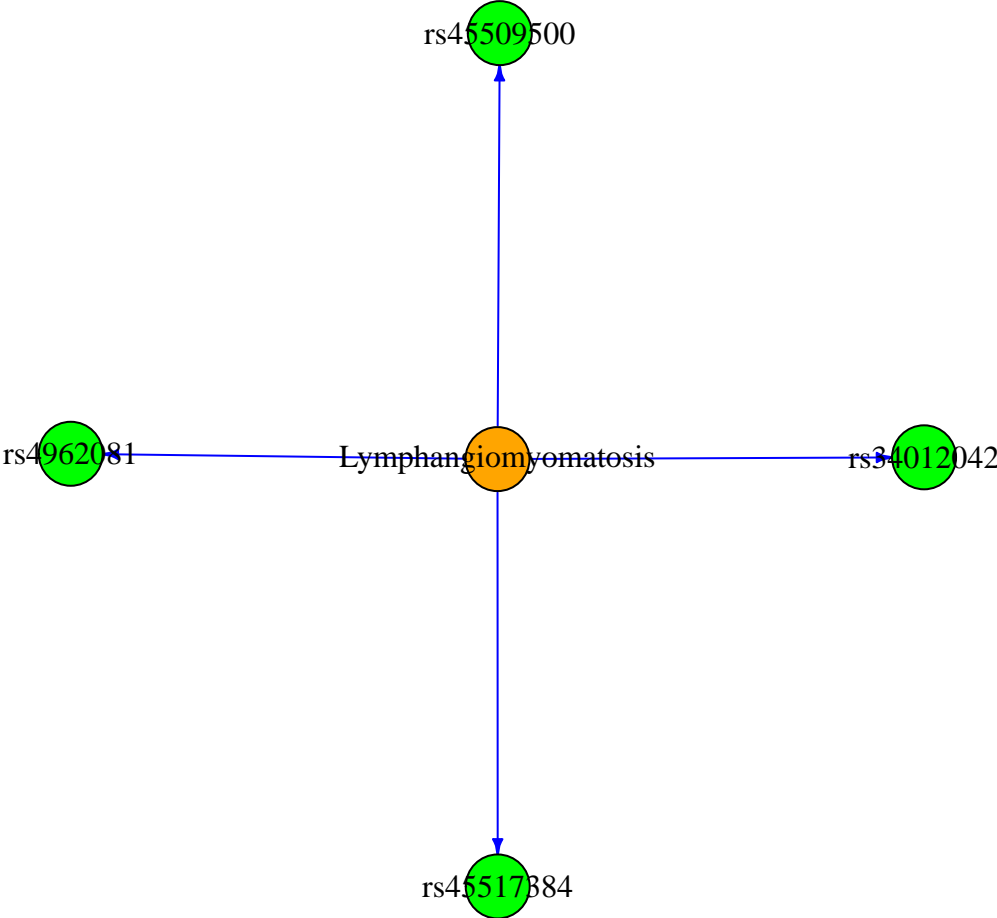

## Variant–Disease Network (Lymphedema)

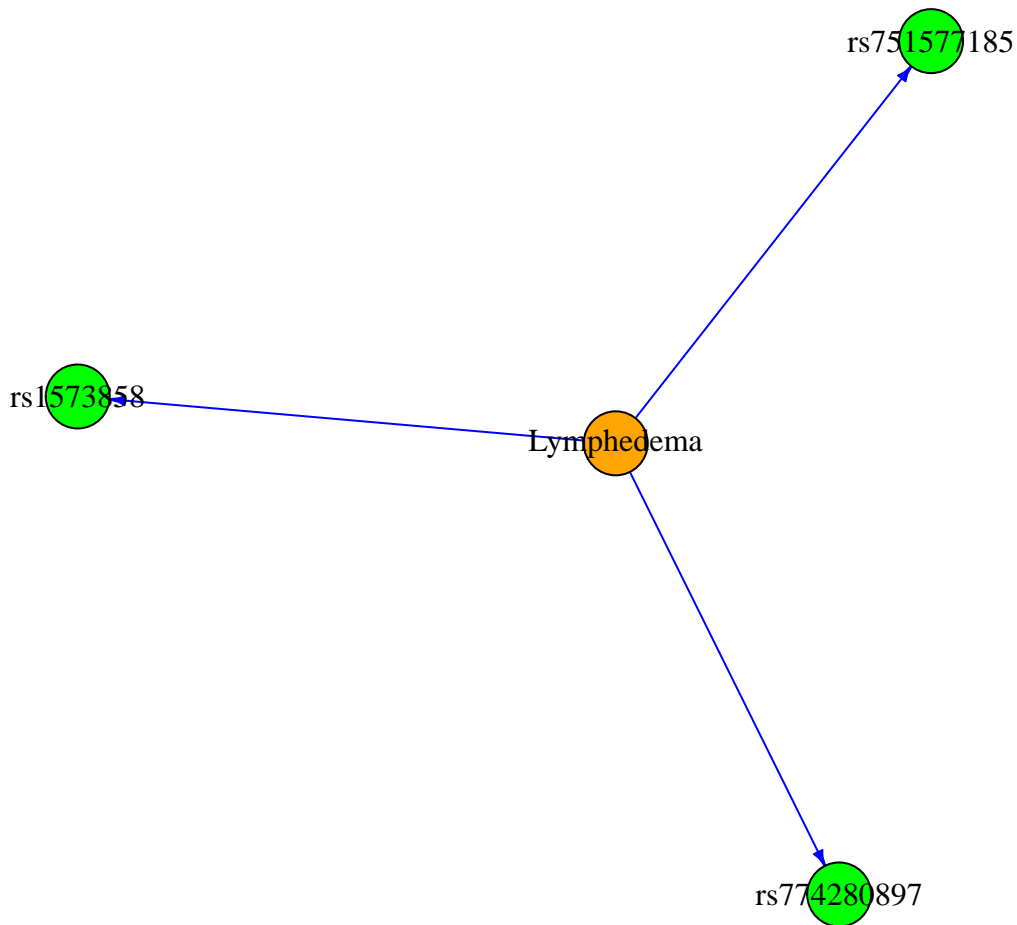

## Variant–Disease Network (Lynch syndrome)

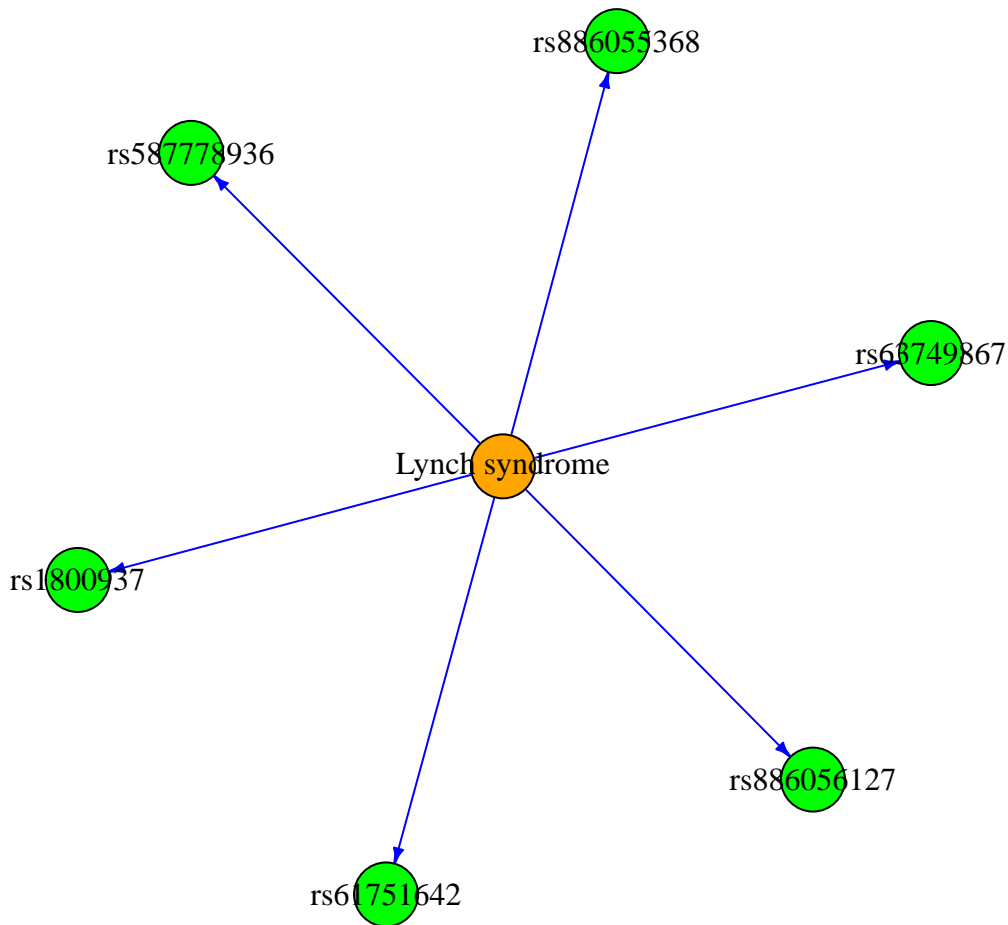

## Variant–Disease Network (Lynch syndrome II)

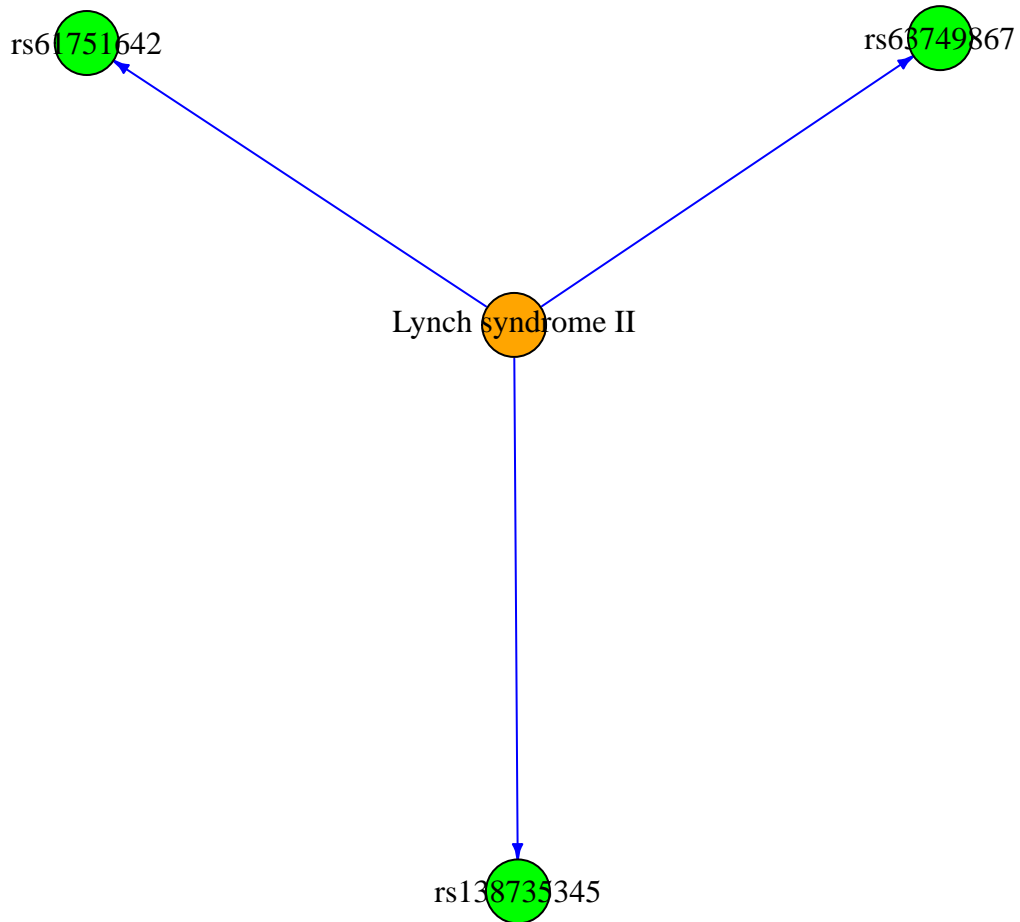

## Variant–Disease Network (Macular degeneration)

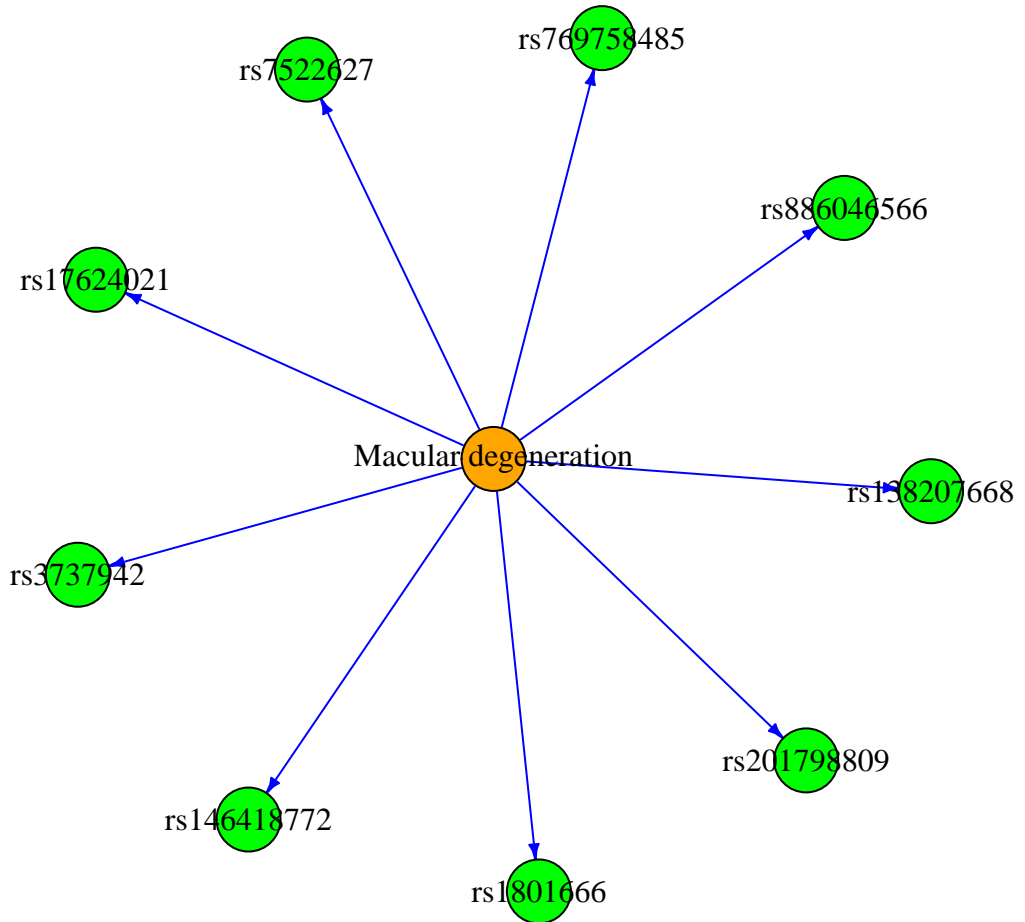

## Variant–Disease Network (Majeed syndrome)

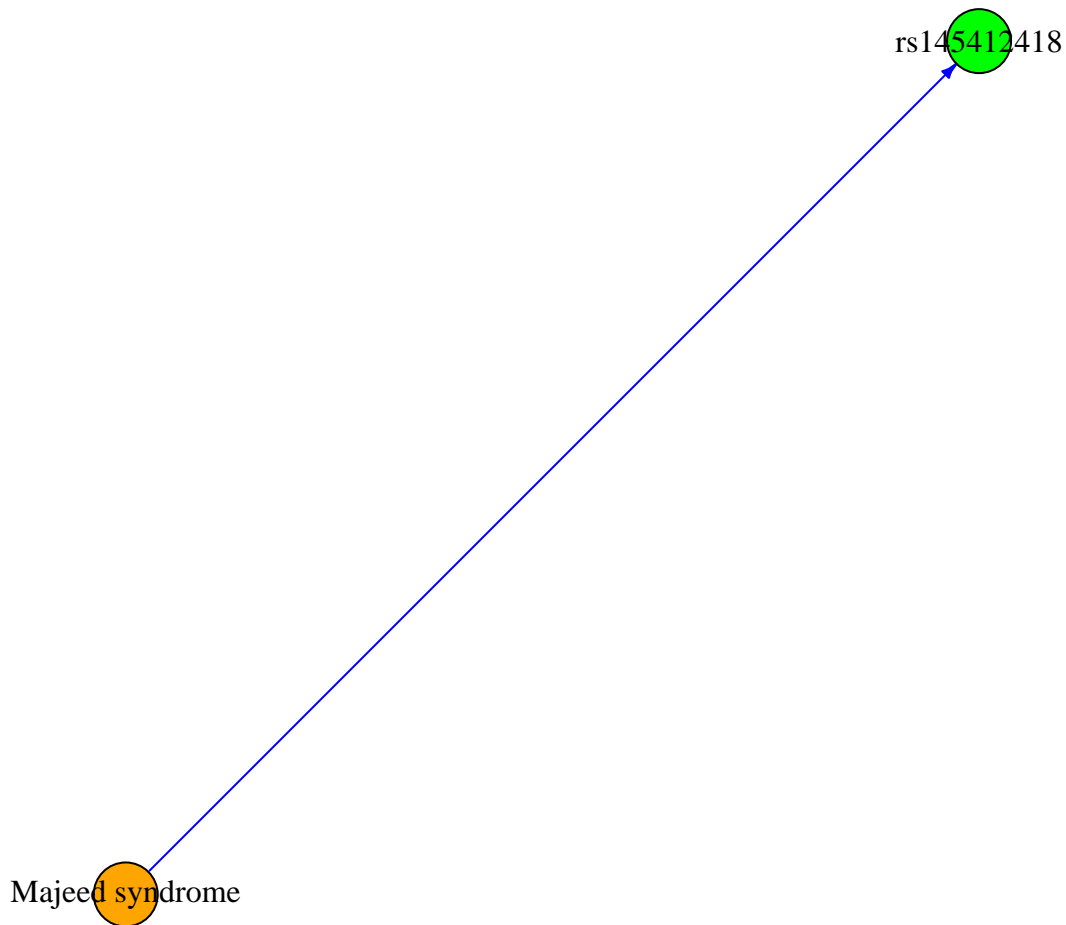



# Variant–Disease Network (Malignant tumor of prostate)

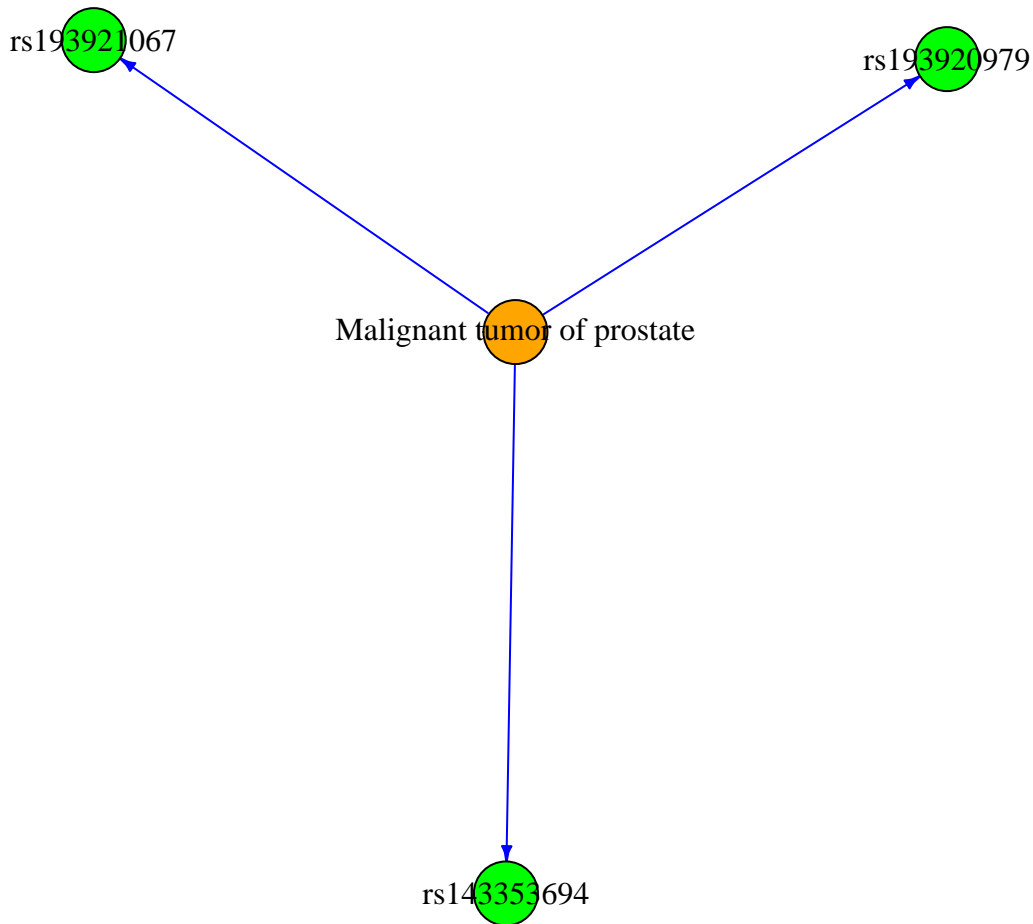

## Variant–Disease Network (Mandibuloacral dysplasia)

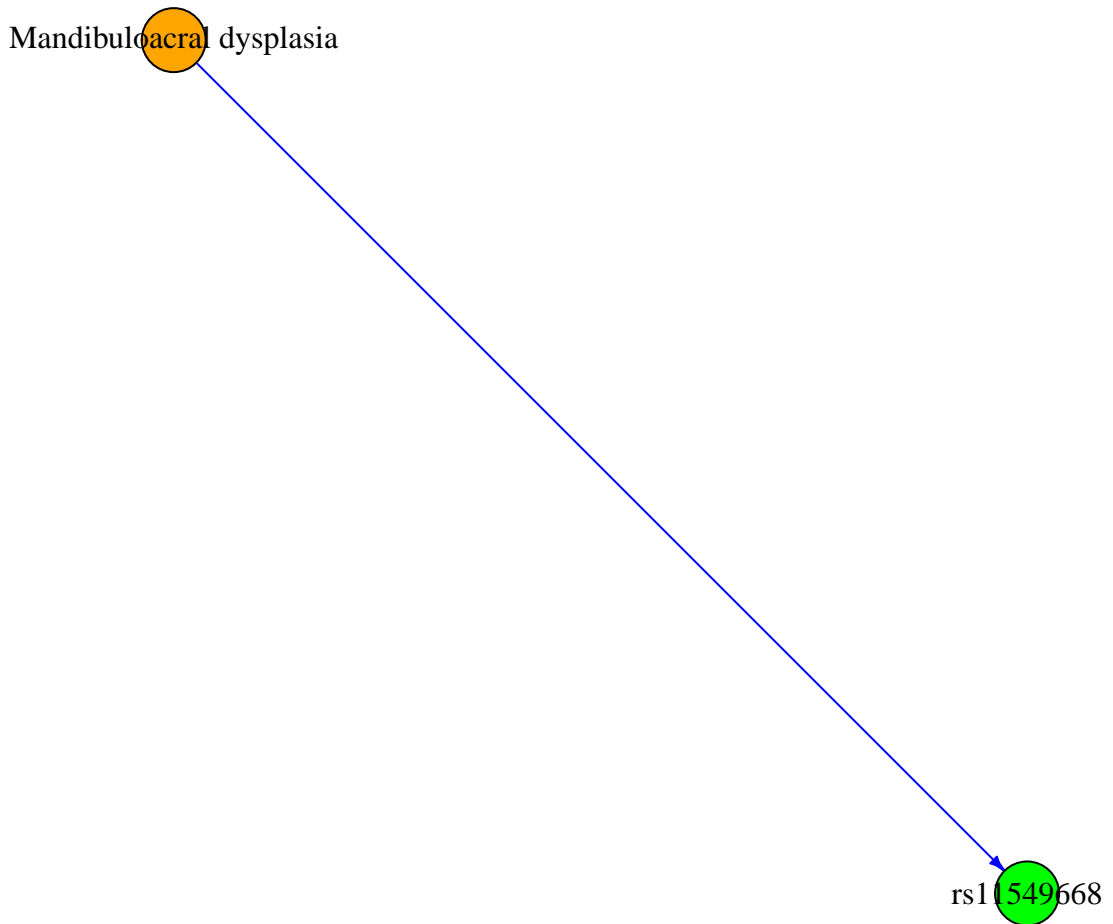

# Variant–Disease Network (Maple syrup urine disease)

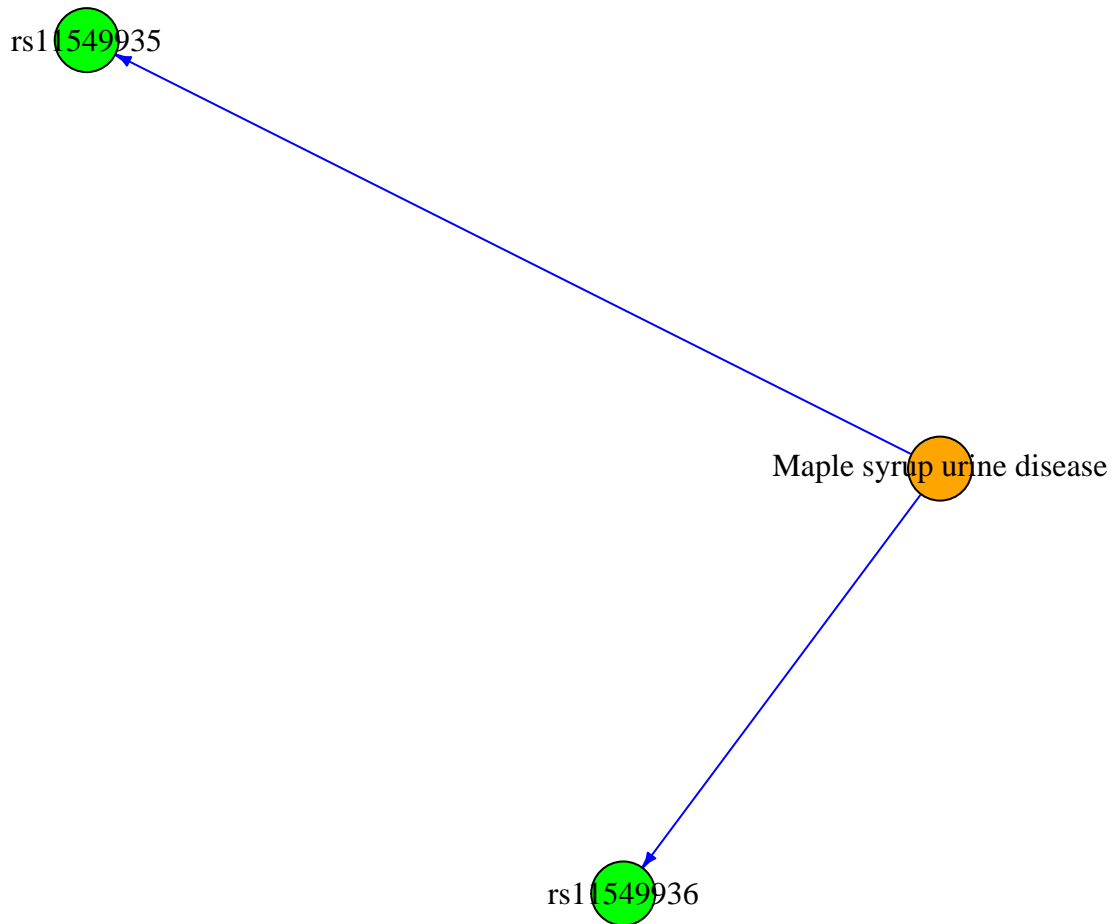

## Variant–Disease Network (Marfan lipodystrophy syndrome)

rs138438849

Marfan lipodystrophy syndrome



## Variant-Disease Network (Marfan syndrome)

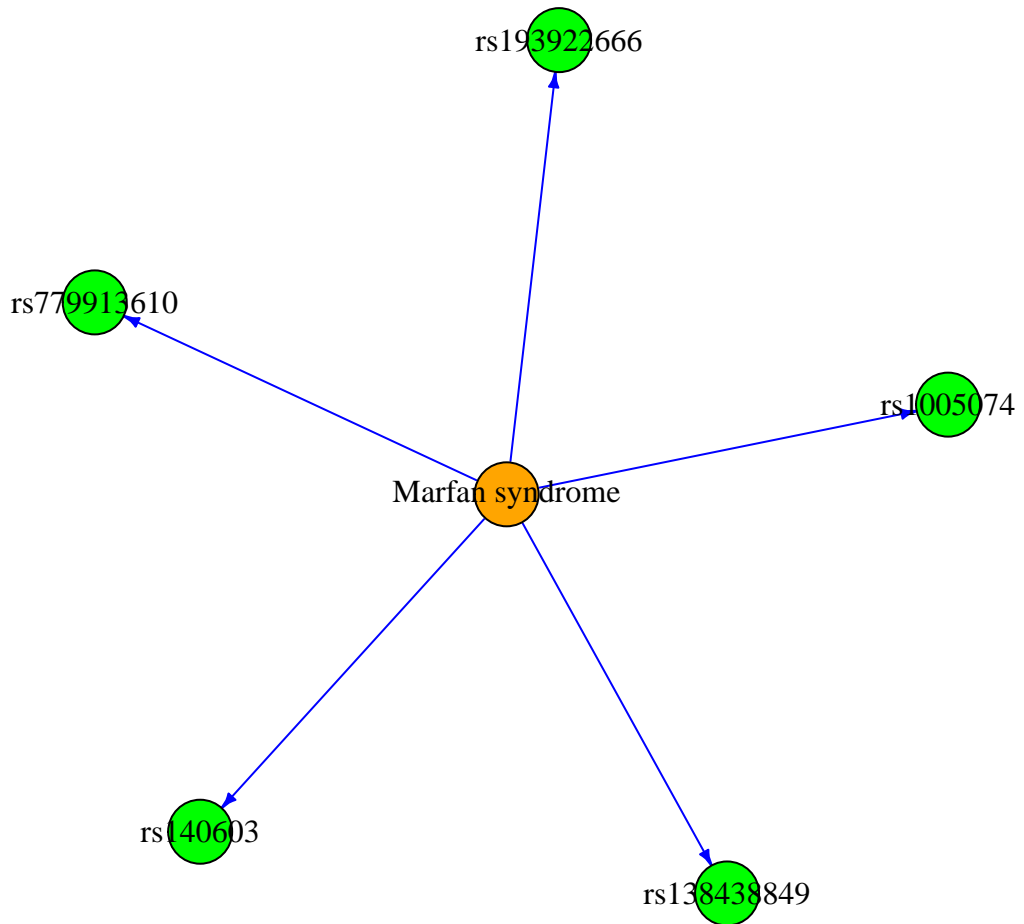

## Variant–Disease Network (Martsolf syndrome)

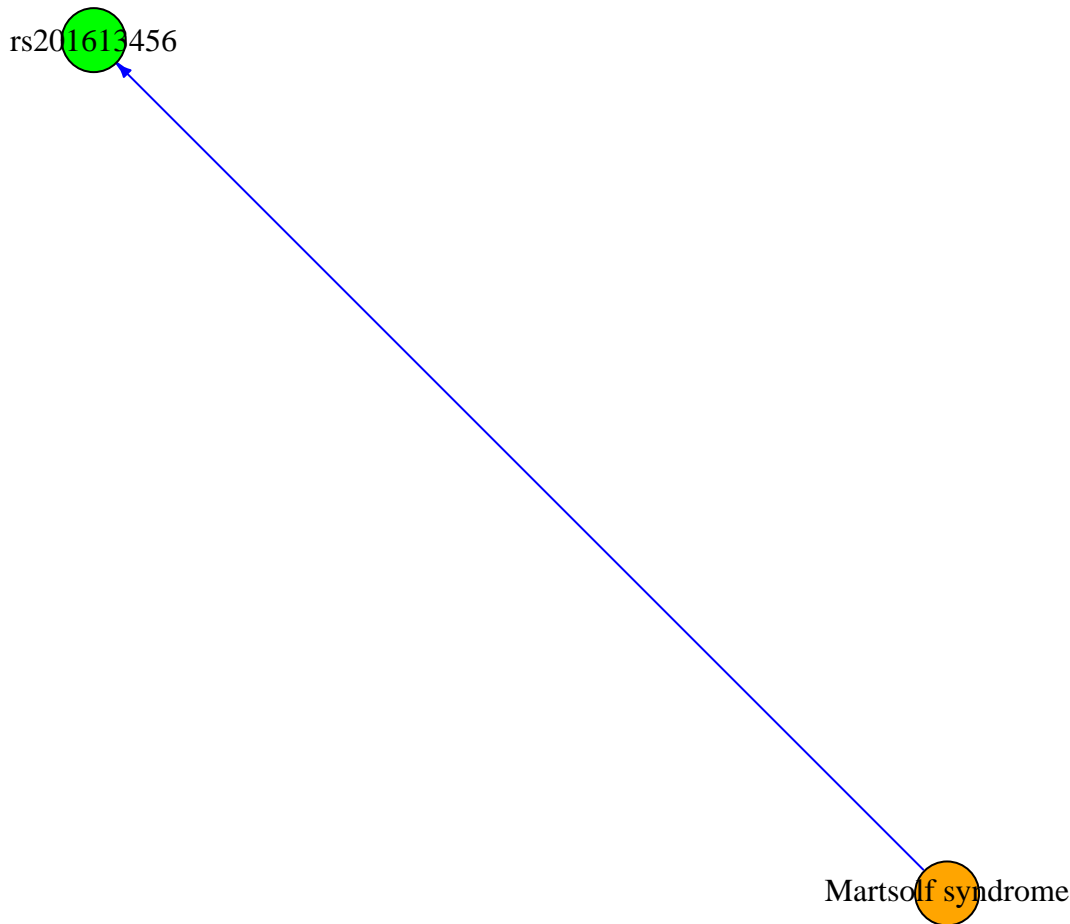

## Variant-Disease Network (MASP2 deficiency)

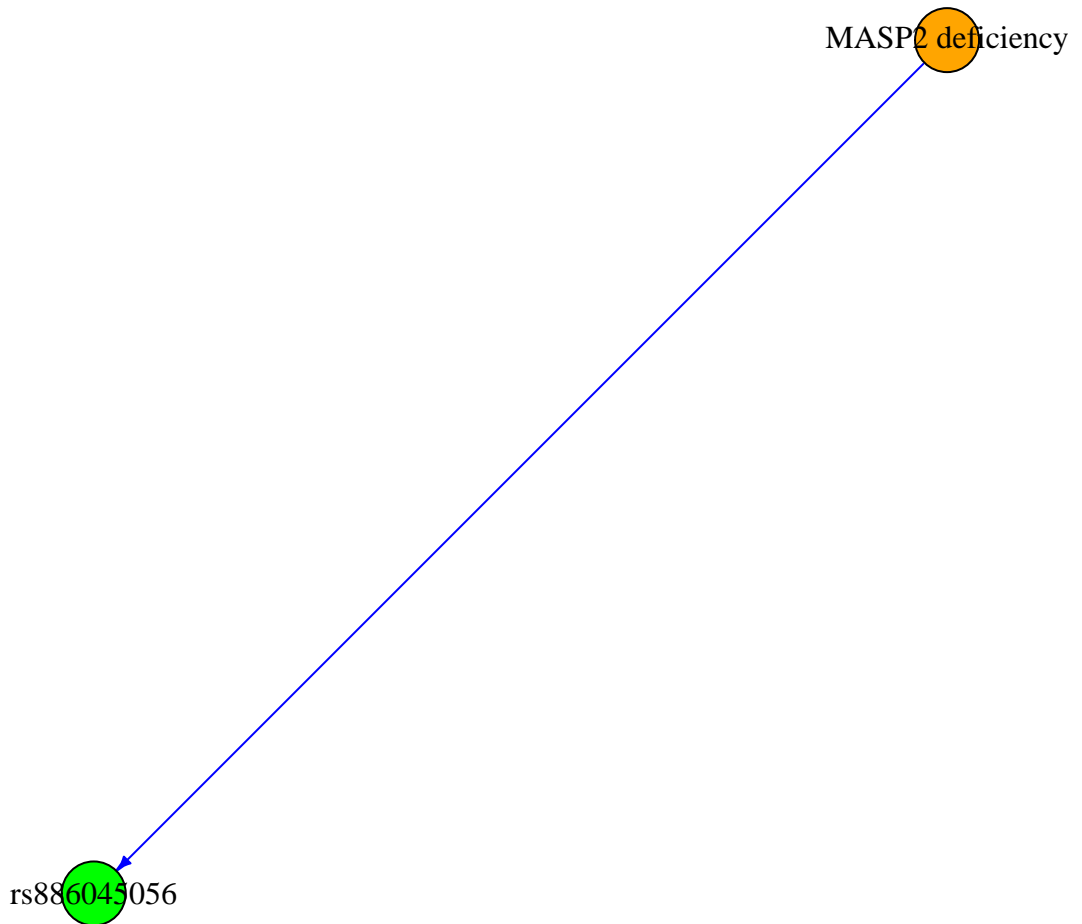

## Variant–Disease Network (MASS syndrome)

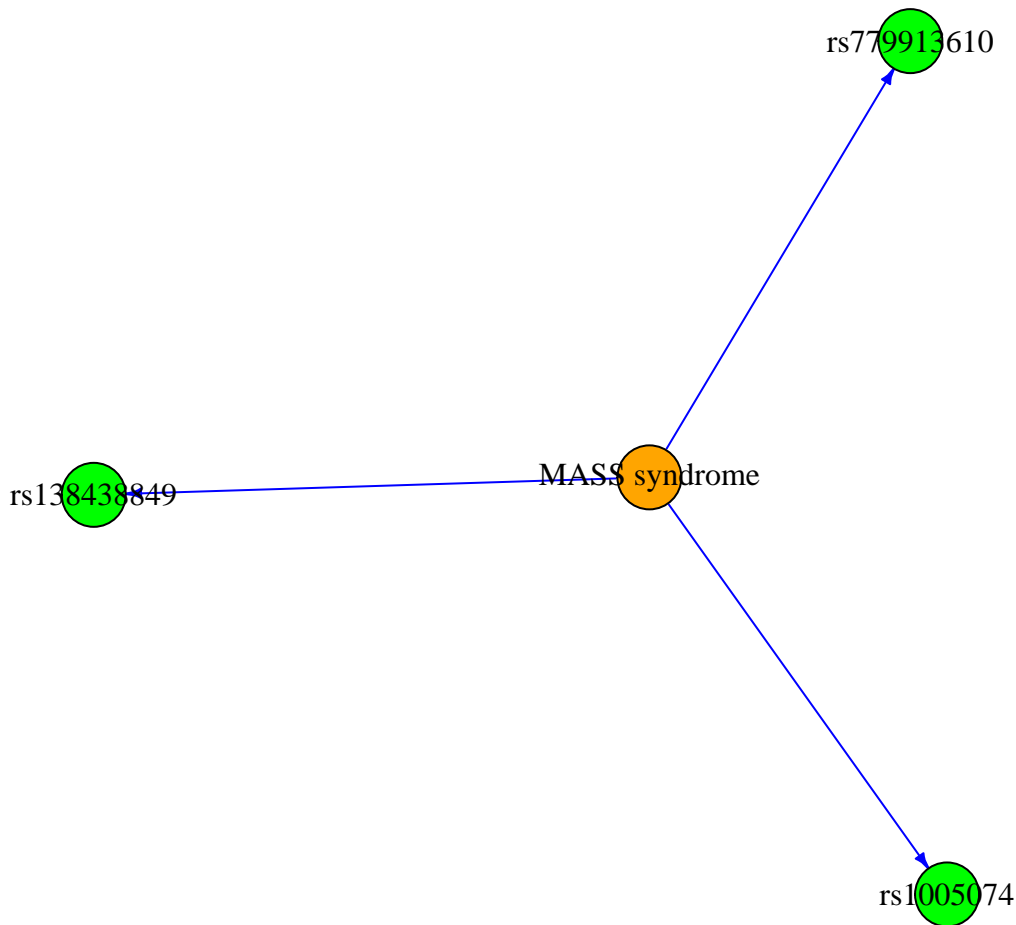



## Variant-Disease Network (Mastocytosis)

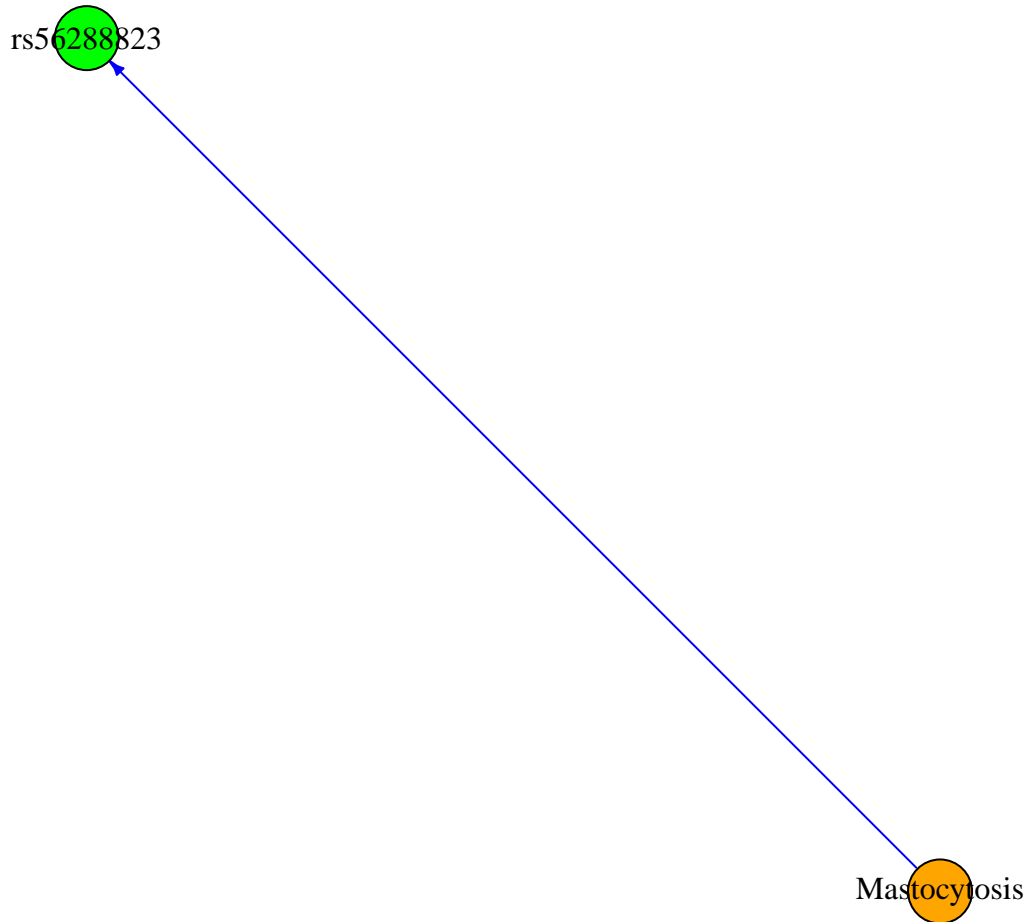

# Variant–Disease Network (Maturity onset diabetes mellitus in young)

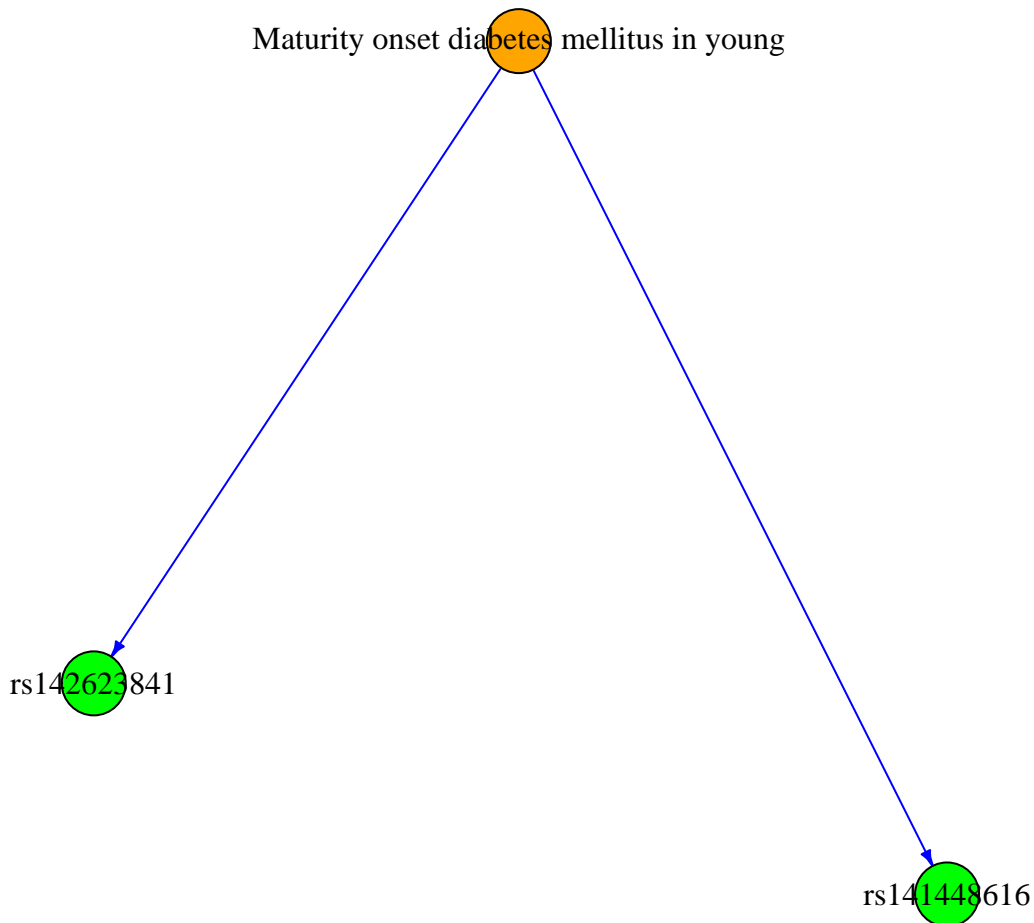

Variant–Disease Network (Maturity–onset diabetes of the young)

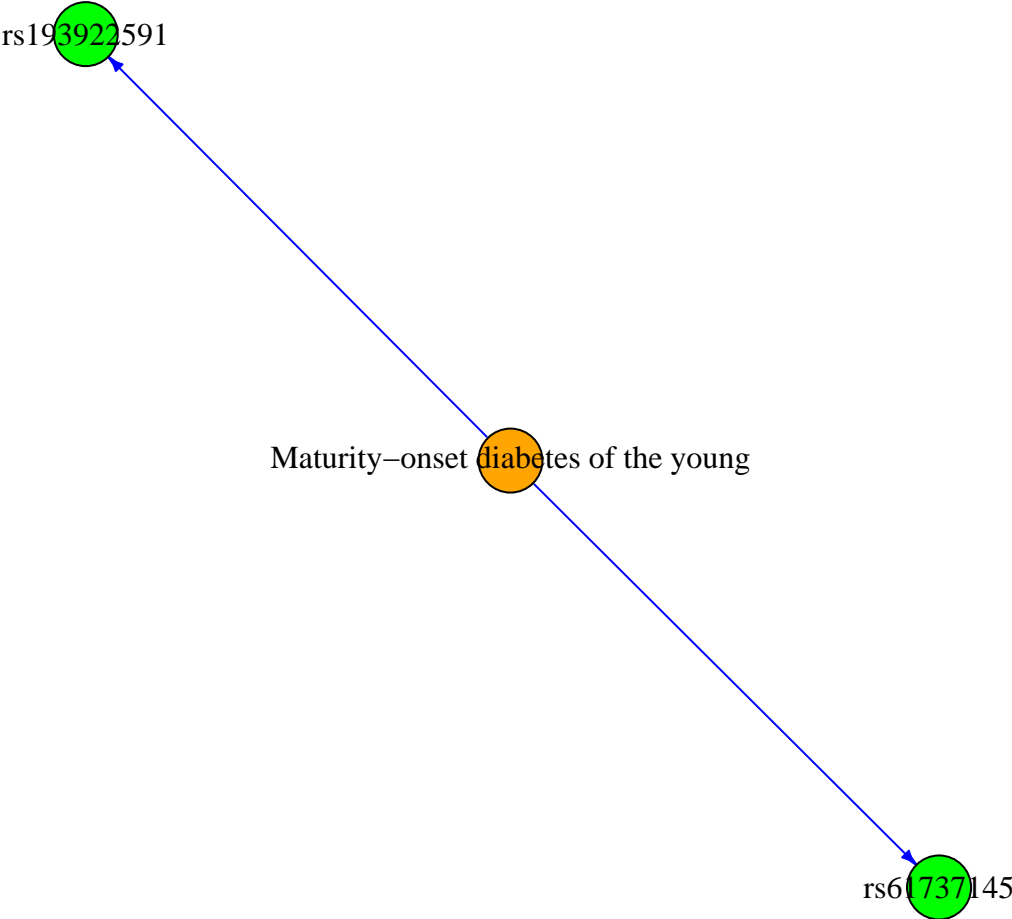

Variant–Disease Network (McKusick Kaufman syndrome)

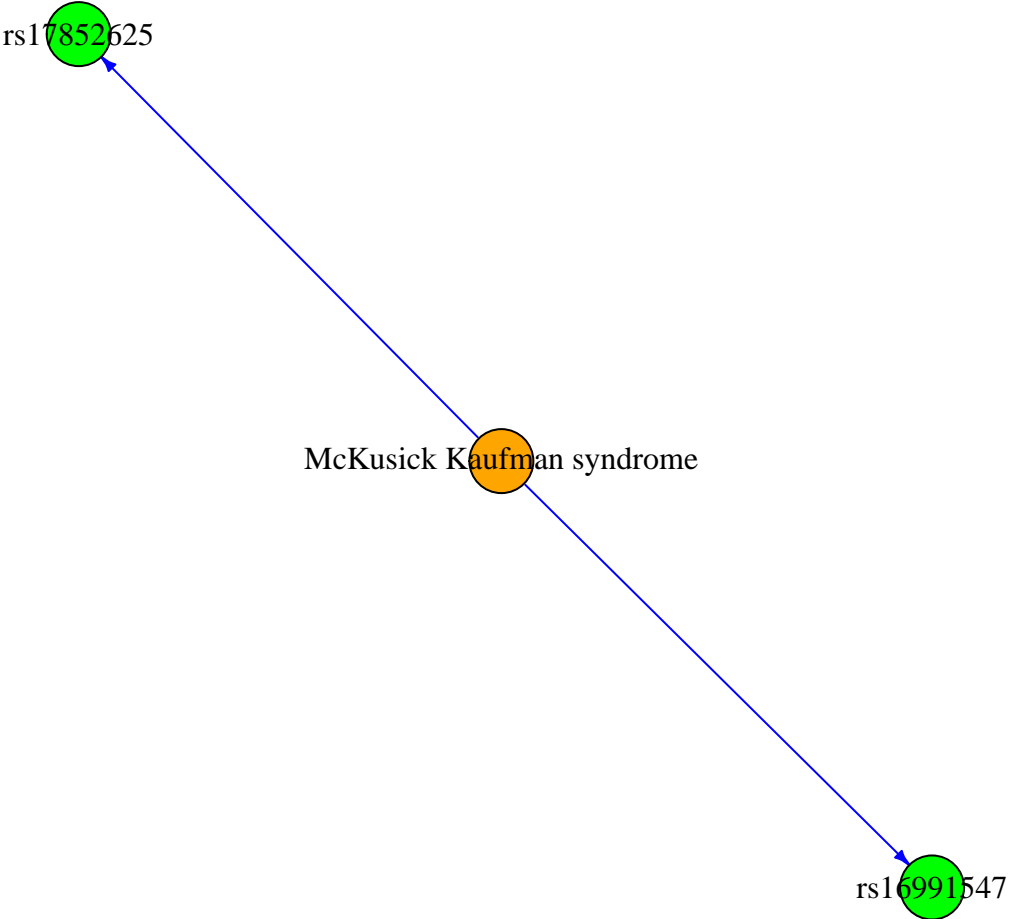

## Variant-Disease Network (Meckel syndrome)

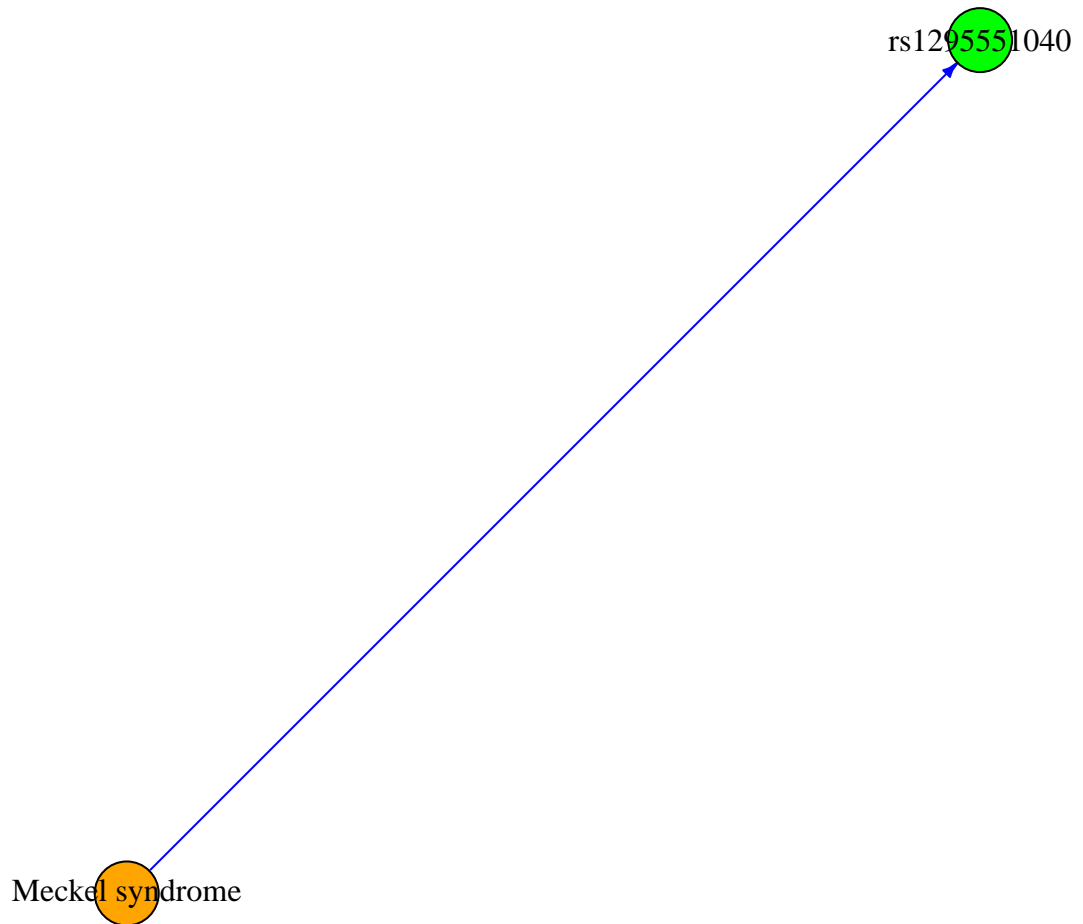

## Variant–Disease Network (Meckel–Gruber syndrome)

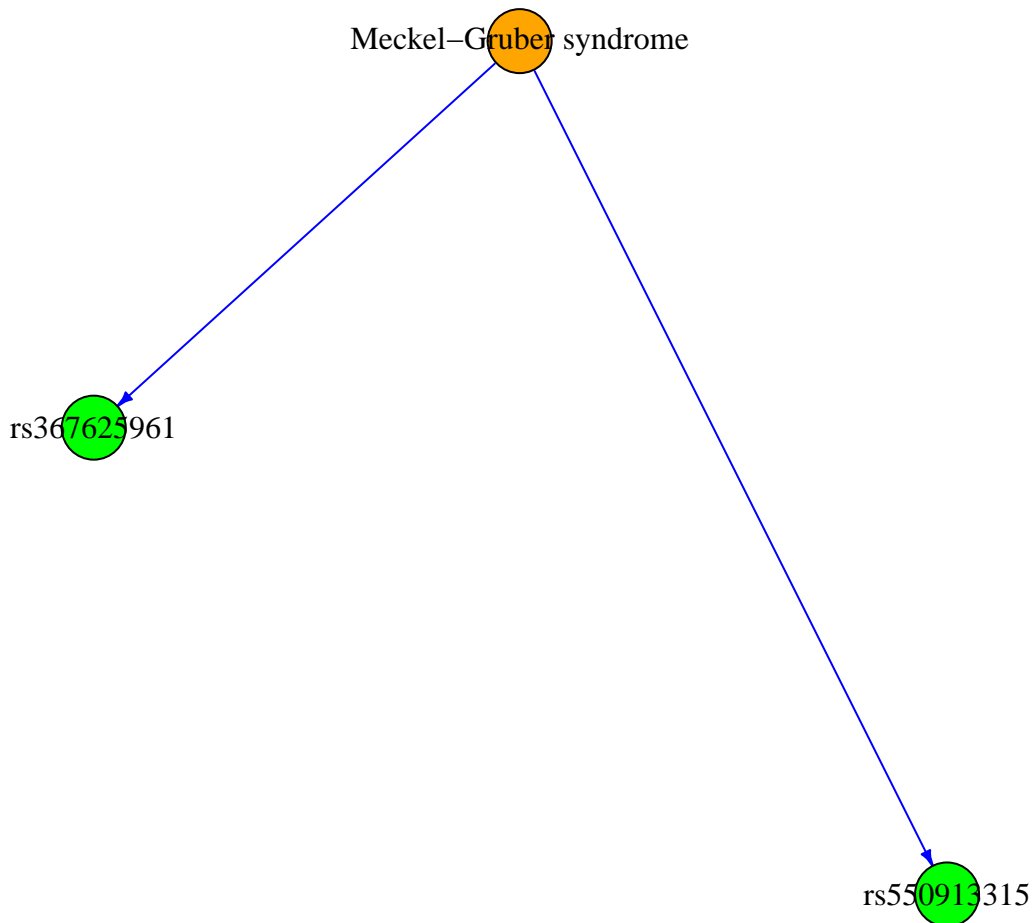

# sease Network (Megalencephaly–polymicrogyria–polydactyly–hydrocephalus)

rs201347487

Megalencephaly–polymicrogyria–polydactyly–hydrocephalus



## Variant–Disease Network (Megaloblastic anemia)

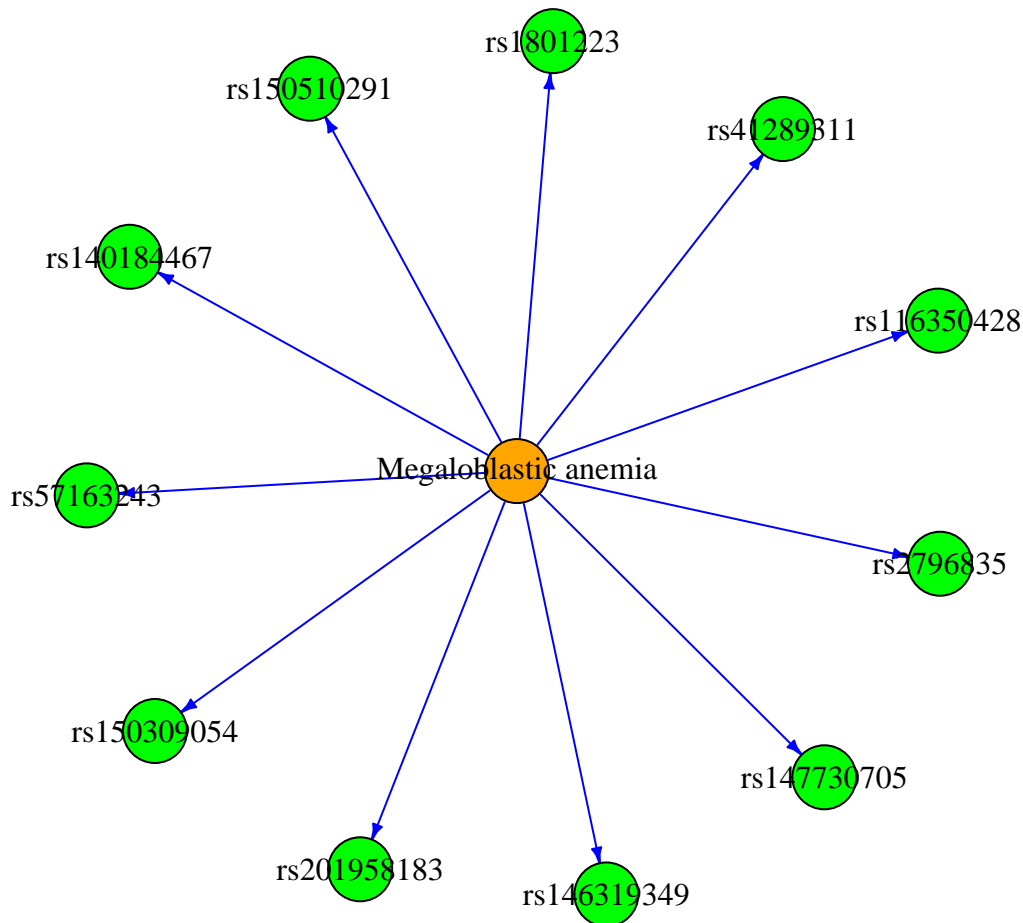



**Variant–Disease Network (Megaloblastic anemia 1)**

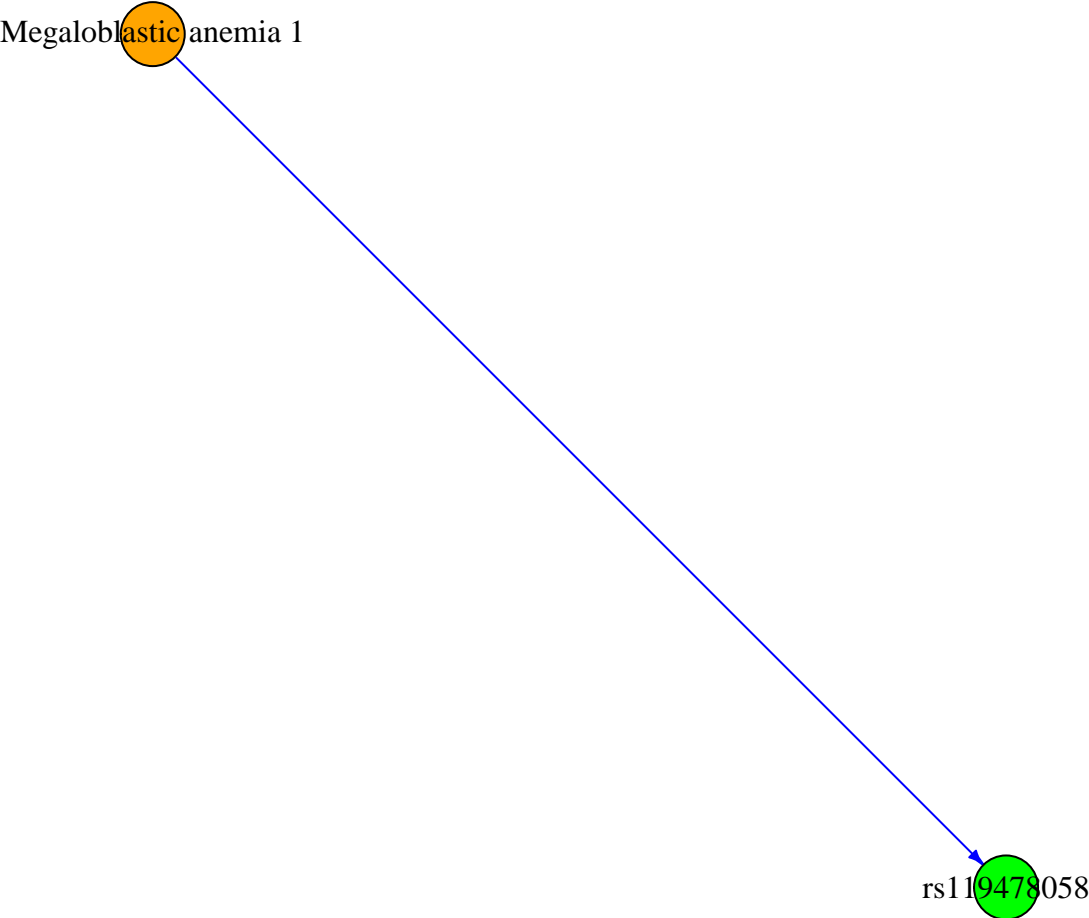

# Variant-Disease Network (Megaloblastic anemia due to inborn errors of metabolism)

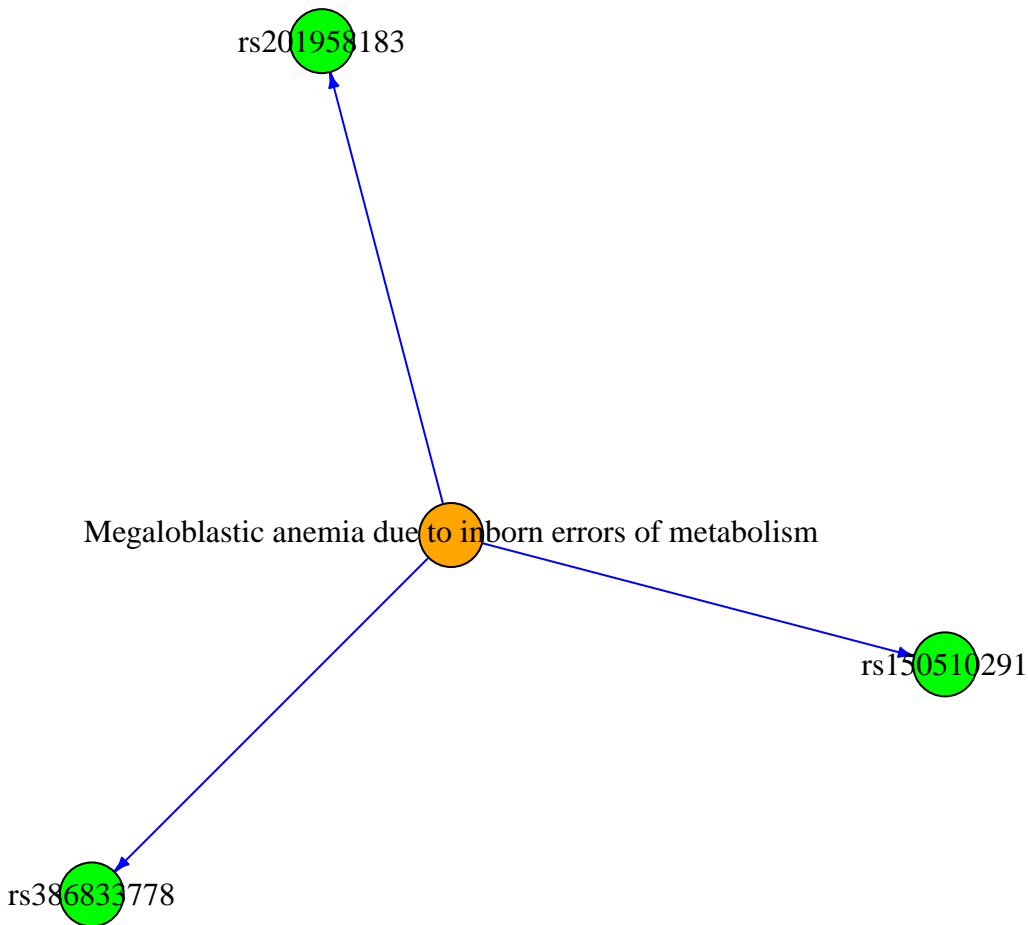

## Variant-Disease Network (Melanoma)

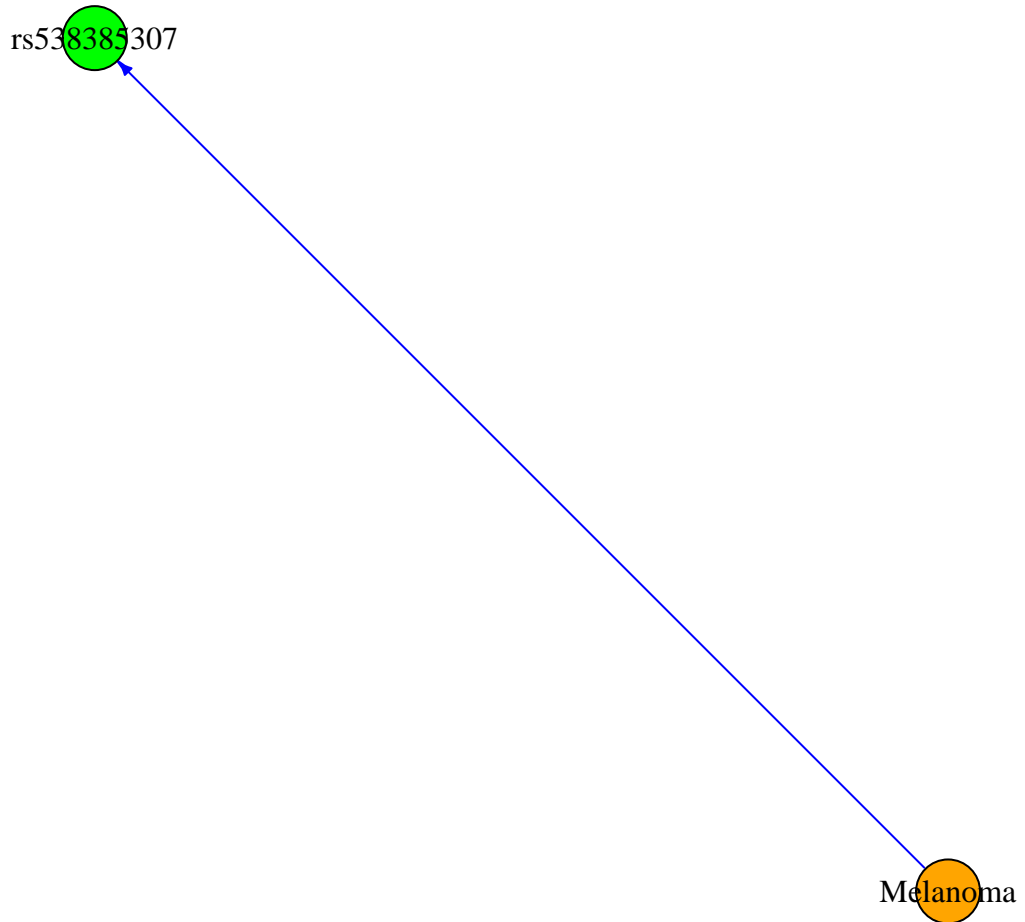

## Variant–Disease Network (Melnick–Needles syndrome)

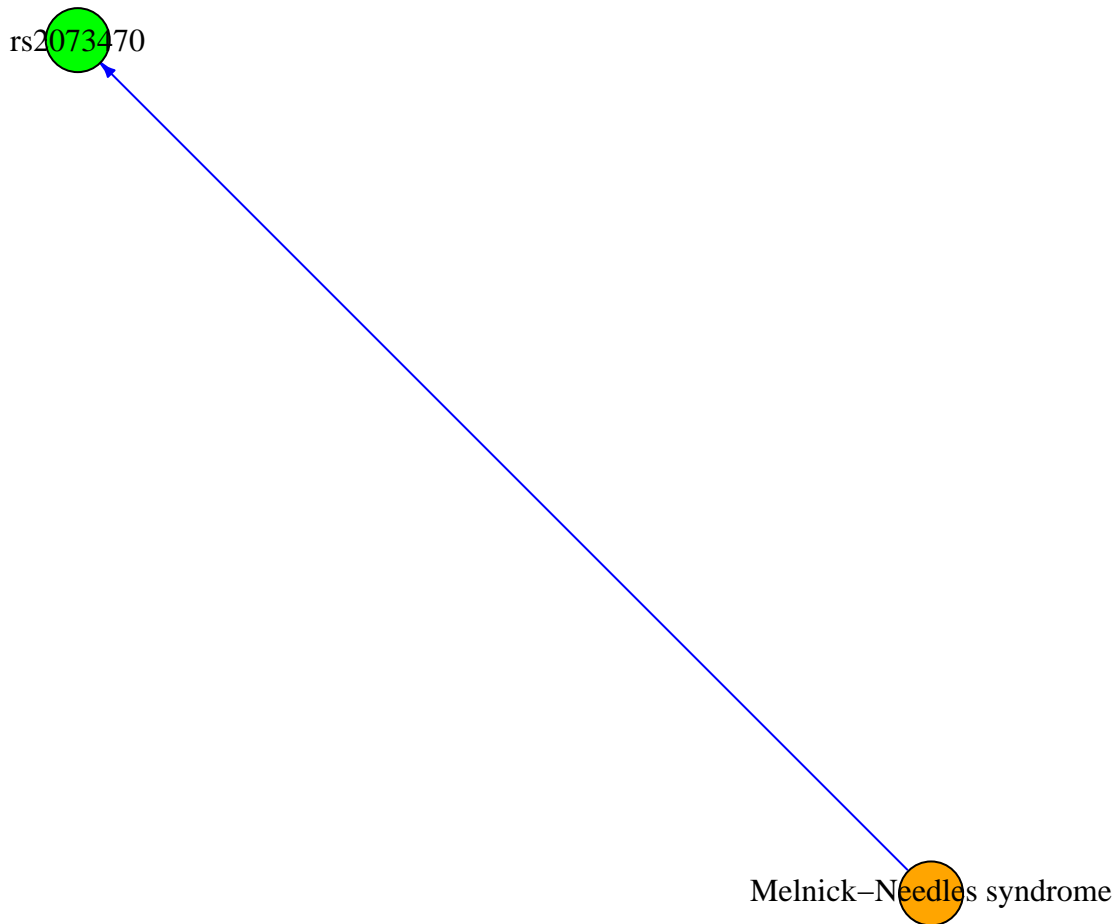

## Variant–Disease Network (Memory impairment)

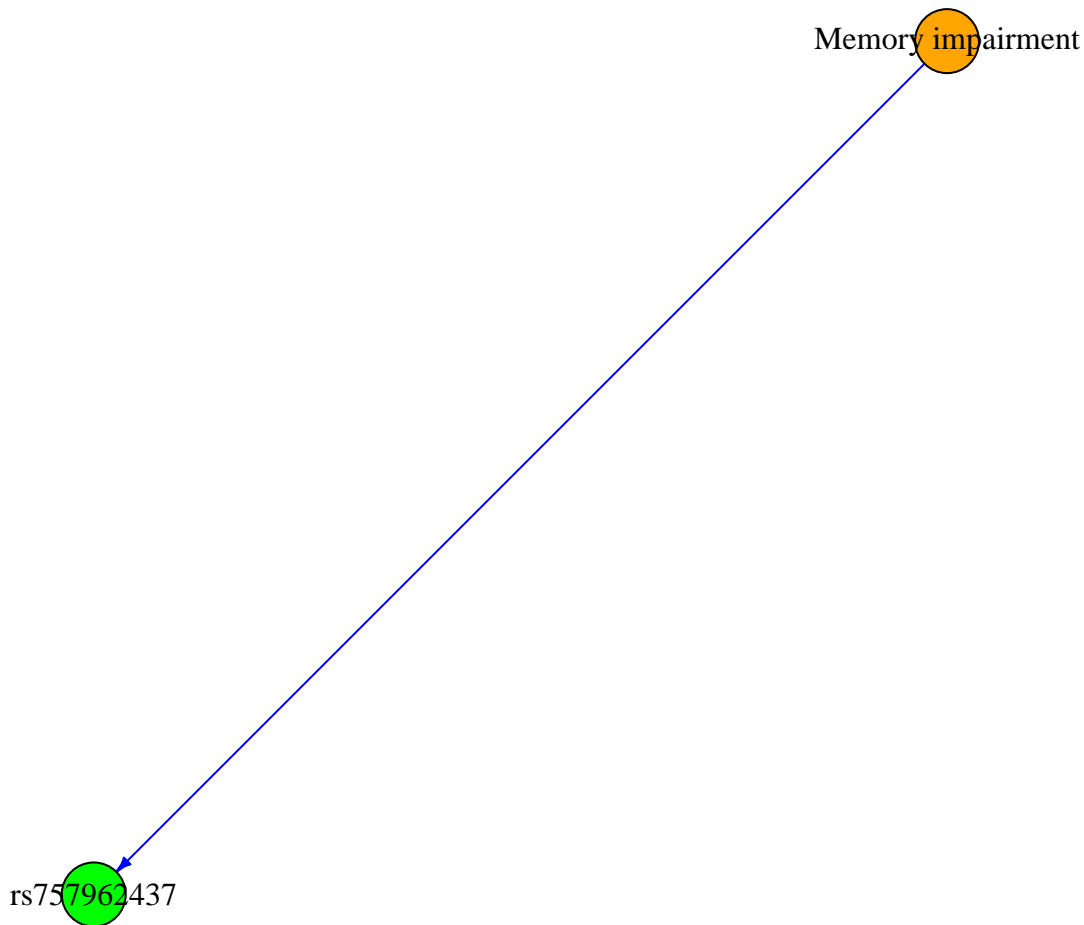

## Variant–Disease Network (Mental retardation)

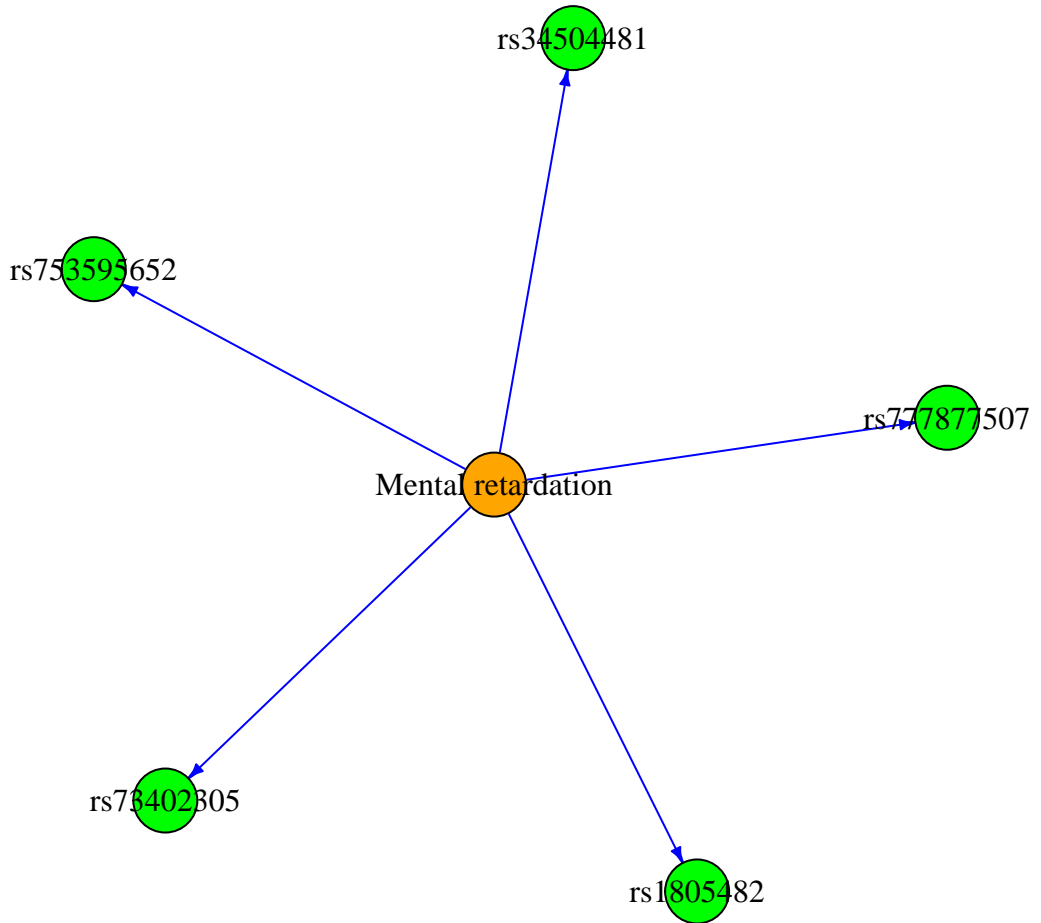

# se Network (Mental retardation with language impairment and with or without

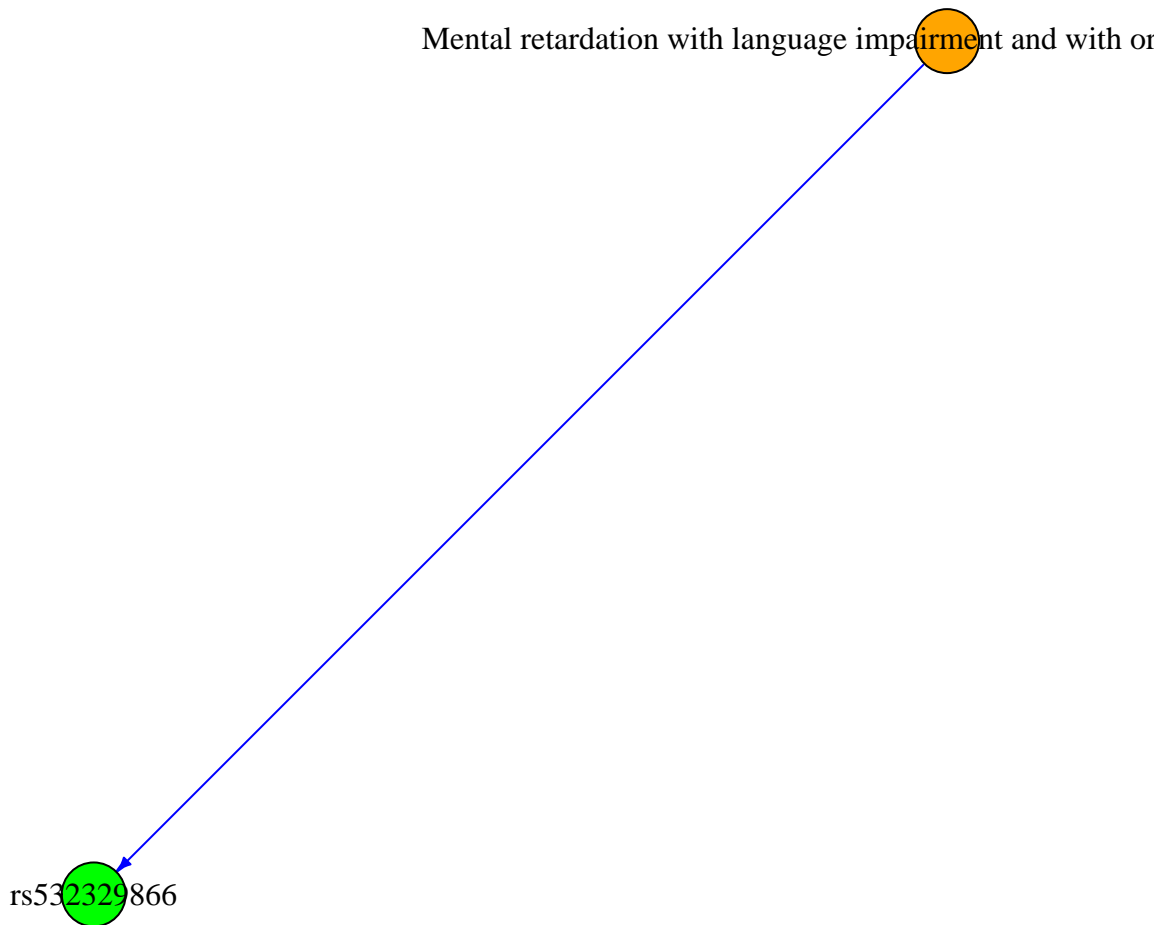

# Variant–Disease Network (Metaphyseal anadysplasia)

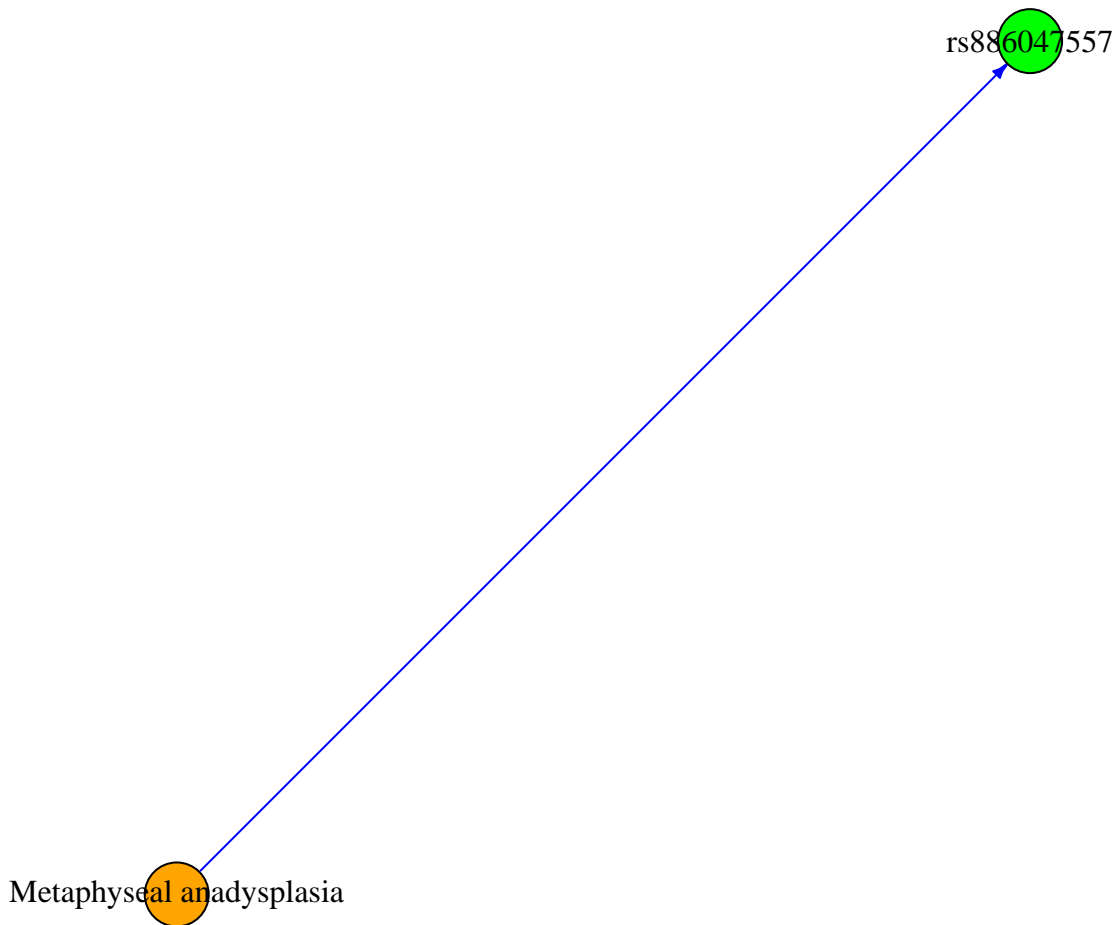



**Variant–Disease Network (Metaphyseal chondrodysplasia)**

Metaphyseal chondrodysplasia

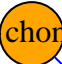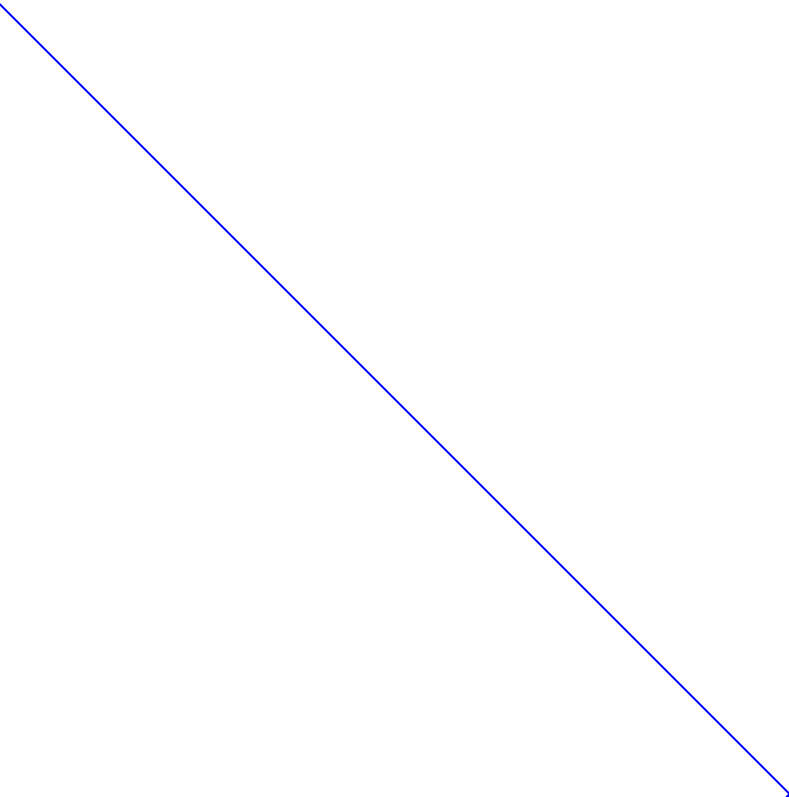

rs568635759

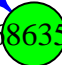

## Variant-Disease Network (Microcephaly)

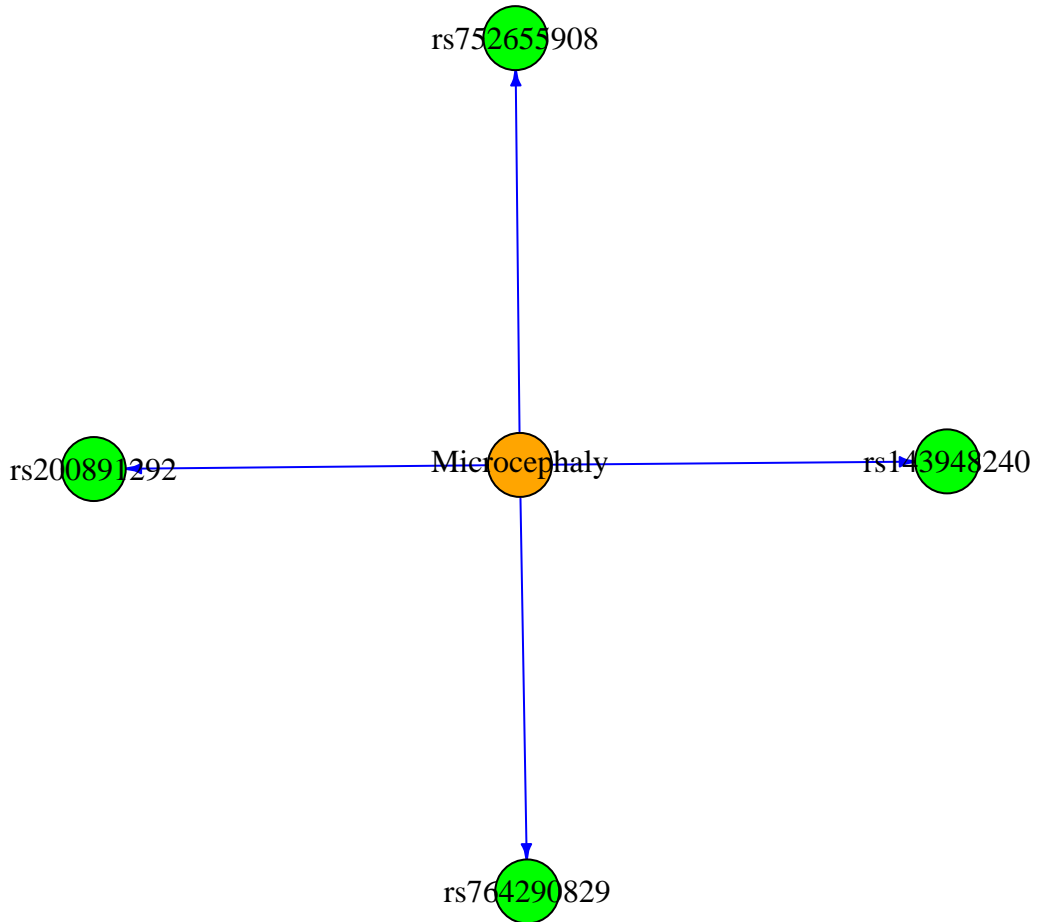

Variant–Disease Network (Microcephaly–capillary malformation syndrome)

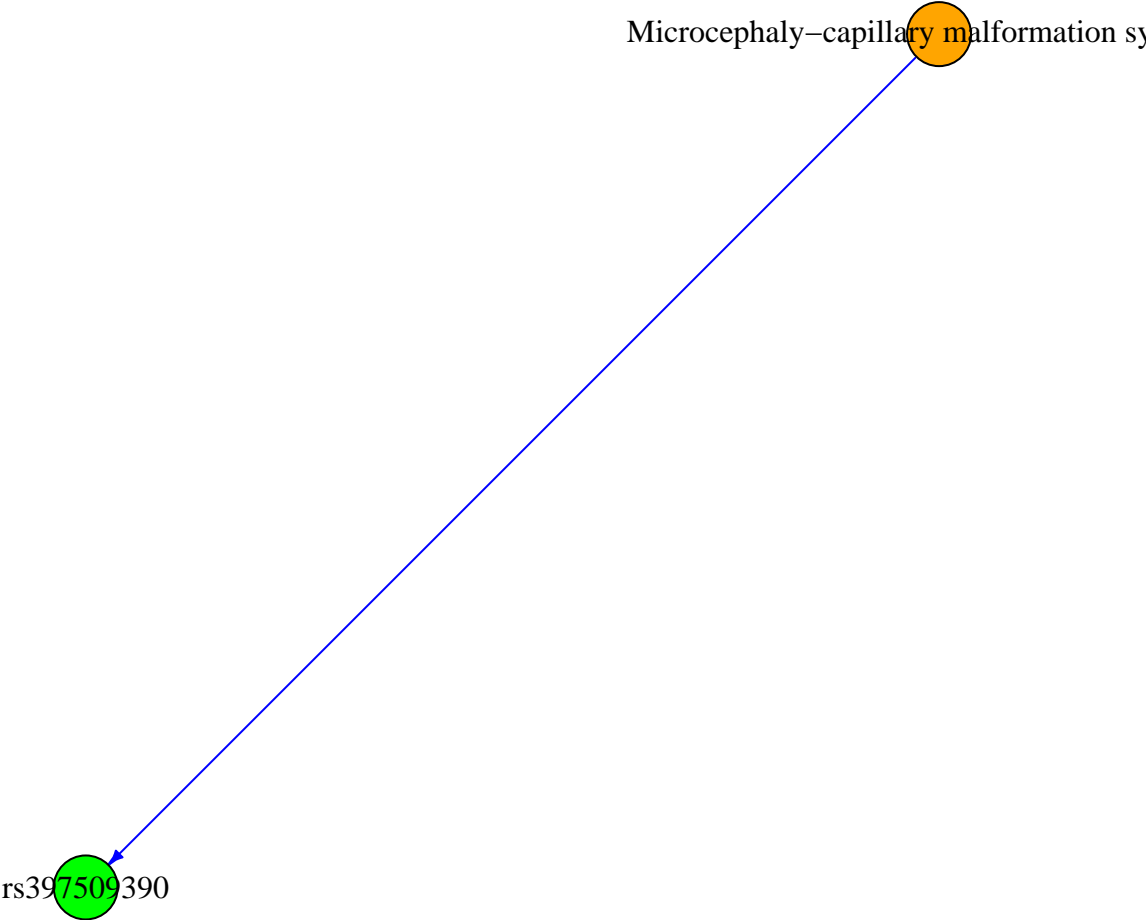

## Variant–Disease Network (Microcytic anemia)

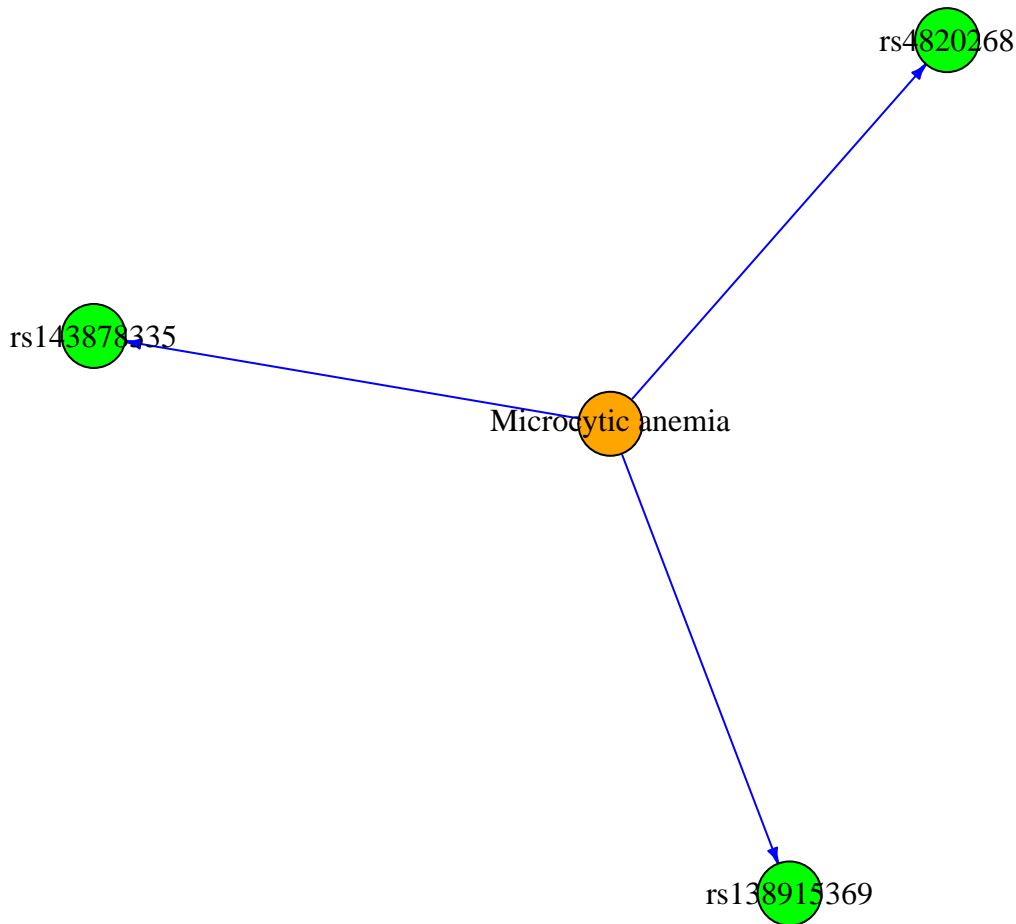

## Variant–Disease Network (Migraine with aura)

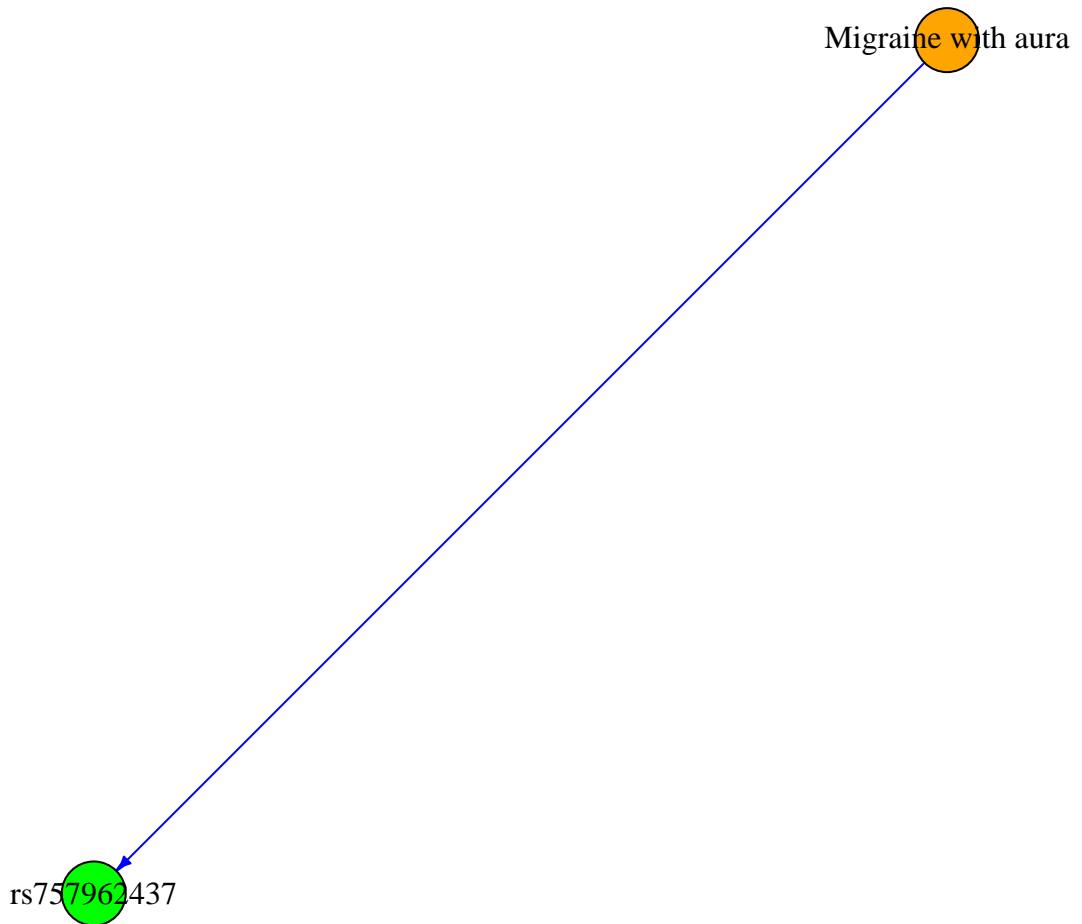

## Variant–Disease Network (Miller syndrome)

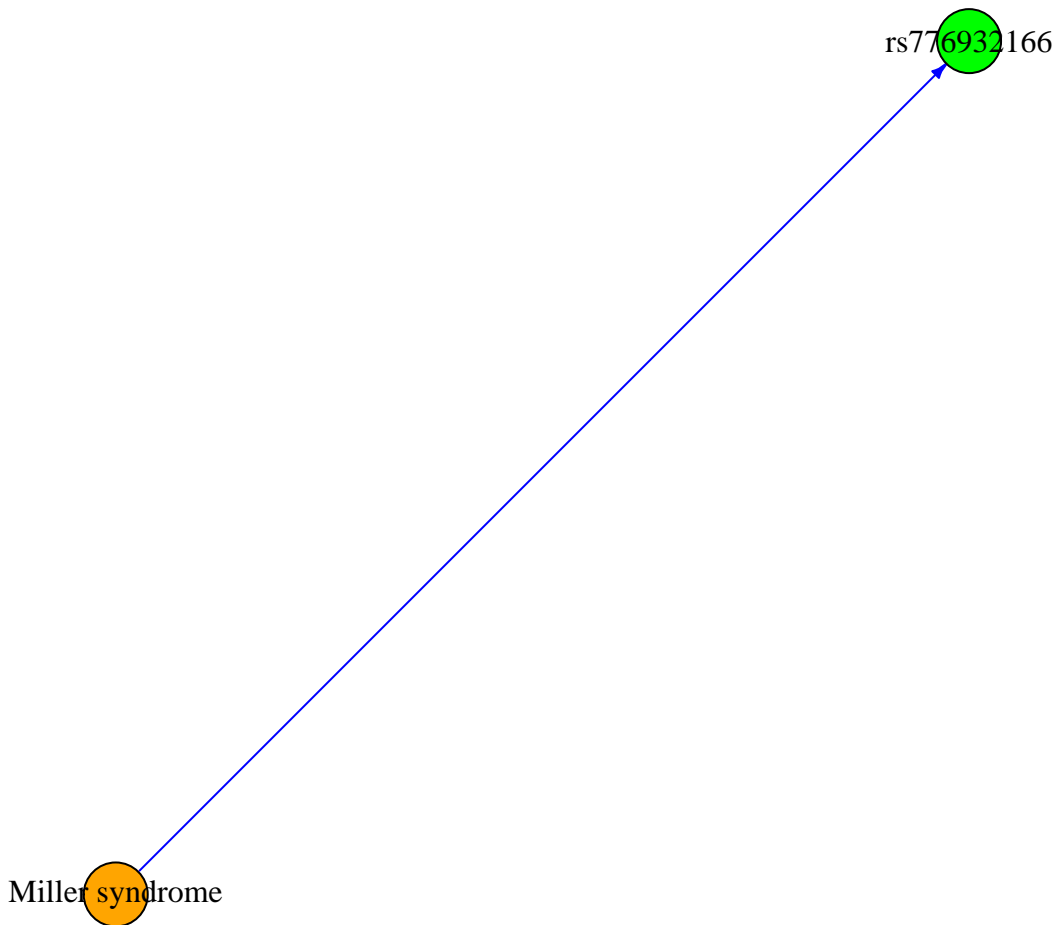

# Disease Network (mitochondrial 3-hydroxy-3-methylglutaryl-CoA synthase)

rs1992376

mitochondrial 3-hydroxy-3-methylglutaryl-CoA synthase

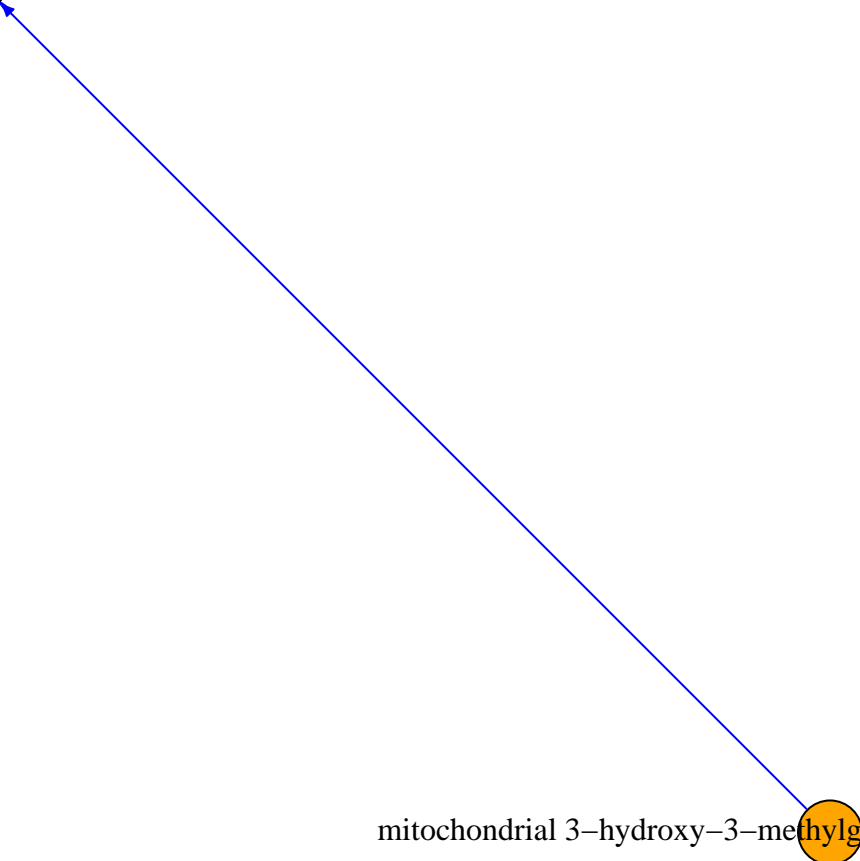

## Variant–Disease Network (Mitochondrial complex I deficiency)

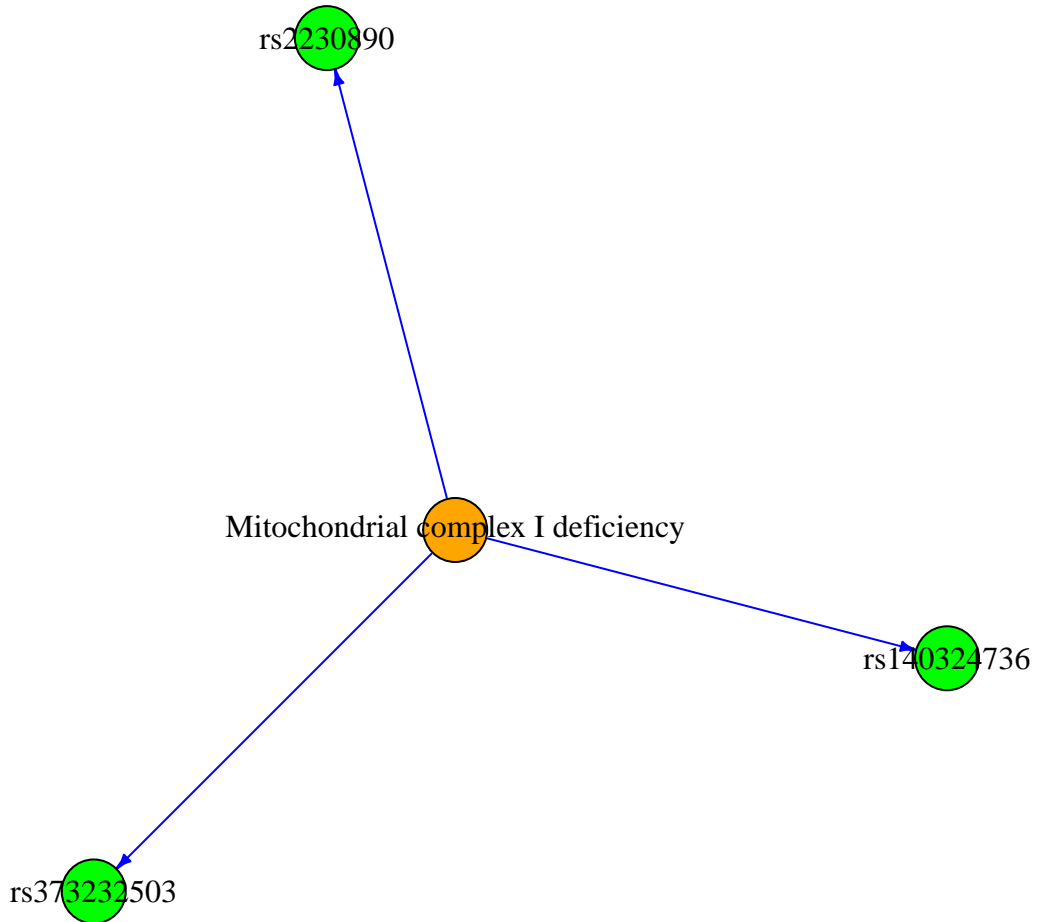



## Variant–Disease Network (Mitochondrial complex II deficiency)

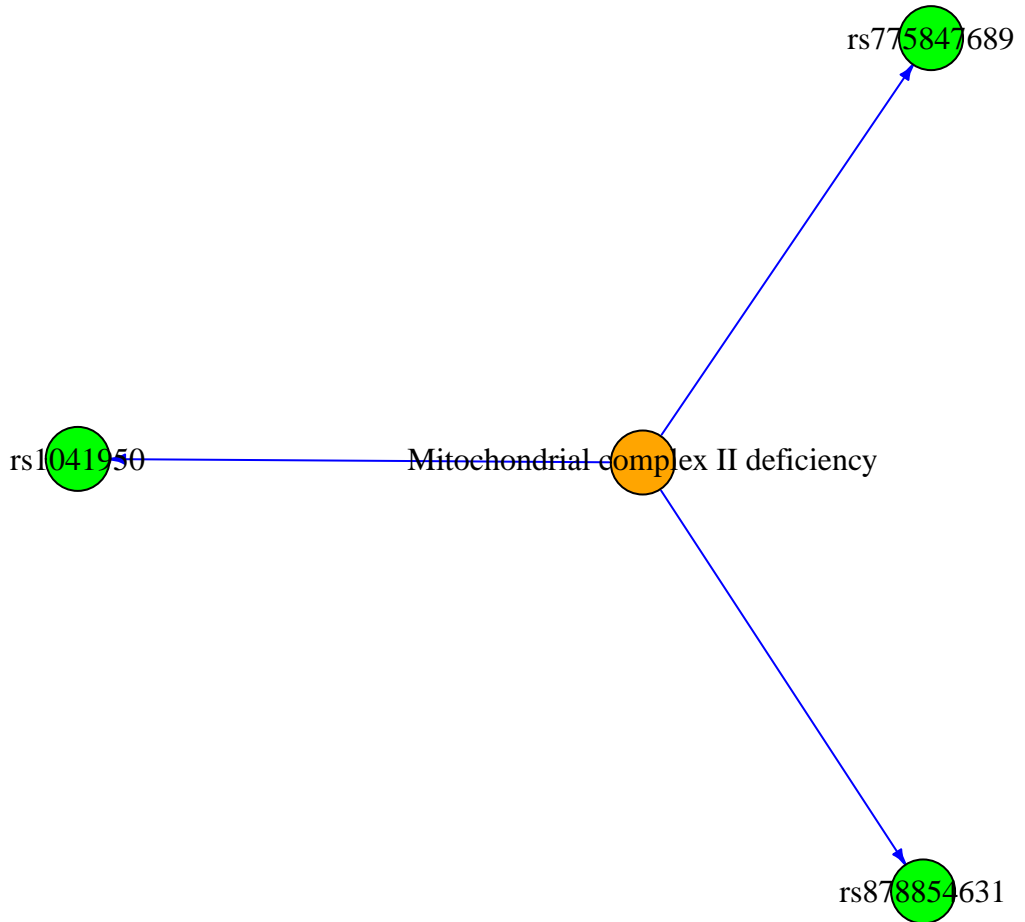

# Variant–Disease Network (Mitochondrial Complex V (ATP Synthase) Deficiency)

rs1053077

Mitochondrial Complex V (ATP Synthase)



# Disease Network (Mitochondrial DNA depletion syndrome 13 (encephalomyopathy

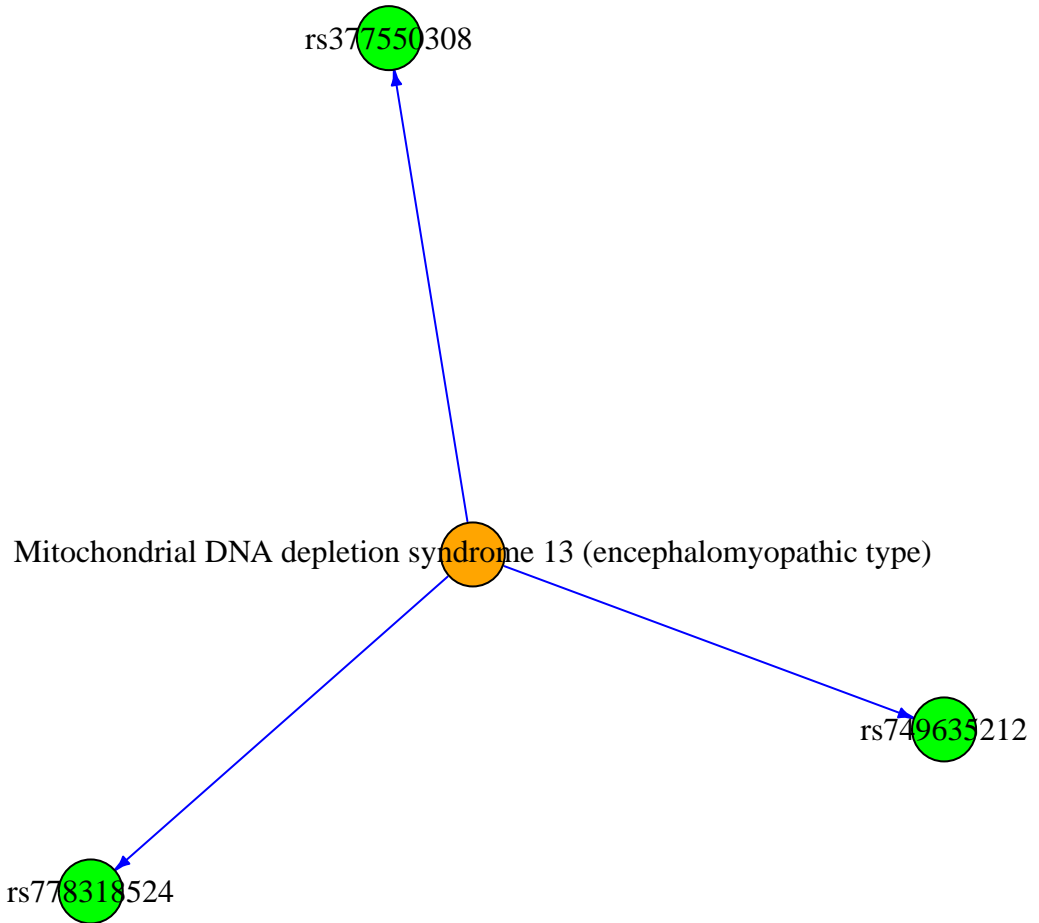

Variant–Disease Network (Mitochondrial myopathy and sideroblastic anemia)

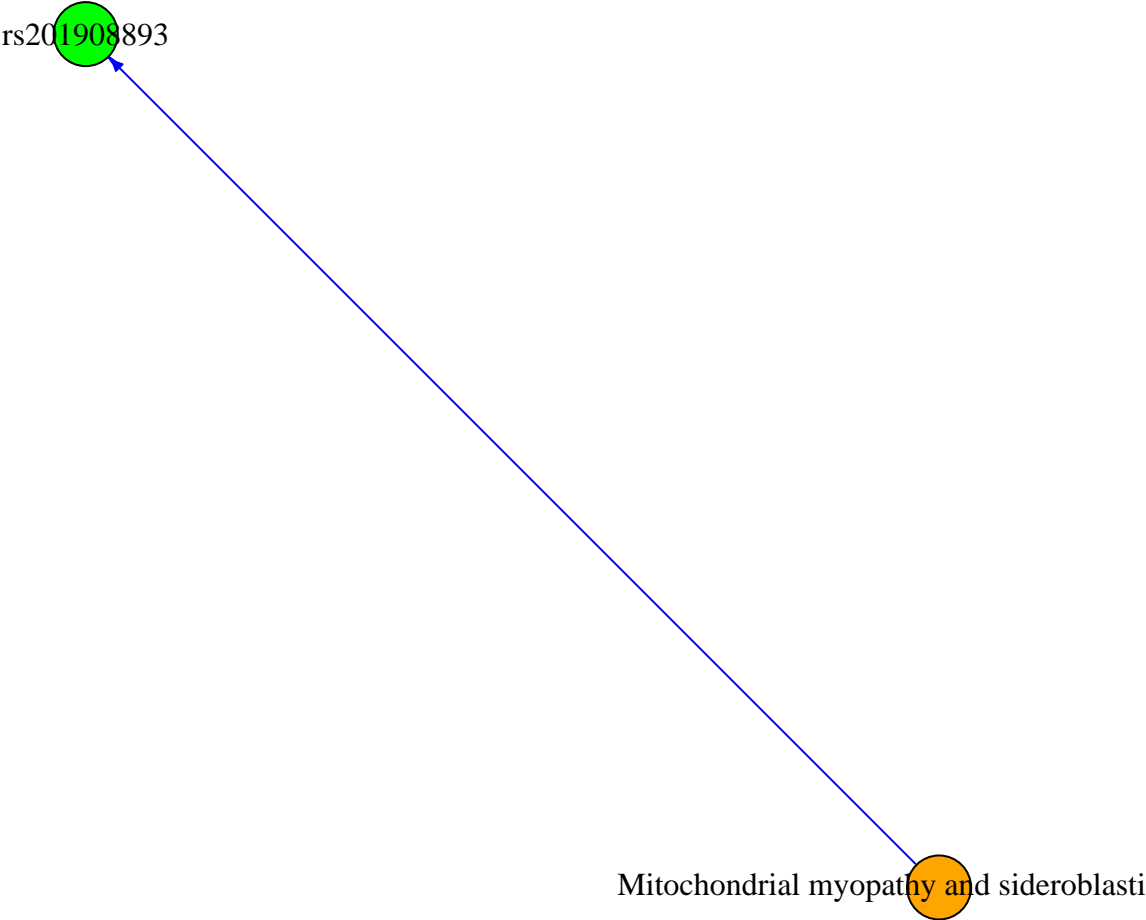

**Variant–Disease Network (Monocarboxylate transporter 1 deficiency)**

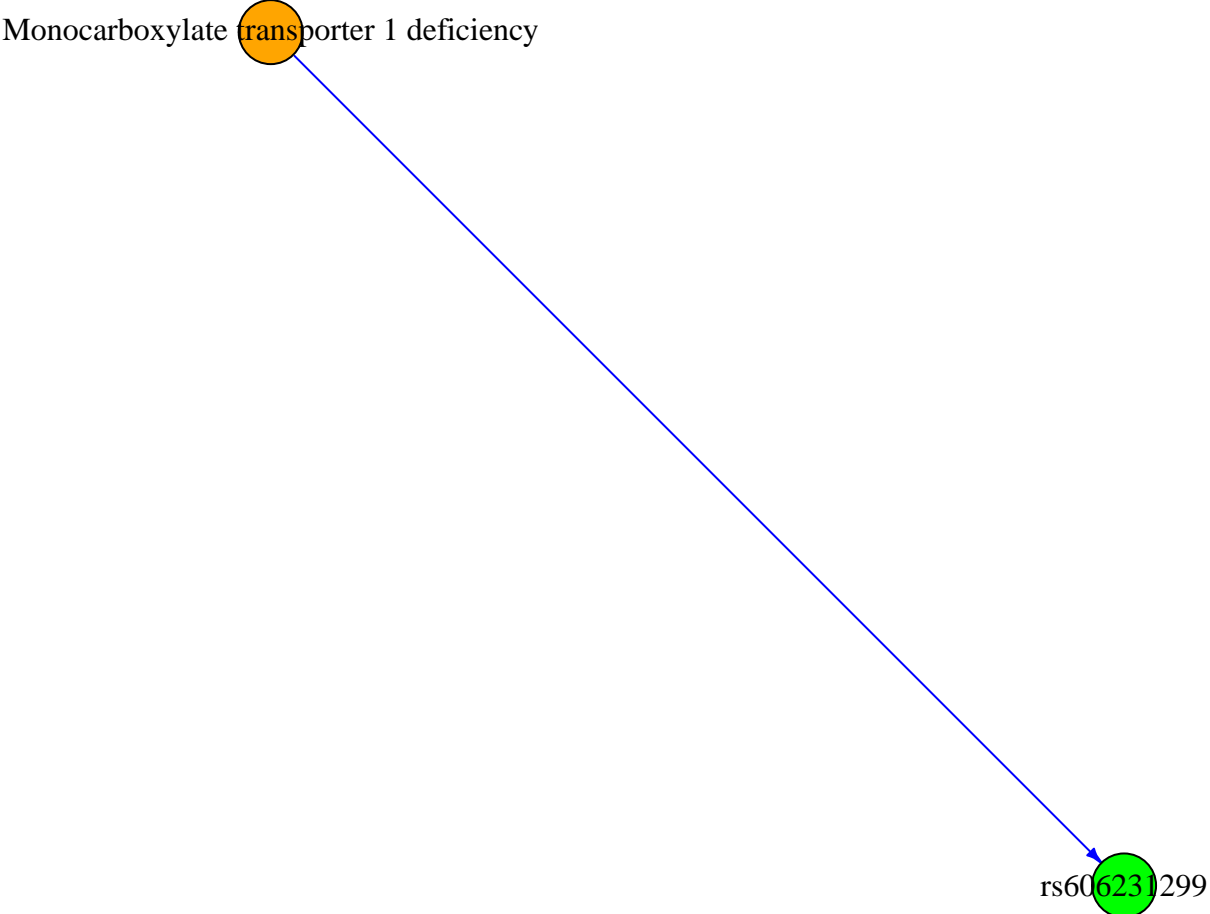

Variant–Disease Network (Monogenic Non–Syndromic Obesity)

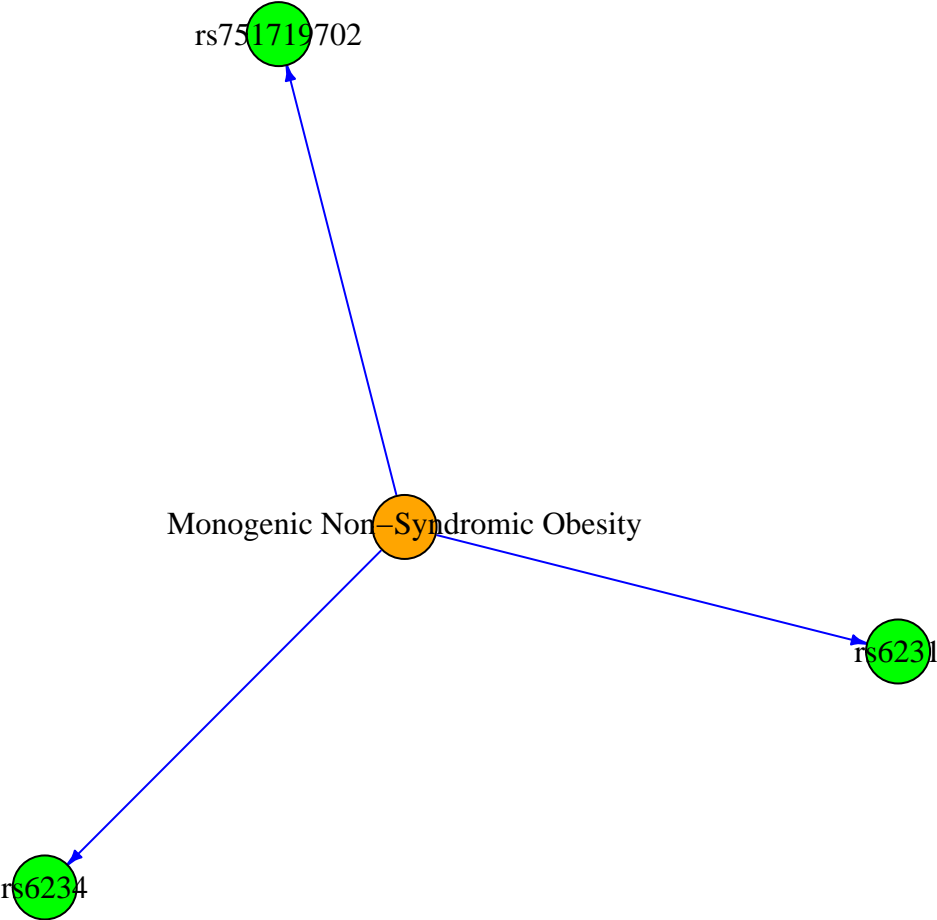

Variant–Disease Network (Mononeuropathy of the Median Nerve)

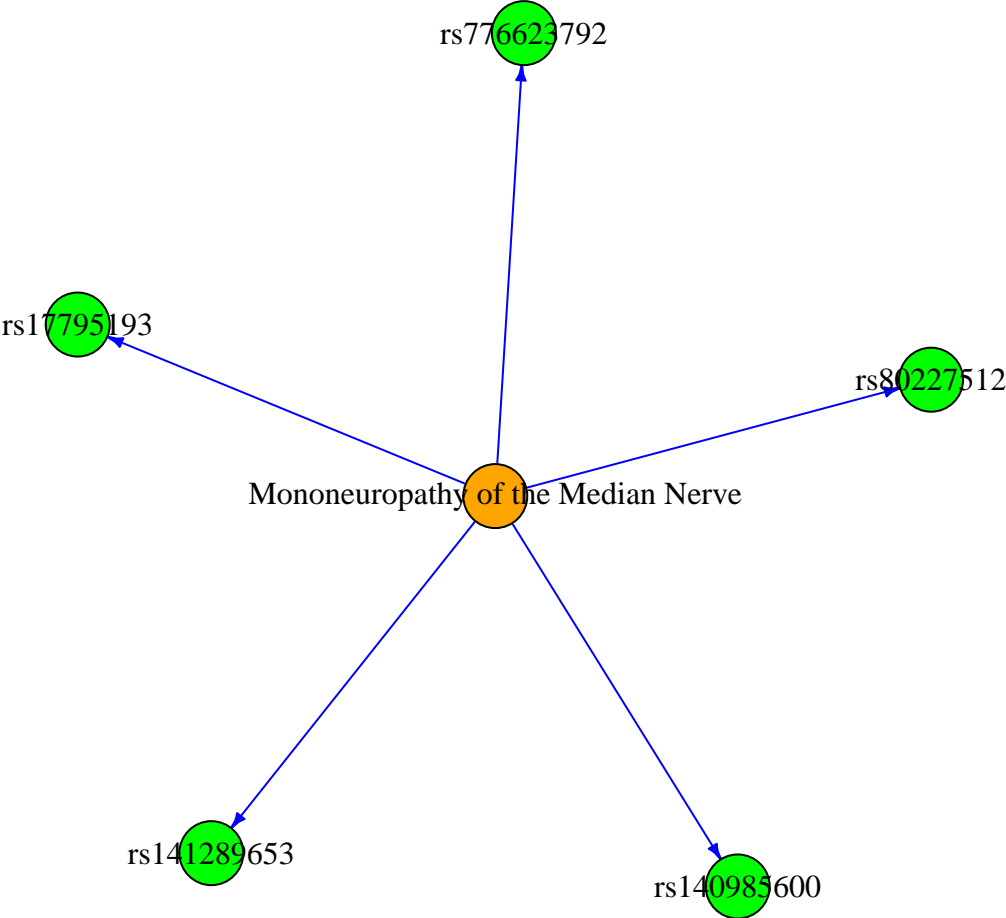

Variant–Disease Network (Morquio syndrome)

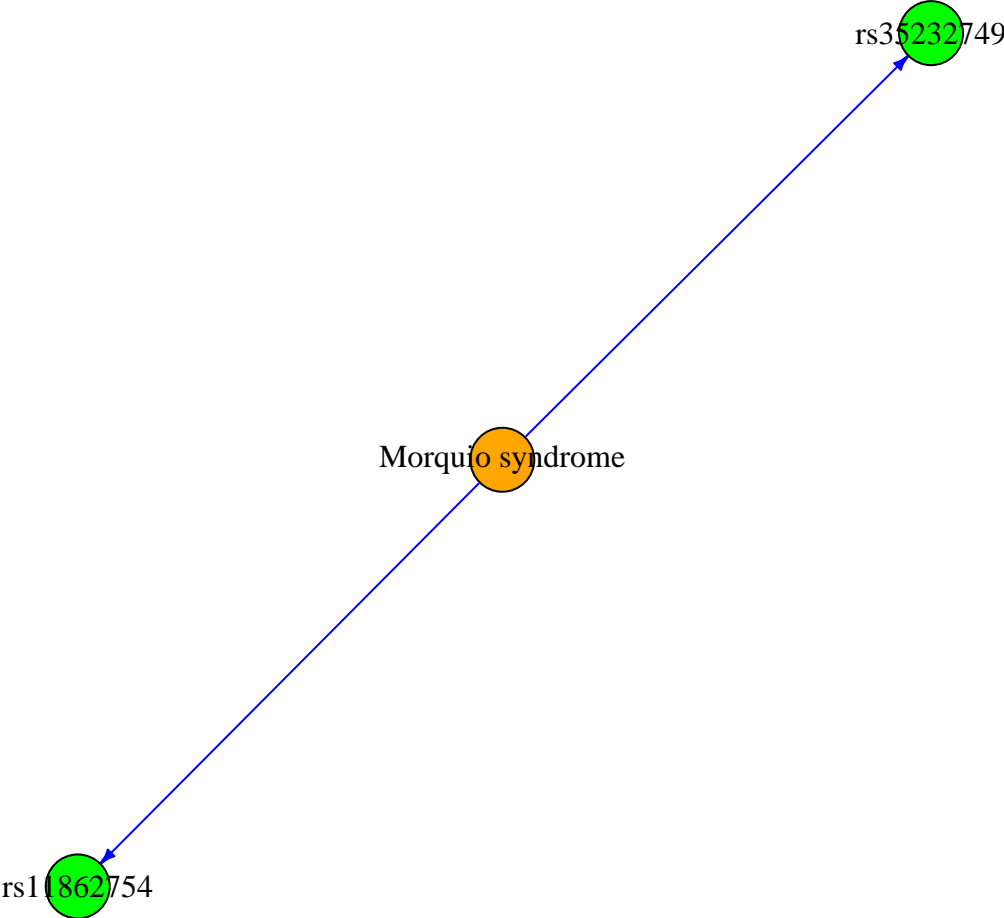



## Variant–Disease Network (Mowat–Wilson syndrome)

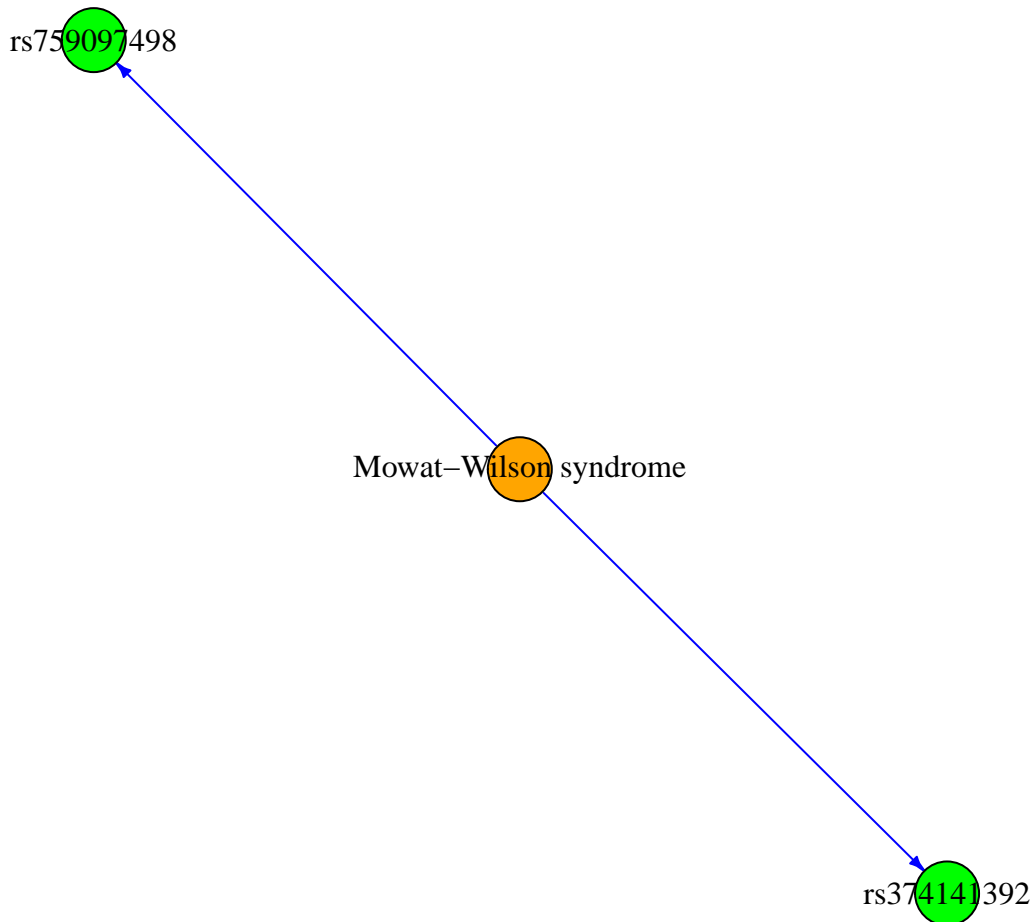

## Variant–Disease Network (Mucopolipidosis type IV)

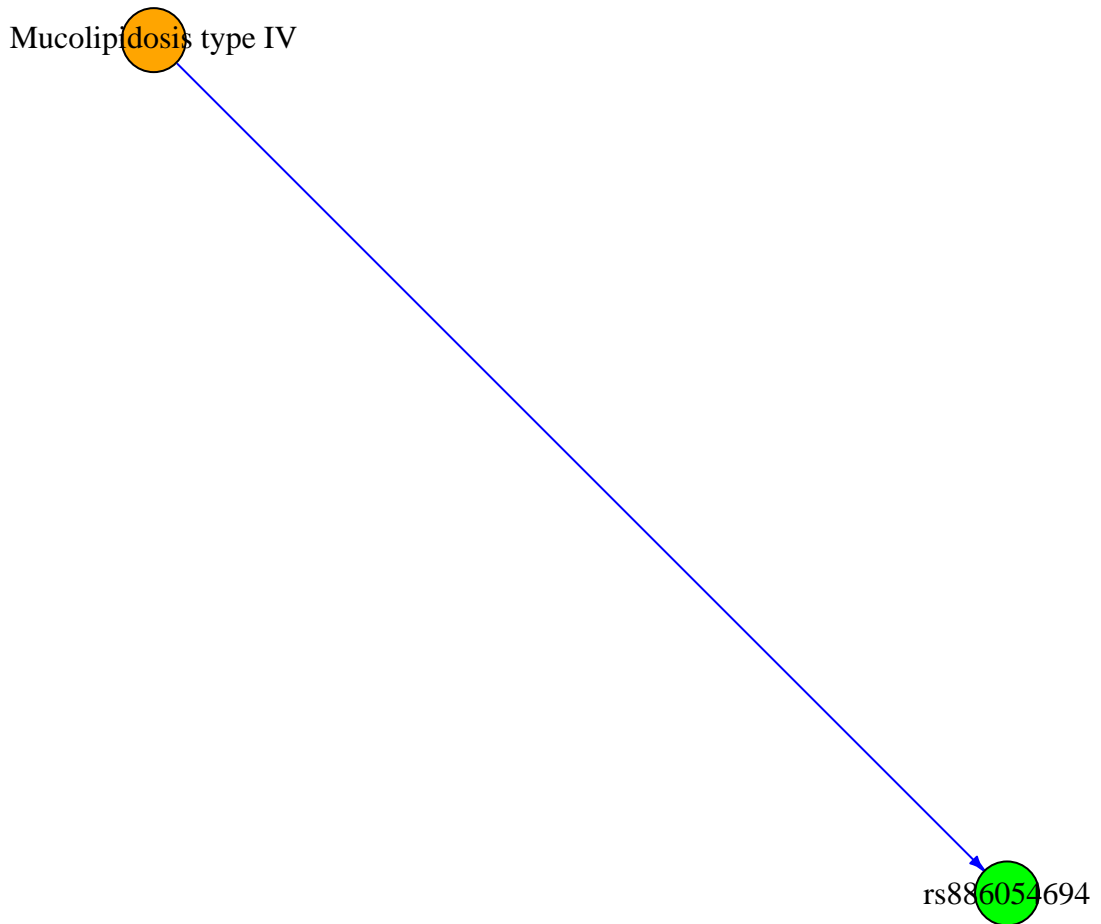

Variant–Disease Network (Mucopolysaccharidosis)

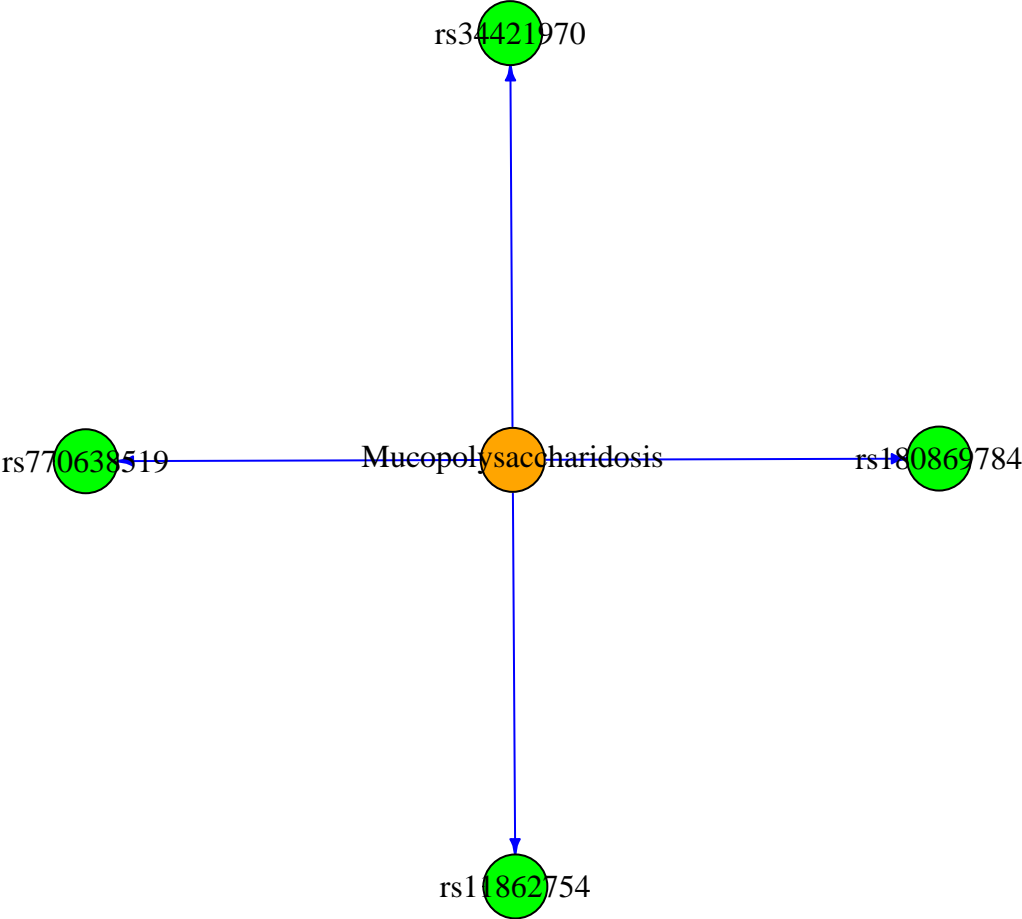

Variant–Disease Network (Mucopolysaccharidosis type I)

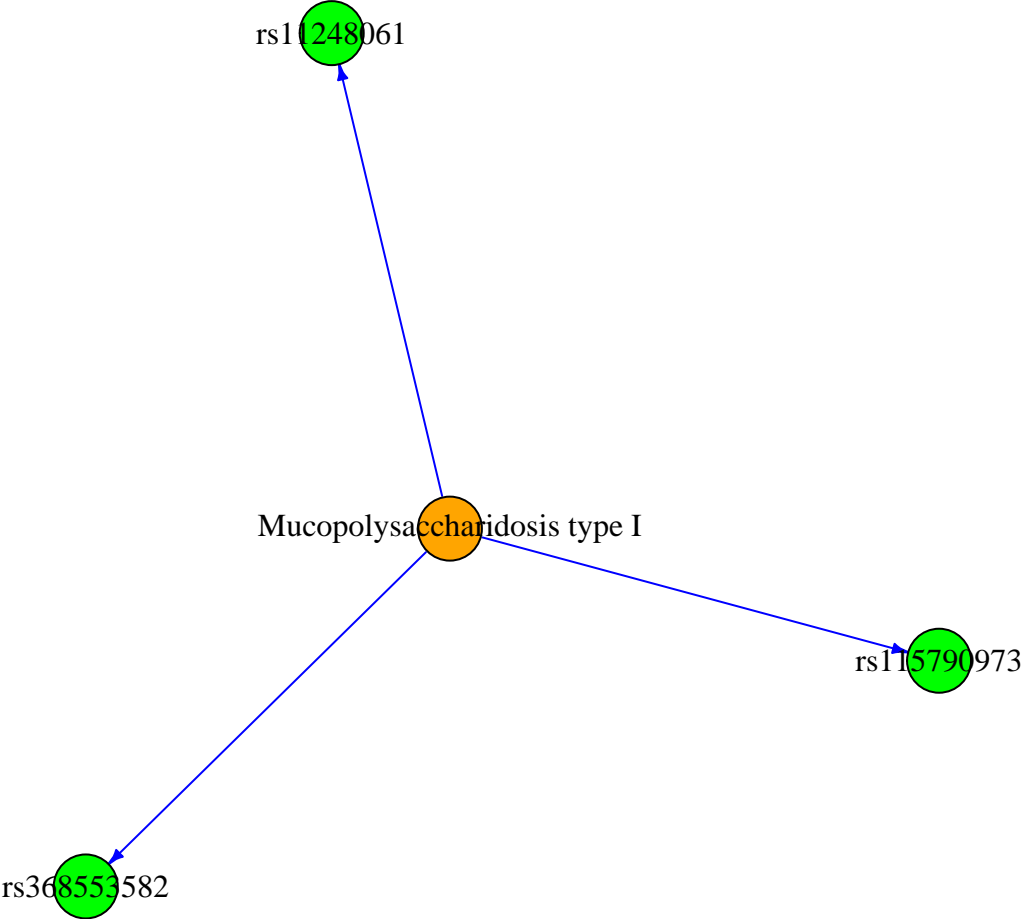

## Variant–Disease Network (Mulibrey nanism syndrome)

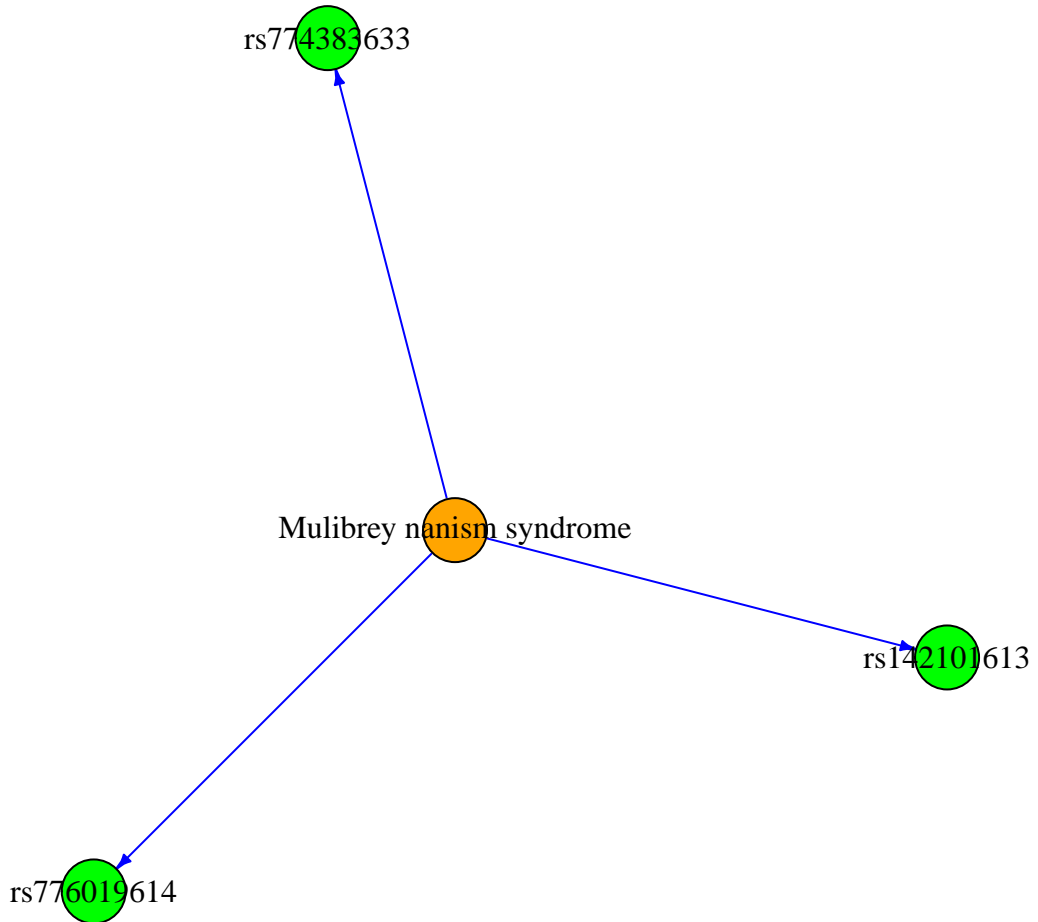

# Disease Network (Multicentric Osteolysis–Nodulosis–Arthropathy (MONA) Spec

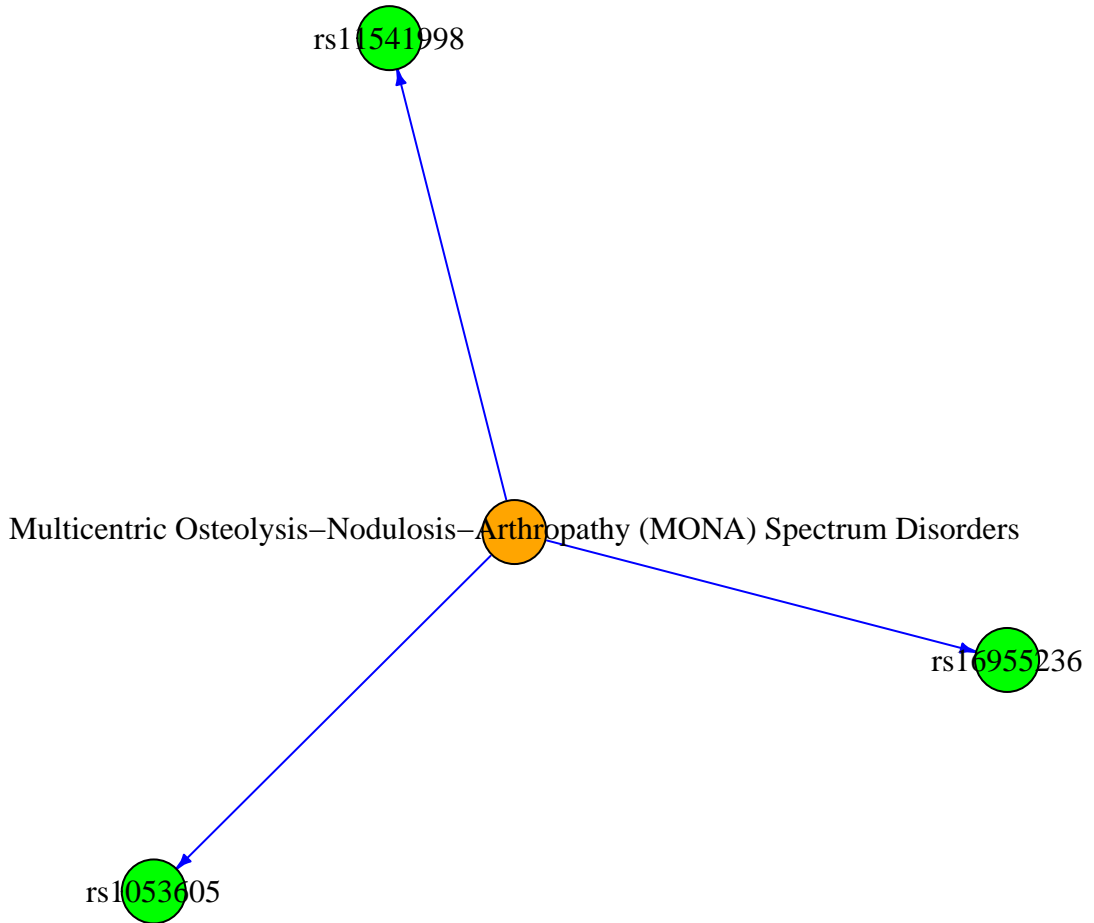

# nt-Disease Network (Multiple congenital anomalies–hypotonia–seizures syn

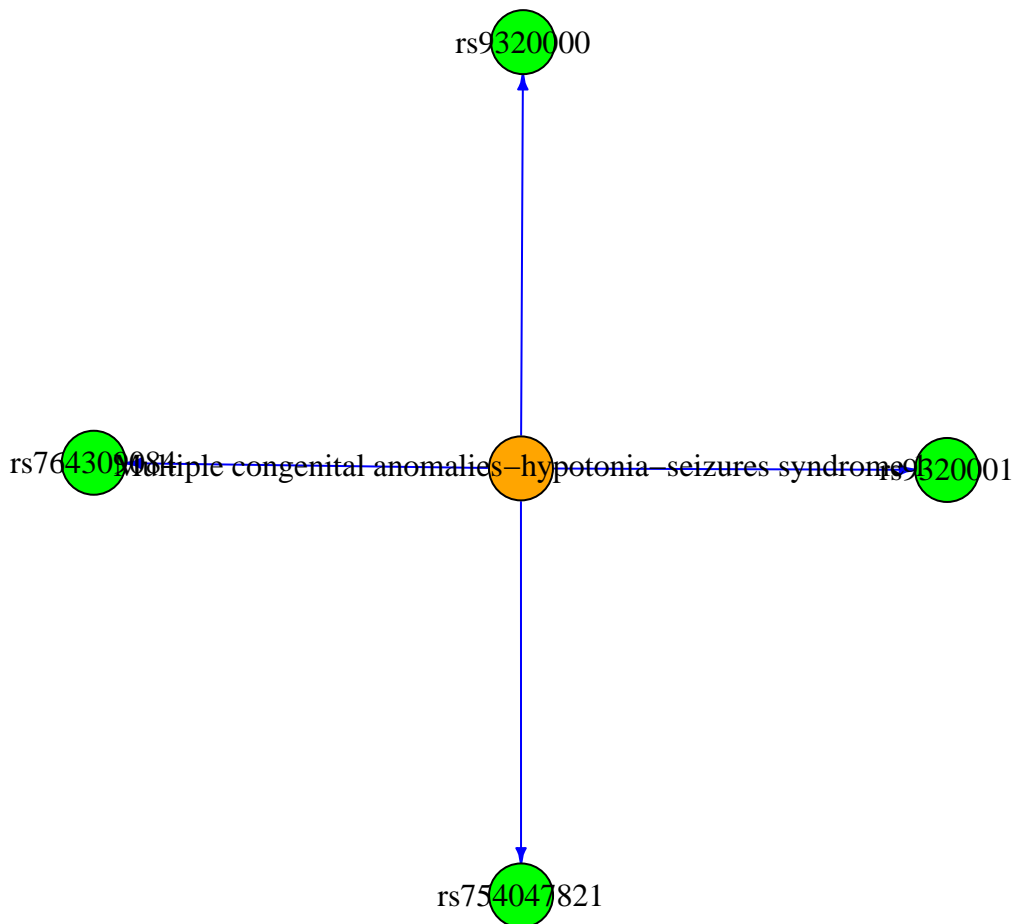

# Variant-Disease Network (Multiple Cutaneous and Mucosal Venous Malformations)

rs35814893

Multiple Cutaneous and Mucosal Venous Malformations





**Variant–Disease Network (Multiple Cutaneous and Uterine Leiomyomas)**

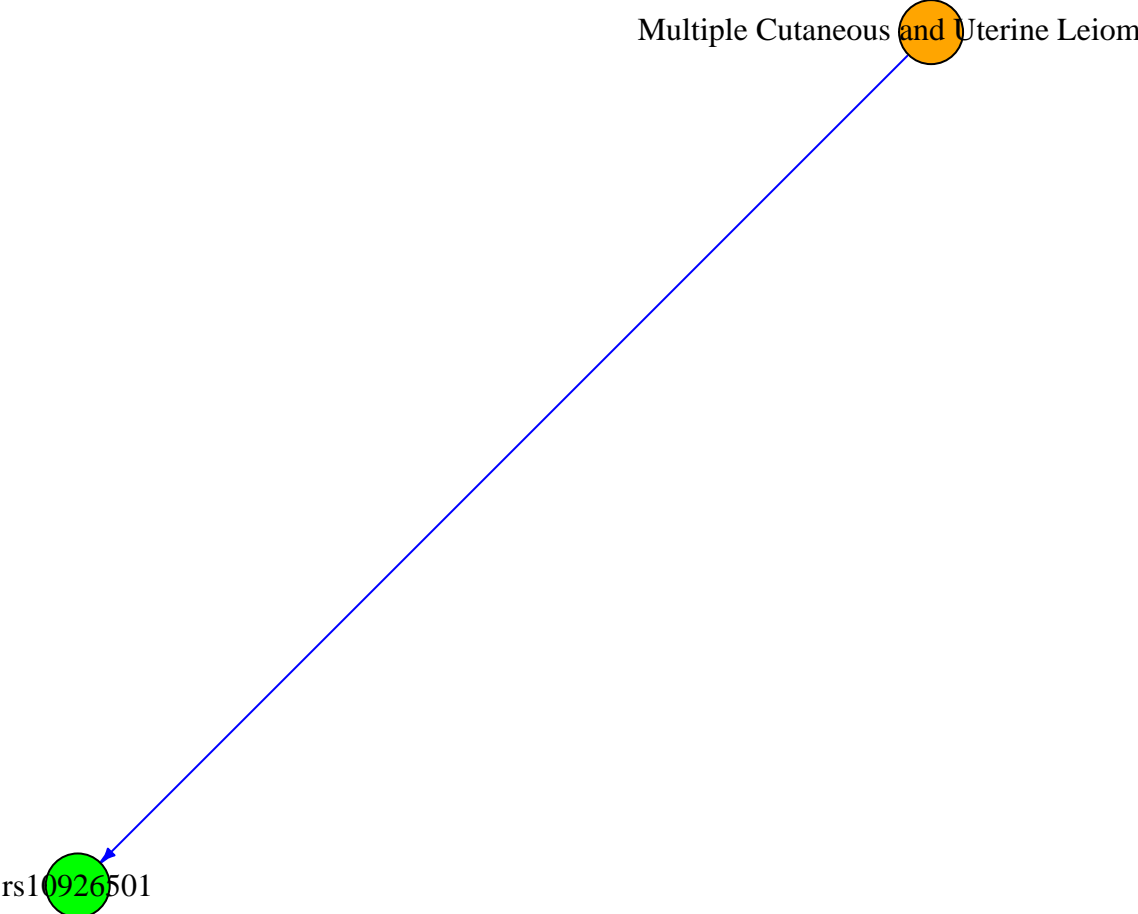

## Variant-Disease Network (Multiple cutaneous leiomyomas)

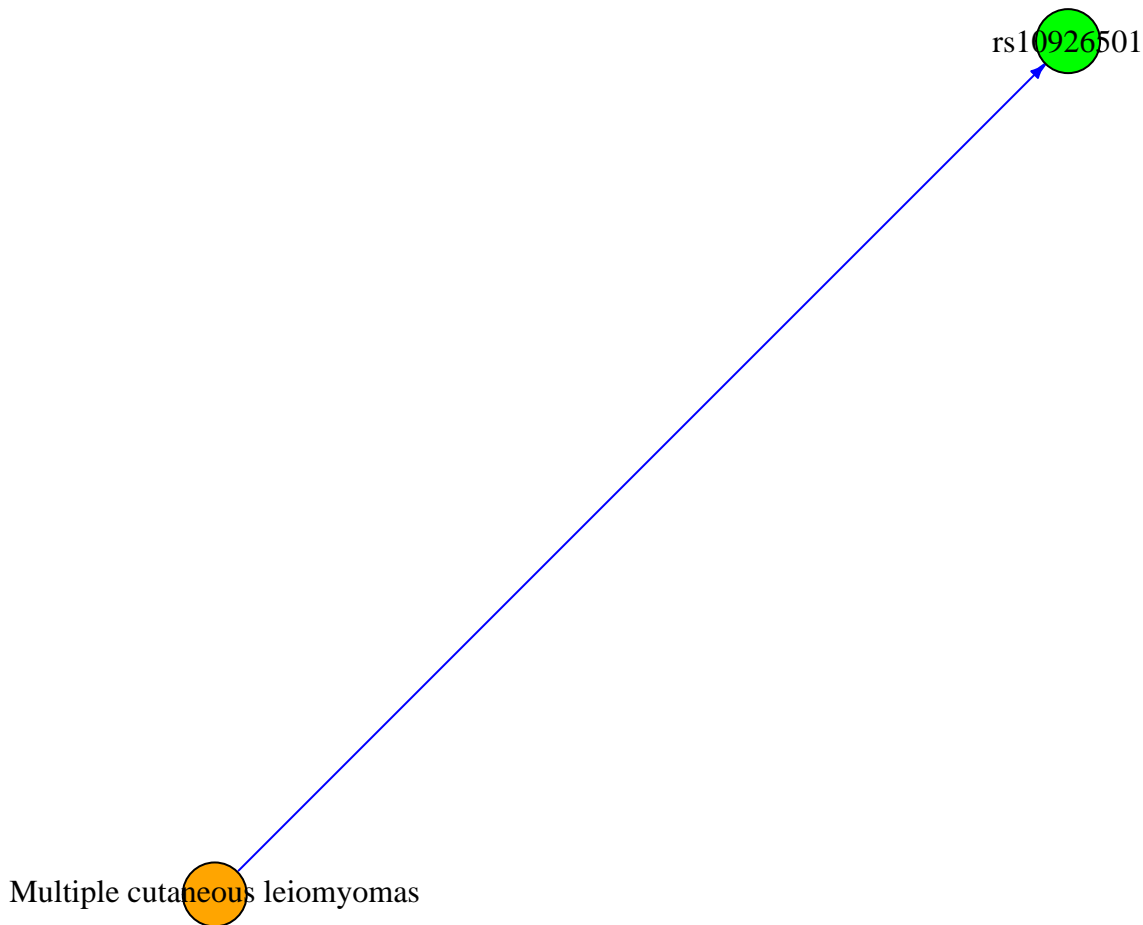

## Variant–Disease Network (Multiple endocrine neoplasia)

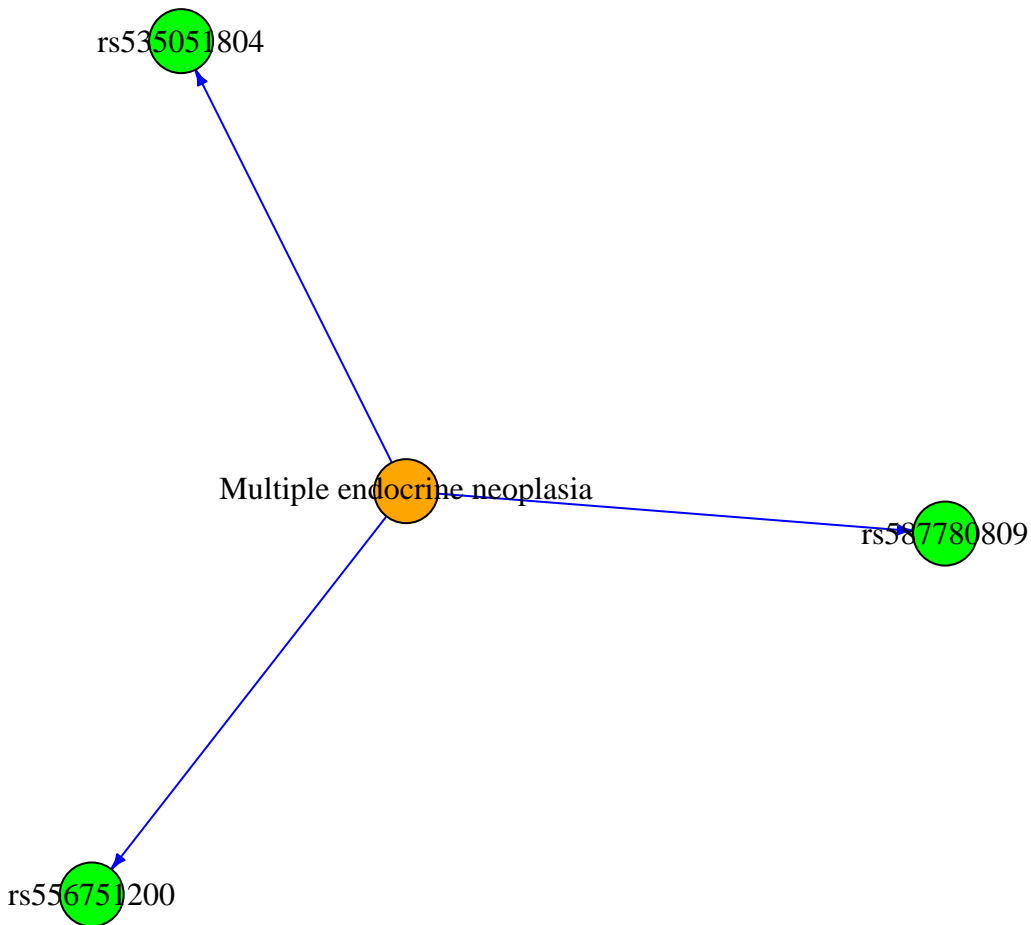

**Variant–Disease Network (Multiple Epiphyseal Dysplasia)**

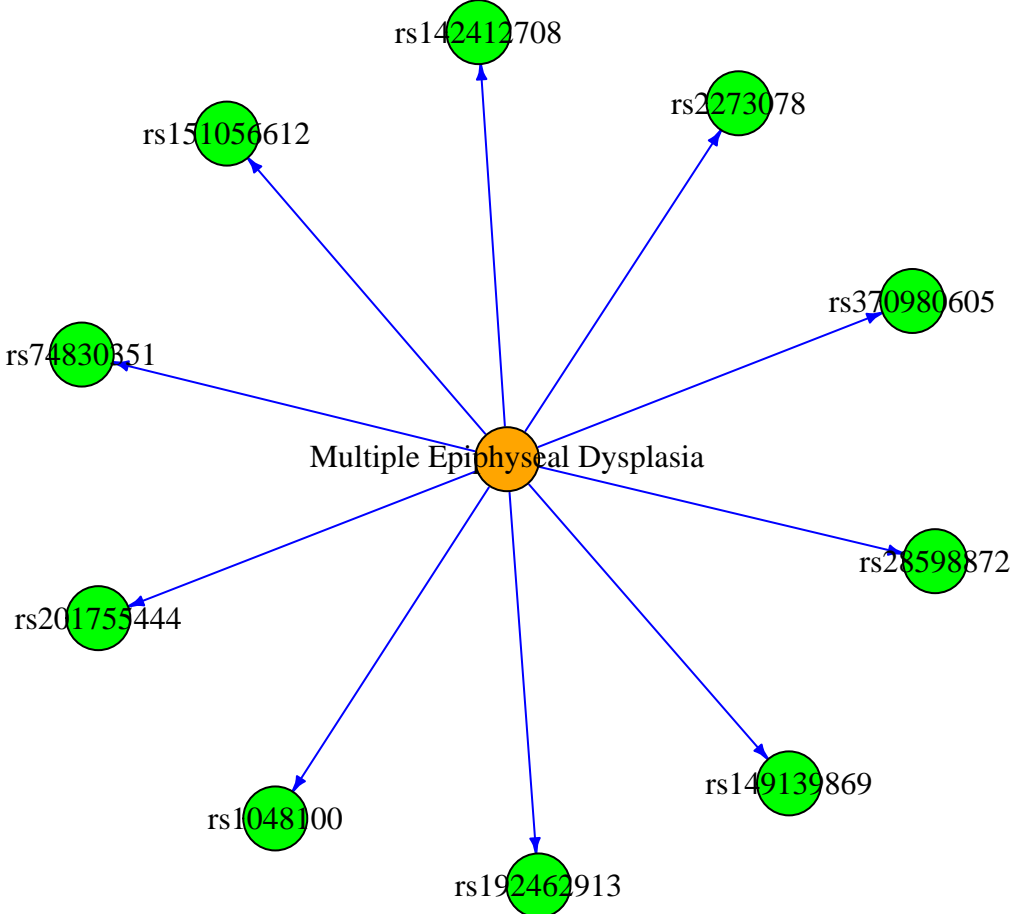

**Variant–Disease Network (Multiple gastrointestinal atresias)**

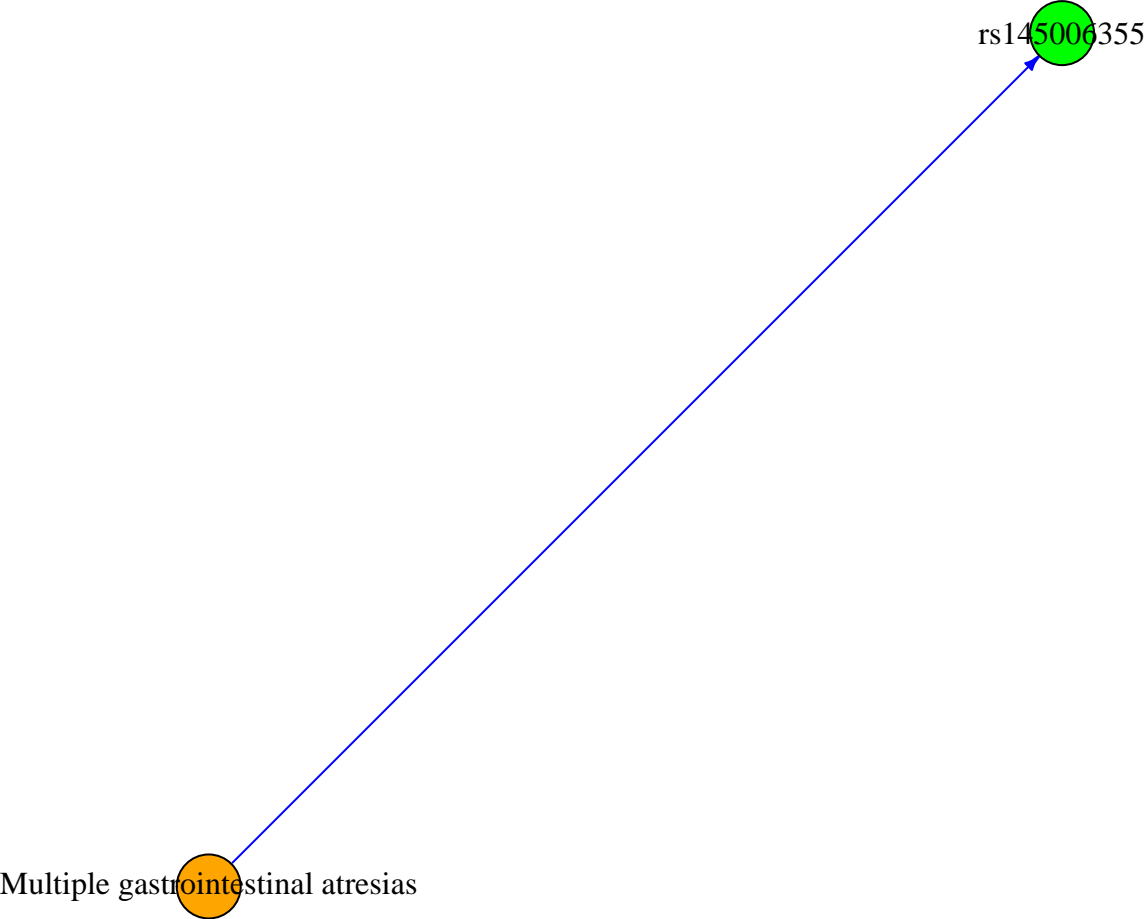

## Variant–Disease Network (Muscular dystrophy)

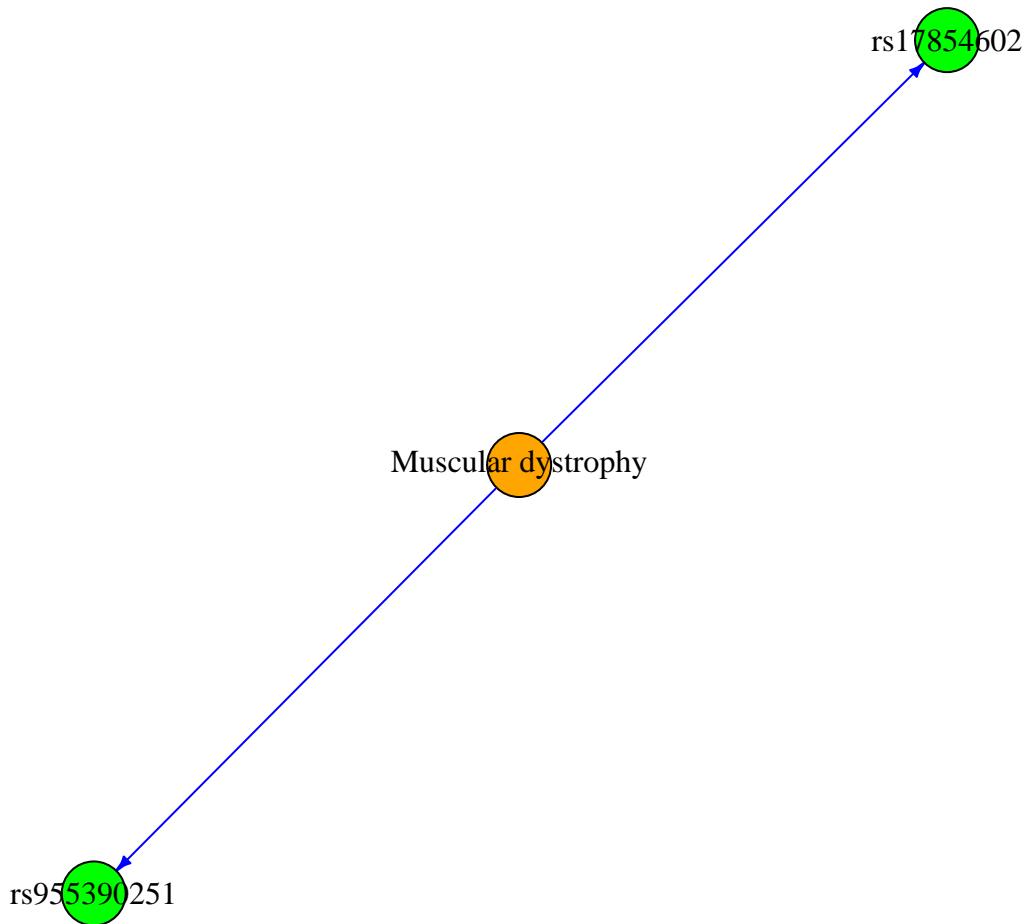

# e Network (Muscular dystrophy–dystroglycanopathy (congenital with brain a

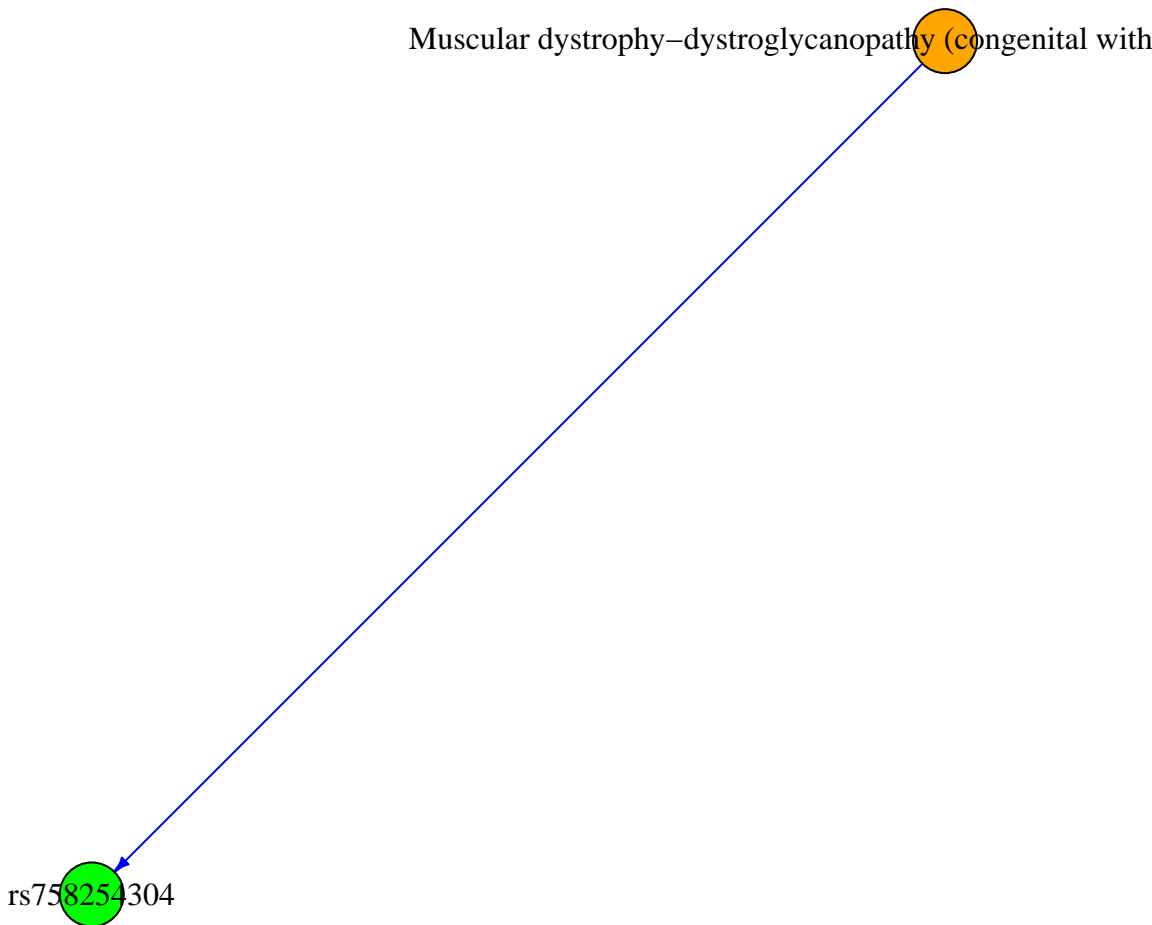

**Variant–Disease Network (Myasthenic syndrome)**

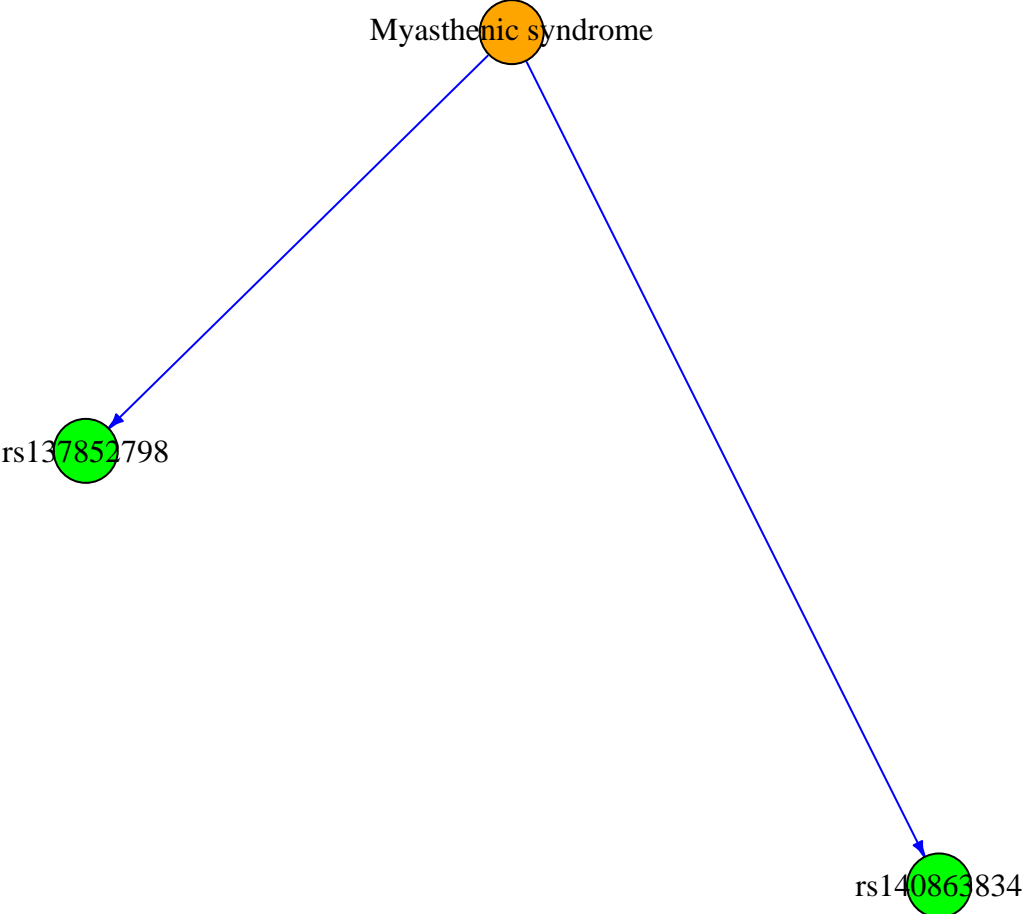



## Variant–Disease Network (MYH-associated polyposis)

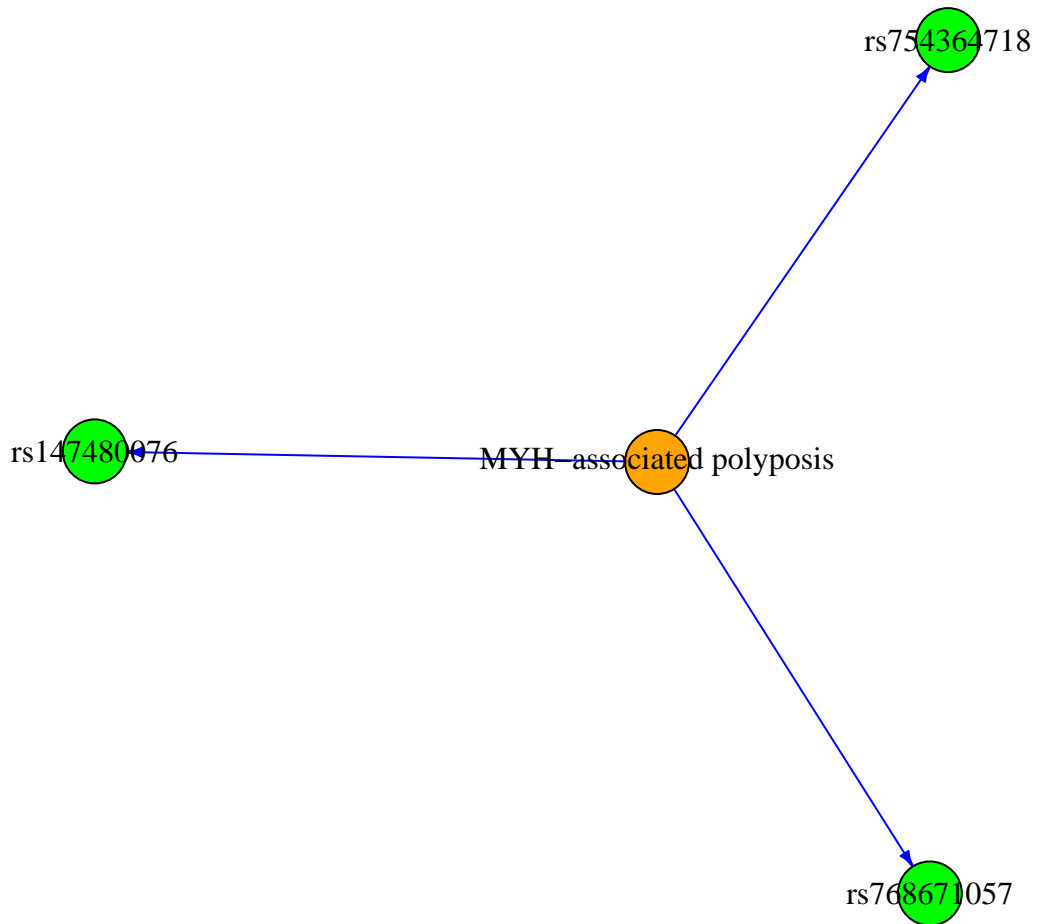

Variant–Disease Network (Myoclonic epilepsy)

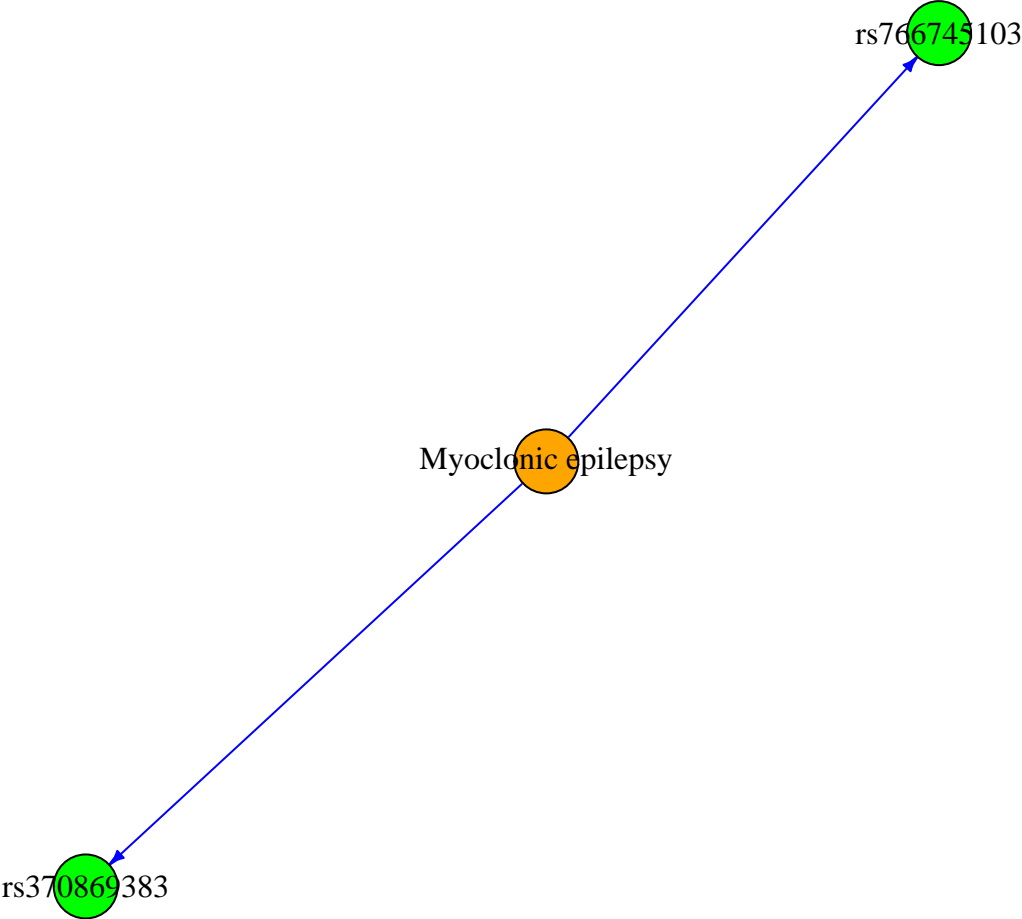

## Variant–Disease Network (Myofibrillar myopathy)

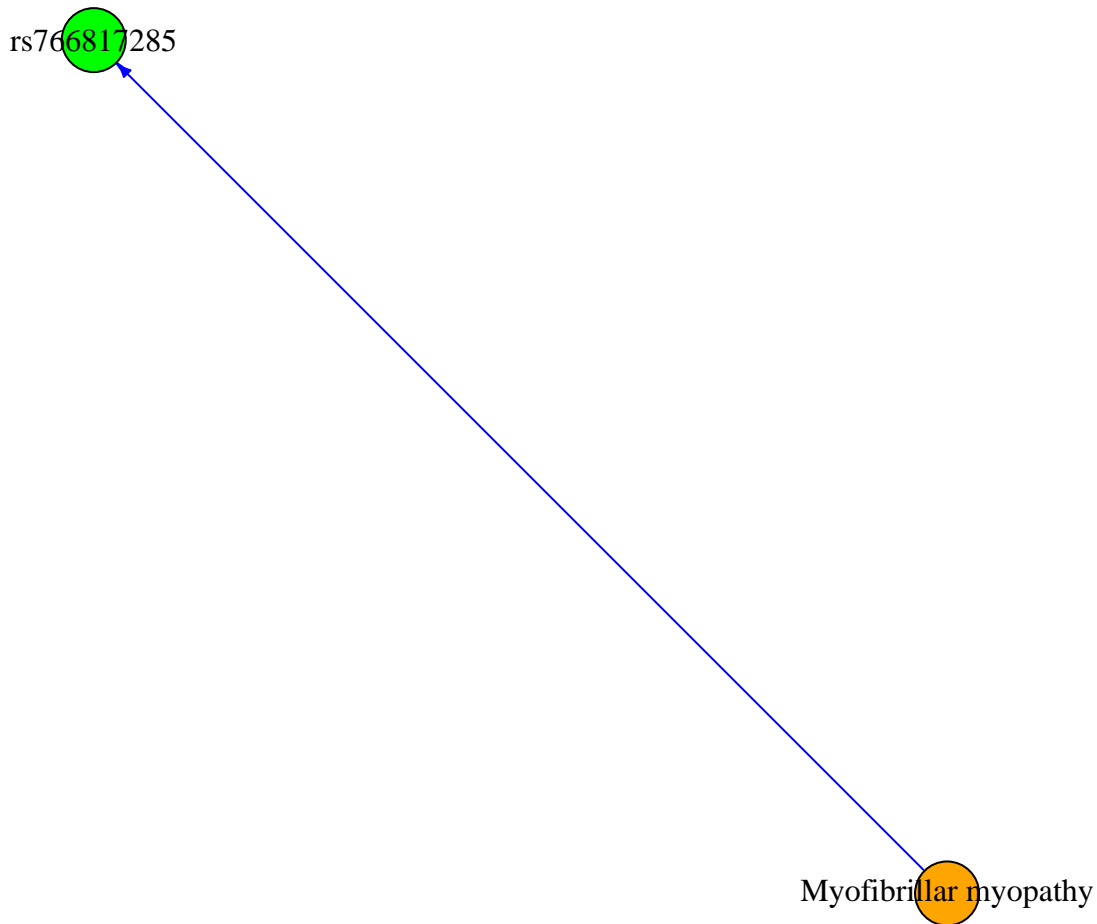

**Variant–Disease Network (Myofibrillar myopathy 1)**

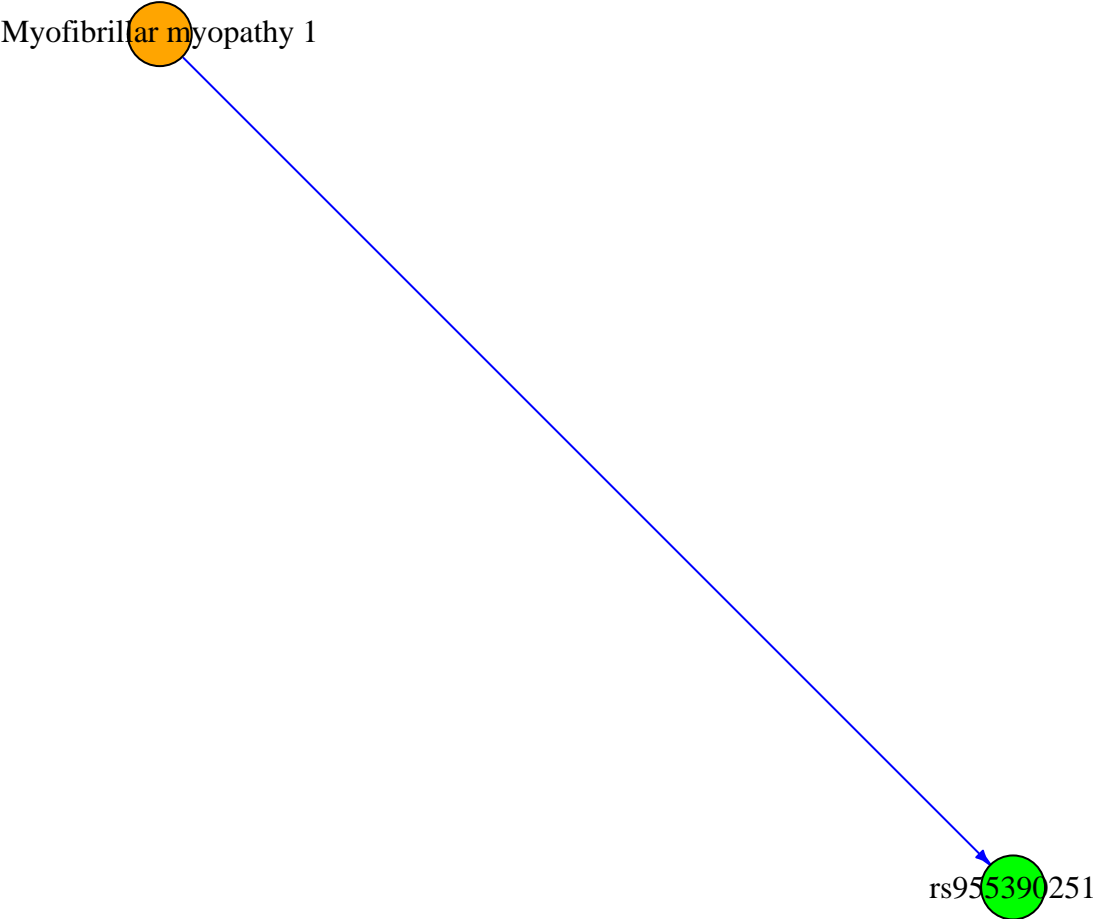

## Variant–Disease Network (Myopia 24)

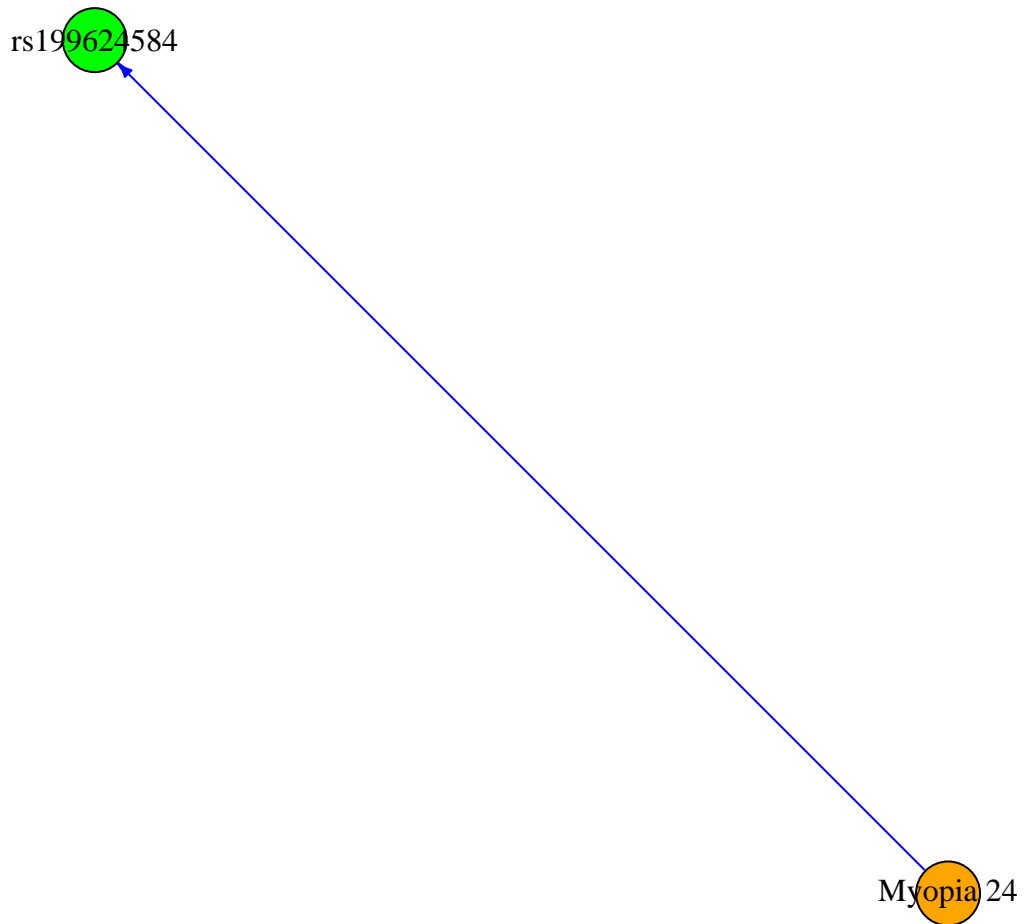

## Variant–Disease Network (Myotonia congenita)

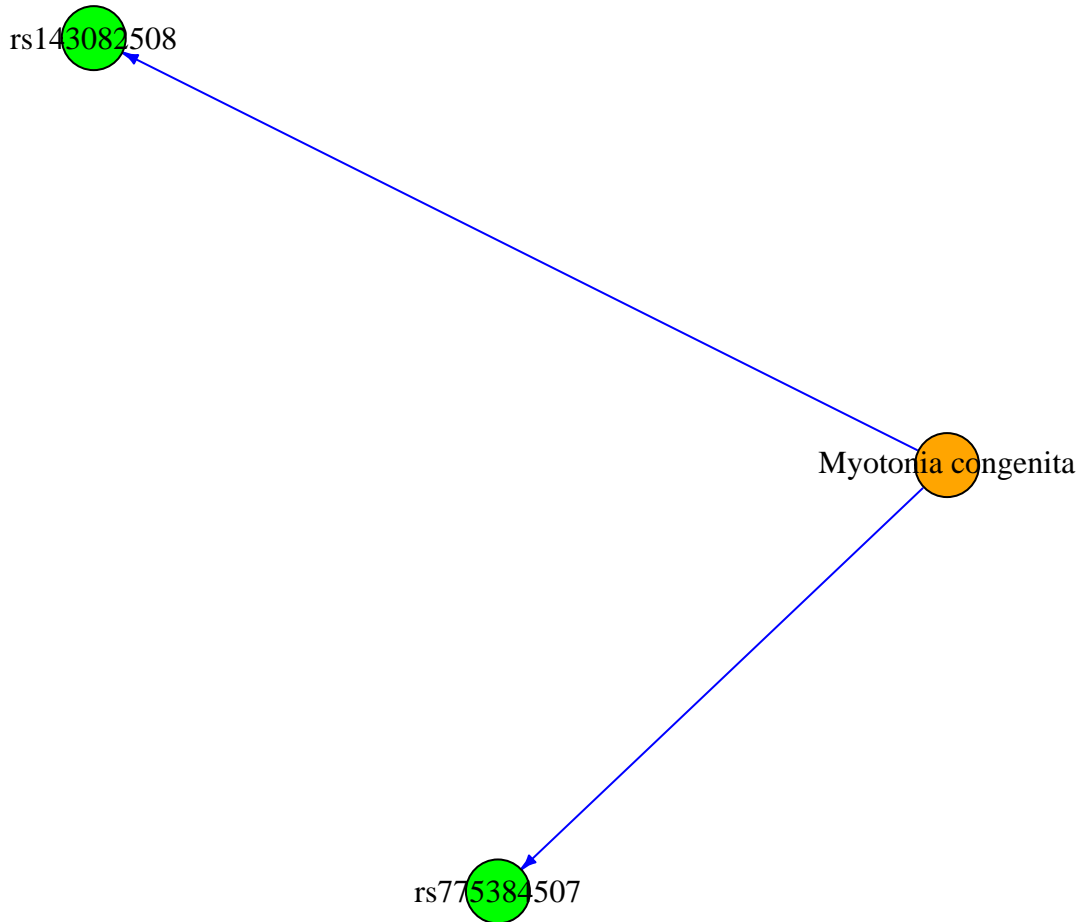

## Variant–Disease Network (Nail–patella syndrome)

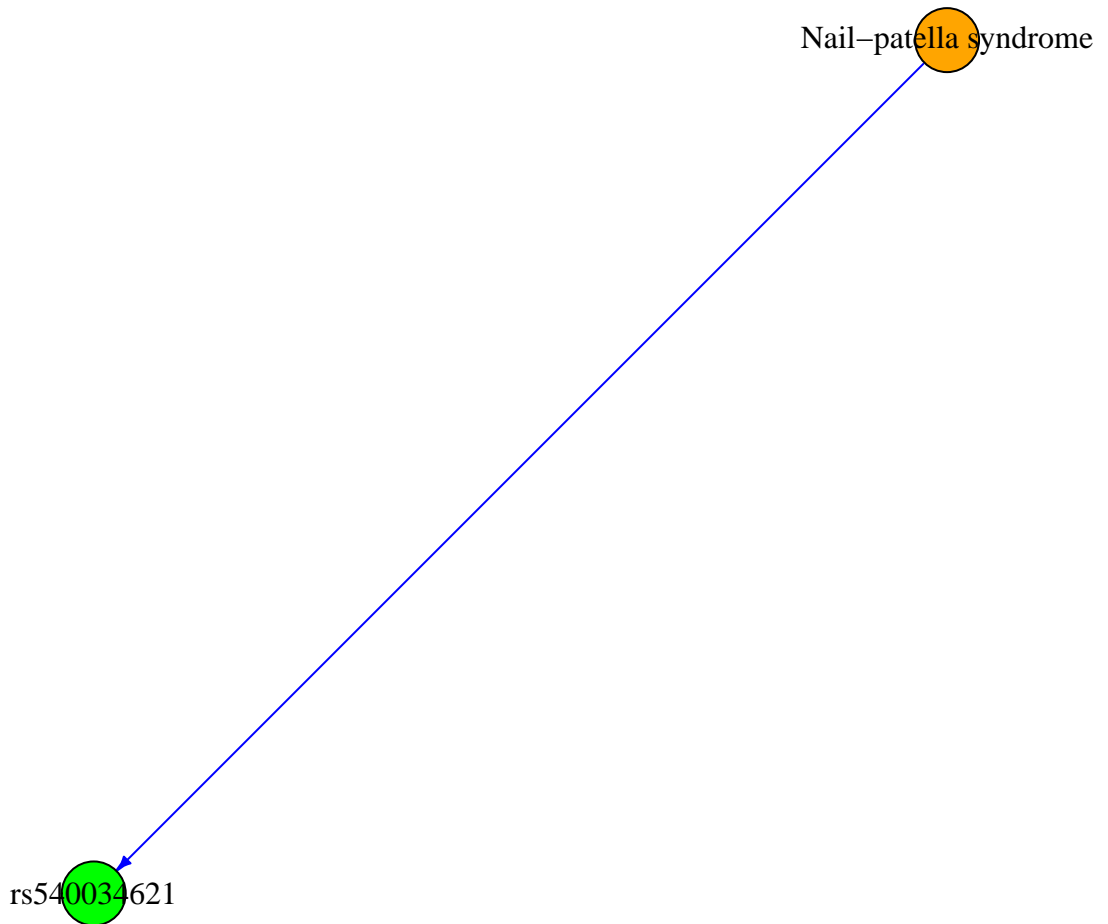

Variant–Disease Network (Naxos disease)

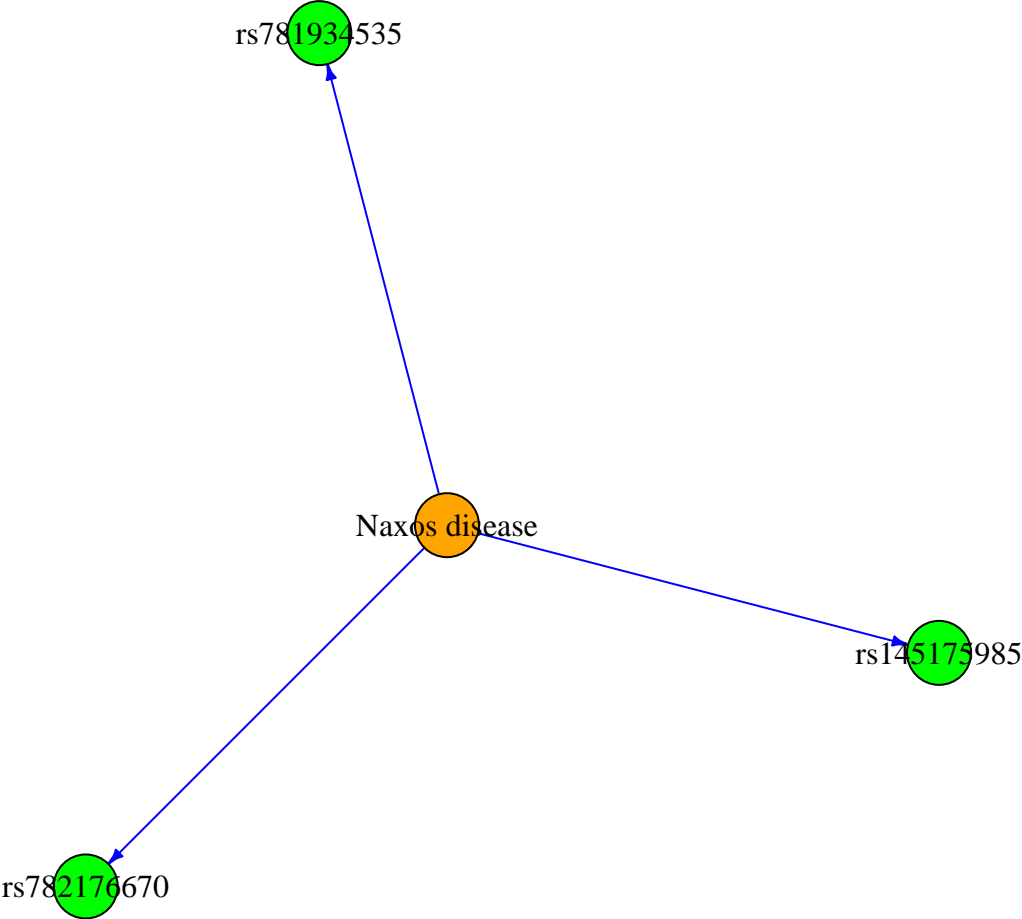



## Variant–Disease Network (Nemaline myopathy 8)

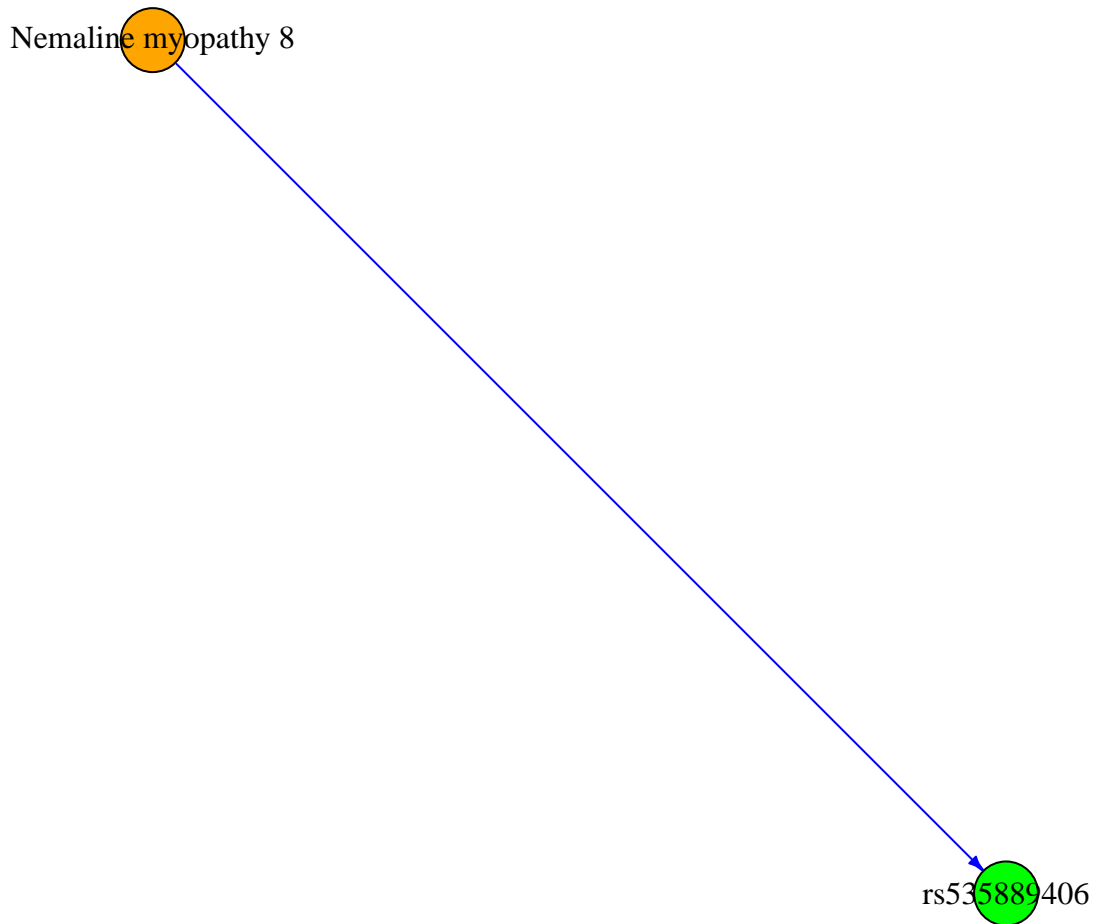

## Variant–Disease Network (Neonatal diabetes mellitus)

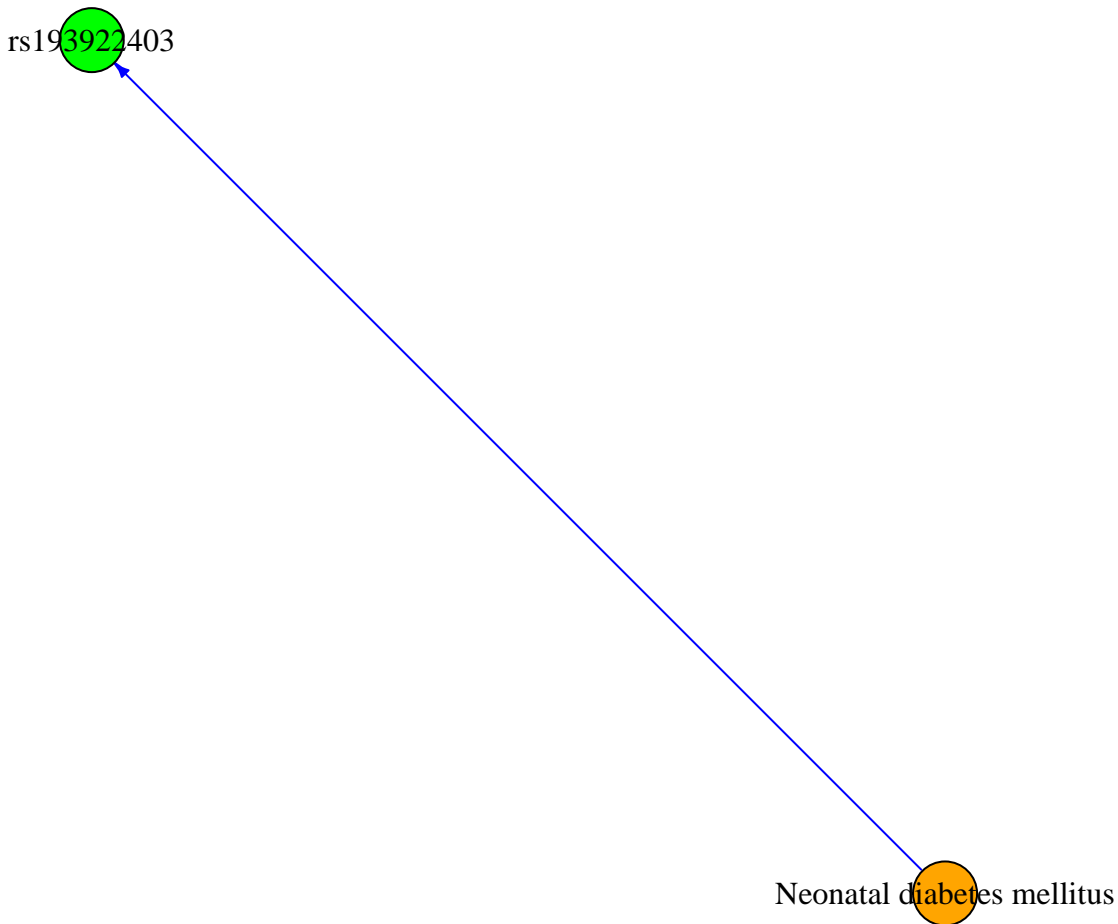

## Variant–Disease Network (Neoplasm of ovary)

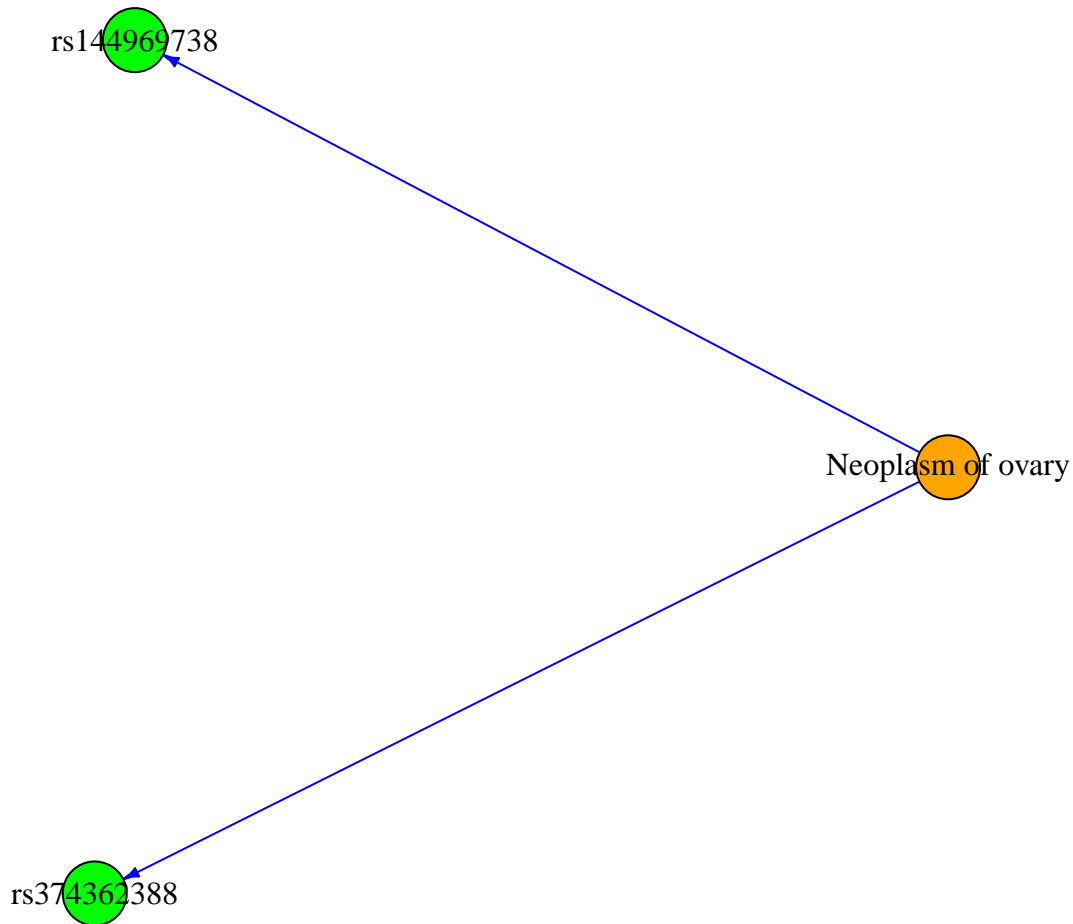

## Variant–Disease Network (Nephrogenic diabetes insipidus)

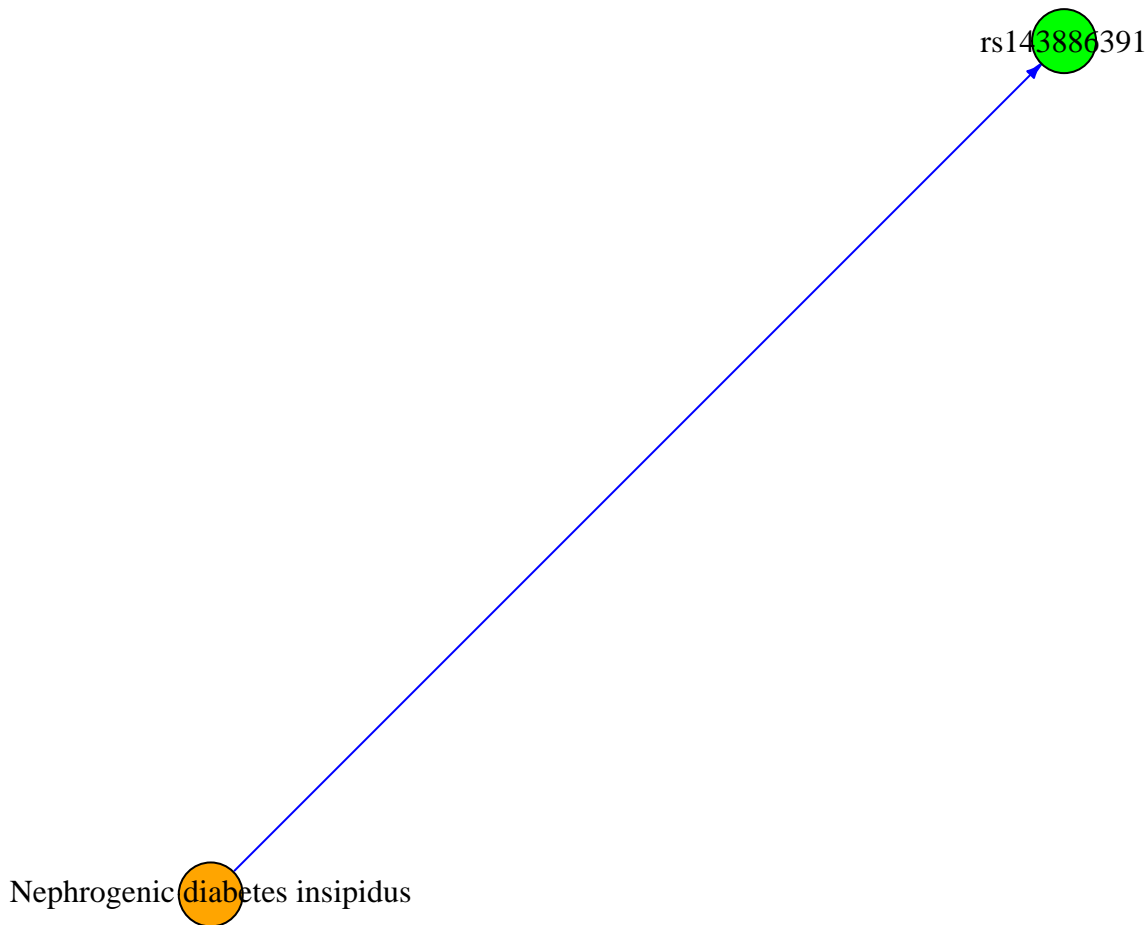

## Variant–Disease Network (Nephronophthisis)

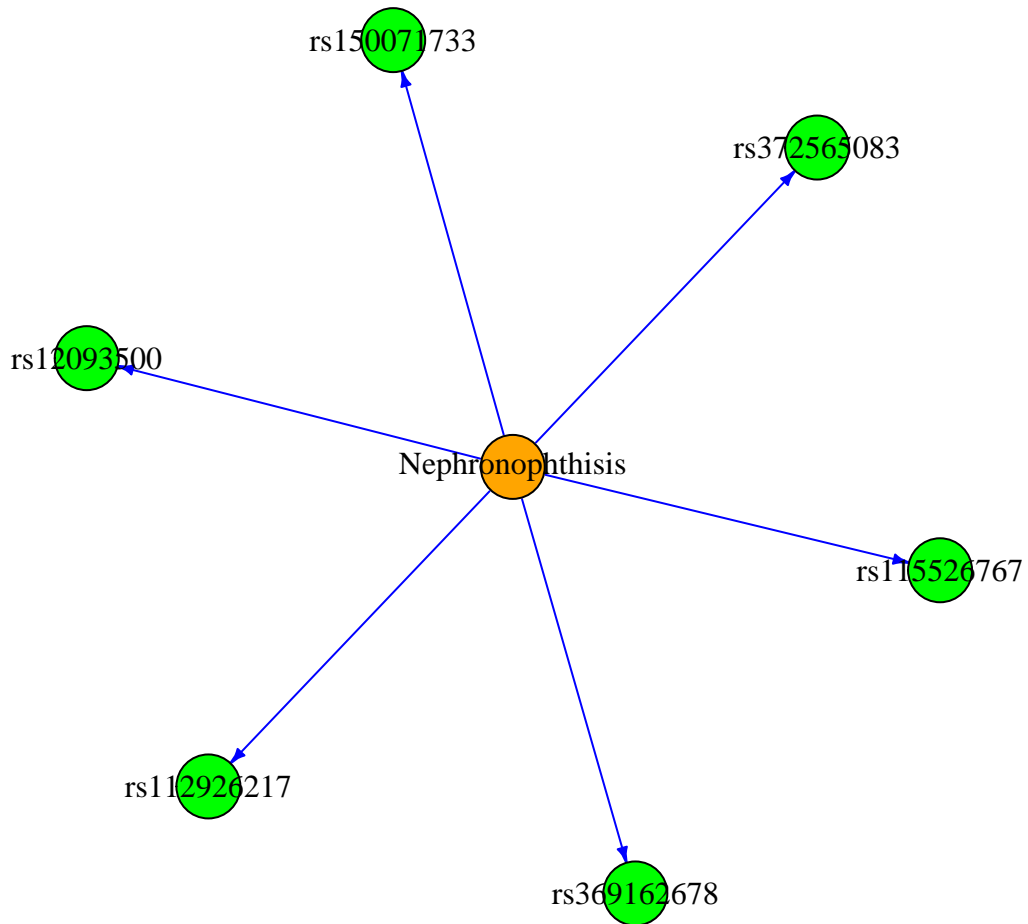

## Variant-Disease Network (Nephronophthisis 14)

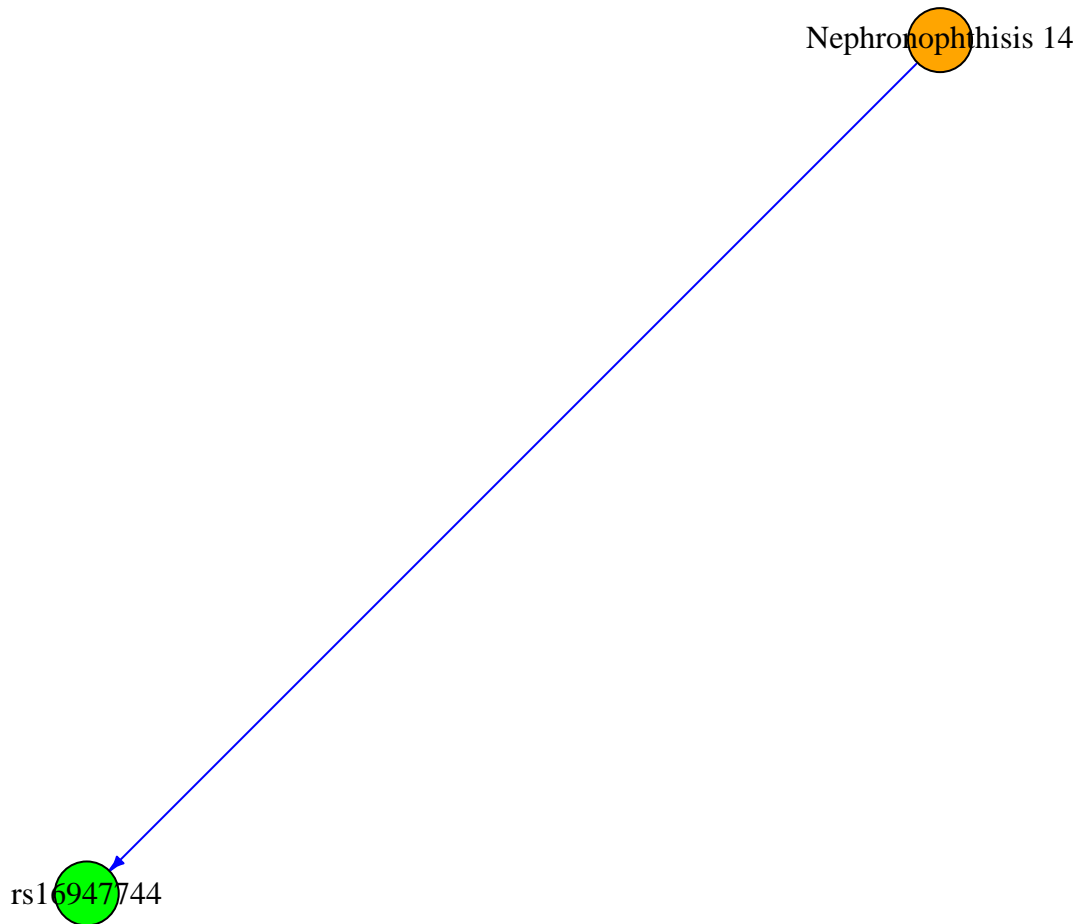

Variant–Disease Network (Nephrotic syndrome)

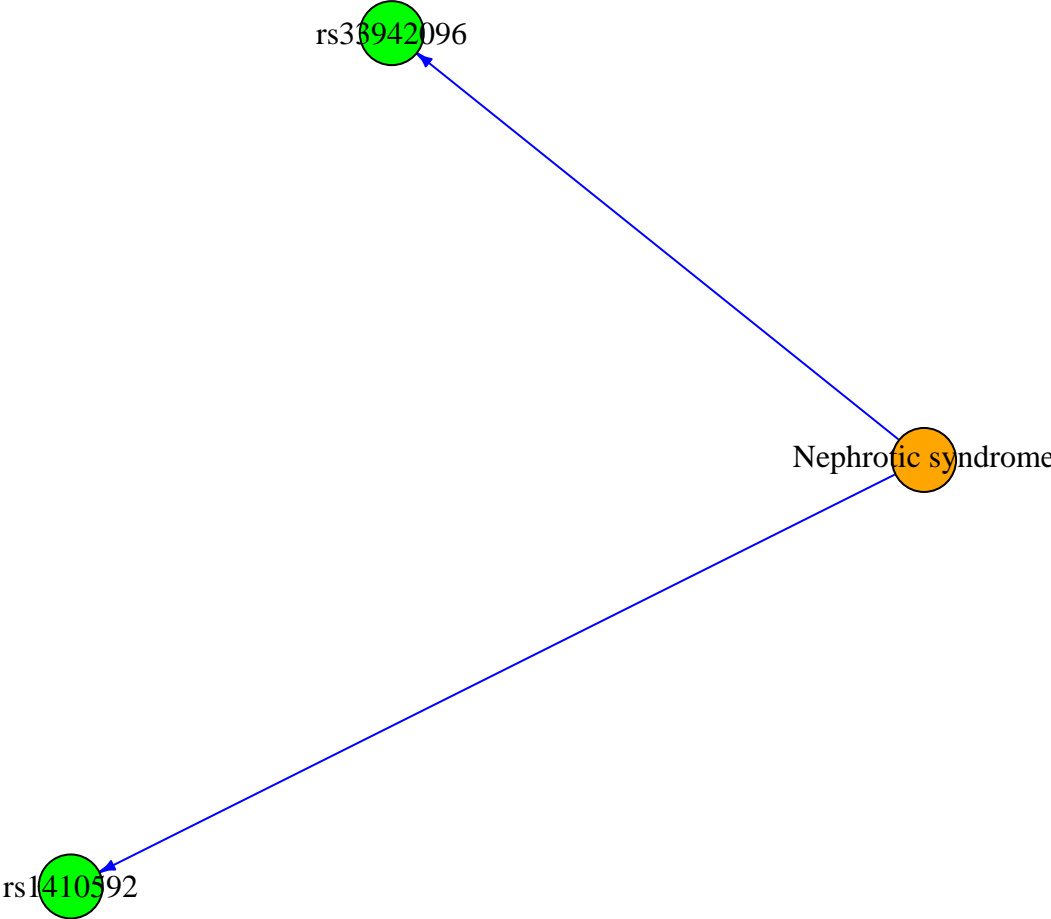

## Variant–Disease Network (Neural tube defect)

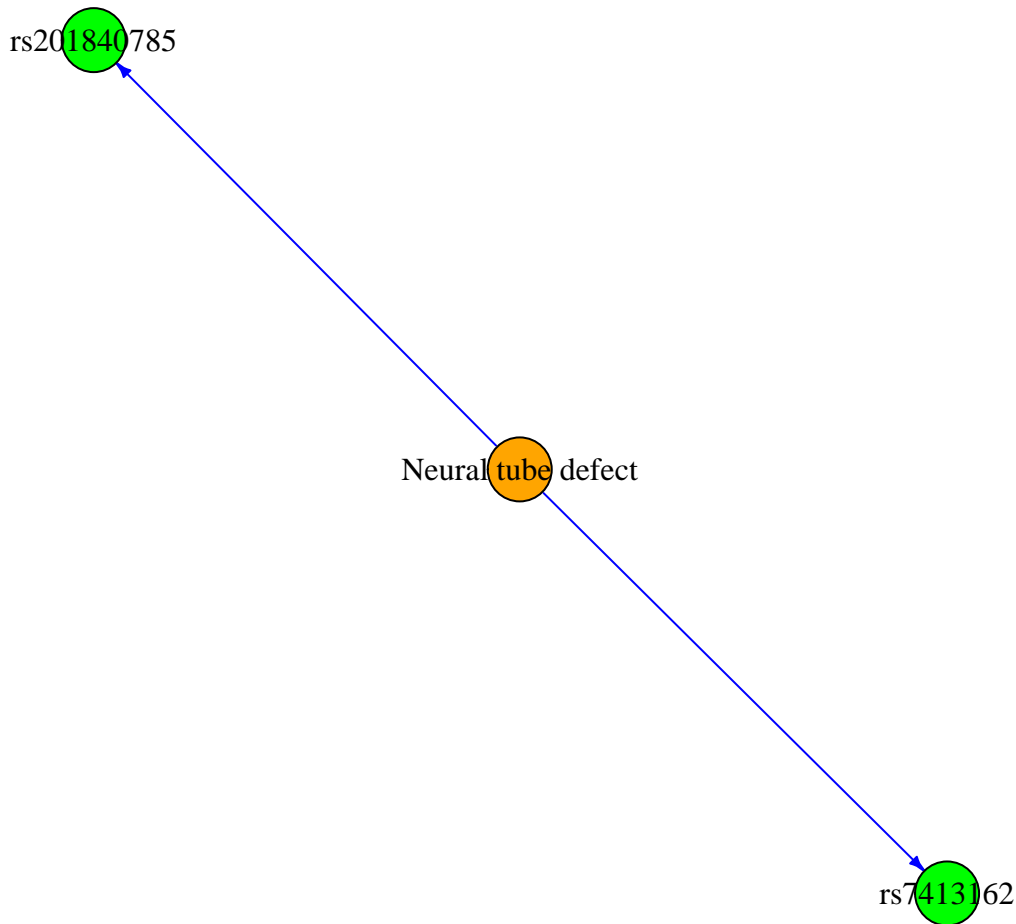



## Variant–Disease Network (Neural tube defects)

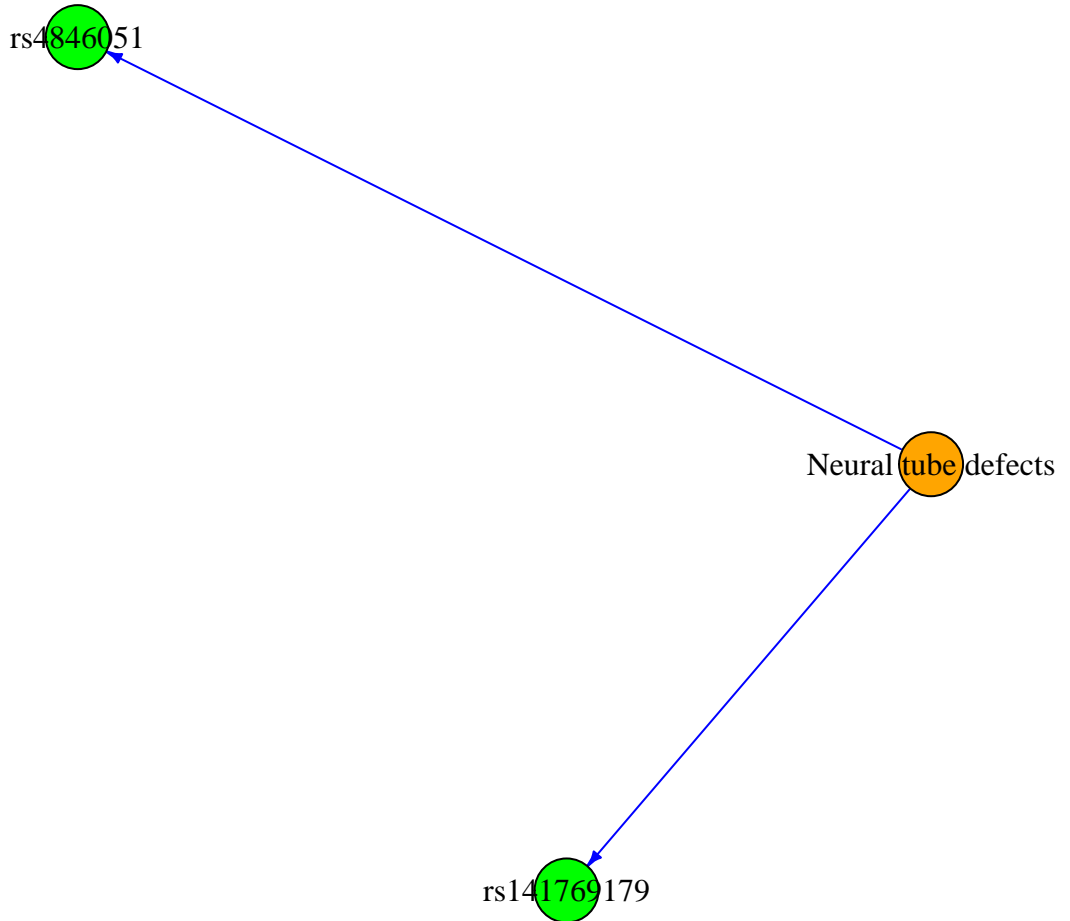

## Variant-Disease Network (Neuroblastoma 3)

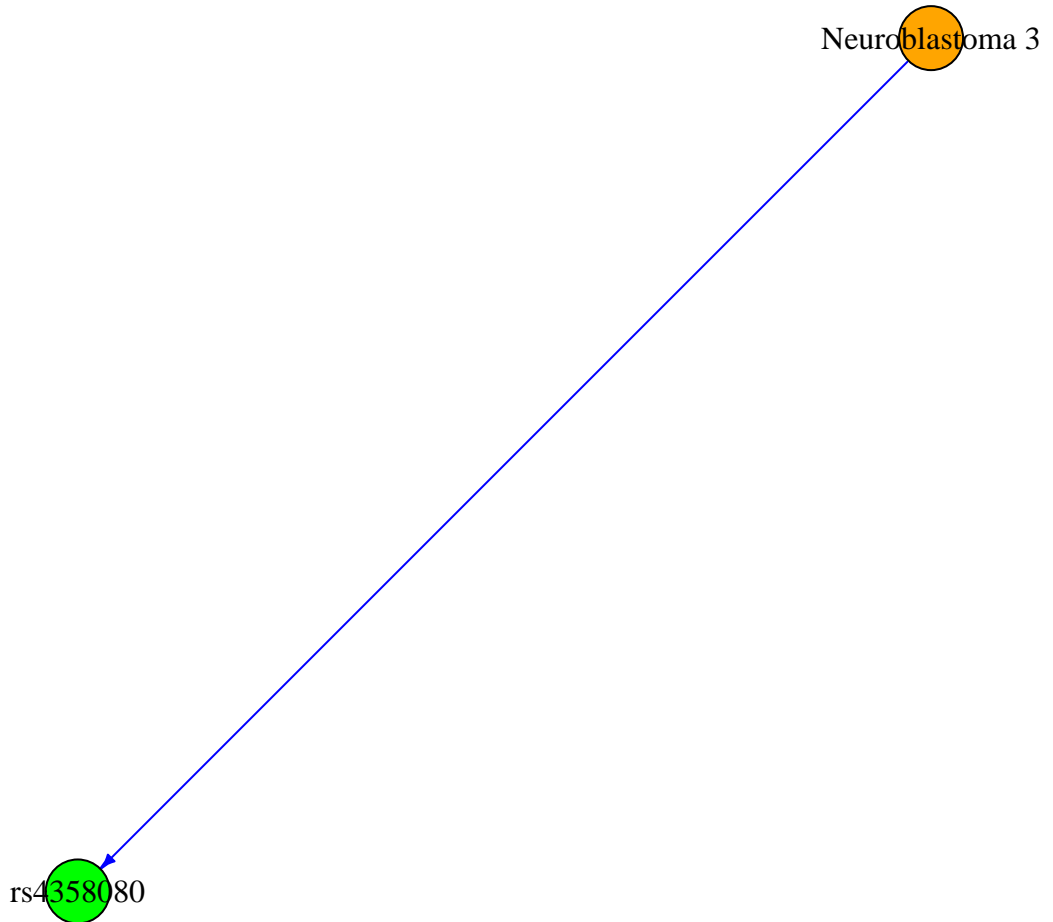

Variant–Disease Network (Neuroblastoma Susceptibility)

Neuroblastoma Susceptibility

rs4358080

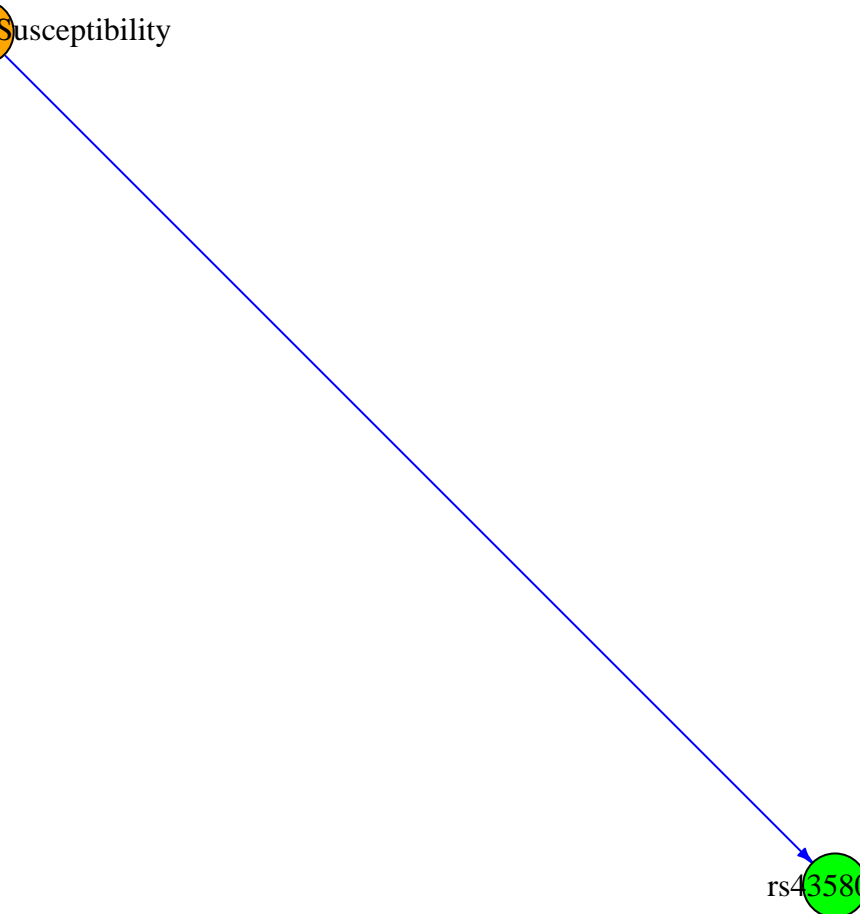

# e Network (Neurodevelopmental disorder with or without hyperkinetic movement disorder)

rs150508714

Neurodevelopmental disorder with or without hyperkinetic movement disorder

rs146086141

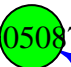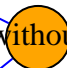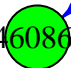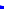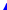

# Variant–Disease Network (Neurofibromatosis)

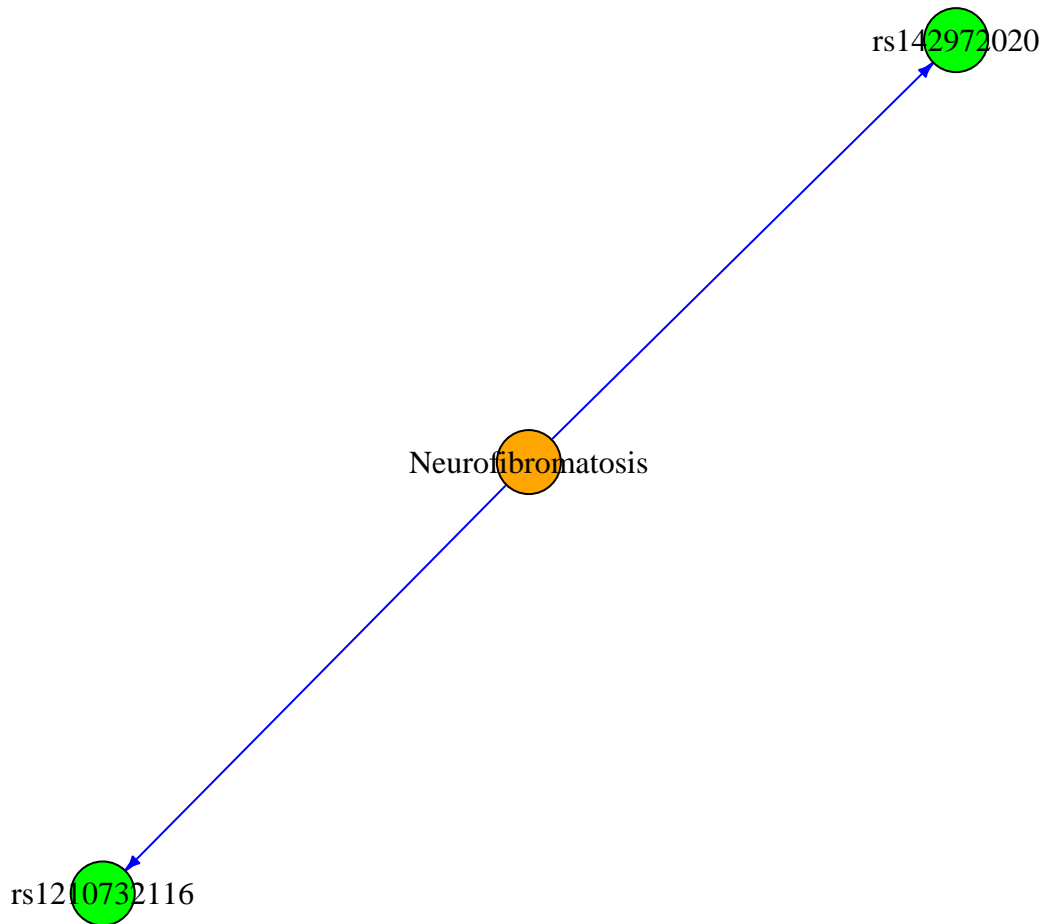

## Variant–Disease Network (Neuronal ceroid lipofuscinosis)

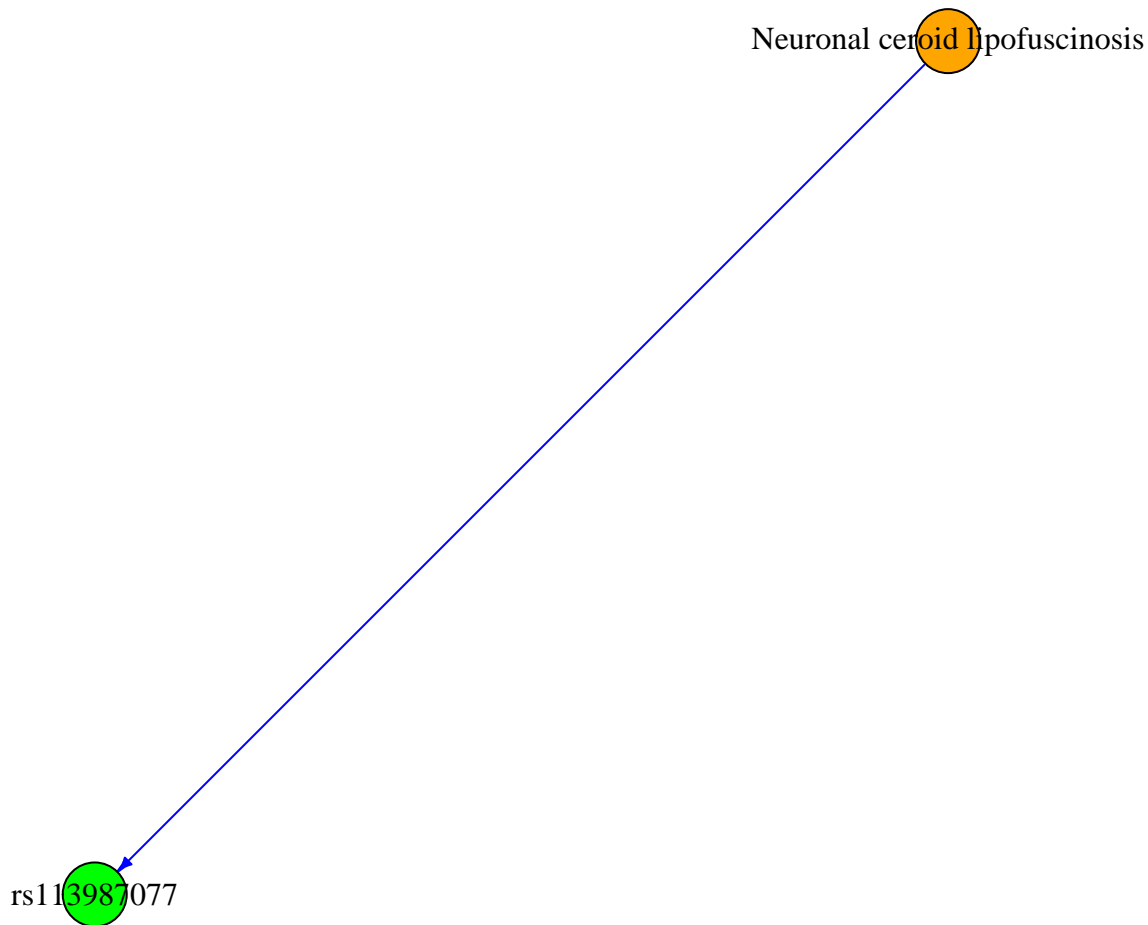

# Variant–Disease Network (Neuronal Ceroid–Lipofuscinosis)

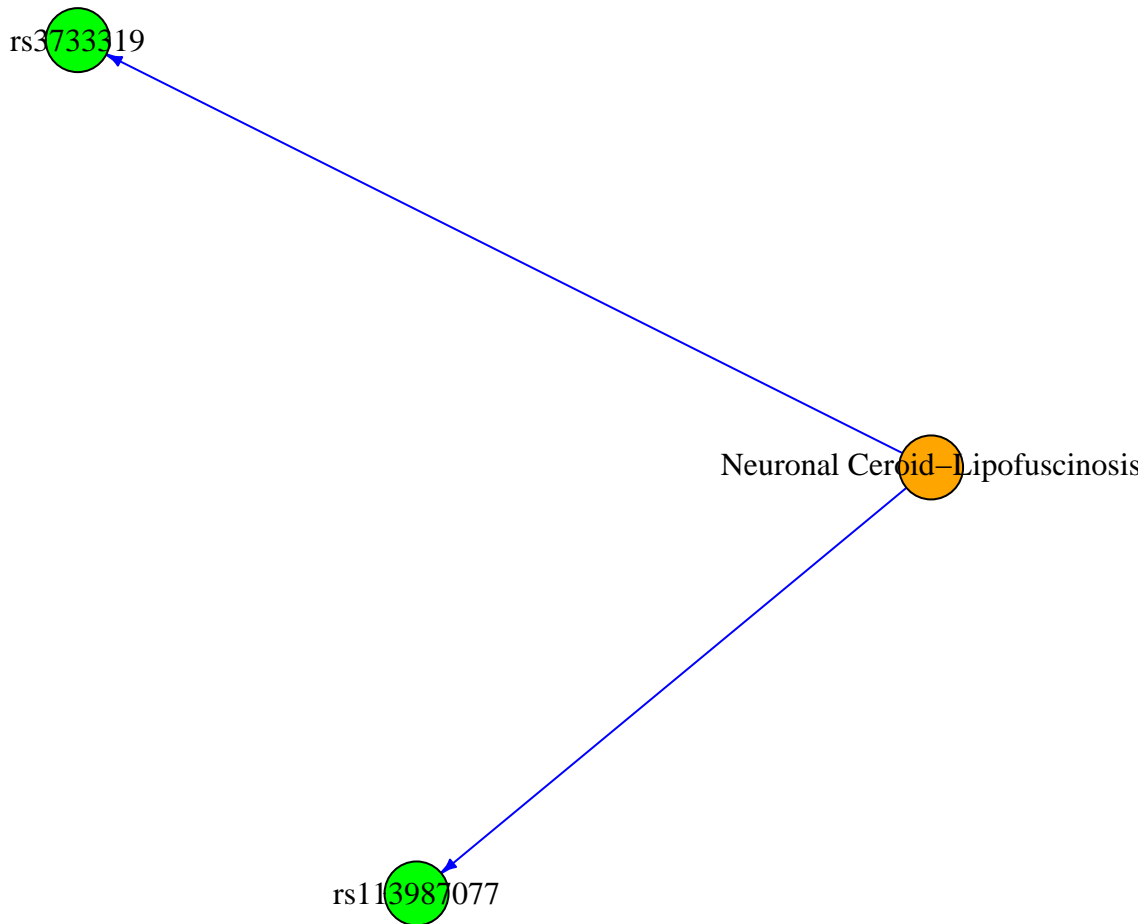

## Variant-Disease Network (Neuronopathy)

Neuronopathy

rs140863834





# Variant–Disease Network (Neutral lipid storage disease with myopathy)

Neutral lipid storage disease with myopathy

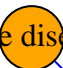

rs767707536

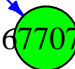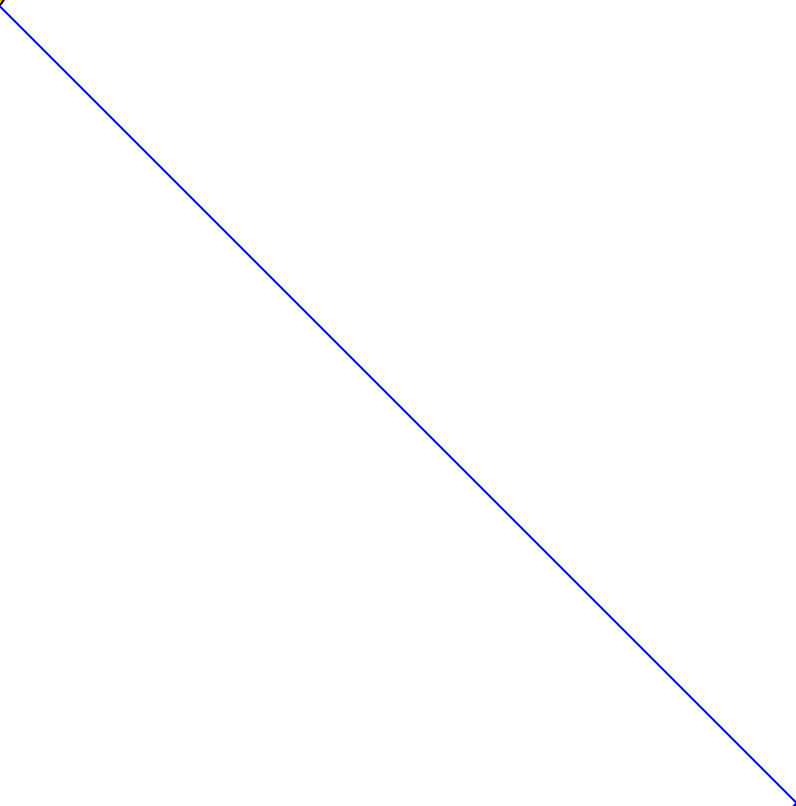

## Variant-Disease Network (Niemann-Pick disease)

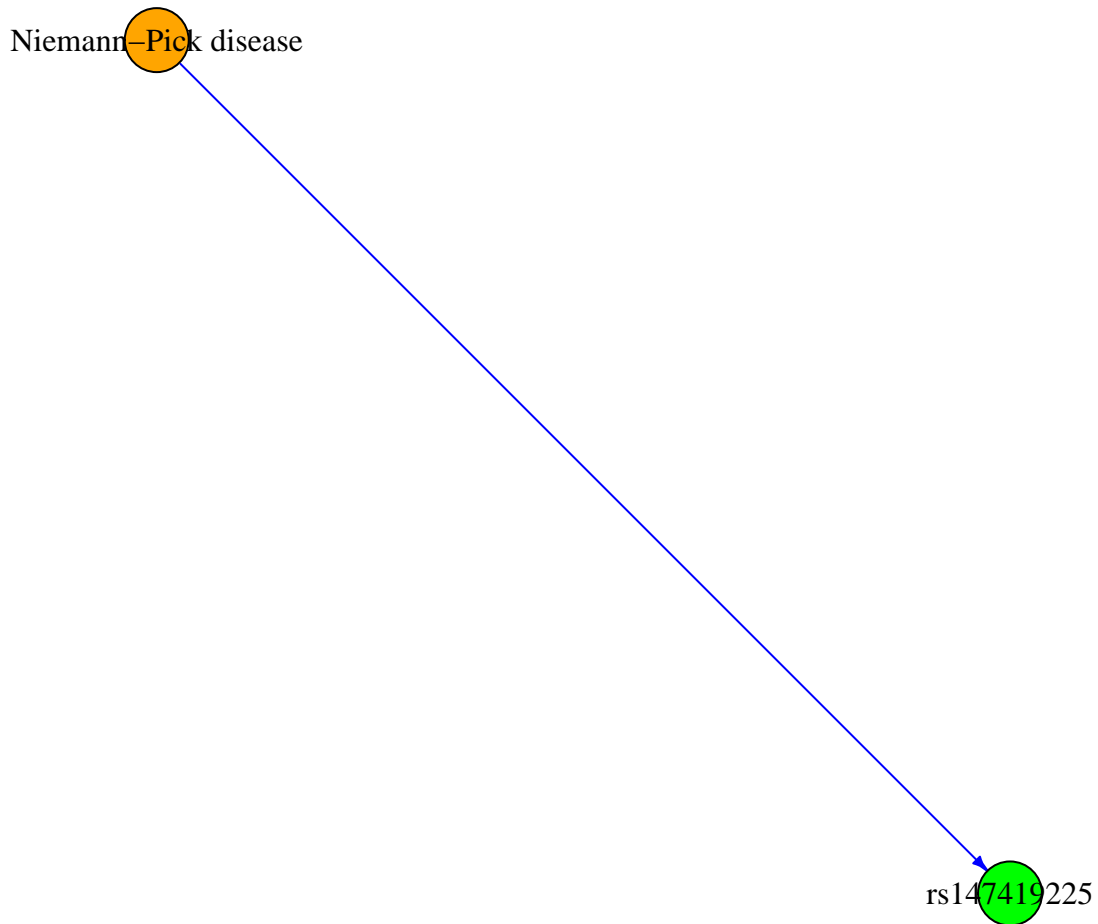

**Variant–Disease Network (Niemann–Pick disease type C1)**

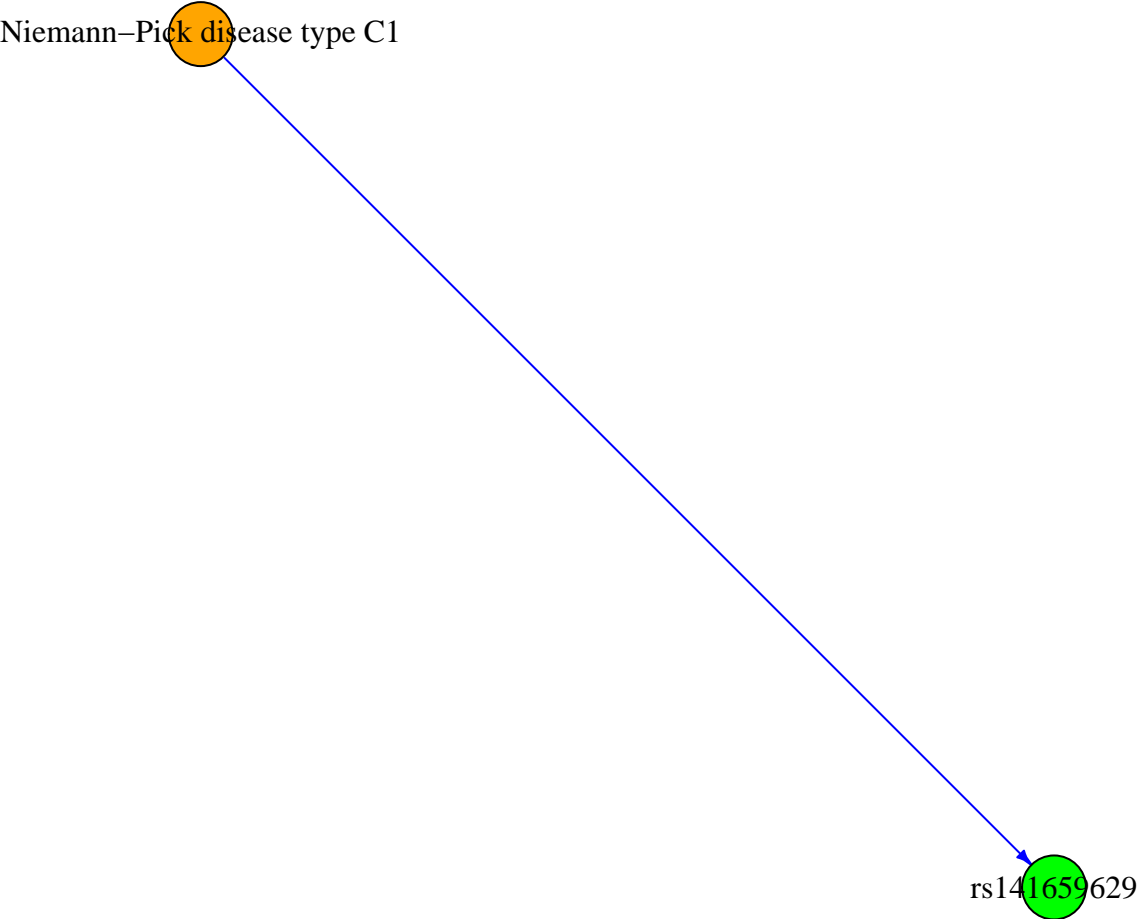

**Variant–Disease Network (Nijmegen breakage syndrome–like disorder)**

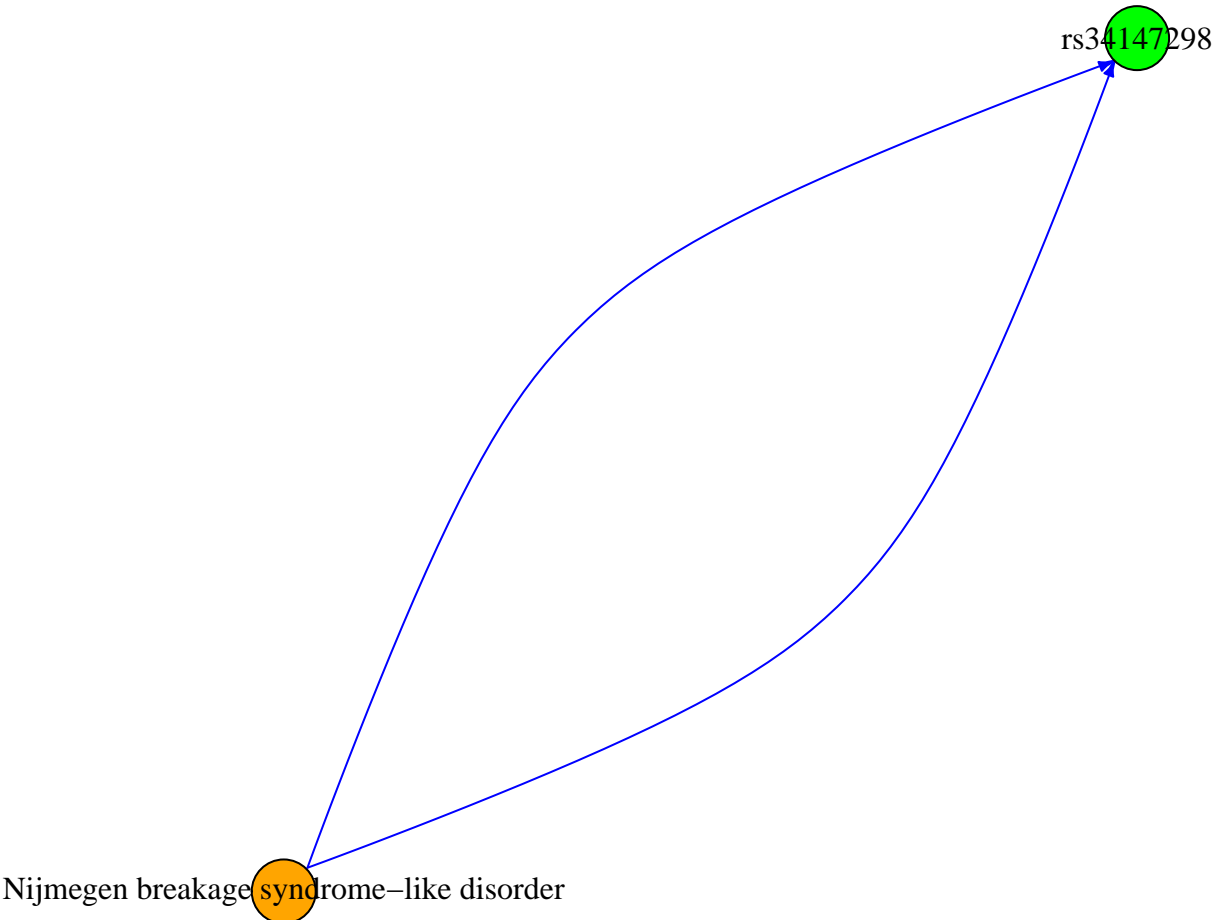

**Variant–Disease Network (Nocturnal frontal lobe epilepsy)**

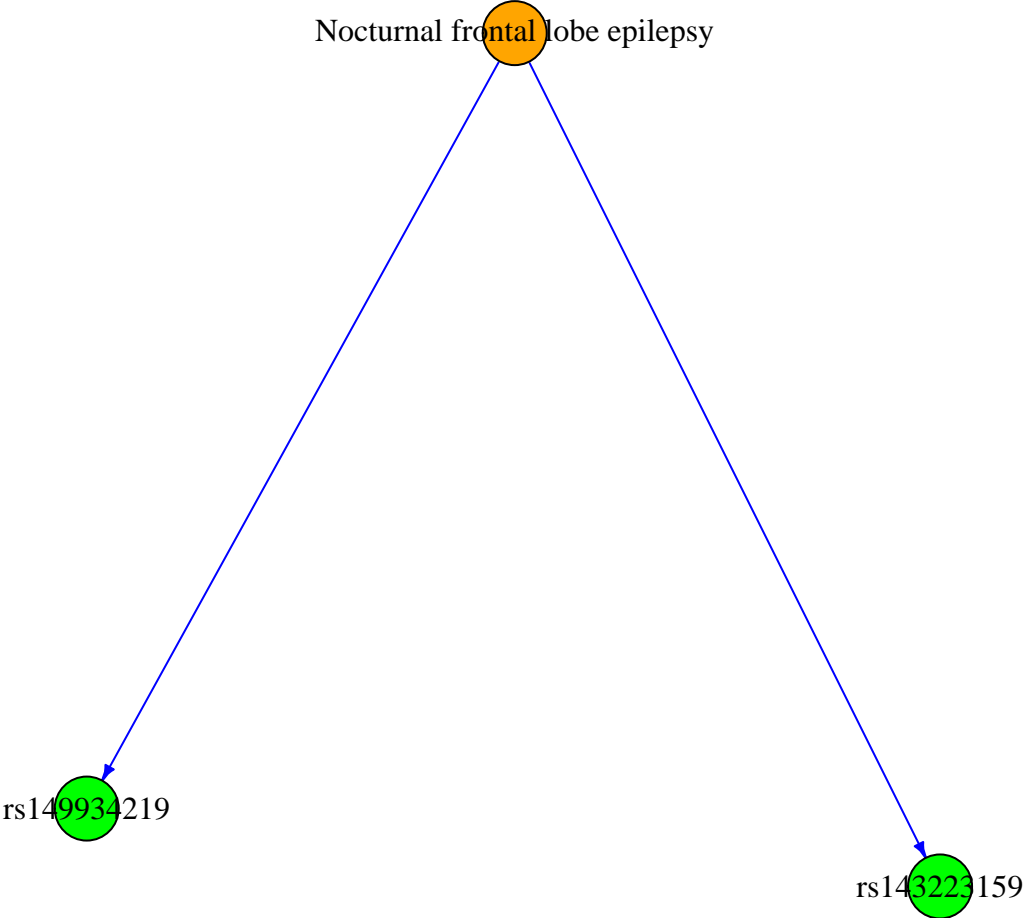

**Variant–Disease Network (Nonepidermolytic palmoplantar keratoderma)**

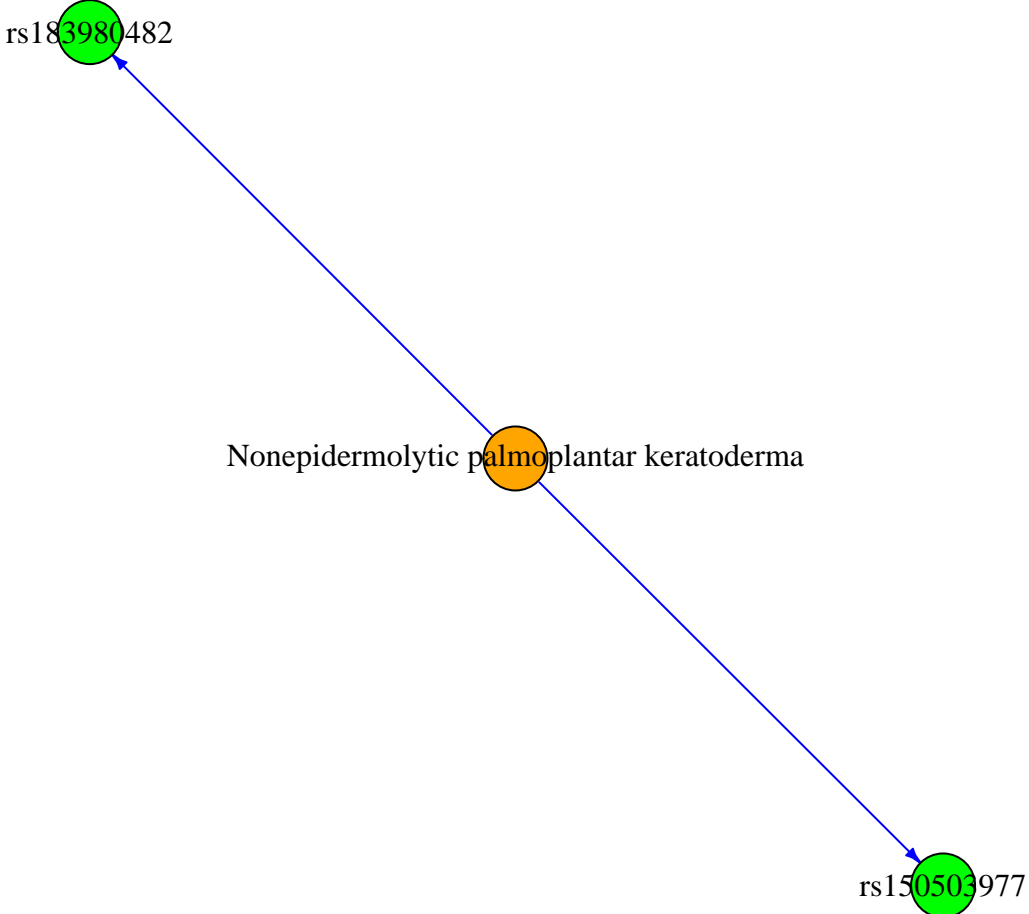

## Variant–Disease Network (Non-immune hydrops fetalis)

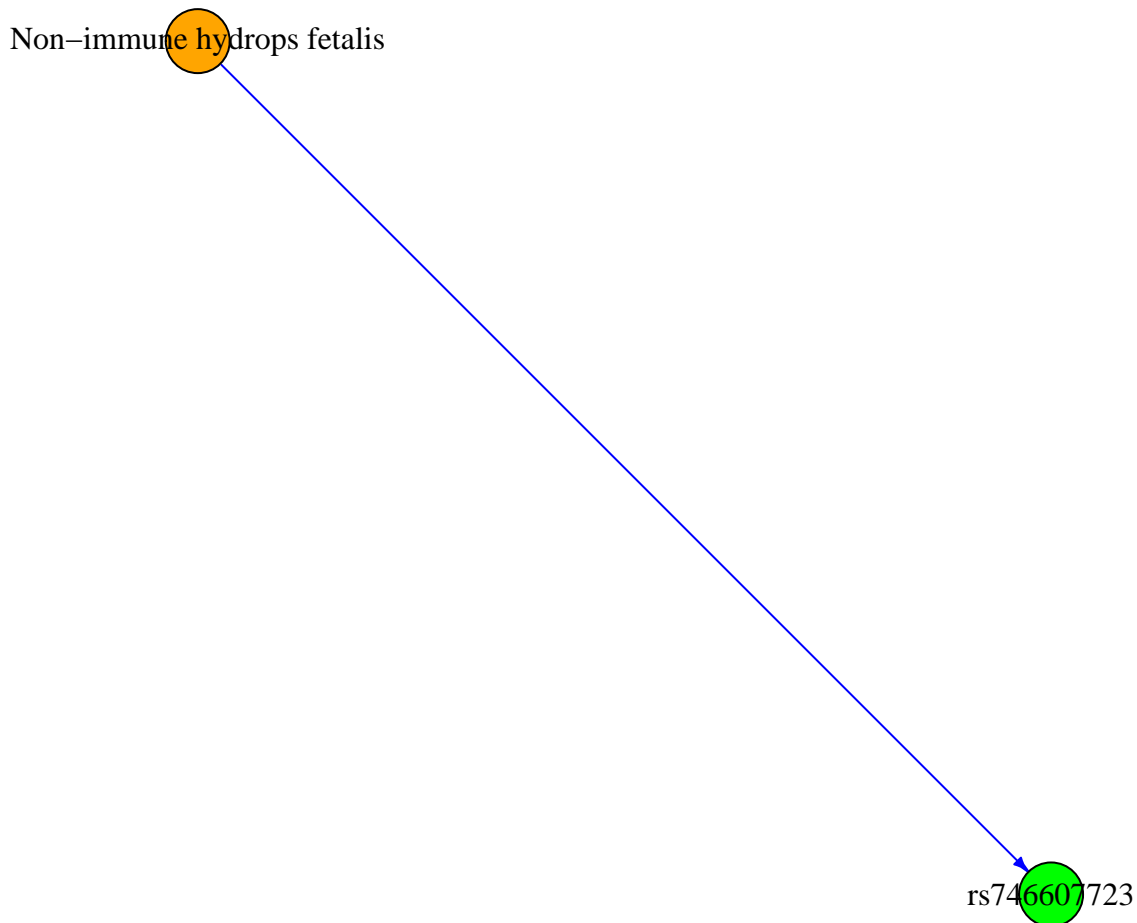

# Variant–Disease Network (Non–ketotic hyperglycinemia)

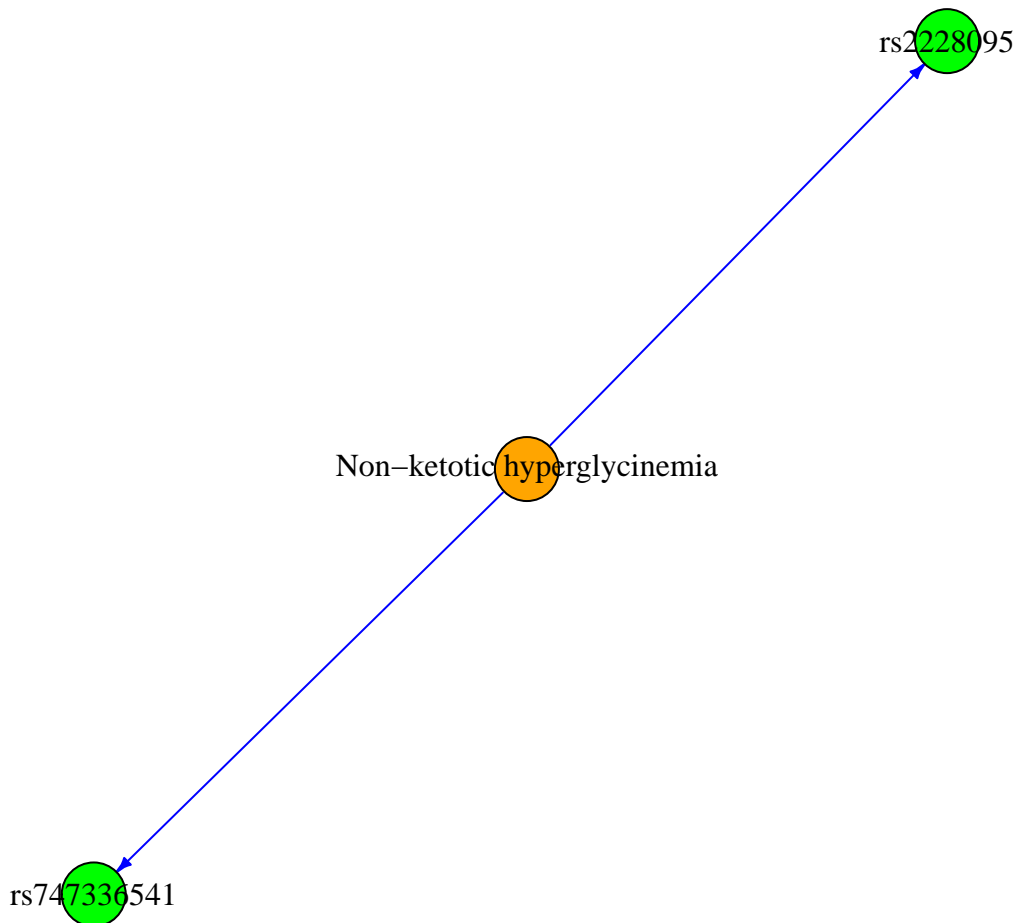



# Variant–Disease Network (Nonsyndromic Hearing Loss)

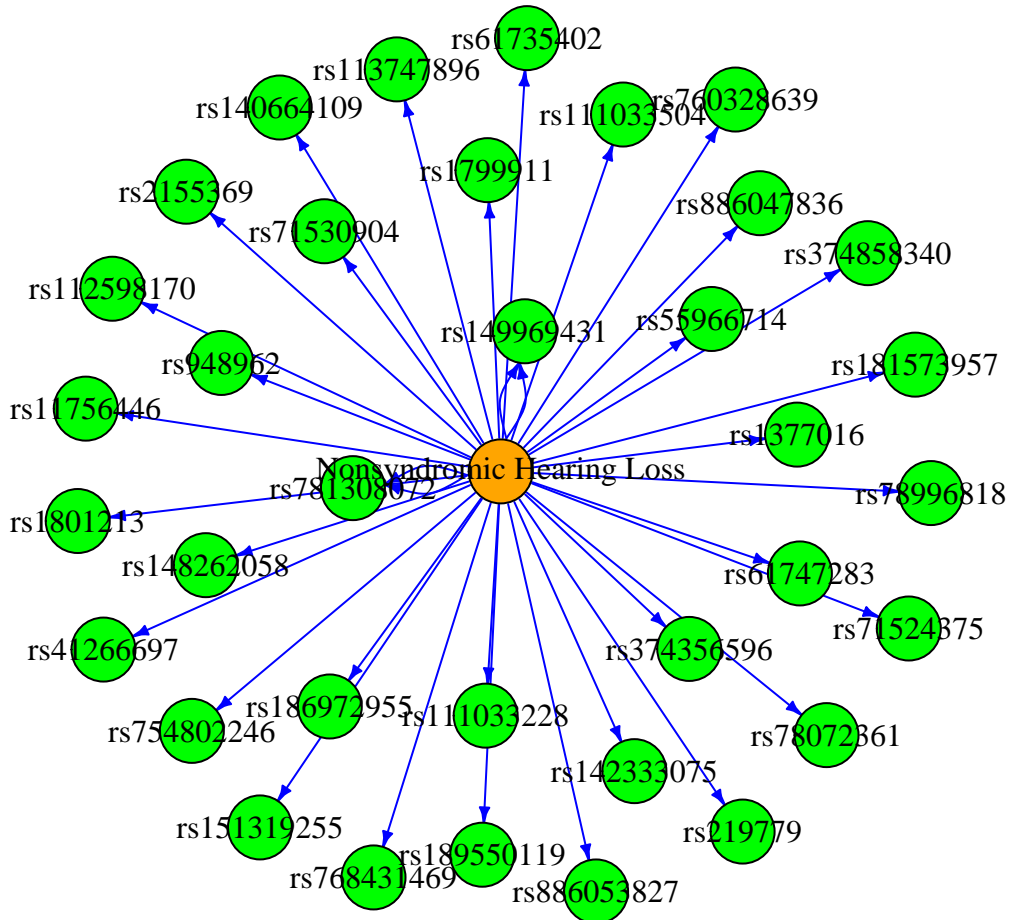

# Variant–Disease Network (Nonsyndromic Triglonocephaly)

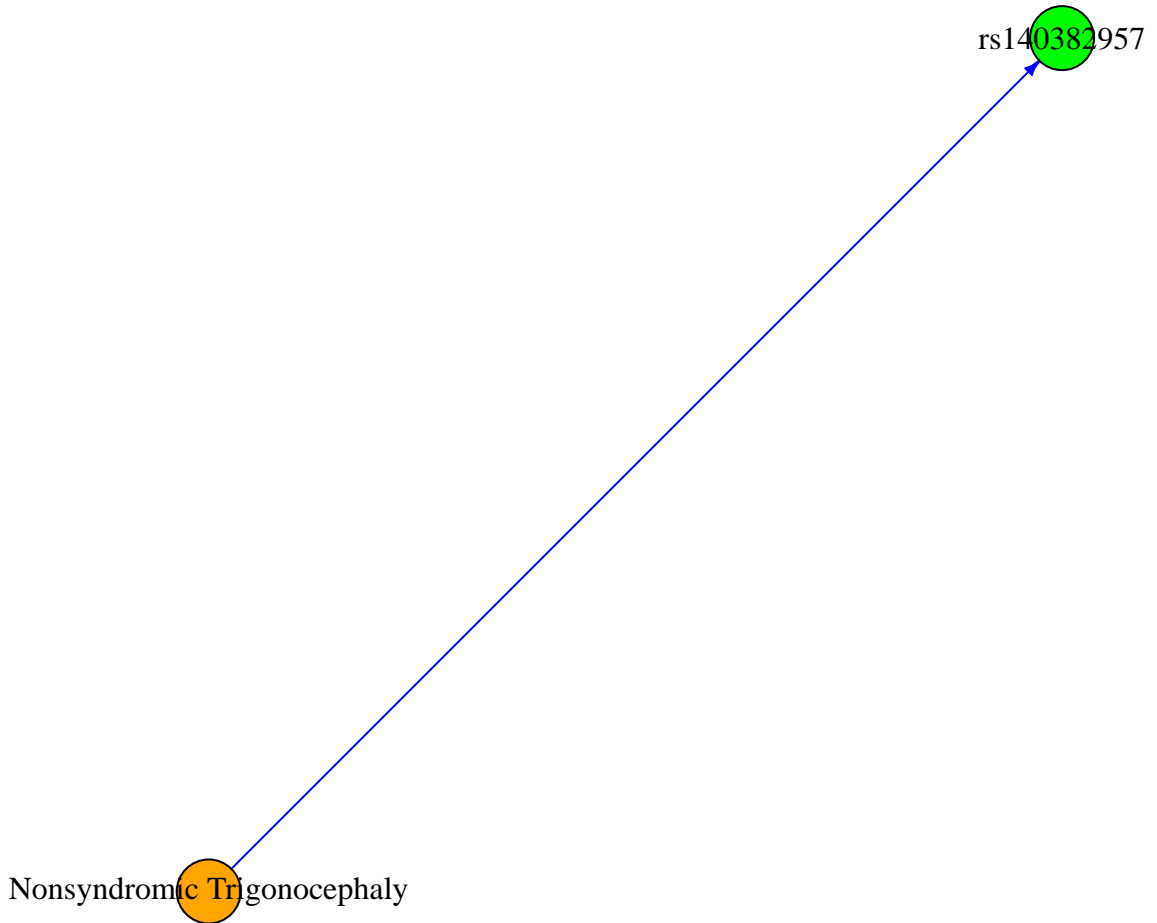

**Variant–Disease Network (Non–syndromic X–linked intellectual disability)**

Non–syndromic X–linked intellectual disability

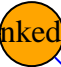

rs12008084

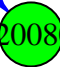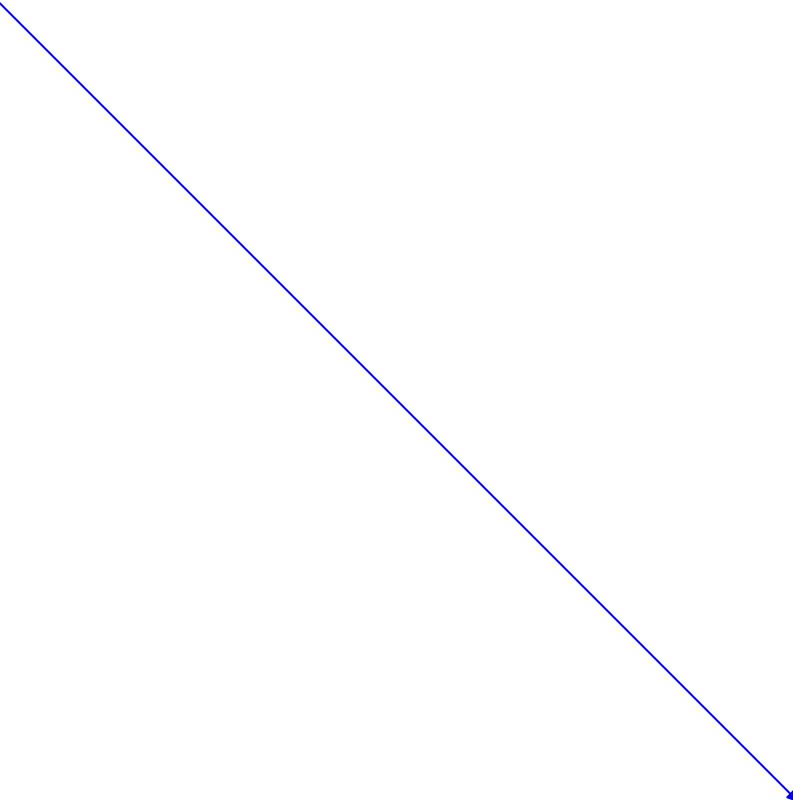

## Variant–Disease Network (Noonan syndrome)

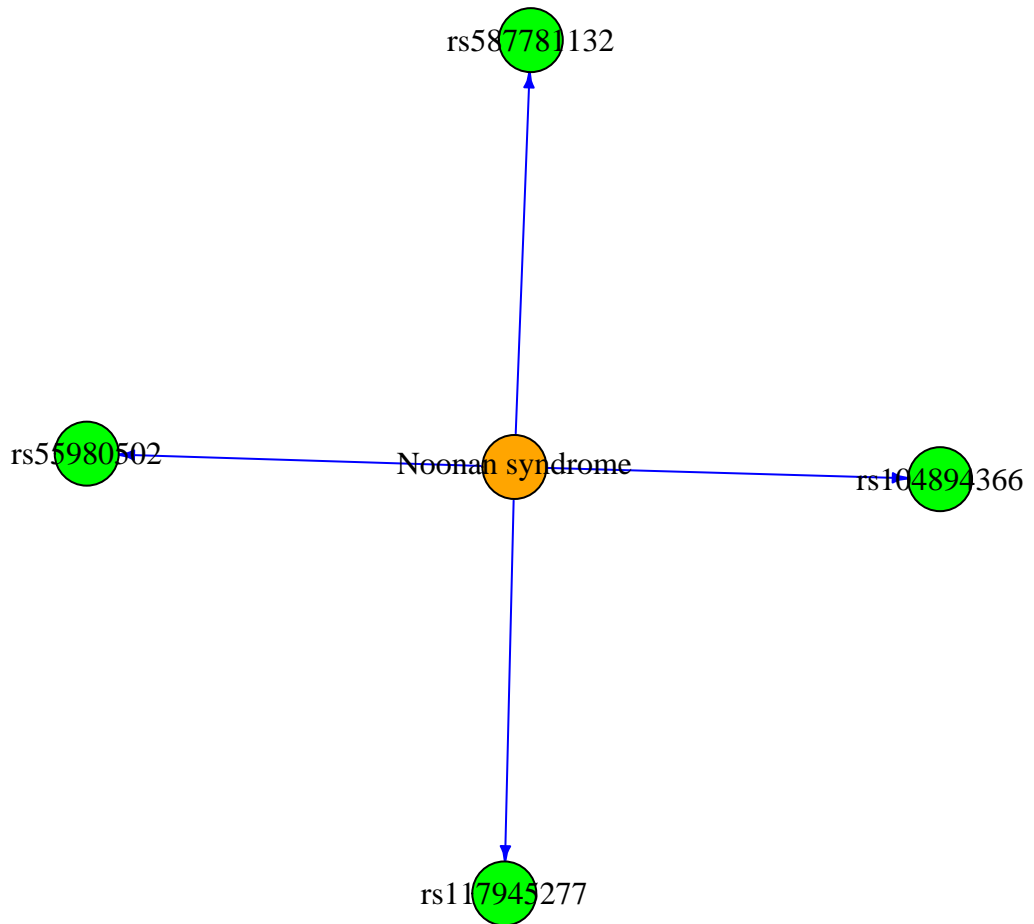

## Variant–Disease Network (Noonan syndrome 3)

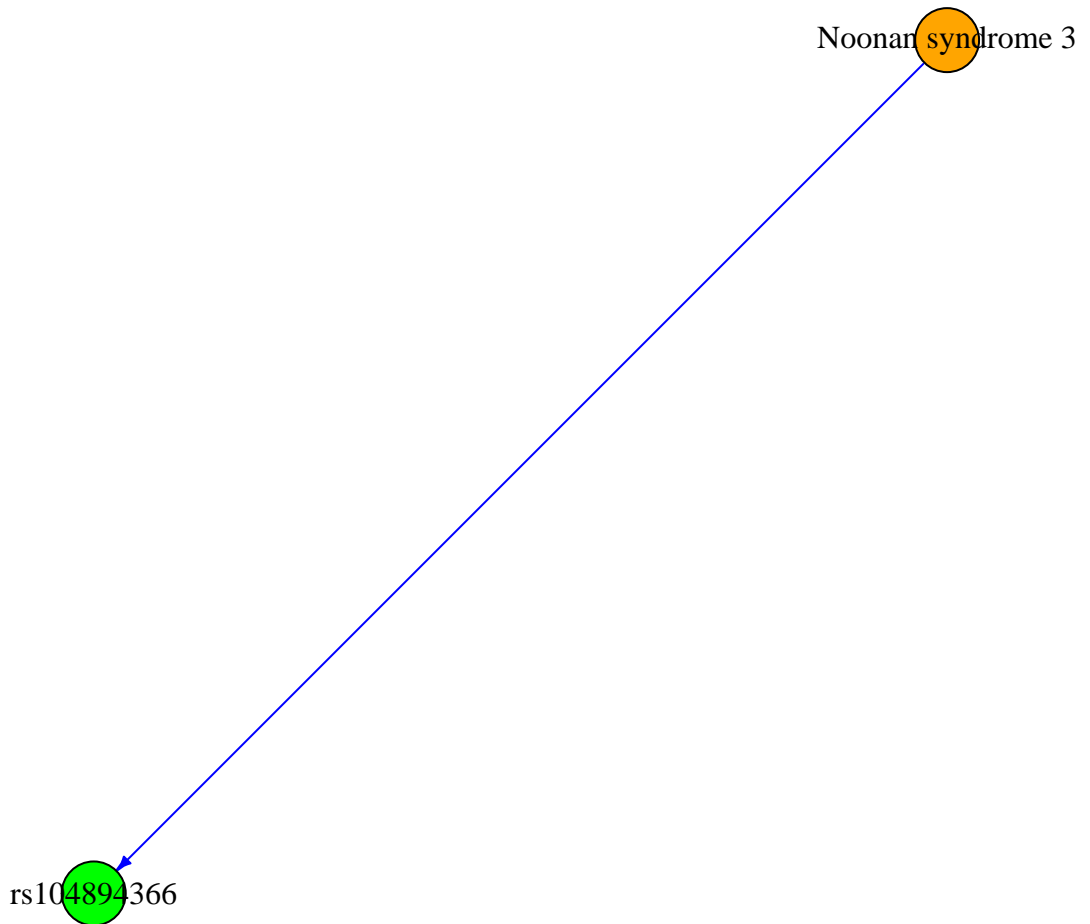

## Variant–Disease Network (Obesity)

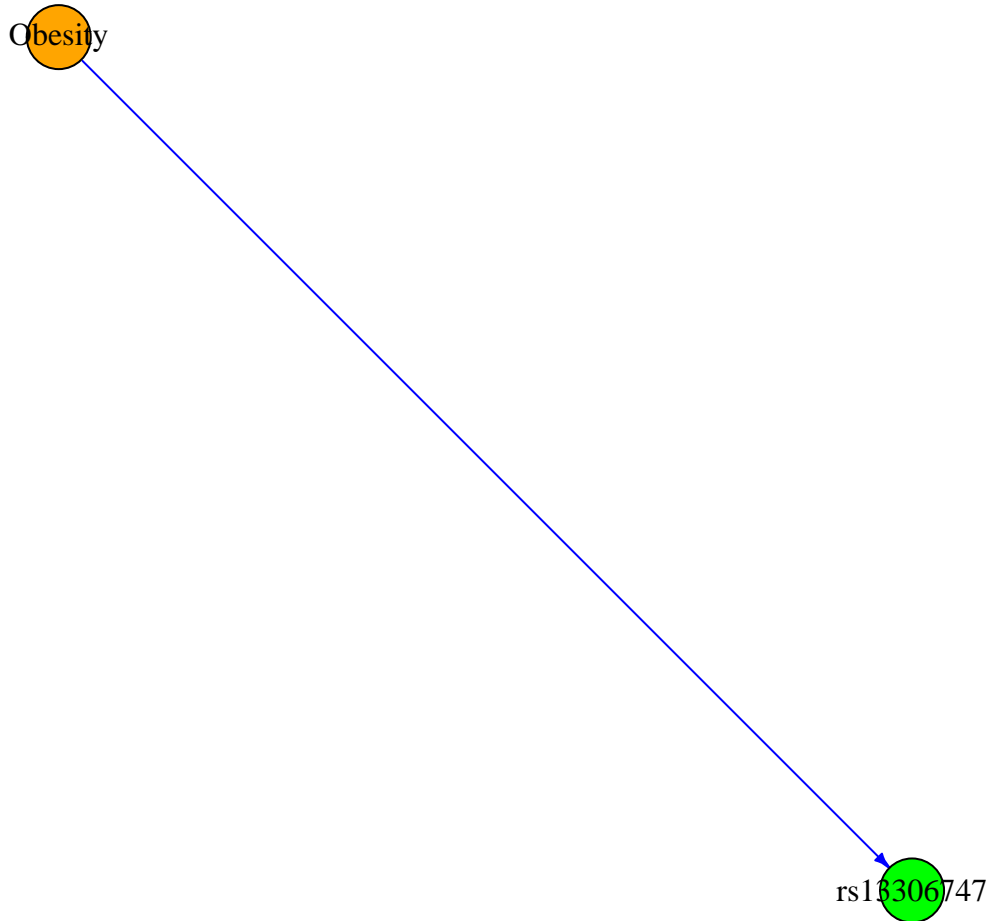

# Variant–Disease Network (Odontoonychodermal dysplasia)

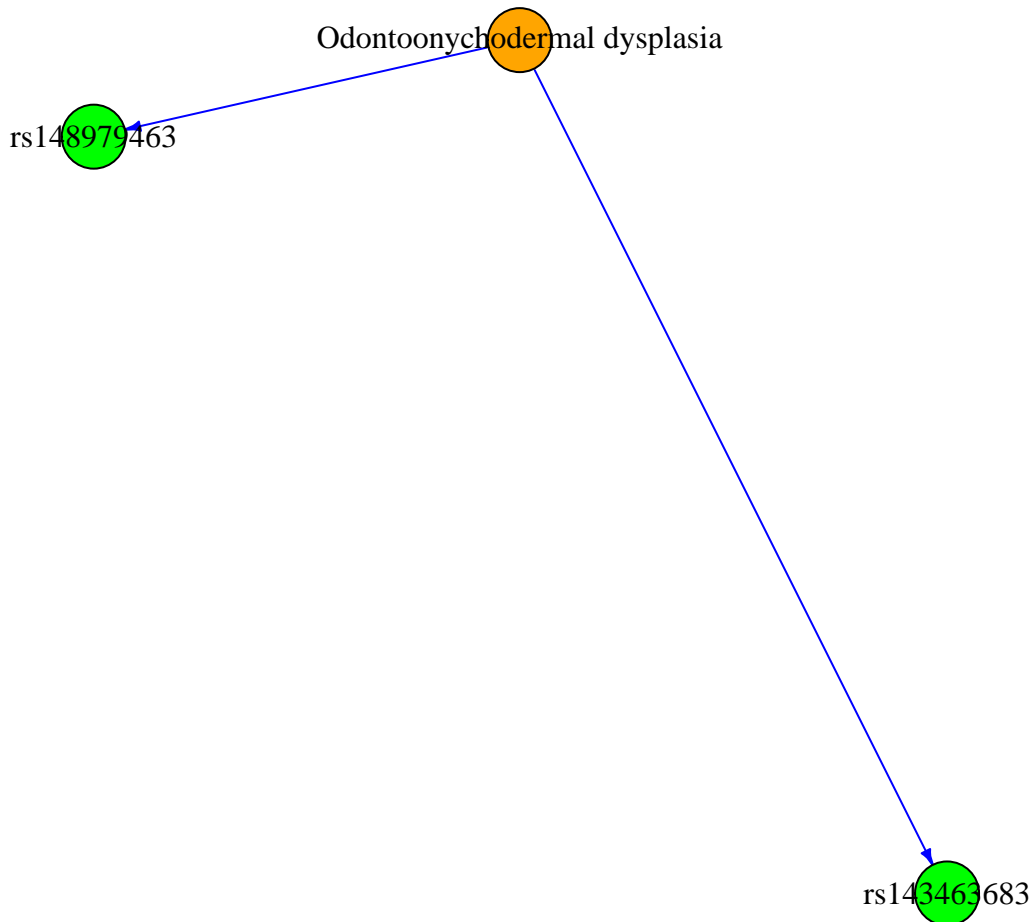

# Variant–Disease Network (Oligodontia–colorectal cancer syndrome)

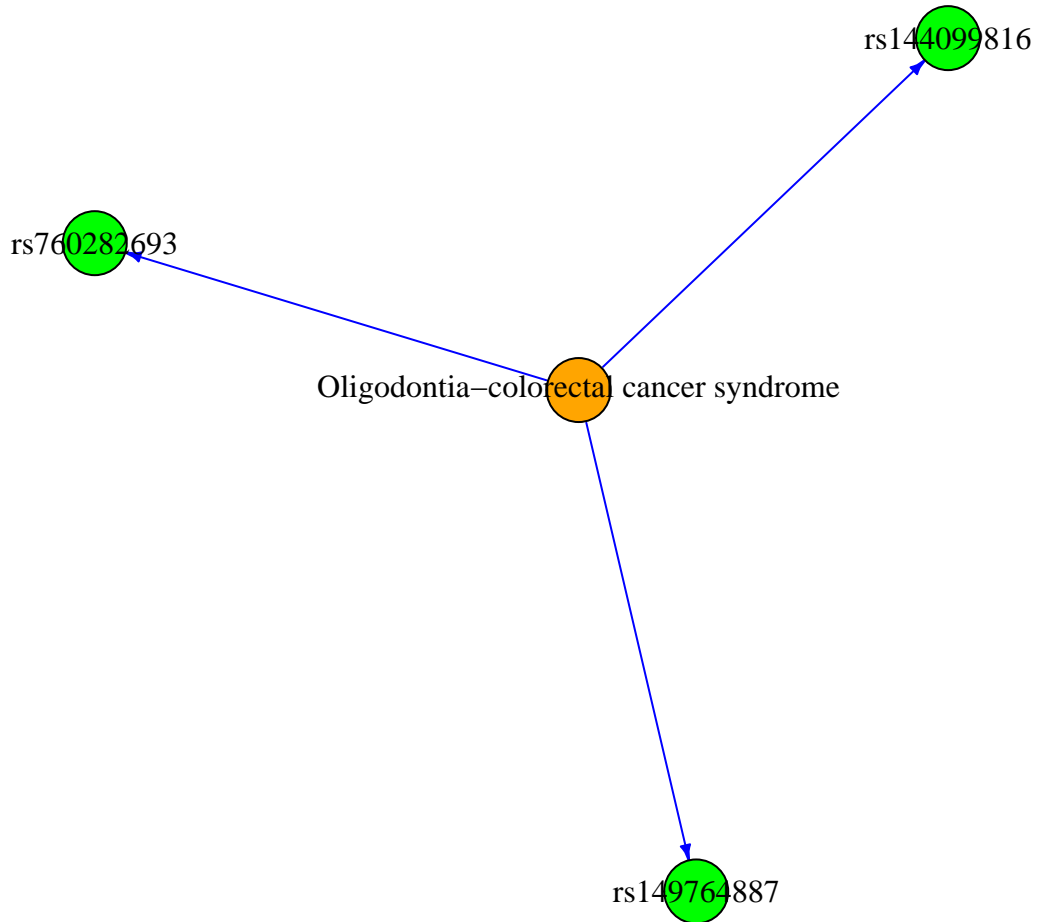



Variant–Disease Network (Omodysplasia)

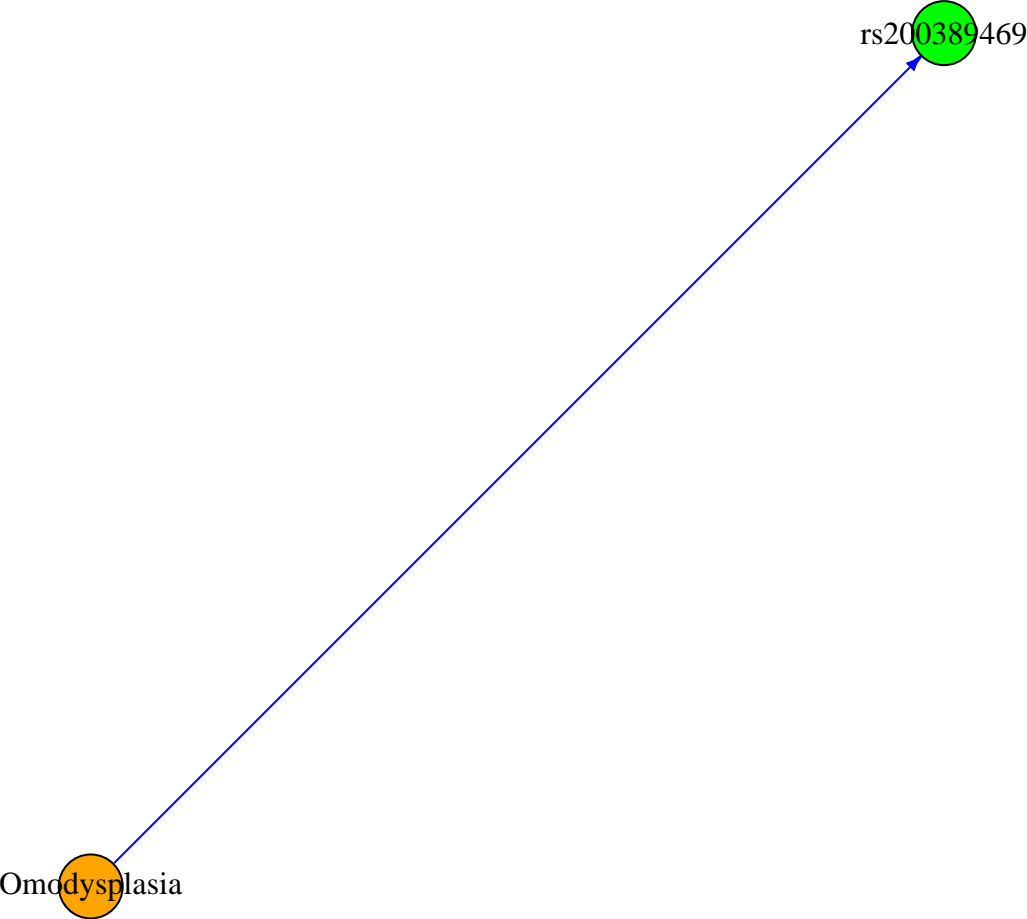

## Variant-Disease Network (Optic Atrophy)

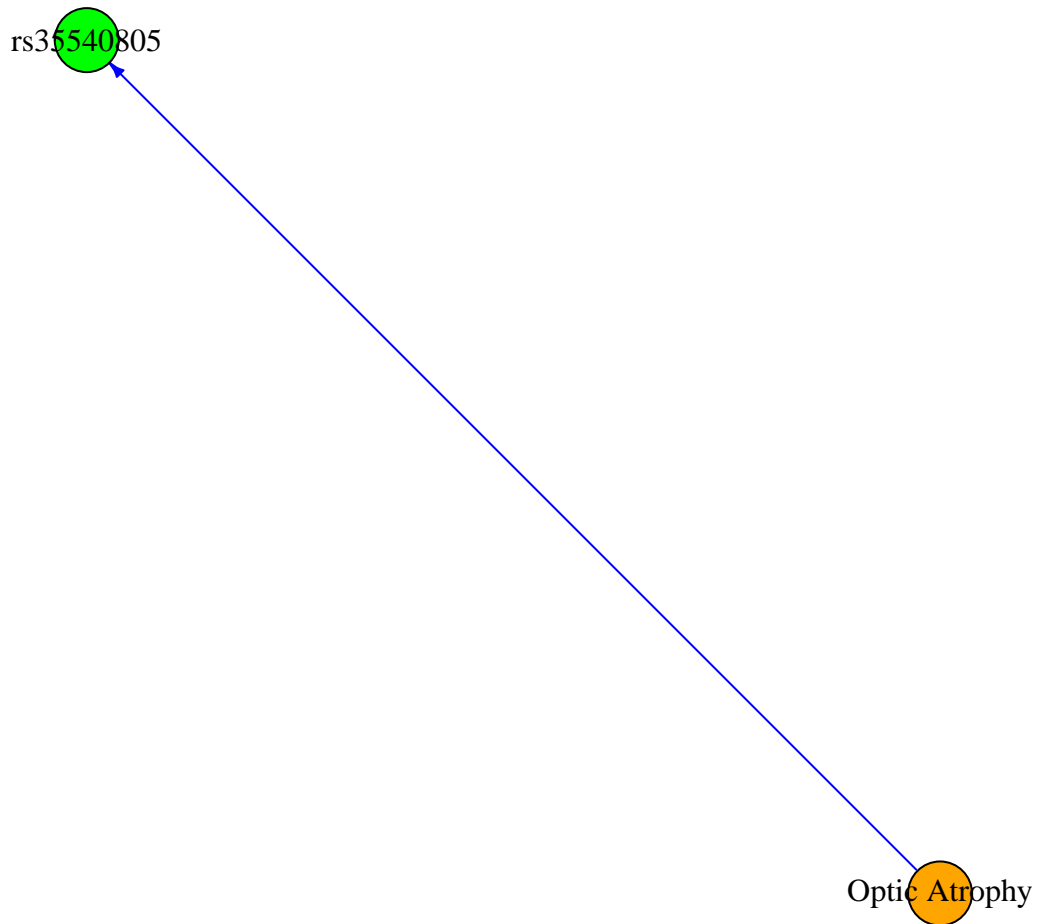

# Variant–Disease Network (Ornithine aminotransferase deficiency)

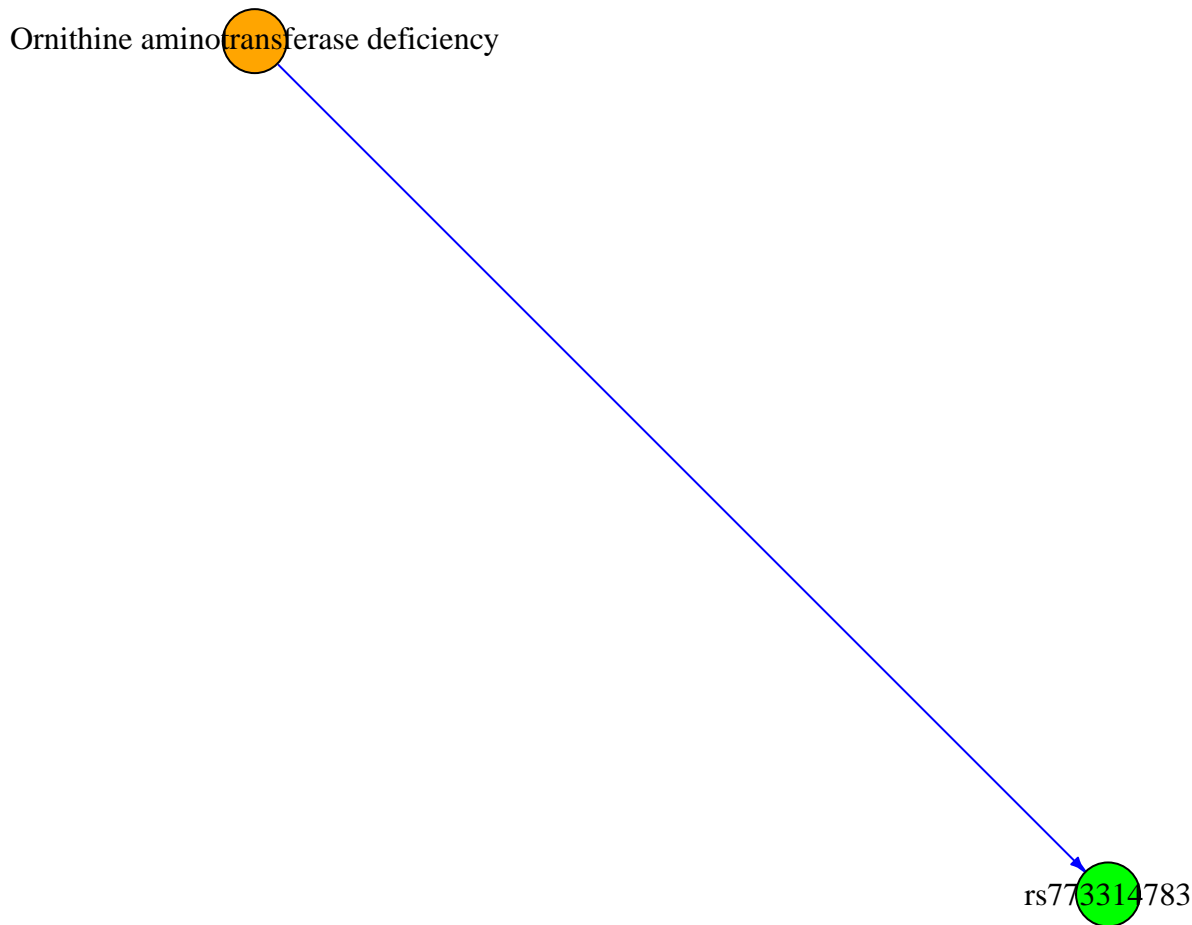

## Variant–Disease Network (Orthostatic hypotension 1)

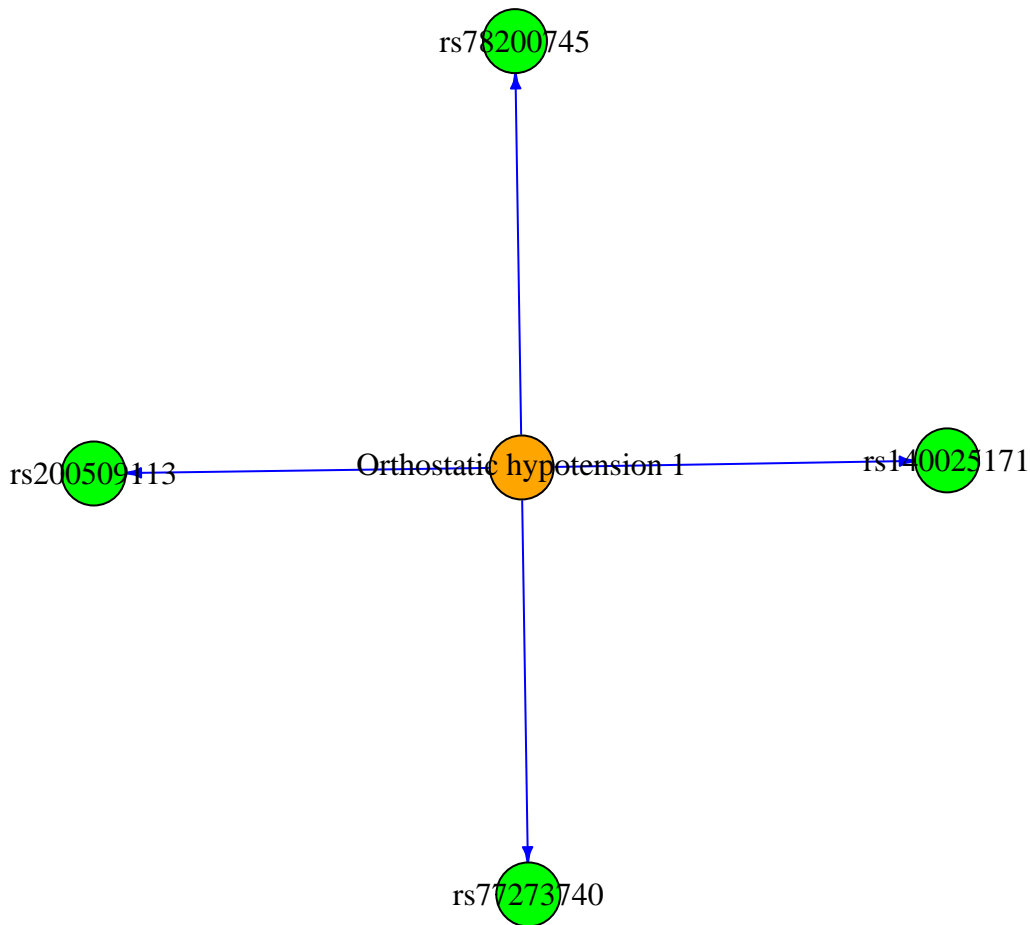

## Variant–Disease Network (Orthostatic intolerance)

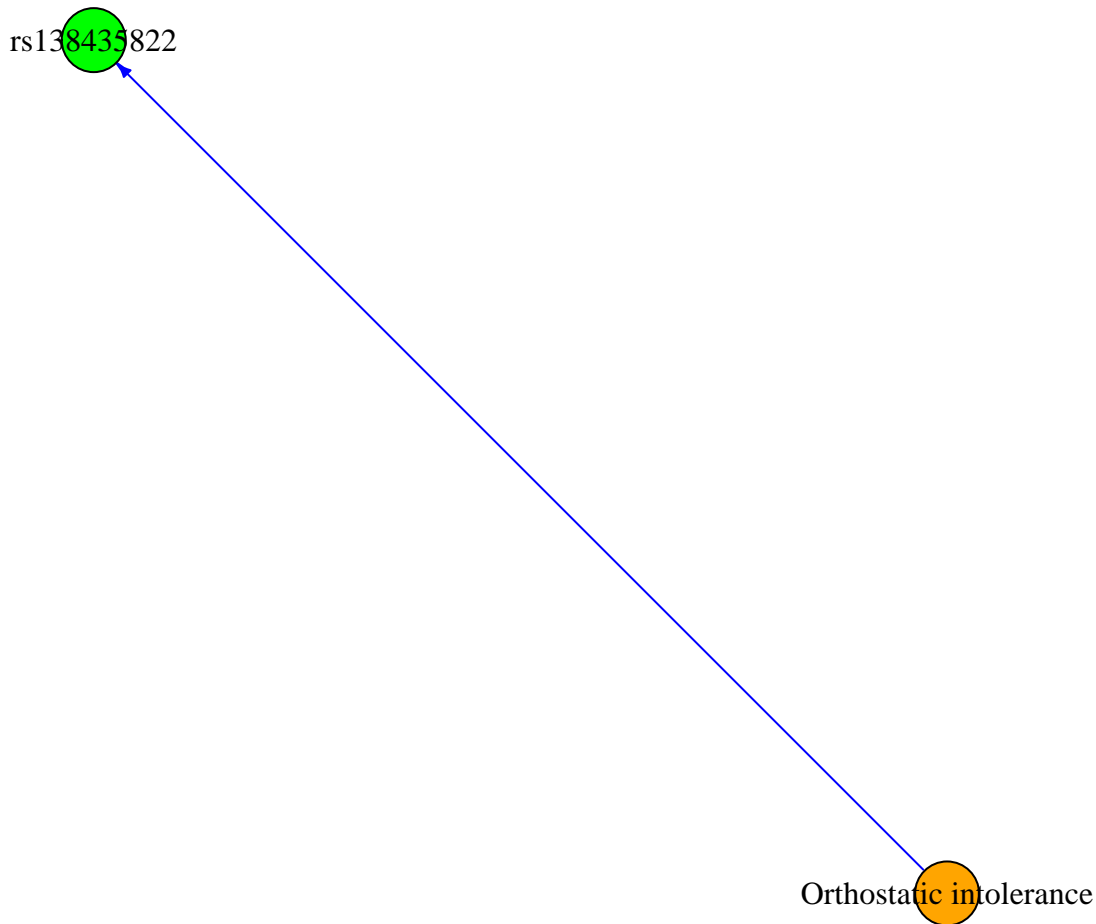

Variant–Disease Network (Osteogenesis Imperfecta)

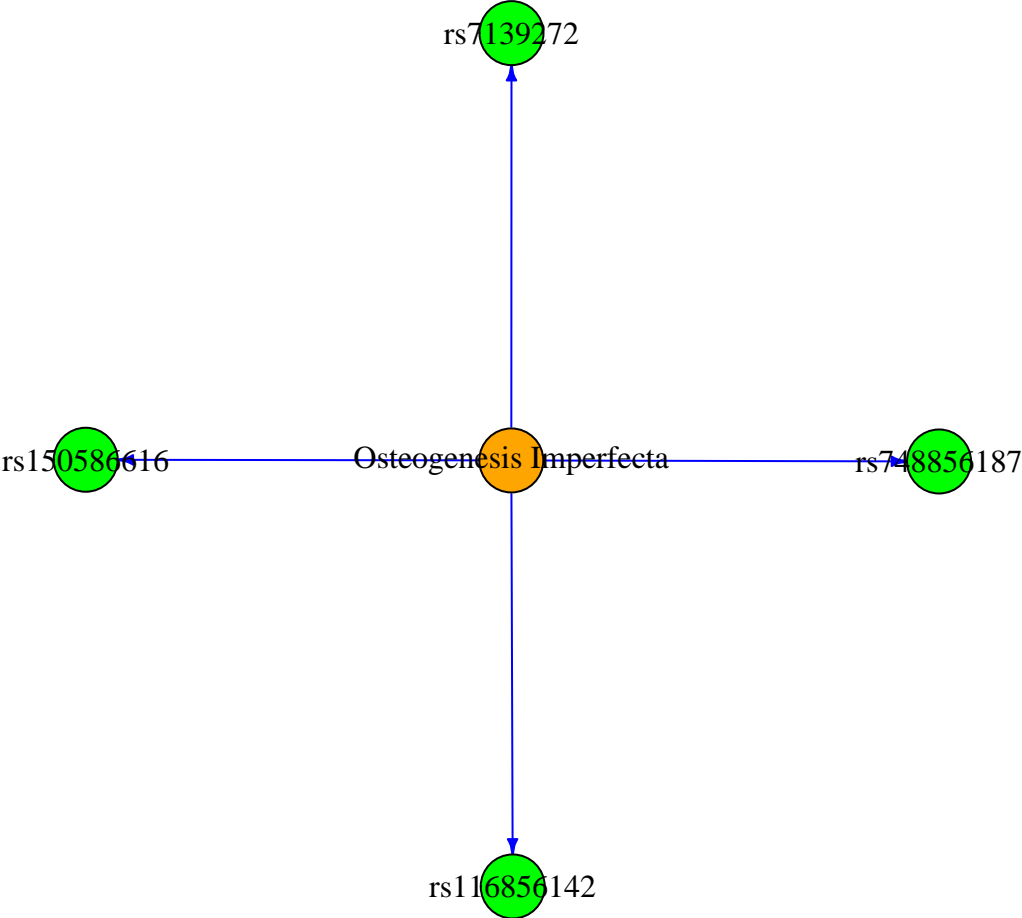

**Variant–Disease Network (Osteogenesis imperfecta type 12)**

Osteogenesis imperfecta type 12

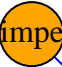

rs7139272

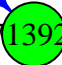

Variant–Disease Network (Osteogenesis imperfecta type I)

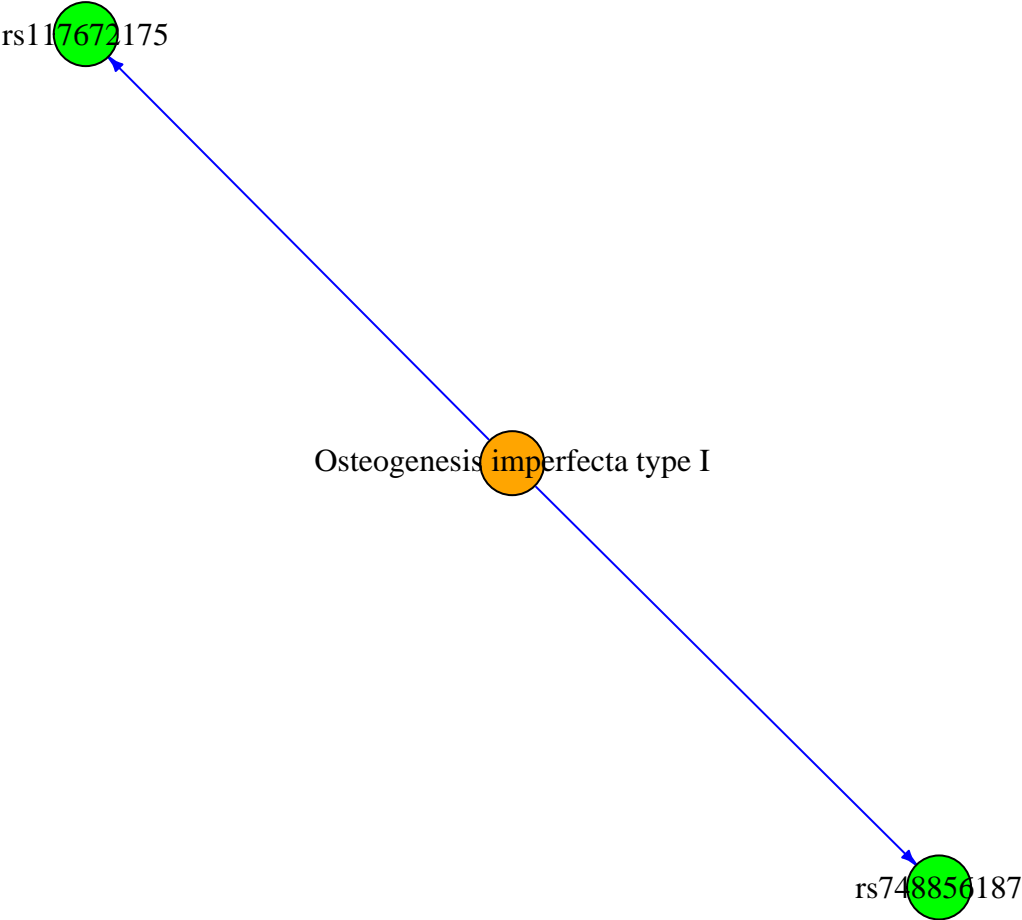



## Variant–Disease Network (Osteoglophonic dysplasia)

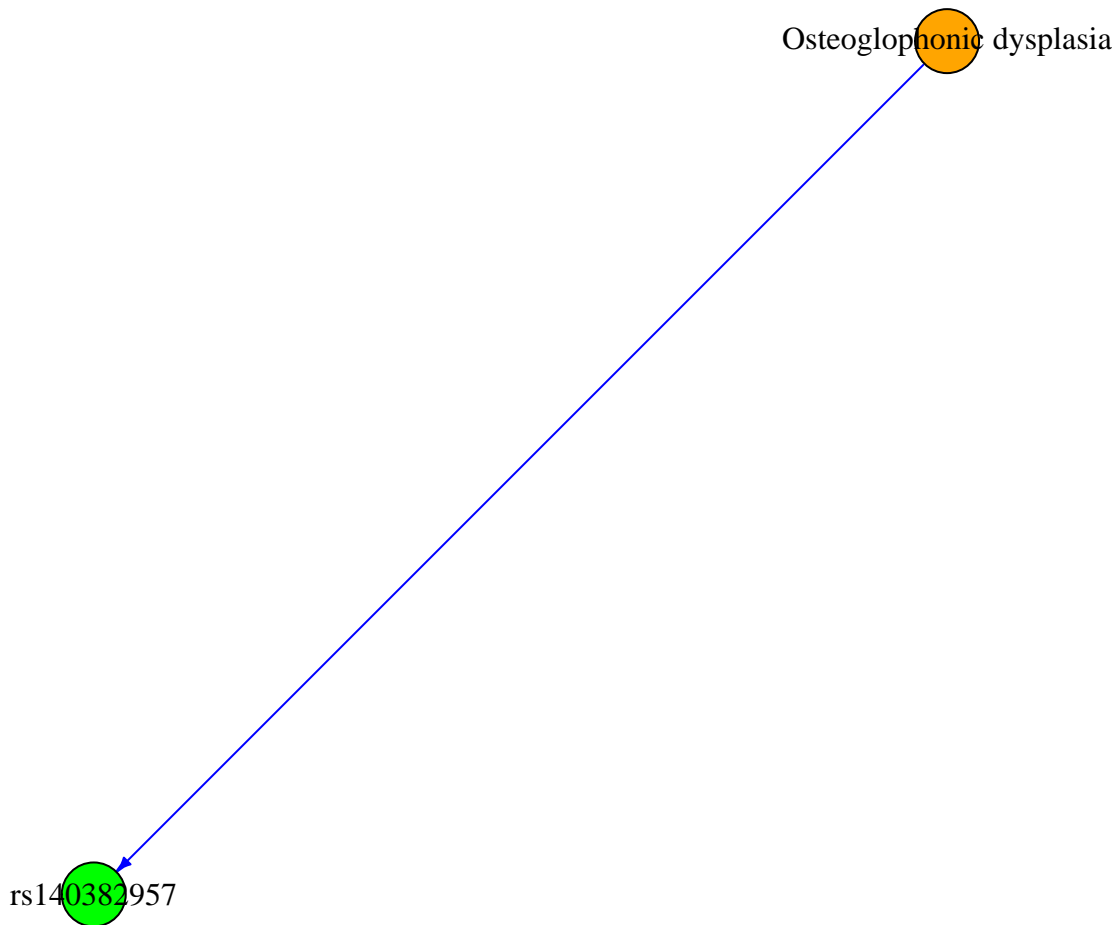

## Variant-Disease Network (Osteopetrosis)

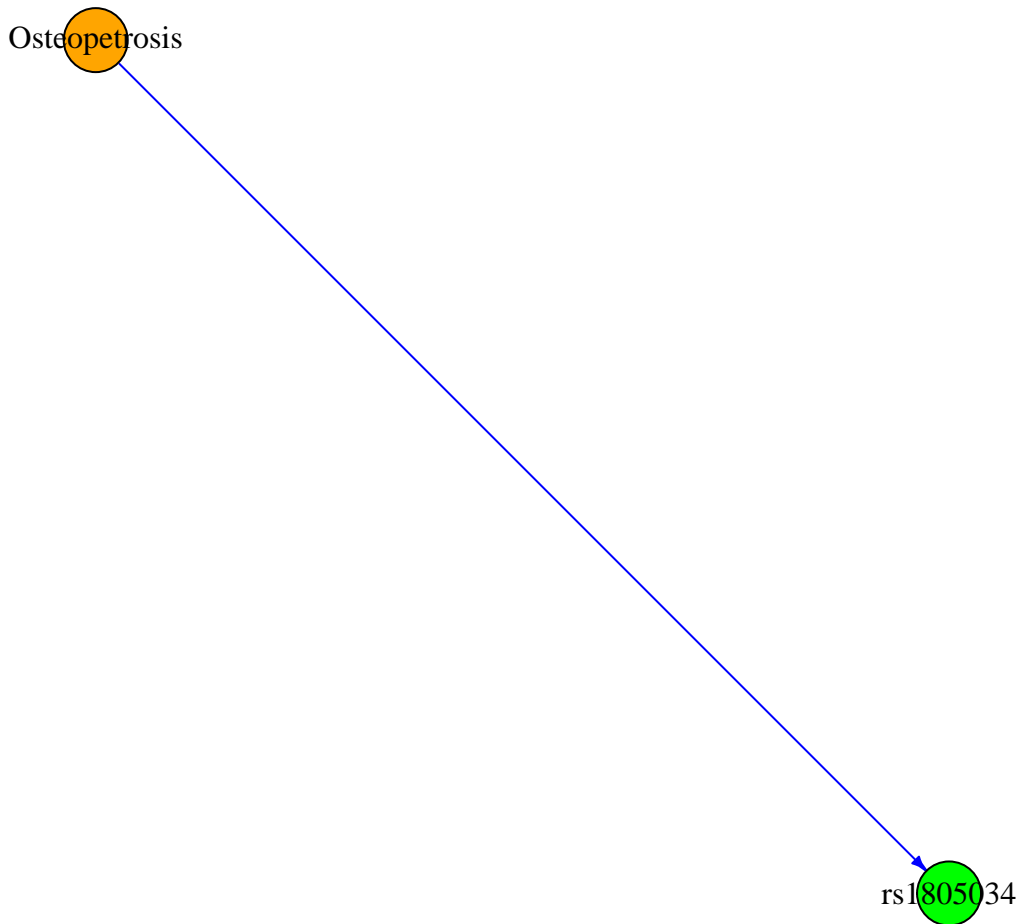

## Variant–Disease Network (Oto–palato–digital syndrome)

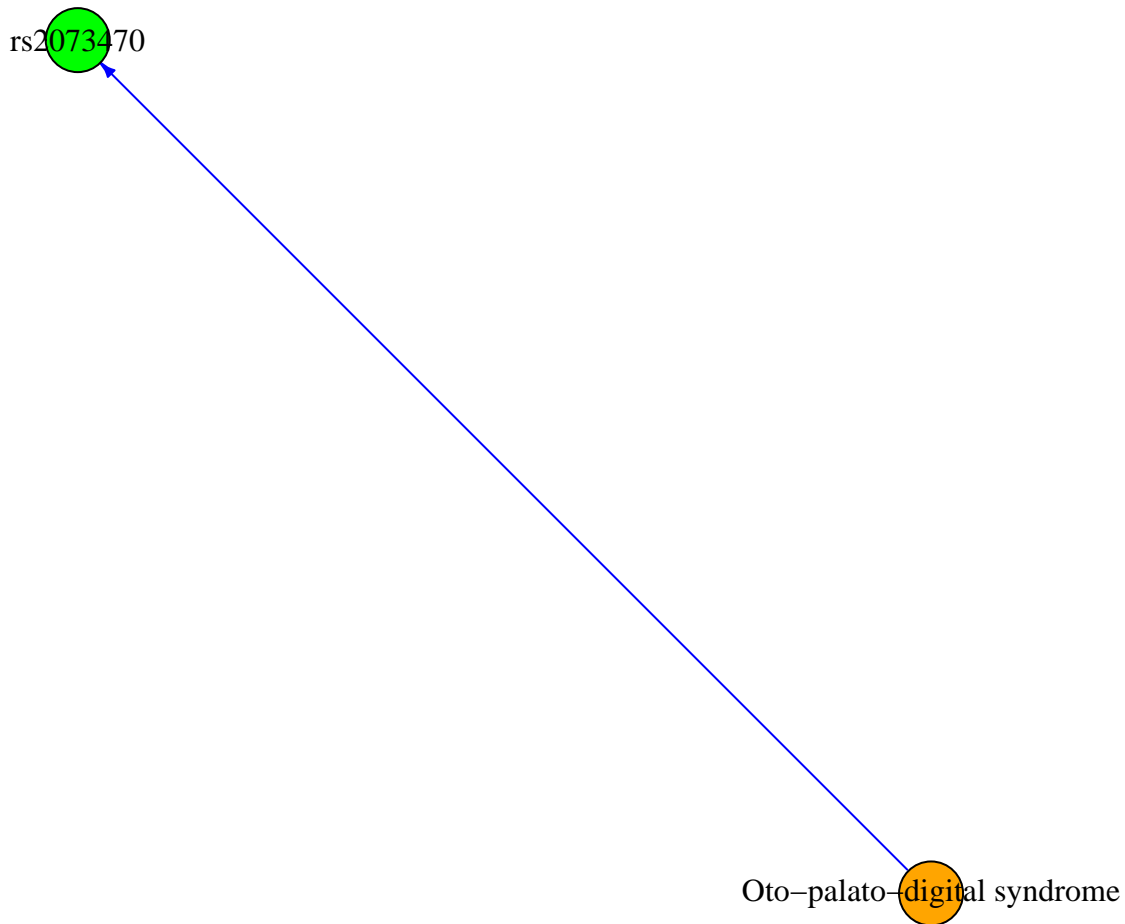

# Variant–Disease Network (Otospondylomegacepiphyseal dysplasia)

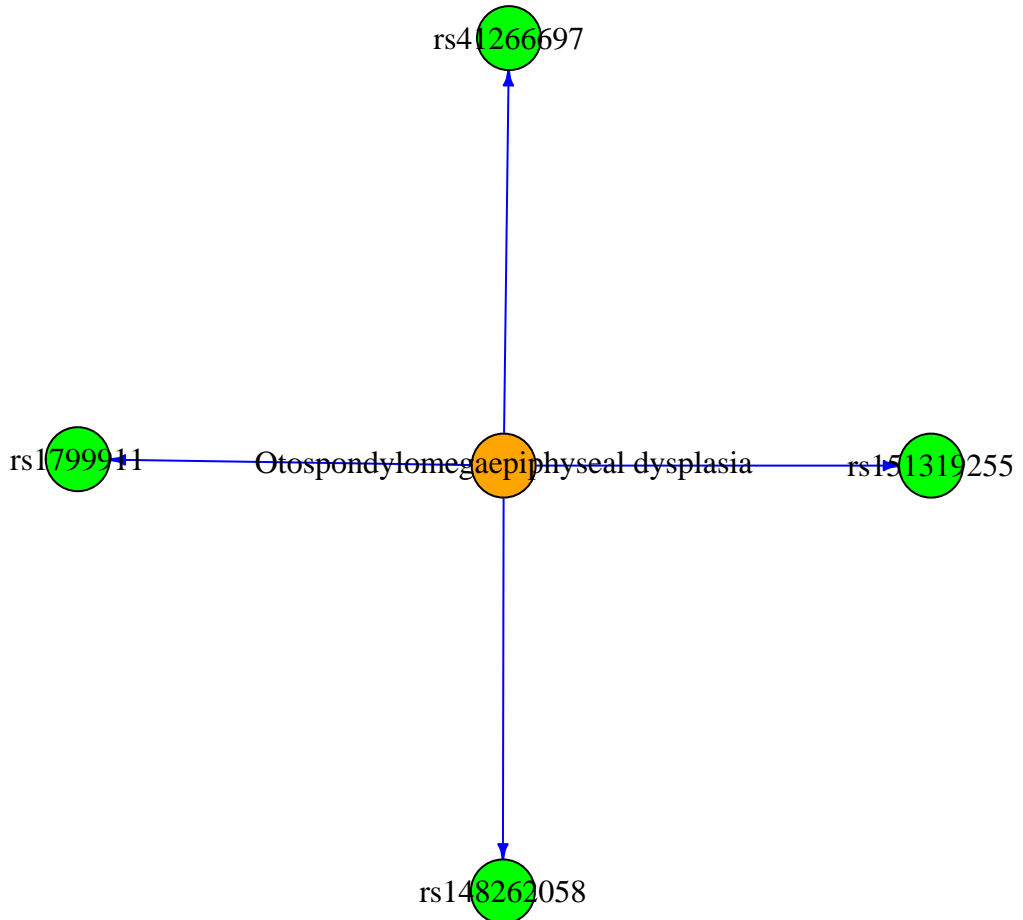

## Variant–Disease Network (Ovarian dysgenesis)

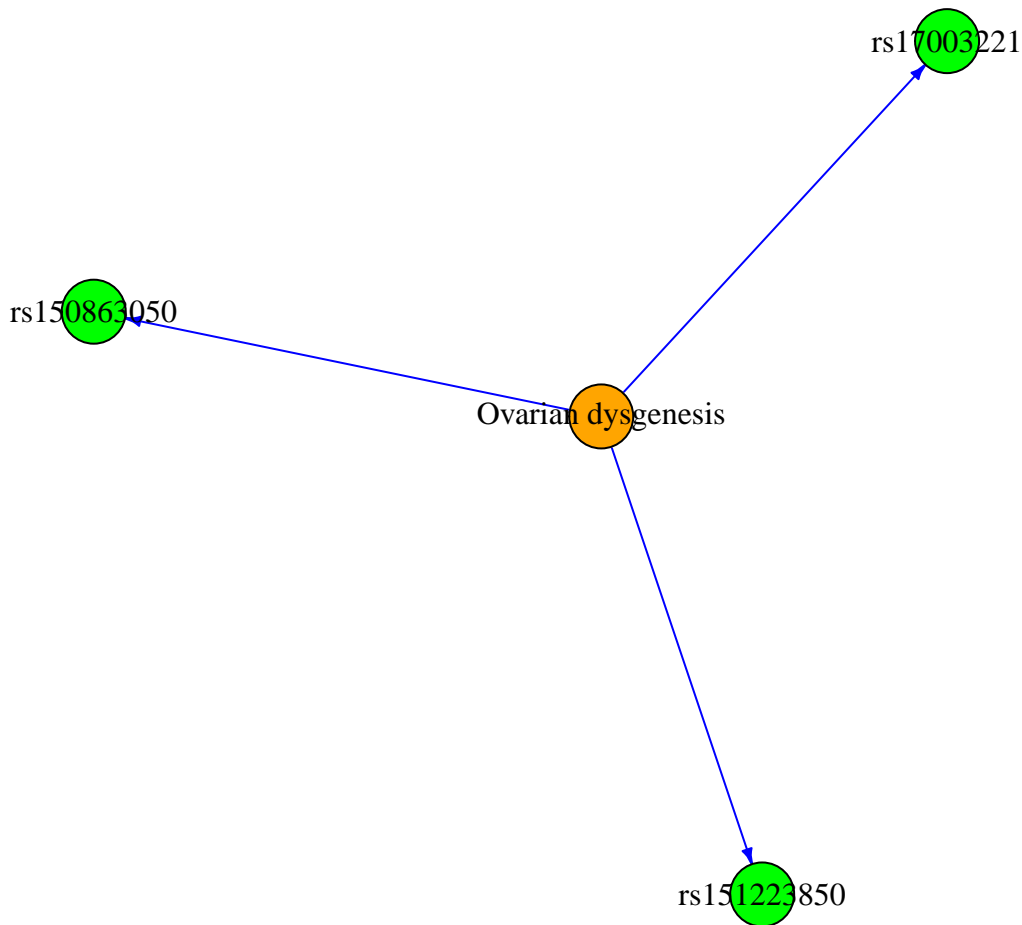

Variant–Disease Network (Ovarian hyperstimulation syndrome)

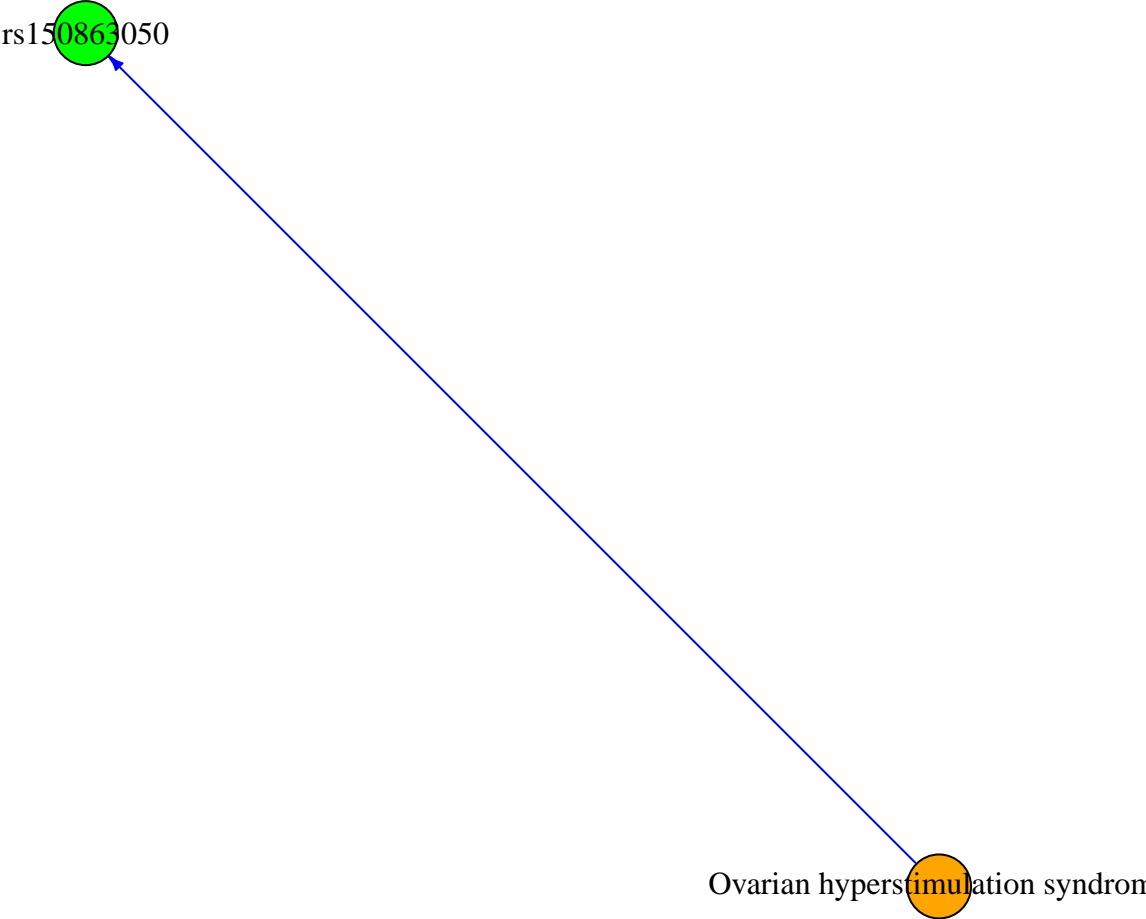

## Variant–Disease Network (Paget disease of bone)

Paget disease of bone

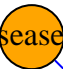

rs1805034

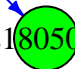

Variant–Disease Network (Pallister–Hall syndrome)

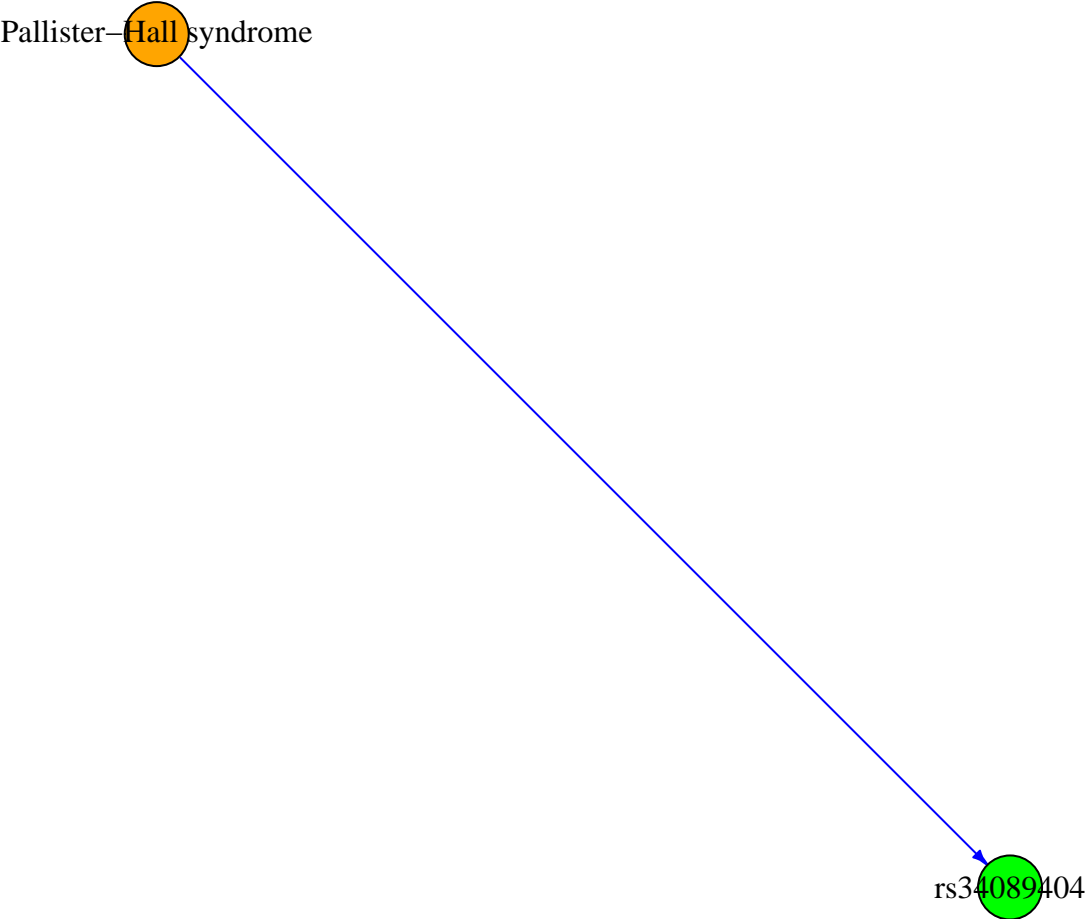



# Variant–Disease Network (Paraganglioma and gastric stromal sarcoma)

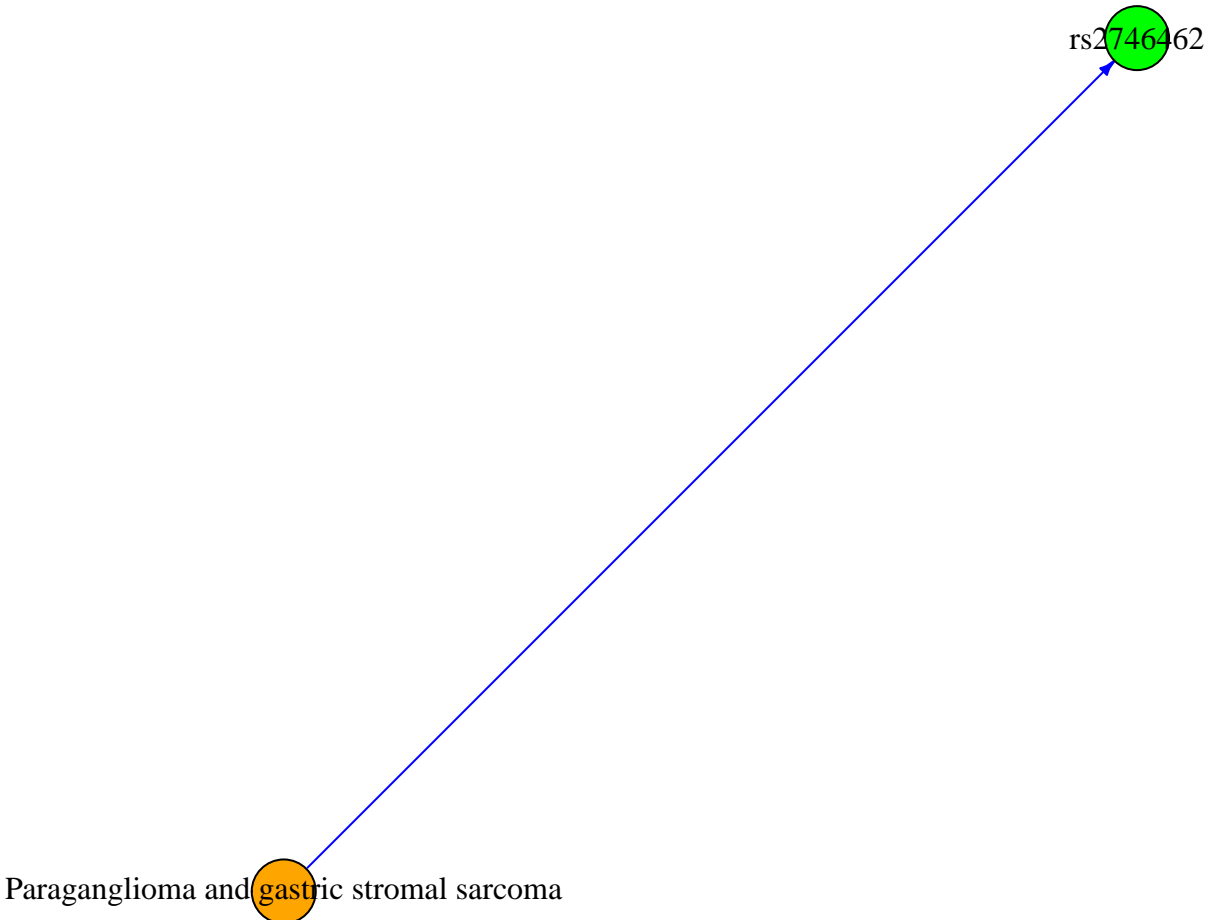

## Variant–Disease Network (Paragangliomas 5)

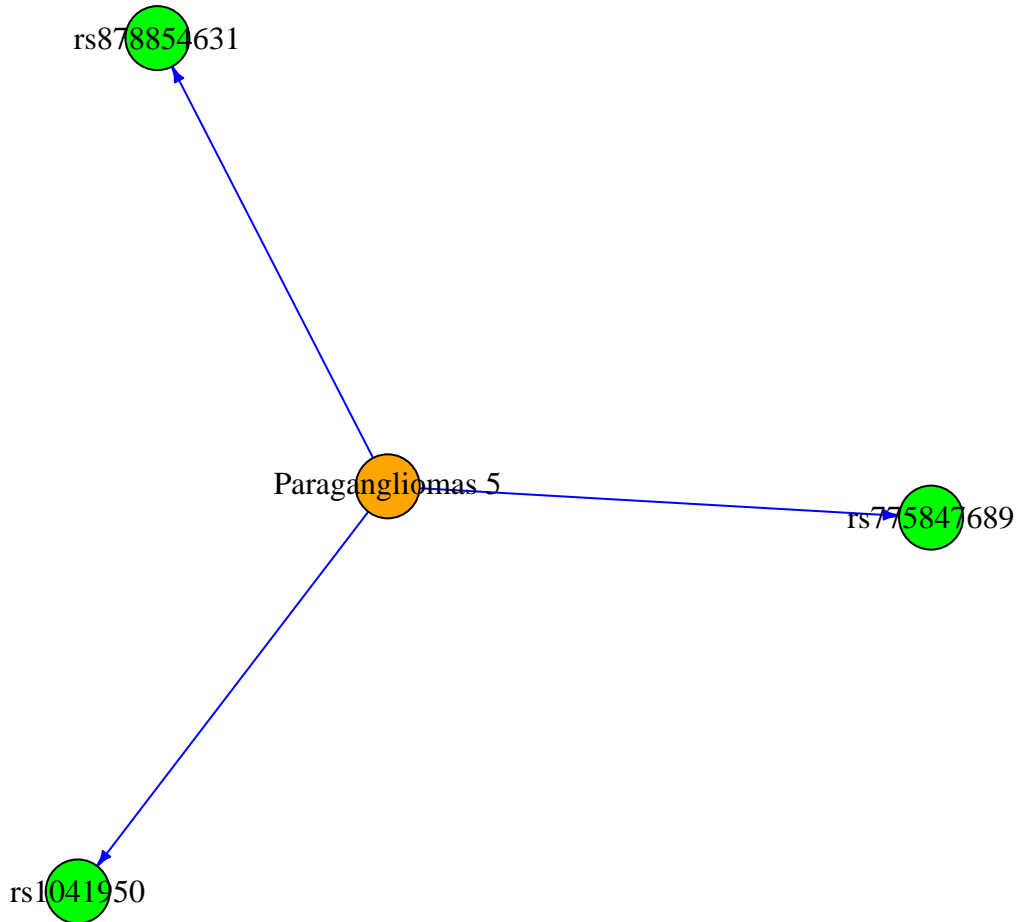

**Variant–Disease Network (Paramyotonia congenita of von Eulenburg)**

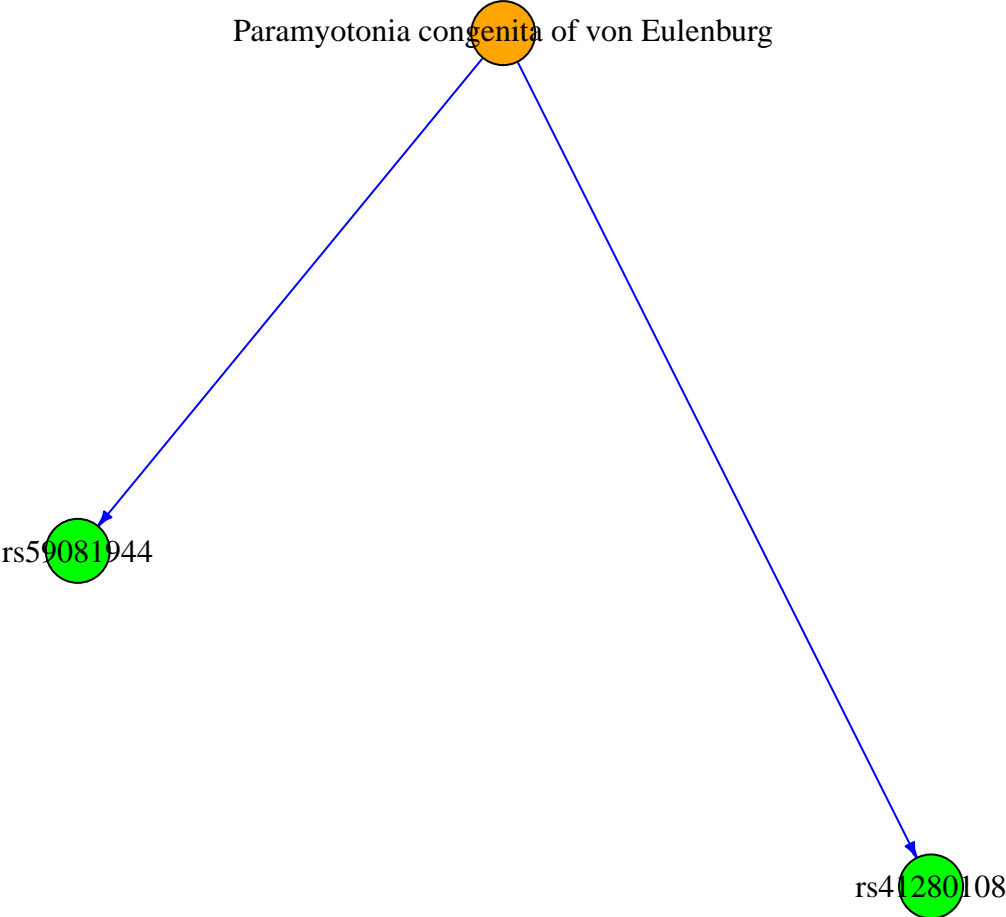

## Variant-Disease Network (Parathyroid carcinoma)

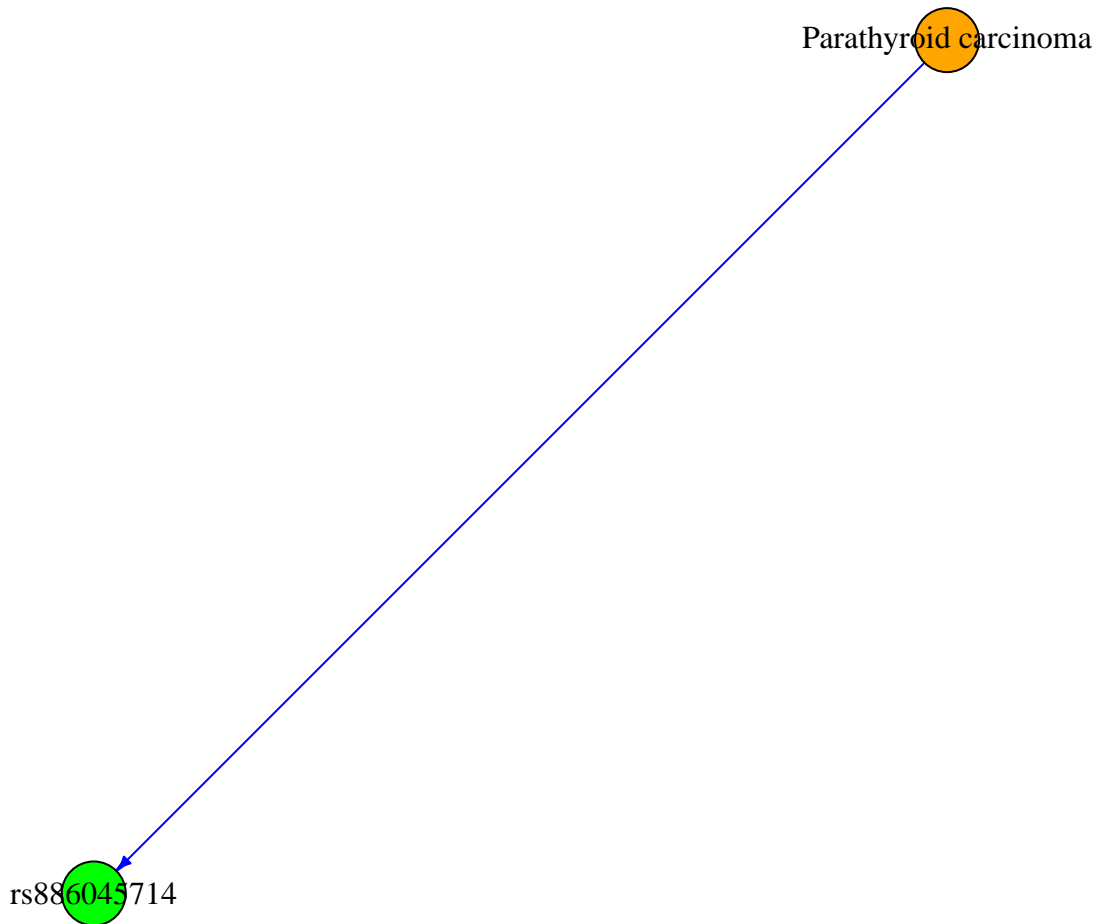

## Variant–Disease Network (Parkinson Disease)

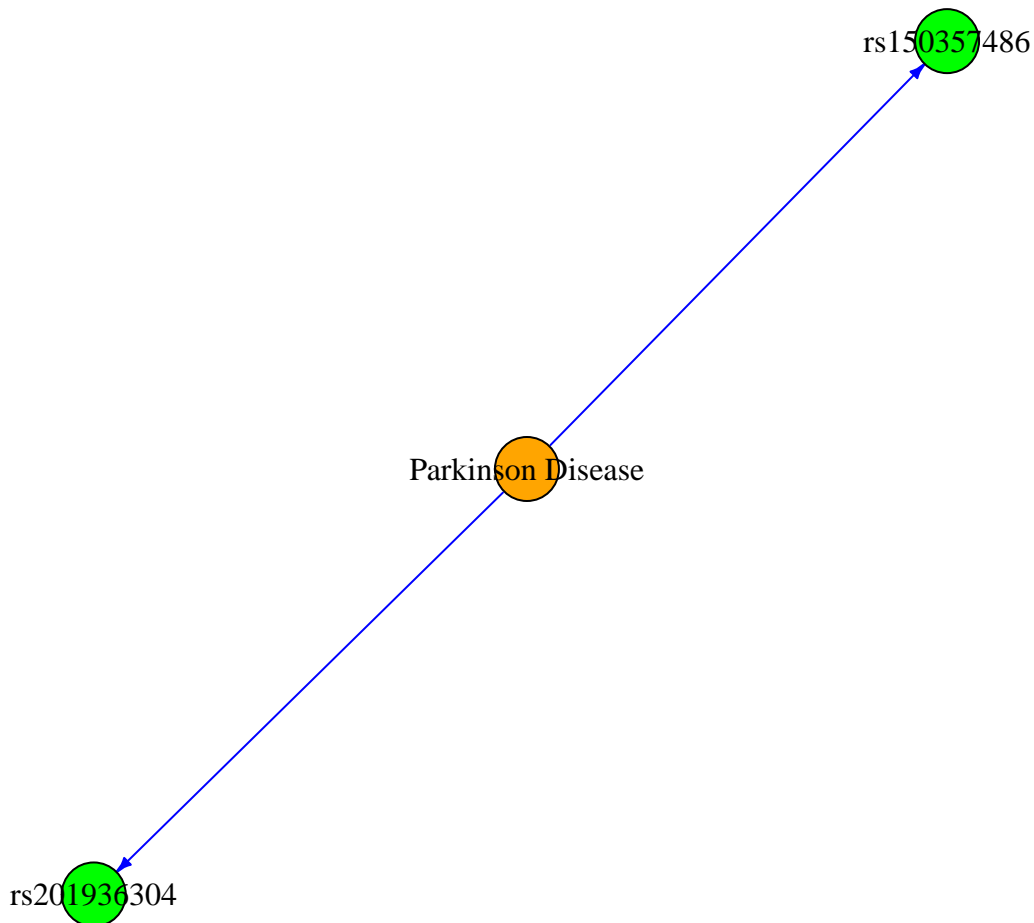

## Variant–Disease Network (Parkinson disease 6)

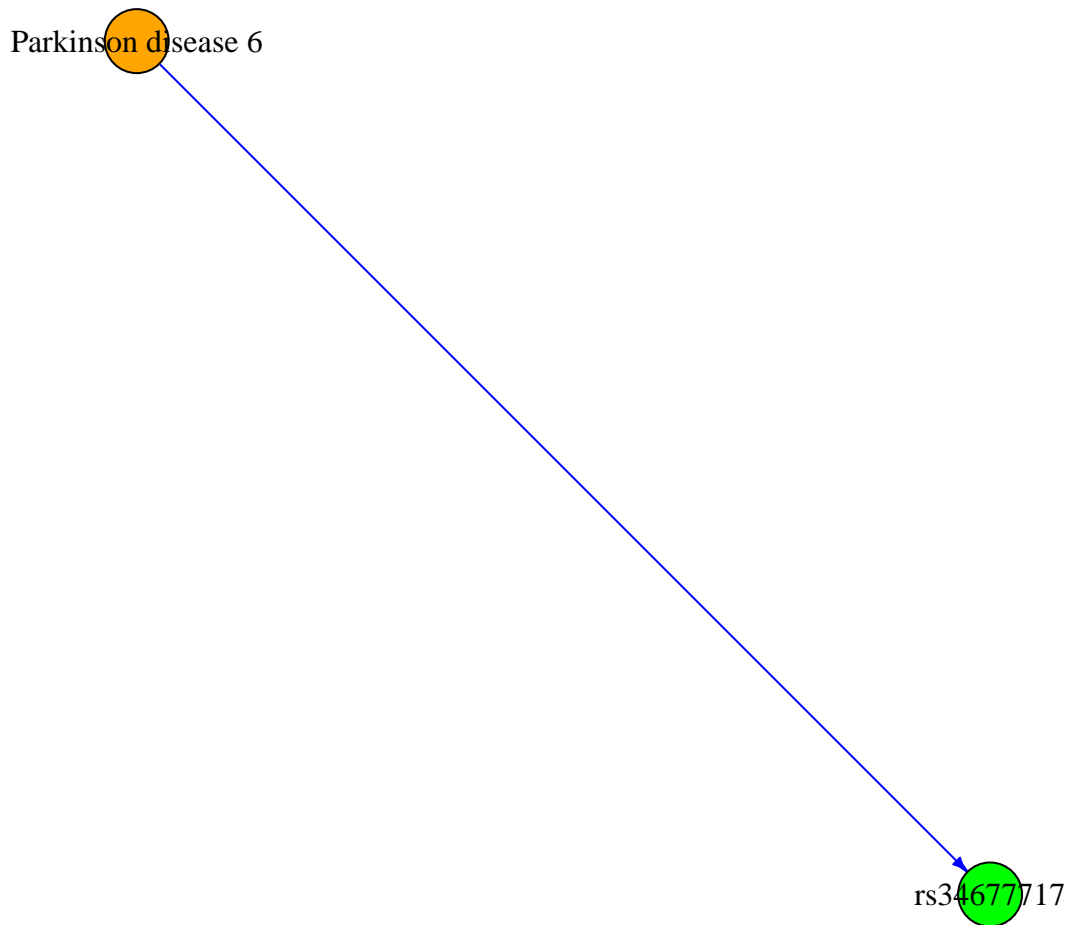

## Variant–Disease Network (Parkinson disease 8)

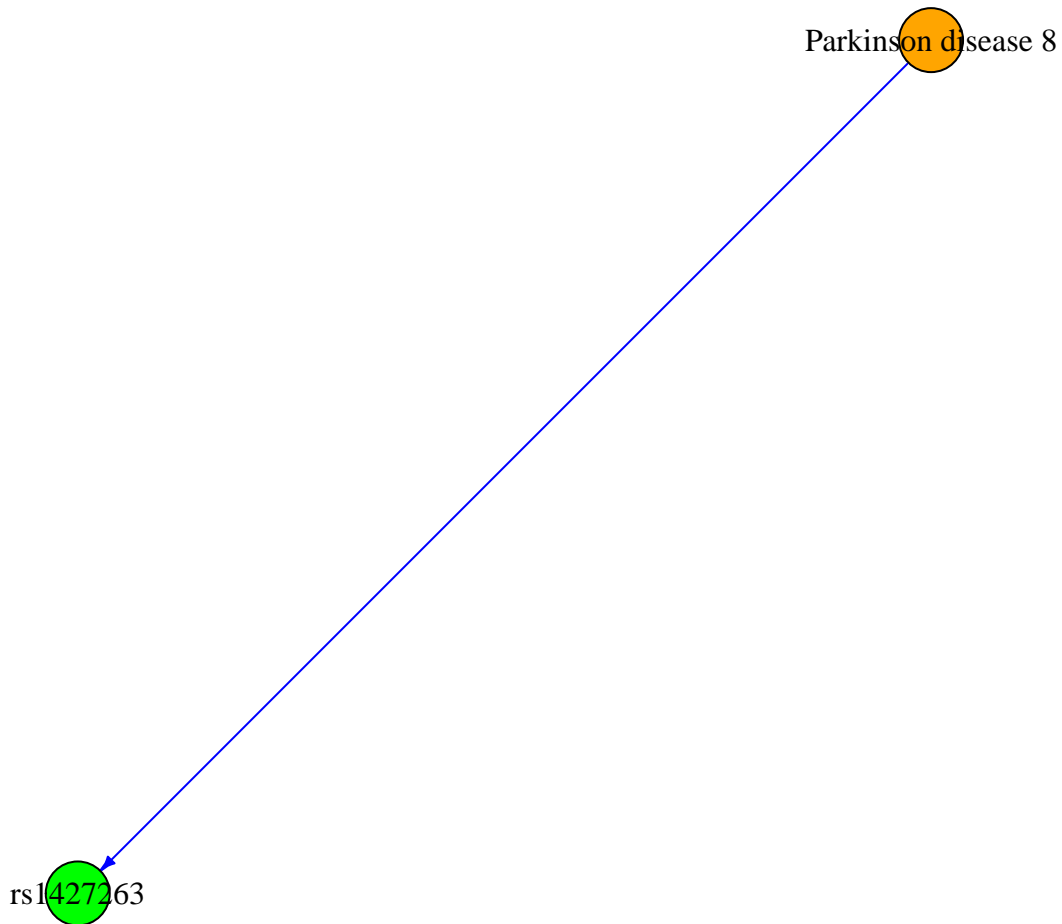

## Variant–Disease Network (Parkinson disease 9)

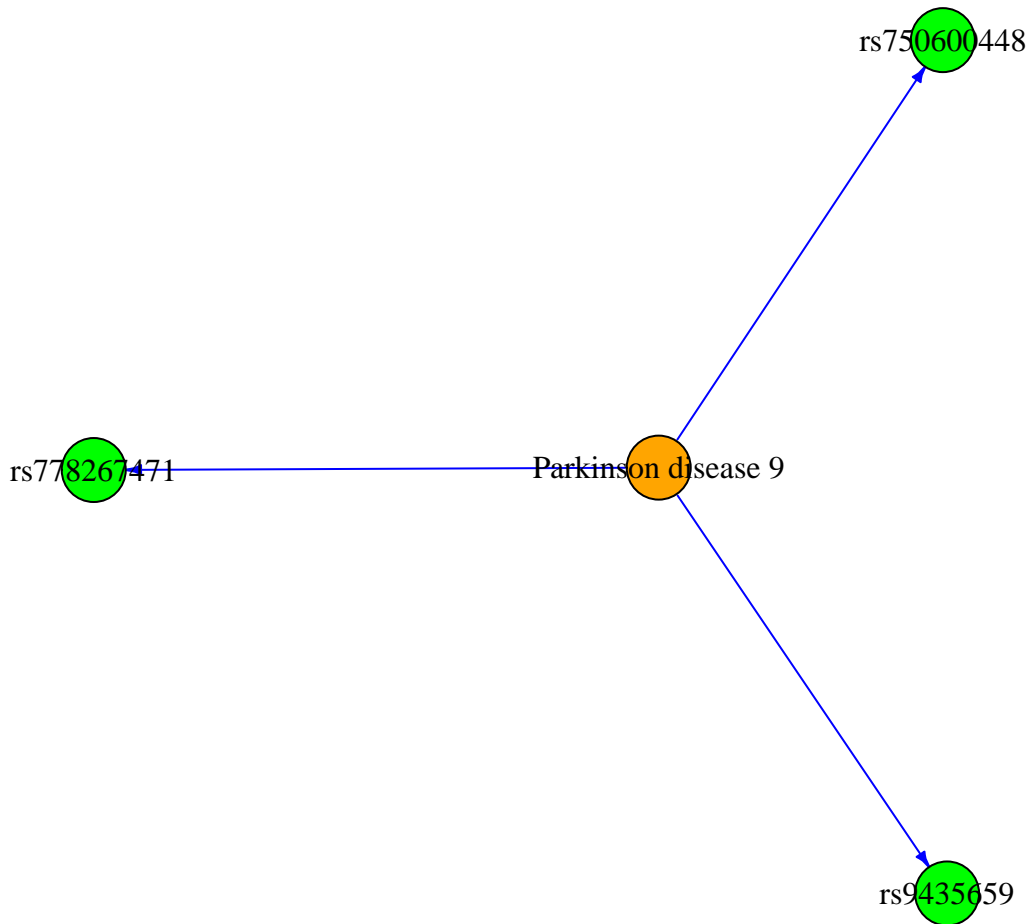



Variant–Disease Network (Parkinsonism–dystonia)

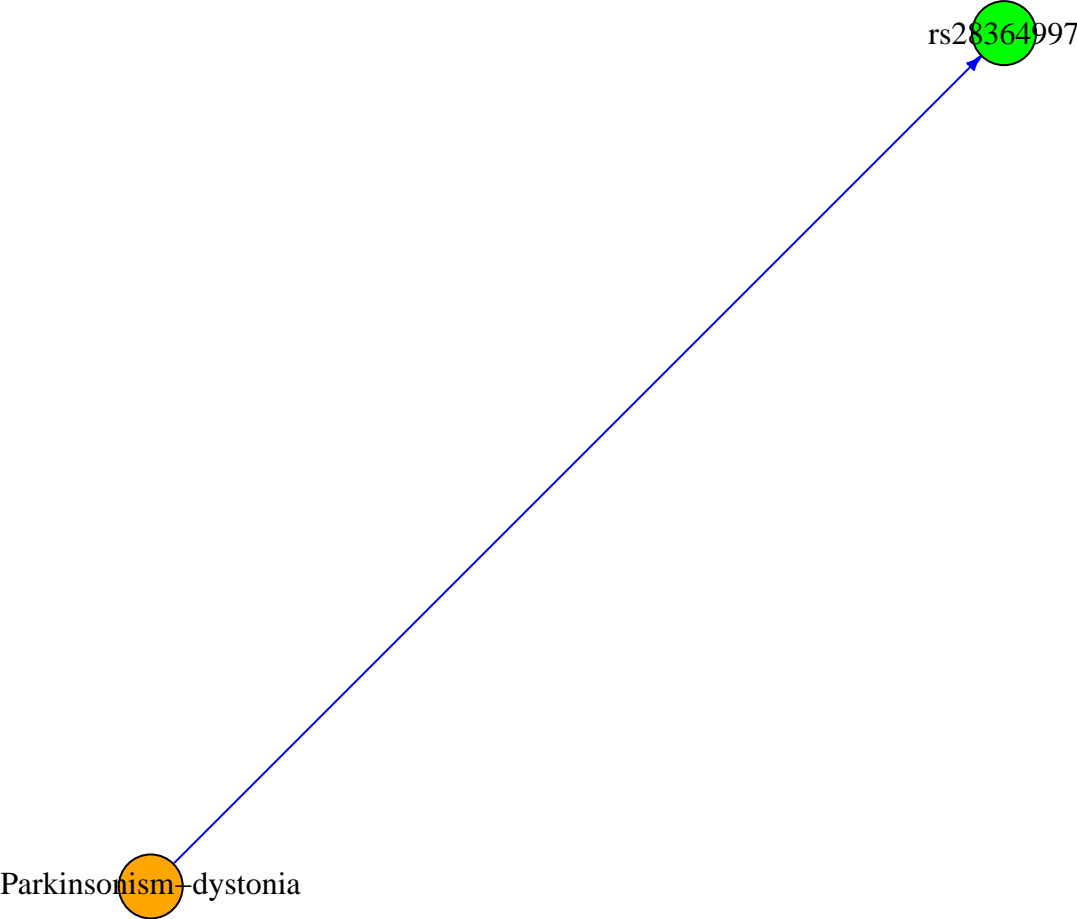

## Variant–Disease Network (Partial albinism)

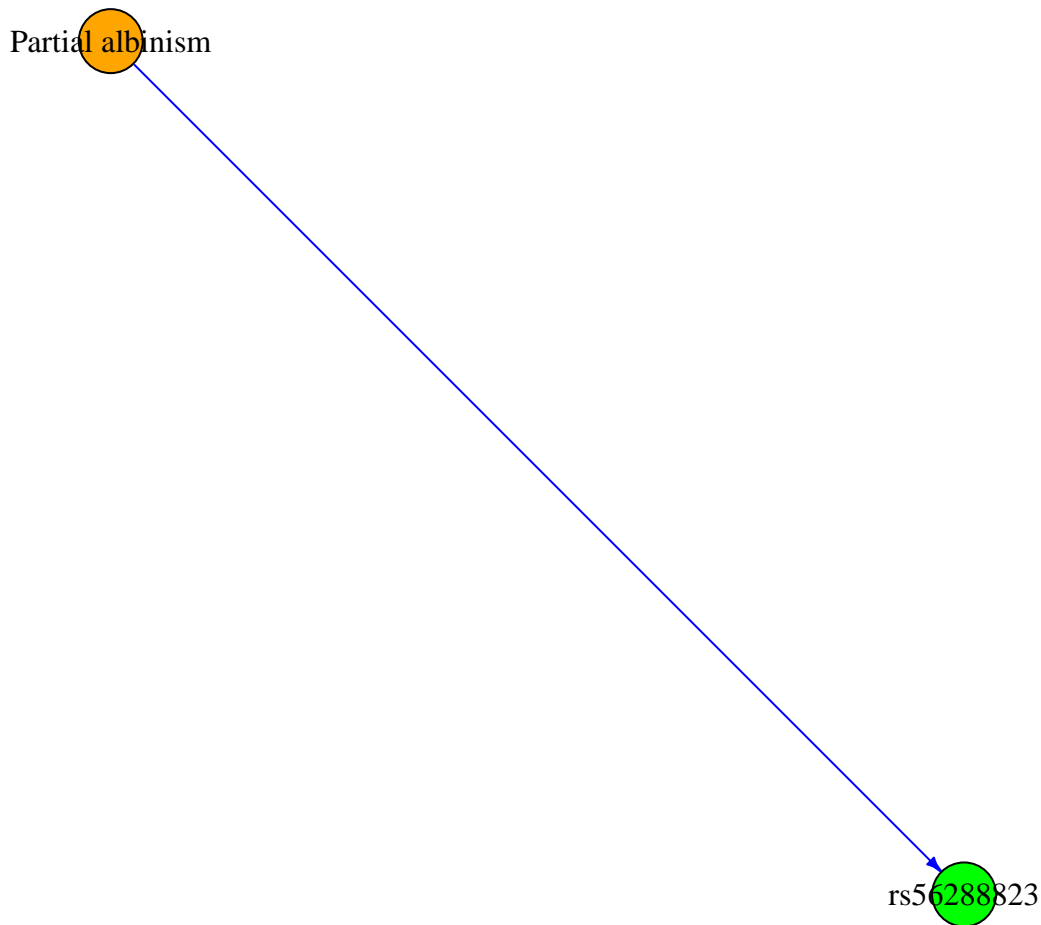

## Variant–Disease Network (Peeling skin syndrome 1)

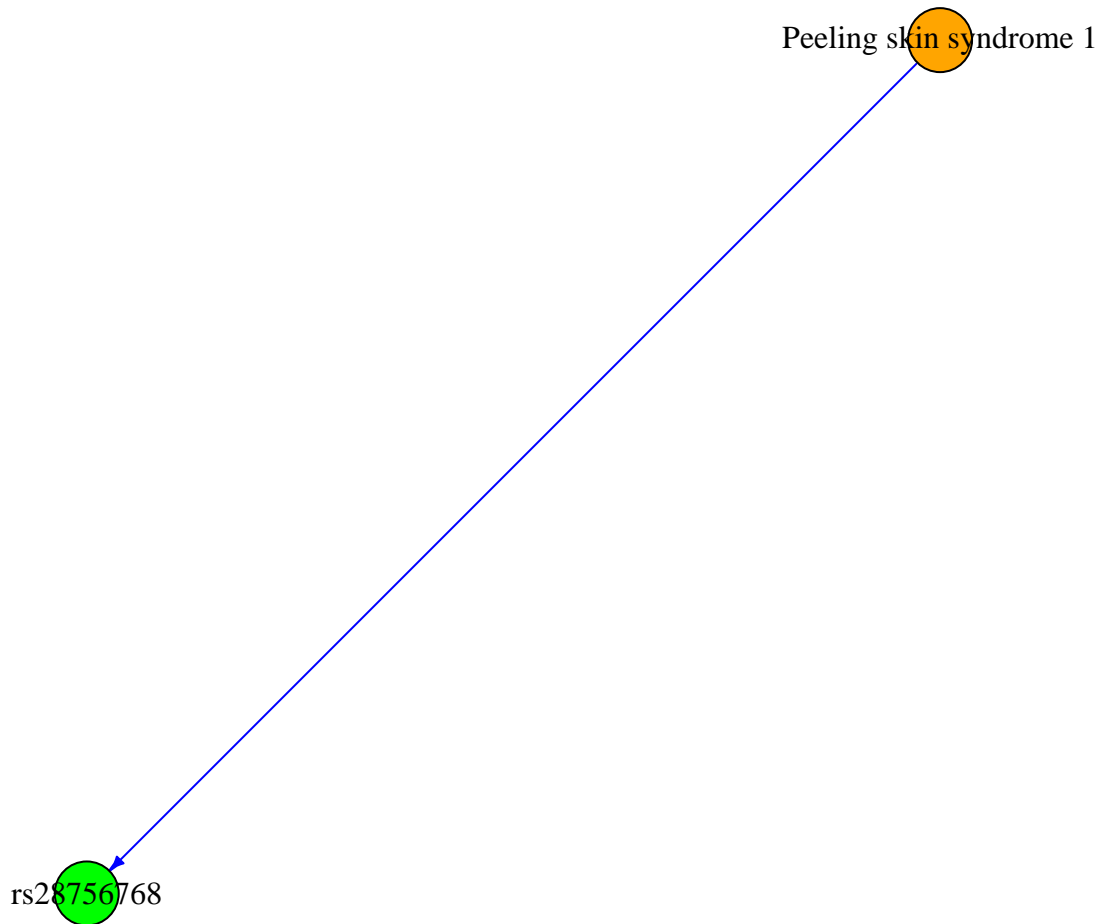

## Variant–Disease Network (Pendred syndrome)

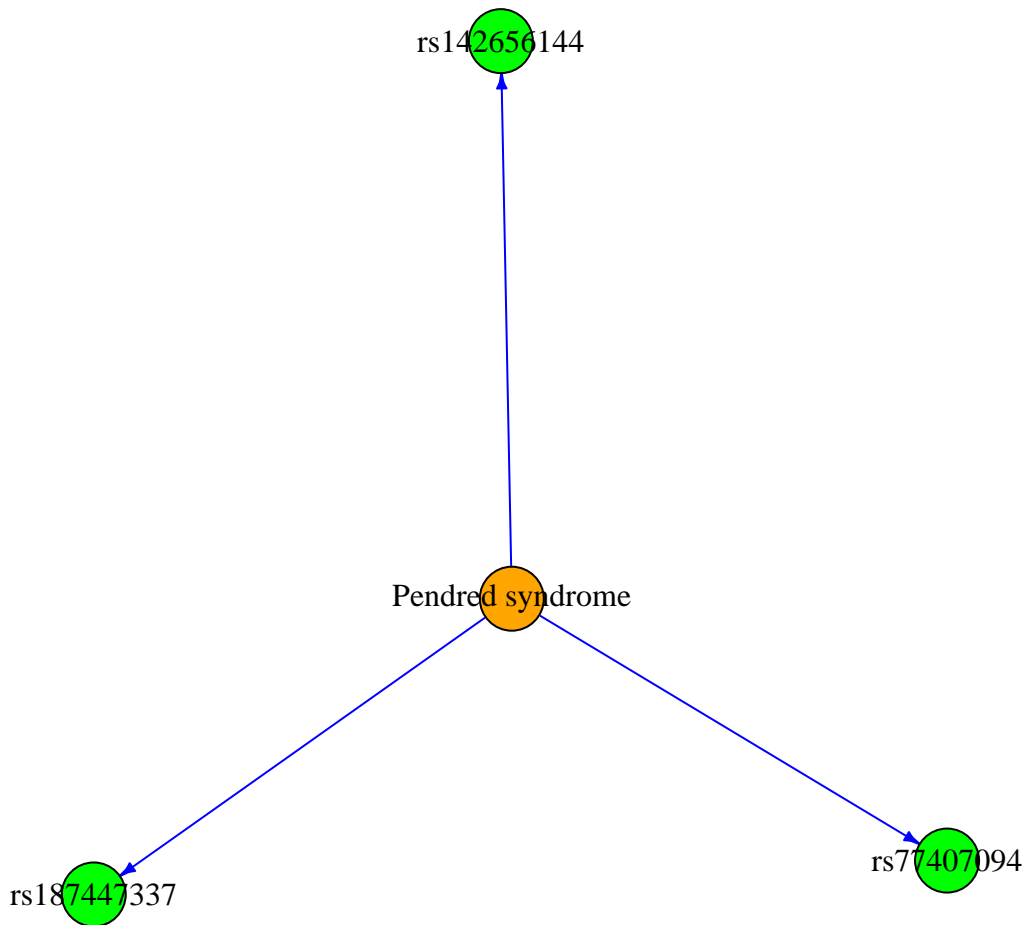

## Variant–Disease Network (PERCHING syndrome)

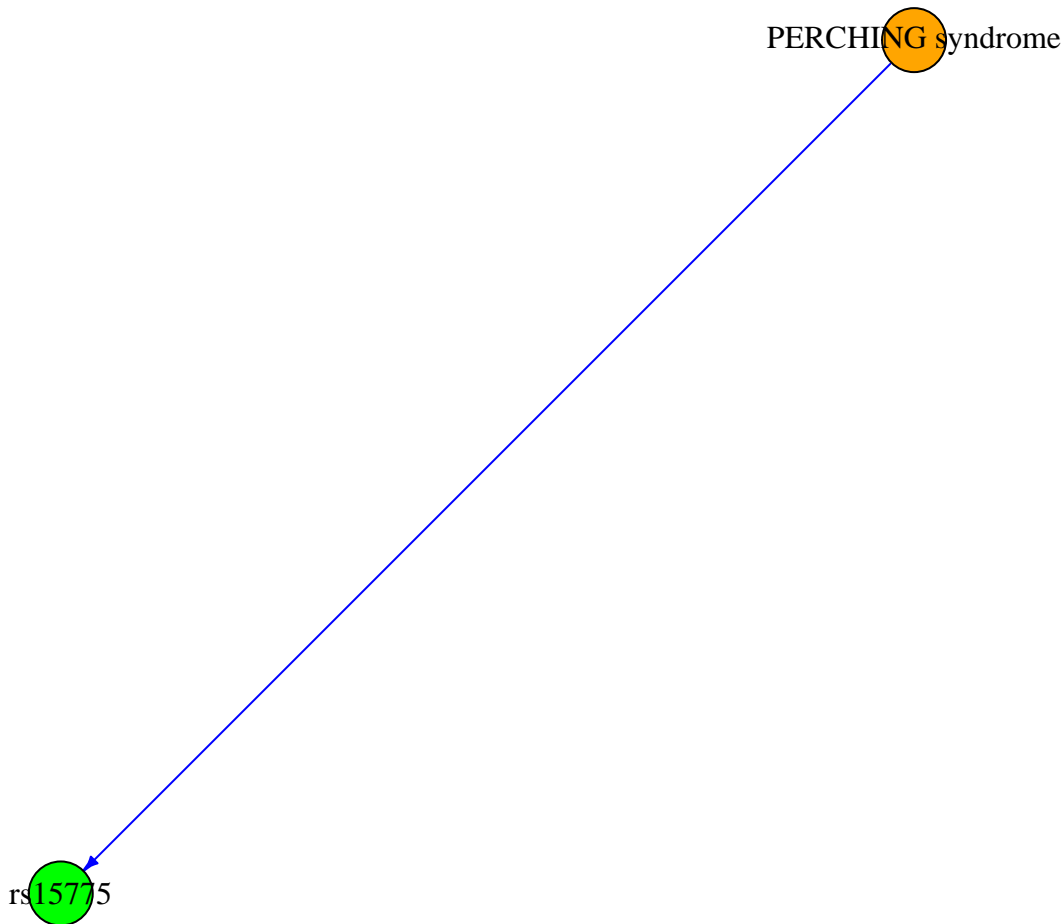

Variant–Disease Network (Peripheral axonal neuropathy)

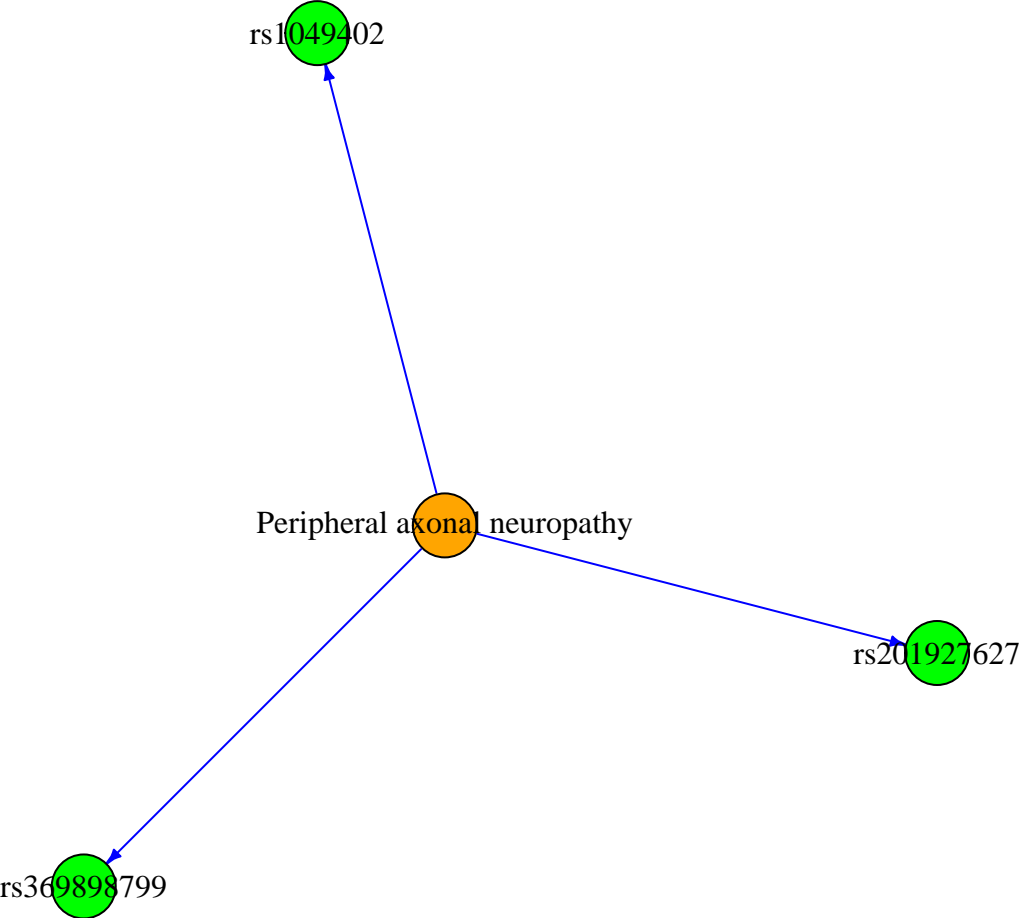

Variant–Disease Network (Peripheral demyelinating neuropathy)

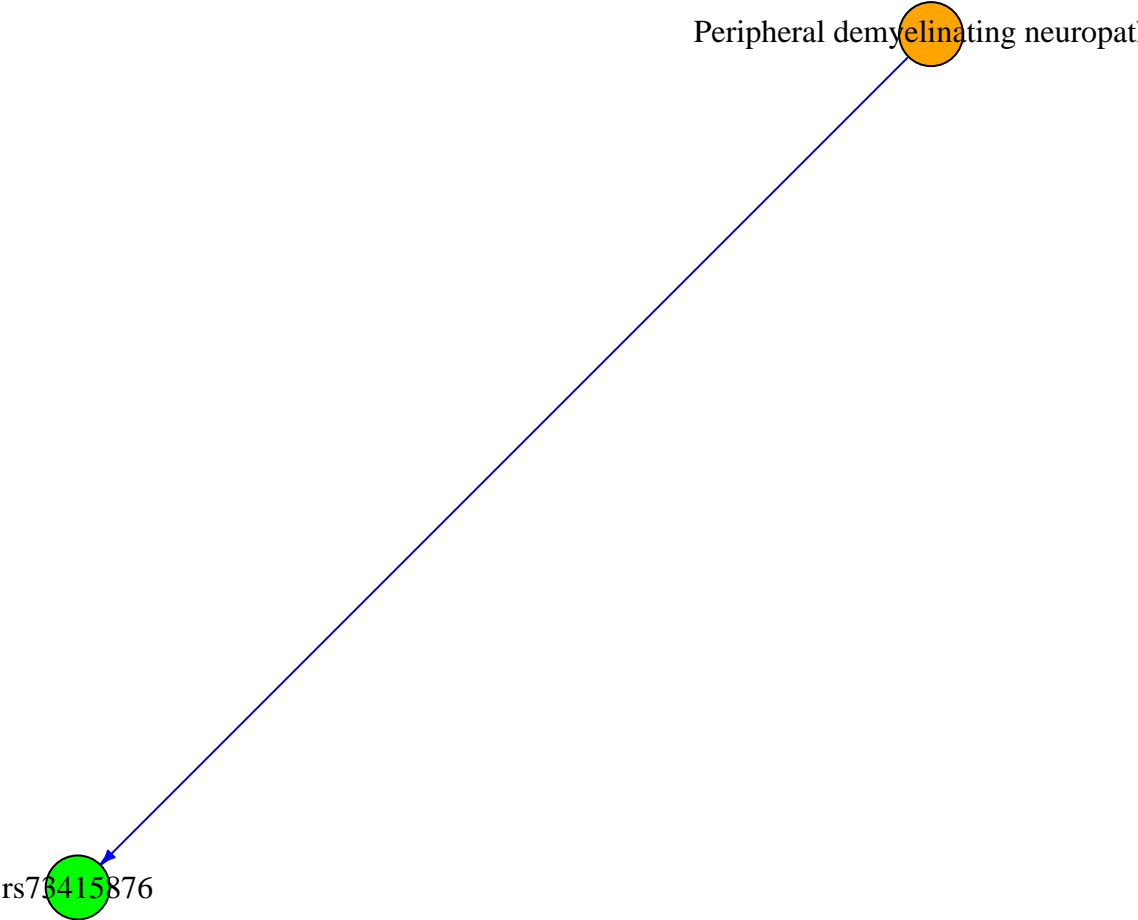

## Variant–Disease Network (Peripheral neuropathy)

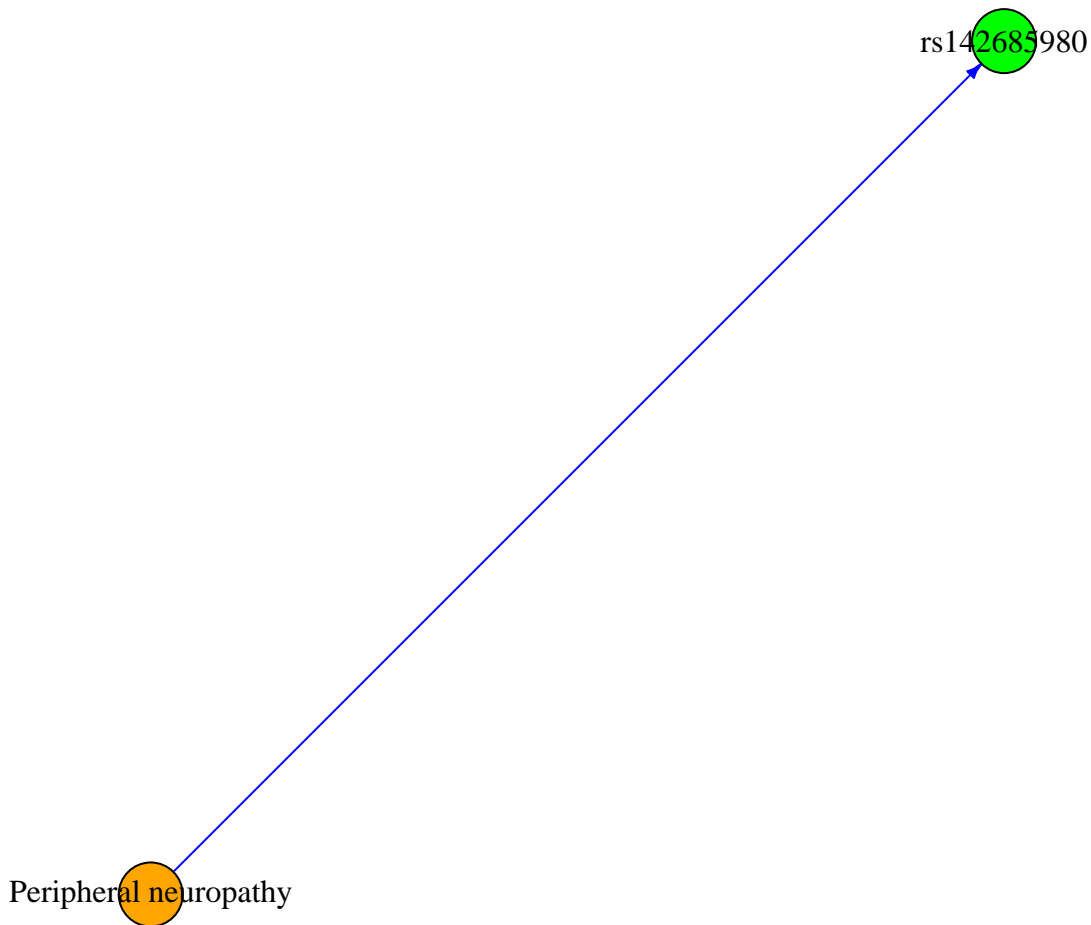



**Variant–Disease Network (Periventricular Heterotopia)**

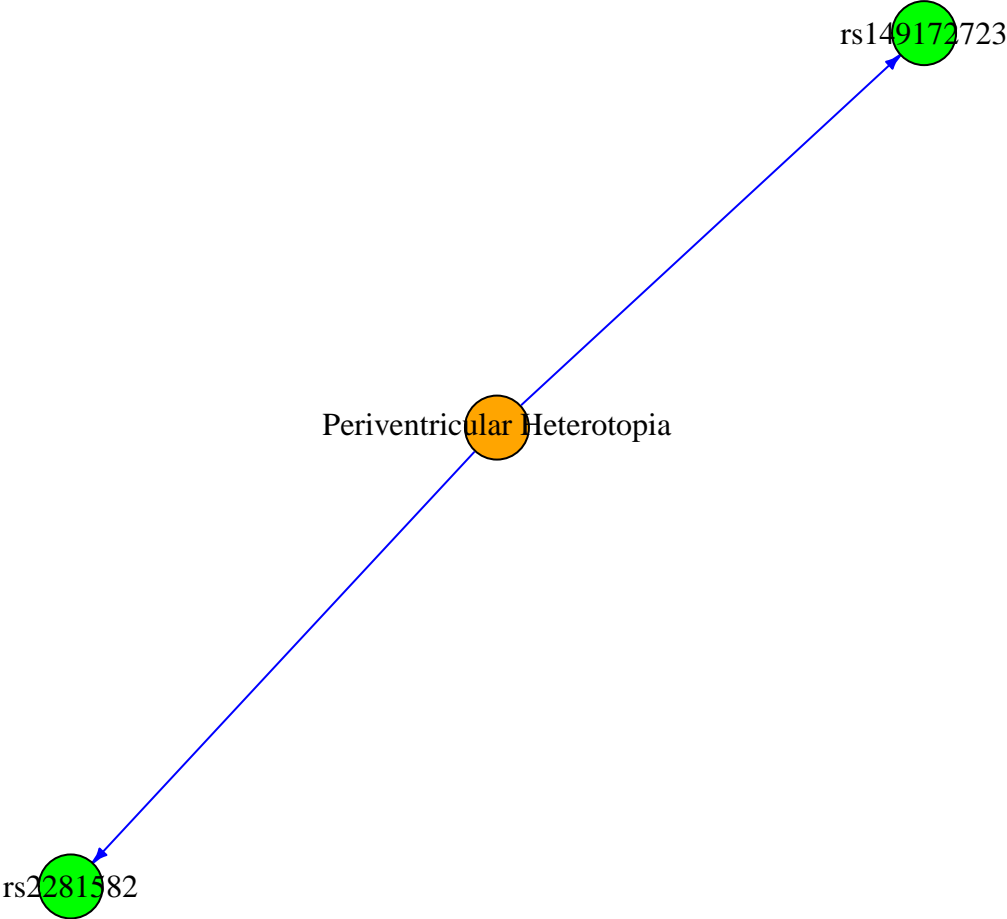

Variant–Disease Network (Periventricular nodular heterotopia 1)

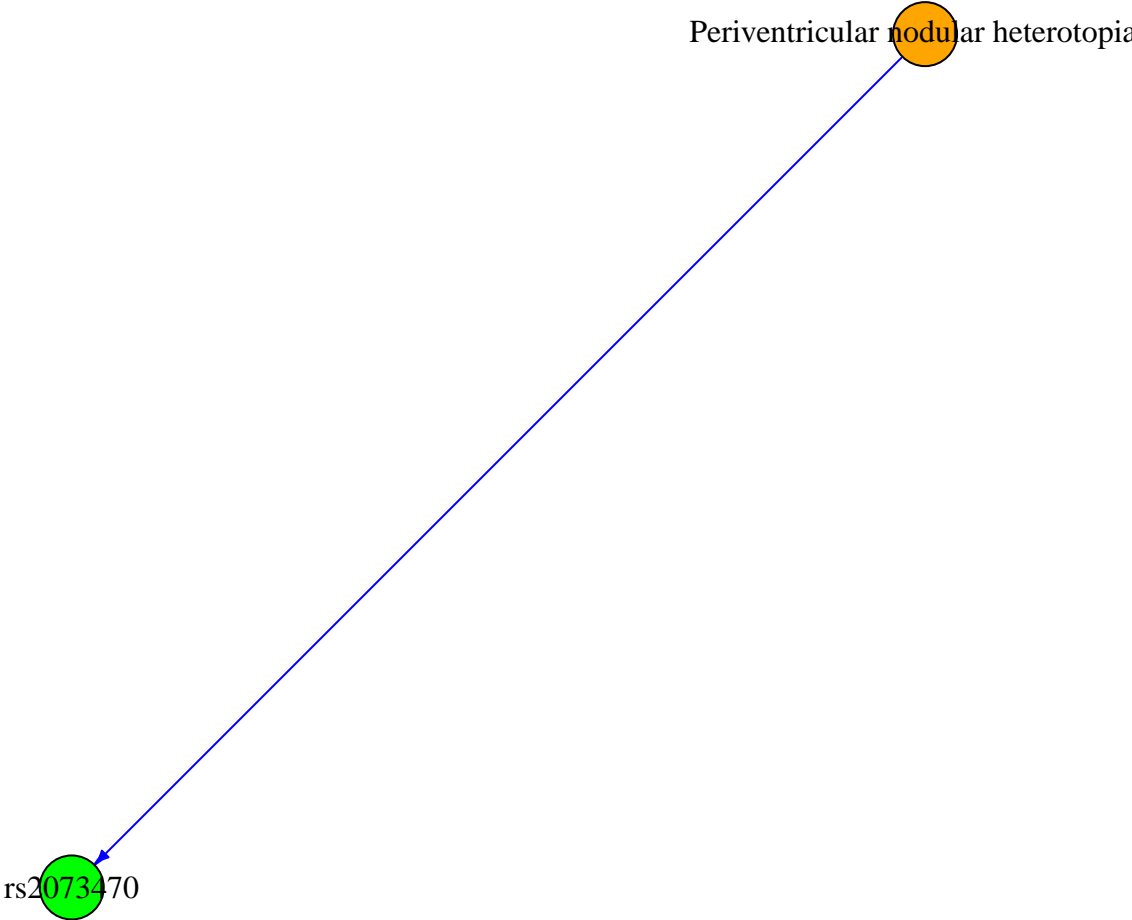

**Variant–Disease Network (Permanent neonatal diabetes mellitus)**

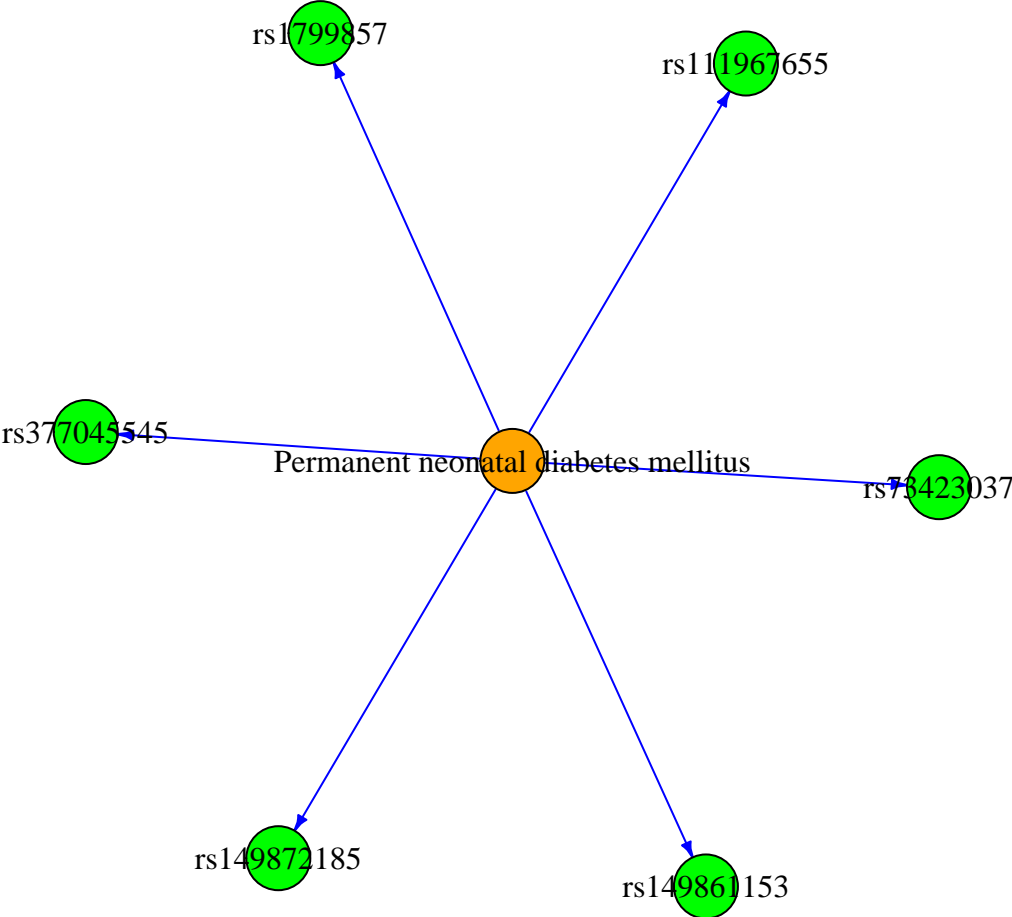

Variant–Disease Network (Peroxisome biogenesis disorder 1A (Zellweger syndrome))

Peroxisome biogenesis disorder 1A (Zellweger syndrome)

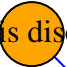

rs10278857

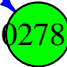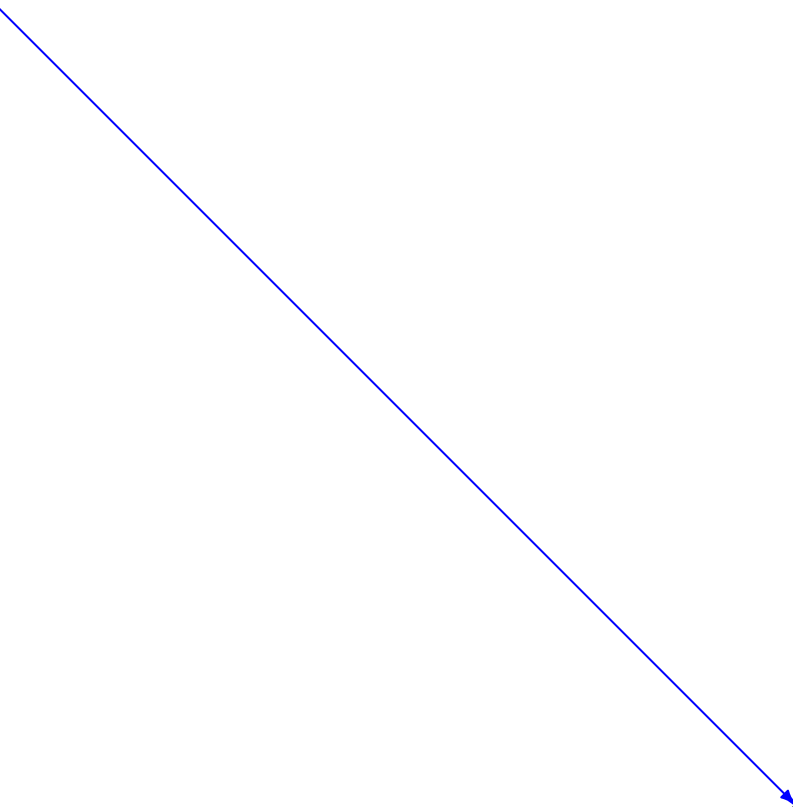

## Variant–Disease Network (Perrault syndrome)

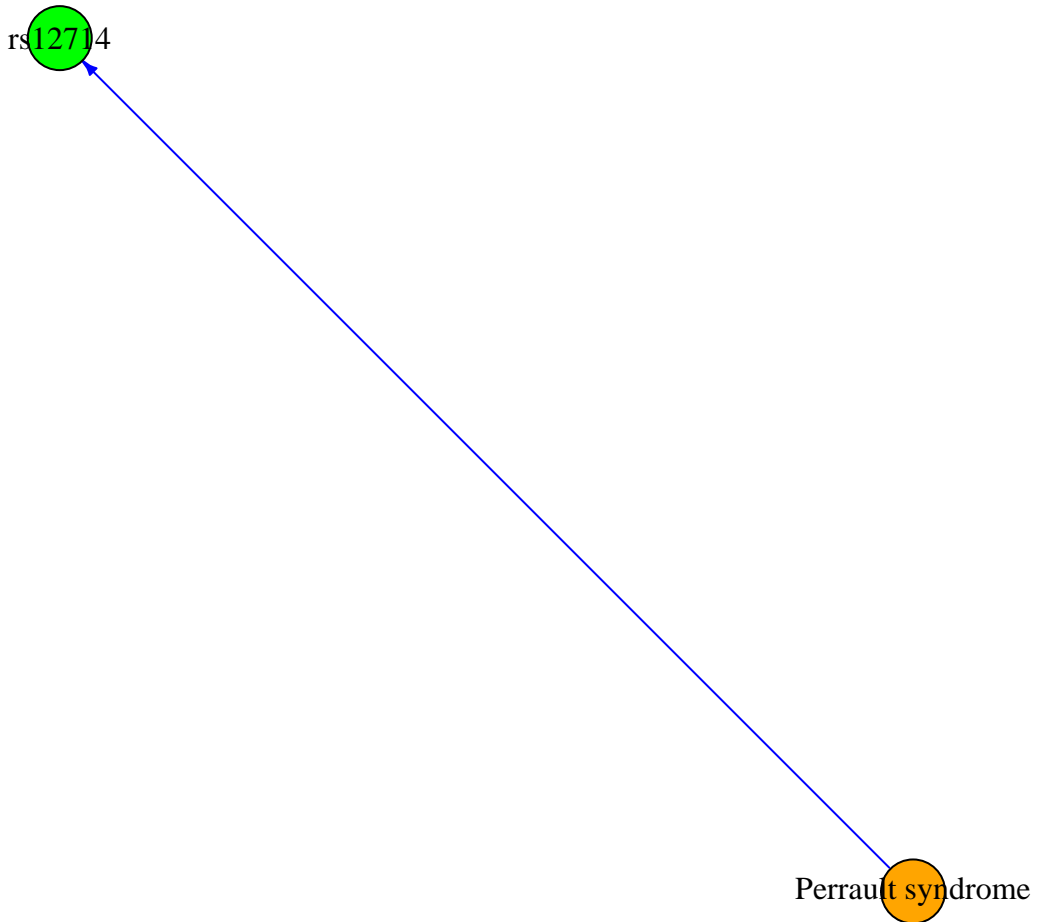

## Variant–Disease Network (Perrault syndrome 1)

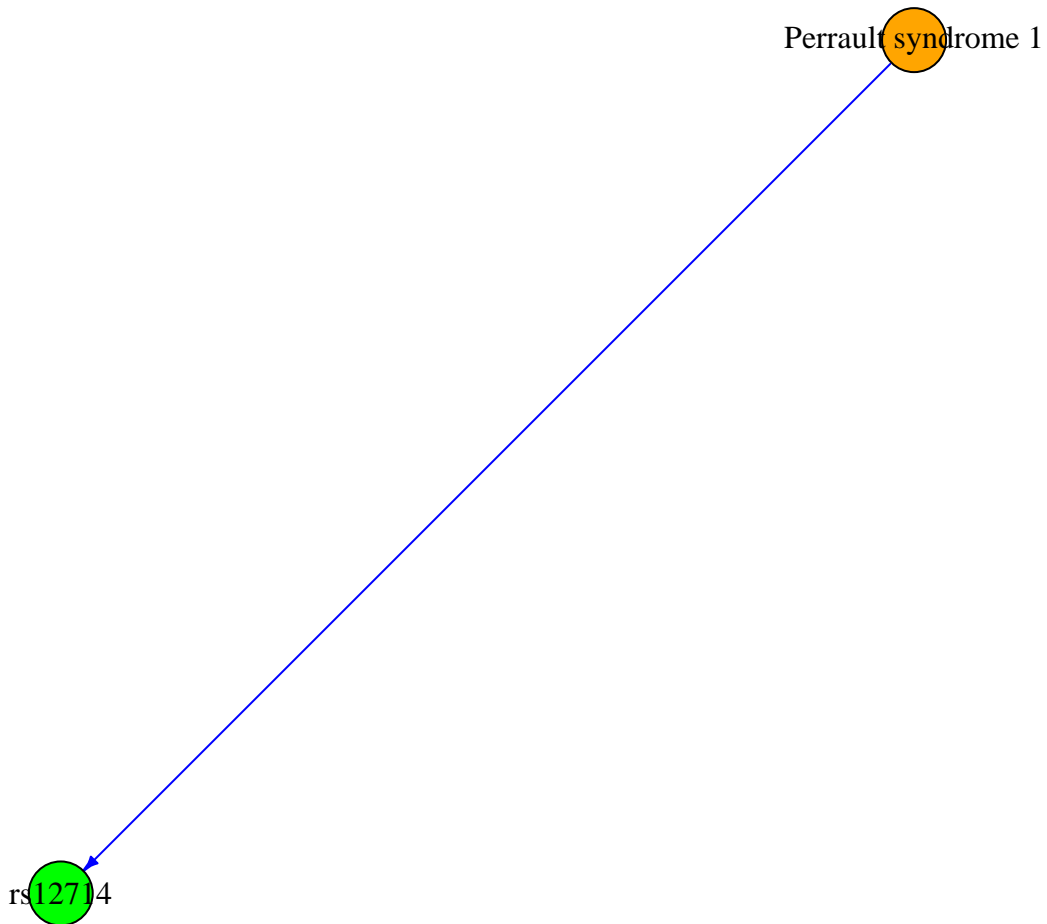

## Variant–Disease Network (Perrault syndrome 4)

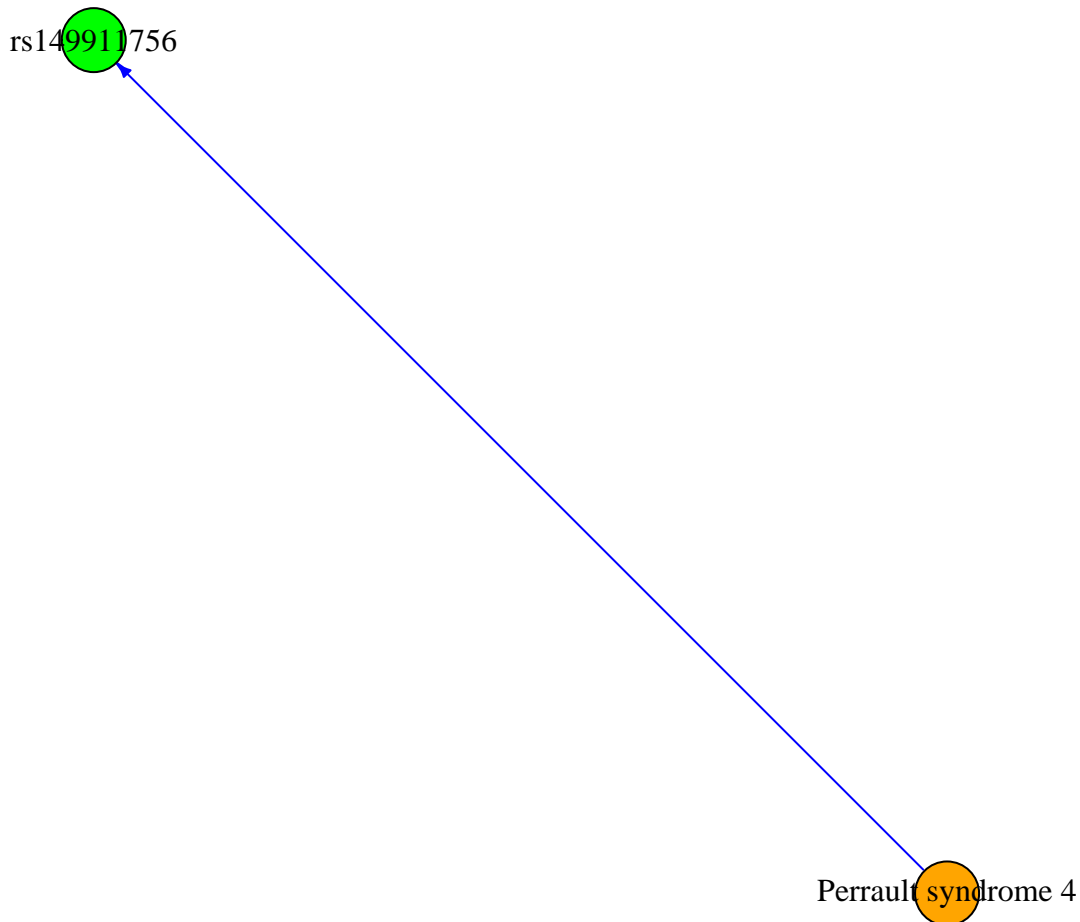

## Variant–Disease Network (Perry syndrome)

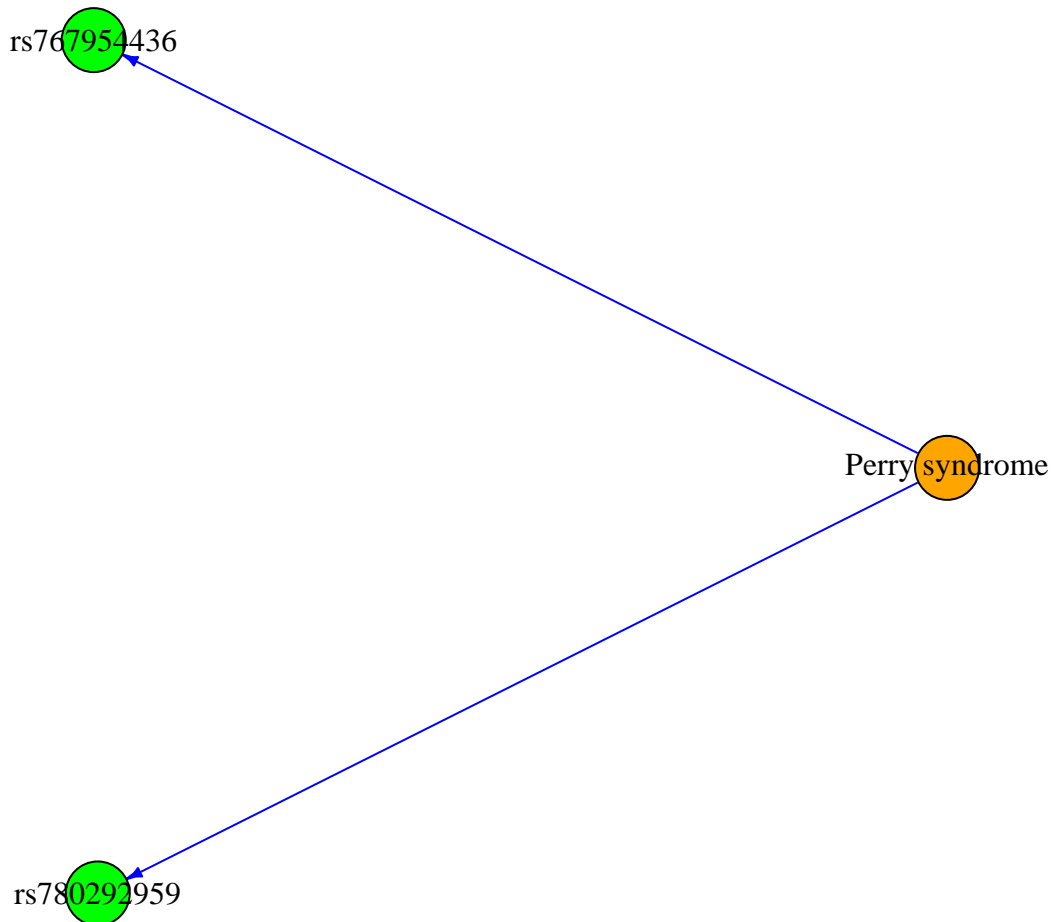



**Variant–Disease Network (Peutz–Jeghers syndrome)**

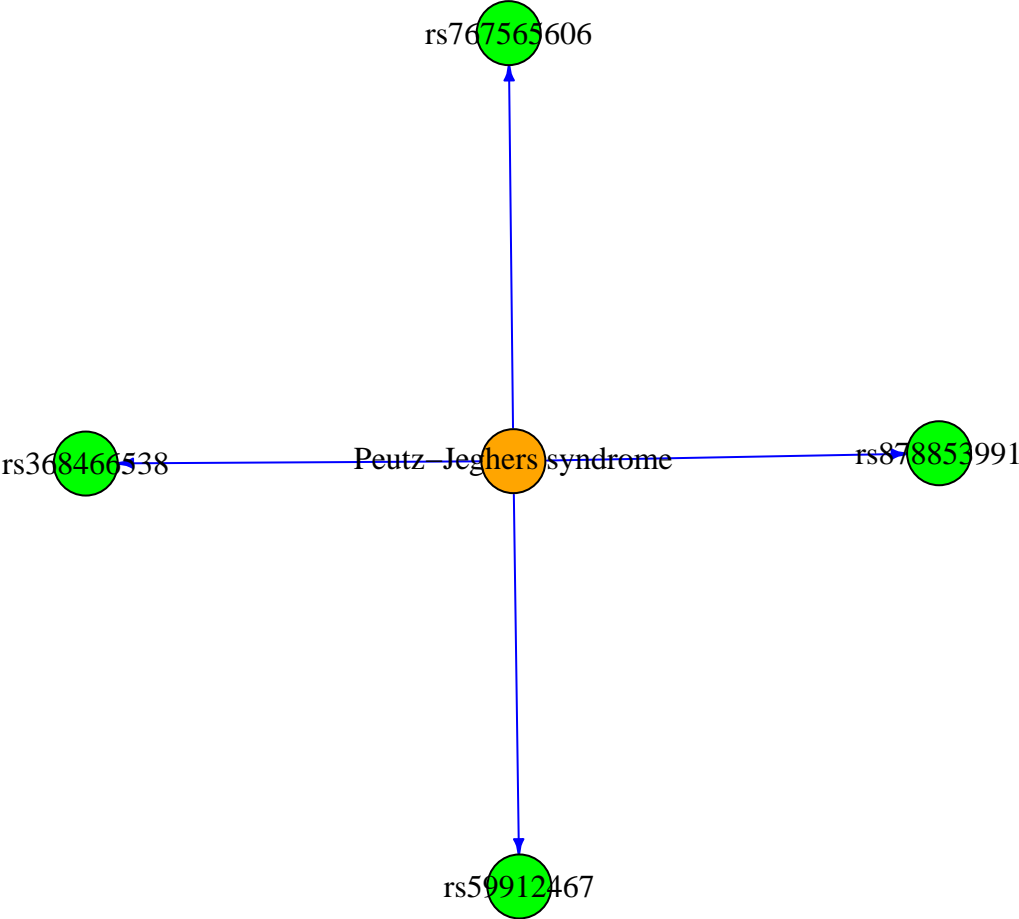

## Variant–Disease Network (Pfeiffer syndrome)

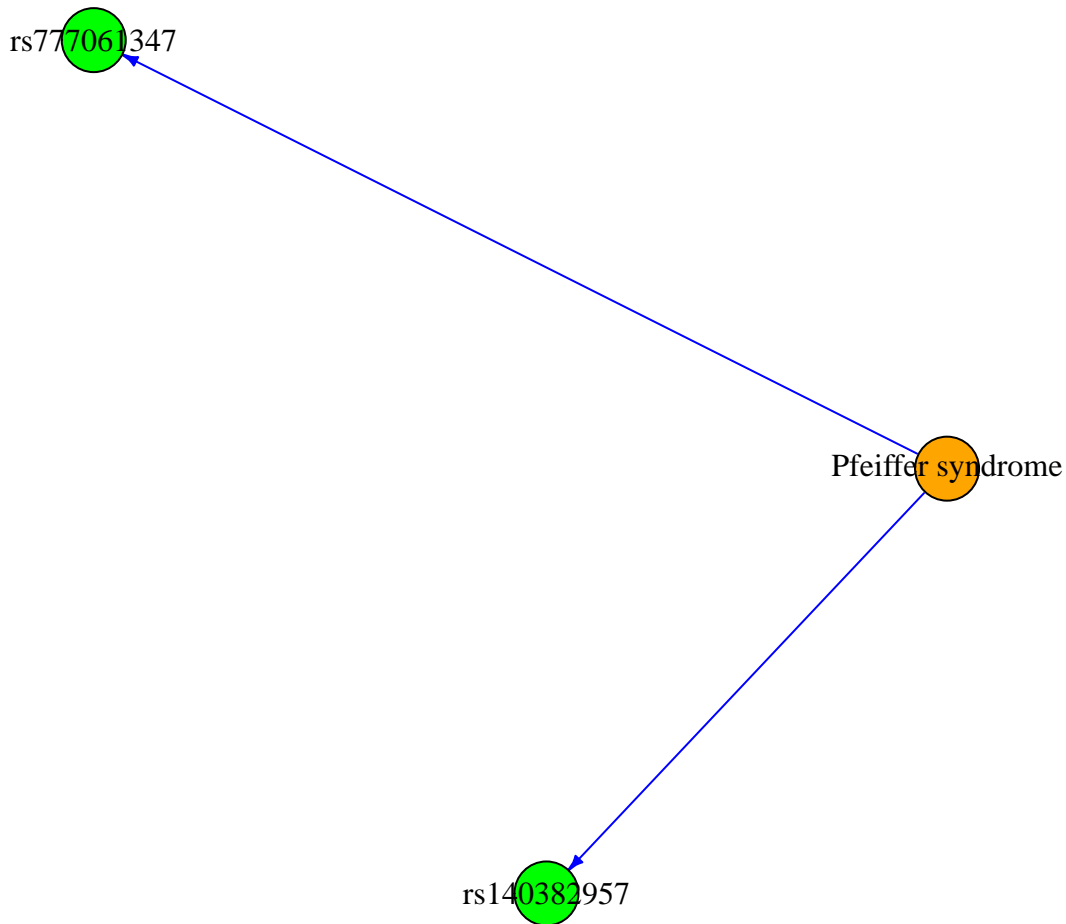

Variant–Disease Network (Phenylketonuria)

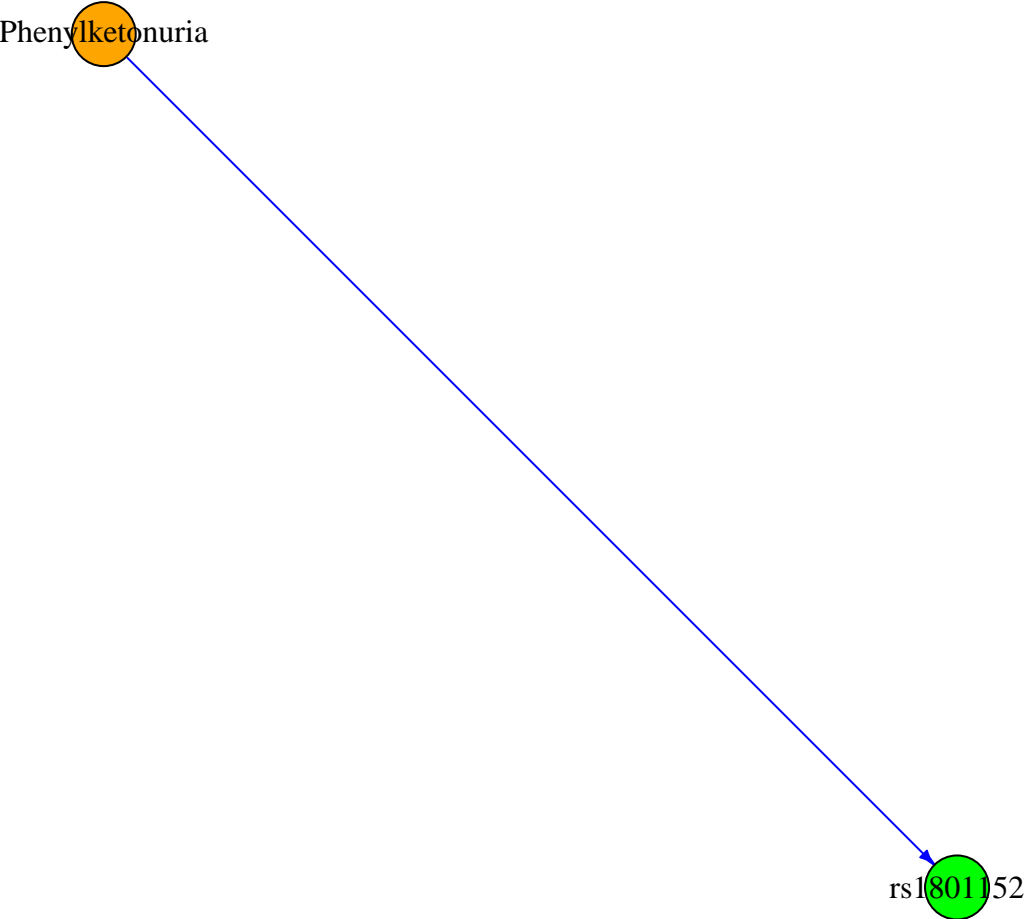

## Variant-Disease Network (Pheochromocytoma)

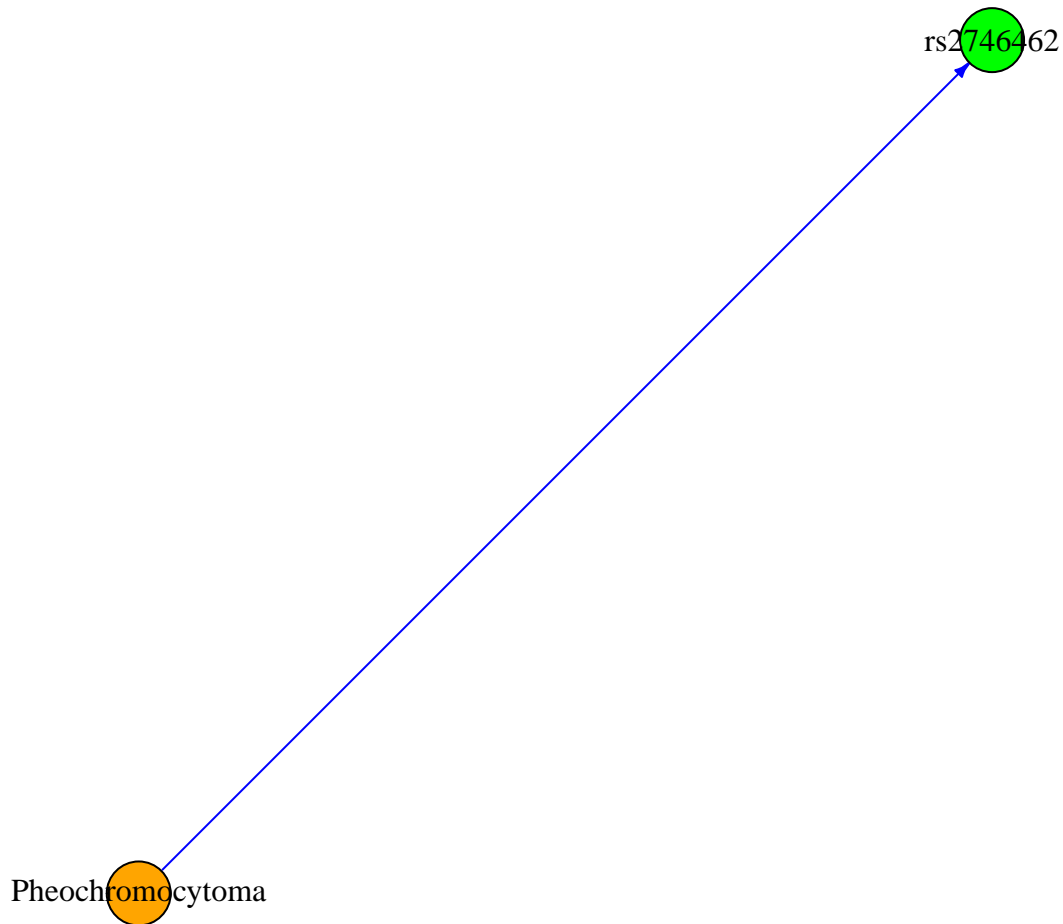

# Variant-Disease Network (Phosphoenolpyruvate carboxykinase (GTP) deficiency)

Phosphoenolpyruvate carboxykinase (GTP) deficiency

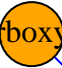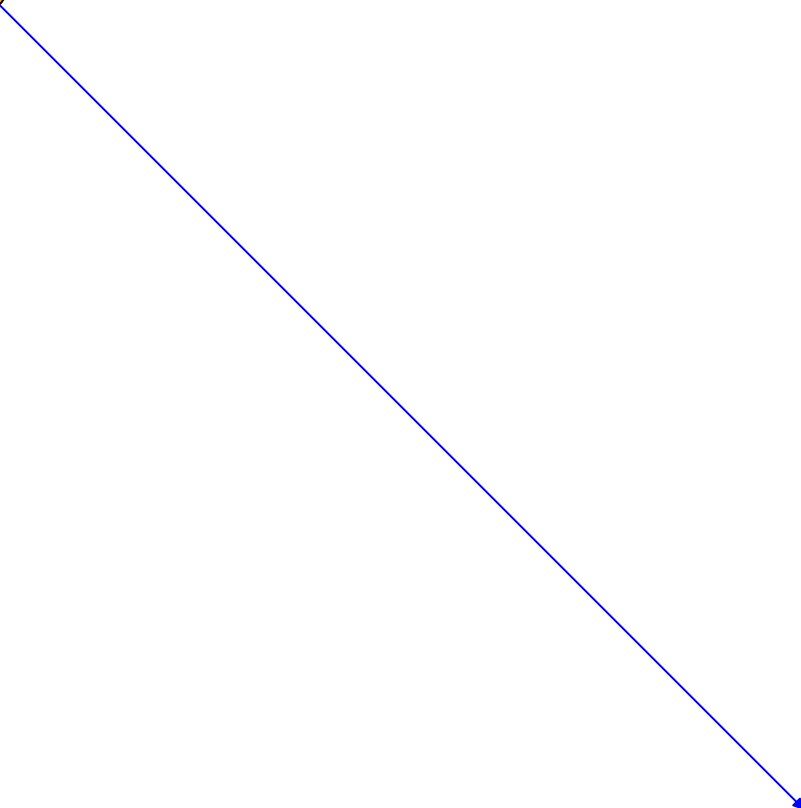

rs200771350

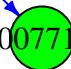

**Variant–Disease Network (Phosphoglycerate dehydrogenase deficiency)**

Phosphoglycerate dehydrogenase deficiency

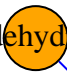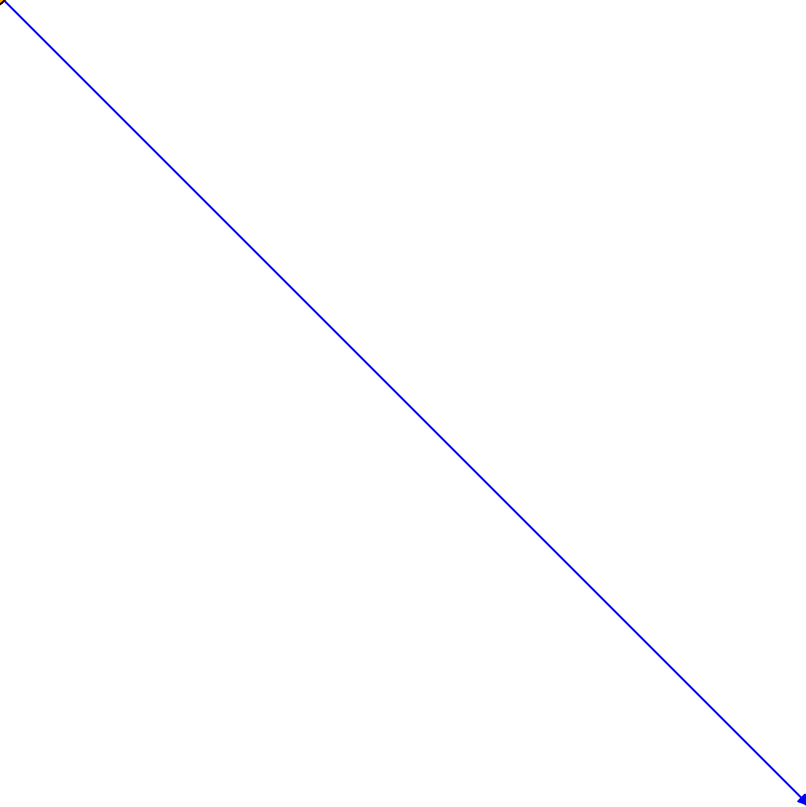

rs148078511

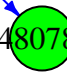

# Variant-Disease Network (Phosphoserine aminotransferase deficiency)

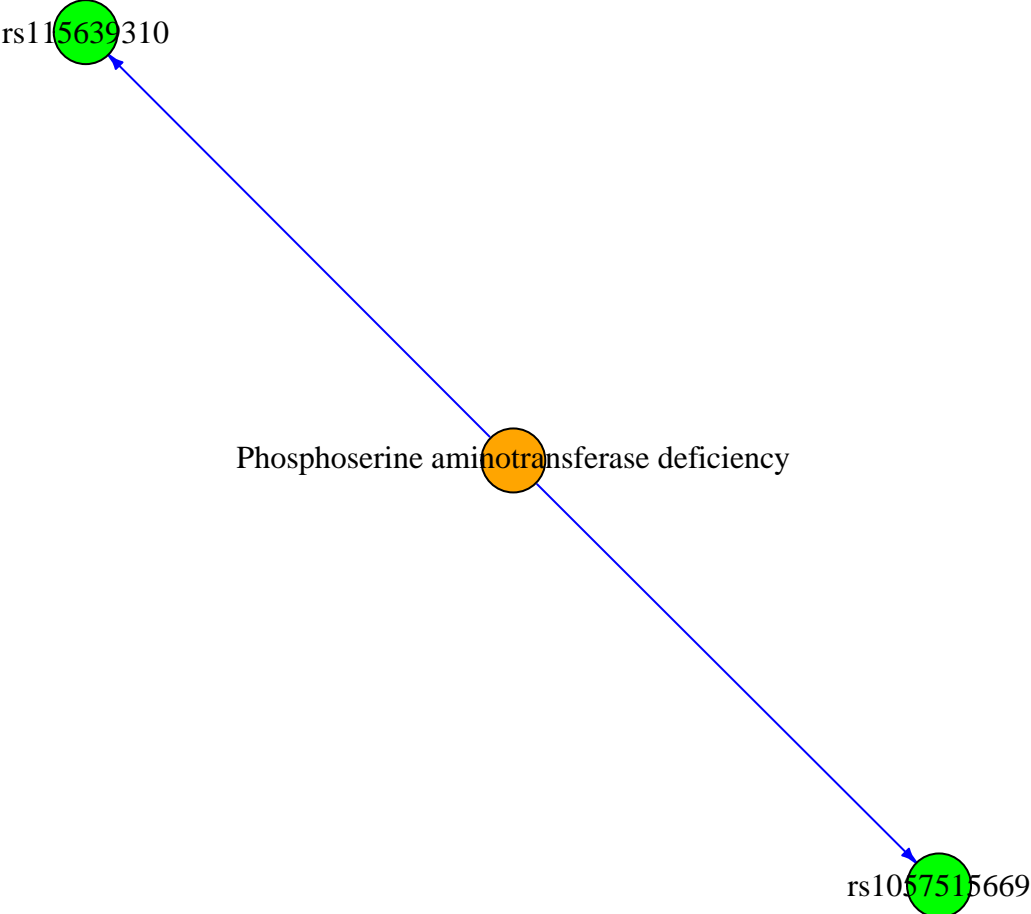

## Variant–Disease Network (Pierson syndrome)

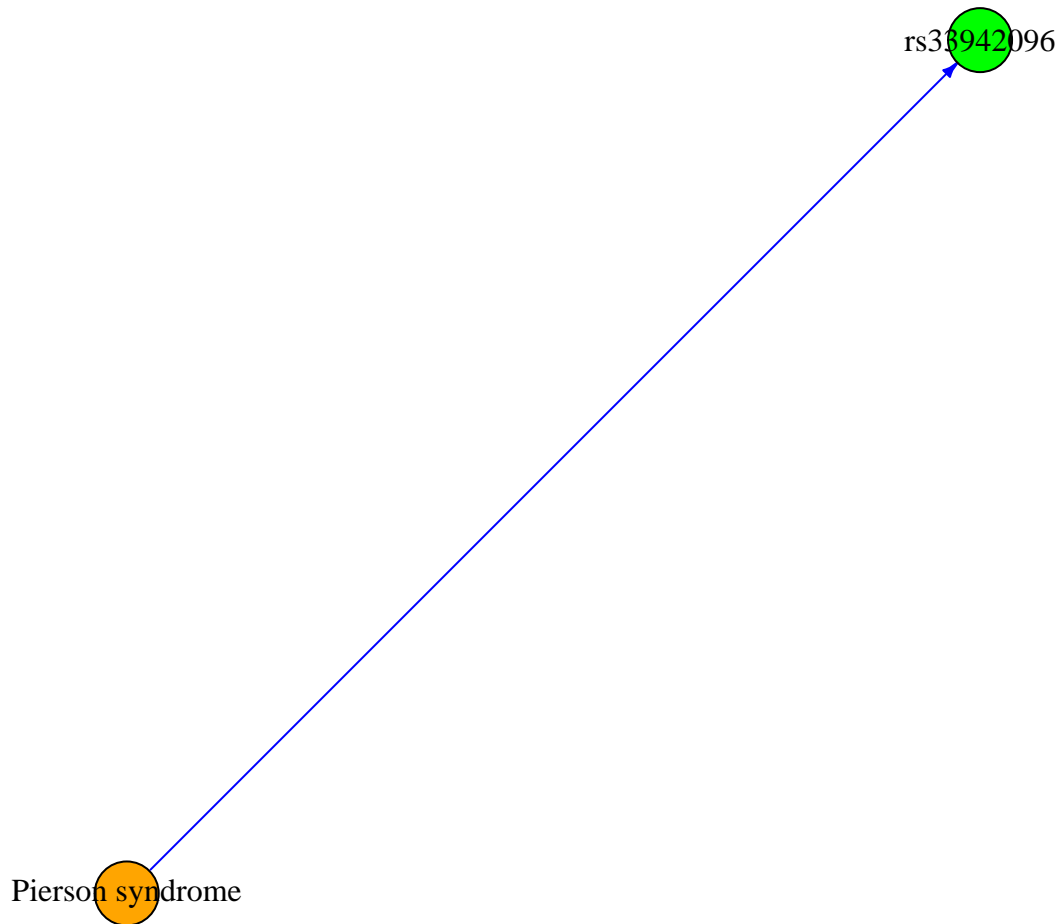



**Variant–Disease Network (Pityriasis rubra pilaris)**

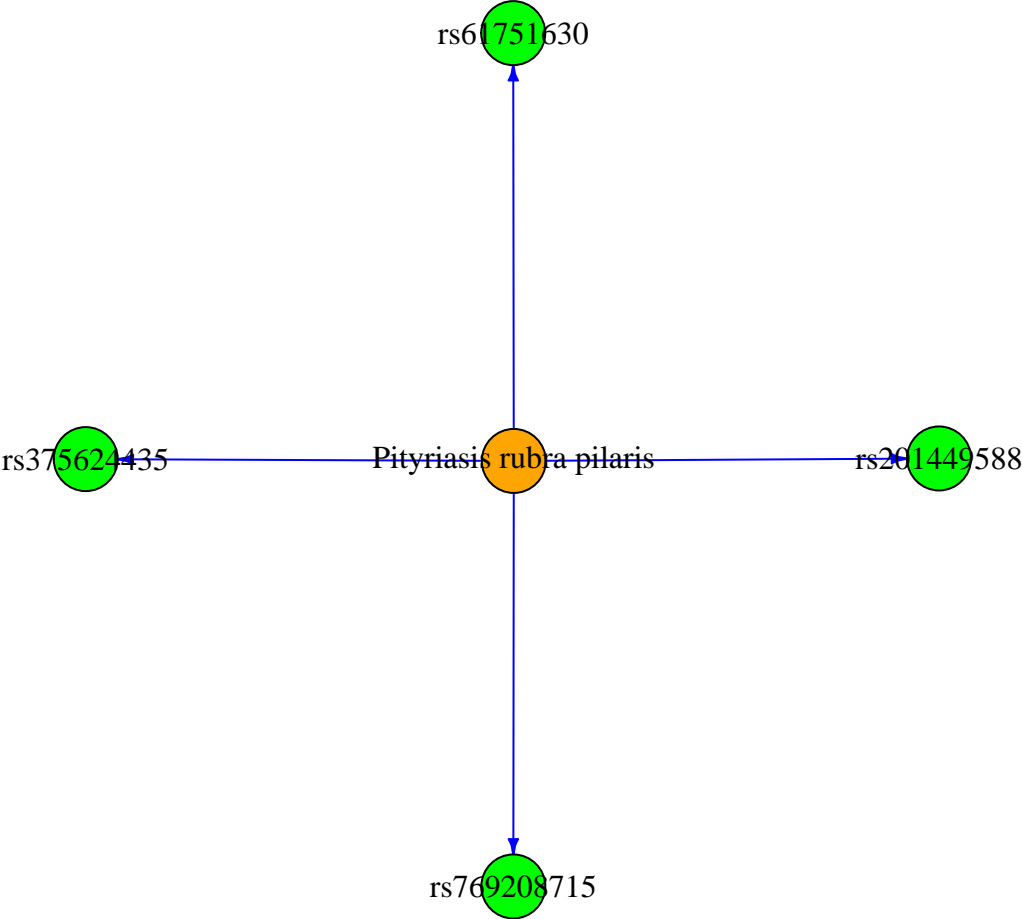

Variant–Disease Network (Plasminogen activator inhibitor type 1 deficiency)

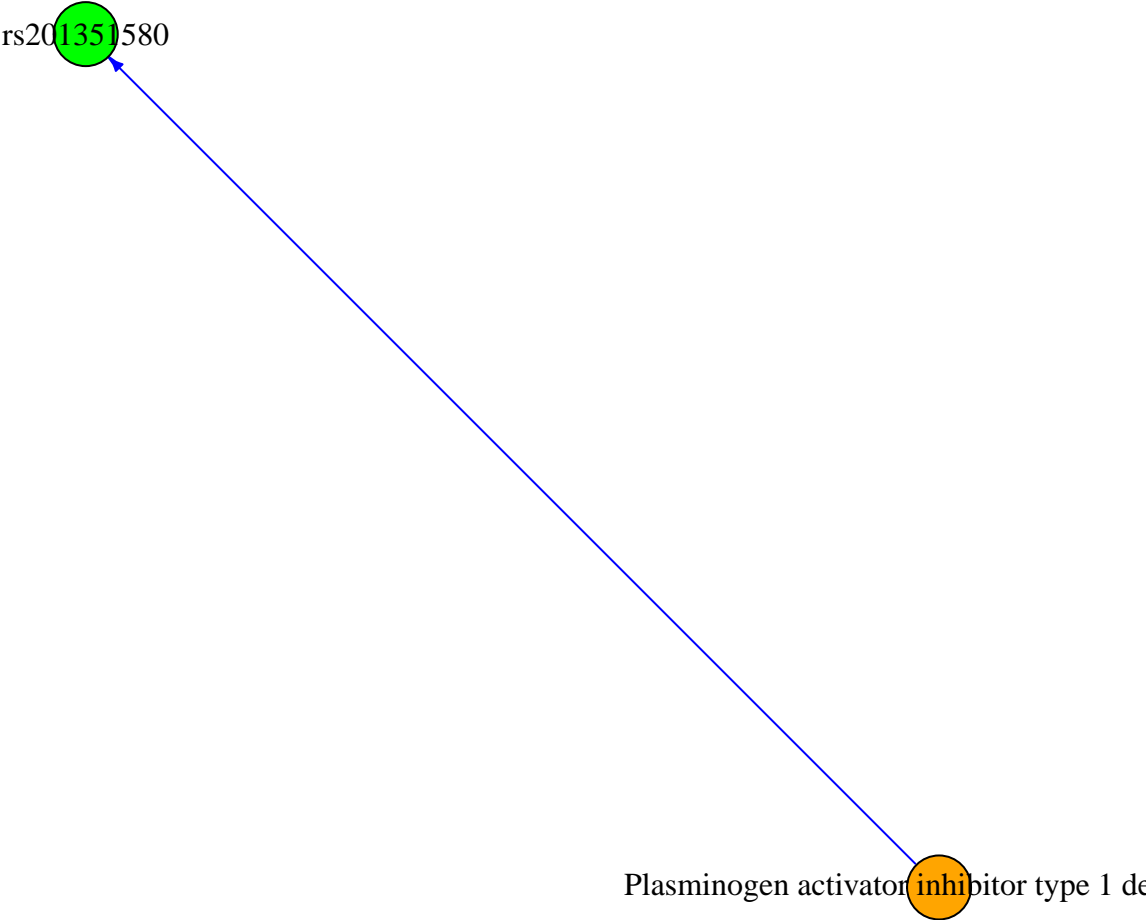

Variant–Disease Network (Platelet–type bleeding disorder 9)

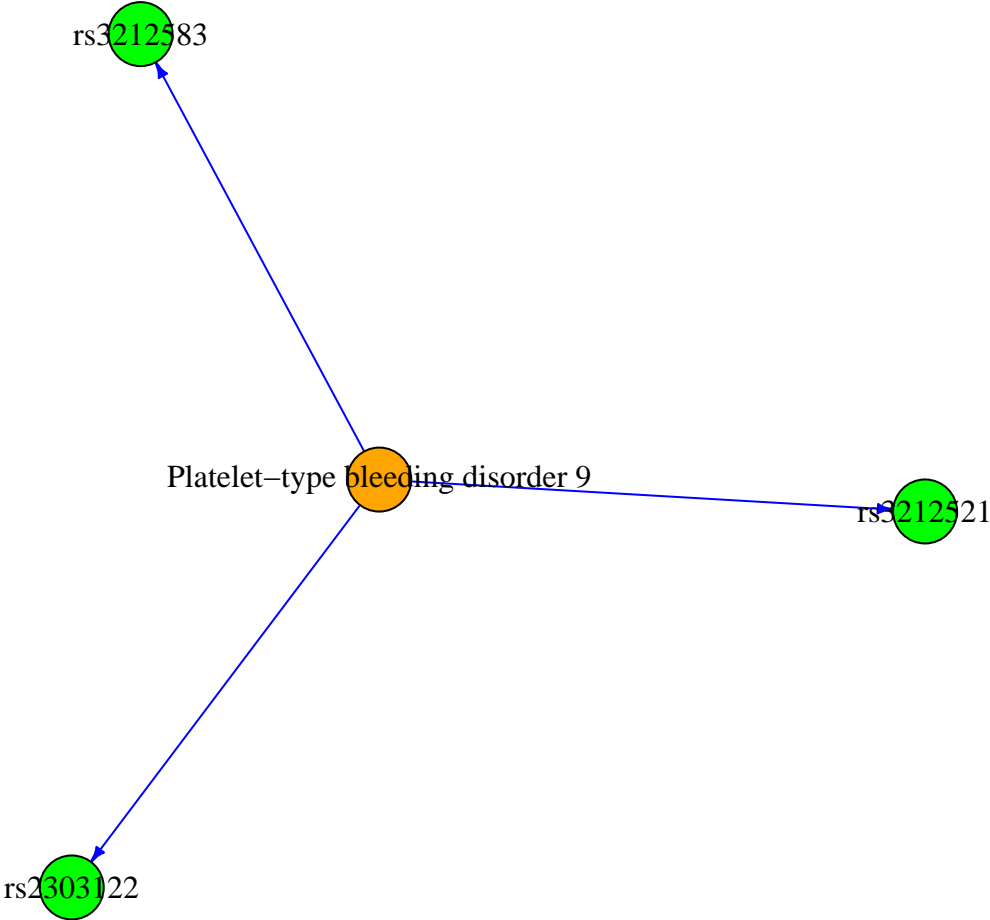

## Variant–Disease Network (Pleuropulmonary blastoma)

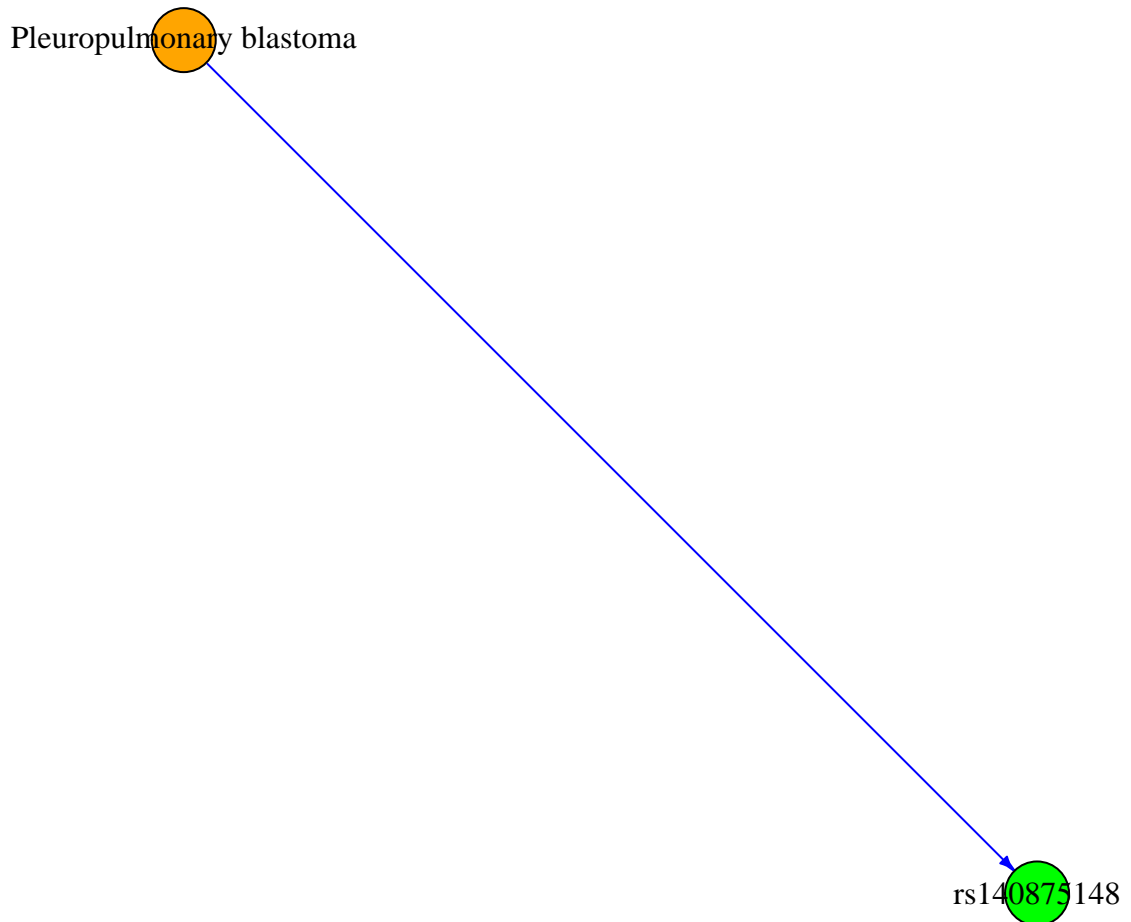

**Variant–Disease Network (Pol III–related leukodystrophy)**

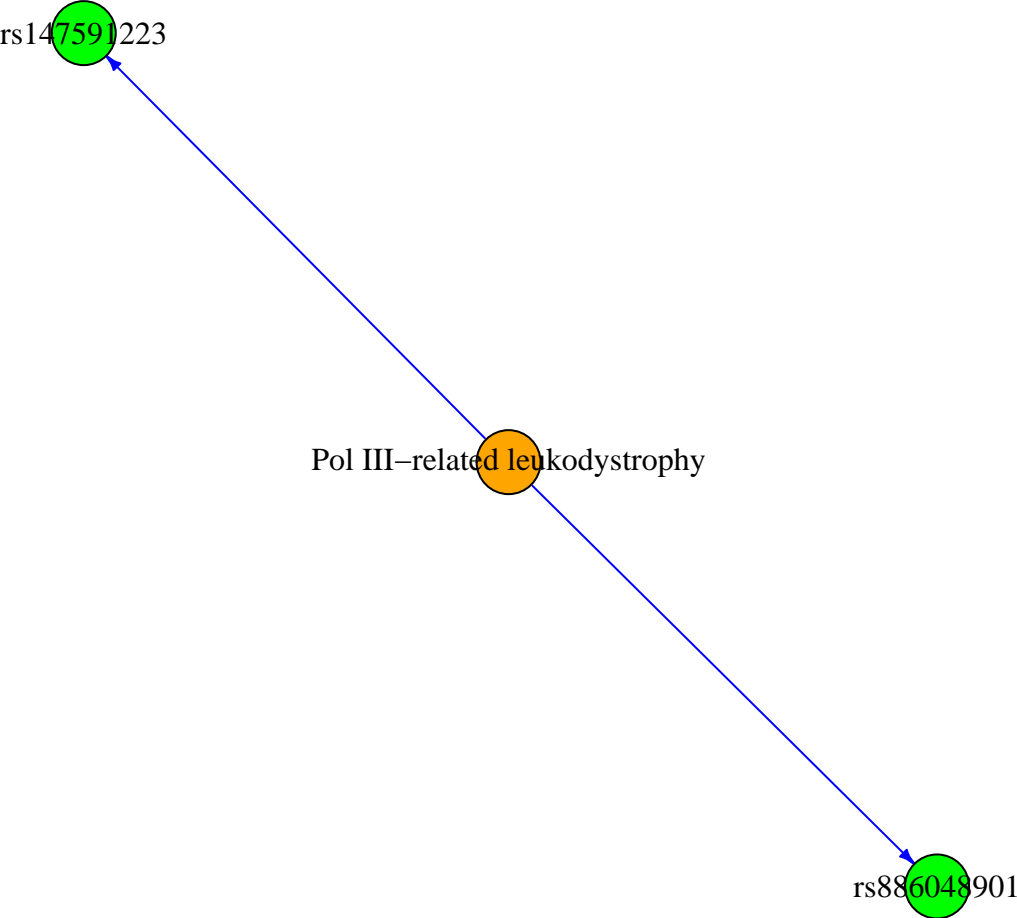

# Variant-Disease Network (POLG-Related Spectrum Disorders)

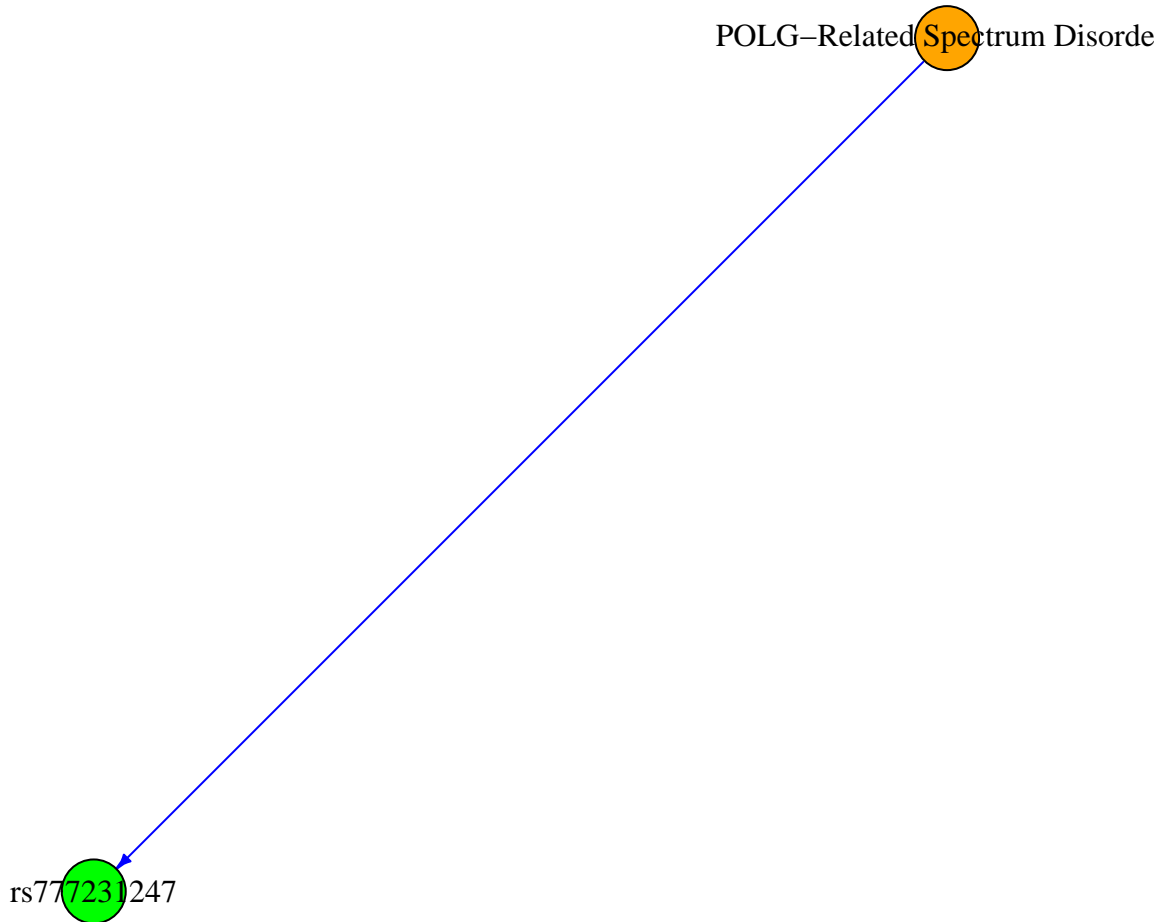

## Variant–Disease Network (Polycystic kidney disease)

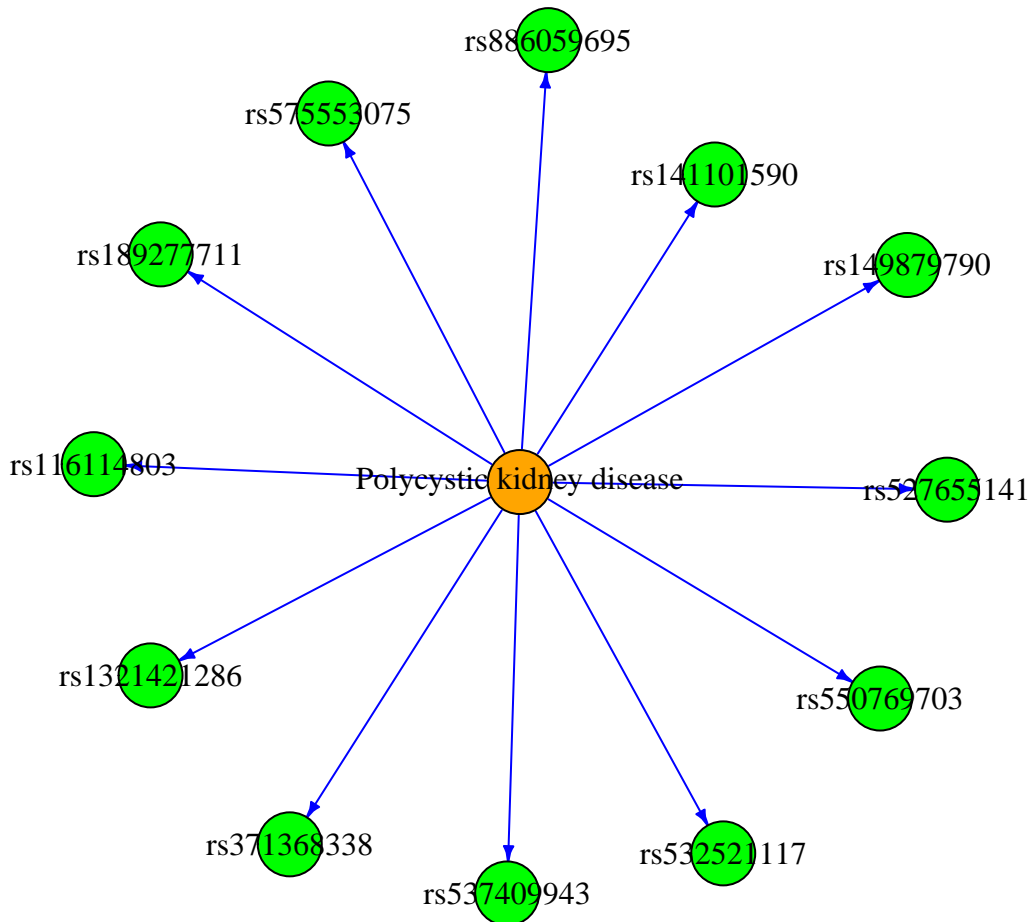

## Variant–Disease Network (Polycystic liver disease 1)

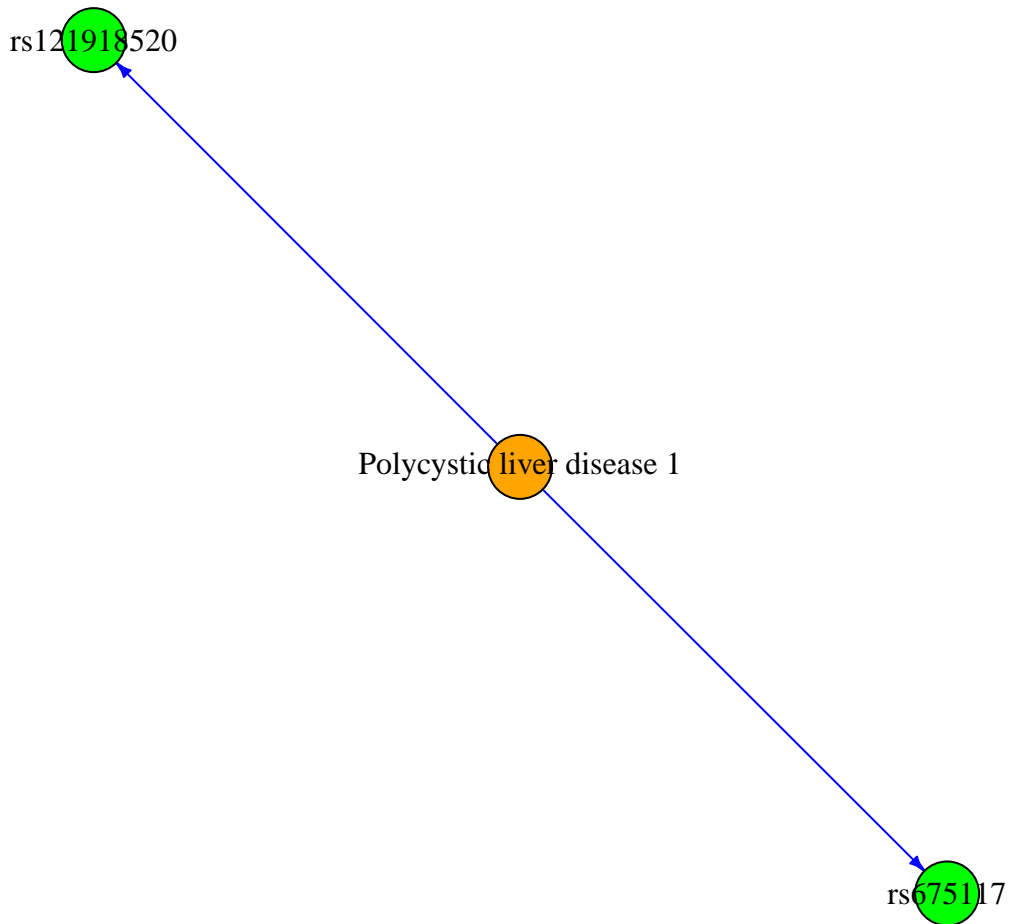



Variant–Disease Network (Polydactyly)

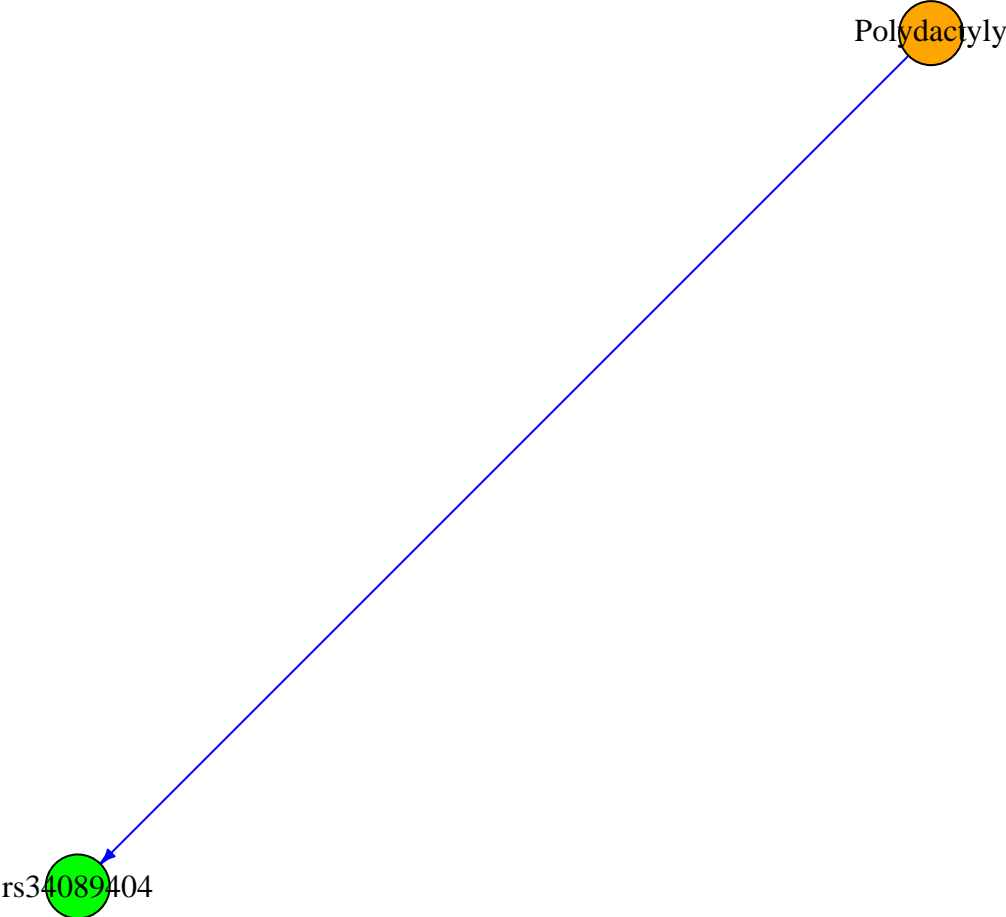

Variant–Disease Network (Polyglandular autoimmune syndrome)

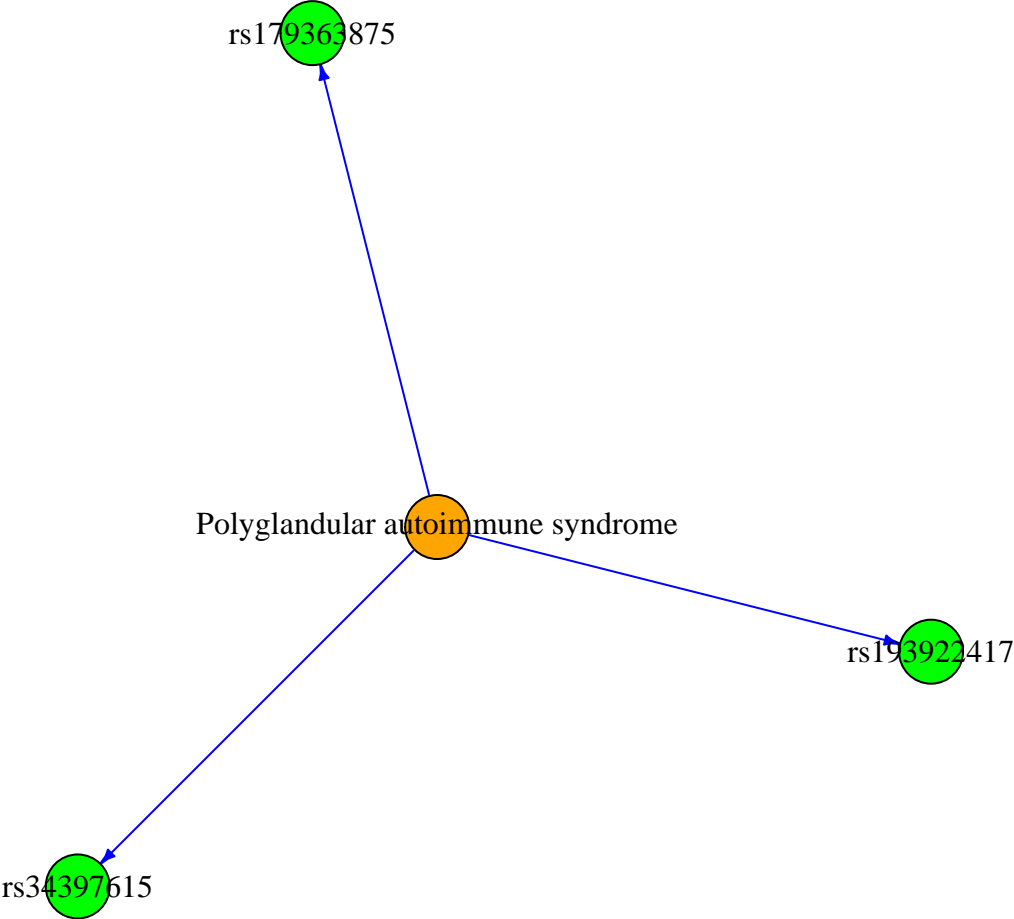

## Variant–Disease Network (Polyglucosan body disease)

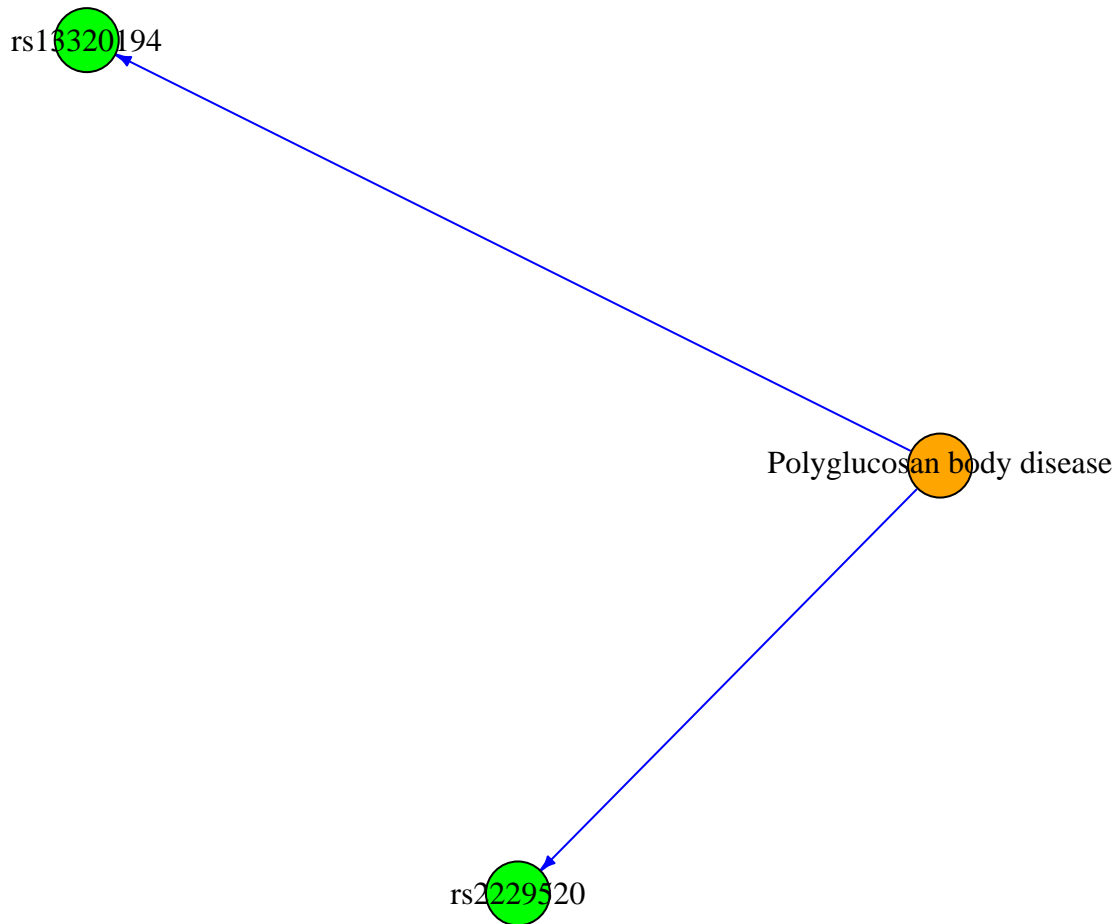

Variant–Disease Network (Polyhydramnios)

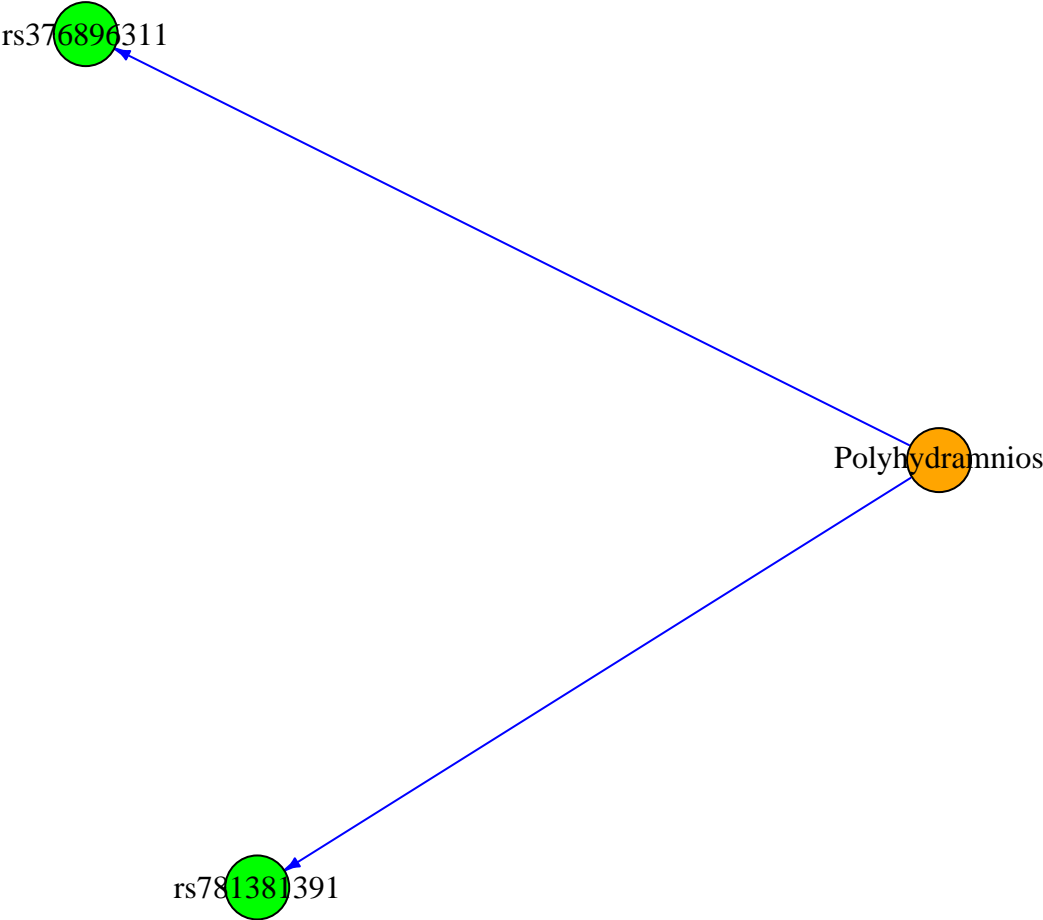

## Variant–Disease Network (Polymicrogyria)

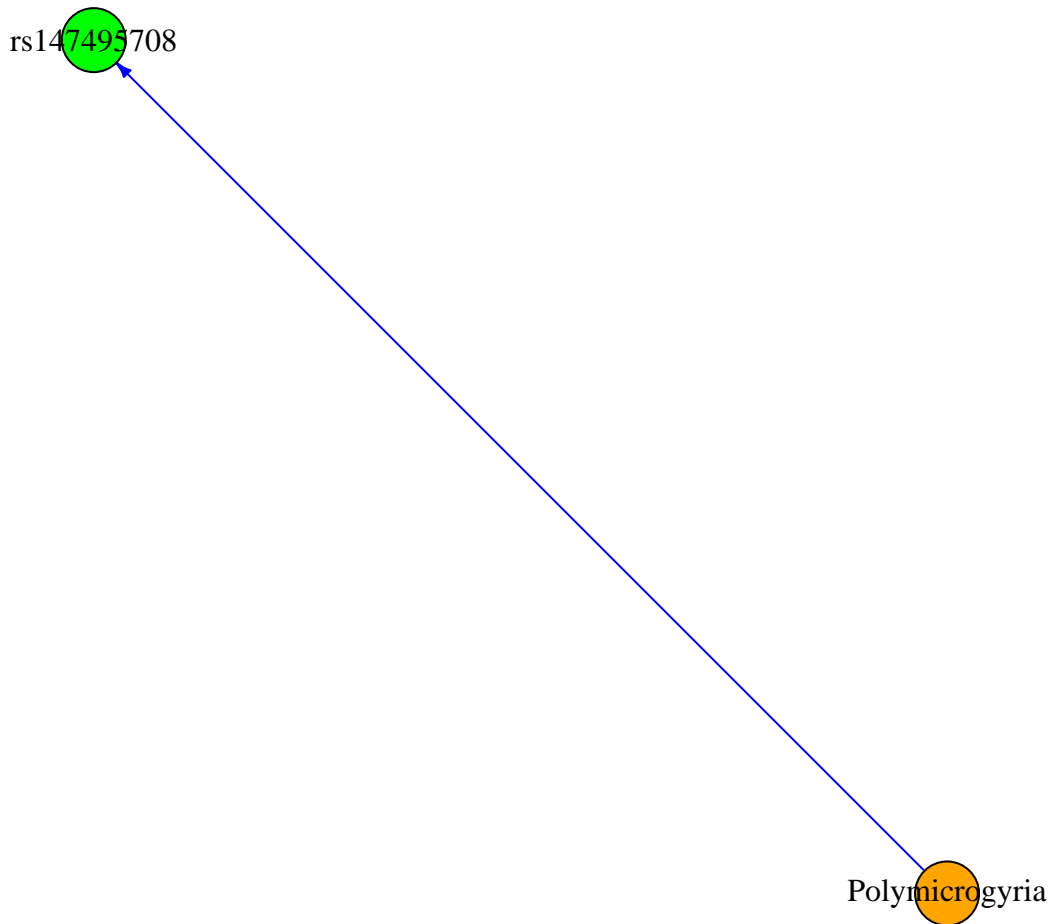

Variant–Disease Network (Polyneuropathy)

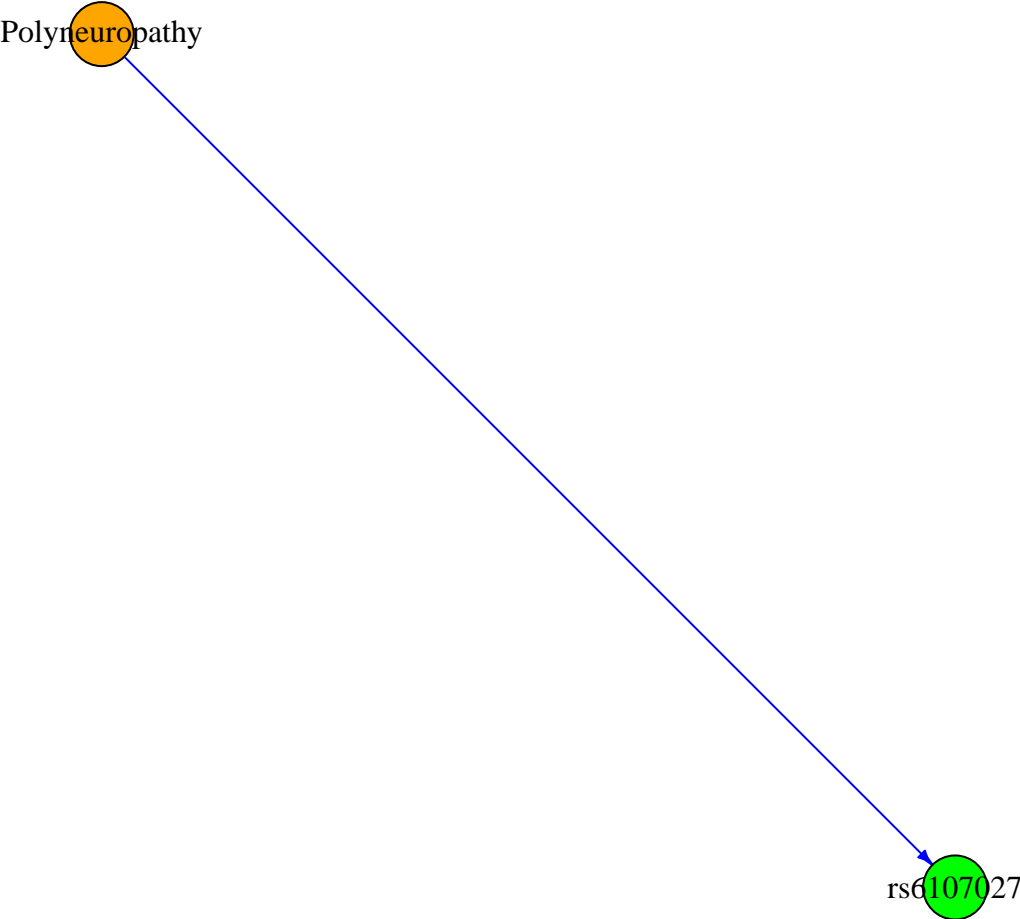

Variant–Disease Network (Pontocerebellar hypoplasia type 1A)

Pontocerebellar hypoplasia type 1A

rs2230532



Variant–Disease Network (Pontoneocerebellar hypoplasia)

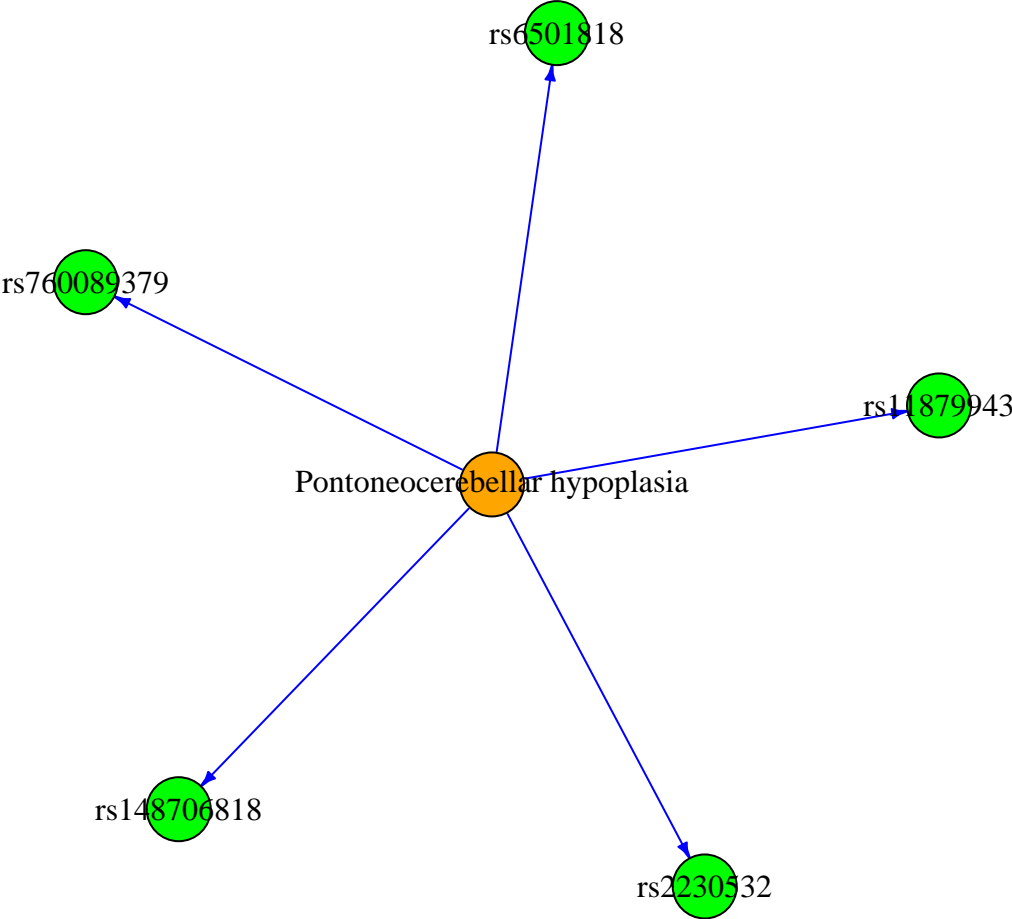



## Variant–Disease Network (Porencephalic cyst)

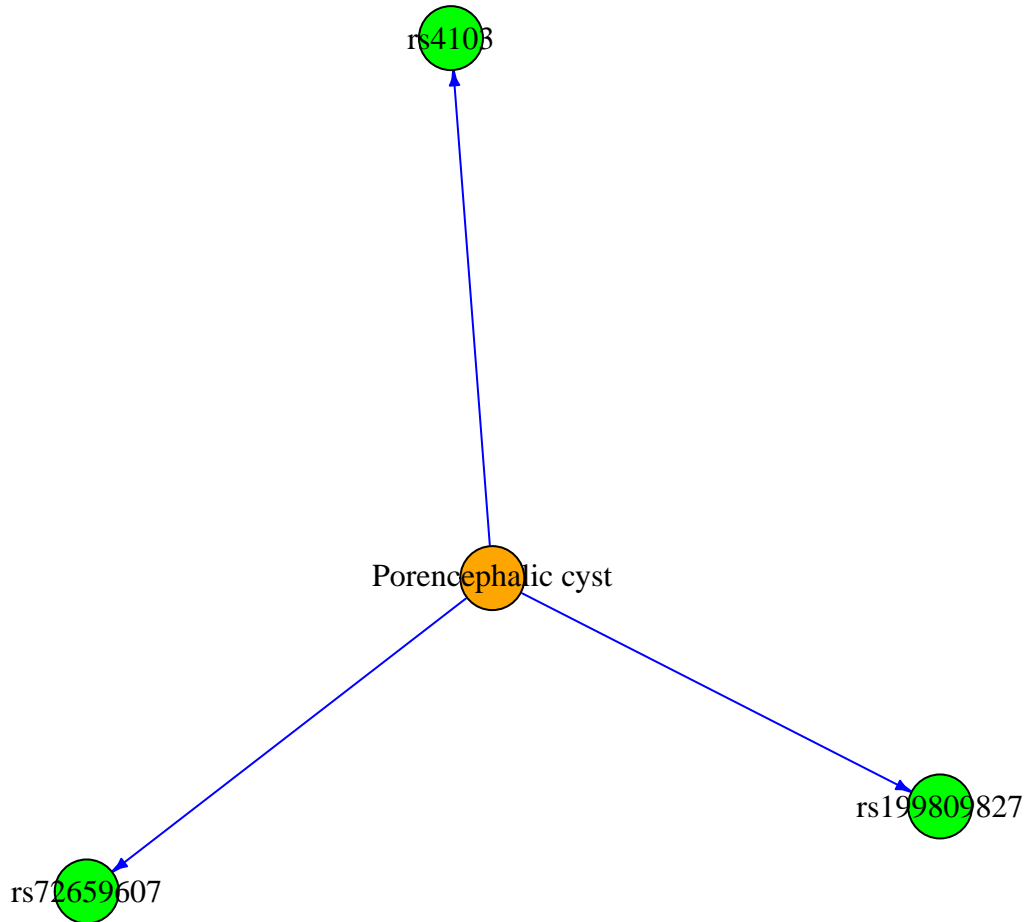

Variant–Disease Network (Porphobilinogen synthase deficiency)

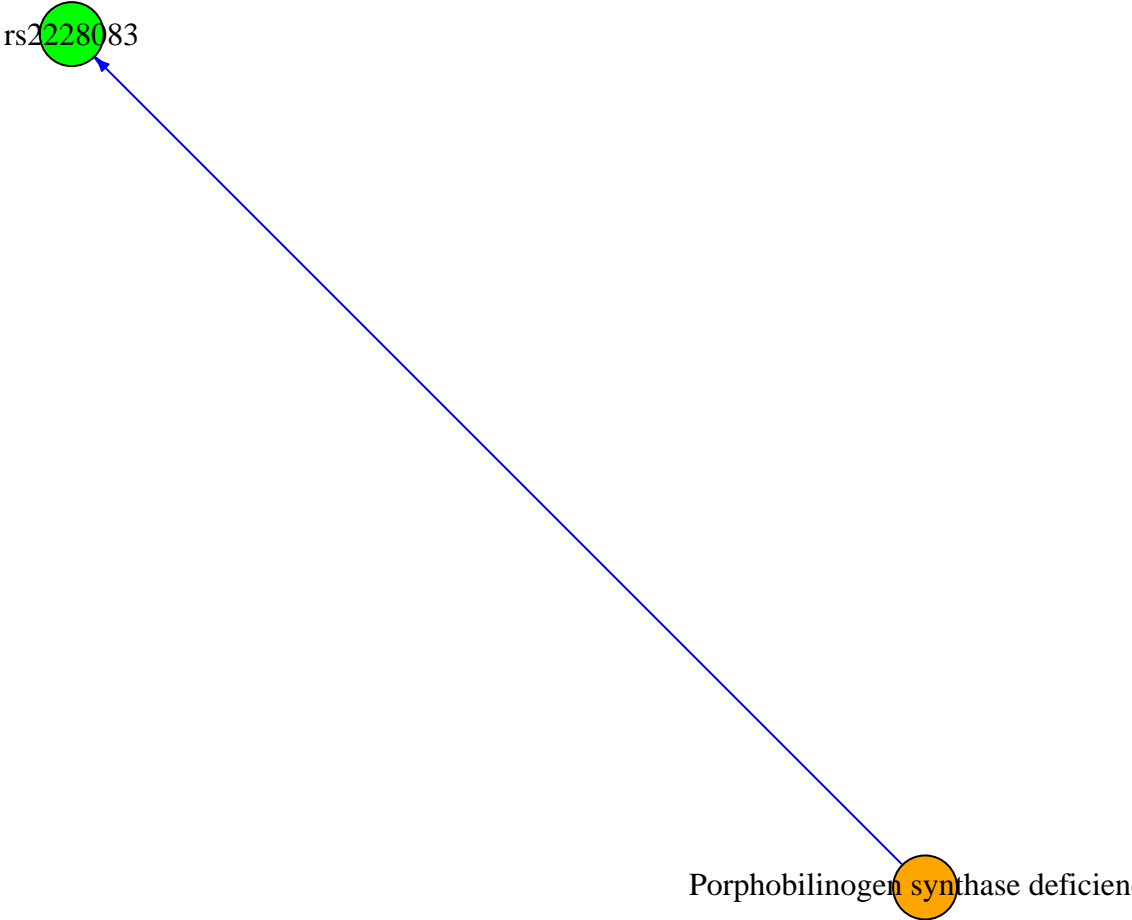

## Variant-Disease Network (Porphyria)

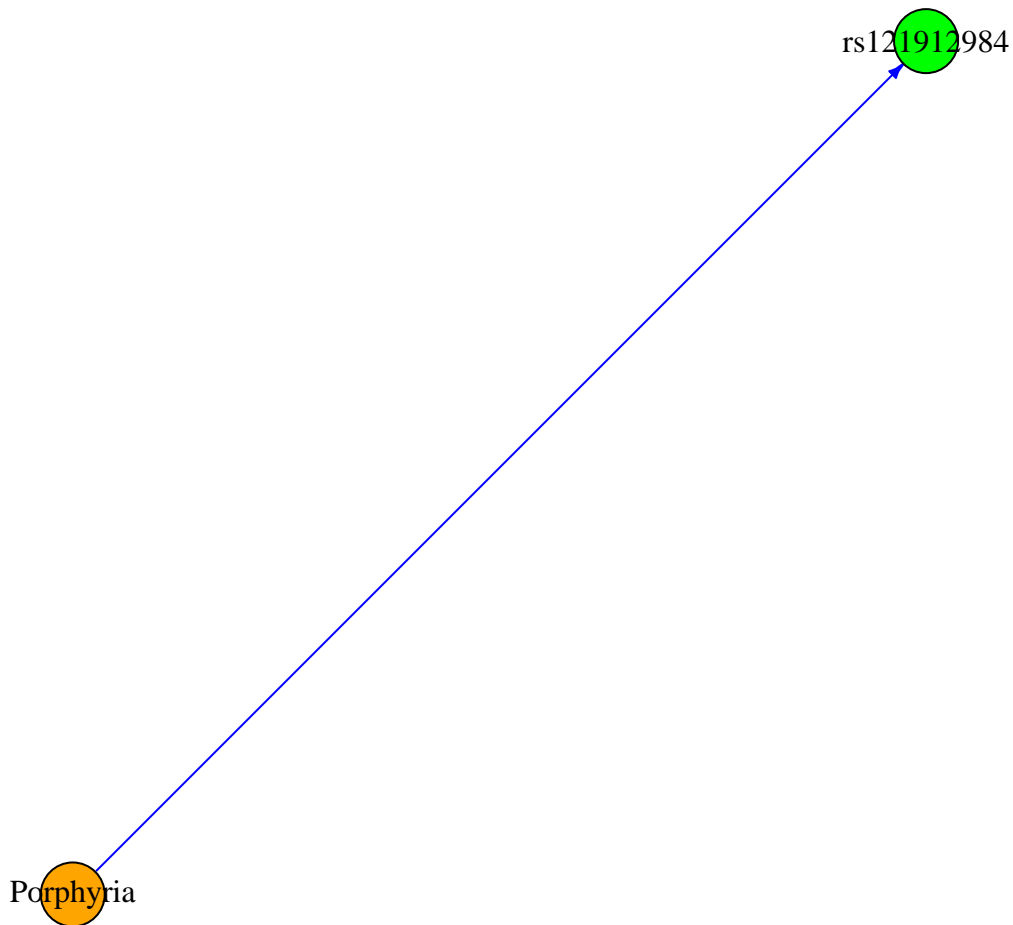

# Variant–Disease Network (Potassium aggravated myotonia)

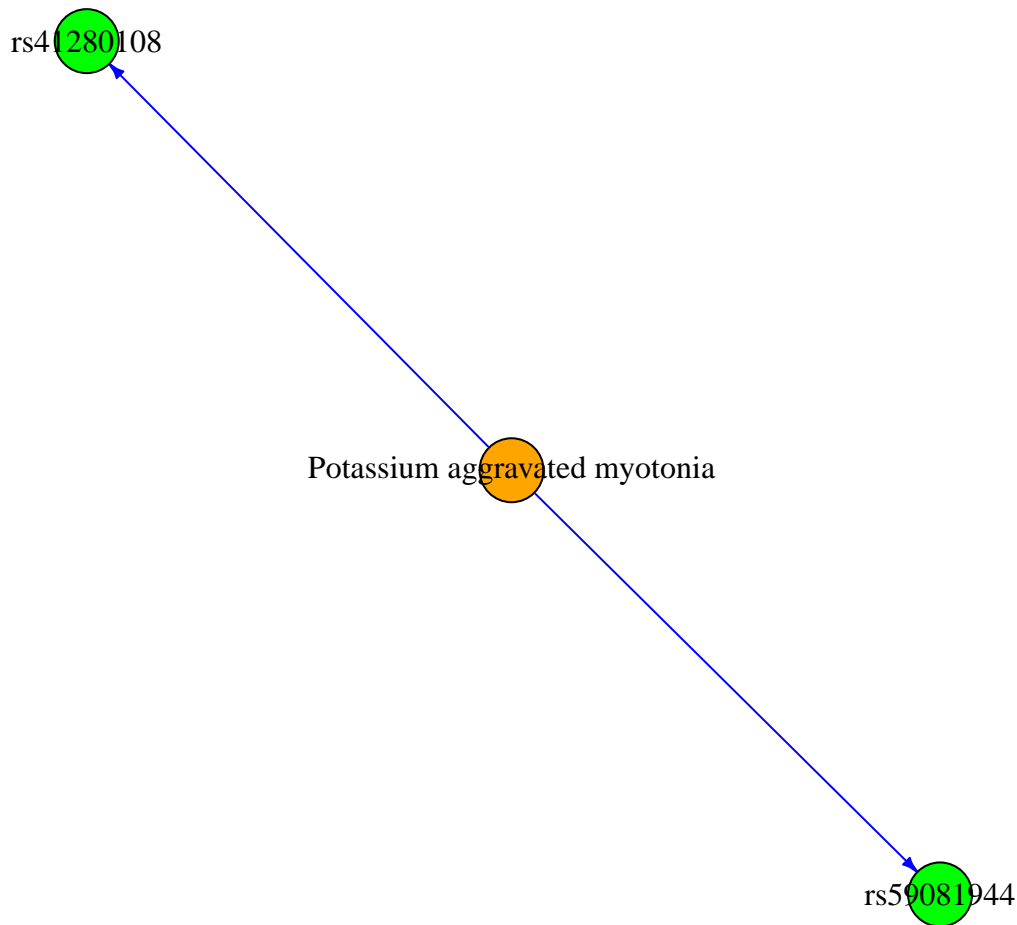

## Variant–Disease Network (Primary ciliary dyskinesia)

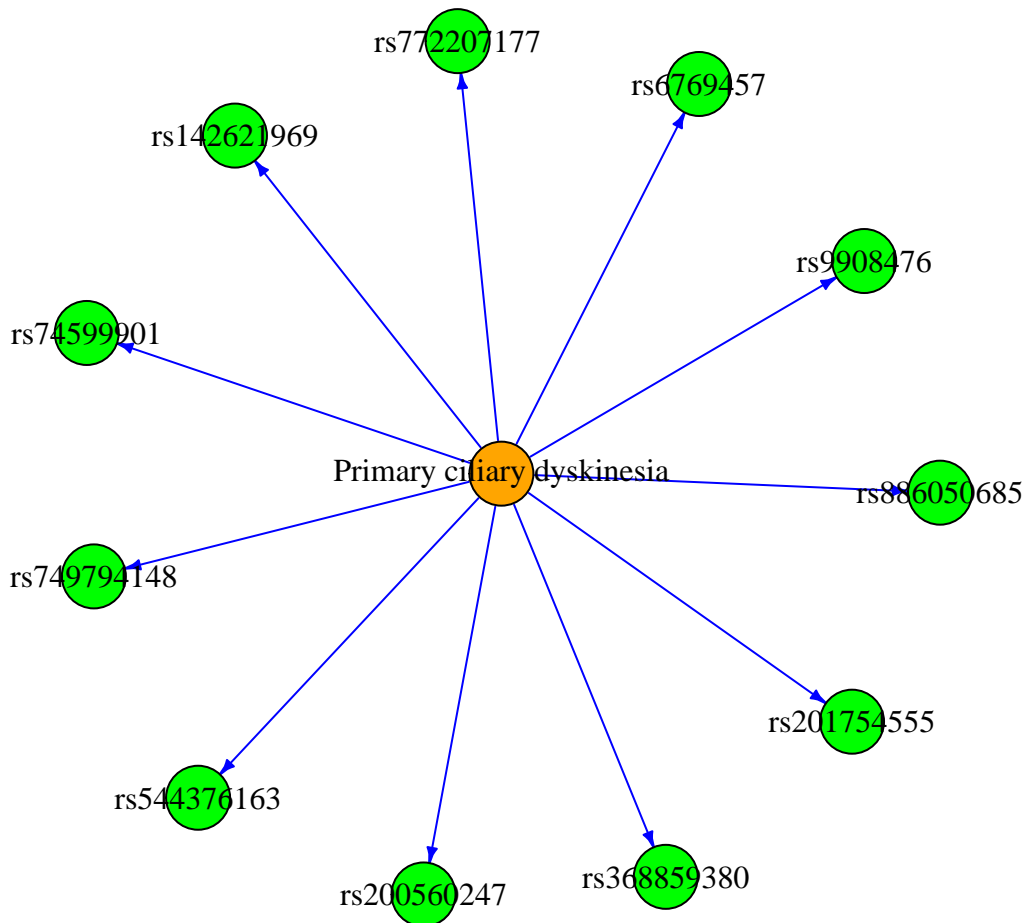

## Variant–Disease Network (Primary ciliary dyskinesia 23)

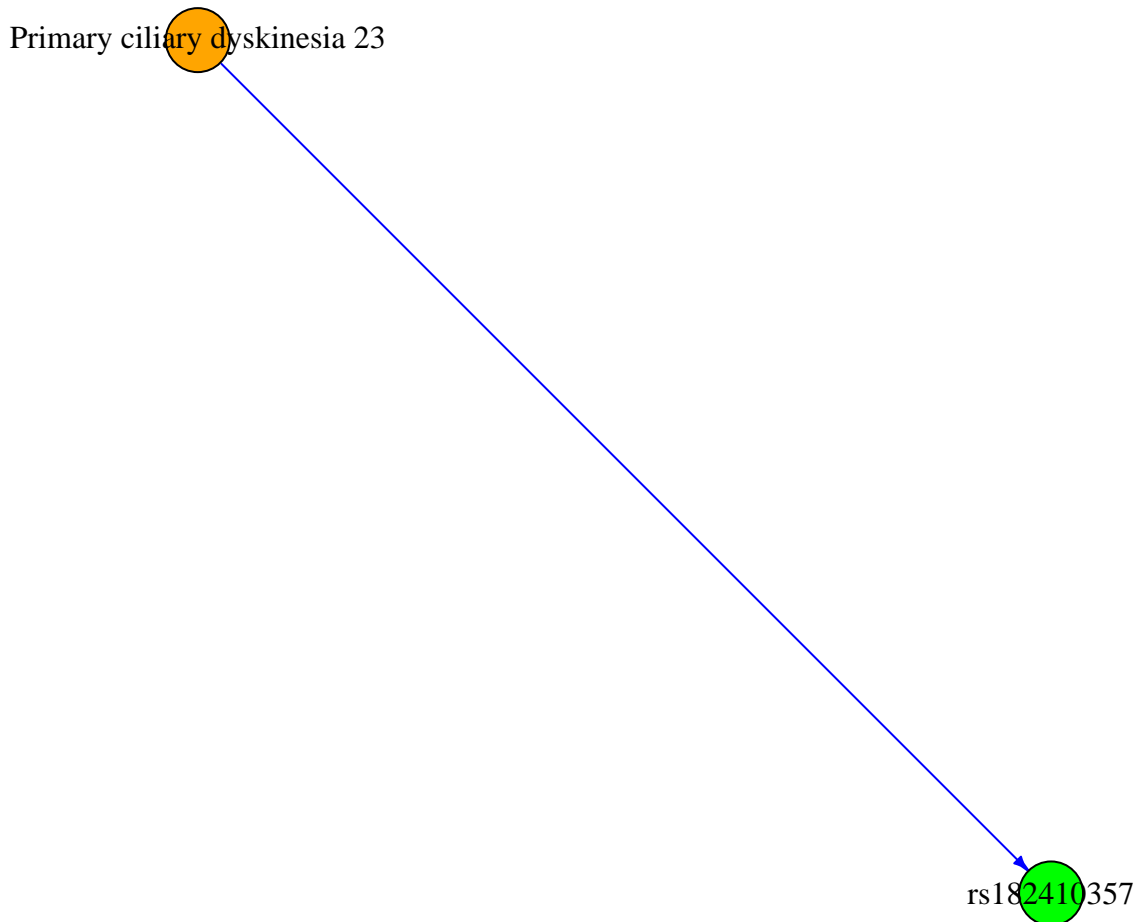

## Variant–Disease Network (Primary congenital glaucoma)

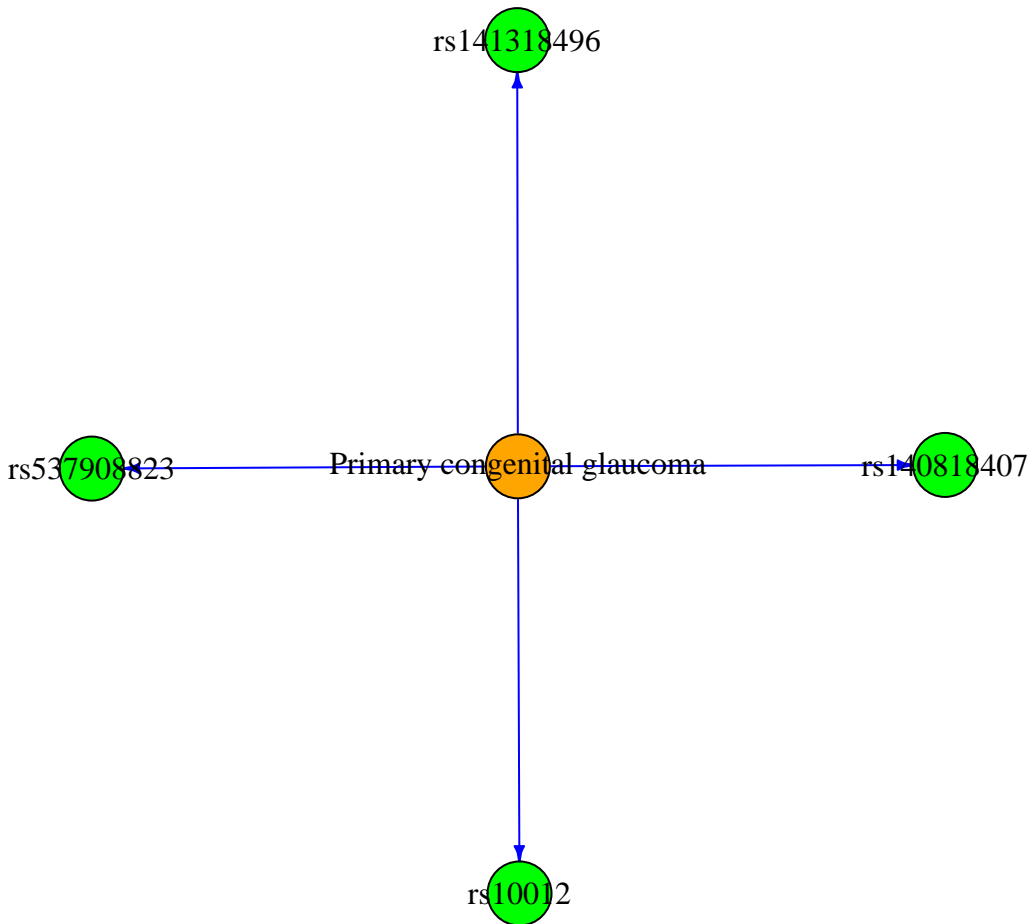

## Variant–Disease Network (Primary dilated cardiomyopathy)

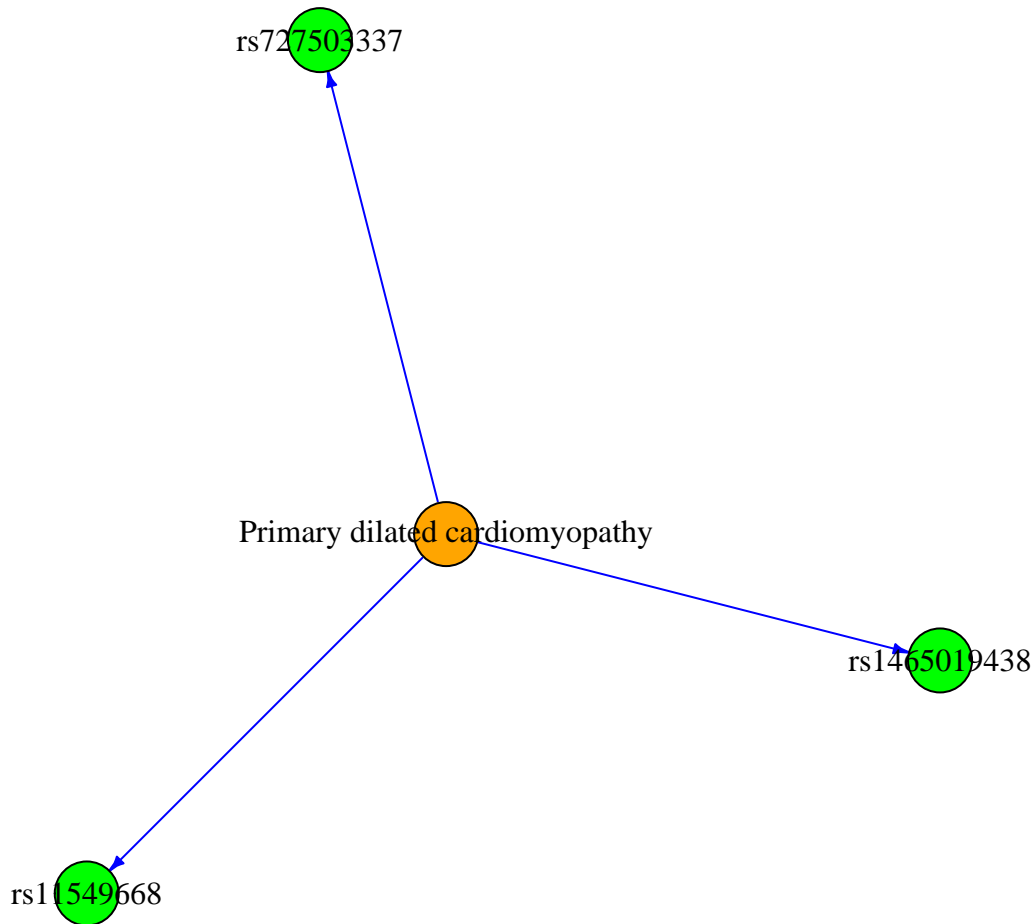



Variant–Disease Network (Primary familial hypertrophic cardiomyopathy

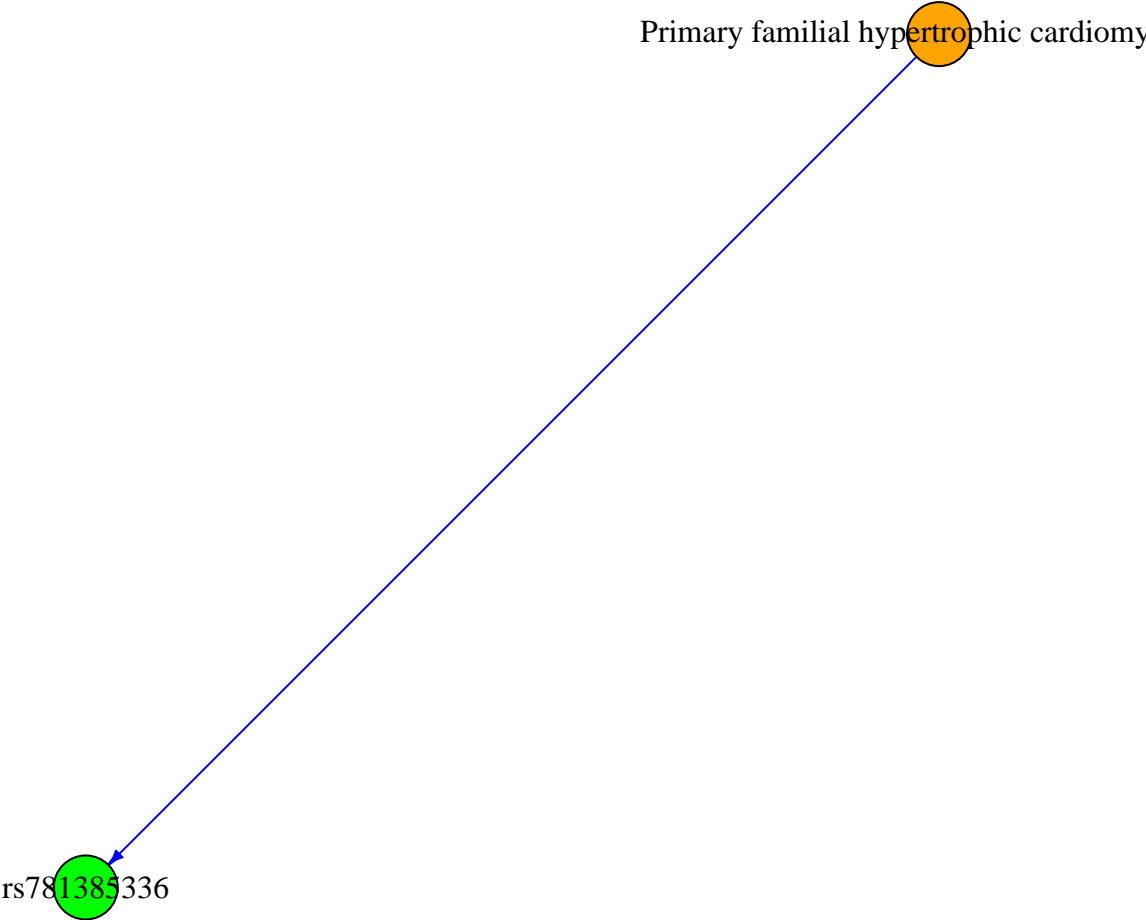

**Variant–Disease Network (Primary hyperoxaluria)**

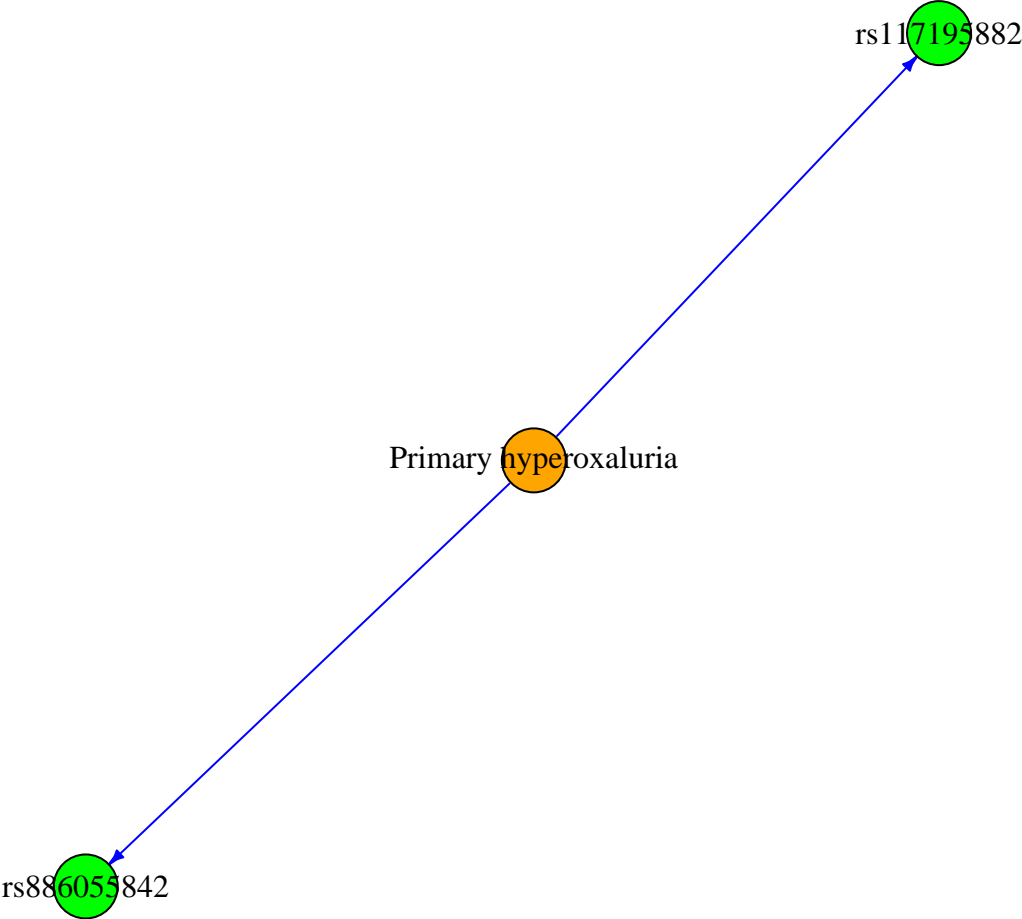

# nt-Disease Network (Primary Microcephaly 2 With or Without Cortical Malfo

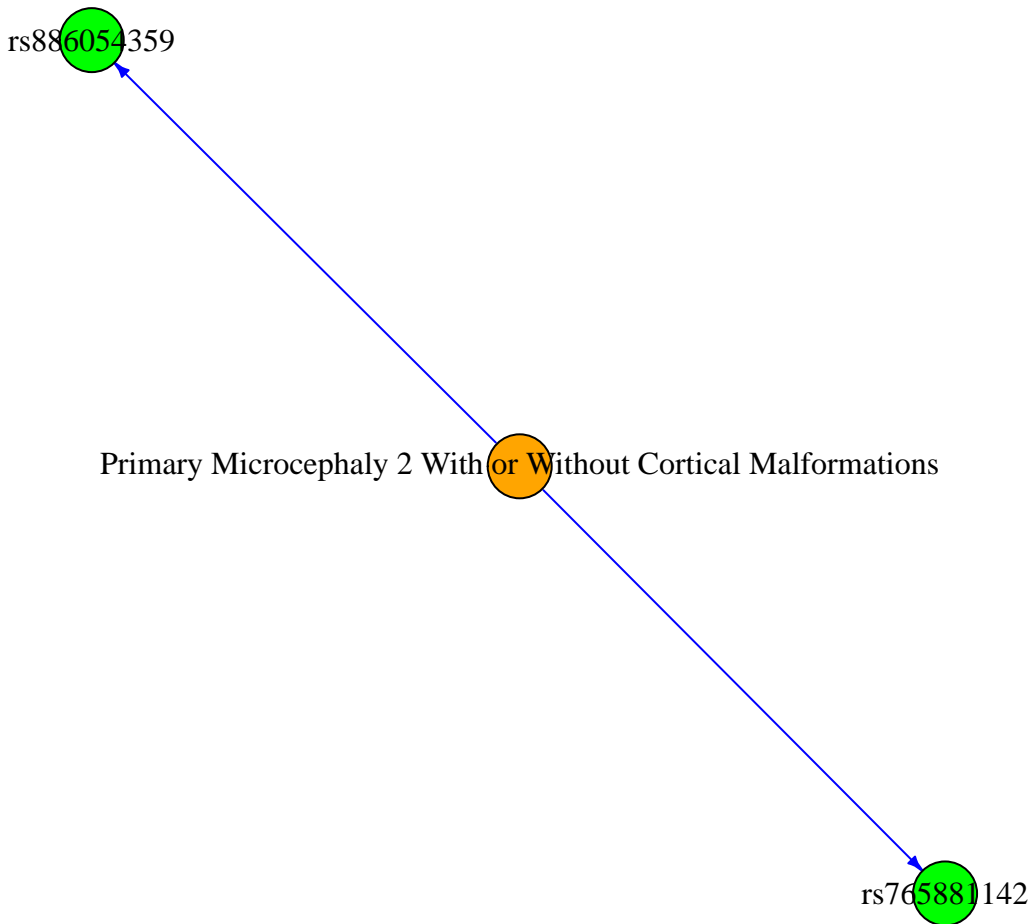

Variant–Disease Network (Primary open angle glaucoma)

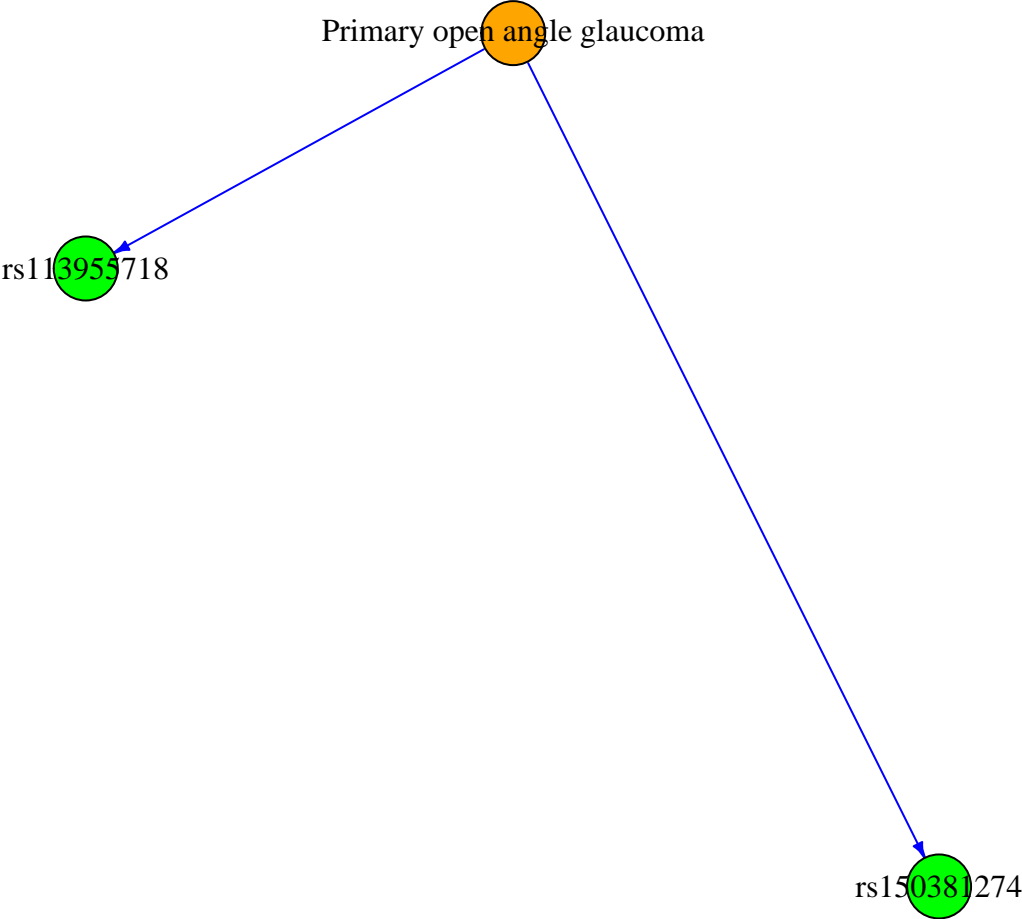

**Variant–Disease Network (Progressive familial heart block)**

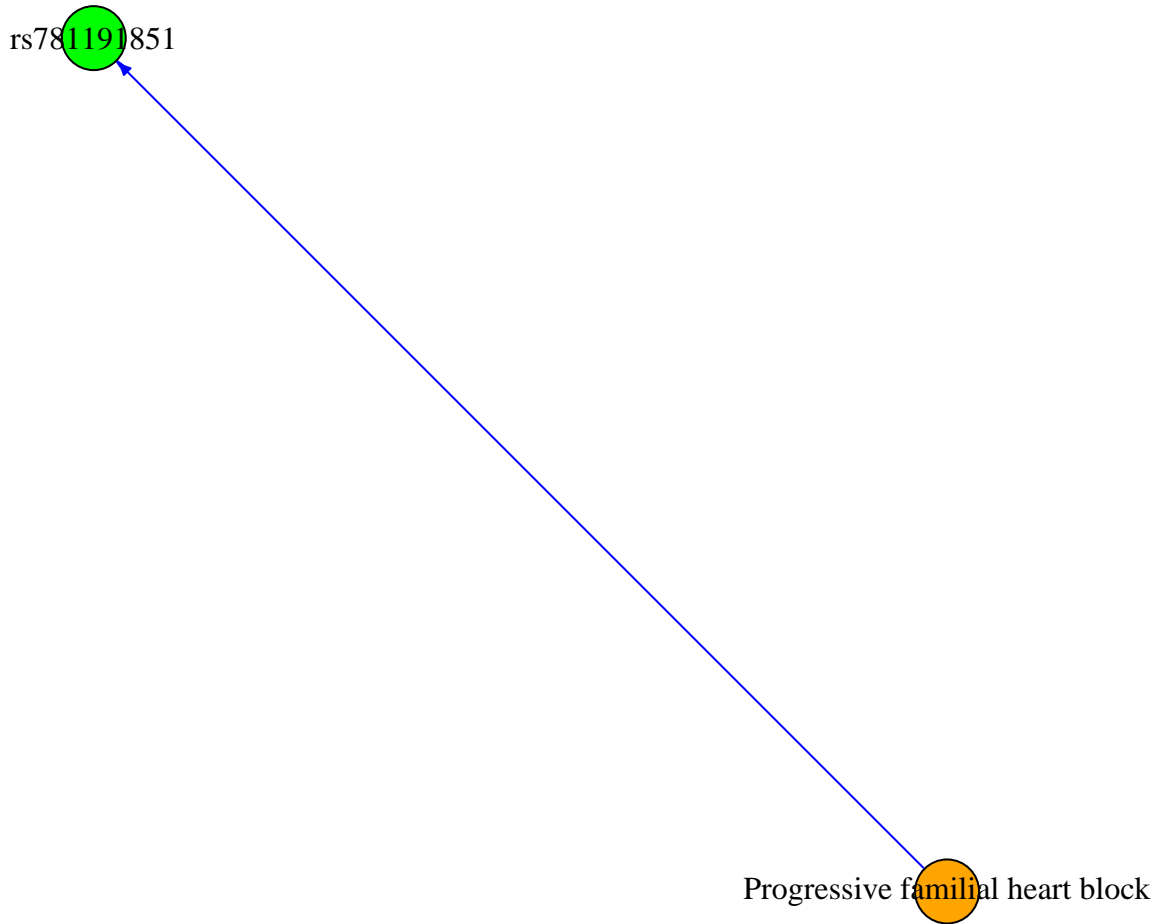

**Variant–Disease Network (Progressive familial intrahepatic cholestasis)**

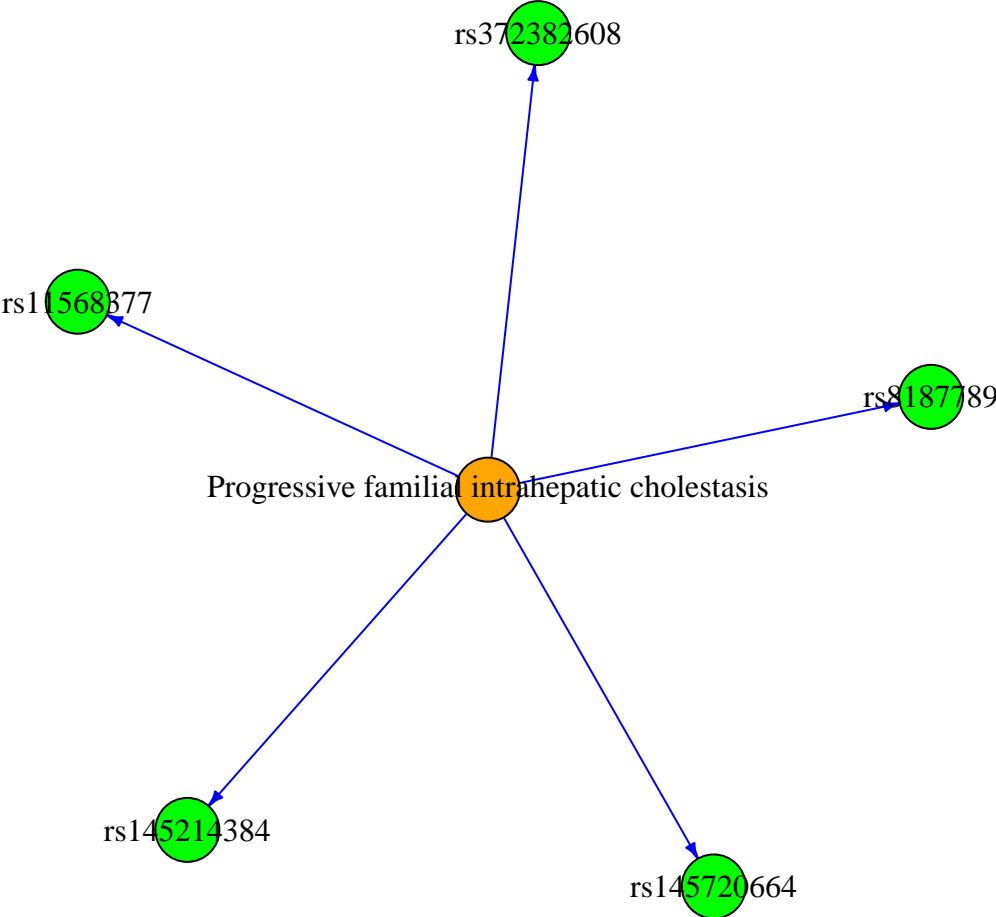

# Variant-Disease Network (Progressive myoclonic epilepsy)

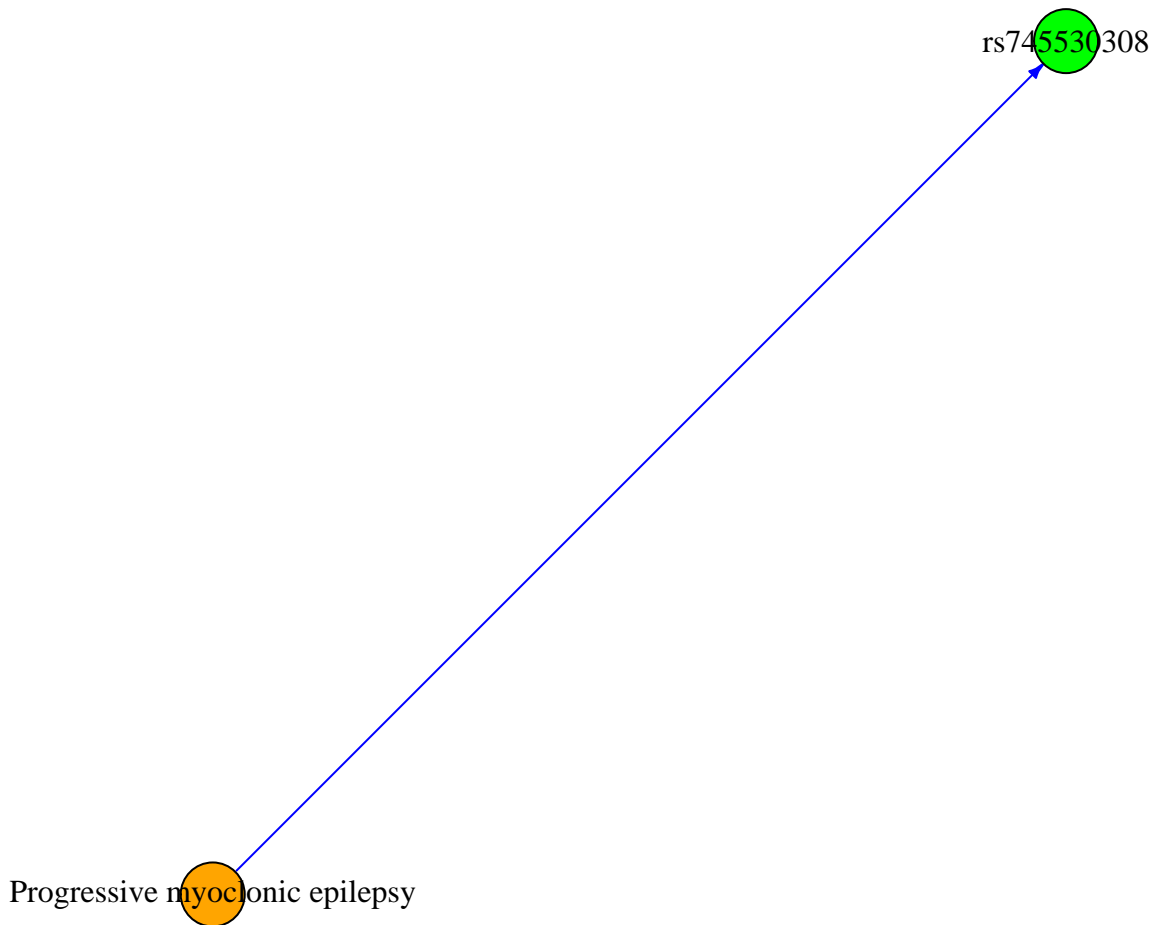

# Variant–Disease Network (Progressive myoclonus epilepsy with ataxia)

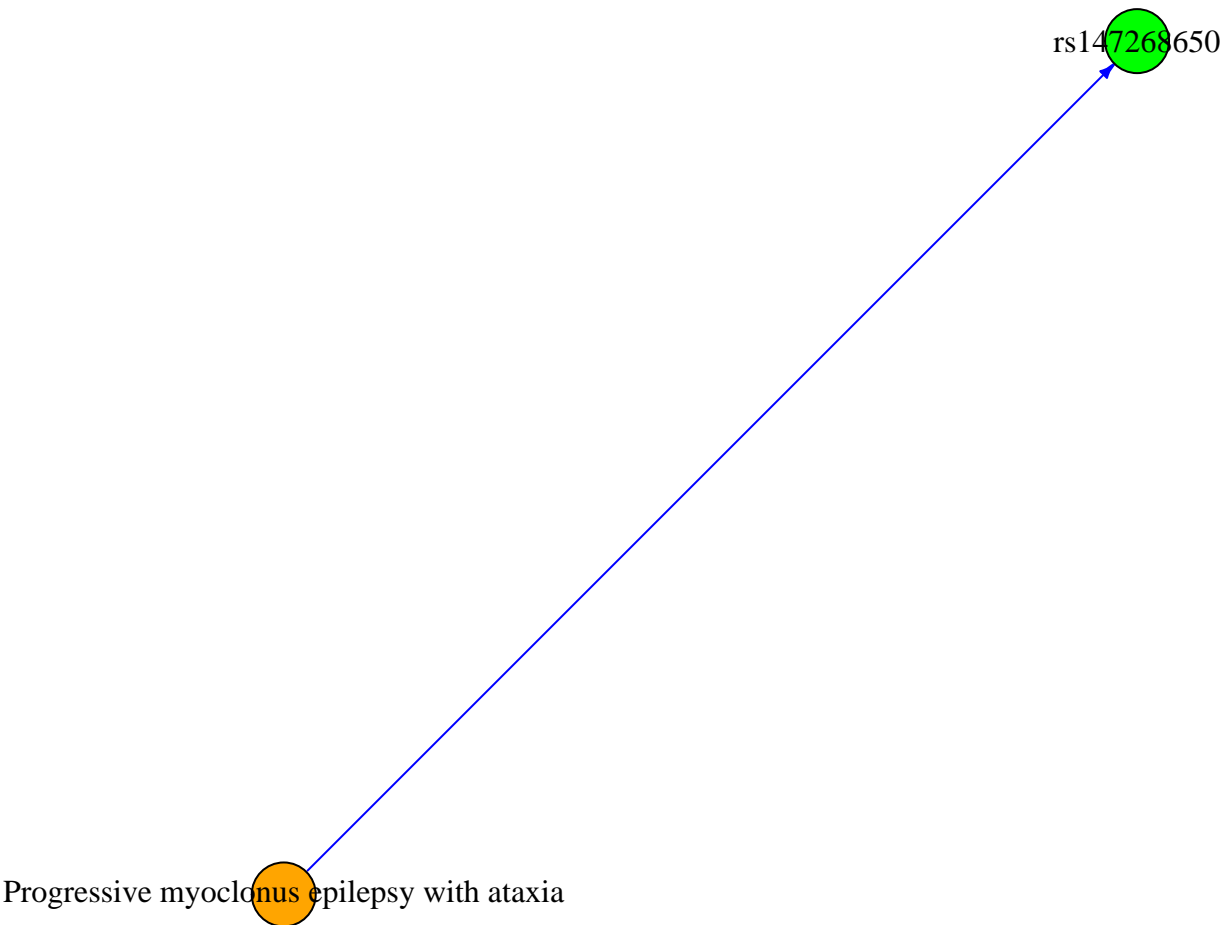



# Variant–Disease Network (Progressive myositis ossificans)

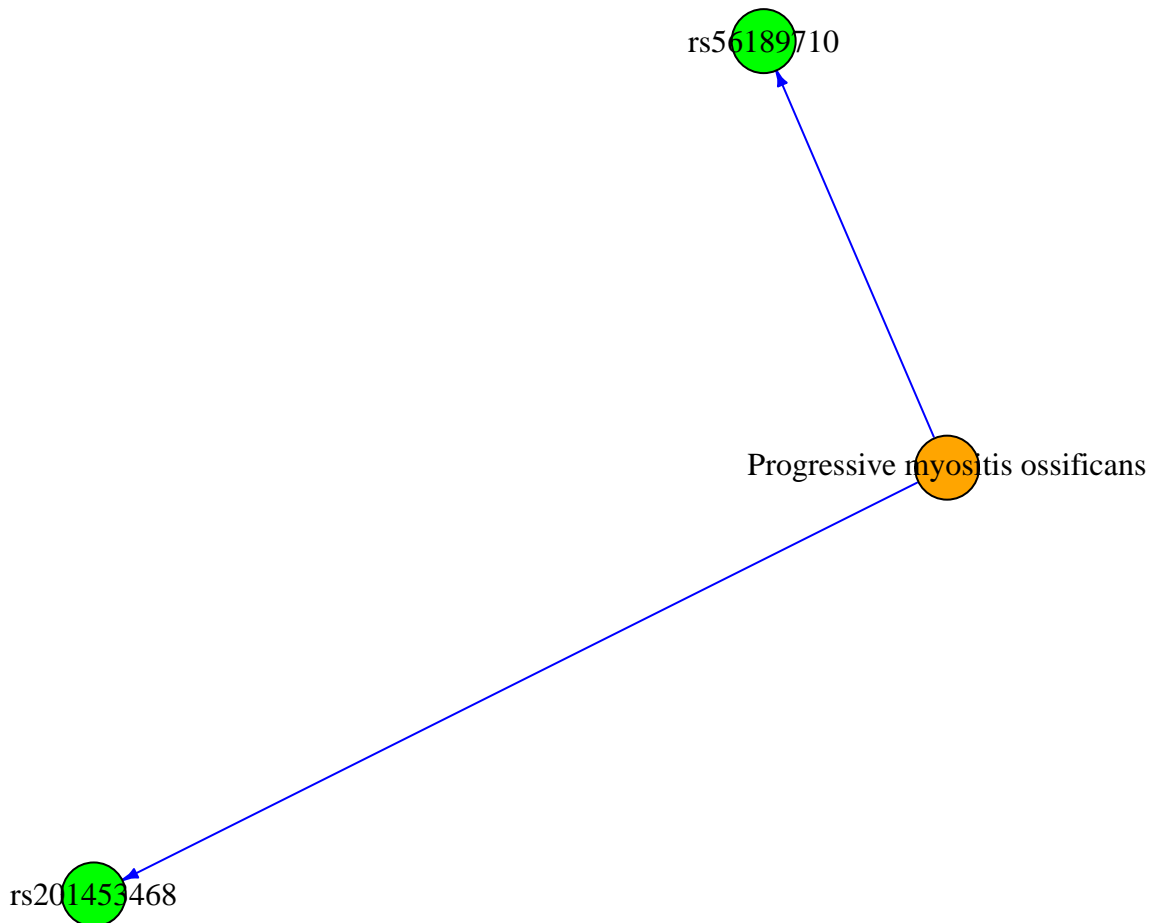

Variant–Disease Network (Progressive sclerosing poliodystrophy)

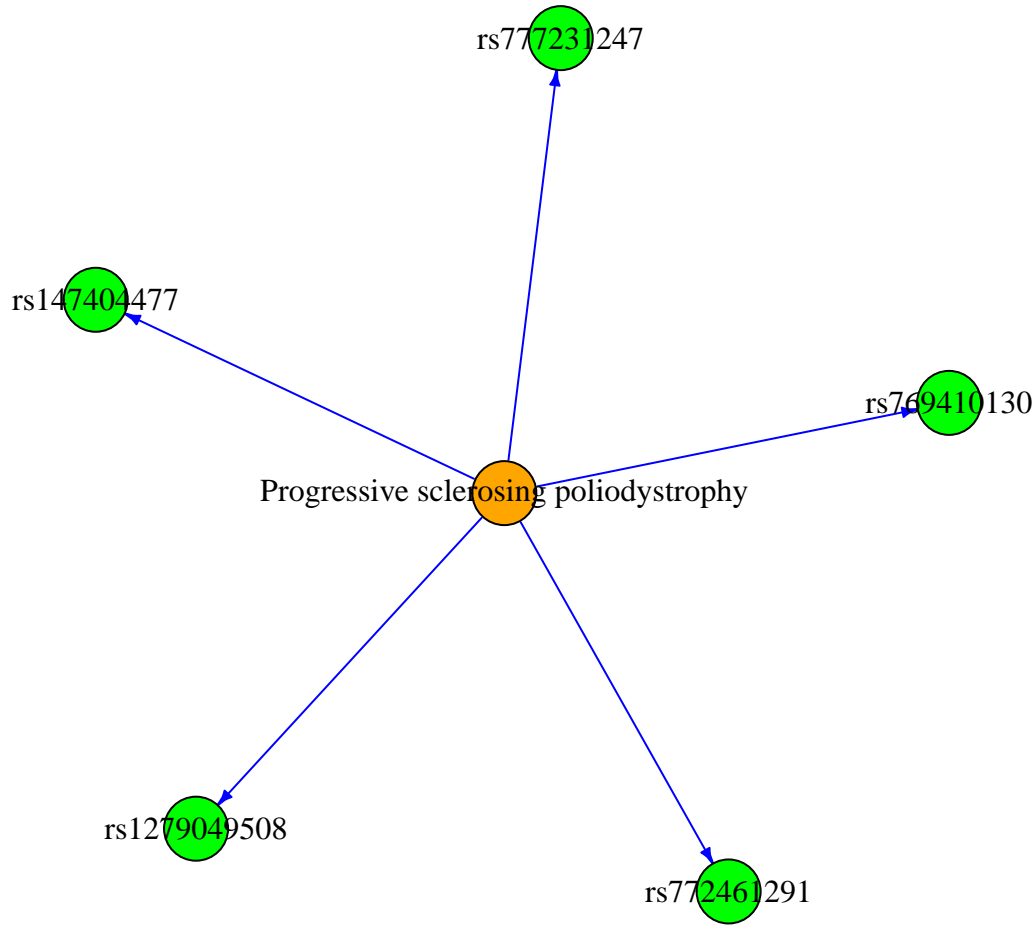

# sease Network (Proliferative vasculopathy and hydranencephaly–hydroceph

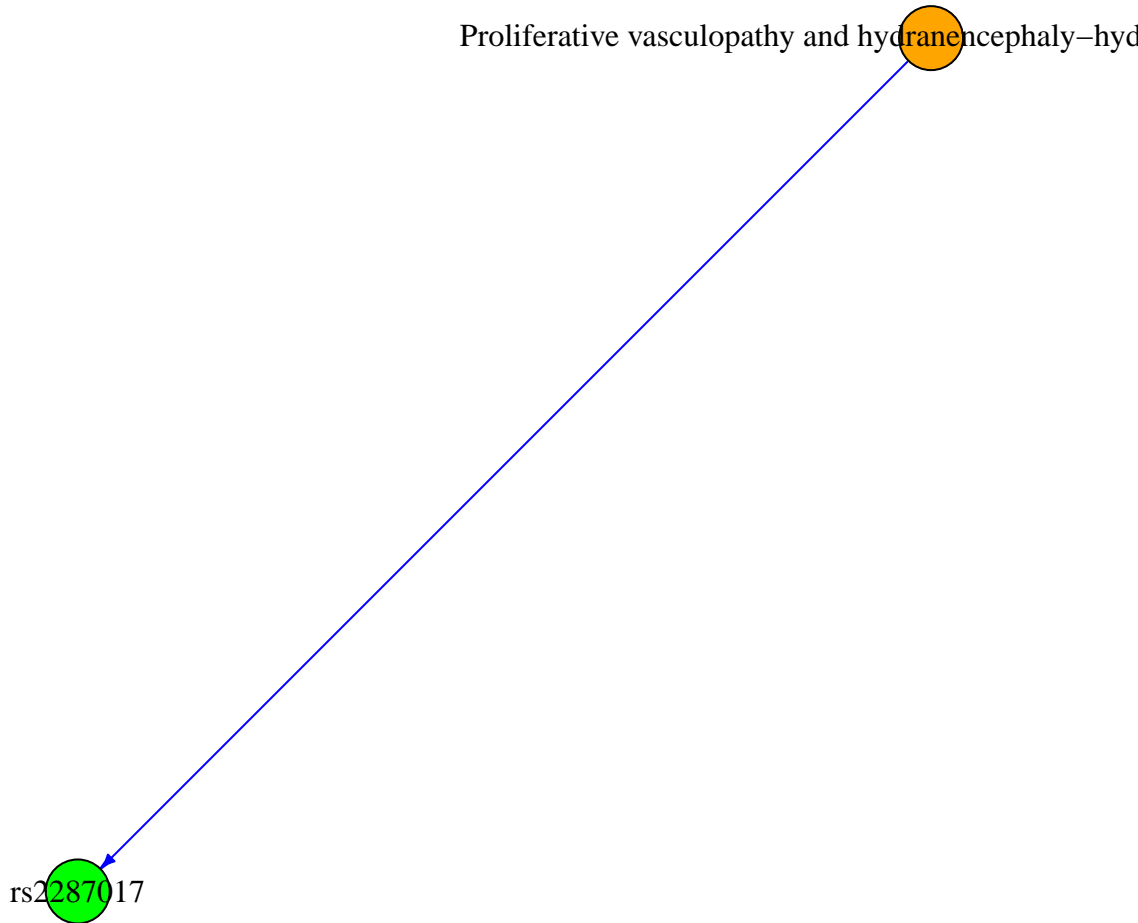

**Variant–Disease Network (Propionyl–CoA carboxylase deficiency)**

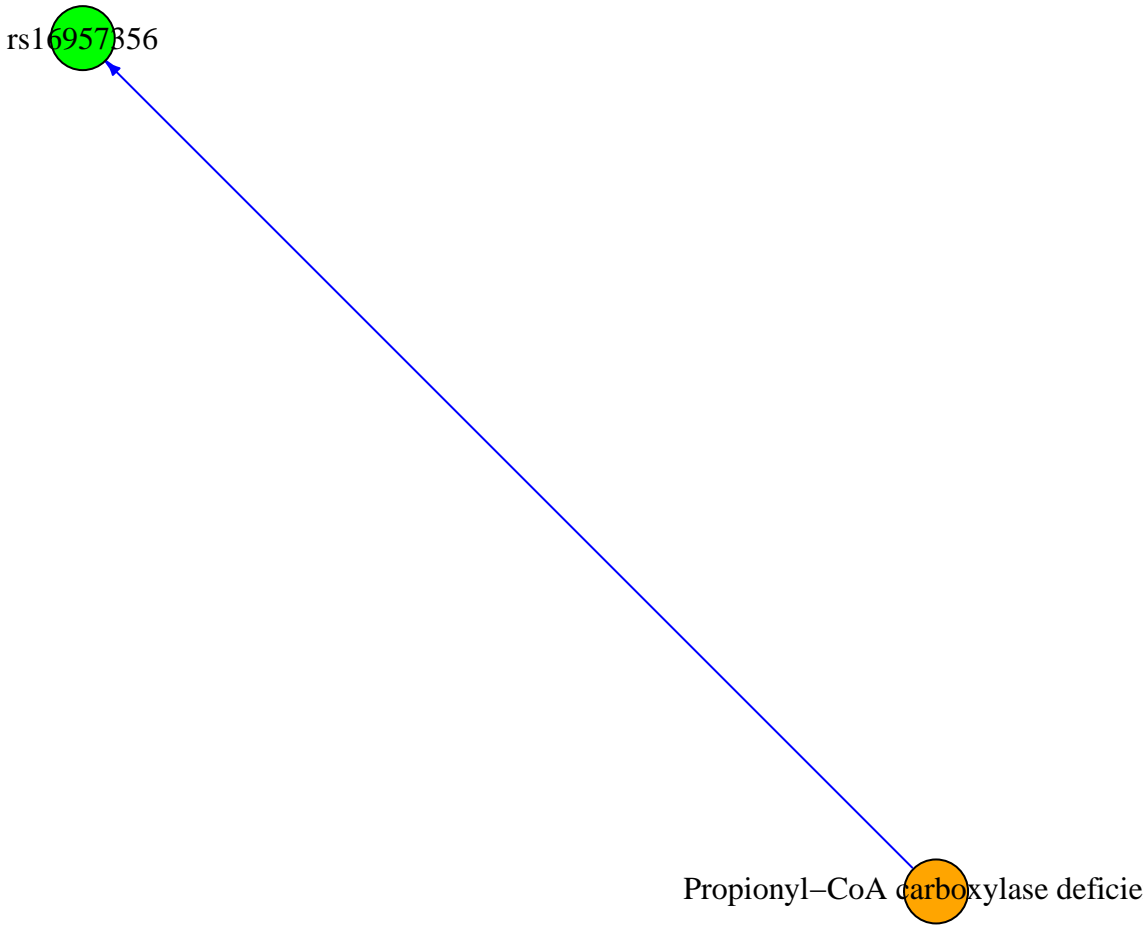

# Variant–Disease Network (Proprotein convertase 1/3 deficiency)

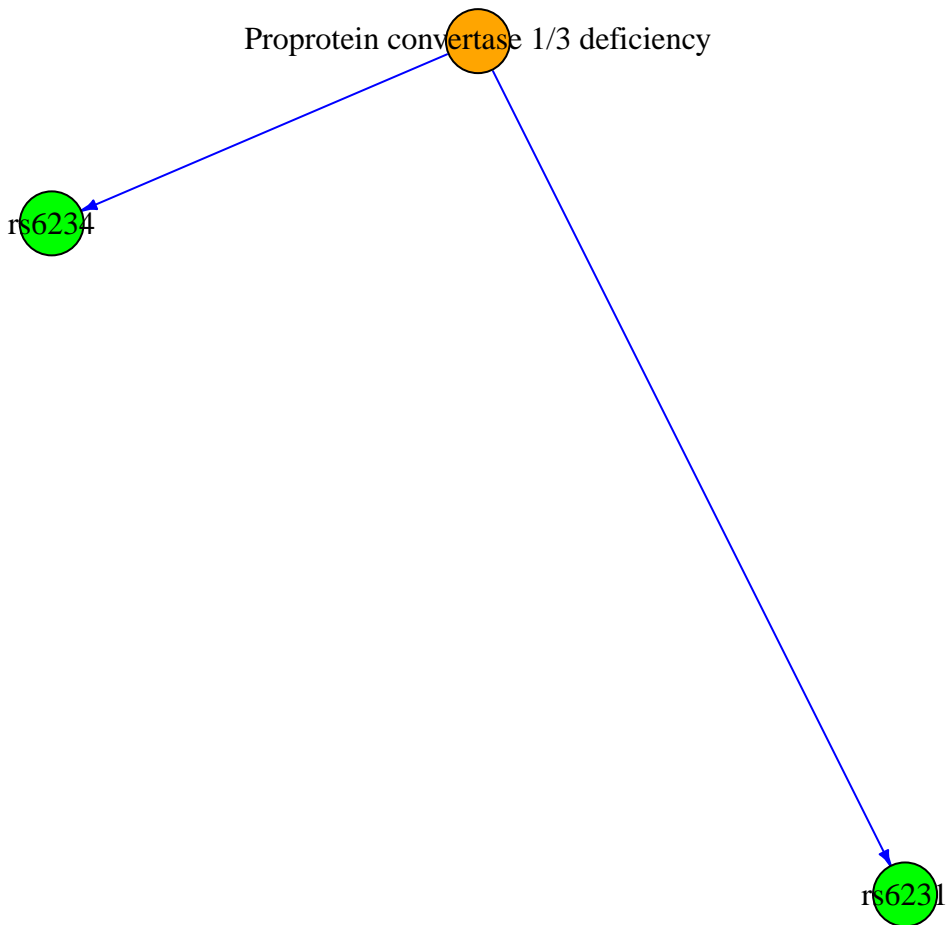

## Variant–Disease Network (Protoporphyrria)

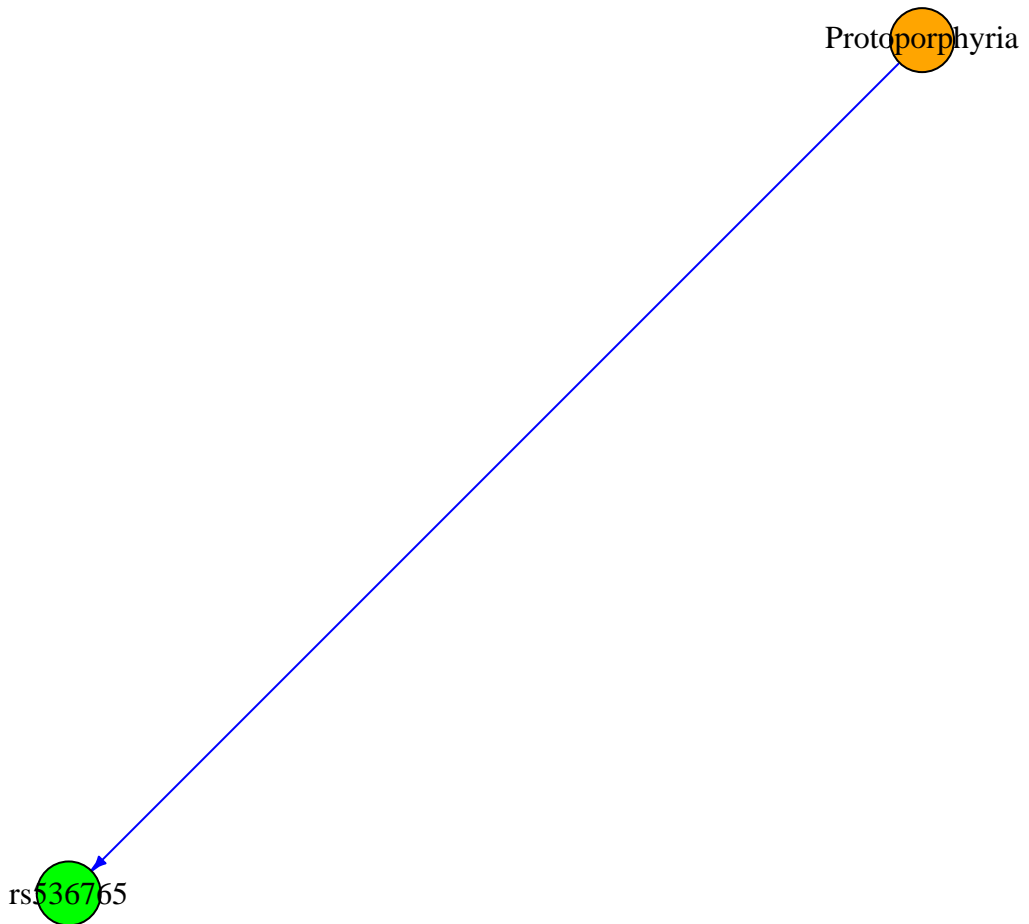

# Variant-Disease Network (Pseudohypoaldosteronism type 1 autosomal dominant)

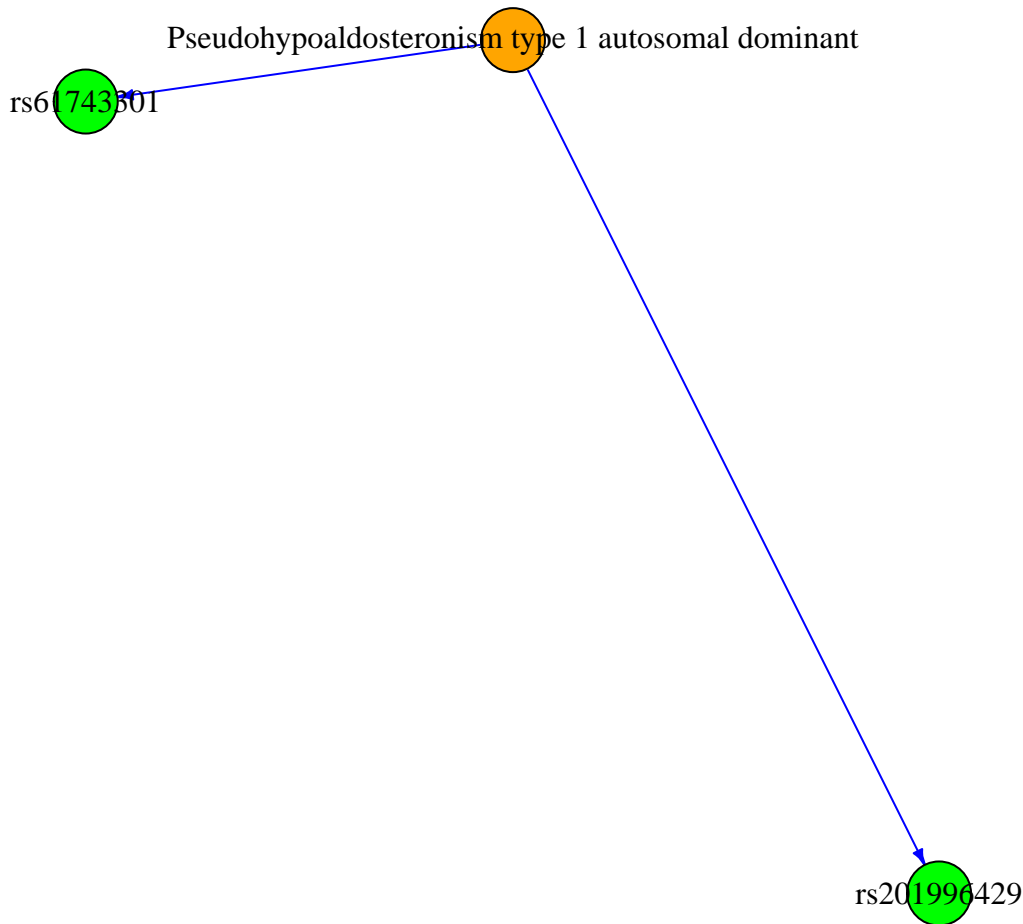

# Variant-Disease Network (Pseudohypoaldosteronism type 1 autosomal recessive)

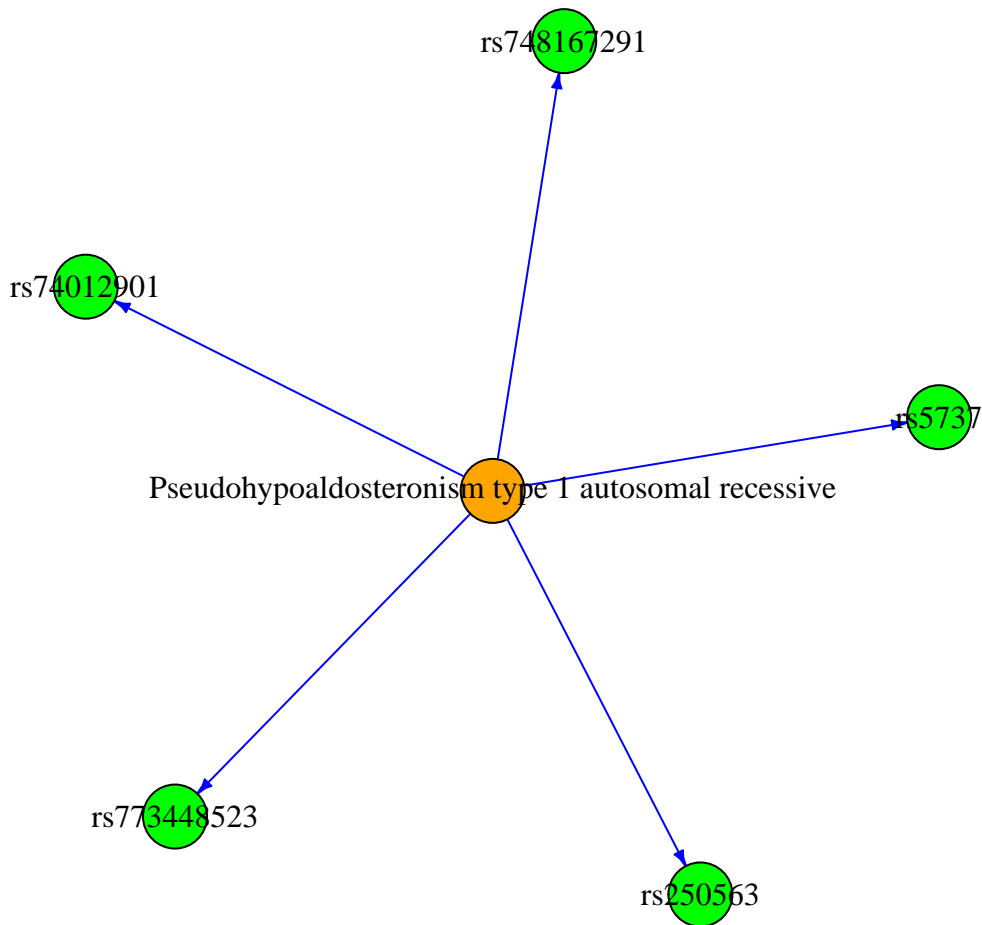



# Variant–Disease Network (Pseudoneonatal adrenoleukodystrophy)

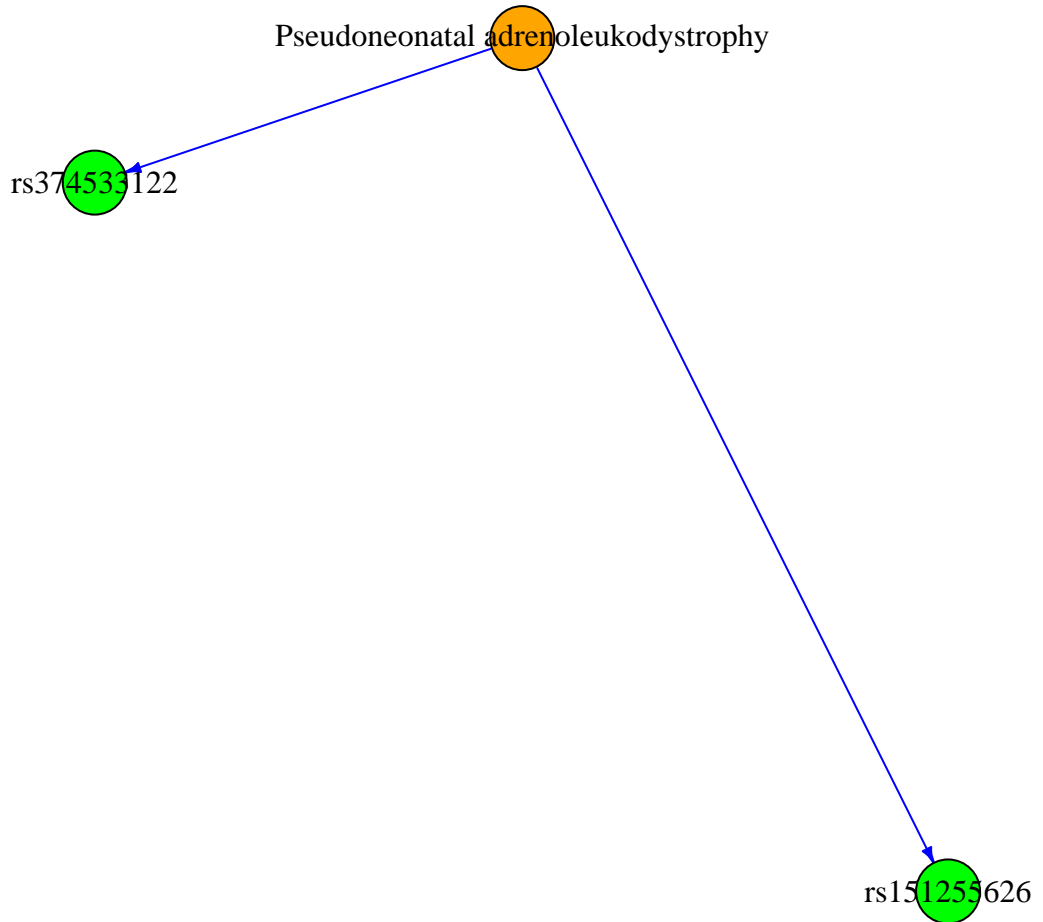

# Variant–Disease Network (Pseudo–TORCH syndrome 1)

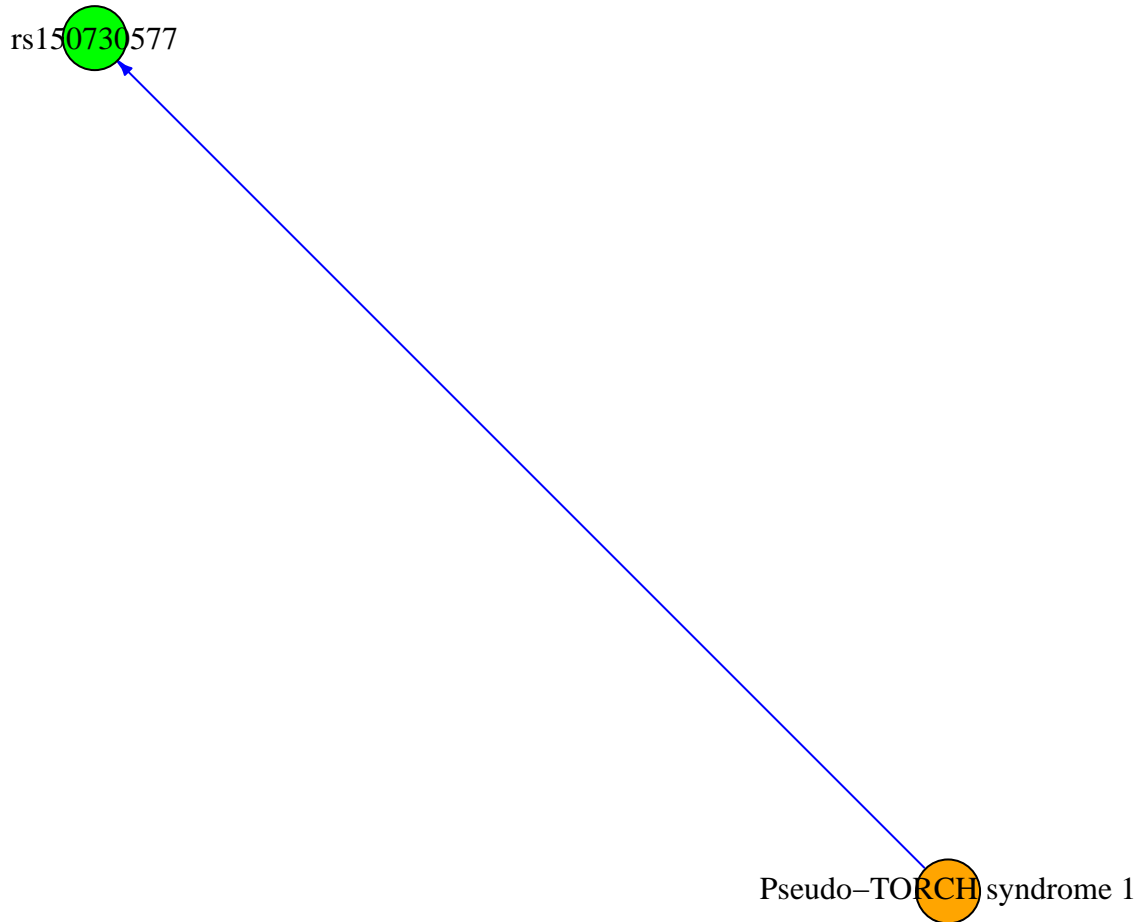

**Variant–Disease Network (Psoriasis susceptibility 2)**

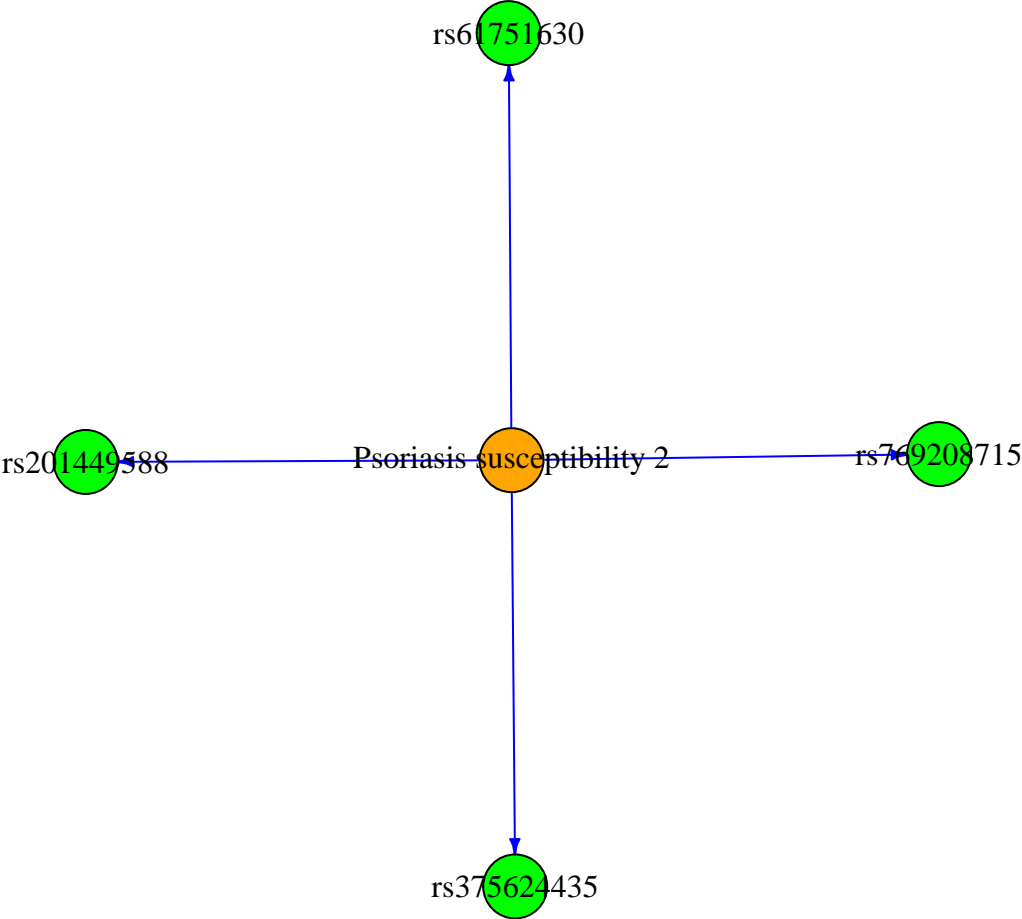

# Case Network (Pulmonary arterial hypertension related to hereditary hemorrhagic telangiectasia)

Pulmonary hypertension related to hereditary hemorrhagic telangiectasia

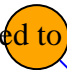

rs28936401

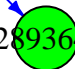

Variant–Disease Network (Pulmonary Surfactant Metabolism Dysfunction

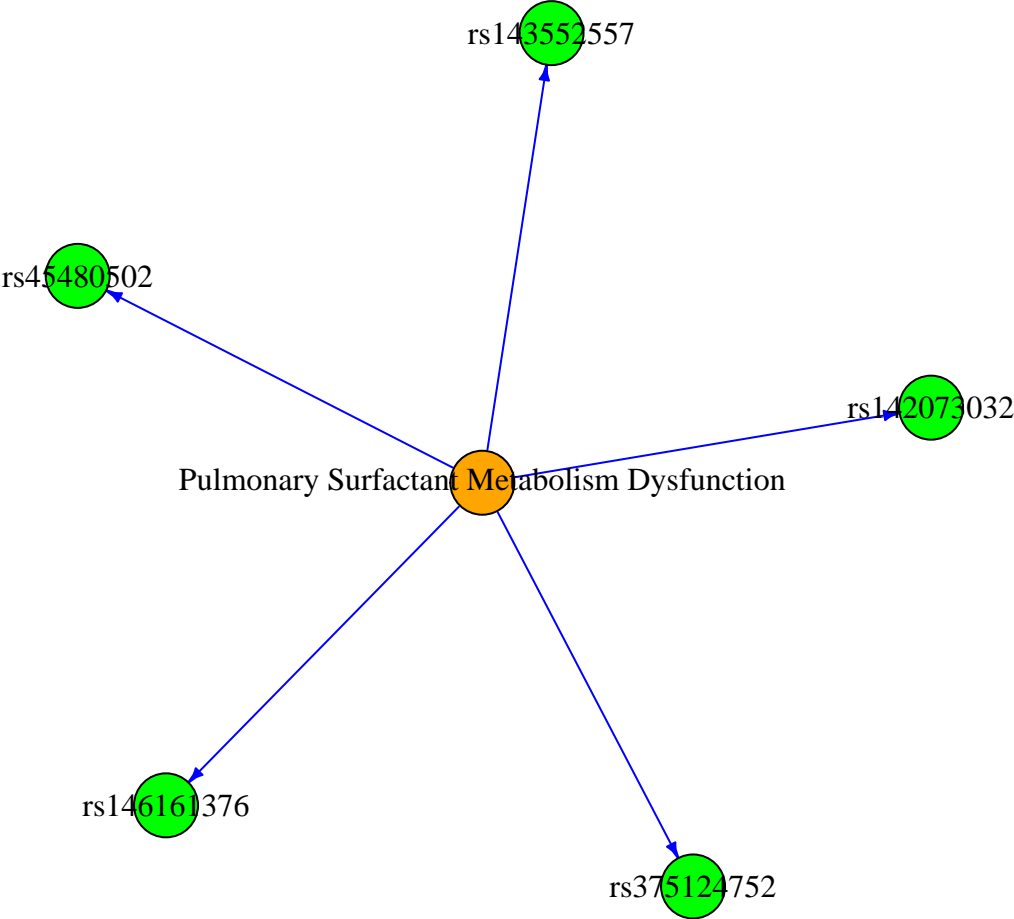

# Variant-Disease Network (Pyridoxal 5'-phosphate-dependent epilepsy)

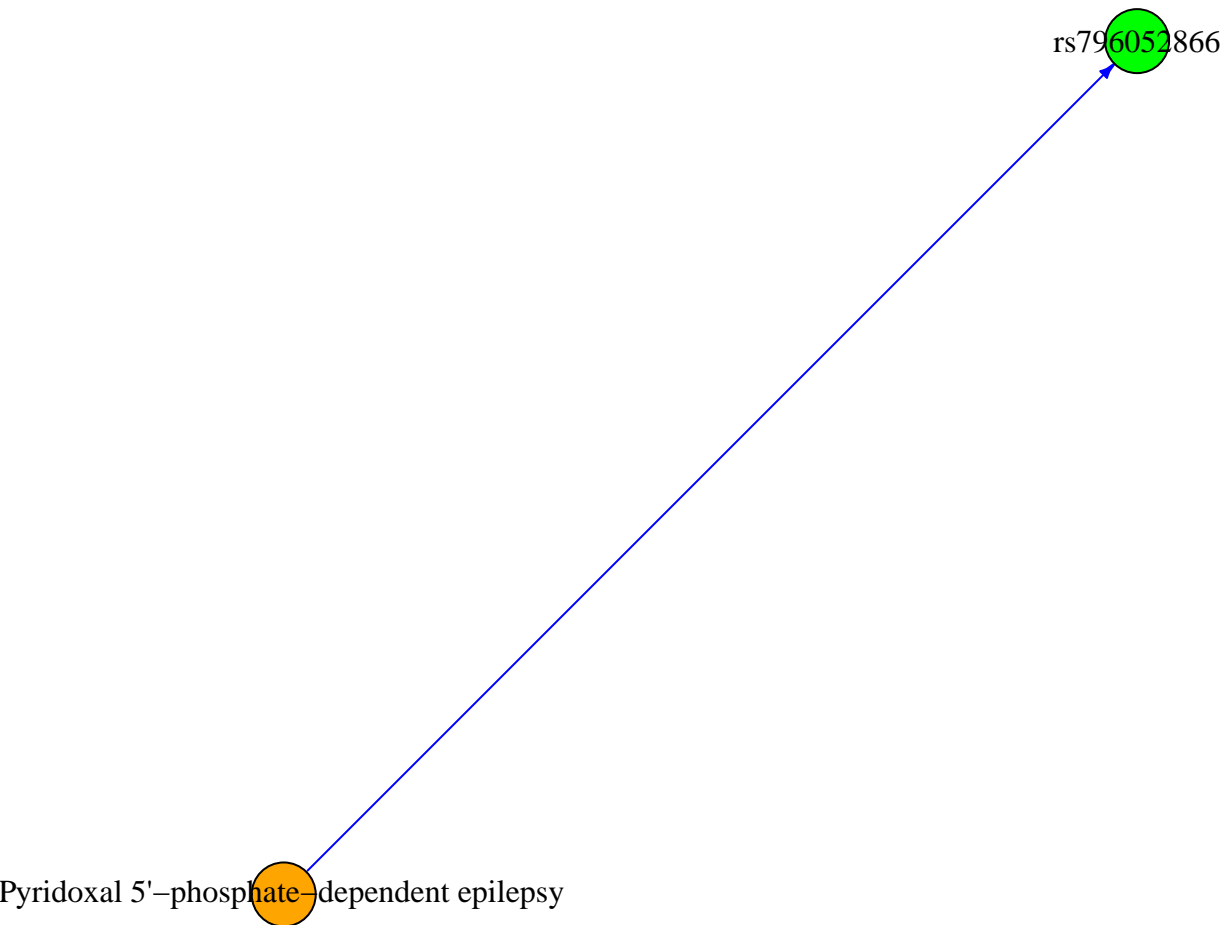

Variant–Disease Network (Pyridoxine–dependent epilepsy)

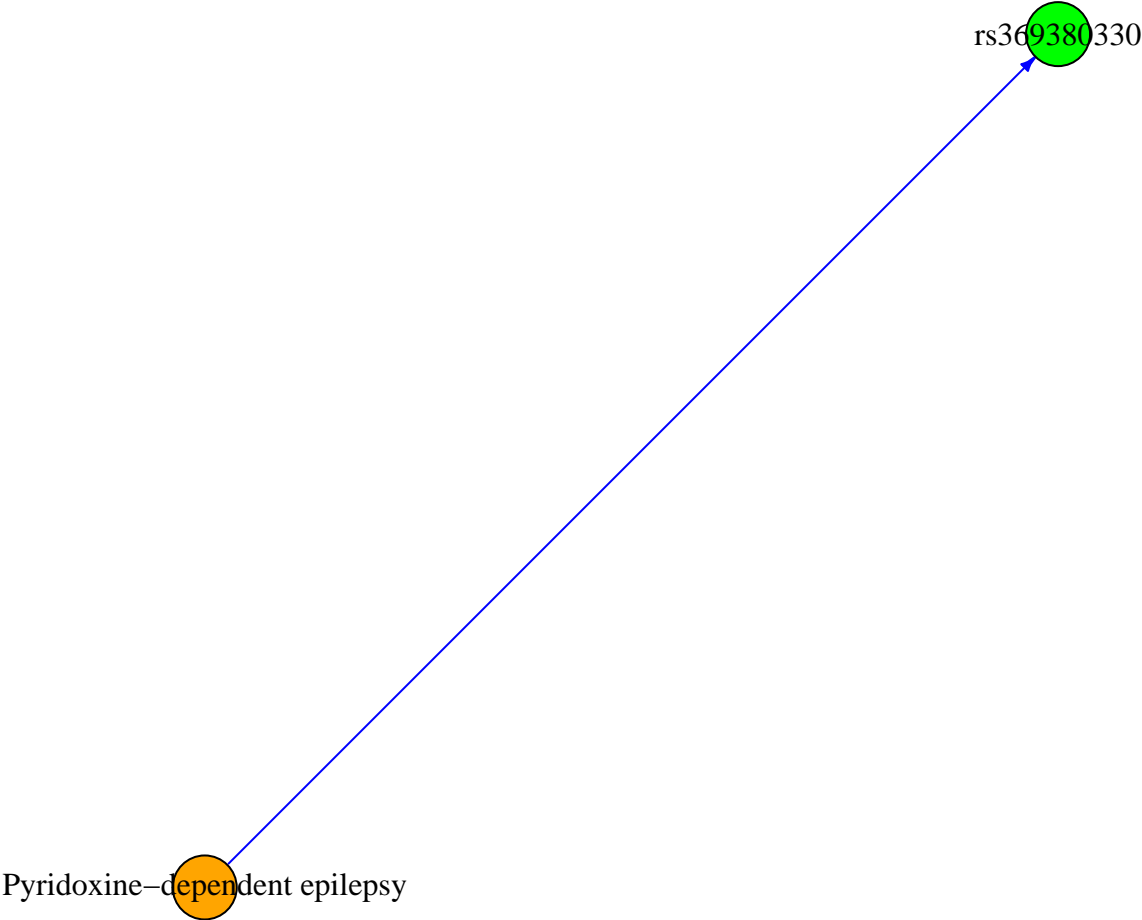

# Variant–Disease Network (Pyruvate carboxylase deficiency)

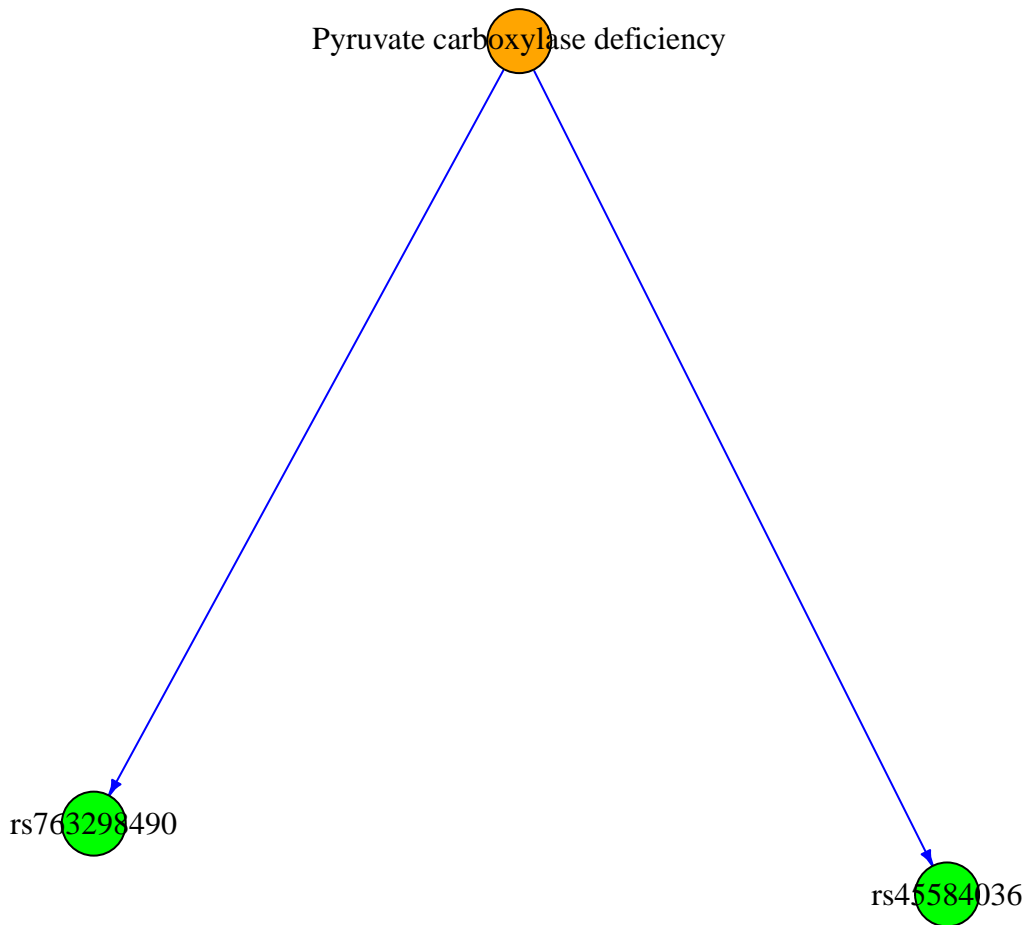



Variant–Disease Network (Pyruvate dehydrogenase phosphatase deficiency)

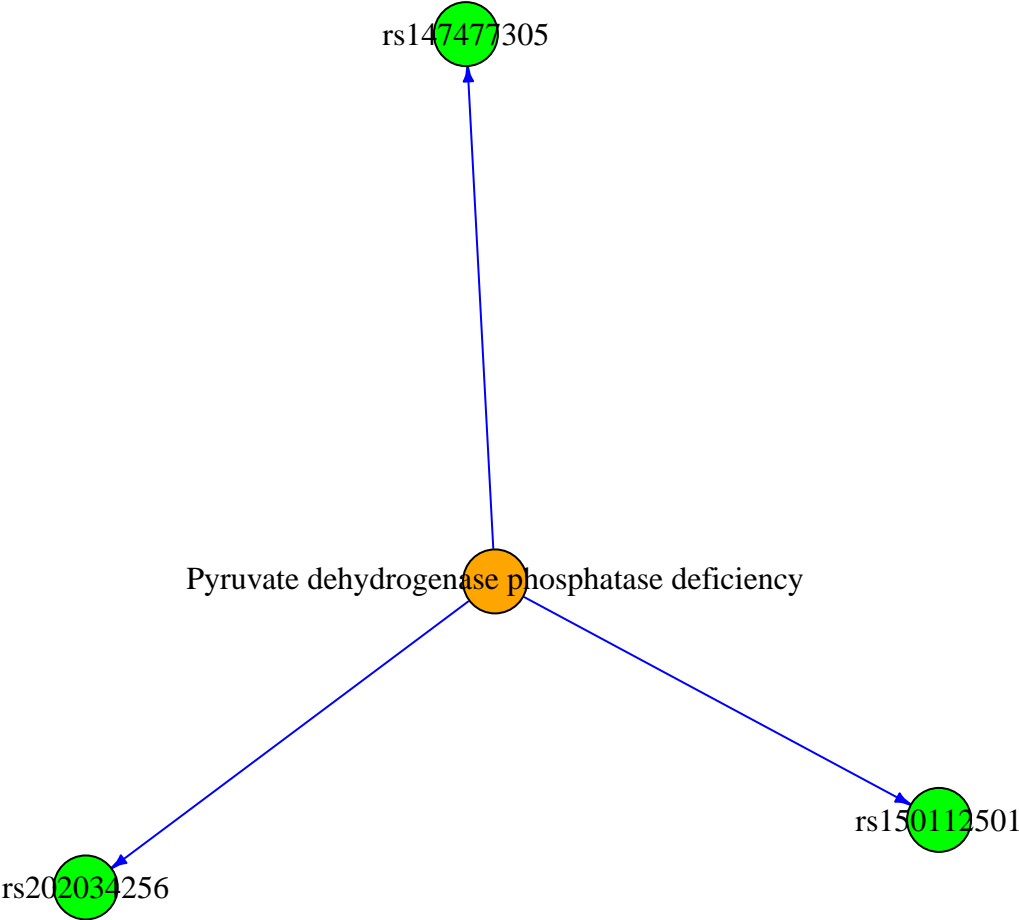

# Variant–Disease Network (Pyruvate kinase deficiency of red cells)

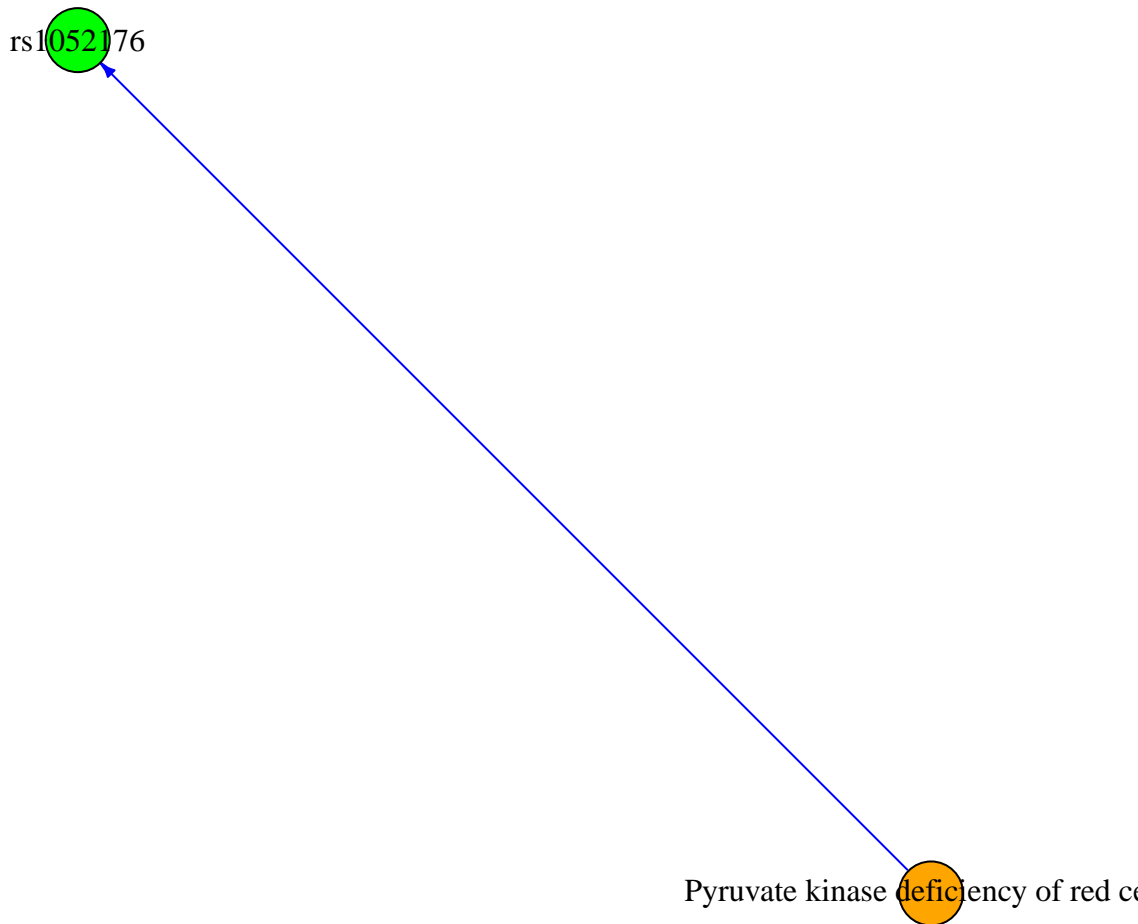

# Variant-Disease Network (RAS-associated autoimmune leukoproliferative dis

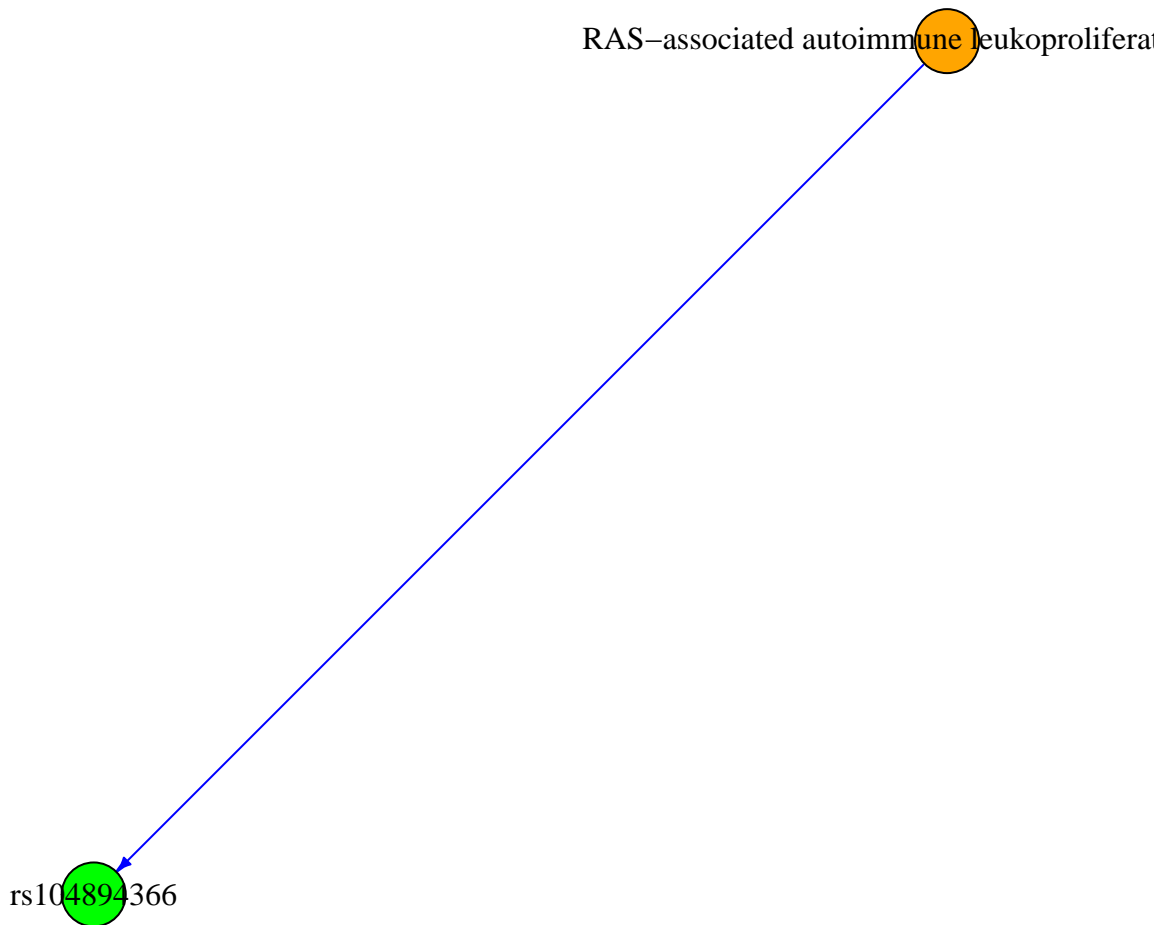

## Variant–Disease Network (Rasopathy)

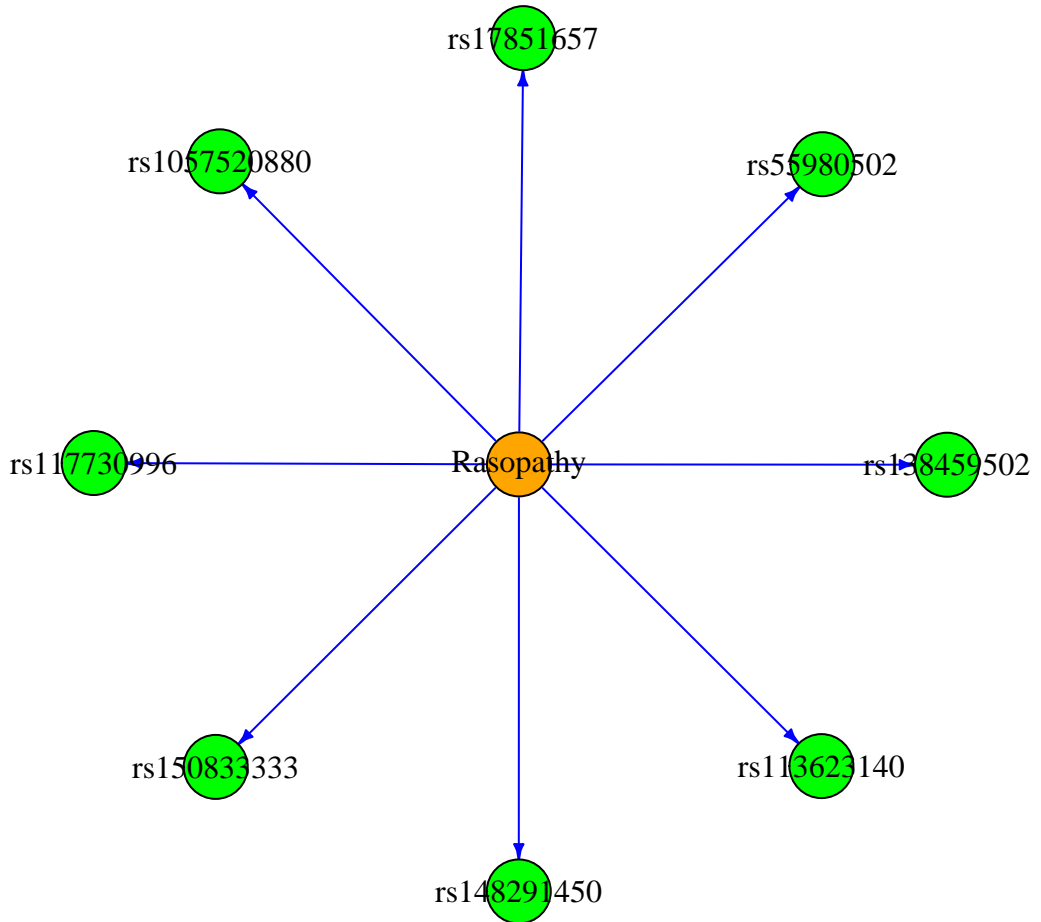

# Variant-Disease Network (Reduced protein S activity)

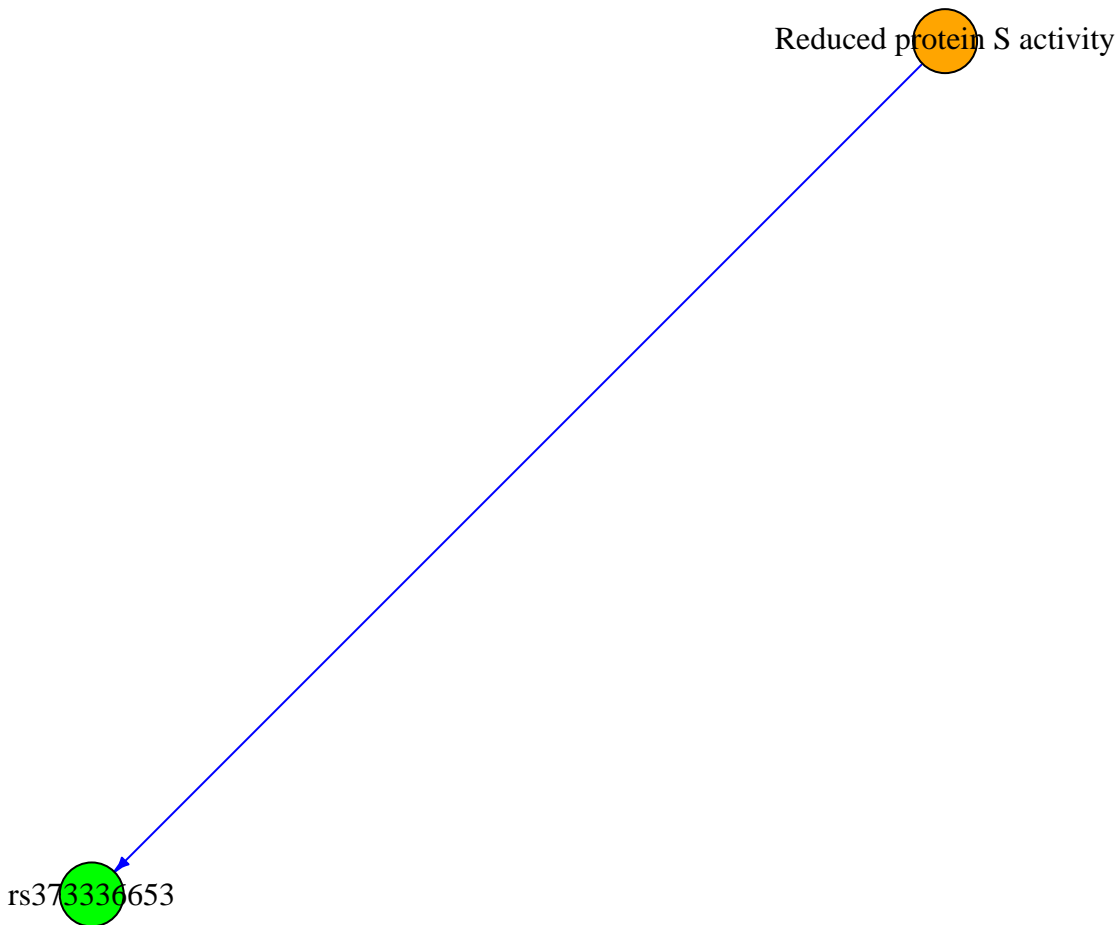

## Variant–Disease Network (Renal carnitine transport defect)

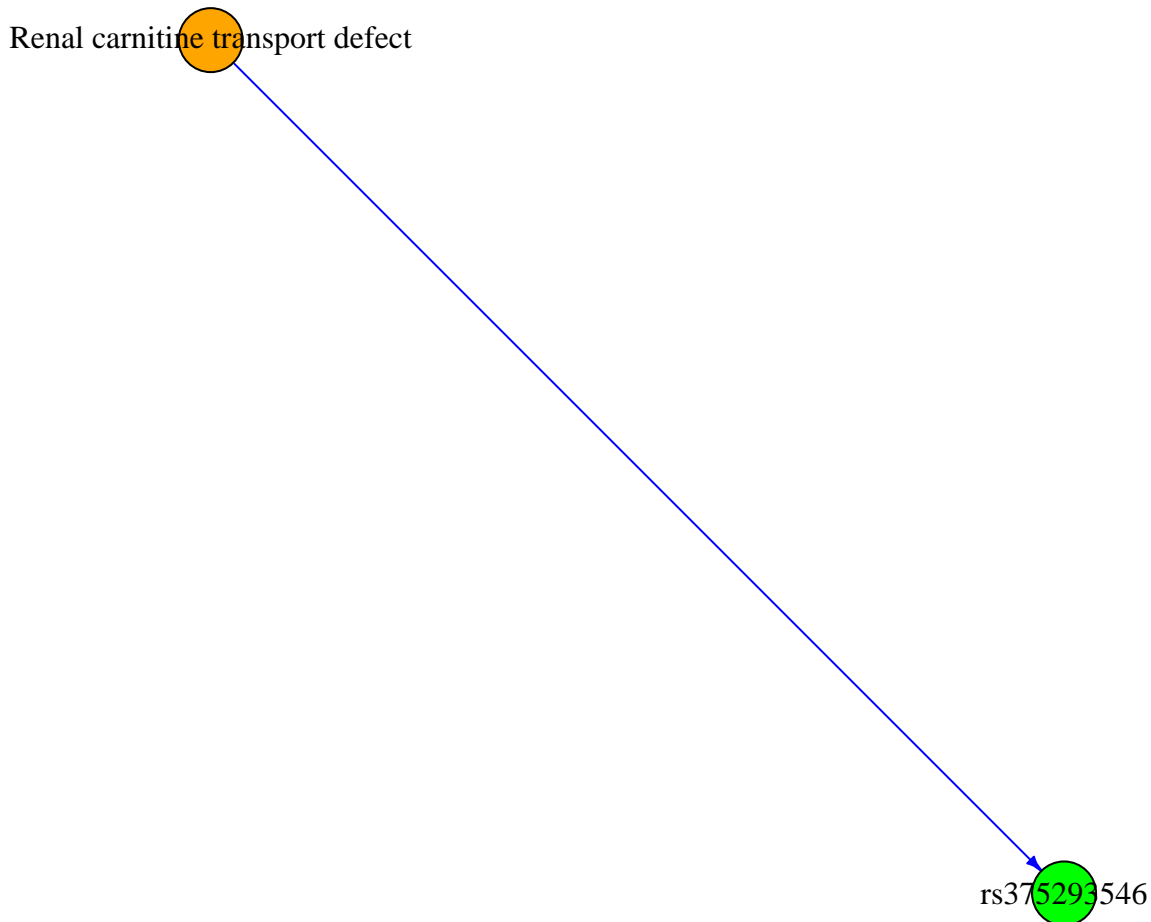

Variant–Disease Network (Renal dysplasia)

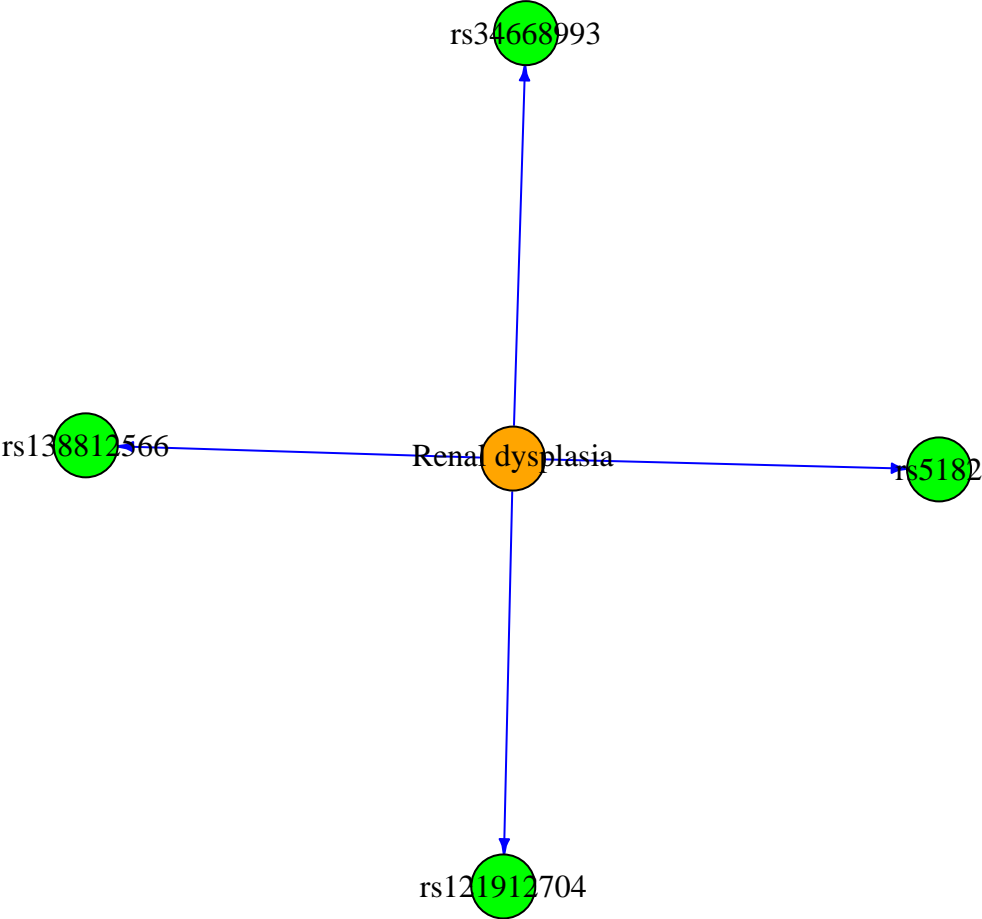

## Variant–Disease Network (Renal dysplasia and retinal aplasia)

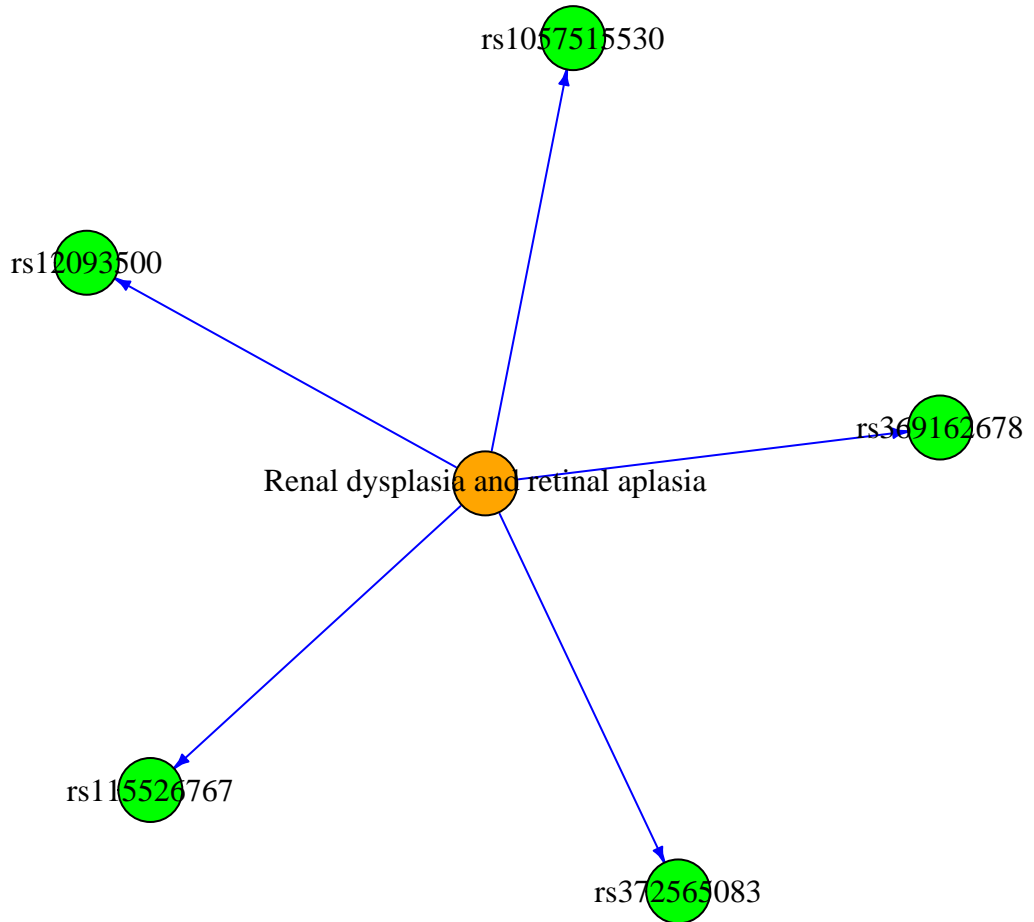



# ant-Disease Network (Renal hamartomas nephroblastomatosis and fetal gigantism)

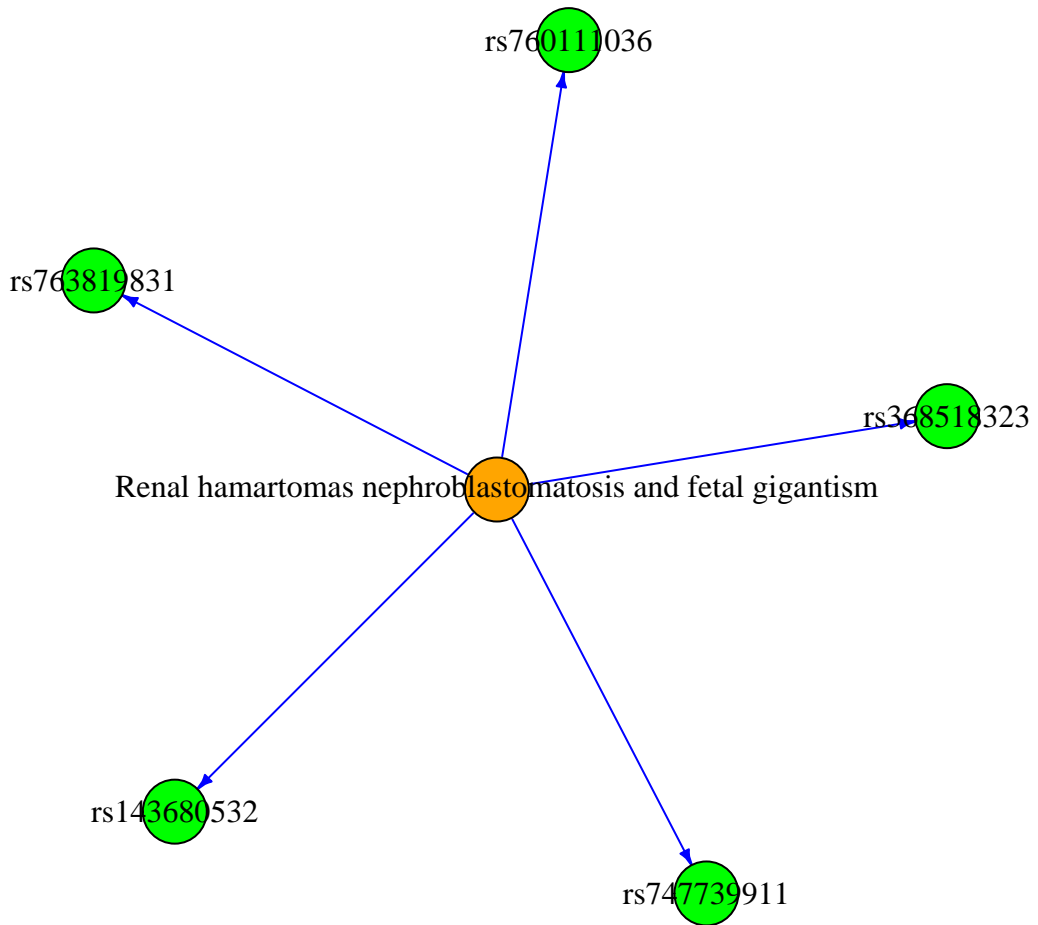

## Variant–Disease Network (Renal tubular acidosis)

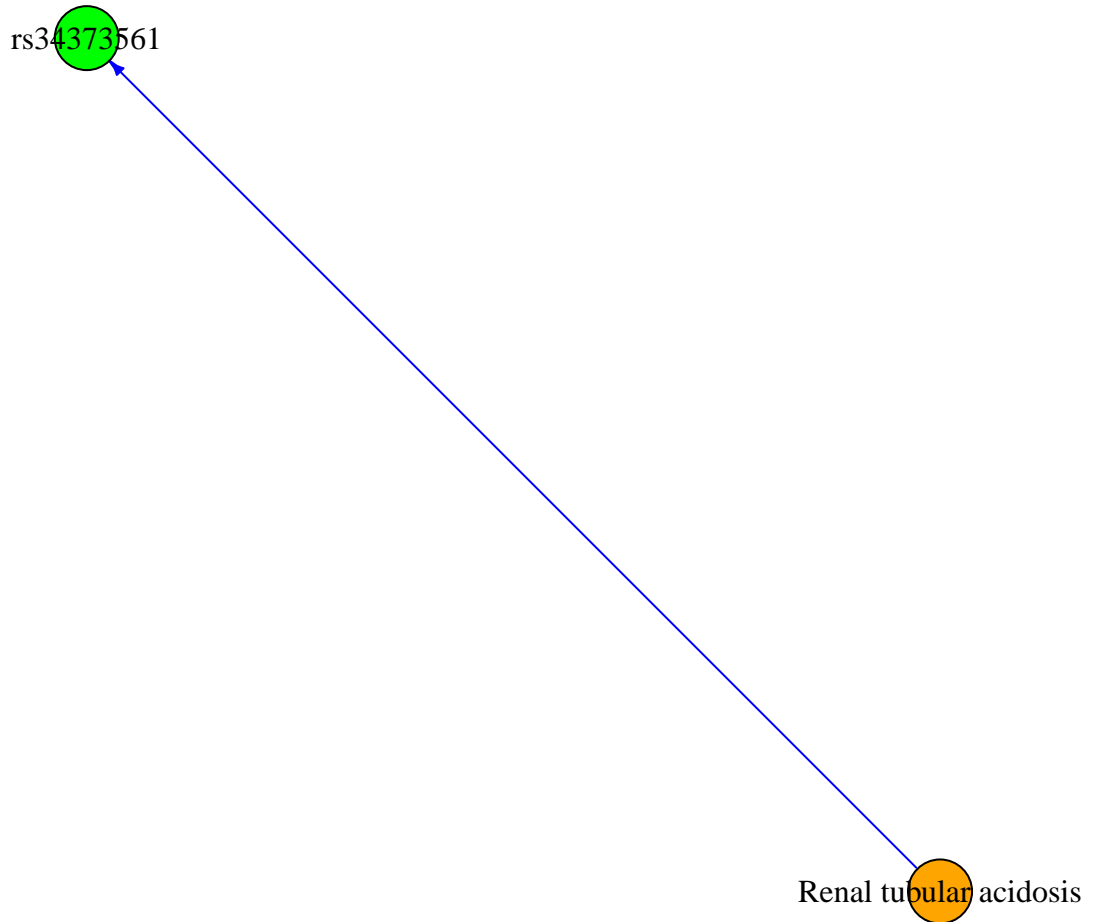

## Variant-Disease Network (Reticular dysgenesis)

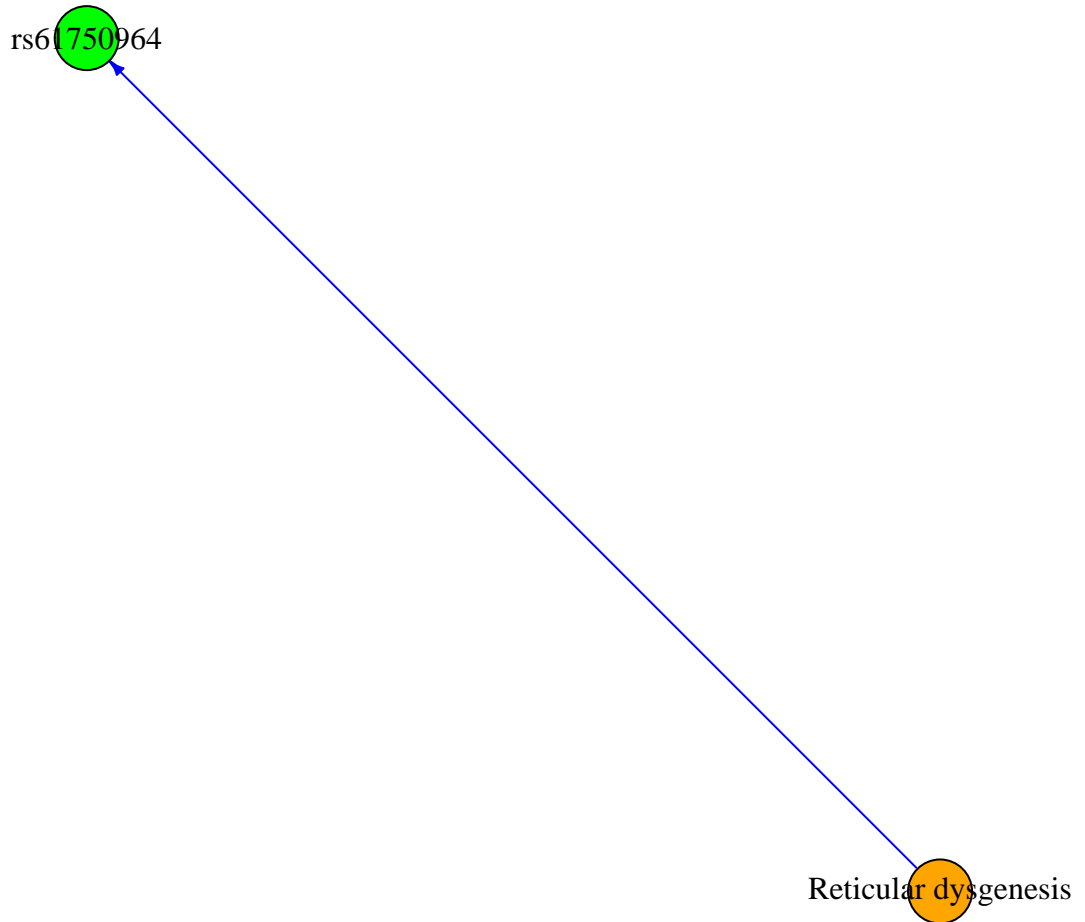

## Variant–Disease Network (Retinitis pigmentosa)

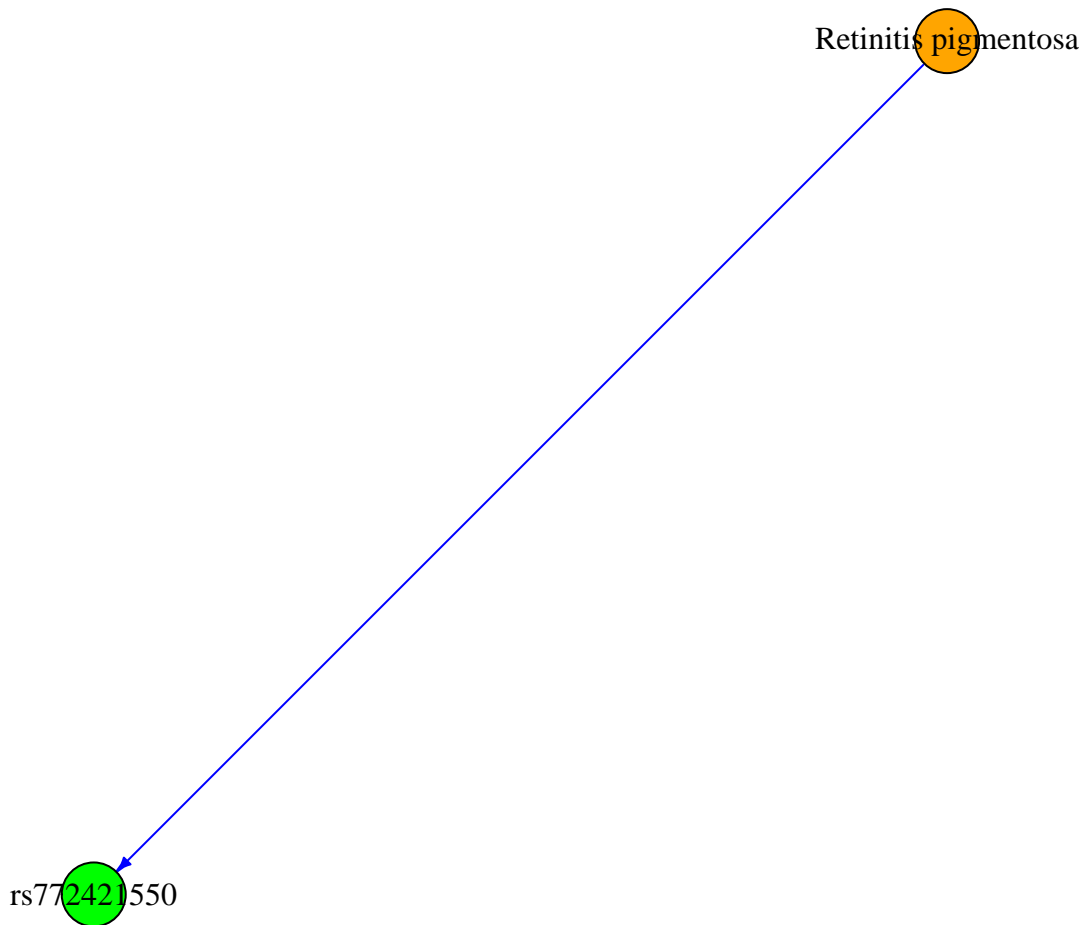

Variant–Disease Network (Retinitis pigmentosa 33)

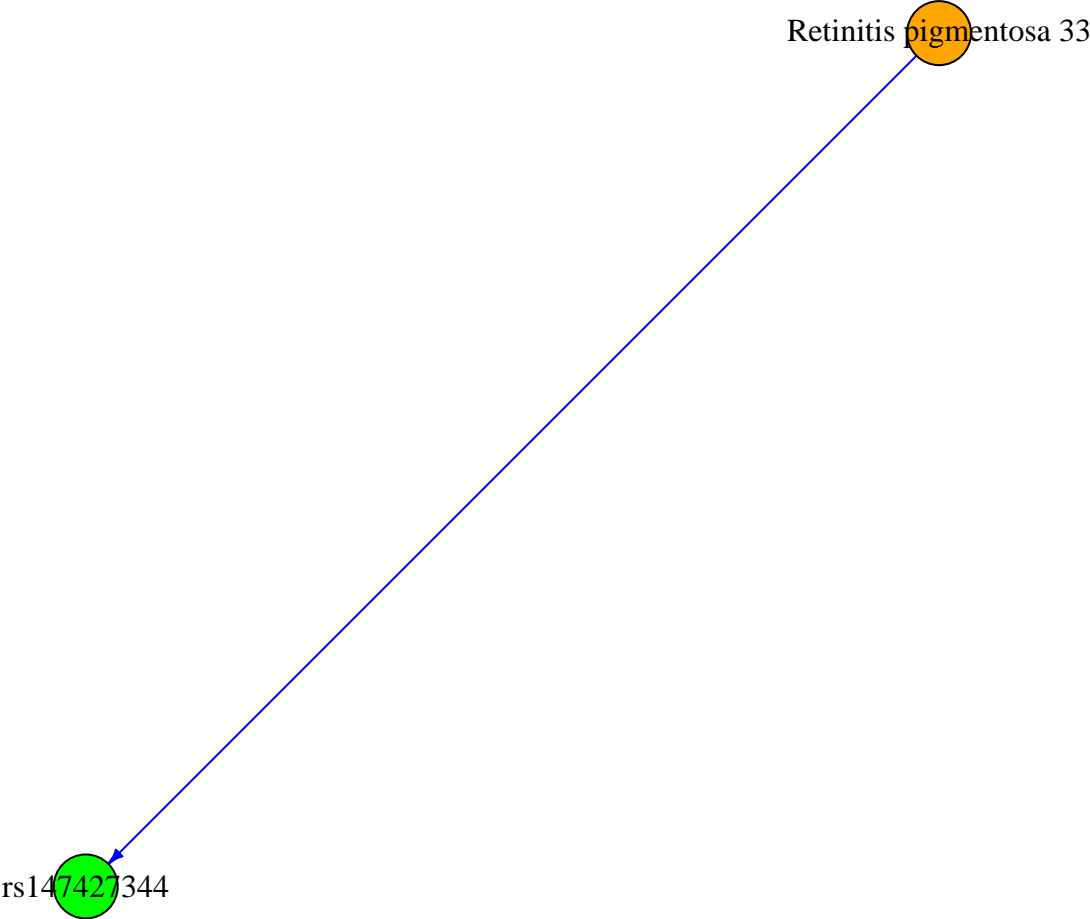

## Variant–Disease Network (Retinitis pigmentosa 66)

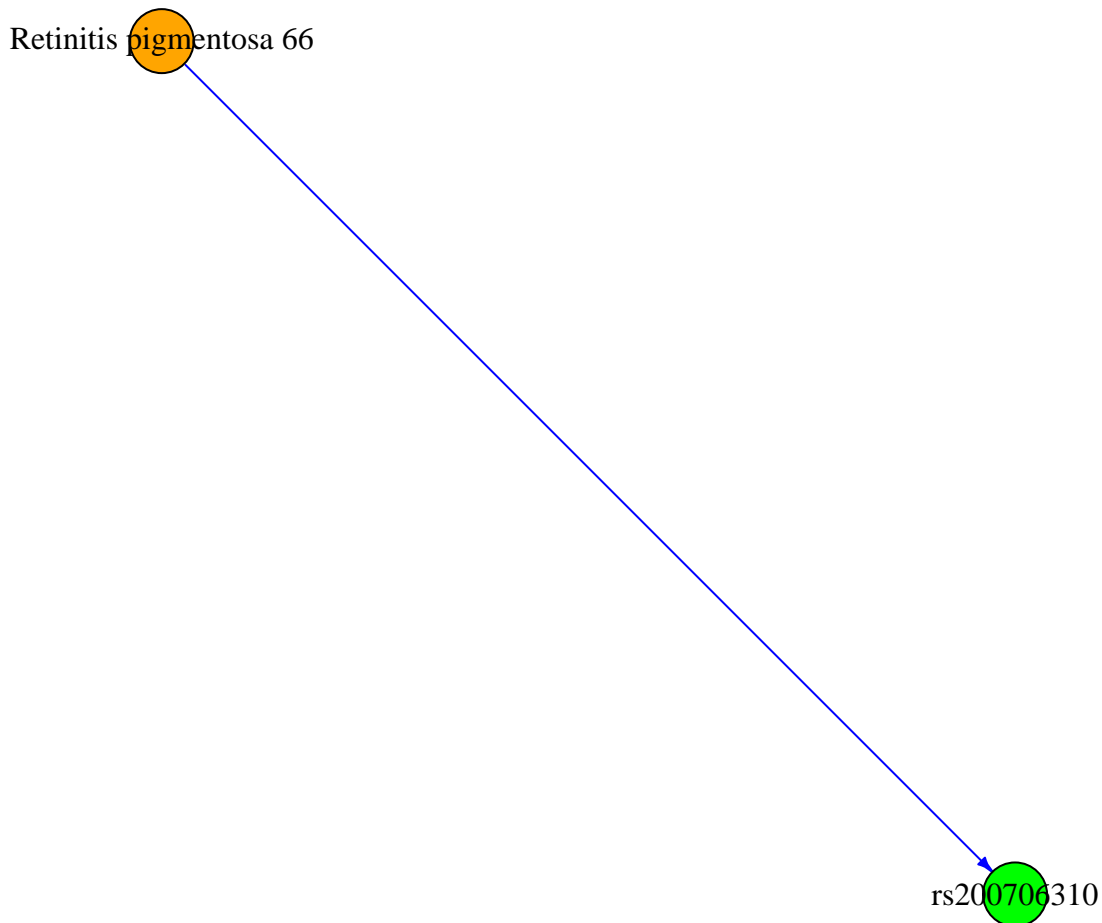

# Variant–Disease Network (Retinitis pigmentosa–deafness syndrome)

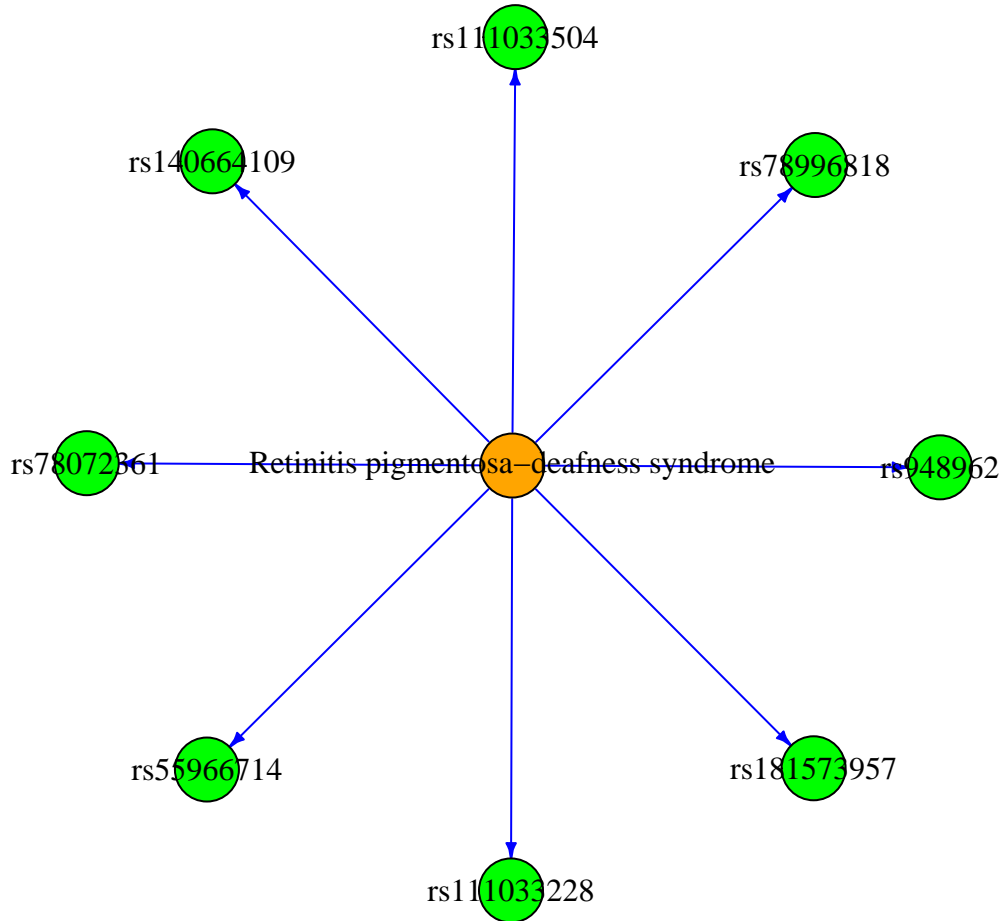

Variant–Disease Network (Retinoblastoma)

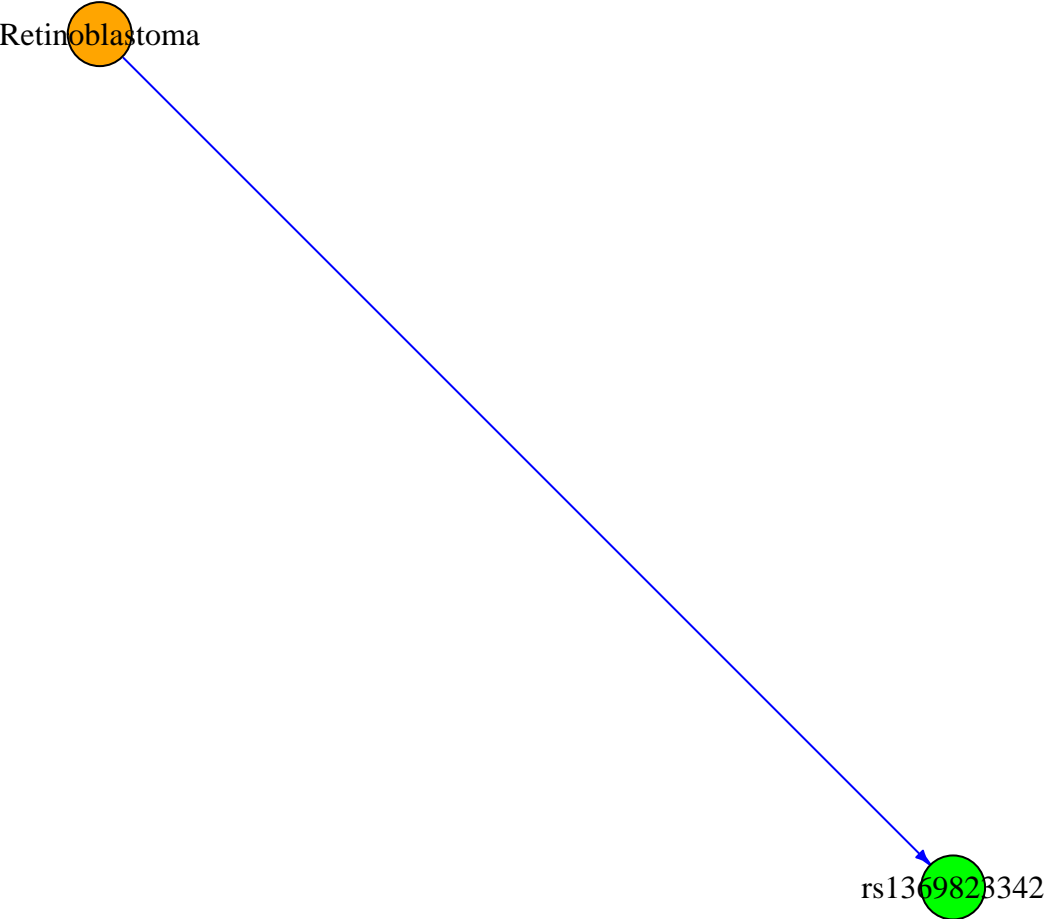



**Variant–Disease Network (Rhizomelic chondrodysplasia punctata)**

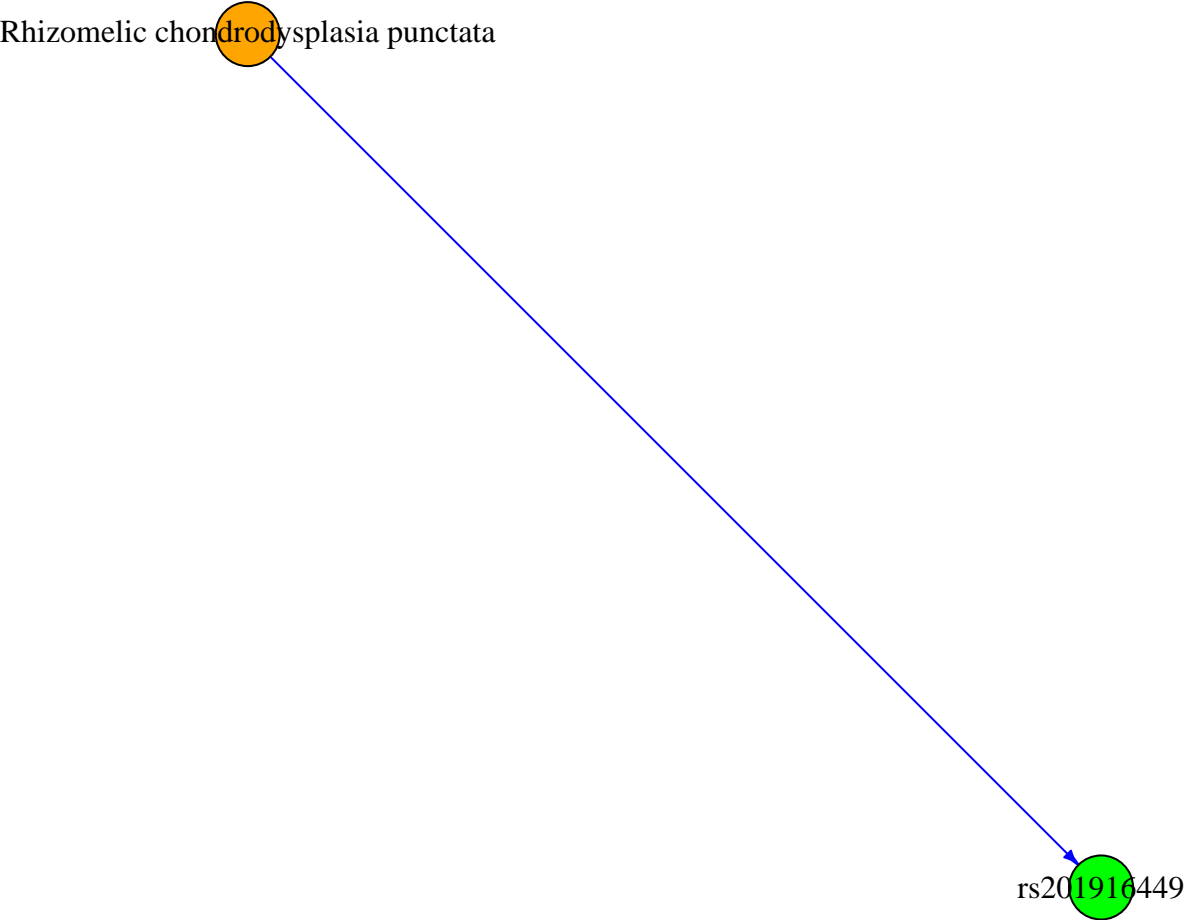

## Variant–Disease Network (Robinow syndrome)

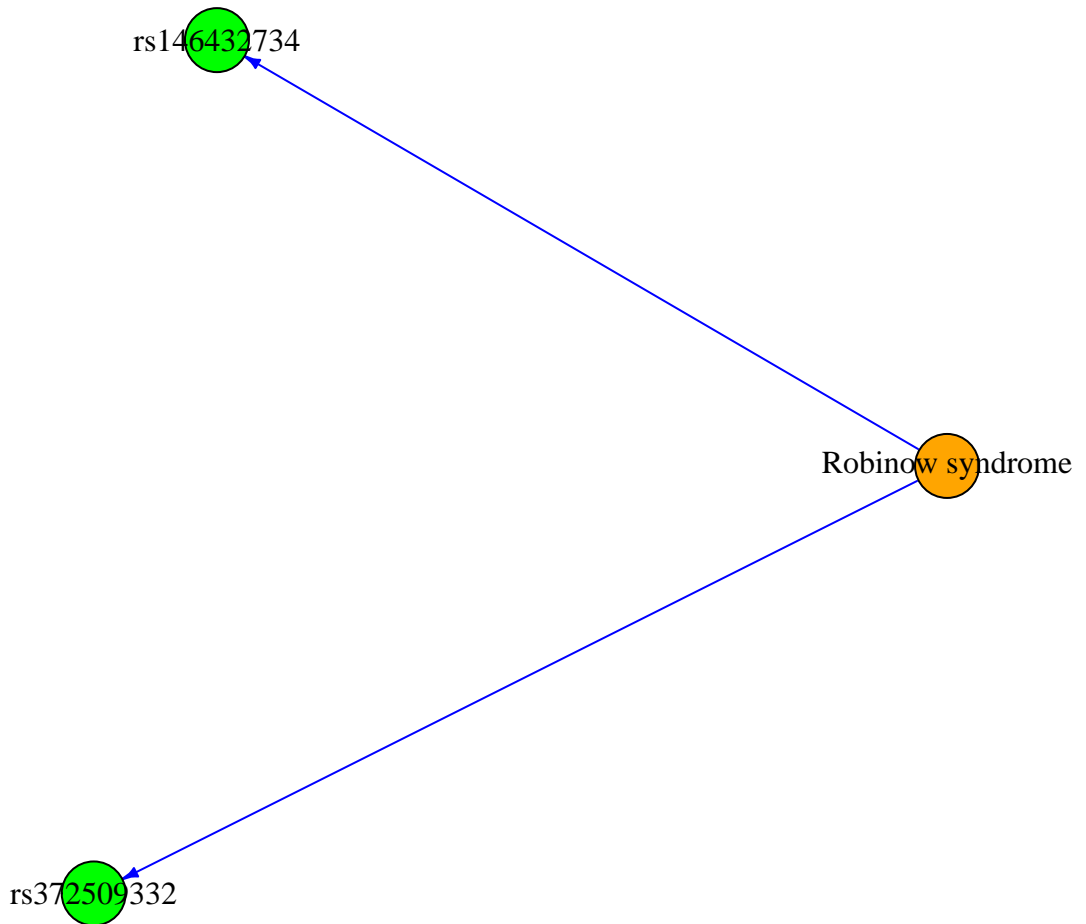

# nt-Disease Network (Rolandic epilepsy with mental retardation and speech c

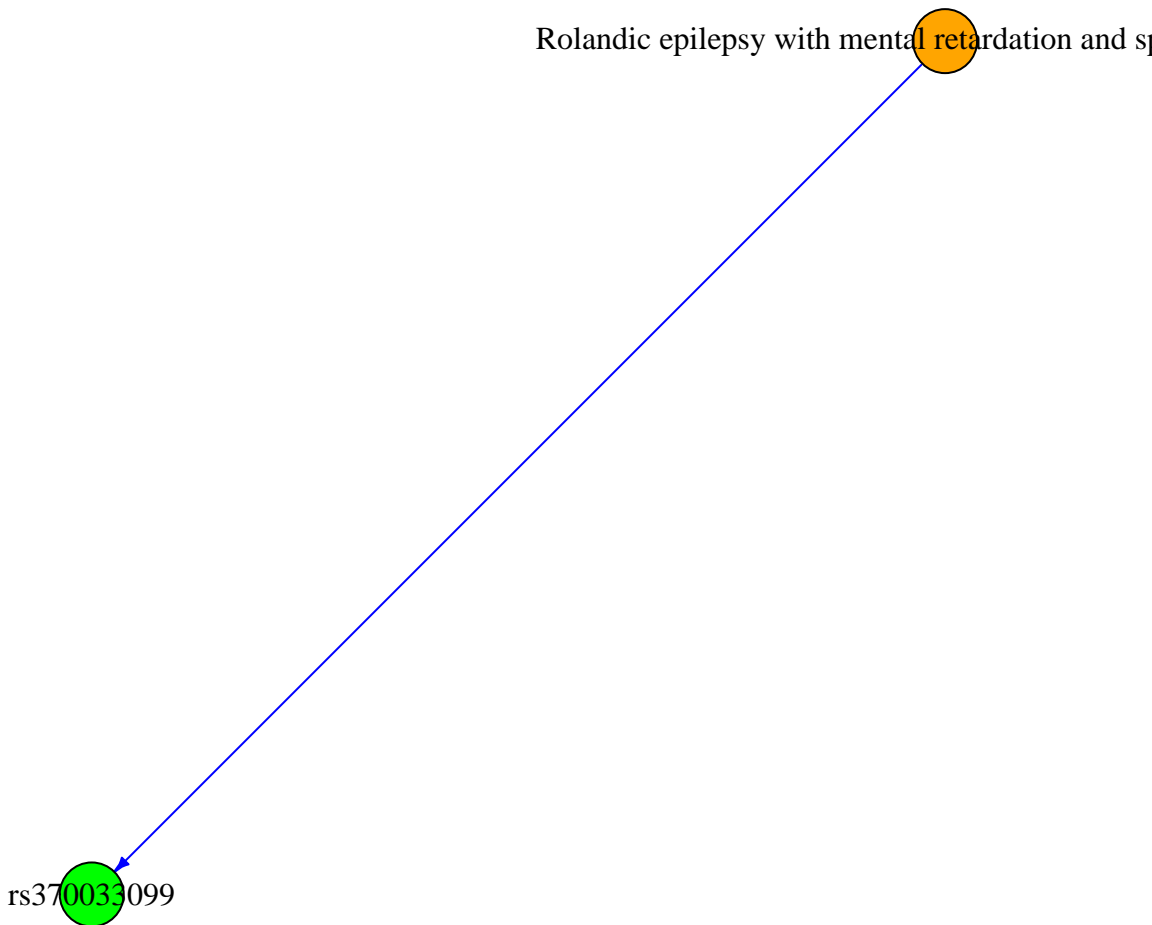

**Variant–Disease Network (Romano–Ward syndrome)**

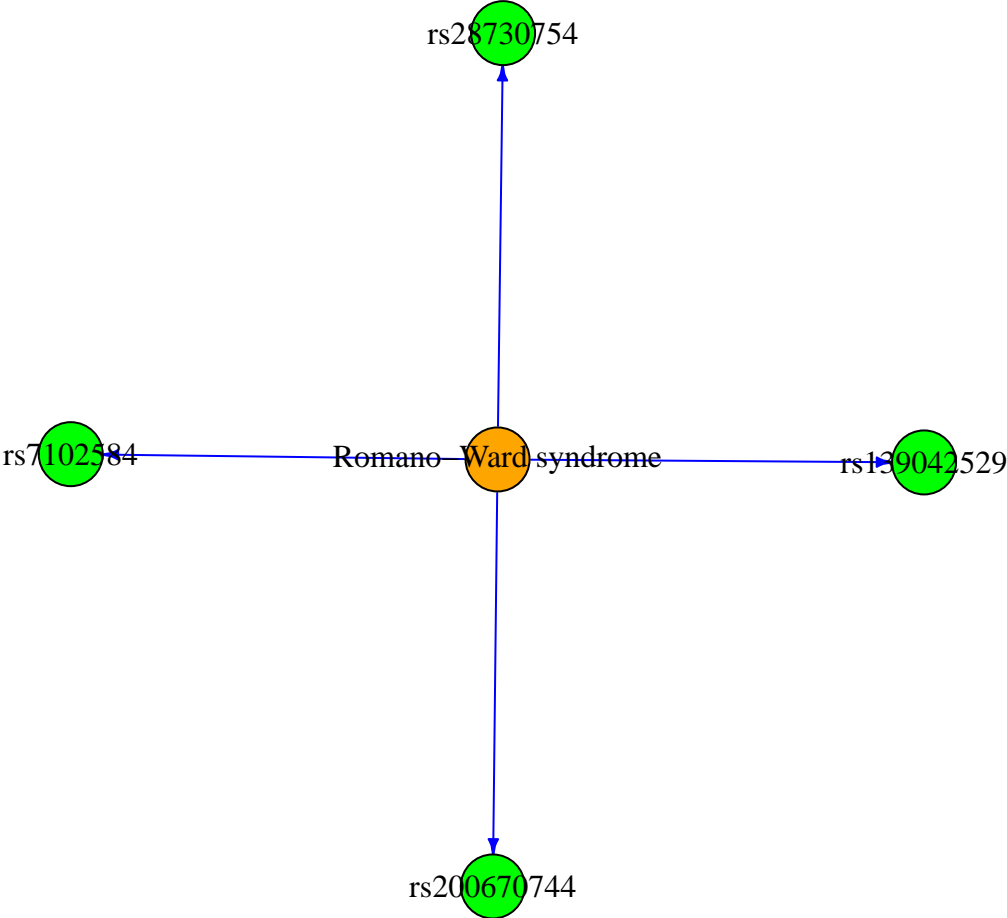

Variant–Disease Network (Rotor syndrome)

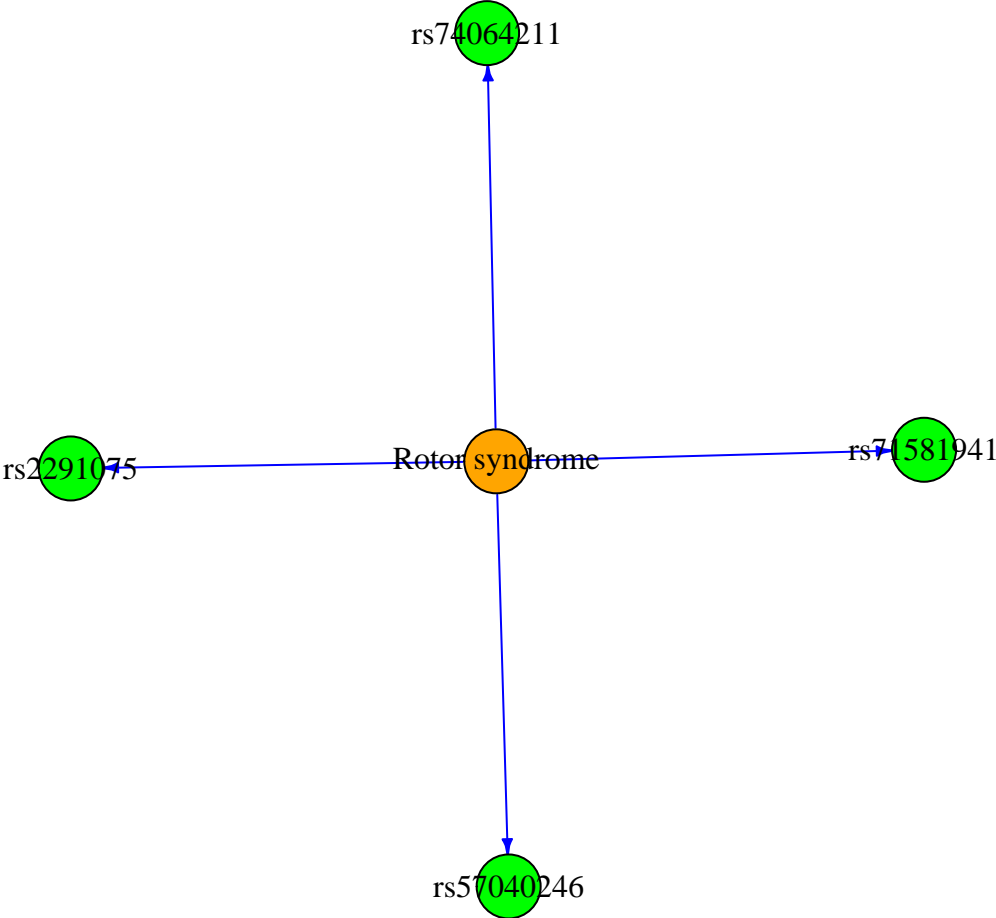

**Variant–Disease Network (Rubinstein–Taybi syndrome 1)**

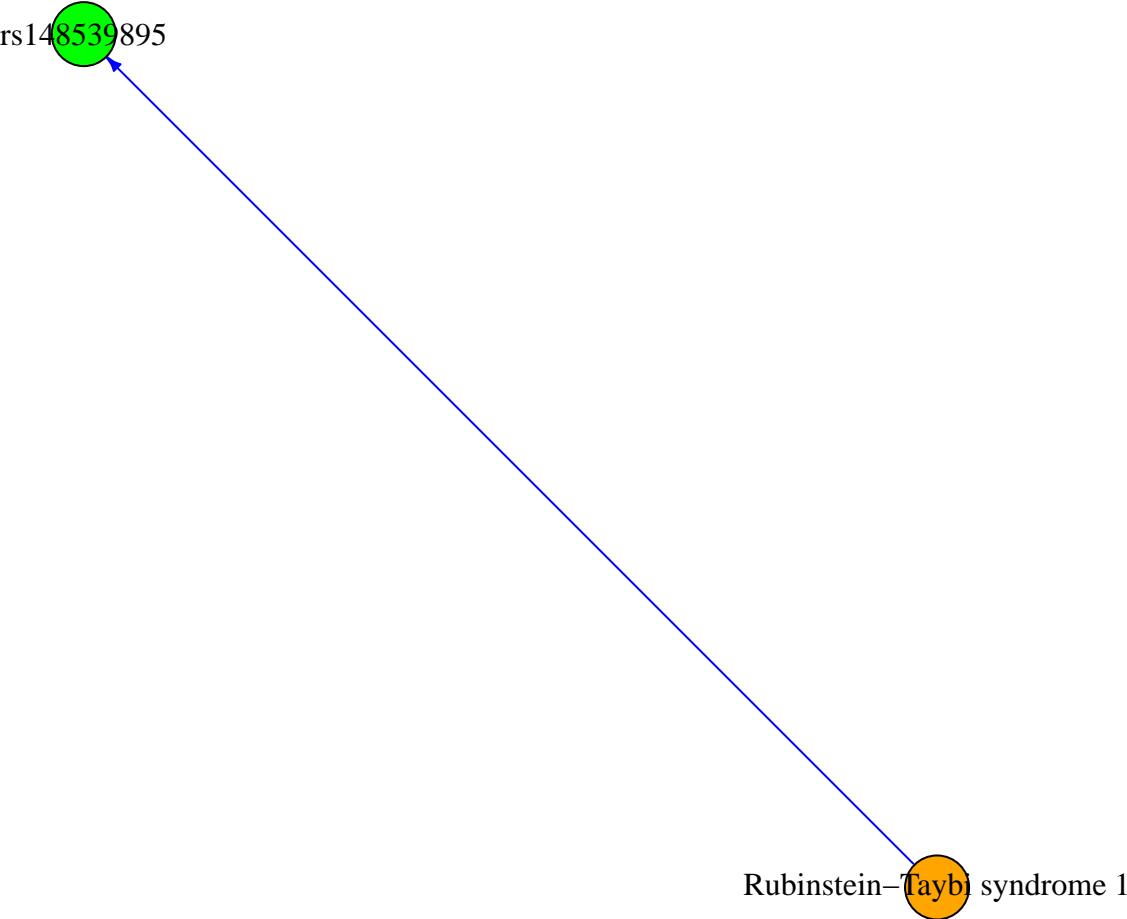

# Variant–Disease Network (Salt and pepper developmental regression syndrome)

and pepper developmental regression syndrome

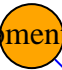

rs149309844

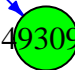

## Variant-Disease Network (Sanfilippo syndrome)

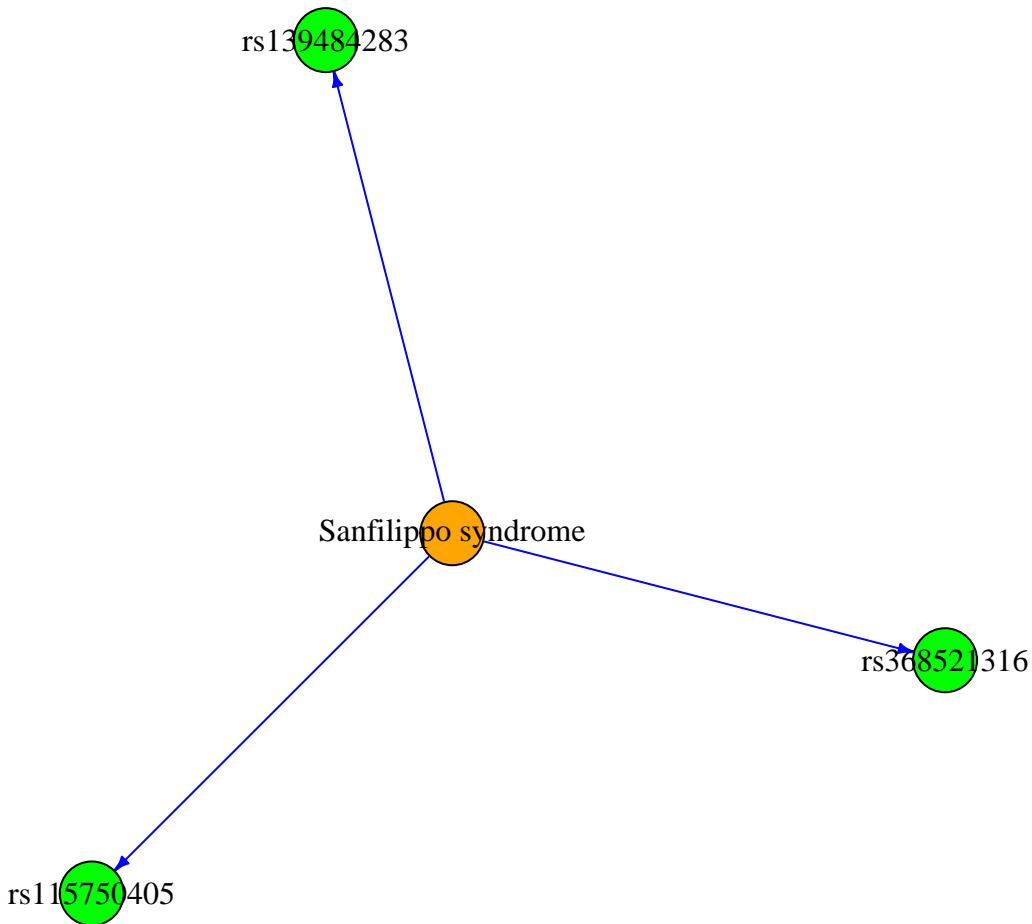



Variant–Disease Network (Schopf–Schulz–Passarge syndrome)

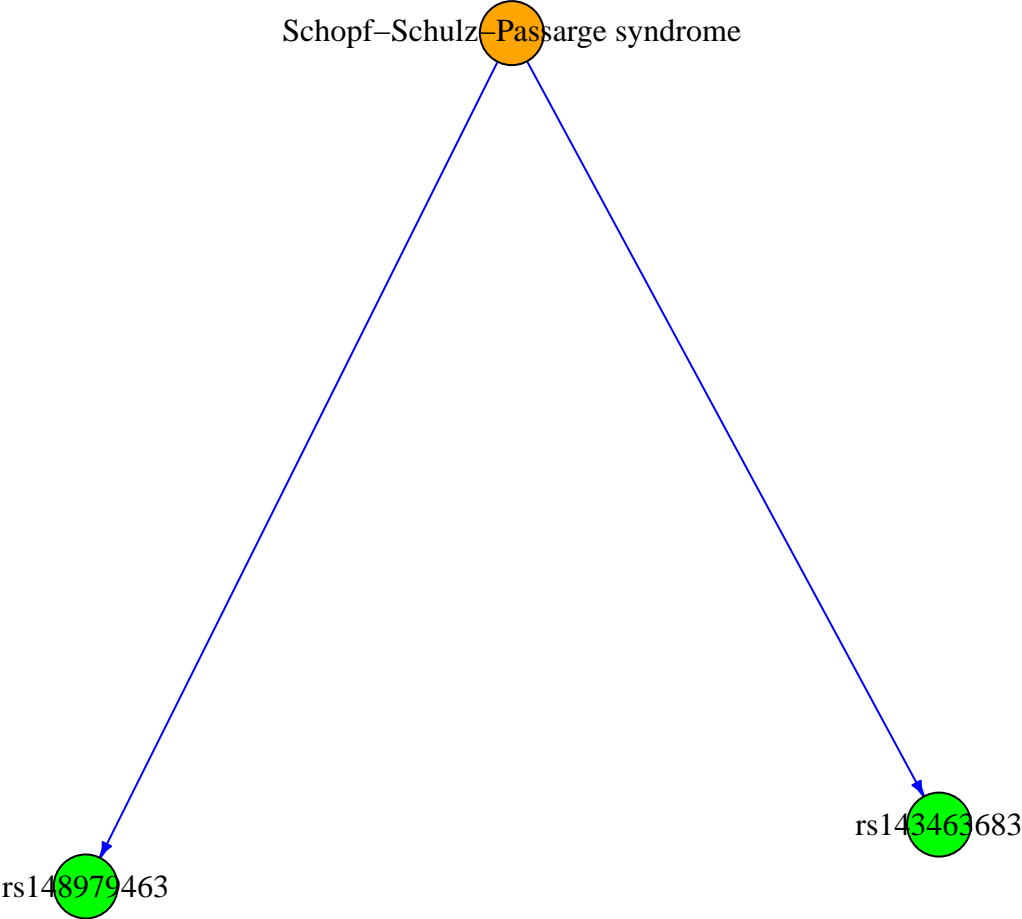

Variant–Disease Network (Schwartz Jampel syndrome type 1)

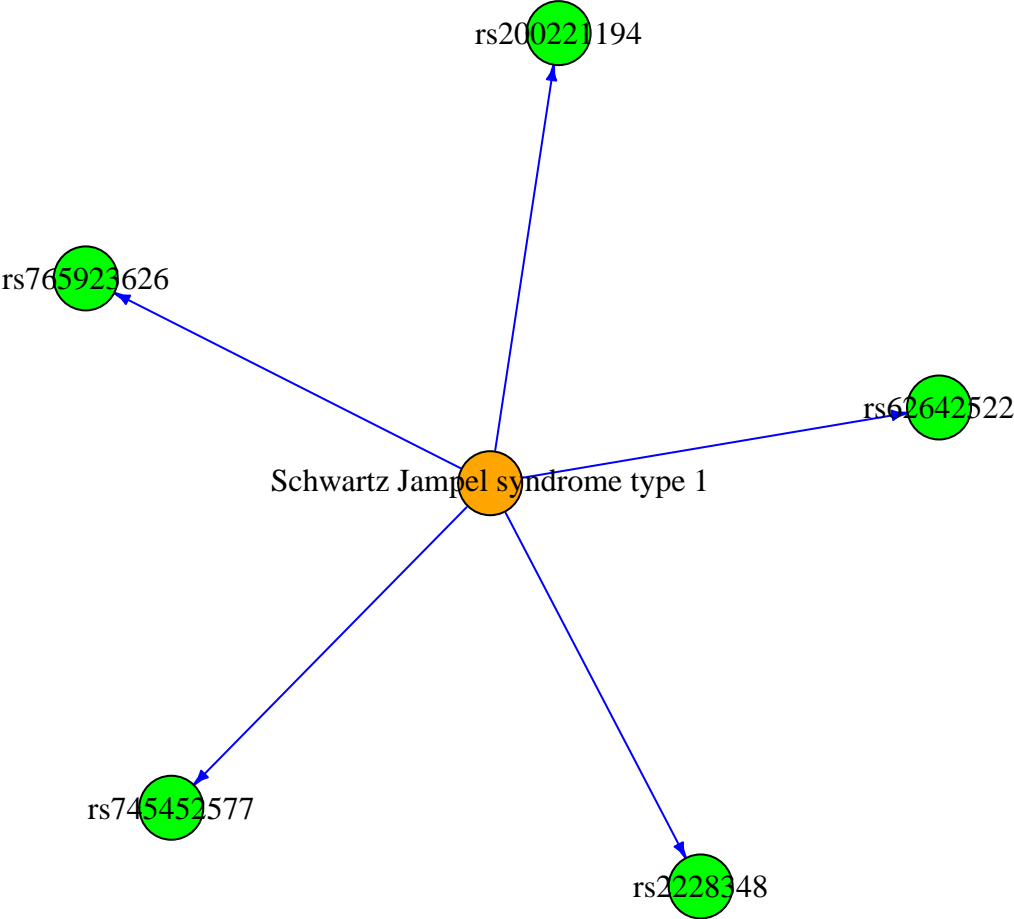

# Variant-Disease Network (Seckel syndrome)

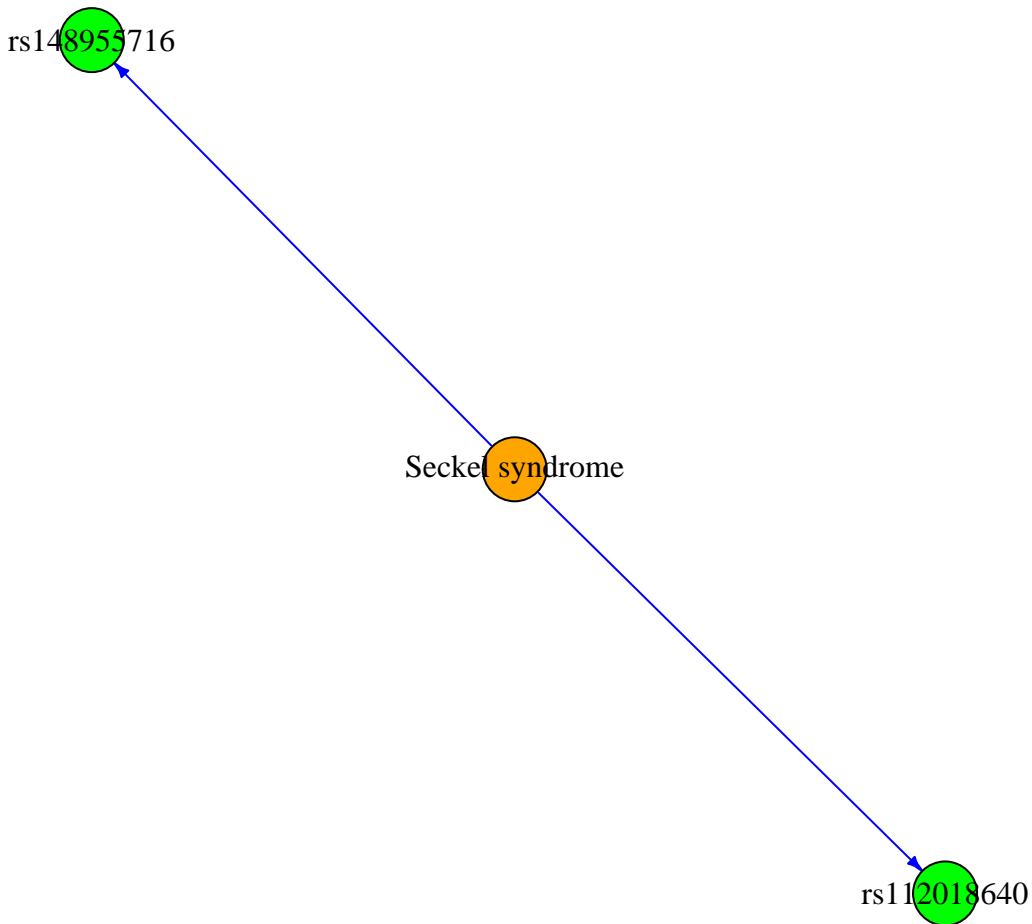

## Variant-Disease Network (Seizures)

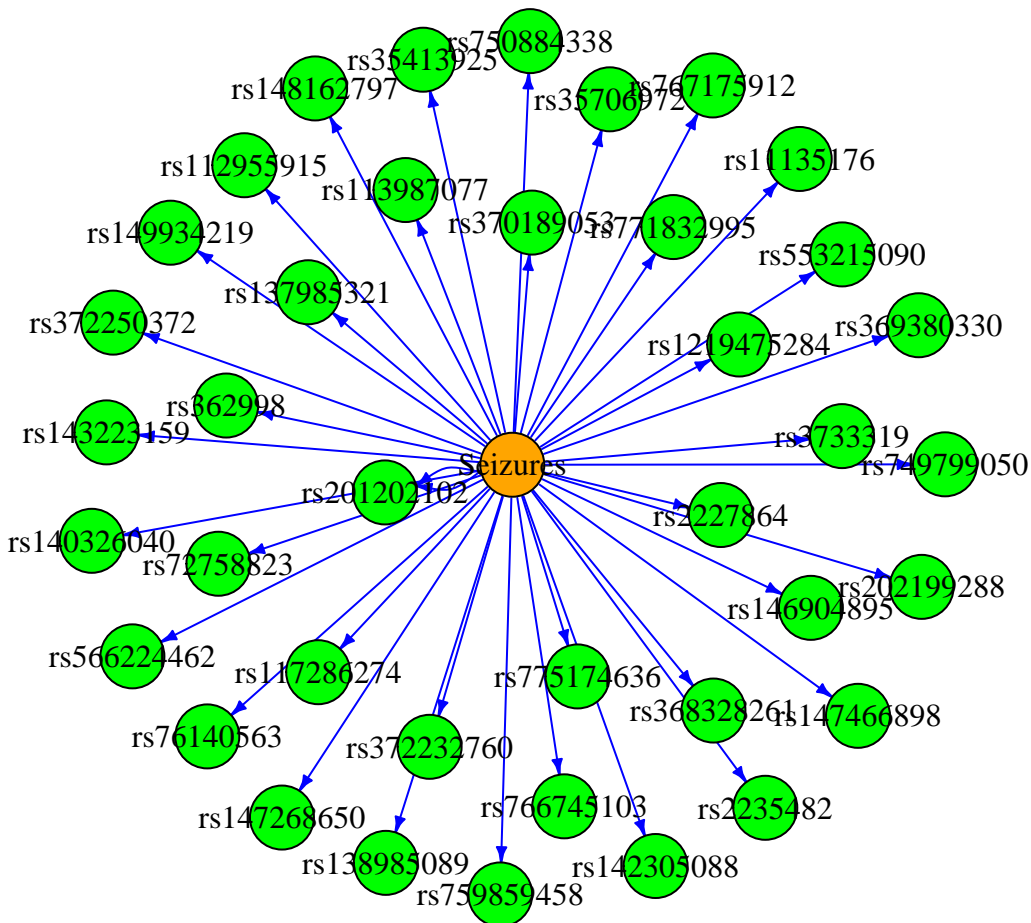

## Variant–Disease Network (Selective tooth agenesis)

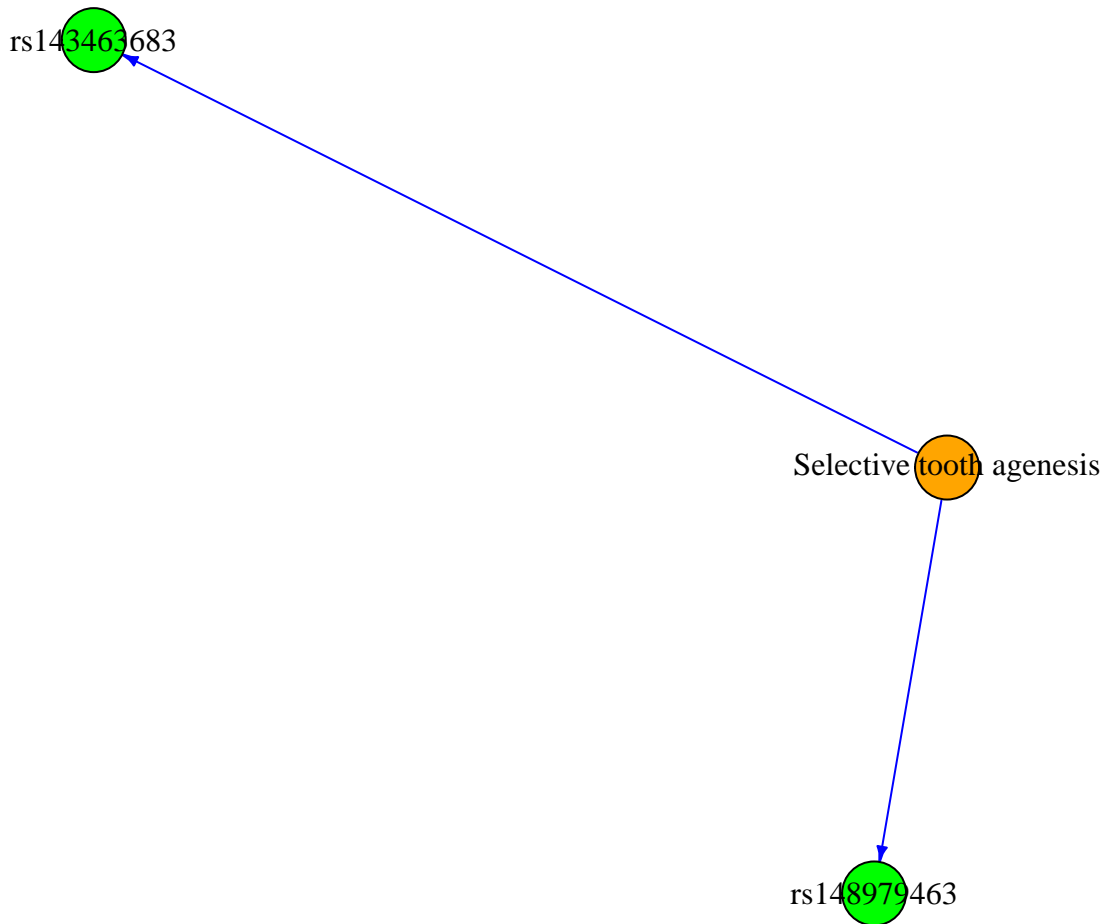

**Variant–Disease Network (Severe combined immunodeficiency disease)**

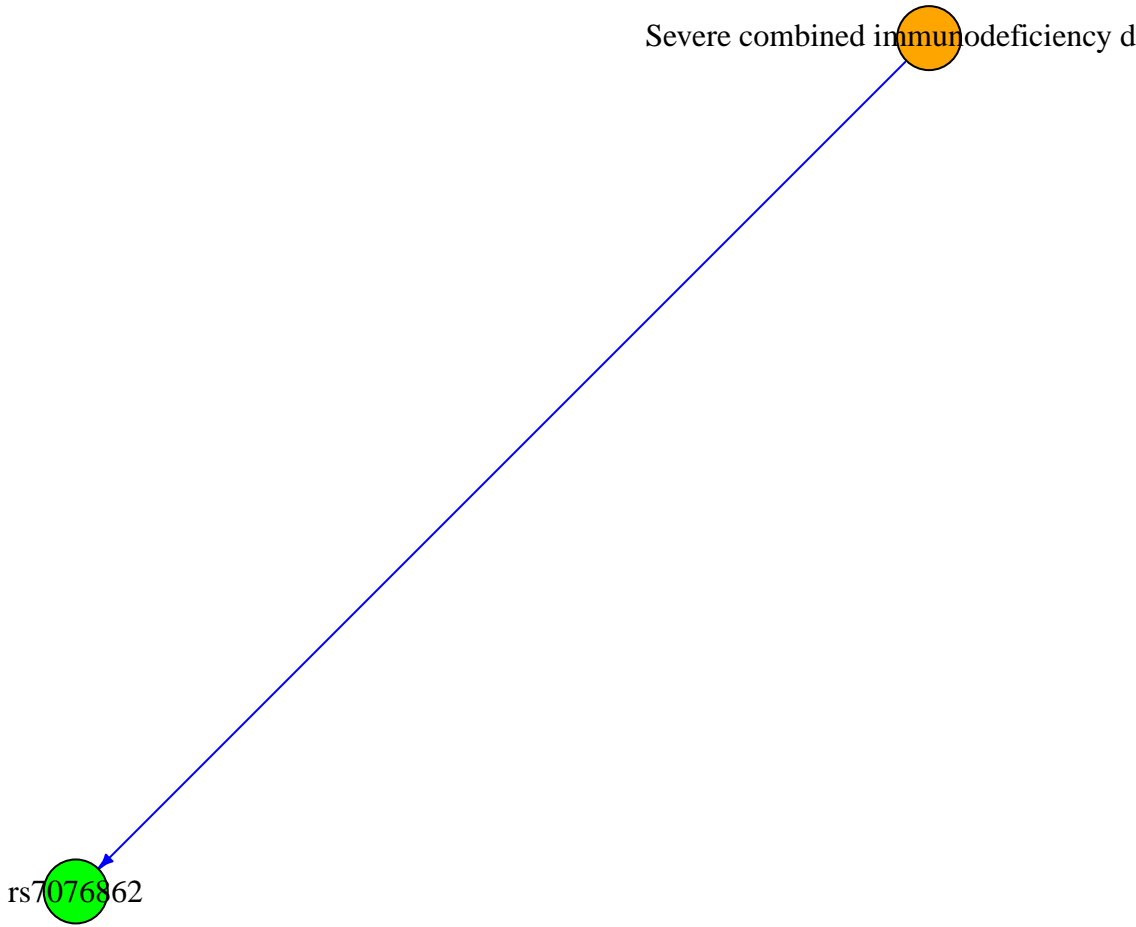

# Variant–Disease Network (Severe myoclonic epilepsy in infancy)

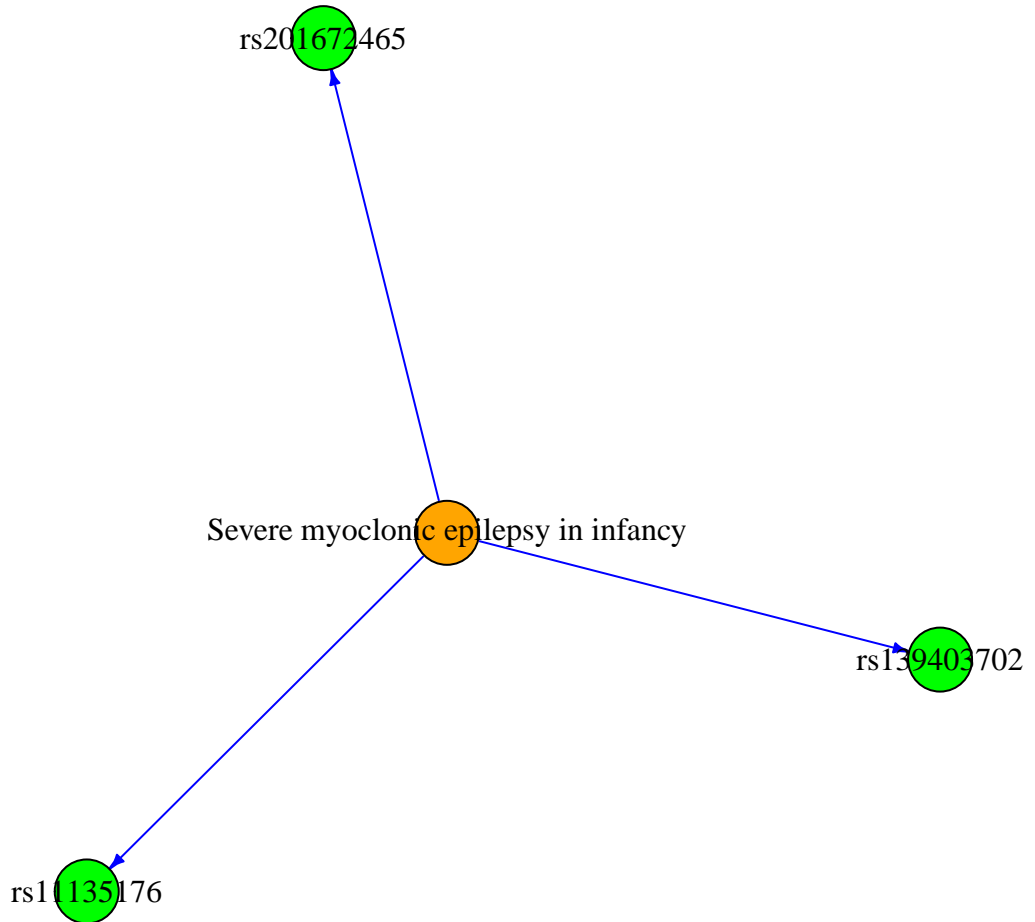

## Variant–Disease Network (short QT syndrome)

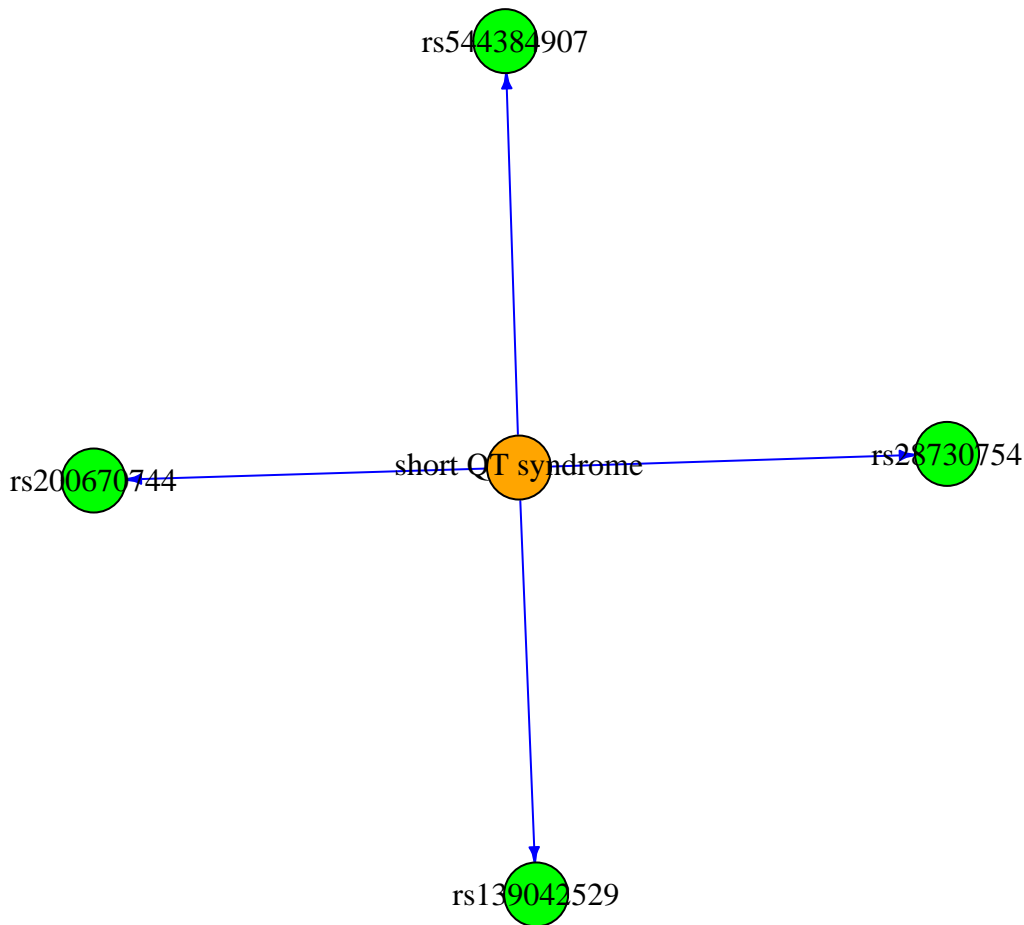



Variant–Disease Network (Short Rib Polydactyly Syndrome)

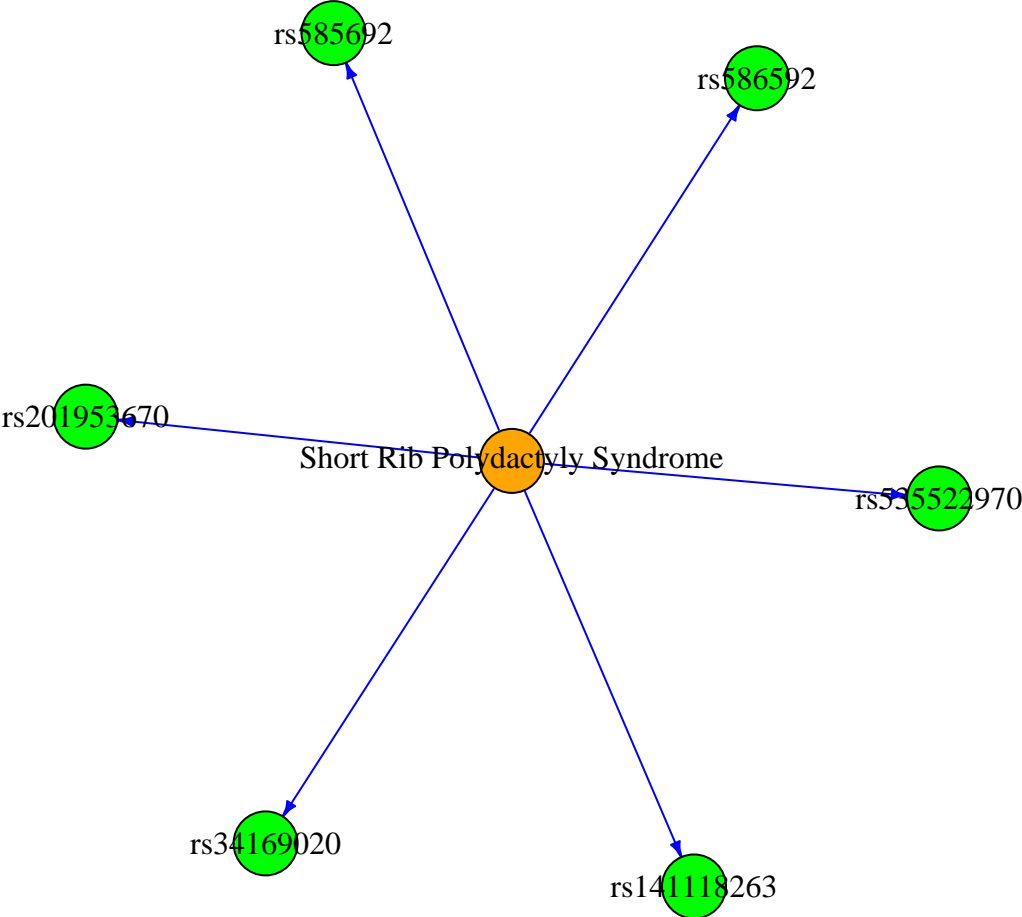

## Variant–Disease Network (Short rib polydactyly syndrome 5)

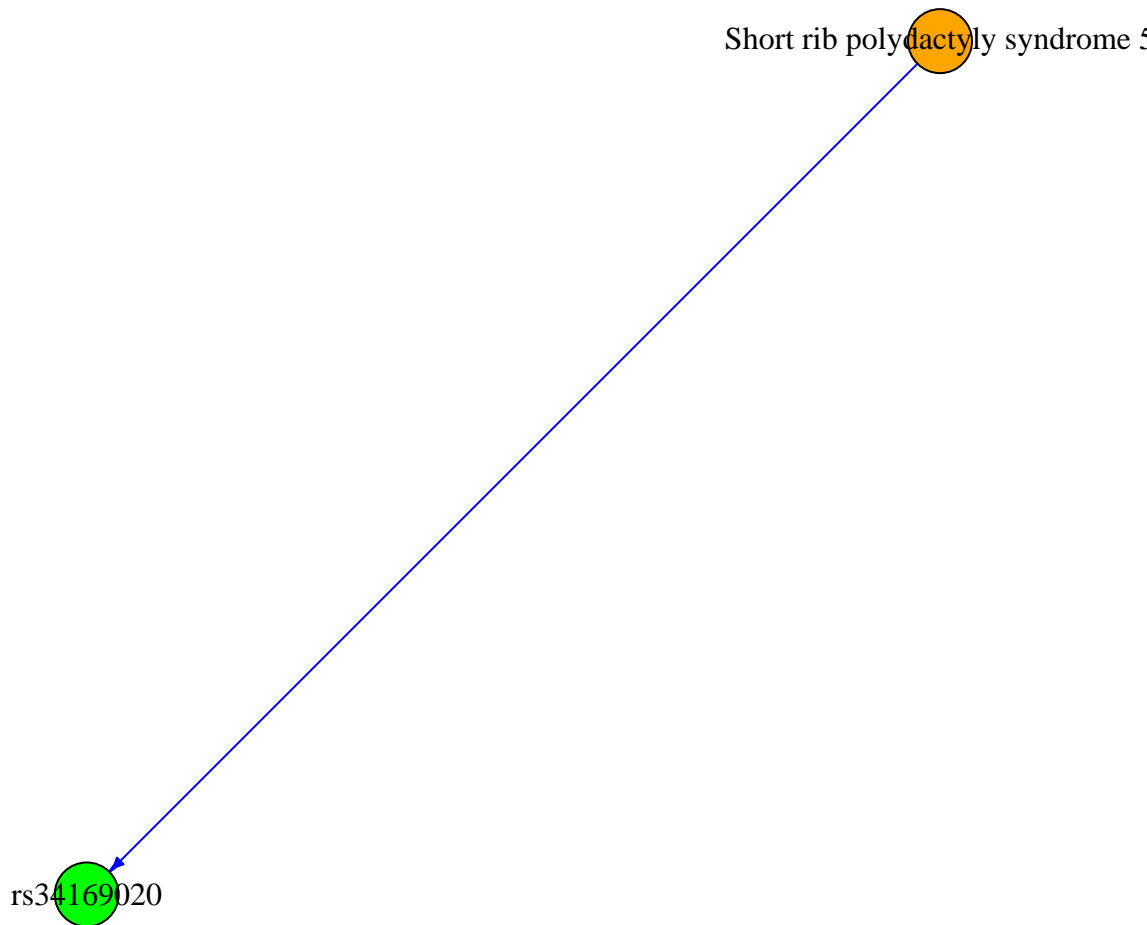

## Variant–Disease Network (Short stature)

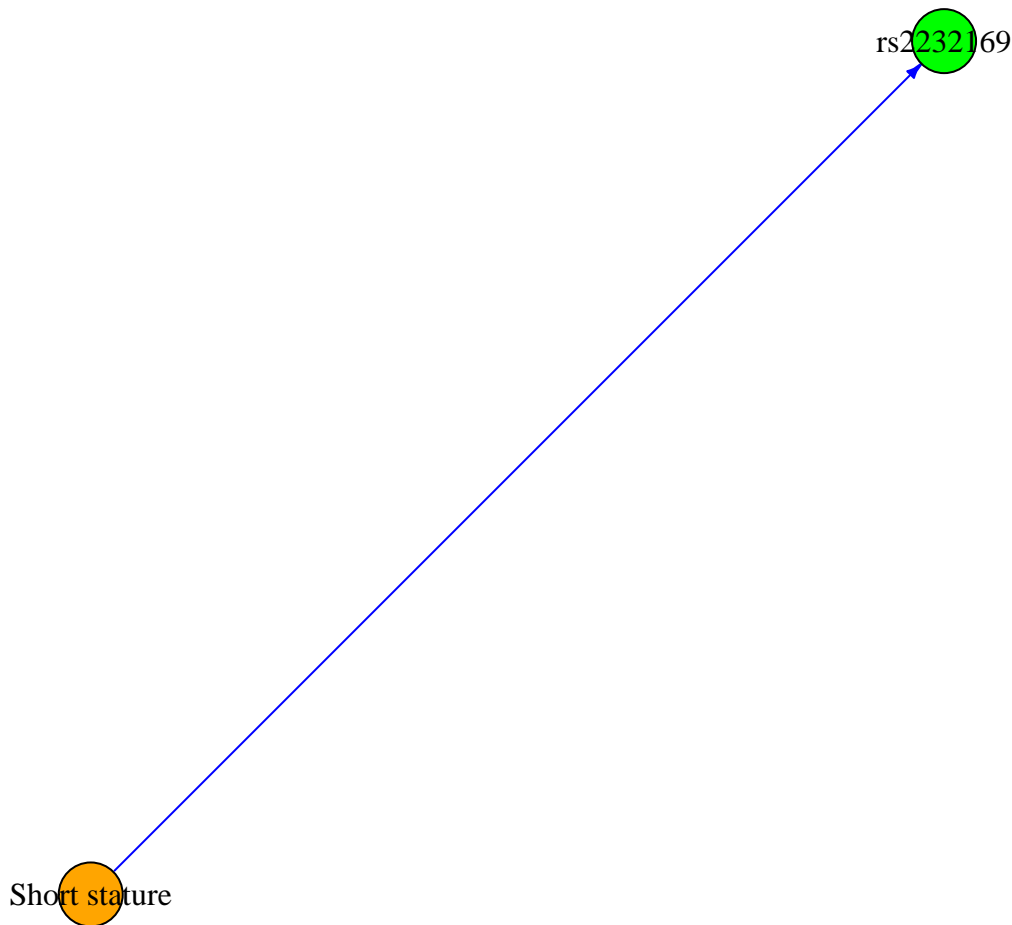

Variant–Disease Network (Short-rib thoracic dysplasia 15 with polydactyly)

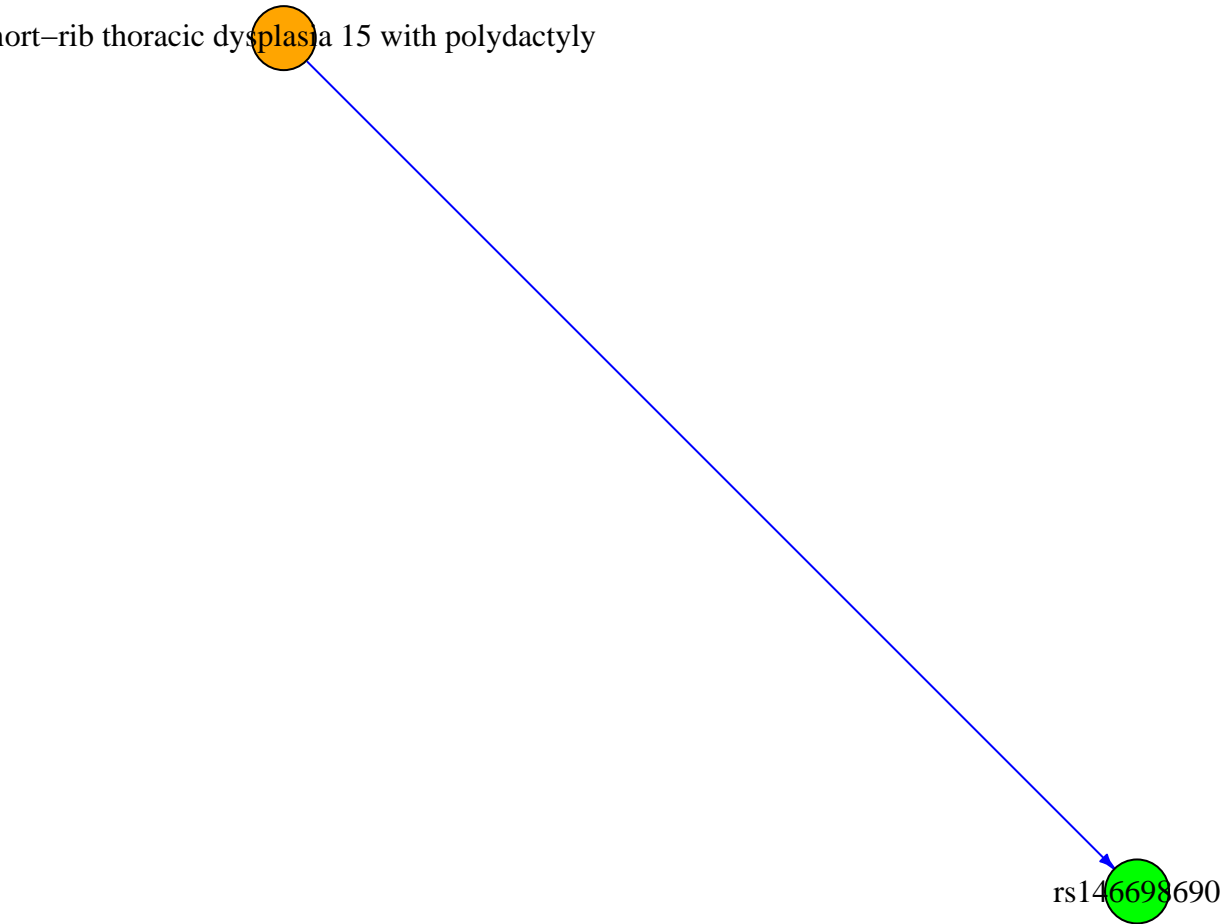

# Variant-Disease Network (Short-rib thoracic dysplasia 8 with or without polyd

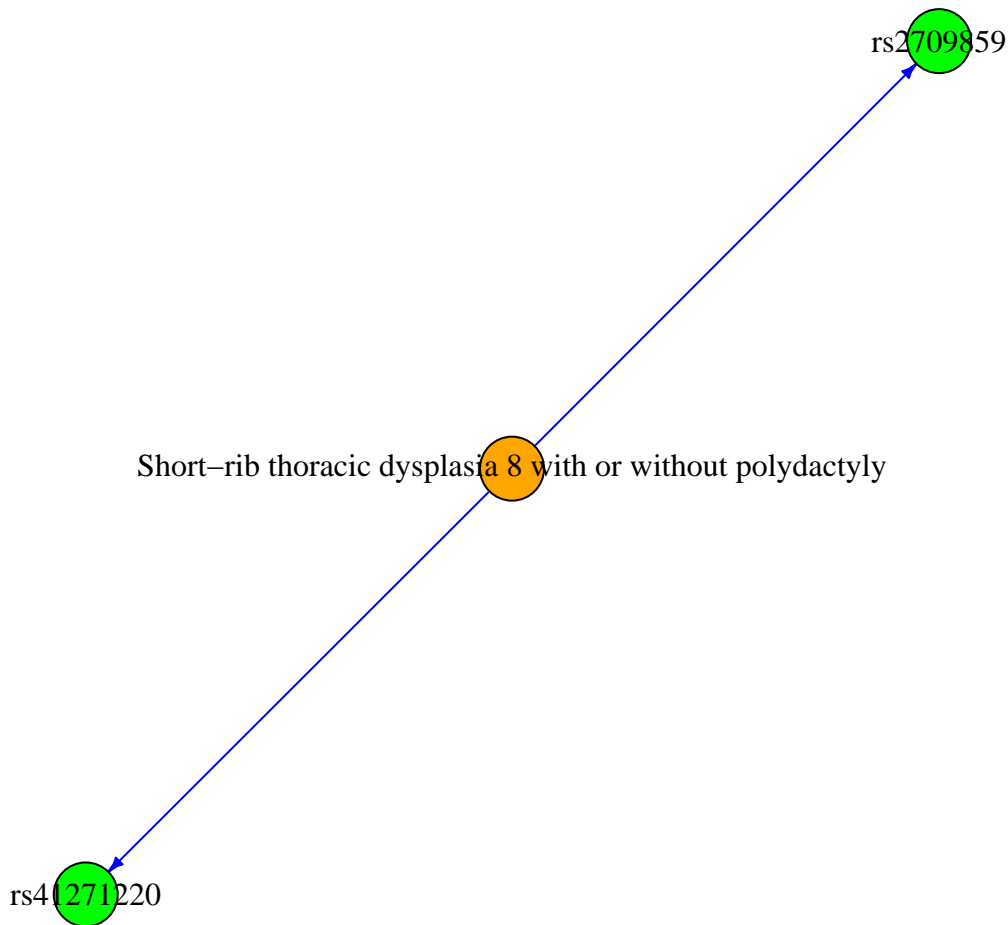

# Variant–Disease Network (Shprintzen–Goldberg syndrome)

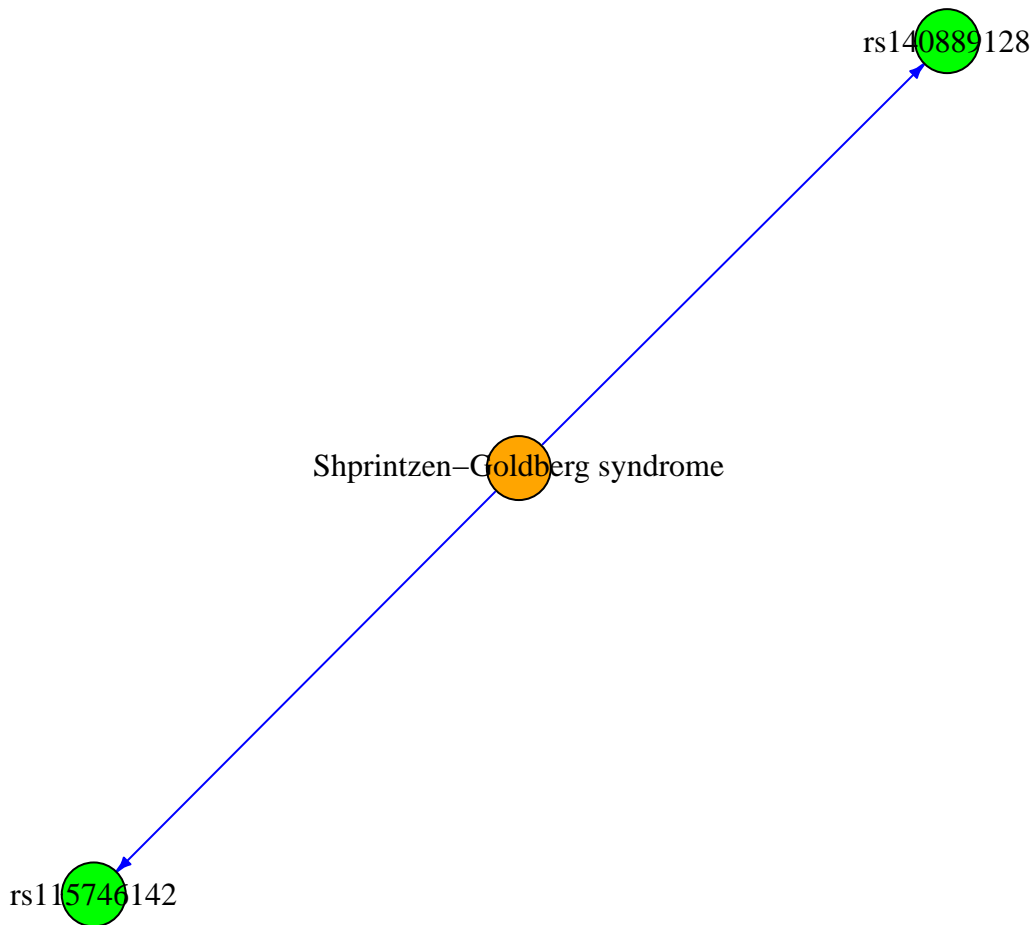

## Variant–Disease Network (Shwachman–Diamond syndrome 1)

rs113993989

Shwachman–Diamond syndrome

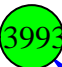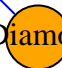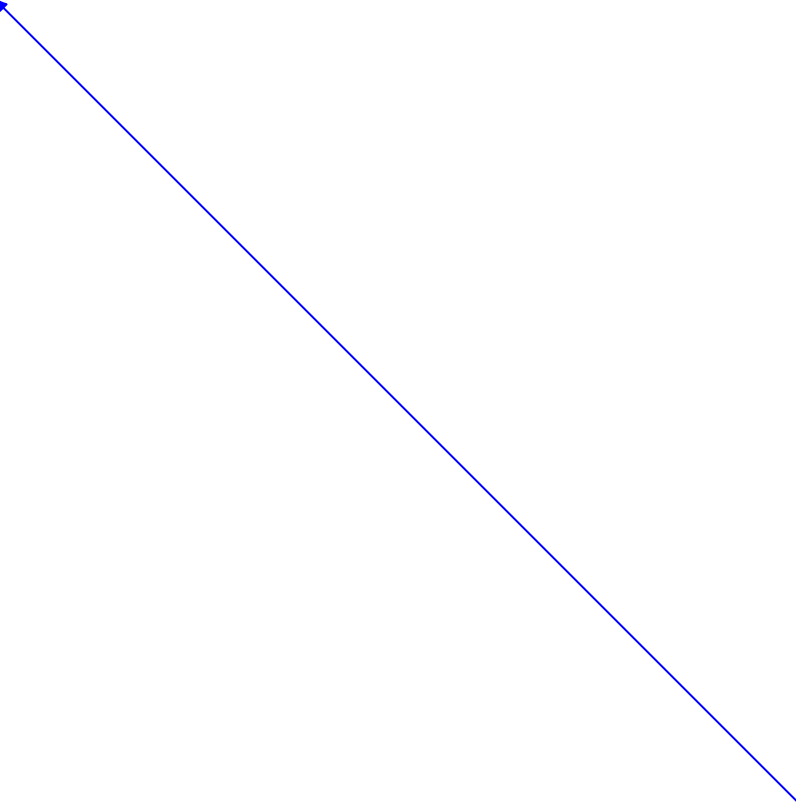

Variant-Disease Network (Sialidosis)

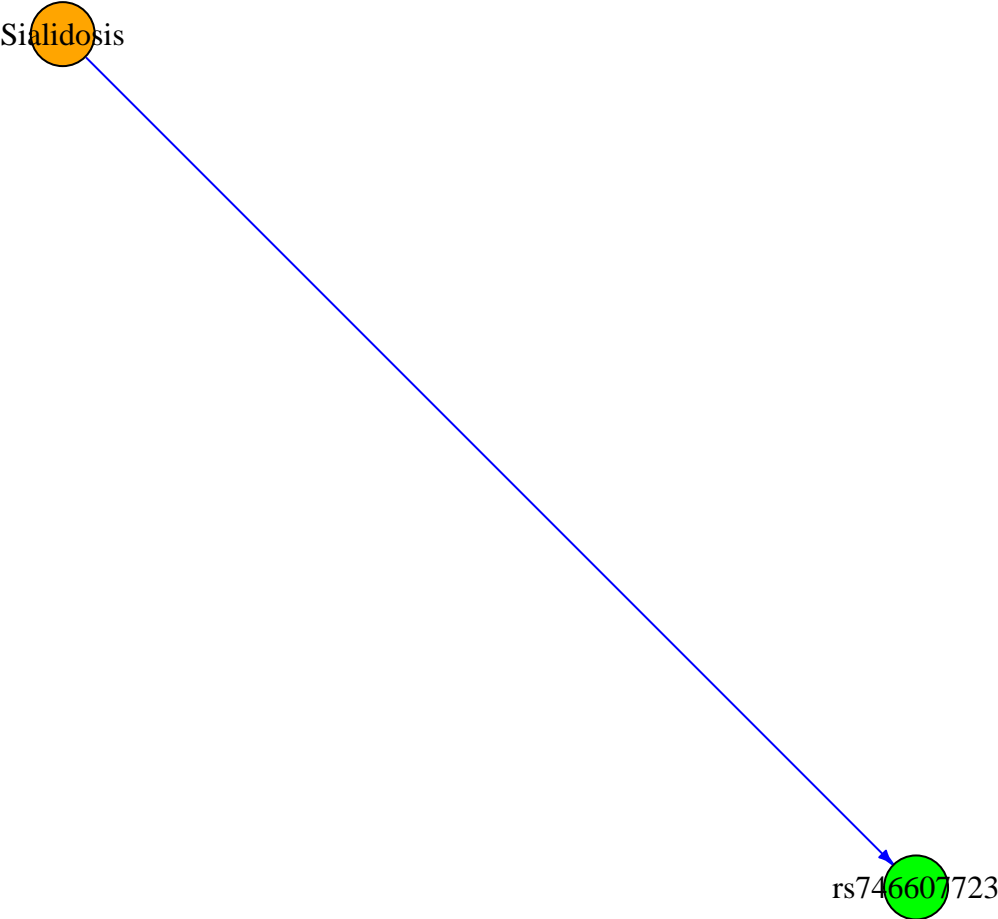



Variant–Disease Network (Sideroblastic anemia with B–cell immunodeficiency)

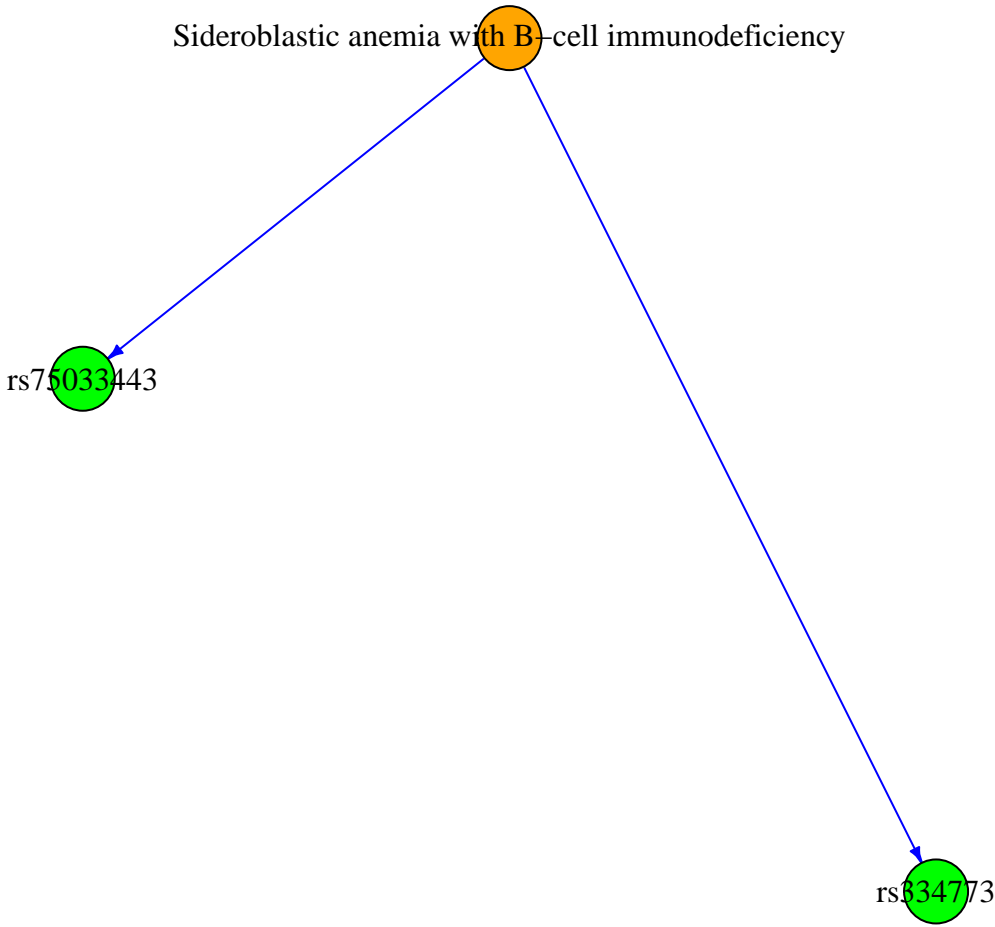

**Variant–Disease Network (Singleton–Merten syndrome 1)**

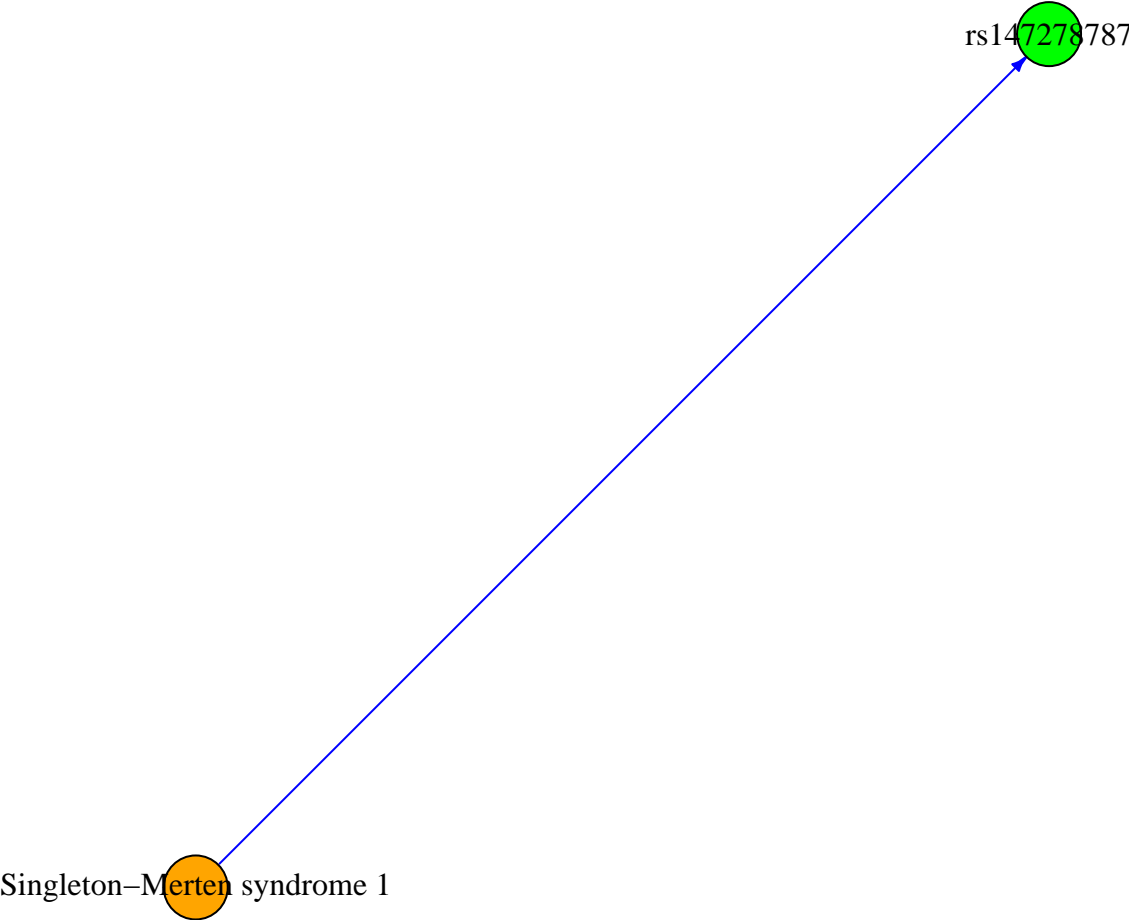

Variant–Disease Network (Sitosterolemia)

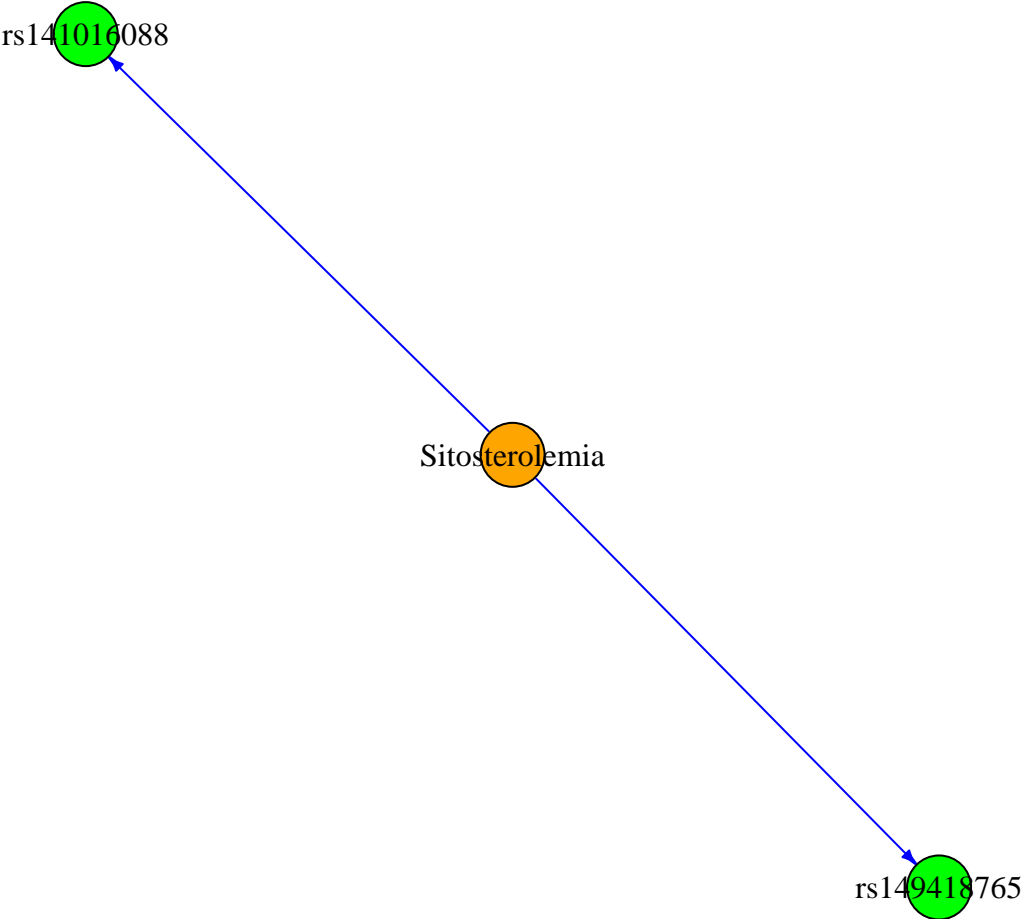

## Variant–Disease Network (Sjögren–Larsson syndrome)

## Variant–Disease Network (Skeletal dysplasia)

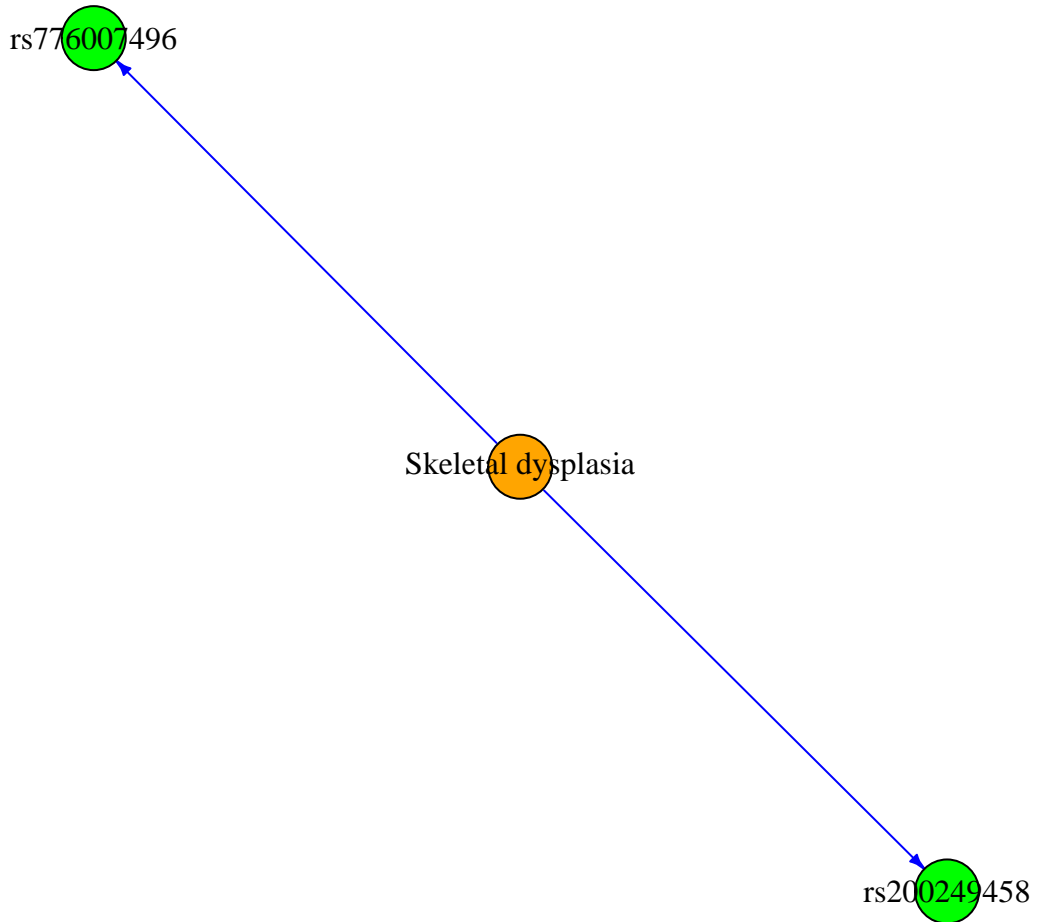

**Variant–Disease Network (Skin fragility woolly hair syndrome)**

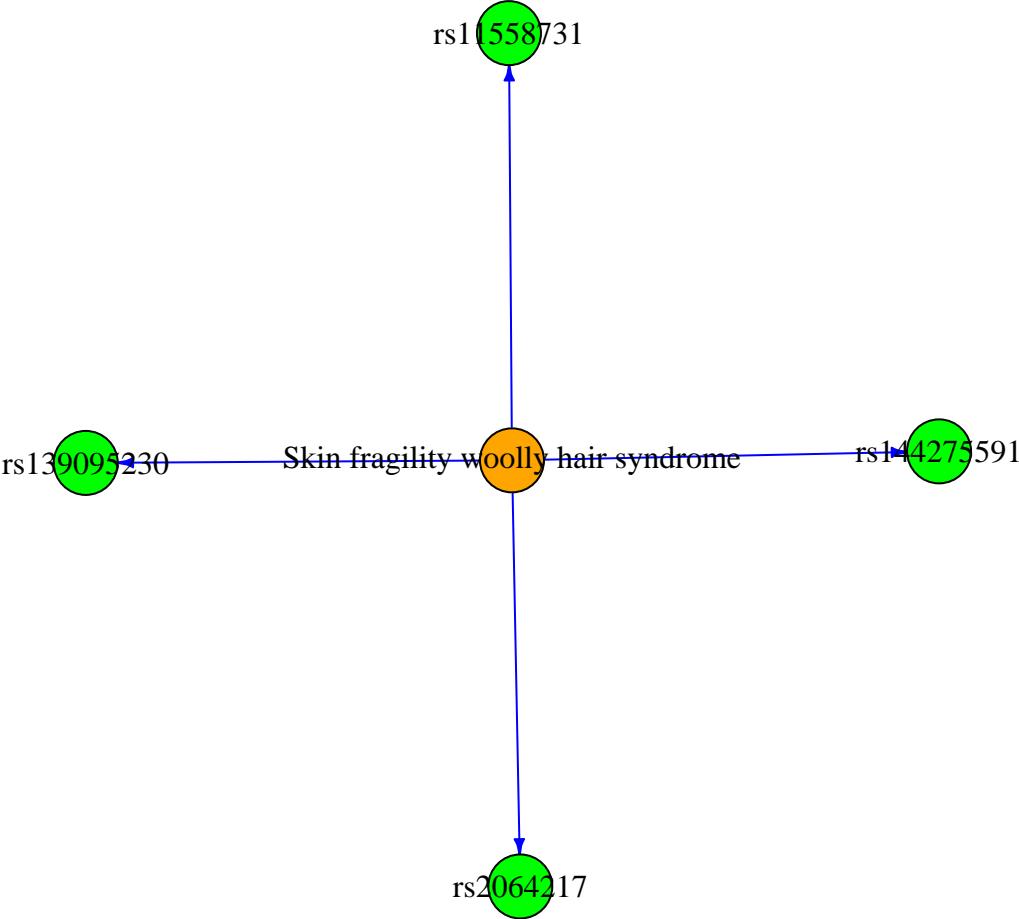

## Variant–Disease Network (Sotos syndrome)

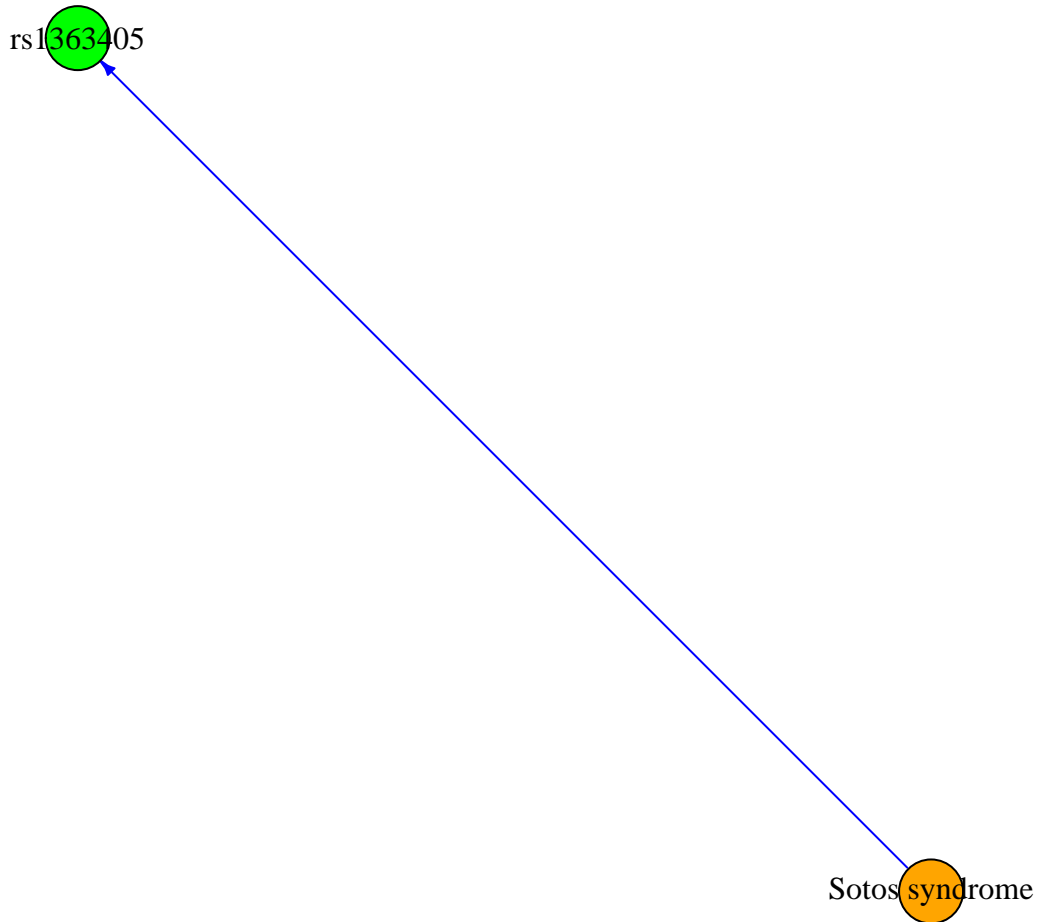

## Variant–Disease Network (Sotos syndrome 1)

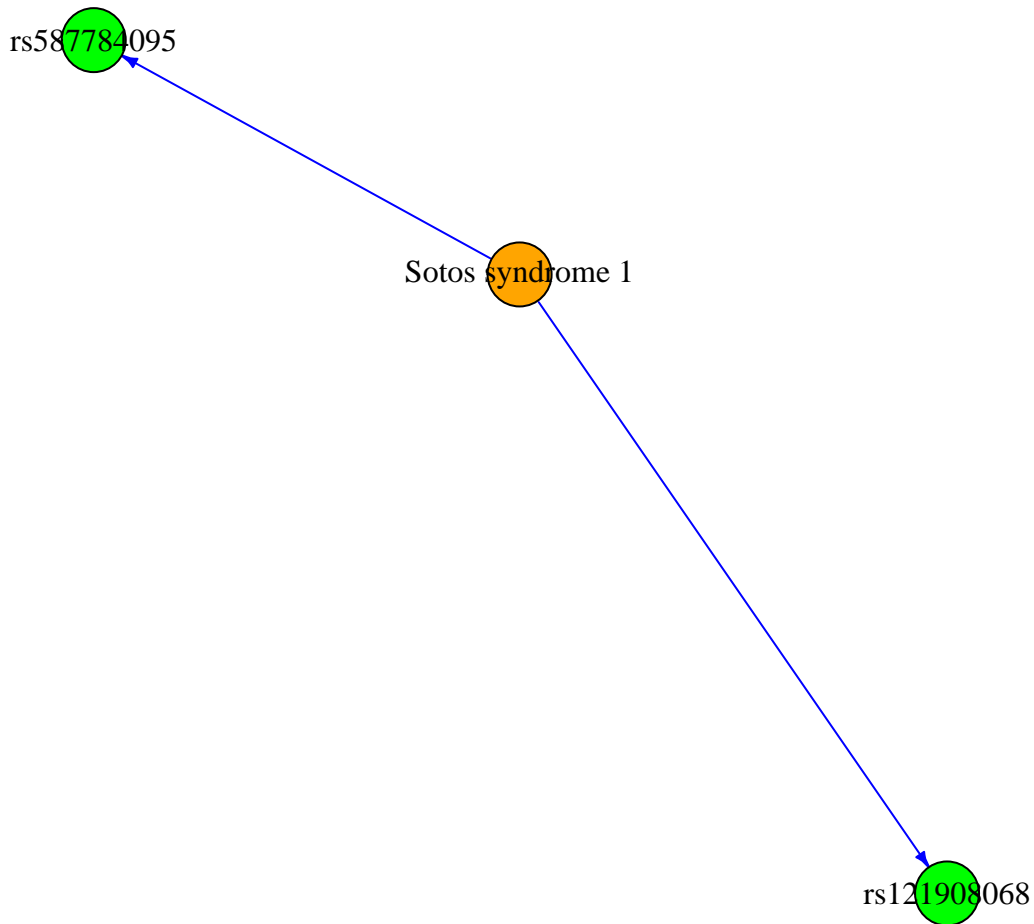



**Variant–Disease Network (Spastic ataxia Charlevoix–Saguenay type)**

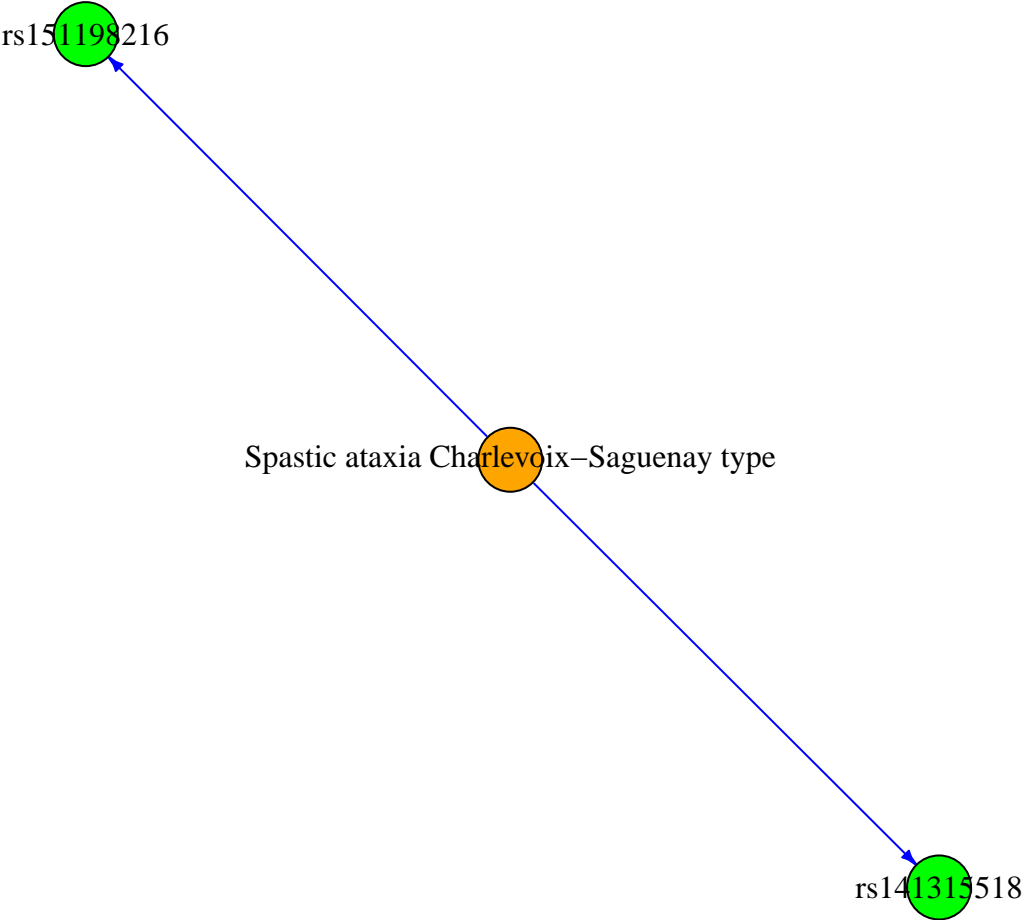

## Variant–Disease Network (Spastic paraplegia)

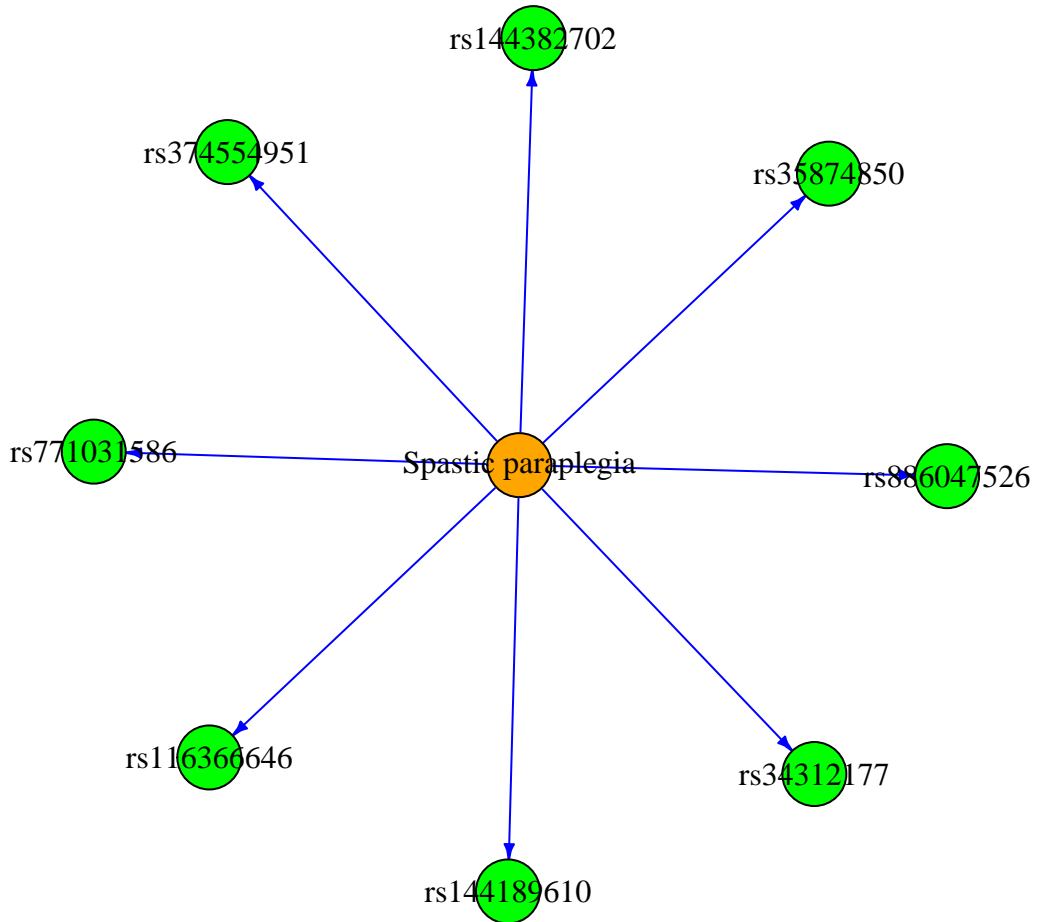

## Variant–Disease Network (Spastic paraplegia 11)

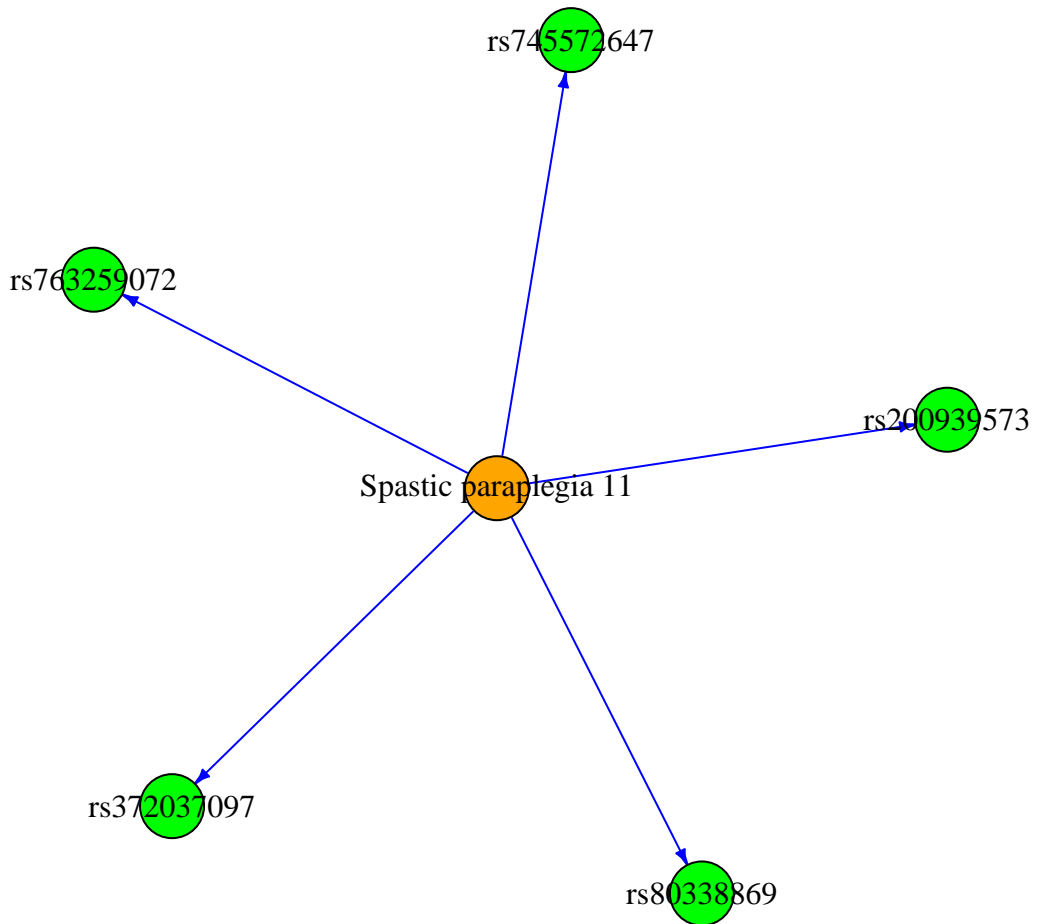

## Variant–Disease Network (Spastic paraplegia 15)

rs151287975

Spastic paraplegia 15



## Variant–Disease Network (Spastic paraplegia 35)

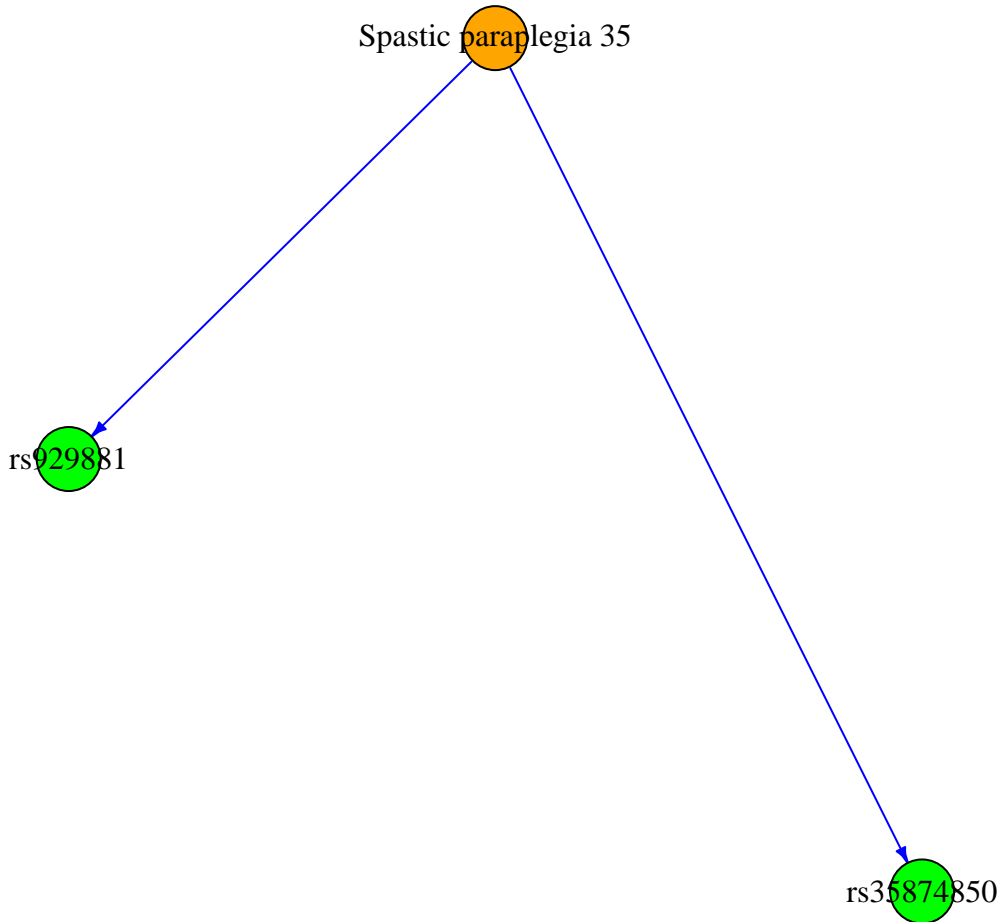

## Variant–Disease Network (Spastic paraplegia 44)

Spastic paraplegia 44

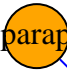

rs75469429

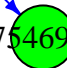

## Variant–Disease Network (Spastic paraplegia 50)

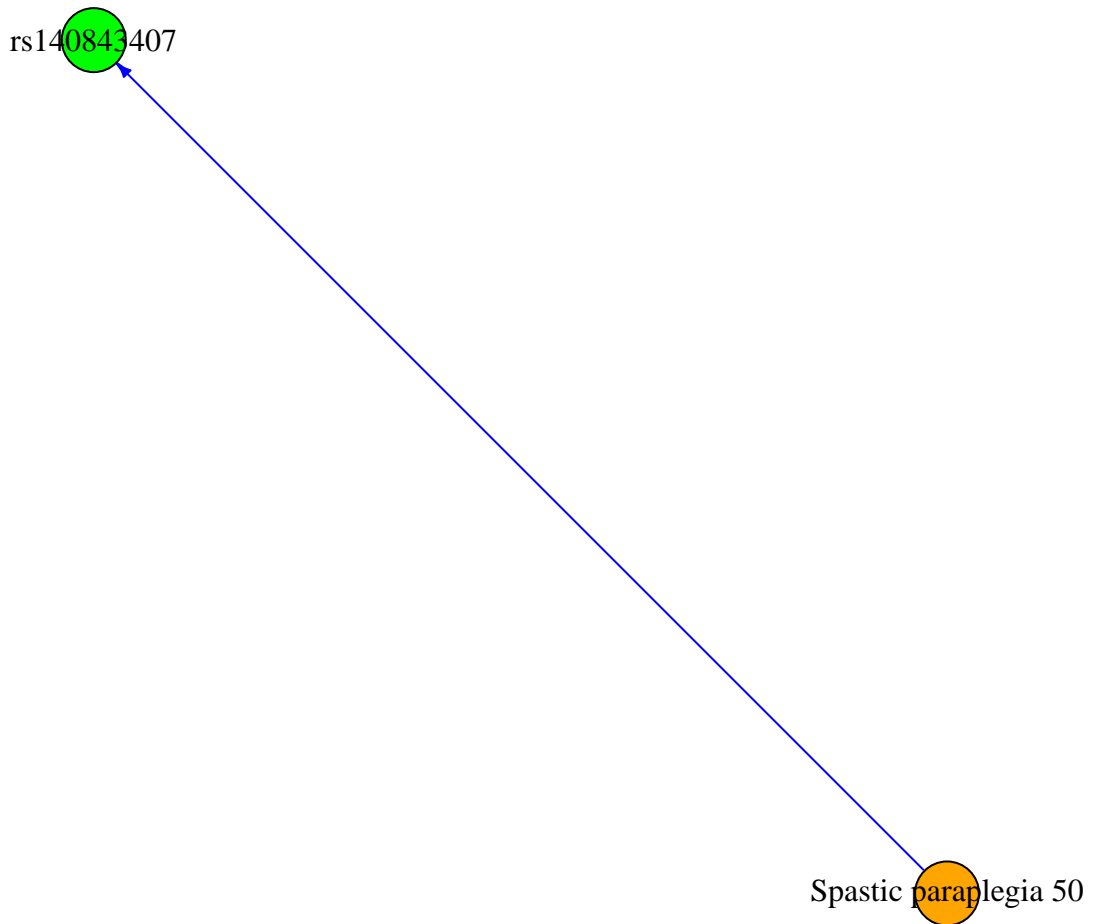

## Variant–Disease Network (Spastic paraplegia 78)

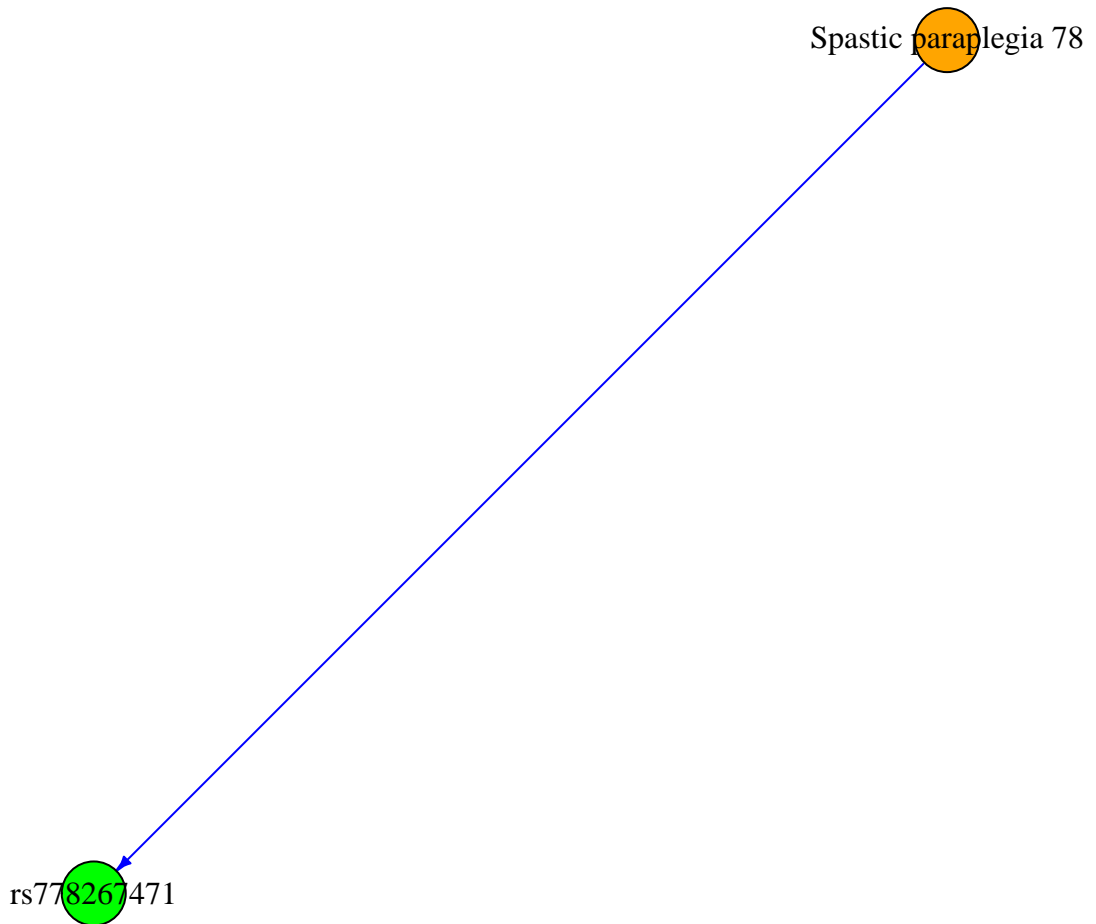



**Variant–Disease Network (Spherocytosis)**

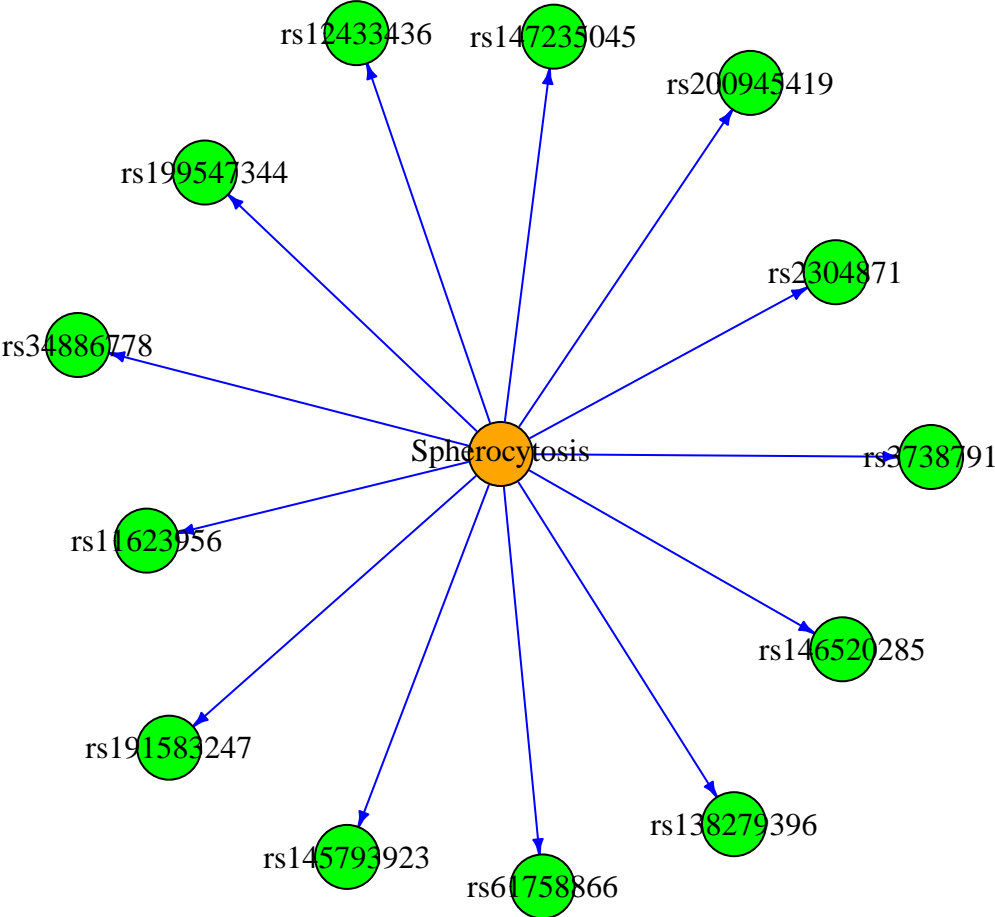

## Variant–Disease Network (Spherocytosis type 1)

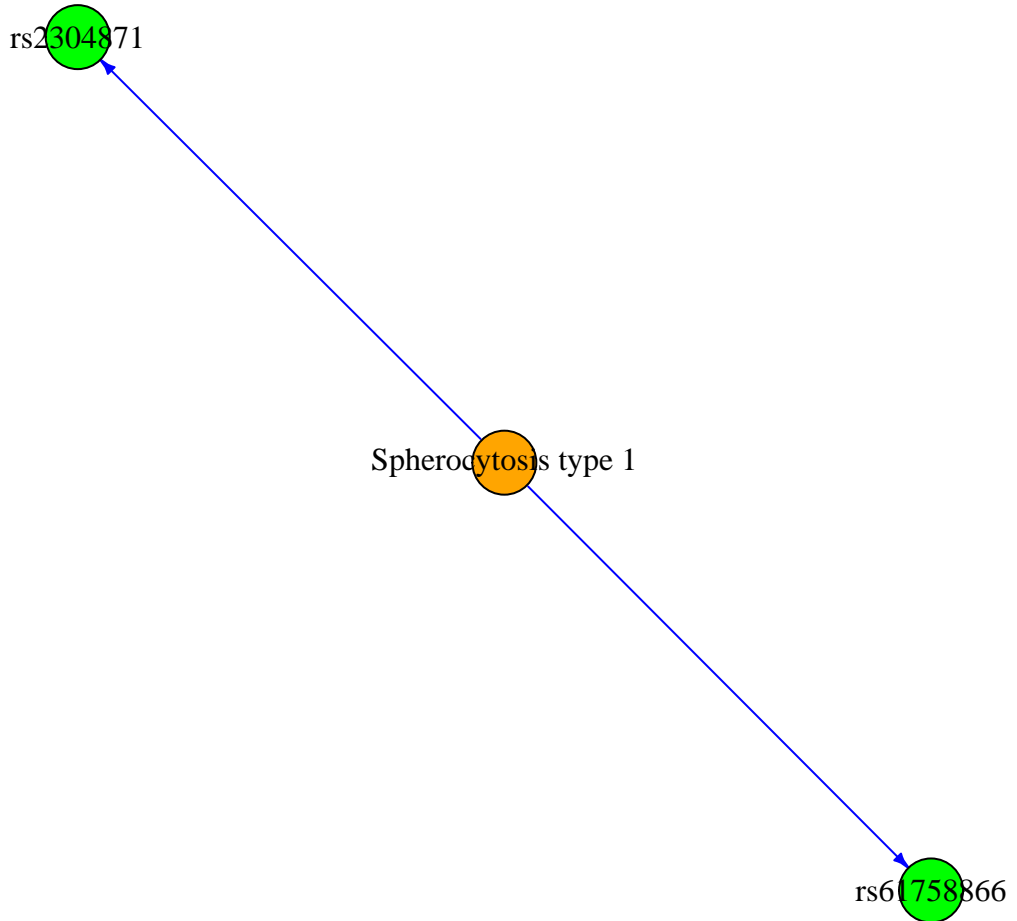

Variant–Disease Network (Sphingomyelin/cholesterol lipidosis)

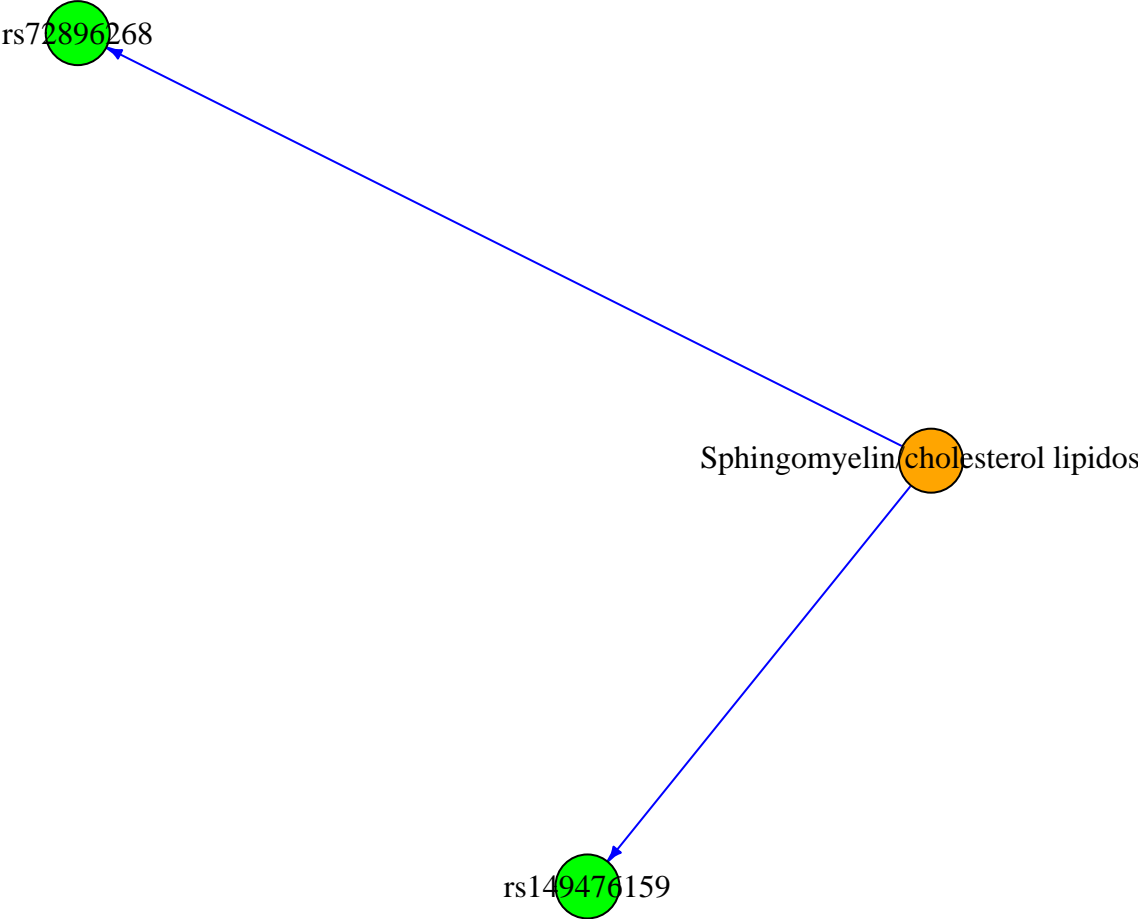

## Variant–Disease Network (Spiegler–Brooke syndrome)

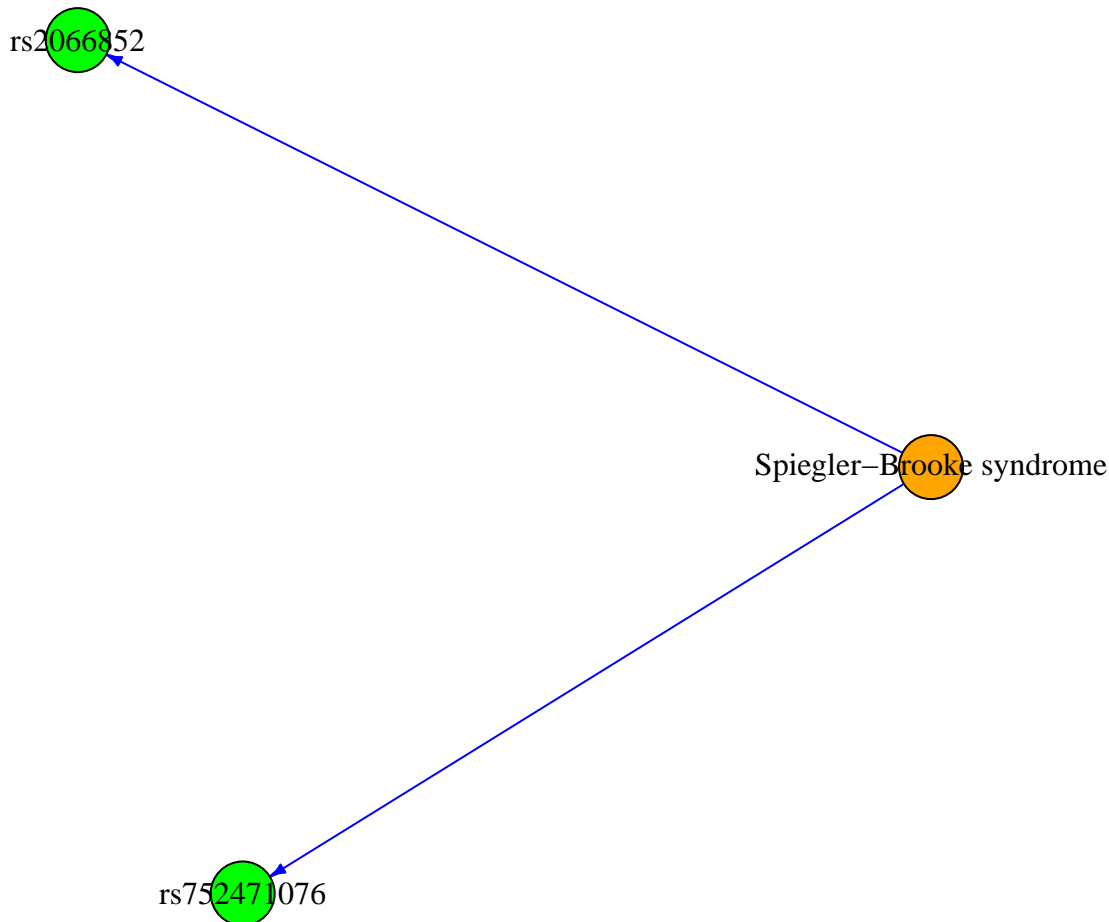

## Variant–Disease Network (Spinal muscular atrophy)

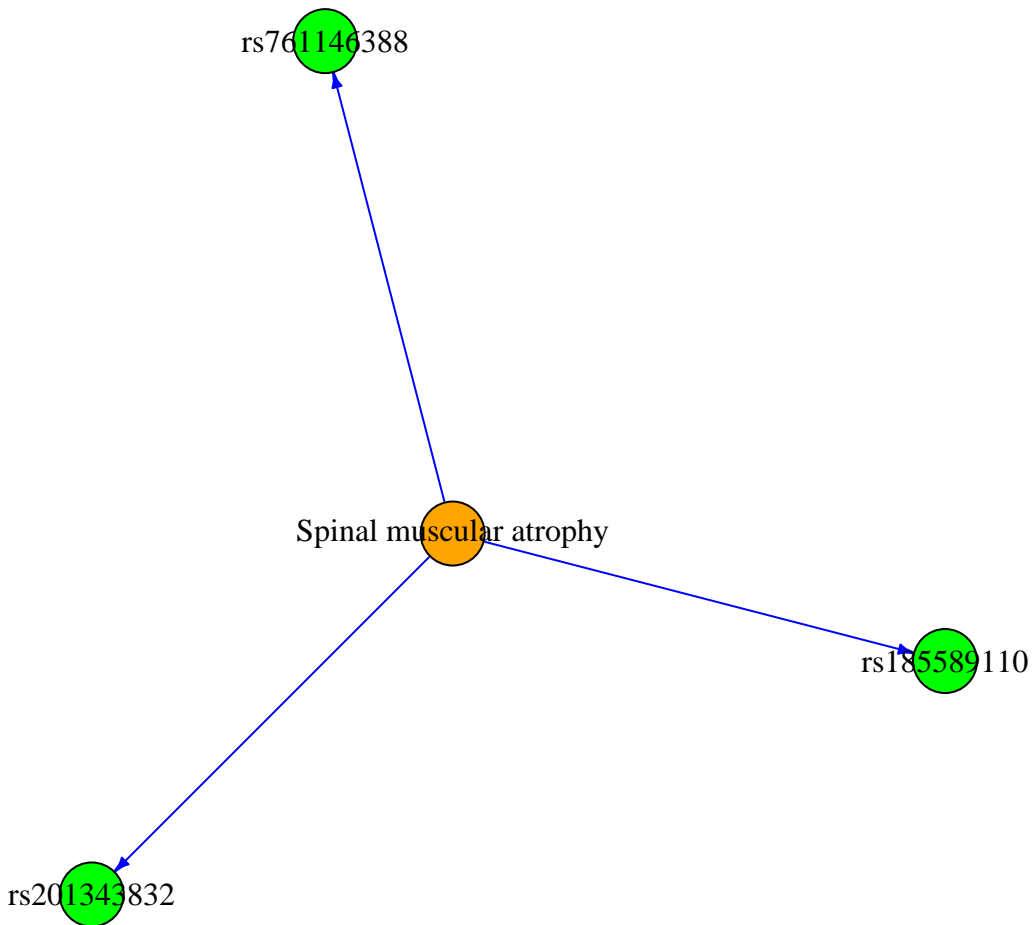

## Variant–Disease Network (Spinocerebellar ataxia)

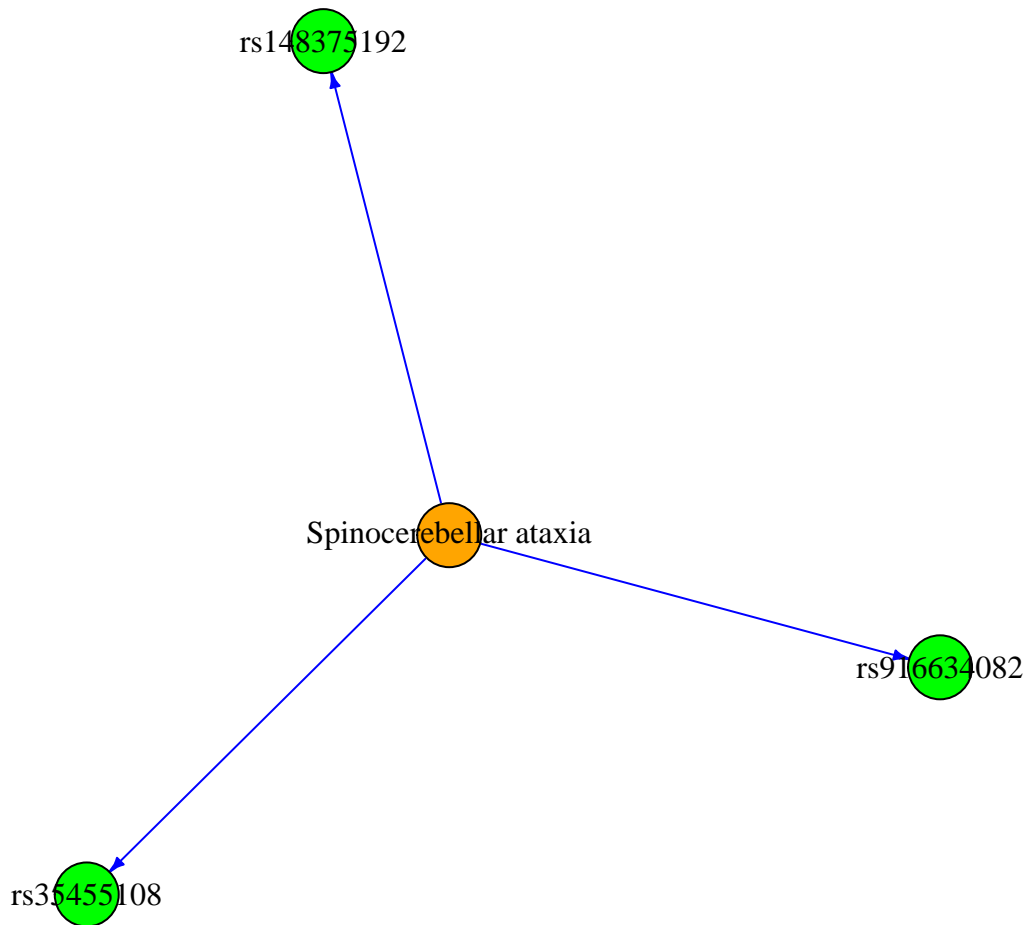

Variant–Disease Network (Spinocerebellar ataxia 14)

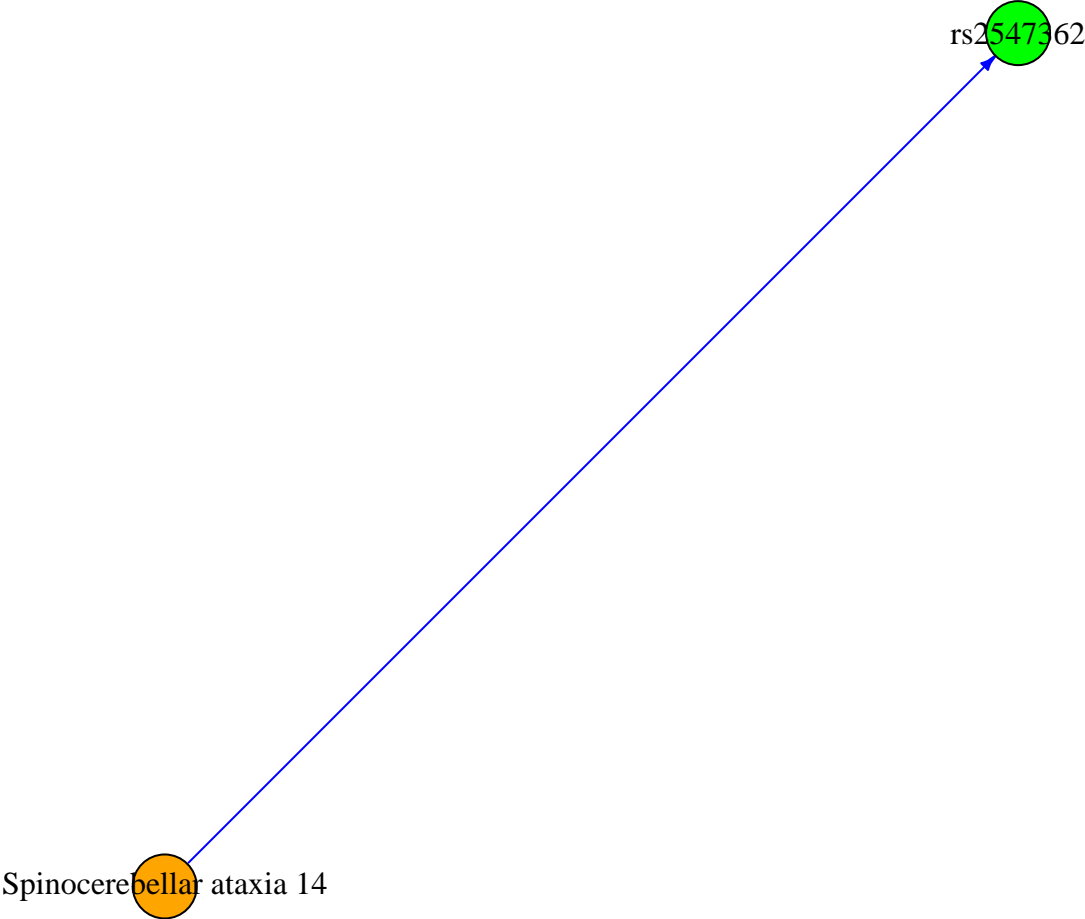

# Variant–Disease Network (Split–hand/foot malformation)

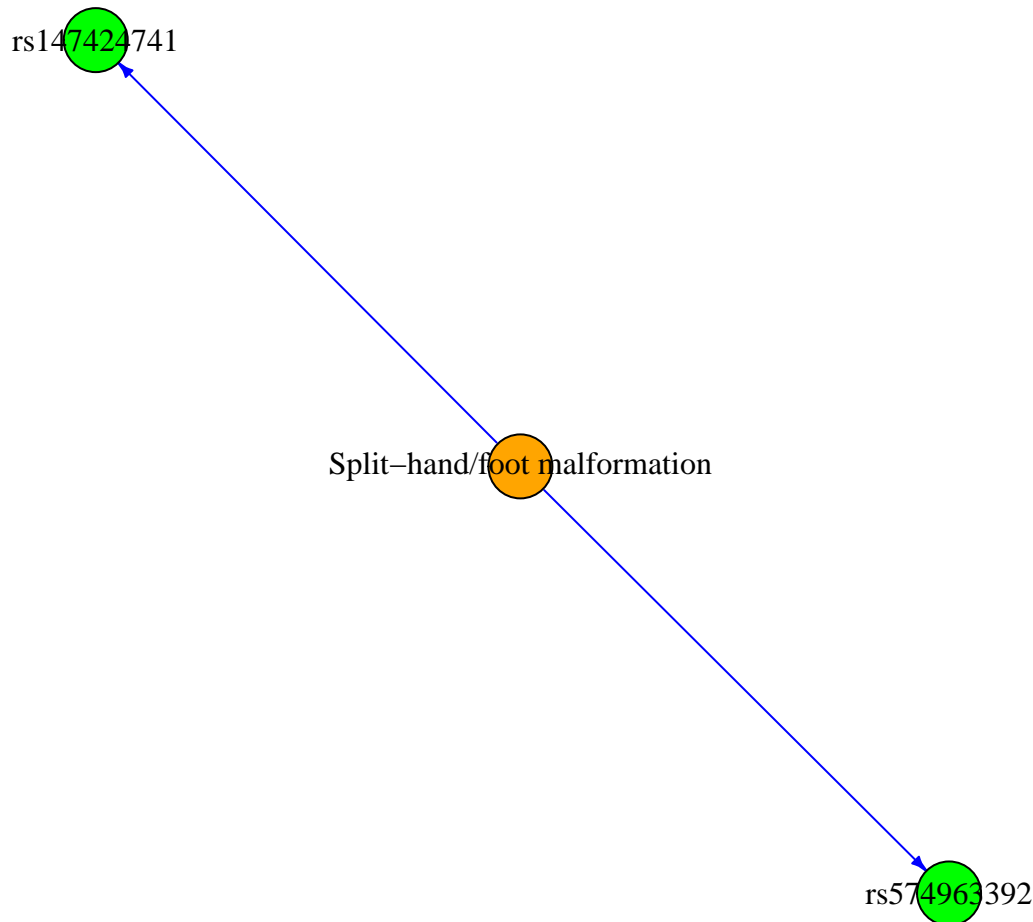



## Variant–Disease Network (Spondylocostal dysostosis 1)

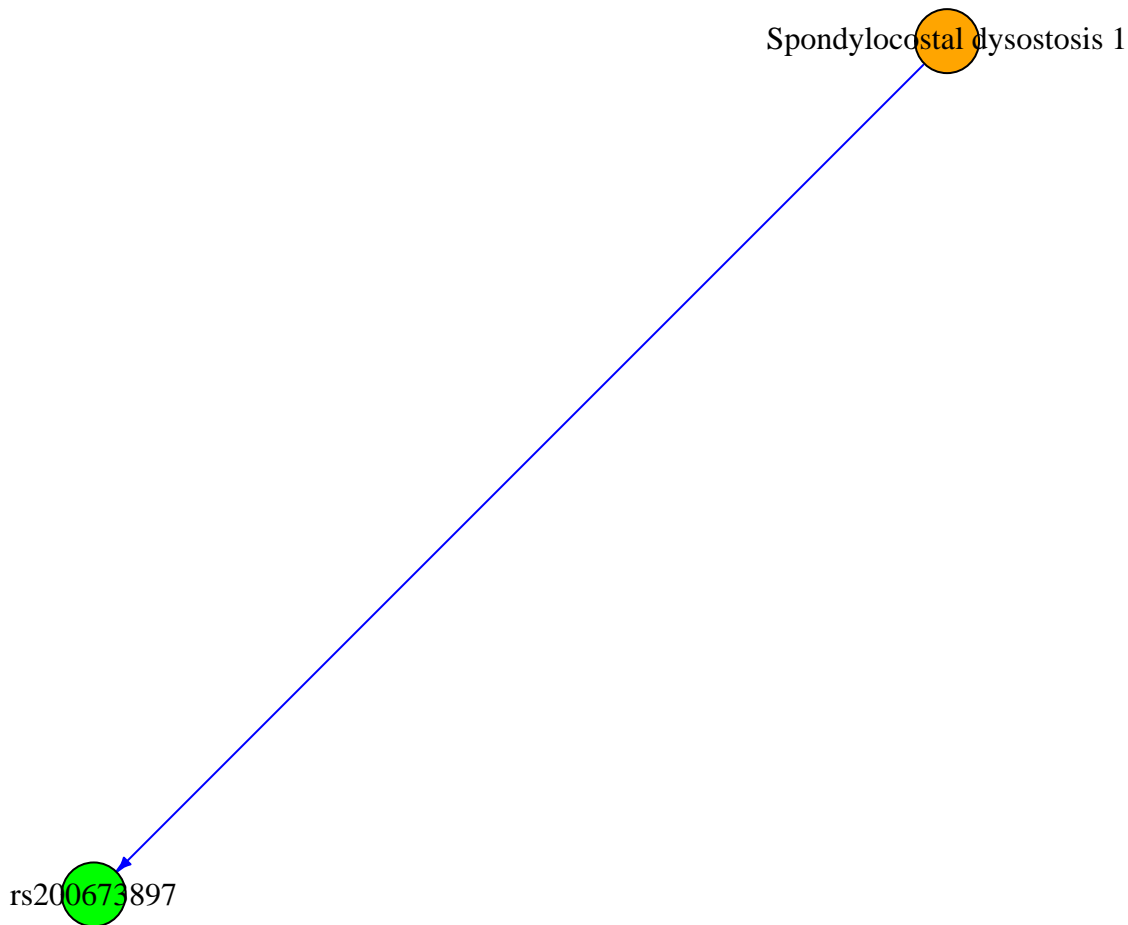

# Variant–Disease Network (Spondyloepimetaphyseal dysplasia)

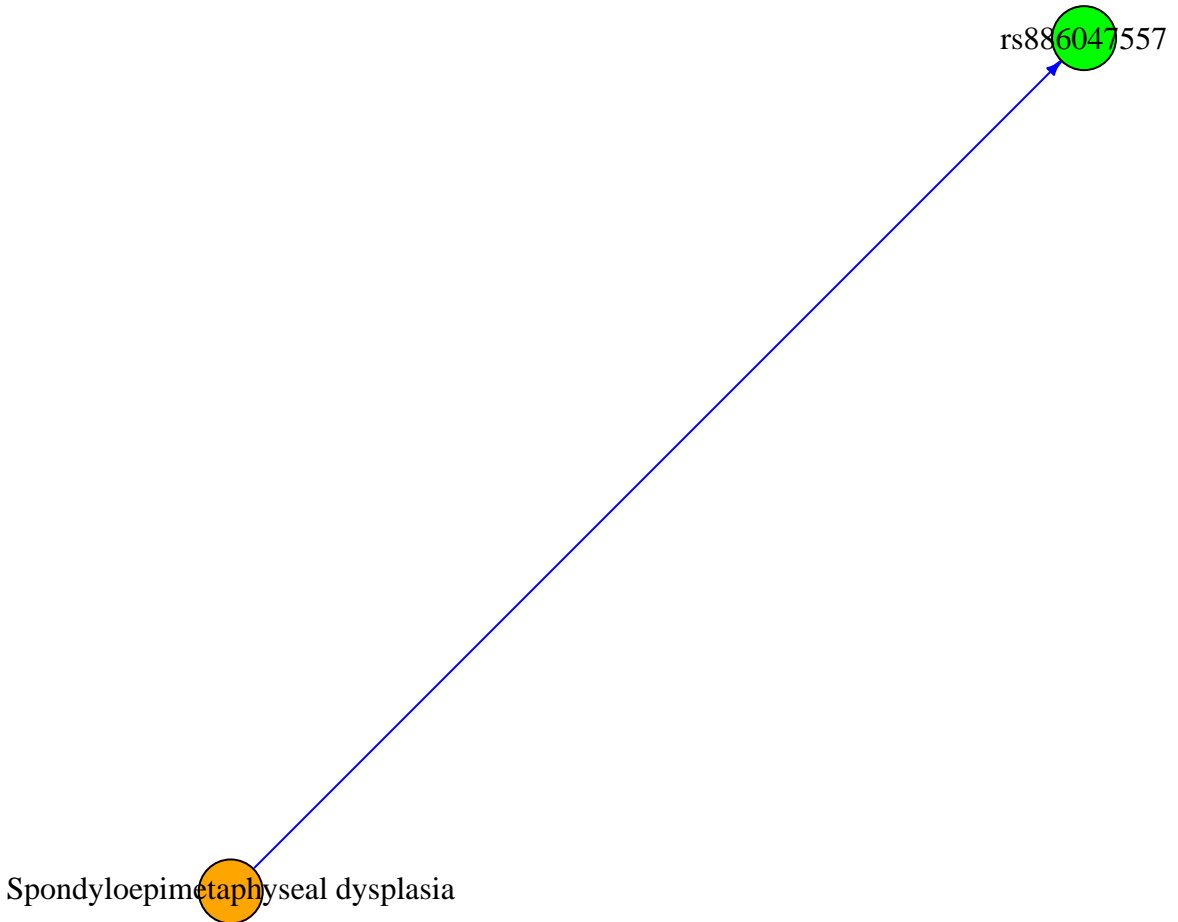

## Variant–Disease Network (Spondyloepiphyseal dysplasia)

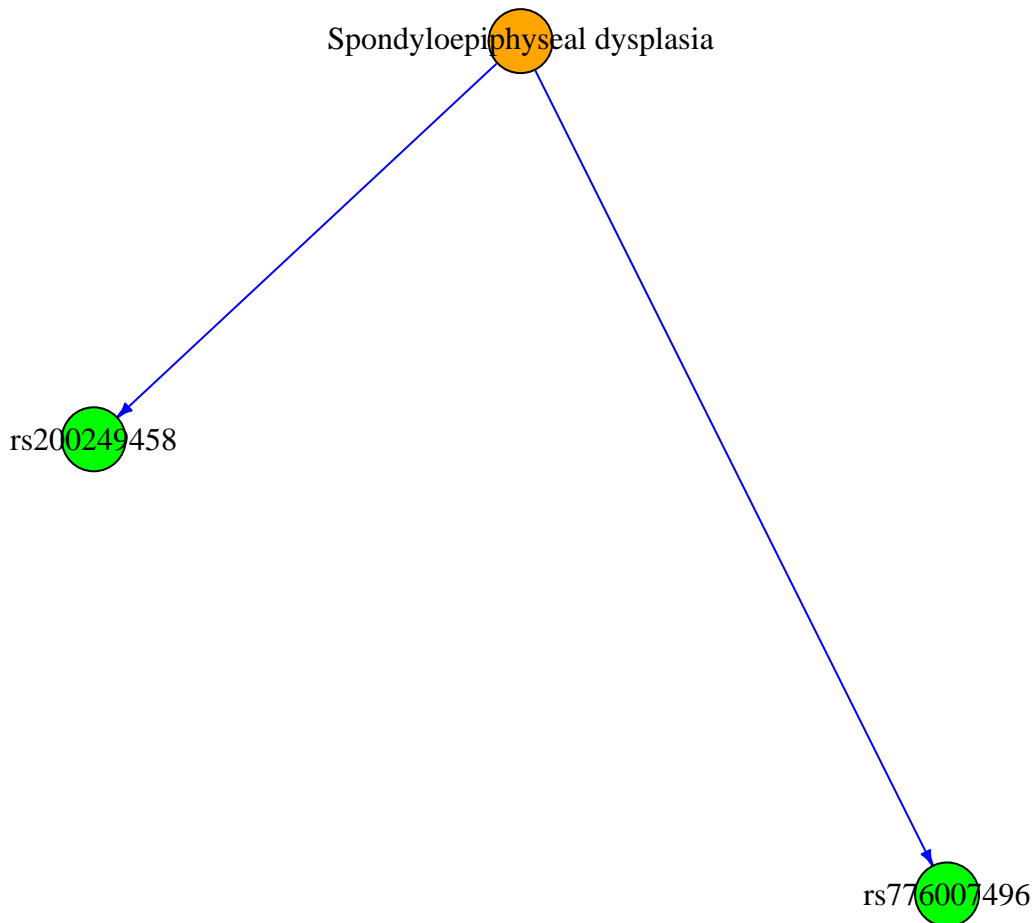

# nt-Disease Network (Spondyloepiphyseal dysplasia with congenital joint dis

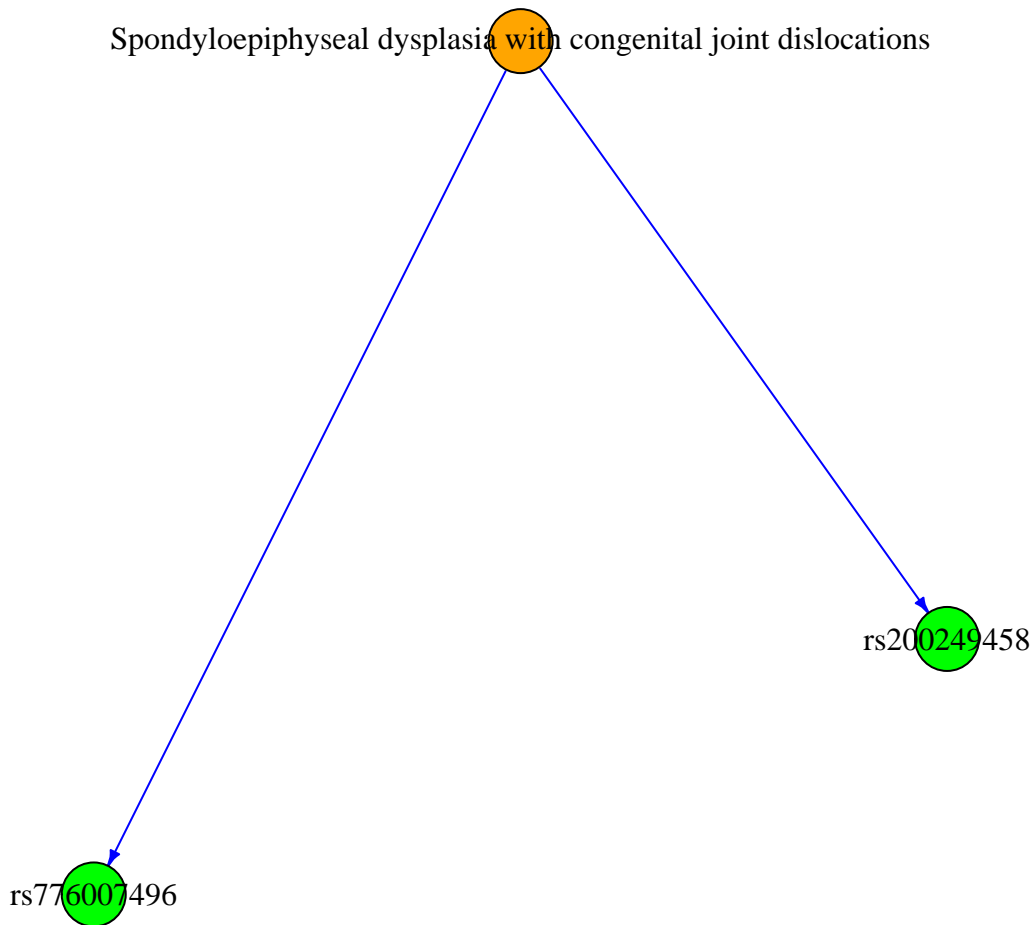

Variant–Disease Network (Spongy degeneration of central nervous system)

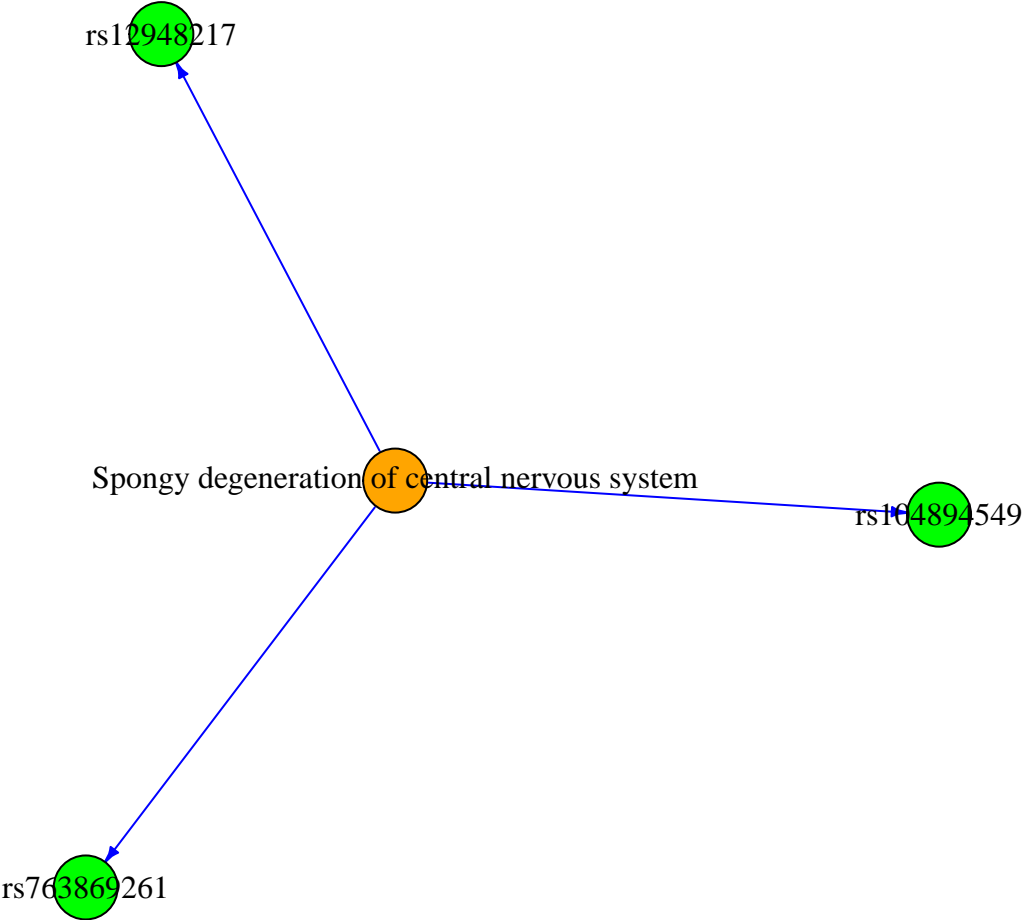

## Variant–Disease Network (Stargardt Disease)

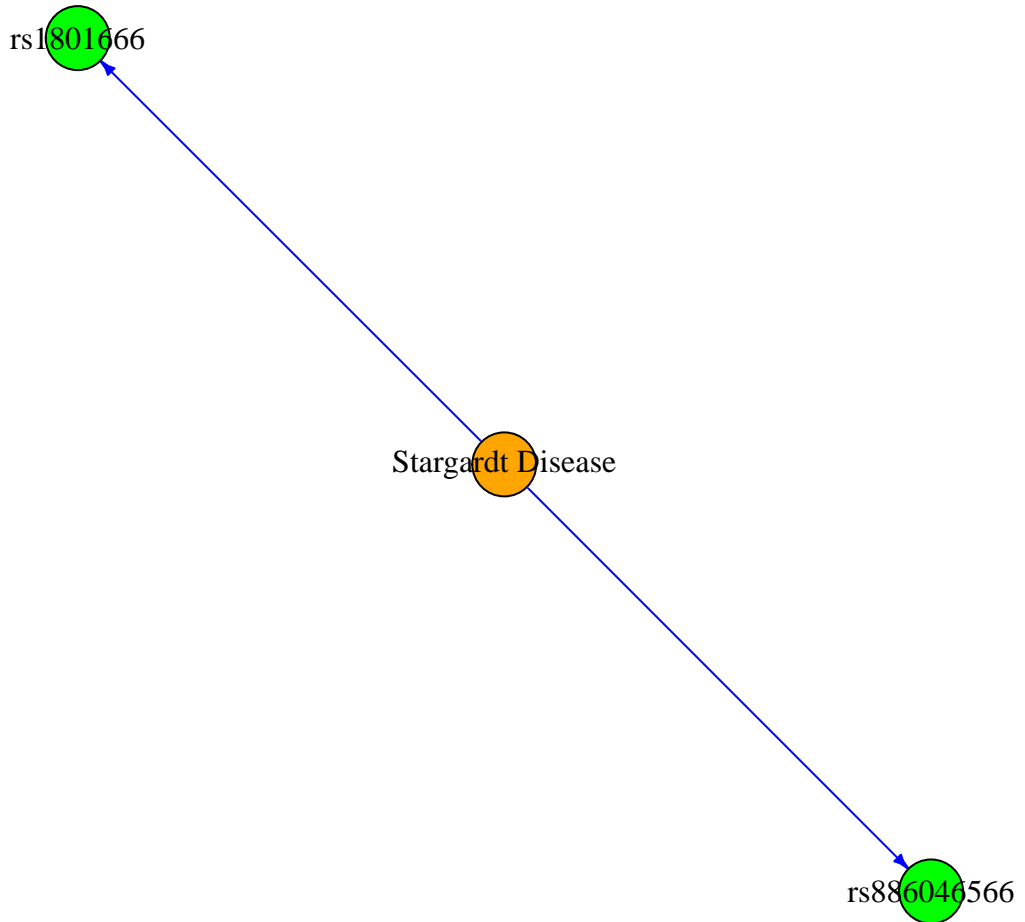

## Variant-Disease Network (Stargardt disease 1)

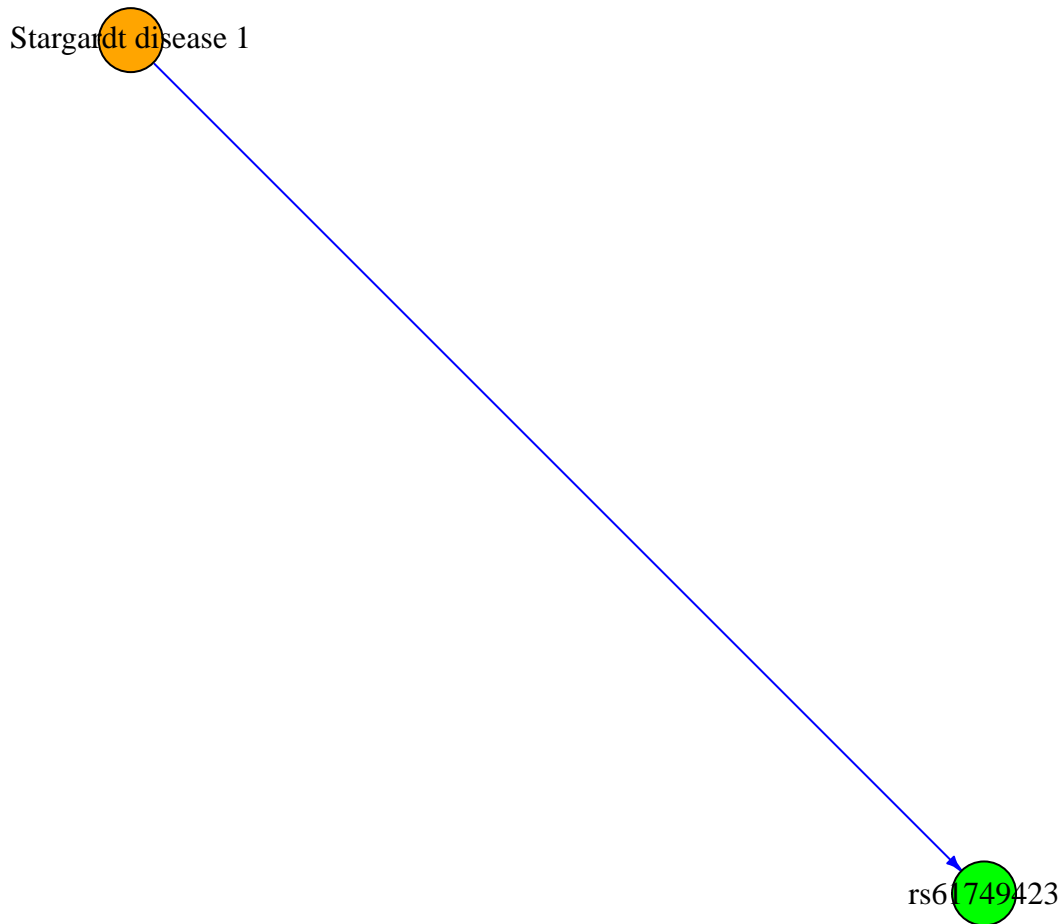

# Variant–Disease Network (Steroid-resistant nephrotic syndrome)

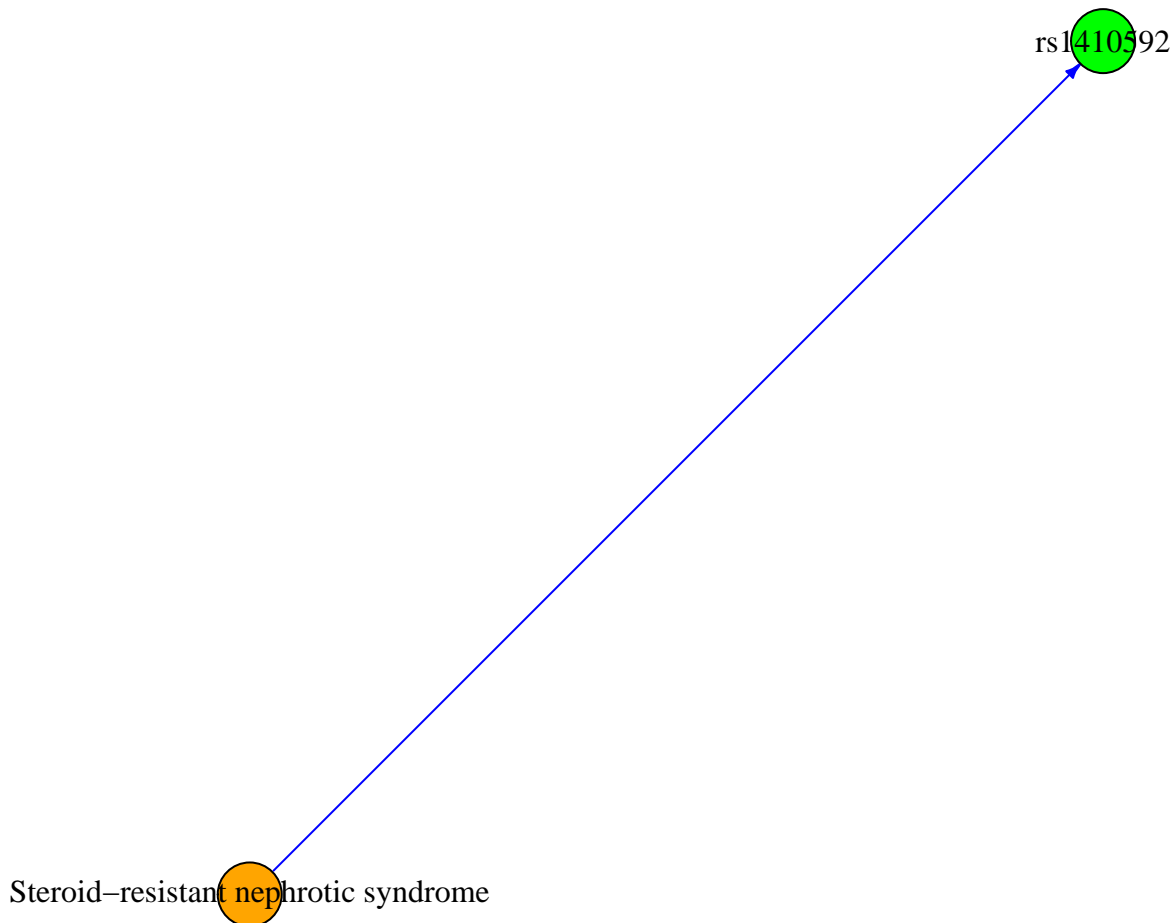



## Variant–Disease Network (Stickler syndrome)

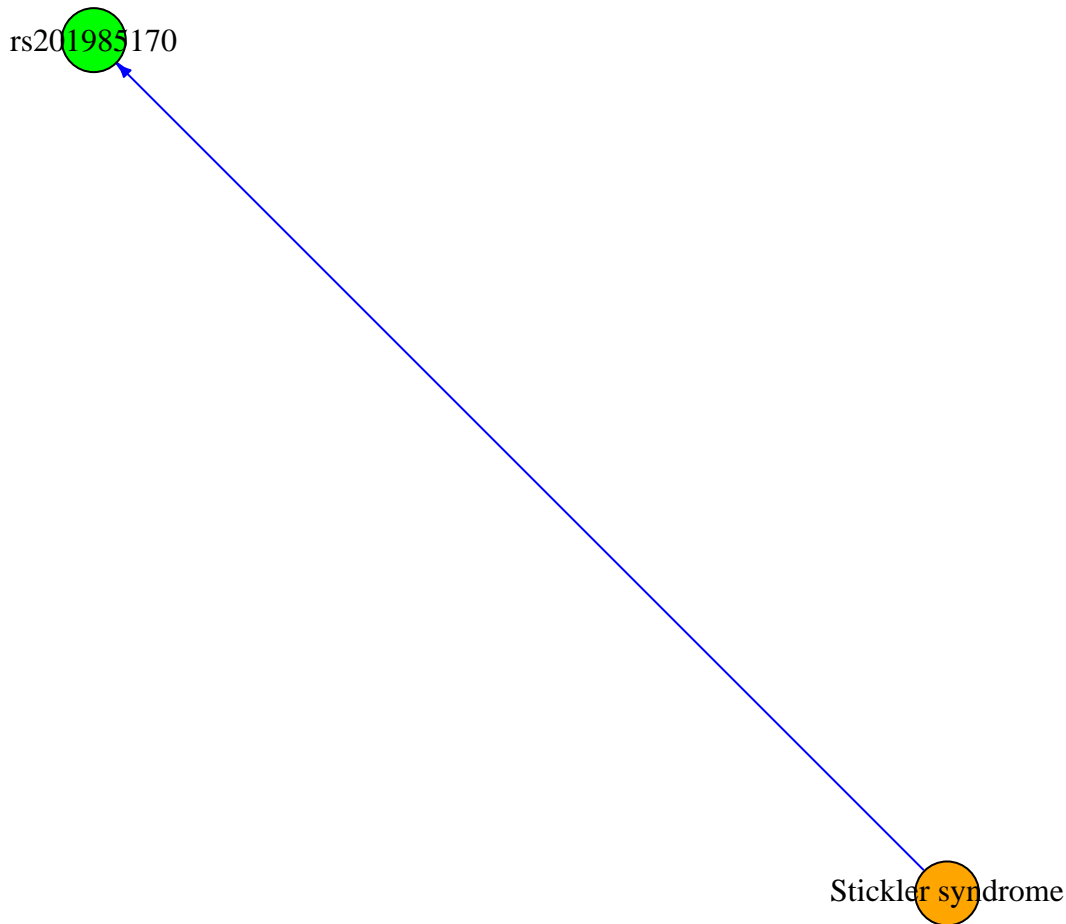

## Variant–Disease Network (Stiff skin syndrome)

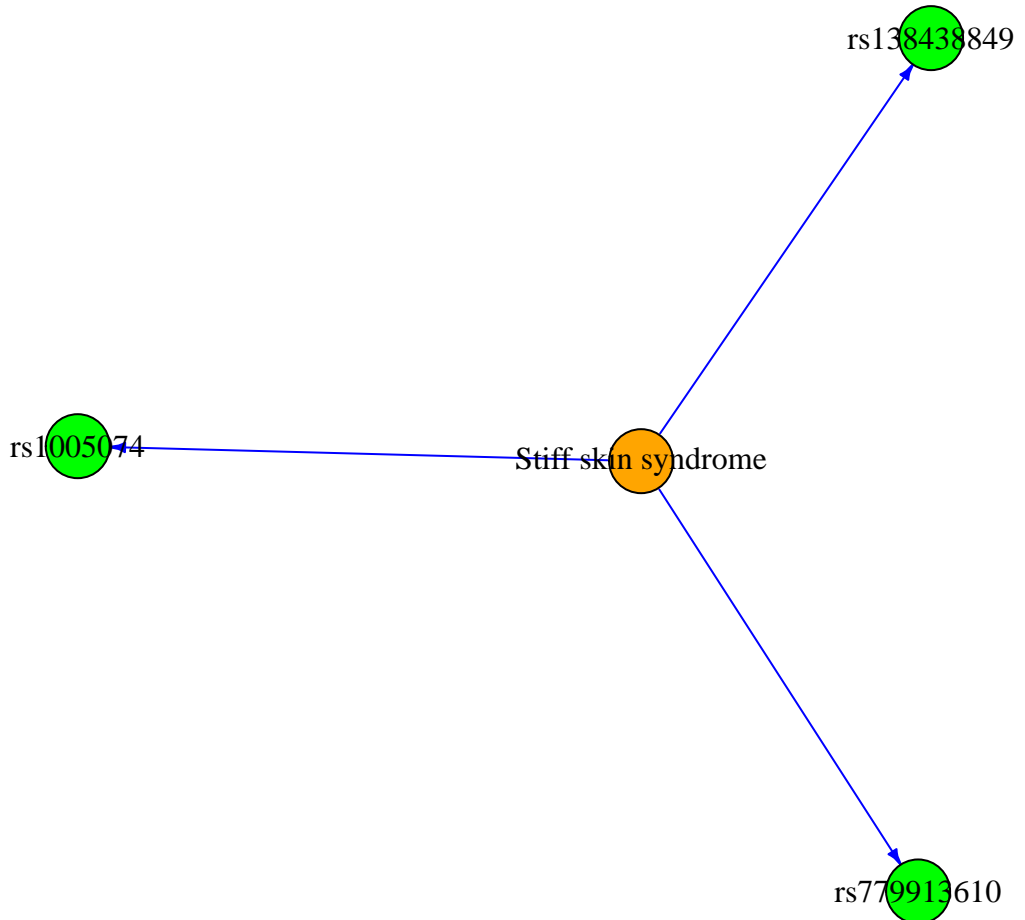

## Variant-Disease Network (Striatal Degeneration)

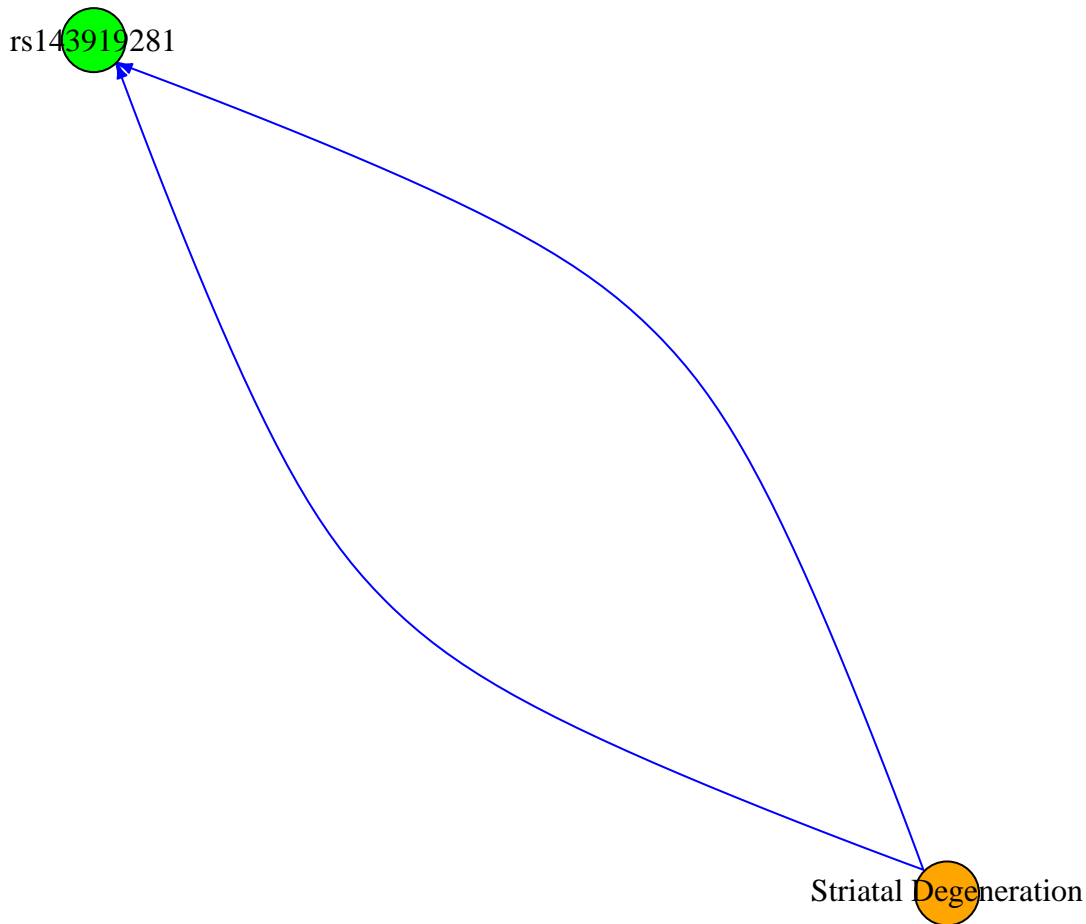

**Variant–Disease Network (Sucrase–isomaltase deficiency)**

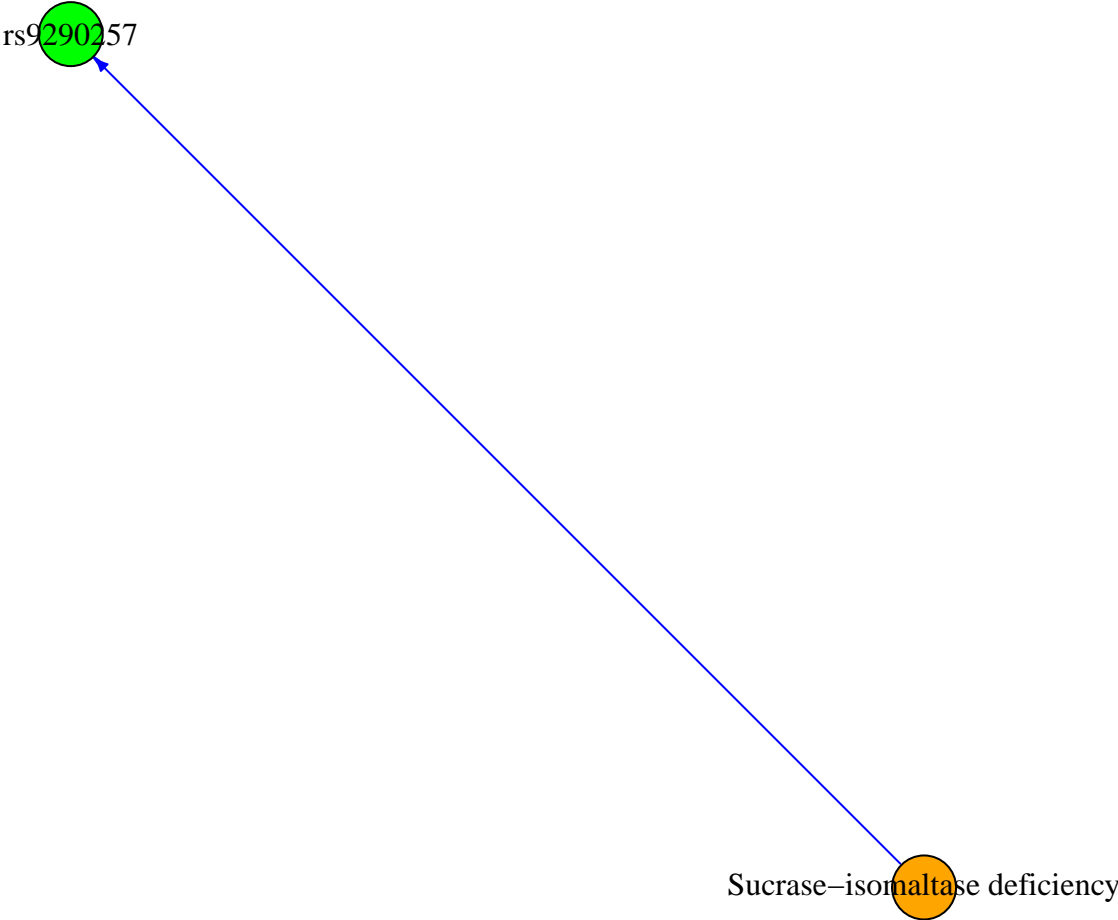

**Variant–Disease Network (Symmetric circumferential skin creases)**

Symmetric circumferential skin creases

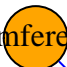

rs864321676

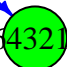

## Variant–Disease Network (Syndromic intellectual disability)

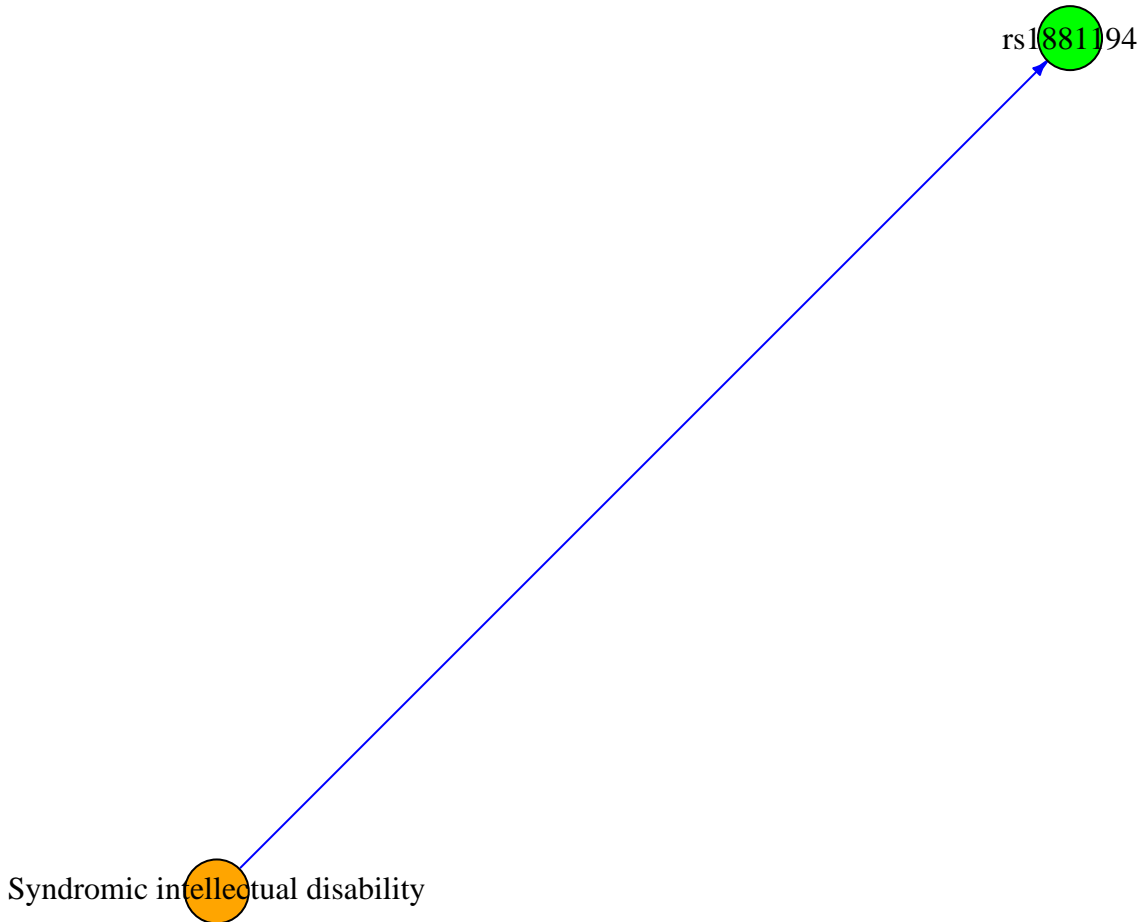

Variant–Disease Network (Syndromic Microphthalmia)

rs11857410

Syndromic Microphthalmia

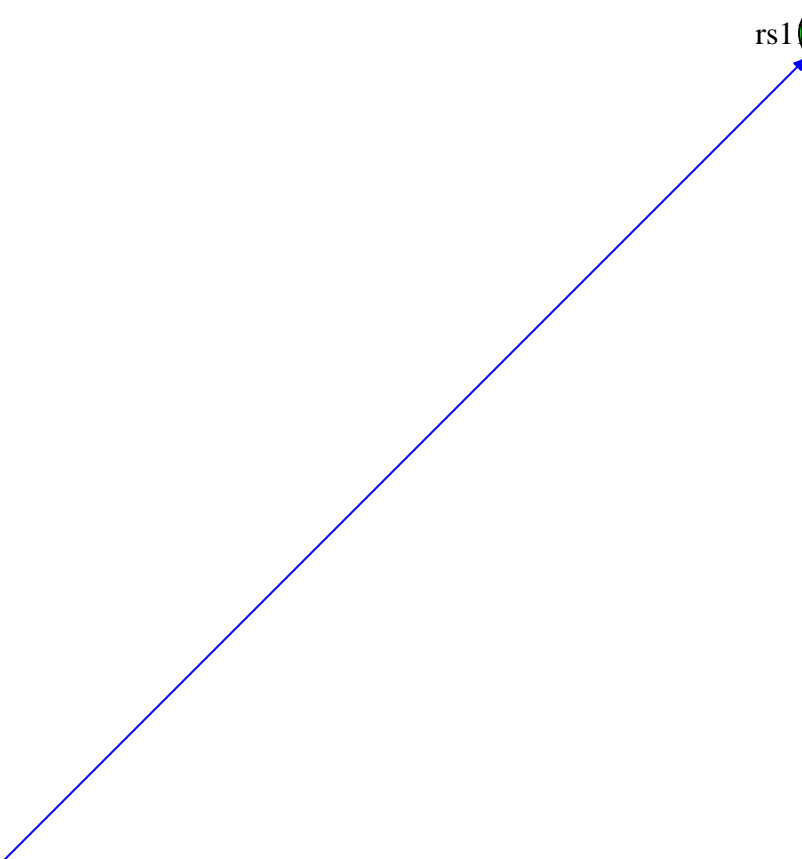

Variant–Disease Network (Tangier disease)

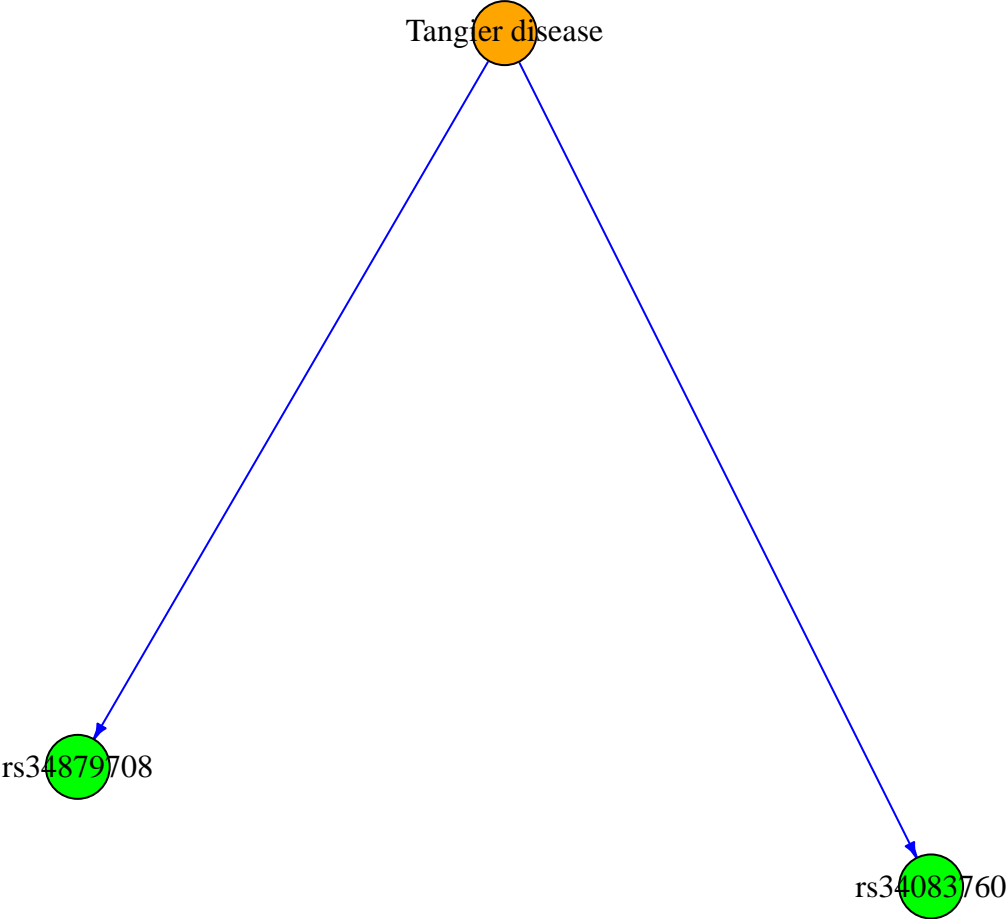



Variant–Disease Network (Thoracic aortic aneurysm and aortic dissection)

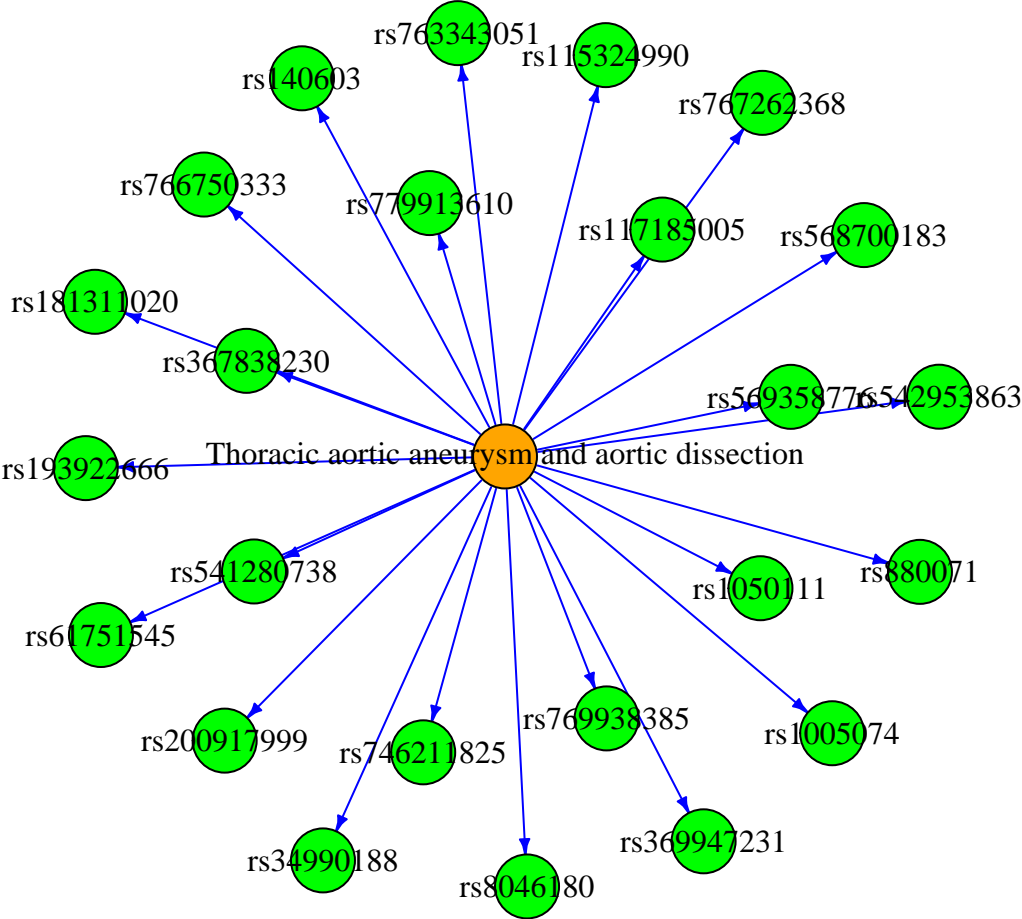

## Variant–Disease Network (Three M syndrome)

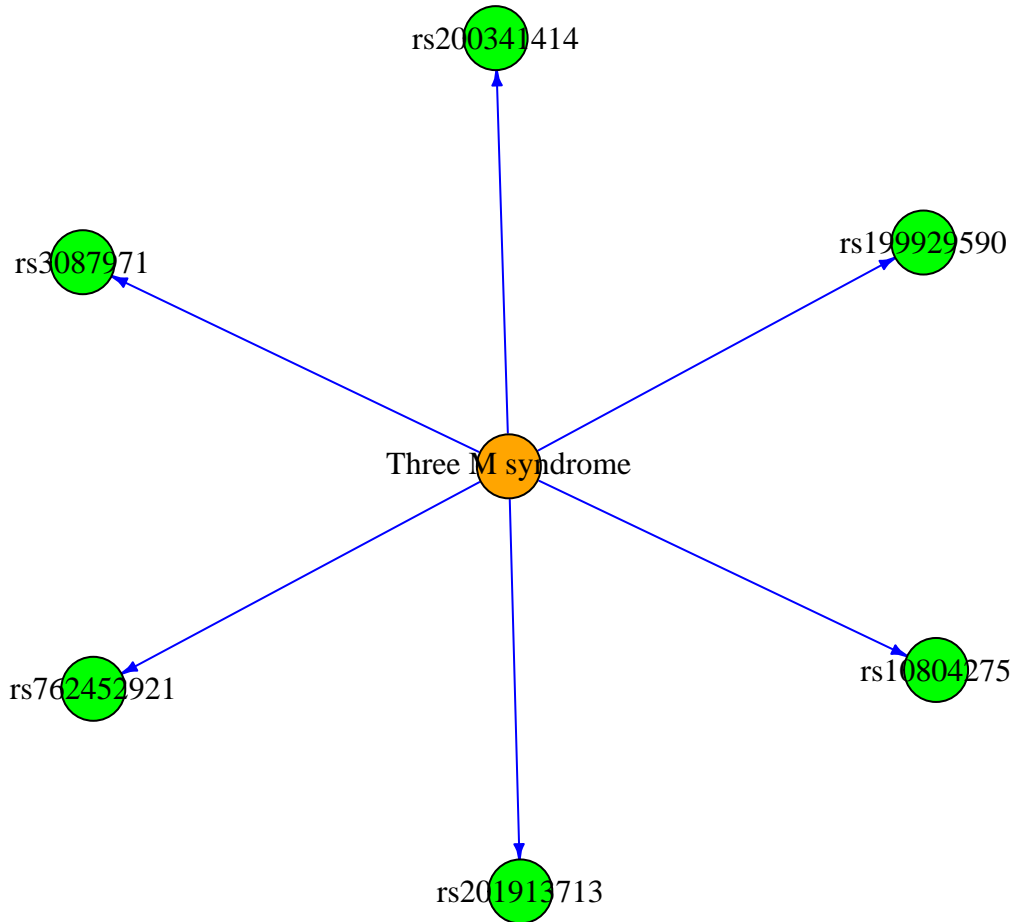

## Variant–Disease Network (Thyroid dysmorphogenesis)

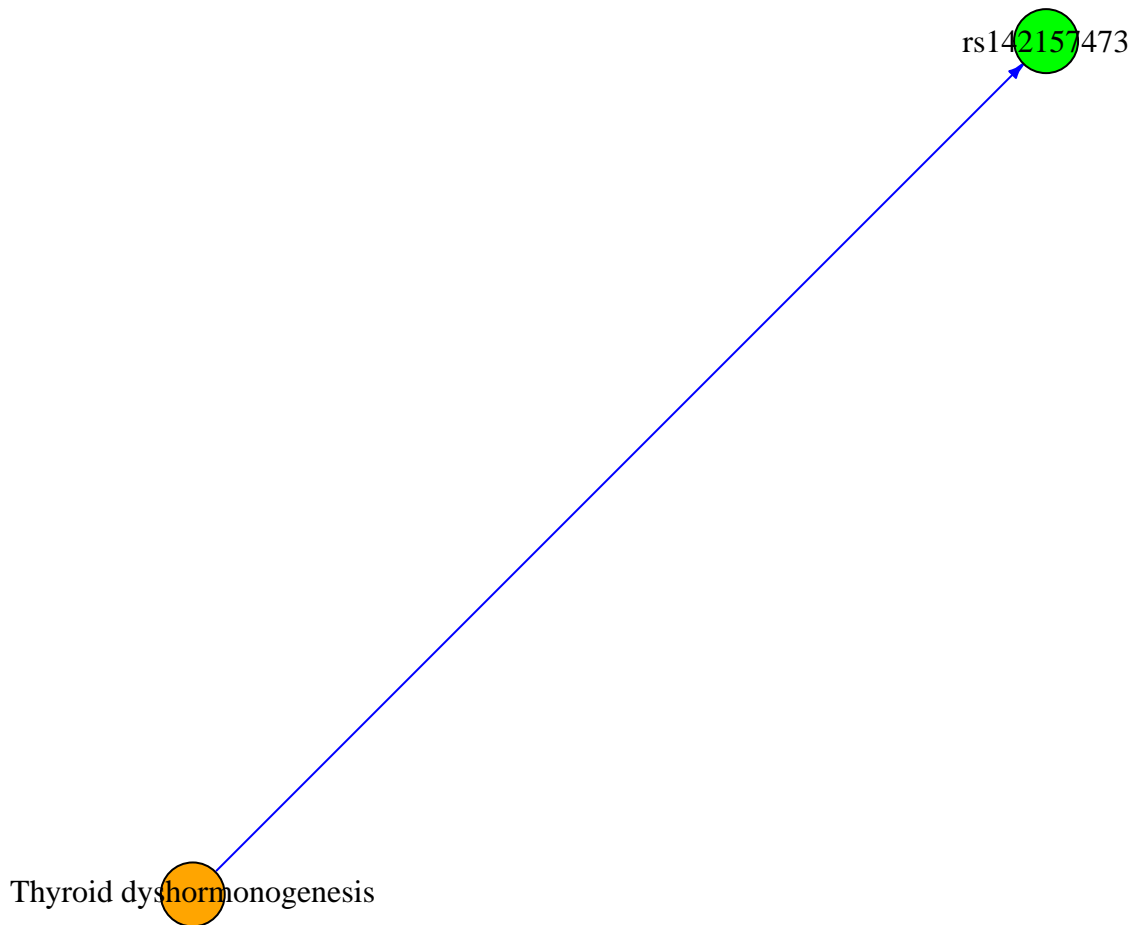

Variant–Disease Network (Thyroid hormone resistance)

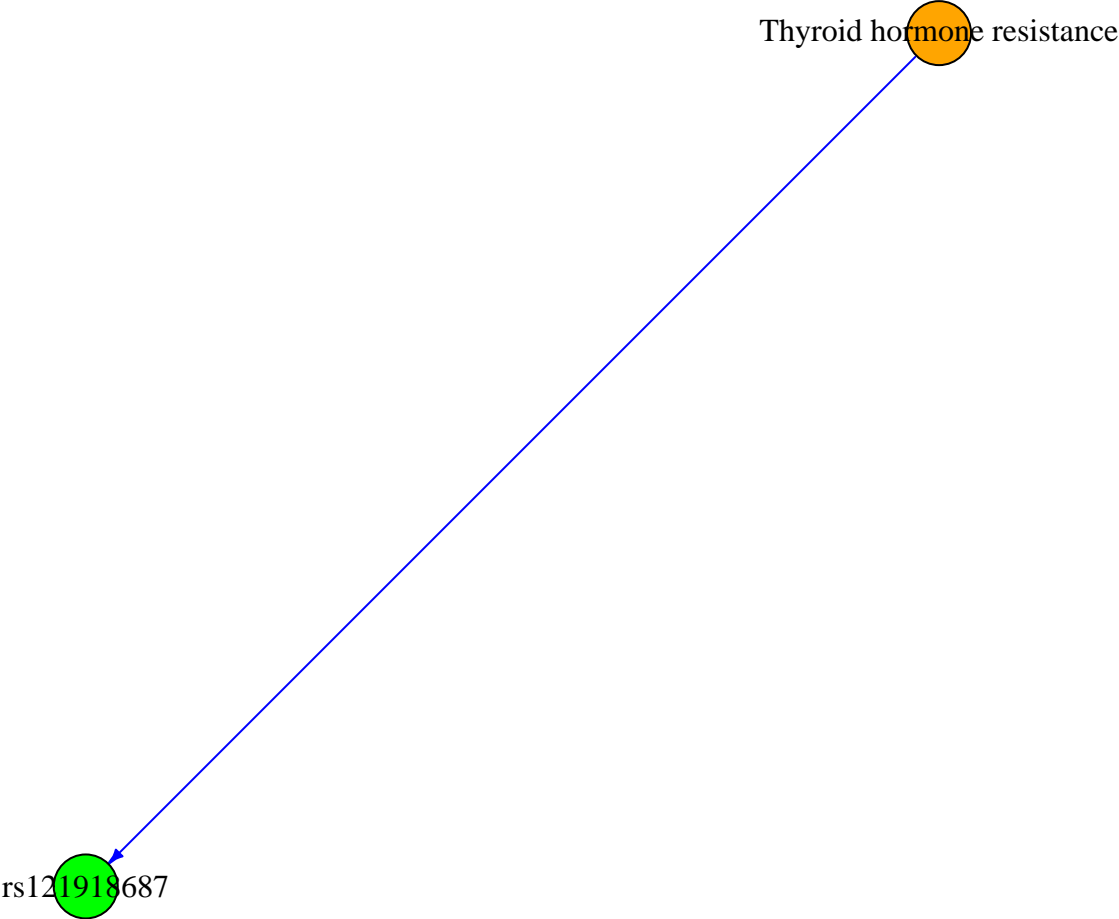

**Variant–Disease Network (Transient Neonatal Diabetes)**

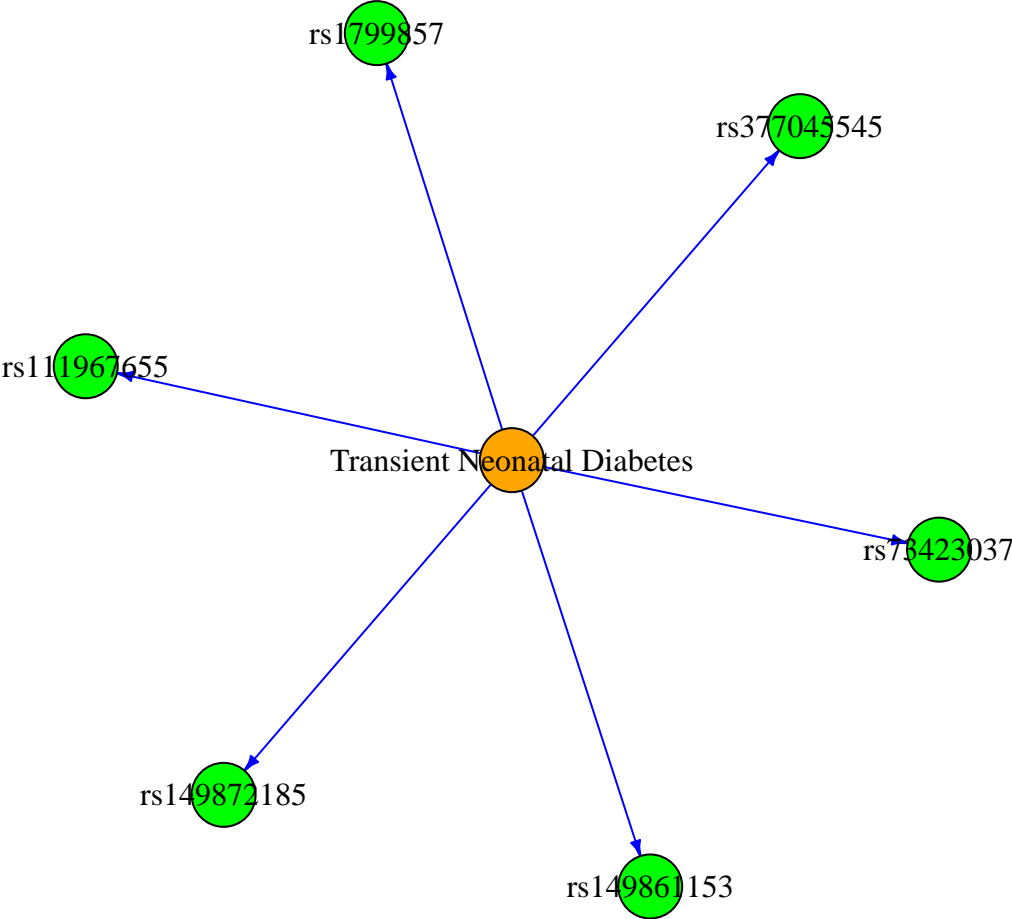

# Variant–Disease Network (Transposition of the great arteries)

Transposition of the great arteries

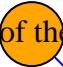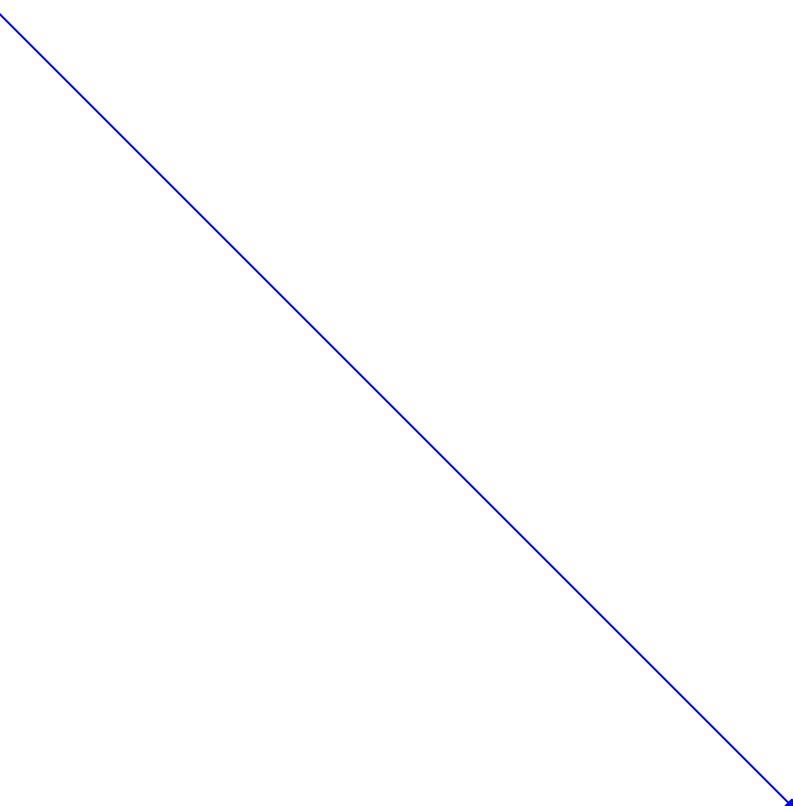

rs121434422

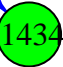

## Variant–Disease Network (Treacher Collins Syndrome)

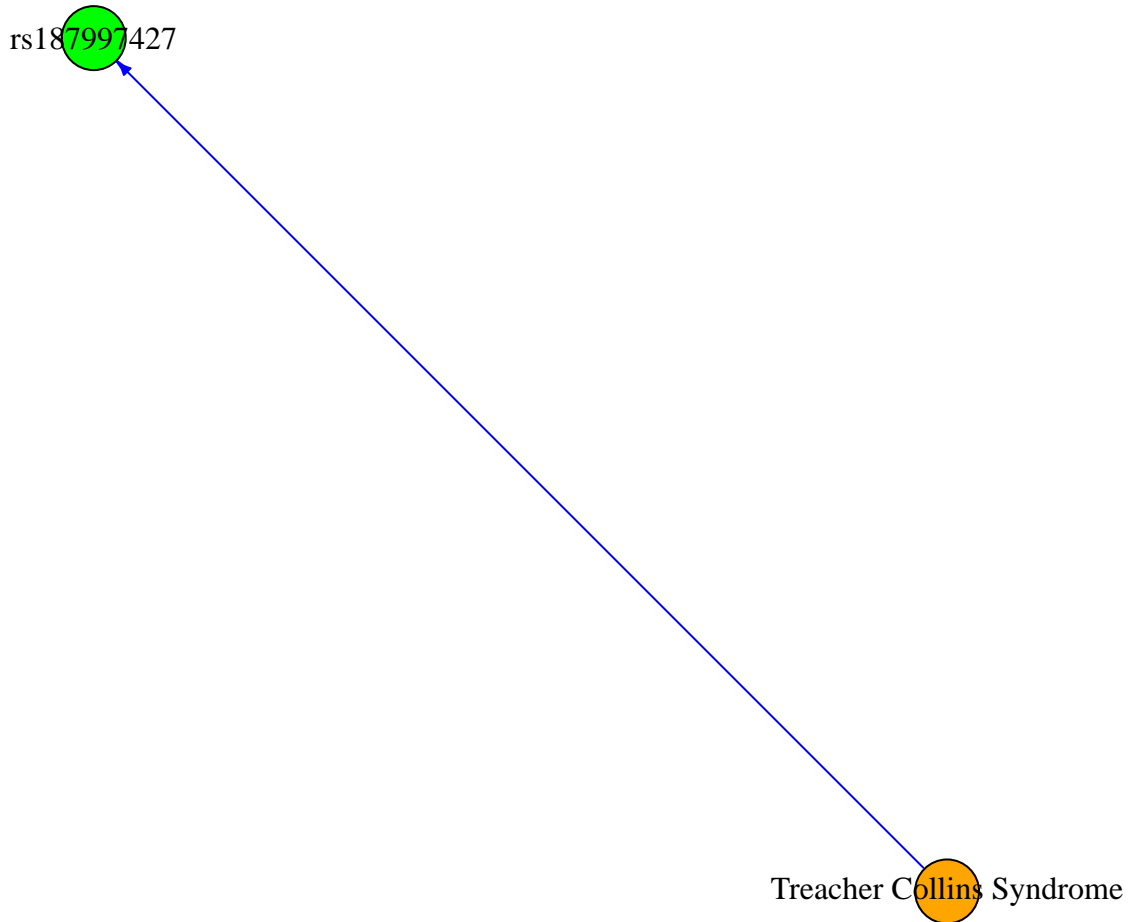

## Variant–Disease Network (Tremor)

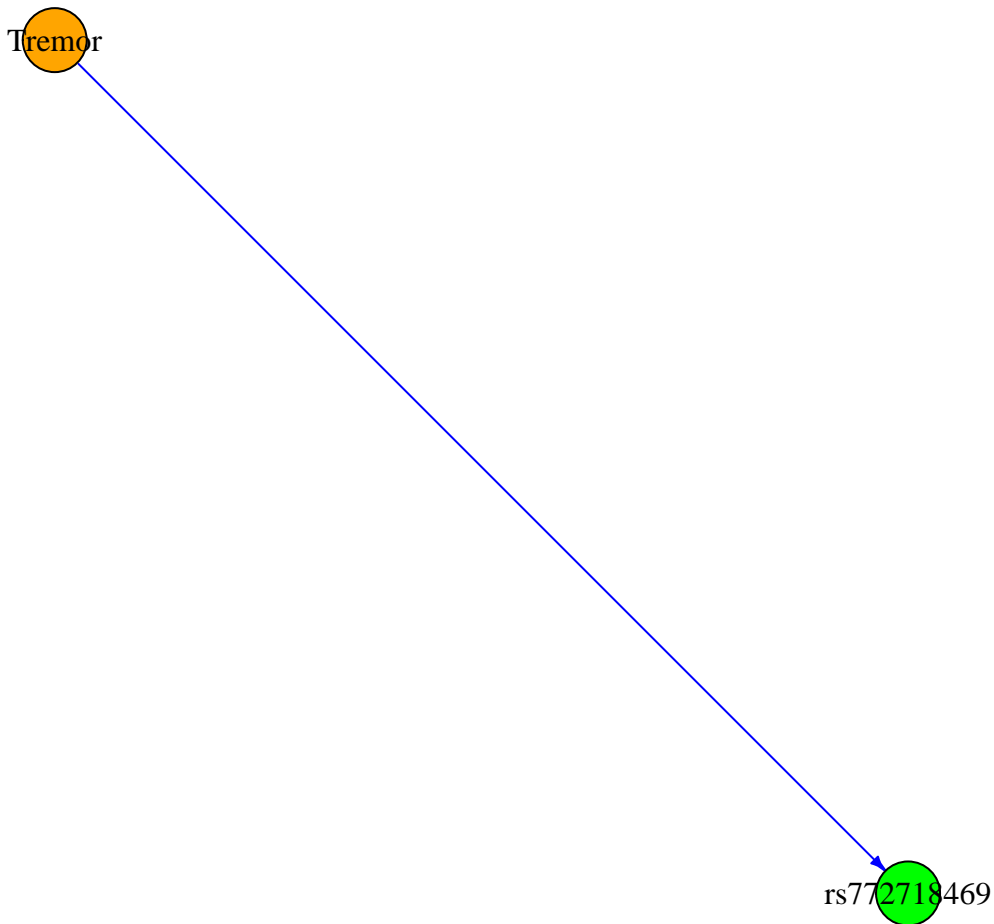



Variant–Disease Network (Trichoepithelioma multiple familial 2)

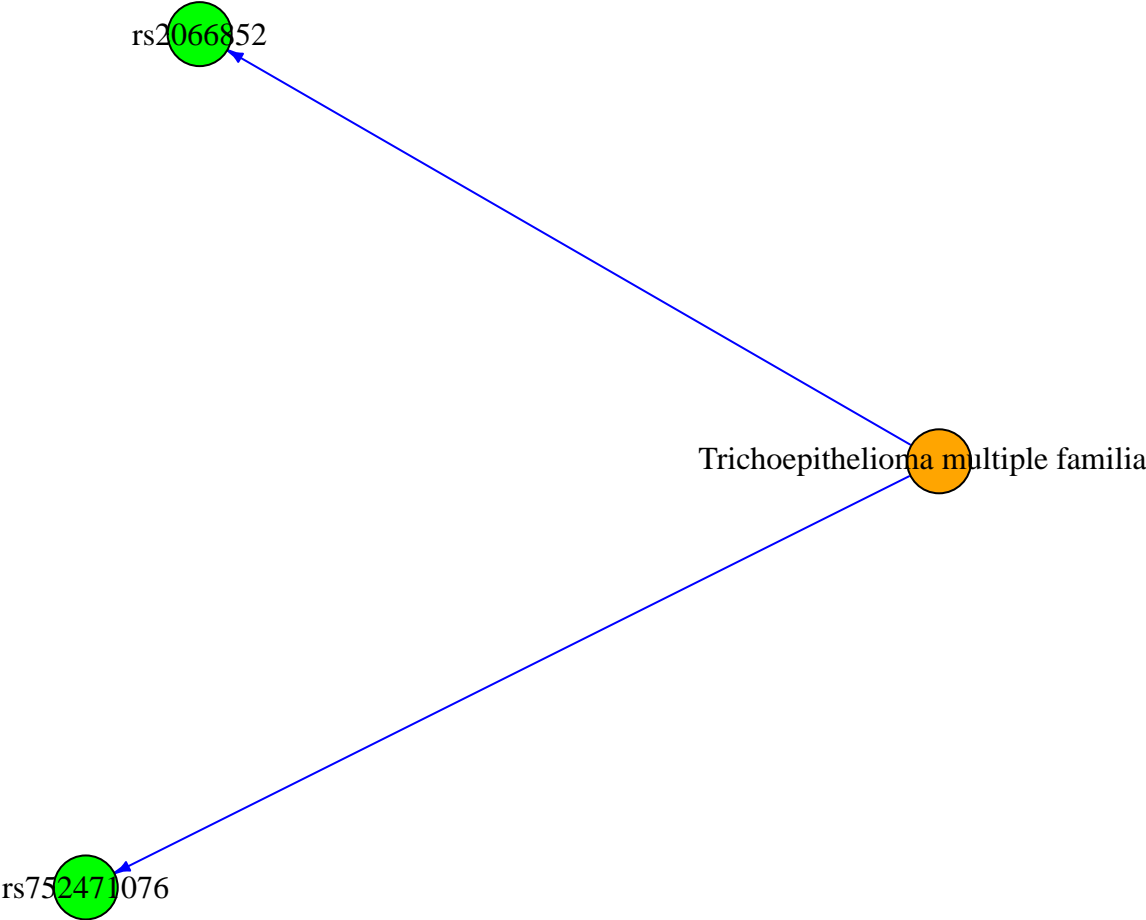

## Variant–Disease Network (Trichohepatoenteric syndrome)

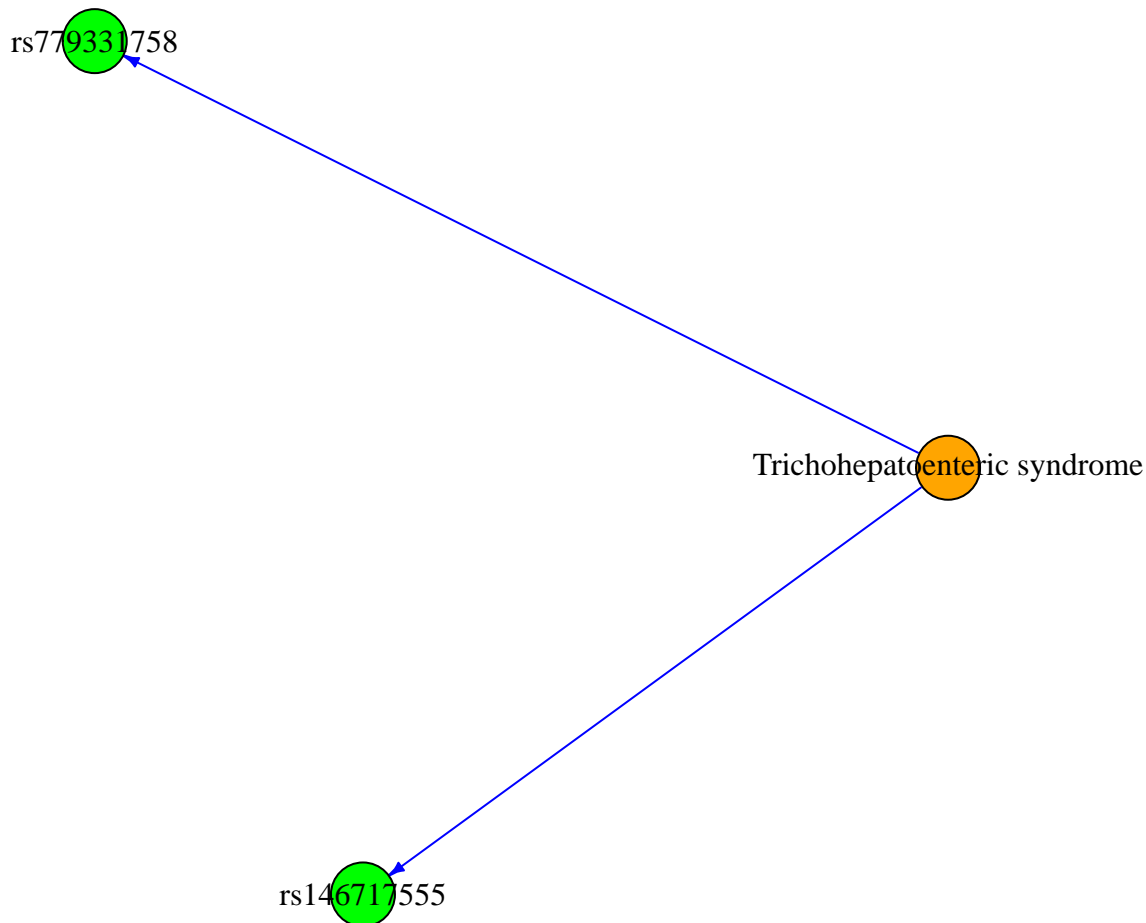

## Variant–Disease Network (Trimethylaminuria)

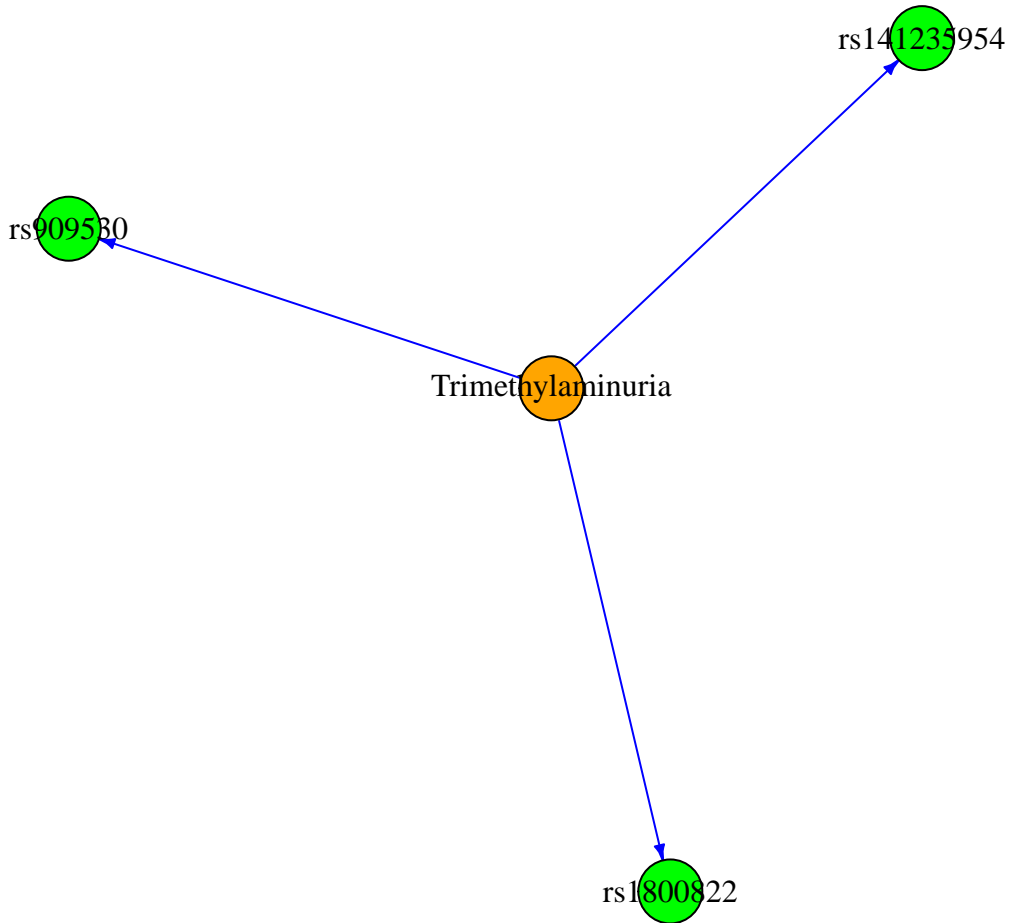

## Variant-Disease Network (Tuberous sclerosis 1)

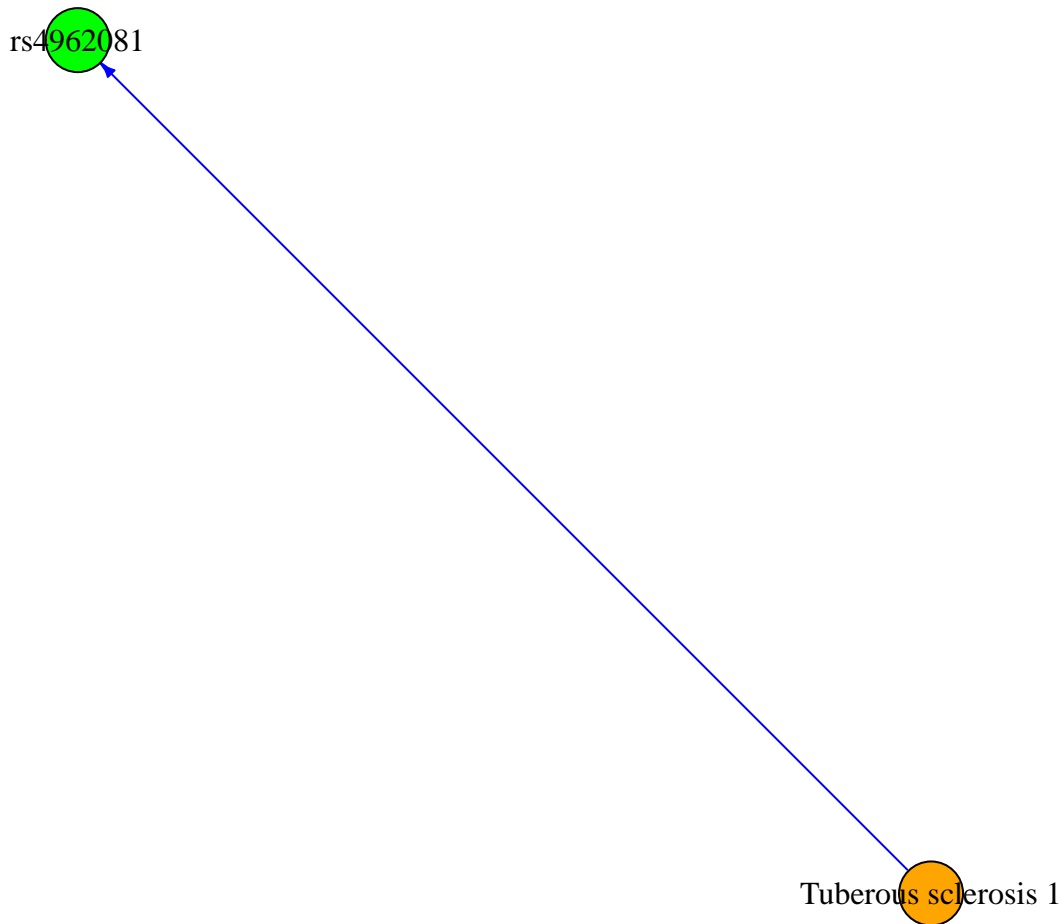

## Variant-Disease Network (Tuberous sclerosis 2)

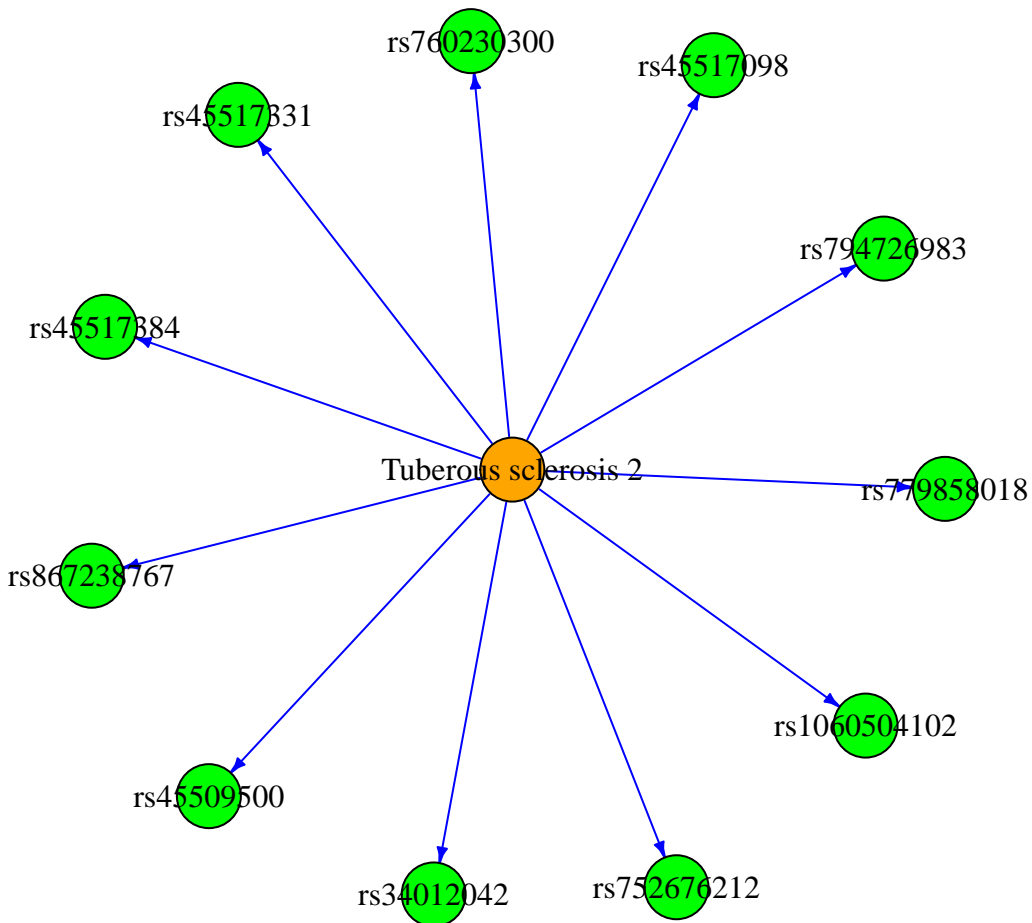

**Variant–Disease Network (Tuberous sclerosis syndrome)**

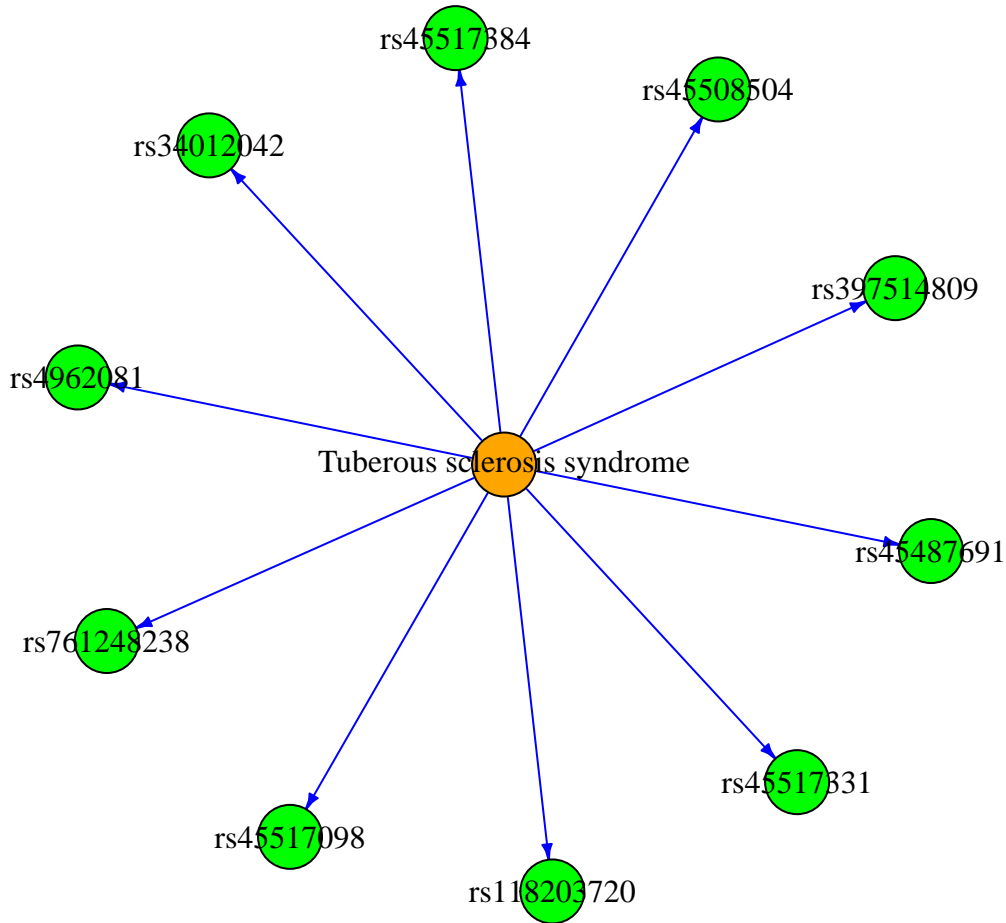

## Variant–Disease Network (Tubulinopathies)

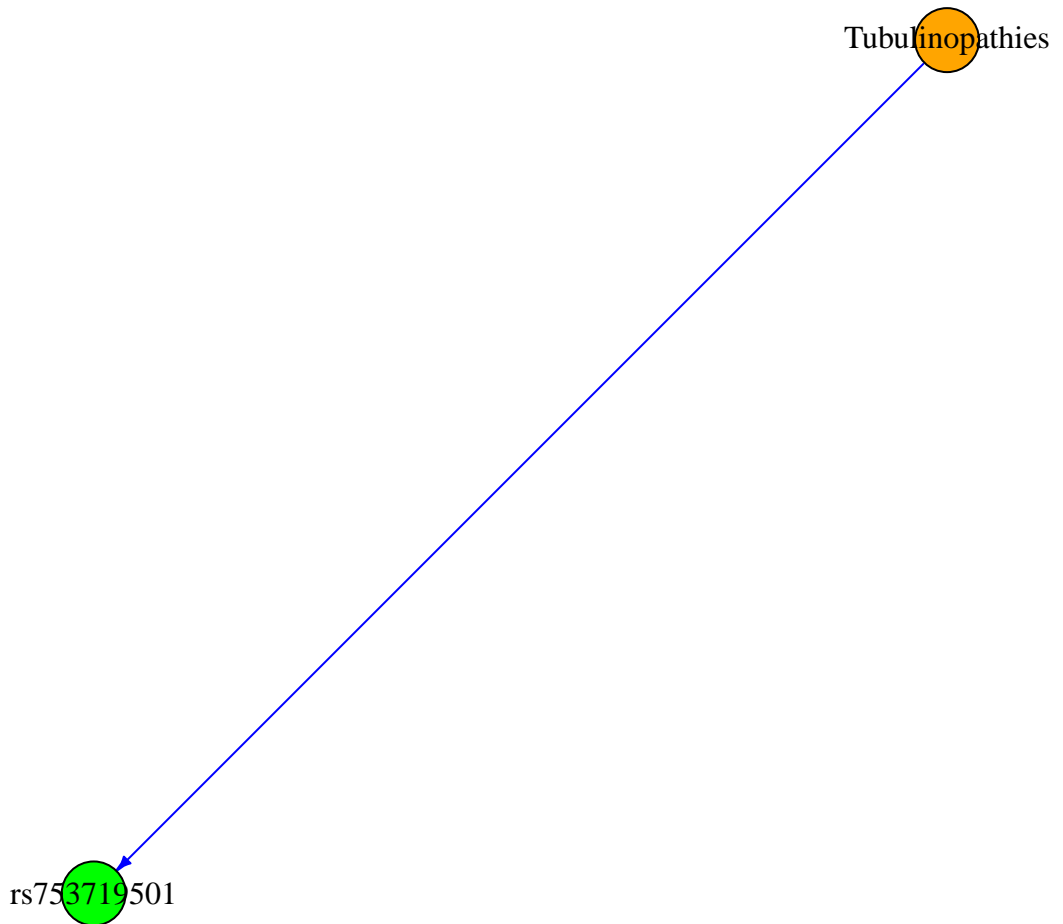

## Variant–Disease Network (Type A2 brachydactyly)

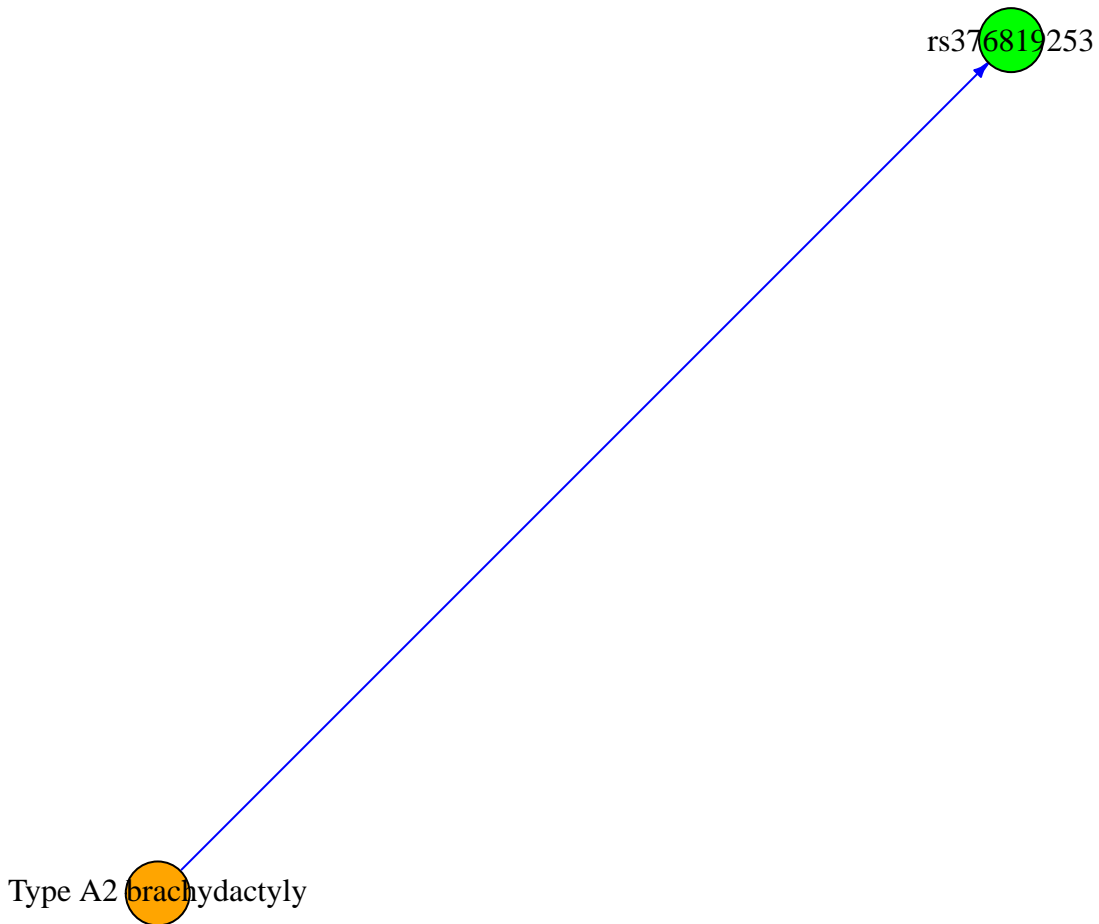



## Variant-Disease Network (Type II Collagenopathies)

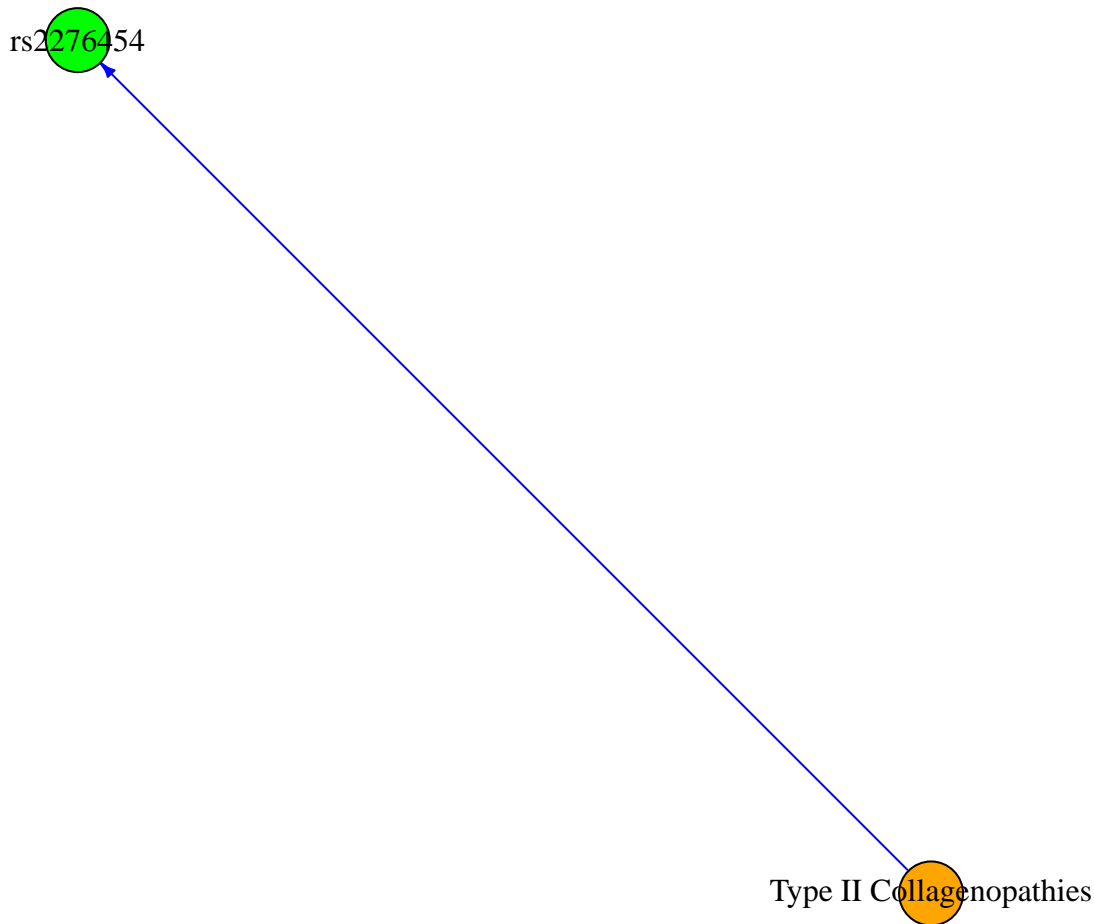

Variant–Disease Network (Tyrosine kinase 2 deficiency)

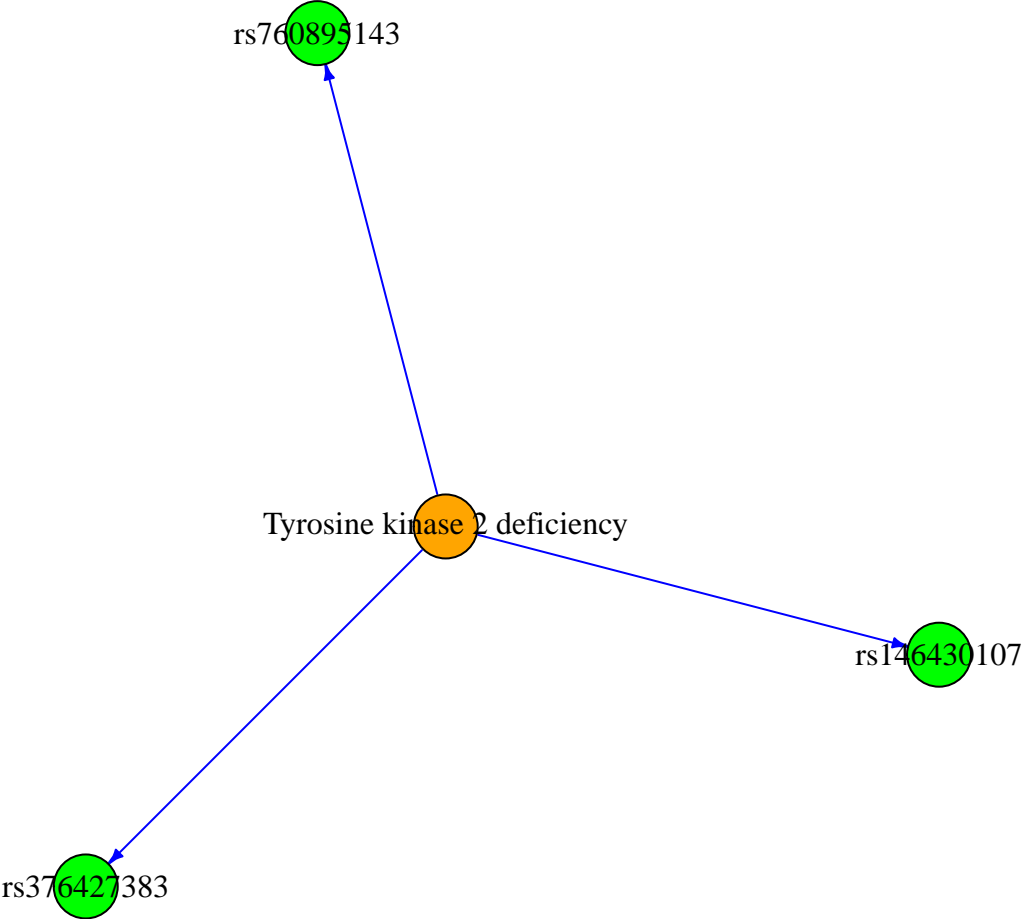

Variant–Disease Network (UDPglucose–4–epimerase deficiency)

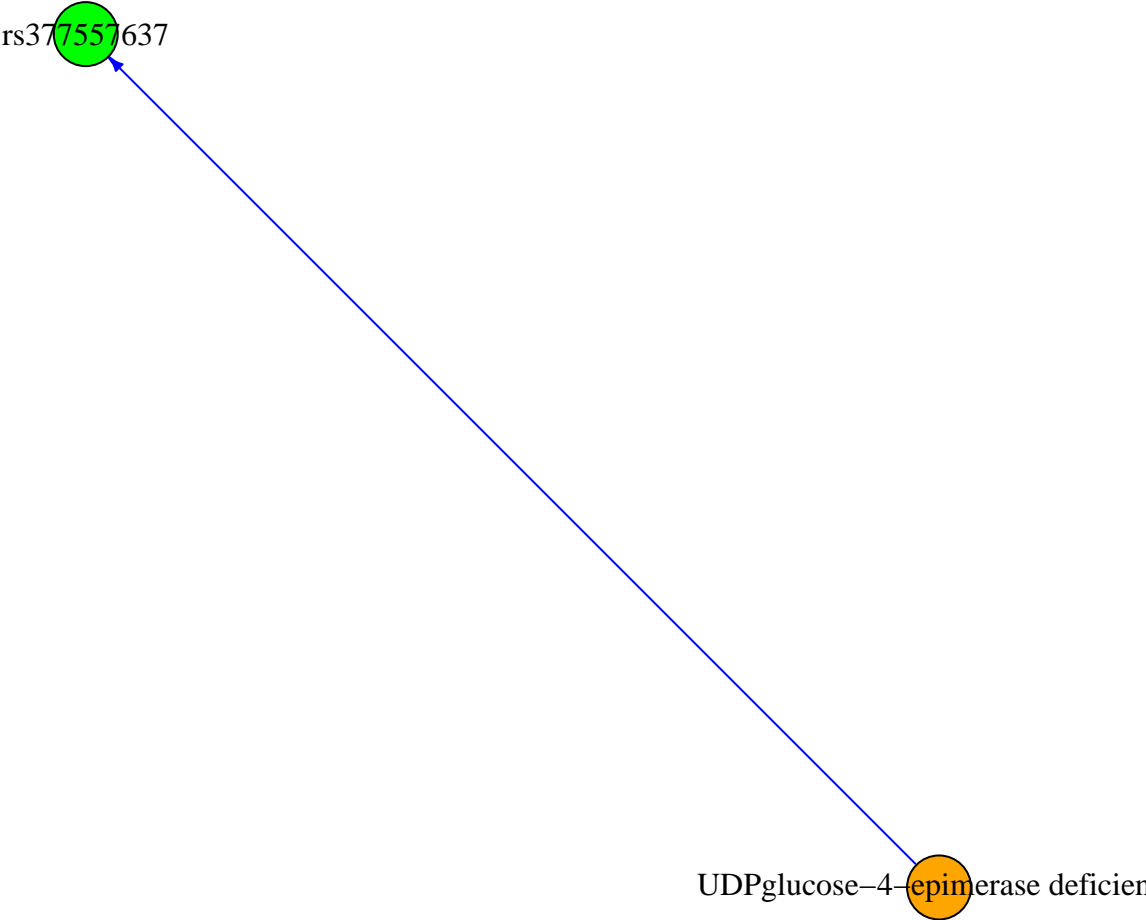

# Variant–Disease Network (Ullrich congenital muscular dystrophy 2)

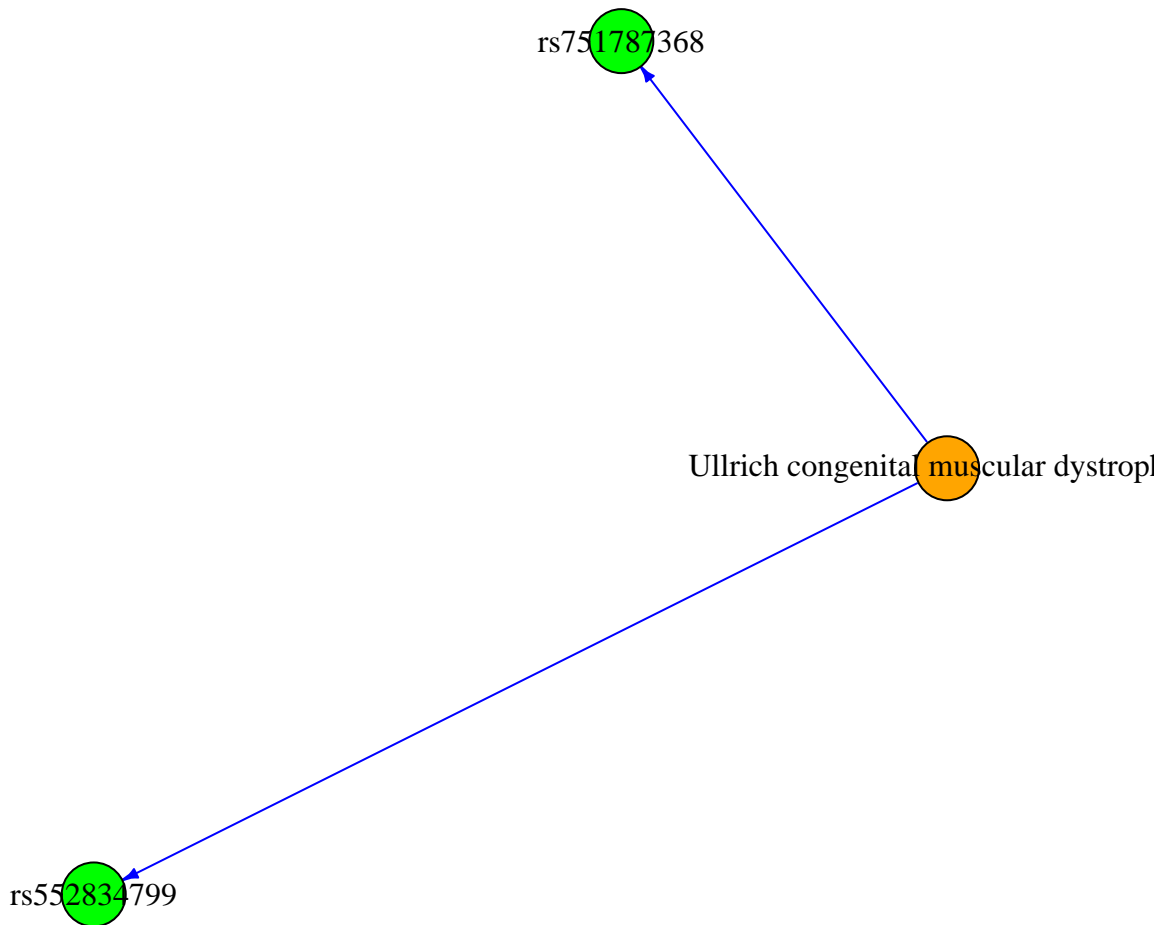

Variant–Disease Network (Upshaw–Schulman syndrome)

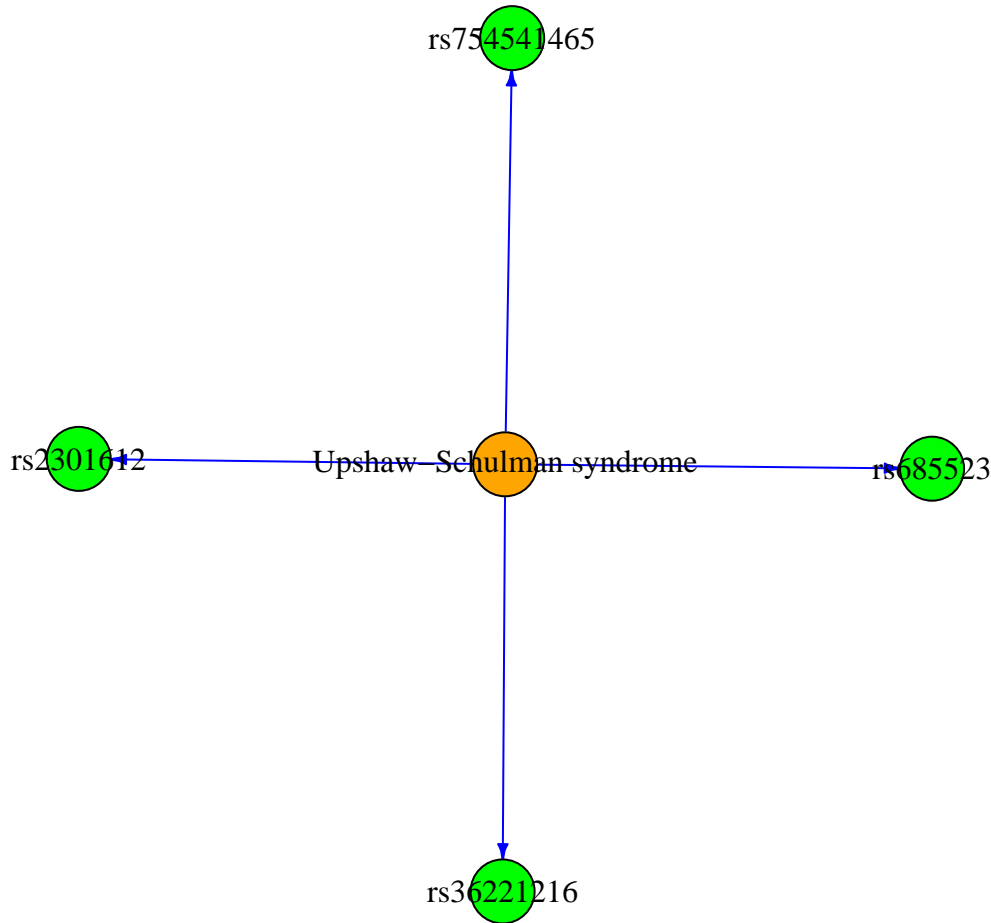

## Variant–Disease Network (Uromodulin–associated kidney disease)

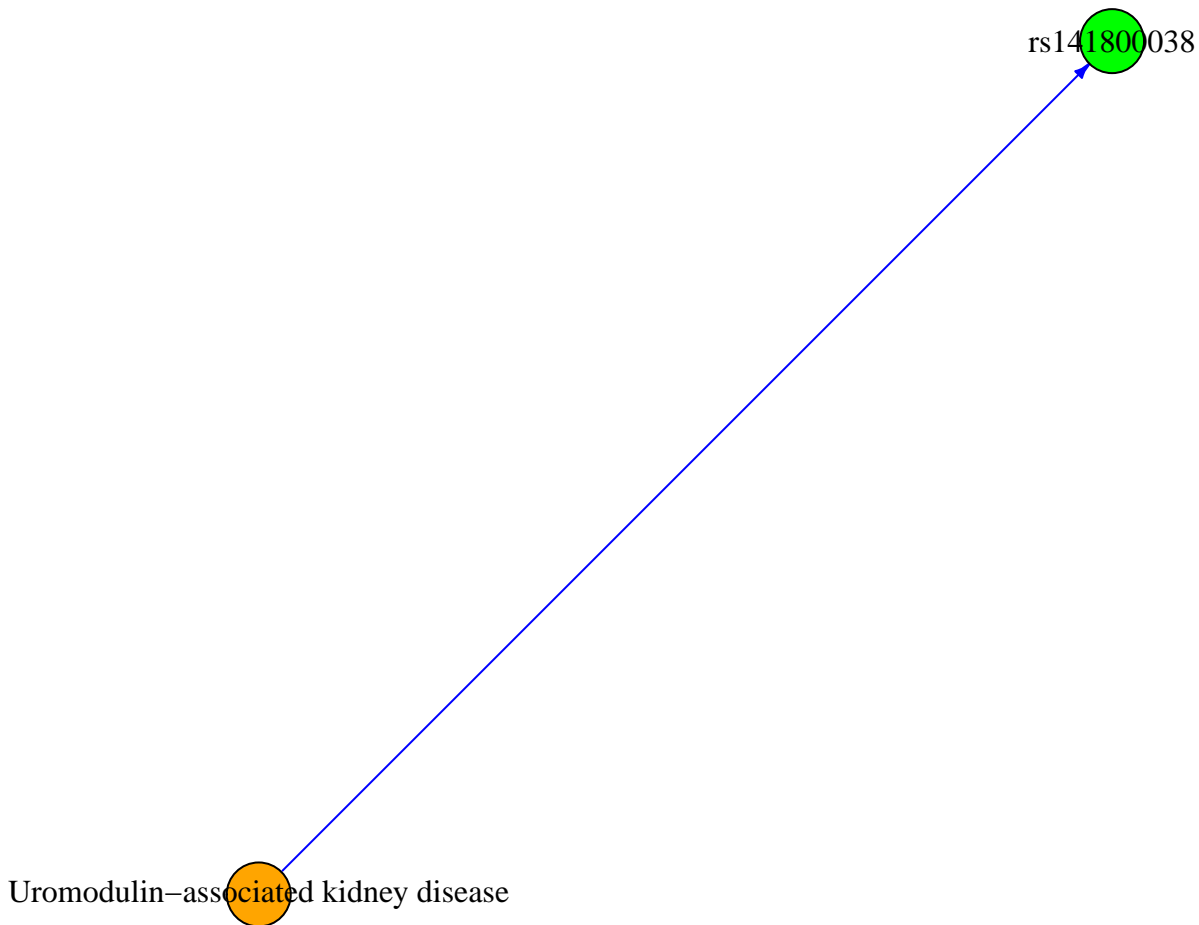

## Variant-Disease Network (Usher syndrome)

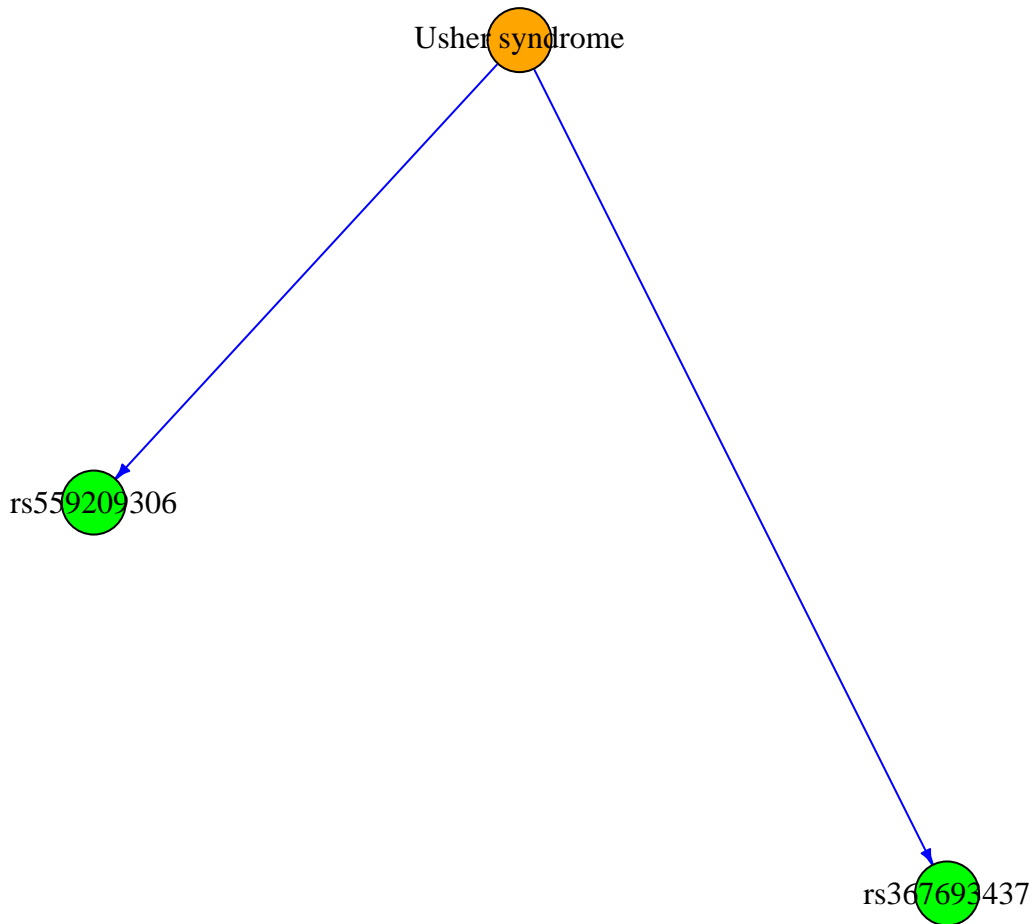

## Variant–Disease Network (Venous thrombosis)

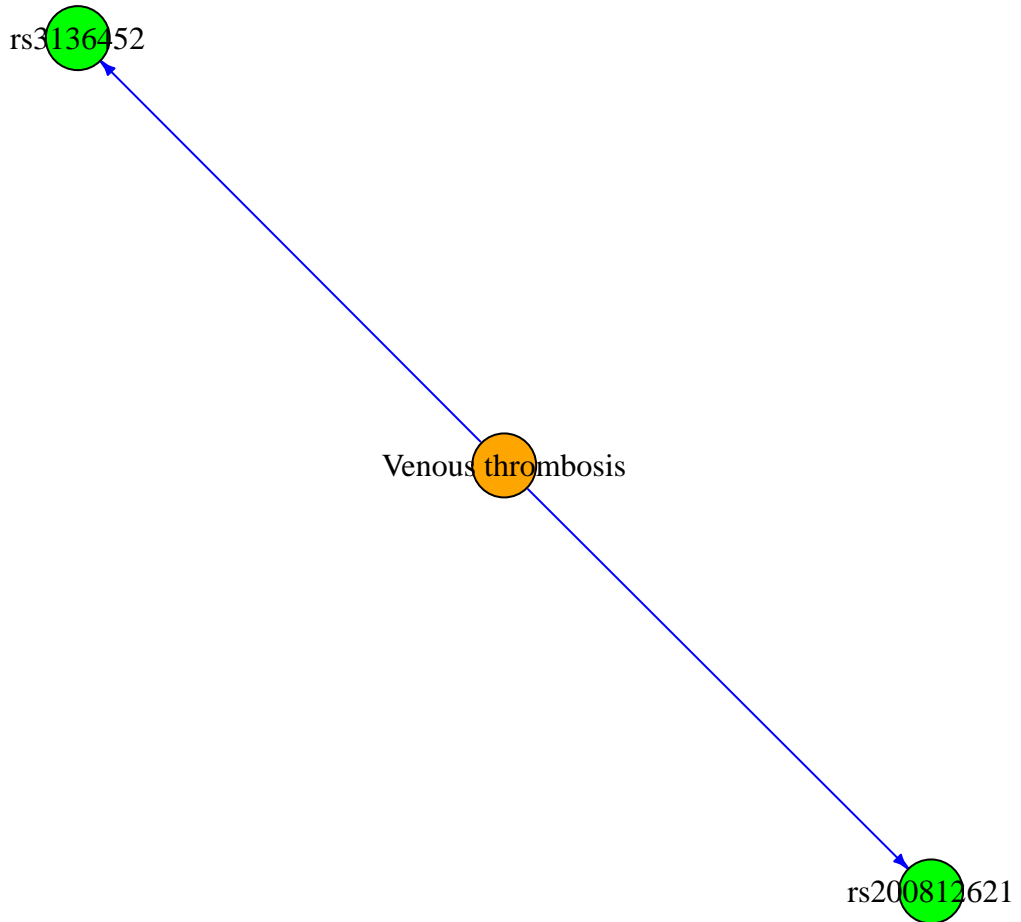



## Variant–Disease Network (Ventricular tachycardia)

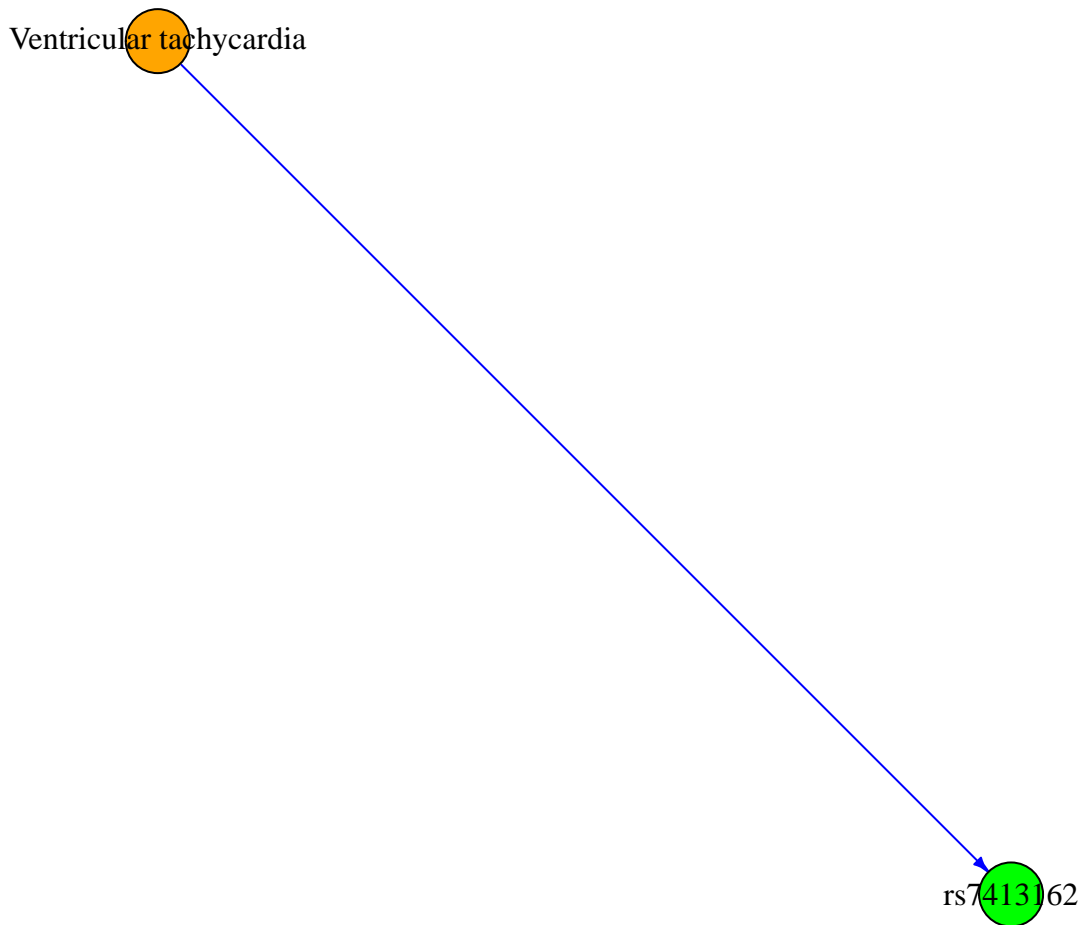

Variant–Disease Network (Vesicoureteral reflux)

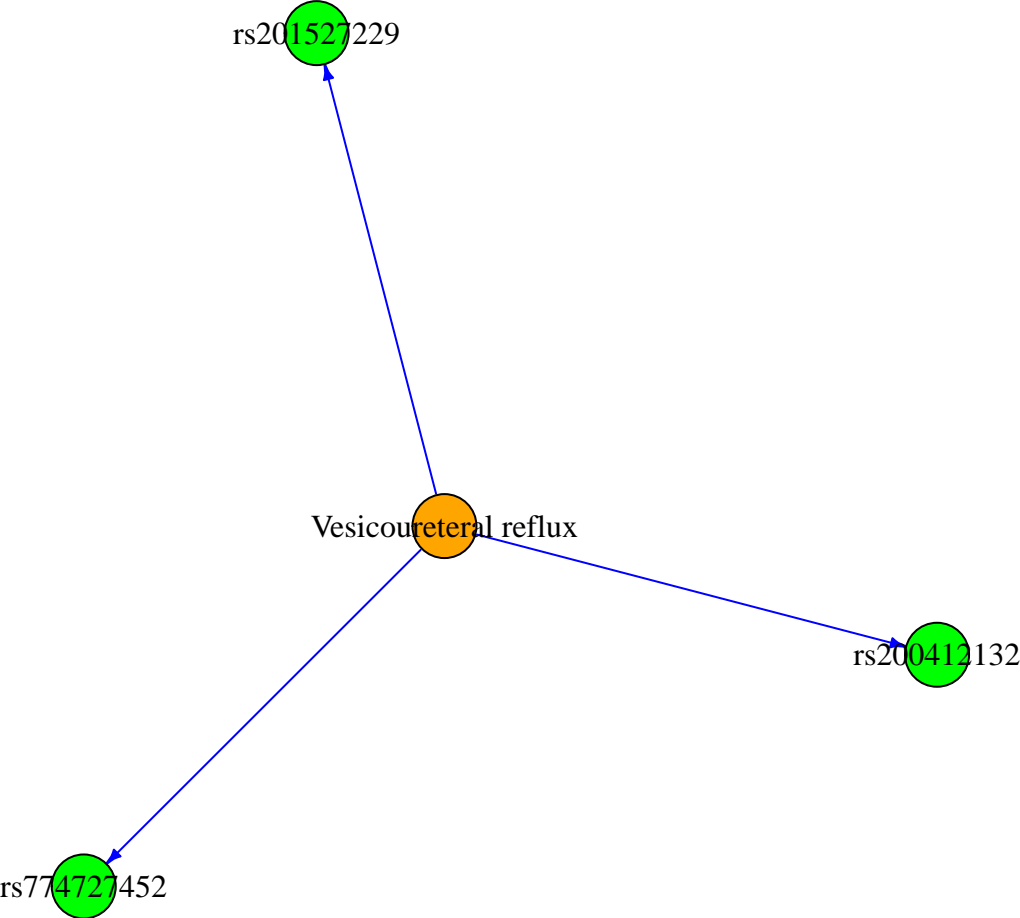

**Variant–Disease Network (Vici syndrome)**

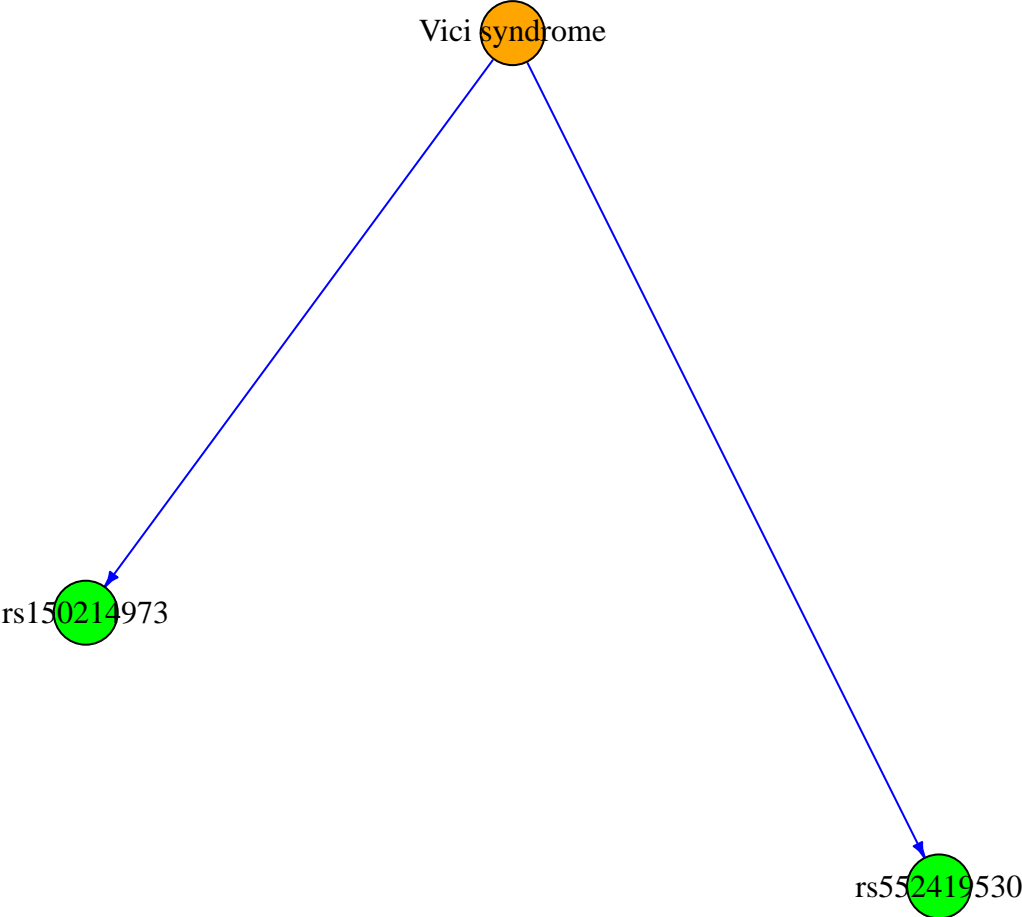

Variant–Disease Network (Vitamin D–Dependent Rickets)

Vitamin D–Dependent Rickets

rs12721865

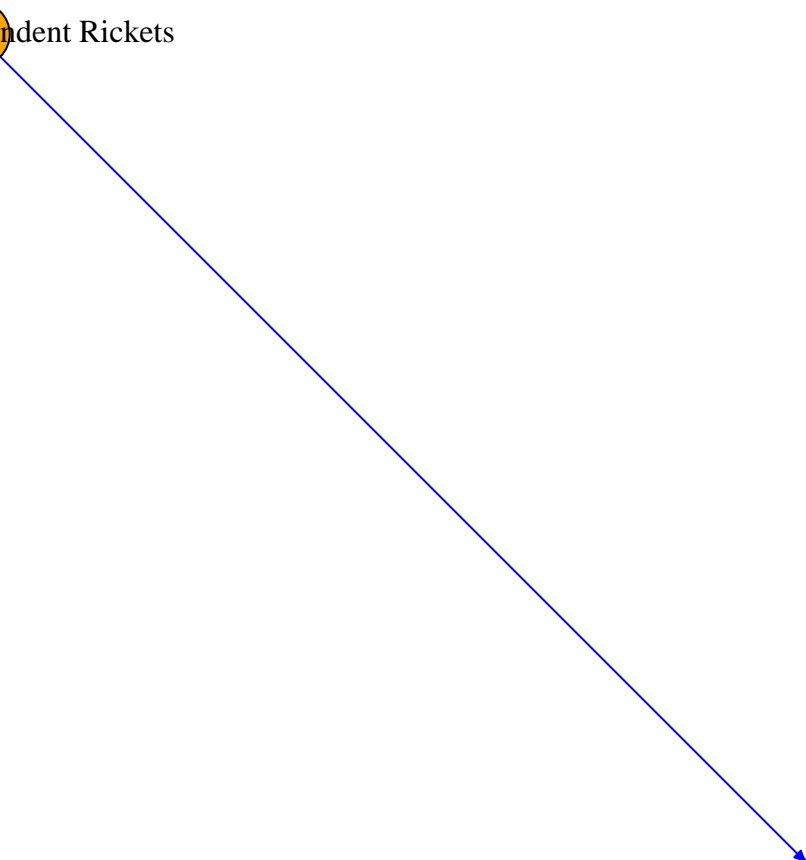

Variant–Disease Network (Vitelliform macular dystrophy type 2)

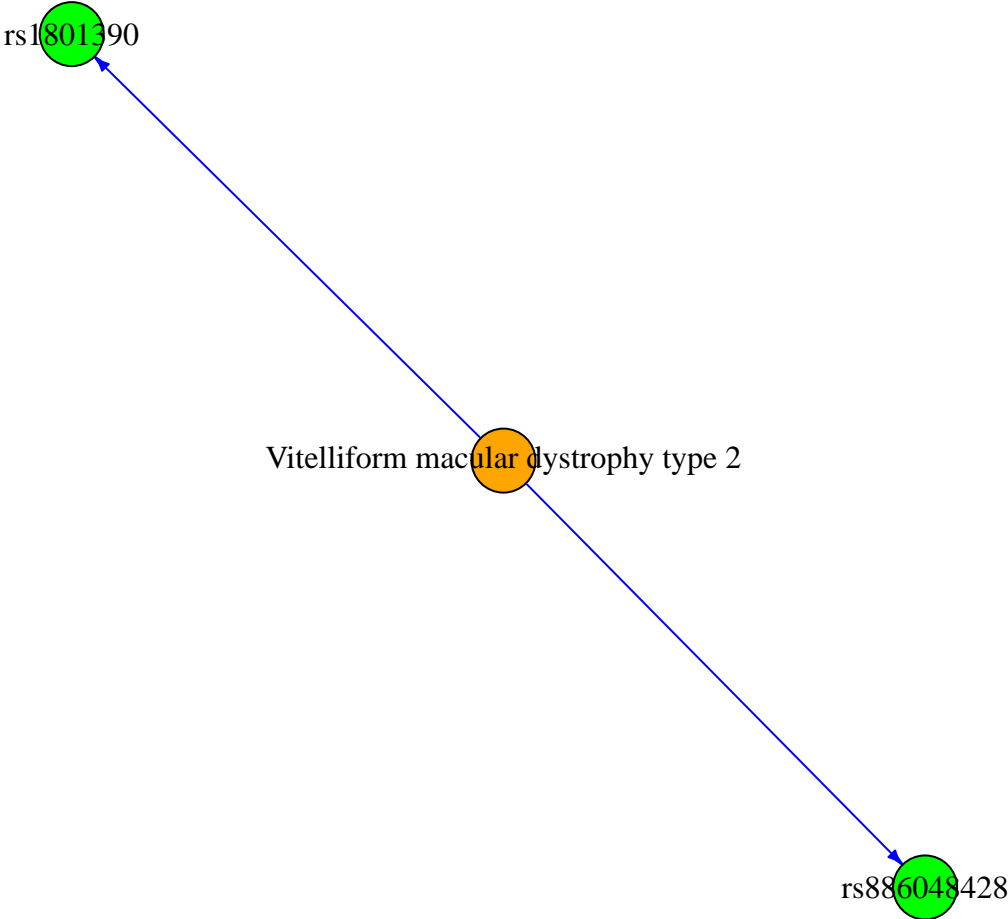

# Variant–Disease Network (Vitreoretinopathology)

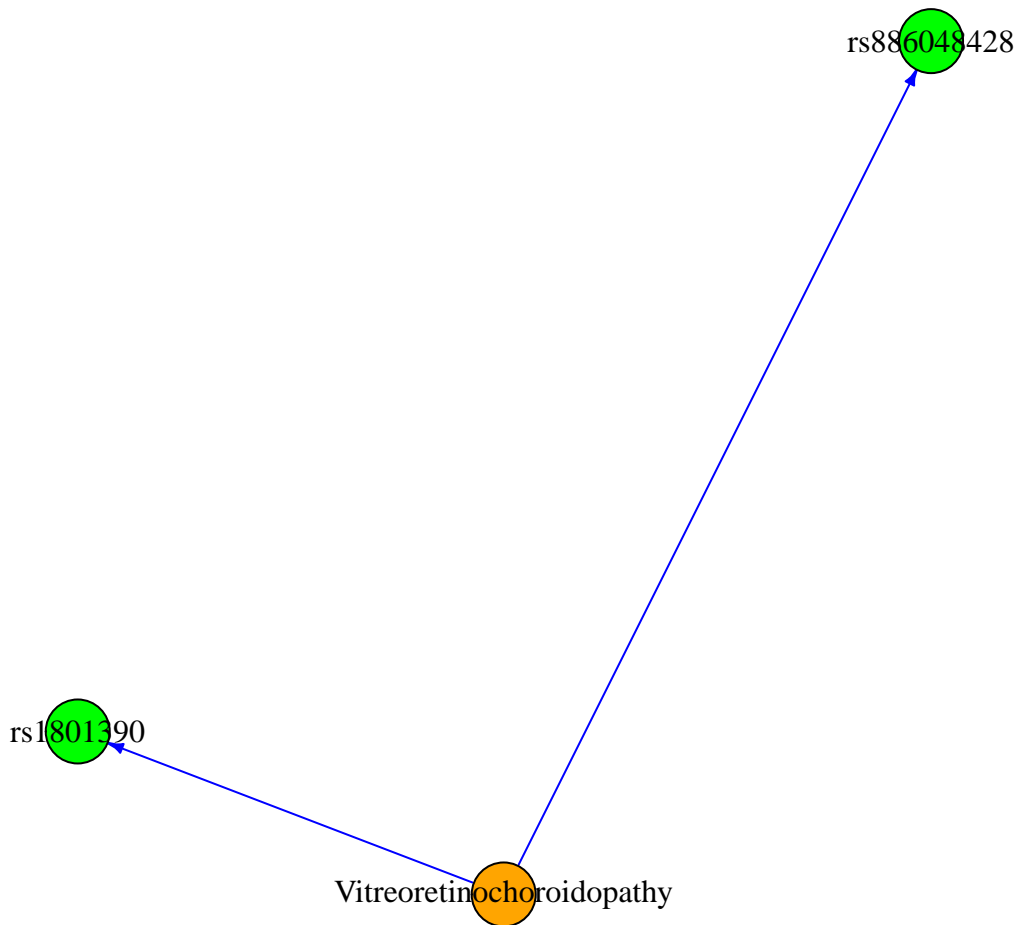

Variant–Disease Network (Vitreoretinopathy)

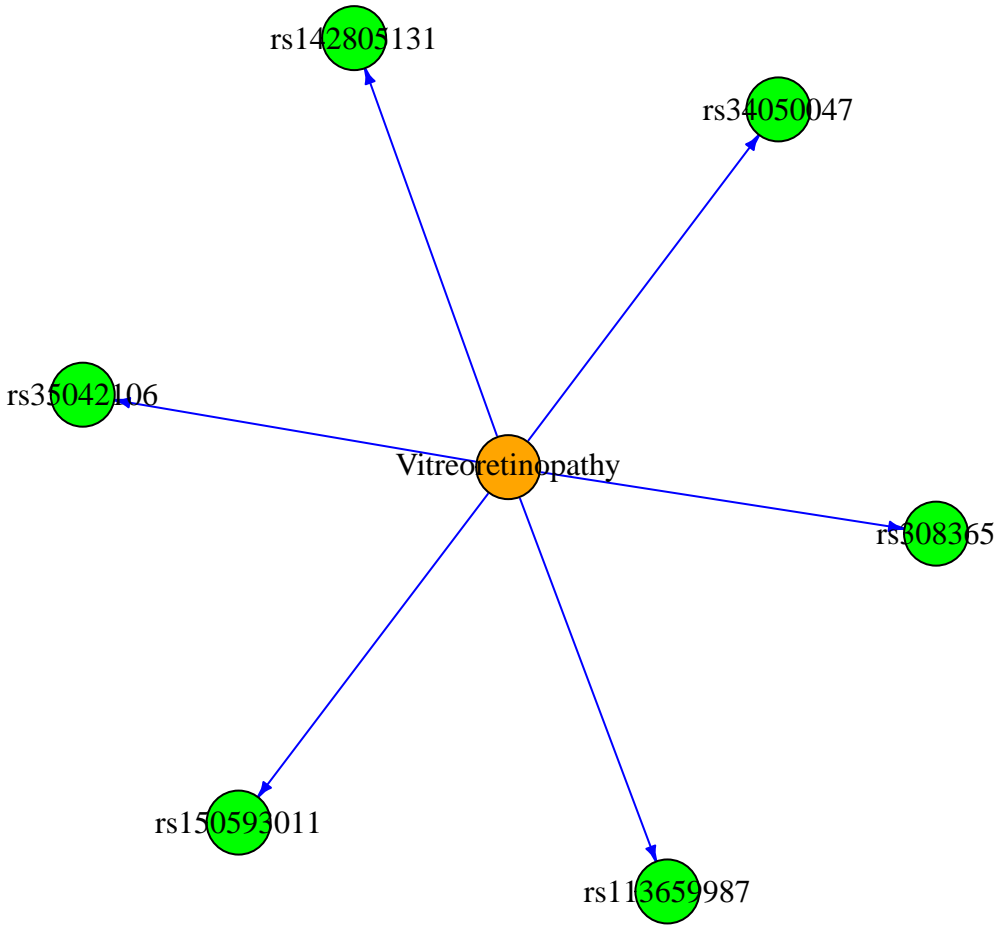

**Variant–Disease Network (Von Hippel–Lindau syndrome)**

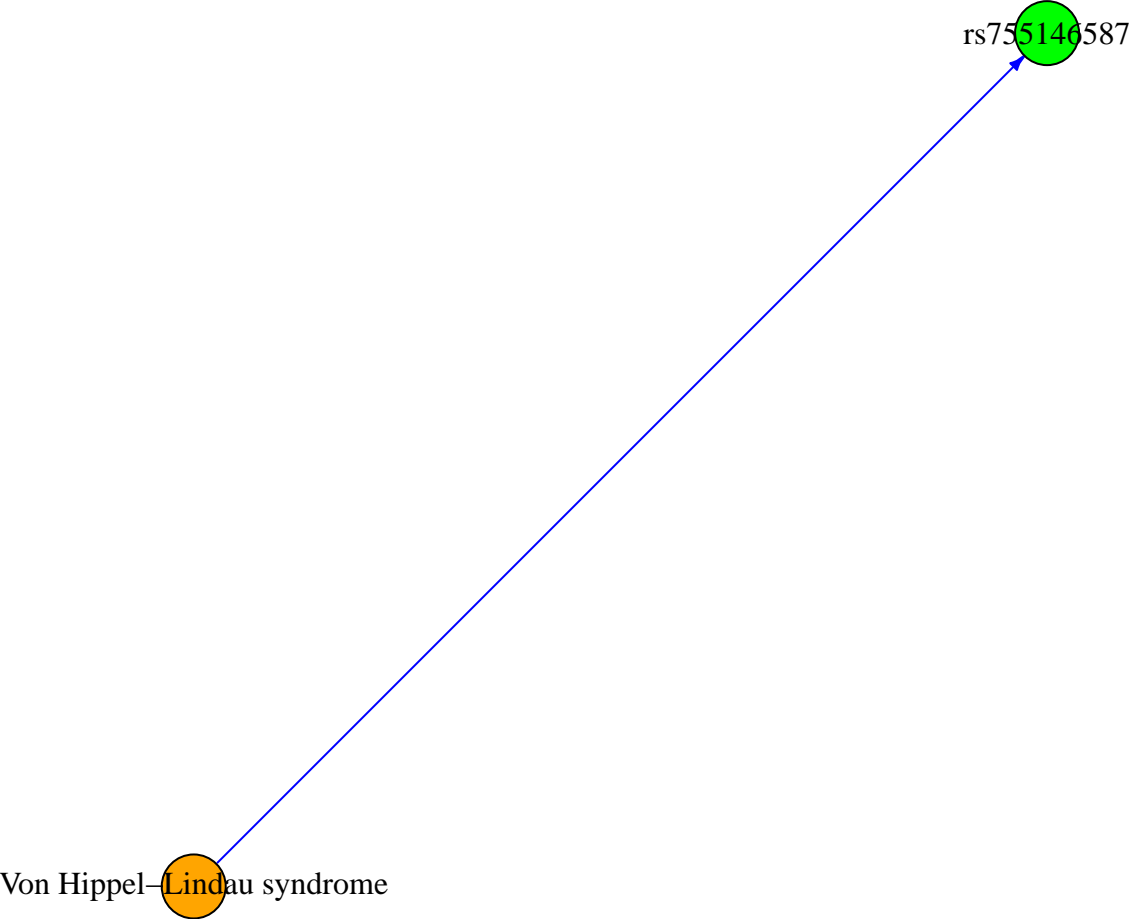



## Variant–Disease Network (von Willebrand disorder)

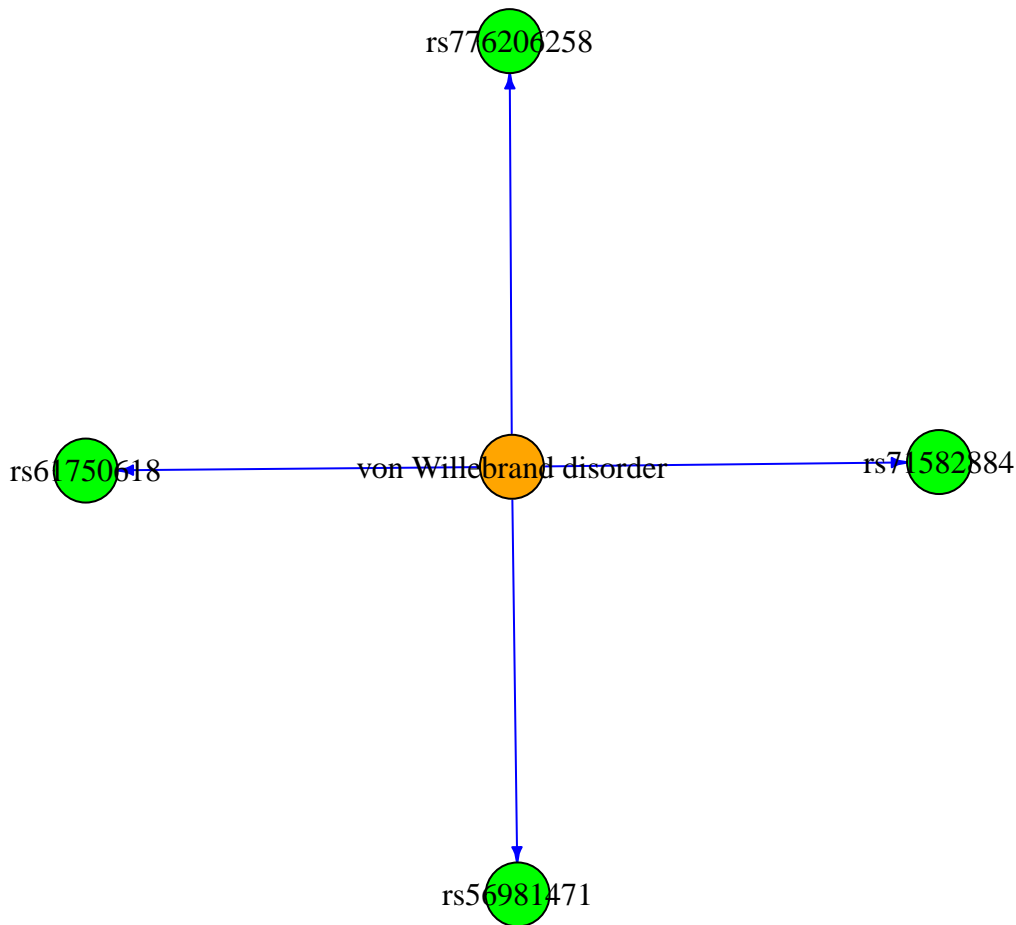

## Variant–Disease Network (Waardenburg syndrome)

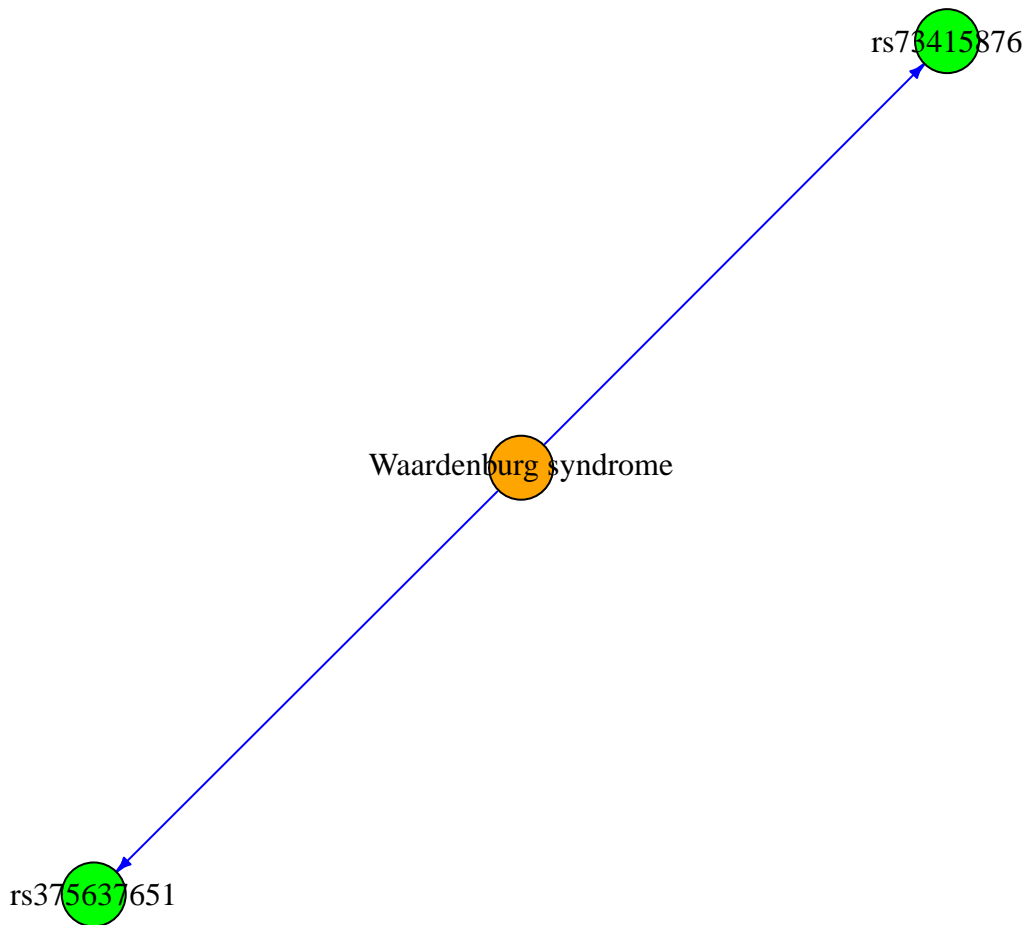

## Variant–Disease Network (Wagner syndrome)

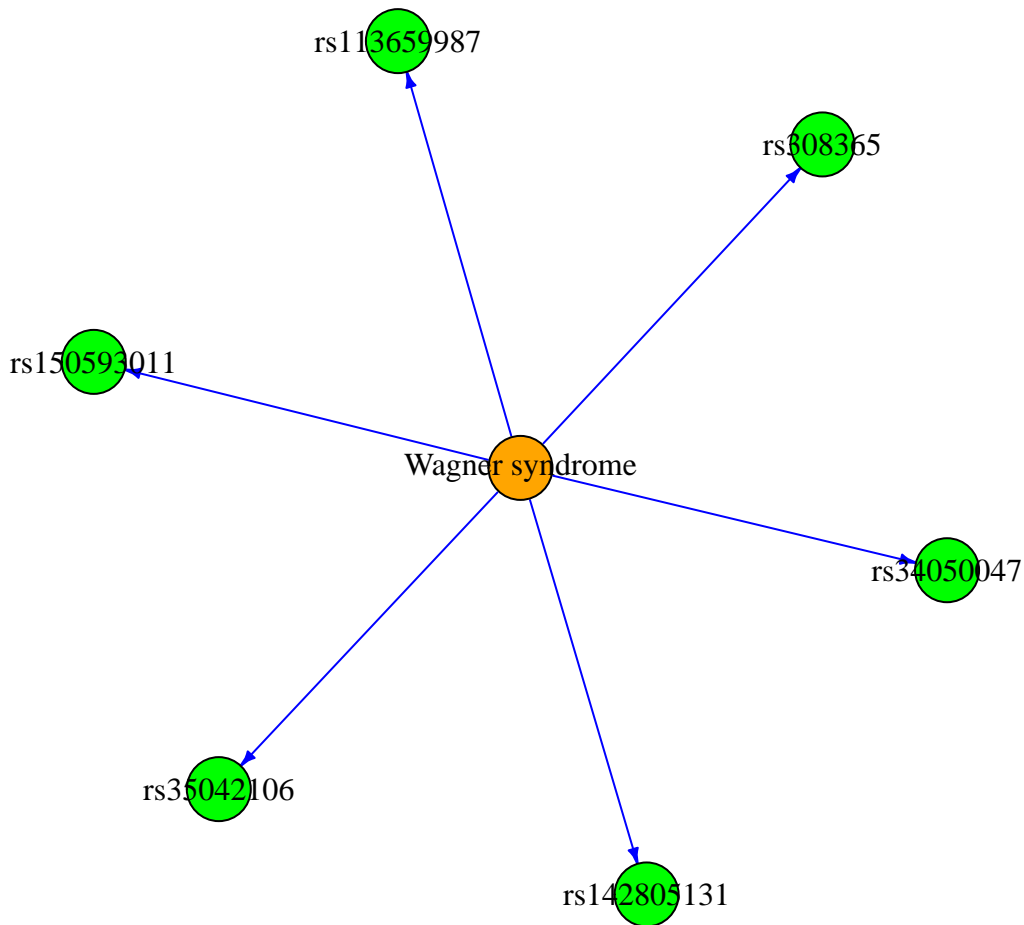

Variant–Disease Network (Walker–Warburg congenital muscular dystrophy)

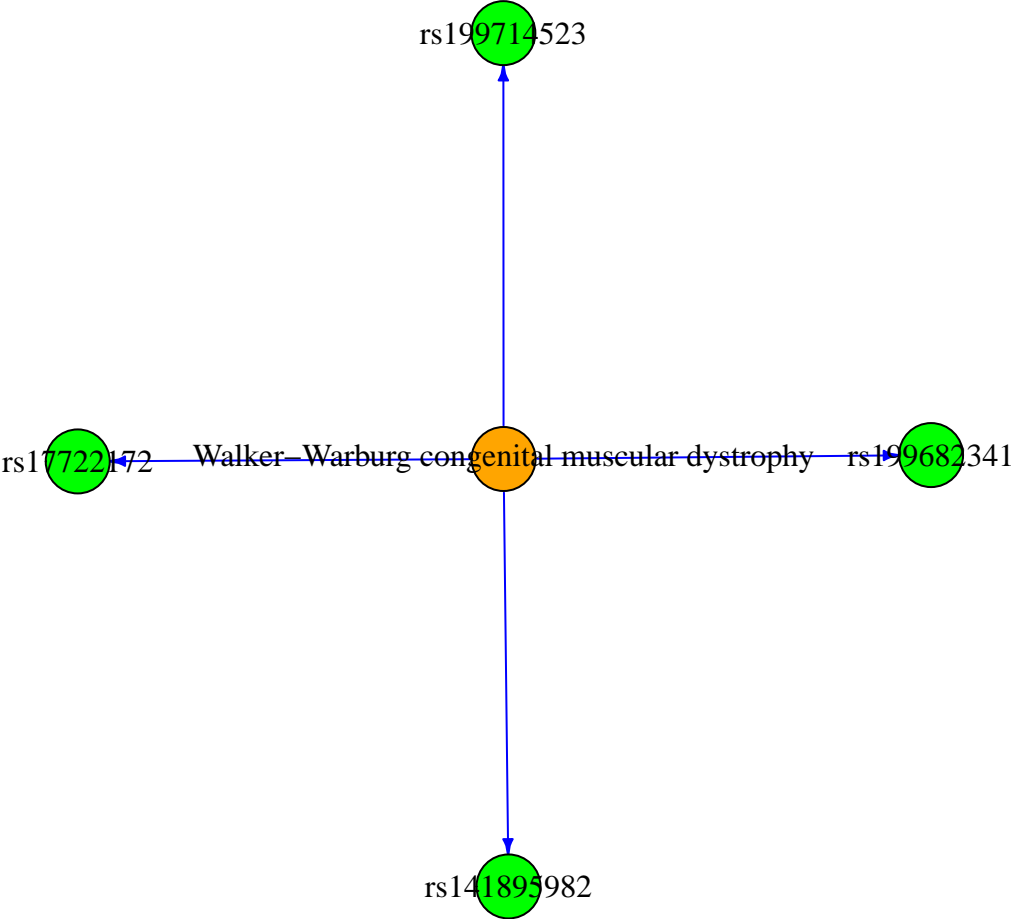

## Variant–Disease Network (Warburg micro syndrome)

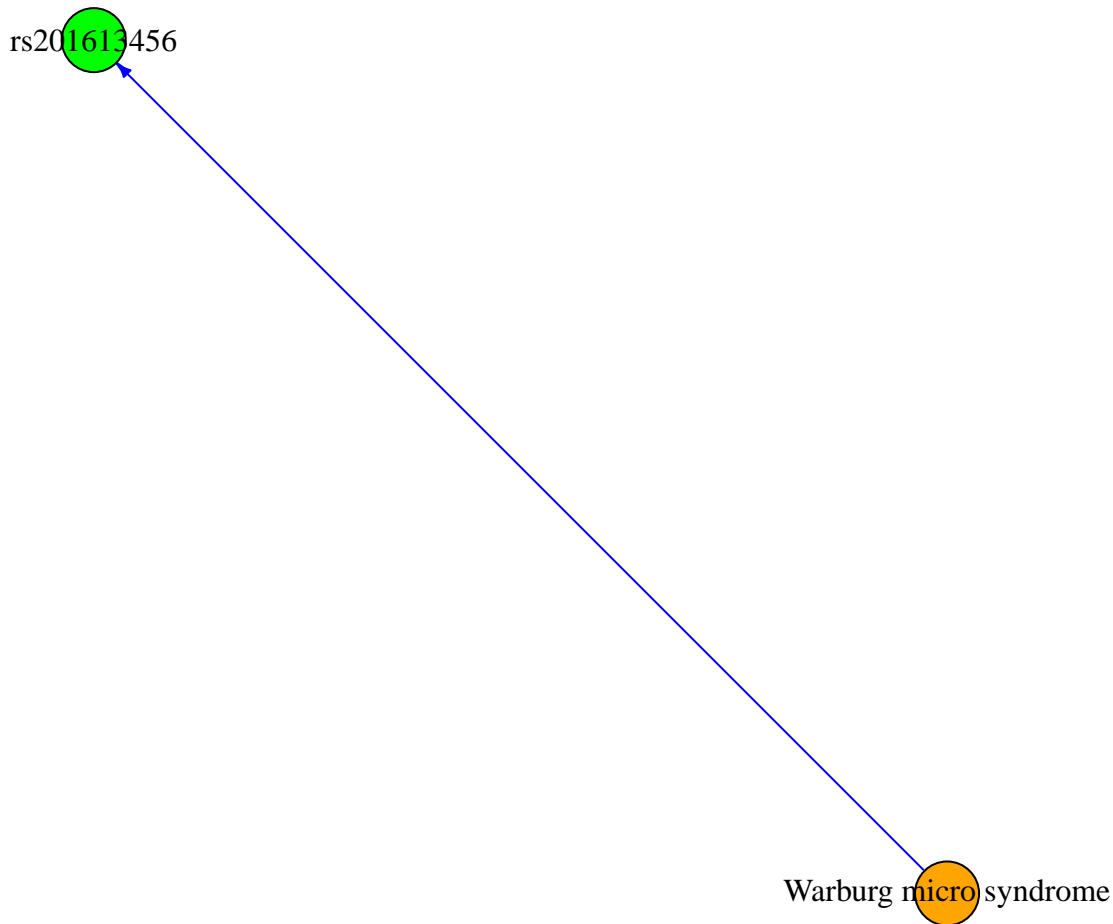

**Variant–Disease Network (Warsaw breakage syndrome)**

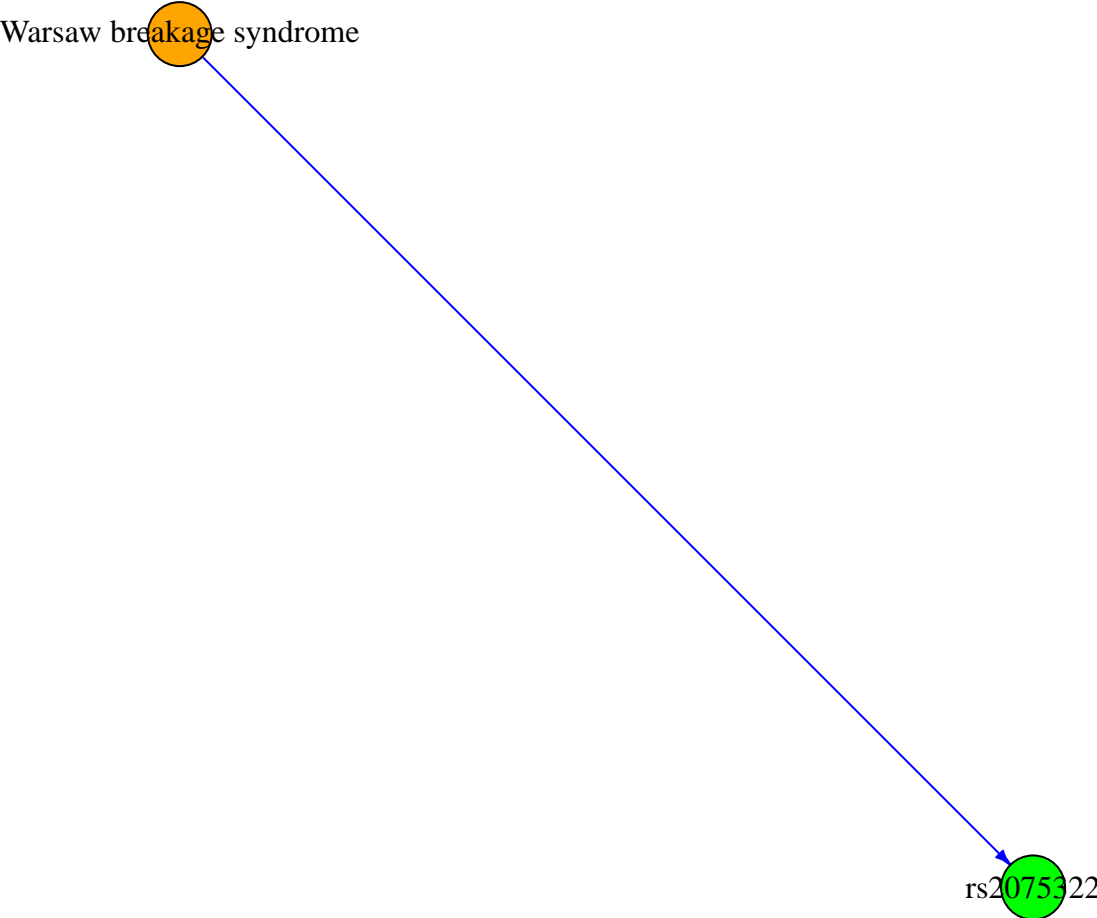

## Variant–Disease Network (Weaver syndrome)

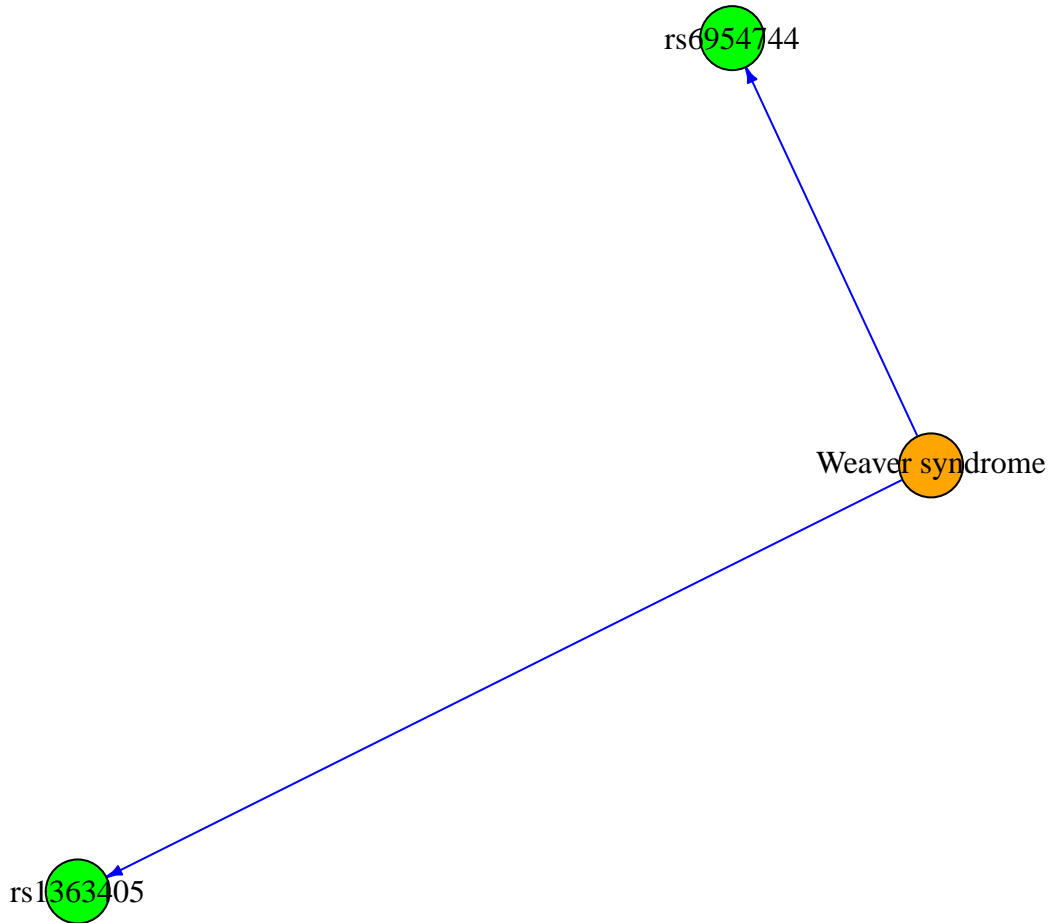

**Variant–Disease Network (Weill–Marchesani syndrome)**

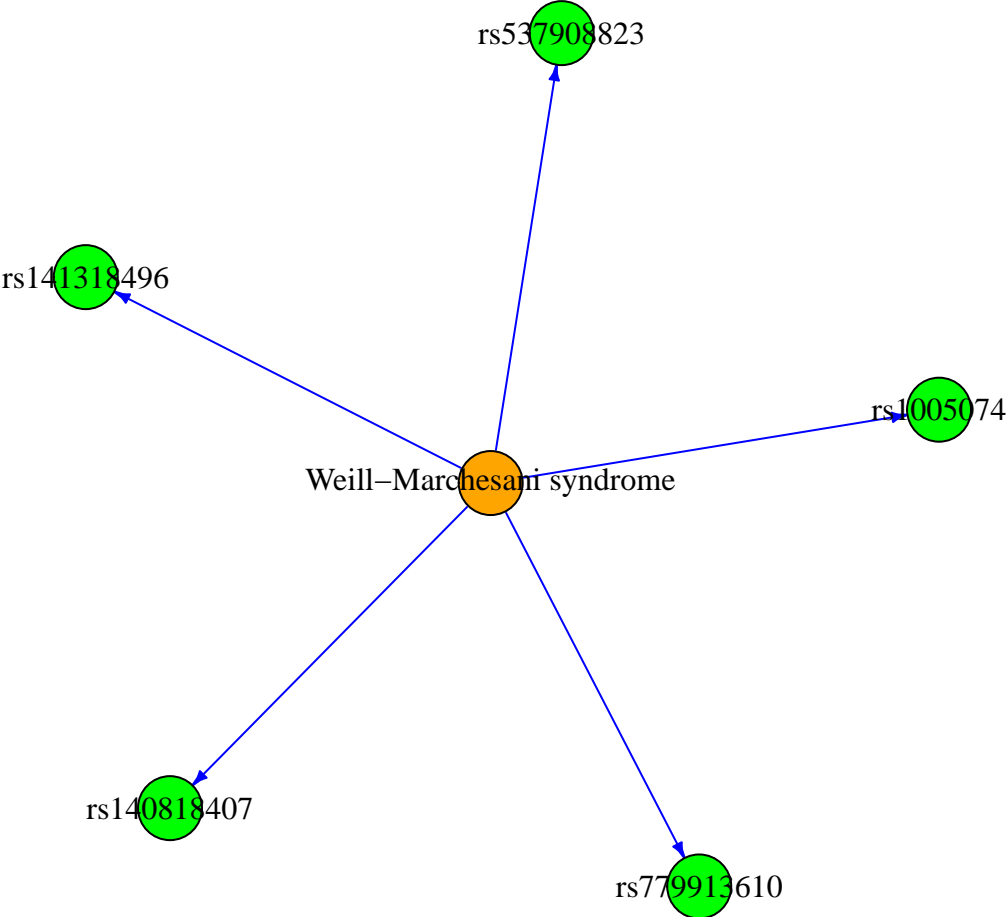



Variant–Disease Network (Weill–Marchesani syndrome 2)

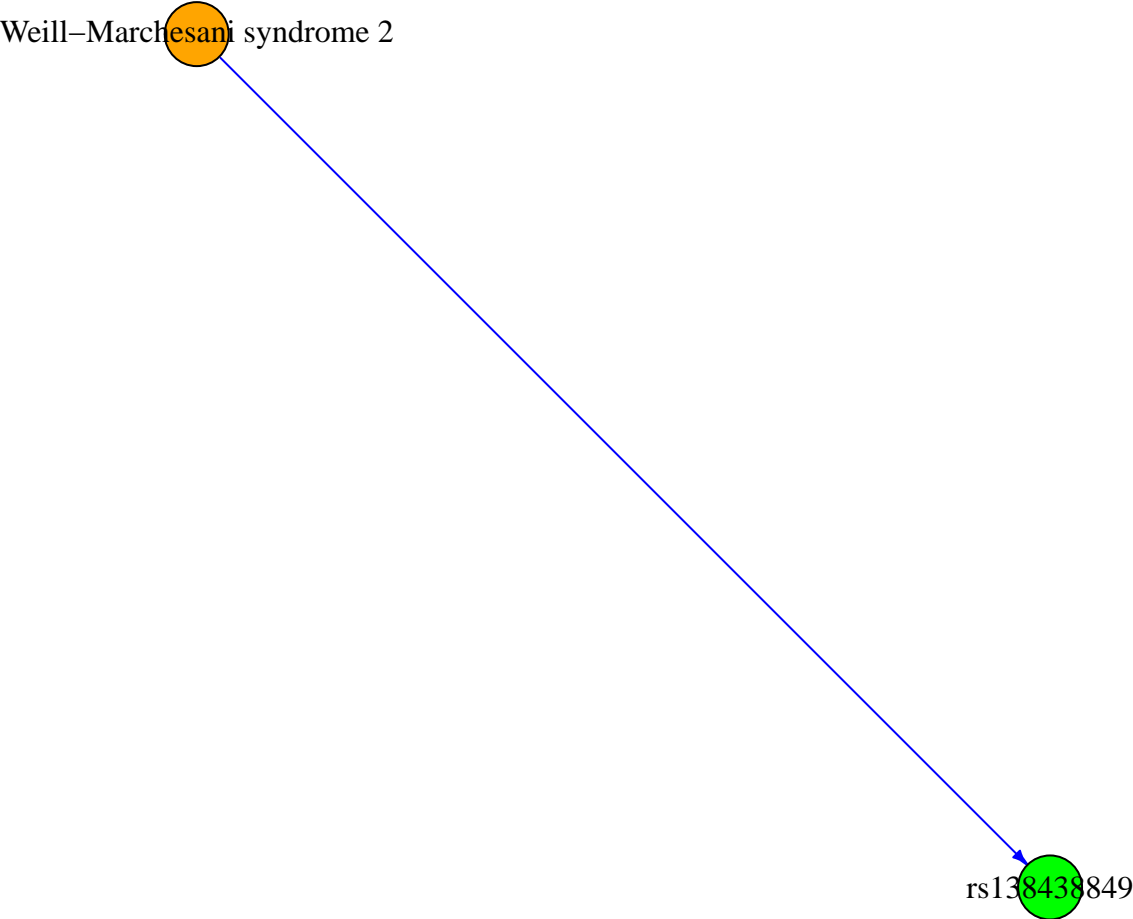

**Variant–Disease Network (Weill–Marchesani syndrome 4)**

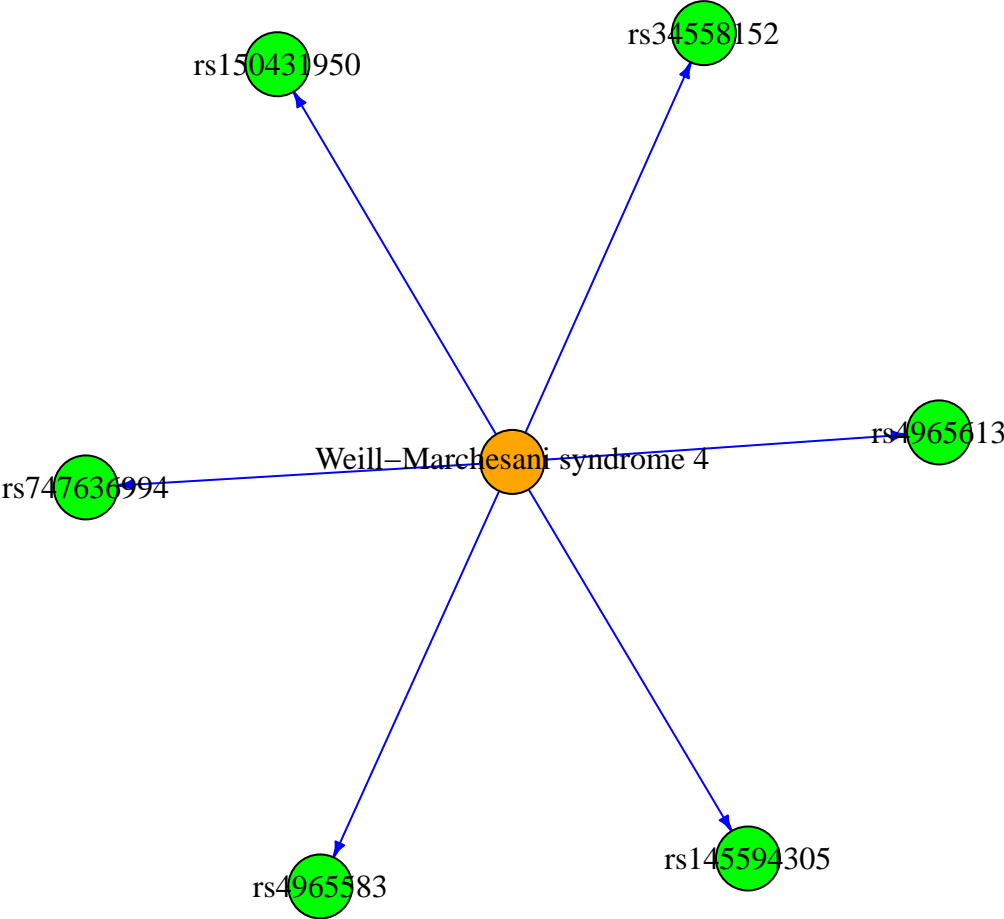

## Variant–Disease Network (Werner syndrome)

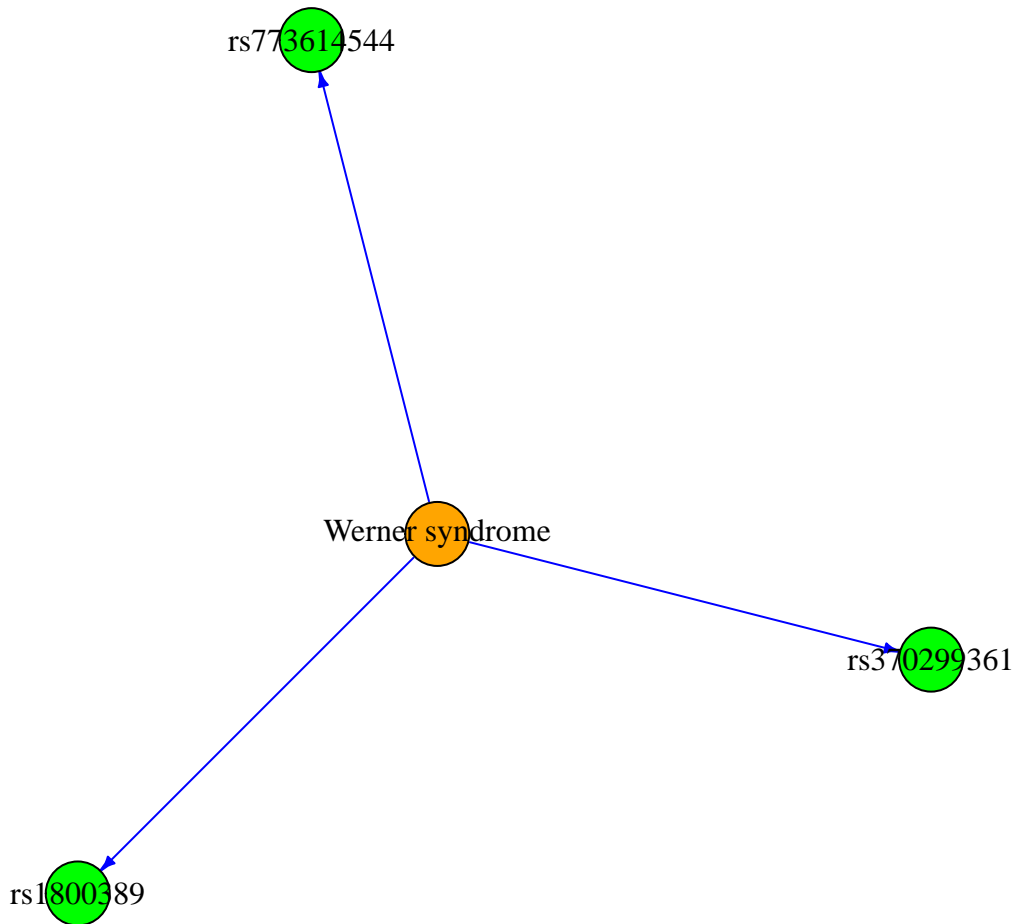

# Variant–Disease Network (WFS1–Related Spectrum Disorders)

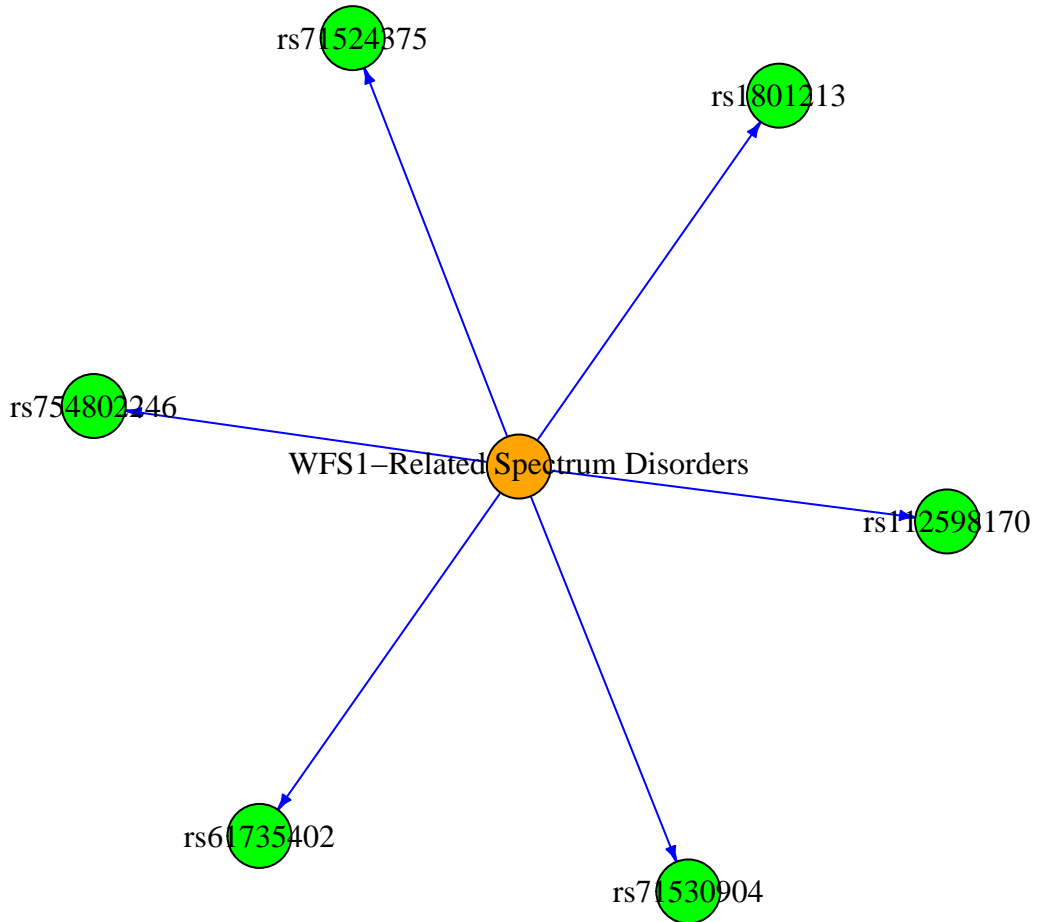

## Variant-Disease Network (Wilms tumor)

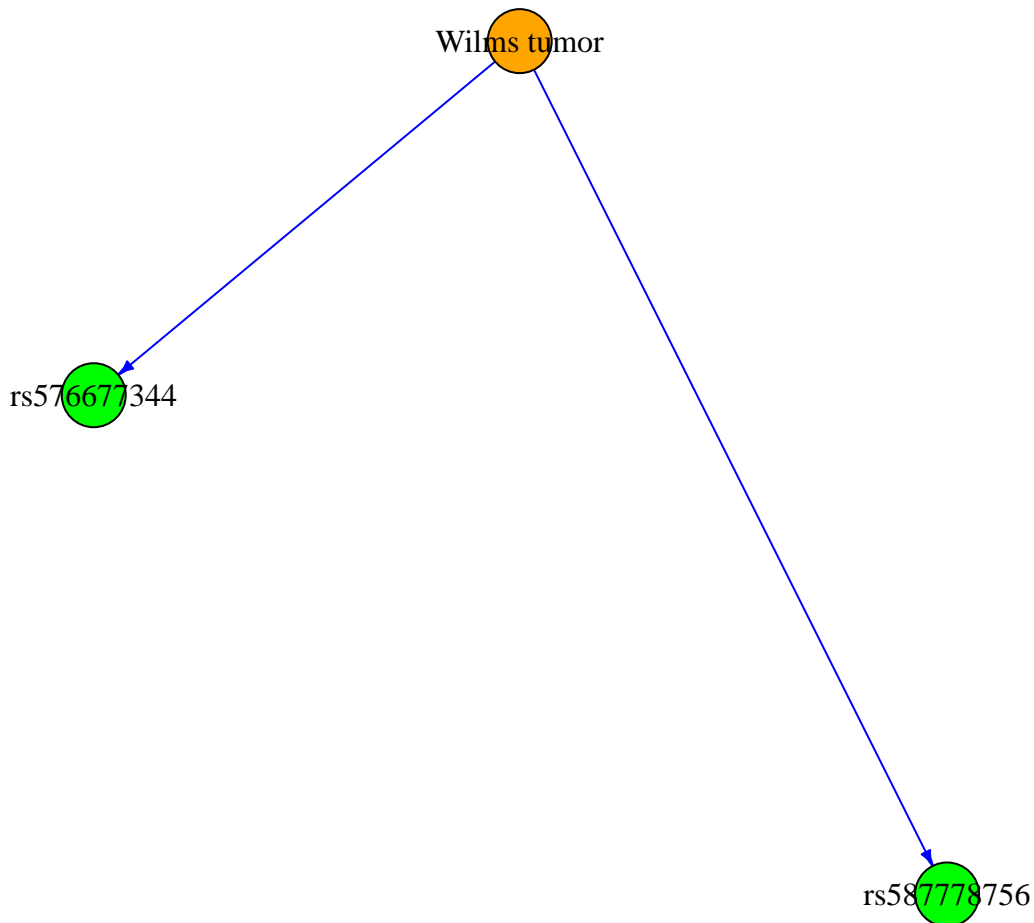

Variant–Disease Network (Wilms tumor 1)

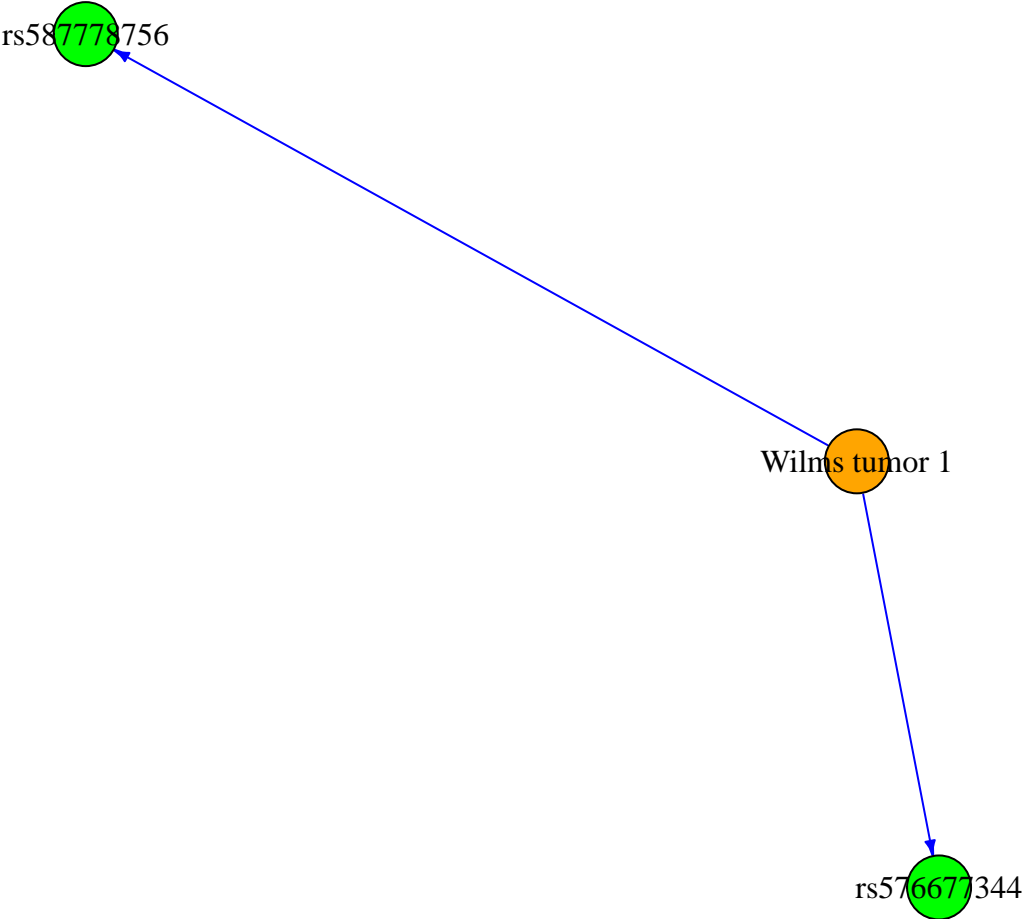

Variant–Disease Network (Wolfram syndrome)

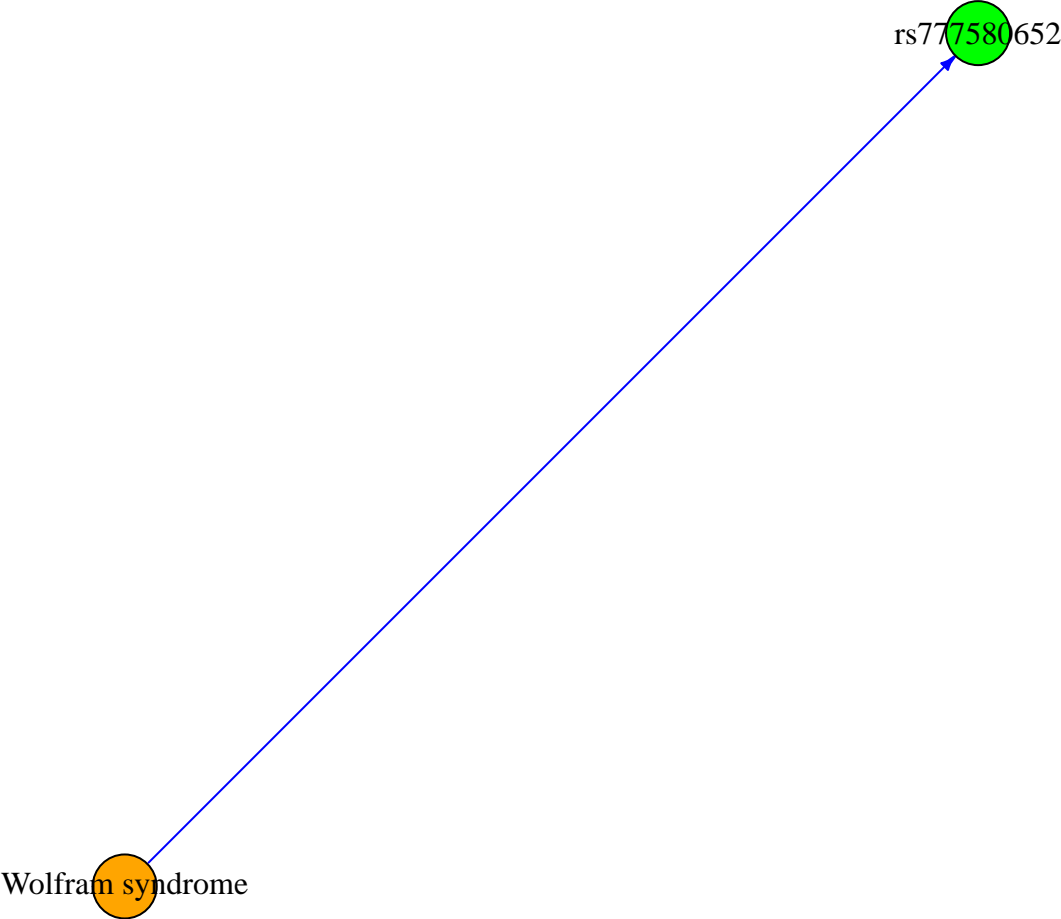

## Variant–Disease Network (Wolman disease)

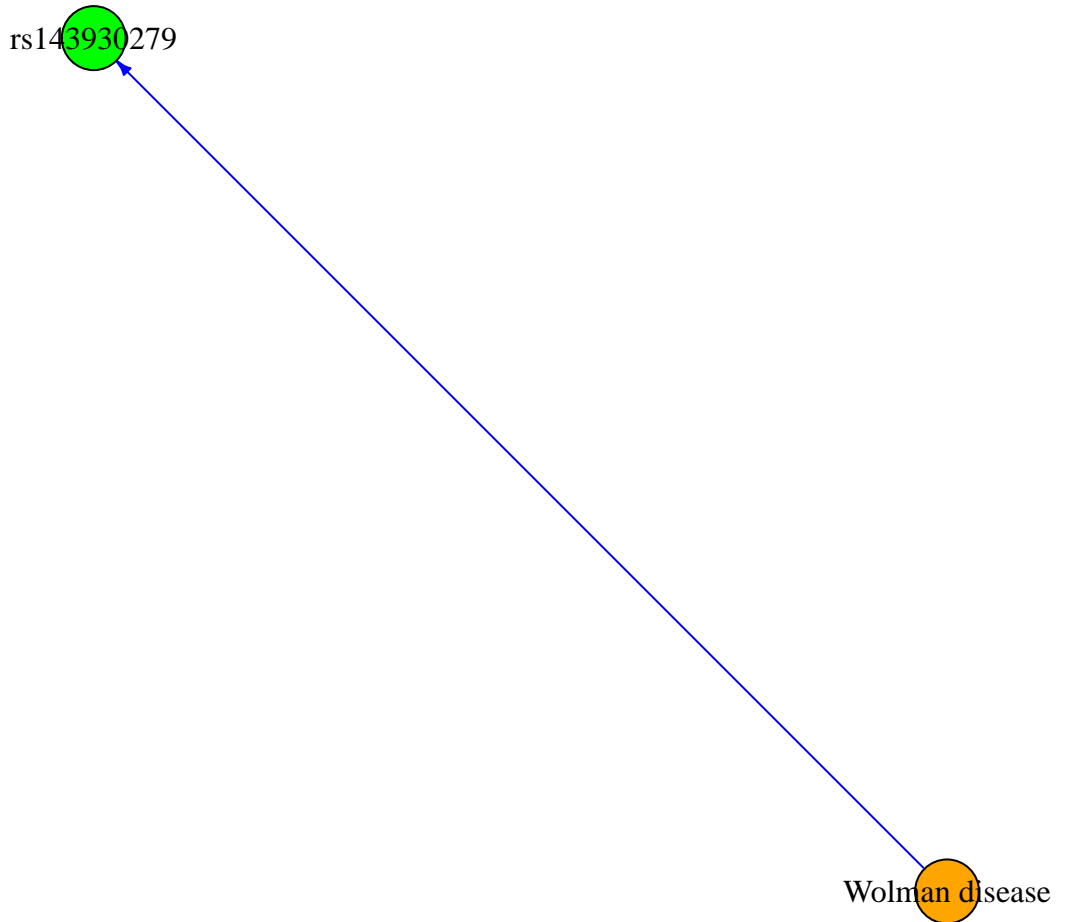



Variant–Disease Network (Xanthinuria)

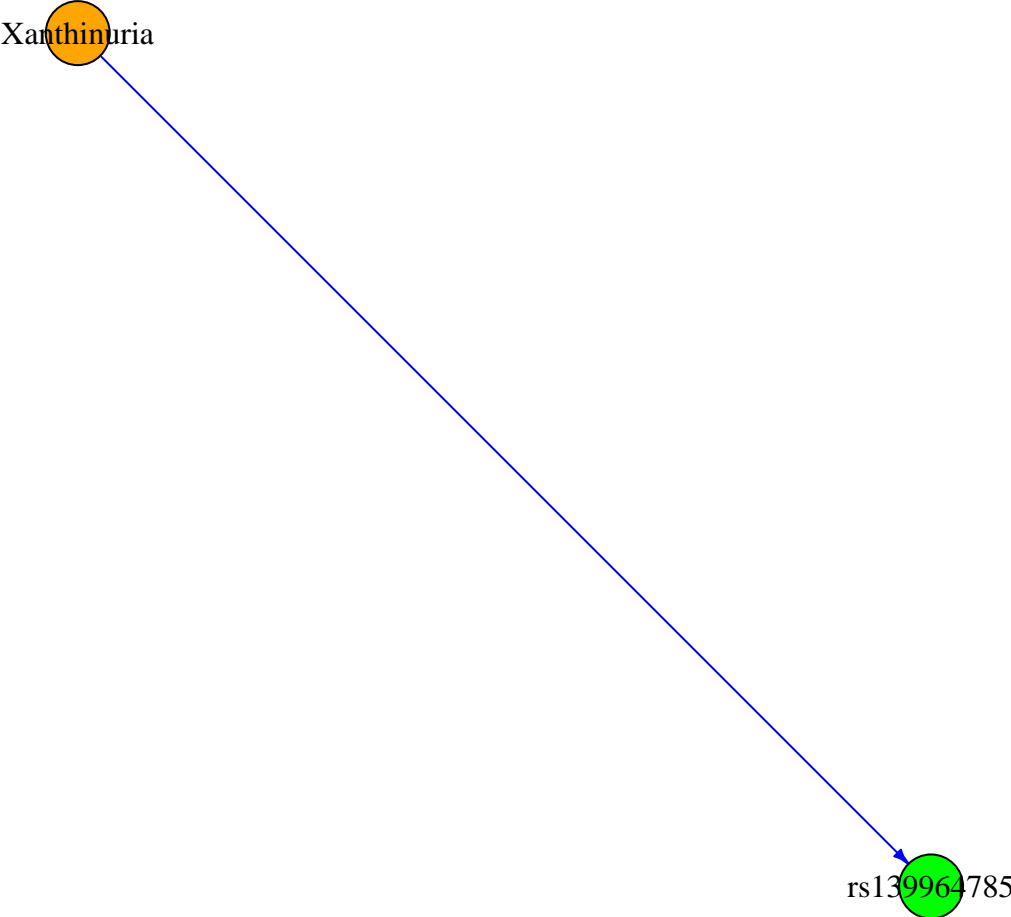

## Variant–Disease Network (Xanthinuria type 2)

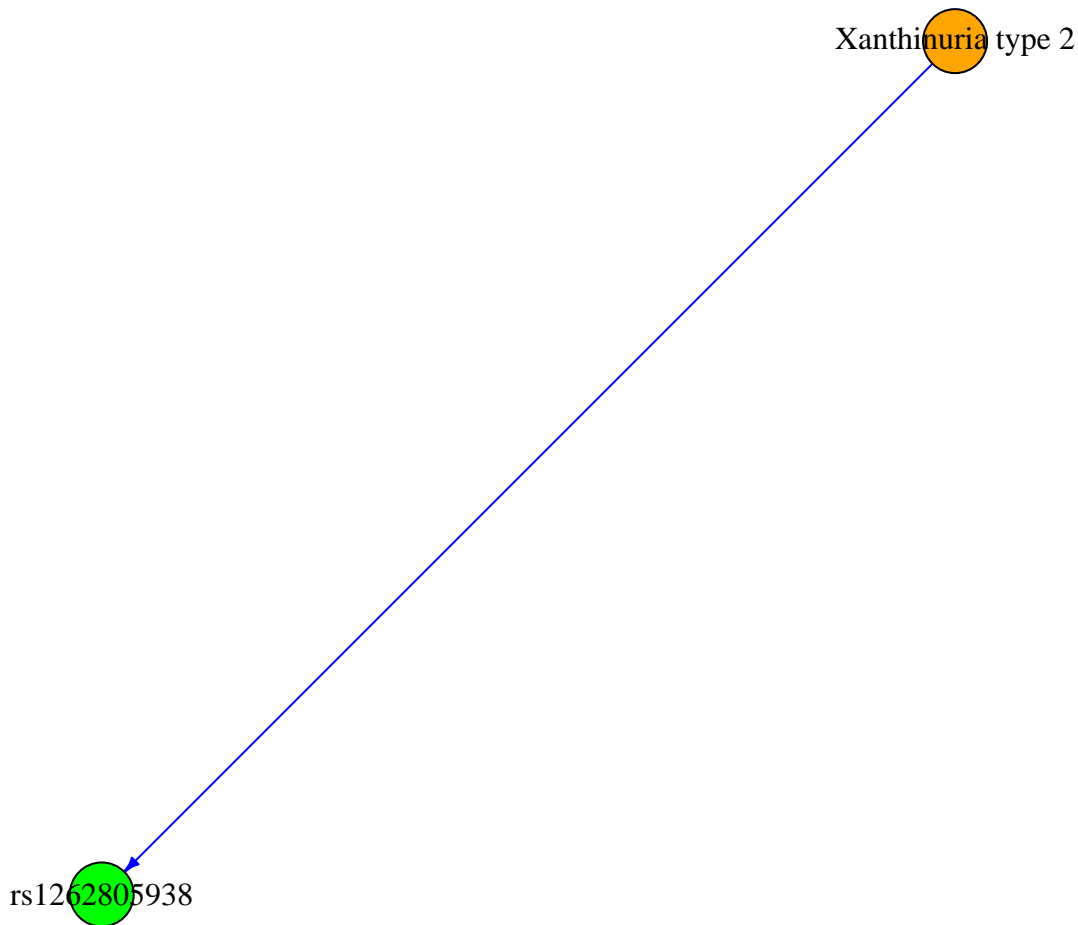

**Variant–Disease Network (Xeroderma pigmentosum)**

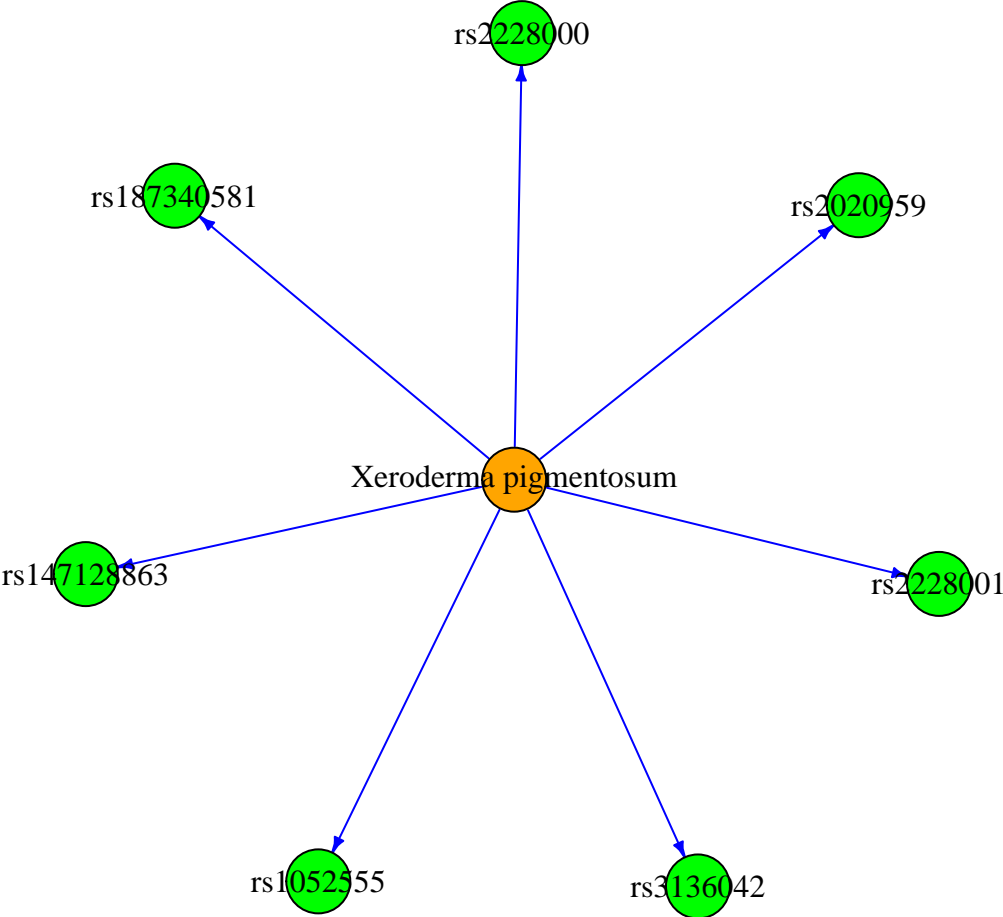

## Variant–Disease Network (X-linked agammaglobulinemia)

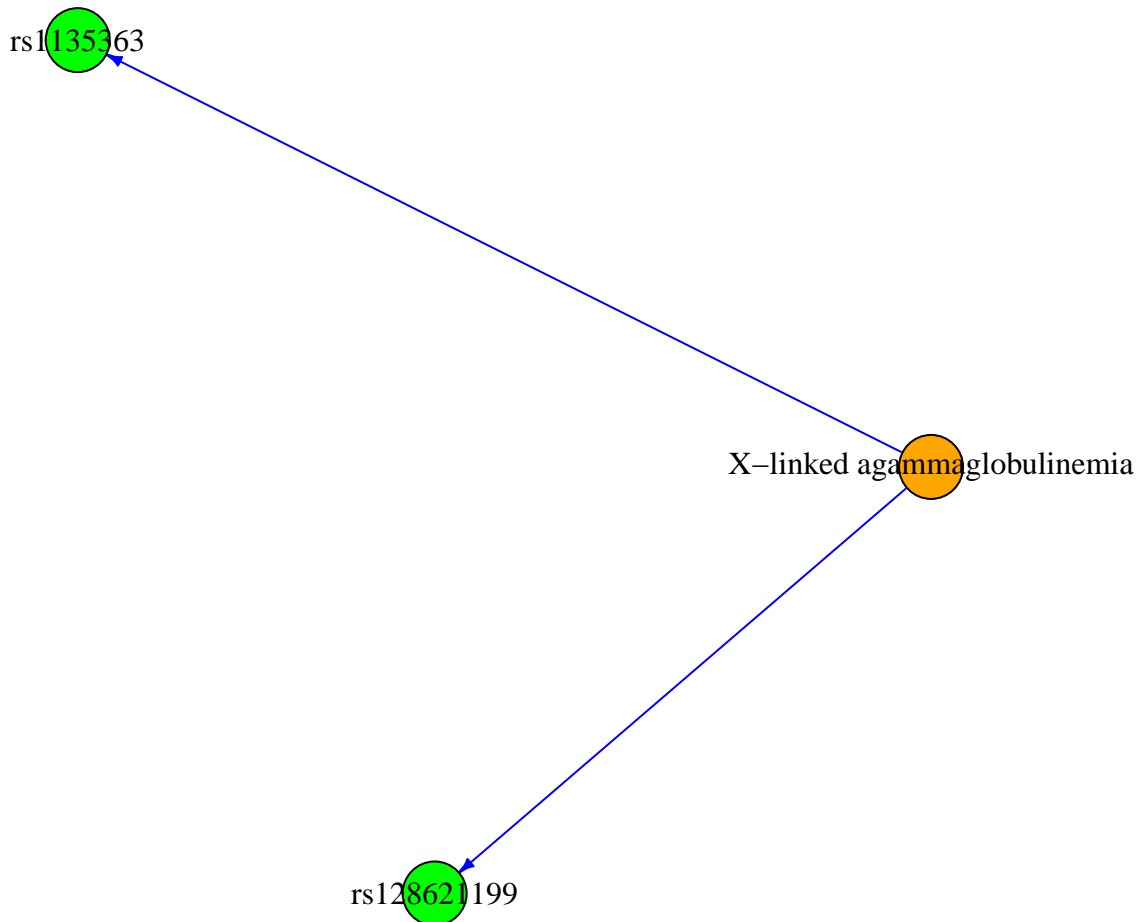

# Variant–Disease Network (Zonular Pulverulent Cataract)

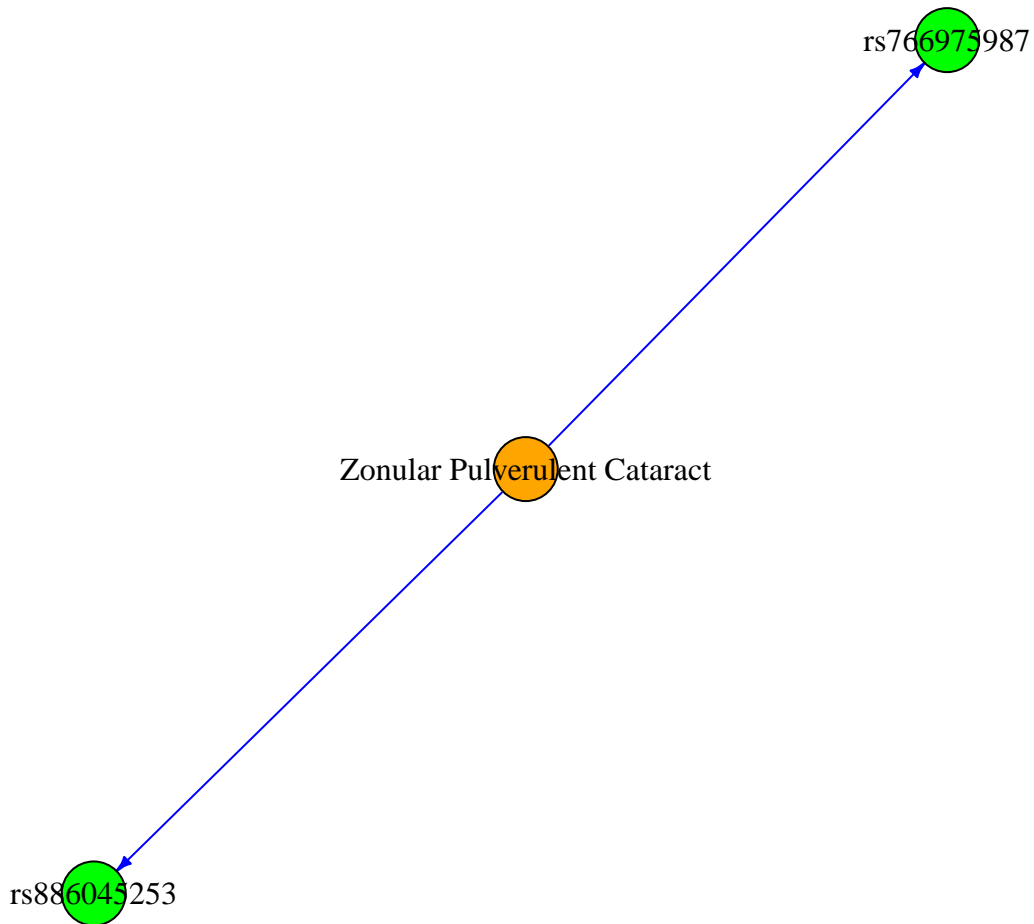

Variant–Disease Network (Zonular pulverulent cataract 3)

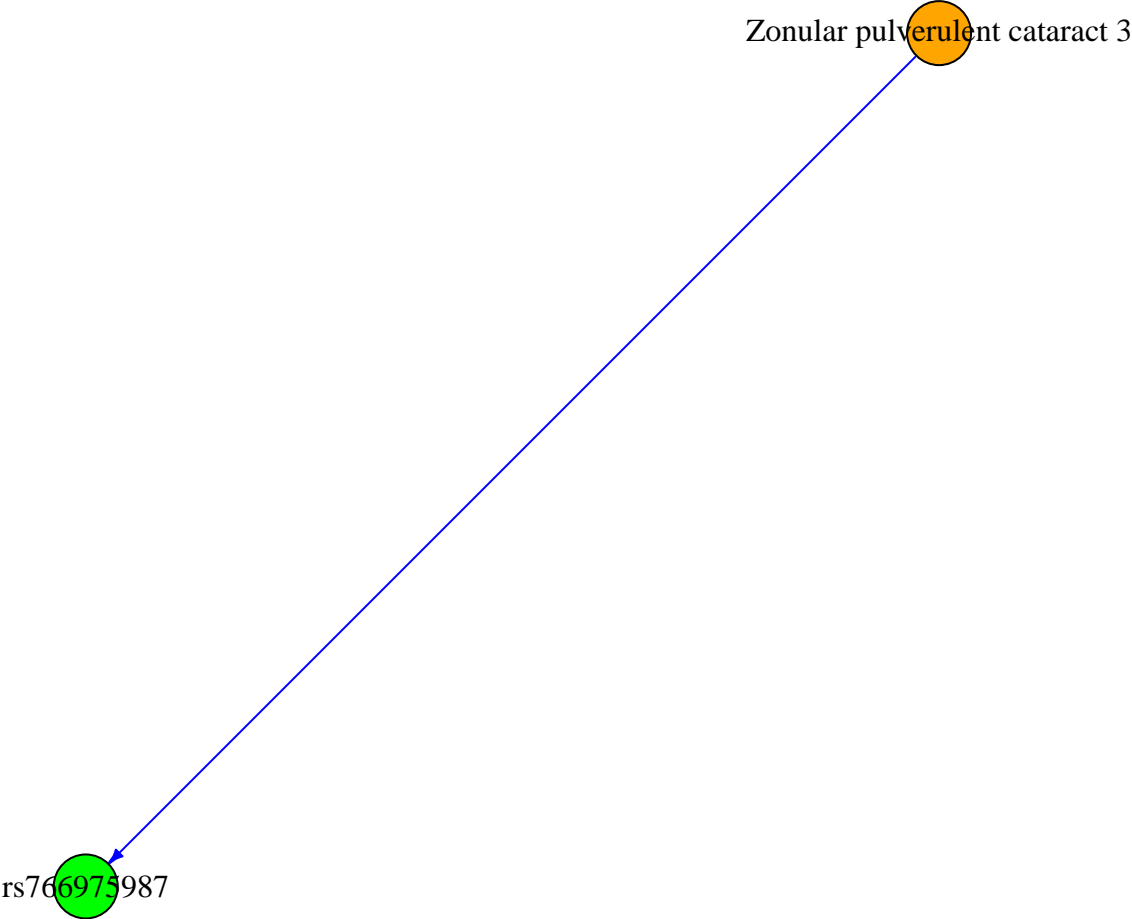

## Variant–Disease Network (Alcohol consumption)

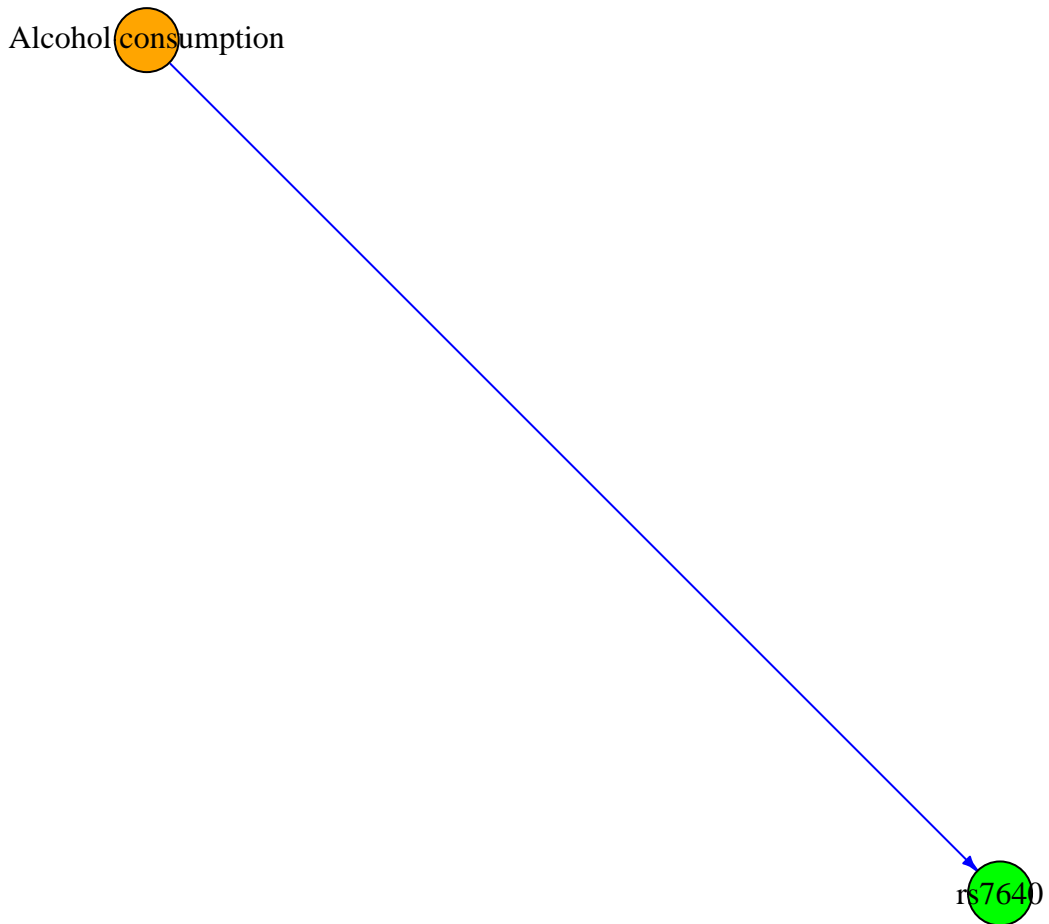

Variant–Disease Network (Alcoholic chronic pancreatitis)

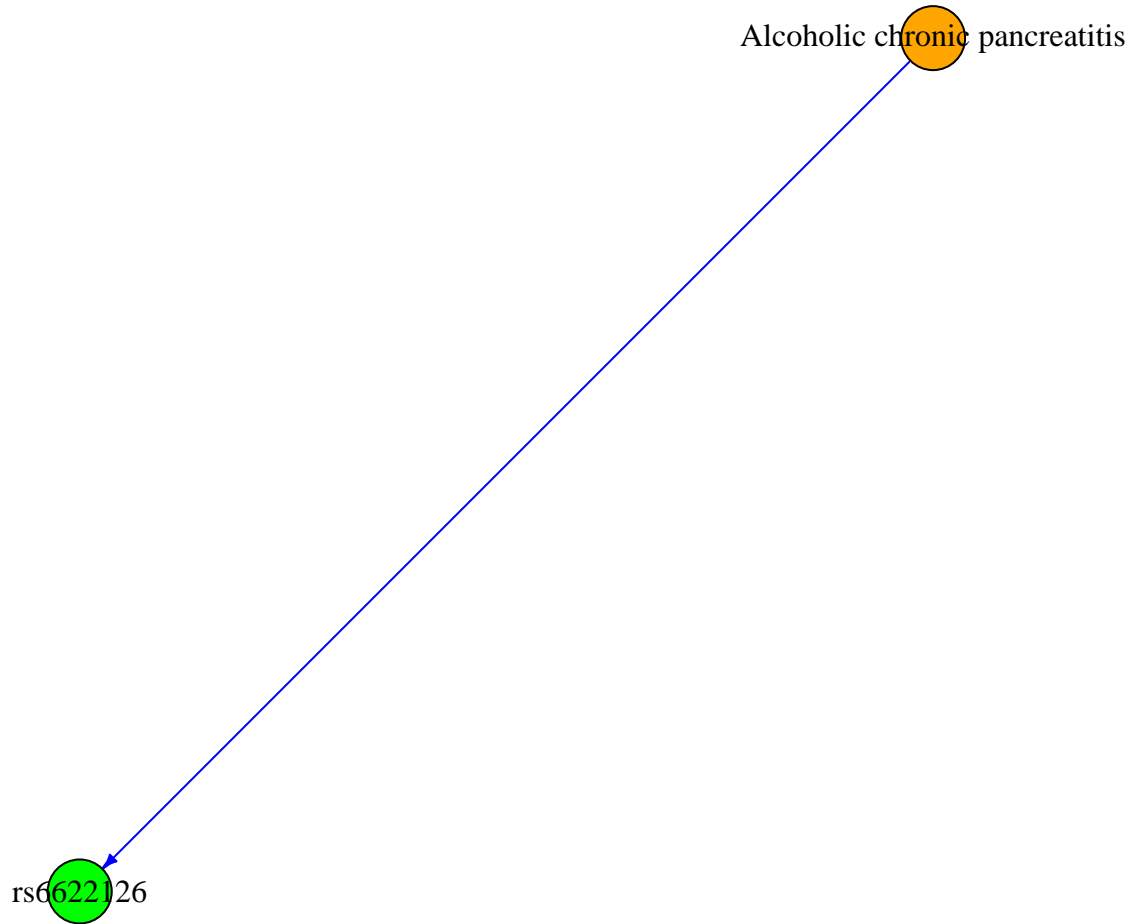



**Variant–Disease Network (Autism spectrum disorder or schizophrenia)**

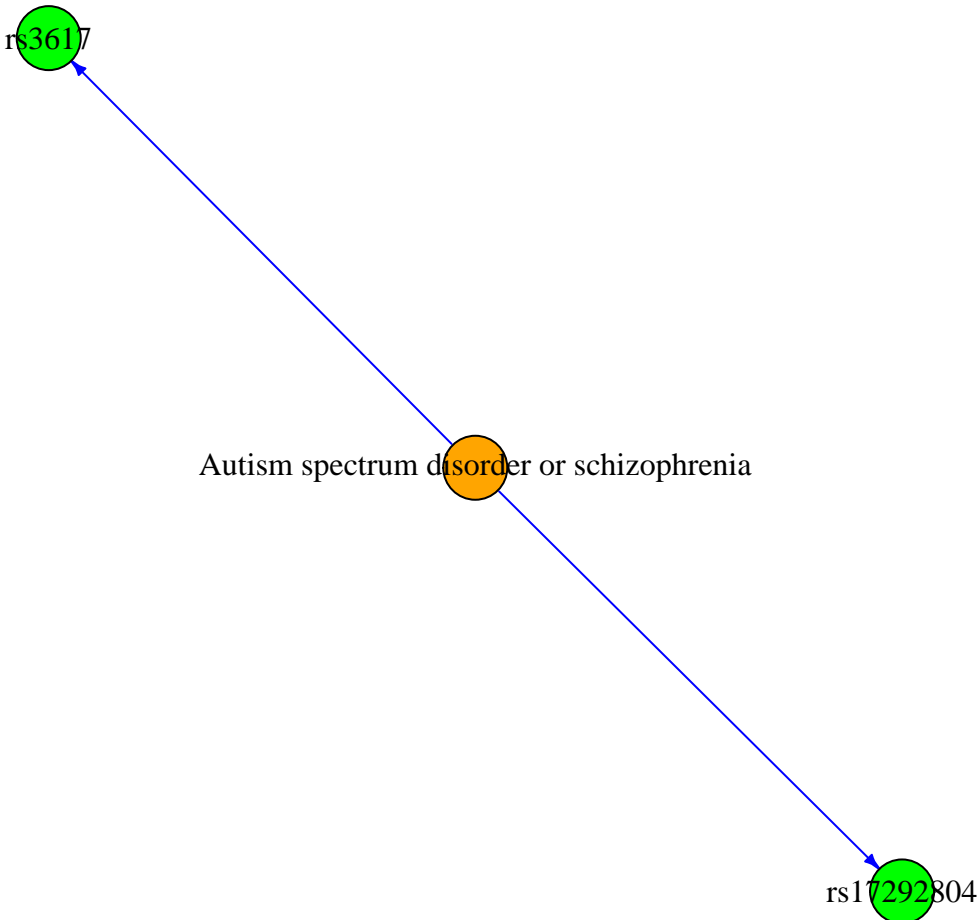

**Variant–Disease Network (Balding type 1)**

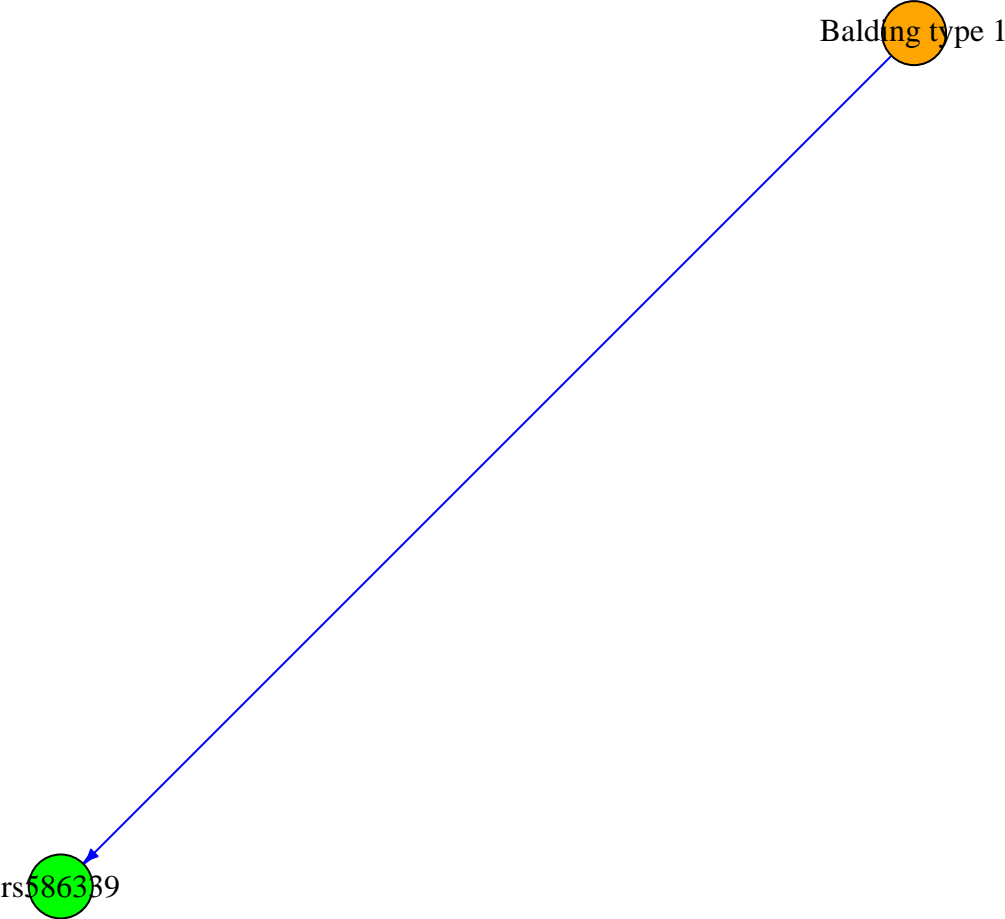

# Variant–Disease Network (Attention deficit hyperactivity disorder)

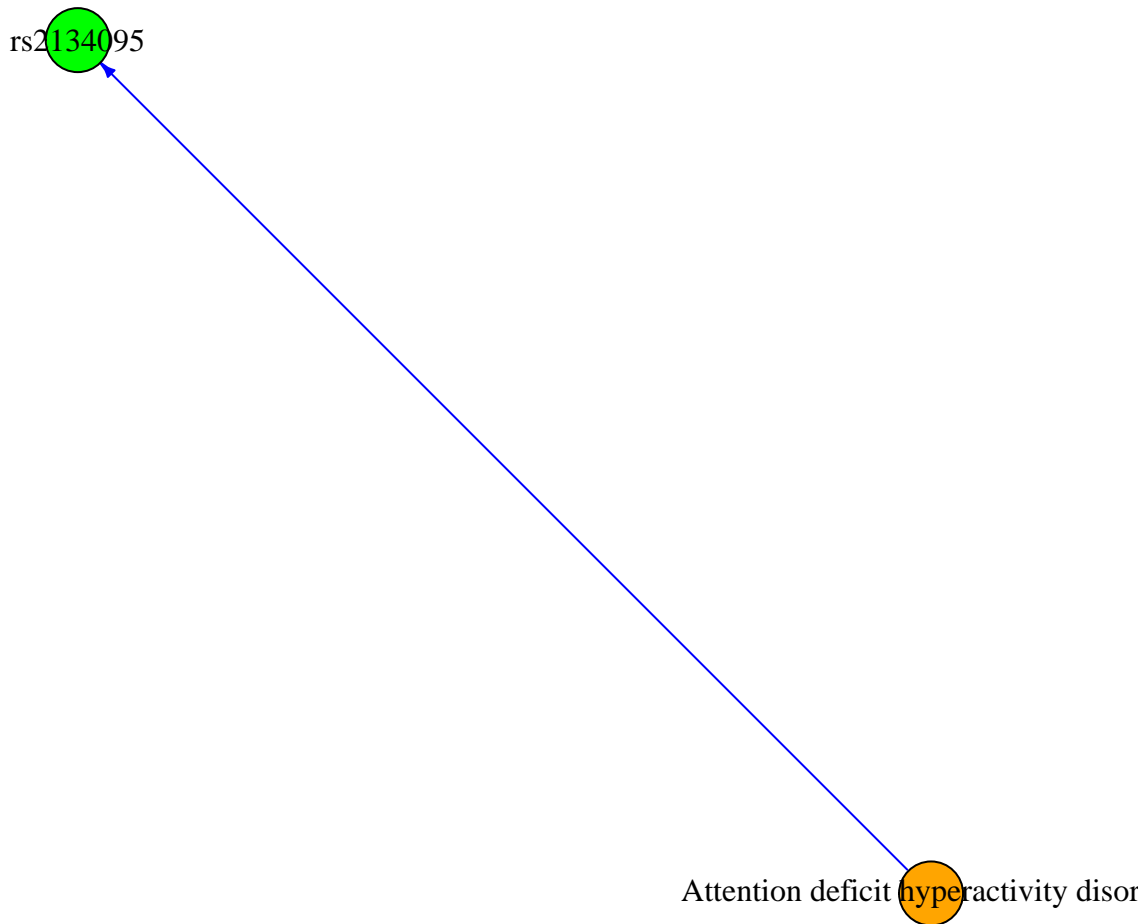

## Variant–Disease Network (Birth weight)

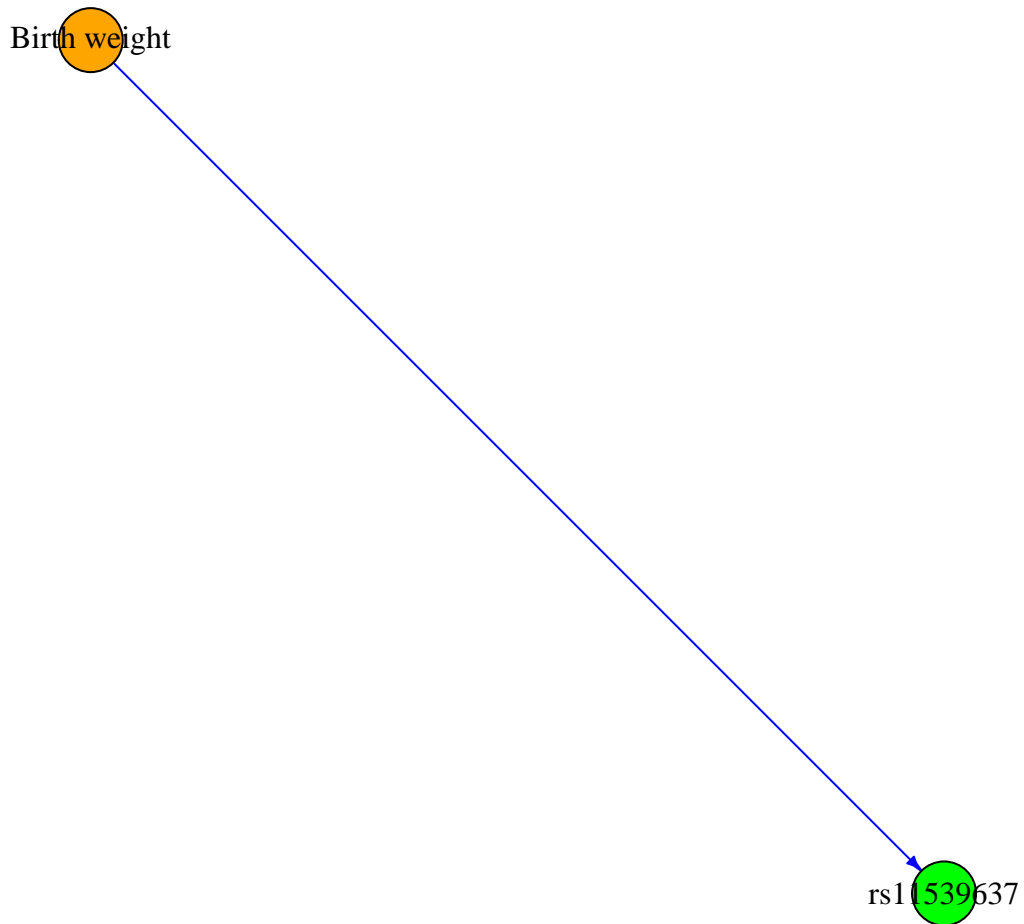

# Variant–Disease Network (Blond vs. brown/black hair color)

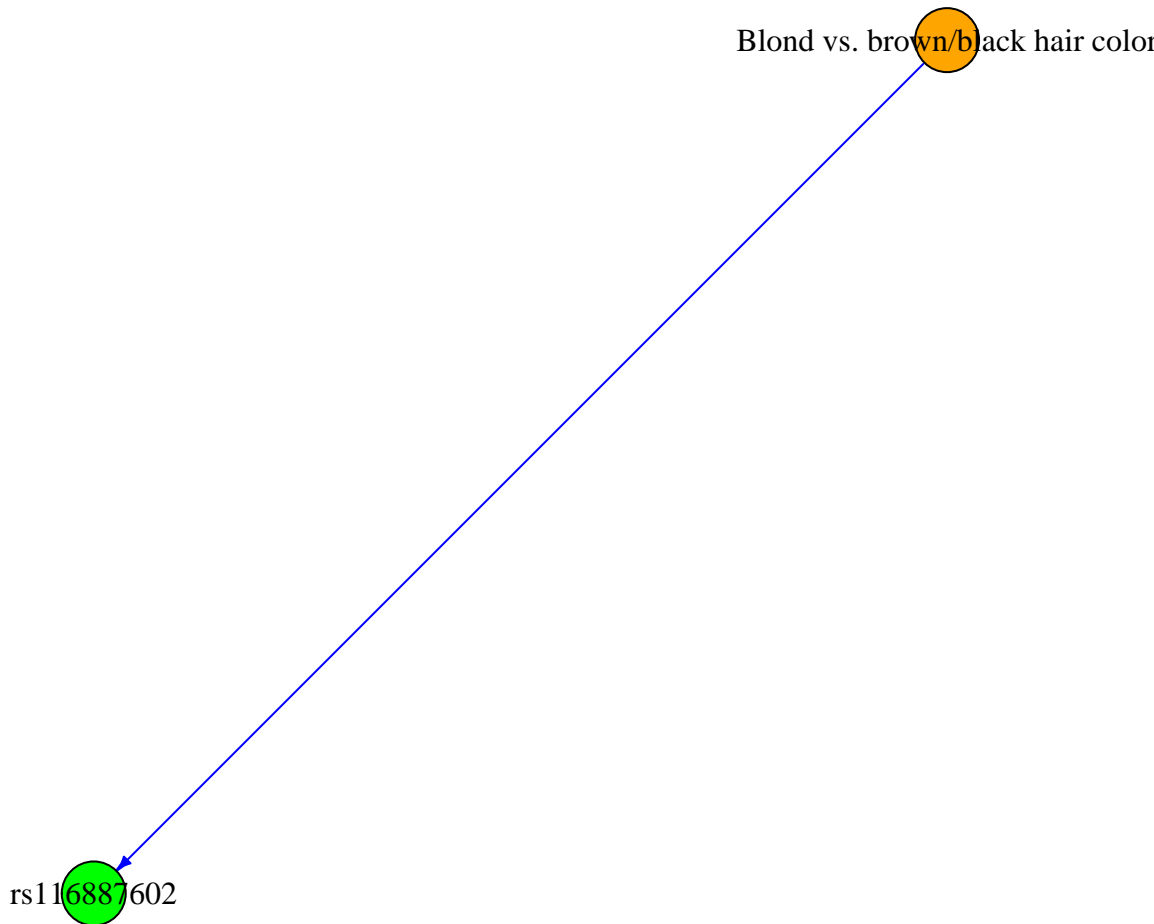

Variant–Disease Network (Blood metabolite ratios)

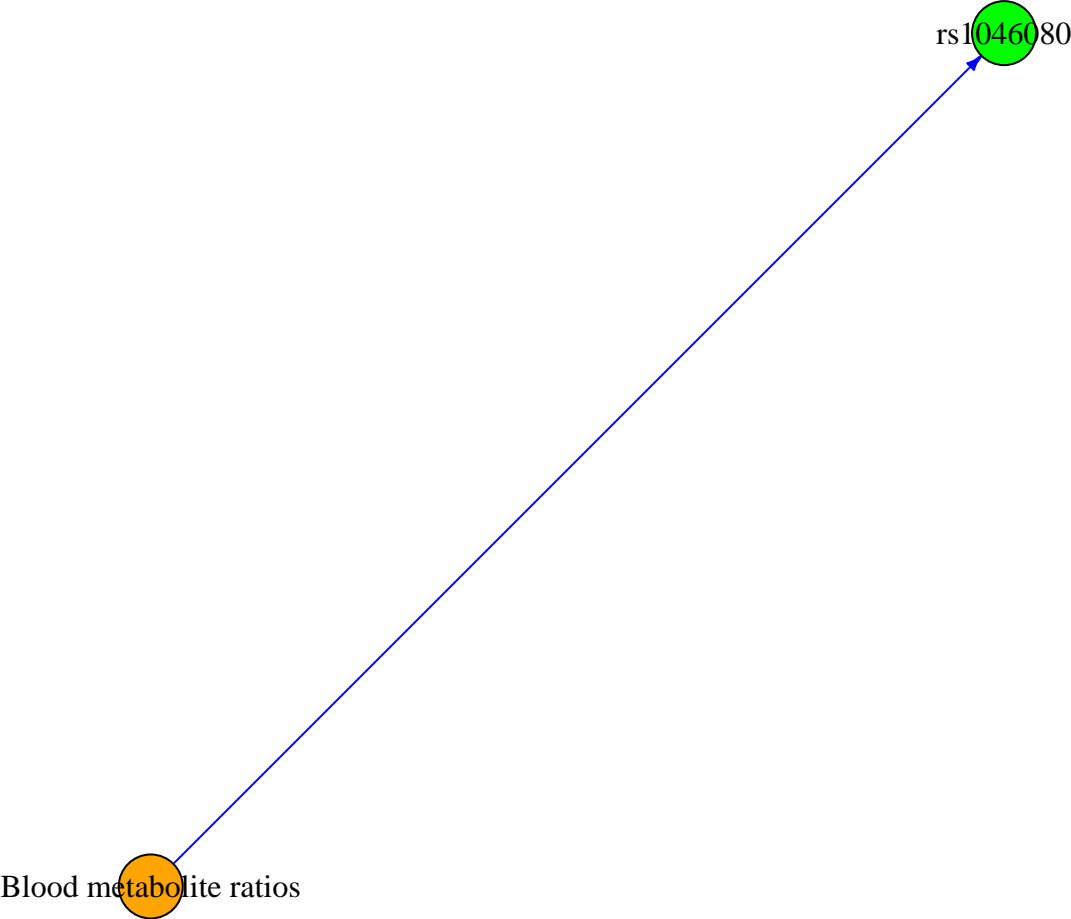

## Variant–Disease Network (Blood protein levels)

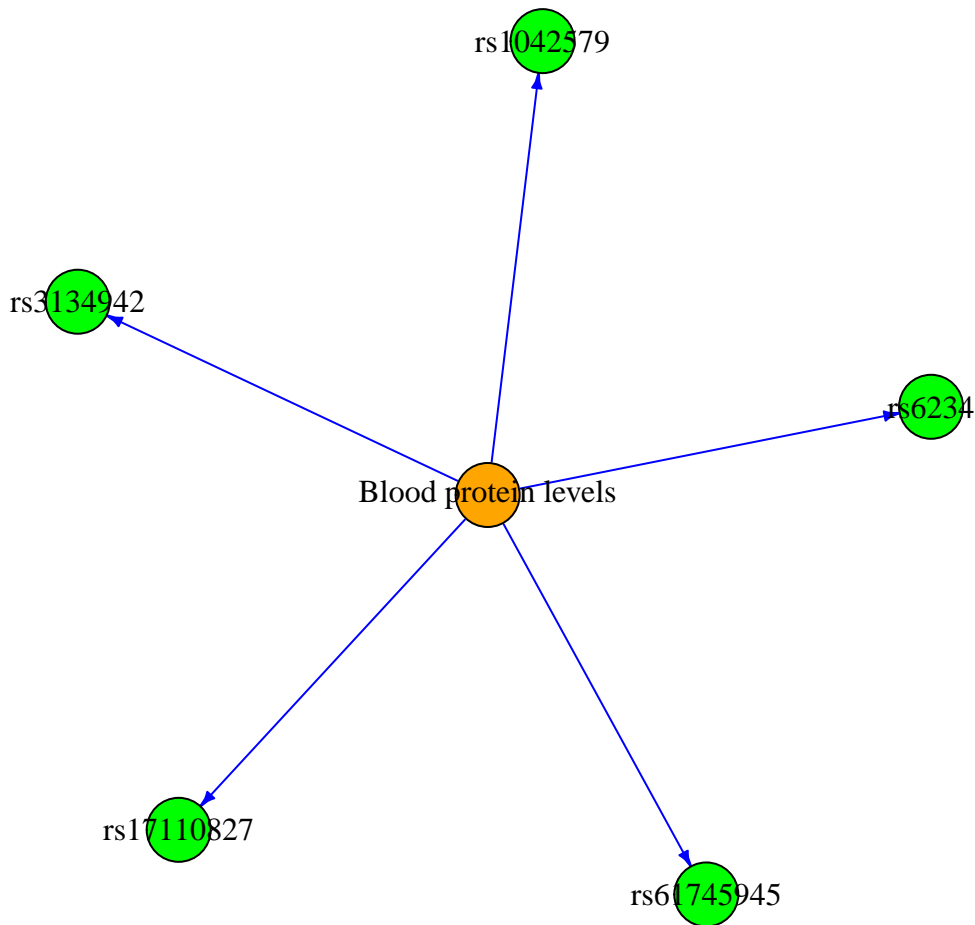

## Variant–Disease Network (Body fat percentage)

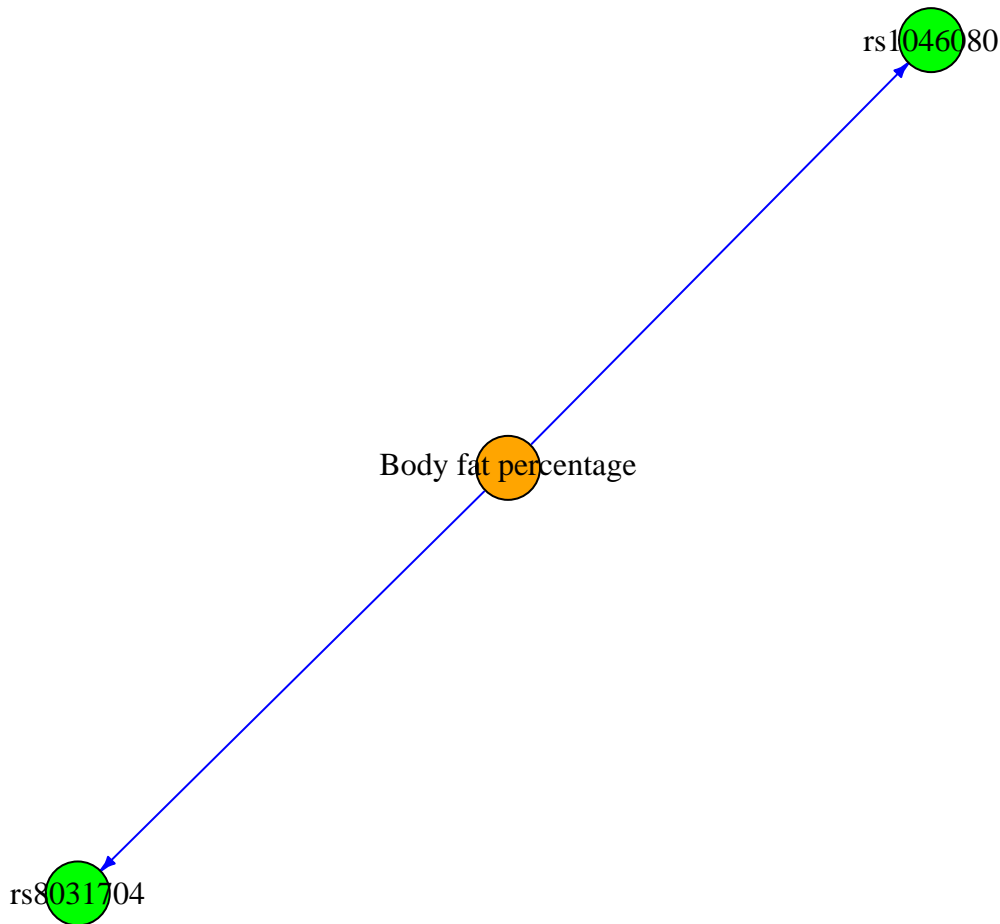



## Variant–Disease Network (Body mass index)

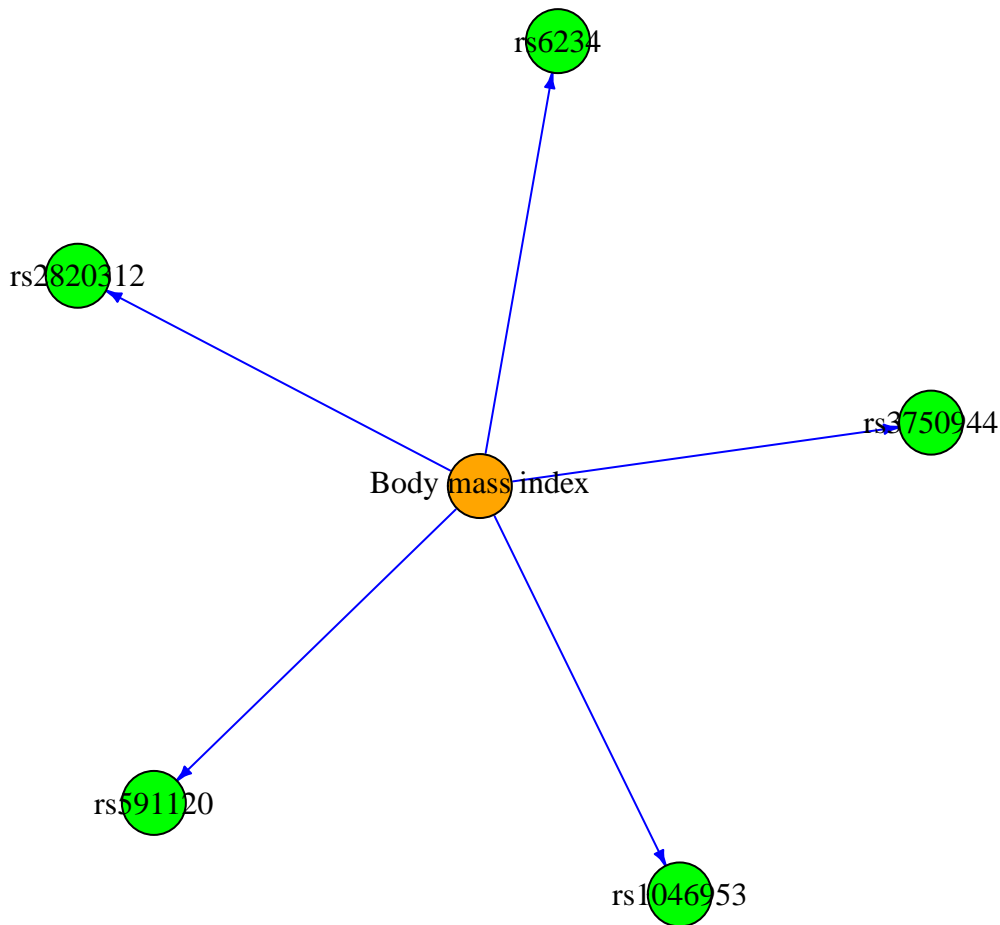

## Variant–Disease Network (Body mass index )

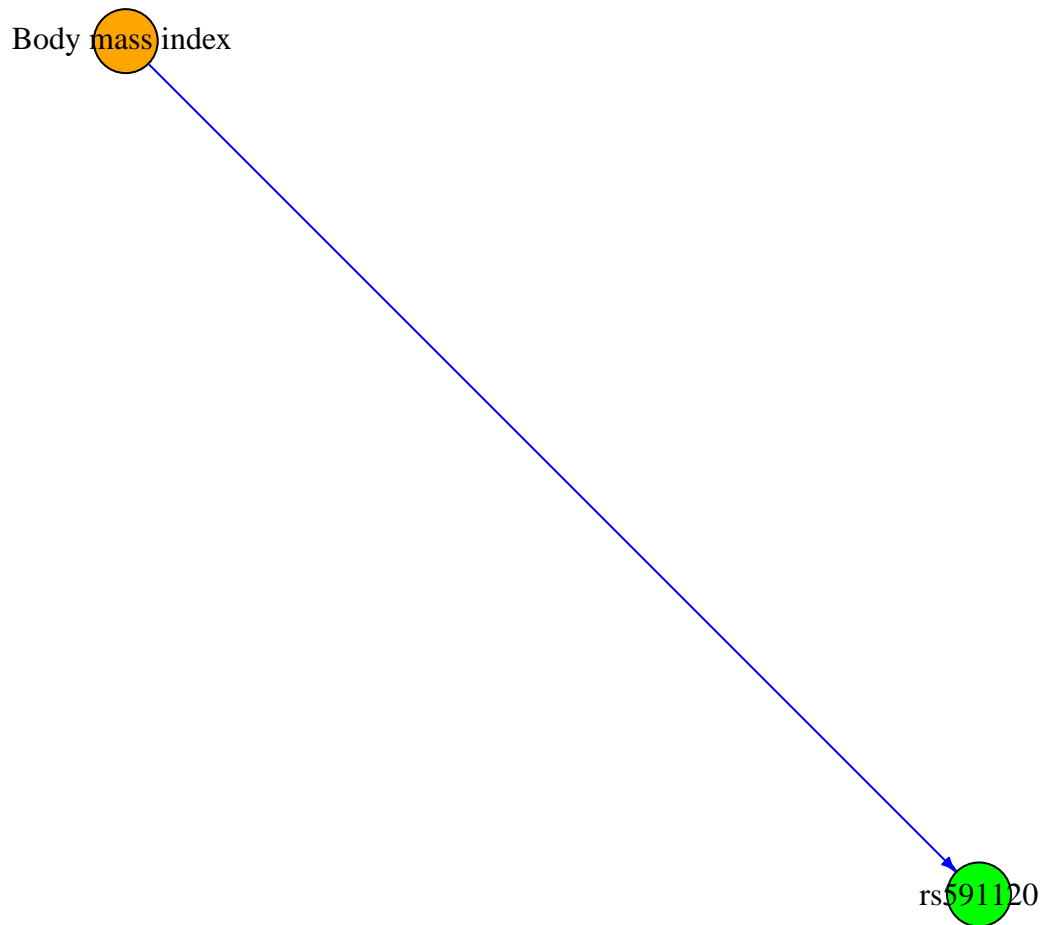

# Variant–Disease Network (Body mass index x sex x age interaction )

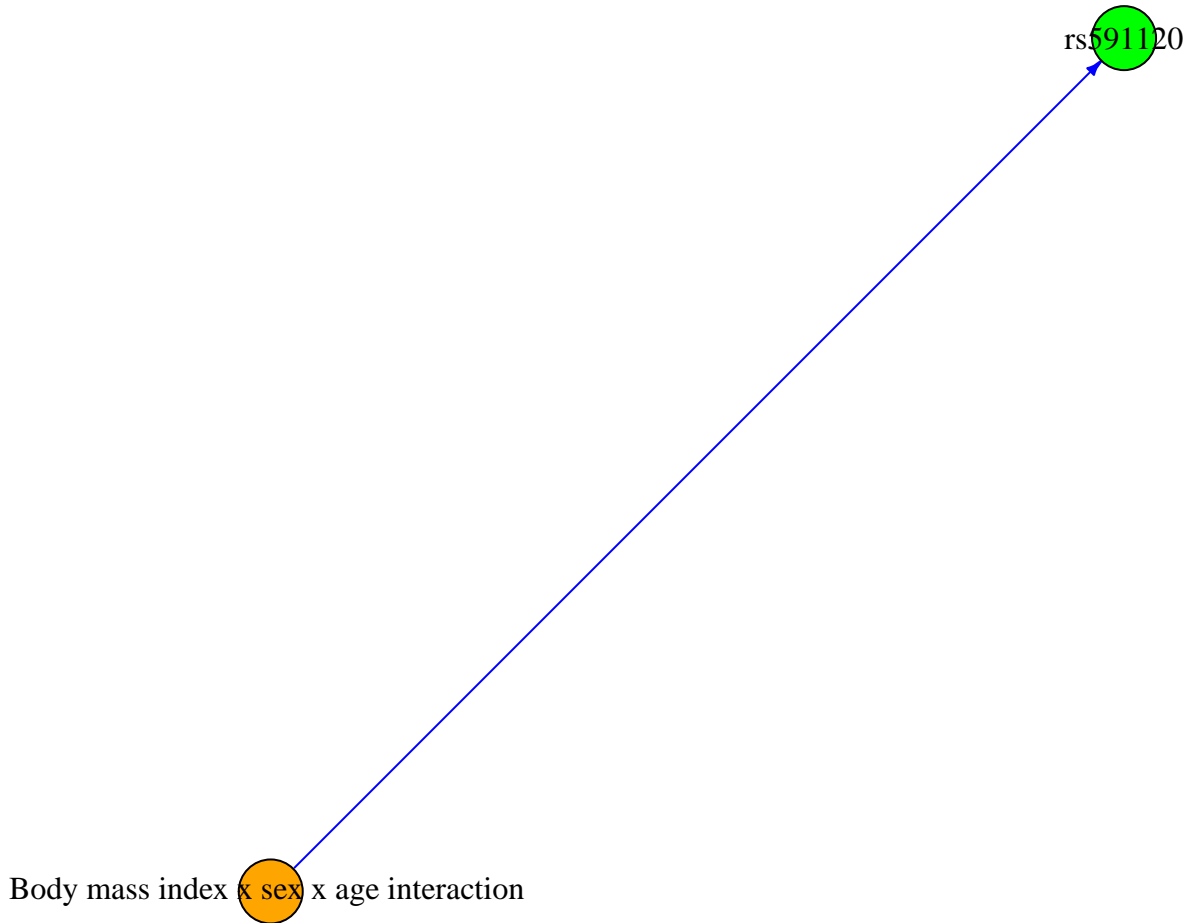

# Variant–Disease Network (Bone mineral density and hip bone size)

rs2296793

Bone mineral density and hip bone



## Variant–Disease Network (Brain region volumes)

rs3741280

Brain region volumes



Variant–Disease Network (Breast cancer specific mortality in breast cancer)

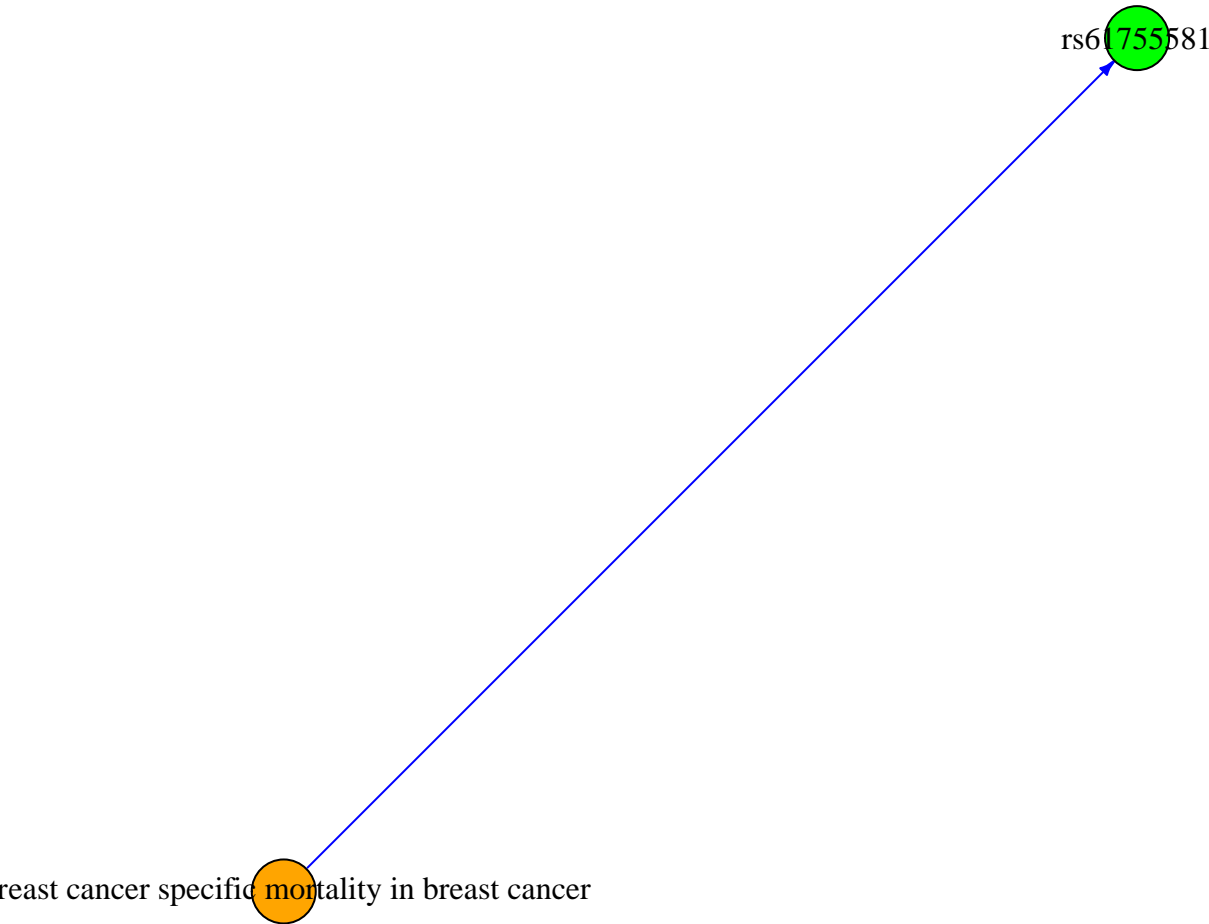

Variant–Disease Network (Calcium levels)

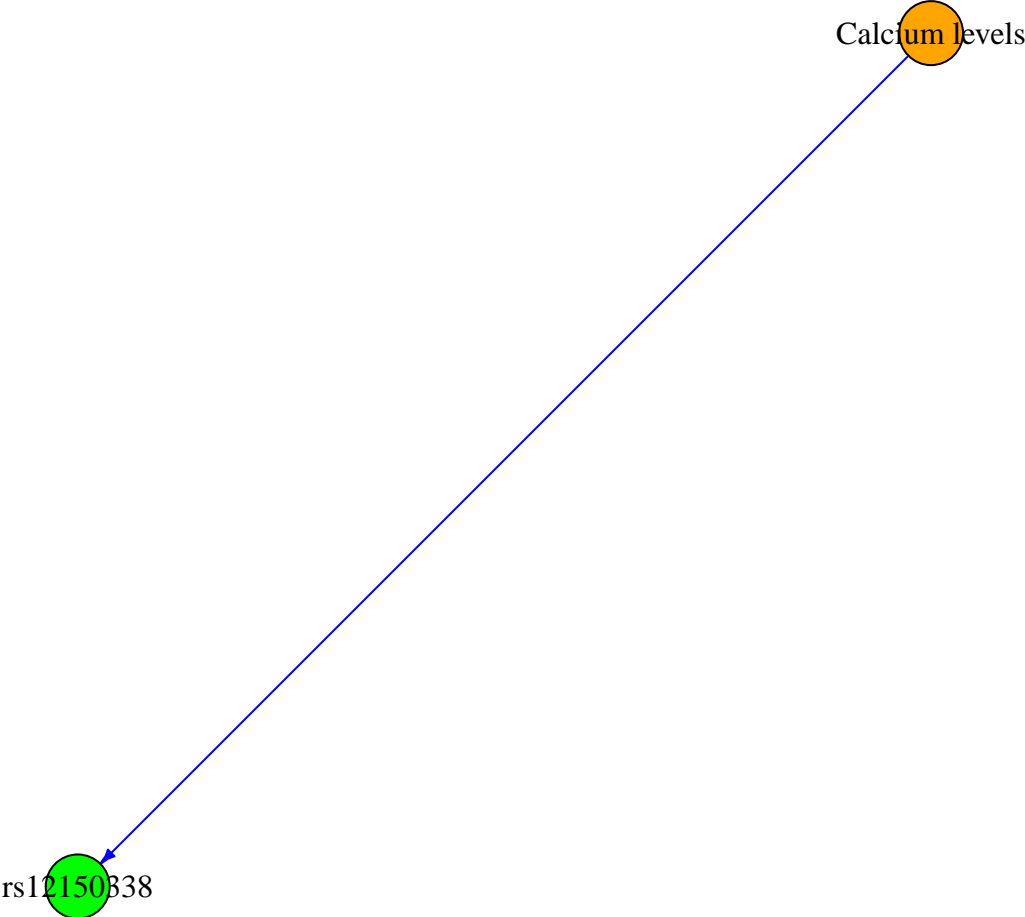

Variant–Disease Network (Cardiovascular disease)

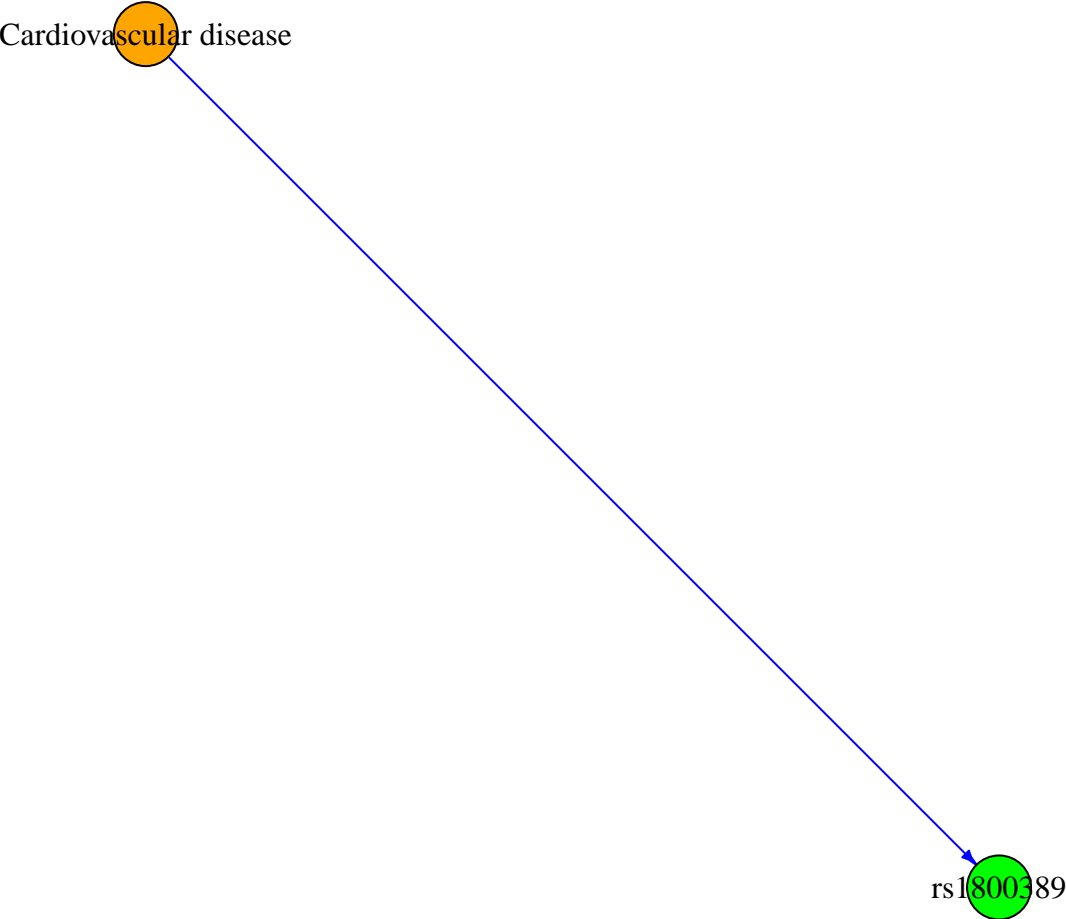



## Variant-Disease Network (Cholesterol, total)

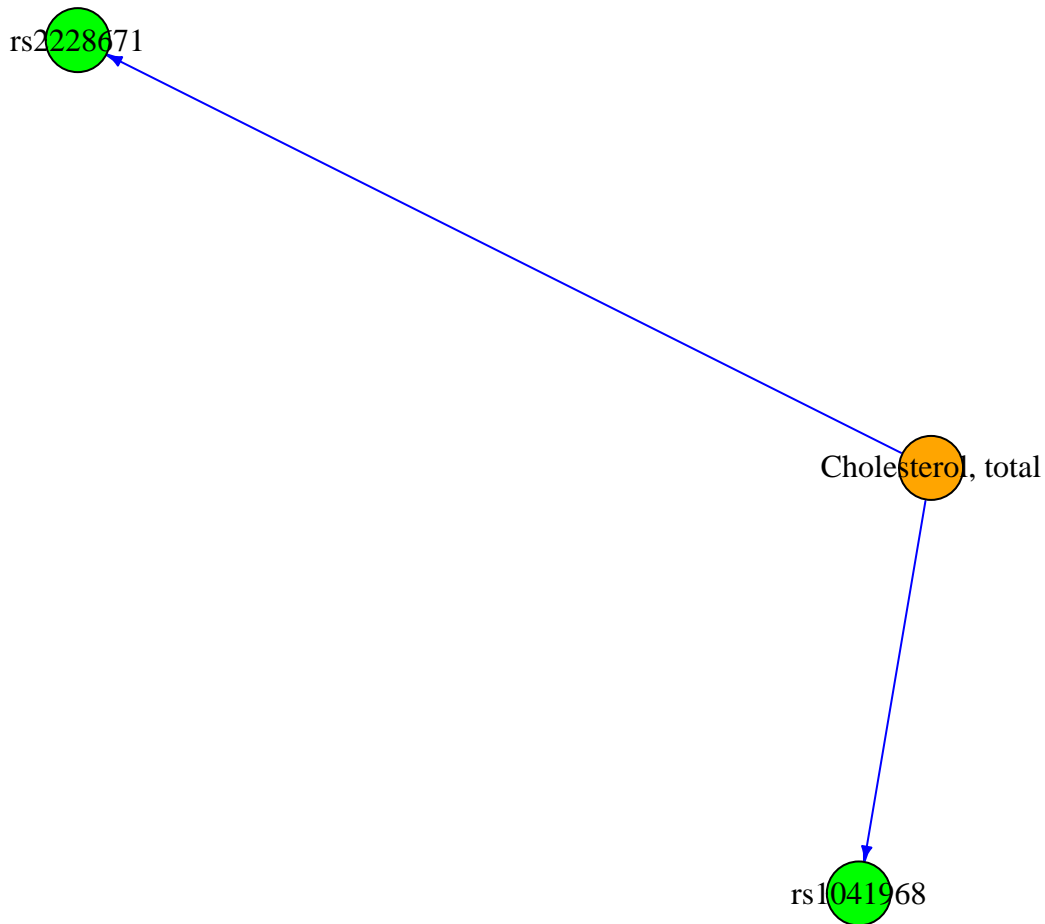

## Variant–Disease Network (Cognitive function)

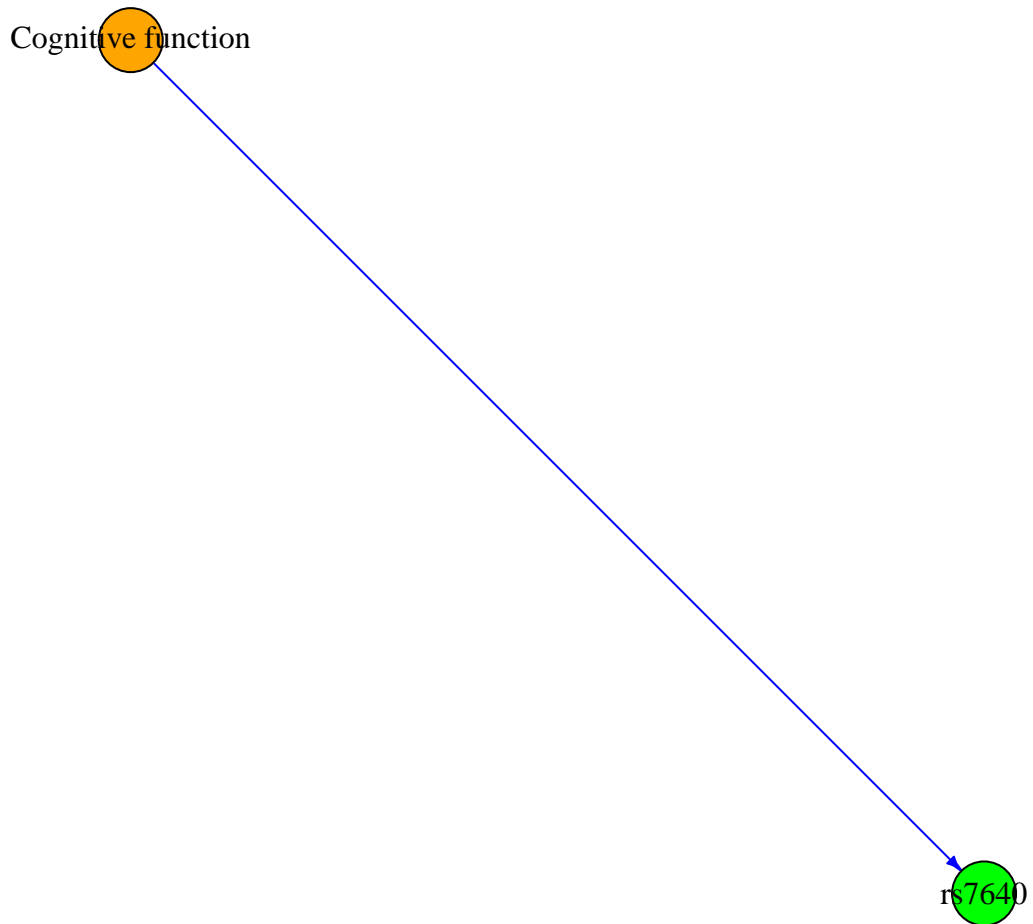

## Variant-Disease Network (Cortical surface area)

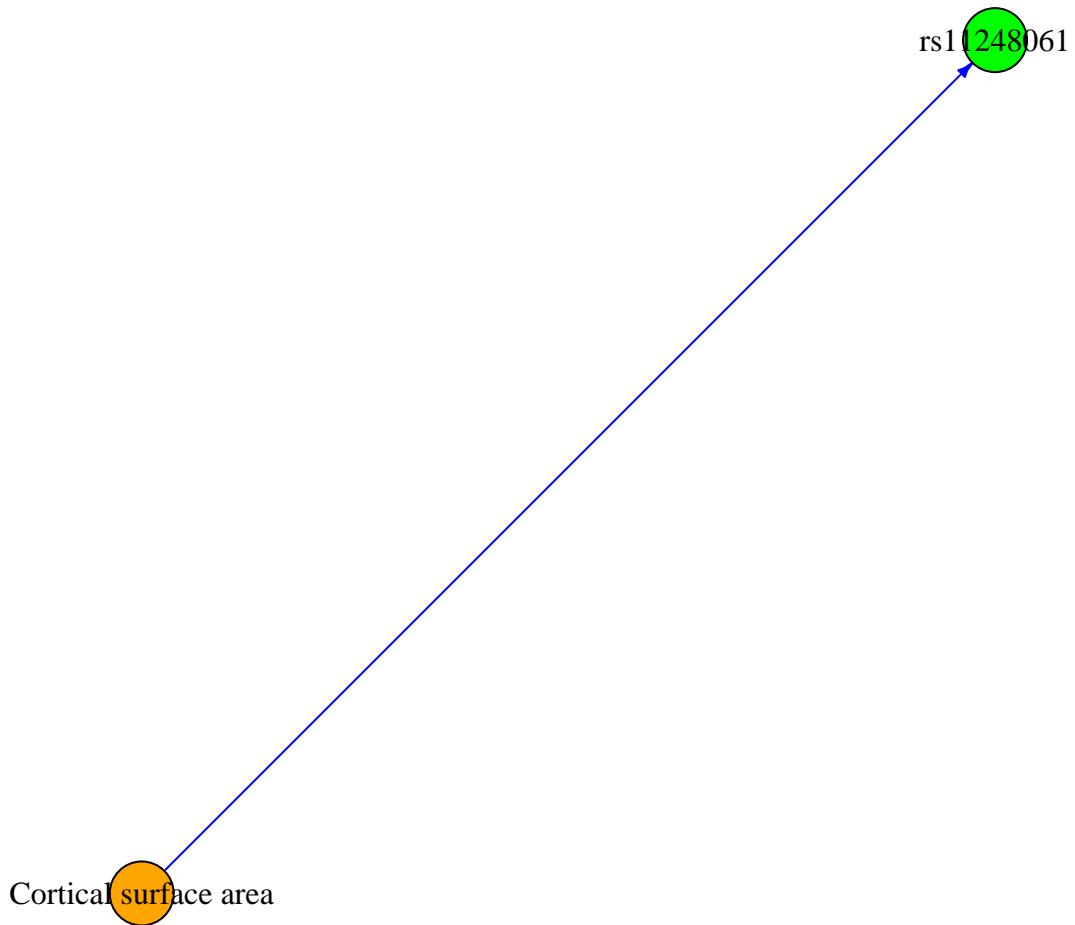

## Variant–Disease Network (Cortical thickness)

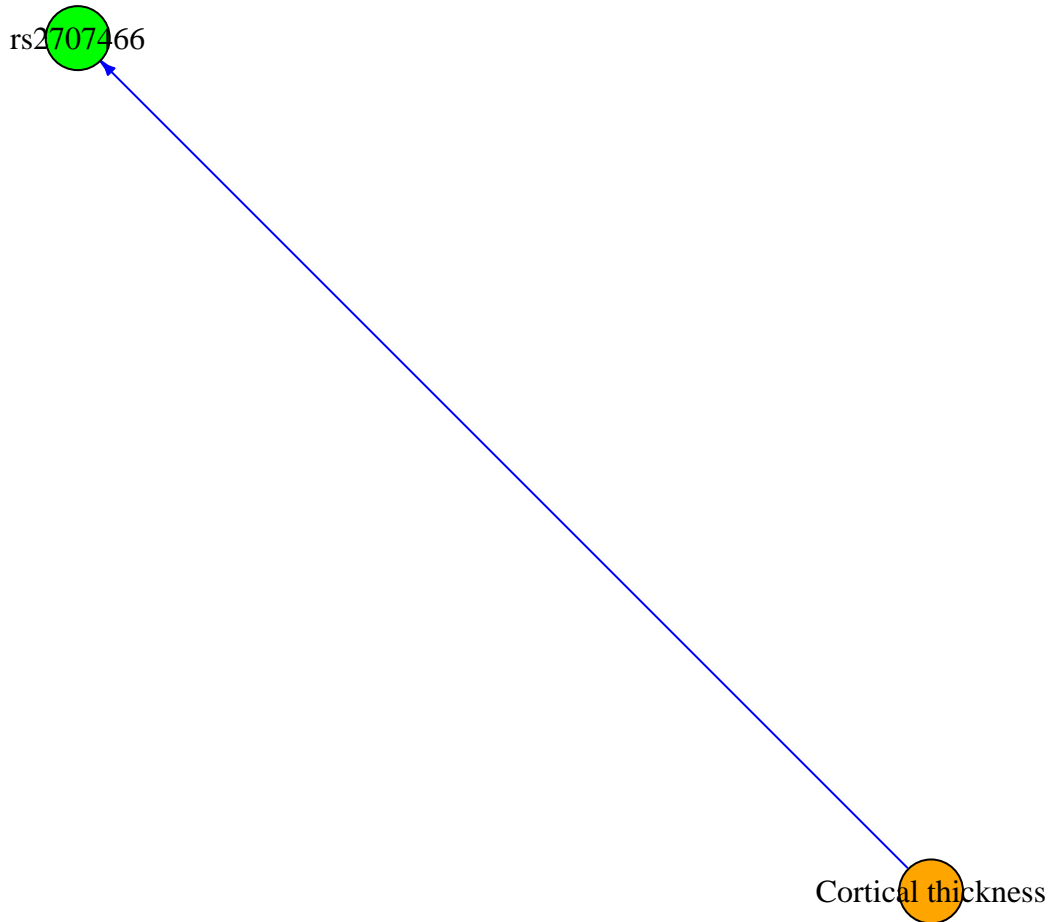

## Variant–Disease Network (Creatinine levels)

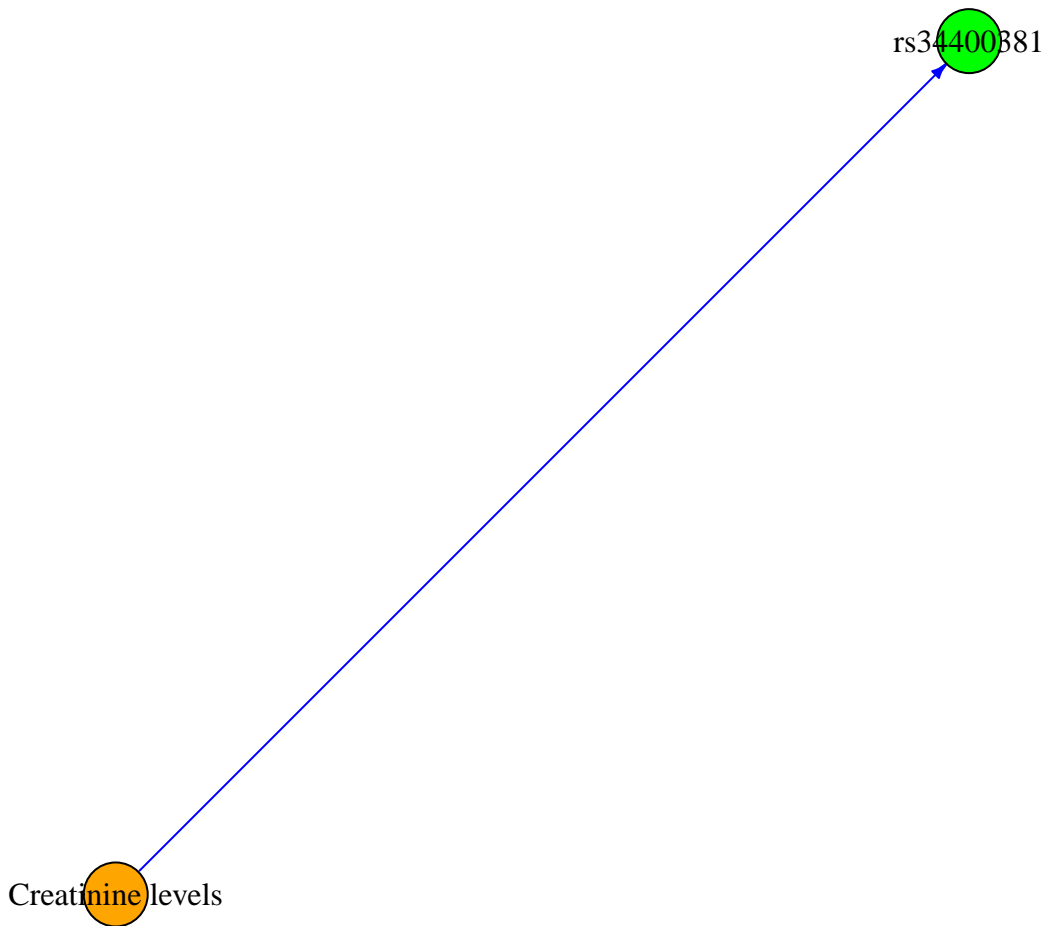

## Variant–Disease Network (Depressive symptoms)

rs3115672

Depressive symptoms



## Variant–Disease Network (Diastolic blood pressure)

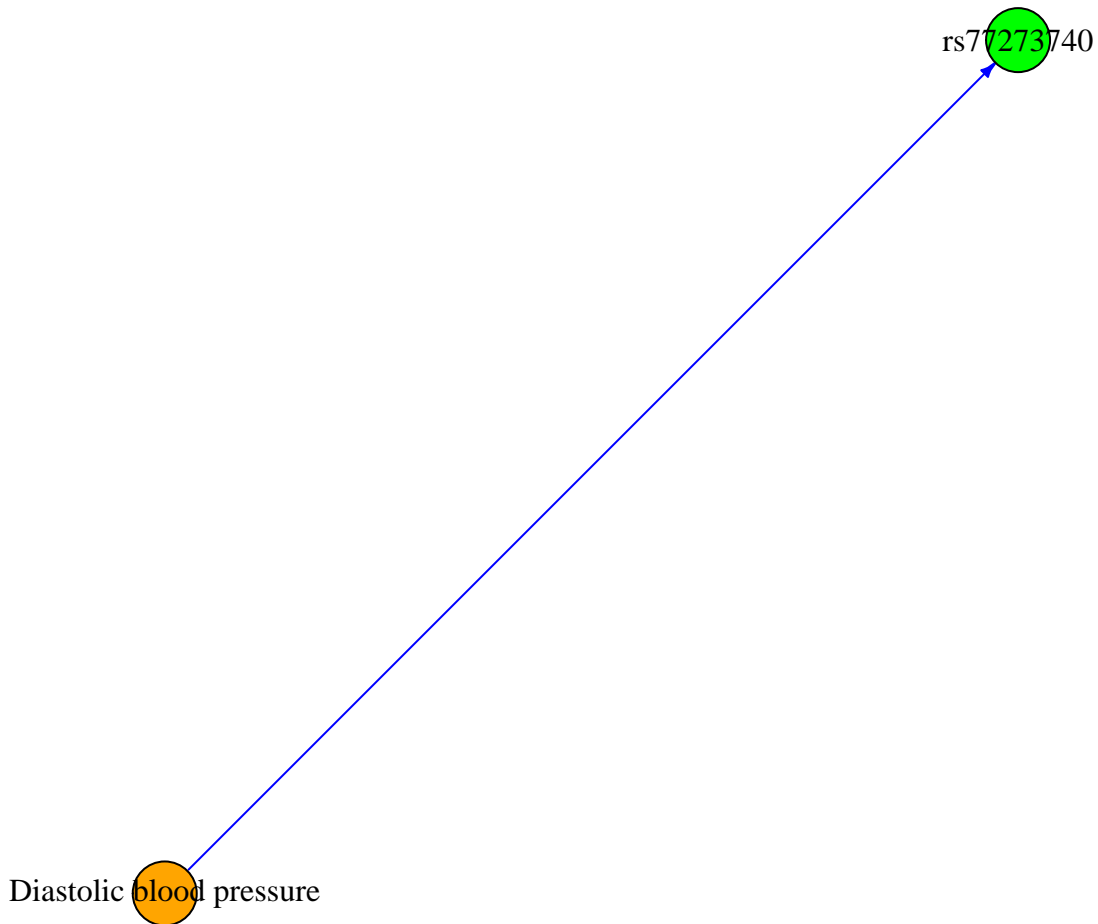

# sease Network (Diastolic blood pressure response to hydrochlorothiazide in

rs10657217

Diastolic blood pressure response to hydrochlorothiazide





Variant–Disease Network (Early spontaneous preterm birth)

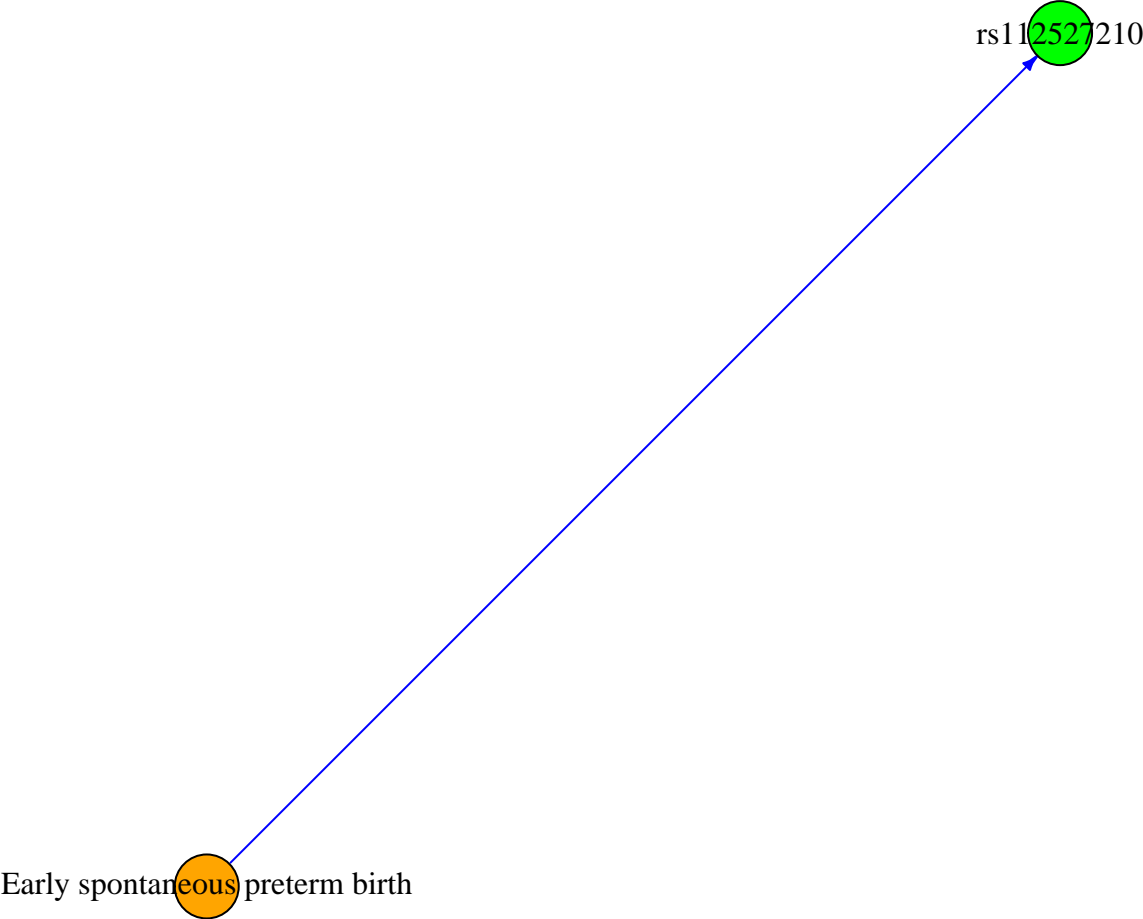

## Variant-Disease Network (Eczema)

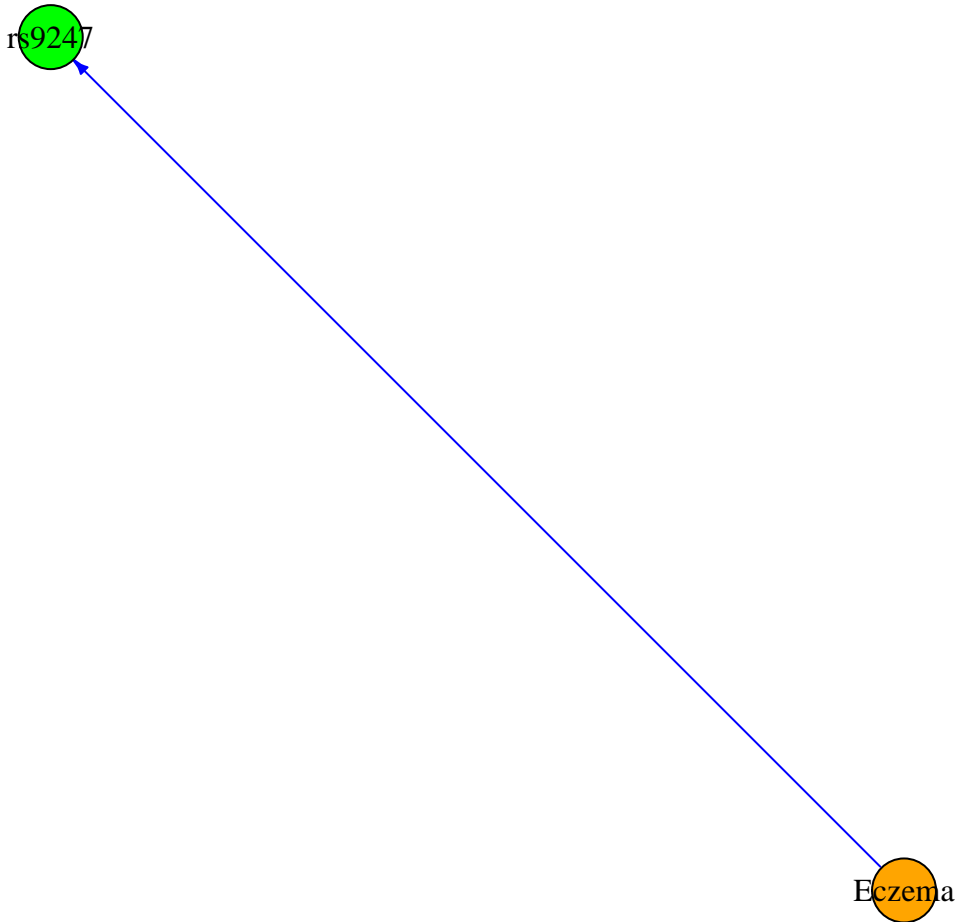

## Variant–Disease Network (Educational attainment )

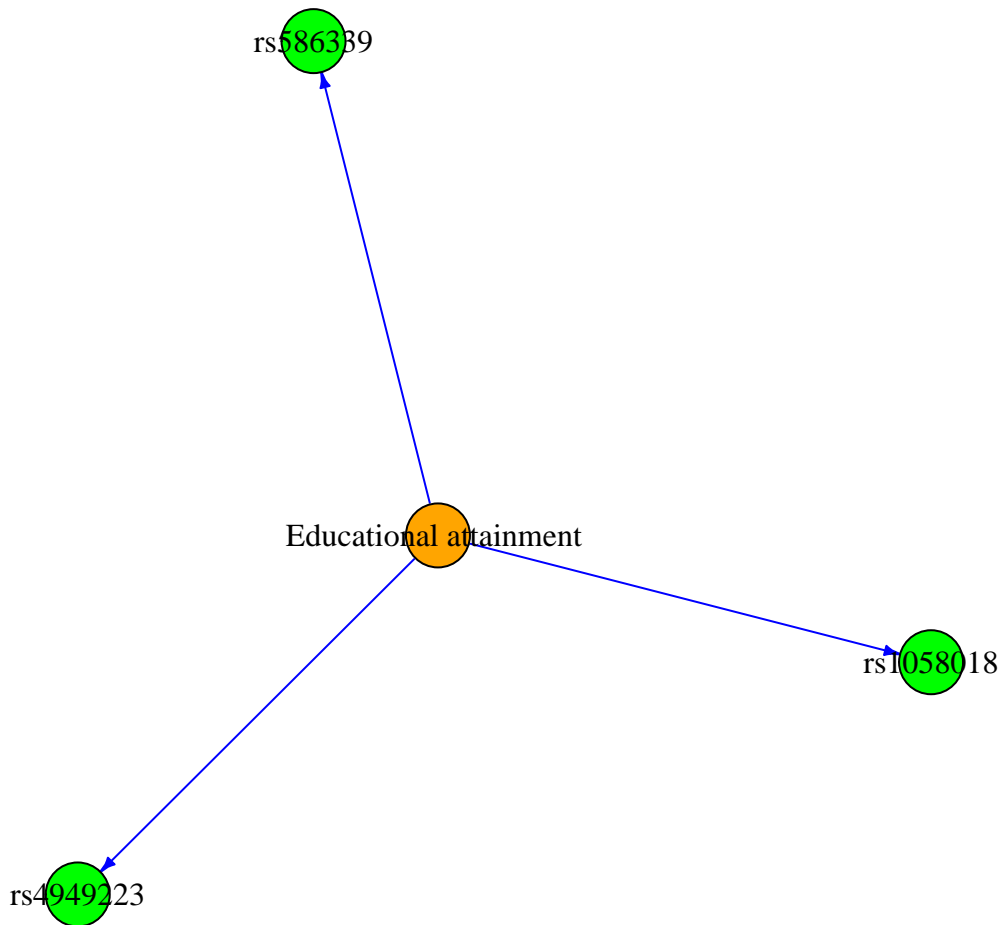

# Variant–Disease Network (Estimated glomerular filtration rate)

Estimated glomerular filtration rate

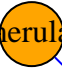

rs883541

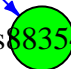

# Variant–Disease Network (Fasting blood glucose adjusted for BMI)

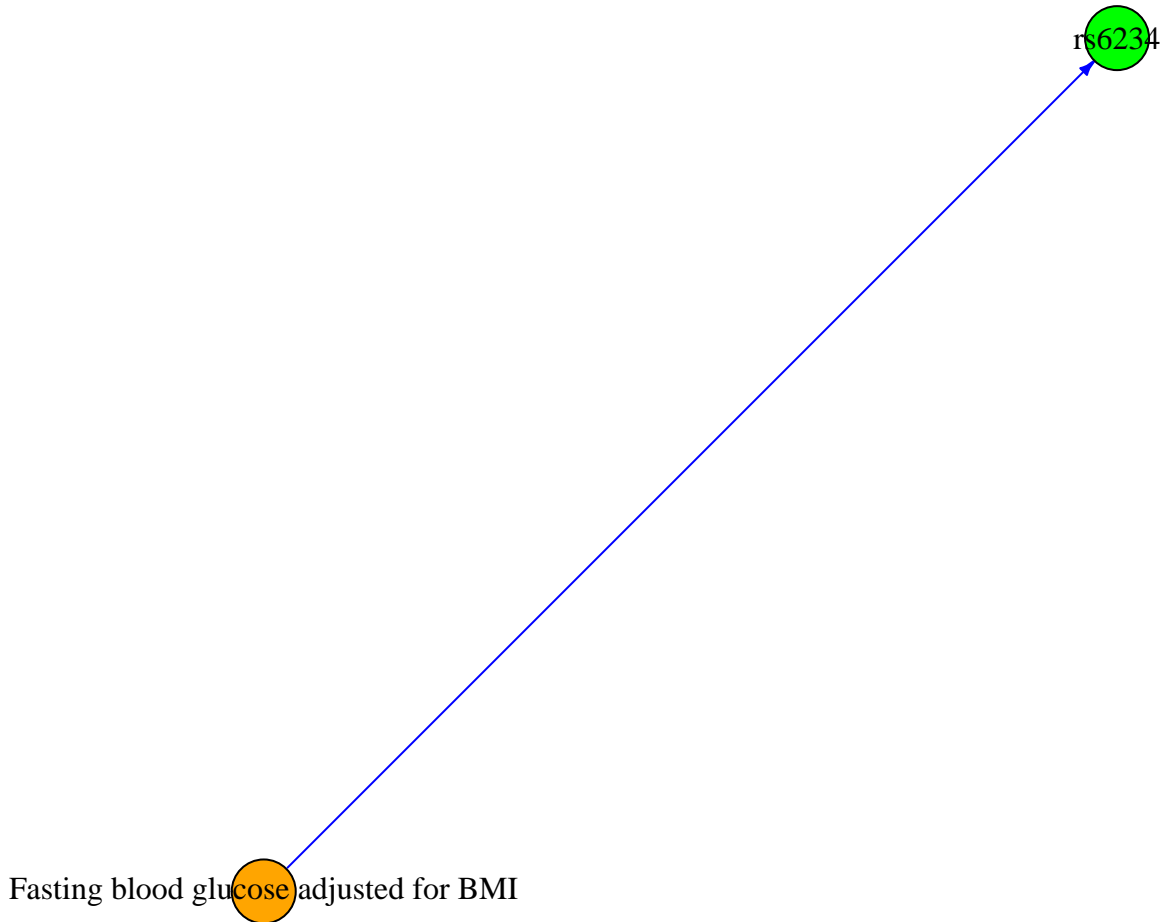

**Variant–Disease Network (Fish– and plant–related diet)**

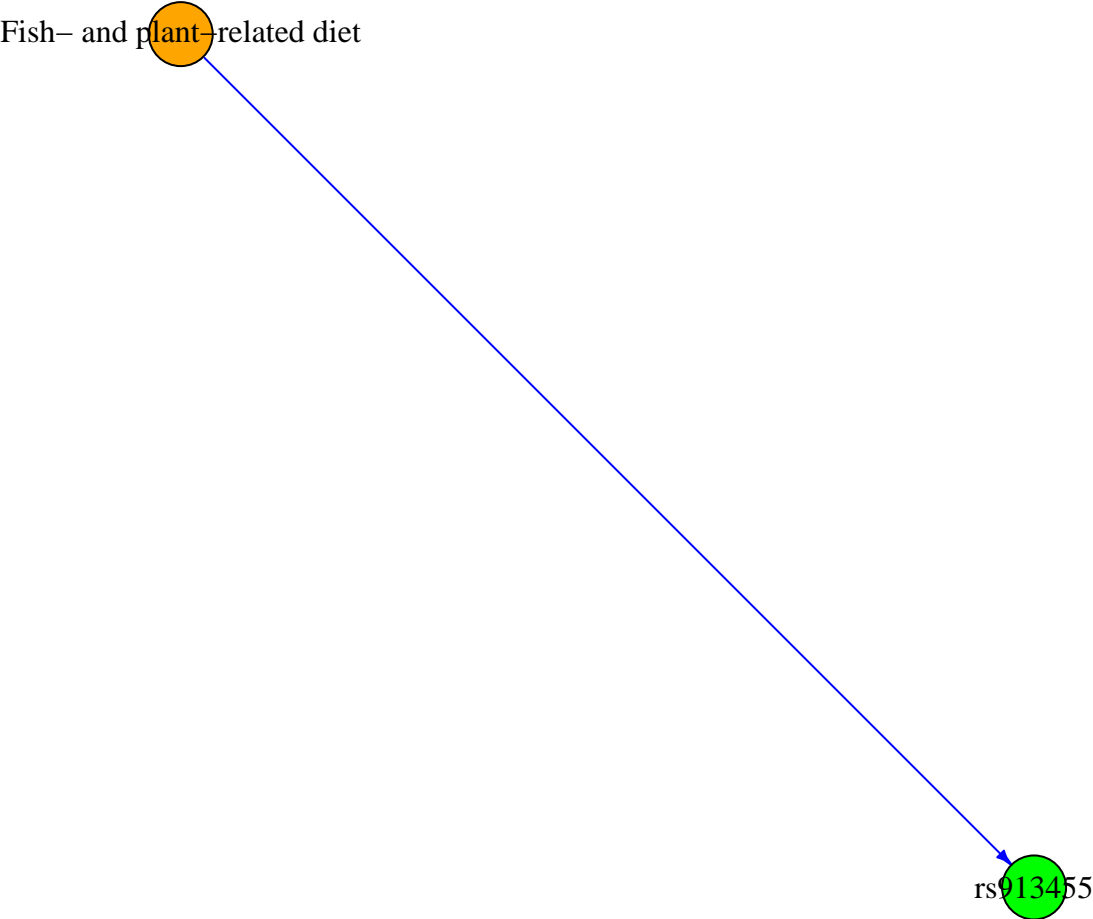

## Variant–Disease Network (General cognitive ability)

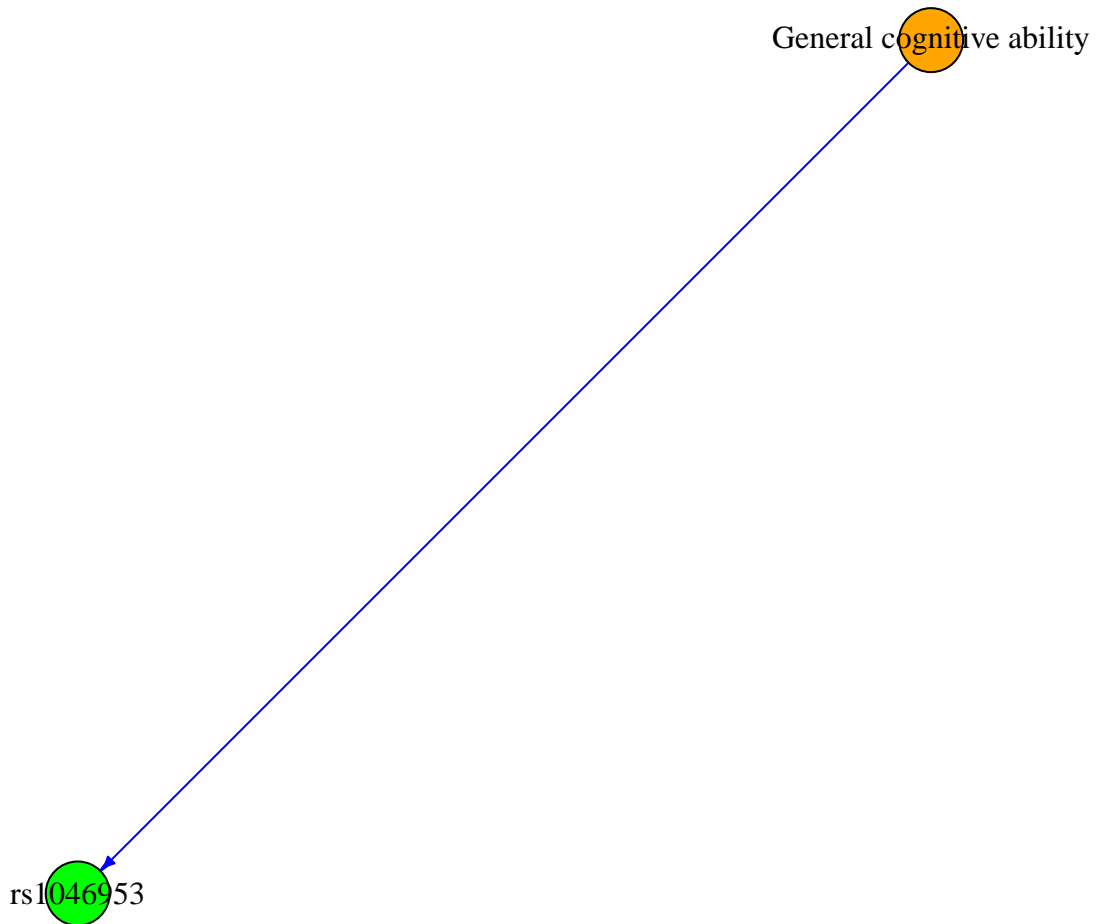

# Variant–Disease Network (Glycated hemoglobin levels)

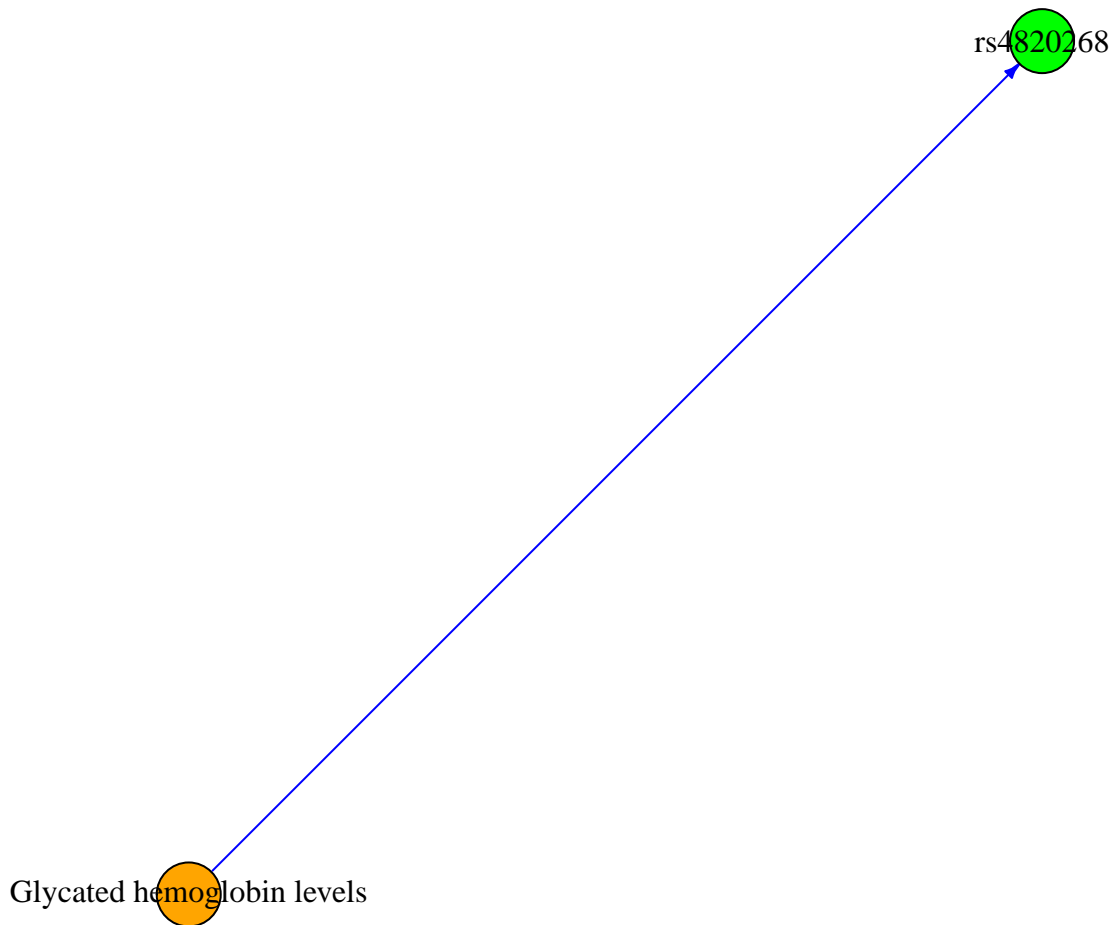



## Variant-Disease Network (Hay fever and/or eczema)

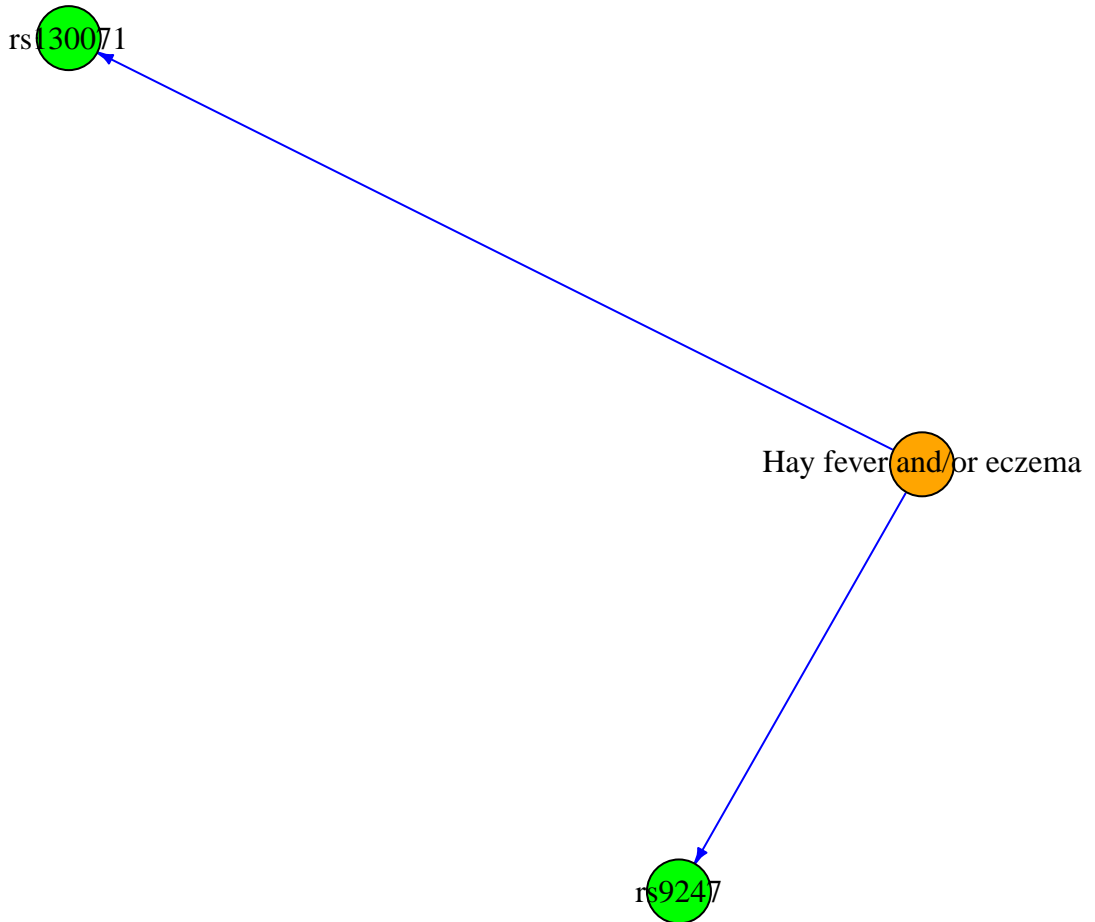

## Variant-Disease Network (Height)

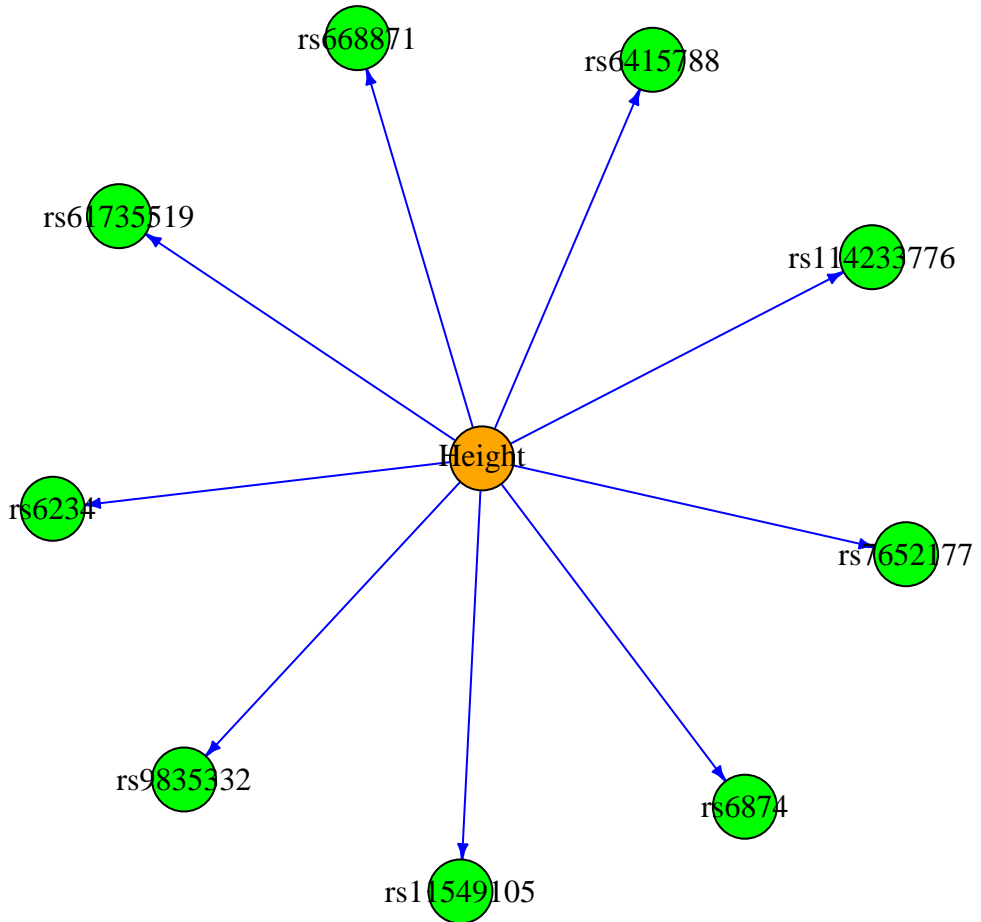

## Variant–Disease Network (Hematocrit)

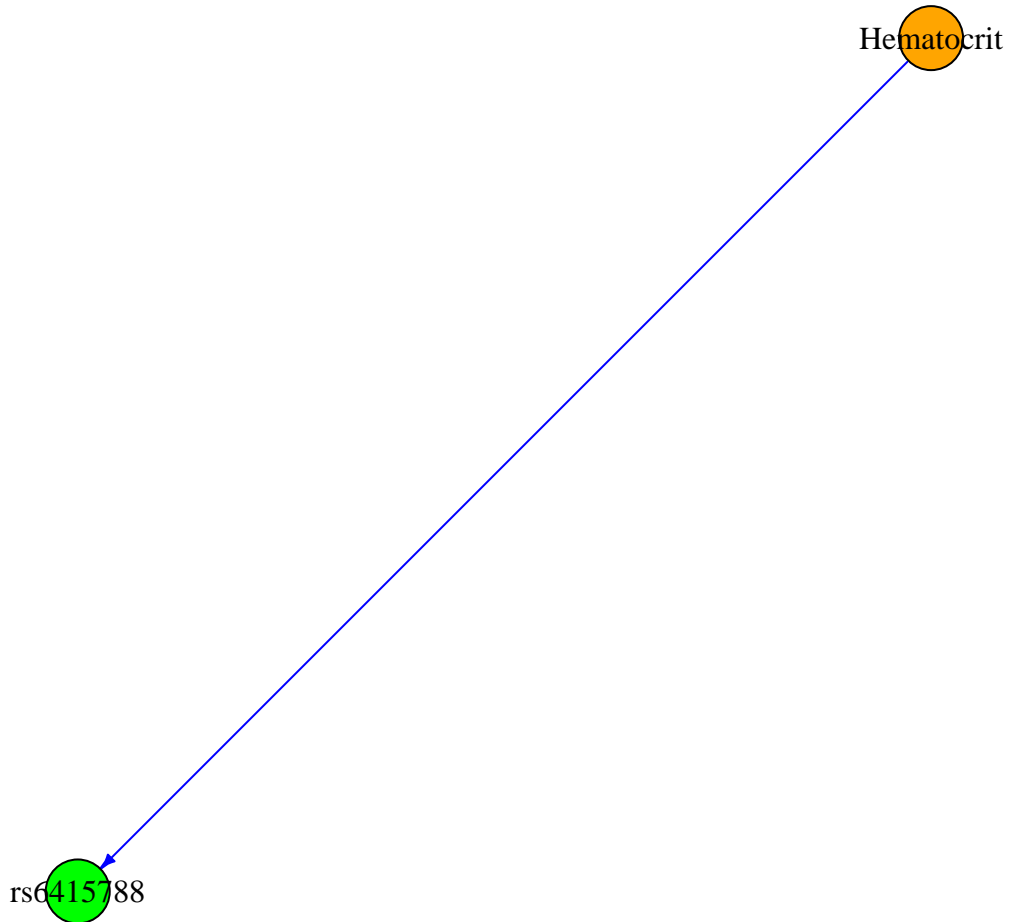

**Variant–Disease Network (Hemoglobin concentration)**

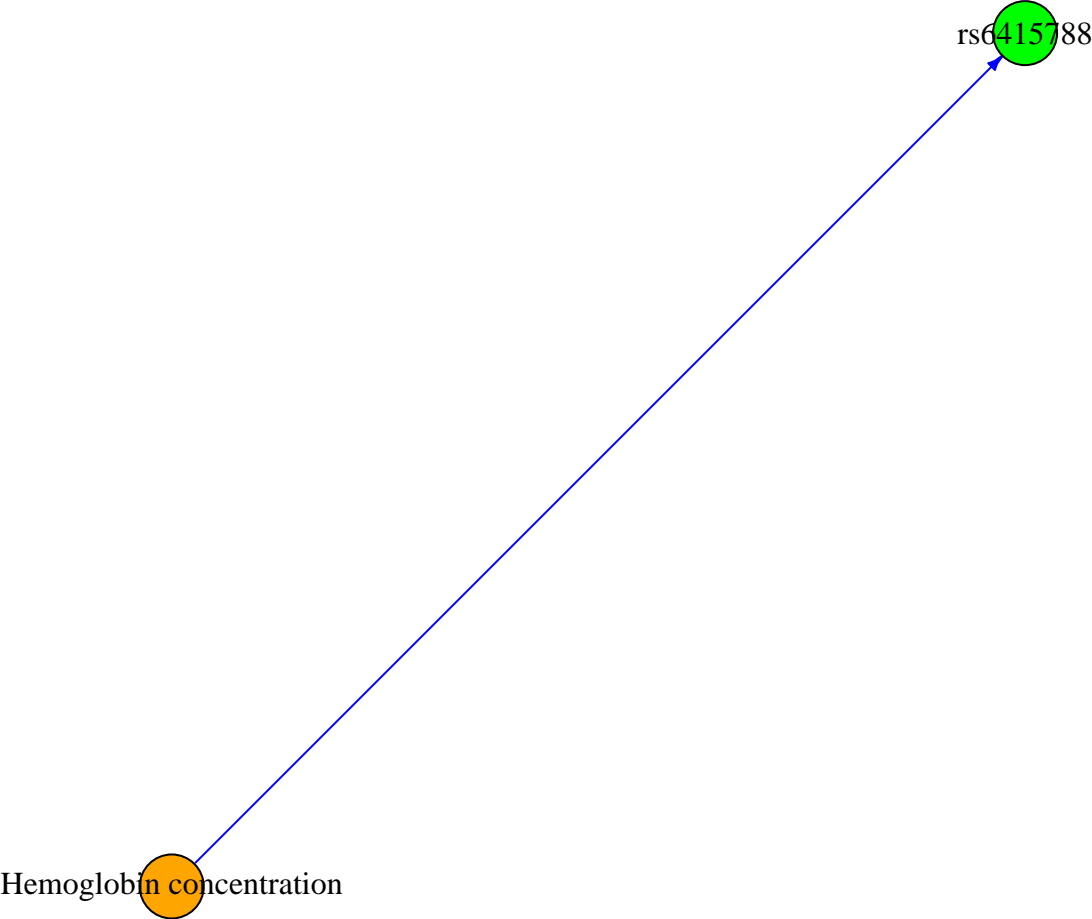

## Variant–Disease Network (Hemoglobin levels)

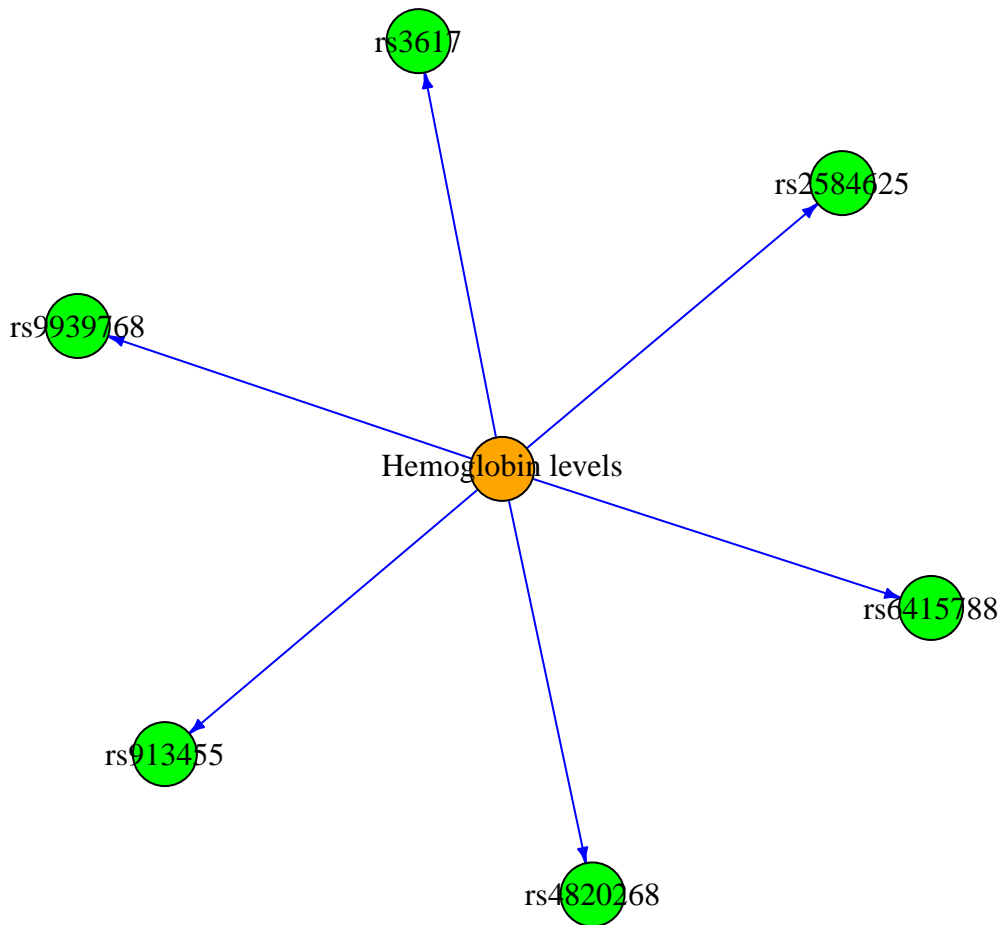

**Variant–Disease Network (High density lipoprotein cholesterol levels)**

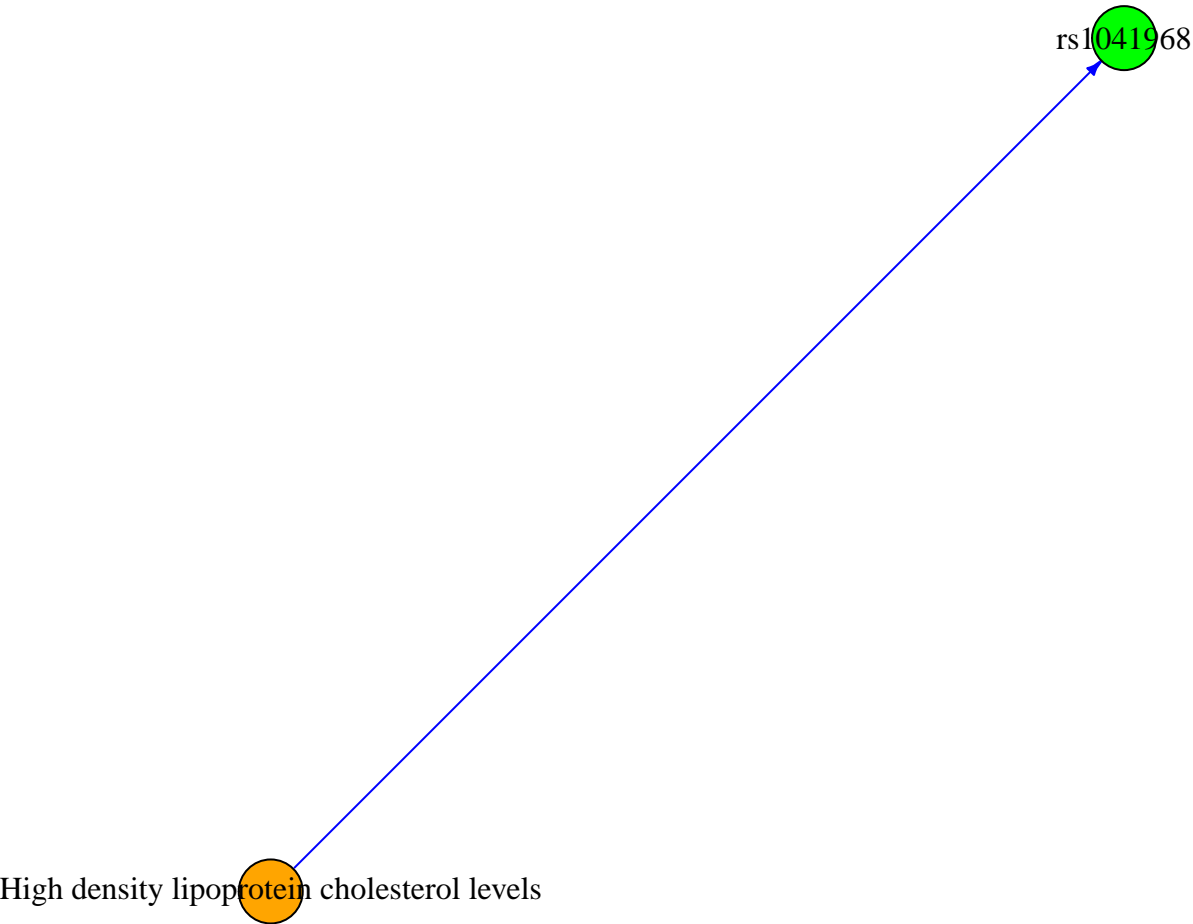

Variant–Disease Network (High light scatter reticulocyte count)

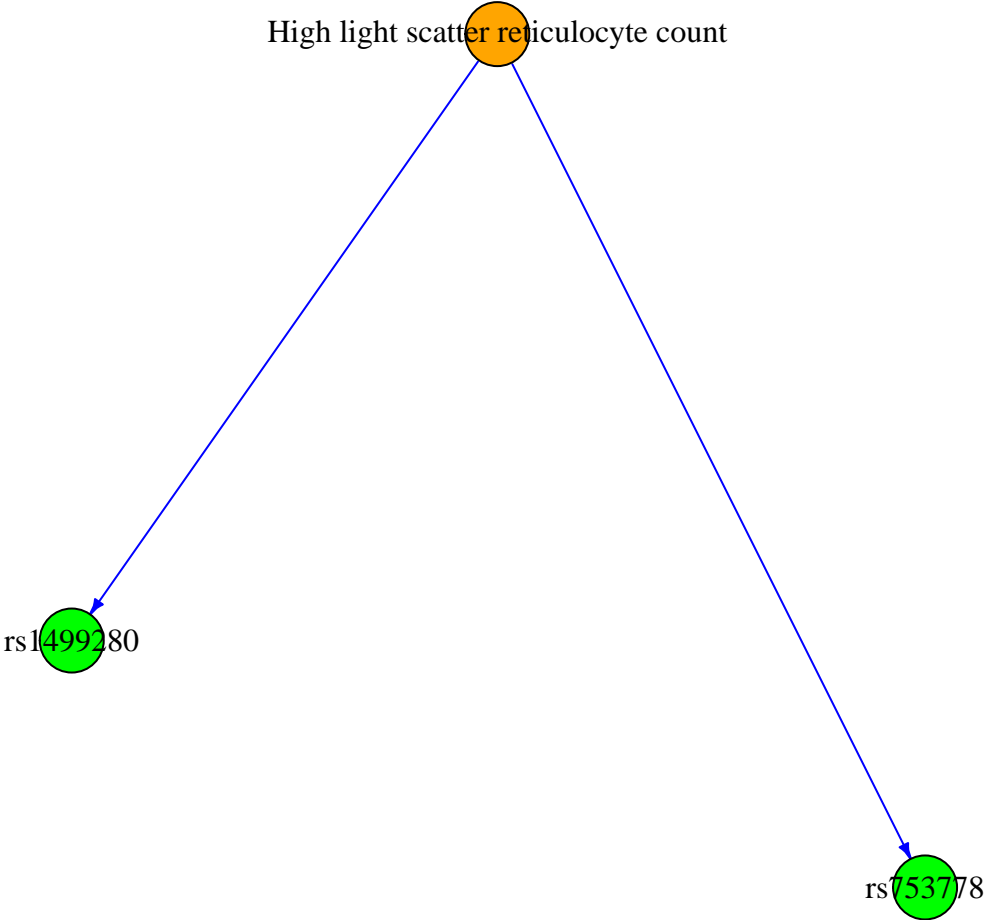

# Variant–Disease Network (High light scatter reticulocyte percentage of red c

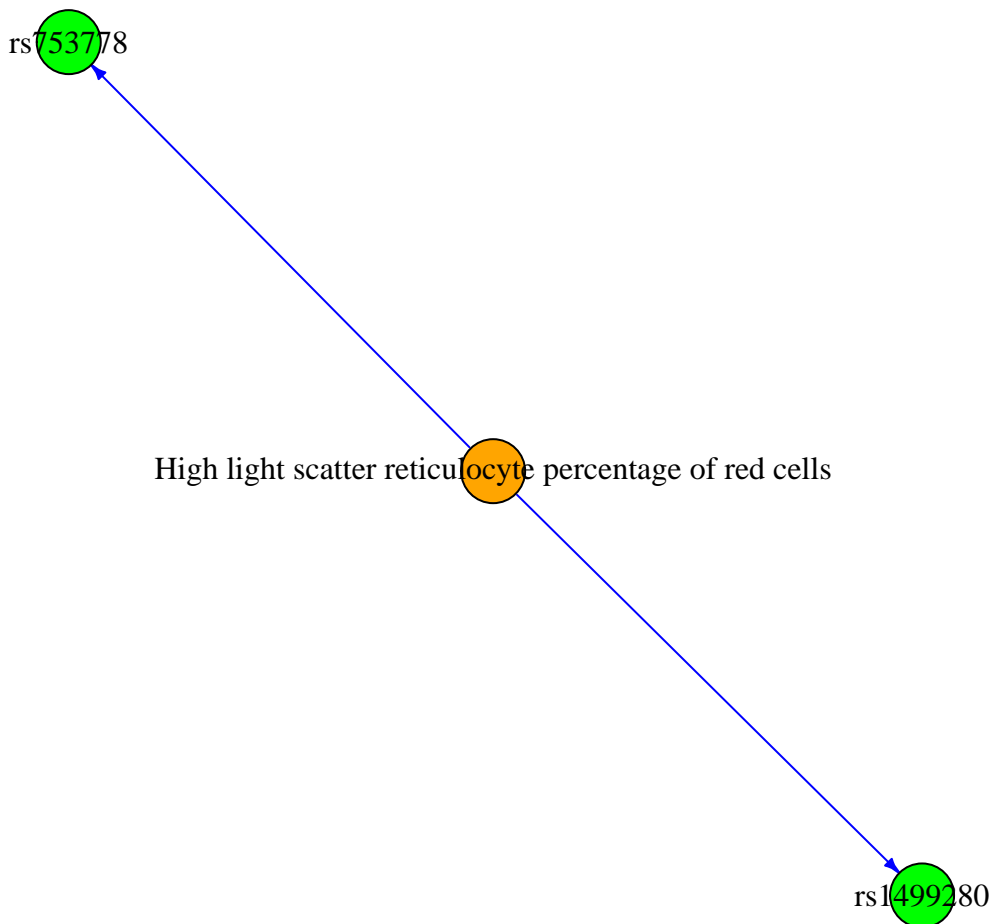



## Variant-Disease Network (Hip bone size)

Hip bone size

rs2296793

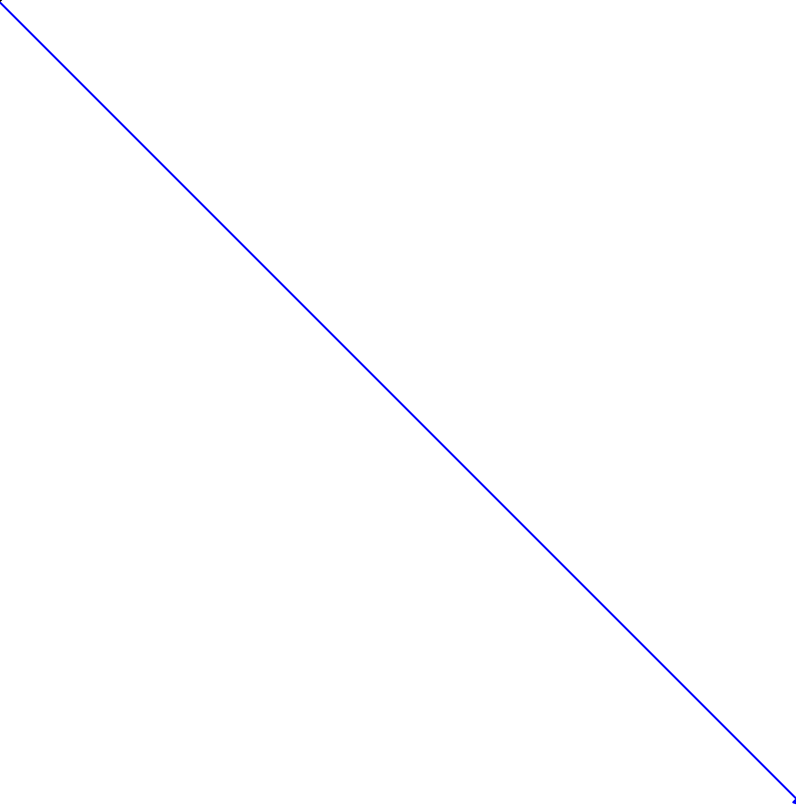

# Variant–Disease Network (Immature fraction of reticulocytes)

Immature fraction of reticulocytes

rs1499280

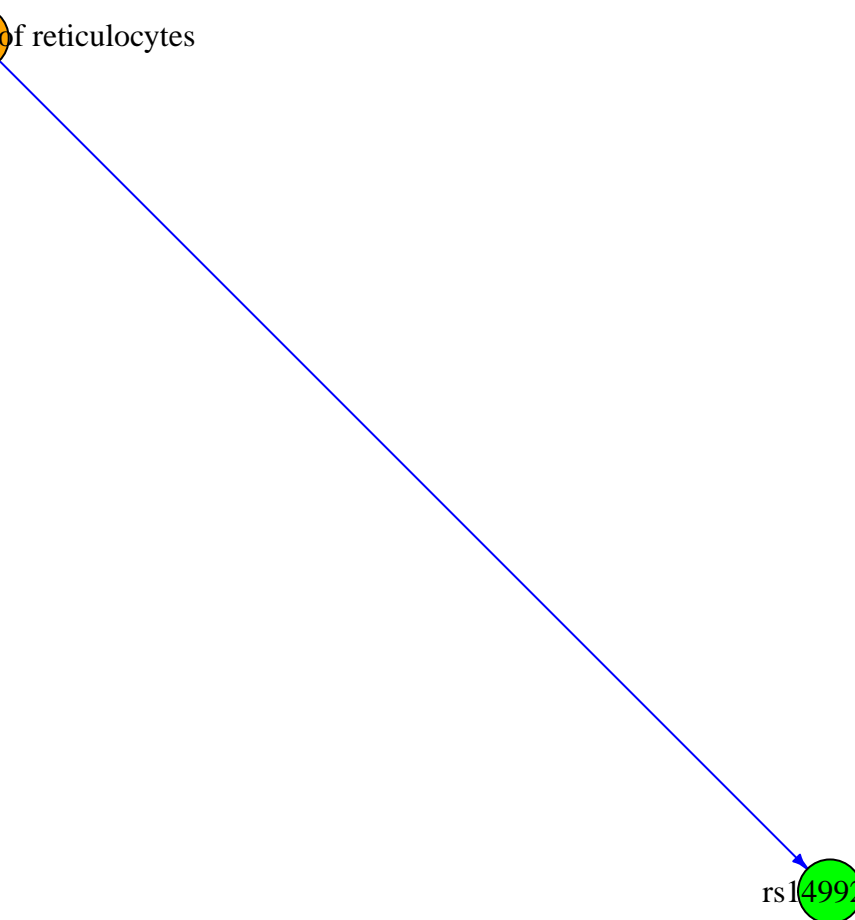

**Variant–Disease Network (Inflammatory bowel disease)**

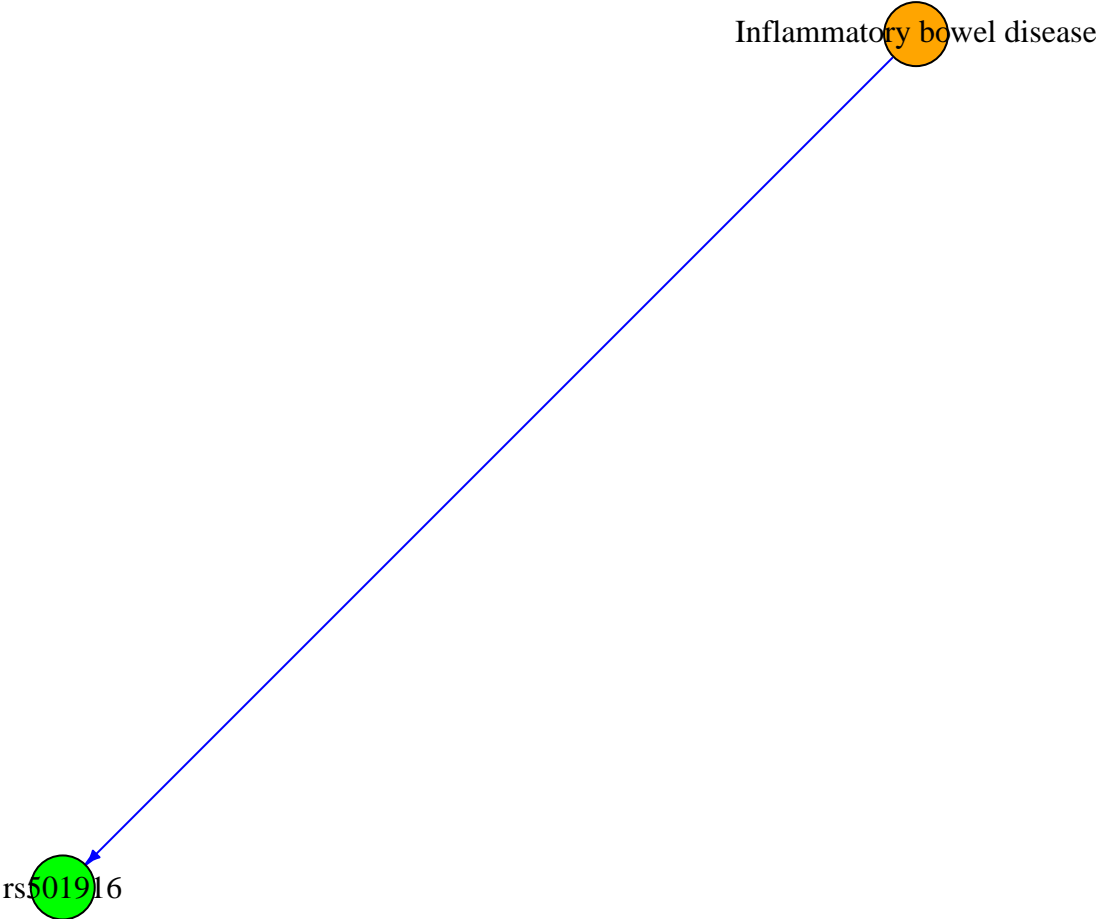

## Variant-Disease Network (Iron levels)

rs4820268

Iron levels



## Variant-Disease Network (Iron status biomarkers)

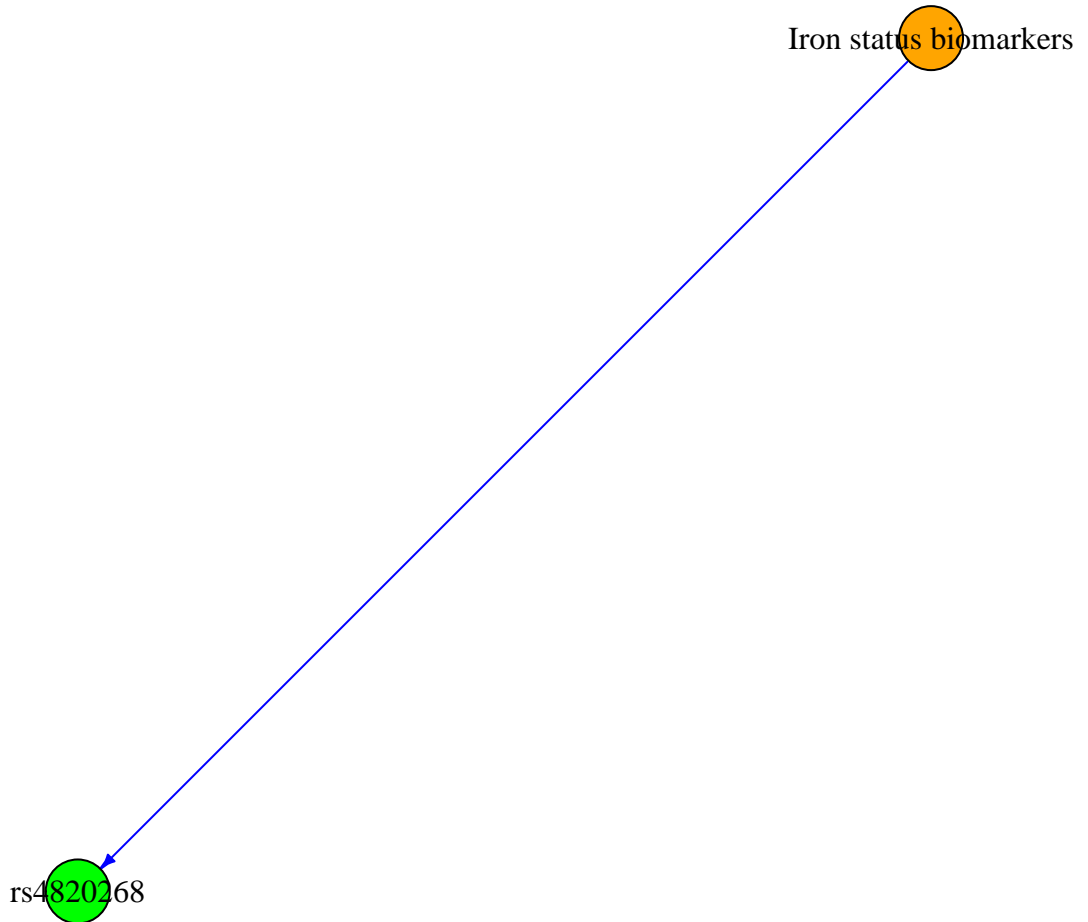

Variant–Disease Network (LDL cholesterol)

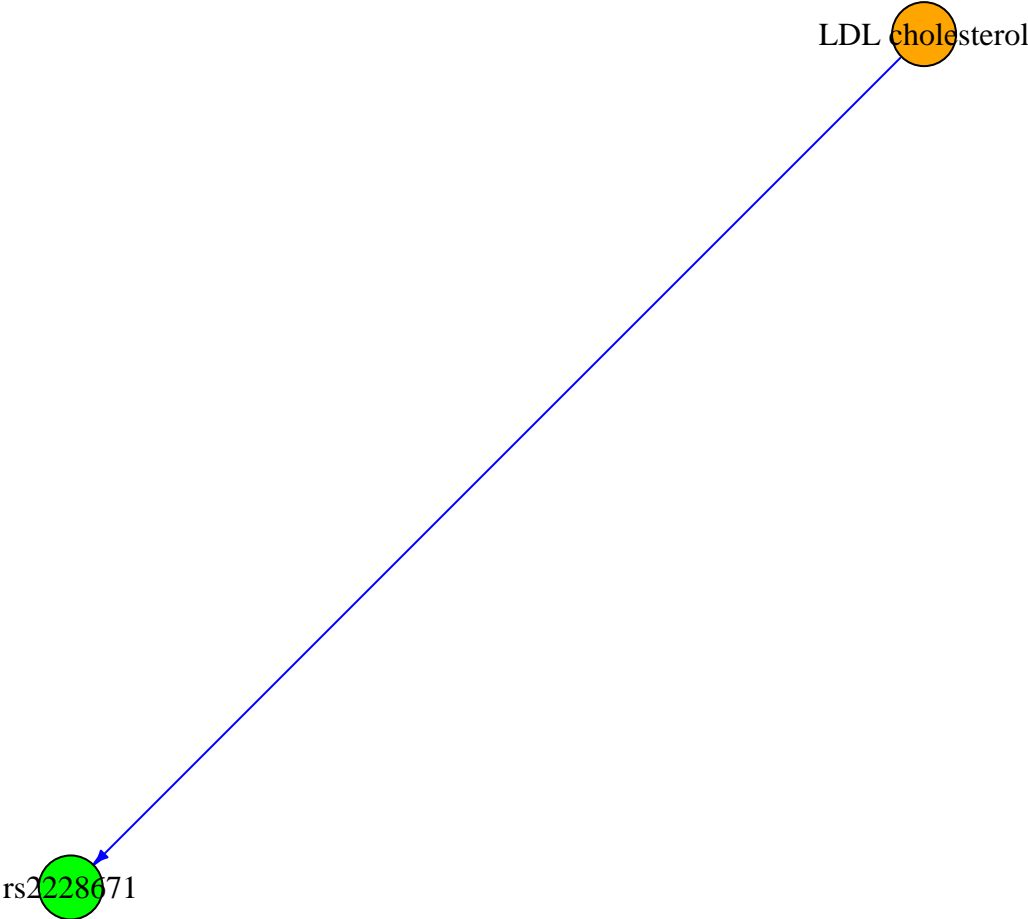

## Variant–Disease Network (Life satisfaction)

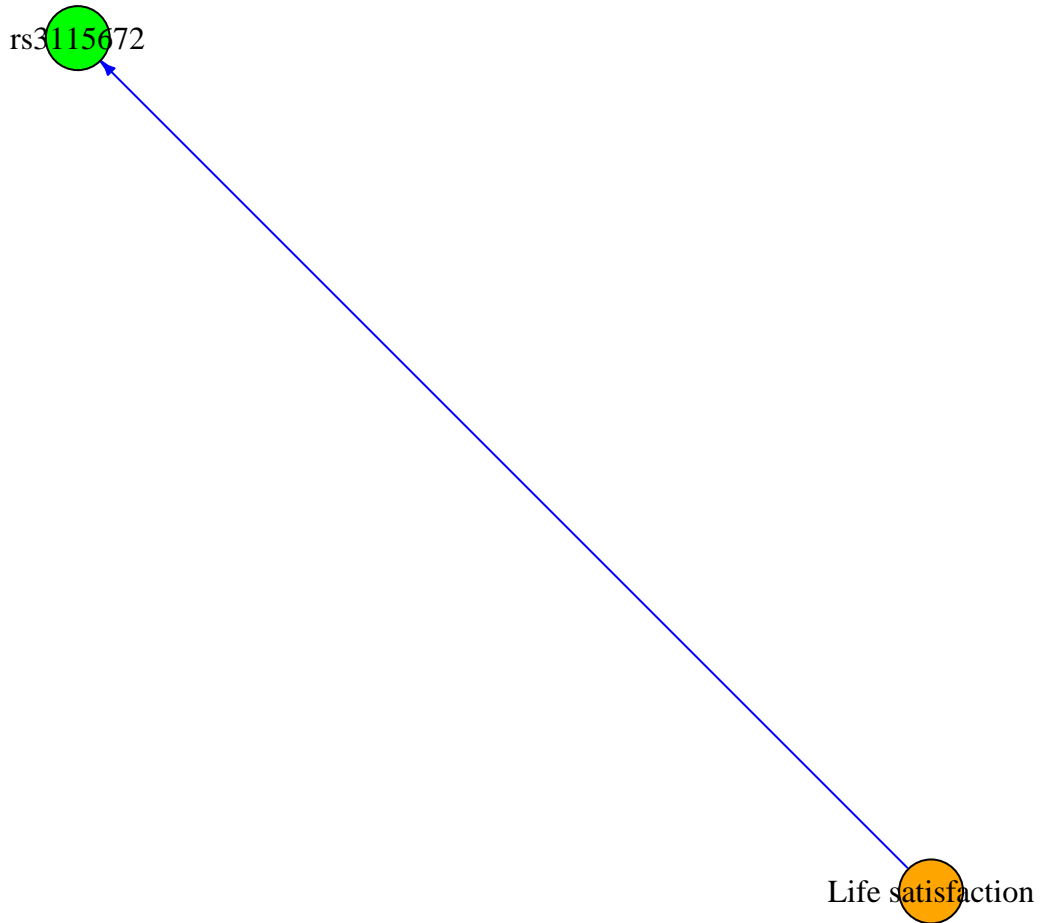

## Variant–Disease Network (Lipoprotein levels)

Lipoprotein levels

rs614754





**Variant–Disease Network (Liver fibrosis and steatohepatitis severity )**

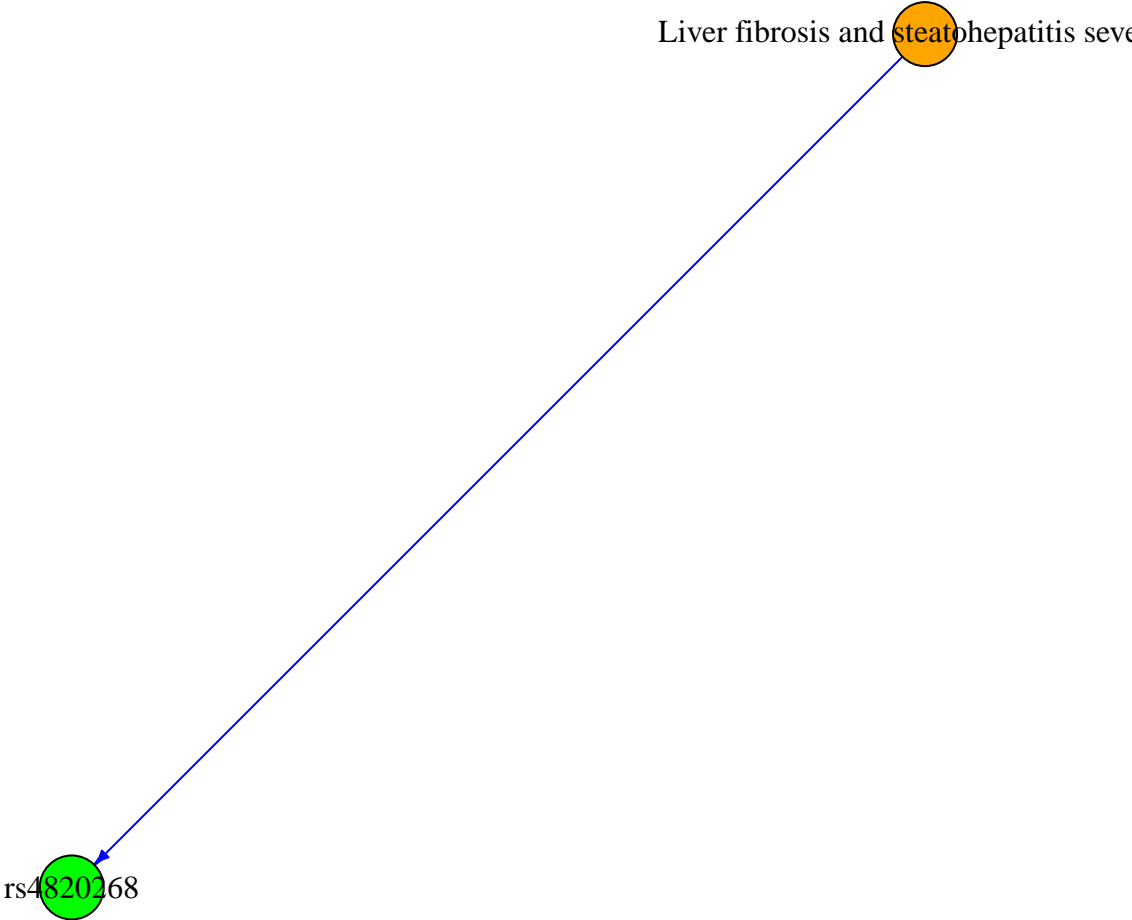

**Variant–Disease Network (Low density lipoprotein cholesterol levels)**

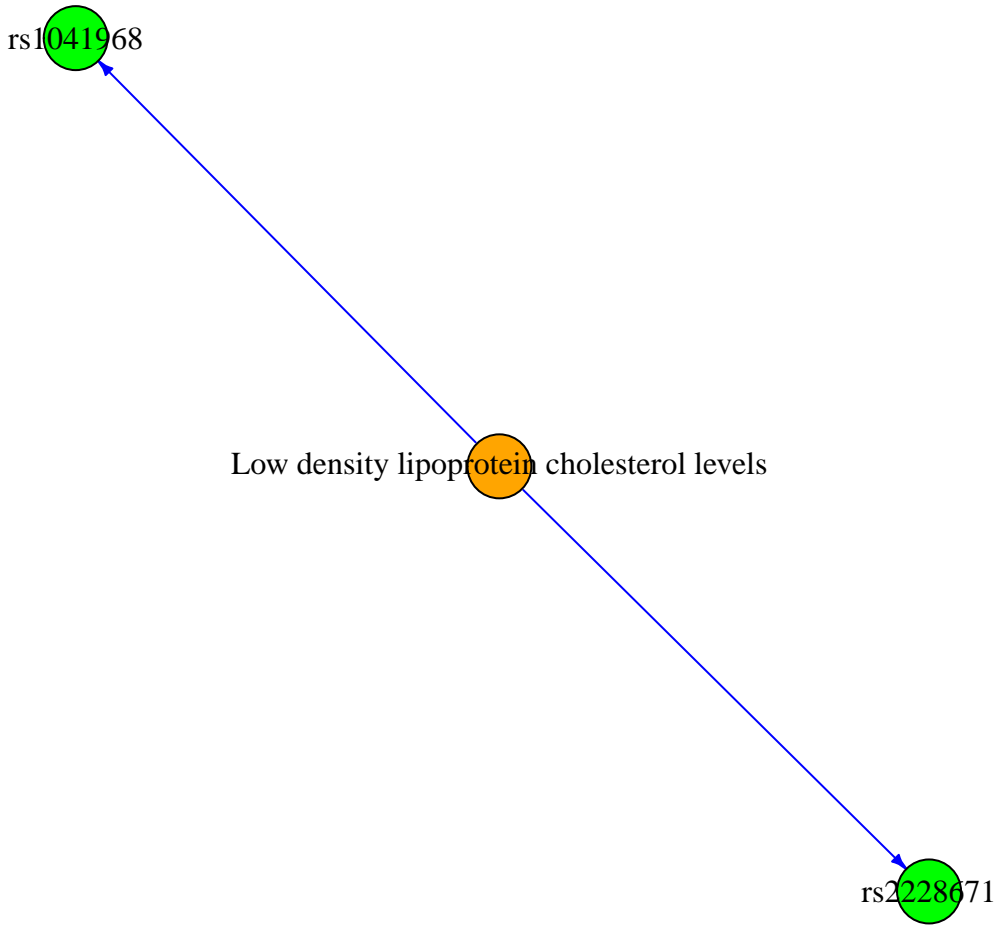

## Variant–Disease Network (Macular thickness)

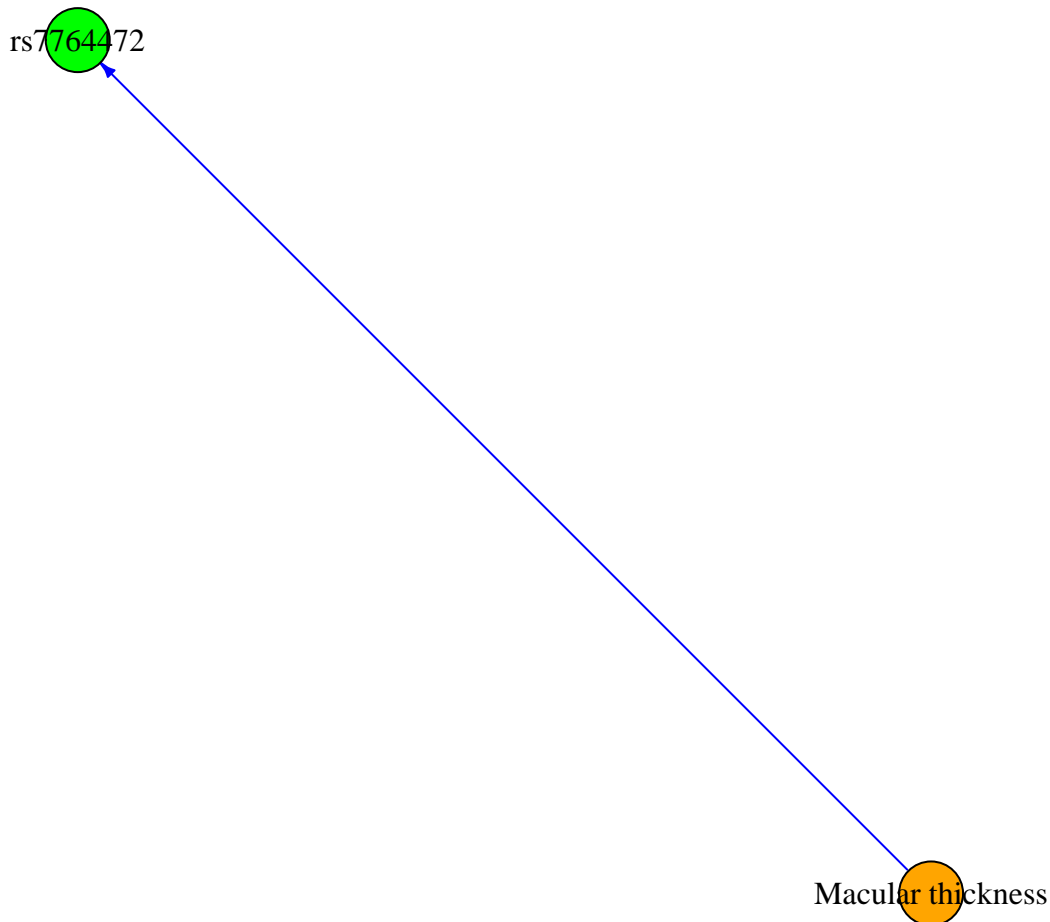

## Variant–Disease Network (Major depressive disorder)

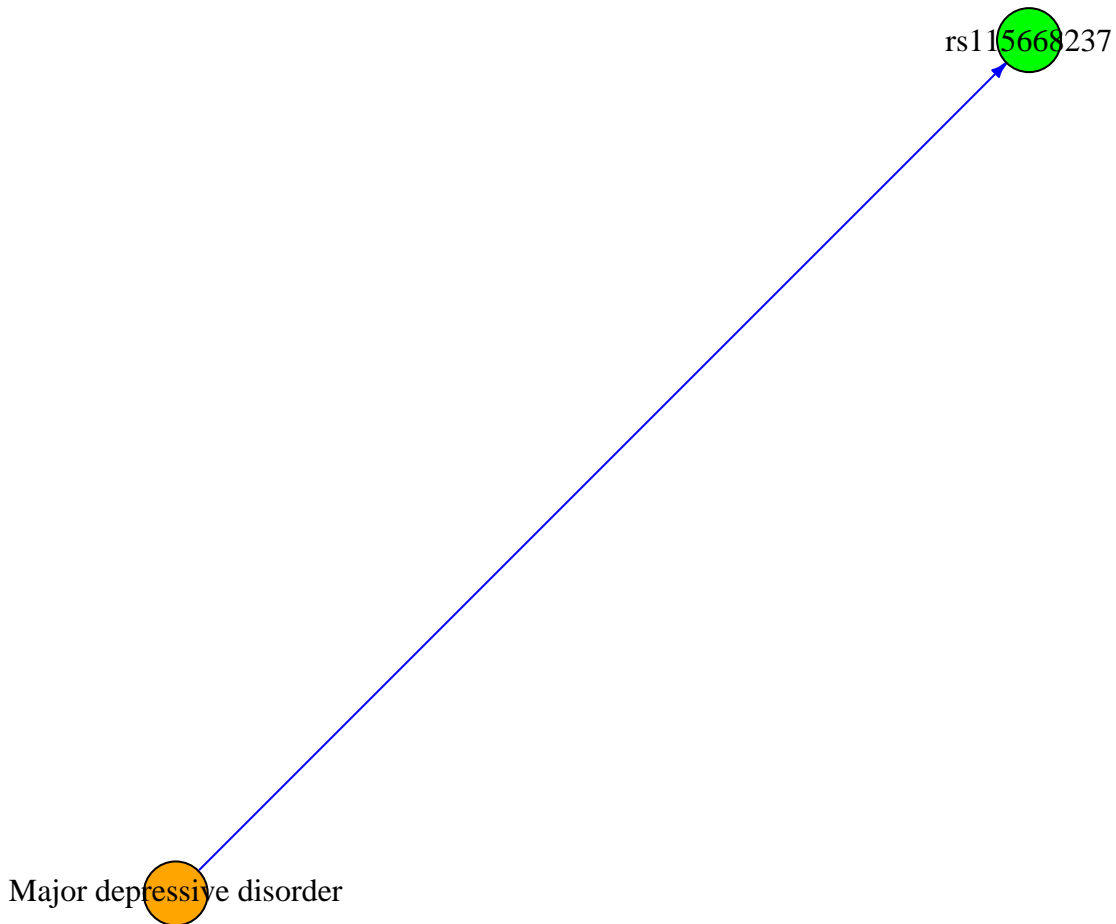

# Variant–Disease Network (Maximum habitual alcohol consumption)

Maximum habitual alcohol consumption

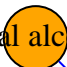

rs1058882

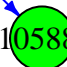

# Variant–Disease Network (Mean corpuscular hemoglobin)

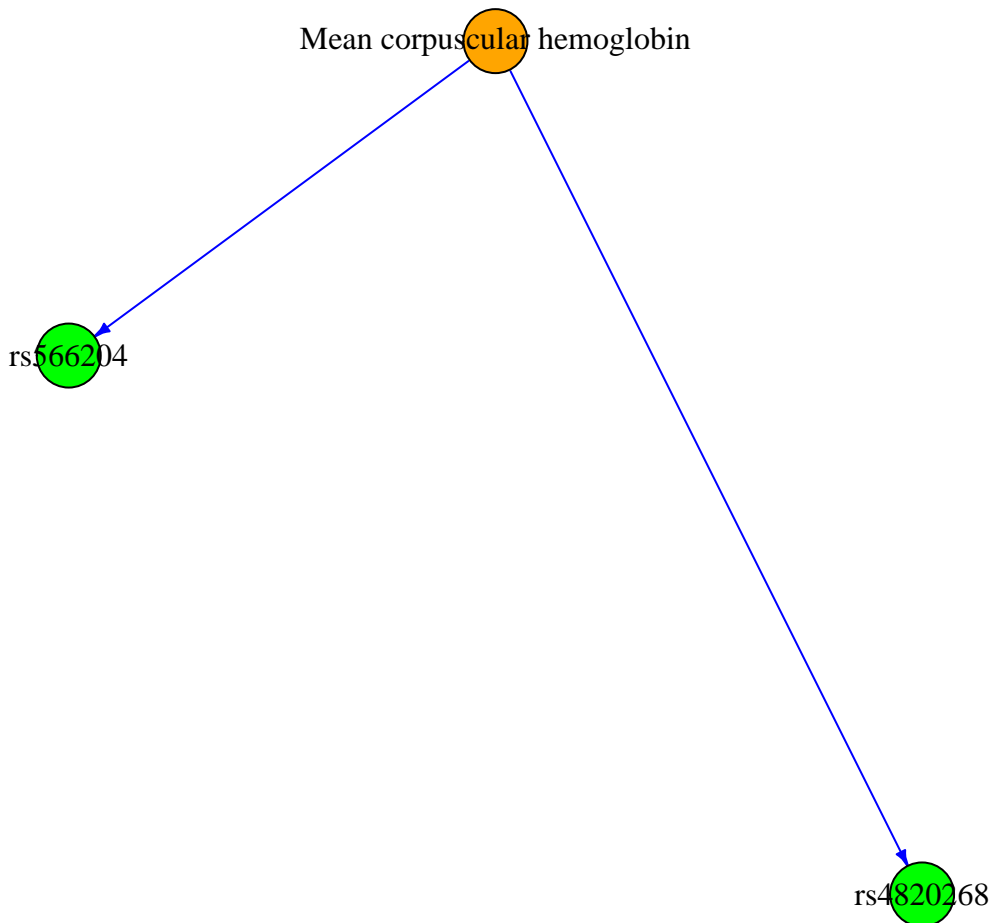

**Variant–Disease Network (Mean corpuscular hemoglobin concentration)**

rs4820268

Mean corpuscular hemoglobin concentration

rs6599079

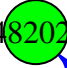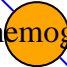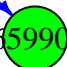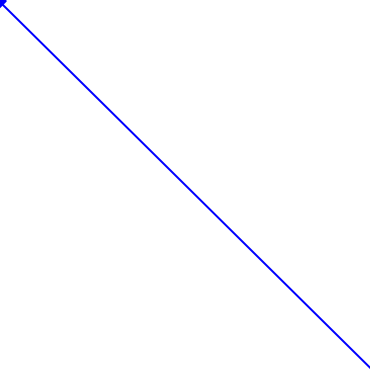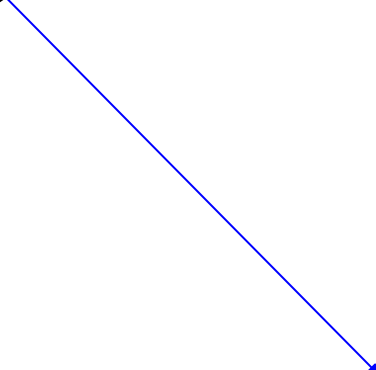

# Variant–Disease Network (Mean corpuscular volume)

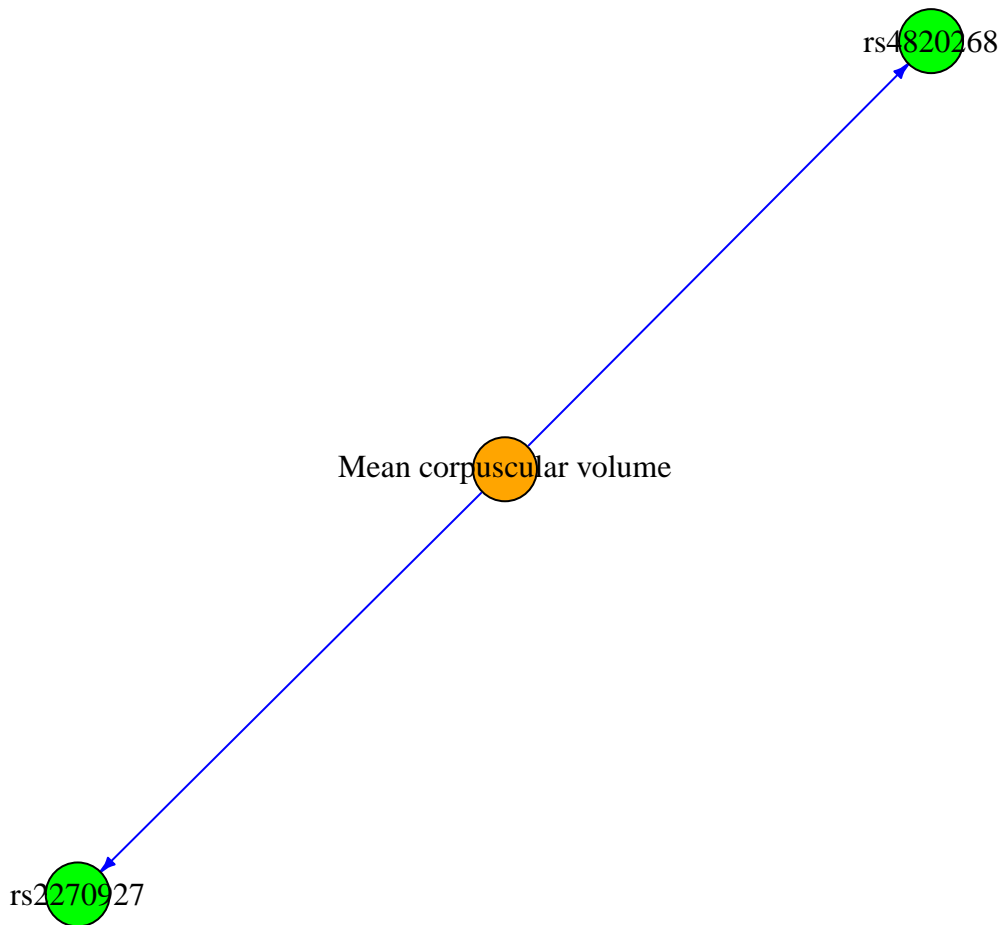



## Variant–Disease Network (Medication use )

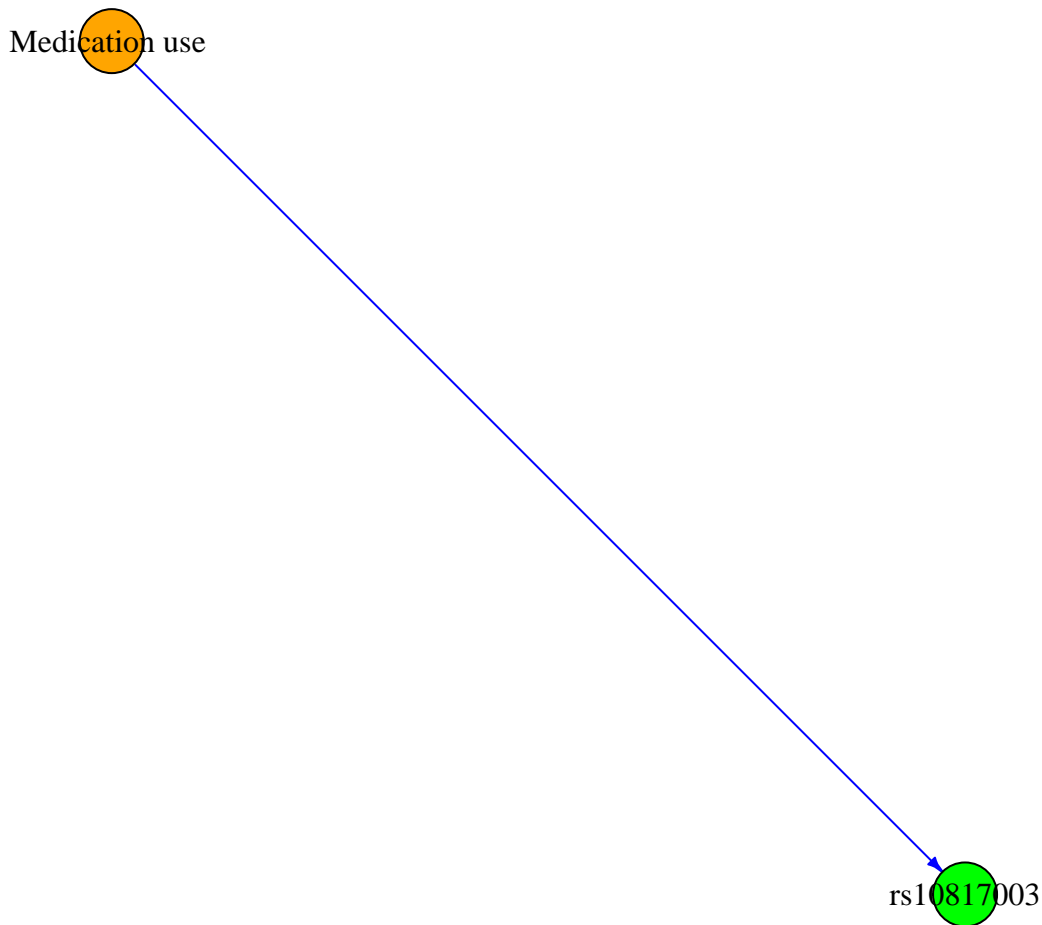

## Variant-Disease Network (Menarche )

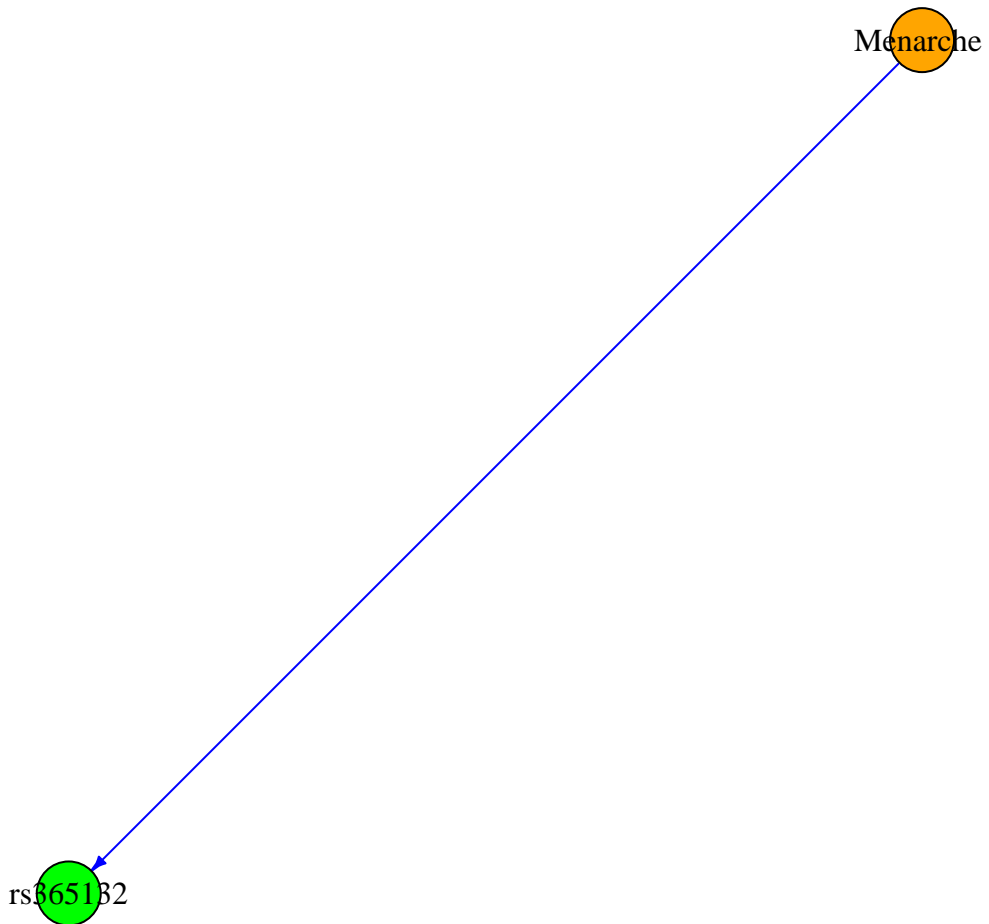

## Variant–Disease Network (Menarche and menopause )

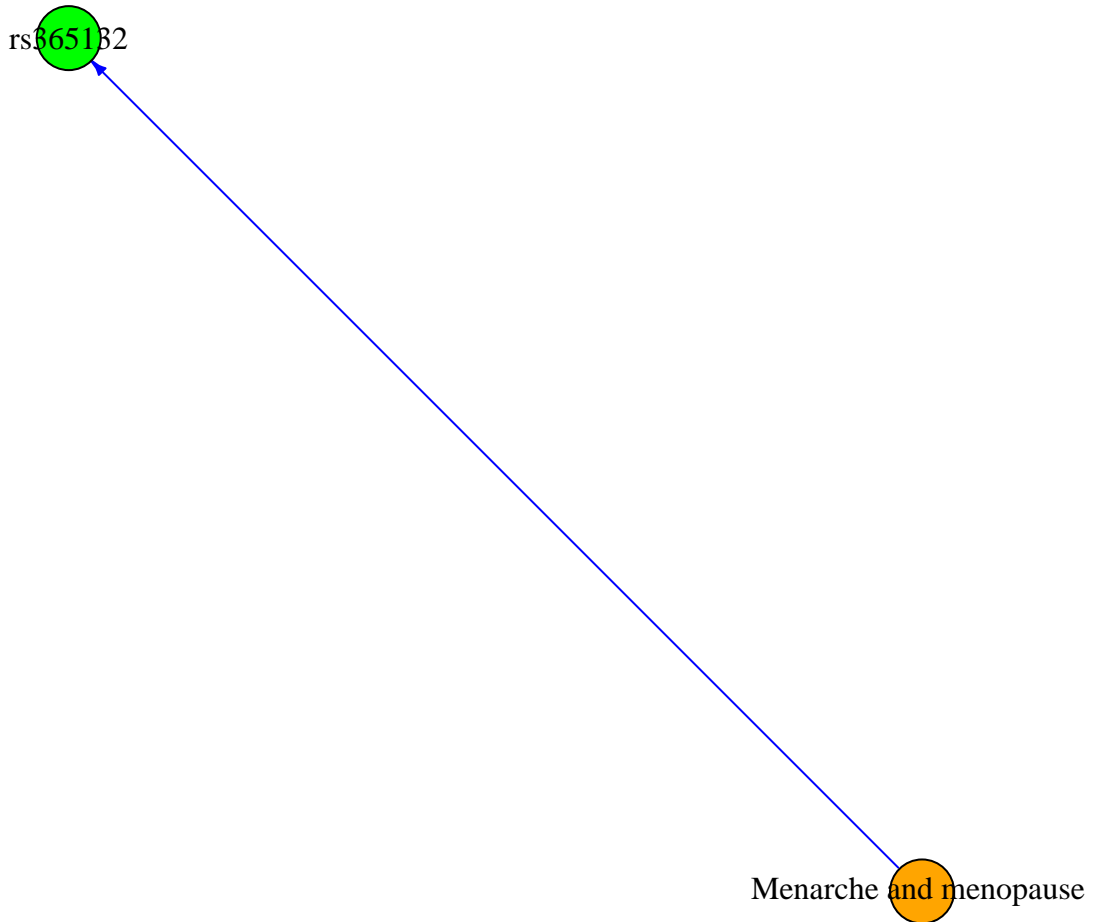

## Variant-Disease Network (Menopause )

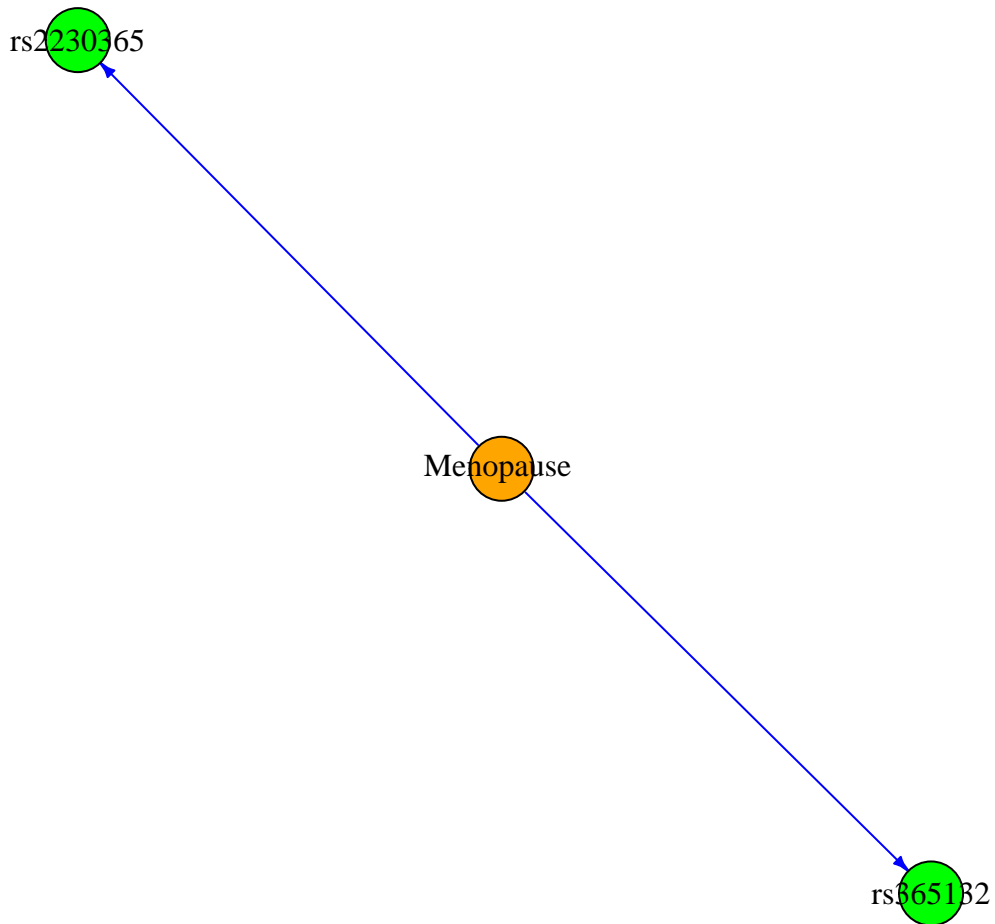

## Variant–Disease Network (Metabolite levels)

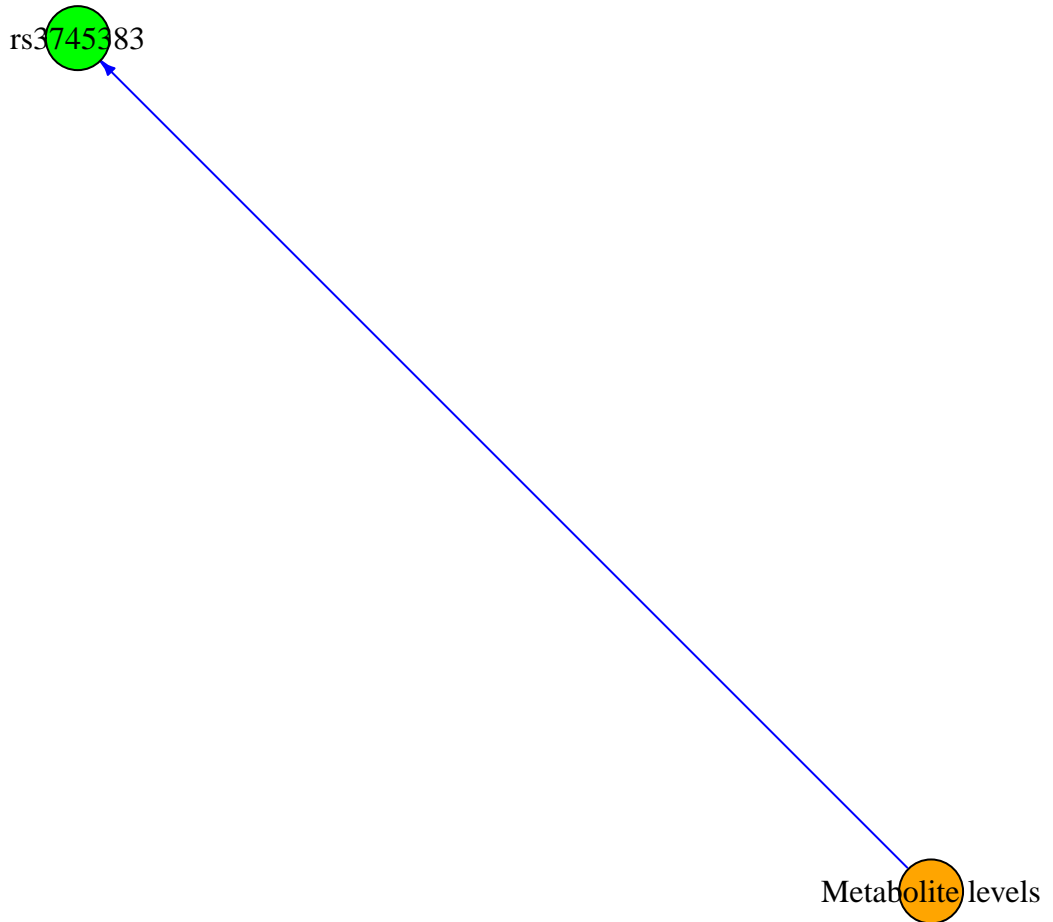

## Variant–Disease Network (Monocyte count)

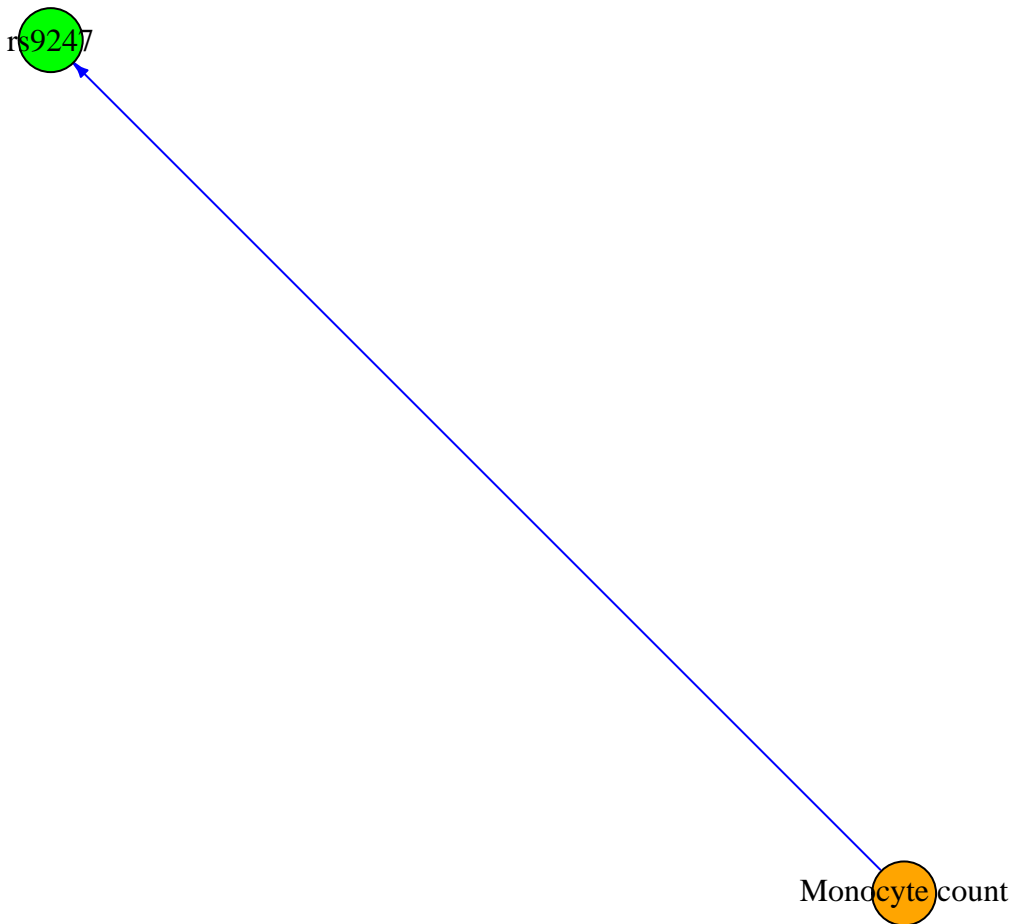

## Variant-Disease Network (Neuroticism)

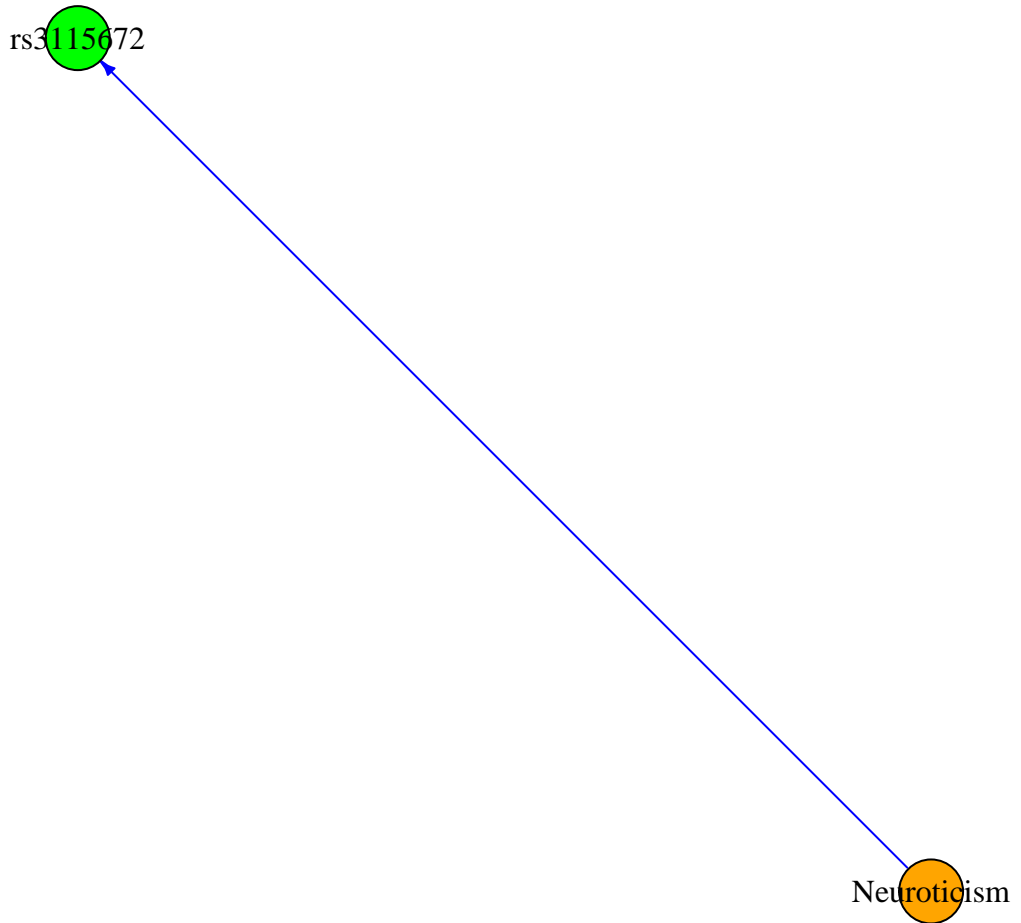

# Variant–Disease Network (Nonobstructive coronary artery disease)

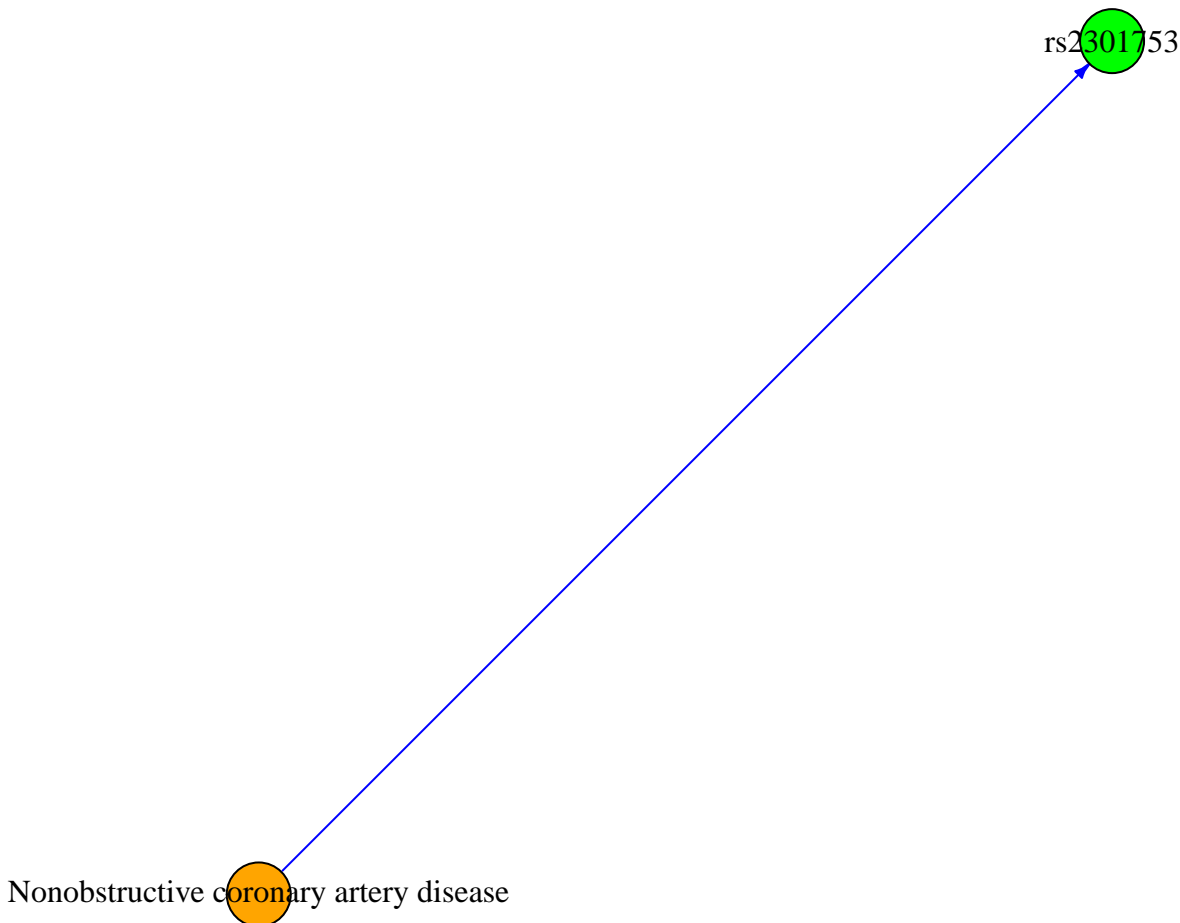



## Variant–Disease Network (Obesity–related traits)

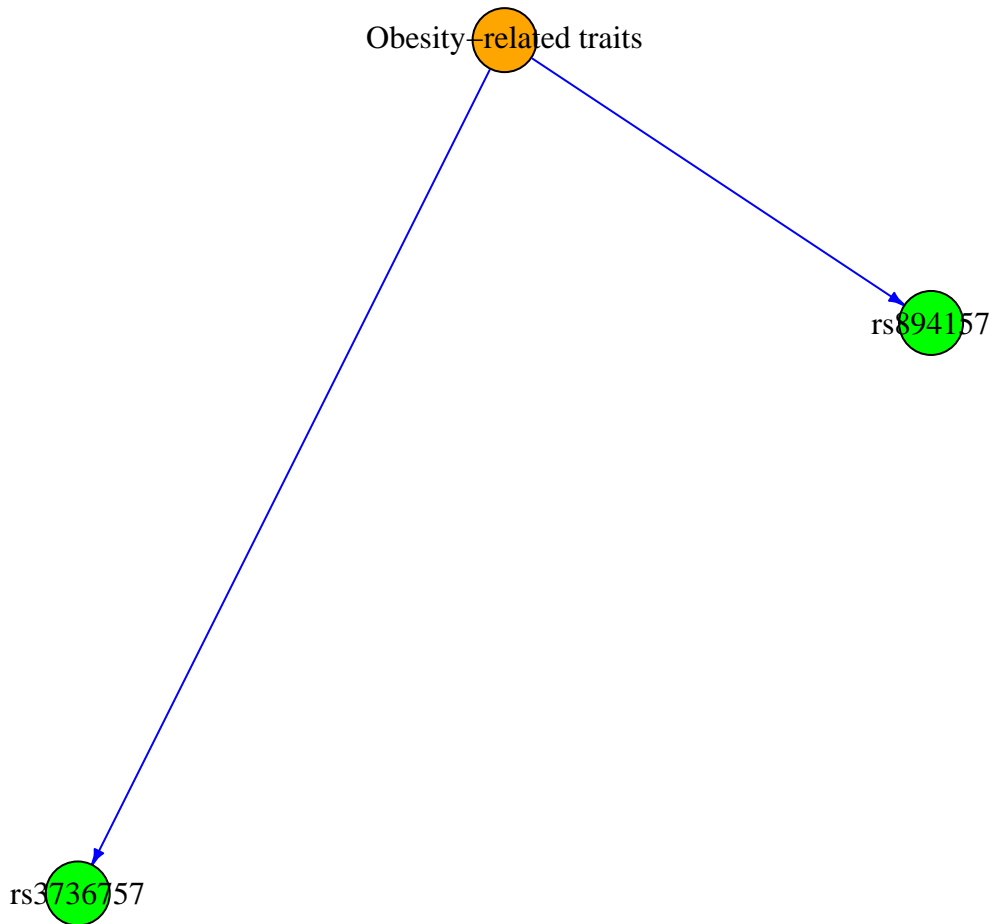

## Variant–Disease Network (Pancreatic cancer)

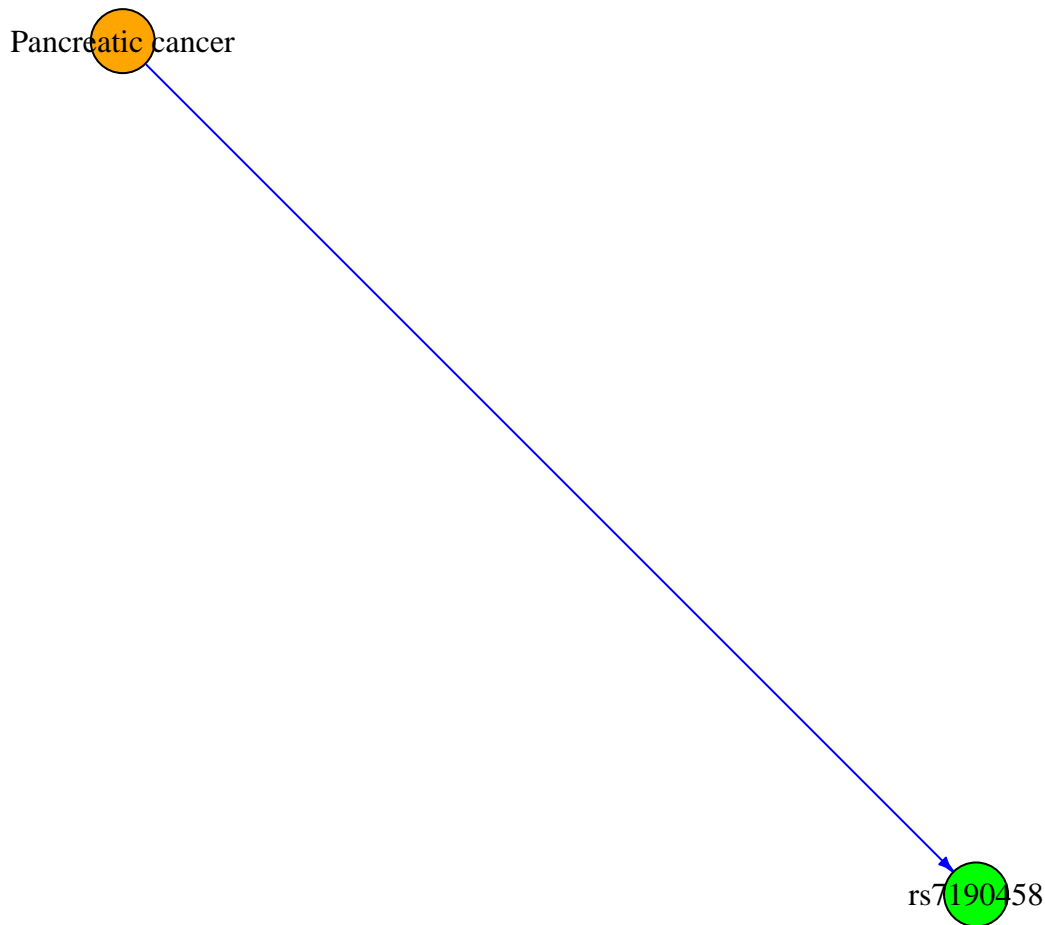

## Variant–Disease Network (Platelet aggregation)

Platelet aggregation

rs1052763

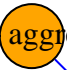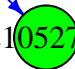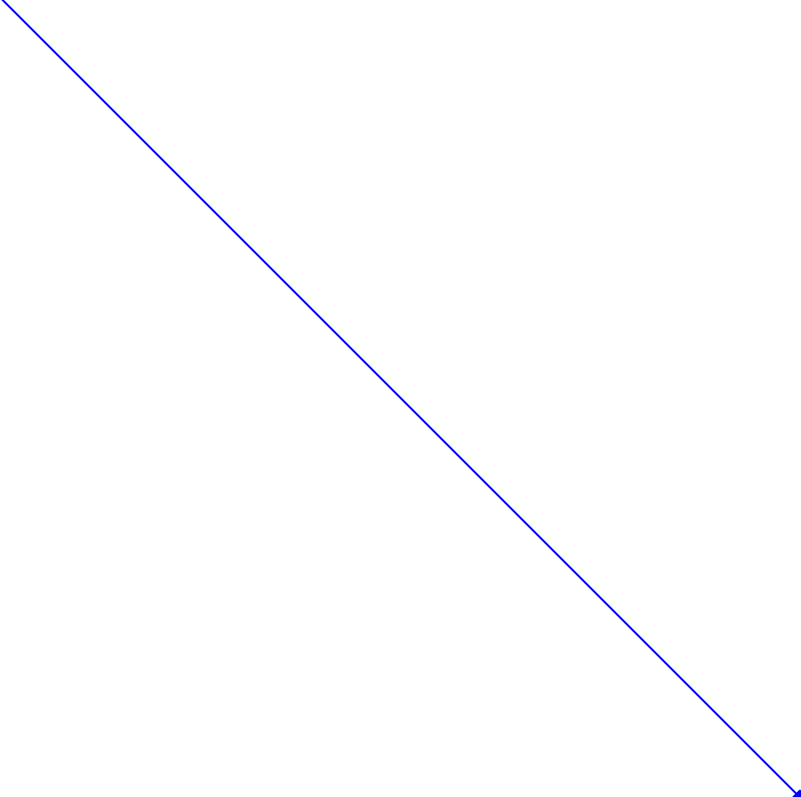

## Variant–Disease Network (Positive affect)

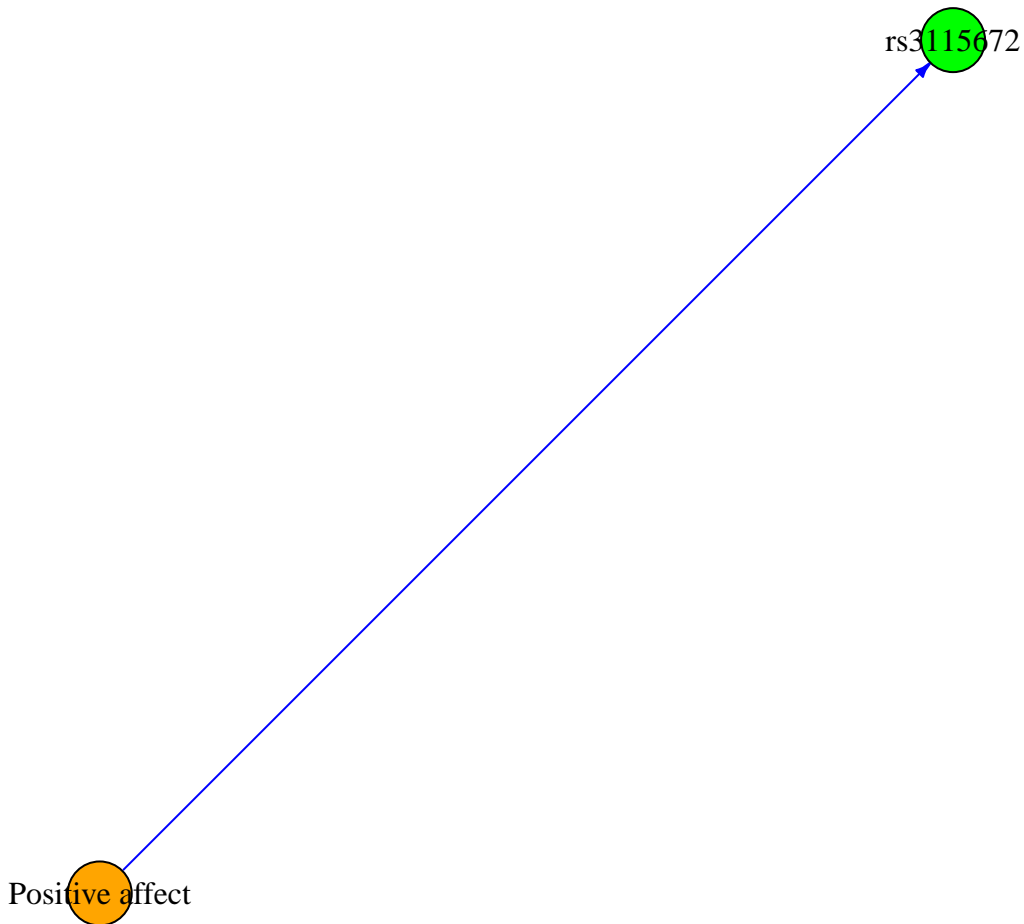

## Variant–Disease Network (Post bronchodilator FEV1)

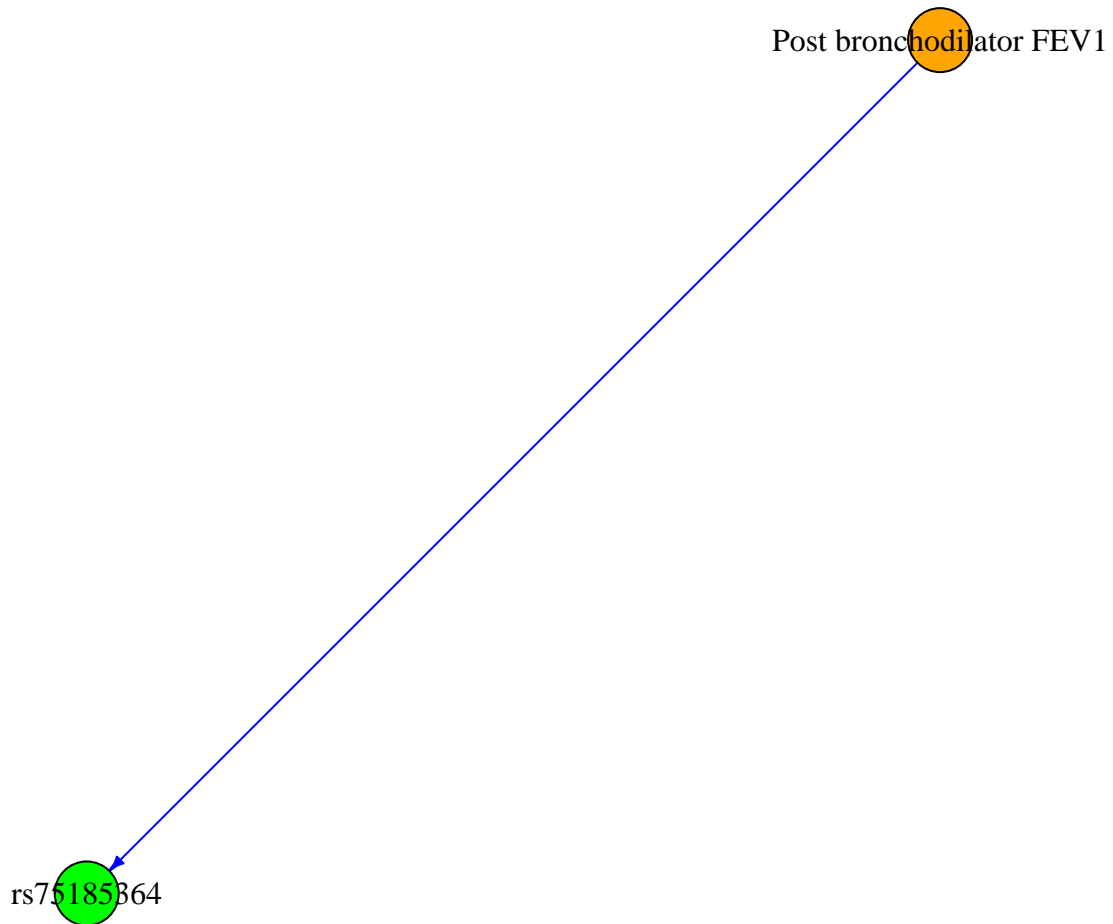

# Variant-Disease Network (Postoperative survival time in hepatocellular carcinoma)

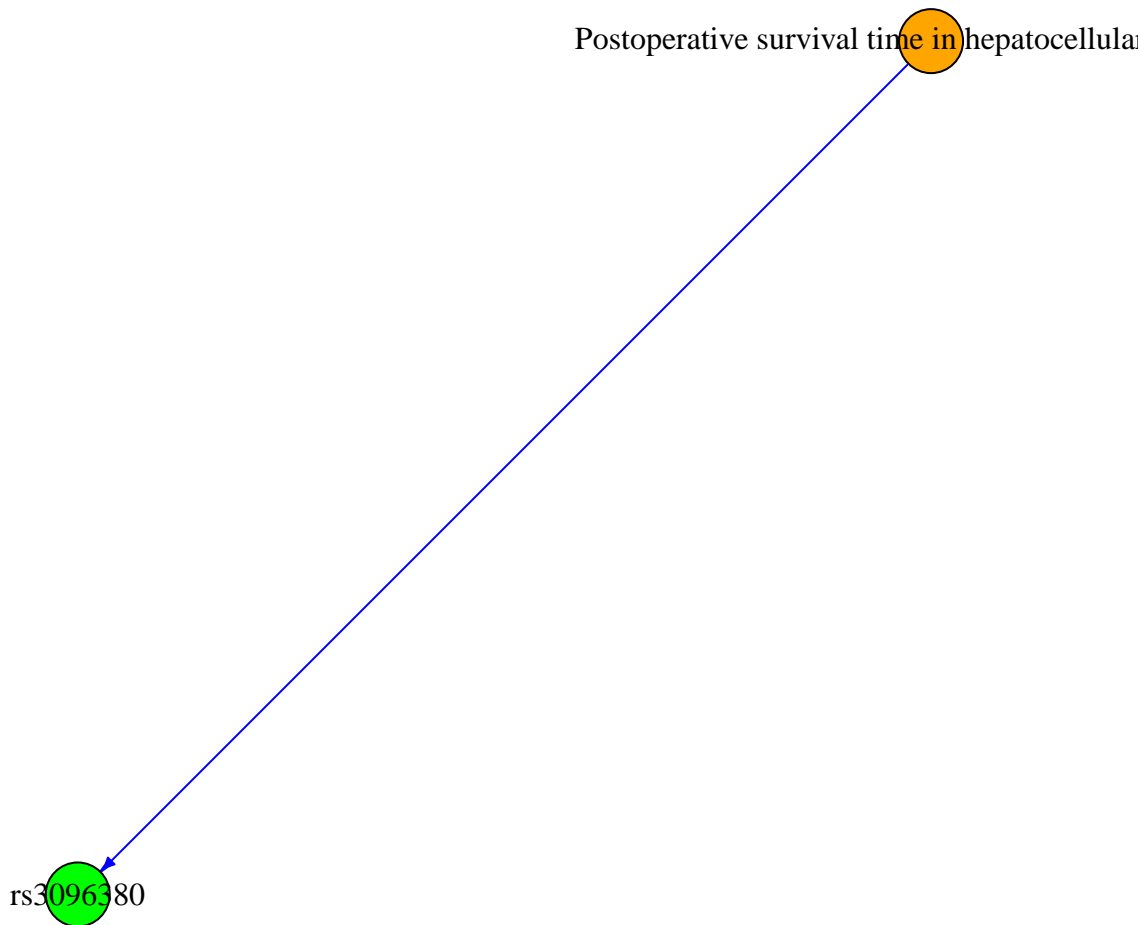

## Variant–Disease Network (Pulse pressure)

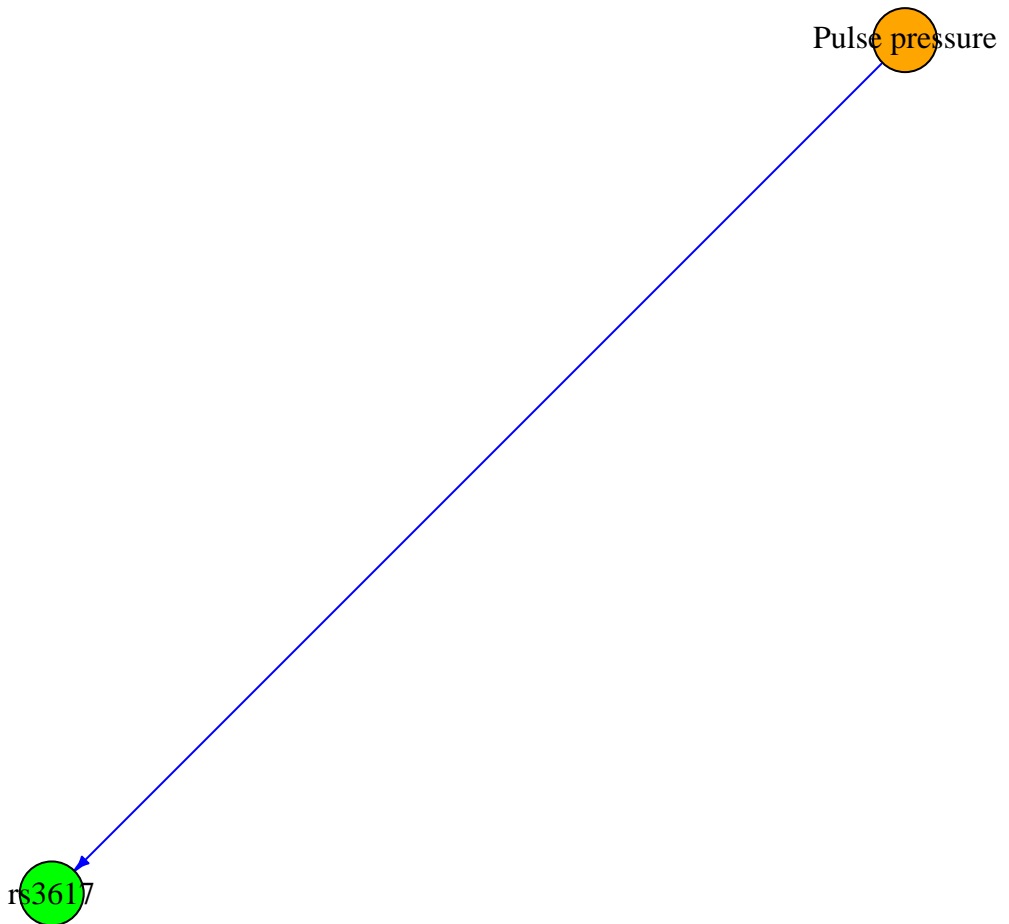

## Variant-Disease Network (QRS duration)

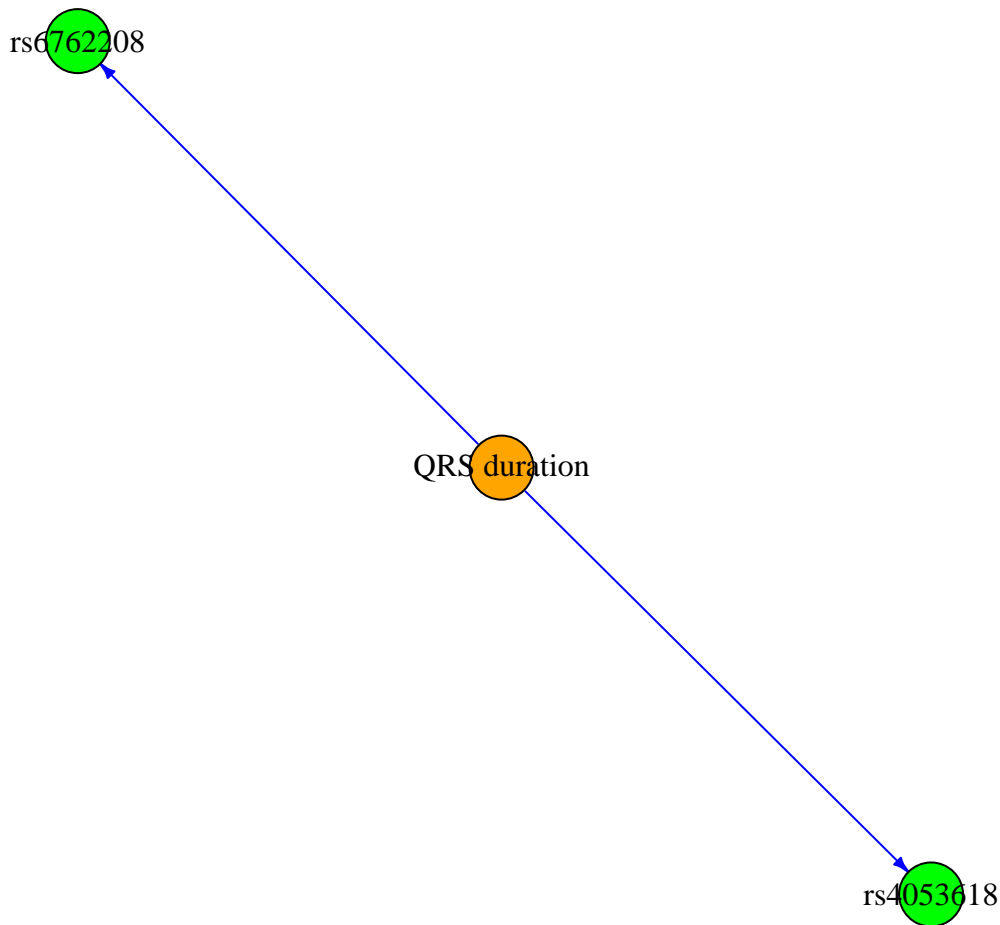



## Variant–Disease Network (Red blood cell count)

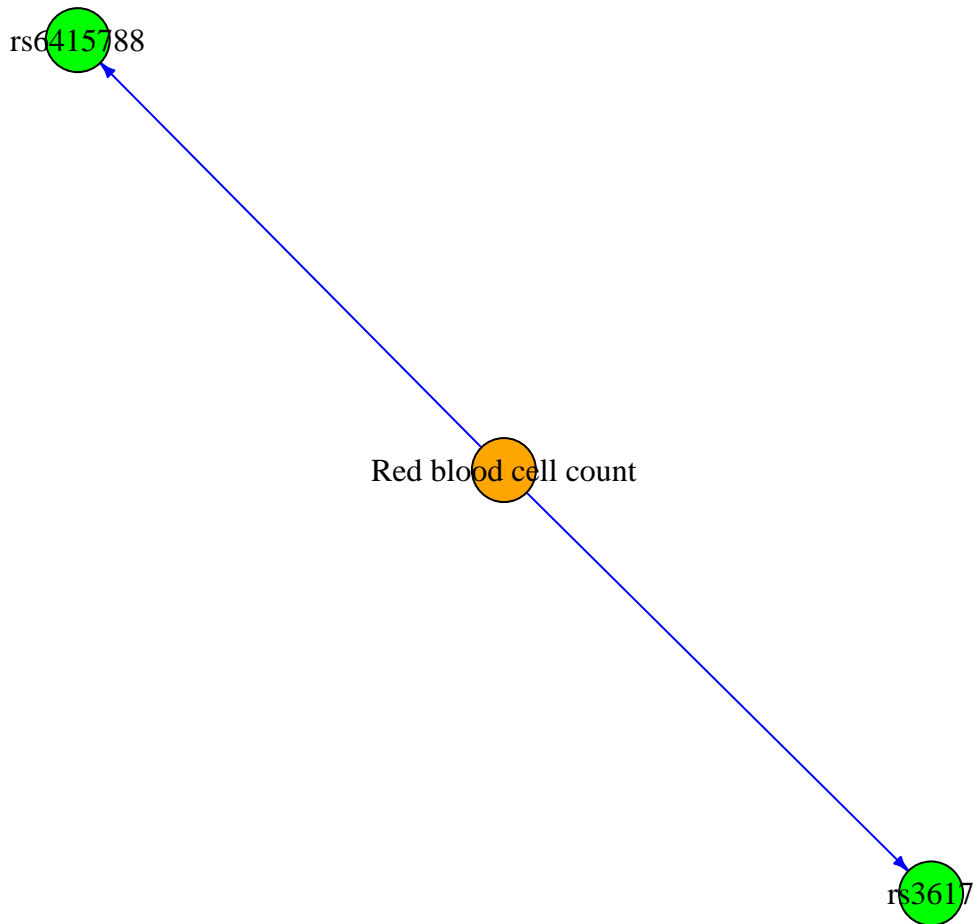

## Variant–Disease Network (Red blood cell traits)

Red blood cell traits

rs4820268

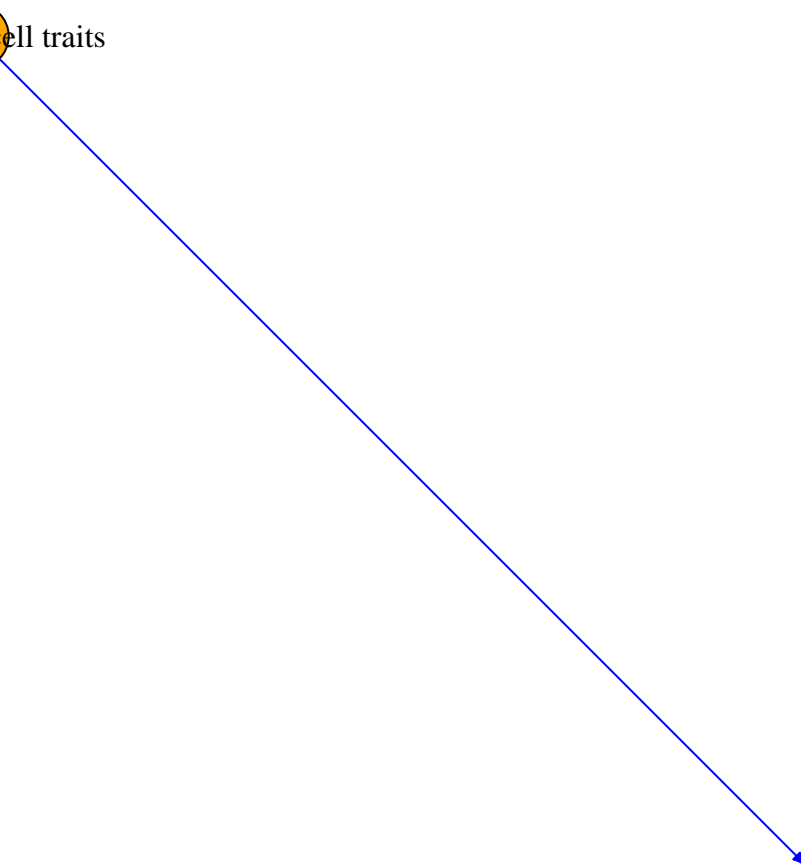

# Variant–Disease Network (Red cell distribution width)

rs6599079

Red cell distribution width

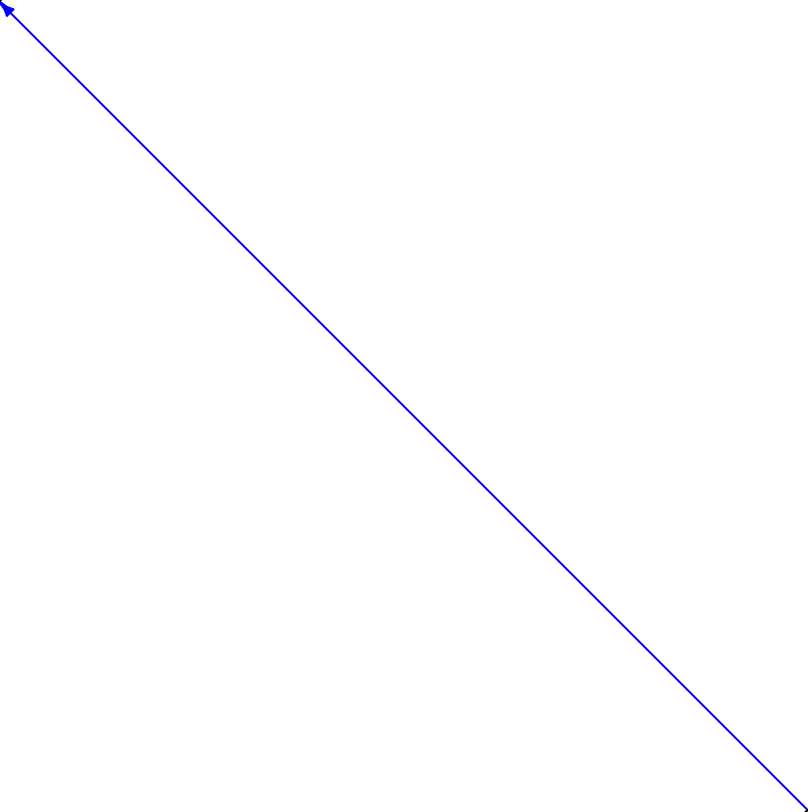

## Variant-Disease Network (Refractive error)

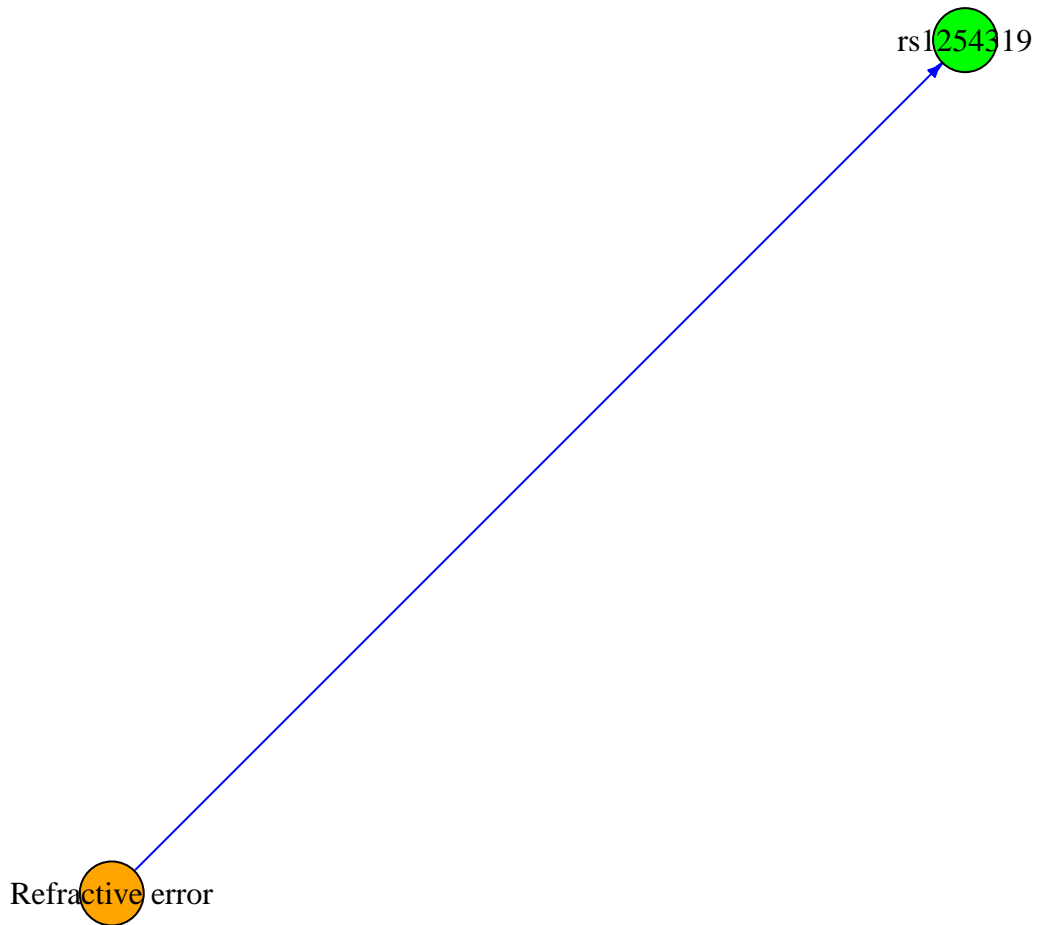

# nt-Disease Network (Response to cognitive-behavioural therapy in anxiety

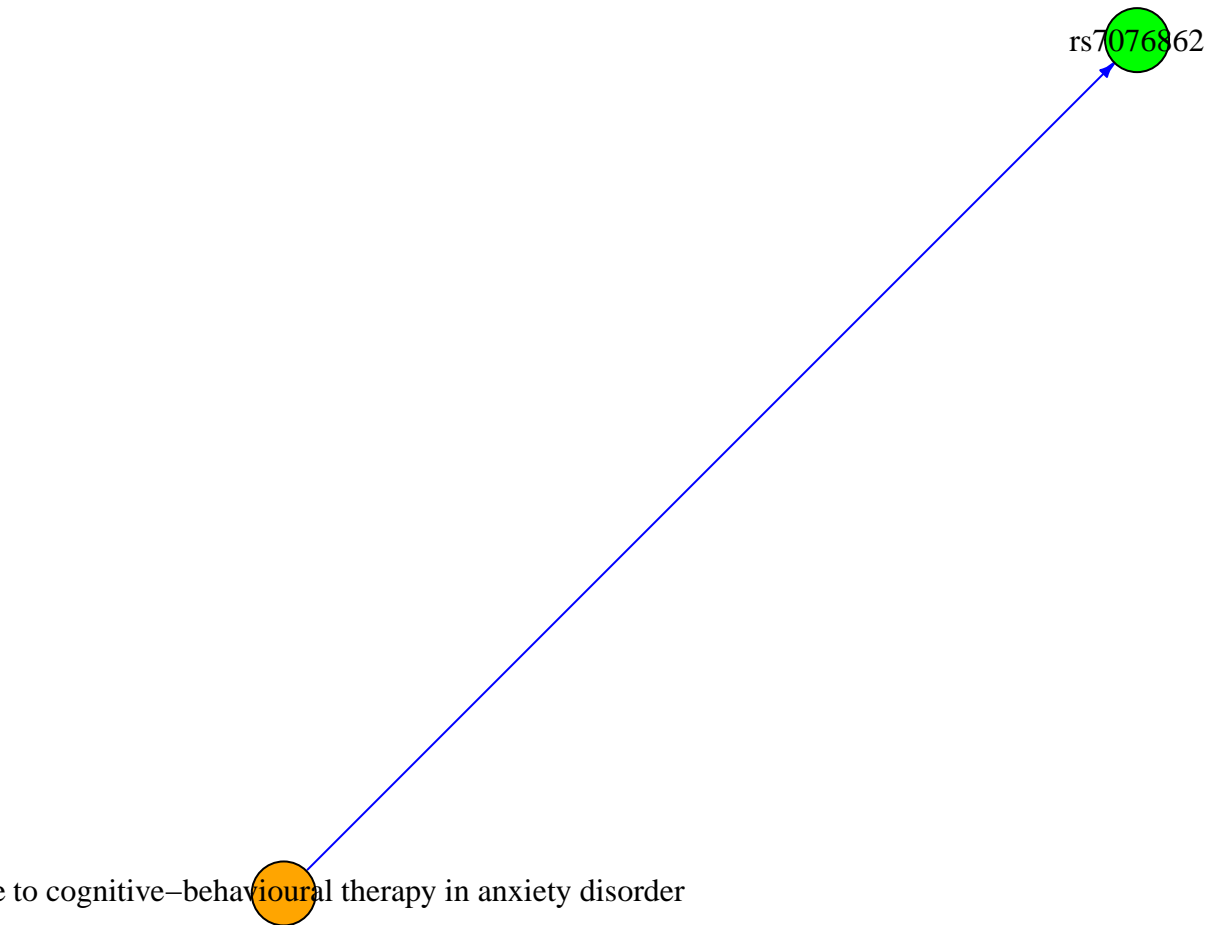

# Variant–Disease Network (Reticulocyte count)

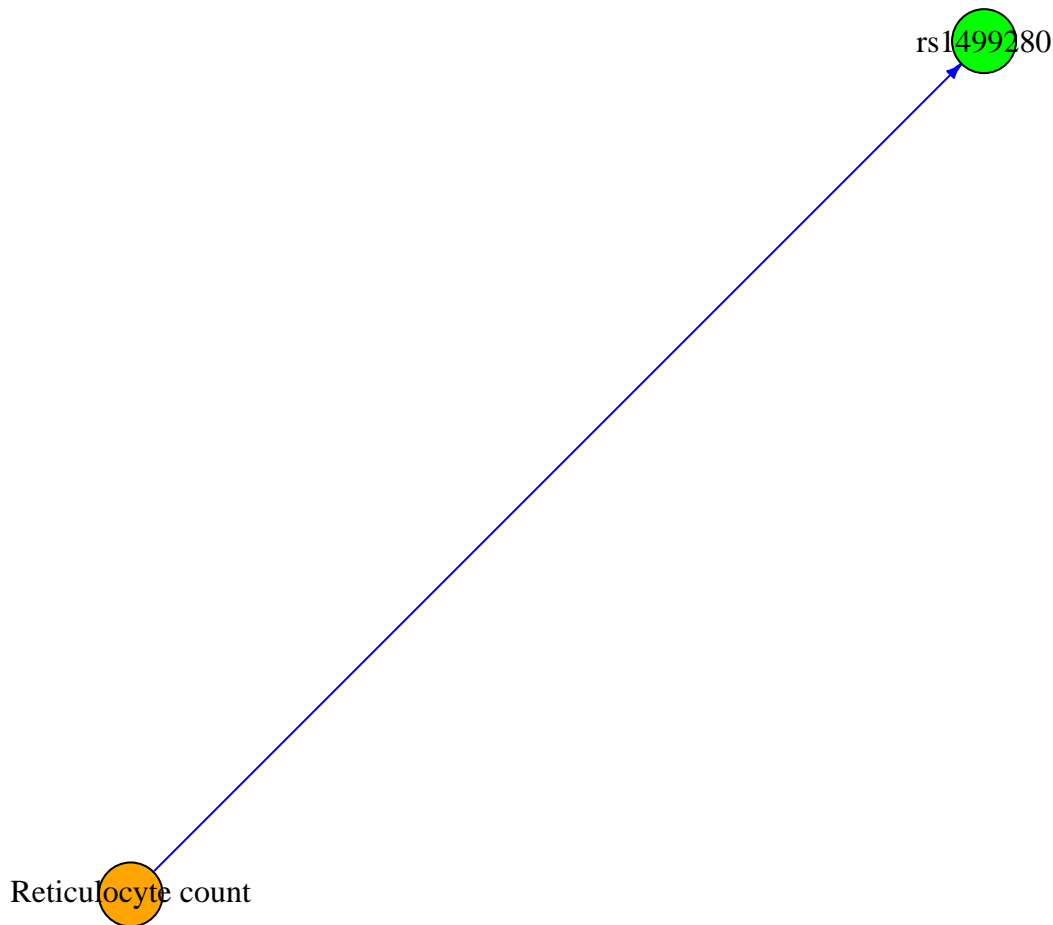

# Variant–Disease Network (Reticulocyte fraction of red cells)

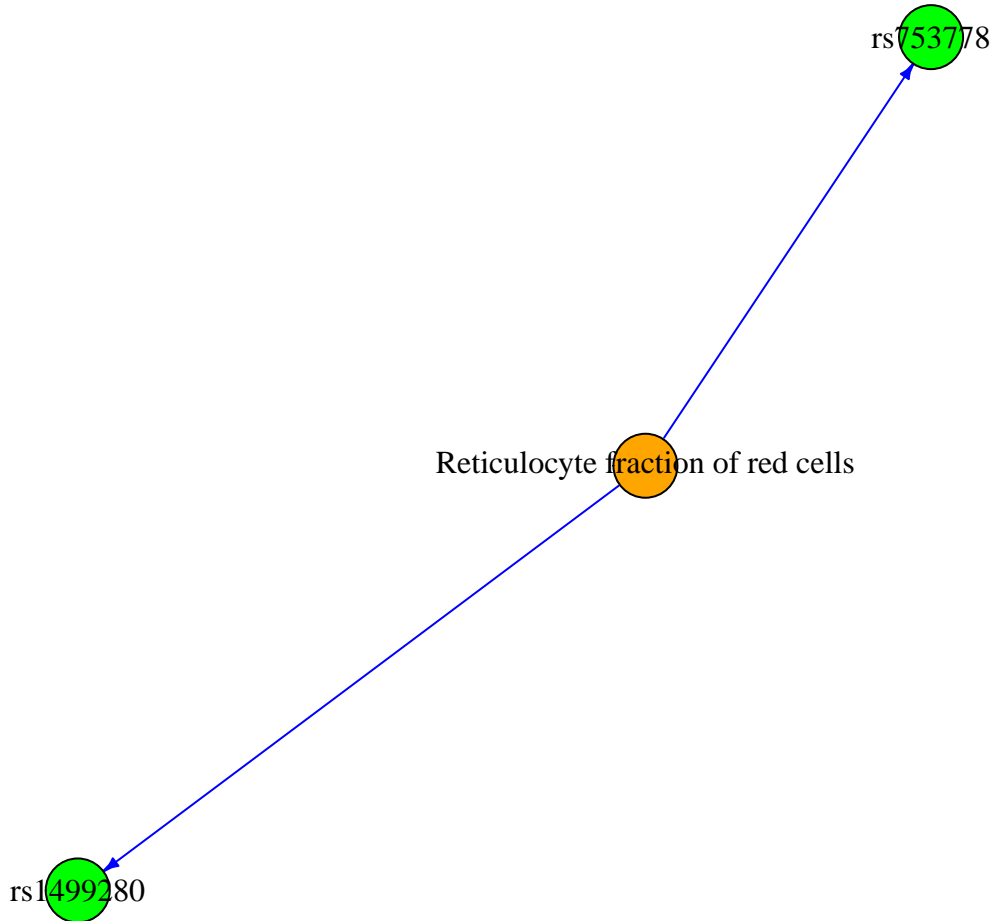

## Variant–Disease Network (Risk-taking tendency )

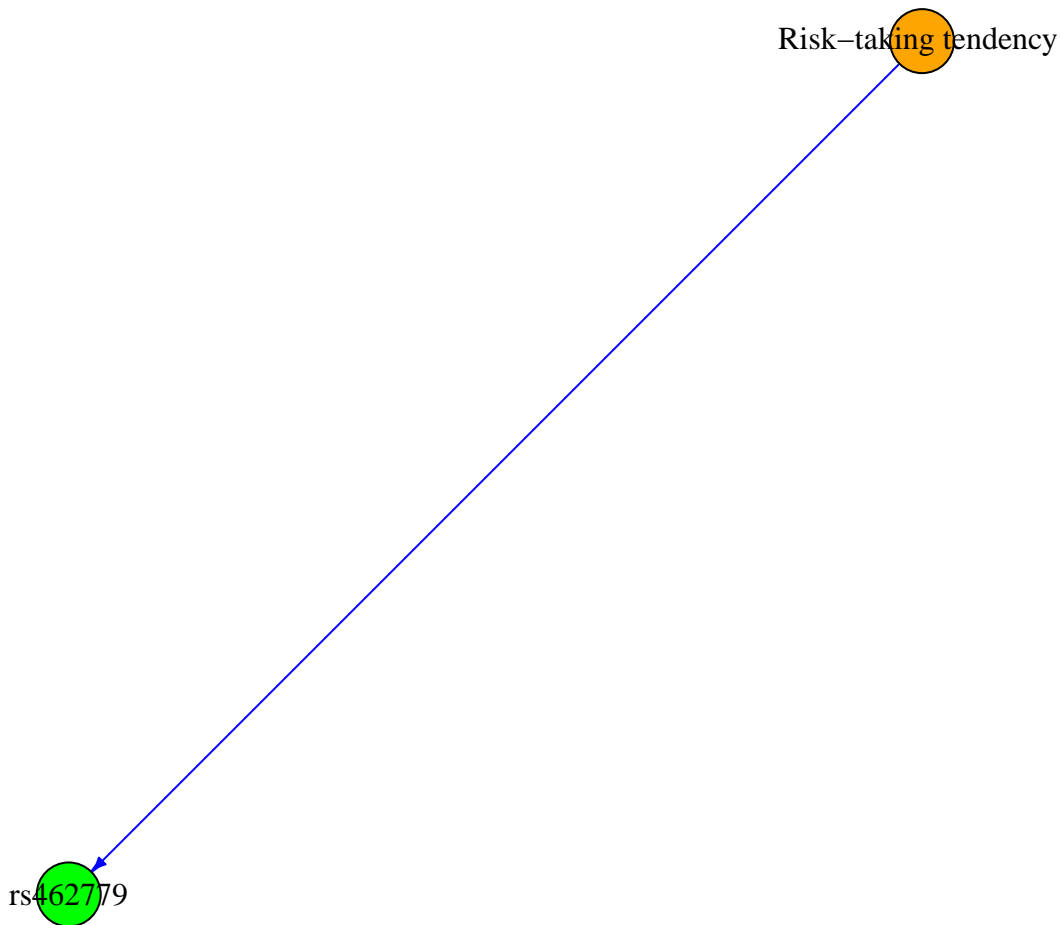



Variant–Disease Network (Schizophrenia)

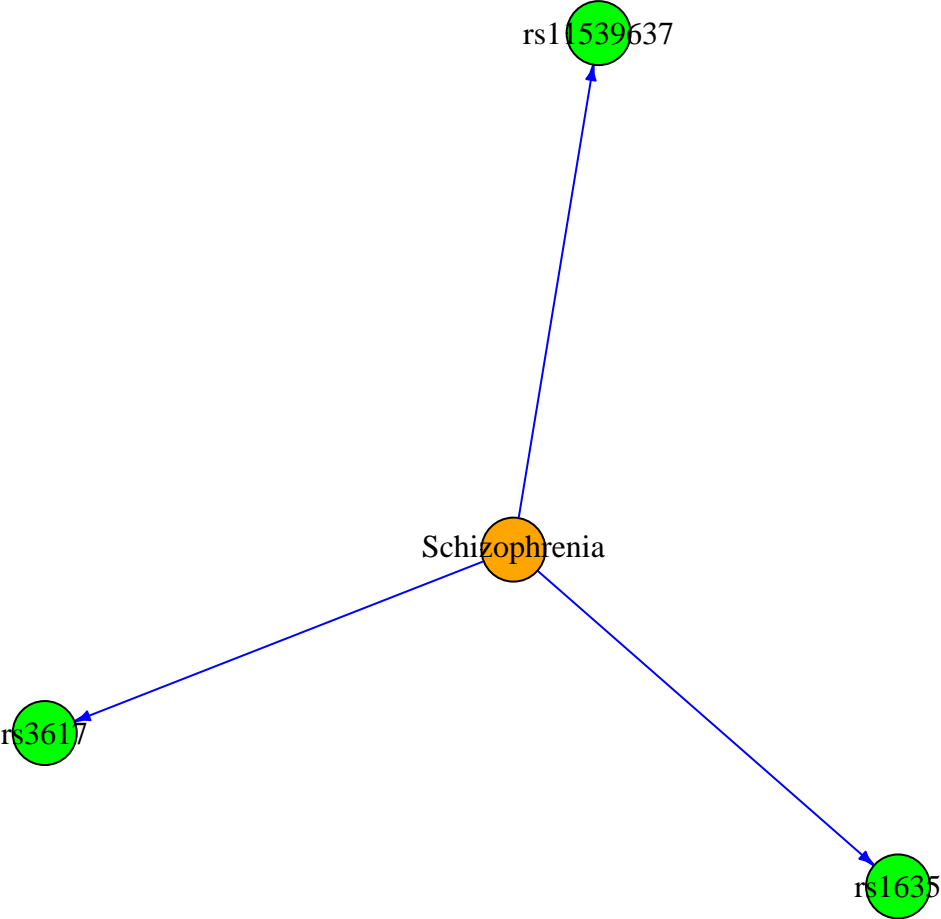

# Variant–Disease Network (Serum 25–Hydroxyvitamin D levels)

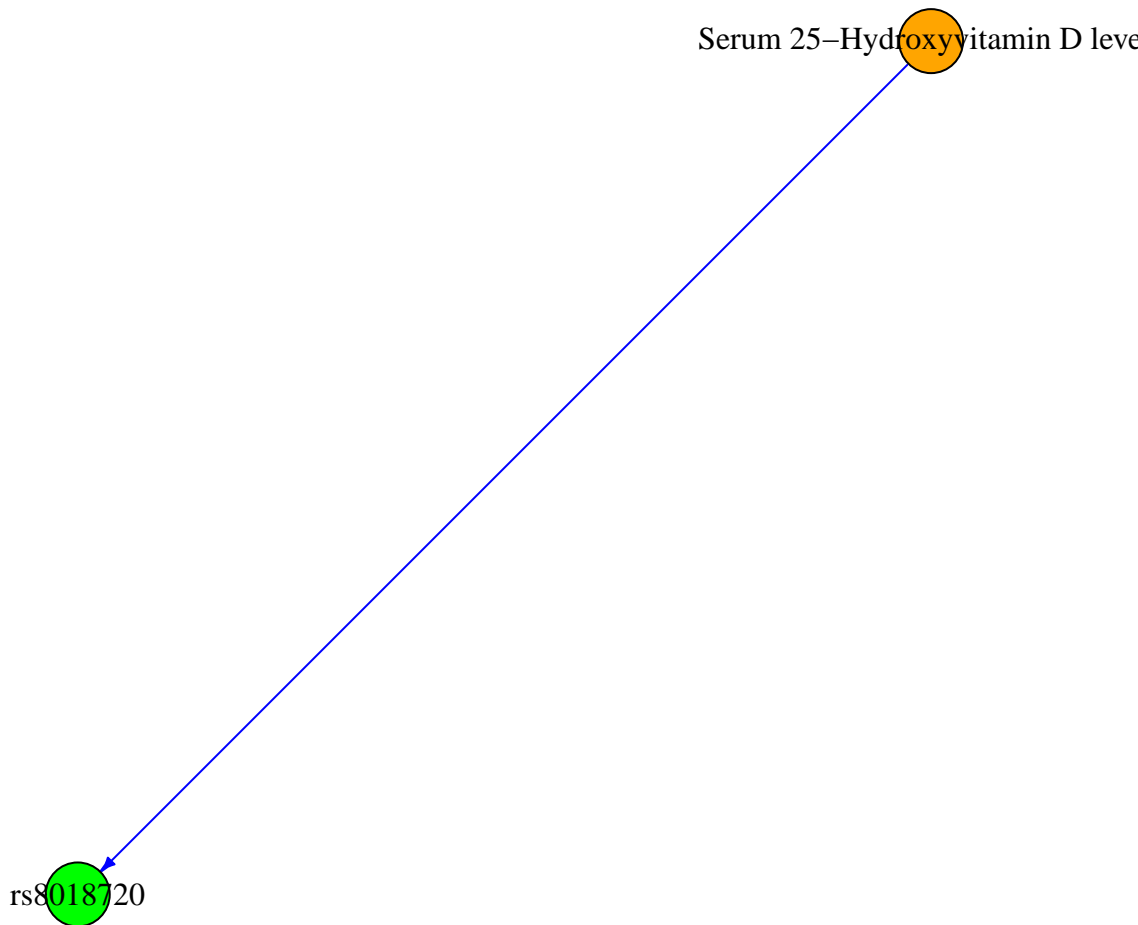

**Variant–Disease Network (Serum dimethylarginine levels )**

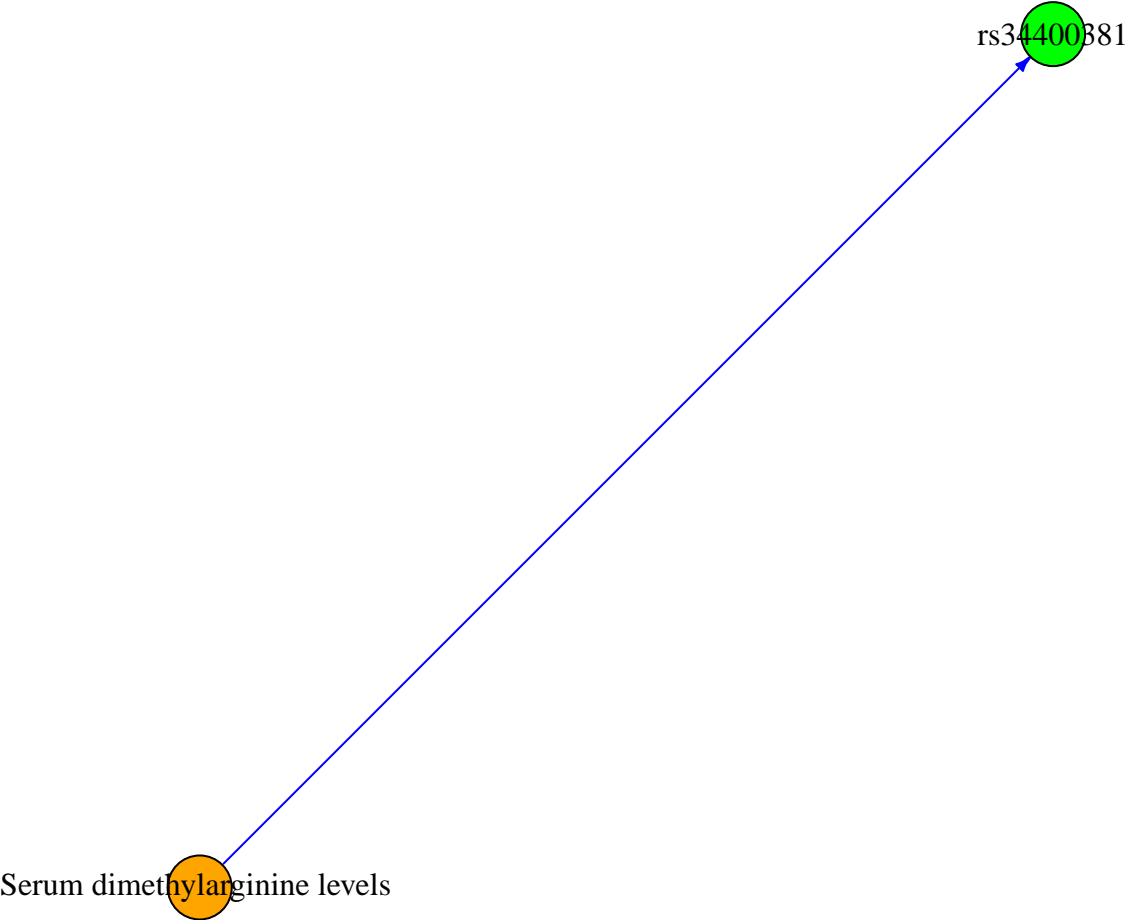

## Variant–Disease Network (Serum metabolite levels)

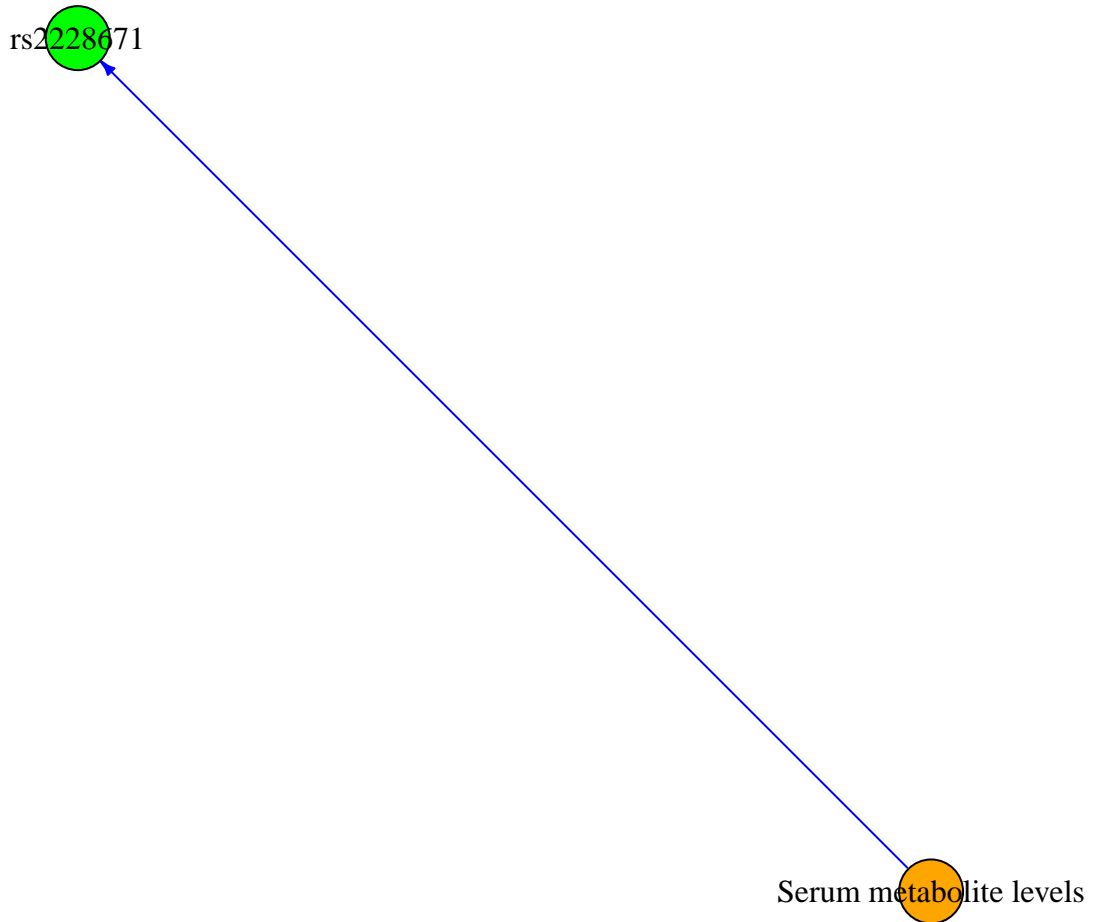

# Variant-Disease Network (Serum metabolite levels )

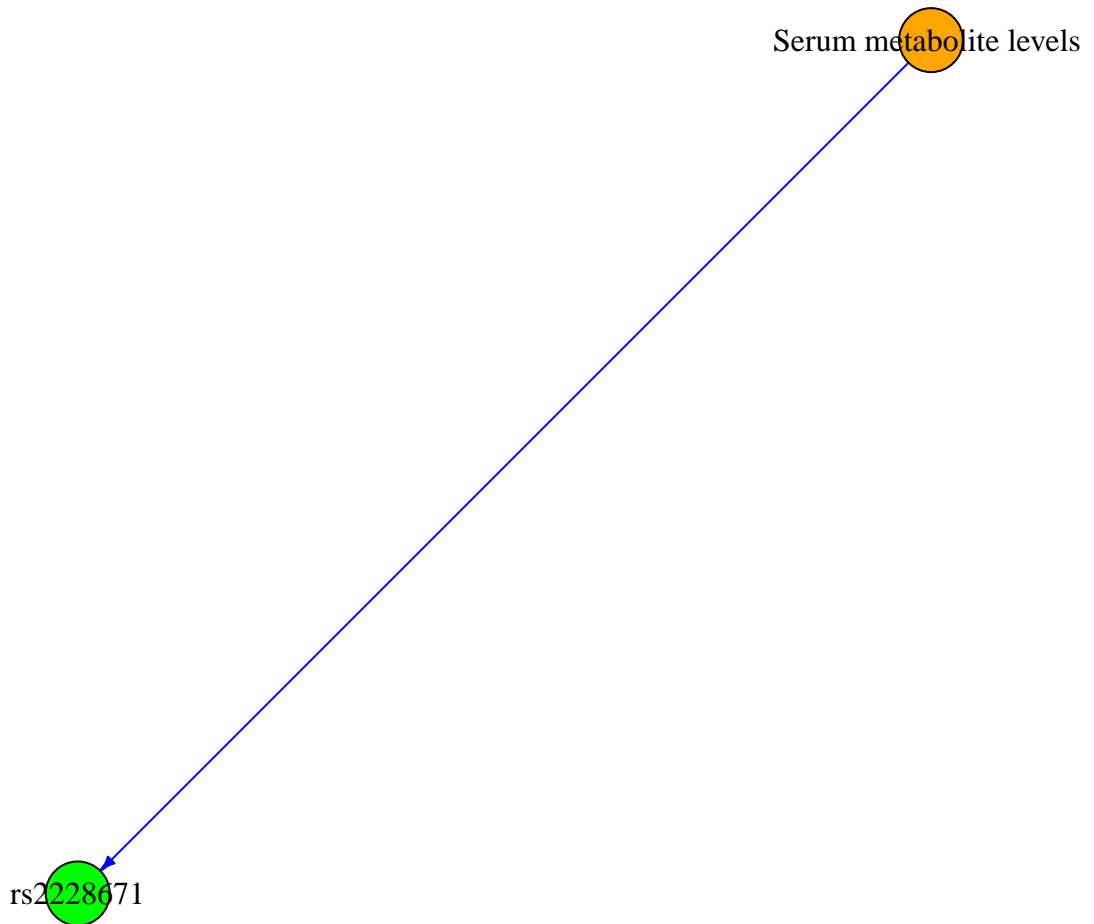

# Variant–Disease Network (Serum parathyroid hormone levels)

Serum parathyroid hormone levels

rs219779

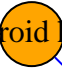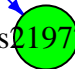

## Variant–Disease Network (Smoking initiation )

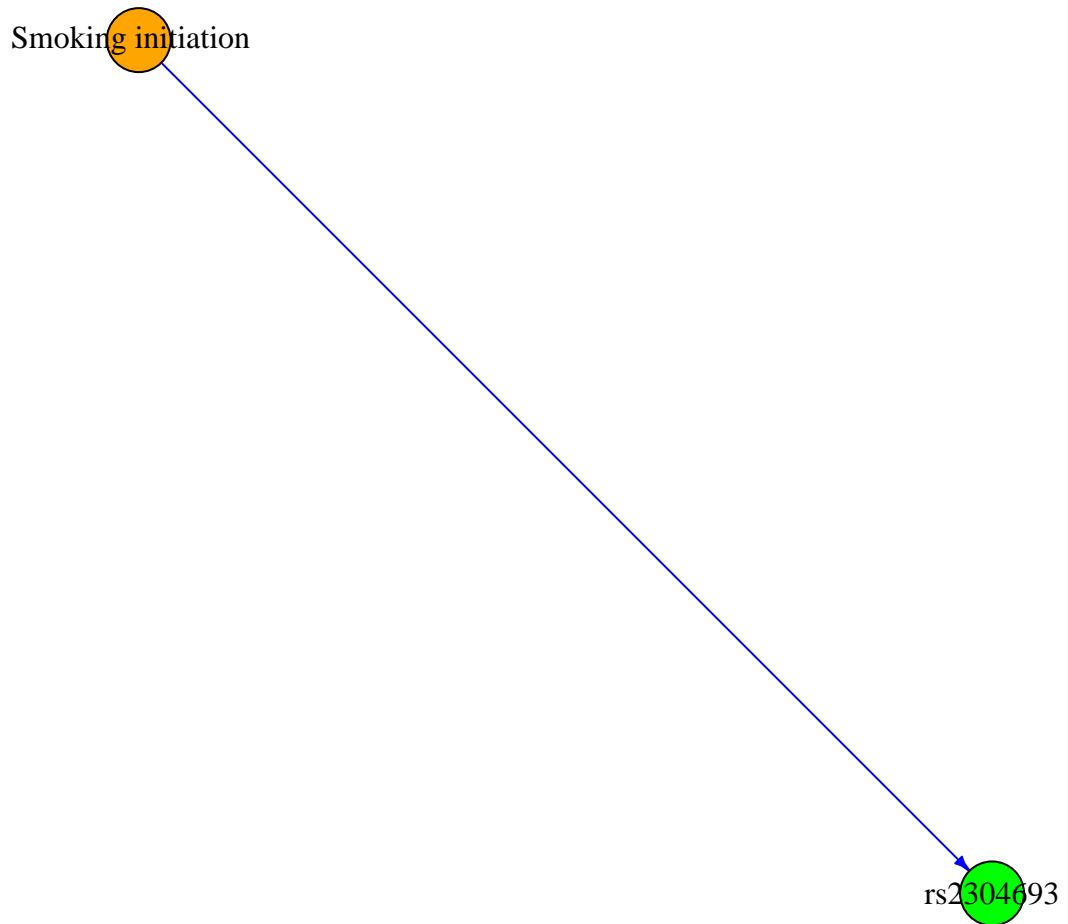

**Variant–Disease Network (Symmetrical dimethylarginine levels)**

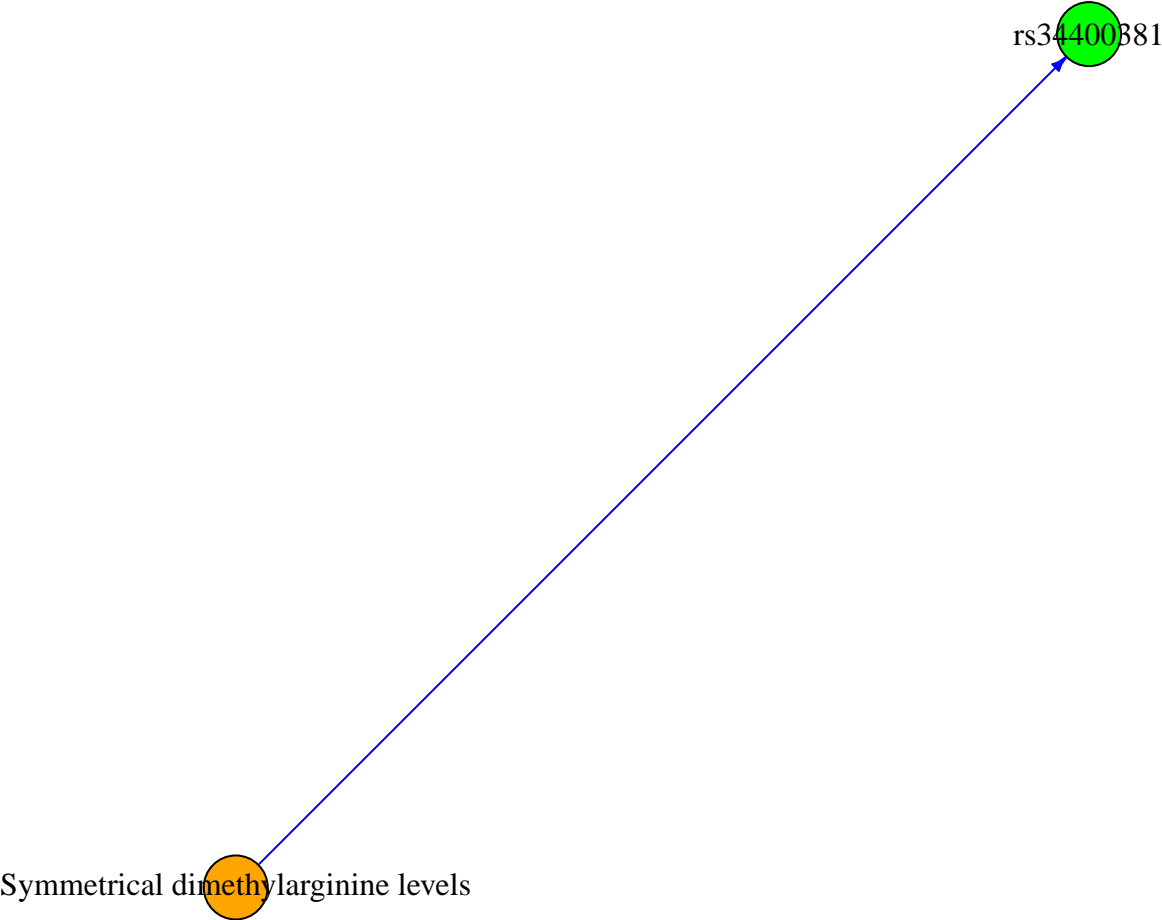



# Variant–Disease Network (Systemic lupus erythematosus)

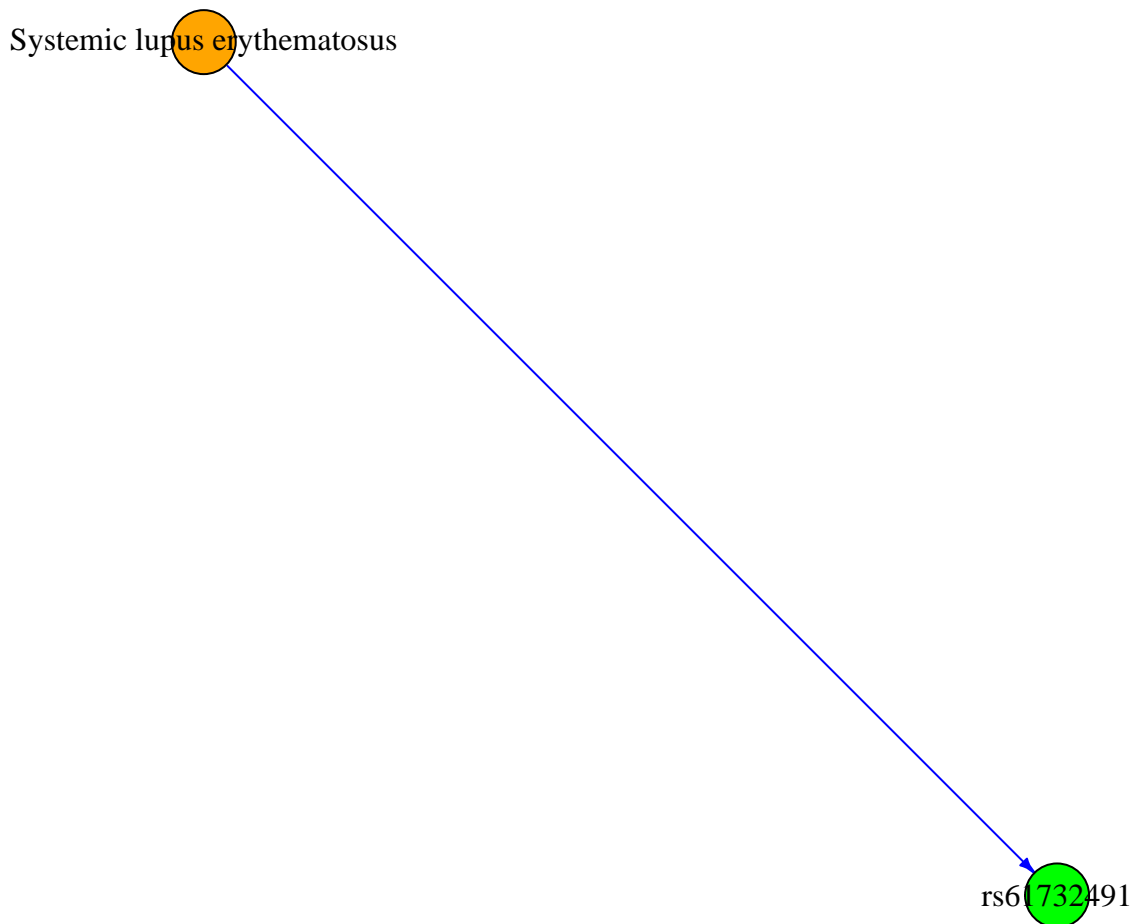

**Variant–Disease Network (Systolic blood pressure in sickle cell anemia)**

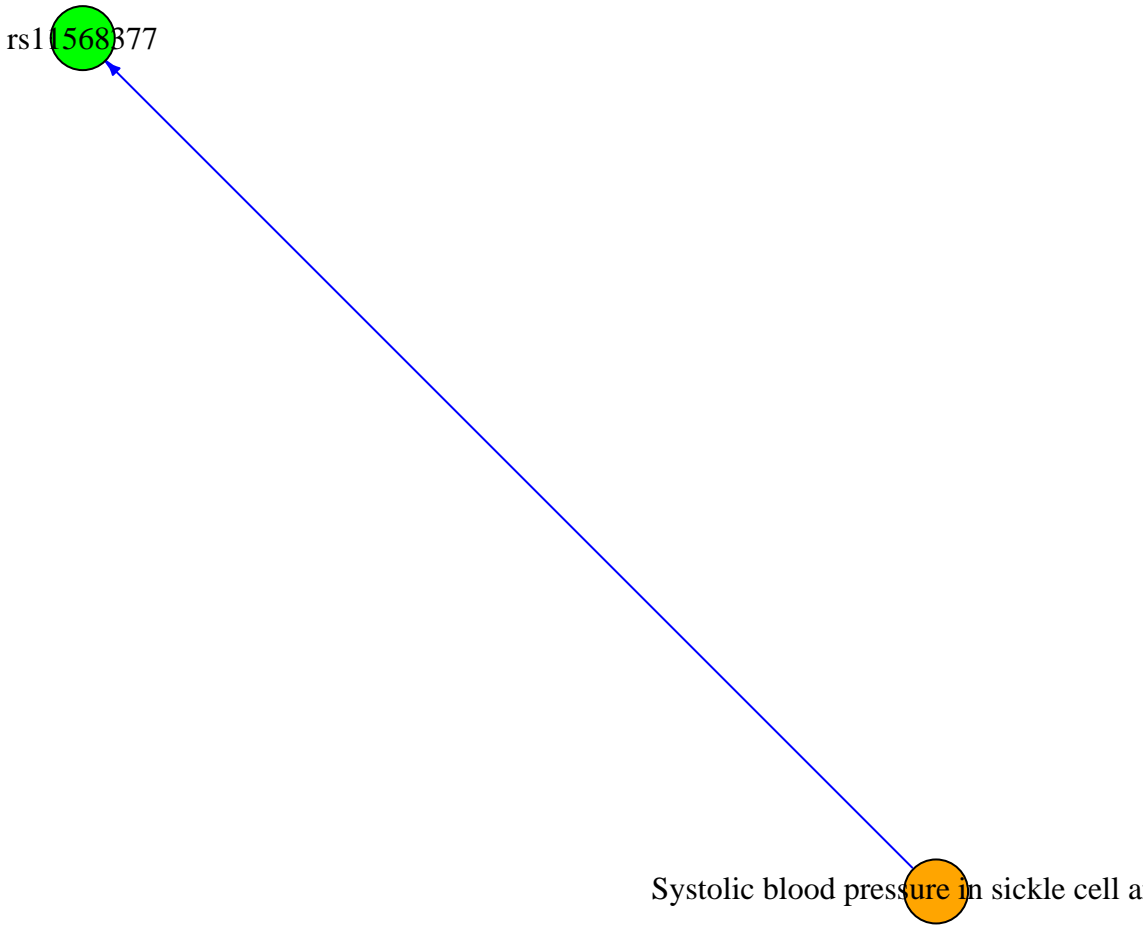

# Variant-Disease Network (Total cholesterol levels)

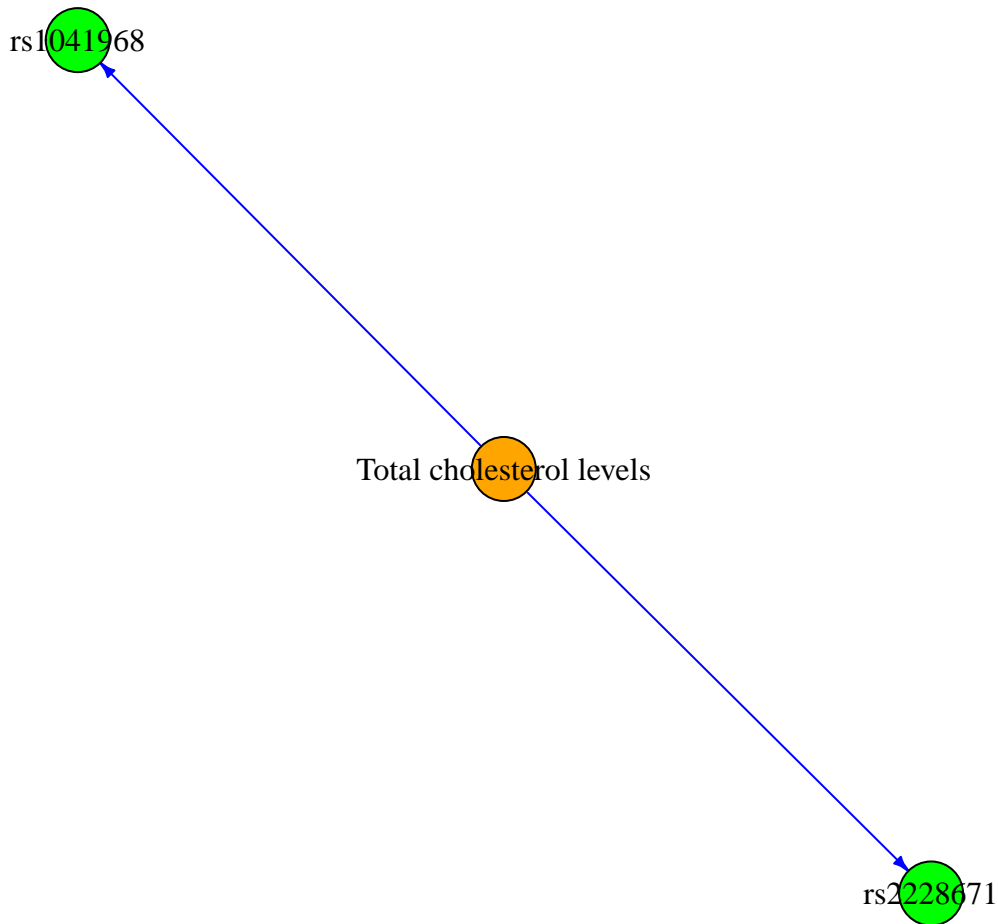

## Variant-Disease Network (Triglyceride levels)

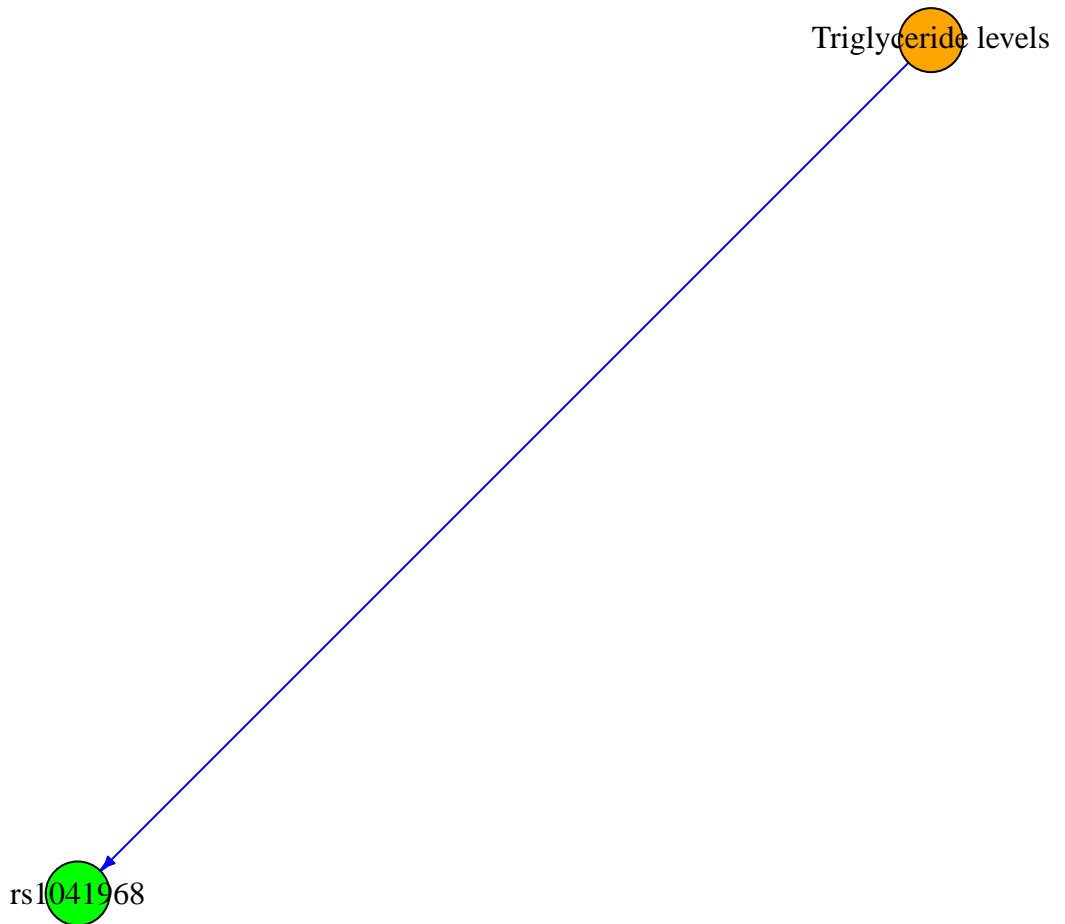

## Variant–Disease Network (Triglycerides)

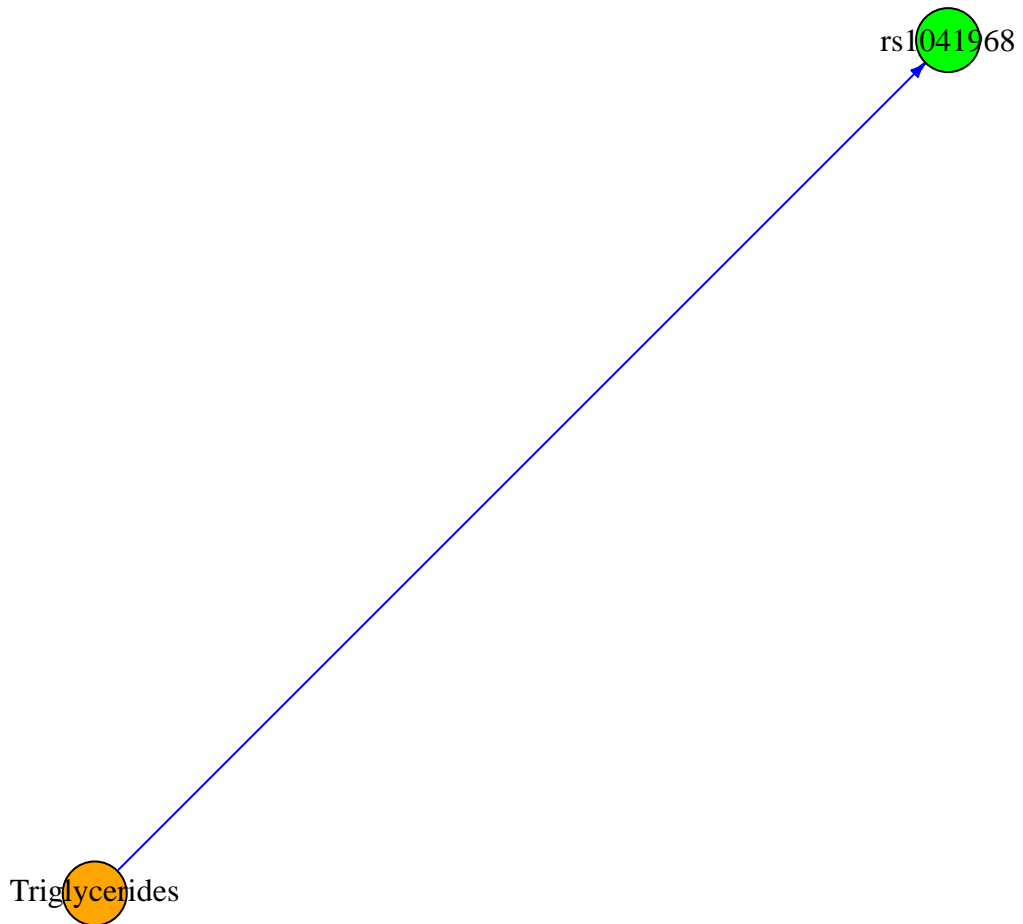

## Variant–Disease Network (Type 2 diabetes)

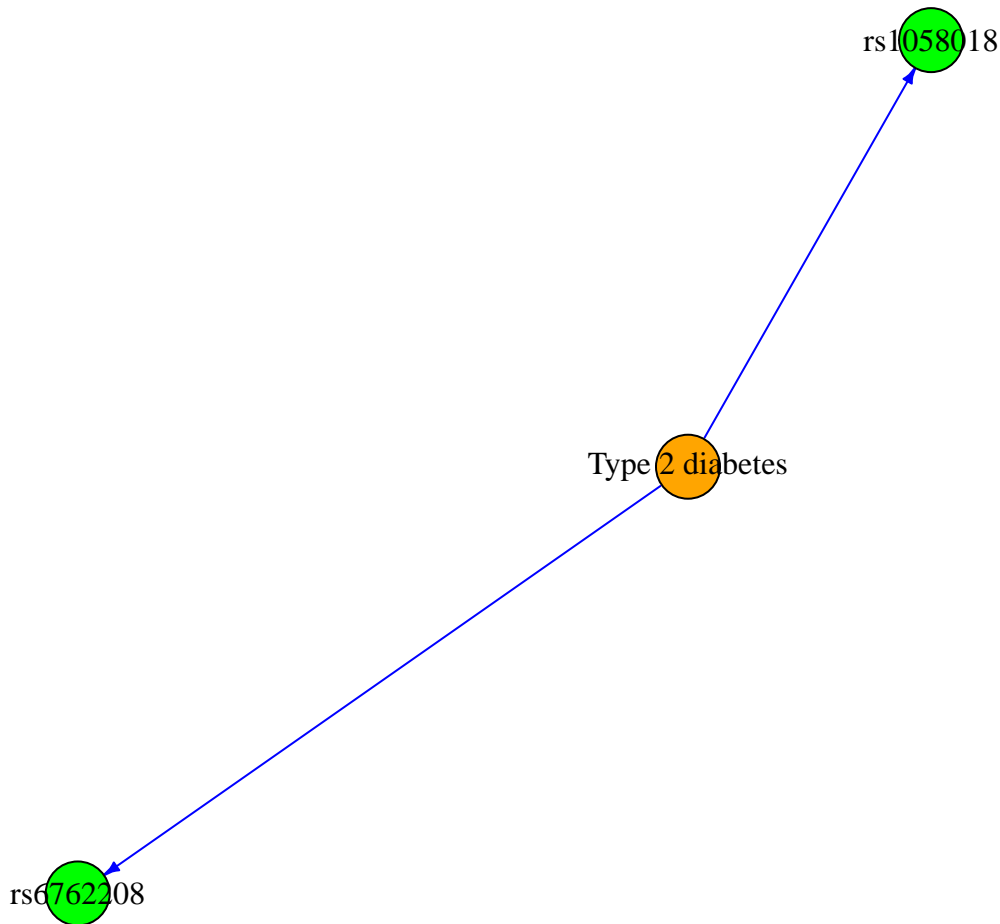

Variant–Disease Network (Type 2 diabetes )

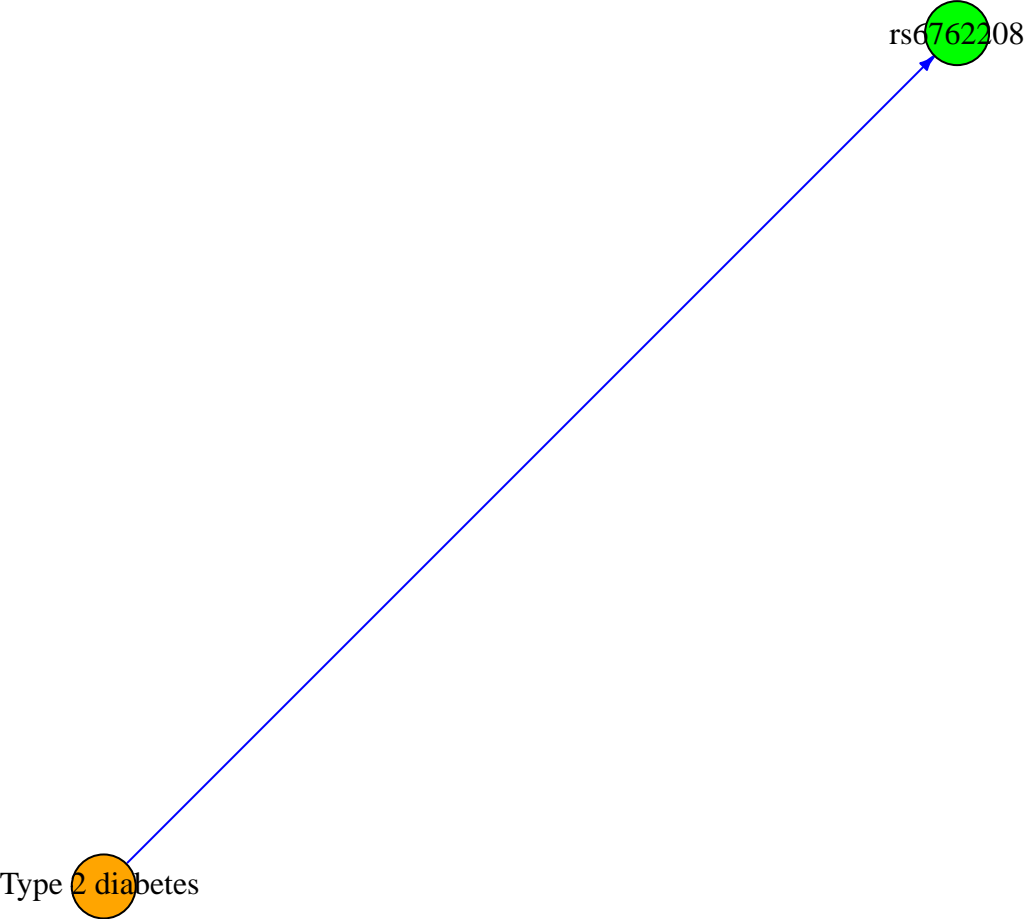

## Variant–Disease Network (Ulcerative colitis)

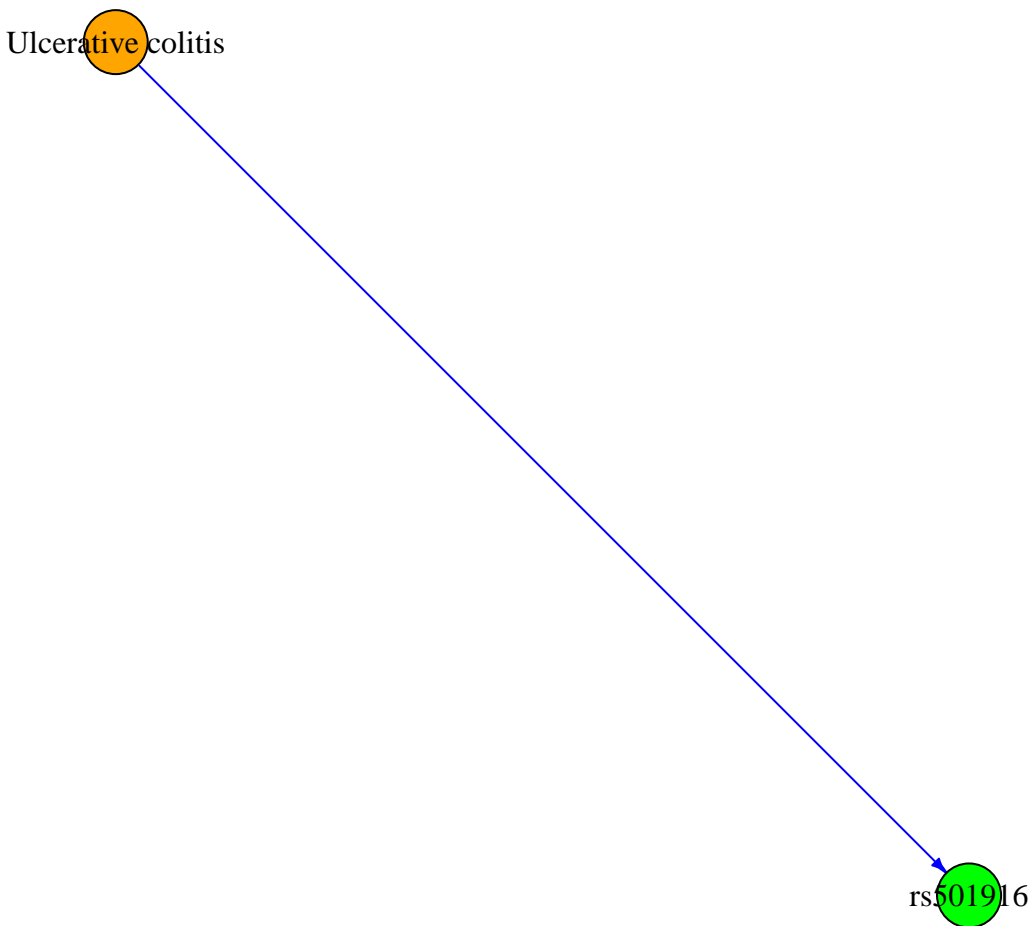



## Variant–Disease Network (Vitamin D levels)

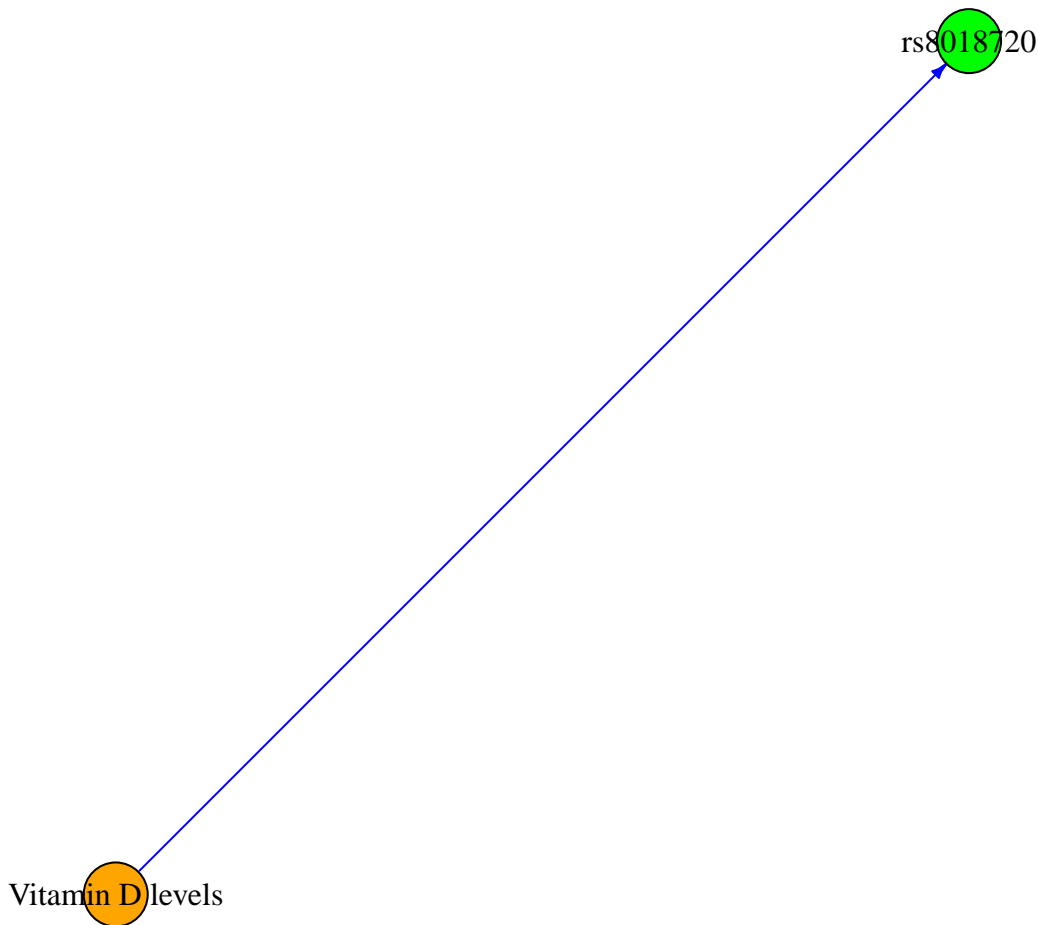

## Variant–Disease Network (Waist–hip ratio)

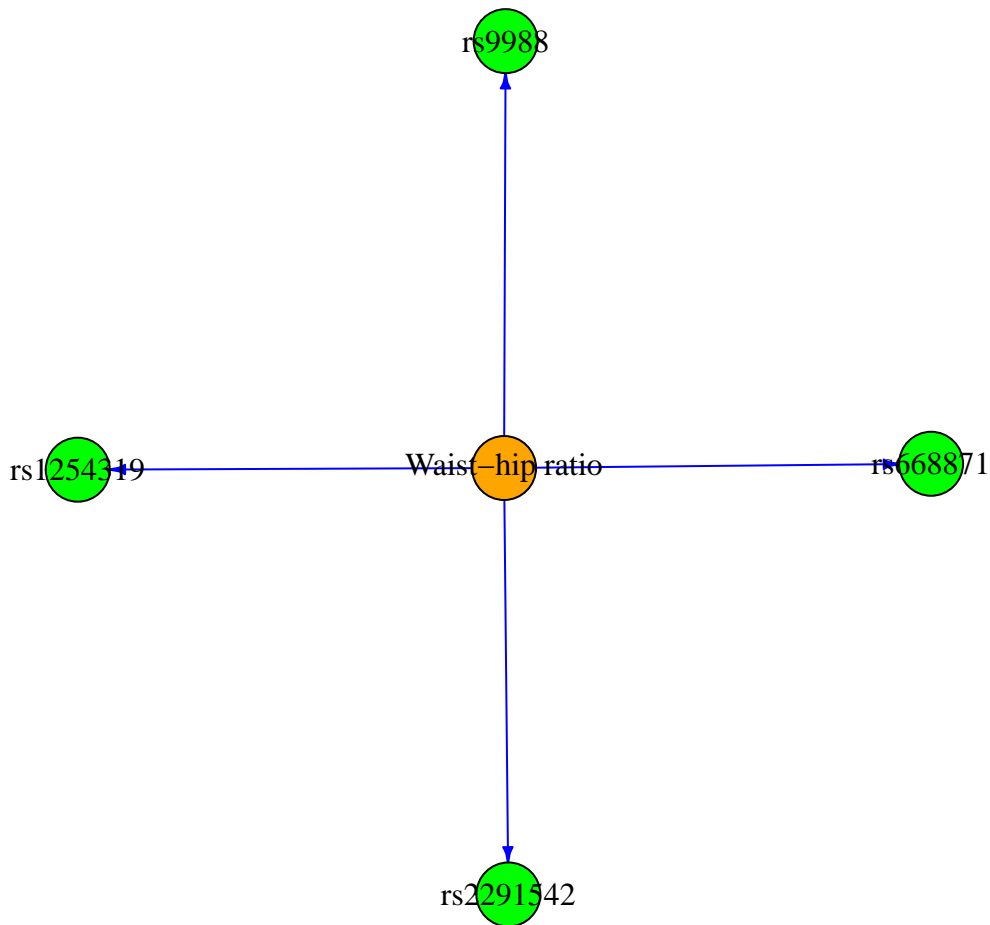

# Variant-Disease Network (Waist-to-hip ratio adjusted for BMI)

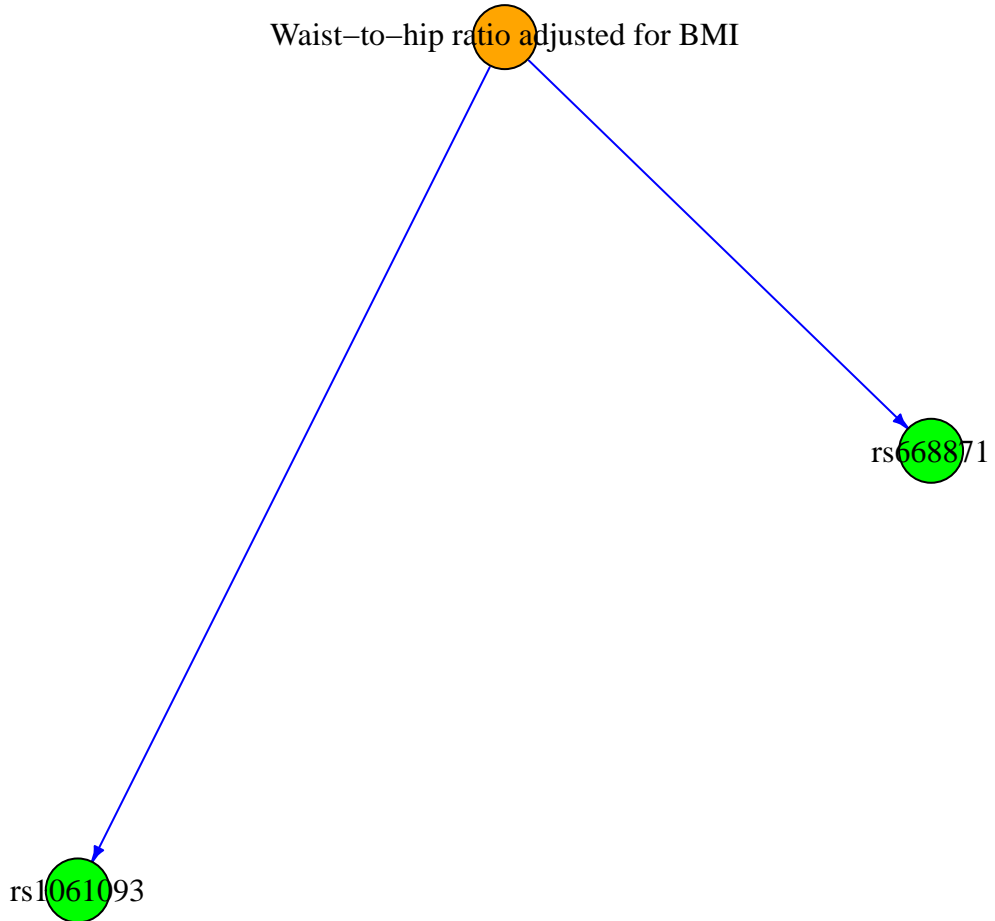

Variant–Disease Network (Waist–to–hip ratio adjusted for BMI )

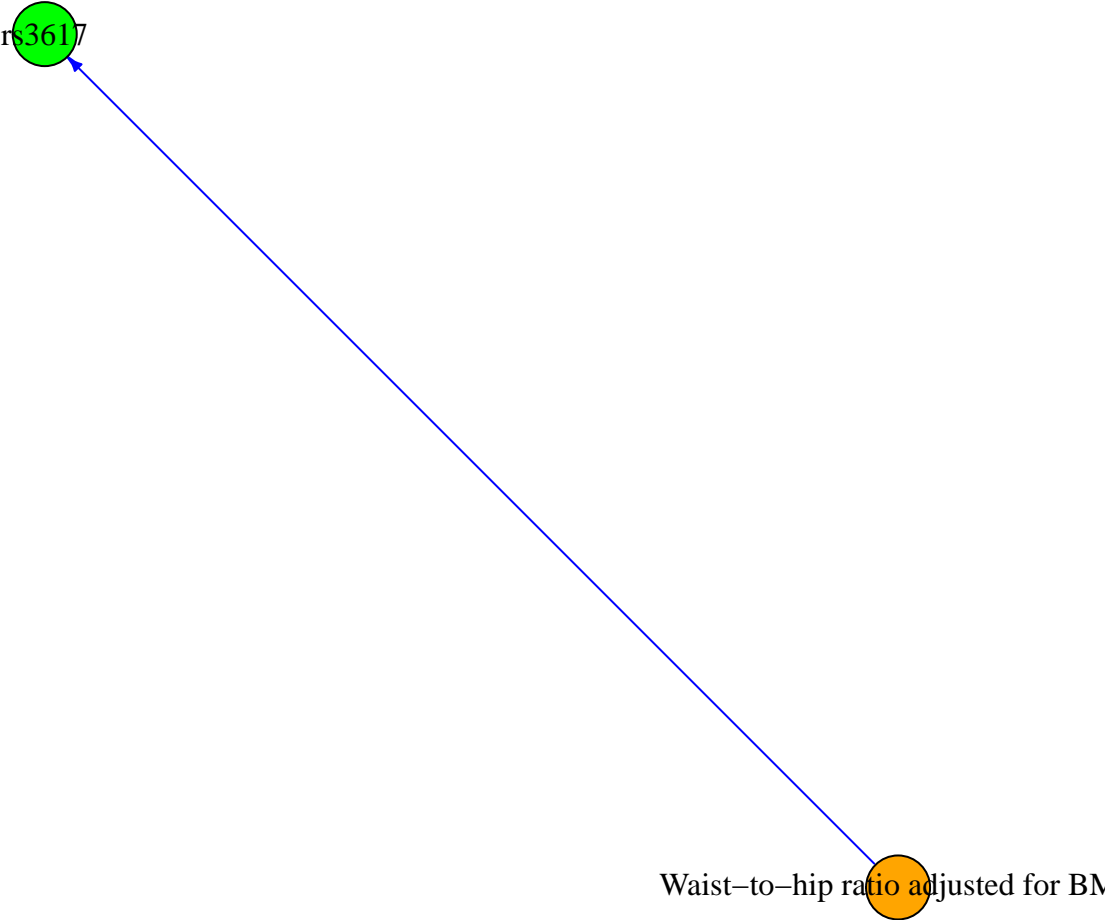

# Variant-Disease Network (Waist-to-hip ratio adjusted for BMI x sex x age inter

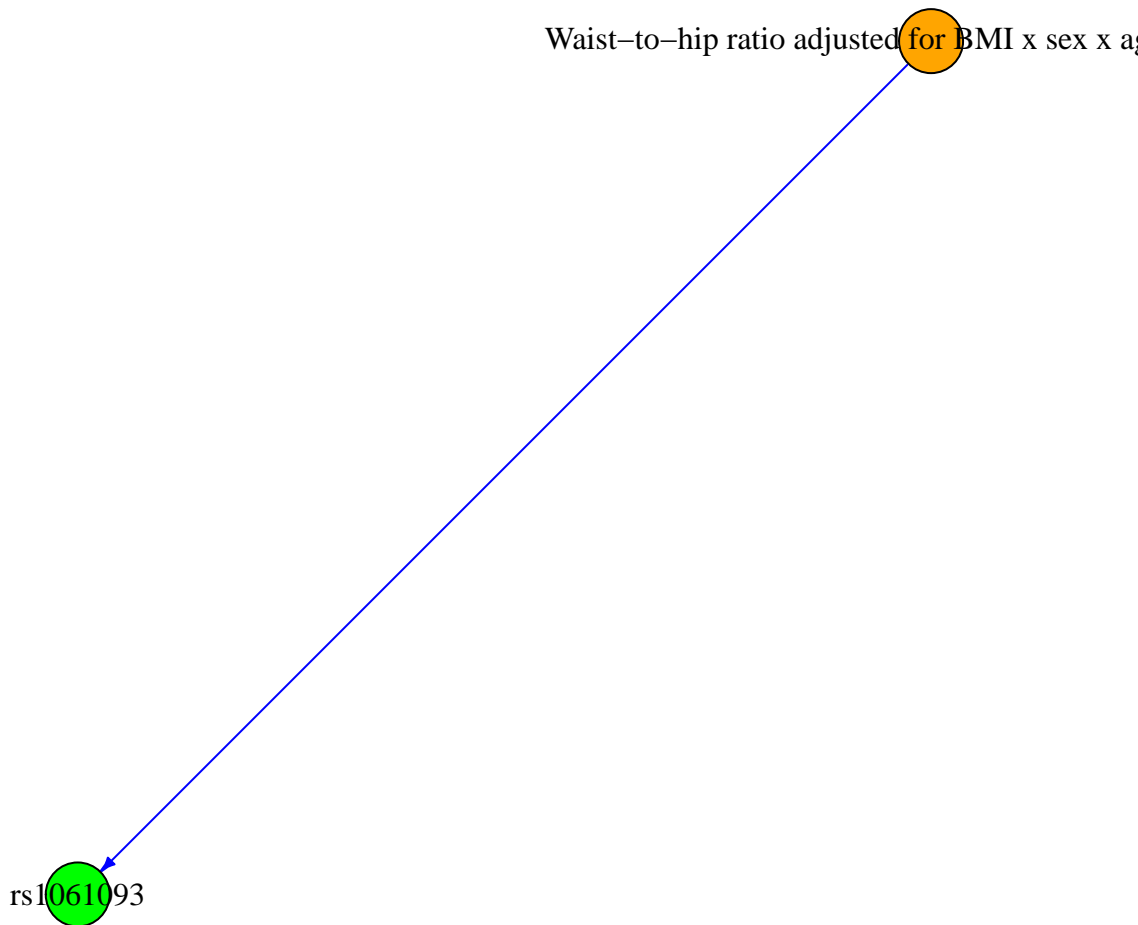

## Variant–Disease Network (bone density)

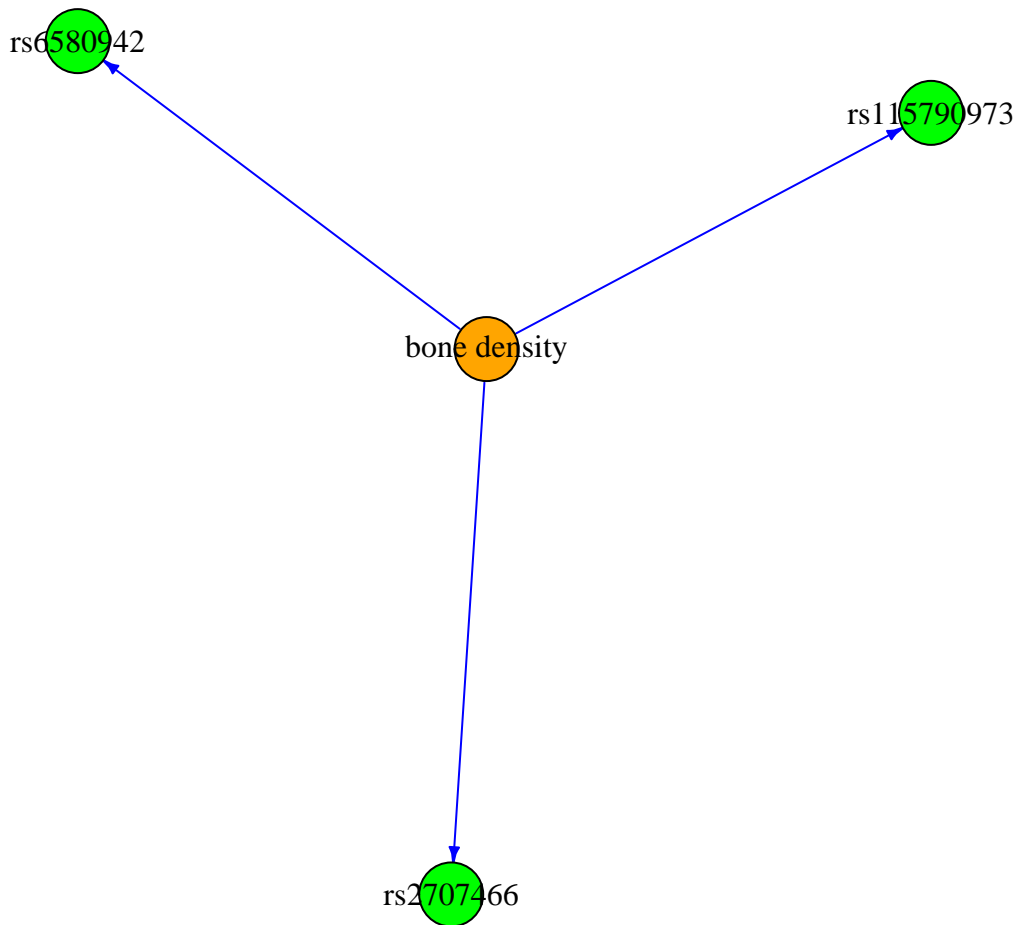

## Variant–Disease Network (response to statin)

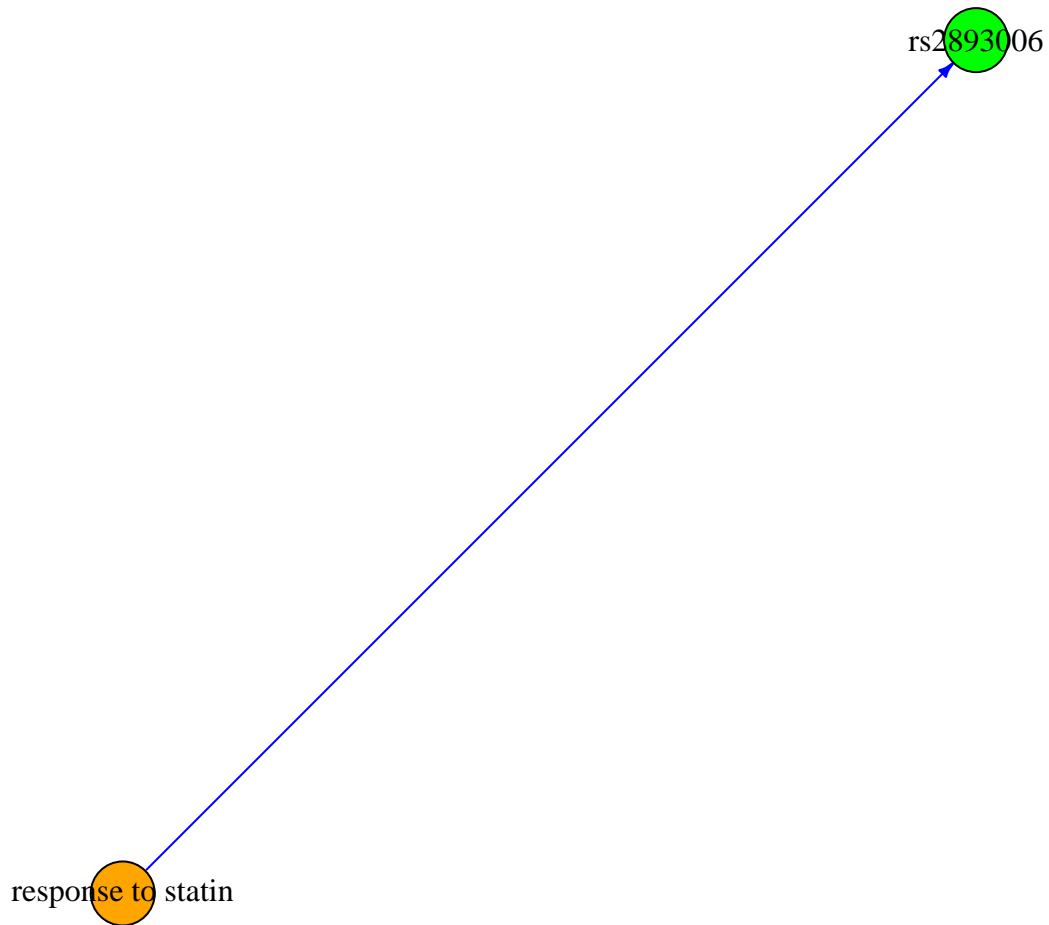

Variant–Disease Network (blood metabolite measurement)

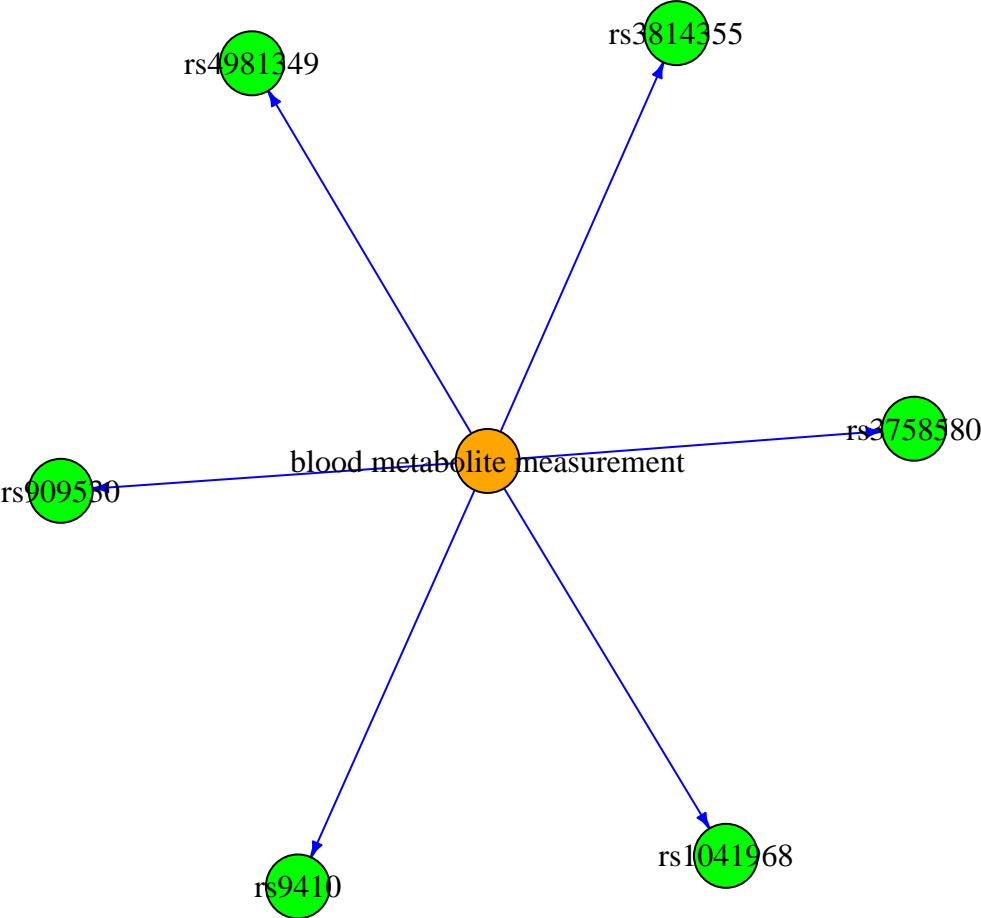



## Variant–Disease Network (cleft lip)

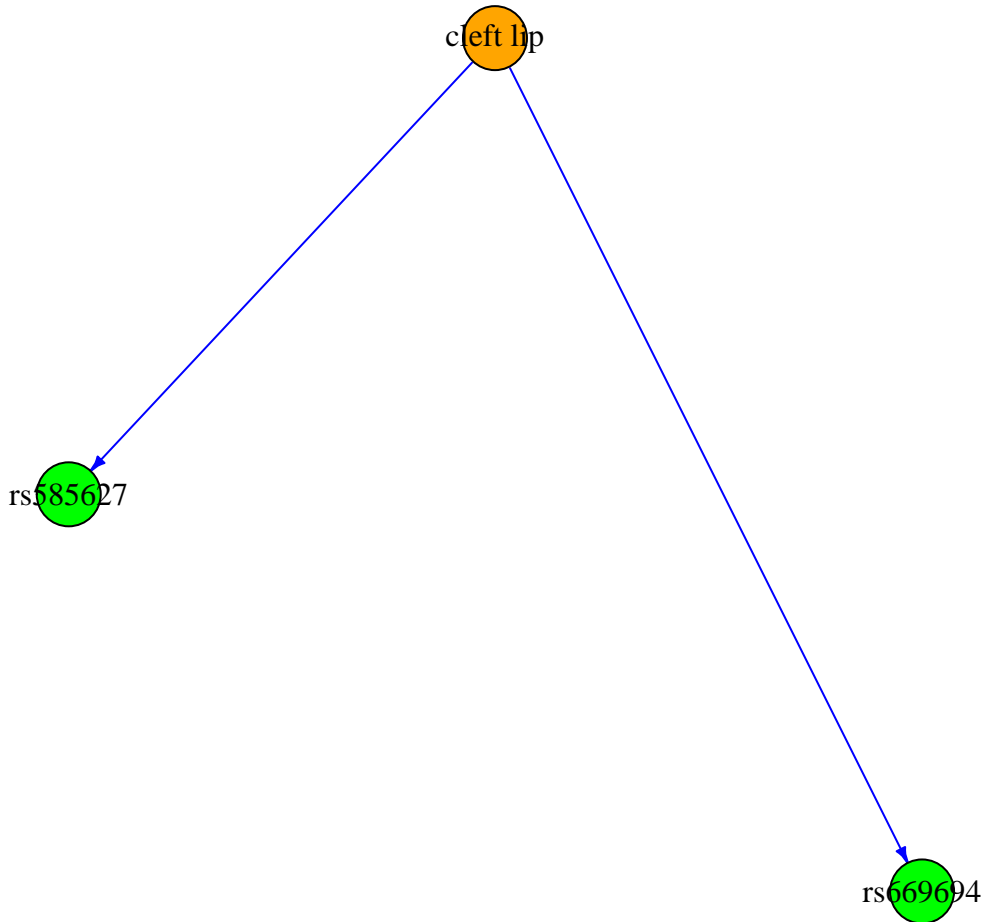

## Variant–Disease Network (progranulin measurement)

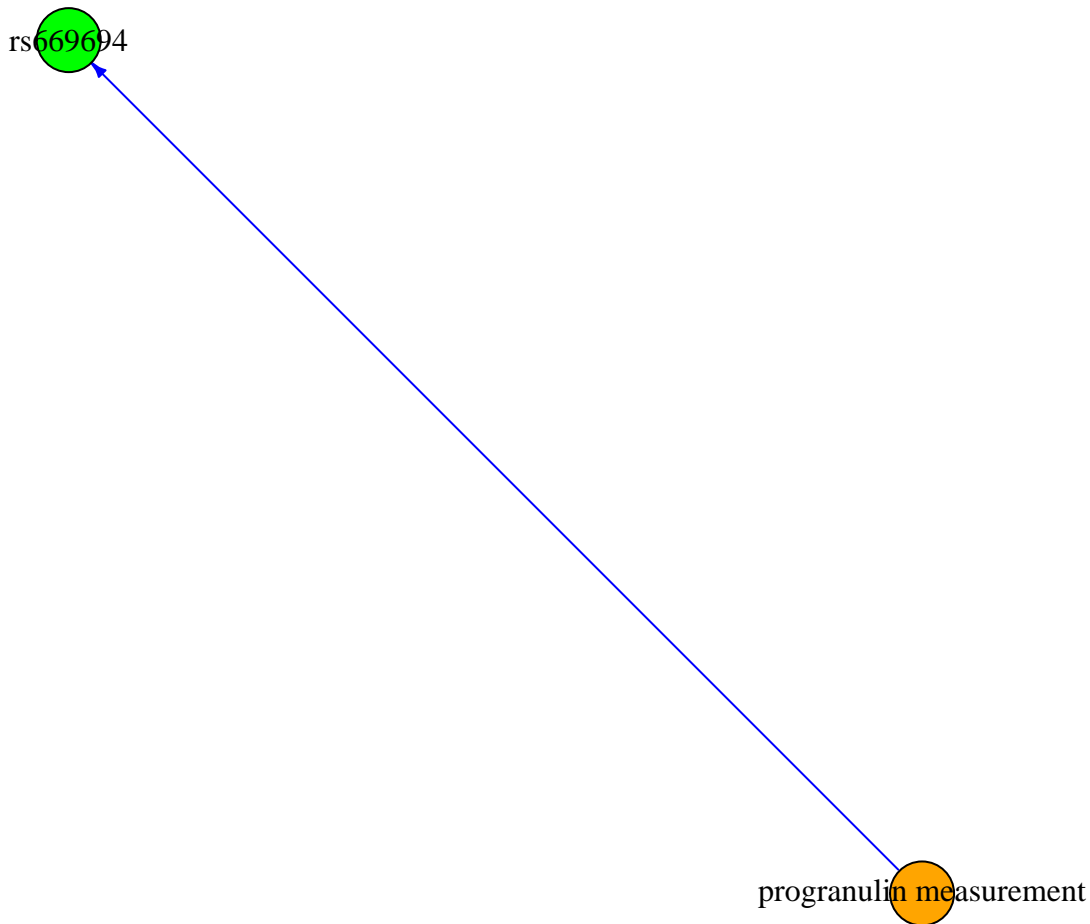

## Variant–Disease Network (systolic blood pressure)

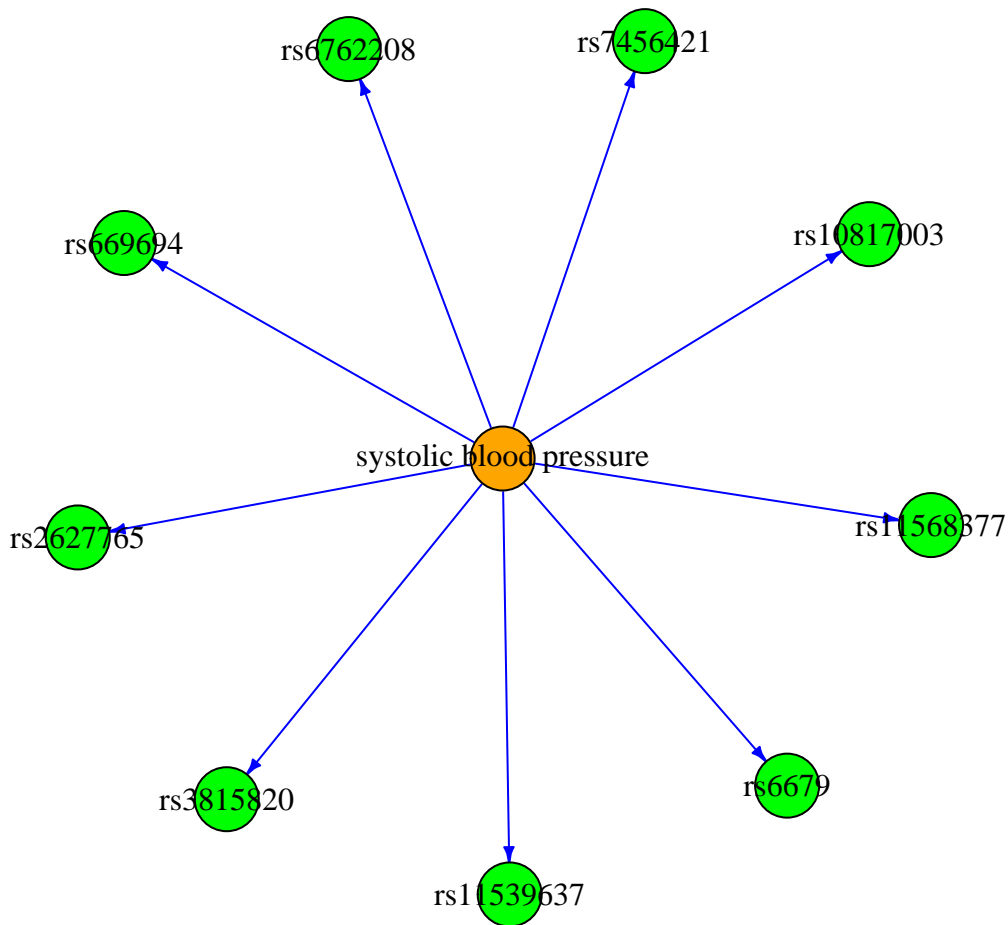

## Variant–Disease Network (alkaline phosphatase measurement)

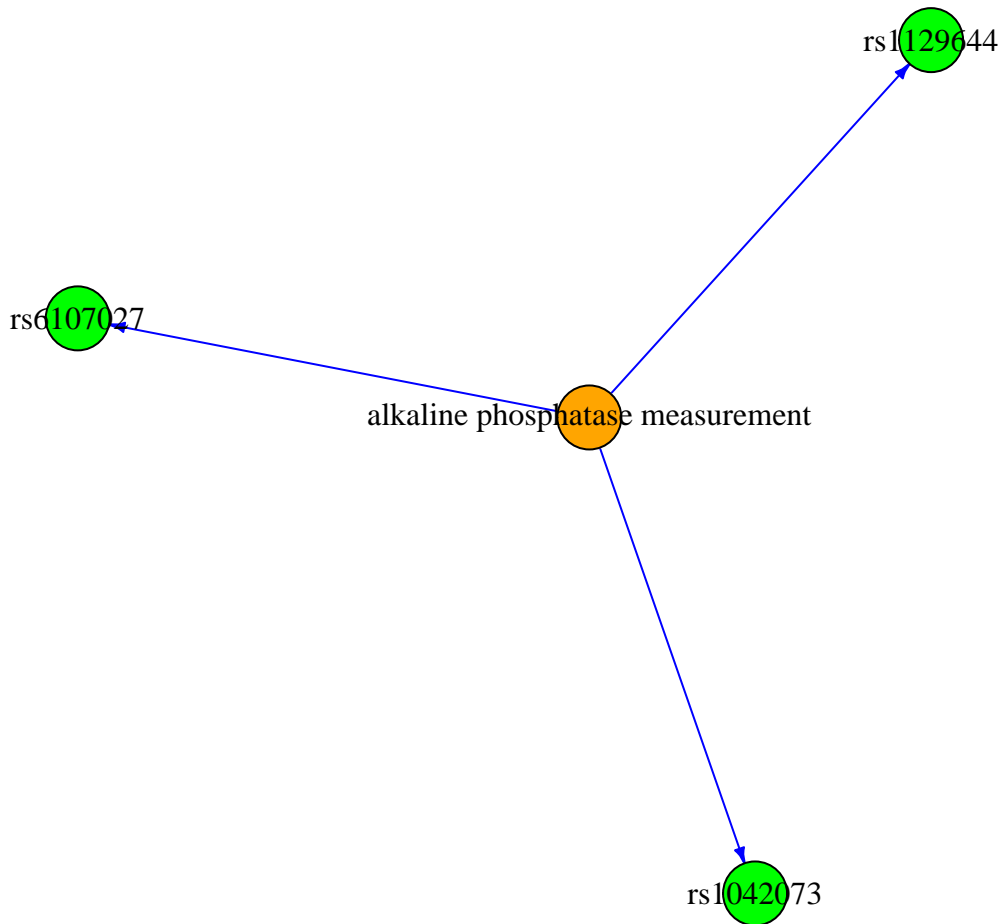

## Variant–Disease Network (unipolar depression)

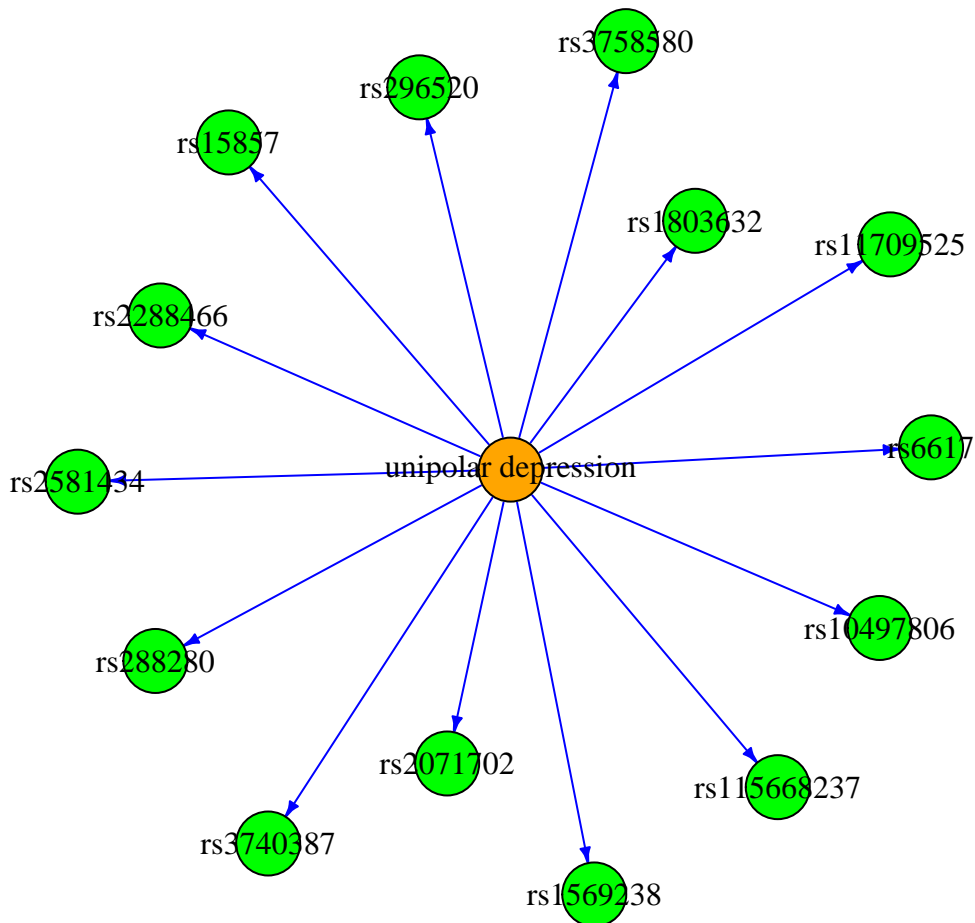

Variant–Disease Network (helping behavior measurement)

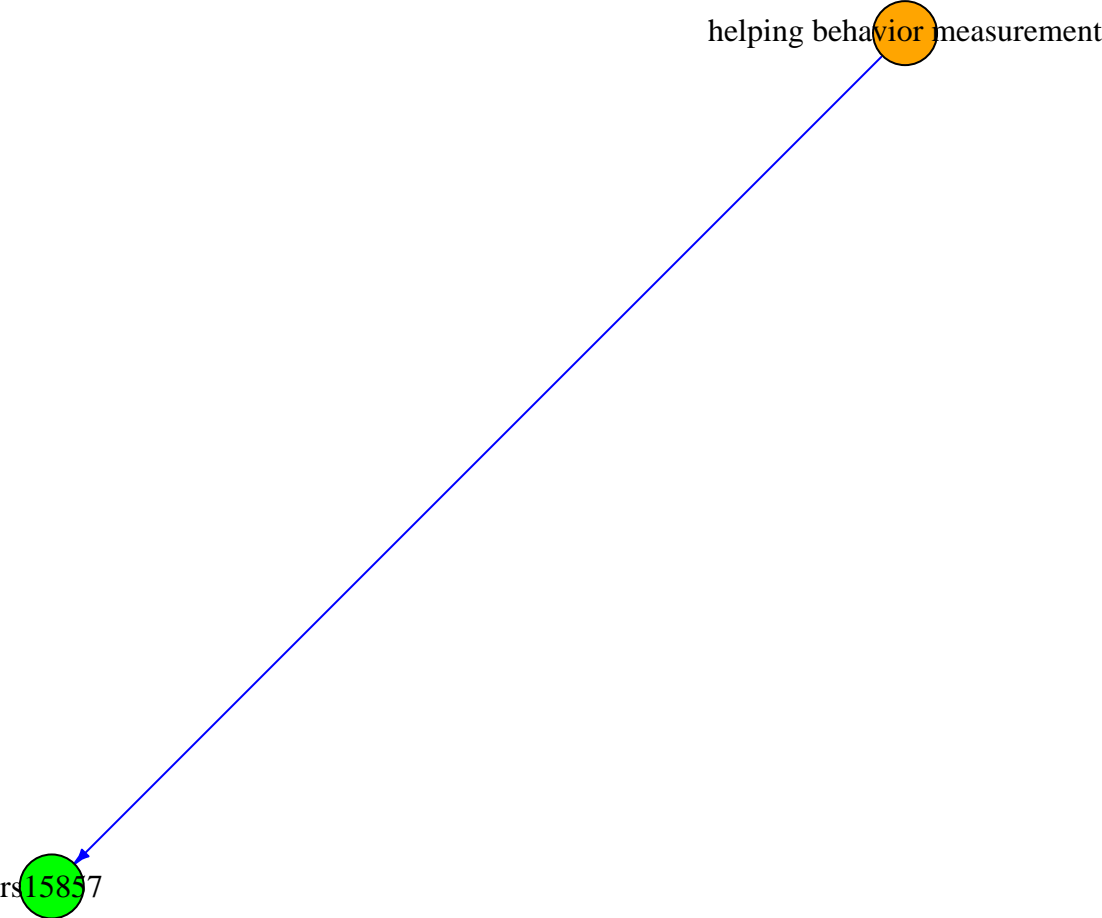

## Variant–Disease Network (age at menarche)

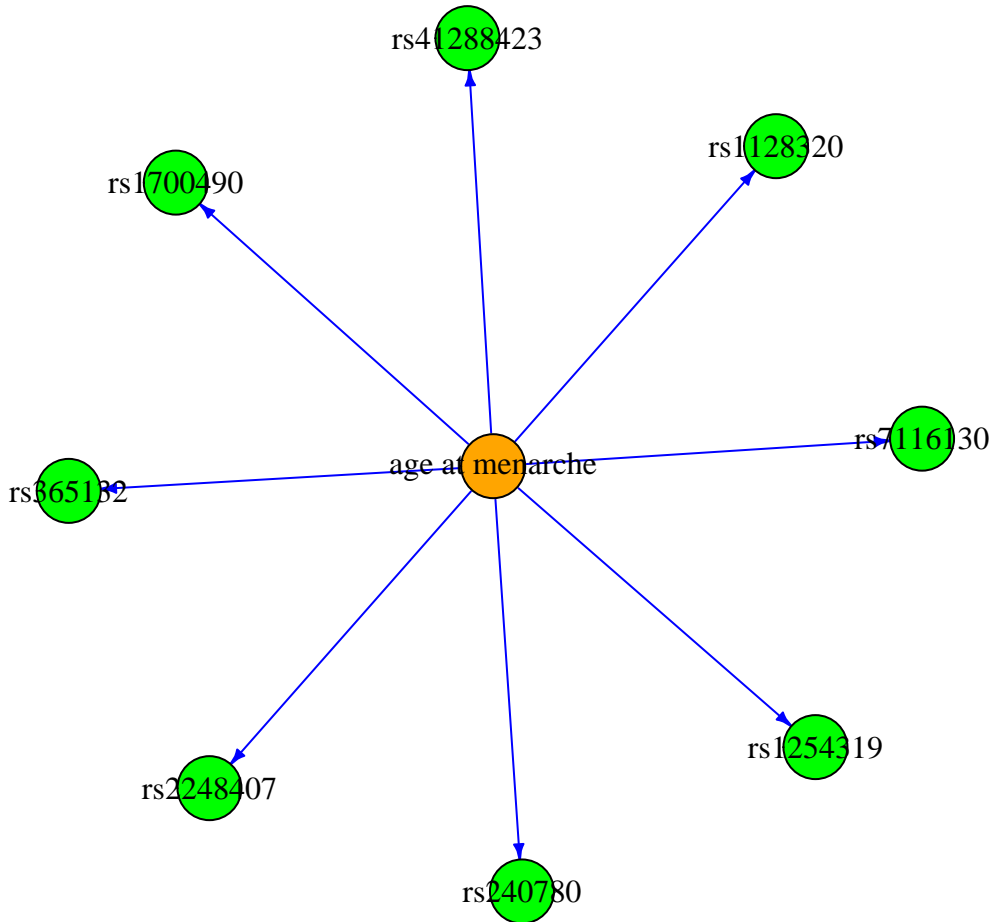

## Variant–Disease Network (Alzheimers disease)

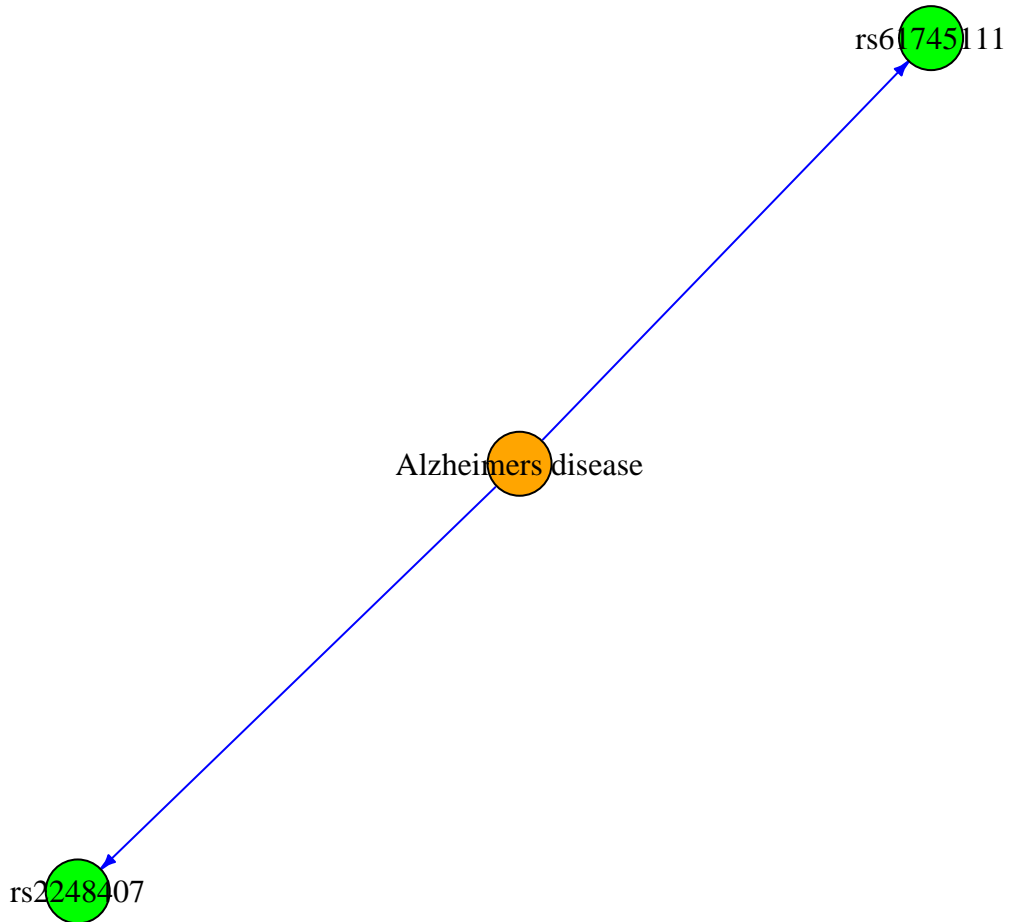



**Variant–Disease Network (creatine kinase measurement)**

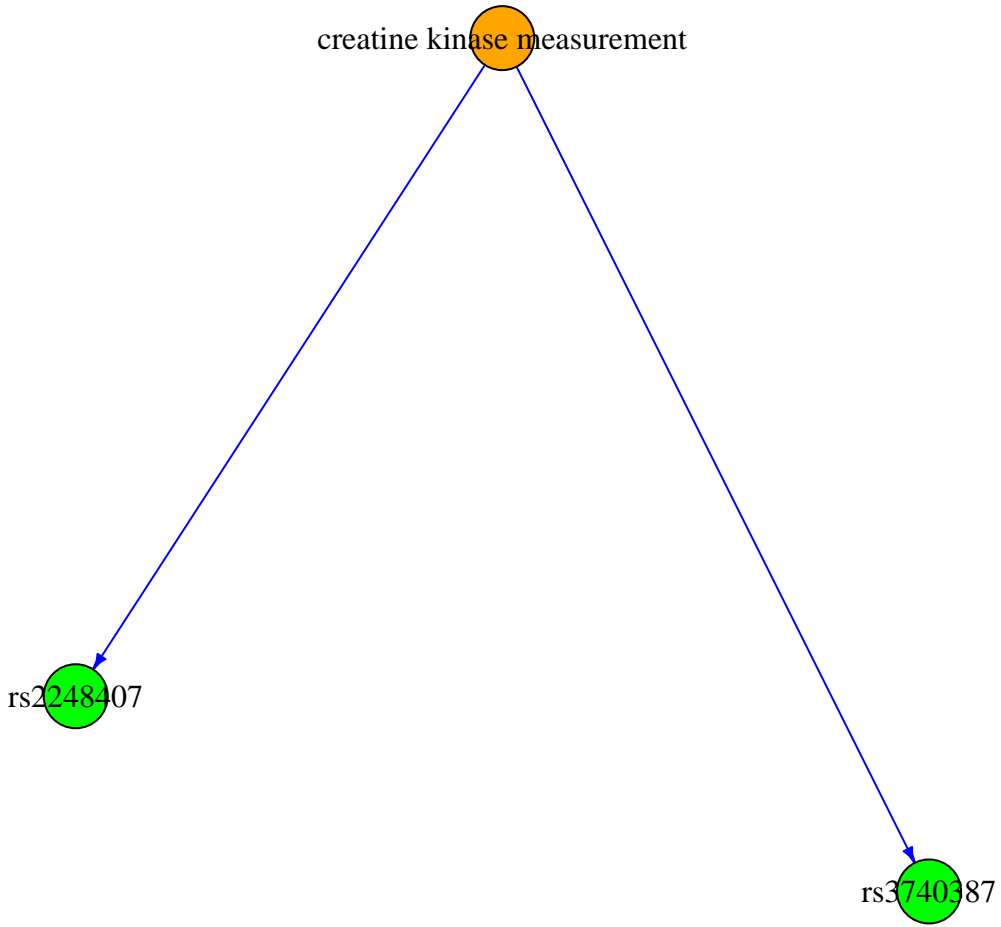

## Variant–Disease Network (glomerular filtration rate)

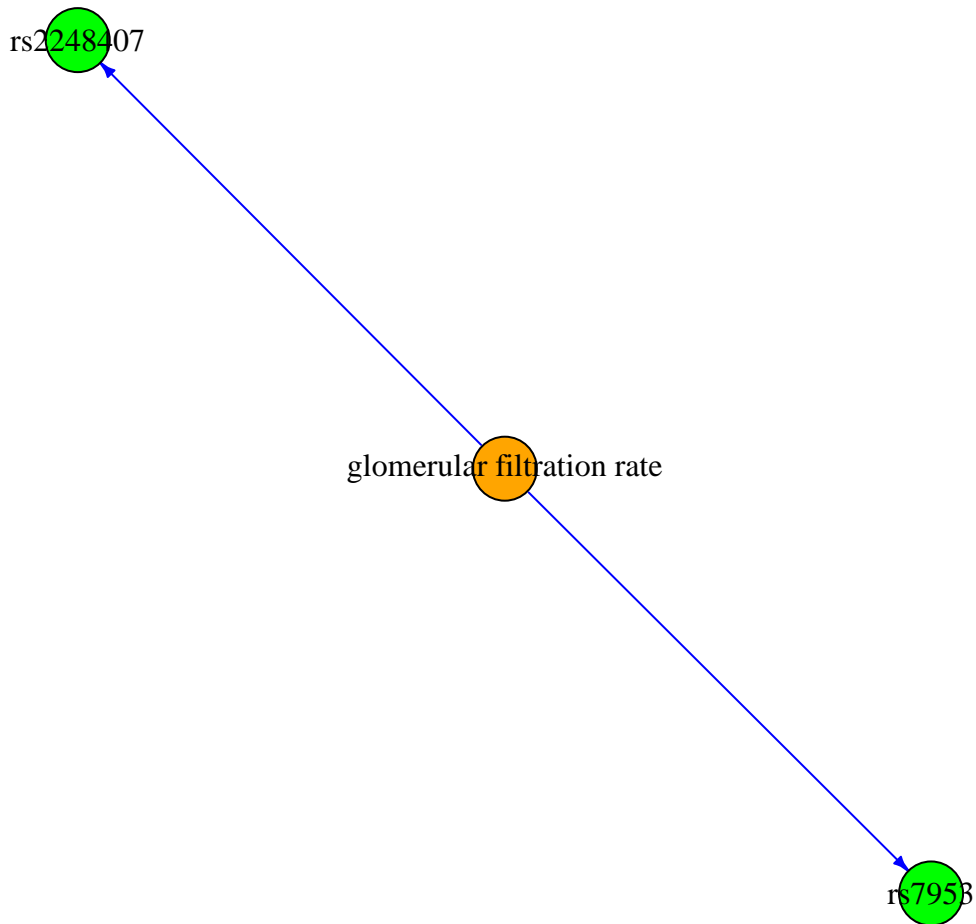

**Variant–Disease Network (hair colour measurement)**

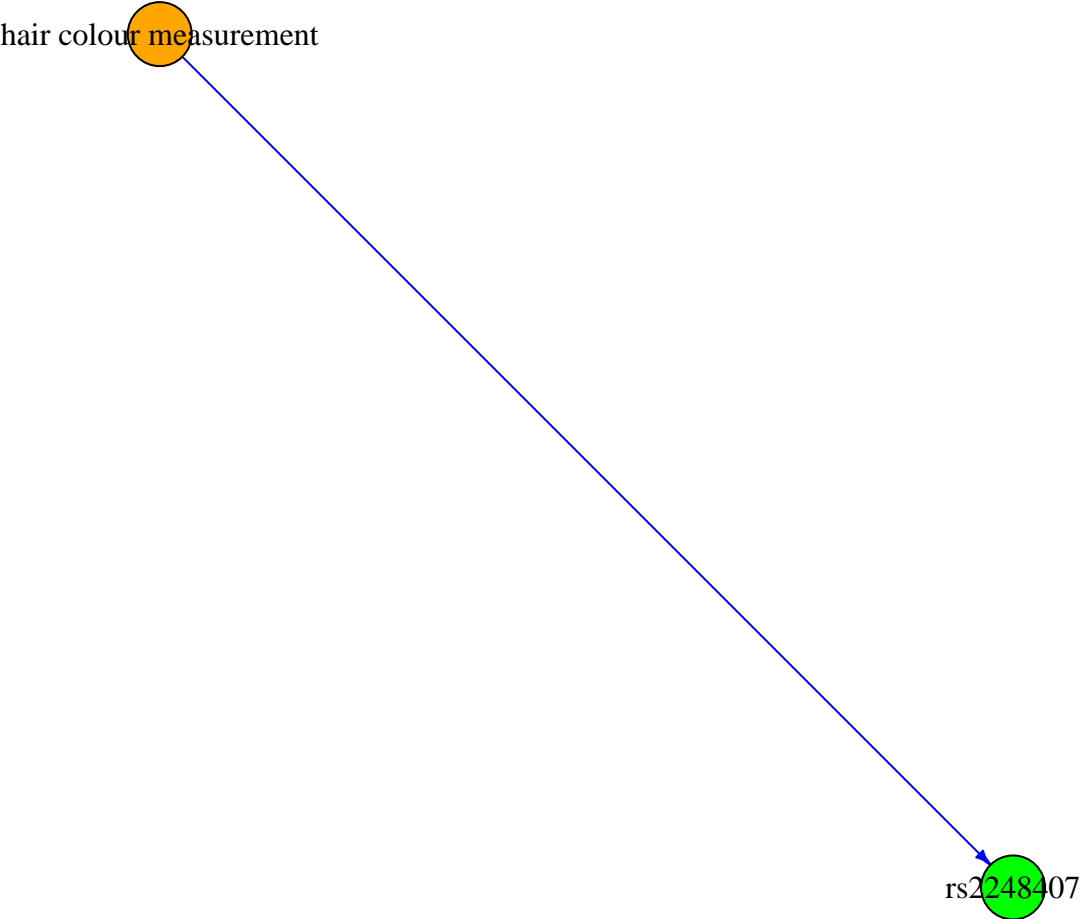

Variant–Disease Network (high density lipoprotein cholesterol measurement)

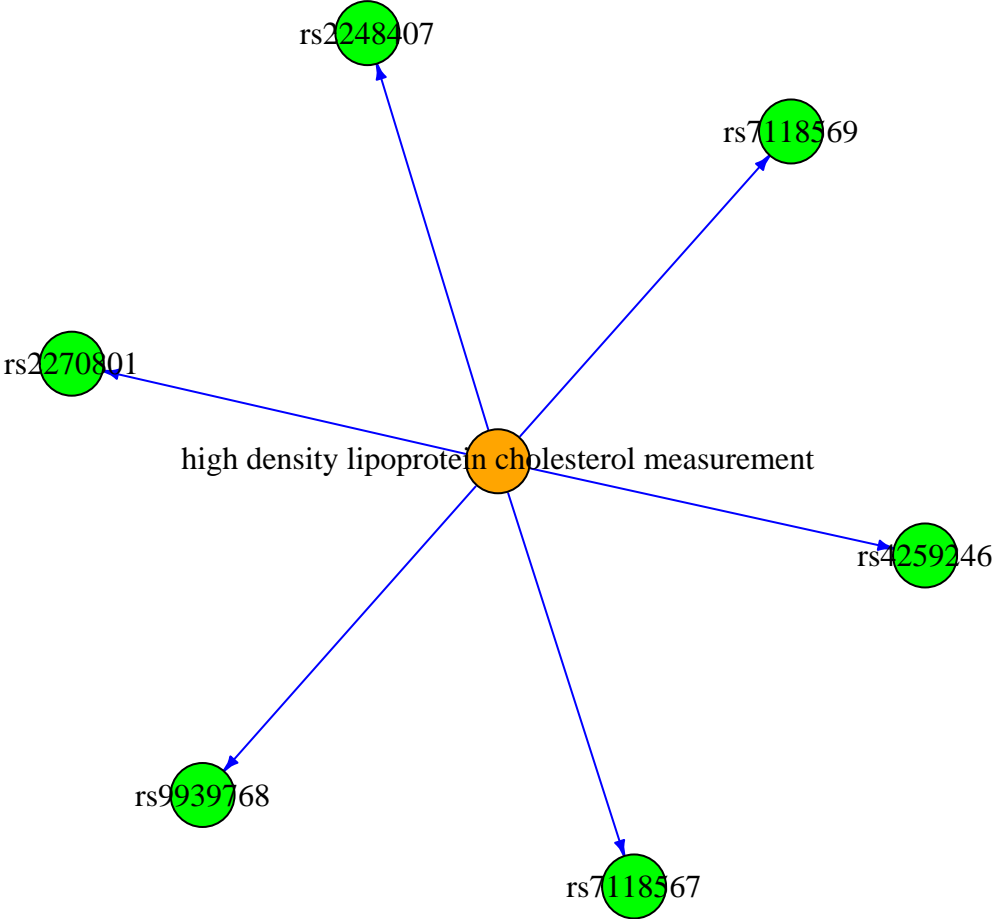

Variant–Disease Network (intraocular pressure measurement)

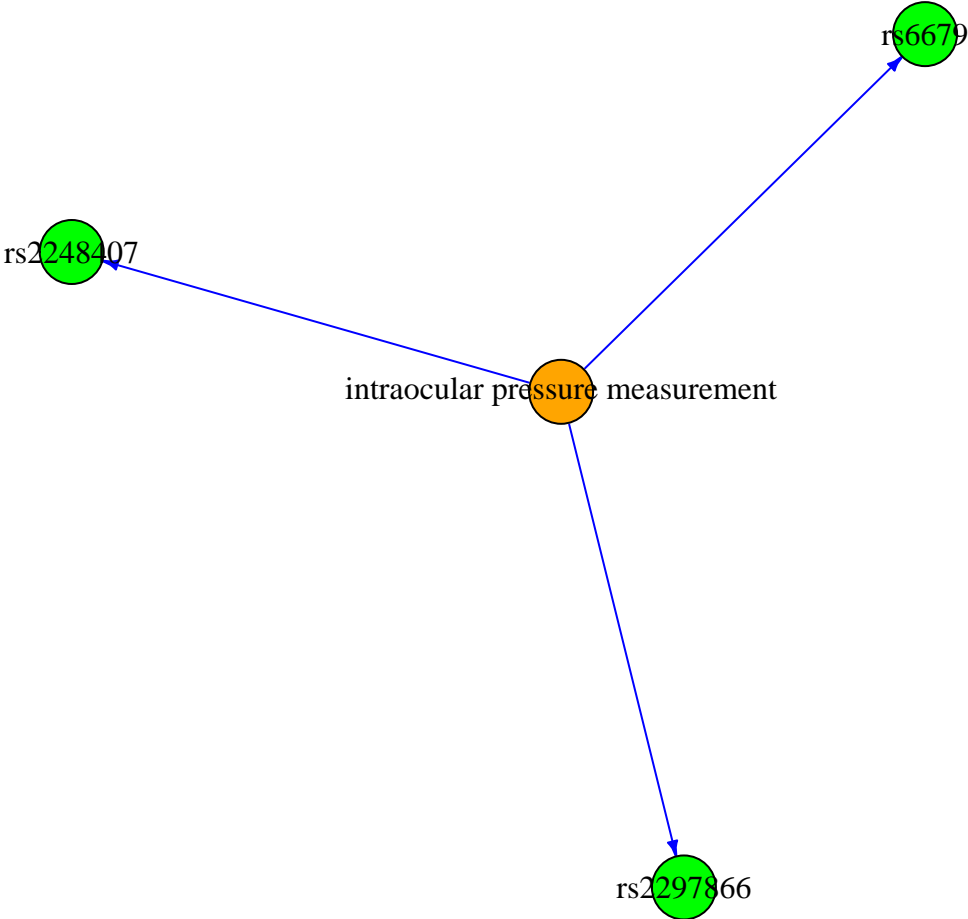

# Variant–Disease Network (l lactate dehydrogenase measurement)

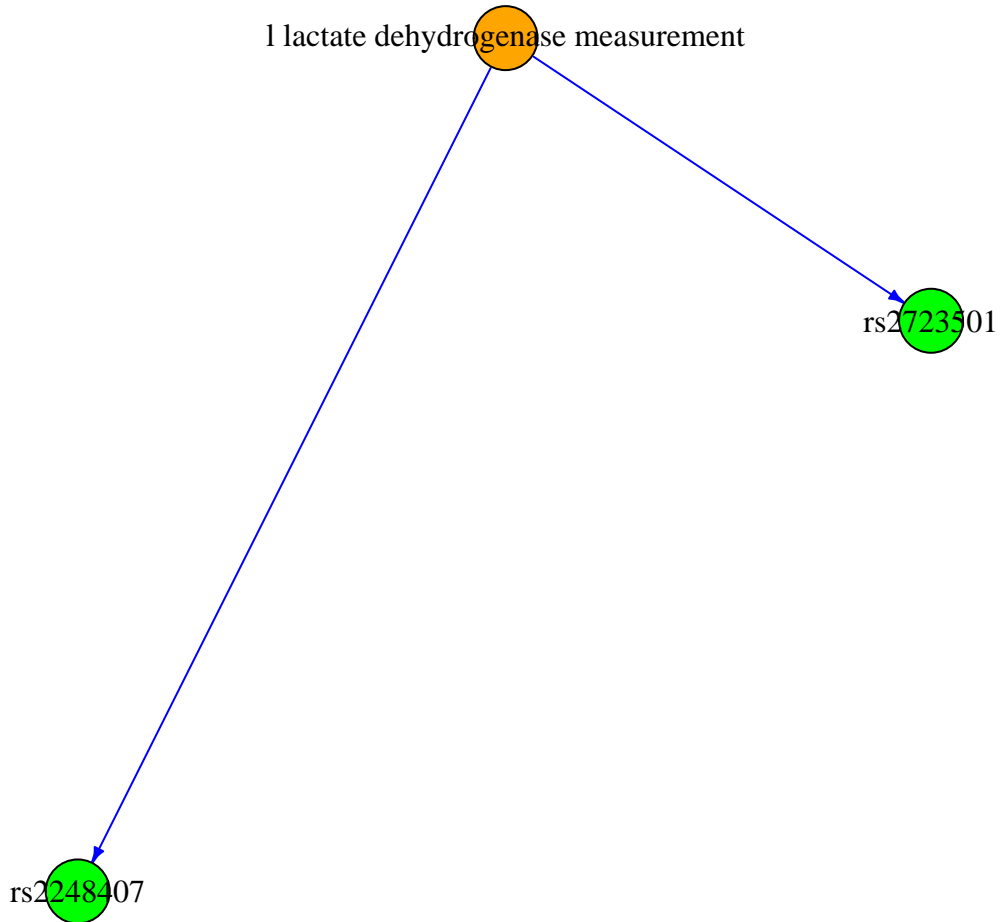

Variant–Disease Network (low density lipoprotein cholesterol measurement)

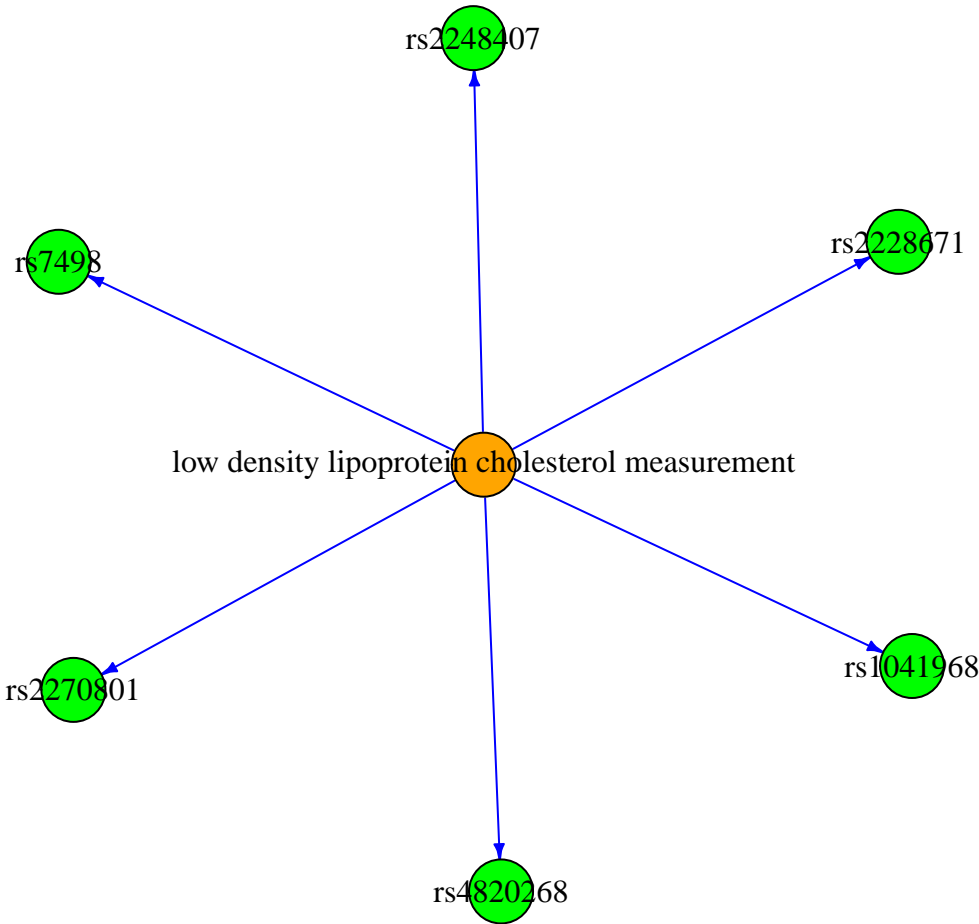

Variant–Disease Network (serum creatinine measurement)

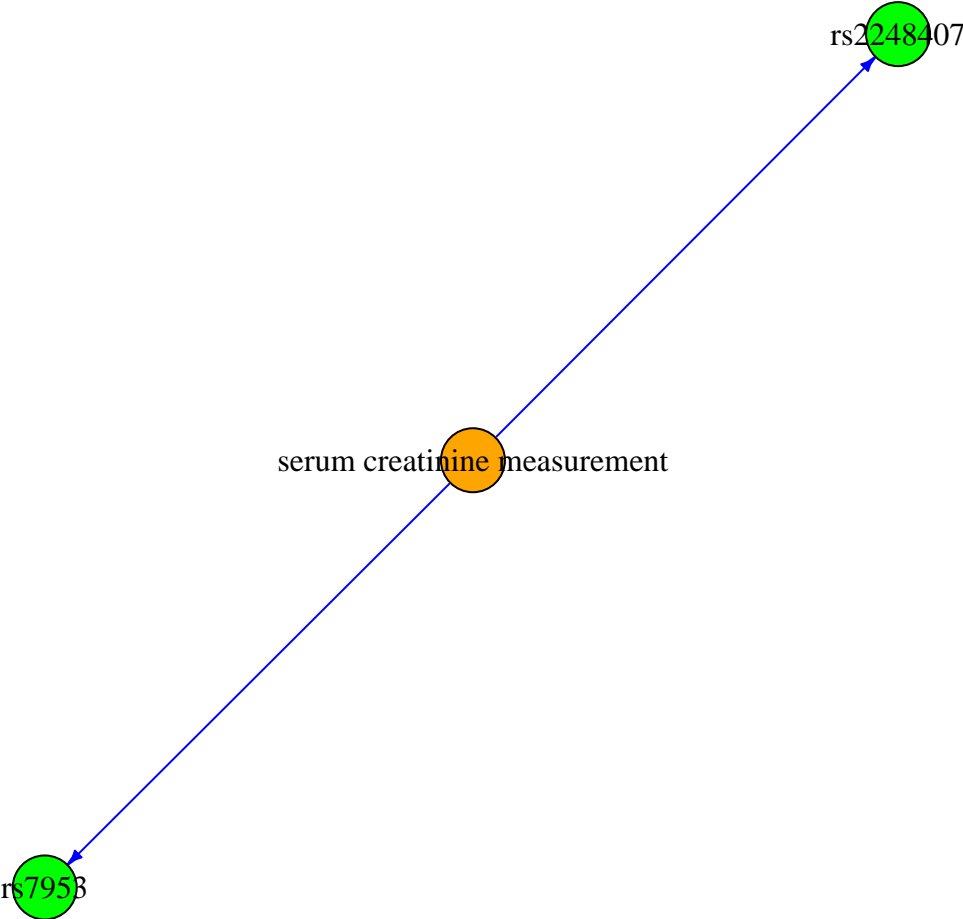



## Variant–Disease Network (Testicular Germ Cell Tumor)

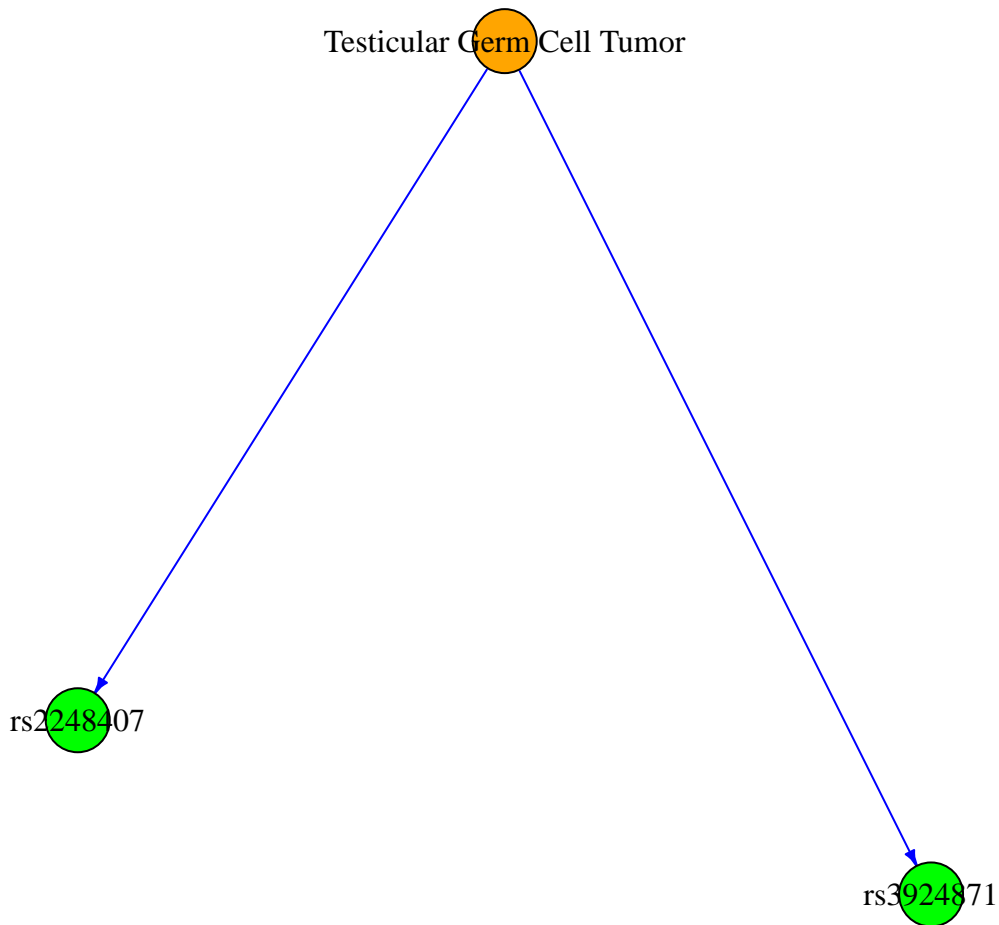

## Variant–Disease Network (total cholesterol measurement)

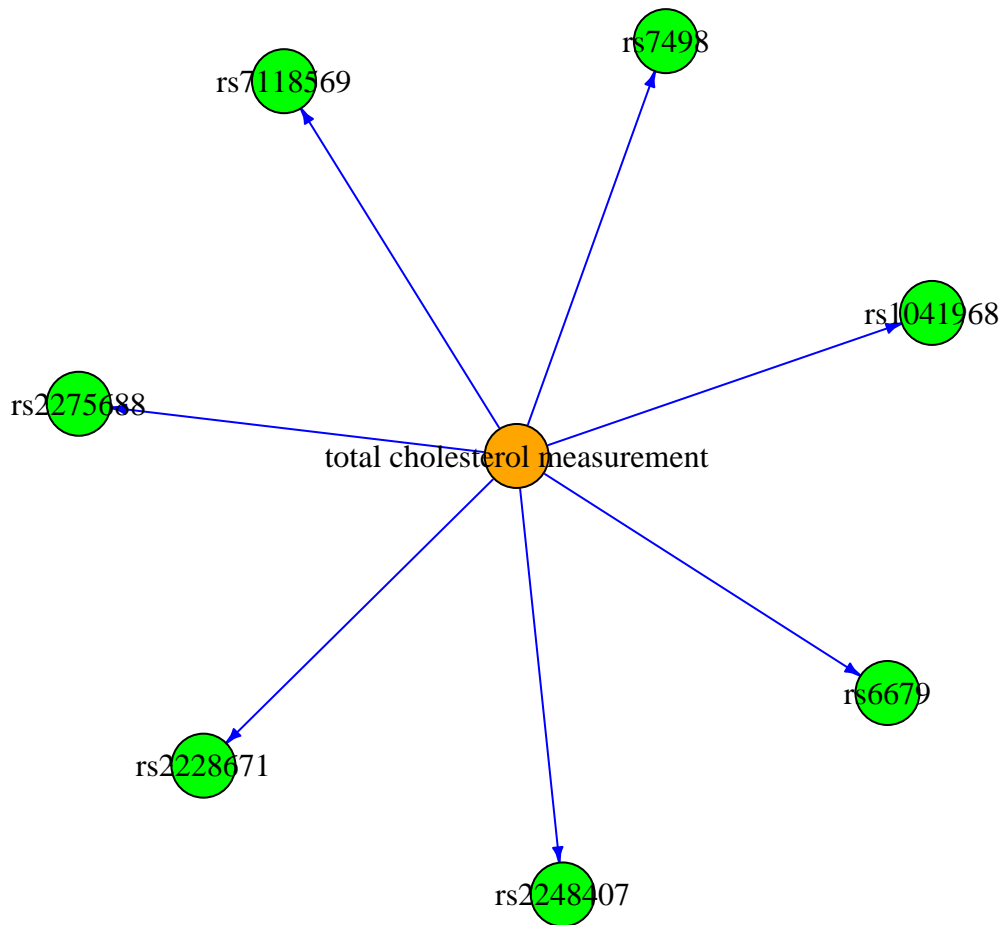

## Variant–Disease Network (triglyceride measurement)

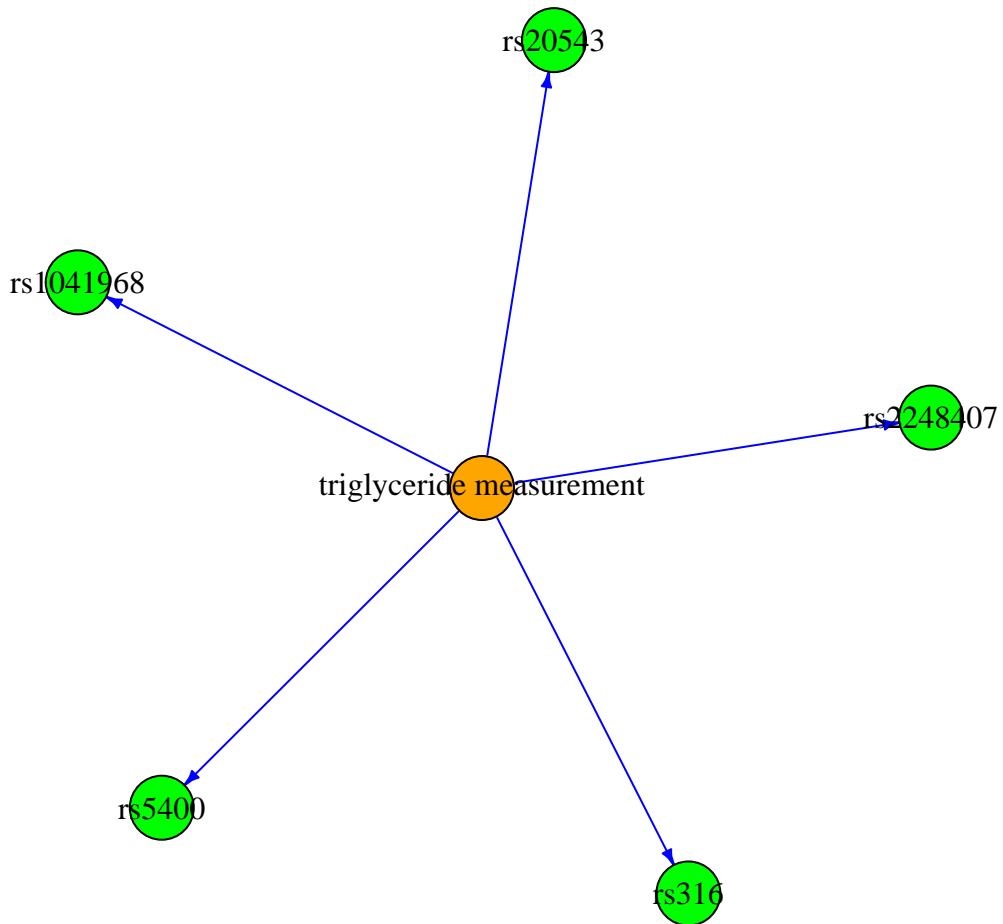

## Variant–Disease Network (diverticulitis)

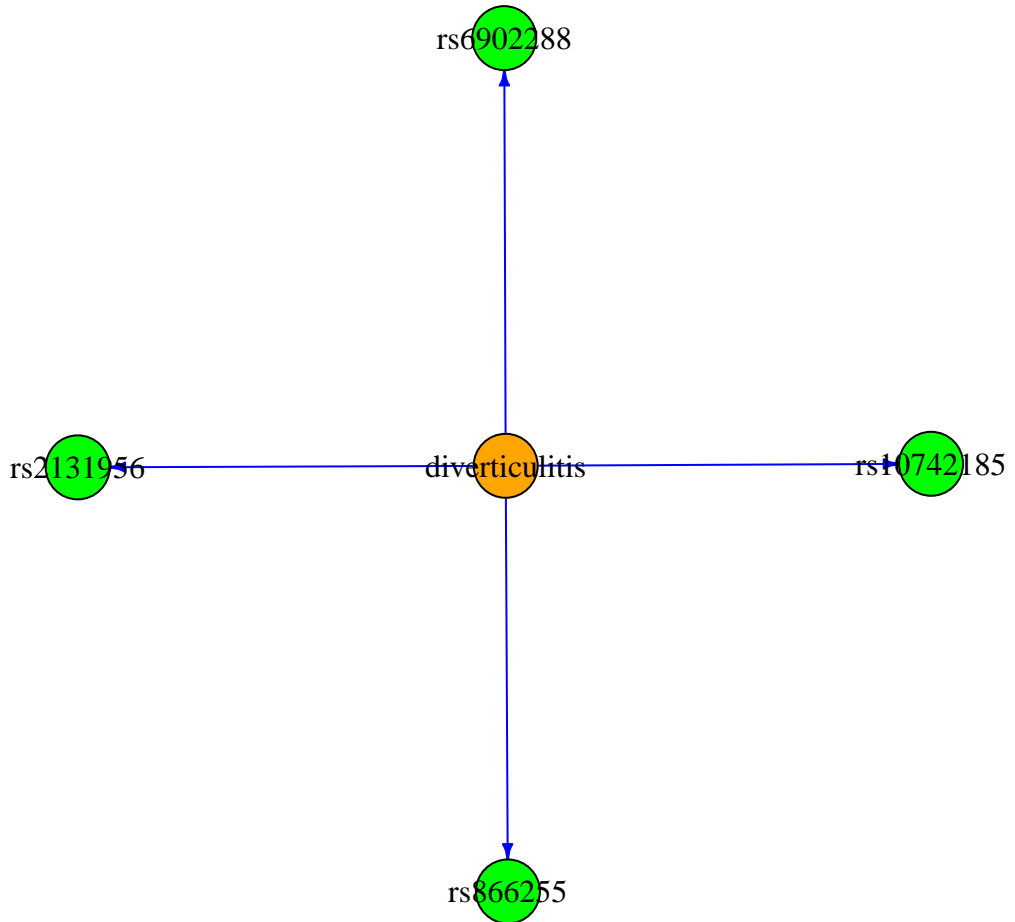

## Variant–Disease Network (congenital heart disease)

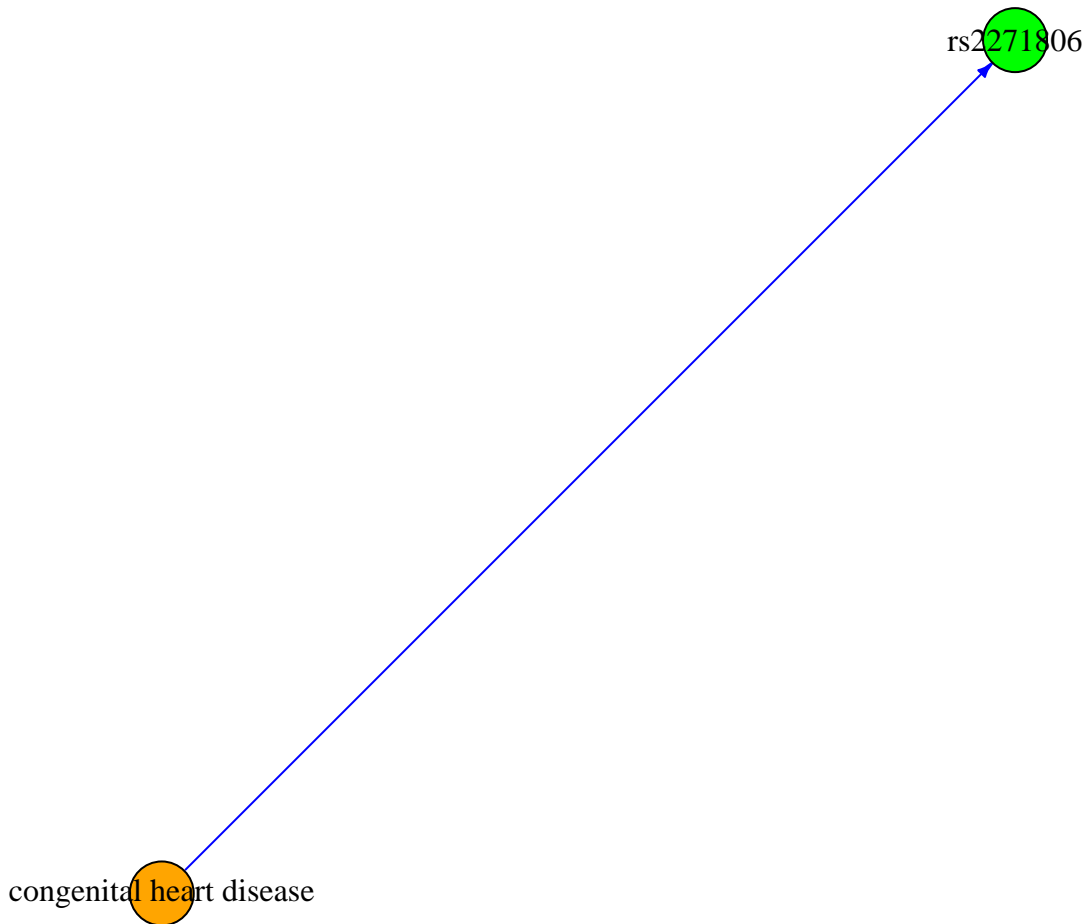

## Variant–Disease Network (pancreatic carcinoma)

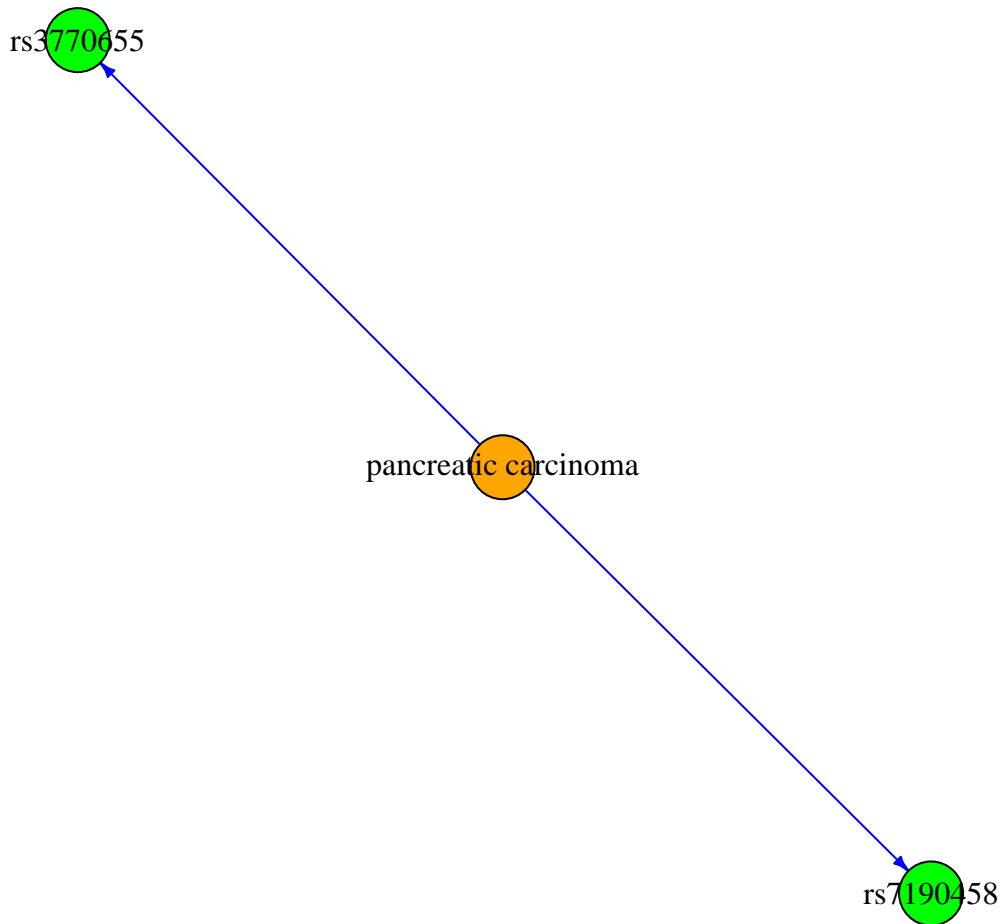

Variant–Disease Network (albumin:globulin ratio measurement)

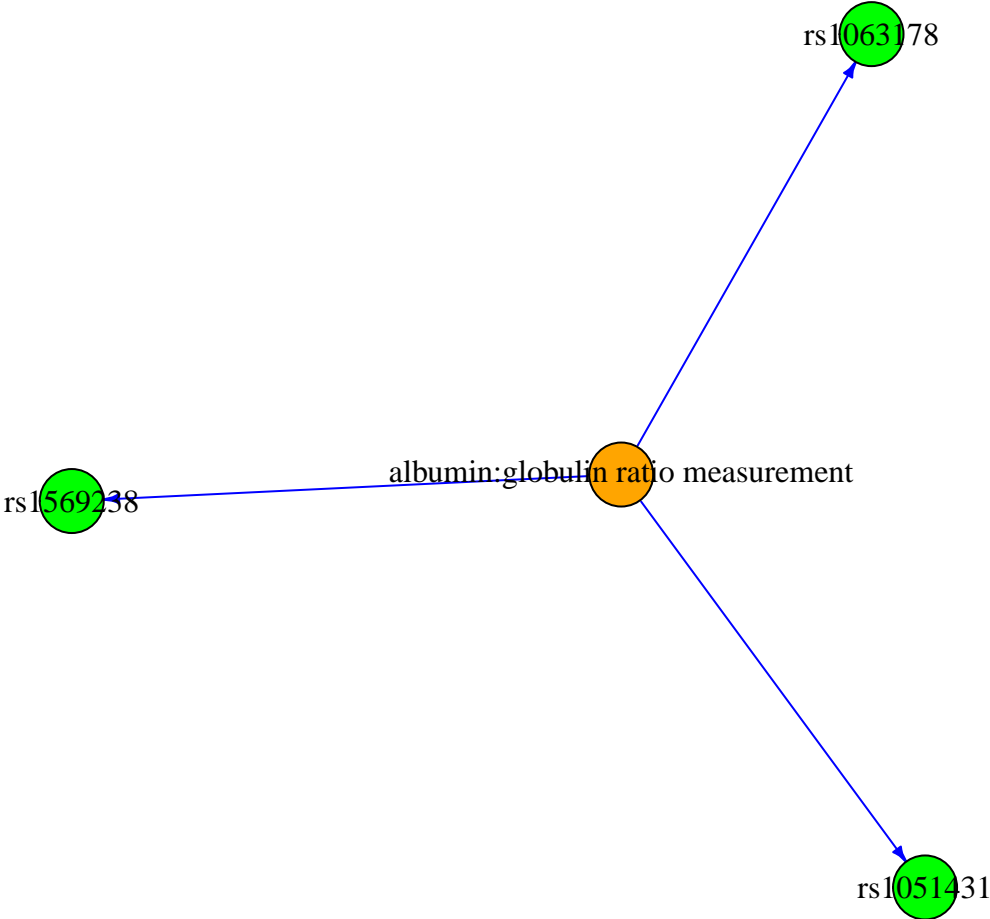

**Variant–Disease Network (allergic rhinitis)**

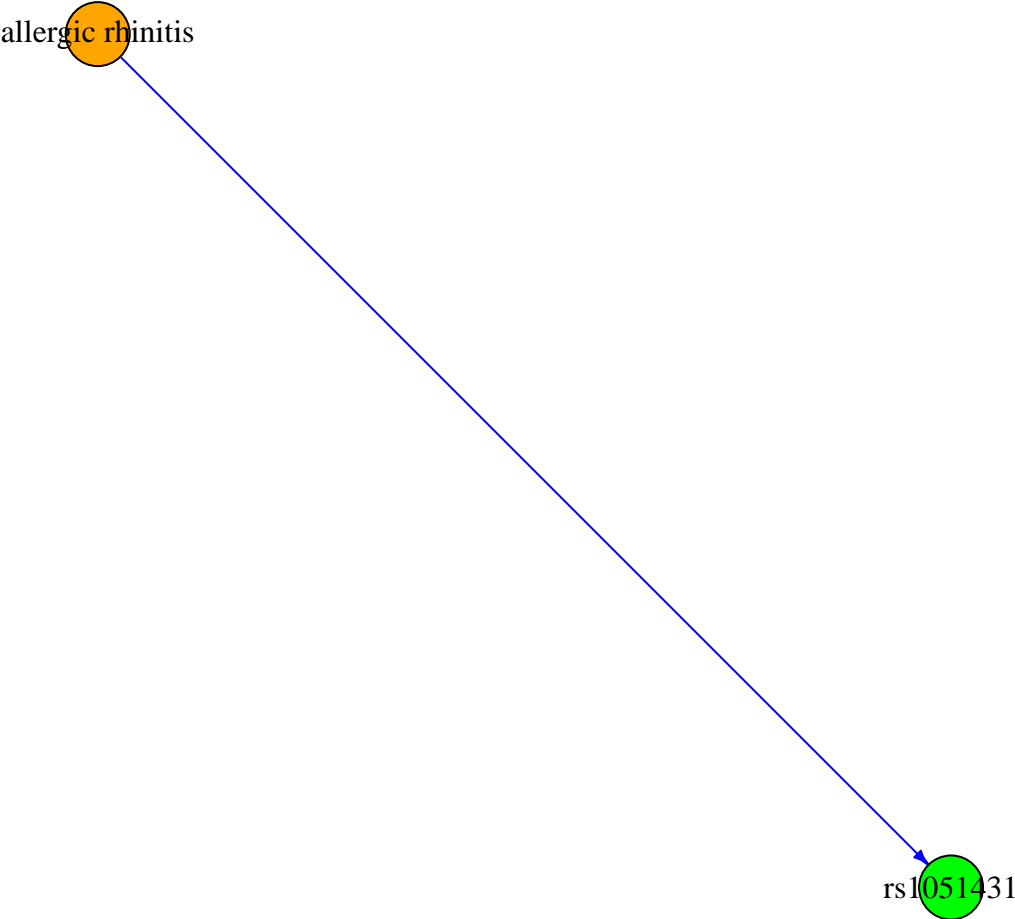



## Variant-Disease Network (allergy)

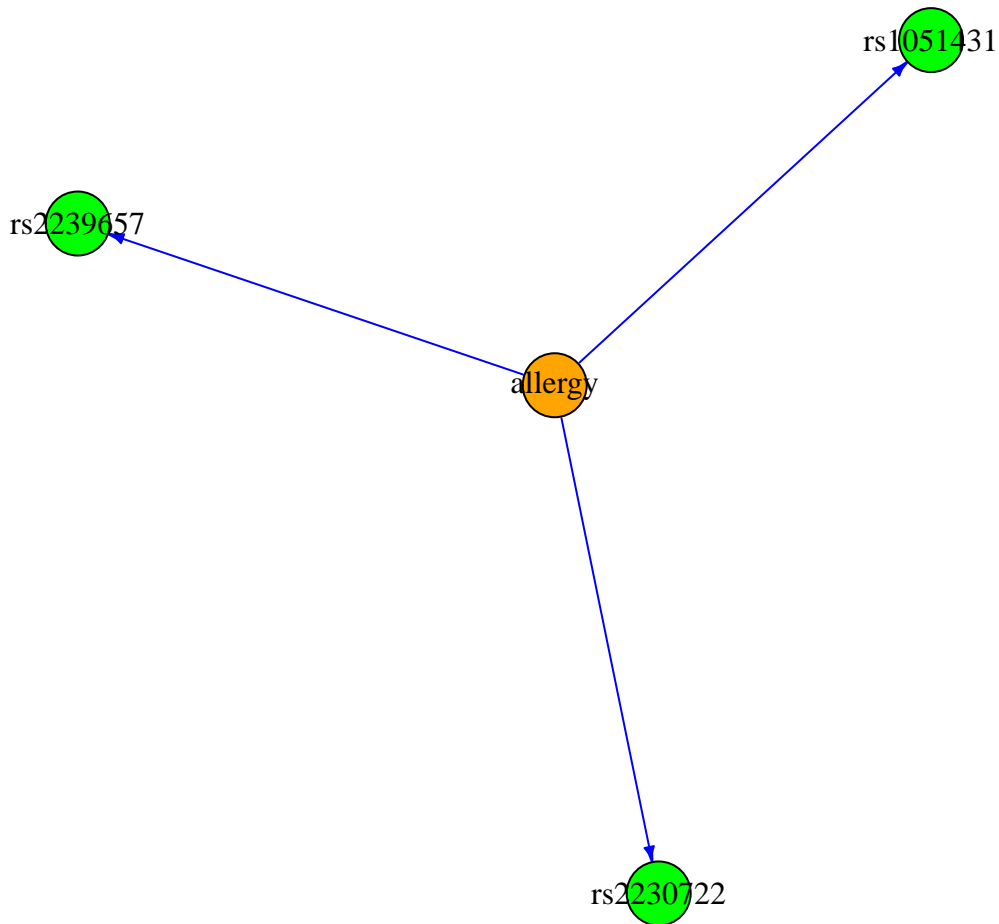

## Variant–Disease Network (autism spectrum disorder)

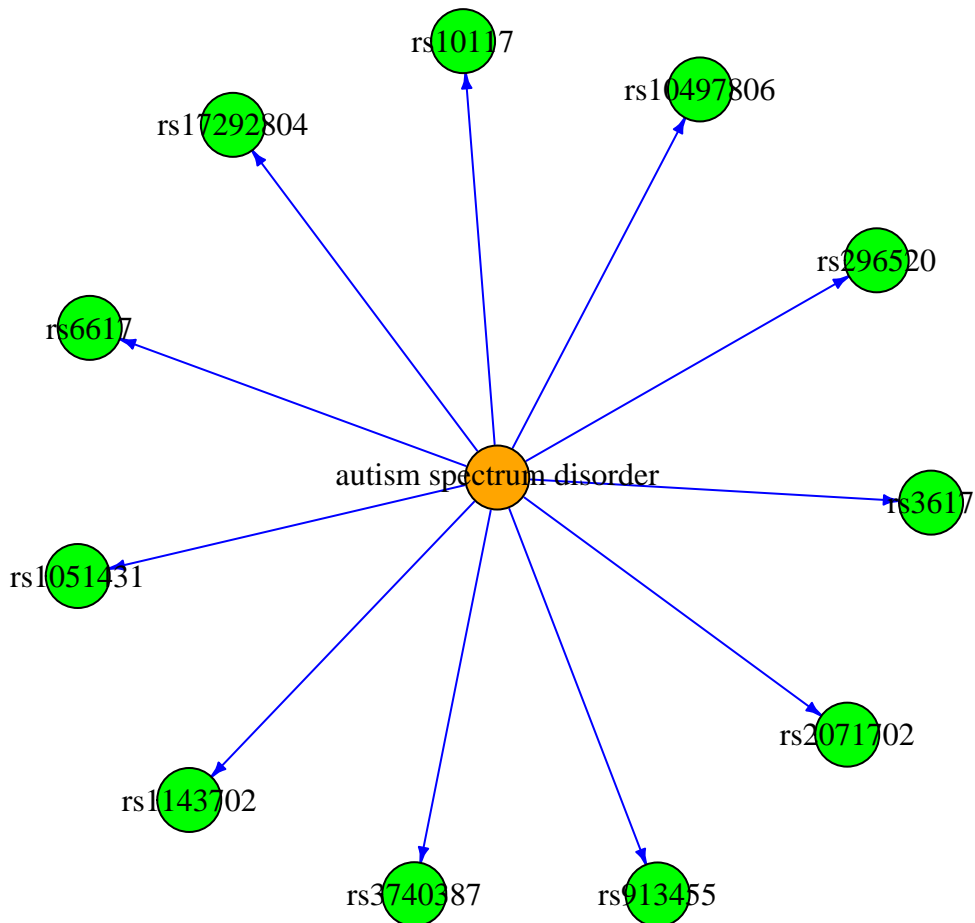

## Variant-Disease Network (body height)

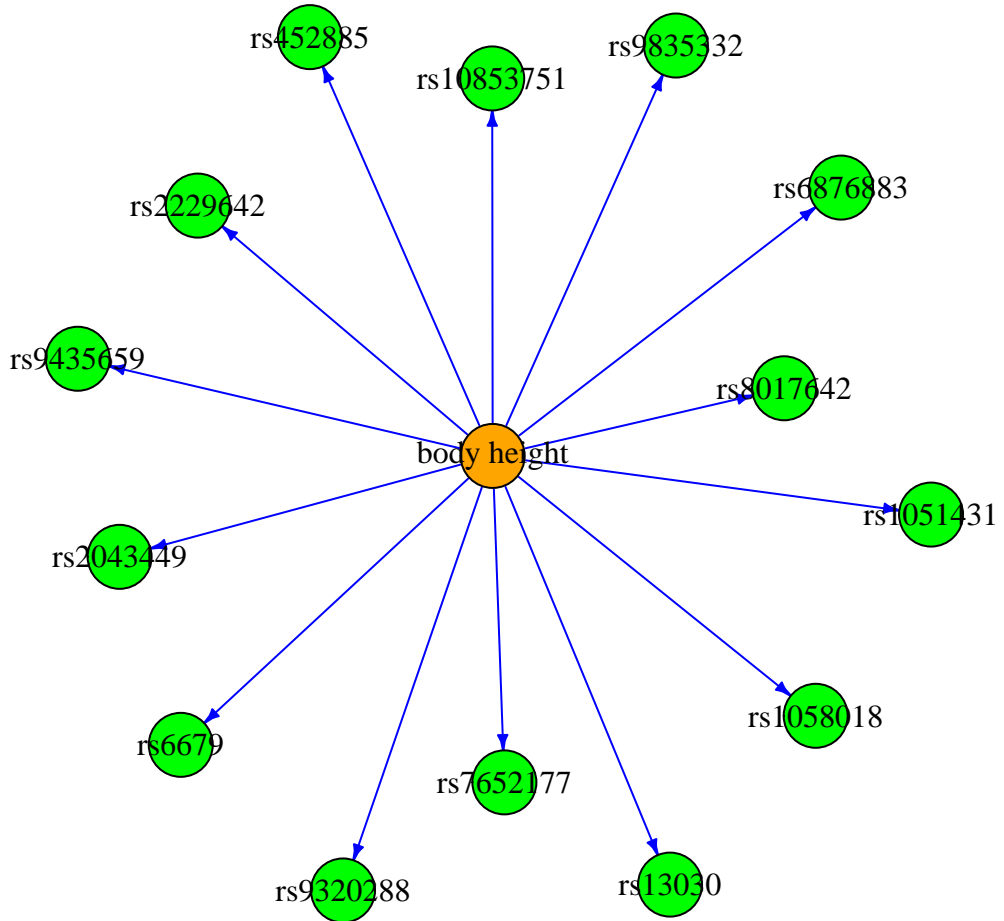

## Variant–Disease Network (hip circumference)

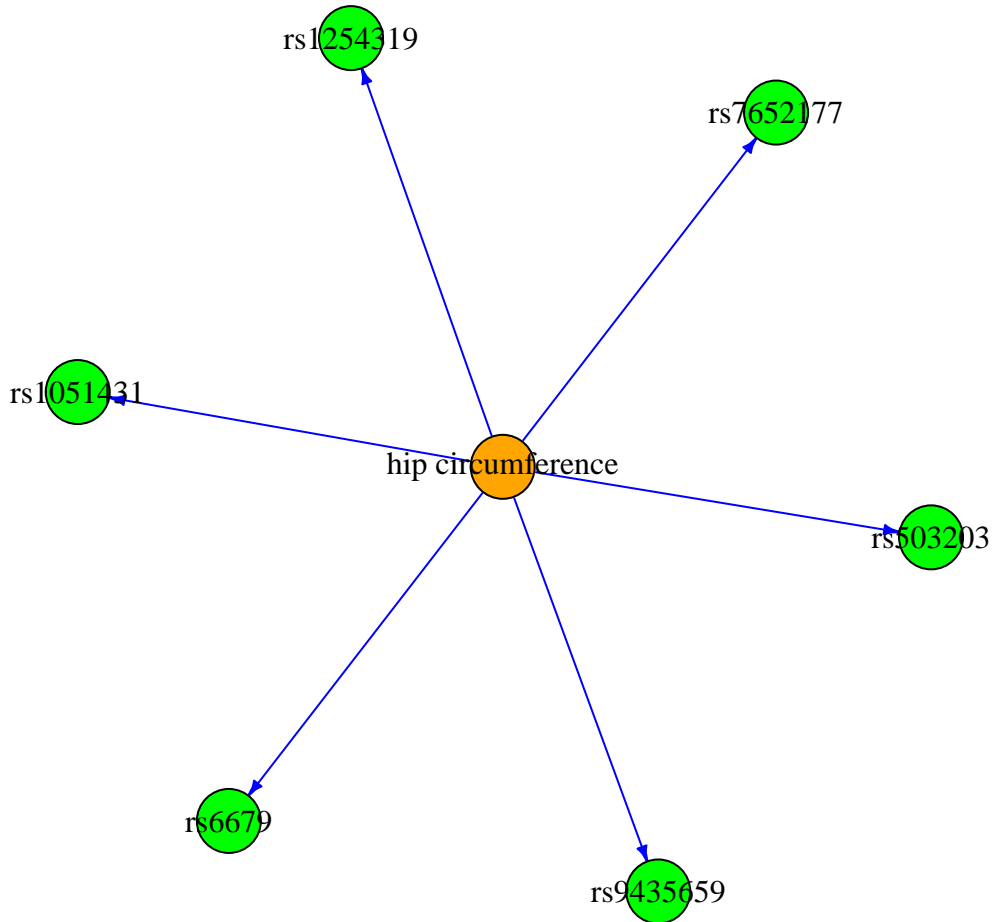

## Variant-Disease Network (infant head circumference)

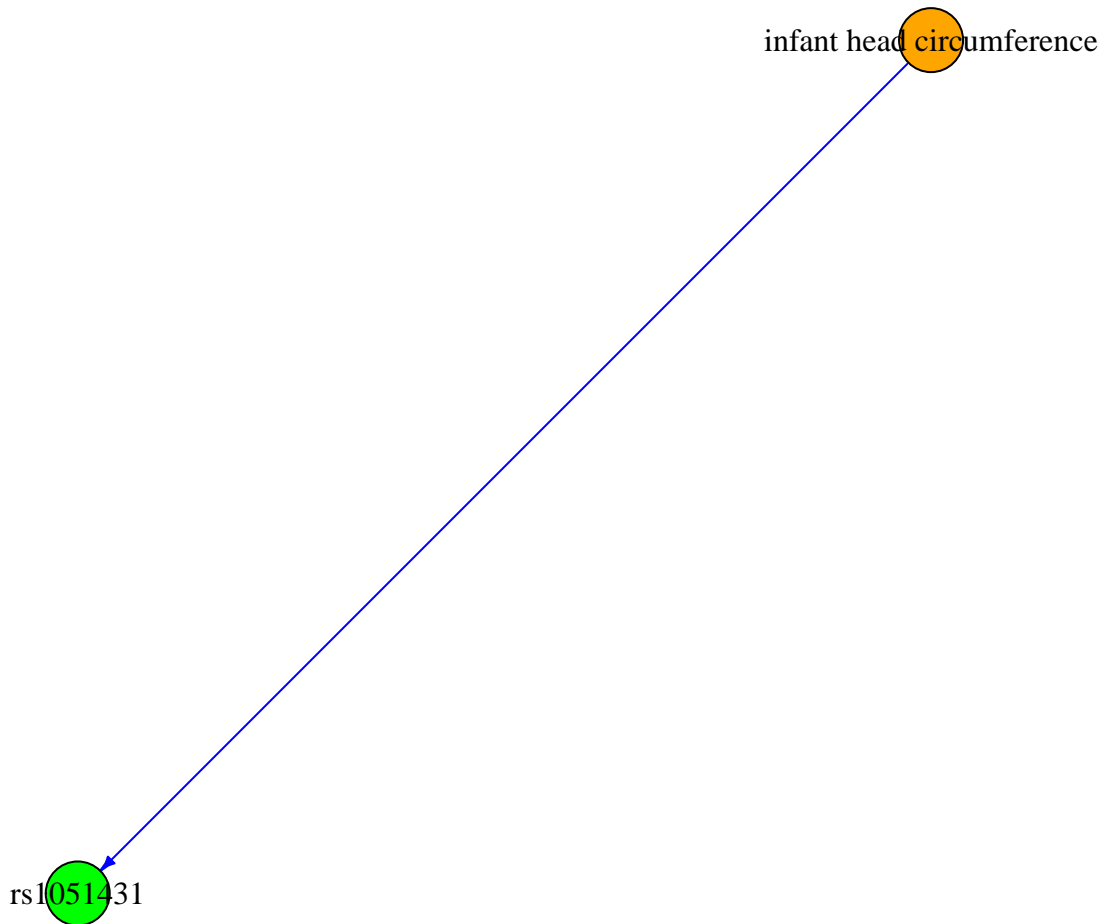

Variant–Disease Network (lymphocyte percentage of white cells)

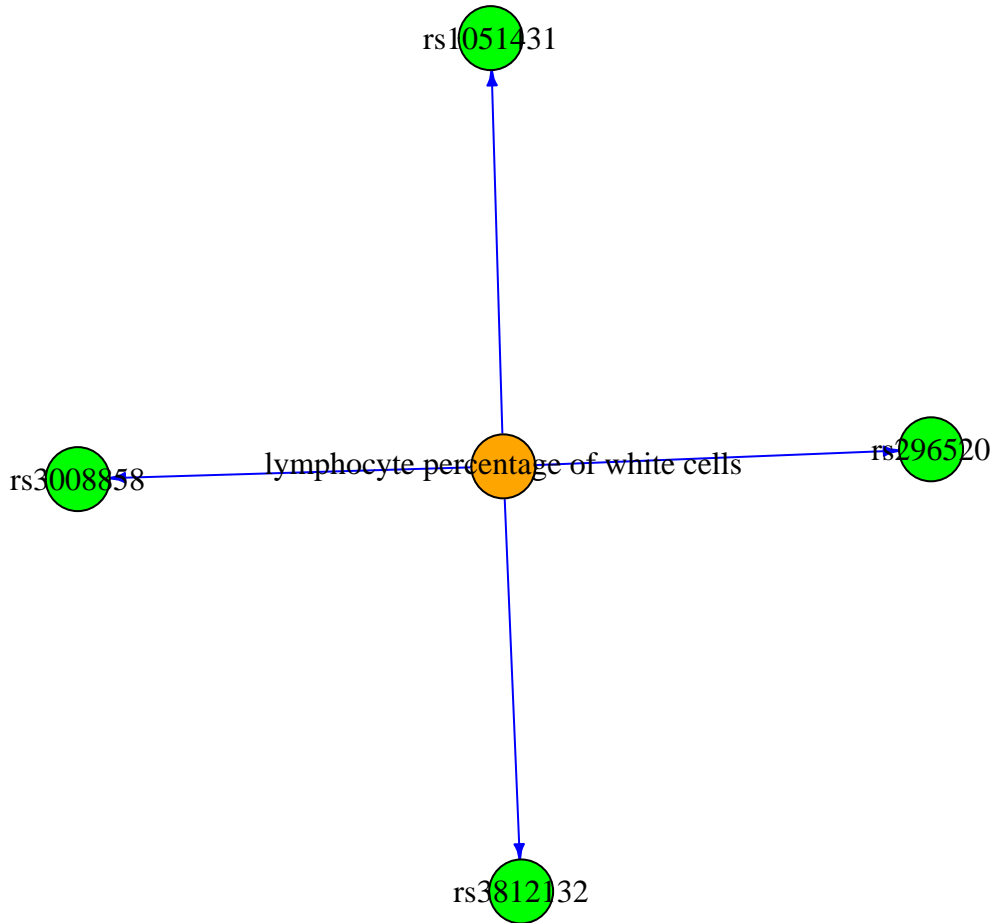

## Variant–Disease Network (mean platelet volume)

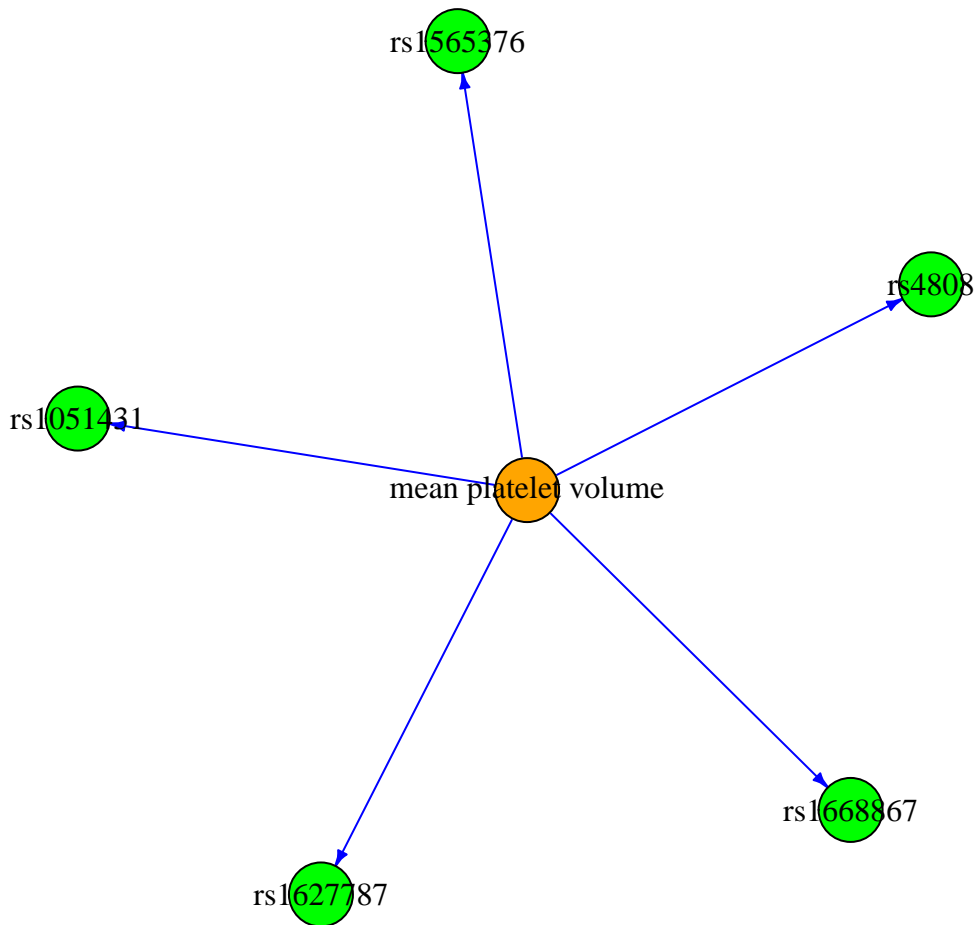

## Variant-Disease Network (multiple sclerosis)

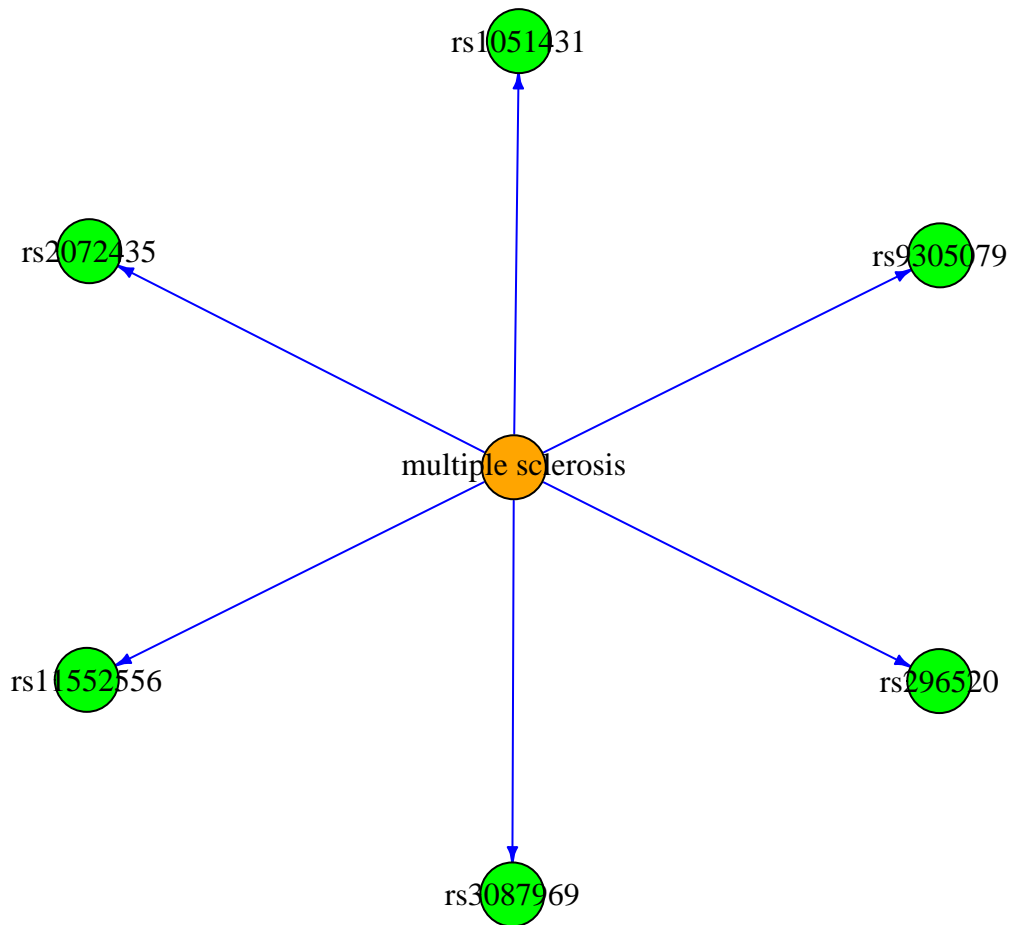



## Variant-Disease Network (platelet count)

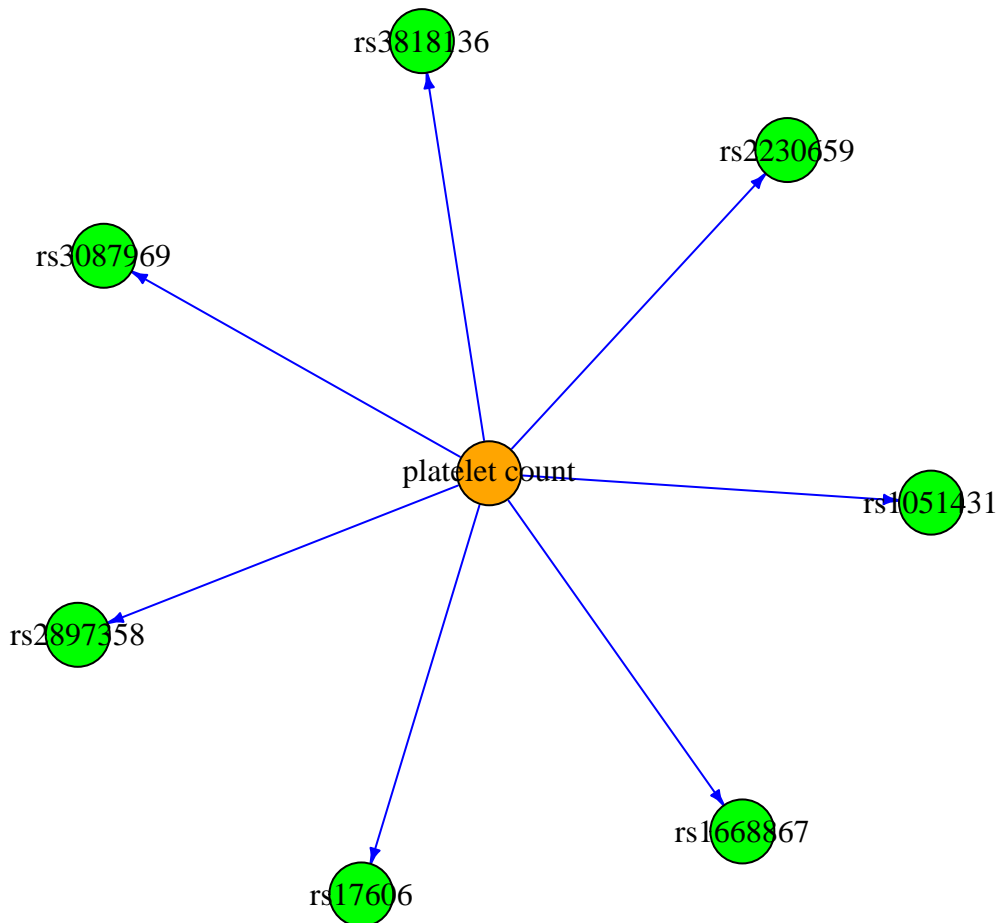

## Variant–Disease Network (plateletcrit)

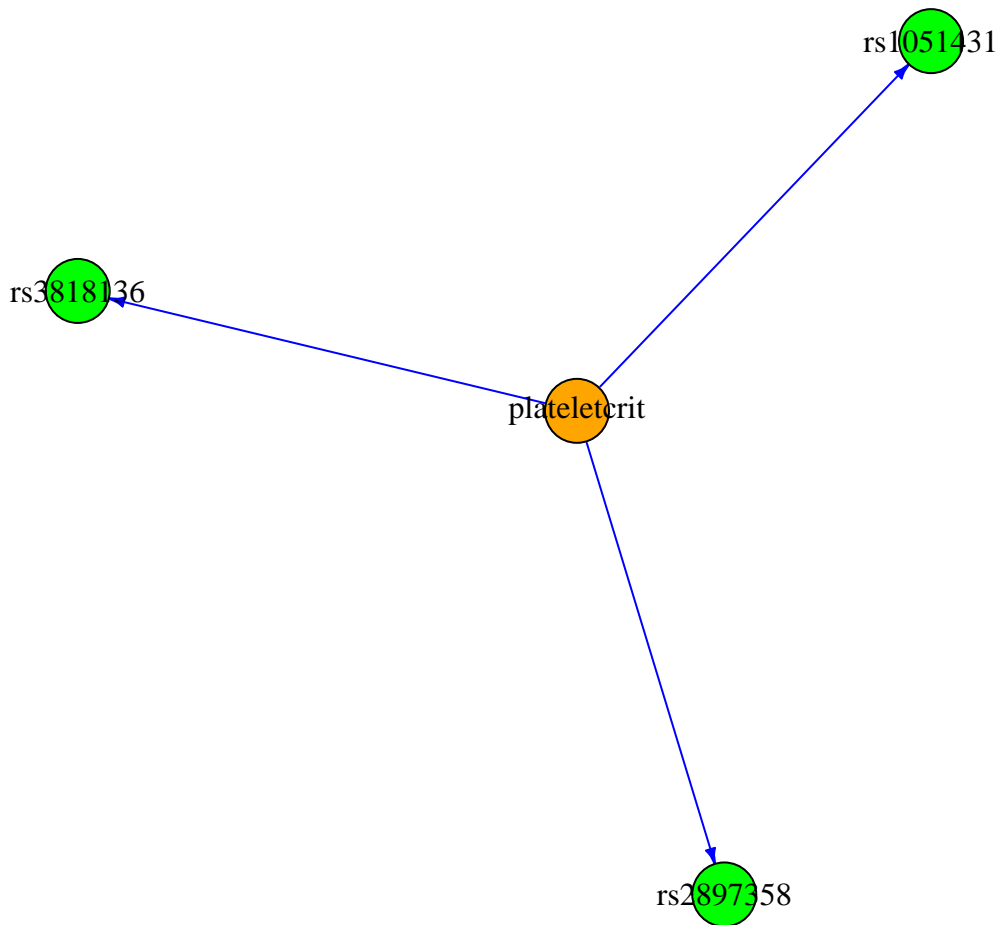

## Variant–Disease Network (type ii diabetes mellitus)

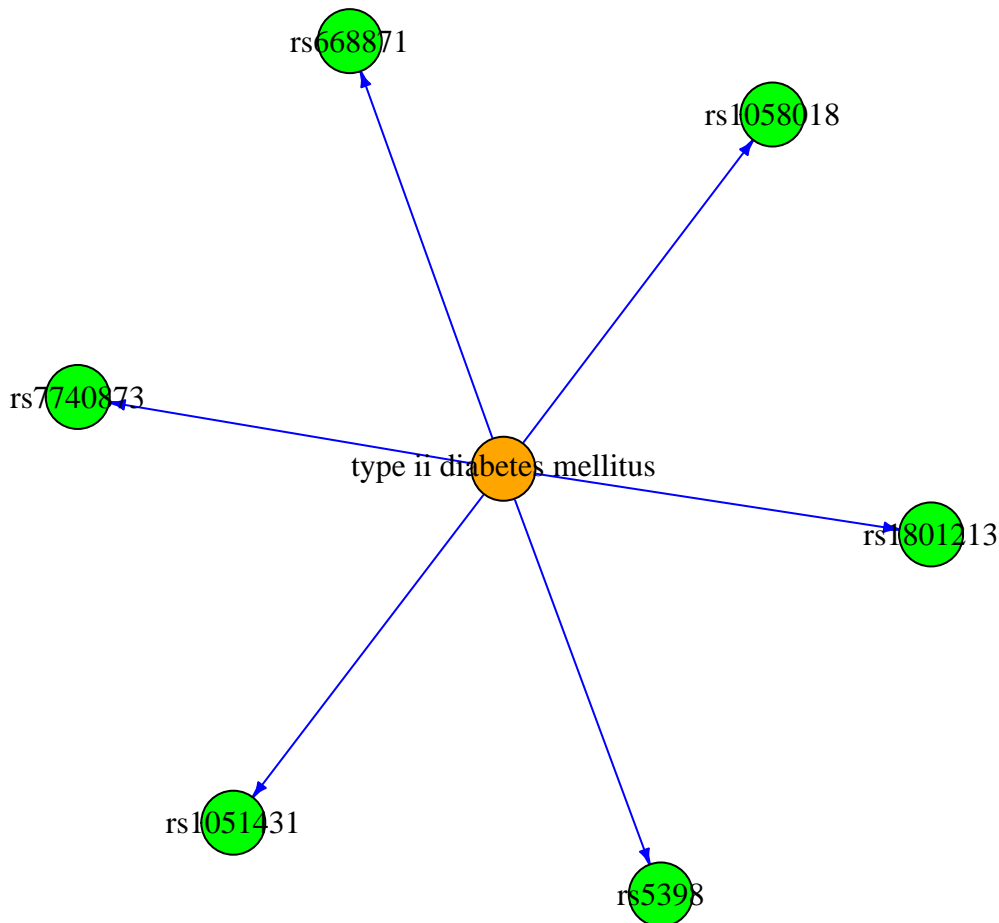

## Variant-Disease Network (crohns disease)

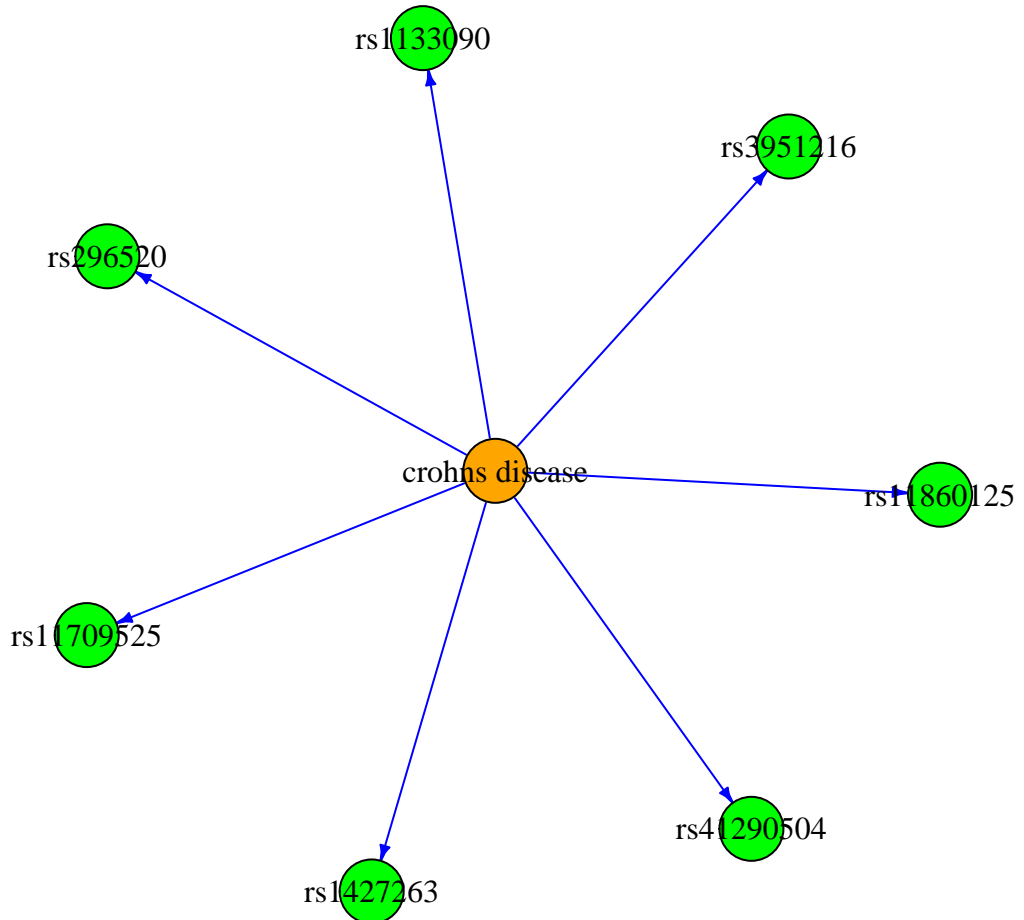

## Variant-Disease Network (erythema nodosum)

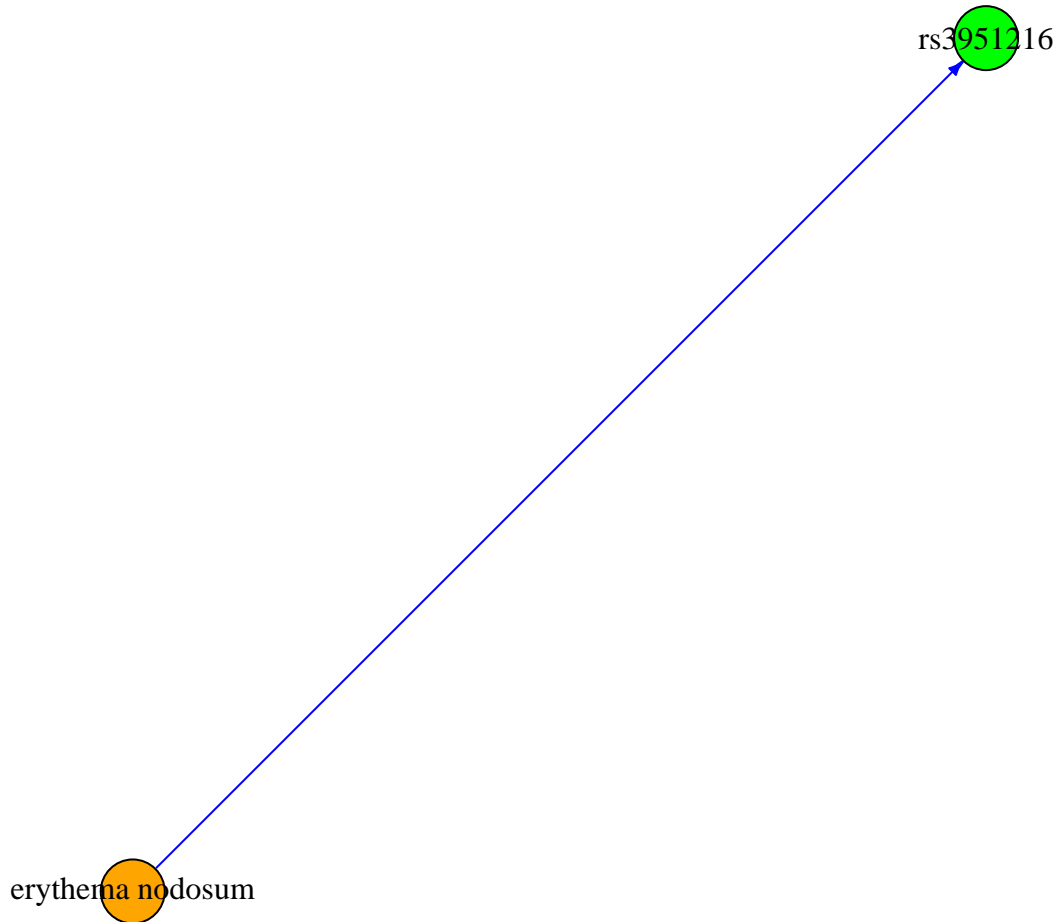

## Variant–Disease Network (leukocyte count)

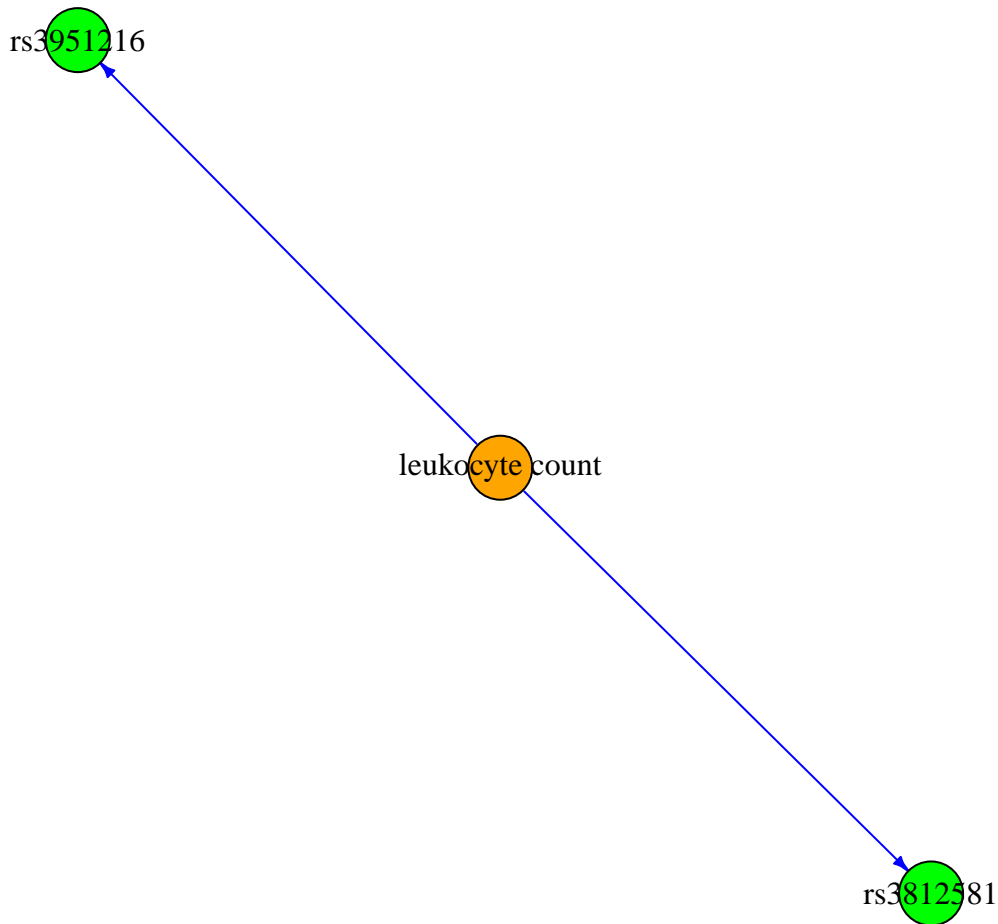

## Variant–Disease Network (sulfate measurement)

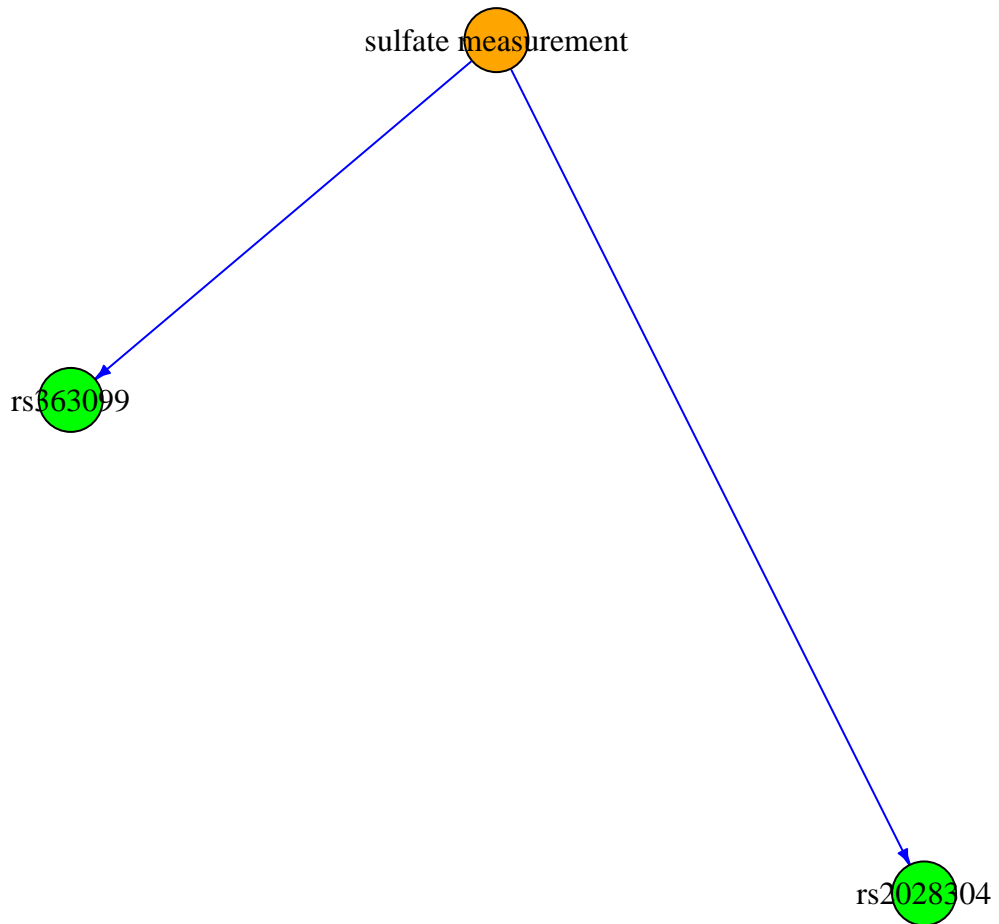

# Variant-Disease Network (head and neck squamous cell carcinoma)

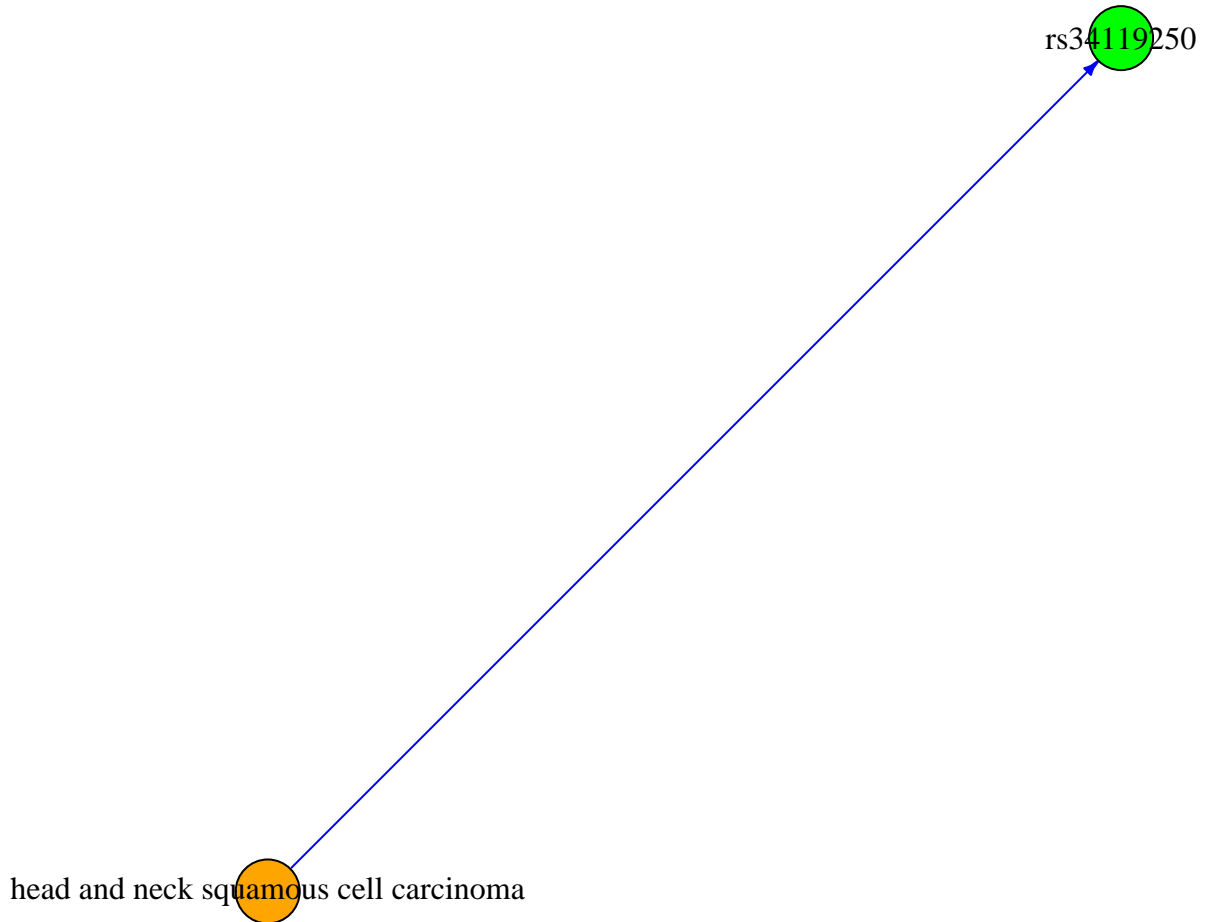



## Variant-Disease Network (pain)

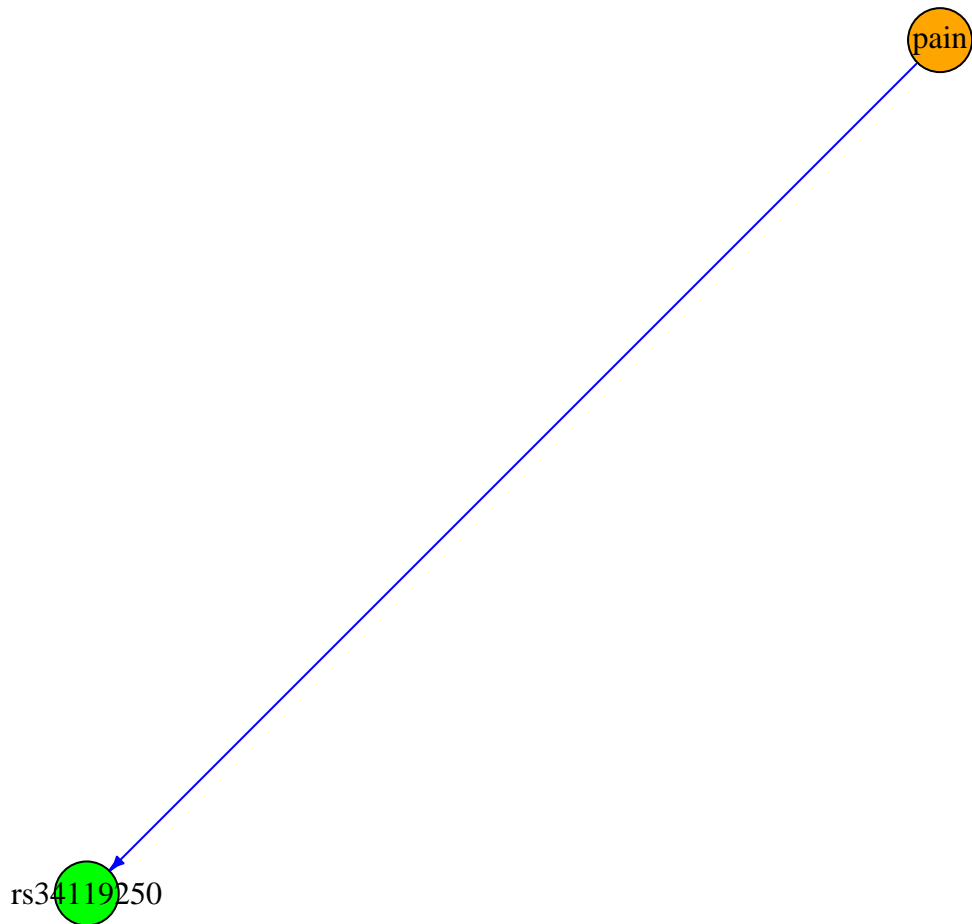

## Variant-Disease Network (immune system disease)

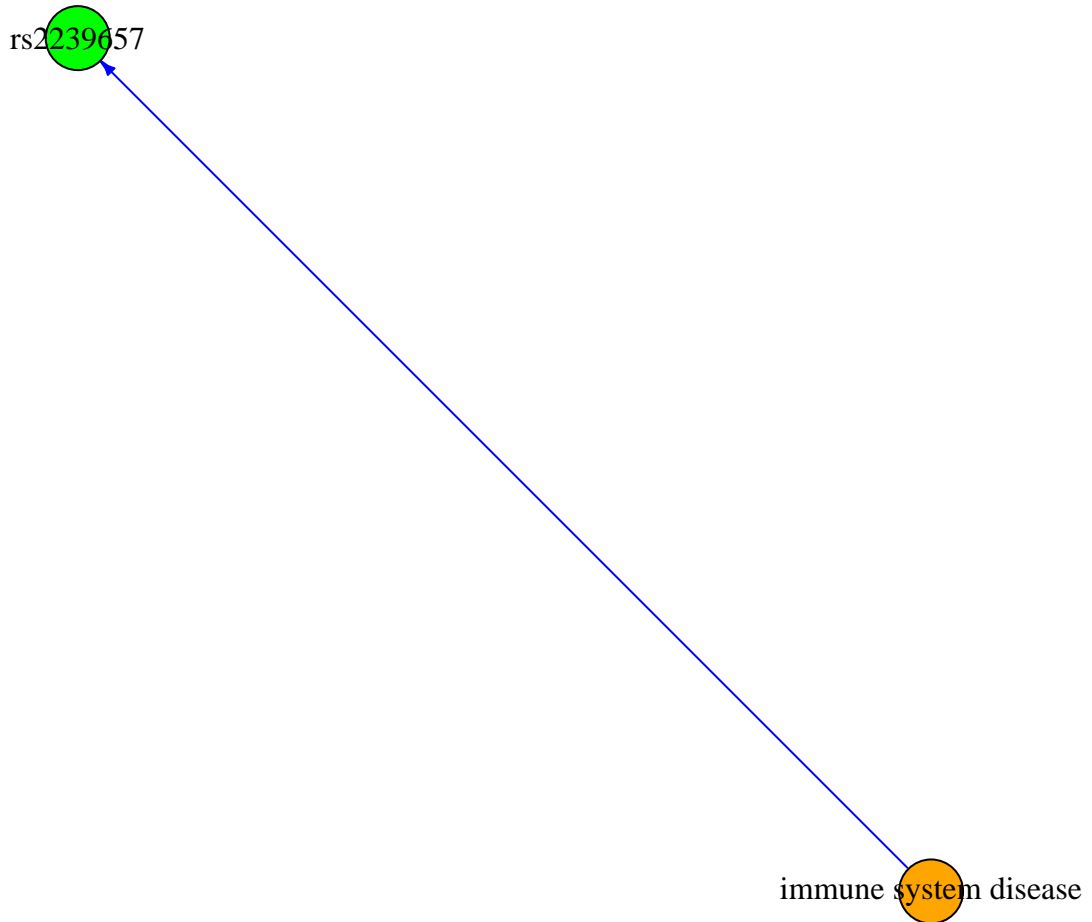

## Variant–Disease Network (lymphocyte count)

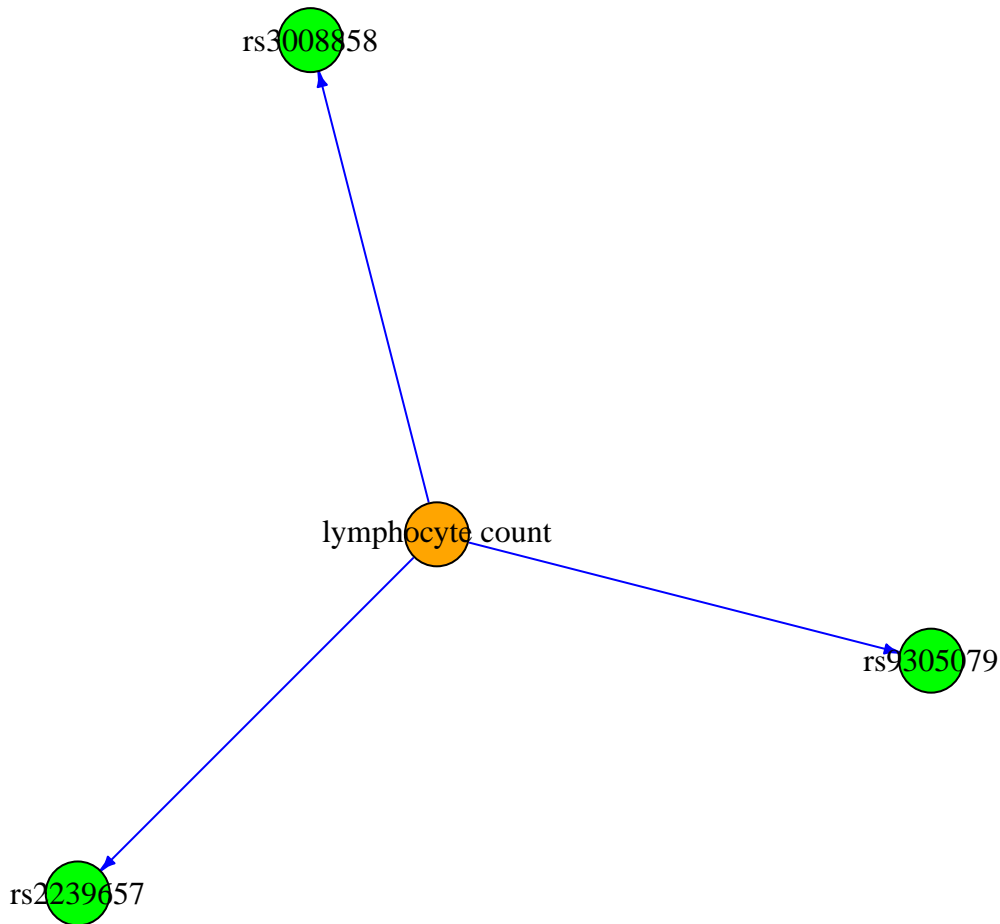

Variant–Disease Network (prostate specific antigen measurement)

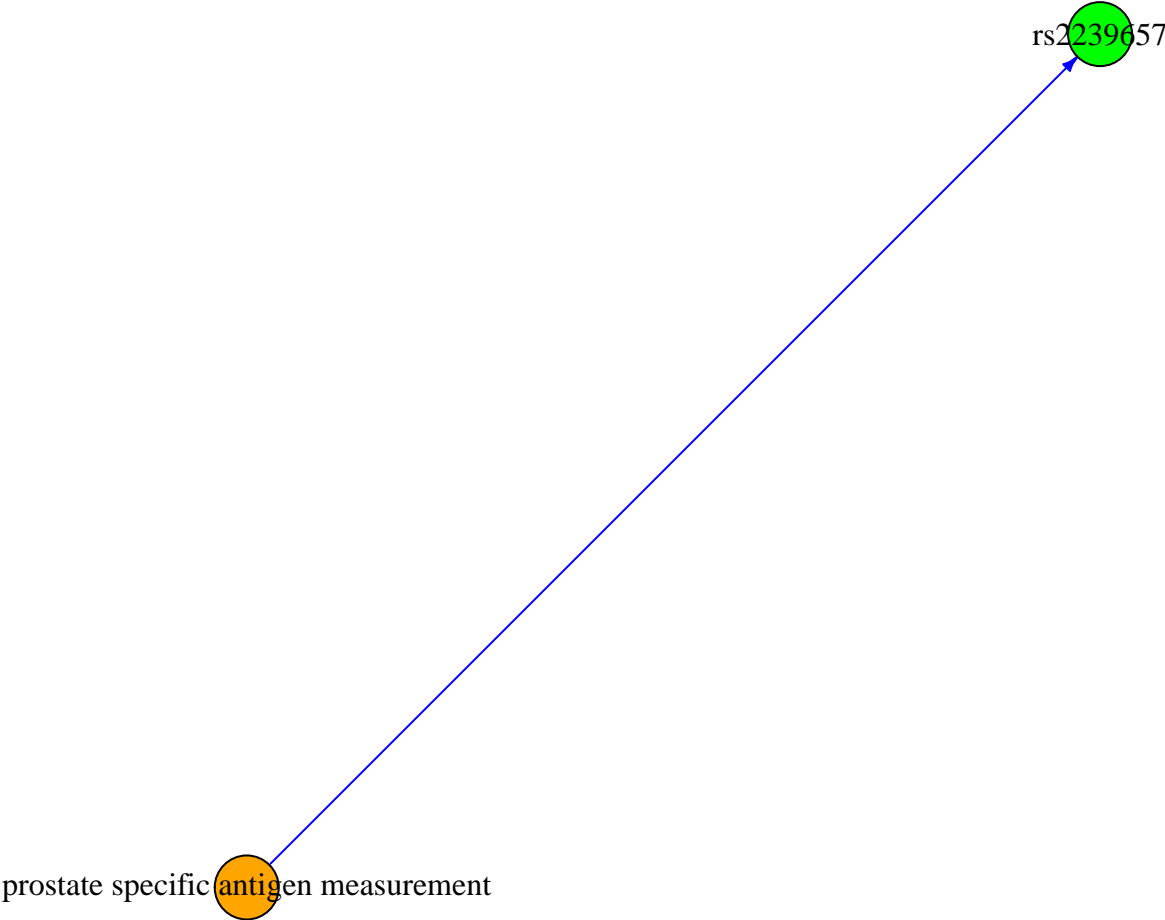

# Variant–Disease Network (pulse pressure measurement)

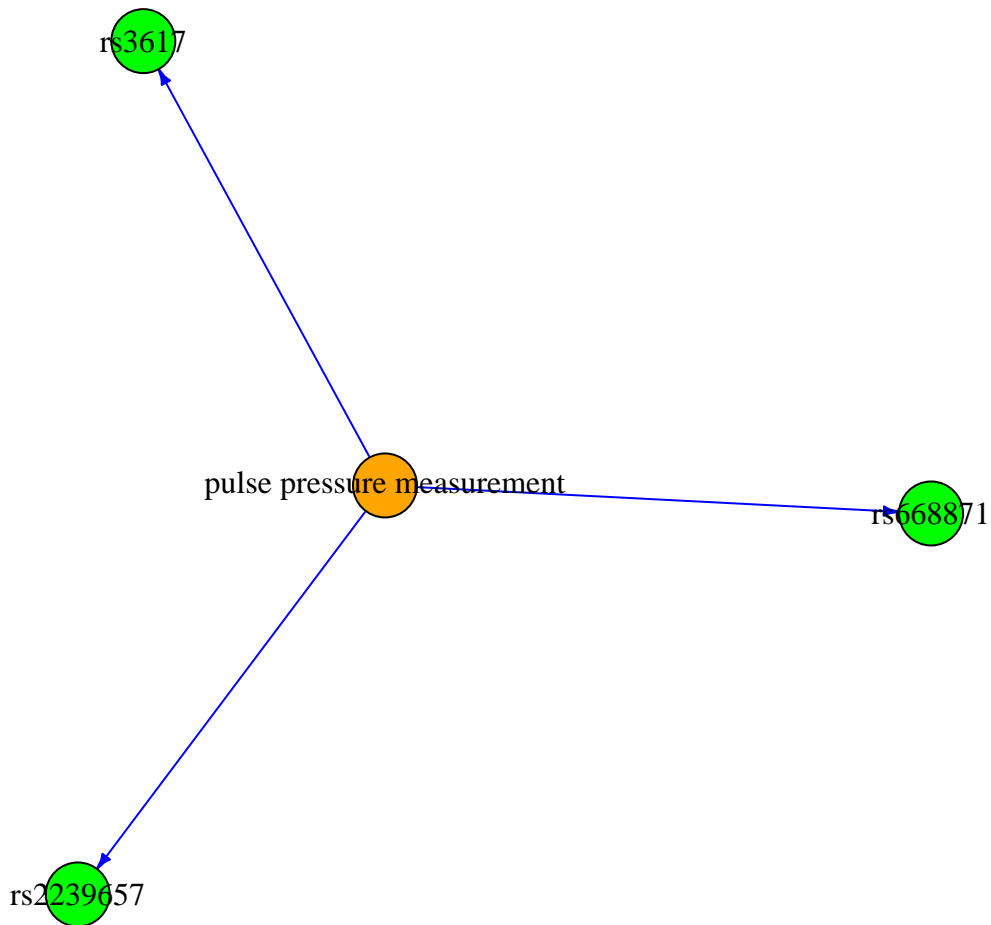

## Variant–Disease Network (rheumatoid arthritis)

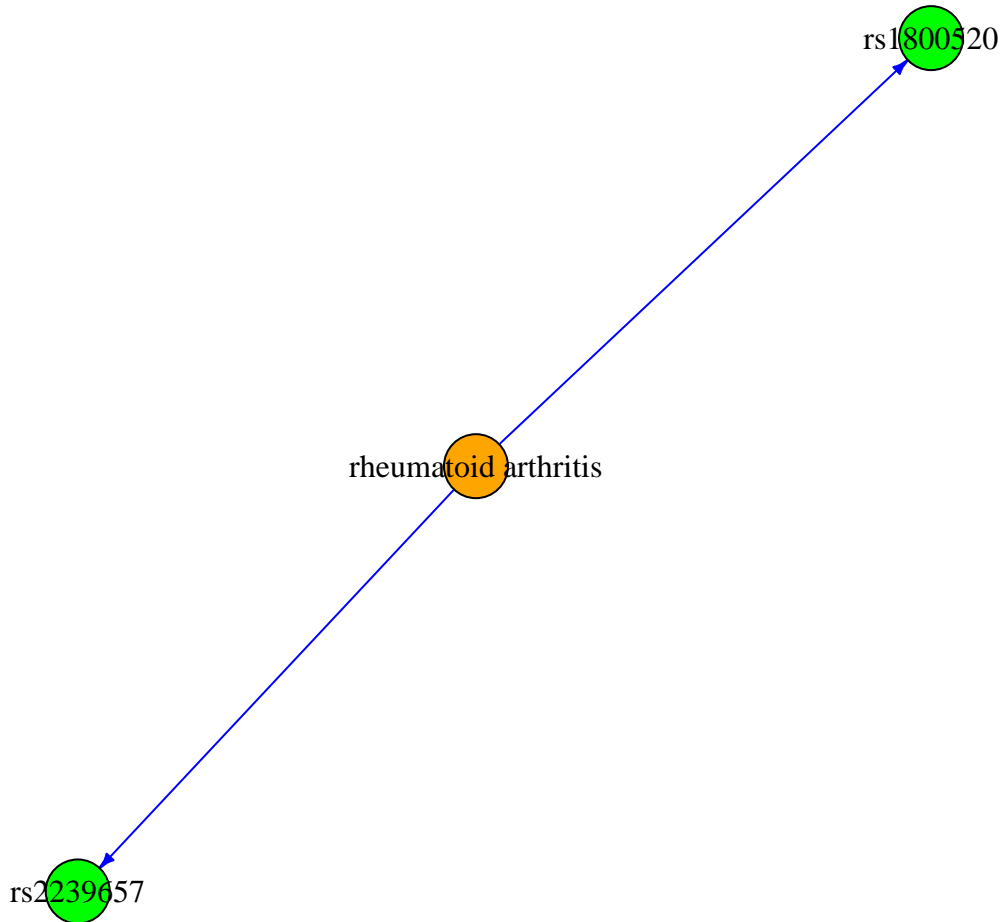

## Variant–Disease Network (grip strength measurement)

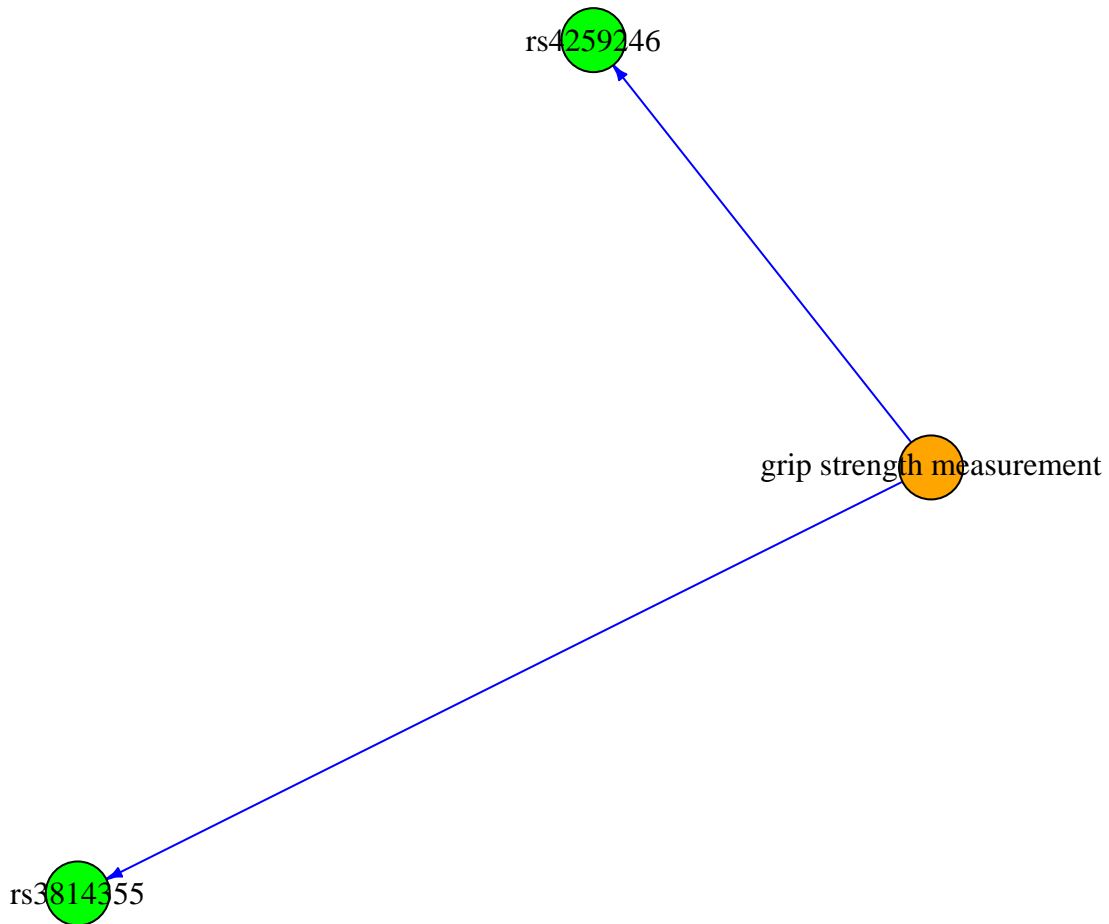

## Variant–Disease Network (smoking behavior)

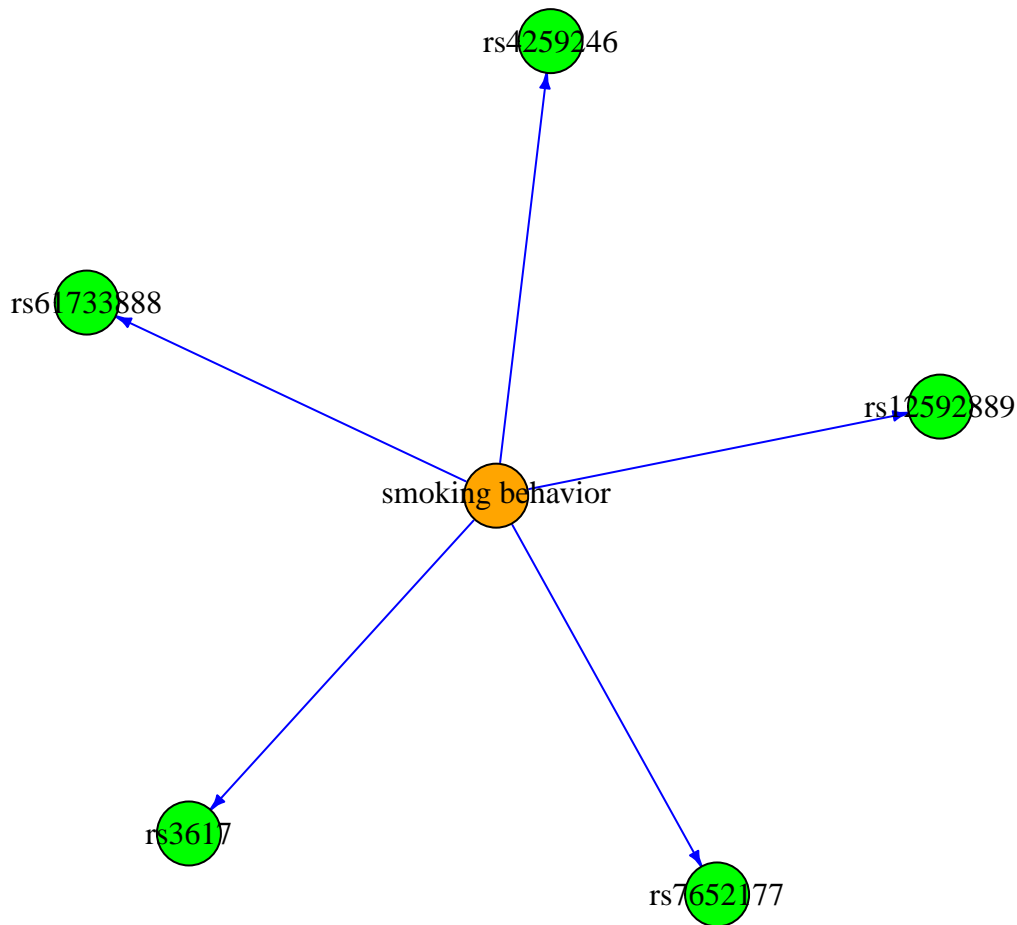



## Variant–Disease Network (type i diabetes mellitus)

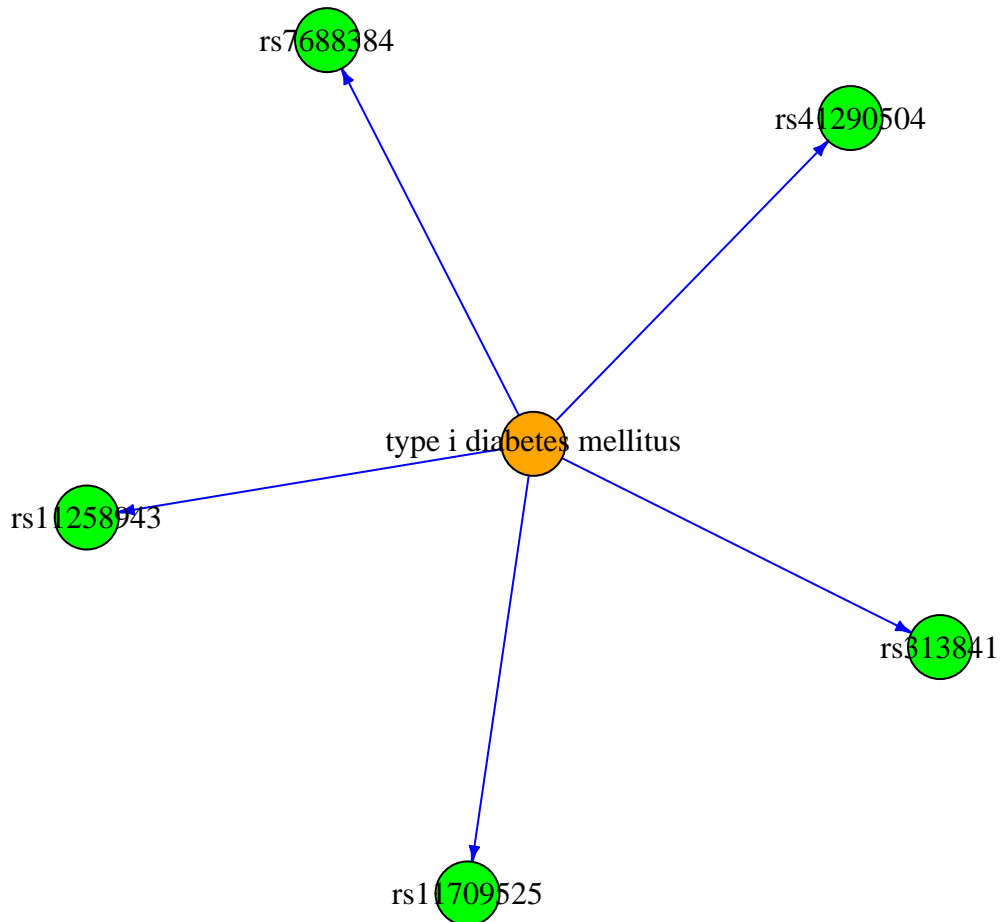

## Variant–Disease Network (lobe attachment)

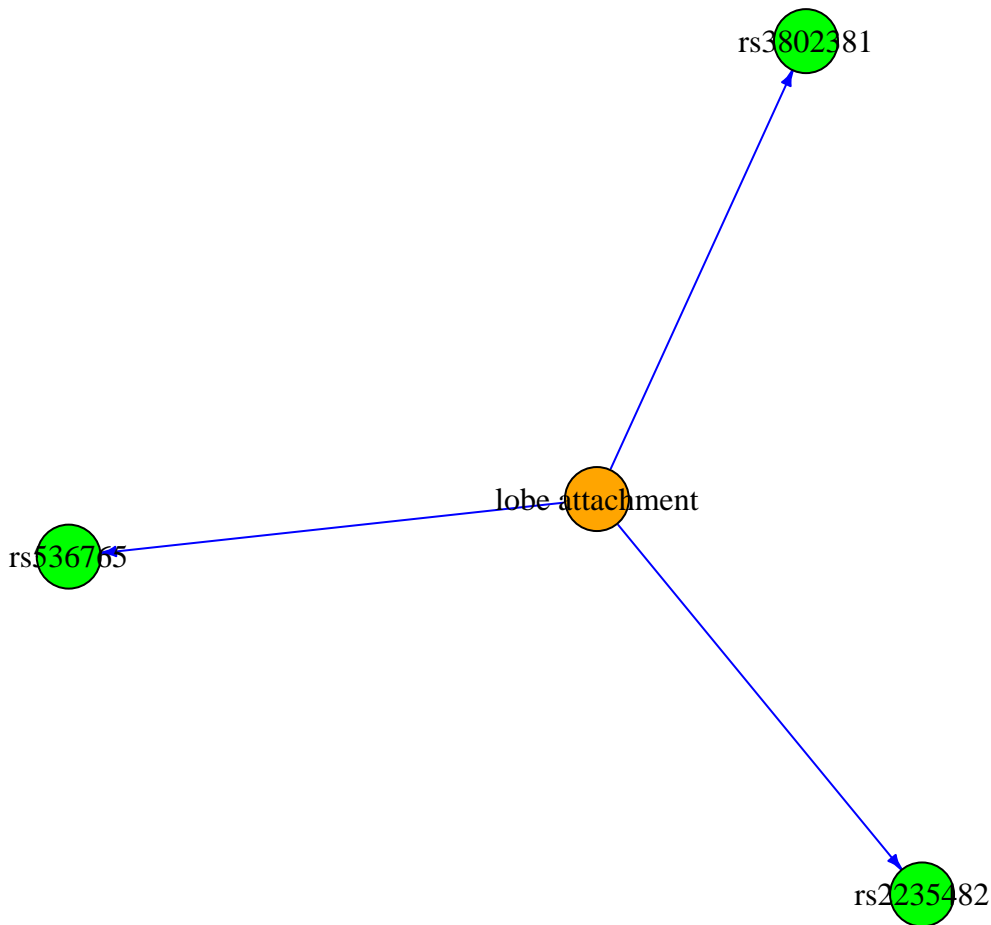

## Variant–Disease Network (parkinsons disease)

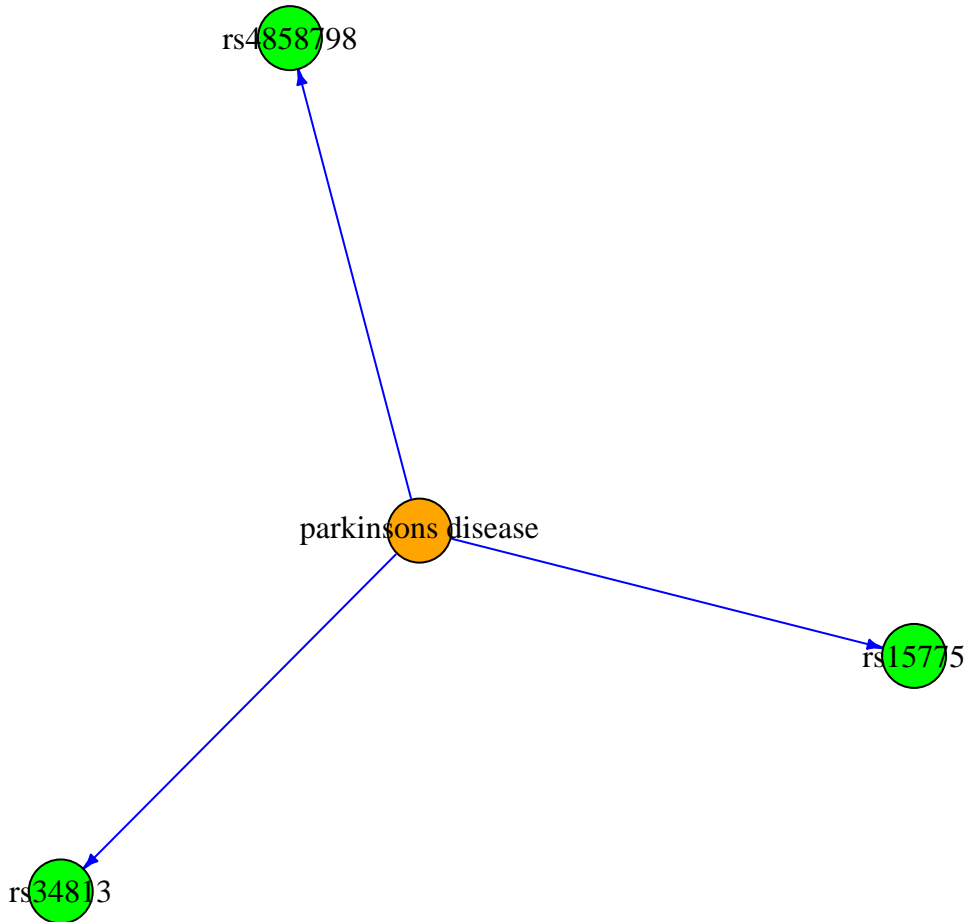

# Variant–Disease Network (late-onset Alzheimers disease)

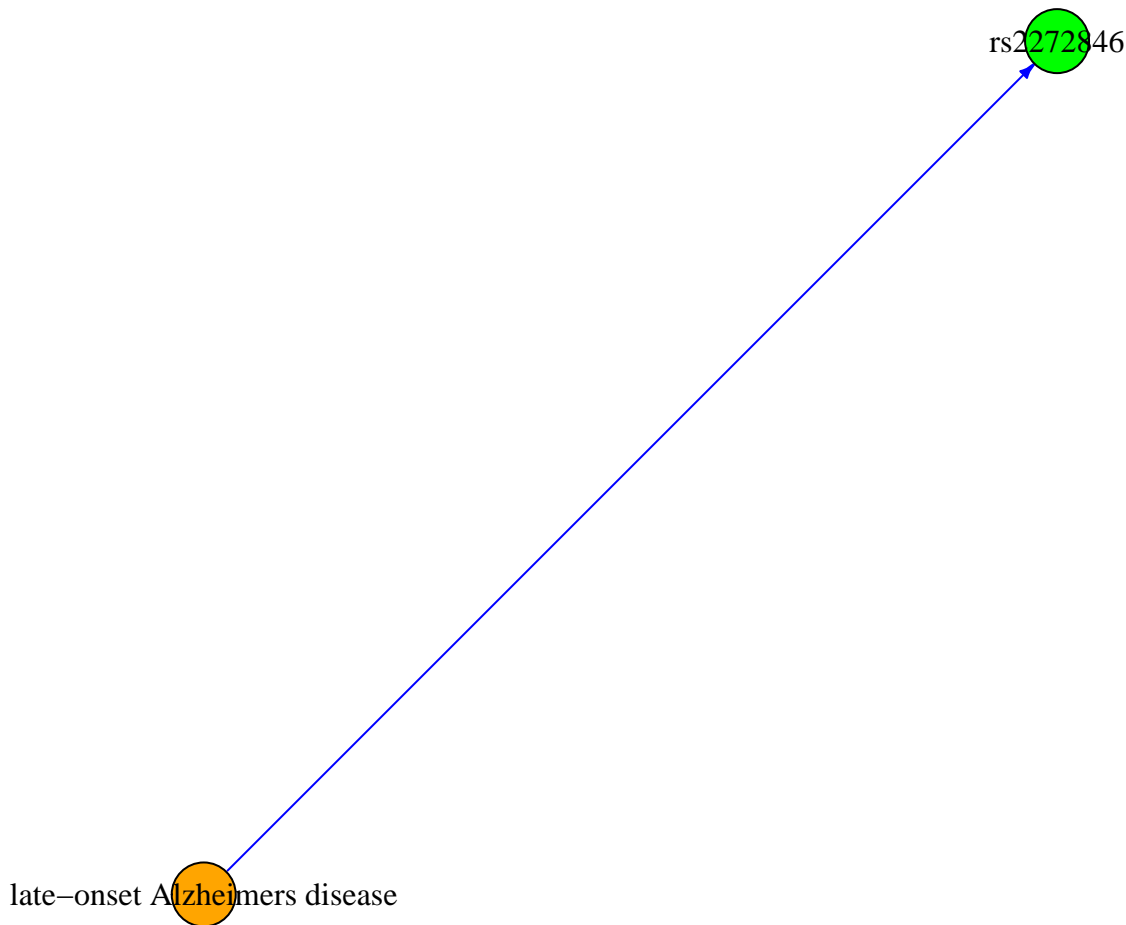

## Variant–Disease Network (sickle cell anemia)

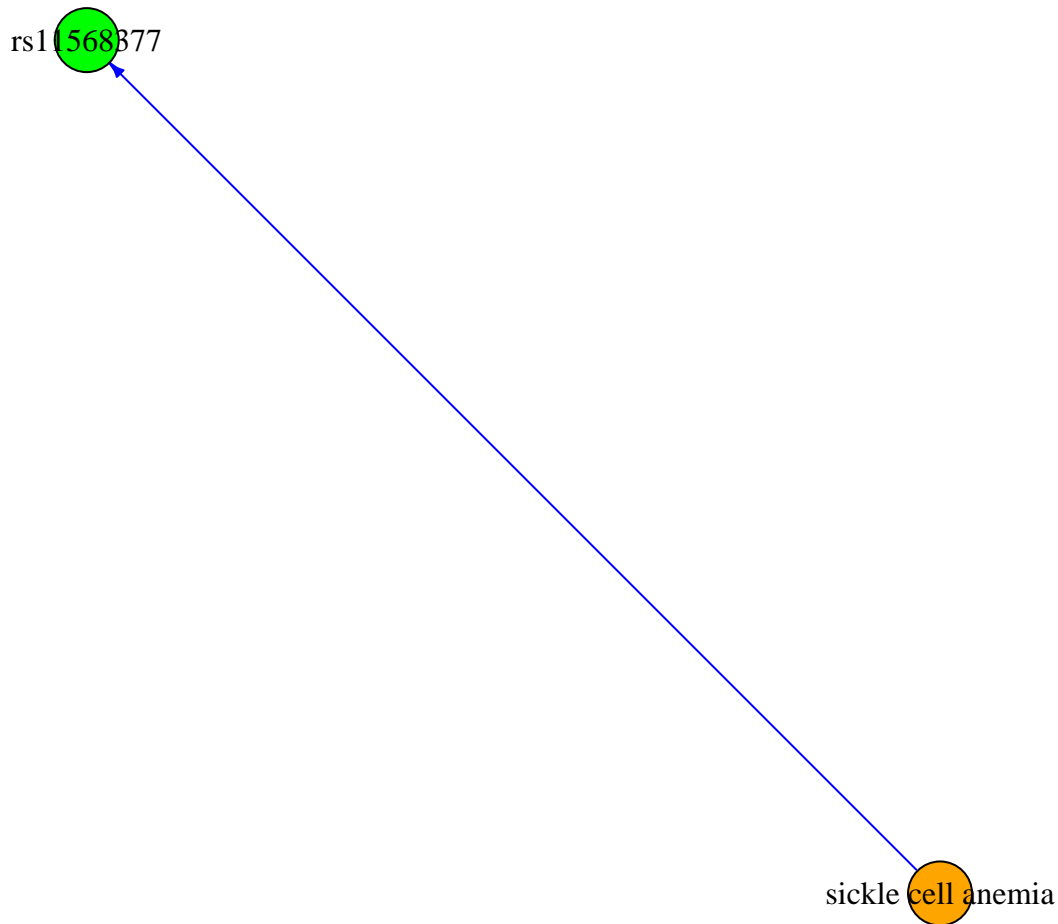

## Variant–Disease Network (age at onset)

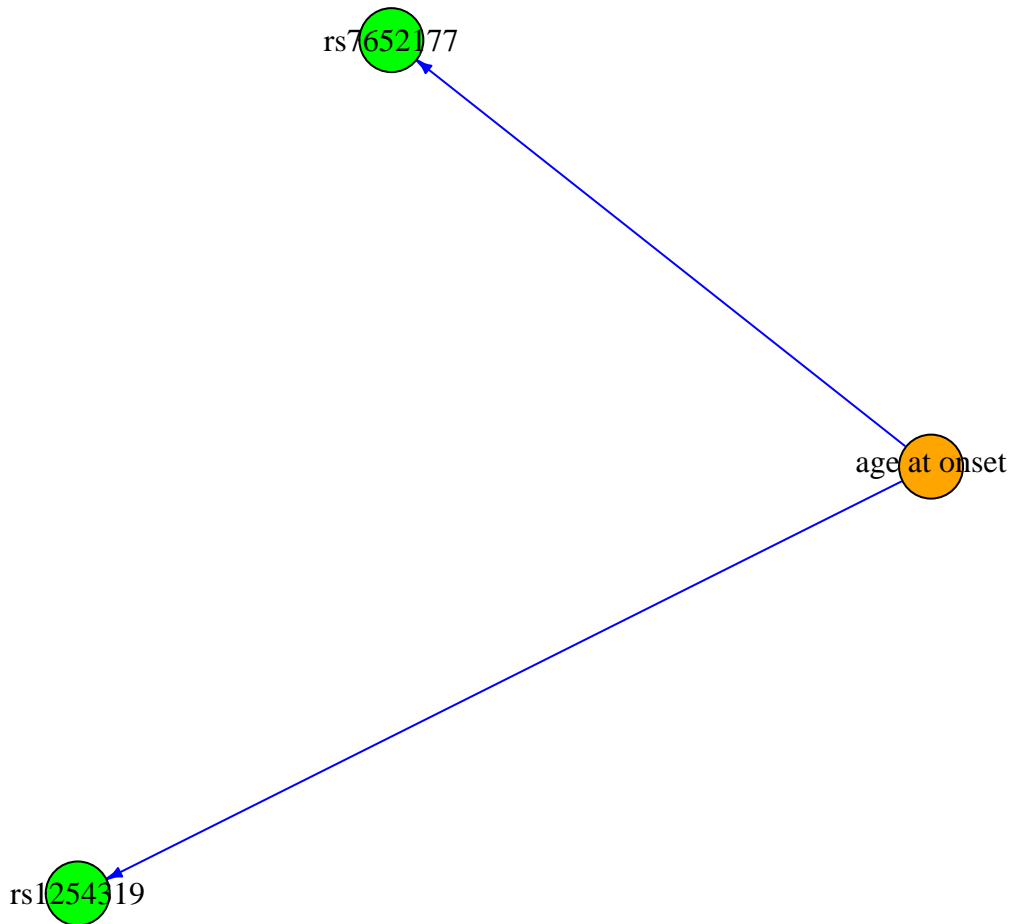

**Variant–Disease Network (BMI-adjusted waist circumference)**

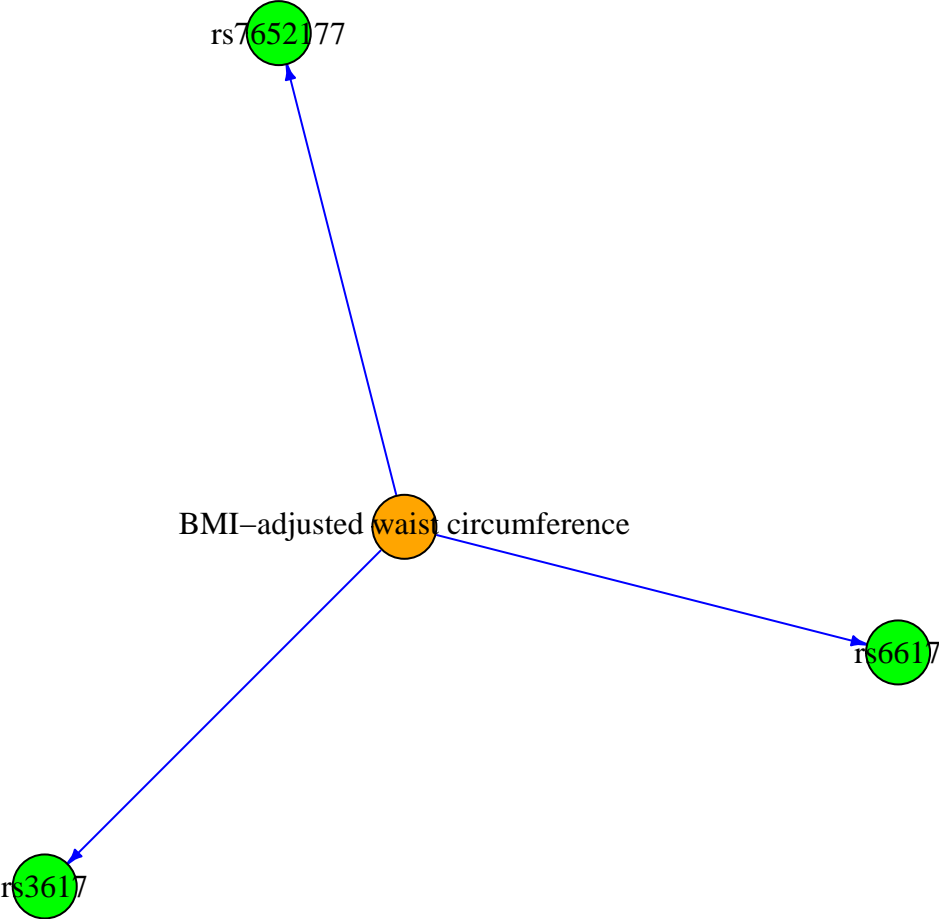

## Variant–Disease Network (Myopia)

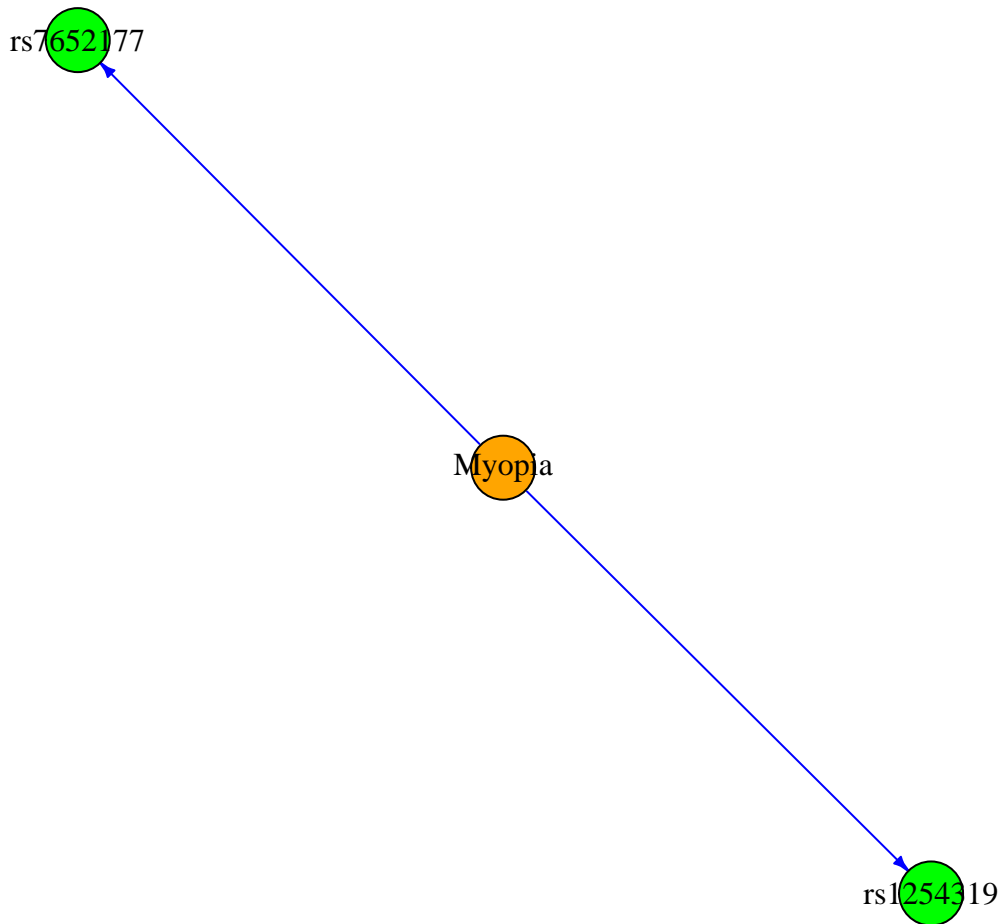



## Variant–Disease Network (physical activity measurement)

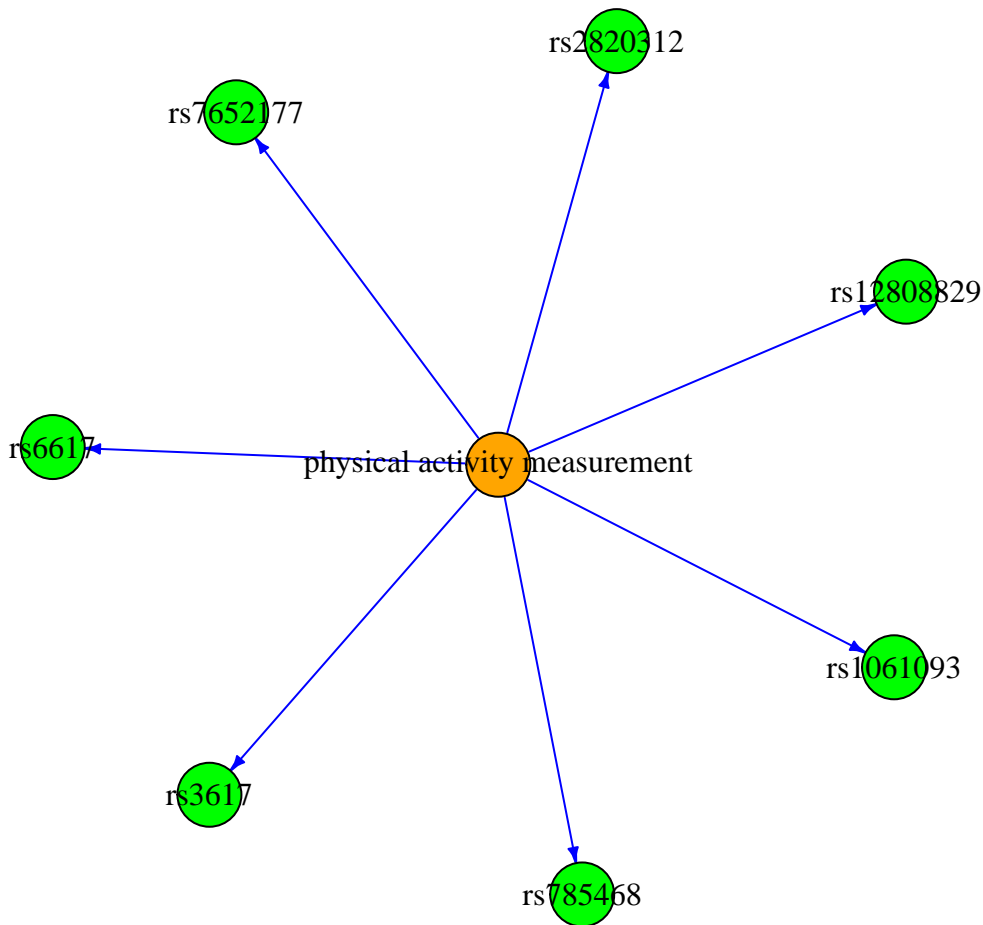

# Variant–Disease Network (refractive error measurement)

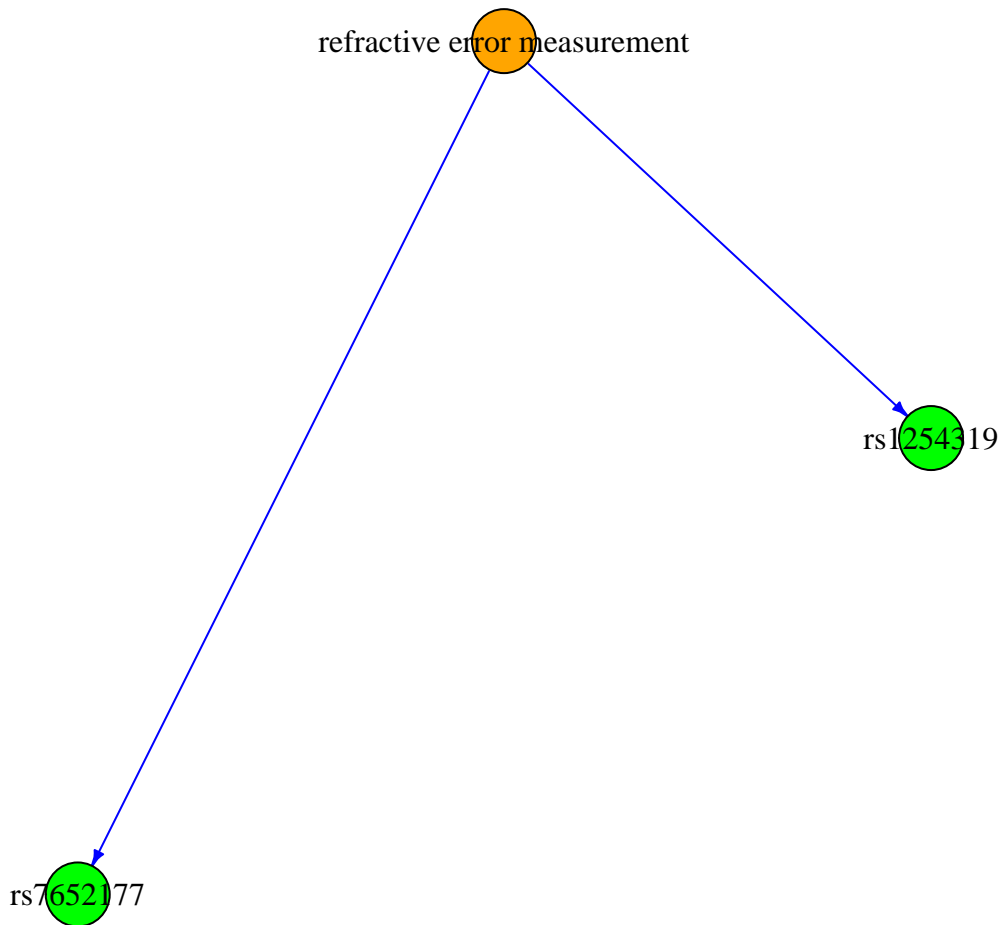

## Variant–Disease Network (waist circumference)

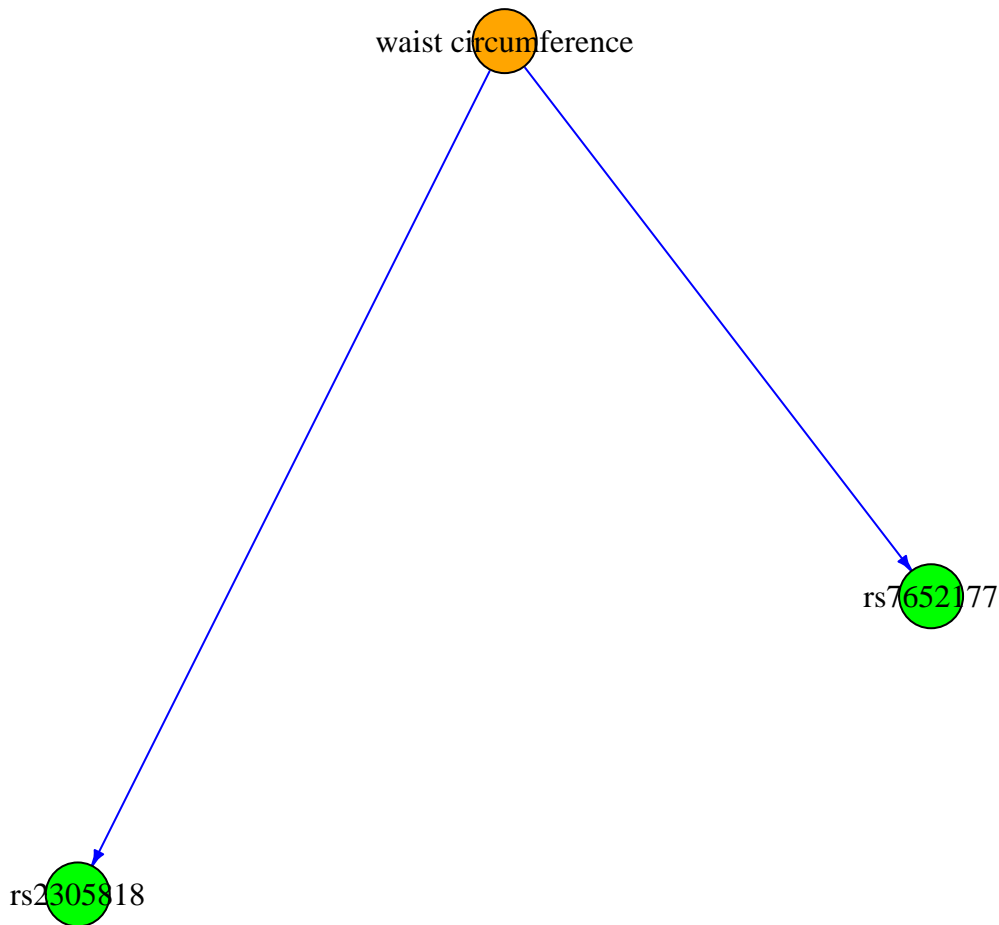

## Variant–Disease Network (dental caries)

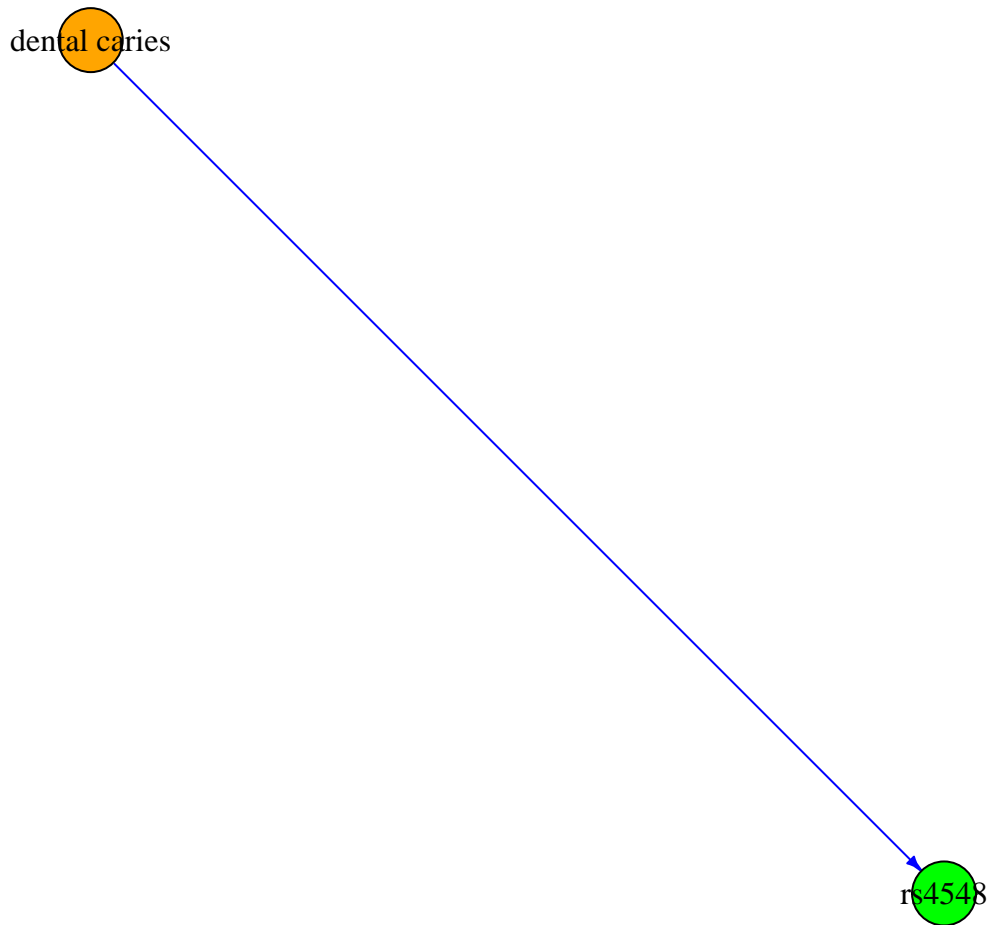

## Variant–Disease Network (fatty acid measurement)

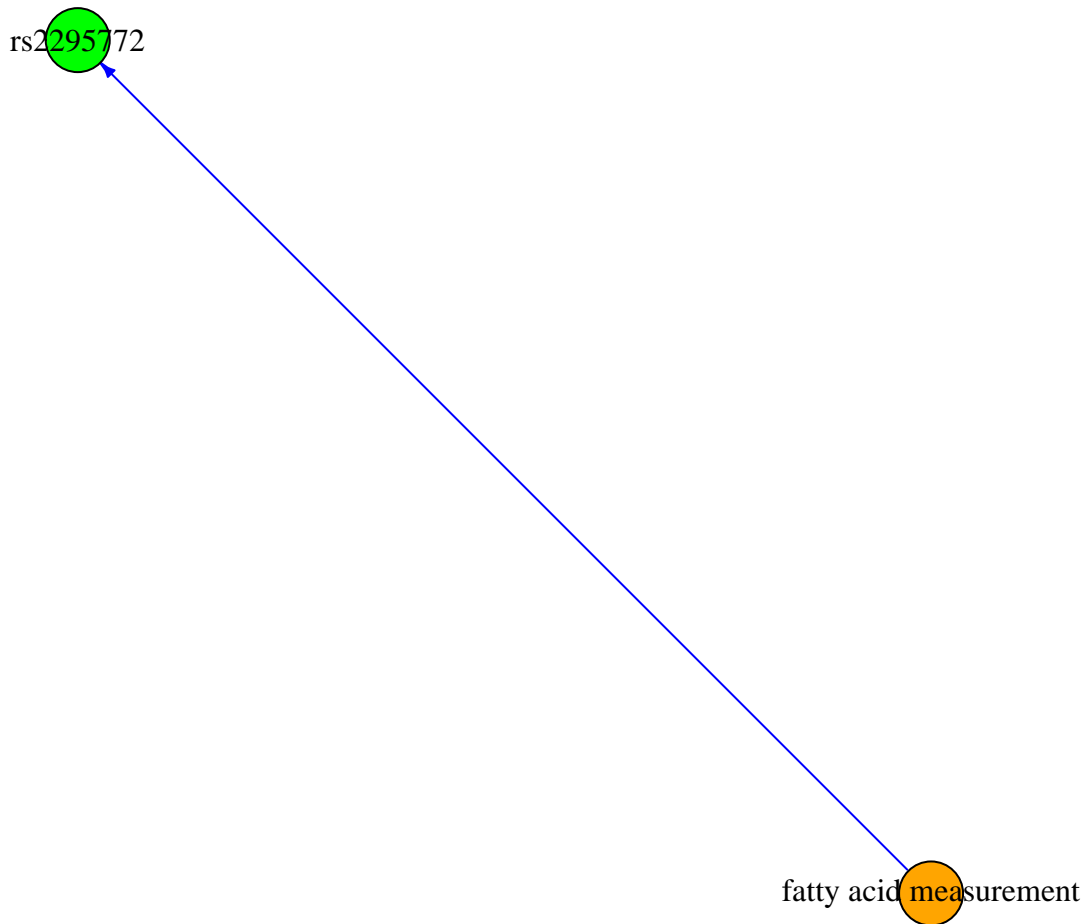

Variant–Disease Network (palmitoleic acid measurement)

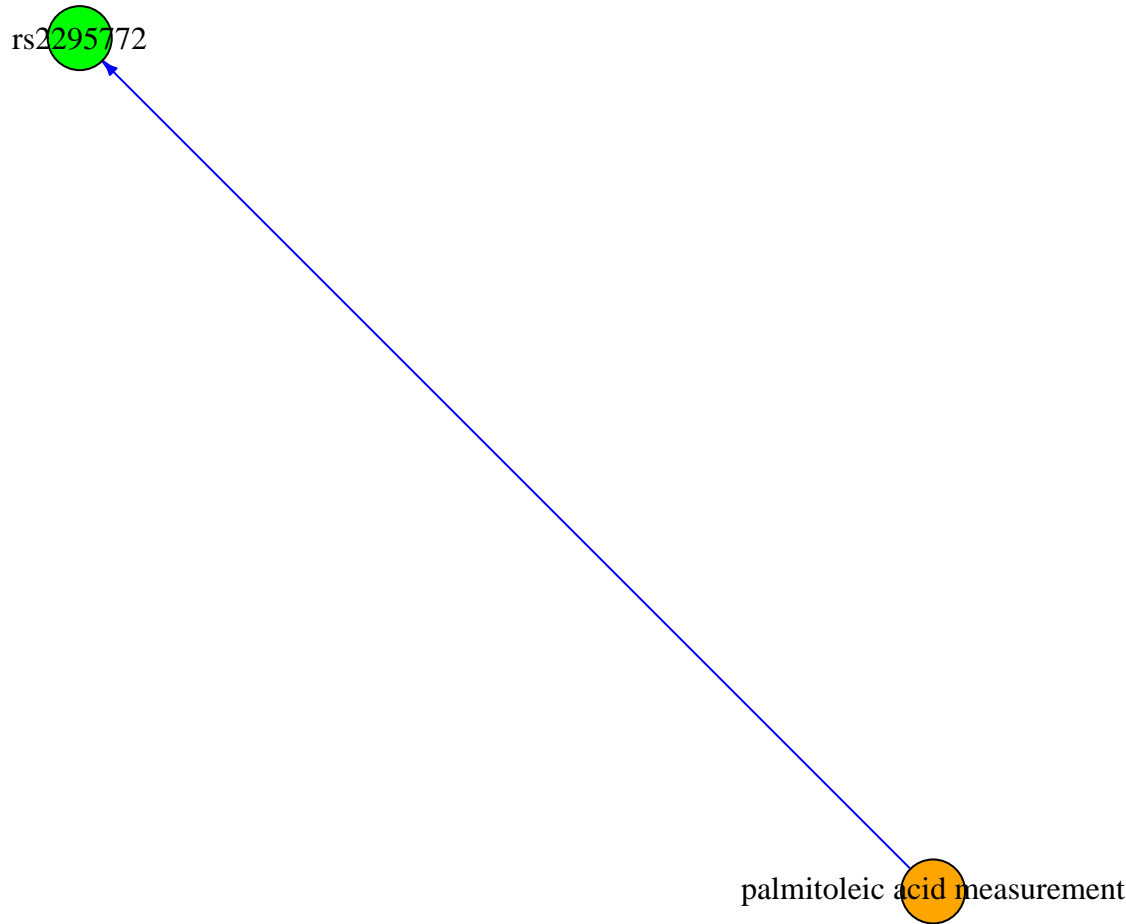

## Variant-Disease Network (anxiety)

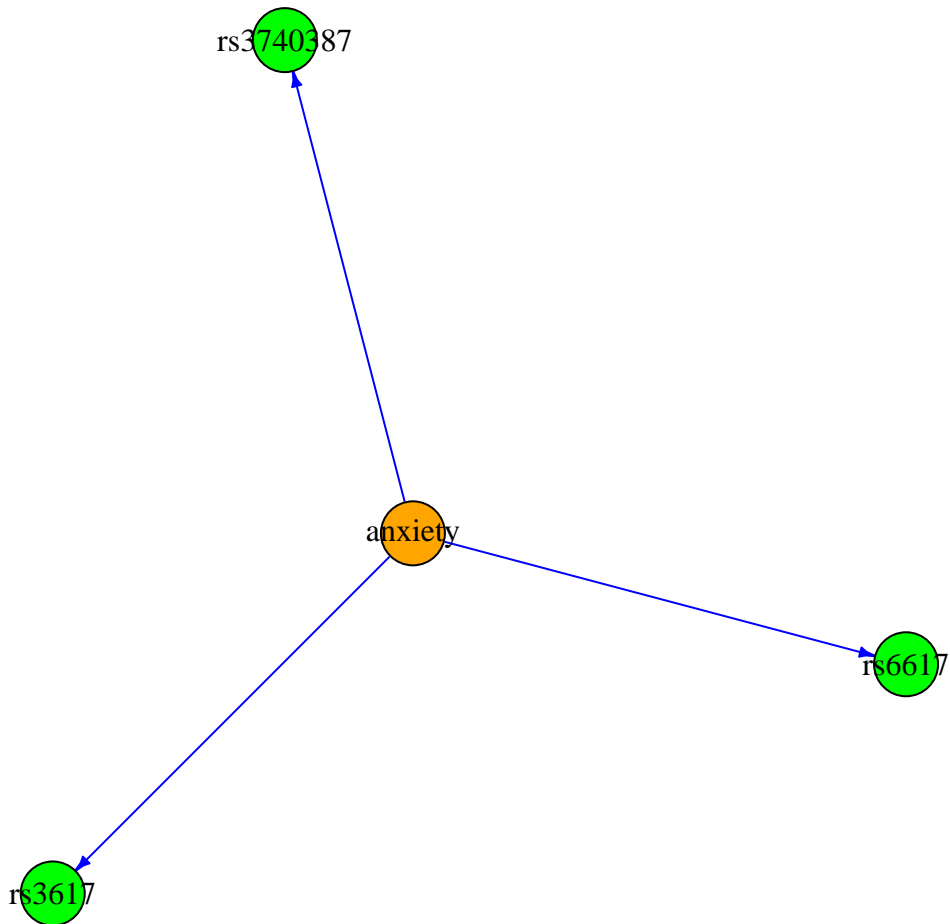

## Variant–Disease Network (bipolar disorder)

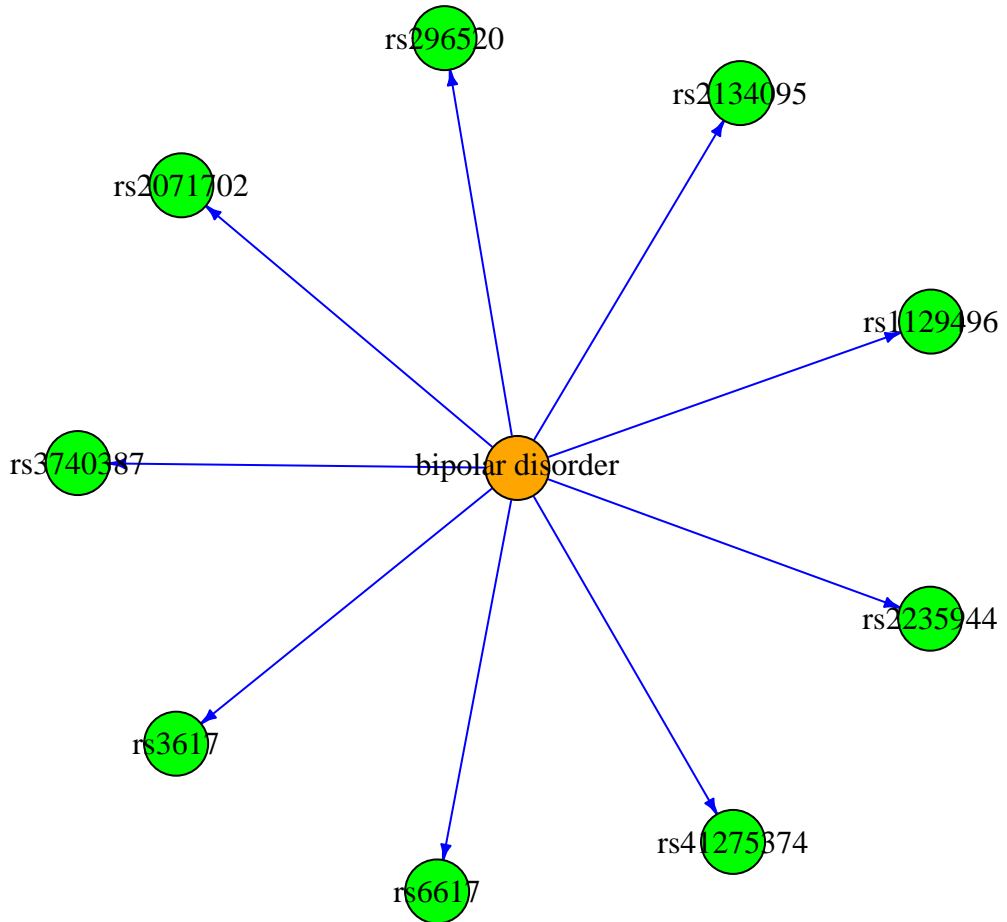



## Variant–Disease Network (migraine disorder)

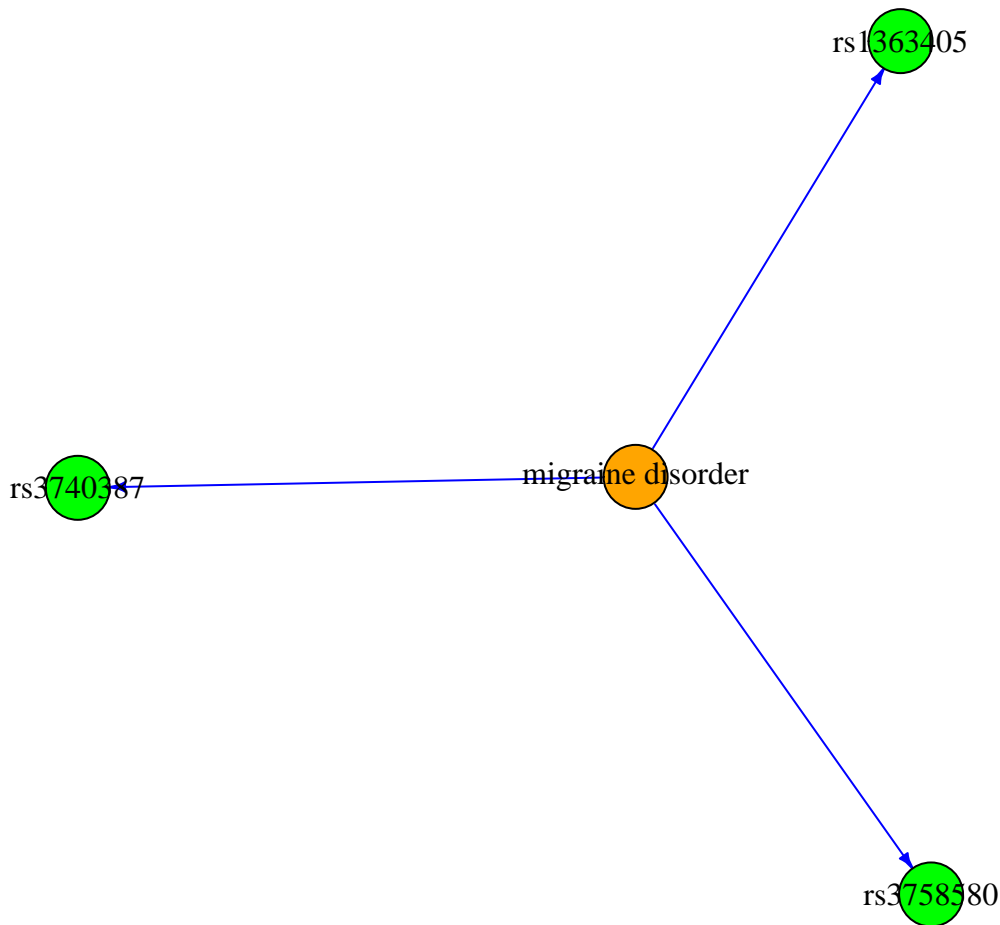

**Variant–Disease Network (white matter lesion progression measurement)**

white matter lesion progression measurement

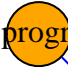

rs3740387

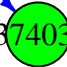

Variant–Disease Network (adolescent idiopathic scoliosis)

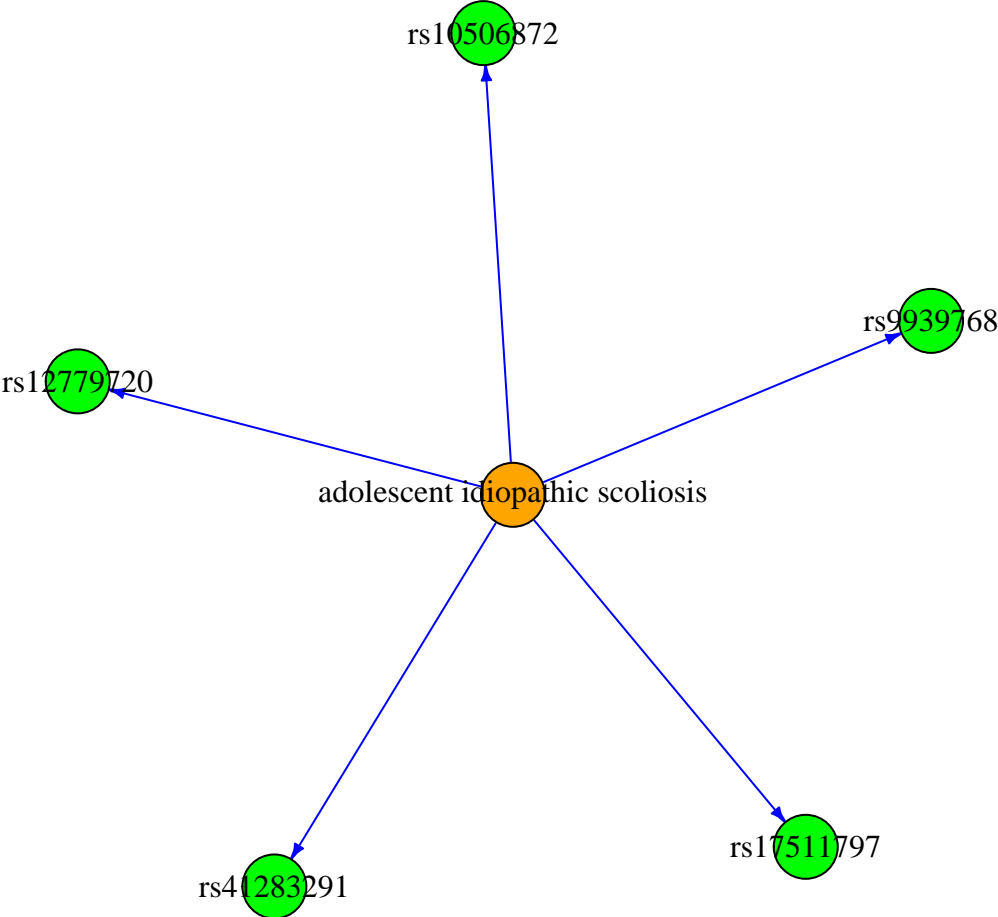

# Variant–Disease Network (parental genotype effect measurement)

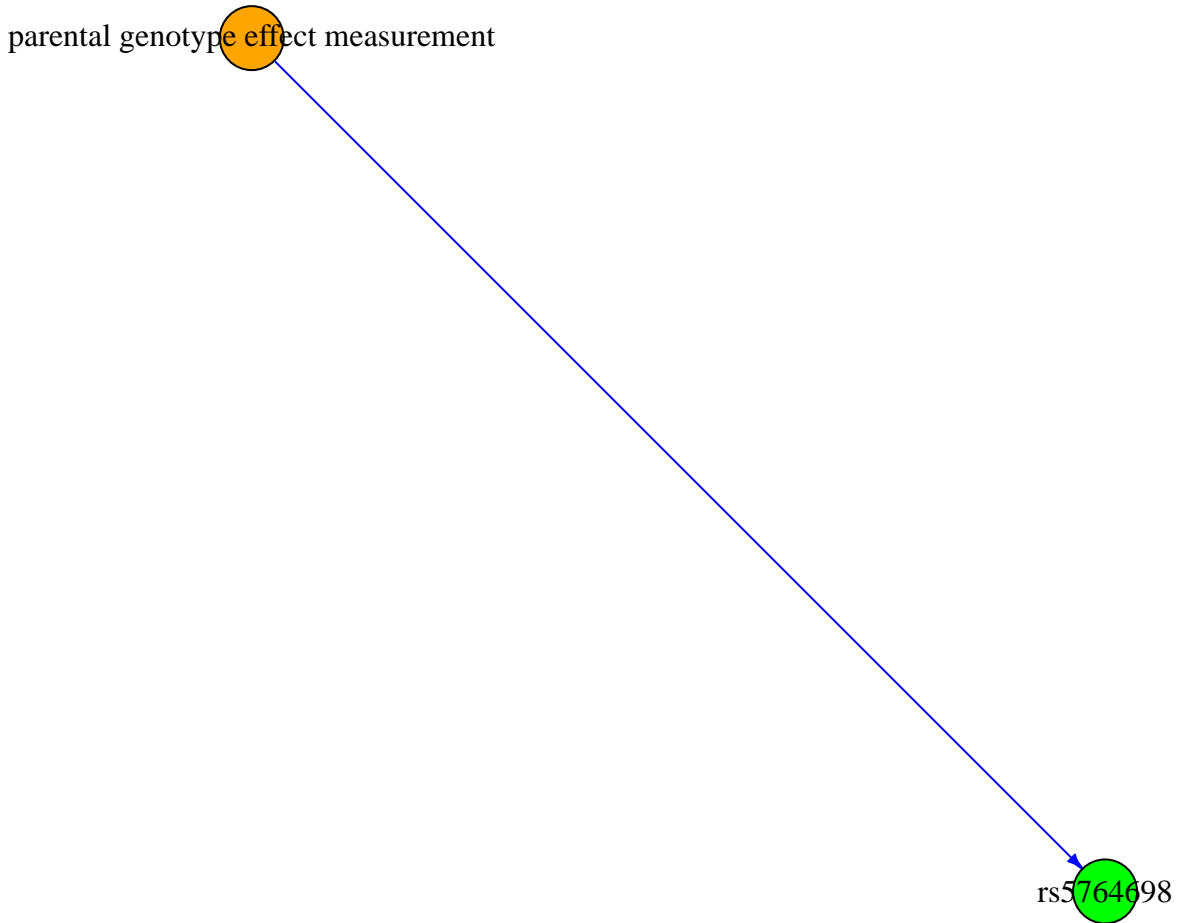

## Variant–Disease Network (peanut allergy measurement)

peanut allergy measurement

rs5764698

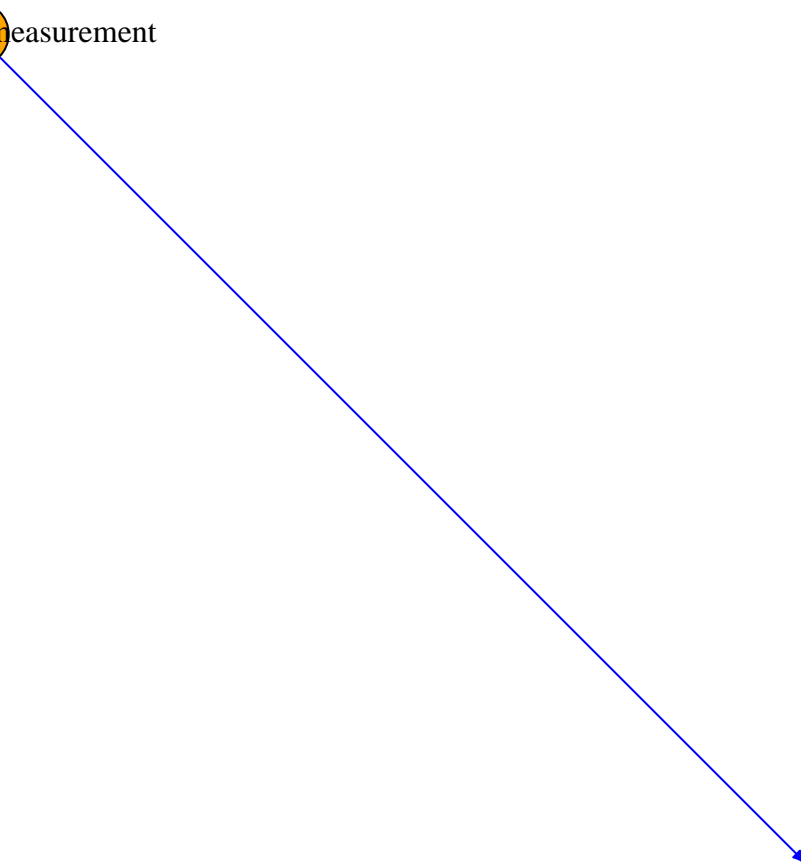

## Variant-Disease Network (coronary artery disease)

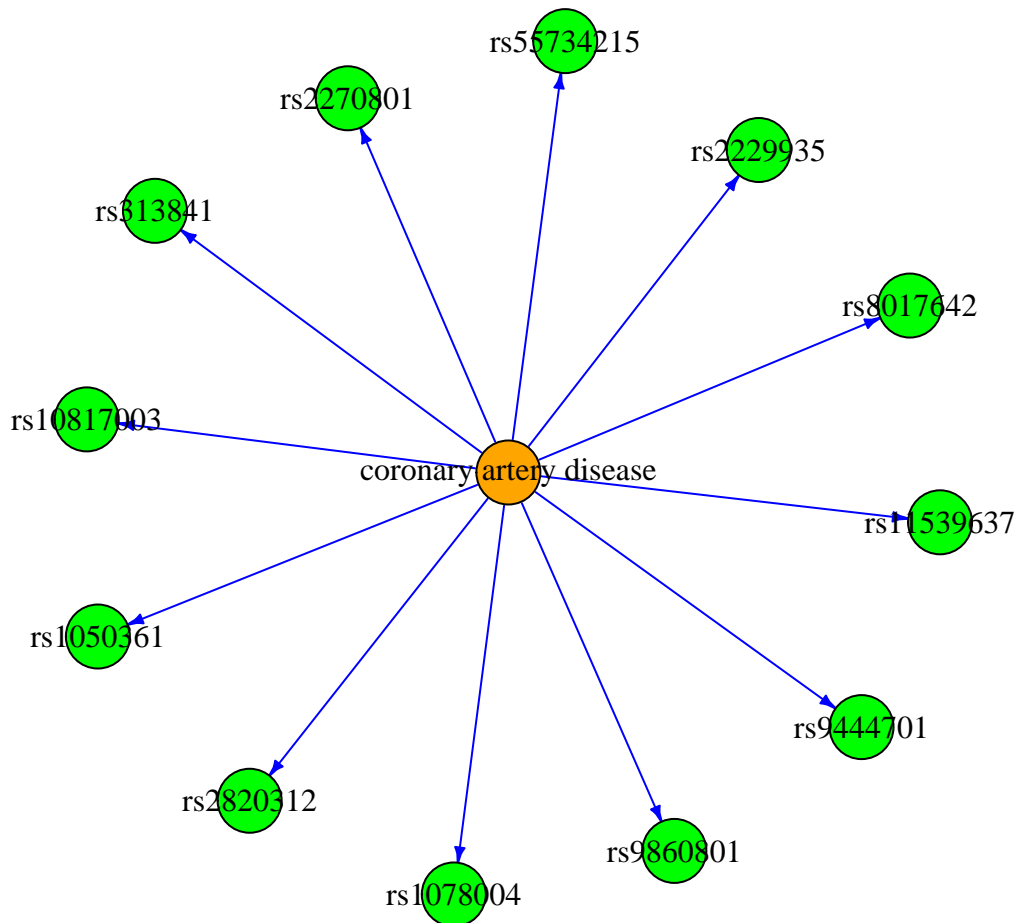

## Variant–Disease Network (D dimer measurement)

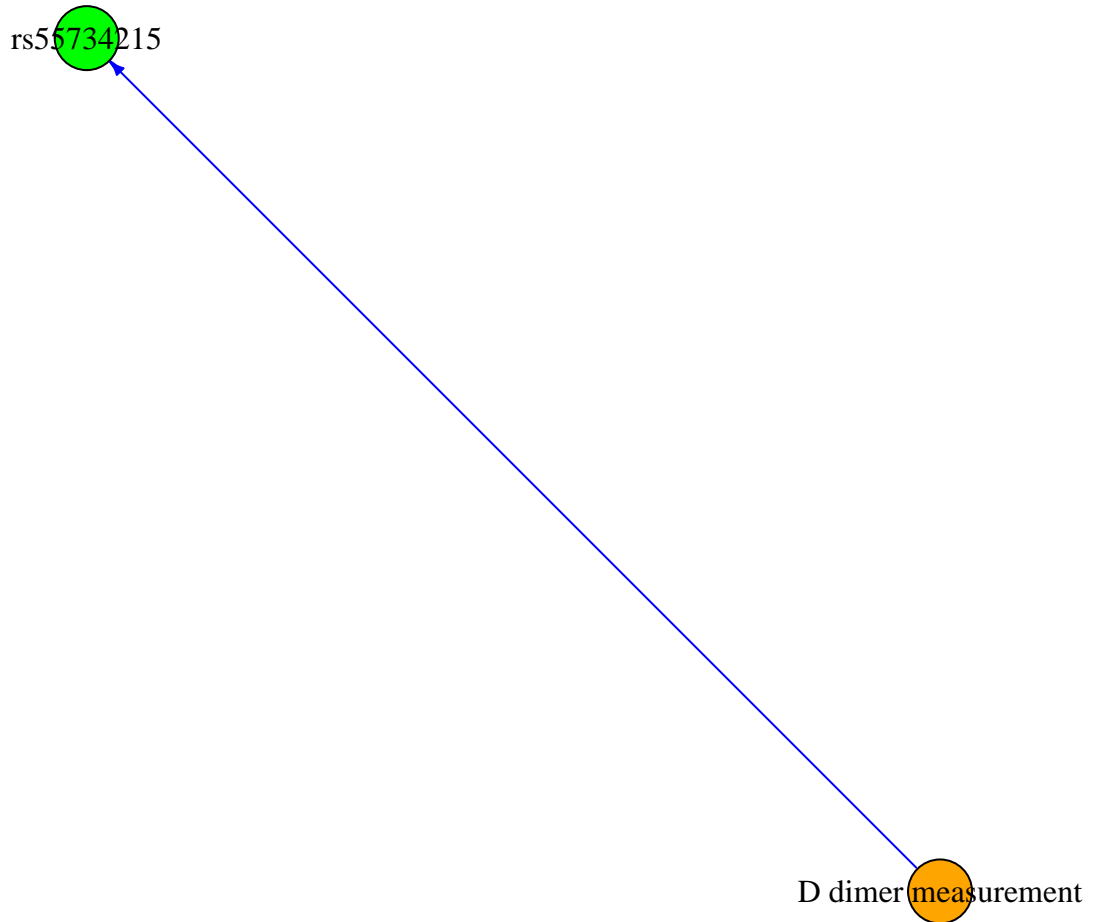

## Variant–Disease Network (factor VII measurement)

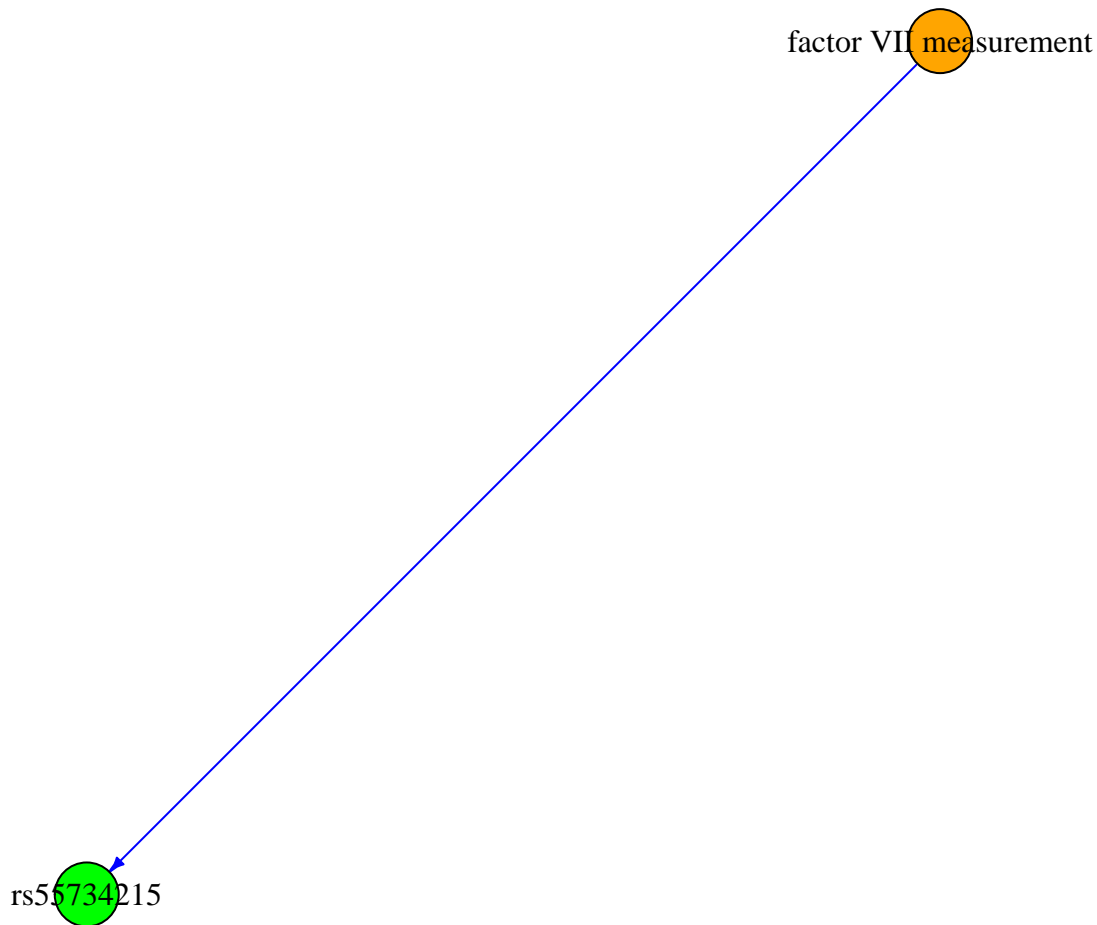



## Variant–Disease Network (hematological measurement)

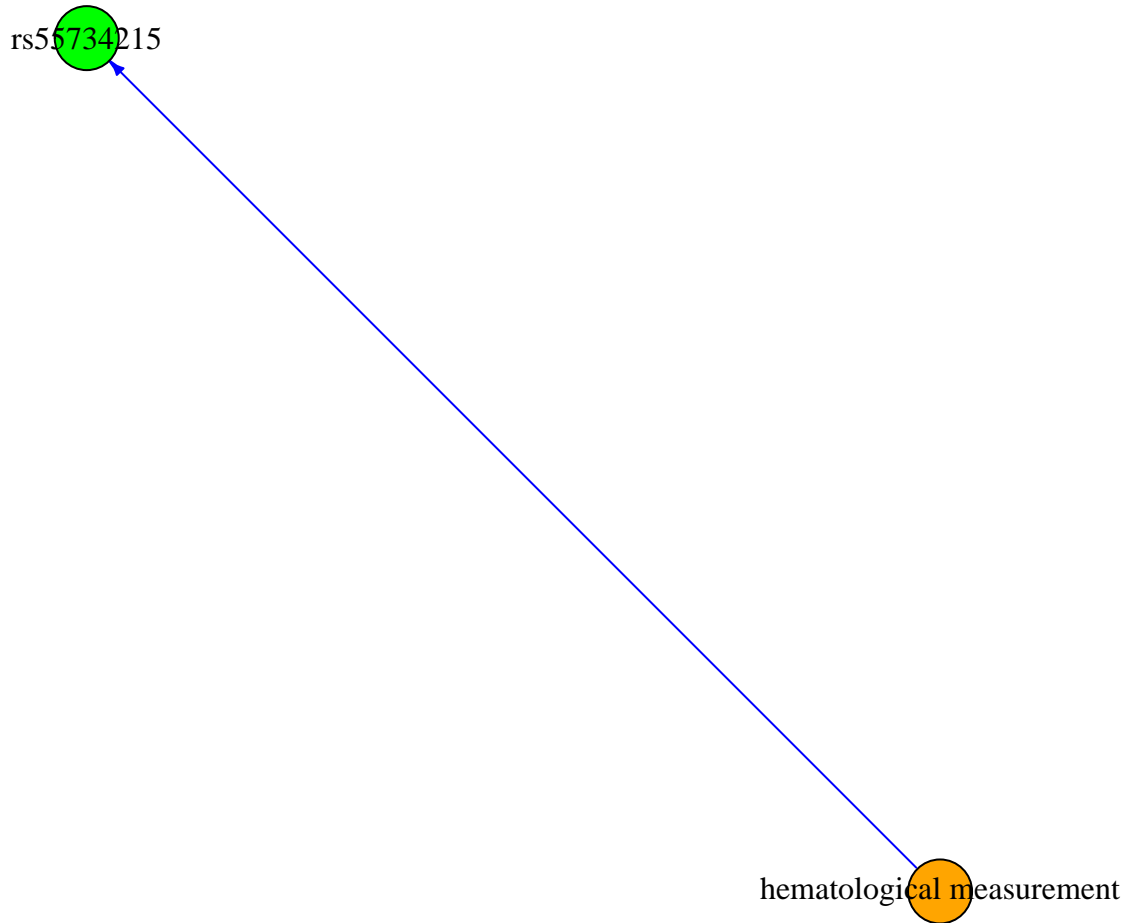

## Variant–Disease Network (protein c measurement)

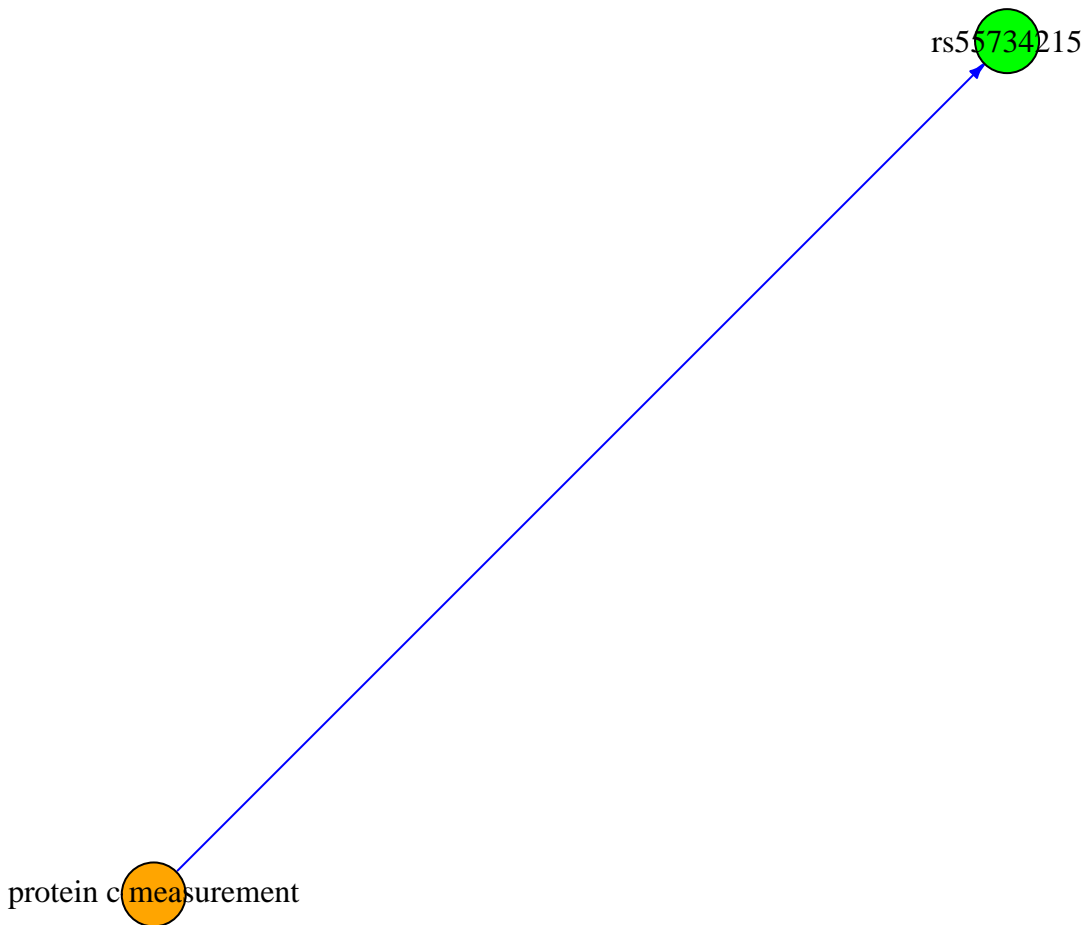

## Variant-Disease Network (prothrombin time measurement)

prothrombin time measurement

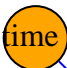

rs55734215

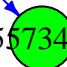

## Variant–Disease Network (sporadic amyotrophic lateral sclerosis)

sporadic amyotrophic lateral sclerosis

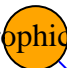

rs55734215



# Variant–Disease Network (vitamin K–dependent protein C measurement)

vitamin K–dependent protein C measurement

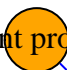

rs55734215

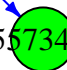

**Variant–Disease Network (smoking status measurement)**

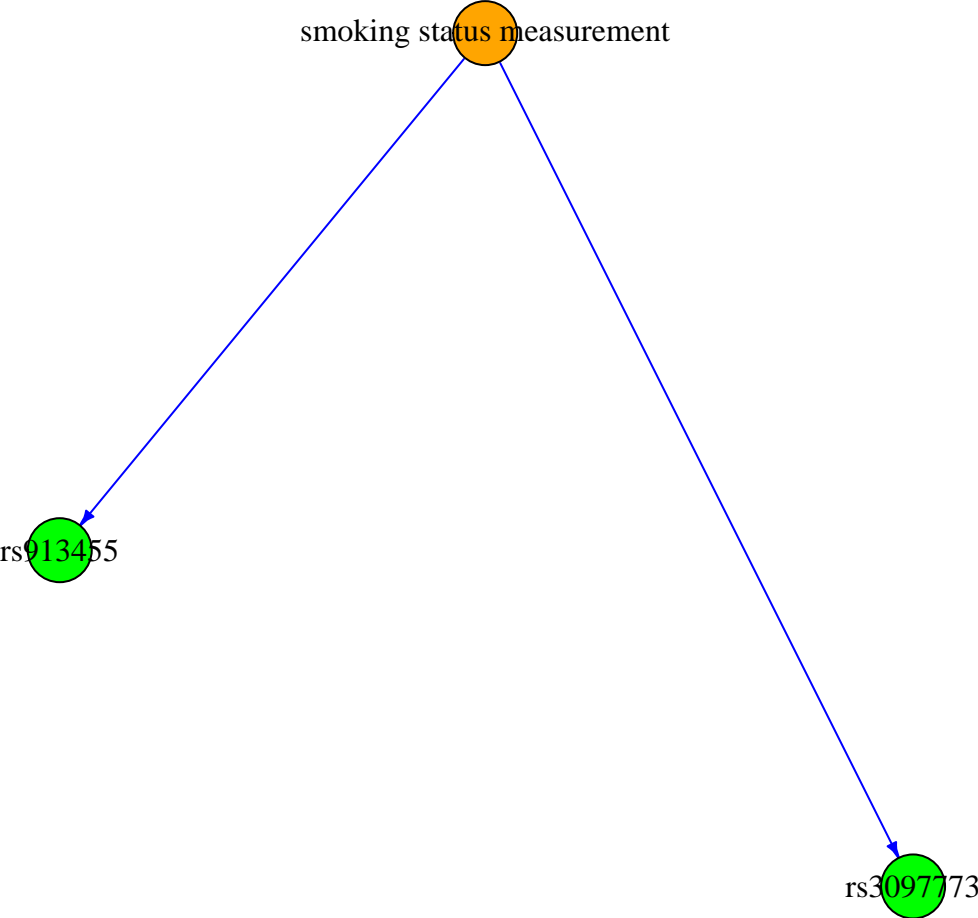

**Variant–Disease Network (squamous cell lung carcinoma)**

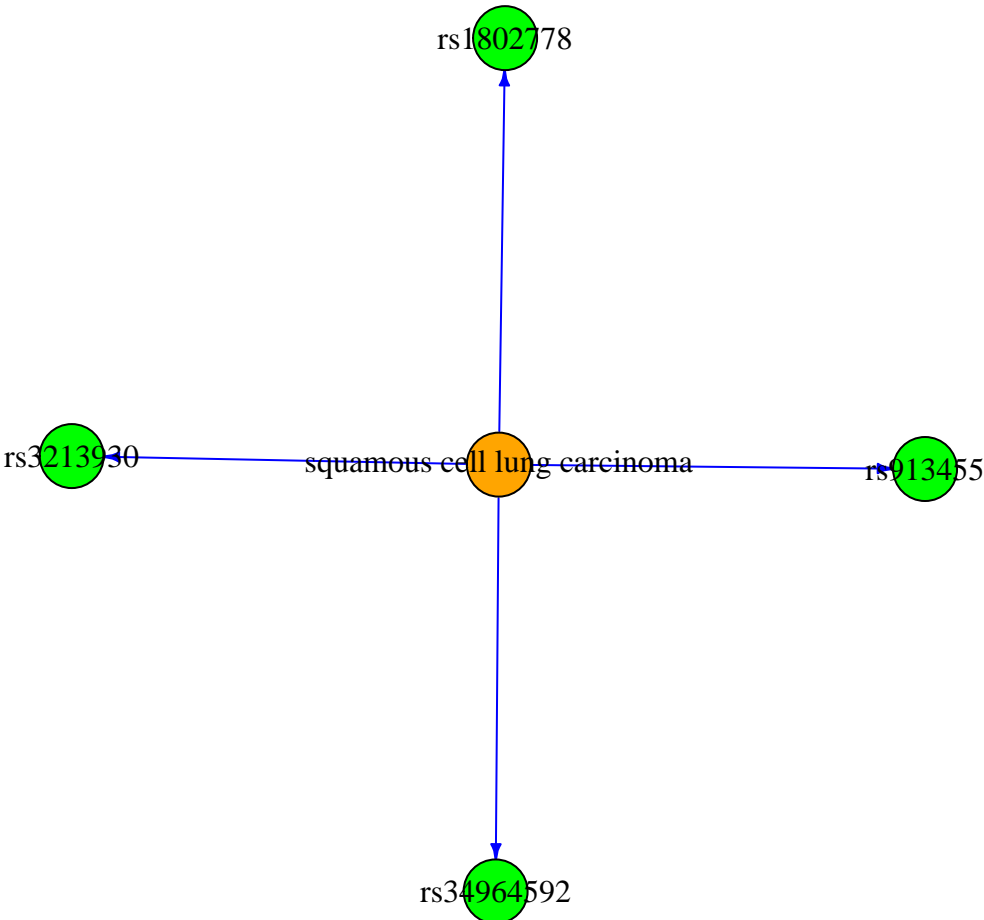

**Variant–Disease Network (serum non–albumin protein measurement)**

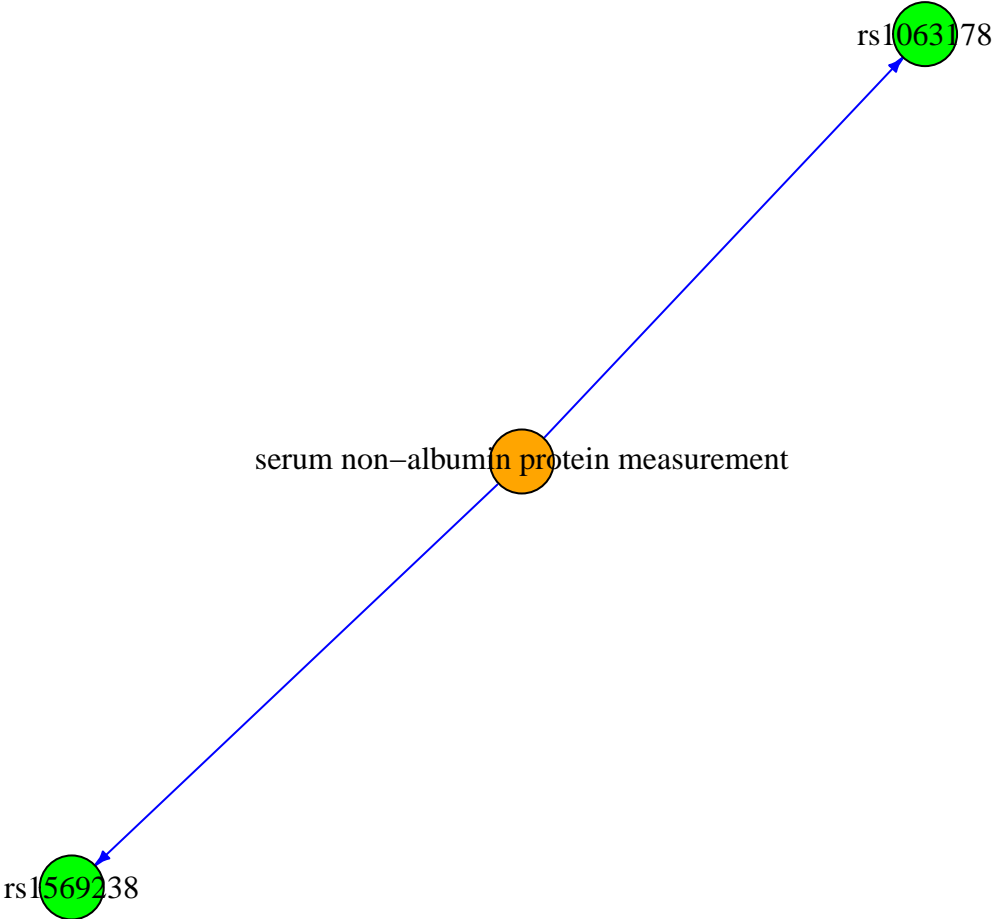



## Variant–Disease Network (asthma)

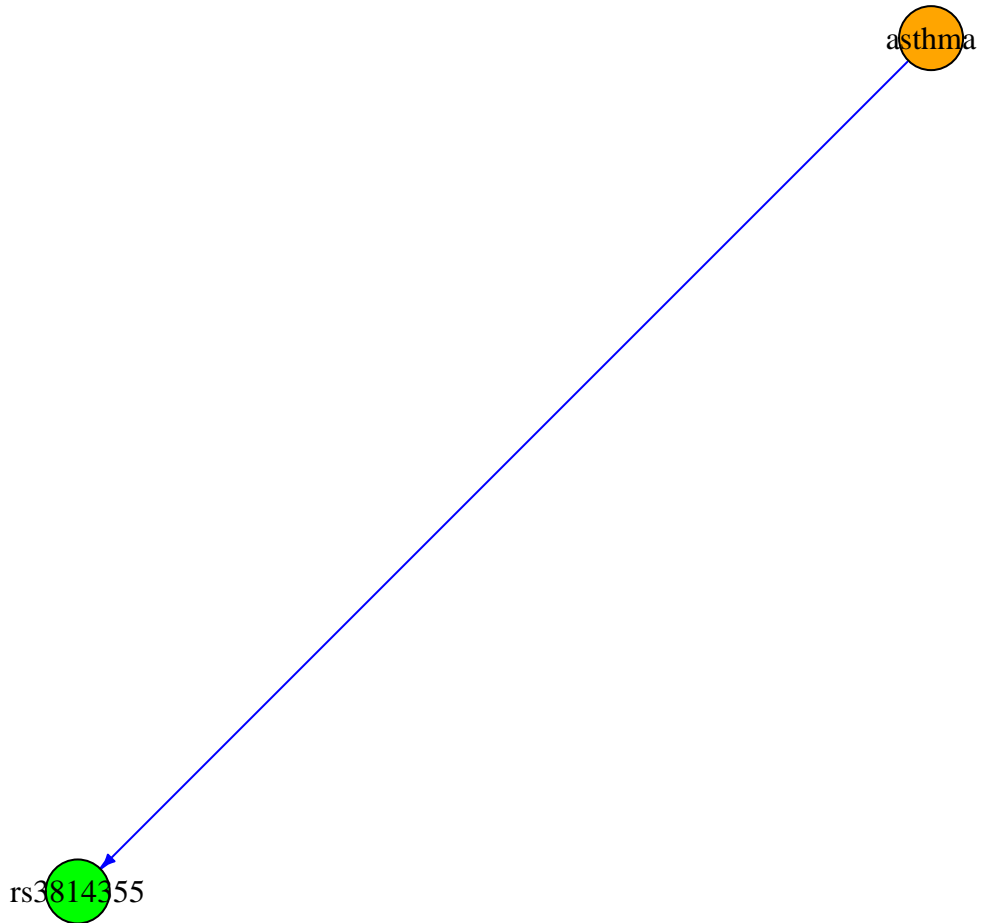

**Variant–Disease Network (response to diisocyanate)**

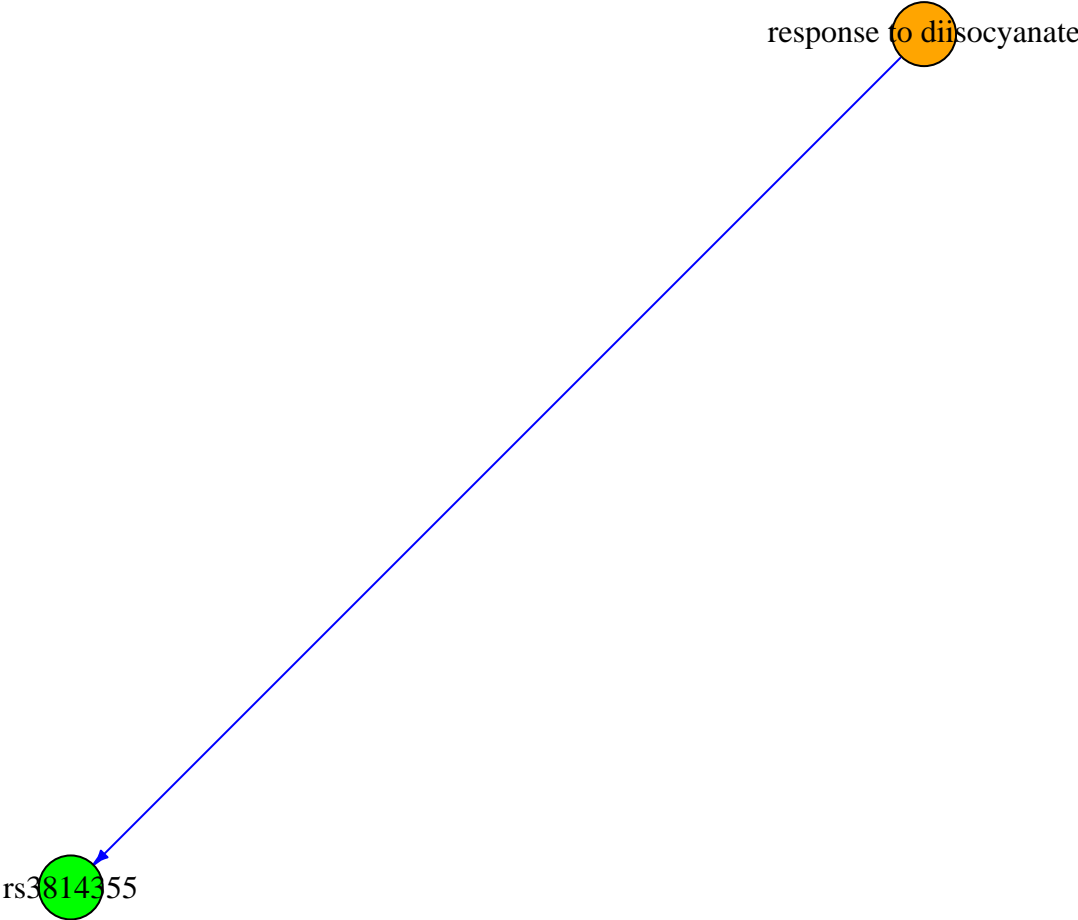

## Variant–Disease Network (small cell lung carcinoma)

small cell lung carcinoma

rs17606

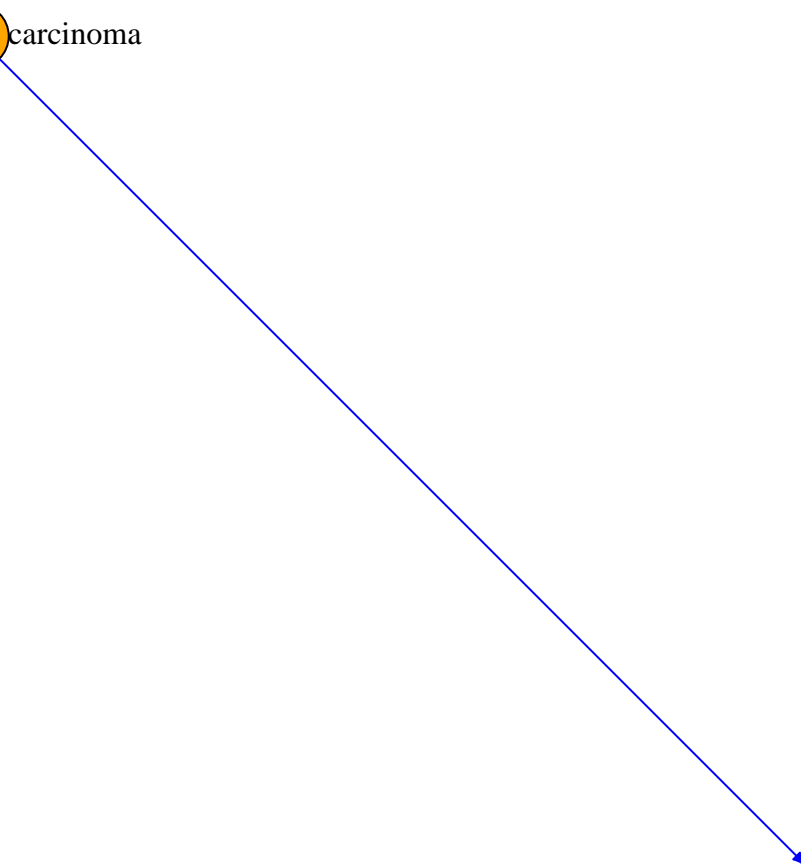

**Variant–Disease Network (lipoprotein measurement)**

lipoprotein measurement

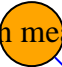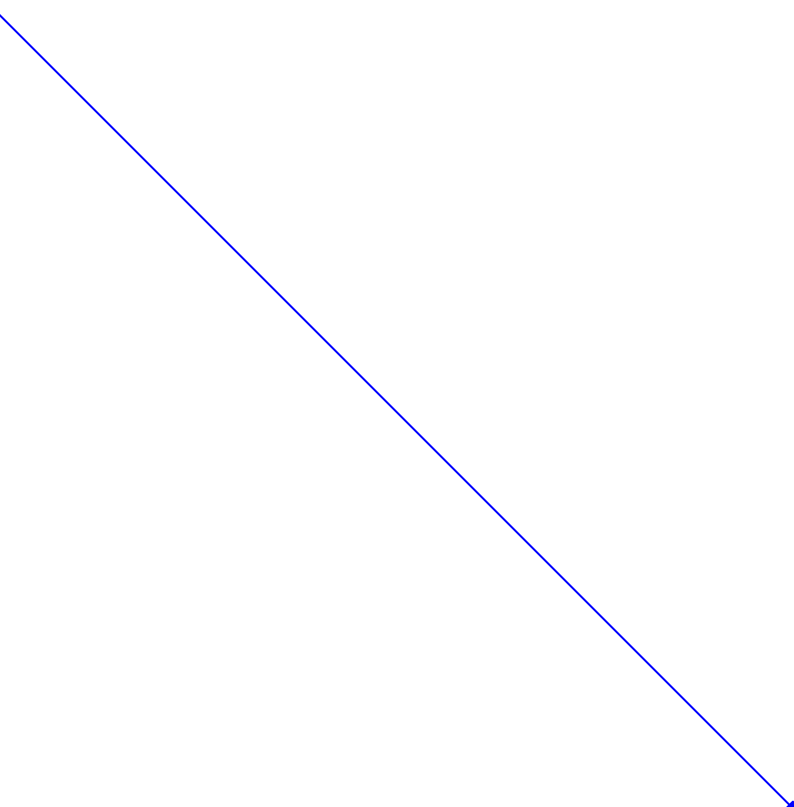

rs1041968

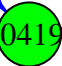

## Variant–Disease Network (cognitive function measurement)

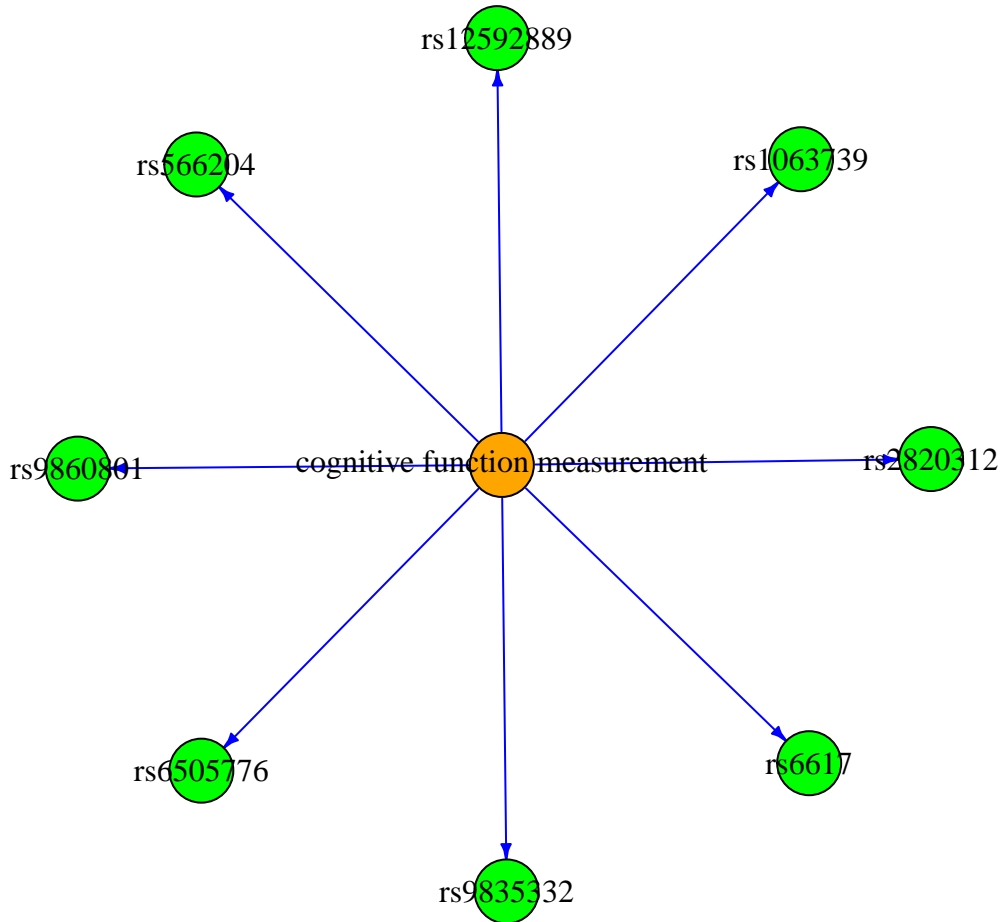

## Variant–Disease Network (diet measurement)

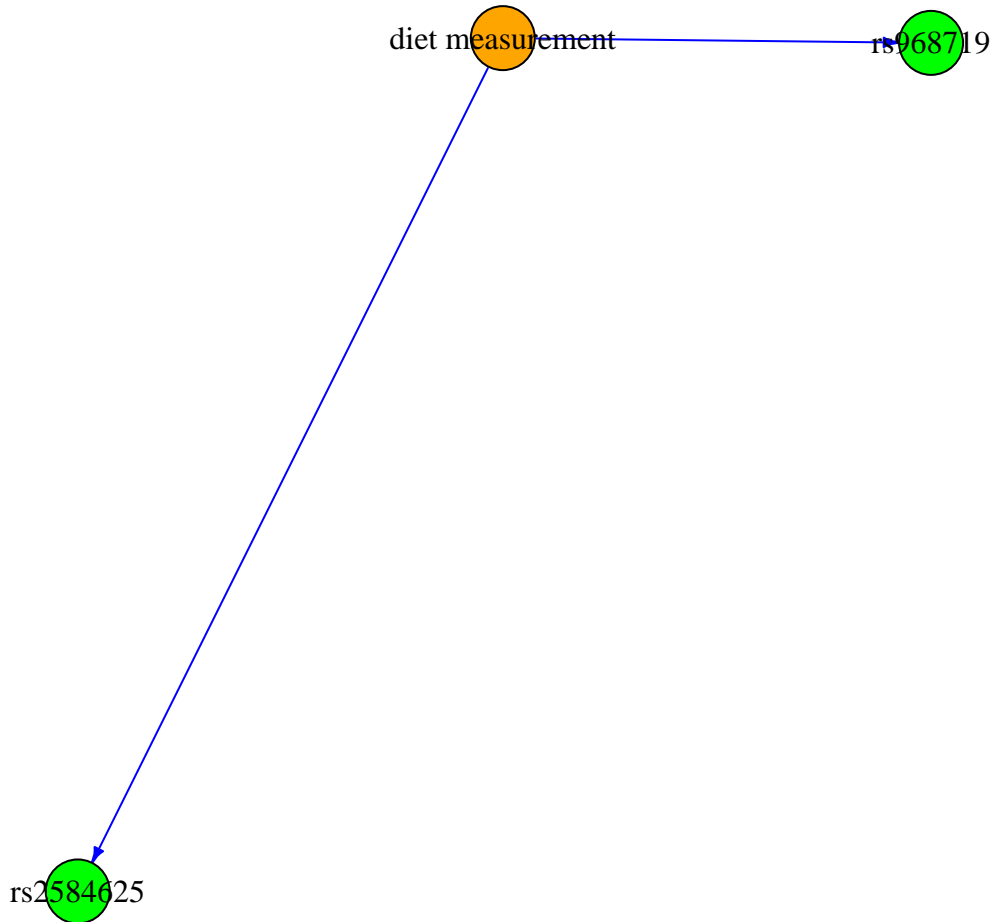

## Variant–Disease Network (age at menopause)

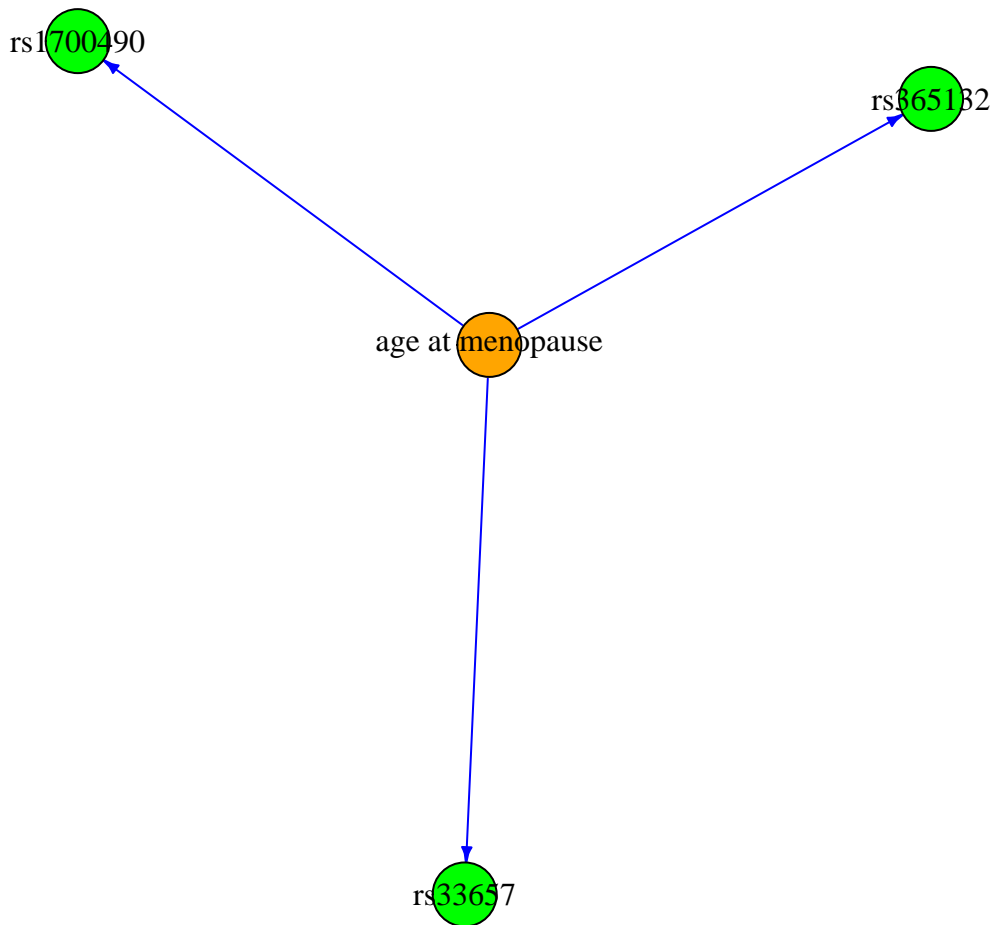

## Variant-Disease Network (uterine fibroid)

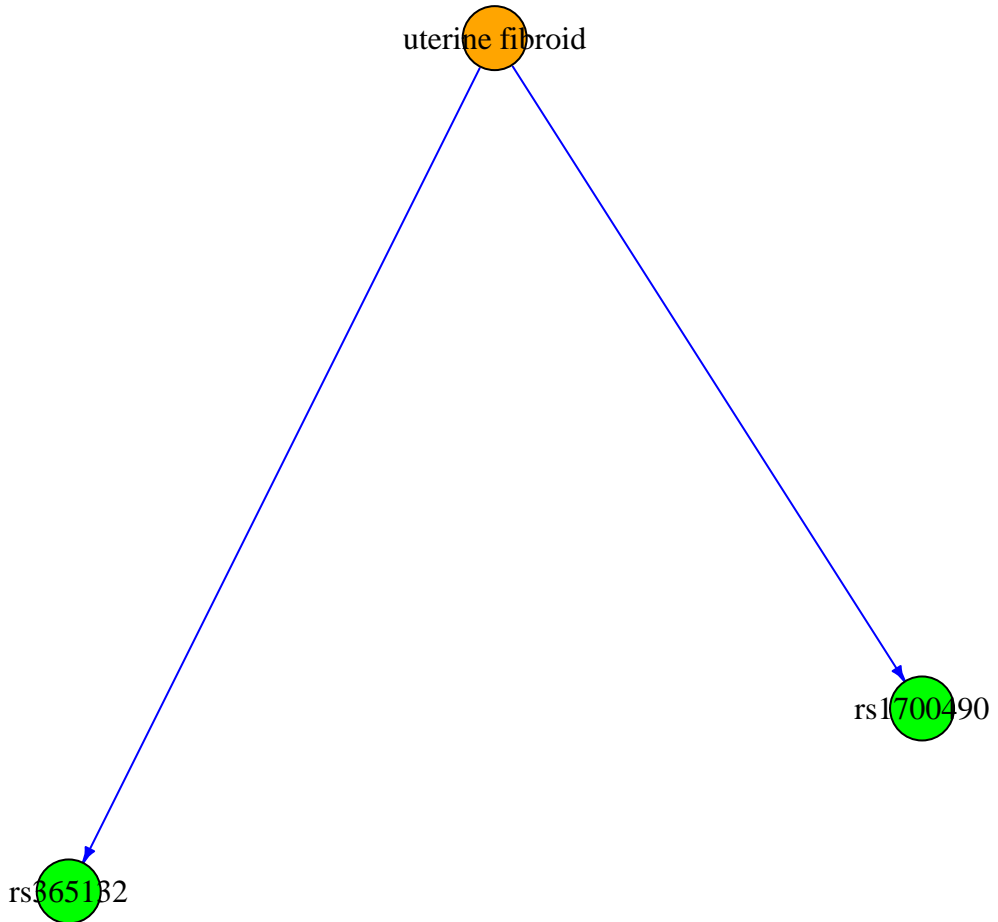



Variant–Disease Network (chronic lymphocytic leukemia)

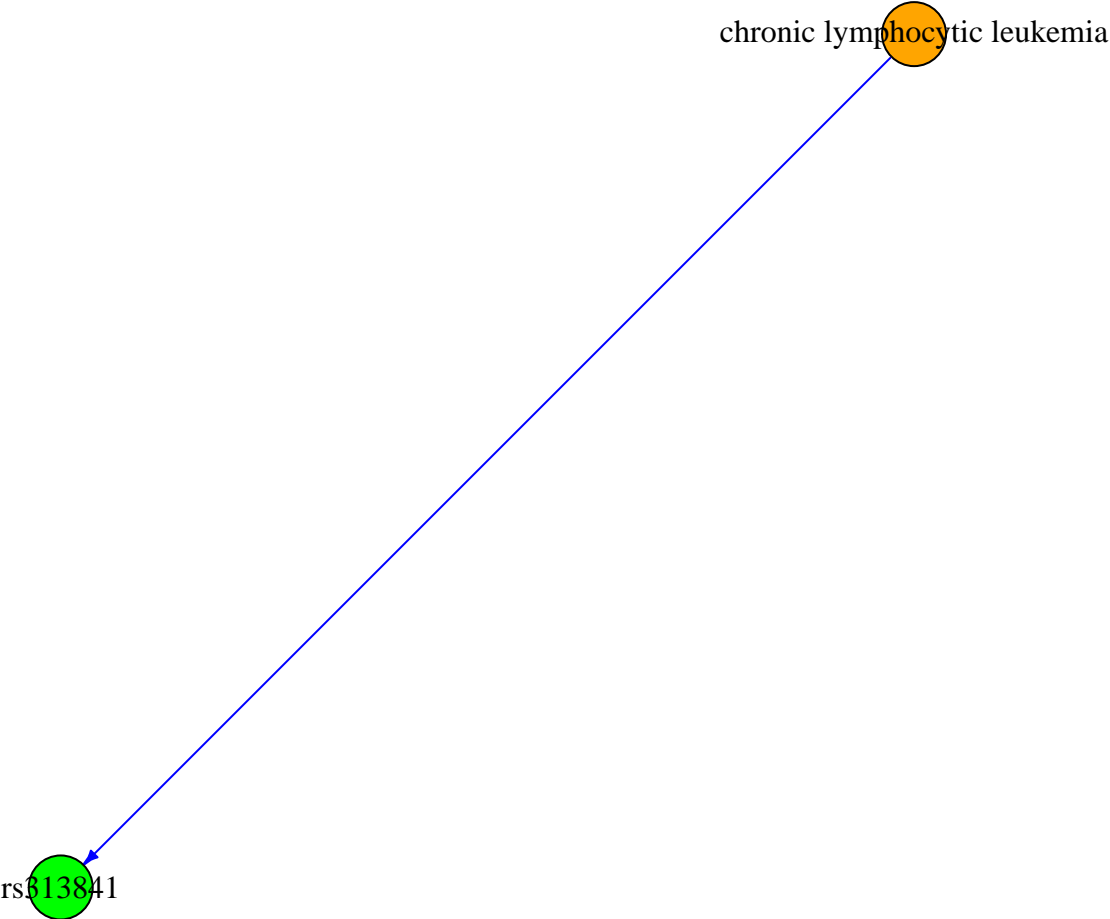

## Variant–Disease Network (sclerosing cholangitis)

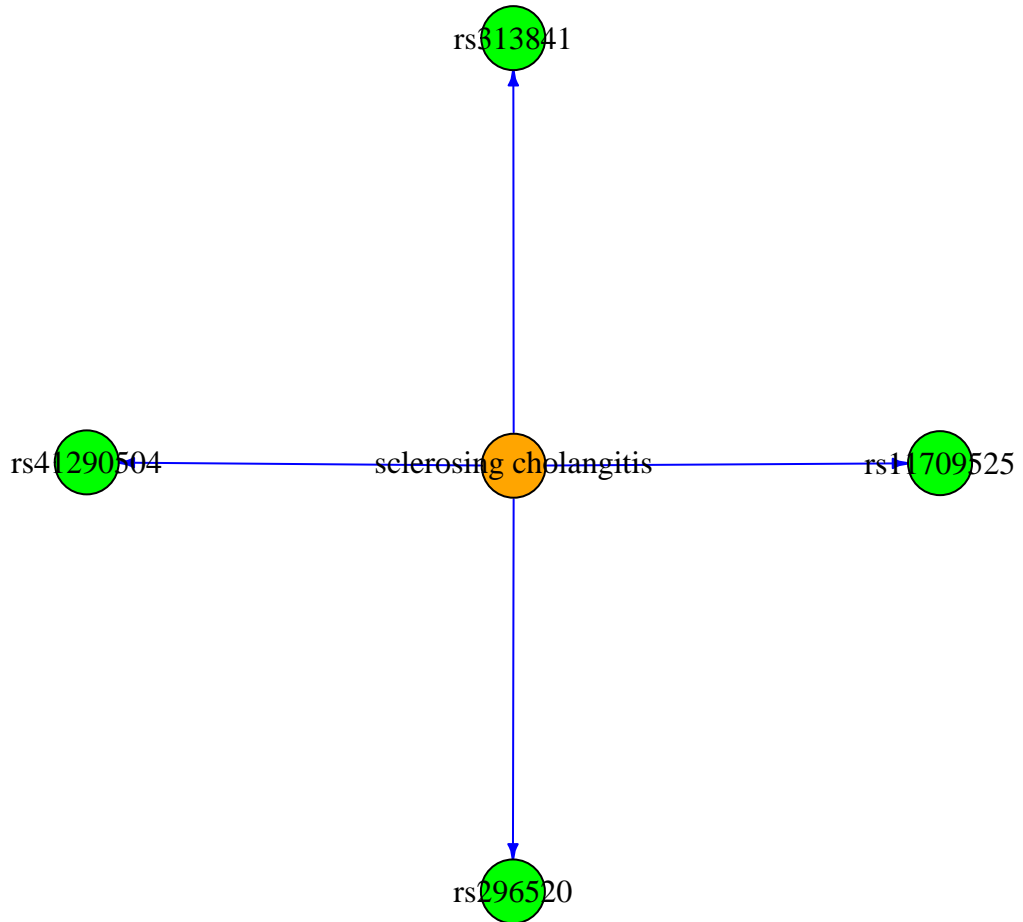

## Variant–Disease Network (1,5 anhydroglucitol measurement)

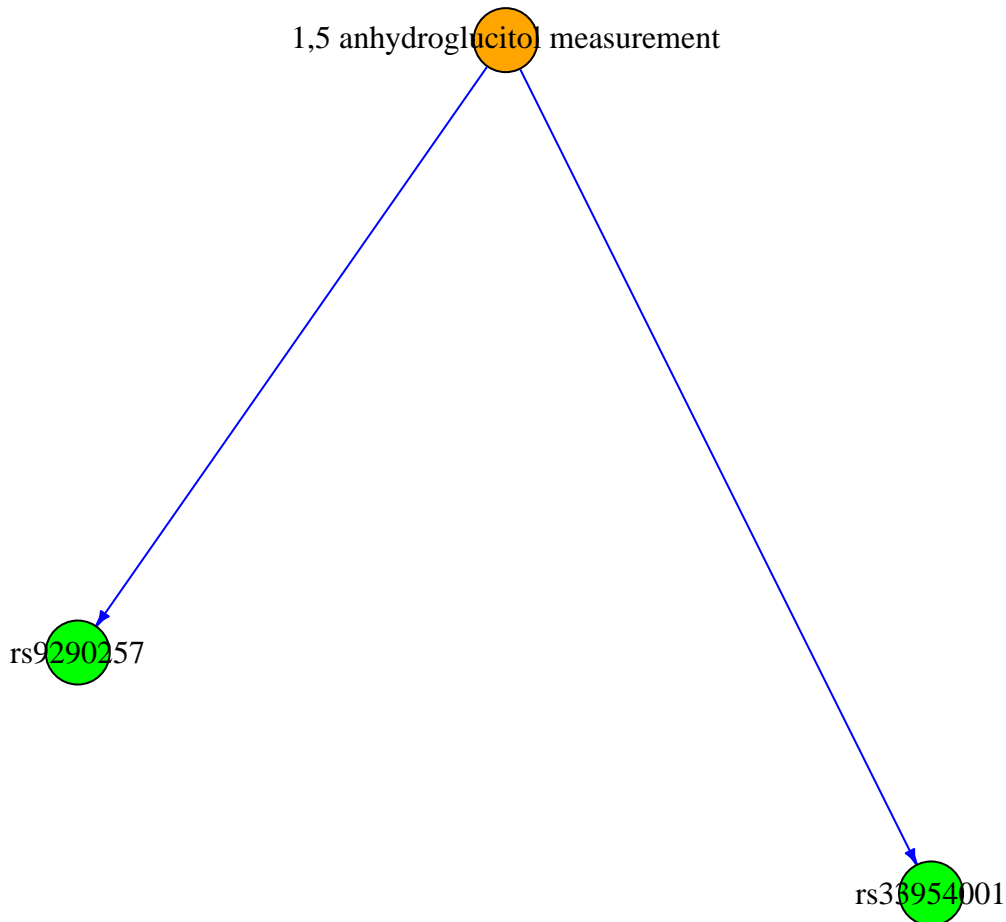

**Variant–Disease Network (granulocyte percentage of myeloid white cells)**

granulocyte percentage of myeloid white cells

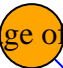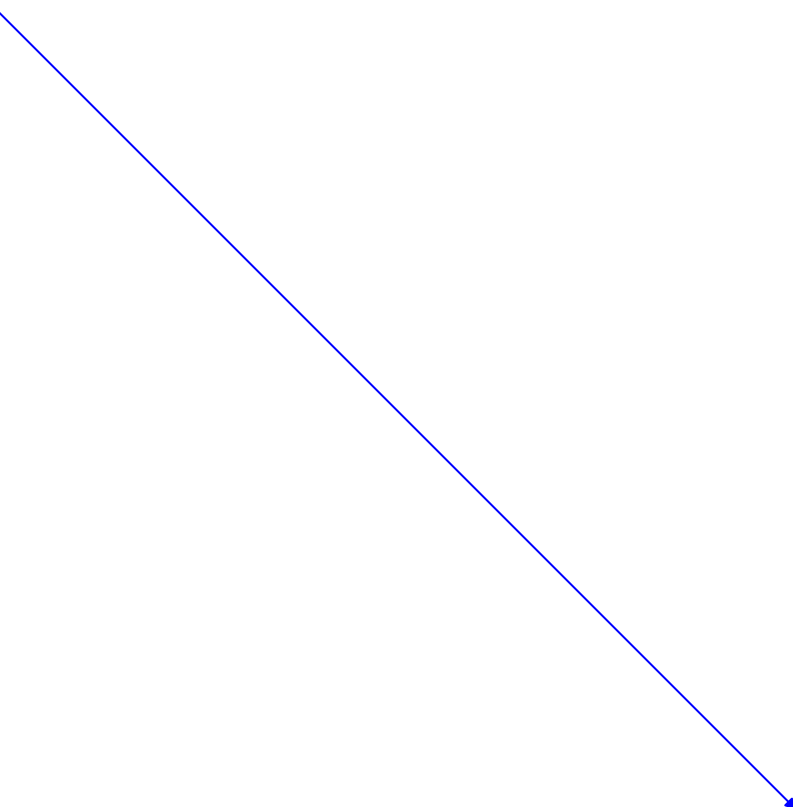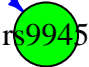

rs9945

# Variant–Disease Network (monocyte percentage of white cells)

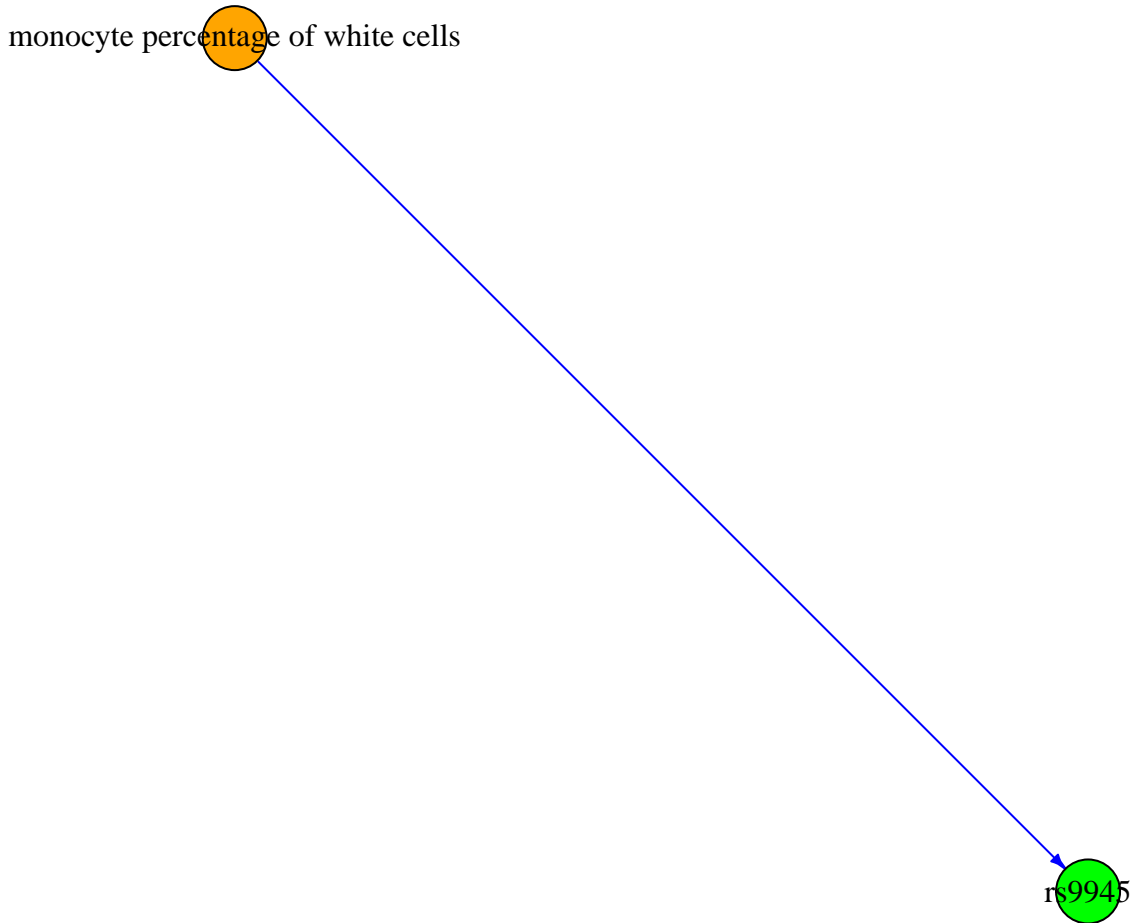

# Variant–Disease Network (cortisol secretion measurement)

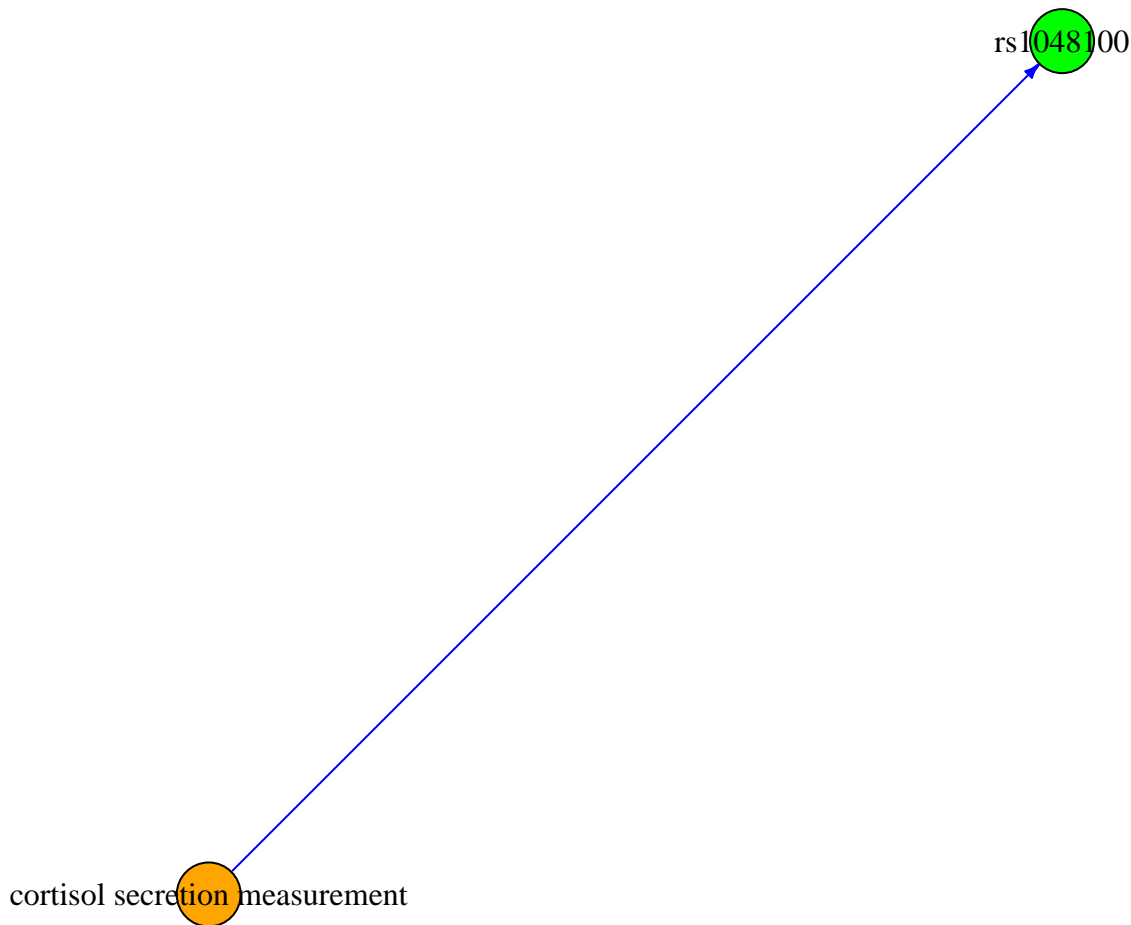

Variant–Disease Network (basophil count)

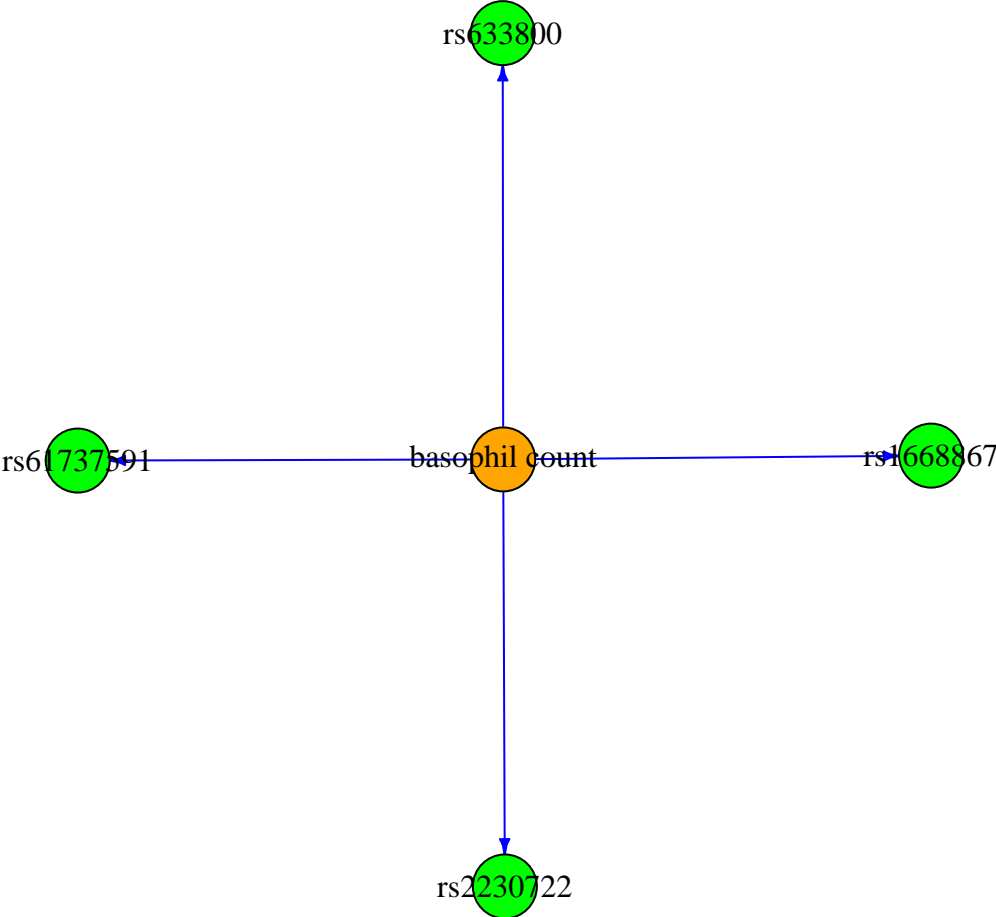

## Variant–Disease Network (eosinophil count)

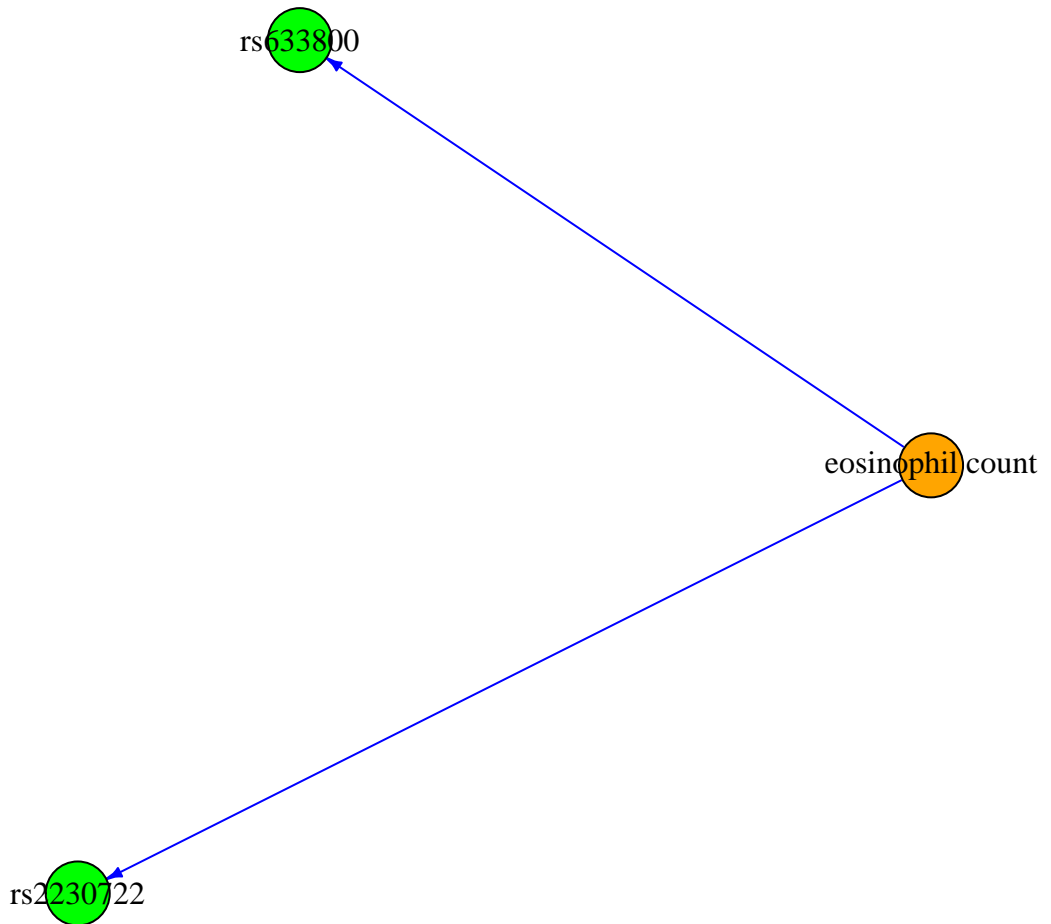



**Variant–Disease Network (myeloproliferative disorder)**

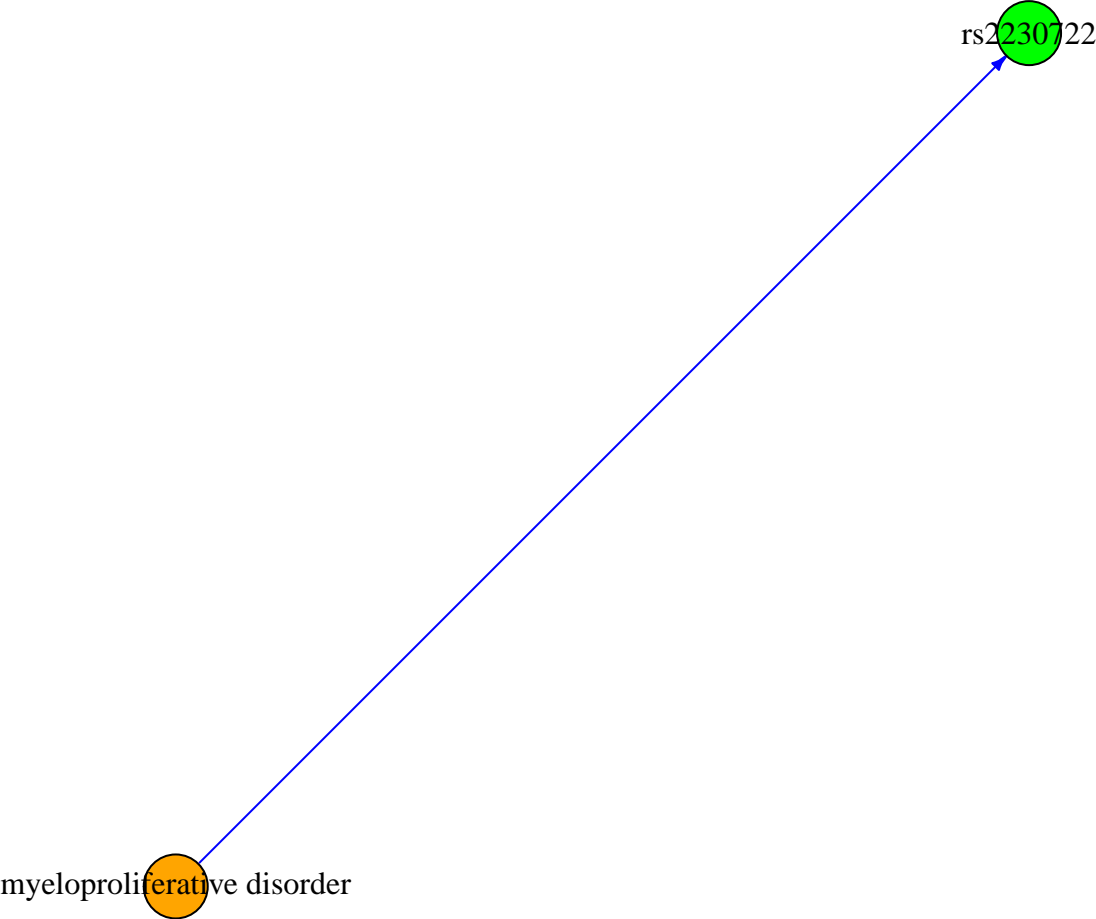

Variant–Disease Network (creatinine clearance measurement)

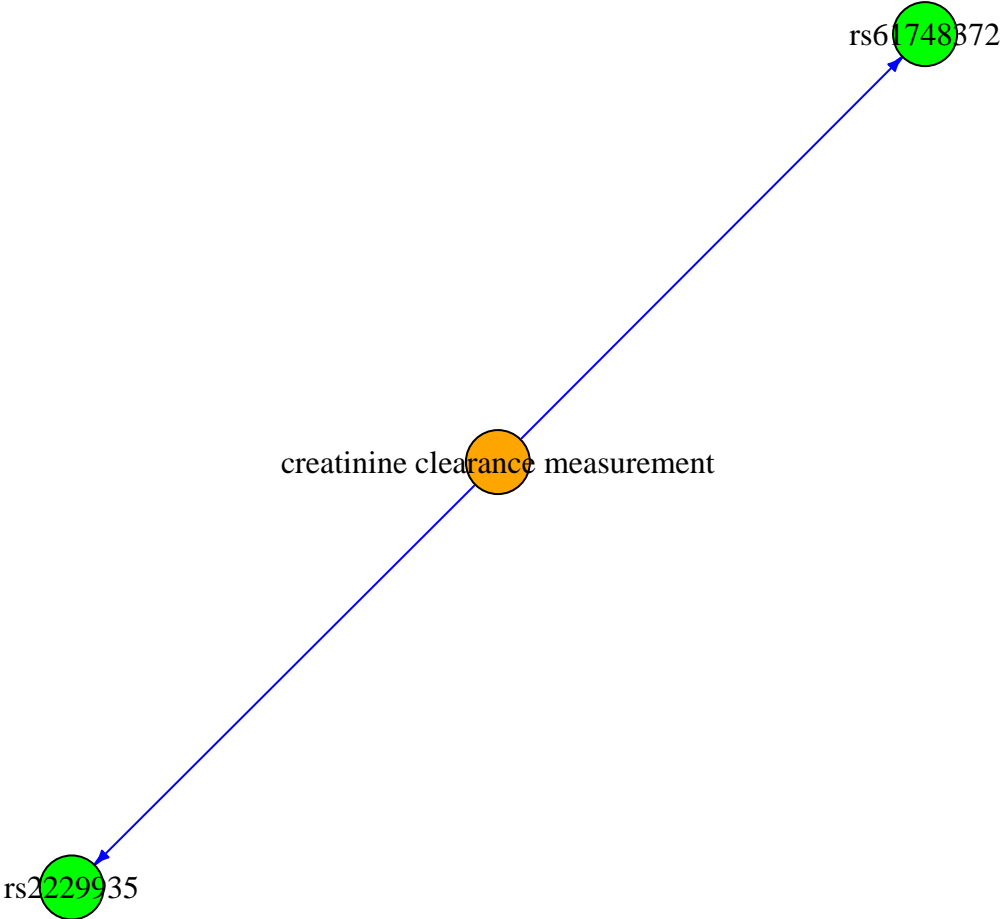

Variant–Disease Network (HIV infection)

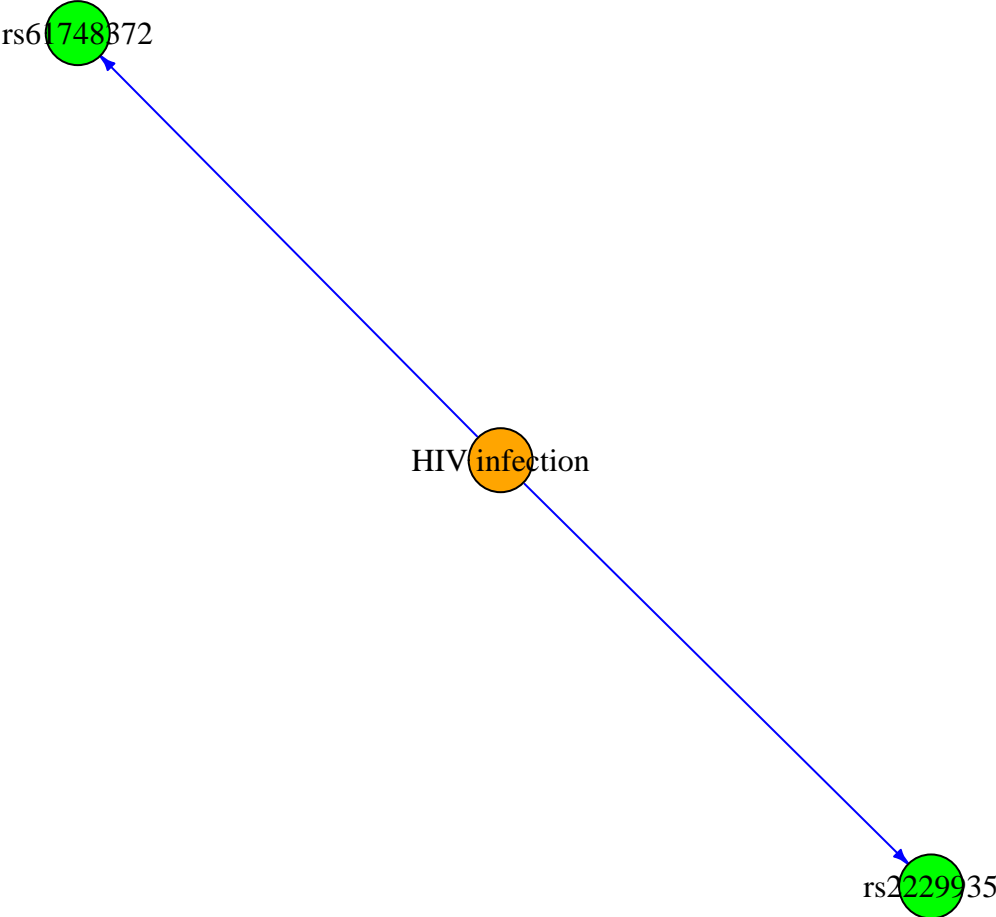

## Variant–Disease Network (response to tenofovir)

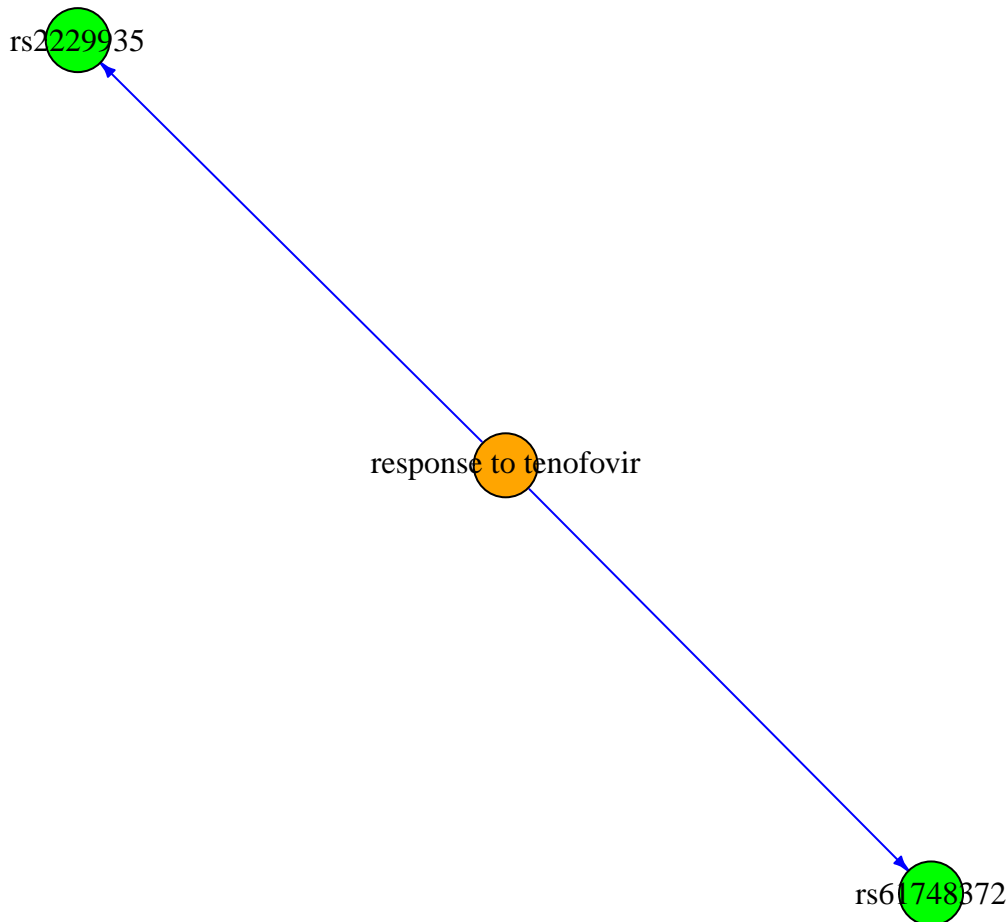

**Variant–Disease Network (brain serotonin transporter measurement)**

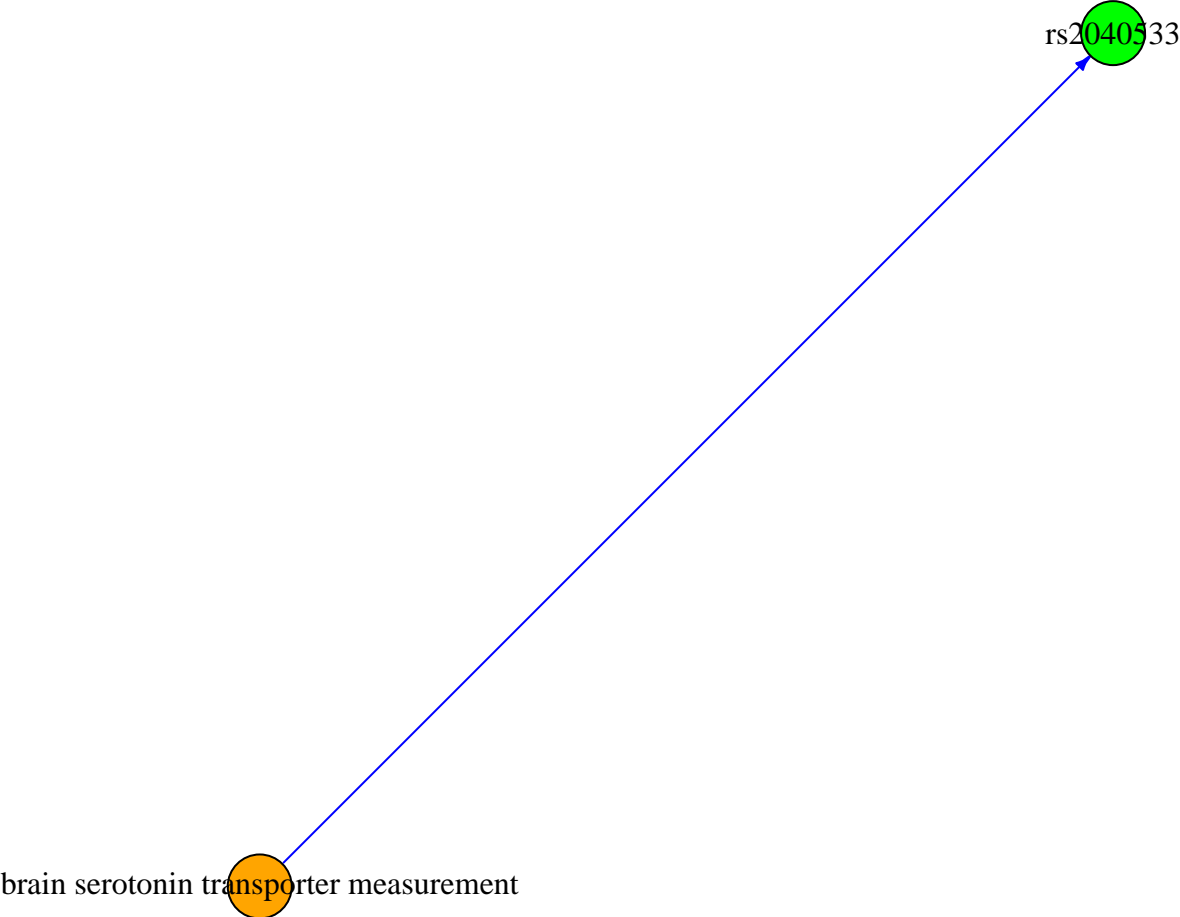

## Variant–Disease Network (diabetic nephropathy)

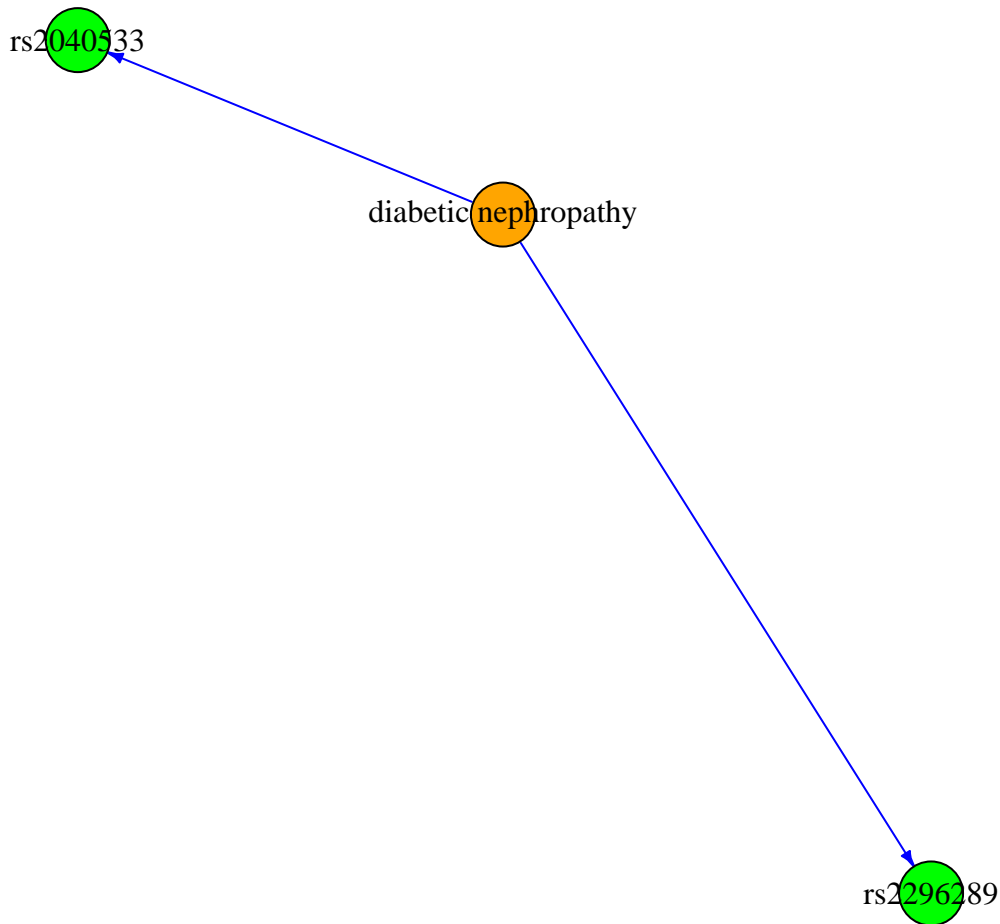

## Variant–Disease Network (reaction time measurement)

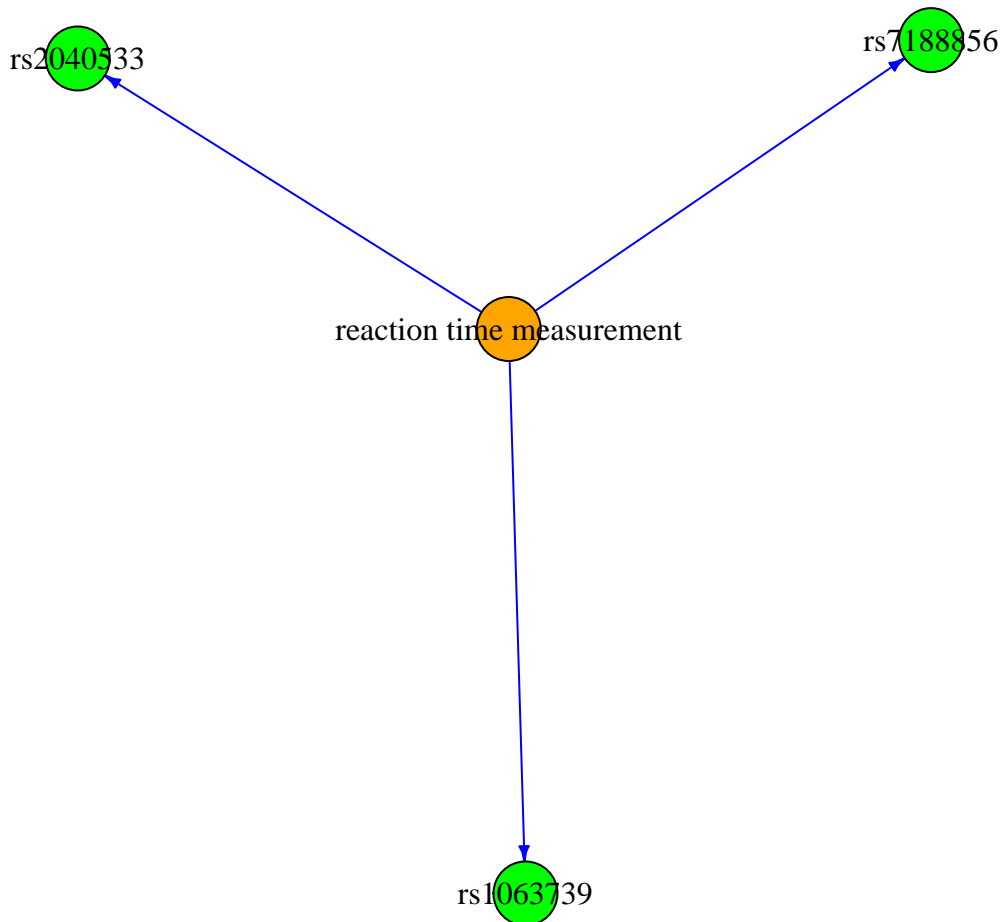

## Variant–Disease Network (response to paclitaxel)

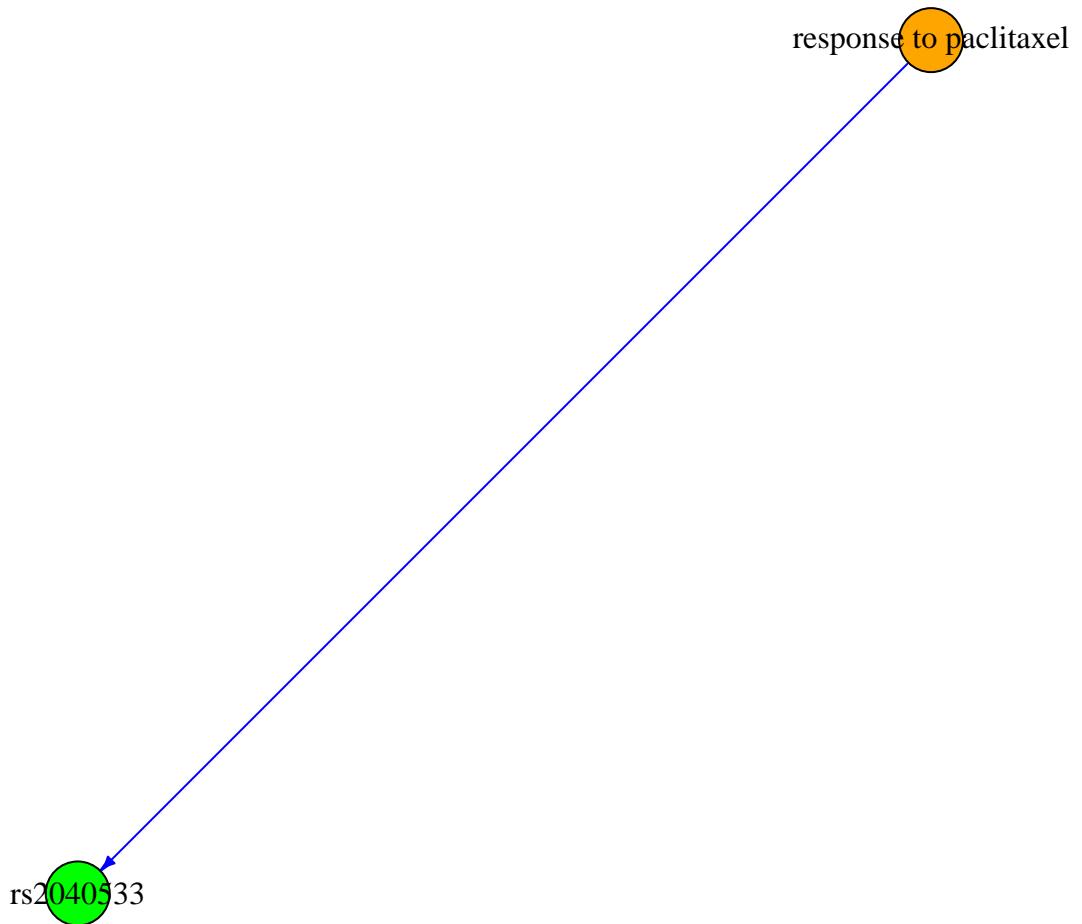



Variant–Disease Network (glucagon–like peptide–1 measurement)

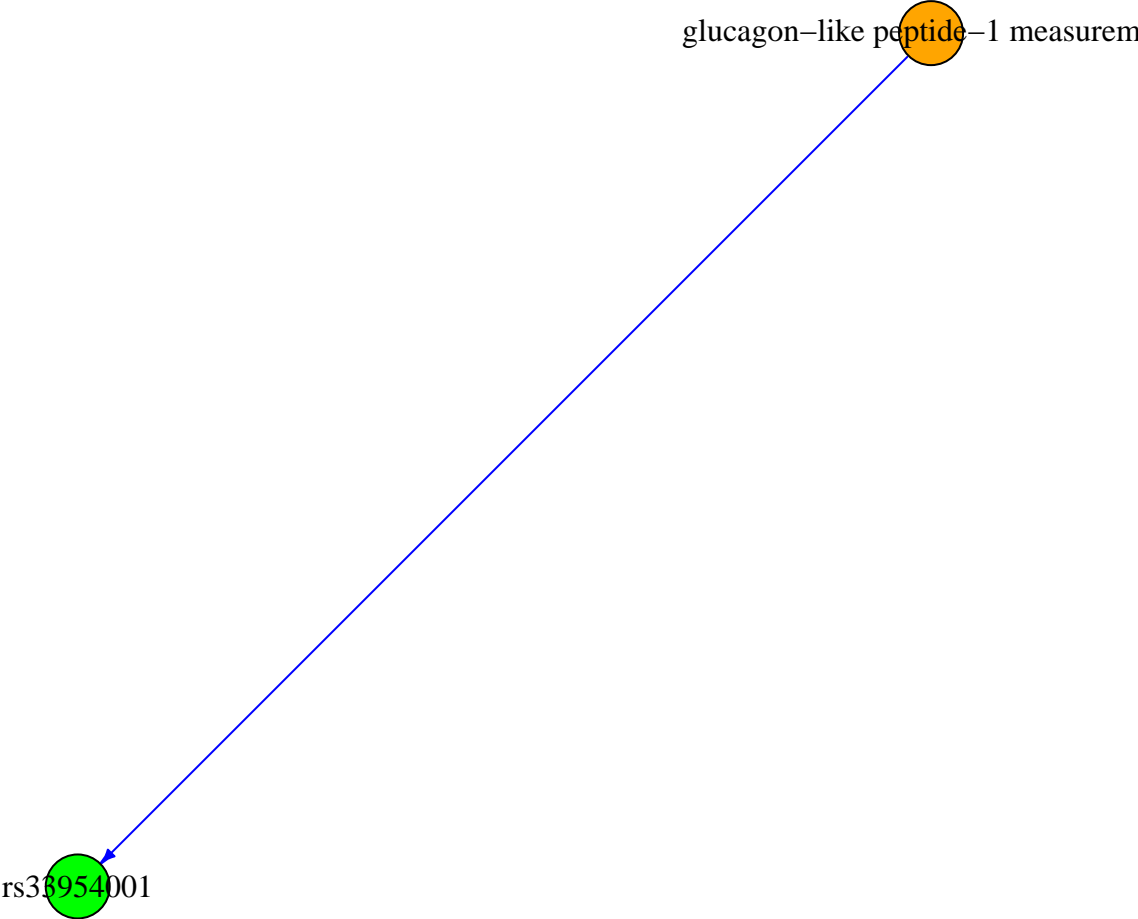

# ant-Disease Network (glucose-dependent insulintropic peptide (GIP) meas

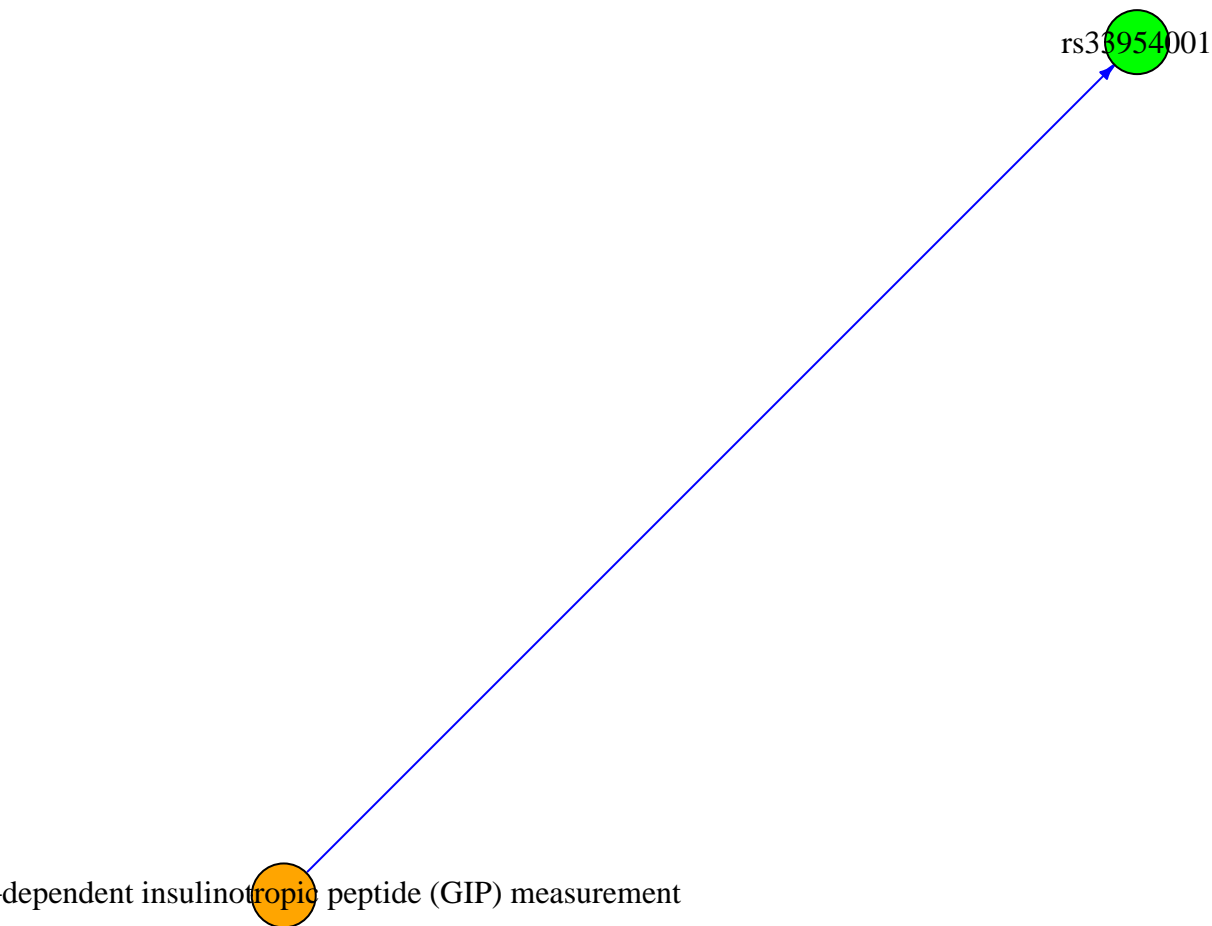

## Variant–Disease Network (glucose tolerance test)

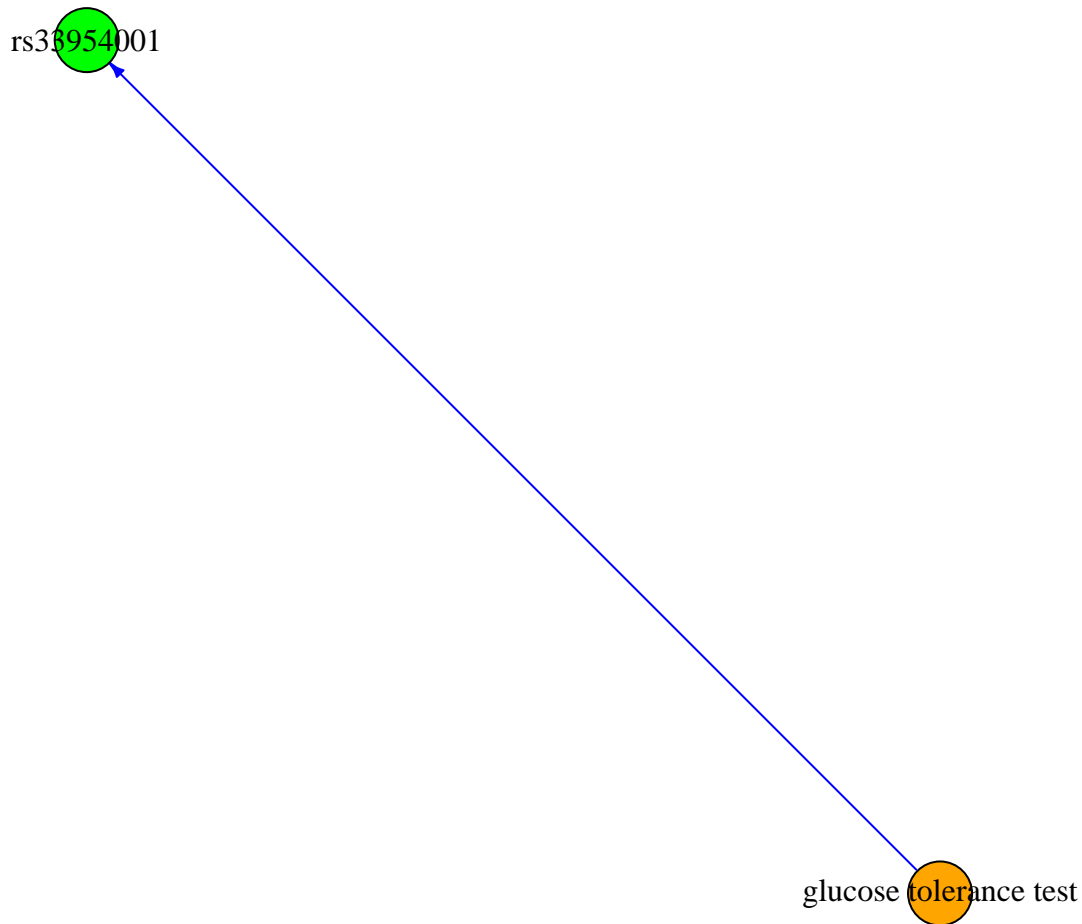

## Variant–Disease Network (neutrophil count)

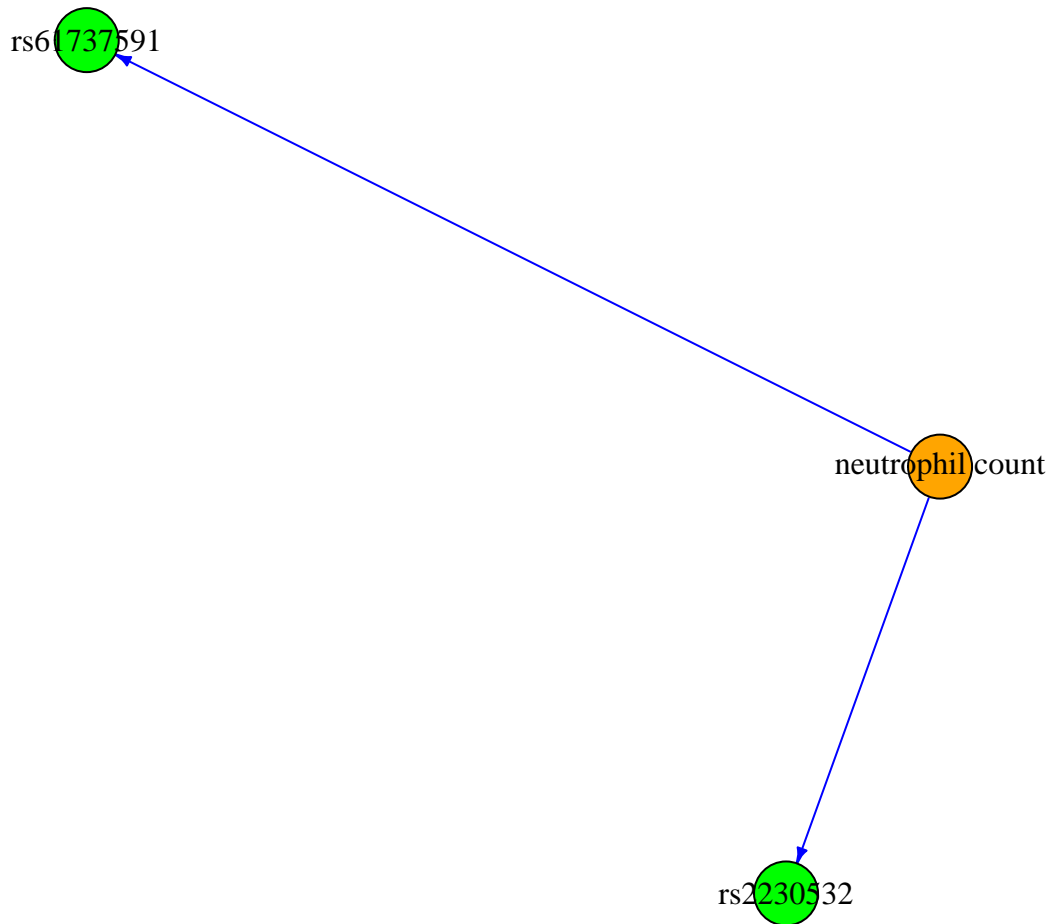

Variant–Disease Network (vitamin D measurement)

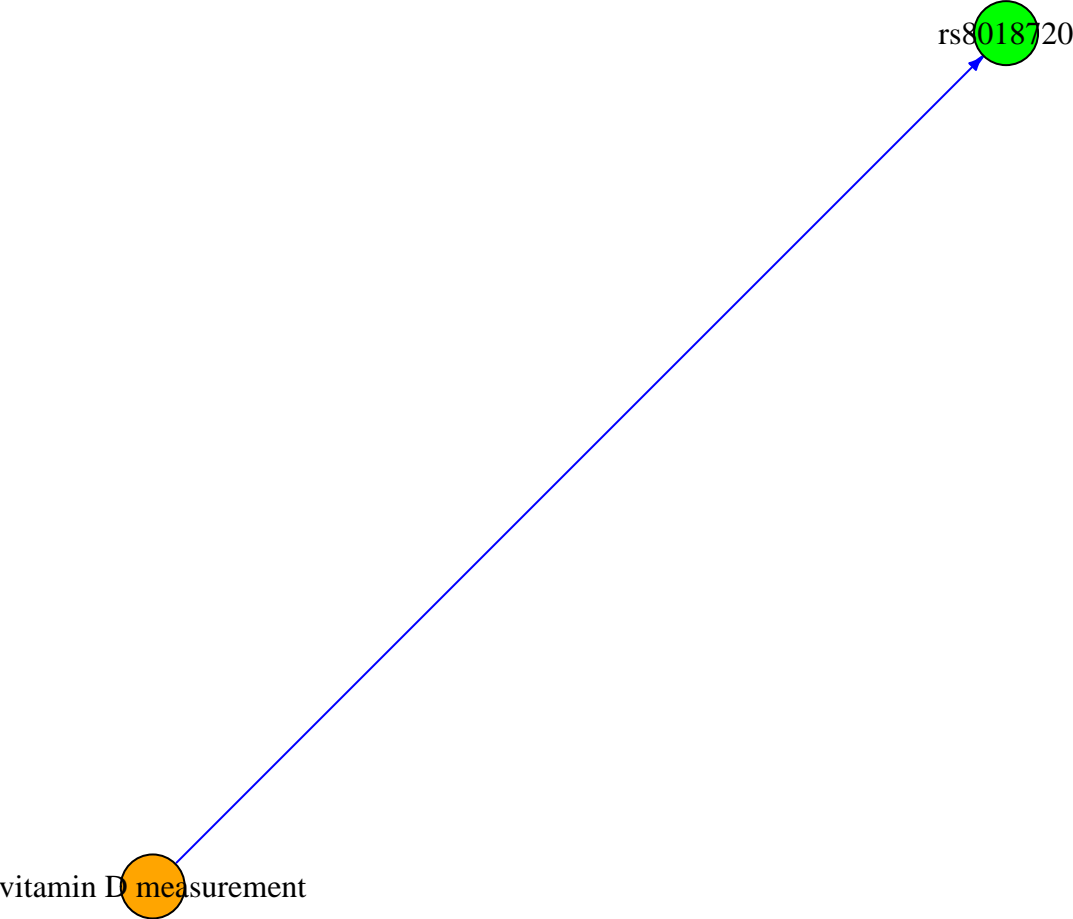

# Variant–Disease Network (disease progression measurement)

disease progression measurement

rs2118017

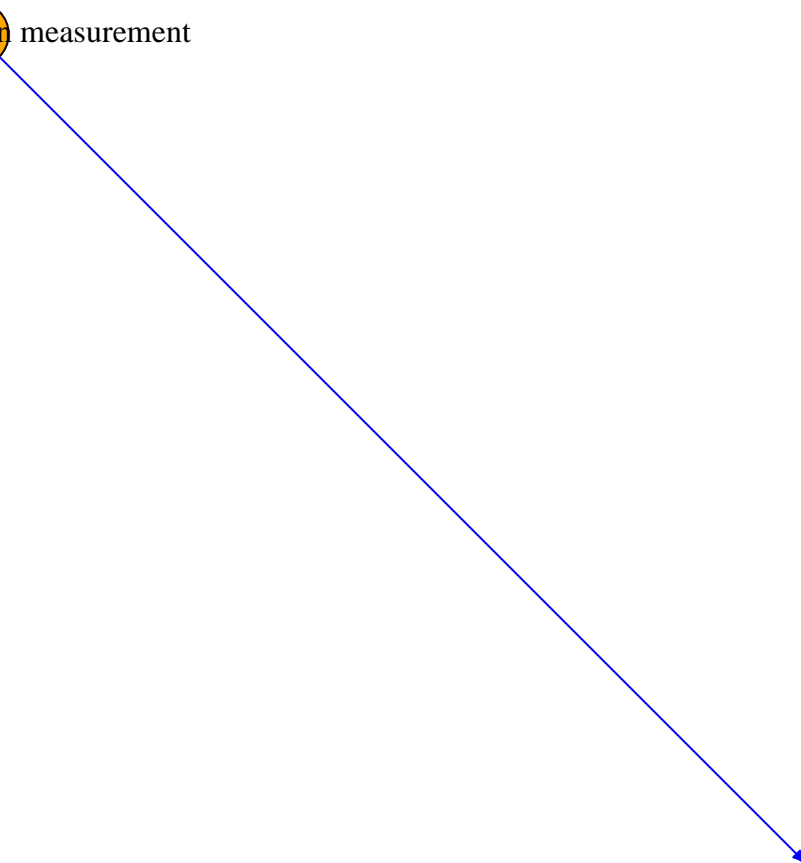

Variant–Disease Network (egg allergy measurement)

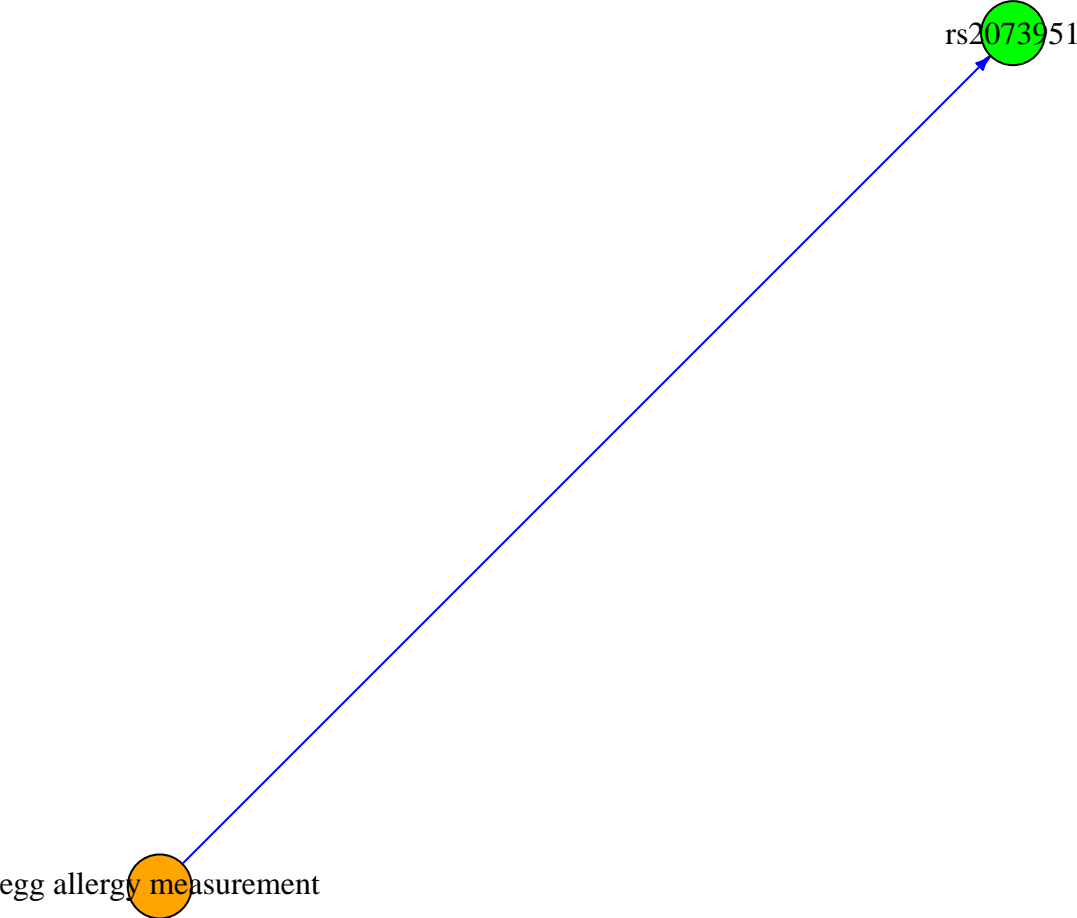

## Variant–Disease Network (eosinophilic esophagitis)

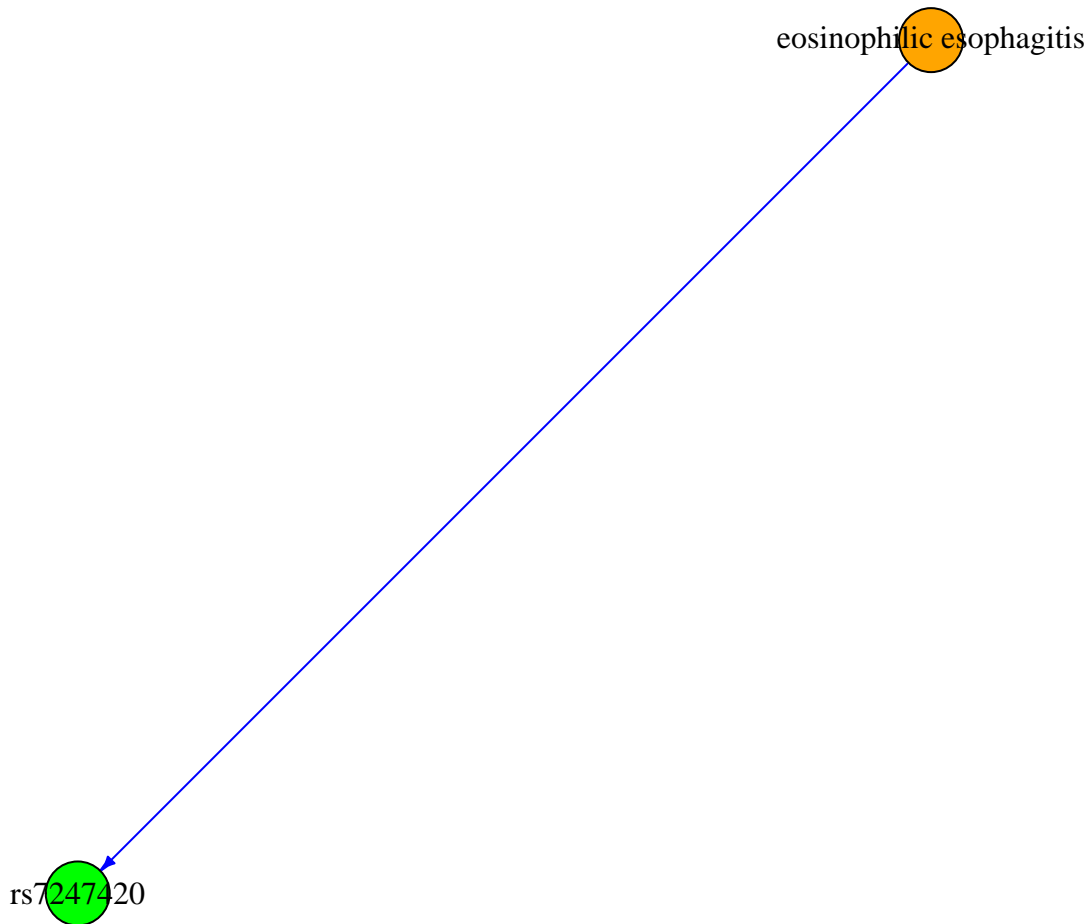



# Variant–Disease Network (forced expiratory volume)

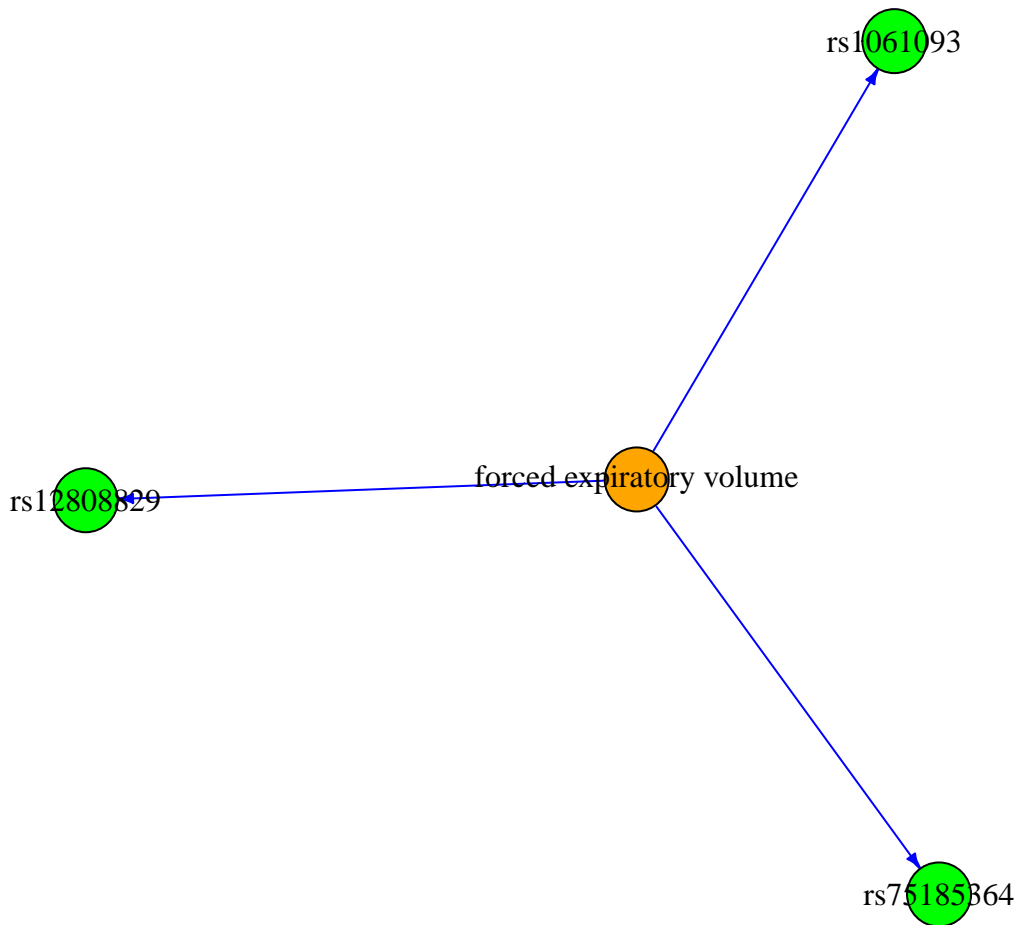

## Variant–Disease Network (clostridium difficile infection)

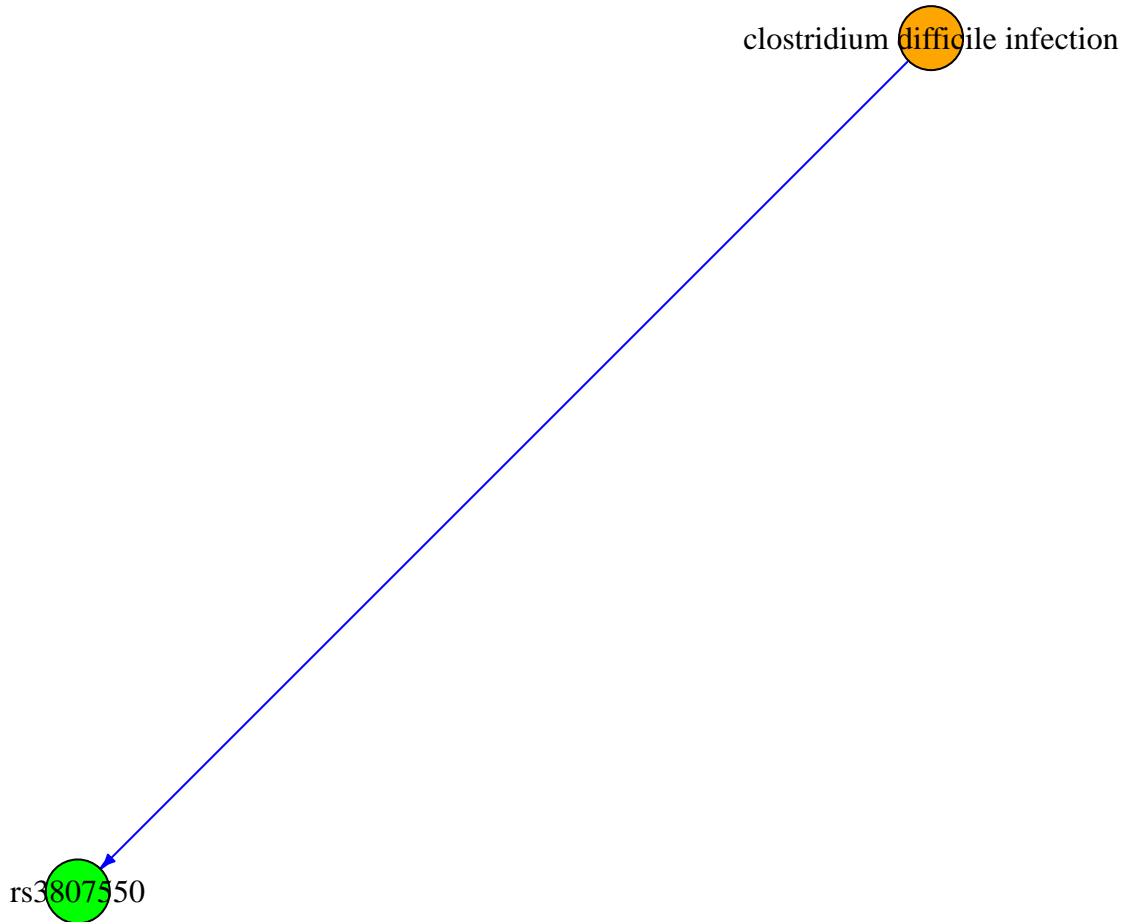

## Variant-Disease Network (multiple myeloma)

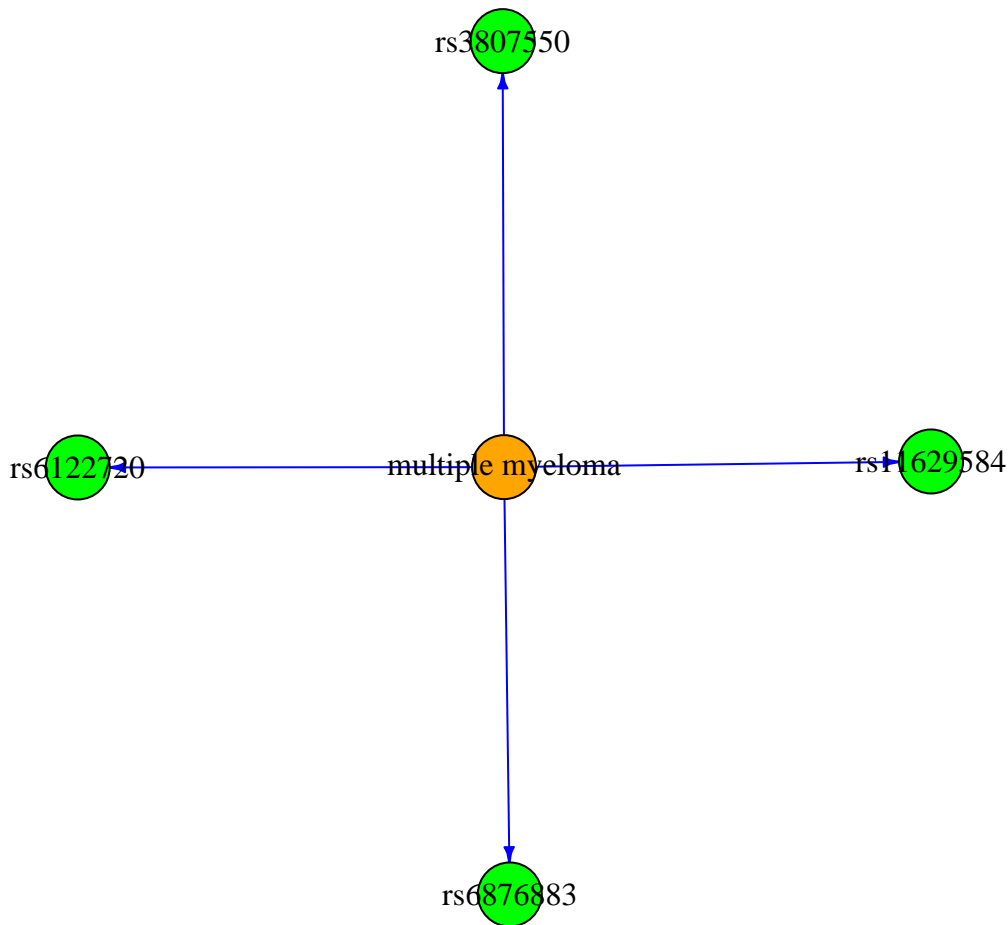

## Variant–Disease Network (erythrocyte count)

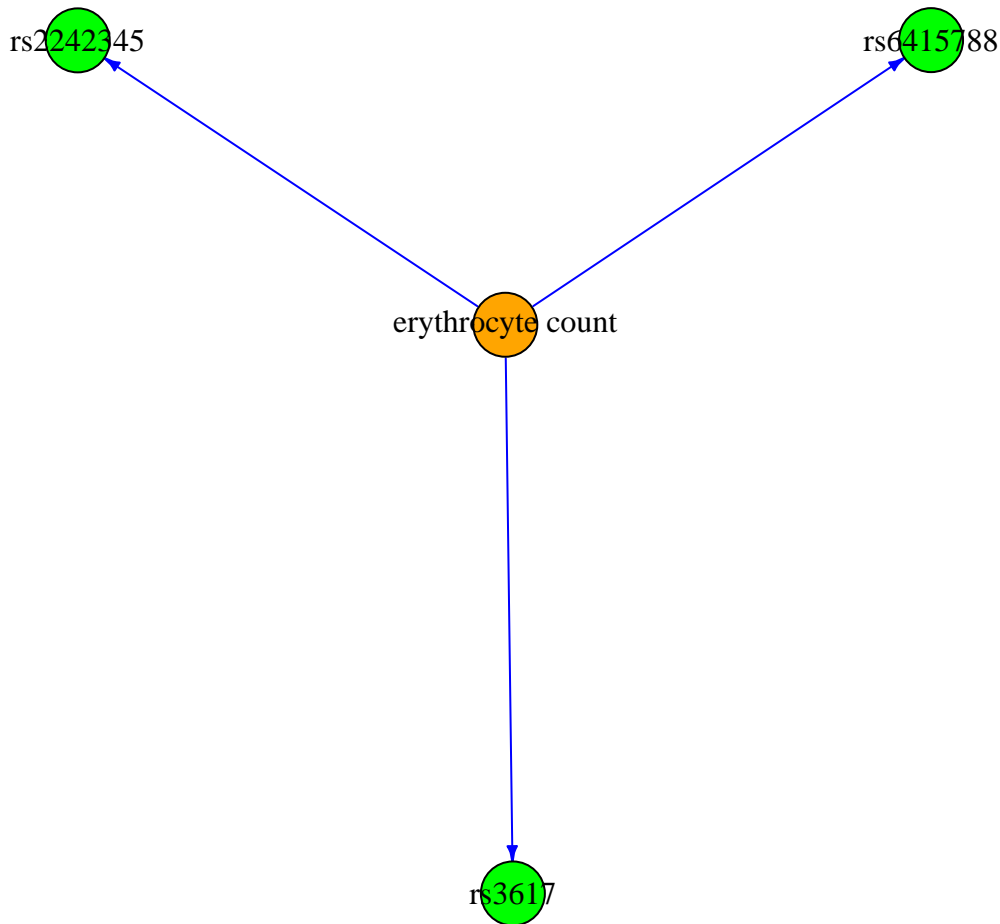

## Variant–Disease Network (hemoglobin measurement)

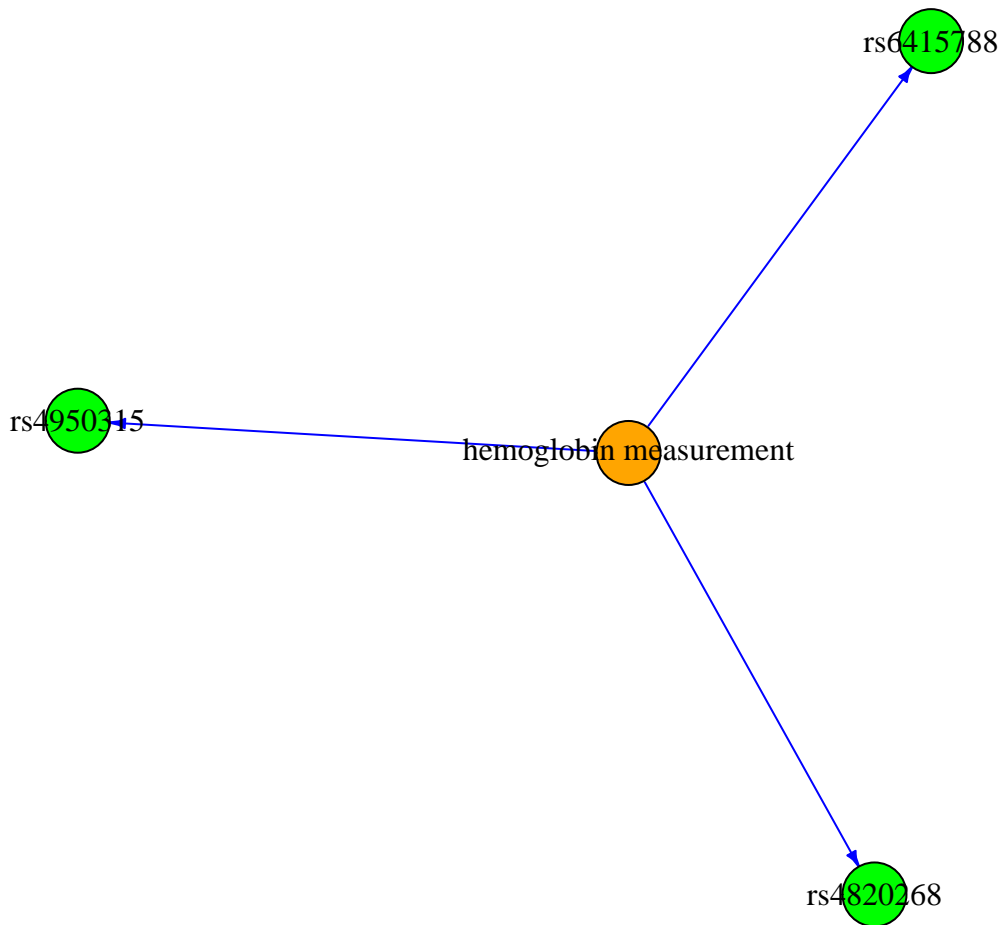

## Variant-Disease Network (telomere length)

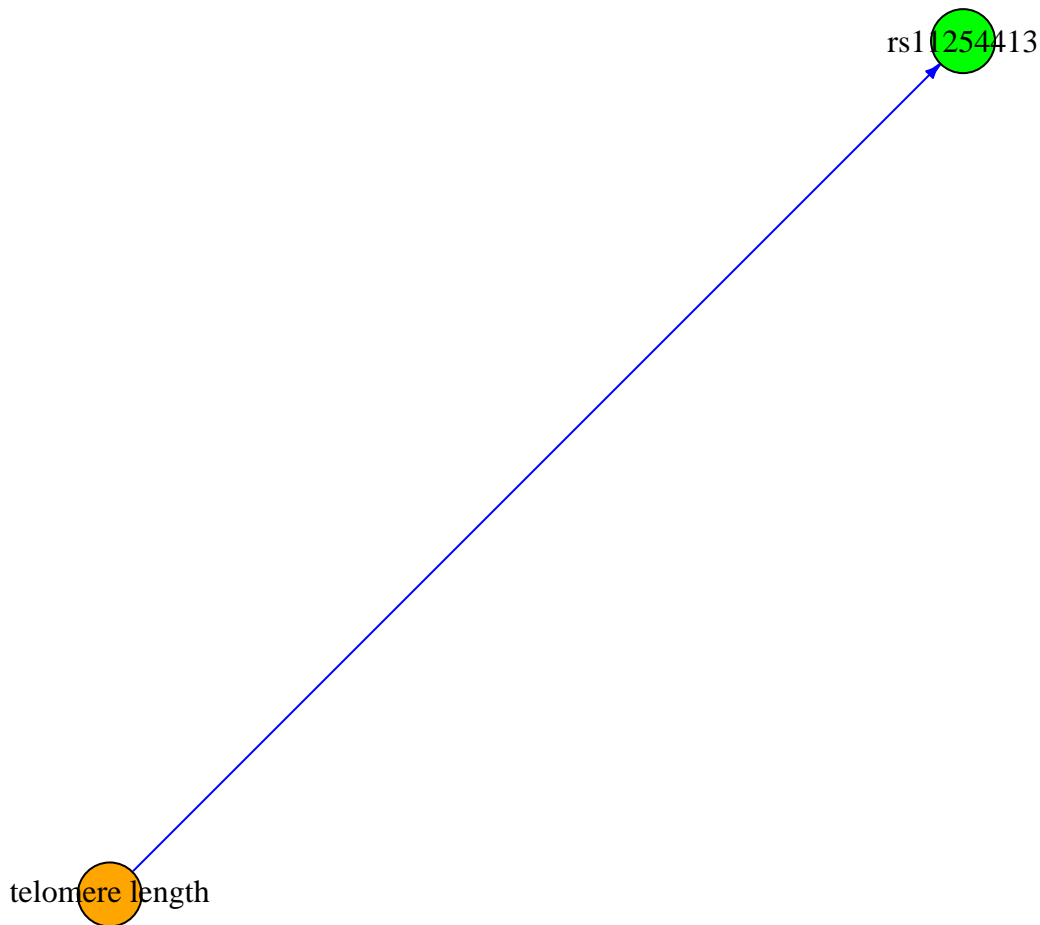

## Variant–Disease Network (cutaneous melanoma)

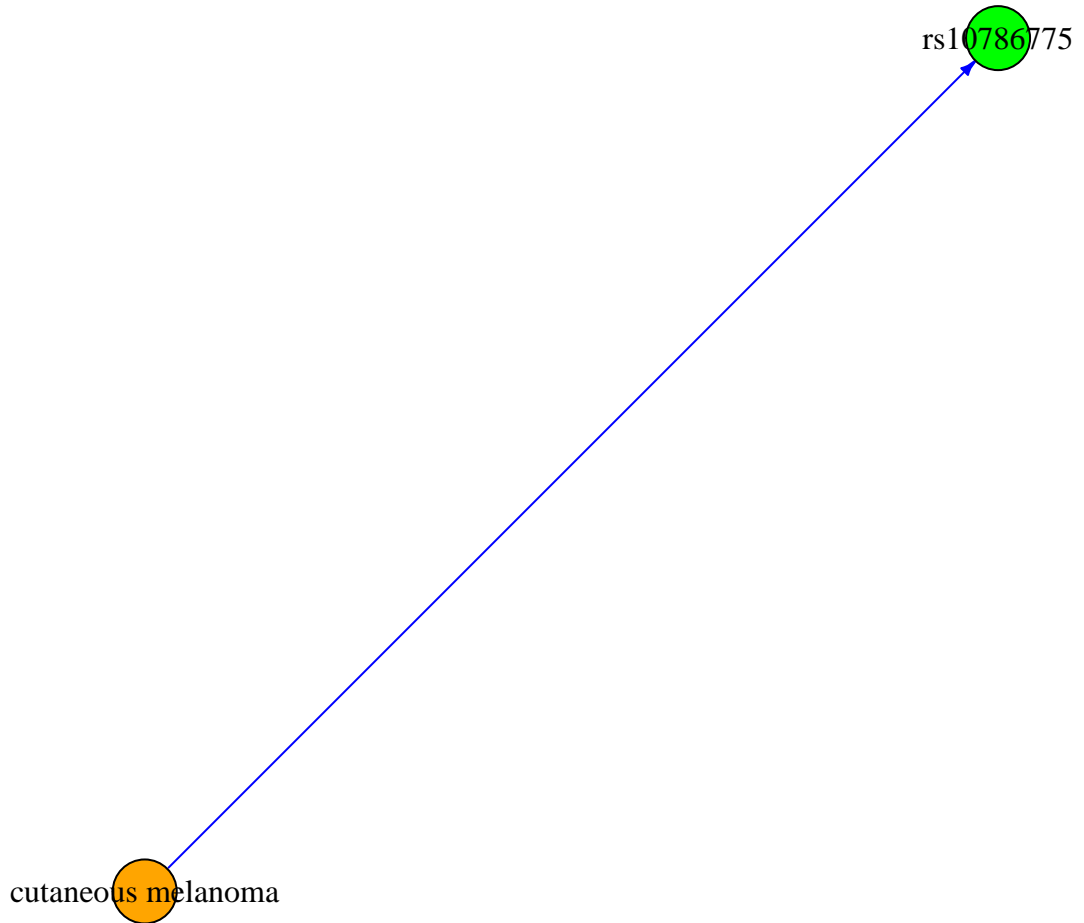

## Variant–Disease Network (ovarian serous carcinoma)

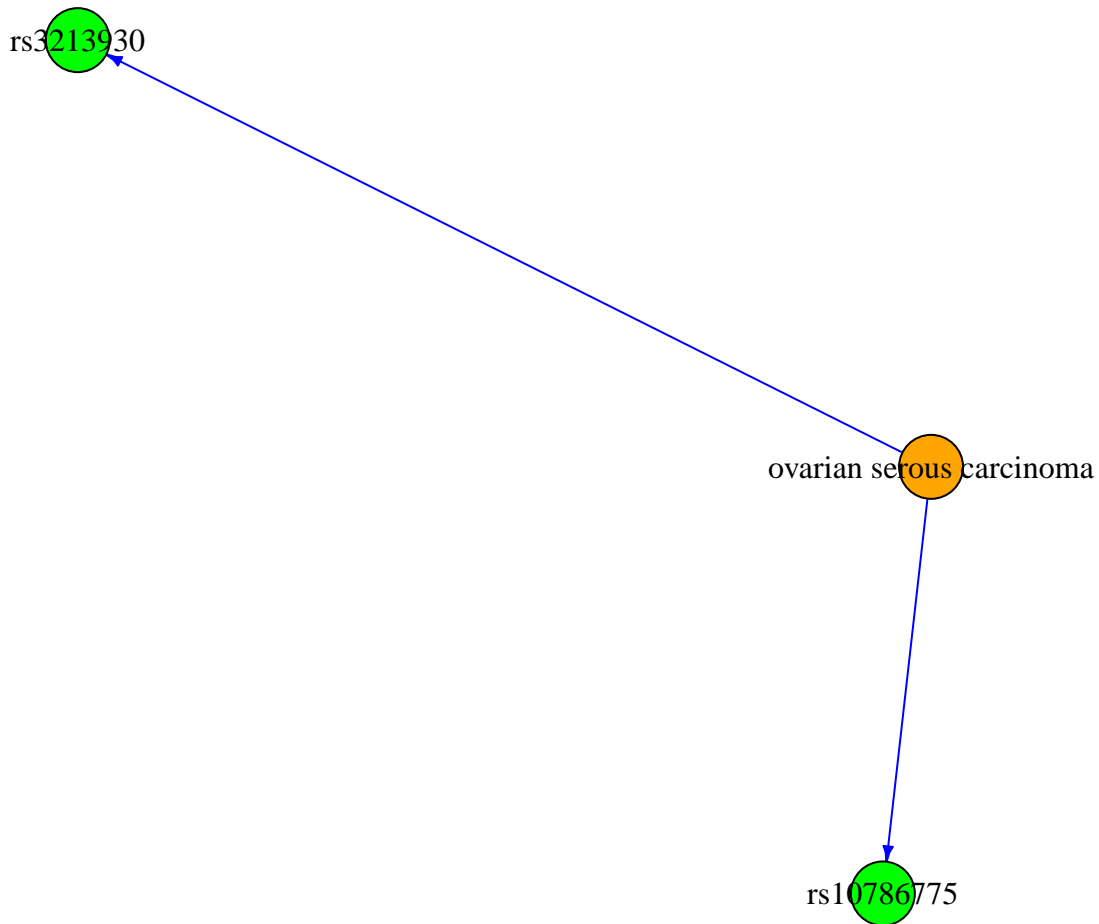



## Variant-Disease Network (thyroid carcinoma)

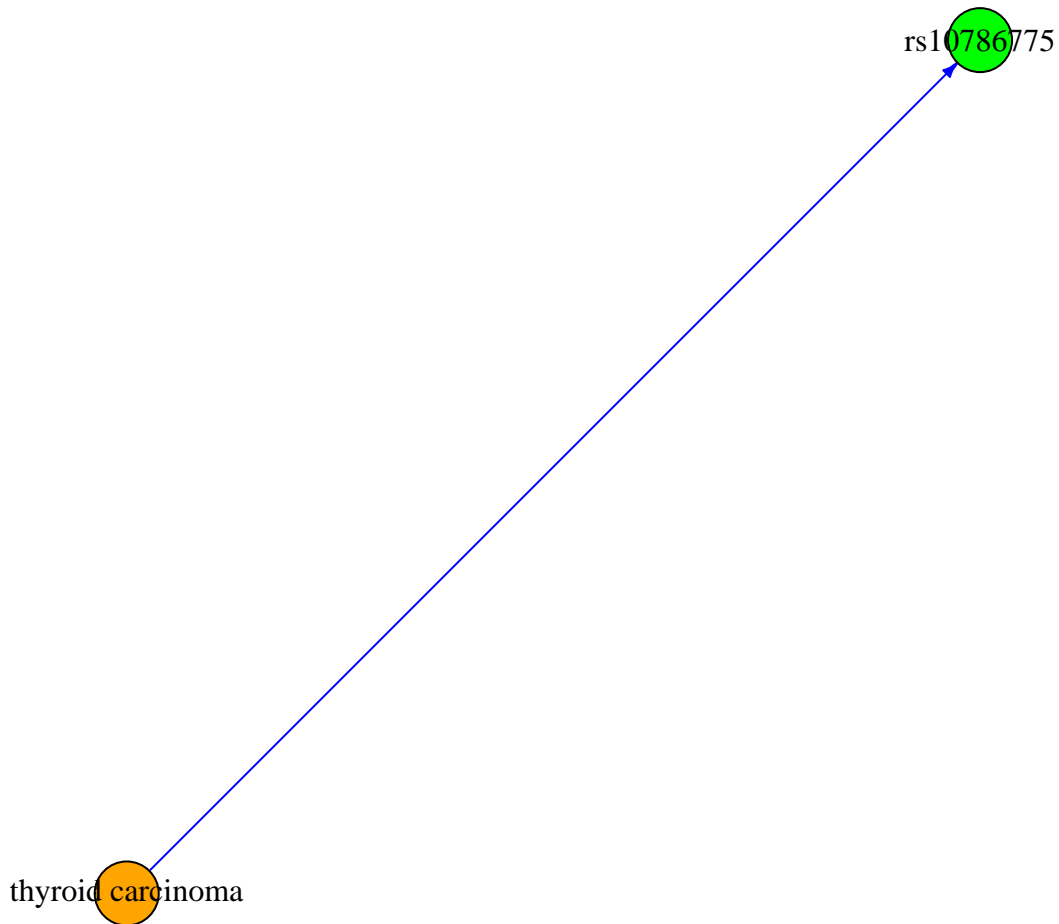

Variant–Disease Network (lip morphology measurement)

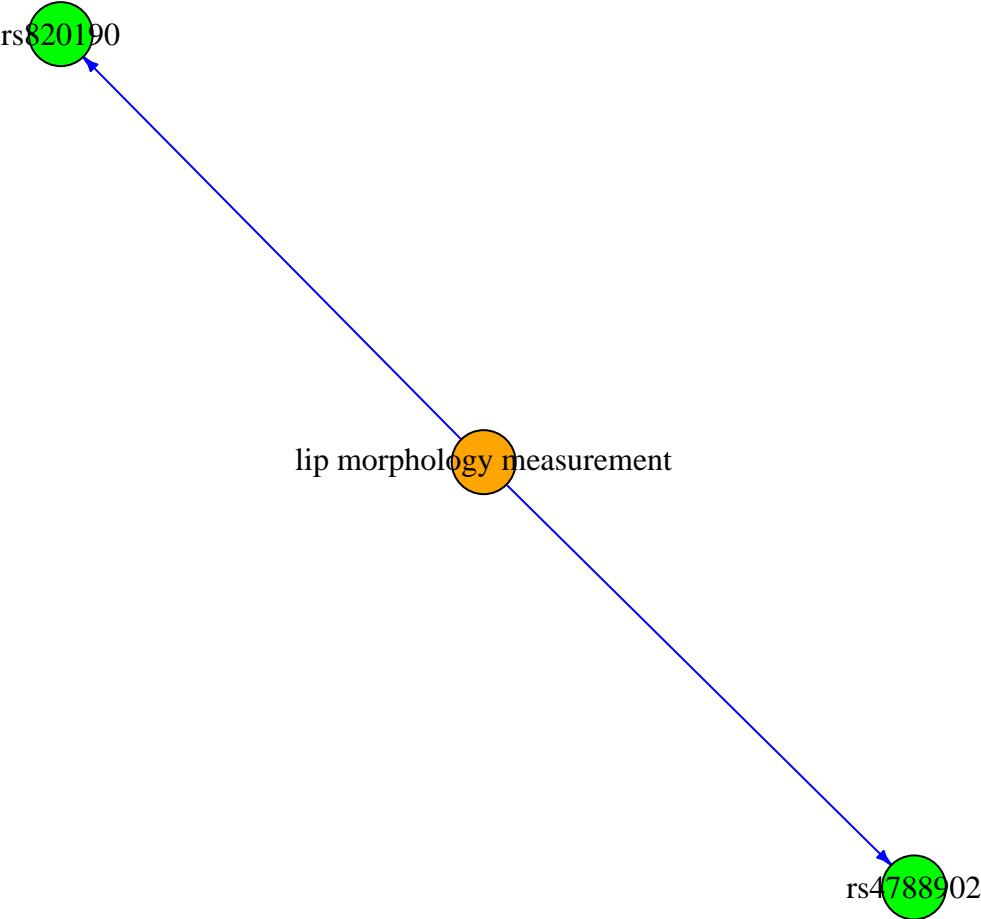

## Variant–Disease Network (rotator cuff tear)

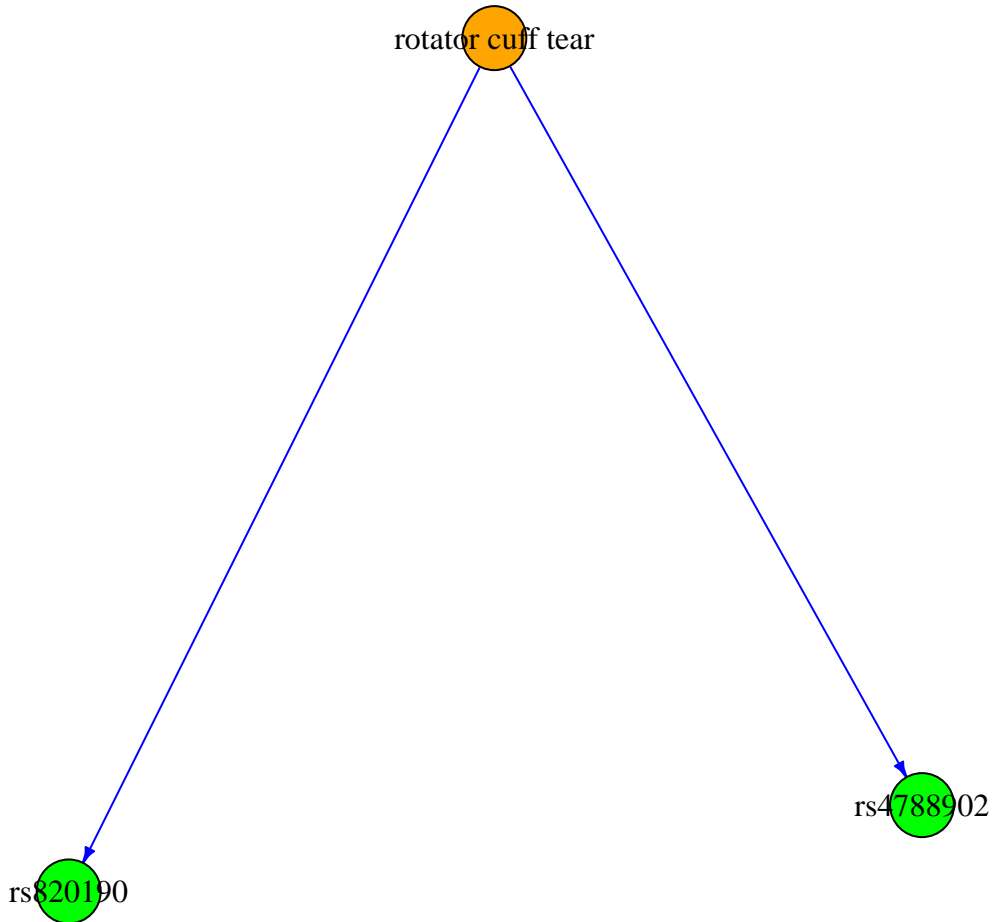

## Variant-Disease Network (fibrinogen measurement)

fibrinogen measurement

rs2230326



Variant-Disease Network (vitiligo)

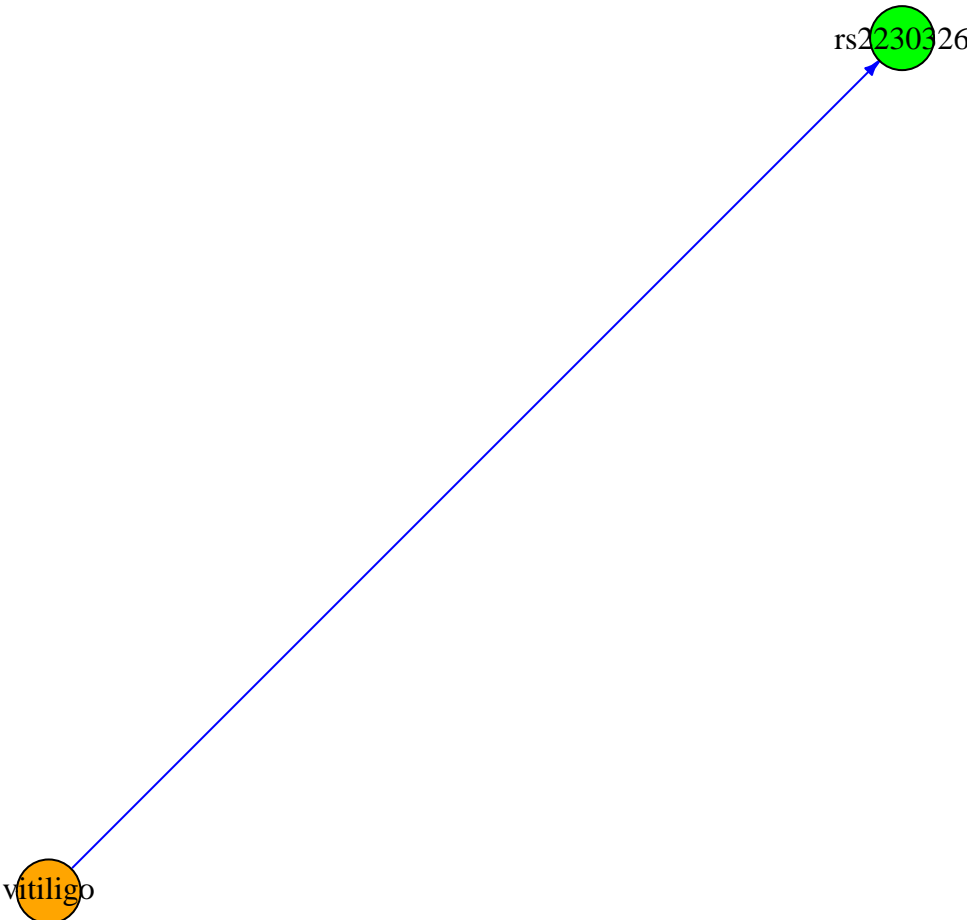

## Variant–Disease Network (optic disc area measurement)

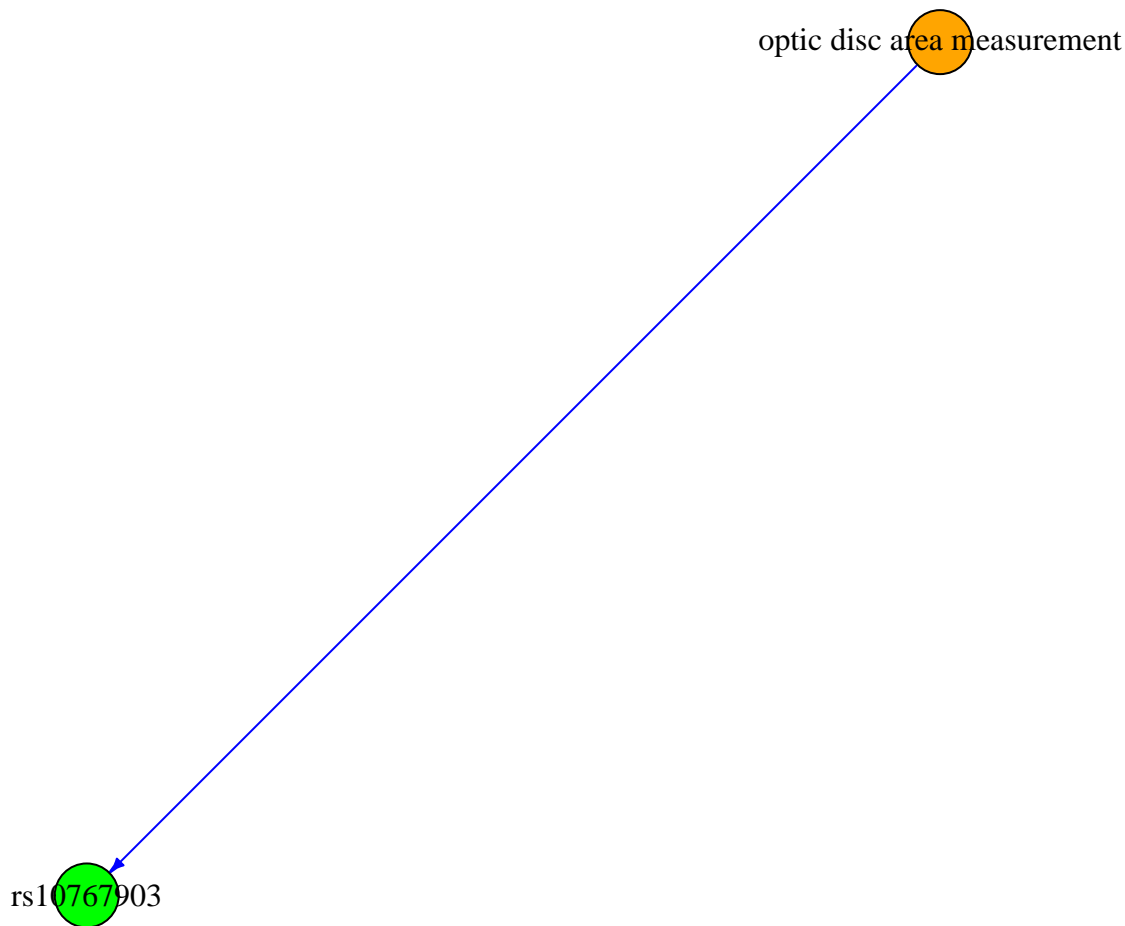

## Variant–Disease Network (coronary heart disease)

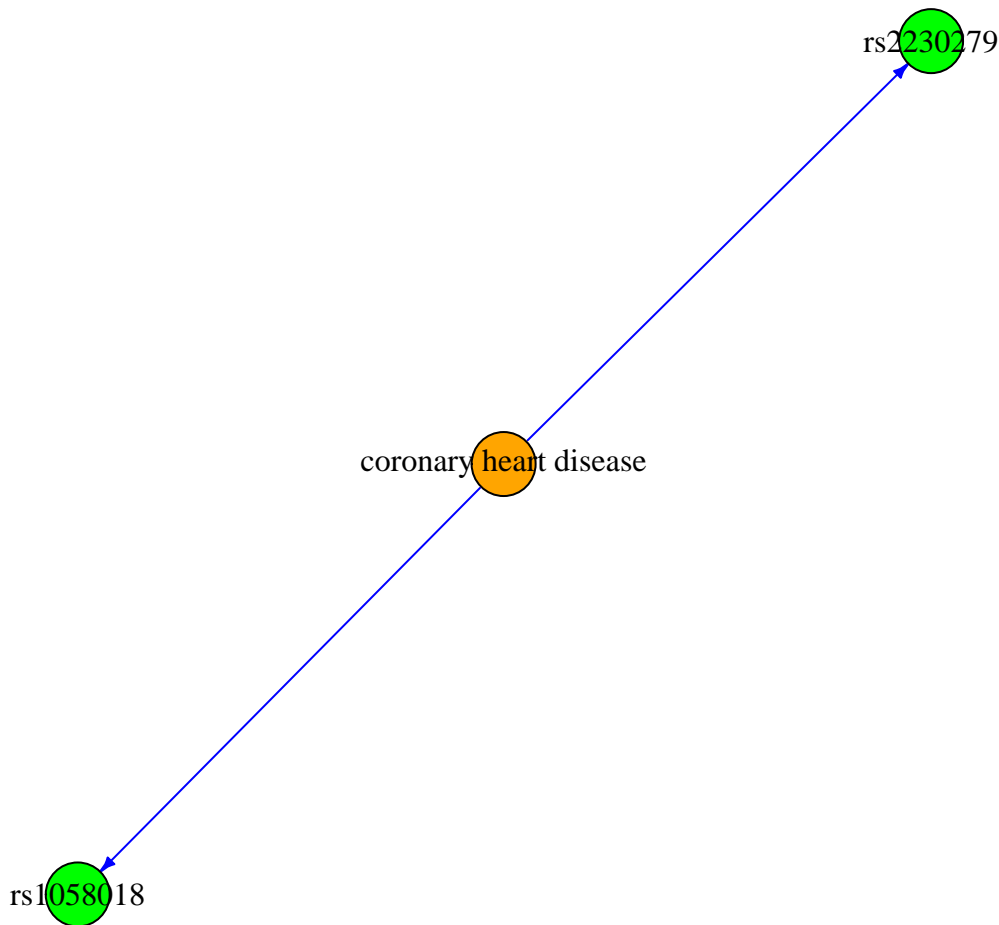

## Variant–Disease Network (attempted suicide)

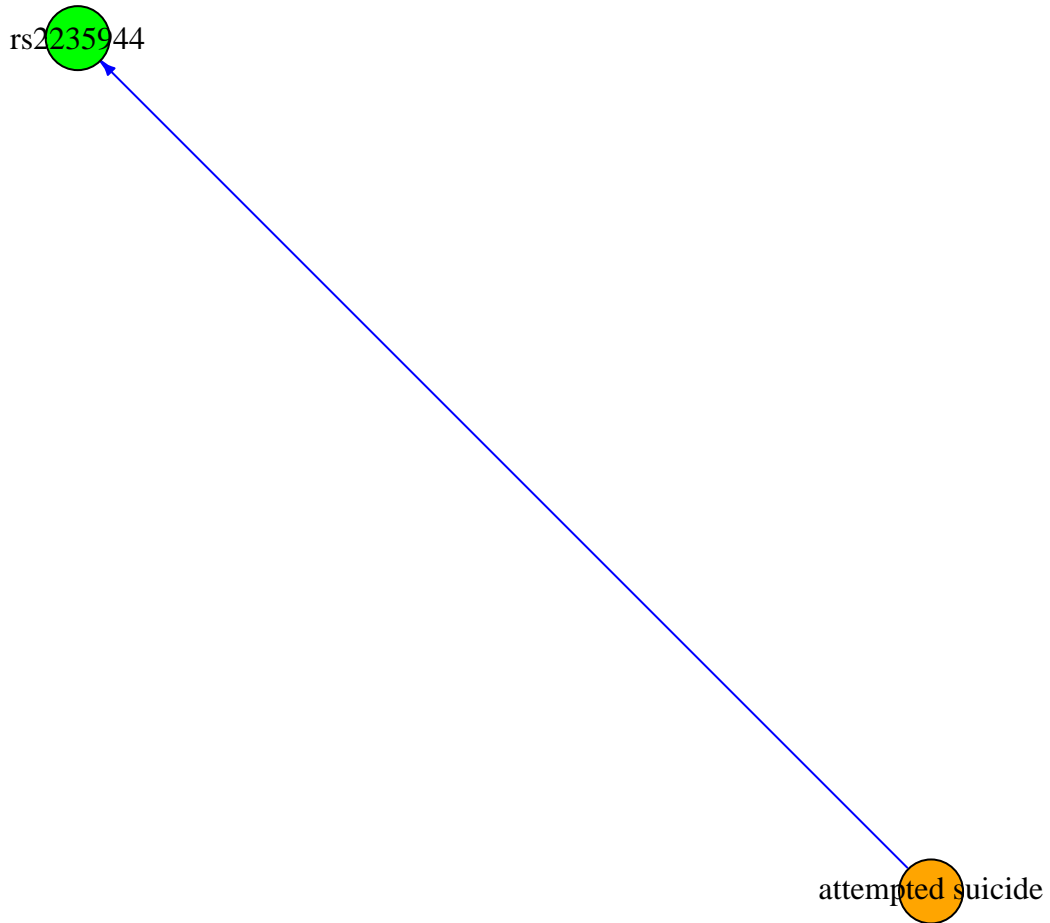



## Variant–Disease Network (cirrhosis of liver)

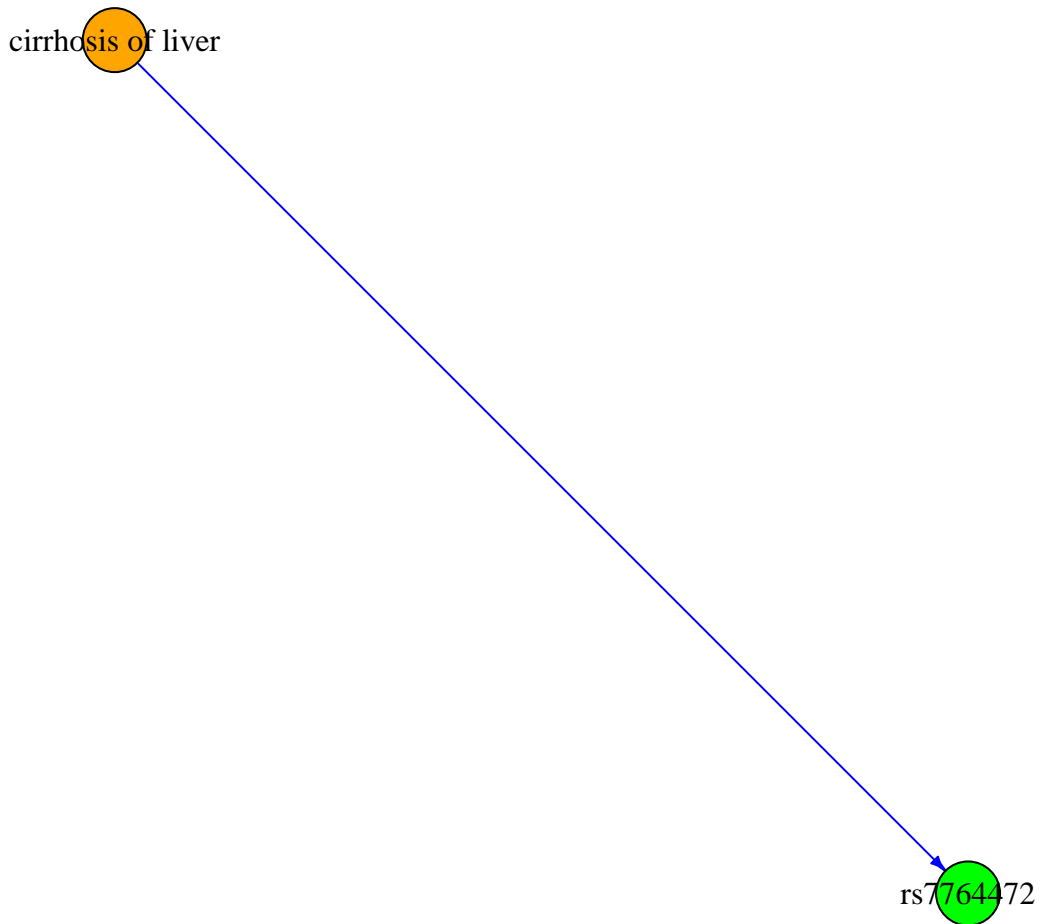

## Variant–Disease Network (hepatitis C infection)

hepatitis C infection

rs7764472

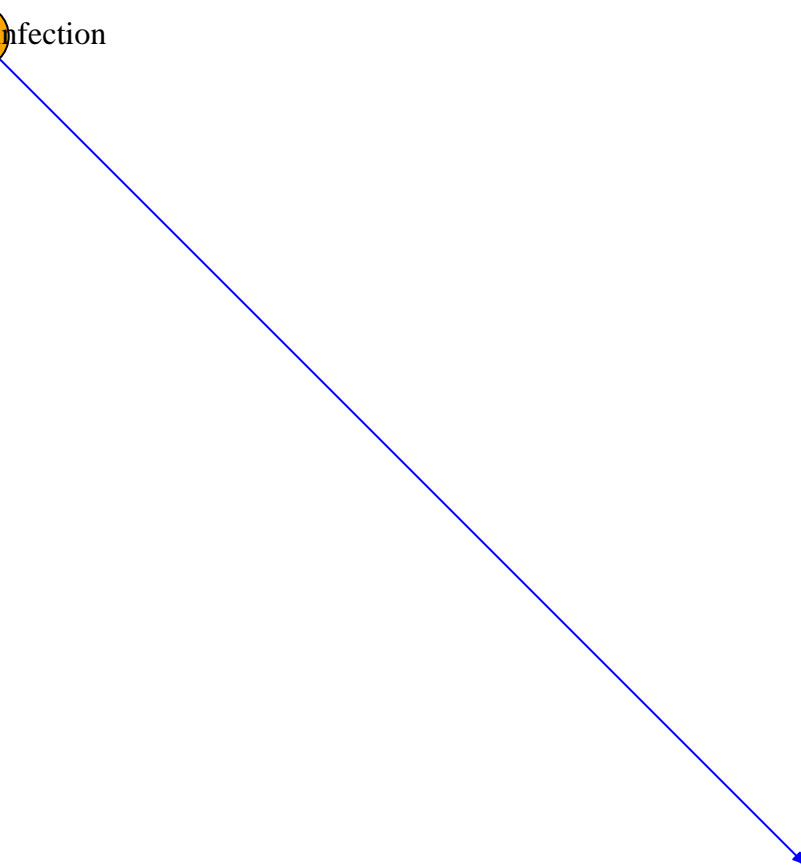

# Variant–Disease Network (response to sulfonylurea)

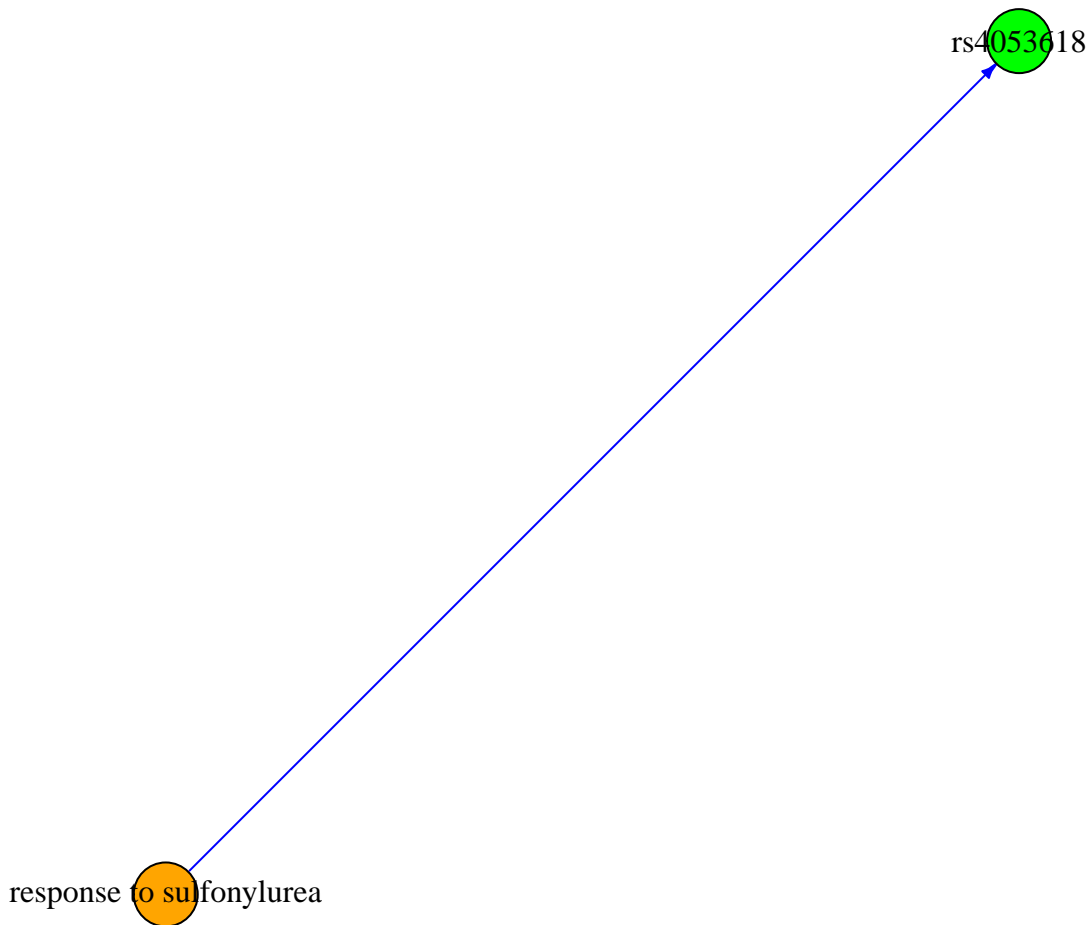

## Variant–Disease Network (neuroticism measurement)

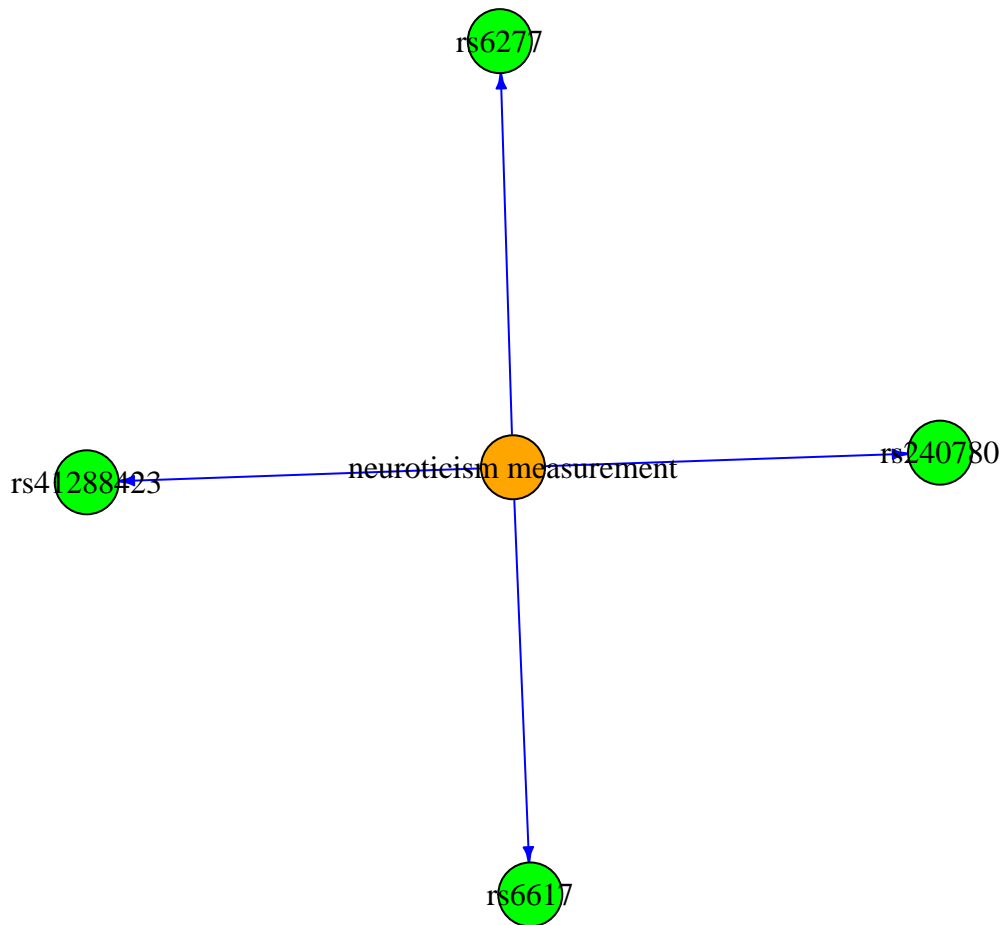

# Variant-Disease Network (venous thromboembolism)

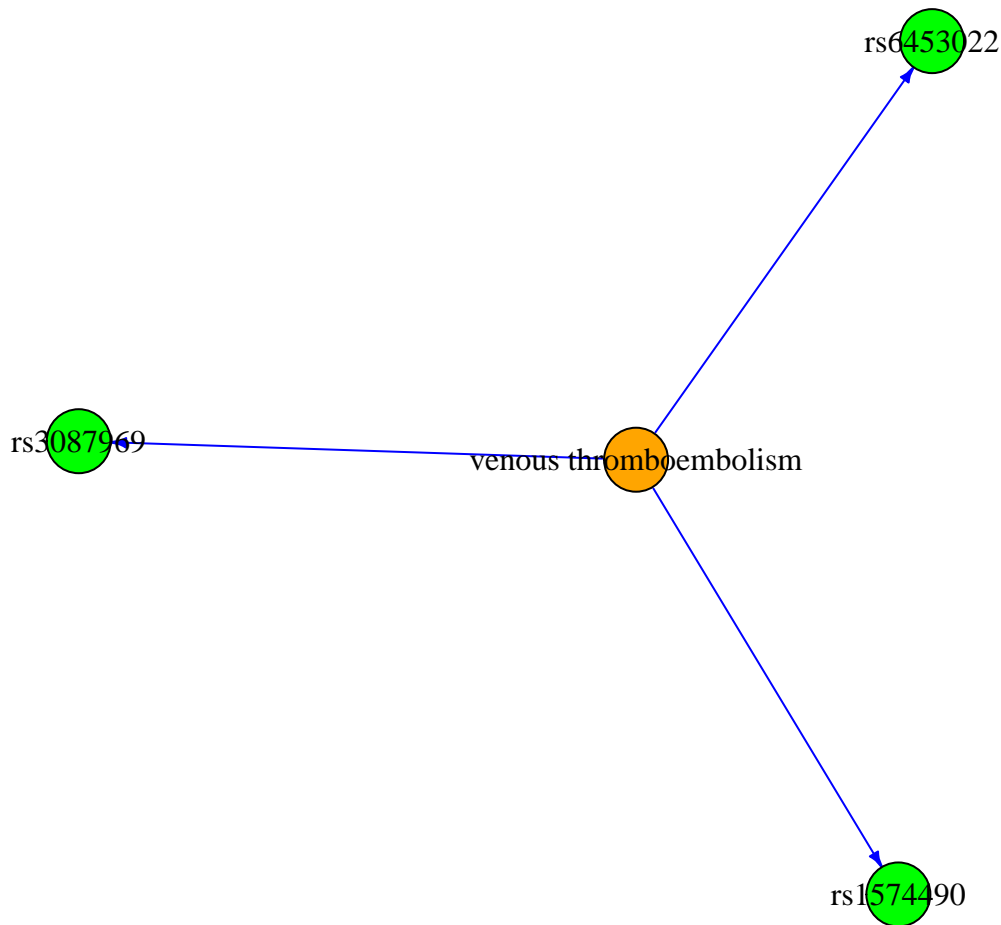

## Variant–Disease Network (a1c measurement)

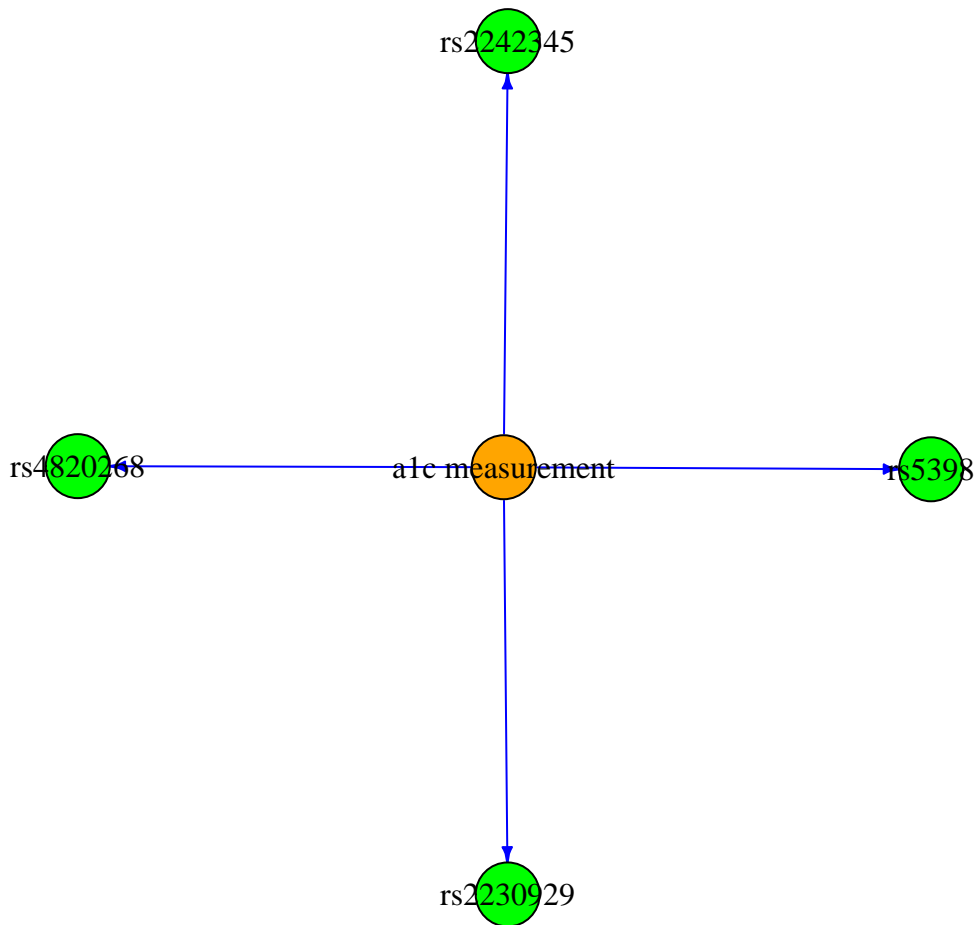

## Variant–Disease Network (functional laterality)

functional laterality

rs2293312

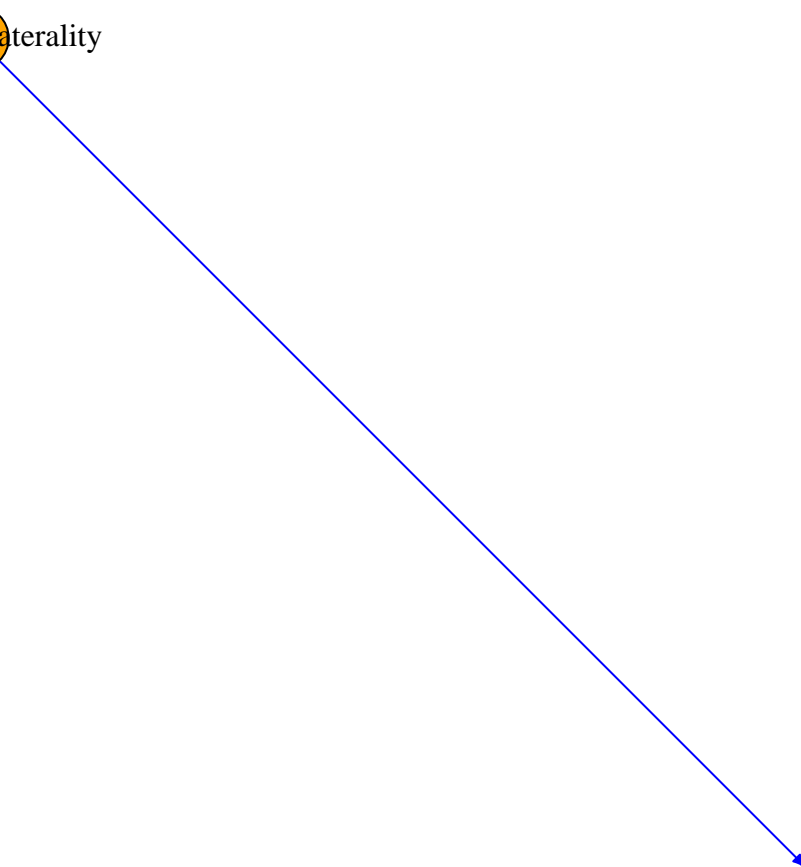

Variant–Disease Network (mood disorder)

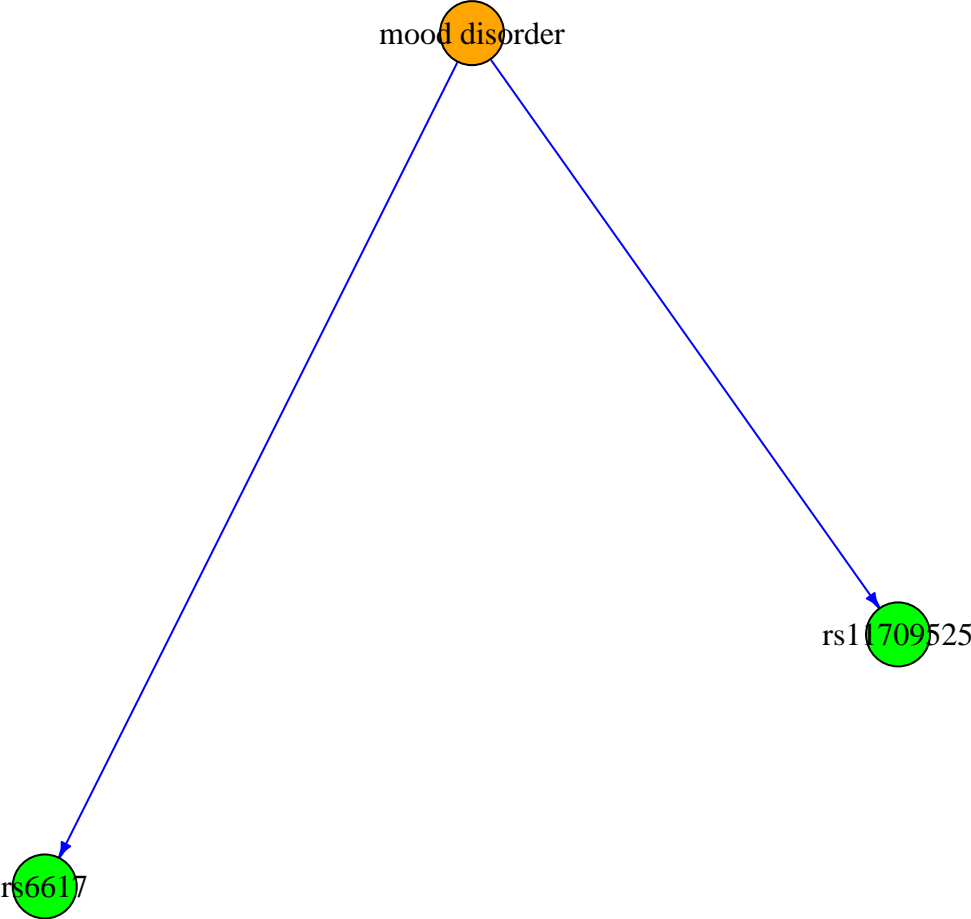



## Variant-Disease Network (osteoarthritis)

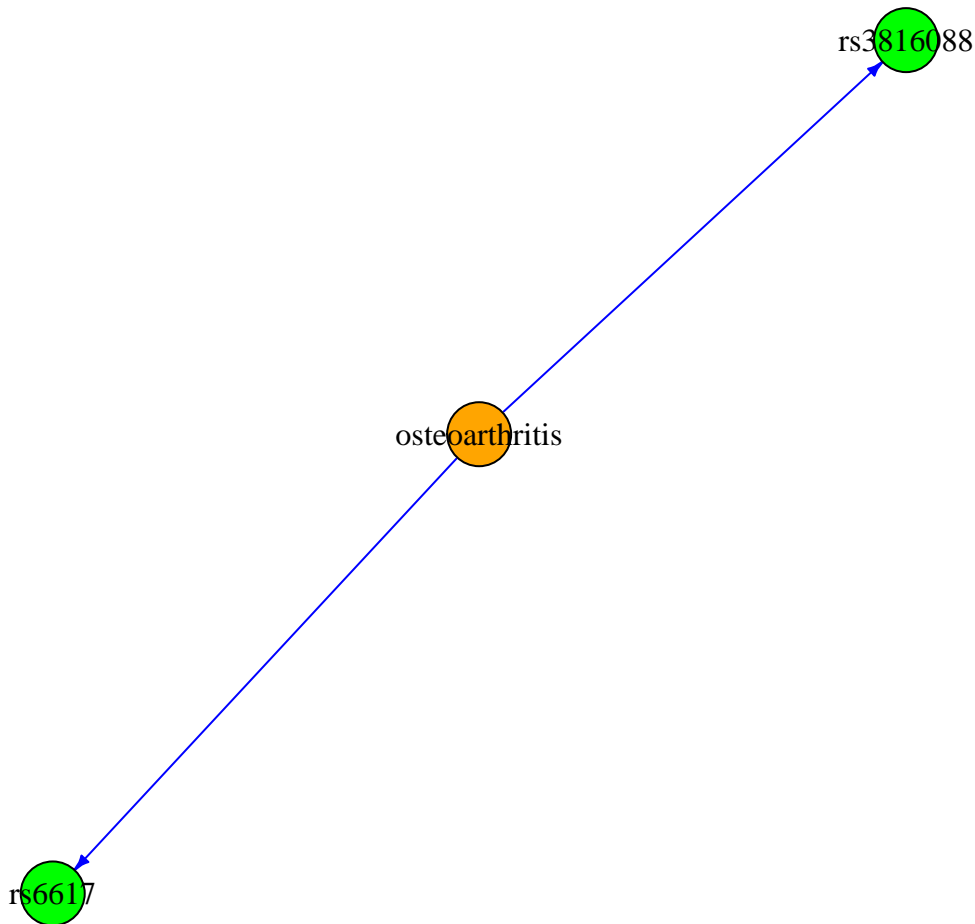

## Variant–Disease Network (membranous glomerulonephritis)

rs2305818

membranous glomerulonephritis

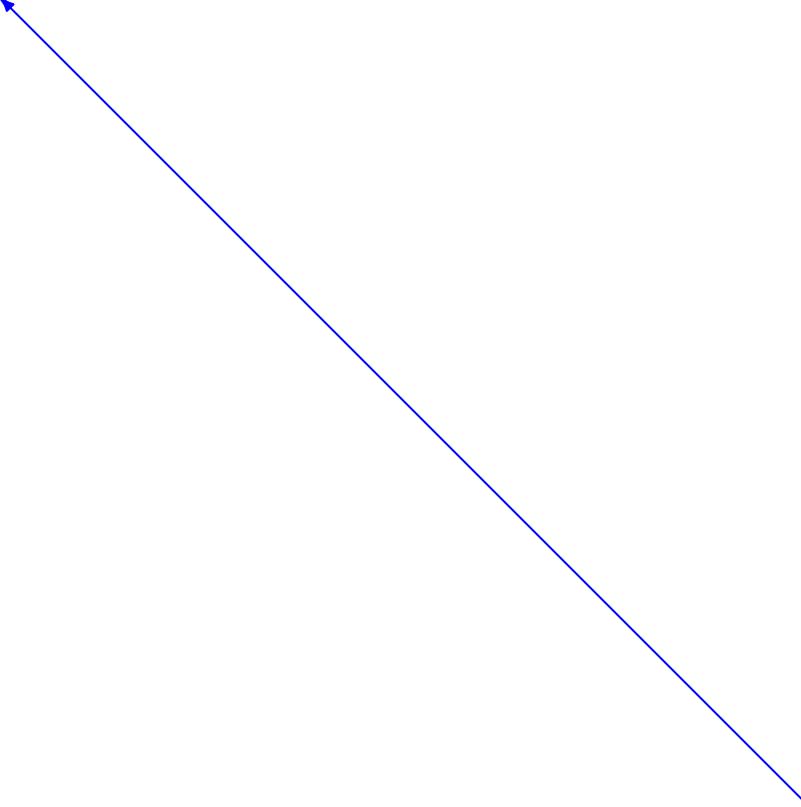

## Variant–Disease Network (alpha linolenic acid measurement)

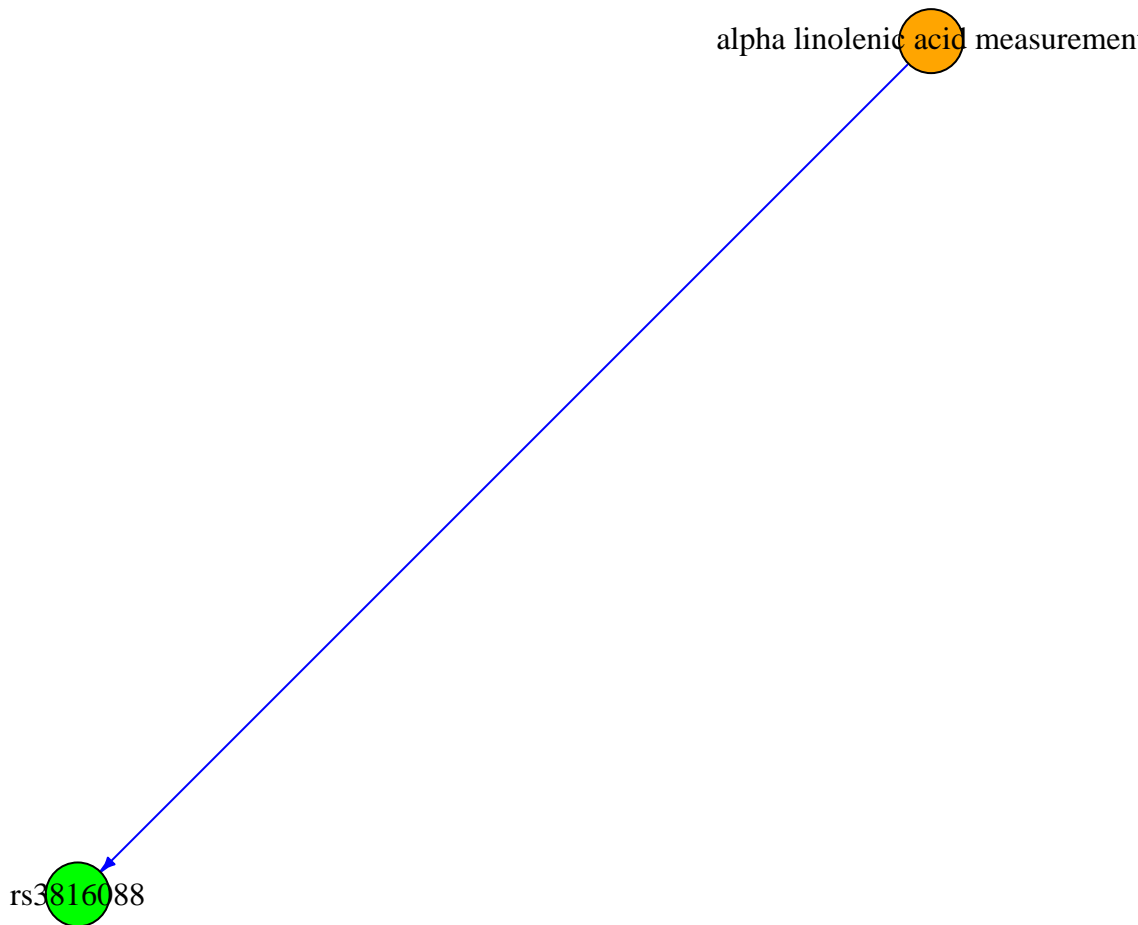

## Variant–Disease Network (QT interval)

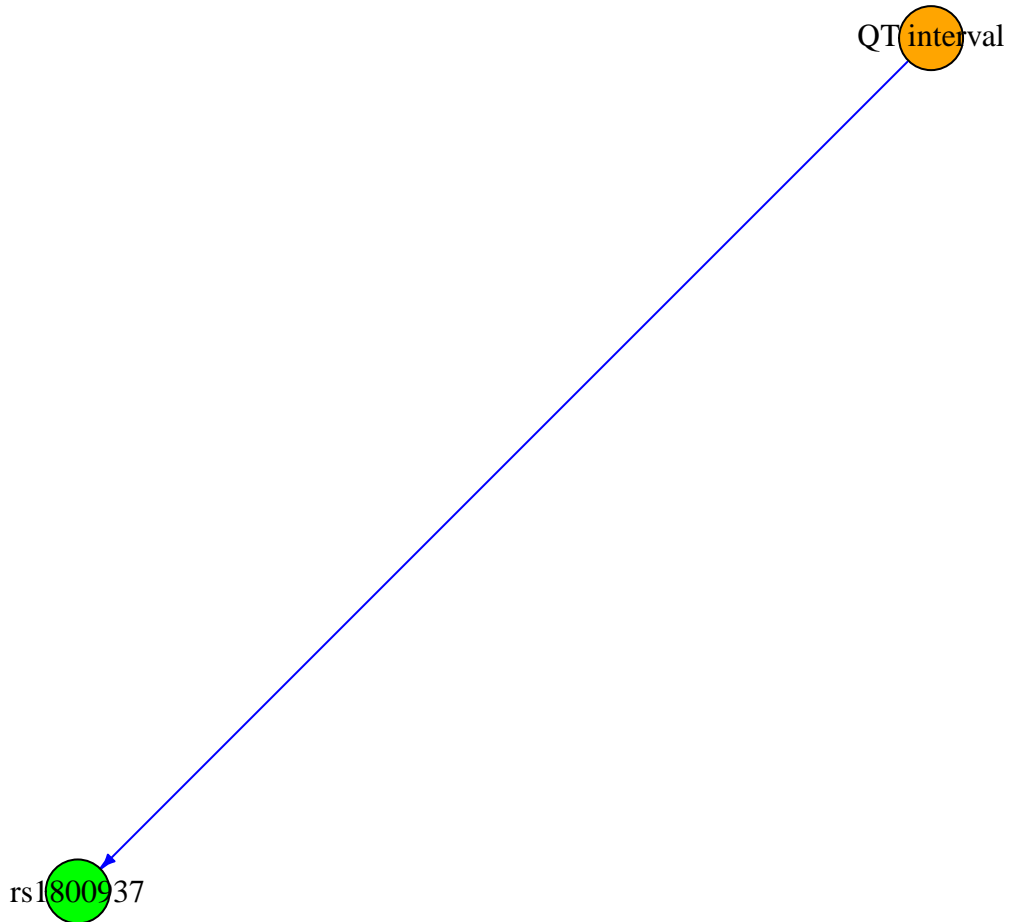

## Variant–Disease Network (Trypanosoma cruzi seropositivity)

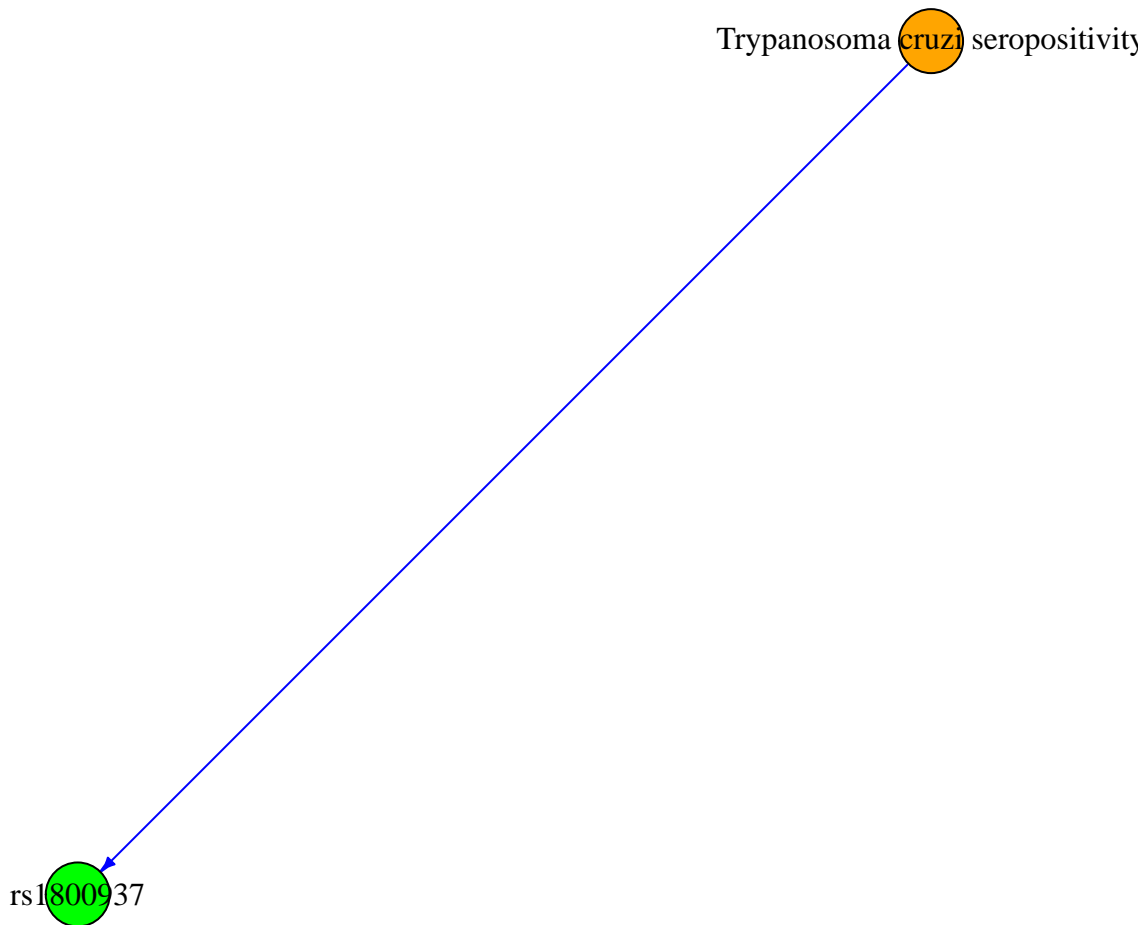

# Variant–Disease Network (body composition measurement)

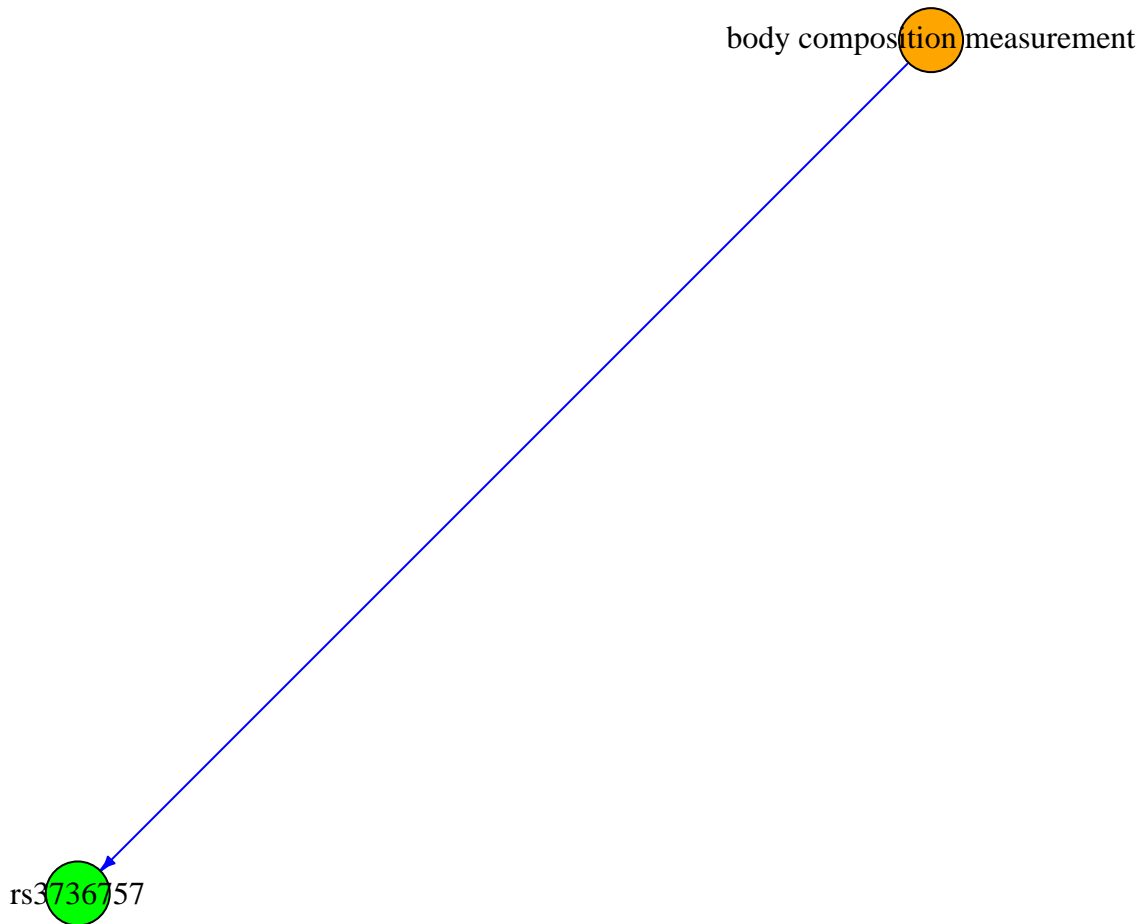

## Variant–Disease Network (sodium measurement)

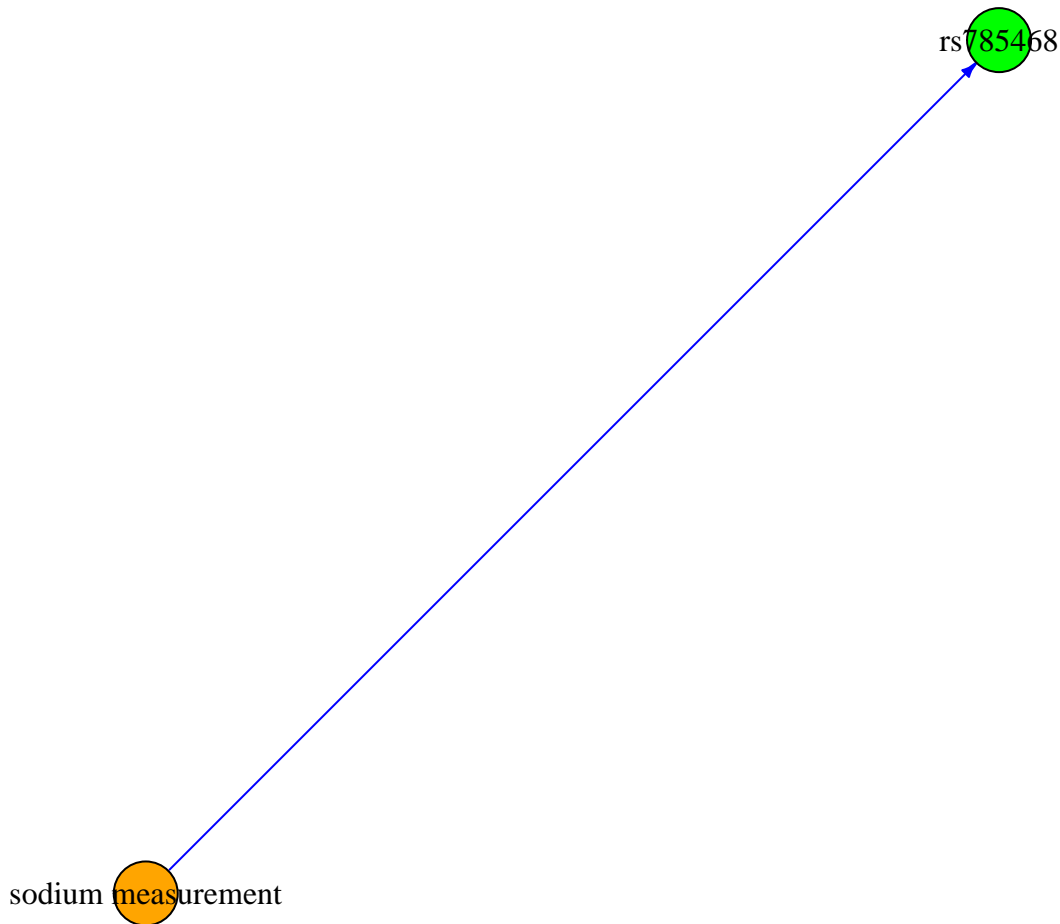

# Variant–Disease Network (depressive symptom measurement)

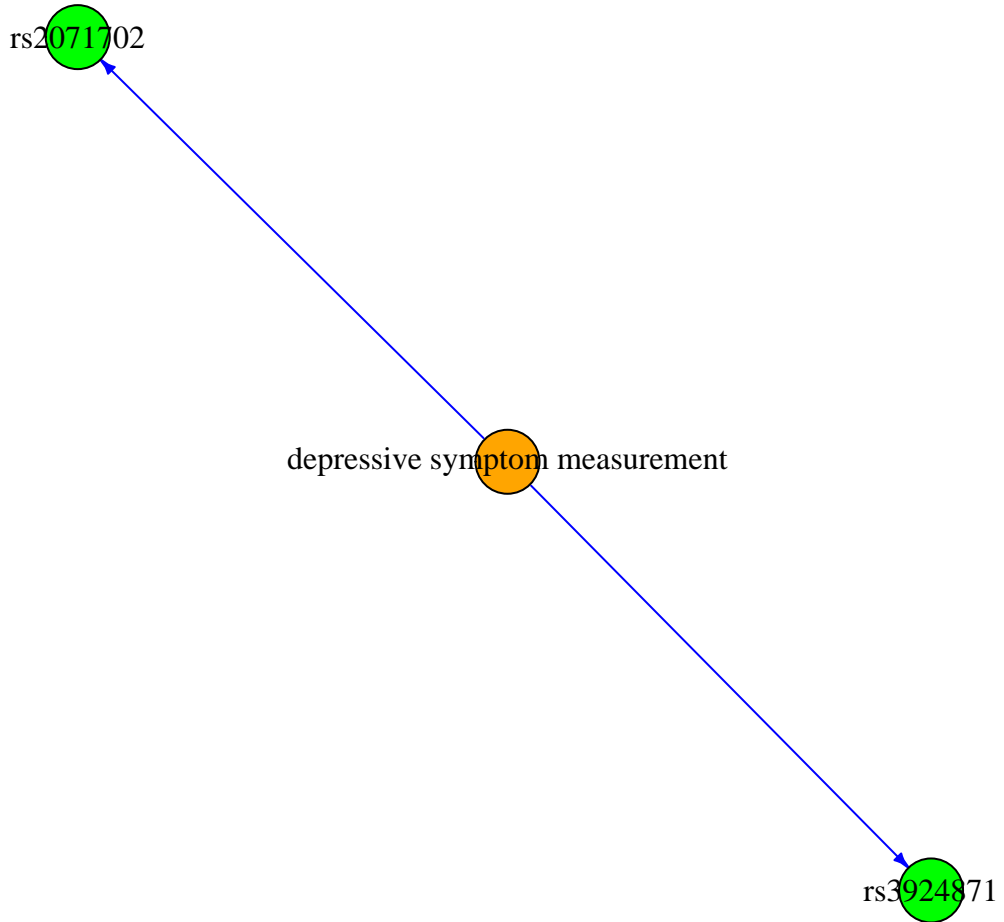



## Variant–Disease Network (generalised epilepsy)

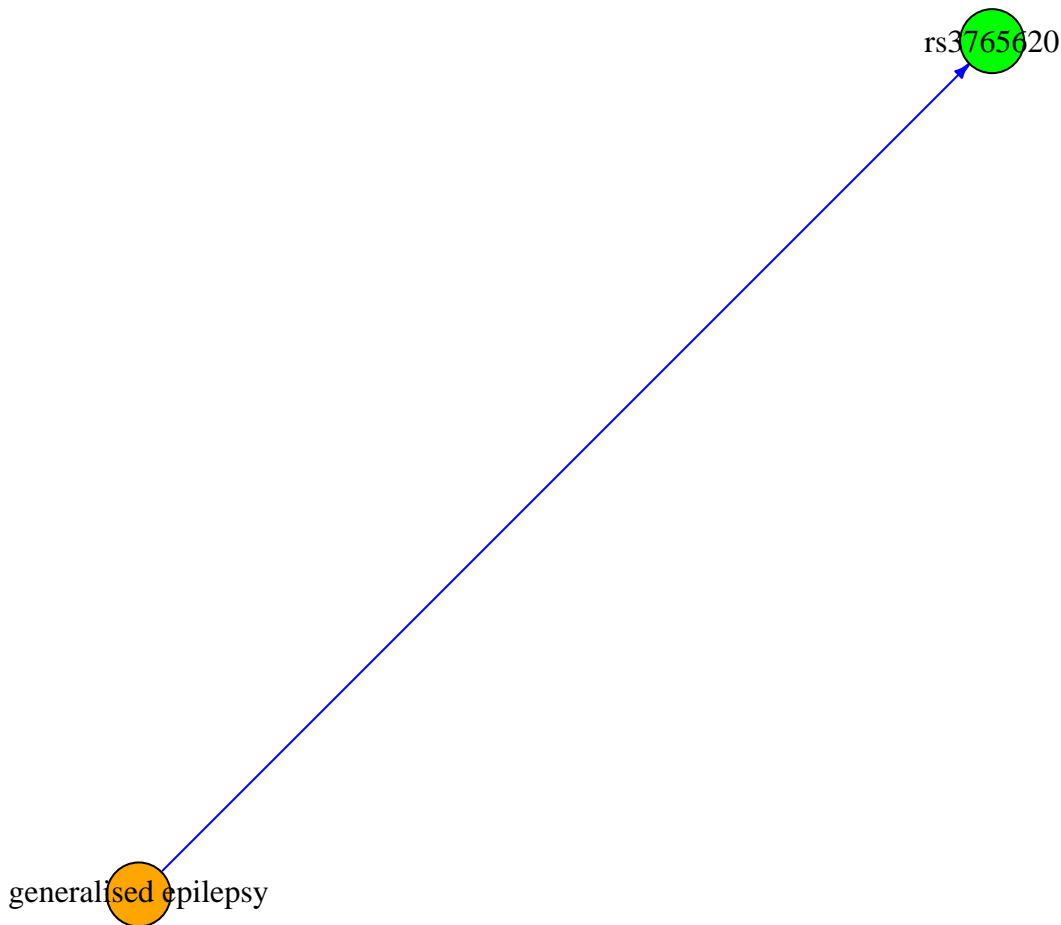

## Variant-Disease Network (ankylosing spondylitis)

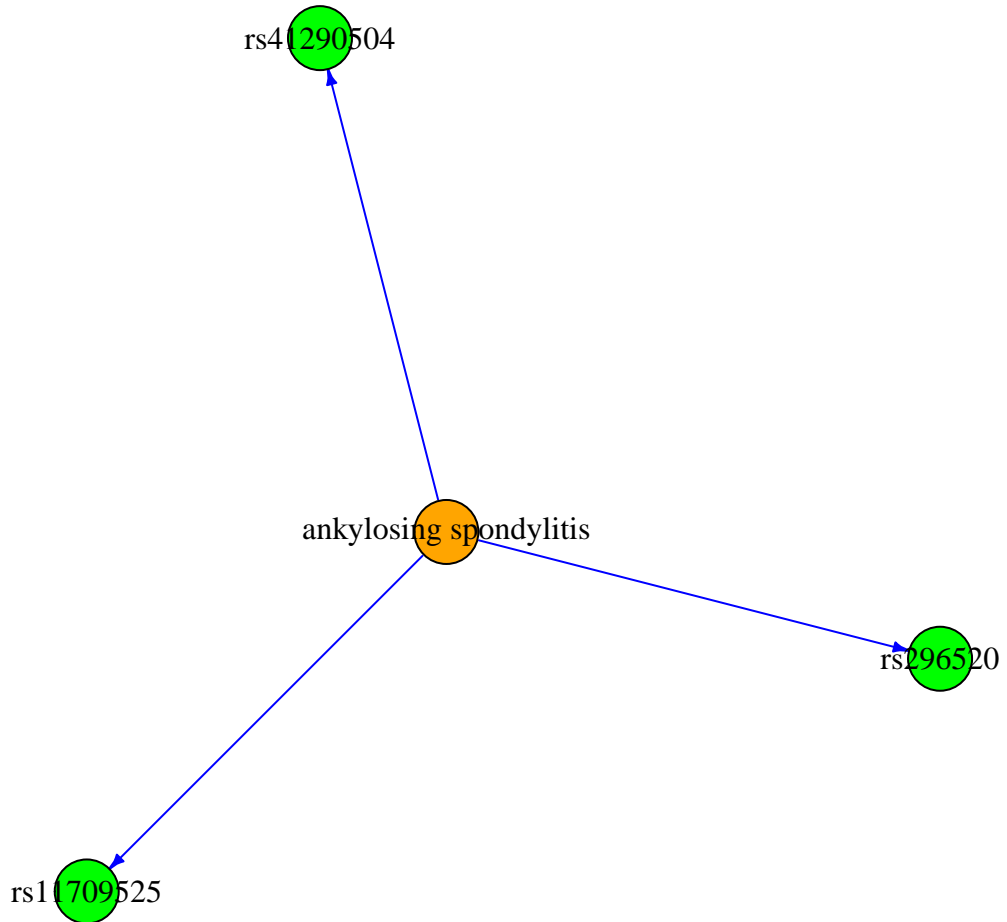

## Variant-Disease Network (autoimmune disease)

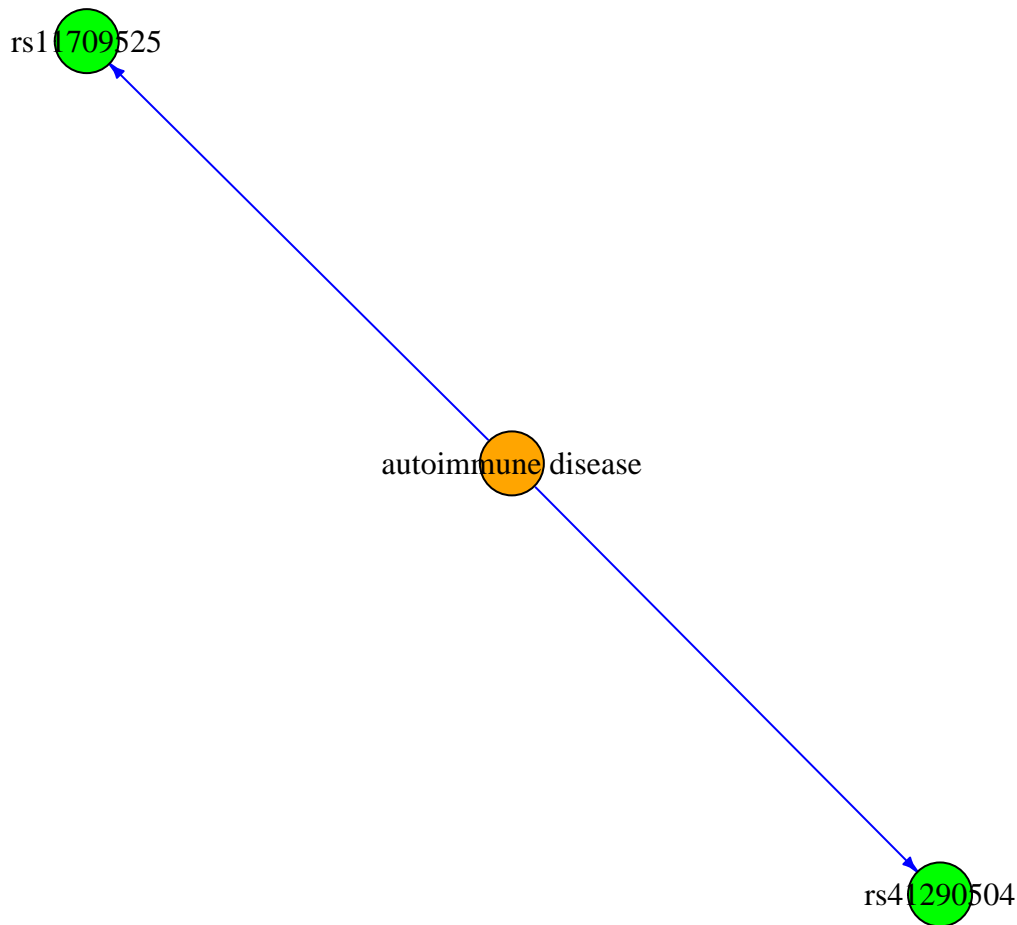

## Variant–Disease Network (autoimmune thyroid disease)

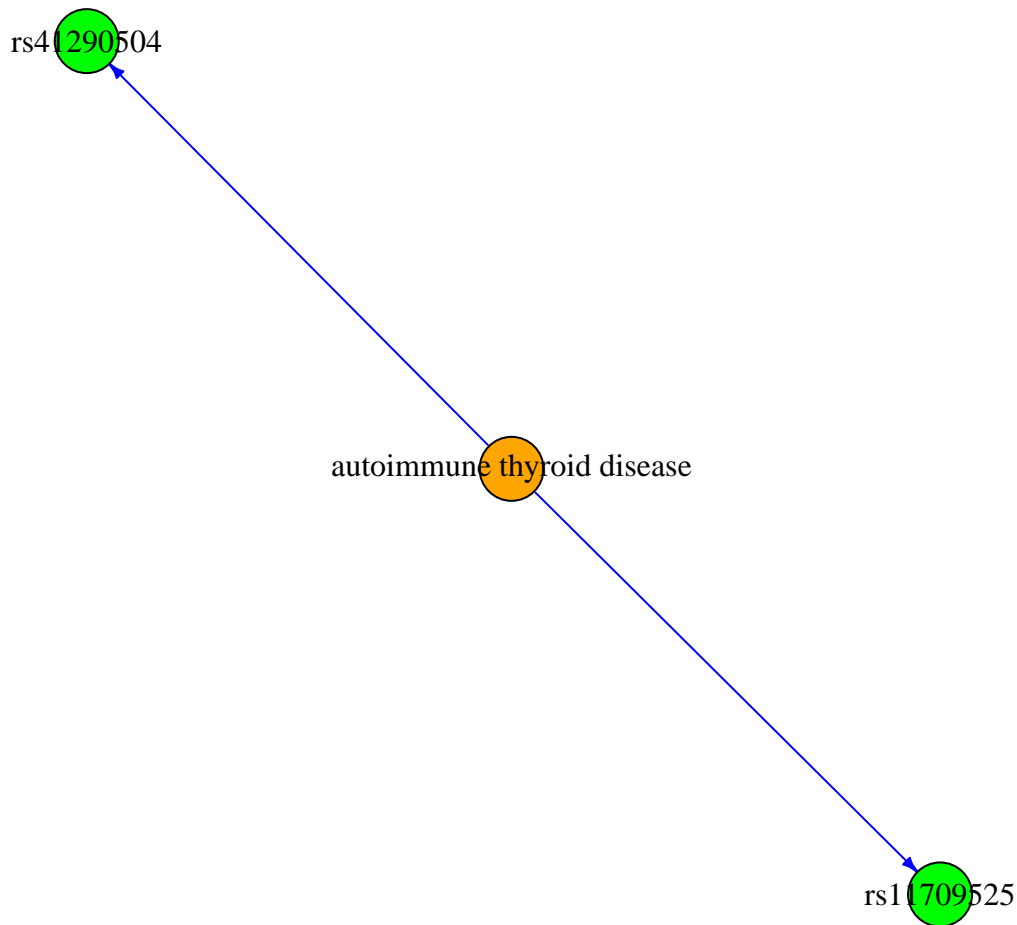

## Variant-Disease Network (celiac disease)

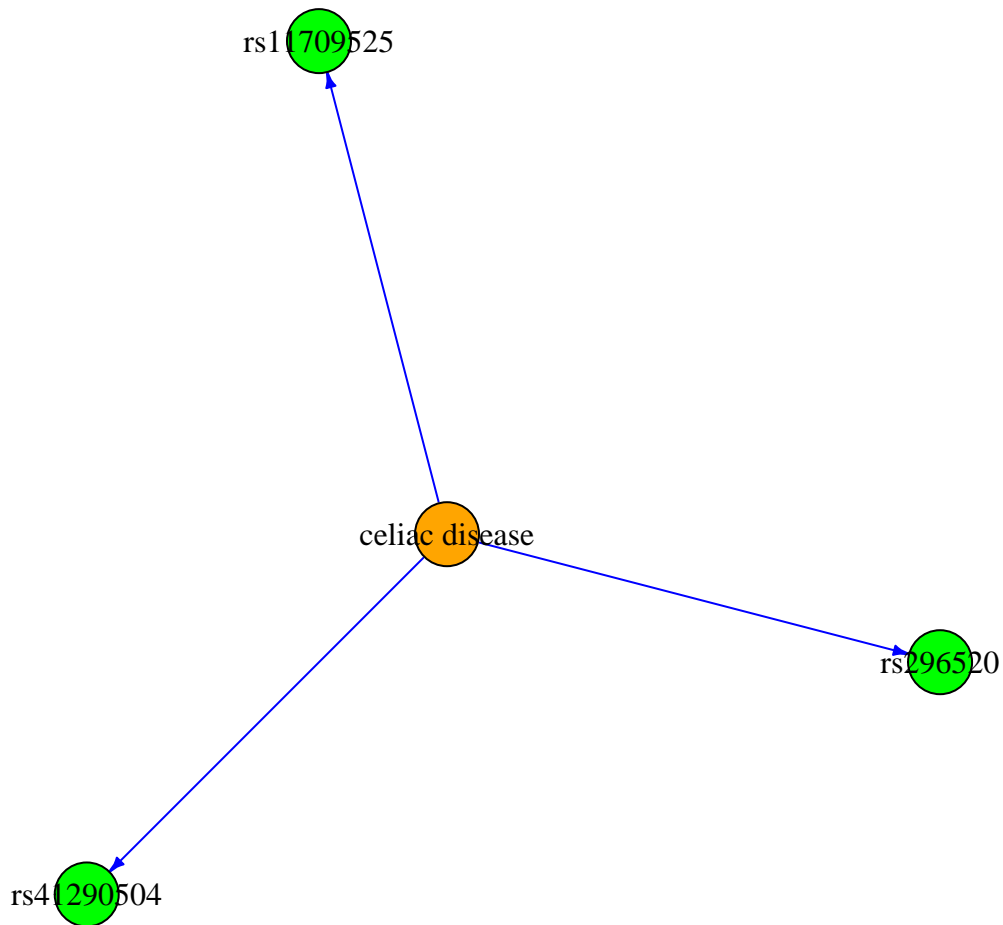

**Variant–Disease Network (chronic childhood arthritis)**

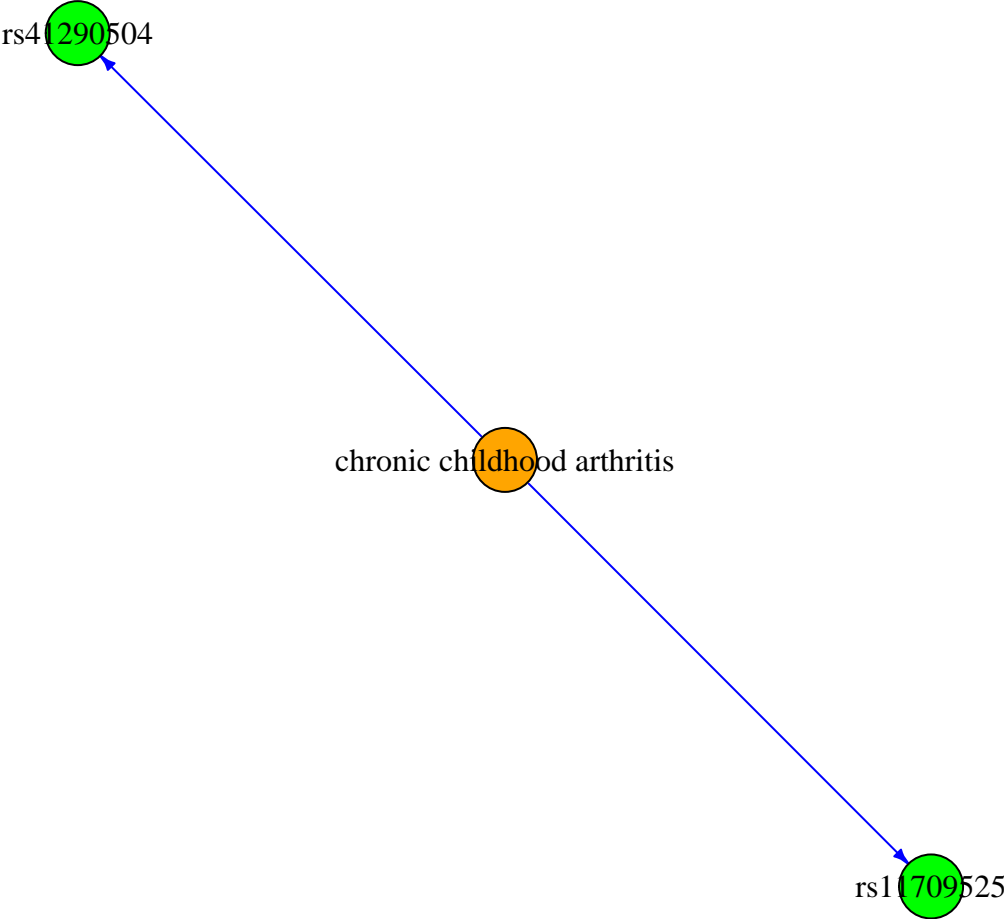

# Variant–Disease Network (common variable immunodeficiency)

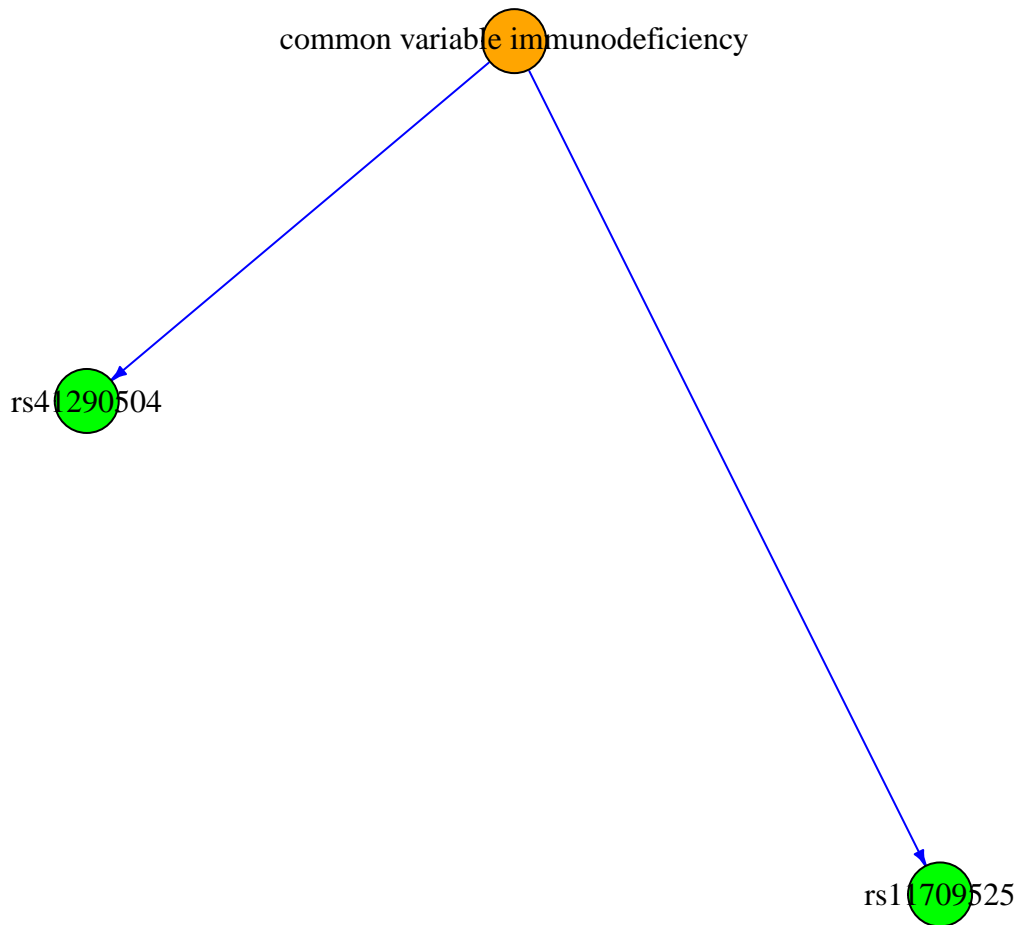

## Variant-Disease Network (hypothyroidism)

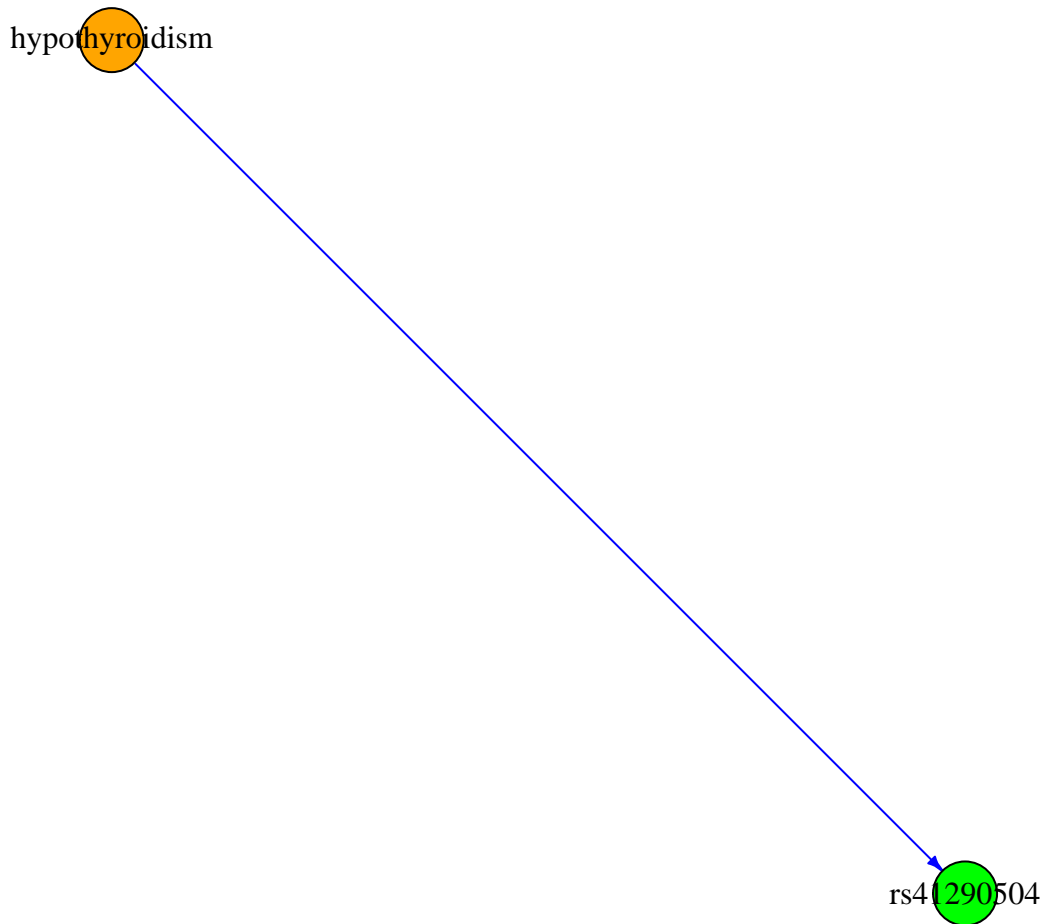



## Variant–Disease Network (psoriasis)

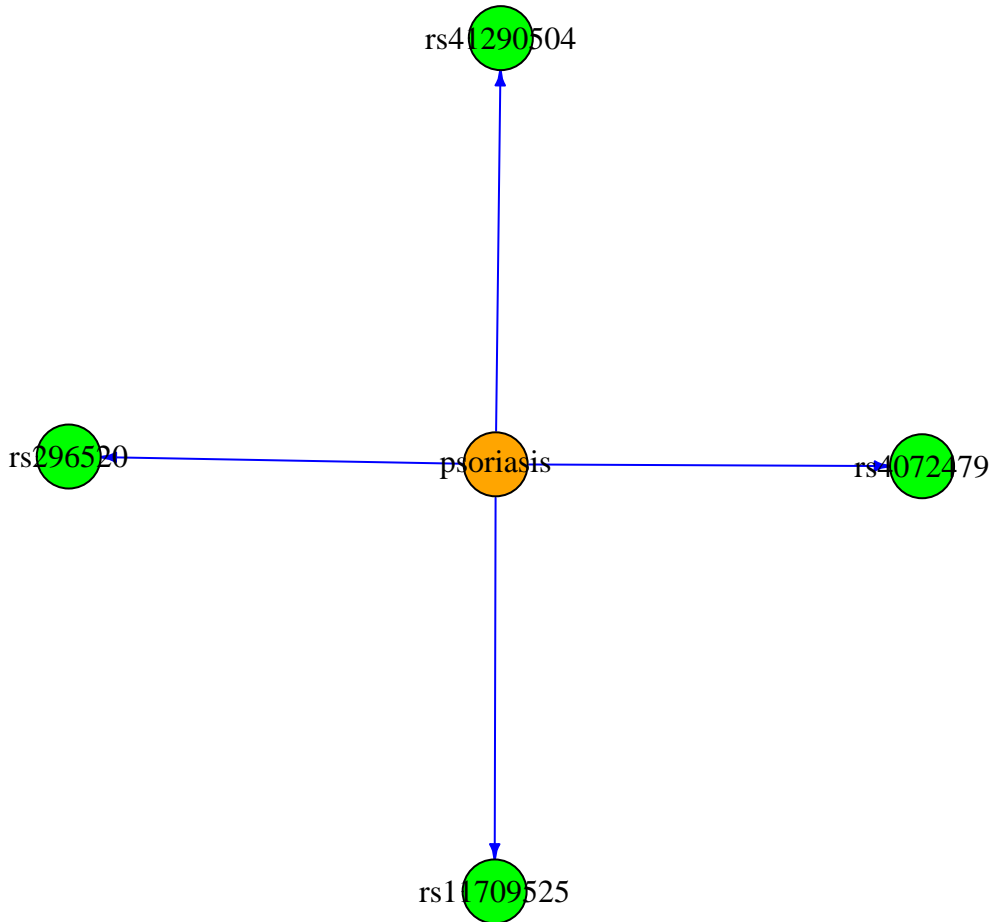

## Variant–Disease Network (age at assessment)

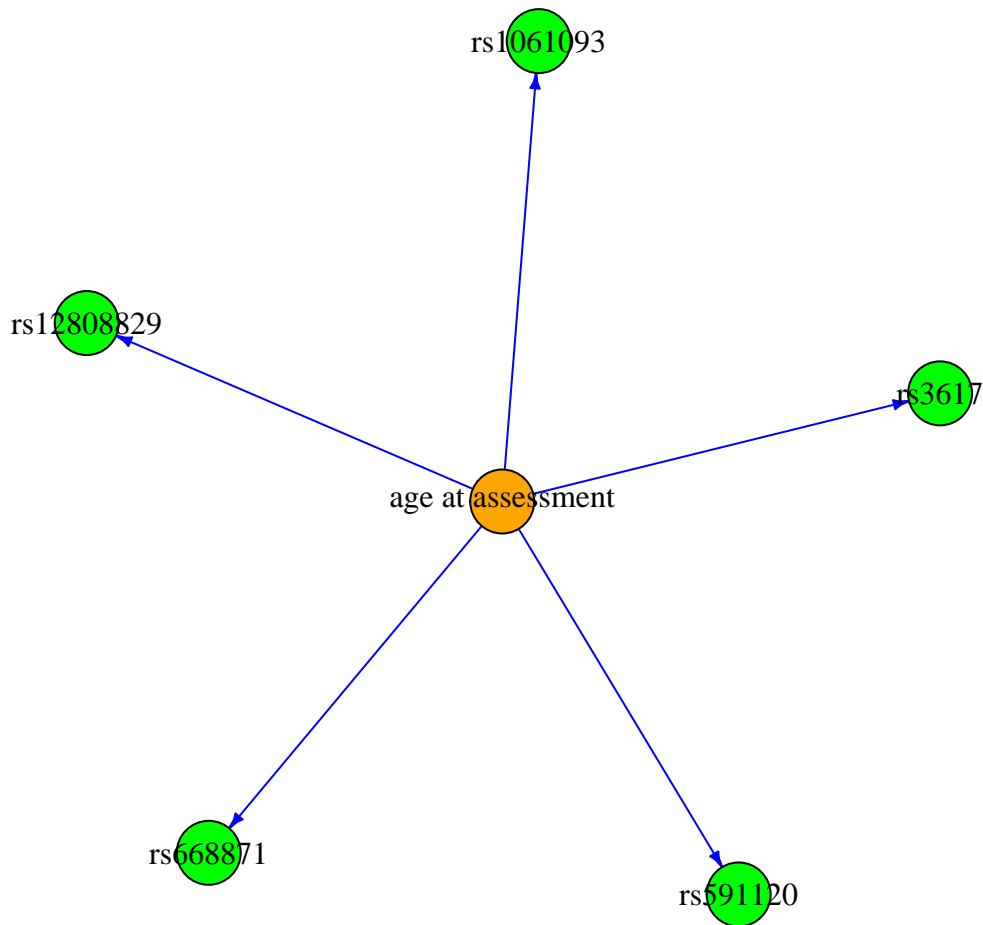

# Variant–Disease Network (sex interaction measurement)

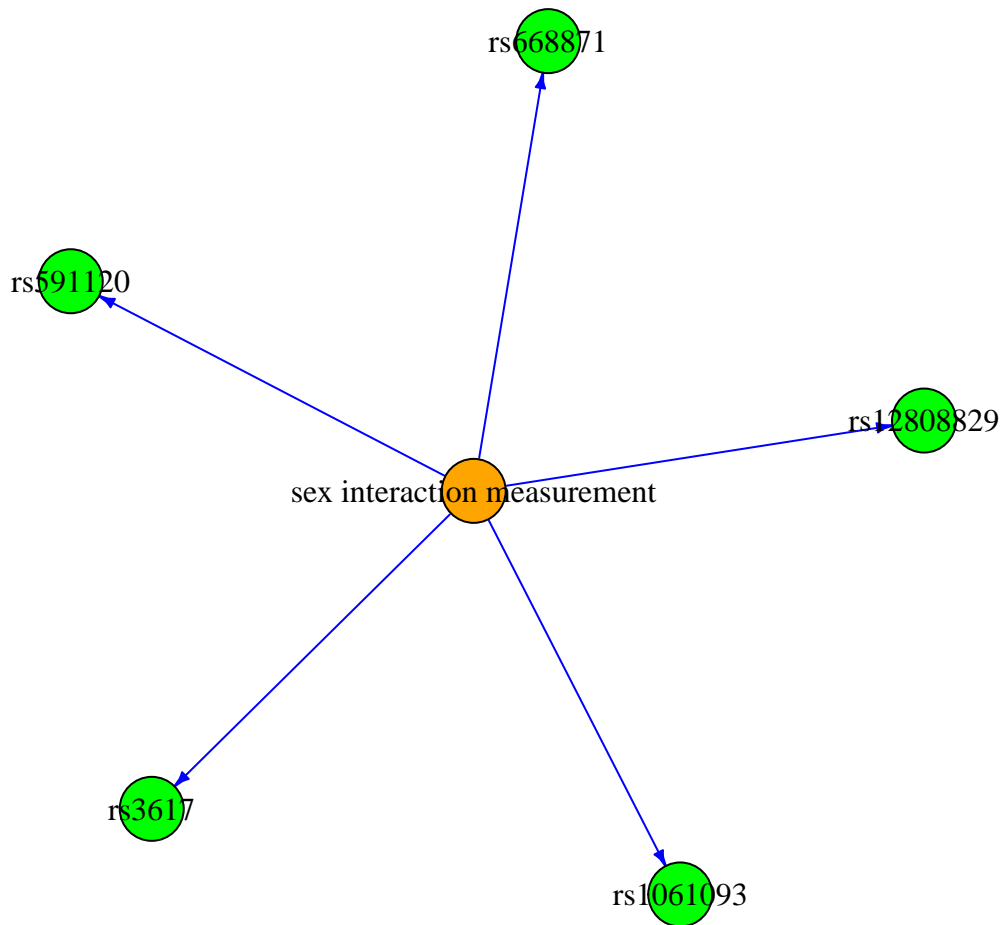

## Variant–Disease Network (brain measurement)

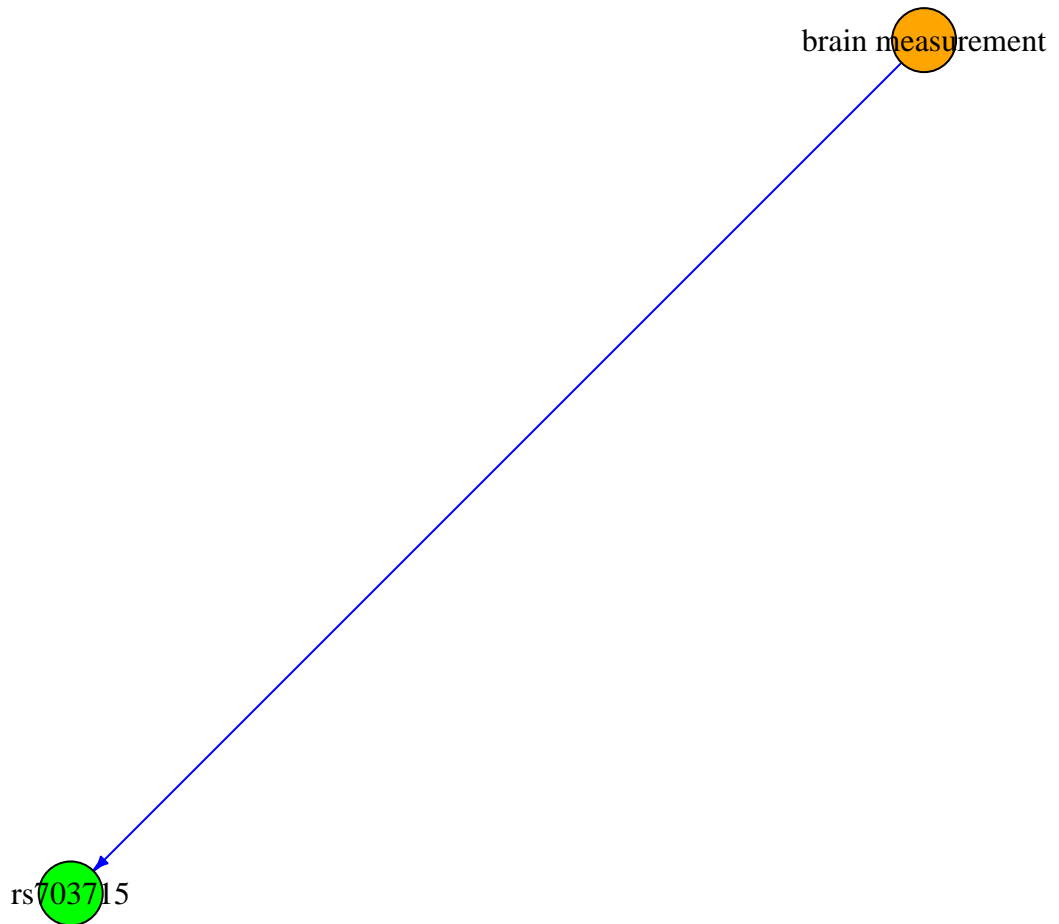

## Variant–Disease Network (hippocampal volume)

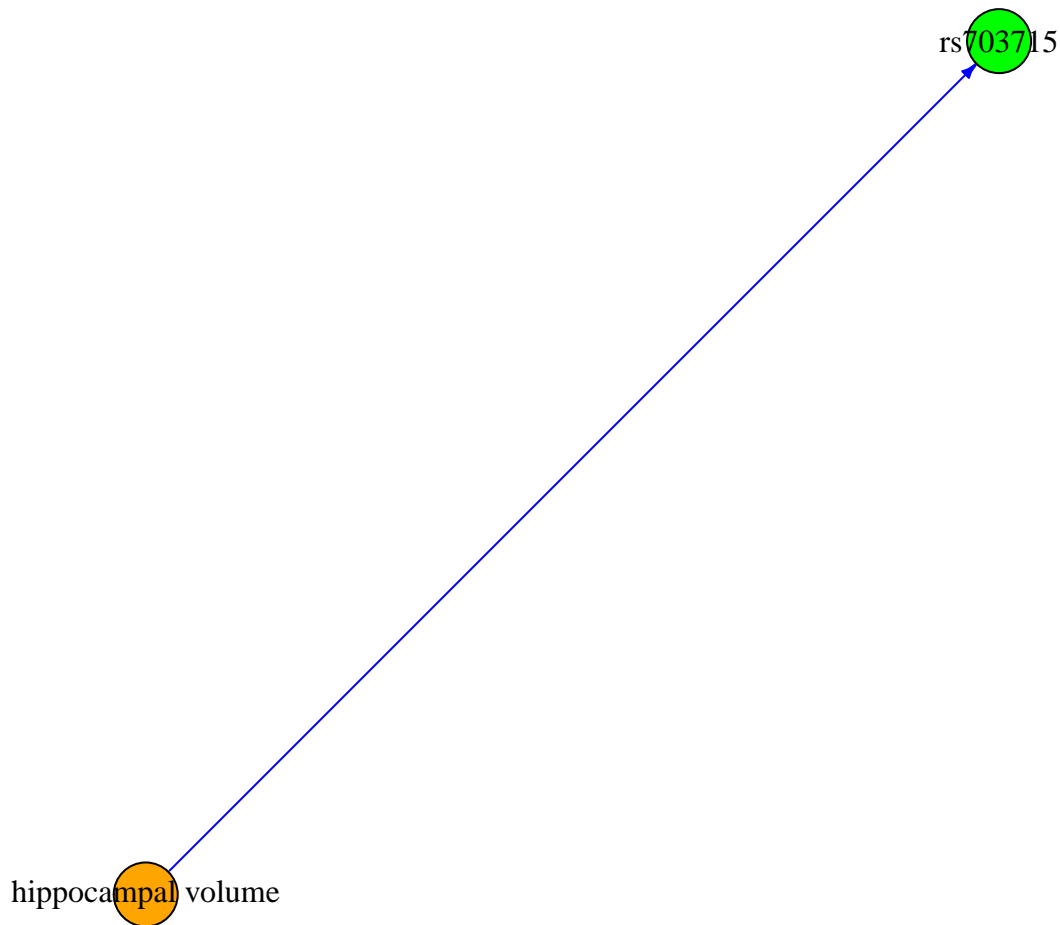

## Variant-Disease Network (age-related hearing impairment)

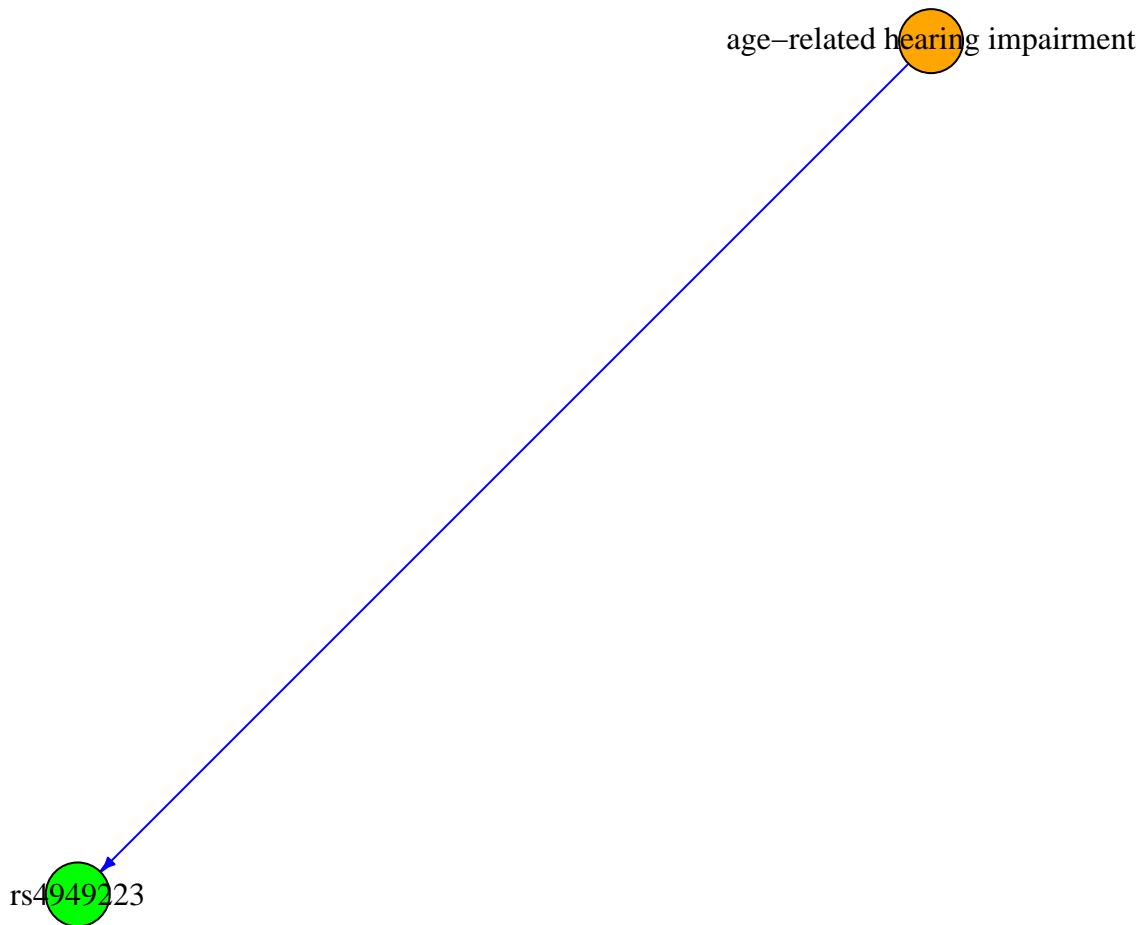

## Variant–Disease Network (breast size)

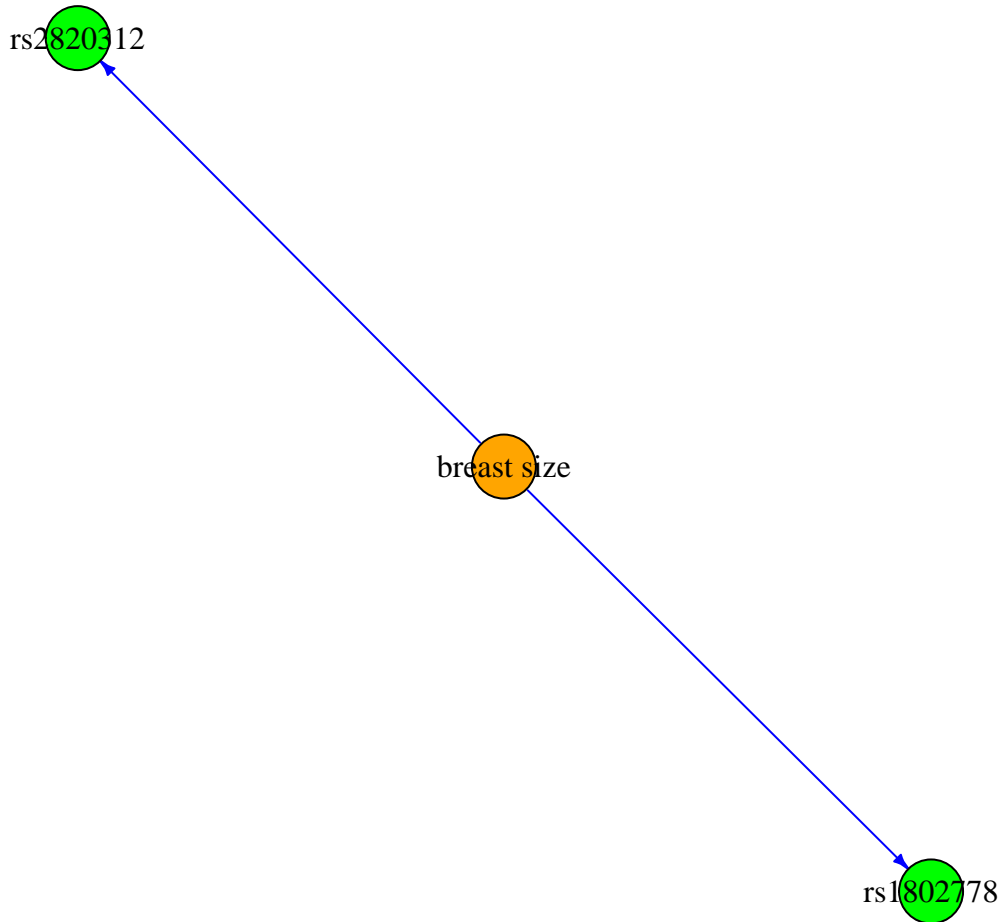

Variant–Disease Network (transmembrane glycoprotein NMB measurement

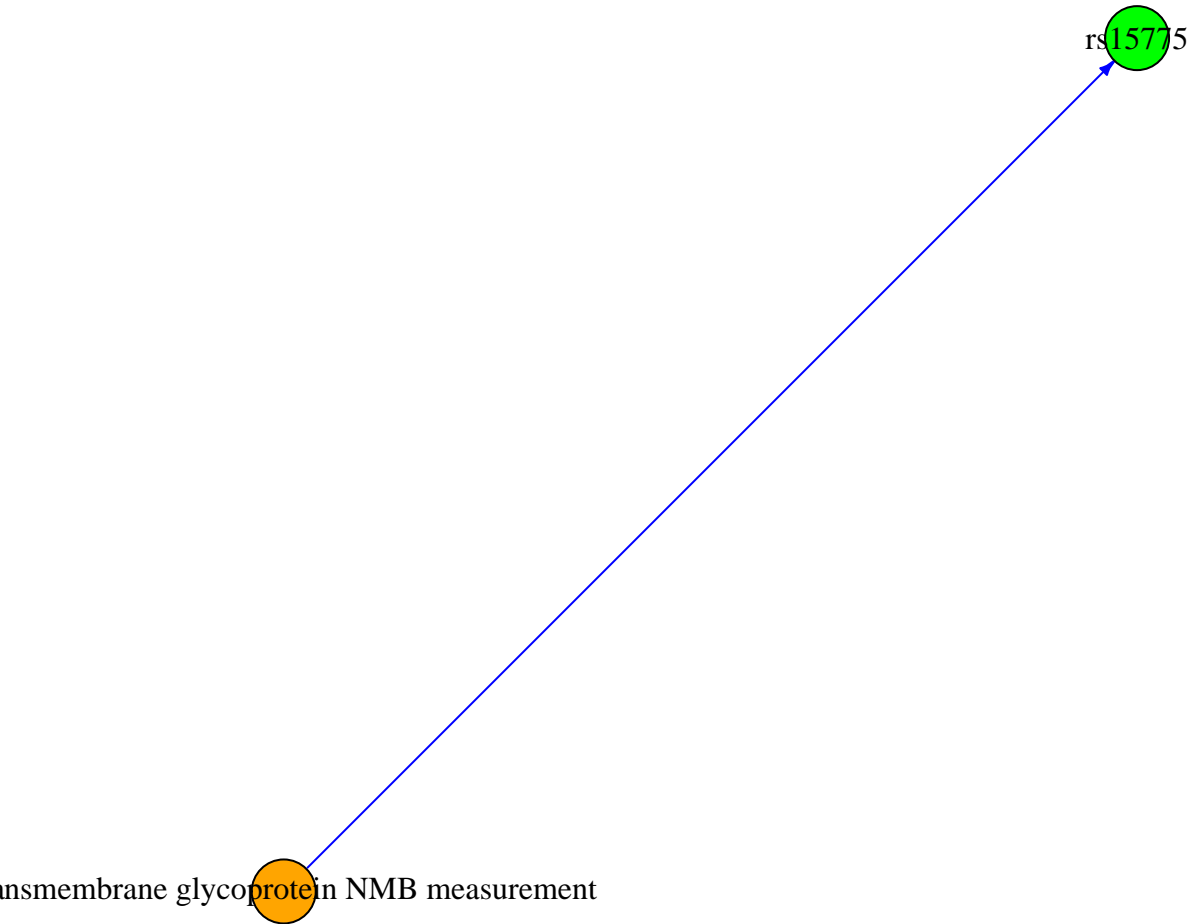



## Variant–Disease Network (beta-amyloid 1–42 measurement)

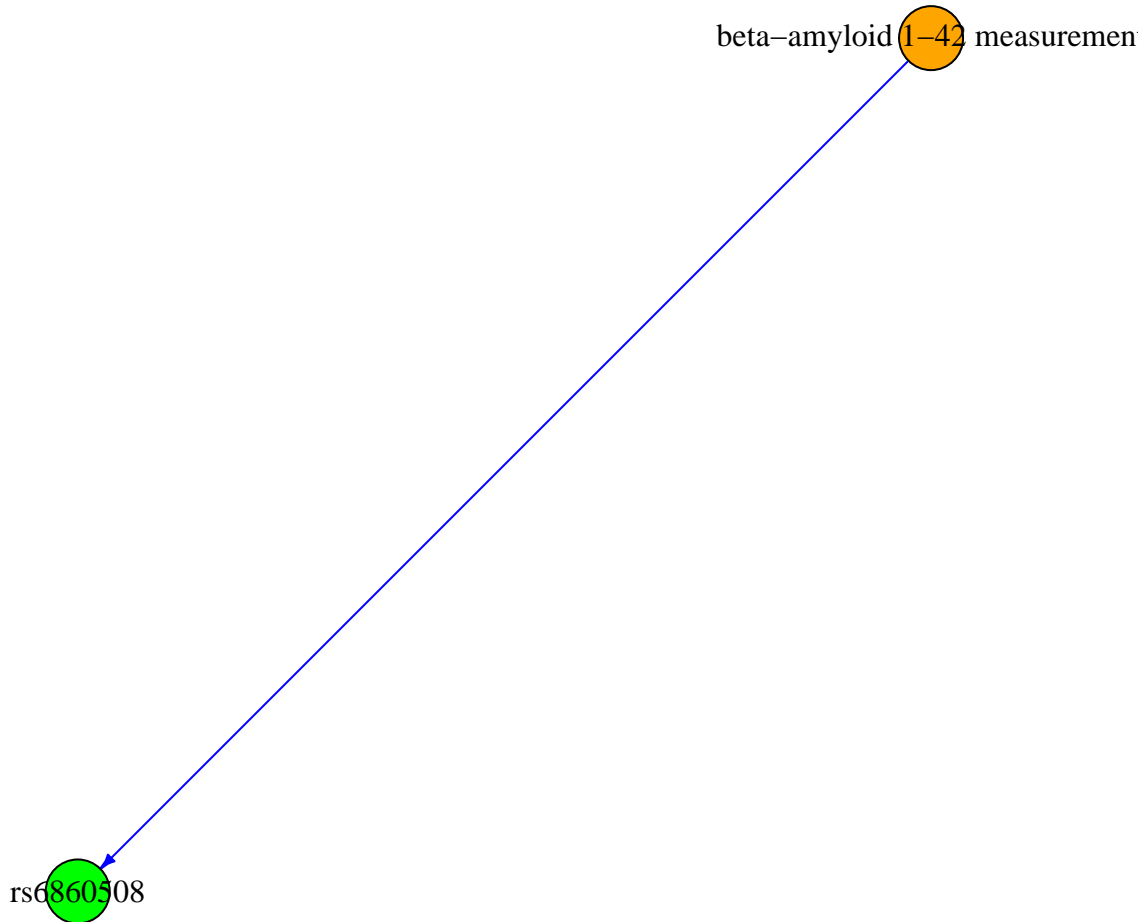

## Variant–Disease Network (limited scleroderma)

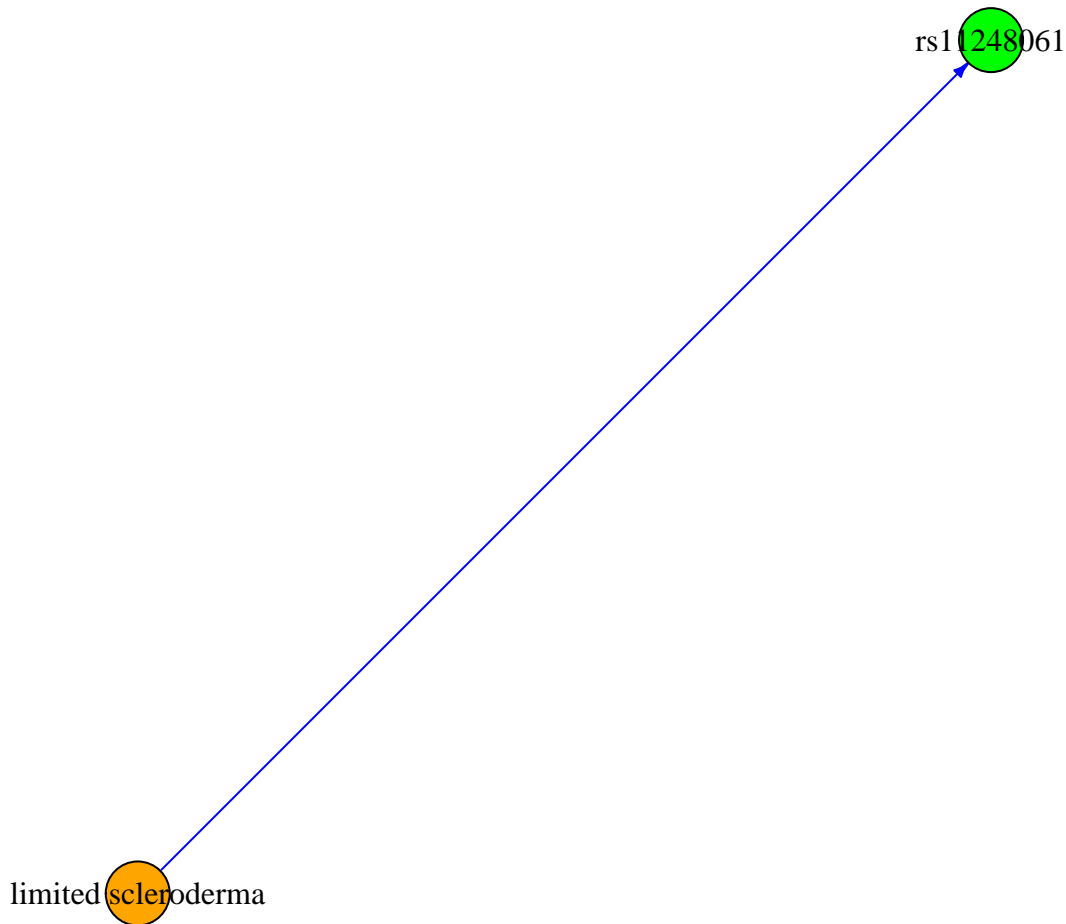

## Variant–Disease Network (polymyositis)

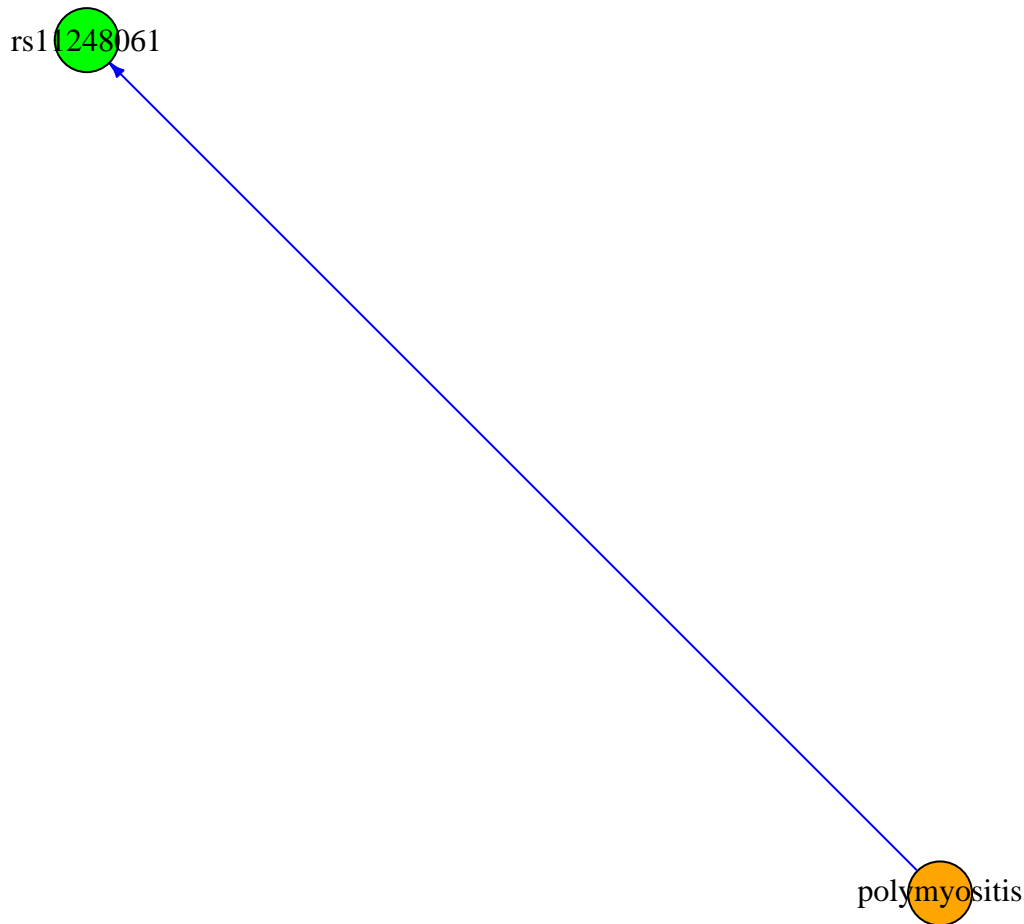

## Variant–Disease Network (primary biliary cirrhosis)

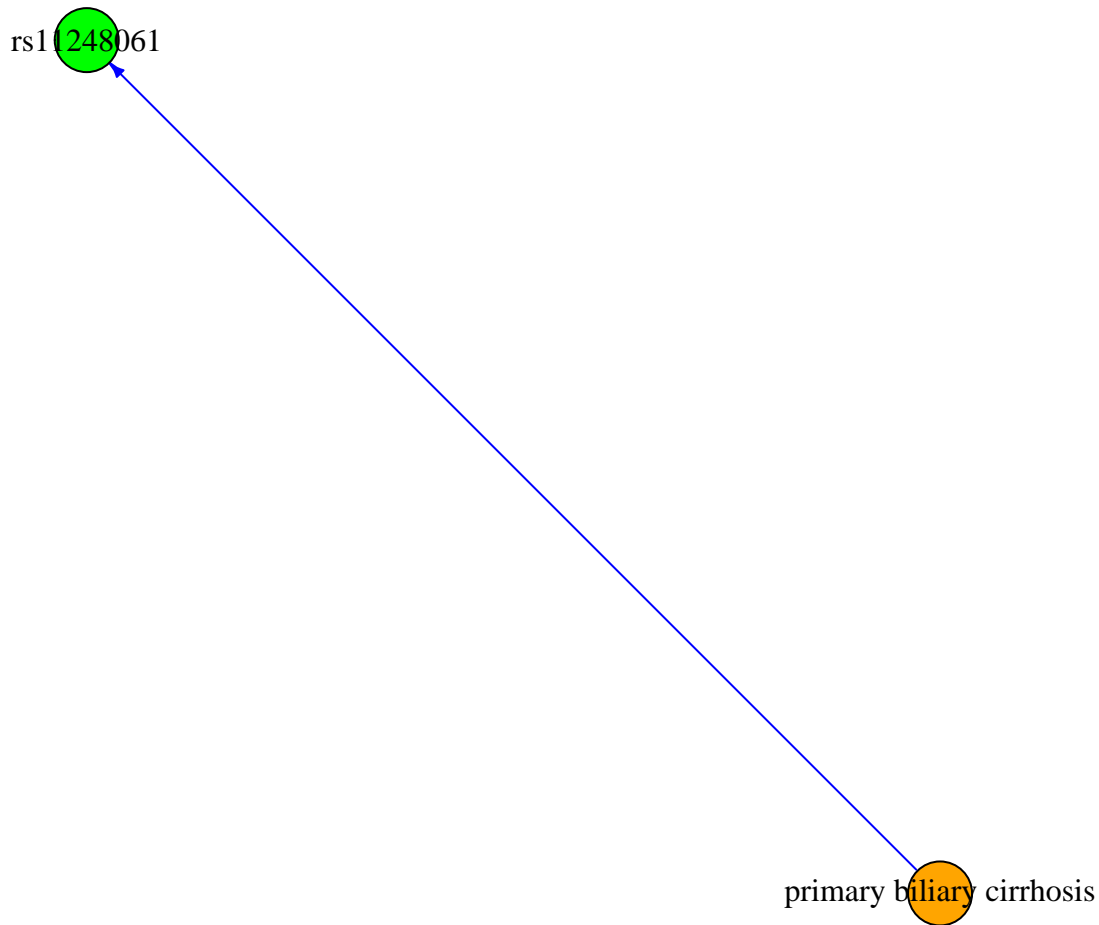

## Variant–Disease Network (Sjogren syndrome)

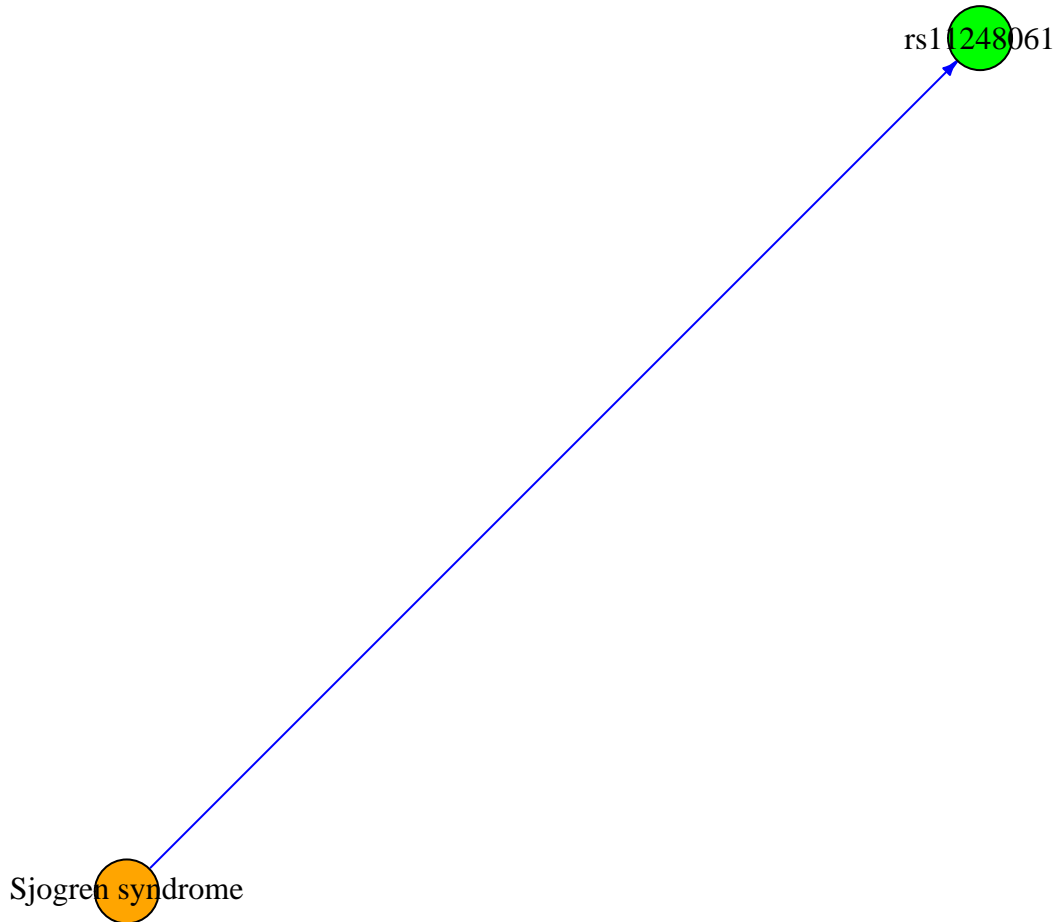

## Variant–Disease Network (mental or behavioural disorder)

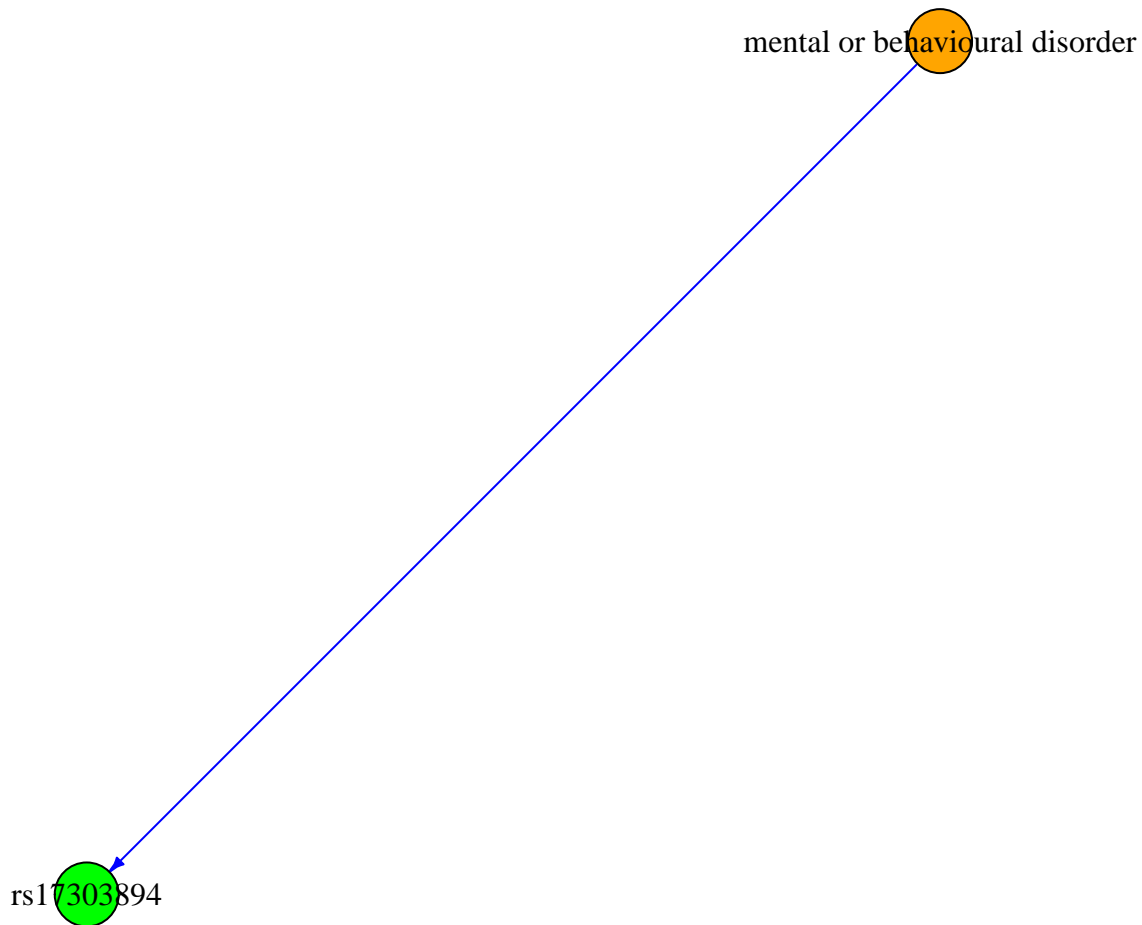

## **Variant–Disease Network (family history of Alzheimer’s disease)**

## Variant–Disease Network (abnormal thrombosis)

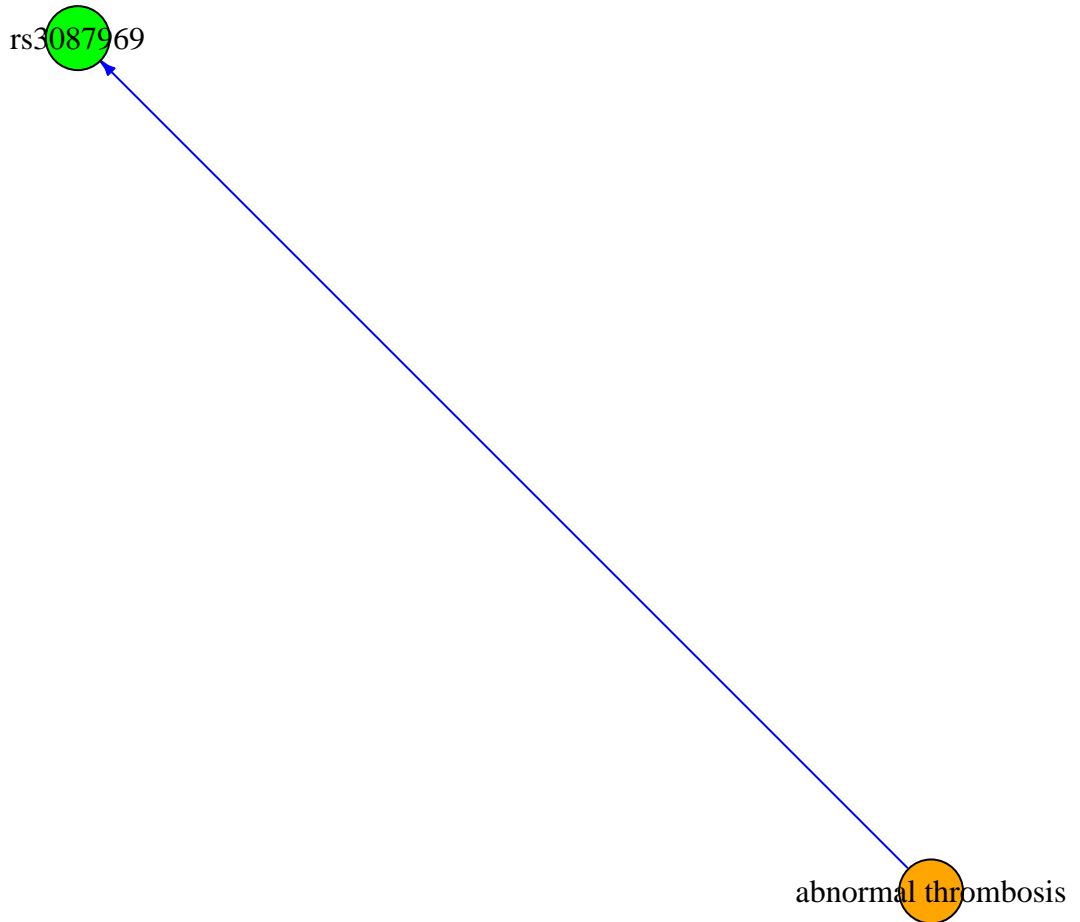



## Variant–Disease Network (deep vein thrombosis)

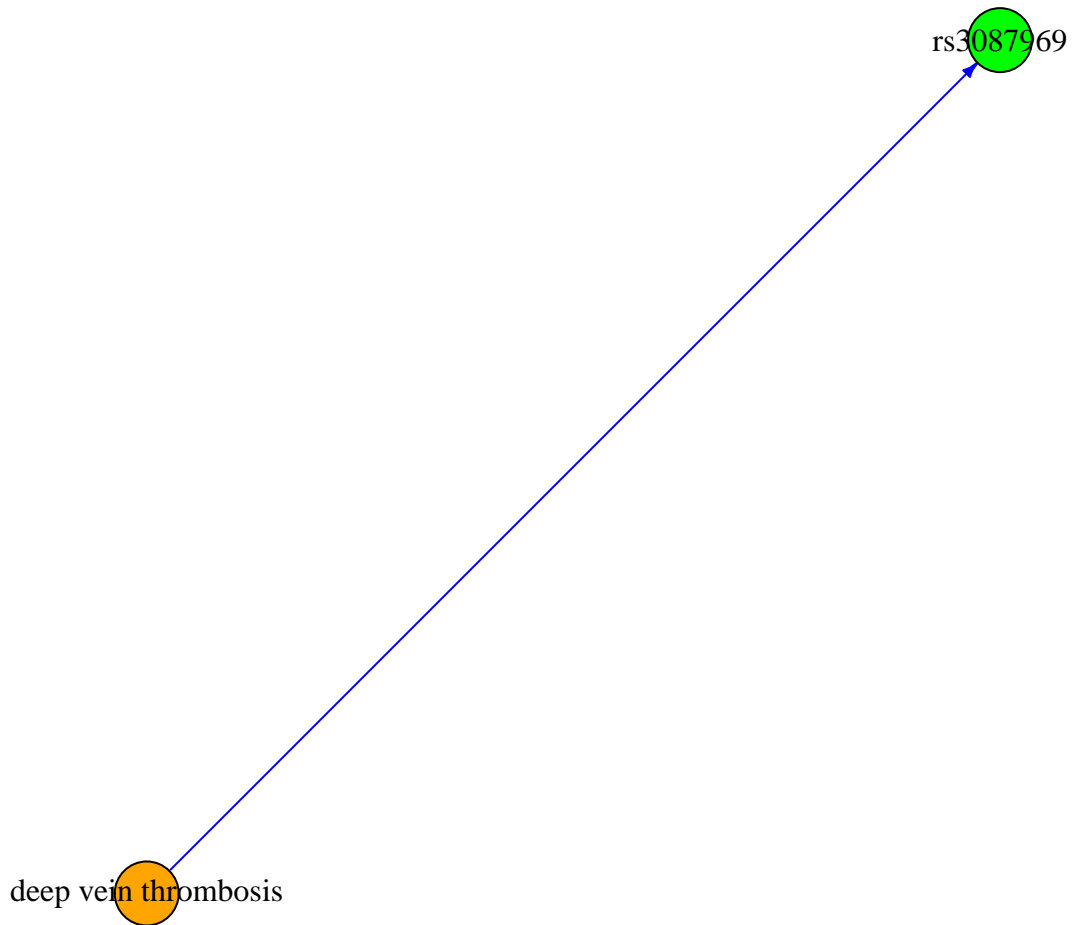

## Variant–Disease Network (Ischemic stroke)

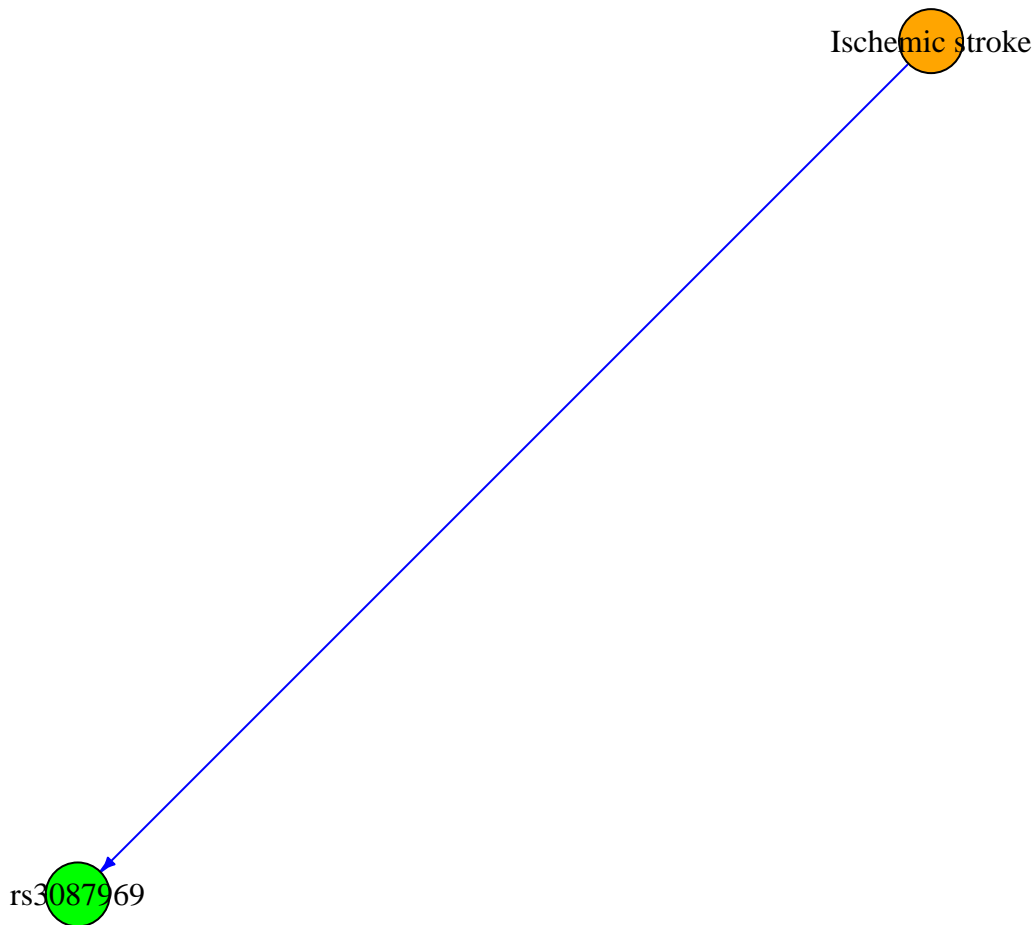

## Variant–Disease Network (platelet distribution width)

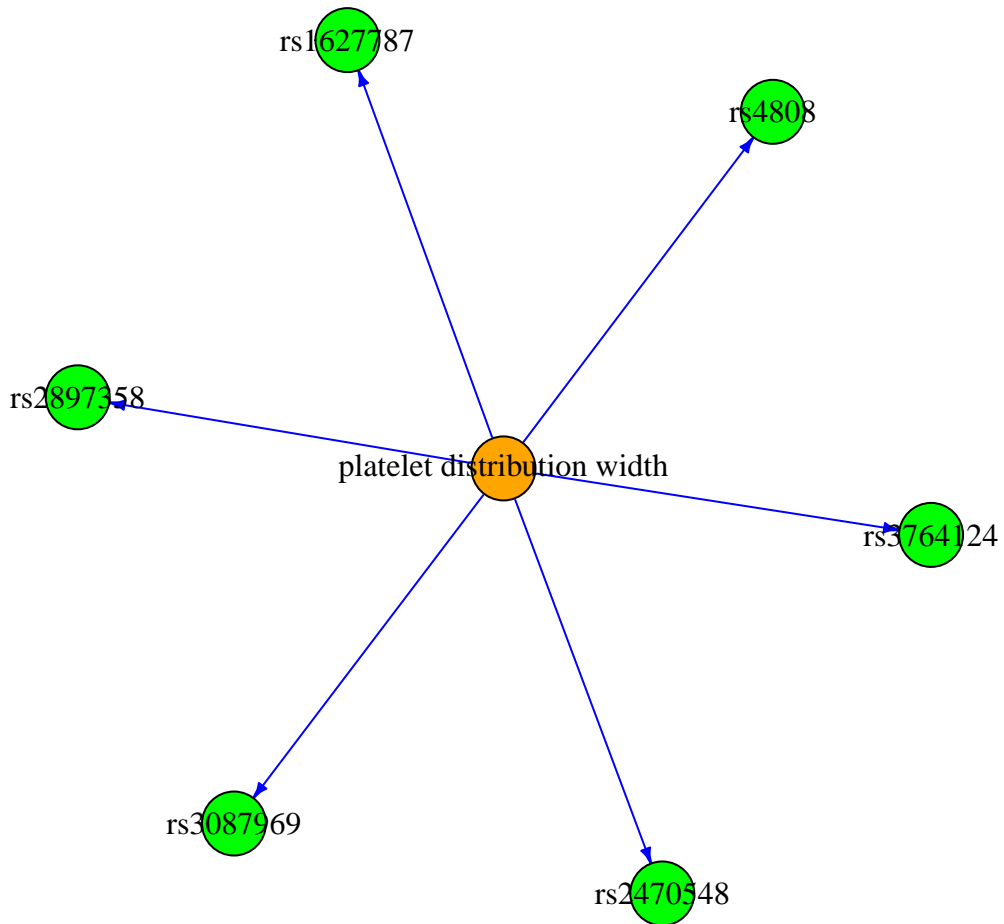

## Variant-Disease Network (pulmonary embolism)

pulmonary embolism

rs3087969

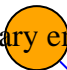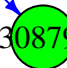

## Variant-Disease Network (stroke)

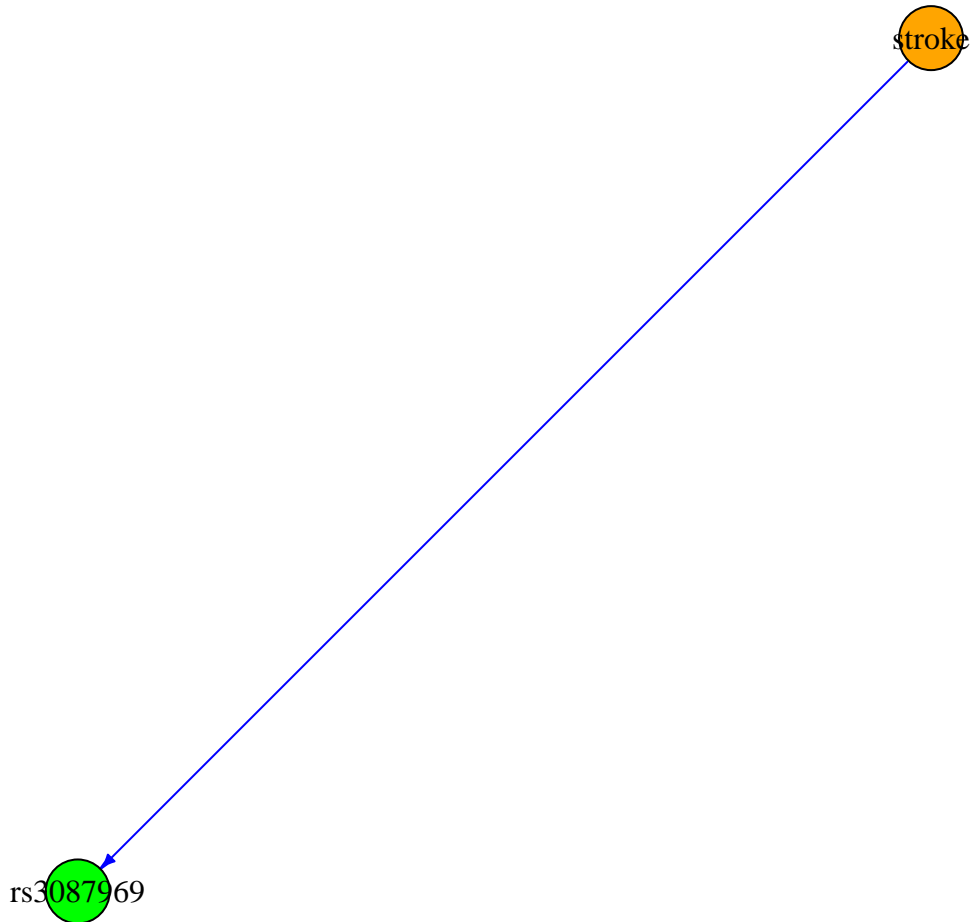

Variant–Disease Network (atrial fibrillation)

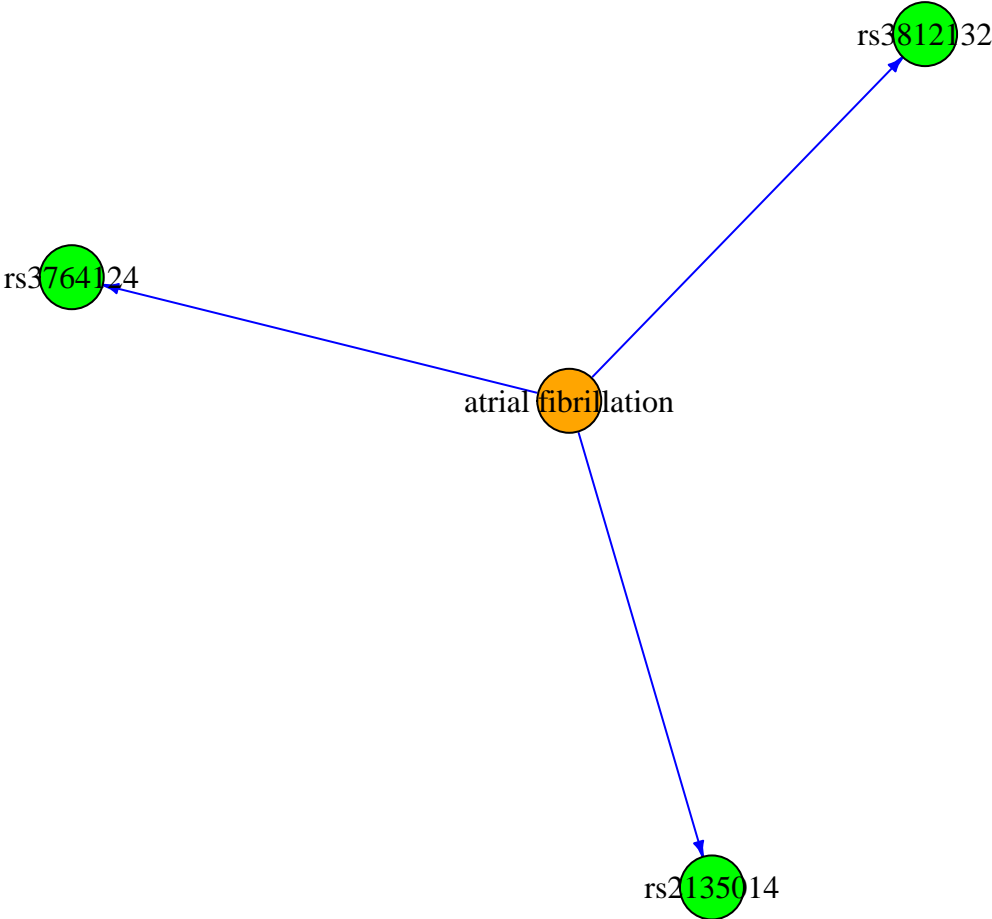

# Variant–Disease Network (response to paliperidone)

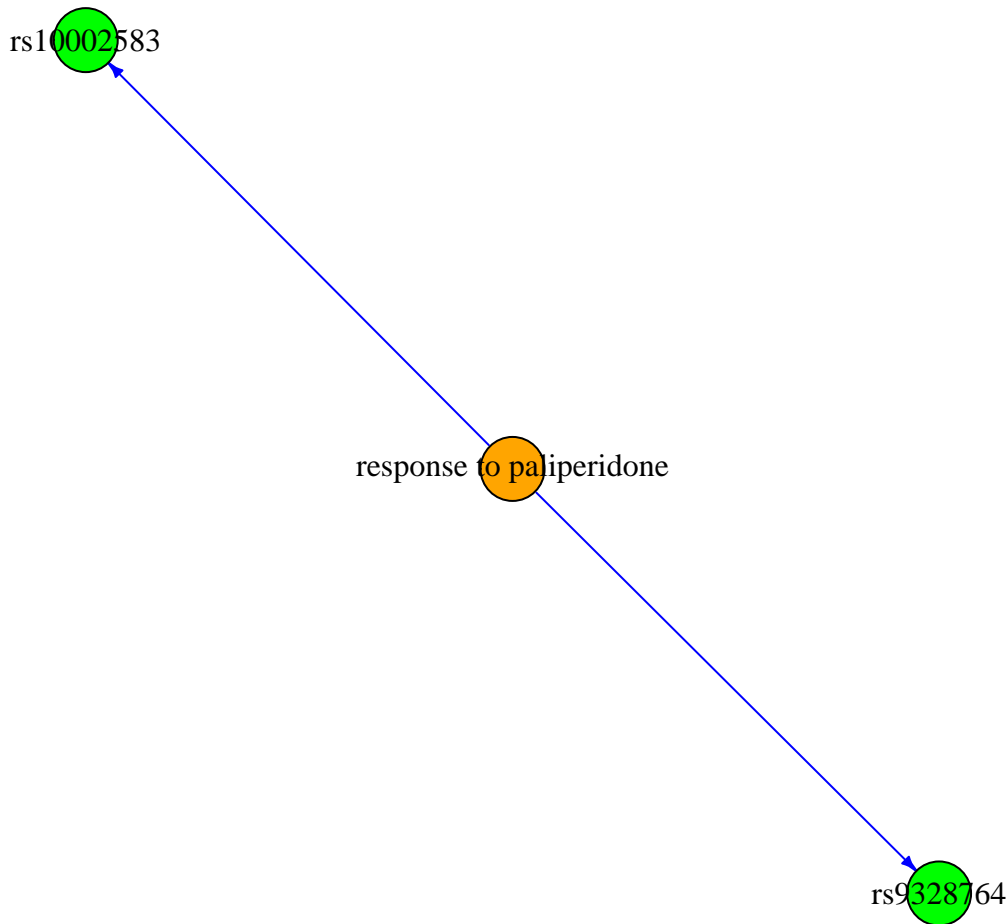

Variant–Disease Network (schizophrenia symptom severity measurement

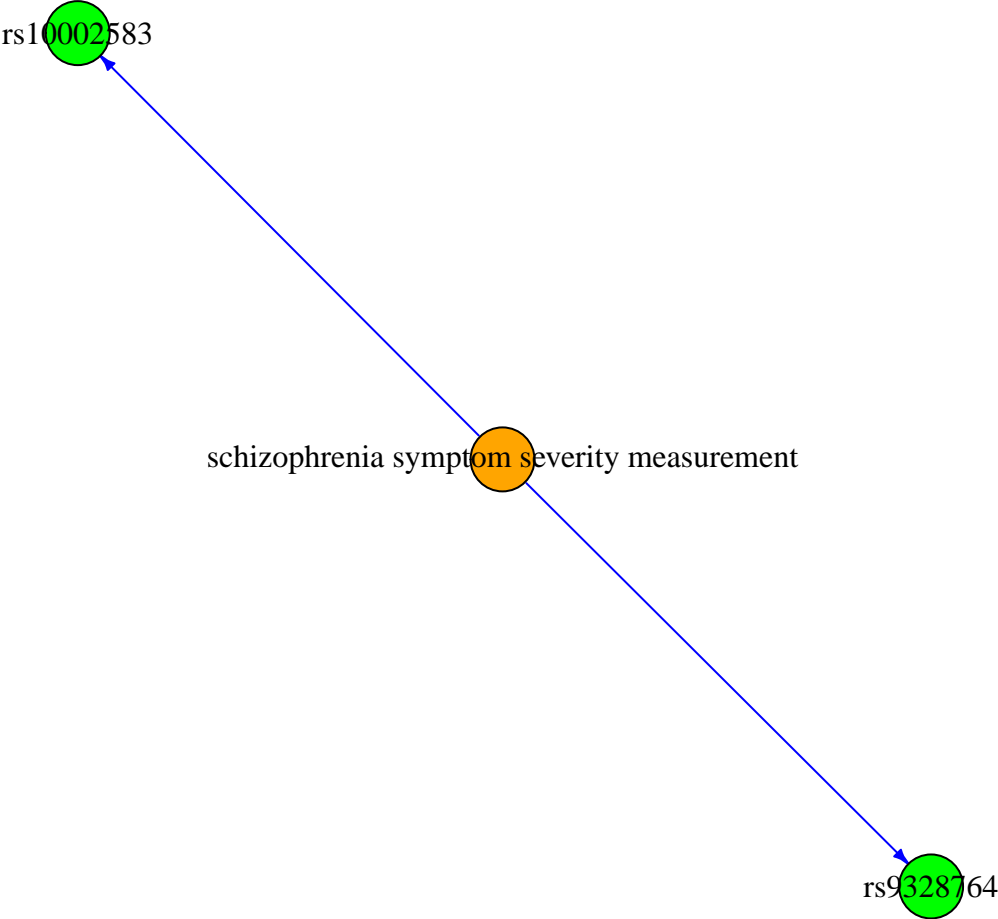



Variant–Disease Network (nicotine dependence symptom count)

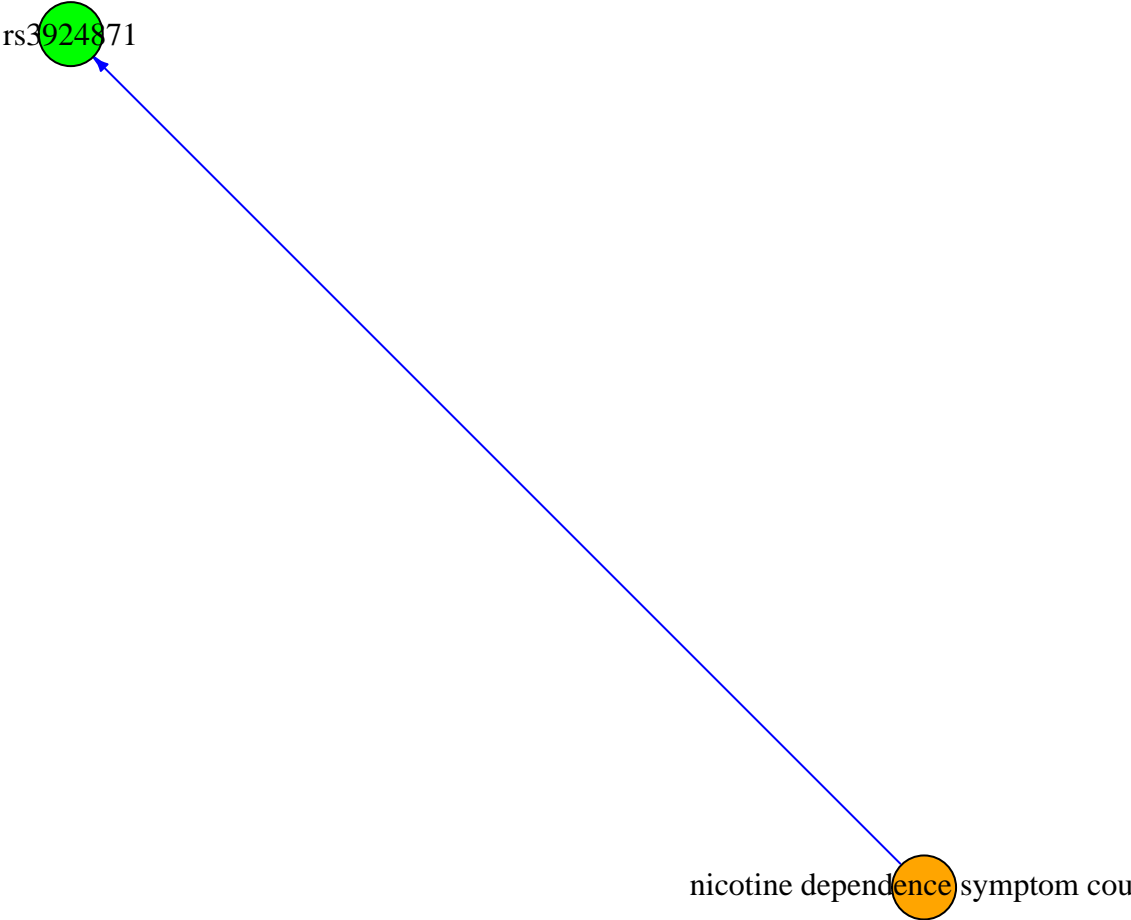

## Variant–Disease Network (endometrial neoplasm)

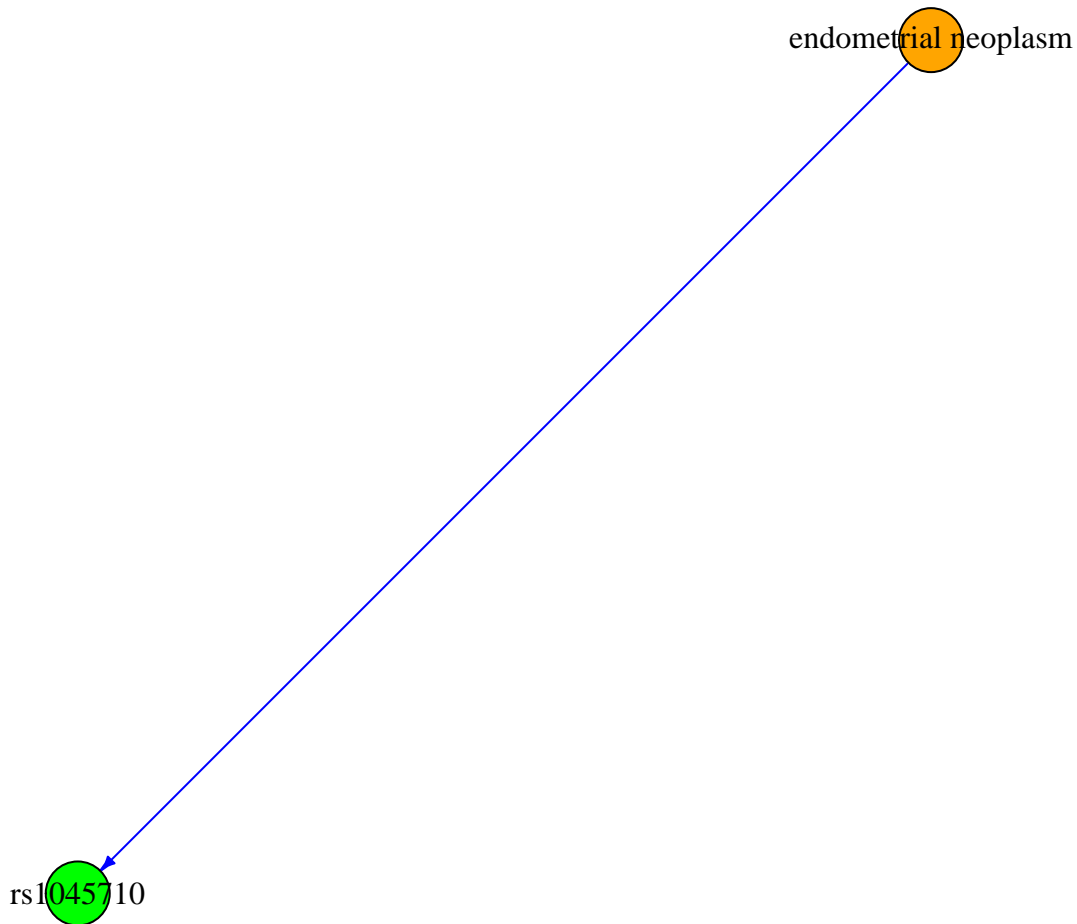

## Variant–Disease Network (resistin measurement)

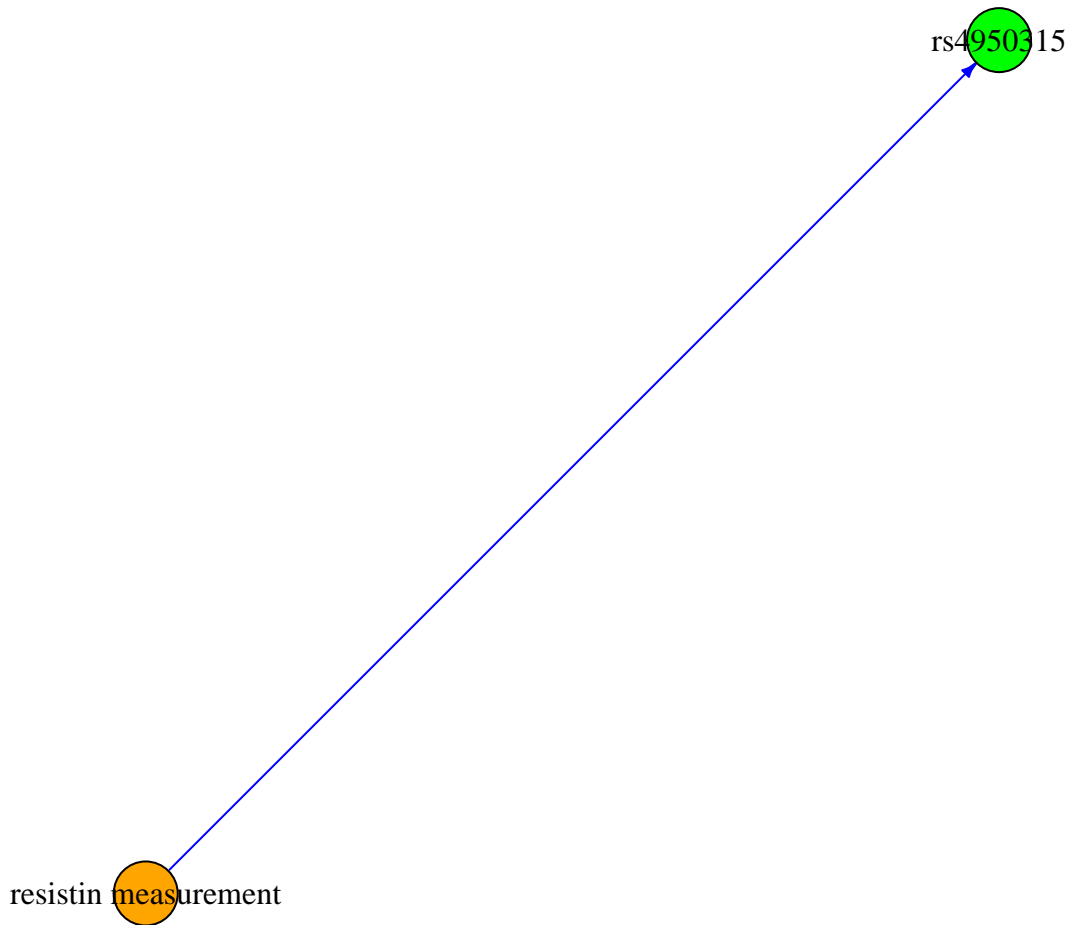

# Variant–Disease Network (white matter hyperintensity measurement)

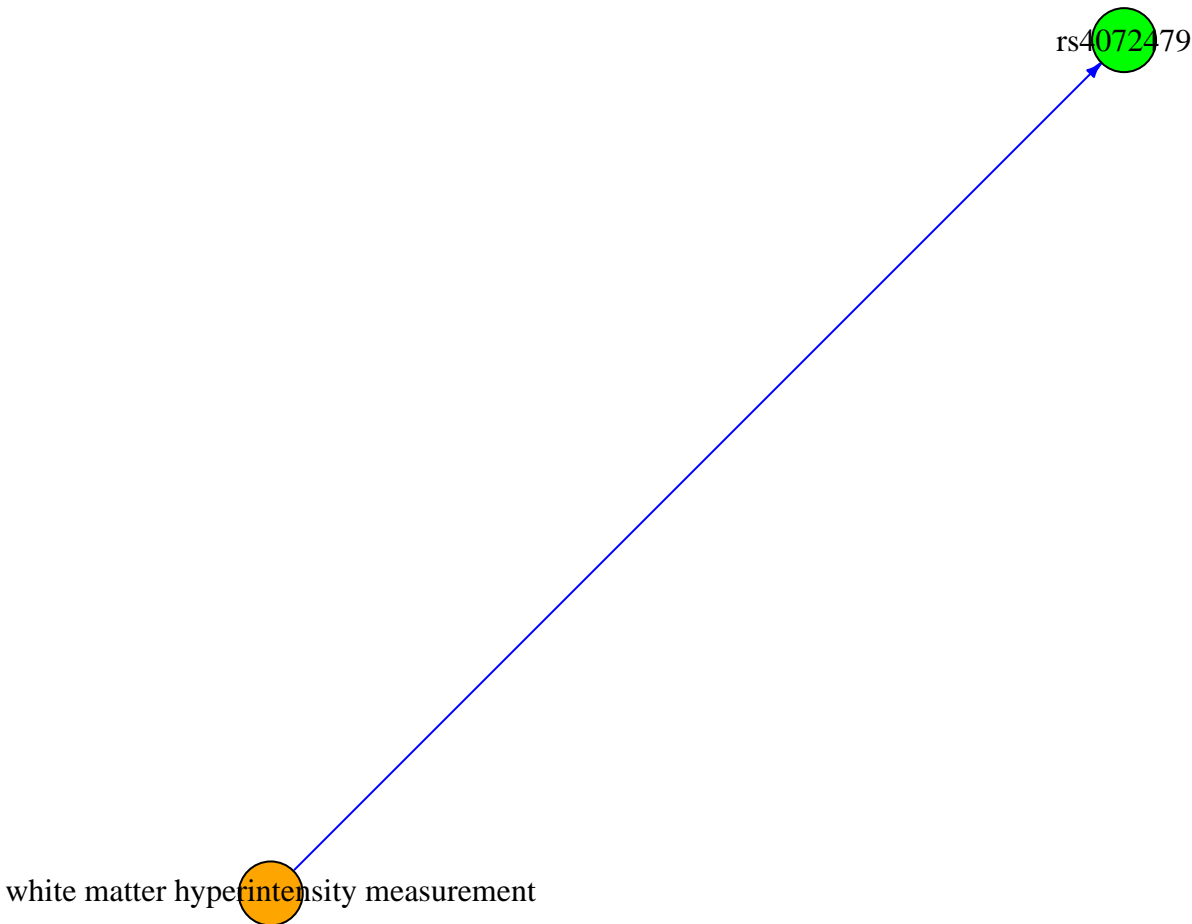

# Variant–Disease Network (red blood cell distribution width)

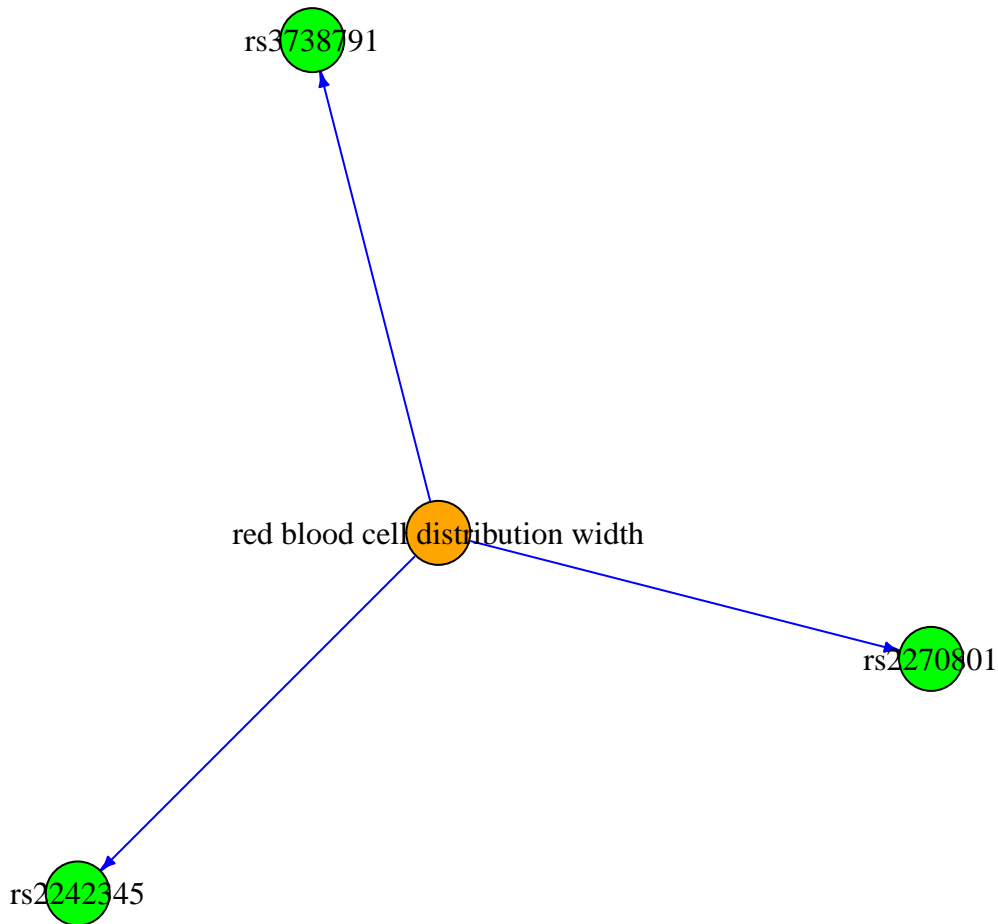

Variant–Disease Network (3–hydroxypropylmercapturic acid measurement)

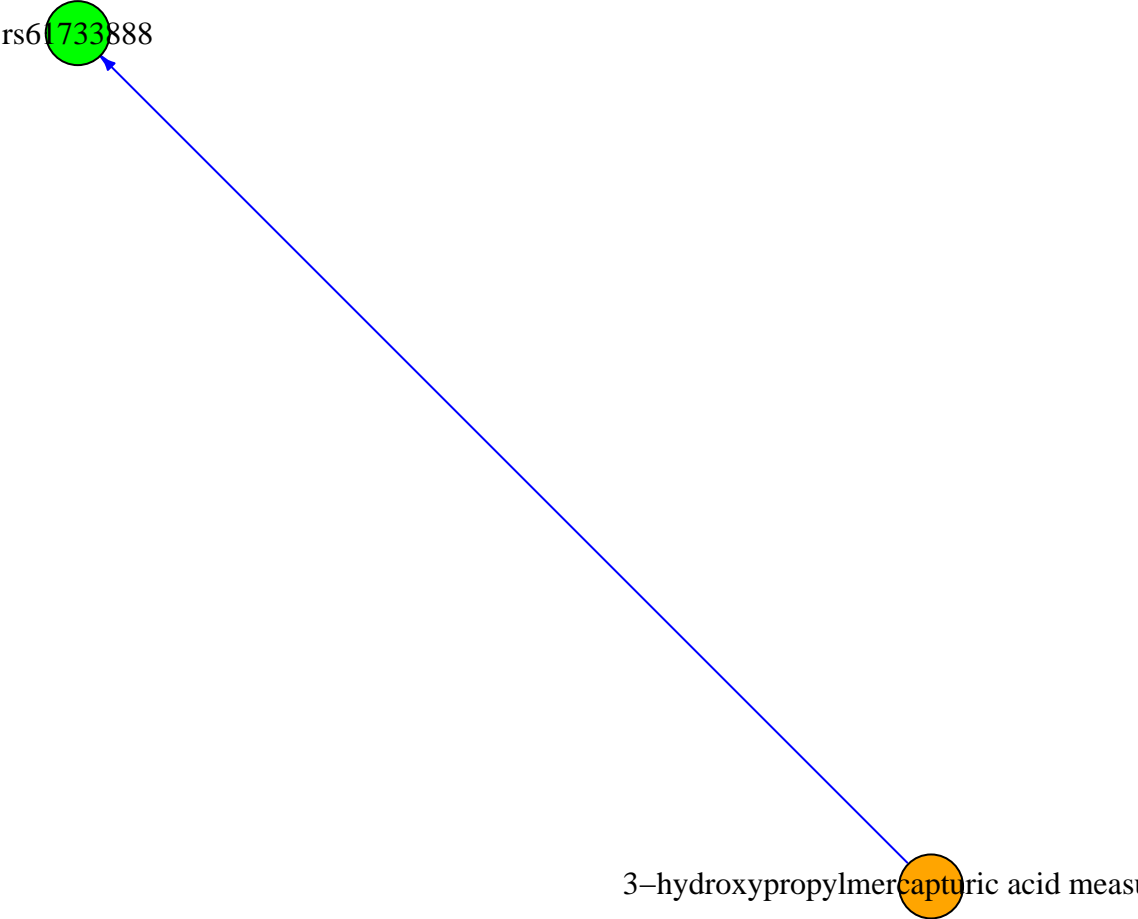

**Variant–Disease Network (selenium measurement)**

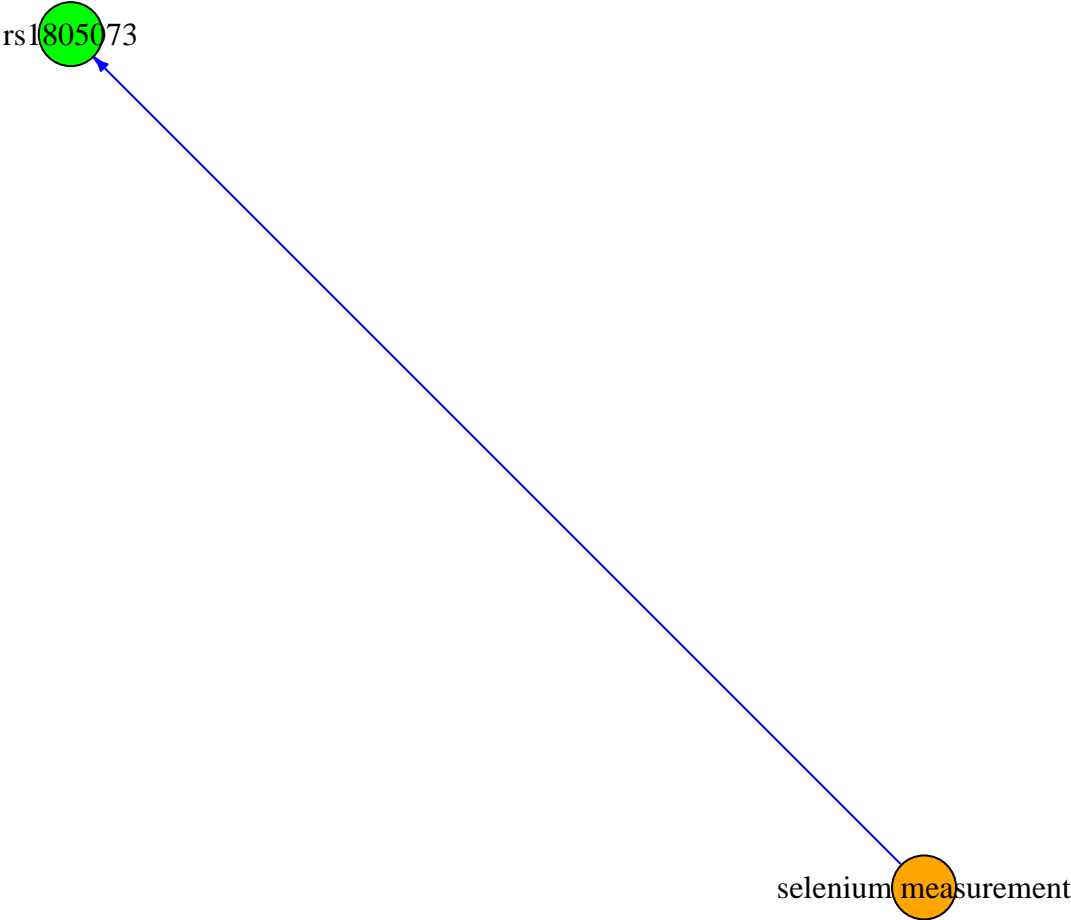

## Variant–Disease Network (serum selenium measurement)

rs1805073

serum selenium measurement

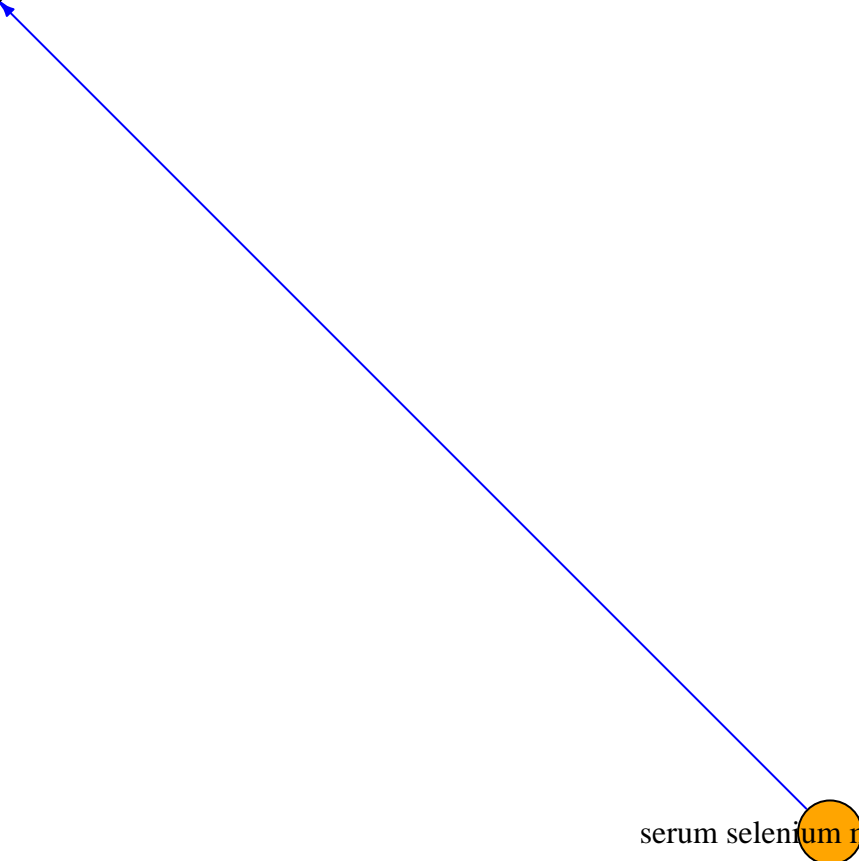



**Variant–Disease Network (basophil percentage of white cells)**

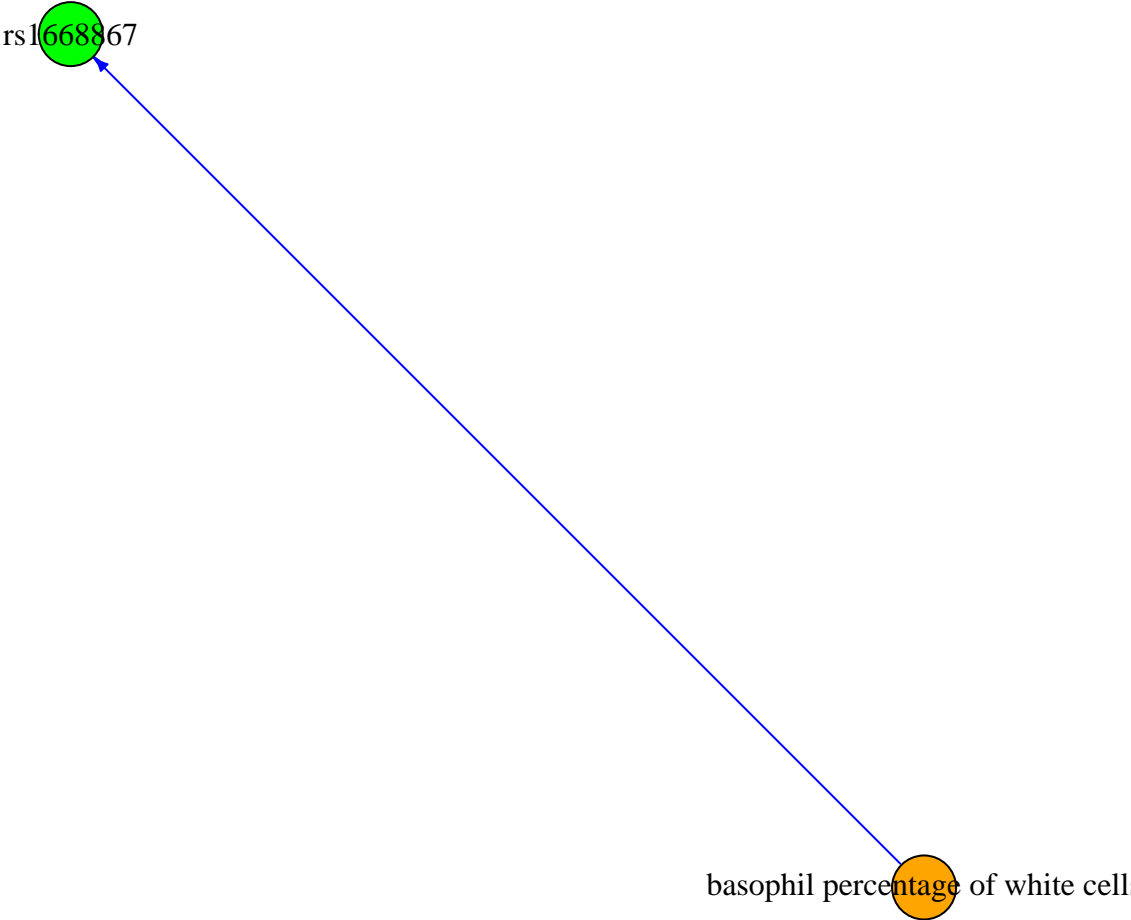

## Variant–Disease Network (alcoholic pancreatitis)

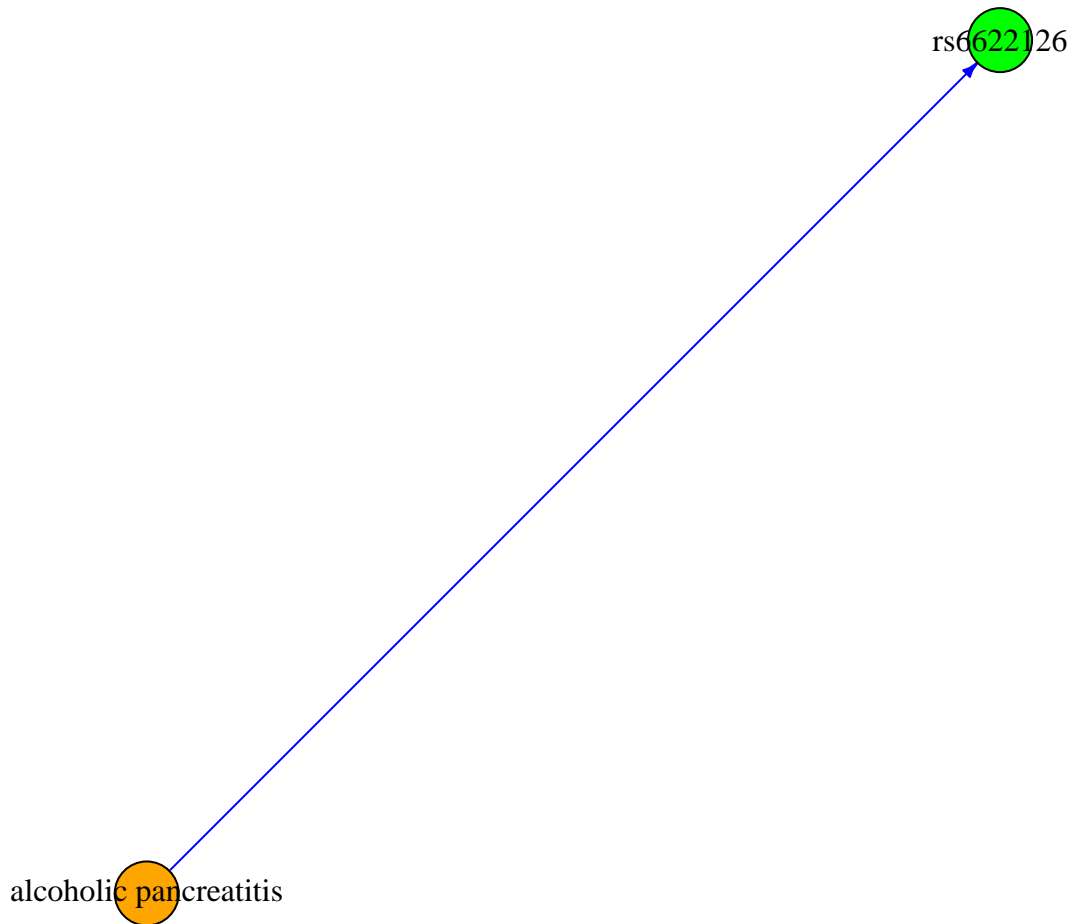

Variant–Disease Network (interleukin 6 receptor subunit beta measurement)

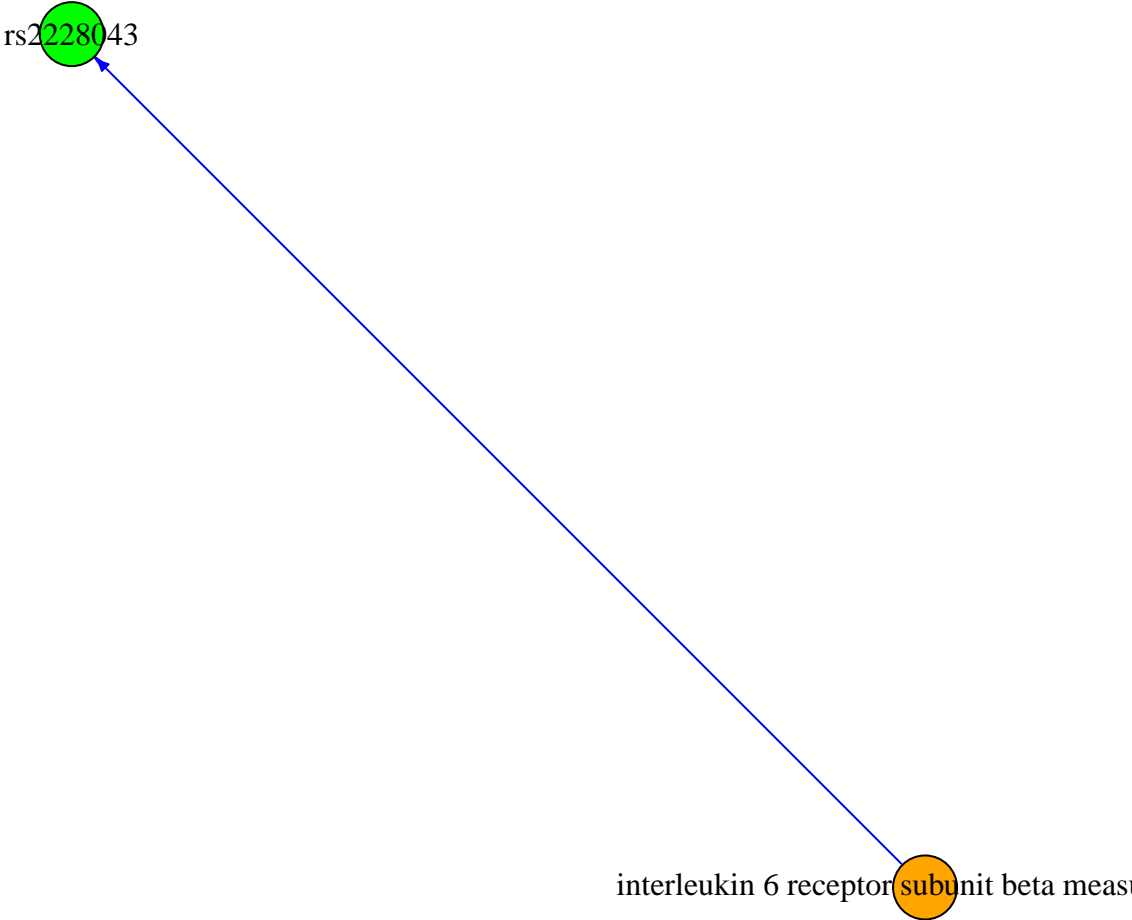

## Variant–Disease Network (chronic kidney disease)

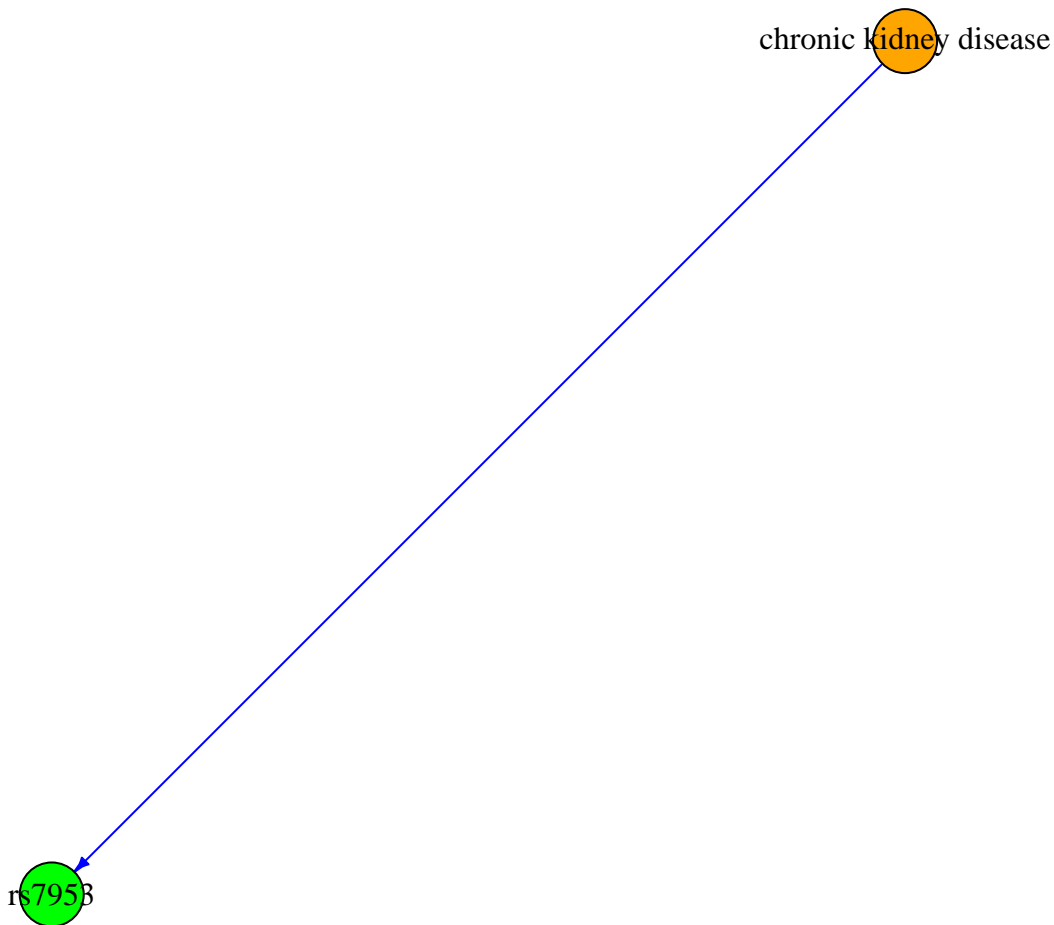

## Variant–Disease Network (colorectal health)

colorectal health

rs6580942



**Variant–Disease Network (femoral neck bone mineral density)**

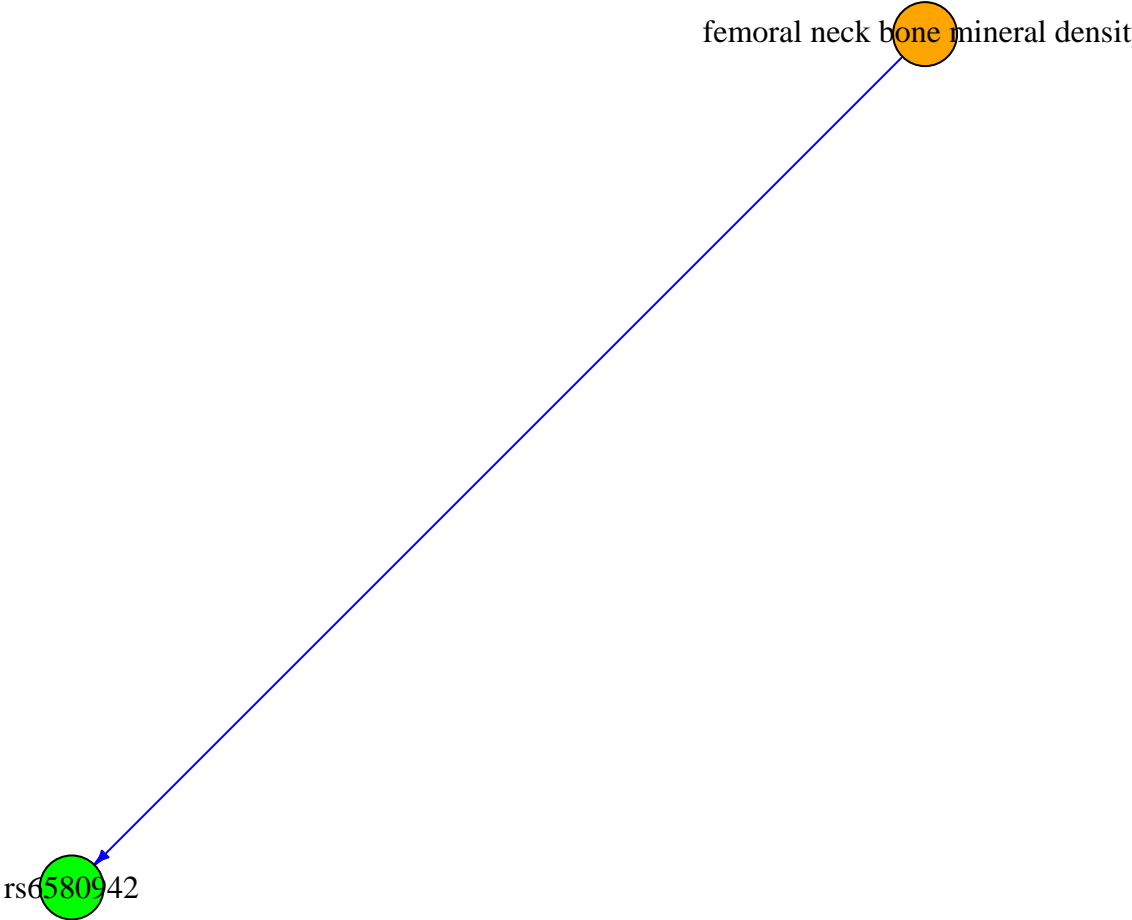

## Variant–Disease Network (spine bone mineral density)

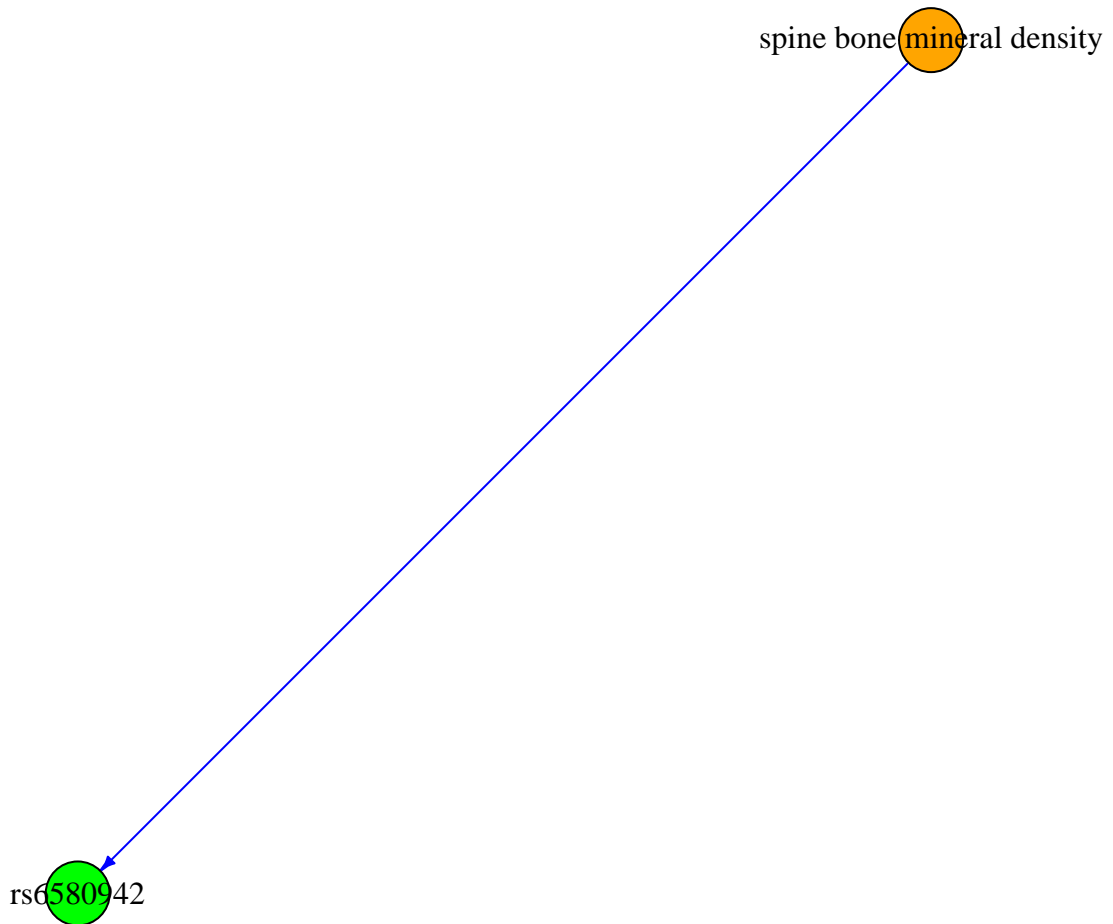

Variant–Disease Network (response to selective serotonin reuptake inhibitor

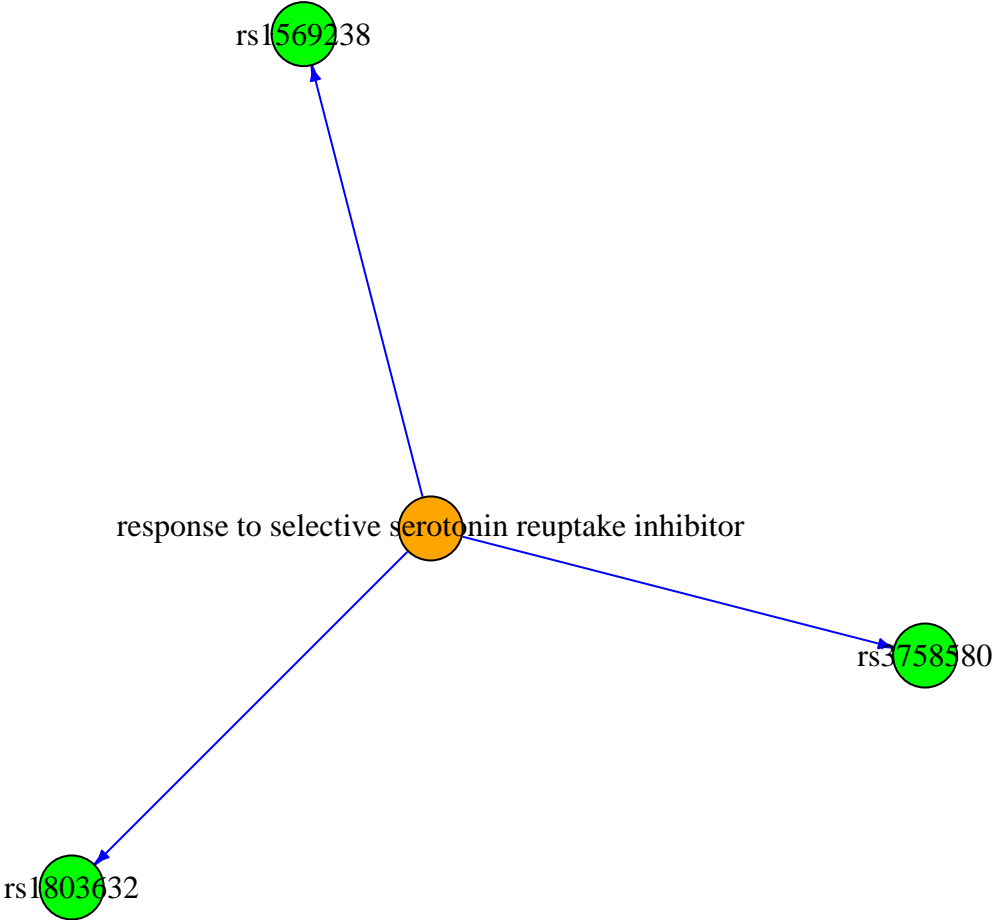



**Variant–Disease Network (metabolic syndrome)**

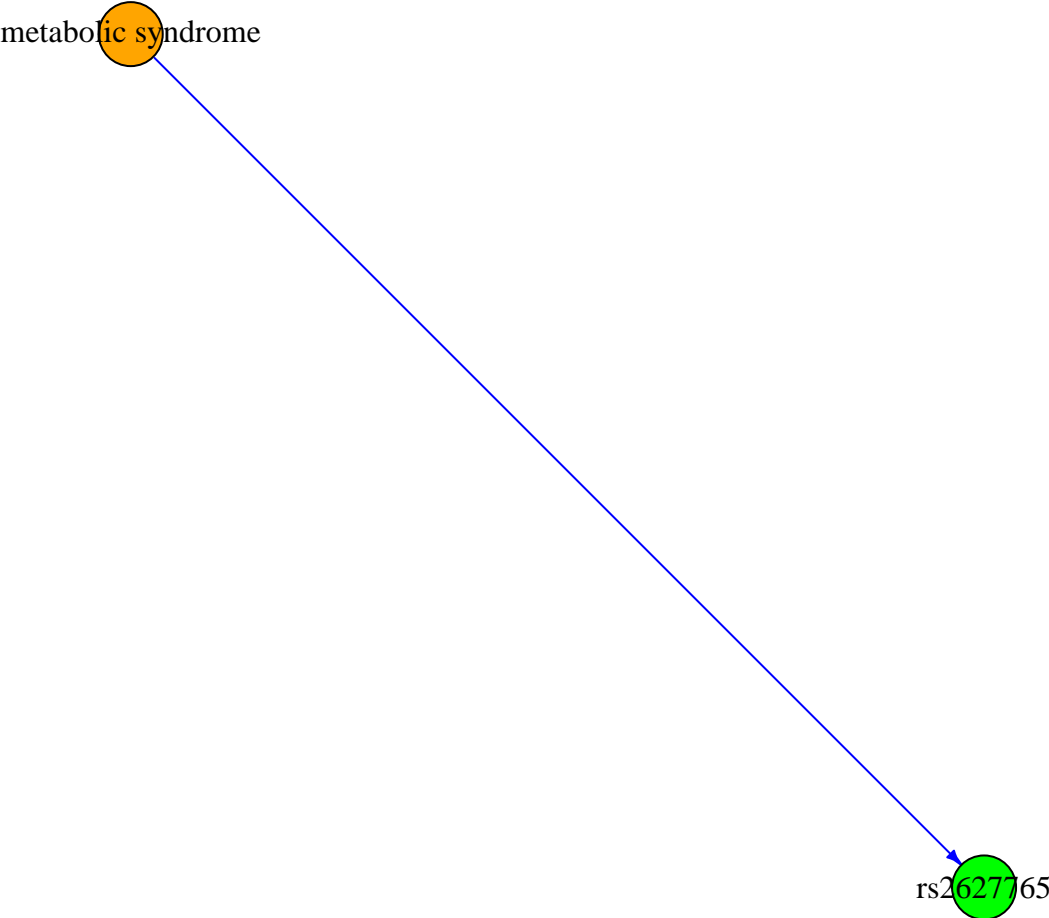

## Variant-Disease Network (suntan)

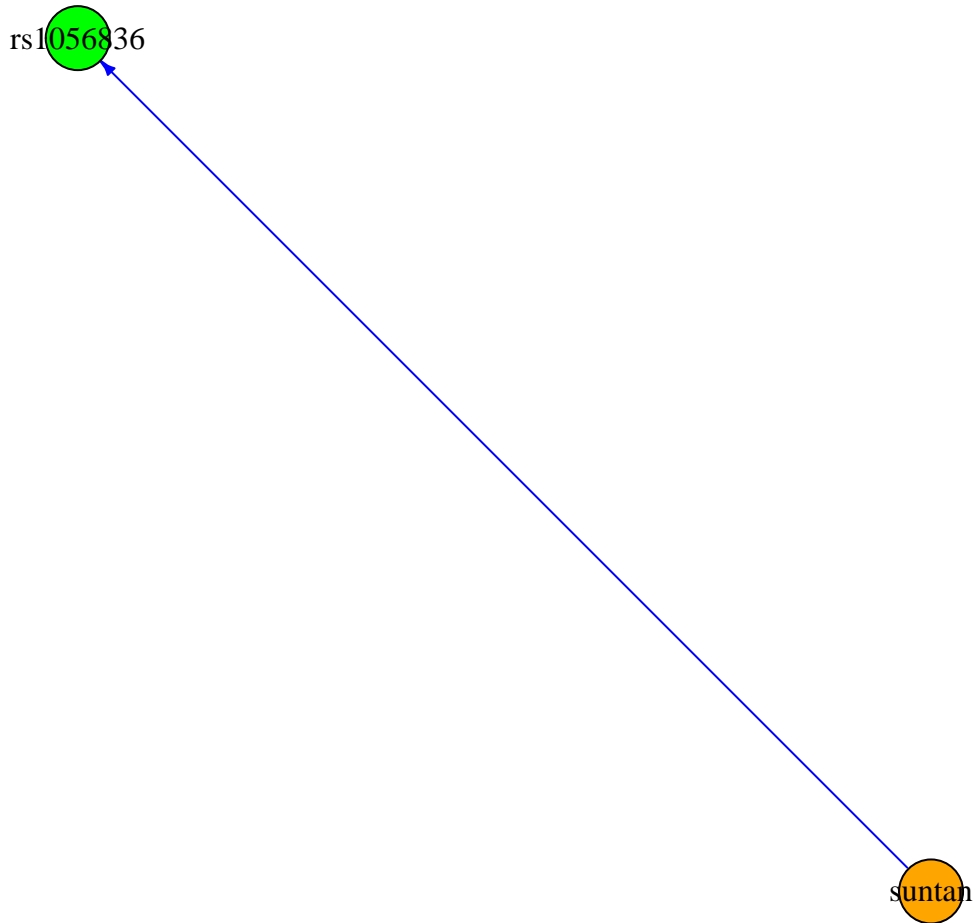

Variant–Disease Network (progressive supranuclear palsy)

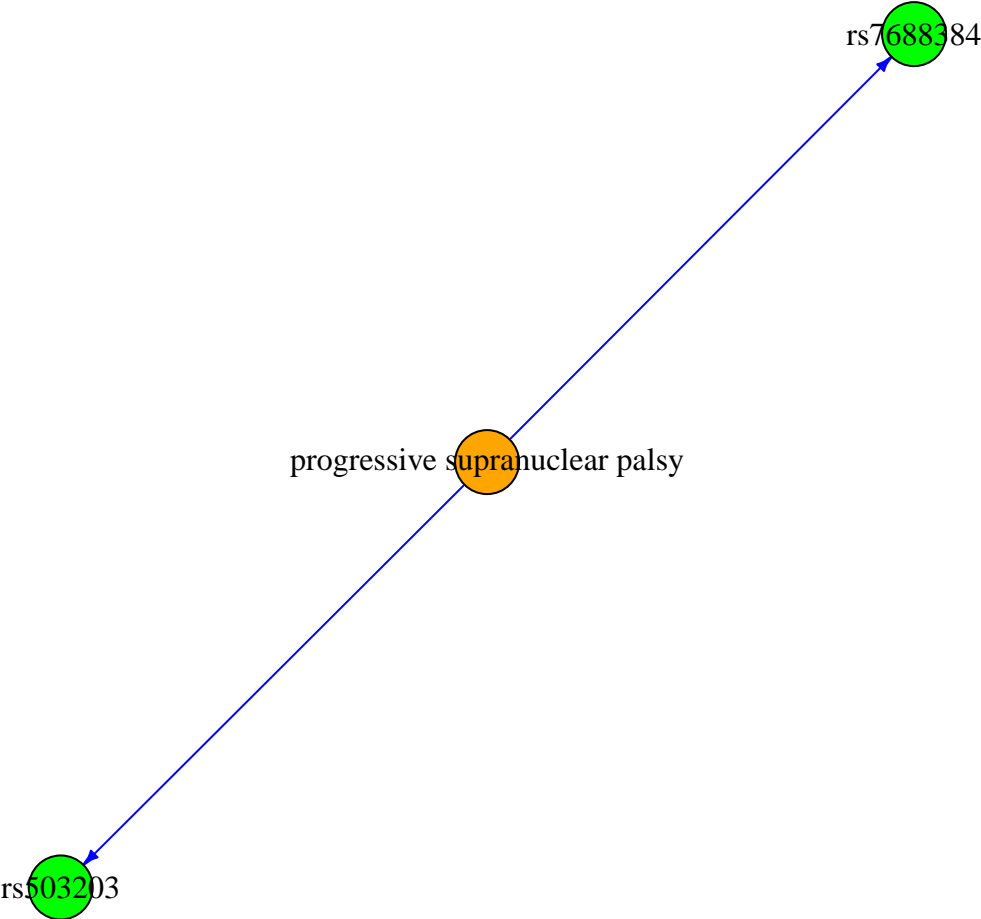

# Disease Network (dual specificity mitogen-activated protein kinase kinase 2 network)

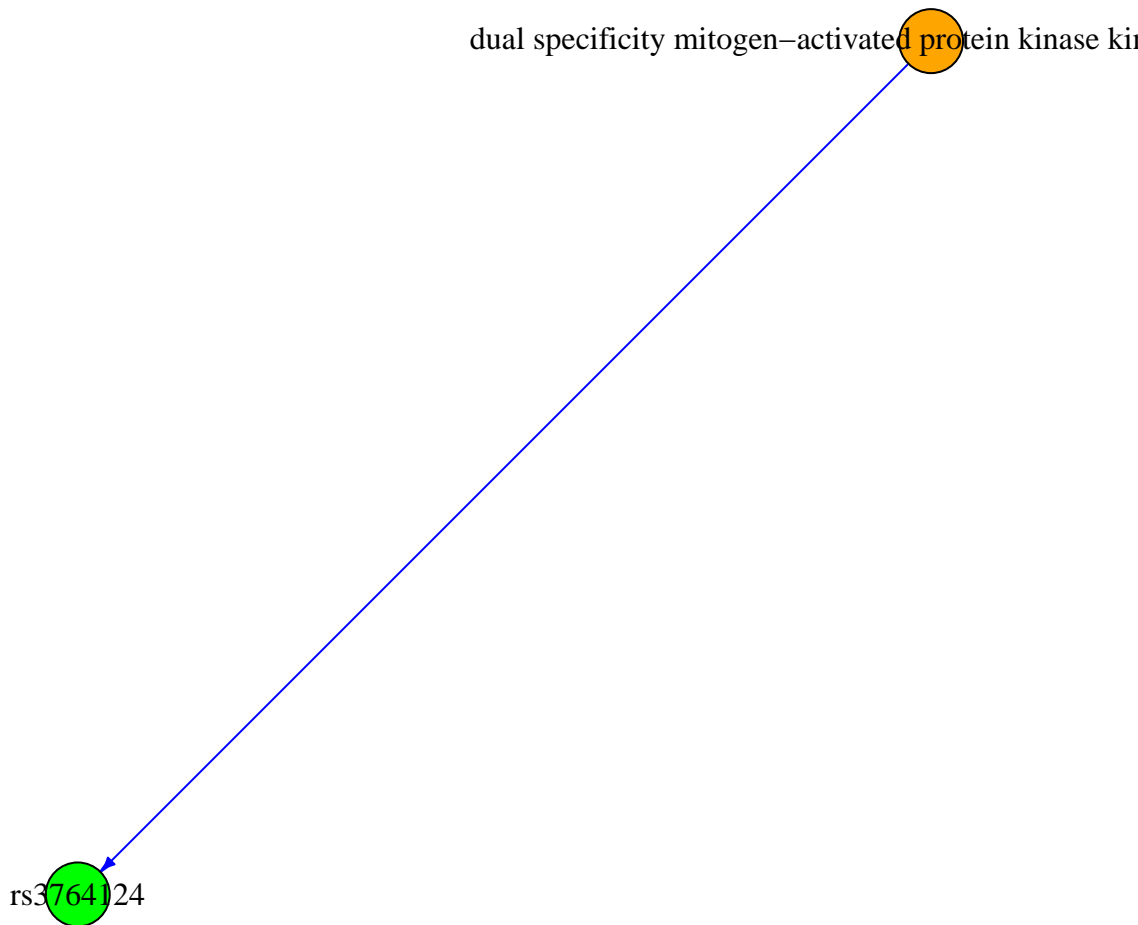

## Variant–Disease Network (lupus nephritis)

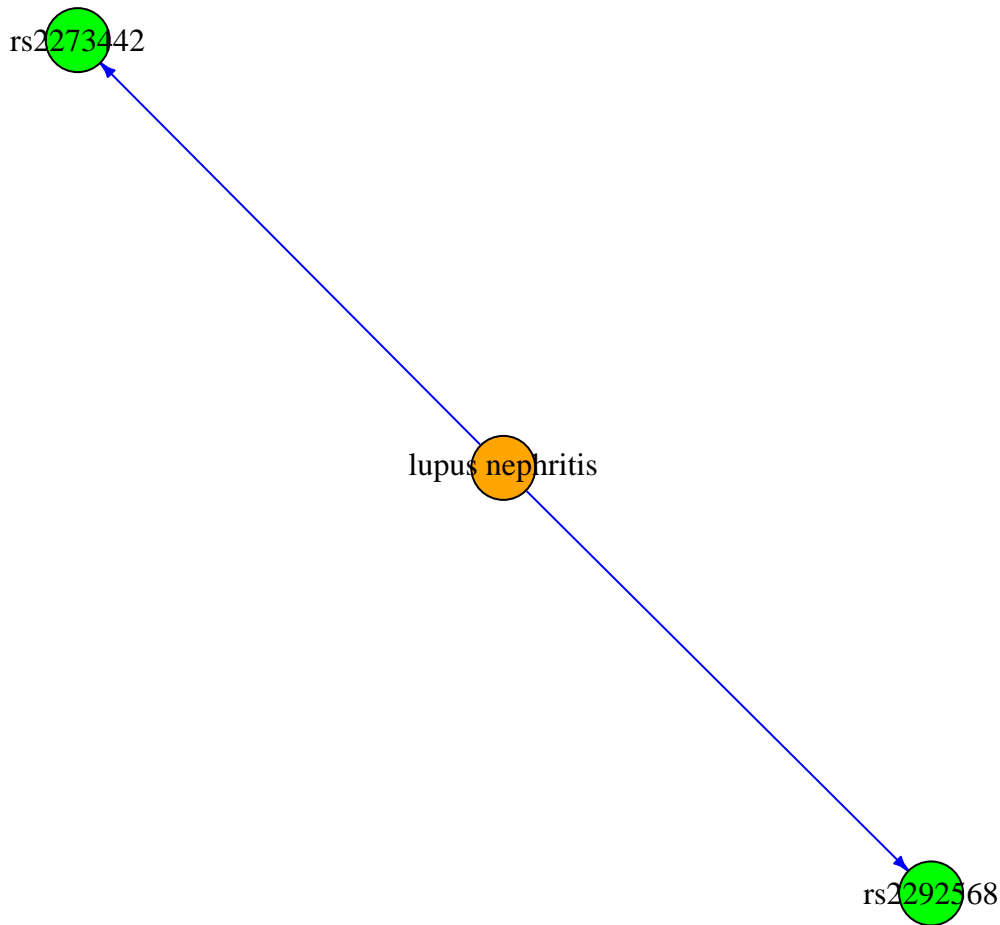

## Variant–Disease Network (IgF–1 measurement)

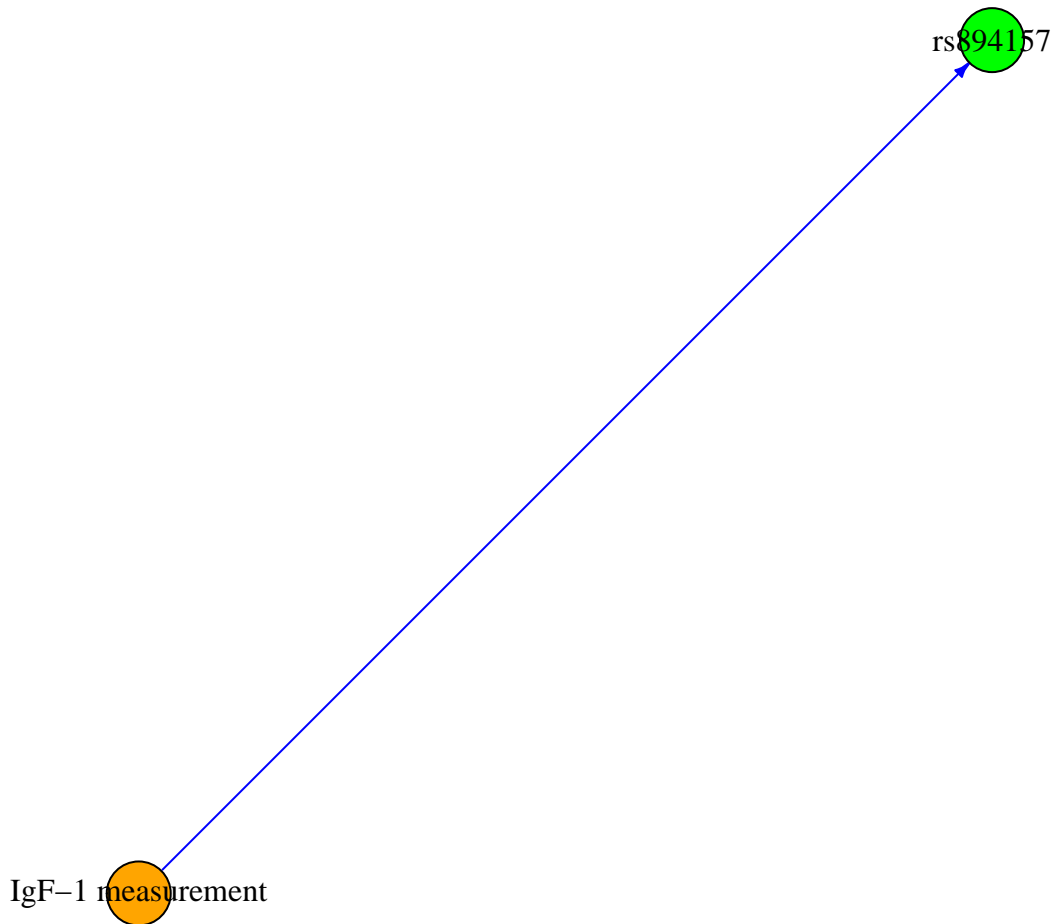

Variant–Disease Network (behavior or behavioral disorder measurement

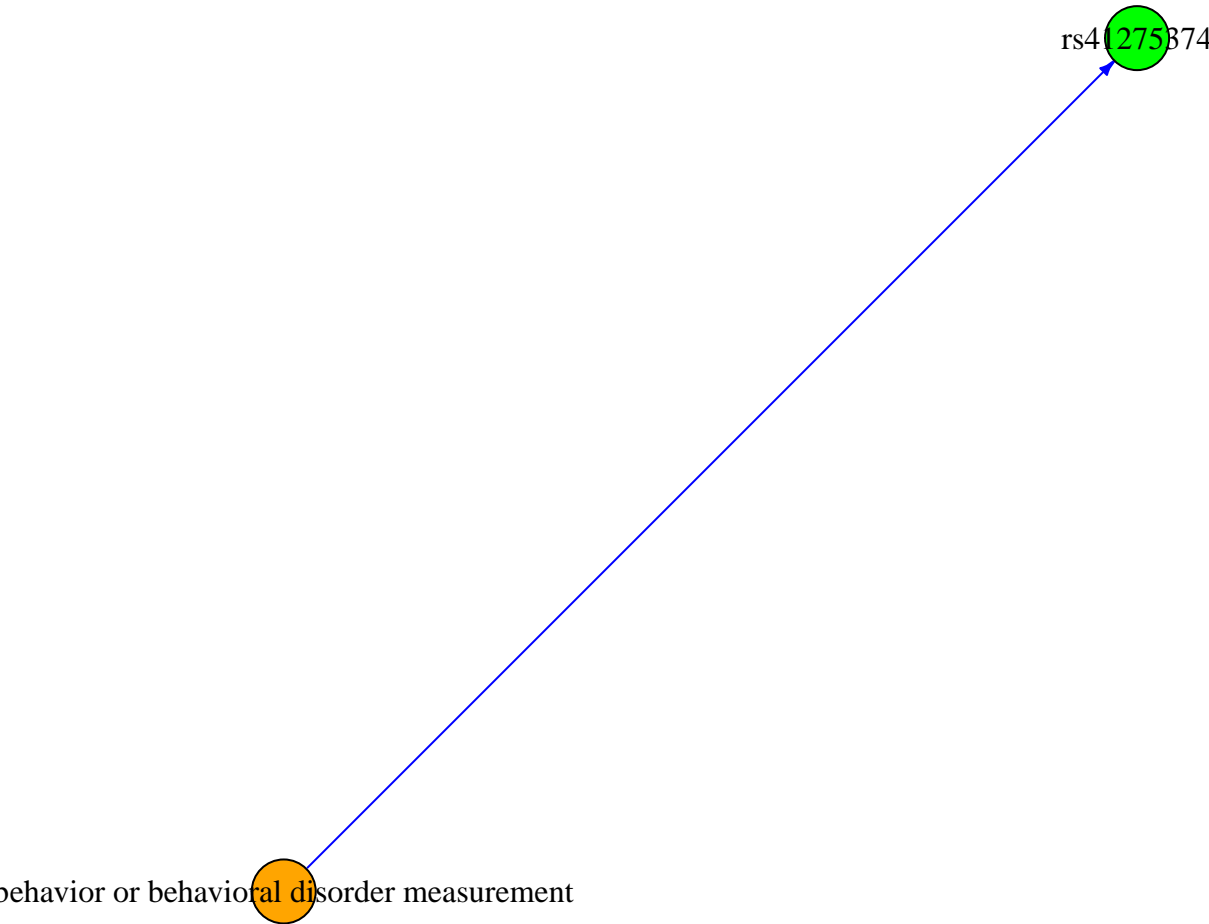

Variant–Disease Network (personality trait)

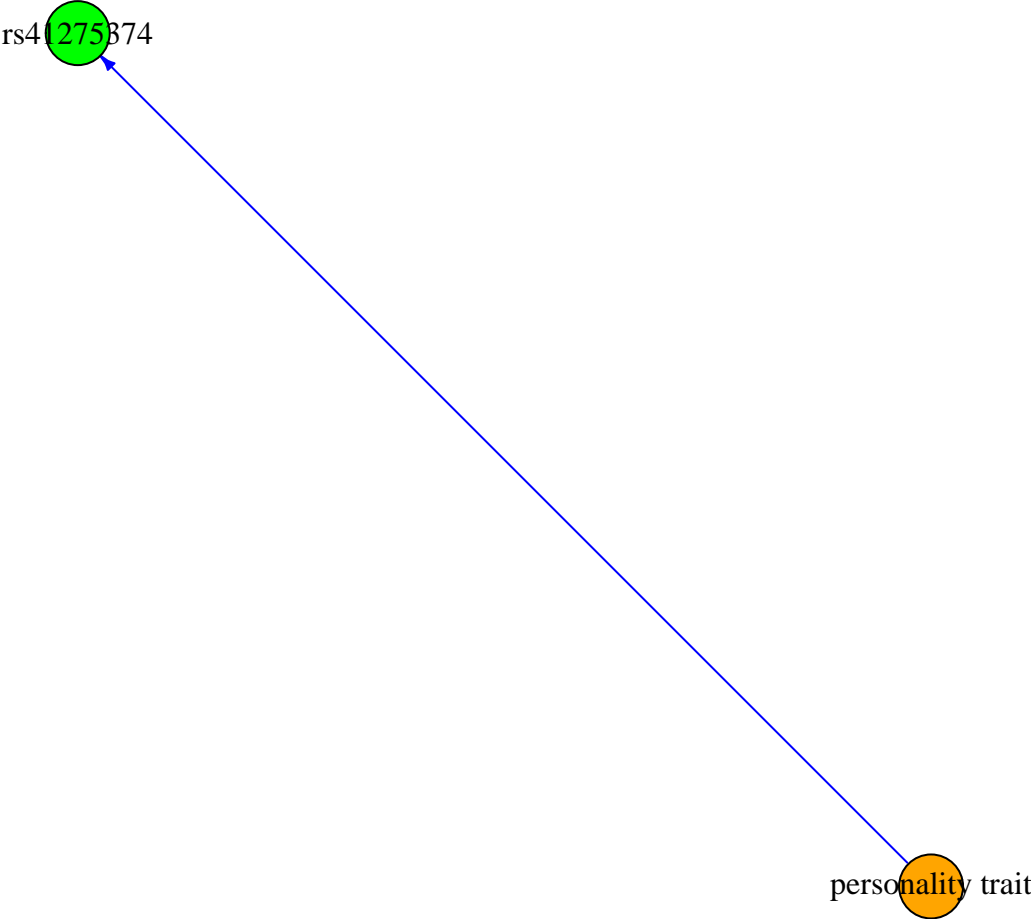



Variant–Disease Network (alpha-carotene measurement)

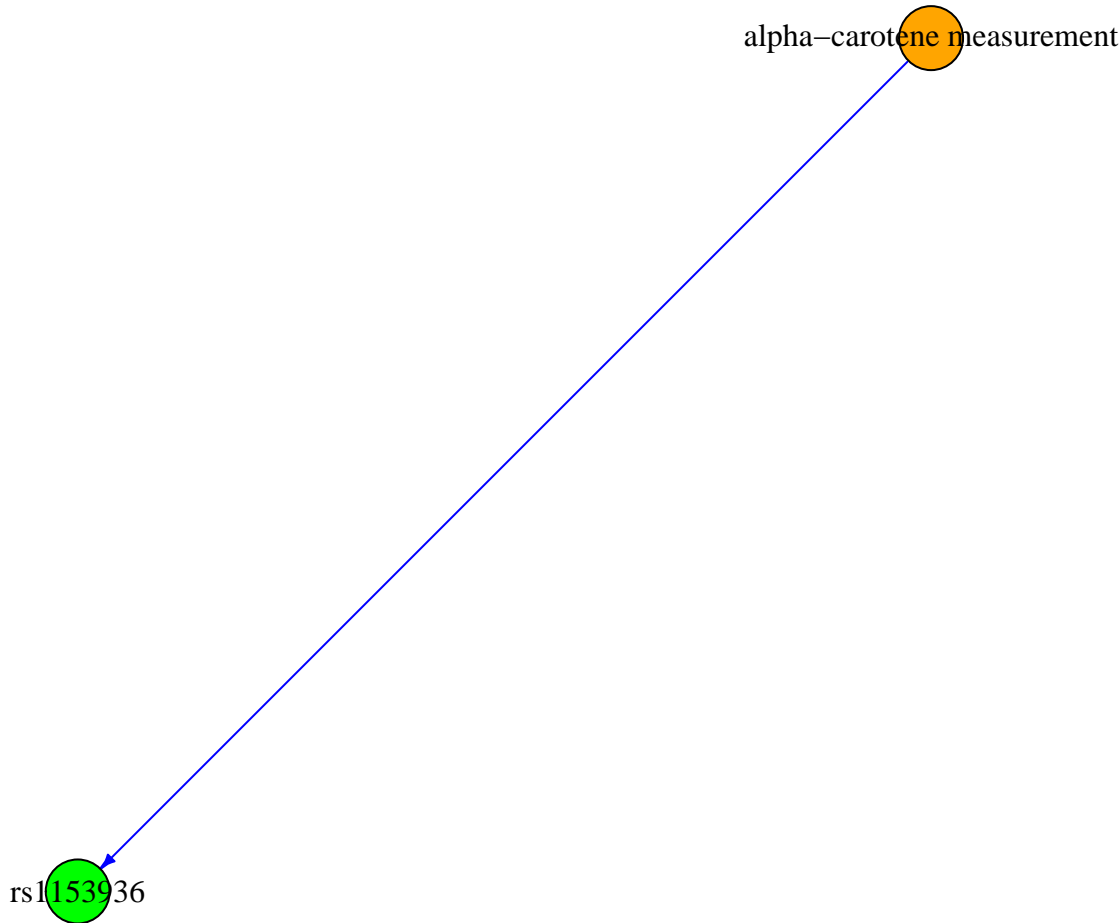

**Variant–Disease Network (response to cyclophosphamide)**

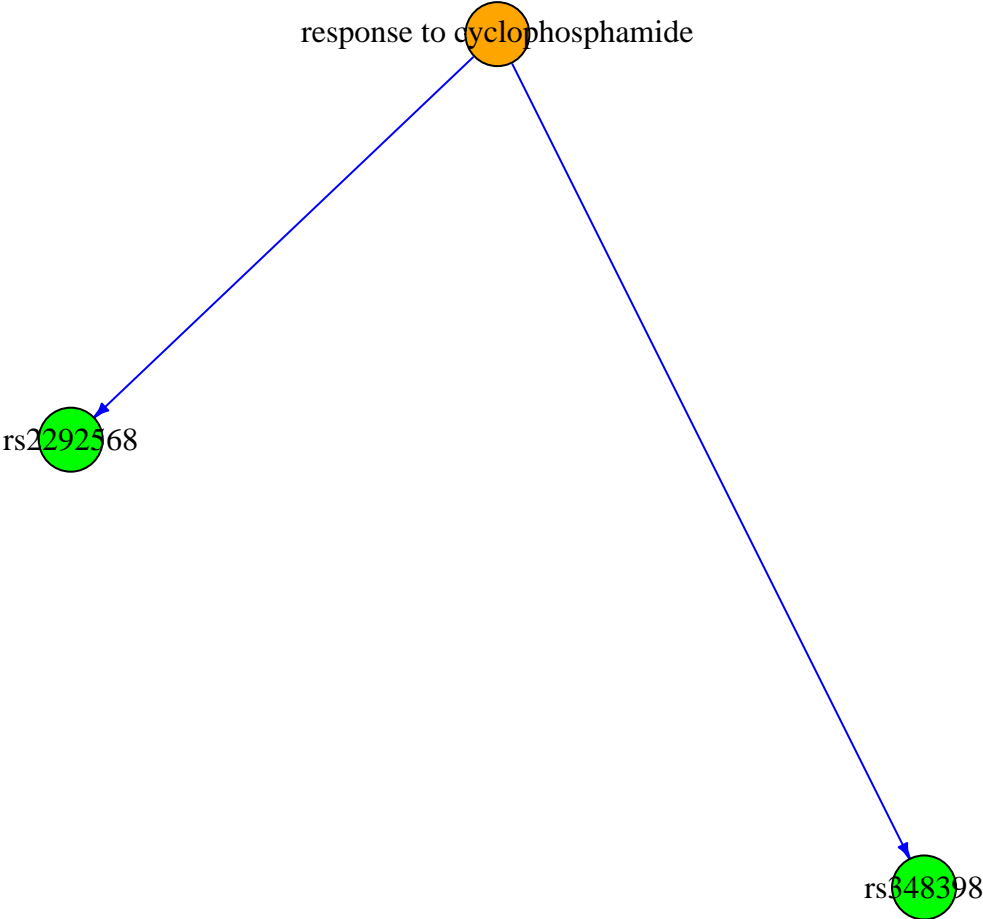

# Variant–Disease Network (BMI-adjusted waist–hip ratio)

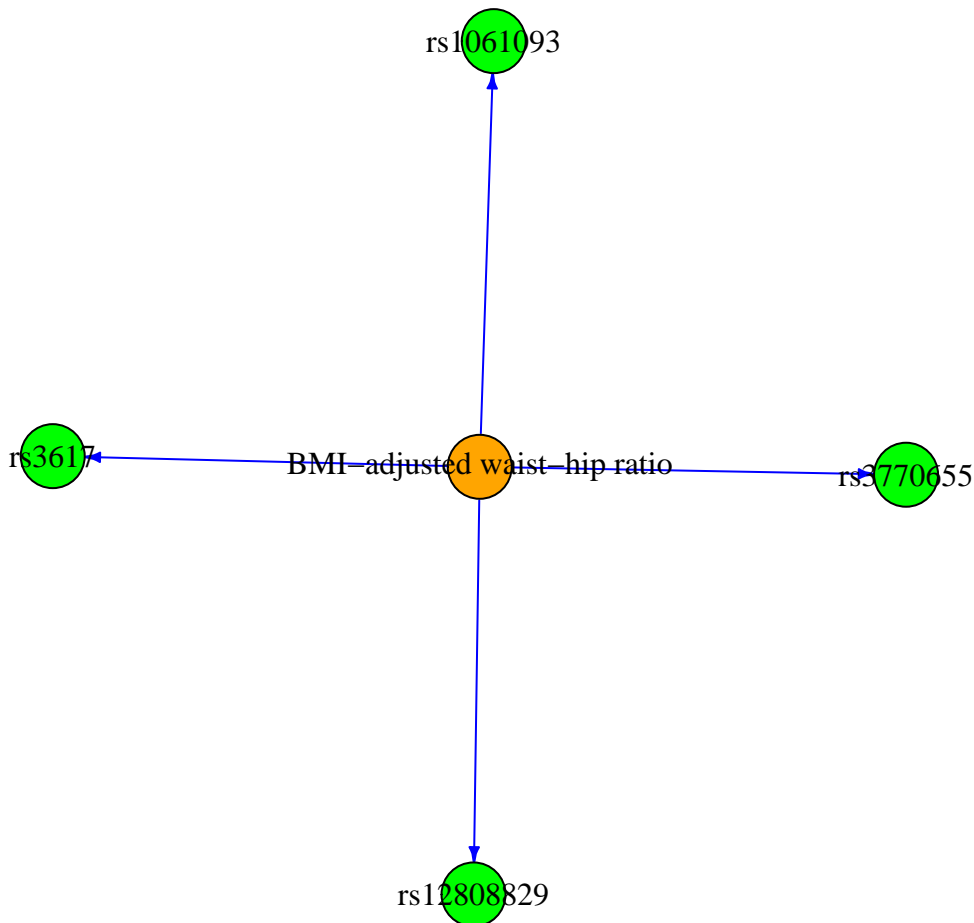

## Variant–Disease Network (maximal midexpiratory flow rate)

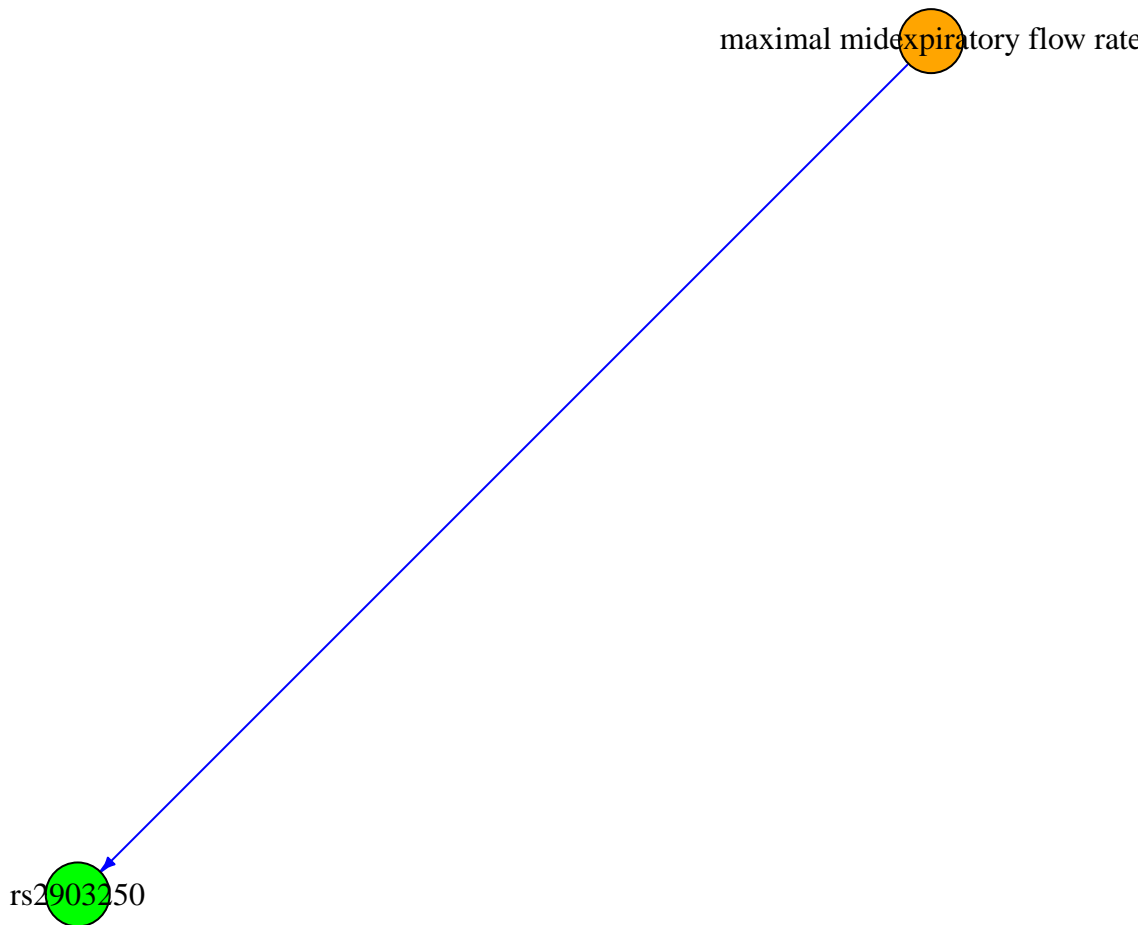

## Variant–Disease Network (lipoprotein A measurement)

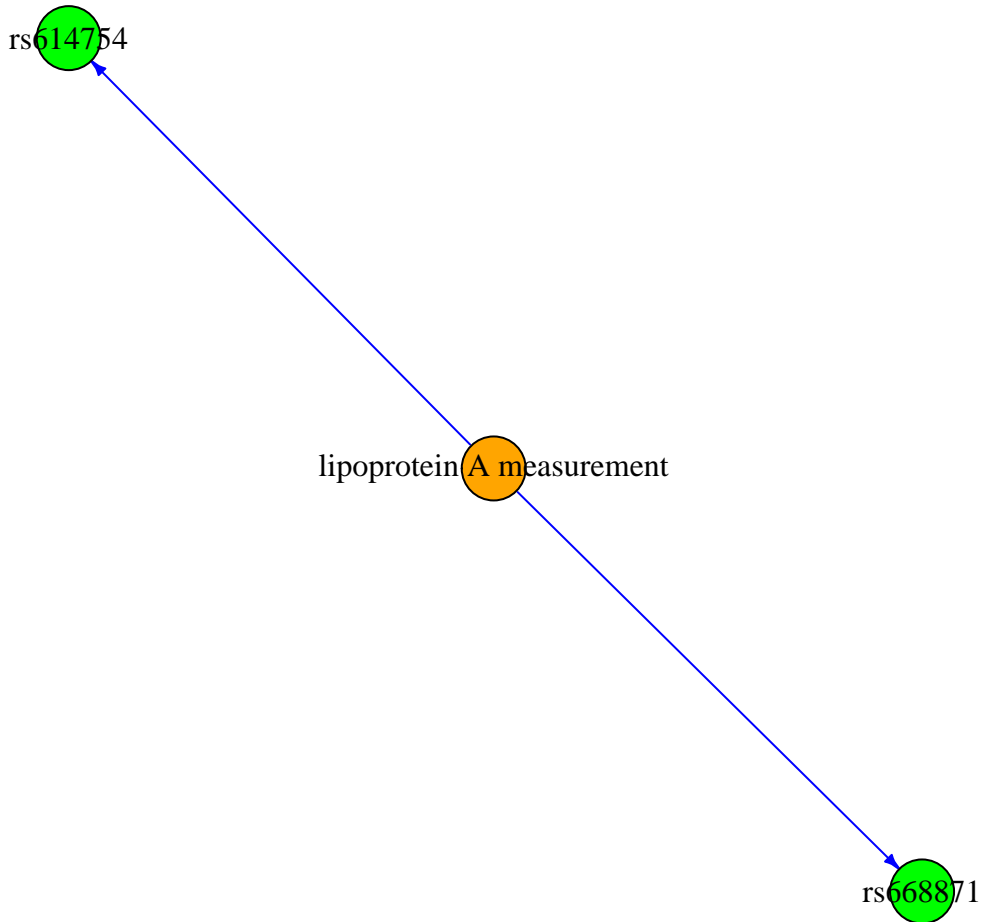

## Variant–Disease Network (congenital left–sided heart lesions)

rs6962756

congenital left–sided heart lesion



**Variant–Disease Network (information processing speed)**

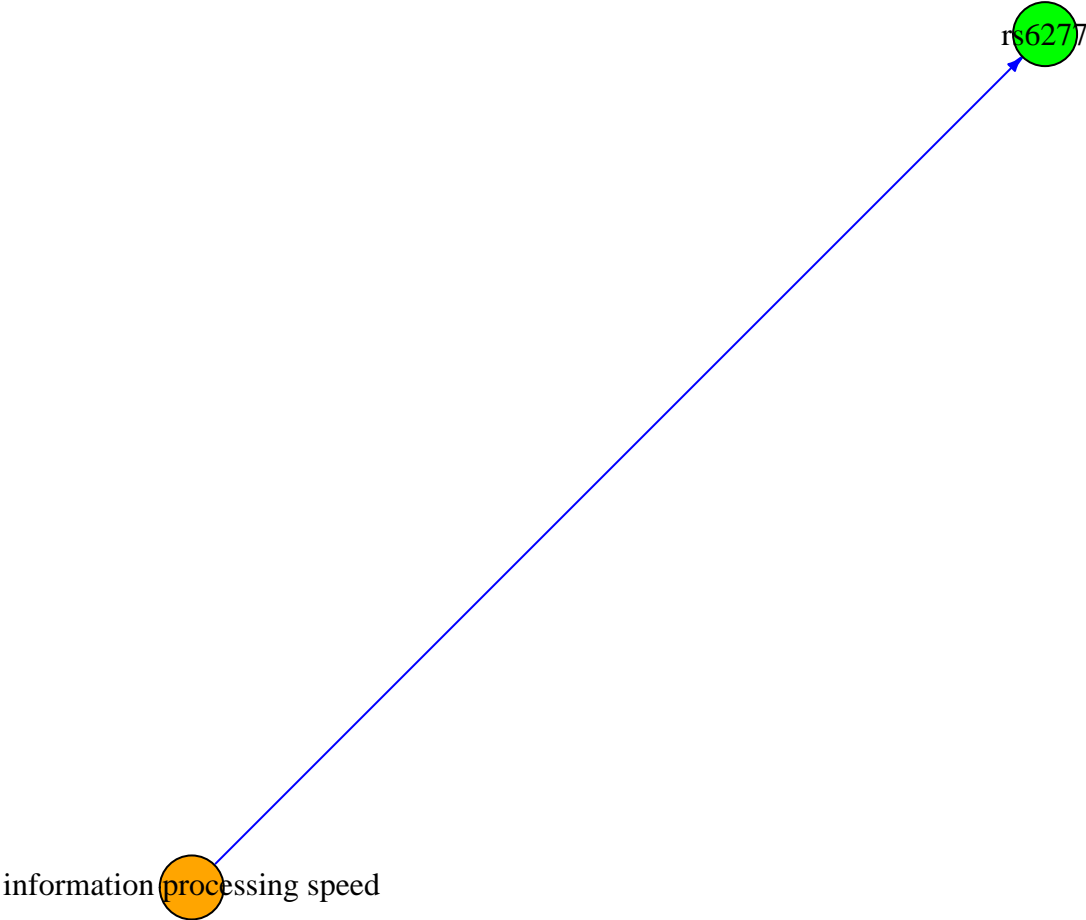

## Variant–Disease Network (DNA methylation)

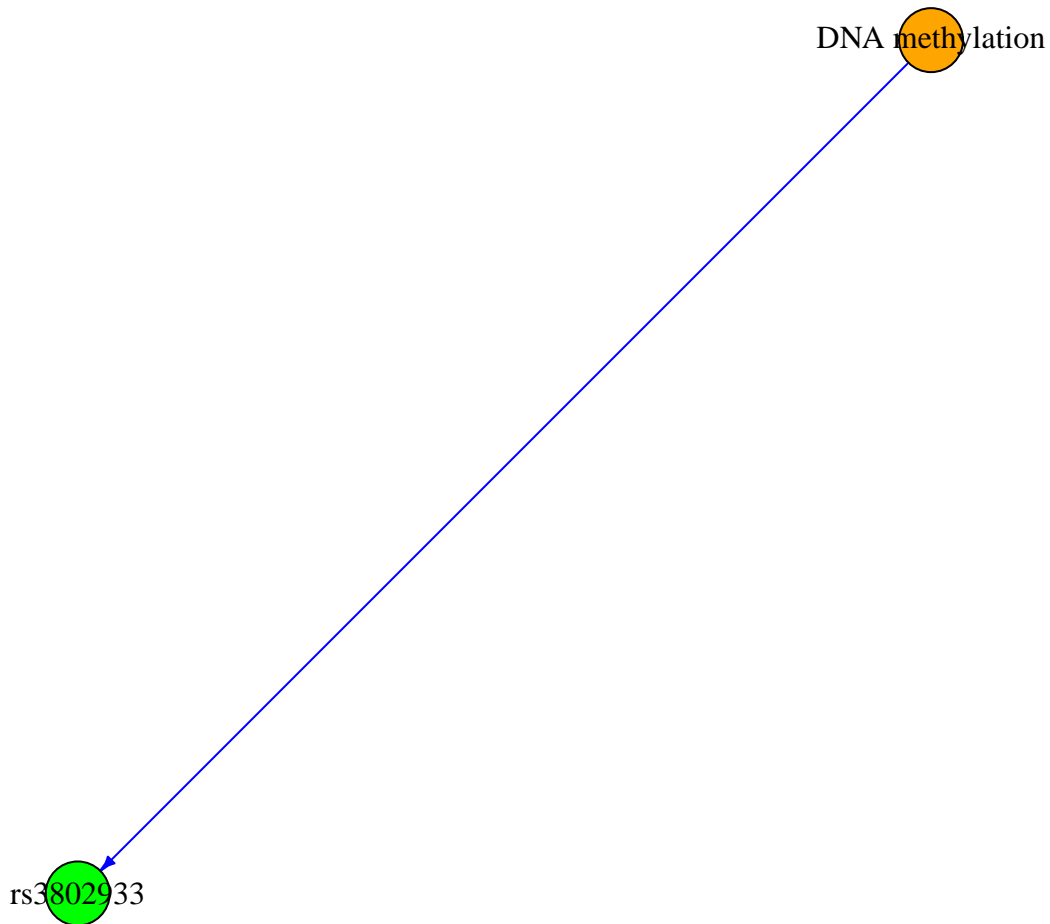



Variant–Disease Network (neutrophil percentage of white cells)

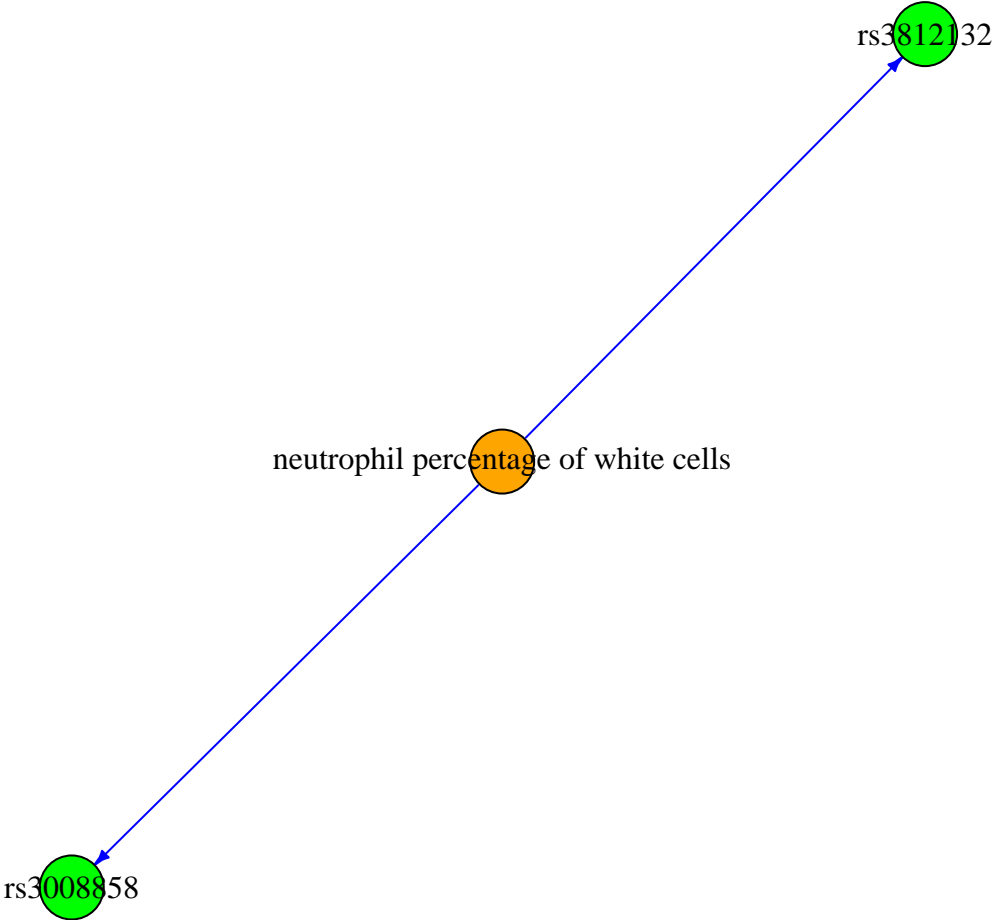

## Variant–Disease Network (calcium measurement)

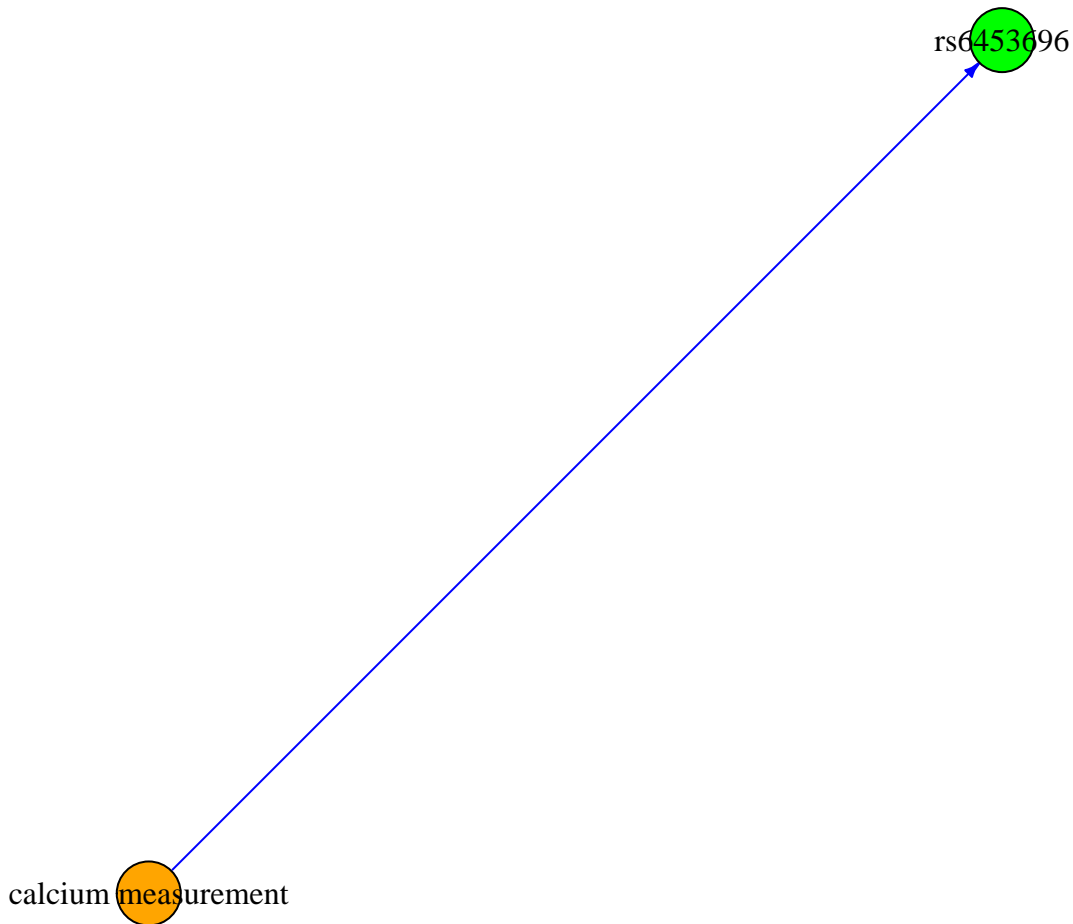

# Variant–Disease Network (CD109 antigen measurement)

CD109 antigen measurement

rs6453696

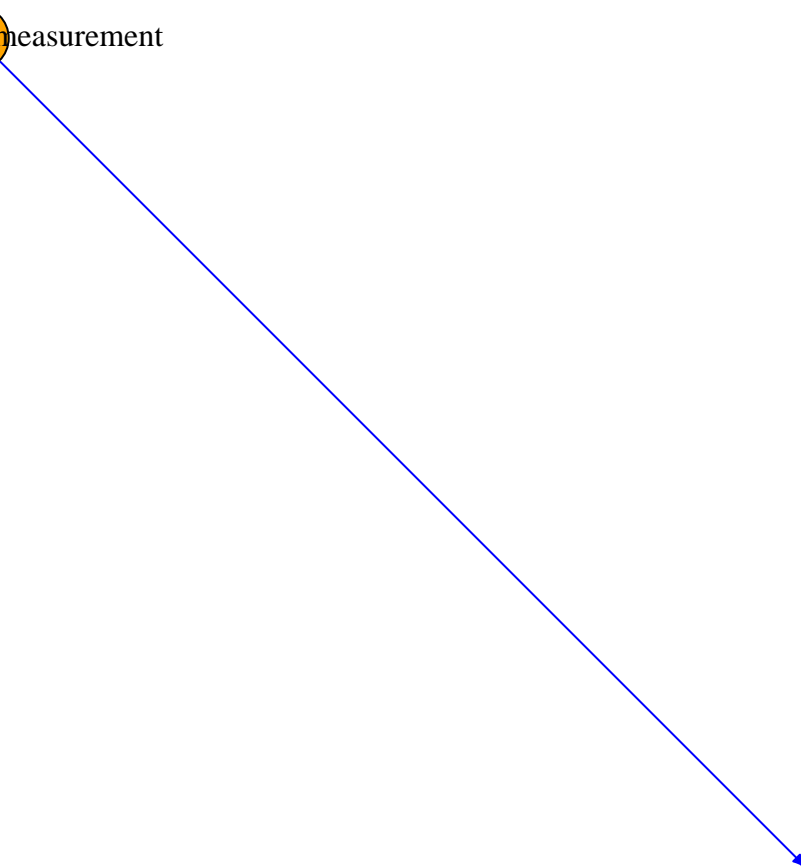

## Variant–Disease Network (alcohol dependence)

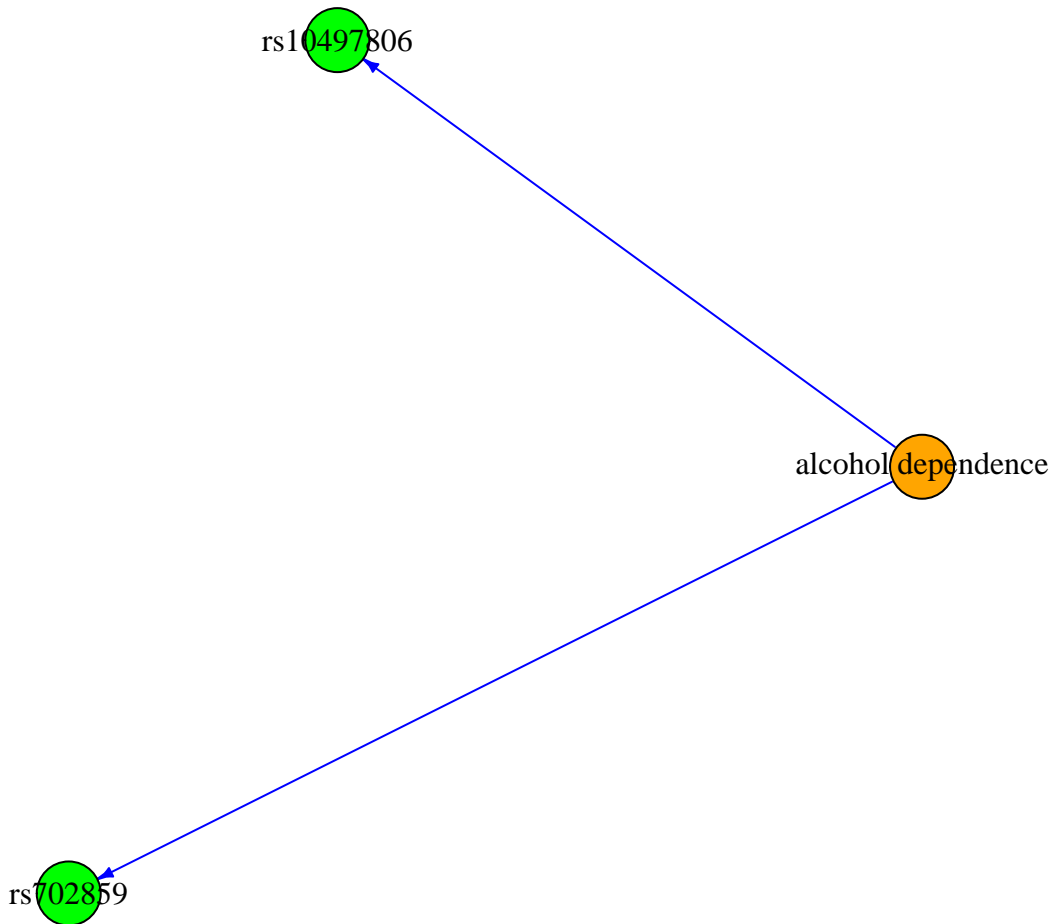

Variant–Disease Network (frontal theta oscillation measurement)

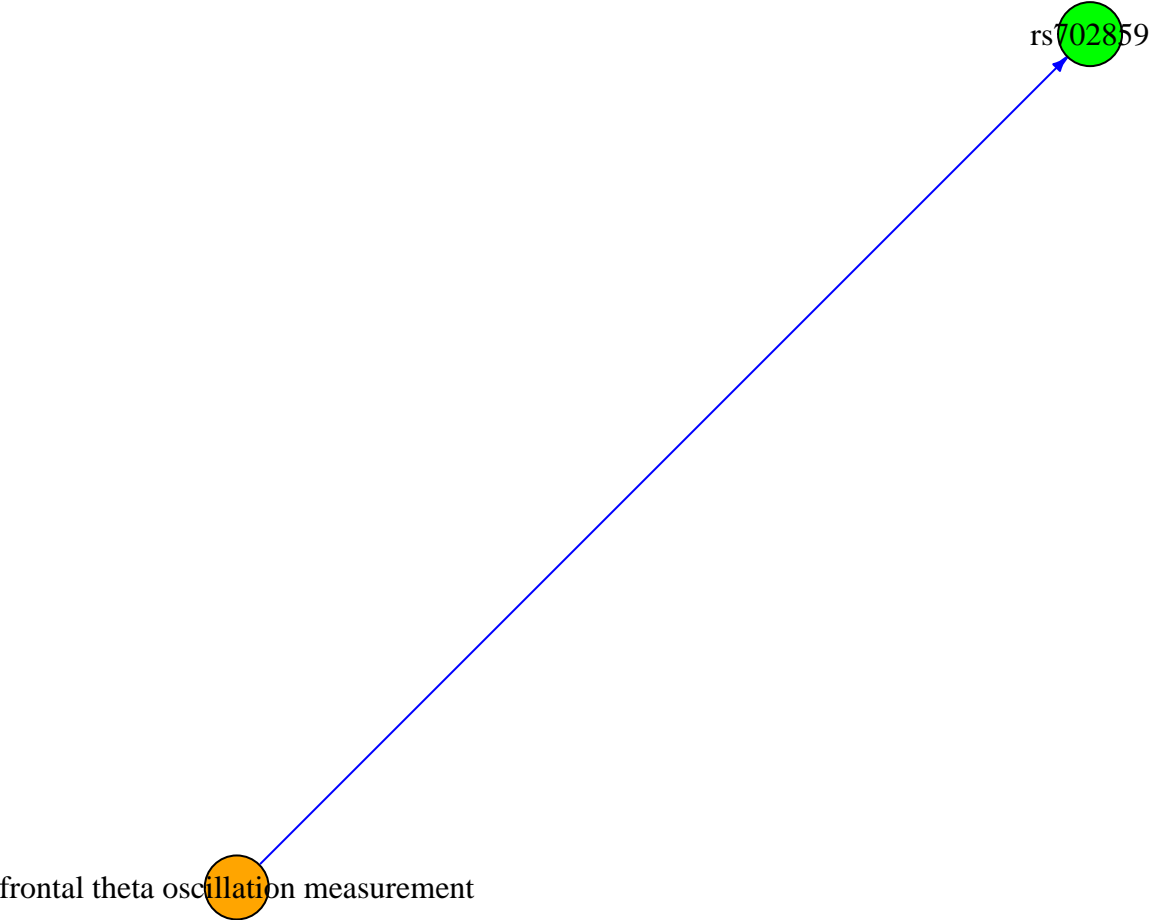

## Variant-Disease Network (kidney stone)

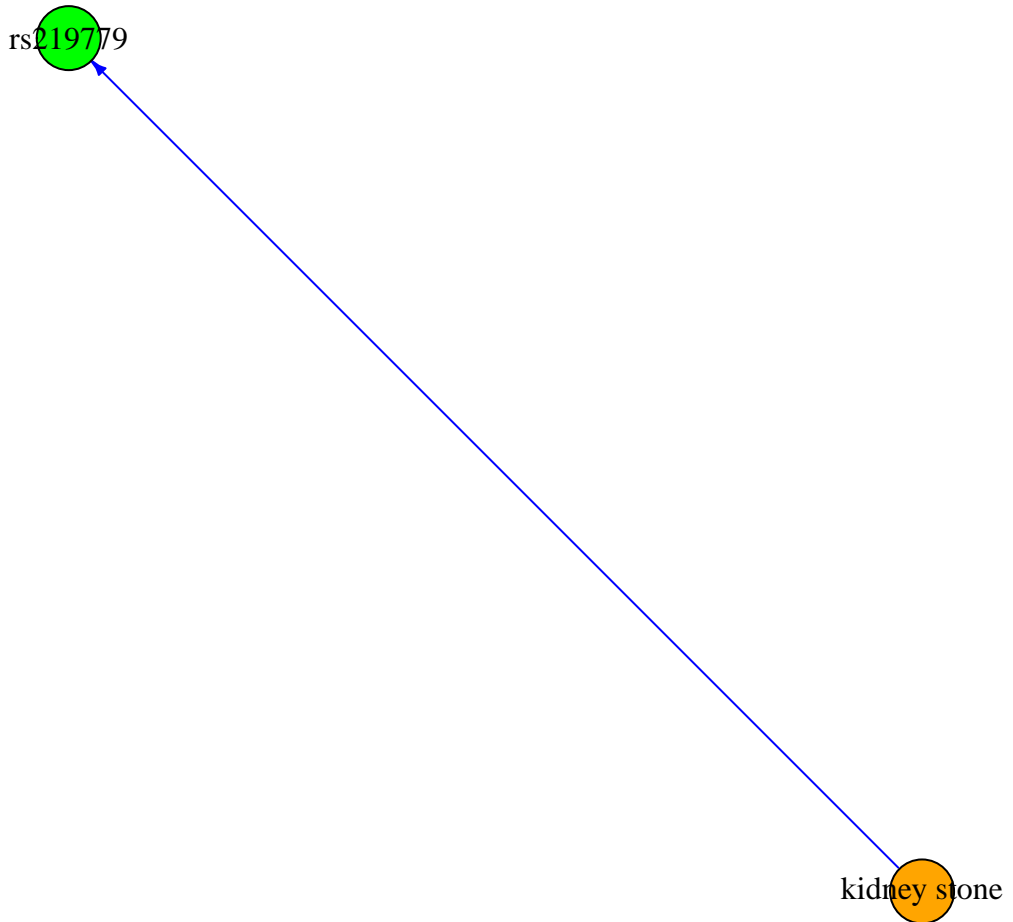

## Variant–Disease Network (parathyroid hormone measurement)

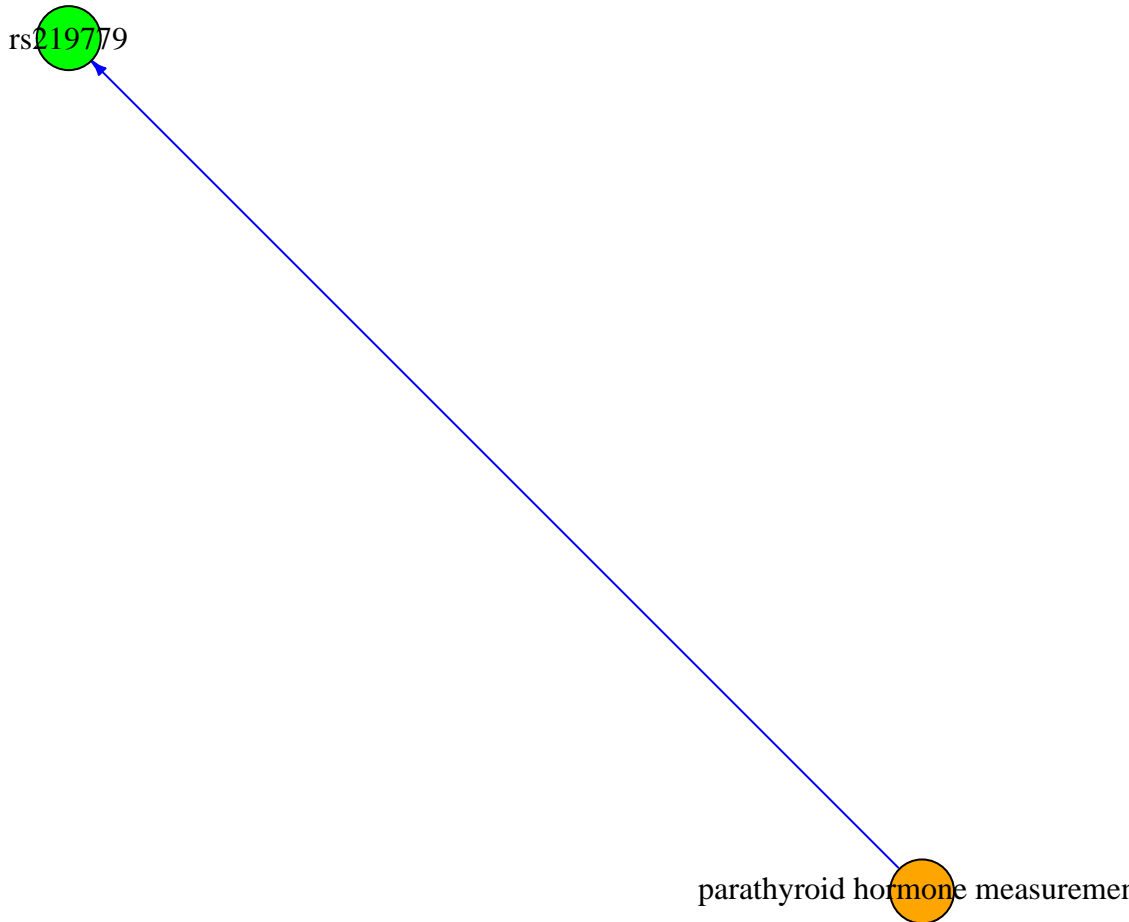

# Variant–Disease Network (pulmonary function measurement)

pulmonary function measurement

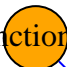

rs9435659

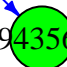



## Variant–Disease Network (smoking behaviour measurement)

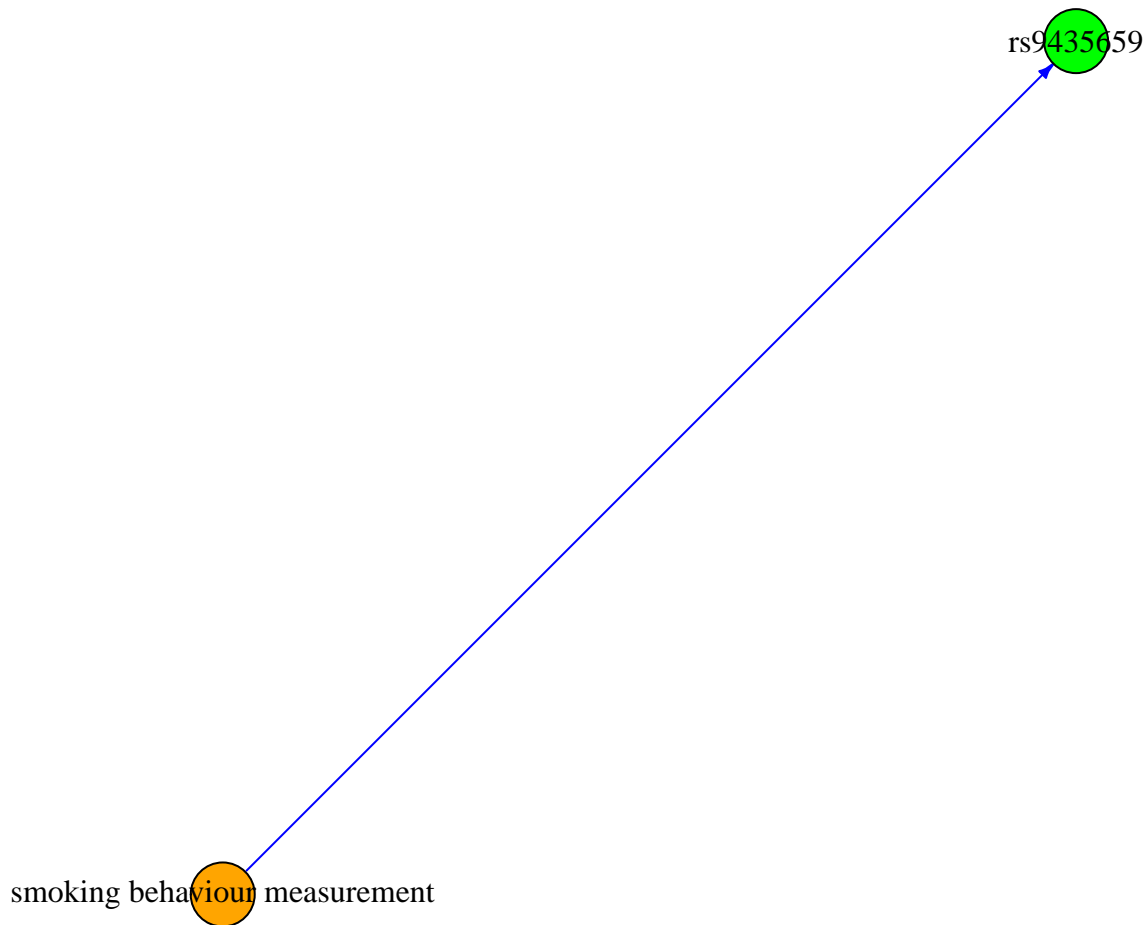

# Variant-Disease Network (serum IgM measurement)

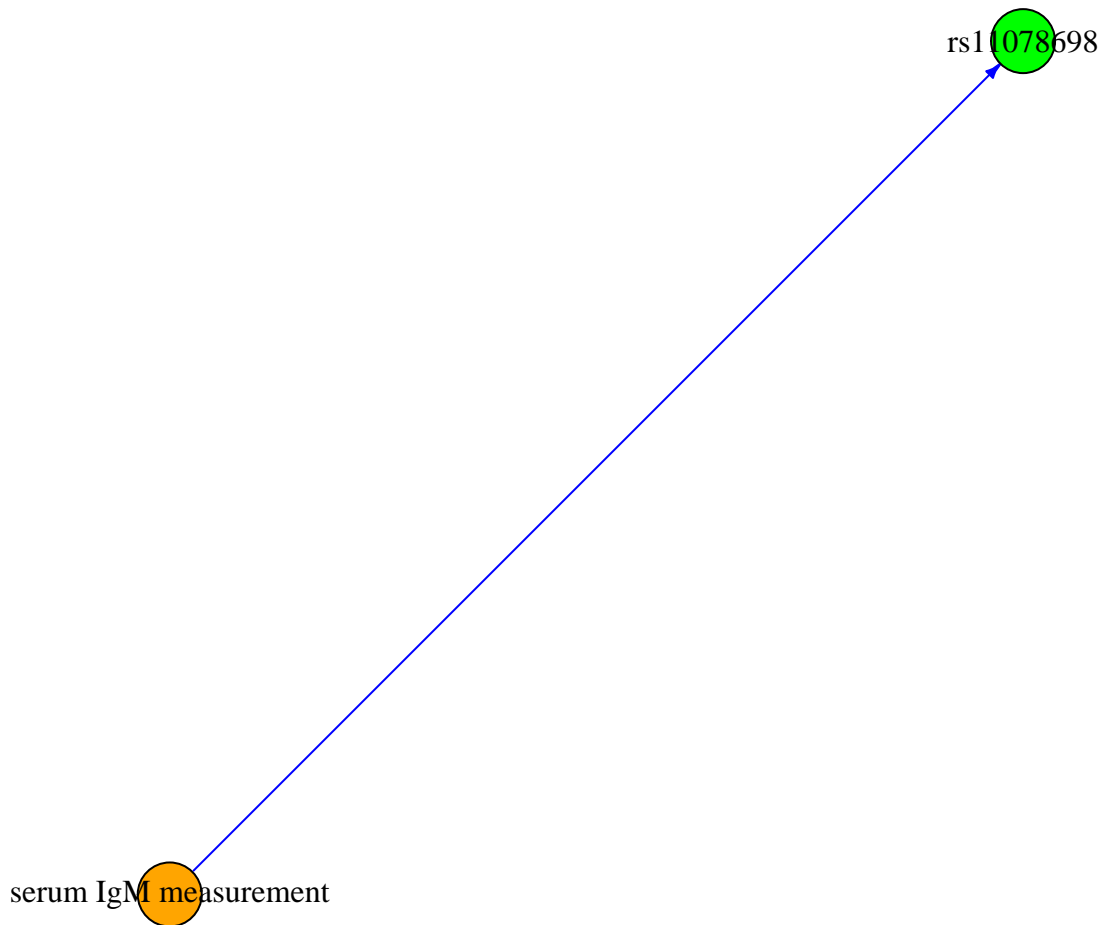

# Variant–Disease Network (serum dimethylarginine measurement)

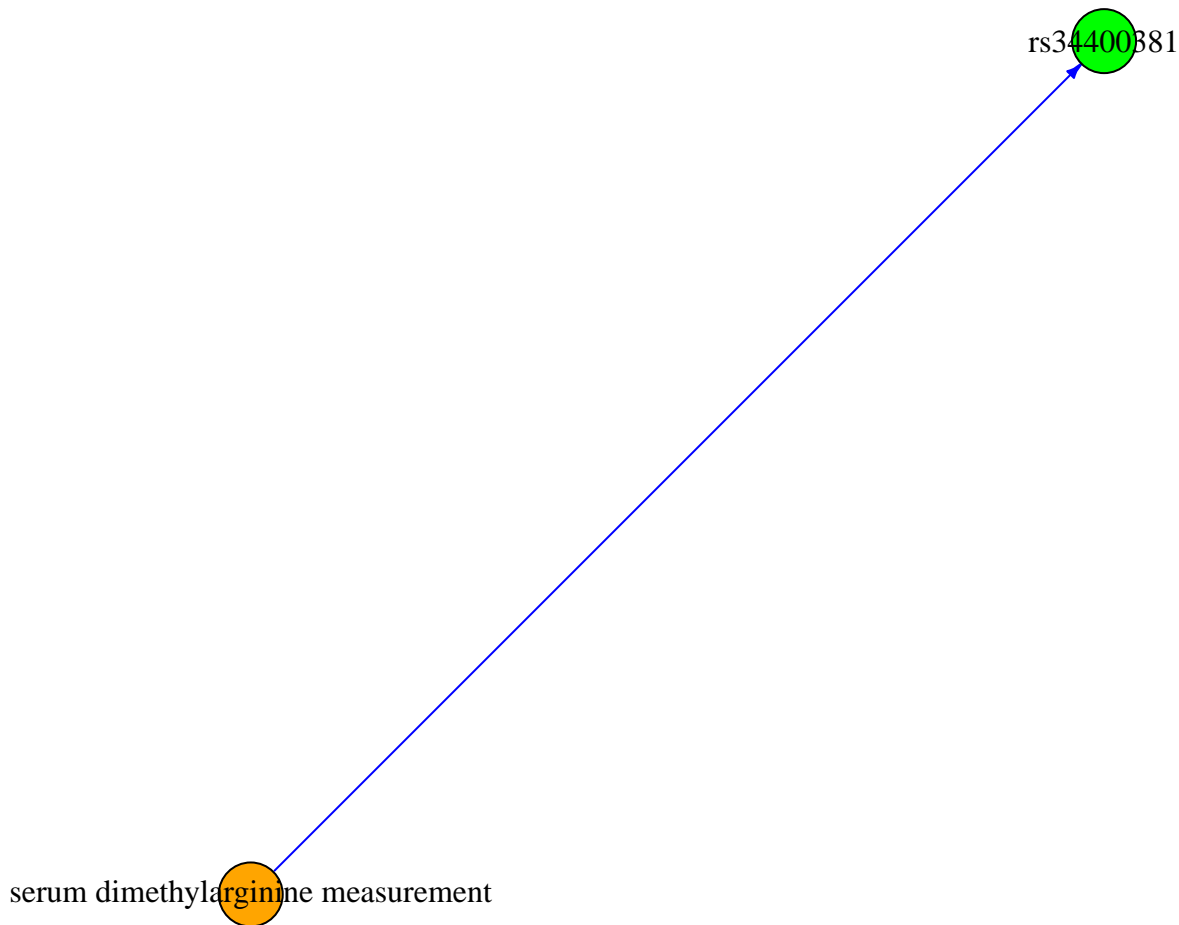

## Variant–Disease Network (adiponectin measurement)

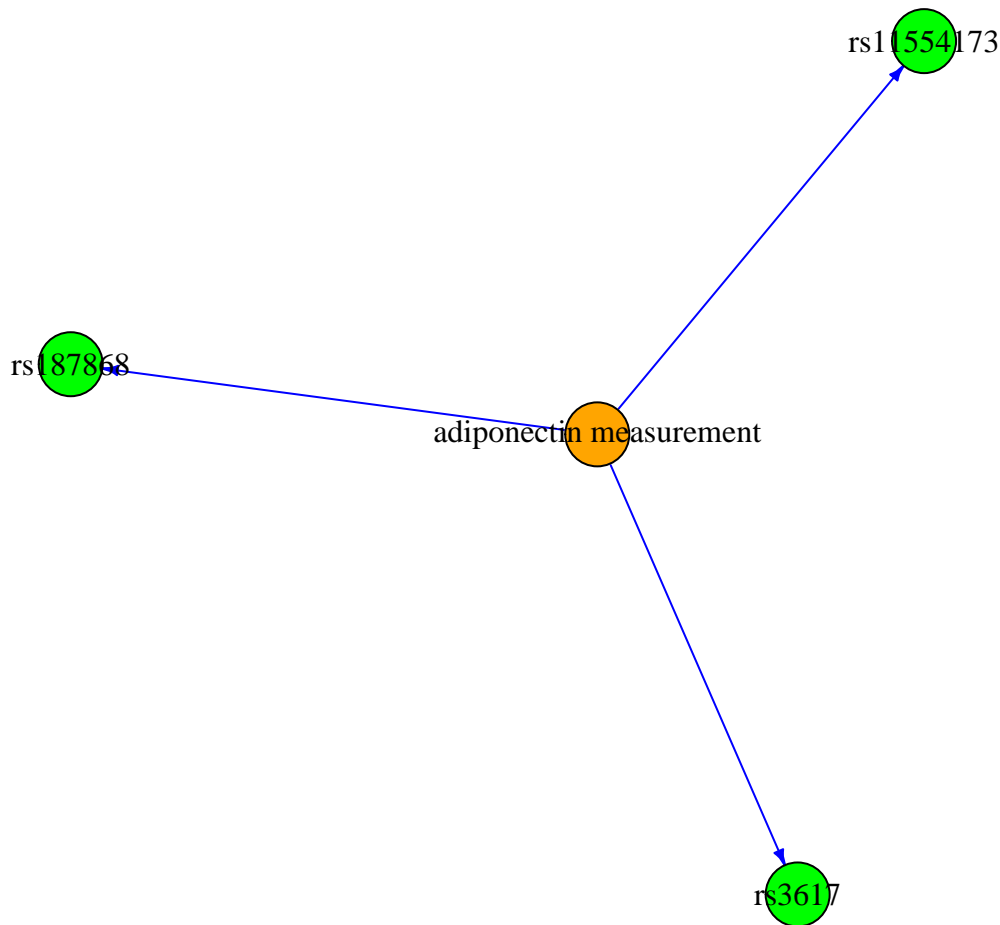

## Variant–Disease Network (open–angle glaucoma)

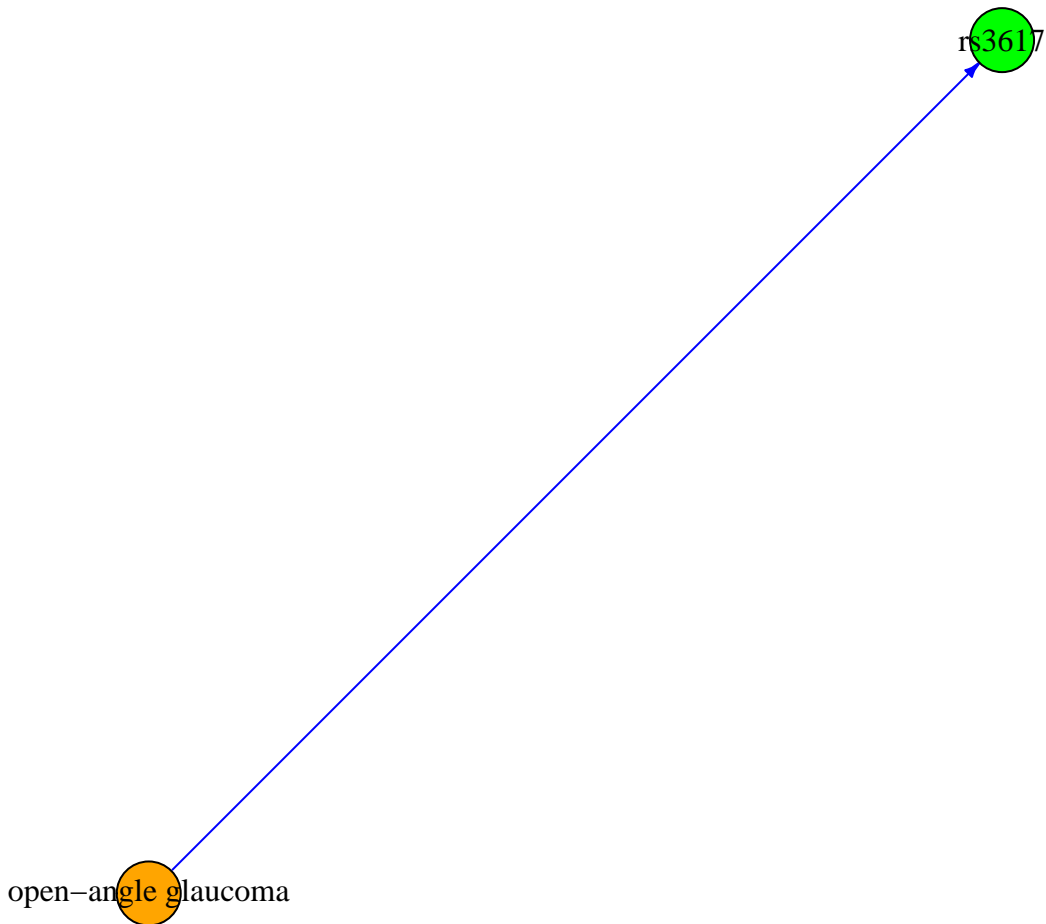

## Variant–Disease Network (schizoaffective disorder)

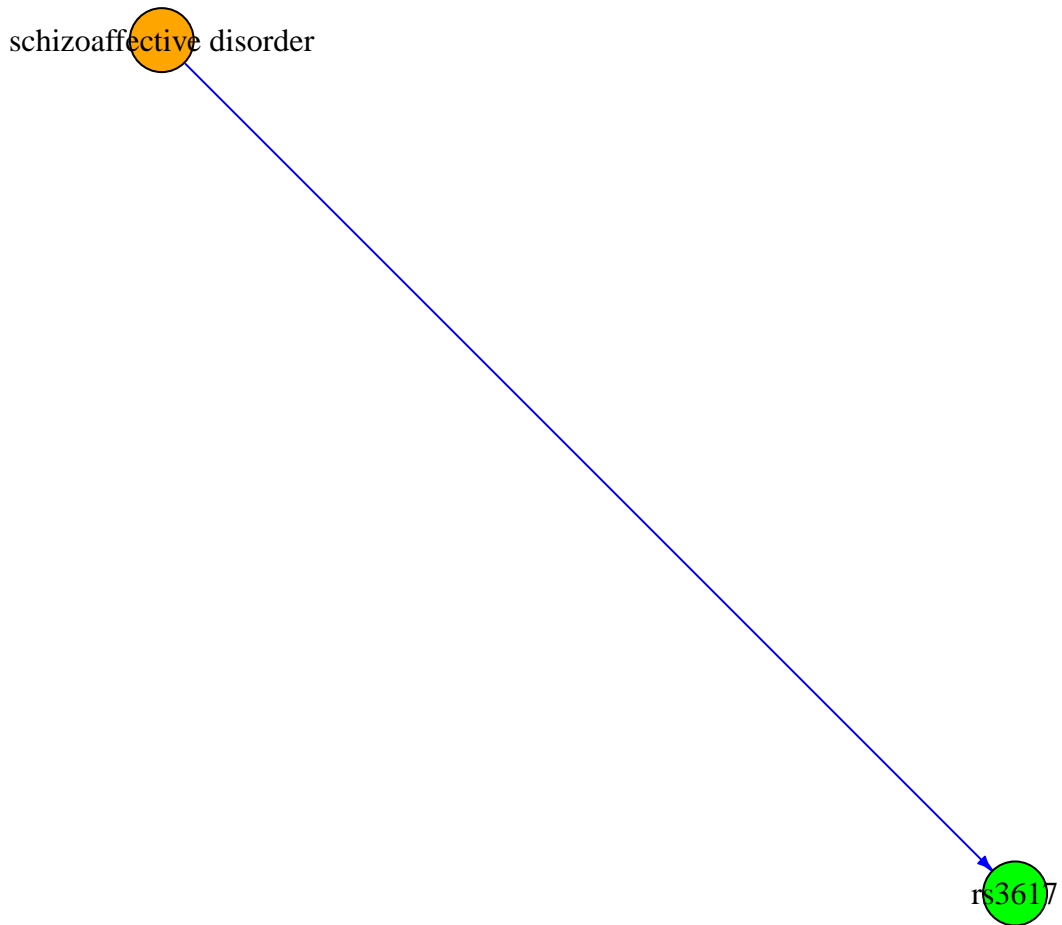

## Variant–Disease Network (openness measurement)

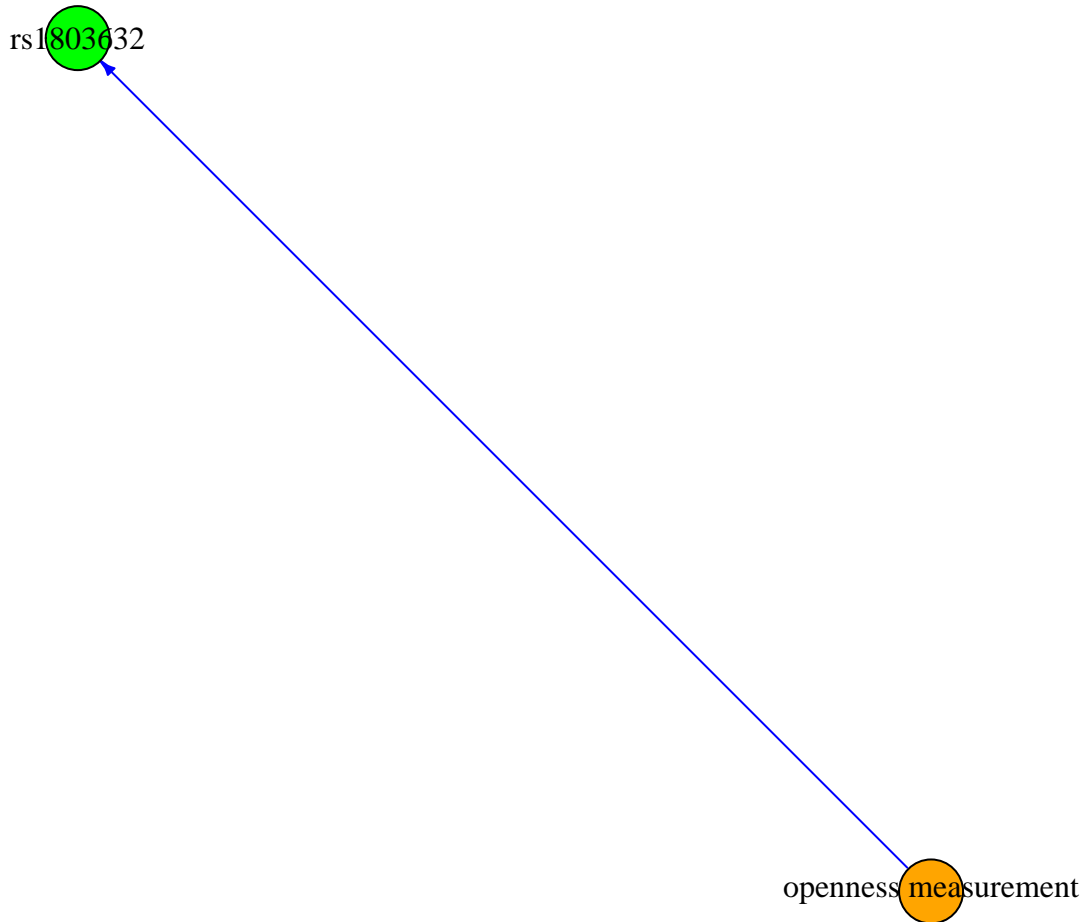

**Variant–Disease Network (psychosocial stress measurement)**

psychosocial stress measurement

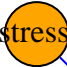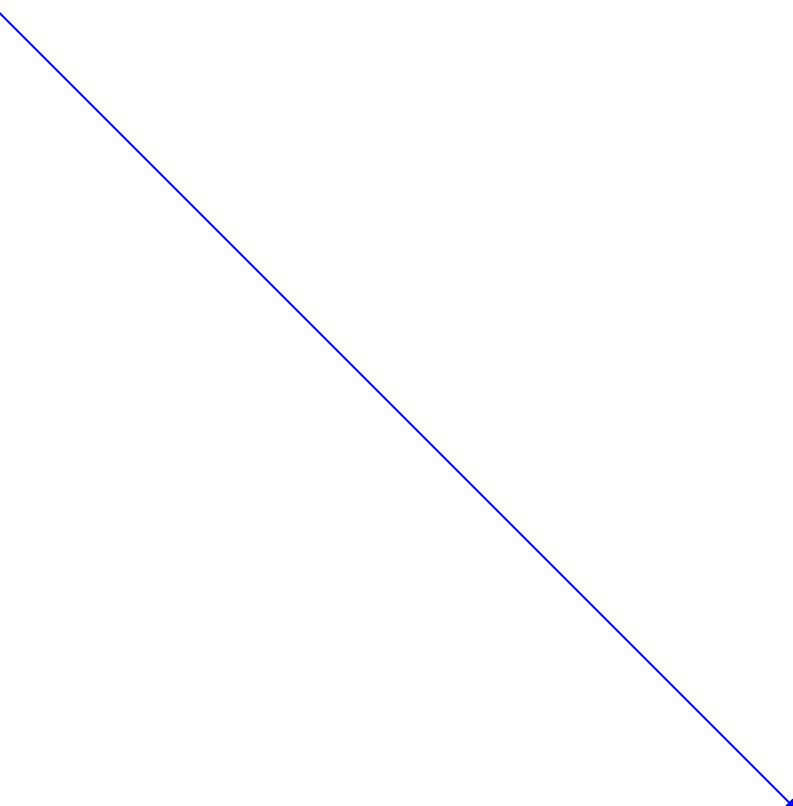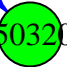

rs503203



## Variant-Disease Network (brain aneurysm)

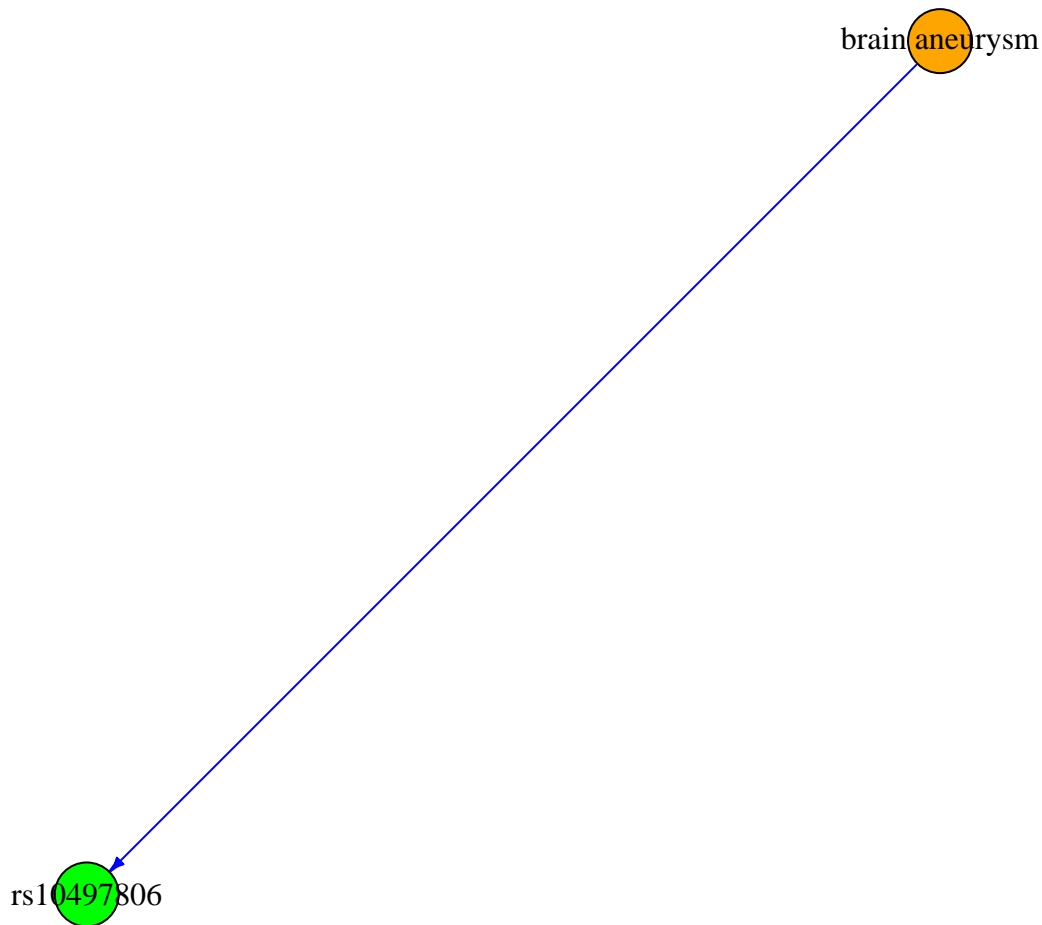

# Variant–Disease Network (estrogen receptor negative breast cancer)

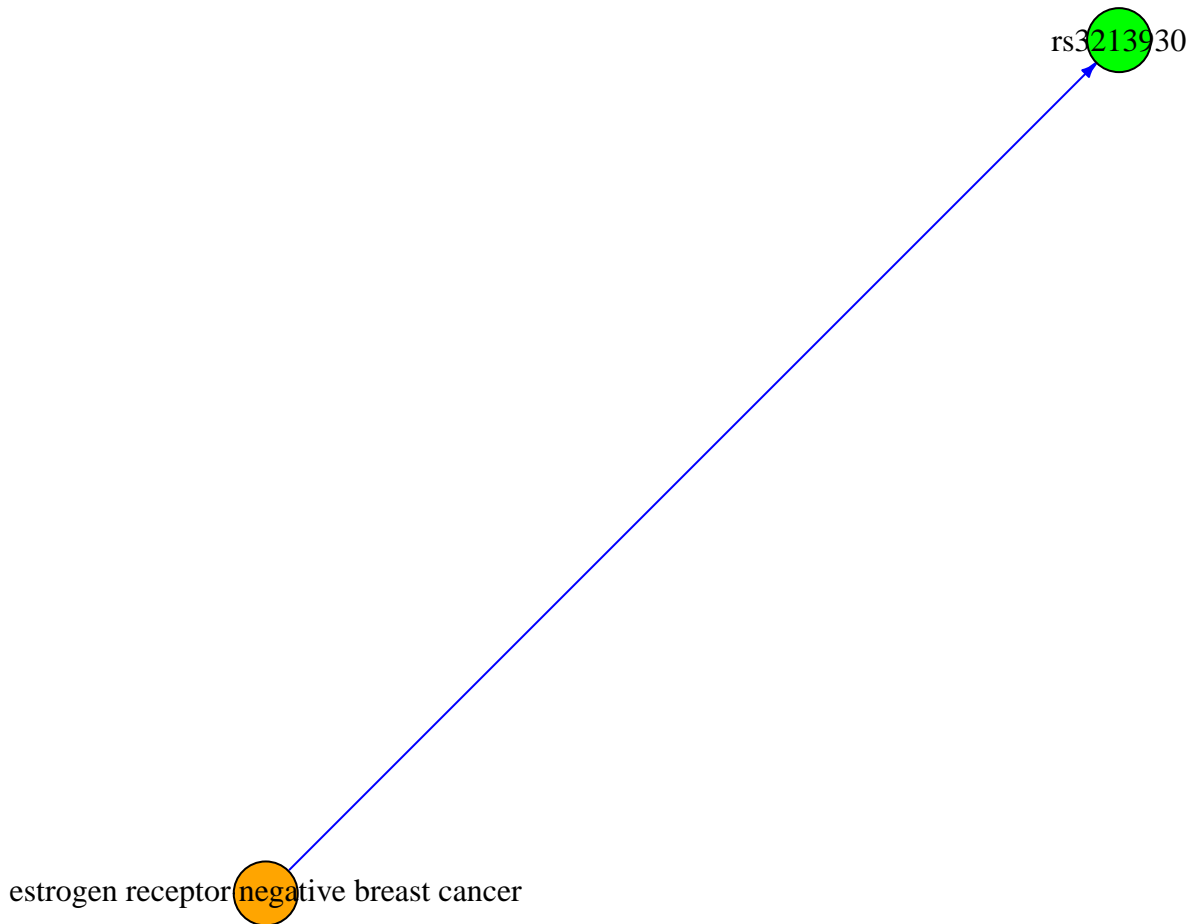

## Variant–Disease Network (lung adenocarcinoma)

lung adenocarcinoma

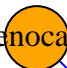

rs3213930

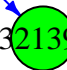

## Variant–Disease Network (ovarian carcinoma)

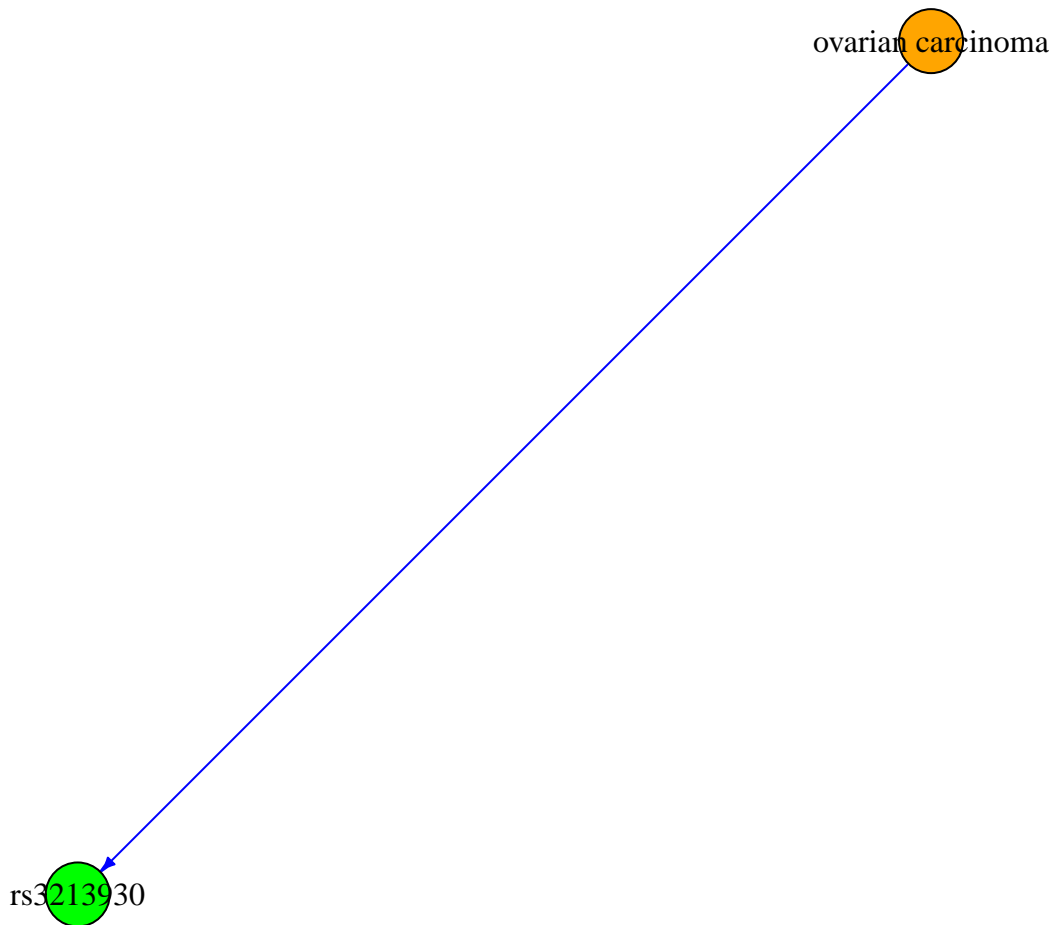

# Variant–Disease Network (ovarian endometrioid carcinoma)

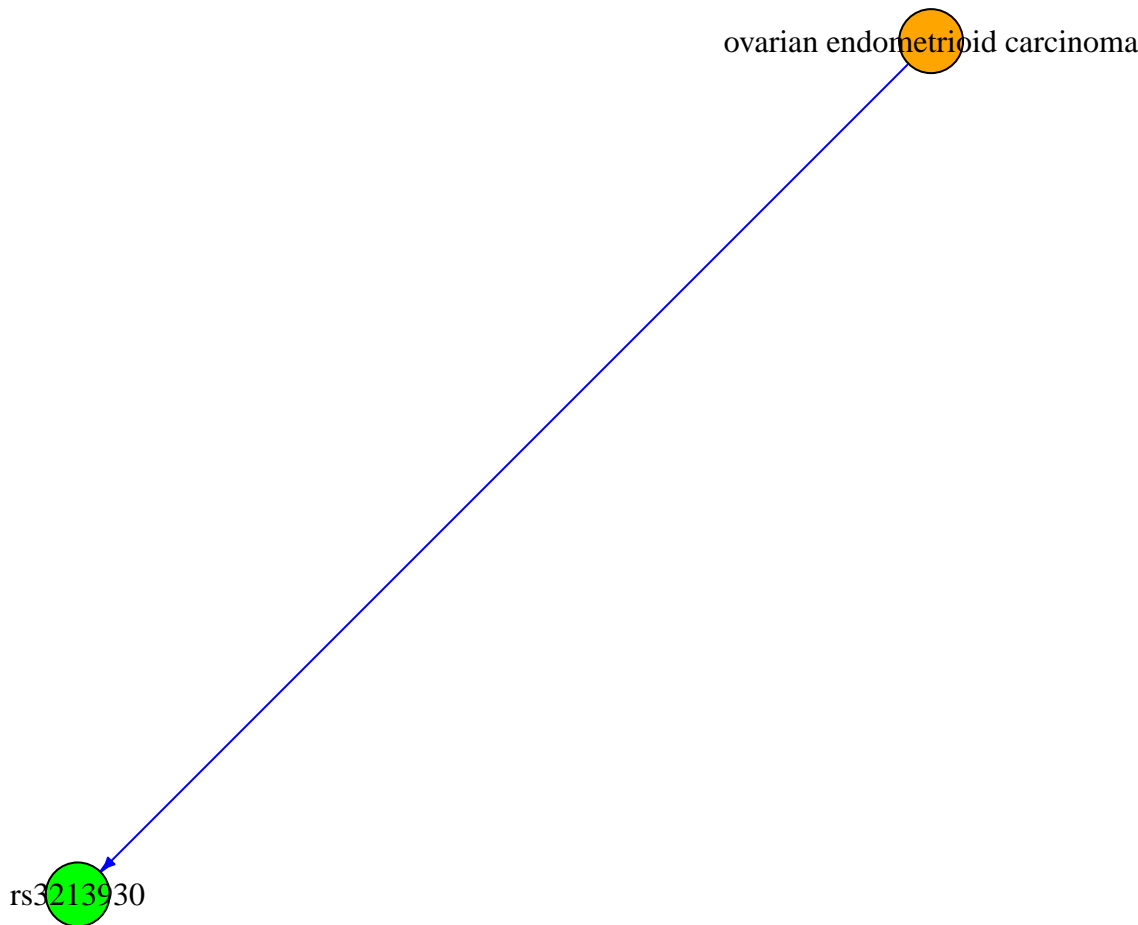

Variant–Disease Network (fasting blood glucose measurement)

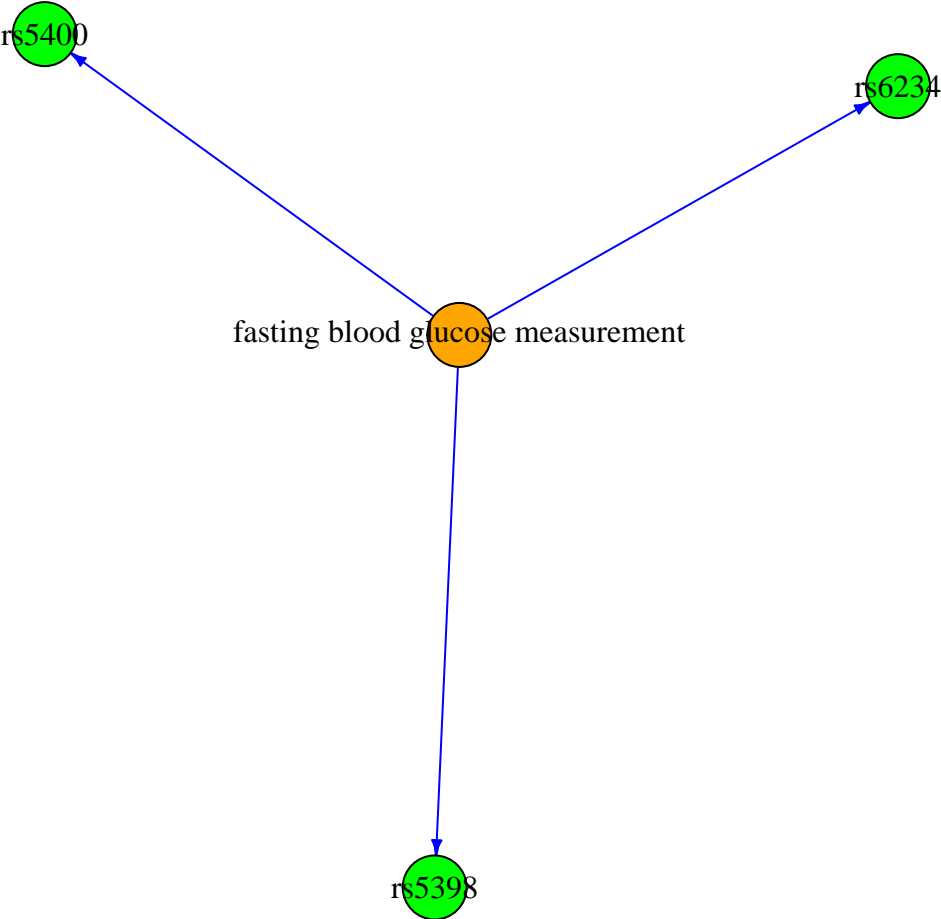

## Variant–Disease Network (HOMA–B)

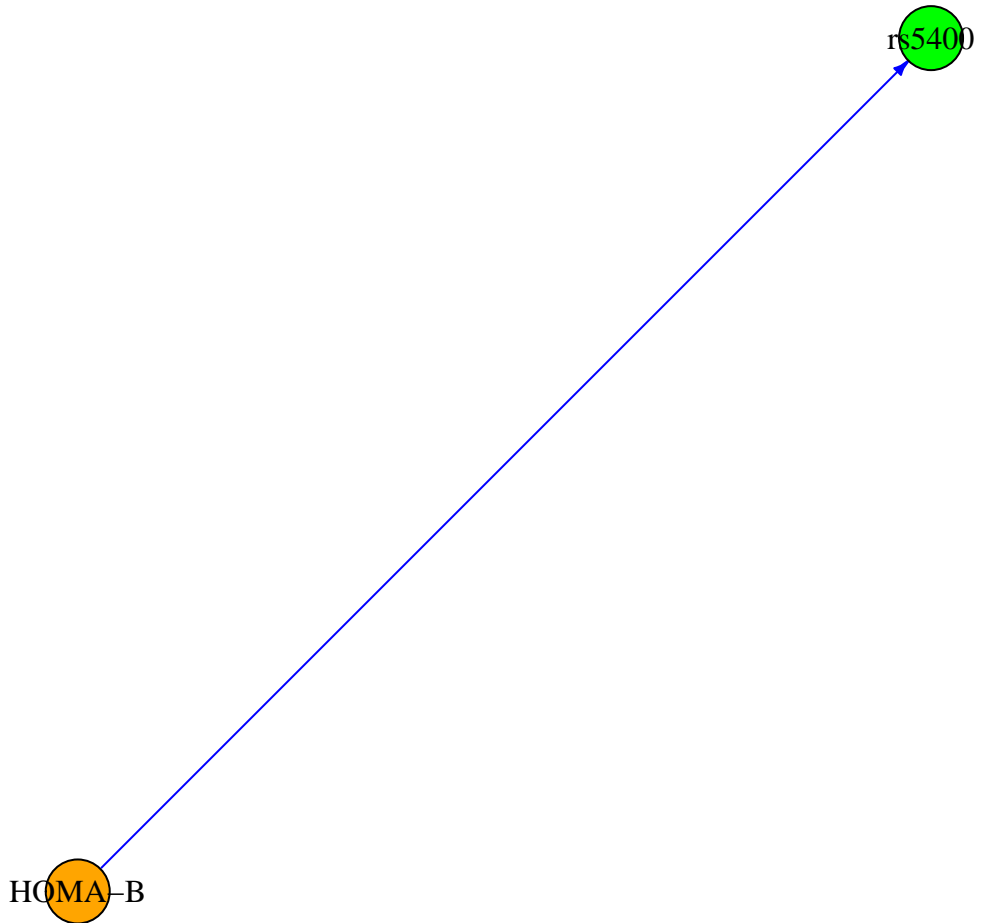

Variant–Disease Network (serum gamma–glutamyl transferase measurement)

serum gamma–glutamyl transferase measurement

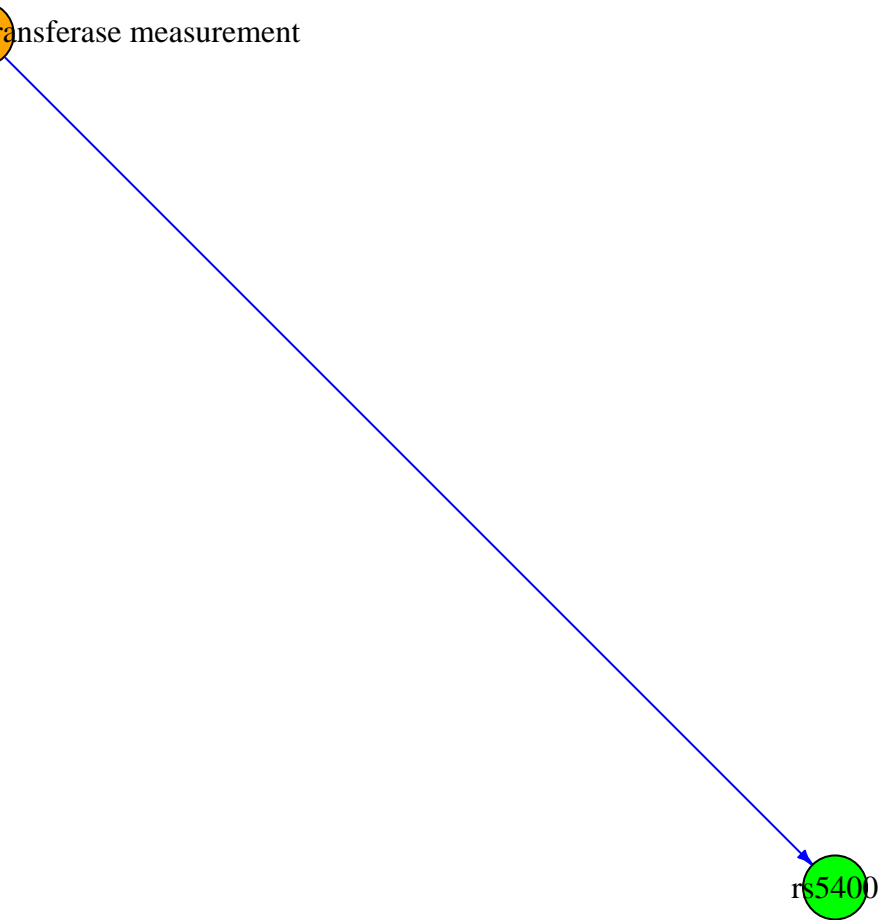



## Variant–Disease Network (glucose measurement)

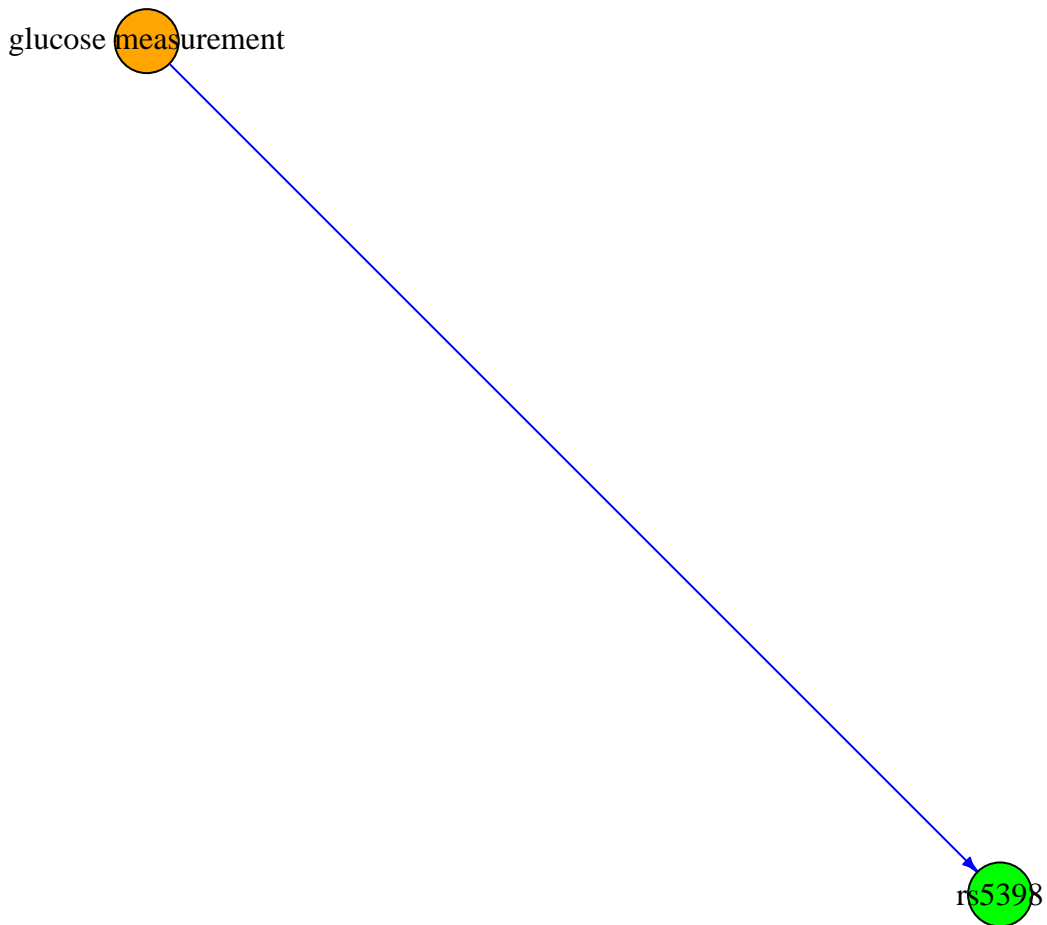

## Variant-Disease Network (response to metformin)

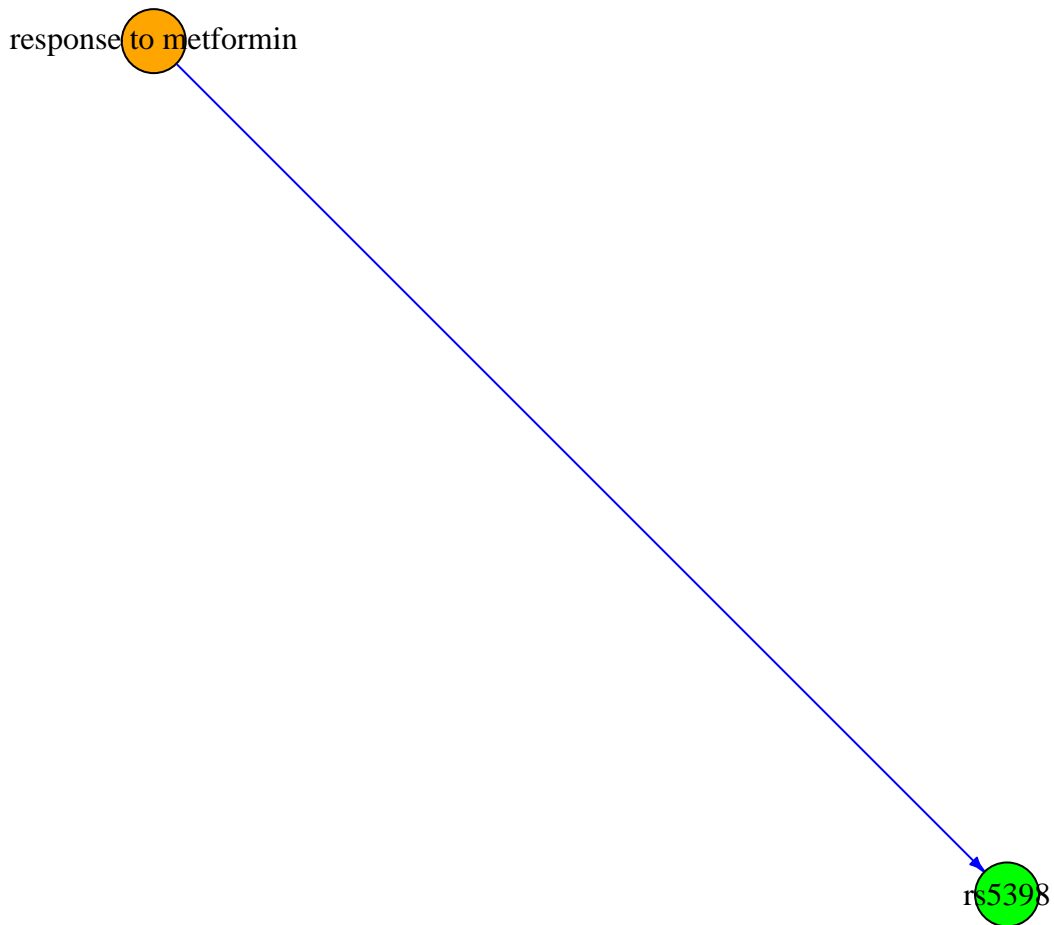

## Variant–Disease Network (seborrheic dermatitis)

seborrheic dermatitis

rs6762208

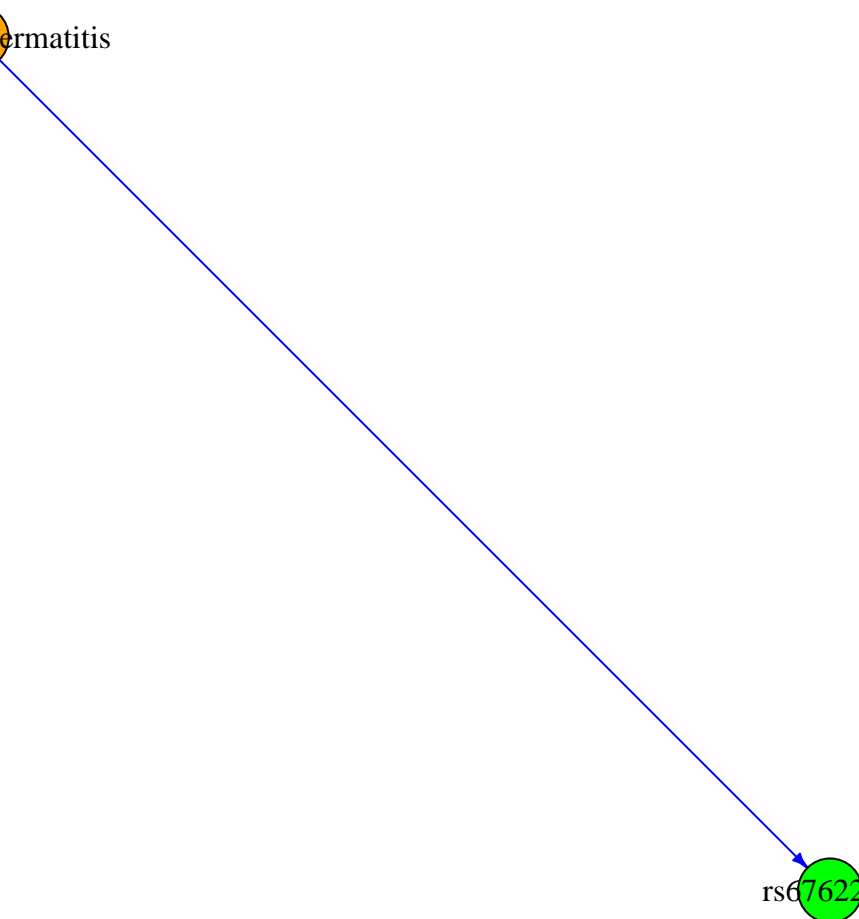

## Variant–Disease Network (attention function measurement)

rs1565376

attention function measurement

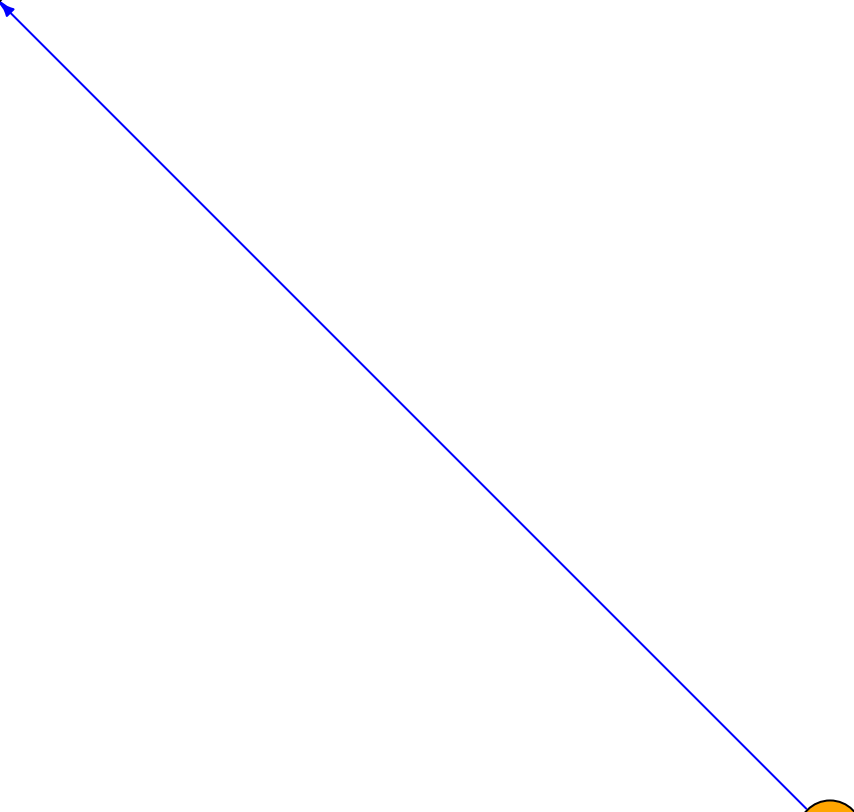

## Variant-Disease Network (longevity)

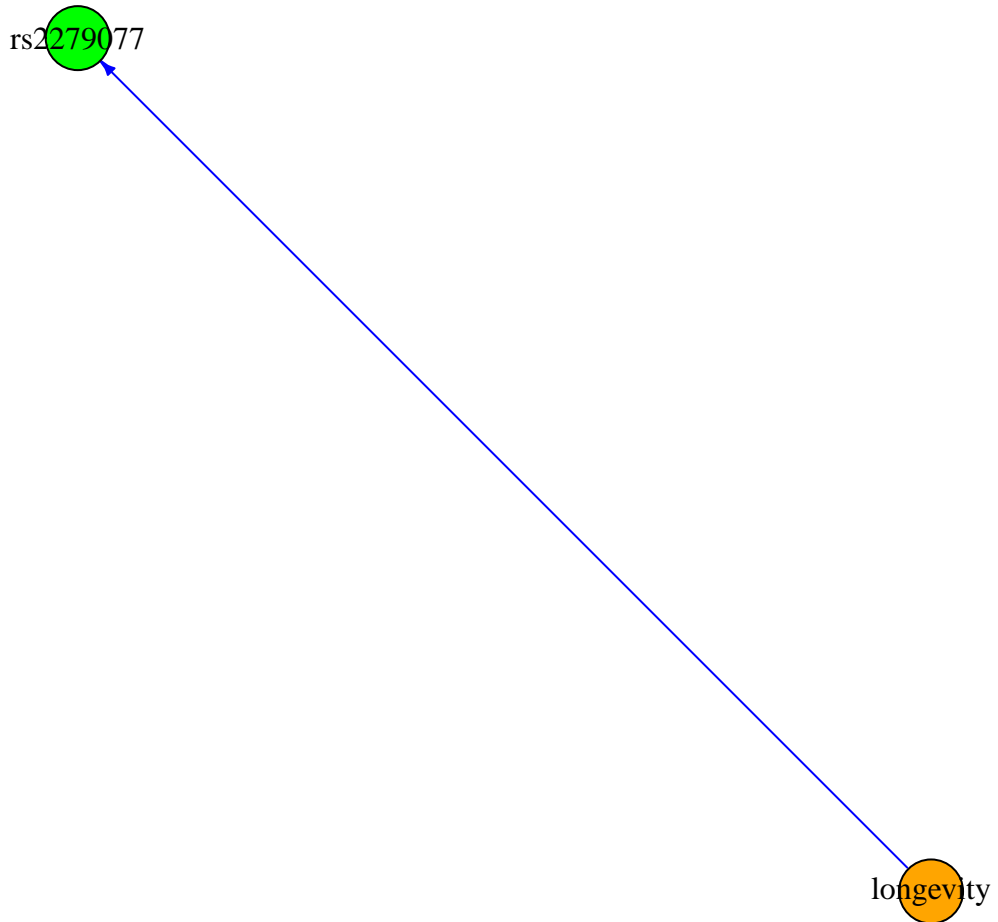

Variant–Disease Network (gut microbiome measurement)

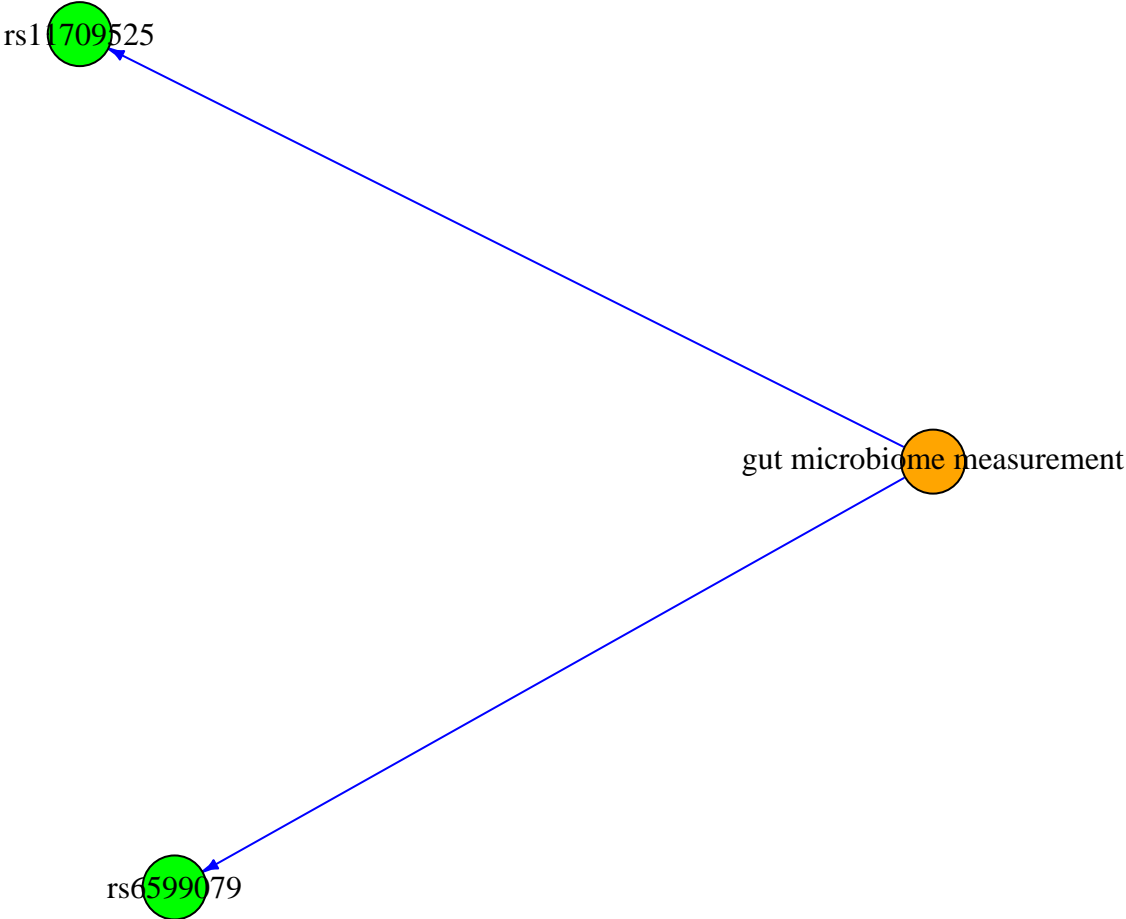

# Variant-Disease Network (hepatocyte growth factor-like protein measurement)

hepatocyte growth factor-like protein measurement

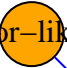

rs11709525

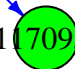

## Variant–Disease Network (self rated health)

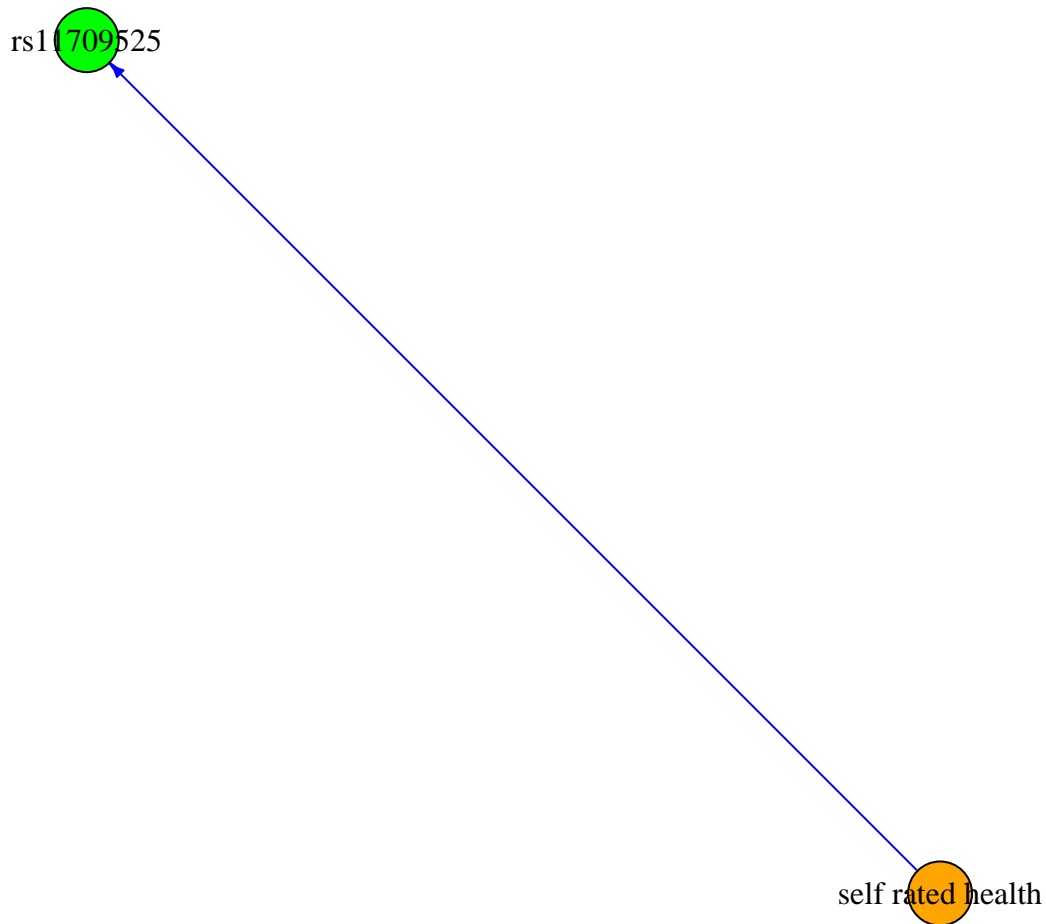



# Variant–Disease Network (resting heart rate)

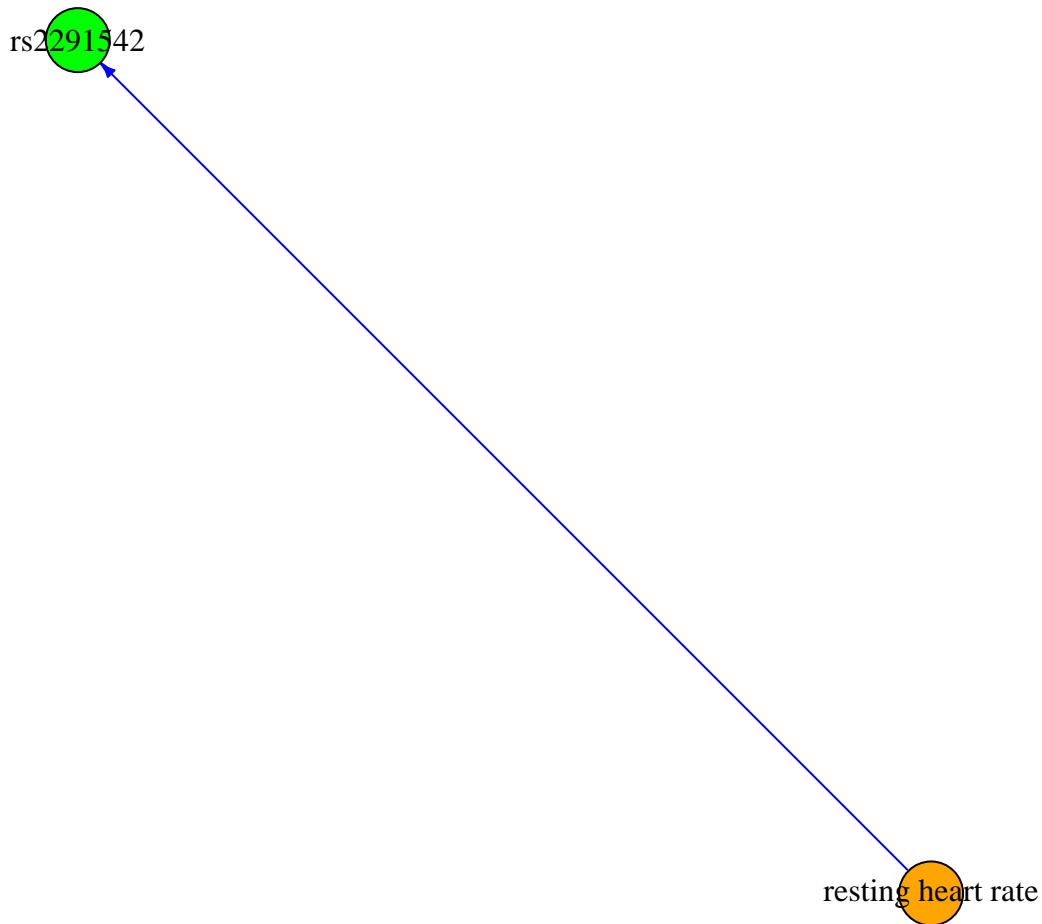

## Variant-Disease Network (mean arterial pressure)

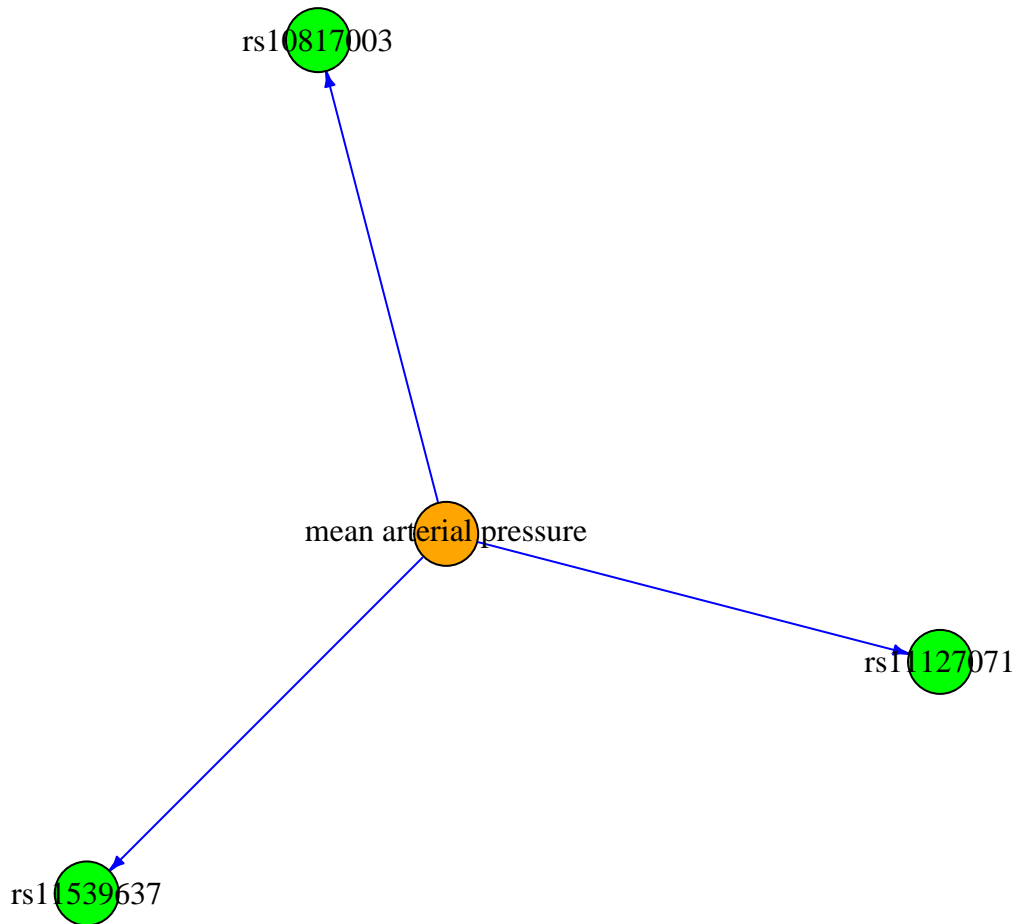

**Variant–Disease Network (abdominal aortic artery calcification)**

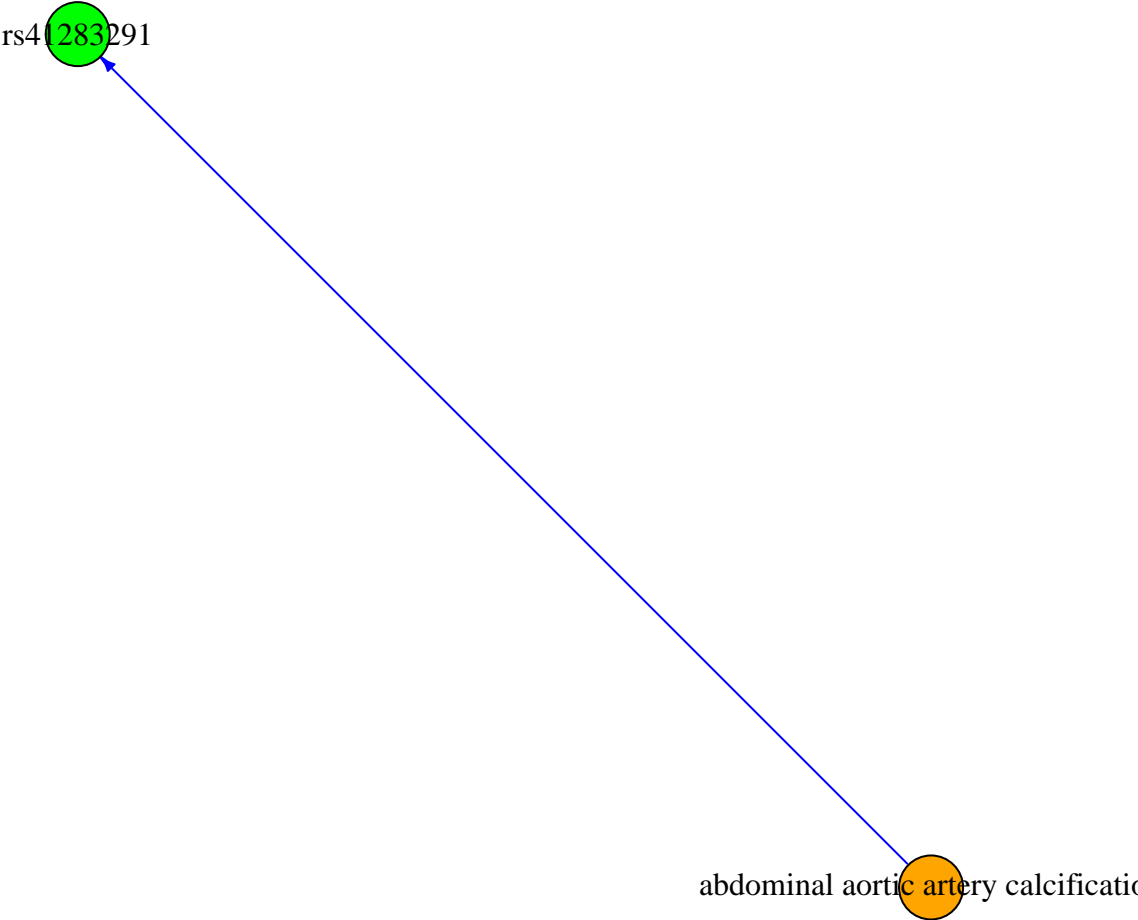

## Variant-Disease Network (exercise test)

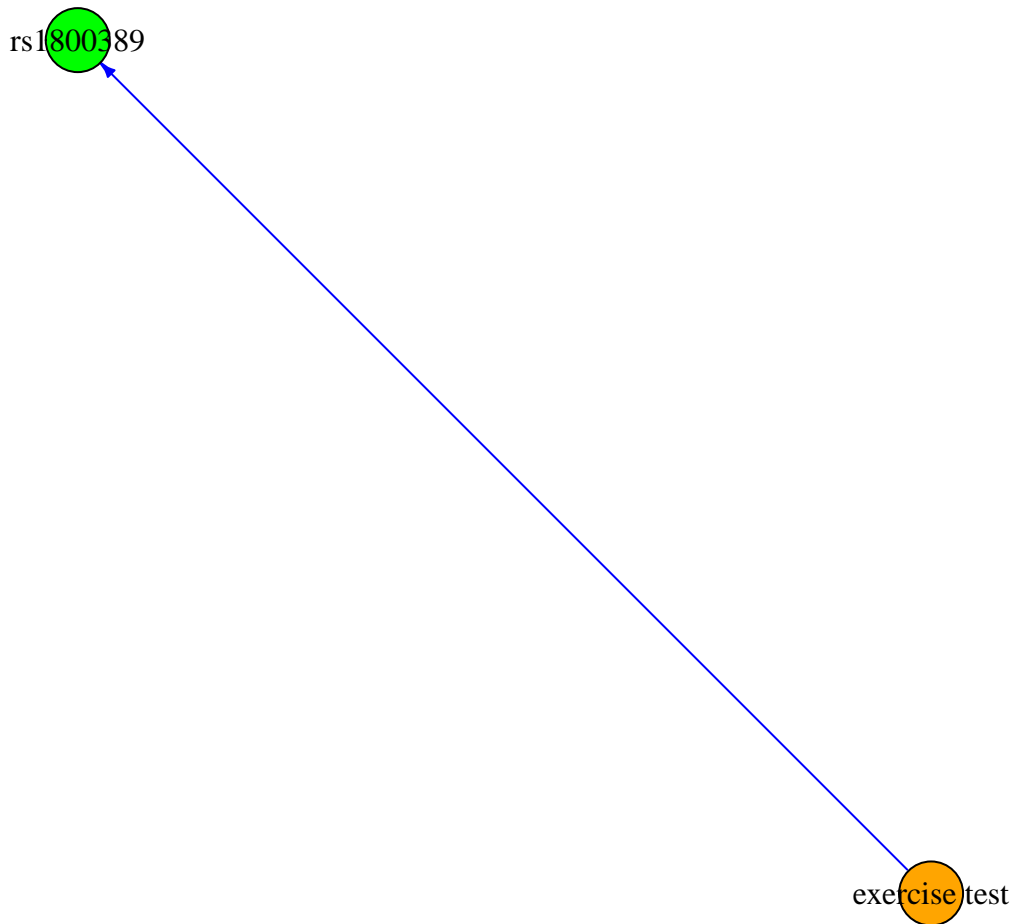

Variant–Disease Network (amino acid measurement)

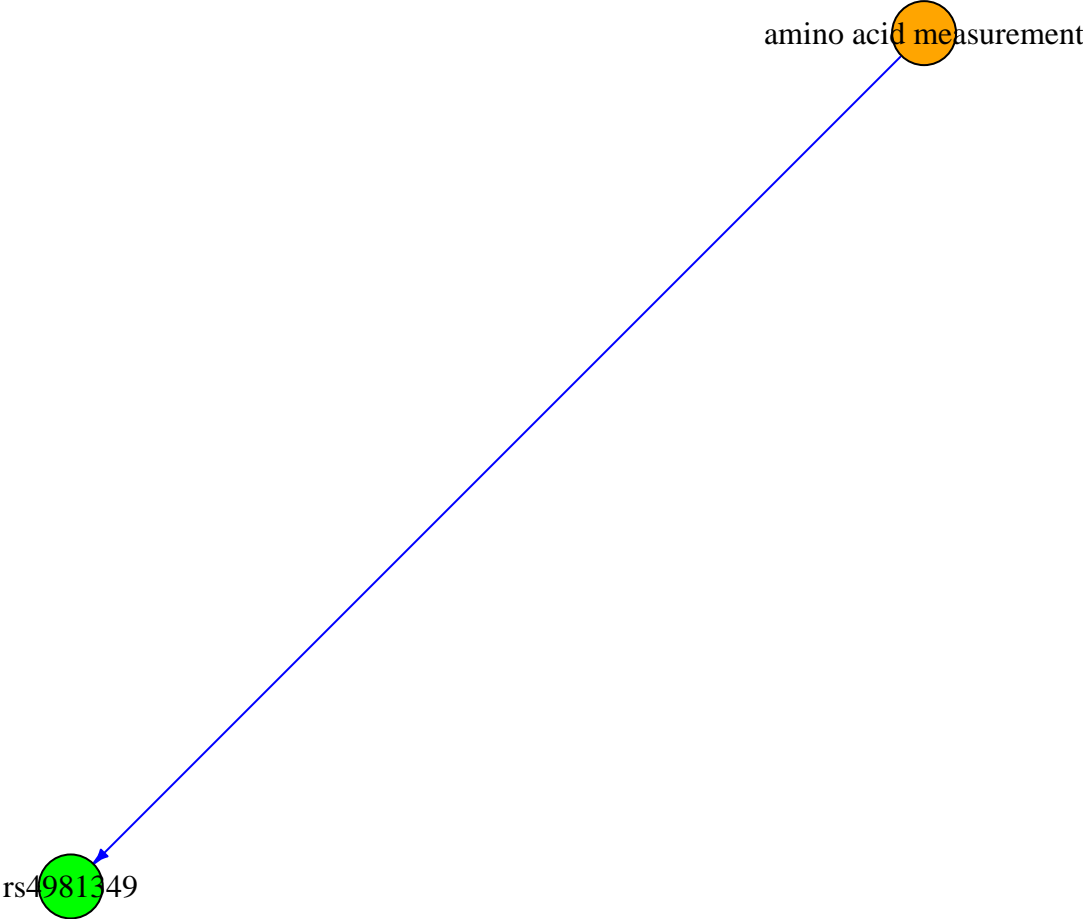

## Variant–Disease Network (protein measurement)

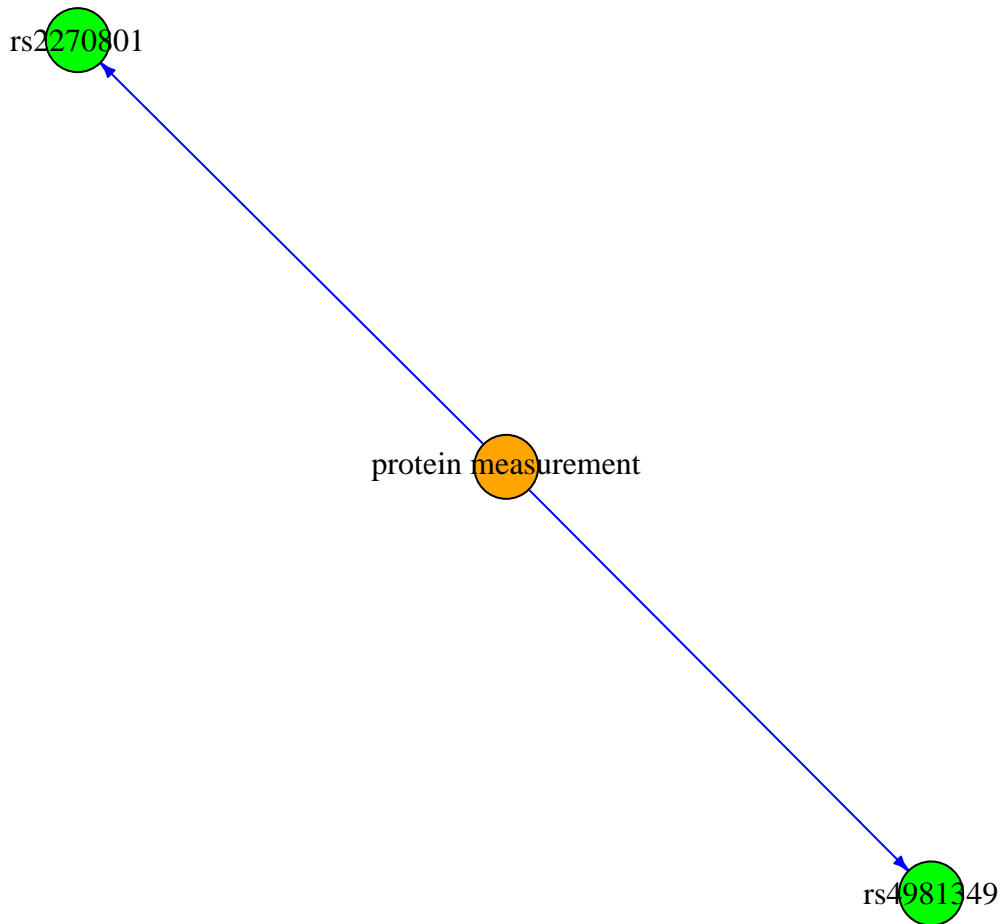

## Variant-Disease Network (response to anticoagulant)

response to anticoagulant

rs3758580

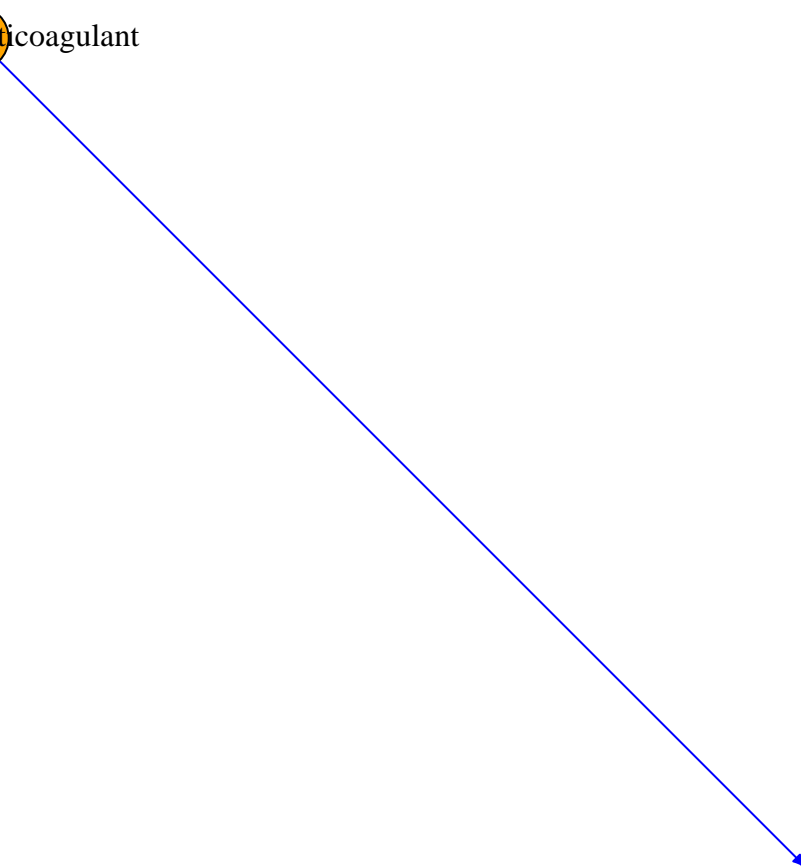

# Variant–Disease Network (response to platelet aggregation inhibitor)

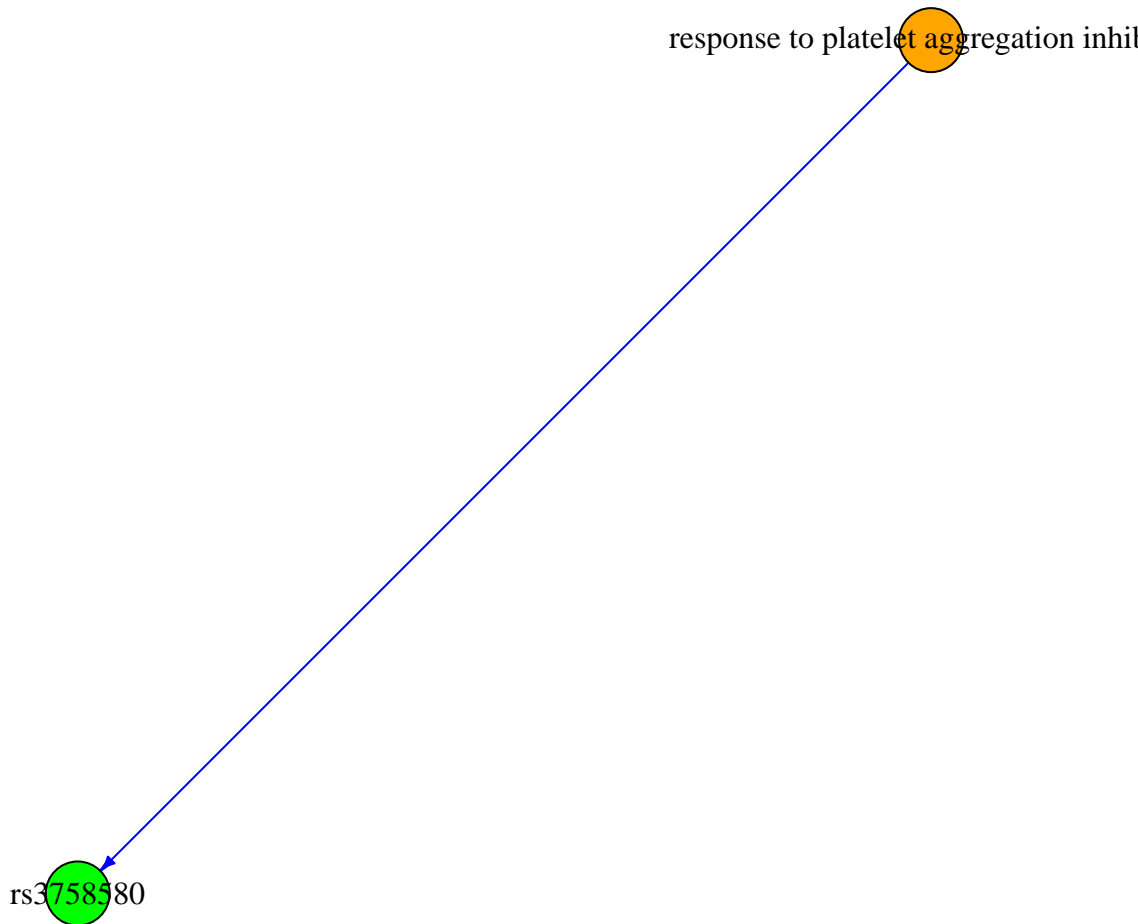



**Variant–Disease Network (age-related macular degeneration)**

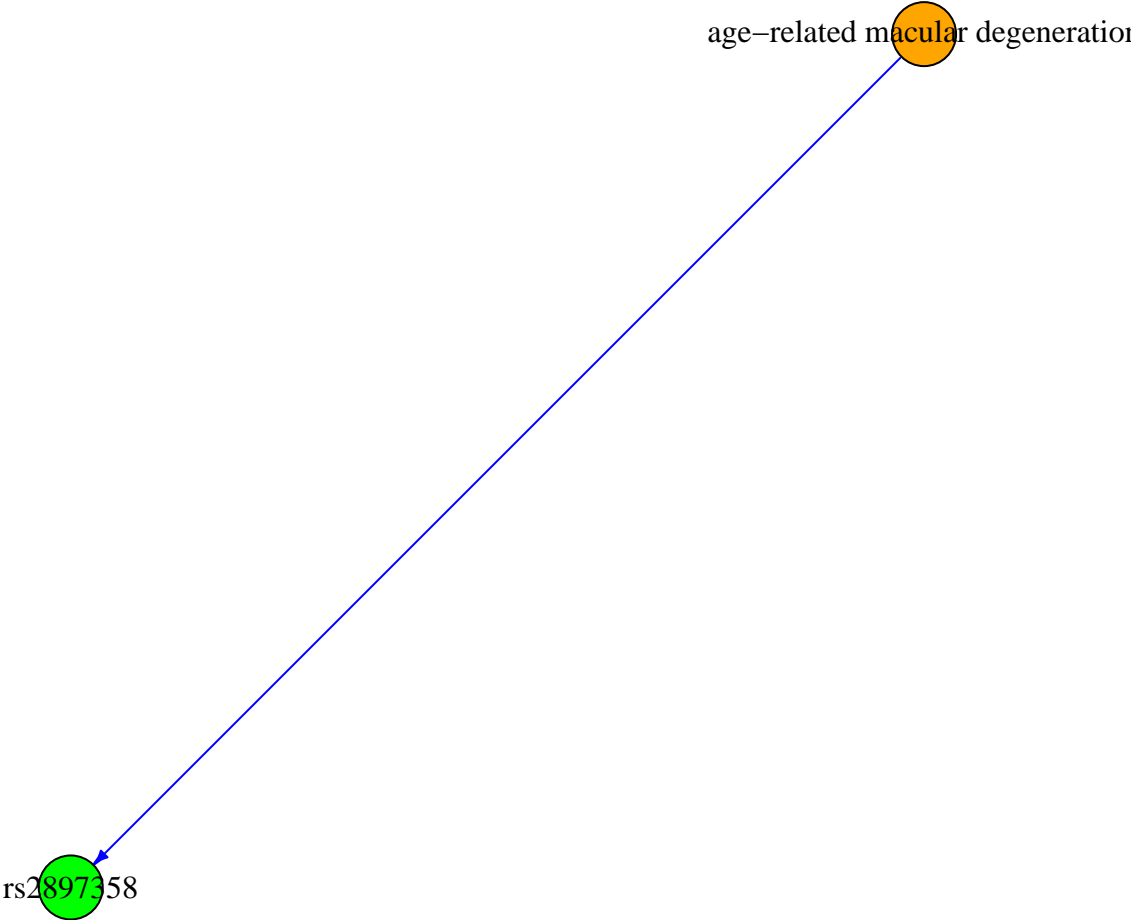

## Variant–Disease Network (atrophic macular degeneration)

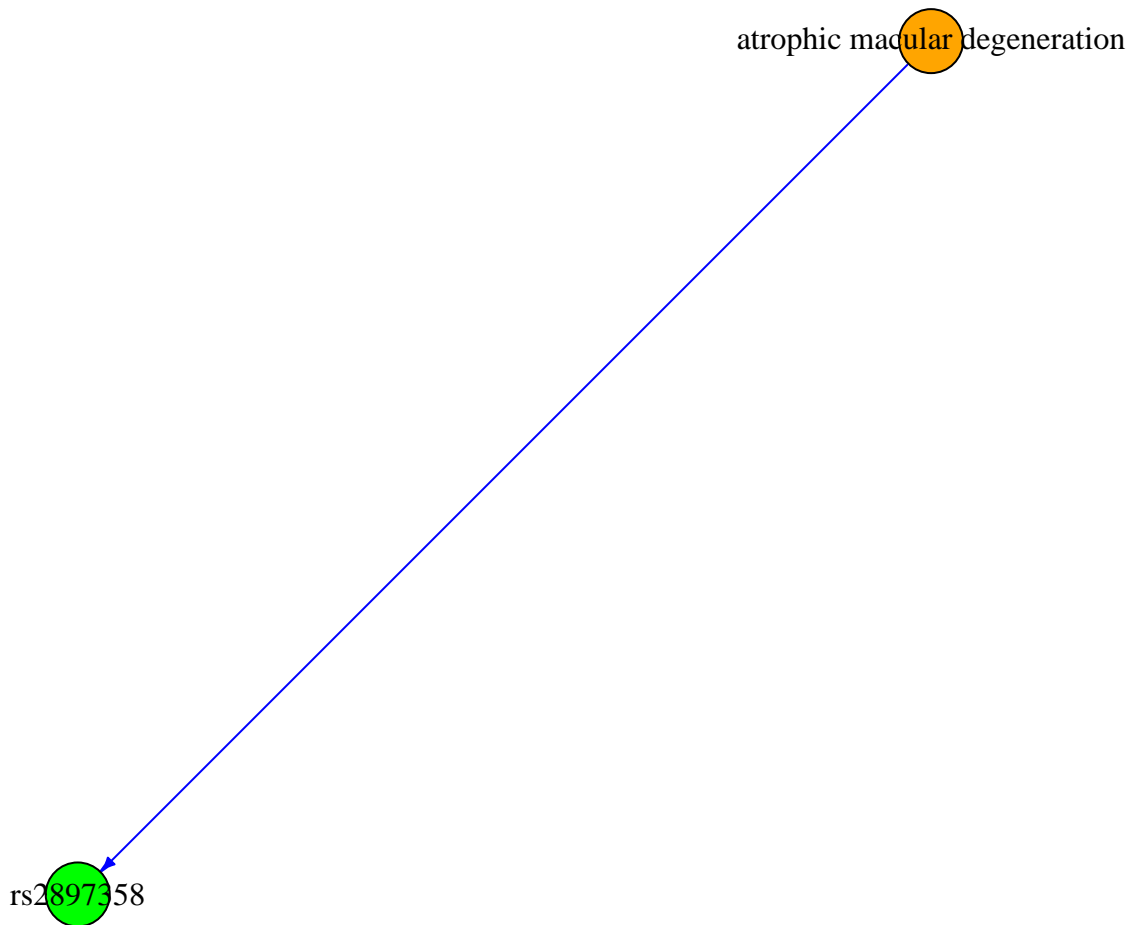

## Variant–Disease Network (wet macular degeneration)

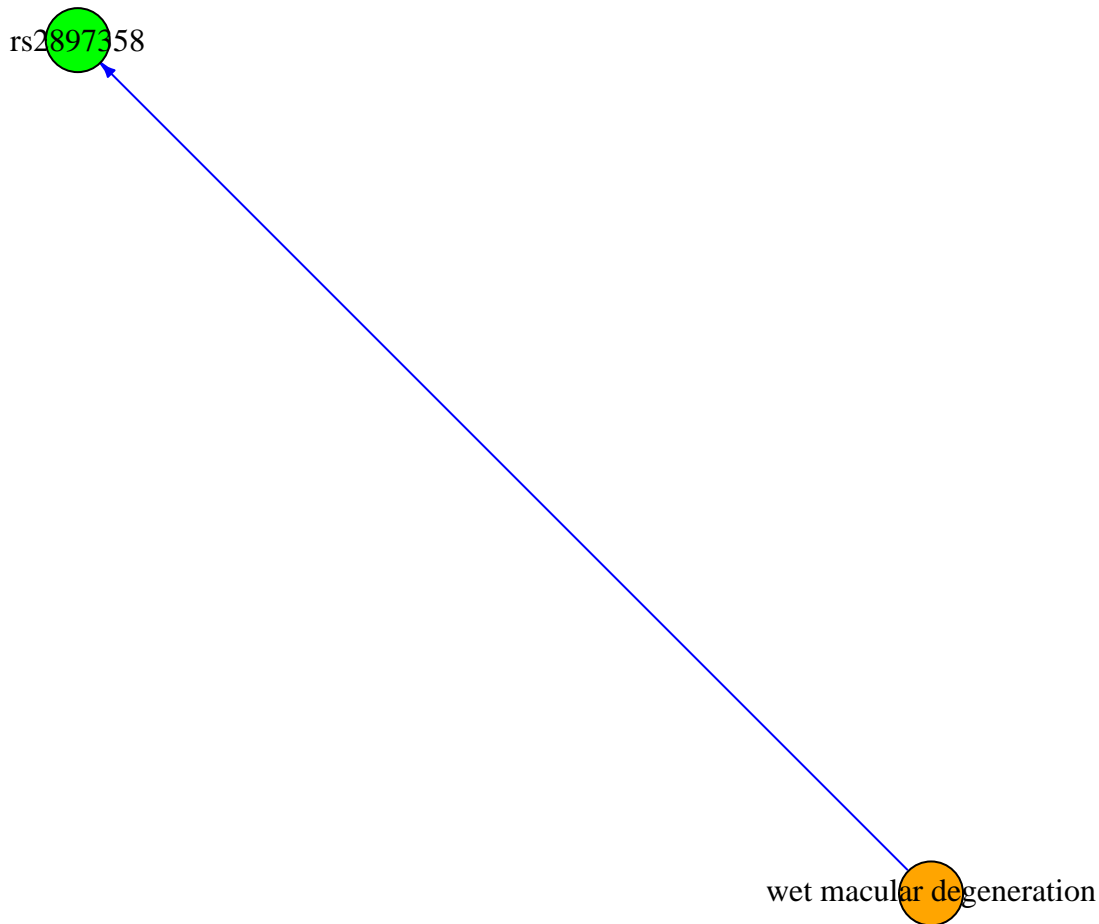

## Variant–Disease Network (age at first birth measurement)

age at first birth measurement

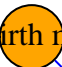

rs1063739

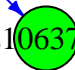

## Variant-Disease Network (albuminuria)

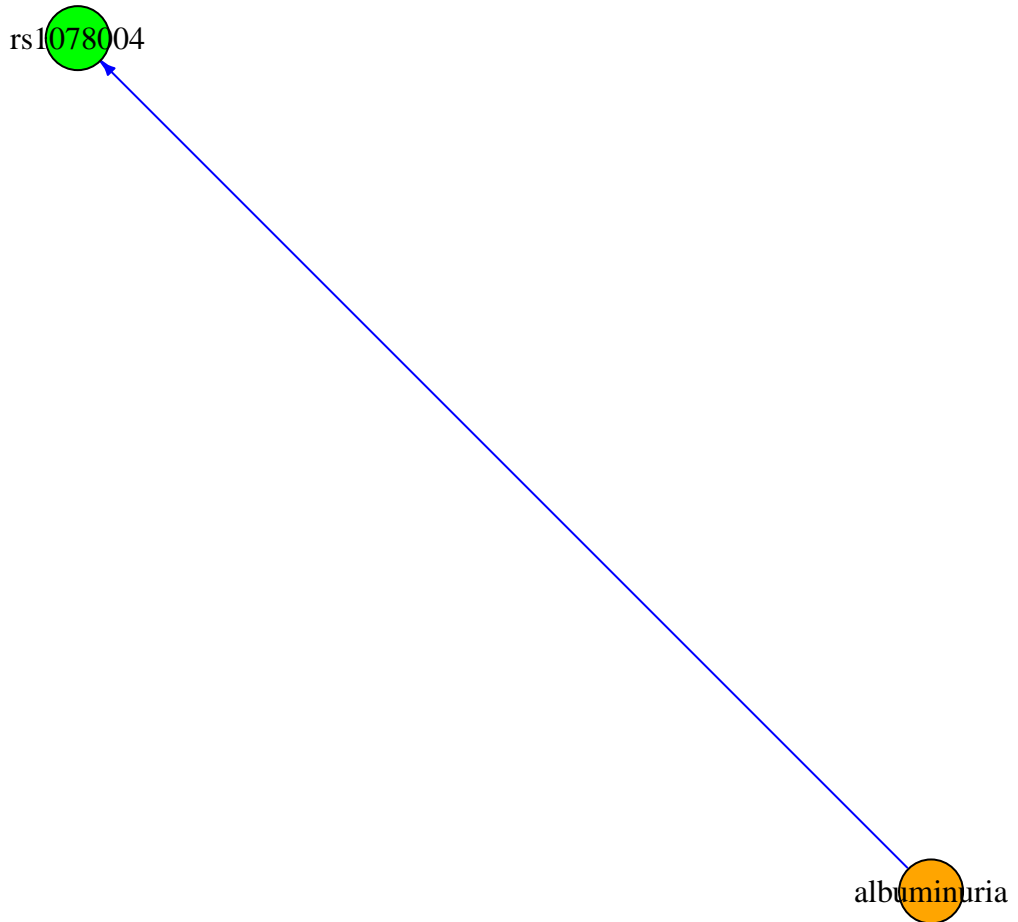

# Variant–Disease Network (blood osmolality measurement)

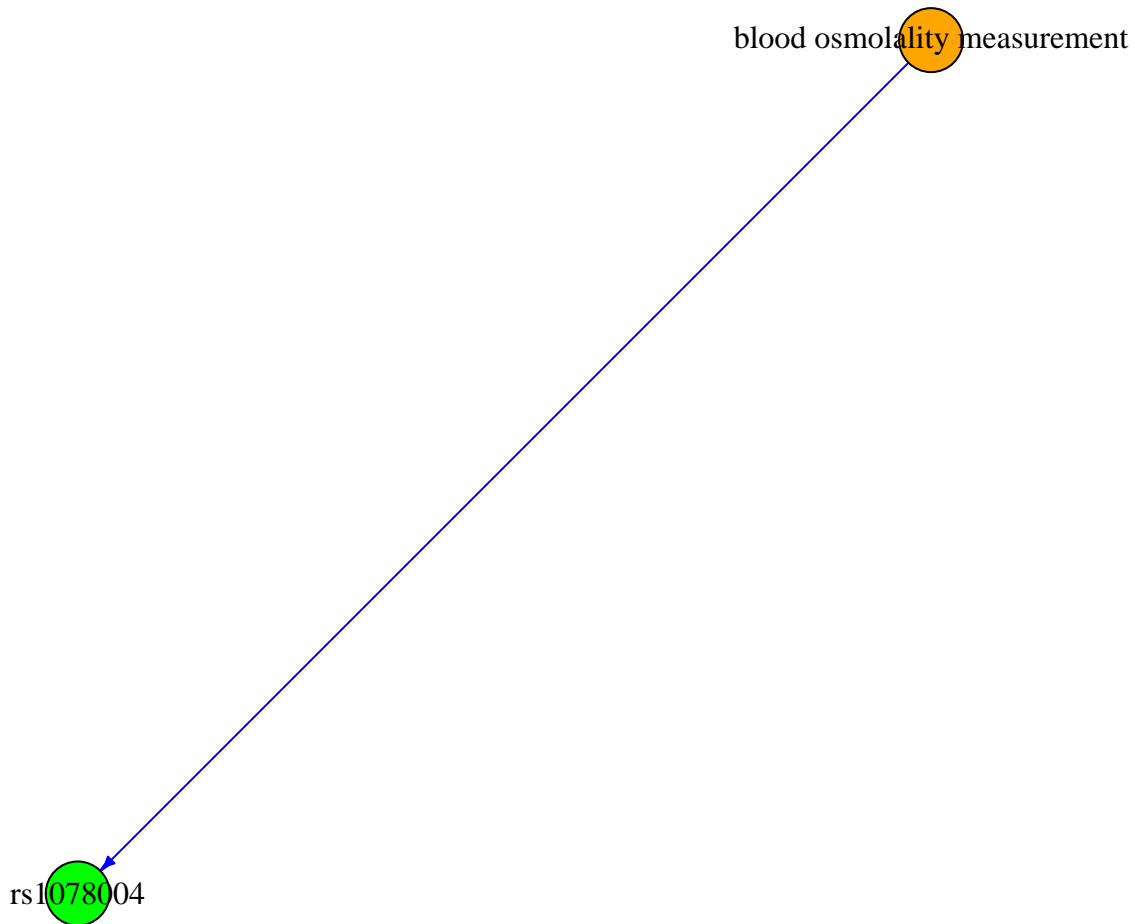

## Variant–Disease Network (myocardial infarction)

myocardial infarction

rs1078004

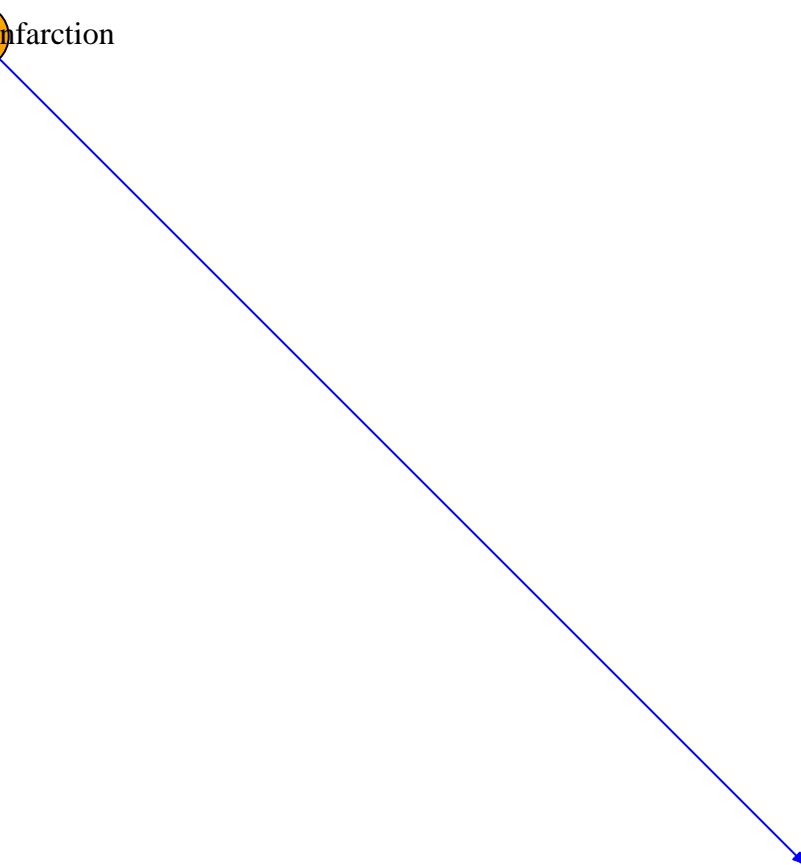

## Variant-Disease Network (body weight)

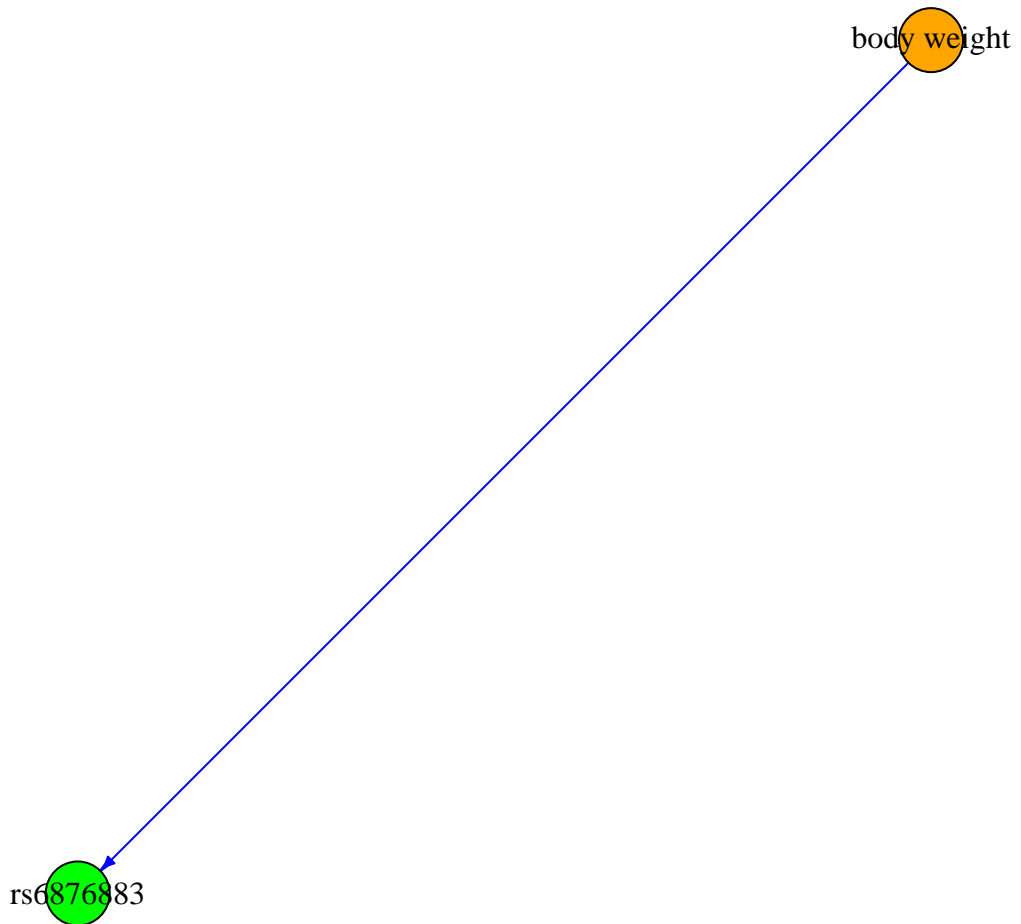



## Variant–Disease Network (nose morphology measurement)

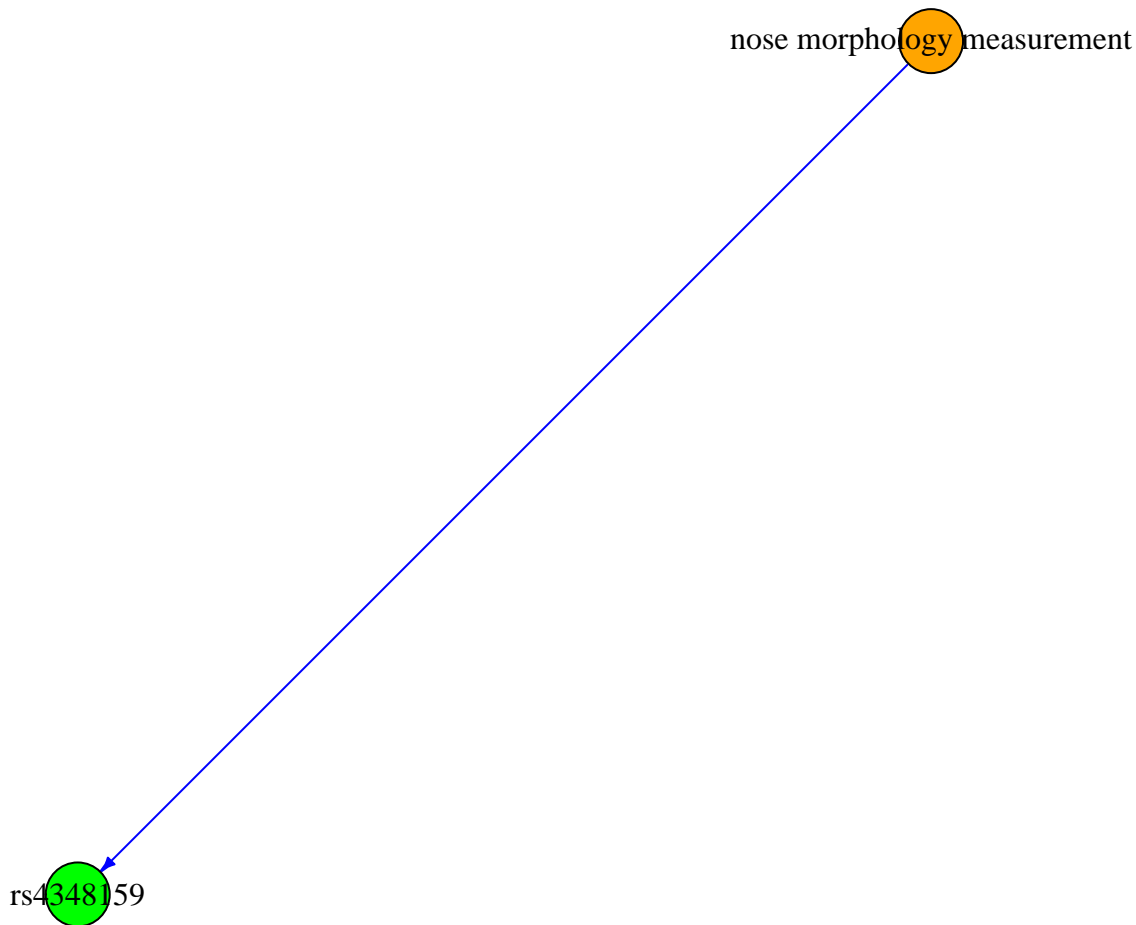

## Variant–Disease Network (acylcarnitine measurement)

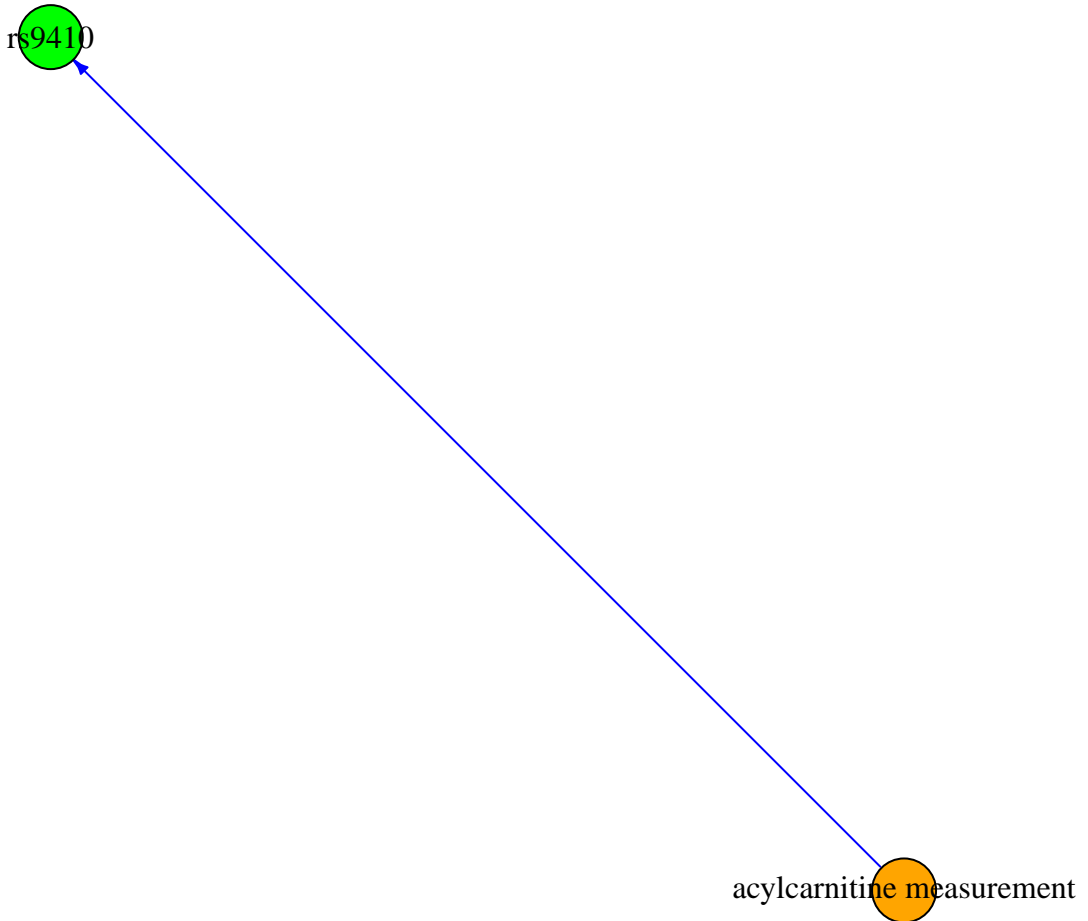

# Variant-Disease Network (metabolite measurement)

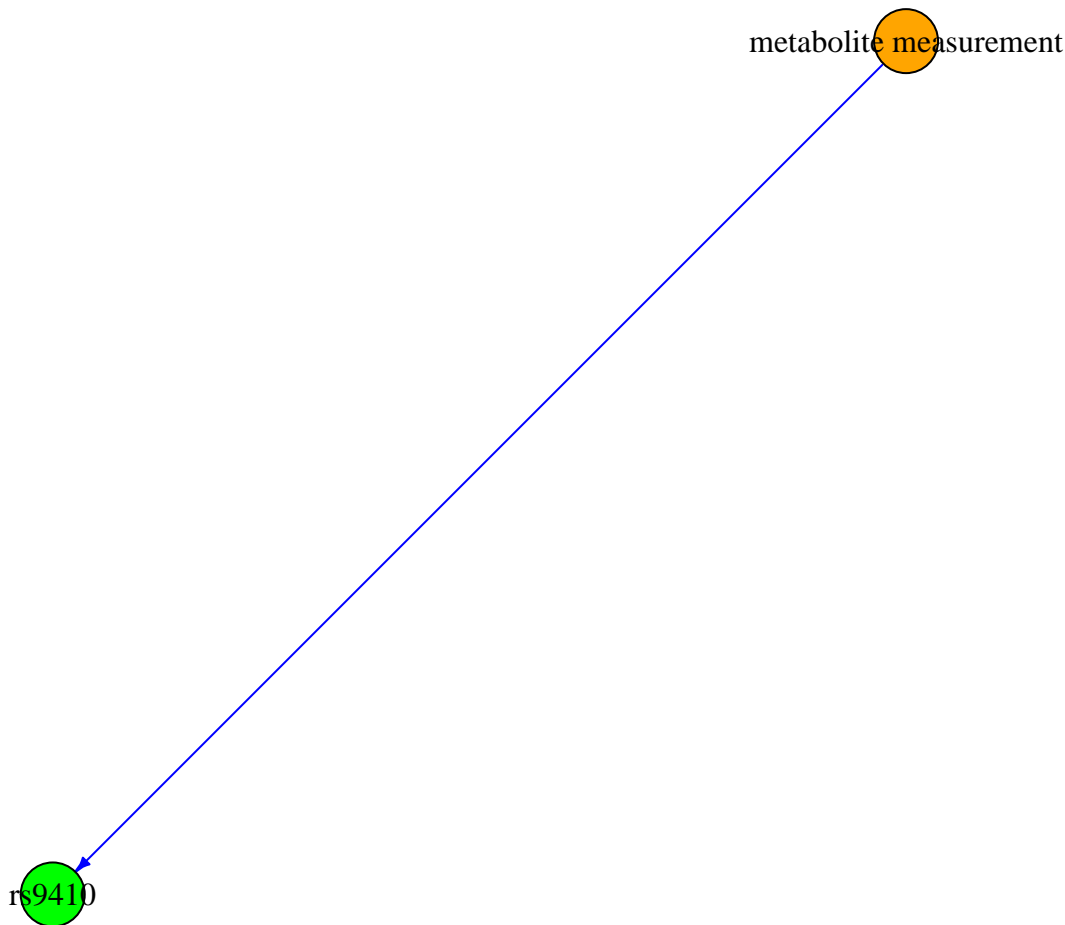

# Variant–Disease Network (peptidyl–prolyl cis–trans isomerase D measurement)

rs94110

peptidyl–prolyl cis–trans isomerase D measurement



## Variant-Disease Network (serum metabolite measurement)

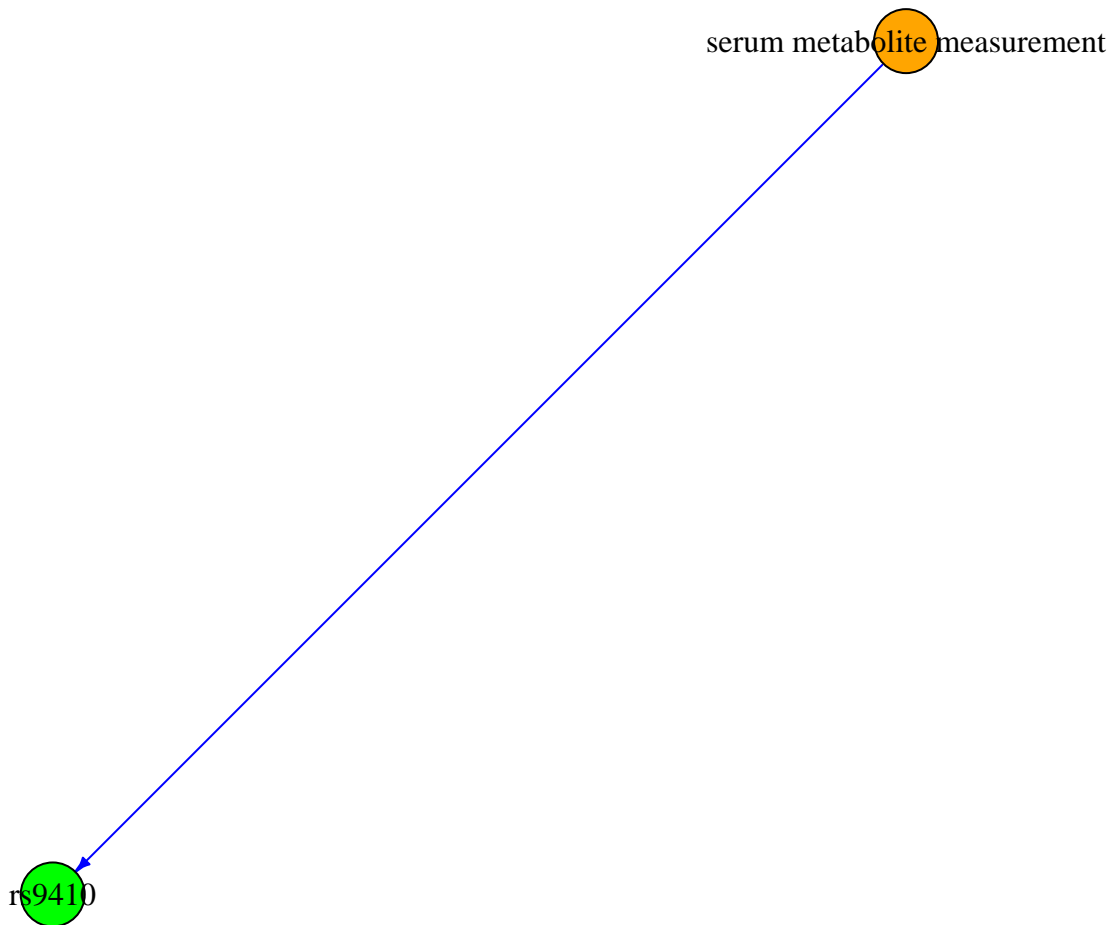

**Variant–Disease Network (chronic hepatitis C infection)**

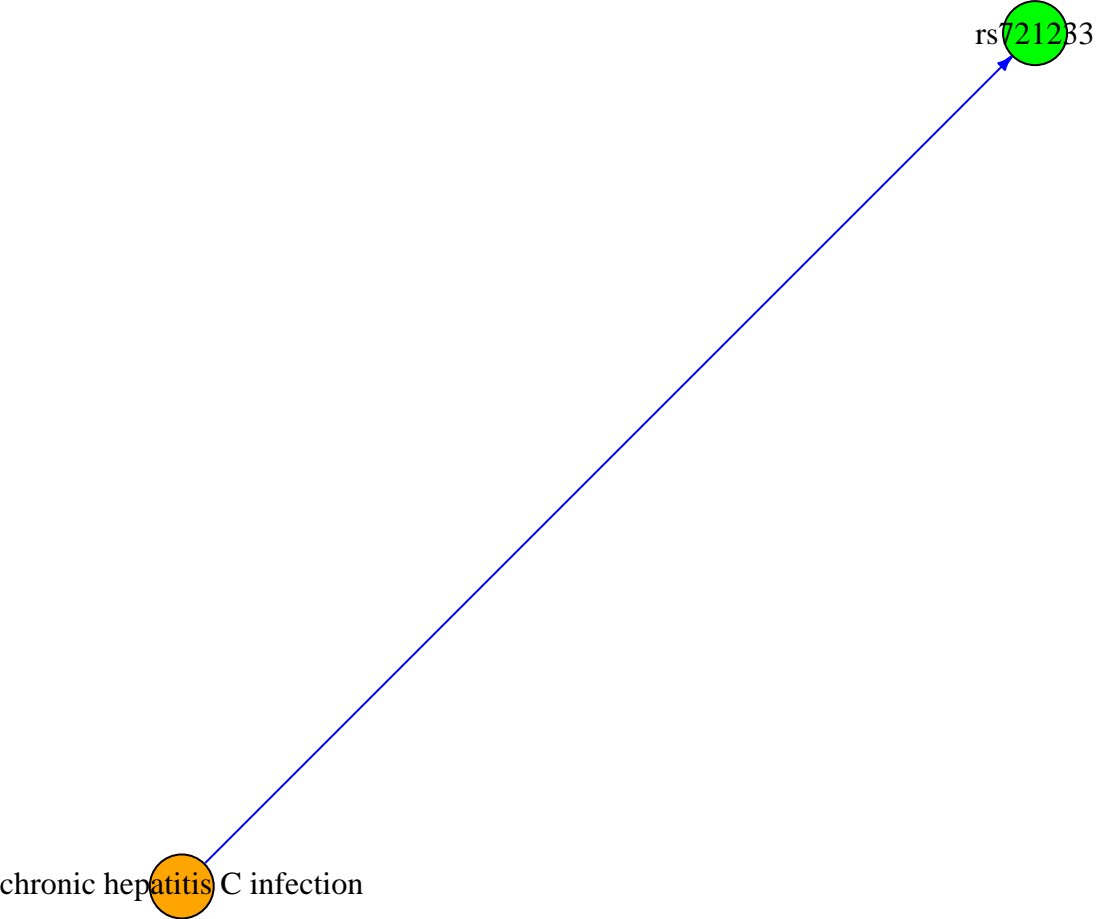

## Variant-Disease Network (necrotizing enterocolitis)

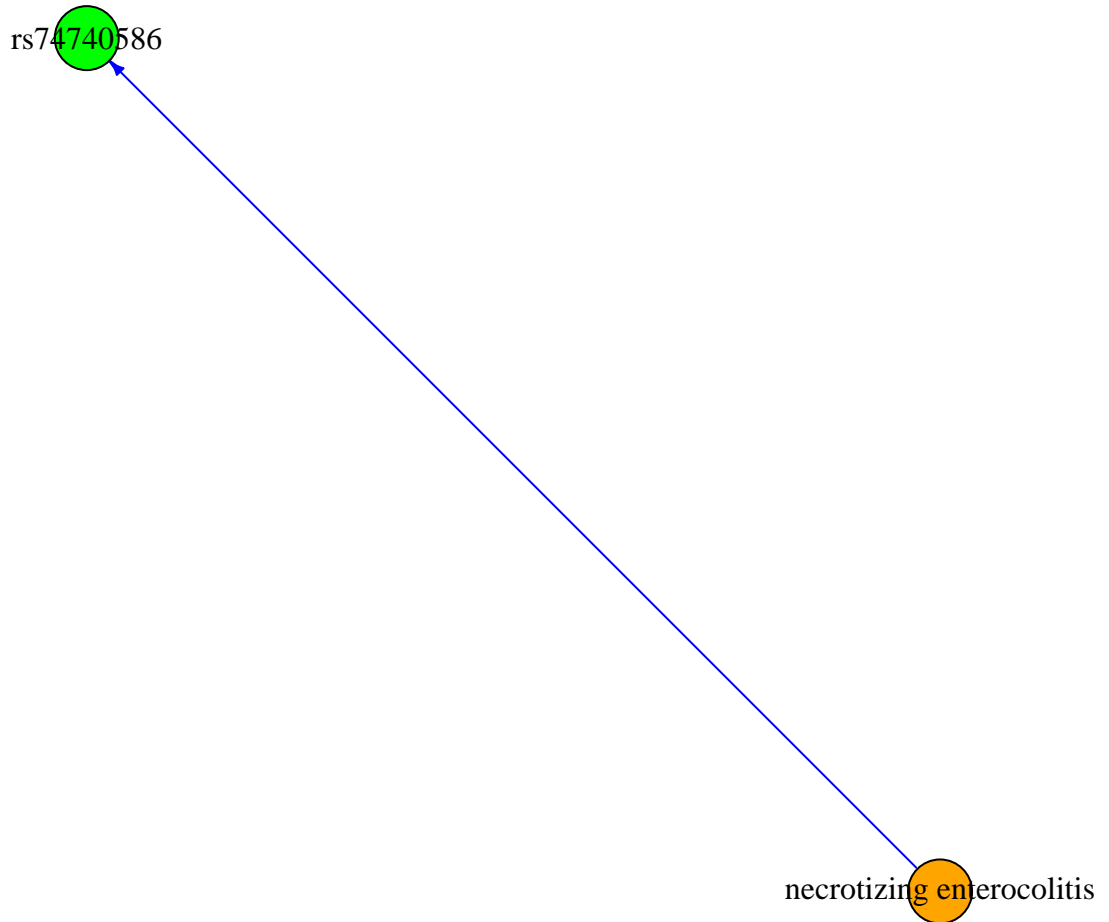

## Variant–Disease Network (premature birth)

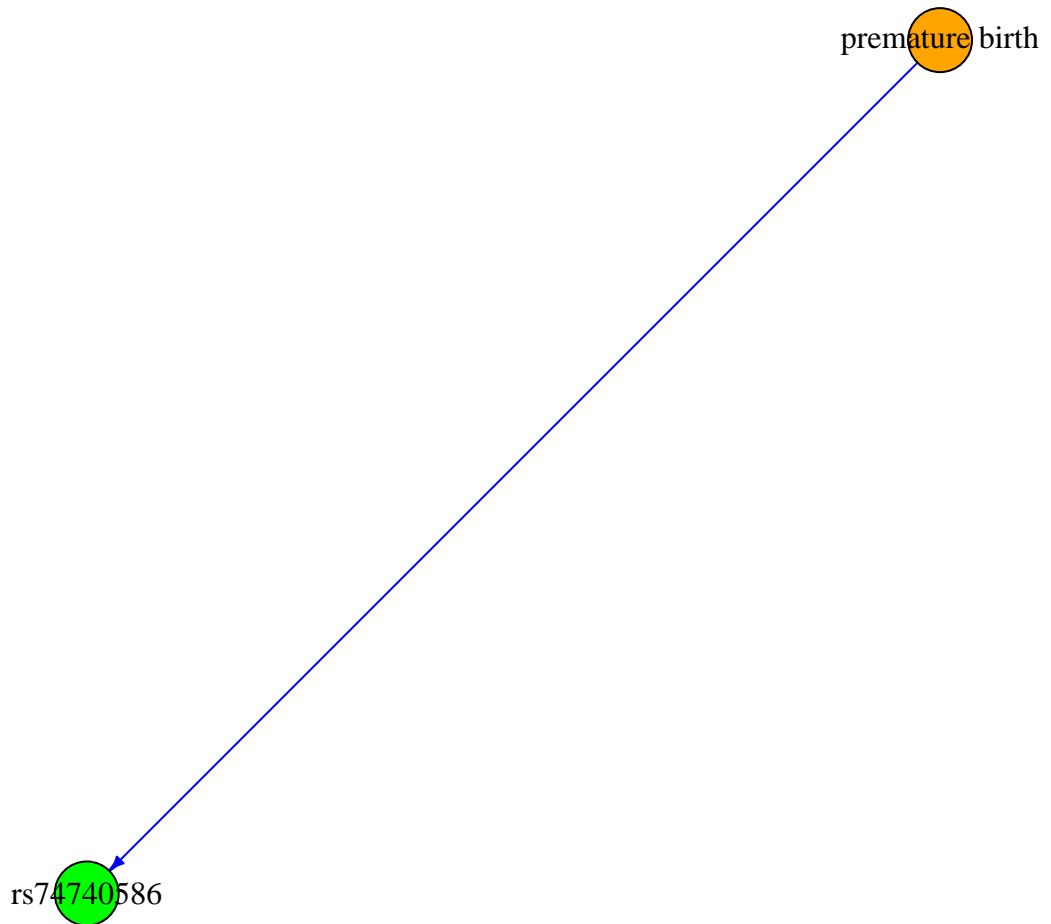



## Variant–Disease Network (allergic sensitization measurement)

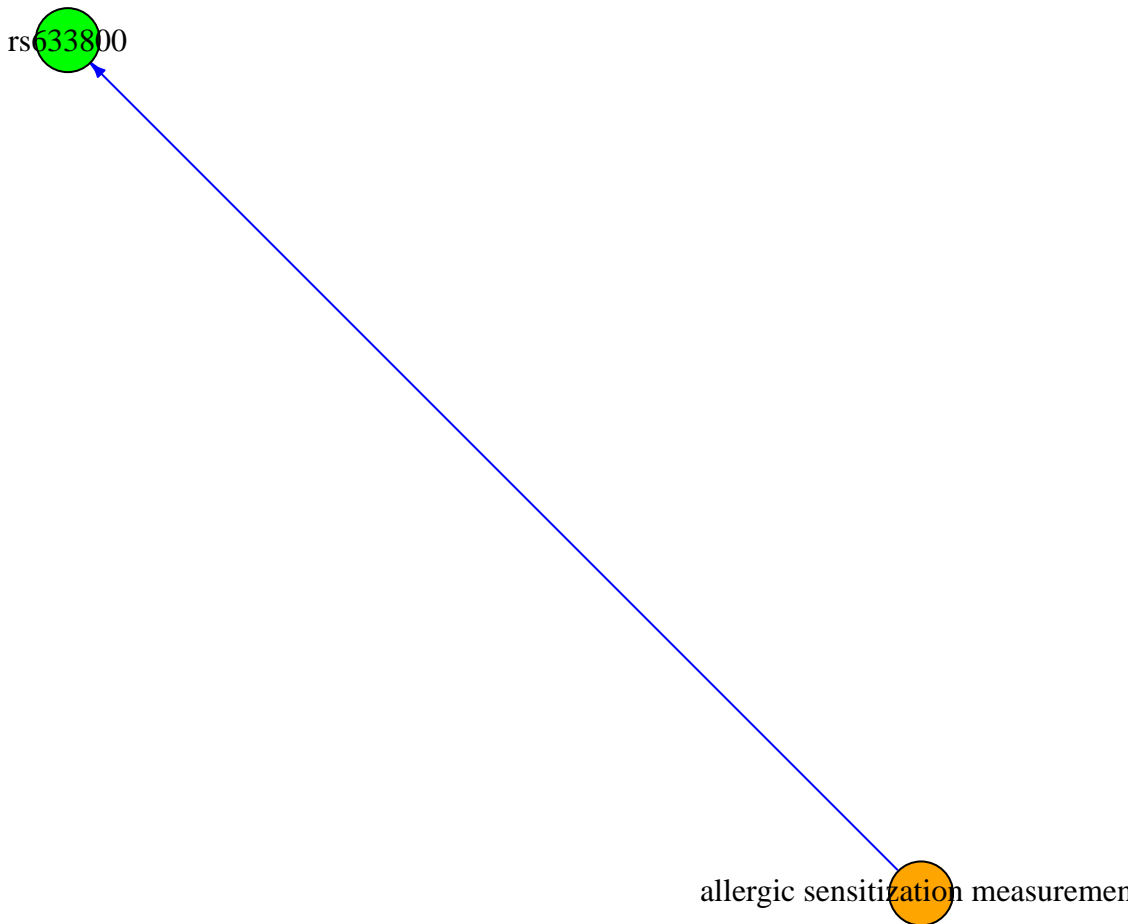

# Variant–Disease Network (eosinophil percentage of granulocytes)

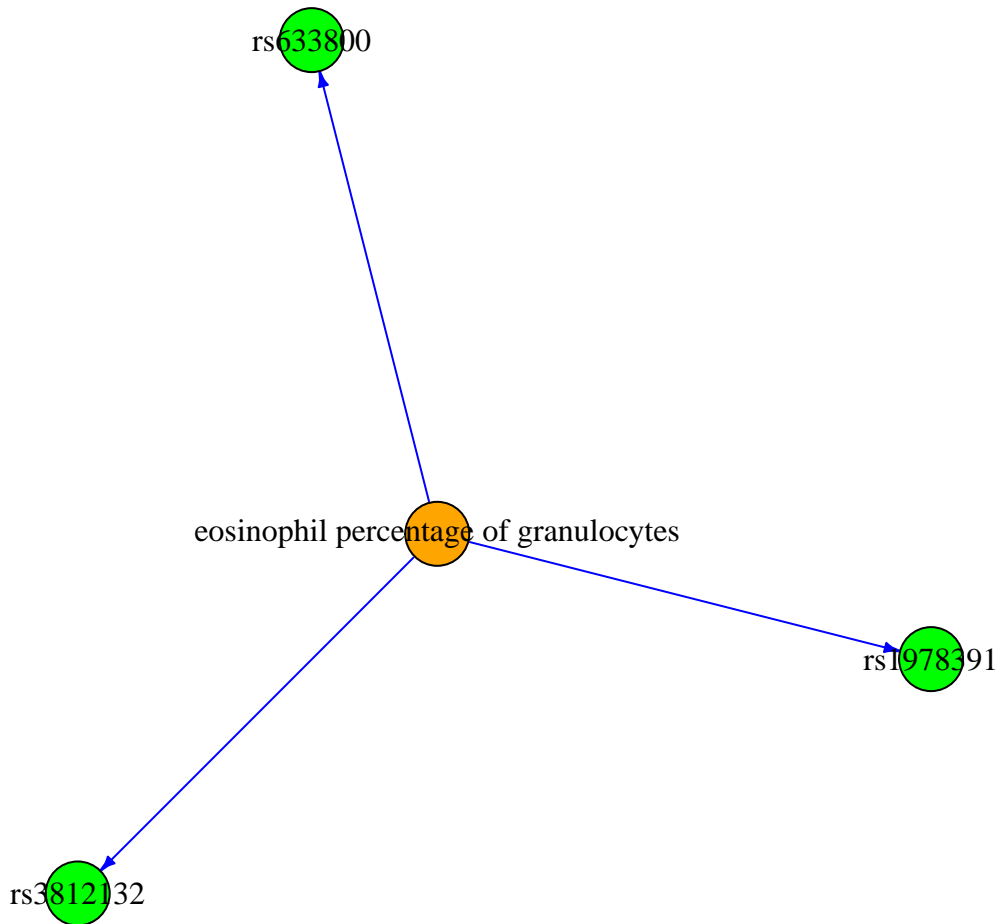

Variant–Disease Network (eosinophil percentage of white cells)

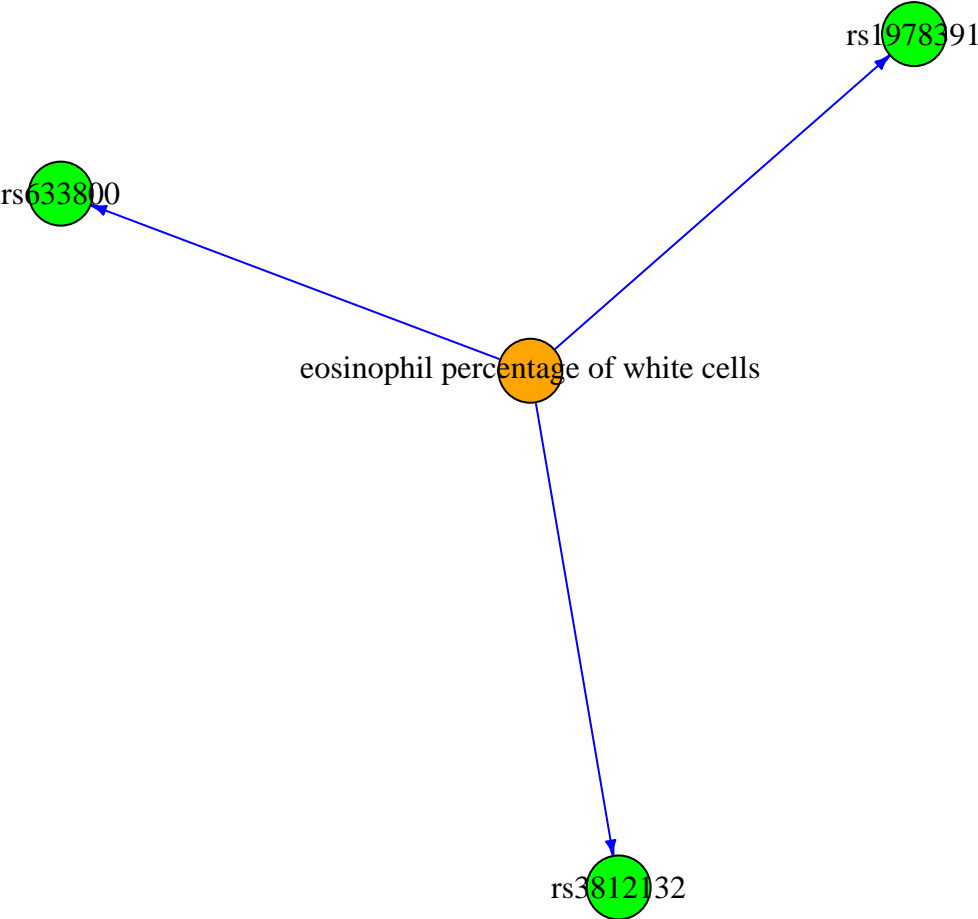

# Variant–Disease Network (neutrophil percentage of granulocytes)

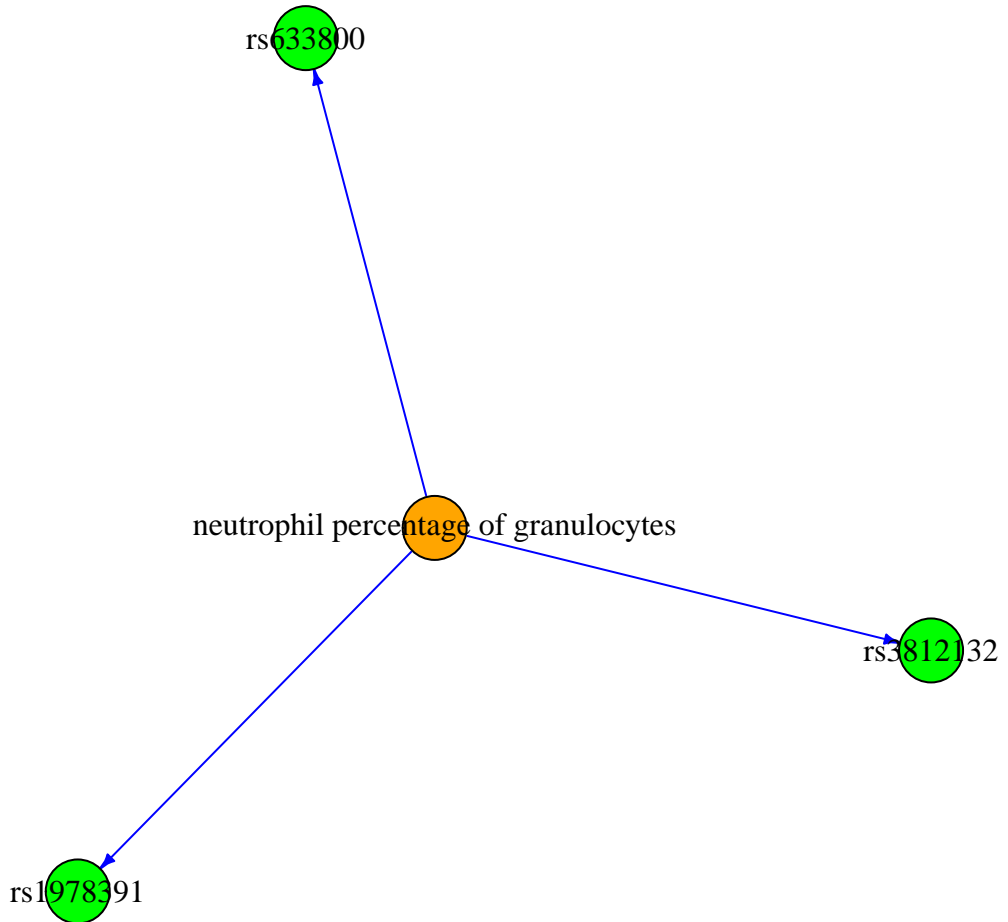

Variant–Disease Network (taxonomic microbiome measurement)

taxonomic microbiome measurement

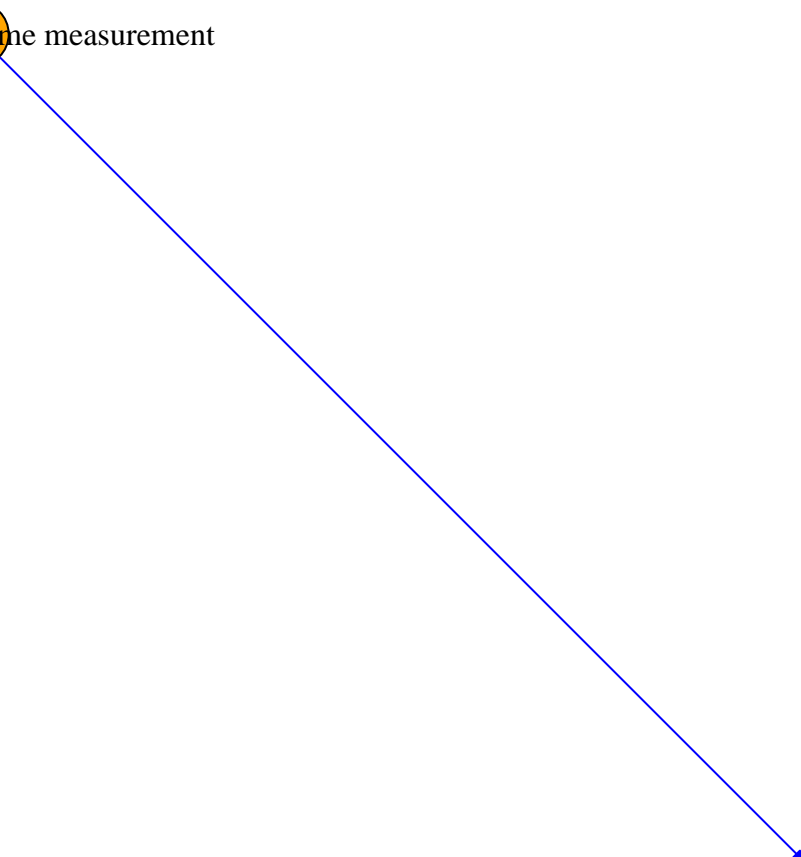

rs6599079

## Variant–Disease Network (insulin measurement)

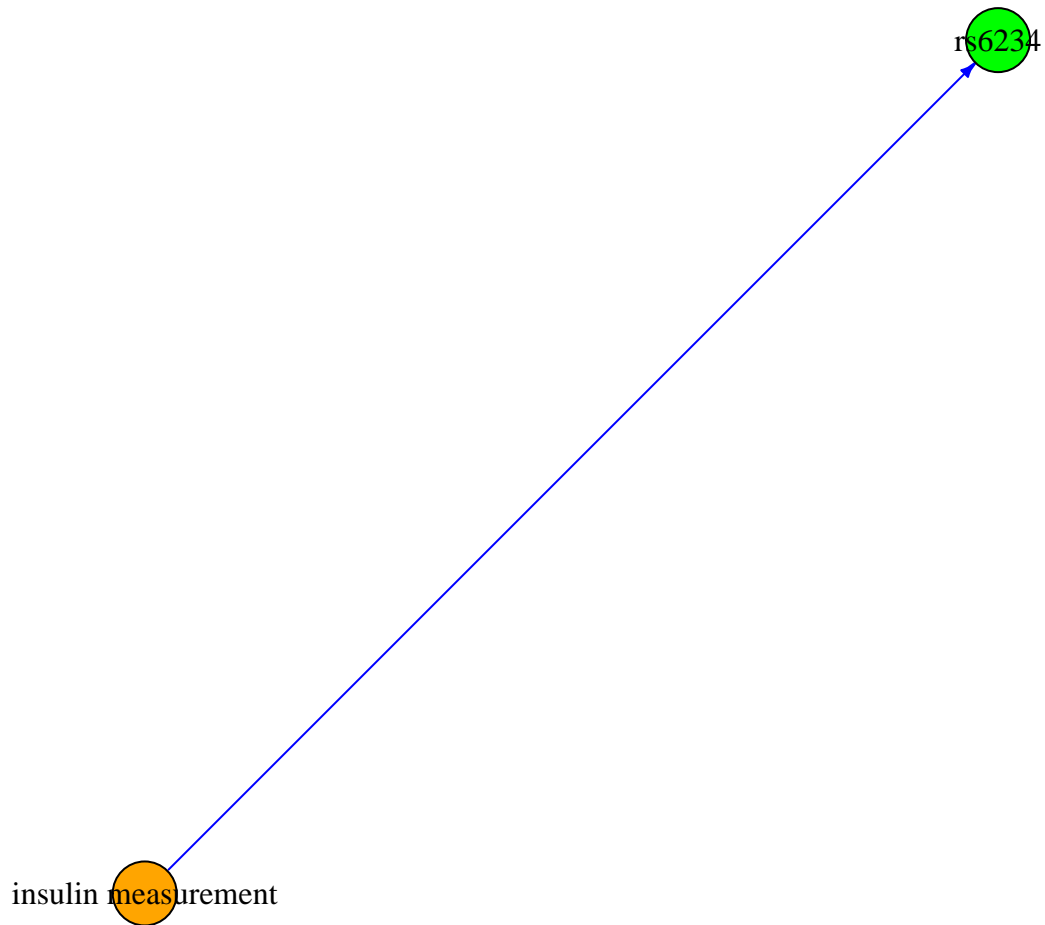

**Variant–Disease Network (BMI-adjusted adiponectin measurement)**

BMI-adjusted adiponectin measurement

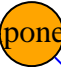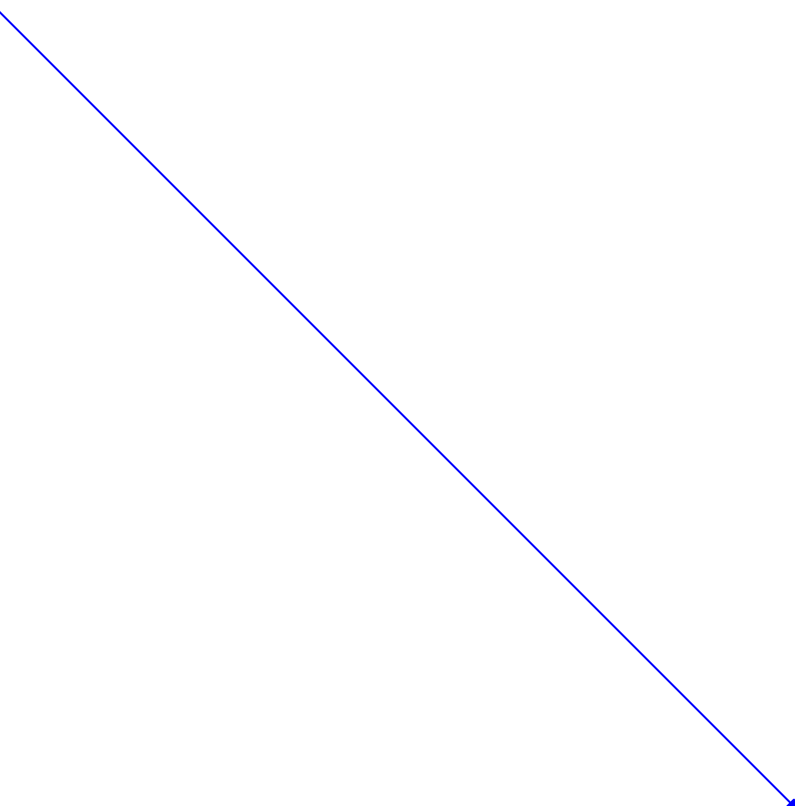

rs11554173

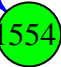

# Variant–Disease Network (beta–nerve growth factor measurement)

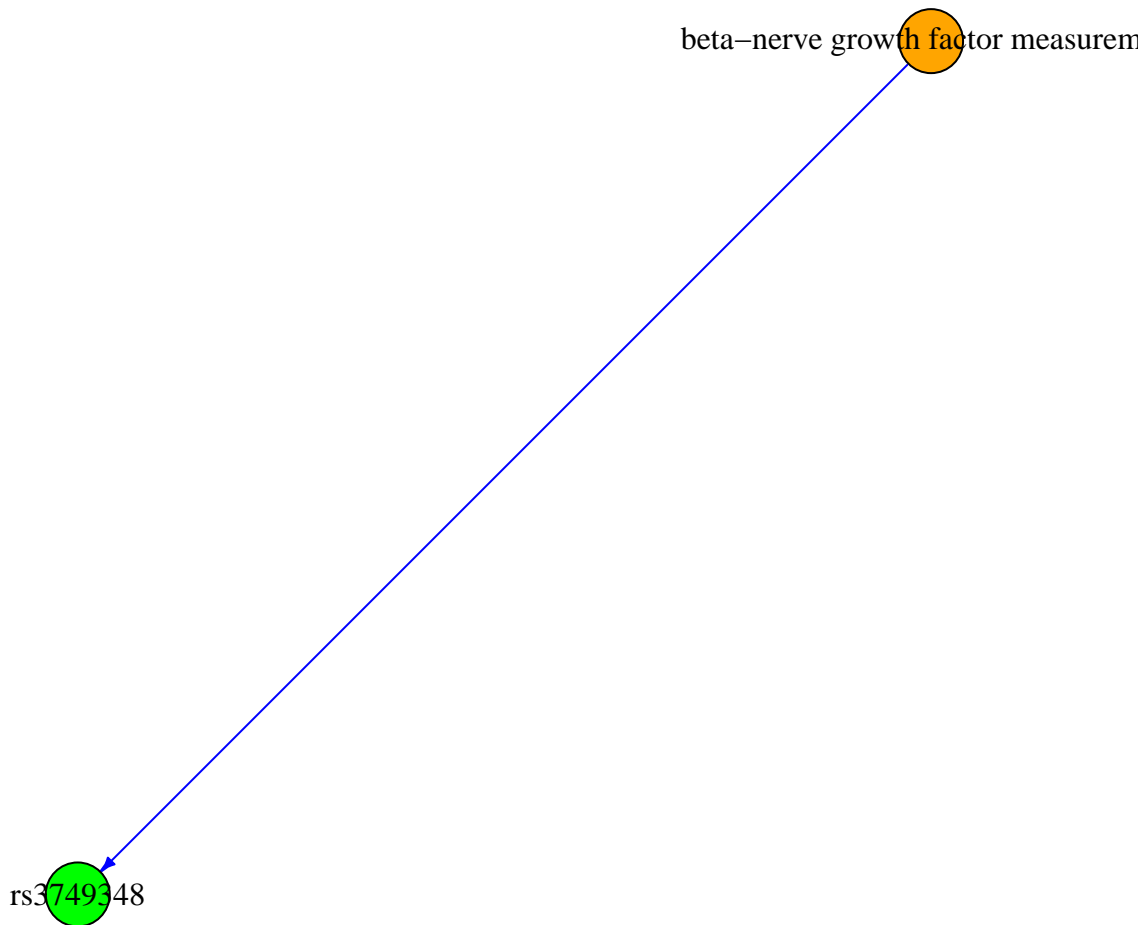



## Variant–Disease Network (alcohol drinking)

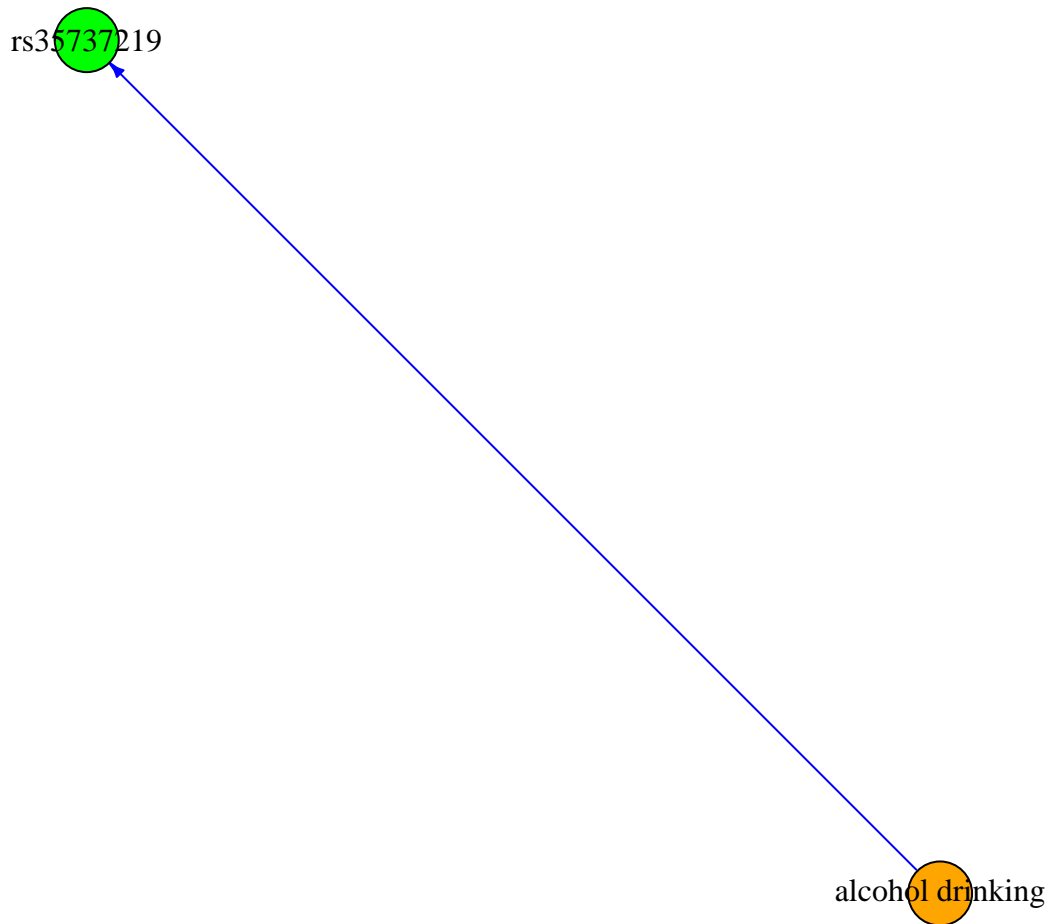

**Variant–Disease Network (testosterone measurement)**

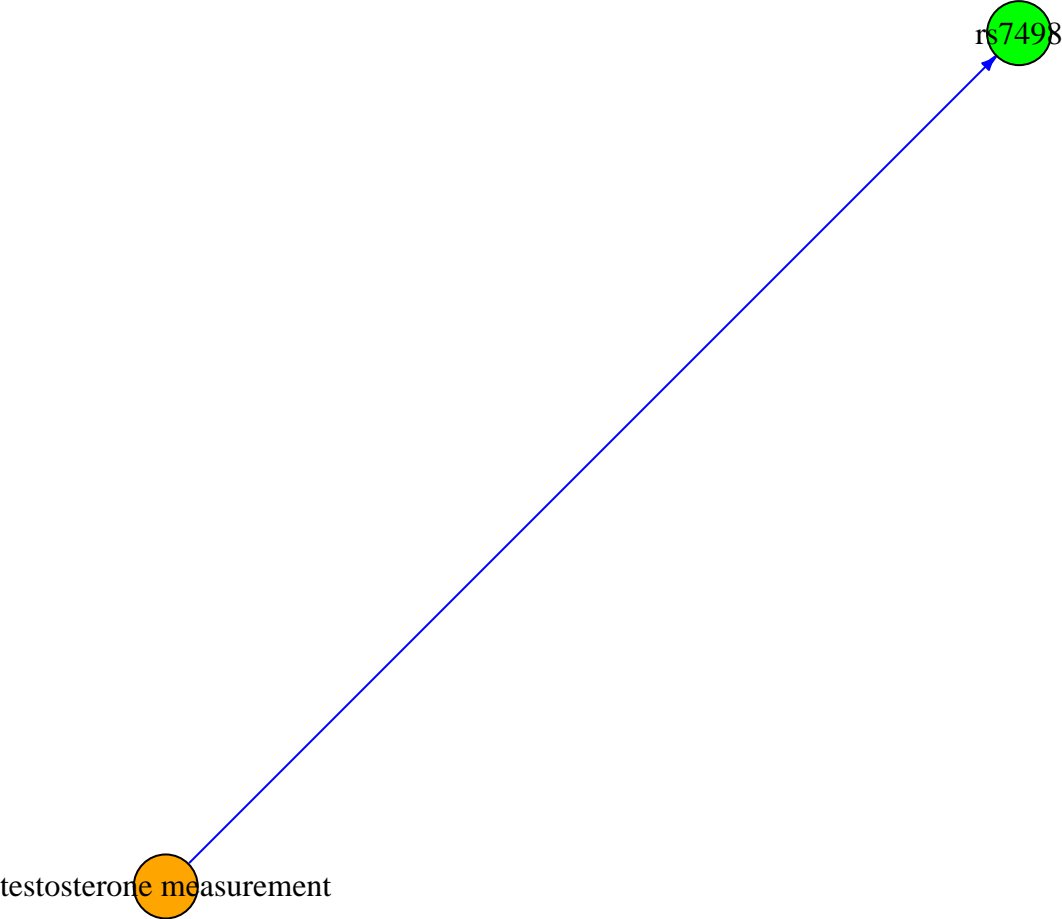

## Variant–Disease Network (response to drug)

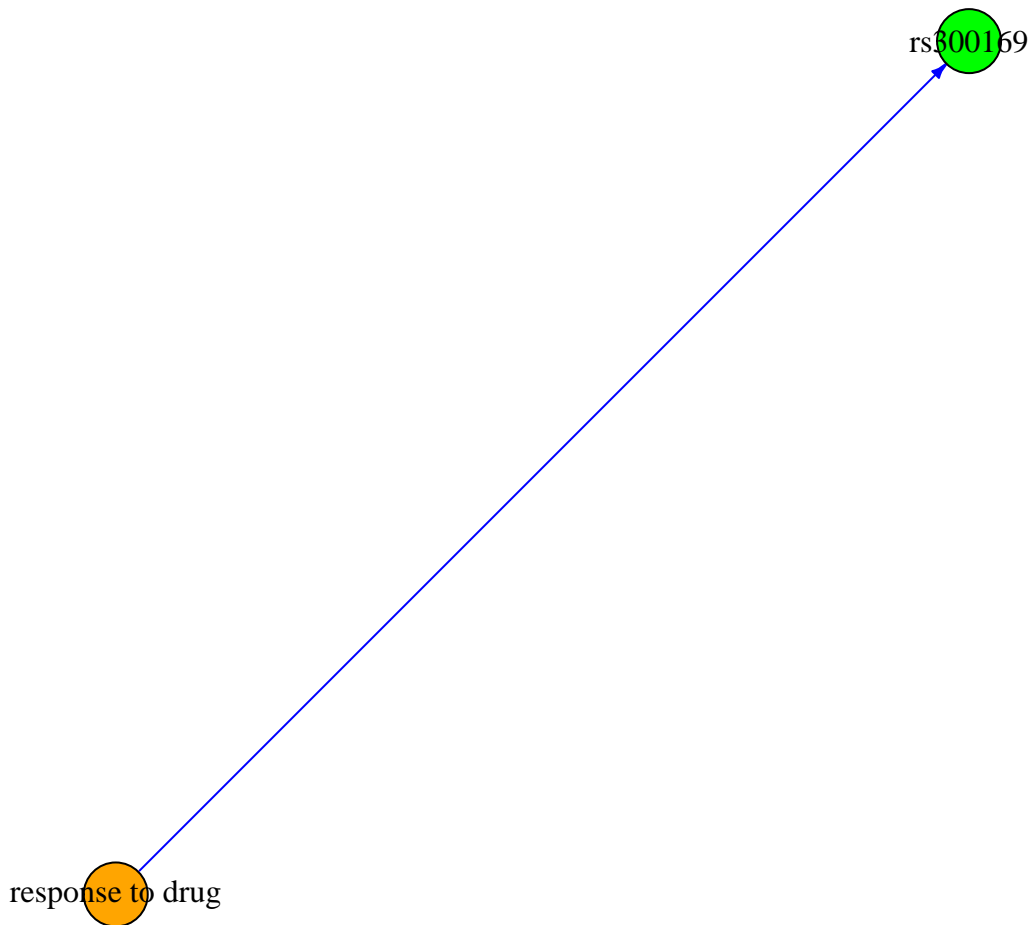

## Variant–Disease Network (Abnormality of refraction)

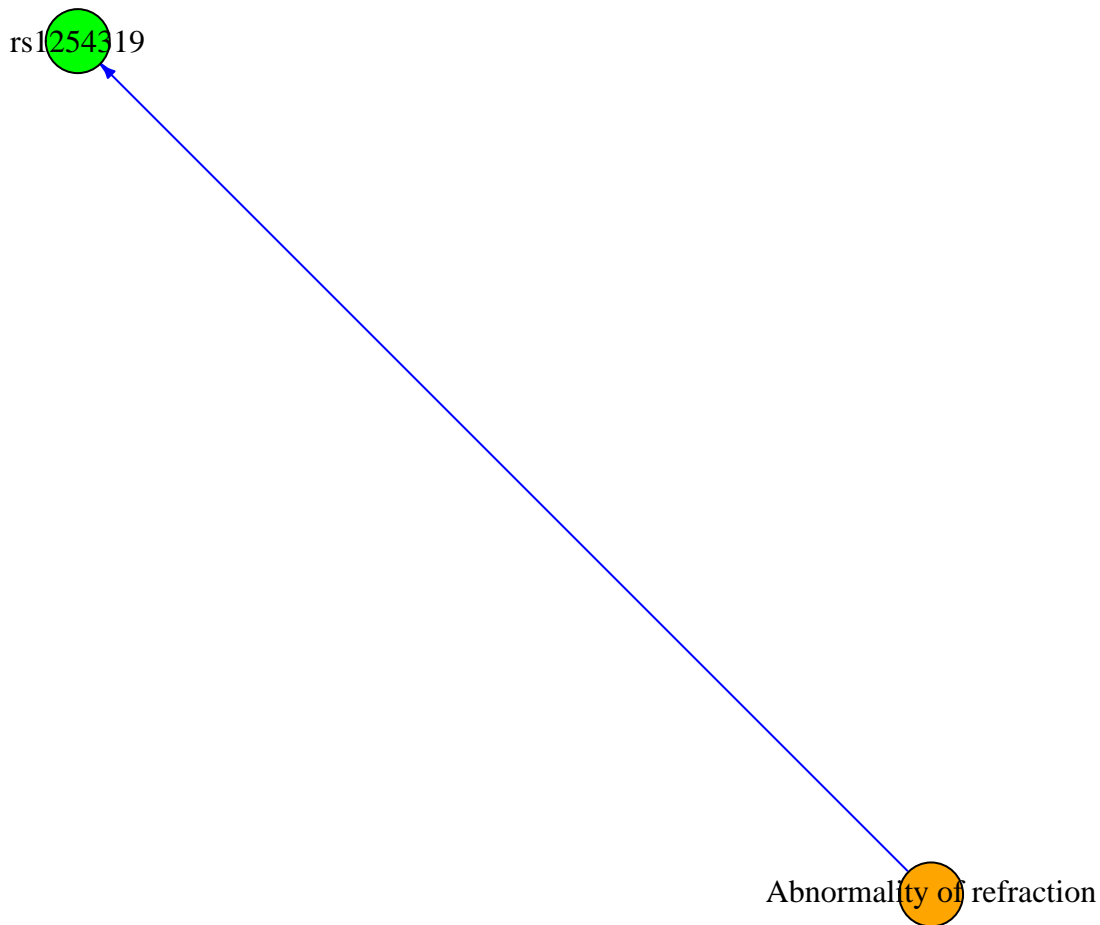

## Variant–Disease Network (estrone measurement)

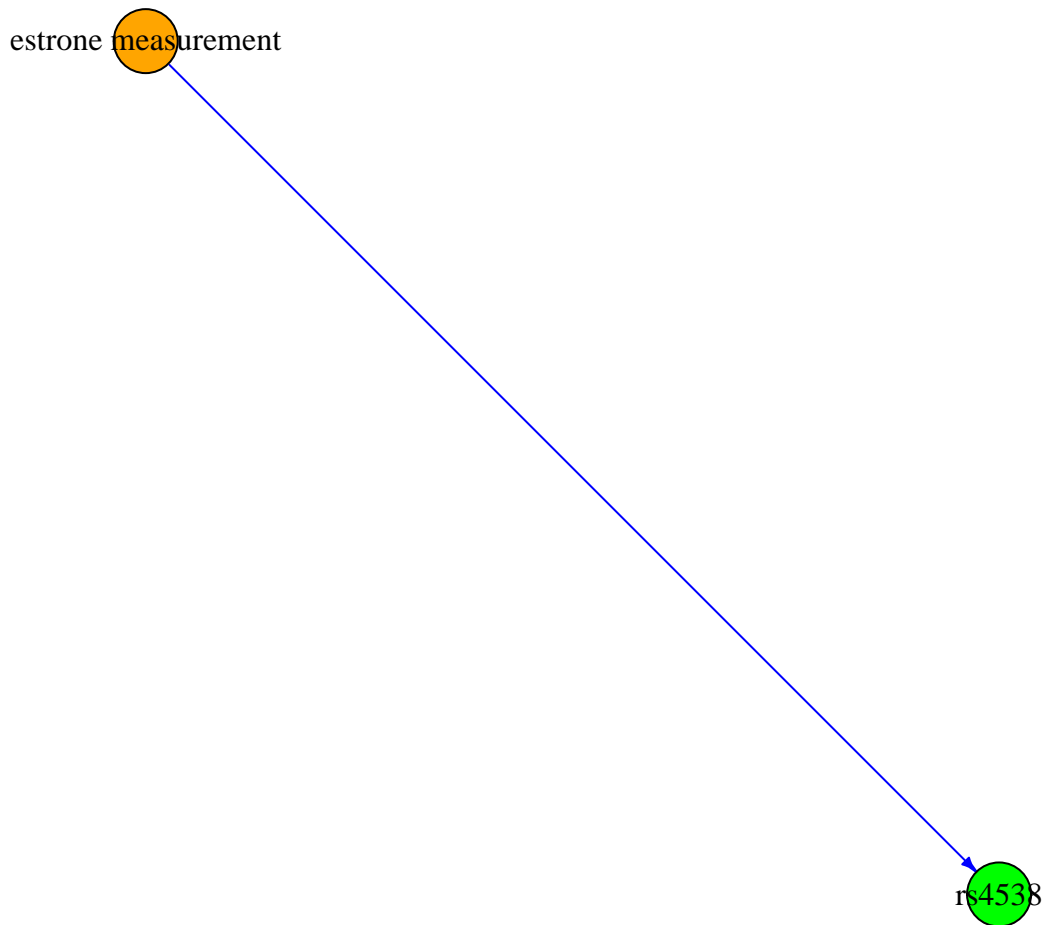

Variant–Disease Network (diastolic blood pressure change measurement)

diastolic blood pressure change measurement

rs11657217

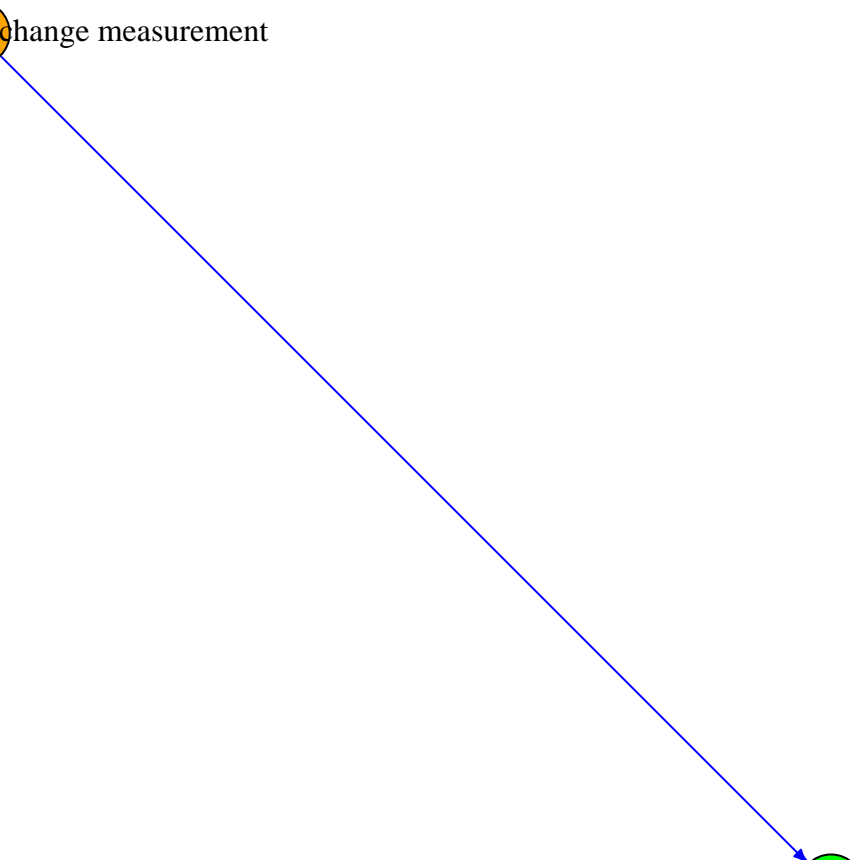

## Variant-Disease Network (hypertension)

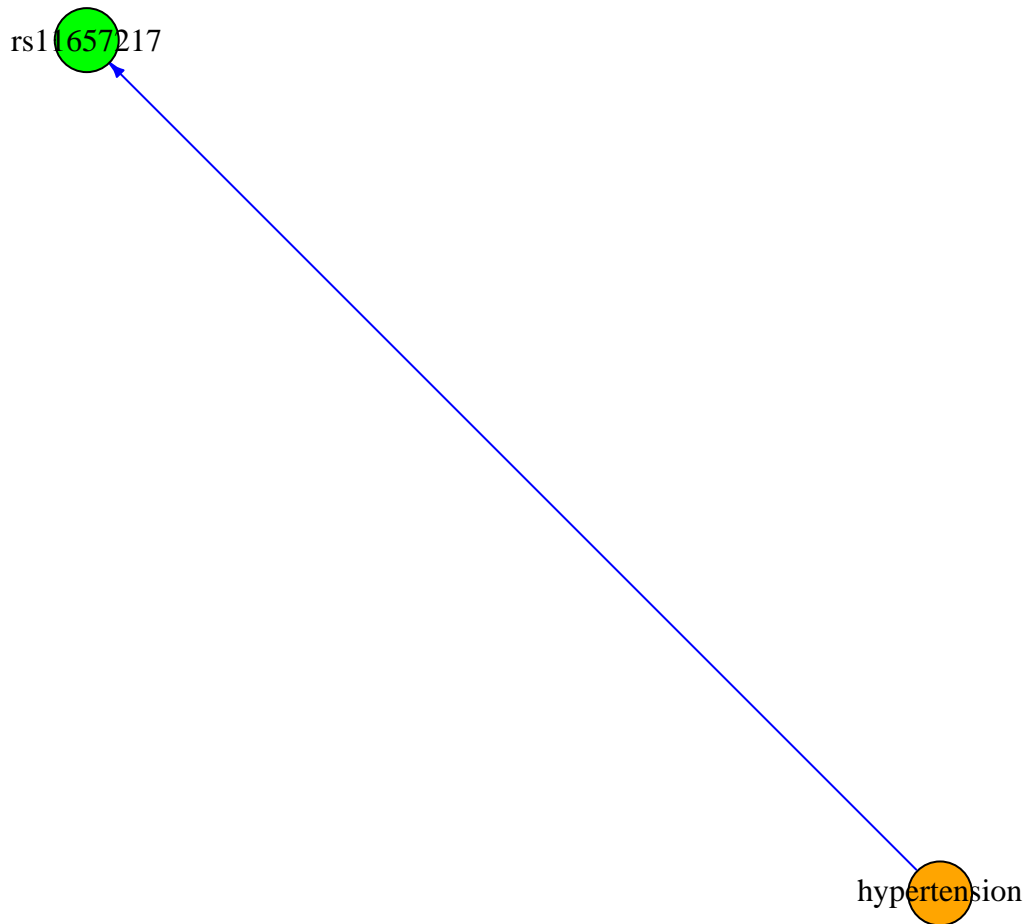

# Variant–Disease Network (response to hydrochlorothiazide)

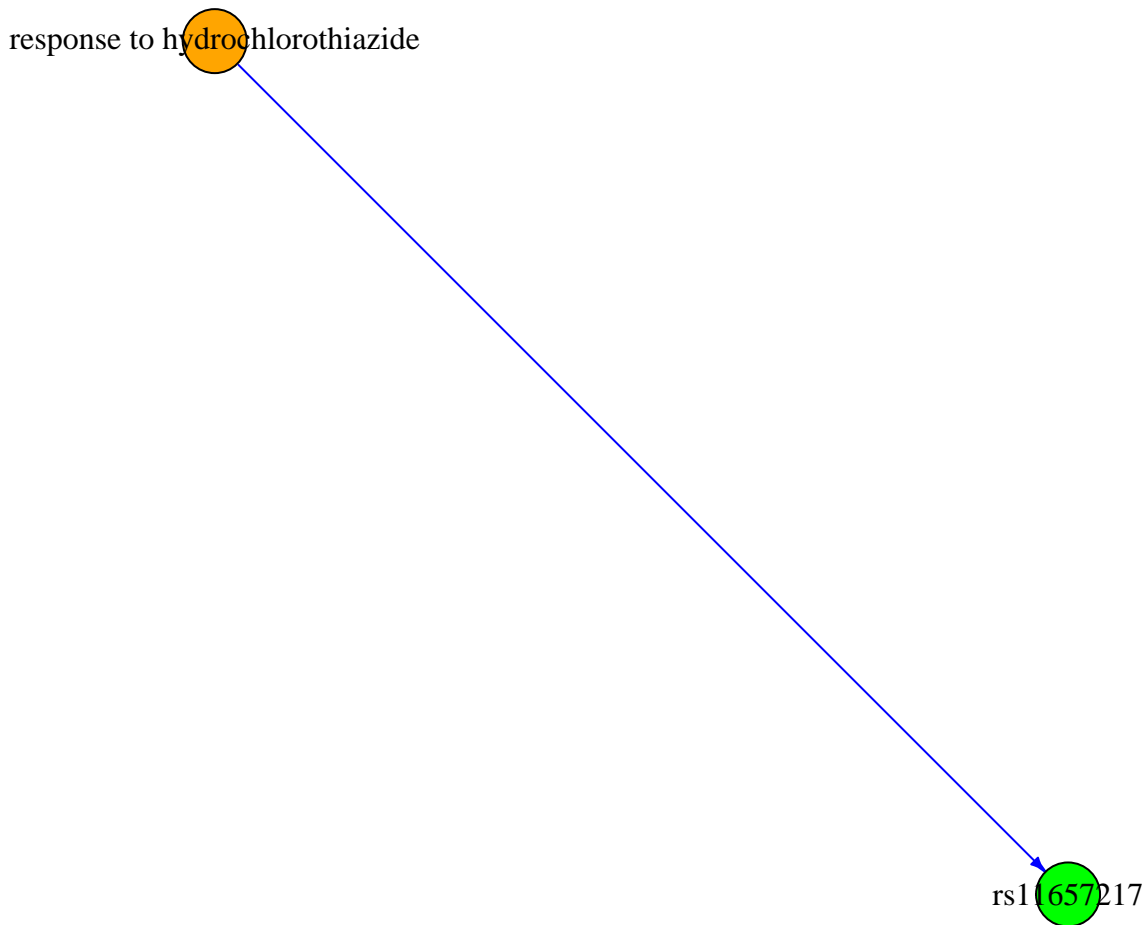



**Variant–Disease Network (serum IgG glycosylation measurement)**

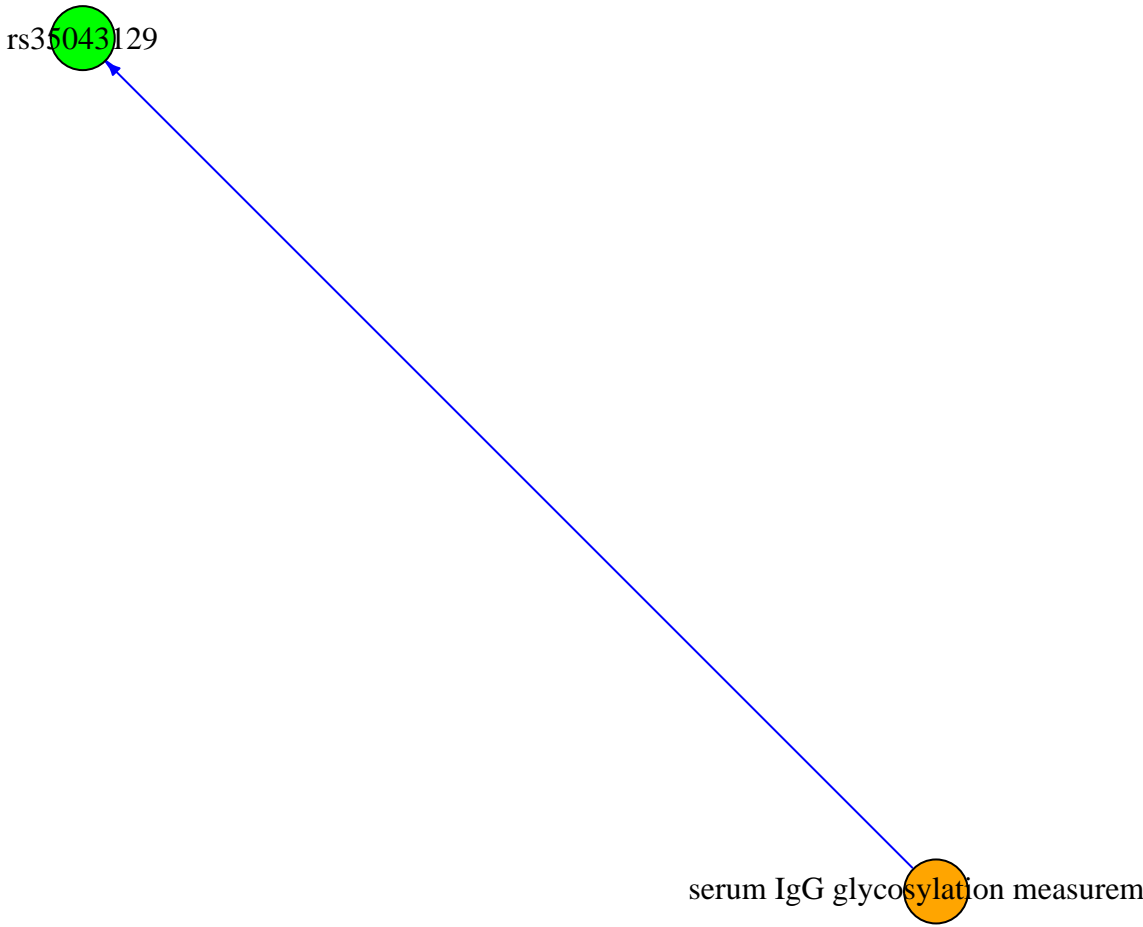

## Variant–Disease Network (bilirubin measurement)

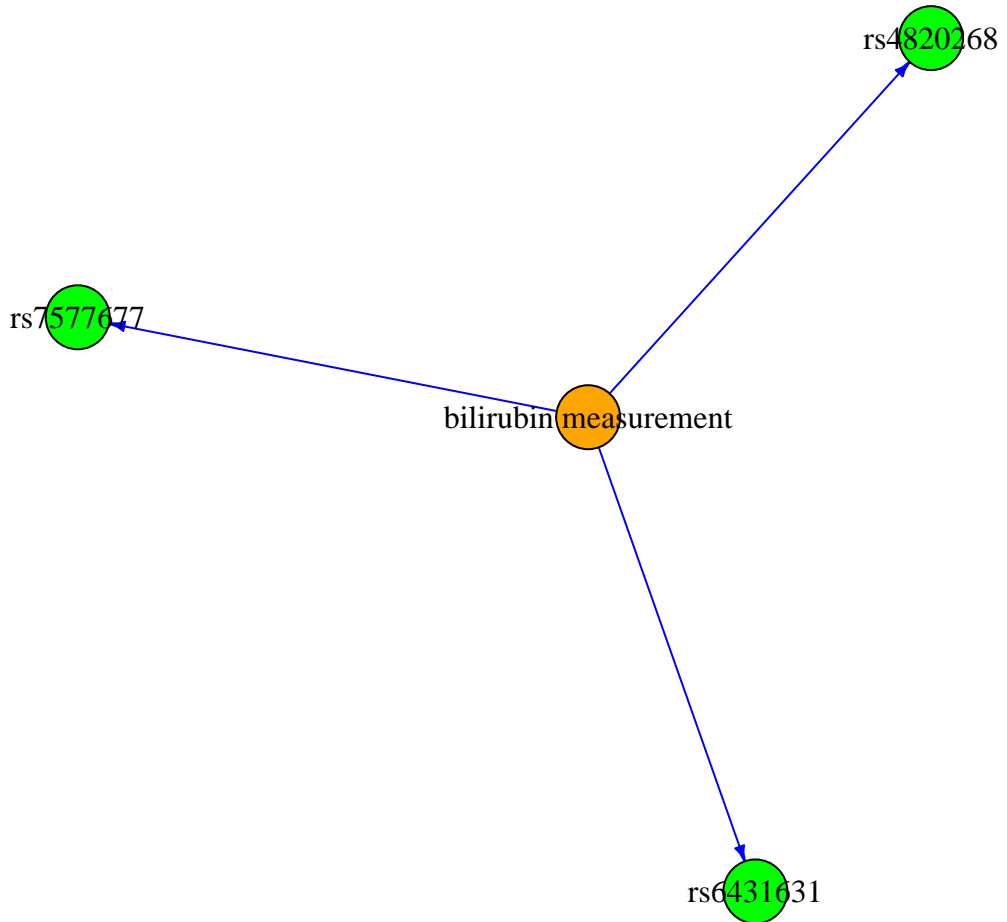

## Variant–Disease Network (wellbeing measurement)

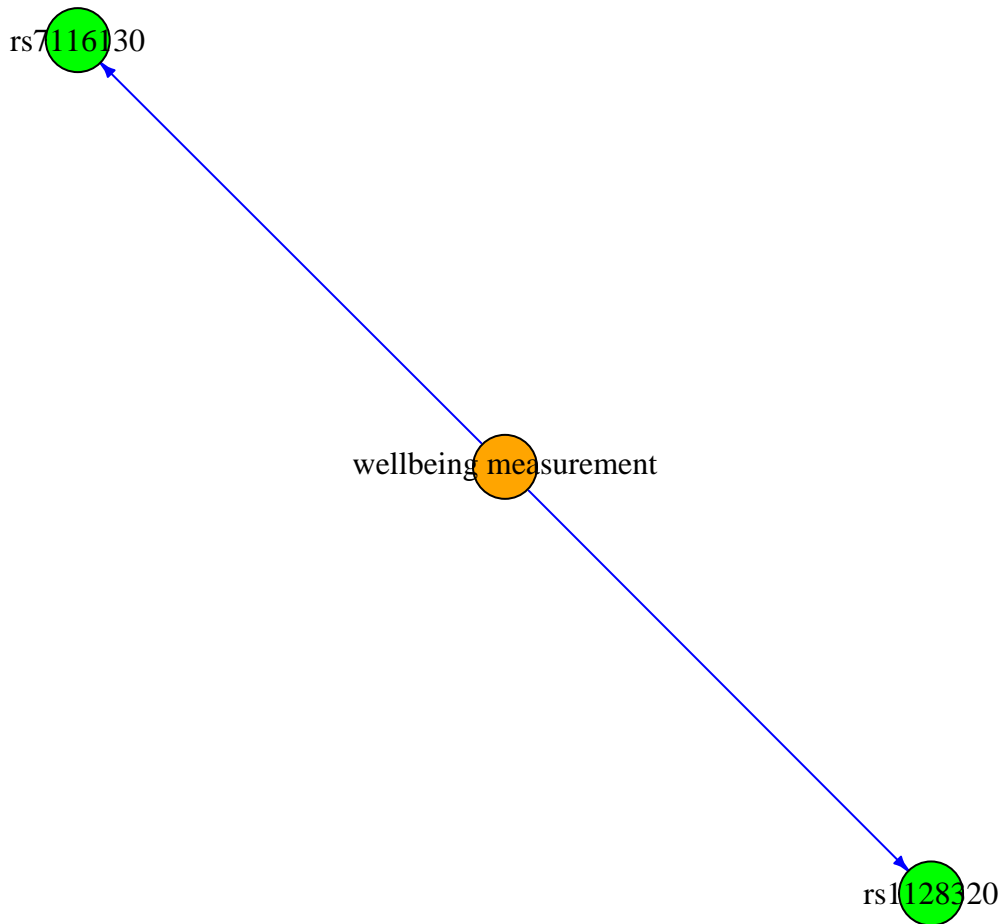

**Variant–Disease Network (left ventricular structural measurement)**

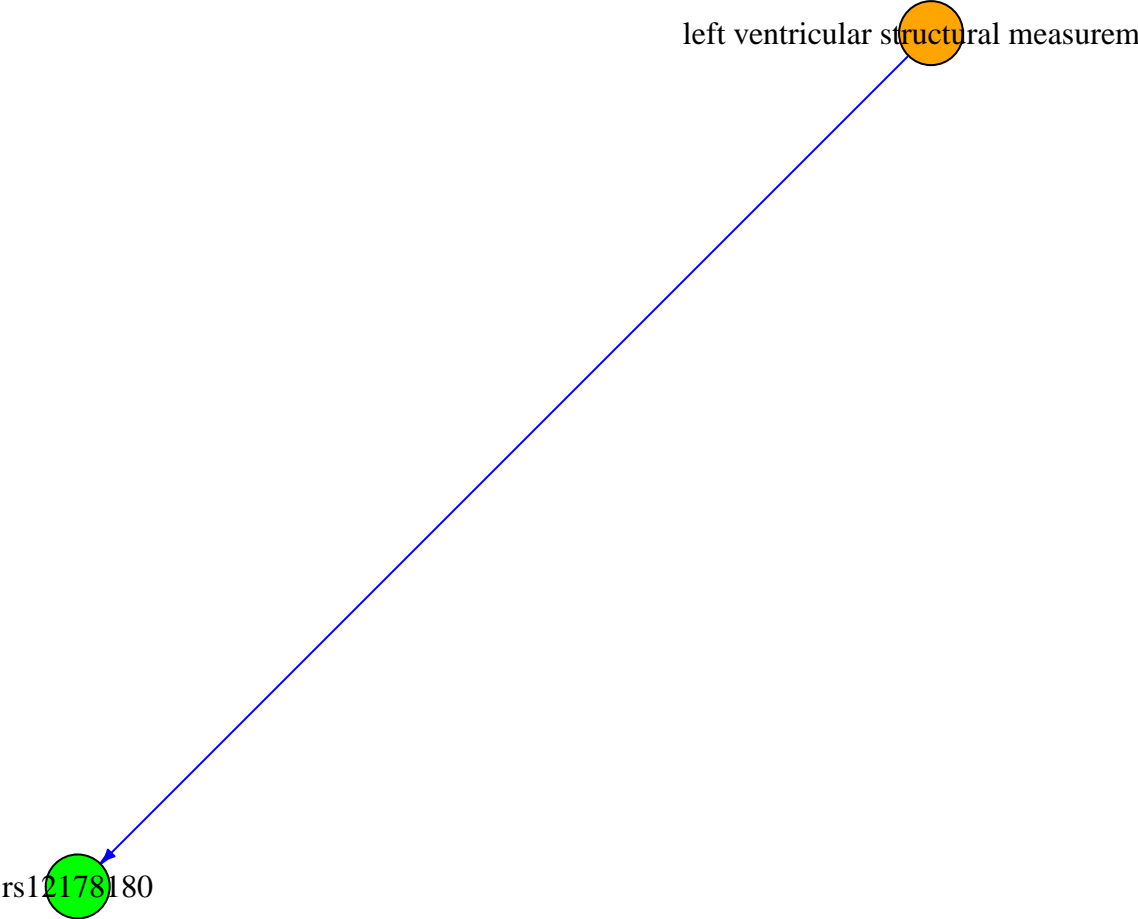

# Variant–Disease Network (clinical laboratory measurement)

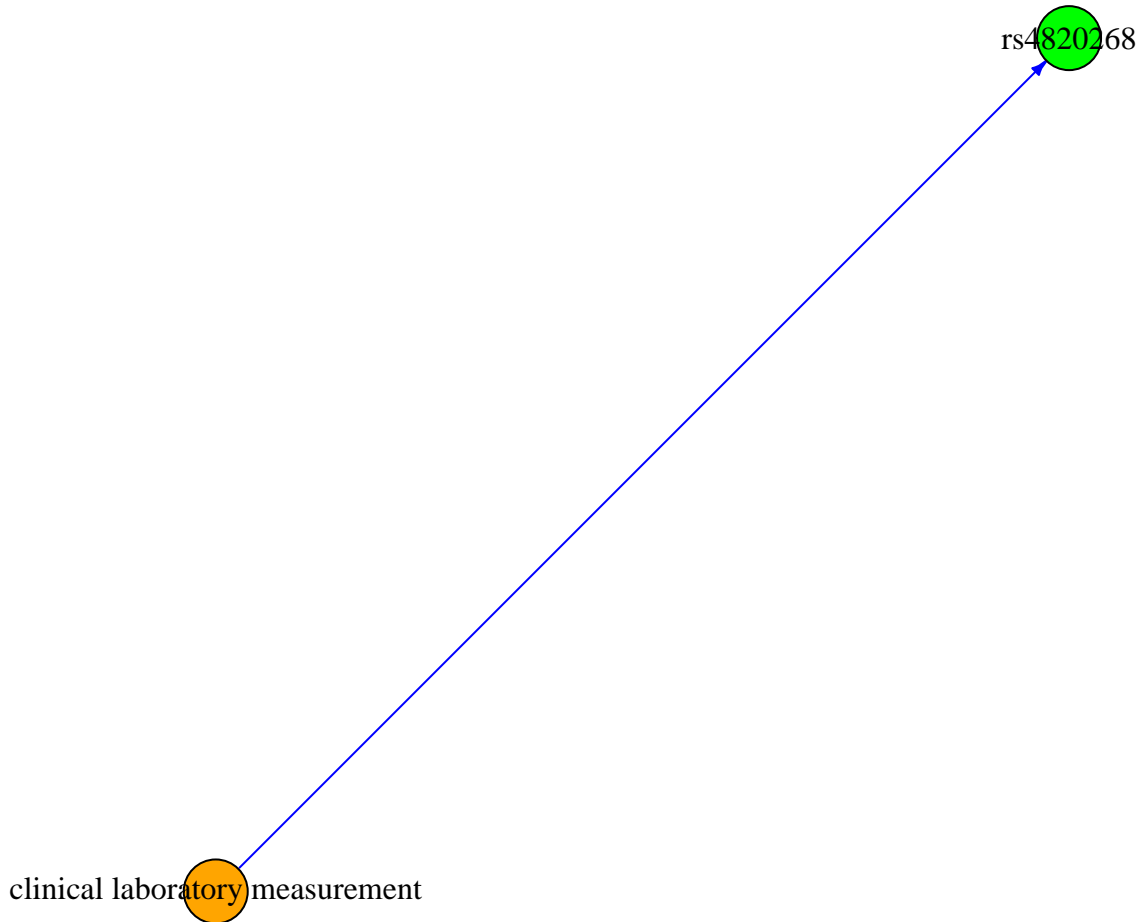

## Variant–Disease Network (ferritin measurement)

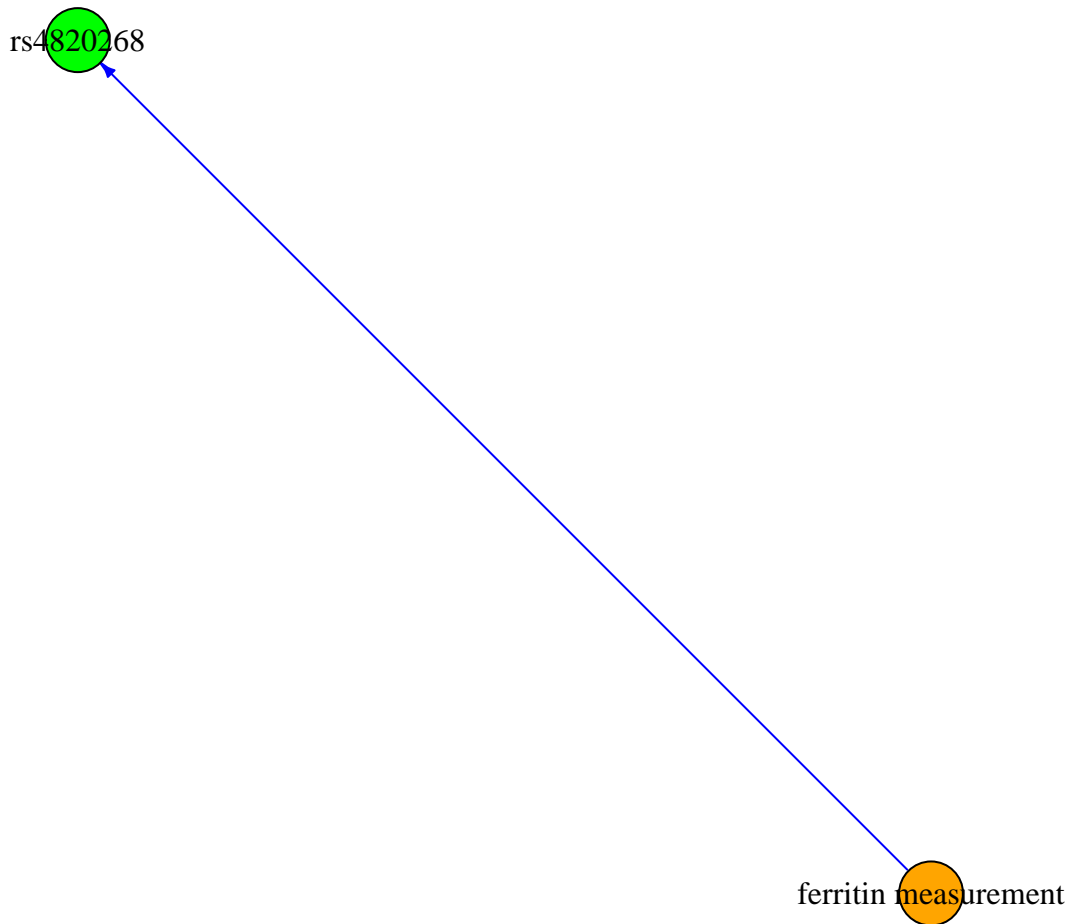

## Variant–Disease Network (hepcidin:ferritin ratio)

rs4820268

hepcidin:ferritin ratio



Variant–Disease Network (hepcidin:transferrin saturation ratio)

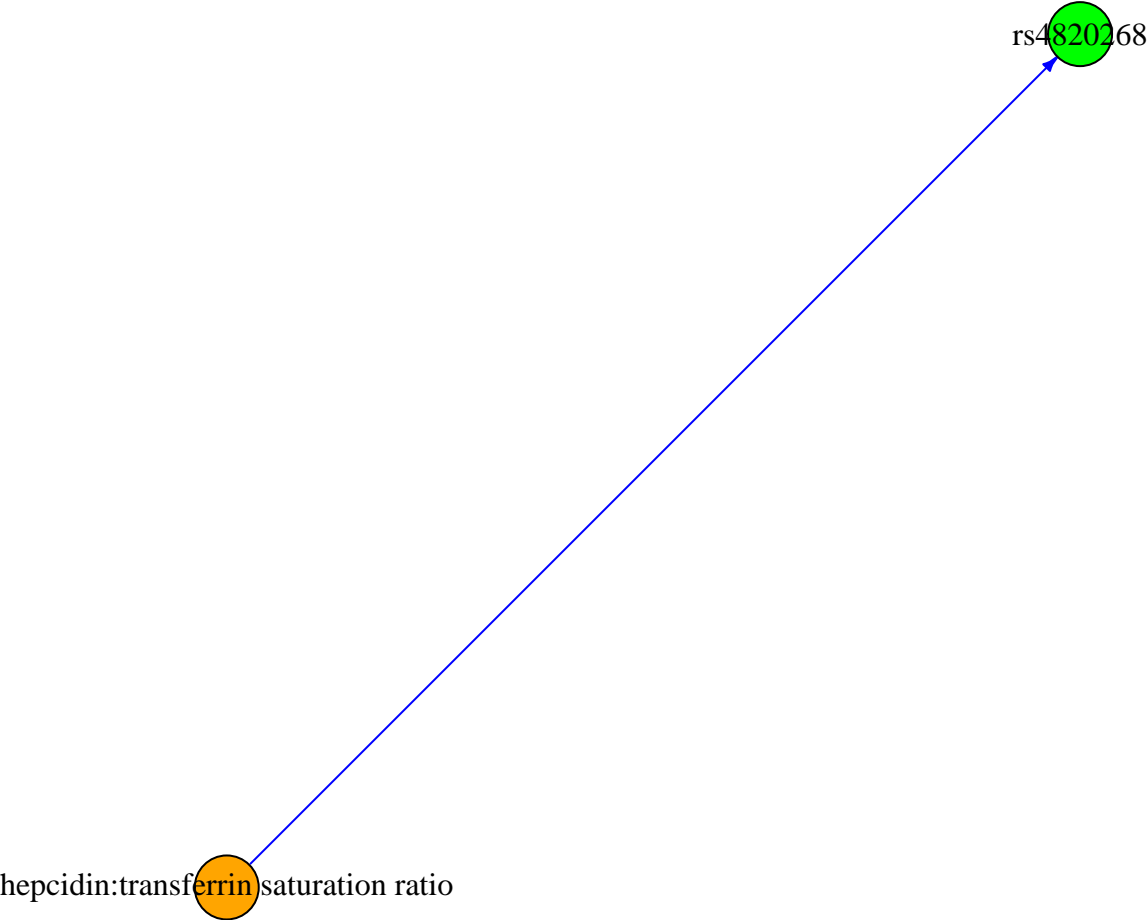



# Variant–Disease Network (iron biomarker measurement)

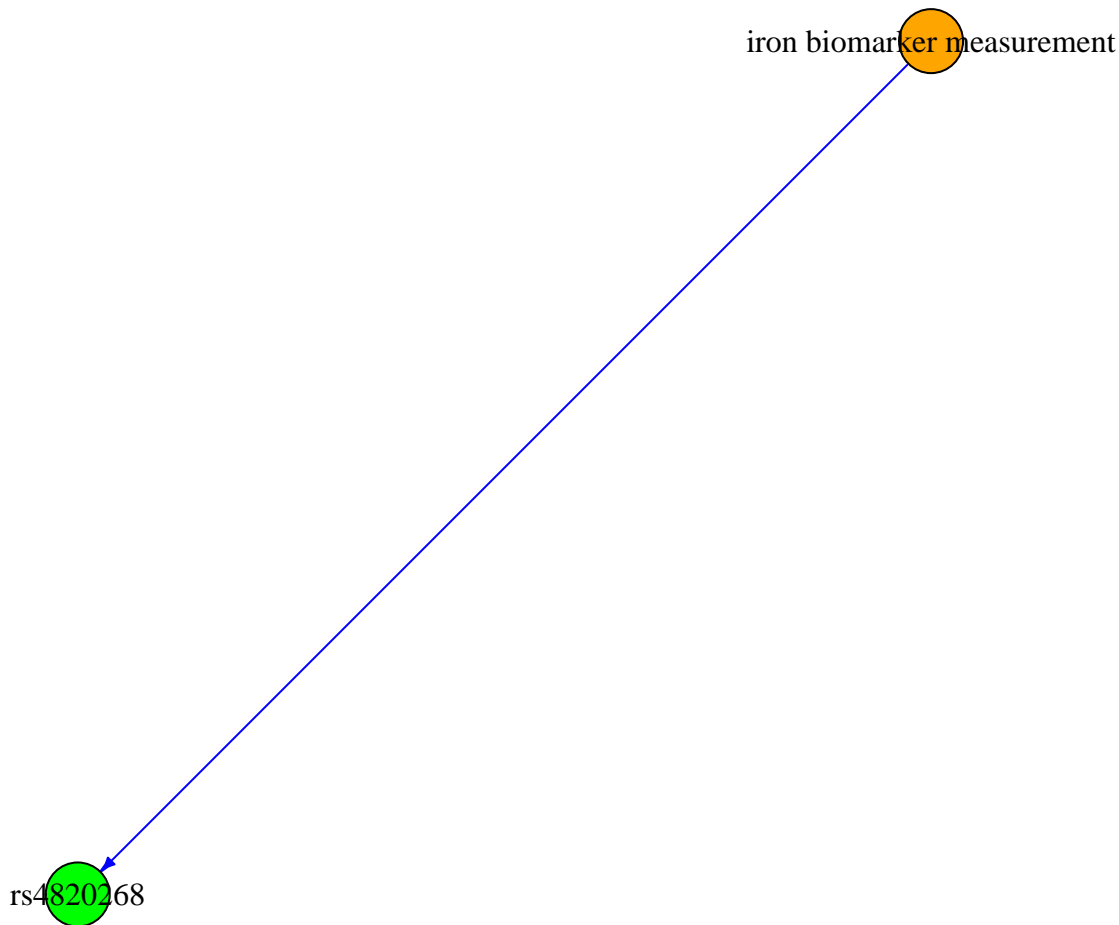

**Variant–Disease Network (serum hepcidin measurement)**

serum hepcidin measurement

rs4820268

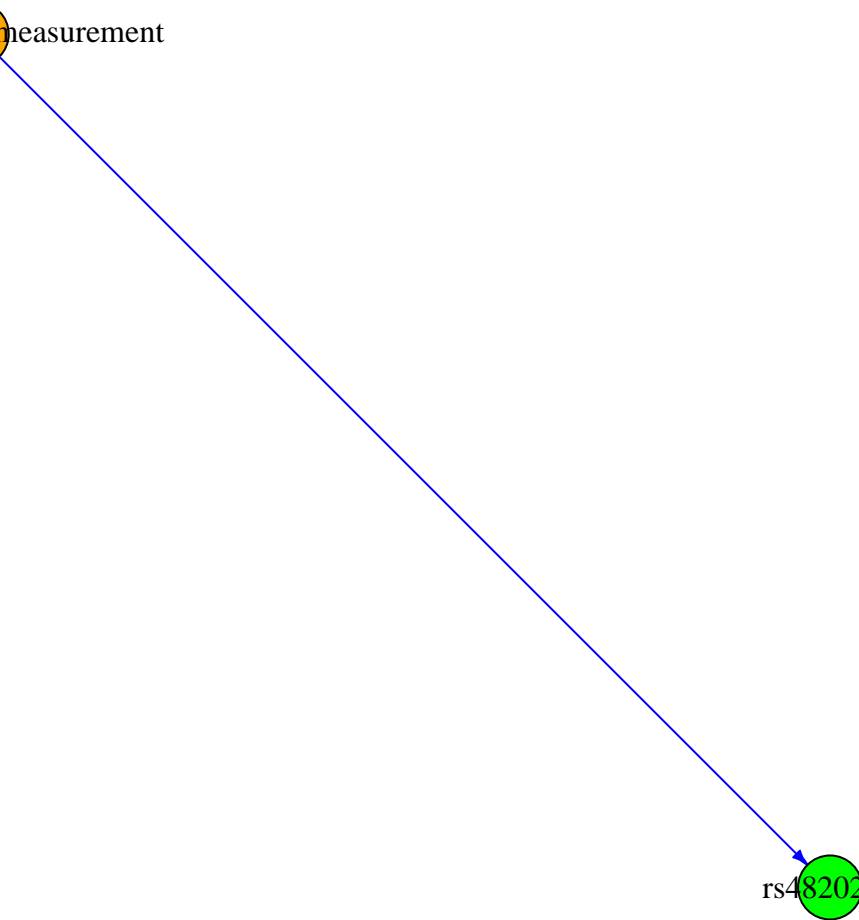

**Variant–Disease Network (serum iron measurement)**

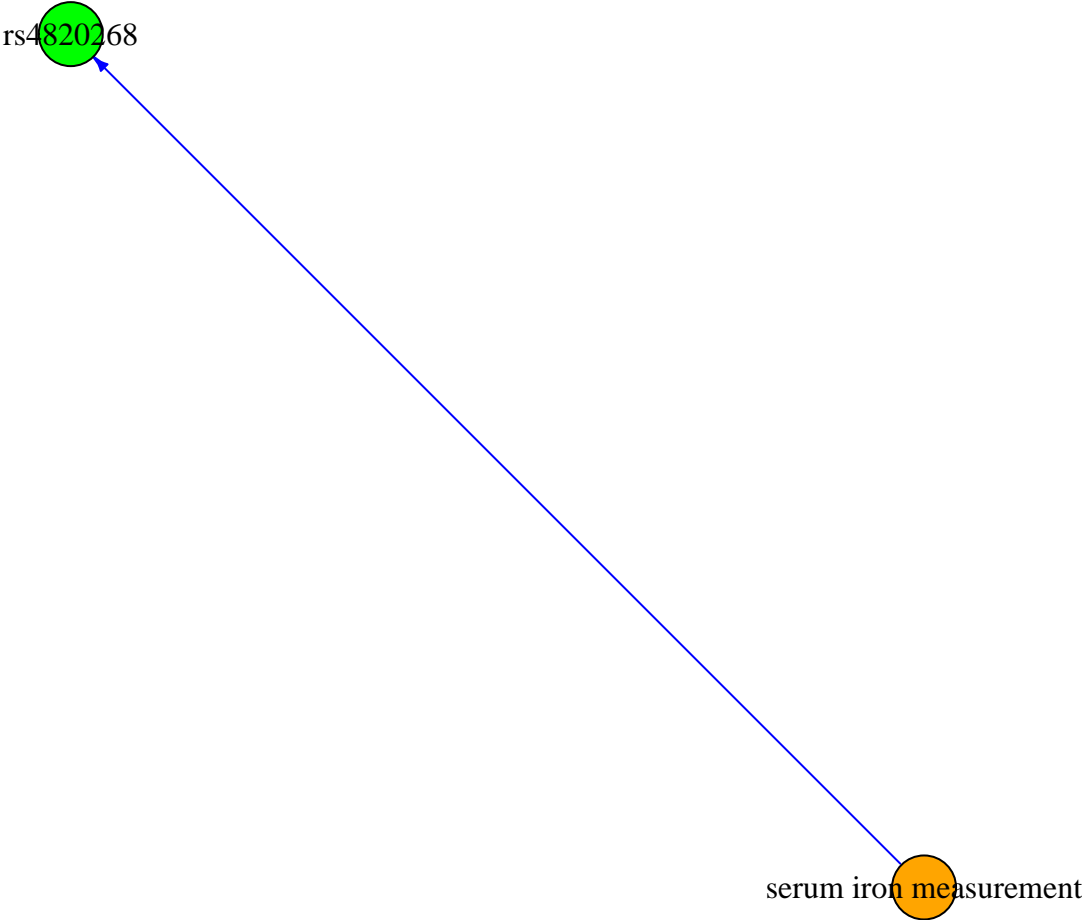

**Variant–Disease Network (soluble transferrin receptor measurement)**

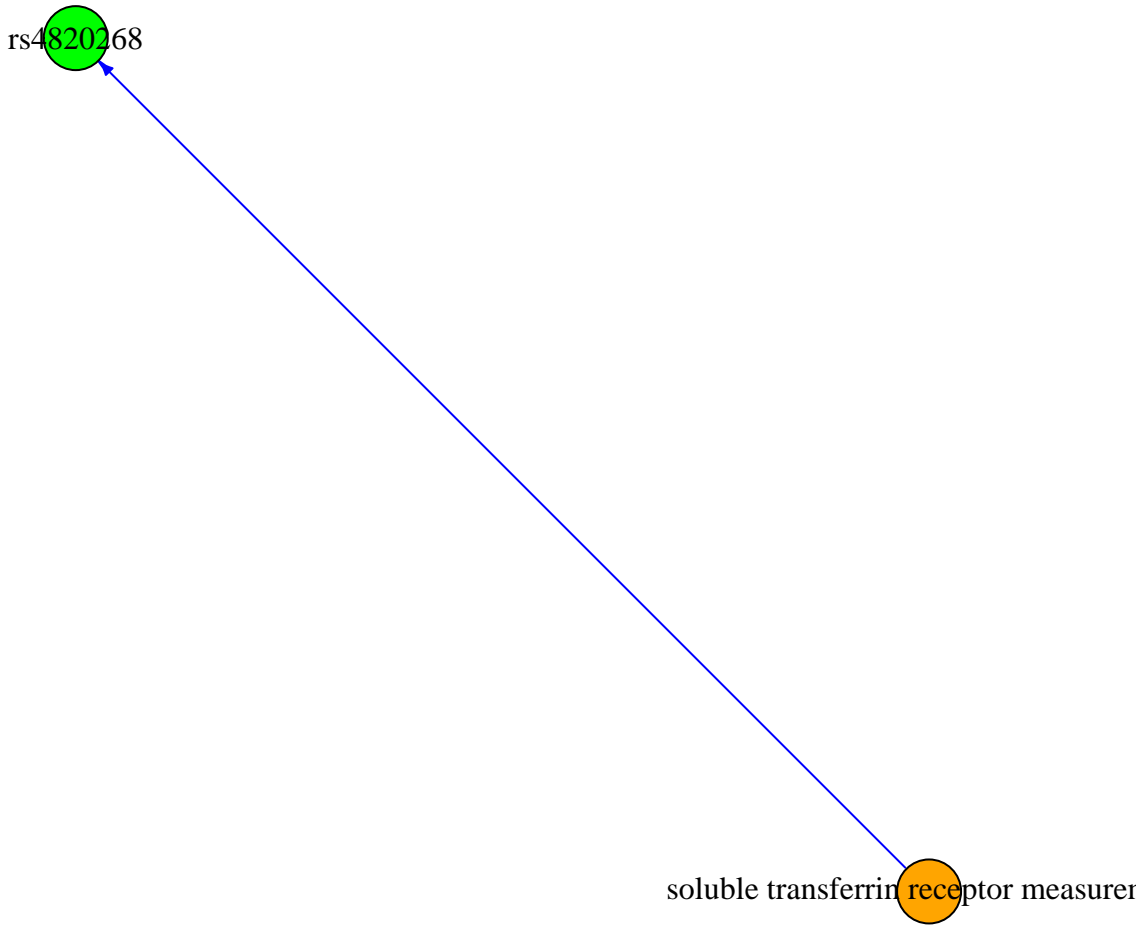

# Variant-Disease Network (transferrin measurement)

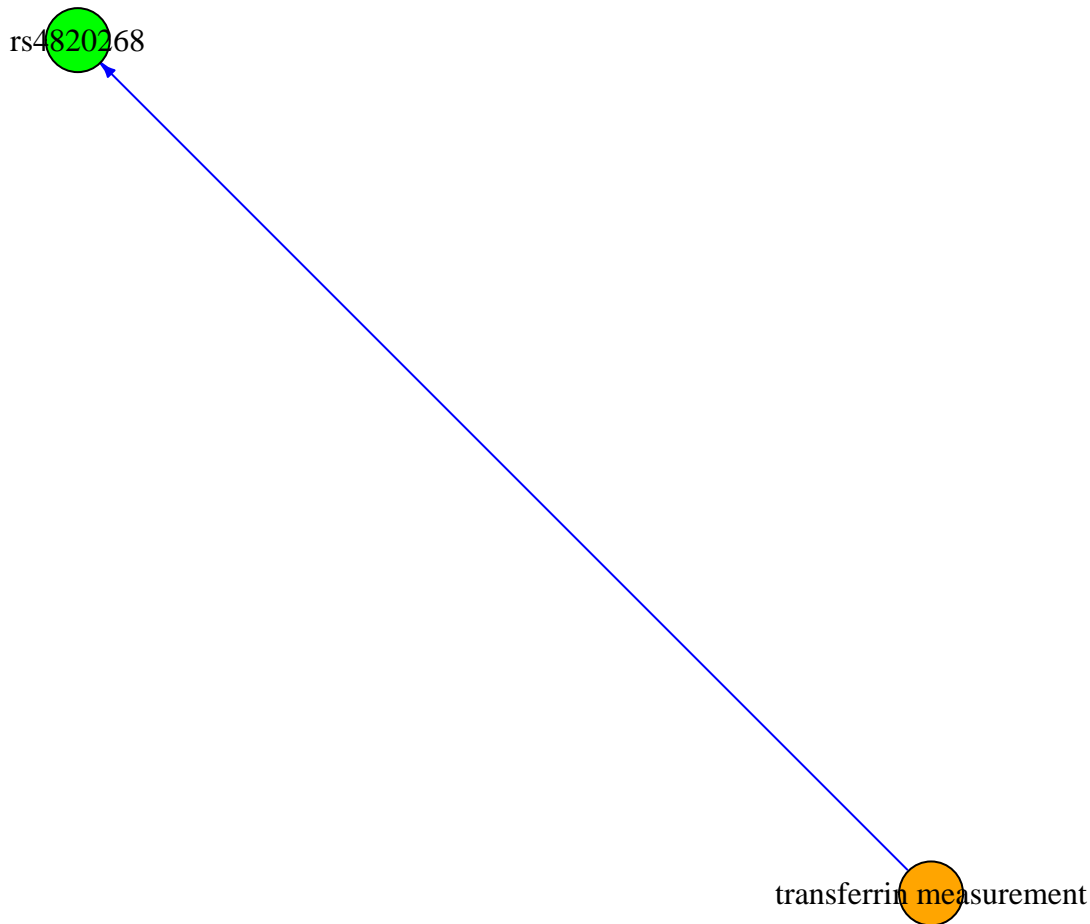

# Variant–Disease Network (transferrin saturation measurement)

transferrin saturation measurement

rs4820268

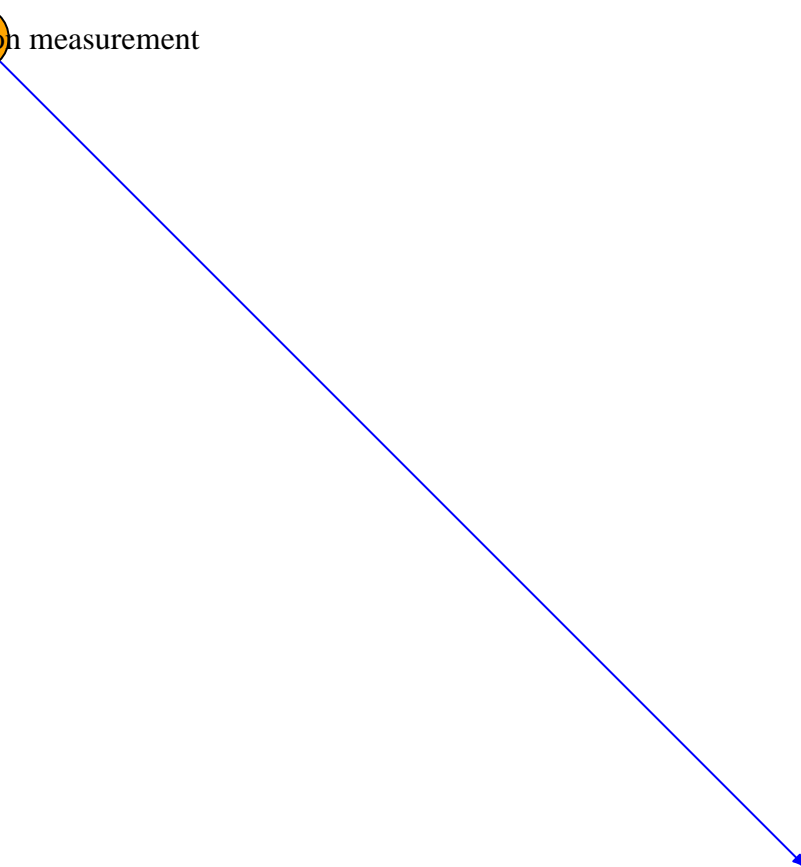

## Variant–Disease Network (parental longevity)

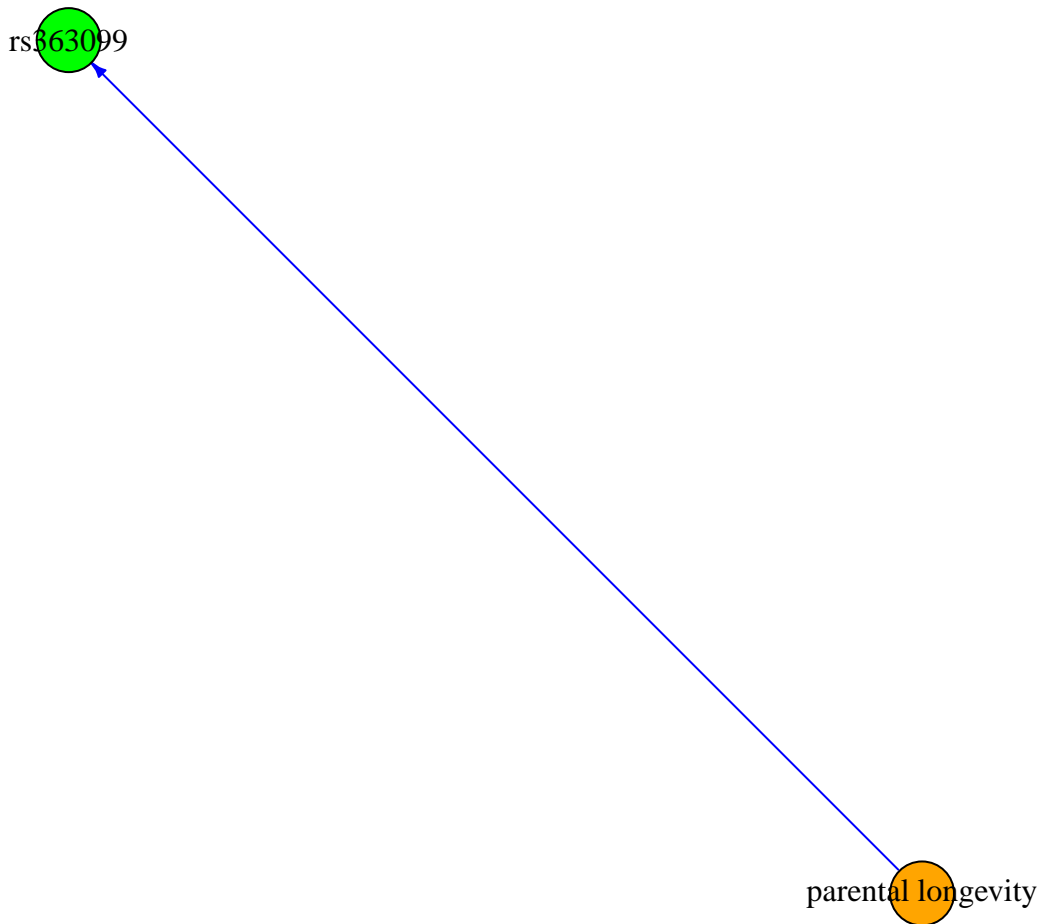

# Variant–Disease Network (synophrys measurement)

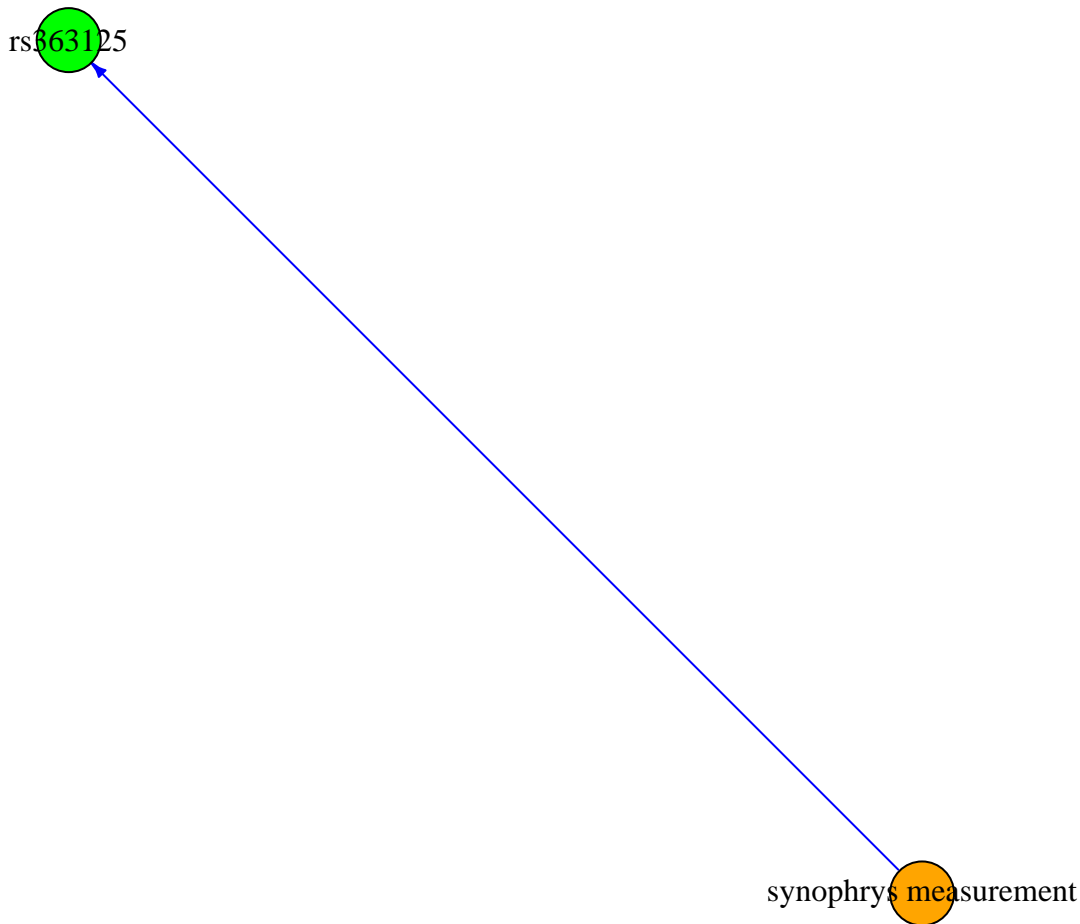



**Variant–Disease Network (response to antineoplastic agent)**

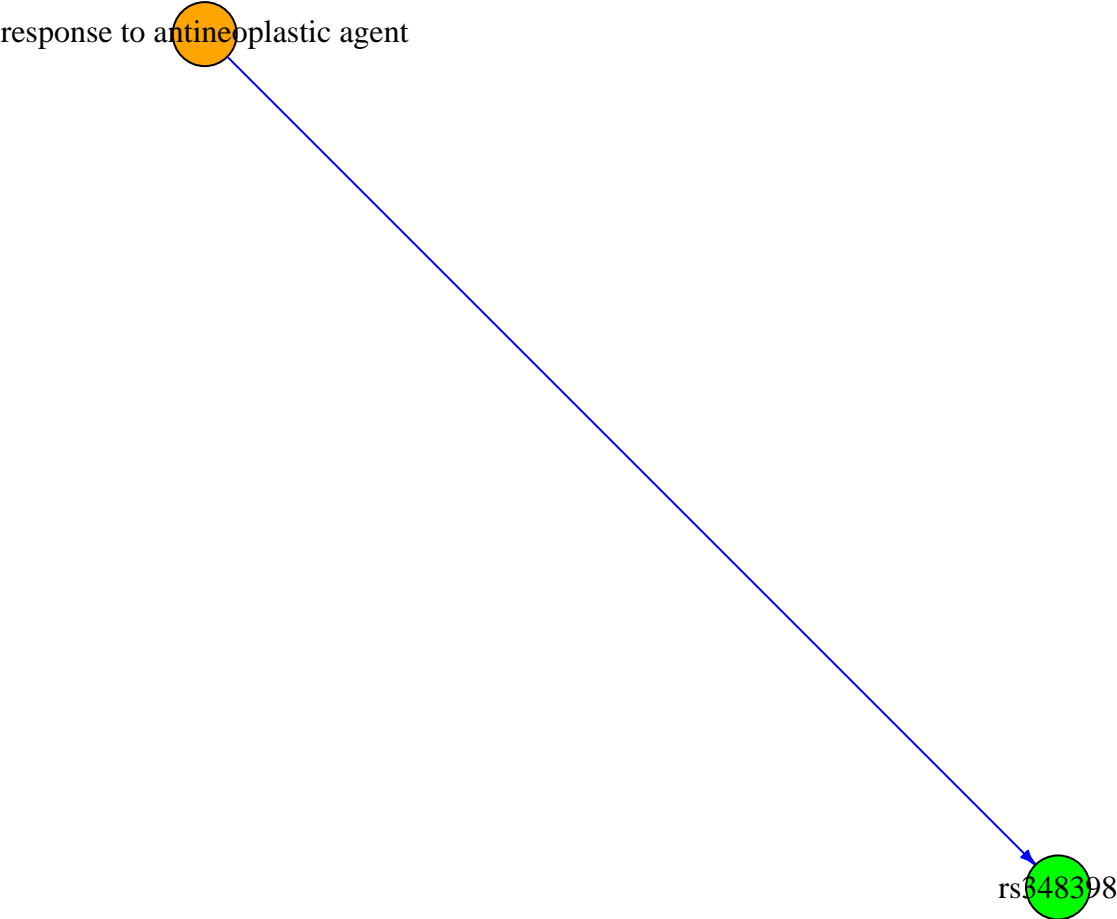

## Variant–Disease Network (Astigmatism)

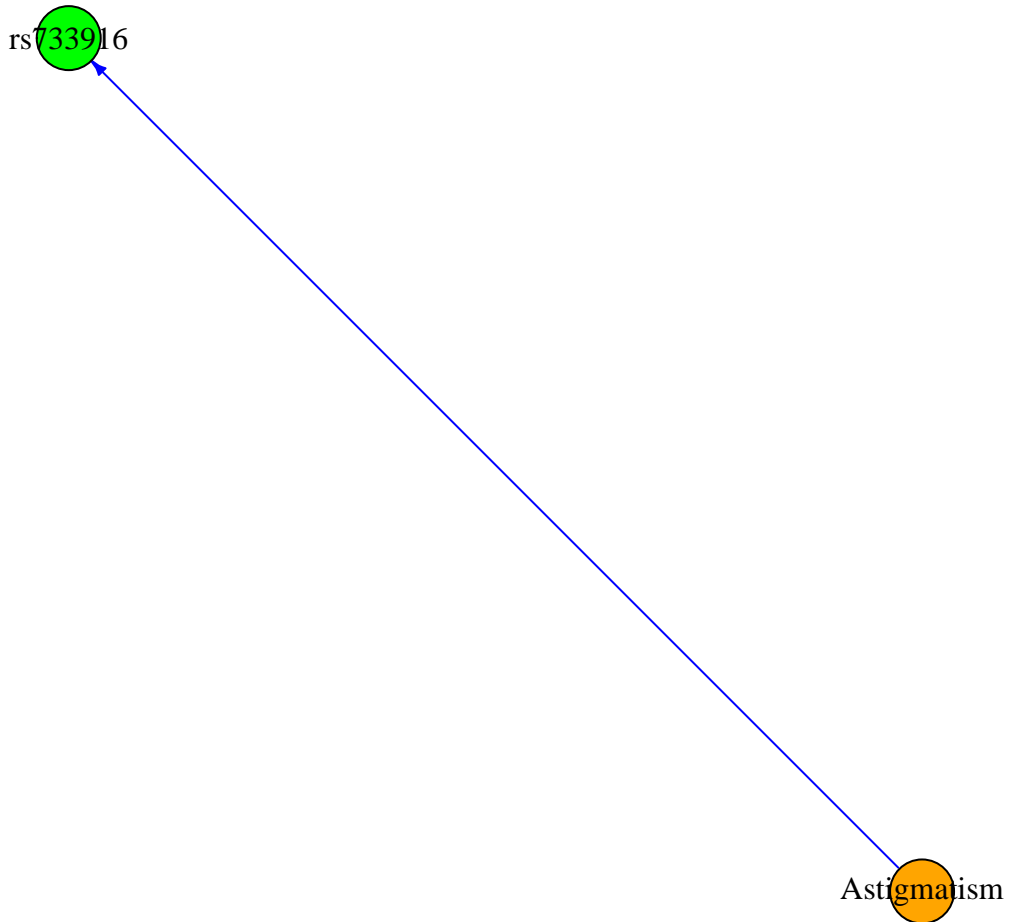

**Variant–Disease Network (C–C motif chemokine 21 measurement)**

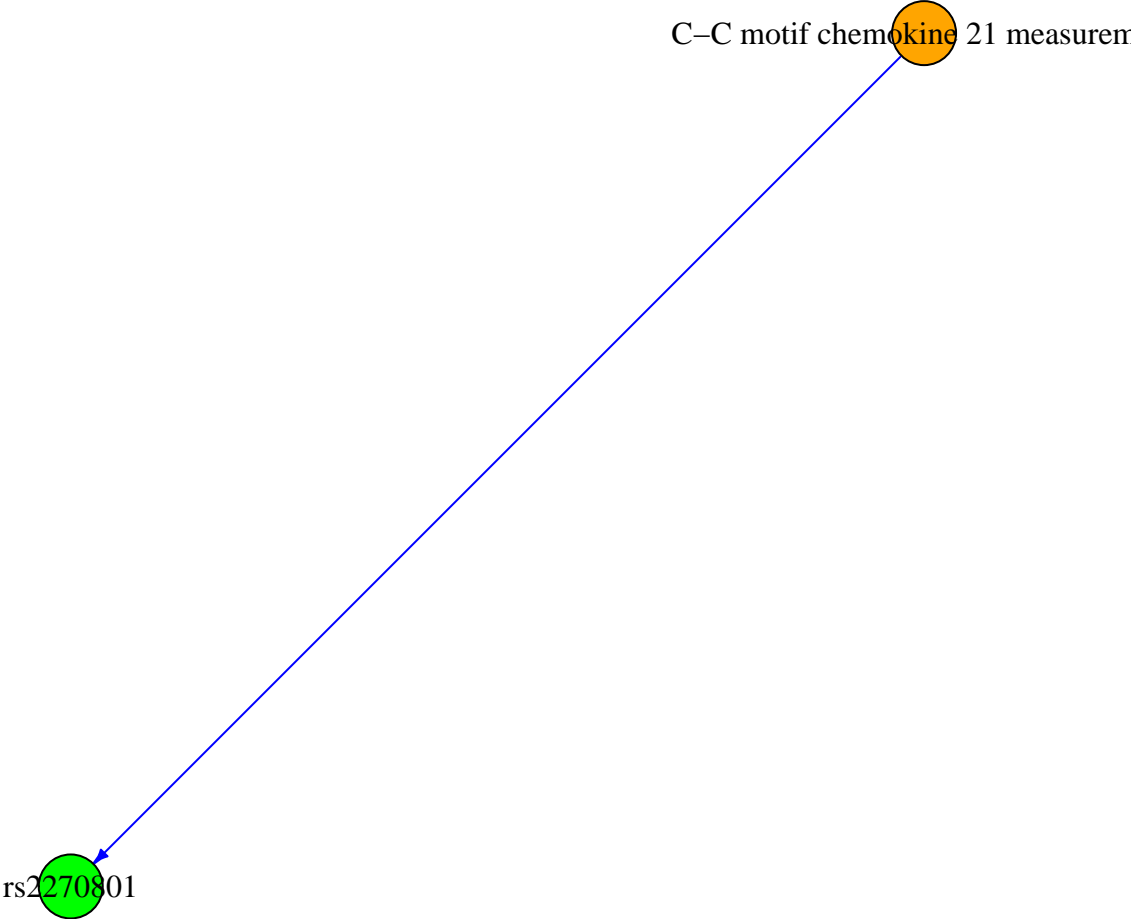

## Variant–Disease Network (fetal genotype effect measurement)

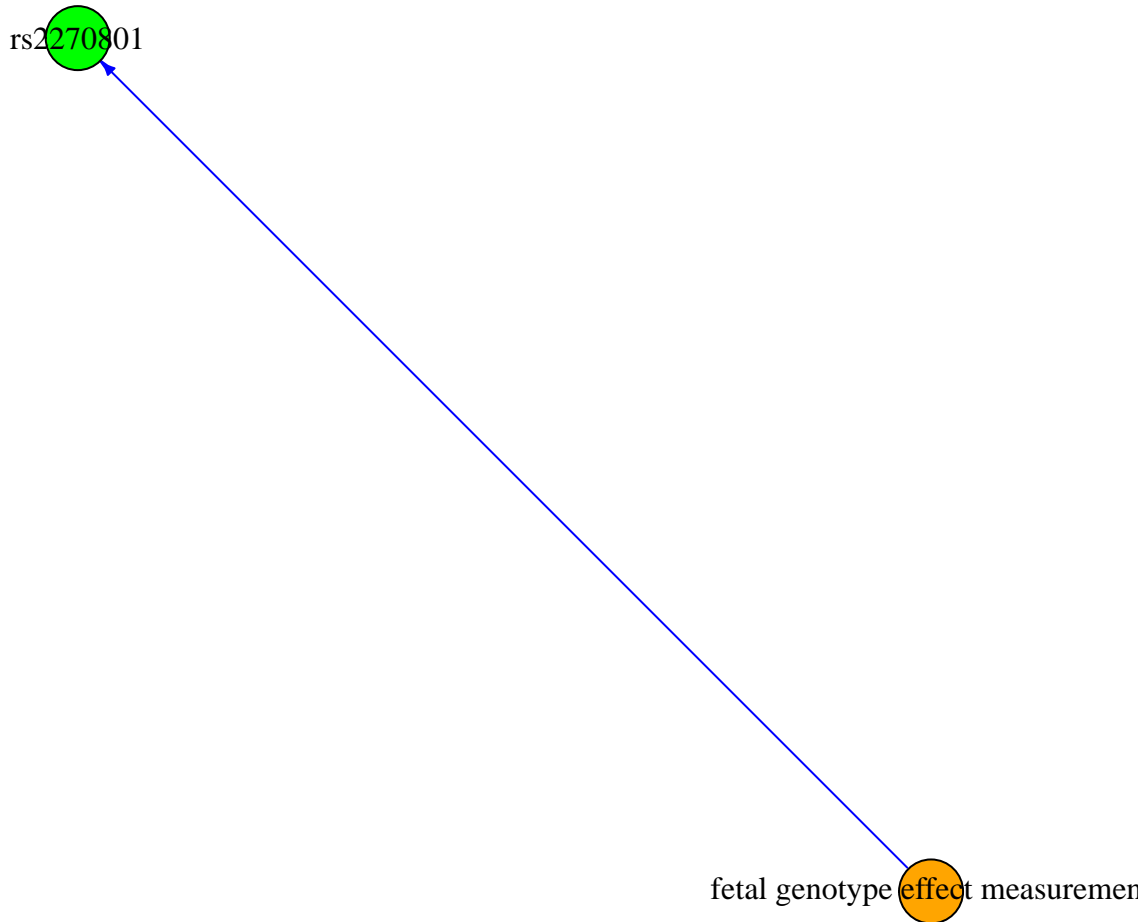

# Variant-Disease Network (cancer biomarker measurement)

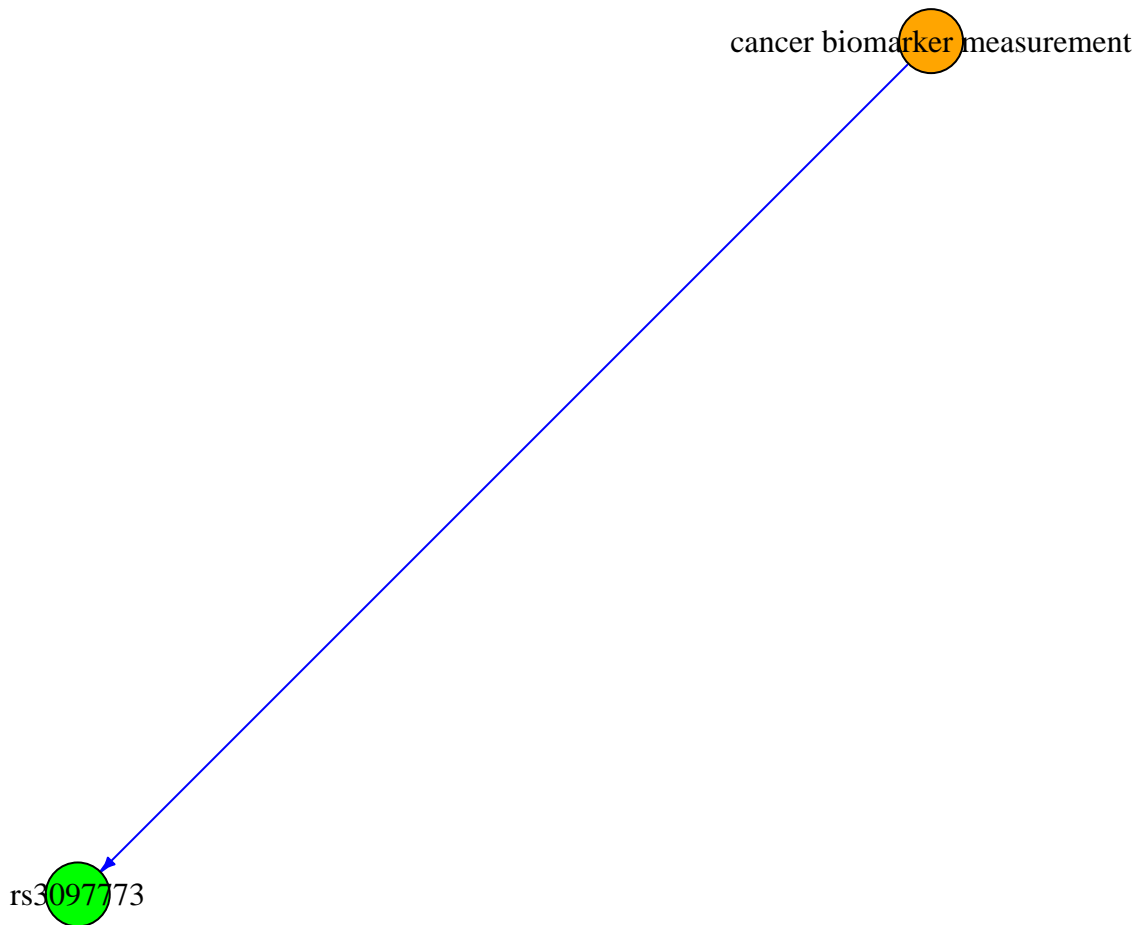

## Variant-Disease Network (oral cavity cancer)

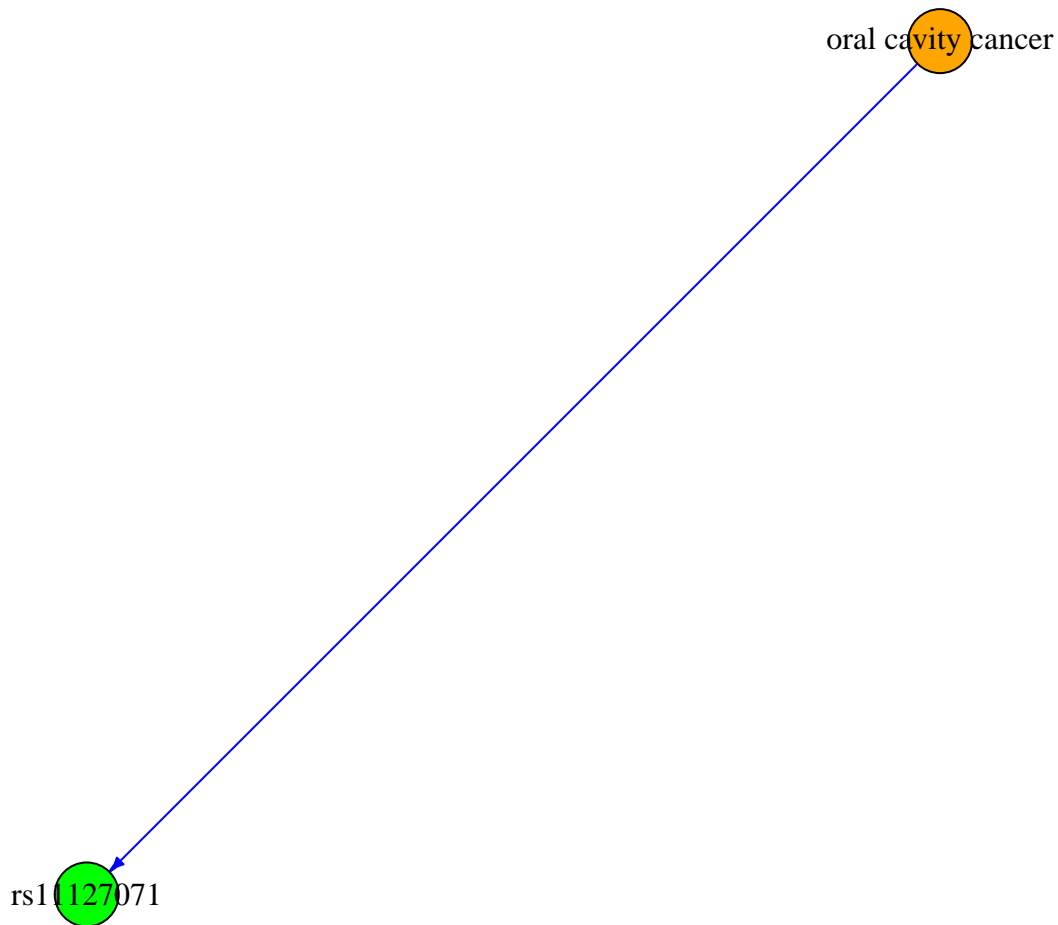

## Variant–Disease Network (HIV–1 infection)

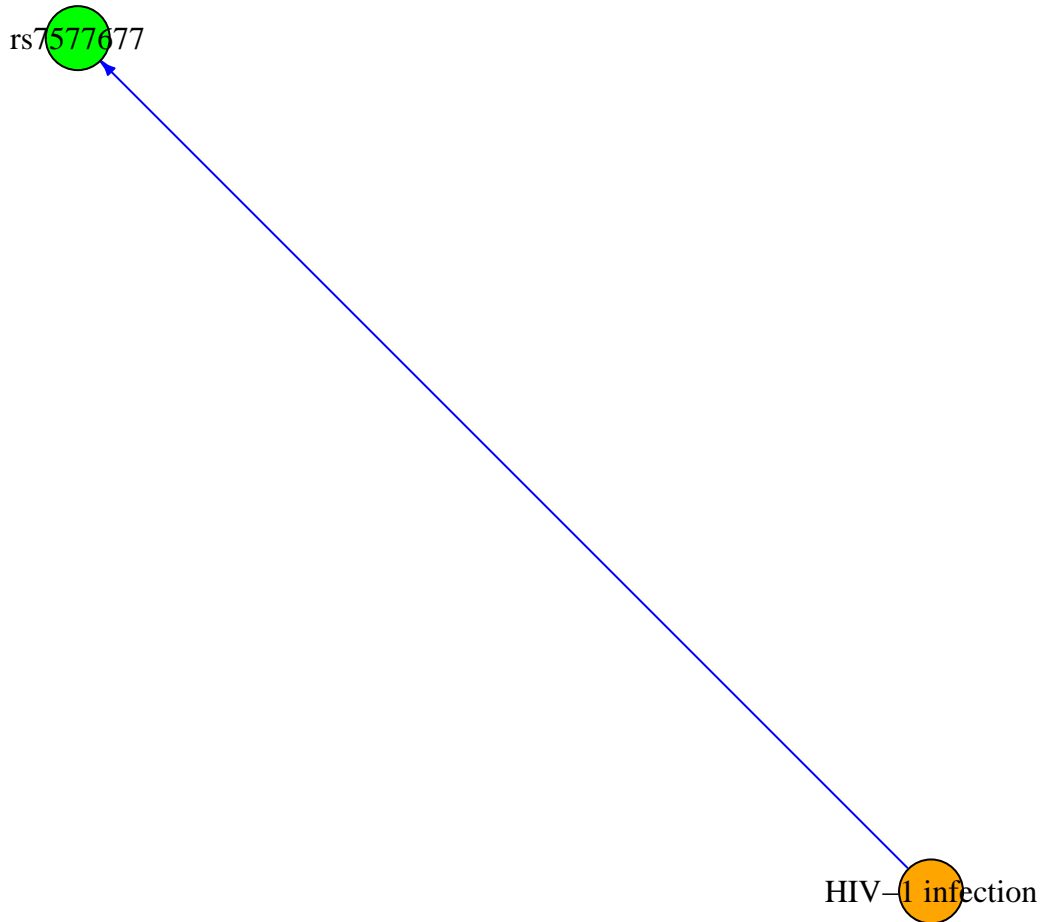

Supplement: Supplementary file 4 [file Supplementary_Fig_S2.pdf › Supplementary files/Supplementary_Fig_S2.pdf]
