# Supplementary material for: Evaluation of Five Mammalian Models for Human Disease Research Using Genomic and Bioinformatic Approaches
Source: Preprints.org preprint supplement (doi:10.20944/preprints202305.1816.v1), 2023-05-26
Supplement: Supplementary file 1 [file Supplementary_Table_S1.docx]

**Supplementary Table S1.** Distribution analysis of all CDS comparison between human and other species

|  | Rhesus macaque | Marmoset | Pig | Mouse | Rat |
| --- | --- | --- | --- | --- | --- |
| Number of values | 17638 | 17787 | 14992 | 13806 | 13222 |
|  |  |  |  |  |  |
| Minimum | 71.74 | 71.63 | 70.81 | 70.11 | 68.93 |
| 25% Percentile | 96.15 | 93.38 | 86.82 | 83.92 | 83.81 |
| Median | 97.29 | 95.29 | 89.89 | 86.99 | 86.88 |
| 75% Percentile | 98.15 | 96.72 | 92.44 | 89.64 | 89.53 |
| Maximum | 100.0 | 100.0 | 100.0 | 100.0 | 100.0 |
| Range | 28.26 | 28.37 | 29.19 | 29.89 | 31.07 |
|  |  |  |  |  |  |
| Mean | 96.82 | 94.65 | 89.37 | 86.65 | 86.53 |
| Std. Deviation | 2.212 | 3.025 | 4.178 | 4.159 | 4.164 |
| Std. Error of Mean | 0.01666 | 0.02268 | 0.03412 | 0.03539 | 0.03621 |
