# Supplementary material for: Evaluation of Five Mammalian Models for Human Disease Research Using Genomic and Bioinformatic Approaches
Source: Preprints.org preprint supplement (doi:10.20944/preprints202305.1816.v1), 2023-05-26
Supplement: Supplementary file 2 [file Supplementary_Table_S3.docx]

**Supplementary Table S3.** Distribution analysis of 10,316 commons CDS comparison between human and other species

|  | Rhesus macaque | Marmoset | Pig | Mouse | Rat |
| --- | --- | --- | --- | --- | --- |
| Number of values | 10316 | 10316 | 10316 | 10316 | 10316 |
| Minimum | 73.32 | 74.47 | 72.54 | 70.11 | 71.73 |
| 25% Percentile | 96.96 | 94.74 | 88.24 | 84.69 | 84.50 |
| Median | 97.75 | 96.05 | 90.73 | 87.46 | 87.32 |
| 75% Percentile | 98.40 | 97.12 | 92.92 | 89.89 | 89.79 |
| Maximum | 100.0 | 100.0 | 99.67 | 98.98 | 100.0 |
| Range | 26.68 | 25.53 | 27.14 | 28.86 | 28.28 |
| Mean | 97.53 | 95.76 | 90.38 | 87.19 | 87.04 |
| Std. Deviation | 1.532 | 1.948 | 3.538 | 3.838 | 3.842 |
| Std. Error of Mean | 0.01508 | 0.01917 | 0.03483 | 0.03779 | 0.03782 |
