# Supplementary material for: Evaluation of Five Mammalian Models for Human Disease Research Using Genomic and Bioinformatic Approaches
Source: Preprints.org preprint supplement (doi:10.20944/preprints202305.1816.v1), 2023-05-26
Supplement: Supplementary file 3 [file Supplementary_Table_S4.docx]

**Human CDS identified across the rhesus macaque genome**

|  |  | **Rhesus macaque chromosomes** | | | | | | | | | | | | | | | | | | | | | |
| --- | --- | --- | --- | --- | --- | --- | --- | --- | --- | --- | --- | --- | --- | --- | --- | --- | --- | --- | --- | --- | --- | --- | --- |
|  |  | **1** | **2** | **3** | **4** | **5** | **6** | **7** | **8** | **9** | **10** | **11** | **12** | **13** | **14** | **15** | **16** | **17** | **18** | **19** | **20** | **X** | **Y** |
| **Human chromosomes** | **1** | 1799 | - | 3 | 2 | - | 1 | 4 | - | 1 | - | 1 | - | 1 | 1 | 1 | - | - | - | 1 | 1 | 1 | - |
| **2** | 2 | 1 | - | 2 | - | 1 | - | - | 1 | 2 | - | 573 | 559 | 4 | 3 | - | - | - | - | - | - | - |
| **3** | - | 988 | 1 | - | 1 | 1 | - | - | - | - | - | 1 | - | - | - | - | 1 | - | - | 1 | 2 | - |
| **4** | - | - | 1 | - | 676 | 3 | - | 1 | 1 | - | - | - | - | - | - | - | - | - | - | - | - | - |
| **5** | - | 1 | - | - | 1 | 761 | 1 | - | - | 1 | - | - | 1 | - | - | - | - | 2 | - | - | - | - |
| **6** | - | - | 2 | 929 | 1 | - | 3 | - | - | - | - | - | - | - | - | 1 | - | - | - | - | - | - |
| **7** | 1 | 1 | 808 | - | - | - | 1 | 1 | - | - | 2 | - | - | - | 1 | 1 | - | - | 2 | - | - | - |
| **8** | 1 | - | - | 1 | - | - | 1 | 600 | - | - | - | - | - | - | - | 1 | - | - | - | 2 | - | - |
| **9** | 1 | 1 | 1 | - | - | - | - | - | - | - | 1 | - | - | - | 687 | - | - | - | - | - | - | - |
| **10** | - | - | - | - | - | 1 | - | - | 651 | - | - | 2 | - | - | 1 | 1 | - | - | - | - | - | - |
| **11** | 6 | - | 1 | - | - | - | - | 2 | - | 1 | - | - | - | 1096 | - | - | - | - | - | - | - | - |
| **12** | 1 | - | - | 3 | - | - | 1 | - | 1 | - | 929 | - | - | 1 | - | 1 | - | - | 1 | 1 | 1 | - |
| **13** | - | 5 | - | 1 | - | 1 | - | - | - | 1 | - | - | - | - | - | - | 292 | - | - | - | 1 | - |
| **14** | - | - | - | 2 | - | - | 554 | - | - | - | 1 | 1 | - | - | - | - | - | - | - | - | - | - |
| **15** | - | - | 1 | - | - | 1 | 522 | - | - | - | 1 | - | - | - | - | 1 | - | - | - | - | - | - |
| **16** | - | 1 | - | 2 | - | 1 | 1 | - | 1 | - | 1 | - | - | - | - | - | - | - | - | 719 | 1 | - |
| **17** | 1 | - | - | 1 | 1 | - | - | - | - | - | 2 | 1 | - | 1 | - | 1019 | - | - | - | - | - | - |
| **18** | - | 2 | - | 1 | - | 1 | 1 | - | - | - | 1 | - | - | - | 1 | 1 | - | 238 | - | - | - | - |
| **19** | - | 1 | 1 | - | - | - | 1 | - | - | - | 1 | - | - | - | - | 2 | - | - | 1129 | - | 2 | - |
| **20** | 1 | - | - | - | 1 | - | - | - | - | 479 | - | - | 1 | - | - | - | - | - | - | - | 1 | - |
| **21** | - | - | 170 | 2 | - | - | - | - | - | - | - | 1 | - | - | - | - | - | - | - | - | - | - |
| **22** | - | 1 | 3 | 1 | - | 1 | - | - | - | 384 | - | - | - | - | - | - | - | - | - | - | - | 1 |
| **X** | 1 | - | - | - | - | - | - | - | 2 | - | 1 | - | 1 | 2 | - | - | - | - | - | - | 758 | - |
| **Y** | - | - | - | - | - | - | - | - | - | - | - | - | - | - | - | - | - | - | - | - | 5 | 16 |

**Human CDS identified across the marmoset genome**

|  |  | **Marmoset chromosomes** | | | | | | | | | | | | | | | | | | | | | | | |
| --- | --- | --- | --- | --- | --- | --- | --- | --- | --- | --- | --- | --- | --- | --- | --- | --- | --- | --- | --- | --- | --- | --- | --- | --- | --- |
|  |  | **1** | **2** | **3** | **4** | **5** | **6** | **7** | **8** | **9** | **10** | **11** | **12** | **13** | **14** | **15** | **16** | **17** | **18** | **19** | **20** | **21** | **22** | **X** | **Y** |
| **Human chromosomes** | **1** | 4 | 3 | 1 | 7 | 1 | 1 | 992 | 2 | 2 | 10 | - | 1 | - | - | - | - | 1 | 503 | 328 | - | - | - | 2 | - |
| **2** | 5 | 1 | 1 | 4 | 3 | 573 | 3 | 1 | - | - | 3 | 1 | - | 554 | 1 | - | 1 | - | - | - | - | - | - | - |
| **3** | 1 | 1 | - | - | 4 | 2 | - | 1 | - | 3 | - | - | - | - | 648 | - | 325 | - | - | - | 21 | 1 | 2 | - |
| **4** | 3 | 1 | 680 | - | - | 1 | - | - | - | - | - | 1 | 21 | - | 1 | 1 | - | - | - | - | - | 1 | 2 | - |
| **5** | 1 | 776 | - | - | - | - | - | - | - | 2 | - | - | - | 1 | 1 | - | - | - | - | 1 | - | 1 | 1 | - |
| **6** | 1 | 1 | - | 947 | 2 | 2 | - | 1 | - | 1 | - | 1 | - | - | - | - | - | - | - | - | - | 1 | - | - |
| **7** | 3 | 228 | - | - | 2 | 3 | - | 560 | - | 4 | - | - | - | 1 | - | - | 1 | - | - | - | - | 1 | - | - |
| **8** | - | 1 | - | 2 | 2 | 1 | 1 | - | - | 1 | - | 2 | 240 | - | 1 | 383 | - | - | - | - | - | - | - | - |
| **9** | 675 | 5 | - | - | - | - | 1 | 1 | 3 | 2 | - | - | 1 | - | - | - | - | 1 | - | - | - | - | 1 | - |
| **10** | - | 1 | - | - | 1 | 2 | 138 | - | - | - | - | 532 | - | 1 | - | - | - | - | - | - | - | - | - | - |
| **11** | 1 | - | - | - | 2 | - | 3 | - | - | - | 1142 | - | 1 | - | - | 4 | - | - | - | - | - | - | - | - |
| **12** | - | 2 | 1 | - | 4 | 1 | 1 | 3 | 932 | 2 | - | - | 1 | 1 | 1 | - | 1 | - | 1 | 1 | - | - | 1 | - |
| **13** | 157 | - | - | - | 131 | 1 | - | - | 1 | - | - | - | - | - | - | 1 | - | 1 | - | - | 3 | - | 1 | - |
| **14** | - | - | 1 | 1 | 1 | - | - | 1 | 1 | 565 | - | - | - | - | - | - | - | - | 2 | - | - | - | 1 | - |
| **15** | - | - | - | - | 1 | 142 | 1 | - | 3 | 386 | - | - | - | - | - | - | - | - | - | - | - | - | - | - |
| **16** | 1 | 1 | 1 | - | - | - | - | - | 2 | 2 | - | 389 | - | - | 1 | 1 | - | 1 | - | 344 | - | - | - | - |
| **17** | 6 | 1 | - | 1 | 1015 | 1 | - | - | 1 | - | 3 | - | - | - | - | 1 | - | 1 | 1 | - | - | - | - | - |
| **18** | 1 | 1 | - | 1 | 1 | - | - | - | - | 1 | 2 | - | 239 | - | - | - | - | - | - | - | - | - | - | - |
| **19** | - | 2 | 1 | 1 | - | - | 1 | 1 | - | 1 | - | - | - | - | - | - | 1 | - | 1 | - | - | 1102 | 1 | - |
| **20** | 1 | - | - | - | 497 | 1 | 1 | - | - | - | - | - | - | - | - | - | - | - | - | - | - | - | - | - |
| **21** | - | - | - | 2 | 1 | - | - | - | - | 1 | - | - | - | 1 | - | - | - | - | - | 1 | 176 | - | - | - |
| **22** | 371 | - | - | - | - | - | 2 | 1 | 1 | - | 1 | - | - | - | 1 | - | 1 | - | 1 | - | - | - | - | - |
| **X** | 4 | - | 1 | 1 | 1 | - | 2 | - | 1 | - | - | 3 | - | - | - | - | - | - | - | - | - | 1 | 706 | 3 |
| **Y** | 1 | - | - | - | 4 | - | - | - | - | - | - | - | - | - | - | - | - | - | - | - | - | - | 6 | 15 |

**Human CDS identified across the pig genome**

|  |  | **Pig chromosomes** | | | | | | | | | | | | | | | | | | | |
| --- | --- | --- | --- | --- | --- | --- | --- | --- | --- | --- | --- | --- | --- | --- | --- | --- | --- | --- | --- | --- | --- |
|  |  | **1** | **2** | **3** | **4** | **5** | **6** | **7** | **8** | **9** | **10** | **11** | **12** | **13** | **14** | **15** | **16** | **17** | **18** | **X** | **Y** |
| **Human chromosomes** | **1** | 1 | 26 | 2 | 518 | 1 | 667 | 17 | - | 182 | 111 | - | 1 | - | 48 | - | - | - | 7 | 1 | - |
| **2** | 5 | - | 493 | - | - | - | - | - | 2 | 1 | - | - | - | 4 | 515 | - | - | - | - | - |
| **3** | - | 1 | 2 | - | - | - | 4 | - | 1 | - | - | 1 | 885 | - | - | - | - | - | - | - |
| **4** | - | - | 1 | 1 | - | 1 | 1 | 504 | - | - | - | - | - | 16 | 37 | 1 | 4 | - | 4 | - |
| **5** | - | 393 | 1 | - | - | 1 | 1 | - | 1 | - | - | - | 1 | 2 | 1 | 289 | - | - | 1 | - |
| **6** | 352 | 1 | - | 2 | - | - | 455 | - | 1 | - | - | 2 | - | - | - | - | 1 | - | 1 | 1 |
| **7** | 2 | 1 | 186 | - | - | - | 1 | 1 | 181 | - | - | 1 | 1 | 1 | - | - | - | 299 | - | - |
| **8** | - | - | - | 329 | - | - | 2 | - | - | 1 | - | 1 | - | 76 | 47 | - | 49 | - | - | - |
| **9** | 429 | 1 | 15 | - | 1 | - | - | - | - | 66 | - | - | - | 15 | - | - | - | 1 | 1 | - |
| **10** | - | - | - | - | - | - | - | - | - | 112 | - | 1 | - | 470 | 1 | - | - | - | - | - |
| **11** | - | 484 | - | - | - | - | - | - | 430 | - | - | - | - | - | - | - | 1 | - | - | - |
| **12** | 1 | 2 | 1 | - | 625 | 1 | 1 | - | - | - | - | 2 | - | 187 | - | 1 | - | 1 | 2 | - |
| **13** | - | 1 | - | 1 | 1 | - | - | - | - | - | 254 | - | - | 2 | - | - | - | - | 1 | - |
| **14** | 109 | - | - | - | - | - | 339 | - | - | - | - | - | - | - | - | - | - | - | - | - |
| **15** | 311 | - | - | 1 | 1 | - | 178 | - | - | - | - | - | - | - | 4 | 1 | - | - | - | - |
| **16** | - | - | 331 | - | 1 | 284 | - | - | - | - | - | - | - | - | - | - | - | - | - | - |
| **17** | 3 | 1 | - | 1 | 1 | - | - | - | - | - | - | 870 | - | - | - | - | - | - | 1 | - |
| **18** | 105 | - | - | - | - | 106 | - | - | - | - | - | 1 | - | - | - | 1 | - | - | - | - |
| **19** | - | 391 | - | - | - | 451 | - | - | - | - | - | - | - | - | - | - | - | - | 1 | - |
| **20** | - | - | - | - | - | - | 1 | 1 | - | - | - | - | - | 1 | - | - | 399 | - | 1 | - |
| **21** | - | - | - | - | - | - | 2 | - | - | - | - | - | 125 | - | - | - | - | - | - | - |
| **22** | - | - | - | - | 178 | - | 1 | - | 1 | - | - | - | - | 141 | - | - | - | - | - | - |
| **X** | - | - | 2 | 1 | 1 | - | 1 | - | - | - | - | 3 | 1 | 2 | - | 2 | - | - | 536 | 6 |
| **Y** | - | - | - | - | - | - | - | - | - | - | - | - | - | - | - | - | - | - | 3 | 14 |

**Human CDS identified across the mouse genome**

|  |  | **Mouse chromosomes** | | | | | | | | | | | | | | | | | | | | | | |
| --- | --- | --- | --- | --- | --- | --- | --- | --- | --- | --- | --- | --- | --- | --- | --- | --- | --- | --- | --- | --- | --- | --- | --- | --- |
|  |  | **1** | **2** | **3** | **4** | **5** | **6** | **7** | **8** | **9** | **10** | **11** | **12** | **13** | **14** | **15** | **16** | **17** | **18** | **19** | **20** | **21** | **X** | **Y** |
| **Human chromosomes** | **1** | 387 | 4 | 399 | 556 | 24 | 6 | 1 | 30 | 1 | 1 | 25 | - | 18 | 2 | - | 1 | 1 | 1 | - | - | - | 1 | - |
| **2** | 376 | 192 | - | - | 40 | 102 | 4 | - | - | 15 | 54 | 73 | - | - | 1 | 1 | 94 | 12 | 1 | - | - | - | - |
| **3** | - | - | 108 | - | - | 132 | - | - | 274 | - | - | - | 2 | 82 | - | 227 | 10 | - | - | - | - | - | - |
| **4** | 1 | - | 142 | - | 261 | 19 | - | 96 | - | - | 1 | - | - | - | - | - | - | 1 | - | - | - | 2 | - |
| **5** | 6 | 1 | - | - | - | 1 | - | - | - | - | 133 | - | 238 | - | 68 | 2 | 17 | 168 | 1 | - | - | 1 | - |
| **6** | 26 | 1 | - | 36 | - | 1 | 1 | - | 53 | 194 | 2 | - | 132 | 2 | - | 1 | 278 | - | - | - | - | 1 | - |
| **7** | - | 1 | - | 1 | 269 | 242 | - | - | 10 | 2 | 41 | 59 | 22 | - | 1 | - | - | - | 1 | - | - | - | - |
| **8** | 48 | 1 | 31 | 57 | - | - | - | 100 | - | - | - | 1 | 3 | 69 | 173 | 7 | 1 | - | - | - | - | - | - |
| **9** | 1 | 206 | - | 202 | - | 1 | - | - | - | - | - | - | 60 | - | - | - | 1 | - | 63 | - | - | 1 | - |
| **10** | 1 | 78 | - | - | - | 16 | 62 | 3 | - | 62 | 1 | - | 18 | 82 | - | 1 | - | 17 | 218 | - | - | - | - |
| **11** | - | 143 | - | 5 | - | - | 291 | - | 230 | - | - | 1 | - | - | 1 | - | - | - | 222 | - | - | - | - |
| **12** | - | - | - | - | 166 | 171 | 1 | - | 2 | 252 | 2 | - | 2 | - | 158 | 3 | 1 | - | - | - | - | 1 | - |
| **13** | 5 | - | 18 | - | 33 | 1 | - | 41 | - | - | - | - | - | 150 | 2 | 1 | - | 1 | - | - | - | 2 | - |
| **14** | - | 1 | - | - | - | - | - | 1 | - | - | 1 | 327 | - | 136 | - | - | - | - | - | - | - | 2 | - |
| **15** | - | 143 | 1 | - | - | 1 | 119 | - | 197 | - | - | - | - | 6 | - | - | 1 | 1 | - | - | - | - | - |
| **16** | - | - | - | - | - | - | 139 | 268 | - | - | 5 | - | - | - | 1 | 58 | 75 | - | 1 | - | - | - | - |
| **17** | - | - | - | - | - | 1 | - | - | - | 1 | 839 | - | - | - | 1 | - | 1 | - | - | - | - | 1 | - |
| **18** | 20 | 1 | - | - | 2 | - | - | - | - | - | - | 1 | - | - | - | - | 24 | 157 | - | - | - | - | - |
| **19** | - | 1 | - | - | - | - | 356 | 121 | 44 | 88 | - | - | 4 | - | - | - | 54 | - | - | - | - | 1 | - |
| **20** | - | 381 | 3 | - | - | - | - | - | - | 1 | - | - | - | - | - | 1 | - | - | - | - | - | 1 | - |
| **21** | - | - | - | - | - | - | - | 1 | - | 29 | - | - | 2 | - | - | 80 | 12 | - | - | - | - | - | - |
| **22** | - | - | - | - | 20 | 9 | - | 5 | 1 | 29 | 44 | - | - | 1 | 150 | 40 | - | - | - | - | - | - | - |
| **X** | 1 | - | - | 1 | 1 | - | 1 | - | - | - | 4 | 2 | - | 1 | - | 2 | 1 | - | 1 | - | - | 480 | - |
| **Y** | - | - | - | - | - | - | - | - | - | - | - | - | - | - | - | - | - | 1 | - | - | - | 8 | 1 |

**Human CDS identified across the rat genome**

|  |  | **Rat chromosomes** | | | | | | | | | | | | | | | | | | | | | |
| --- | --- | --- | --- | --- | --- | --- | --- | --- | --- | --- | --- | --- | --- | --- | --- | --- | --- | --- | --- | --- | --- | --- | --- |
|  |  | **1** | **2** | **3** | **4** | **5** | **6** | **7** | **8** | **9** | **10** | **11** | **12** | **13** | **14** | **15** | **16** | **17** | **18** | **19** | **20** | **X** | **Y** |
| **Human chromosomes** | **1** | 2 | 390 | 4 | 6 | 538 | - | 1 | - | - | 18 | - | - | 364 | 28 | 1 | - | 17 | - | 31 | 1 | 1 | - |
| **2** | 4 | - | 182 | 95 | 1 | 203 | 4 | 1 | 310 | 1 | 1 | - | 35 | 51 | 1 | - | - | 14 | 2 | 14 | - | - |
| **3** | 1 | 109 | - | 118 | 1 | - | 2 | 259 | 7 | 1 | 219 | 1 | - | - | 27 | 51 | - | - | - | - | - | - |
| **4** | - | 133 | - | 18 | 1 | 1 | 1 | 1 | - | 1 | 1 | - | 1 | 245 | - | 61 | - | - | 25 | - | 2 | - |
| **5** | 31 | 225 | 1 | 1 | - | - | 1 | - | 13 | 134 | 2 | 1 | - | - | - | 1 | 50 | 153 | - | - | 3 | - |
| **6** | 159 | 5 | 1 | 2 | 34 | - | - | 47 | 111 | 4 | - | - | - | - | 2 | - | 127 | - | - | 217 | - | - |
| **7** | - | - | 1 | 323 | - | 58 | 2 | 9 | 1 | 3 | - | 151 | - | 37 | - | - | 23 | - | - | 1 | 1 | - |
| **8** | 1 | 30 | 2 | - | 98 | 1 | 161 | 1 | - | 3 | 7 | - | 1 | - | 67 | 96 | 1 | - | - | 1 | 2 | - |
| **9** | 59 | - | 195 | 2 | 194 | - | 1 | - | 1 | - | - | - | - | - | - | 2 | 49 | - | - | - | 1 | - |
| **10** | 265 | - | 1 | 14 | - | - | - | - | 1 | 2 | 1 | - | - | - | 28 | 47 | 103 | - | 3 | 58 | - | - |
| **11** | 502 | 2 | 125 | - | - | 3 | - | 213 | 1 | - | 1 | - | - | - | 1 | - | - | - | - | - | - | - |
| **12** | 1 | - | - | 150 | 1 | - | 392 | 3 | 4 | 1 | 3 | 153 | - | - | - | - | 2 | - | - | - | 3 | - |
| **13** | - | 14 | 1 | 1 | - | - | 2 | - | 5 | 1 | - | 29 | - | - | 132 | 42 | - | 1 | - | - | 2 | - |
| **14** | - | - | - | - | - | 315 | - | - | - | - | - | - | - | - | 130 | - | - | 1 | - | - | 1 | - |
| **15** | 115 | - | 132 | - | 1 | - | - | 198 | - | - | - | - | - | - | 6 | - | - | - | - | - | - | - |
| **16** | 129 | - | 1 | - | - | 1 | 2 | 1 | - | 129 | - | - | - | - | - | 1 | 2 | - | 255 | - | - | - |
| **17** | - | 1 | 1 | - | - | 1 | 1 | - | - | 826 | - | 1 | - | - | - | 1 | - | - | - | 1 | 2 | - |
| **18** | - | - | 2 | - | - | 1 | - | - | 26 | 1 | - | - | 19 | 1 | - | - | - | 145 | - | - | - | - |
| **19** | 348 | 1 | 1 | - | - | - | 96 | 39 | 30 | 1 | - | 16 | - | - | - | 62 | 1 | - | 40 | - | 1 | - |
| **20** | - | - | 363 | 1 | - | - | - | - | - | - | - | - | - | - | - | - | - | - | - | 1 | 1 | - |
| **21** | - | - | - | - | - | - | - | - | - | - | 77 | - | - | - | - | - | 2 | - | - | 41 | - | - |
| **22** | - | - | - | 12 | - | 1 | 151 | - | - | - | 43 | 15 | - | 44 | - | - | - | - | 6 | 17 | - | - |
| **X** | 6 | 3 | - | 1 | 1 | 1 | - | 5 | 1 | 5 | - | 2 | 1 | 2 | - | 1 | 2 | 1 | - | 2 | 424 | - |
| **Y** | - | - | - | - | - | - | - | - | - | - | - | - | - | - | - | - | - | 1 | - | - | 7 | 1 |
