# Supplementary material for: Evaluation of Five Mammalian Models for Human Disease Research Using Genomic and Bioinformatic Approaches
Source: Preprints.org preprint supplement (doi:10.20944/preprints202305.1816.v1), 2023-05-26
Supplement: Supplementary file 4 [file Supplementary_Table_S5.docx]

**Identified 10316 conserved CDS mapped between human and rhesus macaque genome**

|  |  | **Rhesus macaque chromosomes** | | | | | | | | | | | | | | | | | | | | | |
| --- | --- | --- | --- | --- | --- | --- | --- | --- | --- | --- | --- | --- | --- | --- | --- | --- | --- | --- | --- | --- | --- | --- | --- |
|  |  | **1** | **2** | **3** | **4** | **5** | **6** | **7** | **8** | **9** | **10** | **11** | **12** | **13** | **14** | **15** | **16** | **17** | **18** | **19** | **20** | **X** | **Y** |
| **Human chromosomes** | **1** | 1072 | - | - | 1 | - | 1 | 4 | - | 1 | - | 1 | - | 1 | - | - | - | - | - | - | - | - | - |
| **2** | 1 | 1 | - | - | - | - | - | - | - | - | - | 386 | 359 | 2 | 1 | - | - | - | - | - | - | - |
| **3** | - | 642 | 1 | - | 1 | - | - | - | - | - | - | 1 | - | - | - | - | - | - | - | - | - | - |
| **4** | - | - | - | - | 383 | 1 | - | - | 1 | - | - | - | - | - | - | - | - | - | - | - | - | - |
| **5** | - | 1 | - | - | 1 | 495 | 1 | - | - | 1 | - | - | 1 | - | - | - | - | 1 | - | - | - | - |
| **6** | - | - | - | 568 | 1 | - | 3 | - | - | - | - | - | - | - | - | 1 | - | - | - | - | - | - |
| **7** | - | 1 | 463 | - | - | - | 1 | 1 | - | - | 1 | - | - | - | - | 1 | - | - | 2 | - | - | - |
| **8** | - | - | - | 1 | - | - | 1 | 369 | - | - | - | - | - | - | - | - | - | - | - | - | - | - |
| **9** | - | 1 | 1 | - | - | - | - | - | - | - | 1 | - | - | - | 396 | - | - | - | - | - | - | - |
| **10** | - | - | - | - | - | - | - | - | 422 | - | - | 2 | - | - | - | 1 | - | - | - | - | - | - |
| **11** | - | - | 1 | - | - | - | - | - | - | 1 | - | - | - | 615 | - | - | - | - | - | - | - | - |
| **12** | 1 | - | - | 1 | - | - | 1 | - | 1 | - | 574 | - | - | 1 | - | 1 | - | - | 1 | - | 1 | - |
| **13** | - | - | - | 1 | - | 1 | - | - | - | 1 | - | - | - | - | - | - | 178 | - | - | - | 1 | - |
| **14** | - | - | - | 1 | - | - | 358 | - | - | - | 1 | - | - | - | - | - | - | - | - | - | - | - |
| **15** | - | - | 1 | - | - | - | 368 | - | - | - | - | - | - | - | - | 1 | - | - | - | - | - | - |
| **16** | - | - | - | 1 | - | 1 | - | - | - | - | - | - | - | - | - | - | - | - | - | 375 | 1 | - |
| **17** | - | - | - | - | 1 | - | - | - | - | - | 1 | 1 | - | - | - | 632 | - | - | - | - | - | - |
| **18** | - | - | - | - | - | - | 1 | - | - | - | 1 | - | - | - | - | - | - | 155 | - | - | - | - |
| **19** | - | 1 | - | - | - | - | 1 | - | - | - | 1 | - | - | - | - | - | - | - | 446 | - | 2 | - |
| **20** | - | - | - | - | - | - | - | - | - | 280 | - | - | 1 | - | - | - | - | - | - | - | 1 | - |
| **21** | - | - | 74 | 2 | - | - | - | - | - | - | - | - | - | - | - | - | - | - | - | - | - | - |
| **22** | - | - | 1 | 1 | - | - | - | - | - | 200 | - | - | - | - | - | - | - | - | - | - | - | - |
| **X** | 1 | - | - | - | - | - | - | - | 2 | - | 1 | - | 1 | 2 | - | - | - | - | - | - | 374 | - |
| **Y** | - | - | - | - | - | - | - | - | - | - | - | - | - | - | - | - | - | - | - | - | 1 | 6 |

**Identified 10316 conserved CDS mapped between human and marmoset genome**

|  |  | **Marmoset chromosomes** | | | | | | | | | | | | | | | | | | | | | | | |
| --- | --- | --- | --- | --- | --- | --- | --- | --- | --- | --- | --- | --- | --- | --- | --- | --- | --- | --- | --- | --- | --- | --- | --- | --- | --- |
|  |  | **1** | **2** | **3** | **4** | **5** | **6** | **7** | **8** | **9** | **10** | **11** | **12** | **13** | **14** | **15** | **16** | **17** | **18** | **19** | **20** | **21** | **22** | **X** | **Y** |
| **Human chromosomes** | **1** | - | - | 1 | 5 | 1 | 1 | 596 | - | 1 | 5 | - | 1 | - | - | - | - | - | 280 | 196 | - | - | - | 1 | - |
| **2** | 1 | 1 | 1 | 2 | 2 | 381 | 1 | - | - | - | 2 | 1 | - | 356 | 1 | - | 1 | - | - | - | - | - | - | - |
| **3** | 1 | 1 | - | - | - | 1 | - | - | - | 1 | - | - | - | - | 415 | - | 208 | - | - | - | 17 | - | 1 | - |
| **4** | 3 | 1 | 378 | - | - | - | - | - | - | - | - | - | - | - | - | 1 | - | - | - | - | - | - | 1 | - |
| **5** | - | 497 | - | - | - | - | - | - | - | 2 | - | - | - | 1 | 1 | - | - | - | - | - | - | - | 1 | - |
| **6** | 1 | - | - | 570 | 1 | 2 | - | - | - | - | - | - | - | - | - | - | - | - | - | - | - | - | - | - |
| **7** | 1 | 119 | - | - | - | 1 | - | 347 | - | - | - | - | - | - | - | - | 1 | - | - | - | - | 1 | - | - |
| **8** | - | - | - | 1 | 1 | - | 1 | - | - | 1 | - | - | 127 | - | 1 | 240 | - | - | - | - | - | - | - | - |
| **9** | 399 | - | - | - | - | - | - | 1 | 2 | - | - | - | - | - | - | - | - | - | - | - | - | - | - | - |
| **10** | - | - | - | - | 1 | 1 | 84 | - | - | - | - | 344 | - | - | - | - | - | - | - | - | - | - | - | - |
| **11** | - | - | - | - | 1 | - | - | - | - | - | 616 | - | - | - | - | - | - | - | - | - | - | - | - | - |
| **12** | - | 2 | - | - | 1 | - | - | 2 | 575 | - | - | - | - | - | 1 | - | - | - | - | - | - | - | 1 | - |
| **13** | 98 | - | - | - | 80 | 1 | - | - | - | - | - | - | - | - | - | 1 | - | 1 | - | - | - | - | 1 | - |
| **14** | - | - | 1 | 1 | 1 | - | - | 1 | - | 355 | - | - | - | - | - | - | - | - | - | - | - | - | 1 | - |
| **15** | - | - | - | - | 1 | 95 | 1 | - | 2 | 271 | - | - | - | - | - | - | - | - | - | - | - | - | - | - |
| **16** | 1 | - | 1 | - | - | - | - | - | 1 | - | - | 188 | - | - | 1 | - | - | - | - | 186 | - | - | - | - |
| **17** | 2 | - | - | 1 | 630 | 1 | - | - | - | - | 1 | - | - | - | - | 1 | - | 1 | - | - | - | - | - | - |
| **18** | - | - | - | - | - | - | - | - | - | 1 | 1 | - | 155 | - | - | - | - | - | - | - | - | - | - | - |
| **19** | - | 1 | - | 1 | - | - | - | - | - | 1 | - | - | - | - | - | - | - | - | - | - | - | 449 | 1 | - |
| **20** | 1 | - | - | - | 281 | - | - | - | - | - | - | - | - | - | - | - | - | - | - | - | - | - | - | - |
| **21** | - | - | - | 2 | - | - | - | - | - | - | - | - | - | - | - | - | - | - | - | - | 74 | - | - | - |
| **22** | 199 | - | - | - | - | - | 1 | - | - | - | - | - | - | - | - | - | 1 | - | - | - | - | - | - | - |
| **X** | 1 | - | 1 | 1 | - | - | - | - | 1 | - | - | 2 | - | - | - | - | - | - | - | - | - | - | 374 | - |
| **Y** | - | - | - | - | - | - | - | - | - | - | - | - | - | - | - | - | - | - | - | - | - | - | 4 | 3 |

**Identified 10316 conserved CDS mapped between human and pig genome**

|  |  | **Pig chromosomes** | | | | | | | | | | | | | | | | | | | |
| --- | --- | --- | --- | --- | --- | --- | --- | --- | --- | --- | --- | --- | --- | --- | --- | --- | --- | --- | --- | --- | --- |
|  |  | **1** | **2** | **3** | **4** | **5** | **6** | **7** | **8** | **9** | **10** | **11** | **12** | **13** | **14** | **15** | **16** | **17** | **18** | **X** | **Y** |
| **Human chromosomes** | **1** | - | 11 | 2 | 358 | 1 | 447 | 10 | - | 132 | 87 | - | 1 | - | 33 | - | - | - | 1 | 1 | - |
| **2** | 2 | - | 360 | - | - | - | - | - | 2 | - | - | - | - | 2 | 384 | - | - | - | - | - |
| **3** | - | 1 | - | - | - | - | 2 | - | - | - | - | 1 | 640 | - | - | - | - | - | - | - |
| **4** | - | - | - | 1 | - | - | - | 337 | - | - | - | - | - | 13 | 27 | 1 | 3 | - | 4 | - |
| **5** | - | 284 | 1 | - | - | - | 1 | - | 1 | - | - | - | 1 | 1 | 1 | 211 | - | - | 1 | - |
| **6** | 258 | 1 | - | 2 | - | - | 305 | - | - | - | - | 2 | - | - | - | - | - | - | 1 | 1 |
| **7** | - | 1 | 118 | - | - | - | 1 | 1 | 137 | - | - | - | 1 | 1 | - | - | - | 210 | - | - |
| **8** | - | - | - | 243 | - | - | 2 | - | - | - | - | - | - | 56 | 33 | - | 34 | - | - | - |
| **9** | 298 | - | 10 | - | 1 | - | - | - | - | 43 | - | - | - | 13 | - | - | - | 1 | - | - |
| **10** | - | - | - | - | - | - | - | - | - | 84 | - | 1 | - | 346 | 1 | - | - | - | - | - |
| **11** | - | 333 | - | - | - | - | - | - | 282 | - | - | - | - | - | - | - | 1 | - | - | - |
| **12** | 1 | 1 | 1 | - | 442 | - | 1 | - | - | - | - | 2 | - | 127 | - | - | - | - | 2 | - |
| **13** | - | 1 | - | 1 | 1 | - | - | - | - | - | 177 | - | - | 1 | - | - | - | - | 1 | - |
| **14** | 80 | - | - | - | - | - | 247 | - | - | - | - | - | - | - | - | - | - | - | - | - |
| **15** | 219 | - | - | 1 | - | - | 141 | - | - | - | - | - | - | - | 4 | 1 | - | - | - | - |
| **16** | - | - | 186 | - | 1 | 188 | - | - | - | - | - | - | - | - | - | - | - | - | - | - |
| **17** | - | - | - | - | - | - | - | - | - | - | - | 634 | - | - | - | - | - | - | 1 | - |
| **18** | 83 | - | - | - | - | 74 | - | - | - | - | - | - | - | - | - | - | - | - | - | - |
| **19** | - | 197 | - | - | - | 258 | - | - | - | - | - | - | - | - | - | - | - | - | 1 | - |
| **20** | - | - | - | - | - | - | 1 | 1 | - | - | - | - | - | 1 | - | - | 278 | - | 1 | - |
| **21** | - | - | - | - | - | - | 2 | - | - | - | - | - | 70 | - | - | - | - | - | - | - |
| **22** | - | - | - | - | 116 | - | - | - | - | - | - | - | - | 81 | - | - | - | - | - | - |
| **X** | - | - | 2 | - | 1 | - | - | - | - | - | - | - | - | 2 | - | 2 | - | - | 371 | 3 |
| **Y** | - | - | - | - | - | - | - | - | - | - | - | - | - | - | - | - | - | - | 2 | 5 |

**Identified 10316 conserved CDS mapped between human and mouse genome**

|  |  | **Mouse chromosomes** | | | | | | | | | | | | | | | | | | | | | | |
| --- | --- | --- | --- | --- | --- | --- | --- | --- | --- | --- | --- | --- | --- | --- | --- | --- | --- | --- | --- | --- | --- | --- | --- | --- |
|  |  | **1** | **2** | **3** | **4** | **5** | **6** | **7** | **8** | **9** | **10** | **11** | **12** | **13** | **14** | **15** | **16** | **17** | **18** | **19** | **20** | **21** | **X** | **Y** |
| **Human chromosomes** | **1** | 292 | 3 | 303 | 413 | 18 | 5 | - | 23 | 1 | 1 | 14 | - | 12 | 1 | - | - | - | 1 | - | - | - | 1 | - |
| **2** | 278 | 146 | - | - | 30 | 85 | 3 | - | - | 12 | 51 | 58 | - | - | - | - | 75 | 11 | 1 | - | - | - | - |
| **3** | - | - | 92 | - | - | 92 | - | - | 211 | - | - | - | 2 | 66 | - | 176 | 6 | - | - | - | - | - | - |
| **4** | 1 | - | 106 | - | 186 | 17 | - | 73 | - | - | 1 | - | - | - | - | - | - | - | - | - | - | 2 | - |
| **5** | 5 | 1 | - | - | - | 1 | - | - | - | - | 111 | - | 196 | - | 52 | 2 | 13 | 119 | 1 | - | - | 1 | - |
| **6** | 22 | - | - | 31 | - | - | 1 | - | 45 | 161 | 1 | - | 103 | 1 | - | 1 | 207 | - | - | - | - | 1 | - |
| **7** | - | 1 | - | - | 197 | 170 | - | - | 7 | 2 | 27 | 45 | 19 | - | 1 | - | - | - | 1 | - | - | - | - |
| **8** | 39 | 1 | 21 | 48 | - | - | - | 75 | - | - | - | - | 1 | 52 | 129 | 5 | 1 | - | - | - | - | - | - |
| **9** | 1 | 149 | - | 157 | - | 1 | - | - | - | - | - | - | 41 | - | - | - | 1 | - | 52 | - | - | - | - |
| **10** | 1 | 57 | - | - | - | 11 | 41 | 3 | - | 47 | 1 | - | 10 | 68 | - | 1 | - | 13 | 179 | - | - | - | - |
| **11** | - | 94 | - | - | - | - | 203 | - | 168 | - | - | - | - | - | 1 | - | - | - | 153 | - | - | - | - |
| **12** | - | - | - | - | 127 | 122 | 1 | - | 1 | 203 | 1 | - | 2 | - | 120 | 3 | 1 | - | - | - | - | 1 | - |
| **13** | 5 | - | 13 | - | 25 | 1 | - | 27 | - | - | - | - | - | 107 | 2 | - | - | 1 | - | - | - | 1 | - |
| **14** | - | - | - | - | - | - | - | 1 | - | - | - | 258 | - | 99 | - | - | - | - | - | - | - | 2 | - |
| **15** | - | 102 | 1 | - | - | - | 91 | - | 170 | - | - | - | - | 6 | - | - | - | 1 | - | - | - | - | - |
| **16** | - | - | - | - | - | - | 96 | 186 | - | - | 3 | - | - | - | 1 | 47 | 44 | - | 1 | - | - | - | - |
| **17** | - | - | - | - | - | 1 | - | - | - | - | 634 | - | - | - | - | - | 1 | - | - | - | - | 1 | - |
| **18** | 17 | - | - | - | 1 | - | - | - | - | - | - | 1 | - | - | - | - | 18 | 120 | - | - | - | - | - |
| **19** | - | 1 | - | - | - | - | 254 | 87 | 32 | 47 | - | - | 2 | - | - | - | 33 | - | - | - | - | 1 | - |
| **20** | - | 280 | - | - | - | - | - | - | - | 1 | - | - | - | - | - | - | - | - | - | - | - | 1 | - |
| **21** | - | - | - | - | - | - | - | - | - | 15 | - | - | 2 | - | - | 51 | 8 | - | - | - | - | - | - |
| **22** | - | - | - | - | 16 | 4 | - | 5 | - | 13 | 30 | - | - | - | 107 | 27 | - | - | - | - | - | - | - |
| **X** | 1 | - | - | - | 1 | - | 1 | - | - | - | 4 | 2 | - | 1 | - | 1 | 1 | - | 1 | - | - | 368 | - |
| **Y** | - | - | - | - | - | - | - | - | - | - | - | - | - | - | - | - | - | 1 | - | - | - | 5 | 1 |

**Identified 10316 conserved CDS mapped between human and rat genome**

|  |  | **Rat chromosomes** | | | | | | | | | | | | | | | | | | | | | |
| --- | --- | --- | --- | --- | --- | --- | --- | --- | --- | --- | --- | --- | --- | --- | --- | --- | --- | --- | --- | --- | --- | --- | --- |
|  |  | **1** | **2** | **3** | **4** | **5** | **6** | **7** | **8** | **9** | **10** | **11** | **12** | **13** | **14** | **15** | **16** | **17** | **18** | **19** | **20** | **X** | **Y** |
| **Human chromosomes** | **1** | 1 | 302 | 4 | 5 | 415 | - | 1 | - | - | 13 | - | - | 290 | 19 | 1 | - | 12 | - | 23 | - | 1 | - |
| **2** | 4 | - | 146 | 83 | 1 | 160 | 3 | - | 251 | - | - | - | 29 | 50 | - | - | - | 11 | - | 12 | - | - |
| **3** | - | 94 | - | 92 | - | - | 1 | 210 | 6 | 1 | 175 | - | - | - | 22 | 43 | - | - | - | - | - | - |
| **4** | - | 106 | - | 17 | 1 | - | 1 | 1 | - | 1 | 1 | - | 1 | 184 | - | 49 | - | - | 22 | - | 2 | - |
| **5** | 26 | 183 | 1 | 1 | - | - | 1 | - | 11 | 114 | 2 | - | - | - | - | 1 | 42 | 115 | - | - | 3 | - |
| **6** | 127 | 4 | - | - | 30 | - | - | 41 | 95 | 3 | - | - | - | - | 1 | - | 99 | - | - | 174 | - | - |
| **7** | - | - | 1 | 245 | - | 45 | 2 | 6 | 1 | 2 | - | 117 | - | 27 | - | - | 19 | - | - | 1 | 1 | - |
| **8** | - | 21 | 1 | - | 86 | 1 | 127 | 1 | - | 1 | 5 | - | 1 | - | 52 | 74 | 1 | - | - | 1 | - | - |
| **9** | 51 | - | 150 | 2 | 157 | - | 1 | - | 1 | - | - | - | - | - | - | 2 | 38 | - | - | - | - | - |
| **10** | 219 | - | - | 11 | - | - | - | - | 1 | 1 | 1 | - | - | - | 27 | 41 | 80 | - | 3 | 47 | - | - |
| **11** | 353 | 1 | 93 | - | - | 2 | - | 164 | 1 | - | 1 | - | - | - | 1 | - | - | - | - | - | - | - |
| **12** | 1 | - | - | 119 | 1 | - | 322 | 1 | 4 | 1 | 3 | 125 | - | - | - | - | 2 | - | - | - | 2 | - |
| **13** | - | 13 | 1 | 1 | - | - | 2 | - | 5 | 1 | - | 24 | - | - | 106 | 27 | - | 1 | - | - | 1 | - |
| **14** | - | - | - | - | - | 258 | - | - | - | - | - | - | - | - | 100 | - | - | 1 | - | - | 1 | - |
| **15** | 90 | - | 104 | - | - | - | - | 171 | - | - | - | - | - | - | 6 | - | - | - | - | - | - | - |
| **16** | 97 | - | - | - | - | - | 2 | - | - | 93 | - | - | - | - | - | 1 | - | - | 184 | - | - | - |
| **17** | - | 1 | 1 | - | - | 1 | 1 | - | - | 628 | - | - | - | - | - | - | - | - | - | - | 1 | - |
| **18** | - | - | 1 | - | - | 1 | - | - | 19 | - | - | - | 17 | 1 | - | - | - | 117 | - | - | - | - |
| **19** | 257 | 1 | 1 | - | - | - | 59 | 31 | 19 | - | - | 13 | - | - | - | 46 | 1 | - | 28 | - | 1 | - |
| **20** | - | - | 279 | 1 | - | - | - | - | - | - | - | - | - | - | - | - | - | - | - | 1 | 1 | - |
| **21** | - | - | - | - | - | - | - | - | - | - | 51 | - | - | - | - | - | 2 | - | - | 23 | - | - |
| **22** | - | - | - | 4 | - | 1 | 112 | - | - | - | 26 | 12 | - | 34 | - | - | - | - | 5 | 6 | - | - |
| **X** | 6 | 3 | - | - | - | 1 | - | 2 | 1 | 5 | - | 1 | 1 | 2 | - | 1 | 2 | 1 | - | - | 354 | - |
| **Y** | - | - | - | - | - | - | - | - | - | - | - | - | - | - | - | - | - | 1 | - | - | 5 | 1 |
