# Supplementary material for: Evaluation of Five Mammalian Models for Human Disease Research Using Genomic and Bioinformatic Approaches
Source: Preprints.org preprint supplement (doi:10.20944/preprints202305.1816.v1), 2023-05-26
Supplement: Supplementary file 5 [file Supplementary_Table_S7.xlsx]

## Sheet: ReadMe
Sheet_Name	Description
Human vs. Rat	Identified diseases from Human vs. Rat SNPs
Human vs. Mouse	Identified diseases from Human vs. Mouse SNPs
Human vs. Pig	Identified diseases from Human vs. Pig SNPs
Human vs. Marmoset	Identified diseases from Human vs. Marmoset SNPs
Human vs. Rhesus macaque	Identified diseases from Human vs. Rhesus macaque SNPs

## Sheet: Human vs. Rat
Identified diseases from Human vs. Rat SNPs
Uploaded_variation	Chromosome	Location	Gene_id	Transcript_id	Gene_symbol	Variation_ID	Diseases	Source	PubMed	Disease_Class_Name
ENST00000540437.5:C.900C>T	1	1313807	ENSG00000127054	ENST00000540437.5	CPSF3L	rs12142199	crohns disease	Ensembl_Post_GWAS	PMID26192919	Digestive System Diseases
ENST00000540437.5:C.900C>T	1	1313807	ENSG00000127054	ENST00000540437.5	CPSF3L	rs12142199	inflammatory bowel disease	Ensembl_Post_GWAS	PMID28067908	Digestive System Diseases
ENST00000540437.5:C.900C>T	1	1313807	ENSG00000127054	ENST00000540437.5	CPSF3L	rs12142199	ulcerative colitis	Ensembl_Post_GWAS	PMID28067908	Digestive System Diseases
ENST00000378755.9:C.1422C>T	1	1526472	ENSG00000197785	ENST00000378755.9	ATAD3A	rs777124344	breast carcinoma	Cosmic	22722193	Cancer; Organismal Injury and Abnormalities; Reproductive System Disease
ENST00000638771.1:C.14C>G	1	2019437	ENSG00000187730	ENST00000638771.1	GABRD	rs1207791272	Idiopathic generalized epilepsy	ClinVar		Nervous System Diseases
ENST00000638771.1:C.84C>T	1	2024957	ENSG00000187730	ENST00000638771.1	GABRD	rs769857211	Idiopathic generalized epilepsy	ClinVar		Nervous System Diseases
ENST00000638771.1:C.492C>T	1	2027598	ENSG00000187730	ENST00000638771.1	GABRD	rs367776284	Idiopathic generalized epilepsy	ClinVar		Nervous System Diseases
ENST00000638771.1:C.969C>T	1	2029672	ENSG00000187730	ENST00000638771.1	GABRD	rs146381127	Idiopathic generalized epilepsy	ClinVar		Nervous System Diseases
ENST00000638771.1:C.1327C>G	1	2030030	ENSG00000187730	ENST00000638771.1	GABRD	rs148300882	Epilepsy	ClinVar		Nervous System Diseases
ENST00000378536.5:C.360C>T	1	2229126	ENSG00000157933	ENST00000378536.5	SKI	rs375024753	Cardiovascular phenotype	ClinVar		Cardiovascular Diseases
ENST00000378536.5:C.1152C>T	1	2303341	ENSG00000157933	ENST00000378536.5	SKI	rs200160702	Cardiovascular phenotype	ClinVar		Cardiovascular Diseases
ENST00000378536.5:C.1338C>T	1	2303966	ENSG00000157933	ENST00000378536.5	SKI	rs148632347	Cardiovascular phenotype	ClinVar		Cardiovascular Diseases
ENST00000378536.5:C.1400C>T	1	2304028	ENSG00000157933	ENST00000378536.5	SKI	rs752151031	Shprintzen-Goldberg syndrome	ClinVar		Musculoskeletal Diseases; Cardiovascular Diseases; Congenital, Hereditary, and Neonatal Diseases and Abnormalities; Skin and Connective Tissue Diseases
ENST00000378536.5:C.1527C>T	1	2304345	ENSG00000157933	ENST00000378536.5	SKI	rs111935632	Cardiovascular phenotype	ClinVar		Cardiovascular Diseases
ENST00000378536.5:C.1568C>T	1	2304386	ENSG00000157933	ENST00000378536.5	SKI	rs730880212	Arterial dissection	ClinVar		Cardiovascular Diseases
ENST00000378536.5:C.1568C>T	1	2304386	ENSG00000157933	ENST00000378536.5	SKI	rs730880212	Cardiovascular phenotype	ClinVar		Cardiovascular Diseases
ENST00000378536.5:C.1834C>T	1	2306086	ENSG00000157933	ENST00000378536.5	SKI	rs35833638	Cardiovascular phenotype	ClinVar		Cardiovascular Diseases
ENST00000378536.5:C.2058C>T	1	2306636	ENSG00000157933	ENST00000378536.5	SKI	rs1171554207	Cardiovascular phenotype	ClinVar		Cardiovascular Diseases
ENST00000378536.5:C.2058C>T	1	2306636	ENSG00000157933	ENST00000378536.5	SKI	rs1171554207	Shprintzen-Goldberg syndrome	ClinVar		Musculoskeletal Diseases; Cardiovascular Diseases; Congenital, Hereditary, and Neonatal Diseases and Abnormalities; Skin and Connective Tissue Diseases
ENST00000378536.5:C.2168C>A	1	2306746	ENSG00000157933	ENST00000378536.5	SKI	rs1264586139	Cardiovascular phenotype	ClinVar		Cardiovascular Diseases
ENST00000378536.5:C.2168C>A	1	2306746	ENSG00000157933	ENST00000378536.5	SKI	rs1264586139	Shprintzen-Goldberg syndrome	ClinVar		Musculoskeletal Diseases; Cardiovascular Diseases; Congenital, Hereditary, and Neonatal Diseases and Abnormalities; Skin and Connective Tissue Diseases
ENST00000270722.10:C.843C>T	1	3402957	ENSG00000142611	ENST00000270722.10	PRDM16	rs201199516	Left ventricular noncompaction 8	ClinVar		Cardiovascular Diseases
ENST00000270722.10:C.1482C>T	1	3411679	ENSG00000142611	ENST00000270722.10	PRDM16	rs755193238	Left ventricular noncompaction 8	ClinVar		Cardiovascular Diseases
ENST00000270722.10:C.1651C>T	1	3411848	ENSG00000142611	ENST00000270722.10	PRDM16	rs757695488	Left ventricular noncompaction 8	ClinVar		Cardiovascular Diseases
ENST00000270722.10:C.3366C>G	1	3430953	ENSG00000142611	ENST00000270722.10	PRDM16	rs370195954	Left ventricular noncompaction 8	ClinVar		Cardiovascular Diseases
ENST00000378156.9:C.4260C>T	1	5863286	ENSG00000131697	ENST00000378156.9	NPHP4	rs376464726	Nephronophthisis	ClinVar		Male Urogenital Diseases; Female Urogenital Diseases and Pregnancy Complications
ENST00000378156.9:C.3329C>T	1	5867883	ENSG00000131697	ENST00000378156.9	NPHP4	rs139767853	Nephronophthisis	ClinVar		Male Urogenital Diseases; Female Urogenital Diseases and Pregnancy Complications
ENST00000378156.9:C.3329C>T	1	5867883	ENSG00000131697	ENST00000378156.9	NPHP4	rs139767853	Renal dysplasia and retinal aplasia	ClinVar		Congenital, Hereditary, and Neonatal Diseases and Abnormalities; Female Urogenital Diseases and Pregnancy Complications; Eye Diseases; Male Urogenital Diseases; Nervous System Diseases
ENST00000378156.9:C.3027C>T	1	5874891	ENSG00000131697	ENST00000378156.9	NPHP4	rs762202268	Nephronophthisis	ClinVar		Male Urogenital Diseases; Female Urogenital Diseases and Pregnancy Complications
ENST00000378156.9:C.3027C>T	1	5874891	ENSG00000131697	ENST00000378156.9	NPHP4	rs762202268	Renal dysplasia and retinal aplasia	ClinVar		Congenital, Hereditary, and Neonatal Diseases and Abnormalities; Female Urogenital Diseases and Pregnancy Complications; Eye Diseases; Male Urogenital Diseases; Nervous System Diseases
ENST00000378156.9:C.2419C>A	1	5887352	ENSG00000131697	ENST00000378156.9	NPHP4	rs770004315	Nephronophthisis	ClinVar		Male Urogenital Diseases; Female Urogenital Diseases and Pregnancy Complications
ENST00000378156.9:C.2419C>A	1	5887352	ENSG00000131697	ENST00000378156.9	NPHP4	rs770004315	Renal dysplasia and retinal aplasia	ClinVar		Congenital, Hereditary, and Neonatal Diseases and Abnormalities; Female Urogenital Diseases and Pregnancy Complications; Eye Diseases; Male Urogenital Diseases; Nervous System Diseases
ENST00000378156.9:C.2259C>T	1	5890913	ENSG00000131697	ENST00000378156.9	NPHP4	rs199628481	Nephronophthisis	ClinVar		Male Urogenital Diseases; Female Urogenital Diseases and Pregnancy Complications
ENST00000378156.9:C.2259C>T	1	5890913	ENSG00000131697	ENST00000378156.9	NPHP4	rs199628481	Renal dysplasia and retinal aplasia	ClinVar		Congenital, Hereditary, and Neonatal Diseases and Abnormalities; Female Urogenital Diseases and Pregnancy Complications; Eye Diseases; Male Urogenital Diseases; Nervous System Diseases
ENST00000378156.9:C.1923C>T	1	5905324	ENSG00000131697	ENST00000378156.9	NPHP4	rs372430727	Nephronophthisis	ClinVar		Male Urogenital Diseases; Female Urogenital Diseases and Pregnancy Complications
ENST00000378156.9:C.1923C>T	1	5905324	ENSG00000131697	ENST00000378156.9	NPHP4	rs372430727	Renal dysplasia and retinal aplasia	ClinVar		Congenital, Hereditary, and Neonatal Diseases and Abnormalities; Female Urogenital Diseases and Pregnancy Complications; Eye Diseases; Male Urogenital Diseases; Nervous System Diseases
ENST00000378156.9:C.1631C>G	1	5905764	ENSG00000131697	ENST00000378156.9	NPHP4	rs12093500	Nephronophthisis	ClinVar		Male Urogenital Diseases; Female Urogenital Diseases and Pregnancy Complications
ENST00000378156.9:C.1631C>G	1	5905764	ENSG00000131697	ENST00000378156.9	NPHP4	rs12093500	Renal dysplasia and retinal aplasia	ClinVar		Congenital, Hereditary, and Neonatal Diseases and Abnormalities; Female Urogenital Diseases and Pregnancy Complications; Eye Diseases; Male Urogenital Diseases; Nervous System Diseases
ENST00000378156.9:C.1622C>T	1	5905773	ENSG00000131697	ENST00000378156.9	NPHP4	rs145255635	Nephronophthisis	ClinVar		Male Urogenital Diseases; Female Urogenital Diseases and Pregnancy Complications
ENST00000378156.9:C.1622C>T	1	5905773	ENSG00000131697	ENST00000378156.9	NPHP4	rs145255635	Nephronophthisis 4	ClinVar		Male Urogenital Diseases; Female Urogenital Diseases and Pregnancy Complications
ENST00000378156.9:C.1622C>T	1	5905773	ENSG00000131697	ENST00000378156.9	NPHP4	rs145255635	Renal dysplasia and retinal aplasia	ClinVar		Congenital, Hereditary, and Neonatal Diseases and Abnormalities; Female Urogenital Diseases and Pregnancy Complications; Eye Diseases; Male Urogenital Diseases; Nervous System Diseases
ENST00000378156.9:C.1470C>T	1	5909185	ENSG00000131697	ENST00000378156.9	NPHP4	rs12116997	Nephronophthisis	ClinVar		Male Urogenital Diseases; Female Urogenital Diseases and Pregnancy Complications
ENST00000378156.9:C.1470C>T	1	5909185	ENSG00000131697	ENST00000378156.9	NPHP4	rs12116997	Renal dysplasia and retinal aplasia	ClinVar		Congenital, Hereditary, and Neonatal Diseases and Abnormalities; Female Urogenital Diseases and Pregnancy Complications; Eye Diseases; Male Urogenital Diseases; Nervous System Diseases
ENST00000378156.9:C.6C>T	1	5986284	ENSG00000131697	ENST00000378156.9	NPHP4	rs371472576	Nephronophthisis	ClinVar		Male Urogenital Diseases; Female Urogenital Diseases and Pregnancy Complications
ENST00000378156.9:C.6C>T	1	5986284	ENSG00000131697	ENST00000378156.9	NPHP4	rs371472576	Renal dysplasia and retinal aplasia	ClinVar		Congenital, Hereditary, and Neonatal Diseases and Abnormalities; Female Urogenital Diseases and Pregnancy Complications; Eye Diseases; Male Urogenital Diseases; Nervous System Diseases
ENST00000377081.5:C.1818C>T	1	10296622	ENSG00000054523	ENST00000377081.5	KIF1B	rs760404775	Charcot-Marie-Tooth disease	ClinVar		Nervous System Diseases; Congenital, Hereditary, and Neonatal Diseases and Abnormalities
ENST00000377081.5:C.2874C>T	1	10326309	ENSG00000054523	ENST00000377081.5	KIF1B	rs150831576	Charcot-Marie-Tooth disease	ClinVar		Nervous System Diseases; Congenital, Hereditary, and Neonatal Diseases and Abnormalities
ENST00000377081.5:C.2874C>T	1	10326309	ENSG00000054523	ENST00000377081.5	KIF1B	rs150831576	Neuroblastoma	ClinVar		Neoplasms
ENST00000377081.5:C.2874C>T	1	10326309	ENSG00000054523	ENST00000377081.5	KIF1B	rs150831576	Pheochromocytoma	ClinVar		Neoplasms
ENST00000356607.9:C.156C>T	1	10536284	ENSG00000142655	ENST00000356607.9	PEX14	rs12375	Peroxisome biogenesis disorder 1A (Zellweger)	ClinVar		Congenital, Hereditary, and Neonatal Diseases and Abnormalities; Nutritional and Metabolic Diseases
ENST00000356607.9:C.156C>T	1	10536284	ENSG00000142655	ENST00000356607.9	PEX14	rs12375	allergy	Ensembl_Post_GWAS	PMID23817569	Immune System Diseases
ENST00000356607.9:C.156C>T	1	10536284	ENSG00000142655	ENST00000356607.9	PEX14	rs12375	asthma	Ensembl_Post_GWAS	PMID27182965	Respiratory Disease; Immune System Diseases
ENST00000356607.9:C.156C>T	1	10536284	ENSG00000142655	ENST00000356607.9	PEX14	rs12375	breast carcinoma	Ensembl_Post_GWAS	PMID23535733	Cancer; Organismal Injury and Abnormalities; Reproductive System Disease
ENST00000356607.9:C.156C>T	1	10536284	ENSG00000142655	ENST00000356607.9	PEX14	rs12375	breast size	Ensembl_Post_GWAS	PMID27117709	Other diseases
ENST00000356607.9:C.156C>T	1	10536284	ENSG00000142655	ENST00000356607.9	PEX14	rs12375	estrogen receptor negative breast cancer	Ensembl_Post_GWAS	PMID29059683	Other diseases
ENST00000356607.9:C.156C>T	1	10536284	ENSG00000142655	ENST00000356607.9	PEX14	rs12375	low density lipoprotein cholesterol measurement	Ensembl_Post_GWAS	PMID27182965	Congenital, Hereditary, and Neonatal Diseases and Abnormalities; Nutritional and Metabolic Diseases
ENST00000356607.9:C.156C>T	1	10536284	ENSG00000142655	ENST00000356607.9	PEX14	rs12375	prostate carcinoma	Ensembl_Post_GWAS	PMID29058716	Neoplasms; Male Urogenital Diseases
ENST00000356607.9:C.156C>T	1	10536284	ENSG00000142655	ENST00000356607.9	PEX14	rs12375	total cholesterol measurement	Ensembl_Post_GWAS	PMID27117709	Other diseases
ENST00000356607.9:C.1014C>T	1	10629867	ENSG00000142655	ENST00000356607.9	PEX14	rs2128414	Peroxisome biogenesis disorder 1A (Zellweger)	ClinVar		Congenital, Hereditary, and Neonatal Diseases and Abnormalities; Nutritional and Metabolic Diseases
ENST00000356607.9:C.1014C>T	1	10629867	ENSG00000142655	ENST00000356607.9	PEX14	rs2128414	Alopecia	Ensembl_Post_GWAS	PMID28196072	Skin and Connective Tissue Diseases; Pathological Conditions, Signs and Symptoms
ENST00000400897.8:C.828C>T	1	11042936	ENSG00000009724	ENST00000400897.8	MASP2	rs149800848	MASP2 deficiency	ClinVar		Congenital, Hereditary, and Neonatal Diseases and Abnormalities; Immune System Diseases
ENST00000400897.8:C.420C>T	1	11045532	ENSG00000009724	ENST00000400897.8	MASP2	rs760062530	MASP2 deficiency	ClinVar		Congenital, Hereditary, and Neonatal Diseases and Abnormalities; Immune System Diseases
ENST00000400897.8:C.159C>T	1	11046966	ENSG00000009724	ENST00000400897.8	MASP2	rs376802078	MASP2 deficiency	ClinVar		Congenital, Hereditary, and Neonatal Diseases and Abnormalities; Immune System Diseases
ENST00000376810.6:C.370C>A	1	11273901	ENSG00000120942	ENST00000376810.6	UBIAD1	rs748615089	Schnyder crystalline corneal dystrophy	ClinVar		Eye Diseases; Congenital, Hereditary, and Neonatal Diseases and Abnormalities
ENST00000376585.6:C.1428C>T	1	11794400	ENSG00000177000	ENST00000376585.6	MTHFR	rs4846051	Neural tube defects	ClinVar		Congenital, Hereditary, and Neonatal Diseases and Abnormalities; Nervous System Diseases
ENST00000376585.6:C.1179C>T	1	11794839	ENSG00000177000	ENST00000376585.6	MTHFR	rs2066462	Neural tube defects	ClinVar		Congenital, Hereditary, and Neonatal Diseases and Abnormalities; Nervous System Diseases
ENST00000376585.6:C.1179C>T	1	11794839	ENSG00000177000	ENST00000376585.6	MTHFR	rs2066462	alcohol consumption measurement	Ensembl_Post_GWAS	PMID29912962	Behavior and Behavior Mechanisms
ENST00000376585.6:C.1179C>T	1	11794839	ENSG00000177000	ENST00000376585.6	MTHFR	rs2066462	alcohol drinking	Ensembl_Post_GWAS	PMID29912962	Behavior and Behavior Mechanisms
ENST00000376585.6:C.1179C>T	1	11794839	ENSG00000177000	ENST00000376585.6	MTHFR	rs2066462	diastolic blood pressure	Ensembl_Post_GWAS	PMID29912962	Other diseases
ENST00000376585.6:C.1179C>T	1	11794839	ENSG00000177000	ENST00000376585.6	MTHFR	rs2066462	systolic blood pressure	Ensembl_Post_GWAS	PMID29912962	Cardiovascular Diseases
ENST00000376585.6:C.1179C>T	1	11794839	ENSG00000177000	ENST00000376585.6	MTHFR	rs2066462	triglyceride measurement	Ensembl_Post_GWAS	PMID30275531	Other diseases
ENST00000376585.6:C.240C>G	1	11803000	ENSG00000177000	ENST00000376585.6	MTHFR	rs2066470	Neural tube defects	ClinVar		Congenital, Hereditary, and Neonatal Diseases and Abnormalities; Nervous System Diseases
ENST00000376585.6:C.240C>G	1	11803000	ENSG00000177000	ENST00000376585.6	MTHFR	rs2066470	alcohol consumption measurement	Ensembl_Post_GWAS	PMID29912962	Behavior and Behavior Mechanisms
ENST00000376585.6:C.240C>G	1	11803000	ENSG00000177000	ENST00000376585.6	MTHFR	rs2066470	alcohol drinking	Ensembl_Post_GWAS	PMID29912962	Behavior and Behavior Mechanisms
ENST00000376585.6:C.240C>G	1	11803000	ENSG00000177000	ENST00000376585.6	MTHFR	rs2066470	diastolic blood pressure	Ensembl_Post_GWAS	PMID29912962	Other diseases
ENST00000376585.6:C.240C>G	1	11803000	ENSG00000177000	ENST00000376585.6	MTHFR	rs2066470	systolic blood pressure	Ensembl_Post_GWAS	PMID29912962	Cardiovascular Diseases
ENST00000376585.6:C.240C>G	1	11803000	ENSG00000177000	ENST00000376585.6	MTHFR	rs2066470	triglyceride measurement	Ensembl_Post_GWAS	PMID30275531	Other diseases
ENST00000196061.5:C.1026C>T	1	11960696	ENSG00000083444	ENST00000196061.5	PLOD1	rs140159343	Ehlers-Danlos syndrome	ClinVar		Congenital, Hereditary, and Neonatal Diseases and Abnormalities; Skin and Connective Tissue Diseases; Hemic and Lymphatic Diseases; Cardiovascular Diseases
ENST00000196061.5:C.1140C>T	1	11963574	ENSG00000083444	ENST00000196061.5	PLOD1	rs200131516	Cardiovascular phenotype	ClinVar		Cardiovascular Diseases
ENST00000196061.5:C.1206C>T	1	11964178	ENSG00000083444	ENST00000196061.5	PLOD1	rs1130529	Cardiovascular phenotype	ClinVar		Cardiovascular Diseases
ENST00000196061.5:C.1206C>T	1	11964178	ENSG00000083444	ENST00000196061.5	PLOD1	rs1130529	Ehlers-Danlos syndrome	ClinVar		Congenital, Hereditary, and Neonatal Diseases and Abnormalities; Skin and Connective Tissue Diseases; Hemic and Lymphatic Diseases; Cardiovascular Diseases
ENST00000196061.5:C.1530C>T	1	11965539	ENSG00000083444	ENST00000196061.5	PLOD1	rs1025133534	Ehlers-Danlos syndrome	ClinVar		Congenital, Hereditary, and Neonatal Diseases and Abnormalities; Skin and Connective Tissue Diseases; Hemic and Lymphatic Diseases; Cardiovascular Diseases
ENST00000196061.5:C.1581C>T	1	11965590	ENSG00000083444	ENST00000196061.5	PLOD1	rs142934642	Ehlers-Danlos syndrome	ClinVar		Congenital, Hereditary, and Neonatal Diseases and Abnormalities; Skin and Connective Tissue Diseases; Hemic and Lymphatic Diseases; Cardiovascular Diseases
ENST00000196061.5:C.2160C>T	1	11974784	ENSG00000083444	ENST00000196061.5	PLOD1	rs140513387	Ehlers-Danlos syndrome	ClinVar		Congenital, Hereditary, and Neonatal Diseases and Abnormalities; Skin and Connective Tissue Diseases; Hemic and Lymphatic Diseases; Cardiovascular Diseases
ENST00000675298.1:C.159C>T	1	11989327	ENSG00000116688	ENST00000675298.1	MFN2	rs61733200	Charcot-Marie-Tooth disease	ClinVar		Nervous System Diseases; Congenital, Hereditary, and Neonatal Diseases and Abnormalities
ENST00000675298.1:C.159C>T	1	11989327	ENSG00000116688	ENST00000675298.1	MFN2	rs61733200	Hereditary motor and sensory neuropathy	ClinVar		Congenital, Hereditary, and Neonatal Diseases and Abnormalities; Nervous System Diseases
ENST00000675298.1:C.1476C>T	1	12004908	ENSG00000116688	ENST00000675298.1	MFN2	rs143428548	Charcot-Marie-Tooth disease	ClinVar		Nervous System Diseases; Congenital, Hereditary, and Neonatal Diseases and Abnormalities
ENST00000675298.1:C.1827C>T	1	12006648	ENSG00000116688	ENST00000675298.1	MFN2	rs138724074	Charcot-Marie-Tooth disease	ClinVar		Nervous System Diseases; Congenital, Hereditary, and Neonatal Diseases and Abnormalities
ENST00000675298.1:C.1827C>T	1	12006648	ENSG00000116688	ENST00000675298.1	MFN2	rs138724074	Hereditary motor and sensory neuropathy	ClinVar		Congenital, Hereditary, and Neonatal Diseases and Abnormalities; Nervous System Diseases
ENST00000675298.1:C.2010C>T	1	12007190	ENSG00000116688	ENST00000675298.1	MFN2	rs777640054	Charcot-Marie-Tooth disease	ClinVar		Nervous System Diseases; Congenital, Hereditary, and Neonatal Diseases and Abnormalities
ENST00000675298.1:C.2145C>T	1	12009667	ENSG00000116688	ENST00000675298.1	MFN2	rs571011689	Charcot-Marie-Tooth disease	ClinVar		Nervous System Diseases; Congenital, Hereditary, and Neonatal Diseases and Abnormalities
ENST00000675298.1:C.2145C>T	1	12009667	ENSG00000116688	ENST00000675298.1	MFN2	rs571011689	Hereditary motor and sensory neuropathy	ClinVar		Congenital, Hereditary, and Neonatal Diseases and Abnormalities; Nervous System Diseases
ENST00000375799.8:C.2282C>T	1	15730605	ENSG00000116786	ENST00000375799.8	PLEKHM2	rs570032250	Dilated Cardiomyopathy	ClinVar		Cardiovascular Diseases
ENST00000375799.8:C.2677C>A	1	15732401	ENSG00000116786	ENST00000375799.8	PLEKHM2	rs1249701724	Dilated Cardiomyopathy	ClinVar		Cardiovascular Diseases
ENST00000358432.8:C.2874C>T	1	16125272	ENSG00000142627	ENST00000358432.8	EPHA2	rs3754334	Age-related cortical cataract	ClinVar		Behavior and Behavior Mechanisms
ENST00000358432.8:C.1500C>T	1	16135118	ENSG00000142627	ENST00000358432.8	EPHA2	rs746512965	Cataract 6	ClinVar		Eye Diseases
ENST00000358432.8:C.1359C>T	1	16135724	ENSG00000142627	ENST00000358432.8	EPHA2	rs55740291	Age-related cortical cataract	ClinVar		Behavior and Behavior Mechanisms
ENST00000326735.13:C.2808C>T	1	16988189	ENSG00000159363	ENST00000326735.13	ATP13A2	rs886045578	Parkinson disease 9	ClinVar		Nervous System Diseases
ENST00000326735.13:C.2367C>T	1	16990172	ENSG00000159363	ENST00000326735.13	ATP13A2	rs140048110	History of neurodevelopmental disorder	ClinVar		Other diseases
ENST00000326735.13:C.2331C>T	1	16990208	ENSG00000159363	ENST00000326735.13	ATP13A2	rs144708504	Parkinson disease 9	ClinVar		Nervous System Diseases
ENST00000326735.13:C.1947C>T	1	16992301	ENSG00000159363	ENST00000326735.13	ATP13A2	rs369722835	Parkinson disease 9	ClinVar		Nervous System Diseases
ENST00000326735.13:C.1667C>T	1	16993711	ENSG00000159363	ENST00000326735.13	ATP13A2	rs760021599	History of neurodevelopmental disorder	ClinVar		Other diseases
ENST00000326735.13:C.1630C>T	1	16993748	ENSG00000159363	ENST00000326735.13	ATP13A2	rs893985839	Parkinson disease 9	ClinVar		Nervous System Diseases
ENST00000326735.13:C.1630C>T	1	16993748	ENSG00000159363	ENST00000326735.13	ATP13A2	rs893985839	Spastic paraplegia 78	ClinVar		Congenital, Hereditary, and Neonatal Diseases and Abnormalities; Eye Diseases; Nervous System Diseases
ENST00000326735.13:C.1128C>T	1	16997087	ENSG00000159363	ENST00000326735.13	ATP13A2	rs148970081	History of neurodevelopmental disorder	ClinVar		Other diseases
ENST00000326735.13:C.1128C>T	1	16997087	ENSG00000159363	ENST00000326735.13	ATP13A2	rs148970081	Parkinson disease 9	ClinVar		Nervous System Diseases
ENST00000326735.13:C.1128C>T	1	16997087	ENSG00000159363	ENST00000326735.13	ATP13A2	rs148970081	Spastic paraplegia 78	ClinVar		Congenital, Hereditary, and Neonatal Diseases and Abnormalities; Eye Diseases; Nervous System Diseases
ENST00000326735.13:C.777C>T	1	17000463	ENSG00000159363	ENST00000326735.13	ATP13A2	rs780133367	History of neurodevelopmental disorder	ClinVar		Other diseases
ENST00000375499.8:C.552C>T	1	17024063	ENSG00000117118	ENST00000375499.8	SDHB	rs202098600	Hereditary cancer-predisposing syndrome	ClinVar		Other diseases
ENST00000375499.8:C.423C>T	1	17028600	ENSG00000117118	ENST00000375499.8	SDHB	rs150542357	Gastrointestinal stroma tumor	ClinVar		Digestive System Diseases; Neoplasms
ENST00000375499.8:C.423C>T	1	17028600	ENSG00000117118	ENST00000375499.8	SDHB	rs150542357	Hereditary cancer-predisposing syndrome	ClinVar		Other diseases
ENST00000375499.8:C.423C>T	1	17028600	ENSG00000117118	ENST00000375499.8	SDHB	rs150542357	Paragangliomas 4	ClinVar		Congenital, Hereditary, and Neonatal Diseases and Abnormalities; Neoplasms
ENST00000375499.8:C.423C>T	1	17028600	ENSG00000117118	ENST00000375499.8	SDHB	rs150542357	Pheochromocytoma	ClinVar		Neoplasms
ENST00000375499.8:C.45C>T	1	17053975	ENSG00000117118	ENST00000375499.8	SDHB	rs764875162	Hereditary cancer-predisposing syndrome	ClinVar		Other diseases
ENST00000375499.8:C.19C>G	1	17054001	ENSG00000117118	ENST00000375499.8	SDHB	rs745664191	Gastrointestinal stroma tumor	ClinVar		Digestive System Diseases; Neoplasms
ENST00000375499.8:C.19C>G	1	17054001	ENSG00000117118	ENST00000375499.8	SDHB	rs745664191	Hereditary cancer-predisposing syndrome	ClinVar		Other diseases
ENST00000375499.8:C.19C>G	1	17054001	ENSG00000117118	ENST00000375499.8	SDHB	rs745664191	Paragangliomas 4	ClinVar		Congenital, Hereditary, and Neonatal Diseases and Abnormalities; Neoplasms
ENST00000375499.8:C.19C>G	1	17054001	ENSG00000117118	ENST00000375499.8	SDHB	rs745664191	Pheochromocytoma	ClinVar		Neoplasms
ENST00000375499.8:C.18C>G	1	17054002	ENSG00000117118	ENST00000375499.8	SDHB	rs2746462	Hereditary cancer-predisposing syndrome	ClinVar		Other diseases
ENST00000375499.8:C.18C>G	1	17054002	ENSG00000117118	ENST00000375499.8	SDHB	rs2746462	Paraganglioma and gastric stromal sarcoma	ClinVar		Digestive System Diseases; Neoplasms
ENST00000375499.8:C.18C>G	1	17054002	ENSG00000117118	ENST00000375499.8	SDHB	rs2746462	Pheochromocytoma	ClinVar		Neoplasms
ENST00000375460.3:C.510C>T	1	17266820	ENSG00000142619	ENST00000375460.3	PADI3	rs779516592	liver carcinoma	Cosmic	0	Cancer; Gastrointestinal Disease; Hepatic System Disease; Organismal Injury and Abnormalities
ENST00000361221.8:C.3330C>T	1	17696870	ENSG00000074964	ENST00000361221.8	ARHGEF10L	rs2270978	neuroticism measurement	Ensembl_Post_GWAS	PMID27089181	Behavior and Behavior Mechanisms
ENST00000375375.7:C.1374C>T	1	18735850	ENSG00000009709	ENST00000375375.7	PAX7	rs760844061	breast carcinoma	Cosmic	20668451	Cancer; Organismal Injury and Abnormalities; Reproductive System Disease
ENST00000290597.9:C.1583C>A	1	18872954	ENSG00000159423	ENST00000290597.9	ALDH4A1	rs61757683	Deficiency of pyrroline-5-carboxylate reductase	ClinVar		Congenital, Hereditary, and Neonatal Diseases and Abnormalities; Nutritional and Metabolic Diseases
ENST00000290597.9:C.584C>T	1	18883298	ENSG00000159423	ENST00000290597.9	ALDH4A1	rs72936434	Hyperprolinemia	ClinVar		Congenital, Hereditary, and Neonatal Diseases and Abnormalities; Nutritional and Metabolic Diseases
ENST00000290597.9:C.102C>T	1	18890066	ENSG00000159423	ENST00000290597.9	ALDH4A1	rs148778436	Hyperprolinemia	ClinVar		Congenital, Hereditary, and Neonatal Diseases and Abnormalities; Nutritional and Metabolic Diseases
ENST00000374695.8:C.7086C>T	1	21851618	ENSG00000142798	ENST00000374695.8	HSPG2	rs139001173	Dyssegmental Dysplasia	ClinVar		Congenital, Hereditary, and Neonatal Diseases and Abnormalities; Musculoskeletal Diseases; Endocrine System Diseases
ENST00000374695.8:C.7086C>T	1	21851618	ENSG00000142798	ENST00000374695.8	HSPG2	rs139001173	Schwartz Jampel syndrome type 1	ClinVar		Congenital, Hereditary, and Neonatal Diseases and Abnormalities; Musculoskeletal Diseases
ENST00000374695.8:C.7035C>T	1	21851669	ENSG00000142798	ENST00000374695.8	HSPG2	rs2229484	Dyssegmental Dysplasia	ClinVar		Congenital, Hereditary, and Neonatal Diseases and Abnormalities; Musculoskeletal Diseases; Endocrine System Diseases
ENST00000374695.8:C.7035C>T	1	21851669	ENSG00000142798	ENST00000374695.8	HSPG2	rs2229484	Schwartz Jampel syndrome type 1	ClinVar		Congenital, Hereditary, and Neonatal Diseases and Abnormalities; Musculoskeletal Diseases
ENST00000374695.8:C.6927C>T	1	21851870	ENSG00000142798	ENST00000374695.8	HSPG2	rs552716935	Dyssegmental Dysplasia	ClinVar		Congenital, Hereditary, and Neonatal Diseases and Abnormalities; Musculoskeletal Diseases; Endocrine System Diseases
ENST00000374695.8:C.6927C>T	1	21851870	ENSG00000142798	ENST00000374695.8	HSPG2	rs552716935	Schwartz Jampel syndrome type 1	ClinVar		Congenital, Hereditary, and Neonatal Diseases and Abnormalities; Musculoskeletal Diseases
ENST00000374695.8:C.5916C>G	1	21855385	ENSG00000142798	ENST00000374695.8	HSPG2	rs147669915	Dyssegmental Dysplasia	ClinVar		Congenital, Hereditary, and Neonatal Diseases and Abnormalities; Musculoskeletal Diseases; Endocrine System Diseases
ENST00000374695.8:C.5916C>G	1	21855385	ENSG00000142798	ENST00000374695.8	HSPG2	rs147669915	Schwartz Jampel syndrome type 1	ClinVar		Congenital, Hereditary, and Neonatal Diseases and Abnormalities; Musculoskeletal Diseases
ENST00000374695.8:C.5115C>T	1	21859902	ENSG00000142798	ENST00000374695.8	HSPG2	rs370558075	Dyssegmental Dysplasia	ClinVar		Congenital, Hereditary, and Neonatal Diseases and Abnormalities; Musculoskeletal Diseases; Endocrine System Diseases
ENST00000374695.8:C.5115C>T	1	21859902	ENSG00000142798	ENST00000374695.8	HSPG2	rs370558075	Schwartz Jampel syndrome type 1	ClinVar		Congenital, Hereditary, and Neonatal Diseases and Abnormalities; Musculoskeletal Diseases
ENST00000374695.8:C.4299C>T	1	21865732	ENSG00000142798	ENST00000374695.8	HSPG2	rs768475262	Dyssegmental Dysplasia	ClinVar		Congenital, Hereditary, and Neonatal Diseases and Abnormalities; Musculoskeletal Diseases; Endocrine System Diseases
ENST00000374695.8:C.4299C>T	1	21865732	ENSG00000142798	ENST00000374695.8	HSPG2	rs768475262	Schwartz Jampel syndrome type 1	ClinVar		Congenital, Hereditary, and Neonatal Diseases and Abnormalities; Musculoskeletal Diseases
ENST00000374695.8:C.4233C>T	1	21865798	ENSG00000142798	ENST00000374695.8	HSPG2	rs745452577	Childhood-Onset Schizophrenia	ClinVar		Other diseases
ENST00000374695.8:C.4233C>T	1	21865798	ENSG00000142798	ENST00000374695.8	HSPG2	rs745452577	Dyssegmental Dysplasia	ClinVar		Congenital, Hereditary, and Neonatal Diseases and Abnormalities; Musculoskeletal Diseases; Endocrine System Diseases
ENST00000374695.8:C.4233C>T	1	21865798	ENSG00000142798	ENST00000374695.8	HSPG2	rs745452577	Schwartz Jampel syndrome type 1	ClinVar		Congenital, Hereditary, and Neonatal Diseases and Abnormalities; Musculoskeletal Diseases
ENST00000374695.8:C.3591C>T	1	21874471	ENSG00000142798	ENST00000374695.8	HSPG2	rs544392697	Dyssegmental Dysplasia	ClinVar		Congenital, Hereditary, and Neonatal Diseases and Abnormalities; Musculoskeletal Diseases; Endocrine System Diseases
ENST00000374695.8:C.3591C>T	1	21874471	ENSG00000142798	ENST00000374695.8	HSPG2	rs544392697	Schwartz Jampel syndrome type 1	ClinVar		Congenital, Hereditary, and Neonatal Diseases and Abnormalities; Musculoskeletal Diseases
ENST00000374695.8:C.3556C>A	1	21874506	ENSG00000142798	ENST00000374695.8	HSPG2	rs113743582	Dyssegmental Dysplasia	ClinVar		Congenital, Hereditary, and Neonatal Diseases and Abnormalities; Musculoskeletal Diseases; Endocrine System Diseases
ENST00000374695.8:C.3556C>A	1	21874506	ENSG00000142798	ENST00000374695.8	HSPG2	rs113743582	Schwartz Jampel syndrome type 1	ClinVar		Congenital, Hereditary, and Neonatal Diseases and Abnormalities; Musculoskeletal Diseases
ENST00000374695.8:C.2568C>T	1	21878482	ENSG00000142798	ENST00000374695.8	HSPG2	rs886046042	Dyssegmental Dysplasia	ClinVar		Congenital, Hereditary, and Neonatal Diseases and Abnormalities; Musculoskeletal Diseases; Endocrine System Diseases
ENST00000374695.8:C.2568C>T	1	21878482	ENSG00000142798	ENST00000374695.8	HSPG2	rs886046042	Schwartz Jampel syndrome type 1	ClinVar		Congenital, Hereditary, and Neonatal Diseases and Abnormalities; Musculoskeletal Diseases
ENST00000374695.8:C.1776C>T	1	21881381	ENSG00000142798	ENST00000374695.8	HSPG2	rs62642536	Dyssegmental Dysplasia	ClinVar		Congenital, Hereditary, and Neonatal Diseases and Abnormalities; Musculoskeletal Diseases; Endocrine System Diseases
ENST00000374695.8:C.1776C>T	1	21881381	ENSG00000142798	ENST00000374695.8	HSPG2	rs62642536	Schwartz Jampel syndrome type 1	ClinVar		Congenital, Hereditary, and Neonatal Diseases and Abnormalities; Musculoskeletal Diseases
ENST00000374695.8:C.1082C>T	1	21885448	ENSG00000142798	ENST00000374695.8	HSPG2	rs75467696	Dyssegmental Dysplasia	ClinVar		Congenital, Hereditary, and Neonatal Diseases and Abnormalities; Musculoskeletal Diseases; Endocrine System Diseases
ENST00000374695.8:C.1082C>T	1	21885448	ENSG00000142798	ENST00000374695.8	HSPG2	rs75467696	Schwartz Jampel syndrome type 1	ClinVar		Congenital, Hereditary, and Neonatal Diseases and Abnormalities; Musculoskeletal Diseases
ENST00000166244.8:C.1923C>A	1	22597469	ENSG00000070886	ENST00000166244.8	EPHA8	rs761435838	skin carcinoma	Cosmic	25589618	Cancer; Dermatological Diseases and Conditions; Organismal Injury and Abnormalities
ENST00000374490.8:C.594C>T	1	23808291	ENSG00000117305	ENST00000374490.8	HMGCL	rs139799938	Deficiency of hydroxymethylglutaryl-CoA lyase	ClinVar		Congenital, Hereditary, and Neonatal Diseases and Abnormalities; Nutritional and Metabolic Diseases
ENST00000374490.8:C.501C>T	1	23810796	ENSG00000117305	ENST00000374490.8	HMGCL	rs200189529	Deficiency of hydroxymethylglutaryl-CoA lyase	ClinVar		Congenital, Hereditary, and Neonatal Diseases and Abnormalities; Nutritional and Metabolic Diseases
ENST00000374338.5:C.375C>T	1	25557183	ENSG00000157978	ENST00000374338.5	LDLRAP1	rs146134293	Familial hypercholesterolemia 1	ClinVar		Congenital, Hereditary, and Neonatal Diseases and Abnormalities; Nutritional and Metabolic Diseases
ENST00000374338.5:C.423C>G	1	25557231	ENSG00000157978	ENST00000374338.5	LDLRAP1	rs140170877	Familial hypercholesterolemia 1	ClinVar		Congenital, Hereditary, and Neonatal Diseases and Abnormalities; Nutritional and Metabolic Diseases
ENST00000374338.5:C.480C>T	1	25562664	ENSG00000157978	ENST00000374338.5	LDLRAP1	rs1057515463	Familial hypercholesterolemia 1	ClinVar		Congenital, Hereditary, and Neonatal Diseases and Abnormalities; Nutritional and Metabolic Diseases
ENST00000374338.5:C.653C>T	1	25563697	ENSG00000157978	ENST00000374338.5	LDLRAP1	rs114583297	Familial hypercholesterolemia 4	ClinVar		Congenital, Hereditary, and Neonatal Diseases and Abnormalities; Nutritional and Metabolic Diseases
ENST00000374338.5:C.710C>T	1	25563754	ENSG00000157978	ENST00000374338.5	LDLRAP1	rs746229586	Familial hypercholesterolemia 4	ClinVar		Congenital, Hereditary, and Neonatal Diseases and Abnormalities; Nutritional and Metabolic Diseases
ENST00000373658.8:C.525C>T	1	31756312	ENSG00000121753	ENST00000373658.8	ADGRB2	rs4949223	Educational attainment	GWAS	30038396	Other diseases
ENST00000373658.8:C.525C>T	1	31756312	ENSG00000121753	ENST00000373658.8	BAI2	rs4949223	age-related hearing impairment	Ensembl_Post_GWAS	PMID24939585	Behavior and Behavior Mechanisms
ENST00000421922.6:C.330C>T	1	32204044	ENSG00000160050	ENST00000421922.6	CCDC28B	rs41263993	Bardet-Biedl syndrome	ClinVar		Congenital, Hereditary, and Neonatal Diseases and Abnormalities; Eye Diseases; Nervous System Diseases
ENST00000421922.6:C.330C>T	1	32204044	ENSG00000160050	ENST00000421922.6	CCDC28B	rs41263993	Bardet-Biedl syndrome 1	ClinVar		Congenital, Hereditary, and Neonatal Diseases and Abnormalities; Eye Diseases; Nervous System Diseases
ENST00000373477.9:C.1179C>T	1	32780240	ENSG00000134684	ENST00000373477.9	YARS1	rs373909518	Charcot-Marie-Tooth disease	ClinVar		Nervous System Diseases; Congenital, Hereditary, and Neonatal Diseases and Abnormalities
ENST00000672715.1:C.504C>T	1	33013397	ENSG00000004455	ENST00000672715.1	AK2	rs61750964	Reticular dysgenesis	ClinVar		Hemic and Lymphatic Diseases; Congenital, Hereditary, and Neonatal Diseases and Abnormalities; Nutritional and Metabolic Diseases; Immune System Diseases
ENST00000373026.5:C.135C>T	1	37945773	ENSG00000204084	ENST00000373026.5	INPP5B	rs871524	Pulse pressure	GWAS	28739976	Other diseases
ENST00000373026.5:C.135C>T	1	37945773	ENSG00000204084	ENST00000373026.5	INPP5B	rs871524	pulse pressure measurement	Ensembl_Post_GWAS	PMID28739976	Other diseases
ENST00000372748.8:C.2001C>T	1	40301251	ENSG00000049089	ENST00000372748.8	COL9A2	rs2229826	Multiple Epiphyseal Dysplasia	ClinVar		Musculoskeletal Diseases; Congenital, Hereditary, and Neonatal Diseases and Abnormalities
ENST00000372748.8:C.2001C>T	1	40301251	ENSG00000049089	ENST00000372748.8	COL9A2	rs2229826	Stickler Syndrome	ClinVar		Pathological Conditions, Signs and Symptoms; Congenital, Hereditary, and Neonatal Diseases and Abnormalities; Eye Diseases; Musculoskeletal Diseases
ENST00000372748.8:C.1237C>T	1	40304370	ENSG00000049089	ENST00000372748.8	COL9A2	rs201985170	Stickler syndrome	ClinVar		Pathological Conditions, Signs and Symptoms; Congenital, Hereditary, and Neonatal Diseases and Abnormalities; Eye Diseases; Musculoskeletal Diseases
ENST00000372748.8:C.1003C>T	1	40307451	ENSG00000049089	ENST00000372748.8	COL9A2	rs2228567	Multiple Epiphyseal Dysplasia	ClinVar		Musculoskeletal Diseases; Congenital, Hereditary, and Neonatal Diseases and Abnormalities
ENST00000372748.8:C.1003C>T	1	40307451	ENSG00000049089	ENST00000372748.8	COL9A2	rs2228567	Stickler Syndrome	ClinVar		Pathological Conditions, Signs and Symptoms; Congenital, Hereditary, and Neonatal Diseases and Abnormalities; Eye Diseases; Musculoskeletal Diseases
ENST00000372748.8:C.737C>T	1	40310265	ENSG00000049089	ENST00000372748.8	COL9A2	rs2228565	Multiple Epiphyseal Dysplasia	ClinVar		Musculoskeletal Diseases; Congenital, Hereditary, and Neonatal Diseases and Abnormalities
ENST00000372748.8:C.737C>T	1	40310265	ENSG00000049089	ENST00000372748.8	COL9A2	rs2228565	Stickler Syndrome	ClinVar		Pathological Conditions, Signs and Symptoms; Congenital, Hereditary, and Neonatal Diseases and Abnormalities; Eye Diseases; Musculoskeletal Diseases
ENST00000347132.10:C.648C>T	1	40818620	ENSG00000117013	ENST00000347132.10	KCNQ4	rs80358269	DFNA 2 Nonsyndromic Hearing Loss	ClinVar		Pathological Conditions, Signs and Symptoms; Nervous System Diseases; Otorhinolaryngologic Diseases
ENST00000650070.2:C.939C>G	1	40997460	ENSG00000171793	ENST00000650070.2	CTPS1	rs1003752907	Immunodeficiency 24	ClinVar		Immune System Diseases
ENST00000426263.10:C.1437C>T	1	42927083	ENSG00000117394	ENST00000426263.10	SLC2A1	rs146879902	Dystonia	ClinVar		Nervous System Diseases; Pathological Conditions, Signs and Symptoms
ENST00000426263.10:C.1437C>T	1	42927083	ENSG00000117394	ENST00000426263.10	SLC2A1	rs146879902	Glucose transporter type 1 deficiency syndrome	ClinVar		Congenital, Hereditary, and Neonatal Diseases and Abnormalities; Nutritional and Metabolic Diseases
ENST00000426263.10:C.1170C>T	1	42927713	ENSG00000117394	ENST00000426263.10	SLC2A1	rs2236574	Dystonia	ClinVar		Nervous System Diseases; Pathological Conditions, Signs and Symptoms
ENST00000426263.10:C.1170C>T	1	42927713	ENSG00000117394	ENST00000426263.10	SLC2A1	rs2236574	Glucose transporter type 1 deficiency syndrome	ClinVar		Congenital, Hereditary, and Neonatal Diseases and Abnormalities; Nutritional and Metabolic Diseases
ENST00000426263.10:C.1170C>T	1	42927713	ENSG00000117394	ENST00000426263.10	SLC2A1	rs2236574	History of neurodevelopmental disorder	ClinVar		Other diseases
ENST00000426263.10:C.1155C>T	1	42927728	ENSG00000117394	ENST00000426263.10	SLC2A1	rs76860965	History of neurodevelopmental disorder	ClinVar		Other diseases
ENST00000426263.10:C.1023C>G	1	42928983	ENSG00000117394	ENST00000426263.10	SLC2A1	rs143588685	History of neurodevelopmental disorder	ClinVar		Other diseases
ENST00000426263.10:C.966C>G	1	42929216	ENSG00000117394	ENST00000426263.10	SLC2A1	rs2229680	Dystonia	ClinVar		Nervous System Diseases; Pathological Conditions, Signs and Symptoms
ENST00000426263.10:C.966C>G	1	42929216	ENSG00000117394	ENST00000426263.10	SLC2A1	rs2229680	Glucose transporter type 1 deficiency syndrome	ClinVar		Congenital, Hereditary, and Neonatal Diseases and Abnormalities; Nutritional and Metabolic Diseases
ENST00000426263.10:C.966C>G	1	42929216	ENSG00000117394	ENST00000426263.10	SLC2A1	rs2229680	GLUT1 deficiency syndrome 1	ClinVar		Congenital, Hereditary, and Neonatal Diseases and Abnormalities; Nutritional and Metabolic Diseases
ENST00000426263.10:C.966C>G	1	42929216	ENSG00000117394	ENST00000426263.10	SLC2A1	rs2229680	History of neurodevelopmental disorder	ClinVar		Other diseases
ENST00000426263.10:C.507C>T	1	42930635	ENSG00000117394	ENST00000426263.10	SLC2A1	rs115541691	History of neurodevelopmental disorder	ClinVar		Other diseases
ENST00000426263.10:C.498C>T	1	42930644	ENSG00000117394	ENST00000426263.10	SLC2A1	rs150971143	History of neurodevelopmental disorder	ClinVar		Other diseases
ENST00000426263.10:C.417C>T	1	42930725	ENSG00000117394	ENST00000426263.10	SLC2A1	rs144538918	Dystonia	ClinVar		Nervous System Diseases; Pathological Conditions, Signs and Symptoms
ENST00000426263.10:C.417C>T	1	42930725	ENSG00000117394	ENST00000426263.10	SLC2A1	rs144538918	Glucose transporter type 1 deficiency syndrome	ClinVar		Congenital, Hereditary, and Neonatal Diseases and Abnormalities; Nutritional and Metabolic Diseases
ENST00000426263.10:C.417C>T	1	42930725	ENSG00000117394	ENST00000426263.10	SLC2A1	rs144538918	History of neurodevelopmental disorder	ClinVar		Other diseases
ENST00000426263.10:C.399C>T	1	42930743	ENSG00000117394	ENST00000426263.10	SLC2A1	rs11537641	Dystonia	ClinVar		Nervous System Diseases; Pathological Conditions, Signs and Symptoms
ENST00000426263.10:C.399C>T	1	42930743	ENSG00000117394	ENST00000426263.10	SLC2A1	rs11537641	Glucose transporter type 1 deficiency syndrome	ClinVar		Congenital, Hereditary, and Neonatal Diseases and Abnormalities; Nutritional and Metabolic Diseases
ENST00000426263.10:C.399C>T	1	42930743	ENSG00000117394	ENST00000426263.10	SLC2A1	rs11537641	History of neurodevelopmental disorder	ClinVar		Other diseases
ENST00000426263.10:C.387C>T	1	42930755	ENSG00000117394	ENST00000426263.10	SLC2A1	rs751907207	GLUT1 deficiency syndrome 1	ClinVar		Congenital, Hereditary, and Neonatal Diseases and Abnormalities; Nutritional and Metabolic Diseases
ENST00000426263.10:C.312C>T	1	42930830	ENSG00000117394	ENST00000426263.10	SLC2A1	rs76672402	Dystonia	ClinVar		Nervous System Diseases; Pathological Conditions, Signs and Symptoms
ENST00000426263.10:C.312C>T	1	42930830	ENSG00000117394	ENST00000426263.10	SLC2A1	rs76672402	Glucose transporter type 1 deficiency syndrome	ClinVar		Congenital, Hereditary, and Neonatal Diseases and Abnormalities; Nutritional and Metabolic Diseases
ENST00000426263.10:C.312C>T	1	42930830	ENSG00000117394	ENST00000426263.10	SLC2A1	rs76672402	GLUT1 deficiency syndrome 2	ClinVar		Congenital, Hereditary, and Neonatal Diseases and Abnormalities; Nutritional and Metabolic Diseases
ENST00000426263.10:C.274C>A	1	42931047	ENSG00000117394	ENST00000426263.10	SLC2A1	rs202060209	Dystonia	ClinVar		Nervous System Diseases; Pathological Conditions, Signs and Symptoms
ENST00000426263.10:C.274C>A	1	42931047	ENSG00000117394	ENST00000426263.10	SLC2A1	rs202060209	Glucose transporter type 1 deficiency syndrome	ClinVar		Congenital, Hereditary, and Neonatal Diseases and Abnormalities; Nutritional and Metabolic Diseases
ENST00000426263.10:C.274C>A	1	42931047	ENSG00000117394	ENST00000426263.10	SLC2A1	rs202060209	GLUT1 deficiency syndrome 1	ClinVar		Congenital, Hereditary, and Neonatal Diseases and Abnormalities; Nutritional and Metabolic Diseases
ENST00000426263.10:C.274C>A	1	42931047	ENSG00000117394	ENST00000426263.10	SLC2A1	rs202060209	GLUT1 deficiency syndrome 2	ClinVar		Congenital, Hereditary, and Neonatal Diseases and Abnormalities; Nutritional and Metabolic Diseases
ENST00000426263.10:C.274C>A	1	42931047	ENSG00000117394	ENST00000426263.10	SLC2A1	rs202060209	Intellectual disability	ClinVar		Nervous System Diseases; Pathological Conditions, Signs and Symptoms; Behavior and Behavior Mechanisms; Mental Disorders
ENST00000426263.10:C.172C>T	1	42931149	ENSG00000117394	ENST00000426263.10	SLC2A1	rs765479065	GLUT1 deficiency syndrome 1	ClinVar		Congenital, Hereditary, and Neonatal Diseases and Abnormalities; Nutritional and Metabolic Diseases
ENST00000426263.10:C.172C>T	1	42931149	ENSG00000117394	ENST00000426263.10	SLC2A1	rs765479065	History of neurodevelopmental disorder	ClinVar		Other diseases
ENST00000372470.9:C.1467C>T	1	43349001	ENSG00000117400	ENST00000372470.9	MPL	rs759161511	Congenital amegakaryocytic thrombocytopenia	ClinVar		Hemic and Lymphatic Diseases; Congenital, Hereditary, and Neonatal Diseases and Abnormalities
ENST00000372470.9:C.1467C>T	1	43349001	ENSG00000117400	ENST00000372470.9	MPL	rs759161511	Thrombocythemia 1	ClinVar		Other diseases
ENST00000372396.4:C.1445C>A	1	43671586	ENSG00000066135	ENST00000372396.4	KDM4A	rs586339	Balding type 1	GWAS	30595370	Pathological Conditions, Signs and Symptoms; Skin and Connective Tissue Diseases
ENST00000372396.4:C.1445C>A	1	43671586	ENSG00000066135	ENST00000372396.4	KDM4A	rs586339	Educational attainment	GWAS	30038396	Other diseases
ENST00000645034.1:C.630C>T	1	43899613	ENSG00000126091	ENST00000645034.1	ST3GAL3	rs763641682	History of neurodevelopmental disorder	ClinVar		Other diseases
ENST00000645034.1:C.636C>T	1	43899619	ENSG00000126091	ENST00000645034.1	ST3GAL3	rs12140044	History of neurodevelopmental disorder	ClinVar		Other diseases
ENST00000645034.1:C.660C>T	1	43899643	ENSG00000126091	ENST00000645034.1	ST3GAL3	rs201204481	History of neurodevelopmental disorder	ClinVar		Other diseases
ENST00000360403.7:C.1287C>T	1	44857723	ENSG00000070785	ENST00000360403.7	EIF2B3	rs886046358	Leukoencephalopathy with vanishing white matter	ClinVar		Other diseases
ENST00000360403.7:C.633C>T	1	44897378	ENSG00000070785	ENST00000360403.7	EIF2B3	rs139526549	Leukoencephalopathy with vanishing white matter	ClinVar		Other diseases
ENST00000246337.9:C.738C>T	1	45014540	ENSG00000126088	ENST00000246337.9	UROD	rs757178659	Porphyria cutanea tarda	ClinVar		Congenital, Hereditary, and Neonatal Diseases and Abnormalities; Digestive System Diseases; Nutritional and Metabolic Diseases; Skin and Connective Tissue Diseases
ENST00000372098.7:C.1613C>A	1	45329334	ENSG00000132781	ENST00000372098.7	MUTYH	rs751053826	Hereditary cancer-predisposing syndrome	ClinVar		Other diseases
ENST00000372098.7:C.1613C>A	1	45329334	ENSG00000132781	ENST00000372098.7	MUTYH	rs751053826	MYH-associated polyposis	ClinVar		Congenital, Hereditary, and Neonatal Diseases and Abnormalities; Neoplasms
ENST00000372098.7:C.1599C>T	1	45329348	ENSG00000132781	ENST00000372098.7	MUTYH	rs779326923	Hereditary cancer-predisposing syndrome	ClinVar		Other diseases
ENST00000372098.7:C.1533C>T	1	45329414	ENSG00000132781	ENST00000372098.7	MUTYH	rs1000260695	Hereditary cancer-predisposing syndrome	ClinVar		Other diseases
ENST00000372098.7:C.1533C>T	1	45329414	ENSG00000132781	ENST00000372098.7	MUTYH	rs1000260695	MYH-associated polyposis	ClinVar		Congenital, Hereditary, and Neonatal Diseases and Abnormalities; Neoplasms
ENST00000372098.7:C.1455C>T	1	45331194	ENSG00000132781	ENST00000372098.7	MUTYH	rs373973053	Hereditary cancer-predisposing syndrome	ClinVar		Other diseases
ENST00000372098.7:C.1452C>T	1	45331197	ENSG00000132781	ENST00000372098.7	MUTYH	rs876658316	Hereditary cancer-predisposing syndrome	ClinVar		Other diseases
ENST00000372098.7:C.1440C>T	1	45331209	ENSG00000132781	ENST00000372098.7	MUTYH	rs150269172	Hereditary cancer-predisposing syndrome	ClinVar		Other diseases
ENST00000372098.7:C.1323C>T	1	45331326	ENSG00000132781	ENST00000372098.7	MUTYH	rs764366493	Hereditary cancer-predisposing syndrome	ClinVar		Other diseases
ENST00000372098.7:C.1209C>T	1	45331525	ENSG00000132781	ENST00000372098.7	MUTYH	rs759460243	Hereditary cancer-predisposing syndrome	ClinVar		Other diseases
ENST00000372098.7:C.1120C>G	1	45331718	ENSG00000132781	ENST00000372098.7	MUTYH	rs1216396008	MYH-associated polyposis	ClinVar		Congenital, Hereditary, and Neonatal Diseases and Abnormalities; Neoplasms
ENST00000372098.7:C.1089C>T	1	45331749	ENSG00000132781	ENST00000372098.7	MUTYH	rs876658828	Hereditary cancer-predisposing syndrome	ClinVar		Other diseases
ENST00000372098.7:C.1046C>A	1	45331792	ENSG00000132781	ENST00000372098.7	MUTYH	rs587781703	Hereditary cancer-predisposing syndrome	ClinVar		Other diseases
ENST00000372098.7:C.1046C>A	1	45331792	ENSG00000132781	ENST00000372098.7	MUTYH	rs587781703	MYH-associated polyposis	ClinVar		Congenital, Hereditary, and Neonatal Diseases and Abnormalities; Neoplasms
ENST00000372098.7:C.1024C>T	1	45331814	ENSG00000132781	ENST00000372098.7	MUTYH	rs1377976805	MYH-associated polyposis	ClinVar		Congenital, Hereditary, and Neonatal Diseases and Abnormalities; Neoplasms
ENST00000372098.7:C.903C>T	1	45332187	ENSG00000132781	ENST00000372098.7	MUTYH	rs767805597	Hereditary cancer-predisposing syndrome	ClinVar		Other diseases
ENST00000372098.7:C.903C>T	1	45332187	ENSG00000132781	ENST00000372098.7	MUTYH	rs767805597	MYH-associated polyposis	ClinVar		Congenital, Hereditary, and Neonatal Diseases and Abnormalities; Neoplasms
ENST00000372098.7:C.784C>T	1	45332306	ENSG00000132781	ENST00000372098.7	MUTYH	rs878854194	Hereditary cancer-predisposing syndrome	ClinVar		Other diseases
ENST00000372098.7:C.710C>T	1	45332460	ENSG00000132781	ENST00000372098.7	MUTYH	rs369120013	Hereditary cancer-predisposing syndrome	ClinVar		Other diseases
ENST00000372098.7:C.710C>T	1	45332460	ENSG00000132781	ENST00000372098.7	MUTYH	rs369120013	MYH-associated polyposis	ClinVar		Congenital, Hereditary, and Neonatal Diseases and Abnormalities; Neoplasms
ENST00000372098.7:C.669C>T	1	45332586	ENSG00000132781	ENST00000372098.7	MUTYH	rs371875647	Hereditary cancer-predisposing syndrome	ClinVar		Other diseases
ENST00000372098.7:C.562C>A	1	45332768	ENSG00000132781	ENST00000372098.7	MUTYH	rs761101420	Hereditary cancer-predisposing syndrome	ClinVar		Other diseases
ENST00000372098.7:C.562C>A	1	45332768	ENSG00000132781	ENST00000372098.7	MUTYH	rs761101420	MYH-associated polyposis	ClinVar		Congenital, Hereditary, and Neonatal Diseases and Abnormalities; Neoplasms
ENST00000372098.7:C.367C>A	1	45333297	ENSG00000132781	ENST00000372098.7	MUTYH	rs587782041	Hereditary cancer-predisposing syndrome	ClinVar		Other diseases
ENST00000372098.7:C.367C>A	1	45333297	ENSG00000132781	ENST00000372098.7	MUTYH	rs587782041	MYH-associated polyposis	ClinVar		Congenital, Hereditary, and Neonatal Diseases and Abnormalities; Neoplasms
ENST00000372098.7:C.358C>T	1	45333306	ENSG00000132781	ENST00000372098.7	MUTYH	rs764221826	Hereditary cancer-predisposing syndrome	ClinVar		Other diseases
ENST00000372098.7:C.303C>T	1	45333449	ENSG00000132781	ENST00000372098.7	MUTYH	rs121908380	Familial colorectal cancer	ClinVar		Congenital, Hereditary, and Neonatal Diseases and Abnormalities; Digestive System Diseases; Neoplasms; Nutritional and Metabolic Diseases
ENST00000372098.7:C.303C>T	1	45333449	ENSG00000132781	ENST00000372098.7	MUTYH	rs121908380	Hereditary cancer-predisposing syndrome	ClinVar		Other diseases
ENST00000372098.7:C.303C>T	1	45333449	ENSG00000132781	ENST00000372098.7	MUTYH	rs121908380	MUTYH-associated polyposis	ClinVar		Congenital, Hereditary, and Neonatal Diseases and Abnormalities; Neoplasms
ENST00000372098.7:C.303C>T	1	45333449	ENSG00000132781	ENST00000372098.7	MUTYH	rs121908380	MYH-associated polyposis	ClinVar		Congenital, Hereditary, and Neonatal Diseases and Abnormalities; Neoplasms
ENST00000372098.7:C.109C>G	1	45334439	ENSG00000132781	ENST00000372098.7	MUTYH	rs1270853129	MYH-associated polyposis	ClinVar		Congenital, Hereditary, and Neonatal Diseases and Abnormalities; Neoplasms
ENST00000372098.7:C.63C>T	1	45334485	ENSG00000132781	ENST00000372098.7	MUTYH	rs201982344	Hereditary cancer-predisposing syndrome	ClinVar		Other diseases
ENST00000372098.7:C.63C>T	1	45334485	ENSG00000132781	ENST00000372098.7	MUTYH	rs201982344	MYH-associated polyposis	ClinVar		Congenital, Hereditary, and Neonatal Diseases and Abnormalities; Neoplasms
ENST00000372098.7:C.53C>T	1	45334495	ENSG00000132781	ENST00000372098.7	MUTYH	rs79777494	Hereditary cancer-predisposing syndrome	ClinVar		Other diseases
ENST00000372098.7:C.53C>T	1	45334495	ENSG00000132781	ENST00000372098.7	MUTYH	rs79777494	MYH-associated polyposis	ClinVar		Congenital, Hereditary, and Neonatal Diseases and Abnormalities; Neoplasms
ENST00000372090.6:C.1140C>T	1	45343309	ENSG00000132773	ENST00000372090.6	TOE1	rs561466500	glioma	Cosmic	18772396	Neoplasms
ENST00000401061.9:C.315C>T	1	45508250	ENSG00000132763	ENST00000401061.9	MMACHC	rs528744719	Methylmalonic acidemia with homocystinuria	ClinVar		Nervous System Diseases; Congenital, Hereditary, and Neonatal Diseases and Abnormalities; Skin and Connective Tissue Diseases; Nutritional and Metabolic Diseases
ENST00000350030.8:C.1470C>T	1	45613212	ENSG00000132780	ENST00000350030.8	NASP	rs2230659	platelet count	Ensembl_Post_GWAS	PMID29403010	Other diseases
ENST00000262662.5:C.213C>T	1	50973976	ENSG00000123080	ENST00000262662.5	CDKN2C	rs747613664	malignant melanoma	Cosmic	26343386	Cancer; Hematological Disease; Organismal Injury and Abnormalities
ENST00000637252.1:C.511C>T	1	53210185	ENSG00000157184	ENST00000637252.1	CPT2	rs2229292	Carnitine palmitoyltransferase II deficiency	ClinVar		Congenital, Hereditary, and Neonatal Diseases and Abnormalities; Nutritional and Metabolic Diseases
ENST00000302250.7:C.1014C>T	1	54610482	ENSG00000162391	ENST00000302250.7	FAM151A	rs17110827	Blood protein levels	GWAS	29875488	Other diseases
ENST00000302118.5:C.22C>T	1	55039859	ENSG00000169174	ENST00000302118.5	PCSK9	rs1426361407	Familial hypercholesterolemia	ClinVar		Congenital, Hereditary, and Neonatal Diseases and Abnormalities; Nutritional and Metabolic Diseases
ENST00000302118.5:C.158C>T	1	55039995	ENSG00000169174	ENST00000302118.5	PCSK9	rs11583680	Familial hypercholesterolemia 1	ClinVar		Congenital, Hereditary, and Neonatal Diseases and Abnormalities; Nutritional and Metabolic Diseases
ENST00000302118.5:C.158C>T	1	55039995	ENSG00000169174	ENST00000302118.5	PCSK9	rs11583680	Familial hypercholesterolemia 3	ClinVar		Congenital, Hereditary, and Neonatal Diseases and Abnormalities; Nutritional and Metabolic Diseases
ENST00000302118.5:C.158C>T	1	55039995	ENSG00000169174	ENST00000302118.5	PCSK9	rs11583680	Familial hypobetalipoproteinemia	ClinVar		Nutritional and Metabolic Diseases
ENST00000302118.5:C.158C>T	1	55039995	ENSG00000169174	ENST00000302118.5	PCSK9	rs11583680	PCSK9 protein measurement	Ensembl_Post_GWAS	PMID29748315	Other diseases
ENST00000302118.5:C.266C>T	1	55043901	ENSG00000169174	ENST00000302118.5	PCSK9	rs771978846	Familial hypercholesterolemia	ClinVar		Congenital, Hereditary, and Neonatal Diseases and Abnormalities; Nutritional and Metabolic Diseases
ENST00000302118.5:C.266C>T	1	55043901	ENSG00000169174	ENST00000302118.5	PCSK9	rs771978846	Familial hypercholesterolemia 3	ClinVar		Congenital, Hereditary, and Neonatal Diseases and Abnormalities; Nutritional and Metabolic Diseases
ENST00000302118.5:C.321C>T	1	55043956	ENSG00000169174	ENST00000302118.5	PCSK9	rs886039840	Familial hypercholesterolemia 1	ClinVar		Congenital, Hereditary, and Neonatal Diseases and Abnormalities; Nutritional and Metabolic Diseases
ENST00000302118.5:C.384C>T	1	55044019	ENSG00000169174	ENST00000302118.5	PCSK9	rs72646503	Familial hypercholesterolemia	ClinVar		Congenital, Hereditary, and Neonatal Diseases and Abnormalities; Nutritional and Metabolic Diseases
ENST00000302118.5:C.493C>T	1	55046616	ENSG00000169174	ENST00000302118.5	PCSK9	rs141593516	Familial hypercholesterolemia 1	ClinVar		Congenital, Hereditary, and Neonatal Diseases and Abnormalities; Nutritional and Metabolic Diseases
ENST00000302118.5:C.609C>T	1	55052363	ENSG00000169174	ENST00000302118.5	PCSK9	rs200856421	Familial hypercholesterolemia	ClinVar		Congenital, Hereditary, and Neonatal Diseases and Abnormalities; Nutritional and Metabolic Diseases
ENST00000302118.5:C.609C>T	1	55052363	ENSG00000169174	ENST00000302118.5	PCSK9	rs200856421	Familial hypercholesterolemia 1	ClinVar		Congenital, Hereditary, and Neonatal Diseases and Abnormalities; Nutritional and Metabolic Diseases
ENST00000302118.5:C.627C>T	1	55052381	ENSG00000169174	ENST00000302118.5	PCSK9	rs375892354	Familial hypercholesterolemia 1	ClinVar		Congenital, Hereditary, and Neonatal Diseases and Abnormalities; Nutritional and Metabolic Diseases
ENST00000302118.5:C.627C>T	1	55052381	ENSG00000169174	ENST00000302118.5	PCSK9	rs375892354	Familial hypercholesterolemia 3	ClinVar		Congenital, Hereditary, and Neonatal Diseases and Abnormalities; Nutritional and Metabolic Diseases
ENST00000302118.5:C.627C>T	1	55052381	ENSG00000169174	ENST00000302118.5	PCSK9	rs375892354	Familial hypobetalipoproteinemia	ClinVar		Nutritional and Metabolic Diseases
ENST00000302118.5:C.720C>T	1	55052712	ENSG00000169174	ENST00000302118.5	PCSK9	rs41297883	Familial hypercholesterolemia	ClinVar		Congenital, Hereditary, and Neonatal Diseases and Abnormalities; Nutritional and Metabolic Diseases
ENST00000302118.5:C.720C>T	1	55052712	ENSG00000169174	ENST00000302118.5	PCSK9	rs41297883	Familial hypercholesterolemia 1	ClinVar		Congenital, Hereditary, and Neonatal Diseases and Abnormalities; Nutritional and Metabolic Diseases
ENST00000302118.5:C.720C>T	1	55052712	ENSG00000169174	ENST00000302118.5	PCSK9	rs41297883	Familial hypercholesterolemia 3	ClinVar		Congenital, Hereditary, and Neonatal Diseases and Abnormalities; Nutritional and Metabolic Diseases
ENST00000302118.5:C.720C>T	1	55052712	ENSG00000169174	ENST00000302118.5	PCSK9	rs41297883	Familial hypobetalipoproteinemia	ClinVar		Nutritional and Metabolic Diseases
ENST00000302118.5:C.753C>T	1	55052745	ENSG00000169174	ENST00000302118.5	PCSK9	rs28385710	Familial hypercholesterolemia 1	ClinVar		Congenital, Hereditary, and Neonatal Diseases and Abnormalities; Nutritional and Metabolic Diseases
ENST00000302118.5:C.753C>T	1	55052745	ENSG00000169174	ENST00000302118.5	PCSK9	rs28385710	Familial hypercholesterolemia 3	ClinVar		Congenital, Hereditary, and Neonatal Diseases and Abnormalities; Nutritional and Metabolic Diseases
ENST00000302118.5:C.753C>T	1	55052745	ENSG00000169174	ENST00000302118.5	PCSK9	rs28385710	Familial hypobetalipoproteinemia	ClinVar		Nutritional and Metabolic Diseases
ENST00000302118.5:C.1119C>T	1	55057453	ENSG00000169174	ENST00000302118.5	PCSK9	rs139683719	Familial hypercholesterolemia 1	ClinVar		Congenital, Hereditary, and Neonatal Diseases and Abnormalities; Nutritional and Metabolic Diseases
ENST00000302118.5:C.1227C>T	1	55058082	ENSG00000169174	ENST00000302118.5	PCSK9	rs146924245	Familial hypercholesterolemia 1	ClinVar		Congenital, Hereditary, and Neonatal Diseases and Abnormalities; Nutritional and Metabolic Diseases
ENST00000302118.5:C.1431C>T	1	55058575	ENSG00000169174	ENST00000302118.5	PCSK9	rs28362268	Familial hypercholesterolemia	ClinVar		Congenital, Hereditary, and Neonatal Diseases and Abnormalities; Nutritional and Metabolic Diseases
ENST00000302118.5:C.1491C>T	1	55058635	ENSG00000169174	ENST00000302118.5	PCSK9	rs147599496	Familial hypercholesterolemia	ClinVar		Congenital, Hereditary, and Neonatal Diseases and Abnormalities; Nutritional and Metabolic Diseases
ENST00000302118.5:C.1539C>T	1	55059521	ENSG00000169174	ENST00000302118.5	PCSK9	rs781492750	Familial hypercholesterolemia 1	ClinVar		Congenital, Hereditary, and Neonatal Diseases and Abnormalities; Nutritional and Metabolic Diseases
ENST00000302118.5:C.1671C>T	1	55059653	ENSG00000169174	ENST00000302118.5	PCSK9	rs72646521	Familial hypercholesterolemia 1	ClinVar		Congenital, Hereditary, and Neonatal Diseases and Abnormalities; Nutritional and Metabolic Diseases
ENST00000302118.5:C.1851C>T	1	55061544	ENSG00000169174	ENST00000302118.5	PCSK9	rs140364657	Familial hypercholesterolemia	ClinVar		Congenital, Hereditary, and Neonatal Diseases and Abnormalities; Nutritional and Metabolic Diseases
ENST00000302118.5:C.1878C>T	1	55063383	ENSG00000169174	ENST00000302118.5	PCSK9	rs199815786	Familial hypercholesterolemia	ClinVar		Congenital, Hereditary, and Neonatal Diseases and Abnormalities; Nutritional and Metabolic Diseases
ENST00000302118.5:C.1958C>T	1	55063463	ENSG00000169174	ENST00000302118.5	PCSK9	rs759099468	Familial hypercholesterolemia 1	ClinVar		Congenital, Hereditary, and Neonatal Diseases and Abnormalities; Nutritional and Metabolic Diseases
ENST00000302118.5:C.1958C>T	1	55063463	ENSG00000169174	ENST00000302118.5	PCSK9	rs759099468	Familial hypercholesterolemia 3	ClinVar		Congenital, Hereditary, and Neonatal Diseases and Abnormalities; Nutritional and Metabolic Diseases
ENST00000302118.5:C.2022C>T	1	55063527	ENSG00000169174	ENST00000302118.5	PCSK9	rs886046436	Familial hypercholesterolemia	ClinVar		Congenital, Hereditary, and Neonatal Diseases and Abnormalities; Nutritional and Metabolic Diseases
ENST00000302118.5:C.2022C>T	1	55063527	ENSG00000169174	ENST00000302118.5	PCSK9	rs886046436	Familial hypercholesterolemia 1	ClinVar		Congenital, Hereditary, and Neonatal Diseases and Abnormalities; Nutritional and Metabolic Diseases
ENST00000263440.6:C.911C>T	1	63415881	ENSG00000088035	ENST00000263440.6	ALG6	rs4630153	Congenital disorder of glycosylation	ClinVar		Congenital, Hereditary, and Neonatal Diseases and Abnormalities; Nutritional and Metabolic Diseases; Musculoskeletal Diseases
ENST00000650546.1:C.1143C>T	1	63638799	ENSG00000079739	ENST00000650546.1	PGM1	rs140035988	Congenital disorder of glycosylation	ClinVar		Congenital, Hereditary, and Neonatal Diseases and Abnormalities; Nutritional and Metabolic Diseases; Musculoskeletal Diseases
ENST00000650546.1:C.1143C>T	1	63638799	ENSG00000079739	ENST00000650546.1	PGM1	rs140035988	Congenital disorder of glycosylation type 1t	ClinVar		Congenital, Hereditary, and Neonatal Diseases and Abnormalities; Nutritional and Metabolic Diseases
ENST00000371069.5:C.2838C>T	1	65412950	ENSG00000116675	ENST00000371069.5	DNAJC6	rs148209150	Parkinson disease 19a	ClinVar		Nervous System Diseases
ENST00000235345.6:C.301C>T	1	67052794	ENSG00000116704	ENST00000235345.6	SLC35D1	rs145382776	Schneckenbecken dysplasia	ClinVar		Musculoskeletal Diseases; Congenital, Hereditary, and Neonatal Diseases and Abnormalities
ENST00000262340.6:C.1194C>T	1	68431520	ENSG00000116745	ENST00000262340.6	RPE65	rs139640666	Leber congenital amaurosis	ClinVar		Eye Diseases
ENST00000262340.6:C.1194C>T	1	68431520	ENSG00000116745	ENST00000262340.6	RPE65	rs139640666	Retinitis Pigmentosa	ClinVar		Congenital, Hereditary, and Neonatal Diseases and Abnormalities; Eye Diseases
ENST00000262340.6:C.267C>T	1	68444862	ENSG00000116745	ENST00000262340.6	RPE65	rs372620785	Leber congenital amaurosis	ClinVar		Eye Diseases
ENST00000262340.6:C.267C>T	1	68444862	ENSG00000116745	ENST00000262340.6	RPE65	rs372620785	Retinitis Pigmentosa	ClinVar		Congenital, Hereditary, and Neonatal Diseases and Abnormalities; Eye Diseases
ENST00000651989.2:C.3543C>T	1	70039367	ENSG00000033122	ENST00000651989.2	LRRC7	rs765943280	large intestine carcinoma	Cosmic	24951259	Cancer; Gastrointestinal Disease; Organismal Injury and Abnormalities
ENST00000334785.12:C.732C>T	1	77926760	ENSG00000162614	ENST00000334785.12	NEXN	rs201171783	Cardiomyopathy	ClinVar		Cardiovascular Diseases
ENST00000334785.12:C.732C>T	1	77926760	ENSG00000162614	ENST00000334785.12	NEXN	rs201171783	Cardiovascular phenotype	ClinVar		Cardiovascular Diseases
ENST00000334785.12:C.732C>T	1	77926760	ENSG00000162614	ENST00000334785.12	NEXN	rs201171783	Dilated Cardiomyopathy	ClinVar		Cardiovascular Diseases
ENST00000334785.12:C.732C>T	1	77926760	ENSG00000162614	ENST00000334785.12	NEXN	rs201171783	Hypertrophic cardiomyopathy	ClinVar		Cardiovascular Diseases
ENST00000334785.12:C.1271C>G	1	77935842	ENSG00000162614	ENST00000334785.12	NEXN	rs200442502	Dilated cardiomyopathy 1CC	ClinVar		Cardiovascular Diseases
ENST00000334785.12:C.1271C>G	1	77935842	ENSG00000162614	ENST00000334785.12	NEXN	rs200442502	Familial hypertrophic cardiomyopathy 20	ClinVar		Congenital, Hereditary, and Neonatal Diseases and Abnormalities; Cardiovascular Diseases
ENST00000370466.4:C.853C>A	1	89117007	ENSG00000162645	ENST00000370466.4	GBP2	rs1803632	openness measurement	Ensembl_Post_GWAS	PMID29559929	Other diseases
ENST00000370466.4:C.853C>A	1	89117007	ENSG00000162645	ENST00000370466.4	GBP2	rs1803632	response to selective serotonin reuptake inhibitor	Ensembl_Post_GWAS	PMID29559929	Other diseases
ENST00000370466.4:C.853C>A	1	89117007	ENSG00000162645	ENST00000370466.4	GBP2	rs1803632	unipolar depression	Ensembl_Post_GWAS	PMID29559929	Mental Disorders
ENST00000370225.4:C.6249C>A	1	94001891	ENSG00000198691	ENST00000370225.4	ABCA4	rs1801359	Cone-Rod Dystrophy	ClinVar		Congenital, Hereditary, and Neonatal Diseases and Abnormalities; Eye Diseases
ENST00000370225.4:C.6249C>A	1	94001891	ENSG00000198691	ENST00000370225.4	ABCA4	rs1801359	Macular degeneration	ClinVar		Nervous System Diseases; Eye Diseases; Pathological Conditions, Signs and Symptoms
ENST00000370225.4:C.6249C>A	1	94001891	ENSG00000198691	ENST00000370225.4	ABCA4	rs1801359	Retinitis Pigmentosa	ClinVar		Congenital, Hereditary, and Neonatal Diseases and Abnormalities; Eye Diseases
ENST00000370225.4:C.6249C>A	1	94001891	ENSG00000198691	ENST00000370225.4	ABCA4	rs1801359	Stargardt Disease	ClinVar		Eye Diseases
ENST00000370225.4:C.6249C>A	1	94001891	ENSG00000198691	ENST00000370225.4	ABCA4	rs1801359	chronic kidney disease	Ensembl_Post_GWAS	PMID21546767	Female Urogenital Diseases and Pregnancy Complications; Male Urogenital Diseases
ENST00000370225.4:C.6229C>A	1	94001911	ENSG00000198691	ENST00000370225.4	ABCA4	rs61750645	Cone-rod dystrophy 3	ClinVar		Congenital, Hereditary, and Neonatal Diseases and Abnormalities; Eye Diseases
ENST00000370225.4:C.6229C>A	1	94001911	ENSG00000198691	ENST00000370225.4	ABCA4	rs61750645	Retinal dystrophy	ClinVar		Eye Diseases
ENST00000370225.4:C.6229C>A	1	94001911	ENSG00000198691	ENST00000370225.4	ABCA4	rs61750645	Stargardt disease	ClinVar		Eye Diseases
ENST00000370225.4:C.6229C>A	1	94001911	ENSG00000198691	ENST00000370225.4	ABCA4	rs61750645	Stargardt disease 1	ClinVar		Eye Diseases
ENST00000370225.4:C.5478C>T	1	94011368	ENSG00000198691	ENST00000370225.4	ABCA4	rs762632312	Stargardt disease 1	ClinVar		Eye Diseases
ENST00000370225.4:C.4203C>A	1	94031046	ENSG00000198691	ENST00000370225.4	ABCA4	rs1801666	Cone-Rod Dystrophy	ClinVar		Congenital, Hereditary, and Neonatal Diseases and Abnormalities; Eye Diseases
ENST00000370225.4:C.4203C>A	1	94031046	ENSG00000198691	ENST00000370225.4	ABCA4	rs1801666	Macular degeneration	ClinVar		Nervous System Diseases; Eye Diseases; Pathological Conditions, Signs and Symptoms
ENST00000370225.4:C.4203C>A	1	94031046	ENSG00000198691	ENST00000370225.4	ABCA4	rs1801666	Retinitis Pigmentosa	ClinVar		Congenital, Hereditary, and Neonatal Diseases and Abnormalities; Eye Diseases
ENST00000370225.4:C.4203C>A	1	94031046	ENSG00000198691	ENST00000370225.4	ABCA4	rs1801666	Stargardt Disease	ClinVar		Eye Diseases
ENST00000370225.4:C.4194C>T	1	94031055	ENSG00000198691	ENST00000370225.4	ABCA4	rs763857670	Cone-Rod Dystrophy	ClinVar		Congenital, Hereditary, and Neonatal Diseases and Abnormalities; Eye Diseases
ENST00000370225.4:C.4194C>T	1	94031055	ENSG00000198691	ENST00000370225.4	ABCA4	rs763857670	Macular degeneration	ClinVar		Nervous System Diseases; Eye Diseases; Pathological Conditions, Signs and Symptoms
ENST00000370225.4:C.4194C>T	1	94031055	ENSG00000198691	ENST00000370225.4	ABCA4	rs763857670	Retinitis Pigmentosa	ClinVar		Congenital, Hereditary, and Neonatal Diseases and Abnormalities; Eye Diseases
ENST00000370225.4:C.4194C>T	1	94031055	ENSG00000198691	ENST00000370225.4	ABCA4	rs763857670	Stargardt Disease	ClinVar		Eye Diseases
ENST00000370225.4:C.3977C>T	1	94031929	ENSG00000198691	ENST00000370225.4	ABCA4	rs761989194	Cone-Rod Dystrophy	ClinVar		Congenital, Hereditary, and Neonatal Diseases and Abnormalities; Eye Diseases
ENST00000370225.4:C.3977C>T	1	94031929	ENSG00000198691	ENST00000370225.4	ABCA4	rs761989194	Macular degeneration	ClinVar		Nervous System Diseases; Eye Diseases; Pathological Conditions, Signs and Symptoms
ENST00000370225.4:C.3977C>T	1	94031929	ENSG00000198691	ENST00000370225.4	ABCA4	rs761989194	Retinitis Pigmentosa	ClinVar		Congenital, Hereditary, and Neonatal Diseases and Abnormalities; Eye Diseases
ENST00000370225.4:C.3977C>T	1	94031929	ENSG00000198691	ENST00000370225.4	ABCA4	rs761989194	Stargardt Disease	ClinVar		Eye Diseases
ENST00000370225.4:C.2964C>T	1	94044699	ENSG00000198691	ENST00000370225.4	ABCA4	rs61754034	Cone-Rod Dystrophy	ClinVar		Congenital, Hereditary, and Neonatal Diseases and Abnormalities; Eye Diseases
ENST00000370225.4:C.2964C>T	1	94044699	ENSG00000198691	ENST00000370225.4	ABCA4	rs61754034	Macular degeneration	ClinVar		Nervous System Diseases; Eye Diseases; Pathological Conditions, Signs and Symptoms
ENST00000370225.4:C.2964C>T	1	94044699	ENSG00000198691	ENST00000370225.4	ABCA4	rs61754034	Retinitis Pigmentosa	ClinVar		Congenital, Hereditary, and Neonatal Diseases and Abnormalities; Eye Diseases
ENST00000370225.4:C.2964C>T	1	94044699	ENSG00000198691	ENST00000370225.4	ABCA4	rs61754034	Stargardt Disease	ClinVar		Eye Diseases
ENST00000370225.4:C.2877C>T	1	94046960	ENSG00000198691	ENST00000370225.4	ABCA4	rs61754033	Cone-Rod Dystrophy	ClinVar		Congenital, Hereditary, and Neonatal Diseases and Abnormalities; Eye Diseases
ENST00000370225.4:C.2877C>T	1	94046960	ENSG00000198691	ENST00000370225.4	ABCA4	rs61754033	Macular degeneration	ClinVar		Nervous System Diseases; Eye Diseases; Pathological Conditions, Signs and Symptoms
ENST00000370225.4:C.2877C>T	1	94046960	ENSG00000198691	ENST00000370225.4	ABCA4	rs61754033	Retinitis Pigmentosa	ClinVar		Congenital, Hereditary, and Neonatal Diseases and Abnormalities; Eye Diseases
ENST00000370225.4:C.2877C>T	1	94046960	ENSG00000198691	ENST00000370225.4	ABCA4	rs61754033	Stargardt Disease	ClinVar		Eye Diseases
ENST00000370225.4:C.2877C>T	1	94046960	ENSG00000198691	ENST00000370225.4	ABCA4	rs61754033	Stargardt disease 1	ClinVar		Eye Diseases
ENST00000370225.4:C.2517C>T	1	94055181	ENSG00000198691	ENST00000370225.4	ABCA4	rs138246242	Cone-Rod Dystrophy	ClinVar		Congenital, Hereditary, and Neonatal Diseases and Abnormalities; Eye Diseases
ENST00000370225.4:C.2517C>T	1	94055181	ENSG00000198691	ENST00000370225.4	ABCA4	rs138246242	Macular degeneration	ClinVar		Nervous System Diseases; Eye Diseases; Pathological Conditions, Signs and Symptoms
ENST00000370225.4:C.2517C>T	1	94055181	ENSG00000198691	ENST00000370225.4	ABCA4	rs138246242	Retinitis Pigmentosa	ClinVar		Congenital, Hereditary, and Neonatal Diseases and Abnormalities; Eye Diseases
ENST00000370225.4:C.2517C>T	1	94055181	ENSG00000198691	ENST00000370225.4	ABCA4	rs138246242	Stargardt Disease	ClinVar		Eye Diseases
ENST00000370225.4:C.2041C>A	1	94060656	ENSG00000198691	ENST00000370225.4	ABCA4	rs61749423	Bulls eye maculopathy	ClinVar		Other diseases
ENST00000370225.4:C.2041C>A	1	94060656	ENSG00000198691	ENST00000370225.4	ABCA4	rs61749423	Leber congenital amaurosis	ClinVar		Eye Diseases
ENST00000370225.4:C.2041C>A	1	94060656	ENSG00000198691	ENST00000370225.4	ABCA4	rs61749423	Stargardt disease 1	ClinVar		Eye Diseases
ENST00000370225.4:C.981C>A	1	94080596	ENSG00000198691	ENST00000370225.4	ABCA4	rs61753057	Stargardt disease 1	ClinVar		Eye Diseases
ENST00000370225.4:C.658C>T	1	94098904	ENSG00000198691	ENST00000370225.4	ABCA4	rs61748538	Retinal dystrophy	ClinVar		Eye Diseases
ENST00000370225.4:C.52C>A	1	94120994	ENSG00000198691	ENST00000370225.4	ABCA4	rs121909205	Stargardt disease 1	ClinVar		Eye Diseases
ENST00000361915.8:C.967C>A	1	99874695	ENSG00000162688	ENST00000361915.8	AGL	rs757987101	Glycogen storage disease type III	ClinVar		Musculoskeletal Diseases; Nervous System Diseases; Male Urogenital Diseases; Female Urogenital Diseases and Pregnancy Complications
ENST00000644676.1:C.1036C>A	1	100484347	ENSG00000079335	ENST00000644676.1	CDC14A	rs549556142	Deafness	ClinVar		Otorhinolaryngologic Diseases; Nervous System Diseases; Pathological Conditions, Signs and Symptoms
ENST00000644676.1:C.1036C>A	1	100484347	ENSG00000079335	ENST00000644676.1	CDC14A	rs549556142	Sensorineural hearing loss	ClinVar		Pathological Conditions, Signs and Symptoms; Nervous System Diseases; Otorhinolaryngologic Diseases
ENST00000271332.4:C.79C>T	1	109250158	ENSG00000143126	ENST00000271332.4	CELSR2	rs145688131	lymphoid neoplasm	Cosmic	23292937	Cancer; Hematological Disease; Organismal Injury and Abnormalities
ENST00000271332.4:C.5709C>T	1	109265293	ENSG00000143126	ENST00000271332.4	CELSR2	rs41279712	lung carcinoma	Cosmic	26503331	Cancer; Organismal Injury and Abnormalities; Respiratory Disease
ENST00000679935.1:C.14C>T	1	109612857	ENSG00000134183	ENST00000679935.1	GNAT2	rs199503029	Achromatopsia	ClinVar		Nervous System Diseases; Eye Diseases; Pathological Conditions, Signs and Symptoms
ENST00000638616.2:C.1053C>T	1	110603730	ENSG00000177301	ENST00000638616.2	KCNA2	rs748008112	Seizures	ClinVar		Nervous System Diseases; Pathological Conditions, Signs and Symptoms
ENST00000638616.2:C.630C>T	1	110604153	ENSG00000177301	ENST00000638616.2	KCNA2	rs761112803	Seizures	ClinVar		Nervous System Diseases; Pathological Conditions, Signs and Symptoms
ENST00000302127.5:C.1959C>T	1	111776086	ENSG00000171385	ENST00000302127.5	KCND3	rs147087785	Cardiovascular phenotype	ClinVar		Cardiovascular Diseases
ENST00000302127.5:C.1149C>T	1	111787064	ENSG00000171385	ENST00000302127.5	KCND3	rs760817061	Cardiovascular phenotype	ClinVar		Cardiovascular Diseases
ENST00000413052.6:C.1182C>T	1	112694059	ENSG00000155363	ENST00000413052.6	MOV10	rs3748656	Hip circumference adjusted for BMI	GWAS	25673412	Other diseases
ENST00000413052.6:C.1182C>T	1	112694059	ENSG00000155363	ENST00000413052.6	MOV10	rs3748656	body height	Ensembl_Post_GWAS	PMID25282103	Other diseases
ENST00000413052.6:C.1182C>T	1	112694059	ENSG00000155363	ENST00000413052.6	MOV10	rs3748656	diastolic blood pressure	Ensembl_Post_GWAS	PMID26390057	Other diseases
ENST00000413052.6:C.1182C>T	1	112694059	ENSG00000155363	ENST00000413052.6	MOV10	rs3748656	hip circumference	Ensembl_Post_GWAS	PMID25673412	Other diseases
ENST00000413052.6:C.1182C>T	1	112694059	ENSG00000155363	ENST00000413052.6	MOV10	rs3748656	intraocular pressure measurement	Ensembl_Post_GWAS	PMID30054594	Other diseases
ENST00000413052.6:C.1182C>T	1	112694059	ENSG00000155363	ENST00000413052.6	MOV10	rs3748656	systolic blood pressure	Ensembl_Post_GWAS	PMID29617998	Cardiovascular Diseases
ENST00000413052.6:C.1182C>T	1	112694059	ENSG00000155363	ENST00000413052.6	MOV10	rs3748656	total cholesterol measurement	Ensembl_Post_GWAS	PMID29785010	Other diseases
ENST00000413052.6:C.2931C>T	1	112700426	ENSG00000155363	ENST00000413052.6	MOV10	rs6679	body height	Ensembl_Post_GWAS	PMID25282103	Other diseases
ENST00000413052.6:C.2931C>T	1	112700426	ENSG00000155363	ENST00000413052.6	MOV10	rs6679	diastolic blood pressure	Ensembl_Post_GWAS	PMID26390057	Other diseases
ENST00000413052.6:C.2931C>T	1	112700426	ENSG00000155363	ENST00000413052.6	MOV10	rs6679	hip circumference	Ensembl_Post_GWAS	PMID25673412	Other diseases
ENST00000413052.6:C.2931C>T	1	112700426	ENSG00000155363	ENST00000413052.6	MOV10	rs6679	intraocular pressure measurement	Ensembl_Post_GWAS	PMID30054594	Other diseases
ENST00000413052.6:C.2931C>T	1	112700426	ENSG00000155363	ENST00000413052.6	MOV10	rs6679	systolic blood pressure	Ensembl_Post_GWAS	PMID29617998	Cardiovascular Diseases
ENST00000413052.6:C.2931C>T	1	112700426	ENSG00000155363	ENST00000413052.6	MOV10	rs6679	total cholesterol measurement	Ensembl_Post_GWAS	PMID29785010	Other diseases
ENST00000443580.6:C.937C>A	1	112917469	ENSG00000155380	ENST00000443580.6	SLC16A1	rs606231299	Monocarboxylate transporter 1 deficiency	ClinVar		Other diseases
ENST00000443580.6:C.489C>A	1	112917917	ENSG00000155380	ENST00000443580.6	SLC16A1	rs145916504	Hyperinsulinism	ClinVar		Nutritional and Metabolic Diseases
ENST00000369569.6:C.576C>T	1	113901277	ENSG00000134262	ENST00000369569.6	AP4B1	rs17464525	History of neurodevelopmental disorder	ClinVar		Other diseases
ENST00000369569.6:C.576C>T	1	113901277	ENSG00000134262	ENST00000369569.6	AP4B1	rs17464525	Mean corpuscular hemoglobin	GWAS	30595370	Other diseases
ENST00000520113.6:C.1944C>T	1	114674038	ENSG00000116748	ENST00000520113.6	AMPD1	rs34257411	Muscle AMP deaminase deficiency	ClinVar		Congenital, Hereditary, and Neonatal Diseases and Abnormalities; Nutritional and Metabolic Diseases
ENST00000676038.2:C.186C>T	1	115286610	ENSG00000134259	ENST00000676038.2	NGF	rs780432648	Congenital sensory neuropathy with selective loss of small myelinated fibers	ClinVar		Congenital, Hereditary, and Neonatal Diseases and Abnormalities; Nervous System Diseases
ENST00000310260.7:C.114C>T	1	115659683	ENSG00000173218	ENST00000310260.7	VANGL1	rs201840785	Caudal dysgenesis syndrome	ClinVar		Pathological Conditions, Signs and Symptoms; Congenital, Hereditary, and Neonatal Diseases and Abnormalities; Nervous System Diseases
ENST00000310260.7:C.114C>T	1	115659683	ENSG00000173218	ENST00000310260.7	VANGL1	rs201840785	Neural tube defect	ClinVar		Congenital, Hereditary, and Neonatal Diseases and Abnormalities; Nervous System Diseases
ENST00000261448.6:C.846C>T	1	115705285	ENSG00000118729	ENST00000261448.6	CASQ2	rs764692110	Catecholaminergic polymorphic ventricular tachycardia	ClinVar		Pathological Conditions, Signs and Symptoms; Cardiovascular Diseases
ENST00000369448.4:C.87C>G	1	117622955	ENSG00000183508	ENST00000369448.4	TENT5C	rs865443	haemangioblastoma	Cosmic	25589003	Neoplasms
ENST00000369448.4:C.201C>G	1	117623069	ENSG00000183508	ENST00000369448.4	TENT5C	rs1630312	glioma	Cosmic	26487540	Neoplasms
ENST00000369416.4:C.423C>T	1	119421924	ENSG00000203859	ENST00000369416.4	HSD3B2	rs751470493	Congenital adrenal hyperplasia	ClinVar		Congenital, Hereditary, and Neonatal Diseases and Abnormalities; Nutritional and Metabolic Diseases; Female Urogenital Diseases and Pregnancy Complications; Male Urogenital Diseases; Endocrine System Diseases
ENST00000369416.4:C.621C>T	1	119422122	ENSG00000203859	ENST00000369416.4	HSD3B2	rs143758913	Congenital adrenal hyperplasia	ClinVar		Congenital, Hereditary, and Neonatal Diseases and Abnormalities; Nutritional and Metabolic Diseases; Female Urogenital Diseases and Pregnancy Complications; Male Urogenital Diseases; Endocrine System Diseases
ENST00000641597.1:C.318C>T	1	119723403	ENSG00000092621	ENST00000641597.1	PHGDH	rs115747918	Phosphoglycerate dehydrogenase deficiency	ClinVar		Pathological Conditions, Signs and Symptoms; Congenital, Hereditary, and Neonatal Diseases and Abnormalities; Nutritional and Metabolic Diseases; Musculoskeletal Diseases; Nervous System Diseases; Behavior and Behavior Mechanisms
ENST00000641597.1:C.390C>T	1	119726884	ENSG00000092621	ENST00000641597.1	PHGDH	rs148078511	Phosphoglycerate dehydrogenase deficiency	ClinVar		Pathological Conditions, Signs and Symptoms; Congenital, Hereditary, and Neonatal Diseases and Abnormalities; Nutritional and Metabolic Diseases; Musculoskeletal Diseases; Nervous System Diseases; Behavior and Behavior Mechanisms
ENST00000256646.7:C.3234C>T	1	119937960	ENSG00000134250	ENST00000256646.7	NOTCH2	rs7543643	Hajdu-Cheney syndrome	ClinVar		Congenital, Hereditary, and Neonatal Diseases and Abnormalities; Musculoskeletal Diseases
ENST00000369258.8:C.588C>T	1	147264433	ENSG00000131778	ENST00000369258.8	CHD1L	rs4950315	hemoglobin measurement	Ensembl_Post_GWAS	PMID18464913	Other diseases
ENST00000369258.8:C.588C>T	1	147264433	ENSG00000131778	ENST00000369258.8	CHD1L	rs4950315	resistin measurement	Ensembl_Post_GWAS	PMID18464913	Other diseases
ENST00000579774.3:C.369C>T	1	147758870	ENSG00000265107	ENST00000579774.3	GJA5	rs2232191	Familial atrial fibrillation	ClinVar		Pathological Conditions, Signs and Symptoms; Cardiovascular Diseases
ENST00000369235.2:C.183C>T	1	147908138	ENSG00000121634	ENST00000369235.2	GJA8	rs782213276	Cataract 1	ClinVar		Eye Diseases
ENST00000369235.2:C.183C>T	1	147908138	ENSG00000121634	ENST00000369235.2	GJA8	rs782213276	Zonular Pulverulent Cataract	ClinVar		Eye Diseases
ENST00000369235.2:C.300C>T	1	147908255	ENSG00000121634	ENST00000369235.2	GJA8	rs886045254	Cataract 1	ClinVar		Eye Diseases
ENST00000369235.2:C.300C>T	1	147908255	ENSG00000121634	ENST00000369235.2	GJA8	rs886045254	Zonular Pulverulent Cataract	ClinVar		Eye Diseases
ENST00000369235.2:C.519C>T	1	147908474	ENSG00000121634	ENST00000369235.2	GJA8	rs782648768	large intestine carcinoma	Cosmic	17932254	Cancer; Gastrointestinal Disease; Organismal Injury and Abnormalities
ENST00000271628.9:C.735C>T	1	149926014	ENSG00000143368	ENST00000271628.9	SF3B4	rs113949235	Nager syndrome	ClinVar		Musculoskeletal Diseases; Eye Diseases; Congenital, Hereditary, and Neonatal Diseases and Abnormalities
ENST00000271628.9:C.519C>T	1	149926563	ENSG00000143368	ENST00000271628.9	SF3B4	rs143105666	Nager syndrome	ClinVar		Musculoskeletal Diseases; Eye Diseases; Congenital, Hereditary, and Neonatal Diseases and Abnormalities
ENST00000369039.9:C.1845C>T	1	150556965	ENSG00000143382	ENST00000369039.9	ADAMTSL4	rs749692173	Ectopia lentis	ClinVar		Congenital, Hereditary, and Neonatal Diseases and Abnormalities; Eye Diseases
ENST00000369039.9:C.2292C>T	1	150557990	ENSG00000143382	ENST00000369039.9	ADAMTSL4	rs587696191	Ectopia lentis	ClinVar		Congenital, Hereditary, and Neonatal Diseases and Abnormalities; Eye Diseases
ENST00000369039.9:C.2772C>T	1	150559105	ENSG00000143382	ENST00000369039.9	ADAMTSL4	rs139006349	Ectopia lentis	ClinVar		Congenital, Hereditary, and Neonatal Diseases and Abnormalities; Eye Diseases
ENST00000271715.7:C.2669C>T	1	151406366	ENSG00000143442	ENST00000271715.7	POGZ	rs141251585	History of neurodevelopmental disorder	ClinVar		Other diseases
ENST00000271715.7:C.1557C>T	1	151423518	ENSG00000143442	ENST00000271715.7	POGZ	rs141026698	History of neurodevelopmental disorder	ClinVar		Other diseases
ENST00000271715.7:C.222C>T	1	151440989	ENSG00000143442	ENST00000271715.7	POGZ	rs145999381	History of neurodevelopmental disorder	ClinVar		Other diseases
ENST00000368474.9:C.3289C>T	1	154585779	ENSG00000160710	ENST00000368474.9	ADAR	rs200537032	Aicardi-Goutieres syndrome 6	ClinVar		Other diseases
ENST00000368474.9:C.3289C>T	1	154585779	ENSG00000160710	ENST00000368474.9	ADAR	rs200537032	Symmetrical dyschromatosis of extremities	ClinVar		Skin and Connective Tissue Diseases; Pathological Conditions, Signs and Symptoms
ENST00000368474.9:C.3018C>T	1	154588126	ENSG00000160710	ENST00000368474.9	ADAR	rs151241634	Aicardi-Goutieres syndrome 6	ClinVar		Other diseases
ENST00000368474.9:C.3018C>T	1	154588126	ENSG00000160710	ENST00000368474.9	ADAR	rs151241634	Symmetrical dyschromatosis of extremities	ClinVar		Skin and Connective Tissue Diseases; Pathological Conditions, Signs and Symptoms
ENST00000368474.9:C.1766C>T	1	154598421	ENSG00000160710	ENST00000368474.9	ADAR	rs373667326	Aicardi-Goutieres syndrome 6	ClinVar		Other diseases
ENST00000368474.9:C.1766C>T	1	154598421	ENSG00000160710	ENST00000368474.9	ADAR	rs373667326	Symmetrical dyschromatosis of extremities	ClinVar		Skin and Connective Tissue Diseases; Pathological Conditions, Signs and Symptoms
ENST00000342741.6:C.1686C>T	1	155290611	ENSG00000143627	ENST00000342741.6	PKLR	rs140859641	Pyruvate kinase deficiency of red cells	ClinVar		Other diseases
ENST00000342741.6:C.1365C>T	1	155293248	ENSG00000143627	ENST00000342741.6	PKLR	rs146708702	Pyruvate kinase deficiency of red cells	ClinVar		Other diseases
ENST00000675667.1:C.378C>T	1	156130638	ENSG00000160789	ENST00000675667.1	LMNA	rs869025456	Primary familial hypertrophic cardiomyopathy	ClinVar		Congenital, Hereditary, and Neonatal Diseases and Abnormalities; Cardiovascular Diseases
ENST00000675667.1:C.438C>T	1	156130698	ENSG00000160789	ENST00000675667.1	LMNA	rs80356805	Cardiomyopathy	ClinVar		Cardiovascular Diseases
ENST00000675667.1:C.438C>T	1	156130698	ENSG00000160789	ENST00000675667.1	LMNA	rs80356805	Cardiovascular phenotype	ClinVar		Cardiovascular Diseases
ENST00000675667.1:C.897C>T	1	156135273	ENSG00000160789	ENST00000675667.1	LMNA	rs762718963	Cardiovascular phenotype	ClinVar		Cardiovascular Diseases
ENST00000675667.1:C.1122C>T	1	156136086	ENSG00000160789	ENST00000675667.1	LMNA	rs143715750	Cardiovascular phenotype	ClinVar		Cardiovascular Diseases
ENST00000675667.1:C.1566C>T	1	156137190	ENSG00000160789	ENST00000675667.1	LMNA	rs149339264	Hepatic Steatosis	ClinVar		Other diseases
ENST00000675667.1:C.1566C>T	1	156137190	ENSG00000160789	ENST00000675667.1	LMNA	rs149339264	Hypertrophic Cardiomyopathy	ClinVar		Cardiovascular Diseases
ENST00000675667.1:C.1566C>T	1	156137190	ENSG00000160789	ENST00000675667.1	LMNA	rs149339264	Cardiomyopathy	ClinVar		Cardiovascular Diseases
ENST00000675667.1:C.1566C>T	1	156137190	ENSG00000160789	ENST00000675667.1	LMNA	rs149339264	Cardiovascular phenotype	ClinVar		Cardiovascular Diseases
ENST00000675667.1:C.1566C>T	1	156137190	ENSG00000160789	ENST00000675667.1	LMNA	rs149339264	Charcot-Marie-Tooth disease	ClinVar		Nervous System Diseases; Congenital, Hereditary, and Neonatal Diseases and Abnormalities
ENST00000675667.1:C.1566C>T	1	156137190	ENSG00000160789	ENST00000675667.1	LMNA	rs149339264	Congenital muscular dystrophy	ClinVar		Congenital, Hereditary, and Neonatal Diseases and Abnormalities; Musculoskeletal Diseases; Nervous System Diseases
ENST00000675667.1:C.1566C>T	1	156137190	ENSG00000160789	ENST00000675667.1	LMNA	rs149339264	Dilated Cardiomyopathy	ClinVar		Cardiovascular Diseases
ENST00000675667.1:C.1566C>T	1	156137190	ENSG00000160789	ENST00000675667.1	LMNA	rs149339264	Emery-Dreifuss muscular dystrophy	ClinVar		Congenital, Hereditary, and Neonatal Diseases and Abnormalities; Musculoskeletal Diseases; Nervous System Diseases
ENST00000675667.1:C.1566C>T	1	156137190	ENSG00000160789	ENST00000675667.1	LMNA	rs149339264	Familial partial lipodystrophy	ClinVar		Nutritional and Metabolic Diseases; Skin and Connective Tissue Diseases
ENST00000675667.1:C.1566C>T	1	156137190	ENSG00000160789	ENST00000675667.1	LMNA	rs149339264	Hutchinson-Gilford syndrome	ClinVar		Congenital, Hereditary, and Neonatal Diseases and Abnormalities; Nutritional and Metabolic Diseases
ENST00000675667.1:C.1566C>T	1	156137190	ENSG00000160789	ENST00000675667.1	LMNA	rs149339264	Lethal tight skin contracture syndrome	ClinVar		Congenital, Hereditary, and Neonatal Diseases and Abnormalities; Skin and Connective Tissue Diseases; Musculoskeletal Diseases
ENST00000675667.1:C.1566C>T	1	156137190	ENSG00000160789	ENST00000675667.1	LMNA	rs149339264	Limb-Girdle Muscular Dystrophy	ClinVar		Congenital, Hereditary, and Neonatal Diseases and Abnormalities; Musculoskeletal Diseases; Nervous System Diseases
ENST00000675667.1:C.1566C>T	1	156137190	ENSG00000160789	ENST00000675667.1	LMNA	rs149339264	Lipoatrophy with Diabetes	ClinVar		Other diseases
ENST00000675667.1:C.1566C>T	1	156137190	ENSG00000160789	ENST00000675667.1	LMNA	rs149339264	Mandibuloacral dysplasia	ClinVar		Nutritional and Metabolic Diseases; Skin and Connective Tissue Diseases; Musculoskeletal Diseases
ENST00000675667.1:C.1659C>T	1	156137704	ENSG00000160789	ENST00000675667.1	LMNA	rs748768783	Cardiomyopathy	ClinVar		Cardiovascular Diseases
ENST00000675667.1:C.1698C>T	1	156137743	ENSG00000160789	ENST00000675667.1	LMNA	rs4641	Hepatic Steatosis	ClinVar		Other diseases
ENST00000675667.1:C.1698C>T	1	156137743	ENSG00000160789	ENST00000675667.1	LMNA	rs4641	Hypertrophic Cardiomyopathy	ClinVar		Cardiovascular Diseases
ENST00000675667.1:C.1698C>T	1	156137743	ENSG00000160789	ENST00000675667.1	LMNA	rs4641	Cardiomyopathy	ClinVar		Cardiovascular Diseases
ENST00000675667.1:C.1698C>T	1	156137743	ENSG00000160789	ENST00000675667.1	LMNA	rs4641	Cardiovascular phenotype	ClinVar		Cardiovascular Diseases
ENST00000675667.1:C.1698C>T	1	156137743	ENSG00000160789	ENST00000675667.1	LMNA	rs4641	Charcot-Marie-Tooth disease	ClinVar		Nervous System Diseases; Congenital, Hereditary, and Neonatal Diseases and Abnormalities
ENST00000675667.1:C.1698C>T	1	156137743	ENSG00000160789	ENST00000675667.1	LMNA	rs4641	Charcot-Marie-Tooth disease type 2B1	ClinVar		Nervous System Diseases; Congenital, Hereditary, and Neonatal Diseases and Abnormalities
ENST00000675667.1:C.1698C>T	1	156137743	ENSG00000160789	ENST00000675667.1	LMNA	rs4641	Congenital muscular dystrophy	ClinVar		Congenital, Hereditary, and Neonatal Diseases and Abnormalities; Musculoskeletal Diseases; Nervous System Diseases
ENST00000675667.1:C.1698C>T	1	156137743	ENSG00000160789	ENST00000675667.1	LMNA	rs4641	Dilated Cardiomyopathy	ClinVar		Cardiovascular Diseases
ENST00000675667.1:C.1698C>T	1	156137743	ENSG00000160789	ENST00000675667.1	LMNA	rs4641	Emery-Dreifuss muscular dystrophy	ClinVar		Congenital, Hereditary, and Neonatal Diseases and Abnormalities; Musculoskeletal Diseases; Nervous System Diseases
ENST00000675667.1:C.1698C>T	1	156137743	ENSG00000160789	ENST00000675667.1	LMNA	rs4641	Emery-Dreifuss muscular dystrophy 3	ClinVar		Congenital, Hereditary, and Neonatal Diseases and Abnormalities; Musculoskeletal Diseases; Nervous System Diseases
ENST00000675667.1:C.1698C>T	1	156137743	ENSG00000160789	ENST00000675667.1	LMNA	rs4641	Familial partial lipodystrophy	ClinVar		Nutritional and Metabolic Diseases; Skin and Connective Tissue Diseases
ENST00000675667.1:C.1698C>T	1	156137743	ENSG00000160789	ENST00000675667.1	LMNA	rs4641	Hutchinson-Gilford syndrome	ClinVar		Congenital, Hereditary, and Neonatal Diseases and Abnormalities; Nutritional and Metabolic Diseases
ENST00000675667.1:C.1698C>T	1	156137743	ENSG00000160789	ENST00000675667.1	LMNA	rs4641	Lethal tight skin contracture syndrome	ClinVar		Congenital, Hereditary, and Neonatal Diseases and Abnormalities; Skin and Connective Tissue Diseases; Musculoskeletal Diseases
ENST00000675667.1:C.1698C>T	1	156137743	ENSG00000160789	ENST00000675667.1	LMNA	rs4641	Limb-girdle muscular dystrophy	ClinVar		Congenital, Hereditary, and Neonatal Diseases and Abnormalities; Musculoskeletal Diseases; Nervous System Diseases
ENST00000675667.1:C.1698C>T	1	156137743	ENSG00000160789	ENST00000675667.1	LMNA	rs4641	Lipoatrophy with Diabetes	ClinVar		Other diseases
ENST00000675667.1:C.1698C>T	1	156137743	ENSG00000160789	ENST00000675667.1	LMNA	rs4641	Mandibuloacral dysplasia	ClinVar		Nutritional and Metabolic Diseases; Skin and Connective Tissue Diseases; Musculoskeletal Diseases
ENST00000675667.1:C.1698C>T	1	156137743	ENSG00000160789	ENST00000675667.1	LMNA	rs4641	Mandibuloacral dysplasia with type A lipodystrophy	ClinVar		Nutritional and Metabolic Diseases; Skin and Connective Tissue Diseases; Musculoskeletal Diseases
ENST00000675667.1:C.1785C>T	1	156138574	ENSG00000160789	ENST00000675667.1	LMNA	rs748139390	Cardiomyopathy	ClinVar		Cardiovascular Diseases
ENST00000355014.6:C.90C>T	1	156154668	ENSG00000196189	ENST00000355014.6	SEMA4A	rs373565051	Cone-Rod Dystrophy	ClinVar		Congenital, Hereditary, and Neonatal Diseases and Abnormalities; Eye Diseases
ENST00000355014.6:C.90C>T	1	156154668	ENSG00000196189	ENST00000355014.6	SEMA4A	rs373565051	Retinitis Pigmentosa	ClinVar		Congenital, Hereditary, and Neonatal Diseases and Abnormalities; Eye Diseases
ENST00000355014.6:C.494C>T	1	156158750	ENSG00000196189	ENST00000355014.6	SEMA4A	rs201943133	Cone-Rod Dystrophy	ClinVar		Congenital, Hereditary, and Neonatal Diseases and Abnormalities; Eye Diseases
ENST00000355014.6:C.494C>T	1	156158750	ENSG00000196189	ENST00000355014.6	SEMA4A	rs201943133	Retinitis Pigmentosa	ClinVar		Congenital, Hereditary, and Neonatal Diseases and Abnormalities; Eye Diseases
ENST00000368195.4:C.3303C>T	1	156842206	ENSG00000027644	ENST00000368195.4	INSRR	rs746766711	liver carcinoma	Cosmic	0	Cancer; Gastrointestinal Disease; Hepatic System Disease; Organismal Injury and Abnormalities
ENST00000524377.7:C.315C>T	1	156864755	ENSG00000198400	ENST00000524377.7	NTRK1	rs6340	malignant melanoma	Cosmic	26343386	Cancer; Hematological Disease; Organismal Injury and Abnormalities
ENST00000524377.7:C.375C>T	1	156866925	ENSG00000198400	ENST00000524377.7	NTRK1	rs757803799	Hereditary insensitivity to pain with anhidrosis	ClinVar		Other diseases
ENST00000524377.7:C.1101C>T	1	156873883	ENSG00000198400	ENST00000524377.7	NTRK1	rs534972681	skin carcinoma	Cosmic	25589618	Cancer; Dermatological Diseases and Conditions; Organismal Injury and Abnormalities
ENST00000524377.7:C.1728C>T	1	156876495	ENSG00000198400	ENST00000524377.7	NTRK1	rs6335	Hereditary insensitivity to pain with anhidrosis	ClinVar		Other diseases
ENST00000524377.7:C.1747C>G	1	156876514	ENSG00000198400	ENST00000524377.7	NTRK1	rs371344688	malignant melanoma	Cosmic	28481359	Cancer; Hematological Disease; Organismal Injury and Abnormalities
ENST00000524377.7:C.1747C>G	1	156876514	ENSG00000198400	ENST00000524377.7	NTRK1	rs371344688	Hereditary insensitivity to pain with anhidrosis	ClinVar		Other diseases
ENST00000524377.7:C.1860C>T	1	156879176	ENSG00000198400	ENST00000524377.7	NTRK1	rs6338	Hereditary insensitivity to pain with anhidrosis	ClinVar		Other diseases
ENST00000524377.7:C.1887C>T	1	156879203	ENSG00000198400	ENST00000524377.7	NTRK1	rs6337	Hereditary insensitivity to pain with anhidrosis	ClinVar		Other diseases
ENST00000524377.7:C.2169C>T	1	156880121	ENSG00000198400	ENST00000524377.7	NTRK1	rs140852621	Hereditary insensitivity to pain with anhidrosis	ClinVar		Other diseases
ENST00000643759.2:C.5958C>T	1	158623145	ENSG00000163554	ENST00000643759.2	SPTA1	rs3753068	Elliptocytosis	ClinVar		Congenital, Hereditary, and Neonatal Diseases and Abnormalities; Hemic and Lymphatic Diseases
ENST00000643759.2:C.5958C>T	1	158623145	ENSG00000163554	ENST00000643759.2	SPTA1	rs3753068	Hereditary pyropoikilocytosis	ClinVar		Hemic and Lymphatic Diseases; Congenital, Hereditary, and Neonatal Diseases and Abnormalities
ENST00000643759.2:C.5958C>T	1	158623145	ENSG00000163554	ENST00000643759.2	SPTA1	rs3753068	Spherocytosis	ClinVar		Congenital, Hereditary, and Neonatal Diseases and Abnormalities; Hemic and Lymphatic Diseases
ENST00000643759.2:C.5958C>T	1	158623145	ENSG00000163554	ENST00000643759.2	SPTA1	rs3753068	mean corpuscular hemoglobin	Ensembl_Post_GWAS	PMID27863252	Other diseases
ENST00000643759.2:C.5958C>T	1	158623145	ENSG00000163554	ENST00000643759.2	SPTA1	rs3753068	mean corpuscular volume	Ensembl_Post_GWAS	PMID27863252	Other diseases
ENST00000643759.2:C.5958C>T	1	158623145	ENSG00000163554	ENST00000643759.2	SPTA1	rs3753068	red blood cell distribution width	Ensembl_Post_GWAS	PMID28017375	Pathological Conditions, Signs and Symptoms; Hemic and Lymphatic Diseases
ENST00000643759.2:C.5304C>T	1	158636647	ENSG00000163554	ENST00000643759.2	SPTA1	rs886045383	Elliptocytosis	ClinVar		Congenital, Hereditary, and Neonatal Diseases and Abnormalities; Hemic and Lymphatic Diseases
ENST00000643759.2:C.5304C>T	1	158636647	ENSG00000163554	ENST00000643759.2	SPTA1	rs886045383	Hereditary pyropoikilocytosis	ClinVar		Hemic and Lymphatic Diseases; Congenital, Hereditary, and Neonatal Diseases and Abnormalities
ENST00000643759.2:C.5304C>T	1	158636647	ENSG00000163554	ENST00000643759.2	SPTA1	rs886045383	Spherocytosis	ClinVar		Congenital, Hereditary, and Neonatal Diseases and Abnormalities; Hemic and Lymphatic Diseases
ENST00000643759.2:C.5292C>A	1	158636659	ENSG00000163554	ENST00000643759.2	SPTA1	rs3738791	Elliptocytosis	ClinVar		Congenital, Hereditary, and Neonatal Diseases and Abnormalities; Hemic and Lymphatic Diseases
ENST00000643759.2:C.5292C>A	1	158636659	ENSG00000163554	ENST00000643759.2	SPTA1	rs3738791	Hereditary pyropoikilocytosis	ClinVar		Hemic and Lymphatic Diseases; Congenital, Hereditary, and Neonatal Diseases and Abnormalities
ENST00000643759.2:C.5292C>A	1	158636659	ENSG00000163554	ENST00000643759.2	SPTA1	rs3738791	Spherocytosis	ClinVar		Congenital, Hereditary, and Neonatal Diseases and Abnormalities; Hemic and Lymphatic Diseases
ENST00000643759.2:C.5292C>A	1	158636659	ENSG00000163554	ENST00000643759.2	SPTA1	rs3738791	mean corpuscular hemoglobin	Ensembl_Post_GWAS	PMID27863252	Other diseases
ENST00000643759.2:C.5292C>A	1	158636659	ENSG00000163554	ENST00000643759.2	SPTA1	rs3738791	mean corpuscular volume	Ensembl_Post_GWAS	PMID27863252	Other diseases
ENST00000643759.2:C.5292C>A	1	158636659	ENSG00000163554	ENST00000643759.2	SPTA1	rs3738791	red blood cell distribution width	Ensembl_Post_GWAS	PMID28017375	Pathological Conditions, Signs and Symptoms; Hemic and Lymphatic Diseases
ENST00000643759.2:C.5118C>T	1	158638104	ENSG00000163554	ENST00000643759.2	SPTA1	rs200945419	Elliptocytosis	ClinVar		Congenital, Hereditary, and Neonatal Diseases and Abnormalities; Hemic and Lymphatic Diseases
ENST00000643759.2:C.5118C>T	1	158638104	ENSG00000163554	ENST00000643759.2	SPTA1	rs200945419	Hereditary pyropoikilocytosis	ClinVar		Hemic and Lymphatic Diseases; Congenital, Hereditary, and Neonatal Diseases and Abnormalities
ENST00000643759.2:C.5118C>T	1	158638104	ENSG00000163554	ENST00000643759.2	SPTA1	rs200945419	Spherocytosis	ClinVar		Congenital, Hereditary, and Neonatal Diseases and Abnormalities; Hemic and Lymphatic Diseases
ENST00000643759.2:C.82C>A	1	158685290	ENSG00000163554	ENST00000643759.2	SPTA1	rs121918642	Elliptocytosis 2	ClinVar		Congenital, Hereditary, and Neonatal Diseases and Abnormalities; Hemic and Lymphatic Diseases
ENST00000643759.2:C.82C>A	1	158685290	ENSG00000163554	ENST00000643759.2	SPTA1	rs121918642	Hereditary pyropoikilocytosis	ClinVar		Hemic and Lymphatic Diseases; Congenital, Hereditary, and Neonatal Diseases and Abnormalities
ENST00000644903.1:C.684C>T	1	160041849	ENSG00000177807	ENST00000644903.1	KCNJ10	rs533587041	History of neurodevelopmental disorder	ClinVar		Other diseases
ENST00000644903.1:C.300C>A	1	160042233	ENSG00000177807	ENST00000644903.1	KCNJ10	rs139069413	SeSAME syndrome	ClinVar		Otorhinolaryngologic Diseases; Nervous System Diseases; Pathological Conditions, Signs and Symptoms; Behavior and Behavior Mechanisms; Mental Disorders
ENST00000368069.7:C.3460C>T	1	160290674	ENSG00000122218	ENST00000368069.7	COPA	rs747075563	Autoimmune interstitial lung	ClinVar		Other diseases
ENST00000677846.1:C.58C>G	1	161202443	ENSG00000158864	ENST00000677846.1	NDUFS2	rs11538340	Mitochondrial complex I deficiency	ClinVar		Nutritional and Metabolic Diseases
ENST00000677846.1:C.441C>T	1	161209240	ENSG00000158864	ENST00000677846.1	NDUFS2	rs140324736	Mitochondrial complex I deficiency	ClinVar		Nutritional and Metabolic Diseases
ENST00000672602.2:C.270C>T	1	161306886	ENSG00000158887	ENST00000672602.2	MPZ	rs121913584	Charcot-Marie-Tooth disease	ClinVar		Nervous System Diseases; Congenital, Hereditary, and Neonatal Diseases and Abnormalities
ENST00000672602.2:C.90C>T	1	161307402	ENSG00000158887	ENST00000672602.2	MPZ	rs770546306	Charcot-Marie-Tooth disease	ClinVar		Nervous System Diseases; Congenital, Hereditary, and Neonatal Diseases and Abnormalities
ENST00000446985.6:C.720C>T	1	162759844	ENSG00000162733	ENST00000446985.6	DDR2	rs141801107	Spondyloepimetaphyseal dysplasia	ClinVar		Congenital, Hereditary, and Neonatal Diseases and Abnormalities; Musculoskeletal Diseases
ENST00000446985.6:C.978C>T	1	162761333	ENSG00000162733	ENST00000446985.6	DDR2	rs766364700	breast carcinoma	Cosmic	28270497	Cancer; Organismal Injury and Abnormalities; Reproductive System Disease
ENST00000446985.6:C.1260C>G	1	162767326	ENSG00000162733	ENST00000446985.6	DDR2	rs2298258	Spondyloepimetaphyseal dysplasia	ClinVar		Congenital, Hereditary, and Neonatal Diseases and Abnormalities; Musculoskeletal Diseases
ENST00000446985.6:C.2025C>T	1	162775820	ENSG00000162733	ENST00000446985.6	DDR2	rs1273082471	skin carcinoma	Cosmic	25589618	Cancer; Dermatological Diseases and Conditions; Organismal Injury and Abnormalities
ENST00000367770.5:C.1476C>T	1	169854963	ENSG00000000457	ENST00000367770.5	SCYL3	rs12135726	tonsillectomy risk measurement	Ensembl_Post_GWAS	PMID28928442	Other diseases
ENST00000367770.5:C.1167C>T	1	169859186	ENSG00000000457	ENST00000367770.5	SCYL3	rs17602701	tonsillectomy risk measurement	Ensembl_Post_GWAS	PMID28928442	Other diseases
ENST00000367763.8:C.657C>T	1	170544840	ENSG00000120370	ENST00000367763.8	GORAB	rs76365864	Geroderma osteodysplastica	ClinVar		Musculoskeletal Diseases; Congenital, Hereditary, and Neonatal Diseases and Abnormalities; Skin and Connective Tissue Diseases; Endocrine System Diseases
ENST00000239461.11:C.343C>A	1	170719827	ENSG00000116132	ENST00000239461.11	PRRX1	rs756620309	Dysgnathia complex	ClinVar		Congenital, Hereditary, and Neonatal Diseases and Abnormalities; Musculoskeletal Diseases; Nervous System Diseases; Stomatognathic Diseases
ENST00000367755.9:C.441C>T	1	171107794	ENSG00000007933	ENST00000367755.9	FMO3	rs1800822	Trimethylaminuria	ClinVar		Congenital, Hereditary, and Neonatal Diseases and Abnormalities; Nutritional and Metabolic Diseases
ENST00000367755.9:C.855C>T	1	171114034	ENSG00000007933	ENST00000367755.9	FMO3	rs909530	Trimethylaminuria	ClinVar		Congenital, Hereditary, and Neonatal Diseases and Abnormalities; Nutritional and Metabolic Diseases
ENST00000367755.9:C.855C>T	1	171114034	ENSG00000007933	ENST00000367755.9	FMO3	rs909530	blood metabolite measurement	Ensembl_Post_GWAS	PMID24816252	Other diseases
ENST00000367749.4:C.843C>T	1	171334426	ENSG00000076258	ENST00000367749.4	FMO4	rs3737926	Intracranial aneurysm	GWAS	30823506	Nervous System Diseases; Cardiovascular Diseases
ENST00000209884.5:C.831C>T	1	173753287	ENSG00000076321	ENST00000209884.5	KLHL20	rs761284415	breast carcinoma	Cosmic	22722193	Cancer; Organismal Injury and Abnormalities; Reproductive System Disease
ENST00000367698.4:C.678C>T	1	173910838	ENSG00000117601	ENST00000367698.4	SERPINC1	rs2227627	Reduced antithrombin III activity	ClinVar		Congenital, Hereditary, and Neonatal Diseases and Abnormalities; Hemic and Lymphatic Diseases
ENST00000239462.9:C.1124C>T	1	175083825	ENSG00000120332	ENST00000239462.9	TNN	rs897741844	lung carcinoma	Cosmic	22941188	Cancer; Organismal Injury and Abnormalities; Respiratory Disease
ENST00000239462.9:C.3237C>T	1	175128653	ENSG00000120332	ENST00000239462.9	TNN	rs769644575	breast carcinoma	Cosmic	22722193	Cancer; Organismal Injury and Abnormalities; Reproductive System Disease
ENST00000367662.5:C.2328C>T	1	176690327	ENSG00000116183	ENST00000367662.5	PAPPA2	rs10913241	adolescent idiopathic scoliosis	Ensembl_Post_GWAS	PMID30019117	Neoplasms
ENST00000367662.5:C.2328C>T	1	176690327	ENSG00000116183	ENST00000367662.5	PAPPA2	rs10913241	coronary artery bypass	Ensembl_Post_GWAS	PMID25948407	Cardiovascular Diseases
ENST00000367662.5:C.2328C>T	1	176690327	ENSG00000116183	ENST00000367662.5	PAPPA2	rs10913241	myocardial infarction	Ensembl_Post_GWAS	PMID25948407	Pathological Conditions, Signs and Symptoms; Cardiovascular Diseases
ENST00000367662.5:C.2328C>T	1	176690327	ENSG00000116183	ENST00000367662.5	PAPPA2	rs10913241	susceptibility to measles measurement	Ensembl_Post_GWAS	PMID28928442	Other diseases
ENST00000308284.10:C.2590C>G	1	177933618	ENSG00000120341	ENST00000308284.10	SEC16B	rs591120	Body mass index	GWAS	29273807	Other diseases
ENST00000308284.10:C.2590C>G	1	177933618	ENSG00000120341	ENST00000308284.10	SEC16B	rs591120	Body mass index	GWAS	26426971	Other diseases
ENST00000308284.10:C.2590C>G	1	177933618	ENSG00000120341	ENST00000308284.10	SEC16B	rs591120	Body mass index x sex x age interaction	GWAS	26426971	Other diseases
ENST00000308284.10:C.2590C>G	1	177933618	ENSG00000120341	ENST00000308284.10	SEC16B	rs591120	age at assessment	Ensembl_Post_GWAS	PMID26426971	Behavior and Behavior Mechanisms
ENST00000308284.10:C.2590C>G	1	177933618	ENSG00000120341	ENST00000308284.10	SEC16B	rs591120	sex interaction measurement	Ensembl_Post_GWAS	PMID26426971	Other diseases
ENST00000367615.9:C.954C>T	1	179551371	ENSG00000116218	ENST00000367615.9	NPHS2	rs1410592	Nephrotic syndrome	ClinVar		Female Urogenital Diseases and Pregnancy Complications; Male Urogenital Diseases
ENST00000367615.9:C.954C>T	1	179551371	ENSG00000116218	ENST00000367615.9	NPHS2	rs1410592	Steroid-resistant nephrotic syndrome	ClinVar		Male Urogenital Diseases; Female Urogenital Diseases and Pregnancy Complications
ENST00000367615.9:C.288C>T	1	179564780	ENSG00000116218	ENST00000367615.9	NPHS2	rs3738423	Nephrotic syndrome	ClinVar		Female Urogenital Diseases and Pregnancy Complications; Male Urogenital Diseases
ENST00000367615.9:C.288C>T	1	179564780	ENSG00000116218	ENST00000367615.9	NPHS2	rs3738423	Steroid-resistant nephrotic syndrome	ClinVar		Male Urogenital Diseases; Female Urogenital Diseases and Pregnancy Complications
ENST00000367615.9:C.288C>T	1	179564780	ENSG00000116218	ENST00000367615.9	NPHS2	rs3738423	age at onset	Ensembl_Post_GWAS	PMID19010793	Behavior and Behavior Mechanisms
ENST00000367615.9:C.288C>T	1	179564780	ENSG00000116218	ENST00000367615.9	NPHS2	rs3738423	multiple sclerosis	Ensembl_Post_GWAS	PMID19010793	Immune System Diseases; Nervous System Diseases
ENST00000444136.6:C.1497C>T	1	179635864	ENSG00000162782	ENST00000444136.6	TDRD5	rs147568109	breast carcinoma	Cosmic	22722193	Cancer; Organismal Injury and Abnormalities; Reproductive System Disease
ENST00000367573.7:C.3147C>T	1	181733635	ENSG00000198216	ENST00000367573.7	CACNA1E	rs750902818	haematopoietic neoplasm	Cosmic	29386642	Neoplasms; Hemic and Lymphatic Diseases
ENST00000367573.7:C.5073C>T	1	181772165	ENSG00000198216	ENST00000367573.7	CACNA1E	rs199930	neuroticism measurement	Ensembl_Post_GWAS	PMID27089181	Behavior and Behavior Mechanisms
ENST00000367573.7:C.5238C>T	1	181776199	ENSG00000198216	ENST00000367573.7	CACNA1E	rs759983450	breast carcinoma	Cosmic	22722193	Cancer; Organismal Injury and Abnormalities; Reproductive System Disease
ENST00000264144.5:C.297C>T	1	183215481	ENSG00000058085	ENST00000264144.5	LAMC2	rs2274980	Epidermolysis bullosa	ClinVar		Congenital, Hereditary, and Neonatal Diseases and Abnormalities; Skin and Connective Tissue Diseases
ENST00000264144.5:C.3367C>T	1	183243185	ENSG00000058085	ENST00000264144.5	LAMC2	rs587281	Epidermolysis bullosa	ClinVar		Congenital, Hereditary, and Neonatal Diseases and Abnormalities; Skin and Connective Tissue Diseases
ENST00000318130.13:C.1860C>T	1	184708330	ENSG00000116406	ENST00000318130.13	EDEM3	rs3736757	Obesity-related traits	GWAS	23251661	Nutritional and Metabolic Diseases; Pathological Conditions, Signs and Symptoms
ENST00000318130.13:C.1860C>T	1	184708330	ENSG00000116406	ENST00000318130.13	EDEM3	rs3736757	body composition measurement	Ensembl_Post_GWAS	PMID23251661	Congenital, Hereditary, and Neonatal Diseases and Abnormalities; Nutritional and Metabolic Diseases
ENST00000271588.9:C.3684C>T	1	185994993	ENSG00000143341	ENST00000271588.9	HMCN1	rs566865273	Macular degeneration	ClinVar		Nervous System Diseases; Eye Diseases; Pathological Conditions, Signs and Symptoms
ENST00000271588.9:C.5706C>T	1	186023110	ENSG00000143341	ENST00000271588.9	HMCN1	rs769758485	Macular degeneration	ClinVar		Nervous System Diseases; Eye Diseases; Pathological Conditions, Signs and Symptoms
ENST00000271588.9:C.7371C>T	1	186061909	ENSG00000143341	ENST00000271588.9	HMCN1	rs7522627	Macular degeneration	ClinVar		Nervous System Diseases; Eye Diseases; Pathological Conditions, Signs and Symptoms
ENST00000271588.9:C.12987C>A	1	186130048	ENSG00000143341	ENST00000271588.9	HMCN1	rs41317491	Macular degeneration	ClinVar		Nervous System Diseases; Eye Diseases; Pathological Conditions, Signs and Symptoms
ENST00000367435.5:C.333C>T	1	193135416	ENSG00000134371	ENST00000367435.5	CDC73	rs374834265	Hereditary cancer-predisposing syndrome	ClinVar		Other diseases
ENST00000367435.5:C.834C>T	1	193150309	ENSG00000134371	ENST00000367435.5	CDC73	rs886045714	Hyperparathyroidism 2	ClinVar		Endocrine System Diseases
ENST00000367435.5:C.834C>T	1	193150309	ENSG00000134371	ENST00000367435.5	CDC73	rs886045714	Isolated Hyperparathyroidism	ClinVar		Endocrine System Diseases
ENST00000367435.5:C.834C>T	1	193150309	ENSG00000134371	ENST00000367435.5	CDC73	rs886045714	Parathyroid carcinoma	ClinVar		Neoplasms; Endocrine System Diseases
ENST00000367342.8:C.1612C>T	1	200911850	ENSG00000163362	ENST00000367342.8	C1orf106	rs296520	ankylosing spondylitis	Ensembl_Post_GWAS	PMID21743469	Musculoskeletal Diseases
ENST00000367342.8:C.1612C>T	1	200911850	ENSG00000163362	ENST00000367342.8	C1orf106	rs296520	attention deficit hyperactivity disorder	Ensembl_Post_GWAS	PMID26974007	Mental Disorders
ENST00000367342.8:C.1612C>T	1	200911850	ENSG00000163362	ENST00000367342.8	C1orf106	rs296520	autism spectrum disorder	Ensembl_Post_GWAS	PMID23749187	Mental Disorders
ENST00000367342.8:C.1612C>T	1	200911850	ENSG00000163362	ENST00000367342.8	C1orf106	rs296520	bipolar disorder	Ensembl_Post_GWAS	PMID23453885	Mental Disorders
ENST00000367342.8:C.1612C>T	1	200911850	ENSG00000163362	ENST00000367342.8	C1orf106	rs296520	celiac disease	Ensembl_Post_GWAS	PMID23453885	Digestive System Diseases; Nutritional and Metabolic Diseases
ENST00000367342.8:C.1612C>T	1	200911850	ENSG00000163362	ENST00000367342.8	C1orf106	rs296520	crohns disease	Ensembl_Post_GWAS	PMID23453885	Digestive System Diseases
ENST00000367342.8:C.1612C>T	1	200911850	ENSG00000163362	ENST00000367342.8	C1orf106	rs296520	inflammatory bowel disease	Ensembl_Post_GWAS	PMID22057235	Digestive System Diseases
ENST00000367342.8:C.1612C>T	1	200911850	ENSG00000163362	ENST00000367342.8	C1orf106	rs296520	lymphocyte percentage of white cells	Ensembl_Post_GWAS	PMID18587394	Other diseases
ENST00000367342.8:C.1612C>T	1	200911850	ENSG00000163362	ENST00000367342.8	C1orf106	rs296520	multiple sclerosis	Ensembl_Post_GWAS	PMID26974007	Immune System Diseases; Nervous System Diseases
ENST00000367342.8:C.1612C>T	1	200911850	ENSG00000163362	ENST00000367342.8	C1orf106	rs296520	psoriasis	Ensembl_Post_GWAS	PMID21102463	Skin and Connective Tissue Diseases
ENST00000367342.8:C.1612C>T	1	200911850	ENSG00000163362	ENST00000367342.8	C1orf106	rs296520	sclerosing cholangitis	Ensembl_Post_GWAS	PMID26192919	Digestive System Diseases
ENST00000367342.8:C.1612C>T	1	200911850	ENSG00000163362	ENST00000367342.8	C1orf106	rs296520	ulcerative colitis	Ensembl_Post_GWAS	PMID28067908	Digestive System Diseases
ENST00000367342.8:C.1612C>T	1	200911850	ENSG00000163362	ENST00000367342.8	C1orf106	rs296520	unipolar depression	Ensembl_Post_GWAS	PMID27863252	Mental Disorders
ENST00000352845.3:C.918C>T	1	201317643	ENSG00000081277	ENST00000352845.3	PKP1	rs1722779	Ectodermal dysplasia skin fragility syndrome	ClinVar		Congenital, Hereditary, and Neonatal Diseases and Abnormalities; Skin and Connective Tissue Diseases; Immune System Diseases
ENST00000352845.3:C.996C>T	1	201317721	ENSG00000081277	ENST00000352845.3	PKP1	rs147633517	Ectodermal dysplasia skin fragility syndrome	ClinVar		Congenital, Hereditary, and Neonatal Diseases and Abnormalities; Skin and Connective Tissue Diseases; Immune System Diseases
ENST00000658476.1:C.899C>T	1	201359243	ENSG00000118194	ENST00000658476.1	TNNT2	rs45503195	Cardiomyopathy	ClinVar		Cardiovascular Diseases
ENST00000658476.1:C.442C>A	1	201364315	ENSG00000118194	ENST00000658476.1	TNNT2	rs730881123	Familial hypertrophic cardiomyopathy 2	ClinVar		Congenital, Hereditary, and Neonatal Diseases and Abnormalities; Cardiovascular Diseases
ENST00000658476.1:C.442C>A	1	201364315	ENSG00000118194	ENST00000658476.1	TNNT2	rs730881123	Familial restrictive cardiomyopathy 3	ClinVar		Cardiovascular Diseases
ENST00000658476.1:C.442C>A	1	201364315	ENSG00000118194	ENST00000658476.1	TNNT2	rs730881123	Left ventricular noncompaction 6	ClinVar		Cardiovascular Diseases
ENST00000658476.1:C.274C>A	1	201365298	ENSG00000118194	ENST00000658476.1	TNNT2	rs397516456	Cardiovascular phenotype	ClinVar		Cardiovascular Diseases
ENST00000658476.1:C.274C>A	1	201365298	ENSG00000118194	ENST00000658476.1	TNNT2	rs397516456	Familial hypertrophic cardiomyopathy 2	ClinVar		Congenital, Hereditary, and Neonatal Diseases and Abnormalities; Cardiovascular Diseases
ENST00000658476.1:C.274C>A	1	201365298	ENSG00000118194	ENST00000658476.1	TNNT2	rs397516456	Familial restrictive cardiomyopathy 3	ClinVar		Cardiovascular Diseases
ENST00000658476.1:C.274C>A	1	201365298	ENSG00000118194	ENST00000658476.1	TNNT2	rs397516456	Hypertrophic cardiomyopathy	ClinVar		Cardiovascular Diseases
ENST00000658476.1:C.274C>A	1	201365298	ENSG00000118194	ENST00000658476.1	TNNT2	rs397516456	Left ventricular noncompaction 6	ClinVar		Cardiovascular Diseases
ENST00000658476.1:C.274C>A	1	201365298	ENSG00000118194	ENST00000658476.1	TNNT2	rs397516456	Primary familial hypertrophic cardiomyopathy	ClinVar		Congenital, Hereditary, and Neonatal Diseases and Abnormalities; Cardiovascular Diseases
ENST00000658476.1:C.240C>T	1	201365634	ENSG00000118194	ENST00000658476.1	TNNT2	rs140245123	Dilated Cardiomyopathy	ClinVar		Cardiovascular Diseases
ENST00000658476.1:C.240C>T	1	201365634	ENSG00000118194	ENST00000658476.1	TNNT2	rs140245123	Familial restrictive cardiomyopathy	ClinVar		Cardiovascular Diseases
ENST00000658476.1:C.240C>T	1	201365634	ENSG00000118194	ENST00000658476.1	TNNT2	rs140245123	Hypertrophic cardiomyopathy	ClinVar		Cardiovascular Diseases
ENST00000658476.1:C.240C>T	1	201365634	ENSG00000118194	ENST00000658476.1	TNNT2	rs140245123	Left ventricular noncompaction cardiomyopathy	ClinVar		Pathological Conditions, Signs and Symptoms
ENST00000658476.1:C.83C>T	1	201368212	ENSG00000118194	ENST00000658476.1	TNNT2	rs200754249	Cardiomyopathy	ClinVar		Cardiovascular Diseases
ENST00000658476.1:C.83C>T	1	201368212	ENSG00000118194	ENST00000658476.1	TNNT2	rs200754249	Increased left ventricular wall thickness	ClinVar		Other diseases
ENST00000658476.1:C.83C>T	1	201368212	ENSG00000118194	ENST00000658476.1	TNNT2	rs200754249	Left ventricular noncompaction 6	ClinVar		Cardiovascular Diseases
ENST00000658476.1:C.83C>T	1	201368212	ENSG00000118194	ENST00000658476.1	TNNT2	rs200754249	Primary familial hypertrophic cardiomyopathy	ClinVar		Congenital, Hereditary, and Neonatal Diseases and Abnormalities; Cardiovascular Diseases
ENST00000658476.1:C.83C>T	1	201368212	ENSG00000118194	ENST00000658476.1	TNNT2	rs200754249	Supraventricular tachycardia	ClinVar		Cardiovascular Diseases; Pathological Conditions, Signs and Symptoms
ENST00000367229.6:C.1325C>G	1	203216965	ENSG00000133063	ENST00000367229.6	CHIT1	rs1065761	Chitotriosidase deficiency	ClinVar		Other diseases
ENST00000367229.6:C.1076C>T	1	203217819	ENSG00000133063	ENST00000367229.6	CHIT1	rs201682373	Chitotriosidase deficiency	ClinVar		Other diseases
ENST00000367182.8:C.1127C>G	1	204549336	ENSG00000198625	ENST00000367182.8	MDM4	rs777416962	prostate carcinoma	Cosmic	28481359	Neoplasms; Male Urogenital Diseases
ENST00000367175.1:C.981C>T	1	204619012	ENSG00000170382	ENST00000367175.1	LRRN2	rs3747630	Regular attendance at a religious group	GWAS	29970889	Other diseases
ENST00000367175.1:C.981C>T	1	204619012	ENSG00000170382	ENST00000367175.1	LRRN2	rs3747630	cognitive function measurement	Ensembl_Post_GWAS	PMID30038396	Pathological Conditions, Signs and Symptoms; Nervous System Diseases
ENST00000640428.1:C.552C>T	1	205059148	ENSG00000184144	ENST00000640428.1	CNTN2	rs777614226	Epilepsy	ClinVar		Nervous System Diseases
ENST00000640428.1:C.1405C>T	1	205064636	ENSG00000184144	ENST00000640428.1	CNTN2	rs147693556	Epilepsy	ClinVar		Nervous System Diseases
ENST00000640428.1:C.2628C>T	1	205072030	ENSG00000184144	ENST00000640428.1	CNTN2	rs2229868	Adventurousness	GWAS	30643258	Other diseases
ENST00000358024.8:C.1200C>T	1	205269402	ENSG00000133069	ENST00000358024.8	TMCC2	rs1779411	basophil count	Ensembl_Post_GWAS	PMID27863252	Other diseases
ENST00000358024.8:C.1200C>T	1	205269402	ENSG00000133069	ENST00000358024.8	TMCC2	rs1779411	basophil percentage of white cells	Ensembl_Post_GWAS	PMID27863252	Other diseases
ENST00000358024.8:C.1200C>T	1	205269402	ENSG00000133069	ENST00000358024.8	TMCC2	rs1779411	mean corpuscular hemoglobin concentration	Ensembl_Post_GWAS	PMID27863252	Other diseases
ENST00000358024.8:C.1200C>T	1	205269402	ENSG00000133069	ENST00000358024.8	TMCC2	rs1779411	mean corpuscular hemoglobin	Ensembl_Post_GWAS	PMID29403010	Other diseases
ENST00000358024.8:C.1200C>T	1	205269402	ENSG00000133069	ENST00000358024.8	TMCC2	rs1779411	mean corpuscular volume	Ensembl_Post_GWAS	PMID27863252	Other diseases
ENST00000358024.8:C.1200C>T	1	205269402	ENSG00000133069	ENST00000358024.8	TMCC2	rs1779411	mean platelet volume	Ensembl_Post_GWAS	PMID28017375	Other diseases
ENST00000358024.8:C.1200C>T	1	205269402	ENSG00000133069	ENST00000358024.8	TMCC2	rs1779411	platelet count	Ensembl_Post_GWAS	PMID27863252	Other diseases
ENST00000358024.8:C.1200C>T	1	205269402	ENSG00000133069	ENST00000358024.8	TMCC2	rs1779411	reticulocyte count	Ensembl_Post_GWAS	PMID24026423	Other diseases
ENST00000358024.8:C.1686C>T	1	205271123	ENSG00000133069	ENST00000358024.8	TMCC2	rs1668867	basophil count	Ensembl_Post_GWAS	PMID27863252	Other diseases
ENST00000358024.8:C.1686C>T	1	205271123	ENSG00000133069	ENST00000358024.8	TMCC2	rs1668867	basophil percentage of white cells	Ensembl_Post_GWAS	PMID27863252	Other diseases
ENST00000358024.8:C.1686C>T	1	205271123	ENSG00000133069	ENST00000358024.8	TMCC2	rs1668867	mean corpuscular hemoglobin concentration	Ensembl_Post_GWAS	PMID27863252	Other diseases
ENST00000358024.8:C.1686C>T	1	205271123	ENSG00000133069	ENST00000358024.8	TMCC2	rs1668867	mean corpuscular hemoglobin	Ensembl_Post_GWAS	PMID29403010	Other diseases
ENST00000358024.8:C.1686C>T	1	205271123	ENSG00000133069	ENST00000358024.8	TMCC2	rs1668867	mean corpuscular volume	Ensembl_Post_GWAS	PMID27863252	Other diseases
ENST00000358024.8:C.1686C>T	1	205271123	ENSG00000133069	ENST00000358024.8	TMCC2	rs1668867	mean platelet volume	Ensembl_Post_GWAS	PMID28017375	Other diseases
ENST00000358024.8:C.1686C>T	1	205271123	ENSG00000133069	ENST00000358024.8	TMCC2	rs1668867	platelet count	Ensembl_Post_GWAS	PMID27863252	Other diseases
ENST00000358024.8:C.1686C>T	1	205271123	ENSG00000133069	ENST00000358024.8	TMCC2	rs1668867	reticulocyte count	Ensembl_Post_GWAS	PMID24026423	Other diseases
ENST00000367145.4:C.701C>T	1	205663090	ENSG00000158715	ENST00000367145.4	SLC45A3	rs746731143	Elevated serum prostate-specific antigen levels in healthy men	GWAS	28471803	Male Urogenital Diseases
ENST00000367145.4:C.698C>T	1	205663093	ENSG00000158715	ENST00000367145.4	SLC45A3	rs780752998	Elevated serum prostate-specific antigen levels in healthy men	GWAS	28471803	Male Urogenital Diseases
ENST00000581977.7:C.363C>T	1	206476185	ENSG00000263528	ENST00000581977.7	IKBKE	rs1136841	haemangioblastoma	Cosmic	25589003	Neoplasms
ENST00000581977.7:C.1805C>T	1	206491719	ENSG00000263528	ENST00000581977.7	IKBKE	rs12059562	haemangioblastoma	Cosmic	25589003	Neoplasms
ENST00000367080.8:C.546C>T	1	207065074	ENSG00000123836	ENST00000367080.8	PFKFB2	rs72741390	left ventricular structural measurement	Ensembl_Post_GWAS	PMID28394258	Other diseases
ENST00000367057.8:C.1617C>A	1	207472818	ENSG00000117322	ENST00000367057.8	CR2	rs34349246	Common variable immunodeficiency 7	ClinVar		Immune System Diseases
ENST00000356082.9:C.2962C>A	1	209617996	ENSG00000196878	ENST00000356082.9	LAMB3	rs2229467	Junctional epidermolysis bullosa gravis of Herlitz	ClinVar		Other diseases
ENST00000356082.9:C.2157C>T	1	209623706	ENSG00000196878	ENST00000356082.9	LAMB3	rs757647232	Epidermolysis bullosa	ClinVar		Congenital, Hereditary, and Neonatal Diseases and Abnormalities; Skin and Connective Tissue Diseases
ENST00000356082.9:C.1978C>A	1	209623999	ENSG00000196878	ENST00000356082.9	LAMB3	rs146794392	Junctional epidermolysis bullosa gravis of Herlitz	ClinVar		Other diseases
ENST00000356082.9:C.1536C>T	1	209626928	ENSG00000196878	ENST00000356082.9	LAMB3	rs375260663	Epidermolysis bullosa	ClinVar		Congenital, Hereditary, and Neonatal Diseases and Abnormalities; Skin and Connective Tissue Diseases
ENST00000356082.9:C.858C>T	1	209630700	ENSG00000196878	ENST00000356082.9	LAMB3	rs200006309	Epidermolysis bullosa	ClinVar		Congenital, Hereditary, and Neonatal Diseases and Abnormalities; Skin and Connective Tissue Diseases
ENST00000356082.9:C.777C>T	1	209632628	ENSG00000196878	ENST00000356082.9	LAMB3	rs146529524	Epidermolysis bullosa	ClinVar		Congenital, Hereditary, and Neonatal Diseases and Abnormalities; Skin and Connective Tissue Diseases
ENST00000356082.9:C.267C>A	1	209638565	ENSG00000196878	ENST00000356082.9	LAMB3	rs143833060	Epidermolysis bullosa	ClinVar		Congenital, Hereditary, and Neonatal Diseases and Abnormalities; Skin and Connective Tissue Diseases
ENST00000367025.8:C.1117C>G	1	209777415	ENSG00000009790	ENST00000367025.8	TRAF3IP3	rs669694	cleft lip	Ensembl_Post_GWAS	PMID19270707	Congenital, Hereditary, and Neonatal Diseases and Abnormalities; Stomatognathic Diseases
ENST00000367025.8:C.1117C>G	1	209777415	ENSG00000009790	ENST00000367025.8	TRAF3IP3	rs669694	progranulin measurement	Ensembl_Post_GWAS	PMID19270707	Other diseases
ENST00000367025.8:C.1117C>G	1	209777415	ENSG00000009790	ENST00000367025.8	TRAF3IP3	rs669694	systolic blood pressure	Ensembl_Post_GWAS	PMID22863734	Cardiovascular Diseases
ENST00000367021.8:C.711C>T	1	209790844	ENSG00000117595	ENST00000367021.8	IRF6	rs201940391	Autosomal Dominant	ClinVar		Other diseases
ENST00000367021.8:C.711C>T	1	209790844	ENSG00000117595	ENST00000367021.8	IRF6	rs201940391	Cleft Lip +/- Cleft Palate	ClinVar		Congenital, Hereditary, and Neonatal Diseases and Abnormalities; Stomatognathic Diseases
ENST00000367021.8:C.711C>T	1	209790844	ENSG00000117595	ENST00000367021.8	IRF6	rs201940391	Popliteal pterygium syndrome	ClinVar		Musculoskeletal Diseases; Stomatognathic Diseases; Eye Diseases; Male Urogenital Diseases; Female Urogenital Diseases and Pregnancy Complications; Congenital, Hereditary, and Neonatal Diseases and Abnormalities
ENST00000367021.8:C.711C>T	1	209790844	ENSG00000117595	ENST00000367021.8	IRF6	rs201940391	Van der Woude syndrome	ClinVar		Pathological Conditions, Signs and Symptoms; Congenital, Hereditary, and Neonatal Diseases and Abnormalities; Neoplasms; Musculoskeletal Diseases; Stomatognathic Diseases
ENST00000491415.7:C.199C>G	1	209830854	ENSG00000117597	ENST00000491415.7	DIEXF	rs585627	cleft lip	Ensembl_Post_GWAS	PMID19270707	Congenital, Hereditary, and Neonatal Diseases and Abnormalities; Stomatognathic Diseases
ENST00000366958.9:C.1239C>T	1	213997774	ENSG00000117707	ENST00000366958.9	PROX1	rs764766771	liver carcinoma	Cosmic	0	Cancer; Gastrointestinal Disease; Hepatic System Disease; Organismal Injury and Abnormalities
ENST00000366929.4:C.639C>T	1	218434126	ENSG00000092969	ENST00000366929.4	TGFB2	rs760740958	Holt-Oram syndrome	ClinVar		Musculoskeletal Diseases; Cardiovascular Diseases; Congenital, Hereditary, and Neonatal Diseases and Abnormalities
ENST00000366929.4:C.771C>T	1	218434381	ENSG00000092969	ENST00000366929.4	TGFB2	rs398122885	Loeys-Dietz syndrome 4	ClinVar		Congenital, Hereditary, and Neonatal Diseases and Abnormalities; Musculoskeletal Diseases; Cardiovascular Diseases
ENST00000366929.4:C.1113C>T	1	218437439	ENSG00000092969	ENST00000366929.4	TGFB2	rs886045979	Loeys-Dietz syndrome	ClinVar		Congenital, Hereditary, and Neonatal Diseases and Abnormalities; Musculoskeletal Diseases; Cardiovascular Diseases
ENST00000366929.4:C.1224C>T	1	218441257	ENSG00000092969	ENST00000366929.4	TGFB2	rs201129153	Holt-Oram syndrome	ClinVar		Musculoskeletal Diseases; Cardiovascular Diseases; Congenital, Hereditary, and Neonatal Diseases and Abnormalities
ENST00000366923.8:C.924C>G	1	220024283	ENSG00000136628	ENST00000366923.8	EPRS	rs2230301	reticulocyte count	Ensembl_Post_GWAS	PMID27863252	Other diseases
ENST00000358951.7:C.2008C>G	1	220182922	ENSG00000118873	ENST00000358951.7	RAB3GAP2	rs201613456	Martsolf syndrome	ClinVar		Nervous System Diseases; Eye Diseases; Endocrine System Diseases; Pathological Conditions, Signs and Symptoms; Behavior and Behavior Mechanisms; Mental Disorders
ENST00000358951.7:C.2008C>G	1	220182922	ENSG00000118873	ENST00000358951.7	RAB3GAP2	rs201613456	Warburg micro syndrome	ClinVar		Pathological Conditions, Signs and Symptoms; Congenital, Hereditary, and Neonatal Diseases and Abnormalities; Eye Diseases; Musculoskeletal Diseases; Nervous System Diseases; Endocrine System Diseases; Mental Disorders; Behavior and Behavior Mechanisms
ENST00000358951.7:C.1215C>T	1	220193295	ENSG00000118873	ENST00000358951.7	RAB3GAP2	rs762485949	Martsolf syndrome	ClinVar		Nervous System Diseases; Eye Diseases; Endocrine System Diseases; Pathological Conditions, Signs and Symptoms; Behavior and Behavior Mechanisms; Mental Disorders
ENST00000358951.7:C.1215C>T	1	220193295	ENSG00000118873	ENST00000358951.7	RAB3GAP2	rs762485949	Warburg micro syndrome 2	ClinVar		Pathological Conditions, Signs and Symptoms; Congenital, Hereditary, and Neonatal Diseases and Abnormalities; Eye Diseases; Musculoskeletal Diseases; Nervous System Diseases; Endocrine System Diseases; Mental Disorders; Behavior and Behavior Mechanisms
ENST00000295006.6:C.612C>T	1	223747048	ENSG00000162909	ENST00000295006.6	CAPN2	rs139316104	lung carcinoma	Cosmic	20668451	Cancer; Organismal Injury and Abnormalities; Respiratory Disease
ENST00000343537.12:C.2880C>G	1	223792505	ENSG00000143514	ENST00000343537.12	TP53BP2	rs1153936	alpha-carotene measurement	Ensembl_Post_GWAS	PMID28002826	Other diseases
ENST00000272163.9:C.90C>T	1	225423986	ENSG00000143815	ENST00000272163.9	LBR	rs2230416	Greenberg dysplasia	ClinVar		Congenital, Hereditary, and Neonatal Diseases and Abnormalities; Musculoskeletal Diseases
ENST00000272163.9:C.21C>T	1	225424055	ENSG00000143815	ENST00000272163.9	LBR	rs184378202	Greenberg dysplasia	ClinVar		Congenital, Hereditary, and Neonatal Diseases and Abnormalities; Musculoskeletal Diseases
ENST00000366820.10:C.774C>T	1	225937768	ENSG00000143768	ENST00000366820.10	LEFTY2	rs149969900	Heterotaxia	ClinVar		Congenital, Hereditary, and Neonatal Diseases and Abnormalities; Hemic and Lymphatic Diseases; Cardiovascular Diseases
ENST00000366820.10:C.54C>T	1	225941087	ENSG00000143768	ENST00000366820.10	LEFTY2	rs370508860	Left-right axis malformations	ClinVar		Congenital, Hereditary, and Neonatal Diseases and Abnormalities; Hemic and Lymphatic Diseases; Cardiovascular Diseases
ENST00000366777.4:C.993C>T	1	226982947	ENSG00000163050	ENST00000366777.4	COQ8A	rs41303129	Autosomal recessive cerebellar ataxia	ClinVar		Pathological Conditions, Signs and Symptoms; Nervous System Diseases
ENST00000366777.4:C.993C>T	1	226982947	ENSG00000163050	ENST00000366777.4	COQ8A	rs41303129	Coenzyme Q10 deficiency	ClinVar		Pathological Conditions, Signs and Symptoms; Nutritional and Metabolic Diseases; Musculoskeletal Diseases; Nervous System Diseases
ENST00000366777.4:C.1053C>T	1	226983007	ENSG00000163050	ENST00000366777.4	COQ8A	rs55958233	Autosomal recessive cerebellar ataxia	ClinVar		Pathological Conditions, Signs and Symptoms; Nervous System Diseases
ENST00000366777.4:C.1053C>T	1	226983007	ENSG00000163050	ENST00000366777.4	COQ8A	rs55958233	Coenzyme Q10 deficiency	ClinVar		Pathological Conditions, Signs and Symptoms; Nutritional and Metabolic Diseases; Musculoskeletal Diseases; Nervous System Diseases
ENST00000366777.4:C.1053C>T	1	226983007	ENSG00000163050	ENST00000366777.4	COQ8A	rs55958233	Gut microbiota	GWAS	32572223	Other diseases
ENST00000366777.4:C.1185C>T	1	226983783	ENSG00000163050	ENST00000366777.4	COQ8A	rs17849927	Coenzyme Q10 deficiency	ClinVar		Pathological Conditions, Signs and Symptoms; Nutritional and Metabolic Diseases; Musculoskeletal Diseases; Nervous System Diseases
ENST00000366777.4:C.1188C>T	1	226983786	ENSG00000163050	ENST00000366777.4	COQ8A	rs139133094	Autosomal recessive cerebellar ataxia	ClinVar		Pathological Conditions, Signs and Symptoms; Nervous System Diseases
ENST00000366777.4:C.1188C>T	1	226983786	ENSG00000163050	ENST00000366777.4	COQ8A	rs139133094	Coenzyme Q10 deficiency	ClinVar		Pathological Conditions, Signs and Symptoms; Nutritional and Metabolic Diseases; Musculoskeletal Diseases; Nervous System Diseases
ENST00000366777.4:C.1440C>T	1	226984589	ENSG00000163050	ENST00000366777.4	COQ8A	rs12593	Autosomal recessive cerebellar ataxia	ClinVar		Pathological Conditions, Signs and Symptoms; Nervous System Diseases
ENST00000366777.4:C.1440C>T	1	226984589	ENSG00000163050	ENST00000366777.4	COQ8A	rs12593	Coenzyme Q10 deficiency	ClinVar		Pathological Conditions, Signs and Symptoms; Nutritional and Metabolic Diseases; Musculoskeletal Diseases; Nervous System Diseases
ENST00000366777.4:C.1440C>T	1	226984589	ENSG00000163050	ENST00000366777.4	COQ8A	rs12593	Cataracts	GWAS	31816047	Eye Diseases
ENST00000366777.4:C.1440C>T	1	226984589	ENSG00000163050	ENST00000366777.4	ADCK3	rs12593	basophil count	Ensembl_Post_GWAS	PMID27863252	Other diseases
ENST00000366777.4:C.1440C>T	1	226984589	ENSG00000163050	ENST00000366777.4	ADCK3	rs12593	eosinophil count	Ensembl_Post_GWAS	PMID27863252	Other diseases
ENST00000366777.4:C.1440C>T	1	226984589	ENSG00000163050	ENST00000366777.4	ADCK3	rs12593	granulocyte count	Ensembl_Post_GWAS	PMID27863252	Other diseases
ENST00000366777.4:C.1440C>T	1	226984589	ENSG00000163050	ENST00000366777.4	ADCK3	rs12593	granulocyte percentage of myeloid white cells	Ensembl_Post_GWAS	PMID27863252	Other diseases
ENST00000366777.4:C.1440C>T	1	226984589	ENSG00000163050	ENST00000366777.4	ADCK3	rs12593	lymphocyte percentage of white cells	Ensembl_Post_GWAS	PMID27863252	Other diseases
ENST00000366777.4:C.1440C>T	1	226984589	ENSG00000163050	ENST00000366777.4	ADCK3	rs12593	myeloid white cell count	Ensembl_Post_GWAS	PMID27863252	Other diseases
ENST00000366777.4:C.1440C>T	1	226984589	ENSG00000163050	ENST00000366777.4	ADCK3	rs12593	neutrophil count	Ensembl_Post_GWAS	PMID27863252	Other diseases
ENST00000366777.4:C.1440C>T	1	226984589	ENSG00000163050	ENST00000366777.4	ADCK3	rs12593	neutrophil percentage of white cells	Ensembl_Post_GWAS	PMID27863252	Pathological Conditions, Signs and Symptoms; Hemic and Lymphatic Diseases
ENST00000366777.4:C.1644C>T	1	226985325	ENSG00000163050	ENST00000366777.4	COQ8A	rs141423403	Autosomal recessive cerebellar ataxia	ClinVar		Pathological Conditions, Signs and Symptoms; Nervous System Diseases
ENST00000366777.4:C.1644C>T	1	226985325	ENSG00000163050	ENST00000366777.4	COQ8A	rs141423403	Coenzyme Q10 deficiency	ClinVar		Pathological Conditions, Signs and Symptoms; Nutritional and Metabolic Diseases; Musculoskeletal Diseases; Nervous System Diseases
ENST00000366777.4:C.1710C>T	1	226986503	ENSG00000163050	ENST00000366777.4	COQ8A	rs139305619	breast carcinoma	Cosmic	22722193	Cancer; Organismal Injury and Abnormalities; Reproductive System Disease
ENST00000366777.4:C.1713C>T	1	226986506	ENSG00000163050	ENST00000366777.4	COQ8A	rs886046069	Autosomal recessive cerebellar ataxia	ClinVar		Pathological Conditions, Signs and Symptoms; Nervous System Diseases
ENST00000366777.4:C.1713C>T	1	226986506	ENSG00000163050	ENST00000366777.4	COQ8A	rs886046069	Coenzyme Q10 deficiency	ClinVar		Pathological Conditions, Signs and Symptoms; Nutritional and Metabolic Diseases; Musculoskeletal Diseases; Nervous System Diseases
ENST00000366777.4:C.1809C>T	1	226986602	ENSG00000163050	ENST00000366777.4	COQ8A	rs774789966	Autosomal recessive cerebellar ataxia	ClinVar		Pathological Conditions, Signs and Symptoms; Nervous System Diseases
ENST00000366777.4:C.1809C>T	1	226986602	ENSG00000163050	ENST00000366777.4	COQ8A	rs774789966	Coenzyme Q10 deficiency	ClinVar		Pathological Conditions, Signs and Symptoms; Nutritional and Metabolic Diseases; Musculoskeletal Diseases; Nervous System Diseases
ENST00000366777.4:C.1914C>T	1	226986707	ENSG00000163050	ENST00000366777.4	COQ8A	rs56043893	Autosomal recessive cerebellar ataxia	ClinVar		Pathological Conditions, Signs and Symptoms; Nervous System Diseases
ENST00000366777.4:C.1914C>T	1	226986707	ENSG00000163050	ENST00000366777.4	COQ8A	rs56043893	Coenzyme Q10 deficiency	ClinVar		Pathological Conditions, Signs and Symptoms; Nutritional and Metabolic Diseases; Musculoskeletal Diseases; Nervous System Diseases
ENST00000366714.3:C.108C>T	1	228157866	ENSG00000198835	ENST00000366714.3	GJC2	rs75469429	Spastic paraplegia 44	ClinVar		Congenital, Hereditary, and Neonatal Diseases and Abnormalities; Eye Diseases; Nervous System Diseases
ENST00000366714.3:C.594C>T	1	228158352	ENSG00000198835	ENST00000366714.3	GJC2	rs116557768	Spastic paraplegia	ClinVar		Pathological Conditions, Signs and Symptoms; Nervous System Diseases
ENST00000366698.7:C.114C>G	1	228414959	ENSG00000162931	ENST00000366698.7	TRIM17	rs503203	hip circumference	Ensembl_Post_GWAS	PMID25271088	Other diseases
ENST00000366698.7:C.114C>G	1	228414959	ENSG00000162931	ENST00000366698.7	TRIM17	rs503203	progressive supranuclear palsy	Ensembl_Post_GWAS	PMID30066433	Pathological Conditions, Signs and Symptoms; Eye Diseases; Nervous System Diseases
ENST00000366698.7:C.114C>G	1	228414959	ENSG00000162931	ENST00000366698.7	TRIM17	rs503203	psychosocial stress measurement	Ensembl_Post_GWAS	PMID25271088	Other diseases
ENST00000366684.7:C.1113C>T	1	229431520	ENSG00000143632	ENST00000366684.7	ACTA1	rs886046075	Congenital fiber-type disproportion	ClinVar		Musculoskeletal Diseases; Nervous System Diseases
ENST00000366684.7:C.1113C>T	1	229431520	ENSG00000143632	ENST00000366684.7	ACTA1	rs886046075	Familial restrictive cardiomyopathy	ClinVar		Cardiovascular Diseases
ENST00000366684.7:C.1113C>T	1	229431520	ENSG00000143632	ENST00000366684.7	ACTA1	rs886046075	Nemaline myopathy	ClinVar		Musculoskeletal Diseases; Nervous System Diseases
ENST00000366647.9:C.1890C>T	1	231275451	ENSG00000116906	ENST00000366647.9	GNPAT	rs201916449	Rhizomelic chondrodysplasia punctata	ClinVar		Congenital, Hereditary, and Neonatal Diseases and Abnormalities; Nutritional and Metabolic Diseases; Musculoskeletal Diseases
ENST00000366641.4:C.1272C>T	1	231366420	ENSG00000135766	ENST00000366641.4	EGLN1	rs61734647	Familial erythrocytosis	ClinVar		Congenital, Hereditary, and Neonatal Diseases and Abnormalities; Hemic and Lymphatic Diseases
ENST00000662216.1:C.411C>T	1	231366420	ENSG00000287856	ENST00000662216.1	AL445524.2	rs61734647	Familial erythrocytosis	ClinVar		Congenital, Hereditary, and Neonatal Diseases and Abnormalities; Hemic and Lymphatic Diseases
ENST00000366641.4:C.1113C>T	1	231370597	ENSG00000135766	ENST00000366641.4	EGLN1	rs143991968	Familial erythrocytosis	ClinVar		Congenital, Hereditary, and Neonatal Diseases and Abnormalities; Hemic and Lymphatic Diseases
ENST00000662216.1:C.252C>T	1	231370597	ENSG00000287856	ENST00000662216.1	AL445524.2	rs143991968	Familial erythrocytosis	ClinVar		Congenital, Hereditary, and Neonatal Diseases and Abnormalities; Hemic and Lymphatic Diseases
ENST00000542672.6:C.667C>T	1	236731284	ENSG00000077522	ENST00000542672.6	ACTN2	rs778336485	Cardiovascular phenotype	ClinVar		Cardiovascular Diseases
ENST00000542672.6:C.1287C>T	1	236744657	ENSG00000077522	ENST00000542672.6	ACTN2	rs764881077	Cardiomyopathy	ClinVar		Cardiovascular Diseases
ENST00000542672.6:C.1341C>T	1	236744711	ENSG00000077522	ENST00000542672.6	ACTN2	rs34785693	Cardiomyopathy	ClinVar		Cardiovascular Diseases
ENST00000542672.6:C.1341C>T	1	236744711	ENSG00000077522	ENST00000542672.6	ACTN2	rs34785693	Cardiovascular phenotype	ClinVar		Cardiovascular Diseases
ENST00000542672.6:C.1341C>T	1	236744711	ENSG00000077522	ENST00000542672.6	ACTN2	rs34785693	Dilated cardiomyopathy 1AA	ClinVar		Cardiovascular Diseases
ENST00000542672.6:C.1371C>T	1	236744741	ENSG00000077522	ENST00000542672.6	ACTN2	rs114008185	Cardiomyopathy	ClinVar		Cardiovascular Diseases
ENST00000542672.6:C.1371C>T	1	236744741	ENSG00000077522	ENST00000542672.6	ACTN2	rs114008185	Dilated Cardiomyopathy	ClinVar		Cardiovascular Diseases
ENST00000542672.6:C.1371C>T	1	236744741	ENSG00000077522	ENST00000542672.6	ACTN2	rs114008185	Dilated cardiomyopathy 1AA	ClinVar		Cardiovascular Diseases
ENST00000542672.6:C.1371C>T	1	236744741	ENSG00000077522	ENST00000542672.6	ACTN2	rs114008185	Hypertrophic cardiomyopathy	ClinVar		Cardiovascular Diseases
ENST00000542672.6:C.1383C>T	1	236744753	ENSG00000077522	ENST00000542672.6	ACTN2	rs34827377	Cardiovascular phenotype	ClinVar		Cardiovascular Diseases
ENST00000542672.6:C.1383C>T	1	236744753	ENSG00000077522	ENST00000542672.6	ACTN2	rs34827377	Dilated Cardiomyopathy	ClinVar		Cardiovascular Diseases
ENST00000542672.6:C.1383C>T	1	236744753	ENSG00000077522	ENST00000542672.6	ACTN2	rs34827377	Dilated cardiomyopathy 1AA	ClinVar		Cardiovascular Diseases
ENST00000542672.6:C.1383C>T	1	236744753	ENSG00000077522	ENST00000542672.6	ACTN2	rs34827377	Hypertrophic cardiomyopathy	ClinVar		Cardiovascular Diseases
ENST00000542672.6:C.1983C>T	1	236755027	ENSG00000077522	ENST00000542672.6	ACTN2	rs372137571	Cardiomyopathy	ClinVar		Cardiovascular Diseases
ENST00000542672.6:C.1983C>T	1	236755027	ENSG00000077522	ENST00000542672.6	ACTN2	rs372137571	Cardiovascular phenotype	ClinVar		Cardiovascular Diseases
ENST00000542672.6:C.2076C>T	1	236755120	ENSG00000077522	ENST00000542672.6	ACTN2	rs144122893	Cardiovascular phenotype	ClinVar		Cardiovascular Diseases
ENST00000542672.6:C.2445C>T	1	236761092	ENSG00000077522	ENST00000542672.6	ACTN2	rs397516575	Cardiomyopathy	ClinVar		Cardiovascular Diseases
ENST00000542672.6:C.2445C>T	1	236761092	ENSG00000077522	ENST00000542672.6	ACTN2	rs397516575	Cardiovascular phenotype	ClinVar		Cardiovascular Diseases
ENST00000542672.6:C.2658C>T	1	236762592	ENSG00000077522	ENST00000542672.6	ACTN2	rs143297401	Cardiovascular phenotype	ClinVar		Cardiovascular Diseases
ENST00000366577.10:C.2994C>T	1	236889323	ENSG00000116984	ENST00000366577.10	MTR	rs778549407	Disorders of Intracellular Cobalamin Metabolism	ClinVar		Other diseases
ENST00000366577.10:C.3477C>T	1	236895429	ENSG00000116984	ENST00000366577.10	MTR	rs117061132	Disorders of Intracellular Cobalamin Metabolism	ClinVar		Other diseases
ENST00000366577.10:C.3576C>G	1	236895528	ENSG00000116984	ENST00000366577.10	MTR	rs1131449	Disorders of Intracellular Cobalamin Metabolism	ClinVar		Other diseases
ENST00000366560.4:C.1461C>T	1	241497900	ENSG00000091483	ENST00000366560.4	FH	rs377091029	Hereditary cancer-predisposing syndrome	ClinVar		Other diseases
ENST00000366560.4:C.1302C>T	1	241500525	ENSG00000091483	ENST00000366560.4	FH	rs2070080	Fumarase deficiency	ClinVar		Nervous System Diseases; Congenital, Hereditary, and Neonatal Diseases and Abnormalities; Nutritional and Metabolic Diseases; Pathological Conditions, Signs and Symptoms; Behavior and Behavior Mechanisms
ENST00000366560.4:C.1302C>T	1	241500525	ENSG00000091483	ENST00000366560.4	FH	rs2070080	Hereditary cancer-predisposing syndrome	ClinVar		Other diseases
ENST00000366560.4:C.1302C>T	1	241500525	ENSG00000091483	ENST00000366560.4	FH	rs2070080	Multiple Cutaneous and Uterine Leiomyomas	ClinVar		Other diseases
ENST00000366560.4:C.1302C>T	1	241500525	ENSG00000091483	ENST00000366560.4	FH	rs2070080	Multiple cutaneous leiomyomas	ClinVar		Congenital, Hereditary, and Neonatal Diseases and Abnormalities; Neoplasms; Female Urogenital Diseases and Pregnancy Complications; Skin and Connective Tissue Diseases
ENST00000366560.4:C.957C>T	1	241504193	ENSG00000091483	ENST00000366560.4	FH	rs146751488	Hereditary cancer-predisposing syndrome	ClinVar		Other diseases
ENST00000366560.4:C.534C>T	1	241511988	ENSG00000091483	ENST00000366560.4	FH	rs375878939	Hereditary cancer-predisposing syndrome	ClinVar		Other diseases
ENST00000366560.4:C.414C>G	1	241512108	ENSG00000091483	ENST00000366560.4	FH	rs540968725	Hereditary cancer-predisposing syndrome	ClinVar		Other diseases
ENST00000366560.4:C.309C>T	1	241513672	ENSG00000091483	ENST00000366560.4	FH	rs10926501	Fumarase deficiency	ClinVar		Nervous System Diseases; Congenital, Hereditary, and Neonatal Diseases and Abnormalities; Nutritional and Metabolic Diseases; Pathological Conditions, Signs and Symptoms; Behavior and Behavior Mechanisms
ENST00000366560.4:C.309C>T	1	241513672	ENSG00000091483	ENST00000366560.4	FH	rs10926501	Hereditary cancer-predisposing syndrome	ClinVar		Other diseases
ENST00000366560.4:C.309C>T	1	241513672	ENSG00000091483	ENST00000366560.4	FH	rs10926501	Multiple Cutaneous and Uterine Leiomyomas	ClinVar		Other diseases
ENST00000366560.4:C.309C>T	1	241513672	ENSG00000091483	ENST00000366560.4	FH	rs10926501	Multiple cutaneous leiomyomas	ClinVar		Congenital, Hereditary, and Neonatal Diseases and Abnormalities; Neoplasms; Female Urogenital Diseases and Pregnancy Complications; Skin and Connective Tissue Diseases
ENST00000366560.4:C.207C>T	1	241517242	ENSG00000091483	ENST00000366560.4	FH	rs370392829	Hereditary cancer-predisposing syndrome	ClinVar		Other diseases
ENST00000366560.4:C.40C>T	1	241519683	ENSG00000091483	ENST00000366560.4	FH	rs981562354	Fumarase deficiency	ClinVar		Nervous System Diseases; Congenital, Hereditary, and Neonatal Diseases and Abnormalities; Nutritional and Metabolic Diseases; Pathological Conditions, Signs and Symptoms; Behavior and Behavior Mechanisms
ENST00000673466.1:C.840C>T	1	243563828	ENSG00000117020	ENST00000673466.1	AKT3	rs201347487	Megalencephaly-polymicrogyria-polydactyly-hydrocephalus syndrome 2	ClinVar		Congenital, Hereditary, and Neonatal Diseases and Abnormalities; Musculoskeletal Diseases; Nervous System Diseases
ENST00000640218.2:C.2247C>T	1	244855529	ENSG00000153187	ENST00000640218.2	HNRNPU	rs1060504188	Epileptic encephalopathy	ClinVar		Nervous System Diseases
ENST00000640218.2:C.2169C>T	1	244855607	ENSG00000153187	ENST00000640218.2	HNRNPU	rs11537737	History of neurodevelopmental disorder	ClinVar		Other diseases
ENST00000640218.2:C.1434C>T	1	244858071	ENSG00000153187	ENST00000640218.2	HNRNPU	rs778730784	Epileptic encephalopathy	ClinVar		Nervous System Diseases
ENST00000640218.2:C.336C>G	1	244863972	ENSG00000153187	ENST00000640218.2	HNRNPU	rs753169165	Epileptic encephalopathy	ClinVar		Nervous System Diseases
ENST00000640218.2:C.336C>G	1	244863972	ENSG00000153187	ENST00000640218.2	HNRNPU	rs753169165	heterogeneous nuclear ribonucleoprotein G	ClinVar		Other diseases
ENST00000391828.8:C.171C>T	1	247418971	ENSG00000162711	ENST00000391828.8	NLRP3	rs773673175	Inborn genetic diseases	ClinVar		Other diseases
ENST00000391828.8:C.207C>T	1	247419007	ENSG00000162711	ENST00000391828.8	NLRP3	rs200082602	Chronic infantile neurological	ClinVar		Congenital, Hereditary, and Neonatal Diseases and Abnormalities; Skin and Connective Tissue Diseases
ENST00000391828.8:C.207C>T	1	247419007	ENSG00000162711	ENST00000391828.8	NLRP3	rs200082602	Familial amyloid nephropathy with urticaria AND deafness	ClinVar		Congenital, Hereditary, and Neonatal Diseases and Abnormalities; Skin and Connective Tissue Diseases
ENST00000391828.8:C.207C>T	1	247419007	ENSG00000162711	ENST00000391828.8	NLRP3	rs200082602	Familial cold autoinflammatory syndrome	ClinVar		Congenital, Hereditary, and Neonatal Diseases and Abnormalities; Skin and Connective Tissue Diseases
ENST00000391828.8:C.219C>T	1	247419019	ENSG00000162711	ENST00000391828.8	NLRP3	rs201980166	Cryopyrin associated periodic syndrome	ClinVar		Congenital, Hereditary, and Neonatal Diseases and Abnormalities; Skin and Connective Tissue Diseases
ENST00000391828.8:C.423C>T	1	247423872	ENSG00000162711	ENST00000391828.8	NLRP3	rs56710146	Chronic infantile neurological	ClinVar		Congenital, Hereditary, and Neonatal Diseases and Abnormalities; Skin and Connective Tissue Diseases
ENST00000391828.8:C.423C>T	1	247423872	ENSG00000162711	ENST00000391828.8	NLRP3	rs56710146	Familial amyloid nephropathy with urticaria AND deafness	ClinVar		Congenital, Hereditary, and Neonatal Diseases and Abnormalities; Skin and Connective Tissue Diseases
ENST00000391828.8:C.423C>T	1	247423872	ENSG00000162711	ENST00000391828.8	NLRP3	rs56710146	Familial cold autoinflammatory syndrome	ClinVar		Congenital, Hereditary, and Neonatal Diseases and Abnormalities; Skin and Connective Tissue Diseases
ENST00000391828.8:C.930C>T	1	247424379	ENSG00000162711	ENST00000391828.8	NLRP3	rs143840033	Familial cold urticaria	ClinVar		Congenital, Hereditary, and Neonatal Diseases and Abnormalities; Skin and Connective Tissue Diseases
ENST00000391828.8:C.969C>T	1	247424418	ENSG00000162711	ENST00000391828.8	NLRP3	rs201255971	lung carcinoma	Cosmic	22941188	Cancer; Organismal Injury and Abnormalities; Respiratory Disease
ENST00000391828.8:C.973C>A	1	247424422	ENSG00000162711	ENST00000391828.8	NLRP3	rs180177500	Familial cold urticaria	ClinVar		Congenital, Hereditary, and Neonatal Diseases and Abnormalities; Skin and Connective Tissue Diseases
ENST00000391828.8:C.1020C>T	1	247424469	ENSG00000162711	ENST00000391828.8	NLRP3	rs41311573	Familial cold autoinflammatory syndrome	ClinVar		Congenital, Hereditary, and Neonatal Diseases and Abnormalities; Skin and Connective Tissue Diseases
ENST00000391828.8:C.1245C>T	1	247424694	ENSG00000162711	ENST00000391828.8	NLRP3	rs139852370	Chronic infantile neurological	ClinVar		Congenital, Hereditary, and Neonatal Diseases and Abnormalities; Skin and Connective Tissue Diseases
ENST00000391828.8:C.1245C>T	1	247424694	ENSG00000162711	ENST00000391828.8	NLRP3	rs139852370	Familial amyloid nephropathy with urticaria AND deafness	ClinVar		Congenital, Hereditary, and Neonatal Diseases and Abnormalities; Skin and Connective Tissue Diseases
ENST00000391828.8:C.1245C>T	1	247424694	ENSG00000162711	ENST00000391828.8	NLRP3	rs139852370	Familial cold autoinflammatory syndrome	ClinVar		Congenital, Hereditary, and Neonatal Diseases and Abnormalities; Skin and Connective Tissue Diseases
ENST00000391828.8:C.1383C>T	1	247424832	ENSG00000162711	ENST00000391828.8	NLRP3	rs104895398	Familial cold urticaria	ClinVar		Congenital, Hereditary, and Neonatal Diseases and Abnormalities; Skin and Connective Tissue Diseases
ENST00000391828.8:C.1584C>G	1	247425033	ENSG00000162711	ENST00000391828.8	NLRP3	rs201644343	Chronic infantile neurological	ClinVar		Congenital, Hereditary, and Neonatal Diseases and Abnormalities; Skin and Connective Tissue Diseases
ENST00000391828.8:C.1584C>G	1	247425033	ENSG00000162711	ENST00000391828.8	NLRP3	rs201644343	Familial amyloid nephropathy with urticaria AND deafness	ClinVar		Congenital, Hereditary, and Neonatal Diseases and Abnormalities; Skin and Connective Tissue Diseases
ENST00000391828.8:C.1584C>G	1	247425033	ENSG00000162711	ENST00000391828.8	NLRP3	rs201644343	Familial cold autoinflammatory syndrome	ClinVar		Congenital, Hereditary, and Neonatal Diseases and Abnormalities; Skin and Connective Tissue Diseases
ENST00000391828.8:C.1629C>G	1	247425078	ENSG00000162711	ENST00000391828.8	NLRP3	rs376057645	breast carcinoma	Cosmic	20668451	Cancer; Organismal Injury and Abnormalities; Reproductive System Disease
ENST00000391828.8:C.1920C>T	1	247425369	ENSG00000162711	ENST00000391828.8	NLRP3	rs34698071	Chronic infantile neurological	ClinVar		Congenital, Hereditary, and Neonatal Diseases and Abnormalities; Skin and Connective Tissue Diseases
ENST00000391828.8:C.1920C>T	1	247425369	ENSG00000162711	ENST00000391828.8	NLRP3	rs34698071	Familial amyloid nephropathy with urticaria AND deafness	ClinVar		Congenital, Hereditary, and Neonatal Diseases and Abnormalities; Skin and Connective Tissue Diseases
ENST00000391828.8:C.1920C>T	1	247425369	ENSG00000162711	ENST00000391828.8	NLRP3	rs34698071	Familial cold autoinflammatory syndrome	ClinVar		Congenital, Hereditary, and Neonatal Diseases and Abnormalities; Skin and Connective Tissue Diseases
ENST00000391828.8:C.2095C>T	1	247425544	ENSG00000162711	ENST00000391828.8	NLRP3	rs536840312	Cryopyrin associated periodic syndrome	ClinVar		Congenital, Hereditary, and Neonatal Diseases and Abnormalities; Skin and Connective Tissue Diseases
ENST00000329066.9:C.1618C>A	2	1487841	ENSG00000115705	ENST00000329066.9	TPO	rs121908082	Deficiency of iodide peroxidase	ClinVar		Congenital, Hereditary, and Neonatal Diseases and Abnormalities; Musculoskeletal Diseases; Endocrine System Diseases
ENST00000329066.9:C.1998C>T	2	1494031	ENSG00000115705	ENST00000329066.9	TPO	rs1126797	Congenital hypothyroidism	ClinVar		Congenital, Hereditary, and Neonatal Diseases and Abnormalities; Musculoskeletal Diseases; Endocrine System Diseases
ENST00000329066.9:C.1998C>T	2	1494031	ENSG00000115705	ENST00000329066.9	TPO	rs1126797	Deficiency of iodide peroxidase	ClinVar		Congenital, Hereditary, and Neonatal Diseases and Abnormalities; Musculoskeletal Diseases; Endocrine System Diseases
ENST00000252804.9:C.2661C>T	2	1649119	ENSG00000130508	ENST00000252804.9	PXDN	rs1863134	Anterior segment dysgenesis 7	ClinVar		Eye Diseases
ENST00000310823.8:C.354C>T	2	9536705	ENSG00000151694	ENST00000310823.8	ADAM17	rs373534760	Inflammatory skin and bowel disease	ClinVar		Other diseases
ENST00000449576.6:C.219C>T	2	11765613	ENSG00000134324	ENST00000449576.6	LPIN1	rs137942440	Acute Recurrent Myoglobinuria	ClinVar		Other diseases
ENST00000449576.6:C.1440C>T	2	11783857	ENSG00000134324	ENST00000449576.6	LPIN1	rs200898383	Acute Recurrent Myoglobinuria	ClinVar		Other diseases
ENST00000317402.11:C.2039C>T	2	17781251	ENSG00000178295	ENST00000317402.11	GEN1	rs300169	response to drug	Ensembl_Post_GWAS	PMID22952603	Other diseases
ENST00000345530.8:C.2253C>T	2	19937790	ENSG00000118965	ENST00000345530.8	WDR35	rs535522970	Cranioectodermal dysplasia	ClinVar		Musculoskeletal Diseases; Congenital, Hereditary, and Neonatal Diseases and Abnormalities; Endocrine System Diseases
ENST00000345530.8:C.2253C>T	2	19937790	ENSG00000118965	ENST00000345530.8	WDR35	rs535522970	Short Rib Polydactyly Syndrome	ClinVar		Congenital, Hereditary, and Neonatal Diseases and Abnormalities; Musculoskeletal Diseases
ENST00000345530.8:C.798C>T	2	19973647	ENSG00000118965	ENST00000345530.8	WDR35	rs141118263	Cranioectodermal dysplasia	ClinVar		Musculoskeletal Diseases; Congenital, Hereditary, and Neonatal Diseases and Abnormalities; Endocrine System Diseases
ENST00000345530.8:C.798C>T	2	19973647	ENSG00000118965	ENST00000345530.8	WDR35	rs141118263	Short Rib Polydactyly Syndrome	ClinVar		Congenital, Hereditary, and Neonatal Diseases and Abnormalities; Musculoskeletal Diseases
ENST00000345530.8:C.765C>T	2	19973680	ENSG00000118965	ENST00000345530.8	WDR35	rs117255034	Cranioectodermal dysplasia	ClinVar		Musculoskeletal Diseases; Congenital, Hereditary, and Neonatal Diseases and Abnormalities; Endocrine System Diseases
ENST00000345530.8:C.765C>T	2	19973680	ENSG00000118965	ENST00000345530.8	WDR35	rs117255034	Short Rib Polydactyly Syndrome	ClinVar		Congenital, Hereditary, and Neonatal Diseases and Abnormalities; Musculoskeletal Diseases
ENST00000345530.8:C.549C>T	2	19975551	ENSG00000118965	ENST00000345530.8	WDR35	rs34169020	Cranioectodermal dysplasia	ClinVar		Musculoskeletal Diseases; Congenital, Hereditary, and Neonatal Diseases and Abnormalities; Endocrine System Diseases
ENST00000345530.8:C.549C>T	2	19975551	ENSG00000118965	ENST00000345530.8	WDR35	rs34169020	Cranioectodermal dysplasia 2	ClinVar		Musculoskeletal Diseases; Congenital, Hereditary, and Neonatal Diseases and Abnormalities; Endocrine System Diseases
ENST00000345530.8:C.549C>T	2	19975551	ENSG00000118965	ENST00000345530.8	WDR35	rs34169020	Short Rib Polydactyly Syndrome	ClinVar		Congenital, Hereditary, and Neonatal Diseases and Abnormalities; Musculoskeletal Diseases
ENST00000345530.8:C.549C>T	2	19975551	ENSG00000118965	ENST00000345530.8	WDR35	rs34169020	Short rib polydactyly syndrome 5	ClinVar		Congenital, Hereditary, and Neonatal Diseases and Abnormalities; Musculoskeletal Diseases
ENST00000407540.8:C.447C>T	2	20006087	ENSG00000132031	ENST00000407540.8	MATN3	rs28598872	Multiple Epiphyseal Dysplasia	ClinVar		Musculoskeletal Diseases; Congenital, Hereditary, and Neonatal Diseases and Abnormalities
ENST00000407540.8:C.330C>T	2	20006204	ENSG00000132031	ENST00000407540.8	MATN3	rs201755444	Multiple Epiphyseal Dysplasia	ClinVar		Musculoskeletal Diseases; Congenital, Hereditary, and Neonatal Diseases and Abnormalities
ENST00000233242.5:C.13589C>T	2	21001833	ENSG00000084674	ENST00000233242.5	APOB	rs778140846	Familial hypercholesterolemia 1	ClinVar		Congenital, Hereditary, and Neonatal Diseases and Abnormalities; Nutritional and Metabolic Diseases
ENST00000233242.5:C.13451C>T	2	21001971	ENSG00000084674	ENST00000233242.5	APOB	rs12713450	Familial hypercholesterolemia 1	ClinVar		Congenital, Hereditary, and Neonatal Diseases and Abnormalities; Nutritional and Metabolic Diseases
ENST00000233242.5:C.13451C>T	2	21001971	ENSG00000084674	ENST00000233242.5	APOB	rs12713450	Familial hypercholesterolemia 2	ClinVar		Congenital, Hereditary, and Neonatal Diseases and Abnormalities; Nutritional and Metabolic Diseases
ENST00000233242.5:C.13451C>T	2	21001971	ENSG00000084674	ENST00000233242.5	APOB	rs12713450	Familial hypobetalipoproteinemia	ClinVar		Nutritional and Metabolic Diseases
ENST00000233242.5:C.13451C>T	2	21001971	ENSG00000084674	ENST00000233242.5	APOB	rs12713450	Hypobetalipoproteinemia	ClinVar		Congenital, Hereditary, and Neonatal Diseases and Abnormalities; Nutritional and Metabolic Diseases
ENST00000233242.5:C.12364C>A	2	21003058	ENSG00000084674	ENST00000233242.5	APOB	rs767603929	Familial hypercholesterolemia	ClinVar		Congenital, Hereditary, and Neonatal Diseases and Abnormalities; Nutritional and Metabolic Diseases
ENST00000233242.5:C.12219C>T	2	21003203	ENSG00000084674	ENST00000233242.5	APOB	rs886055573	Familial hypercholesterolemia 1	ClinVar		Congenital, Hereditary, and Neonatal Diseases and Abnormalities; Nutritional and Metabolic Diseases
ENST00000233242.5:C.12219C>T	2	21003203	ENSG00000084674	ENST00000233242.5	APOB	rs886055573	Familial hypobetalipoproteinemia	ClinVar		Nutritional and Metabolic Diseases
ENST00000233242.5:C.12024C>T	2	21004332	ENSG00000084674	ENST00000233242.5	APOB	rs145269223	Familial hypercholesterolemia 1	ClinVar		Congenital, Hereditary, and Neonatal Diseases and Abnormalities; Nutritional and Metabolic Diseases
ENST00000233242.5:C.12024C>T	2	21004332	ENSG00000084674	ENST00000233242.5	APOB	rs145269223	Familial hypobetalipoproteinemia	ClinVar		Nutritional and Metabolic Diseases
ENST00000233242.5:C.11854C>T	2	21004610	ENSG00000084674	ENST00000233242.5	APOB	rs535121944	Familial hypercholesterolemia	ClinVar		Congenital, Hereditary, and Neonatal Diseases and Abnormalities; Nutritional and Metabolic Diseases
ENST00000233242.5:C.11819C>A	2	21004645	ENSG00000084674	ENST00000233242.5	APOB	rs72654416	Familial hypercholesterolemia	ClinVar		Congenital, Hereditary, and Neonatal Diseases and Abnormalities; Nutritional and Metabolic Diseases
ENST00000233242.5:C.11808C>T	2	21004656	ENSG00000084674	ENST00000233242.5	APOB	rs12720852	Familial hypercholesterolemia	ClinVar		Congenital, Hereditary, and Neonatal Diseases and Abnormalities; Nutritional and Metabolic Diseases
ENST00000233242.5:C.11808C>T	2	21004656	ENSG00000084674	ENST00000233242.5	APOB	rs12720852	Familial hypercholesterolemia 1	ClinVar		Congenital, Hereditary, and Neonatal Diseases and Abnormalities; Nutritional and Metabolic Diseases
ENST00000233242.5:C.11808C>T	2	21004656	ENSG00000084674	ENST00000233242.5	APOB	rs12720852	Familial hypobetalipoproteinemia	ClinVar		Nutritional and Metabolic Diseases
ENST00000233242.5:C.11541C>T	2	21005327	ENSG00000084674	ENST00000233242.5	APOB	rs886055577	Familial hypercholesterolemia 1	ClinVar		Congenital, Hereditary, and Neonatal Diseases and Abnormalities; Nutritional and Metabolic Diseases
ENST00000233242.5:C.11442C>T	2	21005426	ENSG00000084674	ENST00000233242.5	APOB	rs72654408	Familial hypercholesterolemia	ClinVar		Congenital, Hereditary, and Neonatal Diseases and Abnormalities; Nutritional and Metabolic Diseases
ENST00000233242.5:C.11354C>T	2	21005514	ENSG00000084674	ENST00000233242.5	APOB	rs143710616	Familial hypercholesterolemia	ClinVar		Congenital, Hereditary, and Neonatal Diseases and Abnormalities; Nutritional and Metabolic Diseases
ENST00000233242.5:C.11354C>T	2	21005514	ENSG00000084674	ENST00000233242.5	APOB	rs143710616	Familial hypercholesterolemia 1	ClinVar		Congenital, Hereditary, and Neonatal Diseases and Abnormalities; Nutritional and Metabolic Diseases
ENST00000233242.5:C.11354C>T	2	21005514	ENSG00000084674	ENST00000233242.5	APOB	rs143710616	Familial hypobetalipoproteinemia	ClinVar		Nutritional and Metabolic Diseases
ENST00000233242.5:C.10944C>A	2	21005924	ENSG00000084674	ENST00000233242.5	APOB	rs370314131	Familial hypercholesterolemia	ClinVar		Congenital, Hereditary, and Neonatal Diseases and Abnormalities; Nutritional and Metabolic Diseases
ENST00000233242.5:C.10737C>A	2	21006131	ENSG00000084674	ENST00000233242.5	APOB	rs12713554	Familial hypercholesterolemia 1	ClinVar		Congenital, Hereditary, and Neonatal Diseases and Abnormalities; Nutritional and Metabolic Diseases
ENST00000233242.5:C.10737C>A	2	21006131	ENSG00000084674	ENST00000233242.5	APOB	rs12713554	Familial hypobetalipoproteinemia	ClinVar		Nutritional and Metabolic Diseases
ENST00000233242.5:C.10700C>T	2	21006168	ENSG00000084674	ENST00000233242.5	APOB	rs368278927	Familial hypercholesterolemia	ClinVar		Congenital, Hereditary, and Neonatal Diseases and Abnormalities; Nutritional and Metabolic Diseases
ENST00000233242.5:C.10700C>T	2	21006168	ENSG00000084674	ENST00000233242.5	APOB	rs368278927	Familial hypercholesterolemia 1	ClinVar		Congenital, Hereditary, and Neonatal Diseases and Abnormalities; Nutritional and Metabolic Diseases
ENST00000233242.5:C.10602C>A	2	21006266	ENSG00000084674	ENST00000233242.5	APOB	rs886039828	Familial hypercholesterolemia 1	ClinVar		Congenital, Hereditary, and Neonatal Diseases and Abnormalities; Nutritional and Metabolic Diseases
ENST00000233242.5:C.10575C>T	2	21006293	ENSG00000084674	ENST00000233242.5	APOB	rs142573551	Familial hypercholesterolemia	ClinVar		Congenital, Hereditary, and Neonatal Diseases and Abnormalities; Nutritional and Metabolic Diseases
ENST00000233242.5:C.10575C>T	2	21006293	ENSG00000084674	ENST00000233242.5	APOB	rs142573551	Familial hypercholesterolemia 1	ClinVar		Congenital, Hereditary, and Neonatal Diseases and Abnormalities; Nutritional and Metabolic Diseases
ENST00000233242.5:C.10575C>T	2	21006293	ENSG00000084674	ENST00000233242.5	APOB	rs142573551	Familial hypobetalipoproteinemia	ClinVar		Nutritional and Metabolic Diseases
ENST00000233242.5:C.10554C>T	2	21006314	ENSG00000084674	ENST00000233242.5	APOB	rs768676568	Familial hypercholesterolemia	ClinVar		Congenital, Hereditary, and Neonatal Diseases and Abnormalities; Nutritional and Metabolic Diseases
ENST00000233242.5:C.9855C>T	2	21007013	ENSG00000084674	ENST00000233242.5	APOB	rs72654403	Familial hypercholesterolemia 1	ClinVar		Congenital, Hereditary, and Neonatal Diseases and Abnormalities; Nutritional and Metabolic Diseases
ENST00000233242.5:C.9720C>T	2	21007148	ENSG00000084674	ENST00000233242.5	APOB	rs111899014	Familial hypercholesterolemia	ClinVar		Congenital, Hereditary, and Neonatal Diseases and Abnormalities; Nutritional and Metabolic Diseases
ENST00000233242.5:C.8889C>A	2	21007979	ENSG00000084674	ENST00000233242.5	APOB	rs72653097	Familial hypercholesterolemia	ClinVar		Congenital, Hereditary, and Neonatal Diseases and Abnormalities; Nutritional and Metabolic Diseases
ENST00000233242.5:C.8889C>A	2	21007979	ENSG00000084674	ENST00000233242.5	APOB	rs72653097	Familial hypercholesterolemia 1	ClinVar		Congenital, Hereditary, and Neonatal Diseases and Abnormalities; Nutritional and Metabolic Diseases
ENST00000233242.5:C.8889C>A	2	21007979	ENSG00000084674	ENST00000233242.5	APOB	rs72653097	Familial hypobetalipoproteinemia	ClinVar		Nutritional and Metabolic Diseases
ENST00000233242.5:C.8309C>T	2	21008559	ENSG00000084674	ENST00000233242.5	APOB	rs138391809	Familial hypercholesterolemia	ClinVar		Congenital, Hereditary, and Neonatal Diseases and Abnormalities; Nutritional and Metabolic Diseases
ENST00000233242.5:C.7545C>T	2	21009323	ENSG00000084674	ENST00000233242.5	APOB	rs693	Familial hypercholesterolemia	ClinVar		Congenital, Hereditary, and Neonatal Diseases and Abnormalities; Nutritional and Metabolic Diseases
ENST00000233242.5:C.7545C>T	2	21009323	ENSG00000084674	ENST00000233242.5	APOB	rs693	Familial hypercholesterolemia 1	ClinVar		Congenital, Hereditary, and Neonatal Diseases and Abnormalities; Nutritional and Metabolic Diseases
ENST00000233242.5:C.7545C>T	2	21009323	ENSG00000084674	ENST00000233242.5	APOB	rs693	Familial hypobetalipoproteinemia	ClinVar		Nutritional and Metabolic Diseases
ENST00000233242.5:C.7545C>T	2	21009323	ENSG00000084674	ENST00000233242.5	APOB	rs693	Warfarin response	ClinVar		Other diseases
ENST00000233242.5:C.7545C>T	2	21009323	ENSG00000084674	ENST00000233242.5	APOB	rs693	Cholesterol	GWAS	19060911	Digestive System Diseases
ENST00000233242.5:C.7545C>T	2	21009323	ENSG00000084674	ENST00000233242.5	APOB	rs693	High density lipoprotein cholesterol levels	GWAS	31217584	Other diseases
ENST00000233242.5:C.7545C>T	2	21009323	ENSG00000084674	ENST00000233242.5	APOB	rs693	LDL cholesterol	GWAS	17463246	Nutritional and Metabolic Diseases
ENST00000233242.5:C.7545C>T	2	21009323	ENSG00000084674	ENST00000233242.5	APOB	rs693	LDL cholesterol levels	GWAS	17463246	Nutritional and Metabolic Diseases
ENST00000233242.5:C.7545C>T	2	21009323	ENSG00000084674	ENST00000233242.5	APOB	rs693	Low density lipoprotein cholesterol levels	GWAS	17463246	Congenital, Hereditary, and Neonatal Diseases and Abnormalities; Nutritional and Metabolic Diseases
ENST00000233242.5:C.7545C>T	2	21009323	ENSG00000084674	ENST00000233242.5	APOB	rs693	Total cholesterol levels	GWAS	19060911	Other diseases
ENST00000233242.5:C.7545C>T	2	21009323	ENSG00000084674	ENST00000233242.5	APOB	rs693	Triglyceride levels	GWAS	19060911	Other diseases
ENST00000233242.5:C.7545C>T	2	21009323	ENSG00000084674	ENST00000233242.5	APOB	rs693	Triglycerides	GWAS	19060911	Other diseases
ENST00000233242.5:C.7545C>T	2	21009323	ENSG00000084674	ENST00000233242.5	APOB	rs693	blood metabolite measurement	Ensembl_Post_GWAS	PMID27005778	Other diseases
ENST00000233242.5:C.7545C>T	2	21009323	ENSG00000084674	ENST00000233242.5	APOB	rs693	lipoprotein measurement	Ensembl_Post_GWAS	PMID27005778	Congenital, Hereditary, and Neonatal Diseases and Abnormalities; Nutritional and Metabolic Diseases
ENST00000233242.5:C.7545C>T	2	21009323	ENSG00000084674	ENST00000233242.5	APOB	rs693	low density lipoprotein cholesterol measurement	Ensembl_Post_GWAS	PMID21943158	Congenital, Hereditary, and Neonatal Diseases and Abnormalities; Nutritional and Metabolic Diseases
ENST00000233242.5:C.7545C>T	2	21009323	ENSG00000084674	ENST00000233242.5	APOB	rs693	total cholesterol measurement	Ensembl_Post_GWAS	PMID26780889	Other diseases
ENST00000233242.5:C.7545C>T	2	21009323	ENSG00000084674	ENST00000233242.5	APOB	rs693	triglyceride measurement	Ensembl_Post_GWAS	PMID17463246	Other diseases
ENST00000233242.5:C.7134C>T	2	21009734	ENSG00000084674	ENST00000233242.5	APOB	rs793888518	Familial hypercholesterolemia 1	ClinVar		Congenital, Hereditary, and Neonatal Diseases and Abnormalities; Nutritional and Metabolic Diseases
ENST00000233242.5:C.7011C>T	2	21009857	ENSG00000084674	ENST00000233242.5	APOB	rs776099551	Familial hypercholesterolemia 2	ClinVar		Congenital, Hereditary, and Neonatal Diseases and Abnormalities; Nutritional and Metabolic Diseases
ENST00000233242.5:C.7011C>T	2	21009857	ENSG00000084674	ENST00000233242.5	APOB	rs776099551	Hypobetalipoproteinemia	ClinVar		Congenital, Hereditary, and Neonatal Diseases and Abnormalities; Nutritional and Metabolic Diseases
ENST00000233242.5:C.6645C>G	2	21010223	ENSG00000084674	ENST00000233242.5	APOB	rs751879183	Familial hypercholesterolemia	ClinVar		Congenital, Hereditary, and Neonatal Diseases and Abnormalities; Nutritional and Metabolic Diseases
ENST00000233242.5:C.6261C>A	2	21010607	ENSG00000084674	ENST00000233242.5	APOB	rs61744855	Familial hypercholesterolemia	ClinVar		Congenital, Hereditary, and Neonatal Diseases and Abnormalities; Nutritional and Metabolic Diseases
ENST00000233242.5:C.6261C>A	2	21010607	ENSG00000084674	ENST00000233242.5	APOB	rs61744855	Familial hypercholesterolemia 1	ClinVar		Congenital, Hereditary, and Neonatal Diseases and Abnormalities; Nutritional and Metabolic Diseases
ENST00000233242.5:C.6018C>T	2	21010850	ENSG00000084674	ENST00000233242.5	APOB	rs368422207	Familial hypercholesterolemia 1	ClinVar		Congenital, Hereditary, and Neonatal Diseases and Abnormalities; Nutritional and Metabolic Diseases
ENST00000233242.5:C.6018C>T	2	21010850	ENSG00000084674	ENST00000233242.5	APOB	rs368422207	Familial hypercholesterolemia 2	ClinVar		Congenital, Hereditary, and Neonatal Diseases and Abnormalities; Nutritional and Metabolic Diseases
ENST00000233242.5:C.6018C>T	2	21010850	ENSG00000084674	ENST00000233242.5	APOB	rs368422207	Hypobetalipoproteinemia	ClinVar		Congenital, Hereditary, and Neonatal Diseases and Abnormalities; Nutritional and Metabolic Diseases
ENST00000233242.5:C.4698C>T	2	21012170	ENSG00000084674	ENST00000233242.5	APOB	rs374547474	Familial hypercholesterolemia	ClinVar		Congenital, Hereditary, and Neonatal Diseases and Abnormalities; Nutritional and Metabolic Diseases
ENST00000233242.5:C.4365C>T	2	21012503	ENSG00000084674	ENST00000233242.5	APOB	rs12720847	Familial hypercholesterolemia	ClinVar		Congenital, Hereditary, and Neonatal Diseases and Abnormalities; Nutritional and Metabolic Diseases
ENST00000233242.5:C.4365C>T	2	21012503	ENSG00000084674	ENST00000233242.5	APOB	rs12720847	Familial hypercholesterolemia 1	ClinVar		Congenital, Hereditary, and Neonatal Diseases and Abnormalities; Nutritional and Metabolic Diseases
ENST00000233242.5:C.4365C>T	2	21012503	ENSG00000084674	ENST00000233242.5	APOB	rs12720847	Familial hypobetalipoproteinemia	ClinVar		Nutritional and Metabolic Diseases
ENST00000233242.5:C.3843C>T	2	21013533	ENSG00000084674	ENST00000233242.5	APOB	rs72653079	Familial hypercholesterolemia	ClinVar		Congenital, Hereditary, and Neonatal Diseases and Abnormalities; Nutritional and Metabolic Diseases
ENST00000233242.5:C.3843C>T	2	21013533	ENSG00000084674	ENST00000233242.5	APOB	rs72653079	Familial hypercholesterolemia 1	ClinVar		Congenital, Hereditary, and Neonatal Diseases and Abnormalities; Nutritional and Metabolic Diseases
ENST00000233242.5:C.3843C>T	2	21013533	ENSG00000084674	ENST00000233242.5	APOB	rs72653079	Familial hypobetalipoproteinemia	ClinVar		Nutritional and Metabolic Diseases
ENST00000233242.5:C.3414C>T	2	21015464	ENSG00000084674	ENST00000233242.5	APOB	rs140456702	Familial hypercholesterolemia	ClinVar		Congenital, Hereditary, and Neonatal Diseases and Abnormalities; Nutritional and Metabolic Diseases
ENST00000233242.5:C.3312C>T	2	21016459	ENSG00000084674	ENST00000233242.5	APOB	rs780454824	Familial hypercholesterolemia	ClinVar		Congenital, Hereditary, and Neonatal Diseases and Abnormalities; Nutritional and Metabolic Diseases
ENST00000233242.5:C.3219C>T	2	21016552	ENSG00000084674	ENST00000233242.5	APOB	rs750588820	Familial hypercholesterolemia	ClinVar		Congenital, Hereditary, and Neonatal Diseases and Abnormalities; Nutritional and Metabolic Diseases
ENST00000233242.5:C.3051C>T	2	21019062	ENSG00000084674	ENST00000233242.5	APOB	rs558838327	Familial hypercholesterolemia 1	ClinVar		Congenital, Hereditary, and Neonatal Diseases and Abnormalities; Nutritional and Metabolic Diseases
ENST00000233242.5:C.2988C>A	2	21019734	ENSG00000084674	ENST00000233242.5	APOB	rs137875230	Familial hypercholesterolemia	ClinVar		Congenital, Hereditary, and Neonatal Diseases and Abnormalities; Nutritional and Metabolic Diseases
ENST00000233242.5:C.2917C>A	2	21019805	ENSG00000084674	ENST00000233242.5	APOB	rs886055592	Familial hypercholesterolemia 1	ClinVar		Congenital, Hereditary, and Neonatal Diseases and Abnormalities; Nutritional and Metabolic Diseases
ENST00000233242.5:C.2917C>A	2	21019805	ENSG00000084674	ENST00000233242.5	APOB	rs886055592	Familial hypobetalipoproteinemia	ClinVar		Nutritional and Metabolic Diseases
ENST00000233242.5:C.2706C>T	2	21022941	ENSG00000084674	ENST00000233242.5	APOB	rs1801700	Familial hypercholesterolemia	ClinVar		Congenital, Hereditary, and Neonatal Diseases and Abnormalities; Nutritional and Metabolic Diseases
ENST00000233242.5:C.2706C>T	2	21022941	ENSG00000084674	ENST00000233242.5	APOB	rs1801700	Familial hypercholesterolemia 1	ClinVar		Congenital, Hereditary, and Neonatal Diseases and Abnormalities; Nutritional and Metabolic Diseases
ENST00000233242.5:C.2706C>T	2	21022941	ENSG00000084674	ENST00000233242.5	APOB	rs1801700	Familial hypercholesterolemia 2	ClinVar		Congenital, Hereditary, and Neonatal Diseases and Abnormalities; Nutritional and Metabolic Diseases
ENST00000233242.5:C.2706C>T	2	21022941	ENSG00000084674	ENST00000233242.5	APOB	rs1801700	Familial hypobetalipoproteinemia	ClinVar		Nutritional and Metabolic Diseases
ENST00000233242.5:C.2706C>T	2	21022941	ENSG00000084674	ENST00000233242.5	APOB	rs1801700	Hypobetalipoproteinemia	ClinVar		Congenital, Hereditary, and Neonatal Diseases and Abnormalities; Nutritional and Metabolic Diseases
ENST00000233242.5:C.2568C>T	2	21023561	ENSG00000084674	ENST00000233242.5	APOB	rs184556149	Familial hypercholesterolemia	ClinVar		Congenital, Hereditary, and Neonatal Diseases and Abnormalities; Nutritional and Metabolic Diseases
ENST00000233242.5:C.2310C>T	2	21025059	ENSG00000084674	ENST00000233242.5	APOB	rs72653064	Familial hypercholesterolemia	ClinVar		Congenital, Hereditary, and Neonatal Diseases and Abnormalities; Nutritional and Metabolic Diseases
ENST00000233242.5:C.2160C>T	2	21026872	ENSG00000084674	ENST00000233242.5	APOB	rs756184175	Familial hypercholesterolemia 1	ClinVar		Congenital, Hereditary, and Neonatal Diseases and Abnormalities; Nutritional and Metabolic Diseases
ENST00000233242.5:C.2160C>T	2	21026872	ENSG00000084674	ENST00000233242.5	APOB	rs756184175	Familial hypobetalipoproteinemia	ClinVar		Nutritional and Metabolic Diseases
ENST00000233242.5:C.1198C>A	2	21032508	ENSG00000084674	ENST00000233242.5	APOB	rs778866803	Familial hypercholesterolemia 1	ClinVar		Congenital, Hereditary, and Neonatal Diseases and Abnormalities; Nutritional and Metabolic Diseases
ENST00000233242.5:C.966C>T	2	21033457	ENSG00000084674	ENST00000233242.5	APOB	rs755978246	Familial hypercholesterolemia	ClinVar		Congenital, Hereditary, and Neonatal Diseases and Abnormalities; Nutritional and Metabolic Diseases
ENST00000317799.10:C.423C>A	2	26277141	ENSG00000138029	ENST00000317799.10	HADHB	rs374569092	Mitochondrial trifunctional protein deficiency	ClinVar		Congenital, Hereditary, and Neonatal Diseases and Abnormalities; Nutritional and Metabolic Diseases; Musculoskeletal Diseases; Nervous System Diseases; Cardiovascular Diseases
ENST00000288710.7:C.26C>T	2	26402015	ENSG00000157856	ENST00000288710.7	DRC1	rs146049908	Primary ciliary dyskinesia	ClinVar		Congenital, Hereditary, and Neonatal Diseases and Abnormalities; Respiratory Disease; Otorhinolaryngologic Diseases
ENST00000288710.7:C.402C>T	2	26424316	ENSG00000157856	ENST00000288710.7	DRC1	rs200560247	Primary ciliary dyskinesia	ClinVar		Congenital, Hereditary, and Neonatal Diseases and Abnormalities; Respiratory Disease; Otorhinolaryngologic Diseases
ENST00000288710.7:C.1172C>T	2	26444724	ENSG00000157856	ENST00000288710.7	DRC1	rs148372110	Primary ciliary dyskinesia	ClinVar		Congenital, Hereditary, and Neonatal Diseases and Abnormalities; Respiratory Disease; Otorhinolaryngologic Diseases
ENST00000288710.7:C.1840C>T	2	26453470	ENSG00000157856	ENST00000288710.7	DRC1	rs372284377	Primary ciliary dyskinesia	ClinVar		Congenital, Hereditary, and Neonatal Diseases and Abnormalities; Respiratory Disease; Otorhinolaryngologic Diseases
ENST00000272371.7:C.5655C>T	2	26460909	ENSG00000115155	ENST00000272371.7	OTOF	rs45442103	Deafness	ClinVar		Otorhinolaryngologic Diseases; Nervous System Diseases; Pathological Conditions, Signs and Symptoms
ENST00000272371.7:C.5097C>T	2	26463970	ENSG00000115155	ENST00000272371.7	OTOF	rs12386239	Nonsyndromic Hearing Loss	ClinVar		Pathological Conditions, Signs and Symptoms; Nervous System Diseases; Otorhinolaryngologic Diseases
ENST00000272371.7:C.4809C>T	2	26465020	ENSG00000115155	ENST00000272371.7	OTOF	rs143939430	Deafness	ClinVar		Otorhinolaryngologic Diseases; Nervous System Diseases; Pathological Conditions, Signs and Symptoms
ENST00000272371.7:C.4767C>T	2	26465704	ENSG00000115155	ENST00000272371.7	OTOF	rs80356578	Deafness	ClinVar		Otorhinolaryngologic Diseases; Nervous System Diseases; Pathological Conditions, Signs and Symptoms
ENST00000272371.7:C.4767C>T	2	26465704	ENSG00000115155	ENST00000272371.7	OTOF	rs80356578	Nonsyndromic Hearing Loss	ClinVar		Pathological Conditions, Signs and Symptoms; Nervous System Diseases; Otorhinolaryngologic Diseases
ENST00000272371.7:C.3966C>T	2	26470650	ENSG00000115155	ENST00000272371.7	OTOF	rs80356576	Deafness	ClinVar		Otorhinolaryngologic Diseases; Nervous System Diseases; Pathological Conditions, Signs and Symptoms
ENST00000272371.7:C.2829C>T	2	26476165	ENSG00000115155	ENST00000272371.7	OTOF	rs73920285	Nonsyndromic Hearing Loss	ClinVar		Pathological Conditions, Signs and Symptoms; Nervous System Diseases; Otorhinolaryngologic Diseases
ENST00000272371.7:C.1926C>T	2	26479640	ENSG00000115155	ENST00000272371.7	OTOF	rs72853741	Deafness	ClinVar		Otorhinolaryngologic Diseases; Nervous System Diseases; Pathological Conditions, Signs and Symptoms
ENST00000272371.7:C.366C>T	2	26516561	ENSG00000115155	ENST00000272371.7	OTOF	rs61747283	Nonsyndromic Hearing Loss	ClinVar		Pathological Conditions, Signs and Symptoms; Nervous System Diseases; Otorhinolaryngologic Diseases
ENST00000272371.7:C.51C>T	2	26558521	ENSG00000115155	ENST00000272371.7	OTOF	rs142333075	Nonsyndromic Hearing Loss	ClinVar		Pathological Conditions, Signs and Symptoms; Nervous System Diseases; Otorhinolaryngologic Diseases
ENST00000264705.9:C.5365C>A	2	27239442	ENSG00000084774	ENST00000264705.9	CAD	rs62130681	Epileptic encephalopathy	ClinVar		Nervous System Diseases
ENST00000493344.6:C.1296C>T	2	27364857	ENSG00000115211	ENST00000493344.6	EIF2B4	rs1058065	IgG glycosylation	GWAS	23382691	Other diseases
ENST00000493344.6:C.1296C>T	2	27364857	ENSG00000115211	ENST00000493344.6	EIF2B4	rs1058065	serum IgG glycosylation measurement	Ensembl_Post_GWAS	PMID23382691	Other diseases
ENST00000355467.6:C.1155C>A	2	27615191	ENSG00000243943	ENST00000355467.6	ZNF512	rs11127071	mean arterial pressure	Ensembl_Post_GWAS	PMID27618448	Other diseases
ENST00000355467.6:C.1155C>A	2	27615191	ENSG00000243943	ENST00000355467.6	ZNF512	rs11127071	oral cavity cancer	Ensembl_Post_GWAS	PMID27749845	Cancer; Neoplasms; Stomatognathic Diseases
ENST00000331664.6:C.2889C>T	2	29071373	ENSG00000179270	ENST00000331664.6	PCARE	rs144569618	Retinitis Pigmentosa	ClinVar		Congenital, Hereditary, and Neonatal Diseases and Abnormalities; Eye Diseases
ENST00000331664.6:C.1582C>T	2	29072680	ENSG00000179270	ENST00000331664.6	PCARE	rs80151896	Retinitis Pigmentosa	ClinVar		Congenital, Hereditary, and Neonatal Diseases and Abnormalities; Eye Diseases
ENST00000331664.6:C.1452C>T	2	29072810	ENSG00000179270	ENST00000331664.6	PCARE	rs13385188	Retinitis Pigmentosa	ClinVar		Congenital, Hereditary, and Neonatal Diseases and Abnormalities; Eye Diseases
ENST00000331664.6:C.1297C>T	2	29072965	ENSG00000179270	ENST00000331664.6	PCARE	rs200696965	Retinitis Pigmentosa	ClinVar		Congenital, Hereditary, and Neonatal Diseases and Abnormalities; Eye Diseases
ENST00000331664.6:C.1297C>T	2	29072965	ENSG00000179270	ENST00000331664.6	PCARE	rs200696965	Retinitis pigmentosa 54	ClinVar		Congenital, Hereditary, and Neonatal Diseases and Abnormalities; Eye Diseases
ENST00000331664.6:C.1215C>T	2	29073047	ENSG00000179270	ENST00000331664.6	PCARE	rs754808908	Retinitis Pigmentosa	ClinVar		Congenital, Hereditary, and Neonatal Diseases and Abnormalities; Eye Diseases
ENST00000331664.6:C.958C>T	2	29073304	ENSG00000179270	ENST00000331664.6	PCARE	rs374283240	Retinitis Pigmentosa	ClinVar		Congenital, Hereditary, and Neonatal Diseases and Abnormalities; Eye Diseases
ENST00000331664.6:C.634C>T	2	29073628	ENSG00000179270	ENST00000331664.6	PCARE	rs368688827	Retinitis Pigmentosa	ClinVar		Congenital, Hereditary, and Neonatal Diseases and Abnormalities; Eye Diseases
ENST00000389048.8:C.3633C>A	2	29220718	ENSG00000171094	ENST00000389048.8	ALK	rs144437923	Hereditary cancer-predisposing syndrome	ClinVar		Other diseases
ENST00000389048.8:C.3633C>A	2	29220718	ENSG00000171094	ENST00000389048.8	ALK	rs144437923	Neuroblastoma 3	ClinVar		Neoplasms
ENST00000389048.8:C.3633C>A	2	29220718	ENSG00000171094	ENST00000389048.8	ALK	rs144437923	Neuroblastoma Susceptibility	ClinVar		Neoplasms
ENST00000389048.8:C.3480C>T	2	29222379	ENSG00000171094	ENST00000389048.8	ALK	rs888578421	Hereditary cancer-predisposing syndrome	ClinVar		Other diseases
ENST00000389048.8:C.3432C>T	2	29222535	ENSG00000171094	ENST00000389048.8	ALK	rs148284008	Hereditary cancer-predisposing syndrome	ClinVar		Other diseases
ENST00000389048.8:C.3408C>T	2	29222559	ENSG00000171094	ENST00000389048.8	ALK	rs56146053	Hereditary cancer-predisposing syndrome	ClinVar		Other diseases
ENST00000389048.8:C.3408C>T	2	29222559	ENSG00000171094	ENST00000389048.8	ALK	rs56146053	Neuroblastoma Susceptibility	ClinVar		Neoplasms
ENST00000389048.8:C.2217C>T	2	29239818	ENSG00000171094	ENST00000389048.8	ALK	rs141858653	Neuroblastoma 3	ClinVar		Neoplasms
ENST00000389048.8:C.2175C>T	2	29251134	ENSG00000171094	ENST00000389048.8	ALK	rs57881134	Hereditary cancer-predisposing syndrome	ClinVar		Other diseases
ENST00000389048.8:C.2175C>T	2	29251134	ENSG00000171094	ENST00000389048.8	ALK	rs57881134	Neuroblastoma Susceptibility	ClinVar		Neoplasms
ENST00000389048.8:C.2148C>T	2	29251161	ENSG00000171094	ENST00000389048.8	ALK	rs55733526	Hereditary cancer-predisposing syndrome	ClinVar		Other diseases
ENST00000389048.8:C.2148C>T	2	29251161	ENSG00000171094	ENST00000389048.8	ALK	rs55733526	Neuroblastoma Susceptibility	ClinVar		Neoplasms
ENST00000389048.8:C.2073C>T	2	29251236	ENSG00000171094	ENST00000389048.8	ALK	rs370435082	Neuroblastoma 3	ClinVar		Neoplasms
ENST00000389048.8:C.2011C>T	2	29275129	ENSG00000171094	ENST00000389048.8	ALK	rs145780832	Neuroblastoma Susceptibility	ClinVar		Neoplasms
ENST00000389048.8:C.1962C>T	2	29275178	ENSG00000171094	ENST00000389048.8	ALK	rs755124993	Neuroblastoma 3	ClinVar		Neoplasms
ENST00000389048.8:C.1752C>T	2	29296953	ENSG00000171094	ENST00000389048.8	ALK	rs367912697	Hereditary cancer-predisposing syndrome	ClinVar		Other diseases
ENST00000389048.8:C.1719C>T	2	29296986	ENSG00000171094	ENST00000389048.8	ALK	rs74830770	Hereditary cancer-predisposing syndrome	ClinVar		Other diseases
ENST00000389048.8:C.1107C>T	2	29531962	ENSG00000171094	ENST00000389048.8	ALK	rs114429299	Hereditary cancer-predisposing syndrome	ClinVar		Other diseases
ENST00000389048.8:C.1083C>T	2	29531986	ENSG00000171094	ENST00000389048.8	ALK	rs146261919	Neuroblastoma 3	ClinVar		Neoplasms
ENST00000389048.8:C.885C>T	2	29694917	ENSG00000171094	ENST00000389048.8	ALK	rs1060503882	Neuroblastoma 3	ClinVar		Neoplasms
ENST00000379416.4:C.3930C>T	2	31337662	ENSG00000158125	ENST00000379416.4	XDH	rs138936101	Xanthinuria	ClinVar		Congenital, Hereditary, and Neonatal Diseases and Abnormalities; Nutritional and Metabolic Diseases
ENST00000379416.4:C.3249C>T	2	31347549	ENSG00000158125	ENST00000379416.4	XDH	rs45562835	Xanthinuria	ClinVar		Congenital, Hereditary, and Neonatal Diseases and Abnormalities; Nutritional and Metabolic Diseases
ENST00000379416.4:C.3084C>T	2	31348331	ENSG00000158125	ENST00000379416.4	XDH	rs45604135	Xanthinuria	ClinVar		Congenital, Hereditary, and Neonatal Diseases and Abnormalities; Nutritional and Metabolic Diseases
ENST00000379416.4:C.1800C>T	2	31372284	ENSG00000158125	ENST00000379416.4	XDH	rs139964785	Xanthinuria	ClinVar		Congenital, Hereditary, and Neonatal Diseases and Abnormalities; Nutritional and Metabolic Diseases
ENST00000379416.4:C.1629C>T	2	31373930	ENSG00000158125	ENST00000379416.4	XDH	rs140651875	Xanthinuria	ClinVar		Congenital, Hereditary, and Neonatal Diseases and Abnormalities; Nutritional and Metabolic Diseases
ENST00000379416.4:C.1509C>T	2	31375473	ENSG00000158125	ENST00000379416.4	XDH	rs45612839	Xanthinuria	ClinVar		Congenital, Hereditary, and Neonatal Diseases and Abnormalities; Nutritional and Metabolic Diseases
ENST00000379416.4:C.1134C>T	2	31379975	ENSG00000158125	ENST00000379416.4	XDH	rs45612738	Xanthinuria	ClinVar		Congenital, Hereditary, and Neonatal Diseases and Abnormalities; Nutritional and Metabolic Diseases
ENST00000379416.4:C.405C>T	2	31398601	ENSG00000158125	ENST00000379416.4	XDH	rs72549370	Xanthinuria	ClinVar		Congenital, Hereditary, and Neonatal Diseases and Abnormalities; Nutritional and Metabolic Diseases
ENST00000315285.9:C.89C>T	2	32063920	ENSG00000021574	ENST00000315285.9	SPAST	rs781516235	Spastic paraplegia 4	ClinVar		Congenital, Hereditary, and Neonatal Diseases and Abnormalities; Eye Diseases; Nervous System Diseases
ENST00000233099.6:C.4218C>T	2	37013907	ENSG00000008869	ENST00000233099.6	HEATR5B	rs17020125	QRS complex	Ensembl_Post_GWAS	PMID27659466	Other diseases
ENST00000233099.6:C.4218C>T	2	37013907	ENSG00000008869	ENST00000233099.6	HEATR5B	rs17020125	QRS duration	Ensembl_Post_GWAS	PMID27659466	Other diseases
ENST00000610745.5:C.1294C>G	2	38071060	ENSG00000138061	ENST00000610745.5	CYP1B1	rs1056836	suntan	Ensembl_Post_GWAS	PMID29739929	Other diseases
ENST00000402219.8:C.3600C>T	2	38986226	ENSG00000115904	ENST00000402219.8	SOS1	rs141594736	Noonan syndrome and Noonan-related syndrome	ClinVar		Congenital, Hereditary, and Neonatal Diseases and Abnormalities; Skin and Connective Tissue Diseases; Musculoskeletal Diseases; Cardiovascular Diseases
ENST00000402219.8:C.3600C>T	2	38986226	ENSG00000115904	ENST00000402219.8	SOS1	rs141594736	Rasopathy	ClinVar		Pathological Conditions, Signs and Symptoms; Nervous System Diseases; Otorhinolaryngologic Diseases
ENST00000402219.8:C.3072C>T	2	38996931	ENSG00000115904	ENST00000402219.8	SOS1	rs558386297	Rasopathy	ClinVar		Pathological Conditions, Signs and Symptoms; Nervous System Diseases; Otorhinolaryngologic Diseases
ENST00000402219.8:C.1269C>T	2	39023159	ENSG00000115904	ENST00000402219.8	SOS1	rs138459502	Rasopathy	ClinVar		Pathological Conditions, Signs and Symptoms; Nervous System Diseases; Otorhinolaryngologic Diseases
ENST00000402219.8:C.570C>T	2	39054764	ENSG00000115904	ENST00000402219.8	SOS1	rs55980502	Gingival fibromatosis	ClinVar		Congenital, Hereditary, and Neonatal Diseases and Abnormalities; Stomatognathic Diseases
ENST00000402219.8:C.570C>T	2	39054764	ENSG00000115904	ENST00000402219.8	SOS1	rs55980502	Noonan syndrome	ClinVar		Congenital, Hereditary, and Neonatal Diseases and Abnormalities; Skin and Connective Tissue Diseases; Musculoskeletal Diseases; Cardiovascular Diseases
ENST00000402219.8:C.570C>T	2	39054764	ENSG00000115904	ENST00000402219.8	SOS1	rs55980502	Rasopathy	ClinVar		Pathological Conditions, Signs and Symptoms; Nervous System Diseases; Otorhinolaryngologic Diseases
ENST00000282406.9:C.918C>T	2	43699876	ENSG00000152527	ENST00000282406.9	PLEKHH2	rs187276353	glioma	Cosmic	18772396	Neoplasms
ENST00000405322.8:C.1569C>G	2	43819995	ENSG00000138075	ENST00000405322.8	ABCG5	rs376969021	Sitosterolemia	ClinVar		Digestive System Diseases; Congenital, Hereditary, and Neonatal Diseases and Abnormalities; Nutritional and Metabolic Diseases
ENST00000405322.8:C.1365C>T	2	43822895	ENSG00000138075	ENST00000405322.8	ABCG5	rs141016088	Sitosterolemia	ClinVar		Digestive System Diseases; Congenital, Hereditary, and Neonatal Diseases and Abnormalities; Nutritional and Metabolic Diseases
ENST00000405322.8:C.1336C>A	2	43822924	ENSG00000138075	ENST00000405322.8	ABCG5	rs199689137	Sitosterolemia	ClinVar		Digestive System Diseases; Congenital, Hereditary, and Neonatal Diseases and Abnormalities; Nutritional and Metabolic Diseases
ENST00000405322.8:C.1336C>A	2	43822924	ENSG00000138075	ENST00000405322.8	ABCG5	rs199689137	SITOSTEROLEMIA 2	ClinVar		Congenital, Hereditary, and Neonatal Diseases and Abnormalities; Digestive System Diseases; Nutritional and Metabolic Diseases
ENST00000405322.8:C.1163C>T	2	43824074	ENSG00000138075	ENST00000405322.8	ABCG5	rs149418765	Sitosterolemia	ClinVar		Digestive System Diseases; Congenital, Hereditary, and Neonatal Diseases and Abnormalities; Nutritional and Metabolic Diseases
ENST00000272286.4:C.762C>T	2	43852666	ENSG00000143921	ENST00000272286.4	ABCG8	rs148006993	Sitosterolemia	ClinVar		Digestive System Diseases; Congenital, Hereditary, and Neonatal Diseases and Abnormalities; Nutritional and Metabolic Diseases
ENST00000272286.4:C.1695C>T	2	43875352	ENSG00000143921	ENST00000272286.4	ABCG8	rs4148221	Sitosterolemia	ClinVar		Digestive System Diseases; Congenital, Hereditary, and Neonatal Diseases and Abnormalities; Nutritional and Metabolic Diseases
ENST00000260665.12:C.2385C>T	2	43943806	ENSG00000138095	ENST00000260665.12	LRPPRC	rs886056056	Leigh syndrome	ClinVar		Congenital, Hereditary, and Neonatal Diseases and Abnormalities; Nutritional and Metabolic Diseases; Nervous System Diseases
ENST00000260665.12:C.843C>T	2	43975112	ENSG00000138095	ENST00000260665.12	LRPPRC	rs766703715	Leigh syndrome	ClinVar		Congenital, Hereditary, and Neonatal Diseases and Abnormalities; Nutritional and Metabolic Diseases; Nervous System Diseases
ENST00000260665.12:C.130C>G	2	43995818	ENSG00000138095	ENST00000260665.12	LRPPRC	rs886056062	Leigh syndrome	ClinVar		Congenital, Hereditary, and Neonatal Diseases and Abnormalities; Nutritional and Metabolic Diseases; Nervous System Diseases
ENST00000260649.11:C.417C>T	2	44275952	ENSG00000138079	ENST00000260649.11	SLC3A1	rs150870922	Cystinuria	ClinVar		Male Urogenital Diseases; Female Urogenital Diseases and Pregnancy Complications; Congenital, Hereditary, and Neonatal Diseases and Abnormalities
ENST00000260649.11:C.1074C>T	2	44301065	ENSG00000138079	ENST00000260649.11	SLC3A1	rs754041697	Cystinuria	ClinVar		Male Urogenital Diseases; Female Urogenital Diseases and Pregnancy Complications; Congenital, Hereditary, and Neonatal Diseases and Abnormalities
ENST00000260649.11:C.1269C>T	2	44304275	ENSG00000138079	ENST00000260649.11	SLC3A1	rs557669708	Cystinuria	ClinVar		Male Urogenital Diseases; Female Urogenital Diseases and Pregnancy Complications; Congenital, Hereditary, and Neonatal Diseases and Abnormalities
ENST00000260649.11:C.1955C>T	2	44320536	ENSG00000138079	ENST00000260649.11	SLC3A1	rs121912695	Cystinuria	ClinVar		Male Urogenital Diseases; Female Urogenital Diseases and Pregnancy Complications; Congenital, Hereditary, and Neonatal Diseases and Abnormalities
ENST00000263734.5:C.1263C>T	2	46377907	ENSG00000116016	ENST00000263734.5	EPAS1	rs142534349	Familial erythrocytosis	ClinVar		Congenital, Hereditary, and Neonatal Diseases and Abnormalities; Hemic and Lymphatic Diseases
ENST00000263734.5:C.1833C>T	2	46380505	ENSG00000116016	ENST00000263734.5	EPAS1	rs41281469	Familial erythrocytosis	ClinVar		Congenital, Hereditary, and Neonatal Diseases and Abnormalities; Hemic and Lymphatic Diseases
ENST00000306503.5:C.282C>T	2	46758812	ENSG00000171150	ENST00000306503.5	SOCS5	rs554254234	lung carcinoma	Cosmic	22941188	Cancer; Organismal Injury and Abnormalities; Respiratory Disease
ENST00000394850.6:C.691C>T	2	46978834	ENSG00000068724	ENST00000394850.6	TTC7A	rs1006086423	Multiple gastrointestinal atresias	ClinVar		Congenital, Hereditary, and Neonatal Diseases and Abnormalities; Digestive System Diseases
ENST00000394850.6:C.1684C>T	2	47029266	ENSG00000068724	ENST00000394850.6	TTC7A	rs145006355	Multiple gastrointestinal atresias	ClinVar		Congenital, Hereditary, and Neonatal Diseases and Abnormalities; Digestive System Diseases
ENST00000394850.6:C.2410C>T	2	47060954	ENSG00000068724	ENST00000394850.6	TTC7A	rs777474719	Multiple gastrointestinal atresias	ClinVar		Congenital, Hereditary, and Neonatal Diseases and Abnormalities; Digestive System Diseases
ENST00000405271.5:C.113C>G	2	47369188	ENSG00000119888	ENST00000405271.5	EPCAM	rs886056127	Lynch syndrome	ClinVar		Congenital, Hereditary, and Neonatal Diseases and Abnormalities; Digestive System Diseases; Neoplasms; Nutritional and Metabolic Diseases
ENST00000405271.5:C.195C>G	2	47373497	ENSG00000119888	ENST00000405271.5	EPCAM	rs543584983	Hereditary nonpolyposis colorectal cancer type 8	ClinVar		Congenital, Hereditary, and Neonatal Diseases and Abnormalities; Neoplasms
ENST00000405271.5:C.195C>G	2	47373497	ENSG00000119888	ENST00000405271.5	EPCAM	rs543584983	Lynch syndrome	ClinVar		Congenital, Hereditary, and Neonatal Diseases and Abnormalities; Digestive System Diseases; Neoplasms; Nutritional and Metabolic Diseases
ENST00000405271.5:C.496C>A	2	47374035	ENSG00000119888	ENST00000405271.5	EPCAM	rs397514661	Diarrhea 5	ClinVar		Pathological Conditions, Signs and Symptoms; Digestive System Diseases; Nutritional and Metabolic Diseases
ENST00000234420.11:C.63C>G	2	47783296	ENSG00000116062	ENST00000234420.11	MSH6	rs876660097	Hereditary cancer-predisposing syndrome	ClinVar		Other diseases
ENST00000234420.11:C.63C>G	2	47783296	ENSG00000116062	ENST00000234420.11	MSH6	rs876660097	Hereditary nonpolyposis colon cancer	ClinVar		Congenital, Hereditary, and Neonatal Diseases and Abnormalities; Digestive System Diseases; Neoplasms; Nutritional and Metabolic Diseases
ENST00000234420.11:C.93C>T	2	47783326	ENSG00000116062	ENST00000234420.11	MSH6	rs370817805	Hereditary cancer-predisposing syndrome	ClinVar		Other diseases
ENST00000234420.11:C.93C>T	2	47783326	ENSG00000116062	ENST00000234420.11	MSH6	rs370817805	Hereditary nonpolyposis colon cancer	ClinVar		Congenital, Hereditary, and Neonatal Diseases and Abnormalities; Digestive System Diseases; Neoplasms; Nutritional and Metabolic Diseases
ENST00000234420.11:C.112C>T	2	47783345	ENSG00000116062	ENST00000234420.11	MSH6	rs764009461	Hereditary cancer-predisposing syndrome	ClinVar		Other diseases
ENST00000234420.11:C.124C>G	2	47783357	ENSG00000116062	ENST00000234420.11	MSH6	rs34014629	breast carcinoma	Cosmic	19593635	Cancer; Organismal Injury and Abnormalities; Reproductive System Disease
ENST00000234420.11:C.124C>G	2	47783357	ENSG00000116062	ENST00000234420.11	MSH6	rs34014629	Hereditary cancer-predisposing syndrome	ClinVar		Other diseases
ENST00000234420.11:C.124C>G	2	47783357	ENSG00000116062	ENST00000234420.11	MSH6	rs34014629	Hereditary nonpolyposis colorectal cancer type 5	ClinVar		Congenital, Hereditary, and Neonatal Diseases and Abnormalities; Neoplasms
ENST00000234420.11:C.184C>T	2	47783417	ENSG00000116062	ENST00000234420.11	MSH6	rs876659508	Endometrial carcinoma	ClinVar		Cancer; Organismal Injury and Abnormalities; Reproductive System Disease
ENST00000234420.11:C.184C>T	2	47783417	ENSG00000116062	ENST00000234420.11	MSH6	rs876659508	Hereditary cancer-predisposing syndrome	ClinVar		Other diseases
ENST00000234420.11:C.184C>T	2	47783417	ENSG00000116062	ENST00000234420.11	MSH6	rs876659508	Hereditary nonpolyposis colon cancer	ClinVar		Congenital, Hereditary, and Neonatal Diseases and Abnormalities; Digestive System Diseases; Neoplasms; Nutritional and Metabolic Diseases
ENST00000234420.11:C.184C>T	2	47783417	ENSG00000116062	ENST00000234420.11	MSH6	rs876659508	Hereditary nonpolyposis colorectal cancer type 5	ClinVar		Congenital, Hereditary, and Neonatal Diseases and Abnormalities; Neoplasms
ENST00000234420.11:C.184C>T	2	47783417	ENSG00000116062	ENST00000234420.11	MSH6	rs876659508	Turcot syndrome	ClinVar		Congenital, Hereditary, and Neonatal Diseases and Abnormalities; Digestive System Diseases; Neoplasms; Nervous System Diseases
ENST00000234420.11:C.186C>A	2	47783419	ENSG00000116062	ENST00000234420.11	MSH6	rs1042820	Hereditary cancer-predisposing syndrome	ClinVar		Other diseases
ENST00000234420.11:C.186C>A	2	47783419	ENSG00000116062	ENST00000234420.11	MSH6	rs1042820	Lynch syndrome	ClinVar		Congenital, Hereditary, and Neonatal Diseases and Abnormalities; Digestive System Diseases; Neoplasms; Nutritional and Metabolic Diseases
ENST00000234420.11:C.186C>A	2	47783419	ENSG00000116062	ENST00000234420.11	MSH6	rs1042820	age at menopause	Ensembl_Post_GWAS	PMID26414677	Behavior and Behavior Mechanisms
ENST00000234420.11:C.197C>T	2	47783430	ENSG00000116062	ENST00000234420.11	MSH6	rs730881812	Hereditary cancer-predisposing syndrome	ClinVar		Other diseases
ENST00000234420.11:C.197C>T	2	47783430	ENSG00000116062	ENST00000234420.11	MSH6	rs730881812	Hereditary nonpolyposis colon cancer	ClinVar		Congenital, Hereditary, and Neonatal Diseases and Abnormalities; Digestive System Diseases; Neoplasms; Nutritional and Metabolic Diseases
ENST00000234420.11:C.251C>T	2	47783484	ENSG00000116062	ENST00000234420.11	MSH6	rs878853717	Hereditary cancer-predisposing syndrome	ClinVar		Other diseases
ENST00000234420.11:C.251C>T	2	47783484	ENSG00000116062	ENST00000234420.11	MSH6	rs878853717	Hereditary nonpolyposis colon cancer	ClinVar		Congenital, Hereditary, and Neonatal Diseases and Abnormalities; Digestive System Diseases; Neoplasms; Nutritional and Metabolic Diseases
ENST00000234420.11:C.336C>T	2	47791002	ENSG00000116062	ENST00000234420.11	MSH6	rs1182444882	Hereditary cancer-predisposing syndrome	ClinVar		Other diseases
ENST00000234420.11:C.336C>T	2	47791002	ENSG00000116062	ENST00000234420.11	MSH6	rs1182444882	Hereditary nonpolyposis colon cancer	ClinVar		Congenital, Hereditary, and Neonatal Diseases and Abnormalities; Digestive System Diseases; Neoplasms; Nutritional and Metabolic Diseases
ENST00000234420.11:C.339C>T	2	47791005	ENSG00000116062	ENST00000234420.11	MSH6	rs886056141	Hereditary cancer-predisposing syndrome	ClinVar		Other diseases
ENST00000234420.11:C.339C>T	2	47791005	ENSG00000116062	ENST00000234420.11	MSH6	rs886056141	Lynch syndrome	ClinVar		Congenital, Hereditary, and Neonatal Diseases and Abnormalities; Digestive System Diseases; Neoplasms; Nutritional and Metabolic Diseases
ENST00000234420.11:C.508C>T	2	47795944	ENSG00000116062	ENST00000234420.11	MSH6	rs878853748	Hereditary nonpolyposis colon cancer	ClinVar		Congenital, Hereditary, and Neonatal Diseases and Abnormalities; Digestive System Diseases; Neoplasms; Nutritional and Metabolic Diseases
ENST00000234420.11:C.635C>G	2	47798618	ENSG00000116062	ENST00000234420.11	MSH6	rs876659637	Hereditary cancer-predisposing syndrome	ClinVar		Other diseases
ENST00000234420.11:C.642C>T	2	47798625	ENSG00000116062	ENST00000234420.11	MSH6	rs1800937	Hereditary cancer-predisposing syndrome	ClinVar		Other diseases
ENST00000234420.11:C.642C>T	2	47798625	ENSG00000116062	ENST00000234420.11	MSH6	rs1800937	Hereditary nonpolyposis colon cancer	ClinVar		Congenital, Hereditary, and Neonatal Diseases and Abnormalities; Digestive System Diseases; Neoplasms; Nutritional and Metabolic Diseases
ENST00000234420.11:C.642C>T	2	47798625	ENSG00000116062	ENST00000234420.11	MSH6	rs1800937	Hereditary nonpolyposis colorectal cancer type 5	ClinVar		Congenital, Hereditary, and Neonatal Diseases and Abnormalities; Neoplasms
ENST00000234420.11:C.642C>T	2	47798625	ENSG00000116062	ENST00000234420.11	MSH6	rs1800937	Lynch syndrome	ClinVar		Congenital, Hereditary, and Neonatal Diseases and Abnormalities; Digestive System Diseases; Neoplasms; Nutritional and Metabolic Diseases
ENST00000234420.11:C.642C>T	2	47798625	ENSG00000116062	ENST00000234420.11	MSH6	rs1800937	QT interval	Ensembl_Post_GWAS	PMID24324551	Other diseases
ENST00000234420.11:C.642C>T	2	47798625	ENSG00000116062	ENST00000234420.11	MSH6	rs1800937	Trypanosoma cruzi seropositivity	Ensembl_Post_GWAS	PMID24324551	Infections
ENST00000234420.11:C.806C>G	2	47798789	ENSG00000116062	ENST00000234420.11	MSH6	rs587779322	Hereditary cancer-predisposing syndrome	ClinVar		Other diseases
ENST00000234420.11:C.806C>G	2	47798789	ENSG00000116062	ENST00000234420.11	MSH6	rs587779322	Hereditary nonpolyposis colon cancer	ClinVar		Congenital, Hereditary, and Neonatal Diseases and Abnormalities; Digestive System Diseases; Neoplasms; Nutritional and Metabolic Diseases
ENST00000234420.11:C.877C>T	2	47798860	ENSG00000116062	ENST00000234420.11	MSH6	rs756935130	Hereditary cancer-predisposing syndrome	ClinVar		Other diseases
ENST00000234420.11:C.877C>T	2	47798860	ENSG00000116062	ENST00000234420.11	MSH6	rs756935130	Hereditary nonpolyposis colon cancer	ClinVar		Congenital, Hereditary, and Neonatal Diseases and Abnormalities; Digestive System Diseases; Neoplasms; Nutritional and Metabolic Diseases
ENST00000234420.11:C.926C>G	2	47798909	ENSG00000116062	ENST00000234420.11	MSH6	rs544222338	lymphoid neoplasm	Cosmic	28157215	Cancer; Hematological Disease; Organismal Injury and Abnormalities
ENST00000234420.11:C.926C>G	2	47798909	ENSG00000116062	ENST00000234420.11	MSH6	rs544222338	Hereditary cancer-predisposing syndrome	ClinVar		Other diseases
ENST00000234420.11:C.926C>G	2	47798909	ENSG00000116062	ENST00000234420.11	MSH6	rs544222338	Hereditary nonpolyposis colon cancer	ClinVar		Congenital, Hereditary, and Neonatal Diseases and Abnormalities; Digestive System Diseases; Neoplasms; Nutritional and Metabolic Diseases
ENST00000234420.11:C.942C>T	2	47798925	ENSG00000116062	ENST00000234420.11	MSH6	rs150440246	Hepatoblastoma	ClinVar		Neoplasms
ENST00000234420.11:C.942C>T	2	47798925	ENSG00000116062	ENST00000234420.11	MSH6	rs150440246	Hereditary cancer-predisposing syndrome	ClinVar		Other diseases
ENST00000234420.11:C.942C>T	2	47798925	ENSG00000116062	ENST00000234420.11	MSH6	rs150440246	Hereditary nonpolyposis colon cancer	ClinVar		Congenital, Hereditary, and Neonatal Diseases and Abnormalities; Digestive System Diseases; Neoplasms; Nutritional and Metabolic Diseases
ENST00000234420.11:C.942C>T	2	47798925	ENSG00000116062	ENST00000234420.11	MSH6	rs150440246	Hereditary nonpolyposis colorectal cancer type 5	ClinVar		Congenital, Hereditary, and Neonatal Diseases and Abnormalities; Neoplasms
ENST00000234420.11:C.944C>T	2	47798927	ENSG00000116062	ENST00000234420.11	MSH6	rs63750491	urinary tract carcinoma	Cosmic	10675480	Cancer; Organismal Injury and Abnormalities; Male Urogenital Diseases
ENST00000234420.11:C.944C>T	2	47798927	ENSG00000116062	ENST00000234420.11	MSH6	rs63750491	Hereditary cancer-predisposing syndrome	ClinVar		Other diseases
ENST00000234420.11:C.944C>T	2	47798927	ENSG00000116062	ENST00000234420.11	MSH6	rs63750491	Hereditary nonpolyposis colon cancer	ClinVar		Congenital, Hereditary, and Neonatal Diseases and Abnormalities; Digestive System Diseases; Neoplasms; Nutritional and Metabolic Diseases
ENST00000234420.11:C.989C>T	2	47798972	ENSG00000116062	ENST00000234420.11	MSH6	rs786202848	Hereditary cancer-predisposing syndrome	ClinVar		Other diseases
ENST00000234420.11:C.989C>T	2	47798972	ENSG00000116062	ENST00000234420.11	MSH6	rs786202848	Lynch syndrome	ClinVar		Congenital, Hereditary, and Neonatal Diseases and Abnormalities; Digestive System Diseases; Neoplasms; Nutritional and Metabolic Diseases
ENST00000234420.11:C.1022C>G	2	47799005	ENSG00000116062	ENST00000234420.11	MSH6	rs766202031	Hereditary cancer-predisposing syndrome	ClinVar		Other diseases
ENST00000234420.11:C.1053C>T	2	47799036	ENSG00000116062	ENST00000234420.11	MSH6	rs28903083	Hereditary cancer-predisposing syndrome	ClinVar		Other diseases
ENST00000234420.11:C.1167C>A	2	47799150	ENSG00000116062	ENST00000234420.11	MSH6	rs1042819	Hereditary cancer-predisposing syndrome	ClinVar		Other diseases
ENST00000234420.11:C.1167C>A	2	47799150	ENSG00000116062	ENST00000234420.11	MSH6	rs1042819	Lynch syndrome	ClinVar		Congenital, Hereditary, and Neonatal Diseases and Abnormalities; Digestive System Diseases; Neoplasms; Nutritional and Metabolic Diseases
ENST00000234420.11:C.1188C>G	2	47799171	ENSG00000116062	ENST00000234420.11	MSH6	rs786202626	Hereditary cancer-predisposing syndrome	ClinVar		Other diseases
ENST00000234420.11:C.1303C>T	2	47799286	ENSG00000116062	ENST00000234420.11	MSH6	rs876660441	Hereditary cancer-predisposing syndrome	ClinVar		Other diseases
ENST00000234420.11:C.1308C>T	2	47799291	ENSG00000116062	ENST00000234420.11	MSH6	rs761037236	Hereditary cancer-predisposing syndrome	ClinVar		Other diseases
ENST00000234420.11:C.1509C>T	2	47799492	ENSG00000116062	ENST00000234420.11	MSH6	rs545020313	Hereditary cancer-predisposing syndrome	ClinVar		Other diseases
ENST00000234420.11:C.1539C>T	2	47799522	ENSG00000116062	ENST00000234420.11	MSH6	rs876660656	Hereditary cancer-predisposing syndrome	ClinVar		Other diseases
ENST00000234420.11:C.1572C>T	2	47799555	ENSG00000116062	ENST00000234420.11	MSH6	rs587779215	Hereditary cancer-predisposing syndrome	ClinVar		Other diseases
ENST00000234420.11:C.1572C>T	2	47799555	ENSG00000116062	ENST00000234420.11	MSH6	rs587779215	Hereditary nonpolyposis colon cancer	ClinVar		Congenital, Hereditary, and Neonatal Diseases and Abnormalities; Digestive System Diseases; Neoplasms; Nutritional and Metabolic Diseases
ENST00000234420.11:C.1572C>T	2	47799555	ENSG00000116062	ENST00000234420.11	MSH6	rs587779215	Lynch syndrome	ClinVar		Congenital, Hereditary, and Neonatal Diseases and Abnormalities; Digestive System Diseases; Neoplasms; Nutritional and Metabolic Diseases
ENST00000234420.11:C.1770C>T	2	47799753	ENSG00000116062	ENST00000234420.11	MSH6	rs267608070	Hereditary cancer-predisposing syndrome	ClinVar		Other diseases
ENST00000234420.11:C.1770C>T	2	47799753	ENSG00000116062	ENST00000234420.11	MSH6	rs267608070	Lynch syndrome	ClinVar		Congenital, Hereditary, and Neonatal Diseases and Abnormalities; Digestive System Diseases; Neoplasms; Nutritional and Metabolic Diseases
ENST00000234420.11:C.1835C>A	2	47799818	ENSG00000116062	ENST00000234420.11	MSH6	rs63750564	Lynch syndrome	ClinVar		Congenital, Hereditary, and Neonatal Diseases and Abnormalities; Digestive System Diseases; Neoplasms; Nutritional and Metabolic Diseases
ENST00000234420.11:C.1847C>G	2	47799830	ENSG00000116062	ENST00000234420.11	MSH6	rs772363120	Hereditary cancer-predisposing syndrome	ClinVar		Other diseases
ENST00000234420.11:C.1847C>G	2	47799830	ENSG00000116062	ENST00000234420.11	MSH6	rs772363120	Hereditary nonpolyposis colon cancer	ClinVar		Congenital, Hereditary, and Neonatal Diseases and Abnormalities; Digestive System Diseases; Neoplasms; Nutritional and Metabolic Diseases
ENST00000234420.11:C.1847C>G	2	47799830	ENSG00000116062	ENST00000234420.11	MSH6	rs772363120	Hereditary nonpolyposis colorectal cancer type 5	ClinVar		Congenital, Hereditary, and Neonatal Diseases and Abnormalities; Neoplasms
ENST00000234420.11:C.1847C>G	2	47799830	ENSG00000116062	ENST00000234420.11	MSH6	rs772363120	Lynch syndrome	ClinVar		Congenital, Hereditary, and Neonatal Diseases and Abnormalities; Digestive System Diseases; Neoplasms; Nutritional and Metabolic Diseases
ENST00000234420.11:C.2040C>T	2	47800023	ENSG00000116062	ENST00000234420.11	MSH6	rs746448428	Hereditary cancer-predisposing syndrome	ClinVar		Other diseases
ENST00000234420.11:C.2147C>T	2	47800130	ENSG00000116062	ENST00000234420.11	MSH6	rs587782805	Hereditary cancer-predisposing syndrome	ClinVar		Other diseases
ENST00000234420.11:C.2147C>T	2	47800130	ENSG00000116062	ENST00000234420.11	MSH6	rs587782805	Hereditary nonpolyposis colon cancer	ClinVar		Congenital, Hereditary, and Neonatal Diseases and Abnormalities; Digestive System Diseases; Neoplasms; Nutritional and Metabolic Diseases
ENST00000234420.11:C.2147C>T	2	47800130	ENSG00000116062	ENST00000234420.11	MSH6	rs587782805	Hereditary nonpolyposis colorectal cancer type 5	ClinVar		Congenital, Hereditary, and Neonatal Diseases and Abnormalities; Neoplasms
ENST00000234420.11:C.2159C>T	2	47800142	ENSG00000116062	ENST00000234420.11	MSH6	rs185531778	Hereditary cancer-predisposing syndrome	ClinVar		Other diseases
ENST00000234420.11:C.2159C>T	2	47800142	ENSG00000116062	ENST00000234420.11	MSH6	rs185531778	Hereditary nonpolyposis colon cancer	ClinVar		Congenital, Hereditary, and Neonatal Diseases and Abnormalities; Digestive System Diseases; Neoplasms; Nutritional and Metabolic Diseases
ENST00000234420.11:C.2271C>T	2	47800254	ENSG00000116062	ENST00000234420.11	MSH6	rs142172006	Hereditary cancer-predisposing syndrome	ClinVar		Other diseases
ENST00000234420.11:C.2511C>T	2	47800494	ENSG00000116062	ENST00000234420.11	MSH6	rs587779925	Hereditary cancer-predisposing syndrome	ClinVar		Other diseases
ENST00000234420.11:C.2511C>T	2	47800494	ENSG00000116062	ENST00000234420.11	MSH6	rs587779925	Hereditary nonpolyposis colon cancer	ClinVar		Congenital, Hereditary, and Neonatal Diseases and Abnormalities; Digestive System Diseases; Neoplasms; Nutritional and Metabolic Diseases
ENST00000234420.11:C.2511C>T	2	47800494	ENSG00000116062	ENST00000234420.11	MSH6	rs587779925	Hereditary nonpolyposis colorectal cancer type 5	ClinVar		Congenital, Hereditary, and Neonatal Diseases and Abnormalities; Neoplasms
ENST00000234420.11:C.2517C>T	2	47800500	ENSG00000116062	ENST00000234420.11	MSH6	rs902748383	Hereditary cancer-predisposing syndrome	ClinVar		Other diseases
ENST00000234420.11:C.2520C>T	2	47800503	ENSG00000116062	ENST00000234420.11	MSH6	rs781241667	Hereditary cancer-predisposing syndrome	ClinVar		Other diseases
ENST00000234420.11:C.2520C>T	2	47800503	ENSG00000116062	ENST00000234420.11	MSH6	rs781241667	Hereditary nonpolyposis colon cancer	ClinVar		Congenital, Hereditary, and Neonatal Diseases and Abnormalities; Digestive System Diseases; Neoplasms; Nutritional and Metabolic Diseases
ENST00000234420.11:C.2673C>G	2	47800656	ENSG00000116062	ENST00000234420.11	MSH6	rs146006741	Hereditary cancer-predisposing syndrome	ClinVar		Other diseases
ENST00000234420.11:C.2673C>G	2	47800656	ENSG00000116062	ENST00000234420.11	MSH6	rs146006741	Hereditary nonpolyposis colon cancer	ClinVar		Congenital, Hereditary, and Neonatal Diseases and Abnormalities; Digestive System Diseases; Neoplasms; Nutritional and Metabolic Diseases
ENST00000234420.11:C.2863C>T	2	47800846	ENSG00000116062	ENST00000234420.11	MSH6	rs1401779172	Hereditary cancer-predisposing syndrome	ClinVar		Other diseases
ENST00000234420.11:C.2863C>T	2	47800846	ENSG00000116062	ENST00000234420.11	MSH6	rs1401779172	Hereditary nonpolyposis colon cancer	ClinVar		Congenital, Hereditary, and Neonatal Diseases and Abnormalities; Digestive System Diseases; Neoplasms; Nutritional and Metabolic Diseases
ENST00000234420.11:C.2880C>T	2	47800863	ENSG00000116062	ENST00000234420.11	MSH6	rs1057520440	Hereditary cancer-predisposing syndrome	ClinVar		Other diseases
ENST00000234420.11:C.2955C>T	2	47800938	ENSG00000116062	ENST00000234420.11	MSH6	rs63750942	Hereditary cancer-predisposing syndrome	ClinVar		Other diseases
ENST00000234420.11:C.2958C>T	2	47800941	ENSG00000116062	ENST00000234420.11	MSH6	rs757866392	Hereditary cancer-predisposing syndrome	ClinVar		Other diseases
ENST00000234420.11:C.2964C>A	2	47800947	ENSG00000116062	ENST00000234420.11	MSH6	rs144288981	Hereditary cancer-predisposing syndrome	ClinVar		Other diseases
ENST00000234420.11:C.2982C>T	2	47800965	ENSG00000116062	ENST00000234420.11	MSH6	rs367758473	Hereditary cancer-predisposing syndrome	ClinVar		Other diseases
ENST00000234420.11:C.2982C>T	2	47800965	ENSG00000116062	ENST00000234420.11	MSH6	rs367758473	Hereditary nonpolyposis colorectal cancer type 5	ClinVar		Congenital, Hereditary, and Neonatal Diseases and Abnormalities; Neoplasms
ENST00000234420.11:C.3029C>T	2	47801012	ENSG00000116062	ENST00000234420.11	MSH6	rs768925694	Hereditary cancer-predisposing syndrome	ClinVar		Other diseases
ENST00000234420.11:C.3029C>T	2	47801012	ENSG00000116062	ENST00000234420.11	MSH6	rs768925694	Lynch syndrome	ClinVar		Congenital, Hereditary, and Neonatal Diseases and Abnormalities; Digestive System Diseases; Neoplasms; Nutritional and Metabolic Diseases
ENST00000234420.11:C.3054C>T	2	47801037	ENSG00000116062	ENST00000234420.11	MSH6	rs772191770	Hereditary cancer-predisposing syndrome	ClinVar		Other diseases
ENST00000234420.11:C.3162C>T	2	47801145	ENSG00000116062	ENST00000234420.11	MSH6	rs149605979	Hereditary cancer-predisposing syndrome	ClinVar		Other diseases
ENST00000234420.11:C.3162C>T	2	47801145	ENSG00000116062	ENST00000234420.11	MSH6	rs149605979	Hereditary nonpolyposis colon cancer	ClinVar		Congenital, Hereditary, and Neonatal Diseases and Abnormalities; Digestive System Diseases; Neoplasms; Nutritional and Metabolic Diseases
ENST00000234420.11:C.3255C>A	2	47803502	ENSG00000116062	ENST00000234420.11	MSH6	rs371568610	Hereditary cancer-predisposing syndrome	ClinVar		Other diseases
ENST00000234420.11:C.3255C>A	2	47803502	ENSG00000116062	ENST00000234420.11	MSH6	rs371568610	Hereditary nonpolyposis colorectal cancer type 5	ClinVar		Congenital, Hereditary, and Neonatal Diseases and Abnormalities; Neoplasms
ENST00000234420.11:C.3257C>A	2	47803504	ENSG00000116062	ENST00000234420.11	MSH6	rs780345806	Hereditary cancer-predisposing syndrome	ClinVar		Other diseases
ENST00000234420.11:C.3257C>A	2	47803504	ENSG00000116062	ENST00000234420.11	MSH6	rs780345806	Hereditary nonpolyposis colon cancer	ClinVar		Congenital, Hereditary, and Neonatal Diseases and Abnormalities; Digestive System Diseases; Neoplasms; Nutritional and Metabolic Diseases
ENST00000234420.11:C.3258C>T	2	47803505	ENSG00000116062	ENST00000234420.11	MSH6	rs863224331	skin carcinoma	Cosmic	25589618	Cancer; Dermatological Diseases and Conditions; Organismal Injury and Abnormalities
ENST00000234420.11:C.3258C>T	2	47803505	ENSG00000116062	ENST00000234420.11	MSH6	rs863224331	Hereditary cancer-predisposing syndrome	ClinVar		Other diseases
ENST00000234420.11:C.3364C>G	2	47803611	ENSG00000116062	ENST00000234420.11	MSH6	rs1060502892	Hereditary cancer-predisposing syndrome	ClinVar		Other diseases
ENST00000234420.11:C.3364C>G	2	47803611	ENSG00000116062	ENST00000234420.11	MSH6	rs1060502892	Hereditary nonpolyposis colon cancer	ClinVar		Congenital, Hereditary, and Neonatal Diseases and Abnormalities; Digestive System Diseases; Neoplasms; Nutritional and Metabolic Diseases
ENST00000234420.11:C.3364C>G	2	47803611	ENSG00000116062	ENST00000234420.11	MSH6	rs1060502892	Hereditary nonpolyposis colorectal cancer type 5	ClinVar		Congenital, Hereditary, and Neonatal Diseases and Abnormalities; Neoplasms
ENST00000234420.11:C.3477C>T	2	47804948	ENSG00000116062	ENST00000234420.11	MSH6	rs398123231	Hereditary cancer-predisposing syndrome	ClinVar		Other diseases
ENST00000234420.11:C.3477C>T	2	47804948	ENSG00000116062	ENST00000234420.11	MSH6	rs398123231	Hereditary nonpolyposis colon cancer	ClinVar		Congenital, Hereditary, and Neonatal Diseases and Abnormalities; Digestive System Diseases; Neoplasms; Nutritional and Metabolic Diseases
ENST00000234420.11:C.3477C>T	2	47804948	ENSG00000116062	ENST00000234420.11	MSH6	rs398123231	Lynch syndrome	ClinVar		Congenital, Hereditary, and Neonatal Diseases and Abnormalities; Digestive System Diseases; Neoplasms; Nutritional and Metabolic Diseases
ENST00000234420.11:C.3480C>A	2	47804951	ENSG00000116062	ENST00000234420.11	MSH6	rs786201385	Hereditary cancer-predisposing syndrome	ClinVar		Other diseases
ENST00000234420.11:C.3495C>T	2	47804966	ENSG00000116062	ENST00000234420.11	MSH6	rs780099145	large intestine carcinoma	Cosmic	28002797	Cancer; Gastrointestinal Disease; Organismal Injury and Abnormalities
ENST00000234420.11:C.3495C>T	2	47804966	ENSG00000116062	ENST00000234420.11	MSH6	rs780099145	glioma	Cosmic	28002797	Neoplasms
ENST00000234420.11:C.3495C>T	2	47804966	ENSG00000116062	ENST00000234420.11	MSH6	rs780099145	Hereditary cancer-predisposing syndrome	ClinVar		Other diseases
ENST00000234420.11:C.3747C>T	2	47806304	ENSG00000116062	ENST00000234420.11	MSH6	rs1057520326	Hereditary cancer-predisposing syndrome	ClinVar		Other diseases
ENST00000234420.11:C.3924C>T	2	47806574	ENSG00000116062	ENST00000234420.11	MSH6	rs769973928	Hereditary cancer-predisposing syndrome	ClinVar		Other diseases
ENST00000234420.11:C.3988C>T	2	47806638	ENSG00000116062	ENST00000234420.11	MSH6	rs768944975	Hereditary cancer-predisposing syndrome	ClinVar		Other diseases
ENST00000234420.11:C.3988C>T	2	47806638	ENSG00000116062	ENST00000234420.11	MSH6	rs768944975	Hereditary nonpolyposis colon cancer	ClinVar		Congenital, Hereditary, and Neonatal Diseases and Abnormalities; Digestive System Diseases; Neoplasms; Nutritional and Metabolic Diseases
ENST00000294952.13:C.522C>T	2	48459900	ENSG00000162869	ENST00000294952.13	PPP1R21	rs1459144744	lung carcinoma	Cosmic	22941188	Cancer; Organismal Injury and Abnormalities; Respiratory Disease
ENST00000404971.5:C.3339C>T	2	50472323	ENSG00000179915	ENST00000404971.5	NRXN1	rs563089155	History of neurodevelopmental disorder	ClinVar		Other diseases
ENST00000404971.5:C.3321C>T	2	50472341	ENSG00000179915	ENST00000404971.5	NRXN1	rs75275592	History of neurodevelopmental disorder	ClinVar		Other diseases
ENST00000404971.5:C.2778C>T	2	50497554	ENSG00000179915	ENST00000404971.5	NRXN1	rs752920557	Pitt-Hopkins-like syndrome 2	ClinVar		Congenital, Hereditary, and Neonatal Diseases and Abnormalities; Musculoskeletal Diseases; Nervous System Diseases
ENST00000404971.5:C.2541C>T	2	50506571	ENSG00000179915	ENST00000404971.5	NRXN1	rs115211871	History of neurodevelopmental disorder	ClinVar		Other diseases
ENST00000404971.5:C.2541C>T	2	50506571	ENSG00000179915	ENST00000404971.5	NRXN1	rs115211871	Pitt-Hopkins-like syndrome	ClinVar		Congenital, Hereditary, and Neonatal Diseases and Abnormalities; Musculoskeletal Diseases; Nervous System Diseases
ENST00000404971.5:C.2505C>T	2	50506607	ENSG00000179915	ENST00000404971.5	NRXN1	rs147984237	History of neurodevelopmental disorder	ClinVar		Other diseases
ENST00000404971.5:C.2505C>T	2	50506607	ENSG00000179915	ENST00000404971.5	NRXN1	rs147984237	Pitt-Hopkins-like syndrome	ClinVar		Congenital, Hereditary, and Neonatal Diseases and Abnormalities; Musculoskeletal Diseases; Nervous System Diseases
ENST00000404971.5:C.2067C>T	2	50538449	ENSG00000179915	ENST00000404971.5	NRXN1	rs539484479	History of neurodevelopmental disorder	ClinVar		Other diseases
ENST00000404971.5:C.2007C>T	2	50538509	ENSG00000179915	ENST00000404971.5	NRXN1	rs200603742	History of neurodevelopmental disorder	ClinVar		Other diseases
ENST00000356458.7:C.3777C>T	2	54928414	ENSG00000214595	ENST00000356458.7	EML6	rs733916	Astigmatism	Ensembl_Post_GWAS	PMID25367360	Eye Diseases
ENST00000447944.7:C.1390C>A	2	55656182	ENSG00000138035	ENST00000447944.7	PNPT1	rs2627765	diastolic blood pressure	Ensembl_Post_GWAS	PMID27618452	Other diseases
ENST00000447944.7:C.1390C>A	2	55656182	ENSG00000138035	ENST00000447944.7	PNPT1	rs2627765	metabolic syndrome	Ensembl_Post_GWAS	PMID22399527	Nutritional and Metabolic Diseases
ENST00000447944.7:C.1390C>A	2	55656182	ENSG00000138035	ENST00000447944.7	PNPT1	rs2627765	systolic blood pressure	Ensembl_Post_GWAS	PMID27618452	Cardiovascular Diseases
ENST00000394555.6:C.1413C>T	2	55867142	ENSG00000115380	ENST00000394555.6	EFEMP1	rs374690853	Doyne honeycomb retinal dystrophy	ClinVar		Eye Diseases; Nervous System Diseases
ENST00000394555.6:C.963C>T	2	55874983	ENSG00000115380	ENST00000394555.6	EFEMP1	rs769842736	Doyne honeycomb retinal dystrophy	ClinVar		Eye Diseases; Nervous System Diseases
ENST00000394555.6:C.489C>T	2	55917693	ENSG00000115380	ENST00000394555.6	EFEMP1	rs761107410	Doyne honeycomb retinal dystrophy	ClinVar		Eye Diseases; Nervous System Diseases
ENST00000272342.6:C.2311C>G	2	67404993	ENSG00000143971	ENST00000272342.6	ETAA1	rs3770655	BMI-adjusted waist-hip ratio	Ensembl_Post_GWAS	PMID28430825	Other diseases
ENST00000272342.6:C.2311C>G	2	67404993	ENSG00000143971	ENST00000272342.6	ETAA1	rs3770655	pancreatic carcinoma	Ensembl_Post_GWAS	PMID29422604	Cancer; Endocrine System Diseases; Gastrointestinal Disease; Organismal Injury and Abnormalities
ENST00000357308.9:C.870C>T	2	69348310	ENSG00000198380	ENST00000357308.9	GFPT1	rs754486756	Congenital myasthenic syndrome 12	ClinVar		Congenital, Hereditary, and Neonatal Diseases and Abnormalities; Nervous System Diseases
ENST00000234396.10:C.144C>T	2	70943683	ENSG00000116039	ENST00000234396.10	ATP6V1B1	rs144845223	Renal tubular acidosis with progressive nerve deafness	ClinVar		Pathological Conditions, Signs and Symptoms; Congenital, Hereditary, and Neonatal Diseases and Abnormalities; Nutritional and Metabolic Diseases; Female Urogenital Diseases and Pregnancy Complications; Male Urogenital Diseases; Nervous System Diseases; Otorhinolaryngologic Diseases
ENST00000234396.10:C.1002C>T	2	70963254	ENSG00000116039	ENST00000234396.10	ATP6V1B1	rs2072462	Renal tubular acidosis with progressive nerve deafness	ClinVar		Pathological Conditions, Signs and Symptoms; Congenital, Hereditary, and Neonatal Diseases and Abnormalities; Nutritional and Metabolic Diseases; Female Urogenital Diseases and Pregnancy Complications; Male Urogenital Diseases; Nervous System Diseases; Otorhinolaryngologic Diseases
ENST00000455662.6:C.942C>T	2	71077596	ENSG00000124357	ENST00000455662.6	NAGK	rs768168137	liver carcinoma	Cosmic	0	Cancer; Gastrointestinal Disease; Hepatic System Disease; Organismal Injury and Abnormalities
ENST00000339566.7:C.1230C>T	2	73862214	ENSG00000124356	ENST00000339566.7	STAMBP	rs587784445	Microcephaly-capillary malformation syndrome	ClinVar		Musculoskeletal Diseases; Nervous System Diseases; Cardiovascular Diseases; Congenital, Hereditary, and Neonatal Diseases and Abnormalities
ENST00000628224.3:C.3215C>G	2	74363424	ENSG00000204843	ENST00000628224.3	DCTN1	rs780875333	Amyotrophic lateral sclerosis type 1	ClinVar		Nervous System Diseases; Nutritional and Metabolic Diseases
ENST00000628224.3:C.3215C>G	2	74363424	ENSG00000204843	ENST00000628224.3	DCTN1	rs780875333	Distal hereditary motor neuronopathy type 7B	ClinVar		Nervous System Diseases
ENST00000628224.3:C.3215C>G	2	74363424	ENSG00000204843	ENST00000628224.3	DCTN1	rs780875333	Perry syndrome	ClinVar		Pathological Conditions, Signs and Symptoms; Respiratory Disease; Nervous System Diseases; Behavior and Behavior Mechanisms
ENST00000628224.3:C.810C>G	2	74371012	ENSG00000204843	ENST00000628224.3	DCTN1	rs569011011	Distal hereditary motor neuronopathy	ClinVar		Congenital, Hereditary, and Neonatal Diseases and Abnormalities; Musculoskeletal Diseases
ENST00000628224.3:C.810C>G	2	74371012	ENSG00000204843	ENST00000628224.3	DCTN1	rs569011011	Perry syndrome	ClinVar		Pathological Conditions, Signs and Symptoms; Respiratory Disease; Nervous System Diseases; Behavior and Behavior Mechanisms
ENST00000628224.3:C.42C>T	2	74378237	ENSG00000204843	ENST00000628224.3	DCTN1	rs535554555	Amyotrophic lateral sclerosis type 1	ClinVar		Nervous System Diseases; Nutritional and Metabolic Diseases
ENST00000628224.3:C.42C>T	2	74378237	ENSG00000204843	ENST00000628224.3	DCTN1	rs535554555	Distal hereditary motor neuronopathy type 7B	ClinVar		Nervous System Diseases
ENST00000628224.3:C.42C>T	2	74378237	ENSG00000204843	ENST00000628224.3	DCTN1	rs535554555	Perry syndrome	ClinVar		Pathological Conditions, Signs and Symptoms; Respiratory Disease; Nervous System Diseases; Behavior and Behavior Mechanisms
ENST00000448666.7:C.877C>T	2	74462912	ENSG00000115275	ENST00000448666.7	MOGS	rs2268416	Congenital disorder of glycosylation	ClinVar		Congenital, Hereditary, and Neonatal Diseases and Abnormalities; Nutritional and Metabolic Diseases; Musculoskeletal Diseases
ENST00000448666.7:C.342C>A	2	74464906	ENSG00000115275	ENST00000448666.7	MOGS	rs773049219	Congenital disorder of glycosylation	ClinVar		Congenital, Hereditary, and Neonatal Diseases and Abnormalities; Nutritional and Metabolic Diseases; Musculoskeletal Diseases
ENST00000258080.8:C.480C>T	2	74530486	ENSG00000115317	ENST00000258080.8	HTRA2	rs2231248	Parkinson Disease	ClinVar		Nervous System Diseases
ENST00000258080.8:C.1155C>T	2	74532658	ENSG00000115317	ENST00000258080.8	HTRA2	rs150357486	Parkinson Disease	ClinVar		Nervous System Diseases
ENST00000389394.8:C.1041C>T	2	84547378	ENSG00000115423	ENST00000389394.8	DNAH6	rs751518371	liver carcinoma	Cosmic	0	Cancer; Gastrointestinal Disease; Hepatic System Disease; Organismal Injury and Abnormalities
ENST00000640418.1:C.1116C>T	2	85840342	ENSG00000115525	ENST00000640418.1	ST3GAL5	rs149801673	Salt and pepper developmental regression syndrome	ClinVar		Nervous System Diseases
ENST00000263857.11:C.2868C>T	2	86045635	ENSG00000068654	ENST00000263857.11	POLR1A	rs1561328	facial emotion recognition measurement	Ensembl_Post_GWAS	PMID28608620	Behavior and Behavior Mechanisms
ENST00000263857.11:C.2868C>T	2	86045635	ENSG00000068654	ENST00000263857.11	POLR1A	rs1561328	response to methylphenidate	Ensembl_Post_GWAS	PMID21130132	Other diseases
ENST00000258439.8:C.651C>T	2	96253874	ENSG00000135956	ENST00000258439.8	TMEM127	rs759801591	Hereditary cancer-predisposing syndrome	ClinVar		Other diseases
ENST00000258439.8:C.651C>T	2	96253874	ENSG00000135956	ENST00000258439.8	TMEM127	rs759801591	Hereditary Paraganglioma-Pheochromocytoma Syndromes	ClinVar		Other diseases
ENST00000258439.8:C.522C>T	2	96254003	ENSG00000135956	ENST00000258439.8	TMEM127	rs367951215	Hereditary cancer-predisposing syndrome	ClinVar		Other diseases
ENST00000258439.8:C.519C>T	2	96254006	ENSG00000135956	ENST00000258439.8	TMEM127	rs758676810	Hereditary cancer-predisposing syndrome	ClinVar		Other diseases
ENST00000258439.8:C.327C>T	2	96254915	ENSG00000135956	ENST00000258439.8	TMEM127	rs773650718	Hereditary cancer-predisposing syndrome	ClinVar		Other diseases
ENST00000258439.8:C.280C>A	2	96254962	ENSG00000135956	ENST00000258439.8	TMEM127	rs121908824	Hereditary cancer-predisposing syndrome	ClinVar		Other diseases
ENST00000258439.8:C.280C>A	2	96254962	ENSG00000135956	ENST00000258439.8	TMEM127	rs121908824	Hereditary Paraganglioma-Pheochromocytoma Syndromes	ClinVar		Other diseases
ENST00000258439.8:C.280C>A	2	96254962	ENSG00000135956	ENST00000258439.8	TMEM127	rs121908824	Pheochromocytoma	ClinVar		Neoplasms
ENST00000258439.8:C.33C>A	2	96265349	ENSG00000135956	ENST00000258439.8	TMEM127	rs1268280072	Hereditary cancer-predisposing syndrome	ClinVar		Other diseases
ENST00000258439.8:C.12C>T	2	96265370	ENSG00000135956	ENST00000258439.8	TMEM127	rs1406470818	Hereditary cancer-predisposing syndrome	ClinVar		Other diseases
ENST00000323853.10:C.5409C>T	2	96278626	ENSG00000144028	ENST00000323853.10	SNRNP200	rs139137932	Retinitis Pigmentosa	ClinVar		Congenital, Hereditary, and Neonatal Diseases and Abnormalities; Eye Diseases
ENST00000323853.10:C.4029C>T	2	96285315	ENSG00000144028	ENST00000323853.10	SNRNP200	rs145242546	Retinitis Pigmentosa	ClinVar		Congenital, Hereditary, and Neonatal Diseases and Abnormalities; Eye Diseases
ENST00000323853.10:C.3744C>T	2	96286773	ENSG00000144028	ENST00000323853.10	SNRNP200	rs750593383	Retinitis Pigmentosa	ClinVar		Congenital, Hereditary, and Neonatal Diseases and Abnormalities; Eye Diseases
ENST00000323853.10:C.1098C>T	2	96298305	ENSG00000144028	ENST00000323853.10	SNRNP200	rs774935614	Retinitis Pigmentosa	ClinVar		Congenital, Hereditary, and Neonatal Diseases and Abnormalities; Eye Diseases
ENST00000323853.10:C.732C>T	2	96298965	ENSG00000144028	ENST00000323853.10	SNRNP200	rs199688602	Retinitis Pigmentosa	ClinVar		Congenital, Hereditary, and Neonatal Diseases and Abnormalities; Eye Diseases
ENST00000323853.10:C.651C>T	2	96299407	ENSG00000144028	ENST00000323853.10	SNRNP200	rs147219591	Retinitis Pigmentosa	ClinVar		Congenital, Hereditary, and Neonatal Diseases and Abnormalities; Eye Diseases
ENST00000409059.5:C.1322C>T	2	108010440	ENSG00000115665	ENST00000409059.5	SLC5A7	rs754554826	Myasthenic syndrome	ClinVar		Other diseases
ENST00000409059.5:C.1322C>T	2	108010440	ENSG00000115665	ENST00000409059.5	SLC5A7	rs754554826	Neuronopathy	ClinVar		Other diseases
ENST00000452319.6:C.720C>T	2	120968790	ENSG00000074047	ENST00000452319.6	GLI2	rs142793481	Holoprosencephaly sequence	ClinVar		Congenital, Hereditary, and Neonatal Diseases and Abnormalities; Musculoskeletal Diseases; Nervous System Diseases
ENST00000452319.6:C.1806C>T	2	120984593	ENSG00000074047	ENST00000452319.6	GLI2	rs139202322	Holoprosencephaly sequence	ClinVar		Congenital, Hereditary, and Neonatal Diseases and Abnormalities; Musculoskeletal Diseases; Nervous System Diseases
ENST00000452319.6:C.1869C>T	2	120984656	ENSG00000074047	ENST00000452319.6	GLI2	rs61732850	Holoprosencephaly sequence	ClinVar		Congenital, Hereditary, and Neonatal Diseases and Abnormalities; Musculoskeletal Diseases; Nervous System Diseases
ENST00000452319.6:C.2940C>T	2	120988854	ENSG00000074047	ENST00000452319.6	GLI2	rs146811565	Holoprosencephaly sequence	ClinVar		Congenital, Hereditary, and Neonatal Diseases and Abnormalities; Musculoskeletal Diseases; Nervous System Diseases
ENST00000452319.6:C.3048C>T	2	120988962	ENSG00000074047	ENST00000452319.6	GLI2	rs140479803	Culler-Jones syndrome	ClinVar		Other diseases
ENST00000452319.6:C.3048C>T	2	120988962	ENSG00000074047	ENST00000452319.6	GLI2	rs140479803	Holoprosencephaly 9	ClinVar		Congenital, Hereditary, and Neonatal Diseases and Abnormalities; Musculoskeletal Diseases; Nervous System Diseases
ENST00000452319.6:C.3048C>T	2	120988962	ENSG00000074047	ENST00000452319.6	GLI2	rs140479803	Holoprosencephaly sequence	ClinVar		Congenital, Hereditary, and Neonatal Diseases and Abnormalities; Musculoskeletal Diseases; Nervous System Diseases
ENST00000452319.6:C.3237C>T	2	120989151	ENSG00000074047	ENST00000452319.6	GLI2	rs769533860	Holoprosencephaly sequence	ClinVar		Congenital, Hereditary, and Neonatal Diseases and Abnormalities; Musculoskeletal Diseases; Nervous System Diseases
ENST00000452319.6:C.3937C>T	2	120989851	ENSG00000074047	ENST00000452319.6	GLI2	rs767845340	Holoprosencephaly sequence	ClinVar		Congenital, Hereditary, and Neonatal Diseases and Abnormalities; Musculoskeletal Diseases; Nervous System Diseases
ENST00000452319.6:C.4344C>T	2	120990258	ENSG00000074047	ENST00000452319.6	GLI2	rs374166743	Holoprosencephaly sequence	ClinVar		Congenital, Hereditary, and Neonatal Diseases and Abnormalities; Musculoskeletal Diseases; Nervous System Diseases
ENST00000263707.6:C.1254C>T	2	121231913	ENSG00000115112	ENST00000263707.6	TFCP2L1	rs2304667	Urate levels	GWAS	31578528	Other diseases
ENST00000431078.1:C.2508C>T	2	124764125	ENSG00000155052	ENST00000431078.1	CNTNAP5	rs767005979	breast carcinoma	Cosmic	22722193	Cancer; Organismal Injury and Abnormalities; Reproductive System Disease
ENST00000316724.10:C.714C>T	2	127063631	ENSG00000136717	ENST00000316724.10	BIN1	rs1137845	Autosomal recessive centronuclear myopathy	ClinVar		Musculoskeletal Diseases; Nervous System Diseases
ENST00000316724.10:C.702C>T	2	127063643	ENSG00000136717	ENST00000316724.10	BIN1	rs775573748	Autosomal recessive centronuclear myopathy	ClinVar		Musculoskeletal Diseases; Nervous System Diseases
ENST00000316724.10:C.213C>T	2	127070769	ENSG00000136717	ENST00000316724.10	BIN1	rs560078675	Autosomal recessive centronuclear myopathy	ClinVar		Musculoskeletal Diseases; Nervous System Diseases
ENST00000647169.1:C.1446C>T	2	127280603	ENSG00000163161	ENST00000647169.1	ERCC3	rs769083884	Xeroderma pigmentosum	ClinVar		Congenital, Hereditary, and Neonatal Diseases and Abnormalities; Neoplasms; Nutritional and Metabolic Diseases; Skin and Connective Tissue Diseases
ENST00000647169.1:C.1273C>A	2	127286772	ENSG00000163161	ENST00000647169.1	ERCC3	rs121913047	Xeroderma pigmentosum	ClinVar		Congenital, Hereditary, and Neonatal Diseases and Abnormalities; Neoplasms; Nutritional and Metabolic Diseases; Skin and Connective Tissue Diseases
ENST00000647169.1:C.1155C>T	2	127286890	ENSG00000163161	ENST00000647169.1	ERCC3	rs371396764	Xeroderma pigmentosum	ClinVar		Congenital, Hereditary, and Neonatal Diseases and Abnormalities; Neoplasms; Nutritional and Metabolic Diseases; Skin and Connective Tissue Diseases
ENST00000647169.1:C.1026C>T	2	127288661	ENSG00000163161	ENST00000647169.1	ERCC3	rs752026166	Xeroderma pigmentosum	ClinVar		Congenital, Hereditary, and Neonatal Diseases and Abnormalities; Neoplasms; Nutritional and Metabolic Diseases; Skin and Connective Tissue Diseases
ENST00000647169.1:C.618C>T	2	127289728	ENSG00000163161	ENST00000647169.1	ERCC3	rs145830873	Xeroderma pigmentosum	ClinVar		Congenital, Hereditary, and Neonatal Diseases and Abnormalities; Neoplasms; Nutritional and Metabolic Diseases; Skin and Connective Tissue Diseases
ENST00000409048.1:C.51C>T	2	127419993	ENSG00000115718	ENST00000409048.1	PROC	rs770171684	Thrombophilia	ClinVar		Hemic and Lymphatic Diseases
ENST00000409048.1:C.733C>A	2	127426180	ENSG00000115718	ENST00000409048.1	PROC	rs121918143	Reduced protein C activity	ClinVar		Congenital, Hereditary, and Neonatal Diseases and Abnormalities; Hemic and Lymphatic Diseases
ENST00000409048.1:C.733C>A	2	127426180	ENSG00000115718	ENST00000409048.1	PROC	rs121918143	Thrombophilia	ClinVar		Hemic and Lymphatic Diseases
ENST00000324938.9:C.981C>T	2	127639398	ENSG00000072163	ENST00000324938.9	LIMS2	rs374378217	Muscular dystrophy	ClinVar		Congenital, Hereditary, and Neonatal Diseases and Abnormalities; Musculoskeletal Diseases; Nervous System Diseases
ENST00000264157.10:C.1491C>G	2	134953946	ENSG00000082258	ENST00000264157.10	CCNT2	rs3814355	asthma	Ensembl_Post_GWAS	PMID25918132	Respiratory Disease; Immune System Diseases
ENST00000264157.10:C.1491C>G	2	134953946	ENSG00000082258	ENST00000264157.10	CCNT2	rs3814355	blood metabolite measurement	Ensembl_Post_GWAS	PMID24816252	Other diseases
ENST00000264157.10:C.1491C>G	2	134953946	ENSG00000082258	ENST00000264157.10	CCNT2	rs3814355	diastolic blood pressure	Ensembl_Post_GWAS	PMID30224653	Other diseases
ENST00000264157.10:C.1491C>G	2	134953946	ENSG00000082258	ENST00000264157.10	CCNT2	rs3814355	grip strength measurement	Ensembl_Post_GWAS	PMID29691431	Other diseases
ENST00000264157.10:C.1491C>G	2	134953946	ENSG00000082258	ENST00000264157.10	CCNT2	rs3814355	hematocrit	Ensembl_Post_GWAS	PMID29691431	Other diseases
ENST00000264157.10:C.1491C>G	2	134953946	ENSG00000082258	ENST00000264157.10	CCNT2	rs3814355	response to diisocyanate	Ensembl_Post_GWAS	PMID28017375	Other diseases
ENST00000264162.7:C.5529C>T	2	135789605	ENSG00000115850	ENST00000264162.7	LCT	rs761696901	Congenital lactase deficiency	ClinVar		Congenital, Hereditary, and Neonatal Diseases and Abnormalities; Nutritional and Metabolic Diseases
ENST00000264162.7:C.5529C>T	2	135789605	ENSG00000115850	ENST00000264162.7	LCT	rs761696901	Lactose intolerance	ClinVar		Congenital, Hereditary, and Neonatal Diseases and Abnormalities; Digestive System Diseases; Nutritional and Metabolic Diseases
ENST00000264162.7:C.5493C>T	2	135789641	ENSG00000115850	ENST00000264162.7	LCT	rs369410973	Congenital lactase deficiency	ClinVar		Congenital, Hereditary, and Neonatal Diseases and Abnormalities; Nutritional and Metabolic Diseases
ENST00000264162.7:C.5493C>T	2	135789641	ENSG00000115850	ENST00000264162.7	LCT	rs369410973	Lactose intolerance	ClinVar		Congenital, Hereditary, and Neonatal Diseases and Abnormalities; Digestive System Diseases; Nutritional and Metabolic Diseases
ENST00000264162.7:C.4419C>T	2	135804812	ENSG00000115850	ENST00000264162.7	LCT	rs386833834	Congenital lactase deficiency	ClinVar		Congenital, Hereditary, and Neonatal Diseases and Abnormalities; Nutritional and Metabolic Diseases
ENST00000264162.7:C.4122C>T	2	135807179	ENSG00000115850	ENST00000264162.7	LCT	rs557321611	Congenital lactase deficiency	ClinVar		Congenital, Hereditary, and Neonatal Diseases and Abnormalities; Nutritional and Metabolic Diseases
ENST00000264162.7:C.4122C>T	2	135807179	ENSG00000115850	ENST00000264162.7	LCT	rs557321611	Lactose intolerance	ClinVar		Congenital, Hereditary, and Neonatal Diseases and Abnormalities; Digestive System Diseases; Nutritional and Metabolic Diseases
ENST00000264162.7:C.3848C>T	2	135808499	ENSG00000115850	ENST00000264162.7	LCT	rs147755711	Congenital lactase deficiency	ClinVar		Congenital, Hereditary, and Neonatal Diseases and Abnormalities; Nutritional and Metabolic Diseases
ENST00000264162.7:C.3848C>T	2	135808499	ENSG00000115850	ENST00000264162.7	LCT	rs147755711	Lactose intolerance	ClinVar		Congenital, Hereditary, and Neonatal Diseases and Abnormalities; Digestive System Diseases; Nutritional and Metabolic Diseases
ENST00000264162.7:C.3285C>T	2	135809062	ENSG00000115850	ENST00000264162.7	LCT	rs372534937	Congenital lactase deficiency	ClinVar		Congenital, Hereditary, and Neonatal Diseases and Abnormalities; Nutritional and Metabolic Diseases
ENST00000264162.7:C.3285C>T	2	135809062	ENSG00000115850	ENST00000264162.7	LCT	rs372534937	Lactose intolerance	ClinVar		Congenital, Hereditary, and Neonatal Diseases and Abnormalities; Digestive System Diseases; Nutritional and Metabolic Diseases
ENST00000264162.7:C.2760C>A	2	135809587	ENSG00000115850	ENST00000264162.7	LCT	rs200579267	Congenital lactase deficiency	ClinVar		Congenital, Hereditary, and Neonatal Diseases and Abnormalities; Nutritional and Metabolic Diseases
ENST00000264162.7:C.2760C>A	2	135809587	ENSG00000115850	ENST00000264162.7	LCT	rs200579267	Lactose intolerance	ClinVar		Congenital, Hereditary, and Neonatal Diseases and Abnormalities; Digestive System Diseases; Nutritional and Metabolic Diseases
ENST00000264162.7:C.2457C>T	2	135809890	ENSG00000115850	ENST00000264162.7	LCT	rs149425549	Congenital lactase deficiency	ClinVar		Congenital, Hereditary, and Neonatal Diseases and Abnormalities; Nutritional and Metabolic Diseases
ENST00000264162.7:C.2457C>T	2	135809890	ENSG00000115850	ENST00000264162.7	LCT	rs149425549	Lactose intolerance	ClinVar		Congenital, Hereditary, and Neonatal Diseases and Abnormalities; Digestive System Diseases; Nutritional and Metabolic Diseases
ENST00000264162.7:C.1419C>T	2	135817629	ENSG00000115850	ENST00000264162.7	LCT	rs6719488	Congenital lactase deficiency	ClinVar		Congenital, Hereditary, and Neonatal Diseases and Abnormalities; Nutritional and Metabolic Diseases
ENST00000264162.7:C.1419C>T	2	135817629	ENSG00000115850	ENST00000264162.7	LCT	rs6719488	Lactose intolerance	ClinVar		Congenital, Hereditary, and Neonatal Diseases and Abnormalities; Digestive System Diseases; Nutritional and Metabolic Diseases
ENST00000264162.7:C.1419C>T	2	135817629	ENSG00000115850	ENST00000264162.7	LCT	rs6719488	1,5 anhydroglucitol measurement	Ensembl_Post_GWAS	PMID28588231	Other diseases
ENST00000264162.7:C.1419C>T	2	135817629	ENSG00000115850	ENST00000264162.7	LCT	rs6719488	hip circumference	Ensembl_Post_GWAS	PMID25673412	Other diseases
ENST00000264162.7:C.1419C>T	2	135817629	ENSG00000115850	ENST00000264162.7	LCT	rs6719488	total cholesterol measurement	Ensembl_Post_GWAS	PMID25961943	Other diseases
ENST00000264162.7:C.729C>G	2	135829668	ENSG00000115850	ENST00000264162.7	LCT	rs3816088	Congenital lactase deficiency	ClinVar		Congenital, Hereditary, and Neonatal Diseases and Abnormalities; Nutritional and Metabolic Diseases
ENST00000264162.7:C.729C>G	2	135829668	ENSG00000115850	ENST00000264162.7	LCT	rs3816088	Lactose intolerance	ClinVar		Congenital, Hereditary, and Neonatal Diseases and Abnormalities; Digestive System Diseases; Nutritional and Metabolic Diseases
ENST00000264162.7:C.729C>G	2	135829668	ENSG00000115850	ENST00000264162.7	LCT	rs3816088	alpha linolenic acid measurement	Ensembl_Post_GWAS	PMID21829377	Other diseases
ENST00000264162.7:C.729C>G	2	135829668	ENSG00000115850	ENST00000264162.7	LCT	rs3816088	osteoarthritis	Ensembl_Post_GWAS	PMID29559693	Musculoskeletal Diseases
ENST00000636471.1:C.3519C>T	2	144389652	ENSG00000169554	ENST00000636471.1	ZEB2	rs374141392	Mowat-Wilson syndrome	ClinVar		Musculoskeletal Diseases; Digestive System Diseases; Nervous System Diseases; Congenital, Hereditary, and Neonatal Diseases and Abnormalities; Pathological Conditions, Signs and Symptoms; Behavior and Behavior Mechanisms; Mental Disorders
ENST00000636471.1:C.1296C>T	2	144399966	ENSG00000169554	ENST00000636471.1	ZEB2	rs144613207	History of neurodevelopmental disorder	ClinVar		Other diseases
ENST00000636471.1:C.489C>T	2	144404939	ENSG00000169554	ENST00000636471.1	ZEB2	rs138859323	History of neurodevelopmental disorder	ClinVar		Other diseases
ENST00000636471.1:C.489C>T	2	144404939	ENSG00000169554	ENST00000636471.1	ZEB2	rs138859323	Mowat-Wilson syndrome	ClinVar		Musculoskeletal Diseases; Digestive System Diseases; Nervous System Diseases; Congenital, Hereditary, and Neonatal Diseases and Abnormalities; Pathological Conditions, Signs and Symptoms; Behavior and Behavior Mechanisms; Mental Disorders
ENST00000642680.2:C.384C>T	2	148463906	ENSG00000204406	ENST00000642680.2	MBD5	rs753595652	Mental retardation	ClinVar		Pathological Conditions, Signs and Symptoms; Congenital, Hereditary, and Neonatal Diseases and Abnormalities; Nervous System Diseases; Mental Disorders; Behavior and Behavior Mechanisms
ENST00000642680.2:C.3786C>T	2	148489418	ENSG00000204406	ENST00000642680.2	MBD5	rs771343592	Mental retardation	ClinVar		Pathological Conditions, Signs and Symptoms; Congenital, Hereditary, and Neonatal Diseases and Abnormalities; Nervous System Diseases; Mental Disorders; Behavior and Behavior Mechanisms
ENST00000642680.2:C.3851C>A	2	148489483	ENSG00000204406	ENST00000642680.2	MBD5	rs761872951	Intellectual Disability	ClinVar		Nervous System Diseases; Pathological Conditions, Signs and Symptoms; Behavior and Behavior Mechanisms; Mental Disorders
ENST00000539935.7:C.315C>T	2	151880875	ENSG00000182389	ENST00000539935.7	CACNB4	rs748422887	Idiopathic generalized epilepsy	ClinVar		Nervous System Diseases
ENST00000263640.7:C.270C>T	2	157780398	ENSG00000115170	ENST00000263640.7	ACVR1	rs2227861	Progressive myositis ossificans	ClinVar		Musculoskeletal Diseases
ENST00000409175.6:C.1011C>T	2	159748301	ENSG00000136536	ENST00000409175.6	MARCH7	rs1427329	basophil count	Ensembl_Post_GWAS	PMID27863252	Other diseases
ENST00000409175.6:C.1011C>T	2	159748301	ENSG00000136536	ENST00000409175.6	MARCH7	rs1427329	eosinophil count	Ensembl_Post_GWAS	PMID27863252	Other diseases
ENST00000409175.6:C.1011C>T	2	159748301	ENSG00000136536	ENST00000409175.6	MARCH7	rs1427329	granulocyte count	Ensembl_Post_GWAS	PMID27863252	Other diseases
ENST00000409175.6:C.1011C>T	2	159748301	ENSG00000136536	ENST00000409175.6	MARCH7	rs1427329	granulocyte percentage of myeloid white cells	Ensembl_Post_GWAS	PMID27863252	Other diseases
ENST00000409175.6:C.1011C>T	2	159748301	ENSG00000136536	ENST00000409175.6	MARCH7	rs1427329	monocyte percentage of white cells	Ensembl_Post_GWAS	PMID27863252	Other diseases
ENST00000409175.6:C.1011C>T	2	159748301	ENSG00000136536	ENST00000409175.6	MARCH7	rs1427329	neutrophil count	Ensembl_Post_GWAS	PMID27863252	Other diseases
ENST00000409175.6:C.1011C>T	2	159748301	ENSG00000136536	ENST00000409175.6	MARCH7	rs1427329	neutrophil percentage of white cells	Ensembl_Post_GWAS	PMID27863252	Pathological Conditions, Signs and Symptoms; Hemic and Lymphatic Diseases
ENST00000263636.5:C.2421C>G	2	159854534	ENSG00000054219	ENST00000263636.5	LY75	rs3951216	crohns disease	Ensembl_Post_GWAS	PMID25557950	Digestive System Diseases
ENST00000263636.5:C.2421C>G	2	159854534	ENSG00000054219	ENST00000263636.5	LY75	rs3951216	erythema nodosum	Ensembl_Post_GWAS	PMID25557950	Skin and Connective Tissue Diseases; Immune System Diseases; Chemically-Induced Disorders
ENST00000263636.5:C.2421C>G	2	159854534	ENSG00000054219	ENST00000263636.5	LY75	rs3951216	leukocyte count	Ensembl_Post_GWAS	PMID29403010	Other diseases
ENST00000649979.2:C.2469C>T	2	162272373	ENSG00000115267	ENST00000649979.2	IFIH1	rs13418718	Aicardi-Goutieres syndrome 7	ClinVar		Other diseases
ENST00000649979.2:C.2469C>T	2	162272373	ENSG00000115267	ENST00000649979.2	IFIH1	rs13418718	Singleton-Merten syndrome 1	ClinVar		Other diseases
ENST00000649979.2:C.1996C>T	2	162277463	ENSG00000115267	ENST00000649979.2	IFIH1	rs376074455	Aicardi-Goutieres syndrome 7	ClinVar		Other diseases
ENST00000649979.2:C.1996C>T	2	162277463	ENSG00000115267	ENST00000649979.2	IFIH1	rs376074455	Singleton-Merten syndrome 1	ClinVar		Other diseases
ENST00000679840.1:C.2334C>T	2	165911454	ENSG00000123607	ENST00000679840.1	TTC21B	rs79656636	Jeune thoracic dystrophy	ClinVar		Musculoskeletal Diseases; Congenital, Hereditary, and Neonatal Diseases and Abnormalities; Skin and Connective Tissue Diseases
ENST00000679840.1:C.2334C>T	2	165911454	ENSG00000123607	ENST00000679840.1	TTC21B	rs79656636	Joubert syndrome	ClinVar		Congenital, Hereditary, and Neonatal Diseases and Abnormalities; Female Urogenital Diseases and Pregnancy Complications; Eye Diseases; Male Urogenital Diseases
ENST00000679840.1:C.901C>A	2	165930358	ENSG00000123607	ENST00000679840.1	TTC21B	rs1437304335	Jeune thoracic dystrophy	ClinVar		Musculoskeletal Diseases; Congenital, Hereditary, and Neonatal Diseases and Abnormalities; Skin and Connective Tissue Diseases
ENST00000679840.1:C.901C>A	2	165930358	ENSG00000123607	ENST00000679840.1	TTC21B	rs1437304335	Nephronophthisis	ClinVar		Male Urogenital Diseases; Female Urogenital Diseases and Pregnancy Complications
ENST00000303395.9:C.5217C>T	2	165992058	ENSG00000144285	ENST00000303395.9	SCN1A	rs149315236	Familial hemiplegic migraine type 3	ClinVar		Nervous System Diseases
ENST00000303395.9:C.5217C>T	2	165992058	ENSG00000144285	ENST00000303395.9	SCN1A	rs149315236	Generalized epilepsy with febrile seizures plus	ClinVar		Pathological Conditions, Signs and Symptoms; Nervous System Diseases
ENST00000303395.9:C.5217C>T	2	165992058	ENSG00000144285	ENST00000303395.9	SCN1A	rs149315236	Severe myoclonic epilepsy in infancy	ClinVar		Nervous System Diseases
ENST00000303395.9:C.3501C>T	2	166015656	ENSG00000144285	ENST00000303395.9	SCN1A	rs769635347	Early infantile epileptic encephalopathy	ClinVar		Nervous System Diseases
ENST00000303395.9:C.1842C>T	2	166043870	ENSG00000144285	ENST00000303395.9	SCN1A	rs370463183	Early infantile epileptic encephalopathy	ClinVar		Nervous System Diseases
ENST00000303395.9:C.1837C>A	2	166043875	ENSG00000144285	ENST00000303395.9	SCN1A	rs398123585	Early infantile epileptic encephalopathy	ClinVar		Nervous System Diseases
ENST00000303395.9:C.1837C>A	2	166043875	ENSG00000144285	ENST00000303395.9	SCN1A	rs398123585	Familial hemiplegic migraine type 3	ClinVar		Nervous System Diseases
ENST00000303395.9:C.1837C>A	2	166043875	ENSG00000144285	ENST00000303395.9	SCN1A	rs398123585	Generalized epilepsy with febrile seizures plus	ClinVar		Pathological Conditions, Signs and Symptoms; Nervous System Diseases
ENST00000303395.9:C.1837C>A	2	166043875	ENSG00000144285	ENST00000303395.9	SCN1A	rs398123585	Severe myoclonic epilepsy in infancy	ClinVar		Nervous System Diseases
ENST00000303395.9:C.1803C>T	2	166043909	ENSG00000144285	ENST00000303395.9	SCN1A	rs139403702	Familial hemiplegic migraine type 3	ClinVar		Nervous System Diseases
ENST00000303395.9:C.1803C>T	2	166043909	ENSG00000144285	ENST00000303395.9	SCN1A	rs139403702	Generalized epilepsy with febrile seizures plus	ClinVar		Pathological Conditions, Signs and Symptoms; Nervous System Diseases
ENST00000303395.9:C.1803C>T	2	166043909	ENSG00000144285	ENST00000303395.9	SCN1A	rs139403702	Severe myoclonic epilepsy in infancy	ClinVar		Nervous System Diseases
ENST00000303395.9:C.1624C>A	2	166045081	ENSG00000144285	ENST00000303395.9	SCN1A	rs138877187	Early infantile epileptic encephalopathy	ClinVar		Nervous System Diseases
ENST00000303395.9:C.1624C>A	2	166045081	ENSG00000144285	ENST00000303395.9	SCN1A	rs138877187	Generalized epilepsy with febrile seizures plus	ClinVar		Pathological Conditions, Signs and Symptoms; Nervous System Diseases
ENST00000303395.9:C.1624C>A	2	166045081	ENSG00000144285	ENST00000303395.9	SCN1A	rs138877187	History of neurodevelopmental disorder	ClinVar		Other diseases
ENST00000303395.9:C.1624C>A	2	166045081	ENSG00000144285	ENST00000303395.9	SCN1A	rs138877187	Severe myoclonic epilepsy in infancy	ClinVar		Nervous System Diseases
ENST00000303395.9:C.777C>T	2	166051906	ENSG00000144285	ENST00000303395.9	SCN1A	rs121918735	Seizures	ClinVar		Nervous System Diseases; Pathological Conditions, Signs and Symptoms
ENST00000303395.9:C.777C>T	2	166051906	ENSG00000144285	ENST00000303395.9	SCN1A	rs121918735	Severe myoclonic epilepsy in infancy	ClinVar		Nervous System Diseases
ENST00000303395.9:C.135C>T	2	166073487	ENSG00000144285	ENST00000303395.9	SCN1A	rs201985242	Early infantile epileptic encephalopathy	ClinVar		Nervous System Diseases
ENST00000303395.9:C.132C>T	2	166073490	ENSG00000144285	ENST00000303395.9	SCN1A	rs372758956	History of neurodevelopmental disorder	ClinVar		Other diseases
ENST00000650372.1:C.2943C>T	2	168935297	ENSG00000073734	ENST00000650372.1	ABCB11	rs145720664	Progressive familial intrahepatic cholestasis	ClinVar		Pathological Conditions, Signs and Symptoms; Congenital, Hereditary, and Neonatal Diseases and Abnormalities; Digestive System Diseases; Nutritional and Metabolic Diseases; Skin and Connective Tissue Diseases
ENST00000650372.1:C.930C>T	2	168986263	ENSG00000073734	ENST00000650372.1	ABCB11	rs372382608	Progressive familial intrahepatic cholestasis	ClinVar		Pathological Conditions, Signs and Symptoms; Congenital, Hereditary, and Neonatal Diseases and Abnormalities; Digestive System Diseases; Nutritional and Metabolic Diseases; Skin and Connective Tissue Diseases
ENST00000650372.1:C.402C>T	2	168996710	ENSG00000073734	ENST00000650372.1	ABCB11	rs11568377	Progressive familial intrahepatic cholestasis	ClinVar		Pathological Conditions, Signs and Symptoms; Congenital, Hereditary, and Neonatal Diseases and Abnormalities; Digestive System Diseases; Nutritional and Metabolic Diseases; Skin and Connective Tissue Diseases
ENST00000650372.1:C.402C>T	2	168996710	ENSG00000073734	ENST00000650372.1	ABCB11	rs11568377	Systolic blood pressure in sickle cell anemia	GWAS	24058526	Cardiovascular Diseases
ENST00000650372.1:C.402C>T	2	168996710	ENSG00000073734	ENST00000650372.1	ABCB11	rs11568377	sickle cell anemia	Ensembl_Post_GWAS	PMID24058526	Congenital, Hereditary, and Neonatal Diseases and Abnormalities; Hemic and Lymphatic Diseases
ENST00000650372.1:C.402C>T	2	168996710	ENSG00000073734	ENST00000650372.1	ABCB11	rs11568377	systolic blood pressure	Ensembl_Post_GWAS	PMID24058526	Cardiovascular Diseases
ENST00000649046.1:C.13113C>T	2	169140541	ENSG00000081479	ENST00000649046.1	LRP2	rs990626	Donnai Barrow syndrome	ClinVar		Other diseases
ENST00000649046.1:C.12756C>T	2	169146794	ENSG00000081479	ENST00000649046.1	LRP2	rs201793817	Donnai Barrow syndrome	ClinVar		Other diseases
ENST00000649046.1:C.12379C>A	2	169152881	ENSG00000081479	ENST00000649046.1	LRP2	rs148356370	Donnai Barrow syndrome	ClinVar		Other diseases
ENST00000649046.1:C.11346C>T	2	169170585	ENSG00000081479	ENST00000649046.1	LRP2	rs7598640	Donnai Barrow syndrome	ClinVar		Other diseases
ENST00000649046.1:C.10233C>T	2	169177963	ENSG00000081479	ENST00000649046.1	LRP2	rs139363553	Donnai Barrow syndrome	ClinVar		Other diseases
ENST00000649046.1:C.9234C>T	2	169188064	ENSG00000081479	ENST00000649046.1	LRP2	rs116975392	Donnai Barrow syndrome	ClinVar		Other diseases
ENST00000649046.1:C.8778C>T	2	169193813	ENSG00000081479	ENST00000649046.1	LRP2	rs199845695	Donnai Barrow syndrome	ClinVar		Other diseases
ENST00000649046.1:C.7626C>G	2	169205568	ENSG00000081479	ENST00000649046.1	LRP2	rs13397109	Donnai Barrow syndrome	ClinVar		Other diseases
ENST00000649046.1:C.6048C>T	2	169212200	ENSG00000081479	ENST00000649046.1	LRP2	rs144449508	Donnai Barrow syndrome	ClinVar		Other diseases
ENST00000649046.1:C.4344C>G	2	169238253	ENSG00000081479	ENST00000649046.1	LRP2	rs35297090	Donnai Barrow syndrome	ClinVar		Other diseases
ENST00000649046.1:C.2511C>T	2	169259027	ENSG00000081479	ENST00000649046.1	LRP2	rs375313914	Donnai Barrow syndrome	ClinVar		Other diseases
ENST00000649046.1:C.639C>T	2	169294161	ENSG00000081479	ENST00000649046.1	LRP2	rs2229266	Donnai Barrow syndrome	ClinVar		Other diseases
ENST00000272793.11:C.207C>G	2	169827714	ENSG00000144357	ENST00000272793.11	UBR3	rs2303555	amyloid plaque accumulation rate	Ensembl_Post_GWAS	PMID26268530	Pathological Conditions, Signs and Symptoms
ENST00000234160.5:C.1185C>T	2	170965956	ENSG00000115806	ENST00000234160.5	GORASP2	rs4668356	Cognitive performance	GWAS	19734545	Other diseases
ENST00000234160.5:C.1185C>T	2	170965956	ENSG00000115806	ENST00000234160.5	GORASP2	rs4668356	neuropsychological test	Ensembl_Post_GWAS	PMID19734545	Other diseases
ENST00000375255.8:C.150C>T	2	171435106	ENSG00000115827	ENST00000375255.8	DCAF17	rs6751956	Hypogonadism	ClinVar		Endocrine System Diseases
ENST00000392571.6:C.954C>T	2	172570773	ENSG00000152256	ENST00000392571.6	PDK1	rs752638116	glioma	Cosmic	18772396	Neoplasms
ENST00000392552.7:C.2460C>T	2	174436269	ENSG00000163328	ENST00000392552.7	GPR155	rs6757461	a1c measurement	Ensembl_Post_GWAS	PMID28898252	Other diseases
ENST00000261007.9:C.1407C>T	2	174748166	ENSG00000138435	ENST00000261007.9	CHRNA1	rs771587252	Congenital Myasthenic Syndrome	ClinVar		Congenital, Hereditary, and Neonatal Diseases and Abnormalities; Nervous System Diseases
ENST00000261007.9:C.1407C>T	2	174748166	ENSG00000138435	ENST00000261007.9	CHRNA1	rs771587252	Lethal multiple pterygium syndrome	ClinVar		Pathological Conditions, Signs and Symptoms; Congenital, Hereditary, and Neonatal Diseases and Abnormalities; Skin and Connective Tissue Diseases
ENST00000261007.9:C.1407C>T	2	174748166	ENSG00000138435	ENST00000261007.9	CHRNA1	rs771587252	Multiple pterygium syndrome Escobar type	ClinVar		Other diseases
ENST00000261007.9:C.1389C>T	2	174748184	ENSG00000138435	ENST00000261007.9	CHRNA1	rs137852808	Myasthenic syndrome	ClinVar		Other diseases
ENST00000261007.9:C.987C>T	2	174750036	ENSG00000138435	ENST00000261007.9	CHRNA1	rs373005571	Lethal multiple pterygium syndrome	ClinVar		Pathological Conditions, Signs and Symptoms; Congenital, Hereditary, and Neonatal Diseases and Abnormalities; Skin and Connective Tissue Diseases
ENST00000261007.9:C.780C>T	2	174753576	ENSG00000138435	ENST00000261007.9	CHRNA1	rs143252724	Congenital Myasthenic Syndrome	ClinVar		Congenital, Hereditary, and Neonatal Diseases and Abnormalities; Nervous System Diseases
ENST00000261007.9:C.780C>T	2	174753576	ENSG00000138435	ENST00000261007.9	CHRNA1	rs143252724	Multiple pterygium syndrome Escobar type	ClinVar		Other diseases
ENST00000261007.9:C.762C>T	2	174753594	ENSG00000138435	ENST00000261007.9	CHRNA1	rs545520806	Non-immune hydrops fetalis	ClinVar		Pathological Conditions, Signs and Symptoms; Congenital, Hereditary, and Neonatal Diseases and Abnormalities; Female Urogenital Diseases and Pregnancy Complications; Immune System Diseases; Hemic and Lymphatic Diseases
ENST00000261007.9:C.588C>T	2	174754246	ENSG00000138435	ENST00000261007.9	CHRNA1	rs762327875	Lethal multiple pterygium syndrome	ClinVar		Pathological Conditions, Signs and Symptoms; Congenital, Hereditary, and Neonatal Diseases and Abnormalities; Skin and Connective Tissue Diseases
ENST00000261007.9:C.111C>T	2	174759566	ENSG00000138435	ENST00000261007.9	CHRNA1	rs886055151	Congenital Myasthenic Syndrome	ClinVar		Congenital, Hereditary, and Neonatal Diseases and Abnormalities; Nervous System Diseases
ENST00000261007.9:C.111C>T	2	174759566	ENSG00000138435	ENST00000261007.9	CHRNA1	rs886055151	Multiple pterygium syndrome Escobar type	ClinVar		Other diseases
ENST00000249501.5:C.420C>T	2	176117253	ENSG00000128710	ENST00000249501.5	HOXD10	rs375702128	Vertical talus	ClinVar		Congenital, Hereditary, and Neonatal Diseases and Abnormalities; Musculoskeletal Diseases
ENST00000295108.4:C.129C>T	2	181678732	ENSG00000162992	ENST00000295108.4	NEUROD1	rs116321775	Maturity onset diabetes mellitus in young	ClinVar		Nutritional and Metabolic Diseases; Endocrine System Diseases
ENST00000304698.10:C.1269C>T	2	186761611	ENSG00000144369	ENST00000304698.10	FAM171B	rs13026081	Height	GWAS	30595370	Other diseases
ENST00000304698.10:C.1269C>T	2	186761611	ENSG00000144369	ENST00000304698.10	FAM171B	rs13026081	microalbuminuria	Ensembl_Post_GWAS	PMID26631737	Pathological Conditions, Signs and Symptoms; Female Urogenital Diseases and Pregnancy Complications; Male Urogenital Diseases
ENST00000304698.10:C.1269C>T	2	186761611	ENSG00000144369	ENST00000304698.10	FAM171B	rs13026081	urinary albumin to creatinine ratio	Ensembl_Post_GWAS	PMID26631737	Other diseases
ENST00000304636.9:C.119C>A	2	188984799	ENSG00000168542	ENST00000304636.9	COL3A1	rs201380807	Connective tissue disorder	ClinVar		Skin and Connective Tissue Diseases
ENST00000304636.9:C.119C>A	2	188984799	ENSG00000168542	ENST00000304636.9	COL3A1	rs201380807	Ehlers-Danlos syndrome	ClinVar		Congenital, Hereditary, and Neonatal Diseases and Abnormalities; Skin and Connective Tissue Diseases; Hemic and Lymphatic Diseases; Cardiovascular Diseases
ENST00000304636.9:C.204C>T	2	188984884	ENSG00000168542	ENST00000304636.9	COL3A1	rs368299739	Cardiovascular phenotype	ClinVar		Cardiovascular Diseases
ENST00000304636.9:C.204C>T	2	188984884	ENSG00000168542	ENST00000304636.9	COL3A1	rs368299739	Ehlers-Danlos syndrome	ClinVar		Congenital, Hereditary, and Neonatal Diseases and Abnormalities; Skin and Connective Tissue Diseases; Hemic and Lymphatic Diseases; Cardiovascular Diseases
ENST00000304636.9:C.289C>G	2	188985203	ENSG00000168542	ENST00000304636.9	COL3A1	rs768671254	Ehlers-Danlos syndrome	ClinVar		Congenital, Hereditary, and Neonatal Diseases and Abnormalities; Skin and Connective Tissue Diseases; Hemic and Lymphatic Diseases; Cardiovascular Diseases
ENST00000304636.9:C.432C>T	2	188985763	ENSG00000168542	ENST00000304636.9	COL3A1	rs539430522	Ehlers-Danlos syndrome	ClinVar		Congenital, Hereditary, and Neonatal Diseases and Abnormalities; Skin and Connective Tissue Diseases; Hemic and Lymphatic Diseases; Cardiovascular Diseases
ENST00000304636.9:C.531C>T	2	188988083	ENSG00000168542	ENST00000304636.9	COL3A1	rs41272797	Cardiovascular phenotype	ClinVar		Cardiovascular Diseases
ENST00000304636.9:C.546C>A	2	188988098	ENSG00000168542	ENST00000304636.9	COL3A1	rs754584062	Ehlers-Danlos syndrome	ClinVar		Congenital, Hereditary, and Neonatal Diseases and Abnormalities; Skin and Connective Tissue Diseases; Hemic and Lymphatic Diseases; Cardiovascular Diseases
ENST00000304636.9:C.873C>A	2	188991507	ENSG00000168542	ENST00000304636.9	COL3A1	rs138569287	Cardiovascular phenotype	ClinVar		Cardiovascular Diseases
ENST00000304636.9:C.873C>A	2	188991507	ENSG00000168542	ENST00000304636.9	COL3A1	rs138569287	Ehlers-Danlos syndrome	ClinVar		Congenital, Hereditary, and Neonatal Diseases and Abnormalities; Skin and Connective Tissue Diseases; Hemic and Lymphatic Diseases; Cardiovascular Diseases
ENST00000304636.9:C.1188C>T	2	188994076	ENSG00000168542	ENST00000304636.9	COL3A1	rs745743884	Cardiovascular phenotype	ClinVar		Cardiovascular Diseases
ENST00000304636.9:C.1188C>T	2	188994076	ENSG00000168542	ENST00000304636.9	COL3A1	rs745743884	Thoracic aortic aneurysm and aortic dissection	ClinVar		Other diseases
ENST00000304636.9:C.1662C>T	2	188996178	ENSG00000168542	ENST00000304636.9	COL3A1	rs373963384	Ehlers-Danlos syndrome	ClinVar		Congenital, Hereditary, and Neonatal Diseases and Abnormalities; Skin and Connective Tissue Diseases; Hemic and Lymphatic Diseases; Cardiovascular Diseases
ENST00000304636.9:C.1662C>T	2	188996178	ENSG00000168542	ENST00000304636.9	COL3A1	rs373963384	Thoracic aortic aneurysm and aortic dissection	ClinVar		Other diseases
ENST00000304636.9:C.2355C>T	2	189001553	ENSG00000168542	ENST00000304636.9	COL3A1	rs148901664	Cardiovascular phenotype	ClinVar		Cardiovascular Diseases
ENST00000304636.9:C.2355C>T	2	189001553	ENSG00000168542	ENST00000304636.9	COL3A1	rs148901664	Thoracic aortic aneurysm and aortic dissection	ClinVar		Other diseases
ENST00000304636.9:C.2568C>T	2	189003425	ENSG00000168542	ENST00000304636.9	COL3A1	rs767262368	Thoracic aortic aneurysm and aortic dissection	ClinVar		Other diseases
ENST00000304636.9:C.2712C>T	2	189004032	ENSG00000168542	ENST00000304636.9	COL3A1	rs375673185	Ehlers-Danlos syndrome	ClinVar		Congenital, Hereditary, and Neonatal Diseases and Abnormalities; Skin and Connective Tissue Diseases; Hemic and Lymphatic Diseases; Cardiovascular Diseases
ENST00000304636.9:C.2958C>T	2	189005376	ENSG00000168542	ENST00000304636.9	COL3A1	rs41264441	Cardiovascular phenotype	ClinVar		Cardiovascular Diseases
ENST00000304636.9:C.2958C>T	2	189005376	ENSG00000168542	ENST00000304636.9	COL3A1	rs41264441	Ehlers-Danlos syndrome	ClinVar		Congenital, Hereditary, and Neonatal Diseases and Abnormalities; Skin and Connective Tissue Diseases; Hemic and Lymphatic Diseases; Cardiovascular Diseases
ENST00000304636.9:C.3390C>T	2	189007911	ENSG00000168542	ENST00000304636.9	COL3A1	rs148918486	Ehlers-Danlos syndrome	ClinVar		Congenital, Hereditary, and Neonatal Diseases and Abnormalities; Skin and Connective Tissue Diseases; Hemic and Lymphatic Diseases; Cardiovascular Diseases
ENST00000304636.9:C.3411C>T	2	189007932	ENSG00000168542	ENST00000304636.9	COL3A1	rs776330422	Thoracic aortic aneurysm and aortic dissection	ClinVar		Other diseases
ENST00000304636.9:C.3537C>T	2	189008935	ENSG00000168542	ENST00000304636.9	COL3A1	rs146837092	Thoracic aortic aneurysm and aortic dissection	ClinVar		Other diseases
ENST00000304636.9:C.3693C>T	2	189009091	ENSG00000168542	ENST00000304636.9	COL3A1	rs368556405	Thoracic aortic aneurysm and aortic dissection	ClinVar		Other diseases
ENST00000304636.9:C.3774C>T	2	189009172	ENSG00000168542	ENST00000304636.9	COL3A1	rs149790711	Cardiovascular phenotype	ClinVar		Cardiovascular Diseases
ENST00000304636.9:C.4020C>T	2	189010656	ENSG00000168542	ENST00000304636.9	COL3A1	rs766750333	Ehlers-Danlos syndrome	ClinVar		Congenital, Hereditary, and Neonatal Diseases and Abnormalities; Skin and Connective Tissue Diseases; Hemic and Lymphatic Diseases; Cardiovascular Diseases
ENST00000304636.9:C.4020C>T	2	189010656	ENSG00000168542	ENST00000304636.9	COL3A1	rs766750333	Thoracic aortic aneurysm and aortic dissection	ClinVar		Other diseases
ENST00000304636.9:C.4080C>T	2	189010716	ENSG00000168542	ENST00000304636.9	COL3A1	rs771682647	Cardiovascular phenotype	ClinVar		Cardiovascular Diseases
ENST00000374866.9:C.3855C>T	2	189039342	ENSG00000204262	ENST00000374866.9	COL5A2	rs199904322	Cardiovascular phenotype	ClinVar		Cardiovascular Diseases
ENST00000374866.9:C.2562C>T	2	189053010	ENSG00000204262	ENST00000374866.9	COL5A2	rs148430780	Cardiovascular phenotype	ClinVar		Cardiovascular Diseases
ENST00000374866.9:C.2562C>T	2	189053010	ENSG00000204262	ENST00000374866.9	COL5A2	rs148430780	Connective tissue disorder	ClinVar		Skin and Connective Tissue Diseases
ENST00000374866.9:C.2562C>T	2	189053010	ENSG00000204262	ENST00000374866.9	COL5A2	rs148430780	Ehlers-Danlos syndrome	ClinVar		Congenital, Hereditary, and Neonatal Diseases and Abnormalities; Skin and Connective Tissue Diseases; Hemic and Lymphatic Diseases; Cardiovascular Diseases
ENST00000374866.9:C.2562C>T	2	189053010	ENSG00000204262	ENST00000374866.9	COL5A2	rs148430780	Ehlers-Danlos syndrome classic type 2	ClinVar		Congenital, Hereditary, and Neonatal Diseases and Abnormalities; Skin and Connective Tissue Diseases; Hemic and Lymphatic Diseases; Cardiovascular Diseases
ENST00000374866.9:C.2544C>T	2	189053433	ENSG00000204262	ENST00000374866.9	COL5A2	rs370774253	Cardiovascular phenotype	ClinVar		Cardiovascular Diseases
ENST00000374866.9:C.2544C>T	2	189053433	ENSG00000204262	ENST00000374866.9	COL5A2	rs370774253	Ehlers-Danlos syndrome	ClinVar		Congenital, Hereditary, and Neonatal Diseases and Abnormalities; Skin and Connective Tissue Diseases; Hemic and Lymphatic Diseases; Cardiovascular Diseases
ENST00000374866.9:C.1400C>T	2	189068016	ENSG00000204262	ENST00000374866.9	COL5A2	rs115570272	Cardiovascular phenotype	ClinVar		Cardiovascular Diseases
ENST00000374866.9:C.1400C>T	2	189068016	ENSG00000204262	ENST00000374866.9	COL5A2	rs115570272	Ehlers-Danlos syndrome	ClinVar		Congenital, Hereditary, and Neonatal Diseases and Abnormalities; Skin and Connective Tissue Diseases; Hemic and Lymphatic Diseases; Cardiovascular Diseases
ENST00000374866.9:C.1400C>T	2	189068016	ENSG00000204262	ENST00000374866.9	COL5A2	rs115570272	Ehlers-Danlos syndrome classic type 2	ClinVar		Congenital, Hereditary, and Neonatal Diseases and Abnormalities; Skin and Connective Tissue Diseases; Hemic and Lymphatic Diseases; Cardiovascular Diseases
ENST00000374866.9:C.552C>T	2	189092325	ENSG00000204262	ENST00000374866.9	COL5A2	rs548352939	Ehlers-Danlos syndrome	ClinVar		Congenital, Hereditary, and Neonatal Diseases and Abnormalities; Skin and Connective Tissue Diseases; Hemic and Lymphatic Diseases; Cardiovascular Diseases
ENST00000374866.9:C.315C>A	2	189110232	ENSG00000204262	ENST00000374866.9	COL5A2	rs4128539	Ehlers-Danlos syndrome classic type 2	ClinVar		Congenital, Hereditary, and Neonatal Diseases and Abnormalities; Skin and Connective Tissue Diseases; Hemic and Lymphatic Diseases; Cardiovascular Diseases
ENST00000261024.7:C.1203C>T	2	189563783	ENSG00000138449	ENST00000261024.7	SLC40A1	rs200345331	Hemochromatosis type 4	ClinVar		Congenital, Hereditary, and Neonatal Diseases and Abnormalities; Nutritional and Metabolic Diseases
ENST00000261024.7:C.609C>T	2	189565505	ENSG00000138449	ENST00000261024.7	SLC40A1	rs369846096	Hereditary hemochromatosis	ClinVar		Congenital, Hereditary, and Neonatal Diseases and Abnormalities; Nutritional and Metabolic Diseases
ENST00000261024.7:C.387C>T	2	189572846	ENSG00000138449	ENST00000261024.7	SLC40A1	rs11568344	Hereditary hemochromatosis	ClinVar		Congenital, Hereditary, and Neonatal Diseases and Abnormalities; Nutritional and Metabolic Diseases
ENST00000441310.7:C.171C>T	2	189795807	ENSG00000064933	ENST00000441310.7	PMS1	rs756254396	Lynch syndrome	ClinVar		Congenital, Hereditary, and Neonatal Diseases and Abnormalities; Digestive System Diseases; Neoplasms; Nutritional and Metabolic Diseases
ENST00000441310.7:C.1001C>T	2	189854273	ENSG00000064933	ENST00000441310.7	PMS1	rs147084726	kidney carcinoma	Cosmic	28481359	Cancer; Organismal Injury and Abnormalities; Male Urogenital Diseases
ENST00000441310.7:C.1001C>T	2	189854273	ENSG00000064933	ENST00000441310.7	PMS1	rs147084726	Lynch syndrome	ClinVar		Congenital, Hereditary, and Neonatal Diseases and Abnormalities; Digestive System Diseases; Neoplasms; Nutritional and Metabolic Diseases
ENST00000441310.7:C.1974C>T	2	189863860	ENSG00000064933	ENST00000441310.7	PMS1	rs886055368	Lynch syndrome	ClinVar		Congenital, Hereditary, and Neonatal Diseases and Abnormalities; Digestive System Diseases; Neoplasms; Nutritional and Metabolic Diseases
ENST00000260950.5:C.306C>T	2	190062291	ENSG00000138379	ENST00000260950.5	MSTN	rs34191156	Myostatin-related muscle hypertrophy	ClinVar		Musculoskeletal Diseases; Nervous System Diseases; Pathological Conditions, Signs and Symptoms
ENST00000392318.8:C.1224C>T	2	191381500	ENSG00000128641	ENST00000392318.8	MYO1B	rs147109563	glioma	Cosmic	18772396	Neoplasms
ENST00000295049.9:C.369C>T	2	197644227	ENSG00000162944	ENST00000295049.9	RFTN2	rs10497806	alcohol dependence	Ensembl_Post_GWAS	PMID29071344	Behavior and Behavior Mechanisms
ENST00000295049.9:C.369C>T	2	197644227	ENSG00000162944	ENST00000295049.9	RFTN2	rs10497806	autism spectrum disorder	Ensembl_Post_GWAS	PMID28540026	Mental Disorders
ENST00000295049.9:C.369C>T	2	197644227	ENSG00000162944	ENST00000295049.9	RFTN2	rs10497806	brain aneurysm	Ensembl_Post_GWAS	PMID18997786	Nervous System Diseases; Cardiovascular Diseases
ENST00000295049.9:C.369C>T	2	197644227	ENSG00000162944	ENST00000295049.9	RFTN2	rs10497806	unipolar depression	Ensembl_Post_GWAS	PMID29071344	Mental Disorders
ENST00000417098.6:C.2121C>G	2	199272292	ENSG00000119042	ENST00000417098.6	SATB2	rs141424911	History of neurodevelopmental disorder	ClinVar		Other diseases
ENST00000417098.6:C.408C>T	2	199381759	ENSG00000119042	ENST00000417098.6	SATB2	rs756417252	History of neurodevelopmental disorder	ClinVar		Other diseases
ENST00000417098.6:C.405C>T	2	199381762	ENSG00000119042	ENST00000417098.6	SATB2	rs150990155	History of neurodevelopmental disorder	ClinVar		Other diseases
ENST00000417098.6:C.381C>T	2	199381786	ENSG00000119042	ENST00000417098.6	SATB2	rs746473092	Chromosome 2q32-q33 deletion syndrome	ClinVar		Pathological Conditions, Signs and Symptoms; Congenital, Hereditary, and Neonatal Diseases and Abnormalities; Nervous System Diseases; Mental Disorders; Behavior and Behavior Mechanisms
ENST00000417098.6:C.210C>T	2	199433474	ENSG00000119042	ENST00000417098.6	SATB2	rs34311963	History of neurodevelopmental disorder	ClinVar		Other diseases
ENST00000234296.7:C.1173C>T	2	200921114	ENSG00000115942	ENST00000234296.7	ORC2	rs2307362	cytotoxicity measurement	Ensembl_Post_GWAS	PMID26121980	Other diseases
ENST00000234296.7:C.1173C>T	2	200921114	ENSG00000115942	ENST00000234296.7	ORC2	rs2307362	outer ear morphology trait	Ensembl_Post_GWAS	PMID26121980	Other diseases
ENST00000234296.7:C.1173C>T	2	200921114	ENSG00000115942	ENST00000234296.7	ORC2	rs2307362	parathyroid hormone measurement	Ensembl_Post_GWAS	PMID30134803	Other diseases
ENST00000680497.1:C.2898C>T	2	201728557	ENSG00000003393	ENST00000680497.1	ALS2	rs3219161	ALS2-Related Disorders	ClinVar		Other diseases
ENST00000680497.1:C.2898C>T	2	201728557	ENSG00000003393	ENST00000680497.1	ALS2	rs3219161	Amyotrophic Lateral Sclerosis	ClinVar		Nervous System Diseases; Nutritional and Metabolic Diseases
ENST00000374580.10:C.2124C>T	2	202555789	ENSG00000204217	ENST00000374580.10	BMPR2	rs1085307374	Primary pulmonary hypertension	ClinVar		Respiratory Disease
ENST00000429815.6:C.290C>T	2	203251967	ENSG00000119004	ENST00000429815.6	CYP20A1	rs2043449	body height	Ensembl_Post_GWAS	PMID20966902	Other diseases
ENST00000360409.7:C.1944C>T	2	205752875	ENSG00000118257	ENST00000360409.7	NRP2	rs377534049	haemangioblastoma	Cosmic	25589003	Neoplasms
ENST00000455934.6:C.1017C>T	2	206144030	ENSG00000023228	ENST00000455934.6	NDUFS1	rs2230890	Leigh syndrome	ClinVar		Congenital, Hereditary, and Neonatal Diseases and Abnormalities; Nutritional and Metabolic Diseases; Nervous System Diseases
ENST00000455934.6:C.1017C>T	2	206144030	ENSG00000023228	ENST00000455934.6	NDUFS1	rs2230890	Mitochondrial complex I deficiency	ClinVar		Nutritional and Metabolic Diseases
ENST00000264376.5:C.402C>T	2	208121796	ENSG00000118231	ENST00000264376.5	CRYGD	rs398122948	Cataract 4	ClinVar		Eye Diseases
ENST00000264376.5:C.70C>T	2	208124294	ENSG00000118231	ENST00000264376.5	CRYGD	rs28931605	Cataract 4	ClinVar		Eye Diseases
ENST00000264376.5:C.70C>T	2	208124294	ENSG00000118231	ENST00000264376.5	CRYGD	rs28931605	Congenital cataract	ClinVar		Nervous System Diseases; Eye Diseases; Female Urogenital Diseases and Pregnancy Complications; Congenital, Hereditary, and Neonatal Diseases and Abnormalities; Pathological Conditions, Signs and Symptoms
ENST00000264380.9:C.3270C>T	2	208326081	ENSG00000115020	ENST00000264380.9	PIKFYVE	rs766037305	Fleck corneal dystrophy	ClinVar		Eye Diseases; Congenital, Hereditary, and Neonatal Diseases and Abnormalities
ENST00000264380.9:C.3547C>A	2	208326358	ENSG00000115020	ENST00000264380.9	PIKFYVE	rs1529979	Fleck corneal dystrophy	ClinVar		Eye Diseases; Congenital, Hereditary, and Neonatal Diseases and Abnormalities
ENST00000264380.9:C.4989C>T	2	208342611	ENSG00000115020	ENST00000264380.9	PIKFYVE	rs35784095	Fleck corneal dystrophy	ClinVar		Eye Diseases; Congenital, Hereditary, and Neonatal Diseases and Abnormalities
ENST00000430249.7:C.2179C>A	2	210606910	ENSG00000021826	ENST00000430249.7	CPS1	rs202107577	Congenital hyperammonemia	ClinVar		Congenital, Hereditary, and Neonatal Diseases and Abnormalities; Nutritional and Metabolic Diseases; Nervous System Diseases
ENST00000430249.7:C.2283C>T	2	210608433	ENSG00000021826	ENST00000430249.7	CPS1	rs41272667	Congenital hyperammonemia	ClinVar		Congenital, Hereditary, and Neonatal Diseases and Abnormalities; Nutritional and Metabolic Diseases; Nervous System Diseases
ENST00000430249.7:C.2697C>G	2	210616533	ENSG00000021826	ENST00000430249.7	CPS1	rs2287599	Congenital hyperammonemia	ClinVar		Congenital, Hereditary, and Neonatal Diseases and Abnormalities; Nutritional and Metabolic Diseases; Nervous System Diseases
ENST00000260947.9:C.2178C>T	2	214728832	ENSG00000138376	ENST00000260947.9	BARD1	rs201873551	Hereditary cancer-predisposing syndrome	ClinVar		Other diseases
ENST00000260947.9:C.2160C>T	2	214728850	ENSG00000138376	ENST00000260947.9	BARD1	rs137888190	Familial cancer of breast	ClinVar		Neoplasms; Skin and Connective Tissue Diseases
ENST00000260947.9:C.2160C>T	2	214728850	ENSG00000138376	ENST00000260947.9	BARD1	rs137888190	Hereditary cancer-predisposing syndrome	ClinVar		Other diseases
ENST00000260947.9:C.1838C>A	2	214745132	ENSG00000138376	ENST00000260947.9	BARD1	rs146629794	Familial cancer of breast	ClinVar		Neoplasms; Skin and Connective Tissue Diseases
ENST00000260947.9:C.1838C>A	2	214745132	ENSG00000138376	ENST00000260947.9	BARD1	rs146629794	Hereditary cancer-predisposing syndrome	ClinVar		Other diseases
ENST00000260947.9:C.1655C>T	2	214752469	ENSG00000138376	ENST00000260947.9	BARD1	rs876660617	Familial cancer of breast	ClinVar		Neoplasms; Skin and Connective Tissue Diseases
ENST00000260947.9:C.1655C>T	2	214752469	ENSG00000138376	ENST00000260947.9	BARD1	rs876660617	Hereditary cancer-predisposing syndrome	ClinVar		Other diseases
ENST00000260947.9:C.1593C>G	2	214752531	ENSG00000138376	ENST00000260947.9	BARD1	rs564894014	Hereditary cancer-predisposing syndrome	ClinVar		Other diseases
ENST00000260947.9:C.1554C>T	2	214767496	ENSG00000138376	ENST00000260947.9	BARD1	rs139612775	Hereditary cancer-predisposing syndrome	ClinVar		Other diseases
ENST00000260947.9:C.1324C>T	2	214769303	ENSG00000138376	ENST00000260947.9	BARD1	rs1403432043	Familial cancer of breast	ClinVar		Neoplasms; Skin and Connective Tissue Diseases
ENST00000260947.9:C.1324C>T	2	214769303	ENSG00000138376	ENST00000260947.9	BARD1	rs1403432043	Hereditary cancer-predisposing syndrome	ClinVar		Other diseases
ENST00000260947.9:C.1320C>T	2	214769307	ENSG00000138376	ENST00000260947.9	BARD1	rs780136325	Hereditary cancer-predisposing syndrome	ClinVar		Other diseases
ENST00000260947.9:C.1317C>T	2	214769310	ENSG00000138376	ENST00000260947.9	BARD1	rs369986649	Hereditary cancer-predisposing syndrome	ClinVar		Other diseases
ENST00000260947.9:C.1161C>T	2	214780713	ENSG00000138376	ENST00000260947.9	BARD1	rs553790960	Familial cancer of breast	ClinVar		Neoplasms; Skin and Connective Tissue Diseases
ENST00000260947.9:C.1161C>T	2	214780713	ENSG00000138376	ENST00000260947.9	BARD1	rs553790960	Hereditary cancer-predisposing syndrome	ClinVar		Other diseases
ENST00000260947.9:C.1127C>T	2	214780747	ENSG00000138376	ENST00000260947.9	BARD1	rs587782333	Familial cancer of breast	ClinVar		Neoplasms; Skin and Connective Tissue Diseases
ENST00000260947.9:C.1127C>T	2	214780747	ENSG00000138376	ENST00000260947.9	BARD1	rs587782333	Hereditary cancer-predisposing syndrome	ClinVar		Other diseases
ENST00000260947.9:C.1078C>G	2	214780796	ENSG00000138376	ENST00000260947.9	BARD1	rs1210369014	Hereditary cancer-predisposing syndrome	ClinVar		Other diseases
ENST00000260947.9:C.800C>T	2	214781074	ENSG00000138376	ENST00000260947.9	BARD1	rs1338972046	Hereditary cancer-predisposing syndrome	ClinVar		Other diseases
ENST00000260947.9:C.781C>T	2	214781093	ENSG00000138376	ENST00000260947.9	BARD1	rs767806228	Hereditary cancer-predisposing syndrome	ClinVar		Other diseases
ENST00000260947.9:C.754C>T	2	214781120	ENSG00000138376	ENST00000260947.9	BARD1	rs758368819	Hereditary cancer-predisposing syndrome	ClinVar		Other diseases
ENST00000260947.9:C.736C>A	2	214781138	ENSG00000138376	ENST00000260947.9	BARD1	rs927730167	Hereditary cancer-predisposing syndrome	ClinVar		Other diseases
ENST00000260947.9:C.709C>G	2	214781165	ENSG00000138376	ENST00000260947.9	BARD1	rs587780035	Familial cancer of breast	ClinVar		Neoplasms; Skin and Connective Tissue Diseases
ENST00000260947.9:C.709C>G	2	214781165	ENSG00000138376	ENST00000260947.9	BARD1	rs587780035	Hereditary cancer-predisposing syndrome	ClinVar		Other diseases
ENST00000260947.9:C.690C>T	2	214781184	ENSG00000138376	ENST00000260947.9	BARD1	rs587780034	Familial cancer of breast	ClinVar		Neoplasms; Skin and Connective Tissue Diseases
ENST00000260947.9:C.690C>T	2	214781184	ENSG00000138376	ENST00000260947.9	BARD1	rs587780034	Hereditary cancer-predisposing syndrome	ClinVar		Other diseases
ENST00000260947.9:C.566C>T	2	214781308	ENSG00000138376	ENST00000260947.9	BARD1	rs864622686	Familial cancer of breast	ClinVar		Neoplasms; Skin and Connective Tissue Diseases
ENST00000260947.9:C.566C>T	2	214781308	ENSG00000138376	ENST00000260947.9	BARD1	rs864622686	Hereditary cancer-predisposing syndrome	ClinVar		Other diseases
ENST00000260947.9:C.382C>T	2	214781492	ENSG00000138376	ENST00000260947.9	BARD1	rs878854011	Familial cancer of breast	ClinVar		Neoplasms; Skin and Connective Tissue Diseases
ENST00000260947.9:C.382C>T	2	214781492	ENSG00000138376	ENST00000260947.9	BARD1	rs878854011	Hereditary cancer-predisposing syndrome	ClinVar		Other diseases
ENST00000260947.9:C.142C>T	2	214809428	ENSG00000138376	ENST00000260947.9	BARD1	rs1057521017	Hereditary cancer-predisposing syndrome	ClinVar		Other diseases
ENST00000260947.9:C.117C>G	2	214809453	ENSG00000138376	ENST00000260947.9	BARD1	rs786202271	Hereditary cancer-predisposing syndrome	ClinVar		Other diseases
ENST00000260947.9:C.114C>T	2	214809456	ENSG00000138376	ENST00000260947.9	BARD1	rs1405786437	Hereditary cancer-predisposing syndrome	ClinVar		Other diseases
ENST00000260947.9:C.91C>G	2	214809479	ENSG00000138376	ENST00000260947.9	BARD1	rs1064795053	Familial cancer of breast	ClinVar		Neoplasms; Skin and Connective Tissue Diseases
ENST00000260947.9:C.91C>G	2	214809479	ENSG00000138376	ENST00000260947.9	BARD1	rs1064795053	Hereditary cancer-predisposing syndrome	ClinVar		Other diseases
ENST00000272895.12:C.7496C>A	2	214937556	ENSG00000144452	ENST00000272895.12	ABCA12	rs747030042	Congenital ichthyosiform erythroderma	ClinVar		Congenital, Hereditary, and Neonatal Diseases and Abnormalities; Skin and Connective Tissue Diseases
ENST00000272895.12:C.6306C>T	2	214955289	ENSG00000144452	ENST00000272895.12	ABCA12	rs10498027	Congenital ichthyosiform erythroderma	ClinVar		Congenital, Hereditary, and Neonatal Diseases and Abnormalities; Skin and Connective Tissue Diseases
ENST00000272895.12:C.6306C>T	2	214955289	ENSG00000144452	ENST00000272895.12	ABCA12	rs10498027	Congenital ichthyosis of skin	ClinVar		Congenital, Hereditary, and Neonatal Diseases and Abnormalities; Skin and Connective Tissue Diseases
ENST00000272895.12:C.4782C>T	2	214978999	ENSG00000144452	ENST00000272895.12	ABCA12	rs146990068	Congenital ichthyosiform erythroderma	ClinVar		Congenital, Hereditary, and Neonatal Diseases and Abnormalities; Skin and Connective Tissue Diseases
ENST00000272895.12:C.1427C>T	2	215019657	ENSG00000144452	ENST00000272895.12	ABCA12	rs370640837	Congenital ichthyosiform erythroderma	ClinVar		Congenital, Hereditary, and Neonatal Diseases and Abnormalities; Skin and Connective Tissue Diseases
ENST00000357276.9:C.735C>G	2	216415439	ENSG00000138375	ENST00000357276.9	SMARCAL1	rs149510554	Schimke immunoosseous dysplasia	ClinVar		Musculoskeletal Diseases; Respiratory Disease; Male Urogenital Diseases; Female Urogenital Diseases and Pregnancy Complications; Cardiovascular Diseases; Congenital, Hereditary, and Neonatal Diseases and Abnormalities; Immune System Diseases
ENST00000357276.9:C.1947C>T	2	216450941	ENSG00000138375	ENST00000357276.9	SMARCAL1	rs2066526	Schimke immunoosseous dysplasia	ClinVar		Musculoskeletal Diseases; Respiratory Disease; Male Urogenital Diseases; Female Urogenital Diseases and Pregnancy Complications; Cardiovascular Diseases; Congenital, Hereditary, and Neonatal Diseases and Abnormalities; Immune System Diseases
ENST00000318507.7:C.315C>T	2	218135116	ENSG00000180871	ENST00000318507.7	CXCR2	rs761868394	breast carcinoma	Cosmic	20668451	Cancer; Organismal Injury and Abnormalities; Reproductive System Disease
ENST00000273077.9:C.597C>T	2	218341606	ENSG00000127838	ENST00000273077.9	PNKD	rs139122042	Paroxysmal nonkinesigenic dyskinesia 1	ClinVar		Pathological Conditions, Signs and Symptoms; Nervous System Diseases
ENST00000248444.10:C.1125C>T	2	218431879	ENSG00000127831	ENST00000248444.10	VIL1	rs374915060	breast carcinoma	Cosmic	22722193	Cancer; Organismal Injury and Abnormalities; Reproductive System Disease
ENST00000359273.8:C.112C>T	2	218661099	ENSG00000074582	ENST00000359273.8	BCS1L	rs886055626	GRACILE syndrome	ClinVar		Pathological Conditions, Signs and Symptoms; Congenital, Hereditary, and Neonatal Diseases and Abnormalities; Digestive System Diseases; Nutritional and Metabolic Diseases; Female Urogenital Diseases and Pregnancy Complications; Male Urogenital Diseases
ENST00000359273.8:C.112C>T	2	218661099	ENSG00000074582	ENST00000359273.8	BCS1L	rs886055626	Leigh syndrome	ClinVar		Congenital, Hereditary, and Neonatal Diseases and Abnormalities; Nutritional and Metabolic Diseases; Nervous System Diseases
ENST00000359273.8:C.112C>T	2	218661099	ENSG00000074582	ENST00000359273.8	BCS1L	rs886055626	Mitochondrial complex III deficiency	ClinVar		Nutritional and Metabolic Diseases
ENST00000258415.9:C.789C>T	2	218812694	ENSG00000135929	ENST00000258415.9	CYP27A1	rs143600636	Cholestanol storage disease	ClinVar		Congenital, Hereditary, and Neonatal Diseases and Abnormalities; Nutritional and Metabolic Diseases
ENST00000258415.9:C.1419C>T	2	218814700	ENSG00000135929	ENST00000258415.9	CYP27A1	rs138596741	Cholestanol storage disease	ClinVar		Congenital, Hereditary, and Neonatal Diseases and Abnormalities; Nutritional and Metabolic Diseases
ENST00000258411.8:C.1017C>T	2	218893034	ENSG00000135925	ENST00000258411.8	WNT10A	rs531326479	Odontoonychodermal dysplasia	ClinVar		Stomatognathic Diseases; Congenital, Hereditary, and Neonatal Diseases and Abnormalities; Skin and Connective Tissue Diseases
ENST00000258411.8:C.1017C>T	2	218893034	ENSG00000135925	ENST00000258411.8	WNT10A	rs531326479	Schopf-Schulz-Passarge syndrome	ClinVar		Congenital, Hereditary, and Neonatal Diseases and Abnormalities; Neoplasms; Eye Diseases; Skin and Connective Tissue Diseases; Stomatognathic Diseases
ENST00000258411.8:C.1017C>T	2	218893034	ENSG00000135925	ENST00000258411.8	WNT10A	rs531326479	Selective tooth agenesis	ClinVar		Other diseases
ENST00000295731.7:C.819C>T	2	219055624	ENSG00000163501	ENST00000295731.7	IHH	rs61747697	Brachydactyly	ClinVar		Musculoskeletal Diseases; Congenital, Hereditary, and Neonatal Diseases and Abnormalities
ENST00000373960.4:C.708C>T	2	219420319	ENSG00000175084	ENST00000373960.4	DES	rs886044078	Cardiovascular phenotype	ClinVar		Cardiovascular Diseases
ENST00000373960.4:C.912C>T	2	219420842	ENSG00000175084	ENST00000373960.4	DES	rs778826152	Muscular dystrophy	ClinVar		Congenital, Hereditary, and Neonatal Diseases and Abnormalities; Musculoskeletal Diseases; Nervous System Diseases
ENST00000373960.4:C.912C>T	2	219420842	ENSG00000175084	ENST00000373960.4	DES	rs778826152	Myofibrillar myopathy 1	ClinVar		Other diseases
ENST00000373960.4:C.924C>T	2	219420854	ENSG00000175084	ENST00000373960.4	DES	rs578191306	Dilated Cardiomyopathy	ClinVar		Cardiovascular Diseases
ENST00000373960.4:C.924C>T	2	219420854	ENSG00000175084	ENST00000373960.4	DES	rs578191306	Myofibrillar Myopathy	ClinVar		Musculoskeletal Diseases; Nervous System Diseases
ENST00000373960.4:C.924C>T	2	219420854	ENSG00000175084	ENST00000373960.4	DES	rs578191306	Myofibrillar myopathy 1	ClinVar		Other diseases
ENST00000373960.4:C.924C>T	2	219420854	ENSG00000175084	ENST00000373960.4	DES	rs578191306	Scapuloperoneal weakness	ClinVar		Pathological Conditions, Signs and Symptoms; Musculoskeletal Diseases; Nervous System Diseases
ENST00000373960.4:C.1011C>T	2	219420941	ENSG00000175084	ENST00000373960.4	DES	rs369537705	Muscular dystrophy	ClinVar		Congenital, Hereditary, and Neonatal Diseases and Abnormalities; Musculoskeletal Diseases; Nervous System Diseases
ENST00000373960.4:C.1011C>T	2	219420941	ENSG00000175084	ENST00000373960.4	DES	rs369537705	Myofibrillar myopathy 1	ClinVar		Other diseases
ENST00000373960.4:C.1158C>G	2	219421474	ENSG00000175084	ENST00000373960.4	DES	rs774323736	Muscular dystrophy	ClinVar		Congenital, Hereditary, and Neonatal Diseases and Abnormalities; Musculoskeletal Diseases; Nervous System Diseases
ENST00000373960.4:C.1158C>G	2	219421474	ENSG00000175084	ENST00000373960.4	DES	rs774323736	Myofibrillar myopathy 1	ClinVar		Other diseases
ENST00000373960.4:C.1179C>T	2	219421495	ENSG00000175084	ENST00000373960.4	DES	rs955390251	Muscular dystrophy	ClinVar		Congenital, Hereditary, and Neonatal Diseases and Abnormalities; Musculoskeletal Diseases; Nervous System Diseases
ENST00000373960.4:C.1179C>T	2	219421495	ENSG00000175084	ENST00000373960.4	DES	rs955390251	Myofibrillar myopathy 1	ClinVar		Other diseases
ENST00000373960.4:C.1353C>T	2	219425727	ENSG00000175084	ENST00000373960.4	DES	rs121913002	Cardiovascular phenotype	ClinVar		Cardiovascular Diseases
ENST00000373960.4:C.1353C>T	2	219425727	ENSG00000175084	ENST00000373960.4	DES	rs121913002	Dilated cardiomyopathy 1I	ClinVar		Cardiovascular Diseases
ENST00000373960.4:C.1353C>T	2	219425727	ENSG00000175084	ENST00000373960.4	DES	rs121913002	Muscular dystrophy	ClinVar		Congenital, Hereditary, and Neonatal Diseases and Abnormalities; Musculoskeletal Diseases; Nervous System Diseases
ENST00000373960.4:C.1353C>T	2	219425727	ENSG00000175084	ENST00000373960.4	DES	rs121913002	Myofibrillar myopathy 1	ClinVar		Other diseases
ENST00000404537.6:C.4440C>T	2	219556189	ENSG00000124006	ENST00000404537.6	OBSL1	rs200341414	Three M syndrome	ClinVar		Pathological Conditions, Signs and Symptoms; Congenital, Hereditary, and Neonatal Diseases and Abnormalities; Musculoskeletal Diseases; Nervous System Diseases; Endocrine System Diseases
ENST00000404537.6:C.2730C>T	2	219562625	ENSG00000124006	ENST00000404537.6	OBSL1	rs10804275	Three M syndrome	ClinVar		Pathological Conditions, Signs and Symptoms; Congenital, Hereditary, and Neonatal Diseases and Abnormalities; Musculoskeletal Diseases; Nervous System Diseases; Endocrine System Diseases
ENST00000404537.6:C.2682C>T	2	219562673	ENSG00000124006	ENST00000404537.6	OBSL1	rs3183099	Three M syndrome	ClinVar		Pathological Conditions, Signs and Symptoms; Congenital, Hereditary, and Neonatal Diseases and Abnormalities; Musculoskeletal Diseases; Nervous System Diseases; Endocrine System Diseases
ENST00000404537.6:C.2055C>G	2	219566909	ENSG00000124006	ENST00000404537.6	OBSL1	rs1043537	Three M syndrome	ClinVar		Pathological Conditions, Signs and Symptoms; Congenital, Hereditary, and Neonatal Diseases and Abnormalities; Musculoskeletal Diseases; Nervous System Diseases; Endocrine System Diseases
ENST00000404537.6:C.1884C>T	2	219567080	ENSG00000124006	ENST00000404537.6	OBSL1	rs115194510	Three M syndrome	ClinVar		Pathological Conditions, Signs and Symptoms; Congenital, Hereditary, and Neonatal Diseases and Abnormalities; Musculoskeletal Diseases; Nervous System Diseases; Endocrine System Diseases
ENST00000404537.6:C.1317C>T	2	219567935	ENSG00000124006	ENST00000404537.6	OBSL1	rs201913713	Three M syndrome	ClinVar		Pathological Conditions, Signs and Symptoms; Congenital, Hereditary, and Neonatal Diseases and Abnormalities; Musculoskeletal Diseases; Nervous System Diseases; Endocrine System Diseases
ENST00000404537.6:C.580C>T	2	219570653	ENSG00000124006	ENST00000404537.6	OBSL1	rs1061399	Three M syndrome	ClinVar		Pathological Conditions, Signs and Symptoms; Congenital, Hereditary, and Neonatal Diseases and Abnormalities; Musculoskeletal Diseases; Nervous System Diseases; Endocrine System Diseases
ENST00000243786.3:C.658C>A	2	219575083	ENSG00000123999	ENST00000243786.3	INHA	rs368930117	large intestine carcinoma	Cosmic	28481359	Cancer; Gastrointestinal Disease; Organismal Injury and Abnormalities
ENST00000392069.6:C.126C>A	2	222297173	ENSG00000135903	ENST00000392069.6	PAX3	rs369680052	Craniofacial deafness hand syndrome	ClinVar		Musculoskeletal Diseases; Otorhinolaryngologic Diseases; Nervous System Diseases; Congenital, Hereditary, and Neonatal Diseases and Abnormalities; Pathological Conditions, Signs and Symptoms
ENST00000392069.6:C.126C>A	2	222297173	ENSG00000135903	ENST00000392069.6	PAX3	rs369680052	Waardenburg syndrome	ClinVar		Congenital, Hereditary, and Neonatal Diseases and Abnormalities
ENST00000281830.3:C.234C>T	2	223052911	ENSG00000152049	ENST00000281830.3	KCNE4	rs3795886	acute lymphoblastic leukemia	Ensembl_Post_GWAS	PMID19684603	Neoplasms; Immune System Diseases; Hemic and Lymphatic Diseases
ENST00000305409.3:C.1287C>T	2	223597996	ENSG00000171951	ENST00000305409.3	SCG2	rs721233	chronic hepatitis C infection	Ensembl_Post_GWAS	PMID22095909	Digestive System Diseases; Infections
ENST00000264414.9:C.2052C>T	2	224478323	ENSG00000036257	ENST00000264414.9	CUL3	rs61743301	Pseudohypoaldosteronism type 1 autosomal dominant	ClinVar		Congenital, Hereditary, and Neonatal Diseases and Abnormalities; Female Urogenital Diseases and Pregnancy Complications; Male Urogenital Diseases
ENST00000611582.5:C.259C>A	2	231214912	ENSG00000135931	ENST00000611582.5	ARMC9	rs372770167	ARMC9-related Joubert syndrome	ClinVar		Other diseases
ENST00000611582.5:C.259C>A	2	231214912	ENSG00000135931	ENST00000611582.5	ARMC9	rs372770167	JOUBERT SYNDROME 30	ClinVar		Eye Diseases; Male Urogenital Diseases; Female Urogenital Diseases and Pregnancy Complications; Congenital, Hereditary, and Neonatal Diseases and Abnormalities
ENST00000325385.12:C.34C>T	2	232014961	ENSG00000144535	ENST00000325385.12	DIS3L2	rs723044	Renal hamartomas nephroblastomatosis and fetal gigantism	ClinVar		Other diseases
ENST00000325385.12:C.424C>T	2	232087544	ENSG00000144535	ENST00000325385.12	DIS3L2	rs878855227	Renal hamartomas nephroblastomatosis and fetal gigantism	ClinVar		Other diseases
ENST00000325385.12:C.426C>T	2	232087546	ENSG00000144535	ENST00000325385.12	DIS3L2	rs73001172	Renal hamartomas nephroblastomatosis and fetal gigantism	ClinVar		Other diseases
ENST00000325385.12:C.777C>T	2	232136546	ENSG00000144535	ENST00000325385.12	DIS3L2	rs375649949	Renal hamartomas nephroblastomatosis and fetal gigantism	ClinVar		Other diseases
ENST00000325385.12:C.795C>T	2	232136564	ENSG00000144535	ENST00000325385.12	DIS3L2	rs202042951	Renal hamartomas nephroblastomatosis and fetal gigantism	ClinVar		Other diseases
ENST00000325385.12:C.1158C>T	2	232210359	ENSG00000144535	ENST00000325385.12	DIS3L2	rs539081624	Renal hamartomas nephroblastomatosis and fetal gigantism	ClinVar		Other diseases
ENST00000325385.12:C.1170C>T	2	232210371	ENSG00000144535	ENST00000325385.12	DIS3L2	rs17272089	Renal hamartomas nephroblastomatosis and fetal gigantism	ClinVar		Other diseases
ENST00000325385.12:C.1529C>A	2	232263310	ENSG00000144535	ENST00000325385.12	DIS3L2	rs377321022	Renal hamartomas nephroblastomatosis and fetal gigantism	ClinVar		Other diseases
ENST00000325385.12:C.1638C>T	2	232263419	ENSG00000144535	ENST00000325385.12	DIS3L2	rs775532734	Renal hamartomas nephroblastomatosis and fetal gigantism	ClinVar		Other diseases
ENST00000325385.12:C.1641C>T	2	232263422	ENSG00000144535	ENST00000325385.12	DIS3L2	rs762905765	Renal hamartomas nephroblastomatosis and fetal gigantism	ClinVar		Other diseases
ENST00000325385.12:C.1908C>T	2	232329981	ENSG00000144535	ENST00000325385.12	DIS3L2	rs778830625	Renal hamartomas nephroblastomatosis and fetal gigantism	ClinVar		Other diseases
ENST00000325385.12:C.2067C>T	2	232333896	ENSG00000144535	ENST00000325385.12	DIS3L2	rs186340144	Renal hamartomas nephroblastomatosis and fetal gigantism	ClinVar		Other diseases
ENST00000325385.12:C.2151C>T	2	232333980	ENSG00000144535	ENST00000325385.12	DIS3L2	rs747739911	Renal hamartomas nephroblastomatosis and fetal gigantism	ClinVar		Other diseases
ENST00000325385.12:C.2187C>T	2	232334397	ENSG00000144535	ENST00000325385.12	DIS3L2	rs75782436	Renal hamartomas nephroblastomatosis and fetal gigantism	ClinVar		Other diseases
ENST00000325385.12:C.2413C>T	2	232335791	ENSG00000144535	ENST00000325385.12	DIS3L2	rs1302423283	Renal hamartomas nephroblastomatosis and fetal gigantism	ClinVar		Other diseases
ENST00000325385.12:C.2628C>T	2	232336600	ENSG00000144535	ENST00000325385.12	DIS3L2	rs760111036	Renal hamartomas nephroblastomatosis and fetal gigantism	ClinVar		Other diseases
ENST00000325385.12:C.2637C>T	2	232336609	ENSG00000144535	ENST00000325385.12	DIS3L2	rs376299829	Renal hamartomas nephroblastomatosis and fetal gigantism	ClinVar		Other diseases
ENST00000295463.4:C.553C>T	2	232457227	ENSG00000163295	ENST00000295463.4	ALPI	rs924151706	lung carcinoma	Cosmic	22941188	Cancer; Organismal Injury and Abnormalities; Respiratory Disease
ENST00000258385.8:C.44C>T	2	232526259	ENSG00000135902	ENST00000258385.8	CHRND	rs142531974	Lethal multiple pterygium syndrome	ClinVar		Pathological Conditions, Signs and Symptoms; Congenital, Hereditary, and Neonatal Diseases and Abnormalities; Skin and Connective Tissue Diseases
ENST00000258385.8:C.414C>T	2	232528561	ENSG00000135902	ENST00000258385.8	CHRND	rs150208750	Lethal multiple pterygium syndrome	ClinVar		Pathological Conditions, Signs and Symptoms; Congenital, Hereditary, and Neonatal Diseases and Abnormalities; Skin and Connective Tissue Diseases
ENST00000258385.8:C.1530C>T	2	232535288	ENSG00000135902	ENST00000258385.8	CHRND	rs114463490	Congenital Myasthenic Syndrome	ClinVar		Congenital, Hereditary, and Neonatal Diseases and Abnormalities; Nervous System Diseases
ENST00000258385.8:C.1530C>T	2	232535288	ENSG00000135902	ENST00000258385.8	CHRND	rs114463490	Multiple pterygium syndrome Escobar type	ClinVar		Other diseases
ENST00000233826.4:C.524C>T	2	232768750	ENSG00000115474	ENST00000233826.4	KCNJ13	rs1801251	Leber congenital amaurosis	ClinVar		Eye Diseases
ENST00000233826.4:C.524C>T	2	232768750	ENSG00000115474	ENST00000233826.4	KCNJ13	rs1801251	Coronary artery disease	GWAS	29212778	Cardiovascular Diseases
ENST00000233826.4:C.524C>T	2	232768750	ENSG00000115474	ENST00000233826.4	KCNJ13	rs1801251	cognitive function measurement	Ensembl_Post_GWAS	PMID30038396	Pathological Conditions, Signs and Symptoms; Nervous System Diseases
ENST00000264051.8:C.1071C>T	2	232892969	ENSG00000066248	ENST00000264051.8	NGEF	rs748002	attention deficit hyperactivity disorder	Ensembl_Post_GWAS	PMID23453885	Mental Disorders
ENST00000264051.8:C.1071C>T	2	232892969	ENSG00000066248	ENST00000264051.8	NGEF	rs748002	autism spectrum disorder	Ensembl_Post_GWAS	PMID28540026	Mental Disorders
ENST00000264051.8:C.1071C>T	2	232892969	ENSG00000066248	ENST00000264051.8	NGEF	rs748002	bipolar disorder	Ensembl_Post_GWAS	PMID23453885	Mental Disorders
ENST00000264051.8:C.1071C>T	2	232892969	ENSG00000066248	ENST00000264051.8	NGEF	rs748002	unipolar depression	Ensembl_Post_GWAS	PMID23453885	Mental Disorders
ENST00000409110.6:C.468C>T	2	233327153	ENSG00000130561	ENST00000409110.6	SAG	rs375593027	Oguchis disease	ClinVar		Other diseases
ENST00000409110.6:C.468C>T	2	233327153	ENSG00000130561	ENST00000409110.6	SAG	rs375593027	Retinitis Pigmentosa	ClinVar		Congenital, Hereditary, and Neonatal Diseases and Abnormalities; Eye Diseases
ENST00000409110.6:C.489C>T	2	233327174	ENSG00000130561	ENST00000409110.6	SAG	rs2304773	Oguchis disease	ClinVar		Other diseases
ENST00000409110.6:C.489C>T	2	233327174	ENSG00000130561	ENST00000409110.6	SAG	rs2304773	Retinitis Pigmentosa	ClinVar		Congenital, Hereditary, and Neonatal Diseases and Abnormalities; Eye Diseases
ENST00000409110.6:C.577C>T	2	233328542	ENSG00000130561	ENST00000409110.6	SAG	rs201153410	Oguchis disease	ClinVar		Other diseases
ENST00000373426.3:C.33C>G	2	233681970	ENSG00000244122	ENST00000373426.3	UGT1A7	rs7577677	bilirubin measurement	Ensembl_Post_GWAS	PMID25884002	Other diseases
ENST00000373426.3:C.33C>G	2	233681970	ENSG00000244122	ENST00000373426.3	UGT1A7	rs7577677	HIV-1 infection	Ensembl_Post_GWAS	PMID25884002	Infections; Immune System Diseases
ENST00000373426.3:C.391C>G	2	233682328	ENSG00000244122	ENST00000373426.3	UGT1A7	rs17863778	attention deficit hyperactivity disorder	Ensembl_Post_GWAS	PMID20732626	Mental Disorders
ENST00000610772.4:C.32C>A	2	233779390	ENSG00000185038	ENST00000610772.4	MROH2A	rs6431631	bilirubin measurement	Ensembl_Post_GWAS	PMID29403010	Other diseases
ENST00000307503.4:C.27C>A	2	240868892	ENSG00000172482	ENST00000307503.4	AGXT	rs180177188	Primary hyperoxaluria	ClinVar		Congenital, Hereditary, and Neonatal Diseases and Abnormalities; Nutritional and Metabolic Diseases; Female Urogenital Diseases and Pregnancy Complications; Male Urogenital Diseases
ENST00000307503.4:C.198C>T	2	240869202	ENSG00000172482	ENST00000307503.4	AGXT	rs121908521	Primary hyperoxaluria	ClinVar		Congenital, Hereditary, and Neonatal Diseases and Abnormalities; Nutritional and Metabolic Diseases; Female Urogenital Diseases and Pregnancy Complications; Male Urogenital Diseases
ENST00000307503.4:C.264C>T	2	240869268	ENSG00000172482	ENST00000307503.4	AGXT	rs35698882	Primary hyperoxaluria	ClinVar		Congenital, Hereditary, and Neonatal Diseases and Abnormalities; Nutritional and Metabolic Diseases; Female Urogenital Diseases and Pregnancy Complications; Male Urogenital Diseases
ENST00000307503.4:C.901C>T	2	240877591	ENSG00000172482	ENST00000307503.4	AGXT	rs886055841	Primary hyperoxaluria	ClinVar		Congenital, Hereditary, and Neonatal Diseases and Abnormalities; Nutritional and Metabolic Diseases; Female Urogenital Diseases and Pregnancy Complications; Male Urogenital Diseases
ENST00000307503.4:C.930C>T	2	240877620	ENSG00000172482	ENST00000307503.4	AGXT	rs886055842	Primary hyperoxaluria	ClinVar		Congenital, Hereditary, and Neonatal Diseases and Abnormalities; Nutritional and Metabolic Diseases; Female Urogenital Diseases and Pregnancy Complications; Male Urogenital Diseases
ENST00000307503.4:C.1174C>T	2	240878816	ENSG00000172482	ENST00000307503.4	AGXT	rs180177167	Primary hyperoxaluria	ClinVar		Congenital, Hereditary, and Neonatal Diseases and Abnormalities; Nutritional and Metabolic Diseases; Female Urogenital Diseases and Pregnancy Complications; Male Urogenital Diseases
ENST00000251607.11:C.68C>T	3	3129108	ENSG00000072756	ENST00000251607.11	TRNT1	rs334773	Sideroblastic anemia with B-cell immunodeficiency	ClinVar		Other diseases
ENST00000251607.11:C.133C>T	3	3129173	ENSG00000072756	ENST00000251607.11	TRNT1	rs75033443	Sideroblastic anemia with B-cell immunodeficiency	ClinVar		Other diseases
ENST00000319331.4:C.594C>T	3	3845235	ENSG00000175928	ENST00000319331.4	LRRN1	rs3749348	beta-nerve growth factor measurement	Ensembl_Post_GWAS	PMID27989323	Other diseases
ENST00000649015.2:C.255C>T	3	4627854	ENSG00000150995	ENST00000649015.2	ITPR1	rs367814655	Spinocerebellar Ataxia	ClinVar		Nervous System Diseases; Congenital, Hereditary, and Neonatal Diseases and Abnormalities
ENST00000649015.2:C.805C>A	3	4645678	ENSG00000150995	ENST00000649015.2	ITPR1	rs886039392	Gillespie syndrome	ClinVar		Nervous System Diseases; Eye Diseases; Congenital, Hereditary, and Neonatal Diseases and Abnormalities; Pathological Conditions, Signs and Symptoms; Behavior and Behavior Mechanisms; Mental Disorders
ENST00000649015.2:C.805C>A	3	4645678	ENSG00000150995	ENST00000649015.2	ITPR1	rs886039392	Inborn genetic diseases	ClinVar		Other diseases
ENST00000649015.2:C.805C>A	3	4645678	ENSG00000150995	ENST00000649015.2	ITPR1	rs886039392	Spinocerebellar ataxia 15	ClinVar		Nervous System Diseases; Congenital, Hereditary, and Neonatal Diseases and Abnormalities
ENST00000649015.2:C.805C>A	3	4645678	ENSG00000150995	ENST00000649015.2	ITPR1	rs886039392	Spinocerebellar ataxia 29	ClinVar		Nervous System Diseases; Congenital, Hereditary, and Neonatal Diseases and Abnormalities
ENST00000649015.2:C.882C>T	3	4652149	ENSG00000150995	ENST00000649015.2	ITPR1	rs370157764	Spinocerebellar Ataxia	ClinVar		Nervous System Diseases; Congenital, Hereditary, and Neonatal Diseases and Abnormalities
ENST00000649015.2:C.1926C>T	3	4669693	ENSG00000150995	ENST00000649015.2	ITPR1	rs61757106	Spinocerebellar Ataxia	ClinVar		Nervous System Diseases; Congenital, Hereditary, and Neonatal Diseases and Abnormalities
ENST00000649015.2:C.3195C>T	3	4683419	ENSG00000150995	ENST00000649015.2	ITPR1	rs745351516	Spinocerebellar Ataxia	ClinVar		Nervous System Diseases; Congenital, Hereditary, and Neonatal Diseases and Abnormalities
ENST00000649015.2:C.4263C>T	3	4693723	ENSG00000150995	ENST00000649015.2	ITPR1	rs61757110	Spinocerebellar Ataxia	ClinVar		Nervous System Diseases; Congenital, Hereditary, and Neonatal Diseases and Abnormalities
ENST00000649015.2:C.4854C>T	3	4710336	ENSG00000150995	ENST00000649015.2	ITPR1	rs373127487	Spinocerebellar Ataxia	ClinVar		Nervous System Diseases; Congenital, Hereditary, and Neonatal Diseases and Abnormalities
ENST00000649015.2:C.5403C>T	3	4735213	ENSG00000150995	ENST00000649015.2	ITPR1	rs765524918	Spinocerebellar Ataxia	ClinVar		Nervous System Diseases; Congenital, Hereditary, and Neonatal Diseases and Abnormalities
ENST00000649015.2:C.5466C>T	3	4735276	ENSG00000150995	ENST00000649015.2	ITPR1	rs113368815	Spinocerebellar Ataxia	ClinVar		Nervous System Diseases; Congenital, Hereditary, and Neonatal Diseases and Abnormalities
ENST00000256495.4:C.1212C>T	3	4983665	ENSG00000134107	ENST00000256495.4	BHLHE40	rs1453567870	breast carcinoma	Cosmic	22722193	Cancer; Organismal Injury and Abnormalities; Reproductive System Disease
ENST00000343849.3:C.99C>T	3	8733975	ENSG00000182533	ENST00000343849.3	CAV3	rs1008642	large intestine carcinoma	Cosmic	24951259	Cancer; Gastrointestinal Disease; Organismal Injury and Abnormalities
ENST00000343849.3:C.99C>T	3	8733975	ENSG00000182533	ENST00000343849.3	CAV3	rs1008642	Cardiovascular phenotype	ClinVar		Cardiovascular Diseases
ENST00000343849.3:C.99C>T	3	8733975	ENSG00000182533	ENST00000343849.3	CAV3	rs1008642	Caveolinopathy	ClinVar		Other diseases
ENST00000343849.3:C.99C>T	3	8733975	ENSG00000182533	ENST00000343849.3	CAV3	rs1008642	Distal myopathy	ClinVar		Congenital, Hereditary, and Neonatal Diseases and Abnormalities; Musculoskeletal Diseases; Nervous System Diseases
ENST00000343849.3:C.99C>T	3	8733975	ENSG00000182533	ENST00000343849.3	CAV3	rs1008642	Hypertrophic cardiomyopathy	ClinVar		Cardiovascular Diseases
ENST00000343849.3:C.99C>T	3	8733975	ENSG00000182533	ENST00000343849.3	CAV3	rs1008642	Limb-Girdle Muscular Dystrophy	ClinVar		Congenital, Hereditary, and Neonatal Diseases and Abnormalities; Musculoskeletal Diseases; Nervous System Diseases
ENST00000343849.3:C.99C>T	3	8733975	ENSG00000182533	ENST00000343849.3	CAV3	rs1008642	Long QT syndrome	ClinVar		Pathological Conditions, Signs and Symptoms; Congenital, Hereditary, and Neonatal Diseases and Abnormalities; Cardiovascular Diseases
ENST00000343849.3:C.99C>T	3	8733975	ENSG00000182533	ENST00000343849.3	CAV3	rs1008642	Rippling muscle disease 2	ClinVar		Musculoskeletal Diseases; Nervous System Diseases
ENST00000343849.3:C.99C>T	3	8733975	ENSG00000182533	ENST00000343849.3	CAV3	rs1008642	Romano-Ward syndrome	ClinVar		Pathological Conditions, Signs and Symptoms; Congenital, Hereditary, and Neonatal Diseases and Abnormalities; Cardiovascular Diseases
ENST00000343849.3:C.276C>T	3	8745687	ENSG00000182533	ENST00000343849.3	CAV3	rs72546669	Cardiomyopathy	ClinVar		Cardiovascular Diseases
ENST00000343849.3:C.276C>T	3	8745687	ENSG00000182533	ENST00000343849.3	CAV3	rs72546669	Cardiovascular phenotype	ClinVar		Cardiovascular Diseases
ENST00000343849.3:C.336C>T	3	8745747	ENSG00000182533	ENST00000343849.3	CAV3	rs139985460	Cardiomyopathy	ClinVar		Cardiovascular Diseases
ENST00000343849.3:C.336C>T	3	8745747	ENSG00000182533	ENST00000343849.3	CAV3	rs139985460	Cardiovascular phenotype	ClinVar		Cardiovascular Diseases
ENST00000343849.3:C.369C>G	3	8745780	ENSG00000182533	ENST00000343849.3	CAV3	rs202101572	breast carcinoma	Cosmic	20668451	Cancer; Organismal Injury and Abnormalities; Reproductive System Disease
ENST00000287647.7:C.672C>T	3	10039822	ENSG00000144554	ENST00000287647.7	FANCD2	rs371928644	Fanconi anemia	ClinVar		Congenital, Hereditary, and Neonatal Diseases and Abnormalities; Nutritional and Metabolic Diseases; Hemic and Lymphatic Diseases
ENST00000287647.7:C.1777C>T	3	10062161	ENSG00000144554	ENST00000287647.7	FANCD2	rs147523071	breast cancer	ClinVar		Cancer
ENST00000287647.7:C.1777C>T	3	10062161	ENSG00000144554	ENST00000287647.7	FANCD2	rs147523071	Fanconi anemia	ClinVar		Congenital, Hereditary, and Neonatal Diseases and Abnormalities; Nutritional and Metabolic Diseases; Hemic and Lymphatic Diseases
ENST00000256474.3:C.114C>T	3	10141961	ENSG00000134086	ENST00000256474.3	VHL	rs417164	kidney carcinoma	Cosmic	11536052	Cancer; Organismal Injury and Abnormalities; Male Urogenital Diseases
ENST00000256474.3:C.114C>T	3	10141961	ENSG00000134086	ENST00000256474.3	VHL	rs417164	Hereditary cancer-predisposing syndrome	ClinVar		Other diseases
ENST00000256474.3:C.114C>T	3	10141961	ENSG00000134086	ENST00000256474.3	VHL	rs417164	Von Hippel-Lindau syndrome	ClinVar		Congenital, Hereditary, and Neonatal Diseases and Abnormalities; Nervous System Diseases; Cardiovascular Diseases
ENST00000256474.3:C.117C>T	3	10141964	ENSG00000134086	ENST00000256474.3	VHL	rs1057521552	Erythrocytosis	ClinVar		Hemic and Lymphatic Diseases
ENST00000256474.3:C.117C>T	3	10141964	ENSG00000134086	ENST00000256474.3	VHL	rs1057521552	Von Hippel-Lindau syndrome	ClinVar		Congenital, Hereditary, and Neonatal Diseases and Abnormalities; Nervous System Diseases; Cardiovascular Diseases
ENST00000256474.3:C.150C>T	3	10141997	ENSG00000134086	ENST00000256474.3	VHL	rs61751580	Hereditary cancer-predisposing syndrome	ClinVar		Other diseases
ENST00000256474.3:C.168C>T	3	10142015	ENSG00000134086	ENST00000256474.3	VHL	rs864622714	Erythrocytosis	ClinVar		Hemic and Lymphatic Diseases
ENST00000256474.3:C.168C>T	3	10142015	ENSG00000134086	ENST00000256474.3	VHL	rs864622714	Von Hippel-Lindau syndrome	ClinVar		Congenital, Hereditary, and Neonatal Diseases and Abnormalities; Nervous System Diseases; Cardiovascular Diseases
ENST00000256474.3:C.183C>G	3	10142030	ENSG00000134086	ENST00000256474.3	VHL	rs63650860	kidney carcinoma	Cosmic	15932632	Cancer; Organismal Injury and Abnormalities; Male Urogenital Diseases
ENST00000256474.3:C.183C>G	3	10142030	ENSG00000134086	ENST00000256474.3	VHL	rs63650860	Hereditary cancer-predisposing syndrome	ClinVar		Other diseases
ENST00000256474.3:C.183C>G	3	10142030	ENSG00000134086	ENST00000256474.3	VHL	rs63650860	Von Hippel-Lindau syndrome	ClinVar		Congenital, Hereditary, and Neonatal Diseases and Abnormalities; Nervous System Diseases; Cardiovascular Diseases
ENST00000256474.3:C.258C>T	3	10142105	ENSG00000134086	ENST00000256474.3	VHL	rs781063331	Erythrocytosis	ClinVar		Hemic and Lymphatic Diseases
ENST00000256474.3:C.258C>T	3	10142105	ENSG00000134086	ENST00000256474.3	VHL	rs781063331	Hereditary cancer-predisposing syndrome	ClinVar		Other diseases
ENST00000256474.3:C.258C>T	3	10142105	ENSG00000134086	ENST00000256474.3	VHL	rs781063331	Von Hippel-Lindau syndrome	ClinVar		Congenital, Hereditary, and Neonatal Diseases and Abnormalities; Nervous System Diseases; Cardiovascular Diseases
ENST00000256474.3:C.273C>T	3	10142120	ENSG00000134086	ENST00000256474.3	VHL	rs1060503563	Erythrocytosis	ClinVar		Hemic and Lymphatic Diseases
ENST00000256474.3:C.273C>T	3	10142120	ENSG00000134086	ENST00000256474.3	VHL	rs1060503563	Hereditary cancer-predisposing syndrome	ClinVar		Other diseases
ENST00000256474.3:C.273C>T	3	10142120	ENSG00000134086	ENST00000256474.3	VHL	rs1060503563	Von Hippel-Lindau syndrome	ClinVar		Congenital, Hereditary, and Neonatal Diseases and Abnormalities; Nervous System Diseases; Cardiovascular Diseases
ENST00000256474.3:C.301C>T	3	10142148	ENSG00000134086	ENST00000256474.3	VHL	rs772300829	kidney carcinoma	Cosmic	11793370	Cancer; Organismal Injury and Abnormalities; Male Urogenital Diseases
ENST00000256474.3:C.375C>T	3	10146548	ENSG00000134086	ENST00000256474.3	VHL	rs863224372	kidney carcinoma	Cosmic	23558940	Cancer; Organismal Injury and Abnormalities; Male Urogenital Diseases
ENST00000256474.3:C.375C>T	3	10146548	ENSG00000134086	ENST00000256474.3	VHL	rs863224372	Von Hippel-Lindau syndrome	ClinVar		Congenital, Hereditary, and Neonatal Diseases and Abnormalities; Nervous System Diseases; Cardiovascular Diseases
ENST00000256474.3:C.429C>T	3	10146602	ENSG00000134086	ENST00000256474.3	VHL	rs773556807	Erythrocytosis	ClinVar		Hemic and Lymphatic Diseases
ENST00000256474.3:C.429C>T	3	10146602	ENSG00000134086	ENST00000256474.3	VHL	rs773556807	Hereditary cancer-predisposing syndrome	ClinVar		Other diseases
ENST00000256474.3:C.429C>T	3	10146602	ENSG00000134086	ENST00000256474.3	VHL	rs773556807	Von Hippel-Lindau syndrome	ClinVar		Congenital, Hereditary, and Neonatal Diseases and Abnormalities; Nervous System Diseases; Cardiovascular Diseases
ENST00000256474.3:C.555C>T	3	10149878	ENSG00000134086	ENST00000256474.3	VHL	rs864622109	kidney carcinoma	Cosmic	7977367	Cancer; Organismal Injury and Abnormalities; Male Urogenital Diseases
ENST00000256474.3:C.555C>T	3	10149878	ENSG00000134086	ENST00000256474.3	VHL	rs864622109	Hereditary cancer-predisposing syndrome	ClinVar		Other diseases
ENST00000256474.3:C.555C>T	3	10149878	ENSG00000134086	ENST00000256474.3	VHL	rs864622109	Von Hippel-Lindau syndrome	ClinVar		Congenital, Hereditary, and Neonatal Diseases and Abnormalities; Nervous System Diseases; Cardiovascular Diseases
ENST00000644803.1:C.492C>T	3	11020233	ENSG00000157103	ENST00000644803.1	SLC6A1	rs151263329	History of neurodevelopmental disorder	ClinVar		Other diseases
ENST00000644803.1:C.912C>T	3	11025835	ENSG00000157103	ENST00000644803.1	SLC6A1	rs35450949	History of neurodevelopmental disorder	ClinVar		Other diseases
ENST00000644803.1:C.999C>T	3	11026280	ENSG00000157103	ENST00000644803.1	SLC6A1	rs138166453	History of neurodevelopmental disorder	ClinVar		Other diseases
ENST00000644803.1:C.1329C>T	3	11029331	ENSG00000157103	ENST00000644803.1	SLC6A1	rs200670508	History of neurodevelopmental disorder	ClinVar		Other diseases
ENST00000644803.1:C.1452C>T	3	11031278	ENSG00000157103	ENST00000644803.1	SLC6A1	rs201643896	History of neurodevelopmental disorder	ClinVar		Other diseases
ENST00000442415.7:C.1332C>T	3	12590896	ENSG00000132155	ENST00000442415.7	RAF1	rs142942142	Rasopathy	ClinVar		Pathological Conditions, Signs and Symptoms; Nervous System Diseases; Otorhinolaryngologic Diseases
ENST00000442415.7:C.915C>T	3	12600395	ENSG00000132155	ENST00000442415.7	RAF1	rs763657486	Cardiovascular phenotype	ClinVar		Cardiovascular Diseases
ENST00000442415.7:C.915C>T	3	12600395	ENSG00000132155	ENST00000442415.7	RAF1	rs763657486	Rasopathy	ClinVar		Pathological Conditions, Signs and Symptoms; Nervous System Diseases; Otorhinolaryngologic Diseases
ENST00000442415.7:C.309C>G	3	12611961	ENSG00000132155	ENST00000442415.7	RAF1	rs1057520880	Rasopathy	ClinVar		Pathological Conditions, Signs and Symptoms; Nervous System Diseases; Otorhinolaryngologic Diseases
ENST00000306077.5:C.222C>T	3	14130881	ENSG00000170876	ENST00000306077.5	TMEM43	rs34099410	Arrhythmogenic right ventricular cardiomyopathy	ClinVar		Congenital, Hereditary, and Neonatal Diseases and Abnormalities; Cardiovascular Diseases
ENST00000306077.5:C.222C>T	3	14130881	ENSG00000170876	ENST00000306077.5	TMEM43	rs34099410	Cardiomyopathy	ClinVar		Cardiovascular Diseases
ENST00000306077.5:C.222C>T	3	14130881	ENSG00000170876	ENST00000306077.5	TMEM43	rs34099410	Cardiovascular phenotype	ClinVar		Cardiovascular Diseases
ENST00000306077.5:C.750C>T	3	14135202	ENSG00000170876	ENST00000306077.5	TMEM43	rs374222050	Arrhythmogenic right ventricular cardiomyopathy	ClinVar		Congenital, Hereditary, and Neonatal Diseases and Abnormalities; Cardiovascular Diseases
ENST00000306077.5:C.750C>T	3	14135202	ENSG00000170876	ENST00000306077.5	TMEM43	rs374222050	Cardiomyopathy	ClinVar		Cardiovascular Diseases
ENST00000306077.5:C.864C>T	3	14135890	ENSG00000170876	ENST00000306077.5	TMEM43	rs377585035	Cardiovascular phenotype	ClinVar		Cardiovascular Diseases
ENST00000285021.12:C.2815C>A	3	14145949	ENSG00000154767	ENST00000285021.12	XPC	rs2228001	Arrhythmogenic right ventricular cardiomyopathy	ClinVar		Congenital, Hereditary, and Neonatal Diseases and Abnormalities; Cardiovascular Diseases
ENST00000285021.12:C.2815C>A	3	14145949	ENSG00000154767	ENST00000285021.12	XPC	rs2228001	cisplatin response - Toxicity/ADR	ClinVar		Other diseases
ENST00000285021.12:C.2815C>A	3	14145949	ENSG00000154767	ENST00000285021.12	XPC	rs2228001	Xeroderma pigmentosum	ClinVar		Congenital, Hereditary, and Neonatal Diseases and Abnormalities; Neoplasms; Nutritional and Metabolic Diseases; Skin and Connective Tissue Diseases
ENST00000285021.12:C.1496C>T	3	14158387	ENSG00000154767	ENST00000285021.12	XPC	rs2228000	Xeroderma pigmentosum	ClinVar		Congenital, Hereditary, and Neonatal Diseases and Abnormalities; Neoplasms; Nutritional and Metabolic Diseases; Skin and Connective Tissue Diseases
ENST00000285021.12:C.877C>A	3	14164836	ENSG00000154767	ENST00000285021.12	XPC	rs373519125	Xeroderma pigmentosum	ClinVar		Congenital, Hereditary, and Neonatal Diseases and Abnormalities; Neoplasms; Nutritional and Metabolic Diseases; Skin and Connective Tissue Diseases
ENST00000672112.1:C.114C>T	3	15635487	ENSG00000169814	ENST00000672112.1	BTD	rs201823743	Biotinidase deficiency	ClinVar		Congenital, Hereditary, and Neonatal Diseases and Abnormalities; Nutritional and Metabolic Diseases
ENST00000672112.1:C.230C>A	3	15635603	ENSG00000169814	ENST00000672112.1	BTD	rs1060499720	Global developmental delay	ClinVar		Other diseases
ENST00000672112.1:C.588C>T	3	15644438	ENSG00000169814	ENST00000672112.1	BTD	rs750363004	Biotinidase deficiency	ClinVar		Congenital, Hereditary, and Neonatal Diseases and Abnormalities; Nutritional and Metabolic Diseases
ENST00000399451.6:C.1521C>T	3	15696182	ENSG00000206560	ENST00000399451.6	ANKRD28	rs2470548	platelet distribution width	Ensembl_Post_GWAS	PMID27863252	Other diseases
ENST00000280696.9:C.780C>T	3	24143504	ENSG00000151090	ENST00000280696.9	THRB	rs3752874	Thyroid Hormone Resistance	ClinVar		Endocrine System Diseases
ENST00000280696.9:C.693C>T	3	24143591	ENSG00000151090	ENST00000280696.9	THRB	rs143993214	Thyroid Hormone Resistance	ClinVar		Endocrine System Diseases
ENST00000280700.10:C.930C>T	3	25737407	ENSG00000151092	ENST00000280700.10	NGLY1	rs745814294	Congenital disorder of deglycosylation	ClinVar		Congenital, Hereditary, and Neonatal Diseases and Abnormalities; Nutritional and Metabolic Diseases
ENST00000280700.10:C.491C>T	3	25764067	ENSG00000151092	ENST00000280700.10	NGLY1	rs749441809	Congenital disorder of deglycosylation	ClinVar		Congenital, Hereditary, and Neonatal Diseases and Abnormalities; Nutritional and Metabolic Diseases
ENST00000429845.6:C.2061C>G	3	27256325	ENSG00000163491	ENST00000429845.6	NEK10	rs3213930	breast carcinoma	Ensembl_Post_GWAS	PMID20453838	Cancer; Organismal Injury and Abnormalities; Reproductive System Disease
ENST00000429845.6:C.2061C>G	3	27256325	ENSG00000163491	ENST00000429845.6	NEK10	rs3213930	colorectal cancer	Ensembl_Post_GWAS	PMID19330027	Cancer
ENST00000429845.6:C.2061C>G	3	27256325	ENSG00000163491	ENST00000429845.6	NEK10	rs3213930	estrogen receptor negative breast cancer	Ensembl_Post_GWAS	PMID29059683	Other diseases
ENST00000429845.6:C.2061C>G	3	27256325	ENSG00000163491	ENST00000429845.6	NEK10	rs3213930	lung adenocarcinoma	Ensembl_Post_GWAS	PMID24493630	Cancer; Organismal Injury and Abnormalities; Respiratory Disease
ENST00000429845.6:C.2061C>G	3	27256325	ENSG00000163491	ENST00000429845.6	NEK10	rs3213930	lung carcinoma	Ensembl_Post_GWAS	PMID27197191	Cancer; Organismal Injury and Abnormalities; Respiratory Disease
ENST00000429845.6:C.2061C>G	3	27256325	ENSG00000163491	ENST00000429845.6	NEK10	rs3213930	ovarian carcinoma	Ensembl_Post_GWAS	PMID27197191	Cancer; Organismal Injury and Abnormalities; Reproductive System Disease
ENST00000429845.6:C.2061C>G	3	27256325	ENSG00000163491	ENST00000429845.6	NEK10	rs3213930	ovarian endometrioid carcinoma	Ensembl_Post_GWAS	PMID27197191	Cancer; Organismal Injury and Abnormalities; Reproductive System Disease
ENST00000429845.6:C.2061C>G	3	27256325	ENSG00000163491	ENST00000429845.6	NEK10	rs3213930	ovarian serous carcinoma	Ensembl_Post_GWAS	PMID27197191	Cancer; Organismal Injury and Abnormalities; Reproductive System Disease
ENST00000429845.6:C.2061C>G	3	27256325	ENSG00000163491	ENST00000429845.6	NEK10	rs3213930	prostate carcinoma	Ensembl_Post_GWAS	PMID27197191	Neoplasms; Male Urogenital Diseases
ENST00000429845.6:C.2061C>G	3	27256325	ENSG00000163491	ENST00000429845.6	NEK10	rs3213930	squamous cell lung carcinoma	Ensembl_Post_GWAS	PMID27197191	Cancer; Organismal Injury and Abnormalities
ENST00000454389.5:C.2346C>T	3	27400845	ENSG00000033867	ENST00000454389.5	SLC4A7	rs3736312	diastolic blood pressure	Ensembl_Post_GWAS	PMID29455858	Other diseases
ENST00000454389.5:C.2346C>T	3	27400845	ENSG00000033867	ENST00000454389.5	SLC4A7	rs3736312	mean arterial pressure	Ensembl_Post_GWAS	PMID21909115	Other diseases
ENST00000454389.5:C.2346C>T	3	27400845	ENSG00000033867	ENST00000454389.5	SLC4A7	rs3736312	smoking status measurement	Ensembl_Post_GWAS	PMID27618447	Behavior and Behavior Mechanisms
ENST00000454389.5:C.2346C>T	3	27400845	ENSG00000033867	ENST00000454389.5	SLC4A7	rs3736312	systolic blood pressure	Ensembl_Post_GWAS	PMID28739976	Cardiovascular Diseases
ENST00000359013.4:C.783C>T	3	30671891	ENSG00000163513	ENST00000359013.4	TGFBR2	rs141554621	Thoracic aortic aneurysm and aortic dissection	ClinVar		Other diseases
ENST00000359013.4:C.990C>G	3	30672098	ENSG00000163513	ENST00000359013.4	TGFBR2	rs146030104	Loeys-Dietz syndrome	ClinVar		Congenital, Hereditary, and Neonatal Diseases and Abnormalities; Musculoskeletal Diseases; Cardiovascular Diseases
ENST00000359013.4:C.990C>G	3	30672098	ENSG00000163513	ENST00000359013.4	TGFBR2	rs146030104	Marfan syndrome	ClinVar		Congenital, Hereditary, and Neonatal Diseases and Abnormalities; Skin and Connective Tissue Diseases; Musculoskeletal Diseases; Cardiovascular Diseases
ENST00000359013.4:C.990C>G	3	30672098	ENSG00000163513	ENST00000359013.4	TGFBR2	rs146030104	Thoracic aortic aneurysm and aortic dissection	ClinVar		Other diseases
ENST00000359013.4:C.1059C>T	3	30672167	ENSG00000163513	ENST00000359013.4	TGFBR2	rs193922666	Cardiovascular phenotype	ClinVar		Cardiovascular Diseases
ENST00000359013.4:C.1059C>T	3	30672167	ENSG00000163513	ENST00000359013.4	TGFBR2	rs193922666	Loeys-Dietz syndrome	ClinVar		Congenital, Hereditary, and Neonatal Diseases and Abnormalities; Musculoskeletal Diseases; Cardiovascular Diseases
ENST00000359013.4:C.1059C>T	3	30672167	ENSG00000163513	ENST00000359013.4	TGFBR2	rs193922666	Marfan syndrome	ClinVar		Congenital, Hereditary, and Neonatal Diseases and Abnormalities; Skin and Connective Tissue Diseases; Musculoskeletal Diseases; Cardiovascular Diseases
ENST00000359013.4:C.1059C>T	3	30672167	ENSG00000163513	ENST00000359013.4	TGFBR2	rs193922666	Thoracic aortic aneurysm and aortic dissection	ClinVar		Other diseases
ENST00000359013.4:C.1090C>A	3	30672198	ENSG00000163513	ENST00000359013.4	TGFBR2	rs761991787	Hereditary nonpolyposis colorectal cancer type 6	ClinVar		Congenital, Hereditary, and Neonatal Diseases and Abnormalities; Neoplasms
ENST00000359013.4:C.1090C>A	3	30672198	ENSG00000163513	ENST00000359013.4	TGFBR2	rs761991787	Loeys-Dietz syndrome	ClinVar		Congenital, Hereditary, and Neonatal Diseases and Abnormalities; Musculoskeletal Diseases; Cardiovascular Diseases
ENST00000359013.4:C.1090C>A	3	30672198	ENSG00000163513	ENST00000359013.4	TGFBR2	rs761991787	Loeys-Dietz syndrome 2	ClinVar		Congenital, Hereditary, and Neonatal Diseases and Abnormalities; Musculoskeletal Diseases; Cardiovascular Diseases
ENST00000359013.4:C.1090C>A	3	30672198	ENSG00000163513	ENST00000359013.4	TGFBR2	rs761991787	Lynch syndrome	ClinVar		Congenital, Hereditary, and Neonatal Diseases and Abnormalities; Digestive System Diseases; Neoplasms; Nutritional and Metabolic Diseases
ENST00000359013.4:C.1090C>A	3	30672198	ENSG00000163513	ENST00000359013.4	TGFBR2	rs761991787	Malignant tumor of esophagus	ClinVar		Other diseases
ENST00000359013.4:C.1090C>A	3	30672198	ENSG00000163513	ENST00000359013.4	TGFBR2	rs761991787	Thoracic aortic aneurysm and aortic dissection	ClinVar		Other diseases
ENST00000359013.4:C.1200C>T	3	30672308	ENSG00000163513	ENST00000359013.4	TGFBR2	rs751663055	Thoracic aortic aneurysm and aortic dissection	ClinVar		Other diseases
ENST00000307363.10:C.1588C>G	3	33014202	ENSG00000170266	ENST00000307363.10	GLB1	rs371397760	Gangliosidosis GM1 type 3	ClinVar		Congenital, Hereditary, and Neonatal Diseases and Abnormalities; Nutritional and Metabolic Diseases; Nervous System Diseases
ENST00000307363.10:C.1588C>G	3	33014202	ENSG00000170266	ENST00000307363.10	GLB1	rs371397760	GM1 gangliosidosis type 2	ClinVar		Congenital, Hereditary, and Neonatal Diseases and Abnormalities; Nutritional and Metabolic Diseases; Nervous System Diseases
ENST00000307363.10:C.1588C>G	3	33014202	ENSG00000170266	ENST00000307363.10	GLB1	rs371397760	Infantile GM1 gangliosidosis	ClinVar		Other diseases
ENST00000307363.10:C.1588C>G	3	33014202	ENSG00000170266	ENST00000307363.10	GLB1	rs371397760	Mucopolysaccharidosis	ClinVar		Congenital, Hereditary, and Neonatal Diseases and Abnormalities; Nutritional and Metabolic Diseases; Skin and Connective Tissue Diseases
ENST00000307363.10:C.858C>T	3	33051939	ENSG00000170266	ENST00000307363.10	GLB1	rs770638519	Gangliosidosis GM1 type 3	ClinVar		Congenital, Hereditary, and Neonatal Diseases and Abnormalities; Nutritional and Metabolic Diseases; Nervous System Diseases
ENST00000307363.10:C.858C>T	3	33051939	ENSG00000170266	ENST00000307363.10	GLB1	rs770638519	GM1 gangliosidosis type 2	ClinVar		Congenital, Hereditary, and Neonatal Diseases and Abnormalities; Nutritional and Metabolic Diseases; Nervous System Diseases
ENST00000307363.10:C.858C>T	3	33051939	ENSG00000170266	ENST00000307363.10	GLB1	rs770638519	Infantile GM1 gangliosidosis	ClinVar		Other diseases
ENST00000307363.10:C.858C>T	3	33051939	ENSG00000170266	ENST00000307363.10	GLB1	rs770638519	Mucopolysaccharidosis	ClinVar		Congenital, Hereditary, and Neonatal Diseases and Abnormalities; Nutritional and Metabolic Diseases; Skin and Connective Tissue Diseases
ENST00000320954.11:C.396C>G	3	33114473	ENSG00000170275	ENST00000320954.11	CRTAP	rs1453368481	Osteogenesis imperfecta type 7	ClinVar		Musculoskeletal Diseases; Congenital, Hereditary, and Neonatal Diseases and Abnormalities; Skin and Connective Tissue Diseases
ENST00000231790.8:C.51C>T	3	36993598	ENSG00000076242	ENST00000231790.8	MLH1	rs761498953	Hereditary cancer-predisposing syndrome	ClinVar		Other diseases
ENST00000231790.8:C.51C>T	3	36993598	ENSG00000076242	ENST00000231790.8	MLH1	rs761498953	Hereditary nonpolyposis colon cancer	ClinVar		Congenital, Hereditary, and Neonatal Diseases and Abnormalities; Digestive System Diseases; Neoplasms; Nutritional and Metabolic Diseases
ENST00000231790.8:C.198C>T	3	36996700	ENSG00000076242	ENST00000231790.8	MLH1	rs61751642	Hereditary cancer-predisposing syndrome	ClinVar		Other diseases
ENST00000231790.8:C.198C>T	3	36996700	ENSG00000076242	ENST00000231790.8	MLH1	rs61751642	Hereditary nonpolyposis colon cancer	ClinVar		Congenital, Hereditary, and Neonatal Diseases and Abnormalities; Digestive System Diseases; Neoplasms; Nutritional and Metabolic Diseases
ENST00000231790.8:C.198C>T	3	36996700	ENSG00000076242	ENST00000231790.8	MLH1	rs61751642	Lynch syndrome	ClinVar		Congenital, Hereditary, and Neonatal Diseases and Abnormalities; Digestive System Diseases; Neoplasms; Nutritional and Metabolic Diseases
ENST00000231790.8:C.198C>T	3	36996700	ENSG00000076242	ENST00000231790.8	MLH1	rs61751642	Lynch syndrome II	ClinVar		Congenital, Hereditary, and Neonatal Diseases and Abnormalities; Neoplasms
ENST00000231790.8:C.217C>T	3	37000964	ENSG00000076242	ENST00000231790.8	MLH1	rs766608278	Hereditary cancer-predisposing syndrome	ClinVar		Other diseases
ENST00000231790.8:C.479C>T	3	37008839	ENSG00000076242	ENST00000231790.8	MLH1	rs63749924	Hereditary cancer-predisposing syndrome	ClinVar		Other diseases
ENST00000231790.8:C.954C>T	3	37020379	ENSG00000076242	ENST00000231790.8	MLH1	rs146777069	Familial cancer of breast	ClinVar		Neoplasms; Skin and Connective Tissue Diseases
ENST00000231790.8:C.954C>T	3	37020379	ENSG00000076242	ENST00000231790.8	MLH1	rs146777069	Hereditary cancer-predisposing syndrome	ClinVar		Other diseases
ENST00000231790.8:C.954C>T	3	37020379	ENSG00000076242	ENST00000231790.8	MLH1	rs146777069	Hereditary nonpolyposis colon cancer	ClinVar		Congenital, Hereditary, and Neonatal Diseases and Abnormalities; Digestive System Diseases; Neoplasms; Nutritional and Metabolic Diseases
ENST00000231790.8:C.954C>T	3	37020379	ENSG00000076242	ENST00000231790.8	MLH1	rs146777069	Lynch syndrome II	ClinVar		Congenital, Hereditary, and Neonatal Diseases and Abnormalities; Neoplasms
ENST00000231790.8:C.1003C>T	3	37020428	ENSG00000076242	ENST00000231790.8	MLH1	rs267607812	Hereditary cancer-predisposing syndrome	ClinVar		Other diseases
ENST00000231790.8:C.1003C>T	3	37020428	ENSG00000076242	ENST00000231790.8	MLH1	rs267607812	Lynch syndrome	ClinVar		Congenital, Hereditary, and Neonatal Diseases and Abnormalities; Digestive System Diseases; Neoplasms; Nutritional and Metabolic Diseases
ENST00000231790.8:C.1062C>G	3	37025660	ENSG00000076242	ENST00000231790.8	MLH1	rs730881748	Hereditary cancer-predisposing syndrome	ClinVar		Other diseases
ENST00000231790.8:C.1140C>T	3	37025738	ENSG00000076242	ENST00000231790.8	MLH1	rs786201611	Hereditary cancer-predisposing syndrome	ClinVar		Other diseases
ENST00000231790.8:C.1140C>T	3	37025738	ENSG00000076242	ENST00000231790.8	MLH1	rs786201611	Hereditary nonpolyposis colon cancer	ClinVar		Congenital, Hereditary, and Neonatal Diseases and Abnormalities; Digestive System Diseases; Neoplasms; Nutritional and Metabolic Diseases
ENST00000231790.8:C.1141C>T	3	37025739	ENSG00000076242	ENST00000231790.8	MLH1	rs63750557	Hereditary cancer-predisposing syndrome	ClinVar		Other diseases
ENST00000231790.8:C.1141C>T	3	37025739	ENSG00000076242	ENST00000231790.8	MLH1	rs63750557	Hereditary nonpolyposis colon cancer	ClinVar		Congenital, Hereditary, and Neonatal Diseases and Abnormalities; Digestive System Diseases; Neoplasms; Nutritional and Metabolic Diseases
ENST00000231790.8:C.1164C>T	3	37025762	ENSG00000076242	ENST00000231790.8	MLH1	rs1060504014	Hereditary cancer-predisposing syndrome	ClinVar		Other diseases
ENST00000231790.8:C.1208C>G	3	37025806	ENSG00000076242	ENST00000231790.8	MLH1	rs1311368931	Hereditary nonpolyposis colon cancer	ClinVar		Congenital, Hereditary, and Neonatal Diseases and Abnormalities; Digestive System Diseases; Neoplasms; Nutritional and Metabolic Diseases
ENST00000231790.8:C.1294C>T	3	37025892	ENSG00000076242	ENST00000231790.8	MLH1	rs876659787	Hereditary cancer-predisposing syndrome	ClinVar		Other diseases
ENST00000231790.8:C.1309C>G	3	37025907	ENSG00000076242	ENST00000231790.8	MLH1	rs587782273	lung carcinoma	Cosmic	28481359	Cancer; Organismal Injury and Abnormalities; Respiratory Disease
ENST00000231790.8:C.1309C>G	3	37025907	ENSG00000076242	ENST00000231790.8	MLH1	rs587782273	Hereditary cancer-predisposing syndrome	ClinVar		Other diseases
ENST00000231790.8:C.1309C>G	3	37025907	ENSG00000076242	ENST00000231790.8	MLH1	rs587782273	Hereditary nonpolyposis colon cancer	ClinVar		Congenital, Hereditary, and Neonatal Diseases and Abnormalities; Digestive System Diseases; Neoplasms; Nutritional and Metabolic Diseases
ENST00000231790.8:C.1484C>A	3	37028858	ENSG00000076242	ENST00000231790.8	MLH1	rs1060500685	Hereditary cancer-predisposing syndrome	ClinVar		Other diseases
ENST00000231790.8:C.1484C>A	3	37028858	ENSG00000076242	ENST00000231790.8	MLH1	rs1060500685	Hereditary nonpolyposis colon cancer	ClinVar		Congenital, Hereditary, and Neonatal Diseases and Abnormalities; Digestive System Diseases; Neoplasms; Nutritional and Metabolic Diseases
ENST00000231790.8:C.1590C>T	3	37040217	ENSG00000076242	ENST00000231790.8	MLH1	rs752241564	Hereditary cancer-predisposing syndrome	ClinVar		Other diseases
ENST00000231790.8:C.1590C>T	3	37040217	ENSG00000076242	ENST00000231790.8	MLH1	rs752241564	Hereditary nonpolyposis colon cancer	ClinVar		Congenital, Hereditary, and Neonatal Diseases and Abnormalities; Digestive System Diseases; Neoplasms; Nutritional and Metabolic Diseases
ENST00000231790.8:C.2001C>T	3	37048915	ENSG00000076242	ENST00000231790.8	MLH1	rs63750014	Hereditary cancer-predisposing syndrome	ClinVar		Other diseases
ENST00000231790.8:C.2001C>T	3	37048915	ENSG00000076242	ENST00000231790.8	MLH1	rs63750014	Hereditary nonpolyposis colon cancer	ClinVar		Congenital, Hereditary, and Neonatal Diseases and Abnormalities; Digestive System Diseases; Neoplasms; Nutritional and Metabolic Diseases
ENST00000231790.8:C.2040C>T	3	37048954	ENSG00000076242	ENST00000231790.8	MLH1	rs63749867	Hereditary cancer-predisposing syndrome	ClinVar		Other diseases
ENST00000231790.8:C.2040C>T	3	37048954	ENSG00000076242	ENST00000231790.8	MLH1	rs63749867	Hereditary nonpolyposis colon cancer	ClinVar		Congenital, Hereditary, and Neonatal Diseases and Abnormalities; Digestive System Diseases; Neoplasms; Nutritional and Metabolic Diseases
ENST00000231790.8:C.2040C>T	3	37048954	ENSG00000076242	ENST00000231790.8	MLH1	rs63749867	Lynch syndrome	ClinVar		Congenital, Hereditary, and Neonatal Diseases and Abnormalities; Digestive System Diseases; Neoplasms; Nutritional and Metabolic Diseases
ENST00000231790.8:C.2040C>T	3	37048954	ENSG00000076242	ENST00000231790.8	MLH1	rs63749867	Lynch syndrome II	ClinVar		Congenital, Hereditary, and Neonatal Diseases and Abnormalities; Neoplasms
ENST00000231790.8:C.2130C>G	3	37050512	ENSG00000076242	ENST00000231790.8	MLH1	rs749100096	Hereditary nonpolyposis colon cancer	ClinVar		Congenital, Hereditary, and Neonatal Diseases and Abnormalities; Digestive System Diseases; Neoplasms; Nutritional and Metabolic Diseases
ENST00000311806.8:C.911C>T	3	38230390	ENSG00000172939	ENST00000311806.8	OXSR1	rs6599079	Mean corpuscular hemoglobin concentration	GWAS	32888493	Other diseases
ENST00000311806.8:C.911C>T	3	38230390	ENSG00000172939	ENST00000311806.8	OXSR1	rs6599079	Red cell distribution width	GWAS	30595370	Pathological Conditions, Signs and Symptoms; Hemic and Lymphatic Diseases
ENST00000311806.8:C.911C>T	3	38230390	ENSG00000172939	ENST00000311806.8	OXSR1	rs6599079	gut microbiome measurement	Ensembl_Post_GWAS	PMID27723756	Other diseases
ENST00000311806.8:C.911C>T	3	38230390	ENSG00000172939	ENST00000311806.8	OXSR1	rs6599079	taxonomic microbiome measurement	Ensembl_Post_GWAS	PMID27723756	Other diseases
ENST00000655275.1:C.3783C>T	3	38714003	ENSG00000185313	ENST00000655275.1	SCN10A	rs749134108	Brugada syndrome	ClinVar		Congenital, Hereditary, and Neonatal Diseases and Abnormalities; Cardiovascular Diseases
ENST00000655275.1:C.3088C>T	3	38726632	ENSG00000185313	ENST00000655275.1	SCN10A	rs751252167	Brugada syndrome	ClinVar		Congenital, Hereditary, and Neonatal Diseases and Abnormalities; Cardiovascular Diseases
ENST00000655275.1:C.2526C>T	3	38728683	ENSG00000185313	ENST00000655275.1	SCN10A	rs995722247	Brugada syndrome	ClinVar		Congenital, Hereditary, and Neonatal Diseases and Abnormalities; Cardiovascular Diseases
ENST00000655275.1:C.2492C>T	3	38728717	ENSG00000185313	ENST00000655275.1	SCN10A	rs747839312	Brugada syndrome	ClinVar		Congenital, Hereditary, and Neonatal Diseases and Abnormalities; Cardiovascular Diseases
ENST00000302313.10:C.577C>A	3	39069649	ENSG00000114742	ENST00000302313.10	WDR48	rs2293312	functional laterality	Ensembl_Post_GWAS	PMID24065183	Other diseases
ENST00000287777.5:C.864C>A	3	42686482	ENSG00000157119	ENST00000287777.5	KLHL40	rs374925596	Nemaline myopathy 8	ClinVar		Musculoskeletal Diseases; Nervous System Diseases
ENST00000287777.5:C.1053C>T	3	42686671	ENSG00000157119	ENST00000287777.5	KLHL40	rs61736693	Nemaline myopathy 8	ClinVar		Musculoskeletal Diseases; Nervous System Diseases
ENST00000287777.5:C.1539C>T	3	42688986	ENSG00000157119	ENST00000287777.5	KLHL40	rs535889406	Nemaline myopathy 8	ClinVar		Musculoskeletal Diseases; Nervous System Diseases
ENST00000650792.2:C.1692C>T	3	45500511	ENSG00000011376	ENST00000650792.2	LARS2	rs149911756	Perrault syndrome 4	ClinVar		Pathological Conditions, Signs and Symptoms; Congenital, Hereditary, and Neonatal Diseases and Abnormalities; Female Urogenital Diseases and Pregnancy Complications; Male Urogenital Diseases; Nervous System Diseases; Endocrine System Diseases; Otorhinolaryngologic Diseases
ENST00000358525.9:C.786C>T	3	45771366	ENSG00000163817	ENST00000358525.9	SLC6A20	rs144563792	Hyperglycinuria	ClinVar		Congenital, Hereditary, and Neonatal Diseases and Abnormalities; Nutritional and Metabolic Diseases; Female Urogenital Diseases and Pregnancy Complications; Male Urogenital Diseases
ENST00000358525.9:C.654C>T	3	45772544	ENSG00000163817	ENST00000358525.9	SLC6A20	rs775911371	Hyperglycinuria	ClinVar		Congenital, Hereditary, and Neonatal Diseases and Abnormalities; Nutritional and Metabolic Diseases; Female Urogenital Diseases and Pregnancy Complications; Male Urogenital Diseases
ENST00000358525.9:C.615C>T	3	45772583	ENSG00000163817	ENST00000358525.9	SLC6A20	rs779053318	Hyperglycinuria	ClinVar		Congenital, Hereditary, and Neonatal Diseases and Abnormalities; Nutritional and Metabolic Diseases; Female Urogenital Diseases and Pregnancy Complications; Male Urogenital Diseases
ENST00000358525.9:C.26C>G	3	45796394	ENSG00000163817	ENST00000358525.9	SLC6A20	rs2271615	Hyperglycinuria	ClinVar		Congenital, Hereditary, and Neonatal Diseases and Abnormalities; Nutritional and Metabolic Diseases; Female Urogenital Diseases and Pregnancy Complications; Male Urogenital Diseases
ENST00000292303.4:C.918C>T	3	46373820	ENSG00000160791	ENST00000292303.4	CCR5	rs1251091638	lung carcinoma	Cosmic	20668451	Cancer; Organismal Injury and Abnormalities; Respiratory Disease
ENST00000292303.4:C.992C>A	3	46373894	ENSG00000160791	ENST00000292303.4	CCR5	rs1244960675	lung carcinoma	Cosmic	20668451	Cancer; Organismal Injury and Abnormalities; Respiratory Disease
ENST00000292303.4:C.1004C>T	3	46373906	ENSG00000160791	ENST00000292303.4	CCR5	rs1800944	CCR5 POLYMORPHISM	ClinVar		Other diseases
ENST00000653454.1:C.465C>T	3	46859491	ENSG00000160808	ENST00000653454.1	MYL3	rs147125759	Cardiovascular phenotype	ClinVar		Cardiovascular Diseases
ENST00000653454.1:C.286C>T	3	46860697	ENSG00000160808	ENST00000653454.1	MYL3	rs772804040	Cardiovascular phenotype	ClinVar		Cardiovascular Diseases
ENST00000653454.1:C.261C>T	3	46860722	ENSG00000160808	ENST00000653454.1	MYL3	rs556711370	Cardiomyopathy	ClinVar		Cardiovascular Diseases
ENST00000653454.1:C.69C>T	3	46863322	ENSG00000160808	ENST00000653454.1	MYL3	rs2233264	Cardiomyopathy	ClinVar		Cardiovascular Diseases
ENST00000653454.1:C.69C>T	3	46863322	ENSG00000160808	ENST00000653454.1	MYL3	rs2233264	Cardiovascular phenotype	ClinVar		Cardiovascular Diseases
ENST00000653454.1:C.69C>T	3	46863322	ENSG00000160808	ENST00000653454.1	MYL3	rs2233264	Familial hypertrophic cardiomyopathy 8	ClinVar		Congenital, Hereditary, and Neonatal Diseases and Abnormalities; Cardiovascular Diseases
ENST00000653454.1:C.69C>T	3	46863322	ENSG00000160808	ENST00000653454.1	MYL3	rs2233264	Hypertrophic cardiomyopathy	ClinVar		Cardiovascular Diseases
ENST00000449590.6:C.144C>T	3	46893975	ENSG00000160801	ENST00000449590.6	PTH1R	rs568635759	Chondrodysplasia	ClinVar		Pathological Conditions, Signs and Symptoms; Congenital, Hereditary, and Neonatal Diseases and Abnormalities; Musculoskeletal Diseases
ENST00000449590.6:C.144C>T	3	46893975	ENSG00000160801	ENST00000449590.6	PTH1R	rs568635759	Metaphyseal chondrodysplasia	ClinVar		Musculoskeletal Diseases; Congenital, Hereditary, and Neonatal Diseases and Abnormalities
ENST00000449590.6:C.436C>A	3	46898085	ENSG00000160801	ENST00000449590.6	PTH1R	rs143863124	Chondrodysplasia	ClinVar		Pathological Conditions, Signs and Symptoms; Congenital, Hereditary, and Neonatal Diseases and Abnormalities; Musculoskeletal Diseases
ENST00000449590.6:C.436C>A	3	46898085	ENSG00000160801	ENST00000449590.6	PTH1R	rs143863124	Metaphyseal chondrodysplasia	ClinVar		Musculoskeletal Diseases; Congenital, Hereditary, and Neonatal Diseases and Abnormalities
ENST00000450053.8:C.123C>T	3	46988740	ENSG00000160796	ENST00000450053.8	NBEAL2	rs61734084	Gray platelet syndrome	ClinVar		Congenital, Hereditary, and Neonatal Diseases and Abnormalities; Hemic and Lymphatic Diseases
ENST00000450053.8:C.123C>T	3	46988740	ENSG00000160796	ENST00000450053.8	NBEAL2	rs61734084	Post bronchodilator FEV1/FVC ratio	GWAS	26634245	Other diseases
ENST00000450053.8:C.3036C>T	3	46998144	ENSG00000160796	ENST00000450053.8	NBEAL2	rs139218926	Gray platelet syndrome	ClinVar		Congenital, Hereditary, and Neonatal Diseases and Abnormalities; Hemic and Lymphatic Diseases
ENST00000450053.8:C.3108C>T	3	46998216	ENSG00000160796	ENST00000450053.8	NBEAL2	rs886058596	Gray platelet syndrome	ClinVar		Congenital, Hereditary, and Neonatal Diseases and Abnormalities; Hemic and Lymphatic Diseases
ENST00000450053.8:C.4704C>T	3	47001748	ENSG00000160796	ENST00000450053.8	NBEAL2	rs12489851	Gray platelet syndrome	ClinVar		Congenital, Hereditary, and Neonatal Diseases and Abnormalities; Hemic and Lymphatic Diseases
ENST00000409792.4:C.4344C>G	3	47120292	ENSG00000181555	ENST00000409792.4	SETD2	rs992969331	Luscan-lumish syndrome	ClinVar		Other diseases
ENST00000457607.1:C.2428C>A	3	47848237	ENSG00000132153	ENST00000457607.1	DHX30	rs753242774	EEG abnormality	ClinVar		Nervous System Diseases
ENST00000457607.1:C.2428C>A	3	47848237	ENSG00000132153	ENST00000457607.1	DHX30	rs753242774	Failure to thrive	ClinVar		Pathological Conditions, Signs and Symptoms
ENST00000457607.1:C.2428C>A	3	47848237	ENSG00000132153	ENST00000457607.1	DHX30	rs753242774	Generalized hypotonia	ClinVar		Nervous System Diseases; Pathological Conditions, Signs and Symptoms
ENST00000457607.1:C.2428C>A	3	47848237	ENSG00000132153	ENST00000457607.1	DHX30	rs753242774	Global developmental delay	ClinVar		Other diseases
ENST00000457607.1:C.2428C>A	3	47848237	ENSG00000132153	ENST00000457607.1	DHX30	rs753242774	Hirsutism	ClinVar		Skin and Connective Tissue Diseases; Pathological Conditions, Signs and Symptoms
ENST00000457607.1:C.2428C>A	3	47848237	ENSG00000132153	ENST00000457607.1	DHX30	rs753242774	Intellectual disability	ClinVar		Nervous System Diseases; Pathological Conditions, Signs and Symptoms; Behavior and Behavior Mechanisms; Mental Disorders
ENST00000457607.1:C.2428C>A	3	47848237	ENSG00000132153	ENST00000457607.1	DHX30	rs753242774	Microcephaly	ClinVar		Congenital, Hereditary, and Neonatal Diseases and Abnormalities; Musculoskeletal Diseases; Nervous System Diseases
ENST00000457607.1:C.2428C>A	3	47848237	ENSG00000132153	ENST00000457607.1	DHX30	rs753242774	NEURODEVELOPMENTAL DISORDER WITH SEVERE MOTOR IMPAIRMENT AND ABSENT LANGUAGE	ClinVar		Other diseases
ENST00000457607.1:C.2428C>A	3	47848237	ENSG00000132153	ENST00000457607.1	DHX30	rs753242774	Short stature	ClinVar		Other diseases
ENST00000328631.10:C.639C>T	3	48689679	ENSG00000068745	ENST00000328631.10	IP6K2	rs4858798	parkinsons disease	Ensembl_Post_GWAS	PMID28892059	Nervous System Diseases
ENST00000319017.5:C.10C>G	3	48898785	ENSG00000178537	ENST00000319017.5	SLC25A20	rs756998699	Carnitine acylcarnitine translocase deficiency	ClinVar		Congenital, Hereditary, and Neonatal Diseases and Abnormalities; Nutritional and Metabolic Diseases
ENST00000305544.9:C.3640C>T	3	49123885	ENSG00000172037	ENST00000305544.9	LAMB2	rs760524944	Nephrotic syndrome	ClinVar		Female Urogenital Diseases and Pregnancy Complications; Male Urogenital Diseases
ENST00000305544.9:C.3640C>T	3	49123885	ENSG00000172037	ENST00000305544.9	LAMB2	rs760524944	Pierson syndrome	ClinVar		Nervous System Diseases; Eye Diseases; Male Urogenital Diseases; Female Urogenital Diseases and Pregnancy Complications; Congenital, Hereditary, and Neonatal Diseases and Abnormalities; Pathological Conditions, Signs and Symptoms
ENST00000305544.9:C.3582C>T	3	49123943	ENSG00000172037	ENST00000305544.9	LAMB2	rs138540017	Nephrotic syndrome	ClinVar		Female Urogenital Diseases and Pregnancy Complications; Male Urogenital Diseases
ENST00000305544.9:C.3582C>T	3	49123943	ENSG00000172037	ENST00000305544.9	LAMB2	rs138540017	Pierson syndrome	ClinVar		Nervous System Diseases; Eye Diseases; Male Urogenital Diseases; Female Urogenital Diseases and Pregnancy Complications; Congenital, Hereditary, and Neonatal Diseases and Abnormalities; Pathological Conditions, Signs and Symptoms
ENST00000305544.9:C.2297C>T	3	49126014	ENSG00000172037	ENST00000305544.9	LAMB2	rs773407518	Nephrotic syndrome	ClinVar		Female Urogenital Diseases and Pregnancy Complications; Male Urogenital Diseases
ENST00000305544.9:C.2297C>T	3	49126014	ENSG00000172037	ENST00000305544.9	LAMB2	rs773407518	Pierson syndrome	ClinVar		Nervous System Diseases; Eye Diseases; Male Urogenital Diseases; Female Urogenital Diseases and Pregnancy Complications; Congenital, Hereditary, and Neonatal Diseases and Abnormalities; Pathological Conditions, Signs and Symptoms
ENST00000515359.6:C.41C>G	3	49510575	ENSG00000173402	ENST00000515359.6	DAG1	rs2131107	Limb-girdle muscular dystrophy-dystroglycanopathy	ClinVar		Congenital, Hereditary, and Neonatal Diseases and Abnormalities; Musculoskeletal Diseases; Nervous System Diseases
ENST00000515359.6:C.402C>T	3	49530913	ENSG00000173402	ENST00000515359.6	DAG1	rs367603470	Limb-girdle muscular dystrophy-dystroglycanopathy	ClinVar		Congenital, Hereditary, and Neonatal Diseases and Abnormalities; Musculoskeletal Diseases; Nervous System Diseases
ENST00000515359.6:C.402C>T	3	49530913	ENSG00000173402	ENST00000515359.6	DAG1	rs367603470	Muscular dystrophy-dystroglycanopathy (congenital with brain and eye anomalies)	ClinVar		Congenital, Hereditary, and Neonatal Diseases and Abnormalities; Eye Diseases; Nervous System Diseases
ENST00000515359.6:C.634C>A	3	49531145	ENSG00000173402	ENST00000515359.6	DAG1	rs146574353	Limb-girdle muscular dystrophy-dystroglycanopathy	ClinVar		Congenital, Hereditary, and Neonatal Diseases and Abnormalities; Musculoskeletal Diseases; Nervous System Diseases
ENST00000515359.6:C.634C>A	3	49531145	ENSG00000173402	ENST00000515359.6	DAG1	rs146574353	Muscular dystrophy-dystroglycanopathy (congenital with brain and eye anomalies)	ClinVar		Congenital, Hereditary, and Neonatal Diseases and Abnormalities; Eye Diseases; Nervous System Diseases
ENST00000515359.6:C.1182C>T	3	49531693	ENSG00000173402	ENST00000515359.6	DAG1	rs758186665	Limb-girdle muscular dystrophy-dystroglycanopathy	ClinVar		Congenital, Hereditary, and Neonatal Diseases and Abnormalities; Musculoskeletal Diseases; Nervous System Diseases
ENST00000515359.6:C.1182C>T	3	49531693	ENSG00000173402	ENST00000515359.6	DAG1	rs758186665	Muscular dystrophy-dystroglycanopathy (congenital with brain and eye anomalies)	ClinVar		Congenital, Hereditary, and Neonatal Diseases and Abnormalities; Eye Diseases; Nervous System Diseases
ENST00000296452.5:C.2018C>T	3	49651574	ENSG00000164061	ENST00000296452.5	BSN	rs147953739	lung carcinoma	Cosmic	22941188	Cancer; Organismal Injury and Abnormalities; Respiratory Disease
ENST00000327697.11:C.2988C>T	3	49714152	ENSG00000164068	ENST00000327697.11	RNF123	rs2291542	Waist-hip ratio	GWAS	30239722	Other diseases
ENST00000327697.11:C.2988C>T	3	49714152	ENSG00000164068	ENST00000327697.11	RNF123	rs2291542	resting heart rate	Ensembl_Post_GWAS	PMID29769521	Other diseases
ENST00000477224.6:C.27C>T	3	49862362	ENSG00000164076	ENST00000477224.6	CAMKV	rs3796386	Leisure sedentary behaviour	GWAS	32317632	Other diseases
ENST00000477224.6:C.27C>T	3	49862362	ENSG00000164076	ENST00000477224.6	CAMKV	rs3796386	age at first birth measurement	Ensembl_Post_GWAS	PMID27798627	Behavior and Behavior Mechanisms
ENST00000477224.6:C.27C>T	3	49862362	ENSG00000164076	ENST00000477224.6	CAMKV	rs3796386	age at menarche	Ensembl_Post_GWAS	PMID21102462	Behavior and Behavior Mechanisms
ENST00000002829.8:C.42C>T	3	50159664	ENSG00000001617	ENST00000002829.8	SEMA3F	rs1046953	Body mass index	GWAS	31669095	Other diseases
ENST00000002829.8:C.42C>T	3	50159664	ENSG00000001617	ENST00000002829.8	SEMA3F	rs1046953	General cognitive ability	GWAS	29844566	Other diseases
ENST00000395144.7:C.1277C>G	3	50300514	ENSG00000114378	ENST00000395144.7	HYAL1	rs142342237	Deficiency of hyaluronoglucosaminidase	ClinVar		Congenital, Hereditary, and Neonatal Diseases and Abnormalities; Nutritional and Metabolic Diseases; Skin and Connective Tissue Diseases
ENST00000395144.7:C.384C>T	3	50302573	ENSG00000114378	ENST00000395144.7	HYAL1	rs116097974	Deficiency of hyaluronoglucosaminidase	ClinVar		Congenital, Hereditary, and Neonatal Diseases and Abnormalities; Nutritional and Metabolic Diseases; Skin and Connective Tissue Diseases
ENST00000423994.6:C.945C>T	3	50379773	ENSG00000007402	ENST00000423994.6	CACNA2D2	rs147958763	Early infantile epileptic encephalopathy	ClinVar		Nervous System Diseases
ENST00000423994.6:C.315C>T	3	50434403	ENSG00000007402	ENST00000423994.6	CACNA2D2	rs757250670	Early infantile epileptic encephalopathy	ClinVar		Nervous System Diseases
ENST00000423994.6:C.243C>T	3	50476163	ENSG00000007402	ENST00000423994.6	CACNA2D2	rs374658103	Early infantile epileptic encephalopathy	ClinVar		Nervous System Diseases
ENST00000460680.6:C.2118C>T	3	52402360	ENSG00000163930	ENST00000460680.6	BAP1	rs201122466	Hereditary cancer-predisposing syndrome	ClinVar		Other diseases
ENST00000460680.6:C.2013C>T	3	52402645	ENSG00000163930	ENST00000460680.6	BAP1	rs200194082	Hereditary cancer-predisposing syndrome	ClinVar		Other diseases
ENST00000460680.6:C.1947C>T	3	52402815	ENSG00000163930	ENST00000460680.6	BAP1	rs1041287605	Hereditary cancer-predisposing syndrome	ClinVar		Other diseases
ENST00000460680.6:C.1947C>T	3	52402815	ENSG00000163930	ENST00000460680.6	BAP1	rs1041287605	Tumor susceptibility linked to germline BAP1 mutations	ClinVar		Other diseases
ENST00000460680.6:C.1852C>T	3	52403176	ENSG00000163930	ENST00000460680.6	BAP1	rs1060503728	Hereditary cancer-predisposing syndrome	ClinVar		Other diseases
ENST00000460680.6:C.1852C>T	3	52403176	ENSG00000163930	ENST00000460680.6	BAP1	rs1060503728	Tumor susceptibility linked to germline BAP1 mutations	ClinVar		Other diseases
ENST00000460680.6:C.1671C>T	3	52403474	ENSG00000163930	ENST00000460680.6	BAP1	rs372765585	Hereditary cancer-predisposing syndrome	ClinVar		Other diseases
ENST00000460680.6:C.1497C>T	3	52403648	ENSG00000163930	ENST00000460680.6	BAP1	rs777417522	Hereditary cancer-predisposing syndrome	ClinVar		Other diseases
ENST00000460680.6:C.1497C>T	3	52403648	ENSG00000163930	ENST00000460680.6	BAP1	rs777417522	Tumor susceptibility linked to germline BAP1 mutations	ClinVar		Other diseases
ENST00000460680.6:C.1407C>T	3	52403738	ENSG00000163930	ENST00000460680.6	BAP1	rs150524807	Hereditary cancer-predisposing syndrome	ClinVar		Other diseases
ENST00000460680.6:C.1407C>T	3	52403738	ENSG00000163930	ENST00000460680.6	BAP1	rs150524807	Tumor susceptibility linked to germline BAP1 mutations	ClinVar		Other diseases
ENST00000460680.6:C.1338C>T	3	52403807	ENSG00000163930	ENST00000460680.6	BAP1	rs763735807	Hereditary cancer-predisposing syndrome	ClinVar		Other diseases
ENST00000460680.6:C.1338C>T	3	52403807	ENSG00000163930	ENST00000460680.6	BAP1	rs763735807	Tumor susceptibility linked to germline BAP1 mutations	ClinVar		Other diseases
ENST00000460680.6:C.1212C>G	3	52404491	ENSG00000163930	ENST00000460680.6	BAP1	rs140998455	Hereditary cancer-predisposing syndrome	ClinVar		Other diseases
ENST00000460680.6:C.1212C>G	3	52404491	ENSG00000163930	ENST00000460680.6	BAP1	rs140998455	Tumor susceptibility linked to germline BAP1 mutations	ClinVar		Other diseases
ENST00000460680.6:C.978C>T	3	52405248	ENSG00000163930	ENST00000460680.6	BAP1	rs1043016308	Hereditary cancer-predisposing syndrome	ClinVar		Other diseases
ENST00000460680.6:C.947C>T	3	52405279	ENSG00000163930	ENST00000460680.6	BAP1	rs1365625070	Hereditary cancer-predisposing syndrome	ClinVar		Other diseases
ENST00000460680.6:C.924C>T	3	52405772	ENSG00000163930	ENST00000460680.6	BAP1	rs749945143	Hereditary cancer-predisposing syndrome	ClinVar		Other diseases
ENST00000460680.6:C.705C>T	3	52406331	ENSG00000163930	ENST00000460680.6	BAP1	rs138180791	Hereditary cancer-predisposing syndrome	ClinVar		Other diseases
ENST00000460680.6:C.672C>T	3	52406364	ENSG00000163930	ENST00000460680.6	BAP1	rs756217463	Hereditary cancer-predisposing syndrome	ClinVar		Other diseases
ENST00000460680.6:C.651C>T	3	52406837	ENSG00000163930	ENST00000460680.6	BAP1	rs202170860	Hereditary cancer-predisposing syndrome	ClinVar		Other diseases
ENST00000460680.6:C.648C>T	3	52406840	ENSG00000163930	ENST00000460680.6	BAP1	rs758650064	Hereditary cancer-predisposing syndrome	ClinVar		Other diseases
ENST00000460680.6:C.648C>T	3	52406840	ENSG00000163930	ENST00000460680.6	BAP1	rs758650064	Tumor susceptibility linked to germline BAP1 mutations	ClinVar		Other diseases
ENST00000460680.6:C.333C>G	3	52408000	ENSG00000163930	ENST00000460680.6	BAP1	rs375700254	Hereditary cancer-predisposing syndrome	ClinVar		Other diseases
ENST00000460680.6:C.315C>T	3	52408018	ENSG00000163930	ENST00000460680.6	BAP1	rs576176888	Hereditary cancer-predisposing syndrome	ClinVar		Other diseases
ENST00000460680.6:C.210C>T	3	52408519	ENSG00000163930	ENST00000460680.6	BAP1	rs558581070	Hereditary cancer-predisposing syndrome	ClinVar		Other diseases
ENST00000460680.6:C.186C>T	3	52408543	ENSG00000163930	ENST00000460680.6	BAP1	rs199608453	Hereditary cancer-predisposing syndrome	ClinVar		Other diseases
ENST00000460680.6:C.169C>A	3	52408560	ENSG00000163930	ENST00000460680.6	BAP1	rs1397771498	Hereditary cancer-predisposing syndrome	ClinVar		Other diseases
ENST00000460680.6:C.54C>G	3	52409727	ENSG00000163930	ENST00000460680.6	BAP1	rs769459561	Hereditary cancer-predisposing syndrome	ClinVar		Other diseases
ENST00000460680.6:C.30C>T	3	52409849	ENSG00000163930	ENST00000460680.6	BAP1	rs766423600	Hereditary cancer-predisposing syndrome	ClinVar		Other diseases
ENST00000327906.8:C.231C>T	3	52419877	ENSG00000010318	ENST00000327906.8	PHF7	rs498778	waist-hip ratio	Ensembl_Post_GWAS	PMID20935629	Other diseases
ENST00000232975.8:C.435C>T	3	52451410	ENSG00000114854	ENST00000232975.8	TNNC1	rs267607124	Cardiovascular phenotype	ClinVar		Cardiovascular Diseases
ENST00000232975.8:C.435C>T	3	52451410	ENSG00000114854	ENST00000232975.8	TNNC1	rs267607124	Dilated cardiomyopathy 1S	ClinVar		Cardiovascular Diseases
ENST00000232975.8:C.435C>T	3	52451410	ENSG00000114854	ENST00000232975.8	TNNC1	rs267607124	Dilated cardiomyopathy 1Z	ClinVar		Cardiovascular Diseases
ENST00000232975.8:C.435C>T	3	52451410	ENSG00000114854	ENST00000232975.8	TNNC1	rs267607124	Familial hypertrophic cardiomyopathy 13	ClinVar		Congenital, Hereditary, and Neonatal Diseases and Abnormalities; Cardiovascular Diseases
ENST00000232975.8:C.393C>T	3	52451452	ENSG00000114854	ENST00000232975.8	TNNC1	rs147821122	Dilated cardiomyopathy 1Z	ClinVar		Cardiovascular Diseases
ENST00000232975.8:C.393C>T	3	52451452	ENSG00000114854	ENST00000232975.8	TNNC1	rs147821122	Familial hypertrophic cardiomyopathy 13	ClinVar		Congenital, Hereditary, and Neonatal Diseases and Abnormalities; Cardiovascular Diseases
ENST00000232975.8:C.207C>T	3	52451854	ENSG00000114854	ENST00000232975.8	TNNC1	rs202173903	Dilated cardiomyopathy 1Z	ClinVar		Cardiovascular Diseases
ENST00000232975.8:C.207C>T	3	52451854	ENSG00000114854	ENST00000232975.8	TNNC1	rs202173903	Familial hypertrophic cardiomyopathy 13	ClinVar		Congenital, Hereditary, and Neonatal Diseases and Abnormalities; Cardiovascular Diseases
ENST00000232975.8:C.201C>T	3	52452107	ENSG00000114854	ENST00000232975.8	TNNC1	rs150881554	Cardiovascular phenotype	ClinVar		Cardiovascular Diseases
ENST00000232975.8:C.81C>T	3	52452227	ENSG00000114854	ENST00000232975.8	TNNC1	rs756483143	Dilated Cardiomyopathy	ClinVar		Cardiovascular Diseases
ENST00000232975.8:C.81C>T	3	52452227	ENSG00000114854	ENST00000232975.8	TNNC1	rs756483143	Hypertrophic cardiomyopathy	ClinVar		Cardiovascular Diseases
ENST00000449956.2:C.291C>T	3	52796748	ENSG00000162267	ENST00000449956.2	ITIH3	rs2240921	cytokine measurement	Ensembl_Post_GWAS	PMID22610502	Other diseases
ENST00000449956.2:C.291C>T	3	52796748	ENSG00000162267	ENST00000449956.2	ITIH3	rs2240921	response to vaccine	Ensembl_Post_GWAS	PMID22610502	Other diseases
ENST00000449956.2:C.943C>A	3	52799789	ENSG00000162267	ENST00000449956.2	ITIH3	rs3617	Autism spectrum disorder or schizophrenia	GWAS	28540026	Mental Disorders
ENST00000449956.2:C.943C>A	3	52799789	ENSG00000162267	ENST00000449956.2	ITIH3	rs3617	Hemoglobin levels	GWAS	32327693	Other diseases
ENST00000449956.2:C.943C>A	3	52799789	ENSG00000162267	ENST00000449956.2	ITIH3	rs3617	Pulse pressure	GWAS	27618447	Other diseases
ENST00000449956.2:C.943C>A	3	52799789	ENSG00000162267	ENST00000449956.2	ITIH3	rs3617	Red blood cell count	GWAS	27863252	Pathological Conditions, Signs and Symptoms; Hemic and Lymphatic Diseases
ENST00000449956.2:C.943C>A	3	52799789	ENSG00000162267	ENST00000449956.2	ITIH3	rs3617	Schizophrenia	GWAS	30285260	Mental Disorders
ENST00000449956.2:C.943C>A	3	52799789	ENSG00000162267	ENST00000449956.2	ITIH3	rs3617	Waist-to-hip ratio adjusted for BMI	GWAS	30778226	Other diseases
ENST00000449956.2:C.943C>A	3	52799789	ENSG00000162267	ENST00000449956.2	ITIH3	rs3617	adiponectin measurement	Ensembl_Post_GWAS	PMID22479202	Other diseases
ENST00000449956.2:C.943C>A	3	52799789	ENSG00000162267	ENST00000449956.2	ITIH3	rs3617	age at assessment	Ensembl_Post_GWAS	PMID22479202	Behavior and Behavior Mechanisms
ENST00000449956.2:C.943C>A	3	52799789	ENSG00000162267	ENST00000449956.2	ITIH3	rs3617	anxiety	Ensembl_Post_GWAS	PMID26426971	Behavior and Behavior Mechanisms
ENST00000449956.2:C.943C>A	3	52799789	ENSG00000162267	ENST00000449956.2	ITIH3	rs3617	autism spectrum disorder	Ensembl_Post_GWAS	PMID29942085	Mental Disorders
ENST00000449956.2:C.943C>A	3	52799789	ENSG00000162267	ENST00000449956.2	ITIH3	rs3617	bipolar disorder	Ensembl_Post_GWAS	PMID28540026	Mental Disorders
ENST00000449956.2:C.943C>A	3	52799789	ENSG00000162267	ENST00000449956.2	ITIH3	rs3617	BMI-adjusted waist circumference	Ensembl_Post_GWAS	PMID28072414	Other diseases
ENST00000449956.2:C.943C>A	3	52799789	ENSG00000162267	ENST00000449956.2	ITIH3	rs3617	BMI-adjusted waist-hip ratio	Ensembl_Post_GWAS	PMID24166486	Other diseases
ENST00000449956.2:C.943C>A	3	52799789	ENSG00000162267	ENST00000449956.2	ITIH3	rs3617	erythrocyte count	Ensembl_Post_GWAS	PMID28448500	Musculoskeletal Diseases; Nervous System Diseases
ENST00000449956.2:C.943C>A	3	52799789	ENSG00000162267	ENST00000449956.2	ITIH3	rs3617	open-angle glaucoma	Ensembl_Post_GWAS	PMID28443625	Eye Diseases
ENST00000449956.2:C.943C>A	3	52799789	ENSG00000162267	ENST00000449956.2	ITIH3	rs3617	physical activity measurement	Ensembl_Post_GWAS	PMID28448500	Other diseases
ENST00000449956.2:C.943C>A	3	52799789	ENSG00000162267	ENST00000449956.2	ITIH3	rs3617	pulse pressure measurement	Ensembl_Post_GWAS	PMID27863252	Other diseases
ENST00000449956.2:C.943C>A	3	52799789	ENSG00000162267	ENST00000449956.2	ITIH3	rs3617	schizoaffective disorder	Ensembl_Post_GWAS	PMID25173105	Mental Disorders
ENST00000449956.2:C.943C>A	3	52799789	ENSG00000162267	ENST00000449956.2	ITIH3	rs3617	sex interaction measurement	Ensembl_Post_GWAS	PMID28448500	Other diseases
ENST00000449956.2:C.943C>A	3	52799789	ENSG00000162267	ENST00000449956.2	ITIH3	rs3617	smoking behavior	Ensembl_Post_GWAS	PMID28448500	Behavior and Behavior Mechanisms
ENST00000449956.2:C.943C>A	3	52799789	ENSG00000162267	ENST00000449956.2	ITIH3	rs3617	waist-hip ratio	Ensembl_Post_GWAS	PMID27618447	Other diseases
ENST00000296292.8:C.1270C>A	3	53092557	ENSG00000163933	ENST00000296292.8	RFT1	rs138803905	Congenital disorder of glycosylation type 1N	ClinVar		Congenital, Hereditary, and Neonatal Diseases and Abnormalities; Nutritional and Metabolic Diseases
ENST00000296292.8:C.1101C>T	3	53103954	ENSG00000163933	ENST00000296292.8	RFT1	rs139445704	Congenital disorder of glycosylation	ClinVar		Congenital, Hereditary, and Neonatal Diseases and Abnormalities; Nutritional and Metabolic Diseases; Musculoskeletal Diseases
ENST00000490882.5:C.852C>T	3	58094900	ENSG00000136068	ENST00000490882.5	FLNB	rs765017696	FLNB-Related Spectrum Disorders	ClinVar		Other diseases
ENST00000490882.5:C.864C>T	3	58094912	ENSG00000136068	ENST00000490882.5	FLNB	rs141151998	FLNB-Related Spectrum Disorders	ClinVar		Other diseases
ENST00000490882.5:C.1278C>T	3	58098841	ENSG00000136068	ENST00000490882.5	FLNB	rs572259451	FLNB-Related Spectrum Disorders	ClinVar		Other diseases
ENST00000490882.5:C.2529C>T	3	58111835	ENSG00000136068	ENST00000490882.5	FLNB	rs762942290	FLNB-Related Spectrum Disorders	ClinVar		Other diseases
ENST00000490882.5:C.4221C>T	3	58126761	ENSG00000136068	ENST00000490882.5	FLNB	rs2362904	haemangioblastoma	Cosmic	25589003	Neoplasms
ENST00000490882.5:C.4221C>T	3	58126761	ENSG00000136068	ENST00000490882.5	FLNB	rs2362904	FLNB-Related Spectrum Disorders	ClinVar		Other diseases
ENST00000490882.5:C.4965C>T	3	58138292	ENSG00000136068	ENST00000490882.5	FLNB	rs147426569	FLNB-Related Spectrum Disorders	ClinVar		Other diseases
ENST00000490882.5:C.5184C>T	3	58138511	ENSG00000136068	ENST00000490882.5	FLNB	rs141357606	FLNB-Related Spectrum Disorders	ClinVar		Other diseases
ENST00000490882.5:C.5862C>T	3	58148246	ENSG00000136068	ENST00000490882.5	FLNB	rs201723447	FLNB-Related Spectrum Disorders	ClinVar		Other diseases
ENST00000490882.5:C.6009C>T	3	58148677	ENSG00000136068	ENST00000490882.5	FLNB	rs112942586	FLNB-Related Spectrum Disorders	ClinVar		Other diseases
ENST00000490882.5:C.7347C>T	3	58168495	ENSG00000136068	ENST00000490882.5	FLNB	rs563382903	FLNB-Related Spectrum Disorders	ClinVar		Other diseases
ENST00000490882.5:C.7452C>T	3	58168600	ENSG00000136068	ENST00000490882.5	FLNB	rs8640	haemangioblastoma	Cosmic	25589003	Neoplasms
ENST00000490882.5:C.7452C>T	3	58168600	ENSG00000136068	ENST00000490882.5	FLNB	rs8640	FLNB-Related Spectrum Disorders	ClinVar		Other diseases
ENST00000490882.5:C.7452C>T	3	58168600	ENSG00000136068	ENST00000490882.5	FLNB	rs8640	Height	GWAS	30595370	Other diseases
ENST00000356151.7:C.1604C>T	3	58424827	ENSG00000168297	ENST00000356151.7	PXK	rs34579268	Hematocrit	GWAS	32888493	Other diseases
ENST00000356151.7:C.1604C>T	3	58424827	ENSG00000168297	ENST00000356151.7	PXK	rs34579268	Hemoglobin concentration	GWAS	32888493	Other diseases
ENST00000356151.7:C.1604C>T	3	58424827	ENSG00000168297	ENST00000356151.7	PXK	rs34579268	autoantibody measurement	Ensembl_Post_GWAS	PMID29310926	Other diseases
ENST00000356151.7:C.1604C>T	3	58424827	ENSG00000168297	ENST00000356151.7	PXK	rs34579268	carrier status	Ensembl_Post_GWAS	PMID29310926	Other diseases
ENST00000356151.7:C.1604C>T	3	58424827	ENSG00000168297	ENST00000356151.7	PXK	rs34579268	erythrocyte count	Ensembl_Post_GWAS	PMID27863252	Musculoskeletal Diseases; Nervous System Diseases
ENST00000356151.7:C.1604C>T	3	58424827	ENSG00000168297	ENST00000356151.7	PXK	rs34579268	event free survival time	Ensembl_Post_GWAS	PMID29310926	Other diseases
ENST00000356151.7:C.1604C>T	3	58424827	ENSG00000168297	ENST00000356151.7	PXK	rs34579268	hemoglobin measurement	Ensembl_Post_GWAS	PMID27863252	Other diseases
ENST00000356151.7:C.1604C>T	3	58424827	ENSG00000168297	ENST00000356151.7	PXK	rs34579268	type i diabetes mellitus	Ensembl_Post_GWAS	PMID27863252	Other diseases
ENST00000295902.11:C.1485C>T	3	64147173	ENSG00000163637	ENST00000295902.11	PRICKLE2	rs745530308	Progressive myoclonic epilepsy	ClinVar		Congenital, Hereditary, and Neonatal Diseases and Abnormalities; Nervous System Diseases
ENST00000295902.11:C.1152C>T	3	64147506	ENSG00000163637	ENST00000295902.11	PRICKLE2	rs34460293	Progressive myoclonic epilepsy	ClinVar		Congenital, Hereditary, and Neonatal Diseases and Abnormalities; Nervous System Diseases
ENST00000295902.11:C.909C>T	3	64153228	ENSG00000163637	ENST00000295902.11	PRICKLE2	rs763876127	Epilepsy	ClinVar		Nervous System Diseases
ENST00000332191.12:C.94C>A	3	77098046	ENSG00000185008	ENST00000332191.12	ROBO2	rs6788280	haemangioblastoma	Cosmic	25589003	Neoplasms
ENST00000332191.12:C.94C>A	3	77098046	ENSG00000185008	ENST00000332191.12	ROBO2	rs6788280	Vesicoureteral reflux	ClinVar		Female Urogenital Diseases and Pregnancy Complications; Male Urogenital Diseases
ENST00000332191.12:C.2083C>A	3	77574610	ENSG00000185008	ENST00000332191.12	ROBO2	rs1005812838	lymphoid neoplasm	Cosmic	24682267	Cancer; Hematological Disease; Organismal Injury and Abnormalities
ENST00000332191.12:C.2293C>G	3	77577579	ENSG00000185008	ENST00000332191.12	ROBO2	rs1294357295	lung carcinoma	Cosmic	22941188	Cancer; Organismal Injury and Abnormalities; Respiratory Disease
ENST00000332191.12:C.2394C>T	3	77580012	ENSG00000185008	ENST00000332191.12	ROBO2	rs200412132	Vesicoureteral reflux	ClinVar		Female Urogenital Diseases and Pregnancy Complications; Male Urogenital Diseases
ENST00000332191.12:C.3408C>T	3	77617627	ENSG00000185008	ENST00000332191.12	ROBO2	rs143561771	haemangioblastoma	Cosmic	25589003	Neoplasms
ENST00000332191.12:C.3408C>T	3	77617627	ENSG00000185008	ENST00000332191.12	ROBO2	rs143561771	Vesicoureteral reflux	ClinVar		Female Urogenital Diseases and Pregnancy Complications; Male Urogenital Diseases
ENST00000332191.12:C.3663C>T	3	77622335	ENSG00000185008	ENST00000332191.12	ROBO2	rs774727452	Vesicoureteral reflux	ClinVar		Female Urogenital Diseases and Pregnancy Complications; Male Urogenital Diseases
ENST00000332191.12:C.4221C>T	3	77644807	ENSG00000185008	ENST00000332191.12	ROBO2	rs201527229	Vesicoureteral reflux	ClinVar		Female Urogenital Diseases and Pregnancy Complications; Male Urogenital Diseases
ENST00000429644.7:C.1693C>A	3	81537021	ENSG00000114480	ENST00000429644.7	GBE1	rs552094593	Arthrogryposis multiplex congenita	ClinVar		Congenital, Hereditary, and Neonatal Diseases and Abnormalities; Musculoskeletal Diseases; Stomatognathic Diseases
ENST00000429644.7:C.1693C>A	3	81537021	ENSG00000114480	ENST00000429644.7	GBE1	rs552094593	Fetal akinesia sequence	ClinVar		Congenital, Hereditary, and Neonatal Diseases and Abnormalities; Musculoskeletal Diseases
ENST00000429644.7:C.342C>T	3	81670925	ENSG00000114480	ENST00000429644.7	GBE1	rs13320194	Glycogen storage disease	ClinVar		Musculoskeletal Diseases; Nervous System Diseases; Male Urogenital Diseases; Female Urogenital Diseases and Pregnancy Complications
ENST00000429644.7:C.342C>T	3	81670925	ENSG00000114480	ENST00000429644.7	GBE1	rs13320194	Polyglucosan body disease	ClinVar		Congenital, Hereditary, and Neonatal Diseases and Abnormalities; Nutritional and Metabolic Diseases; Nervous System Diseases
ENST00000344265.7:C.505C>A	3	87264300	ENSG00000064835	ENST00000344265.7	POU1F1	rs142046308	Combined Pituitary Hormone Deficiency	ClinVar		Nervous System Diseases; Endocrine System Diseases
ENST00000336596.7:C.2001C>T	3	89419317	ENSG00000044524	ENST00000336596.7	EPHA3	rs1175020790	skin carcinoma	Cosmic	25589618	Cancer; Dermatological Diseases and Conditions; Organismal Injury and Abnormalities
ENST00000336596.7:C.2685C>T	3	89450365	ENSG00000044524	ENST00000336596.7	EPHA3	rs76565471	haemangioblastoma	Cosmic	25589003	Neoplasms
ENST00000650591.1:C.2114C>A	3	93874258	ENSG00000184500	ENST00000650591.1	PROS1	rs1465989734	Thrombophilia due to protein S deficiency	ClinVar		Hemic and Lymphatic Diseases
ENST00000650591.1:C.780C>T	3	93900847	ENSG00000184500	ENST00000650591.1	PROS1	rs377173471	Protein S deficiency	ClinVar		Hemic and Lymphatic Diseases
ENST00000650591.1:C.527C>T	3	93906059	ENSG00000184500	ENST00000650591.1	PROS1	rs146366248	Protein S deficiency	ClinVar		Hemic and Lymphatic Diseases
ENST00000647941.2:C.165C>T	3	98593340	ENSG00000080819	ENST00000647941.2	CPOX	rs563975822	Hereditary coproporphyria	ClinVar		Congenital, Hereditary, and Neonatal Diseases and Abnormalities; Digestive System Diseases; Nutritional and Metabolic Diseases; Skin and Connective Tissue Diseases
ENST00000193391.8:C.3561C>T	3	101229452	ENSG00000081148	ENST00000193391.8	IMPG2	rs139496326	Retinitis Pigmentosa	ClinVar		Congenital, Hereditary, and Neonatal Diseases and Abnormalities; Eye Diseases
ENST00000193391.8:C.3381C>T	3	101230998	ENSG00000081148	ENST00000193391.8	IMPG2	rs348867	Retinitis Pigmentosa	ClinVar		Congenital, Hereditary, and Neonatal Diseases and Abnormalities; Eye Diseases
ENST00000193391.8:C.2021C>T	3	101244310	ENSG00000081148	ENST00000193391.8	IMPG2	rs571391	Retinitis Pigmentosa	ClinVar		Congenital, Hereditary, and Neonatal Diseases and Abnormalities; Eye Diseases
ENST00000193391.8:C.1265C>T	3	101246080	ENSG00000081148	ENST00000193391.8	IMPG2	rs193920760	Malignant tumor of prostate	ClinVar		Male Urogenital Diseases
ENST00000394030.8:C.1272C>T	3	105720182	ENSG00000114423	ENST00000394030.8	CBLB	rs2305035	mosquito bite reaction size measurement	Ensembl_Post_GWAS	PMID28199695	Other diseases
ENST00000393775.7:C.115C>A	3	118930213	ENSG00000144847	ENST00000393775.7	IGSF11	rs2903250	maximal midexpiratory flow rate	Ensembl_Post_GWAS	PMID24023788	Other diseases
ENST00000489711.6:C.1048C>T	3	121924957	ENSG00000163406	ENST00000489711.6	SLC15A2	rs2257212	Hemoglobin levels	GWAS	32327693	Other diseases
ENST00000489711.6:C.1048C>T	3	121924957	ENSG00000163406	ENST00000489711.6	SLC15A2	rs2257212	allergy	Ensembl_Post_GWAS	PMID29083406	Immune System Diseases
ENST00000489711.6:C.1048C>T	3	121924957	ENSG00000163406	ENST00000489711.6	SLC15A2	rs2257212	blood urea nitrogen measurement	Ensembl_Post_GWAS	PMID29403010	Other diseases
ENST00000489711.6:C.1048C>T	3	121924957	ENSG00000163406	ENST00000489711.6	SLC15A2	rs2257212	glomerular filtration rate	Ensembl_Post_GWAS	PMID29403010	Other diseases
ENST00000232607.7:C.549C>T	3	124737806	ENSG00000114491	ENST00000232607.7	UMPS	rs913514809	skin carcinoma	Cosmic	25589618	Cancer; Dermatological Diseases and Conditions; Organismal Injury and Abnormalities
ENST00000232607.7:C.1320C>T	3	124743961	ENSG00000114491	ENST00000232607.7	UMPS	rs13146	Orotic aciduria	ClinVar		Hemic and Lymphatic Diseases; Congenital, Hereditary, and Neonatal Diseases and Abnormalities; Nutritional and Metabolic Diseases
ENST00000341105.7:C.1347C>T	3	128481115	ENSG00000179348	ENST00000341105.7	GATA2	rs150052821	Dendritic cell	ClinVar		Neoplasms; Hemic and Lymphatic Diseases
ENST00000341105.7:C.1347C>T	3	128481115	ENSG00000179348	ENST00000341105.7	GATA2	rs150052821	Lymphedema	ClinVar		Hemic and Lymphatic Diseases
ENST00000341105.7:C.1242C>T	3	128481220	ENSG00000179348	ENST00000341105.7	GATA2	rs751577185	Dendritic cell	ClinVar		Neoplasms; Hemic and Lymphatic Diseases
ENST00000341105.7:C.1242C>T	3	128481220	ENSG00000179348	ENST00000341105.7	GATA2	rs751577185	Lymphedema	ClinVar		Hemic and Lymphatic Diseases
ENST00000341105.7:C.927C>T	3	128483950	ENSG00000179348	ENST00000341105.7	GATA2	rs750077677	Dendritic cell	ClinVar		Neoplasms; Hemic and Lymphatic Diseases
ENST00000341105.7:C.927C>T	3	128483950	ENSG00000179348	ENST00000341105.7	GATA2	rs750077677	Lymphedema	ClinVar		Hemic and Lymphatic Diseases
ENST00000341105.7:C.15C>T	3	128487017	ENSG00000179348	ENST00000341105.7	GATA2	rs1573858	Lymphedema	ClinVar		Hemic and Lymphatic Diseases
ENST00000675864.1:C.219C>T	3	128806410	ENSG00000075785	ENST00000675864.1	RAB7A	rs4548	Charcot-Marie-Tooth disease	ClinVar		Nervous System Diseases; Congenital, Hereditary, and Neonatal Diseases and Abnormalities
ENST00000675864.1:C.219C>T	3	128806410	ENSG00000075785	ENST00000675864.1	RAB7A	rs4548	dental caries	Ensembl_Post_GWAS	PMID23064961	Stomatognathic Diseases
ENST00000675864.1:C.423C>T	3	128807566	ENSG00000075785	ENST00000675864.1	RAB7A	rs61758751	Charcot-Marie-Tooth disease	ClinVar		Nervous System Diseases; Congenital, Hereditary, and Neonatal Diseases and Abnormalities
ENST00000264990.11:C.2292C>T	3	132559022	ENSG00000240303	ENST00000264990.11	ACAD11	rs2270801	C-C motif chemokine 21 measurement	Ensembl_Post_GWAS	PMID28240269	Other diseases
ENST00000264990.11:C.2292C>T	3	132559022	ENSG00000240303	ENST00000264990.11	ACAD11	rs2270801	coronary artery disease	Ensembl_Post_GWAS	PMID29212778	Cardiovascular Diseases
ENST00000264990.11:C.2292C>T	3	132559022	ENSG00000240303	ENST00000264990.11	ACAD11	rs2270801	fetal genotype effect measurement	Ensembl_Post_GWAS	PMID30134952	Other diseases
ENST00000264990.11:C.2292C>T	3	132559022	ENSG00000240303	ENST00000264990.11	ACAD11	rs2270801	high density lipoprotein cholesterol measurement	Ensembl_Post_GWAS	PMID24097068	Other diseases
ENST00000264990.11:C.2292C>T	3	132559022	ENSG00000240303	ENST00000264990.11	ACAD11	rs2270801	low density lipoprotein cholesterol measurement	Ensembl_Post_GWAS	PMID24097068	Congenital, Hereditary, and Neonatal Diseases and Abnormalities; Nutritional and Metabolic Diseases
ENST00000264990.11:C.2292C>T	3	132559022	ENSG00000240303	ENST00000264990.11	ACAD11	rs2270801	protein measurement	Ensembl_Post_GWAS	PMID28334899	Other diseases
ENST00000264990.11:C.2292C>T	3	132559022	ENSG00000240303	ENST00000264990.11	ACAD11	rs2270801	red blood cell distribution width	Ensembl_Post_GWAS	PMID30134952	Pathological Conditions, Signs and Symptoms; Hemic and Lymphatic Diseases
ENST00000285208.9:C.567C>T	3	133828848	ENSG00000154917	ENST00000285208.9	RAB6B	rs2293373	mean corpuscular hemoglobin concentration	Ensembl_Post_GWAS	PMID29403010	Other diseases
ENST00000647596.1:C.1011C>T	3	135132763	ENSG00000154928	ENST00000647596.1	EPHB1	rs56401137	haemangioblastoma	Cosmic	25589003	Neoplasms
ENST00000647596.1:C.1090C>A	3	135132842	ENSG00000154928	ENST00000647596.1	EPHB1	rs373293977	large intestine carcinoma	Cosmic	28481359	Cancer; Gastrointestinal Disease; Organismal Injury and Abnormalities
ENST00000647596.1:C.1800C>T	3	135179900	ENSG00000154928	ENST00000647596.1	EPHB1	rs1042787	haemangioblastoma	Cosmic	25589003	Neoplasms
ENST00000647596.1:C.2763C>T	3	135249408	ENSG00000154928	ENST00000647596.1	EPHB1	rs765393605	lung carcinoma	Cosmic	28481359	Cancer; Organismal Injury and Abnormalities; Respiratory Disease
ENST00000383202.7:C.2457C>T	3	136369196	ENSG00000118007	ENST00000383202.7	STAG1	rs9860801	cognitive function measurement	Ensembl_Post_GWAS	PMID30038396	Pathological Conditions, Signs and Symptoms; Nervous System Diseases
ENST00000383202.7:C.2457C>T	3	136369196	ENSG00000118007	ENST00000383202.7	STAG1	rs9860801	coronary artery disease	Ensembl_Post_GWAS	PMID29212778	Cardiovascular Diseases
ENST00000458420.7:C.600C>T	3	140404729	ENSG00000158258	ENST00000458420.7	CLSTN2	rs772723832	lung carcinoma	Cosmic	26503331	Cancer; Organismal Injury and Abnormalities; Respiratory Disease
ENST00000458420.7:C.702C>T	3	140421189	ENSG00000158258	ENST00000458420.7	CLSTN2	rs150010064	large intestine carcinoma	Cosmic	24951259	Cancer; Gastrointestinal Disease; Organismal Injury and Abnormalities
ENST00000350721.9:C.5868C>T	3	142496391	ENSG00000175054	ENST00000350721.9	ATR	rs112018640	Seckel syndrome	ClinVar		Pathological Conditions, Signs and Symptoms; Congenital, Hereditary, and Neonatal Diseases and Abnormalities; Musculoskeletal Diseases; Nervous System Diseases; Endocrine System Diseases
ENST00000350721.9:C.4677C>T	3	142512435	ENSG00000175054	ENST00000350721.9	ATR	rs112726878	Seckel syndrome	ClinVar		Pathological Conditions, Signs and Symptoms; Congenital, Hereditary, and Neonatal Diseases and Abnormalities; Musculoskeletal Diseases; Nervous System Diseases; Endocrine System Diseases
ENST00000350721.9:C.1318C>T	3	142561274	ENSG00000175054	ENST00000350721.9	ATR	rs535140939	Seckel syndrome	ClinVar		Pathological Conditions, Signs and Symptoms; Congenital, Hereditary, and Neonatal Diseases and Abnormalities; Musculoskeletal Diseases; Nervous System Diseases; Endocrine System Diseases
ENST00000296051.7:C.1152C>T	3	149145535	ENSG00000163755	ENST00000296051.7	HPS3	rs113381494	Hermansky-Pudlak syndrome	ClinVar		Congenital, Hereditary, and Neonatal Diseases and Abnormalities; Nutritional and Metabolic Diseases; Eye Diseases; Skin and Connective Tissue Diseases; Hemic and Lymphatic Diseases
ENST00000296051.7:C.2526C>T	3	149163886	ENSG00000163755	ENST00000296051.7	HPS3	rs3732557	Hermansky-Pudlak syndrome	ClinVar		Congenital, Hereditary, and Neonatal Diseases and Abnormalities; Nutritional and Metabolic Diseases; Eye Diseases; Skin and Connective Tissue Diseases; Hemic and Lymphatic Diseases
ENST00000264613.11:C.1293C>T	3	149202157	ENSG00000047457	ENST00000264613.11	CP	rs758930665	Deficiency of ferroxidase	ClinVar		Nutritional and Metabolic Diseases; Nervous System Diseases
ENST00000264613.11:C.938C>T	3	149207461	ENSG00000047457	ENST00000264613.11	CP	rs144401501	Deficiency of ferroxidase	ClinVar		Nutritional and Metabolic Diseases; Nervous System Diseases
ENST00000392894.8:C.789C>T	3	149960747	ENSG00000082996	ENST00000392894.8	RNF13	rs6768054	reaction time measurement	Ensembl_Post_GWAS	PMID29844566	Other diseases
ENST00000474524.5:C.3495C>T	3	151369485	ENSG00000144893	ENST00000474524.5	MED12L	rs374594862	primitive neuroectodermal tumour-medulloblastoma	Cosmic	21163964	Neoplasms
ENST00000474524.5:C.5427C>T	3	151390059	ENSG00000144893	ENST00000474524.5	MED12L	rs1386348874	liver carcinoma	Cosmic	0	Cancer; Gastrointestinal Disease; Hepatic System Disease; Organismal Injury and Abnormalities
ENST00000305097.6:C.57C>T	3	152835839	ENSG00000169860	ENST00000305097.6	P2RY1	rs1065776	cytokine measurement	Ensembl_Post_GWAS	PMID22610502	Other diseases
ENST00000305097.6:C.57C>T	3	152835839	ENSG00000169860	ENST00000305097.6	P2RY1	rs1065776	response to vaccine	Ensembl_Post_GWAS	PMID22610502	Other diseases
ENST00000264263.9:C.954C>T	3	158653366	ENSG00000168827	ENST00000264263.9	GFM1	rs763546447	Combined oxidative phosphorylation deficiency	ClinVar		Other diseases
ENST00000326448.12:C.2205C>T	3	160268431	ENSG00000068885	ENST00000326448.12	IFT80	rs886058129	Jeune thoracic dystrophy	ClinVar		Musculoskeletal Diseases; Congenital, Hereditary, and Neonatal Diseases and Abnormalities; Skin and Connective Tissue Diseases
ENST00000392781.7:C.202C>A	3	161086553	ENSG00000169255	ENST00000392781.7	B3GALNT1	rs200235398	p phenotype	ClinVar		Other diseases
ENST00000264382.8:C.4239C>T	3	165007939	ENSG00000090402	ENST00000264382.8	SI	rs138374817	Sucrase-isomaltase deficiency	ClinVar		Congenital, Hereditary, and Neonatal Diseases and Abnormalities; Nutritional and Metabolic Diseases
ENST00000264382.8:C.1437C>T	3	165055269	ENSG00000090402	ENST00000264382.8	SI	rs9290257	Sucrase-isomaltase deficiency	ClinVar		Congenital, Hereditary, and Neonatal Diseases and Abnormalities; Nutritional and Metabolic Diseases
ENST00000264382.8:C.1437C>T	3	165055269	ENSG00000090402	ENST00000264382.8	SI	rs9290257	1,5 anhydroglucitol measurement	Ensembl_Post_GWAS	PMID28588231	Other diseases
ENST00000446050.7:C.1221C>T	3	167825311	ENSG00000163536	ENST00000446050.7	SERPINI1	rs149238028	Encephalopathy	ClinVar		Other diseases
ENST00000295797.5:C.528C>G	3	170270498	ENSG00000163558	ENST00000295797.5	PRKCI	rs56257047	prostate carcinoma	Ensembl_Post_GWAS	PMID25939597	Neoplasms; Male Urogenital Diseases
ENST00000314251.8:C.329C>T	3	171014511	ENSG00000163581	ENST00000314251.8	SLC2A2	rs5400	Fanconi-Bickel syndrome	ClinVar		Congenital, Hereditary, and Neonatal Diseases and Abnormalities; Female Urogenital Diseases and Pregnancy Complications; Male Urogenital Diseases
ENST00000314251.8:C.329C>T	3	171014511	ENSG00000163581	ENST00000314251.8	SLC2A2	rs5400	fasting blood glucose measurement	Ensembl_Post_GWAS	PMID22581228	Other diseases
ENST00000314251.8:C.329C>T	3	171014511	ENSG00000163581	ENST00000314251.8	SLC2A2	rs5400	HOMA-B	Ensembl_Post_GWAS	PMID20081858	Other diseases
ENST00000314251.8:C.329C>T	3	171014511	ENSG00000163581	ENST00000314251.8	SLC2A2	rs5400	serum gamma-glutamyl transferase measurement	Ensembl_Post_GWAS	PMID22001757	Other diseases
ENST00000314251.8:C.329C>T	3	171014511	ENSG00000163581	ENST00000314251.8	SLC2A2	rs5400	triglyceride measurement	Ensembl_Post_GWAS	PMID30275531	Other diseases
ENST00000314251.8:C.203C>T	3	171014637	ENSG00000163581	ENST00000314251.8	SLC2A2	rs7637863	Monogenic diabetes	ClinVar		Nutritional and Metabolic Diseases; Endocrine System Diseases
ENST00000415807.7:C.536C>G	3	172251287	ENSG00000075420	ENST00000415807.7	FNDC3B	rs7652177	Height	GWAS	31217584	Other diseases
ENST00000415807.7:C.536C>G	3	172251287	ENSG00000075420	ENST00000415807.7	FNDC3B	rs7652177	age at onset	Ensembl_Post_GWAS	PMID29808027	Behavior and Behavior Mechanisms
ENST00000415807.7:C.536C>G	3	172251287	ENSG00000075420	ENST00000415807.7	FNDC3B	rs7652177	BMI-adjusted waist circumference	Ensembl_Post_GWAS	PMID28443625	Other diseases
ENST00000415807.7:C.536C>G	3	172251287	ENSG00000075420	ENST00000415807.7	FNDC3B	rs7652177	body height	Ensembl_Post_GWAS	PMID23563607	Other diseases
ENST00000415807.7:C.536C>G	3	172251287	ENSG00000075420	ENST00000415807.7	FNDC3B	rs7652177	hip circumference	Ensembl_Post_GWAS	PMID25429064	Other diseases
ENST00000415807.7:C.536C>G	3	172251287	ENSG00000075420	ENST00000415807.7	FNDC3B	rs7652177	Myopia	Ensembl_Post_GWAS	PMID20881960	Eye Diseases
ENST00000415807.7:C.536C>G	3	172251287	ENSG00000075420	ENST00000415807.7	FNDC3B	rs7652177	physical activity measurement	Ensembl_Post_GWAS	PMID25673412	Other diseases
ENST00000415807.7:C.536C>G	3	172251287	ENSG00000075420	ENST00000415807.7	FNDC3B	rs7652177	refractive error measurement	Ensembl_Post_GWAS	PMID29808027	Eye Diseases
ENST00000415807.7:C.536C>G	3	172251287	ENSG00000075420	ENST00000415807.7	FNDC3B	rs7652177	smoking behavior	Ensembl_Post_GWAS	PMID28448500	Behavior and Behavior Mechanisms
ENST00000415807.7:C.536C>G	3	172251287	ENSG00000075420	ENST00000415807.7	FNDC3B	rs7652177	waist circumference	Ensembl_Post_GWAS	PMID29808027	Other diseases
ENST00000241256.3:C.847C>A	3	172445415	ENSG00000121853	ENST00000241256.3	GHSR	rs148371213	Short stature due to growth hormone secretagogue receptor deficiency	ClinVar		Other diseases
ENST00000241256.3:C.447C>G	3	172447967	ENSG00000121853	ENST00000241256.3	GHSR	rs2232169	Short stature	ClinVar		Other diseases
ENST00000241256.3:C.60C>T	3	172448354	ENSG00000121853	ENST00000241256.3	GHSR	rs2232165	Short stature	ClinVar		Other diseases
ENST00000263967.4:C.1530C>T	3	179210556	ENSG00000121879	ENST00000263967.4	PIK3CA	rs200934230	large intestine carcinoma	Cosmic	15016963	Cancer; Gastrointestinal Disease; Organismal Injury and Abnormalities
ENST00000263967.4:C.2727C>T	3	179230064	ENSG00000121879	ENST00000263967.4	PIK3CA	rs1432181034	breast carcinoma	Cosmic	28685160	Cancer; Organismal Injury and Abnormalities; Reproductive System Disease
ENST00000263967.4:C.2775C>T	3	179230112	ENSG00000121879	ENST00000263967.4	PIK3CA	rs769962451	Cowden syndrome	ClinVar		Other diseases
ENST00000263967.4:C.3075C>T	3	179234232	ENSG00000121879	ENST00000263967.4	PIK3CA	rs17849079	large intestine carcinoma	Cosmic	28002797	Cancer; Gastrointestinal Disease; Organismal Injury and Abnormalities
ENST00000263967.4:C.3075C>T	3	179234232	ENSG00000121879	ENST00000263967.4	PIK3CA	rs17849079	lymphoid neoplasm	Cosmic	19473701	Cancer; Hematological Disease; Organismal Injury and Abnormalities
ENST00000263967.4:C.3075C>T	3	179234232	ENSG00000121879	ENST00000263967.4	PIK3CA	rs17849079	Cowden syndrome	ClinVar		Other diseases
ENST00000296015.9:C.939C>T	3	180606262	ENSG00000163728	ENST00000296015.9	TTC14	rs201415238	breast carcinoma	Cosmic	22722193	Cancer; Organismal Injury and Abnormalities; Reproductive System Disease
ENST00000476379.6:C.2079C>T	3	180619890	ENSG00000284862	ENST00000476379.6	CCDC39	rs376782159	Primary ciliary dyskinesia	ClinVar		Congenital, Hereditary, and Neonatal Diseases and Abnormalities; Respiratory Disease; Otorhinolaryngologic Diseases
ENST00000476379.6:C.1795C>A	3	180642072	ENSG00000284862	ENST00000476379.6	CCDC39	rs201780665	Ellis-van Creveld syndrome	ClinVar		Congenital, Hereditary, and Neonatal Diseases and Abnormalities; Skin and Connective Tissue Diseases; Musculoskeletal Diseases
ENST00000476379.6:C.1795C>A	3	180642072	ENSG00000284862	ENST00000476379.6	CCDC39	rs201780665	Primary ciliary dyskinesia	ClinVar		Congenital, Hereditary, and Neonatal Diseases and Abnormalities; Respiratory Disease; Otorhinolaryngologic Diseases
ENST00000476379.6:C.1728C>T	3	180642139	ENSG00000284862	ENST00000476379.6	CCDC39	rs376737530	Primary ciliary dyskinesia	ClinVar		Congenital, Hereditary, and Neonatal Diseases and Abnormalities; Respiratory Disease; Otorhinolaryngologic Diseases
ENST00000476379.6:C.1359C>T	3	180648168	ENSG00000284862	ENST00000476379.6	CCDC39	rs6769457	Ciliary dyskinesia	ClinVar		Congenital, Hereditary, and Neonatal Diseases and Abnormalities; Respiratory Disease; Otorhinolaryngologic Diseases
ENST00000476379.6:C.1359C>T	3	180648168	ENSG00000284862	ENST00000476379.6	CCDC39	rs6769457	Primary ciliary dyskinesia	ClinVar		Congenital, Hereditary, and Neonatal Diseases and Abnormalities; Respiratory Disease; Otorhinolaryngologic Diseases
ENST00000476379.6:C.232C>T	3	180661986	ENSG00000284862	ENST00000476379.6	CCDC39	rs878855281	Primary ciliary dyskinesia	ClinVar		Congenital, Hereditary, and Neonatal Diseases and Abnormalities; Respiratory Disease; Otorhinolaryngologic Diseases
ENST00000397676.8:C.477C>T	3	184245326	ENSG00000214160	ENST00000397676.8	ALG3	rs201087932	Congenital disorder of glycosylation	ClinVar		Congenital, Hereditary, and Neonatal Diseases and Abnormalities; Nutritional and Metabolic Diseases; Musculoskeletal Diseases
ENST00000397676.8:C.240C>T	3	184245769	ENSG00000214160	ENST00000397676.8	ALG3	rs756013928	Congenital disorder of glycosylation type 1D	ClinVar		Congenital, Hereditary, and Neonatal Diseases and Abnormalities; Nutritional and Metabolic Diseases
ENST00000357474.9:C.855C>T	3	184278280	ENSG00000145194	ENST00000357474.9	ECE2	rs3752904	Body mass index	GWAS	30239722	Other diseases
ENST00000402825.7:C.1071C>T	3	184278280	ENSG00000284917	ENST00000402825.7	EEF1AKMT4-ECE2	rs3752904	Body mass index	GWAS	30239722	Other diseases
ENST00000352767.7:C.4340C>T	3	184331530	ENSG00000114867	ENST00000352767.7	EIF4G1	rs772781836	breast carcinoma	Cosmic	22722193	Cancer; Organismal Injury and Abnormalities; Reproductive System Disease
ENST00000265593.9:C.2003C>G	3	184353275	ENSG00000114859	ENST00000265593.9	CLCN2	rs9820367	Leukoencephalopathy with ataxia	ClinVar		Other diseases
ENST00000330394.3:C.1737C>T	3	184577995	ENSG00000182580	ENST00000330394.3	EPHB3	rs748570339	lung carcinoma	Cosmic	20668451	Cancer; Organismal Injury and Abnormalities; Respiratory Disease
ENST00000424227.5:C.171C>G	3	185428752	ENSG00000073803	ENST00000424227.5	MAP3K13	rs139333467	breast carcinoma	Cosmic	28481359	Cancer; Organismal Injury and Abnormalities; Reproductive System Disease
ENST00000424227.5:C.284C>T	3	185428865	ENSG00000073803	ENST00000424227.5	MAP3K13	rs547600832	urinary tract carcinoma	Cosmic	28481359	Cancer; Organismal Injury and Abnormalities; Male Urogenital Diseases
ENST00000296257.10:C.902C>A	3	185613377	ENSG00000163904	ENST00000296257.10	SENP2	rs6762208	QRS duration	GWAS	30012220	Other diseases
ENST00000296257.10:C.902C>A	3	185613377	ENSG00000163904	ENST00000296257.10	SENP2	rs6762208	Type 2 diabetes	GWAS	29632382	Nutritional and Metabolic Diseases; Endocrine System Diseases
ENST00000296257.10:C.902C>A	3	185613377	ENSG00000163904	ENST00000296257.10	SENP2	rs6762208	Type 2 diabetes	GWAS	29632382	Nutritional and Metabolic Diseases; Endocrine System Diseases
ENST00000296257.10:C.902C>A	3	185613377	ENSG00000163904	ENST00000296257.10	SENP2	rs6762208	diastolic blood pressure	Ensembl_Post_GWAS	PMID28135244	Other diseases
ENST00000296257.10:C.902C>A	3	185613377	ENSG00000163904	ENST00000296257.10	SENP2	rs6762208	seborrheic dermatitis	Ensembl_Post_GWAS	PMID29203360	Skin and Connective Tissue Diseases
ENST00000296257.10:C.902C>A	3	185613377	ENSG00000163904	ENST00000296257.10	SENP2	rs6762208	systolic blood pressure	Ensembl_Post_GWAS	PMID26969751	Cardiovascular Diseases
ENST00000392481.6:C.798C>T	3	186791728	ENSG00000163918	ENST00000392481.6	RFC4	rs187868	adiponectin measurement	Ensembl_Post_GWAS	PMID20011104	Other diseases
ENST00000361510.8:C.339C>T	3	193615029	ENSG00000198836	ENST00000361510.8	OPA1	rs779836454	Optic Atrophy	ClinVar		Nervous System Diseases; Eye Diseases
ENST00000361510.8:C.990C>T	3	193637236	ENSG00000198836	ENST00000361510.8	OPA1	rs201242590	Optic Atrophy	ClinVar		Nervous System Diseases; Eye Diseases
ENST00000361510.8:C.2961C>A	3	193667258	ENSG00000198836	ENST00000361510.8	OPA1	rs35540805	Optic Atrophy	ClinVar		Nervous System Diseases; Eye Diseases
ENST00000323460.10:C.1023C>T	3	196886204	ENSG00000119231	ENST00000323460.10	SENP5	rs34533379	sleep quality	Ensembl_Post_GWAS	PMID27126917	Other diseases
ENST00000453061.7:C.1372C>T	4	521699	ENSG00000174227	ENST00000453061.7	PIGG	rs201636801	Mental retardation	ClinVar		Pathological Conditions, Signs and Symptoms; Congenital, Hereditary, and Neonatal Diseases and Abnormalities; Nervous System Diseases; Mental Disorders; Behavior and Behavior Mechanisms
ENST00000453061.7:C.1925C>T	4	523769	ENSG00000174227	ENST00000453061.7	PIGG	rs1222148392	Mental retardation	ClinVar		Pathological Conditions, Signs and Symptoms; Congenital, Hereditary, and Neonatal Diseases and Abnormalities; Nervous System Diseases; Mental Disorders; Behavior and Behavior Mechanisms
ENST00000453061.7:C.1945C>T	4	523789	ENSG00000174227	ENST00000453061.7	PIGG	rs368124174	Mental retardation	ClinVar		Pathological Conditions, Signs and Symptoms; Congenital, Hereditary, and Neonatal Diseases and Abnormalities; Nervous System Diseases; Mental Disorders; Behavior and Behavior Mechanisms
ENST00000453061.7:C.2190C>T	4	527159	ENSG00000174227	ENST00000453061.7	PIGG	rs755952808	Mental retardation	ClinVar		Pathological Conditions, Signs and Symptoms; Congenital, Hereditary, and Neonatal Diseases and Abnormalities; Nervous System Diseases; Mental Disorders; Behavior and Behavior Mechanisms
ENST00000453061.7:C.2710C>T	4	533956	ENSG00000174227	ENST00000453061.7	PIGG	rs1401973942	Mental retardation	ClinVar		Pathological Conditions, Signs and Symptoms; Congenital, Hereditary, and Neonatal Diseases and Abnormalities; Nervous System Diseases; Mental Disorders; Behavior and Behavior Mechanisms
ENST00000496514.6:C.132C>T	4	625758	ENSG00000133256	ENST00000496514.6	PDE6B	rs199974771	Congenital Stationary Night Blindness	ClinVar		Other diseases
ENST00000496514.6:C.132C>T	4	625758	ENSG00000133256	ENST00000496514.6	PDE6B	rs199974771	Retinitis Pigmentosa	ClinVar		Congenital, Hereditary, and Neonatal Diseases and Abnormalities; Eye Diseases
ENST00000496514.6:C.384C>T	4	626010	ENSG00000133256	ENST00000496514.6	PDE6B	rs28510278	Congenital Stationary Night Blindness	ClinVar		Other diseases
ENST00000496514.6:C.384C>T	4	626010	ENSG00000133256	ENST00000496514.6	PDE6B	rs28510278	Retinitis Pigmentosa	ClinVar		Congenital, Hereditary, and Neonatal Diseases and Abnormalities; Eye Diseases
ENST00000496514.6:C.966C>T	4	654862	ENSG00000133256	ENST00000496514.6	PDE6B	rs143711050	Congenital Stationary Night Blindness	ClinVar		Other diseases
ENST00000496514.6:C.966C>T	4	654862	ENSG00000133256	ENST00000496514.6	PDE6B	rs143711050	Retinitis Pigmentosa	ClinVar		Congenital, Hereditary, and Neonatal Diseases and Abnormalities; Eye Diseases
ENST00000496514.6:C.1026C>T	4	655973	ENSG00000133256	ENST00000496514.6	PDE6B	rs754298712	Congenital Stationary Night Blindness	ClinVar		Other diseases
ENST00000496514.6:C.1026C>T	4	655973	ENSG00000133256	ENST00000496514.6	PDE6B	rs754298712	Retinitis Pigmentosa	ClinVar		Congenital, Hereditary, and Neonatal Diseases and Abnormalities; Eye Diseases
ENST00000496514.6:C.1218C>T	4	656984	ENSG00000133256	ENST00000496514.6	PDE6B	rs148190219	Congenital Stationary Night Blindness	ClinVar		Other diseases
ENST00000496514.6:C.1218C>T	4	656984	ENSG00000133256	ENST00000496514.6	PDE6B	rs148190219	Retinitis Pigmentosa	ClinVar		Congenital, Hereditary, and Neonatal Diseases and Abnormalities; Eye Diseases
ENST00000496514.6:C.2073C>T	4	664165	ENSG00000133256	ENST00000496514.6	PDE6B	rs886059544	Congenital Stationary Night Blindness	ClinVar		Other diseases
ENST00000496514.6:C.2073C>T	4	664165	ENSG00000133256	ENST00000496514.6	PDE6B	rs886059544	Retinitis Pigmentosa	ClinVar		Congenital, Hereditary, and Neonatal Diseases and Abnormalities; Eye Diseases
ENST00000496514.6:C.2526C>T	4	670068	ENSG00000133256	ENST00000496514.6	PDE6B	rs61733857	Congenital Stationary Night Blindness	ClinVar		Other diseases
ENST00000496514.6:C.2526C>T	4	670068	ENSG00000133256	ENST00000496514.6	PDE6B	rs61733857	Retinitis Pigmentosa	ClinVar		Congenital, Hereditary, and Neonatal Diseases and Abnormalities; Eye Diseases
ENST00000314167.9:C.1197C>T	4	888855	ENSG00000178950	ENST00000314167.9	GAK	rs2279181	high density lipoprotein cholesterol measurement	Ensembl_Post_GWAS	PMID30275531	Other diseases
ENST00000314167.9:C.1197C>T	4	888855	ENSG00000178950	ENST00000314167.9	GAK	rs2279181	parkinsons disease	Ensembl_Post_GWAS	PMID20070850	Nervous System Diseases
ENST00000314167.9:C.1197C>T	4	888855	ENSG00000178950	ENST00000314167.9	GAK	rs2279181	triglyceride measurement	Ensembl_Post_GWAS	PMID20711177	Other diseases
ENST00000247933.9:C.65C>T	4	987149	ENSG00000127415	ENST00000247933.9	IDUA	rs745879759	Mucopolysaccharidosis type I	ClinVar		Congenital, Hereditary, and Neonatal Diseases and Abnormalities; Nutritional and Metabolic Diseases; Skin and Connective Tissue Diseases
ENST00000247933.9:C.606C>T	4	1001695	ENSG00000127415	ENST00000247933.9	IDUA	rs1033313360	Hurler syndrome	ClinVar		Congenital, Hereditary, and Neonatal Diseases and Abnormalities; Nutritional and Metabolic Diseases; Skin and Connective Tissue Diseases
ENST00000247933.9:C.663C>T	4	1001752	ENSG00000127415	ENST00000247933.9	IDUA	rs368553582	Mucopolysaccharidosis type I	ClinVar		Congenital, Hereditary, and Neonatal Diseases and Abnormalities; Nutritional and Metabolic Diseases; Skin and Connective Tissue Diseases
ENST00000247933.9:C.891C>T	4	1002080	ENSG00000127415	ENST00000247933.9	IDUA	rs114806891	Mucopolysaccharidosis type I	ClinVar		Congenital, Hereditary, and Neonatal Diseases and Abnormalities; Nutritional and Metabolic Diseases; Skin and Connective Tissue Diseases
ENST00000247933.9:C.1230C>T	4	1002772	ENSG00000127415	ENST00000247933.9	IDUA	rs115790973	Mucopolysaccharidosis type I	ClinVar		Congenital, Hereditary, and Neonatal Diseases and Abnormalities; Nutritional and Metabolic Diseases; Skin and Connective Tissue Diseases
ENST00000247933.9:C.1230C>T	4	1002772	ENSG00000127415	ENST00000247933.9	IDUA	rs115790973	bone density	Ensembl_Post_GWAS	PMID29304378	Other diseases
ENST00000247933.9:C.1479C>A	4	1003112	ENSG00000127415	ENST00000247933.9	IDUA	rs370394527	Mucopolysaccharidosis type I	ClinVar		Congenital, Hereditary, and Neonatal Diseases and Abnormalities; Nutritional and Metabolic Diseases; Skin and Connective Tissue Diseases
ENST00000247933.9:C.1743C>T	4	1004027	ENSG00000127415	ENST00000247933.9	IDUA	rs776787370	Hurler syndrome	ClinVar		Congenital, Hereditary, and Neonatal Diseases and Abnormalities; Nutritional and Metabolic Diseases; Skin and Connective Tissue Diseases
ENST00000508803.6:C.2490C>T	4	1955312	ENSG00000109685	ENST00000508803.6	NSD2	rs1331289337	lymphoid neoplasm	Cosmic	25595890	Cancer; Hematological Disease; Organismal Injury and Abnormalities
ENST00000511885.6:C.1273C>T	4	2174727	ENSG00000130997	ENST00000511885.6	POLN	rs9328764	response to paliperidone	Ensembl_Post_GWAS	PMID27846195	Other diseases
ENST00000511885.6:C.1273C>T	4	2174727	ENSG00000130997	ENST00000511885.6	POLN	rs9328764	schizophrenia symptom severity measurement	Ensembl_Post_GWAS	PMID27846195	Mental Disorders
ENST00000511885.6:C.999C>T	4	2193226	ENSG00000130997	ENST00000511885.6	POLN	rs10002583	response to paliperidone	Ensembl_Post_GWAS	PMID27846195	Other diseases
ENST00000511885.6:C.999C>T	4	2193226	ENSG00000130997	ENST00000511885.6	POLN	rs10002583	schizophrenia symptom severity measurement	Ensembl_Post_GWAS	PMID27846195	Mental Disorders
ENST00000511747.6:C.268C>T	4	2820714	ENSG00000087266	ENST00000511747.6	SH3BP2	rs774809755	Fibrous dysplasia of jaw	ClinVar		Congenital, Hereditary, and Neonatal Diseases and Abnormalities; Musculoskeletal Diseases; Stomatognathic Diseases
ENST00000511747.6:C.447C>T	4	2824649	ENSG00000087266	ENST00000511747.6	SH3BP2	rs140326137	Fibrous dysplasia of jaw	ClinVar		Congenital, Hereditary, and Neonatal Diseases and Abnormalities; Musculoskeletal Diseases; Stomatognathic Diseases
ENST00000511747.6:C.588C>T	4	2825185	ENSG00000087266	ENST00000511747.6	SH3BP2	rs16843413	Fibrous dysplasia of jaw	ClinVar		Congenital, Hereditary, and Neonatal Diseases and Abnormalities; Musculoskeletal Diseases; Stomatognathic Diseases
ENST00000511747.6:C.630C>T	4	2827260	ENSG00000087266	ENST00000511747.6	SH3BP2	rs200183258	Fibrous dysplasia of jaw	ClinVar		Congenital, Hereditary, and Neonatal Diseases and Abnormalities; Musculoskeletal Diseases; Stomatognathic Diseases
ENST00000511747.6:C.699C>T	4	2827616	ENSG00000087266	ENST00000511747.6	SH3BP2	rs138986397	Fibrous dysplasia of jaw	ClinVar		Congenital, Hereditary, and Neonatal Diseases and Abnormalities; Musculoskeletal Diseases; Stomatognathic Diseases
ENST00000511747.6:C.1121C>T	4	2829856	ENSG00000087266	ENST00000511747.6	SH3BP2	rs371366593	Fibrous dysplasia of jaw	ClinVar		Congenital, Hereditary, and Neonatal Diseases and Abnormalities; Musculoskeletal Diseases; Stomatognathic Diseases
ENST00000511747.6:C.1361C>T	4	2830096	ENSG00000087266	ENST00000511747.6	SH3BP2	rs527342066	Fibrous dysplasia of jaw	ClinVar		Congenital, Hereditary, and Neonatal Diseases and Abnormalities; Musculoskeletal Diseases; Stomatognathic Diseases
ENST00000355072.10:C.5159C>A	4	3187820	ENSG00000197386	ENST00000355072.10	HTT	rs363125	synophrys measurement	Ensembl_Post_GWAS	PMID27182965	Congenital, Hereditary, and Neonatal Diseases and Abnormalities; Skin and Connective Tissue Diseases
ENST00000340083.6:C.588C>T	4	3485594	ENSG00000175920	ENST00000340083.6	DOK7	rs149940009	Myasthenia	ClinVar		Pathological Conditions, Signs and Symptoms; Musculoskeletal Diseases; Nervous System Diseases
ENST00000340083.6:C.588C>T	4	3485594	ENSG00000175920	ENST00000340083.6	DOK7	rs149940009	Pena-Shokeir syndrome type I	ClinVar		Musculoskeletal Diseases; Congenital, Hereditary, and Neonatal Diseases and Abnormalities
ENST00000340083.6:C.661C>T	4	3489685	ENSG00000175920	ENST00000340083.6	DOK7	rs377167511	Myasthenia	ClinVar		Pathological Conditions, Signs and Symptoms; Musculoskeletal Diseases; Nervous System Diseases
ENST00000340083.6:C.661C>T	4	3489685	ENSG00000175920	ENST00000340083.6	DOK7	rs377167511	Pena-Shokeir syndrome type I	ClinVar		Musculoskeletal Diseases; Congenital, Hereditary, and Neonatal Diseases and Abnormalities
ENST00000340083.6:C.1477C>T	4	3493463	ENSG00000175920	ENST00000340083.6	DOK7	rs748438470	Myasthenia	ClinVar		Pathological Conditions, Signs and Symptoms; Musculoskeletal Diseases; Nervous System Diseases
ENST00000340083.6:C.1477C>T	4	3493463	ENSG00000175920	ENST00000340083.6	DOK7	rs748438470	Pena-Shokeir syndrome type I	ClinVar		Musculoskeletal Diseases; Congenital, Hereditary, and Neonatal Diseases and Abnormalities
ENST00000282908.10:C.471C>T	4	5398243	ENSG00000152953	ENST00000282908.10	STK32B	rs146665039	large intestine carcinoma	Cosmic	0	Cancer; Gastrointestinal Disease; Organismal Injury and Abnormalities
ENST00000673991.1:C.132C>T	4	6277587	ENSG00000109501	ENST00000673991.1	WFS1	rs754346893	Nonsyndromic Hearing Loss	ClinVar		Pathological Conditions, Signs and Symptoms; Nervous System Diseases; Otorhinolaryngologic Diseases
ENST00000673991.1:C.132C>T	4	6277587	ENSG00000109501	ENST00000673991.1	WFS1	rs754346893	WFS1-Related Spectrum Disorders	ClinVar		Other diseases
ENST00000673991.1:C.1221C>G	4	6300980	ENSG00000109501	ENST00000673991.1	WFS1	rs1801206	Nonsyndromic Hearing Loss	ClinVar		Pathological Conditions, Signs and Symptoms; Nervous System Diseases; Otorhinolaryngologic Diseases
ENST00000673991.1:C.1221C>G	4	6300980	ENSG00000109501	ENST00000673991.1	WFS1	rs1801206	WFS1-Related Spectrum Disorders	ClinVar		Other diseases
ENST00000673991.1:C.1221C>G	4	6300980	ENSG00000109501	ENST00000673991.1	WFS1	rs1801206	autoantibody measurement	Ensembl_Post_GWAS	PMID19734900	Other diseases
ENST00000673991.1:C.1221C>G	4	6300980	ENSG00000109501	ENST00000673991.1	WFS1	rs1801206	type ii diabetes mellitus	Ensembl_Post_GWAS	PMID19734900	Nutritional and Metabolic Diseases; Endocrine System Diseases
ENST00000673991.1:C.1566C>T	4	6301325	ENSG00000109501	ENST00000673991.1	WFS1	rs35789242	Nonsyndromic Hearing Loss	ClinVar		Pathological Conditions, Signs and Symptoms; Nervous System Diseases; Otorhinolaryngologic Diseases
ENST00000673991.1:C.1566C>T	4	6301325	ENSG00000109501	ENST00000673991.1	WFS1	rs35789242	WFS1-Related Spectrum Disorders	ClinVar		Other diseases
ENST00000673991.1:C.1710C>T	4	6301469	ENSG00000109501	ENST00000673991.1	WFS1	rs61735402	Nonsyndromic Hearing Loss	ClinVar		Pathological Conditions, Signs and Symptoms; Nervous System Diseases; Otorhinolaryngologic Diseases
ENST00000673991.1:C.1710C>T	4	6301469	ENSG00000109501	ENST00000673991.1	WFS1	rs61735402	WFS1-Related Spectrum Disorders	ClinVar		Other diseases
ENST00000673991.1:C.1761C>T	4	6301520	ENSG00000109501	ENST00000673991.1	WFS1	rs2230719	Nonsyndromic Hearing Loss	ClinVar		Pathological Conditions, Signs and Symptoms; Nervous System Diseases; Otorhinolaryngologic Diseases
ENST00000673991.1:C.1761C>T	4	6301520	ENSG00000109501	ENST00000673991.1	WFS1	rs2230719	WFS1-Related Spectrum Disorders	ClinVar		Other diseases
ENST00000673991.1:C.1841C>T	4	6301600	ENSG00000109501	ENST00000673991.1	WFS1	rs2230720	Monogenic diabetes	ClinVar		Nutritional and Metabolic Diseases; Endocrine System Diseases
ENST00000673991.1:C.1841C>T	4	6301600	ENSG00000109501	ENST00000673991.1	WFS1	rs2230720	Nonsyndromic Hearing Loss	ClinVar		Pathological Conditions, Signs and Symptoms; Nervous System Diseases; Otorhinolaryngologic Diseases
ENST00000673991.1:C.1841C>T	4	6301600	ENSG00000109501	ENST00000673991.1	WFS1	rs2230720	WFS1-Related Spectrum Disorders	ClinVar		Other diseases
ENST00000673991.1:C.2048C>T	4	6301807	ENSG00000109501	ENST00000673991.1	WFS1	rs71530907	Monogenic diabetes	ClinVar		Nutritional and Metabolic Diseases; Endocrine System Diseases
ENST00000673991.1:C.2048C>T	4	6301807	ENSG00000109501	ENST00000673991.1	WFS1	rs71530907	Nonsyndromic Hearing Loss	ClinVar		Pathological Conditions, Signs and Symptoms; Nervous System Diseases; Otorhinolaryngologic Diseases
ENST00000673991.1:C.2048C>T	4	6301807	ENSG00000109501	ENST00000673991.1	WFS1	rs71530907	WFS1-Related Spectrum Disorders	ClinVar		Other diseases
ENST00000673991.1:C.2055C>T	4	6301814	ENSG00000109501	ENST00000673991.1	WFS1	rs71524375	Nonsyndromic Hearing Loss	ClinVar		Pathological Conditions, Signs and Symptoms; Nervous System Diseases; Otorhinolaryngologic Diseases
ENST00000673991.1:C.2055C>T	4	6301814	ENSG00000109501	ENST00000673991.1	WFS1	rs71524375	WFS1-Related Spectrum Disorders	ClinVar		Other diseases
ENST00000673991.1:C.2220C>T	4	6301979	ENSG00000109501	ENST00000673991.1	WFS1	rs71530908	Nonsyndromic Hearing Loss	ClinVar		Pathological Conditions, Signs and Symptoms; Nervous System Diseases; Otorhinolaryngologic Diseases
ENST00000673991.1:C.2220C>T	4	6301979	ENSG00000109501	ENST00000673991.1	WFS1	rs71530908	WFS1-Related Spectrum Disorders	ClinVar		Other diseases
ENST00000673991.1:C.2405C>A	4	6302164	ENSG00000109501	ENST00000673991.1	WFS1	rs369107336	Wolfram syndrome	ClinVar		Congenital, Hereditary, and Neonatal Diseases and Abnormalities; Nutritional and Metabolic Diseases; Female Urogenital Diseases and Pregnancy Complications; Eye Diseases; Male Urogenital Diseases; Nervous System Diseases; Endocrine System Diseases; Otorhinolaryngologic Diseases
ENST00000389652.11:C.1041C>T	4	15516648	ENSG00000048342	ENST00000389652.11	CC2D2A	rs371086728	CC2D2A-Related Disorders	ClinVar		Other diseases
ENST00000389652.11:C.1041C>T	4	15516648	ENSG00000048342	ENST00000389652.11	CC2D2A	rs371086728	Joubert syndrome	ClinVar		Congenital, Hereditary, and Neonatal Diseases and Abnormalities; Female Urogenital Diseases and Pregnancy Complications; Eye Diseases; Male Urogenital Diseases
ENST00000389652.11:C.1041C>T	4	15516648	ENSG00000048342	ENST00000389652.11	CC2D2A	rs371086728	Meckel-Gruber syndrome	ClinVar		Pathological Conditions, Signs and Symptoms
ENST00000389652.11:C.1953C>T	4	15538087	ENSG00000048342	ENST00000389652.11	CC2D2A	rs550913315	CC2D2A-Related Disorders	ClinVar		Other diseases
[truncated: 6,965 more rows]

## Sheet: Human vs. Mouse
Identified diseases from Human vs. Mouse SNPs
Uploaded_variation	Chromosome	Location	Gene_id	Transcript_id	Gene_symbol	Variation_ID	Diseases	Source	PubMed	Disease_Class_Name
ENST00000540437.5:C.900C>T	1	1313807	ENSG00000127054	ENST00000540437.5	CPSF3L	rs12142199	crohns disease	Ensembl_Post_GWAS	PMID26192919	Digestive System Diseases
ENST00000540437.5:C.900C>T	1	1313807	ENSG00000127054	ENST00000540437.5	CPSF3L	rs12142199	inflammatory bowel disease	Ensembl_Post_GWAS	PMID28067908	Digestive System Diseases
ENST00000540437.5:C.900C>T	1	1313807	ENSG00000127054	ENST00000540437.5	CPSF3L	rs12142199	ulcerative colitis	Ensembl_Post_GWAS	PMID28067908	Digestive System Diseases
ENST00000378755.9:C.1422C>T	1	1526472	ENSG00000197785	ENST00000378755.9	ATAD3A	rs777124344	breast carcinoma	Cosmic	22722193	Cancer; Organismal Injury and Abnormalities; Reproductive System Disease
ENST00000638771.1:C.14C>G	1	2019437	ENSG00000187730	ENST00000638771.1	GABRD	rs1207791272	Idiopathic generalized epilepsy	ClinVar		Nervous System Diseases
ENST00000638771.1:C.84C>T	1	2024957	ENSG00000187730	ENST00000638771.1	GABRD	rs769857211	Idiopathic generalized epilepsy	ClinVar		Nervous System Diseases
ENST00000638771.1:C.492C>T	1	2027598	ENSG00000187730	ENST00000638771.1	GABRD	rs367776284	Idiopathic generalized epilepsy	ClinVar		Nervous System Diseases
ENST00000638771.1:C.969C>T	1	2029672	ENSG00000187730	ENST00000638771.1	GABRD	rs146381127	Idiopathic generalized epilepsy	ClinVar		Nervous System Diseases
ENST00000638771.1:C.1285C>T	1	2029988	ENSG00000187730	ENST00000638771.1	GABRD	rs1031482653	Idiopathic generalized epilepsy	ClinVar		Nervous System Diseases
ENST00000638771.1:C.1324C>T	1	2030027	ENSG00000187730	ENST00000638771.1	GABRD	rs28398772	Idiopathic generalized epilepsy	ClinVar		Nervous System Diseases
ENST00000638771.1:C.1327C>G	1	2030030	ENSG00000187730	ENST00000638771.1	GABRD	rs148300882	Epilepsy	ClinVar		Nervous System Diseases
ENST00000378536.5:C.360C>T	1	2229126	ENSG00000157933	ENST00000378536.5	SKI	rs375024753	Cardiovascular phenotype	ClinVar		Cardiovascular Diseases
ENST00000378536.5:C.726C>T	1	2229492	ENSG00000157933	ENST00000378536.5	SKI	rs139227600	Cardiovascular phenotype	ClinVar		Cardiovascular Diseases
ENST00000378536.5:C.726C>T	1	2229492	ENSG00000157933	ENST00000378536.5	SKI	rs139227600	Shprintzen-Goldberg syndrome	ClinVar		Musculoskeletal Diseases; Cardiovascular Diseases; Congenital, Hereditary, and Neonatal Diseases and Abnormalities; Skin and Connective Tissue Diseases
ENST00000378536.5:C.1152C>T	1	2303341	ENSG00000157933	ENST00000378536.5	SKI	rs200160702	Cardiovascular phenotype	ClinVar		Cardiovascular Diseases
ENST00000378536.5:C.1338C>T	1	2303966	ENSG00000157933	ENST00000378536.5	SKI	rs148632347	Cardiovascular phenotype	ClinVar		Cardiovascular Diseases
ENST00000378536.5:C.1384C>G	1	2304012	ENSG00000157933	ENST00000378536.5	SKI	rs199797772	Cardiovascular phenotype	ClinVar		Cardiovascular Diseases
ENST00000378536.5:C.1384C>G	1	2304012	ENSG00000157933	ENST00000378536.5	SKI	rs199797772	Shprintzen-Goldberg syndrome	ClinVar		Musculoskeletal Diseases; Cardiovascular Diseases; Congenital, Hereditary, and Neonatal Diseases and Abnormalities; Skin and Connective Tissue Diseases
ENST00000378536.5:C.1400C>T	1	2304028	ENSG00000157933	ENST00000378536.5	SKI	rs752151031	Shprintzen-Goldberg syndrome	ClinVar		Musculoskeletal Diseases; Cardiovascular Diseases; Congenital, Hereditary, and Neonatal Diseases and Abnormalities; Skin and Connective Tissue Diseases
ENST00000378536.5:C.1410C>T	1	2304038	ENSG00000157933	ENST00000378536.5	SKI	rs150985728	Cardiovascular phenotype	ClinVar		Cardiovascular Diseases
ENST00000378536.5:C.1527C>T	1	2304345	ENSG00000157933	ENST00000378536.5	SKI	rs111935632	Cardiovascular phenotype	ClinVar		Cardiovascular Diseases
ENST00000378536.5:C.1568C>T	1	2304386	ENSG00000157933	ENST00000378536.5	SKI	rs730880212	Arterial dissection	ClinVar		Cardiovascular Diseases
ENST00000378536.5:C.1568C>T	1	2304386	ENSG00000157933	ENST00000378536.5	SKI	rs730880212	Cardiovascular phenotype	ClinVar		Cardiovascular Diseases
ENST00000378536.5:C.1834C>T	1	2306086	ENSG00000157933	ENST00000378536.5	SKI	rs35833638	Cardiovascular phenotype	ClinVar		Cardiovascular Diseases
ENST00000378536.5:C.2058C>T	1	2306636	ENSG00000157933	ENST00000378536.5	SKI	rs1171554207	Cardiovascular phenotype	ClinVar		Cardiovascular Diseases
[truncated: 9,099 more rows]

## Sheet: Human vs. Pig
Identified diseases from Human vs. Pig SNPs
[truncated: 6,358 more rows]

## Sheet: Human vs. Marmoset
Identified diseases from Human vs. Marmoset SNPs
[truncated: 2,616 more rows]

## Sheet: Human vs. Rhesus macaque
Identified diseases from Human vs. Rhesus macaque SNPs
[truncated: 3,591 more rows]
