# Supplementary material for: Evaluation of Five Mammalian Models for Human Disease Research Using Genomic and Bioinformatic Approaches
Source: Preprints.org preprint supplement (doi:10.20944/preprints202305.1816.v1), 2023-05-26
Supplement: Supplementary file 6 [file Supplementary_Table_S8.xlsx]

## Sheet: ReadMe
Sheet_Name	Description
Human vs. Rat	Identified as specific disease based on Human vs. Rat SNPs
Human vs. Mouse	Identified as specific disease based on Human vs. Mouse SNPs
Human vs. Pig	Identified as specific disease based on Human vs. Pig SNPs
Human vs. Marmoset	Identified as specific disease based on Human vs. Marmoset SNPs
Human vs. Rhesus macaque	Identified as specific disease based on Human vs. Rhesus macaque SNPs

## Sheet: Human vs. Rat
Identified as specific disease based on Human vs. Rat SNPs
Uploaded_variation	Chromosome	Location	Gene_id	Transcript_id	Gene_symbol	Variation_ID	Diseases	Source	PubMed	Disease_Class_Name
ENST00000290597.9:C.1583C>A	1	18872954	ENSG00000159423	ENST00000290597.9	ALDH4A1	rs61757683	Deficiency of pyrroline-5-carboxylate reductase	ClinVar		Congenital, Hereditary, and Neonatal Diseases and Abnormalities; Nutritional and Metabolic Diseases
ENST00000302118.5:C.158C>T	1	55039995	ENSG00000169174	ENST00000302118.5	PCSK9	rs11583680	PCSK9 protein measurement	Ensembl_Post_GWAS	PMID29748315	Other diseases
ENST00000675667.1:C.1566C>T	1	156137190	ENSG00000160789	ENST00000675667.1	LMNA	rs149339264	Hepatic Steatosis	ClinVar		Other diseases
ENST00000675667.1:C.1566C>T	1	156137190	ENSG00000160789	ENST00000675667.1	LMNA	rs149339264	Hypertrophic Cardiomyopathy	ClinVar		Cardiovascular Diseases
ENST00000675667.1:C.1698C>T	1	156137743	ENSG00000160789	ENST00000675667.1	LMNA	rs4641	Hepatic Steatosis	ClinVar		Other diseases
ENST00000675667.1:C.1698C>T	1	156137743	ENSG00000160789	ENST00000675667.1	LMNA	rs4641	Hypertrophic Cardiomyopathy	ClinVar		Cardiovascular Diseases
ENST00000367662.5:C.2328C>T	1	176690327	ENSG00000116183	ENST00000367662.5	PAPPA2	rs10913241	coronary artery bypass	Ensembl_Post_GWAS	PMID25948407	Cardiovascular Diseases
ENST00000367662.5:C.2328C>T	1	176690327	ENSG00000116183	ENST00000367662.5	PAPPA2	rs10913241	susceptibility to measles measurement	Ensembl_Post_GWAS	PMID28928442	Other diseases
ENST00000252804.9:C.2661C>T	2	1649119	ENSG00000130508	ENST00000252804.9	PXDN	rs1863134	Anterior segment dysgenesis 7	ClinVar		Eye Diseases
ENST00000310823.8:C.354C>T	2	9536705	ENSG00000151694	ENST00000310823.8	ADAM17	rs373534760	Inflammatory skin and bowel disease	ClinVar		Other diseases
ENST00000331664.6:C.1297C>T	2	29072965	ENSG00000179270	ENST00000331664.6	PCARE	rs200696965	Retinitis pigmentosa 54	ClinVar		Congenital, Hereditary, and Neonatal Diseases and Abnormalities; Eye Diseases
ENST00000405271.5:C.195C>G	2	47373497	ENSG00000119888	ENST00000405271.5	EPCAM	rs543584983	Hereditary nonpolyposis colorectal cancer type 8	ClinVar		Congenital, Hereditary, and Neonatal Diseases and Abnormalities; Neoplasms
ENST00000405271.5:C.496C>A	2	47374035	ENSG00000119888	ENST00000405271.5	EPCAM	rs397514661	Diarrhea 5	ClinVar		Pathological Conditions, Signs and Symptoms; Digestive System Diseases; Nutritional and Metabolic Diseases
ENST00000234420.11:C.184C>T	2	47783417	ENSG00000116062	ENST00000234420.11	MSH6	rs876659508	Turcot syndrome	ClinVar		Congenital, Hereditary, and Neonatal Diseases and Abnormalities; Digestive System Diseases; Neoplasms; Nervous System Diseases
ENST00000452319.6:C.3048C>T	2	120988962	ENSG00000074047	ENST00000452319.6	GLI2	rs140479803	Culler-Jones syndrome	ClinVar		Other diseases
ENST00000452319.6:C.3048C>T	2	120988962	ENSG00000074047	ENST00000452319.6	GLI2	rs140479803	Holoprosencephaly 9	ClinVar		Congenital, Hereditary, and Neonatal Diseases and Abnormalities; Musculoskeletal Diseases; Nervous System Diseases
ENST00000232607.7:C.1320C>T	3	124743961	ENSG00000114491	ENST00000232607.7	UMPS	rs13146	Orotic aciduria	ClinVar		Hemic and Lymphatic Diseases; Congenital, Hereditary, and Neonatal Diseases and Abnormalities; Nutritional and Metabolic Diseases
ENST00000392781.7:C.202C>A	3	161086553	ENSG00000169255	ENST00000392781.7	B3GALNT1	rs200235398	p phenotype	ClinVar		Other diseases
ENST00000512788.1:C.279C>T	4	41260751	ENSG00000154277	ENST00000512788.1	UCHL1	rs121917767	Parkinson disease 5	ClinVar		Nervous System Diseases
ENST00000226382.4:C.270C>T	4	41747508	ENSG00000109132	ENST00000226382.4	PHOX2B	rs1420633452	Congenital central hypoventilation	ClinVar		Respiratory Disease; Nervous System Diseases; Pathological Conditions, Signs and Symptoms
ENST00000504199.5:C.1364C>A	4	71752606	ENSG00000145321	ENST00000504199.5	GC	rs4588	GC1/GC2 POLYMORPHISM	ClinVar		Other diseases
ENST00000504199.5:C.1364C>A	4	71752606	ENSG00000145321	ENST00000504199.5	GC	rs4588	Neonatal total 25-hydroxyvitamin D levels	GWAS	32047095	Other diseases
ENST00000504199.5:C.1364C>A	4	71752606	ENSG00000145321	ENST00000504199.5	GC	rs4588	vitamin D deficiency	Ensembl_Post_GWAS	PMID20541252	Nutritional and Metabolic Diseases
ENST00000504199.5:C.1364C>A	4	71752606	ENSG00000145321	ENST00000504199.5	GC	rs4588	vitamin D dietary intake measurement	Ensembl_Post_GWAS	PMID29343764	Nutritional and Metabolic Diseases
ENST00000264808.8:C.1768C>T	4	120695236	ENSG00000138738	ENST00000264808.8	PRDM5	rs387907110	Brittle cornea syndrome 2	ClinVar		Other diseases
ENST00000521381.6:C.1692C>T	5	68295271	ENSG00000145675	ENST00000521381.6	PIK3R1	rs773686816	Neoplasm	ClinVar		Neoplasms
ENST00000237853.9:C.936C>T	5	95900711	ENSG00000118985	ENST00000237853.9	ELL2	rs17085249	hodgkins lymphoma	Ensembl_Post_GWAS	PMID28112199	Neoplasms; Immune System Diseases; Hemic and Lymphatic Diseases
ENST00000237853.9:C.936C>T	5	95900711	ENSG00000118985	ENST00000237853.9	ELL2	rs17085249	IgG digalactosylation measurement	Ensembl_Post_GWAS	PMID28878392	Other diseases
ENST00000237853.9:C.936C>T	5	95900711	ENSG00000118985	ENST00000237853.9	ELL2	rs17085249	IgG sialylation measurement	Ensembl_Post_GWAS	PMID28878392	Other diseases
ENST00000237853.9:C.936C>T	5	95900711	ENSG00000118985	ENST00000237853.9	ELL2	rs17085249	monoclonal gammopathy	Ensembl_Post_GWAS	PMID26007630	Immune System Diseases; Hemic and Lymphatic Diseases
ENST00000237853.9:C.936C>T	5	95900711	ENSG00000118985	ENST00000237853.9	ELL2	rs17085249	total blood protein measurement	Ensembl_Post_GWAS	PMID26007630	Other diseases
ENST00000257430.9:C.2593C>T	5	112838187	ENSG00000134982	ENST00000257430.9	APC	rs192620988	APC-Associated Polyposis Disorders	ClinVar		Other diseases
ENST00000422843.8:C.1276C>T	5	157244305	ENSG00000113263	ENST00000422843.8	ITK	rs145991142	Lymphoproliferative syndrome	ClinVar		Immune System Diseases
ENST00000645831.2:C.1491C>T	6	1611936	ENSG00000054598	ENST00000645831.2	FOXC1	rs760676014	Axenfeld-Rieger syndrome type 3	ClinVar		Congenital, Hereditary, and Neonatal Diseases and Abnormalities; Eye Diseases
ENST00000264870.8:C.2067C>T	6	6145751	ENSG00000124491	ENST00000264870.8	F13A1	rs750971578	Factor XIII subunit A deficiency	ClinVar		Other diseases
ENST00000425368.7:C.94C>T	6	31946402	ENSG00000243649	ENST00000425368.7	CFB	rs12614	Factor B fast/slow polymorphism	ClinVar		Other diseases
ENST00000425368.7:C.94C>T	6	31946402	ENSG00000243649	ENST00000425368.7	CFB	rs12614	Chronic hepatitis B infection	GWAS	25802187	Digestive System Diseases; Infections
ENST00000332958.3:C.541C>T	6	116882403	ENSG00000185002	ENST00000332958.3	RFX6	rs587780440	Mitchell-Riley syndrome	ClinVar		Congenital, Hereditary, and Neonatal Diseases and Abnormalities; Digestive System Diseases; Nutritional and Metabolic Diseases; Endocrine System Diseases
ENST00000332958.3:C.2561C>T	6	116928921	ENSG00000185002	ENST00000332958.3	RFX6	rs201522681	Mitchell-Riley syndrome	ClinVar		Congenital, Hereditary, and Neonatal Diseases and Abnormalities; Digestive System Diseases; Nutritional and Metabolic Diseases; Endocrine System Diseases
ENST00000222718.7:C.420C>T	7	27101437	ENSG00000105996	ENST00000222718.7	HOXA2	rs748975641	Microtia	ClinVar		Congenital, Hereditary, and Neonatal Diseases and Abnormalities; Otorhinolaryngologic Diseases
ENST00000265627.10:C.63C>T	7	95396288	ENSG00000105852	ENST00000265627.10	PON3	rs13226149	Yu-Zhi constitution type	Ensembl_Post_GWAS	PMID26169365	Other diseases
ENST00000542996.6:C.269C>G	7	128754552	ENSG00000128595	ENST00000542996.6	CALU	rs2307040	thymoma	Cosmic	24974848	Neoplasms; Hemic and Lymphatic Diseases
ENST00000542996.6:C.269C>G	7	128754552	ENSG00000128595	ENST00000542996.6	CALU	rs2307040	odontogenesis	Ensembl_Post_GWAS	PMID23704328	Congenital, Hereditary, and Neonatal Diseases and Abnormalities; Stomatognathic Diseases
ENST00000542996.6:C.269C>G	7	128754552	ENSG00000128595	ENST00000542996.6	CALU	rs2307040	tooth eruption	Ensembl_Post_GWAS	PMID23704328	Congenital, Hereditary, and Neonatal Diseases and Abnormalities; Stomatognathic Diseases
ENST00000498124.1:C.249C>T	9	21971110	ENSG00000147889	ENST00000498124.1	CDKN2A	rs34968276	Adenocarcinoma of stomach	ClinVar		Cancer; Gastrointestinal Disease; Organismal Injury and Abnormalities
ENST00000498124.1:C.249C>T	9	21971110	ENSG00000147889	ENST00000498124.1	CDKN2A	rs34968276	Malignant melanoma of skin	ClinVar		Neoplasms; Skin and Connective Tissue Diseases
ENST00000498124.1:C.249C>T	9	21971110	ENSG00000147889	ENST00000498124.1	CDKN2A	rs34968276	Pancreatic adenocarcinoma	ClinVar		Cancer; Endocrine System Diseases; Gastrointestinal Disease; Organismal Injury and Abnormalities
ENST00000498124.1:C.249C>T	9	21971110	ENSG00000147889	ENST00000498124.1	CDKN2A	rs34968276	Squamous cell carcinoma of the head and neck	ClinVar		Cancer; Organismal Injury and Abnormalities
ENST00000498124.1:C.249C>T	9	21971110	ENSG00000147889	ENST00000498124.1	CDKN2A	rs34968276	Squamous cell carcinoma of the skin	ClinVar		Cancer; Organismal Injury and Abnormalities
ENST00000498124.1:C.249C>T	9	21971110	ENSG00000147889	ENST00000498124.1	CDKN2A	rs34968276	Transitional cell carcinoma of the bladder	ClinVar		Cancer; Organismal Injury and Abnormalities
ENST00000375123.5:C.825C>T	9	97854739	ENSG00000178919	ENST00000375123.5	FOXE1	rs3021526	Bamforth syndrome	ClinVar		Musculoskeletal Diseases; Stomatognathic Diseases; Congenital, Hereditary, and Neonatal Diseases and Abnormalities; Skin and Connective Tissue Diseases; Endocrine System Diseases
ENST00000375123.5:C.825C>T	9	97854739	ENSG00000178919	ENST00000375123.5	FOXE1	rs3021526	susceptibility to strep throat measurement	Ensembl_Post_GWAS	PMID28928442	Other diseases
ENST00000375123.5:C.825C>T	9	97854739	ENSG00000178919	ENST00000375123.5	FOXE1	rs3021526	alopecia areata	Ensembl_Post_GWAS	PMID25608926	Skin and Connective Tissue Diseases
ENST00000375123.5:C.825C>T	9	97854739	ENSG00000178919	ENST00000375123.5	FOXE1	rs3021526	oral cleft	Ensembl_Post_GWAS	PMID28054174	Other diseases
ENST00000375123.5:C.825C>T	9	97854739	ENSG00000178919	ENST00000375123.5	FOXE1	rs3021526	thyroxine measurement	Ensembl_Post_GWAS	PMID23408906	Other diseases
ENST00000623056.4:C.566C>T	10	86681680	ENSG00000122367	ENST00000623056.4	LDB3	rs45487699	Dilated cardiomyopathy 1C	ClinVar		Cardiovascular Diseases
ENST00000623056.4:C.566C>T	10	86681680	ENSG00000122367	ENST00000623056.4	LDB3	rs45487699	Familial hypertrophic cardiomyopathy 24	ClinVar		Congenital, Hereditary, and Neonatal Diseases and Abnormalities; Cardiovascular Diseases
ENST00000155840.12:C.1986C>T	11	2847958	ENSG00000053918	ENST00000155840.12	KCNQ1	rs11601907	KCNQ1-Related Disorders	ClinVar		Other diseases
ENST00000393324.7:C.1605C>A	11	86442869	ENSG00000151376	ENST00000393324.7	ME3	rs7548	obese body mass index status	Ensembl_Post_GWAS	PMID25811787	Other diseases
ENST00000393324.7:C.1605C>A	11	86442869	ENSG00000151376	ENST00000393324.7	ME3	rs7548	urate measurement	Ensembl_Post_GWAS	PMID25811787	Other diseases
ENST00000645095.1:C.1548C>T	12	6598360	ENSG00000111642	ENST00000645095.1	CHD4	rs11539543	pathological myopia	Ensembl_Post_GWAS	PMID23049088	Eye Diseases
ENST00000252242.9:C.591C>G	12	52519125	ENSG00000186081	ENST00000252242.9	KRT5	rs641615	Rate of cognitive decline in Alzheimers disease	GWAS	32573913	Other diseases
ENST00000257895.10:C.423C>T	12	55721801	ENSG00000135437	ENST00000257895.10	RDH5	rs3138142	High myopia	GWAS	31816047	Eye Diseases
ENST00000257895.10:C.423C>T	12	55721801	ENSG00000135437	ENST00000257895.10	RDH5	rs3138142	Spherical equivalent	GWAS	32352494	Other diseases
ENST00000257895.10:C.423C>T	12	55721801	ENSG00000135437	ENST00000257895.10	RDH5	rs3138142	Spherical equivalent	GWAS	27020472	Other diseases
ENST00000228641.4:C.369C>T	12	80708088	ENSG00000111046	ENST00000228641.4	MYF6	rs777383223	Myopathy	ClinVar		Musculoskeletal Diseases; Nervous System Diseases
ENST00000267415.12:C.81C>A	14	24242252	ENSG00000092330	ENST00000267415.12	TINF2	rs1060499576	Revesz syndrome	ClinVar		Nutritional and Metabolic Diseases; Musculoskeletal Diseases
ENST00000395514.5:C.119C>G	14	54902545	ENSG00000131979	ENST00000395514.5	GCH1	rs995999325	Dopa-responsive type	ClinVar		Nervous System Diseases
ENST00000261978.9:C.818C>T	14	74585866	ENSG00000119681	ENST00000261978.9	LTBP2	rs143282840	Weill-Marchesani syndrome 3	ClinVar		Musculoskeletal Diseases; Eye Diseases; Congenital, Hereditary, and Neonatal Diseases and Abnormalities; Skin and Connective Tissue Diseases
ENST00000646667.1:C.4445C>A	15	50586433	ENSG00000092439	ENST00000646667.1	TRPM7	rs8042919	Amyotrophic lateral sclerosis-parkinsonism/dementia complex 1	ClinVar		Nervous System Diseases; Nutritional and Metabolic Diseases
ENST00000335449.11:C.95C>T	15	51341779	ENSG00000186417	ENST00000335449.11	GLDN	rs779432560	Lethal congenital contracture syndrome 11	ClinVar		Other diseases
ENST00000288840.10:C.1050C>T	15	66781094	ENSG00000137834	ENST00000288840.10	SMAD6	rs200493039	Radioulnar synostosis	ClinVar		Congenital, Hereditary, and Neonatal Diseases and Abnormalities; Musculoskeletal Diseases
ENST00000268124.11:C.1156C>A	15	89328699	ENSG00000140521	ENST00000268124.11	POLG	rs199759055	Mitochondrial DNA depletion syndrome 4B	ClinVar		Other diseases
ENST00000311895.8:C.1870C>T	16	13937824	ENSG00000175595	ENST00000311895.8	ERCC4	rs766395322	penis carcinoma	Cosmic	28481359	Neoplasms; Male Urogenital Diseases
ENST00000567659.3:C.125C>T	16	29813179	ENSG00000167371	ENST00000567659.3	PRRT2	rs1166053009	Paroxysmal kinesigenic dyskinesia	ClinVar		Nervous System Diseases
ENST00000299167.12:C.3039C>T	16	47698483	ENSG00000102893	ENST00000299167.12	PHKB	rs151222947	Glycogen storage disease IXb	ClinVar		Musculoskeletal Diseases; Nervous System Diseases; Male Urogenital Diseases; Female Urogenital Diseases and Pregnancy Complications
ENST00000645063.1:C.1644C>T	16	89548094	ENSG00000197912	ENST00000645063.1	SPG7	rs145441974	Spastic paraplegia 7	ClinVar		Congenital, Hereditary, and Neonatal Diseases and Abnormalities; Eye Diseases; Nervous System Diseases
ENST00000264649.10:C.699C>T	17	42480711	ENSG00000033627	ENST00000264649.10	ATP6V0A1	rs41283429	systolic blood pressure change measurement	Ensembl_Post_GWAS	PMID27980656	Cardiovascular Diseases
ENST00000245479.3:C.1180C>A	17	72124037	ENSG00000125398	ENST00000245479.3	SOX9	rs1057518216	Camptomelic dysplasia	ClinVar		Congenital, Hereditary, and Neonatal Diseases and Abnormalities; Musculoskeletal Diseases
ENST00000245479.3:C.1320C>T	17	72124177	ENSG00000125398	ENST00000245479.3	SOX9	rs80338688	Campomelic dysplasia with autosomal sex reversal	ClinVar		Congenital, Hereditary, and Neonatal Diseases and Abnormalities; Female Urogenital Diseases and Pregnancy Complications; Musculoskeletal Diseases; Male Urogenital Diseases; Endocrine System Diseases
ENST00000245479.3:C.1320C>T	17	72124177	ENSG00000125398	ENST00000245479.3	SOX9	rs80338688	Camptomelic dysplasia	ClinVar		Congenital, Hereditary, and Neonatal Diseases and Abnormalities; Musculoskeletal Diseases
ENST00000313654.14:C.4530C>G	18	23861753	ENSG00000053747	ENST00000313654.14	LAMA3	rs12965685	susceptibility to strep throat measurement	Ensembl_Post_GWAS	PMID28928442	Other diseases
ENST00000078429.9:C.1023C>T	19	3121122	ENSG00000088256	ENST00000078429.9	GNA11	rs140749796	Hypocalcemia	ClinVar		Nutritional and Metabolic Diseases
ENST00000171111.10:C.1437C>T	19	10489742	ENSG00000079999	ENST00000171111.10	KEAP1	rs35074907	Hypothyroidism	GWAS	30595370	Endocrine System Diseases
ENST00000262811.10:C.3135C>G	19	18146940	ENSG00000099308	ENST00000262811.10	MAST3	rs2072490	Intelligence	GWAS	29942086	Behavior and Behavior Mechanisms
ENST00000370274.8:C.906C>T	X	152868900	ENSG00000147383	ENST00000370274.8	NSDHL	rs587784226	Child syndrome	ClinVar		Congenital, Hereditary, and Neonatal Diseases and Abnormalities; Skin and Connective Tissue Diseases; Musculoskeletal Diseases

## Sheet: Human vs. Mouse
Identified as specific disease based on Human vs. Mouse SNPs
Uploaded_variation	Chromosome	Location	Gene_id	Transcript_id	Gene_symbol	Variation_ID	Diseases	Source	PubMed	Disease_Class_Name
ENST00000639083.1:C.1098C>T	1	11022507	ENSG00000120948	ENST00000639083.1	TARDBP	rs148325203	Frontotemporal dementia	ClinVar		Nervous System Diseases; Nutritional and Metabolic Diseases; Mental Disorders
ENST00000371237.9:C.1282C>A	1	56940965	ENSG00000021852	ENST00000371237.9	C8B	rs41286844	Complement component 6 deficiency	ClinVar		Congenital, Hereditary, and Neonatal Diseases and Abnormalities; Immune System Diseases
ENST00000262340.6:C.370C>A	1	68444656	ENSG00000116745	ENST00000262340.6	RPE65	rs61752877	Leber congenital amaurosis 2	ClinVar		Eye Diseases
ENST00000262340.6:C.370C>A	1	68444656	ENSG00000116745	ENST00000262340.6	RPE65	rs61752877	Retinitis pigmentosa 20	ClinVar		Congenital, Hereditary, and Neonatal Diseases and Abnormalities; Eye Diseases
ENST00000256646.7:C.6007C>A	1	119917685	ENSG00000134250	ENST00000256646.7	NOTCH2	rs312262801	Alagille syndrome 2	ClinVar		Congenital, Hereditary, and Neonatal Diseases and Abnormalities; Digestive System Diseases; Cardiovascular Diseases
ENST00000367405.5:C.2493C>T	1	197159596	ENSG00000177888	ENST00000367405.5	ZBTB41	rs12128631	coagulation factor measurement	Ensembl_Post_GWAS	PMID23381943	Other diseases
ENST00000366684.7:C.660C>T	1	229432142	ENSG00000143632	ENST00000366684.7	ACTA1	rs201823652	Nemaline myopathy 3	ClinVar		Musculoskeletal Diseases; Nervous System Diseases
ENST00000366541.8:C.572C>T	1	243293116	ENSG00000054282	ENST00000366541.8	SDCCAG8	rs150070966	Bardet-Biedl syndrome 16	ClinVar		Congenital, Hereditary, and Neonatal Diseases and Abnormalities; Eye Diseases; Nervous System Diseases
ENST00000366541.8:C.572C>T	1	243293116	ENSG00000054282	ENST00000366541.8	SDCCAG8	rs150070966	Senior-Loken syndrome 7	ClinVar		Other diseases
ENST00000294954.12:C.610C>T	2	48709018	ENSG00000138039	ENST00000294954.12	LHCGR	rs61996322	Gonadotropin-independent familial sexual precocity	ClinVar		Endocrine System Diseases
ENST00000294954.12:C.610C>T	2	48709018	ENSG00000138039	ENST00000294954.12	LHCGR	rs61996322	Hypergonadotropic hypogonadism	ClinVar		Endocrine System Diseases
ENST00000294954.12:C.610C>T	2	48709018	ENSG00000138039	ENST00000294954.12	LHCGR	rs61996322	Leydig cell agenesis	ClinVar		Congenital, Hereditary, and Neonatal Diseases and Abnormalities; Female Urogenital Diseases and Pregnancy Complications; Male Urogenital Diseases; Endocrine System Diseases
ENST00000673920.1:C.1513C>A	2	209817086	ENSG00000144406	ENST00000673920.1	UNC80	rs767633598	Hypotonia-speech impairment-severe cognitive delay syndrome	ClinVar		Other diseases
ENST00000644803.1:C.45C>T	3	11017256	ENSG00000157103	ENST00000644803.1	SLC6A1	rs761463345	Myoclonic-atonic epilepsy	ClinVar		Other diseases
ENST00000306125.12:C.1132C>A	3	49100222	ENSG00000172053	ENST00000306125.12	QARS1	rs185476065	Cortical visual impairment	ClinVar		Nervous System Diseases; Eye Diseases; Pathological Conditions, Signs and Symptoms
ENST00000306125.12:C.1132C>A	3	49100222	ENSG00000172053	ENST00000306125.12	QARS1	rs185476065	Impaired use of nonverbal behaviors	ClinVar		Mental Disorders
ENST00000306125.12:C.1132C>A	3	49100222	ENSG00000172053	ENST00000306125.12	QARS1	rs185476065	Insomnia	ClinVar		Nervous System Diseases; Mental Disorders
ENST00000306125.12:C.1132C>A	3	49100222	ENSG00000172053	ENST00000306125.12	QARS1	rs185476065	Short foot	ClinVar		Other diseases
ENST00000306125.12:C.1132C>A	3	49100222	ENSG00000172053	ENST00000306125.12	QARS1	rs185476065	Small hand	ClinVar		Other diseases
ENST00000306125.12:C.1132C>A	3	49100222	ENSG00000172053	ENST00000306125.12	QARS1	rs185476065	Strabismus	ClinVar		Nervous System Diseases; Eye Diseases
ENST00000264932.11:C.91C>T	5	223509	ENSG00000073578	ENST00000264932.11	SDHA	rs142441643	gastrointestinal stromal tumour	Cosmic	28481359	Digestive System Diseases; Neoplasms
ENST00000264932.11:C.91C>T	5	223509	ENSG00000073578	ENST00000264932.11	SDHA	rs142441643	Carney triad	ClinVar		Digestive System Diseases; Neoplasms; Respiratory Disease
ENST00000264932.11:C.91C>T	5	223509	ENSG00000073578	ENST00000264932.11	SDHA	rs142441643	Dilated cardiomyopathy 1GG	ClinVar		Cardiovascular Diseases
ENST00000264932.11:C.91C>T	5	223509	ENSG00000073578	ENST00000264932.11	SDHA	rs142441643	Pilocytic astrocytoma	ClinVar		Neoplasms
ENST00000255266.10:C.1032C>T	5	149907345	ENSG00000132915	ENST00000255266.10	PDE6A	rs121918577	Retinitis pigmentosa 43	ClinVar		Congenital, Hereditary, and Neonatal Diseases and Abnormalities; Eye Diseases
ENST00000377850.8:C.1257C>T	6	25914625	ENSG00000112337	ENST00000377850.8	SLC17A2	rs34525648	susceptibility to urinary tract infection measurement	Ensembl_Post_GWAS	PMID28928442	Other diseases
ENST00000310357.8:C.2061C>T	6	116792862	ENSG00000173612	ENST00000310357.8	GPRC6A	rs6901250	C-reactive protein levels	GWAS	21300955	Other diseases
ENST00000444676.5:C.1889C>T	7	44696501	ENSG00000105953	ENST00000444676.5	OGDH	rs773035937	Alpha-ketoglutarate dehydrogenase deficiency	ClinVar		Congenital, Hereditary, and Neonatal Diseases and Abnormalities; Nutritional and Metabolic Diseases
ENST00000248633.9:C.2992C>A	7	92494331	ENSG00000127980	ENST00000248633.9	PEX1	rs61750428	Deafness enamel hypoplasia nail defects	ClinVar		Otorhinolaryngologic Diseases; Nervous System Diseases; Pathological Conditions, Signs and Symptoms
ENST00000248633.9:C.2992C>A	7	92494331	ENSG00000127980	ENST00000248633.9	PEX1	rs61750428	Peroxisome biogenesis disorders	ClinVar		Congenital, Hereditary, and Neonatal Diseases and Abnormalities; Nutritional and Metabolic Diseases
ENST00000308868.5:C.21C>T	7	128252039	ENSG00000174697	ENST00000308868.5	LEP	rs201523305	Leptin deficiency or dysfunction	ClinVar		Other diseases
ENST00000375708.4:C.2265C>T	9	91724229	ENSG00000169071	ENST00000375708.4	ROR2	rs121909082	Type B brachydactyly	ClinVar		Congenital, Hereditary, and Neonatal Diseases and Abnormalities; Musculoskeletal Diseases
ENST00000223642.3:C.2653C>T	9	120997684	ENSG00000106804	ENST00000223642.3	C5	rs373359894	Eculizumab	ClinVar		Other diseases
ENST00000300456.5:C.504C>T	9	128345497	ENSG00000167114	ENST00000300456.5	SLC27A4	rs137853131	Ichthyosis prematurity syndrome	ClinVar		Congenital, Hereditary, and Neonatal Diseases and Abnormalities; Skin and Connective Tissue Diseases
ENST00000371732.10:C.324C>T	9	136371144	ENSG00000187796	ENST00000371732.10	CARD9	rs34971035	Monocyte chemoattractant protein-1 levels	GWAS	23017229	Other diseases
ENST00000211998.10:C.829C>T	10	74082499	ENSG00000035403	ENST00000211998.10	VCL	rs71579353	Familial hypertrophic cardiomyopathy 15	ClinVar		Congenital, Hereditary, and Neonatal Diseases and Abnormalities; Cardiovascular Diseases
ENST00000336233.10:C.891C>T	10	89222514	ENSG00000107798	ENST00000336233.10	LIPA	rs145066614	Lysosomal acid lipase deficiency	ClinVar		Other diseases
ENST00000397301.5:C.795C>T	11	1938477	ENSG00000130595	ENST00000397301.5	TNNT3	rs4727	Distal arthrogryposis type 2B	ClinVar		Congenital, Hereditary, and Neonatal Diseases and Abnormalities; Musculoskeletal Diseases
ENST00000299440.6:C.2715C>T	11	36576019	ENSG00000166349	ENST00000299440.6	RAG1	rs138119069	Combined cellular and humoral immune defects with granulomas	ClinVar		Congenital, Hereditary, and Neonatal Diseases and Abnormalities; Nutritional and Metabolic Diseases; Immune System Diseases; Hemic and Lymphatic Diseases
ENST00000299440.6:C.2715C>T	11	36576019	ENSG00000166349	ENST00000299440.6	RAG1	rs138119069	Severe immunodeficiency	ClinVar		Congenital, Hereditary, and Neonatal Diseases and Abnormalities; Nutritional and Metabolic Diseases; Immune System Diseases
ENST00000311485.8:C.123C>T	11	36594046	ENSG00000175097	ENST00000311485.8	RAG2	rs121917895	Primary immunodeficiency	ClinVar		Immune System Diseases
ENST00000311485.8:C.123C>T	11	36594046	ENSG00000175097	ENST00000311485.8	RAG2	rs121917895	Recombinase activating gene 2 deficiency	ClinVar		Other diseases
ENST00000311485.8:C.123C>T	11	36594046	ENSG00000175097	ENST00000311485.8	RAG2	rs121917895	Severe immunodeficiency	ClinVar		Congenital, Hereditary, and Neonatal Diseases and Abnormalities; Nutritional and Metabolic Diseases; Immune System Diseases
ENST00000333850.4:C.122C>A	12	71941600	ENSG00000139287	ENST00000333850.4	TPH2	rs78162420	Tryptophan 5-monooxygenase deficiency	ClinVar		Other diseases
ENST00000327720.6:C.726C>T	14	60511237	ENSG00000184302	ENST00000327720.6	SIX6	rs770148963	Anophthalmia - microphthalmia	ClinVar		Congenital, Hereditary, and Neonatal Diseases and Abnormalities; Eye Diseases
ENST00000355774.7:C.3568C>A	14	75039913	ENSG00000119684	ENST00000355774.7	MLH3	rs779651509	MLH3-Related Lynch Syndrome	ClinVar		Other diseases
ENST00000649352.1:C.487C>A	14	99878513	ENSG00000066629	ENST00000649352.1	EML1	rs886037935	Band heterotopia	ClinVar		Other diseases
ENST00000394951.5:C.466C>A	16	31110247	ENSG00000103507	ENST00000394951.5	BCKDK	rs397514573	Branched-chain keto acid dehydrogenase kinase deficiency	ClinVar		Other diseases
ENST00000262493.12:C.513C>T	16	56334777	ENSG00000087258	ENST00000262493.12	GNAO1	rs1065375	circadian rhythm	Ensembl_Post_GWAS	PMID26835600	Other diseases
ENST00000269571.10:C.497C>T	17	39709375	ENSG00000141736	ENST00000269571.10	ERBB2	rs1227559137	adnexal tumour	Cosmic	27287813	Other diseases
ENST00000393930.5:C.867C>T	17	41767421	ENSG00000173801	ENST00000393930.5	JUP	rs2230407	Cardiac arrhythmia	ClinVar		Pathological Conditions, Signs and Symptoms; Cardiovascular Diseases
ENST00000398417.6:C.1606C>T	18	51078414	ENSG00000141646	ENST00000398417.6	SMAD4	rs587780790	Juvenile polyposis syndrome	ClinVar		Neoplasms; Digestive System Diseases; Congenital, Hereditary, and Neonatal Diseases and Abnormalities
ENST00000414982.7:C.3547C>A	19	7558969	ENSG00000032444	ENST00000414982.7	PNPLA6	rs766389806	Spastic paraplegia 39	ClinVar		Congenital, Hereditary, and Neonatal Diseases and Abnormalities; Eye Diseases; Nervous System Diseases
ENST00000252487.9:C.393C>T	19	44892887	ENSG00000130204	ENST00000252487.9	TOMM40	rs11556505	frontotemporal dementia	Ensembl_Post_GWAS	PMID26154020	Nervous System Diseases; Nutritional and Metabolic Diseases; Mental Disorders
ENST00000346798.8:C.1650C>T	21	25954627	ENSG00000142192	ENST00000346798.8	APP	rs201877705	Alzheimer disease	ClinVar		Nervous System Diseases; Mental Disorders
ENST00000396398.8:C.549C>T	22	42066758	ENSG00000198951	ENST00000396398.8	NAGA	rs374984089	Kanzaki disease	ClinVar		Congenital, Hereditary, and Neonatal Diseases and Abnormalities; Nutritional and Metabolic Diseases; Nervous System Diseases
ENST00000396398.8:C.549C>T	22	42066758	ENSG00000198951	ENST00000396398.8	NAGA	rs374984089	Schindler disease	ClinVar		Congenital, Hereditary, and Neonatal Diseases and Abnormalities; Nutritional and Metabolic Diseases; Nervous System Diseases
ENST00000380903.7:C.1934C>G	22	50217293	ENSG00000073169	ENST00000380903.7	SELENOO	rs144505070	Serum uric acid levels	GWAS	29559957	Pathological Conditions, Signs and Symptoms; Female Urogenital Diseases and Pregnancy Complications; Male Urogenital Diseases
ENST00000380903.7:C.1934C>G	22	50217293	ENSG00000073169	ENST00000380903.7	SELO	rs144505070	uric acid measurement	Ensembl_Post_GWAS	PMID29559957	Other diseases
ENST00000394155.8:C.191C>A	X	136207050	ENSG00000022267	ENST00000394155.8	FHL1	rs746834335	Myopathy with postural muscle atrophy	ClinVar		Musculoskeletal Diseases; Nervous System Diseases

## Sheet: Human vs. Pig
Identified as specific disease based on Human vs. Pig SNPs
Uploaded_variation	Chromosome	Location	Gene_id	Transcript_id	Gene_symbol	Variation_ID	Diseases	Source	PubMed	Disease_Class_Name
ENST00000378733.9:C.489C>T	1	1535392	ENSG00000205090	ENST00000378733.9	TMEM240	rs606231452	Spinocerebellar ataxia 21	ClinVar		Nervous System Diseases; Congenital, Hereditary, and Neonatal Diseases and Abnormalities
ENST00000641471.1:C.59C>T	1	40097180	ENSG00000131238	ENST00000641471.1	PPT1	rs1187613034	Ceroid lipofuscinosis neuronal 1	ClinVar		Congenital, Hereditary, and Neonatal Diseases and Abnormalities; Nutritional and Metabolic Diseases; Nervous System Diseases
ENST00000371877.8:C.1699C>T	1	47280759	ENSG00000123473	ENST00000371877.8	STIL	rs778747630	Primary Microcephaly	ClinVar		Congenital, Hereditary, and Neonatal Diseases and Abnormalities; Musculoskeletal Diseases; Nervous System Diseases
ENST00000370141.7:C.757C>T	1	100144083	ENSG00000122435	ENST00000370141.7	TRMT13	rs6681721	carotid artery intima media thickness	Ensembl_Post_GWAS	PMID26343869	Other diseases
ENST00000302127.5:C.1370C>T	1	111780691	ENSG00000171385	ENST00000302127.5	KCND3	rs199637120	Brugada syndrome 9	ClinVar		Congenital, Hereditary, and Neonatal Diseases and Abnormalities; Cardiovascular Diseases
ENST00000336751.11:C.345C>T	1	146019487	ENSG00000168509	ENST00000336751.11	HJV	rs142575526	Juvenile hemochromatosis	ClinVar		Congenital, Hereditary, and Neonatal Diseases and Abnormalities; Nutritional and Metabolic Diseases
ENST00000352210.9:C.360C>T	1	161168016	ENSG00000143224	ENST00000352210.9	PPOX	rs148730591	Variegate porphyria	ClinVar		Congenital, Hereditary, and Neonatal Diseases and Abnormalities; Digestive System Diseases; Nutritional and Metabolic Diseases; Skin and Connective Tissue Diseases
ENST00000642379.1:C.162C>T	1	182390724	ENSG00000135821	ENST00000642379.1	GLUL	rs370070318	Glutamine deficiency	ClinVar		Congenital, Hereditary, and Neonatal Diseases and Abnormalities; Nutritional and Metabolic Diseases
ENST00000367137.4:C.756C>T	1	205798757	ENSG00000133065	ENST00000367137.4	SLC41A1	rs708727	essential tremor	Ensembl_Post_GWAS	PMID27797806	Nervous System Diseases
ENST00000264709.7:C.2644C>T	2	25234374	ENSG00000119772	ENST00000264709.7	DNMT3A	rs377577594	Myelodysplastic syndrome	ClinVar		Hemic and Lymphatic Diseases
ENST00000264709.7:C.2644C>T	2	25234374	ENSG00000119772	ENST00000264709.7	DNMT3A	rs377577594	Tatton-Brown-rahman syndrome	ClinVar		Other diseases
ENST00000410022.7:C.286C>T	2	69423598	ENSG00000169599	ENST00000410022.7	NFU1	rs74637005	Multiple mitochondrial dysfunctions syndrome	ClinVar		Nutritional and Metabolic Diseases
ENST00000431078.1:C.1355C>T	2	124524333	ENSG00000155052	ENST00000431078.1	CNTNAP5	rs17727261	Response to antipsychotic treatment	GWAS	19721433	Other diseases
ENST00000431078.1:C.1355C>T	2	124524333	ENSG00000155052	ENST00000431078.1	CNTNAP5	rs17727261	response to risperidone	Ensembl_Post_GWAS	PMID19721433	Other diseases
ENST00000397081.8:C.1916C>T	2	173017191	ENSG00000091428	ENST00000397081.8	RAPGEF4	rs150495482	GLP-1 levels in response to oral glucose tolerance test	GWAS	29093273	Other diseases
ENST00000261007.9:C.1407C>T	2	174748166	ENSG00000138435	ENST00000261007.9	CHRNA1	rs771587252	Congenital Myasthenic Syndrome	ClinVar		Congenital, Hereditary, and Neonatal Diseases and Abnormalities; Nervous System Diseases
ENST00000325748.9:C.861C>T	2	178432178	ENSG00000180228	ENST00000325748.9	PRKRA	rs116833881	Dystonia 16	ClinVar		Nervous System Diseases; Pathological Conditions, Signs and Symptoms
ENST00000260947.9:C.1972C>A	2	214730440	ENSG00000138376	ENST00000260947.9	BARD1	rs3738888	Neoplasm of the breast	ClinVar		Neoplasms
ENST00000260947.9:C.1972C>A	2	214730440	ENSG00000138376	ENST00000260947.9	BARD1	rs3738888	Triple-Negative Breast Cancer Finding	ClinVar		Other diseases
ENST00000305139.11:C.1018C>G	2	233767873	ENSG00000167165	ENST00000305139.11	UGT1A6	rs72551349	Crigler Najjar syndrome	ClinVar		Congenital, Hereditary, and Neonatal Diseases and Abnormalities; Nutritional and Metabolic Diseases
ENST00000354728.5:C.1012C>G	2	233767873	ENSG00000241119	ENST00000354728.5	UGT1A9	rs72551349	Crigler Najjar syndrome	ClinVar		Congenital, Hereditary, and Neonatal Diseases and Abnormalities; Nutritional and Metabolic Diseases
ENST00000373450.4:C.1012C>G	2	233767873	ENSG00000242366	ENST00000373450.4	UGT1A8	rs72551349	Crigler Najjar syndrome	ClinVar		Congenital, Hereditary, and Neonatal Diseases and Abnormalities; Nutritional and Metabolic Diseases
ENST00000344644.9:C.1012C>G	2	233767873	ENSG00000242515	ENST00000344644.9	UGT1A10	rs72551349	Crigler Najjar syndrome	ClinVar		Congenital, Hereditary, and Neonatal Diseases and Abnormalities; Nutritional and Metabolic Diseases
ENST00000482026.5:C.1024C>G	2	233767873	ENSG00000243135	ENST00000482026.5	UGT1A3	rs72551349	Crigler Najjar syndrome	ClinVar		Congenital, Hereditary, and Neonatal Diseases and Abnormalities; Nutritional and Metabolic Diseases
ENST00000373426.3:C.1012C>G	2	233767873	ENSG00000244122	ENST00000373426.3	UGT1A7	rs72551349	Crigler Najjar syndrome	ClinVar		Congenital, Hereditary, and Neonatal Diseases and Abnormalities; Nutritional and Metabolic Diseases
ENST00000305139.11:C.1018C>G	2	233767873	ENSG00000167165	ENST00000305139.11	UGT1A6	rs72551349	Gilberts syndrome	ClinVar		Congenital, Hereditary, and Neonatal Diseases and Abnormalities; Nutritional and Metabolic Diseases
ENST00000354728.5:C.1012C>G	2	233767873	ENSG00000241119	ENST00000354728.5	UGT1A9	rs72551349	Gilberts syndrome	ClinVar		Congenital, Hereditary, and Neonatal Diseases and Abnormalities; Nutritional and Metabolic Diseases
ENST00000373450.4:C.1012C>G	2	233767873	ENSG00000242366	ENST00000373450.4	UGT1A8	rs72551349	Gilberts syndrome	ClinVar		Congenital, Hereditary, and Neonatal Diseases and Abnormalities; Nutritional and Metabolic Diseases
ENST00000344644.9:C.1012C>G	2	233767873	ENSG00000242515	ENST00000344644.9	UGT1A10	rs72551349	Gilberts syndrome	ClinVar		Congenital, Hereditary, and Neonatal Diseases and Abnormalities; Nutritional and Metabolic Diseases
ENST00000482026.5:C.1024C>G	2	233767873	ENSG00000243135	ENST00000482026.5	UGT1A3	rs72551349	Gilberts syndrome	ClinVar		Congenital, Hereditary, and Neonatal Diseases and Abnormalities; Nutritional and Metabolic Diseases
ENST00000373426.3:C.1012C>G	2	233767873	ENSG00000244122	ENST00000373426.3	UGT1A7	rs72551349	Gilberts syndrome	ClinVar		Congenital, Hereditary, and Neonatal Diseases and Abnormalities; Nutritional and Metabolic Diseases
ENST00000307363.10:C.1529C>A	3	33014261	ENSG00000170266	ENST00000307363.10	GLB1	rs1803198	GM1 gangliosidosis	ClinVar		Congenital, Hereditary, and Neonatal Diseases and Abnormalities; Nutritional and Metabolic Diseases; Nervous System Diseases
ENST00000655275.1:C.4679C>T	3	38701841	ENSG00000185313	ENST00000655275.1	SCN10A	rs756133876	Episodic pain syndrome	ClinVar		Other diseases
ENST00000648323.1:C.501C>T	3	138946222	ENSG00000183770	ENST00000648323.1	FOXL2	rs61750361	Blepharophimosis	ClinVar		Eye Diseases; Congenital, Hereditary, and Neonatal Diseases and Abnormalities
ENST00000389652.11:C.156C>T	4	15480736	ENSG00000048342	ENST00000389652.11	CC2D2A	rs1861050	Conduct disorder	GWAS	20585324	Mental Disorders
ENST00000226413.5:C.648C>T	4	67744662	ENSG00000109163	ENST00000226413.5	GNRHR	rs144451862	Isolated GnRH Deficiency	ClinVar		Other diseases
ENST00000359052.8:C.1839C>T	4	94276369	ENSG00000163104	ENST00000359052.8	SMARCAD1	rs6823404	testicular carcinoma	Ensembl_Post_GWAS	PMID23666239	Neoplasms; Male Urogenital Diseases; Endocrine System Diseases
ENST00000505878.4:C.348C>T	4	108009797	ENSG00000138796	ENST00000505878.4	HADH	rs137853102	Deficiency of 3-hydroxyacyl-CoA dehydrogenase	ClinVar		Congenital, Hereditary, and Neonatal Diseases and Abnormalities; Nutritional and Metabolic Diseases
ENST00000388822.10:C.1074C>G	4	118710005	ENSG00000145388	ENST00000388822.10	METTL14	rs11931194	cannabis dependence measurement	Ensembl_Post_GWAS	PMID27028160	Chemically-Induced Disorders; Mental Disorders
ENST00000405460.9:C.9771C>T	5	90724854	ENSG00000164199	ENST00000405460.9	ADGRV1	rs16869039	Bone mineral density	GWAS	31790847	Other diseases
ENST00000509534.5:C.213C>T	5	139121087	ENSG00000120725	ENST00000509534.5	SIL1	rs148651377	Marinesco-Sjögren syndrome	ClinVar		Congenital, Hereditary, and Neonatal Diseases and Abnormalities; Nervous System Diseases
ENST00000305988.6:C.491C>T	5	148827322	ENSG00000169252	ENST00000305988.6	ADRB2	rs1800888	Beta-2-adrenoreceptor agonist	ClinVar		Other diseases
ENST00000305988.6:C.491C>T	5	148827322	ENSG00000169252	ENST00000305988.6	ADRB2	rs1800888	FEV1	GWAS	30804560	Other diseases
ENST00000305988.6:C.491C>T	5	148827322	ENSG00000169252	ENST00000305988.6	ADRB2	rs1800888	Peak expiratory flow	GWAS	30804560	Other diseases
ENST00000374037.8:C.144C>T	6	34544312	ENSG00000124664	ENST00000374037.8	SPDEF	rs56262607	Tonsillectomy	GWAS	28928442	Other diseases
ENST00000372585.10:C.1275C>T	6	43302413	ENSG00000137204	ENST00000372585.10	SLC22A7	rs2270860	Diastolic blood pressure	GWAS	29455858	Other diseases
ENST00000372585.10:C.1275C>T	6	43302413	ENSG00000137204	ENST00000372585.10	SLC22A7	rs2270860	Hypertension	GWAS	30487518	Cardiovascular Diseases
ENST00000372585.10:C.1275C>T	6	43302413	ENSG00000137204	ENST00000372585.10	SLC22A7	rs2270860	Systolic blood pressure	GWAS	29455858	Cardiovascular Diseases
ENST00000369552.9:C.467C>T	6	87501270	ENSG00000164414	ENST00000369552.9	SLC35A1	rs578205635	Congenital disorder of glycosylation type 2F	ClinVar		Congenital, Hereditary, and Neonatal Diseases and Abnormalities; Nutritional and Metabolic Diseases
ENST00000230122.4:C.1701C>T	6	109466244	ENSG00000112365	ENST00000230122.4	ZBTB24	rs2232449	Immunodeficiency-centromeric instability-facial anomalies syndrome 2	ClinVar		Congenital, Hereditary, and Neonatal Diseases and Abnormalities; Immune System Diseases
ENST00000230122.4:C.1369C>A	6	109467654	ENSG00000112365	ENST00000230122.4	ZBTB24	rs387907106	Immunodeficiency-centromeric instability-facial anomalies syndrome 2	ClinVar		Congenital, Hereditary, and Neonatal Diseases and Abnormalities; Immune System Diseases
ENST00000318471.5:C.60C>G	6	136822725	ENSG00000112357	ENST00000318471.5	PEX7	rs1057516882	Rhizomelic chondrodysplasia punctata type 1	ClinVar		Congenital, Hereditary, and Neonatal Diseases and Abnormalities; Nutritional and Metabolic Diseases; Musculoskeletal Diseases
ENST00000318471.5:C.74C>T	6	136822739	ENSG00000112357	ENST00000318471.5	PEX7	rs61753236	Peroxisome biogenesis disorder 9B	ClinVar		Congenital, Hereditary, and Neonatal Diseases and Abnormalities; Nutritional and Metabolic Diseases
ENST00000318471.5:C.74C>T	6	136822739	ENSG00000112357	ENST00000318471.5	PEX7	rs61753236	Rhizomelic chondrodysplasia punctata type 1	ClinVar		Congenital, Hereditary, and Neonatal Diseases and Abnormalities; Nutritional and Metabolic Diseases; Musculoskeletal Diseases
ENST00000318471.5:C.86C>T	6	136822751	ENSG00000112357	ENST00000318471.5	PEX7	rs757852291	Peroxisome biogenesis disorder 9B	ClinVar		Congenital, Hereditary, and Neonatal Diseases and Abnormalities; Nutritional and Metabolic Diseases
ENST00000318471.5:C.86C>T	6	136822751	ENSG00000112357	ENST00000318471.5	PEX7	rs757852291	Rhizomelic chondrodysplasia punctata type 1	ClinVar		Congenital, Hereditary, and Neonatal Diseases and Abnormalities; Nutritional and Metabolic Diseases; Musculoskeletal Diseases
ENST00000366898.6:C.245C>T	6	162262692	ENSG00000185345	ENST00000366898.6	PRKN	rs55774500	Parkinson disease 2	ClinVar		Nervous System Diseases
ENST00000265723.8:C.175C>T	7	87462869	ENSG00000005471	ENST00000265723.8	ABCB4	rs2302387	gallbladder neoplasm	Ensembl_Post_GWAS	PMID28274756	Neoplasms; Digestive System Diseases
ENST00000265723.8:C.175C>T	7	87462869	ENSG00000005471	ENST00000265723.8	ABCB4	rs2302387	serum alanine aminotransferase measurement	Ensembl_Post_GWAS	PMID29403010	Other diseases
ENST00000292478.9:C.273C>T	7	99434970	ENSG00000106246	ENST00000292478.9	PTCD1	rs11555142	diffuse scleroderma	Ensembl_Post_GWAS	PMID29293537	Skin and Connective Tissue Diseases
ENST00000456015.6:C.973C>T	8	117172544	ENSG00000164756	ENST00000456015.6	SLC30A8	rs13266634	Blood sugar levels	GWAS	29403010	Other diseases
ENST00000456015.6:C.973C>T	8	117172544	ENSG00000164756	ENST00000456015.6	SLC30A8	rs13266634	Fasting plasma glucose	GWAS	28270201	Other diseases
ENST00000456015.6:C.973C>T	8	117172544	ENSG00000164756	ENST00000456015.6	SLC30A8	rs13266634	Hemoglobin A1c levels	GWAS	29403010	Other diseases
ENST00000376238.5:C.1381C>T	9	84286011	ENSG00000197506	ENST00000376238.5	SLC28A3	rs7853758	anthracyclines and related substances response - Toxicity/ADR	ClinVar		Other diseases
ENST00000331920.11:C.3919C>T	9	95447337	ENSG00000185920	ENST00000331920.11	PTCH1	rs574880967	Holoprosencephaly 7	ClinVar		Congenital, Hereditary, and Neonatal Diseases and Abnormalities; Musculoskeletal Diseases; Nervous System Diseases
ENST00000353234.5:C.1007C>T	9	98784058	ENSG00000165138	ENST00000353234.5	ANKS6	rs376870807	Nephronophthisis 16	ClinVar		Male Urogenital Diseases; Female Urogenital Diseases and Pregnancy Complications
ENST00000262457.7:C.2782C>A	9	100293039	ENSG00000119509	ENST00000262457.7	INVS	rs376879175	Infantile nephronophthisis	ClinVar		Female Urogenital Diseases and Pregnancy Complications; Male Urogenital Diseases
ENST00000374448.9:C.299C>T	9	110687209	ENSG00000030304	ENST00000374448.9	MUSK	rs35142681	Congenital Myasthenic Syndrome	ClinVar		Congenital, Hereditary, and Neonatal Diseases and Abnormalities; Nervous System Diseases
ENST00000374448.9:C.537C>T	9	110697375	ENSG00000030304	ENST00000374448.9	MUSK	rs41279051	Congenital Myasthenic Syndrome	ClinVar		Congenital, Hereditary, and Neonatal Diseases and Abnormalities; Nervous System Diseases
ENST00000374448.9:C.2286C>T	9	110800664	ENSG00000030304	ENST00000374448.9	MUSK	rs199832657	Congenital Myasthenic Syndrome	ClinVar		Congenital, Hereditary, and Neonatal Diseases and Abnormalities; Nervous System Diseases
ENST00000373855.7:C.4075C>T	9	121152596	ENSG00000119397	ENST00000373855.7	CNTRL	rs9408926	Immune reponse to smallpox	GWAS	22610502	Other diseases
ENST00000373631.8:C.2400C>T	9	123371542	ENSG00000148204	ENST00000373631.8	CRB2	rs765676223	Ventriculomegaly with cystic kidney disease	ClinVar		Other diseases
ENST00000298552.9:C.1231C>T	9	132910603	ENSG00000165699	ENST00000298552.9	TSC1	rs397514840	Craniopharyngioma	ClinVar		Neoplasms
ENST00000355710.8:C.693C>T	10	43105019	ENSG00000165731	ENST00000355710.8	RET	rs576806329	Hirschsprung Disease	ClinVar		Digestive System Diseases; Congenital, Hereditary, and Neonatal Diseases and Abnormalities
ENST00000355710.8:C.2037C>T	10	43114637	ENSG00000165731	ENST00000355710.8	RET	rs55862116	Hirschsprung Disease	ClinVar		Digestive System Diseases; Congenital, Hereditary, and Neonatal Diseases and Abnormalities
ENST00000355710.8:C.2070C>T	10	43114670	ENSG00000165731	ENST00000355710.8	RET	rs201550433	Hirschsprung Disease	ClinVar		Digestive System Diseases; Congenital, Hereditary, and Neonatal Diseases and Abnormalities
ENST00000404547.5:C.1728C>T	10	82985170	ENSG00000185737	ENST00000404547.5	NRG3	rs17101193	autosomal dominant compelling helio-ophthalmic outburst syndrome	Ensembl_Post_GWAS	PMID27182965	Other diseases
ENST00000404547.5:C.2058C>T	10	82985500	ENSG00000185737	ENST00000404547.5	NRG3	rs2295933	Hirschsprung disease	ClinVar		Digestive System Diseases; Congenital, Hereditary, and Neonatal Diseases and Abnormalities
ENST00000648076.2:C.3156C>T	10	104037688	ENSG00000065618	ENST00000648076.2	COL17A1	rs760714959	Epithelial recurrent erosion dystrophy	ClinVar		Congenital, Hereditary, and Neonatal Diseases and Abnormalities; Eye Diseases
ENST00000369452.9:C.457C>T	10	110964815	ENSG00000108061	ENST00000369452.9	SHOC2	rs34081996	Noonan syndrome-like disorder with loose anagen hair 1	ClinVar		Congenital, Hereditary, and Neonatal Diseases and Abnormalities; Skin and Connective Tissue Diseases; Musculoskeletal Diseases; Cardiovascular Diseases
ENST00000335295.4:C.371C>A	11	5225671	ENSG00000244734	ENST00000335295.4	HBB	rs33935383	HEMOGLOBIN ERNZ	ClinVar		Other diseases
ENST00000335295.4:C.371C>A	11	5225671	ENSG00000244734	ENST00000335295.4	HBB	rs33935383	HEMOGLOBIN VILLEJUIF	ClinVar		Other diseases
ENST00000335295.4:C.29C>A	11	5226993	ENSG00000244734	ENST00000335295.4	HBB	rs33918131	HEMOGLOBIN BREM-SUR-MER	ClinVar		Other diseases
ENST00000335295.4:C.29C>A	11	5226993	ENSG00000244734	ENST00000335295.4	HBB	rs33918131	HEMOGLOBIN PORTO ALEGRE	ClinVar		Other diseases
ENST00000377264.8:C.645C>T	11	64913347	ENSG00000110046	ENST00000377264.8	ATG2A	rs618006	Hair color	GWAS	30595370	Other diseases
ENST00000264033.6:C.1287C>T	11	119278569	ENSG00000110395	ENST00000264033.6	CBL	rs148368481	Noonan syndrome-like disorder with or without juvenile myelomonocytic leukemia	ClinVar		Congenital, Hereditary, and Neonatal Diseases and Abnormalities; Skin and Connective Tissue Diseases; Musculoskeletal Diseases; Cardiovascular Diseases
ENST00000392793.6:C.3492C>T	11	121137971	ENSG00000109927	ENST00000392793.6	TECTA	rs144012985	Nonsyndromic hearing loss and deafness	ClinVar		Pathological Conditions, Signs and Symptoms; Nervous System Diseases; Otorhinolaryngologic Diseases
ENST00000229264.8:C.825C>T	12	6845711	ENSG00000111664	ENST00000229264.8	GNB3	rs5443	sildenafil response - Efficacy	ClinVar		Other diseases
ENST00000543646.5:C.1690C>G	12	64716806	ENSG00000135677	ENST00000543646.5	GNS	rs202228620	Abnormal aggressive	ClinVar		Behavior and Behavior Mechanisms
ENST00000543646.5:C.1690C>G	12	64716806	ENSG00000135677	ENST00000543646.5	GNS	rs202228620	Aggressive behavior	ClinVar		Behavior and Behavior Mechanisms
ENST00000543646.5:C.1690C>G	12	64716806	ENSG00000135677	ENST00000543646.5	GNS	rs202228620	Autistic disorder of childhood onset	ClinVar		Mental Disorders
ENST00000543646.5:C.1690C>G	12	64716806	ENSG00000135677	ENST00000543646.5	GNS	rs202228620	Bulbous nose	ClinVar		Other diseases
ENST00000543646.5:C.1690C>G	12	64716806	ENSG00000135677	ENST00000543646.5	GNS	rs202228620	Clinodactyly of the 5th toe	ClinVar		Other diseases
ENST00000543646.5:C.1690C>G	12	64716806	ENSG00000135677	ENST00000543646.5	GNS	rs202228620	Coarse facial features	ClinVar		Pathological Conditions, Signs and Symptoms
ENST00000543646.5:C.1690C>G	12	64716806	ENSG00000135677	ENST00000543646.5	GNS	rs202228620	Frontal bossing	ClinVar		Musculoskeletal Diseases; Congenital, Hereditary, and Neonatal Diseases and Abnormalities
ENST00000543646.5:C.1690C>G	12	64716806	ENSG00000135677	ENST00000543646.5	GNS	rs202228620	Hallux valgus	ClinVar		Musculoskeletal Diseases
ENST00000543646.5:C.1690C>G	12	64716806	ENSG00000135677	ENST00000543646.5	GNS	rs202228620	Macroglossia	ClinVar		Stomatognathic Diseases
ENST00000543646.5:C.1690C>G	12	64716806	ENSG00000135677	ENST00000543646.5	GNS	rs202228620	Mandibular prognathia	ClinVar		Other diseases
ENST00000543646.5:C.1690C>G	12	64716806	ENSG00000135677	ENST00000543646.5	GNS	rs202228620	Short toe	ClinVar		Other diseases
ENST00000543646.5:C.1690C>G	12	64716806	ENSG00000135677	ENST00000543646.5	GNS	rs202228620	Shortening of all phalanges of fingers	ClinVar		Other diseases
ENST00000543646.5:C.1690C>G	12	64716806	ENSG00000135677	ENST00000543646.5	GNS	rs202228620	Slit-like opening of the exterior auditory meatus	ClinVar		Other diseases
ENST00000543646.5:C.1690C>G	12	64716806	ENSG00000135677	ENST00000543646.5	GNS	rs202228620	Thick lower lip vermilion	ClinVar		Other diseases
ENST00000543646.5:C.1690C>G	12	64716806	ENSG00000135677	ENST00000543646.5	GNS	rs202228620	Widely spaced teeth	ClinVar		Other diseases
ENST00000308330.3:C.336C>T	12	65169932	ENSG00000174106	ENST00000308330.3	LEMD3	rs61736594	Dermatofibrosis lenticularis disseminata	ClinVar		Musculoskeletal Diseases; Congenital, Hereditary, and Neonatal Diseases and Abnormalities; Skin and Connective Tissue Diseases
ENST00000675476.1:C.6637C>A	12	88071860	ENSG00000198707	ENST00000675476.1	CEP290	rs561598805	Joubert syndrome 5	ClinVar		Eye Diseases; Male Urogenital Diseases; Female Urogenital Diseases and Pregnancy Complications; Congenital, Hereditary, and Neonatal Diseases and Abnormalities
ENST00000455146.8:C.1961C>T	13	39751080	ENSG00000133103	ENST00000455146.8	COG6	rs747232819	Congenital disorder of glycosylation type 2L	ClinVar		Congenital, Hereditary, and Neonatal Diseases and Abnormalities; Nutritional and Metabolic Diseases
ENST00000455146.8:C.1961C>T	13	39751080	ENSG00000133103	ENST00000455146.8	COG6	rs747232819	Shaheen syndrome	ClinVar		Other diseases
ENST00000377211.8:C.1047C>T	13	77903180	ENSG00000136160	ENST00000377211.8	EDNRB	rs375637651	Hirschsprung Disease	ClinVar		Digestive System Diseases; Congenital, Hereditary, and Neonatal Diseases and Abnormalities
ENST00000377211.8:C.319C>T	13	77918525	ENSG00000136160	ENST00000377211.8	EDNRB	rs5346	Hirschsprung Disease	ClinVar		Digestive System Diseases; Congenital, Hereditary, and Neonatal Diseases and Abnormalities
ENST00000216797.10:C.306C>T	14	35403720	ENSG00000100906	ENST00000216797.10	NFKBIA	rs1050851	Ectodermal dysplasia and immunodeficiency 2	ClinVar		Congenital, Hereditary, and Neonatal Diseases and Abnormalities; Skin and Connective Tissue Diseases; Immune System Diseases
ENST00000216797.10:C.81C>T	14	35404564	ENSG00000100906	ENST00000216797.10	NFKBIA	rs1957106	Ectodermal dysplasia and immunodeficiency 2	ClinVar		Congenital, Hereditary, and Neonatal Diseases and Abnormalities; Skin and Connective Tissue Diseases; Immune System Diseases
ENST00000216373.10:C.3761C>T	14	50118582	ENSG00000100485	ENST00000216373.10	SOS2	rs772587016	Noonan syndrome 9	ClinVar		Congenital, Hereditary, and Neonatal Diseases and Abnormalities; Skin and Connective Tissue Diseases; Musculoskeletal Diseases; Cardiovascular Diseases
ENST00000216373.10:C.3584C>T	14	50118759	ENSG00000100485	ENST00000216373.10	SOS2	rs753151750	Noonan syndrome 9	ClinVar		Congenital, Hereditary, and Neonatal Diseases and Abnormalities; Skin and Connective Tissue Diseases; Musculoskeletal Diseases; Cardiovascular Diseases
ENST00000530997.7:C.6115C>A	14	50726030	ENSG00000100503	ENST00000530997.7	NIN	rs373844676	Seckel syndrome 7	ClinVar		Pathological Conditions, Signs and Symptoms; Congenital, Hereditary, and Neonatal Diseases and Abnormalities; Musculoskeletal Diseases; Nervous System Diseases; Endocrine System Diseases
ENST00000299084.9:C.587C>T	15	38349426	ENSG00000166068	ENST00000299084.9	SPRED1	rs147474792	Legius syndrome	ClinVar		Pathological Conditions, Signs and Symptoms; Skin and Connective Tissue Diseases
ENST00000299084.9:C.1295C>T	15	38351624	ENSG00000166068	ENST00000299084.9	SPRED1	rs200871227	Legius syndrome	ClinVar		Pathological Conditions, Signs and Symptoms; Skin and Connective Tissue Diseases
ENST00000412359.7:C.2447C>T	15	40212518	ENSG00000156970	ENST00000412359.7	BUB1B	rs878854277	Mosaic variegated aneuploidy syndrome 1	ClinVar		Congenital, Hereditary, and Neonatal Diseases and Abnormalities
ENST00000648595.1:C.1857C>A	15	43203127	ENSG00000166947	ENST00000648595.1	EPB42	rs114354377	Spherocytosis type 5	ClinVar		Congenital, Hereditary, and Neonatal Diseases and Abnormalities; Hemic and Lymphatic Diseases
ENST00000352410.9:C.10C>T	15	74890083	ENSG00000178802	ENST00000352410.9	MPI	rs143982014	Congenital disorder of glycosylation type 1B	ClinVar		Congenital, Hereditary, and Neonatal Diseases and Abnormalities; Nutritional and Metabolic Diseases
ENST00000326181.11:C.22C>T	16	2163942	ENSG00000131653	ENST00000326181.11	TRAF7	rs772309846	synovial sarcoma	Cosmic	28481359	Neoplasms
ENST00000396324.7:C.2229C>T	16	15747916	ENSG00000133392	ENST00000396324.7	MYH11	rs12931799	Familial aortopathy	ClinVar		Other diseases
ENST00000567659.3:C.922C>T	16	29814375	ENSG00000167371	ENST00000567659.3	PRRT2	rs932713001	Dystonia 10	ClinVar		Nervous System Diseases; Pathological Conditions, Signs and Symptoms
ENST00000261769.10:C.1147C>T	16	68813322	ENSG00000039068	ENST00000261769.10	CDH1	rs587782798	Blepharocheilodontic syndrome 1	ClinVar		Congenital, Hereditary, and Neonatal Diseases and Abnormalities; Eye Diseases; Musculoskeletal Diseases; Stomatognathic Diseases
ENST00000355962.5:C.1223C>T	16	71568712	ENSG00000198650	ENST00000355962.5	TAT	rs200815080	Tyrosinemia type 2	ClinVar		Congenital, Hereditary, and Neonatal Diseases and Abnormalities; Nutritional and Metabolic Diseases; Nervous System Diseases
ENST00000649488.2:C.1293C>T	17	4899034	ENSG00000108556	ENST00000649488.2	CHRNE	rs33978919	Congenital Myasthenic Syndrome	ClinVar		Congenital, Hereditary, and Neonatal Diseases and Abnormalities; Nervous System Diseases
ENST00000649488.2:C.966C>T	17	4899534	ENSG00000108556	ENST00000649488.2	CHRNE	rs56377005	Congenital Myasthenic Syndrome	ClinVar		Congenital, Hereditary, and Neonatal Diseases and Abnormalities; Nervous System Diseases
ENST00000617811.5:C.1640C>T	17	37699089	ENSG00000275410	ENST00000617811.5	HNF1B	rs768867418	Renal cysts and diabetes syndrome	ClinVar		Nervous System Diseases; Male Urogenital Diseases; Female Urogenital Diseases and Pregnancy Complications; Nutritional and Metabolic Diseases; Endocrine System Diseases
ENST00000677421.1:C.552C>T	17	42337856	ENSG00000168610	ENST00000677421.1	STAT3	rs202126764	STAT3 gain of function	ClinVar		Other diseases
ENST00000262418.12:C.980C>A	17	44258520	ENSG00000004939	ENST00000262418.12	SLC4A1	rs28931583	Spherocytosis type 4	ClinVar		Congenital, Hereditary, and Neonatal Diseases and Abnormalities; Hemic and Lymphatic Diseases
ENST00000290866.10:C.1215C>T	17	63482562	ENSG00000159640	ENST00000290866.10	ACE	rs4309	angiotensin converting enzyme activity measurement	Ensembl_Post_GWAS	PMID20066004	Other diseases
ENST00000435607.3:C.4360C>A	17	63941922	ENSG00000007314	ENST00000435607.3	SCN4A	rs879253789	Congenital myasthenic syndrome	ClinVar		Congenital, Hereditary, and Neonatal Diseases and Abnormalities; Nervous System Diseases
ENST00000435607.3:C.3759C>T	17	63945022	ENSG00000007314	ENST00000435607.3	SCN4A	rs72851170	Congenital Myasthenic Syndrome	ClinVar		Congenital, Hereditary, and Neonatal Diseases and Abnormalities; Nervous System Diseases
ENST00000390015.7:C.2173C>A	17	80113350	ENSG00000171298	ENST00000390015.7	GAA	rs121907938	Glycogen storage disease II	ClinVar		Musculoskeletal Diseases; Nervous System Diseases; Male Urogenital Diseases; Female Urogenital Diseases and Pregnancy Complications
ENST00000442544.7:C.601C>A	18	52906232	ENSG00000187323	ENST00000442544.7	DCC	rs2229080	Mirror movements 1	ClinVar		Other diseases
ENST00000326873.12:C.96C>T	19	1207009	ENSG00000118046	ENST00000326873.12	STK11	rs79175212	adenoma malignum	Cosmic	12533684	Other diseases
ENST00000263383.8:C.1404C>T	19	15116219	ENSG00000105135	ENST00000263383.8	ILVBL	rs2074263	loneliness measurement	Ensembl_Post_GWAS	PMID27629369	Other diseases
ENST00000415950.4:C.150C>T	19	35032637	ENSG00000105711	ENST00000415950.4	SCN1B	rs147073518	Cardiac conduction defect	ClinVar		Cardiovascular Diseases
ENST00000378910.10:C.1610C>T	19	35846025	ENSG00000161270	ENST00000378910.10	NPHS1	rs368913905	Proteinuria	ClinVar		Male Urogenital Diseases; Female Urogenital Diseases and Pregnancy Complications; Pathological Conditions, Signs and Symptoms
ENST00000544017.5:C.335C>T	19	39480879	ENSG00000105197	ENST00000544017.5	TIMM50	rs35135520	Mitochondrial encephalopathy	ClinVar		Musculoskeletal Diseases; Nervous System Diseases; Nutritional and Metabolic Diseases
ENST00000252487.9:C.393C>T	19	44892887	ENSG00000130204	ENST00000252487.9	TOMM40	rs11556505	frontotemporal dementia	Ensembl_Post_GWAS	PMID26154020	Nervous System Diseases; Nutritional and Metabolic Diseases; Mental Disorders
ENST00000217244.9:C.1145C>T	20	483992	ENSG00000101266	ENST00000217244.9	CSNK2A1	rs1064796883	Okur-chung neurodevelopmental syndrome	ClinVar		Other diseases
ENST00000375687.10:C.3959C>T	20	32436671	ENSG00000171456	ENST00000375687.10	ASXL1	rs760162421	leiomyosarcoma	Cosmic	26891131	Neoplasms
ENST00000433931.7:C.3863C>T	21	32639077	ENSG00000159082	ENST00000433931.7	SYNJ1	rs149288077	Parkinson disease 20	ClinVar		Nervous System Diseases
ENST00000361866.8:C.1977C>T	21	46001981	ENSG00000142156	ENST00000361866.8	COL6A1	rs121912937	Ullrich congenital muscular dystrophy 1	ClinVar		Musculoskeletal Diseases; Nervous System Diseases; Congenital, Hereditary, and Neonatal Diseases and Abnormalities; Pathological Conditions, Signs and Symptoms
ENST00000623402.1:C.2513C>G	22	20425478	ENSG00000244486	ENST00000623402.1	SCARF2	rs874101	Marden Walker like syndrome	ClinVar		Congenital, Hereditary, and Neonatal Diseases and Abnormalities; Eye Diseases; Musculoskeletal Diseases
ENST00000587091.6:C.940C>A	X	74524723	ENSG00000147100	ENST00000587091.6	SLC16A2	rs766773277	Allan-Herndon-Dudley syndrome	ClinVar		Pathological Conditions, Signs and Symptoms; Congenital, Hereditary, and Neonatal Diseases and Abnormalities; Nervous System Diseases

## Sheet: Human vs. Marmoset
Identified as specific disease based on Human vs. Marmoset SNPs
Uploaded_variation	Chromosome	Location	Gene_id	Transcript_id	Gene_symbol	Variation_ID	Diseases	Source	PubMed	Disease_Class_Name
ENST00000413052.6:C.1182C>T	1	112694059	ENSG00000155363	ENST00000413052.6	MOV10	rs3748656	diastolic blood pressure	Ensembl_Post_GWAS	PMID26390057	Other diseases
ENST00000413052.6:C.2931C>T	1	112700426	ENSG00000155363	ENST00000413052.6	MOV10	rs6679	diastolic blood pressure	Ensembl_Post_GWAS	PMID26390057	Other diseases
ENST00000447944.7:C.1390C>A	2	55656182	ENSG00000138035	ENST00000447944.7	PNPT1	rs2627765	diastolic blood pressure	Ensembl_Post_GWAS	PMID27618452	Other diseases
ENST00000264157.10:C.1491C>T	2	134953946	ENSG00000082258	ENST00000264157.10	CCNT2	rs3814355	diastolic blood pressure	Ensembl_Post_GWAS	PMID30224653	Other diseases
ENST00000394095.7:C.1179C>T	3	101366569	ENSG00000138468	ENST00000394095.7	SENP7	rs939443	diastolic blood pressure	Ensembl_Post_GWAS	PMID30224653	Other diseases
ENST00000296257.10:C.902C>A	3	185613377	ENSG00000163904	ENST00000296257.10	SENP2	rs6762208	diastolic blood pressure	Ensembl_Post_GWAS	PMID28135244	Other diseases
ENST00000323110.2:C.1120C>A	8	142913286	ENSG00000179142	ENST00000323110.2	CYP11B2	rs4538	diastolic blood pressure	Ensembl_Post_GWAS	PMID28135244	Other diseases
ENST00000224950.8:C.743C>G	10	103897558	ENSG00000107960	ENST00000224950.8	OBFC1	rs10786775	melanoma	Ensembl_Post_GWAS	PMID28212542	Neoplasms
ENST00000361507.5:C.918C>T	11	78226754	ENSG00000033327	ENST00000361507.5	GAB2	rs2248407	diastolic blood pressure	Ensembl_Post_GWAS	PMID30224653	Other diseases
ENST00000606320.6:C.3261C>T	12	123161256	ENSG00000051825	ENST00000606320.6	MPHOSPH9	rs1051431	diastolic blood pressure	Ensembl_Post_GWAS	PMID27618447	Other diseases
ENST00000308893.9:C.1359C>T	16	29983601	ENSG00000149930	ENST00000308893.9	TAOK2	rs3814883	schizophrenia	GWAS	31374203	Mental Disorders
ENST00000431639.6:C.202C>G	17	7688850	ENSG00000141499	ENST00000431639.6	WRAP53	rs2287499	Dyskeratosis congenita	ClinVar		Congenital, Hereditary, and Neonatal Diseases and Abnormalities; Skin and Connective Tissue Diseases; Hemic and Lymphatic Diseases
ENST00000431639.6:C.1565C>G	17	7703404	ENSG00000141499	ENST00000431639.6	WRAP53	rs7640	Dyskeratosis Congenita	ClinVar		Congenital, Hereditary, and Neonatal Diseases and Abnormalities; Skin and Connective Tissue Diseases; Hemic and Lymphatic Diseases
ENST00000618182.6:C.3864C>T	20	34997634	ENSG00000078814	ENST00000618182.6	MYH7B	rs55734215	diastolic blood pressure	Ensembl_Post_GWAS	PMID27618447	Other diseases

## Sheet: Human vs. Rhesus macaque
Identified as specific disease based on Human vs. Rhesus macaque SNPs
Uploaded_variation	Chromosome	Location	Gene_id	Transcript_id	Gene_symbol	Variation_ID	Diseases	Source	PubMed	Disease_Class_Name
ENST00000376585.6:C.2081C>T	1	11790693	ENSG00000177000	ENST00000376585.6	MTHFR	rs35737219	Homocysteinemia due to MTHFR deficiency	ClinVar		Congenital, Hereditary, and Neonatal Diseases and Abnormalities; Nutritional and Metabolic Diseases
ENST00000326735.13:C.3192C>T	1	16986848	ENSG00000159363	ENST00000326735.13	ATP13A2	rs9435659	smoking behaviour measurement	Ensembl_Post_GWAS	PMID23284291	Behavior and Behavior Mechanisms
ENST00000477853.6:C.1134C>T	1	19238095	ENSG00000127463	ENST00000477853.6	EMC1	rs778470143	Cerebellar atrophy	ClinVar		Nervous System Diseases; Pathological Conditions, Signs and Symptoms
ENST00000321556.5:C.626C>T	1	20638080	ENSG00000158828	ENST00000321556.5	PINK1	rs34677717	Parkinson disease 6	ClinVar		Nervous System Diseases
ENST00000349533.11:C.2970C>G	1	65636487	ENSG00000116678	ENST00000349533.11	LEPR	rs751719702	Leptin receptor deficiency	ClinVar		Other diseases
ENST00000369448.4:C.483C>T	1	117623351	ENSG00000183508	ENST00000369448.4	TENT5C	rs1627787	mean platelet volume	Ensembl_Post_GWAS	PMID27863252	Other diseases
ENST00000368012.4:C.1327C>G	1	161072867	ENSG00000143217	ENST00000368012.4	NECTIN4	rs1537044	Ectodermal dysplasia-syndactyly syndrome 1	ClinVar		Other diseases
ENST00000359842.10:C.1050C>T	1	165408315	ENSG00000143171	ENST00000359842.10	RXRG	rs2134095	Attention deficit hyperactivity disorder	GWAS	27890468	Mental Disorders
ENST00000367342.8:C.1612C>T	1	200911850	ENSG00000163362	ENST00000367342.8	INAVA	rs296520	attention deficit hyperactivity disorder	Ensembl_Post_GWAS	PMID23453885	Mental Disorders
ENST00000367288.5:C.884C>T	1	201900129	ENSG00000163431	ENST00000367288.5	LMOD1	rs2820312	coronary artery disease	Ensembl_Post_GWAS	PMID29212778	Cardiovascular Diseases
ENST00000358024.8:C.1686C>T	1	205271123	ENSG00000133069	ENST00000358024.8	TMCC2	rs1668867	mean platelet volume	Ensembl_Post_GWAS	PMID24026423	Other diseases
ENST00000605786.5:C.16C>G	2	43776789	ENSG00000138036	ENST00000605786.5	DYNC2LI1	rs146698690	Short-rib thoracic dysplasia 15 with polydactyly	ClinVar		Other diseases
ENST00000447944.7:C.1390C>A	2	55656182	ENSG00000138035	ENST00000447944.7	PNPT1	rs2627765	metabolic syndrome	Ensembl_Post_GWAS	PMID22399527	Nutritional and Metabolic Diseases
ENST00000264093.9:C.65C>T	2	73926975	ENSG00000114956	ENST00000264093.9	DGUOK	rs757962437	Cerebral atrophy	ClinVar		Nervous System Diseases; Pathological Conditions, Signs and Symptoms
ENST00000264093.9:C.65C>T	2	73926975	ENSG00000114956	ENST00000264093.9	DGUOK	rs757962437	Increased CSF lactate	ClinVar		Other diseases
ENST00000264093.9:C.65C>T	2	73926975	ENSG00000114956	ENST00000264093.9	DGUOK	rs757962437	Increased serum pyruvate	ClinVar		Other diseases
ENST00000264093.9:C.65C>T	2	73926975	ENSG00000114956	ENST00000264093.9	DGUOK	rs757962437	Memory impairment	ClinVar		Nervous System Diseases; Pathological Conditions, Signs and Symptoms; Behavior and Behavior Mechanisms
ENST00000264093.9:C.65C>T	2	73926975	ENSG00000114956	ENST00000264093.9	DGUOK	rs757962437	Migraine with aura	ClinVar		Nervous System Diseases
ENST00000306434.8:C.792C>G	2	85542588	ENSG00000168906	ENST00000306434.8	MAT2A	rs1078004	coronary artery disease	Ensembl_Post_GWAS	PMID29212778	Cardiovascular Diseases
ENST00000323853.10:C.5766C>T	2	96277704	ENSG00000144028	ENST00000323853.10	SNRNP200	rs147427344	Retinitis pigmentosa 33	ClinVar		Congenital, Hereditary, and Neonatal Diseases and Abnormalities; Eye Diseases
ENST00000324768.6:C.287C>A	2	101387171	ENSG00000175874	ENST00000324768.6	CREG2	rs11554173	BMI-adjusted adiponectin measurement	Ensembl_Post_GWAS	PMID26299439	Other diseases
ENST00000283249.7:C.783C>T	2	160172707	ENSG00000115221	ENST00000283249.7	ITGB6	rs2305818	membranous glomerulonephritis	Ensembl_Post_GWAS	PMID21323541	Female Urogenital Diseases and Pregnancy Complications; Male Urogenital Diseases; Immune System Diseases
ENST00000272895.12:C.6610C>A	2	214953891	ENSG00000144452	ENST00000272895.12	ABCA12	rs137853289	Autosomal recessive congenital ichthyosis 4B	ClinVar		Eye Diseases
ENST00000445964.6:C.3505C>T	2	233204655	ENSG00000168918	ENST00000445964.6	INPP5D	rs9247	Eczema	GWAS	30595370	Skin and Connective Tissue Diseases
ENST00000373426.3:C.391C>A	2	233682328	ENSG00000244122	ENST00000373426.3	UGT1A7	rs17863778	attention deficit hyperactivity disorder	Ensembl_Post_GWAS	PMID20732626	Mental Disorders
ENST00000280696.9:C.1403C>A	3	24122912	ENSG00000151090	ENST00000280696.9	THRB	rs121918687	Thyroid hormone resistance	ClinVar		Endocrine System Diseases
ENST00000307363.10:C.1306C>T	3	33018489	ENSG00000170266	ENST00000307363.10	GLB1	rs34421970	MPS-IV-B	ClinVar		Congenital, Hereditary, and Neonatal Diseases and Abnormalities; Nutritional and Metabolic Diseases; Skin and Connective Tissue Diseases
ENST00000307363.10:C.1285C>T	3	33018510	ENSG00000170266	ENST00000307363.10	GLB1	rs180869784	MPS-IV-B	ClinVar		Congenital, Hereditary, and Neonatal Diseases and Abnormalities; Nutritional and Metabolic Diseases; Skin and Connective Tissue Diseases
ENST00000307363.10:C.858C>T	3	33051939	ENSG00000170266	ENST00000307363.10	GLB1	rs770638519	MPS-IV-B	ClinVar		Congenital, Hereditary, and Neonatal Diseases and Abnormalities; Nutritional and Metabolic Diseases; Skin and Connective Tissue Diseases
ENST00000443003.2:C.571C>T	3	39411706	ENSG00000168028	ENST00000443003.2	RPSA	rs397514761	Asplenia	ClinVar		Congenital, Hereditary, and Neonatal Diseases and Abnormalities; Hemic and Lymphatic Diseases; Cardiovascular Diseases
ENST00000233025.11:C.121C>G	3	52706166	ENSG00000114902	ENST00000233025.11	SPCS1	rs6617	attention deficit hyperactivity disorder	Ensembl_Post_GWAS	PMID23453885	Mental Disorders
ENST00000338458.8:C.1659C>T	3	56729288	ENSG00000163947	ENST00000338458.8	ARHGEF3	rs1565376	attention deficit hyperactivity disorder	Ensembl_Post_GWAS	PMID26174813	Mental Disorders
ENST00000338458.8:C.1659C>T	3	56729288	ENSG00000163947	ENST00000338458.8	ARHGEF3	rs1565376	mean platelet volume	Ensembl_Post_GWAS	PMID27863252	Other diseases
ENST00000647725.1:C.44C>T	3	71198338	ENSG00000285708	ENST00000647725.1	AC097634.4	rs532329866	Cerebellar vermis hypoplasia	ClinVar		Nervous System Diseases; Pathological Conditions, Signs and Symptoms
ENST00000647725.1:C.44C>T	3	71198338	ENSG00000285708	ENST00000647725.1	AC097634.4	rs532329866	Intellectual Disability with Language Impairment and Autistic Features	ClinVar		Other diseases
ENST00000647725.1:C.44C>T	3	71198338	ENSG00000285708	ENST00000647725.1	AC097634.4	rs532329866	Mental retardation with language impairment and with or without autistic features	ClinVar		Congenital, Hereditary, and Neonatal Diseases and Abnormalities; Musculoskeletal Diseases; Nervous System Diseases
ENST00000650591.1:C.1649C>T	3	93879254	ENSG00000184500	ENST00000650591.1	PROS1	rs373336653	Reduced protein S activity	ClinVar		Other diseases
ENST00000264990.11:C.2292C>T	3	132559022	ENSG00000240303	ENST00000264990.11	ACAD11	rs2270801	coronary artery disease	Ensembl_Post_GWAS	PMID29212778	Cardiovascular Diseases
ENST00000383202.7:C.2457C>T	3	136369196	ENSG00000118007	ENST00000383202.7	STAG1	rs9860801	coronary artery disease	Ensembl_Post_GWAS	PMID29212778	Cardiovascular Diseases
ENST00000330852.10:C.409C>A	4	13381577	ENSG00000157869	ENST00000330852.10	RAB28	rs398123044	Cone-rod degeneration	ClinVar		Congenital, Hereditary, and Neonatal Diseases and Abnormalities; Eye Diseases
ENST00000330852.10:C.409C>A	4	13381577	ENSG00000157869	ENST00000330852.10	RAB28	rs398123044	Cone-rod dystrophy 18	ClinVar		Congenital, Hereditary, and Neonatal Diseases and Abnormalities; Eye Diseases
ENST00000381227.5:C.2409C>T	4	57020984	ENSG00000047315	ENST00000381227.5	POLR2B	rs2271806	congenital heart disease	Ensembl_Post_GWAS	PMID28468790	Congenital, Hereditary, and Neonatal Diseases and Abnormalities; Cardiovascular Diseases
ENST00000440890.7:C.816C>T	4	95130002	ENSG00000138696	ENST00000440890.7	BMPR1B	rs376819253	Type A2 brachydactyly	ClinVar		Other diseases
ENST00000282588.7:C.1092C>T	5	52897456	ENSG00000213949	ENST00000282588.7	ITGA1	rs1531545	attention deficit hyperactivity disorder	Ensembl_Post_GWAS	PMID28809852	Mental Disorders
ENST00000439151.7:C.3067C>A	5	177211466	ENSG00000165671	ENST00000439151.7	NSD1	rs587784095	Beckwith-Wiedemann syndrome	ClinVar		Congenital, Hereditary, and Neonatal Diseases and Abnormalities
ENST00000327892.13:C.43C>A	6	30720549	ENSG00000196230	ENST00000327892.13	TUBB	rs864321676	Symmetric circumferential skin creases	ClinVar		Other diseases
ENST00000375703.7:C.1716C>T	6	31760120	ENSG00000204410	ENST00000375703.7	MSH5	rs3115672	Depressive symptoms	GWAS	30643256	Behavior and Behavior Mechanisms
ENST00000375703.7:C.1716C>T	6	31760120	ENSG00000204410	ENST00000375703.7	MSH5	rs3115672	Life satisfaction	GWAS	30643256	Other diseases
ENST00000375703.7:C.1716C>T	6	31760120	ENSG00000204410	ENST00000375703.7	MSH5	rs3115672	Positive affect	GWAS	30643256	Other diseases
ENST00000418814.7:C.474C>T	6	70477264	ENSG00000082269	ENST00000418814.7	FAM135A	rs748520978	Infantile histiocytoid cardiomyopathy	ClinVar		Other diseases
ENST00000369393.8:C.14661C>T	6	89661483	ENSG00000112159	ENST00000369393.8	MDN1	rs9444701	coronary artery disease	Ensembl_Post_GWAS	PMID29212778	Cardiovascular Diseases
ENST00000381112.7:C.675C>T	7	45069828	ENSG00000136280	ENST00000381112.7	CCM2	rs181474100	Cerebral cavernous malformations 2	ClinVar		Nervous System Diseases; Pathological Conditions, Signs and Symptoms
ENST00000361183.8:C.99C>T	7	116888186	ENSG00000198898	ENST00000361183.8	CAPZA2	rs4808	mean platelet volume	Ensembl_Post_GWAS	PMID27863252	Other diseases
ENST00000359321.2:C.608C>T	7	152648877	ENSG00000196584	ENST00000359321.2	XRCC2	rs143856570	Hereditary Cancer Syndrome	ClinVar		Congenital, Hereditary, and Neonatal Diseases and Abnormalities; Neoplasms
ENST00000360538.7:C.58C>T	9	32550914	ENSG00000197579	ENST00000360538.7	TOPORS	rs112527210	Early spontaneous preterm birth	GWAS	31194736	Other diseases
ENST00000401783.6:C.10185C>T	9	110385959	ENSG00000165124	ENST00000401783.6	SVEP1	rs10817003	coronary artery disease	Ensembl_Post_GWAS	PMID28714975	Cardiovascular Diseases
ENST00000351698.5:C.246C>T	9	129822779	ENSG00000136827	ENST00000351698.5	TOR1A	rs2296793	Dystonia 1	ClinVar		Nervous System Diseases; Pathological Conditions, Signs and Symptoms
ENST00000265371.8:C.1266C>T	10	33221735	ENSG00000099250	ENST00000265371.8	NRP1	rs2229935	coronary artery disease	Ensembl_Post_GWAS	PMID29212778	Cardiovascular Diseases
ENST00000344586.9:C.147C>A	10	99533278	ENSG00000119919	ENST00000344586.9	NKX2-3	rs41290504	hypothyroidism	Ensembl_Post_GWAS	PMID27182965	Endocrine System Diseases
ENST00000674860.1:C.1671C>T	10	103089711	ENSG00000076685	ENST00000674860.1	NT5C2	rs3740387	attention deficit hyperactivity disorder	Ensembl_Post_GWAS	PMID23453885	Mental Disorders
ENST00000644772.1:C.4434C>T	11	17395215	ENSG00000006071	ENST00000644772.1	ABCC8	rs193922403	Neonatal diabetes mellitus	ClinVar		Congenital, Hereditary, and Neonatal Diseases and Abnormalities; Nutritional and Metabolic Diseases; Endocrine System Diseases
ENST00000254122.8:C.228C>T	11	30233638	ENSG00000131808	ENST00000254122.8	FSHB	rs6169	isolated follicle-stimulating hormone deficiency	ClinVar		Male Urogenital Diseases
ENST00000279227.9:C.1518C>G	11	64220630	ENSG00000149781	ENST00000279227.9	FERMT3	rs3802933	attention deficit hyperactivity disorder	Ensembl_Post_GWAS	PMID21784300	Mental Disorders
ENST00000527174.5:C.853C>T	11	65376421	ENSG00000162241	ENST00000527174.5	SLC25A45	rs34400381	Serum dimethylarginine levels	GWAS	24159190	Other diseases
ENST00000527174.5:C.853C>T	11	65376421	ENSG00000162241	ENST00000527174.5	SLC25A45	rs34400381	Symmetrical dimethylarginine levels	GWAS	24159190	Other diseases
ENST00000527174.5:C.853C>T	11	65376421	ENSG00000162241	ENST00000527174.5	SLC25A45	rs34400381	serum dimethylarginine measurement	Ensembl_Post_GWAS	PMID24159190	Other diseases
ENST00000534358.8:C.7254C>T	11	118503146	ENSG00000118058	ENST00000534358.8	KMT2A	rs2071702	attention deficit hyperactivity disorder	Ensembl_Post_GWAS	PMID23453885	Mental Disorders
ENST00000256078.10:C.101C>G	12	25245284	ENSG00000133703	ENST00000256078.10	KRAS	rs104894366	Cardiofaciocutaneous syndrome 2	ClinVar		Cardiovascular Diseases; Congenital, Hereditary, and Neonatal Diseases and Abnormalities; Skin and Connective Tissue Diseases; Pathological Conditions, Signs and Symptoms
ENST00000256078.10:C.101C>G	12	25245284	ENSG00000133703	ENST00000256078.10	KRAS	rs104894366	Noonan syndrome 3	ClinVar		Congenital, Hereditary, and Neonatal Diseases and Abnormalities; Skin and Connective Tissue Diseases; Musculoskeletal Diseases; Cardiovascular Diseases
ENST00000256078.10:C.101C>G	12	25245284	ENSG00000133703	ENST00000256078.10	KRAS	rs104894366	RAS-associated autoimmune leukoproliferative disorder	ClinVar		Congenital, Hereditary, and Neonatal Diseases and Abnormalities; Neoplasms; Immune System Diseases; Hemic and Lymphatic Diseases
ENST00000536324.4:C.1098C>T	12	53328344	ENSG00000170374	ENST00000536324.4	SP7	rs7139272	Osteogenesis imperfecta type 12	ClinVar		Musculoskeletal Diseases; Congenital, Hereditary, and Neonatal Diseases and Abnormalities; Skin and Connective Tissue Diseases
ENST00000228347.9:C.2778C>T	12	106496119	ENSG00000013503	ENST00000228347.9	POLR3B	rs267608689	Hypomyelinating leukodystrophy 8	ClinVar		Other diseases
ENST00000289004.8:C.294C>T	12	121856354	ENSG00000158104	ENST00000289004.8	HPD	rs117079110	Hawkinsinuria	ClinVar		Nervous System Diseases; Congenital, Hereditary, and Neonatal Diseases and Abnormalities; Nutritional and Metabolic Diseases
ENST00000606320.6:C.3261C>T	12	123161256	ENSG00000051825	ENST00000606320.6	MPHOSPH9	rs1051431	mean platelet volume	Ensembl_Post_GWAS	PMID27863252	Other diseases
ENST00000678037.1:C.324C>T	14	75124119	ENSG00000119638	ENST00000678037.1	NEK9	rs8017642	coronary artery disease	Ensembl_Post_GWAS	PMID29212778	Cardiovascular Diseases
ENST00000299155.10:C.122C>T	14	102923789	ENSG00000166126	ENST00000299155.10	AMN	rs119478058	Megaloblastic anemia 1	ClinVar		Pathological Conditions, Signs and Symptoms; Digestive System Diseases; Nutritional and Metabolic Diseases; Female Urogenital Diseases and Pregnancy Complications; Male Urogenital Diseases; Hemic and Lymphatic Diseases
ENST00000268124.11:C.915C>T	15	89329051	ENSG00000140521	ENST00000268124.11	POLG	rs769410130	Cerebellar ataxia infantile with progressive external ophthalmoplegia	ClinVar		Pathological Conditions, Signs and Symptoms; Nervous System Diseases
ENST00000328850.8:C.15C>A	15	90885060	ENSG00000182511	ENST00000328850.8	FES	rs11539637	coronary artery disease	Ensembl_Post_GWAS	PMID26343387	Cardiovascular Diseases
ENST00000348261.11:C.6884C>T	16	1220816	ENSG00000196557	ENST00000348261.11	CACNA1H	rs772718469	Arteriovenous malformation	ClinVar		Congenital, Hereditary, and Neonatal Diseases and Abnormalities; Nervous System Diseases; Cardiovascular Diseases
ENST00000348261.11:C.6884C>T	16	1220816	ENSG00000196557	ENST00000348261.11	CACNA1H	rs772718469	Cerebral arteriovenous malformation	ClinVar		Nervous System Diseases; Pathological Conditions, Signs and Symptoms
ENST00000348261.11:C.6884C>T	16	1220816	ENSG00000196557	ENST00000348261.11	CACNA1H	rs772718469	Hand tremor	ClinVar		Other diseases
ENST00000348261.11:C.6884C>T	16	1220816	ENSG00000196557	ENST00000348261.11	CACNA1H	rs772718469	Tremor	ClinVar		Nervous System Diseases; Pathological Conditions, Signs and Symptoms
ENST00000268482.8:C.147C>G	16	72096304	ENSG00000140829	ENST00000268482.8	DHX38	rs1050361	coronary artery disease	Ensembl_Post_GWAS	PMID29212778	Cardiovascular Diseases
ENST00000568377.5:C.841C>G	16	75541366	ENSG00000205084	ENST00000568377.5	TMEM231	rs1295551040	Joubert syndrome 20	ClinVar		Eye Diseases; Male Urogenital Diseases; Female Urogenital Diseases and Pregnancy Complications; Congenital, Hereditary, and Neonatal Diseases and Abnormalities
ENST00000568377.5:C.841C>G	16	75541366	ENSG00000205084	ENST00000568377.5	TMEM231	rs1295551040	Meckel syndrome	ClinVar		Pathological Conditions, Signs and Symptoms; Congenital, Hereditary, and Neonatal Diseases and Abnormalities; Female Urogenital Diseases and Pregnancy Complications; Eye Diseases; Male Urogenital Diseases; Respiratory Disease; Nervous System Diseases; Otorhinolaryngologic Diseases
ENST00000268695.10:C.199C>A	16	88842751	ENSG00000141012	ENST00000268695.10	GALNS	rs11862754	MPS-IV-A	ClinVar		Congenital, Hereditary, and Neonatal Diseases and Abnormalities; Nutritional and Metabolic Diseases; Skin and Connective Tissue Diseases
ENST00000381129.8:C.238C>A	17	6433957	ENSG00000129221	ENST00000381129.8	AIPL1	rs748210823	Leber congenital amaurosis 4	ClinVar		Eye Diseases
ENST00000336174.12:C.1051C>T	17	63704390	ENSG00000266173	ENST00000336174.12	STRADA	rs376896311	Polyhydramnios	ClinVar		Female Urogenital Diseases and Pregnancy Complications
ENST00000336174.12:C.351C>T	17	63710834	ENSG00000266173	ENST00000336174.12	STRADA	rs781381391	Polyhydramnios	ClinVar		Female Urogenital Diseases and Pregnancy Complications
ENST00000328313.10:C.897C>G	17	79735540	ENSG00000182156	ENST00000328313.10	ENPP7	rs11657217	Diastolic blood pressure response to hydrochlorothiazide in hypertension	GWAS	27802415	Other diseases
ENST00000328313.10:C.897C>G	17	79735540	ENSG00000182156	ENST00000328313.10	ENPP7	rs11657217	diastolic blood pressure change measurement	Ensembl_Post_GWAS	PMID27802415	Other diseases
ENST00000328313.10:C.897C>G	17	79735540	ENSG00000182156	ENST00000328313.10	ENPP7	rs11657217	hypertension	Ensembl_Post_GWAS	PMID27802415	Cardiovascular Diseases
ENST00000328313.10:C.897C>G	17	79735540	ENSG00000182156	ENST00000328313.10	ENPP7	rs11657217	response to hydrochlorothiazide	Ensembl_Post_GWAS	PMID27802415	Other diseases
ENST00000678804.1:C.150C>T	19	10180853	ENSG00000130816	ENST00000678804.1	DNMT1	rs146112081	Sensory Neuropathy	ClinVar		Pathological Conditions, Signs and Symptoms; Nervous System Diseases
ENST00000391910.7:C.2193C>T	19	46720692	ENSG00000090372	ENST00000391910.7	STRN4	rs313841	coronary artery disease	Ensembl_Post_GWAS	PMID29212778	Cardiovascular Diseases
ENST00000618182.6:C.3864C>T	20	34997634	ENSG00000078814	ENST00000618182.6	MYH7B	rs55734215	coronary artery disease	Ensembl_Post_GWAS	PMID29212778	Cardiovascular Diseases
ENST00000399139.5:C.243C>T	21	36461453	ENSG00000159261	ENST00000399139.5	CLDN14	rs219779	Serum parathyroid hormone levels	GWAS	27927781	Other diseases
ENST00000399139.5:C.243C>T	21	36461453	ENSG00000159261	ENST00000399139.5	CLDN14	rs219779	kidney stone	Ensembl_Post_GWAS	PMID19561606	Pathological Conditions, Signs and Symptoms; Female Urogenital Diseases and Pregnancy Complications; Male Urogenital Diseases
ENST00000609713.2:C.1032C>T	21	37625399	ENSG00000157542	ENST00000609713.2	KCNJ6	rs702859	frontal theta oscillation measurement	Ensembl_Post_GWAS	PMID22554406	Other diseases
ENST00000360880.6:C.249C>T	22	37983536	ENSG00000100146	ENST00000360880.6	SOX10	rs73415876	Waardenburg syndrome	ClinVar		Congenital, Hereditary, and Neonatal Diseases and Abnormalities
ENST00000360880.6:C.249C>T	22	37983536	ENSG00000100146	ENST00000360880.6	SOX10	rs73415876	Peripheral demyelinating neuropathy	ClinVar		Nervous System Diseases; Immune System Diseases
ENST00000621635.4:C.2001C>T	X	101353203	ENSG00000010671	ENST00000621635.4	BTK	rs1135363	Isolated growth hormone deficiency	ClinVar		Other diseases
ENST00000218099.7:C.108C>T	X	139537029	ENSG00000101981	ENST00000218099.7	F9	rs184837275	Factor IX Deficiency	ClinVar		Congenital, Hereditary, and Neonatal Diseases and Abnormalities; Hemic and Lymphatic Diseases
